# Supplementary material for: circRNA circ_102049 Implicates in Pancreatic Ductal Adenocarcinoma Progression through Activating CD80 by Targeting miR‐455‐3p
Source: Hindawi journal article supplement (doi:10.1155/2021/8819990), 2021-01-01

**Supplementary Figure S1** The survival analysis of target miRNAs of selected DEcircRNAs

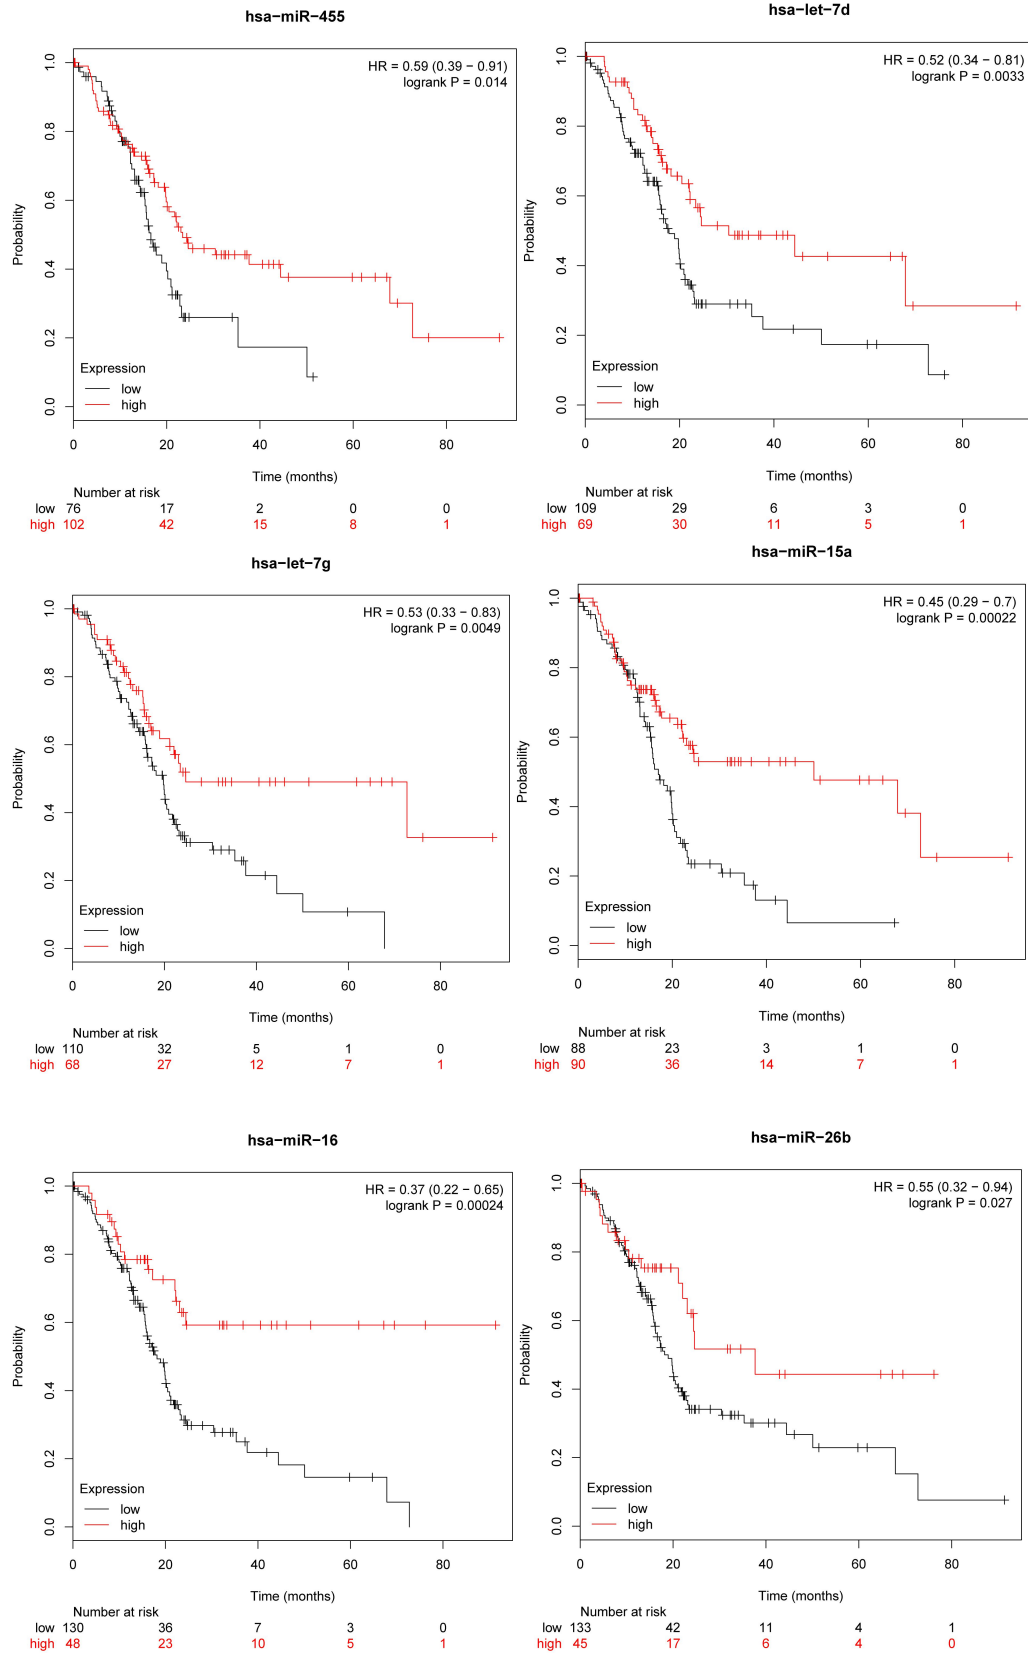

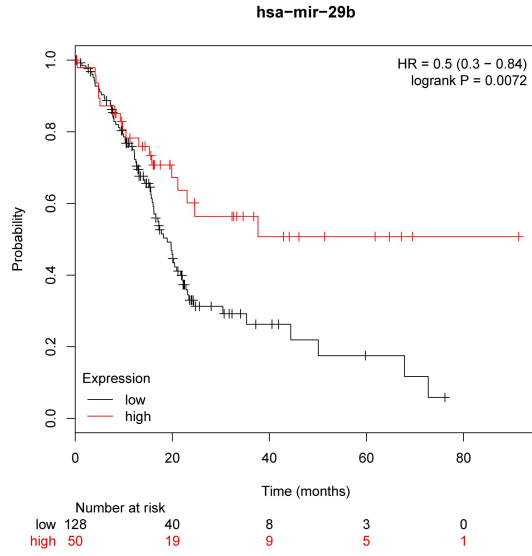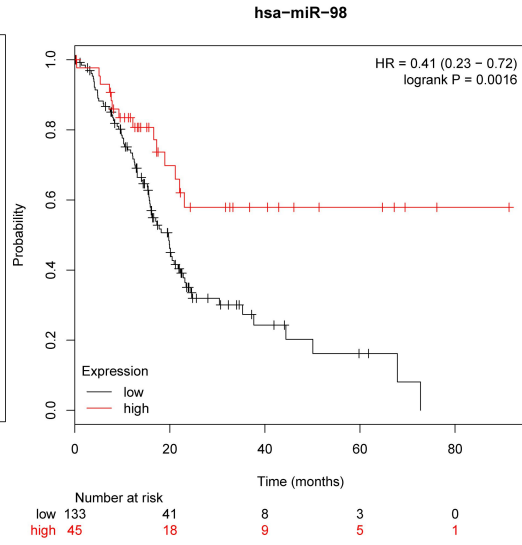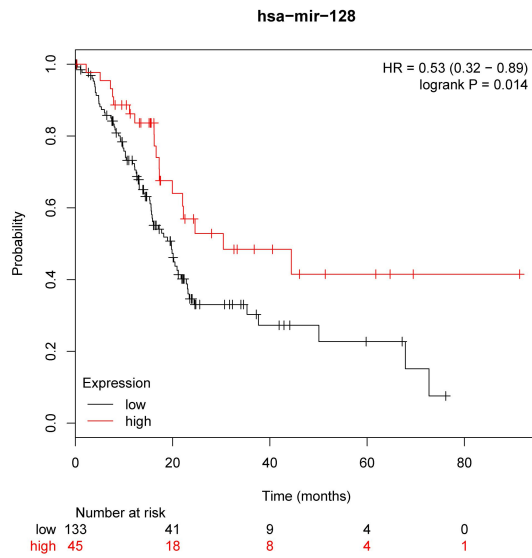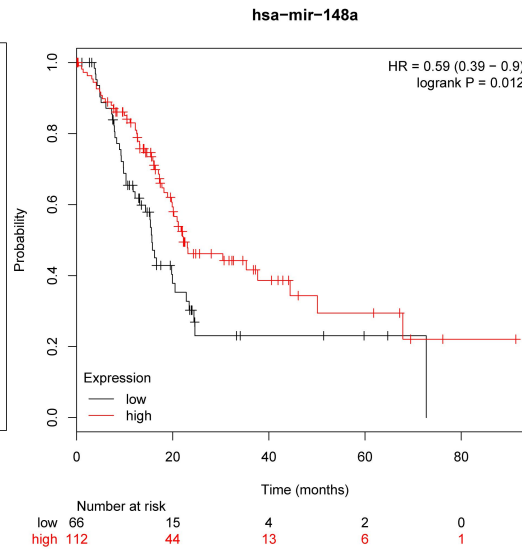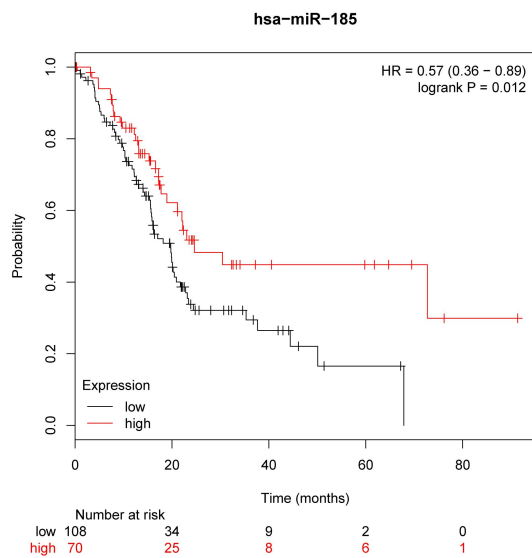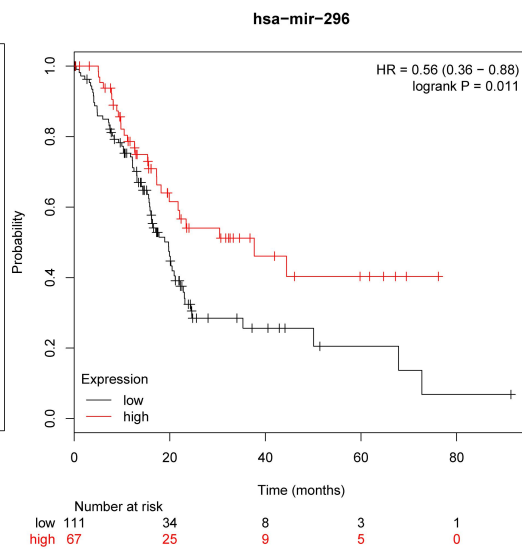

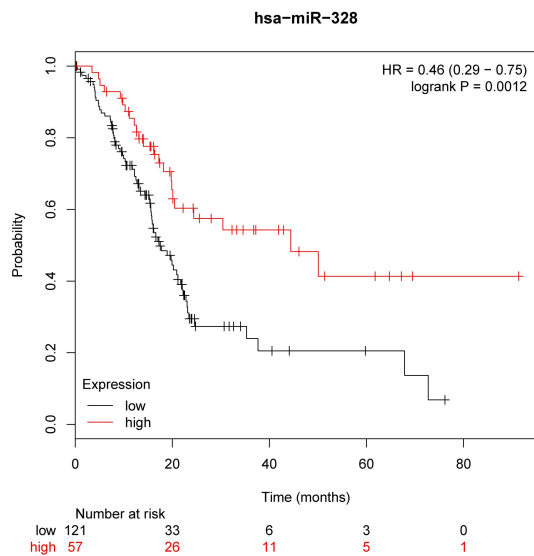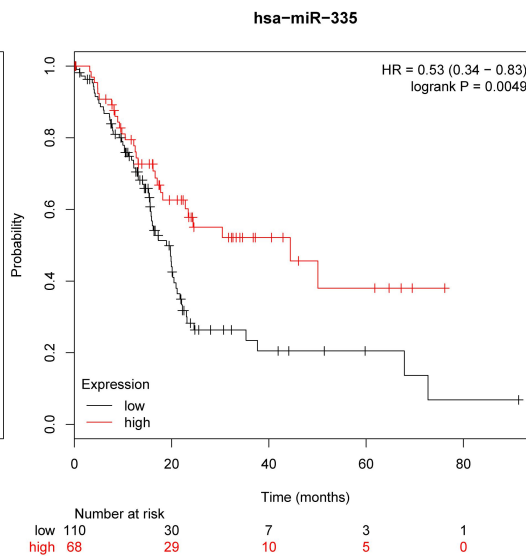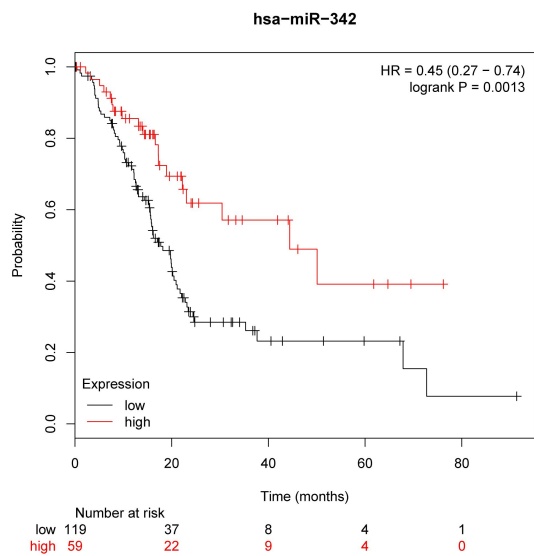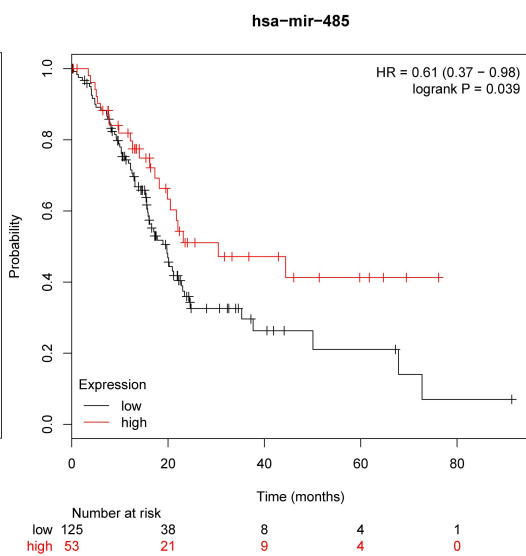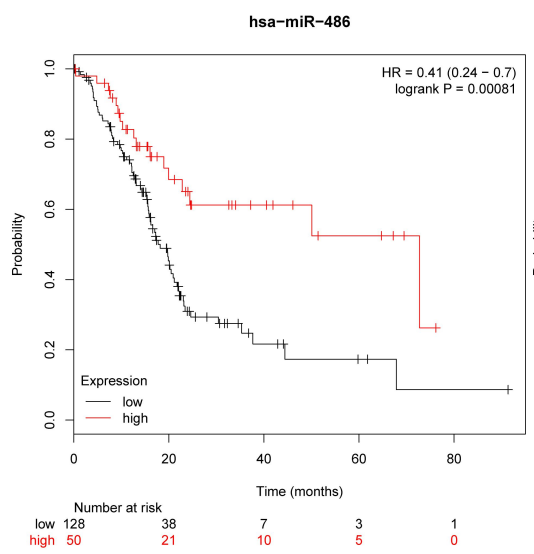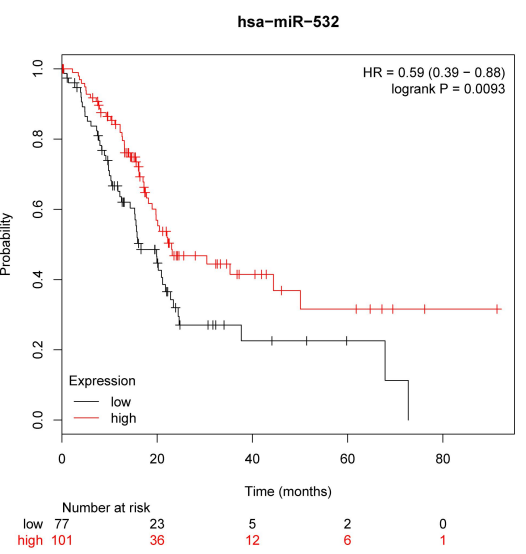

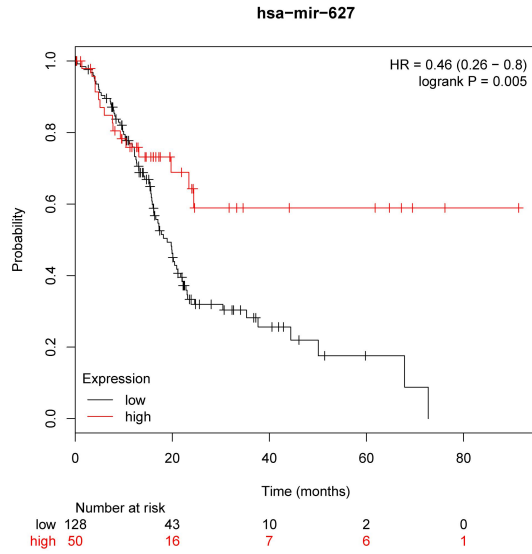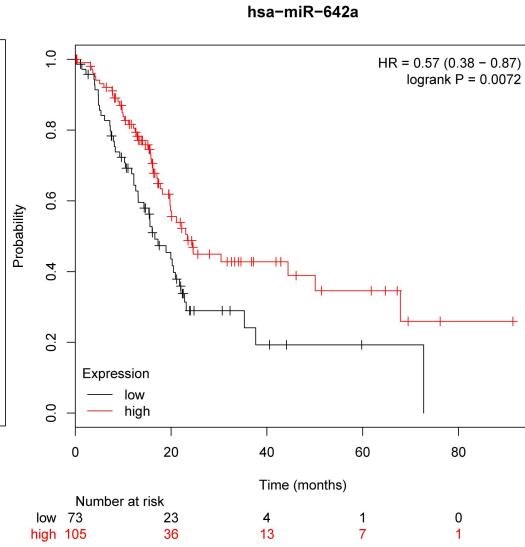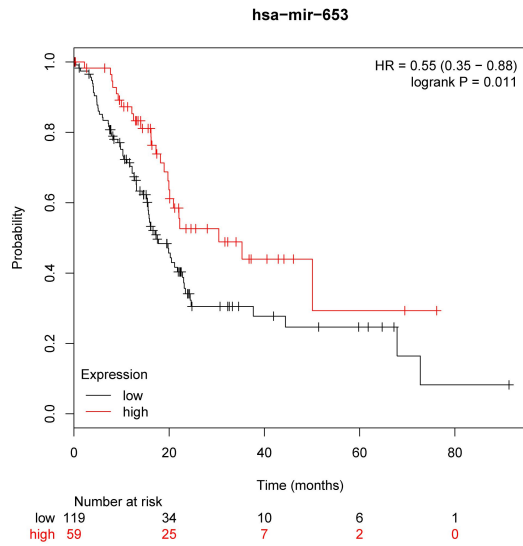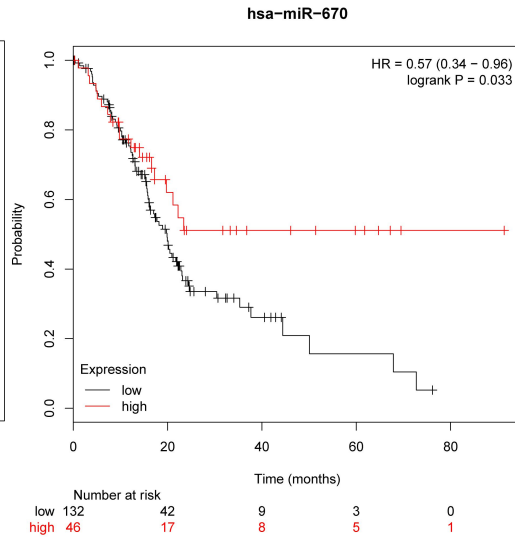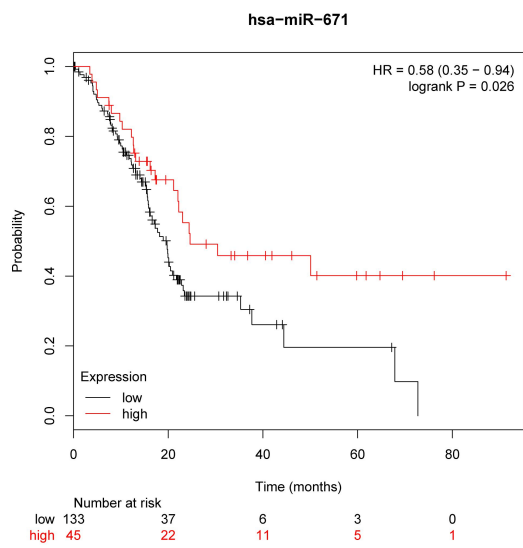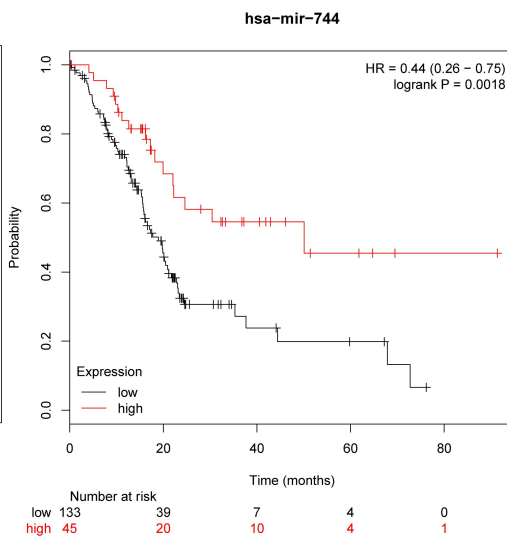

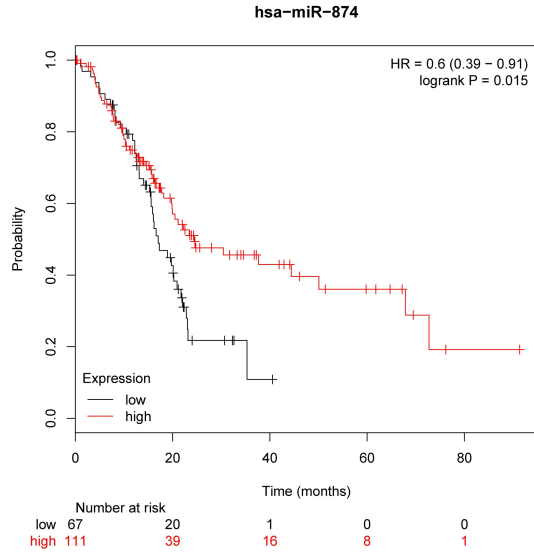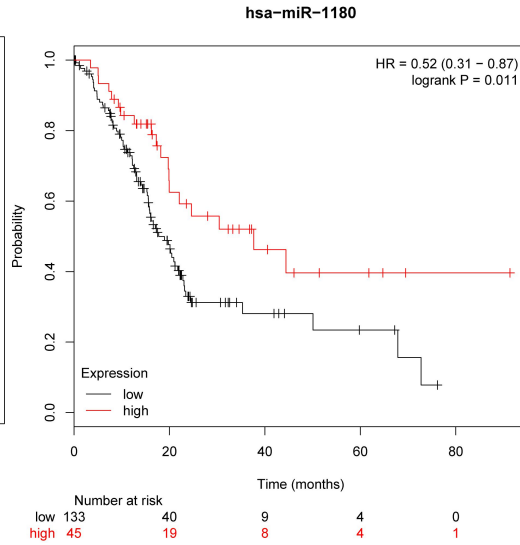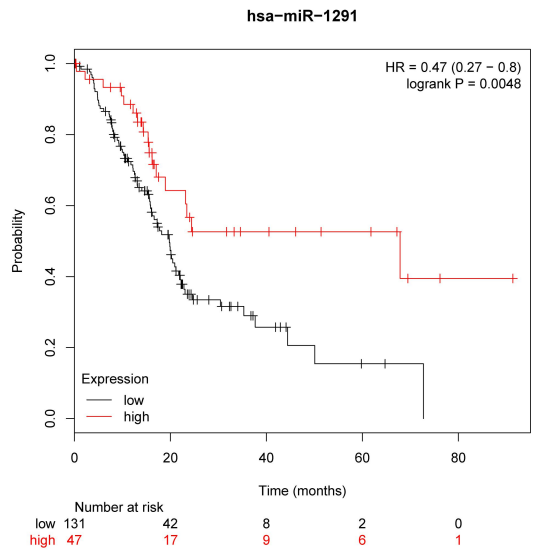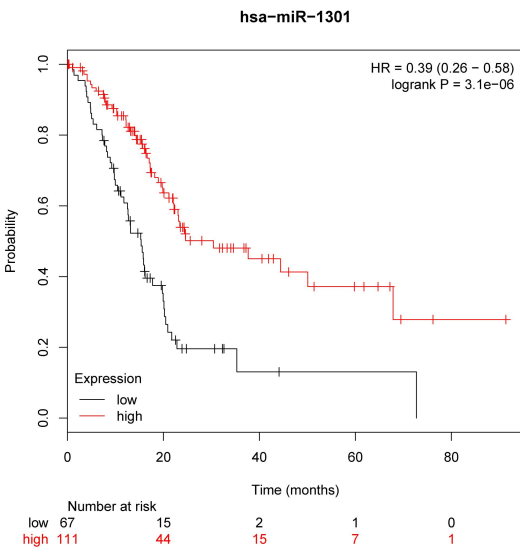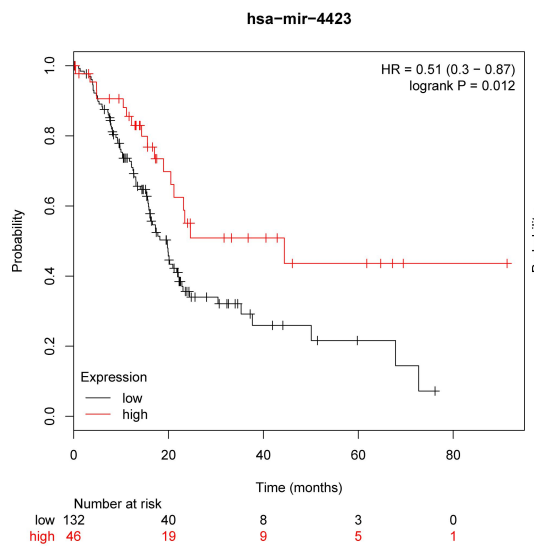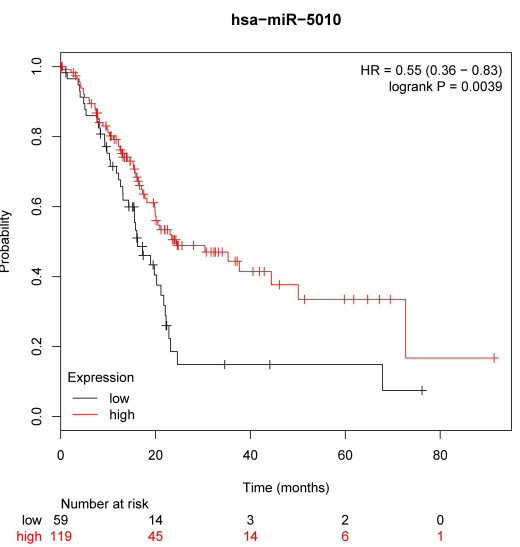

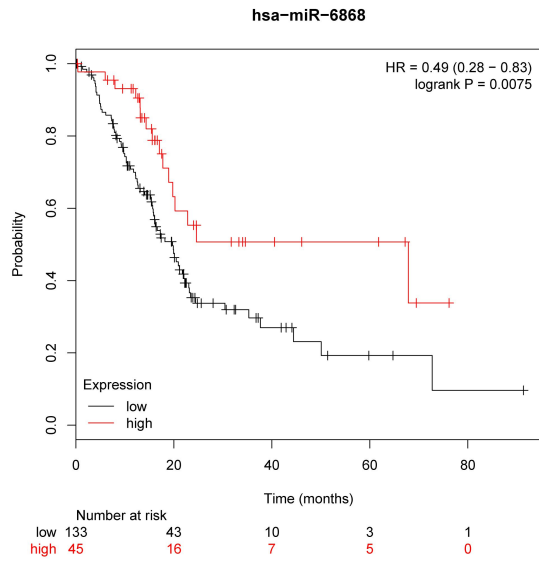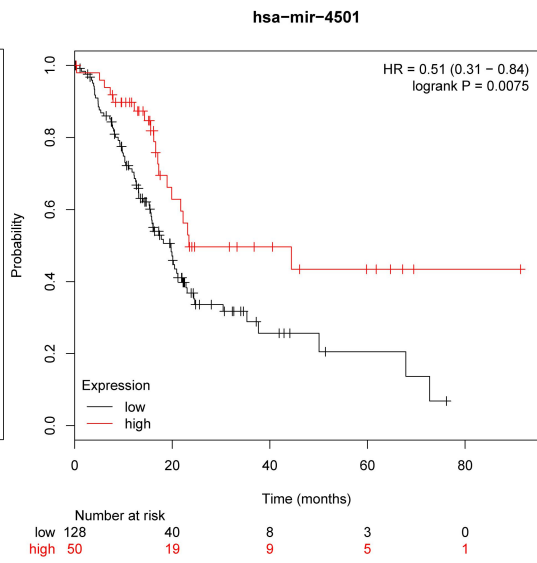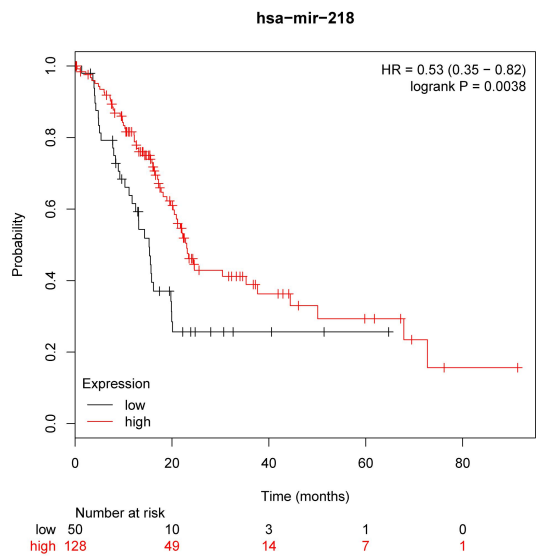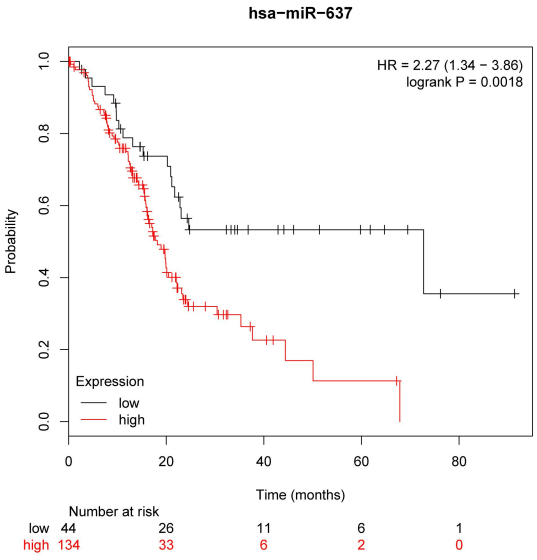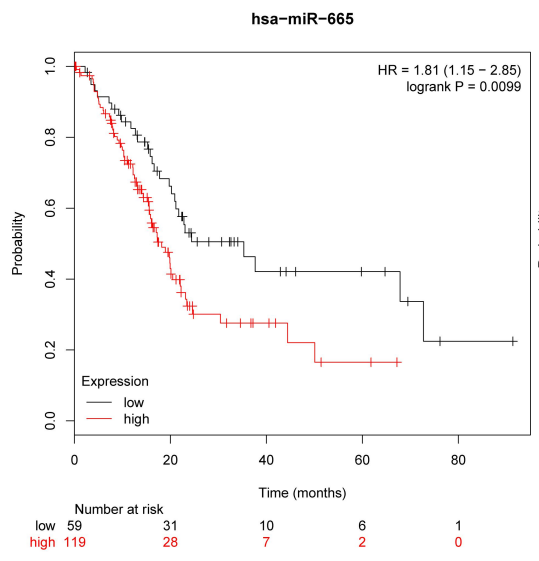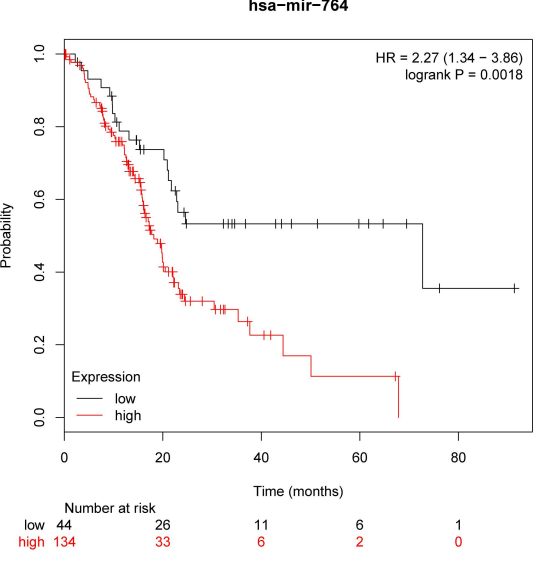

hsa-miR-1256

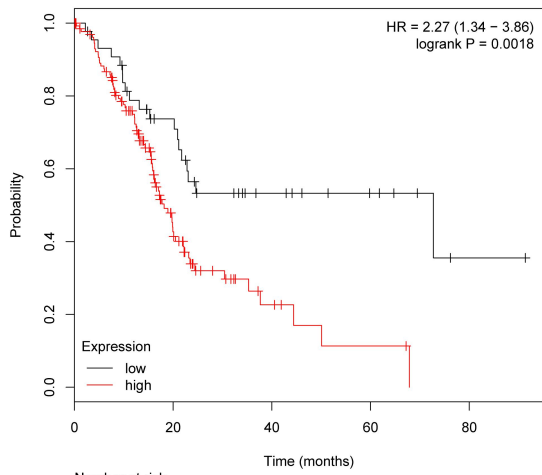

| Number at risk |     | 0  | 20 | 40 | 60 | 80 |
|----------------|-----|----|----|----|----|----|
| low            | 44  | 26 | 11 | 6  | 1  |    |
| high           | 134 | 33 | 6  | 2  | 0  |    |

hsa-miR-1295b

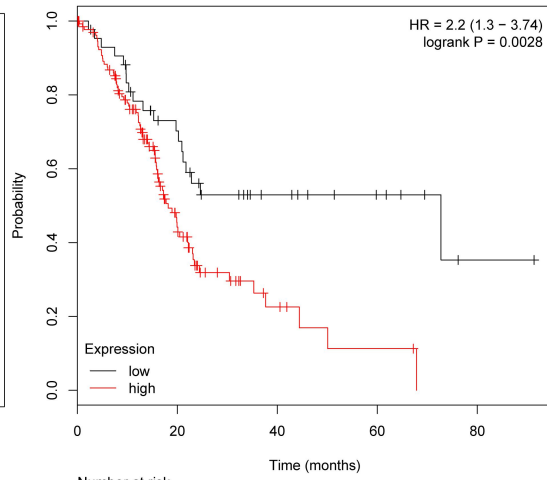

| Number at risk |     | 0  | 20 | 40 | 60 | 80 |
|----------------|-----|----|----|----|----|----|
| low            | 43  | 25 | 11 | 6  | 1  |    |
| high           | 135 | 34 | 6  | 2  | 0  |    |

hsa-miR-1914

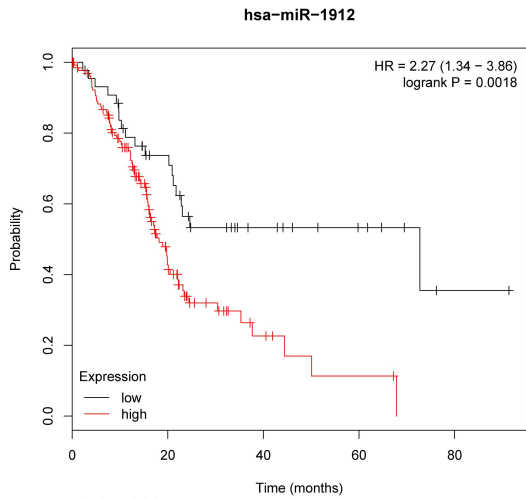

| Number at risk |     | 0  | 20 | 40 | 60 | 80 |
|----------------|-----|----|----|----|----|----|
| low            | 44  | 26 | 11 | 6  | 1  |    |
| high           | 134 | 33 | 6  | 2  | 0  |    |

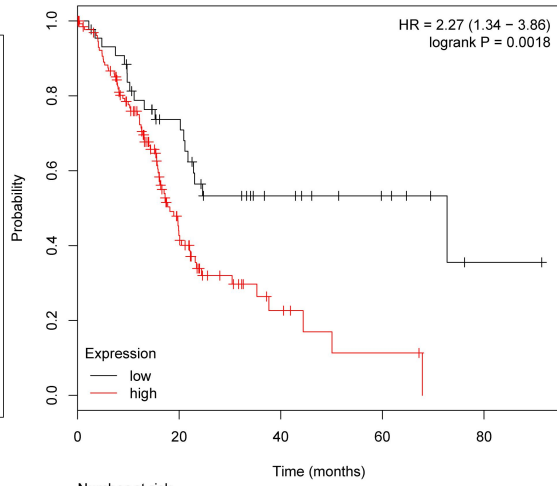

| Number at risk |     | 0  | 20 | 40 | 60 | 80 |
|----------------|-----|----|----|----|----|----|
| low            | 44  | 26 | 11 | 6  | 1  |    |
| high           | 134 | 33 | 6  | 2  | 0  |    |

hsa-miR-2467

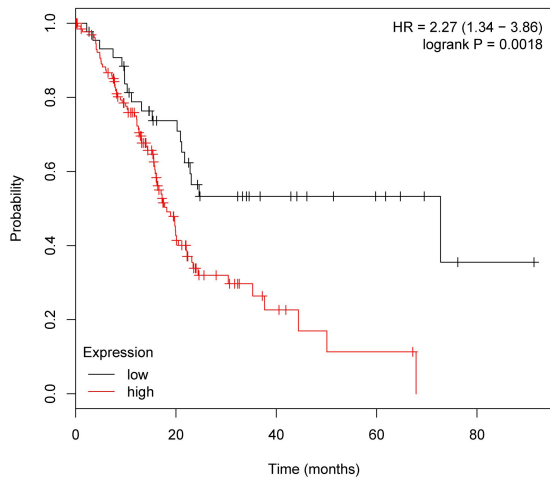

| Number at risk |     | 0  | 20 | 40 | 60 | 80 |
|----------------|-----|----|----|----|----|----|
| low            | 44  | 26 | 11 | 6  | 1  |    |
| high           | 134 | 33 | 6  | 2  | 0  |    |

hsa-miR-3155a

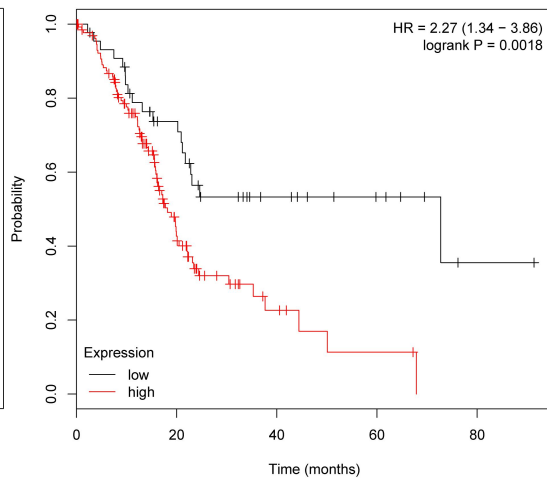

| Number at risk |     | 0  | 20 | 40 | 60 | 80 |
|----------------|-----|----|----|----|----|----|
| low            | 44  | 26 | 11 | 6  | 1  |    |
| high           | 134 | 33 | 6  | 2  | 0  |    |

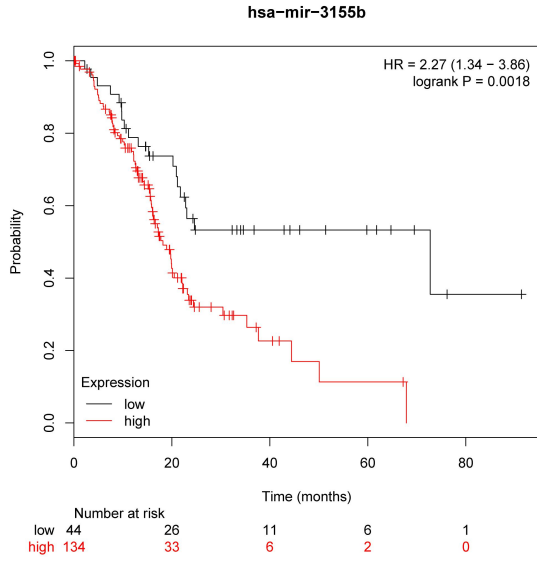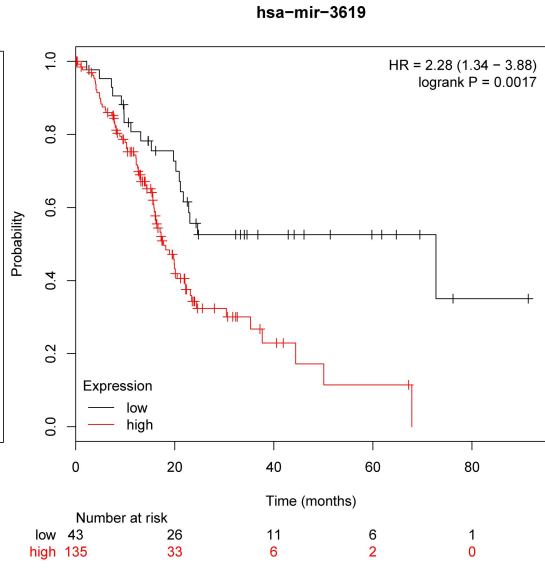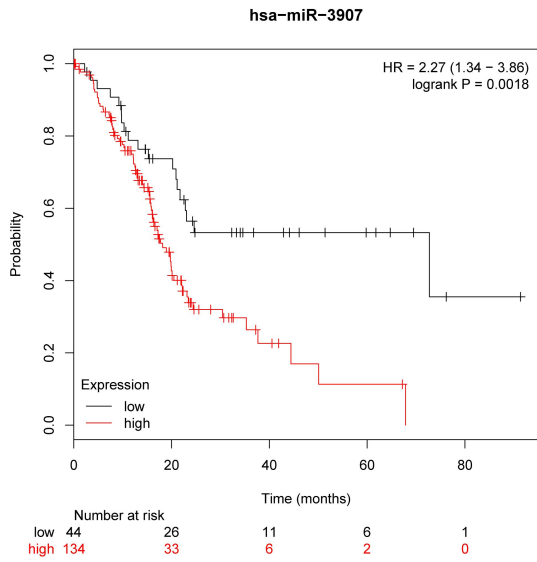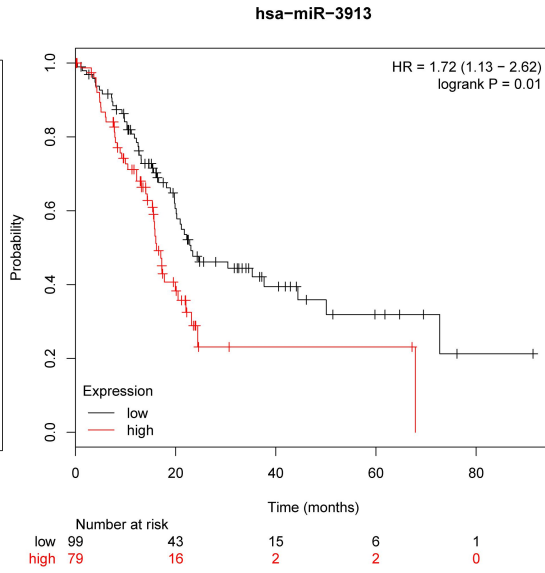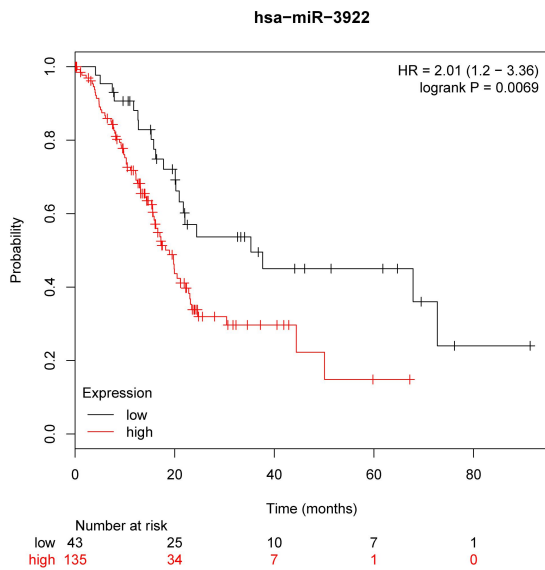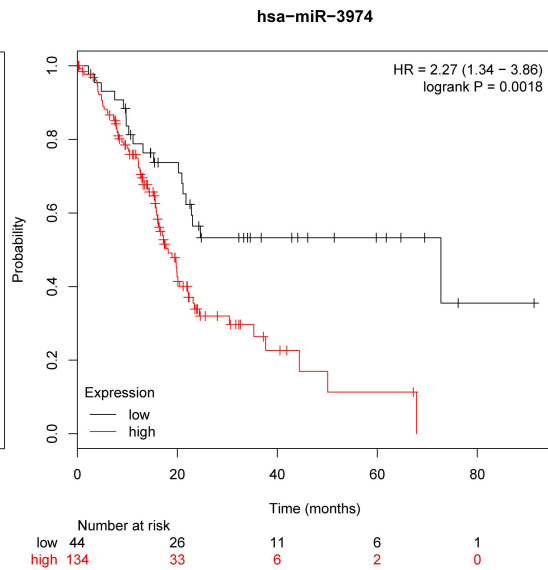



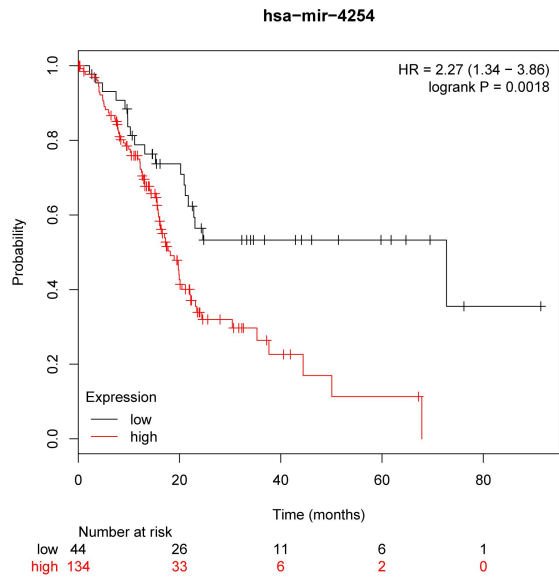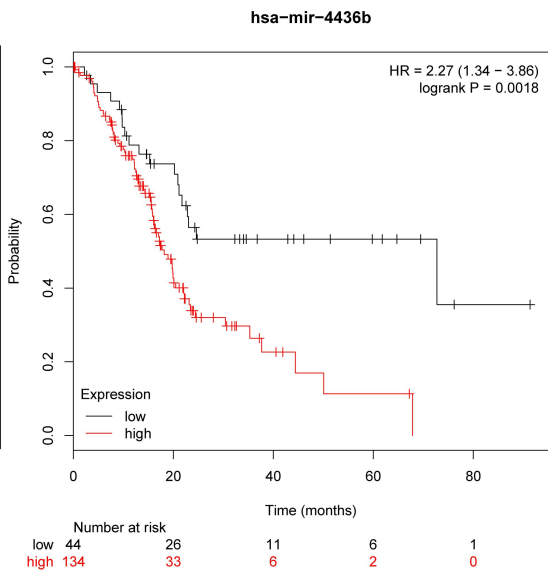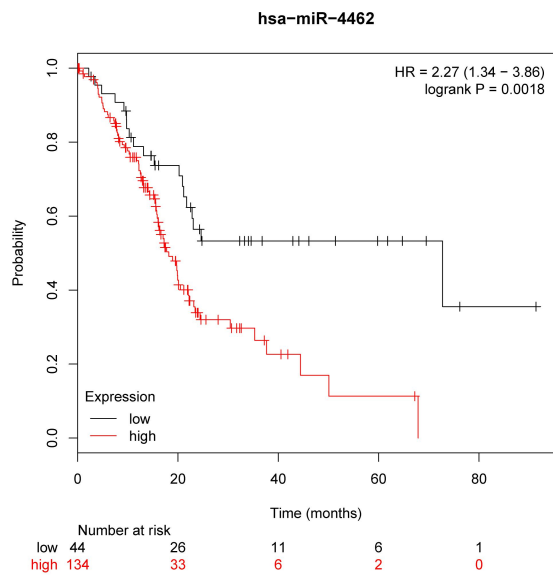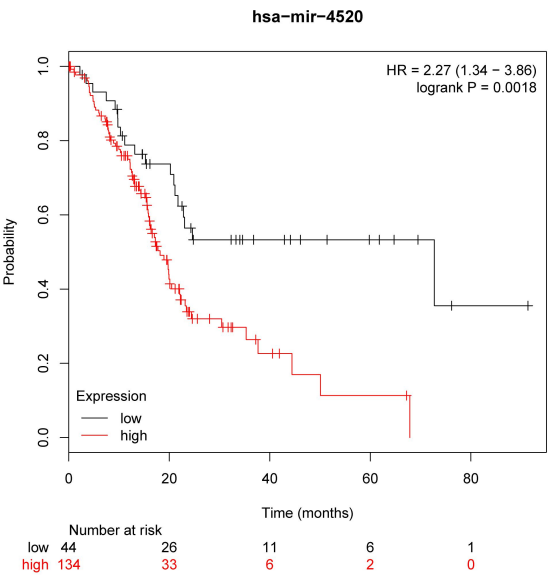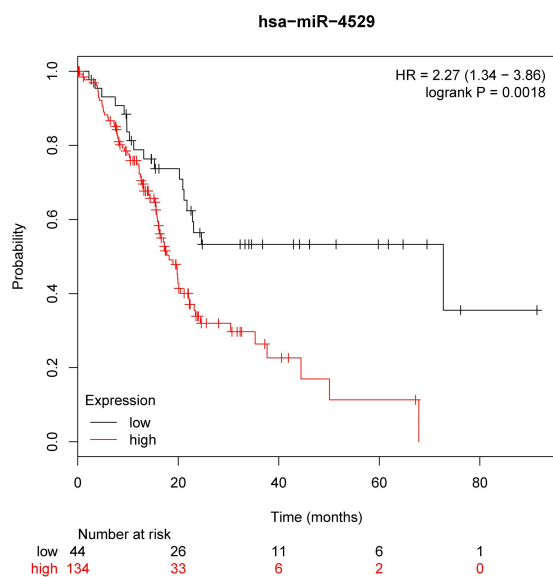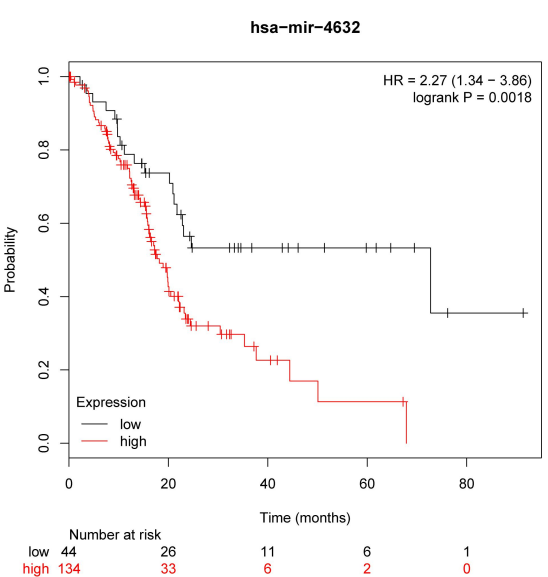

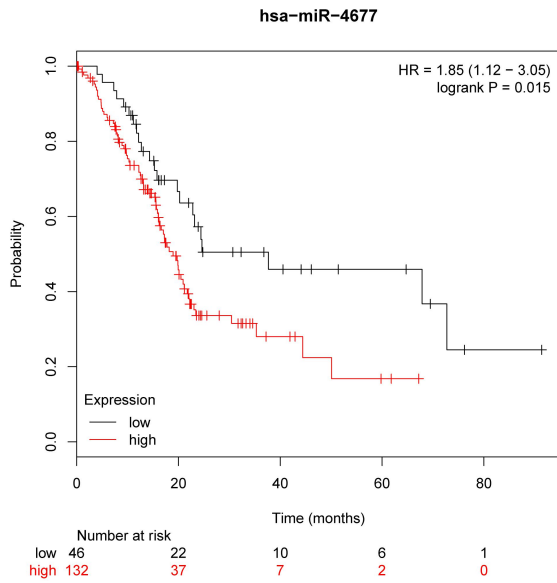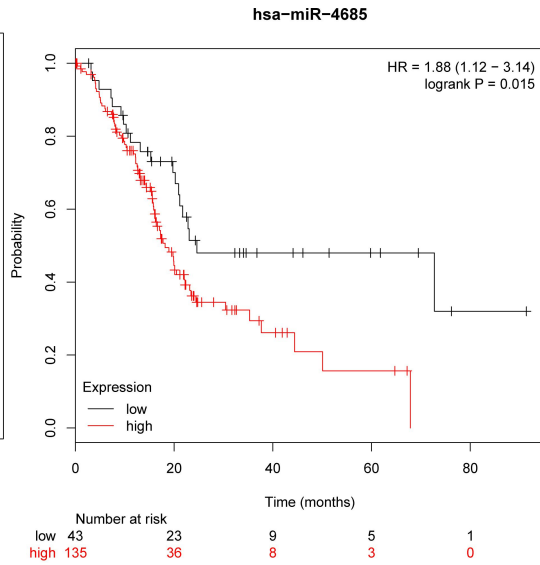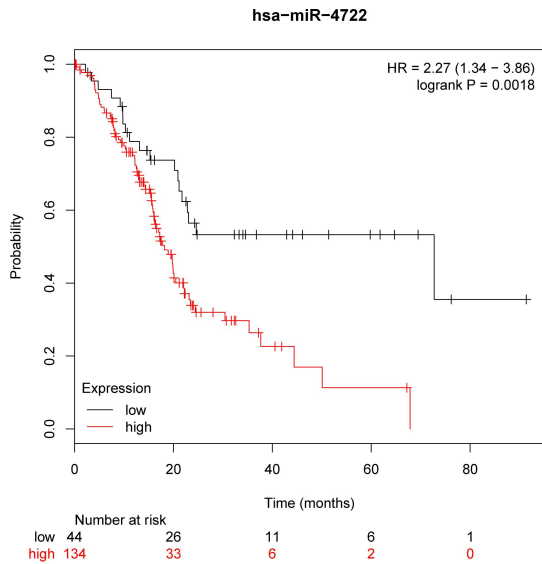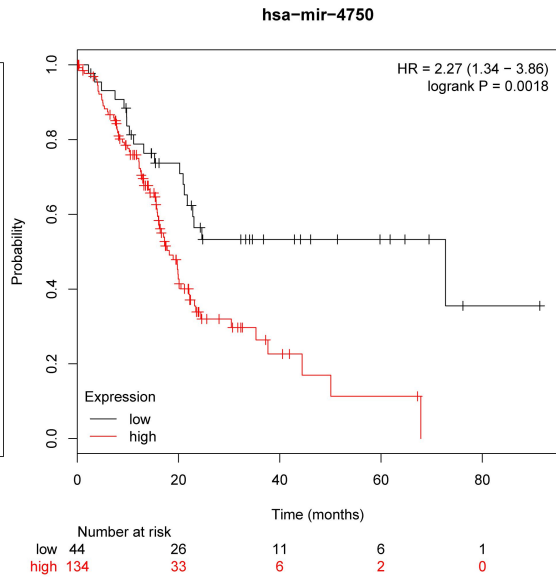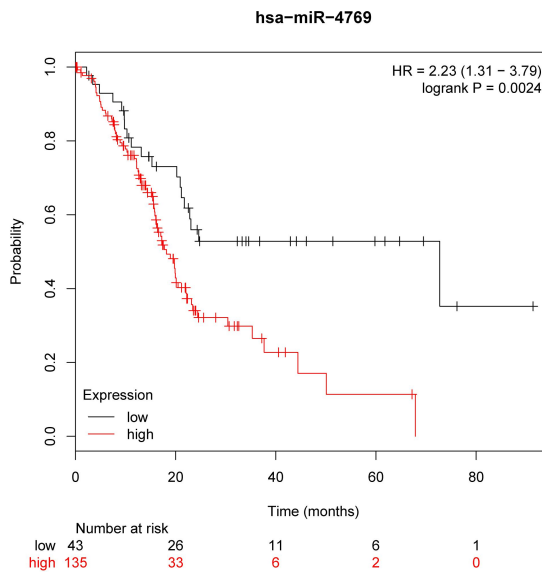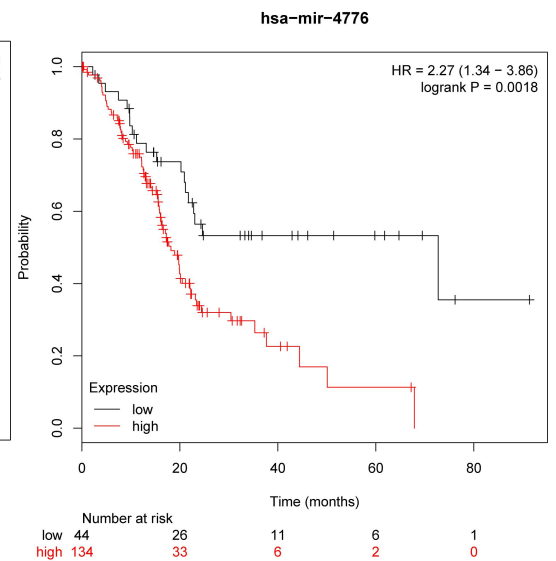

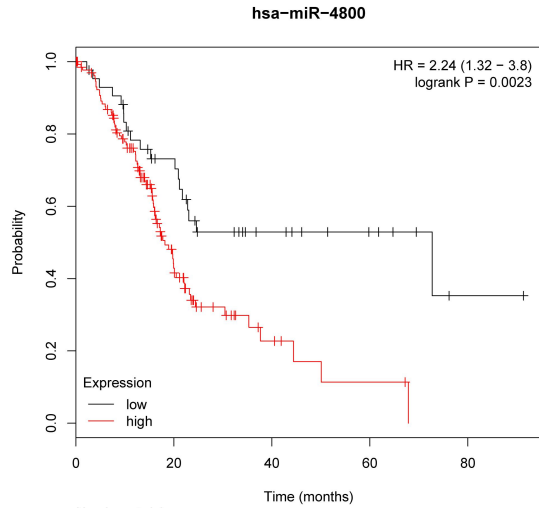

|      |                | 0   | 20 | 40 | 60 | 80 |
|------|----------------|-----|----|----|----|----|
| low  | Number at risk | 43  | 26 | 11 | 6  | 1  |
| high | Number at risk | 135 | 33 | 6  | 2  | 0  |

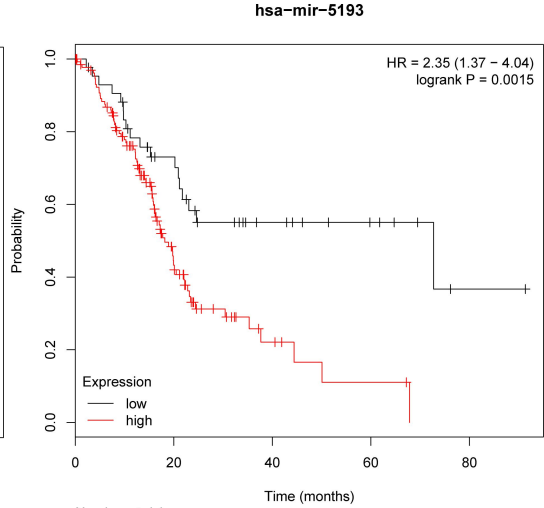

|      |                | 0   | 20 | 40 | 60 | 80 |
|------|----------------|-----|----|----|----|----|
| low  | Number at risk | 43  | 25 | 11 | 6  | 1  |
| high | Number at risk | 135 | 34 | 6  | 2  | 0  |

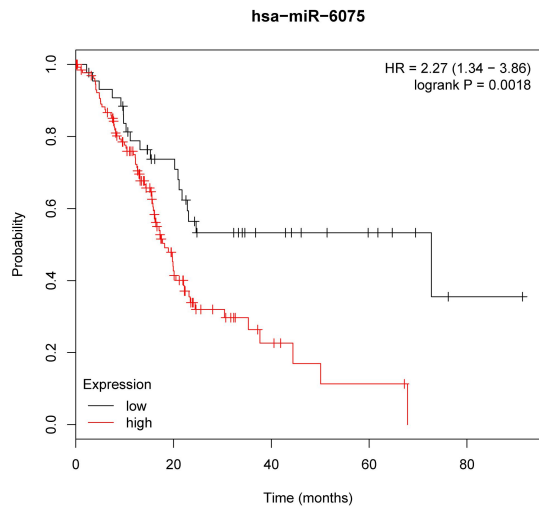

|      |                | 0   | 20 | 40 | 60 | 80 |
|------|----------------|-----|----|----|----|----|
| low  | Number at risk | 44  | 26 | 11 | 6  | 1  |
| high | Number at risk | 134 | 33 | 6  | 2  | 0  |

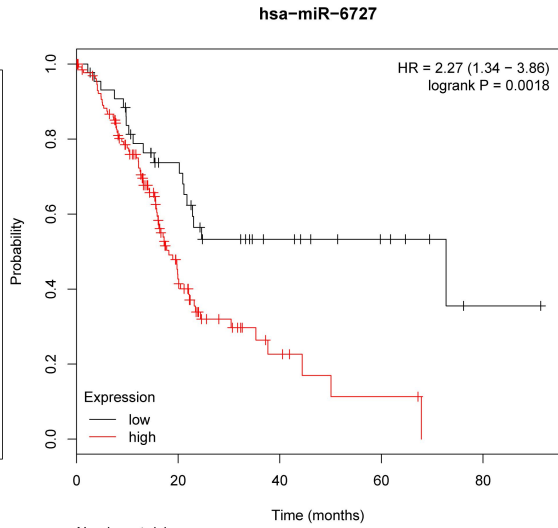

|      |                | 0   | 20 | 40 | 60 | 80 |
|------|----------------|-----|----|----|----|----|
| low  | Number at risk | 44  | 26 | 11 | 6  | 1  |
| high | Number at risk | 134 | 33 | 6  | 2  | 0  |

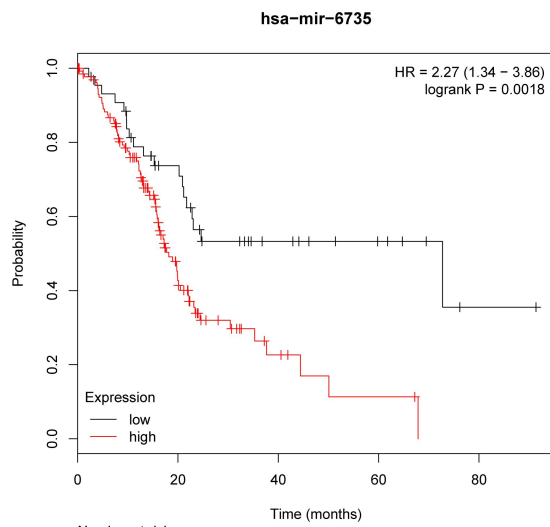

|      |                | 0   | 20 | 40 | 60 | 80 |
|------|----------------|-----|----|----|----|----|
| low  | Number at risk | 44  | 26 | 11 | 6  | 1  |
| high | Number at risk | 134 | 33 | 6  | 2  | 0  |

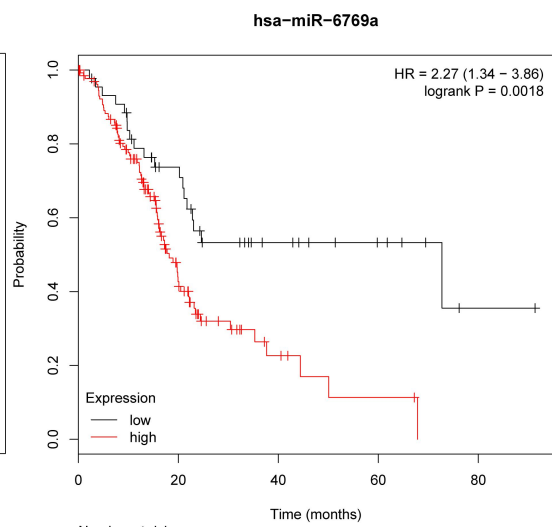

|      |                | 0   | 20 | 40 | 60 | 80 |
|------|----------------|-----|----|----|----|----|
| low  | Number at risk | 44  | 26 | 11 | 6  | 1  |
| high | Number at risk | 134 | 33 | 6  | 2  | 0  |

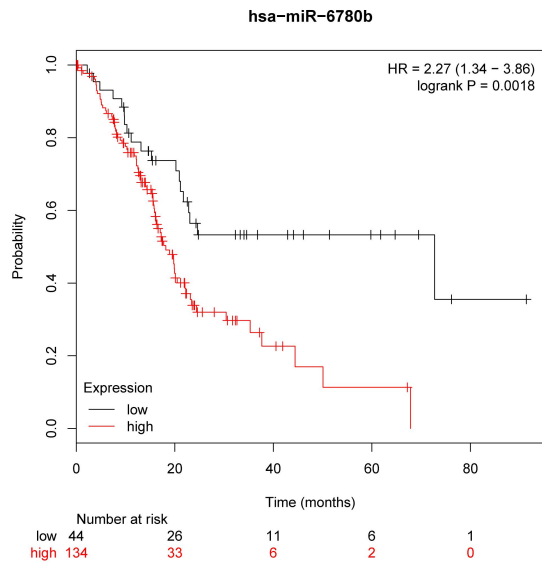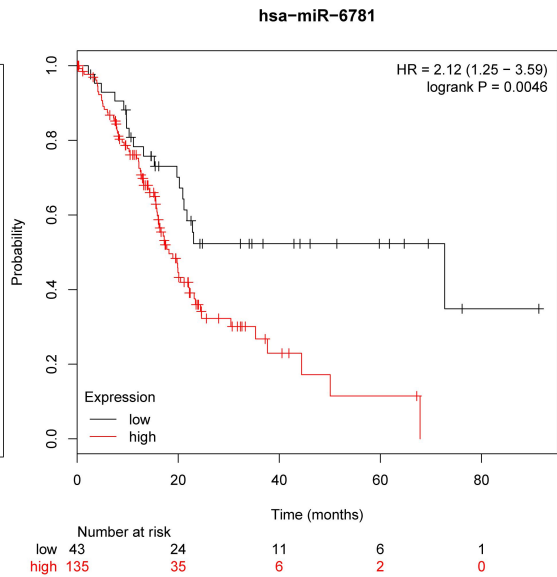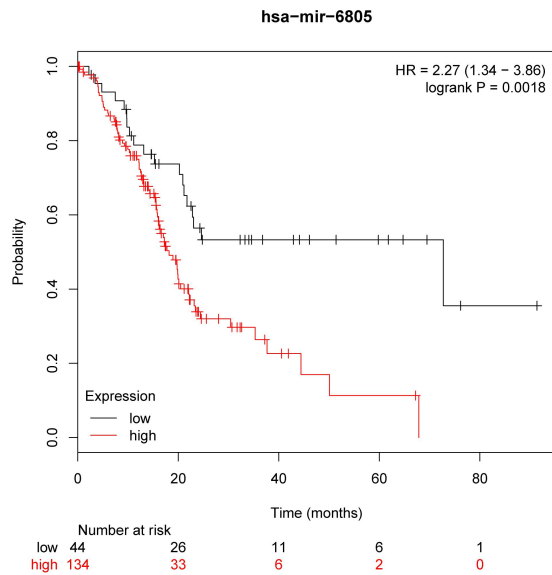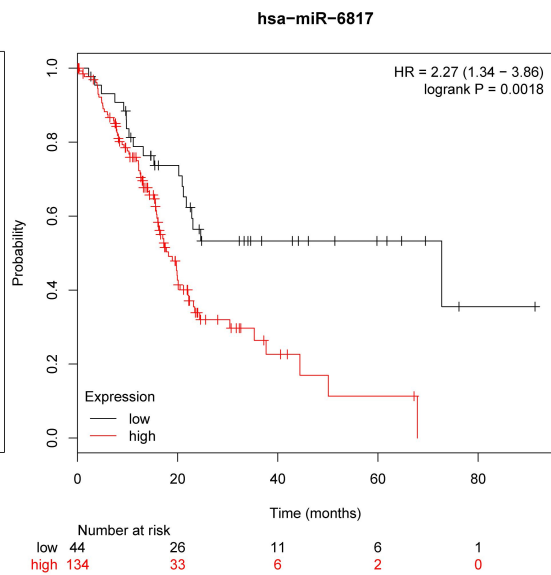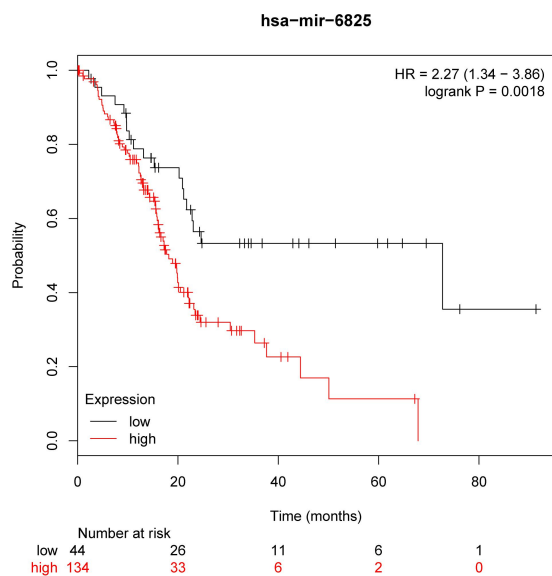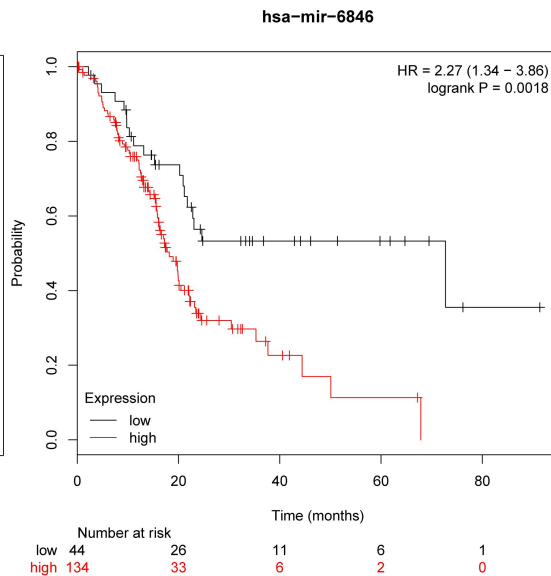

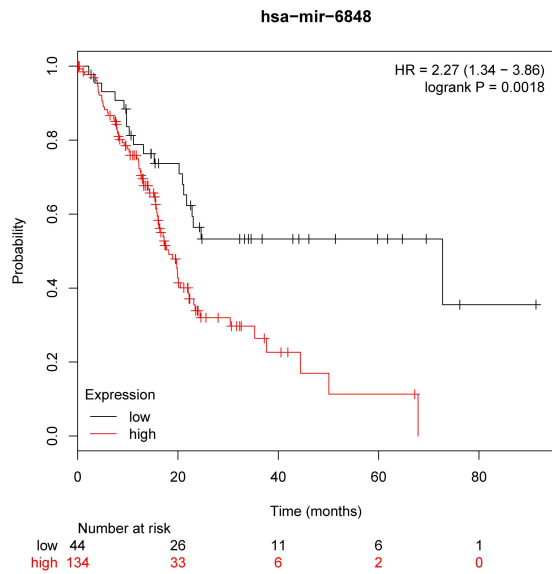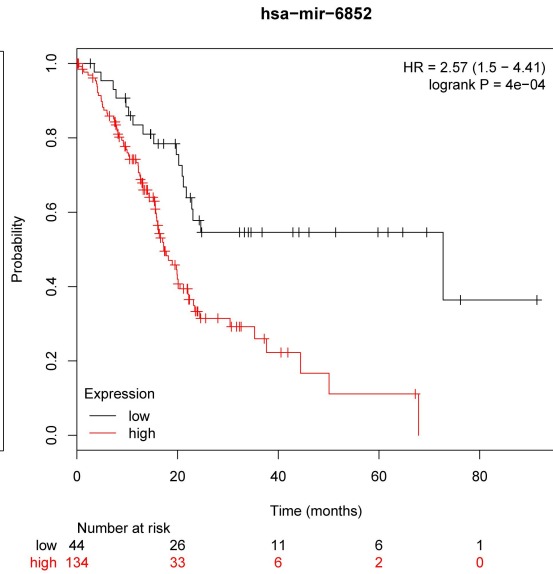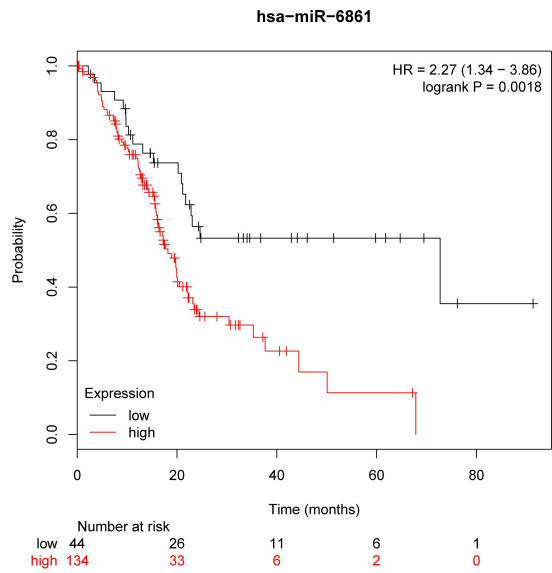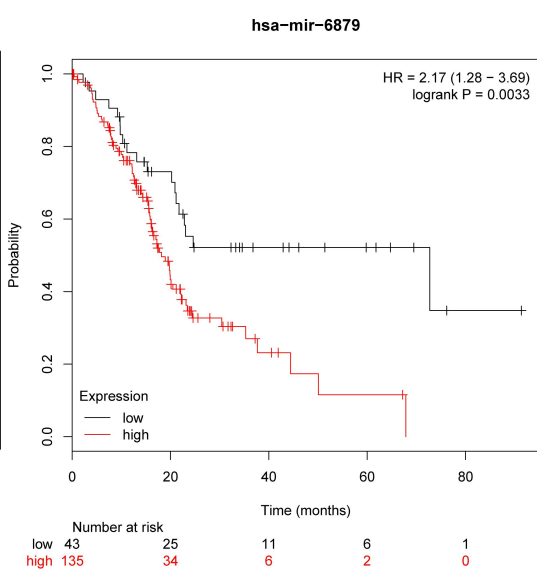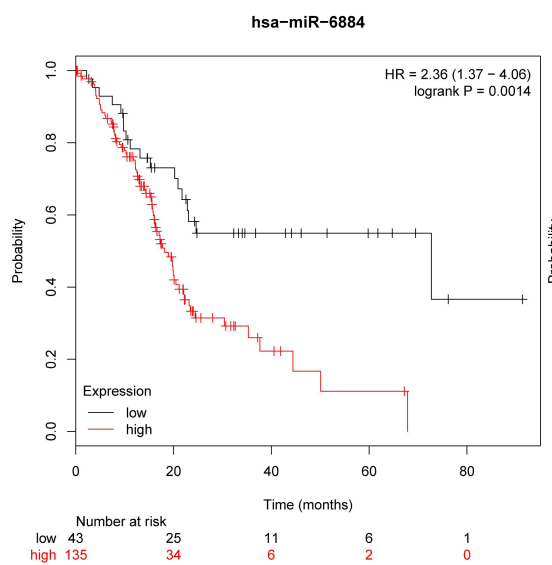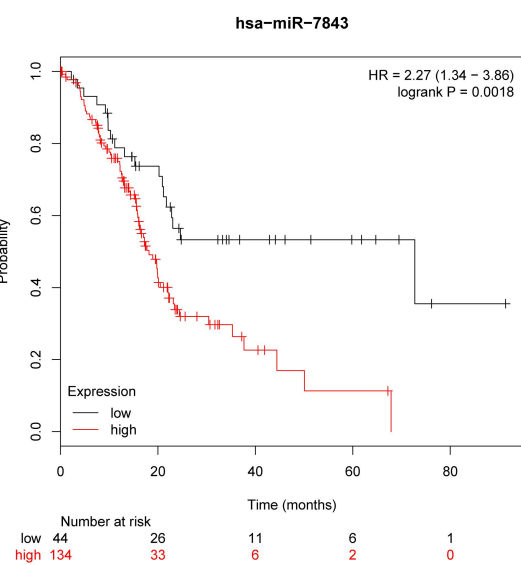

hsa-miR-8057

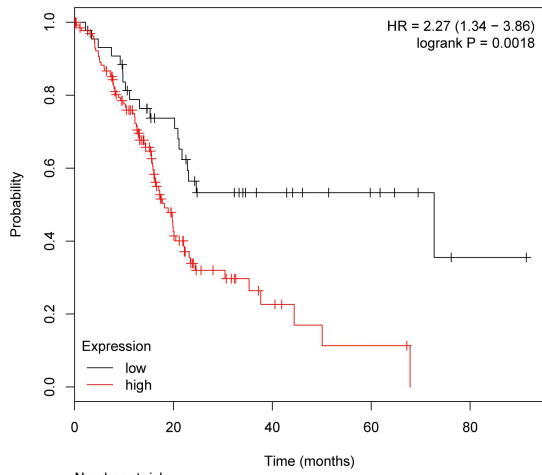

|      |                | 0   | 26 | 44 | 66 | 80 |
|------|----------------|-----|----|----|----|----|
| low  | Number at risk | 44  | 26 | 11 | 6  | 1  |
| high | Number at risk | 134 | 33 | 6  | 2  | 0  |

hsa-miR-8076

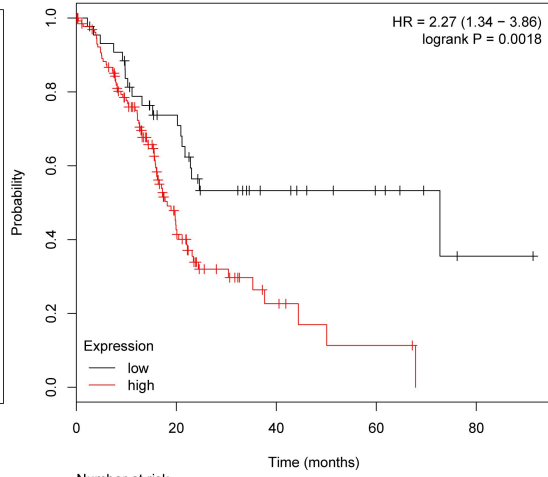

|      |                | 0   | 26 | 44 | 66 | 80 |
|------|----------------|-----|----|----|----|----|
| low  | Number at risk | 44  | 26 | 11 | 6  | 1  |
| high | Number at risk | 134 | 33 | 6  | 2  | 0  |

hsa-miR-8089

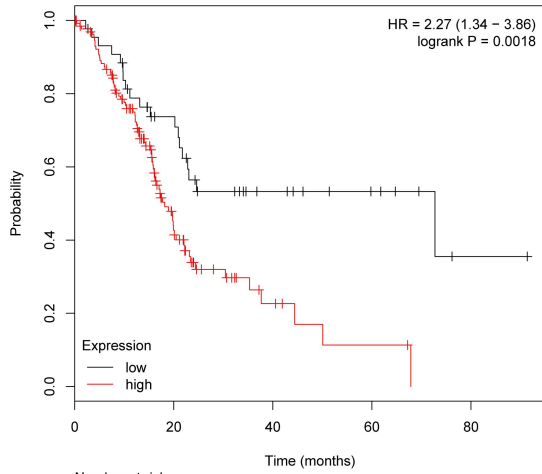

|      |                | 0   | 26 | 44 | 66 | 80 |
|------|----------------|-----|----|----|----|----|
| low  | Number at risk | 44  | 26 | 11 | 6  | 1  |
| high | Number at risk | 134 | 33 | 6  | 2  | 0  |

hsa-miR-4667

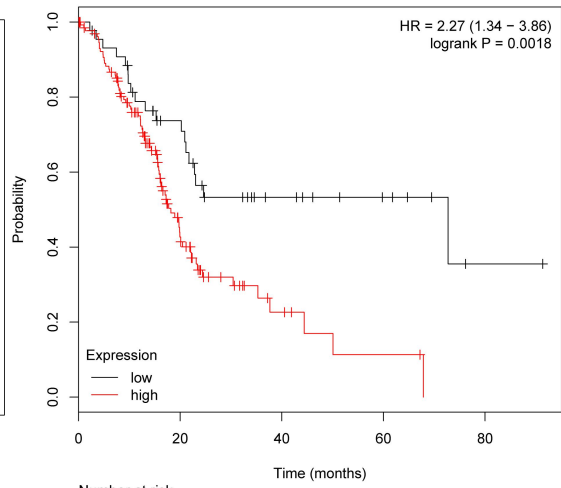

|      |                | 0   | 26 | 44 | 66 | 80 |
|------|----------------|-----|----|----|----|----|
| low  | Number at risk | 44  | 26 | 11 | 6  | 1  |
| high | Number at risk | 134 | 33 | 6  | 2  | 0  |

hsa-miR-4700

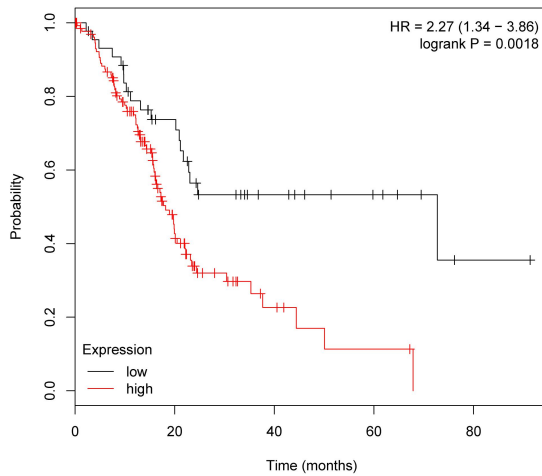

|      |                | 0   | 26 | 44 | 66 | 80 |
|------|----------------|-----|----|----|----|----|
| low  | Number at risk | 44  | 26 | 11 | 6  | 1  |
| high | Number at risk | 134 | 33 | 6  | 2  | 0  |

hsa-miR-4708

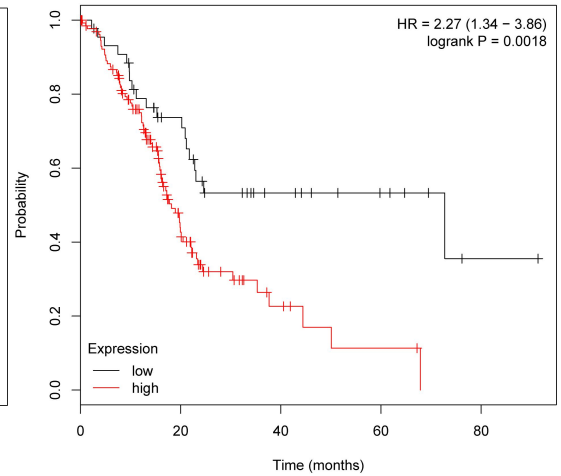

|      |                | 0   | 26 | 44 | 66 | 80 |
|------|----------------|-----|----|----|----|----|
| low  | Number at risk | 44  | 26 | 11 | 6  | 1  |
| high | Number at risk | 134 | 33 | 6  | 2  | 0  |

hsa-mir-4313

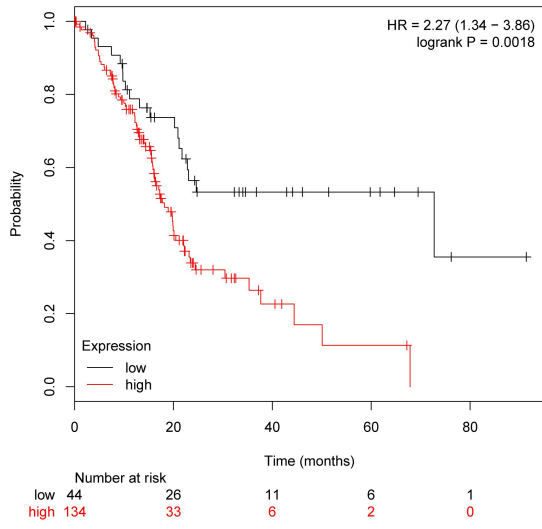

hsa-mir-4652

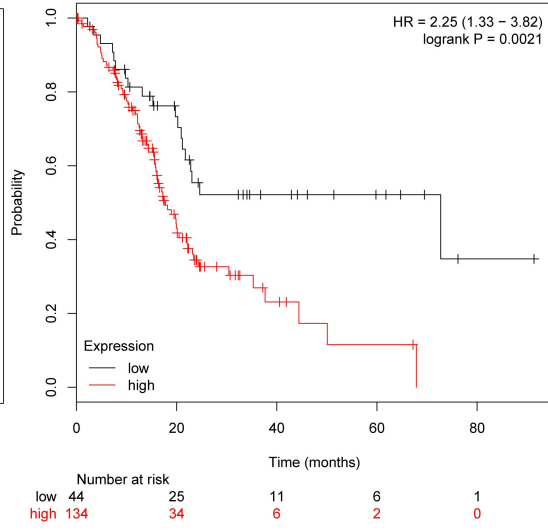

Supplement: f1 [file 8819990.f1.pdf]
