# Supplementary material for: circRNA circ_102049 Implicates in Pancreatic Ductal Adenocarcinoma Progression through Activating CD80 by Targeting miR‐455‐3p
Source: Hindawi journal article supplement (doi:10.1155/2021/8819990), 2021-01-01
Supplement: f9 [file 8819990.f9.pdf]

**Supplementary Table S7 The differentially methylated genes in the GSE14245 dataset**

| ID         | adj.P.Val | P.Value  | t        | B           | logFC    | RANGE_START | RANGE_END | RANGE_GB     |
|------------|-----------|----------|----------|-------------|----------|-------------|-----------|--------------|
| cg22674699 | 4.79E-52  | 1.19E-57 | 2.31E+01 | 120.7358545 | 3.92E-01 | 176987918   | 176988041 | NC_000002.11 |
| cg16732616 | 1.60E-49  | 1.20E-54 | 2.20E+01 | 113.8727168 | 4.04E-01 | 50886782    | 50886905  | NC_000001.10 |
| cg24221648 | 2.96E-48  | 3.68E-53 | 2.14E+01 | 110.4694261 | 3.66E-01 | 79170283    | 79170406  | NC_000013.10 |
| cg14473102 | 1.11E-47  | 1.66E-52 | 2.12E+01 | 108.9708643 | 3.58E-01 | 176994448   | 176994571 | NC_000002.11 |
| cg01059818 | 1.69E-47  | 2.93E-52 | 2.11E+01 | 108.4057534 | 2.48E-01 | 26370690    | 26370813  | NC_000017.10 |
| cg06304097 | 1.01E-46  | 2.01E-51 | 2.08E+01 | 106.4944987 | 4.06E-01 | 133109867   | 133109990 | NC_000010.10 |
| cg14451382 | 7.18E-45  | 2.32E-49 | 2.01E+01 | 101.7751627 | 2.96E-01 | 1876397     | 1876520   | NC_000005.9  |
| cg18375860 | 1.71E-41  | 1.65E-45 | 1.87E+01 | 92.9595531  | 3.20E-01 | 237205409   | 237205532 | NC_000001.10 |
| cg27423760 | 1.71E-41  | 1.69E-45 | 1.87E+01 | 92.9310716  | 3.38E-01 | 51186463    | 51186586  | NC_000016.9  |
| cg02835462 | 1.71E-41  | 1.70E-45 | 1.87E+01 | 92.9250063  | 2.31E-01 | 46391567    | 46391690  | NC_000001.10 |
| cg12526197 | 2.27E-41  | 2.37E-45 | 1.87E+01 | 92.5982992  | 2.16E-01 | 230416938   | 230417061 | NC_000001.10 |
| cg23992403 | 3.16E-41  | 3.62E-45 | 1.86E+01 | 92.1767336  | 2.90E-01 | 226012347   | 226012470 | NC_000001.10 |
| cg03306374 | 3.45E-41  | 4.12E-45 | 1.86E+01 | 92.047072   | 4.69E-01 | 23847325    | 23847448  | NC_000016.9  |
| cg03156893 | 4.08E-41  | 5.07E-45 | 1.86E+01 | 91.841312   | 3.43E-01 | 23847675    | 23847798  | NC_000016.9  |
| cg05732750 | 9.52E-41  | 1.23E-44 | 1.84E+01 | 90.9598158  | 3.05E-01 | 6704045     | 6704168   | NC_000007.13 |
| cg18074820 | 1.21E-40  | 1.63E-44 | 1.84E+01 | 90.6822949  | 2.05E-01 | 99203739    | 99203862  | NC_000015.9  |
| cg11030420 | 3.94E-40  | 5.88E-44 | 1.82E+01 | 89.4040994  | 1.83E-01 | 136758308   | 136758431 | NC_000006.11 |
| cg17495912 | 7.00E-40  | 1.06E-43 | 1.81E+01 | 88.816848   | 3.45E-01 | 37006340    | 37006463  | NC_000013.10 |
| cg14759565 | 1.77E-39  | 2.86E-43 | 1.80E+01 | 87.8304741  | 2.43E-01 | 65360123    | 65360246  | NC_000011.9  |
| cg13438893 | 7.21E-39  | 1.25E-42 | 1.78E+01 | 86.3607392  | 3.39E-01 | 79170303    | 79170426  | NC_000013.10 |
| cg18952796 | 8.39E-39  | 1.50E-42 | 1.77E+01 | 86.181958   | 3.67E-01 | 98246633    | 98246756  | NC_000007.13 |
| cg13755795 | 1.29E-38  | 2.40E-42 | 1.77E+01 | 85.716485   | 3.31E-01 | 51185772    | 51185895  | NC_000016.9  |
| cg11552694 | 1.81E-38  | 3.53E-42 | 1.76E+01 | 85.3300147  | 3.98E-01 | 2752149     | 2752272   | NC_000005.9  |

|            |          |          |          |            |          |           |           |              |
|------------|----------|----------|----------|------------|----------|-----------|-----------|--------------|
| cg11595545 | 2.64E-38 | 5.48E-42 | 1.75E+01 | 84.8946456 | 4.22E-01 | 111217497 | 111217620 | NC_000001.10 |
| cg12918457 | 3.17E-38 | 6.78E-42 | 1.75E+01 | 84.6824463 | 3.53E-01 | 115630748 | 115630871 | NC_000011.9  |
| cg03758150 | 5.40E-38 | 1.23E-41 | 1.74E+01 | 84.086968  | 3.67E-01 | 30866192  | 30866315  | NC_000019.9  |
| cg01464835 | 9.87E-38 | 2.45E-41 | 1.73E+01 | 83.405803  | 3.49E-01 | 30016147  | 30016270  | NC_000019.9  |
| cg17954142 | 1.11E-37 | 2.80E-41 | 1.73E+01 | 83.2698631 | 2.13E-01 | 230417096 | 230417219 | NC_000001.10 |
| cg16675507 | 1.21E-37 | 3.18E-41 | 1.73E+01 | 83.144288  | 3.15E-01 | 155108371 | 155108494 | NC_000005.9  |
| cg06647382 | 1.37E-37 | 3.69E-41 | 1.73E+01 | 82.9973561 | 1.69E-01 | 48175734  | 48175857  | NC_000017.10 |
| cg19384289 | 1.69E-37 | 4.65E-41 | 1.72E+01 | 82.7659913 | 3.20E-01 | 176994365 | 176994488 | NC_000002.11 |
| cg03109827 | 2.19E-37 | 6.08E-41 | 1.72E+01 | 82.4997155 | 3.40E-01 | 133110349 | 133110472 | NC_000010.10 |
| cg07011231 | 3.75E-37 | 1.06E-40 | 1.71E+01 | 81.9467385 | 1.65E-01 | 73329813  | 73329936  | NC_000002.11 |
| cg26504274 | 5.83E-37 | 1.71E-40 | 1.70E+01 | 81.4713915 | 1.83E-01 | 2485409   | 2485532   | NC_000011.9  |
| cg03337430 | 6.76E-37 | 2.05E-40 | 1.70E+01 | 81.2932649 | 2.27E-01 | 226012507 | 226012630 | NC_000001.10 |
| cg10158541 | 6.76E-37 | 2.05E-40 | 1.70E+01 | 81.2920935 | 3.03E-01 | 37006265  | 37006388  | NC_000013.10 |
| cg02609724 | 8.00E-37 | 2.50E-40 | 1.70E+01 | 81.0921083 | 2.06E-01 | 139506447 | 139506570 | NC_000005.9  |
| cg06177254 | 1.23E-36 | 3.97E-40 | 1.69E+01 | 80.6350671 | 2.33E-01 | 77303975  | 77304098  | NC_000011.9  |
| cg09161419 | 1.46E-36 | 4.76E-40 | 1.69E+01 | 80.4527223 | 2.09E-01 | 119593593 | 119593716 | NC_000011.9  |
| cg25096740 | 1.47E-36 | 4.81E-40 | 1.69E+01 | 80.4434868 | 2.14E-01 | 20140828  | 20140951  | NC_000001.10 |
| cg20885063 | 1.75E-36 | 5.90E-40 | 1.69E+01 | 80.2403957 | 2.04E-01 | 17939419  | 17939542  | NC_000017.10 |
| cg15617814 | 1.80E-36 | 6.12E-40 | 1.69E+01 | 80.2038668 | 3.93E-01 | 131780492 | 131780615 | NC_000011.9  |
| cg23331421 | 2.42E-36 | 8.59E-40 | 1.68E+01 | 79.8664908 | 3.15E-01 | 30866202  | 30866325  | NC_000019.9  |
| cg11041817 | 2.51E-36 | 8.99E-40 | 1.68E+01 | 79.8205216 | 2.05E-01 | 46685327  | 46685450  | NC_000017.10 |
| cg03493668 | 3.52E-36 | 1.32E-39 | 1.67E+01 | 79.4392749 | 1.64E-01 | 77776607  | 77776730  | NC_000011.9  |
| cg11546137 | 4.26E-36 | 1.63E-39 | 1.67E+01 | 79.2303307 | 3.01E-01 | 176972563 | 176972686 | NC_000002.11 |
| cg04215359 | 5.07E-36 | 1.98E-39 | 1.67E+01 | 79.0378307 | 1.96E-01 | 153381623 | 153381746 | NC_000002.11 |
| cg17468616 | 7.15E-36 | 2.86E-39 | 1.66E+01 | 78.669991  | 2.58E-01 | 226013212 | 226013335 | NC_000001.10 |

|            |          |          |          |            |          |           |           |              |
|------------|----------|----------|----------|------------|----------|-----------|-----------|--------------|
| cg06724588 | 7.91E-36 | 3.22E-39 | 1.66E+01 | 78.5514885 | 2.94E-01 | 51185459  | 51185582  | NC_000016.9  |
| cg08204280 | 8.26E-36 | 3.40E-39 | 1.66E+01 | 78.4992413 | 3.09E-01 | 2751839   | 2751962   | NC_000005.9  |
| cg24416513 | 8.26E-36 | 3.41E-39 | 1.66E+01 | 78.4959408 | 4.10E-01 | 176994764 | 176994887 | NC_000002.11 |
| cg24472231 | 1.95E-35 | 8.95E-39 | 1.65E+01 | 77.5352147 | 3.10E-01 | 105471979 | 105472102 | NC_000002.11 |
| cg03928367 | 2.27E-35 | 1.06E-38 | 1.64E+01 | 77.367466  | 2.52E-01 | 34186995  | 34187118  | NC_000020.10 |
| cg11950982 | 2.45E-35 | 1.15E-38 | 1.64E+01 | 77.2851732 | 1.69E-01 | 46269126  | 46269249  | NC_000021.8  |
| cg27019093 | 2.49E-35 | 1.18E-38 | 1.64E+01 | 77.2588372 | 2.15E-01 | 4235082   | 4235205   | NC_000017.10 |
| cg14666369 | 2.95E-35 | 1.42E-38 | 1.64E+01 | 77.0761708 | 3.11E-01 | 121164371 | 121164494 | NC_000012.11 |
| cg27393010 | 3.31E-35 | 1.61E-38 | 1.64E+01 | 76.950595  | 3.38E-01 | 121940216 | 121940339 | NC_000007.13 |
| cg18716164 | 3.53E-35 | 1.74E-38 | 1.64E+01 | 76.8753153 | 3.40E-01 | 30019647  | 30019770  | NC_000019.9  |
| cg02371631 | 3.61E-35 | 1.78E-38 | 1.64E+01 | 76.8499172 | 2.48E-01 | 202748718 | 202748841 | NC_000002.11 |
| cg18466162 | 3.94E-35 | 1.97E-38 | 1.64E+01 | 76.7519356 | 2.57E-01 | 114792873 | 114792996 | NC_000005.9  |
| cg20302133 | 5.18E-35 | 2.66E-38 | 1.63E+01 | 76.4507597 | 3.70E-01 | 111217194 | 111217317 | NC_000001.10 |
| cg23619365 | 5.86E-35 | 3.07E-38 | 1.63E+01 | 76.3085298 | 3.09E-01 | 112712009 | 112712132 | NC_000013.10 |
| cg23130131 | 6.75E-35 | 3.61E-38 | 1.63E+01 | 76.1491143 | 2.67E-01 | 111544299 | 111544422 | NC_000004.11 |
| cg12040830 | 8.98E-35 | 4.95E-38 | 1.62E+01 | 75.8330271 | 4.17E-01 | 112833773 | 112833896 | NC_000011.9  |
| cg19674091 | 9.92E-35 | 5.50E-38 | 1.62E+01 | 75.7298024 | 3.08E-01 | 90643766  | 90643889  | NC_000015.9  |
| cg04711162 | 1.07E-34 | 6.05E-38 | 1.62E+01 | 75.6338337 | 2.92E-01 | 30017511  | 30017634  | NC_000019.9  |
| cg16046493 | 1.08E-34 | 6.10E-38 | 1.62E+01 | 75.6263696 | 2.48E-01 | 58551954  | 58552077  | NC_000003.11 |
| cg24079790 | 1.24E-34 | 7.08E-38 | 1.62E+01 | 75.4783847 | 2.39E-01 | 107993467 | 107993590 | NC_000011.9  |
| cg22153181 | 1.43E-34 | 8.34E-38 | 1.61E+01 | 75.314793  | 2.49E-01 | 172734431 | 172734554 | NC_000004.11 |
| cg19196335 | 1.53E-34 | 9.08E-38 | 1.61E+01 | 75.2305879 | 2.28E-01 | 27184094  | 27184217  | NC_000007.13 |
| cg07082358 | 1.99E-34 | 1.22E-37 | 1.61E+01 | 74.9347162 | 2.21E-01 | 102981127 | 102981250 | NC_000007.13 |
| cg07113642 | 2.02E-34 | 1.25E-37 | 1.61E+01 | 74.914747  | 3.92E-01 | 2781262   | 2781385   | NC_000020.10 |
| cg24613080 | 2.05E-34 | 1.27E-37 | 1.61E+01 | 74.9005293 | 2.87E-01 | 32484035  | 32484158  | NC_000017.10 |

|            |          |          |          |            |          |           |           |              |
|------------|----------|----------|----------|------------|----------|-----------|-----------|--------------|
| cg20927661 | 2.46E-34 | 1.54E-37 | 1.61E+01 | 74.7033843 | 3.77E-01 | 5837002   | 5837125   | NC_000002.11 |
| cg10837685 | 2.54E-34 | 1.60E-37 | 1.61E+01 | 74.6695729 | 2.13E-01 | 22968612  | 22968735  | NC_000015.9  |
| cg17509561 | 2.57E-34 | 1.62E-37 | 1.60E+01 | 74.6528707 | 2.00E-01 | 19419126  | 19419249  | NC_000008.10 |
| cg23731805 | 2.64E-34 | 1.69E-37 | 1.60E+01 | 74.6153139 | 1.68E-01 | 56479243  | 56479366  | NC_000012.11 |
| cg25683325 | 2.87E-34 | 1.86E-37 | 1.60E+01 | 74.5154017 | 3.94E-01 | 158151058 | 158151181 | NC_000001.10 |
| cg09709600 | 2.94E-34 | 1.91E-37 | 1.60E+01 | 74.4888403 | 1.99E-01 | 65359521  | 65359644  | NC_000011.9  |
| cg06711560 | 3.79E-34 | 2.59E-37 | 1.60E+01 | 74.1875895 | 2.34E-01 | 139746365 | 139746488 | NC_000009.11 |
| cg08475953 | 3.92E-34 | 2.69E-37 | 1.60E+01 | 74.1504664 | 3.41E-01 | 178004091 | 178004214 | NC_000005.9  |
| cg14952488 | 3.99E-34 | 2.74E-37 | 1.60E+01 | 74.1306784 | 2.08E-01 | 53821365  | 53821488  | NC_000005.9  |
| cg08568670 | 5.04E-34 | 3.53E-37 | 1.59E+01 | 73.8789361 | 1.80E-01 | 48593395  | 48593518  | NC_000003.11 |
| cg15442800 | 5.18E-34 | 3.65E-37 | 1.59E+01 | 73.845367  | 2.42E-01 | 56755990  | 56756113  | NC_000020.10 |
| cg03502002 | 5.78E-34 | 4.10E-37 | 1.59E+01 | 73.7315239 | 3.76E-01 | 74962133  | 74962256  | NC_000018.9  |
| cg26521404 | 7.23E-34 | 5.33E-37 | 1.59E+01 | 73.4695597 | 2.95E-01 | 27204981  | 27205104  | NC_000007.13 |
| cg18885162 | 1.04E-33 | 8.02E-37 | 1.58E+01 | 73.0634917 | 2.30E-01 | 41529269  | 41529392  | NC_000006.11 |
| cg09874822 | 1.09E-33 | 8.46E-37 | 1.58E+01 | 73.0103831 | 3.58E-01 | 1203997   | 1204120   | NC_000016.9  |
| cg16997642 | 1.10E-33 | 8.63E-37 | 1.58E+01 | 72.9904306 | 2.48E-01 | 27184159  | 27184282  | NC_000007.13 |
| cg10936057 | 1.21E-33 | 9.57E-37 | 1.58E+01 | 72.8882737 | 2.95E-01 | 708425    | 708548    | NC_000010.10 |
| cg09880291 | 1.24E-33 | 9.80E-37 | 1.58E+01 | 72.8644828 | 2.63E-01 | 27184109  | 27184232  | NC_000007.13 |
| cg27360326 | 1.26E-33 | 1.00E-36 | 1.58E+01 | 72.8411454 | 3.30E-01 | 53422691  | 53422814  | NC_000013.10 |
| cg17098850 | 1.28E-33 | 1.02E-36 | 1.58E+01 | 72.8255641 | 2.08E-01 | 22968689  | 22968812  | NC_000015.9  |
| cg16784745 | 1.45E-33 | 1.17E-36 | 1.58E+01 | 72.6904412 | 2.40E-01 | 54731086  | 54731209  | NC_000012.11 |
| cg15808943 | 1.60E-33 | 1.29E-36 | 1.57E+01 | 72.5885812 | 3.50E-01 | 176994665 | 176994788 | NC_000002.11 |
| cg17369513 | 1.63E-33 | 1.33E-36 | 1.57E+01 | 72.5630253 | 1.61E-01 | 98121165  | 98121288  | NC_000005.9  |
| cg01447112 | 2.02E-33 | 1.66E-36 | 1.57E+01 | 72.3405871 | 3.43E-01 | 6703803   | 6703926   | NC_000007.13 |
| cg09671258 | 2.14E-33 | 1.76E-36 | 1.57E+01 | 72.280455  | 3.91E-01 | 180202530 | 180202653 | NC_000001.10 |

|            |          |          |          |            |          |           |           |              |
|------------|----------|----------|----------|------------|----------|-----------|-----------|--------------|
| cg02456226 | 2.51E-33 | 2.10E-36 | 1.57E+01 | 72.1066813 | 3.35E-01 | 18429703  | 18429826  | NC_000010.10 |
| cg08823554 | 2.69E-33 | 2.25E-36 | 1.57E+01 | 72.0364981 | 3.12E-01 | 46269191  | 46269314  | NC_000021.8  |
| cg04330449 | 2.98E-33 | 2.52E-36 | 1.57E+01 | 71.9244872 | 3.02E-01 | 134871166 | 134871289 | NC_000005.9  |
| cg14754787 | 3.01E-33 | 2.56E-36 | 1.57E+01 | 71.9088984 | 2.89E-01 | 35299600  | 35299723  | NC_000017.10 |
| cg10327976 | 3.03E-33 | 2.58E-36 | 1.56E+01 | 71.8995327 | 1.92E-01 | 42843303  | 42843426  | NC_000015.9  |
| cg02391433 | 3.52E-33 | 3.03E-36 | 1.56E+01 | 71.7399883 | 1.07E-01 | 37574923  | 37575046  | NC_000009.11 |
| cg12985235 | 4.24E-33 | 3.72E-36 | 1.56E+01 | 71.5374603 | 2.61E-01 | 4345965   | 4346088   | NC_000019.9  |
| cg27200446 | 4.24E-33 | 3.72E-36 | 1.56E+01 | 71.536893  | 3.70E-01 | 41606439  | 41606562  | NC_000006.11 |
| cg25611369 | 4.75E-33 | 4.19E-36 | 1.56E+01 | 71.4186962 | 2.92E-01 | 69460638  | 69460761  | NC_000011.9  |
| cg06991565 | 5.36E-33 | 4.81E-36 | 1.56E+01 | 71.2817707 | 1.55E-01 | 31733799  | 31733922  | NC_000006.11 |
| cg25495534 | 5.81E-33 | 5.26E-36 | 1.55E+01 | 71.1924572 | 2.19E-01 | 65431222  | 65431345  | NC_000010.10 |
| cg05554151 | 6.83E-33 | 6.31E-36 | 1.55E+01 | 71.0116779 | 1.79E-01 | 56700796  | 56700919  | NC_000016.9  |
| cg06068085 | 7.91E-33 | 7.45E-36 | 1.55E+01 | 70.8469683 | 2.28E-01 | 127871927 | 127872050 | NC_000005.9  |
| cg06295294 | 8.21E-33 | 7.79E-36 | 1.55E+01 | 70.801718  | 1.70E-01 | 159956323 | 159956446 | NC_000004.11 |
| cg08526074 | 8.66E-33 | 8.26E-36 | 1.55E+01 | 70.7439125 | 3.58E-01 | 51184562  | 51184685  | NC_000016.9  |
| cg08235864 | 8.82E-33 | 8.44E-36 | 1.55E+01 | 70.7230078 | 3.08E-01 | 2751822   | 2751945   | NC_000005.9  |
| cg26013553 | 1.05E-32 | 1.01E-35 | 1.55E+01 | 70.5427589 | 3.21E-01 | 111217406 | 111217529 | NC_000001.10 |
| cg13267264 | 1.39E-32 | 1.36E-35 | 1.54E+01 | 70.2473646 | 3.72E-01 | 70983600  | 70983723  | NC_000008.10 |
| cg08533364 | 1.55E-32 | 1.55E-35 | 1.54E+01 | 70.1200986 | 1.38E-01 | 3147191   | 3147314   | NC_000020.10 |
| cg12281517 | 1.64E-32 | 1.65E-35 | 1.54E+01 | 70.0583382 | 1.94E-01 | 153576804 | 153576927 | NC_000004.11 |
| cg08315202 | 1.67E-32 | 1.69E-35 | 1.54E+01 | 70.0318981 | 3.31E-01 | 98246006  | 98246129  | NC_000007.13 |
| cg01789499 | 2.09E-32 | 2.16E-35 | 1.53E+01 | 69.7880294 | 2.21E-01 | 81109888  | 81110011  | NC_000004.11 |
| cg25331919 | 2.30E-32 | 2.39E-35 | 1.53E+01 | 69.6868411 | 2.24E-01 | 47092023  | 47092146  | NC_000018.9  |
| cg21436938 | 2.34E-32 | 2.46E-35 | 1.53E+01 | 69.6586432 | 1.79E-01 | 116061416 | 116061539 | NC_000009.11 |
| cg18961681 | 2.40E-32 | 2.54E-35 | 1.53E+01 | 69.6271005 | 2.91E-01 | 32467657  | 32467780  | NC_000007.13 |

|            |          |          |          |            |          |           |           |              |
|------------|----------|----------|----------|------------|----------|-----------|-----------|--------------|
| cg23291301 | 2.56E-32 | 2.72E-35 | 1.53E+01 | 69.5567489 | 2.90E-01 | 105472469 | 105472592 | NC_000002.11 |
| cg03585823 | 2.70E-32 | 2.89E-35 | 1.53E+01 | 69.4996004 | 2.30E-01 | 56693070  | 56693193  | NC_000016.9  |
| cg23642130 | 3.51E-32 | 3.81E-35 | 1.53E+01 | 69.2245893 | 2.98E-01 | 30866365  | 30866488  | NC_000019.9  |
| cg04222358 | 3.74E-32 | 4.09E-35 | 1.53E+01 | 69.1516749 | 2.60E-01 | 2140256   | 2140379   | NC_000003.11 |
| cg03287574 | 4.53E-32 | 5.06E-35 | 1.52E+01 | 68.9412257 | 2.83E-01 | 1886956   | 1887079   | NC_000005.9  |
| cg18348647 | 4.64E-32 | 5.22E-35 | 1.52E+01 | 68.910357  | 3.74E-01 | 37006107  | 37006230  | NC_000013.10 |
| cg15412087 | 4.64E-32 | 5.22E-35 | 1.52E+01 | 68.9099452 | 2.06E-01 | 120085145 | 120085268 | NC_000011.9  |
| cg06262497 | 5.24E-32 | 5.95E-35 | 1.52E+01 | 68.7798271 | 2.34E-01 | 3564676   | 3564799   | NC_000001.10 |
| cg14195103 | 5.38E-32 | 6.13E-35 | 1.52E+01 | 68.7508999 | 2.33E-01 | 73283583  | 73283706  | NC_000017.10 |
| cg25181651 | 6.52E-32 | 7.62E-35 | 1.52E+01 | 68.5345088 | 3.19E-01 | 1748132   | 1748255   | NC_000002.11 |
| cg03769116 | 8.46E-32 | 1.01E-34 | 1.51E+01 | 68.2522346 | 2.62E-01 | 34833674  | 34833797  | NC_000019.9  |
| cg26187962 | 9.14E-32 | 1.10E-34 | 1.51E+01 | 68.1656062 | 1.76E-01 | 226011953 | 226012076 | NC_000001.10 |
| cg21408624 | 9.46E-32 | 1.15E-34 | 1.51E+01 | 68.1230063 | 1.87E-01 | 50800055  | 50800178  | NC_000007.13 |
| cg03544320 | 1.14E-31 | 1.43E-34 | 1.51E+01 | 67.9097931 | 2.81E-01 | 5894691   | 5894814   | NC_000004.11 |
| cg14252236 | 1.16E-31 | 1.45E-34 | 1.51E+01 | 67.8911947 | 1.39E-01 | 143784002 | 143784125 | NC_000002.11 |
| cg09016242 | 1.16E-31 | 1.47E-34 | 1.51E+01 | 67.8802289 | 3.61E-01 | 51185110  | 51185233  | NC_000016.9  |
| cg08272731 | 1.22E-31 | 1.55E-34 | 1.51E+01 | 67.8294945 | 3.23E-01 | 75602167  | 75602290  | NC_000001.10 |
| cg25090514 | 1.29E-31 | 1.64E-34 | 1.51E+01 | 67.7688134 | 2.46E-01 | 2038743   | 2038866   | NC_000005.9  |
| cg27058257 | 1.29E-31 | 1.65E-34 | 1.51E+01 | 67.7667428 | 4.14E-01 | 30019529  | 30019652  | NC_000019.9  |
| cg00939495 | 1.37E-31 | 1.76E-34 | 1.50E+01 | 67.7010194 | 2.88E-01 | 9783398   | 9783521   | NC_000004.11 |
| cg02306798 | 1.44E-31 | 1.86E-34 | 1.50E+01 | 67.6473453 | 2.08E-01 | 14245929  | 14246052  | NC_000005.9  |
| cg24102242 | 1.49E-31 | 1.93E-34 | 1.50E+01 | 67.6104323 | 1.87E-01 | 3327319   | 3327442   | NC_000006.11 |
| cg08152546 | 1.62E-31 | 2.13E-34 | 1.50E+01 | 67.5114668 | 2.80E-01 | 112717207 | 112717330 | NC_000013.10 |
| cg02864757 | 1.64E-31 | 2.16E-34 | 1.50E+01 | 67.4989088 | 2.78E-01 | 51184583  | 51184706  | NC_000016.9  |
| cg23632875 | 1.74E-31 | 2.31E-34 | 1.50E+01 | 67.4303254 | 3.92E-01 | 133110244 | 133110367 | NC_000010.10 |

|            |          |          |          |            |          |           |           |              |
|------------|----------|----------|----------|------------|----------|-----------|-----------|--------------|
| cg26132774 | 1.80E-31 | 2.40E-34 | 1.50E+01 | 67.3934756 | 3.52E-01 | 79170146  | 79170269  | NC_000013.10 |
| cg23906738 | 1.83E-31 | 2.44E-34 | 1.50E+01 | 67.3770034 | 3.47E-01 | 36987301  | 36987424  | NC_000014.8  |
| cg20146541 | 1.89E-31 | 2.53E-34 | 1.50E+01 | 67.3415624 | 3.17E-01 | 248020697 | 248020820 | NC_000001.10 |
| cg23586440 | 1.90E-31 | 2.55E-34 | 1.50E+01 | 67.3334588 | 2.32E-01 | 31067009  | 31067132  | NC_000020.10 |
| cg04347874 | 2.03E-31 | 2.74E-34 | 1.50E+01 | 67.2613401 | 3.81E-01 | 36987408  | 36987531  | NC_000014.8  |
| cg00384539 | 2.07E-31 | 2.79E-34 | 1.50E+01 | 67.2416515 | 2.87E-01 | 70983567  | 70983690  | NC_000008.10 |
| cg09907509 | 2.36E-31 | 3.25E-34 | 1.50E+01 | 67.0917372 | 2.44E-01 | 37248244  | 37248367  | NC_000013.10 |
| cg24389585 | 2.38E-31 | 3.28E-34 | 1.50E+01 | 67.0816679 | 2.06E-01 | 27184125  | 27184248  | NC_000007.13 |
| cg12630983 | 2.48E-31 | 3.43E-34 | 1.50E+01 | 67.0376501 | 1.47E-01 | 127872200 | 127872323 | NC_000005.9  |
| cg22784954 | 2.64E-31 | 3.67E-34 | 1.49E+01 | 66.969209  | 3.15E-01 | 5140646   | 5140769   | NC_000005.9  |
| cg05977021 | 2.88E-31 | 4.04E-34 | 1.49E+01 | 66.8736918 | 1.95E-01 | 92242370  | 92242493  | NC_000007.13 |
| cg06528737 | 2.90E-31 | 4.07E-34 | 1.49E+01 | 66.866706  | 1.90E-01 | 11574303  | 11574426  | NC_000010.10 |
| cg15811515 | 2.91E-31 | 4.10E-34 | 1.49E+01 | 66.8606484 | 3.40E-01 | 31580989  | 31581112  | NC_000016.9  |
| cg25397945 | 2.92E-31 | 4.11E-34 | 1.49E+01 | 66.8566393 | 3.24E-01 | 37096148  | 37096271  | NC_000019.9  |
| cg06429887 | 3.23E-31 | 4.60E-34 | 1.49E+01 | 66.7447556 | 2.80E-01 | 24600500  | 24600623  | NC_000014.8  |
| cg14001664 | 3.42E-31 | 4.89E-34 | 1.49E+01 | 66.6843338 | 2.45E-01 | 132088801 | 132088924 | NC_000002.11 |
| cg18897632 | 3.67E-31 | 5.26E-34 | 1.49E+01 | 66.6121707 | 3.87E-01 | 5836231   | 5836354   | NC_000002.11 |
| cg25955565 | 3.69E-31 | 5.30E-34 | 1.49E+01 | 66.6044742 | 1.43E-01 | 71863756  | 71863879  | NC_000014.8  |
| cg06813419 | 3.85E-31 | 5.58E-34 | 1.49E+01 | 66.552857  | 2.08E-01 | 211502171 | 211502294 | NC_000001.10 |
| cg21253742 | 3.91E-31 | 5.68E-34 | 1.49E+01 | 66.5360427 | 2.27E-01 | 85305079  | 85305202  | NC_000015.9  |
| cg21082141 | 3.91E-31 | 5.69E-34 | 1.49E+01 | 66.5343329 | 1.80E-01 | 81111985  | 81112108  | NC_000004.11 |
| cg17241776 | 4.47E-31 | 6.58E-34 | 1.49E+01 | 66.3893787 | 2.83E-01 | 51417469  | 51417592  | NC_000013.10 |
| cg15653173 | 4.79E-31 | 7.08E-34 | 1.48E+01 | 66.3170108 | 2.90E-01 | 112723034 | 112723157 | NC_000013.10 |
| cg11679455 | 4.98E-31 | 7.39E-34 | 1.48E+01 | 66.2741736 | 2.38E-01 | 8100761   | 8100884   | NC_000010.10 |
| cg14954154 | 5.34E-31 | 8.01E-34 | 1.48E+01 | 66.194612  | 1.34E-01 | 90853443  | 90853566  | NC_000014.8  |

|            |          |          |          |            |          |           |           |              |
|------------|----------|----------|----------|------------|----------|-----------|-----------|--------------|
| cg06367286 | 5.60E-31 | 8.44E-34 | 1.48E+01 | 66.1425419 | 2.30E-01 | 2887873   | 2887996   | NC_000007.13 |
| cg12338417 | 5.72E-31 | 8.65E-34 | 1.48E+01 | 66.1174012 | 2.75E-01 | 32860178  | 32860301  | NC_000003.11 |
| cg13580196 | 6.74E-31 | 1.03E-33 | 1.48E+01 | 65.9405085 | 2.23E-01 | 85529414  | 85529537  | NC_000015.9  |
| cg09835225 | 7.44E-31 | 1.15E-33 | 1.48E+01 | 65.8342658 | 3.31E-01 | 18429643  | 18429766  | NC_000010.10 |
| cg03078269 | 8.39E-31 | 1.31E-33 | 1.48E+01 | 65.7084596 | 3.38E-01 | 54354974  | 54355097  | NC_000012.11 |
| cg01392544 | 9.52E-31 | 1.49E-33 | 1.47E+01 | 65.5768328 | 3.69E-01 | 18429760  | 18429883  | NC_000010.10 |
| cg02674925 | 9.70E-31 | 1.52E-33 | 1.47E+01 | 65.5546773 | 8.91E-02 | 233474079 | 233474202 | NC_000001.10 |
| cg02478448 | 9.96E-31 | 1.57E-33 | 1.47E+01 | 65.524073  | 3.59E-01 | 37006063  | 37006186  | NC_000013.10 |
| cg16412082 | 1.03E-30 | 1.64E-33 | 1.47E+01 | 65.48384   | 2.03E-01 | 114610635 | 114610758 | NC_000010.10 |
| cg10617909 | 1.05E-30 | 1.67E-33 | 1.47E+01 | 65.4648594 | 3.79E-01 | 180527697 | 180527820 | NC_000005.9  |
| cg01805540 | 1.20E-30 | 1.91E-33 | 1.47E+01 | 65.3288548 | 3.60E-01 | 18429749  | 18429872  | NC_000010.10 |
| cg13408027 | 1.20E-30 | 1.93E-33 | 1.47E+01 | 65.3218209 | 1.95E-01 | 116133216 | 116133339 | NC_000009.11 |
| cg27561818 | 1.22E-30 | 1.95E-33 | 1.47E+01 | 65.3066272 | 2.95E-01 | 57832760  | 57832883  | NC_000016.9  |
| cg24144083 | 1.30E-30 | 2.11E-33 | 1.47E+01 | 65.2304045 | 3.18E-01 | 36805814  | 36805937  | NC_000003.11 |
| cg26921611 | 1.32E-30 | 2.15E-33 | 1.47E+01 | 65.211497  | 2.05E-01 | 37917868  | 37917991  | NC_000008.10 |
| cg06923233 | 1.44E-30 | 2.36E-33 | 1.47E+01 | 65.1183356 | 1.25E-01 | 2899061   | 2899184   | NC_000016.9  |
| cg02012703 | 1.44E-30 | 2.37E-33 | 1.47E+01 | 65.117239  | 3.08E-01 | 30016478  | 30016601  | NC_000019.9  |
| cg06521544 | 1.62E-30 | 2.68E-33 | 1.47E+01 | 64.991875  | 1.02E-01 | 57114657  | 57114780  | NC_000003.11 |
| cg25100011 | 1.65E-30 | 2.74E-33 | 1.47E+01 | 64.9701333 | 1.01E-01 | 33146725  | 33146848  | NC_000001.10 |
| cg23121993 | 2.07E-30 | 3.48E-33 | 1.46E+01 | 64.7335513 | 3.75E-01 | 1883954   | 1884077   | NC_000005.9  |
| cg11601252 | 2.12E-30 | 3.56E-33 | 1.46E+01 | 64.7100983 | 3.38E-01 | 68122139  | 68122262  | NC_000015.9  |
| cg20539752 | 2.13E-30 | 3.58E-33 | 1.46E+01 | 64.7035679 | 2.57E-01 | 176994305 | 176994428 | NC_000002.11 |
| cg01423964 | 2.20E-30 | 3.72E-33 | 1.46E+01 | 64.6671156 | 3.47E-01 | 111217575 | 111217698 | NC_000001.10 |
| cg14217074 | 2.41E-30 | 4.10E-33 | 1.46E+01 | 64.5689623 | 1.56E-01 | 187528979 | 187529102 | NC_000003.11 |
| cg08795964 | 2.42E-30 | 4.13E-33 | 1.46E+01 | 64.5628236 | 2.66E-01 | 72468987  | 72469110  | NC_000008.10 |



|            |          |          |          |            |          |           |           |              |
|------------|----------|----------|----------|------------|----------|-----------|-----------|--------------|
| cg25720804 | 2.45E-30 | 4.19E-33 | 1.46E+01 | 64.5484508 | 2.52E-01 | 170736389 | 170736512 | NC_000005.9  |
| cg08860498 | 2.46E-30 | 4.20E-33 | 1.46E+01 | 64.5449256 | 1.10E-01 | 40838861  | 40838984  | NC_000017.10 |
| cg19339146 | 2.62E-30 | 4.52E-33 | 1.46E+01 | 64.4737179 | 2.23E-01 | 62397911  | 62398034  | NC_000004.11 |
| cg18862481 | 2.67E-30 | 4.61E-33 | 1.46E+01 | 64.4532783 | 2.83E-01 | 129693370 | 129693493 | NC_000003.11 |
| cg21545862 | 2.84E-30 | 4.92E-33 | 1.46E+01 | 64.3885791 | 3.24E-01 | 174159294 | 174159417 | NC_000005.9  |
| cg08466792 | 2.89E-30 | 5.02E-33 | 1.46E+01 | 64.3677285 | 3.40E-01 | 3603227   | 3603350   | NC_000005.9  |
| cg05964918 | 2.89E-30 | 5.03E-33 | 1.46E+01 | 64.3669103 | 2.02E-01 | 96953953  | 96954076  | NC_000010.10 |
| cg04353438 | 2.95E-30 | 5.15E-33 | 1.46E+01 | 64.3429959 | 2.66E-01 | 5621182   | 5621305   | NC_000019.9  |
| cg18150339 | 3.06E-30 | 5.39E-33 | 1.46E+01 | 64.2981656 | 1.05E-01 | 10374150  | 10374273  | NC_000005.9  |
| cg10632765 | 3.12E-30 | 5.49E-33 | 1.46E+01 | 64.2800814 | 2.30E-01 | 6534916   | 6535039   | NC_000019.9  |
| cg06000994 | 3.16E-30 | 5.58E-33 | 1.46E+01 | 64.2633235 | 2.60E-01 | 30866194  | 30866317  | NC_000019.9  |
| cg18948722 | 3.36E-30 | 5.94E-33 | 1.45E+01 | 64.2018504 | 3.06E-01 | 37006116  | 37006239  | NC_000013.10 |
| cg15821562 | 3.38E-30 | 5.99E-33 | 1.45E+01 | 64.193805  | 2.39E-01 | 90083275  | 90083398  | NC_000014.8  |
| cg25185173 | 3.43E-30 | 6.08E-33 | 1.45E+01 | 64.1774455 | 3.33E-01 | 154712580 | 154712703 | NC_000004.11 |
| cg19715094 | 3.60E-30 | 6.43E-33 | 1.45E+01 | 64.1231931 | 2.55E-01 | 118402540 | 118402663 | NC_000011.9  |
| cg07421737 | 3.81E-30 | 6.84E-33 | 1.45E+01 | 64.0616765 | 1.98E-01 | 67811641  | 67811764  | NC_000011.9  |
| cg25191628 | 3.90E-30 | 7.02E-33 | 1.45E+01 | 64.0350012 | 2.84E-01 | 50886949  | 50887072  | NC_000001.10 |
| cg18515031 | 3.95E-30 | 7.12E-33 | 1.45E+01 | 64.0211509 | 2.39E-01 | 73988469  | 73988592  | NC_000010.10 |
| cg10266904 | 4.33E-30 | 7.84E-33 | 1.45E+01 | 63.9255501 | 2.07E-01 | 18570097  | 18570220  | NC_000016.9  |
| cg24633978 | 4.47E-30 | 8.11E-33 | 1.45E+01 | 63.8914734 | 2.40E-01 | 176972581 | 176972704 | NC_000002.11 |
| cg04950627 | 4.66E-30 | 8.50E-33 | 1.45E+01 | 63.845306  | 1.10E-01 | 39758157  | 39758280  | NC_000002.11 |
| cg07252731 | 4.72E-30 | 8.62E-33 | 1.45E+01 | 63.8308863 | 3.31E-01 | 88799999  | 88800122  | NC_000015.9  |
| cg00025795 | 4.74E-30 | 8.67E-33 | 1.45E+01 | 63.8255948 | 7.55E-02 | 77983156  | 77983279  | NC_000017.10 |
| cg05579037 | 4.92E-30 | 9.05E-33 | 1.45E+01 | 63.7825201 | 2.22E-01 | 27184853  | 27184976  | NC_000007.13 |
| cg12164282 | 5.16E-30 | 9.54E-33 | 1.45E+01 | 63.7296981 | 2.77E-01 | 1748112   | 1748235   | NC_000002.11 |

|            |          |          |          |            |          |           |           |              |
|------------|----------|----------|----------|------------|----------|-----------|-----------|--------------|
| cg13796823 | 5.17E-30 | 9.58E-33 | 1.45E+01 | 63.7255807 | 2.94E-01 | 130686592 | 130686715 | NC_000006.11 |
| cg00492784 | 5.34E-30 | 9.90E-33 | 1.45E+01 | 63.6930208 | 1.05E-01 | 52681818  | 52681941  | NC_000012.11 |
| cg27618240 | 5.46E-30 | 1.02E-32 | 1.45E+01 | 63.6674467 | 3.45E-01 | 20824770  | 20824893  | NC_000007.13 |
| cg16876236 | 5.78E-30 | 1.08E-32 | 1.45E+01 | 63.6063696 | 1.92E-01 | 17679640  | 17679763  | NC_000020.10 |
| cg10163955 | 5.98E-30 | 1.12E-32 | 1.45E+01 | 63.5696684 | 1.54E-01 | 8101402   | 8101525   | NC_000010.10 |
| cg09772661 | 6.06E-30 | 1.14E-32 | 1.45E+01 | 63.5514311 | 2.94E-01 | 7794952   | 7795075   | NC_000019.9  |
| cg02547394 | 6.13E-30 | 1.16E-32 | 1.44E+01 | 63.5371885 | 2.36E-01 | 112721789 | 112721912 | NC_000013.10 |
| cg23071286 | 6.43E-30 | 1.22E-32 | 1.44E+01 | 63.4844873 | 1.99E-01 | 91360201  | 91360324  | NC_000015.9  |
| cg19712603 | 6.49E-30 | 1.23E-32 | 1.44E+01 | 63.4744469 | 3.06E-01 | 53422777  | 53422900  | NC_000013.10 |
| cg17317266 | 6.55E-30 | 1.25E-32 | 1.44E+01 | 63.4636189 | 1.79E-01 | 11495261  | 11495384  | NC_000019.9  |
| cg21185289 | 6.61E-30 | 1.27E-32 | 1.44E+01 | 63.4473662 | 3.43E-01 | 74743437  | 74743560  | NC_000002.11 |
| cg08039116 | 6.66E-30 | 1.28E-32 | 1.44E+01 | 63.4374916 | 2.27E-01 | 43152254  | 43152377  | NC_000007.13 |
| cg12230883 | 6.73E-30 | 1.30E-32 | 1.44E+01 | 63.4253271 | 2.34E-01 | 184035527 | 184035650 | NC_000003.11 |
| cg03045635 | 6.73E-30 | 1.30E-32 | 1.44E+01 | 63.4239172 | 2.54E-01 | 9783198   | 9783321   | NC_000004.11 |
| cg19870512 | 6.77E-30 | 1.31E-32 | 1.44E+01 | 63.4162802 | 3.57E-01 | 4919081   | 4919204   | NC_000012.11 |
| cg25019378 | 6.77E-30 | 1.31E-32 | 1.44E+01 | 63.4146127 | 2.35E-01 | 158749367 | 158749490 | NC_000006.11 |
| cg02776080 | 6.97E-30 | 1.35E-32 | 1.44E+01 | 63.3834056 | 1.30E-01 | 29999615  | 29999738  | NC_000006.11 |
| cg26524347 | 7.00E-30 | 1.36E-32 | 1.44E+01 | 63.3764095 | 1.88E-01 | 121738449 | 121738572 | NC_000012.11 |
| cg25307168 | 7.85E-30 | 1.53E-32 | 1.44E+01 | 63.2580497 | 2.71E-01 | 37353035  | 37353158  | NC_000020.10 |
| cg19919217 | 7.90E-30 | 1.54E-32 | 1.44E+01 | 63.2512326 | 2.03E-01 | 38248105  | 38248228  | NC_000017.10 |
| cg19764418 | 8.00E-30 | 1.57E-32 | 1.44E+01 | 63.2369086 | 2.32E-01 | 237205098 | 237205221 | NC_000001.10 |
| cg07143083 | 8.01E-30 | 1.57E-32 | 1.44E+01 | 63.2345345 | 2.41E-01 | 70597921  | 70598044  | NC_000007.13 |
| cg02711479 | 8.04E-30 | 1.58E-32 | 1.44E+01 | 63.2294312 | 2.49E-01 | 36849024  | 36849147  | NC_000001.10 |
| cg10960709 | 8.43E-30 | 1.67E-32 | 1.44E+01 | 63.1720847 | 1.87E-01 | 140117543 | 140117666 | NC_000007.13 |
| cg06469345 | 8.67E-30 | 1.73E-32 | 1.44E+01 | 63.1402005 | 2.22E-01 | 9783246   | 9783369   | NC_000004.11 |

|            |          |          |          |            |          |           |           |              |
|------------|----------|----------|----------|------------|----------|-----------|-----------|--------------|
| cg27501612 | 9.72E-30 | 1.94E-32 | 1.44E+01 | 63.0232625 | 1.42E-01 | 56977363  | 56977486  | NC_000016.9  |
| cg13572771 | 1.01E-29 | 2.02E-32 | 1.44E+01 | 62.9841242 | 1.71E-01 | 68871428  | 68871551  | NC_000014.8  |
| cg12085698 | 1.01E-29 | 2.04E-32 | 1.44E+01 | 62.9754153 | 2.36E-01 | 13983784  | 13983907  | NC_000011.9  |
| cg05057720 | 1.29E-29 | 2.65E-32 | 1.43E+01 | 62.7136815 | 3.28E-01 | 38724675  | 38724798  | NC_000014.8  |
| cg01381846 | 1.44E-29 | 2.97E-32 | 1.43E+01 | 62.6000635 | 2.96E-01 | 27204785  | 27204908  | NC_000007.13 |
| cg07314409 | 1.47E-29 | 3.04E-32 | 1.43E+01 | 62.5769356 | 1.46E-01 | 193532456 | 193532579 | NC_000003.11 |
| cg16326743 | 1.49E-29 | 3.08E-32 | 1.43E+01 | 62.5632831 | 1.23E-01 | 176522599 | 176522722 | NC_000005.9  |
| cg18757468 | 1.51E-29 | 3.13E-32 | 1.43E+01 | 62.5497252 | 2.66E-01 | 65352168  | 65352291  | NC_000011.9  |
| cg16354688 | 1.55E-29 | 3.22E-32 | 1.43E+01 | 62.5193346 | 2.48E-01 | 16370265  | 16370388  | NC_000001.10 |
| cg16550651 | 1.60E-29 | 3.34E-32 | 1.43E+01 | 62.4829745 | 1.68E-01 | 40268381  | 40268504  | NC_000017.10 |
| cg05835105 | 1.75E-29 | 3.68E-32 | 1.43E+01 | 62.3886291 | 3.31E-01 | 111543401 | 111543524 | NC_000004.11 |
| cg16827475 | 1.77E-29 | 3.72E-32 | 1.43E+01 | 62.3759057 | 2.87E-01 | 131767526 | 131767649 | NC_000010.10 |
| cg09524907 | 1.77E-29 | 3.73E-32 | 1.43E+01 | 62.3728572 | 3.40E-01 | 56014406  | 56014529  | NC_000008.10 |
| cg02423579 | 1.96E-29 | 4.15E-32 | 1.43E+01 | 62.2671752 | 1.90E-01 | 2872169   | 2872292   | NC_000007.13 |
| cg13699355 | 1.97E-29 | 4.18E-32 | 1.43E+01 | 62.2602244 | 4.17E-01 | 468179    | 468302    | NC_000002.11 |
| cg18652900 | 2.02E-29 | 4.32E-32 | 1.43E+01 | 62.2288406 | 3.49E-01 | 15580445  | 15580568  | NC_000019.9  |
| cg13973641 | 2.04E-29 | 4.35E-32 | 1.43E+01 | 62.2213279 | 1.45E-01 | 109691025 | 109691148 | NC_000009.11 |
| cg00310215 | 2.49E-29 | 5.40E-32 | 1.42E+01 | 62.0067299 | 3.06E-01 | 51185346  | 51185469  | NC_000016.9  |
| cg07565505 | 2.51E-29 | 5.44E-32 | 1.42E+01 | 61.9993303 | 3.10E-01 | 1887300   | 1887423   | NC_000005.9  |
| cg06440348 | 2.52E-29 | 5.47E-32 | 1.42E+01 | 61.9934135 | 1.82E-01 | 81111527  | 81111650  | NC_000004.11 |
| cg11543229 | 2.53E-29 | 5.50E-32 | 1.42E+01 | 61.9875471 | 1.47E-01 | 74382996  | 74383119  | NC_000017.10 |
| cg00575672 | 2.56E-29 | 5.58E-32 | 1.42E+01 | 61.9741482 | 2.01E-01 | 100644171 | 100644294 | NC_000004.11 |
| cg23806621 | 2.57E-29 | 5.61E-32 | 1.42E+01 | 61.9684172 | 2.30E-01 | 61638501  | 61638624  | NC_000020.10 |
| cg22953960 | 2.59E-29 | 5.65E-32 | 1.42E+01 | 61.9616974 | 1.98E-01 | 22766081  | 22766204  | NC_000010.10 |
| cg14060496 | 2.71E-29 | 5.91E-32 | 1.42E+01 | 61.9157    | 3.05E-01 | 61638518  | 61638641  | NC_000020.10 |

|            |          |          |          |            |          |           |           |              |
|------------|----------|----------|----------|------------|----------|-----------|-----------|--------------|
| cg20377305 | 2.75E-29 | 6.02E-32 | 1.42E+01 | 61.8979461 | 3.11E-01 | 96650668  | 96650791  | NC_000007.13 |
| cg25188395 | 2.77E-29 | 6.08E-32 | 1.42E+01 | 61.8881858 | 3.05E-01 | 27204052  | 27204175  | NC_000007.13 |
| cg17839237 | 2.81E-29 | 6.20E-32 | 1.42E+01 | 61.8681753 | 3.87E-01 | 19157193  | 19157316  | NC_000007.13 |
| cg22491927 | 2.86E-29 | 6.32E-32 | 1.42E+01 | 61.8497145 | 3.39E-01 | 13617091  | 13617214  | NC_000019.9  |
| cg20185017 | 2.96E-29 | 6.59E-32 | 1.42E+01 | 61.8085853 | 3.35E-01 | 18429661  | 18429784  | NC_000010.10 |
| cg09118932 | 3.49E-29 | 7.85E-32 | 1.42E+01 | 61.6340447 | 3.17E-01 | 1748337   | 1748460   | NC_000002.11 |
| cg06097580 | 3.53E-29 | 7.96E-32 | 1.42E+01 | 61.6207043 | 2.14E-01 | 56456934  | 56457057  | NC_000016.9  |
| cg15396686 | 3.57E-29 | 8.06E-32 | 1.42E+01 | 61.6081965 | 2.96E-01 | 124897048 | 124897171 | NC_000010.10 |
| cg26520908 | 3.67E-29 | 8.32E-32 | 1.42E+01 | 61.5766969 | 1.81E-01 | 3191876   | 3191999   | NC_000001.10 |
| cg20750832 | 3.73E-29 | 8.46E-32 | 1.42E+01 | 61.5598127 | 2.47E-01 | 170742345 | 170742468 | NC_000005.9  |
| cg17078686 | 3.80E-29 | 8.64E-32 | 1.42E+01 | 61.5388371 | 2.76E-01 | 105471965 | 105472088 | NC_000002.11 |
| cg07821629 | 3.91E-29 | 8.93E-32 | 1.42E+01 | 61.5062905 | 3.21E-01 | 38670840  | 38670963  | NC_000007.13 |
| cg00582971 | 4.02E-29 | 9.23E-32 | 1.42E+01 | 61.4728703 | 3.26E-01 | 178422128 | 178422251 | NC_000005.9  |
| cg00378228 | 4.08E-29 | 9.37E-32 | 1.42E+01 | 61.4577095 | 1.26E-01 | 10122153  | 10122276  | NC_000004.11 |
| cg05446471 | 4.17E-29 | 9.60E-32 | 1.41E+01 | 61.4341457 | 2.68E-01 | 13522740  | 13522863  | NC_000003.11 |
| cg10548254 | 4.26E-29 | 9.80E-32 | 1.41E+01 | 61.4131119 | 1.81E-01 | 50656772  | 50656895  | NC_000022.10 |
| cg05895956 | 4.36E-29 | 1.01E-31 | 1.41E+01 | 61.3875083 | 1.67E-01 | 42216981  | 42217104  | NC_000020.10 |
| cg10853431 | 4.46E-29 | 1.04E-31 | 1.41E+01 | 61.3588196 | 1.89E-01 | 11574300  | 11574423  | NC_000010.10 |
| cg00747890 | 4.46E-29 | 1.04E-31 | 1.41E+01 | 61.3585057 | 2.25E-01 | 90854534  | 90854657  | NC_000014.8  |
| cg16924061 | 4.46E-29 | 1.04E-31 | 1.41E+01 | 61.3584684 | 2.12E-01 | 71955528  | 71955651  | NC_000018.9  |
| cg18206027 | 4.56E-29 | 1.06E-31 | 1.41E+01 | 61.3369962 | 2.90E-01 | 49813486  | 49813609  | NC_000007.13 |
| cg07996393 | 4.63E-29 | 1.08E-31 | 1.41E+01 | 61.3195759 | 1.96E-01 | 43792951  | 43793074  | NC_000006.11 |
| cg19875547 | 4.77E-29 | 1.11E-31 | 1.41E+01 | 61.2853955 | 3.45E-01 | 38670804  | 38670927  | NC_000007.13 |
| cg21759280 | 5.03E-29 | 1.18E-31 | 1.41E+01 | 61.2251218 | 2.15E-01 | 6534936   | 6535059   | NC_000019.9  |
| cg16308533 | 5.09E-29 | 1.20E-31 | 1.41E+01 | 61.2127237 | 1.96E-01 | 40838983  | 40839106  | NC_000017.10 |

|            |          |          |          |            |          |           |           |              |
|------------|----------|----------|----------|------------|----------|-----------|-----------|--------------|
| cg06598836 | 5.21E-29 | 1.23E-31 | 1.41E+01 | 61.1863661 | 3.28E-01 | 2140699   | 2140822   | NC_000003.11 |
| cg17868307 | 5.71E-29 | 1.36E-31 | 1.41E+01 | 61.0886748 | 2.60E-01 | 73597649  | 73597772  | NC_000007.13 |
| cg23937608 | 6.02E-29 | 1.44E-31 | 1.41E+01 | 61.0342711 | 1.04E-01 | 49317231  | 49317354  | NC_000012.11 |
| cg15358549 | 6.08E-29 | 1.45E-31 | 1.41E+01 | 61.0237756 | 2.34E-01 | 127872074 | 127872197 | NC_000005.9  |
| cg10303487 | 6.52E-29 | 1.56E-31 | 1.41E+01 | 60.9517288 | 2.86E-01 | 105479058 | 105479181 | NC_000008.10 |
| cg15975865 | 6.87E-29 | 1.65E-31 | 1.41E+01 | 60.8925077 | 3.68E-01 | 127413831 | 127413954 | NC_000002.11 |
| cg14715696 | 7.04E-29 | 1.70E-31 | 1.41E+01 | 60.8675919 | 2.98E-01 | 176945122 | 176945245 | NC_000002.11 |
| cg16627346 | 7.10E-29 | 1.71E-31 | 1.41E+01 | 60.8581894 | 2.44E-01 | 96057706  | 96057829  | NC_000002.11 |
| cg01699217 | 7.13E-29 | 1.72E-31 | 1.41E+01 | 60.8516487 | 3.11E-01 | 61638488  | 61638611  | NC_000020.10 |
| cg02950701 | 7.77E-29 | 1.89E-31 | 1.41E+01 | 60.7607312 | 1.94E-01 | 35656925  | 35657048  | NC_000010.10 |
| cg12349580 | 8.74E-29 | 2.14E-31 | 1.40E+01 | 60.6362596 | 1.50E-01 | 94681045  | 94681168  | NC_000012.11 |
| cg15689969 | 9.27E-29 | 2.29E-31 | 1.40E+01 | 60.5714922 | 2.06E-01 | 14374397  | 14374520  | NC_000005.9  |
| cg09412882 | 9.43E-29 | 2.33E-31 | 1.40E+01 | 60.5522953 | 2.28E-01 | 12271701  | 12271824  | NC_000011.9  |
| cg19852958 | 1.09E-28 | 2.71E-31 | 1.40E+01 | 60.4014216 | 3.39E-01 | 13545760  | 13545883  | NC_000004.11 |
| cg12435059 | 1.10E-28 | 2.72E-31 | 1.40E+01 | 60.3979399 | 1.30E-01 | 37291314  | 37291437  | NC_000003.11 |
| cg07460095 | 1.15E-28 | 2.87E-31 | 1.40E+01 | 60.3464056 | 8.03E-02 | 132373398 | 132373521 | NC_000003.11 |
| cg19854437 | 1.24E-28 | 3.11E-31 | 1.40E+01 | 60.2641243 | 2.15E-01 | 99891629  | 99891752  | NC_000014.8  |
| cg02300154 | 1.26E-28 | 3.19E-31 | 1.40E+01 | 60.2383605 | 3.53E-01 | 70597058  | 70597181  | NC_000007.13 |
| cg09374673 | 1.27E-28 | 3.21E-31 | 1.40E+01 | 60.2332231 | 1.51E-01 | 144986488 | 144986611 | NC_000008.10 |
| cg15556990 | 1.28E-28 | 3.24E-31 | 1.40E+01 | 60.2255885 | 1.65E-01 | 80544479  | 80544602  | NC_000007.13 |
| cg17214479 | 1.30E-28 | 3.30E-31 | 1.40E+01 | 60.206437  | 1.97E-01 | 32560449  | 32560572  | NC_000013.10 |
| cg21370856 | 1.35E-28 | 3.46E-31 | 1.40E+01 | 60.1600405 | 3.29E-01 | 23848003  | 23848126  | NC_000016.9  |
| cg09238180 | 1.39E-28 | 3.57E-31 | 1.40E+01 | 60.1274241 | 3.29E-01 | 176993632 | 176993755 | NC_000002.11 |
| cg02745847 | 1.40E-28 | 3.59E-31 | 1.40E+01 | 60.1216396 | 2.36E-01 | 47075880  | 47076003  | NC_000017.10 |
| cg19806642 | 1.42E-28 | 3.66E-31 | 1.40E+01 | 60.1045748 | 2.77E-01 | 178422140 | 178422263 | NC_000005.9  |

|            |          |          |          |            |          |           |           |              |
|------------|----------|----------|----------|------------|----------|-----------|-----------|--------------|
| cg01820007 | 1.45E-28 | 3.73E-31 | 1.40E+01 | 60.0847143 | 1.64E-01 | 52858131  | 52858254  | NC_000005.9  |
| cg03449456 | 1.46E-28 | 3.76E-31 | 1.40E+01 | 60.0768035 | 1.75E-01 | 3191219   | 3191342   | NC_000001.10 |
| cg26115633 | 1.49E-28 | 3.84E-31 | 1.39E+01 | 60.0543275 | 3.22E-01 | 129535893 | 129536016 | NC_000010.10 |
| cg07272353 | 1.54E-28 | 4.00E-31 | 1.39E+01 | 60.0161201 | 1.69E-01 | 241631239 | 241631362 | NC_000002.11 |
| cg03935183 | 1.58E-28 | 4.10E-31 | 1.39E+01 | 59.9892351 | 1.60E-01 | 8100563   | 8100686   | NC_000010.10 |
| cg21093166 | 1.81E-28 | 4.73E-31 | 1.39E+01 | 59.8474203 | 2.40E-01 | 2752145   | 2752268   | NC_000005.9  |
| cg15834072 | 1.82E-28 | 4.76E-31 | 1.39E+01 | 59.8412935 | 2.44E-01 | 155411603 | 155411726 | NC_000004.11 |
| cg09813525 | 1.86E-28 | 4.87E-31 | 1.39E+01 | 59.819059  | 3.48E-01 | 53420386  | 53420509  | NC_000013.10 |
| cg10603275 | 1.88E-28 | 4.96E-31 | 1.39E+01 | 59.8019806 | 3.30E-01 | 239665    | 239788    | NC_000003.11 |
| cg25502818 | 1.89E-28 | 4.97E-31 | 1.39E+01 | 59.7988098 | 1.69E-01 | 225410509 | 225410632 | NC_000002.11 |
| cg11940285 | 2.12E-28 | 5.64E-31 | 1.39E+01 | 59.6730754 | 2.98E-01 | 129693385 | 129693508 | NC_000003.11 |
| cg04525408 | 2.23E-28 | 5.95E-31 | 1.39E+01 | 59.6207265 | 1.90E-01 | 74383274  | 74383397  | NC_000017.10 |
| cg17316316 | 2.25E-28 | 6.00E-31 | 1.39E+01 | 59.6115508 | 2.69E-01 | 180525108 | 180525231 | NC_000005.9  |
| cg03422911 | 2.27E-28 | 6.05E-31 | 1.39E+01 | 59.6033627 | 2.53E-01 | 237205295 | 237205418 | NC_000001.10 |
| cg02250259 | 2.29E-28 | 6.12E-31 | 1.39E+01 | 59.5922166 | 8.78E-02 | 27273366  | 27273489  | NC_000007.13 |
| cg12180703 | 2.45E-28 | 6.59E-31 | 1.39E+01 | 59.5178956 | 2.41E-01 | 37353037  | 37353160  | NC_000020.10 |
| cg24547992 | 2.56E-28 | 6.92E-31 | 1.39E+01 | 59.4702053 | 1.87E-01 | 62557944  | 62558067  | NC_000011.9  |
| cg09823859 | 2.66E-28 | 7.21E-31 | 1.39E+01 | 59.4296862 | 2.06E-01 | 88328294  | 88328417  | NC_000013.10 |
| cg09491120 | 2.74E-28 | 7.45E-31 | 1.39E+01 | 59.3966584 | 2.29E-01 | 1394986   | 1395109   | NC_000006.11 |
| cg16494192 | 2.85E-28 | 7.77E-31 | 1.38E+01 | 59.3546715 | 2.55E-01 | 50818652  | 50818775  | NC_000010.10 |
| cg03044249 | 2.98E-28 | 8.12E-31 | 1.38E+01 | 59.3114535 | 3.37E-01 | 70597065  | 70597188  | NC_000007.13 |
| cg23668184 | 3.01E-28 | 8.21E-31 | 1.38E+01 | 59.2999975 | 2.55E-01 | 5836713   | 5836836   | NC_000002.11 |
| cg05141602 | 3.02E-28 | 8.26E-31 | 1.38E+01 | 59.294298  | 1.35E-01 | 234626084 | 234626207 | NC_000002.11 |
| cg13609939 | 3.08E-28 | 8.43E-31 | 1.38E+01 | 59.2738061 | 2.32E-01 | 126105160 | 126105283 | NC_000010.10 |
| cg27462475 | 3.15E-28 | 8.64E-31 | 1.38E+01 | 59.2486362 | 2.24E-01 | 99736304  | 99736427  | NC_000013.10 |

|            |          |          |          |            |          |           |           |              |
|------------|----------|----------|----------|------------|----------|-----------|-----------|--------------|
| cg14063129 | 3.15E-28 | 8.65E-31 | 1.38E+01 | 59.2483537 | 1.57E-01 | 105802387 | 105802510 | NC_000014.8  |
| cg01898698 | 3.24E-28 | 8.92E-31 | 1.38E+01 | 59.2178714 | 1.85E-01 | 105472759 | 105472882 | NC_000002.11 |
| cg14037652 | 3.31E-28 | 9.14E-31 | 1.38E+01 | 59.192935  | 2.03E-01 | 93390387  | 93390510  | NC_000010.10 |
| cg06135139 | 3.33E-28 | 9.21E-31 | 1.38E+01 | 59.1855952 | 2.77E-01 | 61637856  | 61637979  | NC_000020.10 |
| cg00969405 | 3.67E-28 | 1.02E-30 | 1.38E+01 | 59.0847933 | 2.60E-01 | 27184441  | 27184564  | NC_000007.13 |
| cg15512534 | 3.69E-28 | 1.03E-30 | 1.38E+01 | 59.0785726 | 2.01E-01 | 205271231 | 205271354 | NC_000001.10 |
| cg24657817 | 3.70E-28 | 1.03E-30 | 1.38E+01 | 59.0736275 | 3.25E-01 | 42153708  | 42153831  | NC_000004.11 |
| cg10556005 | 3.70E-28 | 1.03E-30 | 1.38E+01 | 59.0733334 | 2.54E-01 | 233467801 | 233467924 | NC_000001.10 |
| cg27028923 | 3.75E-28 | 1.05E-30 | 1.38E+01 | 59.05659   | 2.83E-01 | 1765764   | 1765887   | NC_000019.9  |
| cg19769715 | 3.83E-28 | 1.07E-30 | 1.38E+01 | 59.0350614 | 2.03E-01 | 149636363 | 149636486 | NC_000005.9  |
| cg06577205 | 3.85E-28 | 1.08E-30 | 1.38E+01 | 59.0306677 | 2.87E-01 | 15500714  | 15500837  | NC_000005.9  |
| cg06551540 | 3.86E-28 | 1.08E-30 | 1.38E+01 | 59.0266288 | 1.95E-01 | 45617878  | 45618001  | NC_000012.11 |
| cg06215569 | 4.22E-28 | 1.19E-30 | 1.38E+01 | 58.9308341 | 3.53E-01 | 110611465 | 110611588 | NC_000001.10 |
| cg04513777 | 4.27E-28 | 1.21E-30 | 1.38E+01 | 58.9176241 | 2.28E-01 | 15493409  | 15493532  | NC_000016.9  |
| cg08396193 | 4.38E-28 | 1.24E-30 | 1.38E+01 | 58.8875081 | 2.03E-01 | 27193709  | 27193832  | NC_000007.13 |
| cg18533201 | 4.61E-28 | 1.31E-30 | 1.38E+01 | 58.8350446 | 1.98E-01 | 97157453  | 97157576  | NC_000008.10 |
| cg23316253 | 4.71E-28 | 1.34E-30 | 1.38E+01 | 58.8103631 | 2.45E-01 | 8076277   | 8076400   | NC_000010.10 |
| cg22182451 | 5.03E-28 | 1.44E-30 | 1.38E+01 | 58.7408064 | 1.20E-01 | 72486158  | 72486281  | NC_000015.9  |
| cg11629889 | 5.34E-28 | 1.54E-30 | 1.38E+01 | 58.6772971 | 1.64E-01 | 40839022  | 40839145  | NC_000017.10 |
| cg11439596 | 5.69E-28 | 1.65E-30 | 1.37E+01 | 58.6063237 | 3.16E-01 | 1931376   | 1931499   | NC_000005.9  |
| cg24809973 | 5.69E-28 | 1.65E-30 | 1.37E+01 | 58.6051115 | 2.60E-01 | 72468820  | 72468943  | NC_000008.10 |
| cg05736768 | 5.74E-28 | 1.67E-30 | 1.37E+01 | 58.5968257 | 2.50E-01 | 105479248 | 105479371 | NC_000008.10 |
| cg19515186 | 5.85E-28 | 1.70E-30 | 1.37E+01 | 58.5743308 | 1.97E-01 | 73478549  | 73478672  | NC_000002.11 |
| cg22869726 | 6.00E-28 | 1.75E-30 | 1.37E+01 | 58.5478701 | 3.05E-01 | 34398265  | 34398388  | NC_000021.8  |
| cg20391432 | 6.71E-28 | 1.97E-30 | 1.37E+01 | 58.4313333 | 1.31E-01 | 36667594  | 36667717  | NC_000002.11 |

|            |          |          |          |            |          |           |           |              |
|------------|----------|----------|----------|------------|----------|-----------|-----------|--------------|
| cg14520423 | 6.78E-28 | 1.99E-30 | 1.37E+01 | 58.4184809 | 1.99E-01 | 131681980 | 131682103 | NC_000009.11 |
| cg18690385 | 7.09E-28 | 2.09E-30 | 1.37E+01 | 58.3714122 | 2.13E-01 | 47078966  | 47079089  | NC_000001.10 |
| cg07266046 | 7.28E-28 | 2.15E-30 | 1.37E+01 | 58.3429409 | 2.17E-01 | 202804175 | 202804298 | NC_000002.11 |
| cg18279094 | 7.33E-28 | 2.17E-30 | 1.37E+01 | 58.3348917 | 2.26E-01 | 63790044  | 63790167  | NC_000001.10 |
| cg27065717 | 7.58E-28 | 2.25E-30 | 1.37E+01 | 58.2975999 | 2.12E-01 | 85608934  | 85609057  | NC_000016.9  |
| cg25189564 | 8.37E-28 | 2.50E-30 | 1.37E+01 | 58.1923347 | 3.61E-01 | 158938051 | 158938174 | NC_000007.13 |
| cg05053327 | 8.71E-28 | 2.61E-30 | 1.37E+01 | 58.1501036 | 1.55E-01 | 40837383  | 40837506  | NC_000017.10 |
| cg13314145 | 9.08E-28 | 2.73E-30 | 1.37E+01 | 58.1045508 | 3.08E-01 | 98246001  | 98246124  | NC_000007.13 |
| cg09969277 | 9.28E-28 | 2.80E-30 | 1.37E+01 | 58.0815805 | 2.77E-01 | 89922328  | 89922451  | NC_000015.9  |
| cg21357629 | 9.99E-28 | 3.03E-30 | 1.37E+01 | 58.0003381 | 3.85E-01 | 47063665  | 47063788  | NC_000021.8  |
| cg16073378 | 1.03E-27 | 3.13E-30 | 1.37E+01 | 57.9706357 | 2.56E-01 | 468413    | 468536    | NC_000002.11 |
| cg20782724 | 1.08E-27 | 3.30E-30 | 1.36E+01 | 57.9173611 | 1.73E-01 | 47518657  | 47518780  | NC_000007.13 |
| cg17376609 | 1.13E-27 | 3.46E-30 | 1.36E+01 | 57.8697977 | 1.86E-01 | 88328813  | 88328936  | NC_000013.10 |
| cg24925945 | 1.17E-27 | 3.59E-30 | 1.36E+01 | 57.8332171 | 2.01E-01 | 20055434  | 20055557  | NC_000011.9  |
| cg10224098 | 1.19E-27 | 3.63E-30 | 1.36E+01 | 57.821263  | 3.08E-01 | 44873229  | 44873352  | NC_000001.10 |
| cg01498700 | 1.20E-27 | 3.68E-30 | 1.36E+01 | 57.8088102 | 1.59E-01 | 75241064  | 75241187  | NC_000016.9  |
| cg08349400 | 1.20E-27 | 3.69E-30 | 1.36E+01 | 57.8056022 | 1.27E-01 | 53396138  | 53396261  | NC_000006.11 |
| cg08672919 | 1.25E-27 | 3.84E-30 | 1.36E+01 | 57.7666918 | 1.14E-01 | 169338788 | 169338911 | NC_000006.11 |
| cg04093645 | 1.26E-27 | 3.89E-30 | 1.36E+01 | 57.7543251 | 2.21E-01 | 127872037 | 127872160 | NC_000005.9  |
| cg12757676 | 1.31E-27 | 4.05E-30 | 1.36E+01 | 57.7120737 | 1.89E-01 | 100799558 | 100799681 | NC_000002.11 |
| cg06962177 | 1.37E-27 | 4.25E-30 | 1.36E+01 | 57.6651531 | 3.53E-01 | 63785946  | 63786069  | NC_000001.10 |
| cg03207666 | 1.38E-27 | 4.28E-30 | 1.36E+01 | 57.6584805 | 2.13E-01 | 27183950  | 27184073  | NC_000007.13 |
| cg07318128 | 1.38E-27 | 4.29E-30 | 1.36E+01 | 57.6568512 | 2.00E-01 | 46683806  | 46683929  | NC_000017.10 |
| cg17961200 | 1.40E-27 | 4.37E-30 | 1.36E+01 | 57.638292  | 2.82E-01 | 135937572 | 135937695 | NC_000009.11 |
| cg25007447 | 1.40E-27 | 4.37E-30 | 1.36E+01 | 57.6381519 | 1.65E-01 | 93521330  | 93521453  | NC_000012.11 |



|            |          |          |          |            |          |           |           |              |
|------------|----------|----------|----------|------------|----------|-----------|-----------|--------------|
| cg24496475 | 1.43E-27 | 4.48E-30 | 1.36E+01 | 57.6136046 | 2.41E-01 | 1400189   | 1400312   | NC_000004.11 |
| cg15316843 | 1.45E-27 | 4.54E-30 | 1.36E+01 | 57.5998573 | 3.15E-01 | 65282946  | 65283069  | NC_000008.10 |
| cg09491542 | 1.53E-27 | 4.82E-30 | 1.36E+01 | 57.5402414 | 1.68E-01 | 154835773 | 154835896 | NC_000006.11 |
| cg11211486 | 1.65E-27 | 5.22E-30 | 1.36E+01 | 57.4598225 | 1.37E-01 | 46033800  | 46033923  | NC_000003.11 |
| cg06060135 | 1.79E-27 | 5.69E-30 | 1.36E+01 | 57.3749228 | 3.61E-01 | 3596704   | 3596827   | NC_000005.9  |
| cg14384532 | 1.81E-27 | 5.75E-30 | 1.36E+01 | 57.3646208 | 2.73E-01 | 88800624  | 88800747  | NC_000015.9  |
| cg02087954 | 1.87E-27 | 5.99E-30 | 1.36E+01 | 57.324427  | 3.07E-01 | 100609534 | 100609657 | NC_000007.13 |
| cg14658493 | 1.90E-27 | 6.08E-30 | 1.36E+01 | 57.309701  | 2.49E-01 | 27184077  | 27184200  | NC_000007.13 |
| cg26595278 | 1.93E-27 | 6.18E-30 | 1.36E+01 | 57.2934321 | 2.95E-01 | 32009163  | 32009286  | NC_000011.9  |
| cg26504021 | 1.95E-27 | 6.25E-30 | 1.36E+01 | 57.2822009 | 2.57E-01 | 2752882   | 2753005   | NC_000005.9  |
| cg13300273 | 1.99E-27 | 6.38E-30 | 1.35E+01 | 57.2615529 | 2.80E-01 | 200842890 | 200843013 | NC_000001.10 |
| cg02574509 | 2.05E-27 | 6.58E-30 | 1.35E+01 | 57.2298412 | 2.97E-01 | 240255377 | 240255500 | NC_000001.10 |
| cg16783279 | 2.21E-27 | 7.14E-30 | 1.35E+01 | 57.1492358 | 3.15E-01 | 125425625 | 125425748 | NC_000010.10 |
| cg18247055 | 2.22E-27 | 7.18E-30 | 1.35E+01 | 57.1439731 | 2.21E-01 | 22634226  | 22634349  | NC_000010.10 |
| cg10433549 | 2.22E-27 | 7.20E-30 | 1.35E+01 | 57.1407651 | 1.54E-01 | 41472748  | 41472871  | NC_000017.10 |
| cg14587524 | 2.31E-27 | 7.53E-30 | 1.35E+01 | 57.0957961 | 3.36E-01 | 38183262  | 38183385  | NC_000019.9  |
| cg05137358 | 2.32E-27 | 7.58E-30 | 1.35E+01 | 57.0898964 | 3.29E-01 | 37006127  | 37006250  | NC_000013.10 |
| cg11750165 | 2.36E-27 | 7.73E-30 | 1.35E+01 | 57.0701312 | 2.29E-01 | 112722233 | 112722356 | NC_000013.10 |
| cg04475027 | 2.39E-27 | 7.85E-30 | 1.35E+01 | 57.0553597 | 3.18E-01 | 128752040 | 128752163 | NC_000012.11 |
| cg14051544 | 2.43E-27 | 7.99E-30 | 1.35E+01 | 57.037707  | 2.70E-01 | 170303286 | 170303409 | NC_000003.11 |
| cg23301563 | 2.45E-27 | 8.08E-30 | 1.35E+01 | 57.0263081 | 1.56E-01 | 101770526 | 101770649 | NC_000002.11 |
| cg06183338 | 2.46E-27 | 8.12E-30 | 1.35E+01 | 57.0207903 | 3.24E-01 | 178004204 | 178004327 | NC_000005.9  |
| cg19697232 | 2.47E-27 | 8.15E-30 | 1.35E+01 | 57.0177368 | 1.25E-01 | 16854566  | 16854689  | NC_000005.9  |
| cg20764887 | 2.47E-27 | 8.17E-30 | 1.35E+01 | 57.0156907 | 2.96E-01 | 178004012 | 178004135 | NC_000005.9  |
| cg08569979 | 2.60E-27 | 8.60E-30 | 1.35E+01 | 56.9647096 | 1.27E-01 | 41053715  | 41053838  | NC_000013.10 |

|            |          |          |          |            |          |           |           |              |
|------------|----------|----------|----------|------------|----------|-----------|-----------|--------------|
| cg00022235 | 2.60E-27 | 8.62E-30 | 1.35E+01 | 56.9614513 | 1.78E-01 | 11764847  | 11764970  | NC_000016.9  |
| cg11028624 | 2.62E-27 | 8.69E-30 | 1.35E+01 | 56.9536192 | 1.96E-01 | 13983793  | 13983916  | NC_000011.9  |
| cg14500070 | 2.62E-27 | 8.70E-30 | 1.35E+01 | 56.9523895 | 2.14E-01 | 141119541 | 141119664 | NC_000003.11 |
| cg01217876 | 2.73E-27 | 9.08E-30 | 1.35E+01 | 56.9101218 | 1.64E-01 | 74498163  | 74498286  | NC_000017.10 |
| cg14441976 | 2.75E-27 | 9.15E-30 | 1.35E+01 | 56.9027342 | 3.24E-01 | 128301083 | 128301206 | NC_000005.9  |
| cg02394395 | 2.82E-27 | 9.43E-30 | 1.35E+01 | 56.8728957 | 1.24E-01 | 94825257  | 94825380  | NC_000010.10 |
| cg12744820 | 2.82E-27 | 9.45E-30 | 1.35E+01 | 56.870238  | 2.89E-01 | 137814960 | 137815083 | NC_000006.11 |
| cg14353137 | 2.87E-27 | 9.66E-30 | 1.35E+01 | 56.8490888 | 2.98E-01 | 67873799  | 67873922  | NC_000008.10 |
| cg03804213 | 2.89E-27 | 9.72E-30 | 1.35E+01 | 56.8424233 | 2.82E-01 | 37248078  | 37248201  | NC_000013.10 |
| cg12577942 | 2.98E-27 | 1.01E-29 | 1.35E+01 | 56.8081832 | 2.08E-01 | 90168963  | 90169086  | NC_000004.11 |
| cg01796166 | 3.11E-27 | 1.05E-29 | 1.35E+01 | 56.7633428 | 2.70E-01 | 95239586  | 95239709  | NC_000014.8  |
| cg05506365 | 3.32E-27 | 1.13E-29 | 1.35E+01 | 56.6944416 | 2.39E-01 | 105472193 | 105472316 | NC_000002.11 |
| cg07770968 | 3.35E-27 | 1.14E-29 | 1.35E+01 | 56.6851856 | 3.48E-01 | 53852422  | 53852545  | NC_000008.10 |
| cg27619367 | 3.38E-27 | 1.15E-29 | 1.35E+01 | 56.674404  | 1.36E-01 | 13150556  | 13150679  | NC_000012.11 |
| cg00502618 | 3.72E-27 | 1.27E-29 | 1.35E+01 | 56.5764353 | 1.69E-01 | 26952697  | 26952820  | NC_000022.10 |
| cg23216434 | 3.89E-27 | 1.33E-29 | 1.34E+01 | 56.5300227 | 1.47E-01 | 67871362  | 67871485  | NC_000001.10 |
| cg05294276 | 3.89E-27 | 1.33E-29 | 1.34E+01 | 56.5284549 | 2.15E-01 | 112618918 | 112619041 | NC_000010.10 |
| cg17774559 | 3.89E-27 | 1.33E-29 | 1.34E+01 | 56.5275236 | 3.02E-01 | 1879698   | 1879821   | NC_000005.9  |
| cg01075002 | 3.98E-27 | 1.37E-29 | 1.34E+01 | 56.5028097 | 1.65E-01 | 155450882 | 155451005 | NC_000006.11 |
| cg14015441 | 4.11E-27 | 1.41E-29 | 1.34E+01 | 56.4711491 | 2.14E-01 | 105479318 | 105479441 | NC_000008.10 |
| cg27388763 | 4.35E-27 | 1.50E-29 | 1.34E+01 | 56.4111191 | 1.27E-01 | 44648385  | 44648508  | NC_000017.10 |
| cg21573200 | 4.38E-27 | 1.51E-29 | 1.34E+01 | 56.4020242 | 2.75E-01 | 2739602   | 2739725   | NC_000005.9  |
| cg21932672 | 4.43E-27 | 1.53E-29 | 1.34E+01 | 56.3890413 | 1.62E-01 | 95584445  | 95584568  | NC_000001.10 |
| cg14647620 | 4.58E-27 | 1.59E-29 | 1.34E+01 | 56.352271  | 1.47E-01 | 100462742 | 100462865 | NC_000009.11 |
| cg02194398 | 4.59E-27 | 1.60E-29 | 1.34E+01 | 56.3491359 | 7.93E-02 | 142556368 | 142556491 | NC_000004.11 |

|            |          |          |          |            |          |           |           |              |
|------------|----------|----------|----------|------------|----------|-----------|-----------|--------------|
| cg26392545 | 4.61E-27 | 1.60E-29 | 1.34E+01 | 56.3457415 | 1.58E-01 | 28187379  | 28187502  | NC_000013.10 |
| cg04557544 | 4.74E-27 | 1.65E-29 | 1.34E+01 | 56.315748  | 3.50E-01 | 12996046  | 12996169  | NC_000016.9  |
| cg26393977 | 5.08E-27 | 1.78E-29 | 1.34E+01 | 56.243203  | 1.98E-01 | 37612713  | 37612836  | NC_000008.10 |
| cg09142313 | 5.12E-27 | 1.79E-29 | 1.34E+01 | 56.2336865 | 3.08E-01 | 72677859  | 72677982  | NC_000005.9  |
| cg09493505 | 5.13E-27 | 1.80E-29 | 1.34E+01 | 56.2293231 | 3.63E-01 | 49813111  | 49813234  | NC_000007.13 |
| cg24401487 | 5.27E-27 | 1.85E-29 | 1.34E+01 | 56.2019108 | 1.88E-01 | 230416880 | 230417003 | NC_000001.10 |
| cg08722660 | 5.34E-27 | 1.88E-29 | 1.34E+01 | 56.1868851 | 1.19E-01 | 201099406 | 201099529 | NC_000001.10 |
| cg02482218 | 5.39E-27 | 1.90E-29 | 1.34E+01 | 56.1772551 | 2.61E-01 | 12995568  | 12995691  | NC_000016.9  |
| cg21464220 | 5.45E-27 | 1.92E-29 | 1.34E+01 | 56.1634969 | 2.56E-01 | 242242798 | 242242921 | NC_000002.11 |
| cg09474331 | 5.49E-27 | 1.94E-29 | 1.34E+01 | 56.1568195 | 3.95E-01 | 54926805  | 54926928  | NC_000019.9  |
| cg24288527 | 5.66E-27 | 2.00E-29 | 1.34E+01 | 56.1246248 | 2.24E-01 | 93390347  | 93390470  | NC_000010.10 |
| cg25260137 | 5.75E-27 | 2.04E-29 | 1.34E+01 | 56.1067549 | 2.71E-01 | 65282185  | 65282308  | NC_000008.10 |
| cg08209711 | 5.94E-27 | 2.11E-29 | 1.34E+01 | 56.0722748 | 1.70E-01 | 32825499  | 32825622  | NC_000006.11 |
| cg11667258 | 6.21E-27 | 2.21E-29 | 1.34E+01 | 56.026597  | 2.70E-01 | 155107529 | 155107652 | NC_000005.9  |
| cg03530754 | 6.31E-27 | 2.25E-29 | 1.34E+01 | 56.0087921 | 3.09E-01 | 128751460 | 128751583 | NC_000012.11 |
| cg01660911 | 6.32E-27 | 2.25E-29 | 1.34E+01 | 56.0068485 | 3.13E-01 | 17082772  | 17082895  | NC_000022.10 |
| cg07846220 | 6.38E-27 | 2.28E-29 | 1.34E+01 | 55.9961015 | 3.06E-01 | 7117680   | 7117803   | NC_000018.9  |
| cg17429382 | 6.75E-27 | 2.43E-29 | 1.34E+01 | 55.9332855 | 3.11E-01 | 3786246   | 3786369   | NC_000019.9  |
| cg13468680 | 6.83E-27 | 2.46E-29 | 1.34E+01 | 55.9185239 | 1.67E-01 | 139393050 | 139393173 | NC_000009.11 |
| cg12781700 | 7.06E-27 | 2.56E-29 | 1.34E+01 | 55.8815055 | 3.24E-01 | 42733729  | 42733852  | NC_000017.10 |
| cg02732915 | 7.18E-27 | 2.60E-29 | 1.33E+01 | 55.8643346 | 1.48E-01 | 81120670  | 81120793  | NC_000004.11 |
| cg04597433 | 7.19E-27 | 2.60E-29 | 1.33E+01 | 55.8625217 | 2.77E-01 | 9783206   | 9783329   | NC_000004.11 |
| cg12756396 | 7.39E-27 | 2.69E-29 | 1.33E+01 | 55.8323714 | 2.24E-01 | 50886969  | 50887092  | NC_000001.10 |
| cg26450044 | 7.50E-27 | 2.73E-29 | 1.33E+01 | 55.815759  | 8.83E-02 | 21927746  | 21927869  | NC_000016.9  |
| cg23128056 | 7.83E-27 | 2.86E-29 | 1.33E+01 | 55.7688117 | 1.02E-01 | 39674626  | 39674749  | NC_000017.10 |

|            |          |          |          |            |          |           |           |              |
|------------|----------|----------|----------|------------|----------|-----------|-----------|--------------|
| cg26523264 | 8.07E-27 | 2.95E-29 | 1.33E+01 | 55.737481  | 1.33E-01 | 8649844   | 8649967   | NC_000019.9  |
| cg27616541 | 8.26E-27 | 3.03E-29 | 1.33E+01 | 55.7120048 | 1.73E-01 | 40837288  | 40837411  | NC_000017.10 |
| cg05151154 | 8.36E-27 | 3.08E-29 | 1.33E+01 | 55.6974328 | 3.82E-01 | 51184786  | 51184909  | NC_000016.9  |
| cg00552235 | 8.37E-27 | 3.08E-29 | 1.33E+01 | 55.6956697 | 3.18E-01 | 100943163 | 100943286 | NC_000007.13 |
| cg09614415 | 8.39E-27 | 3.09E-29 | 1.33E+01 | 55.6927169 | 2.46E-01 | 129535509 | 129535632 | NC_000010.10 |
| cg11178863 | 8.47E-27 | 3.12E-29 | 1.33E+01 | 55.6832455 | 3.49E-01 | 13839785  | 13839908  | NC_000001.10 |
| cg24089600 | 8.51E-27 | 3.14E-29 | 1.33E+01 | 55.6771657 | 2.91E-01 | 110960177 | 110960300 | NC_000013.10 |
| cg16348962 | 8.57E-27 | 3.17E-29 | 1.33E+01 | 55.6686182 | 1.28E-01 | 70491417  | 70491540  | NC_000016.9  |
| cg18082337 | 8.75E-27 | 3.24E-29 | 1.33E+01 | 55.6461207 | 2.95E-01 | 147113726 | 147113849 | NC_000003.11 |
| cg20884887 | 8.77E-27 | 3.25E-29 | 1.33E+01 | 55.6424445 | 3.69E-01 | 27208285  | 27208408  | NC_000007.13 |
| cg22910769 | 9.01E-27 | 3.35E-29 | 1.33E+01 | 55.6131806 | 1.87E-01 | 72651035  | 72651158  | NC_000010.10 |
| cg07926618 | 9.12E-27 | 3.39E-29 | 1.33E+01 | 55.6005367 | 2.29E-01 | 17247876  | 17247999  | NC_000001.10 |
| cg00177388 | 9.15E-27 | 3.41E-29 | 1.33E+01 | 55.5961379 | 2.58E-01 | 72677886  | 72678009  | NC_000005.9  |
| cg07533148 | 9.66E-27 | 3.61E-29 | 1.33E+01 | 55.5384876 | 2.90E-01 | 248020812 | 248020935 | NC_000001.10 |
| cg09997062 | 9.79E-27 | 3.66E-29 | 1.33E+01 | 55.5247945 | 1.31E-01 | 39708372  | 39708495  | NC_000017.10 |
| cg03609960 | 1.04E-26 | 3.91E-29 | 1.33E+01 | 55.4585059 | 2.90E-01 | 99288805  | 99288928  | NC_000012.11 |
| cg07847863 | 1.04E-26 | 3.93E-29 | 1.33E+01 | 55.4536118 | 2.73E-01 | 53419963  | 53420086  | NC_000013.10 |
| cg05648614 | 1.07E-26 | 4.03E-29 | 1.33E+01 | 55.4295058 | 2.22E-01 | 5180520   | 5180643   | NC_000003.11 |
| cg04992127 | 1.09E-26 | 4.11E-29 | 1.33E+01 | 55.408766  | 2.72E-01 | 2751854   | 2751977   | NC_000005.9  |
| cg16517298 | 1.14E-26 | 4.32E-29 | 1.33E+01 | 55.3590005 | 1.98E-01 | 230413174 | 230413297 | NC_000001.10 |
| cg09873510 | 1.26E-26 | 4.79E-29 | 1.33E+01 | 55.2564251 | 8.88E-02 | 65016588  | 65016711  | NC_000005.9  |
| cg02976898 | 1.27E-26 | 4.86E-29 | 1.33E+01 | 55.2421821 | 1.56E-01 | 76742856  | 76742979  | NC_000010.10 |
| cg10778841 | 1.30E-26 | 4.99E-29 | 1.33E+01 | 55.215479  | 3.03E-01 | 106401319 | 106401442 | NC_000010.10 |
| cg13563298 | 1.31E-26 | 5.01E-29 | 1.33E+01 | 55.2117345 | 3.05E-01 | 95948059  | 95948182  | NC_000009.11 |
| cg14596987 | 1.32E-26 | 5.09E-29 | 1.33E+01 | 55.1957019 | 1.69E-01 | 98249189  | 98249312  | NC_000009.11 |

|            |          |          |          |            |          |           |           |              |
|------------|----------|----------|----------|------------|----------|-----------|-----------|--------------|
| cg12296772 | 1.40E-26 | 5.39E-29 | 1.32E+01 | 55.1390505 | 2.99E-01 | 17271067  | 17271190  | NC_000008.10 |
| cg26866142 | 1.40E-26 | 5.43E-29 | 1.32E+01 | 55.1319075 | 1.73E-01 | 205779678 | 205779801 | NC_000001.10 |
| cg02467990 | 1.43E-26 | 5.53E-29 | 1.32E+01 | 55.1136121 | 3.86E-01 | 49813102  | 49813225  | NC_000007.13 |
| cg18483908 | 1.43E-26 | 5.54E-29 | 1.32E+01 | 55.111664  | 2.82E-01 | 19017420  | 19017543  | NC_000022.10 |
| cg05343808 | 1.43E-26 | 5.55E-29 | 1.32E+01 | 55.1108856 | 2.14E-01 | 50857635  | 50857758  | NC_000007.13 |
| cg03442254 | 1.50E-26 | 5.85E-29 | 1.32E+01 | 55.058987  | 1.80E-01 | 1849073   | 1849196   | NC_000001.10 |
| cg10671668 | 1.52E-26 | 5.92E-29 | 1.32E+01 | 55.0456218 | 2.96E-01 | 4919230   | 4919353   | NC_000012.11 |
| cg10004079 | 1.53E-26 | 5.97E-29 | 1.32E+01 | 55.0375483 | 2.08E-01 | 26372530  | 26372653  | NC_000017.10 |
| cg16855929 | 1.53E-26 | 5.99E-29 | 1.32E+01 | 55.0346077 | 2.36E-01 | 231561414 | 231561537 | NC_000001.10 |
| cg03727333 | 1.54E-26 | 6.02E-29 | 1.32E+01 | 55.0292309 | 1.51E-01 | 52379467  | 52379590  | NC_000010.10 |
| cg11431723 | 1.56E-26 | 6.11E-29 | 1.32E+01 | 55.0150502 | 1.68E-01 | 149126842 | 149126965 | NC_000003.11 |
| cg05475485 | 1.57E-26 | 6.15E-29 | 1.32E+01 | 55.0086512 | 1.70E-01 | 67810027  | 67810150  | NC_000011.9  |
| cg08832906 | 1.59E-26 | 6.25E-29 | 1.32E+01 | 54.9929282 | 3.10E-01 | 139208852 | 139208975 | NC_000007.13 |
| cg24914884 | 1.60E-26 | 6.31E-29 | 1.32E+01 | 54.9837013 | 1.83E-01 | 64588128  | 64588251  | NC_000002.11 |
| cg20405017 | 1.60E-26 | 6.31E-29 | 1.32E+01 | 54.9833678 | 2.23E-01 | 50235393  | 50235516  | NC_000017.10 |
| cg25691167 | 1.64E-26 | 6.48E-29 | 1.32E+01 | 54.9566959 | 3.15E-01 | 19184961  | 19185084  | NC_000007.13 |
| cg23259001 | 1.64E-26 | 6.48E-29 | 1.32E+01 | 54.9559453 | 1.78E-01 | 105800169 | 105800292 | NC_000014.8  |
| cg14699728 | 1.66E-26 | 6.58E-29 | 1.32E+01 | 54.9410141 | 3.12E-01 | 66188522  | 66188645  | NC_000011.9  |
| cg25308508 | 1.69E-26 | 6.67E-29 | 1.32E+01 | 54.9270761 | 2.53E-01 | 3592638   | 3592761   | NC_000005.9  |
| cg22797031 | 1.86E-26 | 7.41E-29 | 1.32E+01 | 54.822563  | 3.14E-01 | 170630070 | 170630193 | NC_000001.10 |
| cg24304309 | 1.90E-26 | 7.60E-29 | 1.32E+01 | 54.7977261 | 1.86E-01 | 154577895 | 154578018 | NC_000001.10 |
| cg16461861 | 1.92E-26 | 7.70E-29 | 1.32E+01 | 54.7847834 | 1.27E-01 | 43180148  | 43180271  | NC_000005.9  |
| cg23190190 | 1.93E-26 | 7.73E-29 | 1.32E+01 | 54.780937  | 1.14E-01 | 70031725  | 70031848  | NC_000011.9  |
| cg06782035 | 1.93E-26 | 7.74E-29 | 1.32E+01 | 54.7793566 | 3.58E-01 | 16179135  | 16179258  | NC_000005.9  |
| cg17373343 | 1.95E-26 | 7.82E-29 | 1.32E+01 | 54.7700901 | 2.18E-01 | 6026554   | 6026677   | NC_000019.9  |

|            |          |          |          |            |          |           |           |              |
|------------|----------|----------|----------|------------|----------|-----------|-----------|--------------|
| cg25208017 | 1.95E-26 | 7.85E-29 | 1.32E+01 | 54.7657116 | 3.81E-01 | 240255486 | 240255609 | NC_000001.10 |
| cg07106737 | 2.00E-26 | 8.04E-29 | 1.32E+01 | 54.741678  | 1.34E-01 | 88599035  | 88599158  | NC_000016.9  |
| cg07195057 | 2.04E-26 | 8.25E-29 | 1.32E+01 | 54.7167291 | 1.16E-01 | 907118    | 907241    | NC_000001.10 |
| cg06779449 | 2.05E-26 | 8.29E-29 | 1.32E+01 | 54.7121113 | 3.09E-01 | 42544663  | 42544786  | NC_000020.10 |
| cg07860213 | 2.06E-26 | 8.32E-29 | 1.32E+01 | 54.7083506 | 2.54E-01 | 70982039  | 70982162  | NC_000008.10 |
| cg00826626 | 2.07E-26 | 8.37E-29 | 1.32E+01 | 54.7026076 | 1.51E-01 | 19360878  | 19361001  | NC_000014.8  |
| cg01289769 | 2.08E-26 | 8.43E-29 | 1.32E+01 | 54.695534  | 2.37E-01 | 125077434 | 125077557 | NC_000003.11 |
| cg07049592 | 2.09E-26 | 8.45E-29 | 1.32E+01 | 54.6923057 | 1.99E-01 | 27184450  | 27184573  | NC_000007.13 |
| cg04210254 | 2.17E-26 | 8.81E-29 | 1.32E+01 | 54.650635  | 2.13E-01 | 22327148  | 22327271  | NC_000001.10 |
| cg19074340 | 2.22E-26 | 9.05E-29 | 1.32E+01 | 54.6247226 | 3.96E-01 | 32456912  | 32457035  | NC_000011.9  |
| cg19352726 | 2.23E-26 | 9.07E-29 | 1.32E+01 | 54.6222023 | 1.95E-01 | 42757805  | 42757928  | NC_000006.11 |
| cg13056222 | 2.24E-26 | 9.13E-29 | 1.32E+01 | 54.6161036 | 1.76E-01 | 204219199 | 204219322 | NC_000001.10 |
| cg00352652 | 2.31E-26 | 9.42E-29 | 1.32E+01 | 54.5846543 | 2.19E-01 | 88547533  | 88547656  | NC_000016.9  |
| cg18384778 | 2.37E-26 | 9.73E-29 | 1.32E+01 | 54.5519403 | 2.83E-01 | 57618136  | 57618259  | NC_000019.9  |
| cg01826337 | 2.39E-26 | 9.80E-29 | 1.32E+01 | 54.544876  | 1.42E-01 | 1846001   | 1846124   | NC_000001.10 |
| cg14235574 | 2.47E-26 | 1.02E-28 | 1.32E+01 | 54.5075243 | 2.15E-01 | 112080226 | 112080349 | NC_000009.11 |
| cg18009496 | 2.51E-26 | 1.03E-28 | 1.32E+01 | 54.4929139 | 3.20E-01 | 1883940   | 1884063   | NC_000005.9  |
| cg20465933 | 2.53E-26 | 1.04E-28 | 1.32E+01 | 54.4815738 | 1.42E-01 | 152376761 | 152376884 | NC_000004.11 |
| cg22770911 | 2.63E-26 | 1.09E-28 | 1.31E+01 | 54.4432722 | 1.83E-01 | 8101307   | 8101430   | NC_000010.10 |
| cg25750507 | 2.68E-26 | 1.11E-28 | 1.31E+01 | 54.4232579 | 1.99E-01 | 46684004  | 46684127  | NC_000017.10 |
| cg12560987 | 2.68E-26 | 1.11E-28 | 1.31E+01 | 54.42219   | 2.55E-01 | 1287065   | 1287188   | NC_000007.13 |
| cg04456238 | 2.72E-26 | 1.13E-28 | 1.31E+01 | 54.4052551 | 2.36E-01 | 32450104  | 32450227  | NC_000011.9  |
| cg14535746 | 2.72E-26 | 1.13E-28 | 1.31E+01 | 54.4047568 | 1.67E-01 | 96652787  | 96652910  | NC_000012.11 |
| cg12027899 | 2.81E-26 | 1.17E-28 | 1.31E+01 | 54.3693278 | 1.77E-01 | 58385947  | 58386070  | NC_000011.9  |
| cg06117133 | 2.85E-26 | 1.19E-28 | 1.31E+01 | 54.3540519 | 1.32E-01 | 67966621  | 67966744  | NC_000016.9  |

|            |          |          |          |            |          |           |           |              |
|------------|----------|----------|----------|------------|----------|-----------|-----------|--------------|
| cg00559444 | 2.85E-26 | 1.19E-28 | 1.31E+01 | 54.353588  | 1.69E-01 | 22028743  | 22028866  | NC_000008.10 |
| cg01870247 | 2.85E-26 | 1.19E-28 | 1.31E+01 | 54.3497844 | 1.27E-01 | 31354127  | 31354250  | NC_000020.10 |
| cg05261299 | 2.96E-26 | 1.24E-28 | 1.31E+01 | 54.3114615 | 1.98E-01 | 52437299  | 52437422  | NC_000012.11 |
| cg05522011 | 3.00E-26 | 1.26E-28 | 1.31E+01 | 54.2987983 | 2.05E-01 | 81122726  | 81122849  | NC_000004.11 |
| cg11075099 | 3.04E-26 | 1.27E-28 | 1.31E+01 | 54.284252  | 1.74E-01 | 27829087  | 27829210  | NC_000013.10 |
| cg07068756 | 3.06E-26 | 1.29E-28 | 1.31E+01 | 54.275551  | 3.53E-01 | 41258910  | 41259033  | NC_000004.11 |
| cg15384598 | 3.18E-26 | 1.34E-28 | 1.31E+01 | 54.2358679 | 3.03E-01 | 24045549  | 24045672  | NC_000014.8  |
| cg25974626 | 3.28E-26 | 1.38E-28 | 1.31E+01 | 54.2018915 | 1.14E-01 | 32977142  | 32977265  | NC_000007.13 |
| cg14416371 | 3.28E-26 | 1.39E-28 | 1.31E+01 | 54.2009176 | 3.70E-01 | 43602847  | 43602970  | NC_000011.9  |
| cg13794530 | 3.33E-26 | 1.41E-28 | 1.31E+01 | 54.1858396 | 3.14E-01 | 158937494 | 158937617 | NC_000007.13 |
| cg00688962 | 3.38E-26 | 1.43E-28 | 1.31E+01 | 54.1706777 | 2.14E-01 | 21950567  | 21950690  | NC_000004.11 |
| cg02721665 | 3.47E-26 | 1.47E-28 | 1.31E+01 | 54.1403963 | 2.29E-01 | 125425583 | 125425706 | NC_000010.10 |
| cg08305436 | 3.62E-26 | 1.54E-28 | 1.31E+01 | 54.0949976 | 2.32E-01 | 22806184  | 22806307  | NC_000019.9  |
| cg20989443 | 3.65E-26 | 1.56E-28 | 1.31E+01 | 54.0839105 | 2.06E-01 | 230301268 | 230301391 | NC_000001.10 |
| cg27659787 | 3.93E-26 | 1.68E-28 | 1.31E+01 | 54.0067608 | 2.62E-01 | 111544291 | 111544414 | NC_000004.11 |
| cg24626752 | 3.97E-26 | 1.70E-28 | 1.31E+01 | 53.9962998 | 1.91E-01 | 88328274  | 88328397  | NC_000013.10 |
| cg14030258 | 4.08E-26 | 1.76E-28 | 1.31E+01 | 53.9641631 | 1.70E-01 | 29591301  | 29591424  | NC_000001.10 |
| cg19694519 | 4.17E-26 | 1.80E-28 | 1.31E+01 | 53.9419813 | 1.66E-01 | 22389206  | 22389329  | NC_000008.10 |
| cg11232245 | 4.21E-26 | 1.82E-28 | 1.31E+01 | 53.9307438 | 2.05E-01 | 101284535 | 101284658 | NC_000010.10 |
| cg04138185 | 4.29E-26 | 1.85E-28 | 1.31E+01 | 53.9123198 | 3.60E-01 | 84322584  | 84322707  | NC_000015.9  |
| cg09793121 | 4.36E-26 | 1.89E-28 | 1.31E+01 | 53.8949207 | 2.50E-01 | 34398263  | 34398386  | NC_000021.8  |
| cg02642962 | 4.80E-26 | 2.09E-28 | 1.31E+01 | 53.7906003 | 1.72E-01 | 124610404 | 124610527 | NC_000010.10 |
| cg09595050 | 4.82E-26 | 2.10E-28 | 1.31E+01 | 53.7858274 | 2.11E-01 | 81110205  | 81110328  | NC_000004.11 |
| cg20817131 | 4.97E-26 | 2.17E-28 | 1.30E+01 | 53.7534231 | 2.35E-01 | 27184167  | 27184290  | NC_000007.13 |
| cg14624314 | 5.10E-26 | 2.23E-28 | 1.30E+01 | 53.7272673 | 2.46E-01 | 145328877 | 145329000 | NC_000005.9  |

|            |          |          |          |            |          |           |           |              |
|------------|----------|----------|----------|------------|----------|-----------|-----------|--------------|
| cg25517810 | 5.13E-26 | 2.25E-28 | 1.30E+01 | 53.7189078 | 2.86E-01 | 105474385 | 105474508 | NC_000002.11 |
| cg01819995 | 5.25E-26 | 2.30E-28 | 1.30E+01 | 53.6960043 | 1.66E-01 | 30537979  | 30538102  | NC_000020.10 |
| cg27416372 | 5.34E-26 | 2.34E-28 | 1.30E+01 | 53.6780516 | 2.32E-01 | 147110229 | 147110352 | NC_000003.11 |
| cg02091605 | 5.37E-26 | 2.36E-28 | 1.30E+01 | 53.669648  | 2.56E-01 | 1776102   | 1776225   | NC_000019.9  |
| cg14698646 | 5.47E-26 | 2.41E-28 | 1.30E+01 | 53.6510029 | 2.42E-01 | 46684750  | 46684873  | NC_000017.10 |
| cg20754261 | 5.49E-26 | 2.42E-28 | 1.30E+01 | 53.6466173 | 2.92E-01 | 468330    | 468453    | NC_000002.11 |
| cg26050906 | 5.52E-26 | 2.44E-28 | 1.30E+01 | 53.6397203 | 1.53E-01 | 50800202  | 50800325  | NC_000007.13 |
| cg09388605 | 6.09E-26 | 2.70E-28 | 1.30E+01 | 53.5375158 | 2.64E-01 | 56013800  | 56013923  | NC_000008.10 |
| cg16052972 | 6.11E-26 | 2.71E-28 | 1.30E+01 | 53.5330983 | 1.35E-01 | 12184833  | 12184956  | NC_000003.11 |
| cg09521703 | 6.21E-26 | 2.76E-28 | 1.30E+01 | 53.5155911 | 2.11E-01 | 55944864  | 55944987  | NC_000019.9  |
| cg01485075 | 6.40E-26 | 2.86E-28 | 1.30E+01 | 53.4823359 | 3.47E-01 | 22817371  | 22817494  | NC_000019.9  |
| cg10366867 | 6.45E-26 | 2.88E-28 | 1.30E+01 | 53.472575  | 1.28E-01 | 88804589  | 88804712  | NC_000016.9  |
| cg08767286 | 6.56E-26 | 2.94E-28 | 1.30E+01 | 53.4545772 | 2.15E-01 | 237077265 | 237077388 | NC_000002.11 |
| cg23847712 | 6.62E-26 | 2.97E-28 | 1.30E+01 | 53.444571  | 2.64E-01 | 9783196   | 9783319   | NC_000004.11 |
| cg15239304 | 6.72E-26 | 3.01E-28 | 1.30E+01 | 53.4282063 | 1.28E-01 | 224810907 | 224811030 | NC_000002.11 |
| cg02628107 | 6.93E-26 | 3.11E-28 | 1.30E+01 | 53.3962419 | 1.03E-01 | 10279354  | 10279477  | NC_000005.9  |
| cg07033372 | 6.98E-26 | 3.14E-28 | 1.30E+01 | 53.3878416 | 2.57E-01 | 37353032  | 37353155  | NC_000020.10 |
| cg18578405 | 7.13E-26 | 3.21E-28 | 1.30E+01 | 53.3653732 | 2.80E-01 | 12996057  | 12996180  | NC_000016.9  |
| cg20522046 | 7.13E-26 | 3.21E-28 | 1.30E+01 | 53.3643474 | 1.66E-01 | 52024792  | 52024915  | NC_000013.10 |
| cg19937061 | 7.51E-26 | 3.40E-28 | 1.30E+01 | 53.3097038 | 2.93E-01 | 25320133  | 25320256  | NC_000013.10 |
| cg21678445 | 7.54E-26 | 3.41E-28 | 1.30E+01 | 53.3048235 | 3.80E-01 | 22930283  | 22930406  | NC_000018.9  |
| cg25415246 | 7.58E-26 | 3.43E-28 | 1.30E+01 | 53.299088  | 2.13E-01 | 1762710   | 1762833   | NC_000019.9  |
| cg05012672 | 7.65E-26 | 3.47E-28 | 1.30E+01 | 53.2880054 | 1.89E-01 | 3189830   | 3189953   | NC_000019.9  |
| cg22504528 | 7.75E-26 | 3.52E-28 | 1.30E+01 | 53.2745308 | 2.35E-01 | 26951369  | 26951492  | NC_000022.10 |
| cg09061993 | 7.80E-26 | 3.55E-28 | 1.30E+01 | 53.2668933 | 2.26E-01 | 211499620 | 211499743 | NC_000001.10 |



|            |          |          |          |            |          |           |           |              |
|------------|----------|----------|----------|------------|----------|-----------|-----------|--------------|
| cg01535698 | 7.81E-26 | 3.55E-28 | 1.30E+01 | 53.2652853 | 3.20E-01 | 240255136 | 240255259 | NC_000001.10 |
| cg16352072 | 7.82E-26 | 3.56E-28 | 1.30E+01 | 53.2627174 | 1.54E-01 | 910223    | 910346    | NC_000001.10 |
| cg11946583 | 7.82E-26 | 3.56E-28 | 1.30E+01 | 53.2623703 | 2.12E-01 | 75674098  | 75674221  | NC_000007.13 |
| cg03171770 | 7.86E-26 | 3.58E-28 | 1.30E+01 | 53.2561403 | 2.72E-01 | 43393728  | 43393851  | NC_000010.10 |
| cg05206884 | 8.00E-26 | 3.66E-28 | 1.30E+01 | 53.2359281 | 3.24E-01 | 33454324  | 33454447  | NC_000022.10 |
| cg25999442 | 8.04E-26 | 3.68E-28 | 1.30E+01 | 53.2303754 | 3.55E-01 | 34113398  | 34113521  | NC_000019.9  |
| cg03187713 | 8.31E-26 | 3.81E-28 | 1.30E+01 | 53.1963268 | 1.55E-01 | 51330698  | 51330821  | NC_000007.13 |
| cg18372607 | 8.36E-26 | 3.83E-28 | 1.30E+01 | 53.1896586 | 2.91E-01 | 31827084  | 31827207  | NC_000011.9  |
| cg16962557 | 8.41E-26 | 3.86E-28 | 1.30E+01 | 53.1837772 | 1.52E-01 | 153587387 | 153587510 | NC_000004.11 |
| cg06062984 | 8.52E-26 | 3.92E-28 | 1.30E+01 | 53.1678037 | 2.68E-01 | 22413960  | 22414083  | NC_000003.11 |
| cg02393617 | 8.52E-26 | 3.92E-28 | 1.30E+01 | 53.1675704 | 1.21E-01 | 20087765  | 20087888  | NC_000011.9  |
| cg17963548 | 8.65E-26 | 3.98E-28 | 1.30E+01 | 53.1510776 | 1.31E-01 | 224824723 | 224824846 | NC_000002.11 |
| cg03221715 | 8.69E-26 | 4.01E-28 | 1.30E+01 | 53.1455475 | 1.61E-01 | 129148362 | 129148485 | NC_000003.11 |
| cg01283246 | 8.70E-26 | 4.01E-28 | 1.30E+01 | 53.1442064 | 3.20E-01 | 135266135 | 135266258 | NC_000005.9  |
| cg03952724 | 8.77E-26 | 4.05E-28 | 1.30E+01 | 53.1347826 | 1.10E-01 | 30333365  | 30333488  | NC_000008.10 |
| cg22167515 | 8.82E-26 | 4.07E-28 | 1.30E+01 | 53.1294436 | 2.70E-01 | 91192466  | 91192589  | NC_000001.10 |
| cg15874092 | 8.82E-26 | 4.08E-28 | 1.30E+01 | 53.1281281 | 2.75E-01 | 59827921  | 59828044  | NC_000020.10 |
| cg08092050 | 8.83E-26 | 4.08E-28 | 1.30E+01 | 53.1270978 | 1.70E-01 | 78734858  | 78734981  | NC_000015.9  |
| cg00940260 | 8.93E-26 | 4.13E-28 | 1.30E+01 | 53.1142112 | 1.94E-01 | 47064750  | 47064873  | NC_000001.10 |
| cg20049415 | 8.93E-26 | 4.14E-28 | 1.30E+01 | 53.113777  | 2.18E-01 | 21377671  | 21377794  | NC_000020.10 |
| cg27225130 | 8.96E-26 | 4.15E-28 | 1.30E+01 | 53.1096345 | 1.32E-01 | 208218009 | 208218132 | NC_000001.10 |
| cg07125166 | 9.06E-26 | 4.21E-28 | 1.30E+01 | 53.097201  | 1.94E-01 | 48413613  | 48413736  | NC_000003.11 |
| cg24266670 | 9.37E-26 | 4.36E-28 | 1.29E+01 | 53.0610418 | 3.00E-01 | 115630629 | 115630752 | NC_000011.9  |
| cg02983163 | 9.39E-26 | 4.37E-28 | 1.29E+01 | 53.0588185 | 2.06E-01 | 47010461  | 47010584  | NC_000021.8  |
| cg08802358 | 9.39E-26 | 4.38E-28 | 1.29E+01 | 53.0580741 | 2.01E-01 | 176524797 | 176524920 | NC_000005.9  |

|            |          |          |          |            |          |           |           |              |
|------------|----------|----------|----------|------------|----------|-----------|-----------|--------------|
| cg16179589 | 9.41E-26 | 4.39E-28 | 1.29E+01 | 53.055086  | 2.34E-01 | 36107292  | 36107415  | NC_000017.10 |
| cg06271327 | 9.56E-26 | 4.46E-28 | 1.29E+01 | 53.0391459 | 6.72E-02 | 8062512   | 8062635   | NC_000017.10 |
| cg27649239 | 9.92E-26 | 4.64E-28 | 1.29E+01 | 53.0006023 | 1.99E-01 | 68120393  | 68120516  | NC_000015.9  |
| cg11399546 | 9.92E-26 | 4.64E-28 | 1.29E+01 | 53.0005375 | 2.38E-01 | 226730561 | 226730684 | NC_000001.10 |
| cg14465148 | 1.03E-25 | 4.80E-28 | 1.29E+01 | 52.9650706 | 1.30E-01 | 3329791   | 3329914   | NC_000006.11 |
| cg10293925 | 1.03E-25 | 4.81E-28 | 1.29E+01 | 52.9635053 | 3.20E-01 | 38670985  | 38671108  | NC_000007.13 |
| cg26862964 | 1.03E-25 | 4.83E-28 | 1.29E+01 | 52.9602485 | 1.62E-01 | 114878283 | 114878406 | NC_000004.11 |
| cg12201110 | 1.05E-25 | 4.96E-28 | 1.29E+01 | 52.934099  | 1.49E-01 | 95321963  | 95322086  | NC_000005.9  |
| cg00625351 | 1.06E-25 | 5.01E-28 | 1.29E+01 | 52.9242912 | 1.33E-01 | 34048130  | 34048253  | NC_000003.11 |
| cg14684068 | 1.06E-25 | 5.01E-28 | 1.29E+01 | 52.9238583 | 1.70E-01 | 63894400  | 63894523  | NC_000011.9  |
| cg22795586 | 1.07E-25 | 5.06E-28 | 1.29E+01 | 52.9132906 | 2.25E-01 | 170629555 | 170629678 | NC_000001.10 |
| cg12017745 | 1.09E-25 | 5.15E-28 | 1.29E+01 | 52.8963707 | 2.29E-01 | 65352327  | 65352450  | NC_000011.9  |
| cg13530474 | 1.09E-25 | 5.17E-28 | 1.29E+01 | 52.892209  | 1.85E-01 | 97339939  | 97340062  | NC_000008.10 |
| cg05300538 | 1.09E-25 | 5.17E-28 | 1.29E+01 | 52.8916622 | 9.33E-02 | 64898766  | 64898889  | NC_000011.9  |
| cg06535102 | 1.14E-25 | 5.40E-28 | 1.29E+01 | 52.8489295 | 1.63E-01 | 95101861  | 95101984  | NC_000001.10 |
| cg19774425 | 1.14E-25 | 5.42E-28 | 1.29E+01 | 52.8445373 | 1.36E-01 | 51327477  | 51327600  | NC_000019.9  |
| cg09632858 | 1.15E-25 | 5.48E-28 | 1.29E+01 | 52.8347975 | 1.88E-01 | 27219548  | 27219671  | NC_000016.9  |
| cg18657094 | 1.16E-25 | 5.53E-28 | 1.29E+01 | 52.8252341 | 2.91E-01 | 2140030   | 2140153   | NC_000003.11 |
| cg16989443 | 1.17E-25 | 5.57E-28 | 1.29E+01 | 52.8188674 | 1.98E-01 | 1849195   | 1849318   | NC_000001.10 |
| cg05468917 | 1.20E-25 | 5.72E-28 | 1.29E+01 | 52.7915235 | 1.33E-01 | 2882180   | 2882303   | NC_000016.9  |
| cg09469566 | 1.20E-25 | 5.74E-28 | 1.29E+01 | 52.788148  | 2.14E-01 | 112717244 | 112717367 | NC_000013.10 |
| cg24031355 | 1.25E-25 | 6.01E-28 | 1.29E+01 | 52.7429803 | 3.07E-01 | 22634439  | 22634562  | NC_000010.10 |
| cg10089865 | 1.26E-25 | 6.03E-28 | 1.29E+01 | 52.7389695 | 1.38E-01 | 8100286   | 8100409   | NC_000010.10 |
| cg00872726 | 1.26E-25 | 6.05E-28 | 1.29E+01 | 52.736686  | 2.33E-01 | 97499908  | 97500031  | NC_000014.8  |
| cg21885046 | 1.26E-25 | 6.06E-28 | 1.29E+01 | 52.7337596 | 3.08E-01 | 130647004 | 130647127 | NC_000012.11 |

|            |          |          |          |            |          |           |           |              |
|------------|----------|----------|----------|------------|----------|-----------|-----------|--------------|
| cg24792365 | 1.27E-25 | 6.09E-28 | 1.29E+01 | 52.7295842 | 1.01E-01 | 188869178 | 188869301 | NC_000003.11 |
| cg04136610 | 1.27E-25 | 6.10E-28 | 1.29E+01 | 52.7283066 | 3.40E-01 | 5139878   | 5140001   | NC_000005.9  |
| cg09907936 | 1.29E-25 | 6.21E-28 | 1.29E+01 | 52.7092165 | 3.35E-01 | 58570466  | 58570589  | NC_000019.9  |
| cg15382538 | 1.31E-25 | 6.32E-28 | 1.29E+01 | 52.693261  | 2.33E-01 | 72678193  | 72678316  | NC_000005.9  |
| cg06353485 | 1.33E-25 | 6.41E-28 | 1.29E+01 | 52.6790254 | 1.88E-01 | 3409927   | 3410050   | NC_000004.11 |
| cg16631083 | 1.33E-25 | 6.43E-28 | 1.29E+01 | 52.6750514 | 2.55E-01 | 33250039  | 33250162  | NC_000021.8  |
| cg06891164 | 1.34E-25 | 6.46E-28 | 1.29E+01 | 52.6702815 | 1.39E-01 | 105451249 | 105451372 | NC_000014.8  |
| cg24663256 | 1.43E-25 | 6.97E-28 | 1.29E+01 | 52.5948464 | 2.86E-01 | 21950307  | 21950430  | NC_000004.11 |
| cg14373380 | 1.44E-25 | 7.04E-28 | 1.29E+01 | 52.5850387 | 1.55E-01 | 16268457  | 16268580  | NC_000001.10 |
| cg12159189 | 1.48E-25 | 7.24E-28 | 1.29E+01 | 52.5579306 | 2.79E-01 | 17850521  | 17850644  | NC_000022.10 |
| cg11281005 | 1.48E-25 | 7.24E-28 | 1.29E+01 | 52.5576818 | 1.74E-01 | 113396948 | 113397071 | NC_000013.10 |
| cg06159486 | 1.48E-25 | 7.26E-28 | 1.29E+01 | 52.554653  | 2.57E-01 | 18429691  | 18429814  | NC_000010.10 |
| cg05333149 | 1.49E-25 | 7.28E-28 | 1.29E+01 | 52.5512687 | 1.78E-01 | 29660173  | 29660296  | NC_000022.10 |
| cg12477716 | 1.55E-25 | 7.60E-28 | 1.29E+01 | 52.5093661 | 3.92E-01 | 47073436  | 47073559  | NC_000017.10 |
| cg06625077 | 1.60E-25 | 7.86E-28 | 1.29E+01 | 52.476322  | 1.61E-01 | 67963638  | 67963761  | NC_000016.9  |
| cg03190219 | 1.63E-25 | 8.04E-28 | 1.29E+01 | 52.4528014 | 2.19E-01 | 25898688  | 25898811  | NC_000007.13 |
| cg14197071 | 1.65E-25 | 8.13E-28 | 1.29E+01 | 52.4417359 | 2.49E-01 | 81110459  | 81110582  | NC_000004.11 |
| cg20143970 | 1.66E-25 | 8.19E-28 | 1.29E+01 | 52.4345752 | 1.53E-01 | 323570    | 323693    | NC_000006.11 |
| cg12178147 | 1.70E-25 | 8.42E-28 | 1.29E+01 | 52.4073689 | 1.95E-01 | 109576929 | 109577052 | NC_000012.11 |
| cg01874697 | 1.70E-25 | 8.43E-28 | 1.29E+01 | 52.4067302 | 2.45E-01 | 106401517 | 106401640 | NC_000010.10 |
| cg11097433 | 1.73E-25 | 8.56E-28 | 1.29E+01 | 52.3908062 | 2.83E-01 | 108924557 | 108924680 | NC_000010.10 |
| cg03181248 | 1.76E-25 | 8.72E-28 | 1.28E+01 | 52.3722328 | 2.54E-01 | 175199670 | 175199793 | NC_000002.11 |
| cg12599168 | 1.77E-25 | 8.76E-28 | 1.28E+01 | 52.3677347 | 2.23E-01 | 142554539 | 142554662 | NC_000007.13 |
| cg00461236 | 1.77E-25 | 8.79E-28 | 1.28E+01 | 52.3647476 | 1.84E-01 | 86704016  | 86704139  | NC_000016.9  |
| cg01804278 | 1.81E-25 | 8.97E-28 | 1.28E+01 | 52.3449854 | 1.88E-01 | 63894802  | 63894925  | NC_000011.9  |

|            |          |          |          |            |          |           |           |              |
|------------|----------|----------|----------|------------|----------|-----------|-----------|--------------|
| cg03939132 | 1.81E-25 | 8.99E-28 | 1.28E+01 | 52.3426853 | 1.76E-01 | 19316305  | 19316428  | NC_000001.10 |
| cg08858649 | 1.83E-25 | 9.09E-28 | 1.28E+01 | 52.3309038 | 2.45E-01 | 30139903  | 30140026  | NC_000006.11 |
| cg06601579 | 1.86E-25 | 9.24E-28 | 1.28E+01 | 52.3147313 | 2.01E-01 | 142966    | 143089    | NC_000007.13 |
| cg21183256 | 1.96E-25 | 9.77E-28 | 1.28E+01 | 52.2590232 | 2.75E-01 | 73163868  | 73163991  | NC_000008.10 |
| cg11507187 | 1.99E-25 | 9.97E-28 | 1.28E+01 | 52.2393955 | 1.28E-01 | 149636432 | 149636555 | NC_000005.9  |
| cg21899596 | 1.99E-25 | 9.98E-28 | 1.28E+01 | 52.2388078 | 3.56E-01 | 57522493  | 57522616  | NC_000004.11 |
| cg23243867 | 2.00E-25 | 1.00E-27 | 1.28E+01 | 52.2352402 | 3.16E-01 | 77334045  | 77334168  | NC_000001.10 |
| cg11911286 | 2.02E-25 | 1.01E-27 | 1.28E+01 | 52.2251741 | 2.44E-01 | 109177239 | 109177362 | NC_000002.11 |
| cg01024458 | 2.03E-25 | 1.02E-27 | 1.28E+01 | 52.2155227 | 2.86E-01 | 8703816   | 8703939   | NC_000001.10 |
| cg10177528 | 2.10E-25 | 1.06E-27 | 1.28E+01 | 52.1808197 | 1.82E-01 | 211499638 | 211499761 | NC_000001.10 |
| cg14123923 | 2.14E-25 | 1.08E-27 | 1.28E+01 | 52.1605119 | 3.07E-01 | 79176572  | 79176695  | NC_000013.10 |
| cg26313188 | 2.16E-25 | 1.09E-27 | 1.28E+01 | 52.1499655 | 1.73E-01 | 9225416   | 9225539   | NC_000017.10 |
| cg19679633 | 2.17E-25 | 1.09E-27 | 1.28E+01 | 52.1478437 | 3.28E-01 | 2752278   | 2752401   | NC_000005.9  |
| cg07906527 | 2.17E-25 | 1.10E-27 | 1.28E+01 | 52.1439071 | 1.61E-01 | 204116483 | 204116606 | NC_000001.10 |
| cg00801823 | 2.27E-25 | 1.15E-27 | 1.28E+01 | 52.1012073 | 1.30E-01 | 64061354  | 64061477  | NC_000005.9  |
| cg26328893 | 2.31E-25 | 1.17E-27 | 1.28E+01 | 52.0778082 | 1.47E-01 | 105747540 | 105747663 | NC_000014.8  |
| cg25016420 | 2.36E-25 | 1.20E-27 | 1.28E+01 | 52.0559283 | 2.06E-01 | 12989053  | 12989176  | NC_000020.10 |
| cg21135135 | 2.43E-25 | 1.23E-27 | 1.28E+01 | 52.0277263 | 2.73E-01 | 70597687  | 70597810  | NC_000007.13 |
| cg10164264 | 2.50E-25 | 1.27E-27 | 1.28E+01 | 51.998698  | 1.79E-01 | 1373477   | 1373600   | NC_000004.11 |
| cg17643662 | 2.50E-25 | 1.27E-27 | 1.28E+01 | 51.9952949 | 1.55E-01 | 30407052  | 30407175  | NC_000020.10 |
| cg21054521 | 2.60E-25 | 1.33E-27 | 1.28E+01 | 51.9530524 | 2.51E-01 | 112759386 | 112759509 | NC_000013.10 |
| cg21538631 | 2.62E-25 | 1.34E-27 | 1.28E+01 | 51.9442496 | 2.44E-01 | 53391662  | 53391785  | NC_000001.10 |
| cg12006284 | 2.63E-25 | 1.35E-27 | 1.28E+01 | 51.9403932 | 2.14E-01 | 32449638  | 32449761  | NC_000011.9  |
| cg20062116 | 2.69E-25 | 1.38E-27 | 1.28E+01 | 51.9187635 | 1.73E-01 | 98780453  | 98780576  | NC_000010.10 |
| cg02123767 | 2.70E-25 | 1.38E-27 | 1.28E+01 | 51.9140252 | 2.41E-01 | 71295007  | 71295130  | NC_000017.10 |

|            |          |          |          |            |          |           |           |              |
|------------|----------|----------|----------|------------|----------|-----------|-----------|--------------|
| cg26389281 | 2.79E-25 | 1.44E-27 | 1.28E+01 | 51.8771873 | 1.31E-01 | 915978    | 916101    | NC_000017.10 |
| cg14556188 | 2.81E-25 | 1.45E-27 | 1.28E+01 | 51.867256  | 1.16E-01 | 144523541 | 144523664 | NC_000008.10 |
| cg12729166 | 2.83E-25 | 1.46E-27 | 1.28E+01 | 51.8603983 | 1.47E-01 | 100110390 | 100110513 | NC_000001.10 |
| cg07547765 | 2.85E-25 | 1.47E-27 | 1.28E+01 | 51.8552168 | 2.42E-01 | 46685448  | 46685571  | NC_000017.10 |
| cg10093934 | 2.87E-25 | 1.48E-27 | 1.28E+01 | 51.8445869 | 1.51E-01 | 173423557 | 173423680 | NC_000002.11 |
| cg10991081 | 2.95E-25 | 1.53E-27 | 1.28E+01 | 51.8154891 | 9.56E-02 | 201960135 | 201960258 | NC_000001.10 |
| cg14397309 | 2.96E-25 | 1.53E-27 | 1.28E+01 | 51.8112926 | 1.27E-01 | 48437909  | 48438032  | NC_000012.11 |
| cg11452043 | 3.01E-25 | 1.56E-27 | 1.28E+01 | 51.7938863 | 2.00E-01 | 131814000 | 131814123 | NC_000002.11 |
| cg00228689 | 3.02E-25 | 1.57E-27 | 1.28E+01 | 51.7906638 | 1.16E-01 | 53742112  | 53742235  | NC_000001.10 |
| cg20311863 | 3.03E-25 | 1.58E-27 | 1.28E+01 | 51.7838529 | 2.34E-01 | 91184126  | 91184249  | NC_000001.10 |
| cg23479922 | 3.04E-25 | 1.58E-27 | 1.28E+01 | 51.7824521 | 2.13E-01 | 16179633  | 16179756  | NC_000005.9  |
| cg08963581 | 3.11E-25 | 1.62E-27 | 1.28E+01 | 51.7586808 | 1.40E-01 | 72863301  | 72863424  | NC_000016.9  |
| cg22763718 | 3.19E-25 | 1.66E-27 | 1.28E+01 | 51.7330029 | 2.89E-01 | 53422780  | 53422903  | NC_000013.10 |
| cg22996718 | 3.20E-25 | 1.67E-27 | 1.28E+01 | 51.7293113 | 9.14E-02 | 26138213  | 26138336  | NC_000022.10 |
| cg18273421 | 3.23E-25 | 1.69E-27 | 1.28E+01 | 51.7138444 | 1.25E-01 | 31734554  | 31734677  | NC_000006.11 |
| cg04117356 | 3.25E-25 | 1.70E-27 | 1.28E+01 | 51.7074799 | 2.24E-01 | 4406024   | 4406147   | NC_000017.10 |
| cg24008395 | 3.29E-25 | 1.72E-27 | 1.28E+01 | 51.6958631 | 9.87E-02 | 56069567  | 56069690  | NC_000017.10 |
| cg00127167 | 3.34E-25 | 1.75E-27 | 1.27E+01 | 51.6807941 | 2.46E-01 | 5140029   | 5140152   | NC_000005.9  |
| cg03693099 | 3.38E-25 | 1.77E-27 | 1.27E+01 | 51.6677728 | 2.06E-01 | 135936901 | 135937024 | NC_000009.11 |
| cg00315395 | 3.46E-25 | 1.82E-27 | 1.27E+01 | 51.6432858 | 2.46E-01 | 129145951 | 129146074 | NC_000011.9  |
| cg22757824 | 3.51E-25 | 1.85E-27 | 1.27E+01 | 51.6260669 | 3.13E-01 | 110960186 | 110960309 | NC_000013.10 |
| cg12440350 | 3.55E-25 | 1.87E-27 | 1.27E+01 | 51.612936  | 1.41E-01 | 17084335  | 17084458  | NC_000001.10 |
| cg20673829 | 3.58E-25 | 1.89E-27 | 1.27E+01 | 51.6054472 | 2.91E-01 | 158938060 | 158938183 | NC_000007.13 |
| cg03291548 | 3.61E-25 | 1.91E-27 | 1.27E+01 | 51.5943198 | 1.52E-01 | 18266804  | 18266927  | NC_000022.10 |
| cg13458645 | 3.61E-25 | 1.91E-27 | 1.27E+01 | 51.5942367 | 2.79E-01 | 111544271 | 111544394 | NC_000004.11 |

|            |          |          |          |            |          |           |           |              |
|------------|----------|----------|----------|------------|----------|-----------|-----------|--------------|
| cg02927058 | 3.63E-25 | 1.92E-27 | 1.27E+01 | 51.5896417 | 1.75E-01 | 10116780  | 10116903  | NC_000001.10 |
| cg01093311 | 3.63E-25 | 1.92E-27 | 1.27E+01 | 51.5870593 | 1.42E-01 | 31491009  | 31491132  | NC_000014.8  |
| cg22304612 | 3.65E-25 | 1.93E-27 | 1.27E+01 | 51.5822882 | 2.67E-01 | 2781241   | 2781364   | NC_000020.10 |
| cg01856162 | 3.80E-25 | 2.02E-27 | 1.27E+01 | 51.5386669 | 1.89E-01 | 233350940 | 233351063 | NC_000002.11 |
| cg24804436 | 3.84E-25 | 2.04E-27 | 1.27E+01 | 51.528813  | 8.19E-02 | 42955017  | 42955140  | NC_000006.11 |
| cg23042510 | 3.89E-25 | 2.07E-27 | 1.27E+01 | 51.5143618 | 2.02E-01 | 131757695 | 131757818 | NC_000010.10 |
| cg03692651 | 3.91E-25 | 2.08E-27 | 1.27E+01 | 51.5088576 | 3.23E-01 | 22444593  | 22444716  | NC_000019.9  |
| cg15446391 | 3.97E-25 | 2.12E-27 | 1.27E+01 | 51.4910434 | 1.83E-01 | 32452370  | 32452493  | NC_000011.9  |
| cg06382344 | 4.02E-25 | 2.15E-27 | 1.27E+01 | 51.4775452 | 2.88E-01 | 162280519 | 162280642 | NC_000002.11 |
| cg16508480 | 4.08E-25 | 2.18E-27 | 1.27E+01 | 51.4610551 | 3.35E-01 | 5139874   | 5139997   | NC_000005.9  |
| cg01713086 | 4.10E-25 | 2.19E-27 | 1.27E+01 | 51.4551183 | 6.10E-02 | 28268413  | 28268536  | NC_000008.10 |
| cg01645753 | 4.16E-25 | 2.23E-27 | 1.27E+01 | 51.4380756 | 3.04E-01 | 83316734  | 83316857  | NC_000015.9  |
| cg26814276 | 4.24E-25 | 2.28E-27 | 1.27E+01 | 51.4169395 | 3.11E-01 | 172734266 | 172734389 | NC_000004.11 |
| cg07014673 | 4.28E-25 | 2.30E-27 | 1.27E+01 | 51.4071625 | 3.21E-01 | 237078733 | 237078856 | NC_000002.11 |
| cg17445490 | 4.32E-25 | 2.33E-27 | 1.27E+01 | 51.3962504 | 1.87E-01 | 21642517  | 21642640  | NC_000001.10 |
| cg14658067 | 4.46E-25 | 2.41E-27 | 1.27E+01 | 51.3635993 | 2.50E-01 | 1273394   | 1273517   | NC_000007.13 |
| cg16239296 | 4.52E-25 | 2.44E-27 | 1.27E+01 | 51.3496902 | 1.13E-01 | 83736925  | 83737048  | NC_000015.9  |
| cg04159077 | 4.55E-25 | 2.46E-27 | 1.27E+01 | 51.3425896 | 1.42E-01 | 81110820  | 81110943  | NC_000010.10 |
| cg05937737 | 4.65E-25 | 2.52E-27 | 1.27E+01 | 51.3173447 | 2.28E-01 | 170303540 | 170303663 | NC_000003.11 |
| cg24621437 | 4.69E-25 | 2.54E-27 | 1.27E+01 | 51.3092218 | 3.04E-01 | 108924560 | 108924683 | NC_000010.10 |
| cg16709232 | 4.74E-25 | 2.57E-27 | 1.27E+01 | 51.2975776 | 2.76E-01 | 72322154  | 72322277  | NC_000017.10 |
| cg03560996 | 4.77E-25 | 2.59E-27 | 1.27E+01 | 51.2912384 | 1.31E-01 | 31733908  | 31734031  | NC_000006.11 |
| cg06528306 | 4.81E-25 | 2.61E-27 | 1.27E+01 | 51.2815428 | 3.57E-01 | 53852661  | 53852784  | NC_000008.10 |
| cg13944175 | 4.87E-25 | 2.65E-27 | 1.27E+01 | 51.2688412 | 2.40E-01 | 52222698  | 52222821  | NC_000019.9  |
| cg18777119 | 4.90E-25 | 2.67E-27 | 1.27E+01 | 51.2609275 | 2.99E-01 | 30017829  | 30017952  | NC_000019.9  |

|            |          |          |          |            |          |           |           |              |
|------------|----------|----------|----------|------------|----------|-----------|-----------|--------------|
| cg09767822 | 4.90E-25 | 2.67E-27 | 1.27E+01 | 51.2608241 | 1.80E-01 | 20178040  | 20178163  | NC_000011.9  |
| cg19922137 | 4.94E-25 | 2.69E-27 | 1.27E+01 | 51.2529572 | 2.35E-01 | 210111561 | 210111684 | NC_000001.10 |
| cg14058551 | 5.07E-25 | 2.76E-27 | 1.27E+01 | 51.226796  | 1.96E-01 | 115313103 | 115313226 | NC_000009.11 |
| cg08759276 | 5.13E-25 | 2.80E-27 | 1.27E+01 | 51.2125313 | 1.62E-01 | 86644262  | 86644385  | NC_000016.9  |
| cg24604013 | 5.17E-25 | 2.83E-27 | 1.27E+01 | 51.202594  | 2.45E-01 | 112721325 | 112721448 | NC_000013.10 |
| cg11071231 | 5.22E-25 | 2.86E-27 | 1.27E+01 | 51.1936863 | 2.95E-01 | 57069907  | 57070030  | NC_000008.10 |
| cg19126300 | 5.33E-25 | 2.92E-27 | 1.27E+01 | 51.1710217 | 3.08E-01 | 32457162  | 32457285  | NC_000011.9  |
| cg21265287 | 5.35E-25 | 2.94E-27 | 1.27E+01 | 51.165017  | 1.09E-01 | 1228383   | 1228506   | NC_000001.10 |
| cg19761848 | 5.38E-25 | 2.95E-27 | 1.27E+01 | 51.1602407 | 2.77E-01 | 237076815 | 237076938 | NC_000002.11 |
| cg15054725 | 5.42E-25 | 2.98E-27 | 1.27E+01 | 51.1526634 | 2.97E-01 | 223176606 | 223176729 | NC_000002.11 |
| cg06932616 | 5.53E-25 | 3.05E-27 | 1.27E+01 | 51.1289175 | 1.31E-01 | 48908335  | 48908458  | NC_000019.9  |
| cg09627302 | 5.55E-25 | 3.06E-27 | 1.27E+01 | 51.1249992 | 1.35E-01 | 31432787  | 31432910  | NC_000003.11 |
| cg16175941 | 5.68E-25 | 3.14E-27 | 1.27E+01 | 51.0993599 | 2.50E-01 | 154779103 | 154779226 | NC_000006.11 |
| cg24101039 | 5.69E-25 | 3.14E-27 | 1.27E+01 | 51.0976547 | 2.55E-01 | 21470054  | 21470177  | NC_000007.13 |
| cg12480375 | 5.83E-25 | 3.23E-27 | 1.27E+01 | 51.0698188 | 1.40E-01 | 30135523  | 30135646  | NC_000006.11 |
| cg10453719 | 5.86E-25 | 3.25E-27 | 1.27E+01 | 51.0641762 | 2.42E-01 | 165305050 | 165305173 | NC_000004.11 |
| cg13075537 | 6.15E-25 | 3.42E-27 | 1.27E+01 | 51.0129326 | 2.68E-01 | 25810696  | 25810819  | NC_000001.10 |
| cg13914024 | 6.24E-25 | 3.48E-27 | 1.27E+01 | 50.9969114 | 1.76E-01 | 161009644 | 161009767 | NC_000001.10 |
| cg27356162 | 6.33E-25 | 3.54E-27 | 1.26E+01 | 50.9809573 | 1.49E-01 | 65347283  | 65347406  | NC_000015.9  |
| cg23658709 | 6.39E-25 | 3.57E-27 | 1.26E+01 | 50.9711375 | 1.70E-01 | 38120185  | 38120308  | NC_000006.11 |
| cg02415779 | 6.43E-25 | 3.60E-27 | 1.26E+01 | 50.9629114 | 2.68E-01 | 18527778  | 18527901  | NC_000022.10 |
| cg04534765 | 6.46E-25 | 3.62E-27 | 1.26E+01 | 50.9590607 | 2.93E-01 | 74962369  | 74962492  | NC_000018.9  |
| cg05447556 | 6.49E-25 | 3.64E-27 | 1.26E+01 | 50.9523585 | 1.16E-01 | 38377633  | 38377756  | NC_000022.10 |
| cg11958675 | 6.50E-25 | 3.65E-27 | 1.26E+01 | 50.950921  | 1.40E-01 | 35618813  | 35618936  | NC_000010.10 |
| cg24681438 | 6.51E-25 | 3.65E-27 | 1.26E+01 | 50.949103  | 1.59E-01 | 241627226 | 241627349 | NC_000002.11 |

|            |          |          |          |            |          |           |           |              |
|------------|----------|----------|----------|------------|----------|-----------|-----------|--------------|
| cg24708471 | 6.51E-25 | 3.66E-27 | 1.26E+01 | 50.9481804 | 3.58E-01 | 30719437  | 30719560  | NC_000019.9  |
| cg21597025 | 6.59E-25 | 3.71E-27 | 1.26E+01 | 50.9346126 | 1.61E-01 | 142837564 | 142837687 | NC_000003.11 |
| cg14514120 | 6.80E-25 | 3.83E-27 | 1.26E+01 | 50.9012188 | 1.62E-01 | 64801624  | 64801747  | NC_000012.11 |
| cg01047586 | 6.80E-25 | 3.83E-27 | 1.26E+01 | 50.9011982 | 3.24E-01 | 176933407 | 176933530 | NC_000002.11 |
| cg08146323 | 6.86E-25 | 3.87E-27 | 1.26E+01 | 50.8915323 | 2.56E-01 | 57183118  | 57183241  | NC_000019.9  |
| cg11342234 | 7.28E-25 | 4.12E-27 | 1.26E+01 | 50.8292497 | 1.58E-01 | 2710838   | 2710961   | NC_000011.9  |
| cg26709300 | 7.33E-25 | 4.15E-27 | 1.26E+01 | 50.8225103 | 2.25E-01 | 30106682  | 30106805  | NC_000016.9  |
| cg12740910 | 7.37E-25 | 4.18E-27 | 1.26E+01 | 50.815778  | 1.85E-01 | 147233887 | 147234010 | NC_000001.10 |
| cg16763574 | 7.45E-25 | 4.22E-27 | 1.26E+01 | 50.8045327 | 1.81E-01 | 111937052 | 111937175 | NC_000013.10 |
| cg03217795 | 7.45E-25 | 4.23E-27 | 1.26E+01 | 50.8031524 | 3.30E-01 | 23847556  | 23847679  | NC_000016.9  |
| cg00540067 | 7.45E-25 | 4.23E-27 | 1.26E+01 | 50.8028567 | 2.15E-01 | 126074344 | 126074467 | NC_000003.11 |
| cg10266211 | 7.54E-25 | 4.28E-27 | 1.26E+01 | 50.7903426 | 1.94E-01 | 4860082   | 4860205   | NC_000004.11 |
| cg27473355 | 7.64E-25 | 4.35E-27 | 1.26E+01 | 50.7744706 | 1.20E-01 | 28915234  | 28915357  | NC_000016.9  |
| cg16729415 | 7.67E-25 | 4.37E-27 | 1.26E+01 | 50.7710462 | 3.60E-01 | 35047203  | 35047326  | NC_000015.9  |
| cg02259384 | 7.80E-25 | 4.45E-27 | 1.26E+01 | 50.7529059 | 1.82E-01 | 58523373  | 58523496  | NC_000003.11 |
| cg17214456 | 7.85E-25 | 4.49E-27 | 1.26E+01 | 50.7445958 | 1.06E-01 | 102216984 | 102217107 | NC_000012.11 |
| cg02421985 | 7.89E-25 | 4.51E-27 | 1.26E+01 | 50.7393352 | 2.56E-01 | 180527547 | 180527670 | NC_000005.9  |
| cg05167251 | 8.04E-25 | 4.60E-27 | 1.26E+01 | 50.7188318 | 2.53E-01 | 176987465 | 176987588 | NC_000002.11 |
| cg14487131 | 8.12E-25 | 4.65E-27 | 1.26E+01 | 50.7090254 | 3.76E-01 | 79633737  | 79633860  | NC_000009.11 |
| cg11665583 | 8.23E-25 | 4.72E-27 | 1.26E+01 | 50.6947898 | 1.24E-01 | 26893201  | 26893324  | NC_000022.10 |
| cg11728747 | 8.53E-25 | 4.91E-27 | 1.26E+01 | 50.6549922 | 2.47E-01 | 29037910  | 29038033  | NC_000007.13 |
| cg05797615 | 8.62E-25 | 4.97E-27 | 1.26E+01 | 50.6428751 | 1.74E-01 | 220925515 | 220925638 | NC_000001.10 |
| cg21680980 | 8.82E-25 | 5.09E-27 | 1.26E+01 | 50.618556  | 1.28E-01 | 221069572 | 221069695 | NC_000001.10 |
| cg18127659 | 9.03E-25 | 5.22E-27 | 1.26E+01 | 50.5936343 | 1.38E-01 | 170617566 | 170617689 | NC_000006.11 |
| cg10811502 | 9.19E-25 | 5.32E-27 | 1.26E+01 | 50.5755304 | 1.54E-01 | 30407370  | 30407493  | NC_000020.10 |



|            |          |          |          |            |          |           |           |              |
|------------|----------|----------|----------|------------|----------|-----------|-----------|--------------|
| cg07963234 | 9.23E-25 | 5.34E-27 | 1.26E+01 | 50.5709487 | 2.64E-01 | 5894923   | 5895046   | NC_000004.11 |
| cg09591329 | 9.44E-25 | 5.48E-27 | 1.26E+01 | 50.5459396 | 1.67E-01 | 102388664 | 102388787 | NC_000002.11 |
| cg21641458 | 9.49E-25 | 5.51E-27 | 1.26E+01 | 50.5397031 | 2.18E-01 | 27185136  | 27185259  | NC_000007.13 |
| cg04698114 | 9.94E-25 | 5.79E-27 | 1.26E+01 | 50.491325  | 2.58E-01 | 51184379  | 51184502  | NC_000016.9  |
| cg19101893 | 1.00E-24 | 5.85E-27 | 1.26E+01 | 50.4801462 | 1.91E-01 | 43283862  | 43283985  | NC_000001.10 |
| cg01709312 | 1.01E-24 | 5.87E-27 | 1.26E+01 | 50.477104  | 2.11E-01 | 112630835 | 112630958 | NC_000010.10 |
| cg18627235 | 1.01E-24 | 5.92E-27 | 1.26E+01 | 50.4687399 | 2.84E-01 | 96342747  | 96342870  | NC_000014.8  |
| cg02387639 | 1.02E-24 | 6.00E-27 | 1.26E+01 | 50.4564541 | 1.12E-01 | 179384293 | 179384416 | NC_000003.11 |
| cg25612297 | 1.03E-24 | 6.04E-27 | 1.26E+01 | 50.4494044 | 1.58E-01 | 64046701  | 64046824  | NC_000002.11 |
| cg07502439 | 1.04E-24 | 6.11E-27 | 1.26E+01 | 50.4376285 | 2.24E-01 | 51185461  | 51185584  | NC_000016.9  |
| cg15499701 | 1.07E-24 | 6.29E-27 | 1.26E+01 | 50.4090089 | 9.29E-02 | 33208306  | 33208429  | NC_000019.9  |
| cg04413148 | 1.07E-24 | 6.31E-27 | 1.26E+01 | 50.4059359 | 1.95E-01 | 67965867  | 67965990  | NC_000016.9  |
| cg13495205 | 1.07E-24 | 6.31E-27 | 1.26E+01 | 50.4055966 | 3.27E-01 | 4714033   | 4714156   | NC_000001.10 |
| cg20266316 | 1.08E-24 | 6.33E-27 | 1.26E+01 | 50.4017268 | 2.81E-01 | 98247587  | 98247710  | NC_000007.13 |
| cg07022279 | 1.08E-24 | 6.38E-27 | 1.26E+01 | 50.39538   | 1.79E-01 | 64703637  | 64703760  | NC_000011.9  |
| cg04671611 | 1.08E-24 | 6.38E-27 | 1.26E+01 | 50.3952683 | 2.77E-01 | 6623787   | 6623910   | NC_000016.9  |
| cg26047066 | 1.08E-24 | 6.38E-27 | 1.26E+01 | 50.3949559 | 2.83E-01 | 221069136 | 221069259 | NC_000001.10 |
| cg21606866 | 1.10E-24 | 6.48E-27 | 1.26E+01 | 50.3797247 | 1.92E-01 | 43735174  | 43735297  | NC_000001.10 |
| cg19296501 | 1.10E-24 | 6.51E-27 | 1.26E+01 | 50.3751568 | 1.12E-01 | 1371045   | 1371168   | NC_000004.11 |
| cg03422651 | 1.10E-24 | 6.51E-27 | 1.26E+01 | 50.3742656 | 1.47E-01 | 2542324   | 2542447   | NC_000016.9  |
| cg26920808 | 1.11E-24 | 6.55E-27 | 1.26E+01 | 50.368019  | 1.75E-01 | 72237548  | 72237671  | NC_000012.11 |
| cg00421335 | 1.13E-24 | 6.68E-27 | 1.26E+01 | 50.3492238 | 1.63E-01 | 71206528  | 71206651  | NC_000002.11 |
| cg13264399 | 1.17E-24 | 6.93E-27 | 1.26E+01 | 50.3118248 | 1.65E-01 | 176944987 | 176945110 | NC_000002.11 |
| cg23348372 | 1.17E-24 | 6.94E-27 | 1.26E+01 | 50.3115553 | 1.93E-01 | 86282139  | 86282262  | NC_000002.11 |
| cg06610464 | 1.17E-24 | 6.96E-27 | 1.26E+01 | 50.308095  | 1.65E-01 | 40243608  | 40243731  | NC_000020.10 |

|            |          |          |          |            |          |           |           |              |
|------------|----------|----------|----------|------------|----------|-----------|-----------|--------------|
| cg27324804 | 1.18E-24 | 7.01E-27 | 1.26E+01 | 50.3013678 | 1.54E-01 | 101509161 | 101509284 | NC_000007.13 |
| cg12456714 | 1.20E-24 | 7.16E-27 | 1.25E+01 | 50.2799027 | 3.02E-01 | 16180393  | 16180516  | NC_000005.9  |
| cg18422423 | 1.21E-24 | 7.19E-27 | 1.25E+01 | 50.2754127 | 2.14E-01 | 51576922  | 51577045  | NC_000003.11 |
| cg08569799 | 1.21E-24 | 7.23E-27 | 1.25E+01 | 50.2702181 | 3.14E-01 | 1886828   | 1886951   | NC_000005.9  |
| cg06003834 | 1.22E-24 | 7.27E-27 | 1.25E+01 | 50.2647371 | 1.28E-01 | 66354967  | 66355090  | NC_000005.9  |
| cg00001747 | 1.22E-24 | 7.30E-27 | 1.25E+01 | 50.2603537 | 3.18E-01 | 105460263 | 105460386 | NC_000002.11 |
| cg00458564 | 1.24E-24 | 7.41E-27 | 1.25E+01 | 50.245627  | 1.51E-01 | 114847039 | 114847162 | NC_000013.10 |
| cg20427198 | 1.24E-24 | 7.41E-27 | 1.25E+01 | 50.2455647 | 2.16E-01 | 46969267  | 46969390  | NC_000022.10 |
| cg05745622 | 1.27E-24 | 7.62E-27 | 1.25E+01 | 50.2176262 | 9.31E-02 | 80510469  | 80510592  | NC_000017.10 |
| cg10985281 | 1.29E-24 | 7.76E-27 | 1.25E+01 | 50.1994195 | 1.34E-01 | 194573301 | 194573424 | NC_000003.11 |
| cg05178576 | 1.30E-24 | 7.82E-27 | 1.25E+01 | 50.1918768 | 2.72E-01 | 77468486  | 77468609  | NC_000016.9  |
| cg10356210 | 1.31E-24 | 7.88E-27 | 1.25E+01 | 50.1852473 | 1.83E-01 | 26946568  | 26946691  | NC_000002.11 |
| cg25527090 | 1.32E-24 | 7.92E-27 | 1.25E+01 | 50.1796384 | 2.44E-01 | 118894180 | 118894303 | NC_000010.10 |
| cg19923650 | 1.33E-24 | 7.97E-27 | 1.25E+01 | 50.1730043 | 2.66E-01 | 172659730 | 172659853 | NC_000005.9  |
| cg14482712 | 1.33E-24 | 7.97E-27 | 1.25E+01 | 50.172897  | 1.90E-01 | 40348303  | 40348426  | NC_000015.9  |
| cg25324105 | 1.33E-24 | 8.04E-27 | 1.25E+01 | 50.1648225 | 3.11E-01 | 38183259  | 38183382  | NC_000019.9  |
| cg25411239 | 1.33E-24 | 8.04E-27 | 1.25E+01 | 50.1643584 | 1.57E-01 | 3094859   | 3094982   | NC_000001.10 |
| cg20205704 | 1.33E-24 | 8.05E-27 | 1.25E+01 | 50.1636181 | 1.72E-01 | 2213196   | 2213319   | NC_000017.10 |
| cg20443254 | 1.35E-24 | 8.17E-27 | 1.25E+01 | 50.1492545 | 3.10E-01 | 108169020 | 108169143 | NC_000012.11 |
| cg27376182 | 1.36E-24 | 8.22E-27 | 1.25E+01 | 50.1428958 | 3.17E-01 | 3233068   | 3233191   | NC_000016.9  |
| cg03943218 | 1.36E-24 | 8.22E-27 | 1.25E+01 | 50.1426166 | 2.90E-01 | 102419600 | 102419723 | NC_000010.10 |
| cg14564616 | 1.38E-24 | 8.34E-27 | 1.25E+01 | 50.1286427 | 3.10E-01 | 1876337   | 1876460   | NC_000005.9  |
| cg03238797 | 1.38E-24 | 8.38E-27 | 1.25E+01 | 50.1238769 | 2.81E-01 | 77468893  | 77469016  | NC_000016.9  |
| cg17509967 | 1.42E-24 | 8.64E-27 | 1.25E+01 | 50.0938258 | 2.63E-01 | 13617094  | 13617217  | NC_000019.9  |
| cg26417985 | 1.43E-24 | 8.68E-27 | 1.25E+01 | 50.089072  | 1.81E-01 | 17633832  | 17633955  | NC_000020.10 |

|            |          |          |          |            |          |           |           |              |
|------------|----------|----------|----------|------------|----------|-----------|-----------|--------------|
| cg06688293 | 1.45E-24 | 8.82E-27 | 1.25E+01 | 50.0724153 | 1.64E-01 | 16469294  | 16469417  | NC_000005.9  |
| cg24556441 | 1.46E-24 | 8.91E-27 | 1.25E+01 | 50.0626536 | 2.75E-01 | 33453994  | 33454117  | NC_000022.10 |
| cg09978395 | 1.48E-24 | 9.04E-27 | 1.25E+01 | 50.0488268 | 1.81E-01 | 37092121  | 37092244  | NC_000021.8  |
| cg05037270 | 1.51E-24 | 9.20E-27 | 1.25E+01 | 50.0305933 | 1.90E-01 | 21504121  | 21504244  | NC_000001.10 |
| cg17541528 | 1.58E-24 | 9.67E-27 | 1.25E+01 | 49.9813277 | 3.18E-01 | 110959650 | 110959773 | NC_000013.10 |
| cg00718444 | 1.58E-24 | 9.68E-27 | 1.25E+01 | 49.9807041 | 1.90E-01 | 145685564 | 145685687 | NC_000008.10 |
| cg06425919 | 1.59E-24 | 9.75E-27 | 1.25E+01 | 49.9726649 | 2.51E-01 | 17741925  | 17742048  | NC_000011.9  |
| cg27578963 | 1.60E-24 | 9.78E-27 | 1.25E+01 | 49.9699349 | 1.32E-01 | 88803282  | 88803405  | NC_000016.9  |
| cg10966580 | 1.60E-24 | 9.83E-27 | 1.25E+01 | 49.9645698 | 2.36E-01 | 6223973   | 6224096   | NC_000004.11 |
| cg25486824 | 1.61E-24 | 9.89E-27 | 1.25E+01 | 49.9592766 | 2.02E-01 | 13983790  | 13983913  | NC_000011.9  |
| cg05305413 | 1.62E-24 | 9.93E-27 | 1.25E+01 | 49.954808  | 1.92E-01 | 22327119  | 22327242  | NC_000001.10 |
| cg01878308 | 1.63E-24 | 1.00E-26 | 1.25E+01 | 49.9436689 | 2.06E-01 | 86719502  | 86719625  | NC_000002.11 |
| cg19824388 | 1.64E-24 | 1.01E-26 | 1.25E+01 | 49.9406141 | 1.29E-01 | 50192542  | 50192665  | NC_000019.9  |
| cg05185738 | 1.71E-24 | 1.05E-26 | 1.25E+01 | 49.8953287 | 2.40E-01 | 70371992  | 70372115  | NC_000015.9  |
| cg25722041 | 1.72E-24 | 1.06E-26 | 1.25E+01 | 49.8907918 | 1.69E-01 | 8623473   | 8623596   | NC_000001.10 |
| cg18347642 | 1.82E-24 | 1.13E-26 | 1.25E+01 | 49.8294717 | 2.21E-01 | 21950766  | 21950889  | NC_000004.11 |
| cg03419646 | 1.82E-24 | 1.13E-26 | 1.25E+01 | 49.8286516 | 1.96E-01 | 47297268  | 47297391  | NC_000017.10 |
| cg20291049 | 1.83E-24 | 1.13E-26 | 1.25E+01 | 49.8229626 | 2.17E-01 | 105472217 | 105472340 | NC_000002.11 |
| cg08070327 | 1.84E-24 | 1.14E-26 | 1.25E+01 | 49.8141392 | 2.05E-01 | 27184059  | 27184182  | NC_000007.13 |
| cg03894103 | 1.88E-24 | 1.17E-26 | 1.25E+01 | 49.7922774 | 2.06E-01 | 44586901  | 44587024  | NC_000002.11 |
| cg20505375 | 1.88E-24 | 1.17E-26 | 1.25E+01 | 49.7922147 | 1.61E-01 | 143374469 | 143374592 | NC_000008.10 |
| cg15108047 | 1.88E-24 | 1.17E-26 | 1.25E+01 | 49.7894715 | 1.76E-01 | 19742828  | 19742951  | NC_000020.10 |
| cg20773956 | 1.90E-24 | 1.19E-26 | 1.25E+01 | 49.7788025 | 1.63E-01 | 155582325 | 155582448 | NC_000001.10 |
| cg02287325 | 1.91E-24 | 1.19E-26 | 1.25E+01 | 49.7755417 | 1.73E-01 | 75252355  | 75252478  | NC_000016.9  |
| cg03794214 | 1.94E-24 | 1.22E-26 | 1.25E+01 | 49.7542795 | 2.39E-01 | 42912017  | 42912140  | NC_000022.10 |

|            |          |          |          |            |          |           |           |              |
|------------|----------|----------|----------|------------|----------|-----------|-----------|--------------|
| cg06947913 | 1.95E-24 | 1.22E-26 | 1.25E+01 | 49.7537402 | 3.54E-01 | 50297793  | 50297916  | NC_000012.11 |
| cg11599526 | 1.95E-24 | 1.22E-26 | 1.25E+01 | 49.7507796 | 1.76E-01 | 150449509 | 150449632 | NC_000005.9  |
| cg08139729 | 1.96E-24 | 1.23E-26 | 1.25E+01 | 49.7459529 | 1.89E-01 | 41984243  | 41984366  | NC_000001.10 |
| cg14866863 | 2.00E-24 | 1.25E-26 | 1.25E+01 | 49.7227993 | 2.49E-01 | 58332116  | 58332239  | NC_000014.8  |
| cg17332245 | 2.00E-24 | 1.26E-26 | 1.25E+01 | 49.7222628 | 1.61E-01 | 20406947  | 20407070  | NC_000006.11 |
| cg16086620 | 2.01E-24 | 1.26E-26 | 1.25E+01 | 49.7201837 | 3.19E-01 | 93389557  | 93389680  | NC_000014.8  |
| cg01452847 | 2.03E-24 | 1.28E-26 | 1.25E+01 | 49.7059404 | 2.42E-01 | 46711341  | 46711464  | NC_000017.10 |
| cg01688536 | 2.05E-24 | 1.29E-26 | 1.25E+01 | 49.6953173 | 3.29E-01 | 35296968  | 35297091  | NC_000007.13 |
| cg23891360 | 2.09E-24 | 1.32E-26 | 1.25E+01 | 49.6746439 | 2.92E-01 | 130388234 | 130388357 | NC_000012.11 |
| cg27376707 | 2.09E-24 | 1.32E-26 | 1.25E+01 | 49.6712237 | 2.62E-01 | 6533187   | 6533310   | NC_000016.9  |
| cg07793163 | 2.12E-24 | 1.34E-26 | 1.25E+01 | 49.6569913 | 2.01E-01 | 12680897  | 12681020  | NC_000012.11 |
| cg05526731 | 2.14E-24 | 1.36E-26 | 1.25E+01 | 49.6460021 | 2.11E-01 | 185263    | 185386    | NC_000017.10 |
| cg04834608 | 2.19E-24 | 1.39E-26 | 1.25E+01 | 49.620145  | 2.44E-01 | 3706634   | 3706757   | NC_000016.9  |
| cg23180938 | 2.20E-24 | 1.39E-26 | 1.25E+01 | 49.6176923 | 3.18E-01 | 115152485 | 115152608 | NC_000005.9  |
| cg05099508 | 2.23E-24 | 1.41E-26 | 1.25E+01 | 49.6036443 | 3.00E-01 | 22634432  | 22634555  | NC_000010.10 |
| cg21277995 | 2.29E-24 | 1.45E-26 | 1.24E+01 | 49.5761957 | 3.77E-01 | 393239    | 393362    | NC_000006.11 |
| cg25317585 | 2.29E-24 | 1.46E-26 | 1.24E+01 | 49.5728966 | 3.47E-01 | 102568886 | 102569009 | NC_000013.10 |
| cg24454144 | 2.30E-24 | 1.46E-26 | 1.24E+01 | 49.5692152 | 3.10E-01 | 37353126  | 37353249  | NC_000020.10 |
| cg01200640 | 2.30E-24 | 1.46E-26 | 1.24E+01 | 49.569125  | 2.83E-01 | 687384    | 687507    | NC_000008.10 |
| cg07337025 | 2.31E-24 | 1.47E-26 | 1.24E+01 | 49.5620226 | 1.61E-01 | 135996211 | 135996334 | NC_000003.11 |
| cg02623991 | 2.37E-24 | 1.51E-26 | 1.24E+01 | 49.5362999 | 3.21E-01 | 54926431  | 54926554  | NC_000019.9  |
| cg15415452 | 2.44E-24 | 1.56E-26 | 1.24E+01 | 49.5065077 | 2.97E-01 | 112759355 | 112759478 | NC_000013.10 |
| cg27015161 | 2.47E-24 | 1.58E-26 | 1.24E+01 | 49.4925632 | 1.70E-01 | 24816070  | 24816193  | NC_000002.11 |
| cg12252039 | 2.49E-24 | 1.59E-26 | 1.24E+01 | 49.4847701 | 1.78E-01 | 51087971  | 51088094  | NC_000007.13 |
| cg25181284 | 2.49E-24 | 1.60E-26 | 1.24E+01 | 49.4836308 | 7.54E-02 | 50497037  | 50497160  | NC_000012.11 |

|            |          |          |          |            |          |           |           |              |
|------------|----------|----------|----------|------------|----------|-----------|-----------|--------------|
| cg05141333 | 2.53E-24 | 1.62E-26 | 1.24E+01 | 49.4677309 | 2.17E-01 | 145048363 | 145048486 | NC_000008.10 |
| cg26503073 | 2.54E-24 | 1.63E-26 | 1.24E+01 | 49.4616706 | 2.44E-01 | 6704074   | 6704197   | NC_000007.13 |
| cg00058923 | 2.58E-24 | 1.66E-26 | 1.24E+01 | 49.4442622 | 1.89E-01 | 161069167 | 161069290 | NC_000001.10 |
| cg15556502 | 2.58E-24 | 1.66E-26 | 1.24E+01 | 49.4435708 | 3.09E-01 | 43602845  | 43602968  | NC_000011.9  |
| cg26296488 | 2.59E-24 | 1.67E-26 | 1.24E+01 | 49.4440336 | 3.54E-01 | 9783192   | 9783315   | NC_000004.11 |
| cg00316151 | 2.61E-24 | 1.68E-26 | 1.24E+01 | 49.4315376 | 1.57E-01 | 14576504  | 14576627  | NC_000016.9  |
| cg20899584 | 2.62E-24 | 1.68E-26 | 1.24E+01 | 49.4295565 | 6.90E-02 | 33396983  | 33397106  | NC_000011.9  |
| cg00154727 | 2.63E-24 | 1.70E-26 | 1.24E+01 | 49.4236014 | 1.96E-01 | 50863804  | 50863927  | NC_000007.13 |
| cg14724925 | 2.67E-24 | 1.73E-26 | 1.24E+01 | 49.405839  | 1.57E-01 | 134675438 | 134675561 | NC_000010.10 |
| cg12405139 | 2.70E-24 | 1.75E-26 | 1.24E+01 | 49.3942094 | 2.18E-01 | 8106035   | 8106158   | NC_000010.10 |
| cg00177451 | 2.70E-24 | 1.75E-26 | 1.24E+01 | 49.3940057 | 3.63E-01 | 51186266  | 51186389  | NC_000016.9  |
| cg16803678 | 2.71E-24 | 1.75E-26 | 1.24E+01 | 49.3915815 | 1.47E-01 | 133941748 | 133941871 | NC_000003.11 |
| cg22954449 | 2.73E-24 | 1.76E-26 | 1.24E+01 | 49.3840137 | 3.65E-01 | 5140001   | 5140124   | NC_000005.9  |
| cg23839136 | 2.74E-24 | 1.77E-26 | 1.24E+01 | 49.381304  | 2.58E-01 | 70597599  | 70597722  | NC_000007.13 |
| cg01500945 | 2.74E-24 | 1.77E-26 | 1.24E+01 | 49.3788041 | 3.09E-01 | 51185672  | 51185795  | NC_000016.9  |
| cg02200717 | 2.80E-24 | 1.81E-26 | 1.24E+01 | 49.3579282 | 2.44E-01 | 21511676  | 21511799  | NC_000014.8  |
| cg20718350 | 2.80E-24 | 1.81E-26 | 1.24E+01 | 49.3575566 | 3.36E-01 | 103352294 | 103352417 | NC_000012.11 |
| cg04904318 | 2.80E-24 | 1.82E-26 | 1.24E+01 | 49.3553075 | 2.42E-01 | 46607828  | 46607951  | NC_000017.10 |
| cg03409338 | 2.82E-24 | 1.83E-26 | 1.24E+01 | 49.3485526 | 1.25E-01 | 591353    | 591476    | NC_000016.9  |
| cg26247373 | 2.85E-24 | 1.85E-26 | 1.24E+01 | 49.3370554 | 1.31E-01 | 57655696  | 57655819  | NC_000012.11 |
| cg26844246 | 2.90E-24 | 1.89E-26 | 1.24E+01 | 49.3170375 | 1.87E-01 | 170736277 | 170736400 | NC_000005.9  |
| cg16908948 | 2.92E-24 | 1.90E-26 | 1.24E+01 | 49.3093399 | 1.76E-01 | 45500256  | 45500379  | NC_000010.10 |
| cg25946538 | 2.93E-24 | 1.91E-26 | 1.24E+01 | 49.3067071 | 1.45E-01 | 2482531   | 2482654   | NC_000011.9  |
| cg11224582 | 2.97E-24 | 1.93E-26 | 1.24E+01 | 49.2921555 | 3.04E-01 | 4919138   | 4919261   | NC_000012.11 |
| cg16123202 | 2.98E-24 | 1.94E-26 | 1.24E+01 | 49.2876553 | 2.29E-01 | 1287145   | 1287268   | NC_000007.13 |

|            |          |          |          |            |          |           |           |              |
|------------|----------|----------|----------|------------|----------|-----------|-----------|--------------|
| cg12859429 | 3.04E-24 | 1.99E-26 | 1.24E+01 | 49.2666352 | 1.79E-01 | 20046011  | 20046134  | NC_000011.9  |
| cg06876872 | 3.04E-24 | 1.99E-26 | 1.24E+01 | 49.2649795 | 1.81E-01 | 202110290 | 202110413 | NC_000001.10 |
| cg05221264 | 3.04E-24 | 1.99E-26 | 1.24E+01 | 49.2647448 | 1.58E-01 | 15783513  | 15783636  | NC_000001.10 |
| cg08572278 | 3.04E-24 | 1.99E-26 | 1.24E+01 | 49.2631017 | 1.07E-01 | 62467955  | 62468078  | NC_000004.11 |
| cg09499844 | 3.05E-24 | 2.00E-26 | 1.24E+01 | 49.2592192 | 1.92E-01 | 129045722 | 129045845 | NC_000008.10 |
| cg02652344 | 3.13E-24 | 2.06E-26 | 1.24E+01 | 49.2319546 | 2.69E-01 | 123553595 | 123553718 | NC_000009.11 |
| cg04100397 | 3.15E-24 | 2.07E-26 | 1.24E+01 | 49.2259332 | 8.89E-02 | 110875551 | 110875674 | NC_000002.11 |
| cg08566455 | 3.22E-24 | 2.12E-26 | 1.24E+01 | 49.2010158 | 2.54E-01 | 130971164 | 130971287 | NC_000002.11 |
| cg22992279 | 3.25E-24 | 2.14E-26 | 1.24E+01 | 49.1912578 | 2.25E-01 | 26414901  | 26415024  | NC_000004.11 |
| cg24607283 | 3.27E-24 | 2.16E-26 | 1.24E+01 | 49.1846439 | 1.69E-01 | 11302249  | 11302372  | NC_000003.11 |
| cg01618923 | 3.41E-24 | 2.26E-26 | 1.24E+01 | 49.1378305 | 2.01E-01 | 49883335  | 49883458  | NC_000013.10 |
| cg25916711 | 3.42E-24 | 2.27E-26 | 1.24E+01 | 49.1349558 | 2.28E-01 | 172660080 | 172660203 | NC_000005.9  |
| cg19539519 | 3.44E-24 | 2.28E-26 | 1.24E+01 | 49.1289306 | 1.50E-01 | 26553687  | 26553810  | NC_000017.10 |
| cg22978087 | 3.49E-24 | 2.32E-26 | 1.24E+01 | 49.1132362 | 2.93E-01 | 24814126  | 24814249  | NC_000008.10 |
| cg03603866 | 3.53E-24 | 2.34E-26 | 1.24E+01 | 49.1011505 | 1.17E-01 | 107027625 | 107027748 | NC_000013.10 |
| cg20988960 | 3.56E-24 | 2.37E-26 | 1.24E+01 | 49.0924547 | 1.67E-01 | 3191815   | 3191938   | NC_000001.10 |
| cg03964958 | 3.63E-24 | 2.42E-26 | 1.24E+01 | 49.0688985 | 2.54E-01 | 176964720 | 176964843 | NC_000002.11 |
| cg22489321 | 3.64E-24 | 2.43E-26 | 1.24E+01 | 49.0664135 | 2.23E-01 | 100643388 | 100643511 | NC_000013.10 |
| cg23290344 | 3.65E-24 | 2.43E-26 | 1.24E+01 | 49.0638886 | 2.55E-01 | 24771466  | 24771589  | NC_000008.10 |
| cg22125805 | 3.66E-24 | 2.44E-26 | 1.24E+01 | 49.0608031 | 2.86E-01 | 119212248 | 119212371 | NC_000012.11 |
| cg27003782 | 3.74E-24 | 2.50E-26 | 1.24E+01 | 49.037045  | 2.47E-01 | 125651391 | 125651514 | NC_000010.10 |
| cg17236169 | 3.80E-24 | 2.54E-26 | 1.24E+01 | 49.0214374 | 2.02E-01 | 64480683  | 64480806  | NC_000011.9  |
| cg19506628 | 3.83E-24 | 2.56E-26 | 1.24E+01 | 49.012114  | 1.15E-01 | 653442    | 653565    | NC_000005.9  |
| cg12347480 | 3.90E-24 | 2.62E-26 | 1.24E+01 | 48.9924448 | 1.31E-01 | 27497024  | 27497147  | NC_000017.10 |
| cg14532519 | 4.03E-24 | 2.71E-26 | 1.24E+01 | 48.958259  | 1.26E-01 | 42612642  | 42612765  | NC_000022.10 |

|            |          |          |          |            |          |           |           |              |
|------------|----------|----------|----------|------------|----------|-----------|-----------|--------------|
| cg13974192 | 4.05E-24 | 2.72E-26 | 1.24E+01 | 48.9537283 | 2.54E-01 | 53775410  | 53775533  | NC_000013.10 |
| cg09641127 | 4.09E-24 | 2.75E-26 | 1.24E+01 | 48.9428342 | 2.54E-01 | 10193895  | 10194018  | NC_000002.11 |
| cg06392169 | 4.10E-24 | 2.76E-26 | 1.24E+01 | 48.9409092 | 3.42E-01 | 391936    | 392059    | NC_000006.11 |
| cg25390165 | 4.14E-24 | 2.78E-26 | 1.24E+01 | 48.9310999 | 1.97E-01 | 27184188  | 27184311  | NC_000007.13 |
| cg14723977 | 4.21E-24 | 2.83E-26 | 1.24E+01 | 48.9134481 | 1.13E-01 | 15532806  | 15532929  | NC_000019.9  |
| cg16670307 | 4.21E-24 | 2.83E-26 | 1.24E+01 | 48.9127214 | 1.92E-01 | 131720640 | 131720763 | NC_000011.9  |
| cg17107017 | 4.21E-24 | 2.84E-26 | 1.24E+01 | 48.9111731 | 2.03E-01 | 116925613 | 116925736 | NC_000001.10 |
| cg06163274 | 4.21E-24 | 2.84E-26 | 1.24E+01 | 48.9109327 | 2.13E-01 | 52627619  | 52627742  | NC_000018.9  |
| cg15405084 | 4.29E-24 | 2.90E-26 | 1.23E+01 | 48.8907322 | 1.09E-01 | 187864009 | 187864132 | NC_000004.11 |
| cg15788059 | 4.33E-24 | 2.92E-26 | 1.23E+01 | 48.8825552 | 2.07E-01 | 26961237  | 26961360  | NC_000022.10 |
| cg01893212 | 4.33E-24 | 2.93E-26 | 1.23E+01 | 48.8813928 | 3.81E-01 | 49813088  | 49813211  | NC_000007.13 |
| cg09860921 | 4.36E-24 | 2.95E-26 | 1.23E+01 | 48.8741676 | 1.39E-01 | 45116241  | 45116364  | NC_000001.10 |
| cg15629893 | 4.36E-24 | 2.95E-26 | 1.23E+01 | 48.8740096 | 1.68E-01 | 22327131  | 22327254  | NC_000001.10 |
| cg26682580 | 4.38E-24 | 2.97E-26 | 1.23E+01 | 48.8673694 | 2.77E-01 | 128752058 | 128752181 | NC_000012.11 |
| cg21680729 | 4.39E-24 | 2.97E-26 | 1.23E+01 | 48.8651032 | 1.49E-01 | 17426422  | 17426545  | NC_000017.10 |
| cg15684162 | 4.42E-24 | 3.00E-26 | 1.23E+01 | 48.8566854 | 1.60E-01 | 61712639  | 61712762  | NC_000017.10 |
| cg17302155 | 4.44E-24 | 3.01E-26 | 1.23E+01 | 48.8523656 | 3.02E-01 | 100061111 | 100061234 | NC_000006.11 |
| cg02366961 | 4.48E-24 | 3.04E-26 | 1.23E+01 | 48.8430335 | 1.49E-01 | 19095211  | 19095334  | NC_000011.9  |
| cg09426834 | 4.57E-24 | 3.11E-26 | 1.23E+01 | 48.8212571 | 3.26E-01 | 946648    | 946771    | NC_000002.11 |
| cg22759823 | 4.57E-24 | 3.11E-26 | 1.23E+01 | 48.8211376 | 3.25E-01 | 57610870  | 57610993  | NC_000019.9  |
| cg18516557 | 4.65E-24 | 3.16E-26 | 1.23E+01 | 48.8035298 | 2.13E-01 | 177004015 | 177004138 | NC_000002.11 |
| cg15332951 | 4.65E-24 | 3.17E-26 | 1.23E+01 | 48.8023633 | 2.05E-01 | 21194739  | 21194862  | NC_000017.10 |
| cg23054189 | 4.70E-24 | 3.20E-26 | 1.23E+01 | 48.7907699 | 3.04E-01 | 248020692 | 248020815 | NC_000001.10 |
| cg02172150 | 4.76E-24 | 3.24E-26 | 1.23E+01 | 48.7787887 | 2.71E-01 | 70597774  | 70597897  | NC_000007.13 |
| cg12393318 | 4.85E-24 | 3.32E-26 | 1.23E+01 | 48.7562629 | 2.41E-01 | 87981068  | 87981191  | NC_000005.9  |

|            |          |          |          |            |          |           |           |              |
|------------|----------|----------|----------|------------|----------|-----------|-----------|--------------|
| cg12799689 | 4.85E-24 | 3.32E-26 | 1.23E+01 | 48.7558748 | 3.26E-01 | 67067893  | 67068016  | NC_000018.9  |
| cg05148385 | 4.85E-24 | 3.32E-26 | 1.23E+01 | 48.7543407 | 9.51E-02 | 213950646 | 213950769 | NC_000002.11 |
| cg09194815 | 5.00E-24 | 3.43E-26 | 1.23E+01 | 48.7224617 | 2.05E-01 | 100845274 | 100845397 | NC_000013.10 |
| cg06646174 | 5.05E-24 | 3.47E-26 | 1.23E+01 | 48.7130492 | 1.51E-01 | 116948652 | 116948775 | NC_000011.9  |
| cg13532185 | 5.09E-24 | 3.50E-26 | 1.23E+01 | 48.7036726 | 1.57E-01 | 130078849 | 130078972 | NC_000011.9  |
| cg00947023 | 5.19E-24 | 3.57E-26 | 1.23E+01 | 48.6841429 | 1.71E-01 | 11953402  | 11953525  | NC_000017.10 |
| cg24150172 | 5.22E-24 | 3.59E-26 | 1.23E+01 | 48.6780053 | 3.33E-01 | 55372111  | 55372234  | NC_000008.10 |
| cg07536910 | 5.25E-24 | 3.62E-26 | 1.23E+01 | 48.6702144 | 2.61E-01 | 176948105 | 176948228 | NC_000002.11 |
| cg15048991 | 5.25E-24 | 3.62E-26 | 1.23E+01 | 48.6697597 | 3.32E-01 | 5139866   | 5139989   | NC_000005.9  |
| cg16619425 | 5.38E-24 | 3.71E-26 | 1.23E+01 | 48.6452063 | 2.96E-01 | 59828528  | 59828651  | NC_000020.10 |
| cg03984502 | 5.63E-24 | 3.90E-26 | 1.23E+01 | 48.5957768 | 1.23E-01 | 151805661 | 151805784 | NC_000001.10 |
| cg26207909 | 5.63E-24 | 3.90E-26 | 1.23E+01 | 48.5950922 | 2.34E-01 | 103986467 | 103986590 | NC_000014.8  |
| cg11473001 | 5.71E-24 | 3.96E-26 | 1.23E+01 | 48.5794237 | 1.92E-01 | 131780499 | 131780622 | NC_000011.9  |
| cg17902007 | 5.86E-24 | 4.07E-26 | 1.23E+01 | 48.5529064 | 1.63E-01 | 101184847 | 101184970 | NC_000013.10 |
| cg00132509 | 5.92E-24 | 4.12E-26 | 1.23E+01 | 48.5414022 | 2.36E-01 | 3329936   | 3330059   | NC_000006.11 |
| cg09936426 | 5.97E-24 | 4.16E-26 | 1.23E+01 | 48.5325593 | 2.38E-01 | 13839913  | 13840036  | NC_000001.10 |
| cg03462380 | 6.09E-24 | 4.24E-26 | 1.23E+01 | 48.5128384 | 2.60E-01 | 27112902  | 27113025  | NC_000015.9  |
| cg05534710 | 6.15E-24 | 4.28E-26 | 1.23E+01 | 48.5025645 | 2.93E-01 | 3595728   | 3595851   | NC_000005.9  |
| cg03190911 | 6.18E-24 | 4.31E-26 | 1.23E+01 | 48.4964083 | 1.35E-01 | 33273011  | 33273134  | NC_000006.11 |
| cg06999084 | 6.28E-24 | 4.39E-26 | 1.23E+01 | 48.4791141 | 1.35E-01 | 88873729  | 88873852  | NC_000016.9  |
| cg00781795 | 6.29E-24 | 4.39E-26 | 1.23E+01 | 48.4772482 | 1.48E-01 | 55815677  | 55815800  | NC_000018.9  |
| cg04812556 | 6.38E-24 | 4.46E-26 | 1.23E+01 | 48.4614991 | 2.92E-01 | 9112715   | 9112838   | NC_000011.9  |
| cg26947626 | 6.39E-24 | 4.47E-26 | 1.23E+01 | 48.460684  | 2.84E-01 | 72469430  | 72469553  | NC_000008.10 |
| cg16236960 | 6.41E-24 | 4.49E-26 | 1.23E+01 | 48.4557597 | 1.92E-01 | 135011937 | 135012060 | NC_000002.11 |
| cg17860133 | 6.43E-24 | 4.51E-26 | 1.23E+01 | 48.4522043 | 1.84E-01 | 117468345 | 117468468 | NC_000012.11 |



|            |          |          |          |            |          |           |           |              |
|------------|----------|----------|----------|------------|----------|-----------|-----------|--------------|
| cg27234067 | 6.48E-24 | 4.54E-26 | 1.23E+01 | 48.4435912 | 2.01E-01 | 32460799  | 32460922  | NC_000011.9  |
| cg22962425 | 6.56E-24 | 4.60E-26 | 1.23E+01 | 48.4312235 | 1.09E-01 | 58891595  | 58891718  | NC_000014.8  |
| cg15833565 | 6.61E-24 | 4.64E-26 | 1.23E+01 | 48.4227423 | 1.70E-01 | 44741190  | 44741313  | NC_000001.10 |
| cg20866932 | 6.63E-24 | 4.66E-26 | 1.23E+01 | 48.418661  | 1.79E-01 | 150034315 | 150034438 | NC_000007.13 |
| cg00190206 | 6.65E-24 | 4.68E-26 | 1.23E+01 | 48.4152644 | 1.71E-01 | 176999353 | 176999476 | NC_000002.11 |
| cg05807722 | 6.71E-24 | 4.72E-26 | 1.23E+01 | 48.4064341 | 1.44E-01 | 67697020  | 67697143  | NC_000016.9  |
| cg06186808 | 6.71E-24 | 4.72E-26 | 1.23E+01 | 48.405183  | 1.45E-01 | 24600901  | 24601024  | NC_000014.8  |
| cg10595952 | 6.83E-24 | 4.81E-26 | 1.23E+01 | 48.3867586 | 2.56E-01 | 2097052   | 2097175   | NC_000005.9  |
| cg11823511 | 6.86E-24 | 4.83E-26 | 1.23E+01 | 48.3821159 | 2.61E-01 | 91183697  | 91183820  | NC_000001.10 |
| cg23644589 | 6.88E-24 | 4.85E-26 | 1.23E+01 | 48.3788916 | 1.61E-01 | 228404256 | 228404379 | NC_000001.10 |
| cg21223771 | 6.90E-24 | 4.87E-26 | 1.23E+01 | 48.3748087 | 2.27E-01 | 95945201  | 95945324  | NC_000009.11 |
| cg25821781 | 6.93E-24 | 4.90E-26 | 1.23E+01 | 48.3692208 | 1.75E-01 | 2325143   | 2325266   | NC_000017.10 |
| cg20979852 | 6.95E-24 | 4.92E-26 | 1.23E+01 | 48.3657817 | 3.12E-01 | 140770683 | 140770806 | NC_000003.11 |
| cg22959260 | 7.16E-24 | 5.06E-26 | 1.23E+01 | 48.3363389 | 1.97E-01 | 40382862  | 40382985  | NC_000015.9  |
| cg01382137 | 7.19E-24 | 5.09E-26 | 1.23E+01 | 48.3305652 | 3.11E-01 | 53423078  | 53423201  | NC_000013.10 |
| cg12485556 | 7.23E-24 | 5.12E-26 | 1.23E+01 | 48.3246338 | 1.69E-01 | 105774617 | 105774740 | NC_000006.11 |
| cg04184836 | 7.27E-24 | 5.15E-26 | 1.23E+01 | 48.3193381 | 3.89E-01 | 83316640  | 83316763  | NC_000015.9  |
| cg10500503 | 7.35E-24 | 5.21E-26 | 1.23E+01 | 48.3074371 | 1.96E-01 | 57011246  | 57011369  | NC_000001.10 |
| cg20312205 | 7.45E-24 | 5.29E-26 | 1.23E+01 | 48.2936667 | 2.88E-01 | 84456308  | 84456431  | NC_000013.10 |
| cg06338150 | 7.50E-24 | 5.33E-26 | 1.23E+01 | 48.2852729 | 1.45E-01 | 139392895 | 139393018 | NC_000009.11 |
| cg16137772 | 7.52E-24 | 5.35E-26 | 1.23E+01 | 48.2813767 | 2.00E-01 | 43937721  | 43937844  | NC_000020.10 |
| cg07969308 | 7.62E-24 | 5.42E-26 | 1.23E+01 | 48.2681285 | 9.77E-02 | 460746    | 460869    | NC_000016.9  |
| cg14446951 | 7.62E-24 | 5.43E-26 | 1.23E+01 | 48.2670393 | 1.10E-01 | 36605829  | 36605952  | NC_000002.11 |
| cg25623768 | 7.62E-24 | 5.43E-26 | 1.23E+01 | 48.2663605 | 3.03E-01 | 45241008  | 45241131  | NC_000002.11 |
| cg00762738 | 7.68E-24 | 5.48E-26 | 1.23E+01 | 48.2582773 | 1.95E-01 | 205780033 | 205780156 | NC_000001.10 |

|            |          |          |          |            |          |           |           |              |
|------------|----------|----------|----------|------------|----------|-----------|-----------|--------------|
| cg06410537 | 7.70E-24 | 5.50E-26 | 1.23E+01 | 48.2542603 | 1.90E-01 | 170736572 | 170736695 | NC_000005.9  |
| cg26990587 | 7.72E-24 | 5.52E-26 | 1.23E+01 | 48.251047  | 2.57E-01 | 100253901 | 100254024 | NC_000007.13 |
| cg17105834 | 7.77E-24 | 5.55E-26 | 1.23E+01 | 48.2443355 | 3.10E-01 | 177133566 | 177133689 | NC_000001.10 |
| cg07870999 | 7.83E-24 | 5.61E-26 | 1.23E+01 | 48.2352116 | 2.36E-01 | 155260895 | 155261018 | NC_000007.13 |
| cg05778278 | 7.86E-24 | 5.63E-26 | 1.23E+01 | 48.2312866 | 1.41E-01 | 54505303  | 54505426  | NC_000008.10 |
| cg23244488 | 7.88E-24 | 5.65E-26 | 1.23E+01 | 48.2279952 | 2.77E-01 | 19146032  | 19146155  | NC_000007.13 |
| cg25958283 | 7.91E-24 | 5.67E-26 | 1.23E+01 | 48.2246388 | 3.39E-01 | 11752089  | 11752212  | NC_000018.9  |
| cg03304610 | 7.95E-24 | 5.70E-26 | 1.23E+01 | 48.2185738 | 3.23E-01 | 172734276 | 172734399 | NC_000004.11 |
| cg22620221 | 8.01E-24 | 5.74E-26 | 1.22E+01 | 48.2109492 | 2.58E-01 | 153584416 | 153584539 | NC_000007.13 |
| cg08268892 | 8.05E-24 | 5.77E-26 | 1.22E+01 | 48.2059115 | 9.91E-02 | 157131429 | 157131552 | NC_000006.11 |
| cg16638580 | 8.07E-24 | 5.79E-26 | 1.22E+01 | 48.2026516 | 1.24E-01 | 39890911  | 39891034  | NC_000019.9  |
| cg23106559 | 8.14E-24 | 5.85E-26 | 1.22E+01 | 48.1929798 | 1.44E-01 | 58167483  | 58167606  | NC_000012.11 |
| cg05888894 | 8.23E-24 | 5.92E-26 | 1.22E+01 | 48.1815765 | 2.21E-01 | 119107030 | 119107153 | NC_000008.10 |
| cg22457637 | 8.27E-24 | 5.95E-26 | 1.22E+01 | 48.1767453 | 1.66E-01 | 142142872 | 142142995 | NC_000008.10 |
| cg15638709 | 8.36E-24 | 6.02E-26 | 1.22E+01 | 48.164083  | 2.58E-01 | 110226387 | 110226510 | NC_000010.10 |
| cg23934404 | 8.48E-24 | 6.11E-26 | 1.22E+01 | 48.1493791 | 3.12E-01 | 112758491 | 112758614 | NC_000013.10 |
| cg22789318 | 8.71E-24 | 6.28E-26 | 1.22E+01 | 48.1219864 | 1.59E-01 | 981643    | 981766    | NC_000017.10 |
| cg25247290 | 8.77E-24 | 6.33E-26 | 1.22E+01 | 48.1138524 | 2.40E-01 | 32461212  | 32461335  | NC_000011.9  |
| cg02155398 | 8.81E-24 | 6.36E-26 | 1.22E+01 | 48.1089657 | 2.76E-01 | 45160490  | 45160613  | NC_000002.11 |
| cg14657517 | 8.89E-24 | 6.43E-26 | 1.22E+01 | 48.0981159 | 2.87E-01 | 32456910  | 32457033  | NC_000011.9  |
| cg04489066 | 8.89E-24 | 6.44E-26 | 1.22E+01 | 48.097961  | 1.99E-01 | 42211509  | 42211632  | NC_000015.9  |
| cg22754569 | 8.92E-24 | 6.46E-26 | 1.22E+01 | 48.0947458 | 1.72E-01 | 59564444  | 59564567  | NC_000008.10 |
| cg07271473 | 9.13E-24 | 6.62E-26 | 1.22E+01 | 48.0691906 | 1.43E-01 | 40124792  | 40124915  | NC_000021.8  |
| cg04227922 | 9.21E-24 | 6.69E-26 | 1.22E+01 | 48.059979  | 2.26E-01 | 119615496 | 119615619 | NC_000002.11 |
| cg08747377 | 9.21E-24 | 6.69E-26 | 1.22E+01 | 48.0588682 | 3.43E-01 | 82660670  | 82660793  | NC_000016.9  |

|            |          |          |          |            |          |           |           |              |
|------------|----------|----------|----------|------------|----------|-----------|-----------|--------------|
| cg21039708 | 9.26E-24 | 6.74E-26 | 1.22E+01 | 48.0527116 | 3.44E-01 | 57278729  | 57278852  | NC_000014.8  |
| cg25732961 | 9.32E-24 | 6.78E-26 | 1.22E+01 | 48.045796  | 2.17E-01 | 7755877   | 7756000   | NC_000017.10 |
| cg15929797 | 9.35E-24 | 6.81E-26 | 1.22E+01 | 48.0418505 | 2.32E-01 | 172660796 | 172660919 | NC_000005.9  |
| cg18887759 | 9.43E-24 | 6.88E-26 | 1.22E+01 | 48.0320423 | 1.72E-01 | 50324282  | 50324405  | NC_000019.9  |
| cg19760241 | 9.59E-24 | 7.01E-26 | 1.22E+01 | 48.0135437 | 2.35E-01 | 35300010  | 35300133  | NC_000017.10 |
| cg06750832 | 9.59E-24 | 7.01E-26 | 1.22E+01 | 48.0134164 | 3.19E-01 | 111217691 | 111217814 | NC_000001.10 |
| cg13912196 | 9.78E-24 | 7.15E-26 | 1.22E+01 | 47.9932883 | 2.14E-01 | 70372127  | 70372250  | NC_000015.9  |
| cg24968692 | 9.96E-24 | 7.30E-26 | 1.22E+01 | 47.9731725 | 1.45E-01 | 131032645 | 131032768 | NC_000007.13 |
| cg18092028 | 9.98E-24 | 7.31E-26 | 1.22E+01 | 47.9709529 | 2.95E-01 | 59827212  | 59827335  | NC_000020.10 |
| cg03867465 | 1.02E-23 | 7.48E-26 | 1.22E+01 | 47.9483352 | 1.93E-01 | 183062301 | 183062424 | NC_000004.11 |
| cg13829550 | 1.02E-23 | 7.51E-26 | 1.22E+01 | 47.9441512 | 2.64E-01 | 74893112  | 74893235  | NC_000014.8  |
| cg04917226 | 1.03E-23 | 7.56E-26 | 1.22E+01 | 47.938457  | 2.74E-01 | 19157839  | 19157962  | NC_000007.13 |
| cg27230984 | 1.04E-23 | 7.61E-26 | 1.22E+01 | 47.9317776 | 1.43E-01 | 916362    | 916485    | NC_000017.10 |
| cg12325536 | 1.05E-23 | 7.76E-26 | 1.22E+01 | 47.9118009 | 1.97E-01 | 87968658  | 87968781  | NC_000005.9  |
| cg21625737 | 1.06E-23 | 7.81E-26 | 1.22E+01 | 47.9056626 | 1.99E-01 | 1011049   | 1011172   | NC_000011.9  |
| cg11344566 | 1.08E-23 | 7.94E-26 | 1.22E+01 | 47.8895805 | 1.73E-01 | 124782885 | 124783008 | NC_000002.11 |
| cg07926691 | 1.08E-23 | 7.95E-26 | 1.22E+01 | 47.8886318 | 3.06E-01 | 38670987  | 38671110  | NC_000007.13 |
| cg15132565 | 1.08E-23 | 7.96E-26 | 1.22E+01 | 47.8872081 | 3.17E-01 | 72740154  | 72740277  | NC_000005.9  |
| cg00295794 | 1.08E-23 | 7.97E-26 | 1.22E+01 | 47.8858431 | 2.87E-01 | 100641409 | 100641532 | NC_000013.10 |
| cg04865220 | 1.09E-23 | 8.06E-26 | 1.22E+01 | 47.8741234 | 2.00E-01 | 73886532  | 73886655  | NC_000015.9  |
| cg23322933 | 1.09E-23 | 8.09E-26 | 1.22E+01 | 47.8706417 | 2.68E-01 | 61109207  | 61109330  | NC_000014.8  |
| cg23858040 | 1.10E-23 | 8.13E-26 | 1.22E+01 | 47.8653828 | 3.85E-01 | 11059577  | 11059700  | NC_000010.10 |
| cg17832688 | 1.11E-23 | 8.19E-26 | 1.22E+01 | 47.8585172 | 9.59E-02 | 44017421  | 44017544  | NC_000001.10 |
| cg18316735 | 1.11E-23 | 8.23E-26 | 1.22E+01 | 47.8542307 | 1.30E-01 | 204339486 | 204339609 | NC_000001.10 |
| cg19508622 | 1.11E-23 | 8.24E-26 | 1.22E+01 | 47.8527833 | 2.45E-01 | 129103558 | 129103681 | NC_000008.10 |

|            |          |          |          |            |          |           |           |              |
|------------|----------|----------|----------|------------|----------|-----------|-----------|--------------|
| cg25339054 | 1.13E-23 | 8.37E-26 | 1.22E+01 | 47.8368978 | 3.00E-01 | 50673808  | 50673931  | NC_000005.9  |
| cg03444587 | 1.14E-23 | 8.47E-26 | 1.22E+01 | 47.8253826 | 1.67E-01 | 2054271   | 2054394   | NC_000016.9  |
| cg13265572 | 1.15E-23 | 8.54E-26 | 1.22E+01 | 47.8172057 | 1.58E-01 | 182694617 | 182694740 | NC_000003.11 |
| cg00905220 | 1.16E-23 | 8.59E-26 | 1.22E+01 | 47.8111458 | 1.70E-01 | 982154    | 982277    | NC_000017.10 |
| cg21631754 | 1.17E-23 | 8.73E-26 | 1.22E+01 | 47.7946637 | 1.91E-01 | 45737485  | 45737608  | NC_000019.9  |
| cg09531492 | 1.18E-23 | 8.75E-26 | 1.22E+01 | 47.7925758 | 1.57E-01 | 50632560  | 50632683  | NC_000022.10 |
| cg14696396 | 1.18E-23 | 8.81E-26 | 1.22E+01 | 47.7855696 | 2.96E-01 | 83776446  | 83776569  | NC_000015.9  |
| cg23723818 | 1.18E-23 | 8.82E-26 | 1.22E+01 | 47.7843085 | 1.29E-01 | 57015477  | 57015600  | NC_000001.10 |
| cg05903444 | 1.18E-23 | 8.83E-26 | 1.22E+01 | 47.7841276 | 1.85E-01 | 2751041   | 2751164   | NC_000005.9  |
| cg17391928 | 1.19E-23 | 8.88E-26 | 1.22E+01 | 47.7777727 | 2.54E-01 | 128301230 | 128301353 | NC_000005.9  |
| cg25539045 | 1.19E-23 | 8.90E-26 | 1.22E+01 | 47.7755135 | 3.22E-01 | 129535186 | 129535309 | NC_000010.10 |
| cg20054111 | 1.21E-23 | 9.02E-26 | 1.22E+01 | 47.7629532 | 1.76E-01 | 140829046 | 140829169 | NC_000004.11 |
| cg19256368 | 1.21E-23 | 9.03E-26 | 1.22E+01 | 47.7613167 | 1.96E-01 | 83619037  | 83619160  | NC_000015.9  |
| cg05452645 | 1.22E-23 | 9.15E-26 | 1.22E+01 | 47.7488572 | 1.98E-01 | 81117647  | 81117770  | NC_000004.11 |
| cg10312981 | 1.25E-23 | 9.36E-26 | 1.22E+01 | 47.7254327 | 1.52E-01 | 87577304  | 87577427  | NC_000016.9  |
| cg12048508 | 1.28E-23 | 9.59E-26 | 1.22E+01 | 47.7014641 | 8.98E-02 | 65418238  | 65418361  | NC_000012.11 |
| cg20441606 | 1.28E-23 | 9.60E-26 | 1.22E+01 | 47.700887  | 1.53E-01 | 79084557  | 79084680  | NC_000017.10 |
| cg09138865 | 1.29E-23 | 9.67E-26 | 1.22E+01 | 47.6939124 | 1.72E-01 | 88427435  | 88427558  | NC_000010.10 |
| cg08186575 | 1.30E-23 | 9.74E-26 | 1.22E+01 | 47.6858286 | 1.26E-01 | 4371730   | 4371853   | NC_000019.9  |
| cg05295006 | 1.30E-23 | 9.76E-26 | 1.22E+01 | 47.6842065 | 2.45E-01 | 172734347 | 172734470 | NC_000004.11 |
| cg03900143 | 1.31E-23 | 9.88E-26 | 1.22E+01 | 47.6717195 | 2.73E-01 | 147111660 | 147111783 | NC_000003.11 |
| cg16697214 | 1.32E-23 | 9.90E-26 | 1.22E+01 | 47.670191  | 3.03E-01 | 50343361  | 50343484  | NC_000007.13 |
| cg05376374 | 1.32E-23 | 9.90E-26 | 1.22E+01 | 47.669867  | 3.16E-01 | 43602920  | 43603043  | NC_000011.9  |
| cg12483476 | 1.32E-23 | 9.95E-26 | 1.22E+01 | 47.664655  | 2.65E-01 | 178421711 | 178421834 | NC_000005.9  |
| cg10370850 | 1.32E-23 | 9.98E-26 | 1.22E+01 | 47.6618655 | 1.15E-01 | 70027093  | 70027216  | NC_000011.9  |

|            |          |          |          |            |          |           |           |              |
|------------|----------|----------|----------|------------|----------|-----------|-----------|--------------|
| cg26476852 | 1.35E-23 | 1.02E-25 | 1.22E+01 | 47.6404922 | 2.45E-01 | 27204728  | 27204851  | NC_000007.13 |
| cg24687655 | 1.37E-23 | 1.03E-25 | 1.22E+01 | 47.6269554 | 1.58E-01 | 110398293 | 110398416 | NC_000013.10 |
| cg04543008 | 1.37E-23 | 1.04E-25 | 1.22E+01 | 47.6250775 | 2.98E-01 | 71955332  | 71955455  | NC_000011.9  |
| cg02128191 | 1.37E-23 | 1.04E-25 | 1.22E+01 | 47.6230683 | 7.72E-02 | 669285    | 669408    | NC_000010.10 |
| cg18770350 | 1.43E-23 | 1.08E-25 | 1.22E+01 | 47.5802265 | 3.15E-01 | 236849966 | 236850089 | NC_000001.10 |
| cg12122146 | 1.48E-23 | 1.13E-25 | 1.22E+01 | 47.5421367 | 3.23E-01 | 130388216 | 130388339 | NC_000012.11 |
| cg05463136 | 1.48E-23 | 1.13E-25 | 1.22E+01 | 47.5401038 | 1.01E-01 | 16286371  | 16286494  | NC_000003.11 |
| cg19736009 | 1.49E-23 | 1.13E-25 | 1.22E+01 | 47.5381119 | 1.67E-01 | 73994187  | 73994310  | NC_000010.10 |
| cg02672378 | 1.49E-23 | 1.14E-25 | 1.22E+01 | 47.5338939 | 1.58E-01 | 41506029  | 41506152  | NC_000006.11 |
| cg02091786 | 1.50E-23 | 1.14E-25 | 1.22E+01 | 47.5296212 | 1.17E-01 | 62415525  | 62415648  | NC_000011.9  |
| cg14073722 | 1.53E-23 | 1.16E-25 | 1.21E+01 | 47.5093767 | 2.82E-01 | 50235737  | 50235860  | NC_000017.10 |
| cg19497031 | 1.53E-23 | 1.17E-25 | 1.21E+01 | 47.5069217 | 2.72E-01 | 79176272  | 79176395  | NC_000013.10 |
| cg26813646 | 1.55E-23 | 1.19E-25 | 1.21E+01 | 47.491136  | 2.25E-01 | 50817651  | 50817774  | NC_000010.10 |
| cg20277356 | 1.56E-23 | 1.19E-25 | 1.21E+01 | 47.4845101 | 1.65E-01 | 123353800 | 123353923 | NC_000010.10 |
| cg11173579 | 1.62E-23 | 1.25E-25 | 1.21E+01 | 47.4412632 | 2.62E-01 | 33247885  | 33248008  | NC_000021.8  |
| cg18486102 | 1.64E-23 | 1.26E-25 | 1.21E+01 | 47.4338352 | 3.61E-01 | 50297777  | 50297900  | NC_000012.11 |
| cg25746778 | 1.68E-23 | 1.30E-25 | 1.21E+01 | 47.4032336 | 2.44E-01 | 131758331 | 131758454 | NC_000010.10 |
| cg22729543 | 1.77E-23 | 1.37E-25 | 1.21E+01 | 47.3475068 | 2.28E-01 | 98991418  | 98991541  | NC_000007.13 |
| cg00637144 | 1.78E-23 | 1.37E-25 | 1.21E+01 | 47.3453989 | 1.70E-01 | 52360268  | 52360391  | NC_000013.10 |
| cg02219383 | 1.78E-23 | 1.38E-25 | 1.21E+01 | 47.3417164 | 1.37E-01 | 43385111  | 43385234  | NC_000003.11 |
| cg27317541 | 1.83E-23 | 1.42E-25 | 1.21E+01 | 47.3142966 | 9.18E-02 | 17454056  | 17454179  | NC_000017.10 |
| cg04180086 | 1.85E-23 | 1.43E-25 | 1.21E+01 | 47.3019588 | 2.52E-01 | 1878499   | 1878622   | NC_000005.9  |
| cg11953609 | 1.86E-23 | 1.44E-25 | 1.21E+01 | 47.2965503 | 1.17E-01 | 170629048 | 170629171 | NC_000001.10 |
| cg02457680 | 1.86E-23 | 1.44E-25 | 1.21E+01 | 47.2960128 | 2.19E-01 | 154475139 | 154475262 | NC_000001.10 |
| cg03873105 | 1.86E-23 | 1.45E-25 | 1.21E+01 | 47.2942578 | 1.53E-01 | 76096456  | 76096579  | NC_000011.9  |

|            |          |          |          |            |          |           |           |              |
|------------|----------|----------|----------|------------|----------|-----------|-----------|--------------|
| cg16664405 | 1.90E-23 | 1.48E-25 | 1.21E+01 | 47.2719568 | 2.66E-01 | 111216962 | 111217085 | NC_000010.10 |
| cg08498138 | 1.91E-23 | 1.48E-25 | 1.21E+01 | 47.2682684 | 1.21E-01 | 14576651  | 14576774  | NC_000016.9  |
| cg03568039 | 1.92E-23 | 1.50E-25 | 1.21E+01 | 47.2605546 | 1.53E-01 | 52561293  | 52561416  | NC_000020.10 |
| cg26794346 | 1.92E-23 | 1.50E-25 | 1.21E+01 | 47.2586284 | 1.09E-01 | 16472305  | 16472428  | NC_000006.11 |
| cg19640789 | 1.93E-23 | 1.51E-25 | 1.21E+01 | 47.252484  | 7.22E-02 | 8650112   | 8650235   | NC_000019.9  |
| cg05757474 | 1.95E-23 | 1.52E-25 | 1.21E+01 | 47.2438125 | 2.05E-01 | 63894504  | 63894627  | NC_000011.9  |
| cg13985639 | 1.96E-23 | 1.53E-25 | 1.21E+01 | 47.2364589 | 2.28E-01 | 99344969  | 99345092  | NC_000010.10 |
| cg00145904 | 1.98E-23 | 1.55E-25 | 1.21E+01 | 47.2278115 | 1.27E-01 | 10697703  | 10697826  | NC_000001.10 |
| cg06974135 | 2.04E-23 | 1.60E-25 | 1.21E+01 | 47.1954395 | 9.50E-02 | 58824741  | 58824864  | NC_000005.9  |
| cg11512704 | 2.07E-23 | 1.62E-25 | 1.21E+01 | 47.181923  | 1.81E-01 | 2057358   | 2057481   | NC_000012.11 |
| cg13358636 | 2.07E-23 | 1.62E-25 | 1.21E+01 | 47.1800935 | 2.57E-01 | 124782263 | 124782386 | NC_000002.11 |
| cg04206025 | 2.10E-23 | 1.65E-25 | 1.21E+01 | 47.1635917 | 1.98E-01 | 16975443  | 16975566  | NC_000001.10 |
| cg25015733 | 2.13E-23 | 1.68E-25 | 1.21E+01 | 47.1475595 | 2.62E-01 | 99342986  | 99343109  | NC_000002.11 |
| cg24888814 | 2.16E-23 | 1.70E-25 | 1.21E+01 | 47.1327329 | 1.35E-01 | 54723931  | 54724054  | NC_000012.11 |
| cg17863912 | 2.18E-23 | 1.71E-25 | 1.21E+01 | 47.1250253 | 2.25E-01 | 176994362 | 176994485 | NC_000002.11 |
| cg07018577 | 2.20E-23 | 1.73E-25 | 1.21E+01 | 47.1144019 | 2.26E-01 | 180831396 | 180831519 | NC_000001.10 |
| cg23029851 | 2.20E-23 | 1.74E-25 | 1.21E+01 | 47.1120418 | 1.84E-01 | 293878    | 294001    | NC_000011.9  |
| cg03361789 | 2.28E-23 | 1.80E-25 | 1.21E+01 | 47.076324  | 1.38E-01 | 74005651  | 74005774  | NC_000017.10 |
| cg17217443 | 2.28E-23 | 1.81E-25 | 1.21E+01 | 47.0730661 | 1.08E-01 | 36511291  | 36511414  | NC_000017.10 |
| cg26674966 | 2.28E-23 | 1.81E-25 | 1.21E+01 | 47.0724919 | 1.99E-01 | 22929993  | 22930116  | NC_000015.9  |
| cg26667091 | 2.28E-23 | 1.81E-25 | 1.21E+01 | 47.0723311 | 1.73E-01 | 65352232  | 65352355  | NC_000011.9  |
| cg17160666 | 2.30E-23 | 1.82E-25 | 1.21E+01 | 47.0665701 | 1.89E-01 | 8545003   | 8545126   | NC_000010.10 |
| cg05753794 | 2.31E-23 | 1.83E-25 | 1.21E+01 | 47.0578301 | 1.52E-01 | 150781341 | 150781464 | NC_000007.13 |
| cg00767886 | 2.33E-23 | 1.84E-25 | 1.21E+01 | 47.0524232 | 1.55E-01 | 42193112  | 42193235  | NC_000015.9  |
| cg16146718 | 2.33E-23 | 1.85E-25 | 1.21E+01 | 47.0511389 | 1.91E-01 | 145537915 | 145538038 | NC_000008.10 |

|            |          |          |          |            |          |           |           |              |
|------------|----------|----------|----------|------------|----------|-----------|-----------|--------------|
| cg18229521 | 2.33E-23 | 1.85E-25 | 1.21E+01 | 47.049392  | 2.98E-01 | 92790285  | 92790408  | NC_000014.8  |
| cg15007156 | 2.34E-23 | 1.86E-25 | 1.21E+01 | 47.0444073 | 2.57E-01 | 14925135  | 14925258  | NC_000001.10 |
| cg18354248 | 2.34E-23 | 1.86E-25 | 1.21E+01 | 47.0437712 | 1.68E-01 | 93390311  | 93390434  | NC_000010.10 |
| cg08036188 | 2.39E-23 | 1.89E-25 | 1.21E+01 | 47.0256521 | 9.17E-02 | 46522560  | 46522683  | NC_000017.10 |
| cg08460580 | 2.40E-23 | 1.90E-25 | 1.21E+01 | 47.020356  | 9.39E-02 | 689187    | 689310    | NC_000006.11 |
| cg08182501 | 2.44E-23 | 1.94E-25 | 1.21E+01 | 47.0021468 | 1.64E-01 | 177003406 | 177003529 | NC_000002.11 |
| cg01939477 | 2.44E-23 | 1.94E-25 | 1.21E+01 | 47.0019154 | 3.36E-01 | 43602879  | 43603002  | NC_000011.9  |
| cg12764034 | 2.46E-23 | 1.95E-25 | 1.21E+01 | 46.9943146 | 2.20E-01 | 75602846  | 75602969  | NC_000001.10 |
| cg19329160 | 2.48E-23 | 1.98E-25 | 1.21E+01 | 46.9835596 | 2.38E-01 | 79182095  | 79182218  | NC_000013.10 |
| cg07922933 | 2.50E-23 | 2.00E-25 | 1.21E+01 | 46.9737034 | 1.95E-01 | 228548842 | 228548965 | NC_000001.10 |
| cg20735050 | 2.51E-23 | 2.00E-25 | 1.21E+01 | 46.9690571 | 2.45E-01 | 94521117  | 94521240  | NC_000011.9  |
| cg27276079 | 2.52E-23 | 2.01E-25 | 1.21E+01 | 46.9659693 | 1.93E-01 | 42211520  | 42211643  | NC_000015.9  |
| cg09980058 | 2.53E-23 | 2.02E-25 | 1.21E+01 | 46.9635239 | 2.46E-01 | 18898325  | 18898448  | NC_000019.9  |
| cg19288904 | 2.53E-23 | 2.02E-25 | 1.21E+01 | 46.9623538 | 3.00E-01 | 98836248  | 98836371  | NC_000015.9  |
| cg10516993 | 2.55E-23 | 2.04E-25 | 1.21E+01 | 46.9514058 | 2.56E-01 | 158147446 | 158147569 | NC_000001.10 |
| cg21908235 | 2.64E-23 | 2.11E-25 | 1.21E+01 | 46.9189588 | 2.83E-01 | 146551744 | 146551867 | NC_000001.10 |
| cg03599078 | 2.67E-23 | 2.13E-25 | 1.21E+01 | 46.9065726 | 1.95E-01 | 8078314   | 8078437   | NC_000010.10 |
| cg14078335 | 2.68E-23 | 2.15E-25 | 1.21E+01 | 46.8999232 | 2.48E-01 | 71760291  | 71760414  | NC_000011.9  |
| cg15989068 | 2.79E-23 | 2.24E-25 | 1.21E+01 | 46.857323  | 1.93E-01 | 5837057   | 5837180   | NC_000002.11 |
| cg18988498 | 2.80E-23 | 2.25E-25 | 1.21E+01 | 46.8542374 | 1.86E-01 | 31824262  | 31824385  | NC_000011.9  |
| cg06818435 | 2.84E-23 | 2.28E-25 | 1.21E+01 | 46.8404936 | 1.55E-01 | 33279680  | 33279803  | NC_000001.10 |
| cg03858756 | 2.87E-23 | 2.31E-25 | 1.20E+01 | 46.8272682 | 2.95E-01 | 176994637 | 176994760 | NC_000002.11 |
| cg15139644 | 2.90E-23 | 2.34E-25 | 1.20E+01 | 46.8159945 | 2.80E-01 | 35065386  | 35065509  | NC_000018.9  |
| cg22541735 | 2.91E-23 | 2.35E-25 | 1.20E+01 | 46.8121235 | 3.23E-01 | 176988203 | 176988326 | NC_000002.11 |
| cg24760961 | 2.93E-23 | 2.36E-25 | 1.20E+01 | 46.8075616 | 1.41E-01 | 130782216 | 130782339 | NC_000011.9  |

|            |          |          |          |            |          |           |           |              |
|------------|----------|----------|----------|------------|----------|-----------|-----------|--------------|
| cg20066716 | 2.93E-23 | 2.36E-25 | 1.20E+01 | 46.8070156 | 2.92E-01 | 49815181  | 49815304  | NC_000007.13 |
| cg05627639 | 2.95E-23 | 2.38E-25 | 1.20E+01 | 46.7970737 | 3.21E-01 | 34113449  | 34113572  | NC_000019.9  |
| cg19259125 | 2.97E-23 | 2.40E-25 | 1.20E+01 | 46.7884755 | 1.65E-01 | 113396924 | 113397047 | NC_000013.10 |
| cg02022519 | 2.98E-23 | 2.41E-25 | 1.20E+01 | 46.7872504 | 1.27E-01 | 115830067 | 115830190 | NC_000011.9  |
| cg26134895 | 2.98E-23 | 2.41E-25 | 1.20E+01 | 46.7851959 | 3.75E-01 | 15500270  | 15500393  | NC_000005.9  |
| cg03730428 | 2.99E-23 | 2.42E-25 | 1.20E+01 | 46.781706  | 2.23E-01 | 32009004  | 32009127  | NC_000011.9  |
| cg19206040 | 3.00E-23 | 2.43E-25 | 1.20E+01 | 46.776472  | 2.99E-01 | 37500441  | 37500564  | NC_000001.10 |
| cg07917052 | 3.00E-23 | 2.43E-25 | 1.20E+01 | 46.776311  | 1.10E-01 | 51110982  | 51111105  | NC_000013.10 |
| cg13234587 | 3.02E-23 | 2.45E-25 | 1.20E+01 | 46.7689493 | 7.03E-02 | 189148133 | 189148256 | NC_000003.11 |
| cg04064644 | 3.07E-23 | 2.49E-25 | 1.20E+01 | 46.7523281 | 2.33E-01 | 1876719   | 1876842   | NC_000005.9  |
| cg24135615 | 3.07E-23 | 2.49E-25 | 1.20E+01 | 46.7521187 | 1.26E-01 | 37042201  | 37042324  | NC_000017.10 |
| cg07007754 | 3.09E-23 | 2.51E-25 | 1.20E+01 | 46.7470354 | 2.05E-01 | 114847329 | 114847452 | NC_000013.10 |
| cg04423294 | 3.09E-23 | 2.51E-25 | 1.20E+01 | 46.7453486 | 1.44E-01 | 188479059 | 188479182 | NC_000003.11 |
| cg07898582 | 3.13E-23 | 2.54E-25 | 1.20E+01 | 46.7324872 | 1.79E-01 | 2953930   | 2954053   | NC_000007.13 |
| cg01366419 | 3.15E-23 | 2.56E-25 | 1.20E+01 | 46.7260393 | 2.46E-01 | 70597091  | 70597214  | NC_000007.13 |
| cg25116216 | 3.16E-23 | 2.57E-25 | 1.20E+01 | 46.7228988 | 3.19E-01 | 10101581  | 10101704  | NC_000017.10 |
| cg00619126 | 3.19E-23 | 2.60E-25 | 1.20E+01 | 46.7101638 | 2.43E-01 | 105459775 | 105459898 | NC_000002.11 |
| cg18380175 | 3.20E-23 | 2.61E-25 | 1.20E+01 | 46.7067712 | 2.58E-01 | 77334070  | 77334193  | NC_000001.10 |
| cg00911881 | 3.21E-23 | 2.62E-25 | 1.20E+01 | 46.7049661 | 1.52E-01 | 11605722  | 11605845  | NC_000008.10 |
| cg03993087 | 3.21E-23 | 2.62E-25 | 1.20E+01 | 46.7023469 | 1.44E-01 | 80499721  | 80499844  | NC_000010.10 |
| cg00377332 | 3.25E-23 | 2.65E-25 | 1.20E+01 | 46.6903718 | 1.92E-01 | 45761250  | 45761373  | NC_000003.11 |
| cg05185021 | 3.25E-23 | 2.65E-25 | 1.20E+01 | 46.6903131 | 2.14E-01 | 2324794   | 2324917   | NC_000017.10 |
| cg09685182 | 3.26E-23 | 2.66E-25 | 1.20E+01 | 46.6871819 | 2.18E-01 | 130236037 | 130236160 | NC_000003.11 |
| cg04999691 | 3.26E-23 | 2.67E-25 | 1.20E+01 | 46.6862726 | 1.62E-01 | 150027050 | 150027173 | NC_000007.13 |
| cg01130127 | 3.27E-23 | 2.68E-25 | 1.20E+01 | 46.6816191 | 3.16E-01 | 51228821  | 51228944  | NC_000019.9  |



|            |          |          |          |            |          |           |           |              |
|------------|----------|----------|----------|------------|----------|-----------|-----------|--------------|
| cg27460824 | 3.28E-23 | 2.68E-25 | 1.20E+01 | 46.6800384 | 2.03E-01 | 24750164  | 24750287  | NC_000013.10 |
| cg11657808 | 3.29E-23 | 2.70E-25 | 1.20E+01 | 46.6750659 | 3.07E-01 | 237205950 | 237206073 | NC_000001.10 |
| cg10179300 | 3.30E-23 | 2.70E-25 | 1.20E+01 | 46.6737882 | 1.61E-01 | 14147618  | 14147741  | NC_000005.9  |
| cg04991747 | 3.43E-23 | 2.82E-25 | 1.20E+01 | 46.6304043 | 1.56E-01 | 230207211 | 230207334 | NC_000001.10 |
| cg26650638 | 3.48E-23 | 2.85E-25 | 1.20E+01 | 46.6180395 | 3.13E-01 | 86320857  | 86320980  | NC_000016.9  |
| cg05501996 | 3.52E-23 | 2.89E-25 | 1.20E+01 | 46.6044058 | 2.25E-01 | 50673730  | 50673853  | NC_000005.9  |
| cg04234070 | 3.53E-23 | 2.91E-25 | 1.20E+01 | 46.6001498 | 1.38E-01 | 95275575  | 95275698  | NC_000008.10 |
| cg02753742 | 3.53E-23 | 2.91E-25 | 1.20E+01 | 46.5994056 | 1.06E-01 | 159956264 | 159956387 | NC_000004.11 |
| cg26122980 | 3.61E-23 | 2.98E-25 | 1.20E+01 | 46.5766321 | 3.51E-01 | 38671001  | 38671124  | NC_000007.13 |
| cg22564695 | 3.65E-23 | 3.01E-25 | 1.20E+01 | 46.5652165 | 1.45E-01 | 13080436  | 13080559  | NC_000019.9  |
| cg20872937 | 3.68E-23 | 3.04E-25 | 1.20E+01 | 46.5556055 | 3.23E-01 | 74961968  | 74962091  | NC_000018.9  |
| cg19047707 | 3.68E-23 | 3.04E-25 | 1.20E+01 | 46.5555517 | 2.46E-01 | 233351525 | 233351648 | NC_000002.11 |
| cg12923203 | 3.69E-23 | 3.05E-25 | 1.20E+01 | 46.5519123 | 1.64E-01 | 90771952  | 90772075  | NC_000015.9  |
| cg26804891 | 3.72E-23 | 3.08E-25 | 1.20E+01 | 46.5432216 | 1.42E-01 | 2055242   | 2055365   | NC_000016.9  |
| cg08961621 | 3.79E-23 | 3.14E-25 | 1.20E+01 | 46.5222615 | 1.67E-01 | 39644244  | 39644367  | NC_000021.8  |
| cg20162240 | 3.80E-23 | 3.15E-25 | 1.20E+01 | 46.5192291 | 1.43E-01 | 129733373 | 129733496 | NC_000010.10 |
| cg03574723 | 3.87E-23 | 3.22E-25 | 1.20E+01 | 46.499523  | 2.18E-01 | 125425994 | 125426117 | NC_000010.10 |
| cg10042132 | 3.91E-23 | 3.25E-25 | 1.20E+01 | 46.4895506 | 7.95E-02 | 81938575  | 81938698  | NC_000014.8  |
| cg18348836 | 3.96E-23 | 3.29E-25 | 1.20E+01 | 46.4756587 | 2.85E-01 | 60282400  | 60282523  | NC_000001.10 |
| cg01281157 | 4.01E-23 | 3.34E-25 | 1.20E+01 | 46.4624718 | 2.77E-01 | 178422260 | 178422383 | NC_000005.9  |
| cg27593537 | 4.05E-23 | 3.37E-25 | 1.20E+01 | 46.4543885 | 1.37E-01 | 102810606 | 102810729 | NC_000010.10 |
| cg18411108 | 4.11E-23 | 3.42E-25 | 1.20E+01 | 46.4379857 | 2.72E-01 | 63955727  | 63955850  | NC_000003.11 |
| cg14160480 | 4.15E-23 | 3.46E-25 | 1.20E+01 | 46.4263297 | 2.17E-01 | 15697398  | 15697521  | NC_000001.10 |
| cg18556676 | 4.15E-23 | 3.46E-25 | 1.20E+01 | 46.4259759 | 2.21E-01 | 22095111  | 22095234  | NC_000012.11 |
| cg20569034 | 4.17E-23 | 3.48E-25 | 1.20E+01 | 46.4206019 | 2.01E-01 | 58121550  | 58121673  | NC_000012.11 |

|            |          |          |          |            |          |           |           |              |
|------------|----------|----------|----------|------------|----------|-----------|-----------|--------------|
| cg14297867 | 4.18E-23 | 3.49E-25 | 1.20E+01 | 46.417726  | 1.63E-01 | 27526172  | 27526295  | NC_000009.11 |
| cg12475759 | 4.20E-23 | 3.50E-25 | 1.20E+01 | 46.4143895 | 2.56E-01 | 4714672   | 4714795   | NC_000001.10 |
| cg19589652 | 4.22E-23 | 3.52E-25 | 1.20E+01 | 46.4087282 | 1.75E-01 | 56000809  | 56000932  | NC_000019.9  |
| cg19400113 | 4.22E-23 | 3.53E-25 | 1.20E+01 | 46.407887  | 1.33E-01 | 189546778 | 189546901 | NC_000003.11 |
| cg10250663 | 4.22E-23 | 3.53E-25 | 1.20E+01 | 46.4076211 | 3.09E-01 | 55358458  | 55358581  | NC_000016.9  |
| cg13074532 | 4.30E-23 | 3.60E-25 | 1.20E+01 | 46.3873155 | 9.30E-02 | 120156359 | 120156482 | NC_000012.11 |
| cg06641279 | 4.35E-23 | 3.64E-25 | 1.20E+01 | 46.3762155 | 1.31E-01 | 22307561  | 22307684  | NC_000001.10 |
| cg19513834 | 4.36E-23 | 3.65E-25 | 1.20E+01 | 46.3737621 | 3.42E-01 | 105470561 | 105470684 | NC_000002.11 |
| cg05426006 | 4.36E-23 | 3.66E-25 | 1.20E+01 | 46.3720955 | 2.41E-01 | 45781603  | 45781726  | NC_000013.10 |
| cg09634469 | 4.38E-23 | 3.67E-25 | 1.20E+01 | 46.367738  | 1.80E-01 | 21128411  | 21128534  | NC_000022.10 |
| cg03807298 | 4.50E-23 | 3.78E-25 | 1.20E+01 | 46.3397639 | 3.80E-01 | 174159039 | 174159162 | NC_000005.9  |
| cg21550372 | 4.54E-23 | 3.82E-25 | 1.20E+01 | 46.3297318 | 1.58E-01 | 100908908 | 100909031 | NC_000014.8  |
| cg25024074 | 4.56E-23 | 3.84E-25 | 1.20E+01 | 46.3235581 | 3.18E-01 | 182322501 | 182322624 | NC_000002.11 |
| cg05708656 | 4.59E-23 | 3.86E-25 | 1.20E+01 | 46.3184057 | 1.74E-01 | 71792305  | 71792428  | NC_000016.9  |
| cg04880278 | 4.60E-23 | 3.87E-25 | 1.20E+01 | 46.3157254 | 1.37E-01 | 11597172  | 11597295  | NC_000008.10 |
| cg07882671 | 4.64E-23 | 3.91E-25 | 1.20E+01 | 46.3056837 | 3.85E-01 | 1883005   | 1883128   | NC_000005.9  |
| cg22812005 | 4.68E-23 | 3.95E-25 | 1.20E+01 | 46.2956094 | 1.30E-01 | 244216231 | 244216354 | NC_000001.10 |
| cg21802055 | 4.70E-23 | 3.97E-25 | 1.20E+01 | 46.2914459 | 2.64E-01 | 4868794   | 4868917   | NC_000004.11 |
| cg04475936 | 4.77E-23 | 4.03E-25 | 1.20E+01 | 46.2743049 | 1.64E-01 | 2112184   | 2112307   | NC_000005.9  |
| cg23204968 | 4.78E-23 | 4.04E-25 | 1.20E+01 | 46.2735468 | 2.21E-01 | 27183816  | 27183939  | NC_000007.13 |
| cg27631389 | 4.78E-23 | 4.04E-25 | 1.20E+01 | 46.2721444 | 1.81E-01 | 12263892  | 12264015  | NC_000011.9  |
| cg07723431 | 4.83E-23 | 4.08E-25 | 1.20E+01 | 46.2624453 | 9.10E-02 | 2044540   | 2044663   | NC_000019.9  |
| cg16583088 | 4.92E-23 | 4.16E-25 | 1.20E+01 | 46.2431007 | 2.01E-01 | 197395440 | 197395563 | NC_000003.11 |
| cg02505749 | 4.96E-23 | 4.20E-25 | 1.20E+01 | 46.2339105 | 2.80E-01 | 140715735 | 140715858 | NC_000008.10 |
| cg02700891 | 5.01E-23 | 4.25E-25 | 1.20E+01 | 46.2229488 | 2.92E-01 | 129693586 | 129693709 | NC_000003.11 |

|            |          |          |          |            |          |           |           |              |
|------------|----------|----------|----------|------------|----------|-----------|-----------|--------------|
| cg27172557 | 5.07E-23 | 4.32E-25 | 1.20E+01 | 46.2073472 | 1.92E-01 | 91012362  | 91012485  | NC_000014.8  |
| cg05500840 | 5.15E-23 | 4.39E-25 | 1.20E+01 | 46.1915691 | 2.26E-01 | 176972068 | 176972191 | NC_000002.11 |
| cg05999324 | 5.16E-23 | 4.40E-25 | 1.20E+01 | 46.1879517 | 2.02E-01 | 112655570 | 112655693 | NC_000010.10 |
| cg00274203 | 5.17E-23 | 4.41E-25 | 1.20E+01 | 46.1870543 | 1.88E-01 | 56661537  | 56661660  | NC_000012.11 |
| cg06965409 | 5.17E-23 | 4.41E-25 | 1.20E+01 | 46.1858647 | 7.61E-02 | 1611973   | 1612096   | NC_000016.9  |
| cg08485158 | 5.17E-23 | 4.42E-25 | 1.20E+01 | 46.1846369 | 1.85E-01 | 35766021  | 35766144  | NC_000006.11 |
| cg04585435 | 5.17E-23 | 4.42E-25 | 1.20E+01 | 46.184536  | 1.78E-01 | 4211943   | 4212066   | NC_000017.10 |
| cg06585708 | 5.26E-23 | 4.49E-25 | 1.20E+01 | 46.1678394 | 2.30E-01 | 3602413   | 3602536   | NC_000005.9  |
| cg03112869 | 5.29E-23 | 4.52E-25 | 1.20E+01 | 46.1612787 | 1.87E-01 | 48413769  | 48413892  | NC_000003.11 |
| cg14517454 | 5.34E-23 | 4.58E-25 | 1.20E+01 | 46.1490432 | 8.90E-02 | 26671918  | 26672041  | NC_000001.10 |
| cg22490780 | 5.35E-23 | 4.58E-25 | 1.20E+01 | 46.1479839 | 2.43E-01 | 16867064  | 16867187  | NC_000005.9  |
| cg08806408 | 5.39E-23 | 4.62E-25 | 1.20E+01 | 46.1405106 | 2.92E-01 | 51185001  | 51185124  | NC_000016.9  |
| cg20810478 | 5.39E-23 | 4.62E-25 | 1.19E+01 | 46.1386808 | 2.74E-01 | 248020632 | 248020755 | NC_000001.10 |
| cg25076197 | 5.45E-23 | 4.68E-25 | 1.19E+01 | 46.1269606 | 1.03E-01 | 104681440 | 104681563 | NC_000007.13 |
| cg10659886 | 5.53E-23 | 4.75E-25 | 1.19E+01 | 46.1119514 | 1.89E-01 | 58629719  | 58629842  | NC_000019.9  |
| cg04021697 | 5.53E-23 | 4.76E-25 | 1.19E+01 | 46.1110684 | 3.09E-01 | 3567303   | 3567426   | NC_000001.10 |
| cg14507560 | 5.55E-23 | 4.77E-25 | 1.19E+01 | 46.108235  | 3.49E-01 | 1882885   | 1883008   | NC_000005.9  |
| cg01992684 | 5.57E-23 | 4.79E-25 | 1.19E+01 | 46.1044925 | 1.22E-01 | 154147579 | 154147702 | NC_000005.9  |
| cg02345417 | 5.57E-23 | 4.79E-25 | 1.19E+01 | 46.1043092 | 1.78E-01 | 111631732 | 111631855 | NC_000011.9  |
| cg10564464 | 5.70E-23 | 4.91E-25 | 1.19E+01 | 46.0800284 | 1.78E-01 | 134963133 | 134963256 | NC_000002.11 |
| cg23358612 | 5.73E-23 | 4.93E-25 | 1.19E+01 | 46.0751694 | 2.36E-01 | 1275258   | 1275381   | NC_000007.13 |
| cg18022344 | 5.86E-23 | 5.05E-25 | 1.19E+01 | 46.050902  | 1.63E-01 | 21665238  | 21665361  | NC_000016.9  |
| cg24398479 | 5.89E-23 | 5.09E-25 | 1.19E+01 | 46.0442298 | 2.73E-01 | 27192061  | 27192184  | NC_000007.13 |
| cg02857643 | 5.90E-23 | 5.09E-25 | 1.19E+01 | 46.0435033 | 1.30E-01 | 48696108  | 48696231  | NC_000017.10 |
| cg18326021 | 5.94E-23 | 5.13E-25 | 1.19E+01 | 46.036166  | 2.59E-01 | 106401479 | 106401602 | NC_000010.10 |

|            |          |          |          |            |          |           |           |              |
|------------|----------|----------|----------|------------|----------|-----------|-----------|--------------|
| cg19211295 | 6.03E-23 | 5.21E-25 | 1.19E+01 | 46.0204231 | 1.36E-01 | 6328369   | 6328492   | NC_000004.11 |
| cg00483562 | 6.24E-23 | 5.40E-25 | 1.19E+01 | 45.9846817 | 2.86E-01 | 1931781   | 1931904   | NC_000005.9  |
| cg02334126 | 6.28E-23 | 5.44E-25 | 1.19E+01 | 45.9768675 | 1.36E-01 | 121017209 | 121017332 | NC_000012.11 |
| cg02135861 | 6.29E-23 | 5.45E-25 | 1.19E+01 | 45.9754177 | 1.88E-01 | 2752139   | 2752262   | NC_000005.9  |
| cg13536060 | 6.35E-23 | 5.50E-25 | 1.19E+01 | 45.9666779 | 1.63E-01 | 51189671  | 51189794  | NC_000019.9  |
| cg01126567 | 6.40E-23 | 5.55E-25 | 1.19E+01 | 45.9581626 | 2.63E-01 | 20085047  | 20085170  | NC_000016.9  |
| cg09017434 | 6.41E-23 | 5.56E-25 | 1.19E+01 | 45.9561295 | 1.83E-01 | 16179660  | 16179783  | NC_000005.9  |
| cg26010655 | 6.43E-23 | 5.58E-25 | 1.19E+01 | 45.9529937 | 1.69E-01 | 181911749 | 181911872 | NC_000003.11 |
| cg26978776 | 6.44E-23 | 5.59E-25 | 1.19E+01 | 45.9508704 | 1.83E-01 | 124605370 | 124605493 | NC_000010.10 |
| cg20815339 | 6.50E-23 | 5.65E-25 | 1.19E+01 | 45.9399087 | 1.43E-01 | 7435357   | 7435480   | NC_000004.11 |
| cg06653699 | 6.55E-23 | 5.70E-25 | 1.19E+01 | 45.9316294 | 2.82E-01 | 51185082  | 51185205  | NC_000016.9  |
| cg08238265 | 6.56E-23 | 5.70E-25 | 1.19E+01 | 45.9310988 | 1.91E-01 | 64682912  | 64683035  | NC_000014.8  |
| cg23994802 | 6.59E-23 | 5.73E-25 | 1.19E+01 | 45.926347  | 1.23E-01 | 241621882 | 241622005 | NC_000002.11 |
| cg26333652 | 6.64E-23 | 5.78E-25 | 1.19E+01 | 45.9178763 | 1.82E-01 | 2750758   | 2750881   | NC_000005.9  |
| cg16110314 | 6.67E-23 | 5.81E-25 | 1.19E+01 | 45.9125038 | 1.99E-01 | 246203683 | 246203806 | NC_000001.10 |
| cg15520279 | 6.75E-23 | 5.88E-25 | 1.19E+01 | 45.9004719 | 2.39E-01 | 176995088 | 176995211 | NC_000002.11 |
| cg05267269 | 6.79E-23 | 5.92E-25 | 1.19E+01 | 45.8935447 | 1.57E-01 | 101461653 | 101461776 | NC_000002.11 |
| cg11878045 | 6.81E-23 | 5.94E-25 | 1.19E+01 | 45.8902971 | 1.61E-01 | 2482536   | 2482659   | NC_000011.9  |
| cg26675654 | 6.89E-23 | 6.02E-25 | 1.19E+01 | 45.8763619 | 2.18E-01 | 1269693   | 1269816   | NC_000007.13 |
| cg12426612 | 6.89E-23 | 6.02E-25 | 1.19E+01 | 45.8760145 | 2.06E-01 | 25905125  | 25905248  | NC_000017.10 |
| cg26693553 | 6.96E-23 | 6.08E-25 | 1.19E+01 | 45.8663804 | 7.03E-02 | 3147056   | 3147179   | NC_000010.10 |
| cg15427886 | 6.98E-23 | 6.10E-25 | 1.19E+01 | 45.8633609 | 2.41E-01 | 55379663  | 55379786  | NC_000008.10 |
| cg24691891 | 7.02E-23 | 6.14E-25 | 1.19E+01 | 45.8568505 | 2.25E-01 | 33829934  | 33830057  | NC_000001.10 |
| cg11159090 | 7.08E-23 | 6.21E-25 | 1.19E+01 | 45.8464278 | 7.06E-02 | 72633627  | 72633750  | NC_000005.9  |
| cg13214504 | 7.15E-23 | 6.27E-25 | 1.19E+01 | 45.8360436 | 1.62E-01 | 240251238 | 240251361 | NC_000002.11 |

|            |          |          |          |            |          |           |           |              |
|------------|----------|----------|----------|------------|----------|-----------|-----------|--------------|
| cg12714007 | 7.23E-23 | 6.34E-25 | 1.19E+01 | 45.8247447 | 1.87E-01 | 119233234 | 119233357 | NC_000011.9  |
| cg12973941 | 7.35E-23 | 6.46E-25 | 1.19E+01 | 45.8074285 | 2.57E-01 | 13545639  | 13545762  | NC_000004.11 |
| cg23624016 | 7.36E-23 | 6.47E-25 | 1.19E+01 | 45.8049692 | 2.06E-01 | 43968501  | 43968624  | NC_000007.13 |
| cg08497311 | 7.39E-23 | 6.50E-25 | 1.19E+01 | 45.8000256 | 1.46E-01 | 88806610  | 88806733  | NC_000016.9  |
| cg07915921 | 7.39E-23 | 6.50E-25 | 1.19E+01 | 45.8000202 | 2.95E-01 | 54321502  | 54321625  | NC_000012.11 |
| cg17548735 | 7.46E-23 | 6.56E-25 | 1.19E+01 | 45.7912369 | 2.43E-01 | 41020969  | 41021092  | NC_000006.11 |
| cg11651237 | 7.51E-23 | 6.62E-25 | 1.19E+01 | 45.7830482 | 2.31E-01 | 27216529  | 27216652  | NC_000015.9  |
| cg17741689 | 7.52E-23 | 6.62E-25 | 1.19E+01 | 45.781927  | 2.60E-01 | 4714574   | 4714697   | NC_000001.10 |
| cg00582524 | 7.80E-23 | 6.88E-25 | 1.19E+01 | 45.7434524 | 2.31E-01 | 51184392  | 51184515  | NC_000016.9  |
| cg08290240 | 8.06E-23 | 7.13E-25 | 1.19E+01 | 45.7092976 | 2.87E-01 | 59827195  | 59827318  | NC_000020.10 |
| cg06679720 | 8.08E-23 | 7.15E-25 | 1.19E+01 | 45.7060097 | 2.46E-01 | 51417686  | 51417809  | NC_000013.10 |
| cg04560767 | 8.29E-23 | 7.34E-25 | 1.19E+01 | 45.6800557 | 8.31E-02 | 19107491  | 19107614  | NC_000022.10 |
| cg27269917 | 8.30E-23 | 7.35E-25 | 1.19E+01 | 45.678339  | 2.05E-01 | 18853737  | 18853860  | NC_000017.10 |
| cg19814981 | 8.32E-23 | 7.38E-25 | 1.19E+01 | 45.6747264 | 2.34E-01 | 3592435   | 3592558   | NC_000005.9  |
| cg20800509 | 8.34E-23 | 7.40E-25 | 1.19E+01 | 45.6723998 | 3.60E-01 | 104513083 | 104513206 | NC_000008.10 |
| cg21371645 | 8.48E-23 | 7.52E-25 | 1.19E+01 | 45.6553603 | 1.20E-01 | 7147256   | 7147379   | NC_000017.10 |
| cg18973238 | 8.50E-23 | 7.55E-25 | 1.19E+01 | 45.6517098 | 1.66E-01 | 64169293  | 64169416  | NC_000001.10 |
| cg21433558 | 8.54E-23 | 7.59E-25 | 1.19E+01 | 45.6466398 | 1.78E-01 | 40837037  | 40837160  | NC_000017.10 |
| cg09663584 | 8.65E-23 | 7.69E-25 | 1.19E+01 | 45.6342023 | 1.03E-01 | 77347405  | 77347528  | NC_000015.9  |
| cg26820209 | 8.68E-23 | 7.72E-25 | 1.19E+01 | 45.629613  | 2.03E-01 | 22303326  | 22303449  | NC_000001.10 |
| cg16976499 | 8.72E-23 | 7.76E-25 | 1.19E+01 | 45.6244199 | 1.55E-01 | 76330505  | 76330628  | NC_000006.11 |
| cg18456140 | 8.78E-23 | 7.82E-25 | 1.19E+01 | 45.6168669 | 2.16E-01 | 67810268  | 67810391  | NC_000011.9  |
| cg11823159 | 8.91E-23 | 7.94E-25 | 1.19E+01 | 45.601366  | 1.52E-01 | 128611859 | 128611982 | NC_000002.11 |
| cg12921171 | 8.98E-23 | 8.02E-25 | 1.19E+01 | 45.5918508 | 1.47E-01 | 63204710  | 63204833  | NC_000015.9  |
| cg26194092 | 9.09E-23 | 8.13E-25 | 1.19E+01 | 45.5782364 | 1.69E-01 | 15819330  | 15819453  | NC_000001.10 |

|            |          |          |          |            |          |           |           |              |
|------------|----------|----------|----------|------------|----------|-----------|-----------|--------------|
| cg10631097 | 9.26E-23 | 8.30E-25 | 1.19E+01 | 45.5579405 | 1.60E-01 | 10144309  | 10144432  | NC_000002.11 |
| cg24604988 | 9.43E-23 | 8.46E-25 | 1.19E+01 | 45.5393841 | 2.15E-01 | 32421988  | 32422111  | NC_000020.10 |
| cg17987112 | 9.46E-23 | 8.49E-25 | 1.19E+01 | 45.5357735 | 3.50E-01 | 174158654 | 174158777 | NC_000005.9  |
| cg10013501 | 9.47E-23 | 8.49E-25 | 1.19E+01 | 45.5351595 | 1.57E-01 | 25257813  | 25257936  | NC_000001.10 |
| cg00786909 | 9.52E-23 | 8.54E-25 | 1.19E+01 | 45.5295171 | 1.95E-01 | 227163427 | 227163550 | NC_000001.10 |
| cg17113147 | 9.55E-23 | 8.57E-25 | 1.19E+01 | 45.5257385 | 1.91E-01 | 753545    | 753668    | NC_000017.10 |
| cg06962944 | 9.59E-23 | 8.62E-25 | 1.19E+01 | 45.5200783 | 3.17E-01 | 42544728  | 42544851  | NC_000020.10 |
| cg24456002 | 9.66E-23 | 8.69E-25 | 1.19E+01 | 45.5122451 | 2.18E-01 | 96911165  | 96911288  | NC_000015.9  |
| cg10158997 | 9.67E-23 | 8.70E-25 | 1.19E+01 | 45.5112607 | 1.59E-01 | 31734106  | 31734229  | NC_000006.11 |
| cg24186506 | 9.85E-23 | 8.87E-25 | 1.19E+01 | 45.4921166 | 1.66E-01 | 125780810 | 125780933 | NC_000010.10 |
| cg12111714 | 9.89E-23 | 8.91E-25 | 1.19E+01 | 45.4871247 | 2.24E-01 | 26043472  | 26043595  | NC_000013.10 |
| cg14854850 | 1.00E-22 | 9.03E-25 | 1.19E+01 | 45.474041  | 1.08E-01 | 48237752  | 48237875  | NC_000012.11 |
| cg05783449 | 1.03E-22 | 9.29E-25 | 1.18E+01 | 45.4458825 | 1.79E-01 | 64868710  | 64868833  | NC_000002.11 |
| cg24109980 | 1.04E-22 | 9.44E-25 | 1.18E+01 | 45.430381  | 2.94E-01 | 50818707  | 50818830  | NC_000010.10 |
| cg07918545 | 1.05E-22 | 9.46E-25 | 1.18E+01 | 45.4273562 | 3.15E-01 | 129535669 | 129535792 | NC_000010.10 |
| cg03531687 | 1.06E-22 | 9.56E-25 | 1.18E+01 | 45.4176008 | 1.15E-01 | 25638551  | 25638674  | NC_000003.11 |
| cg01851378 | 1.07E-22 | 9.70E-25 | 1.18E+01 | 45.403032  | 2.66E-01 | 51186925  | 51187048  | NC_000016.9  |
| cg22997113 | 1.07E-22 | 9.74E-25 | 1.18E+01 | 45.3987092 | 2.24E-01 | 27170241  | 27170364  | NC_000007.13 |
| cg16538471 | 1.07E-22 | 9.74E-25 | 1.18E+01 | 45.3987086 | 1.21E-01 | 20153546  | 20153669  | NC_000007.13 |
| cg17432857 | 1.09E-22 | 9.89E-25 | 1.18E+01 | 45.3839732 | 2.42E-01 | 27184438  | 27184561  | NC_000007.13 |
| cg19255084 | 1.10E-22 | 9.97E-25 | 1.18E+01 | 45.3761857 | 9.95E-02 | 113412723 | 113412846 | NC_000003.11 |
| cg24794906 | 1.10E-22 | 9.97E-25 | 1.18E+01 | 45.3752609 | 1.05E-01 | 37836827  | 37836950  | NC_000021.8  |
| cg07442479 | 1.12E-22 | 1.02E-24 | 1.18E+01 | 45.3513489 | 2.11E-01 | 37839769  | 37839892  | NC_000005.9  |
| cg16126178 | 1.13E-22 | 1.03E-24 | 1.18E+01 | 45.3432782 | 1.36E-01 | 105239857 | 105239980 | NC_000014.8  |
| cg24847829 | 1.16E-22 | 1.05E-24 | 1.18E+01 | 45.3197468 | 3.26E-01 | 136834464 | 136834587 | NC_000005.9  |

|            |          |          |          |            |          |           |           |              |
|------------|----------|----------|----------|------------|----------|-----------|-----------|--------------|
| cg05115106 | 1.16E-22 | 1.06E-24 | 1.18E+01 | 45.3178332 | 6.28E-02 | 75250344  | 75250467  | NC_000017.10 |
| cg05528516 | 1.16E-22 | 1.06E-24 | 1.18E+01 | 45.3148829 | 9.99E-02 | 1070040   | 1070163   | NC_000001.10 |
| cg07838483 | 1.18E-22 | 1.08E-24 | 1.18E+01 | 45.2957494 | 2.13E-01 | 30202712  | 30202835  | NC_000019.9  |
| cg06214745 | 1.20E-22 | 1.10E-24 | 1.18E+01 | 45.2823974 | 1.07E-01 | 1051817   | 1051940   | NC_000017.10 |
| cg11843333 | 1.20E-22 | 1.10E-24 | 1.18E+01 | 45.2823934 | 1.34E-01 | 15719138  | 15719261  | NC_000004.11 |
| cg15937832 | 1.21E-22 | 1.11E-24 | 1.18E+01 | 45.2678132 | 7.05E-02 | 26368795  | 26368918  | NC_000008.10 |
| cg17716724 | 1.25E-22 | 1.14E-24 | 1.18E+01 | 45.2416244 | 9.92E-02 | 200118677 | 200118800 | NC_000001.10 |
| cg21216220 | 1.25E-22 | 1.14E-24 | 1.18E+01 | 45.238746  | 1.37E-01 | 35732945  | 35733068  | NC_000017.10 |
| cg03611809 | 1.25E-22 | 1.14E-24 | 1.18E+01 | 45.2385915 | 1.69E-01 | 43709209  | 43709332  | NC_000001.10 |
| cg22288657 | 1.26E-22 | 1.16E-24 | 1.18E+01 | 45.2280564 | 1.58E-01 | 688002    | 688125    | NC_000017.10 |
| cg21929943 | 1.27E-22 | 1.16E-24 | 1.18E+01 | 45.2211083 | 2.62E-01 | 152622815 | 152622938 | NC_000007.13 |
| cg09086835 | 1.27E-22 | 1.17E-24 | 1.18E+01 | 45.2206891 | 1.85E-01 | 89922345  | 89922468  | NC_000015.9  |
| cg22424284 | 1.28E-22 | 1.17E-24 | 1.18E+01 | 45.2130381 | 2.58E-01 | 118166402 | 118166525 | NC_000001.10 |
| cg02430183 | 1.28E-22 | 1.18E-24 | 1.18E+01 | 45.2111098 | 2.12E-01 | 95947766  | 95947889  | NC_000009.11 |
| cg18763223 | 1.28E-22 | 1.18E-24 | 1.18E+01 | 45.2109054 | 1.09E-01 | 74334701  | 74334824  | NC_000015.9  |
| cg00982535 | 1.29E-22 | 1.19E-24 | 1.18E+01 | 45.2007295 | 1.88E-01 | 118166013 | 118166136 | NC_000001.10 |
| cg14058329 | 1.31E-22 | 1.20E-24 | 1.18E+01 | 45.1886717 | 2.03E-01 | 27183946  | 27184069  | NC_000007.13 |
| cg14014225 | 1.31E-22 | 1.20E-24 | 1.18E+01 | 45.1885856 | 1.44E-01 | 38479236  | 38479359  | NC_000022.10 |
| cg19593767 | 1.33E-22 | 1.22E-24 | 1.18E+01 | 45.1736915 | 2.30E-01 | 42544666  | 42544789  | NC_000020.10 |
| cg05335030 | 1.33E-22 | 1.22E-24 | 1.18E+01 | 45.172064  | 1.72E-01 | 50632819  | 50632942  | NC_000022.10 |
| cg23811117 | 1.33E-22 | 1.23E-24 | 1.18E+01 | 45.1706263 | 8.61E-02 | 158155310 | 158155433 | NC_000002.11 |
| cg12981843 | 1.36E-22 | 1.26E-24 | 1.18E+01 | 45.1465496 | 1.40E-01 | 779218    | 779341    | NC_000016.9  |
| cg10386483 | 1.36E-22 | 1.26E-24 | 1.18E+01 | 45.143096  | 3.04E-01 | 35047189  | 35047312  | NC_000015.9  |
| cg16749093 | 1.40E-22 | 1.30E-24 | 1.18E+01 | 45.1148287 | 1.65E-01 | 65352605  | 65352728  | NC_000011.9  |
| cg09923593 | 1.40E-22 | 1.30E-24 | 1.18E+01 | 45.1104057 | 1.51E-01 | 65287548  | 65287671  | NC_000002.11 |

|            |          |          |          |            |          |           |           |              |
|------------|----------|----------|----------|------------|----------|-----------|-----------|--------------|
| cg23942526 | 1.42E-22 | 1.32E-24 | 1.18E+01 | 45.0996231 | 1.62E-01 | 27882598  | 27882721  | NC_000007.13 |
| cg01614020 | 1.44E-22 | 1.33E-24 | 1.18E+01 | 45.0866445 | 3.20E-01 | 24814137  | 24814260  | NC_000008.10 |
| cg03283421 | 1.44E-22 | 1.34E-24 | 1.18E+01 | 45.0842301 | 2.46E-01 | 124610984 | 124611107 | NC_000010.10 |
| cg21908828 | 1.45E-22 | 1.34E-24 | 1.18E+01 | 45.0790121 | 1.37E-01 | 154386136 | 154386259 | NC_000004.11 |
| cg05578673 | 1.47E-22 | 1.37E-24 | 1.18E+01 | 45.0608695 | 2.15E-01 | 90307339  | 90307462  | NC_000001.10 |
| cg23065561 | 1.48E-22 | 1.37E-24 | 1.18E+01 | 45.0571452 | 1.83E-01 | 53522876  | 53522999  | NC_000004.11 |
| cg13938785 | 1.48E-22 | 1.38E-24 | 1.18E+01 | 45.0556237 | 2.22E-01 | 140471399 | 140471522 | NC_000009.11 |
| cg26997966 | 1.50E-22 | 1.40E-24 | 1.18E+01 | 45.0397409 | 1.25E-01 | 117155868 | 117155991 | NC_000011.9  |
| cg19219655 | 1.54E-22 | 1.43E-24 | 1.18E+01 | 45.0142036 | 1.27E-01 | 10187086  | 10187209  | NC_000002.11 |
| cg16523655 | 1.54E-22 | 1.44E-24 | 1.18E+01 | 45.0118567 | 1.26E-01 | 30103301  | 30103424  | NC_000006.11 |
| cg10155522 | 1.54E-22 | 1.44E-24 | 1.18E+01 | 45.0103481 | 2.07E-01 | 94868555  | 94868678  | NC_000011.9  |
| cg05369857 | 1.55E-22 | 1.45E-24 | 1.18E+01 | 45.0040952 | 2.90E-01 | 101923702 | 101923825 | NC_000014.8  |
| cg14697605 | 1.55E-22 | 1.45E-24 | 1.18E+01 | 45.0030829 | 1.01E-01 | 22240140  | 22240263  | NC_000008.10 |
| cg14882265 | 1.56E-22 | 1.45E-24 | 1.18E+01 | 45.0007984 | 2.01E-01 | 27184375  | 27184498  | NC_000007.13 |
| cg18405631 | 1.56E-22 | 1.46E-24 | 1.18E+01 | 45.0001315 | 1.28E-01 | 171155686 | 171155809 | NC_000003.11 |
| cg18524262 | 1.56E-22 | 1.46E-24 | 1.18E+01 | 44.9990664 | 1.95E-01 | 55862111  | 55862234  | NC_000018.9  |
| cg20482698 | 1.57E-22 | 1.47E-24 | 1.18E+01 | 44.9933291 | 2.71E-01 | 236849994 | 236850117 | NC_000001.10 |
| cg21865150 | 1.58E-22 | 1.48E-24 | 1.18E+01 | 44.9817499 | 2.79E-01 | 46804239  | 46804362  | NC_000017.10 |
| cg07532965 | 1.59E-22 | 1.49E-24 | 1.18E+01 | 44.9790414 | 1.58E-01 | 24667149  | 24667272  | NC_000014.8  |
| cg13784195 | 1.59E-22 | 1.49E-24 | 1.18E+01 | 44.9780041 | 2.06E-01 | 27104564  | 27104687  | NC_000021.8  |
| cg18256498 | 1.59E-22 | 1.49E-24 | 1.18E+01 | 44.9758491 | 1.61E-01 | 173125575 | 173125698 | NC_000005.9  |
| cg25113237 | 1.59E-22 | 1.49E-24 | 1.18E+01 | 44.9742513 | 3.34E-01 | 2756113   | 2756236   | NC_000005.9  |
| cg13053408 | 1.62E-22 | 1.52E-24 | 1.18E+01 | 44.9580524 | 1.07E-01 | 10146330  | 10146453  | NC_000003.11 |
| cg04494197 | 1.62E-22 | 1.52E-24 | 1.18E+01 | 44.9572702 | 1.93E-01 | 1011415   | 1011538   | NC_000011.9  |
| cg07985164 | 1.62E-22 | 1.52E-24 | 1.18E+01 | 44.9555358 | 1.72E-01 | 93196523  | 93196646  | NC_000015.9  |



|            |          |          |          |            |          |           |           |              |
|------------|----------|----------|----------|------------|----------|-----------|-----------|--------------|
| cg07099331 | 1.64E-22 | 1.54E-24 | 1.18E+01 | 44.9446961 | 2.50E-01 | 102419617 | 102419740 | NC_000010.10 |
| cg08572611 | 1.65E-22 | 1.55E-24 | 1.18E+01 | 44.9356165 | 2.60E-01 | 100253914 | 100254037 | NC_000007.13 |
| cg03893271 | 1.65E-22 | 1.55E-24 | 1.18E+01 | 44.9354116 | 2.72E-01 | 70597458  | 70597581  | NC_000007.13 |
| cg14013695 | 1.67E-22 | 1.58E-24 | 1.18E+01 | 44.9204854 | 2.39E-01 | 27184176  | 27184299  | NC_000007.13 |
| cg16457842 | 1.71E-22 | 1.61E-24 | 1.18E+01 | 44.8967015 | 1.57E-01 | 84417445  | 84417568  | NC_000006.11 |
| cg24980653 | 1.72E-22 | 1.63E-24 | 1.18E+01 | 44.8885779 | 3.23E-01 | 1399235   | 1399358   | NC_000004.11 |
| cg05162256 | 1.72E-22 | 1.63E-24 | 1.18E+01 | 44.8877502 | 1.30E-01 | 53522945  | 53523068  | NC_000004.11 |
| cg07060551 | 1.74E-22 | 1.65E-24 | 1.18E+01 | 44.875085  | 1.81E-01 | 51198381  | 51198504  | NC_000019.9  |
| cg05938267 | 1.75E-22 | 1.66E-24 | 1.18E+01 | 44.8714962 | 7.75E-02 | 77228897  | 77229020  | NC_000016.9  |
| cg21198455 | 1.77E-22 | 1.68E-24 | 1.18E+01 | 44.8577229 | 1.91E-01 | 131679993 | 131680116 | NC_000009.11 |
| cg04457114 | 1.84E-22 | 1.74E-24 | 1.18E+01 | 44.8207422 | 2.02E-01 | 174159705 | 174159828 | NC_000005.9  |
| cg24200426 | 1.84E-22 | 1.75E-24 | 1.18E+01 | 44.8187173 | 1.08E-01 | 50184585  | 50184708  | NC_000019.9  |
| cg27353143 | 1.84E-22 | 1.75E-24 | 1.18E+01 | 44.8162719 | 2.07E-01 | 38308057  | 38308180  | NC_000019.9  |
| cg18501001 | 1.86E-22 | 1.77E-24 | 1.18E+01 | 44.8044852 | 1.82E-01 | 76497386  | 76497509  | NC_000017.10 |
| cg26400421 | 1.87E-22 | 1.78E-24 | 1.18E+01 | 44.7982391 | 1.38E-01 | 33334443  | 33334566  | NC_000011.9  |
| cg03507412 | 1.88E-22 | 1.79E-24 | 1.18E+01 | 44.792833  | 6.14E-02 | 6491411   | 6491534   | NC_000011.9  |
| cg19263228 | 1.90E-22 | 1.81E-24 | 1.18E+01 | 44.7827733 | 1.48E-01 | 3191660   | 3191783   | NC_000001.10 |
| cg00646347 | 1.91E-22 | 1.82E-24 | 1.18E+01 | 44.7777616 | 1.93E-01 | 135044856 | 135044979 | NC_000010.10 |
| cg14834653 | 1.96E-22 | 1.87E-24 | 1.17E+01 | 44.7504692 | 1.56E-01 | 123353791 | 123353914 | NC_000010.10 |
| cg16679302 | 1.98E-22 | 1.90E-24 | 1.17E+01 | 44.737076  | 1.14E-01 | 85622276  | 85622399  | NC_000016.9  |
| cg23342718 | 2.01E-22 | 1.93E-24 | 1.17E+01 | 44.7217627 | 2.77E-01 | 115135576 | 115135699 | NC_000012.11 |
| cg15868425 | 2.02E-22 | 1.94E-24 | 1.17E+01 | 44.7155576 | 1.77E-01 | 105643522 | 105643645 | NC_000014.8  |
| cg24902995 | 2.06E-22 | 1.97E-24 | 1.17E+01 | 44.6982058 | 1.91E-01 | 922165    | 922288    | NC_000007.13 |
| cg19333201 | 2.11E-22 | 2.03E-24 | 1.17E+01 | 44.6705936 | 1.57E-01 | 53137547  | 53137670  | NC_000010.10 |
| cg07790615 | 2.11E-22 | 2.03E-24 | 1.17E+01 | 44.6701741 | 3.27E-01 | 237205174 | 237205297 | NC_000001.10 |

|            |          |          |          |            |          |           |           |              |
|------------|----------|----------|----------|------------|----------|-----------|-----------|--------------|
| cg04295172 | 2.12E-22 | 2.04E-24 | 1.17E+01 | 44.6667362 | 1.38E-01 | 108365051 | 108365174 | NC_000011.9  |
| cg09467345 | 2.17E-22 | 2.09E-24 | 1.17E+01 | 44.6416059 | 1.49E-01 | 30407202  | 30407325  | NC_000020.10 |
| cg11075451 | 2.20E-22 | 2.12E-24 | 1.17E+01 | 44.6252425 | 1.49E-01 | 89600119  | 89600242  | NC_000001.10 |
| cg03744763 | 2.21E-22 | 2.13E-24 | 1.17E+01 | 44.6226696 | 2.14E-01 | 27184737  | 27184860  | NC_000007.13 |
| cg02582387 | 2.22E-22 | 2.15E-24 | 1.17E+01 | 44.6136157 | 2.68E-01 | 20879813  | 20879936  | NC_000001.10 |
| cg23850283 | 2.22E-22 | 2.15E-24 | 1.17E+01 | 44.6132696 | 1.86E-01 | 114261369 | 114261492 | NC_000002.11 |
| cg12786452 | 2.23E-22 | 2.15E-24 | 1.17E+01 | 44.6127067 | 1.69E-01 | 62309293  | 62309416  | NC_000017.10 |
| cg24856726 | 2.25E-22 | 2.17E-24 | 1.17E+01 | 44.6027054 | 2.94E-01 | 108169333 | 108169456 | NC_000012.11 |
| cg03650119 | 2.25E-22 | 2.17E-24 | 1.17E+01 | 44.6020229 | 1.98E-01 | 228346014 | 228346137 | NC_000001.10 |
| cg25403721 | 2.25E-22 | 2.18E-24 | 1.17E+01 | 44.6005461 | 2.63E-01 | 114885372 | 114885495 | NC_000012.11 |
| cg02930721 | 2.25E-22 | 2.18E-24 | 1.17E+01 | 44.6003419 | 1.81E-01 | 89375113  | 89375236  | NC_000016.9  |
| cg23415434 | 2.26E-22 | 2.19E-24 | 1.17E+01 | 44.595847  | 2.14E-01 | 131798869 | 131798992 | NC_000002.11 |
| cg22236375 | 2.26E-22 | 2.19E-24 | 1.17E+01 | 44.5946509 | 8.01E-02 | 100089996 | 100090119 | NC_000002.11 |
| cg12801067 | 2.27E-22 | 2.20E-24 | 1.17E+01 | 44.5896848 | 1.20E-01 | 89380779  | 89380902  | NC_000012.11 |
| cg04252204 | 2.29E-22 | 2.21E-24 | 1.17E+01 | 44.583097  | 1.51E-01 | 80401500  | 80401623  | NC_000017.10 |
| cg07160746 | 2.29E-22 | 2.22E-24 | 1.17E+01 | 44.5788778 | 2.03E-01 | 43726765  | 43726888  | NC_000020.10 |
| cg01088387 | 2.29E-22 | 2.22E-24 | 1.17E+01 | 44.5787522 | 8.51E-02 | 78215445  | 78215568  | NC_000011.9  |
| cg16404157 | 2.31E-22 | 2.24E-24 | 1.17E+01 | 44.5736006 | 2.56E-01 | 38724648  | 38724771  | NC_000014.8  |
| cg03840594 | 2.37E-22 | 2.30E-24 | 1.17E+01 | 44.5449817 | 1.47E-01 | 99283553  | 99283676  | NC_000006.11 |
| cg27606499 | 2.37E-22 | 2.31E-24 | 1.17E+01 | 44.5421799 | 2.47E-01 | 147111120 | 147111243 | NC_000003.11 |
| cg18920088 | 2.38E-22 | 2.31E-24 | 1.17E+01 | 44.5408885 | 2.10E-01 | 151346409 | 151346532 | NC_000006.11 |
| cg18987410 | 2.38E-22 | 2.31E-24 | 1.17E+01 | 44.5397605 | 2.43E-01 | 124791197 | 124791320 | NC_000011.9  |
| cg06488443 | 2.40E-22 | 2.34E-24 | 1.17E+01 | 44.5284964 | 1.67E-01 | 162280341 | 162280464 | NC_000002.11 |
| cg06009783 | 2.42E-22 | 2.35E-24 | 1.17E+01 | 44.5228081 | 1.71E-01 | 64588440  | 64588563  | NC_000002.11 |
| cg24709001 | 2.46E-22 | 2.39E-24 | 1.17E+01 | 44.5069817 | 1.29E-01 | 3235319   | 3235442   | NC_000004.11 |

|            |          |          |          |            |          |           |           |              |
|------------|----------|----------|----------|------------|----------|-----------|-----------|--------------|
| cg10536898 | 2.47E-22 | 2.40E-24 | 1.17E+01 | 44.5017751 | 2.04E-01 | 50673227  | 50673350  | NC_000005.9  |
| cg05966235 | 2.48E-22 | 2.42E-24 | 1.17E+01 | 44.4963883 | 1.60E-01 | 28915196  | 28915319  | NC_000016.9  |
| cg06158650 | 2.50E-22 | 2.44E-24 | 1.17E+01 | 44.4881979 | 2.57E-01 | 119522637 | 119522760 | NC_000001.10 |
| cg09574499 | 2.50E-22 | 2.44E-24 | 1.17E+01 | 44.4863932 | 2.04E-01 | 27168962  | 27169085  | NC_000007.13 |
| cg08313939 | 2.50E-22 | 2.44E-24 | 1.17E+01 | 44.4857642 | 2.43E-01 | 37353117  | 37353240  | NC_000020.10 |
| cg26693451 | 2.51E-22 | 2.44E-24 | 1.17E+01 | 44.4847795 | 8.59E-02 | 78163892  | 78164015  | NC_000017.10 |
| cg04510788 | 2.51E-22 | 2.45E-24 | 1.17E+01 | 44.481536  | 2.05E-01 | 37498900  | 37499023  | NC_000001.10 |
| cg21300373 | 2.51E-22 | 2.45E-24 | 1.17E+01 | 44.4808037 | 2.09E-01 | 165304540 | 165304663 | NC_000004.11 |
| cg18267047 | 2.53E-22 | 2.47E-24 | 1.17E+01 | 44.4743569 | 1.69E-01 | 30121774  | 30121897  | NC_000006.11 |
| cg04170948 | 2.55E-22 | 2.49E-24 | 1.17E+01 | 44.4667526 | 1.48E-01 | 56979519  | 56979642  | NC_000016.9  |
| cg13284646 | 2.59E-22 | 2.54E-24 | 1.17E+01 | 44.4484314 | 1.49E-01 | 32505474  | 32505597  | NC_000017.10 |
| cg24937685 | 2.63E-22 | 2.57E-24 | 1.17E+01 | 44.4350672 | 1.57E-01 | 129806002 | 129806125 | NC_000011.9  |
| cg20227326 | 2.65E-22 | 2.60E-24 | 1.17E+01 | 44.4255615 | 1.42E-01 | 25227128  | 25227251  | NC_000008.10 |
| cg13306921 | 2.67E-22 | 2.62E-24 | 1.17E+01 | 44.4179614 | 1.59E-01 | 54863529  | 54863652  | NC_000001.10 |
| cg14565725 | 2.71E-22 | 2.65E-24 | 1.17E+01 | 44.4030517 | 1.96E-01 | 119532044 | 119532167 | NC_000001.10 |
| cg04904331 | 2.72E-22 | 2.67E-24 | 1.17E+01 | 44.3974927 | 3.62E-01 | 49813033  | 49813156  | NC_000007.13 |
| cg11932644 | 2.73E-22 | 2.68E-24 | 1.17E+01 | 44.3932561 | 1.80E-01 | 129230657 | 129230780 | NC_000004.11 |
| cg01281038 | 2.74E-22 | 2.69E-24 | 1.17E+01 | 44.3917156 | 1.58E-01 | 67966256  | 67966379  | NC_000016.9  |
| cg09302895 | 2.74E-22 | 2.69E-24 | 1.17E+01 | 44.3908012 | 1.99E-01 | 237077311 | 237077434 | NC_000002.11 |
| cg21875330 | 2.78E-22 | 2.73E-24 | 1.17E+01 | 44.3740644 | 1.92E-01 | 37127874  | 37127997  | NC_000014.8  |
| cg14636164 | 2.79E-22 | 2.74E-24 | 1.17E+01 | 44.372203  | 1.09E-01 | 127121878 | 127122001 | NC_000009.11 |
| cg20704654 | 2.79E-22 | 2.74E-24 | 1.17E+01 | 44.3708989 | 2.06E-01 | 30072118  | 30072241  | NC_000020.10 |
| cg12863545 | 2.79E-22 | 2.75E-24 | 1.17E+01 | 44.368754  | 3.22E-01 | 8869136   | 8869259   | NC_000017.10 |
| cg27578811 | 2.81E-22 | 2.76E-24 | 1.17E+01 | 44.3628069 | 2.22E-01 | 83316223  | 83316346  | NC_000015.9  |
| cg20309677 | 2.81E-22 | 2.77E-24 | 1.17E+01 | 44.3606481 | 1.50E-01 | 116925753 | 116925876 | NC_000001.10 |

|            |          |          |          |            |          |           |           |              |
|------------|----------|----------|----------|------------|----------|-----------|-----------|--------------|
| cg17873048 | 2.86E-22 | 2.82E-24 | 1.17E+01 | 44.3439959 | 2.50E-01 | 46697700  | 46697823  | NC_000017.10 |
| cg22508930 | 2.89E-22 | 2.85E-24 | 1.17E+01 | 44.3317735 | 1.41E-01 | 69016159  | 69016282  | NC_000012.11 |
| cg01237333 | 2.91E-22 | 2.88E-24 | 1.17E+01 | 44.3226763 | 1.51E-01 | 113530    | 113653    | NC_000009.11 |
| cg17116895 | 2.93E-22 | 2.89E-24 | 1.17E+01 | 44.3171538 | 8.18E-02 | 112133054 | 112133177 | NC_000006.11 |
| cg14096889 | 2.94E-22 | 2.91E-24 | 1.17E+01 | 44.3125145 | 2.46E-01 | 84322591  | 84322714  | NC_000015.9  |
| cg01983105 | 2.95E-22 | 2.92E-24 | 1.17E+01 | 44.309416  | 1.78E-01 | 103421224 | 103421347 | NC_000004.11 |
| cg22911054 | 2.95E-22 | 2.92E-24 | 1.17E+01 | 44.3075049 | 2.36E-01 | 68603379  | 68603502  | NC_000011.9  |
| cg13678973 | 2.95E-22 | 2.92E-24 | 1.17E+01 | 44.3071108 | 2.85E-01 | 50513870  | 50513993  | NC_000001.10 |
| cg12754421 | 2.99E-22 | 2.96E-24 | 1.17E+01 | 44.2940258 | 2.68E-01 | 105480790 | 105480913 | NC_000011.9  |
| cg00676269 | 2.99E-22 | 2.96E-24 | 1.17E+01 | 44.2935041 | 1.35E-01 | 46429970  | 46430093  | NC_000022.10 |
| cg02742906 | 2.99E-22 | 2.96E-24 | 1.17E+01 | 44.2933142 | 2.86E-01 | 112758625 | 112758748 | NC_000013.10 |
| cg25447202 | 3.01E-22 | 2.98E-24 | 1.17E+01 | 44.2867522 | 9.89E-02 | 3409885   | 3410008   | NC_000004.11 |
| cg13857947 | 3.01E-22 | 2.99E-24 | 1.17E+01 | 44.2864565 | 1.80E-01 | 240318818 | 240318941 | NC_000002.11 |
| cg24693478 | 3.01E-22 | 2.99E-24 | 1.17E+01 | 44.2862118 | 1.08E-01 | 208218000 | 208218123 | NC_000001.10 |
| cg27343663 | 3.02E-22 | 3.00E-24 | 1.17E+01 | 44.2819715 | 6.00E-02 | 79082811  | 79082934  | NC_000017.10 |
| cg14888296 | 3.02E-22 | 3.00E-24 | 1.17E+01 | 44.2804617 | 1.66E-01 | 48413707  | 48413830  | NC_000003.11 |
| cg25104105 | 3.03E-22 | 3.01E-24 | 1.17E+01 | 44.2786136 | 3.23E-01 | 14925198  | 14925321  | NC_000001.10 |
| cg18940047 | 3.05E-22 | 3.04E-24 | 1.17E+01 | 44.2699658 | 2.19E-01 | 153749736 | 153749859 | NC_000007.13 |
| cg00790847 | 3.09E-22 | 3.08E-24 | 1.17E+01 | 44.2553081 | 1.49E-01 | 40497575  | 40497698  | NC_000012.11 |
| cg16021909 | 3.10E-22 | 3.09E-24 | 1.17E+01 | 44.2506295 | 2.63E-01 | 248021091 | 248021214 | NC_000001.10 |
| cg14048837 | 3.12E-22 | 3.11E-24 | 1.17E+01 | 44.2449663 | 1.98E-01 | 109658527 | 109658650 | NC_000009.11 |
| cg18597315 | 3.16E-22 | 3.15E-24 | 1.17E+01 | 44.232378  | 1.78E-01 | 40549191  | 40549314  | NC_000015.9  |
| cg25575115 | 3.19E-22 | 3.19E-24 | 1.17E+01 | 44.2209887 | 1.01E-01 | 101175912 | 101176035 | NC_000013.10 |
| cg19912142 | 3.20E-22 | 3.20E-24 | 1.17E+01 | 44.2183837 | 2.87E-01 | 119494671 | 119494794 | NC_000010.10 |
| cg23572908 | 3.20E-22 | 3.20E-24 | 1.17E+01 | 44.2170605 | 3.42E-01 | 158937969 | 158938092 | NC_000007.13 |

|            |          |          |          |            |          |           |           |              |
|------------|----------|----------|----------|------------|----------|-----------|-----------|--------------|
| cg08965374 | 3.22E-22 | 3.22E-24 | 1.17E+01 | 44.2124418 | 1.26E-01 | 124370088 | 124370211 | NC_000005.9  |
| cg27151303 | 3.25E-22 | 3.25E-24 | 1.17E+01 | 44.2008048 | 2.26E-01 | 27184821  | 27184944  | NC_000007.13 |
| cg05058846 | 3.26E-22 | 3.26E-24 | 1.17E+01 | 44.1978045 | 1.40E-01 | 79270707  | 79270830  | NC_000010.10 |
| cg04213746 | 3.27E-22 | 3.28E-24 | 1.17E+01 | 44.1929877 | 2.30E-01 | 8106003   | 8106126   | NC_000010.10 |
| cg27391357 | 3.31E-22 | 3.32E-24 | 1.17E+01 | 44.1810851 | 1.92E-01 | 107017800 | 107017923 | NC_000004.11 |
| cg10952925 | 3.31E-22 | 3.32E-24 | 1.17E+01 | 44.1807577 | 1.97E-01 | 22327803  | 22327926  | NC_000001.10 |
| cg08842021 | 3.31E-22 | 3.32E-24 | 1.17E+01 | 44.1807364 | 9.44E-02 | 45481731  | 45481854  | NC_000006.11 |
| cg10613332 | 3.32E-22 | 3.33E-24 | 1.17E+01 | 44.1777093 | 1.33E-01 | 13368845  | 13368968  | NC_000019.9  |
| cg27201802 | 3.33E-22 | 3.34E-24 | 1.17E+01 | 44.173601  | 1.49E-01 | 30138225  | 30138348  | NC_000006.11 |
| cg02451516 | 3.34E-22 | 3.35E-24 | 1.17E+01 | 44.1715417 | 1.63E-01 | 74657147  | 74657270  | NC_000016.9  |
| cg24049451 | 3.36E-22 | 3.37E-24 | 1.17E+01 | 44.1657228 | 1.01E-01 | 37826163  | 37826286  | NC_000017.10 |
| cg00760272 | 3.36E-22 | 3.38E-24 | 1.17E+01 | 44.1632963 | 6.96E-02 | 44067042  | 44067165  | NC_000002.11 |
| cg06180630 | 3.37E-22 | 3.39E-24 | 1.17E+01 | 44.1599376 | 8.72E-02 | 3401607   | 3401730   | NC_000001.10 |
| cg09578475 | 3.40E-22 | 3.42E-24 | 1.17E+01 | 44.1513193 | 2.86E-01 | 9473688   | 9473811   | NC_000019.9  |
| cg26514080 | 3.41E-22 | 3.44E-24 | 1.17E+01 | 44.146924  | 1.14E-01 | 33239538  | 33239661  | NC_000001.10 |
| cg18946437 | 3.43E-22 | 3.46E-24 | 1.17E+01 | 44.1409009 | 1.61E-01 | 25335346  | 25335469  | NC_000022.10 |
| cg24892571 | 3.45E-22 | 3.48E-24 | 1.17E+01 | 44.1353957 | 5.68E-02 | 66284828  | 66284951  | NC_000012.11 |
| cg06504162 | 3.49E-22 | 3.52E-24 | 1.17E+01 | 44.1233615 | 1.77E-01 | 11559800  | 11559923  | NC_000011.9  |
| cg17433998 | 3.52E-22 | 3.55E-24 | 1.17E+01 | 44.1142243 | 1.83E-01 | 130025478 | 130025601 | NC_000007.13 |
| cg06616014 | 3.52E-22 | 3.56E-24 | 1.17E+01 | 44.1128167 | 1.95E-01 | 48413738  | 48413861  | NC_000003.11 |
| cg18786873 | 3.56E-22 | 3.59E-24 | 1.17E+01 | 44.1034913 | 2.76E-01 | 110610899 | 110611022 | NC_000001.10 |
| cg04082793 | 3.56E-22 | 3.60E-24 | 1.17E+01 | 44.1018637 | 1.15E-01 | 11513849  | 11513972  | NC_000004.11 |
| cg27378890 | 3.57E-22 | 3.60E-24 | 1.17E+01 | 44.1000716 | 1.31E-01 | 10834591  | 10834714  | NC_000016.9  |
| cg12999453 | 3.59E-22 | 3.62E-24 | 1.17E+01 | 44.0944666 | 1.86E-01 | 59482319  | 59482442  | NC_000017.10 |
| cg00912625 | 3.60E-22 | 3.63E-24 | 1.17E+01 | 44.0909748 | 2.70E-01 | 2140977   | 2141100   | NC_000003.11 |

|            |          |          |          |            |          |           |           |              |
|------------|----------|----------|----------|------------|----------|-----------|-----------|--------------|
| cg19719409 | 3.60E-22 | 3.65E-24 | 1.17E+01 | 44.0879599 | 1.50E-01 | 27130324  | 27130447  | NC_000007.13 |
| cg12964697 | 3.61E-22 | 3.65E-24 | 1.17E+01 | 44.0858975 | 1.69E-01 | 2140231   | 2140354   | NC_000007.13 |
| cg26277754 | 3.62E-22 | 3.67E-24 | 1.17E+01 | 44.0811925 | 2.17E-01 | 50673033  | 50673156  | NC_000005.9  |
| cg17806437 | 3.62E-22 | 3.67E-24 | 1.17E+01 | 44.0811129 | 2.13E-01 | 42211581  | 42211704  | NC_000015.9  |
| cg10666081 | 3.64E-22 | 3.69E-24 | 1.17E+01 | 44.0757615 | 1.01E-01 | 105985002 | 105985125 | NC_000002.11 |
| cg00334063 | 3.64E-22 | 3.69E-24 | 1.17E+01 | 44.0754509 | 2.46E-01 | 147106010 | 147106133 | NC_000003.11 |
| cg13707793 | 3.66E-22 | 3.71E-24 | 1.16E+01 | 44.070745  | 2.34E-01 | 139045301 | 139045424 | NC_000005.9  |
| cg25710107 | 3.66E-22 | 3.71E-24 | 1.16E+01 | 44.0696009 | 2.18E-01 | 101187390 | 101187513 | NC_000013.10 |
| cg03264601 | 3.69E-22 | 3.74E-24 | 1.16E+01 | 44.0617231 | 3.06E-01 | 55500670  | 55500793  | NC_000020.10 |
| cg14045872 | 3.70E-22 | 3.76E-24 | 1.16E+01 | 44.0564732 | 2.97E-01 | 49813065  | 49813188  | NC_000007.13 |
| cg26328180 | 3.71E-22 | 3.77E-24 | 1.16E+01 | 44.0536794 | 1.34E-01 | 91874214  | 91874337  | NC_000002.11 |
| cg27243166 | 3.74E-22 | 3.80E-24 | 1.16E+01 | 44.0471149 | 1.59E-01 | 64479496  | 64479619  | NC_000011.9  |
| cg16472542 | 3.79E-22 | 3.85E-24 | 1.16E+01 | 44.0328378 | 1.10E-01 | 20020575  | 20020698  | NC_000022.10 |
| cg24123634 | 3.83E-22 | 3.90E-24 | 1.16E+01 | 44.020403  | 1.20E-01 | 52008360  | 52008483  | NC_000010.10 |
| cg14113442 | 3.83E-22 | 3.91E-24 | 1.16E+01 | 44.0190567 | 7.01E-02 | 44078112  | 44078235  | NC_000021.8  |
| cg23246769 | 3.87E-22 | 3.95E-24 | 1.16E+01 | 44.0081421 | 1.50E-01 | 124461296 | 124461419 | NC_000012.11 |
| cg19267252 | 3.88E-22 | 3.96E-24 | 1.16E+01 | 44.0063084 | 2.46E-01 | 105459317 | 105459440 | NC_000002.11 |
| cg22175781 | 3.89E-22 | 3.97E-24 | 1.16E+01 | 44.0044892 | 1.09E-01 | 101175948 | 101176071 | NC_000013.10 |
| cg24536114 | 3.89E-22 | 3.97E-24 | 1.16E+01 | 44.0030295 | 1.22E-01 | 89448405  | 89448528  | NC_000001.10 |
| cg15966151 | 3.95E-22 | 4.03E-24 | 1.16E+01 | 43.987231  | 1.78E-01 | 27238472  | 27238595  | NC_000001.10 |
| cg03735012 | 3.95E-22 | 4.04E-24 | 1.16E+01 | 43.9868493 | 2.64E-01 | 55964092  | 55964215  | NC_000019.9  |
| cg24948406 | 3.98E-22 | 4.07E-24 | 1.16E+01 | 43.9783272 | 2.10E-01 | 46608268  | 46608391  | NC_000017.10 |
| cg15705563 | 4.01E-22 | 4.10E-24 | 1.16E+01 | 43.9720642 | 1.09E-01 | 33273014  | 33273137  | NC_000006.11 |
| cg01192746 | 4.04E-22 | 4.13E-24 | 1.16E+01 | 43.9640572 | 2.09E-01 | 179717478 | 179717601 | NC_000005.9  |
| cg05184377 | 4.06E-22 | 4.16E-24 | 1.16E+01 | 43.9574932 | 1.73E-01 | 50976646  | 50976769  | NC_000010.10 |

|            |          |          |          |            |          |           |           |              |
|------------|----------|----------|----------|------------|----------|-----------|-----------|--------------|
| cg21049762 | 4.07E-22 | 4.16E-24 | 1.16E+01 | 43.9560259 | 1.68E-01 | 67805456  | 67805579  | NC_000011.9  |
| cg04860563 | 4.11E-22 | 4.21E-24 | 1.16E+01 | 43.9443458 | 1.10E-01 | 189524470 | 189524593 | NC_000003.11 |
| cg01835580 | 4.14E-22 | 4.25E-24 | 1.16E+01 | 43.9361909 | 2.06E-01 | 21511501  | 21511624  | NC_000014.8  |
| cg26770907 | 4.17E-22 | 4.27E-24 | 1.16E+01 | 43.9298447 | 1.95E-01 | 48844808  | 48844931  | NC_000016.9  |
| cg18829521 | 4.18E-22 | 4.30E-24 | 1.16E+01 | 43.925126  | 1.09E-01 | 24496598  | 24496721  | NC_000010.10 |
| cg21836358 | 4.20E-22 | 4.32E-24 | 1.16E+01 | 43.9198346 | 2.41E-01 | 63790202  | 63790325  | NC_000001.10 |
| cg04127342 | 4.28E-22 | 4.41E-24 | 1.16E+01 | 43.8999545 | 2.58E-01 | 57358130  | 57358253  | NC_000008.10 |
| cg18259189 | 4.29E-22 | 4.41E-24 | 1.16E+01 | 43.8987407 | 5.59E-02 | 70020941  | 70021064  | NC_000011.9  |
| cg07562888 | 4.29E-22 | 4.42E-24 | 1.16E+01 | 43.8967526 | 2.19E-01 | 80883720  | 80883843  | NC_000010.10 |
| cg03311556 | 4.33E-22 | 4.46E-24 | 1.16E+01 | 43.887562  | 1.90E-01 | 81108070  | 81108193  | NC_000004.11 |
| cg22795470 | 4.33E-22 | 4.46E-24 | 1.16E+01 | 43.8868783 | 2.42E-01 | 43152542  | 43152665  | NC_000007.13 |
| cg21510284 | 4.35E-22 | 4.48E-24 | 1.16E+01 | 43.8835164 | 1.68E-01 | 103854927 | 103855050 | NC_000014.8  |
| cg15805451 | 4.42E-22 | 4.57E-24 | 1.16E+01 | 43.8644071 | 1.68E-01 | 51135775  | 51135898  | NC_000007.13 |
| cg06582663 | 4.45E-22 | 4.60E-24 | 1.16E+01 | 43.8571366 | 1.95E-01 | 79043264  | 79043387  | NC_000017.10 |
| cg07800670 | 4.49E-22 | 4.64E-24 | 1.16E+01 | 43.8482706 | 1.32E-01 | 56765087  | 56765210  | NC_000006.11 |
| cg01242602 | 4.49E-22 | 4.64E-24 | 1.16E+01 | 43.8477454 | 6.40E-02 | 99871510  | 99871633  | NC_000006.11 |
| cg12595013 | 4.51E-22 | 4.67E-24 | 1.16E+01 | 43.8429728 | 1.96E-01 | 147128123 | 147128246 | NC_000003.11 |
| cg01581084 | 4.52E-22 | 4.68E-24 | 1.16E+01 | 43.8402374 | 2.55E-01 | 99961874  | 99961997  | NC_000008.10 |
| cg20230732 | 4.59E-22 | 4.76E-24 | 1.16E+01 | 43.8240351 | 1.50E-01 | 128721448 | 128721571 | NC_000003.11 |
| cg05520712 | 4.61E-22 | 4.77E-24 | 1.16E+01 | 43.8205934 | 1.11E-01 | 53079912  | 53080035  | NC_000005.9  |
| cg17934871 | 4.67E-22 | 4.84E-24 | 1.16E+01 | 43.8064247 | 2.70E-01 | 37248423  | 37248546  | NC_000013.10 |
| cg12685548 | 4.69E-22 | 4.87E-24 | 1.16E+01 | 43.800722  | 1.56E-01 | 180644451 | 180644574 | NC_000003.11 |
| cg23244289 | 4.70E-22 | 4.87E-24 | 1.16E+01 | 43.7996204 | 2.85E-01 | 79331135  | 79331258  | NC_000005.9  |
| cg15067606 | 4.70E-22 | 4.88E-24 | 1.16E+01 | 43.7993275 | 1.36E-01 | 113458144 | 113458267 | NC_000003.11 |
| cg18731024 | 4.80E-22 | 4.98E-24 | 1.16E+01 | 43.7775419 | 2.29E-01 | 2998264   | 2998387   | NC_000005.9  |

|            |          |          |          |            |          |           |           |              |
|------------|----------|----------|----------|------------|----------|-----------|-----------|--------------|
| cg08643997 | 4.80E-22 | 4.99E-24 | 1.16E+01 | 43.7771959 | 1.09E-01 | 224136349 | 224136472 | NC_000001.10 |
| cg01354473 | 4.81E-22 | 5.00E-24 | 1.16E+01 | 43.7743167 | 1.87E-01 | 27204803  | 27204926  | NC_000007.13 |
| cg14836602 | 4.82E-22 | 5.01E-24 | 1.16E+01 | 43.7715787 | 2.64E-01 | 3592718   | 3592841   | NC_000005.9  |
| cg10216615 | 4.86E-22 | 5.06E-24 | 1.16E+01 | 43.7626012 | 2.78E-01 | 37353158  | 37353281  | NC_000020.10 |
| cg04150488 | 4.88E-22 | 5.08E-24 | 1.16E+01 | 43.7575263 | 1.25E-01 | 58799794  | 58799917  | NC_000012.11 |
| cg22702772 | 4.88E-22 | 5.09E-24 | 1.16E+01 | 43.75676   | 2.98E-01 | 48699012  | 48699135  | NC_000003.11 |
| cg01814898 | 4.92E-22 | 5.14E-24 | 1.16E+01 | 43.7474727 | 2.20E-01 | 110530427 | 110530550 | NC_000001.10 |
| cg24415208 | 4.93E-22 | 5.14E-24 | 1.16E+01 | 43.747145  | 2.88E-01 | 54466441  | 54466564  | NC_000019.9  |
| cg16768018 | 4.97E-22 | 5.18E-24 | 1.16E+01 | 43.7385651 | 2.46E-01 | 147108843 | 147108966 | NC_000003.11 |
| cg11389172 | 4.98E-22 | 5.19E-24 | 1.16E+01 | 43.7362901 | 2.97E-01 | 50818299  | 50818422  | NC_000010.10 |
| cg23666536 | 5.01E-22 | 5.24E-24 | 1.16E+01 | 43.7280997 | 1.41E-01 | 114240177 | 114240300 | NC_000001.10 |
| cg27501362 | 5.05E-22 | 5.28E-24 | 1.16E+01 | 43.7208106 | 1.38E-01 | 24796628  | 24796751  | NC_000022.10 |
| cg09124223 | 5.05E-22 | 5.28E-24 | 1.16E+01 | 43.7207823 | 2.28E-01 | 153749738 | 153749861 | NC_000007.13 |
| cg01939453 | 5.09E-22 | 5.32E-24 | 1.16E+01 | 43.7120933 | 2.68E-01 | 166077483 | 166077606 | NC_000006.11 |
| cg27241576 | 5.10E-22 | 5.34E-24 | 1.16E+01 | 43.7088443 | 7.12E-02 | 81663253  | 81663376  | NC_000016.9  |
| cg07792478 | 5.11E-22 | 5.36E-24 | 1.16E+01 | 43.7061263 | 3.07E-01 | 65290484  | 65290607  | NC_000008.10 |
| cg23495279 | 5.12E-22 | 5.37E-24 | 1.16E+01 | 43.7042003 | 2.56E-01 | 4849827   | 4849950   | NC_000008.10 |
| cg15373592 | 5.14E-22 | 5.39E-24 | 1.16E+01 | 43.6998924 | 2.26E-01 | 56405167  | 56405290  | NC_000006.11 |
| cg15443067 | 5.14E-22 | 5.39E-24 | 1.16E+01 | 43.6992501 | 5.67E-02 | 564731    | 564854    | NC_000012.11 |
| cg05260031 | 5.15E-22 | 5.40E-24 | 1.16E+01 | 43.6973678 | 2.02E-01 | 145677584 | 145677707 | NC_000008.10 |
| cg13751267 | 5.17E-22 | 5.42E-24 | 1.16E+01 | 43.6939195 | 1.26E-01 | 178416402 | 178416525 | NC_000002.11 |
| cg02473540 | 5.17E-22 | 5.42E-24 | 1.16E+01 | 43.6937755 | 2.34E-01 | 58570454  | 58570577  | NC_000019.9  |
| cg07823492 | 5.18E-22 | 5.44E-24 | 1.16E+01 | 43.6910558 | 2.41E-01 | 46608099  | 46608222  | NC_000017.10 |
| cg03790250 | 5.21E-22 | 5.47E-24 | 1.16E+01 | 43.6850273 | 2.38E-01 | 20256326  | 20256449  | NC_000004.11 |
| cg18065874 | 5.23E-22 | 5.49E-24 | 1.16E+01 | 43.6807528 | 1.47E-01 | 37244283  | 37244406  | NC_000008.10 |



|            |          |          |          |            |          |           |           |              |
|------------|----------|----------|----------|------------|----------|-----------|-----------|--------------|
| cg17972789 | 5.23E-22 | 5.50E-24 | 1.16E+01 | 43.6800175 | 2.25E-01 | 70372105  | 70372228  | NC_000015.9  |
| cg14362113 | 5.26E-22 | 5.53E-24 | 1.16E+01 | 43.6736036 | 1.64E-01 | 22956527  | 22956650  | NC_000006.11 |
| cg17326855 | 5.28E-22 | 5.56E-24 | 1.16E+01 | 43.669615  | 1.96E-01 | 118435653 | 118435776 | NC_000001.10 |
| cg11106836 | 5.31E-22 | 5.59E-24 | 1.16E+01 | 43.6637748 | 1.37E-01 | 117852822 | 117852945 | NC_000011.9  |
| cg04183158 | 5.37E-22 | 5.66E-24 | 1.16E+01 | 43.6515928 | 1.98E-01 | 1010983   | 1011106   | NC_000011.9  |
| cg15228928 | 5.38E-22 | 5.66E-24 | 1.16E+01 | 43.6506864 | 3.05E-01 | 112727521 | 112727644 | NC_000013.10 |
| cg26069037 | 5.44E-22 | 5.73E-24 | 1.16E+01 | 43.6389998 | 1.04E-01 | 38479240  | 38479363  | NC_000022.10 |
| cg25424419 | 5.44E-22 | 5.73E-24 | 1.16E+01 | 43.6389861 | 1.70E-01 | 26284491  | 26284614  | NC_000017.10 |
| cg01962750 | 5.46E-22 | 5.76E-24 | 1.16E+01 | 43.6335034 | 1.29E-01 | 8298983   | 8299106   | NC_000002.11 |
| cg04290346 | 5.47E-22 | 5.77E-24 | 1.16E+01 | 43.63177   | 3.00E-01 | 20177852  | 20177975  | NC_000011.9  |
| cg22879689 | 5.49E-22 | 5.79E-24 | 1.16E+01 | 43.6284275 | 1.59E-01 | 925143    | 925266    | NC_000007.13 |
| cg16065021 | 5.49E-22 | 5.79E-24 | 1.16E+01 | 43.6283995 | 2.44E-01 | 127940654 | 127940777 | NC_000012.11 |
| cg06122635 | 5.53E-22 | 5.84E-24 | 1.16E+01 | 43.6199852 | 3.01E-01 | 105461368 | 105461491 | NC_000002.11 |
| cg14841514 | 5.63E-22 | 5.96E-24 | 1.16E+01 | 43.6005144 | 1.51E-01 | 80866619  | 80866742  | NC_000010.10 |
| cg25139636 | 5.64E-22 | 5.96E-24 | 1.16E+01 | 43.5990168 | 1.30E-01 | 69084888  | 69085011  | NC_000015.9  |
| cg26807475 | 5.69E-22 | 6.02E-24 | 1.16E+01 | 43.5897082 | 1.08E-01 | 16671081  | 16671204  | NC_000005.9  |
| cg22918700 | 5.70E-22 | 6.04E-24 | 1.16E+01 | 43.5868697 | 1.25E-01 | 24600067  | 24600190  | NC_000014.8  |
| cg21350575 | 5.74E-22 | 6.08E-24 | 1.16E+01 | 43.5797718 | 3.12E-01 | 19617439  | 19617562  | NC_000021.8  |
| cg06616729 | 5.76E-22 | 6.11E-24 | 1.16E+01 | 43.575925  | 3.13E-01 | 55379248  | 55379371  | NC_000008.10 |
| cg04784672 | 5.78E-22 | 6.12E-24 | 1.16E+01 | 43.5733794 | 2.83E-01 | 42077674  | 42077797  | NC_000014.8  |
| cg02914667 | 5.83E-22 | 6.19E-24 | 1.16E+01 | 43.5629114 | 1.62E-01 | 63894453  | 63894576  | NC_000011.9  |
| cg11328149 | 5.97E-22 | 6.34E-24 | 1.16E+01 | 43.5386628 | 7.79E-02 | 31689459  | 31689582  | NC_000006.11 |
| cg23901212 | 6.00E-22 | 6.38E-24 | 1.16E+01 | 43.5326154 | 1.42E-01 | 228632807 | 228632930 | NC_000002.11 |
| cg06503286 | 6.09E-22 | 6.47E-24 | 1.16E+01 | 43.5178609 | 1.64E-01 | 241626691 | 241626814 | NC_000002.11 |
| cg23220071 | 6.11E-22 | 6.50E-24 | 1.16E+01 | 43.5133109 | 1.45E-01 | 227061009 | 227061132 | NC_000001.10 |

|            |          |          |          |            |          |           |           |              |
|------------|----------|----------|----------|------------|----------|-----------|-----------|--------------|
| cg27173965 | 6.12E-22 | 6.51E-24 | 1.16E+01 | 43.5125537 | 1.79E-01 | 68841715  | 68841838  | NC_000001.10 |
| cg10295552 | 6.21E-22 | 6.61E-24 | 1.16E+01 | 43.4971106 | 2.12E-01 | 35464574  | 35464697  | NC_000017.10 |
| cg12127472 | 6.26E-22 | 6.67E-24 | 1.16E+01 | 43.4876886 | 2.58E-01 | 42733724  | 42733847  | NC_000017.10 |
| cg15591616 | 6.29E-22 | 6.71E-24 | 1.16E+01 | 43.4825073 | 1.61E-01 | 8024678   | 8024801   | NC_000001.10 |
| cg24101492 | 6.29E-22 | 6.72E-24 | 1.16E+01 | 43.4811407 | 2.74E-01 | 96343119  | 96343242  | NC_000014.8  |
| cg05839533 | 6.40E-22 | 6.84E-24 | 1.16E+01 | 43.4631022 | 1.11E-01 | 39642907  | 39643030  | NC_000017.10 |
| cg22851691 | 6.57E-22 | 7.02E-24 | 1.16E+01 | 43.4368763 | 2.81E-01 | 46711446  | 46711569  | NC_000017.10 |
| cg20803857 | 6.57E-22 | 7.03E-24 | 1.16E+01 | 43.4357492 | 2.87E-01 | 107502615 | 107502738 | NC_000002.11 |
| cg24721899 | 6.72E-22 | 7.19E-24 | 1.16E+01 | 43.4128514 | 2.28E-01 | 13543985  | 13544108  | NC_000004.11 |
| cg22008075 | 6.74E-22 | 7.22E-24 | 1.16E+01 | 43.4097055 | 1.77E-01 | 118215567 | 118215690 | NC_000001.10 |
| cg17509220 | 6.77E-22 | 7.26E-24 | 1.16E+01 | 43.4043832 | 2.78E-01 | 13617012  | 13617135  | NC_000019.9  |
| cg08812189 | 6.78E-22 | 7.27E-24 | 1.16E+01 | 43.4026208 | 2.89E-01 | 147110367 | 147110490 | NC_000003.11 |
| cg07830644 | 6.79E-22 | 7.29E-24 | 1.16E+01 | 43.4002276 | 1.32E-01 | 172409790 | 172409913 | NC_000005.9  |
| cg12551813 | 6.81E-22 | 7.31E-24 | 1.16E+01 | 43.3975147 | 1.03E-01 | 200781121 | 200781244 | NC_000001.10 |
| cg04908960 | 6.82E-22 | 7.32E-24 | 1.16E+01 | 43.3952129 | 2.45E-01 | 30425679  | 30425802  | NC_000016.9  |
| cg14676407 | 6.83E-22 | 7.33E-24 | 1.16E+01 | 43.3937875 | 1.93E-01 | 125651370 | 125651493 | NC_000010.10 |
| cg01477835 | 6.86E-22 | 7.37E-24 | 1.16E+01 | 43.3890856 | 1.87E-01 | 87989696  | 87989819  | NC_000004.11 |
| cg02347113 | 6.98E-22 | 7.50E-24 | 1.15E+01 | 43.3712393 | 1.66E-01 | 101752032 | 101752155 | NC_000002.11 |
| cg18197377 | 6.98E-22 | 7.50E-24 | 1.15E+01 | 43.3709446 | 2.60E-01 | 115134688 | 115134811 | NC_000012.11 |
| cg14029170 | 7.06E-22 | 7.59E-24 | 1.15E+01 | 43.359243  | 1.55E-01 | 53388842  | 53388965  | NC_000006.11 |
| cg09524455 | 7.09E-22 | 7.62E-24 | 1.15E+01 | 43.3554197 | 2.65E-01 | 2751872   | 2751995   | NC_000005.9  |
| cg07710971 | 7.25E-22 | 7.82E-24 | 1.15E+01 | 43.3305134 | 1.62E-01 | 46920836  | 46920959  | NC_000016.9  |
| cg04788956 | 7.26E-22 | 7.82E-24 | 1.15E+01 | 43.3299286 | 1.37E-01 | 67696138  | 67696261  | NC_000016.9  |
| cg11036833 | 7.36E-22 | 7.93E-24 | 1.15E+01 | 43.3159584 | 2.55E-01 | 115152494 | 115152617 | NC_000005.9  |
| cg17193062 | 7.53E-22 | 8.13E-24 | 1.15E+01 | 43.2915816 | 9.91E-02 | 32545455  | 32545578  | NC_000003.11 |

|            |          |          |          |            |          |           |           |              |
|------------|----------|----------|----------|------------|----------|-----------|-----------|--------------|
| cg01385836 | 7.67E-22 | 8.29E-24 | 1.15E+01 | 43.2724247 | 1.41E-01 | 190644623 | 190644746 | NC_000002.11 |
| cg22501243 | 7.68E-22 | 8.30E-24 | 1.15E+01 | 43.2705202 | 8.27E-02 | 122611269 | 122611392 | NC_000012.11 |
| cg08447992 | 7.76E-22 | 8.40E-24 | 1.15E+01 | 43.2589728 | 1.72E-01 | 93389086  | 93389209  | NC_000010.10 |
| cg10877130 | 7.76E-22 | 8.40E-24 | 1.15E+01 | 43.2589108 | 9.15E-02 | 69285772  | 69285895  | NC_000011.9  |
| cg07453407 | 7.94E-22 | 8.60E-24 | 1.15E+01 | 43.2359432 | 2.30E-01 | 46404031  | 46404154  | NC_000019.9  |
| cg15034345 | 7.94E-22 | 8.60E-24 | 1.15E+01 | 43.235213  | 3.36E-01 | 5836111   | 5836234   | NC_000002.11 |
| cg27287438 | 8.04E-22 | 8.72E-24 | 1.15E+01 | 43.2218538 | 1.75E-01 | 1066396   | 1066519   | NC_000007.13 |
| cg21289124 | 8.12E-22 | 8.81E-24 | 1.15E+01 | 43.2118158 | 1.37E-01 | 26951249  | 26951372  | NC_000022.10 |
| cg02237470 | 8.12E-22 | 8.82E-24 | 1.15E+01 | 43.211052  | 2.98E-01 | 53852443  | 53852566  | NC_000008.10 |
| cg06818851 | 8.24E-22 | 8.96E-24 | 1.15E+01 | 43.1949332 | 1.03E-01 | 907708    | 907831    | NC_000001.10 |
| cg12717584 | 8.42E-22 | 9.16E-24 | 1.15E+01 | 43.1732859 | 1.20E-01 | 23122112  | 23122235  | NC_000001.10 |
| cg06824581 | 8.51E-22 | 9.27E-24 | 1.15E+01 | 43.1616439 | 8.55E-02 | 20515978  | 20516101  | NC_000001.10 |
| cg00457495 | 8.52E-22 | 9.27E-24 | 1.15E+01 | 43.1608879 | 1.33E-01 | 49883384  | 49883507  | NC_000022.10 |
| cg05901579 | 8.59E-22 | 9.36E-24 | 1.15E+01 | 43.1512186 | 3.54E-01 | 88800567  | 88800690  | NC_000015.9  |
| cg24800630 | 8.65E-22 | 9.43E-24 | 1.15E+01 | 43.1438753 | 9.99E-02 | 156747654 | 156747777 | NC_000006.11 |
| cg06507244 | 8.71E-22 | 9.49E-24 | 1.15E+01 | 43.1376048 | 1.81E-01 | 127569494 | 127569617 | NC_000010.10 |
| cg14669274 | 8.76E-22 | 9.55E-24 | 1.15E+01 | 43.1312229 | 3.12E-01 | 143592375 | 143592498 | NC_000008.10 |
| cg03963198 | 8.80E-22 | 9.61E-24 | 1.15E+01 | 43.1256704 | 2.60E-01 | 1882871   | 1882994   | NC_000005.9  |
| cg05222243 | 8.82E-22 | 9.63E-24 | 1.15E+01 | 43.1232491 | 1.42E-01 | 71672822  | 71672945  | NC_000010.10 |
| cg15092343 | 8.87E-22 | 9.69E-24 | 1.15E+01 | 43.1175801 | 2.91E-01 | 4860061   | 4860184   | NC_000004.11 |
| cg25492363 | 9.09E-22 | 9.93E-24 | 1.15E+01 | 43.0925018 | 2.18E-01 | 57319872  | 57319995  | NC_000011.9  |
| cg20340508 | 9.09E-22 | 9.93E-24 | 1.15E+01 | 43.0924432 | 3.57E-01 | 34442377  | 34442500  | NC_000021.8  |
| cg05526341 | 9.10E-22 | 9.96E-24 | 1.15E+01 | 43.0903378 | 1.28E-01 | 66489362  | 66489485  | NC_000003.11 |
| cg16738453 | 9.11E-22 | 9.97E-24 | 1.15E+01 | 43.0888985 | 2.13E-01 | 57029014  | 57029137  | NC_000001.10 |
| cg17608570 | 9.13E-22 | 1.00E-23 | 1.15E+01 | 43.0864243 | 1.81E-01 | 130228545 | 130228668 | NC_000010.10 |

|            |          |          |          |            |          |           |           |              |
|------------|----------|----------|----------|------------|----------|-----------|-----------|--------------|
| cg24430140 | 9.18E-22 | 1.01E-23 | 1.15E+01 | 43.08092   | 2.56E-01 | 57276642  | 57276765  | NC_000019.9  |
| cg08513123 | 9.27E-22 | 1.02E-23 | 1.15E+01 | 43.0707601 | 1.51E-01 | 30121930  | 30122053  | NC_000006.11 |
| cg02004979 | 9.28E-22 | 1.02E-23 | 1.15E+01 | 43.0693821 | 2.49E-01 | 141043480 | 141043603 | NC_000003.11 |
| cg09013267 | 9.35E-22 | 1.03E-23 | 1.15E+01 | 43.0605522 | 8.62E-02 | 176762943 | 176763066 | NC_000005.9  |
| cg17239236 | 9.47E-22 | 1.04E-23 | 1.15E+01 | 43.0475757 | 3.70E-01 | 71802184  | 71802307  | NC_000007.13 |
| cg05221057 | 9.47E-22 | 1.04E-23 | 1.15E+01 | 43.0471868 | 2.80E-01 | 112711587 | 112711710 | NC_000013.10 |
| cg20793665 | 9.53E-22 | 1.05E-23 | 1.15E+01 | 43.0410043 | 1.84E-01 | 232549224 | 232549347 | NC_000002.11 |
| cg13445796 | 9.60E-22 | 1.06E-23 | 1.15E+01 | 43.0326865 | 2.99E-01 | 20181725  | 20181848  | NC_000011.9  |
| cg02731193 | 9.62E-22 | 1.06E-23 | 1.15E+01 | 43.0307432 | 1.11E-01 | 53407186  | 53407309  | NC_000006.11 |
| cg16510099 | 9.71E-22 | 1.07E-23 | 1.15E+01 | 43.0199459 | 1.43E-01 | 63851177  | 63851300  | NC_000011.9  |
| cg17050632 | 9.79E-22 | 1.08E-23 | 1.15E+01 | 43.0125031 | 1.17E-01 | 141577526 | 141577649 | NC_000008.10 |
| cg21472165 | 9.79E-22 | 1.08E-23 | 1.15E+01 | 43.0118371 | 1.37E-01 | 82749904  | 82750027  | NC_000006.11 |
| cg14289542 | 9.80E-22 | 1.08E-23 | 1.15E+01 | 43.0105152 | 2.26E-01 | 112726662 | 112726785 | NC_000013.10 |
| cg22887845 | 9.82E-22 | 1.08E-23 | 1.15E+01 | 43.0081462 | 2.42E-01 | 41544539  | 41544662  | NC_000006.11 |
| cg17592667 | 9.82E-22 | 1.08E-23 | 1.15E+01 | 43.0077429 | 1.91E-01 | 1848649   | 1848772   | NC_000001.10 |
| cg13512268 | 9.93E-22 | 1.10E-23 | 1.15E+01 | 42.9945472 | 2.22E-01 | 27183973  | 27184096  | NC_000007.13 |
| cg16856049 | 9.97E-22 | 1.10E-23 | 1.15E+01 | 42.9905447 | 2.39E-01 | 115134709 | 115134832 | NC_000012.11 |
| cg02242894 | 1.00E-21 | 1.11E-23 | 1.15E+01 | 42.9832235 | 5.78E-02 | 31494799  | 31494922  | NC_000016.9  |
| cg22312354 | 1.01E-21 | 1.12E-23 | 1.15E+01 | 42.9746898 | 1.80E-01 | 56158714  | 56158837  | NC_000019.9  |
| cg23444251 | 1.02E-21 | 1.12E-23 | 1.15E+01 | 42.9697527 | 1.52E-01 | 123353298 | 123353421 | NC_000010.10 |
| cg08347047 | 1.02E-21 | 1.13E-23 | 1.15E+01 | 42.9689398 | 2.39E-01 | 21680426  | 21680549  | NC_000012.11 |
| cg17555373 | 1.02E-21 | 1.13E-23 | 1.15E+01 | 42.9687015 | 1.95E-01 | 53775108  | 53775231  | NC_000013.10 |
| cg09619146 | 1.02E-21 | 1.13E-23 | 1.15E+01 | 42.966836  | 1.98E-01 | 125651034 | 125651157 | NC_000010.10 |
| cg07557903 | 1.02E-21 | 1.13E-23 | 1.15E+01 | 42.9665776 | 1.78E-01 | 144600645 | 144600768 | NC_000008.10 |
| cg08067346 | 1.02E-21 | 1.13E-23 | 1.15E+01 | 42.9646634 | 2.44E-01 | 25011481  | 25011604  | NC_000016.9  |

|            |          |          |          |            |          |           |           |              |
|------------|----------|----------|----------|------------|----------|-----------|-----------|--------------|
| cg07179981 | 1.02E-21 | 1.13E-23 | 1.15E+01 | 42.9630247 | 2.02E-01 | 922051    | 922174    | NC_000007.13 |
| cg08641514 | 1.02E-21 | 1.13E-23 | 1.15E+01 | 42.9620652 | 2.36E-01 | 25987606  | 25987729  | NC_000007.13 |
| cg08448701 | 1.03E-21 | 1.14E-23 | 1.15E+01 | 42.9576567 | 2.69E-01 | 21686282  | 21686405  | NC_000020.10 |
| cg01350077 | 1.04E-21 | 1.16E-23 | 1.15E+01 | 42.9419983 | 2.95E-01 | 41606317  | 41606440  | NC_000006.11 |
| cg26319015 | 1.04E-21 | 1.16E-23 | 1.15E+01 | 42.941631  | 1.43E-01 | 5647145   | 5647268   | NC_000007.13 |
| cg06373870 | 1.04E-21 | 1.16E-23 | 1.15E+01 | 42.94007   | 1.96E-01 | 81117853  | 81117976  | NC_000004.11 |
| cg10481072 | 1.05E-21 | 1.17E-23 | 1.15E+01 | 42.9342179 | 1.54E-01 | 92459517  | 92459640  | NC_000007.13 |
| cg13461482 | 1.08E-21 | 1.20E-23 | 1.15E+01 | 42.9069472 | 1.54E-01 | 67809271  | 67809394  | NC_000011.9  |
| cg05661282 | 1.09E-21 | 1.21E-23 | 1.15E+01 | 42.8999351 | 3.20E-01 | 58220370  | 58220493  | NC_000019.9  |
| cg11867552 | 1.10E-21 | 1.23E-23 | 1.15E+01 | 42.8839364 | 1.73E-01 | 50801000  | 50801123  | NC_000007.13 |
| cg10420161 | 1.11E-21 | 1.24E-23 | 1.15E+01 | 42.8750252 | 1.49E-01 | 102899983 | 102900106 | NC_000010.10 |
| cg17525406 | 1.12E-21 | 1.24E-23 | 1.15E+01 | 42.8684602 | 2.71E-01 | 4715520   | 4715643   | NC_000001.10 |
| cg09923953 | 1.12E-21 | 1.25E-23 | 1.15E+01 | 42.8659028 | 2.06E-01 | 51525638  | 51525761  | NC_000019.9  |
| cg09754845 | 1.12E-21 | 1.25E-23 | 1.15E+01 | 42.862153  | 2.75E-01 | 1408818   | 1408941   | NC_000007.13 |
| cg18343437 | 1.13E-21 | 1.26E-23 | 1.15E+01 | 42.8599472 | 2.45E-01 | 142528415 | 142528538 | NC_000008.10 |
| cg04812726 | 1.13E-21 | 1.26E-23 | 1.15E+01 | 42.8594637 | 1.64E-01 | 171875049 | 171875172 | NC_000005.9  |
| cg26775079 | 1.13E-21 | 1.26E-23 | 1.15E+01 | 42.858678  | 1.70E-01 | 56158830  | 56158953  | NC_000019.9  |
| cg16930572 | 1.13E-21 | 1.27E-23 | 1.15E+01 | 42.8524153 | 1.49E-01 | 16761118  | 16761241  | NC_000012.11 |
| cg14043702 | 1.14E-21 | 1.27E-23 | 1.15E+01 | 42.8488809 | 1.77E-01 | 101136251 | 101136374 | NC_000001.10 |
| cg05336395 | 1.14E-21 | 1.27E-23 | 1.15E+01 | 42.8457629 | 1.71E-01 | 53421688  | 53421811  | NC_000013.10 |
| cg03469054 | 1.15E-21 | 1.28E-23 | 1.15E+01 | 42.8411085 | 2.56E-01 | 130387861 | 130387984 | NC_000012.11 |
| cg22682201 | 1.17E-21 | 1.30E-23 | 1.15E+01 | 42.8219775 | 2.04E-01 | 41020847  | 41020970  | NC_000006.11 |
| cg13569987 | 1.17E-21 | 1.31E-23 | 1.15E+01 | 42.8145815 | 1.62E-01 | 26975979  | 26976102  | NC_000017.10 |
| cg04813119 | 1.19E-21 | 1.34E-23 | 1.15E+01 | 42.7972421 | 1.72E-01 | 75181254  | 75181377  | NC_000017.10 |
| cg14503395 | 1.22E-21 | 1.37E-23 | 1.15E+01 | 42.7765945 | 2.01E-01 | 126128745 | 126128868 | NC_000009.11 |

|            |          |          |          |            |          |           |           |              |
|------------|----------|----------|----------|------------|----------|-----------|-----------|--------------|
| cg12776966 | 1.23E-21 | 1.38E-23 | 1.15E+01 | 42.7689851 | 2.65E-01 | 30021276  | 30021399  | NC_000019.9  |
| cg21485062 | 1.23E-21 | 1.38E-23 | 1.15E+01 | 42.7664072 | 1.27E-01 | 42949773  | 42949896  | NC_000007.13 |
| cg05869585 | 1.24E-21 | 1.39E-23 | 1.15E+01 | 42.758379  | 1.26E-01 | 8890233   | 8890356   | NC_000016.9  |
| cg06906472 | 1.25E-21 | 1.40E-23 | 1.15E+01 | 42.752389  | 2.78E-01 | 107502801 | 107502924 | NC_000002.11 |
| cg08006727 | 1.25E-21 | 1.40E-23 | 1.15E+01 | 42.7496377 | 1.61E-01 | 116061614 | 116061737 | NC_000009.11 |
| cg20391793 | 1.27E-21 | 1.42E-23 | 1.15E+01 | 42.7354318 | 7.85E-02 | 106135414 | 106135537 | NC_000002.11 |
| cg06707356 | 1.28E-21 | 1.44E-23 | 1.15E+01 | 42.7268784 | 1.48E-01 | 11832612  | 11832735  | NC_000016.9  |
| cg11401159 | 1.28E-21 | 1.44E-23 | 1.15E+01 | 42.7264163 | 1.83E-01 | 6759129   | 6759252   | NC_000005.9  |
| cg27493243 | 1.28E-21 | 1.44E-23 | 1.15E+01 | 42.7259798 | 1.24E-01 | 233366070 | 233366193 | NC_000002.11 |
| cg09975561 | 1.28E-21 | 1.44E-23 | 1.15E+01 | 42.7214568 | 9.71E-02 | 71187554  | 71187677  | NC_000016.9  |
| cg22282131 | 1.28E-21 | 1.44E-23 | 1.15E+01 | 42.7210282 | 1.38E-01 | 127439670 | 127439793 | NC_000007.13 |
| cg15273575 | 1.29E-21 | 1.46E-23 | 1.15E+01 | 42.7132442 | 1.71E-01 | 145090803 | 145090926 | NC_000006.11 |
| cg11307865 | 1.29E-21 | 1.46E-23 | 1.15E+01 | 42.7114339 | 8.29E-02 | 27587175  | 27587298  | NC_000012.11 |
| cg02135728 | 1.29E-21 | 1.46E-23 | 1.15E+01 | 42.7112757 | 1.45E-01 | 97486613  | 97486736  | NC_000003.11 |
| cg17438849 | 1.30E-21 | 1.46E-23 | 1.15E+01 | 42.7091264 | 2.93E-01 | 43152468  | 43152591  | NC_000007.13 |
| cg11793269 | 1.30E-21 | 1.47E-23 | 1.15E+01 | 42.7052112 | 2.49E-01 | 2752545   | 2752668   | NC_000005.9  |
| cg07268058 | 1.30E-21 | 1.47E-23 | 1.15E+01 | 42.7047886 | 2.49E-01 | 76630260  | 76630383  | NC_000015.9  |
| cg21694591 | 1.31E-21 | 1.48E-23 | 1.14E+01 | 42.6961359 | 1.62E-01 | 118165133 | 118165256 | NC_000001.10 |
| cg03881775 | 1.32E-21 | 1.49E-23 | 1.14E+01 | 42.6877953 | 1.86E-01 | 147111135 | 147111258 | NC_000003.11 |
| cg24403845 | 1.33E-21 | 1.50E-23 | 1.14E+01 | 42.6829137 | 3.56E-01 | 108924366 | 108924489 | NC_000010.10 |
| cg14928149 | 1.33E-21 | 1.50E-23 | 1.14E+01 | 42.6819335 | 1.64E-01 | 155485385 | 155485508 | NC_000007.13 |
| cg12374721 | 1.33E-21 | 1.51E-23 | 1.14E+01 | 42.6781199 | 3.02E-01 | 46799640  | 46799763  | NC_000017.10 |
| cg10201616 | 1.34E-21 | 1.52E-23 | 1.14E+01 | 42.6733245 | 2.32E-01 | 11198556  | 11198679  | NC_000019.9  |
| cg07631435 | 1.37E-21 | 1.55E-23 | 1.14E+01 | 42.6503651 | 1.99E-01 | 114043903 | 114044026 | NC_000011.9  |
| cg18926450 | 1.38E-21 | 1.56E-23 | 1.14E+01 | 42.6416691 | 2.23E-01 | 110368234 | 110368357 | NC_000012.11 |

|            |          |          |          |            |          |           |           |              |
|------------|----------|----------|----------|------------|----------|-----------|-----------|--------------|
| cg04205744 | 1.39E-21 | 1.57E-23 | 1.14E+01 | 42.6350611 | 2.05E-01 | 86606367  | 86606490  | NC_000016.9  |
| cg17221945 | 1.40E-21 | 1.59E-23 | 1.14E+01 | 42.6283968 | 1.67E-01 | 39953603  | 39953726  | NC_000001.10 |
| cg07081061 | 1.40E-21 | 1.59E-23 | 1.14E+01 | 42.6276712 | 1.23E-01 | 3350901   | 3351024   | NC_000006.11 |
| cg10358533 | 1.41E-21 | 1.60E-23 | 1.14E+01 | 42.6181938 | 2.97E-01 | 34114209  | 34114332  | NC_000019.9  |
| cg24004943 | 1.41E-21 | 1.61E-23 | 1.14E+01 | 42.6148644 | 1.64E-01 | 127569905 | 127570028 | NC_000010.10 |
| cg24937747 | 1.42E-21 | 1.62E-23 | 1.14E+01 | 42.609749  | 2.34E-01 | 1882902   | 1883025   | NC_000005.9  |
| cg25923577 | 1.42E-21 | 1.62E-23 | 1.14E+01 | 42.6094462 | 3.83E-01 | 61276447  | 61276570  | NC_000011.9  |
| cg12989041 | 1.42E-21 | 1.62E-23 | 1.14E+01 | 42.6050303 | 1.64E-01 | 159049761 | 159049884 | NC_000006.11 |
| cg02906874 | 1.44E-21 | 1.64E-23 | 1.14E+01 | 42.5939475 | 1.65E-01 | 125767965 | 125768088 | NC_000010.10 |
| cg01802258 | 1.45E-21 | 1.66E-23 | 1.14E+01 | 42.5839151 | 3.26E-01 | 92790097  | 92790220  | NC_000014.8  |
| cg22609785 | 1.45E-21 | 1.66E-23 | 1.14E+01 | 42.5836161 | 1.69E-01 | 80416672  | 80416795  | NC_000010.10 |
| cg08751950 | 1.45E-21 | 1.66E-23 | 1.14E+01 | 42.5834139 | 2.04E-01 | 2416396   | 2416519   | NC_000007.13 |
| cg19791143 | 1.47E-21 | 1.68E-23 | 1.14E+01 | 42.5701396 | 3.95E-02 | 29778848  | 29778971  | NC_000008.10 |
| cg07316978 | 1.48E-21 | 1.69E-23 | 1.14E+01 | 42.5644237 | 1.41E-01 | 157529107 | 157529230 | NC_000006.11 |
| cg16396488 | 1.48E-21 | 1.70E-23 | 1.14E+01 | 42.5612137 | 2.03E-01 | 120766223 | 120766346 | NC_000012.11 |
| cg22526226 | 1.51E-21 | 1.73E-23 | 1.14E+01 | 42.5438885 | 9.95E-02 | 46169000  | 46169123  | NC_000012.11 |
| cg03368099 | 1.51E-21 | 1.73E-23 | 1.14E+01 | 42.543564  | 1.90E-01 | 27184521  | 27184644  | NC_000007.13 |
| cg27552378 | 1.55E-21 | 1.78E-23 | 1.14E+01 | 42.5142494 | 1.93E-01 | 3702776   | 3702899   | NC_000016.9  |
| cg21664351 | 1.55E-21 | 1.78E-23 | 1.14E+01 | 42.5121866 | 2.01E-01 | 19841423  | 19841546  | NC_000011.9  |
| cg01530101 | 1.56E-21 | 1.78E-23 | 1.14E+01 | 42.5112508 | 1.72E-01 | 2891098   | 2891221   | NC_000011.9  |
| cg03101522 | 1.56E-21 | 1.79E-23 | 1.14E+01 | 42.505155  | 1.29E-01 | 127897503 | 127897626 | NC_000006.11 |
| cg02126424 | 1.58E-21 | 1.81E-23 | 1.14E+01 | 42.4961931 | 1.91E-01 | 67965099  | 67965222  | NC_000016.9  |
| cg26059468 | 1.58E-21 | 1.82E-23 | 1.14E+01 | 42.4909154 | 2.74E-01 | 55370579  | 55370702  | NC_000008.10 |
| cg21393713 | 1.60E-21 | 1.84E-23 | 1.14E+01 | 42.4811287 | 3.42E-01 | 69064801  | 69064924  | NC_000007.13 |
| cg06365177 | 1.61E-21 | 1.86E-23 | 1.14E+01 | 42.470572  | 1.57E-01 | 30798589  | 30798712  | NC_000020.10 |

|            |          |          |          |            |          |           |           |              |
|------------|----------|----------|----------|------------|----------|-----------|-----------|--------------|
| cg03532926 | 1.62E-21 | 1.86E-23 | 1.14E+01 | 42.4700535 | 2.40E-01 | 153584839 | 153584962 | NC_000007.13 |
| cg05011468 | 1.63E-21 | 1.87E-23 | 1.14E+01 | 42.4632135 | 1.22E-01 | 96997582  | 96997705  | NC_000002.11 |
| cg01204060 | 1.65E-21 | 1.90E-23 | 1.14E+01 | 42.4495815 | 1.25E-01 | 4227342   | 4227465   | NC_000020.10 |
| cg14378259 | 1.65E-21 | 1.90E-23 | 1.14E+01 | 42.4494065 | 6.71E-02 | 37765272  | 37765395  | NC_000022.10 |
| cg14215786 | 1.66E-21 | 1.92E-23 | 1.14E+01 | 42.4378754 | 1.48E-01 | 100857629 | 100857752 | NC_000014.8  |
| cg17012160 | 1.68E-21 | 1.94E-23 | 1.14E+01 | 42.4263937 | 2.12E-01 | 240255691 | 240255814 | NC_000001.10 |
| cg04322298 | 1.69E-21 | 1.95E-23 | 1.14E+01 | 42.4202817 | 1.30E-01 | 190635899 | 190636022 | NC_000002.11 |
| cg04849541 | 1.70E-21 | 1.96E-23 | 1.14E+01 | 42.4170359 | 3.24E-01 | 1931620   | 1931743   | NC_000005.9  |
| cg16244648 | 1.72E-21 | 1.99E-23 | 1.14E+01 | 42.4031962 | 9.65E-02 | 141555043 | 141555166 | NC_000005.9  |
| cg14184817 | 1.72E-21 | 1.99E-23 | 1.14E+01 | 42.4028885 | 1.94E-01 | 45737483  | 45737606  | NC_000019.9  |
| cg10521808 | 1.72E-21 | 1.99E-23 | 1.14E+01 | 42.4018757 | 5.98E-02 | 7313750   | 7313873   | NC_000001.10 |
| cg04332526 | 1.72E-21 | 2.00E-23 | 1.14E+01 | 42.3996247 | 2.00E-01 | 3707039   | 3707162   | NC_000016.9  |
| cg09067029 | 1.72E-21 | 2.00E-23 | 1.14E+01 | 42.3992345 | 1.53E-01 | 186954259 | 186954382 | NC_000001.10 |
| cg12307484 | 1.74E-21 | 2.01E-23 | 1.14E+01 | 42.3917253 | 2.41E-01 | 19158721  | 19158844  | NC_000007.13 |
| cg13987572 | 1.74E-21 | 2.02E-23 | 1.14E+01 | 42.3865267 | 1.36E-01 | 140477134 | 140477257 | NC_000009.11 |
| cg04908382 | 1.75E-21 | 2.03E-23 | 1.14E+01 | 42.3843905 | 1.03E-01 | 105415856 | 105415979 | NC_000014.8  |
| cg19412007 | 1.75E-21 | 2.03E-23 | 1.14E+01 | 42.383246  | 9.40E-02 | 32825056  | 32825179  | NC_000006.11 |
| cg07206256 | 1.75E-21 | 2.03E-23 | 1.14E+01 | 42.3817086 | 8.81E-02 | 194573323 | 194573446 | NC_000003.11 |
| cg09971314 | 1.75E-21 | 2.04E-23 | 1.14E+01 | 42.379555  | 2.83E-01 | 28415023  | 28415146  | NC_000006.11 |
| cg06302806 | 1.75E-21 | 2.04E-23 | 1.14E+01 | 42.3794845 | 1.74E-01 | 43939970  | 43940093  | NC_000020.10 |
| cg17133446 | 1.77E-21 | 2.06E-23 | 1.14E+01 | 42.368263  | 1.87E-01 | 26961427  | 26961550  | NC_000022.10 |
| cg19505194 | 1.79E-21 | 2.08E-23 | 1.14E+01 | 42.3597255 | 1.64E-01 | 15801943  | 15802066  | NC_000001.10 |
| cg27088639 | 1.85E-21 | 2.15E-23 | 1.14E+01 | 42.3253514 | 1.37E-01 | 64682573  | 64682696  | NC_000014.8  |
| cg13435326 | 1.85E-21 | 2.15E-23 | 1.14E+01 | 42.3246869 | 1.82E-01 | 178907655 | 178907778 | NC_000003.11 |
| cg13434308 | 1.85E-21 | 2.15E-23 | 1.14E+01 | 42.3236924 | 2.27E-01 | 29936486  | 29936609  | NC_000012.11 |



|            |          |          |          |            |          |           |           |              |
|------------|----------|----------|----------|------------|----------|-----------|-----------|--------------|
| cg05064936 | 1.85E-21 | 2.16E-23 | 1.14E+01 | 42.3232031 | 1.60E-01 | 45764416  | 45764539  | NC_000017.10 |
| cg03184368 | 1.86E-21 | 2.17E-23 | 1.14E+01 | 42.3162103 | 1.89E-01 | 40555722  | 40555845  | NC_000004.11 |
| cg05364072 | 1.86E-21 | 2.17E-23 | 1.14E+01 | 42.3160165 | 1.68E-01 | 36643981  | 36644104  | NC_000001.10 |
| cg10126205 | 1.87E-21 | 2.17E-23 | 1.14E+01 | 42.3147136 | 2.89E-01 | 19158664  | 19158787  | NC_000007.13 |
| cg26206456 | 1.88E-21 | 2.19E-23 | 1.14E+01 | 42.3062732 | 2.09E-01 | 992484    | 992607    | NC_000008.10 |
| cg06868026 | 1.89E-21 | 2.21E-23 | 1.14E+01 | 42.3005043 | 2.04E-01 | 46787813  | 46787936  | NC_000021.8  |
| cg03700449 | 1.89E-21 | 2.21E-23 | 1.14E+01 | 42.2995476 | 2.77E-01 | 103352326 | 103352449 | NC_000012.11 |
| cg11416620 | 1.90E-21 | 2.22E-23 | 1.14E+01 | 42.2953499 | 1.34E-01 | 129072147 | 129072270 | NC_000002.11 |
| cg11081251 | 1.91E-21 | 2.23E-23 | 1.14E+01 | 42.2892636 | 1.32E-01 | 65375977  | 65376100  | NC_000015.9  |
| cg14958141 | 1.91E-21 | 2.23E-23 | 1.14E+01 | 42.2884551 | 1.73E-01 | 38394114  | 38394237  | NC_000019.9  |
| cg21174375 | 1.92E-21 | 2.25E-23 | 1.14E+01 | 42.282     | 2.23E-01 | 64681225  | 64681348  | NC_000014.8  |
| cg17352462 | 1.93E-21 | 2.25E-23 | 1.14E+01 | 42.2799441 | 8.16E-02 | 134364082 | 134364205 | NC_000010.10 |
| cg24046689 | 1.94E-21 | 2.27E-23 | 1.14E+01 | 42.2716676 | 1.77E-01 | 922235    | 922358    | NC_000007.13 |
| cg01429449 | 1.94E-21 | 2.28E-23 | 1.14E+01 | 42.2695441 | 1.96E-01 | 176936397 | 176936520 | NC_000002.11 |
| cg07524000 | 1.95E-21 | 2.28E-23 | 1.14E+01 | 42.2673194 | 1.67E-01 | 816020    | 816143    | NC_000016.9  |
| cg19142026 | 1.97E-21 | 2.30E-23 | 1.14E+01 | 42.2572171 | 2.90E-01 | 27170394  | 27170517  | NC_000007.13 |
| cg03256198 | 1.97E-21 | 2.30E-23 | 1.14E+01 | 42.2569265 | 2.32E-01 | 230283231 | 230283354 | NC_000001.10 |
| cg13839457 | 1.97E-21 | 2.31E-23 | 1.14E+01 | 42.2565397 | 3.47E-01 | 115630889 | 115631012 | NC_000011.9  |
| cg11294513 | 1.97E-21 | 2.31E-23 | 1.14E+01 | 42.2539387 | 2.97E-01 | 58220295  | 58220418  | NC_000019.9  |
| cg22867629 | 2.01E-21 | 2.36E-23 | 1.14E+01 | 42.2319247 | 1.31E-01 | 96699068  | 96699191  | NC_000014.8  |
| cg07120346 | 2.02E-21 | 2.37E-23 | 1.14E+01 | 42.2310099 | 2.68E-01 | 58141890  | 58142013  | NC_000006.11 |
| cg04990472 | 2.02E-21 | 2.37E-23 | 1.14E+01 | 42.2270607 | 1.62E-01 | 69950043  | 69950166  | NC_000014.8  |
| cg17130486 | 2.04E-21 | 2.39E-23 | 1.14E+01 | 42.2197867 | 1.60E-01 | 52437360  | 52437483  | NC_000012.11 |
| cg21880222 | 2.04E-21 | 2.39E-23 | 1.14E+01 | 42.2190398 | 1.66E-01 | 103327770 | 103327893 | NC_000002.11 |
| cg26923490 | 2.06E-21 | 2.42E-23 | 1.14E+01 | 42.2093362 | 2.45E-01 | 49575475  | 49575598  | NC_000019.9  |

|            |          |          |          |            |          |           |           |              |
|------------|----------|----------|----------|------------|----------|-----------|-----------|--------------|
| cg24013351 | 2.07E-21 | 2.43E-23 | 1.14E+01 | 42.2023173 | 1.02E-01 | 37670820  | 37670943  | NC_000014.8  |
| cg24319902 | 2.08E-21 | 2.45E-23 | 1.14E+01 | 42.1948849 | 2.21E-01 | 41166990  | 41167113  | NC_000008.10 |
| cg04140596 | 2.12E-21 | 2.49E-23 | 1.14E+01 | 42.179562  | 1.74E-01 | 228404239 | 228404362 | NC_000001.10 |
| cg04819959 | 2.12E-21 | 2.49E-23 | 1.14E+01 | 42.1787161 | 1.54E-01 | 130135065 | 130135188 | NC_000007.13 |
| cg03654783 | 2.14E-21 | 2.52E-23 | 1.14E+01 | 42.1683748 | 1.41E-01 | 156634034 | 156634157 | NC_000001.10 |
| cg09917805 | 2.14E-21 | 2.52E-23 | 1.14E+01 | 42.1679028 | 1.48E-01 | 4763596   | 4763719   | NC_000004.11 |
| cg02133510 | 2.14E-21 | 2.53E-23 | 1.14E+01 | 42.1660567 | 1.05E-01 | 32044959  | 32045082  | NC_000006.11 |
| cg05863502 | 2.17E-21 | 2.56E-23 | 1.14E+01 | 42.1540821 | 2.29E-01 | 140771990 | 140772113 | NC_000009.11 |
| cg19131667 | 2.17E-21 | 2.56E-23 | 1.14E+01 | 42.1536032 | 1.98E-01 | 17236940  | 17237063  | NC_000003.11 |
| cg12015737 | 2.17E-21 | 2.56E-23 | 1.14E+01 | 42.1520356 | 2.45E-01 | 27184030  | 27184153  | NC_000007.13 |
| cg06675190 | 2.17E-21 | 2.57E-23 | 1.14E+01 | 42.1487244 | 2.29E-01 | 89346205  | 89346328  | NC_000015.9  |
| cg00862117 | 2.20E-21 | 2.60E-23 | 1.14E+01 | 42.136074  | 1.89E-01 | 176111    | 176234    | NC_000012.11 |
| cg10169070 | 2.23E-21 | 2.64E-23 | 1.14E+01 | 42.120718  | 1.36E-01 | 114098428 | 114098551 | NC_000006.11 |
| cg20148575 | 2.24E-21 | 2.65E-23 | 1.14E+01 | 42.1190629 | 3.79E-01 | 132182671 | 132182794 | NC_000002.11 |
| cg13962186 | 2.27E-21 | 2.69E-23 | 1.14E+01 | 42.1028923 | 2.41E-01 | 79633650  | 79633773  | NC_000009.11 |
| cg01417692 | 2.28E-21 | 2.70E-23 | 1.14E+01 | 42.0993724 | 2.22E-01 | 47078581  | 47078704  | NC_000001.10 |
| cg23024254 | 2.29E-21 | 2.71E-23 | 1.14E+01 | 42.0945988 | 7.00E-02 | 33433579  | 33433702  | NC_000001.10 |
| cg14416248 | 2.29E-21 | 2.72E-23 | 1.14E+01 | 42.0934287 | 1.62E-01 | 3170095   | 3170218   | NC_000004.11 |
| cg13786429 | 2.30E-21 | 2.73E-23 | 1.14E+01 | 42.0889079 | 1.07E-01 | 35210094  | 35210217  | NC_000021.8  |
| cg14415914 | 2.31E-21 | 2.73E-23 | 1.14E+01 | 42.0876413 | 1.28E-01 | 36537273  | 36537396  | NC_000022.10 |
| cg04629133 | 2.32E-21 | 2.75E-23 | 1.14E+01 | 42.0829589 | 1.71E-01 | 30791409  | 30791532  | NC_000020.10 |
| cg14024461 | 2.37E-21 | 2.81E-23 | 1.14E+01 | 42.0605548 | 2.25E-01 | 228646047 | 228646170 | NC_000001.10 |
| cg18002447 | 2.38E-21 | 2.83E-23 | 1.14E+01 | 42.0535378 | 1.84E-01 | 59482956  | 59483079  | NC_000017.10 |
| cg08662665 | 2.41E-21 | 2.87E-23 | 1.14E+01 | 42.0405788 | 1.78E-01 | 30865823  | 30865946  | NC_000019.9  |
| cg16405026 | 2.41E-21 | 2.87E-23 | 1.14E+01 | 42.0402804 | 3.29E-01 | 145281942 | 145282065 | NC_000002.11 |

|            |          |          |          |            |          |           |           |              |
|------------|----------|----------|----------|------------|----------|-----------|-----------|--------------|
| cg24364723 | 2.42E-21 | 2.87E-23 | 1.14E+01 | 42.0381554 | 1.04E-01 | 22838414  | 22838537  | NC_000001.10 |
| cg06763054 | 2.43E-21 | 2.88E-23 | 1.14E+01 | 42.0342796 | 1.71E-01 | 17270834  | 17270957  | NC_000008.10 |
| cg12763813 | 2.43E-21 | 2.90E-23 | 1.14E+01 | 42.0303253 | 8.91E-02 | 123278445 | 123278568 | NC_000010.10 |
| cg06925438 | 2.47E-21 | 2.94E-23 | 1.14E+01 | 42.0156654 | 1.48E-01 | 480121    | 480244    | NC_000005.9  |
| cg04819499 | 2.47E-21 | 2.94E-23 | 1.13E+01 | 42.0136653 | 2.49E-01 | 43045014  | 43045137  | NC_000017.10 |
| cg09268963 | 2.47E-21 | 2.95E-23 | 1.13E+01 | 42.0134105 | 2.19E-01 | 64692302  | 64692425  | NC_000014.8  |
| cg18944047 | 2.48E-21 | 2.95E-23 | 1.13E+01 | 42.0107621 | 2.57E-01 | 72322143  | 72322266  | NC_000017.10 |
| cg22108469 | 2.51E-21 | 2.99E-23 | 1.13E+01 | 41.9985167 | 2.88E-01 | 174158984 | 174159107 | NC_000005.9  |
| cg11199046 | 2.52E-21 | 3.00E-23 | 1.13E+01 | 41.9943094 | 1.90E-01 | 115136308 | 115136431 | NC_000012.11 |
| cg11888359 | 2.53E-21 | 3.02E-23 | 1.13E+01 | 41.9901406 | 1.78E-01 | 4936127   | 4936250   | NC_000019.9  |
| cg27635470 | 2.55E-21 | 3.04E-23 | 1.13E+01 | 41.98105   | 1.97E-01 | 75241125  | 75241248  | NC_000016.9  |
| cg18596689 | 2.60E-21 | 3.10E-23 | 1.13E+01 | 41.9619714 | 1.80E-01 | 35766051  | 35766174  | NC_000006.11 |
| cg17038626 | 2.62E-21 | 3.14E-23 | 1.13E+01 | 41.9508917 | 2.52E-01 | 2435931   | 2436054   | NC_000012.11 |
| cg09762115 | 2.63E-21 | 3.14E-23 | 1.13E+01 | 41.9492071 | 1.86E-01 | 86095308  | 86095431  | NC_000002.11 |
| cg07787771 | 2.63E-21 | 3.15E-23 | 1.13E+01 | 41.9481531 | 1.81E-01 | 104341826 | 104341949 | NC_000010.10 |
| cg17087479 | 2.64E-21 | 3.16E-23 | 1.13E+01 | 41.9441501 | 3.17E-01 | 214156255 | 214156378 | NC_000001.10 |
| cg02973693 | 2.66E-21 | 3.19E-23 | 1.13E+01 | 41.9344141 | 1.79E-01 | 73085092  | 73085215  | NC_000016.9  |
| cg18579862 | 2.67E-21 | 3.20E-23 | 1.13E+01 | 41.932355  | 3.46E-01 | 58095595  | 58095718  | NC_000019.9  |
| cg23855818 | 2.67E-21 | 3.20E-23 | 1.13E+01 | 41.9318151 | 1.89E-01 | 105323396 | 105323519 | NC_000012.11 |
| cg13767223 | 2.67E-21 | 3.20E-23 | 1.13E+01 | 41.9316713 | 6.12E-02 | 96009863  | 96009986  | NC_000009.11 |
| cg19456540 | 2.68E-21 | 3.22E-23 | 1.13E+01 | 41.9261295 | 2.89E-01 | 60976285  | 60976408  | NC_000014.8  |
| cg23895963 | 2.72E-21 | 3.27E-23 | 1.13E+01 | 41.9105618 | 1.54E-01 | 117471115 | 117471238 | NC_000012.11 |
| cg14062050 | 2.73E-21 | 3.28E-23 | 1.13E+01 | 41.906441  | 2.99E-01 | 1886994   | 1887117   | NC_000005.9  |
| cg08249988 | 2.75E-21 | 3.30E-23 | 1.13E+01 | 41.8992508 | 3.13E-01 | 19322818  | 19322941  | NC_000019.9  |
| cg11611505 | 2.75E-21 | 3.31E-23 | 1.13E+01 | 41.8979795 | 9.86E-02 | 3373478   | 3373601   | NC_000010.10 |

|            |          |          |          |            |          |           |           |              |
|------------|----------|----------|----------|------------|----------|-----------|-----------|--------------|
| cg14156751 | 2.77E-21 | 3.32E-23 | 1.13E+01 | 41.8931019 | 1.99E-01 | 50976571  | 50976694  | NC_000010.10 |
| cg08720517 | 2.77E-21 | 3.34E-23 | 1.13E+01 | 41.8899004 | 2.60E-01 | 138729919 | 138730042 | NC_000005.9  |
| cg13100190 | 2.83E-21 | 3.41E-23 | 1.13E+01 | 41.8671246 | 2.10E-01 | 114053961 | 114054084 | NC_000006.11 |
| cg25069596 | 2.84E-21 | 3.42E-23 | 1.13E+01 | 41.8656024 | 1.35E-01 | 916509    | 916632    | NC_000017.10 |
| cg11659652 | 2.86E-21 | 3.45E-23 | 1.13E+01 | 41.8577481 | 1.61E-01 | 129797840 | 129797963 | NC_000010.10 |
| cg06419180 | 2.90E-21 | 3.49E-23 | 1.13E+01 | 41.8434952 | 1.37E-01 | 19262414  | 19262537  | NC_000008.10 |
| cg20575761 | 2.92E-21 | 3.52E-23 | 1.13E+01 | 41.8368809 | 2.04E-01 | 57275166  | 57275289  | NC_000014.8  |
| cg01068023 | 2.93E-21 | 3.54E-23 | 1.13E+01 | 41.8299028 | 1.37E-01 | 761370    | 761493    | NC_000001.10 |
| cg18734095 | 2.96E-21 | 3.57E-23 | 1.13E+01 | 41.821204  | 1.59E-01 | 50062005  | 50062128  | NC_000019.9  |
| cg23651826 | 3.02E-21 | 3.65E-23 | 1.13E+01 | 41.799502  | 2.45E-01 | 115630531 | 115630654 | NC_000011.9  |
| cg16002355 | 3.03E-21 | 3.67E-23 | 1.13E+01 | 41.7958532 | 3.20E-01 | 111544387 | 111544510 | NC_000004.11 |
| cg12799677 | 3.07E-21 | 3.72E-23 | 1.13E+01 | 41.7810726 | 1.14E-01 | 165631596 | 165631719 | NC_000001.10 |
| cg01990572 | 3.10E-21 | 3.76E-23 | 1.13E+01 | 41.7719915 | 1.05E-01 | 8555659   | 8555782   | NC_000010.10 |
| cg17504999 | 3.14E-21 | 3.80E-23 | 1.13E+01 | 41.7594203 | 2.39E-01 | 134072723 | 134072846 | NC_000004.11 |
| cg05260714 | 3.23E-21 | 3.93E-23 | 1.13E+01 | 41.7282472 | 1.62E-01 | 25344500  | 25344623  | NC_000022.10 |
| cg16792230 | 3.25E-21 | 3.95E-23 | 1.13E+01 | 41.7225403 | 1.69E-01 | 27629665  | 27629788  | NC_000016.9  |
| cg00903932 | 3.26E-21 | 3.97E-23 | 1.13E+01 | 41.7175427 | 1.74E-01 | 101258727 | 101258850 | NC_000001.10 |
| cg27480241 | 3.31E-21 | 4.03E-23 | 1.13E+01 | 41.7027936 | 1.63E-01 | 179310165 | 179310288 | NC_000002.11 |
| cg15534461 | 3.31E-21 | 4.03E-23 | 1.13E+01 | 41.7010829 | 2.11E-01 | 118575033 | 118575156 | NC_000012.11 |
| cg16700920 | 3.31E-21 | 4.04E-23 | 1.13E+01 | 41.7008067 | 1.73E-01 | 133810060 | 133810183 | NC_000010.10 |
| cg13824665 | 3.33E-21 | 4.05E-23 | 1.13E+01 | 41.6967318 | 1.05E-01 | 76183993  | 76184116  | NC_000014.8  |
| cg27288226 | 3.35E-21 | 4.08E-23 | 1.13E+01 | 41.68905   | 2.43E-01 | 57618436  | 57618559  | NC_000019.9  |
| cg13227624 | 3.36E-21 | 4.09E-23 | 1.13E+01 | 41.6869362 | 8.26E-02 | 104352735 | 104352858 | NC_000010.10 |
| cg26681523 | 3.36E-21 | 4.09E-23 | 1.13E+01 | 41.6863923 | 1.59E-01 | 22854408  | 22854531  | NC_000001.10 |
| cg26337821 | 3.39E-21 | 4.14E-23 | 1.13E+01 | 41.6754869 | 1.55E-01 | 123364675 | 123364798 | NC_000007.13 |

|            |          |          |          |            |          |           |           |              |
|------------|----------|----------|----------|------------|----------|-----------|-----------|--------------|
| cg00157668 | 3.40E-21 | 4.15E-23 | 1.13E+01 | 41.6726737 | 2.09E-01 | 109674526 | 109674649 | NC_000010.10 |
| cg18066946 | 3.40E-21 | 4.16E-23 | 1.13E+01 | 41.6703633 | 1.19E-01 | 126803477 | 126803600 | NC_000010.10 |
| cg26034658 | 3.41E-21 | 4.17E-23 | 1.13E+01 | 41.6688111 | 1.92E-01 | 65836743  | 65836866  | NC_000011.9  |
| cg26120073 | 3.42E-21 | 4.18E-23 | 1.13E+01 | 41.6658719 | 1.74E-01 | 91841955  | 91842078  | NC_000014.8  |
| cg11293312 | 3.44E-21 | 4.21E-23 | 1.13E+01 | 41.6585957 | 1.61E-01 | 49252020  | 49252143  | NC_000019.9  |
| cg03653317 | 3.50E-21 | 4.29E-23 | 1.13E+01 | 41.6399976 | 1.98E-01 | 118165598 | 118165721 | NC_000001.10 |
| cg19238875 | 3.50E-21 | 4.29E-23 | 1.13E+01 | 41.6392044 | 1.37E-01 | 61612218  | 61612341  | NC_000003.11 |
| cg09624466 | 3.51E-21 | 4.30E-23 | 1.13E+01 | 41.63767   | 2.88E-01 | 57278710  | 57278833  | NC_000014.8  |
| cg10300684 | 3.51E-21 | 4.30E-23 | 1.13E+01 | 41.6376353 | 2.99E-01 | 29236323  | 29236446  | NC_000014.8  |
| cg16181903 | 3.51E-21 | 4.30E-23 | 1.13E+01 | 41.6368591 | 1.22E-01 | 134828123 | 134828246 | NC_000010.10 |
| cg02468316 | 3.52E-21 | 4.32E-23 | 1.13E+01 | 41.6326058 | 1.35E-01 | 50801032  | 50801155  | NC_000007.13 |
| cg25019707 | 3.53E-21 | 4.33E-23 | 1.13E+01 | 41.6306914 | 1.02E-01 | 69994152  | 69994275  | NC_000011.9  |
| cg20002958 | 3.55E-21 | 4.36E-23 | 1.13E+01 | 41.6245352 | 1.82E-01 | 221282600 | 221282723 | NC_000002.11 |
| cg26295057 | 3.56E-21 | 4.37E-23 | 1.13E+01 | 41.621367  | 3.55E-01 | 37839829  | 37839952  | NC_000005.9  |
| cg11464895 | 3.58E-21 | 4.40E-23 | 1.13E+01 | 41.6150933 | 2.16E-01 | 135044789 | 135044912 | NC_000010.10 |
| cg02149136 | 3.59E-21 | 4.41E-23 | 1.13E+01 | 41.6121892 | 1.17E-01 | 85995039  | 85995162  | NC_000011.9  |
| cg21410980 | 3.61E-21 | 4.44E-23 | 1.13E+01 | 41.6066306 | 1.38E-01 | 40121831  | 40121954  | NC_000004.11 |
| cg26003814 | 3.61E-21 | 4.45E-23 | 1.13E+01 | 41.604597  | 8.21E-02 | 16444599  | 16444722  | NC_000001.10 |
| cg12845177 | 3.62E-21 | 4.46E-23 | 1.13E+01 | 41.6020789 | 1.89E-01 | 8650523   | 8650646   | NC_000019.9  |
| cg25635000 | 3.64E-21 | 4.48E-23 | 1.13E+01 | 41.5969655 | 1.75E-01 | 26952678  | 26952801  | NC_000022.10 |
| cg00474798 | 3.65E-21 | 4.50E-23 | 1.13E+01 | 41.592479  | 1.64E-01 | 84684489  | 84684612  | NC_000002.11 |
| cg10402471 | 3.67E-21 | 4.52E-23 | 1.13E+01 | 41.5885865 | 7.72E-02 | 200377740 | 200377863 | NC_000001.10 |
| cg07712904 | 3.69E-21 | 4.55E-23 | 1.13E+01 | 41.580995  | 1.51E-01 | 40389891  | 40390014  | NC_000015.9  |
| cg08210637 | 3.70E-21 | 4.56E-23 | 1.13E+01 | 41.578381  | 2.31E-01 | 58160654  | 58160777  | NC_000016.9  |
| cg10656845 | 3.71E-21 | 4.57E-23 | 1.13E+01 | 41.577172  | 1.80E-01 | 44159780  | 44159903  | NC_000007.13 |

|            |          |          |          |            |          |           |           |              |
|------------|----------|----------|----------|------------|----------|-----------|-----------|--------------|
| cg04785284 | 3.72E-21 | 4.60E-23 | 1.13E+01 | 41.5715012 | 6.70E-02 | 86702451  | 86702574  | NC_000016.9  |
| cg19864468 | 3.73E-21 | 4.60E-23 | 1.13E+01 | 41.570061  | 1.98E-01 | 113346566 | 113346689 | NC_000002.11 |
| cg18270675 | 3.74E-21 | 4.62E-23 | 1.13E+01 | 41.5658371 | 1.55E-01 | 85422118  | 85422241  | NC_000011.9  |
| cg08516516 | 3.75E-21 | 4.63E-23 | 1.13E+01 | 41.564139  | 2.81E-01 | 115152492 | 115152615 | NC_000005.9  |
| cg05941108 | 3.77E-21 | 4.66E-23 | 1.13E+01 | 41.5573782 | 2.86E-01 | 1884212   | 1884335   | NC_000005.9  |
| cg13245817 | 3.79E-21 | 4.69E-23 | 1.13E+01 | 41.5524814 | 6.96E-02 | 47481224  | 47481347  | NC_000007.13 |
| cg05339076 | 3.82E-21 | 4.73E-23 | 1.13E+01 | 41.5441101 | 1.80E-01 | 47513051  | 47513174  | NC_000022.10 |
| cg26053840 | 3.85E-21 | 4.76E-23 | 1.13E+01 | 41.5358625 | 2.08E-01 | 38644662  | 38644785  | NC_000006.11 |
| cg22966391 | 3.90E-21 | 4.82E-23 | 1.13E+01 | 41.5233436 | 1.66E-01 | 2416675   | 2416798   | NC_000007.13 |
| cg21179088 | 3.92E-21 | 4.86E-23 | 1.13E+01 | 41.5156004 | 2.81E-01 | 54612333  | 54612456  | NC_000007.13 |
| cg14570652 | 3.96E-21 | 4.90E-23 | 1.13E+01 | 41.5072687 | 2.00E-01 | 139393736 | 139393859 | NC_000009.11 |
| cg04454951 | 4.02E-21 | 4.99E-23 | 1.13E+01 | 41.49089   | 3.26E-01 | 49813031  | 49813154  | NC_000007.13 |
| cg20748132 | 4.04E-21 | 5.01E-23 | 1.13E+01 | 41.4856238 | 2.16E-01 | 125217707 | 125217830 | NC_000012.11 |
| cg13398440 | 4.04E-21 | 5.02E-23 | 1.13E+01 | 41.4838044 | 1.95E-01 | 178688308 | 178688431 | NC_000005.9  |
| cg25664813 | 4.11E-21 | 5.11E-23 | 1.13E+01 | 41.4665126 | 2.45E-01 | 1123123   | 1123246   | NC_000005.9  |
| cg25966682 | 4.15E-21 | 5.17E-23 | 1.13E+01 | 41.455437  | 1.02E-01 | 57577597  | 57577720  | NC_000012.11 |
| cg14091497 | 4.16E-21 | 5.17E-23 | 1.13E+01 | 41.4540124 | 8.83E-02 | 139430748 | 139430871 | NC_000009.11 |
| cg02198895 | 4.17E-21 | 5.20E-23 | 1.13E+01 | 41.4499168 | 1.31E-01 | 110759424 | 110759547 | NC_000013.10 |
| cg10179363 | 4.23E-21 | 5.26E-23 | 1.13E+01 | 41.4367276 | 1.47E-01 | 90352112  | 90352235  | NC_000015.9  |
| cg13912599 | 4.26E-21 | 5.30E-23 | 1.13E+01 | 41.429876  | 1.02E-01 | 150959380 | 150959503 | NC_000001.10 |
| cg13175830 | 4.29E-21 | 5.34E-23 | 1.13E+01 | 41.4223592 | 1.71E-01 | 123353956 | 123354079 | NC_000010.10 |
| cg15944367 | 4.30E-21 | 5.36E-23 | 1.13E+01 | 41.4188167 | 1.65E-01 | 36897829  | 36897952  | NC_000017.10 |
| cg09487611 | 4.31E-21 | 5.37E-23 | 1.13E+01 | 41.4164496 | 2.50E-01 | 5019311   | 5019434   | NC_000012.11 |
| cg22286978 | 4.33E-21 | 5.40E-23 | 1.13E+01 | 41.410717  | 3.33E-01 | 58858806  | 58858929  | NC_000019.9  |
| cg16939364 | 4.38E-21 | 5.47E-23 | 1.13E+01 | 41.3983037 | 2.19E-01 | 56015750  | 56015873  | NC_000008.10 |

|            |          |          |          |            |          |           |           |              |
|------------|----------|----------|----------|------------|----------|-----------|-----------|--------------|
| cg17403609 | 4.40E-21 | 5.49E-23 | 1.13E+01 | 41.3944032 | 2.20E-01 | 180075862 | 180075985 | NC_000005.9  |
| cg21158528 | 4.48E-21 | 5.60E-23 | 1.13E+01 | 41.3748955 | 2.15E-01 | 211501629 | 211501752 | NC_000001.10 |
| cg09053680 | 4.50E-21 | 5.62E-23 | 1.13E+01 | 41.371633  | 3.55E-01 | 135044114 | 135044237 | NC_000010.10 |
| cg16107331 | 4.50E-21 | 5.62E-23 | 1.13E+01 | 41.3712164 | 7.82E-02 | 73623052  | 73623175  | NC_000015.9  |
| cg19570244 | 4.51E-21 | 5.64E-23 | 1.13E+01 | 41.3675659 | 3.23E-01 | 32457158  | 32457281  | NC_000011.9  |
| cg06659380 | 4.55E-21 | 5.69E-23 | 1.13E+01 | 41.3590437 | 1.61E-01 | 52162604  | 52162727  | NC_000013.10 |
| cg19625388 | 4.55E-21 | 5.70E-23 | 1.13E+01 | 41.3586773 | 1.11E-01 | 113977418 | 113977541 | NC_000013.10 |
| cg23332582 | 4.57E-21 | 5.73E-23 | 1.13E+01 | 41.3533569 | 3.16E-01 | 140770308 | 140770431 | NC_000003.11 |
| cg13544006 | 4.63E-21 | 5.80E-23 | 1.13E+01 | 41.3408658 | 3.16E-01 | 34189411  | 34189534  | NC_000020.10 |
| cg26594445 | 4.63E-21 | 5.80E-23 | 1.13E+01 | 41.3406925 | 1.14E-01 | 64888605  | 64888728  | NC_000011.9  |
| cg11308643 | 4.71E-21 | 5.91E-23 | 1.12E+01 | 41.3222069 | 2.22E-01 | 105480788 | 105480911 | NC_000011.9  |
| cg08508724 | 4.73E-21 | 5.94E-23 | 1.12E+01 | 41.3168541 | 7.45E-02 | 30122045  | 30122168  | NC_000006.11 |
| cg04051396 | 4.76E-21 | 5.99E-23 | 1.12E+01 | 41.308643  | 2.09E-01 | 93130178  | 93130301  | NC_000012.11 |
| cg02030452 | 4.83E-21 | 6.08E-23 | 1.12E+01 | 41.294082  | 1.68E-01 | 65589615  | 65589738  | NC_000011.9  |
| cg17181598 | 4.84E-21 | 6.09E-23 | 1.12E+01 | 41.2924448 | 2.15E-01 | 118165662 | 118165785 | NC_000001.10 |
| cg10812717 | 4.86E-21 | 6.11E-23 | 1.12E+01 | 41.2883055 | 9.49E-02 | 158183846 | 158183969 | NC_000002.11 |
| cg20398486 | 4.87E-21 | 6.13E-23 | 1.12E+01 | 41.2858271 | 2.64E-01 | 176944442 | 176944565 | NC_000002.11 |
| cg18149207 | 4.87E-21 | 6.13E-23 | 1.12E+01 | 41.2855318 | 1.91E-01 | 151805634 | 151805757 | NC_000001.10 |
| cg22526990 | 4.87E-21 | 6.14E-23 | 1.12E+01 | 41.2844659 | 1.90E-01 | 33788511  | 33788634  | NC_000019.9  |
| cg14694622 | 4.90E-21 | 6.18E-23 | 1.12E+01 | 41.278255  | 1.40E-01 | 171836486 | 171836609 | NC_000003.11 |
| cg00385596 | 4.90E-21 | 6.18E-23 | 1.12E+01 | 41.278162  | 1.36E-01 | 76088726  | 76088849  | NC_000011.9  |
| cg05185038 | 4.91E-21 | 6.20E-23 | 1.12E+01 | 41.2750295 | 1.56E-01 | 105945685 | 105945808 | NC_000014.8  |
| cg09395612 | 4.93E-21 | 6.21E-23 | 1.12E+01 | 41.2723125 | 1.98E-01 | 86018936  | 86019059  | NC_000016.9  |
| cg00539976 | 4.94E-21 | 6.23E-23 | 1.12E+01 | 41.2691225 | 1.80E-01 | 1878508   | 1878631   | NC_000005.9  |
| cg04217218 | 4.97E-21 | 6.27E-23 | 1.12E+01 | 41.2630286 | 1.57E-01 | 14693888  | 14694011  | NC_000009.11 |

|            |          |          |          |            |          |           |           |              |
|------------|----------|----------|----------|------------|----------|-----------|-----------|--------------|
| cg21426003 | 4.97E-21 | 6.27E-23 | 1.12E+01 | 41.2626418 | 2.79E-01 | 237076811 | 237076934 | NC_000002.11 |
| cg18036653 | 4.98E-21 | 6.29E-23 | 1.12E+01 | 41.2597421 | 1.33E-01 | 39484787  | 39484910  | NC_000017.10 |
| cg25906620 | 5.08E-21 | 6.43E-23 | 1.12E+01 | 41.2387782 | 1.81E-01 | 11985726  | 11985849  | NC_000018.9  |
| cg14101442 | 5.11E-21 | 6.46E-23 | 1.12E+01 | 41.2329728 | 9.54E-02 | 130742236 | 130742359 | NC_000011.9  |
| cg16012489 | 5.12E-21 | 6.49E-23 | 1.12E+01 | 41.229192  | 1.33E-01 | 11489852  | 11489975  | NC_000008.10 |
| cg21151122 | 5.13E-21 | 6.50E-23 | 1.12E+01 | 41.2267445 | 1.06E-01 | 241568880 | 241569003 | NC_000002.11 |
| cg09427374 | 5.19E-21 | 6.58E-23 | 1.12E+01 | 41.2159331 | 1.91E-01 | 86095320  | 86095443  | NC_000002.11 |
| cg10659805 | 5.27E-21 | 6.69E-23 | 1.12E+01 | 41.1983531 | 2.65E-01 | 96631680  | 96631803  | NC_000007.13 |
| cg03276408 | 5.27E-21 | 6.69E-23 | 1.12E+01 | 41.1982942 | 2.77E-01 | 112712475 | 112712598 | NC_000013.10 |
| cg04682580 | 5.31E-21 | 6.74E-23 | 1.12E+01 | 41.1919455 | 1.30E-01 | 53016396  | 53016519  | NC_000001.10 |
| cg20129213 | 5.35E-21 | 6.79E-23 | 1.12E+01 | 41.184113  | 3.66E-01 | 104512317 | 104512440 | NC_000008.10 |
| cg14035202 | 5.36E-21 | 6.82E-23 | 1.12E+01 | 41.1801354 | 1.10E-01 | 136338301 | 136338424 | NC_000009.11 |
| cg15985191 | 5.36E-21 | 6.82E-23 | 1.12E+01 | 41.1800866 | 2.29E-01 | 18429357  | 18429480  | NC_000010.10 |
| cg16790374 | 5.43E-21 | 6.91E-23 | 1.12E+01 | 41.166168  | 1.88E-01 | 57212793  | 57212916  | NC_000008.10 |
| cg01454947 | 5.44E-21 | 6.93E-23 | 1.12E+01 | 41.1644389 | 2.18E-01 | 99223011  | 99223134  | NC_000002.11 |
| cg01023808 | 5.54E-21 | 7.06E-23 | 1.12E+01 | 41.1452337 | 1.84E-01 | 97857492  | 97857615  | NC_000007.13 |
| cg26802026 | 5.55E-21 | 7.07E-23 | 1.12E+01 | 41.1440381 | 2.47E-01 | 127872329 | 127872452 | NC_000005.9  |
| cg07806674 | 5.56E-21 | 7.08E-23 | 1.12E+01 | 41.1421605 | 1.73E-01 | 27994978  | 27995101  | NC_000001.10 |
| cg23536473 | 5.57E-21 | 7.10E-23 | 1.12E+01 | 41.140135  | 2.83E-01 | 19184555  | 19184678  | NC_000007.13 |
| cg07728793 | 5.59E-21 | 7.13E-23 | 1.12E+01 | 41.1353365 | 5.02E-02 | 238771724 | 238771847 | NC_000002.11 |
| cg05098381 | 5.59E-21 | 7.14E-23 | 1.12E+01 | 41.134881  | 1.81E-01 | 71301786  | 71301909  | NC_000003.11 |
| cg07213616 | 5.59E-21 | 7.14E-23 | 1.12E+01 | 41.1343857 | 1.06E-01 | 60725347  | 60725470  | NC_000005.9  |
| cg24372485 | 5.62E-21 | 7.18E-23 | 1.12E+01 | 41.1292538 | 1.61E-01 | 2078331   | 2078454   | NC_000019.9  |
| cg15446073 | 5.63E-21 | 7.19E-23 | 1.12E+01 | 41.1273418 | 9.11E-02 | 62339136  | 62339259  | NC_000011.9  |
| cg08918120 | 5.63E-21 | 7.20E-23 | 1.12E+01 | 41.12656   | 6.57E-02 | 88294021  | 88294144  | NC_000016.9  |



|            |          |          |          |            |          |           |           |              |
|------------|----------|----------|----------|------------|----------|-----------|-----------|--------------|
| cg07850418 | 5.67E-21 | 7.24E-23 | 1.12E+01 | 41.1201974 | 2.53E-01 | 147110378 | 147110501 | NC_000003.11 |
| cg05413282 | 5.71E-21 | 7.30E-23 | 1.12E+01 | 41.1118353 | 2.41E-01 | 33796088  | 33796211  | NC_000009.11 |
| cg26452868 | 5.81E-21 | 7.44E-23 | 1.12E+01 | 41.0933436 | 3.12E-01 | 57387715  | 57387838  | NC_000010.10 |
| cg18172877 | 5.82E-21 | 7.45E-23 | 1.12E+01 | 41.0915421 | 2.33E-01 | 1878672   | 1878795   | NC_000005.9  |
| cg07177011 | 5.83E-21 | 7.47E-23 | 1.12E+01 | 41.0889591 | 1.89E-01 | 1849305   | 1849428   | NC_000001.10 |
| cg02657828 | 5.85E-21 | 7.50E-23 | 1.12E+01 | 41.0848159 | 1.55E-01 | 86703935  | 86704058  | NC_000016.9  |
| cg07103493 | 5.86E-21 | 7.51E-23 | 1.12E+01 | 41.084124  | 2.15E-01 | 128301232 | 128301355 | NC_000005.9  |
| cg12505170 | 5.89E-21 | 7.56E-23 | 1.12E+01 | 41.0781543 | 2.88E-01 | 72595685  | 72595808  | NC_000005.9  |
| cg04336624 | 5.90E-21 | 7.57E-23 | 1.12E+01 | 41.0755774 | 8.83E-02 | 29167281  | 29167404  | NC_000016.9  |
| cg00733324 | 5.91E-21 | 7.58E-23 | 1.12E+01 | 41.0748239 | 1.69E-01 | 67845244  | 67845367  | NC_000014.8  |
| cg22568703 | 5.91E-21 | 7.58E-23 | 1.12E+01 | 41.0746229 | 9.65E-02 | 129733117 | 129733240 | NC_000010.10 |
| cg04704053 | 5.91E-21 | 7.59E-23 | 1.12E+01 | 41.0737374 | 2.58E-01 | 15090275  | 15090398  | NC_000019.9  |
| cg07147449 | 5.92E-21 | 7.60E-23 | 1.12E+01 | 41.0725506 | 2.96E-01 | 115136072 | 115136195 | NC_000012.11 |
| cg09492893 | 5.97E-21 | 7.67E-23 | 1.12E+01 | 41.0635522 | 8.96E-02 | 149939853 | 149939976 | NC_000005.9  |
| cg07382920 | 6.05E-21 | 7.78E-23 | 1.12E+01 | 41.049572  | 2.15E-01 | 3567646   | 3567769   | NC_000001.10 |
| cg03659519 | 6.06E-21 | 7.79E-23 | 1.12E+01 | 41.0473973 | 2.63E-01 | 74961966  | 74962089  | NC_000018.9  |
| cg24840099 | 6.06E-21 | 7.79E-23 | 1.12E+01 | 41.0473254 | 1.97E-01 | 4864430   | 4864553   | NC_000004.11 |
| cg05371578 | 6.06E-21 | 7.80E-23 | 1.12E+01 | 41.046968  | 1.80E-01 | 147128157 | 147128280 | NC_000003.11 |
| cg16027761 | 6.08E-21 | 7.82E-23 | 1.12E+01 | 41.0436377 | 3.07E-01 | 53422871  | 53422994  | NC_000013.10 |
| cg24258347 | 6.10E-21 | 7.84E-23 | 1.12E+01 | 41.0410801 | 2.33E-01 | 13983851  | 13983974  | NC_000011.9  |
| cg16752592 | 6.10E-21 | 7.85E-23 | 1.12E+01 | 41.0399936 | 2.20E-01 | 145537709 | 145537832 | NC_000008.10 |
| cg01033419 | 6.12E-21 | 7.88E-23 | 1.12E+01 | 41.0368212 | 1.74E-01 | 56387378  | 56387501  | NC_000006.11 |
| cg00410895 | 6.14E-21 | 7.90E-23 | 1.12E+01 | 41.0334405 | 1.87E-01 | 43283884  | 43284007  | NC_000001.10 |
| cg21104155 | 6.21E-21 | 8.01E-23 | 1.12E+01 | 41.0207491 | 1.55E-01 | 68040530  | 68040653  | NC_000014.8  |
| cg08172947 | 6.23E-21 | 8.04E-23 | 1.12E+01 | 41.0168542 | 2.16E-01 | 41868550  | 41868673  | NC_000022.10 |

|            |          |          |          |            |          |           |           |              |
|------------|----------|----------|----------|------------|----------|-----------|-----------|--------------|
| cg06712089 | 6.24E-21 | 8.05E-23 | 1.12E+01 | 41.015728  | 5.03E-02 | 139128651 | 139128774 | NC_000009.11 |
| cg20449685 | 6.27E-21 | 8.09E-23 | 1.12E+01 | 41.0103267 | 2.34E-01 | 58545728  | 58545851  | NC_000019.9  |
| cg24695614 | 6.29E-21 | 8.12E-23 | 1.12E+01 | 41.0065906 | 5.43E-02 | 3143611   | 3143734   | NC_000010.10 |
| cg10739556 | 6.33E-21 | 8.17E-23 | 1.12E+01 | 40.9999549 | 2.79E-01 | 27192056  | 27192179  | NC_000007.13 |
| cg11215976 | 6.33E-21 | 8.18E-23 | 1.12E+01 | 40.9995273 | 2.54E-01 | 236849942 | 236850065 | NC_000001.10 |
| cg26517714 | 6.34E-21 | 8.18E-23 | 1.12E+01 | 40.998778  | 2.42E-01 | 170736245 | 170736368 | NC_000005.9  |
| cg01642521 | 6.35E-21 | 8.20E-23 | 1.12E+01 | 40.9963387 | 3.22E-01 | 20618250  | 20618373  | NC_000011.9  |
| cg16597537 | 6.42E-21 | 8.30E-23 | 1.12E+01 | 40.985029  | 9.07E-02 | 20252617  | 20252740  | NC_000022.10 |
| cg04273148 | 6.47E-21 | 8.38E-23 | 1.12E+01 | 40.9758603 | 2.22E-01 | 57808038  | 57808161  | NC_000016.9  |
| cg00748072 | 6.49E-21 | 8.40E-23 | 1.12E+01 | 40.9733722 | 1.70E-01 | 174862824 | 174862947 | NC_000002.11 |
| cg22674789 | 6.51E-21 | 8.43E-23 | 1.12E+01 | 40.9693481 | 1.66E-01 | 81740565  | 81740688  | NC_000010.10 |
| cg24368408 | 6.56E-21 | 8.50E-23 | 1.12E+01 | 40.9609782 | 1.53E-01 | 27361313  | 27361436  | NC_000002.11 |
| cg14958635 | 6.68E-21 | 8.66E-23 | 1.12E+01 | 40.9425734 | 2.22E-01 | 134870977 | 134871100 | NC_000005.9  |
| cg26454350 | 6.68E-21 | 8.66E-23 | 1.12E+01 | 40.942487  | 9.27E-02 | 27493204  | 27493327  | NC_000017.10 |
| cg26876703 | 6.72E-21 | 8.71E-23 | 1.12E+01 | 40.9365389 | 1.99E-01 | 48540366  | 48540489  | NC_000017.10 |
| cg02285003 | 6.72E-21 | 8.72E-23 | 1.12E+01 | 40.9362785 | 1.09E-01 | 32296777  | 32296900  | NC_000005.9  |
| cg12377139 | 6.72E-21 | 8.72E-23 | 1.12E+01 | 40.9359922 | 1.82E-01 | 22634218  | 22634341  | NC_000010.10 |
| cg03345668 | 6.76E-21 | 8.77E-23 | 1.12E+01 | 40.9297986 | 1.52E-01 | 47081524  | 47081647  | NC_000001.10 |
| cg15409013 | 6.80E-21 | 8.83E-23 | 1.12E+01 | 40.9237657 | 2.86E-01 | 5139855   | 5139978   | NC_000005.9  |
| cg10172887 | 6.81E-21 | 8.85E-23 | 1.12E+01 | 40.9213991 | 1.85E-01 | 170578592 | 170578715 | NC_000006.11 |
| cg26252958 | 6.81E-21 | 8.85E-23 | 1.12E+01 | 40.921151  | 1.99E-01 | 105847870 | 105847993 | NC_000006.11 |
| cg00741333 | 6.85E-21 | 8.90E-23 | 1.12E+01 | 40.9157406 | 1.81E-01 | 43197675  | 43197798  | NC_000006.11 |
| cg08044097 | 6.85E-21 | 8.90E-23 | 1.12E+01 | 40.9156246 | 2.41E-01 | 55371013  | 55371136  | NC_000008.10 |
| cg24224020 | 6.85E-21 | 8.90E-23 | 1.12E+01 | 40.9152051 | 2.57E-01 | 111544443 | 111544566 | NC_000004.11 |
| cg12797017 | 6.94E-21 | 9.03E-23 | 1.12E+01 | 40.9006285 | 1.16E-01 | 89059249  | 89059372  | NC_000014.8  |

|            |          |          |          |            |          |           |           |              |
|------------|----------|----------|----------|------------|----------|-----------|-----------|--------------|
| cg08813062 | 7.01E-21 | 9.13E-23 | 1.12E+01 | 40.8904815 | 1.91E-01 | 175199576 | 175199699 | NC_000002.11 |
| cg15043723 | 7.03E-21 | 9.16E-23 | 1.12E+01 | 40.8865836 | 1.73E-01 | 8106006   | 8106129   | NC_000010.10 |
| cg18347903 | 7.05E-21 | 9.19E-23 | 1.12E+01 | 40.8841853 | 8.76E-02 | 427580    | 427703    | NC_000002.11 |
| cg02621287 | 7.07E-21 | 9.22E-23 | 1.12E+01 | 40.880968  | 2.46E-01 | 11653278  | 11653401  | NC_000012.11 |
| cg18722841 | 7.10E-21 | 9.26E-23 | 1.12E+01 | 40.8765497 | 2.76E-01 | 71954982  | 71955105  | NC_000011.9  |
| cg09804711 | 7.13E-21 | 9.30E-23 | 1.12E+01 | 40.8715065 | 1.25E-01 | 61403556  | 61403679  | NC_000020.10 |
| cg01878345 | 7.13E-21 | 9.31E-23 | 1.12E+01 | 40.8708834 | 2.70E-01 | 105471960 | 105472083 | NC_000002.11 |
| cg25379036 | 7.13E-21 | 9.32E-23 | 1.12E+01 | 40.8702899 | 1.25E-01 | 125544500 | 125544623 | NC_000006.11 |
| cg19651694 | 7.13E-21 | 9.32E-23 | 1.12E+01 | 40.8702871 | 2.24E-01 | 71955164  | 71955287  | NC_000011.9  |
| cg15107670 | 7.17E-21 | 9.37E-23 | 1.12E+01 | 40.8648985 | 2.42E-01 | 32456759  | 32456882  | NC_000011.9  |
| cg25409308 | 7.17E-21 | 9.37E-23 | 1.12E+01 | 40.8646193 | 1.33E-01 | 111602911 | 111603034 | NC_000011.9  |
| cg18450832 | 7.18E-21 | 9.38E-23 | 1.12E+01 | 40.8632371 | 1.19E-01 | 37250092  | 37250215  | NC_000005.9  |
| cg07573209 | 7.20E-21 | 9.41E-23 | 1.12E+01 | 40.8604385 | 2.92E-01 | 76630095  | 76630218  | NC_000015.9  |
| cg07149609 | 7.21E-21 | 9.43E-23 | 1.12E+01 | 40.8584404 | 2.51E-01 | 170630734 | 170630857 | NC_000001.10 |
| cg11345432 | 7.26E-21 | 9.50E-23 | 1.12E+01 | 40.8510005 | 1.20E-01 | 125767838 | 125767961 | NC_000010.10 |
| cg03109914 | 7.27E-21 | 9.51E-23 | 1.12E+01 | 40.8501871 | 1.48E-01 | 823348    | 823471    | NC_000011.9  |
| cg09656848 | 7.56E-21 | 9.90E-23 | 1.12E+01 | 40.8102377 | 3.25E-01 | 61276678  | 61276801  | NC_000011.9  |
| cg07700514 | 7.56E-21 | 9.91E-23 | 1.12E+01 | 40.8090386 | 3.77E-01 | 56228467  | 56228590  | NC_000016.9  |
| cg15070710 | 7.58E-21 | 9.94E-23 | 1.12E+01 | 40.8061267 | 2.15E-01 | 19532345  | 19532468  | NC_000001.10 |
| cg02478836 | 7.80E-21 | 1.02E-22 | 1.12E+01 | 40.775859  | 1.30E-01 | 47510037  | 47510160  | NC_000022.10 |
| cg01285862 | 7.89E-21 | 1.04E-22 | 1.12E+01 | 40.7647678 | 1.63E-01 | 153414365 | 153414488 | NC_000005.9  |
| cg08623156 | 7.90E-21 | 1.04E-22 | 1.12E+01 | 40.7622953 | 1.08E-01 | 113577046 | 113577169 | NC_000012.11 |
| cg16246661 | 7.91E-21 | 1.04E-22 | 1.12E+01 | 40.7609393 | 2.04E-01 | 230272611 | 230272734 | NC_000001.10 |
| cg25444386 | 7.97E-21 | 1.05E-22 | 1.12E+01 | 40.7528664 | 2.75E-01 | 55990944  | 55991067  | NC_000004.11 |
| cg02660165 | 8.04E-21 | 1.06E-22 | 1.12E+01 | 40.7438114 | 1.37E-01 | 160391109 | 160391232 | NC_000001.10 |

|            |          |          |          |            |          |           |           |              |
|------------|----------|----------|----------|------------|----------|-----------|-----------|--------------|
| cg24498500 | 8.06E-21 | 1.06E-22 | 1.12E+01 | 40.7411313 | 1.77E-01 | 118166247 | 118166370 | NC_000001.10 |
| cg09915729 | 8.08E-21 | 1.06E-22 | 1.12E+01 | 40.7383123 | 2.07E-01 | 121513707 | 121513830 | NC_000010.10 |
| cg04402007 | 8.23E-21 | 1.09E-22 | 1.12E+01 | 40.7178105 | 2.69E-01 | 35093901  | 35094024  | NC_000008.10 |
| cg20987924 | 8.25E-21 | 1.09E-22 | 1.12E+01 | 40.7152583 | 2.45E-01 | 60296981  | 60297104  | NC_000015.9  |
| cg25555505 | 8.25E-21 | 1.09E-22 | 1.12E+01 | 40.7150514 | 1.26E-01 | 4791054   | 4791177   | NC_000007.13 |
| cg22455914 | 8.32E-21 | 1.10E-22 | 1.12E+01 | 40.706861  | 3.92E-01 | 7116977   | 7117100   | NC_000018.9  |
| cg16407471 | 8.34E-21 | 1.10E-22 | 1.12E+01 | 40.7029287 | 2.93E-01 | 43602914  | 43603037  | NC_000011.9  |
| cg05787035 | 8.38E-21 | 1.11E-22 | 1.12E+01 | 40.6982522 | 1.28E-01 | 202171635 | 202171758 | NC_000001.10 |
| cg14893932 | 8.39E-21 | 1.11E-22 | 1.12E+01 | 40.6975674 | 1.28E-01 | 66584493  | 66584616  | NC_000015.9  |
| cg20115910 | 8.60E-21 | 1.14E-22 | 1.12E+01 | 40.6720229 | 9.38E-02 | 49934906  | 49935029  | NC_000012.11 |
| cg26756625 | 8.62E-21 | 1.14E-22 | 1.12E+01 | 40.6695156 | 2.14E-01 | 126779875 | 126779998 | NC_000009.11 |
| cg08810842 | 8.62E-21 | 1.14E-22 | 1.12E+01 | 40.6692617 | 2.39E-01 | 22548546  | 22548669  | NC_000008.10 |
| cg02172312 | 8.62E-21 | 1.14E-22 | 1.12E+01 | 40.6682884 | 2.45E-01 | 62069337  | 62069460  | NC_000016.9  |
| cg20664238 | 8.65E-21 | 1.15E-22 | 1.12E+01 | 40.66531   | 2.82E-01 | 88798877  | 88799000  | NC_000015.9  |
| cg10909506 | 8.74E-21 | 1.16E-22 | 1.12E+01 | 40.6543414 | 1.59E-01 | 38081995  | 38082118  | NC_000017.10 |
| cg01226231 | 8.75E-21 | 1.16E-22 | 1.12E+01 | 40.6530973 | 1.12E-01 | 139935196 | 139935319 | NC_000005.9  |
| cg20707409 | 8.81E-21 | 1.17E-22 | 1.11E+01 | 40.6454619 | 1.58E-01 | 124605957 | 124606080 | NC_000010.10 |
| cg07135701 | 8.87E-21 | 1.18E-22 | 1.11E+01 | 40.6391863 | 1.15E-01 | 23519441  | 23519564  | NC_000016.9  |
| cg05774699 | 8.87E-21 | 1.18E-22 | 1.11E+01 | 40.6381621 | 2.06E-01 | 27184316  | 27184439  | NC_000007.13 |
| cg17924901 | 8.91E-21 | 1.18E-22 | 1.11E+01 | 40.633395  | 1.49E-01 | 3475233   | 3475356   | NC_000004.11 |
| cg15639951 | 8.94E-21 | 1.19E-22 | 1.11E+01 | 40.6300311 | 1.73E-01 | 43367609  | 43367732  | NC_000017.10 |
| cg08065231 | 8.97E-21 | 1.19E-22 | 1.11E+01 | 40.626679  | 2.98E-01 | 9473684   | 9473807   | NC_000019.9  |
| cg17141972 | 9.05E-21 | 1.20E-22 | 1.11E+01 | 40.6171706 | 1.60E-01 | 77547510  | 77547633  | NC_000006.11 |
| cg13465477 | 9.13E-21 | 1.21E-22 | 1.11E+01 | 40.6075323 | 2.40E-01 | 133534961 | 133535084 | NC_000009.11 |
| cg15031661 | 9.18E-21 | 1.22E-22 | 1.11E+01 | 40.6012331 | 2.88E-01 | 240256603 | 240256726 | NC_000001.10 |

|            |          |          |          |            |          |           |           |              |
|------------|----------|----------|----------|------------|----------|-----------|-----------|--------------|
| cg17927493 | 9.21E-21 | 1.22E-22 | 1.11E+01 | 40.5987869 | 1.64E-01 | 81997731  | 81997854  | NC_000014.8  |
| cg22762091 | 9.23E-21 | 1.23E-22 | 1.11E+01 | 40.5955828 | 1.97E-01 | 132052843 | 132052966 | NC_000008.10 |
| cg15585794 | 9.27E-21 | 1.23E-22 | 1.11E+01 | 40.5918543 | 2.85E-01 | 131780329 | 131780452 | NC_000011.9  |
| cg09868598 | 9.29E-21 | 1.24E-22 | 1.11E+01 | 40.5890126 | 2.18E-01 | 50674015  | 50674138  | NC_000005.9  |
| cg18493314 | 9.30E-21 | 1.24E-22 | 1.11E+01 | 40.5882477 | 1.44E-01 | 21899075  | 21899198  | NC_000014.8  |
| cg22620090 | 9.34E-21 | 1.24E-22 | 1.11E+01 | 40.5826185 | 2.96E-01 | 105400993 | 105401116 | NC_000006.11 |
| cg23881278 | 9.35E-21 | 1.25E-22 | 1.11E+01 | 40.5813992 | 2.86E-01 | 113346299 | 113346422 | NC_000011.9  |
| cg26675485 | 9.47E-21 | 1.26E-22 | 1.11E+01 | 40.5679666 | 1.57E-01 | 67968879  | 67969002  | NC_000016.9  |
| cg13151751 | 9.51E-21 | 1.27E-22 | 1.11E+01 | 40.5637661 | 1.20E-01 | 89993815  | 89993938  | NC_000001.10 |
| cg03243768 | 9.51E-21 | 1.27E-22 | 1.11E+01 | 40.5631117 | 2.10E-01 | 9115107   | 9115230   | NC_000011.9  |
| cg20100801 | 9.57E-21 | 1.28E-22 | 1.11E+01 | 40.5561937 | 1.84E-01 | 95987654  | 95987777  | NC_000012.11 |
| cg25475443 | 9.57E-21 | 1.28E-22 | 1.11E+01 | 40.5559717 | 9.20E-02 | 125806388 | 125806511 | NC_000010.10 |
| cg16626318 | 9.72E-21 | 1.30E-22 | 1.11E+01 | 40.5395832 | 1.01E-01 | 37288164  | 37288287  | NC_000003.11 |
| cg23476745 | 9.81E-21 | 1.31E-22 | 1.11E+01 | 40.5304522 | 1.24E-01 | 79076552  | 79076675  | NC_000017.10 |
| cg08042322 | 9.82E-21 | 1.31E-22 | 1.11E+01 | 40.5298429 | 1.65E-01 | 104233595 | 104233718 | NC_000012.11 |
| cg03957649 | 9.94E-21 | 1.33E-22 | 1.11E+01 | 40.5165203 | 8.96E-02 | 30121853  | 30121976  | NC_000006.11 |
| cg24705818 | 9.98E-21 | 1.34E-22 | 1.11E+01 | 40.5123559 | 1.68E-01 | 18964128  | 18964251  | NC_000010.10 |
| cg07575617 | 1.00E-20 | 1.34E-22 | 1.11E+01 | 40.5074772 | 1.09E-01 | 218460685 | 218460808 | NC_000001.10 |
| cg08165221 | 1.00E-20 | 1.34E-22 | 1.11E+01 | 40.5073023 | 2.17E-01 | 5833017   | 5833140   | NC_000002.11 |
| cg20168230 | 1.01E-20 | 1.35E-22 | 1.11E+01 | 40.5011693 | 2.05E-01 | 37499649  | 37499772  | NC_000001.10 |
| cg03013699 | 1.01E-20 | 1.36E-22 | 1.11E+01 | 40.4979949 | 5.76E-02 | 50772477  | 50772600  | NC_000007.13 |
| cg09004195 | 1.02E-20 | 1.37E-22 | 1.11E+01 | 40.4903947 | 1.04E-01 | 222323493 | 222323616 | NC_000002.11 |
| cg18863595 | 1.02E-20 | 1.37E-22 | 1.11E+01 | 40.4868464 | 2.63E-01 | 6902845   | 6902968   | NC_000003.11 |
| cg07707505 | 1.02E-20 | 1.37E-22 | 1.11E+01 | 40.4867475 | 1.68E-01 | 12185435  | 12185558  | NC_000001.10 |
| cg22295334 | 1.03E-20 | 1.38E-22 | 1.11E+01 | 40.4817507 | 1.22E-01 | 135835943 | 135836066 | NC_000008.10 |

|            |          |          |          |            |          |           |           |              |
|------------|----------|----------|----------|------------|----------|-----------|-----------|--------------|
| cg02148562 | 1.03E-20 | 1.38E-22 | 1.11E+01 | 40.4805936 | 2.19E-01 | 128766988 | 128767111 | NC_000008.10 |
| cg16142306 | 1.04E-20 | 1.39E-22 | 1.11E+01 | 40.4712466 | 2.24E-01 | 41258935  | 41259058  | NC_000004.11 |
| cg25342872 | 1.04E-20 | 1.40E-22 | 1.11E+01 | 40.4633682 | 1.32E-01 | 79175132  | 79175255  | NC_000017.10 |
| cg01570424 | 1.05E-20 | 1.41E-22 | 1.11E+01 | 40.4600183 | 3.29E-01 | 2038922   | 2039045   | NC_000005.9  |
| cg08487909 | 1.05E-20 | 1.41E-22 | 1.11E+01 | 40.4576359 | 1.22E-01 | 30904981  | 30905104  | NC_000006.11 |
| cg19596468 | 1.05E-20 | 1.41E-22 | 1.11E+01 | 40.4571881 | 1.78E-01 | 4864110   | 4864233   | NC_000004.11 |
| cg00298405 | 1.05E-20 | 1.41E-22 | 1.11E+01 | 40.455413  | 1.21E-01 | 46835192  | 46835315  | NC_000022.10 |
| cg10888790 | 1.05E-20 | 1.42E-22 | 1.11E+01 | 40.4512216 | 1.60E-01 | 131766874 | 131766997 | NC_000010.10 |
| cg27277463 | 1.06E-20 | 1.42E-22 | 1.11E+01 | 40.44907   | 3.22E-01 | 62585031  | 62585154  | NC_000012.11 |
| cg17538572 | 1.06E-20 | 1.43E-22 | 1.11E+01 | 40.4462906 | 3.17E-01 | 94834763  | 94834886  | NC_000010.10 |
| cg26524638 | 1.06E-20 | 1.43E-22 | 1.11E+01 | 40.4461865 | 1.33E-01 | 2481449   | 2481572   | NC_000011.9  |
| cg07600374 | 1.06E-20 | 1.43E-22 | 1.11E+01 | 40.4415188 | 1.19E-01 | 134278787 | 134278910 | NC_000006.11 |
| cg12656740 | 1.07E-20 | 1.44E-22 | 1.11E+01 | 40.4391877 | 1.10E-01 | 205422437 | 205422560 | NC_000001.10 |
| cg08013557 | 1.07E-20 | 1.44E-22 | 1.11E+01 | 40.4353415 | 2.38E-01 | 147115043 | 147115166 | NC_000003.11 |
| cg08094235 | 1.07E-20 | 1.45E-22 | 1.11E+01 | 40.4339502 | 1.49E-01 | 3463558   | 3463681   | NC_000002.11 |
| cg12177001 | 1.08E-20 | 1.46E-22 | 1.11E+01 | 40.4244026 | 1.22E-01 | 94576148  | 94576271  | NC_000014.8  |
| cg18507379 | 1.09E-20 | 1.47E-22 | 1.11E+01 | 40.4188191 | 2.99E-01 | 140787507 | 140787630 | NC_000005.9  |
| cg08829841 | 1.09E-20 | 1.47E-22 | 1.11E+01 | 40.4184102 | 2.16E-01 | 129535348 | 129535471 | NC_000010.10 |
| cg13067139 | 1.09E-20 | 1.47E-22 | 1.11E+01 | 40.4182822 | 8.90E-02 | 155221277 | 155221400 | NC_000001.10 |
| cg24342610 | 1.09E-20 | 1.48E-22 | 1.11E+01 | 40.4123145 | 1.19E-01 | 50331002  | 50331125  | NC_000003.11 |
| cg08080923 | 1.10E-20 | 1.49E-22 | 1.11E+01 | 40.4056263 | 1.33E-01 | 47763943  | 47764066  | NC_000019.9  |
| cg08893692 | 1.10E-20 | 1.49E-22 | 1.11E+01 | 40.4039482 | 2.80E-01 | 72595741  | 72595864  | NC_000005.9  |
| cg22795216 | 1.10E-20 | 1.49E-22 | 1.11E+01 | 40.4030687 | 1.87E-01 | 47078649  | 47078772  | NC_000001.10 |
| cg07737063 | 1.10E-20 | 1.50E-22 | 1.11E+01 | 40.4000521 | 2.23E-01 | 1486341   | 1486464   | NC_000011.9  |
| cg08296263 | 1.11E-20 | 1.51E-22 | 1.11E+01 | 40.391815  | 1.51E-01 | 28938433  | 28938556  | NC_000008.10 |

|            |          |          |          |            |          |           |           |              |
|------------|----------|----------|----------|------------|----------|-----------|-----------|--------------|
| cg08158952 | 1.12E-20 | 1.51E-22 | 1.11E+01 | 40.3882531 | 2.87E-01 | 57183016  | 57183139  | NC_000019.9  |
| cg01691522 | 1.12E-20 | 1.52E-22 | 1.11E+01 | 40.38483   | 1.20E-01 | 42998521  | 42998644  | NC_000005.9  |
| cg02852421 | 1.12E-20 | 1.52E-22 | 1.11E+01 | 40.3844186 | 2.53E-01 | 70372614  | 70372737  | NC_000015.9  |
| cg02119792 | 1.12E-20 | 1.52E-22 | 1.11E+01 | 40.3832292 | 3.00E-01 | 47010818  | 47010941  | NC_000021.8  |
| cg05543520 | 1.12E-20 | 1.52E-22 | 1.11E+01 | 40.3831329 | 2.20E-01 | 66500703  | 66500826  | NC_000003.11 |
| cg04562755 | 1.12E-20 | 1.52E-22 | 1.11E+01 | 40.3823968 | 1.67E-01 | 64090011  | 64090134  | NC_000001.10 |
| cg06431953 | 1.12E-20 | 1.52E-22 | 1.11E+01 | 40.3814788 | 1.65E-01 | 112630726 | 112630849 | NC_000010.10 |
| cg18794282 | 1.13E-20 | 1.54E-22 | 1.11E+01 | 40.3720011 | 1.44E-01 | 48253633  | 48253756  | NC_000008.10 |
| cg08627010 | 1.13E-20 | 1.54E-22 | 1.11E+01 | 40.3705716 | 1.67E-01 | 125651697 | 125651820 | NC_000010.10 |
| cg08776356 | 1.14E-20 | 1.55E-22 | 1.11E+01 | 40.3669146 | 2.66E-01 | 51186260  | 51186383  | NC_000016.9  |
| cg17176911 | 1.15E-20 | 1.56E-22 | 1.11E+01 | 40.3564782 | 1.58E-01 | 150261107 | 150261230 | NC_000003.11 |
| cg06762395 | 1.18E-20 | 1.60E-22 | 1.11E+01 | 40.3328114 | 1.23E-01 | 75263297  | 75263420  | NC_000016.9  |
| cg18725867 | 1.18E-20 | 1.60E-22 | 1.11E+01 | 40.332026  | 2.84E-01 | 37834958  | 37835081  | NC_000005.9  |
| cg25033990 | 1.19E-20 | 1.61E-22 | 1.11E+01 | 40.3240736 | 2.22E-01 | 32484014  | 32484137  | NC_000017.10 |
| cg00495201 | 1.19E-20 | 1.62E-22 | 1.11E+01 | 40.3229315 | 1.99E-01 | 137825623 | 137825746 | NC_000005.9  |
| cg06741803 | 1.19E-20 | 1.62E-22 | 1.11E+01 | 40.3187004 | 1.43E-01 | 46807522  | 46807645  | NC_000001.10 |
| cg13808641 | 1.20E-20 | 1.63E-22 | 1.11E+01 | 40.3124836 | 9.81E-02 | 96006533  | 96006656  | NC_000009.11 |
| cg25059165 | 1.20E-20 | 1.63E-22 | 1.11E+01 | 40.3124249 | 1.05E-01 | 33171467  | 33171590  | NC_000006.11 |
| cg05239811 | 1.20E-20 | 1.63E-22 | 1.11E+01 | 40.3118879 | 1.49E-01 | 31734147  | 31734270  | NC_000006.11 |
| cg22112000 | 1.20E-20 | 1.64E-22 | 1.11E+01 | 40.3084406 | 1.56E-01 | 5647182   | 5647305   | NC_000007.13 |
| cg22978326 | 1.21E-20 | 1.66E-22 | 1.11E+01 | 40.2970065 | 1.39E-01 | 171761287 | 171761410 | NC_000003.11 |
| cg07828377 | 1.24E-20 | 1.70E-22 | 1.11E+01 | 40.2730558 | 1.16E-01 | 109496    | 109619    | NC_000017.10 |
| cg26956874 | 1.24E-20 | 1.70E-22 | 1.11E+01 | 40.2722549 | 2.66E-01 | 237206643 | 237206766 | NC_000001.10 |
| cg05977017 | 1.25E-20 | 1.71E-22 | 1.11E+01 | 40.2691315 | 1.11E-01 | 126856298 | 126856421 | NC_000005.9  |
| cg15467759 | 1.25E-20 | 1.71E-22 | 1.11E+01 | 40.2668511 | 7.55E-02 | 149900327 | 149900450 | NC_000005.9  |

|            |          |          |          |            |          |           |           |              |
|------------|----------|----------|----------|------------|----------|-----------|-----------|--------------|
| cg17800654 | 1.25E-20 | 1.71E-22 | 1.11E+01 | 40.26489   | 2.39E-01 | 50888590  | 50888713  | NC_000001.10 |
| cg05560435 | 1.26E-20 | 1.72E-22 | 1.11E+01 | 40.2618986 | 2.66E-01 | 172671526 | 172671649 | NC_000005.9  |
| cg09850764 | 1.26E-20 | 1.73E-22 | 1.11E+01 | 40.2580896 | 1.49E-01 | 1406322   | 1406445   | NC_000016.9  |
| cg21584979 | 1.26E-20 | 1.73E-22 | 1.11E+01 | 40.254212  | 1.77E-01 | 235878176 | 235878299 | NC_000002.11 |
| cg26509731 | 1.27E-20 | 1.74E-22 | 1.11E+01 | 40.2513166 | 2.06E-01 | 80578590  | 80578713  | NC_000006.11 |
| cg26284985 | 1.29E-20 | 1.77E-22 | 1.11E+01 | 40.2353159 | 1.48E-01 | 110426718 | 110426841 | NC_000006.11 |
| cg05237641 | 1.30E-20 | 1.79E-22 | 1.11E+01 | 40.22088   | 1.75E-01 | 128077307 | 128077430 | NC_000010.10 |
| cg24872782 | 1.31E-20 | 1.79E-22 | 1.11E+01 | 40.2203168 | 2.87E-01 | 15500249  | 15500372  | NC_000005.9  |
| cg17397631 | 1.31E-20 | 1.80E-22 | 1.11E+01 | 40.2175411 | 2.78E-01 | 779880    | 780003    | NC_000004.11 |
| cg18755296 | 1.31E-20 | 1.81E-22 | 1.11E+01 | 40.2128967 | 2.77E-01 | 53852446  | 53852569  | NC_000008.10 |
| cg09321400 | 1.32E-20 | 1.81E-22 | 1.11E+01 | 40.2102075 | 2.73E-01 | 55690443  | 55690566  | NC_000016.9  |
| cg04224064 | 1.32E-20 | 1.82E-22 | 1.11E+01 | 40.2049732 | 2.37E-01 | 36992233  | 36992356  | NC_000014.8  |
| cg17035132 | 1.33E-20 | 1.83E-22 | 1.11E+01 | 40.200572  | 1.33E-01 | 2504160   | 2504283   | NC_000011.9  |
| cg20319604 | 1.33E-20 | 1.83E-22 | 1.11E+01 | 40.1996602 | 1.69E-01 | 44428936  | 44429059  | NC_000002.11 |
| cg27062795 | 1.38E-20 | 1.90E-22 | 1.11E+01 | 40.1621188 | 2.74E-01 | 56879613  | 56879736  | NC_000019.9  |
| cg04958794 | 1.38E-20 | 1.91E-22 | 1.11E+01 | 40.1586328 | 2.60E-01 | 97685274  | 97685397  | NC_000014.8  |
| cg15459774 | 1.39E-20 | 1.91E-22 | 1.11E+01 | 40.1560494 | 1.45E-01 | 8331529   | 8331652   | NC_000010.10 |
| cg15111065 | 1.40E-20 | 1.93E-22 | 1.11E+01 | 40.1475219 | 1.92E-01 | 129491725 | 129491848 | NC_000007.13 |
| cg10550033 | 1.42E-20 | 1.96E-22 | 1.11E+01 | 40.1323737 | 1.89E-01 | 59983940  | 59984063  | NC_000013.10 |
| cg05223720 | 1.42E-20 | 1.97E-22 | 1.11E+01 | 40.1290465 | 3.05E-01 | 71801793  | 71801916  | NC_000007.13 |
| cg16767916 | 1.43E-20 | 1.97E-22 | 1.11E+01 | 40.1247424 | 1.72E-01 | 105473128 | 105473251 | NC_000002.11 |
| cg01310768 | 1.44E-20 | 1.99E-22 | 1.11E+01 | 40.1177594 | 1.71E-01 | 89823130  | 89823253  | NC_000005.9  |
| cg00446413 | 1.44E-20 | 1.99E-22 | 1.11E+01 | 40.1145176 | 2.03E-01 | 153749206 | 153749329 | NC_000007.13 |
| cg17226356 | 1.44E-20 | 2.00E-22 | 1.11E+01 | 40.1133754 | 1.12E-01 | 48600317  | 48600440  | NC_000003.11 |
| cg08289056 | 1.45E-20 | 2.01E-22 | 1.11E+01 | 40.1057421 | 1.59E-01 | 6233666   | 6233789   | NC_000010.10 |



|            |          |          |          |            |          |           |           |              |
|------------|----------|----------|----------|------------|----------|-----------|-----------|--------------|
| cg02825211 | 1.46E-20 | 2.02E-22 | 1.11E+01 | 40.104195  | 1.88E-01 | 8808663   | 8808786   | NC_000019.9  |
| cg08351085 | 1.46E-20 | 2.02E-22 | 1.11E+01 | 40.1031493 | 1.59E-01 | 113980035 | 113980158 | NC_000013.10 |
| cg03044684 | 1.47E-20 | 2.04E-22 | 1.11E+01 | 40.0935966 | 2.66E-01 | 33248032  | 33248155  | NC_000021.8  |
| cg22821931 | 1.47E-20 | 2.04E-22 | 1.11E+01 | 40.0914134 | 1.55E-01 | 50800837  | 50800960  | NC_000007.13 |
| cg23665381 | 1.49E-20 | 2.07E-22 | 1.11E+01 | 40.079915  | 2.60E-01 | 5710098   | 5710221   | NC_000004.11 |
| cg02807786 | 1.50E-20 | 2.07E-22 | 1.11E+01 | 40.0754494 | 1.36E-01 | 125141606 | 125141729 | NC_000012.11 |
| cg15079455 | 1.52E-20 | 2.10E-22 | 1.11E+01 | 40.0621498 | 1.12E-01 | 127989828 | 127989951 | NC_000003.11 |
| cg11696200 | 1.54E-20 | 2.14E-22 | 1.11E+01 | 40.0432065 | 2.50E-01 | 33768013  | 33768136  | NC_000013.10 |
| cg06146977 | 1.59E-20 | 2.21E-22 | 1.11E+01 | 40.0144473 | 1.75E-01 | 43469464  | 43469587  | NC_000013.10 |
| cg15854333 | 1.59E-20 | 2.21E-22 | 1.11E+01 | 40.0138063 | 8.91E-02 | 33171765  | 33171888  | NC_000006.11 |
| cg08065657 | 1.65E-20 | 2.31E-22 | 1.11E+01 | 39.970653  | 2.27E-01 | 52223099  | 52223222  | NC_000019.9  |
| cg27031484 | 1.66E-20 | 2.31E-22 | 1.11E+01 | 39.9685675 | 1.78E-01 | 129502834 | 129502957 | NC_000007.13 |
| cg01295203 | 1.66E-20 | 2.32E-22 | 1.10E+01 | 39.9641195 | 2.28E-01 | 70984199  | 70984322  | NC_000008.10 |
| cg24656388 | 1.71E-20 | 2.38E-22 | 1.10E+01 | 39.9373903 | 1.43E-01 | 8085918   | 8086041   | NC_000006.11 |
| cg25799348 | 1.73E-20 | 2.42E-22 | 1.10E+01 | 39.9236644 | 1.26E-01 | 4729417   | 4729540   | NC_000007.13 |
| cg24345261 | 1.74E-20 | 2.44E-22 | 1.10E+01 | 39.9156524 | 7.85E-02 | 154196770 | 154196893 | NC_000004.11 |
| cg24733475 | 1.75E-20 | 2.45E-22 | 1.10E+01 | 39.9108575 | 7.11E-02 | 64694047  | 64694170  | NC_000014.8  |
| cg10477621 | 1.75E-20 | 2.46E-22 | 1.10E+01 | 39.9074417 | 2.22E-01 | 19184950  | 19185073  | NC_000007.13 |
| cg00431835 | 1.77E-20 | 2.47E-22 | 1.10E+01 | 39.9003493 | 1.76E-01 | 86796158  | 86796281  | NC_000016.9  |
| cg24469464 | 1.77E-20 | 2.48E-22 | 1.10E+01 | 39.8992625 | 2.03E-01 | 4860157   | 4860280   | NC_000004.11 |
| cg09753632 | 1.79E-20 | 2.52E-22 | 1.10E+01 | 39.8829454 | 8.34E-02 | 95413861  | 95413984  | NC_000005.9  |
| cg03059131 | 1.81E-20 | 2.53E-22 | 1.10E+01 | 39.8769145 | 3.10E-01 | 60296996  | 60297119  | NC_000015.9  |
| cg00128386 | 1.81E-20 | 2.53E-22 | 1.10E+01 | 39.8766157 | 1.80E-01 | 85665539  | 85665662  | NC_000016.9  |
| cg01610605 | 1.82E-20 | 2.55E-22 | 1.10E+01 | 39.8701597 | 2.11E-01 | 6069399   | 6069522   | NC_000016.9  |
| cg05083202 | 1.82E-20 | 2.56E-22 | 1.10E+01 | 39.8668155 | 1.69E-01 | 40146149  | 40146272  | NC_000021.8  |

|            |          |          |          |            |          |           |           |              |
|------------|----------|----------|----------|------------|----------|-----------|-----------|--------------|
| cg24032666 | 1.83E-20 | 2.57E-22 | 1.10E+01 | 39.8635085 | 2.89E-01 | 24814035  | 24814158  | NC_000008.10 |
| cg24284973 | 1.83E-20 | 2.57E-22 | 1.10E+01 | 39.8627918 | 2.74E-01 | 131780357 | 131780480 | NC_000011.9  |
| cg01693350 | 1.83E-20 | 2.58E-22 | 1.10E+01 | 39.8598677 | 1.81E-01 | 32452187  | 32452310  | NC_000011.9  |
| cg12894814 | 1.85E-20 | 2.61E-22 | 1.10E+01 | 39.8470852 | 1.66E-01 | 22232412  | 22232535  | NC_000007.13 |
| cg11829371 | 1.85E-20 | 2.61E-22 | 1.10E+01 | 39.8468739 | 1.04E-01 | 981724    | 981847    | NC_000017.10 |
| cg00418282 | 1.89E-20 | 2.66E-22 | 1.10E+01 | 39.8290654 | 2.73E-01 | 2740132   | 2740255   | NC_000005.9  |
| cg24297348 | 1.91E-20 | 2.69E-22 | 1.10E+01 | 39.8159256 | 8.74E-02 | 112706316 | 112706439 | NC_000003.11 |
| cg27532754 | 1.93E-20 | 2.72E-22 | 1.10E+01 | 39.8062371 | 1.72E-01 | 134905361 | 134905484 | NC_000010.10 |
| cg15310162 | 1.93E-20 | 2.73E-22 | 1.10E+01 | 39.8043927 | 2.20E-01 | 37852822  | 37852945  | NC_000021.8  |
| cg08575330 | 1.93E-20 | 2.73E-22 | 1.10E+01 | 39.8042258 | 2.79E-01 | 175199828 | 175199951 | NC_000002.11 |
| cg18180407 | 1.95E-20 | 2.75E-22 | 1.10E+01 | 39.7947007 | 2.06E-01 | 55047736  | 55047859  | NC_000001.10 |
| cg15040499 | 1.95E-20 | 2.76E-22 | 1.10E+01 | 39.7908469 | 1.48E-01 | 35861263  | 35861386  | NC_000017.10 |
| cg08407408 | 1.96E-20 | 2.77E-22 | 1.10E+01 | 39.7896535 | 1.77E-01 | 123007555 | 123007678 | NC_000012.11 |
| cg00812833 | 1.97E-20 | 2.79E-22 | 1.10E+01 | 39.7801456 | 2.82E-01 | 242687412 | 242687535 | NC_000001.10 |
| cg16428857 | 1.98E-20 | 2.80E-22 | 1.10E+01 | 39.7773507 | 1.18E-01 | 33248616  | 33248739  | NC_000006.11 |
| cg01150683 | 2.02E-20 | 2.86E-22 | 1.10E+01 | 39.7581658 | 1.91E-01 | 111216646 | 111216769 | NC_000010.10 |
| cg04775304 | 2.03E-20 | 2.88E-22 | 1.10E+01 | 39.7516126 | 7.32E-02 | 75266396  | 75266519  | NC_000016.9  |
| cg26710891 | 2.04E-20 | 2.88E-22 | 1.10E+01 | 39.7486763 | 1.84E-01 | 2324923   | 2325046   | NC_000017.10 |
| cg02743222 | 2.04E-20 | 2.88E-22 | 1.10E+01 | 39.7486751 | 2.15E-01 | 170736335 | 170736458 | NC_000005.9  |
| cg06482428 | 2.04E-20 | 2.89E-22 | 1.10E+01 | 39.748103  | 2.12E-01 | 21950173  | 21950296  | NC_000004.11 |
| cg20883194 | 2.04E-20 | 2.89E-22 | 1.10E+01 | 39.7455716 | 1.48E-01 | 45801769  | 45801892  | NC_000012.11 |
| cg20170533 | 2.05E-20 | 2.91E-22 | 1.10E+01 | 39.7408128 | 2.22E-01 | 51417846  | 51417969  | NC_000013.10 |
| cg26769186 | 2.06E-20 | 2.93E-22 | 1.10E+01 | 39.7337578 | 8.46E-02 | 196010417 | 196010540 | NC_000003.11 |
| cg10153349 | 2.10E-20 | 2.98E-22 | 1.10E+01 | 39.7170908 | 1.74E-01 | 13983893  | 13984016  | NC_000011.9  |
| cg15928093 | 2.13E-20 | 3.02E-22 | 1.10E+01 | 39.7025997 | 2.59E-01 | 130647213 | 130647336 | NC_000012.11 |

|            |          |          |          |            |          |           |           |              |
|------------|----------|----------|----------|------------|----------|-----------|-----------|--------------|
| cg18795809 | 2.14E-20 | 3.04E-22 | 1.10E+01 | 39.6978721 | 3.10E-01 | 10458531  | 10458654  | NC_000004.11 |
| cg18255813 | 2.14E-20 | 3.04E-22 | 1.10E+01 | 39.6970848 | 2.42E-01 | 7195966   | 7196089   | NC_000006.11 |
| cg07471614 | 2.15E-20 | 3.07E-22 | 1.10E+01 | 39.688029  | 2.08E-01 | 125855152 | 125855275 | NC_000008.10 |
| cg16823083 | 2.16E-20 | 3.07E-22 | 1.10E+01 | 39.6871186 | 2.08E-01 | 3567412   | 3567535   | NC_000001.10 |
| cg12974388 | 2.16E-20 | 3.07E-22 | 1.10E+01 | 39.6853543 | 2.86E-01 | 237072998 | 237073121 | NC_000002.11 |
| cg23495748 | 2.17E-20 | 3.10E-22 | 1.10E+01 | 39.6783979 | 3.04E-01 | 175223636 | 175223759 | NC_000005.9  |
| cg18129971 | 2.19E-20 | 3.13E-22 | 1.10E+01 | 39.6687028 | 1.04E-01 | 9884912   | 9885035   | NC_000018.9  |
| cg13138089 | 2.19E-20 | 3.13E-22 | 1.10E+01 | 39.6683133 | 1.32E-01 | 233251770 | 233251893 | NC_000002.11 |
| cg12212311 | 2.20E-20 | 3.14E-22 | 1.10E+01 | 39.6643238 | 2.51E-01 | 77558916  | 77559039  | NC_000018.9  |
| cg06223767 | 2.22E-20 | 3.16E-22 | 1.10E+01 | 39.6571221 | 3.14E-01 | 393616    | 393739    | NC_000006.11 |
| cg20634442 | 2.23E-20 | 3.19E-22 | 1.10E+01 | 39.6493346 | 2.33E-01 | 75524696  | 75524819  | NC_000017.10 |
| cg07281879 | 2.24E-20 | 3.19E-22 | 1.10E+01 | 39.6485955 | 1.89E-01 | 32459626  | 32459749  | NC_000011.9  |
| cg04304509 | 2.25E-20 | 3.21E-22 | 1.10E+01 | 39.6430506 | 1.48E-01 | 230215193 | 230215316 | NC_000001.10 |
| cg19755314 | 2.26E-20 | 3.22E-22 | 1.10E+01 | 39.63764   | 1.90E-01 | 143220    | 143343    | NC_000007.13 |
| cg10530883 | 2.28E-20 | 3.26E-22 | 1.10E+01 | 39.6278884 | 2.37E-01 | 3596207   | 3596330   | NC_000005.9  |
| cg19267861 | 2.31E-20 | 3.30E-22 | 1.10E+01 | 39.6145859 | 2.23E-01 | 61809724  | 61809847  | NC_000020.10 |
| cg24370974 | 2.32E-20 | 3.32E-22 | 1.10E+01 | 39.6095121 | 1.64E-01 | 31721356  | 31721479  | NC_000006.11 |
| cg26509915 | 2.33E-20 | 3.34E-22 | 1.10E+01 | 39.6039268 | 1.14E-01 | 69285633  | 69285756  | NC_000011.9  |
| cg16475811 | 2.34E-20 | 3.35E-22 | 1.10E+01 | 39.6013003 | 1.39E-01 | 69308726  | 69308849  | NC_000011.9  |
| cg19936016 | 2.34E-20 | 3.35E-22 | 1.10E+01 | 39.5997938 | 1.60E-01 | 1206045   | 1206168   | NC_000004.11 |
| cg11667086 | 2.34E-20 | 3.35E-22 | 1.10E+01 | 39.599768  | 1.90E-01 | 31848554  | 31848677  | NC_000011.9  |
| cg06360427 | 2.34E-20 | 3.35E-22 | 1.10E+01 | 39.5989158 | 2.23E-01 | 74962672  | 74962795  | NC_000018.9  |
| cg13686789 | 2.35E-20 | 3.37E-22 | 1.10E+01 | 39.5934196 | 1.04E-01 | 72655401  | 72655524  | NC_000009.11 |
| cg16332256 | 2.36E-20 | 3.38E-22 | 1.10E+01 | 39.5923217 | 2.93E-01 | 9534388   | 9534511   | NC_000004.11 |
| cg03926852 | 2.36E-20 | 3.38E-22 | 1.10E+01 | 39.5915816 | 9.43E-02 | 31681562  | 31681685  | NC_000006.11 |

|            |          |          |          |            |          |           |           |              |
|------------|----------|----------|----------|------------|----------|-----------|-----------|--------------|
| cg06593118 | 2.39E-20 | 3.42E-22 | 1.10E+01 | 39.5793042 | 2.28E-01 | 117711896 | 117712019 | NC_000011.9  |
| cg11254700 | 2.42E-20 | 3.48E-22 | 1.10E+01 | 39.5618735 | 2.81E-01 | 53561386  | 53561509  | NC_000019.9  |
| cg00922781 | 2.43E-20 | 3.49E-22 | 1.10E+01 | 39.5582001 | 2.02E-01 | 128077080 | 128077203 | NC_000010.10 |
| cg01851970 | 2.44E-20 | 3.50E-22 | 1.10E+01 | 39.5562164 | 9.62E-02 | 73579244  | 73579367  | NC_000005.9  |
| cg13023623 | 2.44E-20 | 3.51E-22 | 1.10E+01 | 39.5536253 | 2.28E-01 | 57276257  | 57276380  | NC_000014.8  |
| cg25953239 | 2.45E-20 | 3.53E-22 | 1.10E+01 | 39.5487268 | 2.41E-01 | 176982342 | 176982465 | NC_000002.11 |
| cg27428744 | 2.46E-20 | 3.54E-22 | 1.10E+01 | 39.5461001 | 1.68E-01 | 65508251  | 65508374  | NC_000016.9  |
| cg17529832 | 2.48E-20 | 3.56E-22 | 1.10E+01 | 39.5387289 | 2.78E-01 | 105461096 | 105461219 | NC_000002.11 |
| cg19949955 | 2.48E-20 | 3.57E-22 | 1.10E+01 | 39.5354836 | 2.31E-01 | 33402443  | 33402566  | NC_000014.8  |
| cg11776930 | 2.49E-20 | 3.59E-22 | 1.10E+01 | 39.5313123 | 1.43E-01 | 88427400  | 88427523  | NC_000010.10 |
| cg15362957 | 2.50E-20 | 3.60E-22 | 1.10E+01 | 39.5285183 | 1.55E-01 | 97684772  | 97684895  | NC_000014.8  |
| cg18856388 | 2.53E-20 | 3.64E-22 | 1.10E+01 | 39.5167535 | 3.08E-01 | 1875886   | 1876009   | NC_000005.9  |
| cg12751432 | 2.53E-20 | 3.65E-22 | 1.10E+01 | 39.5156921 | 3.06E-01 | 56015066  | 56015189  | NC_000008.10 |
| cg03680996 | 2.54E-20 | 3.65E-22 | 1.10E+01 | 39.5139258 | 1.62E-01 | 10725534  | 10725657  | NC_000006.11 |
| cg23151413 | 2.60E-20 | 3.75E-22 | 1.10E+01 | 39.4887846 | 1.88E-01 | 79350405  | 79350528  | NC_000002.11 |
| cg23169059 | 2.63E-20 | 3.79E-22 | 1.10E+01 | 39.477334  | 8.76E-02 | 167761204 | 167761327 | NC_000006.11 |
| cg22865128 | 2.64E-20 | 3.82E-22 | 1.10E+01 | 39.4699762 | 1.56E-01 | 241627555 | 241627678 | NC_000002.11 |
| cg26492368 | 2.65E-20 | 3.82E-22 | 1.10E+01 | 39.4690007 | 2.09E-01 | 22634733  | 22634856  | NC_000010.10 |
| cg22860848 | 2.66E-20 | 3.84E-22 | 1.10E+01 | 39.4653576 | 1.31E-01 | 241631345 | 241631468 | NC_000002.11 |
| cg14991487 | 2.66E-20 | 3.85E-22 | 1.10E+01 | 39.4619661 | 2.60E-01 | 176987404 | 176987527 | NC_000002.11 |
| cg13277254 | 2.66E-20 | 3.85E-22 | 1.10E+01 | 39.4618966 | 1.46E-01 | 171333801 | 171333924 | NC_000005.9  |
| cg06613775 | 2.67E-20 | 3.86E-22 | 1.10E+01 | 39.4585291 | 1.58E-01 | 88897441  | 88897564  | NC_000012.11 |
| cg20979061 | 2.68E-20 | 3.87E-22 | 1.10E+01 | 39.4570732 | 1.57E-01 | 49939949  | 49940072  | NC_000019.9  |
| cg19653979 | 2.76E-20 | 4.00E-22 | 1.10E+01 | 39.4245551 | 8.48E-02 | 11881462  | 11881585  | NC_000002.11 |
| cg27642784 | 2.81E-20 | 4.07E-22 | 1.10E+01 | 39.4059955 | 1.91E-01 | 157813670 | 157813793 | NC_000003.11 |

|            |          |          |          |            |          |           |           |              |
|------------|----------|----------|----------|------------|----------|-----------|-----------|--------------|
| cg06518628 | 2.81E-20 | 4.08E-22 | 1.10E+01 | 39.4044685 | 2.48E-01 | 104513704 | 104513827 | NC_000008.10 |
| cg10696504 | 2.85E-20 | 4.13E-22 | 1.10E+01 | 39.3916161 | 1.31E-01 | 25201541  | 25201664  | NC_000013.10 |
| cg13478737 | 2.95E-20 | 4.29E-22 | 1.10E+01 | 39.353695  | 1.46E-01 | 133807443 | 133807566 | NC_000009.11 |
| cg07401230 | 2.99E-20 | 4.35E-22 | 1.10E+01 | 39.3407607 | 3.18E-01 | 9763877   | 9764000   | NC_000008.10 |
| cg14038391 | 3.00E-20 | 4.37E-22 | 1.10E+01 | 39.3353977 | 2.87E-01 | 102900130 | 102900253 | NC_000010.10 |
| cg03229780 | 3.01E-20 | 4.38E-22 | 1.10E+01 | 39.3339784 | 2.70E-01 | 108238372 | 108238495 | NC_000012.11 |
| cg01815671 | 3.05E-20 | 4.44E-22 | 1.10E+01 | 39.3212229 | 2.77E-01 | 126113663 | 126113786 | NC_000003.11 |
| cg26246807 | 3.07E-20 | 4.47E-22 | 1.10E+01 | 39.3144161 | 3.44E-01 | 58095659  | 58095782  | NC_000019.9  |
| cg19528797 | 3.07E-20 | 4.47E-22 | 1.10E+01 | 39.3140913 | 1.74E-01 | 117468110 | 117468233 | NC_000012.11 |
| cg19326874 | 3.07E-20 | 4.47E-22 | 1.10E+01 | 39.3129065 | 1.50E-01 | 37903243  | 37903366  | NC_000004.11 |
| cg15985184 | 3.07E-20 | 4.48E-22 | 1.10E+01 | 39.3119226 | 2.37E-01 | 51830311  | 51830434  | NC_000019.9  |
| cg16975225 | 3.13E-20 | 4.56E-22 | 1.10E+01 | 39.2937281 | 1.60E-01 | 52437342  | 52437465  | NC_000012.11 |
| cg07527426 | 3.14E-20 | 4.58E-22 | 1.10E+01 | 39.2901612 | 8.42E-02 | 44125473  | 44125596  | NC_000006.11 |
| cg07575466 | 3.14E-20 | 4.59E-22 | 1.10E+01 | 39.2881957 | 1.56E-01 | 40769708  | 40769831  | NC_000001.10 |
| cg04437648 | 3.16E-20 | 4.61E-22 | 1.09E+01 | 39.2836604 | 9.55E-02 | 234627450 | 234627573 | NC_000002.11 |
| cg08621473 | 3.16E-20 | 4.61E-22 | 1.09E+01 | 39.2833151 | 2.34E-01 | 23734512  | 23734635  | NC_000013.10 |
| cg06356454 | 3.17E-20 | 4.62E-22 | 1.09E+01 | 39.2799571 | 1.67E-01 | 241631498 | 241631621 | NC_000002.11 |
| cg21298249 | 3.18E-20 | 4.65E-22 | 1.09E+01 | 39.2751897 | 1.49E-01 | 77734286  | 77734409  | NC_000015.9  |
| cg15047344 | 3.19E-20 | 4.66E-22 | 1.09E+01 | 39.2730942 | 1.16E-01 | 42997034  | 42997157  | NC_000006.11 |
| cg19909349 | 3.19E-20 | 4.66E-22 | 1.09E+01 | 39.2726604 | 2.94E-01 | 7118092   | 7118215   | NC_000018.9  |
| cg11814826 | 3.20E-20 | 4.68E-22 | 1.09E+01 | 39.2683915 | 9.74E-02 | 26666694  | 26666817  | NC_000017.10 |
| cg21049487 | 3.23E-20 | 4.73E-22 | 1.09E+01 | 39.2578315 | 1.50E-01 | 104328065 | 104328188 | NC_000012.11 |
| cg17594242 | 3.24E-20 | 4.74E-22 | 1.09E+01 | 39.2546656 | 1.34E-01 | 115654782 | 115654905 | NC_000001.10 |
| cg26034341 | 3.26E-20 | 4.78E-22 | 1.09E+01 | 39.2467297 | 2.15E-01 | 477314    | 477437    | NC_000017.10 |
| cg08333333 | 3.28E-20 | 4.81E-22 | 1.09E+01 | 39.2415343 | 2.12E-01 | 57182844  | 57182967  | NC_000019.9  |

|            |          |          |          |            |          |           |           |              |
|------------|----------|----------|----------|------------|----------|-----------|-----------|--------------|
| cg24555562 | 3.30E-20 | 4.83E-22 | 1.09E+01 | 39.2360918 | 1.57E-01 | 242827096 | 242827219 | NC_000002.11 |
| cg00503690 | 3.31E-20 | 4.85E-22 | 1.09E+01 | 39.2317008 | 1.15E-01 | 66431055  | 66431178  | NC_000003.11 |
| cg03124514 | 3.31E-20 | 4.86E-22 | 1.09E+01 | 39.2313076 | 1.38E-01 | 42943857  | 42943980  | NC_000005.9  |
| cg10534873 | 3.32E-20 | 4.87E-22 | 1.09E+01 | 39.2294932 | 1.84E-01 | 56591902  | 56592025  | NC_000014.8  |
| cg13723983 | 3.32E-20 | 4.87E-22 | 1.09E+01 | 39.2292697 | 1.08E-01 | 132383362 | 132383485 | NC_000009.11 |
| cg12012932 | 3.32E-20 | 4.87E-22 | 1.09E+01 | 39.22788   | 2.78E-01 | 30484033  | 30484156  | NC_000015.9  |
| cg13057167 | 3.36E-20 | 4.93E-22 | 1.09E+01 | 39.2168773 | 8.77E-02 | 103750565 | 103750688 | NC_000014.8  |
| cg06407390 | 3.36E-20 | 4.93E-22 | 1.09E+01 | 39.2164784 | 1.49E-01 | 134723491 | 134723614 | NC_000010.10 |
| cg24824686 | 3.36E-20 | 4.94E-22 | 1.09E+01 | 39.2150374 | 1.66E-01 | 129797777 | 129797900 | NC_000010.10 |
| cg05977002 | 3.37E-20 | 4.95E-22 | 1.09E+01 | 39.2122447 | 2.04E-01 | 92908051  | 92908174  | NC_000005.9  |
| cg01856023 | 3.38E-20 | 4.96E-22 | 1.09E+01 | 39.209537  | 1.34E-01 | 81969883  | 81970006  | NC_000016.9  |
| cg09048251 | 3.40E-20 | 5.00E-22 | 1.09E+01 | 39.2030432 | 2.18E-01 | 77253974  | 77254097  | NC_000005.9  |
| cg14364472 | 3.42E-20 | 5.02E-22 | 1.09E+01 | 39.1976101 | 2.15E-01 | 139394549 | 139394672 | NC_000009.11 |
| cg04653800 | 3.43E-20 | 5.04E-22 | 1.09E+01 | 39.1938951 | 2.16E-01 | 7910535   | 7910658   | NC_000002.11 |
| cg23089825 | 3.47E-20 | 5.11E-22 | 1.09E+01 | 39.1807409 | 2.73E-01 | 170630558 | 170630681 | NC_000001.10 |
| cg06548118 | 3.48E-20 | 5.13E-22 | 1.09E+01 | 39.1775634 | 1.53E-01 | 38812043  | 38812166  | NC_000002.11 |
| cg12559685 | 3.49E-20 | 5.14E-22 | 1.09E+01 | 39.1755462 | 8.48E-02 | 40839469  | 40839592  | NC_000017.10 |
| cg15107132 | 3.50E-20 | 5.15E-22 | 1.09E+01 | 39.1737505 | 1.35E-01 | 63991130  | 63991253  | NC_000011.9  |
| cg07065111 | 3.50E-20 | 5.15E-22 | 1.09E+01 | 39.1727977 | 2.50E-01 | 5831213   | 5831336   | NC_000002.11 |
| cg19672997 | 3.52E-20 | 5.19E-22 | 1.09E+01 | 39.1652005 | 2.02E-01 | 48144369  | 48144492  | NC_000014.8  |
| cg05181041 | 3.53E-20 | 5.20E-22 | 1.09E+01 | 39.163857  | 2.75E-01 | 128076941 | 128077064 | NC_000010.10 |
| cg17766651 | 3.53E-20 | 5.20E-22 | 1.09E+01 | 39.1628218 | 2.00E-01 | 76303552  | 76303675  | NC_000012.11 |
| cg17132535 | 3.55E-20 | 5.24E-22 | 1.09E+01 | 39.1564755 | 1.76E-01 | 47133191  | 47133314  | NC_000002.11 |
| cg17429000 | 3.60E-20 | 5.31E-22 | 1.09E+01 | 39.1426381 | 2.30E-01 | 76936636  | 76936759  | NC_000005.9  |
| cg01783070 | 3.61E-20 | 5.32E-22 | 1.09E+01 | 39.1399818 | 2.93E-01 | 21686293  | 21686416  | NC_000020.10 |

|            |          |          |          |            |          |           |           |              |
|------------|----------|----------|----------|------------|----------|-----------|-----------|--------------|
| cg18088415 | 3.61E-20 | 5.33E-22 | 1.09E+01 | 39.1396927 | 1.72E-01 | 31770979  | 31771102  | NC_000006.11 |
| cg05374412 | 3.61E-20 | 5.33E-22 | 1.09E+01 | 39.1395723 | 3.00E-01 | 82660727  | 82660850  | NC_000016.9  |
| cg07317062 | 3.61E-20 | 5.34E-22 | 1.09E+01 | 39.1376706 | 2.45E-01 | 27170388  | 27170511  | NC_000007.13 |
| cg25221239 | 3.63E-20 | 5.37E-22 | 1.09E+01 | 39.1323851 | 2.11E-01 | 131764419 | 131764542 | NC_000010.10 |
| cg09800974 | 3.64E-20 | 5.37E-22 | 1.09E+01 | 39.1310162 | 2.21E-01 | 178688272 | 178688395 | NC_000005.9  |
| cg06120492 | 3.64E-20 | 5.38E-22 | 1.09E+01 | 39.1306005 | 1.20E-01 | 38529102  | 38529225  | NC_000003.11 |
| cg27391267 | 3.65E-20 | 5.40E-22 | 1.09E+01 | 39.1262455 | 1.93E-01 | 58545333  | 58545456  | NC_000019.9  |
| cg04319844 | 3.66E-20 | 5.41E-22 | 1.09E+01 | 39.123957  | 9.60E-02 | 41519026  | 41519149  | NC_000008.10 |
| cg07266350 | 3.71E-20 | 5.49E-22 | 1.09E+01 | 39.109526  | 2.38E-01 | 49460521  | 49460644  | NC_000003.11 |
| cg13876553 | 3.72E-20 | 5.51E-22 | 1.09E+01 | 39.106588  | 1.94E-01 | 426894    | 427017    | NC_000009.11 |
| cg08701621 | 3.72E-20 | 5.51E-22 | 1.09E+01 | 39.1061298 | 3.33E-01 | 58570419  | 58570542  | NC_000019.9  |
| cg22562383 | 3.73E-20 | 5.52E-22 | 1.09E+01 | 39.1046271 | 2.41E-01 | 1123154   | 1123277   | NC_000005.9  |
| cg11510891 | 3.73E-20 | 5.53E-22 | 1.09E+01 | 39.1025641 | 1.51E-01 | 41053747  | 41053870  | NC_000013.10 |
| cg14780068 | 3.76E-20 | 5.57E-22 | 1.09E+01 | 39.0961262 | 1.48E-01 | 201751846 | 201751969 | NC_000001.10 |
| cg07111441 | 3.76E-20 | 5.57E-22 | 1.09E+01 | 39.0948258 | 9.54E-02 | 47130423  | 47130546  | NC_000001.10 |
| cg21997746 | 3.76E-20 | 5.58E-22 | 1.09E+01 | 39.0937806 | 2.07E-01 | 22718216  | 22718339  | NC_000006.11 |
| cg09422450 | 3.78E-20 | 5.61E-22 | 1.09E+01 | 39.088288  | 2.18E-01 | 79623618  | 79623741  | NC_000016.9  |
| cg01729827 | 3.79E-20 | 5.62E-22 | 1.09E+01 | 39.086207  | 2.50E-01 | 54579084  | 54579207  | NC_000020.10 |
| cg09505233 | 3.80E-20 | 5.64E-22 | 1.09E+01 | 39.0825633 | 1.61E-01 | 133810087 | 133810210 | NC_000010.10 |
| cg14072515 | 3.89E-20 | 5.77E-22 | 1.09E+01 | 39.0605028 | 3.17E-01 | 125732604 | 125732727 | NC_000010.10 |
| cg00695558 | 3.96E-20 | 5.88E-22 | 1.09E+01 | 39.0415826 | 1.19E-01 | 42992137  | 42992260  | NC_000008.10 |
| cg02879159 | 3.96E-20 | 5.89E-22 | 1.09E+01 | 39.0396391 | 1.55E-01 | 30135449  | 30135572  | NC_000006.11 |
| cg24301352 | 3.96E-20 | 5.89E-22 | 1.09E+01 | 39.0395132 | 1.74E-01 | 3189957   | 3190080   | NC_000019.9  |
| cg14267754 | 4.00E-20 | 5.96E-22 | 1.09E+01 | 39.0288182 | 2.48E-01 | 99424203  | 99424326  | NC_000007.13 |
| cg05044994 | 4.02E-20 | 5.98E-22 | 1.09E+01 | 39.024804  | 1.13E-01 | 187896605 | 187896728 | NC_000003.11 |

|            |          |          |          |            |          |           |           |              |
|------------|----------|----------|----------|------------|----------|-----------|-----------|--------------|
| cg23231692 | 4.03E-20 | 6.00E-22 | 1.09E+01 | 39.0218604 | 9.29E-02 | 636167    | 636290    | NC_000011.9  |
| cg14944647 | 4.03E-20 | 6.00E-22 | 1.09E+01 | 39.0207251 | 2.54E-01 | 43602857  | 43602980  | NC_000011.9  |
| cg20721467 | 4.04E-20 | 6.02E-22 | 1.09E+01 | 39.018999  | 1.74E-01 | 76597927  | 76598050  | NC_000010.10 |
| cg25023379 | 4.04E-20 | 6.03E-22 | 1.09E+01 | 39.0169746 | 1.17E-01 | 70138712  | 70138835  | NC_000014.8  |
| cg02633363 | 4.07E-20 | 6.07E-22 | 1.09E+01 | 39.0097437 | 1.35E-01 | 149906179 | 149906302 | NC_000005.9  |
| cg05184456 | 4.08E-20 | 6.09E-22 | 1.09E+01 | 39.0066273 | 1.85E-01 | 145557639 | 145557762 | NC_000008.10 |
| cg02213971 | 4.11E-20 | 6.13E-22 | 1.09E+01 | 38.9995937 | 1.53E-01 | 69994230  | 69994353  | NC_000011.9  |
| cg13257146 | 4.12E-20 | 6.15E-22 | 1.09E+01 | 38.9974403 | 5.89E-02 | 42076143  | 42076266  | NC_000003.11 |
| cg09887059 | 4.16E-20 | 6.22E-22 | 1.09E+01 | 38.985994  | 2.58E-01 | 113916664 | 113916787 | NC_000012.11 |
| cg21178568 | 4.16E-20 | 6.22E-22 | 1.09E+01 | 38.9849828 | 1.06E-01 | 97390853  | 97390976  | NC_000009.11 |
| cg23877720 | 4.17E-20 | 6.24E-22 | 1.09E+01 | 38.9818876 | 2.38E-01 | 49815117  | 49815240  | NC_000007.13 |
| cg24425021 | 4.18E-20 | 6.26E-22 | 1.09E+01 | 38.9800876 | 2.69E-01 | 79177520  | 79177643  | NC_000013.10 |
| cg08146945 | 4.19E-20 | 6.28E-22 | 1.09E+01 | 38.9766683 | 1.76E-01 | 86538307  | 86538430  | NC_000016.9  |
| cg20597139 | 4.20E-20 | 6.29E-22 | 1.09E+01 | 38.9748905 | 8.41E-02 | 64451491  | 64451614  | NC_000015.9  |
| cg05916700 | 4.20E-20 | 6.29E-22 | 1.09E+01 | 38.9739426 | 1.39E-01 | 93130344  | 93130467  | NC_000012.11 |
| cg15672437 | 4.21E-20 | 6.31E-22 | 1.09E+01 | 38.971952  | 3.02E-01 | 113764555 | 113764678 | NC_000013.10 |
| cg24190603 | 4.21E-20 | 6.31E-22 | 1.09E+01 | 38.9712418 | 2.95E-01 | 84418433  | 84418556  | NC_000006.11 |
| cg07489048 | 4.24E-20 | 6.36E-22 | 1.09E+01 | 38.9641387 | 1.86E-01 | 29236898  | 29237021  | NC_000014.8  |
| cg06147743 | 4.25E-20 | 6.37E-22 | 1.09E+01 | 38.9613922 | 8.58E-02 | 42835588  | 42835711  | NC_000020.10 |
| cg23209575 | 4.26E-20 | 6.39E-22 | 1.09E+01 | 38.9585035 | 1.64E-01 | 77436344  | 77436467  | NC_000017.10 |
| cg12363472 | 4.27E-20 | 6.41E-22 | 1.09E+01 | 38.9554135 | 1.80E-01 | 166218867 | 166218990 | NC_000006.11 |
| cg17780246 | 4.31E-20 | 6.48E-22 | 1.09E+01 | 38.9454749 | 1.84E-01 | 54481467  | 54481590  | NC_000019.9  |
| cg12411994 | 4.31E-20 | 6.48E-22 | 1.09E+01 | 38.9451058 | 5.31E-02 | 150017070 | 150017193 | NC_000007.13 |
| cg13545633 | 4.32E-20 | 6.49E-22 | 1.09E+01 | 38.9435202 | 1.18E-01 | 75524350  | 75524473  | NC_000017.10 |
| cg01860957 | 4.32E-20 | 6.49E-22 | 1.09E+01 | 38.9435148 | 8.46E-02 | 78163790  | 78163913  | NC_000017.10 |



|            |          |          |          |            |          |           |           |              |
|------------|----------|----------|----------|------------|----------|-----------|-----------|--------------|
| cg04011497 | 4.32E-20 | 6.50E-22 | 1.09E+01 | 38.9420431 | 1.74E-01 | 78338052  | 78338175  | NC_000017.10 |
| cg25354617 | 4.33E-20 | 6.51E-22 | 1.09E+01 | 38.9402484 | 1.95E-01 | 3241813   | 3241936   | NC_000004.11 |
| cg12904880 | 4.39E-20 | 6.60E-22 | 1.09E+01 | 38.9269167 | 2.36E-01 | 30139832  | 30139955  | NC_000006.11 |
| cg18343862 | 4.39E-20 | 6.61E-22 | 1.09E+01 | 38.9248661 | 9.21E-02 | 10590003  | 10590126  | NC_000011.9  |
| cg25967031 | 4.48E-20 | 6.75E-22 | 1.09E+01 | 38.9038855 | 2.24E-01 | 27171203  | 27171326  | NC_000007.13 |
| cg10298052 | 4.48E-20 | 6.76E-22 | 1.09E+01 | 38.903243  | 2.16E-01 | 57391055  | 57391178  | NC_000010.10 |
| cg01472043 | 4.49E-20 | 6.77E-22 | 1.09E+01 | 38.9012643 | 1.45E-01 | 11868183  | 11868306  | NC_000010.10 |
| cg04619046 | 4.50E-20 | 6.79E-22 | 1.09E+01 | 38.8992274 | 1.77E-01 | 64541730  | 64541853  | NC_000011.9  |
| cg25219728 | 4.54E-20 | 6.85E-22 | 1.09E+01 | 38.8896282 | 1.37E-01 | 75895858  | 75895981  | NC_000004.11 |
| cg12072964 | 4.55E-20 | 6.86E-22 | 1.09E+01 | 38.8885953 | 3.22E-01 | 7117321   | 7117444   | NC_000018.9  |
| cg01323381 | 4.58E-20 | 6.91E-22 | 1.09E+01 | 38.8816555 | 2.54E-01 | 27184264  | 27184387  | NC_000007.13 |
| cg10144751 | 4.63E-20 | 6.99E-22 | 1.09E+01 | 38.870217  | 1.23E-01 | 1618846   | 1618969   | NC_000016.9  |
| cg04607024 | 4.66E-20 | 7.05E-22 | 1.09E+01 | 38.8615748 | 1.27E-01 | 67696204  | 67696327  | NC_000016.9  |
| cg24575234 | 4.68E-20 | 7.07E-22 | 1.09E+01 | 38.8580675 | 2.36E-01 | 136553884 | 136554007 | NC_000007.13 |
| cg06024951 | 4.69E-20 | 7.10E-22 | 1.09E+01 | 38.8547813 | 1.00E-01 | 74670386  | 74670509  | NC_000015.9  |
| cg06305026 | 4.71E-20 | 7.12E-22 | 1.09E+01 | 38.8518313 | 5.91E-02 | 155432132 | 155432255 | NC_000006.11 |
| cg09191036 | 4.71E-20 | 7.12E-22 | 1.09E+01 | 38.8512678 | 1.81E-01 | 9783363   | 9783486   | NC_000004.11 |
| cg16863382 | 4.72E-20 | 7.14E-22 | 1.09E+01 | 38.8488697 | 1.76E-01 | 75252695  | 75252818  | NC_000016.9  |
| cg13364311 | 4.75E-20 | 7.19E-22 | 1.09E+01 | 38.8423934 | 1.43E-01 | 222333289 | 222333412 | NC_000002.11 |
| cg22828305 | 4.78E-20 | 7.24E-22 | 1.09E+01 | 38.8347906 | 1.14E-01 | 124722991 | 124723114 | NC_000003.11 |
| cg14668632 | 4.78E-20 | 7.25E-22 | 1.09E+01 | 38.83413   | 1.19E-01 | 2872130   | 2872253   | NC_000007.13 |
| cg26212135 | 4.79E-20 | 7.25E-22 | 1.09E+01 | 38.833639  | 1.15E-01 | 3456947   | 3457070   | NC_000010.10 |
| cg27260891 | 4.83E-20 | 7.33E-22 | 1.09E+01 | 38.8225727 | 1.15E-01 | 70028721  | 70028844  | NC_000011.9  |
| cg10307632 | 4.86E-20 | 7.37E-22 | 1.09E+01 | 38.8179093 | 1.16E-01 | 206621802 | 206621925 | NC_000002.11 |
| cg01410878 | 4.88E-20 | 7.40E-22 | 1.09E+01 | 38.8135492 | 2.68E-01 | 32908285  | 32908408  | NC_000017.10 |

|            |          |          |          |            |          |           |           |              |
|------------|----------|----------|----------|------------|----------|-----------|-----------|--------------|
| cg24499462 | 4.88E-20 | 7.40E-22 | 1.09E+01 | 38.8133652 | 8.56E-02 | 37095576  | 37095699  | NC_000015.9  |
| cg26894523 | 4.89E-20 | 7.42E-22 | 1.09E+01 | 38.8110285 | 1.99E-01 | 107725    | 107848    | NC_000004.11 |
| cg09963962 | 4.90E-20 | 7.44E-22 | 1.09E+01 | 38.8077153 | 5.90E-02 | 64812414  | 64812537  | NC_000011.9  |
| cg20763327 | 4.93E-20 | 7.48E-22 | 1.09E+01 | 38.8027161 | 1.59E-01 | 16667384  | 16667507  | NC_000005.9  |
| cg18480906 | 5.00E-20 | 7.59E-22 | 1.09E+01 | 38.7879796 | 9.44E-02 | 14014169  | 14014292  | NC_000005.9  |
| cg13912117 | 5.02E-20 | 7.63E-22 | 1.09E+01 | 38.7830913 | 2.95E-01 | 132054555 | 132054678 | NC_000008.10 |
| cg21676440 | 5.04E-20 | 7.67E-22 | 1.09E+01 | 38.7782421 | 2.49E-01 | 134493324 | 134493447 | NC_000006.11 |
| cg11220663 | 5.05E-20 | 7.68E-22 | 1.09E+01 | 38.7764123 | 2.33E-01 | 70994863  | 70994986  | NC_000002.11 |
| cg12824952 | 5.10E-20 | 7.76E-22 | 1.09E+01 | 38.7656892 | 1.08E-01 | 74042596  | 74042719  | NC_000011.9  |
| cg00111823 | 5.23E-20 | 7.96E-22 | 1.09E+01 | 38.7409774 | 1.07E-01 | 38479215  | 38479338  | NC_000022.10 |
| cg08141862 | 5.28E-20 | 8.06E-22 | 1.09E+01 | 38.7291481 | 1.23E-01 | 177458423 | 177458546 | NC_000003.11 |
| cg08217024 | 5.33E-20 | 8.13E-22 | 1.09E+01 | 38.7203417 | 3.13E-01 | 48145108  | 48145231  | NC_000014.8  |
| cg00163006 | 5.41E-20 | 8.26E-22 | 1.09E+01 | 38.7045903 | 1.17E-01 | 4417124   | 4417247   | NC_000017.10 |
| cg20496928 | 5.41E-20 | 8.26E-22 | 1.09E+01 | 38.7037997 | 9.66E-02 | 80179899  | 80180022  | NC_000017.10 |
| cg11381539 | 5.44E-20 | 8.31E-22 | 1.09E+01 | 38.6981615 | 2.69E-01 | 71801535  | 71801658  | NC_000007.13 |
| cg17423650 | 5.46E-20 | 8.35E-22 | 1.09E+01 | 38.6938563 | 1.12E-01 | 185218725 | 185218848 | NC_000001.10 |
| cg16475423 | 5.53E-20 | 8.45E-22 | 1.09E+01 | 38.6818572 | 1.04E-01 | 145106459 | 145106582 | NC_000002.11 |
| cg17374034 | 5.55E-20 | 8.48E-22 | 1.09E+01 | 38.6781024 | 5.63E-02 | 39000613  | 39000736  | NC_000015.9  |
| cg06813782 | 5.57E-20 | 8.53E-22 | 1.09E+01 | 38.6726925 | 1.51E-01 | 31046836  | 31046959  | NC_000020.10 |
| cg17509681 | 5.58E-20 | 8.54E-22 | 1.09E+01 | 38.6717293 | 1.68E-01 | 37930596  | 37930719  | NC_000008.10 |
| cg18403551 | 5.61E-20 | 8.58E-22 | 1.09E+01 | 38.6660451 | 2.99E-01 | 140770306 | 140770429 | NC_000003.11 |
| cg01331275 | 5.61E-20 | 8.59E-22 | 1.09E+01 | 38.6651878 | 1.98E-01 | 9908576   | 9908699   | NC_000002.11 |
| cg22702328 | 5.66E-20 | 8.68E-22 | 1.09E+01 | 38.6555645 | 2.29E-01 | 50235965  | 50236088  | NC_000017.10 |
| cg04492228 | 5.66E-20 | 8.68E-22 | 1.09E+01 | 38.655301  | 2.02E-01 | 8101513   | 8101636   | NC_000010.10 |
| cg02392025 | 5.69E-20 | 8.71E-22 | 1.09E+01 | 38.6510789 | 1.44E-01 | 56658502  | 56658625  | NC_000019.9  |

|            |          |          |          |            |          |           |           |              |
|------------|----------|----------|----------|------------|----------|-----------|-----------|--------------|
| cg23398109 | 5.79E-20 | 8.88E-22 | 1.09E+01 | 38.6322159 | 1.57E-01 | 26658767  | 26658890  | NC_000017.10 |
| cg04415798 | 5.81E-20 | 8.92E-22 | 1.09E+01 | 38.6279026 | 2.71E-01 | 37128586  | 37128709  | NC_000014.8  |
| cg21946698 | 5.81E-20 | 8.92E-22 | 1.09E+01 | 38.6277479 | 1.94E-01 | 326615    | 326738    | NC_000016.9  |
| cg14875171 | 5.84E-20 | 8.96E-22 | 1.09E+01 | 38.6232687 | 2.27E-01 | 50574196  | 50574319  | NC_000002.11 |
| cg25056332 | 5.91E-20 | 9.08E-22 | 1.08E+01 | 38.6099449 | 1.39E-01 | 64682466  | 64682589  | NC_000014.8  |
| cg25520960 | 5.93E-20 | 9.12E-22 | 1.08E+01 | 38.6058232 | 1.36E-01 | 219863984 | 219864107 | NC_000002.11 |
| cg06454760 | 5.97E-20 | 9.18E-22 | 1.08E+01 | 38.5993837 | 3.10E-01 | 58570427  | 58570550  | NC_000019.9  |
| cg23457506 | 5.98E-20 | 9.20E-22 | 1.08E+01 | 38.5974015 | 1.19E-01 | 30687453  | 30687576  | NC_000002.11 |
| cg11994674 | 5.98E-20 | 9.20E-22 | 1.08E+01 | 38.597279  | 2.42E-01 | 47547767  | 47547890  | NC_000017.10 |
| cg27528510 | 5.99E-20 | 9.21E-22 | 1.08E+01 | 38.5957935 | 2.68E-01 | 101006058 | 101006181 | NC_000007.13 |
| cg21790570 | 6.03E-20 | 9.29E-22 | 1.08E+01 | 38.5881974 | 6.05E-02 | 38133323  | 38133446  | NC_000017.10 |
| cg08330031 | 6.03E-20 | 9.30E-22 | 1.08E+01 | 38.5869374 | 2.15E-01 | 104623503 | 104623626 | NC_000010.10 |
| cg06462796 | 6.04E-20 | 9.30E-22 | 1.08E+01 | 38.5861852 | 1.54E-01 | 79634861  | 79634984  | NC_000009.11 |
| cg15365218 | 6.04E-20 | 9.32E-22 | 1.08E+01 | 38.584963  | 8.09E-02 | 33396859  | 33396982  | NC_000011.9  |
| cg23092421 | 6.05E-20 | 9.33E-22 | 1.08E+01 | 38.5836728 | 2.00E-01 | 49253689  | 49253812  | NC_000019.9  |
| cg20852557 | 6.06E-20 | 9.35E-22 | 1.08E+01 | 38.5814027 | 1.69E-01 | 184035519 | 184035642 | NC_000003.11 |
| cg00287312 | 6.08E-20 | 9.38E-22 | 1.08E+01 | 38.5785498 | 3.27E-01 | 53420425  | 53420548  | NC_000013.10 |
| cg03357798 | 6.11E-20 | 9.43E-22 | 1.08E+01 | 38.5726452 | 2.77E-01 | 69243285  | 69243408  | NC_000008.10 |
| cg04279973 | 6.11E-20 | 9.43E-22 | 1.08E+01 | 38.5724764 | 2.59E-01 | 23846968  | 23847091  | NC_000016.9  |
| cg22550847 | 6.14E-20 | 9.49E-22 | 1.08E+01 | 38.5665065 | 1.03E-01 | 79240082  | 79240205  | NC_000004.11 |
| cg07584981 | 6.17E-20 | 9.54E-22 | 1.08E+01 | 38.5616424 | 1.39E-01 | 38172854  | 38172977  | NC_000017.10 |
| cg01927745 | 6.19E-20 | 9.57E-22 | 1.08E+01 | 38.5580636 | 1.73E-01 | 72677723  | 72677846  | NC_000005.9  |
| cg26109568 | 6.20E-20 | 9.59E-22 | 1.08E+01 | 38.5562279 | 1.81E-01 | 105697685 | 105697808 | NC_000002.11 |
| cg24852548 | 6.22E-20 | 9.62E-22 | 1.08E+01 | 38.5528803 | 3.49E-01 | 57522632  | 57522755  | NC_000004.11 |
| cg05494604 | 6.23E-20 | 9.64E-22 | 1.08E+01 | 38.5505257 | 3.05E-01 | 23733862  | 23733985  | NC_000013.10 |

|            |          |          |          |            |          |           |           |              |
|------------|----------|----------|----------|------------|----------|-----------|-----------|--------------|
| cg00210133 | 6.24E-20 | 9.66E-22 | 1.08E+01 | 38.5493859 | 1.53E-01 | 50632714  | 50632837  | NC_000022.10 |
| cg19885761 | 6.27E-20 | 9.71E-22 | 1.08E+01 | 38.5440294 | 2.49E-01 | 175223646 | 175223769 | NC_000005.9  |
| cg12733154 | 6.30E-20 | 9.75E-22 | 1.08E+01 | 38.5397684 | 1.52E-01 | 69801321  | 69801444  | NC_000011.9  |
| cg21553980 | 6.34E-20 | 9.82E-22 | 1.08E+01 | 38.5328446 | 1.58E-01 | 109444    | 109567    | NC_000017.10 |
| cg27528817 | 6.34E-20 | 9.83E-22 | 1.08E+01 | 38.5320293 | 1.43E-01 | 72860419  | 72860542  | NC_000003.11 |
| cg03224572 | 6.39E-20 | 9.90E-22 | 1.08E+01 | 38.5242413 | 2.58E-01 | 97172012  | 97172135  | NC_000008.10 |
| cg06991300 | 6.41E-20 | 9.94E-22 | 1.08E+01 | 38.520644  | 2.44E-01 | 122301724 | 122301847 | NC_000004.11 |
| cg09916030 | 6.41E-20 | 9.95E-22 | 1.08E+01 | 38.5199347 | 5.86E-02 | 37949197  | 37949320  | NC_000021.8  |
| cg01003961 | 6.42E-20 | 9.97E-22 | 1.08E+01 | 38.5180277 | 1.67E-01 | 20824706  | 20824829  | NC_000007.13 |
| cg18225577 | 6.43E-20 | 9.97E-22 | 1.08E+01 | 38.5176374 | 1.81E-01 | 49713901  | 49714024  | NC_000019.9  |
| cg06785999 | 6.43E-20 | 9.98E-22 | 1.08E+01 | 38.5161081 | 2.94E-01 | 60975964  | 60976087  | NC_000014.8  |
| cg08087868 | 6.51E-20 | 1.01E-21 | 1.08E+01 | 38.5033147 | 1.86E-01 | 51188129  | 51188252  | NC_000016.9  |
| cg03704308 | 6.56E-20 | 1.02E-21 | 1.08E+01 | 38.4966053 | 2.86E-01 | 42533414  | 42533537  | NC_000007.13 |
| cg23121787 | 6.61E-20 | 1.03E-21 | 1.08E+01 | 38.4876818 | 1.92E-01 | 42211437  | 42211560  | NC_000015.9  |
| cg18473234 | 6.61E-20 | 1.03E-21 | 1.08E+01 | 38.4872197 | 1.19E-01 | 5097819   | 5097942   | NC_000019.9  |
| cg15618758 | 6.61E-20 | 1.03E-21 | 1.08E+01 | 38.4871764 | 1.63E-01 | 157168834 | 157168957 | NC_000006.11 |
| cg01540023 | 6.62E-20 | 1.03E-21 | 1.08E+01 | 38.485547  | 7.34E-02 | 98950565  | 98950688  | NC_000013.10 |
| cg17087899 | 6.73E-20 | 1.05E-21 | 1.08E+01 | 38.4686041 | 1.45E-01 | 151038698 | 151038821 | NC_000007.13 |
| cg03786842 | 6.81E-20 | 1.06E-21 | 1.08E+01 | 38.4555055 | 1.34E-01 | 127569751 | 127569874 | NC_000010.10 |
| cg09554406 | 6.83E-20 | 1.06E-21 | 1.08E+01 | 38.4531136 | 1.54E-01 | 49714044  | 49714167  | NC_000019.9  |
| cg06241792 | 6.86E-20 | 1.07E-21 | 1.08E+01 | 38.4492544 | 3.13E-01 | 21680669  | 21680792  | NC_000012.11 |
| cg16992627 | 6.90E-20 | 1.08E-21 | 1.08E+01 | 38.4419527 | 9.74E-02 | 32081610  | 32081733  | NC_000006.11 |
| cg16719582 | 6.91E-20 | 1.08E-21 | 1.08E+01 | 38.4402293 | 1.20E-01 | 133090971 | 133091094 | NC_000012.11 |
| cg20847228 | 6.93E-20 | 1.08E-21 | 1.08E+01 | 38.4366656 | 1.82E-01 | 50297087  | 50297210  | NC_000003.11 |
| cg09748975 | 6.95E-20 | 1.08E-21 | 1.08E+01 | 38.4350104 | 1.77E-01 | 4864532   | 4864655   | NC_000004.11 |

|            |          |          |          |            |          |           |           |              |
|------------|----------|----------|----------|------------|----------|-----------|-----------|--------------|
| cg04550052 | 6.96E-20 | 1.09E-21 | 1.08E+01 | 38.4320384 | 2.28E-01 | 51184355  | 51184478  | NC_000016.9  |
| cg04200485 | 7.00E-20 | 1.09E-21 | 1.08E+01 | 38.426255  | 1.26E-01 | 95900374  | 95900497  | NC_000011.9  |
| cg08146483 | 7.02E-20 | 1.10E-21 | 1.08E+01 | 38.4230691 | 2.74E-01 | 75602412  | 75602535  | NC_000001.10 |
| cg12982322 | 7.02E-20 | 1.10E-21 | 1.08E+01 | 38.4230531 | 1.74E-01 | 32449821  | 32449944  | NC_000011.9  |
| cg07302069 | 7.03E-20 | 1.10E-21 | 1.08E+01 | 38.4213232 | 3.71E-01 | 27196286  | 27196409  | NC_000007.13 |
| cg13791971 | 7.03E-20 | 1.10E-21 | 1.08E+01 | 38.420942  | 2.01E-01 | 97945584  | 97945707  | NC_000009.11 |
| cg10152131 | 7.04E-20 | 1.10E-21 | 1.08E+01 | 38.4205027 | 3.00E-01 | 51111677  | 51111800  | NC_000019.9  |
| cg06719900 | 7.06E-20 | 1.10E-21 | 1.08E+01 | 38.4161464 | 2.12E-01 | 109292894 | 109293017 | NC_000011.9  |
| cg14791193 | 7.08E-20 | 1.11E-21 | 1.08E+01 | 38.4139933 | 1.41E-01 | 16702476  | 16702599  | NC_000001.10 |
| cg05026135 | 7.10E-20 | 1.11E-21 | 1.08E+01 | 38.41087   | 2.73E-01 | 30713427  | 30713550  | NC_000019.9  |
| cg00021933 | 7.14E-20 | 1.12E-21 | 1.08E+01 | 38.4049145 | 1.16E-01 | 86082316  | 86082439  | NC_000001.10 |
| cg06727067 | 7.24E-20 | 1.13E-21 | 1.08E+01 | 38.3898008 | 1.85E-01 | 92582155  | 92582278  | NC_000005.9  |
| cg20310894 | 7.35E-20 | 1.15E-21 | 1.08E+01 | 38.3741148 | 1.22E-01 | 100125898 | 100126021 | NC_000014.8  |
| cg21578219 | 7.40E-20 | 1.16E-21 | 1.08E+01 | 38.367556  | 2.55E-01 | 18434542  | 18434665  | NC_000001.10 |
| cg16005494 | 7.48E-20 | 1.17E-21 | 1.08E+01 | 38.3554589 | 1.89E-01 | 70597713  | 70597836  | NC_000007.13 |
| cg03591376 | 7.52E-20 | 1.18E-21 | 1.08E+01 | 38.3492248 | 8.21E-02 | 45998201  | 45998324  | NC_000019.9  |
| cg22250605 | 7.57E-20 | 1.19E-21 | 1.08E+01 | 38.3422086 | 1.49E-01 | 189804187 | 189804310 | NC_000003.11 |
| cg13057576 | 7.57E-20 | 1.19E-21 | 1.08E+01 | 38.3420795 | 2.07E-01 | 64692154  | 64692277  | NC_000014.8  |
| cg12552402 | 7.65E-20 | 1.20E-21 | 1.08E+01 | 38.331885  | 1.37E-01 | 72083379  | 72083502  | NC_000012.11 |
| cg00573165 | 7.68E-20 | 1.21E-21 | 1.08E+01 | 38.327147  | 1.28E-01 | 20250849  | 20250972  | NC_000001.10 |
| cg04905644 | 7.68E-20 | 1.21E-21 | 1.08E+01 | 38.3271117 | 1.99E-01 | 28938493  | 28938616  | NC_000008.10 |
| cg18374393 | 7.71E-20 | 1.21E-21 | 1.08E+01 | 38.3231412 | 1.82E-01 | 105737848 | 105737971 | NC_000014.8  |
| cg11326311 | 7.73E-20 | 1.22E-21 | 1.08E+01 | 38.3199872 | 1.61E-01 | 58400854  | 58400977  | NC_000011.9  |
| cg12091642 | 7.75E-20 | 1.22E-21 | 1.08E+01 | 38.3177965 | 3.08E-01 | 61104566  | 61104689  | NC_000014.8  |
| cg05142982 | 7.81E-20 | 1.23E-21 | 1.08E+01 | 38.3097354 | 3.12E-01 | 495736    | 495859    | NC_000008.10 |

|            |          |          |          |            |          |           |           |              |
|------------|----------|----------|----------|------------|----------|-----------|-----------|--------------|
| cg18098286 | 7.81E-20 | 1.23E-21 | 1.08E+01 | 38.3088159 | 8.53E-02 | 234544271 | 234544394 | NC_000002.11 |
| cg23154526 | 7.83E-20 | 1.23E-21 | 1.08E+01 | 38.3065775 | 2.40E-01 | 60297323  | 60297446  | NC_000015.9  |
| cg14098847 | 8.02E-20 | 1.27E-21 | 1.08E+01 | 38.2810028 | 2.47E-01 | 101923218 | 101923341 | NC_000014.8  |
| cg00874589 | 8.04E-20 | 1.27E-21 | 1.08E+01 | 38.2784885 | 1.08E-01 | 112405614 | 112405737 | NC_000003.11 |
| cg27445278 | 8.09E-20 | 1.28E-21 | 1.08E+01 | 38.2723044 | 1.48E-01 | 26961465  | 26961588  | NC_000022.10 |
| cg06193628 | 8.09E-20 | 1.28E-21 | 1.08E+01 | 38.2718185 | 1.93E-01 | 228526145 | 228526268 | NC_000002.11 |
| cg23484951 | 8.09E-20 | 1.28E-21 | 1.08E+01 | 38.271295  | 2.24E-01 | 144241407 | 144241530 | NC_000008.10 |
| cg02230017 | 8.12E-20 | 1.28E-21 | 1.08E+01 | 38.2674966 | 2.89E-01 | 6069019   | 6069142   | NC_000016.9  |
| cg00851532 | 8.15E-20 | 1.29E-21 | 1.08E+01 | 38.2642061 | 1.93E-01 | 64680245  | 64680368  | NC_000014.8  |
| cg21287017 | 8.17E-20 | 1.29E-21 | 1.08E+01 | 38.2611507 | 8.53E-02 | 9498109   | 9498232   | NC_000020.10 |
| cg05404010 | 8.23E-20 | 1.30E-21 | 1.08E+01 | 38.2528407 | 2.55E-01 | 51186211  | 51186334  | NC_000016.9  |
| cg15437741 | 8.27E-20 | 1.31E-21 | 1.08E+01 | 38.2482249 | 1.58E-01 | 80194576  | 80194699  | NC_000017.10 |
| cg26552361 | 8.32E-20 | 1.32E-21 | 1.08E+01 | 38.2411988 | 9.31E-02 | 172293806 | 172293929 | NC_000005.9  |
| cg11049828 | 8.33E-20 | 1.32E-21 | 1.08E+01 | 38.239912  | 6.18E-02 | 69290831  | 69290954  | NC_000011.9  |
| cg11300341 | 8.47E-20 | 1.34E-21 | 1.08E+01 | 38.2226195 | 1.48E-01 | 17689562  | 17689685  | NC_000017.10 |
| cg03058660 | 8.48E-20 | 1.34E-21 | 1.08E+01 | 38.2206856 | 2.24E-01 | 48919198  | 48919321  | NC_000019.9  |
| cg14603098 | 8.50E-20 | 1.35E-21 | 1.08E+01 | 38.2184134 | 2.97E-01 | 32484259  | 32484382  | NC_000017.10 |
| cg16670554 | 8.53E-20 | 1.35E-21 | 1.08E+01 | 38.2150902 | 2.19E-01 | 68118985  | 68119108  | NC_000015.9  |
| cg18919209 | 8.54E-20 | 1.35E-21 | 1.08E+01 | 38.2138034 | 1.14E-01 | 96012039  | 96012162  | NC_000011.9  |
| cg10168149 | 8.65E-20 | 1.37E-21 | 1.08E+01 | 38.2000859 | 2.62E-01 | 200335558 | 200335681 | NC_000002.11 |
| cg21154627 | 8.69E-20 | 1.38E-21 | 1.08E+01 | 38.194589  | 2.56E-01 | 170303190 | 170303313 | NC_000003.11 |
| cg25136495 | 8.74E-20 | 1.39E-21 | 1.08E+01 | 38.1887318 | 2.28E-01 | 6729718   | 6729841   | NC_000012.11 |
| cg03426602 | 8.78E-20 | 1.39E-21 | 1.08E+01 | 38.1847725 | 1.79E-01 | 227312417 | 227312540 | NC_000002.11 |
| cg16417374 | 8.85E-20 | 1.41E-21 | 1.08E+01 | 38.1762427 | 1.89E-01 | 26098310  | 26098433  | NC_000001.10 |
| cg27111250 | 8.90E-20 | 1.42E-21 | 1.08E+01 | 38.1695454 | 2.14E-01 | 81111177  | 81111300  | NC_000004.11 |

|            |          |          |          |            |          |           |           |              |
|------------|----------|----------|----------|------------|----------|-----------|-----------|--------------|
| cg14874750 | 8.93E-20 | 1.42E-21 | 1.08E+01 | 38.1660796 | 3.05E-01 | 101006063 | 101006186 | NC_000007.13 |
| cg09686443 | 8.96E-20 | 1.42E-21 | 1.08E+01 | 38.163237  | 2.40E-01 | 126113658 | 126113781 | NC_000003.11 |
| cg20629316 | 8.96E-20 | 1.43E-21 | 1.08E+01 | 38.163052  | 2.44E-01 | 64413782  | 64413905  | NC_000001.10 |
| cg06178310 | 8.97E-20 | 1.43E-21 | 1.08E+01 | 38.1613182 | 5.41E-02 | 190105653 | 190105776 | NC_000003.11 |
| cg05749855 | 8.97E-20 | 1.43E-21 | 1.08E+01 | 38.1607649 | 2.21E-01 | 89472771  | 89472894  | NC_000016.9  |
| cg02187214 | 8.97E-20 | 1.43E-21 | 1.08E+01 | 38.1606774 | 1.85E-01 | 86599468  | 86599591  | NC_000016.9  |
| cg06051411 | 9.06E-20 | 1.44E-21 | 1.08E+01 | 38.1516336 | 2.06E-01 | 73044991  | 73045114  | NC_000017.10 |
| cg14667871 | 9.11E-20 | 1.45E-21 | 1.08E+01 | 38.1452436 | 2.54E-01 | 15500833  | 15500956  | NC_000005.9  |
| cg11847933 | 9.12E-20 | 1.45E-21 | 1.08E+01 | 38.1436046 | 1.60E-01 | 227130394 | 227130517 | NC_000001.10 |
| cg03209854 | 9.15E-20 | 1.46E-21 | 1.08E+01 | 38.140256  | 2.36E-01 | 5140003   | 5140126   | NC_000005.9  |
| cg05030680 | 9.16E-20 | 1.46E-21 | 1.08E+01 | 38.1394659 | 2.63E-01 | 111542366 | 111542489 | NC_000004.11 |
| cg16508028 | 9.17E-20 | 1.46E-21 | 1.08E+01 | 38.1380837 | 1.60E-01 | 145678763 | 145678886 | NC_000008.10 |
| cg00761700 | 9.19E-20 | 1.47E-21 | 1.08E+01 | 38.1349957 | 1.63E-01 | 95727673  | 95727796  | NC_000014.8  |
| cg22686881 | 9.25E-20 | 1.48E-21 | 1.08E+01 | 38.1288077 | 1.79E-01 | 170737255 | 170737378 | NC_000005.9  |
| cg08167286 | 9.25E-20 | 1.48E-21 | 1.08E+01 | 38.1284095 | 8.58E-02 | 31779529  | 31779652  | NC_000006.11 |
| cg17436134 | 9.25E-20 | 1.48E-21 | 1.08E+01 | 38.1280607 | 2.68E-01 | 119536288 | 119536411 | NC_000001.10 |
| cg03413355 | 9.30E-20 | 1.48E-21 | 1.08E+01 | 38.1232367 | 1.50E-01 | 56537579  | 56537702  | NC_000015.9  |
| cg19443257 | 9.31E-20 | 1.49E-21 | 1.08E+01 | 38.1214364 | 3.23E-01 | 140770549 | 140770672 | NC_000003.11 |
| cg16787600 | 9.45E-20 | 1.51E-21 | 1.08E+01 | 38.1062559 | 3.17E-01 | 106400880 | 106401003 | NC_000010.10 |
| cg23356505 | 9.49E-20 | 1.52E-21 | 1.08E+01 | 38.1014387 | 9.84E-02 | 144613012 | 144613135 | NC_000006.11 |
| cg00379720 | 9.51E-20 | 1.52E-21 | 1.08E+01 | 38.0989523 | 2.27E-01 | 23185968  | 23186091  | NC_000019.9  |
| cg03929977 | 9.60E-20 | 1.54E-21 | 1.08E+01 | 38.0893436 | 2.57E-01 | 5019017   | 5019140   | NC_000012.11 |
| cg22791678 | 9.60E-20 | 1.54E-21 | 1.08E+01 | 38.0887516 | 1.99E-01 | 41552580  | 41552703  | NC_000006.11 |
| cg25762262 | 9.62E-20 | 1.54E-21 | 1.08E+01 | 38.0869783 | 1.18E-01 | 194056482 | 194056605 | NC_000003.11 |
| cg23208176 | 9.67E-20 | 1.55E-21 | 1.08E+01 | 38.0809474 | 2.82E-01 | 1876168   | 1876291   | NC_000005.9  |

|            |          |          |          |            |          |           |           |              |
|------------|----------|----------|----------|------------|----------|-----------|-----------|--------------|
| cg01259220 | 9.72E-20 | 1.56E-21 | 1.08E+01 | 38.0764036 | 1.61E-01 | 914964    | 915087    | NC_000007.13 |
| cg17040483 | 9.84E-20 | 1.58E-21 | 1.08E+01 | 38.0624994 | 1.92E-01 | 131221478 | 131221601 | NC_000007.13 |
| cg06162185 | 9.88E-20 | 1.58E-21 | 1.08E+01 | 38.0589121 | 1.70E-01 | 8546551   | 8546674   | NC_000010.10 |
| cg12727138 | 9.97E-20 | 1.60E-21 | 1.08E+01 | 38.0495674 | 1.88E-01 | 162102947 | 162103070 | NC_000002.11 |
| cg23901592 | 9.97E-20 | 1.60E-21 | 1.08E+01 | 38.0491049 | 1.97E-01 | 90126322  | 90126445  | NC_000014.8  |
| cg26931862 | 9.98E-20 | 1.60E-21 | 1.08E+01 | 38.0478912 | 1.95E-01 | 54349169  | 54349292  | NC_000012.11 |
| cg18063733 | 1.00E-19 | 1.61E-21 | 1.08E+01 | 38.0441902 | 2.92E-01 | 50265443  | 50265566  | NC_000005.9  |
| cg03385262 | 1.00E-19 | 1.61E-21 | 1.08E+01 | 38.0419661 | 1.17E-01 | 128890086 | 128890209 | NC_000004.11 |
| cg25684999 | 1.00E-19 | 1.61E-21 | 1.08E+01 | 38.0405035 | 2.55E-01 | 23480803  | 23480926  | NC_000010.10 |
| cg20333001 | 1.01E-19 | 1.63E-21 | 1.08E+01 | 38.0306507 | 1.62E-01 | 242212896 | 242213019 | NC_000002.11 |
| cg21647227 | 1.02E-19 | 1.64E-21 | 1.08E+01 | 38.0266167 | 2.22E-01 | 119527111 | 119527234 | NC_000001.10 |
| cg17789809 | 1.03E-19 | 1.66E-21 | 1.08E+01 | 38.0094326 | 2.00E-01 | 181343322 | 181343445 | NC_000003.11 |
| cg00688802 | 1.04E-19 | 1.66E-21 | 1.08E+01 | 38.008849  | 1.18E-01 | 227861715 | 227861838 | NC_000002.11 |
| cg15652169 | 1.04E-19 | 1.67E-21 | 1.08E+01 | 38.0056447 | 1.05E-01 | 141864511 | 141864634 | NC_000005.9  |
| cg27017251 | 1.05E-19 | 1.68E-21 | 1.08E+01 | 37.9979156 | 1.24E-01 | 22334553  | 22334676  | NC_000022.10 |
| cg02703822 | 1.07E-19 | 1.72E-21 | 1.08E+01 | 37.9780899 | 1.54E-01 | 81680007  | 81680130  | NC_000008.10 |
| cg00818229 | 1.07E-19 | 1.73E-21 | 1.08E+01 | 37.9729622 | 8.12E-02 | 40815902  | 40816025  | NC_000022.10 |
| cg12072376 | 1.08E-19 | 1.73E-21 | 1.08E+01 | 37.9684139 | 1.17E-01 | 76000521  | 76000644  | NC_000017.10 |
| cg11643022 | 1.08E-19 | 1.74E-21 | 1.08E+01 | 37.9627897 | 4.69E-02 | 141589945 | 141590068 | NC_000005.9  |
| cg14282050 | 1.09E-19 | 1.76E-21 | 1.08E+01 | 37.9546738 | 1.74E-01 | 20353615  | 20353738  | NC_000009.11 |
| cg27595860 | 1.10E-19 | 1.77E-21 | 1.08E+01 | 37.9466685 | 1.98E-01 | 145557636 | 145557759 | NC_000008.10 |
| cg01440556 | 1.10E-19 | 1.77E-21 | 1.08E+01 | 37.9460293 | 1.12E-01 | 242165309 | 242165432 | NC_000002.11 |
| cg13637871 | 1.10E-19 | 1.78E-21 | 1.08E+01 | 37.9423131 | 1.60E-01 | 130924728 | 130924851 | NC_000009.11 |
| cg23883696 | 1.13E-19 | 1.82E-21 | 1.07E+01 | 37.9213341 | 2.12E-01 | 70534298  | 70534421  | NC_000018.9  |
| cg02432280 | 1.13E-19 | 1.83E-21 | 1.07E+01 | 37.9147954 | 3.09E-01 | 152622368 | 152622491 | NC_000007.13 |



|            |          |          |          |            |          |           |           |              |
|------------|----------|----------|----------|------------|----------|-----------|-----------|--------------|
| cg10373086 | 1.14E-19 | 1.84E-21 | 1.07E+01 | 37.9083605 | 1.85E-01 | 111544286 | 111544409 | NC_000004.11 |
| cg07169046 | 1.14E-19 | 1.84E-21 | 1.07E+01 | 37.9071136 | 1.42E-01 | 39120381  | 39120504  | NC_000015.9  |
| cg01603847 | 1.14E-19 | 1.85E-21 | 1.07E+01 | 37.9057069 | 2.96E-01 | 6449461   | 6449584   | NC_000005.9  |
| cg22586653 | 1.14E-19 | 1.85E-21 | 1.07E+01 | 37.9043098 | 2.44E-01 | 115136098 | 115136221 | NC_000012.11 |
| cg04428163 | 1.15E-19 | 1.87E-21 | 1.07E+01 | 37.8951153 | 1.51E-01 | 1294021   | 1294144   | NC_000020.10 |
| cg23736843 | 1.15E-19 | 1.87E-21 | 1.07E+01 | 37.8948749 | 2.75E-01 | 113541915 | 113542038 | NC_000012.11 |
| cg26015019 | 1.16E-19 | 1.87E-21 | 1.07E+01 | 37.8920082 | 1.25E-01 | 11631138  | 11631261  | NC_000003.11 |
| cg00800512 | 1.16E-19 | 1.88E-21 | 1.07E+01 | 37.8875244 | 2.49E-01 | 58095518  | 58095641  | NC_000019.9  |
| cg01869554 | 1.16E-19 | 1.88E-21 | 1.07E+01 | 37.8862291 | 1.18E-01 | 90772557  | 90772680  | NC_000015.9  |
| cg24129977 | 1.17E-19 | 1.89E-21 | 1.07E+01 | 37.8807923 | 2.57E-01 | 1748872   | 1748995   | NC_000002.11 |
| cg06246941 | 1.18E-19 | 1.92E-21 | 1.07E+01 | 37.8688753 | 2.00E-01 | 45671708  | 45671831  | NC_000015.9  |
| cg26687072 | 1.19E-19 | 1.93E-21 | 1.07E+01 | 37.8618449 | 1.86E-01 | 46608345  | 46608468  | NC_000017.10 |
| cg02587316 | 1.19E-19 | 1.93E-21 | 1.07E+01 | 37.860338  | 3.10E-01 | 37096321  | 37096444  | NC_000019.9  |
| cg04577162 | 1.21E-19 | 1.96E-21 | 1.07E+01 | 37.8484036 | 1.81E-01 | 73667397  | 73667520  | NC_000007.13 |
| cg12824796 | 1.21E-19 | 1.96E-21 | 1.07E+01 | 37.8457841 | 2.84E-01 | 131768928 | 131769051 | NC_000010.10 |
| cg04276723 | 1.21E-19 | 1.97E-21 | 1.07E+01 | 37.8442356 | 2.10E-01 | 38670597  | 38670720  | NC_000007.13 |
| cg07187971 | 1.22E-19 | 1.98E-21 | 1.07E+01 | 37.8375765 | 1.54E-01 | 60481018  | 60481141  | NC_000018.9  |
| cg27009703 | 1.23E-19 | 2.00E-21 | 1.07E+01 | 37.8258969 | 1.52E-01 | 27204894  | 27205017  | NC_000007.13 |
| cg08295111 | 1.23E-19 | 2.00E-21 | 1.07E+01 | 37.8254969 | 1.58E-01 | 133866097 | 133866220 | NC_000005.9  |
| cg04389897 | 1.23E-19 | 2.01E-21 | 1.07E+01 | 37.8236199 | 3.22E-01 | 10398601  | 10398724  | NC_000006.11 |
| cg19094872 | 1.24E-19 | 2.02E-21 | 1.07E+01 | 37.8170574 | 1.66E-01 | 242065898 | 242066021 | NC_000002.11 |
| cg04923773 | 1.24E-19 | 2.02E-21 | 1.07E+01 | 37.8158214 | 7.58E-02 | 96161502  | 96161625  | NC_000012.11 |
| cg09618102 | 1.25E-19 | 2.03E-21 | 1.07E+01 | 37.8103899 | 2.69E-01 | 1747364   | 1747487   | NC_000002.11 |
| cg14023291 | 1.25E-19 | 2.03E-21 | 1.07E+01 | 37.8097166 | 1.68E-01 | 124615180 | 124615303 | NC_000009.11 |
| cg24334259 | 1.26E-19 | 2.04E-21 | 1.07E+01 | 37.8053365 | 1.01E-01 | 138311416 | 138311539 | NC_000003.11 |

|            |          |          |          |            |          |           |           |              |
|------------|----------|----------|----------|------------|----------|-----------|-----------|--------------|
| cg23007540 | 1.26E-19 | 2.06E-21 | 1.07E+01 | 37.7992377 | 1.71E-01 | 142179688 | 142179811 | NC_000008.10 |
| cg14730445 | 1.26E-19 | 2.06E-21 | 1.07E+01 | 37.7989128 | 2.55E-01 | 101603581 | 101603704 | NC_000012.11 |
| cg17575394 | 1.27E-19 | 2.06E-21 | 1.07E+01 | 37.7955201 | 1.12E-01 | 49248930  | 49249053  | NC_000012.11 |
| cg07780543 | 1.27E-19 | 2.07E-21 | 1.07E+01 | 37.7932457 | 2.30E-01 | 22094750  | 22094873  | NC_000012.11 |
| cg17007640 | 1.27E-19 | 2.07E-21 | 1.07E+01 | 37.7930154 | 1.95E-01 | 29243504  | 29243627  | NC_000014.8  |
| cg09647110 | 1.27E-19 | 2.07E-21 | 1.07E+01 | 37.7908967 | 1.55E-01 | 44772303  | 44772426  | NC_000002.11 |
| cg27254482 | 1.27E-19 | 2.08E-21 | 1.07E+01 | 37.7894295 | 2.26E-01 | 34398085  | 34398208  | NC_000021.8  |
| cg22466784 | 1.28E-19 | 2.09E-21 | 1.07E+01 | 37.7825957 | 1.21E-01 | 540176    | 540299    | NC_000007.13 |
| cg01405040 | 1.29E-19 | 2.10E-21 | 1.07E+01 | 37.7767368 | 2.56E-01 | 176964137 | 176964260 | NC_000002.11 |
| cg06870213 | 1.29E-19 | 2.11E-21 | 1.07E+01 | 37.7759751 | 2.06E-01 | 55444335  | 55444458  | NC_000006.11 |
| cg02799090 | 1.29E-19 | 2.11E-21 | 1.07E+01 | 37.7734497 | 1.54E-01 | 130508166 | 130508289 | NC_000010.10 |
| cg15817769 | 1.29E-19 | 2.11E-21 | 1.07E+01 | 37.7731228 | 2.03E-01 | 230272542 | 230272665 | NC_000001.10 |
| cg12159995 | 1.30E-19 | 2.11E-21 | 1.07E+01 | 37.7719736 | 1.79E-01 | 70398671  | 70398794  | NC_000011.9  |
| cg06746009 | 1.30E-19 | 2.13E-21 | 1.07E+01 | 37.7659315 | 2.05E-01 | 101896452 | 101896575 | NC_000007.13 |
| cg06496010 | 1.31E-19 | 2.13E-21 | 1.07E+01 | 37.7635396 | 1.18E-01 | 97201196  | 97201319  | NC_000002.11 |
| cg24727311 | 1.31E-19 | 2.14E-21 | 1.07E+01 | 37.7607472 | 2.76E-01 | 13424269  | 13424392  | NC_000008.10 |
| cg17526573 | 1.31E-19 | 2.14E-21 | 1.07E+01 | 37.7599909 | 3.10E-01 | 50574708  | 50574831  | NC_000002.11 |
| cg01532168 | 1.31E-19 | 2.14E-21 | 1.07E+01 | 37.7598141 | 2.47E-01 | 140715557 | 140715680 | NC_000008.10 |
| cg02347074 | 1.31E-19 | 2.15E-21 | 1.07E+01 | 37.7548995 | 1.98E-01 | 223155925 | 223156048 | NC_000002.11 |
| cg02812891 | 1.34E-19 | 2.19E-21 | 1.07E+01 | 37.7368198 | 1.52E-01 | 233251773 | 233251896 | NC_000002.11 |
| cg22724228 | 1.34E-19 | 2.20E-21 | 1.07E+01 | 37.7320043 | 1.14E-01 | 154826964 | 154827087 | NC_000006.11 |
| cg21517947 | 1.34E-19 | 2.20E-21 | 1.07E+01 | 37.7317333 | 2.93E-01 | 41167107  | 41167230  | NC_000008.10 |
| cg11539055 | 1.35E-19 | 2.21E-21 | 1.07E+01 | 37.7289339 | 1.07E-01 | 80886264  | 80886387  | NC_000004.11 |
| cg05375744 | 1.35E-19 | 2.21E-21 | 1.07E+01 | 37.7273791 | 1.36E-01 | 54634871  | 54634994  | NC_000019.9  |
| cg03063639 | 1.36E-19 | 2.22E-21 | 1.07E+01 | 37.7222922 | 3.36E-01 | 83776422  | 83776545  | NC_000015.9  |

|            |          |          |          |            |          |           |           |              |
|------------|----------|----------|----------|------------|----------|-----------|-----------|--------------|
| cg18324707 | 1.36E-19 | 2.23E-21 | 1.07E+01 | 37.7191574 | 2.57E-01 | 137531801 | 137531924 | NC_000007.13 |
| cg09897064 | 1.38E-19 | 2.26E-21 | 1.07E+01 | 37.7051206 | 1.02E-01 | 56188065  | 56188188  | NC_000020.10 |
| cg16144331 | 1.38E-19 | 2.27E-21 | 1.07E+01 | 37.7031788 | 1.19E-01 | 142251375 | 142251498 | NC_000008.10 |
| cg09051560 | 1.40E-19 | 2.29E-21 | 1.07E+01 | 37.6916925 | 6.61E-02 | 35118158  | 35118281  | NC_000006.11 |
| cg23003783 | 1.41E-19 | 2.32E-21 | 1.07E+01 | 37.6803994 | 2.13E-01 | 178422071 | 178422194 | NC_000005.9  |
| cg17663418 | 1.41E-19 | 2.32E-21 | 1.07E+01 | 37.679628  | 1.90E-01 | 184013877 | 184014000 | NC_000003.11 |
| cg07704235 | 1.46E-19 | 2.40E-21 | 1.07E+01 | 37.6461857 | 9.32E-02 | 46501202  | 46501325  | NC_000018.9  |
| cg00282426 | 1.46E-19 | 2.41E-21 | 1.07E+01 | 37.6435141 | 1.87E-01 | 136843224 | 136843347 | NC_000009.11 |
| cg17353412 | 1.46E-19 | 2.41E-21 | 1.07E+01 | 37.6413312 | 1.94E-01 | 27141774  | 27141897  | NC_000007.13 |
| cg17499719 | 1.47E-19 | 2.41E-21 | 1.07E+01 | 37.6401947 | 1.32E-01 | 17588410  | 17588533  | NC_000020.10 |
| cg05446629 | 1.47E-19 | 2.43E-21 | 1.07E+01 | 37.635232  | 2.88E-01 | 134281742 | 134281865 | NC_000011.9  |
| cg18767920 | 1.47E-19 | 2.43E-21 | 1.07E+01 | 37.6340064 | 1.49E-01 | 33048493  | 33048616  | NC_000018.9  |
| cg21097881 | 1.48E-19 | 2.43E-21 | 1.07E+01 | 37.6319767 | 3.31E-01 | 24323939  | 24324062  | NC_000007.13 |
| cg02596427 | 1.48E-19 | 2.44E-21 | 1.07E+01 | 37.6298087 | 9.42E-02 | 47295058  | 47295181  | NC_000002.11 |
| cg23663774 | 1.49E-19 | 2.45E-21 | 1.07E+01 | 37.6245354 | 3.11E-01 | 111555440 | 111555563 | NC_000004.11 |
| cg12001304 | 1.50E-19 | 2.48E-21 | 1.07E+01 | 37.6152871 | 2.94E-01 | 229045020 | 229045143 | NC_000002.11 |
| cg19826115 | 1.52E-19 | 2.50E-21 | 1.07E+01 | 37.6043037 | 8.37E-02 | 143673332 | 143673455 | NC_000002.11 |
| cg10550245 | 1.52E-19 | 2.51E-21 | 1.07E+01 | 37.6017576 | 1.58E-01 | 48141749  | 48141872  | NC_000007.13 |
| cg06159352 | 1.52E-19 | 2.52E-21 | 1.07E+01 | 37.5983032 | 3.53E-01 | 37487613  | 37487736  | NC_000007.13 |
| cg00562553 | 1.53E-19 | 2.52E-21 | 1.07E+01 | 37.5959166 | 1.81E-01 | 27169740  | 27169863  | NC_000007.13 |
| cg20672930 | 1.53E-19 | 2.53E-21 | 1.07E+01 | 37.5923363 | 1.39E-01 | 259396    | 259519    | NC_000012.11 |
| cg19054524 | 1.53E-19 | 2.53E-21 | 1.07E+01 | 37.5919758 | 2.47E-01 | 21686273  | 21686396  | NC_000020.10 |
| cg23783862 | 1.54E-19 | 2.55E-21 | 1.07E+01 | 37.5855972 | 1.58E-01 | 82658145  | 82658268  | NC_000008.10 |
| cg21548038 | 1.54E-19 | 2.55E-21 | 1.07E+01 | 37.5849706 | 5.03E-02 | 50517157  | 50517280  | NC_000014.8  |
| cg11251614 | 1.54E-19 | 2.55E-21 | 1.07E+01 | 37.5849301 | 1.03E-01 | 36839846  | 36839969  | NC_000006.11 |

|            |          |          |          |            |          |           |           |              |
|------------|----------|----------|----------|------------|----------|-----------|-----------|--------------|
| cg24061141 | 1.55E-19 | 2.56E-21 | 1.07E+01 | 37.5832225 | 2.44E-01 | 35293869  | 35293992  | NC_000007.13 |
| cg25001102 | 1.56E-19 | 2.57E-21 | 1.07E+01 | 37.5763654 | 2.20E-01 | 221068935 | 221069058 | NC_000001.10 |
| cg03335246 | 1.56E-19 | 2.58E-21 | 1.07E+01 | 37.57379   | 1.90E-01 | 4860431   | 4860554   | NC_000004.11 |
| cg27050153 | 1.56E-19 | 2.59E-21 | 1.07E+01 | 37.5695537 | 1.95E-01 | 102030110 | 102030233 | NC_000014.8  |
| cg13173552 | 1.57E-19 | 2.61E-21 | 1.07E+01 | 37.5642237 | 1.44E-01 | 16091599  | 16091722  | NC_000001.10 |
| cg14317001 | 1.58E-19 | 2.61E-21 | 1.07E+01 | 37.5621995 | 6.44E-02 | 144462776 | 144462899 | NC_000008.10 |
| cg02500960 | 1.58E-19 | 2.62E-21 | 1.07E+01 | 37.5580743 | 1.40E-01 | 8122233   | 8122356   | NC_000004.11 |
| cg17498296 | 1.58E-19 | 2.62E-21 | 1.07E+01 | 37.5575418 | 3.12E-01 | 124907540 | 124907663 | NC_000010.10 |
| cg05874561 | 1.58E-19 | 2.63E-21 | 1.07E+01 | 37.5565563 | 3.05E-01 | 154709828 | 154709951 | NC_000004.11 |
| cg13085403 | 1.59E-19 | 2.63E-21 | 1.07E+01 | 37.5545893 | 1.97E-01 | 232901128 | 232901251 | NC_000001.10 |
| cg10799492 | 1.61E-19 | 2.67E-21 | 1.07E+01 | 37.5398714 | 9.01E-02 | 42591850  | 42591973  | NC_000008.10 |
| cg02675546 | 1.61E-19 | 2.68E-21 | 1.07E+01 | 37.5365333 | 1.60E-01 | 29292730  | 29292853  | NC_000008.10 |
| cg02383130 | 1.62E-19 | 2.68E-21 | 1.07E+01 | 37.534831  | 3.02E-01 | 38670957  | 38671080  | NC_000007.13 |
| cg02197303 | 1.62E-19 | 2.68E-21 | 1.07E+01 | 37.5346244 | 1.43E-01 | 3240621   | 3240744   | NC_000004.11 |
| cg22846776 | 1.62E-19 | 2.69E-21 | 1.07E+01 | 37.5331483 | 1.72E-01 | 2324861   | 2324984   | NC_000017.10 |
| cg06597095 | 1.63E-19 | 2.70E-21 | 1.07E+01 | 37.5281722 | 1.44E-01 | 43480361  | 43480484  | NC_000005.9  |
| cg12627299 | 1.63E-19 | 2.72E-21 | 1.07E+01 | 37.5228558 | 1.32E-01 | 66444235  | 66444358  | NC_000011.9  |
| cg18275316 | 1.64E-19 | 2.74E-21 | 1.07E+01 | 37.5158107 | 1.89E-01 | 3607063   | 3607186   | NC_000005.9  |
| cg04430996 | 1.65E-19 | 2.75E-21 | 1.07E+01 | 37.510573  | 7.45E-02 | 591437    | 591560    | NC_000016.9  |
| cg13694927 | 1.65E-19 | 2.75E-21 | 1.07E+01 | 37.5105318 | 1.80E-01 | 27184712  | 27184835  | NC_000007.13 |
| cg02809746 | 1.65E-19 | 2.75E-21 | 1.07E+01 | 37.5101223 | 2.48E-01 | 49312033  | 49312156  | NC_000016.9  |
| cg03112087 | 1.65E-19 | 2.75E-21 | 1.07E+01 | 37.5100645 | 3.23E-01 | 142053720 | 142053843 | NC_000004.11 |
| cg20826024 | 1.66E-19 | 2.76E-21 | 1.07E+01 | 37.5079341 | 1.08E-01 | 31529154  | 31529277  | NC_000006.11 |
| cg09797337 | 1.66E-19 | 2.76E-21 | 1.07E+01 | 37.507259  | 2.19E-01 | 112709538 | 112709661 | NC_000013.10 |
| cg00845900 | 1.68E-19 | 2.80E-21 | 1.07E+01 | 37.4945318 | 1.50E-01 | 129931729 | 129931852 | NC_000007.13 |

|            |          |          |          |            |          |           |           |              |
|------------|----------|----------|----------|------------|----------|-----------|-----------|--------------|
| cg19505136 | 1.68E-19 | 2.80E-21 | 1.07E+01 | 37.4943592 | 2.50E-01 | 239506    | 239629    | NC_000003.11 |
| cg11183632 | 1.68E-19 | 2.81E-21 | 1.07E+01 | 37.4906092 | 2.68E-01 | 21503152  | 21503275  | NC_000020.10 |
| cg19304150 | 1.69E-19 | 2.83E-21 | 1.07E+01 | 37.48297   | 2.28E-01 | 114696350 | 114696473 | NC_000001.10 |
| cg24401026 | 1.69E-19 | 2.83E-21 | 1.07E+01 | 37.4823289 | 1.47E-01 | 136732287 | 136732410 | NC_000006.11 |
| cg19777853 | 1.70E-19 | 2.85E-21 | 1.07E+01 | 37.477015  | 8.43E-02 | 26643109  | 26643232  | NC_000001.10 |
| cg14938313 | 1.71E-19 | 2.85E-21 | 1.07E+01 | 37.4742746 | 9.66E-02 | 70028676  | 70028799  | NC_000011.9  |
| cg03146949 | 1.71E-19 | 2.86E-21 | 1.07E+01 | 37.470843  | 2.92E-01 | 56879662  | 56879785  | NC_000019.9  |
| cg21610839 | 1.72E-19 | 2.88E-21 | 1.07E+01 | 37.4665949 | 1.63E-01 | 23861312  | 23861435  | NC_000003.11 |
| cg25339566 | 1.72E-19 | 2.88E-21 | 1.07E+01 | 37.4655001 | 2.56E-01 | 67218165  | 67218288  | NC_000001.10 |
| cg01693830 | 1.73E-19 | 2.89E-21 | 1.07E+01 | 37.462072  | 1.48E-01 | 127790462 | 127790585 | NC_000003.11 |
| cg16850173 | 1.73E-19 | 2.90E-21 | 1.07E+01 | 37.457472  | 2.75E-01 | 140033611 | 140033734 | NC_000009.11 |
| cg11626496 | 1.74E-19 | 2.91E-21 | 1.07E+01 | 37.4552597 | 2.31E-01 | 25320388  | 25320511  | NC_000013.10 |
| cg15603568 | 1.74E-19 | 2.92E-21 | 1.07E+01 | 37.4518868 | 3.25E-01 | 105481283 | 105481406 | NC_000011.9  |
| cg01243371 | 1.75E-19 | 2.92E-21 | 1.07E+01 | 37.4503069 | 2.20E-01 | 86547386  | 86547509  | NC_000016.9  |
| cg08594218 | 1.76E-19 | 2.94E-21 | 1.07E+01 | 37.4449798 | 2.96E-01 | 46803008  | 46803131  | NC_000017.10 |
| cg18105665 | 1.77E-19 | 2.97E-21 | 1.07E+01 | 37.4353026 | 1.84E-01 | 93257417  | 93257540  | NC_000014.8  |
| cg04865659 | 1.77E-19 | 2.97E-21 | 1.07E+01 | 37.4352196 | 1.08E-01 | 90771840  | 90771963  | NC_000015.9  |
| cg17713613 | 1.77E-19 | 2.97E-21 | 1.07E+01 | 37.4339527 | 1.93E-01 | 21541765  | 21541888  | NC_000019.9  |
| cg05686497 | 1.78E-19 | 2.98E-21 | 1.07E+01 | 37.4309371 | 2.63E-01 | 127874587 | 127874710 | NC_000005.9  |
| cg02276973 | 1.79E-19 | 3.00E-21 | 1.07E+01 | 37.4239274 | 1.20E-01 | 90610486  | 90610609  | NC_000015.9  |
| cg13092806 | 1.82E-19 | 3.05E-21 | 1.07E+01 | 37.4095555 | 3.11E-01 | 177043255 | 177043378 | NC_000002.11 |
| cg13555335 | 1.82E-19 | 3.05E-21 | 1.07E+01 | 37.4091362 | 5.62E-02 | 140583757 | 140583880 | NC_000009.11 |
| cg27655671 | 1.82E-19 | 3.05E-21 | 1.07E+01 | 37.4074578 | 1.59E-01 | 38207741  | 38207864  | NC_000006.11 |
| cg08430009 | 1.82E-19 | 3.06E-21 | 1.07E+01 | 37.405251  | 2.95E-01 | 19138124  | 19138247  | NC_000022.10 |
| cg11334771 | 1.83E-19 | 3.06E-21 | 1.07E+01 | 37.4039386 | 2.63E-01 | 71955337  | 71955460  | NC_000011.9  |

|            |          |          |          |            |          |           |           |              |
|------------|----------|----------|----------|------------|----------|-----------|-----------|--------------|
| cg16509851 | 1.83E-19 | 3.06E-21 | 1.07E+01 | 37.4033106 | 2.14E-01 | 174430614 | 174430737 | NC_000004.11 |
| cg00073837 | 1.83E-19 | 3.07E-21 | 1.07E+01 | 37.40241   | 2.16E-01 | 223177008 | 223177131 | NC_000002.11 |
| cg00608779 | 1.83E-19 | 3.07E-21 | 1.07E+01 | 37.4015797 | 1.31E-01 | 132436490 | 132436613 | NC_000009.11 |
| cg21231400 | 1.83E-19 | 3.07E-21 | 1.07E+01 | 37.400808  | 2.23E-01 | 155108085 | 155108208 | NC_000005.9  |
| cg25522738 | 1.83E-19 | 3.08E-21 | 1.07E+01 | 37.3980939 | 1.68E-01 | 2416486   | 2416609   | NC_000007.13 |
| cg26814650 | 1.84E-19 | 3.09E-21 | 1.07E+01 | 37.3965171 | 1.47E-01 | 1269399   | 1269522   | NC_000001.10 |
| cg11662315 | 1.84E-19 | 3.10E-21 | 1.07E+01 | 37.3934274 | 5.46E-02 | 43717310  | 43717433  | NC_000021.8  |
| cg09825670 | 1.85E-19 | 3.10E-21 | 1.07E+01 | 37.3906917 | 1.50E-01 | 1611999   | 1612122   | NC_000001.10 |
| cg20195319 | 1.87E-19 | 3.14E-21 | 1.07E+01 | 37.3794212 | 8.96E-02 | 47568297  | 47568420  | NC_000007.13 |
| cg15549927 | 1.87E-19 | 3.15E-21 | 1.07E+01 | 37.3761384 | 1.73E-01 | 153749756 | 153749879 | NC_000007.13 |
| cg27165867 | 1.87E-19 | 3.15E-21 | 1.07E+01 | 37.3750912 | 6.08E-02 | 105738592 | 105738715 | NC_000014.8  |
| cg04254769 | 1.91E-19 | 3.21E-21 | 1.07E+01 | 37.357464  | 1.60E-01 | 141674673 | 141674796 | NC_000005.9  |
| cg10187707 | 1.91E-19 | 3.22E-21 | 1.07E+01 | 37.3553754 | 8.00E-02 | 49626842  | 49626965  | NC_000020.10 |
| cg27260772 | 1.91E-19 | 3.22E-21 | 1.07E+01 | 37.3529624 | 3.13E-01 | 50791202  | 50791325  | NC_000006.11 |
| cg26423824 | 1.92E-19 | 3.25E-21 | 1.07E+01 | 37.3463149 | 9.93E-02 | 25898825  | 25898948  | NC_000017.10 |
| cg12646649 | 1.93E-19 | 3.26E-21 | 1.07E+01 | 37.3408    | 2.83E-01 | 102987257 | 102987380 | NC_000010.10 |
| cg25923609 | 1.96E-19 | 3.31E-21 | 1.07E+01 | 37.3279999 | 2.92E-01 | 3607092   | 3607215   | NC_000005.9  |
| cg22294804 | 1.96E-19 | 3.31E-21 | 1.07E+01 | 37.3254984 | 1.05E-01 | 26484149  | 26484272  | NC_000008.10 |
| cg24219974 | 1.98E-19 | 3.36E-21 | 1.07E+01 | 37.3135354 | 1.66E-01 | 14729722  | 14729845  | NC_000006.11 |
| cg09013789 | 2.00E-19 | 3.38E-21 | 1.07E+01 | 37.3053243 | 8.04E-02 | 138776683 | 138776806 | NC_000007.13 |
| cg24637364 | 2.02E-19 | 3.42E-21 | 1.07E+01 | 37.2952666 | 2.62E-01 | 66259084  | 66259207  | NC_000001.10 |
| cg02215776 | 2.02E-19 | 3.43E-21 | 1.07E+01 | 37.2918667 | 1.05E-01 | 3116792   | 3116915   | NC_000010.10 |
| cg26549595 | 2.04E-19 | 3.45E-21 | 1.07E+01 | 37.2857757 | 1.58E-01 | 145048235 | 145048358 | NC_000008.10 |
| cg13251292 | 2.06E-19 | 3.50E-21 | 1.07E+01 | 37.2724216 | 1.21E-01 | 94790112  | 94790235  | NC_000014.8  |
| cg15880211 | 2.06E-19 | 3.50E-21 | 1.07E+01 | 37.2720764 | 1.64E-01 | 50250494  | 50250617  | NC_000022.10 |

|            |          |          |          |            |          |           |           |              |
|------------|----------|----------|----------|------------|----------|-----------|-----------|--------------|
| cg11073558 | 2.06E-19 | 3.50E-21 | 1.07E+01 | 37.2706512 | 2.46E-01 | 97171901  | 97172024  | NC_000008.10 |
| cg13615983 | 2.06E-19 | 3.50E-21 | 1.07E+01 | 37.2705906 | 1.27E-01 | 139746152 | 139746275 | NC_000009.11 |
| cg01561200 | 2.07E-19 | 3.52E-21 | 1.07E+01 | 37.2655134 | 1.43E-01 | 93176520  | 93176643  | NC_000001.10 |
| cg20302957 | 2.09E-19 | 3.55E-21 | 1.06E+01 | 37.2580576 | 1.02E-01 | 58870494  | 58870617  | NC_000011.9  |
| cg24248680 | 2.10E-19 | 3.56E-21 | 1.06E+01 | 37.2538355 | 1.75E-01 | 124610364 | 124610487 | NC_000010.10 |
| cg27058882 | 2.12E-19 | 3.60E-21 | 1.06E+01 | 37.2449999 | 1.30E-01 | 27187966  | 27188089  | NC_000017.10 |
| cg17647091 | 2.12E-19 | 3.60E-21 | 1.06E+01 | 37.2429313 | 1.46E-01 | 54474036  | 54474159  | NC_000012.11 |
| cg10538440 | 2.13E-19 | 3.63E-21 | 1.06E+01 | 37.2354393 | 1.31E-01 | 38117682  | 38117805  | NC_000021.8  |
| cg15711902 | 2.14E-19 | 3.63E-21 | 1.06E+01 | 37.2346327 | 3.01E-01 | 170630457 | 170630580 | NC_000001.10 |
| cg06659727 | 2.14E-19 | 3.64E-21 | 1.06E+01 | 37.2330144 | 2.08E-01 | 110959428 | 110959551 | NC_000013.10 |
| cg01845451 | 2.14E-19 | 3.65E-21 | 1.06E+01 | 37.2305519 | 1.47E-01 | 67805250  | 67805373  | NC_000011.9  |
| cg19064258 | 2.15E-19 | 3.66E-21 | 1.06E+01 | 37.2280921 | 2.32E-01 | 22826117  | 22826240  | NC_000016.9  |
| cg24239808 | 2.15E-19 | 3.66E-21 | 1.06E+01 | 37.2278287 | 6.71E-02 | 15641908  | 15642031  | NC_000003.11 |
| cg24053163 | 2.15E-19 | 3.66E-21 | 1.06E+01 | 37.2264285 | 1.83E-01 | 92503425  | 92503548  | NC_000014.8  |
| cg19098763 | 2.16E-19 | 3.68E-21 | 1.06E+01 | 37.2213253 | 2.80E-01 | 50513661  | 50513784  | NC_000001.10 |
| cg00955686 | 2.17E-19 | 3.69E-21 | 1.06E+01 | 37.2191448 | 5.79E-02 | 36620450  | 36620573  | NC_000001.10 |
| cg08189989 | 2.17E-19 | 3.70E-21 | 1.06E+01 | 37.2166785 | 2.83E-01 | 105459164 | 105459287 | NC_000002.11 |
| cg14848450 | 2.18E-19 | 3.71E-21 | 1.06E+01 | 37.2148022 | 2.28E-01 | 28590760  | 28590883  | NC_000010.10 |
| cg14987002 | 2.18E-19 | 3.72E-21 | 1.06E+01 | 37.2119151 | 9.03E-02 | 151496830 | 151496953 | NC_000004.11 |
| cg19379102 | 2.18E-19 | 3.72E-21 | 1.06E+01 | 37.2103701 | 1.09E-01 | 37576698  | 37576821  | NC_000022.10 |
| cg01009664 | 2.19E-19 | 3.73E-21 | 1.06E+01 | 37.2096028 | 2.79E-01 | 129693613 | 129693736 | NC_000003.11 |
| cg27219961 | 2.19E-19 | 3.74E-21 | 1.06E+01 | 37.2070511 | 8.04E-02 | 1692107   | 1692230   | NC_000008.10 |
| cg09236176 | 2.19E-19 | 3.74E-21 | 1.06E+01 | 37.2066853 | 2.89E-01 | 77179455  | 77179578  | NC_000017.10 |
| cg16707405 | 2.20E-19 | 3.75E-21 | 1.06E+01 | 37.2040623 | 2.65E-01 | 115152413 | 115152536 | NC_000005.9  |
| cg15885337 | 2.20E-19 | 3.75E-21 | 1.06E+01 | 37.2031709 | 2.81E-01 | 132813819 | 132813942 | NC_000011.9  |

|            |          |          |          |            |          |           |           |              |
|------------|----------|----------|----------|------------|----------|-----------|-----------|--------------|
| cg04228709 | 2.21E-19 | 3.76E-21 | 1.06E+01 | 37.1995486 | 1.35E-01 | 155537930 | 155538053 | NC_000006.11 |
| cg11965370 | 2.22E-19 | 3.78E-21 | 1.06E+01 | 37.194188  | 2.35E-01 | 131780946 | 131781069 | NC_000011.9  |
| cg02572033 | 2.23E-19 | 3.81E-21 | 1.06E+01 | 37.1871075 | 1.60E-01 | 217444    | 217567    | NC_000017.10 |
| cg15073906 | 2.24E-19 | 3.83E-21 | 1.06E+01 | 37.1814831 | 2.26E-01 | 178887722 | 178887845 | NC_000001.10 |
| cg22961814 | 2.26E-19 | 3.86E-21 | 1.06E+01 | 37.1747076 | 9.95E-02 | 112670508 | 112670631 | NC_000010.10 |
| cg06306260 | 2.26E-19 | 3.87E-21 | 1.06E+01 | 37.1732074 | 1.75E-01 | 99330962  | 99331085  | NC_000007.13 |
| cg02279670 | 2.31E-19 | 3.94E-21 | 1.06E+01 | 37.1530771 | 3.09E-01 | 79177195  | 79177318  | NC_000013.10 |
| cg17391741 | 2.31E-19 | 3.95E-21 | 1.06E+01 | 37.1515938 | 1.69E-01 | 141071381 | 141071504 | NC_000005.9  |
| cg12355110 | 2.31E-19 | 3.96E-21 | 1.06E+01 | 37.150367  | 1.96E-01 | 57617754  | 57617877  | NC_000019.9  |
| cg21516162 | 2.31E-19 | 3.96E-21 | 1.06E+01 | 37.1491001 | 1.97E-01 | 2953889   | 2954012   | NC_000007.13 |
| cg10185489 | 2.32E-19 | 3.98E-21 | 1.06E+01 | 37.1448248 | 9.48E-02 | 31079555  | 31079678  | NC_000006.11 |
| cg21660452 | 2.35E-19 | 4.02E-21 | 1.06E+01 | 37.134404  | 1.80E-01 | 64397807  | 64397930  | NC_000011.9  |
| cg12306195 | 2.35E-19 | 4.02E-21 | 1.06E+01 | 37.1333978 | 2.12E-01 | 5892350   | 5892473   | NC_000004.11 |
| cg16767801 | 2.35E-19 | 4.02E-21 | 1.06E+01 | 37.1329694 | 2.40E-01 | 21686548  | 21686671  | NC_000020.10 |
| cg20148389 | 2.35E-19 | 4.03E-21 | 1.06E+01 | 37.1310747 | 5.60E-02 | 41053543  | 41053666  | NC_000013.10 |
| cg14477205 | 2.36E-19 | 4.04E-21 | 1.06E+01 | 37.1281108 | 1.39E-01 | 20817076  | 20817199  | NC_000001.10 |
| cg05923687 | 2.41E-19 | 4.14E-21 | 1.06E+01 | 37.1047095 | 2.30E-01 | 63795711  | 63795834  | NC_000001.10 |
| cg19350360 | 2.43E-19 | 4.17E-21 | 1.06E+01 | 37.0967872 | 2.21E-01 | 100913948 | 100914071 | NC_000015.9  |
| cg09997532 | 2.43E-19 | 4.17E-21 | 1.06E+01 | 37.0966808 | 7.33E-02 | 11403999  | 11404122  | NC_000004.11 |
| cg14024321 | 2.43E-19 | 4.18E-21 | 1.06E+01 | 37.0954886 | 8.95E-02 | 95286432  | 95286555  | NC_000009.11 |
| cg23876072 | 2.43E-19 | 4.18E-21 | 1.06E+01 | 37.0944944 | 1.35E-01 | 69931921  | 69932044  | NC_000011.9  |
| cg14784253 | 2.46E-19 | 4.23E-21 | 1.06E+01 | 37.084473  | 1.34E-01 | 30473983  | 30474106  | NC_000007.13 |
| cg07198552 | 2.46E-19 | 4.24E-21 | 1.06E+01 | 37.0820669 | 2.30E-01 | 59828977  | 59829100  | NC_000020.10 |
| cg01419831 | 2.47E-19 | 4.25E-21 | 1.06E+01 | 37.0800647 | 3.10E-01 | 162283705 | 162283828 | NC_000002.11 |
| cg10681992 | 2.47E-19 | 4.25E-21 | 1.06E+01 | 37.0788125 | 1.01E-01 | 6964527   | 6964650   | NC_000004.11 |



|            |          |          |          |            |          |           |           |              |
|------------|----------|----------|----------|------------|----------|-----------|-----------|--------------|
| cg25144207 | 2.47E-19 | 4.26E-21 | 1.06E+01 | 37.0767874 | 1.73E-01 | 4864302   | 4864425   | NC_000004.11 |
| cg01615424 | 2.49E-19 | 4.29E-21 | 1.06E+01 | 37.0707631 | 2.48E-01 | 32639059  | 32639182  | NC_000015.9  |
| cg01718742 | 2.50E-19 | 4.31E-21 | 1.06E+01 | 37.0649158 | 2.27E-01 | 62070184  | 62070307  | NC_000016.9  |
| cg07645809 | 2.55E-19 | 4.39E-21 | 1.06E+01 | 37.0469483 | 7.21E-02 | 168677970 | 168678093 | NC_000006.11 |
| cg25575937 | 2.55E-19 | 4.40E-21 | 1.06E+01 | 37.0437025 | 1.59E-01 | 48414383  | 48414506  | NC_000003.11 |
| cg08053523 | 2.56E-19 | 4.41E-21 | 1.06E+01 | 37.0419432 | 1.25E-01 | 220026863 | 220026986 | NC_000002.11 |
| cg08629895 | 2.57E-19 | 4.44E-21 | 1.06E+01 | 37.0356357 | 1.34E-01 | 41787856  | 41787979  | NC_000017.10 |
| cg04433909 | 2.58E-19 | 4.45E-21 | 1.06E+01 | 37.0339452 | 1.06E-01 | 38368572  | 38368695  | NC_000015.9  |
| cg16656078 | 2.62E-19 | 4.53E-21 | 1.06E+01 | 37.0147653 | 1.85E-01 | 95278638  | 95278761  | NC_000005.9  |
| cg01246835 | 2.63E-19 | 4.55E-21 | 1.06E+01 | 37.0106904 | 2.27E-01 | 6703708   | 6703831   | NC_000007.13 |
| cg08091192 | 2.64E-19 | 4.56E-21 | 1.06E+01 | 37.008695  | 2.50E-01 | 147114986 | 147115109 | NC_000003.11 |
| cg05667838 | 2.64E-19 | 4.57E-21 | 1.06E+01 | 37.0079336 | 8.85E-02 | 31015282  | 31015405  | NC_000007.13 |
| cg26809635 | 2.66E-19 | 4.61E-21 | 1.06E+01 | 36.9989652 | 3.47E-01 | 54355087  | 54355210  | NC_000012.11 |
| cg26460092 | 2.69E-19 | 4.66E-21 | 1.06E+01 | 36.9874041 | 3.34E-01 | 83776420  | 83776543  | NC_000015.9  |
| cg03966669 | 2.69E-19 | 4.67E-21 | 1.06E+01 | 36.9865163 | 1.56E-01 | 4763799   | 4763922   | NC_000016.9  |
| cg25203481 | 2.70E-19 | 4.67E-21 | 1.06E+01 | 36.9860948 | 1.78E-01 | 2891082   | 2891205   | NC_000011.9  |
| cg01184975 | 2.70E-19 | 4.68E-21 | 1.06E+01 | 36.9840161 | 2.77E-01 | 114852091 | 114852214 | NC_000012.11 |
| cg15827843 | 2.70E-19 | 4.68E-21 | 1.06E+01 | 36.9829581 | 1.66E-01 | 1123765   | 1123888   | NC_000005.9  |
| cg17117243 | 2.71E-19 | 4.70E-21 | 1.06E+01 | 36.9795198 | 1.36E-01 | 109341365 | 109341488 | NC_000006.11 |
| cg11014373 | 2.76E-19 | 4.79E-21 | 1.06E+01 | 36.961117  | 3.12E-01 | 105479054 | 105479177 | NC_000002.11 |
| cg14043816 | 2.78E-19 | 4.83E-21 | 1.06E+01 | 36.9528781 | 1.60E-01 | 229166684 | 229166807 | NC_000001.10 |
| cg21385480 | 2.79E-19 | 4.84E-21 | 1.06E+01 | 36.9499397 | 1.76E-01 | 66454763  | 66454886  | NC_000003.11 |
| cg24202221 | 2.79E-19 | 4.85E-21 | 1.06E+01 | 36.9488858 | 1.33E-01 | 38694132  | 38694255  | NC_000002.11 |
| cg21681320 | 2.80E-19 | 4.86E-21 | 1.06E+01 | 36.9455662 | 1.80E-01 | 3011044   | 3011167   | NC_000001.10 |
| cg05311626 | 2.83E-19 | 4.93E-21 | 1.06E+01 | 36.9327637 | 1.17E-01 | 1320114   | 1320237   | NC_000011.9  |

|            |          |          |          |            |          |           |           |              |
|------------|----------|----------|----------|------------|----------|-----------|-----------|--------------|
| cg00473624 | 2.85E-19 | 4.96E-21 | 1.06E+01 | 36.9251811 | 2.34E-01 | 62139710  | 62139833  | NC_000011.9  |
| cg07914084 | 2.86E-19 | 4.97E-21 | 1.06E+01 | 36.9228631 | 3.23E-01 | 237205999 | 237206122 | NC_000001.10 |
| cg15841063 | 2.87E-19 | 5.00E-21 | 1.06E+01 | 36.9183045 | 2.56E-01 | 63789500  | 63789623  | NC_000001.10 |
| cg09268125 | 2.92E-19 | 5.08E-21 | 1.06E+01 | 36.901718  | 1.45E-01 | 67695975  | 67696098  | NC_000016.9  |
| cg24561661 | 2.93E-19 | 5.11E-21 | 1.06E+01 | 36.8971021 | 2.59E-01 | 176972812 | 176972935 | NC_000002.11 |
| cg10689404 | 2.94E-19 | 5.12E-21 | 1.06E+01 | 36.8941696 | 1.82E-01 | 35300645  | 35300768  | NC_000017.10 |
| cg15045356 | 2.95E-19 | 5.14E-21 | 1.06E+01 | 36.8901734 | 8.65E-02 | 11969590  | 11969713  | NC_000011.9  |
| cg24923694 | 2.95E-19 | 5.15E-21 | 1.06E+01 | 36.8887231 | 1.99E-01 | 25905747  | 25905870  | NC_000008.10 |
| cg20981086 | 2.96E-19 | 5.15E-21 | 1.06E+01 | 36.8882985 | 2.34E-01 | 101923256 | 101923379 | NC_000014.8  |
| cg00324719 | 2.96E-19 | 5.15E-21 | 1.06E+01 | 36.8875302 | 1.36E-01 | 1155602   | 1155725   | NC_000008.10 |
| cg08862035 | 2.96E-19 | 5.16E-21 | 1.06E+01 | 36.8871634 | 2.49E-01 | 2617432   | 2617555   | NC_000002.11 |
| cg14904079 | 2.97E-19 | 5.18E-21 | 1.06E+01 | 36.8819925 | 1.48E-01 | 103514655 | 103514778 | NC_000013.10 |
| cg17611647 | 2.99E-19 | 5.22E-21 | 1.06E+01 | 36.8756836 | 1.07E-01 | 75260857  | 75260980  | NC_000017.10 |
| cg06392753 | 2.99E-19 | 5.22E-21 | 1.06E+01 | 36.8744374 | 2.43E-01 | 102783282 | 102783405 | NC_000002.11 |
| cg14345012 | 3.04E-19 | 5.30E-21 | 1.06E+01 | 36.8593134 | 1.47E-01 | 26189240  | 26189363  | NC_000020.10 |
| cg16759221 | 3.04E-19 | 5.31E-21 | 1.06E+01 | 36.858211  | 1.64E-01 | 45003025  | 45003148  | NC_000017.10 |
| cg07220650 | 3.05E-19 | 5.33E-21 | 1.06E+01 | 36.8546557 | 1.29E-01 | 2336575   | 2336698   | NC_000001.10 |
| cg15393937 | 3.10E-19 | 5.42E-21 | 1.06E+01 | 36.8375161 | 2.26E-01 | 2161383   | 2161506   | NC_000011.9  |
| cg13982529 | 3.11E-19 | 5.44E-21 | 1.06E+01 | 36.8339612 | 2.47E-01 | 87974398  | 87974521  | NC_000005.9  |
| cg14252519 | 3.16E-19 | 5.52E-21 | 1.06E+01 | 36.818936  | 3.24E-01 | 137533851 | 137533974 | NC_000009.11 |
| cg20546778 | 3.17E-19 | 5.55E-21 | 1.06E+01 | 36.8134643 | 2.13E-01 | 75263599  | 75263722  | NC_000008.10 |
| cg14470895 | 3.18E-19 | 5.56E-21 | 1.06E+01 | 36.8116146 | 2.68E-01 | 115152431 | 115152554 | NC_000005.9  |
| cg17787134 | 3.19E-19 | 5.59E-21 | 1.06E+01 | 36.8070613 | 2.67E-01 | 47073522  | 47073645  | NC_000017.10 |
| cg22562942 | 3.20E-19 | 5.61E-21 | 1.06E+01 | 36.8027316 | 1.87E-01 | 24772309  | 24772432  | NC_000008.10 |
| cg25506432 | 3.22E-19 | 5.65E-21 | 1.06E+01 | 36.7973179 | 1.61E-01 | 27184065  | 27184188  | NC_000007.13 |

|            |          |          |          |            |          |           |           |              |
|------------|----------|----------|----------|------------|----------|-----------|-----------|--------------|
| cg00182639 | 3.22E-19 | 5.66E-21 | 1.06E+01 | 36.7952782 | 1.74E-01 | 114841671 | 114841794 | NC_000012.11 |
| cg03354113 | 3.23E-19 | 5.66E-21 | 1.06E+01 | 36.7949132 | 3.34E-01 | 79396793  | 79396916  | NC_000010.10 |
| cg05152503 | 3.23E-19 | 5.67E-21 | 1.06E+01 | 36.7939055 | 1.43E-01 | 30407098  | 30407221  | NC_000020.10 |
| cg17194668 | 3.27E-19 | 5.74E-21 | 1.06E+01 | 36.7815678 | 1.48E-01 | 85186517  | 85186640  | NC_000015.9  |
| cg15122439 | 3.27E-19 | 5.74E-21 | 1.06E+01 | 36.7805347 | 2.30E-01 | 200469026 | 200469149 | NC_000002.11 |
| cg12377641 | 3.27E-19 | 5.76E-21 | 1.06E+01 | 36.7781595 | 1.50E-01 | 11868179  | 11868302  | NC_000010.10 |
| cg00252733 | 3.28E-19 | 5.76E-21 | 1.06E+01 | 36.7777779 | 7.59E-02 | 102727239 | 102727362 | NC_000010.10 |
| cg13293266 | 3.28E-19 | 5.77E-21 | 1.06E+01 | 36.7755532 | 8.94E-02 | 118591684 | 118591807 | NC_000002.11 |
| cg16940012 | 3.34E-19 | 5.87E-21 | 1.06E+01 | 36.758451  | 2.52E-01 | 174159564 | 174159687 | NC_000005.9  |
| cg12647587 | 3.37E-19 | 5.94E-21 | 1.06E+01 | 36.7474789 | 1.48E-01 | 96954252  | 96954375  | NC_000010.10 |
| cg02767771 | 3.40E-19 | 5.98E-21 | 1.06E+01 | 36.7401274 | 2.96E-01 | 135043492 | 135043615 | NC_000010.10 |
| cg14568830 | 3.40E-19 | 5.99E-21 | 1.06E+01 | 36.738309  | 2.29E-01 | 23463243  | 23463366  | NC_000010.10 |
| cg13803688 | 3.41E-19 | 6.01E-21 | 1.06E+01 | 36.7359275 | 1.70E-01 | 110610452 | 110610575 | NC_000001.10 |
| cg16630482 | 3.44E-19 | 6.06E-21 | 1.06E+01 | 36.7274287 | 2.79E-01 | 133657751 | 133657874 | NC_000011.9  |
| cg11834658 | 3.44E-19 | 6.06E-21 | 1.06E+01 | 36.7270112 | 1.44E-01 | 21611224  | 21611347  | NC_000001.10 |
| cg17192315 | 3.47E-19 | 6.12E-21 | 1.06E+01 | 36.7179924 | 1.13E-01 | 61375622  | 61375745  | NC_000018.9  |
| cg01262036 | 3.49E-19 | 6.16E-21 | 1.06E+01 | 36.7109489 | 7.06E-02 | 105513535 | 105513658 | NC_000014.8  |
| cg18630667 | 3.49E-19 | 6.16E-21 | 1.06E+01 | 36.7108012 | 3.07E-01 | 37096323  | 37096446  | NC_000019.9  |
| cg08612137 | 3.50E-19 | 6.18E-21 | 1.06E+01 | 36.708032  | 2.54E-01 | 42533206  | 42533329  | NC_000007.13 |
| cg10719970 | 3.52E-19 | 6.23E-21 | 1.06E+01 | 36.700325  | 1.63E-01 | 41529932  | 41530055  | NC_000006.11 |
| cg04326540 | 3.54E-19 | 6.25E-21 | 1.06E+01 | 36.6963551 | 1.53E-01 | 105747951 | 105748074 | NC_000014.8  |
| cg04415176 | 3.55E-19 | 6.27E-21 | 1.06E+01 | 36.6930799 | 2.57E-01 | 176957842 | 176957965 | NC_000002.11 |
| cg04022561 | 3.55E-19 | 6.28E-21 | 1.06E+01 | 36.6924207 | 2.29E-01 | 50673245  | 50673368  | NC_000005.9  |
| cg00806490 | 3.57E-19 | 6.31E-21 | 1.06E+01 | 36.6870491 | 2.27E-01 | 82660873  | 82660996  | NC_000016.9  |
| cg11878331 | 3.58E-19 | 6.34E-21 | 1.06E+01 | 36.6829814 | 2.65E-01 | 72469507  | 72469630  | NC_000008.10 |

|            |          |          |          |            |          |           |           |              |
|------------|----------|----------|----------|------------|----------|-----------|-----------|--------------|
| cg07849944 | 3.62E-19 | 6.41E-21 | 1.06E+01 | 36.6709868 | 2.46E-01 | 6623738   | 6623861   | NC_000016.9  |
| cg26332560 | 3.64E-19 | 6.44E-21 | 1.06E+01 | 36.6665789 | 2.23E-01 | 132052887 | 132053010 | NC_000008.10 |
| cg19045729 | 3.70E-19 | 6.55E-21 | 1.06E+01 | 36.6496776 | 1.02E-01 | 104252630 | 104252753 | NC_000010.10 |
| cg25677548 | 3.70E-19 | 6.57E-21 | 1.06E+01 | 36.6472234 | 8.25E-02 | 41247912  | 41248035  | NC_000015.9  |
| cg08143349 | 3.72E-19 | 6.60E-21 | 1.06E+01 | 36.6423195 | 1.16E-01 | 27180888  | 27181011  | NC_000007.13 |
| cg23758305 | 3.72E-19 | 6.61E-21 | 1.06E+01 | 36.6408353 | 2.51E-01 | 70982867  | 70982990  | NC_000008.10 |
| cg19689151 | 3.72E-19 | 6.61E-21 | 1.06E+01 | 36.6407493 | 1.66E-01 | 105778041 | 105778164 | NC_000014.8  |
| cg20019985 | 3.73E-19 | 6.62E-21 | 1.06E+01 | 36.6390737 | 1.85E-01 | 32008961  | 32009084  | NC_000011.9  |
| cg07537750 | 3.74E-19 | 6.63E-21 | 1.06E+01 | 36.6374487 | 1.50E-01 | 64703510  | 64703633  | NC_000011.9  |
| cg01705052 | 3.75E-19 | 6.66E-21 | 1.06E+01 | 36.634091  | 3.07E-01 | 12996234  | 12996357  | NC_000016.9  |
| cg23312743 | 3.75E-19 | 6.67E-21 | 1.06E+01 | 36.632628  | 1.03E-01 | 64877311  | 64877434  | NC_000011.9  |
| cg02474076 | 3.78E-19 | 6.72E-21 | 1.06E+01 | 36.624882  | 1.30E-01 | 127223255 | 127223378 | NC_000007.13 |
| cg22747746 | 3.80E-19 | 6.75E-21 | 1.06E+01 | 36.6198468 | 2.34E-01 | 23564193  | 23564316  | NC_000008.10 |
| cg04718883 | 3.81E-19 | 6.77E-21 | 1.06E+01 | 36.6172677 | 1.08E-01 | 151346358 | 151346481 | NC_000006.11 |
| cg04020999 | 3.81E-19 | 6.77E-21 | 1.06E+01 | 36.6172324 | 1.02E-01 | 110352548 | 110352671 | NC_000012.11 |
| cg24013378 | 3.81E-19 | 6.77E-21 | 1.06E+01 | 36.6166911 | 7.45E-02 | 69480958  | 69481081  | NC_000011.9  |
| cg22001496 | 3.82E-19 | 6.79E-21 | 1.06E+01 | 36.6138658 | 3.25E-01 | 69243486  | 69243609  | NC_000008.10 |
| cg03696599 | 3.83E-19 | 6.83E-21 | 1.06E+01 | 36.6090284 | 2.02E-01 | 124782261 | 124782384 | NC_000002.11 |
| cg10055580 | 3.84E-19 | 6.84E-21 | 1.06E+01 | 36.60688   | 1.85E-01 | 46707781  | 46707904  | NC_000017.10 |
| cg01743841 | 3.85E-19 | 6.85E-21 | 1.06E+01 | 36.6049867 | 2.92E-01 | 61992494  | 61992617  | NC_000020.10 |
| cg26554592 | 3.88E-19 | 6.92E-21 | 1.06E+01 | 36.5953035 | 2.68E-01 | 108924398 | 108924521 | NC_000010.10 |
| cg02201132 | 3.89E-19 | 6.93E-21 | 1.06E+01 | 36.5946809 | 1.52E-01 | 242212884 | 242213007 | NC_000002.11 |
| cg05962092 | 3.94E-19 | 7.03E-21 | 1.05E+01 | 36.5799697 | 1.69E-01 | 49575664  | 49575787  | NC_000019.9  |
| cg26353287 | 3.94E-19 | 7.04E-21 | 1.05E+01 | 36.5786295 | 1.94E-01 | 42954090  | 42954213  | NC_000005.9  |
| cg13752649 | 3.94E-19 | 7.04E-21 | 1.05E+01 | 36.578446  | 1.38E-01 | 46608559  | 46608682  | NC_000017.10 |

|            |          |          |          |            |          |           |           |              |
|------------|----------|----------|----------|------------|----------|-----------|-----------|--------------|
| cg22818319 | 3.95E-19 | 7.05E-21 | 1.05E+01 | 36.5773241 | 1.53E-01 | 118372162 | 118372285 | NC_000010.10 |
| cg02510924 | 4.02E-19 | 7.19E-21 | 1.05E+01 | 36.5580456 | 6.06E-02 | 127802658 | 127802781 | NC_000003.11 |
| cg08712082 | 4.08E-19 | 7.30E-21 | 1.05E+01 | 36.5422675 | 1.66E-01 | 30673506  | 30673629  | NC_000007.13 |
| cg00816224 | 4.09E-19 | 7.32E-21 | 1.05E+01 | 36.5395649 | 2.12E-01 | 17083482  | 17083605  | NC_000022.10 |
| cg27317647 | 4.16E-19 | 7.44E-21 | 1.05E+01 | 36.5234082 | 1.70E-01 | 145562760 | 145562883 | NC_000008.10 |
| cg04674315 | 4.17E-19 | 7.46E-21 | 1.05E+01 | 36.5207823 | 1.79E-01 | 25897907  | 25898030  | NC_000007.13 |
| cg13301003 | 4.19E-19 | 7.50E-21 | 1.05E+01 | 36.5158346 | 1.93E-01 | 32449254  | 32449377  | NC_000011.9  |
| cg26477488 | 4.22E-19 | 7.56E-21 | 1.05E+01 | 36.507507  | 2.86E-01 | 153858936 | 153859059 | NC_000005.9  |
| cg06928993 | 4.23E-19 | 7.58E-21 | 1.05E+01 | 36.5045629 | 2.22E-01 | 49313421  | 49313544  | NC_000019.9  |
| cg00549566 | 4.28E-19 | 7.67E-21 | 1.05E+01 | 36.4927376 | 3.46E-01 | 37488253  | 37488376  | NC_000007.13 |
| cg07319253 | 4.29E-19 | 7.70E-21 | 1.05E+01 | 36.4898905 | 1.70E-01 | 17249877  | 17250000  | NC_000001.10 |
| cg27237300 | 4.29E-19 | 7.71E-21 | 1.05E+01 | 36.4880014 | 2.77E-01 | 34442292  | 34442415  | NC_000021.8  |
| cg26767593 | 4.31E-19 | 7.74E-21 | 1.05E+01 | 36.484046  | 1.63E-01 | 30015647  | 30015770  | NC_000008.10 |
| cg14486338 | 4.35E-19 | 7.82E-21 | 1.05E+01 | 36.4743731 | 1.92E-01 | 99440279  | 99440402  | NC_000008.10 |
| cg11501438 | 4.36E-19 | 7.83E-21 | 1.05E+01 | 36.473443  | 2.32E-01 | 20755949  | 20756072  | NC_000017.10 |
| cg17489908 | 4.36E-19 | 7.83E-21 | 1.05E+01 | 36.4728354 | 2.01E-01 | 8101566   | 8101689   | NC_000010.10 |
| cg18734428 | 4.38E-19 | 7.86E-21 | 1.05E+01 | 36.4685655 | 2.59E-01 | 84322277  | 84322400  | NC_000015.9  |
| cg06243400 | 4.40E-19 | 7.91E-21 | 1.05E+01 | 36.4632751 | 2.22E-01 | 19157813  | 19157936  | NC_000007.13 |
| cg02400787 | 4.46E-19 | 8.03E-21 | 1.05E+01 | 36.448273  | 5.98E-02 | 6399178   | 6399301   | NC_000012.11 |
| cg08383929 | 4.48E-19 | 8.06E-21 | 1.05E+01 | 36.443852  | 1.17E-01 | 180646754 | 180646877 | NC_000005.9  |
| cg11574745 | 4.50E-19 | 8.10E-21 | 1.05E+01 | 36.4387362 | 1.86E-01 | 5087031   | 5087154   | NC_000006.11 |
| cg23705060 | 4.51E-19 | 8.12E-21 | 1.05E+01 | 36.4367311 | 1.34E-01 | 132443404 | 132443527 | NC_000012.11 |
| cg10564112 | 4.56E-19 | 8.21E-21 | 1.05E+01 | 36.4260959 | 1.04E-01 | 91842149  | 91842272  | NC_000014.8  |
| cg04270085 | 4.59E-19 | 8.27E-21 | 1.05E+01 | 36.4180591 | 1.28E-01 | 12223636  | 12223759  | NC_000002.11 |
| cg22142922 | 4.60E-19 | 8.30E-21 | 1.05E+01 | 36.4155216 | 1.68E-01 | 69969430  | 69969553  | NC_000011.9  |

|            |          |          |          |            |          |           |           |              |
|------------|----------|----------|----------|------------|----------|-----------|-----------|--------------|
| cg04541474 | 4.61E-19 | 8.32E-21 | 1.05E+01 | 36.41304   | 3.03E-01 | 44873592  | 44873715  | NC_000001.10 |
| cg11462939 | 4.63E-19 | 8.35E-21 | 1.05E+01 | 36.4092608 | 6.70E-02 | 99606117  | 99606240  | NC_000013.10 |
| cg20501882 | 4.69E-19 | 8.47E-21 | 1.05E+01 | 36.3949754 | 1.60E-01 | 107542178 | 107542301 | NC_000007.13 |
| cg09557313 | 4.71E-19 | 8.49E-21 | 1.05E+01 | 36.3920213 | 2.54E-01 | 53313174  | 53313297  | NC_000013.10 |
| cg21236845 | 4.76E-19 | 8.60E-21 | 1.05E+01 | 36.3796737 | 2.34E-01 | 98115329  | 98115452  | NC_000005.9  |
| cg16591875 | 4.87E-19 | 8.81E-21 | 1.05E+01 | 36.3556126 | 1.28E-01 | 23932864  | 23932987  | NC_000015.9  |
| cg18298050 | 4.87E-19 | 8.81E-21 | 1.05E+01 | 36.3555091 | 1.25E-01 | 26829938  | 26830061  | NC_000022.10 |
| cg01449136 | 4.87E-19 | 8.81E-21 | 1.05E+01 | 36.355355  | 2.20E-01 | 61109317  | 61109440  | NC_000014.8  |
| cg04853843 | 4.88E-19 | 8.82E-21 | 1.05E+01 | 36.3542423 | 2.30E-01 | 55358461  | 55358584  | NC_000016.9  |
| cg19016714 | 4.90E-19 | 8.86E-21 | 1.05E+01 | 36.3501087 | 5.54E-02 | 80806029  | 80806152  | NC_000010.10 |
| cg25904659 | 4.90E-19 | 8.87E-21 | 1.05E+01 | 36.3490223 | 1.54E-01 | 916272    | 916395    | NC_000017.10 |
| cg13613439 | 4.94E-19 | 8.94E-21 | 1.05E+01 | 36.3416208 | 9.00E-02 | 131683312 | 131683435 | NC_000009.11 |
| cg05038396 | 4.95E-19 | 8.97E-21 | 1.05E+01 | 36.3376479 | 1.39E-01 | 86363010  | 86363133  | NC_000002.11 |
| cg10241684 | 4.96E-19 | 8.98E-21 | 1.05E+01 | 36.3367439 | 7.76E-02 | 14998547  | 14998670  | NC_000003.11 |
| cg01730970 | 4.99E-19 | 9.04E-21 | 1.05E+01 | 36.3308318 | 2.36E-01 | 27687074  | 27687197  | NC_000001.10 |
| cg17245290 | 4.99E-19 | 9.05E-21 | 1.05E+01 | 36.3293852 | 1.26E-01 | 35504020  | 35504143  | NC_000010.10 |
| cg20064693 | 5.03E-19 | 9.13E-21 | 1.05E+01 | 36.3202637 | 6.60E-02 | 228601611 | 228601734 | NC_000001.10 |
| cg26485937 | 5.04E-19 | 9.14E-21 | 1.05E+01 | 36.3191684 | 1.78E-01 | 140802432 | 140802555 | NC_000005.9  |
| cg08045301 | 5.04E-19 | 9.15E-21 | 1.05E+01 | 36.3181997 | 2.38E-01 | 71887487  | 71887610  | NC_000016.9  |
| cg00953825 | 5.06E-19 | 9.18E-21 | 1.05E+01 | 36.3148176 | 7.20E-02 | 60757134  | 60757257  | NC_000017.10 |
| cg06942814 | 5.08E-19 | 9.23E-21 | 1.05E+01 | 36.3098219 | 1.41E-01 | 27170819  | 27170942  | NC_000007.13 |
| cg16111364 | 5.09E-19 | 9.25E-21 | 1.05E+01 | 36.3079943 | 1.07E-01 | 122891696 | 122891819 | NC_000012.11 |
| cg00063369 | 5.10E-19 | 9.26E-21 | 1.05E+01 | 36.3069839 | 1.40E-01 | 213811478 | 213811601 | NC_000002.11 |
| cg25157999 | 5.13E-19 | 9.31E-21 | 1.05E+01 | 36.3009667 | 1.03E-01 | 657046    | 657169    | NC_000012.11 |
| cg13516768 | 5.14E-19 | 9.34E-21 | 1.05E+01 | 36.2979741 | 1.00E-01 | 61599125  | 61599248  | NC_000020.10 |

|            |          |          |          |            |          |           |           |              |
|------------|----------|----------|----------|------------|----------|-----------|-----------|--------------|
| cg12667031 | 5.16E-19 | 9.38E-21 | 1.05E+01 | 36.2936925 | 7.64E-02 | 169878852 | 169878975 | NC_000001.10 |
| cg02595832 | 5.16E-19 | 9.38E-21 | 1.05E+01 | 36.2932033 | 2.89E-01 | 129535786 | 129535909 | NC_000010.10 |
| cg05917460 | 5.18E-19 | 9.41E-21 | 1.05E+01 | 36.2901698 | 3.05E-01 | 37126902  | 37127025  | NC_000014.8  |
| cg26768816 | 5.21E-19 | 9.47E-21 | 1.05E+01 | 36.2841038 | 2.99E-02 | 30302793  | 30302916  | NC_000019.9  |
| cg24613957 | 5.24E-19 | 9.53E-21 | 1.05E+01 | 36.2776905 | 1.19E-01 | 20250684  | 20250807  | NC_000001.10 |
| cg24904818 | 5.26E-19 | 9.57E-21 | 1.05E+01 | 36.2734183 | 9.12E-02 | 49713323  | 49713446  | NC_000019.9  |
| cg04865180 | 5.32E-19 | 9.69E-21 | 1.05E+01 | 36.2614478 | 2.83E-01 | 23734385  | 23734508  | NC_000013.10 |
| cg09737668 | 5.36E-19 | 9.77E-21 | 1.05E+01 | 36.2535848 | 9.05E-02 | 159923525 | 159923648 | NC_000001.10 |
| cg19722706 | 5.39E-19 | 9.82E-21 | 1.05E+01 | 36.2484199 | 1.28E-01 | 83732977  | 83733100  | NC_000015.9  |
| cg03813164 | 5.39E-19 | 9.82E-21 | 1.05E+01 | 36.2478996 | 3.45E-01 | 11059725  | 11059848  | NC_000010.10 |
| cg26150514 | 5.42E-19 | 9.87E-21 | 1.05E+01 | 36.2428629 | 1.69E-01 | 96907209  | 96907332  | NC_000015.9  |
| cg11147786 | 5.43E-19 | 9.91E-21 | 1.05E+01 | 36.2393916 | 1.79E-01 | 19157739  | 19157862  | NC_000007.13 |
| cg11379081 | 5.46E-19 | 9.96E-21 | 1.05E+01 | 36.2343453 | 1.98E-01 | 209405050 | 209405173 | NC_000001.10 |
| cg18878432 | 5.50E-19 | 1.00E-20 | 1.05E+01 | 36.2263449 | 2.08E-01 | 46683409  | 46683532  | NC_000017.10 |
| cg08733739 | 5.61E-19 | 1.02E-20 | 1.05E+01 | 36.2061705 | 7.75E-02 | 13438879  | 13439002  | NC_000006.11 |
| cg07821427 | 5.61E-19 | 1.03E-20 | 1.05E+01 | 36.2053079 | 3.35E-01 | 77822419  | 77822542  | NC_000016.9  |
| cg03704667 | 5.63E-19 | 1.03E-20 | 1.05E+01 | 36.2026268 | 1.34E-01 | 69152610  | 69152733  | NC_000016.9  |
| cg01341355 | 5.64E-19 | 1.03E-20 | 1.05E+01 | 36.1993695 | 1.34E-01 | 31505493  | 31505616  | NC_000006.11 |
| cg07592513 | 5.66E-19 | 1.04E-20 | 1.05E+01 | 36.195713  | 1.20E-01 | 49994239  | 49994362  | NC_000019.9  |
| cg12853539 | 5.68E-19 | 1.04E-20 | 1.05E+01 | 36.1925586 | 1.37E-01 | 125623465 | 125623588 | NC_000006.11 |
| cg09979356 | 5.70E-19 | 1.04E-20 | 1.05E+01 | 36.1889658 | 9.83E-02 | 23725375  | 23725498  | NC_000016.9  |
| cg22289434 | 5.70E-19 | 1.04E-20 | 1.05E+01 | 36.1876105 | 2.44E-01 | 34188940  | 34189063  | NC_000020.10 |
| cg16521917 | 5.78E-19 | 1.06E-20 | 1.05E+01 | 36.1735726 | 2.38E-01 | 145813946 | 145814069 | NC_000007.13 |
| cg02583418 | 5.86E-19 | 1.07E-20 | 1.05E+01 | 36.1591547 | 2.27E-01 | 105473340 | 105473463 | NC_000002.11 |
| cg26998044 | 5.91E-19 | 1.08E-20 | 1.05E+01 | 36.1513796 | 3.13E-01 | 8869155   | 8869278   | NC_000017.10 |

|            |          |          |          |            |          |           |           |              |
|------------|----------|----------|----------|------------|----------|-----------|-----------|--------------|
| cg07017374 | 5.98E-19 | 1.10E-20 | 1.05E+01 | 36.1393199 | 3.47E-01 | 28674451  | 28674574  | NC_000013.10 |
| cg20423781 | 5.99E-19 | 1.10E-20 | 1.05E+01 | 36.1379052 | 1.53E-01 | 31031734  | 31031857  | NC_000002.11 |
| cg17075865 | 6.00E-19 | 1.10E-20 | 1.05E+01 | 36.1363945 | 8.89E-02 | 121287467 | 121287590 | NC_000010.10 |
| cg23836168 | 6.08E-19 | 1.12E-20 | 1.05E+01 | 36.1219406 | 8.12E-02 | 77084618  | 77084741  | NC_000017.10 |
| cg15443767 | 6.09E-19 | 1.12E-20 | 1.05E+01 | 36.1197561 | 1.11E-01 | 157943975 | 157944098 | NC_000002.11 |
| cg16197088 | 6.16E-19 | 1.13E-20 | 1.05E+01 | 36.1074466 | 1.69E-01 | 823500    | 823623    | NC_000011.9  |
| cg16733813 | 6.17E-19 | 1.13E-20 | 1.05E+01 | 36.1061189 | 1.29E-01 | 228295568 | 228295691 | NC_000001.10 |
| cg02825373 | 6.17E-19 | 1.13E-20 | 1.05E+01 | 36.1053017 | 2.90E-01 | 55501101  | 55501224  | NC_000020.10 |
| cg27543385 | 6.20E-19 | 1.14E-20 | 1.05E+01 | 36.1004157 | 1.71E-01 | 71800219  | 71800342  | NC_000017.10 |
| cg00248856 | 6.23E-19 | 1.15E-20 | 1.05E+01 | 36.0950671 | 1.11E-01 | 69464272  | 69464395  | NC_000011.9  |
| cg03058444 | 6.25E-19 | 1.15E-20 | 1.05E+01 | 36.0919662 | 1.53E-01 | 1873540   | 1873663   | NC_000006.11 |
| cg08676975 | 6.26E-19 | 1.15E-20 | 1.05E+01 | 36.0903599 | 2.98E-01 | 37005582  | 37005705  | NC_000013.10 |
| cg10297617 | 6.26E-19 | 1.15E-20 | 1.05E+01 | 36.0893994 | 1.89E-01 | 91610405  | 91610528  | NC_000014.8  |
| cg25383605 | 6.26E-19 | 1.15E-20 | 1.05E+01 | 36.0889833 | 1.19E-01 | 155538047 | 155538170 | NC_000006.11 |
| cg20959189 | 6.28E-19 | 1.16E-20 | 1.05E+01 | 36.0858732 | 1.42E-01 | 141122632 | 141122755 | NC_000003.11 |
| cg05663453 | 6.32E-19 | 1.16E-20 | 1.05E+01 | 36.0792249 | 1.61E-01 | 22782452  | 22782575  | NC_000001.10 |
| cg12198813 | 6.35E-19 | 1.17E-20 | 1.05E+01 | 36.0750033 | 1.67E-01 | 2891077   | 2891200   | NC_000011.9  |
| cg05940984 | 6.36E-19 | 1.17E-20 | 1.05E+01 | 36.0722727 | 2.45E-01 | 32448678  | 32448801  | NC_000011.9  |
| cg04221877 | 6.39E-19 | 1.18E-20 | 1.05E+01 | 36.0673472 | 1.57E-01 | 25257515  | 25257638  | NC_000001.10 |
| cg07016605 | 6.40E-19 | 1.18E-20 | 1.05E+01 | 36.0655177 | 1.55E-01 | 80194706  | 80194829  | NC_000017.10 |
| cg24880892 | 6.42E-19 | 1.18E-20 | 1.05E+01 | 36.0631255 | 5.89E-02 | 39034493  | 39034616  | NC_000017.10 |
| cg22372285 | 6.42E-19 | 1.18E-20 | 1.05E+01 | 36.062841  | 1.13E-01 | 125951005 | 125951128 | NC_000011.9  |
| cg26268287 | 6.42E-19 | 1.19E-20 | 1.05E+01 | 36.0617404 | 9.02E-02 | 114957848 | 114957971 | NC_000005.9  |
| cg23040011 | 6.45E-19 | 1.19E-20 | 1.05E+01 | 36.0572505 | 1.46E-01 | 56594902  | 56595025  | NC_000014.8  |
| cg16334617 | 6.46E-19 | 1.19E-20 | 1.05E+01 | 36.0551941 | 6.76E-02 | 126306823 | 126306946 | NC_000011.9  |



|            |          |          |          |            |          |           |           |              |
|------------|----------|----------|----------|------------|----------|-----------|-----------|--------------|
| cg22940988 | 6.47E-19 | 1.20E-20 | 1.05E+01 | 36.0533158 | 7.10E-02 | 67538446  | 67538569  | NC_000015.9  |
| cg08819431 | 6.48E-19 | 1.20E-20 | 1.05E+01 | 36.0514601 | 2.13E-01 | 139067293 | 139067416 | NC_000005.9  |
| cg14981055 | 6.49E-19 | 1.20E-20 | 1.05E+01 | 36.0493622 | 1.14E-01 | 56658336  | 56658459  | NC_000019.9  |
| cg26692294 | 6.51E-19 | 1.20E-20 | 1.05E+01 | 36.0470297 | 2.78E-01 | 6449001   | 6449124   | NC_000005.9  |
| cg05762309 | 6.58E-19 | 1.22E-20 | 1.05E+01 | 36.0355806 | 8.41E-02 | 30121843  | 30121966  | NC_000006.11 |
| cg27648808 | 6.63E-19 | 1.23E-20 | 1.05E+01 | 36.0285681 | 6.60E-02 | 168439973 | 168440096 | NC_000005.9  |
| cg02455820 | 6.64E-19 | 1.23E-20 | 1.05E+01 | 36.0266967 | 2.72E-01 | 51147769  | 51147892  | NC_000016.9  |
| cg27515369 | 6.64E-19 | 1.23E-20 | 1.05E+01 | 36.0265036 | 3.72E-01 | 140770599 | 140770722 | NC_000003.11 |
| cg10741025 | 6.65E-19 | 1.23E-20 | 1.05E+01 | 36.0238977 | 2.64E-01 | 37132665  | 37132788  | NC_000014.8  |
| cg10869641 | 6.66E-19 | 1.23E-20 | 1.05E+01 | 36.0231159 | 5.78E-02 | 170184833 | 170184956 | NC_000006.11 |
| cg00895997 | 6.66E-19 | 1.23E-20 | 1.05E+01 | 36.0228006 | 2.05E-01 | 122840109 | 122840232 | NC_000007.13 |
| cg27403628 | 6.67E-19 | 1.23E-20 | 1.05E+01 | 36.0217505 | 2.57E-01 | 17679263  | 17679386  | NC_000020.10 |
| cg06383163 | 6.68E-19 | 1.24E-20 | 1.05E+01 | 36.0192273 | 1.77E-01 | 139509073 | 139509196 | NC_000008.10 |
| cg08222702 | 6.72E-19 | 1.24E-20 | 1.05E+01 | 36.0139732 | 1.05E-01 | 122897859 | 122897982 | NC_000010.10 |
| cg14323675 | 6.81E-19 | 1.26E-20 | 1.05E+01 | 36.0000217 | 1.97E-01 | 17907018  | 17907141  | NC_000009.11 |
| cg14285308 | 6.81E-19 | 1.26E-20 | 1.05E+01 | 35.9995908 | 6.37E-02 | 20517512  | 20517635  | NC_000001.10 |
| cg13459498 | 6.83E-19 | 1.27E-20 | 1.05E+01 | 35.9957109 | 2.68E-01 | 42544792  | 42544915  | NC_000020.10 |
| cg19372975 | 6.85E-19 | 1.27E-20 | 1.05E+01 | 35.9930499 | 1.92E-01 | 242212901 | 242213024 | NC_000002.11 |
| cg06904649 | 6.91E-19 | 1.28E-20 | 1.05E+01 | 35.9840287 | 7.92E-02 | 64291323  | 64291446  | NC_000015.9  |
| cg16896847 | 6.92E-19 | 1.28E-20 | 1.05E+01 | 35.9816745 | 3.03E-01 | 144512042 | 144512165 | NC_000008.10 |
| cg01058717 | 6.96E-19 | 1.29E-20 | 1.05E+01 | 35.9754134 | 1.42E-01 | 1487068   | 1487191   | NC_000001.10 |
| cg03142393 | 6.97E-19 | 1.30E-20 | 1.05E+01 | 35.9738103 | 6.90E-02 | 96327674  | 96327797  | NC_000002.11 |
| cg05020604 | 6.99E-19 | 1.30E-20 | 1.05E+01 | 35.9708754 | 3.05E-01 | 37096329  | 37096452  | NC_000019.9  |
| cg06584784 | 6.99E-19 | 1.30E-20 | 1.05E+01 | 35.9707186 | 1.19E-01 | 86606923  | 86607046  | NC_000016.9  |
| cg21538208 | 7.02E-19 | 1.30E-20 | 1.05E+01 | 35.9668086 | 2.17E-01 | 4864488   | 4864611   | NC_000004.11 |

|            |          |          |          |            |          |           |           |              |
|------------|----------|----------|----------|------------|----------|-----------|-----------|--------------|
| cg17045801 | 7.08E-19 | 1.32E-20 | 1.05E+01 | 35.9575484 | 2.92E-01 | 43153223  | 43153346  | NC_000007.13 |
| cg19037143 | 7.11E-19 | 1.32E-20 | 1.05E+01 | 35.9528805 | 8.09E-02 | 187524750 | 187524873 | NC_000004.11 |
| cg20535067 | 7.12E-19 | 1.32E-20 | 1.05E+01 | 35.9518435 | 1.00E-01 | 134794320 | 134794443 | NC_000010.10 |
| cg17241310 | 7.13E-19 | 1.33E-20 | 1.05E+01 | 35.9496146 | 2.01E-01 | 91182856  | 91182979  | NC_000001.10 |
| cg06355272 | 7.20E-19 | 1.34E-20 | 1.05E+01 | 35.9400836 | 6.85E-02 | 3576929   | 3577052   | NC_000010.10 |
| cg02952703 | 7.23E-19 | 1.35E-20 | 1.05E+01 | 35.9349898 | 1.47E-01 | 14584130  | 14584253  | NC_000019.9  |
| cg13071306 | 7.25E-19 | 1.35E-20 | 1.05E+01 | 35.9323544 | 1.19E-01 | 6314113   | 6314236   | NC_000001.10 |
| cg18901940 | 7.27E-19 | 1.35E-20 | 1.05E+01 | 35.9305682 | 1.41E-01 | 69869364  | 69869487  | NC_000010.10 |
| cg09025327 | 7.39E-19 | 1.38E-20 | 1.04E+01 | 35.9128301 | 1.24E-01 | 9309004   | 9309127   | NC_000001.10 |
| cg26145461 | 7.42E-19 | 1.38E-20 | 1.04E+01 | 35.9083777 | 9.03E-02 | 2510637   | 2510760   | NC_000006.11 |
| cg08393317 | 7.55E-19 | 1.41E-20 | 1.04E+01 | 35.8913825 | 2.94E-01 | 54445463  | 54445586  | NC_000019.9  |
| cg05046306 | 7.56E-19 | 1.41E-20 | 1.04E+01 | 35.8890517 | 1.90E-01 | 46698273  | 46698396  | NC_000017.10 |
| cg08857144 | 7.57E-19 | 1.41E-20 | 1.04E+01 | 35.8879044 | 2.64E-01 | 70995351  | 70995474  | NC_000002.11 |
| cg20277905 | 7.60E-19 | 1.42E-20 | 1.04E+01 | 35.8837842 | 2.02E-01 | 61809716  | 61809839  | NC_000020.10 |
| cg00152008 | 7.63E-19 | 1.42E-20 | 1.04E+01 | 35.8798305 | 2.46E-01 | 50889225  | 50889348  | NC_000001.10 |
| cg03475671 | 7.64E-19 | 1.43E-20 | 1.04E+01 | 35.8783477 | 8.96E-02 | 90317562  | 90317685  | NC_000015.9  |
| cg24469013 | 7.66E-19 | 1.43E-20 | 1.04E+01 | 35.8755239 | 1.52E-01 | 72946534  | 72946657  | NC_000011.9  |
| cg23383871 | 7.68E-19 | 1.43E-20 | 1.04E+01 | 35.8732298 | 2.35E-01 | 47934987  | 47935110  | NC_000020.10 |
| cg02438781 | 7.72E-19 | 1.44E-20 | 1.04E+01 | 35.8667169 | 1.89E-01 | 22469533  | 22469656  | NC_000019.9  |
| cg01889899 | 7.81E-19 | 1.46E-20 | 1.04E+01 | 35.855502  | 1.07E-01 | 101922827 | 101922950 | NC_000015.9  |
| cg17219656 | 7.83E-19 | 1.46E-20 | 1.04E+01 | 35.8525946 | 1.36E-01 | 236924443 | 236924566 | NC_000001.10 |
| cg22628240 | 7.88E-19 | 1.47E-20 | 1.04E+01 | 35.8453619 | 1.79E-01 | 235107837 | 235107960 | NC_000001.10 |
| cg13060997 | 7.98E-19 | 1.49E-20 | 1.04E+01 | 35.8321195 | 2.94E-01 | 37006611  | 37006734  | NC_000013.10 |
| cg15219163 | 8.01E-19 | 1.50E-20 | 1.04E+01 | 35.8278984 | 6.79E-02 | 70842128  | 70842251  | NC_000011.9  |
| cg27127645 | 8.02E-19 | 1.50E-20 | 1.04E+01 | 35.8275987 | 1.32E-01 | 55220956  | 55221079  | NC_000014.8  |

|            |          |          |          |            |          |           |           |              |
|------------|----------|----------|----------|------------|----------|-----------|-----------|--------------|
| cg11021995 | 8.04E-19 | 1.51E-20 | 1.04E+01 | 35.8243482 | 2.90E-01 | 37488577  | 37488700  | NC_000007.13 |
| cg02027945 | 8.07E-19 | 1.51E-20 | 1.04E+01 | 35.8208367 | 3.53E-01 | 20618230  | 20618353  | NC_000011.9  |
| cg14324370 | 8.12E-19 | 1.52E-20 | 1.04E+01 | 35.8140511 | 2.76E-01 | 177042789 | 177042912 | NC_000002.11 |
| cg04207632 | 8.13E-19 | 1.52E-20 | 1.04E+01 | 35.8118762 | 1.75E-01 | 6986609   | 6986732   | NC_000004.11 |
| cg10383568 | 8.20E-19 | 1.54E-20 | 1.04E+01 | 35.8039166 | 1.85E-01 | 6589761   | 6589884   | NC_000011.9  |
| cg27425459 | 8.20E-19 | 1.54E-20 | 1.04E+01 | 35.8032755 | 1.59E-01 | 105697589 | 105697712 | NC_000002.11 |
| cg19909787 | 8.21E-19 | 1.54E-20 | 1.04E+01 | 35.801357  | 2.44E-01 | 124907708 | 124907831 | NC_000010.10 |
| cg07714085 | 8.22E-19 | 1.54E-20 | 1.04E+01 | 35.8002863 | 1.36E-01 | 46424852  | 46424975  | NC_000002.11 |
| cg16294838 | 8.22E-19 | 1.54E-20 | 1.04E+01 | 35.8001247 | 2.17E-01 | 169195305 | 169195428 | NC_000005.9  |
| cg22805485 | 8.34E-19 | 1.57E-20 | 1.04E+01 | 35.7853729 | 2.10E-01 | 13983818  | 13983941  | NC_000011.9  |
| cg09179999 | 8.35E-19 | 1.57E-20 | 1.04E+01 | 35.7836259 | 4.76E-02 | 77811681  | 77811804  | NC_000015.9  |
| cg03143486 | 8.37E-19 | 1.57E-20 | 1.04E+01 | 35.7809736 | 1.60E-01 | 811491    | 811614    | NC_000007.13 |
| cg19643053 | 8.41E-19 | 1.58E-20 | 1.04E+01 | 35.7759616 | 2.44E-01 | 27184271  | 27184394  | NC_000007.13 |
| cg12331980 | 8.44E-19 | 1.59E-20 | 1.04E+01 | 35.7728797 | 1.52E-01 | 179749654 | 179749777 | NC_000002.11 |
| cg17869851 | 8.52E-19 | 1.60E-20 | 1.04E+01 | 35.7627366 | 1.04E-01 | 230976414 | 230976537 | NC_000001.10 |
| cg01672943 | 8.56E-19 | 1.61E-20 | 1.04E+01 | 35.7572289 | 3.12E-01 | 37125292  | 37125415  | NC_000014.8  |
| cg16370720 | 8.58E-19 | 1.61E-20 | 1.04E+01 | 35.7552469 | 4.87E-02 | 108907710 | 108907833 | NC_000006.11 |
| cg00209786 | 8.62E-19 | 1.62E-20 | 1.04E+01 | 35.7495145 | 1.20E-01 | 56752779  | 56752902  | NC_000020.10 |
| cg05747555 | 8.66E-19 | 1.63E-20 | 1.04E+01 | 35.7447538 | 1.30E-01 | 60778881  | 60779004  | NC_000017.10 |
| cg18907180 | 8.68E-19 | 1.63E-20 | 1.04E+01 | 35.7428858 | 2.41E-01 | 97499987  | 97500110  | NC_000014.8  |
| cg19591056 | 8.76E-19 | 1.65E-20 | 1.04E+01 | 35.7329216 | 2.84E-01 | 240254988 | 240255111 | NC_000001.10 |
| cg15979173 | 8.76E-19 | 1.65E-20 | 1.04E+01 | 35.7324266 | 1.67E-01 | 91182128  | 91182251  | NC_000001.10 |
| cg23712458 | 8.86E-19 | 1.67E-20 | 1.04E+01 | 35.7208373 | 1.77E-01 | 189002    | 189125    | NC_000017.10 |
| cg06873316 | 8.91E-19 | 1.68E-20 | 1.04E+01 | 35.7146951 | 2.57E-01 | 20690682  | 20690805  | NC_000011.9  |
| cg26789779 | 8.96E-19 | 1.69E-20 | 1.04E+01 | 35.70857   | 2.43E-01 | 37839943  | 37840066  | NC_000005.9  |

|            |          |          |          |            |          |           |           |              |
|------------|----------|----------|----------|------------|----------|-----------|-----------|--------------|
| cg15266705 | 8.99E-19 | 1.70E-20 | 1.04E+01 | 35.7051881 | 2.69E-01 | 115136096 | 115136219 | NC_000012.11 |
| cg03262554 | 8.99E-19 | 1.70E-20 | 1.04E+01 | 35.7049261 | 2.48E-01 | 136474735 | 136474858 | NC_000009.11 |
| cg16700555 | 9.13E-19 | 1.73E-20 | 1.04E+01 | 35.6891754 | 1.80E-01 | 29700860  | 29700983  | NC_000019.9  |
| cg20018563 | 9.19E-19 | 1.74E-20 | 1.04E+01 | 35.6818579 | 1.65E-01 | 92690264  | 92690387  | NC_000015.9  |
| cg10901633 | 9.27E-19 | 1.75E-20 | 1.04E+01 | 35.6737912 | 1.77E-01 | 4814459   | 4814582   | NC_000003.11 |
| cg04946749 | 9.28E-19 | 1.76E-20 | 1.04E+01 | 35.6715442 | 3.04E-01 | 74865838  | 74865961  | NC_000017.10 |
| cg20713968 | 9.29E-19 | 1.76E-20 | 1.04E+01 | 35.6711753 | 2.32E-01 | 1737564   | 1737687   | NC_000008.10 |
| cg24656269 | 9.30E-19 | 1.76E-20 | 1.04E+01 | 35.6696873 | 2.45E-01 | 132271581 | 132271704 | NC_000011.9  |
| cg14776201 | 9.31E-19 | 1.76E-20 | 1.04E+01 | 35.6686743 | 3.23E-01 | 5836256   | 5836379   | NC_000002.11 |
| cg06424065 | 9.36E-19 | 1.77E-20 | 1.04E+01 | 35.6632003 | 2.32E-01 | 6247640   | 6247763   | NC_000004.11 |
| cg13291694 | 9.37E-19 | 1.77E-20 | 1.04E+01 | 35.6616125 | 9.53E-02 | 136584563 | 136584686 | NC_000006.11 |
| cg00028935 | 9.39E-19 | 1.78E-20 | 1.04E+01 | 35.6593513 | 2.33E-01 | 147114406 | 147114529 | NC_000003.11 |
| cg20522483 | 9.45E-19 | 1.79E-20 | 1.04E+01 | 35.6524388 | 1.42E-01 | 119659495 | 119659618 | NC_000004.11 |
| cg19560588 | 9.53E-19 | 1.81E-20 | 1.04E+01 | 35.6436164 | 2.55E-01 | 25892614  | 25892737  | NC_000007.13 |
| cg10959353 | 9.62E-19 | 1.82E-20 | 1.04E+01 | 35.6339951 | 2.35E-01 | 229046515 | 229046638 | NC_000002.11 |
| cg16499947 | 9.62E-19 | 1.83E-20 | 1.04E+01 | 35.6335075 | 7.97E-02 | 123329113 | 123329236 | NC_000010.10 |
| cg04220930 | 9.63E-19 | 1.83E-20 | 1.04E+01 | 35.6327944 | 1.67E-01 | 52814681  | 52814804  | NC_000008.10 |
| cg17086686 | 9.64E-19 | 1.83E-20 | 1.04E+01 | 35.6307673 | 1.39E-01 | 134578213 | 134578336 | NC_000008.10 |
| cg01578017 | 9.79E-19 | 1.86E-20 | 1.04E+01 | 35.6151187 | 3.23E-01 | 84814683  | 84814806  | NC_000007.13 |
| cg16587616 | 9.80E-19 | 1.86E-20 | 1.04E+01 | 35.6143397 | 2.27E-01 | 62996022  | 62996145  | NC_000006.11 |
| cg10038009 | 9.89E-19 | 1.88E-20 | 1.04E+01 | 35.6035638 | 2.96E-01 | 31228202  | 31228325  | NC_000016.9  |
| cg18127648 | 9.90E-19 | 1.88E-20 | 1.04E+01 | 35.6023979 | 1.09E-01 | 79652632  | 79652755  | NC_000010.10 |
| cg23722790 | 9.91E-19 | 1.88E-20 | 1.04E+01 | 35.6017508 | 1.79E-01 | 67467602  | 67467725  | NC_000001.10 |
| cg16166796 | 1.00E-18 | 1.90E-20 | 1.04E+01 | 35.5924379 | 2.97E-01 | 220174201 | 220174324 | NC_000002.11 |
| cg17796333 | 1.00E-18 | 1.91E-20 | 1.04E+01 | 35.5899227 | 7.97E-02 | 52511342  | 52511465  | NC_000006.11 |

|            |          |          |          |            |          |           |           |              |
|------------|----------|----------|----------|------------|----------|-----------|-----------|--------------|
| cg06809252 | 1.00E-18 | 1.91E-20 | 1.04E+01 | 35.5882046 | 2.21E-01 | 110612044 | 110612167 | NC_000001.10 |
| cg12071328 | 1.00E-18 | 1.91E-20 | 1.04E+01 | 35.588129  | 3.04E-01 | 20690930  | 20691053  | NC_000011.9  |
| cg01269620 | 1.00E-18 | 1.91E-20 | 1.04E+01 | 35.5870985 | 3.06E-01 | 166074191 | 166074314 | NC_000006.11 |
| cg16389924 | 1.01E-18 | 1.91E-20 | 1.04E+01 | 35.5862597 | 8.76E-02 | 79298604  | 79298727  | NC_000015.9  |
| cg19910231 | 1.01E-18 | 1.92E-20 | 1.04E+01 | 35.5853271 | 1.12E-01 | 3167371   | 3167494   | NC_000010.10 |
| cg08939095 | 1.01E-18 | 1.92E-20 | 1.04E+01 | 35.5836499 | 2.48E-01 | 83953068  | 83953191  | NC_000015.9  |
| cg10786098 | 1.04E-18 | 1.99E-20 | 1.04E+01 | 35.5471468 | 1.41E-01 | 117468289 | 117468412 | NC_000012.11 |
| cg03416228 | 1.04E-18 | 1.99E-20 | 1.04E+01 | 35.5462916 | 1.32E-01 | 65360321  | 65360444  | NC_000011.9  |
| cg08586541 | 1.05E-18 | 2.01E-20 | 1.04E+01 | 35.5388059 | 2.41E-01 | 51198888  | 51199011  | NC_000019.9  |
| cg13772815 | 1.05E-18 | 2.01E-20 | 1.04E+01 | 35.5384763 | 1.11E-01 | 20492631  | 20492754  | NC_000017.10 |
| cg14690510 | 1.05E-18 | 2.01E-20 | 1.04E+01 | 35.5366676 | 1.09E-01 | 60757589  | 60757712  | NC_000017.10 |
| cg14678084 | 1.06E-18 | 2.03E-20 | 1.04E+01 | 35.5301698 | 1.81E-01 | 127627251 | 127627374 | NC_000007.13 |
| cg12919006 | 1.07E-18 | 2.04E-20 | 1.04E+01 | 35.5249724 | 2.70E-01 | 124782713 | 124782836 | NC_000002.11 |
| cg03711485 | 1.07E-18 | 2.04E-20 | 1.04E+01 | 35.5233461 | 2.31E-01 | 101296036 | 101296159 | NC_000010.10 |
| cg01105418 | 1.07E-18 | 2.04E-20 | 1.04E+01 | 35.5233421 | 2.36E-01 | 244214593 | 244214716 | NC_000001.10 |
| cg08241225 | 1.07E-18 | 2.04E-20 | 1.04E+01 | 35.5231034 | 9.32E-02 | 36041510  | 36041633  | NC_000019.9  |
| cg27603283 | 1.07E-18 | 2.05E-20 | 1.04E+01 | 35.519094  | 2.11E-01 | 4998649   | 4998772   | NC_000007.13 |
| cg15487498 | 1.08E-18 | 2.06E-20 | 1.04E+01 | 35.5127457 | 1.30E-01 | 230372938 | 230373061 | NC_000001.10 |
| cg00864684 | 1.08E-18 | 2.07E-20 | 1.04E+01 | 35.5064766 | 1.27E-01 | 125825166 | 125825289 | NC_000010.10 |
| cg10257471 | 1.09E-18 | 2.08E-20 | 1.04E+01 | 35.5042659 | 1.70E-01 | 83933961  | 83934084  | NC_000016.9  |
| cg18485844 | 1.09E-18 | 2.09E-20 | 1.04E+01 | 35.5003745 | 3.29E-01 | 2291652   | 2291775   | NC_000011.9  |
| cg24060451 | 1.10E-18 | 2.11E-20 | 1.04E+01 | 35.4912082 | 2.76E-01 | 33454209  | 33454332  | NC_000022.10 |
| cg06469895 | 1.10E-18 | 2.11E-20 | 1.04E+01 | 35.4891359 | 1.38E-01 | 69418206  | 69418329  | NC_000016.9  |
| cg03603062 | 1.11E-18 | 2.14E-20 | 1.04E+01 | 35.477247  | 1.98E-01 | 95224434  | 95224557  | NC_000007.13 |
| cg24885417 | 1.12E-18 | 2.14E-20 | 1.04E+01 | 35.4751981 | 2.86E-01 | 24323764  | 24323887  | NC_000007.13 |

|            |          |          |          |            |          |           |           |              |
|------------|----------|----------|----------|------------|----------|-----------|-----------|--------------|
| cg23852994 | 1.12E-18 | 2.15E-20 | 1.04E+01 | 35.4695198 | 1.01E-01 | 67076568  | 67076691  | NC_000015.9  |
| cg23277659 | 1.13E-18 | 2.17E-20 | 1.04E+01 | 35.4625338 | 1.48E-01 | 47066498  | 47066621  | NC_000001.10 |
| cg08798685 | 1.13E-18 | 2.17E-20 | 1.04E+01 | 35.4614283 | 1.76E-01 | 27730294  | 27730417  | NC_000006.11 |
| cg05181279 | 1.14E-18 | 2.19E-20 | 1.04E+01 | 35.4544287 | 1.30E-01 | 11982794  | 11982917  | NC_000011.9  |
| cg06639332 | 1.14E-18 | 2.19E-20 | 1.04E+01 | 35.4506253 | 2.76E-01 | 37248305  | 37248428  | NC_000013.10 |
| cg24192845 | 1.14E-18 | 2.20E-20 | 1.04E+01 | 35.4500665 | 9.32E-02 | 15497029  | 15497152  | NC_000006.11 |
| cg08708684 | 1.15E-18 | 2.21E-20 | 1.04E+01 | 35.4450821 | 3.05E-01 | 135043506 | 135043629 | NC_000010.10 |
| cg25211622 | 1.15E-18 | 2.21E-20 | 1.04E+01 | 35.4440942 | 2.04E-01 | 794443    | 794566    | NC_000011.9  |
| cg10050410 | 1.16E-18 | 2.23E-20 | 1.04E+01 | 35.4357404 | 1.02E-01 | 4035293   | 4035416   | NC_000010.10 |
| cg13469286 | 1.17E-18 | 2.25E-20 | 1.04E+01 | 35.4274475 | 1.29E-01 | 134680756 | 134680879 | NC_000010.10 |
| cg20627646 | 1.17E-18 | 2.25E-20 | 1.04E+01 | 35.4253156 | 1.63E-01 | 103943308 | 103943431 | NC_000008.10 |
| cg16571983 | 1.17E-18 | 2.25E-20 | 1.04E+01 | 35.4240171 | 2.18E-01 | 78492922  | 78493045  | NC_000013.10 |
| cg15826444 | 1.17E-18 | 2.26E-20 | 1.04E+01 | 35.4231265 | 9.52E-02 | 20767574  | 20767697  | NC_000002.11 |
| cg10655629 | 1.17E-18 | 2.26E-20 | 1.04E+01 | 35.4227692 | 1.33E-01 | 480253    | 480376    | NC_000005.9  |
| cg26949037 | 1.17E-18 | 2.26E-20 | 1.04E+01 | 35.4217342 | 5.52E-02 | 31003936  | 31004059  | NC_000016.9  |
| cg05106231 | 1.18E-18 | 2.27E-20 | 1.04E+01 | 35.4192725 | 1.09E-01 | 7338152   | 7338275   | NC_000017.10 |
| cg11668749 | 1.18E-18 | 2.28E-20 | 1.04E+01 | 35.4140283 | 1.68E-01 | 229568360 | 229568483 | NC_000001.10 |
| cg26078977 | 1.20E-18 | 2.32E-20 | 1.04E+01 | 35.3960052 | 1.93E-01 | 59189467  | 59189590  | NC_000005.9  |
| cg05523056 | 1.20E-18 | 2.32E-20 | 1.04E+01 | 35.3948165 | 2.20E-01 | 77468458  | 77468581  | NC_000016.9  |
| cg19947104 | 1.21E-18 | 2.32E-20 | 1.04E+01 | 35.3935528 | 2.10E-01 | 17757342  | 17757465  | NC_000011.9  |
| cg16535788 | 1.21E-18 | 2.33E-20 | 1.04E+01 | 35.3926607 | 1.63E-01 | 80395405  | 80395528  | NC_000017.10 |
| cg24183575 | 1.21E-18 | 2.33E-20 | 1.04E+01 | 35.3905717 | 1.93E-01 | 49497929  | 49498052  | NC_000003.11 |
| cg00890054 | 1.21E-18 | 2.34E-20 | 1.04E+01 | 35.3863304 | 1.40E-01 | 9405823   | 9405946   | NC_000001.10 |
| cg00542638 | 1.21E-18 | 2.34E-20 | 1.04E+01 | 35.3860637 | 1.50E-01 | 20007500  | 20007623  | NC_000022.10 |
| cg22036988 | 1.23E-18 | 2.38E-20 | 1.04E+01 | 35.3705514 | 2.99E-01 | 140770345 | 140770468 | NC_000003.11 |

|            |          |          |          |            |          |           |           |              |
|------------|----------|----------|----------|------------|----------|-----------|-----------|--------------|
| cg01096617 | 1.23E-18 | 2.38E-20 | 1.04E+01 | 35.3689756 | 2.11E-01 | 58569180  | 58569303  | NC_000016.9  |
| cg03140968 | 1.24E-18 | 2.39E-20 | 1.04E+01 | 35.3647715 | 2.18E-01 | 21686264  | 21686387  | NC_000020.10 |
| cg05678749 | 1.24E-18 | 2.39E-20 | 1.04E+01 | 35.3643836 | 1.82E-01 | 27216819  | 27216942  | NC_000015.9  |
| cg16787483 | 1.25E-18 | 2.42E-20 | 1.04E+01 | 35.3541499 | 1.91E-01 | 88328251  | 88328374  | NC_000013.10 |
| cg25426892 | 1.26E-18 | 2.43E-20 | 1.04E+01 | 35.349572  | 1.74E-01 | 100942959 | 100943082 | NC_000007.13 |
| cg16409261 | 1.26E-18 | 2.44E-20 | 1.04E+01 | 35.3458738 | 2.11E-01 | 61703735  | 61703858  | NC_000020.10 |
| cg07804728 | 1.27E-18 | 2.45E-20 | 1.04E+01 | 35.3425292 | 2.01E-01 | 129284050 | 129284173 | NC_000010.10 |
| cg24127719 | 1.27E-18 | 2.45E-20 | 1.04E+01 | 35.3404491 | 2.26E-01 | 38068660  | 38068783  | NC_000021.8  |
| cg05574357 | 1.27E-18 | 2.46E-20 | 1.04E+01 | 35.3365125 | 2.10E-01 | 115134362 | 115134485 | NC_000012.11 |
| cg24930713 | 1.27E-18 | 2.46E-20 | 1.04E+01 | 35.3358305 | 1.17E-01 | 47048981  | 47049104  | NC_000017.10 |
| cg12932195 | 1.28E-18 | 2.47E-20 | 1.04E+01 | 35.3317049 | 1.61E-01 | 50313343  | 50313466  | NC_000022.10 |
| cg16051656 | 1.28E-18 | 2.48E-20 | 1.04E+01 | 35.331112  | 1.65E-01 | 41162610  | 41162733  | NC_000003.11 |
| cg13718664 | 1.28E-18 | 2.49E-20 | 1.04E+01 | 35.3267749 | 1.70E-01 | 3854593   | 3854716   | NC_000005.9  |
| cg05809668 | 1.29E-18 | 2.49E-20 | 1.04E+01 | 35.3263053 | 2.97E-01 | 35301188  | 35301311  | NC_000007.13 |
| cg24792289 | 1.29E-18 | 2.50E-20 | 1.04E+01 | 35.3205448 | 2.26E-01 | 134825895 | 134826018 | NC_000005.9  |
| cg06434428 | 1.30E-18 | 2.51E-20 | 1.04E+01 | 35.3184941 | 1.09E-01 | 83016630  | 83016753  | NC_000005.9  |
| cg00761344 | 1.31E-18 | 2.53E-20 | 1.04E+01 | 35.3095723 | 1.10E-01 | 40103693  | 40103816  | NC_000001.10 |
| cg03261682 | 1.32E-18 | 2.56E-20 | 1.04E+01 | 35.2998688 | 1.68E-01 | 6233757   | 6233880   | NC_000010.10 |
| cg12907379 | 1.32E-18 | 2.56E-20 | 1.04E+01 | 35.2993815 | 2.52E-01 | 100624130 | 100624253 | NC_000013.10 |
| cg14209299 | 1.32E-18 | 2.56E-20 | 1.04E+01 | 35.2964292 | 2.31E-01 | 107502793 | 107502916 | NC_000002.11 |
| cg13703871 | 1.32E-18 | 2.57E-20 | 1.04E+01 | 35.2946086 | 2.85E-01 | 9473674   | 9473797   | NC_000019.9  |
| cg26351229 | 1.33E-18 | 2.58E-20 | 1.04E+01 | 35.2921411 | 1.94E-01 | 132053780 | 132053903 | NC_000008.10 |
| cg13007988 | 1.34E-18 | 2.59E-20 | 1.04E+01 | 35.2862066 | 1.78E-01 | 49449136  | 49449259  | NC_000012.11 |
| cg12537619 | 1.34E-18 | 2.60E-20 | 1.04E+01 | 35.282457  | 1.15E-01 | 3187923   | 3188046   | NC_000011.9  |
| cg00660765 | 1.34E-18 | 2.61E-20 | 1.04E+01 | 35.2801504 | 8.52E-02 | 69371349  | 69371472  | NC_000003.11 |

|            |          |          |          |            |          |           |           |              |
|------------|----------|----------|----------|------------|----------|-----------|-----------|--------------|
| cg07356488 | 1.34E-18 | 2.61E-20 | 1.04E+01 | 35.2786304 | 1.51E-01 | 121477737 | 121477860 | NC_000011.9  |
| cg15186181 | 1.35E-18 | 2.61E-20 | 1.04E+01 | 35.2779678 | 2.72E-01 | 55370434  | 55370557  | NC_000008.10 |
| cg09137301 | 1.35E-18 | 2.61E-20 | 1.04E+01 | 35.2772627 | 1.54E-01 | 150026998 | 150027121 | NC_000007.13 |
| cg25423888 | 1.35E-18 | 2.62E-20 | 1.04E+01 | 35.2734115 | 4.80E-02 | 102286179 | 102286302 | NC_000010.10 |
| cg07883457 | 1.36E-18 | 2.63E-20 | 1.04E+01 | 35.269451  | 1.33E-01 | 58147897  | 58148020  | NC_000006.11 |
| cg04738965 | 1.36E-18 | 2.65E-20 | 1.04E+01 | 35.2636145 | 1.82E-01 | 147127662 | 147127785 | NC_000003.11 |
| cg22036165 | 1.37E-18 | 2.65E-20 | 1.04E+01 | 35.2618735 | 7.85E-02 | 101871315 | 101871438 | NC_000008.10 |
| cg18854045 | 1.37E-18 | 2.67E-20 | 1.04E+01 | 35.2562596 | 5.95E-02 | 11271359  | 11271482  | NC_000002.11 |
| cg24903893 | 1.38E-18 | 2.68E-20 | 1.04E+01 | 35.2516516 | 1.69E-01 | 158522515 | 158522638 | NC_000005.9  |
| cg23797411 | 1.42E-18 | 2.77E-20 | 1.03E+01 | 35.2194172 | 2.85E-01 | 106399877 | 106400000 | NC_000010.10 |
| cg02390606 | 1.43E-18 | 2.78E-20 | 1.03E+01 | 35.2164899 | 4.79E-02 | 42979979  | 42980102  | NC_000017.10 |
| cg13977835 | 1.44E-18 | 2.80E-20 | 1.03E+01 | 35.2089327 | 1.39E-01 | 23883338  | 23883461  | NC_000001.10 |
| cg13292542 | 1.44E-18 | 2.81E-20 | 1.03E+01 | 35.2061371 | 2.15E-01 | 80394588  | 80394711  | NC_000017.10 |
| cg14564076 | 1.44E-18 | 2.81E-20 | 1.03E+01 | 35.2046949 | 2.55E-01 | 153584873 | 153584996 | NC_000007.13 |
| cg24436462 | 1.45E-18 | 2.82E-20 | 1.03E+01 | 35.2029953 | 2.03E-01 | 183595745 | 183595868 | NC_000001.10 |
| cg07052063 | 1.46E-18 | 2.85E-20 | 1.03E+01 | 35.1914271 | 1.32E-01 | 99255236  | 99255359  | NC_000010.10 |
| cg12334871 | 1.47E-18 | 2.87E-20 | 1.03E+01 | 35.1833669 | 2.43E-01 | 149993971 | 149994094 | NC_000005.9  |
| cg13847853 | 1.48E-18 | 2.88E-20 | 1.03E+01 | 35.1796642 | 5.85E-02 | 39696336  | 39696459  | NC_000017.10 |
| cg21995919 | 1.48E-18 | 2.88E-20 | 1.03E+01 | 35.1794845 | 3.09E-01 | 182322279 | 182322402 | NC_000002.11 |
| cg09797577 | 1.49E-18 | 2.90E-20 | 1.03E+01 | 35.1736998 | 2.52E-01 | 28778226  | 28778349  | NC_000006.11 |
| cg26162582 | 1.50E-18 | 2.93E-20 | 1.03E+01 | 35.1656697 | 3.27E-01 | 4918391   | 4918514   | NC_000012.11 |
| cg25973534 | 1.50E-18 | 2.93E-20 | 1.03E+01 | 35.1625504 | 2.92E-01 | 5139853   | 5139976   | NC_000005.9  |
| cg07881405 | 1.51E-18 | 2.95E-20 | 1.03E+01 | 35.1582071 | 2.78E-01 | 3597487   | 3597610   | NC_000005.9  |
| cg21145524 | 1.51E-18 | 2.95E-20 | 1.03E+01 | 35.1571837 | 2.97E-01 | 239207    | 239330    | NC_000003.11 |
| cg24039697 | 1.52E-18 | 2.97E-20 | 1.03E+01 | 35.1505875 | 2.69E-01 | 8094534   | 8094657   | NC_000010.10 |



|            |          |          |          |            |          |           |           |              |
|------------|----------|----------|----------|------------|----------|-----------|-----------|--------------|
| cg21459340 | 1.52E-18 | 2.97E-20 | 1.03E+01 | 35.149285  | 2.64E-01 | 2781324   | 2781447   | NC_000020.10 |
| cg10507231 | 1.52E-18 | 2.97E-20 | 1.03E+01 | 35.149044  | 9.29E-02 | 204459638 | 204459761 | NC_000001.10 |
| cg01361263 | 1.52E-18 | 2.98E-20 | 1.03E+01 | 35.1480365 | 1.89E-01 | 58051763  | 58051886  | NC_000003.11 |
| cg02642565 | 1.52E-18 | 2.98E-20 | 1.03E+01 | 35.1463824 | 1.43E-01 | 4579402   | 4579525   | NC_000016.9  |
| cg10364040 | 1.53E-18 | 2.99E-20 | 1.03E+01 | 35.144979  | 2.74E-01 | 176981064 | 176981187 | NC_000002.11 |
| cg05134019 | 1.53E-18 | 2.99E-20 | 1.03E+01 | 35.1440238 | 2.07E-01 | 227059463 | 227059586 | NC_000001.10 |
| cg24347663 | 1.53E-18 | 2.99E-20 | 1.03E+01 | 35.1433256 | 2.68E-01 | 70995349  | 70995472  | NC_000002.11 |
| cg07157230 | 1.53E-18 | 3.00E-20 | 1.03E+01 | 35.1415405 | 1.78E-01 | 105363943 | 105364066 | NC_000014.8  |
| cg27029821 | 1.55E-18 | 3.03E-20 | 1.03E+01 | 35.1294328 | 1.35E-01 | 70983741  | 70983864  | NC_000008.10 |
| cg19727439 | 1.55E-18 | 3.05E-20 | 1.03E+01 | 35.1247247 | 2.59E-01 | 37500508  | 37500631  | NC_000001.10 |
| cg14642432 | 1.56E-18 | 3.07E-20 | 1.03E+01 | 35.1173518 | 2.45E-01 | 6533163   | 6533286   | NC_000016.9  |
| cg18267049 | 1.57E-18 | 3.08E-20 | 1.03E+01 | 35.1154981 | 2.43E-01 | 101875028 | 101875151 | NC_000010.10 |
| cg27413385 | 1.57E-18 | 3.08E-20 | 1.03E+01 | 35.1149175 | 1.45E-01 | 7515425   | 7515548   | NC_000017.10 |
| cg13073589 | 1.57E-18 | 3.08E-20 | 1.03E+01 | 35.1146655 | 1.33E-01 | 172517922 | 172518045 | NC_000001.10 |
| cg16797818 | 1.57E-18 | 3.08E-20 | 1.03E+01 | 35.1130461 | 1.20E-01 | 70463309  | 70463432  | NC_000012.11 |
| cg02128244 | 1.58E-18 | 3.10E-20 | 1.03E+01 | 35.1071648 | 2.03E-01 | 31848008  | 31848131  | NC_000019.9  |
| cg23010538 | 1.59E-18 | 3.13E-20 | 1.03E+01 | 35.0978676 | 3.46E-01 | 190447290 | 190447413 | NC_000001.10 |
| cg10437806 | 1.60E-18 | 3.15E-20 | 1.03E+01 | 35.0935336 | 2.54E-01 | 21680508  | 21680631  | NC_000012.11 |
| cg11254527 | 1.60E-18 | 3.15E-20 | 1.03E+01 | 35.0911454 | 1.45E-01 | 35873695  | 35873818  | NC_000001.10 |
| cg05743346 | 1.61E-18 | 3.16E-20 | 1.03E+01 | 35.0879216 | 3.01E-01 | 71800987  | 71801110  | NC_000007.13 |
| cg13587564 | 1.61E-18 | 3.17E-20 | 1.03E+01 | 35.0844836 | 1.68E-01 | 137003752 | 137003875 | NC_000009.11 |
| cg02765177 | 1.61E-18 | 3.18E-20 | 1.03E+01 | 35.0838946 | 1.86E-01 | 124605963 | 124606086 | NC_000010.10 |
| cg18340983 | 1.62E-18 | 3.18E-20 | 1.03E+01 | 35.0831374 | 6.56E-02 | 72941691  | 72941814  | NC_000011.9  |
| cg16422814 | 1.62E-18 | 3.18E-20 | 1.03E+01 | 35.0830988 | 2.07E-01 | 123691602 | 123691725 | NC_000010.10 |
| cg07152216 | 1.62E-18 | 3.19E-20 | 1.03E+01 | 35.0786705 | 2.50E-01 | 147141219 | 147141342 | NC_000003.11 |

|            |          |          |          |            |          |           |           |              |
|------------|----------|----------|----------|------------|----------|-----------|-----------|--------------|
| cg27408345 | 1.64E-18 | 3.22E-20 | 1.03E+01 | 35.0690813 | 1.73E-01 | 112630738 | 112630861 | NC_000010.10 |
| cg13019491 | 1.64E-18 | 3.23E-20 | 1.03E+01 | 35.0670467 | 2.80E-01 | 60977856  | 60977979  | NC_000014.8  |
| cg05646686 | 1.64E-18 | 3.23E-20 | 1.03E+01 | 35.0668741 | 2.13E-01 | 33402368  | 33402491  | NC_000014.8  |
| cg09409845 | 1.65E-18 | 3.26E-20 | 1.03E+01 | 35.0593784 | 1.28E-01 | 128657791 | 128657914 | NC_000008.10 |
| cg03781266 | 1.66E-18 | 3.27E-20 | 1.03E+01 | 35.0557037 | 2.65E-01 | 43153023  | 43153146  | NC_000007.13 |
| cg09639151 | 1.66E-18 | 3.28E-20 | 1.03E+01 | 35.0515417 | 2.09E-01 | 140810920 | 140811043 | NC_000005.9  |
| cg26634219 | 1.67E-18 | 3.29E-20 | 1.03E+01 | 35.0501108 | 2.22E-01 | 46608277  | 46608400  | NC_000017.10 |
| cg01017689 | 1.67E-18 | 3.29E-20 | 1.03E+01 | 35.0498908 | 8.05E-02 | 76376266  | 76376389  | NC_000005.9  |
| cg27190946 | 1.67E-18 | 3.29E-20 | 1.03E+01 | 35.0483127 | 2.12E-01 | 32639011  | 32639134  | NC_000015.9  |
| cg20676716 | 1.68E-18 | 3.31E-20 | 1.03E+01 | 35.0421516 | 2.04E-01 | 177053568 | 177053691 | NC_000002.11 |
| cg16463460 | 1.68E-18 | 3.31E-20 | 1.03E+01 | 35.0418144 | 1.74E-01 | 32454718  | 32454841  | NC_000011.9  |
| cg02801786 | 1.68E-18 | 3.32E-20 | 1.03E+01 | 35.0412794 | 2.68E-01 | 113914222 | 113914345 | NC_000012.11 |
| cg04914996 | 1.68E-18 | 3.32E-20 | 1.03E+01 | 35.0399424 | 1.28E-01 | 186915259 | 186915382 | NC_000003.11 |
| cg01519253 | 1.69E-18 | 3.34E-20 | 1.03E+01 | 35.0353888 | 2.44E-01 | 114886463 | 114886586 | NC_000012.11 |
| cg03886699 | 1.70E-18 | 3.35E-20 | 1.03E+01 | 35.0316591 | 9.33E-02 | 212698918 | 212699041 | NC_000001.10 |
| cg16711792 | 1.72E-18 | 3.39E-20 | 1.03E+01 | 35.0192093 | 2.30E-01 | 32930054  | 32930177  | NC_000021.8  |
| cg13754948 | 1.72E-18 | 3.40E-20 | 1.03E+01 | 35.0173042 | 1.41E-01 | 155679340 | 155679463 | NC_000007.13 |
| cg14230666 | 1.72E-18 | 3.41E-20 | 1.03E+01 | 35.0143071 | 2.58E-01 | 84322946  | 84323069  | NC_000015.9  |
| cg24815973 | 1.73E-18 | 3.41E-20 | 1.03E+01 | 35.0132466 | 1.34E-01 | 3140901   | 3141024   | NC_000006.11 |
| cg04944853 | 1.73E-18 | 3.43E-20 | 1.03E+01 | 35.0091752 | 1.99E-01 | 139252106 | 139252229 | NC_000003.11 |
| cg21239439 | 1.74E-18 | 3.44E-20 | 1.03E+01 | 35.0050461 | 1.20E-01 | 170038665 | 170038788 | NC_000006.11 |
| cg05398903 | 1.75E-18 | 3.45E-20 | 1.03E+01 | 35.001058  | 2.63E-01 | 115135045 | 115135168 | NC_000012.11 |
| cg18371475 | 1.75E-18 | 3.47E-20 | 1.03E+01 | 34.9977057 | 2.05E-01 | 2751550   | 2751673   | NC_000005.9  |
| cg24280540 | 1.76E-18 | 3.47E-20 | 1.03E+01 | 34.9952555 | 2.72E-01 | 69243510  | 69243633  | NC_000008.10 |
| cg03637815 | 1.78E-18 | 3.52E-20 | 1.03E+01 | 34.982665  | 2.51E-01 | 95359718  | 95359841  | NC_000013.10 |

|            |          |          |          |            |          |           |           |              |
|------------|----------|----------|----------|------------|----------|-----------|-----------|--------------|
| cg05042123 | 1.80E-18 | 3.56E-20 | 1.03E+01 | 34.9702351 | 8.91E-02 | 2590002   | 2590125   | NC_000004.11 |
| cg14055887 | 1.80E-18 | 3.57E-20 | 1.03E+01 | 34.967487  | 1.53E-01 | 136236665 | 136236788 | NC_000009.11 |
| cg20139706 | 1.83E-18 | 3.64E-20 | 1.03E+01 | 34.9498717 | 1.86E-01 | 237068750 | 237068873 | NC_000002.11 |
| cg09799983 | 1.84E-18 | 3.64E-20 | 1.03E+01 | 34.9477763 | 2.37E-01 | 38301756  | 38301879  | NC_000002.11 |
| cg21115346 | 1.85E-18 | 3.68E-20 | 1.03E+01 | 34.9386363 | 2.05E-01 | 130021544 | 130021667 | NC_000007.13 |
| cg03843000 | 1.86E-18 | 3.68E-20 | 1.03E+01 | 34.9377157 | 2.87E-01 | 114846968 | 114847091 | NC_000012.11 |
| cg18060030 | 1.86E-18 | 3.69E-20 | 1.03E+01 | 34.9360065 | 1.15E-01 | 168967238 | 168967361 | NC_000003.11 |
| cg22518433 | 1.87E-18 | 3.70E-20 | 1.03E+01 | 34.9322289 | 2.38E-01 | 49253931  | 49254054  | NC_000019.9  |
| cg00252282 | 1.87E-18 | 3.71E-20 | 1.03E+01 | 34.9307808 | 2.76E-01 | 5542736   | 5542859   | NC_000012.11 |
| cg01566592 | 1.87E-18 | 3.71E-20 | 1.03E+01 | 34.9289234 | 3.53E-01 | 104512858 | 104512981 | NC_000008.10 |
| cg14833621 | 1.87E-18 | 3.72E-20 | 1.03E+01 | 34.9261933 | 1.78E-01 | 47801438  | 47801561  | NC_000012.11 |
| cg13046832 | 1.88E-18 | 3.73E-20 | 1.03E+01 | 34.9246778 | 2.61E-01 | 29254680  | 29254803  | NC_000014.8  |
| cg00963169 | 1.88E-18 | 3.74E-20 | 1.03E+01 | 34.921303  | 2.54E-01 | 50513927  | 50514050  | NC_000001.10 |
| cg20464143 | 1.89E-18 | 3.75E-20 | 1.03E+01 | 34.9199316 | 2.28E-01 | 16728219  | 16728342  | NC_000005.9  |
| cg24909309 | 1.89E-18 | 3.76E-20 | 1.03E+01 | 34.9178549 | 1.94E-01 | 38387291  | 38387414  | NC_000008.10 |
| cg01627823 | 1.89E-18 | 3.76E-20 | 1.03E+01 | 34.9177532 | 2.76E-01 | 37125531  | 37125654  | NC_000014.8  |
| cg20993754 | 1.89E-18 | 3.76E-20 | 1.03E+01 | 34.9171432 | 1.22E-01 | 55226987  | 55227110  | NC_000002.11 |
| cg05713794 | 1.89E-18 | 3.76E-20 | 1.03E+01 | 34.9156528 | 5.68E-02 | 194119861 | 194119984 | NC_000003.11 |
| cg02523640 | 1.89E-18 | 3.77E-20 | 1.03E+01 | 34.9146262 | 2.43E-01 | 129534613 | 129534736 | NC_000010.10 |
| cg14872657 | 1.90E-18 | 3.79E-20 | 1.03E+01 | 34.9097337 | 2.57E-01 | 43153216  | 43153339  | NC_000007.13 |
| cg24680586 | 1.90E-18 | 3.79E-20 | 1.03E+01 | 34.9094127 | 3.15E-01 | 105036727 | 105036850 | NC_000010.10 |
| cg20611911 | 1.91E-18 | 3.81E-20 | 1.03E+01 | 34.9045004 | 2.35E-01 | 3567930   | 3568053   | NC_000001.10 |
| cg17279592 | 1.92E-18 | 3.83E-20 | 1.03E+01 | 34.8994324 | 1.21E-01 | 170038733 | 170038856 | NC_000006.11 |
| cg04802221 | 1.93E-18 | 3.84E-20 | 1.03E+01 | 34.895043  | 9.15E-02 | 67223955  | 67224078  | NC_000016.9  |
| cg02912476 | 1.96E-18 | 3.90E-20 | 1.03E+01 | 34.8800877 | 1.15E-01 | 2035087   | 2035210   | NC_000001.10 |

|            |          |          |          |            |          |           |           |              |
|------------|----------|----------|----------|------------|----------|-----------|-----------|--------------|
| cg09010671 | 1.96E-18 | 3.91E-20 | 1.03E+01 | 34.8768553 | 3.05E-01 | 79177763  | 79177886  | NC_000013.10 |
| cg13884295 | 1.96E-18 | 3.92E-20 | 1.03E+01 | 34.876414  | 1.68E-01 | 50618355  | 50618478  | NC_000003.11 |
| cg12189382 | 1.96E-18 | 3.92E-20 | 1.03E+01 | 34.8760644 | 5.76E-02 | 79077463  | 79077586  | NC_000017.10 |
| cg23287992 | 1.97E-18 | 3.92E-20 | 1.03E+01 | 34.8743678 | 1.29E-01 | 31734390  | 31734513  | NC_000006.11 |
| cg18120446 | 1.98E-18 | 3.94E-20 | 1.03E+01 | 34.8694611 | 1.87E-01 | 13531076  | 13531199  | NC_000004.11 |
| cg17278793 | 1.98E-18 | 3.95E-20 | 1.03E+01 | 34.8673353 | 9.40E-02 | 149767909 | 149768032 | NC_000001.10 |
| cg26750489 | 2.00E-18 | 3.99E-20 | 1.03E+01 | 34.8583879 | 6.33E-02 | 33171106  | 33171229  | NC_000006.11 |
| cg12536527 | 2.00E-18 | 4.00E-20 | 1.03E+01 | 34.8559542 | 1.88E-01 | 81637024  | 81637147  | NC_000007.13 |
| cg23205387 | 2.01E-18 | 4.02E-20 | 1.03E+01 | 34.8507932 | 2.04E-01 | 152623043 | 152623166 | NC_000007.13 |
| cg15478767 | 2.02E-18 | 4.03E-20 | 1.03E+01 | 34.8486799 | 1.23E-01 | 178039086 | 178039209 | NC_000003.11 |
| cg21220462 | 2.02E-18 | 4.03E-20 | 1.03E+01 | 34.8478209 | 1.74E-01 | 92005563  | 92005686  | NC_000009.11 |
| cg02792792 | 2.03E-18 | 4.06E-20 | 1.03E+01 | 34.8413435 | 2.29E-01 | 115152420 | 115152543 | NC_000005.9  |
| cg18819620 | 2.05E-18 | 4.10E-20 | 1.03E+01 | 34.8298745 | 6.28E-02 | 155450816 | 155450939 | NC_000006.11 |
| cg18609306 | 2.06E-18 | 4.11E-20 | 1.03E+01 | 34.827393  | 1.56E-01 | 81015941  | 81016064  | NC_000017.10 |
| cg19570924 | 2.06E-18 | 4.13E-20 | 1.03E+01 | 34.8236718 | 2.27E-01 | 3457015   | 3457138   | NC_000010.10 |
| cg16982087 | 2.07E-18 | 4.14E-20 | 1.03E+01 | 34.8221617 | 1.90E-01 | 924964    | 925087    | NC_000007.13 |
| cg16241878 | 2.07E-18 | 4.14E-20 | 1.03E+01 | 34.8216985 | 8.52E-02 | 44328648  | 44328771  | NC_000015.9  |
| cg15920654 | 2.07E-18 | 4.14E-20 | 1.03E+01 | 34.8216779 | 2.15E-01 | 4869091   | 4869214   | NC_000004.11 |
| cg18529845 | 2.08E-18 | 4.16E-20 | 1.03E+01 | 34.8162862 | 3.21E-01 | 31806042  | 31806165  | NC_000002.11 |
| cg24946597 | 2.09E-18 | 4.19E-20 | 1.03E+01 | 34.8100004 | 2.97E-01 | 31497464  | 31497587  | NC_000008.10 |
| cg07048527 | 2.10E-18 | 4.21E-20 | 1.03E+01 | 34.8055753 | 2.13E-01 | 46700449  | 46700572  | NC_000017.10 |
| cg25479320 | 2.11E-18 | 4.24E-20 | 1.03E+01 | 34.7985848 | 8.98E-02 | 30127152  | 30127275  | NC_000006.11 |
| cg07572028 | 2.11E-18 | 4.24E-20 | 1.03E+01 | 34.7966878 | 1.38E-01 | 3695198   | 3695321   | NC_000001.10 |
| cg01370449 | 2.11E-18 | 4.24E-20 | 1.03E+01 | 34.7966408 | 1.89E-01 | 27183369  | 27183492  | NC_000007.13 |
| cg25727671 | 2.12E-18 | 4.26E-20 | 1.03E+01 | 34.7927648 | 2.05E-01 | 27193351  | 27193474  | NC_000007.13 |

|            |          |          |          |            |          |           |           |              |
|------------|----------|----------|----------|------------|----------|-----------|-----------|--------------|
| cg11668923 | 2.13E-18 | 4.27E-20 | 1.03E+01 | 34.7910437 | 2.55E-01 | 128076936 | 128077059 | NC_000010.10 |
| cg10722226 | 2.13E-18 | 4.27E-20 | 1.03E+01 | 34.7907054 | 2.17E-01 | 214156203 | 214156326 | NC_000001.10 |
| cg19958511 | 2.14E-18 | 4.29E-20 | 1.03E+01 | 34.7856496 | 1.02E-01 | 134821825 | 134821948 | NC_000010.10 |
| cg08199563 | 2.14E-18 | 4.30E-20 | 1.03E+01 | 34.7829082 | 1.17E-01 | 55816212  | 55816335  | NC_000019.9  |
| cg00812438 | 2.18E-18 | 4.37E-20 | 1.03E+01 | 34.7667155 | 2.48E-01 | 127940086 | 127940209 | NC_000012.11 |
| cg14141102 | 2.18E-18 | 4.38E-20 | 1.03E+01 | 34.7663914 | 9.84E-02 | 107974557 | 107974680 | NC_000012.11 |
| cg13525804 | 2.21E-18 | 4.44E-20 | 1.03E+01 | 34.7511819 | 1.43E-01 | 33857698  | 33857821  | NC_000009.11 |
| cg26163578 | 2.22E-18 | 4.46E-20 | 1.03E+01 | 34.747609  | 2.25E-01 | 57154589  | 57154712  | NC_000019.9  |
| cg01614102 | 2.23E-18 | 4.48E-20 | 1.03E+01 | 34.743013  | 2.21E-01 | 115134918 | 115135041 | NC_000012.11 |
| cg20427331 | 2.23E-18 | 4.49E-20 | 1.03E+01 | 34.7408585 | 1.59E-01 | 52000062  | 52000185  | NC_000013.10 |
| cg01261206 | 2.25E-18 | 4.53E-20 | 1.03E+01 | 34.7330035 | 2.18E-01 | 1011281   | 1011404   | NC_000011.9  |
| cg00778995 | 2.25E-18 | 4.54E-20 | 1.03E+01 | 34.730705  | 2.69E-01 | 105470558 | 105470681 | NC_000002.11 |
| cg00181125 | 2.27E-18 | 4.57E-20 | 1.03E+01 | 34.7226685 | 2.32E-01 | 22095182  | 22095305  | NC_000012.11 |
| cg26049726 | 2.27E-18 | 4.59E-20 | 1.03E+01 | 34.7200464 | 2.02E-01 | 73518702  | 73518825  | NC_000002.11 |
| cg08208595 | 2.30E-18 | 4.63E-20 | 1.03E+01 | 34.7093561 | 9.74E-02 | 105793554 | 105793677 | NC_000014.8  |
| cg14345213 | 2.30E-18 | 4.63E-20 | 1.03E+01 | 34.7093526 | 1.60E-01 | 100176407 | 100176530 | NC_000009.11 |
| cg12164321 | 2.31E-18 | 4.66E-20 | 1.03E+01 | 34.7046226 | 2.34E-01 | 125651085 | 125651208 | NC_000010.10 |
| cg16942595 | 2.31E-18 | 4.66E-20 | 1.03E+01 | 34.7030948 | 1.46E-01 | 149375316 | 149375439 | NC_000006.11 |
| cg17297362 | 2.33E-18 | 4.70E-20 | 1.03E+01 | 34.6946777 | 1.79E-01 | 233641507 | 233641630 | NC_000002.11 |
| cg22014983 | 2.36E-18 | 4.78E-20 | 1.03E+01 | 34.6795234 | 7.97E-02 | 39637465  | 39637588  | NC_000002.11 |
| cg26074603 | 2.37E-18 | 4.80E-20 | 1.03E+01 | 34.6739777 | 2.85E-01 | 75603068  | 75603191  | NC_000012.11 |
| cg02842158 | 2.37E-18 | 4.81E-20 | 1.03E+01 | 34.6735279 | 1.43E-01 | 50943720  | 50943843  | NC_000022.10 |
| cg02986692 | 2.38E-18 | 4.81E-20 | 1.03E+01 | 34.6716662 | 5.07E-02 | 156030348 | 156030471 | NC_000006.11 |
| cg03522150 | 2.39E-18 | 4.83E-20 | 1.03E+01 | 34.6683025 | 2.43E-01 | 46969673  | 46969796  | NC_000011.9  |
| cg27097660 | 2.39E-18 | 4.84E-20 | 1.03E+01 | 34.6673338 | 1.53E-01 | 75241082  | 75241205  | NC_000016.9  |

|            |          |          |          |            |          |           |           |              |
|------------|----------|----------|----------|------------|----------|-----------|-----------|--------------|
| cg22356339 | 2.42E-18 | 4.90E-20 | 1.03E+01 | 34.6539533 | 2.54E-01 | 103352454 | 103352577 | NC_000012.11 |
| cg08074851 | 2.44E-18 | 4.95E-20 | 1.03E+01 | 34.644672  | 2.20E-01 | 47797590  | 47797713  | NC_000002.11 |
| cg03487983 | 2.44E-18 | 4.95E-20 | 1.03E+01 | 34.643949  | 1.37E-01 | 67729501  | 67729624  | NC_000014.8  |
| cg16987305 | 2.46E-18 | 4.98E-20 | 1.03E+01 | 34.6372038 | 2.94E-01 | 65991596  | 65991719  | NC_000001.10 |
| cg21649258 | 2.48E-18 | 5.03E-20 | 1.03E+01 | 34.6280057 | 2.72E-01 | 107503672 | 107503795 | NC_000002.11 |
| cg08567279 | 2.49E-18 | 5.05E-20 | 1.03E+01 | 34.6240209 | 2.70E-01 | 53313529  | 53313652  | NC_000013.10 |
| cg14354398 | 2.49E-18 | 5.06E-20 | 1.03E+01 | 34.6223814 | 8.10E-02 | 113539759 | 113539882 | NC_000013.10 |
| cg13628577 | 2.50E-18 | 5.07E-20 | 1.03E+01 | 34.620657  | 2.04E-01 | 122431121 | 122431244 | NC_000005.9  |
| cg16973406 | 2.50E-18 | 5.07E-20 | 1.03E+01 | 34.6195266 | 1.05E-01 | 43265991  | 43266114  | NC_000022.10 |
| cg14211735 | 2.51E-18 | 5.10E-20 | 1.03E+01 | 34.6153647 | 1.64E-01 | 78837981  | 78838104  | NC_000015.9  |
| cg14755690 | 2.51E-18 | 5.10E-20 | 1.03E+01 | 34.6135752 | 2.25E-01 | 128868265 | 128868388 | NC_000007.13 |
| cg03096785 | 2.52E-18 | 5.11E-20 | 1.03E+01 | 34.6116343 | 2.01E-01 | 15764869  | 15764992  | NC_000001.10 |
| cg19088962 | 2.52E-18 | 5.13E-20 | 1.03E+01 | 34.6081369 | 6.53E-02 | 54576274  | 54576397  | NC_000012.11 |
| cg26091021 | 2.53E-18 | 5.14E-20 | 1.03E+01 | 34.6070134 | 2.63E-01 | 177021826 | 177021949 | NC_000002.11 |
| cg04991805 | 2.55E-18 | 5.20E-20 | 1.03E+01 | 34.595367  | 2.44E-01 | 99790910  | 99791033  | NC_000010.10 |
| cg18002116 | 2.56E-18 | 5.20E-20 | 1.03E+01 | 34.5945376 | 2.18E-01 | 53419596  | 53419719  | NC_000013.10 |
| cg13784966 | 2.56E-18 | 5.21E-20 | 1.03E+01 | 34.5924504 | 1.36E-01 | 3158710   | 3158833   | NC_000010.10 |
| cg25261694 | 2.58E-18 | 5.25E-20 | 1.03E+01 | 34.5866231 | 1.80E-01 | 88559053  | 88559176  | NC_000010.10 |
| cg14436491 | 2.62E-18 | 5.33E-20 | 1.02E+01 | 34.5705961 | 1.16E-01 | 176893    | 177016    | NC_000009.11 |
| cg07926644 | 2.62E-18 | 5.34E-20 | 1.02E+01 | 34.5682162 | 1.45E-01 | 4011511   | 4011634   | NC_000019.9  |
| cg10784386 | 2.63E-18 | 5.37E-20 | 1.02E+01 | 34.564065  | 2.53E-01 | 79330943  | 79331066  | NC_000005.9  |
| cg23454797 | 2.63E-18 | 5.37E-20 | 1.02E+01 | 34.5627203 | 1.93E-01 | 27183990  | 27184113  | NC_000007.13 |
| cg00992417 | 2.63E-18 | 5.37E-20 | 1.02E+01 | 34.5626928 | 1.61E-01 | 917891    | 918014    | NC_000005.9  |
| cg16564132 | 2.65E-18 | 5.40E-20 | 1.02E+01 | 34.5576269 | 1.35E-01 | 47193871  | 47193994  | NC_000007.13 |
| cg01724683 | 2.65E-18 | 5.42E-20 | 1.02E+01 | 34.5546329 | 6.77E-02 | 75180961  | 75181084  | NC_000017.10 |

|            |          |          |          |            |          |           |           |              |
|------------|----------|----------|----------|------------|----------|-----------|-----------|--------------|
| cg12526923 | 2.65E-18 | 5.42E-20 | 1.02E+01 | 34.5541282 | 2.33E-01 | 17439208  | 17439331  | NC_000019.9  |
| cg12600530 | 2.66E-18 | 5.43E-20 | 1.02E+01 | 34.5523551 | 1.81E-01 | 86687001  | 86687124  | NC_000005.9  |
| cg11644515 | 2.66E-18 | 5.44E-20 | 1.02E+01 | 34.5506778 | 1.30E-01 | 35827824  | 35827947  | NC_000021.8  |
| cg13329346 | 2.66E-18 | 5.44E-20 | 1.02E+01 | 34.5505204 | 1.20E-01 | 172750611 | 172750734 | NC_000005.9  |
| cg06232807 | 2.66E-18 | 5.44E-20 | 1.02E+01 | 34.5496839 | 2.00E-01 | 51185132  | 51185255  | NC_000016.9  |
| cg07811198 | 2.70E-18 | 5.53E-20 | 1.02E+01 | 34.5348918 | 2.05E-01 | 153585368 | 153585491 | NC_000007.13 |
| cg16519587 | 2.73E-18 | 5.58E-20 | 1.02E+01 | 34.5259501 | 2.77E-01 | 26614649  | 26614772  | NC_000006.11 |
| cg02289739 | 2.75E-18 | 5.62E-20 | 1.02E+01 | 34.5177942 | 1.21E-01 | 131156554 | 131156677 | NC_000007.13 |
| cg06266582 | 2.76E-18 | 5.65E-20 | 1.02E+01 | 34.5134801 | 2.24E-01 | 64871778  | 64871901  | NC_000011.9  |
| cg10981651 | 2.77E-18 | 5.66E-20 | 1.02E+01 | 34.5103598 | 1.98E-01 | 153853545 | 153853668 | NC_000005.9  |
| cg09123188 | 2.77E-18 | 5.67E-20 | 1.02E+01 | 34.5091384 | 2.57E-01 | 100913934 | 100914057 | NC_000015.9  |
| cg24848035 | 2.77E-18 | 5.67E-20 | 1.02E+01 | 34.5087949 | 2.58E-01 | 101118525 | 101118648 | NC_000008.10 |
| cg06560026 | 2.77E-18 | 5.68E-20 | 1.02E+01 | 34.507678  | 1.24E-01 | 6624242   | 6624365   | NC_000016.9  |
| cg12768681 | 2.80E-18 | 5.73E-20 | 1.02E+01 | 34.4990673 | 2.85E-01 | 20879547  | 20879670  | NC_000001.10 |
| cg26795540 | 2.81E-18 | 5.76E-20 | 1.02E+01 | 34.4937118 | 1.12E-01 | 35082070  | 35082193  | NC_000010.10 |
| cg17517480 | 2.81E-18 | 5.76E-20 | 1.02E+01 | 34.4931903 | 1.62E-01 | 22303542  | 22303665  | NC_000001.10 |
| cg13732302 | 2.81E-18 | 5.77E-20 | 1.02E+01 | 34.4922304 | 7.94E-02 | 44222207  | 44222330  | NC_000017.10 |
| cg20779964 | 2.82E-18 | 5.78E-20 | 1.02E+01 | 34.489707  | 1.90E-01 | 54580070  | 54580193  | NC_000020.10 |
| cg12432010 | 2.83E-18 | 5.81E-20 | 1.02E+01 | 34.484726  | 1.74E-01 | 176081    | 176204    | NC_000012.11 |
| cg22381068 | 2.84E-18 | 5.83E-20 | 1.02E+01 | 34.4812784 | 1.87E-01 | 906363    | 906486    | NC_000001.10 |
| cg19047292 | 2.85E-18 | 5.84E-20 | 1.02E+01 | 34.4794229 | 3.00E-01 | 56228442  | 56228565  | NC_000016.9  |
| cg10721834 | 2.87E-18 | 5.89E-20 | 1.02E+01 | 34.4723347 | 1.88E-01 | 22990066  | 22990189  | NC_000019.9  |
| cg02081266 | 2.88E-18 | 5.92E-20 | 1.02E+01 | 34.4664128 | 2.82E-01 | 59529618  | 59529741  | NC_000017.10 |
| cg12465501 | 2.90E-18 | 5.96E-20 | 1.02E+01 | 34.4607246 | 1.53E-01 | 211518776 | 211518899 | NC_000001.10 |
| cg10717869 | 2.91E-18 | 5.98E-20 | 1.02E+01 | 34.4566626 | 1.98E-01 | 205780912 | 205781035 | NC_000001.10 |

|            |          |          |          |            |          |           |           |              |
|------------|----------|----------|----------|------------|----------|-----------|-----------|--------------|
| cg15416279 | 2.92E-18 | 6.00E-20 | 1.02E+01 | 34.4541461 | 2.14E-01 | 3606795   | 3606918   | NC_000005.9  |
| cg10586087 | 2.92E-18 | 6.01E-20 | 1.02E+01 | 34.4521037 | 7.12E-02 | 148376773 | 148376896 | NC_000005.9  |
| cg14114931 | 2.92E-18 | 6.01E-20 | 1.02E+01 | 34.4510065 | 1.25E-01 | 50943910  | 50944033  | NC_000022.10 |
| cg13805533 | 2.93E-18 | 6.03E-20 | 1.02E+01 | 34.4476159 | 1.51E-01 | 19674482  | 19674605  | NC_000020.10 |
| cg27142536 | 2.94E-18 | 6.05E-20 | 1.02E+01 | 34.4449702 | 2.42E-01 | 20618198  | 20618321  | NC_000011.9  |
| cg26344513 | 2.94E-18 | 6.05E-20 | 1.02E+01 | 34.4447704 | 1.60E-01 | 22930613  | 22930736  | NC_000015.9  |
| cg26777883 | 2.96E-18 | 6.09E-20 | 1.02E+01 | 34.4388253 | 2.87E-01 | 688417    | 688540    | NC_000008.10 |
| cg15448975 | 2.96E-18 | 6.10E-20 | 1.02E+01 | 34.4373603 | 1.66E-01 | 5894930   | 5895053   | NC_000004.11 |
| cg20707345 | 2.98E-18 | 6.14E-20 | 1.02E+01 | 34.4305719 | 1.07E-01 | 67695867  | 67695990  | NC_000016.9  |
| cg13449606 | 3.00E-18 | 6.18E-20 | 1.02E+01 | 34.4248386 | 5.73E-02 | 27686328  | 27686451  | NC_000001.10 |
| cg12299795 | 3.00E-18 | 6.19E-20 | 1.02E+01 | 34.4221897 | 2.29E-01 | 64982093  | 64982216  | NC_000001.10 |
| cg07929264 | 3.01E-18 | 6.20E-20 | 1.02E+01 | 34.4213779 | 1.47E-01 | 89064822  | 89064945  | NC_000002.11 |
| cg13748640 | 3.01E-18 | 6.20E-20 | 1.02E+01 | 34.4204962 | 1.34E-01 | 102858493 | 102858616 | NC_000009.11 |
| cg02253760 | 3.01E-18 | 6.21E-20 | 1.02E+01 | 34.4187894 | 2.98E-01 | 147077616 | 147077739 | NC_000003.11 |
| cg21286173 | 3.02E-18 | 6.23E-20 | 1.02E+01 | 34.4161664 | 7.32E-02 | 38121490  | 38121613  | NC_000008.10 |
| cg15577706 | 3.02E-18 | 6.23E-20 | 1.02E+01 | 34.4161137 | 8.76E-02 | 33763575  | 33763698  | NC_000017.10 |
| cg06749715 | 3.02E-18 | 6.23E-20 | 1.02E+01 | 34.4156858 | 2.61E-01 | 37132291  | 37132414  | NC_000014.8  |
| cg12933903 | 3.04E-18 | 6.28E-20 | 1.02E+01 | 34.4086889 | 1.50E-01 | 20223923  | 20224046  | NC_000003.11 |
| cg11171221 | 3.05E-18 | 6.29E-20 | 1.02E+01 | 34.4066327 | 2.30E-01 | 124902844 | 124902967 | NC_000010.10 |
| cg26330304 | 3.05E-18 | 6.30E-20 | 1.02E+01 | 34.4057217 | 1.92E-01 | 90569017  | 90569140  | NC_000015.9  |
| cg22603247 | 3.08E-18 | 6.35E-20 | 1.02E+01 | 34.3968302 | 3.26E-01 | 124907553 | 124907676 | NC_000010.10 |
| cg15260552 | 3.08E-18 | 6.36E-20 | 1.02E+01 | 34.3960322 | 9.66E-02 | 64338402  | 64338525  | NC_000012.11 |
| cg24773418 | 3.09E-18 | 6.39E-20 | 1.02E+01 | 34.3905446 | 2.83E-01 | 33402512  | 33402635  | NC_000014.8  |
| cg04784475 | 3.10E-18 | 6.41E-20 | 1.02E+01 | 34.3882382 | 2.45E-01 | 38183130  | 38183253  | NC_000019.9  |
| cg25051341 | 3.10E-18 | 6.41E-20 | 1.02E+01 | 34.3878368 | 3.09E-01 | 100061307 | 100061430 | NC_000006.11 |



|            |          |          |          |            |          |           |           |              |
|------------|----------|----------|----------|------------|----------|-----------|-----------|--------------|
| cg09507526 | 3.10E-18 | 6.41E-20 | 1.02E+01 | 34.3877413 | 2.80E-01 | 23847816  | 23847939  | NC_000016.9  |
| cg18331515 | 3.10E-18 | 6.41E-20 | 1.02E+01 | 34.3874002 | 2.93E-01 | 178772385 | 178772508 | NC_000005.9  |
| cg06055845 | 3.10E-18 | 6.42E-20 | 1.02E+01 | 34.385907  | 1.54E-01 | 40788787  | 40788910  | NC_000019.9  |
| cg13063344 | 3.12E-18 | 6.47E-20 | 1.02E+01 | 34.378967  | 2.40E-01 | 132906443 | 132906566 | NC_000012.11 |
| cg22115076 | 3.13E-18 | 6.47E-20 | 1.02E+01 | 34.3779008 | 2.31E-01 | 50673588  | 50673711  | NC_000005.9  |
| cg12489915 | 3.14E-18 | 6.50E-20 | 1.02E+01 | 34.373405  | 1.66E-01 | 49194795  | 49194918  | NC_000017.10 |
| cg25681339 | 3.16E-18 | 6.54E-20 | 1.02E+01 | 34.368409  | 2.14E-01 | 1174148   | 1174271   | NC_000017.10 |
| cg09359114 | 3.16E-18 | 6.55E-20 | 1.02E+01 | 34.36665   | 2.40E-01 | 96650096  | 96650219  | NC_000007.13 |
| cg19107469 | 3.17E-18 | 6.57E-20 | 1.02E+01 | 34.3639382 | 1.93E-01 | 55200445  | 55200568  | NC_000020.10 |
| cg07598407 | 3.17E-18 | 6.57E-20 | 1.02E+01 | 34.3630471 | 1.31E-01 | 145048767 | 145048890 | NC_000008.10 |
| cg11403907 | 3.19E-18 | 6.62E-20 | 1.02E+01 | 34.3565168 | 1.86E-01 | 98569645  | 98569768  | NC_000001.10 |
| cg25943821 | 3.19E-18 | 6.62E-20 | 1.02E+01 | 34.3558641 | 1.22E-01 | 32283464  | 32283587  | NC_000003.11 |
| cg05976714 | 3.20E-18 | 6.63E-20 | 1.02E+01 | 34.3541513 | 2.62E-01 | 180076481 | 180076604 | NC_000005.9  |
| cg00663972 | 3.21E-18 | 6.65E-20 | 1.02E+01 | 34.351129  | 2.17E-01 | 112721725 | 112721848 | NC_000013.10 |
| cg04342955 | 3.21E-18 | 6.66E-20 | 1.02E+01 | 34.3504156 | 3.17E-01 | 12995296  | 12995419  | NC_000016.9  |
| cg03011535 | 3.22E-18 | 6.69E-20 | 1.02E+01 | 34.3451389 | 2.87E-01 | 42544794  | 42544917  | NC_000020.10 |
| cg09234616 | 3.24E-18 | 6.73E-20 | 1.02E+01 | 34.3401065 | 2.03E-01 | 32452592  | 32452715  | NC_000011.9  |
| cg18468354 | 3.26E-18 | 6.78E-20 | 1.02E+01 | 34.3318206 | 2.36E-01 | 36993517  | 36993640  | NC_000014.8  |
| cg07912789 | 3.26E-18 | 6.78E-20 | 1.02E+01 | 34.3317217 | 2.45E-01 | 3600273   | 3600396   | NC_000012.11 |
| cg19651132 | 3.29E-18 | 6.84E-20 | 1.02E+01 | 34.323773  | 3.00E-01 | 5018805   | 5018928   | NC_000012.11 |
| cg00209893 | 3.32E-18 | 6.90E-20 | 1.02E+01 | 34.3145222 | 7.90E-02 | 220097009 | 220097132 | NC_000002.11 |
| cg08526991 | 3.34E-18 | 6.96E-20 | 1.02E+01 | 34.3059898 | 2.09E-01 | 5831394   | 5831517   | NC_000002.11 |
| cg01889143 | 3.35E-18 | 6.98E-20 | 1.02E+01 | 34.3039798 | 2.72E-01 | 134825791 | 134825914 | NC_000005.9  |
| cg00966405 | 3.39E-18 | 7.06E-20 | 1.02E+01 | 34.2924162 | 1.38E-01 | 5535748   | 5535871   | NC_000007.13 |
| cg15607538 | 3.39E-18 | 7.06E-20 | 1.02E+01 | 34.2915077 | 3.13E-01 | 133484853 | 133484976 | NC_000012.11 |

|            |          |          |          |            |          |           |           |              |
|------------|----------|----------|----------|------------|----------|-----------|-----------|--------------|
| cg02012771 | 3.39E-18 | 7.07E-20 | 1.02E+01 | 34.2911491 | 9.15E-02 | 75646783  | 75646906  | NC_000015.9  |
| cg16638540 | 3.40E-18 | 7.09E-20 | 1.02E+01 | 34.2879775 | 2.20E-01 | 58570468  | 58570591  | NC_000019.9  |
| cg26886462 | 3.42E-18 | 7.13E-20 | 1.02E+01 | 34.2823184 | 1.24E-01 | 155108449 | 155108572 | NC_000005.9  |
| cg08790440 | 3.42E-18 | 7.13E-20 | 1.02E+01 | 34.2817986 | 1.69E-01 | 124782831 | 124782954 | NC_000002.11 |
| cg14610335 | 3.42E-18 | 7.14E-20 | 1.02E+01 | 34.2813804 | 1.42E-01 | 117012651 | 117012774 | NC_000009.11 |
| cg09937500 | 3.42E-18 | 7.14E-20 | 1.02E+01 | 34.2805565 | 1.47E-01 | 208175271 | 208175394 | NC_000002.11 |
| cg01080927 | 3.43E-18 | 7.15E-20 | 1.02E+01 | 34.2795289 | 1.77E-01 | 125341187 | 125341310 | NC_000006.11 |
| cg00557947 | 3.43E-18 | 7.16E-20 | 1.02E+01 | 34.2780276 | 2.96E-01 | 102419245 | 102419368 | NC_000010.10 |
| cg02350039 | 3.45E-18 | 7.21E-20 | 1.02E+01 | 34.271247  | 1.64E-01 | 138813263 | 138813386 | NC_000006.11 |
| cg26737985 | 3.45E-18 | 7.21E-20 | 1.02E+01 | 34.2711632 | 2.05E-01 | 170263544 | 170263667 | NC_000004.11 |
| cg08182446 | 3.47E-18 | 7.24E-20 | 1.02E+01 | 34.2671558 | 2.65E-01 | 27216012  | 27216135  | NC_000015.9  |
| cg00346208 | 3.48E-18 | 7.27E-20 | 1.02E+01 | 34.2628235 | 1.73E-01 | 20669905  | 20670028  | NC_000001.10 |
| cg00808403 | 3.50E-18 | 7.32E-20 | 1.02E+01 | 34.2568089 | 1.02E-01 | 47052636  | 47052759  | NC_000003.11 |
| cg25712695 | 3.51E-18 | 7.34E-20 | 1.02E+01 | 34.2532951 | 8.77E-02 | 120741653 | 120741776 | NC_000012.11 |
| cg20649017 | 3.53E-18 | 7.39E-20 | 1.02E+01 | 34.2469435 | 2.46E-01 | 176980837 | 176980960 | NC_000002.11 |
| cg08355659 | 3.55E-18 | 7.42E-20 | 1.02E+01 | 34.2430536 | 1.48E-01 | 54399190  | 54399313  | NC_000012.11 |
| cg23690166 | 3.57E-18 | 7.46E-20 | 1.02E+01 | 34.2370503 | 2.31E-01 | 46711017  | 46711140  | NC_000017.10 |
| cg27038101 | 3.57E-18 | 7.47E-20 | 1.02E+01 | 34.2367274 | 1.53E-01 | 67965804  | 67965927  | NC_000016.9  |
| cg23938834 | 3.57E-18 | 7.48E-20 | 1.02E+01 | 34.2350741 | 1.28E-01 | 101303628 | 101303751 | NC_000008.10 |
| cg10406295 | 3.58E-18 | 7.49E-20 | 1.02E+01 | 34.232955  | 2.65E-01 | 41167113  | 41167236  | NC_000008.10 |
| cg27125965 | 3.60E-18 | 7.53E-20 | 1.02E+01 | 34.2280068 | 1.00E-01 | 11707246  | 11707369  | NC_000019.9  |
| cg12513880 | 3.60E-18 | 7.54E-20 | 1.02E+01 | 34.2265113 | 2.38E-01 | 115136298 | 115136421 | NC_000012.11 |
| cg26664161 | 3.60E-18 | 7.54E-20 | 1.02E+01 | 34.2263125 | 2.14E-01 | 135265937 | 135266060 | NC_000005.9  |
| cg26306435 | 3.60E-18 | 7.55E-20 | 1.02E+01 | 34.225748  | 1.40E-01 | 125805783 | 125805906 | NC_000010.10 |
| cg14125530 | 3.62E-18 | 7.59E-20 | 1.02E+01 | 34.2207576 | 1.16E-01 | 70329240  | 70329363  | NC_000012.11 |

|            |          |          |          |            |          |           |           |              |
|------------|----------|----------|----------|------------|----------|-----------|-----------|--------------|
| cg09266229 | 3.62E-18 | 7.59E-20 | 1.02E+01 | 34.2204876 | 1.16E-01 | 111697455 | 111697578 | NC_000013.10 |
| cg18017383 | 3.64E-18 | 7.62E-20 | 1.02E+01 | 34.2162604 | 1.11E-01 | 51379874  | 51379997  | NC_000003.11 |
| cg01054478 | 3.64E-18 | 7.63E-20 | 1.02E+01 | 34.2154646 | 2.37E-01 | 180100963 | 180101086 | NC_000005.9  |
| cg17092583 | 3.66E-18 | 7.67E-20 | 1.02E+01 | 34.2094258 | 7.09E-02 | 735575    | 735698    | NC_000011.9  |
| cg00004996 | 3.66E-18 | 7.69E-20 | 1.02E+01 | 34.2078586 | 1.17E-01 | 17271535  | 17271658  | NC_000008.10 |
| cg23714705 | 3.68E-18 | 7.72E-20 | 1.02E+01 | 34.2035862 | 1.48E-01 | 134360912 | 134361035 | NC_000010.10 |
| cg20978694 | 3.69E-18 | 7.75E-20 | 1.02E+01 | 34.1994349 | 2.75E-01 | 2061804   | 2061927   | NC_000004.11 |
| cg14352682 | 3.71E-18 | 7.78E-20 | 1.02E+01 | 34.1952709 | 1.35E-01 | 30614168  | 30614291  | NC_000006.11 |
| cg00463011 | 3.73E-18 | 7.83E-20 | 1.02E+01 | 34.189236  | 1.37E-01 | 30550239  | 30550362  | NC_000016.9  |
| cg21758446 | 3.74E-18 | 7.85E-20 | 1.02E+01 | 34.1873502 | 1.32E-01 | 71518879  | 71519002  | NC_000012.11 |
| cg06034255 | 3.77E-18 | 7.93E-20 | 1.02E+01 | 34.1772354 | 1.29E-01 | 125806958 | 125807081 | NC_000010.10 |
| cg07568194 | 3.78E-18 | 7.94E-20 | 1.02E+01 | 34.1761675 | 2.27E-01 | 77468850  | 77468973  | NC_000016.9  |
| cg04086977 | 3.78E-18 | 7.94E-20 | 1.02E+01 | 34.1758766 | 1.10E-01 | 134829832 | 134829955 | NC_000010.10 |
| cg27009556 | 3.79E-18 | 7.96E-20 | 1.02E+01 | 34.1725851 | 1.40E-01 | 81813969  | 81814092  | NC_000016.9  |
| cg12284836 | 3.80E-18 | 7.98E-20 | 1.02E+01 | 34.1702762 | 1.08E-01 | 36481121  | 36481244  | NC_000007.13 |
| cg14908122 | 3.80E-18 | 7.99E-20 | 1.02E+01 | 34.1687522 | 3.98E-02 | 120971358 | 120971481 | NC_000012.11 |
| cg19685567 | 3.82E-18 | 8.03E-20 | 1.02E+01 | 34.1640953 | 7.83E-02 | 155639944 | 155640067 | NC_000007.13 |
| cg12356890 | 3.82E-18 | 8.04E-20 | 1.02E+01 | 34.1626622 | 3.99E-01 | 11059727  | 11059850  | NC_000010.10 |
| cg21629500 | 3.83E-18 | 8.06E-20 | 1.02E+01 | 34.1603811 | 2.87E-01 | 2754753   | 2754876   | NC_000005.9  |
| cg24035107 | 3.84E-18 | 8.07E-20 | 1.02E+01 | 34.1594073 | 2.34E-01 | 2394399   | 2394522   | NC_000017.10 |
| cg19014214 | 3.84E-18 | 8.08E-20 | 1.02E+01 | 34.1581664 | 1.48E-01 | 122230364 | 122230487 | NC_000011.9  |
| cg05409693 | 3.87E-18 | 8.15E-20 | 1.02E+01 | 34.1491556 | 1.60E-01 | 78680140  | 78680263  | NC_000012.11 |
| cg12887317 | 3.88E-18 | 8.17E-20 | 1.02E+01 | 34.1475449 | 1.06E-01 | 42921456  | 42921579  | NC_000005.9  |
| cg23204113 | 3.90E-18 | 8.21E-20 | 1.02E+01 | 34.1423266 | 1.49E-01 | 91408027  | 91408150  | NC_000010.10 |
| cg21643731 | 3.90E-18 | 8.23E-20 | 1.02E+01 | 34.1402045 | 8.03E-02 | 133545053 | 133545176 | NC_000007.13 |

|            |          |          |          |            |          |           |           |              |
|------------|----------|----------|----------|------------|----------|-----------|-----------|--------------|
| cg06341513 | 3.91E-18 | 8.23E-20 | 1.02E+01 | 34.1398496 | 3.45E-01 | 61277017  | 61277140  | NC_000011.9  |
| cg04507915 | 3.93E-18 | 8.28E-20 | 1.02E+01 | 34.1343208 | 1.55E-01 | 32861407  | 32861530  | NC_000003.11 |
| cg23786625 | 3.93E-18 | 8.29E-20 | 1.02E+01 | 34.1327605 | 2.64E-01 | 106402741 | 106402864 | NC_000010.10 |
| cg02657836 | 3.93E-18 | 8.30E-20 | 1.02E+01 | 34.1320411 | 1.94E-01 | 155109126 | 155109249 | NC_000005.9  |
| cg23151051 | 3.93E-18 | 8.30E-20 | 1.02E+01 | 34.1319799 | 1.19E-01 | 75789908  | 75790031  | NC_000002.11 |
| cg27223047 | 3.96E-18 | 8.37E-20 | 1.02E+01 | 34.1236076 | 2.41E-01 | 127874825 | 127874948 | NC_000005.9  |
| cg04658707 | 3.98E-18 | 8.40E-20 | 1.02E+01 | 34.1199465 | 1.59E-01 | 47453889  | 47454012  | NC_000021.8  |
| cg18533546 | 3.99E-18 | 8.42E-20 | 1.02E+01 | 34.1177915 | 1.05E-01 | 1845250   | 1845373   | NC_000008.10 |
| cg00745725 | 3.99E-18 | 8.43E-20 | 1.02E+01 | 34.1165346 | 2.18E-01 | 27216288  | 27216411  | NC_000015.9  |
| cg00551679 | 4.00E-18 | 8.45E-20 | 1.02E+01 | 34.1142756 | 2.19E-01 | 86547530  | 86547653  | NC_000016.9  |
| cg20422099 | 4.00E-18 | 8.45E-20 | 1.02E+01 | 34.1139347 | 2.86E-01 | 178771393 | 178771516 | NC_000005.9  |
| cg06496344 | 4.03E-18 | 8.51E-20 | 1.02E+01 | 34.1069105 | 2.51E-01 | 23253834  | 23253957  | NC_000019.9  |
| cg17749384 | 4.04E-18 | 8.54E-20 | 1.02E+01 | 34.1029655 | 1.87E-01 | 28571186  | 28571309  | NC_000010.10 |
| cg24313571 | 4.05E-18 | 8.55E-20 | 1.02E+01 | 34.1016362 | 1.60E-01 | 823352    | 823475    | NC_000011.9  |
| cg01495122 | 4.08E-18 | 8.63E-20 | 1.02E+01 | 34.0925085 | 2.09E-01 | 41167087  | 41167210  | NC_000008.10 |
| cg08140236 | 4.09E-18 | 8.66E-20 | 1.02E+01 | 34.0897439 | 8.50E-02 | 337132    | 337255    | NC_000016.9  |
| cg16218477 | 4.10E-18 | 8.67E-20 | 1.02E+01 | 34.087978  | 1.59E-01 | 1066167   | 1066290   | NC_000007.13 |
| cg16642284 | 4.11E-18 | 8.69E-20 | 1.02E+01 | 34.0862828 | 3.51E-01 | 129535378 | 129535501 | NC_000010.10 |
| cg21363377 | 4.11E-18 | 8.70E-20 | 1.02E+01 | 34.0852368 | 1.49E-01 | 127651533 | 127651656 | NC_000007.13 |
| cg18716083 | 4.14E-18 | 8.76E-20 | 1.02E+01 | 34.0778288 | 1.26E-01 | 111506418 | 111506541 | NC_000005.9  |
| cg09894698 | 4.18E-18 | 8.86E-20 | 1.02E+01 | 34.066886  | 2.78E-01 | 2291347   | 2291470   | NC_000011.9  |
| cg12213850 | 4.18E-18 | 8.86E-20 | 1.02E+01 | 34.0666275 | 5.87E-02 | 71157272  | 71157395  | NC_000010.10 |
| cg14526718 | 4.23E-18 | 8.97E-20 | 1.02E+01 | 34.0546312 | 2.26E-01 | 176932840 | 176932963 | NC_000002.11 |
| cg23944586 | 4.27E-18 | 9.06E-20 | 1.02E+01 | 34.0449415 | 7.49E-02 | 19598794  | 19598917  | NC_000011.9  |
| cg18202449 | 4.28E-18 | 9.07E-20 | 1.02E+01 | 34.0431642 | 2.72E-01 | 50513654  | 50513777  | NC_000001.10 |

|            |          |          |          |            |          |           |           |              |
|------------|----------|----------|----------|------------|----------|-----------|-----------|--------------|
| cg14238959 | 4.28E-18 | 9.08E-20 | 1.02E+01 | 34.0425543 | 2.54E-01 | 114885270 | 114885393 | NC_000012.11 |
| cg10339775 | 4.28E-18 | 9.09E-20 | 1.02E+01 | 34.0416435 | 7.78E-02 | 111493027 | 111493150 | NC_000007.13 |
| cg23235241 | 4.28E-18 | 9.10E-20 | 1.02E+01 | 34.0406623 | 3.16E-01 | 25704505  | 25704628  | NC_000016.9  |
| cg15501942 | 4.31E-18 | 9.16E-20 | 1.02E+01 | 34.0342456 | 1.53E-01 | 2482442   | 2482565   | NC_000011.9  |
| cg13070156 | 4.33E-18 | 9.20E-20 | 1.02E+01 | 34.029351  | 1.00E-01 | 134997000 | 134997123 | NC_000010.10 |
| cg19998400 | 4.35E-18 | 9.25E-20 | 1.02E+01 | 34.0238432 | 8.79E-02 | 235875195 | 235875318 | NC_000002.11 |
| cg02344784 | 4.36E-18 | 9.27E-20 | 1.02E+01 | 34.0215205 | 2.04E-01 | 104178138 | 104178261 | NC_000012.11 |
| cg20604446 | 4.37E-18 | 9.29E-20 | 1.02E+01 | 34.0203718 | 1.47E-01 | 175292778 | 175292901 | NC_000002.11 |
| cg05576262 | 4.43E-18 | 9.42E-20 | 1.02E+01 | 34.0056832 | 2.49E-01 | 3234344   | 3234467   | NC_000016.9  |
| cg15921239 | 4.44E-18 | 9.45E-20 | 1.02E+01 | 34.0025331 | 1.59E-01 | 35765215  | 35765338  | NC_000006.11 |
| cg15393022 | 4.44E-18 | 9.45E-20 | 1.02E+01 | 34.0025101 | 1.38E-01 | 54775837  | 54775960  | NC_000001.10 |
| cg03574652 | 4.46E-18 | 9.49E-20 | 1.02E+01 | 33.9988894 | 1.20E-01 | 187100815 | 187100938 | NC_000003.11 |
| cg15484532 | 4.49E-18 | 9.57E-20 | 1.02E+01 | 33.990651  | 2.03E-01 | 4714171   | 4714294   | NC_000001.10 |
| cg07362258 | 4.51E-18 | 9.61E-20 | 1.02E+01 | 33.9865603 | 1.08E-01 | 41109707  | 41109830  | NC_000013.10 |
| cg11763094 | 4.53E-18 | 9.65E-20 | 1.02E+01 | 33.9820008 | 2.40E-01 | 84322323  | 84322446  | NC_000015.9  |
| cg24042452 | 4.58E-18 | 9.77E-20 | 1.02E+01 | 33.9703384 | 1.59E-01 | 156305664 | 156305787 | NC_000001.10 |
| cg18368845 | 4.62E-18 | 9.84E-20 | 1.02E+01 | 33.9624929 | 1.81E-01 | 41173440  | 41173563  | NC_000013.10 |
| cg25942450 | 4.65E-18 | 9.93E-20 | 1.02E+01 | 33.9535733 | 1.85E-01 | 170736251 | 170736374 | NC_000005.9  |
| cg18465962 | 4.66E-18 | 9.94E-20 | 1.02E+01 | 33.9527113 | 9.28E-02 | 100767262 | 100767385 | NC_000007.13 |
| cg08190858 | 4.68E-18 | 9.99E-20 | 1.02E+01 | 33.9478417 | 2.74E-01 | 54321346  | 54321469  | NC_000012.11 |
| cg08445263 | 4.69E-18 | 1.00E-19 | 1.02E+01 | 33.9454197 | 2.22E-01 | 27216277  | 27216400  | NC_000015.9  |
| cg16504626 | 4.70E-18 | 1.00E-19 | 1.02E+01 | 33.9423966 | 3.04E-01 | 57070013  | 57070136  | NC_000008.10 |
| cg25690589 | 4.74E-18 | 1.01E-19 | 1.02E+01 | 33.9344695 | 1.31E-01 | 60285478  | 60285601  | NC_000015.9  |
| cg16206659 | 4.80E-18 | 1.03E-19 | 1.02E+01 | 33.9206025 | 2.15E-01 | 189203762 | 189203885 | NC_000004.11 |
| cg16752876 | 4.82E-18 | 1.03E-19 | 1.02E+01 | 33.9150806 | 2.19E-01 | 19553237  | 19553360  | NC_000002.11 |

|            |          |          |          |            |          |           |           |              |
|------------|----------|----------|----------|------------|----------|-----------|-----------|--------------|
| cg10039444 | 4.82E-18 | 1.03E-19 | 1.02E+01 | 33.9147185 | 8.77E-02 | 56233676  | 56233799  | NC_000014.8  |
| cg19019537 | 4.83E-18 | 1.03E-19 | 1.02E+01 | 33.9129653 | 3.63E-01 | 495817    | 495940    | NC_000008.10 |
| cg08086720 | 4.84E-18 | 1.04E-19 | 1.02E+01 | 33.9117858 | 2.65E-01 | 115135003 | 115135126 | NC_000012.11 |
| cg21389753 | 4.86E-18 | 1.04E-19 | 1.01E+01 | 33.9059492 | 2.39E-01 | 59480674  | 59480797  | NC_000017.10 |
| cg24457118 | 4.90E-18 | 1.05E-19 | 1.01E+01 | 33.898183  | 1.81E-01 | 155167337 | 155167460 | NC_000001.10 |
| cg15736783 | 4.92E-18 | 1.05E-19 | 1.01E+01 | 33.8944939 | 8.45E-02 | 80178612  | 80178735  | NC_000006.11 |
| cg21210370 | 4.93E-18 | 1.06E-19 | 1.01E+01 | 33.8926423 | 1.15E-01 | 143609637 | 143609760 | NC_000008.10 |
| cg19951107 | 4.94E-18 | 1.06E-19 | 1.01E+01 | 33.8886776 | 1.37E-01 | 111760098 | 111760221 | NC_000003.11 |
| cg05936441 | 4.96E-18 | 1.06E-19 | 1.01E+01 | 33.8857795 | 1.81E-01 | 37356844  | 37356967  | NC_000020.10 |
| cg17352975 | 4.98E-18 | 1.07E-19 | 1.01E+01 | 33.8808939 | 2.56E-01 | 5297429   | 5297552   | NC_000020.10 |
| cg15563974 | 4.99E-18 | 1.07E-19 | 1.01E+01 | 33.8798982 | 8.23E-02 | 38864256  | 38864379  | NC_000019.9  |
| cg08809260 | 5.00E-18 | 1.07E-19 | 1.01E+01 | 33.8758595 | 1.95E-01 | 177054140 | 177054263 | NC_000002.11 |
| cg07136554 | 5.04E-18 | 1.08E-19 | 1.01E+01 | 33.868567  | 1.12E-01 | 52542167  | 52542290  | NC_000014.8  |
| cg02213822 | 5.07E-18 | 1.09E-19 | 1.01E+01 | 33.8620644 | 1.29E-01 | 128985576 | 128985699 | NC_000009.11 |
| cg06651311 | 5.09E-18 | 1.09E-19 | 1.01E+01 | 33.858613  | 2.90E-01 | 37246230  | 37246353  | NC_000004.11 |
| cg14377687 | 5.10E-18 | 1.10E-19 | 1.01E+01 | 33.8560341 | 1.24E-01 | 1220228   | 1220351   | NC_000011.9  |
| cg09171111 | 5.14E-18 | 1.11E-19 | 1.01E+01 | 33.8475421 | 1.56E-01 | 100506730 | 100506853 | NC_000001.10 |
| cg06226516 | 5.14E-18 | 1.11E-19 | 1.01E+01 | 33.8474101 | 1.37E-01 | 13072314  | 13072437  | NC_000007.13 |
| cg03299269 | 5.15E-18 | 1.11E-19 | 1.01E+01 | 33.8448338 | 1.16E-01 | 250003    | 250126    | NC_000002.11 |
| cg05132851 | 5.16E-18 | 1.11E-19 | 1.01E+01 | 33.8430005 | 1.35E-01 | 134828962 | 134829085 | NC_000010.10 |
| cg01408881 | 5.16E-18 | 1.11E-19 | 1.01E+01 | 33.8427405 | 9.81E-02 | 65566249  | 65566372  | NC_000012.11 |
| cg05573844 | 5.17E-18 | 1.11E-19 | 1.01E+01 | 33.8410269 | 2.12E-01 | 54354590  | 54354713  | NC_000012.11 |
| cg22192275 | 5.20E-18 | 1.12E-19 | 1.01E+01 | 33.8352129 | 1.48E-01 | 217528557 | 217528680 | NC_000002.11 |
| cg20517050 | 5.20E-18 | 1.12E-19 | 1.01E+01 | 33.8341729 | 2.42E-01 | 27183806  | 27183929  | NC_000007.13 |
| cg09537620 | 5.21E-18 | 1.12E-19 | 1.01E+01 | 33.8334245 | 2.29E-01 | 31826574  | 31826697  | NC_000011.9  |

|            |          |          |          |            |          |           |           |              |
|------------|----------|----------|----------|------------|----------|-----------|-----------|--------------|
| cg18318715 | 5.21E-18 | 1.12E-19 | 1.01E+01 | 33.8327545 | 5.23E-02 | 181068076 | 181068199 | NC_000001.10 |
| cg11323198 | 5.25E-18 | 1.13E-19 | 1.01E+01 | 33.8246364 | 2.32E-01 | 62069806  | 62069929  | NC_000016.9  |
| cg23349790 | 5.26E-18 | 1.13E-19 | 1.01E+01 | 33.8231092 | 2.92E-01 | 18434576  | 18434699  | NC_000001.10 |
| cg22758454 | 5.27E-18 | 1.13E-19 | 1.01E+01 | 33.8217238 | 2.45E-01 | 16570483  | 16570606  | NC_000017.10 |
| cg26168118 | 5.32E-18 | 1.15E-19 | 1.01E+01 | 33.8119724 | 1.60E-01 | 105751711 | 105751834 | NC_000014.8  |
| cg22173510 | 5.32E-18 | 1.15E-19 | 1.01E+01 | 33.811203  | 1.60E-01 | 753400    | 753523    | NC_000017.10 |
| cg12612118 | 5.37E-18 | 1.16E-19 | 1.01E+01 | 33.8012498 | 2.83E-01 | 392555    | 392678    | NC_000006.11 |
| cg01501009 | 5.45E-18 | 1.18E-19 | 1.01E+01 | 33.7860657 | 2.13E-01 | 57183268  | 57183391  | NC_000019.9  |
| cg09286367 | 5.47E-18 | 1.18E-19 | 1.01E+01 | 33.7833439 | 1.47E-01 | 5535692   | 5535815   | NC_000007.13 |
| cg21200408 | 5.47E-18 | 1.18E-19 | 1.01E+01 | 33.7832034 | 2.51E-01 | 21378211  | 21378334  | NC_000020.10 |
| cg02307288 | 5.50E-18 | 1.19E-19 | 1.01E+01 | 33.7764494 | 1.17E-01 | 135549111 | 135549234 | NC_000005.9  |
| cg27518272 | 5.52E-18 | 1.19E-19 | 1.01E+01 | 33.7724978 | 8.97E-02 | 63918395  | 63918518  | NC_000003.11 |
| cg08286181 | 5.54E-18 | 1.20E-19 | 1.01E+01 | 33.7690794 | 2.33E-01 | 115134991 | 115135114 | NC_000012.11 |
| cg18749629 | 5.57E-18 | 1.20E-19 | 1.01E+01 | 33.7632284 | 7.74E-02 | 144566769 | 144566892 | NC_000008.10 |
| cg18401406 | 5.57E-18 | 1.20E-19 | 1.01E+01 | 33.7627614 | 9.13E-02 | 37247537  | 37247660  | NC_000013.10 |
| cg12498326 | 5.60E-18 | 1.21E-19 | 1.01E+01 | 33.7572641 | 9.01E-02 | 130599682 | 130599805 | NC_000012.11 |
| cg12258042 | 5.61E-18 | 1.21E-19 | 1.01E+01 | 33.7558987 | 2.45E-01 | 4852036   | 4852159   | NC_000008.10 |
| cg20670075 | 5.68E-18 | 1.23E-19 | 1.01E+01 | 33.7422751 | 2.27E-01 | 113909388 | 113909511 | NC_000012.11 |
| cg26328510 | 5.69E-18 | 1.23E-19 | 1.01E+01 | 33.7414547 | 3.29E-01 | 11059718  | 11059841  | NC_000010.10 |
| cg15294361 | 5.70E-18 | 1.23E-19 | 1.01E+01 | 33.738579  | 4.38E-02 | 675222    | 675345    | NC_000012.11 |
| cg02203336 | 5.70E-18 | 1.23E-19 | 1.01E+01 | 33.7379907 | 1.54E-01 | 31031755  | 31031878  | NC_000002.11 |
| cg09237849 | 5.84E-18 | 1.26E-19 | 1.01E+01 | 33.7139391 | 9.03E-02 | 22974668  | 22974791  | NC_000008.10 |
| cg15724256 | 5.84E-18 | 1.27E-19 | 1.01E+01 | 33.7137608 | 2.19E-01 | 119602857 | 119602980 | NC_000002.11 |
| cg15251319 | 5.87E-18 | 1.27E-19 | 1.01E+01 | 33.7088922 | 8.06E-02 | 194836302 | 194836425 | NC_000003.11 |
| cg27205902 | 5.88E-18 | 1.27E-19 | 1.01E+01 | 33.7066417 | 1.52E-01 | 1006985   | 1007108   | NC_000011.9  |

|            |          |          |          |            |          |           |           |              |
|------------|----------|----------|----------|------------|----------|-----------|-----------|--------------|
| cg25574603 | 5.89E-18 | 1.28E-19 | 1.01E+01 | 33.704232  | 1.33E-01 | 13256766  | 13256889  | NC_000012.11 |
| cg15767218 | 5.91E-18 | 1.28E-19 | 1.01E+01 | 33.7013491 | 1.55E-01 | 69949353  | 69949476  | NC_000011.9  |
| cg14386867 | 5.93E-18 | 1.29E-19 | 1.01E+01 | 33.6966168 | 7.82E-02 | 140086051 | 140086174 | NC_000009.11 |
| cg15993401 | 5.94E-18 | 1.29E-19 | 1.01E+01 | 33.6958275 | 1.17E-01 | 31079306  | 31079429  | NC_000006.11 |
| cg27357571 | 5.94E-18 | 1.29E-19 | 1.01E+01 | 33.6948307 | 2.60E-01 | 34398226  | 34398349  | NC_000021.8  |
| cg19026124 | 5.95E-18 | 1.29E-19 | 1.01E+01 | 33.6940641 | 1.46E-01 | 6056784   | 6056907   | NC_000020.10 |
| cg15625675 | 5.98E-18 | 1.30E-19 | 1.01E+01 | 33.689014  | 1.22E-01 | 114957464 | 114957587 | NC_000005.9  |
| cg13044838 | 5.99E-18 | 1.30E-19 | 1.01E+01 | 33.6859939 | 6.17E-02 | 61594176  | 61594299  | NC_000020.10 |
| cg10511902 | 6.00E-18 | 1.30E-19 | 1.01E+01 | 33.6848798 | 1.52E-01 | 91842949  | 91843072  | NC_000014.8  |
| cg05647602 | 6.04E-18 | 1.31E-19 | 1.01E+01 | 33.6783114 | 1.05E-01 | 18258664  | 18258787  | NC_000022.10 |
| cg26937772 | 6.05E-18 | 1.31E-19 | 1.01E+01 | 33.6765133 | 1.27E-01 | 56704905  | 56705028  | NC_000016.9  |
| cg23316360 | 6.06E-18 | 1.32E-19 | 1.01E+01 | 33.6743501 | 2.24E-01 | 78492916  | 78493039  | NC_000013.10 |
| cg12716639 | 6.08E-18 | 1.32E-19 | 1.01E+01 | 33.6699727 | 1.70E-01 | 119234198 | 119234321 | NC_000011.9  |
| cg22599115 | 6.10E-18 | 1.33E-19 | 1.01E+01 | 33.6674442 | 1.06E-01 | 1223262   | 1223385   | NC_000005.9  |
| cg09590897 | 6.14E-18 | 1.34E-19 | 1.01E+01 | 33.6595395 | 1.47E-01 | 3961702   | 3961825   | NC_000019.9  |
| cg17160984 | 6.17E-18 | 1.34E-19 | 1.01E+01 | 33.655785  | 1.50E-01 | 131765778 | 131765901 | NC_000010.10 |
| cg16449219 | 6.17E-18 | 1.34E-19 | 1.01E+01 | 33.6544349 | 2.36E-01 | 51290169  | 51290292  | NC_000014.8  |
| cg09410234 | 6.17E-18 | 1.34E-19 | 1.01E+01 | 33.6542588 | 2.79E-01 | 111217715 | 111217838 | NC_000001.10 |
| cg16927040 | 6.18E-18 | 1.34E-19 | 1.01E+01 | 33.6537115 | 2.10E-01 | 187388128 | 187388251 | NC_000003.11 |
| cg22512256 | 6.21E-18 | 1.35E-19 | 1.01E+01 | 33.6479453 | 1.15E-01 | 8221132   | 8221255   | NC_000004.11 |
| cg17101296 | 6.21E-18 | 1.35E-19 | 1.01E+01 | 33.6478502 | 2.66E-01 | 145925708 | 145925831 | NC_000008.10 |
| cg26988853 | 6.21E-18 | 1.35E-19 | 1.01E+01 | 33.6478171 | 1.20E-01 | 67695978  | 67696101  | NC_000016.9  |
| cg14229207 | 6.22E-18 | 1.35E-19 | 1.01E+01 | 33.6460861 | 2.51E-01 | 135929747 | 135929870 | NC_000009.11 |
| cg00329272 | 6.23E-18 | 1.36E-19 | 1.01E+01 | 33.64459   | 1.13E-01 | 3191481   | 3191604   | NC_000001.10 |
| cg27284034 | 6.25E-18 | 1.36E-19 | 1.01E+01 | 33.6404223 | 1.36E-01 | 75252211  | 75252334  | NC_000016.9  |



|            |          |          |          |            |          |           |           |              |
|------------|----------|----------|----------|------------|----------|-----------|-----------|--------------|
| cg12351768 | 6.26E-18 | 1.36E-19 | 1.01E+01 | 33.639431  | 1.89E-01 | 113296192 | 113296315 | NC_000013.10 |
| cg00316508 | 6.26E-18 | 1.36E-19 | 1.01E+01 | 33.6392065 | 9.86E-02 | 146828698 | 146828821 | NC_000004.11 |
| cg13488201 | 6.27E-18 | 1.37E-19 | 1.01E+01 | 33.6363661 | 1.86E-01 | 128077323 | 128077446 | NC_000010.10 |
| cg23245711 | 6.31E-18 | 1.38E-19 | 1.01E+01 | 33.6296198 | 1.50E-01 | 48413678  | 48413801  | NC_000003.11 |
| cg13476204 | 6.35E-18 | 1.39E-19 | 1.01E+01 | 33.6226351 | 1.86E-01 | 75241216  | 75241339  | NC_000016.9  |
| cg20337445 | 6.37E-18 | 1.39E-19 | 1.01E+01 | 33.6205467 | 1.04E-01 | 35947818  | 35947941  | NC_000022.10 |
| cg16964348 | 6.39E-18 | 1.39E-19 | 1.01E+01 | 33.6169495 | 3.65E-01 | 24323799  | 24323922  | NC_000007.13 |
| cg04704085 | 6.44E-18 | 1.41E-19 | 1.01E+01 | 33.6082794 | 1.23E-01 | 47513235  | 47513358  | NC_000022.10 |
| cg04669574 | 6.46E-18 | 1.41E-19 | 1.01E+01 | 33.604787  | 2.26E-01 | 50297945  | 50298068  | NC_000012.11 |
| cg14885748 | 6.46E-18 | 1.41E-19 | 1.01E+01 | 33.6047816 | 2.20E-01 | 127211262 | 127211385 | NC_000012.11 |
| cg03897125 | 6.51E-18 | 1.42E-19 | 1.01E+01 | 33.596921  | 6.62E-02 | 73767359  | 73767482  | NC_000010.10 |
| cg25976755 | 6.57E-18 | 1.44E-19 | 1.01E+01 | 33.5861778 | 1.11E-01 | 2481495   | 2481618   | NC_000011.9  |
| cg22843912 | 6.59E-18 | 1.44E-19 | 1.01E+01 | 33.5832137 | 1.14E-01 | 121274655 | 121274778 | NC_000012.11 |
| cg08453021 | 6.60E-18 | 1.44E-19 | 1.01E+01 | 33.5826017 | 2.72E-01 | 37488575  | 37488698  | NC_000007.13 |
| cg10432569 | 6.63E-18 | 1.45E-19 | 1.01E+01 | 33.5769924 | 2.41E-01 | 46709858  | 46709981  | NC_000017.10 |
| cg17294725 | 6.65E-18 | 1.46E-19 | 1.01E+01 | 33.5741277 | 1.68E-01 | 1272559   | 1272682   | NC_000007.13 |
| cg09799658 | 6.66E-18 | 1.46E-19 | 1.01E+01 | 33.5718879 | 2.55E-01 | 19157304  | 19157427  | NC_000007.13 |
| cg00712762 | 6.67E-18 | 1.46E-19 | 1.01E+01 | 33.5702466 | 9.45E-02 | 36351470  | 36351593  | NC_000001.10 |
| cg25574024 | 6.72E-18 | 1.47E-19 | 1.01E+01 | 33.5624937 | 2.51E-01 | 2161894   | 2162017   | NC_000011.9  |
| cg10629020 | 6.75E-18 | 1.48E-19 | 1.01E+01 | 33.5585805 | 5.80E-02 | 981730    | 981853    | NC_000017.10 |
| cg05713044 | 6.80E-18 | 1.49E-19 | 1.01E+01 | 33.5506301 | 1.88E-01 | 16671496  | 16671619  | NC_000005.9  |
| cg23791824 | 6.80E-18 | 1.49E-19 | 1.01E+01 | 33.5498438 | 1.40E-01 | 56722243  | 56722366  | NC_000020.10 |
| cg25409794 | 6.80E-18 | 1.49E-19 | 1.01E+01 | 33.549783  | 3.07E-02 | 14020824  | 14020947  | NC_000019.9  |
| cg27088038 | 6.81E-18 | 1.49E-19 | 1.01E+01 | 33.5491149 | 1.16E-01 | 92959927  | 92960050  | NC_000014.8  |
| cg11548404 | 6.84E-18 | 1.50E-19 | 1.01E+01 | 33.5437748 | 1.11E-01 | 133076622 | 133076745 | NC_000012.11 |

|            |          |          |          |            |          |           |           |              |
|------------|----------|----------|----------|------------|----------|-----------|-----------|--------------|
| cg03511513 | 6.87E-18 | 1.51E-19 | 1.01E+01 | 33.5384231 | 1.49E-01 | 90472777  | 90472900  | NC_000012.11 |
| cg03315215 | 6.89E-18 | 1.51E-19 | 1.01E+01 | 33.5354438 | 2.26E-01 | 53422847  | 53422970  | NC_000013.10 |
| cg00017221 | 6.93E-18 | 1.52E-19 | 1.01E+01 | 33.5296454 | 2.36E-01 | 149719536 | 149719659 | NC_000001.10 |
| cg25015867 | 6.96E-18 | 1.53E-19 | 1.01E+01 | 33.5249472 | 2.43E-01 | 22929808  | 22929931  | NC_000018.9  |
| cg26329756 | 6.96E-18 | 1.53E-19 | 1.01E+01 | 33.5243928 | 7.16E-02 | 99250482  | 99250605  | NC_000015.9  |
| cg22746058 | 6.99E-18 | 1.54E-19 | 1.01E+01 | 33.5209086 | 2.13E-01 | 23481176  | 23481299  | NC_000010.10 |
| cg08031769 | 7.00E-18 | 1.54E-19 | 1.01E+01 | 33.5194069 | 1.56E-01 | 41042969  | 41043092  | NC_000003.11 |
| cg01674009 | 7.02E-18 | 1.54E-19 | 1.01E+01 | 33.5157371 | 1.21E-01 | 45655294  | 45655417  | NC_000019.9  |
| cg04617948 | 7.03E-18 | 1.55E-19 | 1.01E+01 | 33.5137694 | 2.33E-01 | 129535138 | 129535261 | NC_000010.10 |
| cg16935065 | 7.05E-18 | 1.55E-19 | 1.01E+01 | 33.511597  | 3.09E-01 | 107503233 | 107503356 | NC_000002.11 |
| cg02035348 | 7.05E-18 | 1.55E-19 | 1.01E+01 | 33.5109185 | 8.41E-02 | 69624697  | 69624820  | NC_000011.9  |
| cg12637676 | 7.08E-18 | 1.56E-19 | 1.01E+01 | 33.5063674 | 1.47E-01 | 11587161  | 11587284  | NC_000008.10 |
| cg25724283 | 7.13E-18 | 1.57E-19 | 1.01E+01 | 33.4993843 | 2.60E-01 | 36705475  | 36705598  | NC_000013.10 |
| cg17535595 | 7.22E-18 | 1.59E-19 | 1.01E+01 | 33.4859429 | 3.34E-01 | 53422808  | 53422931  | NC_000013.10 |
| cg00318436 | 7.23E-18 | 1.59E-19 | 1.01E+01 | 33.484212  | 1.62E-01 | 67696181  | 67696304  | NC_000016.9  |
| cg00100012 | 7.23E-18 | 1.59E-19 | 1.01E+01 | 33.4841972 | 1.97E-01 | 37302983  | 37303106  | NC_000020.10 |
| cg02245533 | 7.23E-18 | 1.60E-19 | 1.01E+01 | 33.4832912 | 1.04E-01 | 735913    | 736036    | NC_000011.9  |
| cg12868970 | 7.24E-18 | 1.60E-19 | 1.01E+01 | 33.4826501 | 1.75E-01 | 189569600 | 189569723 | NC_000003.11 |
| cg10856812 | 7.24E-18 | 1.60E-19 | 1.01E+01 | 33.4818499 | 1.93E-01 | 117523153 | 117523276 | NC_000012.11 |
| cg15566448 | 7.28E-18 | 1.61E-19 | 1.01E+01 | 33.4765979 | 9.57E-02 | 11808230  | 11808353  | NC_000001.10 |
| cg05864326 | 7.31E-18 | 1.62E-19 | 1.01E+01 | 33.4710321 | 2.38E-01 | 177030150 | 177030273 | NC_000002.11 |
| cg11047382 | 7.31E-18 | 1.62E-19 | 1.01E+01 | 33.4708153 | 3.96E-02 | 1812614   | 1812737   | NC_000008.10 |
| cg14859460 | 7.39E-18 | 1.63E-19 | 1.01E+01 | 33.4605442 | 2.32E-01 | 178422244 | 178422367 | NC_000005.9  |
| cg13747435 | 7.47E-18 | 1.65E-19 | 1.01E+01 | 33.449031  | 4.73E-02 | 130631782 | 130631905 | NC_000009.11 |
| cg18051552 | 7.52E-18 | 1.66E-19 | 1.01E+01 | 33.4418505 | 1.40E-01 | 71548732  | 71548855  | NC_000006.11 |

|            |          |          |          |            |          |           |           |              |
|------------|----------|----------|----------|------------|----------|-----------|-----------|--------------|
| cg16856286 | 7.56E-18 | 1.67E-19 | 1.01E+01 | 33.4365669 | 2.50E-01 | 54332992  | 54333115  | NC_000012.11 |
| cg24158307 | 7.57E-18 | 1.67E-19 | 1.01E+01 | 33.4356516 | 4.21E-02 | 95599667  | 95599790  | NC_000014.8  |
| cg22655696 | 7.58E-18 | 1.68E-19 | 1.01E+01 | 33.4345089 | 1.65E-01 | 131757191 | 131757314 | NC_000010.10 |
| cg18297437 | 7.59E-18 | 1.68E-19 | 1.01E+01 | 33.4325554 | 1.93E-01 | 147131332 | 147131455 | NC_000003.11 |
| cg17911318 | 7.60E-18 | 1.68E-19 | 1.01E+01 | 33.4311489 | 2.68E-01 | 74962000  | 74962123  | NC_000018.9  |
| cg10594506 | 7.68E-18 | 1.70E-19 | 1.01E+01 | 33.4197909 | 7.96E-02 | 155166889 | 155167012 | NC_000001.10 |
| cg09204108 | 7.75E-18 | 1.72E-19 | 1.01E+01 | 33.410063  | 1.49E-01 | 42211679  | 42211802  | NC_000015.9  |
| cg21851672 | 7.81E-18 | 1.73E-19 | 1.01E+01 | 33.4016473 | 1.80E-01 | 200007863 | 200007986 | NC_000001.10 |
| cg06748955 | 7.86E-18 | 1.75E-19 | 1.01E+01 | 33.3949614 | 1.07E-01 | 3094696   | 3094819   | NC_000001.10 |
| cg08540745 | 7.88E-18 | 1.75E-19 | 1.01E+01 | 33.3930557 | 1.75E-01 | 25867637  | 25867760  | NC_000001.10 |
| cg00014998 | 7.93E-18 | 1.76E-19 | 1.01E+01 | 33.3863138 | 2.13E-01 | 177014962 | 177015085 | NC_000002.11 |
| cg04249642 | 7.98E-18 | 1.77E-19 | 1.01E+01 | 33.3798317 | 1.12E-01 | 8117354   | 8117477   | NC_000010.10 |
| cg08684959 | 7.98E-18 | 1.77E-19 | 1.01E+01 | 33.3793754 | 8.66E-02 | 70031709  | 70031832  | NC_000011.9  |
| cg06121800 | 7.99E-18 | 1.77E-19 | 1.01E+01 | 33.3783707 | 7.20E-02 | 134996984 | 134997107 | NC_000010.10 |
| cg25400358 | 7.99E-18 | 1.77E-19 | 1.01E+01 | 33.3781413 | 1.37E-01 | 64054159  | 64054282  | NC_000011.9  |
| cg05658487 | 8.01E-18 | 1.78E-19 | 1.01E+01 | 33.3747956 | 1.91E-01 | 1887583   | 1887706   | NC_000005.9  |
| cg18664856 | 8.01E-18 | 1.78E-19 | 1.01E+01 | 33.3746229 | 9.33E-02 | 105240263 | 105240386 | NC_000014.8  |
| cg20505728 | 8.05E-18 | 1.79E-19 | 1.01E+01 | 33.3694756 | 1.23E-01 | 43800538  | 43800661  | NC_000003.11 |
| cg09717809 | 8.06E-18 | 1.79E-19 | 1.01E+01 | 33.3684674 | 1.99E-01 | 74375930  | 74376053  | NC_000002.11 |
| cg01790274 | 8.07E-18 | 1.79E-19 | 1.01E+01 | 33.3678395 | 1.23E-01 | 136241020 | 136241143 | NC_000009.11 |
| cg23508908 | 8.09E-18 | 1.80E-19 | 1.01E+01 | 33.3650634 | 1.15E-01 | 84771783  | 84771906  | NC_000006.11 |
| cg16890121 | 8.09E-18 | 1.80E-19 | 1.01E+01 | 33.364567  | 2.00E-01 | 28198579  | 28198702  | NC_000013.10 |
| cg22434409 | 8.10E-18 | 1.80E-19 | 1.01E+01 | 33.3633691 | 2.78E-01 | 21950722  | 21950845  | NC_000004.11 |
| cg26831119 | 8.11E-18 | 1.80E-19 | 1.01E+01 | 33.3624007 | 2.54E-01 | 111550830 | 111550953 | NC_000004.11 |
| cg09905605 | 8.13E-18 | 1.81E-19 | 1.01E+01 | 33.3591728 | 1.57E-01 | 31053323  | 31053446  | NC_000016.9  |

|            |          |          |          |            |          |           |           |              |
|------------|----------|----------|----------|------------|----------|-----------|-----------|--------------|
| cg17550175 | 8.23E-18 | 1.83E-19 | 1.01E+01 | 33.3473328 | 1.05E-01 | 95322270  | 95322393  | NC_000010.10 |
| cg13939859 | 8.27E-18 | 1.84E-19 | 1.01E+01 | 33.3410414 | 2.43E-01 | 91183519  | 91183642  | NC_000001.10 |
| cg04944090 | 8.30E-18 | 1.85E-19 | 1.01E+01 | 33.3379559 | 1.61E-01 | 85635486  | 85635609  | NC_000016.9  |
| cg14905600 | 8.32E-18 | 1.85E-19 | 1.01E+01 | 33.3351978 | 1.94E-01 | 134226361 | 134226484 | NC_000010.10 |
| cg23295683 | 8.32E-18 | 1.85E-19 | 1.01E+01 | 33.3350266 | 1.68E-01 | 81998796  | 81998919  | NC_000014.8  |
| cg24309428 | 8.32E-18 | 1.85E-19 | 1.01E+01 | 33.3348141 | 2.14E-01 | 89224381  | 89224504  | NC_000011.9  |
| cg03679565 | 8.41E-18 | 1.88E-19 | 1.01E+01 | 33.3235186 | 2.95E-01 | 1882775   | 1882898   | NC_000005.9  |
| cg26348803 | 8.41E-18 | 1.88E-19 | 1.01E+01 | 33.3225426 | 1.58E-01 | 202331299 | 202331422 | NC_000001.10 |
| cg27638288 | 8.44E-18 | 1.88E-19 | 1.01E+01 | 33.3191663 | 1.32E-01 | 12071946  | 12072069  | NC_000011.9  |
| cg05869438 | 8.46E-18 | 1.89E-19 | 1.01E+01 | 33.316585  | 9.98E-02 | 1112006   | 1112129   | NC_000011.9  |
| cg19962424 | 8.48E-18 | 1.89E-19 | 1.01E+01 | 33.3142527 | 2.15E-01 | 35110045  | 35110168  | NC_000011.9  |
| cg05590233 | 8.56E-18 | 1.91E-19 | 1.01E+01 | 33.3042416 | 1.08E-01 | 109545    | 109668    | NC_000017.10 |
| cg15890103 | 8.60E-18 | 1.92E-19 | 1.01E+01 | 33.2997716 | 7.54E-02 | 86663160  | 86663283  | NC_000011.9  |
| cg27398263 | 8.61E-18 | 1.92E-19 | 1.01E+01 | 33.2985412 | 3.17E-01 | 79177700  | 79177823  | NC_000013.10 |
| cg21787249 | 8.63E-18 | 1.93E-19 | 1.01E+01 | 33.2957283 | 1.58E-01 | 39230144  | 39230267  | NC_000003.11 |
| cg14024893 | 8.65E-18 | 1.93E-19 | 1.01E+01 | 33.2927871 | 1.39E-01 | 139943146 | 139943269 | NC_000009.11 |
| cg05815404 | 8.74E-18 | 1.95E-19 | 1.01E+01 | 33.2825207 | 1.89E-01 | 78825501  | 78825624  | NC_000017.10 |
| cg18113295 | 8.75E-18 | 1.96E-19 | 1.01E+01 | 33.2813472 | 1.51E-01 | 232135730 | 232135853 | NC_000002.11 |
| cg06758591 | 8.75E-18 | 1.96E-19 | 1.01E+01 | 33.2807092 | 1.34E-01 | 177140203 | 177140326 | NC_000001.10 |
| cg14391419 | 8.76E-18 | 1.96E-19 | 1.01E+01 | 33.2798081 | 2.48E-01 | 19158647  | 19158770  | NC_000007.13 |
| cg14168530 | 8.77E-18 | 1.96E-19 | 1.01E+01 | 33.2789399 | 3.23E-01 | 45155991  | 45156114  | NC_000002.11 |
| cg23204707 | 8.80E-18 | 1.97E-19 | 1.01E+01 | 33.2754761 | 8.00E-02 | 234726683 | 234726806 | NC_000002.11 |
| cg20792062 | 8.90E-18 | 1.99E-19 | 1.01E+01 | 33.2632955 | 1.87E-01 | 5153288   | 5153411   | NC_000012.11 |
| cg12766736 | 8.90E-18 | 1.99E-19 | 1.01E+01 | 33.2628921 | 1.37E-01 | 32460656  | 32460779  | NC_000011.9  |
| cg14394550 | 8.93E-18 | 2.00E-19 | 1.01E+01 | 33.2602035 | 2.59E-01 | 22548400  | 22548523  | NC_000008.10 |

|            |          |          |          |            |          |           |           |              |
|------------|----------|----------|----------|------------|----------|-----------|-----------|--------------|
| cg02316283 | 8.94E-18 | 2.00E-19 | 1.01E+01 | 33.2584449 | 5.07E-02 | 23313866  | 23313989  | NC_000014.8  |
| cg00388812 | 8.95E-18 | 2.01E-19 | 1.01E+01 | 33.2569646 | 1.63E-01 | 99961376  | 99961499  | NC_000008.10 |
| cg09888049 | 8.96E-18 | 2.01E-19 | 1.01E+01 | 33.2564513 | 1.68E-01 | 114848083 | 114848206 | NC_000013.10 |
| cg02892577 | 8.96E-18 | 2.01E-19 | 1.01E+01 | 33.2553917 | 1.95E-01 | 121181759 | 121181882 | NC_000010.10 |
| cg09878914 | 8.98E-18 | 2.01E-19 | 1.01E+01 | 33.2528638 | 1.25E-01 | 31507316  | 31507439  | NC_000006.11 |
| cg15318546 | 9.01E-18 | 2.02E-19 | 1.01E+01 | 33.2501899 | 2.16E-01 | 133069091 | 133069214 | NC_000012.11 |
| cg22117637 | 9.01E-18 | 2.02E-19 | 1.01E+01 | 33.2493852 | 1.03E-01 | 223285495 | 223285618 | NC_000002.11 |
| cg10595406 | 9.05E-18 | 2.03E-19 | 1.00E+01 | 33.2453965 | 1.44E-01 | 2586303   | 2586426   | NC_000017.10 |
| cg22344581 | 9.06E-18 | 2.03E-19 | 1.00E+01 | 33.2438468 | 7.97E-02 | 30650712  | 30650835  | NC_000017.10 |
| cg25915838 | 9.06E-18 | 2.03E-19 | 1.00E+01 | 33.2434513 | 2.53E-01 | 100999077 | 100999200 | NC_000011.9  |
| cg06952671 | 9.06E-18 | 2.03E-19 | 1.00E+01 | 33.2431401 | 3.28E-01 | 182322268 | 182322391 | NC_000002.11 |
| cg02039267 | 9.08E-18 | 2.04E-19 | 1.00E+01 | 33.241361  | 1.88E-01 | 118894069 | 118894192 | NC_000010.10 |
| cg06427772 | 9.12E-18 | 2.05E-19 | 1.00E+01 | 33.2371671 | 7.40E-02 | 134230646 | 134230769 | NC_000010.10 |
| cg25631414 | 9.17E-18 | 2.06E-19 | 1.00E+01 | 33.2312408 | 8.61E-02 | 169641941 | 169642064 | NC_000006.11 |
| cg12396325 | 9.17E-18 | 2.06E-19 | 1.00E+01 | 33.2310775 | 2.28E-01 | 105235606 | 105235729 | NC_000008.10 |
| cg06200670 | 9.18E-18 | 2.06E-19 | 1.00E+01 | 33.2301981 | 1.37E-01 | 226730581 | 226730704 | NC_000001.10 |
| cg08845329 | 9.19E-18 | 2.06E-19 | 1.00E+01 | 33.2281446 | 9.50E-02 | 80932127  | 80932250  | NC_000017.10 |
| cg26468007 | 9.28E-18 | 2.09E-19 | 1.00E+01 | 33.2179795 | 2.95E-01 | 4998714   | 4998837   | NC_000007.13 |
| cg00682096 | 9.32E-18 | 2.10E-19 | 1.00E+01 | 33.2133903 | 2.03E-01 | 46672924  | 46673047  | NC_000017.10 |
| cg00747187 | 9.33E-18 | 2.10E-19 | 1.00E+01 | 33.2129096 | 1.29E-01 | 97800068  | 97800191  | NC_000007.13 |
| cg09746044 | 9.36E-18 | 2.10E-19 | 1.00E+01 | 33.2093291 | 1.13E-01 | 44221832  | 44221955  | NC_000015.9  |
| cg15954353 | 9.52E-18 | 2.14E-19 | 1.00E+01 | 33.1913241 | 1.99E-01 | 5403337   | 5403460   | NC_000017.10 |
| cg11033014 | 9.52E-18 | 2.14E-19 | 1.00E+01 | 33.1909323 | 9.67E-02 | 46805673  | 46805796  | NC_000022.10 |
| cg10381113 | 9.52E-18 | 2.14E-19 | 1.00E+01 | 33.1908256 | 1.75E-01 | 24797136  | 24797259  | NC_000013.10 |
| cg20728791 | 9.57E-18 | 2.16E-19 | 1.00E+01 | 33.1854785 | 1.74E-01 | 112675455 | 112675578 | NC_000010.10 |

|            |          |          |          |            |          |           |           |              |
|------------|----------|----------|----------|------------|----------|-----------|-----------|--------------|
| cg21874706 | 9.62E-18 | 2.17E-19 | 1.00E+01 | 33.1798359 | 1.04E-01 | 39744055  | 39744178  | NC_000017.10 |
| cg06213876 | 9.79E-18 | 2.21E-19 | 1.00E+01 | 33.1617852 | 1.55E-01 | 16357187  | 16357310  | NC_000016.9  |
| cg14654886 | 9.81E-18 | 2.21E-19 | 1.00E+01 | 33.1597363 | 2.75E-01 | 5710319   | 5710442   | NC_000004.11 |
| cg13586987 | 9.85E-18 | 2.22E-19 | 1.00E+01 | 33.1549463 | 5.00E-02 | 16282230  | 16282353  | NC_000006.11 |
| cg00123055 | 9.90E-18 | 2.24E-19 | 1.00E+01 | 33.1493064 | 1.76E-01 | 55370951  | 55371074  | NC_000008.10 |
| cg13641903 | 9.90E-18 | 2.24E-19 | 1.00E+01 | 33.1492812 | 1.18E-01 | 32452608  | 32452731  | NC_000011.9  |
| cg07072722 | 9.91E-18 | 2.24E-19 | 1.00E+01 | 33.1486954 | 1.90E-01 | 131781246 | 131781369 | NC_000011.9  |
| cg05317455 | 9.92E-18 | 2.24E-19 | 1.00E+01 | 33.1468724 | 6.52E-02 | 69811162  | 69811285  | NC_000011.9  |
| cg01624637 | 9.92E-18 | 2.24E-19 | 1.00E+01 | 33.1466975 | 1.51E-01 | 87739377  | 87739500  | NC_000016.9  |
| cg15921518 | 9.93E-18 | 2.24E-19 | 1.00E+01 | 33.146278  | 1.15E-01 | 180664022 | 180664145 | NC_000005.9  |
| cg01436998 | 9.94E-18 | 2.25E-19 | 1.00E+01 | 33.1450541 | 2.49E-01 | 38308263  | 38308386  | NC_000019.9  |
| cg01762091 | 9.95E-18 | 2.25E-19 | 1.00E+01 | 33.1441762 | 2.04E-01 | 7197775   | 7197898   | NC_000017.10 |
| cg22679474 | 1.00E-17 | 2.27E-19 | 1.00E+01 | 33.1353862 | 6.37E-02 | 63929152  | 63929275  | NC_000003.11 |
| cg01487892 | 1.00E-17 | 2.27E-19 | 1.00E+01 | 33.1338807 | 9.74E-02 | 46895183  | 46895306  | NC_000021.8  |
| cg26430027 | 1.01E-17 | 2.28E-19 | 1.00E+01 | 33.1304228 | 1.55E-01 | 137393288 | 137393411 | NC_000009.11 |
| cg13963807 | 1.01E-17 | 2.28E-19 | 1.00E+01 | 33.1284622 | 7.14E-02 | 67165707  | 67165830  | NC_000011.9  |
| cg27052183 | 1.01E-17 | 2.29E-19 | 1.00E+01 | 33.1246448 | 1.18E-01 | 66411986  | 66412109  | NC_000011.9  |
| cg19594626 | 1.02E-17 | 2.30E-19 | 1.00E+01 | 33.122339  | 1.35E-01 | 133077819 | 133077942 | NC_000006.11 |
| cg14505585 | 1.03E-17 | 2.32E-19 | 1.00E+01 | 33.1110548 | 2.34E-01 | 17082770  | 17082893  | NC_000022.10 |
| cg04031454 | 1.03E-17 | 2.33E-19 | 1.00E+01 | 33.1070051 | 7.89E-02 | 71028968  | 71029091  | NC_000010.10 |
| cg05262829 | 1.03E-17 | 2.34E-19 | 1.00E+01 | 33.1052433 | 2.13E-01 | 226921576 | 226921699 | NC_000001.10 |
| cg10734448 | 1.04E-17 | 2.35E-19 | 1.00E+01 | 33.0999864 | 1.23E-01 | 32052373  | 32052496  | NC_000006.11 |
| cg00765233 | 1.04E-17 | 2.35E-19 | 1.00E+01 | 33.0981392 | 1.48E-01 | 235877260 | 235877383 | NC_000002.11 |
| cg25157472 | 1.05E-17 | 2.38E-19 | 1.00E+01 | 33.0876206 | 1.53E-01 | 12996362  | 12996485  | NC_000003.11 |
| cg11167100 | 1.05E-17 | 2.38E-19 | 1.00E+01 | 33.0866452 | 3.33E-01 | 83776269  | 83776392  | NC_000015.9  |

|            |          |          |          |            |          |           |           |              |
|------------|----------|----------|----------|------------|----------|-----------|-----------|--------------|
| cg18739887 | 1.05E-17 | 2.38E-19 | 1.00E+01 | 33.0865129 | 1.76E-01 | 109675284 | 109675407 | NC_000010.10 |
| cg14062468 | 1.06E-17 | 2.40E-19 | 1.00E+01 | 33.0796242 | 2.46E-01 | 33453893  | 33454016  | NC_000022.10 |
| cg22041073 | 1.06E-17 | 2.41E-19 | 1.00E+01 | 33.0757568 | 9.95E-02 | 29604114  | 29604237  | NC_000006.11 |
| cg10333808 | 1.07E-17 | 2.42E-19 | 1.00E+01 | 33.0693739 | 2.47E-01 | 22487459  | 22487582  | NC_000012.11 |
| cg18236477 | 1.07E-17 | 2.42E-19 | 1.00E+01 | 33.06893   | 2.02E-01 | 26043066  | 26043189  | NC_000013.10 |
| cg05337753 | 1.07E-17 | 2.44E-19 | 1.00E+01 | 33.0640674 | 1.93E-01 | 75373407  | 75373530  | NC_000017.10 |
| cg19058765 | 1.08E-17 | 2.45E-19 | 1.00E+01 | 33.0585563 | 1.43E-01 | 64226103  | 64226226  | NC_000017.10 |
| cg24748769 | 1.08E-17 | 2.46E-19 | 1.00E+01 | 33.0536575 | 2.22E-01 | 57271015  | 57271138  | NC_000014.8  |
| cg08417728 | 1.09E-17 | 2.47E-19 | 1.00E+01 | 33.0524438 | 2.73E-01 | 17850647  | 17850770  | NC_000022.10 |
| cg19153228 | 1.09E-17 | 2.47E-19 | 1.00E+01 | 33.0522895 | 1.66E-01 | 173902435 | 173902558 | NC_000002.11 |
| cg04609801 | 1.09E-17 | 2.47E-19 | 1.00E+01 | 33.0505573 | 1.68E-01 | 28609176  | 28609299  | NC_000016.9  |
| cg03950807 | 1.09E-17 | 2.48E-19 | 1.00E+01 | 33.0447675 | 1.01E-01 | 81082931  | 81083054  | NC_000015.9  |
| cg20945566 | 1.10E-17 | 2.49E-19 | 1.00E+01 | 33.0422206 | 2.70E-01 | 46800020  | 46800143  | NC_000017.10 |
| cg08239858 | 1.10E-17 | 2.51E-19 | 1.00E+01 | 33.0347157 | 1.89E-01 | 2739131   | 2739254   | NC_000005.9  |
| cg26588943 | 1.10E-17 | 2.51E-19 | 1.00E+01 | 33.0344647 | 1.94E-01 | 172734718 | 172734841 | NC_000004.11 |
| cg19866325 | 1.11E-17 | 2.52E-19 | 1.00E+01 | 33.0297082 | 1.79E-01 | 47078752  | 47078875  | NC_000001.10 |
| cg01975714 | 1.11E-17 | 2.52E-19 | 1.00E+01 | 33.0289501 | 1.07E-01 | 18981736  | 18981859  | NC_000022.10 |
| cg02773698 | 1.11E-17 | 2.53E-19 | 1.00E+01 | 33.0268065 | 1.45E-01 | 72682460  | 72682583  | NC_000011.9  |
| cg17174566 | 1.11E-17 | 2.54E-19 | 1.00E+01 | 33.02463   | 1.12E-01 | 148635022 | 148635145 | NC_000002.11 |
| cg13209481 | 1.11E-17 | 2.54E-19 | 1.00E+01 | 33.0241395 | 1.92E-01 | 36973483  | 36973606  | NC_000014.8  |
| cg16190732 | 1.11E-17 | 2.54E-19 | 1.00E+01 | 33.0236557 | 3.22E-01 | 34113010  | 34113133  | NC_000019.9  |
| cg01727145 | 1.12E-17 | 2.54E-19 | 1.00E+01 | 33.0218357 | 1.63E-01 | 220313422 | 220313545 | NC_000002.11 |
| cg05241461 | 1.13E-17 | 2.57E-19 | 1.00E+01 | 33.0124458 | 2.57E-01 | 22816980  | 22817103  | NC_000019.9  |
| cg25211875 | 1.13E-17 | 2.57E-19 | 1.00E+01 | 33.0095514 | 8.39E-02 | 55944483  | 55944606  | NC_000015.9  |
| cg03703637 | 1.13E-17 | 2.58E-19 | 1.00E+01 | 33.0087119 | 3.09E-01 | 178771776 | 178771899 | NC_000005.9  |

|            |          |          |          |            |          |           |           |              |
|------------|----------|----------|----------|------------|----------|-----------|-----------|--------------|
| cg05499134 | 1.14E-17 | 2.59E-19 | 1.00E+01 | 33.0031354 | 5.36E-02 | 88294692  | 88294815  | NC_000016.9  |
| cg19098710 | 1.14E-17 | 2.61E-19 | 1.00E+01 | 32.9956717 | 2.49E-01 | 113541698 | 113541821 | NC_000012.11 |
| cg13606990 | 1.15E-17 | 2.62E-19 | 1.00E+01 | 32.9927967 | 1.65E-01 | 32848016  | 32848139  | NC_000018.9  |
| cg24154951 | 1.15E-17 | 2.62E-19 | 1.00E+01 | 32.9920732 | 1.92E-01 | 177001426 | 177001549 | NC_000002.11 |
| cg07703530 | 1.15E-17 | 2.62E-19 | 1.00E+01 | 32.9909099 | 1.74E-01 | 81422474  | 81422597  | NC_000008.10 |
| cg20902425 | 1.15E-17 | 2.63E-19 | 1.00E+01 | 32.9874856 | 6.23E-02 | 46805678  | 46805801  | NC_000022.10 |
| cg04682699 | 1.16E-17 | 2.65E-19 | 1.00E+01 | 32.9815095 | 1.96E-01 | 50248845  | 50248968  | NC_000003.11 |
| cg17607298 | 1.16E-17 | 2.66E-19 | 1.00E+01 | 32.9769758 | 2.00E-01 | 112727981 | 112728104 | NC_000013.10 |
| cg02919422 | 1.18E-17 | 2.69E-19 | 1.00E+01 | 32.9671134 | 1.74E-01 | 55370544  | 55370667  | NC_000008.10 |
| cg10422777 | 1.18E-17 | 2.69E-19 | 1.00E+01 | 32.9667026 | 2.31E-01 | 79631227  | 79631350  | NC_000009.11 |
| cg12775934 | 1.18E-17 | 2.69E-19 | 1.00E+01 | 32.9648183 | 3.67E-02 | 62603273  | 62603396  | NC_000011.9  |
| cg23551917 | 1.19E-17 | 2.72E-19 | 1.00E+01 | 32.9547162 | 1.26E-01 | 45077070  | 45077193  | NC_000003.11 |
| cg11067712 | 1.20E-17 | 2.75E-19 | 1.00E+01 | 32.9452287 | 1.22E-01 | 105850644 | 105850767 | NC_000011.9  |
| cg12175729 | 1.20E-17 | 2.75E-19 | 1.00E+01 | 32.9451128 | 2.70E-01 | 140715540 | 140715663 | NC_000008.10 |
| cg13601435 | 1.20E-17 | 2.76E-19 | 1.00E+01 | 32.9415561 | 3.12E-01 | 120507431 | 120507554 | NC_000009.11 |
| cg23486580 | 1.21E-17 | 2.77E-19 | 1.00E+01 | 32.9360275 | 1.10E-01 | 105688375 | 105688498 | NC_000014.8  |
| cg06494105 | 1.21E-17 | 2.78E-19 | 1.00E+01 | 32.9350202 | 9.39E-02 | 3961553   | 3961676   | NC_000019.9  |
| cg21251230 | 1.22E-17 | 2.78E-19 | 1.00E+01 | 32.9319218 | 2.00E-01 | 129566665 | 129566788 | NC_000009.11 |
| cg09578028 | 1.23E-17 | 2.81E-19 | 1.00E+01 | 32.9225995 | 2.33E-01 | 176987411 | 176987534 | NC_000002.11 |
| cg07312654 | 1.23E-17 | 2.81E-19 | 1.00E+01 | 32.9224873 | 2.10E-01 | 132053773 | 132053896 | NC_000008.10 |
| cg13375463 | 1.23E-17 | 2.82E-19 | 1.00E+01 | 32.9193899 | 1.45E-01 | 27899025  | 27899148  | NC_000001.10 |
| cg19915413 | 1.23E-17 | 2.83E-19 | 1.00E+01 | 32.9156803 | 7.86E-02 | 79977640  | 79977763  | NC_000017.10 |
| cg02327997 | 1.24E-17 | 2.85E-19 | 1.00E+01 | 32.9091802 | 1.71E-01 | 128077318 | 128077441 | NC_000010.10 |
| cg09830022 | 1.24E-17 | 2.85E-19 | 1.00E+01 | 32.9086406 | 4.19E-02 | 104862488 | 104862611 | NC_000010.10 |
| cg03284640 | 1.24E-17 | 2.85E-19 | 1.00E+01 | 32.9081176 | 1.23E-01 | 125804060 | 125804183 | NC_000010.10 |



|            |          |          |          |            |          |           |           |              |
|------------|----------|----------|----------|------------|----------|-----------|-----------|--------------|
| cg17078116 | 1.24E-17 | 2.85E-19 | 1.00E+01 | 32.9074818 | 1.89E-01 | 24772344  | 24772467  | NC_000008.10 |
| cg01542143 | 1.25E-17 | 2.87E-19 | 1.00E+01 | 32.9029112 | 1.65E-01 | 3240754   | 3240877   | NC_000004.11 |
| cg24512644 | 1.25E-17 | 2.87E-19 | 1.00E+01 | 32.9012509 | 1.76E-01 | 41248902  | 41249025  | NC_000022.10 |
| cg10703826 | 1.25E-17 | 2.88E-19 | 1.00E+01 | 32.8992906 | 2.39E-01 | 119532116 | 119532239 | NC_000001.10 |
| cg26984343 | 1.26E-17 | 2.89E-19 | 1.00E+01 | 32.8960171 | 1.98E-01 | 37006133  | 37006256  | NC_000013.10 |
| cg15260428 | 1.26E-17 | 2.89E-19 | 1.00E+01 | 32.894025  | 2.13E-01 | 132381902 | 132382025 | NC_000012.11 |
| cg23699196 | 1.27E-17 | 2.91E-19 | 1.00E+01 | 32.8871294 | 2.41E-01 | 131780334 | 131780457 | NC_000011.9  |
| cg23559689 | 1.27E-17 | 2.92E-19 | 1.00E+01 | 32.884886  | 3.04E-01 | 105481292 | 105481415 | NC_000011.9  |
| cg16476975 | 1.28E-17 | 2.95E-19 | 9.99     | 32.8740927 | 2.95E-01 | 155164995 | 155165118 | NC_000007.13 |
| cg09562938 | 1.29E-17 | 2.97E-19 | 9.99     | 32.8685017 | 9.17E-02 | 62307787  | 62307910  | NC_000017.10 |
| cg14369938 | 1.30E-17 | 2.99E-19 | 9.99     | 32.8624717 | 2.80E-01 | 32338150  | 32338273  | NC_000007.13 |
| cg11289296 | 1.30E-17 | 2.99E-19 | 9.99     | 32.8606236 | 8.96E-02 | 74383131  | 74383254  | NC_000017.10 |
| cg24880701 | 1.30E-17 | 3.00E-19 | 9.99     | 32.8593393 | 1.62E-01 | 68121563  | 68121686  | NC_000015.9  |
| cg03401357 | 1.30E-17 | 3.00E-19 | 9.99     | 32.8577778 | 2.95E-01 | 46951477  | 46951600  | NC_000001.10 |
| cg00320094 | 1.31E-17 | 3.02E-19 | 9.99     | 32.8511663 | 2.12E-01 | 68695183  | 68695306  | NC_000001.10 |
| cg12238343 | 1.32E-17 | 3.05E-19 | 9.99     | 32.8425171 | 2.68E-01 | 33936402  | 33936525  | NC_000005.9  |
| cg13707645 | 1.32E-17 | 3.05E-19 | 9.99     | 32.8420808 | 1.12E-01 | 131682162 | 131682285 | NC_000009.11 |
| cg04913118 | 1.33E-17 | 3.06E-19 | 9.99     | 32.838545  | 1.46E-01 | 32826171  | 32826294  | NC_000006.11 |
| cg00400832 | 1.33E-17 | 3.07E-19 | 9.99     | 32.8342458 | 2.17E-01 | 96650323  | 96650446  | NC_000007.13 |
| cg15790820 | 1.34E-17 | 3.08E-19 | 9.99     | 32.8303174 | 2.70E-01 | 2292510   | 2292633   | NC_000011.9  |
| cg12724826 | 1.34E-17 | 3.09E-19 | 9.99     | 32.8277388 | 1.05E-01 | 31630051  | 31630174  | NC_000006.11 |
| cg20334627 | 1.34E-17 | 3.09E-19 | 9.99     | 32.8275034 | 2.99E-01 | 130686697 | 130686820 | NC_000006.11 |
| cg13070738 | 1.35E-17 | 3.10E-19 | 9.99     | 32.8245378 | 1.39E-01 | 144054288 | 144054411 | NC_000007.13 |
| cg07540084 | 1.35E-17 | 3.11E-19 | 9.99     | 32.8206183 | 2.08E-01 | 2537210   | 2537333   | NC_000005.9  |
| cg08470764 | 1.36E-17 | 3.13E-19 | 9.99     | 32.8154256 | 1.66E-01 | 100609792 | 100609915 | NC_000007.13 |

|            |          |          |      |            |          |           |           |              |
|------------|----------|----------|------|------------|----------|-----------|-----------|--------------|
| cg19414741 | 1.36E-17 | 3.14E-19 | 9.98 | 32.8128246 | 2.06E-01 | 57358240  | 57358363  | NC_000008.10 |
| cg07758738 | 1.37E-17 | 3.17E-19 | 9.98 | 32.8034866 | 1.72E-01 | 12911528  | 12911651  | NC_000018.9  |
| cg08318726 | 1.37E-17 | 3.17E-19 | 9.98 | 32.8027896 | 2.25E-01 | 114844265 | 114844388 | NC_000012.11 |
| cg18764577 | 1.37E-17 | 3.17E-19 | 9.98 | 32.8021058 | 2.30E-01 | 7117790   | 7117913   | NC_000018.9  |
| cg10987503 | 1.38E-17 | 3.20E-19 | 9.98 | 32.7953209 | 1.15E-01 | 922825    | 922948    | NC_000007.13 |
| cg26381364 | 1.39E-17 | 3.21E-19 | 9.98 | 32.7921162 | 2.66E-01 | 103889772 | 103889895 | NC_000012.11 |
| cg18705773 | 1.40E-17 | 3.23E-19 | 9.98 | 32.7855648 | 2.79E-01 | 170743564 | 170743687 | NC_000005.9  |
| cg09492451 | 1.40E-17 | 3.23E-19 | 9.98 | 32.784311  | 2.56E-01 | 54967389  | 54967512  | NC_000016.9  |
| cg15001431 | 1.40E-17 | 3.24E-19 | 9.98 | 32.7818013 | 1.70E-01 | 108538614 | 108538737 | NC_000011.9  |
| cg05729352 | 1.40E-17 | 3.25E-19 | 9.98 | 32.7800689 | 1.19E-01 | 109524367 | 109524490 | NC_000002.11 |
| cg27338807 | 1.41E-17 | 3.26E-19 | 9.98 | 32.7743652 | 1.48E-01 | 87739385  | 87739508  | NC_000016.9  |
| cg09534159 | 1.42E-17 | 3.29E-19 | 9.98 | 32.7669481 | 2.87E-01 | 10458918  | 10459041  | NC_000004.11 |
| cg08737543 | 1.44E-17 | 3.33E-19 | 9.98 | 32.7539155 | 1.21E-01 | 10118766  | 10118889  | NC_000001.10 |
| cg22633932 | 1.44E-17 | 3.35E-19 | 9.97 | 32.7491067 | 1.23E-01 | 140472802 | 140472925 | NC_000004.11 |
| cg01146232 | 1.44E-17 | 3.35E-19 | 9.97 | 32.7490499 | 2.53E-01 | 51185147  | 51185270  | NC_000016.9  |
| cg14007067 | 1.45E-17 | 3.37E-19 | 9.97 | 32.7430756 | 2.43E-01 | 76740258  | 76740381  | NC_000018.9  |
| cg11337945 | 1.47E-17 | 3.41E-19 | 9.97 | 32.7299039 | 2.72E-01 | 2755158   | 2755281   | NC_000005.9  |
| cg20303815 | 1.48E-17 | 3.44E-19 | 9.97 | 32.7216978 | 1.16E-01 | 69706981  | 69707104  | NC_000011.9  |
| cg23263937 | 1.49E-17 | 3.47E-19 | 9.97 | 32.7141261 | 2.73E-01 | 27192656  | 27192779  | NC_000007.13 |
| cg26371320 | 1.50E-17 | 3.47E-19 | 9.97 | 32.7125225 | 2.35E-01 | 28778091  | 28778214  | NC_000006.11 |
| cg21078322 | 1.50E-17 | 3.48E-19 | 9.97 | 32.7121887 | 2.14E-01 | 134491163 | 134491286 | NC_000006.11 |
| cg11293190 | 1.50E-17 | 3.48E-19 | 9.97 | 32.709819  | 1.50E-01 | 1523856   | 1523979   | NC_000019.9  |
| cg11375458 | 1.50E-17 | 3.49E-19 | 9.97 | 32.7083168 | 1.88E-01 | 177003996 | 177004119 | NC_000002.11 |
| cg26992415 | 1.50E-17 | 3.49E-19 | 9.97 | 32.7068483 | 1.49E-01 | 94533087  | 94533210  | NC_000011.9  |
| cg18319533 | 1.51E-17 | 3.50E-19 | 9.97 | 32.7046878 | 2.28E-01 | 1011315   | 1011438   | NC_000011.9  |

|            |          |          |      |            |          |           |           |              |
|------------|----------|----------|------|------------|----------|-----------|-----------|--------------|
| cg10297491 | 1.51E-17 | 3.52E-19 | 9.97 | 32.6996366 | 3.27E-01 | 11059677  | 11059800  | NC_000010.10 |
| cg23935522 | 1.52E-17 | 3.53E-19 | 9.97 | 32.696793  | 1.16E-01 | 77162317  | 77162440  | NC_000012.11 |
| cg18800739 | 1.53E-17 | 3.55E-19 | 9.97 | 32.6897365 | 1.13E-01 | 144626962 | 144627085 | NC_000006.11 |
| cg20498685 | 1.53E-17 | 3.57E-19 | 9.97 | 32.6860271 | 2.68E-01 | 19156086  | 19156209  | NC_000007.13 |
| cg06495961 | 1.53E-17 | 3.57E-19 | 9.97 | 32.6845821 | 2.39E-01 | 153584582 | 153584705 | NC_000007.13 |
| cg02167020 | 1.55E-17 | 3.60E-19 | 9.96 | 32.6759021 | 2.12E-01 | 102899949 | 102900072 | NC_000010.10 |
| cg03764518 | 1.55E-17 | 3.61E-19 | 9.96 | 32.6751608 | 2.15E-01 | 57388402  | 57388525  | NC_000010.10 |
| cg08676249 | 1.56E-17 | 3.63E-19 | 9.96 | 32.6693844 | 2.39E-01 | 69064868  | 69064991  | NC_000007.13 |
| cg11562901 | 1.56E-17 | 3.63E-19 | 9.96 | 32.668892  | 1.66E-01 | 56318135  | 56318258  | NC_000012.11 |
| cg11868921 | 1.56E-17 | 3.65E-19 | 9.96 | 32.6640326 | 1.38E-01 | 154812487 | 154812610 | NC_000006.11 |
| cg06313718 | 1.56E-17 | 3.65E-19 | 9.96 | 32.6636408 | 1.06E-01 | 49714199  | 49714322  | NC_000003.11 |
| cg23294090 | 1.57E-17 | 3.65E-19 | 9.96 | 32.6622448 | 2.46E-01 | 139509672 | 139509795 | NC_000008.10 |
| cg10516089 | 1.57E-17 | 3.67E-19 | 9.96 | 32.6588245 | 5.75E-02 | 50800620  | 50800743  | NC_000007.13 |
| cg26624744 | 1.57E-17 | 3.67E-19 | 9.96 | 32.6581238 | 1.73E-01 | 156692507 | 156692630 | NC_000005.9  |
| cg13078140 | 1.58E-17 | 3.69E-19 | 9.96 | 32.6518261 | 2.85E-01 | 20255082  | 20255205  | NC_000004.11 |
| cg18675128 | 1.59E-17 | 3.72E-19 | 9.96 | 32.6457689 | 1.04E-01 | 71177172  | 71177295  | NC_000010.10 |
| cg21694941 | 1.60E-17 | 3.74E-19 | 9.96 | 32.6402865 | 1.64E-01 | 57358590  | 57358713  | NC_000008.10 |
| cg00235367 | 1.62E-17 | 3.78E-19 | 9.96 | 32.6282183 | 2.09E-01 | 147110322 | 147110445 | NC_000003.11 |
| cg04620418 | 1.63E-17 | 3.80E-19 | 9.96 | 32.6233245 | 1.93E-01 | 65282285  | 65282408  | NC_000008.10 |
| cg04248279 | 1.64E-17 | 3.82E-19 | 9.96 | 32.6174709 | 1.72E-01 | 184833    | 184956    | NC_000017.10 |
| cg00046625 | 1.64E-17 | 3.83E-19 | 9.95 | 32.6165778 | 2.47E-01 | 66258760  | 66258883  | NC_000001.10 |
| cg00733001 | 1.64E-17 | 3.83E-19 | 9.95 | 32.6154624 | 1.25E-01 | 679432    | 679555    | NC_000008.10 |
| cg17499173 | 1.64E-17 | 3.85E-19 | 9.95 | 32.6119222 | 8.06E-02 | 736285    | 736408    | NC_000019.9  |
| cg27639662 | 1.65E-17 | 3.85E-19 | 9.95 | 32.6108198 | 1.68E-01 | 81111393  | 81111516  | NC_000004.11 |
| cg27313012 | 1.65E-17 | 3.87E-19 | 9.95 | 32.6066482 | 1.13E-01 | 233497542 | 233497665 | NC_000001.10 |

|            |          |          |      |            |          |           |           |              |
|------------|----------|----------|------|------------|----------|-----------|-----------|--------------|
| cg21012296 | 1.67E-17 | 3.91E-19 | 9.95 | 32.5963607 | 2.62E-01 | 21502728  | 21502851  | NC_000020.10 |
| cg02520593 | 1.67E-17 | 3.92E-19 | 9.95 | 32.5923569 | 1.49E-01 | 109015999 | 109016122 | NC_000012.11 |
| cg02511231 | 1.68E-17 | 3.93E-19 | 9.95 | 32.5899693 | 3.52E-01 | 170738274 | 170738397 | NC_000005.9  |
| cg17016394 | 1.68E-17 | 3.94E-19 | 9.95 | 32.5886154 | 3.41E-01 | 34442360  | 34442483  | NC_000021.8  |
| cg10601582 | 1.69E-17 | 3.95E-19 | 9.95 | 32.5857224 | 2.61E-01 | 22605234  | 22605357  | NC_000019.9  |
| cg26530319 | 1.69E-17 | 3.95E-19 | 9.95 | 32.5844965 | 1.50E-01 | 221060923 | 221061046 | NC_000001.10 |
| cg02164046 | 1.69E-17 | 3.96E-19 | 9.95 | 32.5823648 | 2.21E-01 | 187388148 | 187388271 | NC_000003.11 |
| cg11559967 | 1.69E-17 | 3.97E-19 | 9.95 | 32.5797527 | 5.54E-02 | 38363872  | 38363995  | NC_000022.10 |
| cg06766541 | 1.70E-17 | 3.98E-19 | 9.95 | 32.5785445 | 1.11E-01 | 128556540 | 128556663 | NC_000007.13 |
| cg01560873 | 1.71E-17 | 4.00E-19 | 9.95 | 32.5725113 | 2.35E-01 | 3116792   | 3116915   | NC_000005.9  |
| cg14042889 | 1.71E-17 | 4.01E-19 | 9.95 | 32.5691724 | 1.93E-01 | 27169208  | 27169331  | NC_000007.13 |
| cg04370314 | 1.71E-17 | 4.02E-19 | 9.95 | 32.5689878 | 2.45E-01 | 100643312 | 100643435 | NC_000013.10 |
| cg22519702 | 1.71E-17 | 4.02E-19 | 9.95 | 32.5679171 | 1.39E-01 | 147204189 | 147204312 | NC_000005.9  |
| cg02668075 | 1.71E-17 | 4.02E-19 | 9.95 | 32.5671801 | 8.54E-02 | 109558595 | 109558718 | NC_000002.11 |
| cg23302682 | 1.72E-17 | 4.04E-19 | 9.95 | 32.564015  | 2.90E-01 | 166580952 | 166581075 | NC_000006.11 |
| cg06908618 | 1.72E-17 | 4.04E-19 | 9.95 | 32.5634723 | 2.09E-01 | 87739453  | 87739576  | NC_000016.9  |
| cg15597540 | 1.72E-17 | 4.04E-19 | 9.95 | 32.5620217 | 7.35E-02 | 50387202  | 50387325  | NC_000003.11 |
| cg18307838 | 1.72E-17 | 4.04E-19 | 9.95 | 32.5617454 | 1.14E-01 | 228380005 | 228380128 | NC_000002.11 |
| cg00286701 | 1.72E-17 | 4.05E-19 | 9.95 | 32.5610338 | 9.81E-02 | 2583402   | 2583525   | NC_000007.13 |
| cg14532376 | 1.73E-17 | 4.06E-19 | 9.95 | 32.5582833 | 1.45E-01 | 133799686 | 133799809 | NC_000009.11 |
| cg10099056 | 1.73E-17 | 4.07E-19 | 9.95 | 32.5557284 | 1.04E-01 | 227131420 | 227131543 | NC_000001.10 |
| cg14249876 | 1.74E-17 | 4.09E-19 | 9.95 | 32.5511468 | 3.65E-01 | 44143993  | 44144116  | NC_000007.13 |
| cg07737566 | 1.75E-17 | 4.11E-19 | 9.94 | 32.5464038 | 1.80E-01 | 50847263  | 50847386  | NC_000007.13 |
| cg17553300 | 1.75E-17 | 4.11E-19 | 9.94 | 32.5452414 | 1.83E-01 | 55508460  | 55508583  | NC_000003.11 |
| cg13803632 | 1.75E-17 | 4.12E-19 | 9.94 | 32.5437969 | 6.20E-02 | 81968855  | 81968978  | NC_000001.10 |

|            |          |          |      |            |          |           |           |              |
|------------|----------|----------|------|------------|----------|-----------|-----------|--------------|
| cg15344640 | 1.76E-17 | 4.14E-19 | 9.94 | 32.5385778 | 9.82E-02 | 176774729 | 176774852 | NC_000005.9  |
| cg22043936 | 1.76E-17 | 4.15E-19 | 9.94 | 32.5368168 | 9.70E-02 | 28504564  | 28504687  | NC_000001.10 |
| cg09968620 | 1.78E-17 | 4.18E-19 | 9.94 | 32.527987  | 2.55E-01 | 176987383 | 176987506 | NC_000002.11 |
| cg09287629 | 1.78E-17 | 4.19E-19 | 9.94 | 32.5273825 | 1.55E-01 | 203036208 | 203036331 | NC_000002.11 |
| cg10329579 | 1.78E-17 | 4.19E-19 | 9.94 | 32.5265596 | 2.32E-01 | 17754830  | 17754953  | NC_000001.10 |
| cg16311306 | 1.79E-17 | 4.21E-19 | 9.94 | 32.5228456 | 1.01E-01 | 203244158 | 203244281 | NC_000001.10 |
| cg09815977 | 1.79E-17 | 4.22E-19 | 9.94 | 32.519838  | 1.32E-01 | 7021987   | 7022110   | NC_000012.11 |
| cg18406033 | 1.80E-17 | 4.24E-19 | 9.94 | 32.5152851 | 2.38E-01 | 223159869 | 223159992 | NC_000002.11 |
| cg07297322 | 1.80E-17 | 4.24E-19 | 9.94 | 32.5143627 | 1.59E-01 | 74661825  | 74661948  | NC_000016.9  |
| cg27058486 | 1.82E-17 | 4.28E-19 | 9.94 | 32.5059846 | 2.71E-01 | 34112683  | 34112806  | NC_000019.9  |
| cg07788092 | 1.82E-17 | 4.30E-19 | 9.94 | 32.5017409 | 2.14E-01 | 9473691   | 9473814   | NC_000019.9  |
| cg12271981 | 1.83E-17 | 4.31E-19 | 9.94 | 32.4998507 | 2.28E-01 | 88326752  | 88326875  | NC_000013.10 |
| cg04548856 | 1.83E-17 | 4.31E-19 | 9.94 | 32.4994929 | 2.39E-01 | 57284528  | 57284651  | NC_000014.8  |
| cg03656099 | 1.83E-17 | 4.31E-19 | 9.94 | 32.4988406 | 1.63E-01 | 59481954  | 59482077  | NC_000017.10 |
| cg01342411 | 1.83E-17 | 4.33E-19 | 9.94 | 32.4953322 | 2.19E-01 | 75263551  | 75263674  | NC_000016.9  |
| cg14627862 | 1.84E-17 | 4.34E-19 | 9.94 | 32.4926426 | 1.44E-01 | 169641232 | 169641355 | NC_000006.11 |
| cg15848561 | 1.84E-17 | 4.35E-19 | 9.94 | 32.4896507 | 1.27E-01 | 101924186 | 101924309 | NC_000014.8  |
| cg18437365 | 1.85E-17 | 4.37E-19 | 9.94 | 32.4861911 | 2.14E-01 | 112717484 | 112717607 | NC_000013.10 |
| cg01748268 | 1.85E-17 | 4.37E-19 | 9.94 | 32.4849752 | 8.90E-02 | 30122143  | 30122266  | NC_000006.11 |
| cg03579904 | 1.86E-17 | 4.38E-19 | 9.93 | 32.4828395 | 1.92E-01 | 87739430  | 87739553  | NC_000016.9  |
| cg14802771 | 1.86E-17 | 4.39E-19 | 9.93 | 32.4816038 | 8.60E-02 | 232903780 | 232903903 | NC_000002.11 |
| cg02036494 | 1.87E-17 | 4.41E-19 | 9.93 | 32.4753311 | 1.40E-01 | 130467986 | 130468109 | NC_000009.11 |
| cg08319991 | 1.87E-17 | 4.42E-19 | 9.93 | 32.4743111 | 3.00E-01 | 41259283  | 41259406  | NC_000004.11 |
| cg11868485 | 1.87E-17 | 4.42E-19 | 9.93 | 32.4729952 | 1.92E-01 | 140782938 | 140783061 | NC_000004.11 |
| cg04819539 | 1.87E-17 | 4.43E-19 | 9.93 | 32.4715964 | 6.48E-02 | 58167550  | 58167673  | NC_000012.11 |

|            |          |          |      |            |          |           |           |              |
|------------|----------|----------|------|------------|----------|-----------|-----------|--------------|
| cg15439725 | 1.88E-17 | 4.44E-19 | 9.93 | 32.4702591 | 2.07E-01 | 299311    | 299434    | NC_000004.11 |
| cg20398120 | 1.88E-17 | 4.45E-19 | 9.93 | 32.4676437 | 7.15E-02 | 219696690 | 219696813 | NC_000002.11 |
| cg18724565 | 1.89E-17 | 4.46E-19 | 9.93 | 32.4655224 | 1.80E-01 | 5633068   | 5633191   | NC_000007.13 |
| cg19861741 | 1.90E-17 | 4.49E-19 | 9.93 | 32.4574587 | 2.25E-01 | 170742608 | 170742731 | NC_000005.9  |
| cg00343633 | 1.90E-17 | 4.50E-19 | 9.93 | 32.4566515 | 3.39E-01 | 105481306 | 105481429 | NC_000011.9  |
| cg24446548 | 1.90E-17 | 4.50E-19 | 9.93 | 32.4564676 | 3.07E-01 | 19157263  | 19157386  | NC_000007.13 |
| cg09225840 | 1.91E-17 | 4.52E-19 | 9.93 | 32.4524587 | 1.08E-01 | 12248163  | 12248286  | NC_000001.10 |
| cg12610471 | 1.91E-17 | 4.52E-19 | 9.93 | 32.4511759 | 1.64E-01 | 22634199  | 22634322  | NC_000010.10 |
| cg22720790 | 1.92E-17 | 4.56E-19 | 9.93 | 32.4430617 | 1.79E-01 | 58716032  | 58716155  | NC_000019.9  |
| cg17048000 | 1.93E-17 | 4.56E-19 | 9.93 | 32.4421512 | 1.17E-01 | 235921243 | 235921366 | NC_000002.11 |
| cg12503717 | 1.93E-17 | 4.57E-19 | 9.93 | 32.4414477 | 9.86E-02 | 59664229  | 59664352  | NC_000011.9  |
| cg10888854 | 1.93E-17 | 4.57E-19 | 9.93 | 32.4407179 | 7.99E-02 | 56644191  | 56644314  | NC_000014.8  |
| cg11081894 | 1.93E-17 | 4.57E-19 | 9.93 | 32.4397631 | 1.63E-01 | 101283847 | 101283970 | NC_000010.10 |
| cg08630080 | 1.93E-17 | 4.58E-19 | 9.93 | 32.4396271 | 5.26E-02 | 69605276  | 69605399  | NC_000015.9  |
| cg20881910 | 1.94E-17 | 4.60E-19 | 9.93 | 32.4350735 | 2.42E-01 | 131780332 | 131780455 | NC_000011.9  |
| cg07557260 | 1.94E-17 | 4.61E-19 | 9.93 | 32.4322747 | 2.24E-01 | 132052870 | 132052993 | NC_000008.10 |
| cg20313677 | 1.95E-17 | 4.62E-19 | 9.93 | 32.4303137 | 1.03E-01 | 3738610   | 3738733   | NC_000001.10 |
| cg05196969 | 1.95E-17 | 4.62E-19 | 9.93 | 32.4294876 | 2.34E-01 | 76627594  | 76627717  | NC_000015.9  |
| cg04635983 | 1.96E-17 | 4.64E-19 | 9.93 | 32.425292  | 1.49E-01 | 3602558   | 3602681   | NC_000005.9  |
| cg22403344 | 1.97E-17 | 4.67E-19 | 9.92 | 32.4185844 | 2.56E-01 | 95691500  | 95691623  | NC_000002.11 |
| cg11382529 | 1.97E-17 | 4.68E-19 | 9.92 | 32.417855  | 1.82E-01 | 65490613  | 65490736  | NC_000008.10 |
| cg18034737 | 1.98E-17 | 4.70E-19 | 9.92 | 32.4139688 | 2.65E-01 | 188916865 | 188916988 | NC_000004.11 |
| cg08573038 | 1.98E-17 | 4.71E-19 | 9.92 | 32.4105459 | 1.32E-01 | 110399302 | 110399425 | NC_000012.11 |
| cg11469391 | 1.98E-17 | 4.71E-19 | 9.92 | 32.4098277 | 2.18E-01 | 155242445 | 155242568 | NC_000007.13 |
| cg16677112 | 1.99E-17 | 4.72E-19 | 9.92 | 32.408291  | 2.34E-01 | 155103905 | 155104028 | NC_000001.10 |

|            |          |          |      |            |          |           |           |              |
|------------|----------|----------|------|------------|----------|-----------|-----------|--------------|
| cg27373390 | 2.00E-17 | 4.75E-19 | 9.92 | 32.402594  | 1.75E-01 | 37095036  | 37095159  | NC_000003.11 |
| cg18266783 | 2.00E-17 | 4.75E-19 | 9.92 | 32.4016259 | 1.91E-01 | 156466729 | 156466852 | NC_000001.10 |
| cg04111071 | 2.02E-17 | 4.79E-19 | 9.92 | 32.3933981 | 2.24E-01 | 19813299  | 19813422  | NC_000007.13 |
| cg21245492 | 2.02E-17 | 4.81E-19 | 9.92 | 32.39017   | 1.86E-01 | 99250440  | 99250563  | NC_000015.9  |
| cg08059402 | 2.03E-17 | 4.84E-19 | 9.92 | 32.3844844 | 8.78E-02 | 194188646 | 194188769 | NC_000003.11 |
| cg23134259 | 2.03E-17 | 4.84E-19 | 9.92 | 32.3842308 | 1.78E-01 | 173039661 | 173039784 | NC_000005.9  |
| cg08364561 | 2.04E-17 | 4.86E-19 | 9.92 | 32.3807194 | 2.36E-01 | 31846844  | 31846967  | NC_000011.9  |
| cg10826733 | 2.05E-17 | 4.88E-19 | 9.92 | 32.3754141 | 1.51E-01 | 128482561 | 128482684 | NC_000007.13 |
| cg12085155 | 2.06E-17 | 4.91E-19 | 9.92 | 32.3697528 | 1.05E-01 | 37769679  | 37769802  | NC_000022.10 |
| cg01800148 | 2.06E-17 | 4.91E-19 | 9.92 | 32.3692886 | 2.05E-01 | 9130886   | 9131009   | NC_000001.10 |
| cg01972751 | 2.06E-17 | 4.92E-19 | 9.92 | 32.3676577 | 2.58E-01 | 137814728 | 137814851 | NC_000006.11 |
| cg13502382 | 2.07E-17 | 4.94E-19 | 9.92 | 32.3642728 | 1.69E-01 | 167192488 | 167192611 | NC_000006.11 |
| cg07983905 | 2.07E-17 | 4.95E-19 | 9.92 | 32.3622392 | 2.24E-01 | 3073561   | 3073684   | NC_000020.10 |
| cg02430935 | 2.08E-17 | 4.95E-19 | 9.92 | 32.3615028 | 2.12E-01 | 124909028 | 124909151 | NC_000010.10 |
| cg15547669 | 2.08E-17 | 4.96E-19 | 9.92 | 32.3586828 | 2.70E-01 | 2781122   | 2781245   | NC_000020.10 |
| cg21107103 | 2.09E-17 | 4.98E-19 | 9.92 | 32.3563477 | 1.64E-01 | 18630052  | 18630175  | NC_000011.9  |
| cg00489401 | 2.09E-17 | 4.99E-19 | 9.92 | 32.3542325 | 2.15E-01 | 180075875 | 180075998 | NC_000005.9  |
| cg15718581 | 2.10E-17 | 5.00E-19 | 9.91 | 32.3511938 | 2.66E-01 | 188916581 | 188916704 | NC_000004.11 |
| cg21606928 | 2.13E-17 | 5.08E-19 | 9.91 | 32.336351  | 2.24E-01 | 23501122  | 23501245  | NC_000013.10 |
| cg07377907 | 2.13E-17 | 5.08E-19 | 9.91 | 32.3361389 | 9.66E-02 | 69150318  | 69150441  | NC_000016.9  |
| cg08528626 | 2.16E-17 | 5.15E-19 | 9.91 | 32.322105  | 2.46E-01 | 107503728 | 107503851 | NC_000002.11 |
| cg25751484 | 2.16E-17 | 5.15E-19 | 9.91 | 32.3220514 | 1.38E-01 | 13915817  | 13915940  | NC_000019.9  |
| cg25809841 | 2.16E-17 | 5.17E-19 | 9.91 | 32.3185811 | 2.22E-01 | 51162684  | 51162807  | NC_000019.9  |
| cg06558014 | 2.17E-17 | 5.20E-19 | 9.91 | 32.312948  | 2.64E-01 | 100051116 | 100051239 | NC_000006.11 |
| cg24671810 | 2.18E-17 | 5.22E-19 | 9.91 | 32.3088635 | 1.36E-01 | 1026978   | 1027101   | NC_000017.10 |

|            |          |          |      |            |          |           |           |              |
|------------|----------|----------|------|------------|----------|-----------|-----------|--------------|
| cg05498785 | 2.19E-17 | 5.23E-19 | 9.91 | 32.3079838 | 8.86E-02 | 85990170  | 85990293  | NC_000016.9  |
| cg01991967 | 2.20E-17 | 5.25E-19 | 9.91 | 32.3024629 | 1.44E-01 | 113884734 | 113884857 | NC_000002.11 |
| cg02315940 | 2.21E-17 | 5.29E-19 | 9.91 | 32.2952586 | 3.17E-01 | 139653872 | 139653995 | NC_000003.11 |
| cg02783918 | 2.22E-17 | 5.32E-19 | 9.91 | 32.2908235 | 1.70E-01 | 86547544  | 86547667  | NC_000016.9  |
| cg04927004 | 2.23E-17 | 5.33E-19 | 9.91 | 32.2880948 | 1.31E-01 | 61809348  | 61809471  | NC_000020.10 |
| cg13197551 | 2.23E-17 | 5.33E-19 | 9.91 | 32.2873759 | 1.06E-01 | 60709957  | 60710080  | NC_000020.10 |
| cg25602684 | 2.24E-17 | 5.36E-19 | 9.9  | 32.2834269 | 2.40E-01 | 37839918  | 37840041  | NC_000005.9  |
| cg24896053 | 2.24E-17 | 5.37E-19 | 9.9  | 32.2817244 | 1.65E-01 | 8553099   | 8553222   | NC_000010.10 |
| cg15466862 | 2.24E-17 | 5.37E-19 | 9.9  | 32.2801249 | 1.92E-01 | 112722333 | 112722456 | NC_000013.10 |
| cg19191600 | 2.25E-17 | 5.38E-19 | 9.9  | 32.2787425 | 3.96E-02 | 30613506  | 30613629  | NC_000006.11 |
| cg13797914 | 2.25E-17 | 5.40E-19 | 9.9  | 32.2748794 | 8.77E-02 | 42192995  | 42193118  | NC_000015.9  |
| cg23068913 | 2.27E-17 | 5.44E-19 | 9.9  | 32.2671799 | 2.57E-01 | 23463377  | 23463500  | NC_000010.10 |
| cg03936663 | 2.29E-17 | 5.50E-19 | 9.9  | 32.2574329 | 1.97E-01 | 218098422 | 218098545 | NC_000001.10 |
| cg06893273 | 2.29E-17 | 5.51E-19 | 9.9  | 32.2562531 | 2.01E-01 | 46604774  | 46604897  | NC_000017.10 |
| cg03276484 | 2.30E-17 | 5.51E-19 | 9.9  | 32.2550331 | 7.27E-02 | 194803749 | 194803872 | NC_000003.11 |
| cg24414344 | 2.31E-17 | 5.54E-19 | 9.9  | 32.2494465 | 1.38E-01 | 39019556  | 39019679  | NC_000017.10 |
| cg08151857 | 2.31E-17 | 5.55E-19 | 9.9  | 32.2480582 | 3.20E-01 | 46691820  | 46691943  | NC_000017.10 |
| cg06720544 | 2.31E-17 | 5.55E-19 | 9.9  | 32.2473172 | 1.48E-01 | 65641018  | 65641141  | NC_000002.11 |
| cg01150105 | 2.32E-17 | 5.56E-19 | 9.9  | 32.2464864 | 1.70E-01 | 175139160 | 175139283 | NC_000003.11 |
| cg01777643 | 2.34E-17 | 5.61E-19 | 9.9  | 32.237562  | 2.46E-01 | 224805287 | 224805410 | NC_000001.10 |
| cg01315916 | 2.34E-17 | 5.63E-19 | 9.9  | 32.2341283 | 1.85E-01 | 3591609   | 3591732   | NC_000005.9  |
| cg10743390 | 2.34E-17 | 5.63E-19 | 9.9  | 32.2337772 | 1.60E-01 | 30020728  | 30020851  | NC_000019.9  |
| cg26791307 | 2.35E-17 | 5.65E-19 | 9.9  | 32.23087   | 1.87E-01 | 97629235  | 97629358  | NC_000015.9  |
| cg12667732 | 2.39E-17 | 5.74E-19 | 9.89 | 32.2145127 | 1.51E-01 | 92673594  | 92673717  | NC_000015.9  |
| cg06164660 | 2.39E-17 | 5.75E-19 | 9.89 | 32.2123712 | 2.26E-01 | 128751582 | 128751705 | NC_000012.11 |



|            |          |          |      |            |          |           |           |              |
|------------|----------|----------|------|------------|----------|-----------|-----------|--------------|
| cg08076955 | 2.39E-17 | 5.75E-19 | 9.89 | 32.2122821 | 1.13E-01 | 46608462  | 46608585  | NC_000017.10 |
| cg02250846 | 2.41E-17 | 5.79E-19 | 9.89 | 32.2066093 | 2.69E-01 | 23258484  | 23258607  | NC_000019.9  |
| cg04209913 | 2.41E-17 | 5.79E-19 | 9.89 | 32.2063412 | 2.25E-01 | 37836246  | 37836369  | NC_000005.9  |
| cg04155485 | 2.41E-17 | 5.81E-19 | 9.89 | 32.2034006 | 1.22E-01 | 5535934   | 5536057   | NC_000007.13 |
| cg23413567 | 2.42E-17 | 5.82E-19 | 9.89 | 32.2019692 | 1.49E-01 | 41223175  | 41223298  | NC_000013.10 |
| cg27269962 | 2.42E-17 | 5.84E-19 | 9.89 | 32.1980188 | 1.58E-01 | 127540997 | 127541120 | NC_000007.13 |
| cg04175111 | 2.43E-17 | 5.84E-19 | 9.89 | 32.1971335 | 2.03E-01 | 2334971   | 2335094   | NC_000005.9  |
| cg14089067 | 2.43E-17 | 5.84E-19 | 9.89 | 32.1970157 | 1.50E-01 | 55442785  | 55442908  | NC_000001.10 |
| cg22660578 | 2.44E-17 | 5.88E-19 | 9.89 | 32.1907688 | 2.30E-01 | 35294029  | 35294152  | NC_000017.10 |
| cg18773844 | 2.44E-17 | 5.89E-19 | 9.89 | 32.1895172 | 9.65E-02 | 69463247  | 69463370  | NC_000011.9  |
| cg00228281 | 2.44E-17 | 5.89E-19 | 9.89 | 32.1891434 | 1.33E-01 | 50800963  | 50801086  | NC_000007.13 |
| cg00792424 | 2.46E-17 | 5.92E-19 | 9.89 | 32.1846187 | 2.55E-01 | 10386160  | 10386283  | NC_000006.11 |
| cg23740135 | 2.46E-17 | 5.93E-19 | 9.89 | 32.1817811 | 1.58E-01 | 41621208  | 41621331  | NC_000006.11 |
| cg12520549 | 2.47E-17 | 5.95E-19 | 9.89 | 32.178781  | 1.54E-01 | 162280741 | 162280864 | NC_000002.11 |
| cg19031475 | 2.48E-17 | 5.98E-19 | 9.89 | 32.1747058 | 1.02E-01 | 134659481 | 134659604 | NC_000010.10 |
| cg05924485 | 2.50E-17 | 6.02E-19 | 9.89 | 32.1669143 | 1.85E-01 | 22990378  | 22990501  | NC_000019.9  |
| cg13724788 | 2.50E-17 | 6.03E-19 | 9.89 | 32.1654272 | 2.79E-01 | 19322778  | 19322901  | NC_000019.9  |
| cg10514097 | 2.50E-17 | 6.04E-19 | 9.89 | 32.1647428 | 2.17E-01 | 86544787  | 86544910  | NC_000016.9  |
| cg17751591 | 2.52E-17 | 6.07E-19 | 9.89 | 32.1587237 | 1.10E-01 | 80139098  | 80139221  | NC_000017.10 |
| cg26565021 | 2.52E-17 | 6.08E-19 | 9.89 | 32.1581784 | 2.86E-01 | 34112825  | 34112948  | NC_000019.9  |
| cg01790144 | 2.52E-17 | 6.08E-19 | 9.89 | 32.157124  | 9.42E-02 | 84476098  | 84476221  | NC_000016.9  |
| cg23266594 | 2.52E-17 | 6.09E-19 | 9.89 | 32.1555228 | 1.68E-01 | 149546691 | 149546814 | NC_000005.9  |
| cg04362839 | 2.53E-17 | 6.12E-19 | 9.88 | 32.1511925 | 9.56E-02 | 105688421 | 105688544 | NC_000014.8  |
| cg07208172 | 2.53E-17 | 6.12E-19 | 9.88 | 32.1507368 | 1.19E-01 | 32818353  | 32818476  | NC_000001.10 |
| cg18740861 | 2.54E-17 | 6.14E-19 | 9.88 | 32.147892  | 8.61E-02 | 134998487 | 134998610 | NC_000010.10 |

|            |          |          |      |            |          |           |           |              |
|------------|----------|----------|------|------------|----------|-----------|-----------|--------------|
| cg26858704 | 2.55E-17 | 6.16E-19 | 9.88 | 32.144063  | 2.71E-01 | 4918848   | 4918971   | NC_000012.11 |
| cg26685294 | 2.56E-17 | 6.20E-19 | 9.88 | 32.1385503 | 7.48E-02 | 67696047  | 67696170  | NC_000016.9  |
| cg14497054 | 2.57E-17 | 6.21E-19 | 9.88 | 32.1364441 | 1.53E-01 | 34261116  | 34261239  | NC_000012.11 |
| cg19859290 | 2.58E-17 | 6.24E-19 | 9.88 | 32.1325157 | 3.07E-01 | 20618399  | 20618522  | NC_000011.9  |
| cg03032025 | 2.58E-17 | 6.24E-19 | 9.88 | 32.1318862 | 1.83E-01 | 173316748 | 173316871 | NC_000005.9  |
| cg04802545 | 2.59E-17 | 6.25E-19 | 9.88 | 32.1296936 | 1.13E-01 | 2423231   | 2423354   | NC_000011.9  |
| cg02332982 | 2.61E-17 | 6.31E-19 | 9.88 | 32.1217297 | 2.60E-01 | 45444420  | 45444543  | NC_000012.11 |
| cg22670033 | 2.61E-17 | 6.32E-19 | 9.88 | 32.1188467 | 1.42E-01 | 180646608 | 180646731 | NC_000005.9  |
| cg23030040 | 2.64E-17 | 6.39E-19 | 9.88 | 32.1087504 | 4.83E-02 | 3414302   | 3414425   | NC_000004.11 |
| cg17816908 | 2.66E-17 | 6.43E-19 | 9.88 | 32.1016989 | 2.16E-01 | 41167109  | 41167232  | NC_000008.10 |
| cg08885198 | 2.67E-17 | 6.46E-19 | 9.88 | 32.0976009 | 6.66E-02 | 79051613  | 79051736  | NC_000017.10 |
| cg13865360 | 2.67E-17 | 6.47E-19 | 9.88 | 32.0967637 | 1.06E-01 | 15476258  | 15476381  | NC_000001.10 |
| cg00831710 | 2.68E-17 | 6.51E-19 | 9.88 | 32.0903842 | 1.73E-01 | 144240945 | 144241068 | NC_000008.10 |
| cg11664818 | 2.69E-17 | 6.53E-19 | 9.87 | 32.087132  | 1.66E-01 | 37852665  | 37852788  | NC_000021.8  |
| cg18065686 | 2.71E-17 | 6.58E-19 | 9.87 | 32.0790164 | 1.20E-01 | 23411171  | 23411294  | NC_000008.10 |
| cg05593641 | 2.71E-17 | 6.59E-19 | 9.87 | 32.0785816 | 2.70E-01 | 106398816 | 106398939 | NC_000010.10 |
| cg03570636 | 2.74E-17 | 6.65E-19 | 9.87 | 32.0683924 | 1.77E-01 | 2753375   | 2753498   | NC_000005.9  |
| cg27292667 | 2.75E-17 | 6.67E-19 | 9.87 | 32.0667699 | 9.56E-02 | 1049628   | 1049751   | NC_000016.9  |
| cg05542338 | 2.77E-17 | 6.73E-19 | 9.87 | 32.0571851 | 2.63E-01 | 5710407   | 5710530   | NC_000004.11 |
| cg13596497 | 2.78E-17 | 6.75E-19 | 9.87 | 32.053748  | 2.43E-01 | 110959104 | 110959227 | NC_000013.10 |
| cg15916399 | 2.78E-17 | 6.75E-19 | 9.87 | 32.0535913 | 2.12E-01 | 67068457  | 67068580  | NC_000018.9  |
| cg10633658 | 2.78E-17 | 6.77E-19 | 9.87 | 32.0519416 | 1.89E-01 | 58147525  | 58147648  | NC_000006.11 |
| cg18173058 | 2.80E-17 | 6.80E-19 | 9.87 | 32.0471073 | 2.05E-01 | 114838359 | 114838482 | NC_000012.11 |
| cg19385090 | 2.80E-17 | 6.81E-19 | 9.87 | 32.0452854 | 2.04E-01 | 27292614  | 27292737  | NC_000007.13 |
| cg08442064 | 2.80E-17 | 6.81E-19 | 9.87 | 32.0448402 | 1.45E-01 | 139394779 | 139394902 | NC_000003.11 |

|            |          |          |      |            |          |           |           |              |
|------------|----------|----------|------|------------|----------|-----------|-----------|--------------|
| cg07766263 | 2.82E-17 | 6.85E-19 | 9.87 | 32.0390972 | 1.73E-01 | 170303045 | 170303168 | NC_000003.11 |
| cg04247508 | 2.83E-17 | 6.87E-19 | 9.87 | 32.0361899 | 5.91E-02 | 48557420  | 48557543  | NC_000008.10 |
| cg18590299 | 2.86E-17 | 6.95E-19 | 9.87 | 32.0253739 | 1.15E-01 | 3975803   | 3975926   | NC_000017.10 |
| cg22729726 | 2.86E-17 | 6.96E-19 | 9.87 | 32.0241525 | 1.79E-01 | 3123854   | 3123977   | NC_000001.10 |
| cg08945642 | 2.86E-17 | 6.96E-19 | 9.87 | 32.0236333 | 8.47E-02 | 205863    | 205986    | NC_000005.9  |
| cg05571970 | 2.88E-17 | 7.02E-19 | 9.86 | 32.0148128 | 1.86E-01 | 166422182 | 166422305 | NC_000006.11 |
| cg27179533 | 2.89E-17 | 7.03E-19 | 9.86 | 32.0135883 | 2.44E-01 | 101006052 | 101006175 | NC_000007.13 |
| cg01522592 | 2.89E-17 | 7.04E-19 | 9.86 | 32.0127358 | 1.63E-01 | 75235311  | 75235434  | NC_000011.9  |
| cg00067600 | 2.89E-17 | 7.05E-19 | 9.86 | 32.0115764 | 1.61E-01 | 34109141  | 34109264  | NC_000003.11 |
| cg22163834 | 2.90E-17 | 7.07E-19 | 9.86 | 32.0081018 | 9.70E-02 | 32025965  | 32026088  | NC_000006.11 |
| cg13840252 | 2.90E-17 | 7.07E-19 | 9.86 | 32.0078613 | 1.05E-01 | 10732744  | 10732867  | NC_000001.10 |
| cg03331387 | 2.91E-17 | 7.08E-19 | 9.86 | 32.0066473 | 9.88E-02 | 127114962 | 127115085 | NC_000003.11 |
| cg15720516 | 2.91E-17 | 7.09E-19 | 9.86 | 32.0055636 | 1.02E-01 | 12907933  | 12908056  | NC_000019.9  |
| cg27313941 | 2.91E-17 | 7.10E-19 | 9.86 | 32.0042833 | 1.78E-01 | 27186554  | 27186677  | NC_000007.13 |
| cg10188823 | 2.91E-17 | 7.11E-19 | 9.86 | 32.0030814 | 2.91E-01 | 29876206  | 29876329  | NC_000022.10 |
| cg03091551 | 2.92E-17 | 7.12E-19 | 9.86 | 32.0015466 | 1.98E-01 | 57275967  | 57276090  | NC_000014.8  |
| cg12169568 | 2.92E-17 | 7.12E-19 | 9.86 | 32.0011351 | 7.99E-02 | 89708532  | 89708655  | NC_000014.8  |
| cg20289688 | 2.92E-17 | 7.13E-19 | 9.86 | 31.9995896 | 2.09E-01 | 17742502  | 17742625  | NC_000011.9  |
| cg04861929 | 2.93E-17 | 7.15E-19 | 9.86 | 31.9973289 | 2.32E-01 | 109293070 | 109293193 | NC_000011.9  |
| cg05208056 | 2.94E-17 | 7.18E-19 | 9.86 | 31.9931518 | 1.85E-01 | 106502915 | 106503038 | NC_000002.11 |
| cg02311364 | 2.94E-17 | 7.18E-19 | 9.86 | 31.9930959 | 1.29E-01 | 13001256  | 13001379  | NC_000003.11 |
| cg00332937 | 2.96E-17 | 7.24E-19 | 9.86 | 31.98463   | 2.18E-01 | 72740460  | 72740583  | NC_000005.9  |
| cg09268961 | 2.99E-17 | 7.31E-19 | 9.86 | 31.9747026 | 1.70E-01 | 14400943  | 14401066  | NC_000016.9  |
| cg08755736 | 3.00E-17 | 7.35E-19 | 9.86 | 31.9702143 | 1.69E-01 | 95957928  | 95958051  | NC_000008.10 |
| cg02291403 | 3.01E-17 | 7.36E-19 | 9.86 | 31.9678832 | 2.39E-01 | 130646461 | 130646584 | NC_000012.11 |

|            |          |          |      |            |          |           |           |              |
|------------|----------|----------|------|------------|----------|-----------|-----------|--------------|
| cg22079195 | 3.01E-17 | 7.37E-19 | 9.86 | 31.9677939 | 1.08E-01 | 100799756 | 100799879 | NC_000002.11 |
| cg16733714 | 3.02E-17 | 7.40E-19 | 9.86 | 31.9634275 | 4.67E-02 | 54318953  | 54319076  | NC_000001.10 |
| cg13747145 | 3.04E-17 | 7.43E-19 | 9.86 | 31.95895   | 9.55E-02 | 33261000  | 33261123  | NC_000003.11 |
| cg10631546 | 3.05E-17 | 7.47E-19 | 9.85 | 31.9536003 | 9.97E-02 | 114903101 | 114903224 | NC_000004.11 |
| cg27420520 | 3.06E-17 | 7.50E-19 | 9.85 | 31.9504643 | 2.43E-01 | 103352267 | 103352390 | NC_000012.11 |
| cg09497124 | 3.10E-17 | 7.59E-19 | 9.85 | 31.9380409 | 6.33E-02 | 43883469  | 43883592  | NC_000015.9  |
| cg08549332 | 3.11E-17 | 7.61E-19 | 9.85 | 31.9352143 | 1.17E-01 | 101558461 | 101558584 | NC_000007.13 |
| cg15960924 | 3.12E-17 | 7.65E-19 | 9.85 | 31.9300941 | 1.74E-01 | 32151282  | 32151405  | NC_000003.11 |
| cg13929328 | 3.13E-17 | 7.66E-19 | 9.85 | 31.9287522 | 1.94E-01 | 129535898 | 129536021 | NC_000010.10 |
| cg21229268 | 3.15E-17 | 7.73E-19 | 9.85 | 31.9200883 | 2.02E-01 | 34442350  | 34442473  | NC_000021.8  |
| cg15262242 | 3.15E-17 | 7.73E-19 | 9.85 | 31.9193508 | 3.10E-01 | 47301741  | 47301864  | NC_000017.10 |
| cg00515457 | 3.17E-17 | 7.78E-19 | 9.85 | 31.9138605 | 2.50E-01 | 35396203  | 35396326  | NC_000019.9  |
| cg27248474 | 3.17E-17 | 7.78E-19 | 9.85 | 31.9135386 | 1.77E-01 | 88991238  | 88991361  | NC_000016.9  |
| cg23551605 | 3.18E-17 | 7.80E-19 | 9.85 | 31.9105353 | 1.28E-01 | 236442942 | 236443065 | NC_000002.11 |
| cg07062388 | 3.19E-17 | 7.82E-19 | 9.85 | 31.9081264 | 7.76E-02 | 70507787  | 70507910  | NC_000006.11 |
| cg23663318 | 3.20E-17 | 7.84E-19 | 9.85 | 31.9055417 | 1.08E-01 | 89448407  | 89448530  | NC_000001.10 |
| cg04124457 | 3.20E-17 | 7.84E-19 | 9.85 | 31.9052542 | 1.32E-01 | 56036455  | 56036578  | NC_000015.9  |
| cg03724721 | 3.21E-17 | 7.89E-19 | 9.85 | 31.899673  | 1.45E-01 | 19939061  | 19939184  | NC_000022.10 |
| cg23251122 | 3.22E-17 | 7.90E-19 | 9.85 | 31.8984254 | 1.14E-01 | 35947995  | 35948118  | NC_000022.10 |
| cg10164795 | 3.22E-17 | 7.90E-19 | 9.85 | 31.898114  | 1.41E-01 | 44181838  | 44181961  | NC_000010.10 |
| cg09743650 | 3.23E-17 | 7.94E-19 | 9.85 | 31.8930431 | 1.37E-01 | 85675160  | 85675283  | NC_000016.9  |
| cg19760441 | 3.24E-17 | 7.96E-19 | 9.84 | 31.8907766 | 5.94E-02 | 32825139  | 32825262  | NC_000006.11 |
| cg25902889 | 3.26E-17 | 8.01E-19 | 9.84 | 31.8844755 | 1.96E-01 | 4305090   | 4305213   | NC_000019.9  |
| cg27621340 | 3.27E-17 | 8.02E-19 | 9.84 | 31.8829092 | 2.68E-01 | 89346269  | 89346392  | NC_000015.9  |
| cg16754788 | 3.28E-17 | 8.06E-19 | 9.84 | 31.8779586 | 2.05E-01 | 97803770  | 97803893  | NC_000008.10 |

|            |          |          |      |            |          |           |           |              |
|------------|----------|----------|------|------------|----------|-----------|-----------|--------------|
| cg02661431 | 3.30E-17 | 8.11E-19 | 9.84 | 31.8725315 | 9.47E-02 | 45010881  | 45011004  | NC_000001.10 |
| cg19182986 | 3.30E-17 | 8.12E-19 | 9.84 | 31.8709723 | 1.20E-01 | 124613500 | 124613623 | NC_000011.9  |
| cg11028052 | 3.32E-17 | 8.16E-19 | 9.84 | 31.8665058 | 1.04E-01 | 81154387  | 81154510  | NC_000015.9  |
| cg23003534 | 3.33E-17 | 8.19E-19 | 9.84 | 31.8630886 | 2.61E-01 | 105036747 | 105036870 | NC_000010.10 |
| cg21915998 | 3.33E-17 | 8.19E-19 | 9.84 | 31.8627534 | 1.51E-01 | 67060872  | 67060995  | NC_000002.11 |
| cg16342949 | 3.33E-17 | 8.19E-19 | 9.84 | 31.8622095 | 1.10E-01 | 63883584  | 63883707  | NC_000011.9  |
| cg23329015 | 3.34E-17 | 8.20E-19 | 9.84 | 31.8608561 | 1.14E-01 | 1027680   | 1027803   | NC_000017.10 |
| cg07444414 | 3.38E-17 | 8.32E-19 | 9.84 | 31.8472945 | 1.27E-01 | 32117377  | 32117500  | NC_000006.11 |
| cg14394692 | 3.40E-17 | 8.37E-19 | 9.84 | 31.8406342 | 2.36E-01 | 30517589  | 30517712  | NC_000015.9  |
| cg00028844 | 3.40E-17 | 8.38E-19 | 9.84 | 31.8401605 | 1.38E-01 | 43938184  | 43938307  | NC_000020.10 |
| cg16501028 | 3.40E-17 | 8.38E-19 | 9.84 | 31.8397204 | 1.56E-01 | 32450000  | 32450123  | NC_000011.9  |
| cg22539706 | 3.42E-17 | 8.43E-19 | 9.84 | 31.8340567 | 9.94E-02 | 24646727  | 24646850  | NC_000010.10 |
| cg00916179 | 3.42E-17 | 8.44E-19 | 9.84 | 31.83325   | 1.15E-01 | 43992805  | 43992928  | NC_000002.11 |
| cg06874656 | 3.45E-17 | 8.51E-19 | 9.83 | 31.824909  | 2.23E-01 | 131780353 | 131780476 | NC_000011.9  |
| cg10023272 | 3.47E-17 | 8.55E-19 | 9.83 | 31.820371  | 1.94E-01 | 110611823 | 110611946 | NC_000001.10 |
| cg26133372 | 3.47E-17 | 8.55E-19 | 9.83 | 31.8203533 | 3.42E-02 | 1537930   | 1538053   | NC_000005.9  |
| cg17686487 | 3.47E-17 | 8.55E-19 | 9.83 | 31.8194773 | 2.11E-01 | 50686281  | 50686404  | NC_000005.9  |
| cg11058904 | 3.48E-17 | 8.57E-19 | 9.83 | 31.8173252 | 1.01E-01 | 69987299  | 69987422  | NC_000011.9  |
| cg18409985 | 3.50E-17 | 8.63E-19 | 9.83 | 31.811174  | 1.38E-01 | 113513520 | 113513643 | NC_000013.10 |
| cg07598357 | 3.51E-17 | 8.66E-19 | 9.83 | 31.8069208 | 1.91E-01 | 170595195 | 170595318 | NC_000006.11 |
| cg05132905 | 3.52E-17 | 8.69E-19 | 9.83 | 31.8040426 | 8.30E-02 | 38600367  | 38600490  | NC_000002.11 |
| cg19913496 | 3.52E-17 | 8.69E-19 | 9.83 | 31.8039778 | 1.51E-01 | 116694158 | 116694281 | NC_000001.10 |
| cg11155547 | 3.55E-17 | 8.77E-19 | 9.83 | 31.7945313 | 6.34E-02 | 42856236  | 42856359  | NC_000006.11 |
| cg06660530 | 3.58E-17 | 8.84E-19 | 9.83 | 31.7866188 | 2.09E-01 | 61809911  | 61810034  | NC_000020.10 |
| cg24739457 | 3.59E-17 | 8.88E-19 | 9.83 | 31.7821331 | 2.12E-01 | 205821442 | 205821565 | NC_000001.10 |

|            |          |          |      |            |          |           |           |              |
|------------|----------|----------|------|------------|----------|-----------|-----------|--------------|
| cg25652781 | 3.63E-17 | 8.97E-19 | 9.83 | 31.7723433 | 6.02E-02 | 153586344 | 153586467 | NC_000004.11 |
| cg18489289 | 3.64E-17 | 8.99E-19 | 9.83 | 31.7701363 | 1.92E-01 | 44876292  | 44876415  | NC_000010.10 |
| cg04023150 | 3.66E-17 | 9.05E-19 | 9.83 | 31.7639916 | 3.11E-01 | 44873064  | 44873187  | NC_000001.10 |
| cg18407189 | 3.68E-17 | 9.10E-19 | 9.82 | 31.7578083 | 8.89E-02 | 67810421  | 67810544  | NC_000011.9  |
| cg16437211 | 3.70E-17 | 9.15E-19 | 9.82 | 31.753078  | 1.28E-01 | 142844692 | 142844815 | NC_000008.10 |
| cg18818210 | 3.73E-17 | 9.22E-19 | 9.82 | 31.7450581 | 1.26E-01 | 147286378 | 147286501 | NC_000005.9  |
| cg12682684 | 3.73E-17 | 9.25E-19 | 9.82 | 31.7425231 | 2.24E-01 | 66535403  | 66535526  | NC_000004.11 |
| cg13473356 | 3.79E-17 | 9.39E-19 | 9.82 | 31.7271128 | 2.29E-01 | 179754613 | 179754736 | NC_000003.11 |
| cg11903177 | 3.79E-17 | 9.39E-19 | 9.82 | 31.7270765 | 1.69E-01 | 17379358  | 17379481  | NC_000017.10 |
| cg00783000 | 3.80E-17 | 9.43E-19 | 9.82 | 31.7232976 | 1.38E-01 | 101007650 | 101007773 | NC_000014.8  |
| cg24997888 | 3.81E-17 | 9.44E-19 | 9.82 | 31.7216248 | 1.23E-01 | 179042747 | 179042870 | NC_000001.10 |
| cg00661970 | 3.81E-17 | 9.45E-19 | 9.82 | 31.7211033 | 2.62E-01 | 115135027 | 115135150 | NC_000012.11 |
| cg14137354 | 3.81E-17 | 9.45E-19 | 9.82 | 31.7208844 | 1.84E-01 | 95993155  | 95993278  | NC_000009.11 |
| cg00811065 | 3.83E-17 | 9.50E-19 | 9.82 | 31.71598   | 1.97E-01 | 1287159   | 1287282   | NC_000007.13 |
| cg02172669 | 3.83E-17 | 9.50E-19 | 9.82 | 31.7150978 | 1.51E-01 | 149410459 | 149410582 | NC_000007.13 |
| cg19736604 | 3.84E-17 | 9.54E-19 | 9.82 | 31.7113101 | 9.14E-02 | 32052289  | 32052412  | NC_000006.11 |
| cg13302823 | 3.84E-17 | 9.54E-19 | 9.82 | 31.7111456 | 2.04E-01 | 145559792 | 145559915 | NC_000008.10 |
| cg02567323 | 3.85E-17 | 9.55E-19 | 9.82 | 31.710026  | 1.67E-01 | 48671699  | 48671822  | NC_000002.11 |
| cg22290744 | 3.85E-17 | 9.57E-19 | 9.82 | 31.7087204 | 2.53E-01 | 5710016   | 5710139   | NC_000004.11 |
| cg04606397 | 3.87E-17 | 9.61E-19 | 9.82 | 31.7040406 | 1.63E-01 | 157129618 | 157129741 | NC_000006.11 |
| cg13660679 | 3.88E-17 | 9.64E-19 | 9.82 | 31.7013697 | 9.21E-02 | 133570890 | 133571013 | NC_000009.11 |
| cg25884711 | 3.89E-17 | 9.66E-19 | 9.82 | 31.6988052 | 3.39E-01 | 24323840  | 24323963  | NC_000007.13 |
| cg02400740 | 3.90E-17 | 9.69E-19 | 9.82 | 31.6955187 | 2.20E-01 | 19157938  | 19158061  | NC_000007.13 |
| cg15111708 | 3.90E-17 | 9.70E-19 | 9.82 | 31.6949916 | 9.50E-02 | 154146853 | 154146976 | NC_000005.9  |
| cg00348762 | 3.93E-17 | 9.77E-19 | 9.81 | 31.6873891 | 2.01E-01 | 56228114  | 56228237  | NC_000016.9  |

|            |          |          |      |            |          |           |           |              |
|------------|----------|----------|------|------------|----------|-----------|-----------|--------------|
| cg25994871 | 3.95E-17 | 9.82E-19 | 9.81 | 31.6832145 | 1.47E-01 | 107967614 | 107967737 | NC_000007.13 |
| cg21972431 | 3.95E-17 | 9.82E-19 | 9.81 | 31.6828314 | 1.67E-01 | 17812356  | 17812479  | NC_000007.13 |
| cg04773818 | 3.95E-17 | 9.83E-19 | 9.81 | 31.6821774 | 2.47E-01 | 31496966  | 31497089  | NC_000008.10 |
| cg05210258 | 3.97E-17 | 9.89E-19 | 9.81 | 31.6760634 | 2.60E-01 | 102569538 | 102569661 | NC_000013.10 |
| cg26581504 | 3.98E-17 | 9.91E-19 | 9.81 | 31.6741796 | 1.41E-01 | 112046963 | 112047086 | NC_000011.9  |
| cg27032146 | 3.98E-17 | 9.92E-19 | 9.81 | 31.6730603 | 2.12E-01 | 96652115  | 96652238  | NC_000007.13 |
| cg20591728 | 4.00E-17 | 9.97E-19 | 9.81 | 31.6679571 | 1.80E-01 | 46683606  | 46683729  | NC_000017.10 |
| cg16197186 | 4.01E-17 | 9.98E-19 | 9.81 | 31.667108  | 1.01E-01 | 12413887  | 12414010  | NC_000003.11 |
| cg17910121 | 4.02E-17 | 1.00E-18 | 9.81 | 31.6623288 | 2.03E-01 | 28034669  | 28034792  | NC_000010.10 |
| cg01287000 | 4.03E-17 | 1.00E-18 | 9.81 | 31.6612908 | 1.49E-01 | 145938564 | 145938687 | NC_000008.10 |
| cg16720807 | 4.03E-17 | 1.00E-18 | 9.81 | 31.6605116 | 1.68E-01 | 75786714  | 75786837  | NC_000002.11 |
| cg12500879 | 4.03E-17 | 1.00E-18 | 9.81 | 31.6603782 | 2.76E-01 | 31848649  | 31848772  | NC_000011.9  |
| cg04023204 | 4.05E-17 | 1.01E-18 | 9.81 | 31.6557285 | 9.80E-02 | 68281979  | 68282102  | NC_000016.9  |
| cg11611932 | 4.05E-17 | 1.01E-18 | 9.81 | 31.6546142 | 8.44E-02 | 46073483  | 46073606  | NC_000007.13 |
| cg18007757 | 4.06E-17 | 1.01E-18 | 9.81 | 31.6526163 | 4.19E-02 | 110358928 | 110359051 | NC_000013.10 |
| cg22694818 | 4.08E-17 | 1.02E-18 | 9.81 | 31.6487318 | 1.86E-01 | 75595970  | 75596093  | NC_000001.10 |
| cg10334767 | 4.08E-17 | 1.02E-18 | 9.81 | 31.6480731 | 2.77E-01 | 10459128  | 10459251  | NC_000004.11 |
| cg26290155 | 4.08E-17 | 1.02E-18 | 9.81 | 31.6471824 | 1.89E-01 | 69449994  | 69450117  | NC_000014.8  |
| cg07747616 | 4.09E-17 | 1.02E-18 | 9.81 | 31.6448014 | 1.37E-01 | 7729794   | 7729917   | NC_000006.11 |
| cg10276506 | 4.13E-17 | 1.03E-18 | 9.81 | 31.6356302 | 9.17E-02 | 31690170  | 31690293  | NC_000006.11 |
| cg17545805 | 4.13E-17 | 1.03E-18 | 9.81 | 31.6347524 | 4.05E-02 | 134551796 | 134551919 | NC_000010.10 |
| cg08463758 | 4.14E-17 | 1.03E-18 | 9.81 | 31.6329578 | 1.96E-01 | 39995649  | 39995772  | NC_000020.10 |
| cg26998274 | 4.14E-17 | 1.03E-18 | 9.81 | 31.6325915 | 2.73E-01 | 84456258  | 84456381  | NC_000013.10 |
| cg20829347 | 4.14E-17 | 1.03E-18 | 9.81 | 31.6316761 | 1.60E-01 | 112720927 | 112721050 | NC_000013.10 |
| cg25970454 | 4.15E-17 | 1.04E-18 | 9.81 | 31.6302201 | 1.46E-01 | 76957699  | 76957822  | NC_000012.11 |

|            |          |          |      |            |          |           |           |              |
|------------|----------|----------|------|------------|----------|-----------|-----------|--------------|
| cg23845153 | 4.17E-17 | 1.04E-18 | 9.8  | 31.6242307 | 9.97E-02 | 7750448   | 7750571   | NC_000004.11 |
| cg09387587 | 4.18E-17 | 1.04E-18 | 9.8  | 31.6226798 | 5.69E-02 | 90000322  | 90000445  | NC_000016.9  |
| cg11097541 | 4.18E-17 | 1.04E-18 | 9.8  | 31.6223672 | 1.84E-01 | 27208188  | 27208311  | NC_000007.13 |
| cg06522679 | 4.20E-17 | 1.05E-18 | 9.8  | 31.6176025 | 8.15E-02 | 18287231  | 18287354  | NC_000011.9  |
| cg21356750 | 4.20E-17 | 1.05E-18 | 9.8  | 31.6171905 | 9.53E-02 | 31864236  | 31864359  | NC_000006.11 |
| cg25643223 | 4.22E-17 | 1.06E-18 | 9.8  | 31.6106647 | 1.89E-01 | 24787195  | 24787318  | NC_000013.10 |
| cg22557091 | 4.25E-17 | 1.06E-18 | 9.8  | 31.6051884 | 2.35E-01 | 31827920  | 31828043  | NC_000011.9  |
| cg16648062 | 4.27E-17 | 1.07E-18 | 9.8  | 31.5984519 | 2.53E-01 | 104512168 | 104512291 | NC_000008.10 |
| cg15187276 | 4.28E-17 | 1.07E-18 | 9.8  | 31.5973992 | 9.30E-02 | 62531608  | 62531731  | NC_000011.9  |
| cg02866106 | 4.29E-17 | 1.07E-18 | 9.8  | 31.5952299 | 1.85E-01 | 136553110 | 136553233 | NC_000007.13 |
| cg09825082 | 4.29E-17 | 1.07E-18 | 9.8  | 31.5941077 | 2.08E-01 | 2567907   | 2568030   | NC_000002.11 |
| cg02253499 | 4.29E-17 | 1.08E-18 | 9.8  | 31.5929588 | 1.40E-01 | 12602046  | 12602169  | NC_000003.11 |
| cg00495860 | 4.31E-17 | 1.08E-18 | 9.8  | 31.5882528 | 2.32E-01 | 38065524  | 38065647  | NC_000021.8  |
| cg17079833 | 4.32E-17 | 1.08E-18 | 9.8  | 31.5877628 | 3.31E-01 | 22487847  | 22487970  | NC_000012.11 |
| cg14645650 | 4.32E-17 | 1.08E-18 | 9.8  | 31.5875318 | 7.00E-02 | 25228801  | 25228924  | NC_000001.10 |
| cg13519035 | 4.32E-17 | 1.08E-18 | 9.8  | 31.5873215 | 2.06E-01 | 34261006  | 34261129  | NC_000012.11 |
| cg25463470 | 4.38E-17 | 1.10E-18 | 9.8  | 31.5714514 | 1.99E-01 | 112721712 | 112721835 | NC_000013.10 |
| cg02864844 | 4.38E-17 | 1.10E-18 | 9.8  | 31.5713999 | 3.02E-01 | 149917263 | 149917386 | NC_000007.13 |
| cg03737442 | 4.39E-17 | 1.10E-18 | 9.8  | 31.5697246 | 1.09E-01 | 11177295  | 11177418  | NC_000003.11 |
| cg26310913 | 4.39E-17 | 1.10E-18 | 9.8  | 31.5693923 | 1.18E-01 | 239554854 | 239554977 | NC_000001.10 |
| cg00902516 | 4.39E-17 | 1.10E-18 | 9.8  | 31.5685325 | 1.72E-01 | 6233774   | 6233897   | NC_000010.10 |
| cg02150536 | 4.42E-17 | 1.11E-18 | 9.8  | 31.5625614 | 4.33E-02 | 11302179  | 11302302  | NC_000003.11 |
| cg21966860 | 4.43E-17 | 1.11E-18 | 9.79 | 31.5585269 | 1.62E-01 | 145538097 | 145538220 | NC_000008.10 |
| cg21779611 | 4.48E-17 | 1.12E-18 | 9.79 | 31.5483044 | 2.57E-01 | 76738999  | 76739122  | NC_000018.9  |
| cg09714184 | 4.49E-17 | 1.13E-18 | 9.79 | 31.5458767 | 1.08E-01 | 15740113  | 15740236  | NC_000016.9  |



|            |          |          |      |            |          |           |           |              |
|------------|----------|----------|------|------------|----------|-----------|-----------|--------------|
| cg27553667 | 4.50E-17 | 1.13E-18 | 9.79 | 31.5417848 | 2.34E-01 | 27216083  | 27216206  | NC_000015.9  |
| cg14027297 | 4.51E-17 | 1.13E-18 | 9.79 | 31.540829  | 8.64E-02 | 26911633  | 26911756  | NC_000022.10 |
| cg15934634 | 4.51E-17 | 1.13E-18 | 9.79 | 31.5404537 | 1.73E-01 | 68920095  | 68920218  | NC_000011.9  |
| cg18605137 | 4.52E-17 | 1.14E-18 | 9.79 | 31.5376398 | 1.12E-01 | 80915044  | 80915167  | NC_000017.10 |
| cg04219410 | 4.59E-17 | 1.16E-18 | 9.79 | 31.5216663 | 6.78E-02 | 21106687  | 21106810  | NC_000020.10 |
| cg18101138 | 4.61E-17 | 1.16E-18 | 9.79 | 31.5163684 | 1.83E-01 | 4942469   | 4942592   | NC_000005.9  |
| cg18603028 | 4.72E-17 | 1.19E-18 | 9.78 | 31.4934106 | 2.18E-01 | 136834392 | 136834515 | NC_000005.9  |
| cg08886973 | 4.75E-17 | 1.20E-18 | 9.78 | 31.4873955 | 2.35E-01 | 166402416 | 166402539 | NC_000006.11 |
| cg03278146 | 4.75E-17 | 1.20E-18 | 9.78 | 31.4862548 | 2.93E-01 | 5197327   | 5197450   | NC_000018.9  |
| cg15798050 | 4.76E-17 | 1.20E-18 | 9.78 | 31.4849518 | 9.85E-02 | 47513521  | 47513644  | NC_000022.10 |
| cg14461586 | 4.76E-17 | 1.20E-18 | 9.78 | 31.4839879 | 7.26E-02 | 122707223 | 122707346 | NC_000010.10 |
| cg11021317 | 4.78E-17 | 1.21E-18 | 9.78 | 31.4795379 | 9.40E-02 | 11471730  | 11471853  | NC_000004.11 |
| cg23288059 | 4.78E-17 | 1.21E-18 | 9.78 | 31.4794853 | 2.48E-01 | 38724945  | 38725068  | NC_000014.8  |
| cg16794506 | 4.81E-17 | 1.21E-18 | 9.78 | 31.4736919 | 2.30E-01 | 119600002 | 119600125 | NC_000002.11 |
| cg25060525 | 4.81E-17 | 1.21E-18 | 9.78 | 31.4724628 | 6.46E-02 | 3235295   | 3235418   | NC_000004.11 |
| cg11162839 | 4.83E-17 | 1.22E-18 | 9.78 | 31.4689686 | 1.25E-01 | 135688971 | 135689094 | NC_000003.11 |
| cg11401784 | 4.85E-17 | 1.22E-18 | 9.78 | 31.4642931 | 1.55E-01 | 16092264  | 16092387  | NC_000001.10 |
| cg02947450 | 4.87E-17 | 1.23E-18 | 9.78 | 31.4595265 | 9.53E-02 | 22766861  | 22766984  | NC_000010.10 |
| cg24952102 | 4.87E-17 | 1.23E-18 | 9.78 | 31.4590985 | 8.26E-02 | 93062752  | 93062875  | NC_000011.9  |
| cg27054655 | 4.88E-17 | 1.23E-18 | 9.78 | 31.457829  | 1.49E-01 | 178772969 | 178773092 | NC_000005.9  |
| cg11976616 | 4.89E-17 | 1.24E-18 | 9.78 | 31.4551361 | 2.27E-01 | 41213172  | 41213295  | NC_000005.9  |
| cg16794682 | 4.92E-17 | 1.24E-18 | 9.78 | 31.4489437 | 9.70E-02 | 69460951  | 69461074  | NC_000011.9  |
| cg17178489 | 4.93E-17 | 1.25E-18 | 9.78 | 31.4468241 | 1.27E-01 | 22896140  | 22896263  | NC_000015.9  |
| cg01008267 | 4.94E-17 | 1.25E-18 | 9.78 | 31.4448057 | 8.50E-02 | 47515249  | 47515372  | NC_000022.10 |
| cg19600023 | 4.96E-17 | 1.25E-18 | 9.78 | 31.4402914 | 1.25E-01 | 150525304 | 150525427 | NC_000006.11 |

|            |          |          |      |            |          |           |           |              |
|------------|----------|----------|------|------------|----------|-----------|-----------|--------------|
| cg04360793 | 4.97E-17 | 1.26E-18 | 9.78 | 31.4378781 | 2.37E-01 | 79472361  | 79472484  | NC_000001.10 |
| cg20510724 | 4.97E-17 | 1.26E-18 | 9.78 | 31.4370812 | 2.48E-01 | 89346795  | 89346918  | NC_000015.9  |
| cg14099664 | 5.00E-17 | 1.26E-18 | 9.78 | 31.4321754 | 1.38E-01 | 32545349  | 32545472  | NC_000003.11 |
| cg02656891 | 5.03E-17 | 1.27E-18 | 9.77 | 31.4264112 | 2.23E-01 | 34642519  | 34642642  | NC_000001.10 |
| cg22484980 | 5.07E-17 | 1.28E-18 | 9.77 | 31.4178392 | 1.15E-01 | 68815449  | 68815572  | NC_000011.9  |
| cg06805834 | 5.08E-17 | 1.29E-18 | 9.77 | 31.415865  | 9.82E-02 | 45081274  | 45081397  | NC_000003.11 |
| cg18811550 | 5.09E-17 | 1.29E-18 | 9.77 | 31.4140661 | 1.66E-01 | 27198311  | 27198434  | NC_000007.13 |
| cg23253569 | 5.09E-17 | 1.29E-18 | 9.77 | 31.4123371 | 2.77E-01 | 34398222  | 34398345  | NC_000021.8  |
| cg20661138 | 5.10E-17 | 1.29E-18 | 9.77 | 31.4100693 | 2.25E-01 | 145925314 | 145925437 | NC_000008.10 |
| cg19304273 | 5.11E-17 | 1.30E-18 | 9.77 | 31.4084392 | 1.42E-01 | 49070231  | 49070354  | NC_000011.9  |
| cg01219205 | 5.12E-17 | 1.30E-18 | 9.77 | 31.4056662 | 1.54E-01 | 33937433  | 33937556  | NC_000001.10 |
| cg07139350 | 5.15E-17 | 1.31E-18 | 9.77 | 31.4001529 | 1.82E-01 | 12416368  | 12416491  | NC_000001.10 |
| cg07193766 | 5.18E-17 | 1.31E-18 | 9.77 | 31.3952101 | 3.23E-01 | 32457127  | 32457250  | NC_000011.9  |
| cg14626309 | 5.19E-17 | 1.32E-18 | 9.77 | 31.392778  | 2.38E-01 | 299051    | 299174    | NC_000004.11 |
| cg14879760 | 5.23E-17 | 1.33E-18 | 9.77 | 31.3850657 | 2.28E-01 | 50673965  | 50674088  | NC_000005.9  |
| cg24988036 | 5.24E-17 | 1.33E-18 | 9.77 | 31.3816499 | 1.64E-01 | 32260699  | 32260822  | NC_000020.10 |
| cg02434880 | 5.26E-17 | 1.34E-18 | 9.77 | 31.377389  | 1.08E-01 | 30620732  | 30620855  | NC_000006.11 |
| cg22409854 | 5.30E-17 | 1.35E-18 | 9.77 | 31.3702576 | 2.51E-01 | 88877301  | 88877424  | NC_000006.11 |
| cg08722638 | 5.31E-17 | 1.35E-18 | 9.77 | 31.3685395 | 1.44E-01 | 43035419  | 43035542  | NC_000002.11 |
| cg05766140 | 5.32E-17 | 1.35E-18 | 9.77 | 31.3668976 | 2.98E-01 | 391743    | 391866    | NC_000006.11 |
| cg00061039 | 5.33E-17 | 1.36E-18 | 9.76 | 31.3629573 | 2.14E-01 | 187186953 | 187187076 | NC_000004.11 |
| cg17120366 | 5.35E-17 | 1.36E-18 | 9.76 | 31.3593939 | 1.56E-01 | 28571322  | 28571445  | NC_000010.10 |
| cg18126097 | 5.35E-17 | 1.36E-18 | 9.76 | 31.3588737 | 2.38E-01 | 200014673 | 200014796 | NC_000001.10 |
| cg14492800 | 5.37E-17 | 1.36E-18 | 9.76 | 31.3565962 | 2.53E-01 | 37839923  | 37840046  | NC_000005.9  |
| cg12491966 | 5.38E-17 | 1.37E-18 | 9.76 | 31.354595  | 1.29E-01 | 46925242  | 46925365  | NC_000021.8  |

|            |          |          |      |            |          |           |           |              |
|------------|----------|----------|------|------------|----------|-----------|-----------|--------------|
| cg10824063 | 5.39E-17 | 1.37E-18 | 9.76 | 31.3516259 | 2.39E-01 | 20690934  | 20691057  | NC_000011.9  |
| cg08274637 | 5.43E-17 | 1.38E-18 | 9.76 | 31.3439372 | 1.43E-01 | 51417923  | 51418046  | NC_000013.10 |
| cg09830455 | 5.46E-17 | 1.39E-18 | 9.76 | 31.3380643 | 1.56E-01 | 70886197  | 70886320  | NC_000011.9  |
| cg01670608 | 5.50E-17 | 1.40E-18 | 9.76 | 31.3298445 | 1.66E-01 | 35765093  | 35765216  | NC_000006.11 |
| cg13692446 | 5.52E-17 | 1.41E-18 | 9.76 | 31.3270312 | 2.51E-01 | 112759719 | 112759842 | NC_000013.10 |
| cg01670896 | 5.53E-17 | 1.41E-18 | 9.76 | 31.3250512 | 1.70E-01 | 1933522   | 1933645   | NC_000008.10 |
| cg04772968 | 5.53E-17 | 1.41E-18 | 9.76 | 31.3249404 | 1.87E-01 | 12404112  | 12404235  | NC_000019.9  |
| cg05843106 | 5.53E-17 | 1.41E-18 | 9.76 | 31.3247103 | 1.88E-01 | 186030462 | 186030585 | NC_000004.11 |
| cg03976877 | 5.58E-17 | 1.42E-18 | 9.76 | 31.3160904 | 3.17E-01 | 158937610 | 158937733 | NC_000007.13 |
| cg07121488 | 5.58E-17 | 1.42E-18 | 9.76 | 31.3159345 | 6.91E-02 | 40581105  | 40581228  | NC_000015.9  |
| cg23528705 | 5.62E-17 | 1.43E-18 | 9.76 | 31.3080889 | 2.08E-01 | 1275252   | 1275375   | NC_000007.13 |
| cg04207385 | 5.67E-17 | 1.45E-18 | 9.75 | 31.2978272 | 2.63E-01 | 88877064  | 88877187  | NC_000006.11 |
| cg08498254 | 5.68E-17 | 1.45E-18 | 9.75 | 31.2968136 | 2.20E-01 | 155109505 | 155109628 | NC_000005.9  |
| cg13791254 | 5.70E-17 | 1.46E-18 | 9.75 | 31.2923309 | 2.20E-01 | 100616607 | 100616730 | NC_000009.11 |
| cg16334314 | 5.71E-17 | 1.46E-18 | 9.75 | 31.2912043 | 2.58E-01 | 84418789  | 84418912  | NC_000006.11 |
| cg04559779 | 5.75E-17 | 1.47E-18 | 9.75 | 31.2837378 | 2.50E-01 | 65291730  | 65291853  | NC_000008.10 |
| cg05161082 | 5.77E-17 | 1.47E-18 | 9.75 | 31.2798556 | 2.74E-01 | 21680409  | 21680532  | NC_000012.11 |
| cg21234123 | 5.77E-17 | 1.47E-18 | 9.75 | 31.2797975 | 7.89E-02 | 139435339 | 139435462 | NC_000009.11 |
| cg08323651 | 5.78E-17 | 1.48E-18 | 9.75 | 31.2782112 | 2.12E-01 | 136553855 | 136553978 | NC_000007.13 |
| cg21033440 | 5.80E-17 | 1.48E-18 | 9.75 | 31.2738472 | 2.01E-01 | 65409861  | 65409984  | NC_000011.9  |
| cg27032232 | 5.81E-17 | 1.48E-18 | 9.75 | 31.2732401 | 2.40E-01 | 153584609 | 153584732 | NC_000007.13 |
| cg12419135 | 5.82E-17 | 1.49E-18 | 9.75 | 31.2715822 | 2.92E-01 | 29719023  | 29719146  | NC_000017.10 |
| cg22425711 | 5.85E-17 | 1.50E-18 | 9.75 | 31.2662897 | 9.52E-02 | 38200251  | 38200374  | NC_000001.10 |
| cg12566756 | 5.86E-17 | 1.50E-18 | 9.75 | 31.2636967 | 2.40E-01 | 106975149 | 106975272 | NC_000012.11 |
| cg00729039 | 5.86E-17 | 1.50E-18 | 9.75 | 31.2630394 | 1.14E-01 | 148722798 | 148722921 | NC_000007.13 |

|            |          |          |      |            |          |           |           |              |
|------------|----------|----------|------|------------|----------|-----------|-----------|--------------|
| cg22226398 | 5.87E-17 | 1.50E-18 | 9.75 | 31.2612494 | 1.04E-01 | 235295459 | 235295582 | NC_000001.10 |
| cg15196806 | 5.90E-17 | 1.51E-18 | 9.75 | 31.2561838 | 1.79E-01 | 27171213  | 27171336  | NC_000007.13 |
| cg18394552 | 5.90E-17 | 1.51E-18 | 9.75 | 31.2558834 | 1.87E-01 | 159428643 | 159428766 | NC_000005.9  |
| cg21369812 | 5.91E-17 | 1.51E-18 | 9.75 | 31.2535178 | 1.17E-01 | 73471699  | 73471822  | NC_000010.10 |
| cg06239131 | 5.92E-17 | 1.52E-18 | 9.75 | 31.2519856 | 1.02E-01 | 2483786   | 2483909   | NC_000001.10 |
| cg04839289 | 5.93E-17 | 1.52E-18 | 9.75 | 31.249845  | 1.33E-01 | 24045274  | 24045397  | NC_000014.8  |
| cg24624901 | 5.93E-17 | 1.52E-18 | 9.75 | 31.249711  | 2.71E-01 | 19184273  | 19184396  | NC_000007.13 |
| cg16282242 | 5.93E-17 | 1.52E-18 | 9.75 | 31.2496484 | 4.05E-02 | 94975980  | 94976103  | NC_000012.11 |
| cg07944936 | 5.94E-17 | 1.52E-18 | 9.75 | 31.2481177 | 1.81E-01 | 107950685 | 107950808 | NC_000006.11 |
| cg25113462 | 5.99E-17 | 1.54E-18 | 9.75 | 31.2386121 | 1.45E-01 | 239299293 | 239299416 | NC_000002.11 |
| cg17284804 | 6.02E-17 | 1.54E-18 | 9.75 | 31.2342797 | 2.28E-01 | 67218135  | 67218258  | NC_000001.10 |
| cg25012961 | 6.03E-17 | 1.55E-18 | 9.74 | 31.2322063 | 2.04E-01 | 124034288 | 124034411 | NC_000005.9  |
| cg15837333 | 6.07E-17 | 1.56E-18 | 9.74 | 31.2241578 | 1.22E-01 | 64519179  | 64519302  | NC_000012.11 |
| cg00332021 | 6.08E-17 | 1.56E-18 | 9.74 | 31.2223856 | 1.96E-01 | 17083412  | 17083535  | NC_000022.10 |
| cg18566177 | 6.14E-17 | 1.58E-18 | 9.74 | 31.2137911 | 2.36E-01 | 134491483 | 134491606 | NC_000006.11 |
| cg23411518 | 6.14E-17 | 1.58E-18 | 9.74 | 31.2128527 | 1.53E-01 | 57680479  | 57680602  | NC_000015.9  |
| cg22660196 | 6.14E-17 | 1.58E-18 | 9.74 | 31.2127178 | 9.31E-02 | 143932803 | 143932926 | NC_000006.11 |
| cg12537437 | 6.18E-17 | 1.59E-18 | 9.74 | 31.206067  | 1.80E-01 | 74871202  | 74871325  | NC_000011.9  |
| cg24860020 | 6.21E-17 | 1.60E-18 | 9.74 | 31.2002754 | 4.24E-02 | 122515725 | 122515848 | NC_000008.10 |
| cg15814504 | 6.24E-17 | 1.60E-18 | 9.74 | 31.1965548 | 2.66E-01 | 50694985  | 50695108  | NC_000005.9  |
| cg16638920 | 6.27E-17 | 1.61E-18 | 9.74 | 31.1904635 | 1.85E-01 | 87974012  | 87974135  | NC_000005.9  |
| cg27364012 | 6.35E-17 | 1.63E-18 | 9.74 | 31.1781638 | 1.43E-01 | 109322605 | 109322728 | NC_000006.11 |
| cg02585142 | 6.38E-17 | 1.64E-18 | 9.74 | 31.1735692 | 1.45E-01 | 89434967  | 89435090  | NC_000015.9  |
| cg02428119 | 6.38E-17 | 1.64E-18 | 9.74 | 31.1726131 | 2.72E-01 | 58520874  | 58520997  | NC_000019.9  |
| cg00097146 | 6.38E-17 | 1.64E-18 | 9.74 | 31.1725674 | 2.21E-01 | 45171818  | 45171941  | NC_000002.11 |

|            |          |          |      |            |          |           |           |              |
|------------|----------|----------|------|------------|----------|-----------|-----------|--------------|
| cg13048147 | 6.39E-17 | 1.65E-18 | 9.74 | 31.1705643 | 1.57E-01 | 73044542  | 73044665  | NC_000017.10 |
| cg22735650 | 6.40E-17 | 1.65E-18 | 9.74 | 31.1700099 | 6.19E-02 | 71504159  | 71504282  | NC_000015.9  |
| cg08211028 | 6.40E-17 | 1.65E-18 | 9.74 | 31.1690685 | 2.44E-01 | 109674963 | 109675086 | NC_000010.10 |
| cg03200786 | 6.45E-17 | 1.66E-18 | 9.73 | 31.1618312 | 1.41E-01 | 2483916   | 2484039   | NC_000004.11 |
| cg01118679 | 6.48E-17 | 1.67E-18 | 9.73 | 31.1566658 | 6.20E-02 | 87018135  | 87018258  | NC_000001.10 |
| cg08620154 | 6.48E-17 | 1.67E-18 | 9.73 | 31.1565581 | 2.78E-01 | 69244553  | 69244676  | NC_000008.10 |
| cg05206661 | 6.49E-17 | 1.67E-18 | 9.73 | 31.1549167 | 5.91E-02 | 11271531  | 11271654  | NC_000002.11 |
| cg14413262 | 6.50E-17 | 1.68E-18 | 9.73 | 31.1529427 | 9.07E-02 | 8384046   | 8384169   | NC_000001.10 |
| cg02412684 | 6.55E-17 | 1.69E-18 | 9.73 | 31.1455628 | 1.22E-01 | 123354194 | 123354317 | NC_000010.10 |
| cg05085500 | 6.55E-17 | 1.69E-18 | 9.73 | 31.145502  | 2.24E-01 | 19692172  | 19692295  | NC_000006.11 |
| cg10640181 | 6.57E-17 | 1.69E-18 | 9.73 | 31.1426174 | 5.46E-02 | 16704094  | 16704217  | NC_000005.9  |
| cg02217367 | 6.58E-17 | 1.70E-18 | 9.73 | 31.1405041 | 5.50E-02 | 926438    | 926561    | NC_000017.10 |
| cg24895178 | 6.58E-17 | 1.70E-18 | 9.73 | 31.1396816 | 1.32E-01 | 14207927  | 14208050  | NC_000017.10 |
| cg02533364 | 6.62E-17 | 1.71E-18 | 9.73 | 31.1338475 | 1.10E-01 | 79076083  | 79076206  | NC_000017.10 |
| cg04835383 | 6.63E-17 | 1.71E-18 | 9.73 | 31.1326545 | 1.51E-01 | 28888029  | 28888152  | NC_000006.11 |
| cg18932798 | 6.65E-17 | 1.72E-18 | 9.73 | 31.1294722 | 2.72E-01 | 105037503 | 105037626 | NC_000010.10 |
| cg06372151 | 6.65E-17 | 1.72E-18 | 9.73 | 31.1282439 | 1.66E-01 | 49340730  | 49340853  | NC_000012.11 |
| cg17744883 | 6.69E-17 | 1.73E-18 | 9.73 | 31.1224346 | 1.97E-01 | 2279386   | 2279509   | NC_000005.9  |
| cg24876960 | 6.72E-17 | 1.74E-18 | 9.73 | 31.1184552 | 2.71E-01 | 1883214   | 1883337   | NC_000005.9  |
| cg21003878 | 6.73E-17 | 1.74E-18 | 9.73 | 31.1156725 | 1.14E-01 | 24872323  | 24872446  | NC_000014.8  |
| cg26272270 | 6.75E-17 | 1.74E-18 | 9.73 | 31.1135953 | 2.54E-01 | 18430144  | 18430267  | NC_000010.10 |
| cg24375626 | 6.88E-17 | 1.78E-18 | 9.72 | 31.0936284 | 2.04E-01 | 182098716 | 182098839 | NC_000001.10 |
| cg08787083 | 6.96E-17 | 1.80E-18 | 9.72 | 31.0816842 | 1.19E-01 | 129868324 | 129868447 | NC_000010.10 |
| cg06320418 | 6.98E-17 | 1.81E-18 | 9.72 | 31.0783976 | 1.36E-01 | 766888    | 767011    | NC_000016.9  |
| cg17390350 | 6.99E-17 | 1.81E-18 | 9.72 | 31.077517  | 2.67E-01 | 42267747  | 42267870  | NC_000007.13 |

|            |          |          |      |            |          |           |           |              |
|------------|----------|----------|------|------------|----------|-----------|-----------|--------------|
| cg06334484 | 7.02E-17 | 1.82E-18 | 9.72 | 31.0723289 | 1.22E-01 | 35948145  | 35948268  | NC_000007.13 |
| cg23207990 | 7.04E-17 | 1.82E-18 | 9.72 | 31.0692174 | 2.32E-01 | 154710535 | 154710658 | NC_000004.11 |
| cg01367097 | 7.05E-17 | 1.83E-18 | 9.72 | 31.0677948 | 1.55E-01 | 163037784 | 163037907 | NC_000001.10 |
| cg27337857 | 7.05E-17 | 1.83E-18 | 9.72 | 31.0673879 | 1.24E-01 | 18628714  | 18628837  | NC_000007.13 |
| cg09617993 | 7.08E-17 | 1.84E-18 | 9.72 | 31.0630294 | 2.18E-01 | 3239294   | 3239417   | NC_000016.9  |
| cg01790438 | 7.12E-17 | 1.85E-18 | 9.72 | 31.0576162 | 1.46E-01 | 10332117  | 10332240  | NC_000005.9  |
| cg01760189 | 7.18E-17 | 1.86E-18 | 9.72 | 31.0483405 | 1.42E-01 | 35656896  | 35657019  | NC_000017.10 |
| cg22694087 | 7.26E-17 | 1.88E-18 | 9.71 | 31.0370811 | 6.93E-02 | 128273476 | 128273599 | NC_000003.11 |
| cg23081855 | 7.29E-17 | 1.89E-18 | 9.71 | 31.0322039 | 2.09E-01 | 134889789 | 134889912 | NC_000007.13 |
| cg03816707 | 7.30E-17 | 1.90E-18 | 9.71 | 31.0305625 | 1.78E-01 | 43726544  | 43726667  | NC_000020.10 |
| cg16498194 | 7.31E-17 | 1.90E-18 | 9.71 | 31.0292099 | 1.60E-01 | 130647874 | 130647997 | NC_000012.11 |
| cg09257635 | 7.33E-17 | 1.90E-18 | 9.71 | 31.0268495 | 1.95E-01 | 228346181 | 228346304 | NC_000001.10 |
| cg02318926 | 7.33E-17 | 1.90E-18 | 9.71 | 31.0264438 | 2.38E-01 | 83952345  | 83952468  | NC_000015.9  |
| cg02880877 | 7.33E-17 | 1.90E-18 | 9.71 | 31.0262456 | 1.61E-01 | 125623484 | 125623607 | NC_000006.11 |
| cg00429509 | 7.38E-17 | 1.92E-18 | 9.71 | 31.019109  | 1.27E-01 | 365132    | 365255    | NC_000002.11 |
| cg26993198 | 7.40E-17 | 1.92E-18 | 9.71 | 31.0166236 | 2.12E-01 | 153859740 | 153859863 | NC_000005.9  |
| cg03968618 | 7.43E-17 | 1.93E-18 | 9.71 | 31.0120202 | 1.96E-01 | 186758663 | 186758786 | NC_000004.11 |
| cg10845893 | 7.45E-17 | 1.94E-18 | 9.71 | 31.0103674 | 1.61E-01 | 139420170 | 139420293 | NC_000005.9  |
| cg07514158 | 7.47E-17 | 1.94E-18 | 9.71 | 31.0072643 | 2.43E-01 | 24267526  | 24267649  | NC_000016.9  |
| cg27316626 | 7.48E-17 | 1.95E-18 | 9.71 | 31.0056435 | 1.75E-01 | 73450762  | 73450885  | NC_000008.10 |
| cg17744110 | 7.48E-17 | 1.95E-18 | 9.71 | 31.0048696 | 1.53E-01 | 47107173  | 47107296  | NC_000019.9  |
| cg14359292 | 7.49E-17 | 1.95E-18 | 9.71 | 31.0041492 | 2.02E-01 | 27170892  | 27171015  | NC_000007.13 |
| cg05213609 | 7.52E-17 | 1.96E-18 | 9.71 | 30.9997481 | 2.30E-01 | 51185407  | 51185530  | NC_000016.9  |
| cg26390050 | 7.59E-17 | 1.98E-18 | 9.71 | 30.9895795 | 9.66E-02 | 144621170 | 144621293 | NC_000008.10 |
| cg11338420 | 7.61E-17 | 1.98E-18 | 9.71 | 30.9879639 | 9.94E-02 | 144621219 | 144621342 | NC_000008.10 |

|            |          |          |      |            |          |           |           |              |
|------------|----------|----------|------|------------|----------|-----------|-----------|--------------|
| cg11414560 | 7.61E-17 | 1.98E-18 | 9.71 | 30.9877644 | 2.73E-01 | 58179996  | 58180119  | NC_000020.10 |
| cg00573504 | 7.64E-17 | 1.99E-18 | 9.71 | 30.9831944 | 1.80E-01 | 1123809   | 1123932   | NC_000005.9  |
| cg22872857 | 7.66E-17 | 1.99E-18 | 9.71 | 30.9805294 | 1.87E-01 | 21794985  | 21795108  | NC_000008.10 |
| cg20844851 | 7.67E-17 | 2.00E-18 | 9.71 | 30.9787953 | 2.50E-01 | 117591827 | 117591950 | NC_000006.11 |
| cg17857070 | 7.67E-17 | 2.00E-18 | 9.71 | 30.9786026 | 2.39E-01 | 14320475  | 14320598  | NC_000019.9  |
| cg14548038 | 7.69E-17 | 2.00E-18 | 9.71 | 30.9766696 | 8.62E-02 | 140178418 | 140178541 | NC_000009.11 |
| cg23774356 | 7.69E-17 | 2.00E-18 | 9.71 | 30.9763645 | 3.05E-01 | 19137874  | 19137997  | NC_000022.10 |
| cg08448668 | 7.76E-17 | 2.02E-18 | 9.7  | 30.9670952 | 8.90E-02 | 245852157 | 245852280 | NC_000001.10 |
| cg17245135 | 7.77E-17 | 2.02E-18 | 9.7  | 30.9660278 | 1.22E-01 | 88018524  | 88018647  | NC_000005.9  |
| cg26500398 | 7.80E-17 | 2.03E-18 | 9.7  | 30.9612873 | 7.06E-02 | 22974616  | 22974739  | NC_000008.10 |
| cg06369992 | 7.84E-17 | 2.04E-18 | 9.7  | 30.9566171 | 2.51E-01 | 119494494 | 119494617 | NC_000010.10 |
| cg10888399 | 7.84E-17 | 2.05E-18 | 9.7  | 30.9559351 | 9.21E-02 | 18061368  | 18061491  | NC_000022.10 |
| cg05546264 | 7.90E-17 | 2.06E-18 | 9.7  | 30.9487318 | 1.44E-01 | 187507476 | 187507599 | NC_000004.11 |
| cg06685737 | 7.91E-17 | 2.06E-18 | 9.7  | 30.9472919 | 2.17E-01 | 35301730  | 35301853  | NC_000007.13 |
| cg22346124 | 7.93E-17 | 2.07E-18 | 9.7  | 30.9446349 | 2.97E-01 | 2291677   | 2291800   | NC_000011.9  |
| cg20380465 | 7.93E-17 | 2.07E-18 | 9.7  | 30.9446029 | 8.03E-02 | 13919497  | 13919620  | NC_000005.9  |
| cg17804850 | 7.95E-17 | 2.08E-18 | 9.7  | 30.9408007 | 1.56E-01 | 60052386  | 60052509  | NC_000018.9  |
| cg05546878 | 8.00E-17 | 2.09E-18 | 9.7  | 30.9351952 | 8.48E-02 | 219696695 | 219696818 | NC_000002.11 |
| cg20470857 | 8.05E-17 | 2.10E-18 | 9.7  | 30.928509  | 1.60E-01 | 119915783 | 119915906 | NC_000002.11 |
| cg08097359 | 8.10E-17 | 2.12E-18 | 9.7  | 30.9225135 | 1.53E-01 | 50064054  | 50064177  | NC_000019.9  |
| cg08389151 | 8.10E-17 | 2.12E-18 | 9.7  | 30.9224335 | 1.25E-01 | 58862087  | 58862210  | NC_000019.9  |
| cg03496114 | 8.11E-17 | 2.12E-18 | 9.7  | 30.9206002 | 2.05E-01 | 80329459  | 80329582  | NC_000017.10 |
| cg08133669 | 8.12E-17 | 2.12E-18 | 9.7  | 30.9195387 | 1.56E-01 | 222790218 | 222790341 | NC_000001.10 |
| cg19788941 | 8.12E-17 | 2.12E-18 | 9.7  | 30.9191006 | 1.73E-01 | 23907989  | 23908112  | NC_000002.11 |
| cg00956199 | 8.13E-17 | 2.13E-18 | 9.7  | 30.9170979 | 2.13E-01 | 8078325   | 8078448   | NC_000010.10 |

|            |          |          |      |            |          |           |           |              |
|------------|----------|----------|------|------------|----------|-----------|-----------|--------------|
| cg03230154 | 8.16E-17 | 2.14E-18 | 9.7  | 30.9130383 | 2.52E-01 | 22817176  | 22817299  | NC_000019.9  |
| cg24468199 | 8.16E-17 | 2.14E-18 | 9.7  | 30.9130266 | 1.21E-01 | 65410028  | 65410151  | NC_000011.9  |
| cg16195091 | 8.16E-17 | 2.14E-18 | 9.7  | 30.9128207 | 2.22E-01 | 76227996  | 76228119  | NC_000017.10 |
| cg26304088 | 8.17E-17 | 2.14E-18 | 9.7  | 30.9126623 | 1.38E-01 | 51462100  | 51462223  | NC_000019.9  |
| cg23999224 | 8.17E-17 | 2.14E-18 | 9.7  | 30.9114994 | 9.08E-02 | 39836003  | 39836126  | NC_000019.9  |
| cg10569606 | 8.25E-17 | 2.16E-18 | 9.69 | 30.9017113 | 2.37E-01 | 5019004   | 5019127   | NC_000012.11 |
| cg26422458 | 8.28E-17 | 2.17E-18 | 9.69 | 30.898462  | 2.25E-01 | 79472452  | 79472575  | NC_000001.10 |
| cg26705960 | 8.31E-17 | 2.18E-18 | 9.69 | 30.8945962 | 2.42E-01 | 100999009 | 100999132 | NC_000011.9  |
| cg24011260 | 8.35E-17 | 2.19E-18 | 9.69 | 30.8891074 | 2.61E-01 | 153584748 | 153584871 | NC_000007.13 |
| cg04123776 | 8.36E-17 | 2.19E-18 | 9.69 | 30.8876357 | 2.77E-01 | 170630602 | 170630725 | NC_000001.10 |
| cg10273340 | 8.42E-17 | 2.21E-18 | 9.69 | 30.8804716 | 2.96E-01 | 56224793  | 56224916  | NC_000016.9  |
| cg04834436 | 8.49E-17 | 2.23E-18 | 9.69 | 30.8715572 | 1.79E-01 | 55362754  | 55362877  | NC_000016.9  |
| cg13567542 | 8.54E-17 | 2.24E-18 | 9.69 | 30.8664183 | 2.25E-01 | 30140018  | 30140141  | NC_000006.11 |
| cg07462756 | 8.54E-17 | 2.24E-18 | 9.69 | 30.8660317 | 1.99E-01 | 4859985   | 4860108   | NC_000004.11 |
| cg14611258 | 8.55E-17 | 2.24E-18 | 9.69 | 30.8643119 | 1.56E-01 | 17946468  | 17946591  | NC_000017.10 |
| cg14763548 | 8.67E-17 | 2.28E-18 | 9.69 | 30.8494045 | 3.30E-01 | 25062447  | 25062570  | NC_000020.10 |
| cg26878836 | 8.68E-17 | 2.28E-18 | 9.69 | 30.8482997 | 1.10E-01 | 68183902  | 68184025  | NC_000011.9  |
| cg18587340 | 8.74E-17 | 2.29E-18 | 9.69 | 30.8420716 | 1.74E-01 | 39995654  | 39995777  | NC_000020.10 |
| cg08066943 | 8.74E-17 | 2.30E-18 | 9.69 | 30.8411567 | 1.99E-01 | 147136922 | 147137045 | NC_000003.11 |
| cg01940460 | 8.75E-17 | 2.30E-18 | 9.68 | 30.839889  | 7.91E-02 | 191207242 | 191207365 | NC_000002.11 |
| cg24870688 | 8.78E-17 | 2.31E-18 | 9.68 | 30.8371403 | 1.22E-01 | 168399841 | 168399964 | NC_000006.11 |
| cg02246645 | 8.81E-17 | 2.32E-18 | 9.68 | 30.8331231 | 2.48E-01 | 103352235 | 103352358 | NC_000012.11 |
| cg16519433 | 8.82E-17 | 2.32E-18 | 9.68 | 30.8317645 | 4.62E-02 | 3143596   | 3143719   | NC_000010.10 |
| cg06636427 | 8.88E-17 | 2.33E-18 | 9.68 | 30.8246835 | 2.00E-01 | 1273200   | 1273323   | NC_000007.13 |
| cg19124242 | 8.93E-17 | 2.35E-18 | 9.68 | 30.8181192 | 1.74E-01 | 105747184 | 105747307 | NC_000012.11 |



|            |          |          |      |            |          |           |           |              |
|------------|----------|----------|------|------------|----------|-----------|-----------|--------------|
| cg27567561 | 8.99E-17 | 2.37E-18 | 9.68 | 30.811829  | 1.32E-01 | 107974733 | 107974856 | NC_000012.11 |
| cg09776094 | 9.00E-17 | 2.37E-18 | 9.68 | 30.810808  | 8.16E-02 | 89357477  | 89357600  | NC_000016.9  |
| cg20449659 | 9.00E-17 | 2.37E-18 | 9.68 | 30.8107658 | 1.60E-01 | 32421752  | 32421875  | NC_000011.9  |
| cg05821789 | 9.03E-17 | 2.38E-18 | 9.68 | 30.8066467 | 2.75E-01 | 122848098 | 122848221 | NC_000011.9  |
| cg04983128 | 9.06E-17 | 2.39E-18 | 9.68 | 30.8031116 | 4.56E-02 | 10654462  | 10654585  | NC_000001.10 |
| cg02775230 | 9.07E-17 | 2.39E-18 | 9.68 | 30.8024603 | 1.72E-01 | 75263800  | 75263923  | NC_000016.9  |
| cg03289872 | 9.15E-17 | 2.41E-18 | 9.68 | 30.7935426 | 2.50E-01 | 56989102  | 56989225  | NC_000019.9  |
| cg00185829 | 9.17E-17 | 2.41E-18 | 9.68 | 30.7913152 | 3.06E-01 | 50064374  | 50064497  | NC_000022.10 |
| cg27347269 | 9.20E-17 | 2.43E-18 | 9.68 | 30.7870142 | 3.10E-01 | 67067867  | 67067990  | NC_000018.9  |
| cg17305436 | 9.27E-17 | 2.44E-18 | 9.68 | 30.7792422 | 2.38E-01 | 19837319  | 19837442  | NC_000006.11 |
| cg15950068 | 9.32E-17 | 2.46E-18 | 9.67 | 30.7732629 | 2.28E-01 | 84418659  | 84418782  | NC_000006.11 |
| cg01375869 | 9.33E-17 | 2.46E-18 | 9.67 | 30.7728516 | 1.21E-01 | 134828713 | 134828836 | NC_000010.10 |
| cg07514159 | 9.35E-17 | 2.47E-18 | 9.67 | 30.7700797 | 1.04E-01 | 80982257  | 80982380  | NC_000010.10 |
| cg18276638 | 9.37E-17 | 2.47E-18 | 9.67 | 30.7681562 | 2.56E-01 | 214360619 | 214360742 | NC_000001.10 |
| cg04243901 | 9.38E-17 | 2.48E-18 | 9.67 | 30.766406  | 8.11E-02 | 125441307 | 125441430 | NC_000012.11 |
| cg14239494 | 9.38E-17 | 2.48E-18 | 9.67 | 30.7660921 | 8.26E-02 | 40245598  | 40245721  | NC_000020.10 |
| cg22643811 | 9.41E-17 | 2.48E-18 | 9.67 | 30.7633487 | 2.29E-01 | 48885446  | 48885569  | NC_000022.10 |
| cg17394126 | 9.43E-17 | 2.49E-18 | 9.67 | 30.7609186 | 5.53E-02 | 137787060 | 137787183 | NC_000003.11 |
| cg13415242 | 9.45E-17 | 2.49E-18 | 9.67 | 30.7590488 | 7.69E-02 | 69568346  | 69568469  | NC_000010.10 |
| cg05157140 | 9.47E-17 | 2.50E-18 | 9.67 | 30.7569392 | 2.69E-01 | 1272545   | 1272668   | NC_000007.13 |
| cg18147485 | 9.49E-17 | 2.51E-18 | 9.67 | 30.7540234 | 3.68E-01 | 110986685 | 110986808 | NC_000008.10 |
| cg07104660 | 9.54E-17 | 2.52E-18 | 9.67 | 30.7486142 | 2.47E-01 | 67873511  | 67873634  | NC_000008.10 |
| cg21834684 | 9.59E-17 | 2.53E-18 | 9.67 | 30.7432644 | 1.58E-01 | 81797427  | 81797550  | NC_000014.8  |
| cg22717014 | 9.61E-17 | 2.54E-18 | 9.67 | 30.7404121 | 2.48E-01 | 111542473 | 111542596 | NC_000004.11 |
| cg02747390 | 9.62E-17 | 2.55E-18 | 9.67 | 30.7391868 | 9.93E-02 | 104939819 | 104939942 | NC_000007.13 |

|            |          |          |      |            |          |           |           |              |
|------------|----------|----------|------|------------|----------|-----------|-----------|--------------|
| cg09530108 | 9.68E-17 | 2.56E-18 | 9.67 | 30.7332801 | 1.44E-01 | 36586710  | 36586833  | NC_000002.11 |
| cg11661914 | 9.68E-17 | 2.56E-18 | 9.67 | 30.732249  | 1.95E-01 | 49180849  | 49180972  | NC_000012.11 |
| cg10836101 | 9.68E-17 | 2.56E-18 | 9.67 | 30.7322487 | 1.80E-01 | 30020886  | 30021009  | NC_000019.9  |
| cg10319073 | 9.69E-17 | 2.56E-18 | 9.67 | 30.7319577 | 1.01E-01 | 123351548 | 123351671 | NC_000012.11 |
| cg00228796 | 9.69E-17 | 2.57E-18 | 9.67 | 30.731113  | 1.59E-01 | 21670736  | 21670859  | NC_000001.10 |
| cg24837370 | 9.70E-17 | 2.57E-18 | 9.67 | 30.7303367 | 2.23E-01 | 5833774   | 5833897   | NC_000002.11 |
| cg04007726 | 9.74E-17 | 2.58E-18 | 9.67 | 30.7253667 | 1.66E-01 | 80981129  | 80981252  | NC_000010.10 |
| cg02708922 | 9.75E-17 | 2.58E-18 | 9.67 | 30.7244733 | 1.43E-01 | 3502790   | 3502913   | NC_000002.11 |
| cg09569989 | 9.84E-17 | 2.61E-18 | 9.67 | 30.7151269 | 1.08E-01 | 38053419  | 38053542  | NC_000004.11 |
| cg02417576 | 9.86E-17 | 2.61E-18 | 9.67 | 30.7133204 | 9.21E-02 | 46846389  | 46846512  | NC_000021.8  |
| cg18583931 | 9.87E-17 | 2.62E-18 | 9.67 | 30.7123428 | 1.22E-01 | 71378283  | 71378406  | NC_000015.9  |
| cg16595750 | 9.89E-17 | 2.62E-18 | 9.67 | 30.7100899 | 1.18E-01 | 123338597 | 123338720 | NC_000010.10 |
| cg27580905 | 9.89E-17 | 2.62E-18 | 9.67 | 30.7100019 | 1.45E-01 | 39335085  | 39335208  | NC_000002.11 |
| cg25094569 | 9.93E-17 | 2.63E-18 | 9.66 | 30.7056562 | 2.22E-01 | 32448769  | 32448892  | NC_000011.9  |
| cg10898258 | 1.01E-16 | 2.67E-18 | 9.66 | 30.6929236 | 6.07E-02 | 104192495 | 104192618 | NC_000014.8  |
| cg18349138 | 1.01E-16 | 2.68E-18 | 9.66 | 30.6892445 | 2.61E-01 | 19617138  | 19617261  | NC_000021.8  |
| cg19764973 | 1.01E-16 | 2.68E-18 | 9.66 | 30.6868205 | 6.28E-02 | 59525433  | 59525556  | NC_000011.9  |
| cg08248516 | 1.01E-16 | 2.69E-18 | 9.66 | 30.6857331 | 2.34E-01 | 27194745  | 27194868  | NC_000007.13 |
| cg09851951 | 1.01E-16 | 2.69E-18 | 9.66 | 30.6843502 | 2.22E-01 | 54323498  | 54323621  | NC_000016.9  |
| cg22328746 | 1.02E-16 | 2.70E-18 | 9.66 | 30.6816438 | 1.14E-01 | 186578455 | 186578578 | NC_000004.11 |
| cg24774396 | 1.02E-16 | 2.70E-18 | 9.66 | 30.6809082 | 1.65E-01 | 706005    | 706128    | NC_000017.10 |
| cg05275605 | 1.02E-16 | 2.71E-18 | 9.66 | 30.6771869 | 1.13E-01 | 46844883  | 46845006  | NC_000021.8  |
| cg05835726 | 1.03E-16 | 2.74E-18 | 9.66 | 30.6673099 | 2.12E-01 | 27183861  | 27183984  | NC_000007.13 |
| cg04308769 | 1.03E-16 | 2.74E-18 | 9.66 | 30.665181  | 2.01E-01 | 200007623 | 200007746 | NC_000001.10 |
| cg18617005 | 1.03E-16 | 2.75E-18 | 9.66 | 30.6642102 | 2.77E-01 | 140787504 | 140787627 | NC_000005.9  |

|            |          |          |      |            |          |           |           |              |
|------------|----------|----------|------|------------|----------|-----------|-----------|--------------|
| cg25855768 | 1.03E-16 | 2.75E-18 | 9.66 | 30.6621462 | 1.36E-01 | 127472121 | 127472244 | NC_000007.13 |
| cg20585500 | 1.04E-16 | 2.77E-18 | 9.66 | 30.6567122 | 1.52E-01 | 64703192  | 64703315  | NC_000011.9  |
| cg09587487 | 1.04E-16 | 2.77E-18 | 9.66 | 30.6560064 | 1.13E-01 | 178993784 | 178993907 | NC_000001.10 |
| cg01477546 | 1.05E-16 | 2.78E-18 | 9.66 | 30.6516555 | 7.46E-02 | 86096098  | 86096221  | NC_000002.11 |
| cg22816059 | 1.05E-16 | 2.79E-18 | 9.66 | 30.6489829 | 8.55E-02 | 422114    | 422237    | NC_000005.9  |
| cg25053002 | 1.05E-16 | 2.80E-18 | 9.65 | 30.6436106 | 6.99E-02 | 3142765   | 3142888   | NC_000010.10 |
| cg26963839 | 1.05E-16 | 2.81E-18 | 9.65 | 30.6421693 | 5.34E-02 | 134230196 | 134230319 | NC_000010.10 |
| cg05015495 | 1.06E-16 | 2.81E-18 | 9.65 | 30.6418536 | 8.45E-02 | 93957782  | 93957905  | NC_000005.9  |
| cg27120816 | 1.06E-16 | 2.82E-18 | 9.65 | 30.6391098 | 2.20E-01 | 62070164  | 62070287  | NC_000016.9  |
| cg19961522 | 1.06E-16 | 2.82E-18 | 9.65 | 30.6381372 | 1.62E-01 | 30407388  | 30407511  | NC_000020.10 |
| cg10266455 | 1.06E-16 | 2.82E-18 | 9.65 | 30.6379073 | 1.02E-01 | 174411207 | 174411330 | NC_000002.11 |
| cg15708153 | 1.06E-16 | 2.83E-18 | 9.65 | 30.6356299 | 3.24E-01 | 56879554  | 56879677  | NC_000019.9  |
| cg21790626 | 1.06E-16 | 2.83E-18 | 9.65 | 30.6330083 | 2.76E-01 | 58220494  | 58220617  | NC_000019.9  |
| cg12133498 | 1.07E-16 | 2.85E-18 | 9.65 | 30.625914  | 1.82E-01 | 148248073 | 148248196 | NC_000001.10 |
| cg16640855 | 1.08E-16 | 2.87E-18 | 9.65 | 30.6192073 | 2.54E-01 | 182543233 | 182543356 | NC_000002.11 |
| cg26769435 | 1.08E-16 | 2.88E-18 | 9.65 | 30.6157547 | 8.52E-02 | 53397932  | 53398055  | NC_000008.10 |
| cg20239391 | 1.08E-16 | 2.88E-18 | 9.65 | 30.6151418 | 1.59E-01 | 45030732  | 45030855  | NC_000020.10 |
| cg05267893 | 1.09E-16 | 2.90E-18 | 9.65 | 30.6112877 | 5.51E-02 | 156213621 | 156213744 | NC_000001.10 |
| cg20434239 | 1.09E-16 | 2.90E-18 | 9.65 | 30.6089136 | 4.09E-02 | 43028046  | 43028169  | NC_000017.10 |
| cg16897114 | 1.10E-16 | 2.92E-18 | 9.65 | 30.6026293 | 2.54E-01 | 5153174   | 5153297   | NC_000012.11 |
| cg03199646 | 1.10E-16 | 2.92E-18 | 9.65 | 30.6025019 | 9.25E-02 | 105408428 | 105408551 | NC_000007.13 |
| cg25897161 | 1.10E-16 | 2.94E-18 | 9.65 | 30.5964878 | 1.34E-01 | 64367485  | 64367608  | NC_000015.9  |
| cg16400238 | 1.10E-16 | 2.95E-18 | 9.65 | 30.5934897 | 6.19E-02 | 27237364  | 27237487  | NC_000017.10 |
| cg01069965 | 1.11E-16 | 2.95E-18 | 9.65 | 30.5927354 | 1.60E-01 | 48331548  | 48331671  | NC_000020.10 |
| cg20985450 | 1.11E-16 | 2.95E-18 | 9.65 | 30.5927088 | 2.91E-01 | 100621382 | 100621505 | NC_000013.10 |

|            |          |          |      |            |          |           |           |              |
|------------|----------|----------|------|------------|----------|-----------|-----------|--------------|
| cg17290701 | 1.11E-16 | 2.96E-18 | 9.65 | 30.5905252 | 3.02E-01 | 11059714  | 11059837  | NC_000010.10 |
| cg10888878 | 1.11E-16 | 2.96E-18 | 9.65 | 30.5889939 | 6.64E-02 | 48459961  | 48460084  | NC_000001.10 |
| cg23369632 | 1.11E-16 | 2.97E-18 | 9.65 | 30.5852996 | 2.06E-01 | 56438637  | 56438760  | NC_000006.11 |
| cg14189141 | 1.12E-16 | 2.98E-18 | 9.65 | 30.5814275 | 2.27E-01 | 1042605   | 1042728   | NC_000009.11 |
| cg00578032 | 1.12E-16 | 2.99E-18 | 9.65 | 30.5812143 | 1.71E-01 | 38308069  | 38308192  | NC_000019.9  |
| cg13427828 | 1.12E-16 | 2.99E-18 | 9.65 | 30.5800865 | 1.03E-01 | 42301921  | 42302044  | NC_000003.11 |
| cg27318539 | 1.12E-16 | 2.99E-18 | 9.65 | 30.5799248 | 7.67E-02 | 10220494  | 10220617  | NC_000019.9  |
| cg26102342 | 1.12E-16 | 2.99E-18 | 9.64 | 30.5782626 | 1.11E-01 | 98878655  | 98878778  | NC_000012.11 |
| cg24394172 | 1.12E-16 | 3.01E-18 | 9.64 | 30.5739401 | 1.83E-01 | 46995203  | 46995326  | NC_000004.11 |
| cg07349208 | 1.13E-16 | 3.02E-18 | 9.64 | 30.5709119 | 2.11E-01 | 111532679 | 111532802 | NC_000004.11 |
| cg08621277 | 1.13E-16 | 3.02E-18 | 9.64 | 30.570611  | 7.06E-02 | 68271518  | 68271641  | NC_000011.9  |
| cg24148757 | 1.13E-16 | 3.03E-18 | 9.64 | 30.5669586 | 8.32E-02 | 112942995 | 112943118 | NC_000001.10 |
| cg05754861 | 1.13E-16 | 3.04E-18 | 9.64 | 30.5646836 | 1.47E-01 | 99961768  | 99961891  | NC_000008.10 |
| cg03714676 | 1.14E-16 | 3.05E-18 | 9.64 | 30.5615307 | 1.84E-01 | 48174649  | 48174772  | NC_000008.10 |
| cg18391899 | 1.14E-16 | 3.06E-18 | 9.64 | 30.5568983 | 2.27E-01 | 23462616  | 23462739  | NC_000010.10 |
| cg19938826 | 1.14E-16 | 3.06E-18 | 9.64 | 30.5554036 | 1.46E-01 | 145218181 | 145218304 | NC_000005.9  |
| cg12453014 | 1.15E-16 | 3.08E-18 | 9.64 | 30.5518386 | 2.54E-01 | 119801142 | 119801265 | NC_000005.9  |
| cg06645033 | 1.15E-16 | 3.08E-18 | 9.64 | 30.5513689 | 1.56E-01 | 50890678  | 50890801  | NC_000001.10 |
| cg24596008 | 1.15E-16 | 3.08E-18 | 9.64 | 30.5503592 | 6.05E-02 | 242741273 | 242741396 | NC_000002.11 |
| cg07857469 | 1.15E-16 | 3.09E-18 | 9.64 | 30.5484199 | 1.58E-01 | 81107185  | 81107308  | NC_000004.11 |
| cg04613834 | 1.15E-16 | 3.09E-18 | 9.64 | 30.5457699 | 1.70E-01 | 12996419  | 12996542  | NC_000016.9  |
| cg17103088 | 1.16E-16 | 3.10E-18 | 9.64 | 30.5444362 | 1.44E-01 | 3600595   | 3600718   | NC_000019.9  |
| cg23303685 | 1.16E-16 | 3.10E-18 | 9.64 | 30.5433276 | 1.56E-01 | 157521999 | 157522122 | NC_000006.11 |
| cg03413465 | 1.16E-16 | 3.10E-18 | 9.64 | 30.5432946 | 2.18E-01 | 172734776 | 172734899 | NC_000004.11 |
| cg03975694 | 1.16E-16 | 3.12E-18 | 9.64 | 30.5381884 | 2.06E-01 | 38042472  | 38042595  | NC_000019.9  |

|            |          |          |      |            |          |           |           |              |
|------------|----------|----------|------|------------|----------|-----------|-----------|--------------|
| cg00525392 | 1.17E-16 | 3.14E-18 | 9.64 | 30.531941  | 1.46E-01 | 19744123  | 19744246  | NC_000018.9  |
| cg00529958 | 1.17E-16 | 3.15E-18 | 9.64 | 30.5284976 | 1.84E-01 | 100624288 | 100624411 | NC_000013.10 |
| cg00295485 | 1.18E-16 | 3.16E-18 | 9.64 | 30.5248991 | 1.53E-01 | 106755721 | 106755844 | NC_000002.11 |
| cg18249173 | 1.19E-16 | 3.19E-18 | 9.64 | 30.5144502 | 2.70E-01 | 35293245  | 35293368  | NC_000007.13 |
| cg05107500 | 1.19E-16 | 3.20E-18 | 9.63 | 30.513007  | 1.67E-01 | 6070292   | 6070415   | NC_000016.9  |
| cg09936609 | 1.19E-16 | 3.20E-18 | 9.63 | 30.5126784 | 1.16E-01 | 232283700 | 232283823 | NC_000002.11 |
| cg14244674 | 1.19E-16 | 3.21E-18 | 9.63 | 30.509378  | 1.06E-01 | 140148456 | 140148579 | NC_000009.11 |
| cg26053480 | 1.20E-16 | 3.22E-18 | 9.63 | 30.5051264 | 1.88E-01 | 25898758  | 25898881  | NC_000007.13 |
| cg25952663 | 1.20E-16 | 3.24E-18 | 9.63 | 30.5003683 | 1.00E-01 | 54450826  | 54450949  | NC_000012.11 |
| cg24699097 | 1.20E-16 | 3.24E-18 | 9.63 | 30.5001872 | 1.09E-01 | 29795469  | 29795592  | NC_000017.10 |
| cg17047566 | 1.21E-16 | 3.25E-18 | 9.63 | 30.4982609 | 6.99E-02 | 38120258  | 38120381  | NC_000006.11 |
| cg15378605 | 1.21E-16 | 3.26E-18 | 9.63 | 30.4948937 | 1.30E-01 | 125805592 | 125805715 | NC_000010.10 |
| cg19864758 | 1.22E-16 | 3.29E-18 | 9.63 | 30.4847317 | 2.54E-01 | 17206720  | 17206843  | NC_000020.10 |
| cg18643383 | 1.22E-16 | 3.29E-18 | 9.63 | 30.4845893 | 8.26E-02 | 69864882  | 69865005  | NC_000002.11 |
| cg14750277 | 1.22E-16 | 3.30E-18 | 9.63 | 30.482922  | 2.54E-01 | 73164024  | 73164147  | NC_000008.10 |
| cg18918418 | 1.23E-16 | 3.30E-18 | 9.63 | 30.4821802 | 8.61E-02 | 216745386 | 216745509 | NC_000002.11 |
| cg14738806 | 1.23E-16 | 3.32E-18 | 9.63 | 30.4756328 | 2.24E-01 | 115102713 | 115102836 | NC_000012.11 |
| cg03981213 | 1.23E-16 | 3.32E-18 | 9.63 | 30.4750034 | 1.73E-01 | 60766554  | 60766677  | NC_000002.11 |
| cg12118269 | 1.24E-16 | 3.35E-18 | 9.63 | 30.4667787 | 2.35E-01 | 102893980 | 102894103 | NC_000010.10 |
| cg04490714 | 1.25E-16 | 3.36E-18 | 9.63 | 30.4647319 | 2.03E-01 | 55690564  | 55690687  | NC_000016.9  |
| cg10004365 | 1.25E-16 | 3.37E-18 | 9.63 | 30.4599754 | 1.32E-01 | 134657833 | 134657956 | NC_000010.10 |
| cg11718868 | 1.26E-16 | 3.40E-18 | 9.63 | 30.4521031 | 1.53E-01 | 94487237  | 94487360  | NC_000010.10 |
| cg03916756 | 1.27E-16 | 3.42E-18 | 9.62 | 30.446883  | 6.81E-02 | 79032487  | 79032610  | NC_000017.10 |
| cg11804381 | 1.27E-16 | 3.43E-18 | 9.62 | 30.4426274 | 5.92E-02 | 36662414  | 36662537  | NC_000022.10 |
| cg26293019 | 1.28E-16 | 3.45E-18 | 9.62 | 30.4379013 | 2.36E-01 | 50688913  | 50689036  | NC_000005.9  |

|            |          |          |      |            |          |           |           |              |
|------------|----------|----------|------|------------|----------|-----------|-----------|--------------|
| cg07027430 | 1.28E-16 | 3.46E-18 | 9.62 | 30.4363173 | 1.96E-01 | 7354685   | 7354808   | NC_000016.9  |
| cg09430118 | 1.29E-16 | 3.47E-18 | 9.62 | 30.4313843 | 2.11E-01 | 37095681  | 37095804  | NC_000019.9  |
| cg13879483 | 1.29E-16 | 3.47E-18 | 9.62 | 30.4307869 | 3.35E-01 | 95942907  | 95943030  | NC_000012.11 |
| cg04672979 | 1.29E-16 | 3.49E-18 | 9.62 | 30.4272059 | 1.38E-01 | 13369111  | 13369234  | NC_000012.11 |
| cg04549162 | 1.30E-16 | 3.50E-18 | 9.62 | 30.424526  | 1.92E-01 | 125425690 | 125425813 | NC_000010.10 |
| cg00187692 | 1.30E-16 | 3.50E-18 | 9.62 | 30.4228936 | 2.25E-01 | 52199954  | 52200077  | NC_000013.10 |
| cg02874376 | 1.30E-16 | 3.51E-18 | 9.62 | 30.4219826 | 2.42E-01 | 101193397 | 101193520 | NC_000014.8  |
| cg09821185 | 1.30E-16 | 3.51E-18 | 9.62 | 30.421542  | 2.41E-01 | 101923366 | 101923489 | NC_000014.8  |
| cg17976839 | 1.30E-16 | 3.51E-18 | 9.62 | 30.4211397 | 1.15E-01 | 50923823  | 50923946  | NC_000013.10 |
| cg17283453 | 1.30E-16 | 3.52E-18 | 9.62 | 30.4172153 | 1.82E-01 | 9473880   | 9474003   | NC_000019.9  |
| cg10289790 | 1.30E-16 | 3.53E-18 | 9.62 | 30.4165181 | 1.60E-01 | 105359915 | 105360038 | NC_000014.8  |
| cg23401445 | 1.30E-16 | 3.53E-18 | 9.62 | 30.4163277 | 1.80E-01 | 113442419 | 113442542 | NC_000004.11 |
| cg03431585 | 1.31E-16 | 3.55E-18 | 9.62 | 30.4108276 | 9.54E-02 | 44995633  | 44995756  | NC_000020.10 |
| cg13012916 | 1.31E-16 | 3.55E-18 | 9.62 | 30.4090897 | 2.34E-01 | 36973691  | 36973814  | NC_000014.8  |
| cg25451660 | 1.32E-16 | 3.56E-18 | 9.62 | 30.4074731 | 1.43E-01 | 11641324  | 11641447  | NC_000011.9  |
| cg10767192 | 1.32E-16 | 3.56E-18 | 9.62 | 30.4064208 | 2.00E-01 | 115135606 | 115135729 | NC_000012.11 |
| cg05984554 | 1.32E-16 | 3.57E-18 | 9.62 | 30.4048347 | 2.17E-01 | 30019369  | 30019492  | NC_000019.9  |
| cg20401252 | 1.33E-16 | 3.60E-18 | 9.62 | 30.3956805 | 1.84E-01 | 5834062   | 5834185   | NC_000002.11 |
| cg20265470 | 1.34E-16 | 3.63E-18 | 9.62 | 30.3881081 | 6.32E-02 | 20503098  | 20503221  | NC_000001.10 |
| cg19339311 | 1.34E-16 | 3.63E-18 | 9.62 | 30.3868873 | 7.83E-02 | 42213292  | 42213415  | NC_000020.10 |
| cg17076890 | 1.34E-16 | 3.63E-18 | 9.62 | 30.3864585 | 2.08E-01 | 23481421  | 23481544  | NC_000010.10 |
| cg08855249 | 1.36E-16 | 3.67E-18 | 9.61 | 30.3758114 | 5.42E-02 | 207975363 | 207975486 | NC_000001.10 |
| cg14649650 | 1.37E-16 | 3.71E-18 | 9.61 | 30.3659812 | 3.17E-01 | 13933996  | 13934119  | NC_000010.10 |
| cg09888336 | 1.37E-16 | 3.71E-18 | 9.61 | 30.3648061 | 8.73E-02 | 57180335  | 57180458  | NC_000004.11 |
| cg04556126 | 1.37E-16 | 3.72E-18 | 9.61 | 30.3628913 | 2.35E-01 | 147106561 | 147106684 | NC_000003.11 |

|            |          |          |      |            |          |           |           |              |
|------------|----------|----------|------|------------|----------|-----------|-----------|--------------|
| cg03602280 | 1.38E-16 | 3.74E-18 | 9.61 | 30.3580534 | 2.67E-01 | 11148914  | 11149037  | NC_000018.9  |
| cg23222169 | 1.38E-16 | 3.74E-18 | 9.61 | 30.3573911 | 2.07E-01 | 47710949  | 47711072  | NC_000013.10 |
| cg26877508 | 1.38E-16 | 3.74E-18 | 9.61 | 30.3571378 | 1.86E-01 | 71495324  | 71495447  | NC_000015.9  |
| cg07050692 | 1.38E-16 | 3.75E-18 | 9.61 | 30.355298  | 2.40E-01 | 61664695  | 61664818  | NC_000008.10 |
| cg16497340 | 1.39E-16 | 3.76E-18 | 9.61 | 30.3524409 | 1.64E-01 | 180601183 | 180601306 | NC_000005.9  |
| cg26590537 | 1.39E-16 | 3.76E-18 | 9.61 | 30.3521824 | 2.50E-01 | 5020202   | 5020325   | NC_000012.11 |
| cg19157034 | 1.39E-16 | 3.77E-18 | 9.61 | 30.3504504 | 2.27E-01 | 89905761  | 89905884  | NC_000015.9  |
| cg09643136 | 1.40E-16 | 3.80E-18 | 9.61 | 30.3434528 | 1.72E-01 | 223176683 | 223176806 | NC_000002.11 |
| cg24767148 | 1.40E-16 | 3.80E-18 | 9.61 | 30.3430477 | 2.53E-01 | 23481786  | 23481909  | NC_000010.10 |
| cg12381873 | 1.40E-16 | 3.80E-18 | 9.61 | 30.3427865 | 1.30E-01 | 72270059  | 72270182  | NC_000017.10 |
| cg12860686 | 1.41E-16 | 3.82E-18 | 9.61 | 30.3363319 | 2.20E-01 | 2753876   | 2753999   | NC_000005.9  |
| cg16294325 | 1.41E-16 | 3.84E-18 | 9.61 | 30.3320217 | 1.18E-01 | 42929934  | 42930057  | NC_000006.11 |
| cg14717906 | 1.41E-16 | 3.84E-18 | 9.61 | 30.3306324 | 1.28E-01 | 138641864 | 138641987 | NC_000005.9  |
| cg05349077 | 1.42E-16 | 3.86E-18 | 9.61 | 30.3279372 | 1.83E-01 | 630159    | 630282    | NC_000016.9  |
| cg21830368 | 1.42E-16 | 3.86E-18 | 9.61 | 30.3262303 | 2.18E-01 | 75373327  | 75373450  | NC_000017.10 |
| cg25606066 | 1.43E-16 | 3.88E-18 | 9.61 | 30.3205358 | 1.50E-01 | 245844087 | 245844210 | NC_000001.10 |
| cg07829842 | 1.44E-16 | 3.92E-18 | 9.6  | 30.3108063 | 2.73E-01 | 56228495  | 56228618  | NC_000016.9  |
| cg23987444 | 1.45E-16 | 3.93E-18 | 9.6  | 30.3080125 | 3.15E-01 | 50817810  | 50817933  | NC_000010.10 |
| cg20190649 | 1.45E-16 | 3.94E-18 | 9.6  | 30.3064826 | 1.70E-01 | 46255433  | 46255556  | NC_000017.10 |
| cg20696432 | 1.46E-16 | 3.96E-18 | 9.6  | 30.3011909 | 1.29E-01 | 18881907  | 18882030  | NC_000017.10 |
| cg14750948 | 1.46E-16 | 3.96E-18 | 9.6  | 30.3003517 | 2.09E-01 | 147130477 | 147130600 | NC_000003.11 |
| cg16234978 | 1.46E-16 | 3.97E-18 | 9.6  | 30.2997219 | 2.06E-01 | 1704095   | 1704218   | NC_000007.13 |
| cg06041278 | 1.46E-16 | 3.97E-18 | 9.6  | 30.2996621 | 1.62E-01 | 43937467  | 43937590  | NC_000020.10 |
| cg03518469 | 1.46E-16 | 3.97E-18 | 9.6  | 30.298333  | 6.55E-02 | 88791646  | 88791769  | NC_000016.9  |
| cg19673115 | 1.46E-16 | 3.98E-18 | 9.6  | 30.2960549 | 6.70E-02 | 3105482   | 3105605   | NC_000010.10 |

|            |          |          |      |            |          |           |           |              |
|------------|----------|----------|------|------------|----------|-----------|-----------|--------------|
| cg04171235 | 1.47E-16 | 4.01E-18 | 9.6  | 30.2894765 | 1.58E-01 | 46604393  | 46604516  | NC_000017.10 |
| cg10628201 | 1.48E-16 | 4.03E-18 | 9.6  | 30.2852276 | 9.97E-02 | 21977597  | 21977720  | NC_000022.10 |
| cg01307939 | 1.48E-16 | 4.03E-18 | 9.6  | 30.2845656 | 2.43E-01 | 98467571  | 98467694  | NC_000007.13 |
| cg19125081 | 1.48E-16 | 4.03E-18 | 9.6  | 30.284096  | 7.22E-02 | 242219370 | 242219493 | NC_000002.11 |
| cg20354141 | 1.50E-16 | 4.09E-18 | 9.6  | 30.2684914 | 1.99E-01 | 100609766 | 100609889 | NC_000007.13 |
| cg14447193 | 1.50E-16 | 4.10E-18 | 9.6  | 30.265756  | 1.34E-01 | 87433864  | 87433987  | NC_000009.11 |
| cg14522302 | 1.52E-16 | 4.15E-18 | 9.6  | 30.2556544 | 6.47E-02 | 226300601 | 226300724 | NC_000001.10 |
| cg06585566 | 1.53E-16 | 4.17E-18 | 9.59 | 30.2502246 | 2.52E-01 | 57276794  | 57276917  | NC_000019.9  |
| cg04739647 | 1.53E-16 | 4.17E-18 | 9.59 | 30.2495803 | 1.97E-01 | 176987462 | 176987585 | NC_000002.11 |
| cg06610849 | 1.53E-16 | 4.18E-18 | 9.59 | 30.2486218 | 2.59E-01 | 58520847  | 58520970  | NC_000019.9  |
| cg18633154 | 1.54E-16 | 4.21E-18 | 9.59 | 30.2418609 | 1.99E-01 | 77296234  | 77296357  | NC_000014.8  |
| cg21305068 | 1.55E-16 | 4.25E-18 | 9.59 | 30.2316467 | 1.08E-01 | 45622219  | 45622342  | NC_000021.8  |
| cg11787626 | 1.56E-16 | 4.25E-18 | 9.59 | 30.2310294 | 3.81E-02 | 147233738 | 147233861 | NC_000001.10 |
| cg21627409 | 1.56E-16 | 4.26E-18 | 9.59 | 30.2283286 | 2.35E-01 | 140810106 | 140810229 | NC_000005.9  |
| cg25120992 | 1.56E-16 | 4.27E-18 | 9.59 | 30.2257077 | 7.57E-02 | 31735435  | 31735558  | NC_000006.11 |
| cg24509810 | 1.57E-16 | 4.28E-18 | 9.59 | 30.2237699 | 2.00E-01 | 80549634  | 80549757  | NC_000002.11 |
| cg21816308 | 1.57E-16 | 4.30E-18 | 9.59 | 30.2207533 | 2.31E-01 | 39044140  | 39044263  | NC_000001.10 |
| cg24574863 | 1.58E-16 | 4.31E-18 | 9.59 | 30.2166103 | 1.05E-01 | 42954752  | 42954875  | NC_000005.9  |
| cg12740087 | 1.58E-16 | 4.32E-18 | 9.59 | 30.2153461 | 6.81E-02 | 224445738 | 224445861 | NC_000001.10 |
| cg14317414 | 1.58E-16 | 4.32E-18 | 9.59 | 30.2153231 | 1.68E-01 | 109991376 | 109991499 | NC_000009.11 |
| cg26751356 | 1.59E-16 | 4.35E-18 | 9.59 | 30.2085135 | 2.24E-01 | 112712635 | 112712758 | NC_000013.10 |
| cg01371799 | 1.59E-16 | 4.36E-18 | 9.59 | 30.2052145 | 1.65E-01 | 1264049   | 1264172   | NC_000007.13 |
| cg27649806 | 1.60E-16 | 4.37E-18 | 9.59 | 30.203969  | 9.38E-02 | 35101217  | 35101340  | NC_000009.11 |
| cg14562712 | 1.60E-16 | 4.38E-18 | 9.59 | 30.2017402 | 2.81E-01 | 100823377 | 100823500 | NC_000007.13 |
| cg14983606 | 1.60E-16 | 4.38E-18 | 9.59 | 30.2015282 | 2.46E-01 | 65493706  | 65493829  | NC_000008.10 |



|            |          |          |      |            |          |           |           |              |
|------------|----------|----------|------|------------|----------|-----------|-----------|--------------|
| cg07671291 | 1.60E-16 | 4.40E-18 | 9.59 | 30.1978178 | 9.81E-02 | 67523109  | 67523232  | NC_000017.10 |
| cg19980199 | 1.61E-16 | 4.40E-18 | 9.59 | 30.197001  | 1.04E-01 | 480033    | 480156    | NC_000005.9  |
| cg23746628 | 1.61E-16 | 4.41E-18 | 9.59 | 30.1939184 | 1.61E-01 | 74439996  | 74440119  | NC_000004.11 |
| cg02944637 | 1.63E-16 | 4.46E-18 | 9.58 | 30.1832695 | 1.30E-01 | 19733345  | 19733468  | NC_000016.9  |
| cg12121983 | 1.63E-16 | 4.47E-18 | 9.58 | 30.180614  | 1.04E-01 | 1387582   | 1387705   | NC_000017.10 |
| cg00765783 | 1.64E-16 | 4.49E-18 | 9.58 | 30.1764117 | 2.46E-01 | 12996587  | 12996710  | NC_000016.9  |
| cg14518868 | 1.64E-16 | 4.50E-18 | 9.58 | 30.1754364 | 2.18E-02 | 69864352  | 69864475  | NC_000012.11 |
| cg11831238 | 1.65E-16 | 4.52E-18 | 9.58 | 30.1696891 | 1.92E-01 | 20182021  | 20182144  | NC_000011.9  |
| cg03566787 | 1.65E-16 | 4.53E-18 | 9.58 | 30.1685289 | 1.13E-01 | 47517381  | 47517504  | NC_000011.9  |
| cg04928096 | 1.65E-16 | 4.53E-18 | 9.58 | 30.1675582 | 7.93E-02 | 338079    | 338202    | NC_000016.9  |
| cg15554678 | 1.65E-16 | 4.54E-18 | 9.58 | 30.1669237 | 2.22E-01 | 17083563  | 17083686  | NC_000022.10 |
| cg20776543 | 1.66E-16 | 4.55E-18 | 9.58 | 30.1641901 | 1.56E-01 | 921156    | 921279    | NC_000007.13 |
| cg10658542 | 1.66E-16 | 4.55E-18 | 9.58 | 30.1628239 | 2.84E-01 | 33592642  | 33592765  | NC_000012.11 |
| cg21856645 | 1.67E-16 | 4.59E-18 | 9.58 | 30.1560122 | 6.30E-02 | 23517243  | 23517366  | NC_000014.8  |
| cg04514249 | 1.67E-16 | 4.59E-18 | 9.58 | 30.1543116 | 2.82E-01 | 144621385 | 144621508 | NC_000004.11 |
| cg26587870 | 1.68E-16 | 4.62E-18 | 9.58 | 30.1481427 | 1.62E-01 | 27730563  | 27730686  | NC_000006.11 |
| cg26204042 | 1.69E-16 | 4.65E-18 | 9.58 | 30.1424695 | 1.74E-01 | 110163765 | 110163888 | NC_000011.9  |
| cg24154839 | 1.70E-16 | 4.66E-18 | 9.58 | 30.1396186 | 1.95E-01 | 46995741  | 46995864  | NC_000004.11 |
| cg17629929 | 1.70E-16 | 4.68E-18 | 9.58 | 30.1367766 | 2.41E-01 | 1875548   | 1875671   | NC_000005.9  |
| cg11099899 | 1.70E-16 | 4.68E-18 | 9.58 | 30.1357315 | 1.87E-01 | 37852334  | 37852457  | NC_000021.8  |
| cg11361442 | 1.71E-16 | 4.70E-18 | 9.58 | 30.1315309 | 1.51E-01 | 68841024  | 68841147  | NC_000011.9  |
| cg05327509 | 1.71E-16 | 4.72E-18 | 9.58 | 30.1281217 | 8.73E-02 | 101175894 | 101176017 | NC_000013.10 |
| cg01069451 | 1.72E-16 | 4.73E-18 | 9.58 | 30.1263989 | 1.13E-01 | 3210387   | 3210510   | NC_000020.10 |
| cg06722633 | 1.72E-16 | 4.74E-18 | 9.58 | 30.1241097 | 1.93E-01 | 37499309  | 37499432  | NC_000001.10 |
| cg06668065 | 1.72E-16 | 4.75E-18 | 9.58 | 30.1217171 | 2.07E-01 | 92909069  | 92909192  | NC_000005.9  |

|            |          |          |      |            |          |           |           |              |
|------------|----------|----------|------|------------|----------|-----------|-----------|--------------|
| cg08324703 | 1.73E-16 | 4.76E-18 | 9.57 | 30.1185731 | 1.86E-01 | 679514    | 679637    | NC_000010.10 |
| cg25496678 | 1.73E-16 | 4.77E-18 | 9.57 | 30.1170465 | 2.47E-01 | 118899407 | 118899530 | NC_000010.10 |
| cg00986824 | 1.74E-16 | 4.78E-18 | 9.57 | 30.1151919 | 1.97E-01 | 75601465  | 75601588  | NC_000012.11 |
| cg17606491 | 1.74E-16 | 4.78E-18 | 9.57 | 30.1151781 | 9.70E-02 | 125806390 | 125806513 | NC_000010.10 |
| cg08101174 | 1.74E-16 | 4.80E-18 | 9.57 | 30.1111157 | 9.33E-02 | 104196541 | 104196664 | NC_000010.10 |
| cg05245094 | 1.75E-16 | 4.82E-18 | 9.57 | 30.1070604 | 1.42E-01 | 85669572  | 85669695  | NC_000016.9  |
| cg06077738 | 1.76E-16 | 4.85E-18 | 9.57 | 30.0996981 | 9.75E-02 | 63872429  | 63872552  | NC_000003.11 |
| cg10710457 | 1.77E-16 | 4.87E-18 | 9.57 | 30.0964854 | 4.58E-02 | 3143236   | 3143359   | NC_000010.10 |
| cg22715788 | 1.77E-16 | 4.88E-18 | 9.57 | 30.0948613 | 1.25E-01 | 2624148   | 2624271   | NC_000007.13 |
| cg13557668 | 1.77E-16 | 4.88E-18 | 9.57 | 30.0946959 | 2.39E-01 | 135265931 | 135266054 | NC_000005.9  |
| cg13982505 | 1.78E-16 | 4.90E-18 | 9.57 | 30.0895176 | 1.60E-01 | 233642094 | 233642217 | NC_000002.11 |
| cg16538343 | 1.78E-16 | 4.92E-18 | 9.57 | 30.0861038 | 7.76E-02 | 68772961  | 68773084  | NC_000011.9  |
| cg07920503 | 1.80E-16 | 4.96E-18 | 9.57 | 30.0784833 | 2.99E-01 | 25745406  | 25745529  | NC_000013.10 |
| cg08701047 | 1.80E-16 | 4.96E-18 | 9.57 | 30.0783386 | 2.16E-01 | 130085199 | 130085322 | NC_000010.10 |
| cg04943927 | 1.80E-16 | 4.98E-18 | 9.57 | 30.0752501 | 9.82E-02 | 12937632  | 12937755  | NC_000012.11 |
| cg25984671 | 1.80E-16 | 4.98E-18 | 9.57 | 30.0751449 | 2.27E-01 | 591083    | 591206    | NC_000020.10 |
| cg19353431 | 1.81E-16 | 4.99E-18 | 9.57 | 30.0731764 | 1.89E-01 | 170578785 | 170578908 | NC_000006.11 |
| cg13021333 | 1.81E-16 | 4.99E-18 | 9.57 | 30.0730764 | 2.65E-01 | 6004207   | 6004330   | NC_000006.11 |
| cg04332534 | 1.81E-16 | 5.00E-18 | 9.57 | 30.070945  | 2.43E-01 | 37096487  | 37096610  | NC_000019.9  |
| cg04541368 | 1.82E-16 | 5.02E-18 | 9.57 | 30.0671659 | 2.21E-01 | 92909429  | 92909552  | NC_000005.9  |
| cg14308254 | 1.82E-16 | 5.04E-18 | 9.57 | 30.0623283 | 1.34E-01 | 124219699 | 124219822 | NC_000008.10 |
| cg05237374 | 1.83E-16 | 5.06E-18 | 9.57 | 30.059534  | 2.05E-01 | 66980127  | 66980250  | NC_000014.8  |
| cg06204922 | 1.83E-16 | 5.06E-18 | 9.57 | 30.0576659 | 2.90E-01 | 5019933   | 5020056   | NC_000012.11 |
| cg00663077 | 1.84E-16 | 5.08E-18 | 9.56 | 30.0554008 | 2.41E-01 | 188916709 | 188916832 | NC_000004.11 |
| cg18077971 | 1.84E-16 | 5.08E-18 | 9.56 | 30.0553387 | 2.55E-01 | 223164867 | 223164990 | NC_000002.11 |

|            |          |          |      |            |          |           |           |              |
|------------|----------|----------|------|------------|----------|-----------|-----------|--------------|
| cg26950756 | 1.84E-16 | 5.08E-18 | 9.56 | 30.0548746 | 9.59E-02 | 78707683  | 78707806  | NC_000015.9  |
| cg21219666 | 1.84E-16 | 5.09E-18 | 9.56 | 30.0529876 | 7.58E-02 | 40166108  | 40166231  | NC_000017.10 |
| cg13432737 | 1.85E-16 | 5.11E-18 | 9.56 | 30.047928  | 8.91E-02 | 37922420  | 37922543  | NC_000017.10 |
| cg01397513 | 1.86E-16 | 5.15E-18 | 9.56 | 30.0409755 | 1.42E-01 | 85670135  | 85670258  | NC_000016.9  |
| cg03122264 | 1.87E-16 | 5.17E-18 | 9.56 | 30.0374015 | 8.85E-02 | 127797208 | 127797331 | NC_000006.11 |
| cg06816350 | 1.87E-16 | 5.17E-18 | 9.56 | 30.0372827 | 2.22E-01 | 2278885   | 2279008   | NC_000005.9  |
| cg21883754 | 1.87E-16 | 5.17E-18 | 9.56 | 30.036899  | 2.07E-01 | 54926437  | 54926560  | NC_000019.9  |
| cg03111576 | 1.87E-16 | 5.18E-18 | 9.56 | 30.0359188 | 5.03E-02 | 11268374  | 11268497  | NC_000016.9  |
| cg09257178 | 1.87E-16 | 5.18E-18 | 9.56 | 30.0353854 | 9.33E-02 | 114197839 | 114197962 | NC_000002.11 |
| cg09252766 | 1.88E-16 | 5.22E-18 | 9.56 | 30.0278146 | 7.90E-02 | 134722243 | 134722366 | NC_000010.10 |
| cg21479226 | 1.89E-16 | 5.23E-18 | 9.56 | 30.0260198 | 3.37E-01 | 69244510  | 69244633  | NC_000008.10 |
| cg11372090 | 1.89E-16 | 5.23E-18 | 9.56 | 30.0249843 | 3.01E-01 | 37488660  | 37488783  | NC_000007.13 |
| cg04494873 | 1.89E-16 | 5.24E-18 | 9.56 | 30.0244355 | 1.65E-01 | 72677287  | 72677410  | NC_000005.9  |
| cg00260012 | 1.89E-16 | 5.24E-18 | 9.56 | 30.0237858 | 1.45E-01 | 31031702  | 31031825  | NC_000002.11 |
| cg03751030 | 1.90E-16 | 5.28E-18 | 9.56 | 30.0169205 | 2.12E-01 | 56015576  | 56015699  | NC_000008.10 |
| cg13976988 | 1.91E-16 | 5.28E-18 | 9.56 | 30.0158087 | 1.54E-01 | 38607402  | 38607525  | NC_000005.9  |
| cg02757432 | 1.91E-16 | 5.29E-18 | 9.56 | 30.0154146 | 1.63E-01 | 125426048 | 125426171 | NC_000010.10 |
| cg27296759 | 1.91E-16 | 5.30E-18 | 9.56 | 30.0136134 | 1.51E-01 | 71503901  | 71504024  | NC_000005.9  |
| cg08236767 | 1.91E-16 | 5.30E-18 | 9.56 | 30.0121717 | 2.87E-01 | 107503662 | 107503785 | NC_000002.11 |
| cg26195356 | 1.91E-16 | 5.31E-18 | 9.56 | 30.0109771 | 2.11E-01 | 2743601   | 2743724   | NC_000005.9  |
| cg23051392 | 1.92E-16 | 5.32E-18 | 9.56 | 30.0090991 | 2.21E-01 | 34043481  | 34043604  | NC_000005.9  |
| cg26053291 | 1.92E-16 | 5.32E-18 | 9.56 | 30.0085613 | 1.52E-01 | 89064631  | 89064754  | NC_000002.11 |
| cg06094615 | 1.93E-16 | 5.35E-18 | 9.56 | 30.0031072 | 2.23E-01 | 50887578  | 50887701  | NC_000010.10 |
| cg06401021 | 1.94E-16 | 5.39E-18 | 9.56 | 29.9965086 | 3.01E-01 | 55443868  | 55443991  | NC_000006.11 |
| cg18239942 | 1.94E-16 | 5.39E-18 | 9.56 | 29.9952946 | 1.10E-01 | 105793879 | 105794002 | NC_000014.8  |

|            |          |          |      |            |          |           |           |              |
|------------|----------|----------|------|------------|----------|-----------|-----------|--------------|
| cg04816311 | 1.95E-16 | 5.41E-18 | 9.56 | 29.9929754 | 1.78E-01 | 1066650   | 1066773   | NC_000007.13 |
| cg23528400 | 1.95E-16 | 5.41E-18 | 9.56 | 29.9924573 | 2.93E-01 | 32859438  | 32859561  | NC_000003.11 |
| cg22145666 | 1.95E-16 | 5.41E-18 | 9.56 | 29.9917206 | 8.32E-02 | 234663900 | 234664023 | NC_000002.11 |
| cg10806483 | 1.95E-16 | 5.41E-18 | 9.56 | 29.9916438 | 8.91E-02 | 102459329 | 102459452 | NC_000012.11 |
| cg13594465 | 1.95E-16 | 5.42E-18 | 9.55 | 29.9902027 | 1.16E-01 | 71491485  | 71491608  | NC_000015.9  |
| cg10034890 | 1.95E-16 | 5.43E-18 | 9.55 | 29.9888008 | 2.90E-01 | 230578216 | 230578339 | NC_000002.11 |
| cg16504397 | 1.96E-16 | 5.44E-18 | 9.55 | 29.9860058 | 1.29E-01 | 27523945  | 27524068  | NC_000011.9  |
| cg02066441 | 1.97E-16 | 5.46E-18 | 9.55 | 29.982398  | 1.63E-01 | 17858588  | 17858711  | NC_000001.10 |
| cg14712186 | 1.97E-16 | 5.48E-18 | 9.55 | 29.9797039 | 2.05E-01 | 91184413  | 91184536  | NC_000001.10 |
| cg19741167 | 1.99E-16 | 5.52E-18 | 9.55 | 29.9719113 | 2.54E-01 | 86263270  | 86263393  | NC_000002.11 |
| cg02499453 | 1.99E-16 | 5.53E-18 | 9.55 | 29.9713455 | 1.06E-01 | 32572722  | 32572845  | NC_000022.10 |
| cg11075176 | 1.99E-16 | 5.53E-18 | 9.55 | 29.9702631 | 1.49E-01 | 155476729 | 155476852 | NC_000007.13 |
| cg08361180 | 2.00E-16 | 5.58E-18 | 9.55 | 29.9623711 | 7.08E-02 | 103432427 | 103432550 | NC_000010.10 |
| cg06272038 | 2.01E-16 | 5.59E-18 | 9.55 | 29.960539  | 2.55E-01 | 2292512   | 2292635   | NC_000011.9  |
| cg01610488 | 2.02E-16 | 5.63E-18 | 9.55 | 29.9537155 | 2.35E-01 | 72987870  | 72987993  | NC_000008.10 |
| cg04720592 | 2.02E-16 | 5.63E-18 | 9.55 | 29.952107  | 1.59E-01 | 118165724 | 118165847 | NC_000001.10 |
| cg18757267 | 2.03E-16 | 5.64E-18 | 9.55 | 29.9512206 | 7.05E-02 | 164704545 | 164704668 | NC_000001.10 |
| cg02281208 | 2.04E-16 | 5.68E-18 | 9.55 | 29.9448614 | 2.28E-01 | 27216008  | 27216131  | NC_000015.9  |
| cg19894253 | 2.04E-16 | 5.69E-18 | 9.55 | 29.9424831 | 1.38E-01 | 124261709 | 124261832 | NC_000008.10 |
| cg18034637 | 2.04E-16 | 5.70E-18 | 9.55 | 29.9413759 | 1.66E-01 | 111846087 | 111846210 | NC_000011.9  |
| cg27163412 | 2.05E-16 | 5.73E-18 | 9.55 | 29.9362029 | 8.58E-02 | 137358801 | 137358924 | NC_000009.11 |
| cg02282631 | 2.06E-16 | 5.74E-18 | 9.55 | 29.9334718 | 2.20E-01 | 42953543  | 42953666  | NC_000005.9  |
| cg27296293 | 2.06E-16 | 5.75E-18 | 9.55 | 29.9324286 | 2.86E-01 | 101454680 | 101454803 | NC_000011.9  |
| cg07641160 | 2.07E-16 | 5.77E-18 | 9.55 | 29.927693  | 2.97E-01 | 117086850 | 117086973 | NC_000006.11 |
| cg07273003 | 2.07E-16 | 5.78E-18 | 9.55 | 29.9260432 | 2.19E-01 | 16955416  | 16955539  | NC_000011.9  |

|            |          |          |      |            |          |           |           |              |
|------------|----------|----------|------|------------|----------|-----------|-----------|--------------|
| cg25605754 | 2.08E-16 | 5.79E-18 | 9.54 | 29.9249577 | 1.20E-01 | 116595196 | 116595319 | NC_000007.13 |
| cg04575395 | 2.08E-16 | 5.80E-18 | 9.54 | 29.9232066 | 2.53E-01 | 5892072   | 5892195   | NC_000004.11 |
| cg13918042 | 2.08E-16 | 5.82E-18 | 9.54 | 29.9208111 | 2.16E-01 | 98596430  | 98596553  | NC_000010.10 |
| cg16509158 | 2.09E-16 | 5.82E-18 | 9.54 | 29.9198256 | 9.46E-02 | 95894040  | 95894163  | NC_000011.9  |
| cg22122013 | 2.09E-16 | 5.82E-18 | 9.54 | 29.9191679 | 8.40E-02 | 97564501  | 97564624  | NC_000002.11 |
| cg18957463 | 2.09E-16 | 5.85E-18 | 9.54 | 29.9154107 | 1.44E-01 | 47597617  | 47597740  | NC_000004.11 |
| cg08499046 | 2.10E-16 | 5.85E-18 | 9.54 | 29.9142152 | 2.05E-01 | 31824327  | 31824450  | NC_000011.9  |
| cg03122532 | 2.10E-16 | 5.87E-18 | 9.54 | 29.9117213 | 1.69E-01 | 39644216  | 39644339  | NC_000021.8  |
| cg05552490 | 2.11E-16 | 5.90E-18 | 9.54 | 29.9064082 | 1.45E-01 | 43952511  | 43952634  | NC_000006.11 |
| cg26402660 | 2.12E-16 | 5.94E-18 | 9.54 | 29.9006101 | 2.17E-01 | 27179268  | 27179391  | NC_000007.13 |
| cg00526336 | 2.13E-16 | 5.96E-18 | 9.54 | 29.8963432 | 7.90E-02 | 230415902 | 230416025 | NC_000001.10 |
| cg19905504 | 2.13E-16 | 5.96E-18 | 9.54 | 29.8962819 | 8.61E-02 | 242165248 | 242165371 | NC_000002.11 |
| cg10178917 | 2.14E-16 | 5.99E-18 | 9.54 | 29.8918928 | 7.30E-02 | 99665210  | 99665333  | NC_000014.8  |
| cg03346706 | 2.14E-16 | 5.99E-18 | 9.54 | 29.8915732 | 1.64E-01 | 3162988   | 3163111   | NC_000019.9  |
| cg06375328 | 2.15E-16 | 6.00E-18 | 9.54 | 29.890317  | 5.27E-02 | 69308768  | 69308891  | NC_000011.9  |
| cg07295918 | 2.15E-16 | 6.01E-18 | 9.54 | 29.8886298 | 9.91E-02 | 69463131  | 69463254  | NC_000011.9  |
| cg02511172 | 2.15E-16 | 6.01E-18 | 9.54 | 29.8885609 | 6.50E-02 | 233085209 | 233085332 | NC_000001.10 |
| cg10132208 | 2.15E-16 | 6.02E-18 | 9.54 | 29.886168  | 1.64E-01 | 58545542  | 58545665  | NC_000019.9  |
| cg07204550 | 2.17E-16 | 6.07E-18 | 9.54 | 29.8788712 | 1.88E-01 | 21950155  | 21950278  | NC_000004.11 |
| cg18527574 | 2.17E-16 | 6.09E-18 | 9.54 | 29.875616  | 1.66E-01 | 222434303 | 222434426 | NC_000002.11 |
| cg25875213 | 2.18E-16 | 6.10E-18 | 9.54 | 29.8742649 | 2.76E-01 | 38183055  | 38183178  | NC_000019.9  |
| cg14950829 | 2.18E-16 | 6.11E-18 | 9.54 | 29.8723707 | 2.00E-01 | 53419617  | 53419740  | NC_000013.10 |
| cg15150652 | 2.19E-16 | 6.14E-18 | 9.54 | 29.866982  | 1.51E-01 | 82637778  | 82637901  | NC_000005.9  |
| cg09434624 | 2.19E-16 | 6.15E-18 | 9.54 | 29.865459  | 1.36E-01 | 8010881   | 8011004   | NC_000011.9  |
| cg02630214 | 2.20E-16 | 6.16E-18 | 9.54 | 29.8636213 | 2.01E-01 | 147098585 | 147098708 | NC_000003.11 |

|            |          |          |      |            |          |           |           |              |
|------------|----------|----------|------|------------|----------|-----------|-----------|--------------|
| cg24911113 | 2.21E-16 | 6.19E-18 | 9.53 | 29.8595405 | 2.07E-01 | 23185714  | 23185837  | NC_000019.9  |
| cg13079837 | 2.21E-16 | 6.19E-18 | 9.53 | 29.8586127 | 1.35E-01 | 1104452   | 1104575   | NC_000012.11 |
| cg20948997 | 2.22E-16 | 6.23E-18 | 9.53 | 29.853044  | 1.91E-01 | 56014433  | 56014556  | NC_000008.10 |
| cg25641533 | 2.23E-16 | 6.25E-18 | 9.53 | 29.8499091 | 1.25E-01 | 31734580  | 31734703  | NC_000006.11 |
| cg13272644 | 2.23E-16 | 6.25E-18 | 9.53 | 29.8493901 | 2.22E-01 | 37499476  | 37499599  | NC_000001.10 |
| cg08105748 | 2.23E-16 | 6.26E-18 | 9.53 | 29.8478984 | 2.04E-02 | 57086875  | 57086998  | NC_000006.11 |
| cg18685561 | 2.24E-16 | 6.29E-18 | 9.53 | 29.8431367 | 2.16E-01 | 165305022 | 165305145 | NC_000004.11 |
| cg10362542 | 2.24E-16 | 6.30E-18 | 9.53 | 29.8421246 | 3.35E-01 | 77179709  | 77179832  | NC_000017.10 |
| cg26407316 | 2.25E-16 | 6.31E-18 | 9.53 | 29.8398333 | 1.25E-01 | 50801745  | 50801868  | NC_000014.8  |
| cg18543991 | 2.25E-16 | 6.33E-18 | 9.53 | 29.8365191 | 1.87E-01 | 145871392 | 145871515 | NC_000003.11 |
| cg02842496 | 2.26E-16 | 6.36E-18 | 9.53 | 29.831887  | 2.45E-01 | 132053262 | 132053385 | NC_000008.10 |
| cg16848154 | 2.26E-16 | 6.36E-18 | 9.53 | 29.8318418 | 1.40E-01 | 2785183   | 2785306   | NC_000020.10 |
| cg25657222 | 2.27E-16 | 6.39E-18 | 9.53 | 29.8277225 | 1.45E-01 | 6556270   | 6556393   | NC_000017.10 |
| cg07496545 | 2.27E-16 | 6.39E-18 | 9.53 | 29.8274498 | 1.77E-01 | 140683737 | 140683860 | NC_000005.9  |
| cg18668753 | 2.28E-16 | 6.41E-18 | 9.53 | 29.8236339 | 1.17E-01 | 57352657  | 57352780  | NC_000019.9  |
| cg09142135 | 2.28E-16 | 6.42E-18 | 9.53 | 29.823479  | 1.42E-01 | 67809980  | 67810103  | NC_000011.9  |
| cg23989821 | 2.28E-16 | 6.42E-18 | 9.53 | 29.823227  | 2.77E-01 | 60952405  | 60952528  | NC_000014.8  |
| cg03904711 | 2.28E-16 | 6.42E-18 | 9.53 | 29.8224687 | 1.21E-01 | 118865255 | 118865378 | NC_000003.11 |
| cg07177123 | 2.33E-16 | 6.56E-18 | 9.53 | 29.8008025 | 6.26E-02 | 30909162  | 30909285  | NC_000007.13 |
| cg14621053 | 2.34E-16 | 6.58E-18 | 9.53 | 29.7986235 | 1.65E-01 | 128077315 | 128077438 | NC_000010.10 |
| cg21096141 | 2.34E-16 | 6.60E-18 | 9.53 | 29.7959087 | 1.71E-01 | 83627633  | 83627756  | NC_000004.11 |
| cg13750802 | 2.36E-16 | 6.64E-18 | 9.52 | 29.7900763 | 1.03E-01 | 41055185  | 41055308  | NC_000013.10 |
| cg07148651 | 2.37E-16 | 6.68E-18 | 9.52 | 29.7839203 | 1.52E-01 | 1155617   | 1155740   | NC_000008.10 |
| cg23390118 | 2.37E-16 | 6.68E-18 | 9.52 | 29.7837331 | 1.41E-01 | 2339513   | 2339636   | NC_000012.11 |
| cg21864868 | 2.37E-16 | 6.69E-18 | 9.52 | 29.7824305 | 1.95E-01 | 46673002  | 46673125  | NC_000017.10 |

|            |          |          |      |            |          |           |           |              |
|------------|----------|----------|------|------------|----------|-----------|-----------|--------------|
| cg04894619 | 2.37E-16 | 6.69E-18 | 9.52 | 29.7815102 | 2.11E-01 | 179754615 | 179754738 | NC_000003.11 |
| cg17098147 | 2.40E-16 | 6.76E-18 | 9.52 | 29.7717331 | 1.68E-01 | 22634142  | 22634265  | NC_000010.10 |
| cg01316476 | 2.42E-16 | 6.82E-18 | 9.52 | 29.7632306 | 1.56E-01 | 25899194  | 25899317  | NC_000007.13 |
| cg22506453 | 2.42E-16 | 6.83E-18 | 9.52 | 29.7615645 | 1.71E-01 | 39122753  | 39122876  | NC_000017.10 |
| cg19593741 | 2.42E-16 | 6.84E-18 | 9.52 | 29.7603275 | 1.30E-01 | 31734217  | 31734340  | NC_000006.11 |
| cg02739346 | 2.44E-16 | 6.89E-18 | 9.52 | 29.7529387 | 1.81E-01 | 119600519 | 119600642 | NC_000002.11 |
| cg23476802 | 2.45E-16 | 6.90E-18 | 9.52 | 29.7508449 | 1.50E-01 | 30407261  | 30407384  | NC_000020.10 |
| cg14978741 | 2.45E-16 | 6.91E-18 | 9.52 | 29.750504  | 7.24E-02 | 21460005  | 21460128  | NC_000010.10 |
| cg01182048 | 2.46E-16 | 6.93E-18 | 9.52 | 29.7465092 | 1.17E-01 | 71005638  | 71005761  | NC_000010.10 |
| cg10870587 | 2.46E-16 | 6.93E-18 | 9.52 | 29.746454  | 9.80E-02 | 95249627  | 95249750  | NC_000010.10 |
| cg10552126 | 2.47E-16 | 6.96E-18 | 9.52 | 29.7427475 | 1.71E-01 | 154002064 | 154002187 | NC_000007.13 |
| cg27659049 | 2.48E-16 | 7.01E-18 | 9.52 | 29.7353375 | 2.17E-01 | 115173713 | 115173836 | NC_000012.11 |
| cg08701998 | 2.49E-16 | 7.03E-18 | 9.52 | 29.7334912 | 1.11E-01 | 31430863  | 31430986  | NC_000013.10 |
| cg05892568 | 2.50E-16 | 7.06E-18 | 9.51 | 29.728427  | 2.14E-01 | 30015782  | 30015905  | NC_000019.9  |
| cg16130238 | 2.53E-16 | 7.15E-18 | 9.51 | 29.715888  | 8.86E-02 | 22958402  | 22958525  | NC_000014.8  |
| cg13142700 | 2.53E-16 | 7.16E-18 | 9.51 | 29.7149783 | 2.76E-01 | 11034501  | 11034624  | NC_000003.11 |
| cg18254364 | 2.54E-16 | 7.19E-18 | 9.51 | 29.7106567 | 9.98E-02 | 24741821  | 24741944  | NC_000014.8  |
| cg15797110 | 2.56E-16 | 7.23E-18 | 9.51 | 29.7048578 | 2.64E-01 | 27196314  | 27196437  | NC_000007.13 |
| cg10676084 | 2.56E-16 | 7.24E-18 | 9.51 | 29.7033253 | 1.99E-01 | 27017560  | 27017683  | NC_000015.9  |
| cg11717507 | 2.58E-16 | 7.30E-18 | 9.51 | 29.6953406 | 2.60E-01 | 114838825 | 114838948 | NC_000012.11 |
| cg01952234 | 2.58E-16 | 7.30E-18 | 9.51 | 29.6949535 | 2.76E-01 | 32457130  | 32457253  | NC_000011.9  |
| cg11751117 | 2.59E-16 | 7.32E-18 | 9.51 | 29.6929113 | 1.84E-01 | 56663411  | 56663534  | NC_000014.8  |
| cg15873149 | 2.59E-16 | 7.33E-18 | 9.51 | 29.6920821 | 2.40E-01 | 147137180 | 147137303 | NC_000003.11 |
| cg26782150 | 2.61E-16 | 7.38E-18 | 9.51 | 29.6852075 | 1.60E-01 | 664719    | 664842    | NC_000010.10 |
| cg04071270 | 2.62E-16 | 7.40E-18 | 9.51 | 29.6815895 | 1.62E-01 | 140457553 | 140457676 | NC_000005.9  |

|            |          |          |      |            |          |           |           |              |
|------------|----------|----------|------|------------|----------|-----------|-----------|--------------|
| cg03699469 | 2.62E-16 | 7.42E-18 | 9.51 | 29.680136  | 2.34E-01 | 144242029 | 144242152 | NC_000008.10 |
| cg26333393 | 2.63E-16 | 7.46E-18 | 9.51 | 29.6747179 | 1.39E-01 | 125651726 | 125651849 | NC_000010.10 |
| cg00076307 | 2.64E-16 | 7.47E-18 | 9.51 | 29.673121  | 1.96E-01 | 128300967 | 128301090 | NC_000005.9  |
| cg11965976 | 2.66E-16 | 7.53E-18 | 9.5  | 29.6653698 | 3.08E-01 | 127874463 | 127874586 | NC_000005.9  |
| cg25403974 | 2.67E-16 | 7.55E-18 | 9.5  | 29.6620284 | 7.58E-02 | 150105495 | 150105618 | NC_000007.13 |
| cg20959866 | 2.67E-16 | 7.55E-18 | 9.5  | 29.6619607 | 1.90E-01 | 4714008   | 4714131   | NC_000001.10 |
| cg00459623 | 2.67E-16 | 7.56E-18 | 9.5  | 29.6607726 | 3.05E-01 | 176936581 | 176936704 | NC_000002.11 |
| cg00824018 | 2.67E-16 | 7.56E-18 | 9.5  | 29.660632  | 1.90E-01 | 105037661 | 105037784 | NC_000010.10 |
| cg06671614 | 2.68E-16 | 7.60E-18 | 9.5  | 29.6554145 | 1.41E-01 | 44876162  | 44876285  | NC_000010.10 |
| cg12737285 | 2.68E-16 | 7.60E-18 | 9.5  | 29.6550895 | 1.09E-01 | 192362155 | 192362278 | NC_000002.11 |
| cg15302311 | 2.68E-16 | 7.61E-18 | 9.5  | 29.6542624 | 1.23E-01 | 100584395 | 100584518 | NC_000006.11 |
| cg08159291 | 2.70E-16 | 7.65E-18 | 9.5  | 29.6494197 | 1.99E-01 | 4715615   | 4715738   | NC_000001.10 |
| cg00188627 | 2.70E-16 | 7.67E-18 | 9.5  | 29.6467005 | 1.76E-01 | 159557779 | 159557902 | NC_000003.11 |
| cg10502121 | 2.71E-16 | 7.69E-18 | 9.5  | 29.6445886 | 1.47E-01 | 53286906  | 53287029  | NC_000007.13 |
| cg23443847 | 2.71E-16 | 7.69E-18 | 9.5  | 29.6436939 | 8.17E-02 | 126170483 | 126170606 | NC_000003.11 |
| cg25798792 | 2.73E-16 | 7.74E-18 | 9.5  | 29.6372252 | 2.25E-01 | 66535351  | 66535474  | NC_000004.11 |
| cg03810326 | 2.73E-16 | 7.75E-18 | 9.5  | 29.6364797 | 6.45E-02 | 43230937  | 43231060  | NC_000006.11 |
| cg12057127 | 2.76E-16 | 7.85E-18 | 9.5  | 29.6240829 | 1.83E-01 | 46699155  | 46699278  | NC_000017.10 |
| cg06282952 | 2.77E-16 | 7.86E-18 | 9.5  | 29.6230245 | 1.60E-01 | 148859147 | 148859270 | NC_000006.11 |
| cg10730712 | 2.77E-16 | 7.87E-18 | 9.5  | 29.620745  | 2.91E-01 | 178017827 | 178017950 | NC_000005.9  |
| cg17481117 | 2.84E-16 | 8.08E-18 | 9.49 | 29.5956706 | 1.66E-01 | 27113459  | 27113582  | NC_000015.9  |
| cg03908391 | 2.85E-16 | 8.10E-18 | 9.49 | 29.5929894 | 1.49E-01 | 57427170  | 57427293  | NC_000020.10 |
| cg21699044 | 2.86E-16 | 8.13E-18 | 9.49 | 29.5890268 | 2.14E-01 | 65281689  | 65281812  | NC_000008.10 |
| cg01572468 | 2.86E-16 | 8.14E-18 | 9.49 | 29.5875932 | 5.83E-02 | 75225065  | 75225188  | NC_000011.9  |
| cg10883258 | 2.87E-16 | 8.16E-18 | 9.49 | 29.5851826 | 9.22E-02 | 179239447 | 179239570 | NC_000005.9  |



|            |          |          |      |            |          |           |           |              |
|------------|----------|----------|------|------------|----------|-----------|-----------|--------------|
| cg09775628 | 2.87E-16 | 8.18E-18 | 9.49 | 29.5833324 | 3.23E-02 | 1479573   | 1479696   | NC_000019.9  |
| cg16557964 | 2.89E-16 | 8.21E-18 | 9.49 | 29.5791109 | 1.30E-01 | 100253838 | 100253961 | NC_000003.11 |
| cg11566394 | 2.90E-16 | 8.26E-18 | 9.49 | 29.573245  | 2.24E-01 | 4856709   | 4856832   | NC_000004.11 |
| cg04112058 | 2.90E-16 | 8.26E-18 | 9.49 | 29.5727183 | 1.00E-01 | 46648124  | 46648247  | NC_000016.9  |
| cg08658787 | 2.91E-16 | 8.29E-18 | 9.49 | 29.5701855 | 1.56E-01 | 113916646 | 113916769 | NC_000012.11 |
| cg11859489 | 2.91E-16 | 8.29E-18 | 9.49 | 29.5701085 | 1.79E-01 | 92459058  | 92459181  | NC_000015.9  |
| cg21331088 | 2.92E-16 | 8.32E-18 | 9.49 | 29.5663053 | 2.54E-01 | 908290    | 908413    | NC_000018.9  |
| cg23242052 | 2.92E-16 | 8.32E-18 | 9.49 | 29.5660361 | 2.32E-01 | 176947786 | 176947909 | NC_000002.11 |
| cg07544045 | 2.94E-16 | 8.37E-18 | 9.49 | 29.5602381 | 8.00E-02 | 158592420 | 158592543 | NC_000006.11 |
| cg22082456 | 2.94E-16 | 8.38E-18 | 9.49 | 29.5591915 | 1.54E-01 | 53392538  | 53392661  | NC_000001.10 |
| cg21356962 | 2.95E-16 | 8.41E-18 | 9.49 | 29.5549787 | 7.52E-02 | 243035414 | 243035537 | NC_000002.11 |
| cg16922279 | 2.96E-16 | 8.43E-18 | 9.49 | 29.5532253 | 2.03E-01 | 71955439  | 71955562  | NC_000011.9  |
| cg04525757 | 2.96E-16 | 8.45E-18 | 9.49 | 29.5506238 | 2.00E-01 | 29235973  | 29236096  | NC_000014.8  |
| cg00853742 | 2.98E-16 | 8.49E-18 | 9.49 | 29.5459638 | 1.53E-01 | 39990972  | 39991095  | NC_000020.10 |
| cg01046104 | 2.98E-16 | 8.50E-18 | 9.49 | 29.5449083 | 2.81E-01 | 58095588  | 58095711  | NC_000019.9  |
| cg14823825 | 2.98E-16 | 8.52E-18 | 9.49 | 29.5429038 | 1.55E-01 | 26170211  | 26170334  | NC_000008.10 |
| cg15241920 | 2.99E-16 | 8.54E-18 | 9.49 | 29.5402205 | 3.05E-01 | 54926514  | 54926637  | NC_000019.9  |
| cg06124883 | 3.00E-16 | 8.56E-18 | 9.49 | 29.5384222 | 1.62E-01 | 15525193  | 15525316  | NC_000001.10 |
| cg00397673 | 3.00E-16 | 8.58E-18 | 9.49 | 29.5360186 | 1.57E-01 | 56940418  | 56940541  | NC_000018.9  |
| cg20954484 | 3.01E-16 | 8.61E-18 | 9.48 | 29.5325686 | 1.16E-01 | 42727014  | 42727137  | NC_000003.11 |
| cg10254035 | 3.03E-16 | 8.64E-18 | 9.48 | 29.5283545 | 1.57E-01 | 21741635  | 21741758  | NC_000006.11 |
| cg18081940 | 3.04E-16 | 8.70E-18 | 9.48 | 29.521903  | 1.98E-01 | 154475173 | 154475296 | NC_000001.10 |
| cg16673508 | 3.05E-16 | 8.71E-18 | 9.48 | 29.5211111 | 9.67E-02 | 1056794   | 1056917   | NC_000016.9  |
| cg05168977 | 3.06E-16 | 8.75E-18 | 9.48 | 29.5158554 | 1.45E-01 | 98247142  | 98247265  | NC_000007.13 |
| cg17971129 | 3.07E-16 | 8.77E-18 | 9.48 | 29.5136964 | 1.45E-01 | 3866461   | 3866584   | NC_000006.11 |

|            |          |          |      |            |          |           |           |              |
|------------|----------|----------|------|------------|----------|-----------|-----------|--------------|
| cg24530480 | 3.08E-16 | 8.80E-18 | 9.48 | 29.5105202 | 1.56E-01 | 1008155   | 1008278   | NC_000008.10 |
| cg15617155 | 3.08E-16 | 8.82E-18 | 9.48 | 29.5087555 | 2.47E-01 | 63785321  | 63785444  | NC_000001.10 |
| cg04569897 | 3.08E-16 | 8.82E-18 | 9.48 | 29.5079212 | 1.16E-01 | 45609407  | 45609530  | NC_000006.11 |
| cg19257274 | 3.10E-16 | 8.86E-18 | 9.48 | 29.503382  | 1.87E-01 | 207990250 | 207990373 | NC_000001.10 |
| cg13172905 | 3.10E-16 | 8.87E-18 | 9.48 | 29.5027733 | 1.87E-01 | 30341765  | 30341888  | NC_000008.10 |
| cg17104824 | 3.10E-16 | 8.88E-18 | 9.48 | 29.5021288 | 2.00E-01 | 177014959 | 177015082 | NC_000002.11 |
| cg02396253 | 3.10E-16 | 8.88E-18 | 9.48 | 29.502089  | 1.16E-01 | 135271056 | 135271179 | NC_000006.11 |
| cg26090619 | 3.10E-16 | 8.88E-18 | 9.48 | 29.5017458 | 1.23E-01 | 80330167  | 80330290  | NC_000017.10 |
| cg03876413 | 3.10E-16 | 8.88E-18 | 9.48 | 29.5011993 | 2.46E-01 | 32338240  | 32338363  | NC_000007.13 |
| cg10327980 | 3.11E-16 | 8.91E-18 | 9.48 | 29.4986151 | 1.52E-01 | 24601001  | 24601124  | NC_000014.8  |
| cg25209842 | 3.12E-16 | 8.93E-18 | 9.48 | 29.4965864 | 2.18E-01 | 103536342 | 103536465 | NC_000010.10 |
| cg10677144 | 3.13E-16 | 8.97E-18 | 9.48 | 29.4913883 | 1.63E-01 | 3220106   | 3220229   | NC_000018.9  |
| cg00355281 | 3.14E-16 | 8.98E-18 | 9.48 | 29.4901416 | 2.78E-01 | 24323767  | 24323890  | NC_000007.13 |
| cg13895004 | 3.14E-16 | 9.00E-18 | 9.48 | 29.4878161 | 9.95E-02 | 112217129 | 112217252 | NC_000009.11 |
| cg13486833 | 3.15E-16 | 9.01E-18 | 9.48 | 29.4867218 | 1.23E-01 | 71507300  | 71507423  | NC_000015.9  |
| cg15995935 | 3.16E-16 | 9.06E-18 | 9.48 | 29.4816294 | 1.04E-01 | 111871839 | 111871962 | NC_000002.11 |
| cg24782949 | 3.17E-16 | 9.08E-18 | 9.48 | 29.4796088 | 1.60E-01 | 179749875 | 179749998 | NC_000002.11 |
| cg08320122 | 3.17E-16 | 9.10E-18 | 9.48 | 29.4773989 | 1.19E-01 | 62090588  | 62090711  | NC_000004.11 |
| cg14054928 | 3.20E-16 | 9.16E-18 | 9.47 | 29.4705334 | 2.17E-01 | 50235328  | 50235451  | NC_000017.10 |
| cg10211414 | 3.20E-16 | 9.17E-18 | 9.47 | 29.4694187 | 1.69E-01 | 8875053   | 8875176   | NC_000001.10 |
| cg06943925 | 3.20E-16 | 9.19E-18 | 9.47 | 29.4674558 | 1.74E-01 | 132145434 | 132145557 | NC_000005.9  |
| cg22752533 | 3.23E-16 | 9.26E-18 | 9.47 | 29.4599065 | 1.68E-01 | 44657948  | 44658071  | NC_000020.10 |
| cg14710529 | 3.25E-16 | 9.31E-18 | 9.47 | 29.4543544 | 1.32E-01 | 9387472   | 9387595   | NC_000002.11 |
| cg22321267 | 3.25E-16 | 9.33E-18 | 9.47 | 29.4529922 | 9.92E-02 | 5647332   | 5647455   | NC_000007.13 |
| cg08455781 | 3.25E-16 | 9.33E-18 | 9.47 | 29.4528803 | 1.22E-01 | 85669875  | 85669998  | NC_000016.9  |

|            |          |          |      |            |          |           |           |              |
|------------|----------|----------|------|------------|----------|-----------|-----------|--------------|
| cg13353160 | 3.25E-16 | 9.33E-18 | 9.47 | 29.4524839 | 9.01E-02 | 153567375 | 153567498 | NC_000004.11 |
| cg10311602 | 3.25E-16 | 9.33E-18 | 9.47 | 29.4524084 | 7.22E-02 | 53739778  | 53739901  | NC_000001.10 |
| cg27217474 | 3.27E-16 | 9.38E-18 | 9.47 | 29.4472416 | 2.01E-01 | 46697543  | 46697666  | NC_000017.10 |
| cg13846270 | 3.28E-16 | 9.41E-18 | 9.47 | 29.4442608 | 1.54E-01 | 51417929  | 51418052  | NC_000013.10 |
| cg03243226 | 3.28E-16 | 9.42E-18 | 9.47 | 29.4432755 | 2.52E-01 | 105480979 | 105481102 | NC_000011.9  |
| cg01806590 | 3.30E-16 | 9.48E-18 | 9.47 | 29.4364022 | 1.40E-01 | 23066421  | 23066544  | NC_000014.8  |
| cg10356613 | 3.30E-16 | 9.50E-18 | 9.47 | 29.435214  | 3.25E-01 | 35294491  | 35294614  | NC_000017.10 |
| cg26309134 | 3.31E-16 | 9.50E-18 | 9.47 | 29.4344181 | 3.04E-01 | 56879571  | 56879694  | NC_000019.9  |
| cg18130905 | 3.31E-16 | 9.52E-18 | 9.47 | 29.4330397 | 1.56E-01 | 30517666  | 30517789  | NC_000018.9  |
| cg01309744 | 3.31E-16 | 9.52E-18 | 9.47 | 29.4327013 | 1.99E-01 | 155167401 | 155167524 | NC_000007.13 |
| cg02914422 | 3.32E-16 | 9.55E-18 | 9.47 | 29.4300514 | 2.26E-01 | 32110145  | 32110268  | NC_000007.13 |
| cg24925839 | 3.33E-16 | 9.57E-18 | 9.47 | 29.4275709 | 5.36E-02 | 698480    | 698603    | NC_000004.11 |
| cg17868687 | 3.34E-16 | 9.60E-18 | 9.47 | 29.4247507 | 6.23E-02 | 242197976 | 242198099 | NC_000002.11 |
| cg10985145 | 3.35E-16 | 9.64E-18 | 9.47 | 29.4206094 | 1.78E-01 | 135227049 | 135227172 | NC_000005.9  |
| cg02093732 | 3.35E-16 | 9.64E-18 | 9.47 | 29.4204997 | 1.48E-01 | 30517601  | 30517724  | NC_000015.9  |
| cg08047969 | 3.35E-16 | 9.64E-18 | 9.47 | 29.41981   | 1.04E-01 | 29266384  | 29266507  | NC_000016.9  |
| cg00866976 | 3.38E-16 | 9.72E-18 | 9.47 | 29.4116877 | 2.76E-01 | 56224782  | 56224905  | NC_000016.9  |
| cg21475402 | 3.38E-16 | 9.73E-18 | 9.47 | 29.4113388 | 1.79E-01 | 156612140 | 156612263 | NC_000001.10 |
| cg17256609 | 3.38E-16 | 9.74E-18 | 9.47 | 29.4105378 | 1.28E-01 | 41643375  | 41643498  | NC_000008.10 |
| cg12557626 | 3.38E-16 | 9.74E-18 | 9.47 | 29.4096213 | 1.14E-01 | 113977332 | 113977455 | NC_000013.10 |
| cg00240432 | 3.39E-16 | 9.77E-18 | 9.47 | 29.4072581 | 2.75E-01 | 19157296  | 19157419  | NC_000007.13 |
| cg05409131 | 3.41E-16 | 9.84E-18 | 9.46 | 29.4000412 | 1.11E-01 | 132070595 | 132070718 | NC_000003.11 |
| cg15772157 | 3.43E-16 | 9.88E-18 | 9.46 | 29.3961483 | 1.51E-01 | 22766320  | 22766443  | NC_000010.10 |
| cg15022051 | 3.43E-16 | 9.90E-18 | 9.46 | 29.393629  | 2.02E-01 | 170396116 | 170396239 | NC_000006.11 |
| cg18078087 | 3.44E-16 | 9.91E-18 | 9.46 | 29.3924517 | 7.49E-02 | 15005463  | 15005586  | NC_000004.11 |

|            |          |          |      |            |          |           |           |              |
|------------|----------|----------|------|------------|----------|-----------|-----------|--------------|
| cg17691543 | 3.44E-16 | 9.92E-18 | 9.46 | 29.3921015 | 1.52E-01 | 49759312  | 49759435  | NC_000003.11 |
| cg10469980 | 3.44E-16 | 9.93E-18 | 9.46 | 29.3908791 | 1.95E-01 | 85660101  | 85660224  | NC_000016.9  |
| cg06443644 | 3.45E-16 | 9.97E-18 | 9.46 | 29.3872037 | 1.35E-01 | 1846046   | 1846169   | NC_000001.10 |
| cg07104706 | 3.47E-16 | 1.00E-17 | 9.46 | 29.3829748 | 2.52E-01 | 84456127  | 84456250  | NC_000013.10 |
| cg06717850 | 3.48E-16 | 1.00E-17 | 9.46 | 29.3792075 | 1.78E-01 | 57617602  | 57617725  | NC_000019.9  |
| cg16646879 | 3.49E-16 | 1.01E-17 | 9.46 | 29.3769285 | 9.73E-02 | 21844541  | 21844664  | NC_000016.9  |
| cg08431563 | 3.49E-16 | 1.01E-17 | 9.46 | 29.3766785 | 2.66E-01 | 77334207  | 77334330  | NC_000001.10 |
| cg16307965 | 3.49E-16 | 1.01E-17 | 9.46 | 29.3756475 | 1.26E-01 | 143593367 | 143593490 | NC_000002.11 |
| cg17320707 | 3.49E-16 | 1.01E-17 | 9.46 | 29.374774  | 2.45E-01 | 119307931 | 119308054 | NC_000010.10 |
| cg26925408 | 3.49E-16 | 1.01E-17 | 9.46 | 29.3743292 | 1.53E-01 | 147212748 | 147212871 | NC_000005.9  |
| cg12354056 | 3.50E-16 | 1.01E-17 | 9.46 | 29.3739433 | 1.88E-01 | 186136503 | 186136626 | NC_000003.11 |
| cg19594305 | 3.51E-16 | 1.01E-17 | 9.46 | 29.3702918 | 2.38E-01 | 34112991  | 34113114  | NC_000019.9  |
| cg02687288 | 3.52E-16 | 1.02E-17 | 9.46 | 29.365136  | 2.01E-01 | 97839561  | 97839684  | NC_000005.9  |
| cg09554951 | 3.53E-16 | 1.02E-17 | 9.46 | 29.3626896 | 1.68E-01 | 2890725   | 2890848   | NC_000011.9  |
| cg06528626 | 3.54E-16 | 1.02E-17 | 9.46 | 29.3609377 | 1.36E-01 | 16761002  | 16761125  | NC_000012.11 |
| cg22050611 | 3.54E-16 | 1.02E-17 | 9.46 | 29.3608254 | 1.75E-01 | 1321954   | 1322077   | NC_000011.9  |
| cg09936561 | 3.54E-16 | 1.02E-17 | 9.46 | 29.3603168 | 1.46E-01 | 9783623   | 9783746   | NC_000004.11 |
| cg25436126 | 3.54E-16 | 1.03E-17 | 9.46 | 29.35908   | 7.00E-02 | 10942676  | 10942799  | NC_000002.11 |
| cg01165177 | 3.55E-16 | 1.03E-17 | 9.46 | 29.3585922 | 4.43E-02 | 68772710  | 68772833  | NC_000011.9  |
| cg11472279 | 3.59E-16 | 1.04E-17 | 9.46 | 29.3461763 | 3.38E-01 | 11059733  | 11059856  | NC_000010.10 |
| cg20457796 | 3.59E-16 | 1.04E-17 | 9.46 | 29.3443656 | 1.74E-01 | 50819500  | 50819623  | NC_000010.10 |
| cg16991765 | 3.60E-16 | 1.04E-17 | 9.46 | 29.343796  | 1.72E-01 | 178594097 | 178594220 | NC_000005.9  |
| cg01228134 | 3.60E-16 | 1.04E-17 | 9.46 | 29.3434078 | 1.49E-01 | 233351921 | 233352044 | NC_000002.11 |
| cg00674365 | 3.62E-16 | 1.05E-17 | 9.45 | 29.3372124 | 3.21E-01 | 57019069  | 57019192  | NC_000019.9  |
| cg15339231 | 3.62E-16 | 1.05E-17 | 9.45 | 29.3363363 | 2.20E-01 | 96650407  | 96650530  | NC_000007.13 |

|            |          |          |      |            |          |           |           |              |
|------------|----------|----------|------|------------|----------|-----------|-----------|--------------|
| cg02497428 | 3.62E-16 | 1.05E-17 | 9.45 | 29.3355351 | 1.45E-01 | 21665138  | 21665261  | NC_000016.9  |
| cg16234490 | 3.62E-16 | 1.05E-17 | 9.45 | 29.3354319 | 1.46E-01 | 77138082  | 77138205  | NC_000004.11 |
| cg06472636 | 3.63E-16 | 1.05E-17 | 9.45 | 29.3331237 | 9.43E-02 | 168174824 | 168174947 | NC_000005.9  |
| cg21593606 | 3.65E-16 | 1.06E-17 | 9.45 | 29.3286834 | 1.10E-01 | 98676195  | 98676318  | NC_000007.13 |
| cg14524704 | 3.67E-16 | 1.06E-17 | 9.45 | 29.3236398 | 1.42E-01 | 25899168  | 25899291  | NC_000007.13 |
| cg10409860 | 3.67E-16 | 1.06E-17 | 9.45 | 29.3233948 | 7.46E-02 | 81969992  | 81970115  | NC_000016.9  |
| cg02431089 | 3.67E-16 | 1.06E-17 | 9.45 | 29.3233759 | 5.78E-02 | 4884396   | 4884519   | NC_000006.11 |
| cg20357228 | 3.67E-16 | 1.06E-17 | 9.45 | 29.3223166 | 5.42E-02 | 32817977  | 32818100  | NC_000006.11 |
| cg07066163 | 3.69E-16 | 1.07E-17 | 9.45 | 29.3174007 | 1.15E-01 | 85635689  | 85635812  | NC_000016.9  |
| cg12070646 | 3.69E-16 | 1.07E-17 | 9.45 | 29.3152732 | 9.46E-02 | 71149811  | 71149934  | NC_000002.11 |
| cg07742235 | 3.71E-16 | 1.08E-17 | 9.45 | 29.3106918 | 5.92E-02 | 69308752  | 69308875  | NC_000011.9  |
| cg14230810 | 3.71E-16 | 1.08E-17 | 9.45 | 29.3099812 | 6.15E-02 | 74024488  | 74024611  | NC_000017.10 |
| cg01799115 | 3.73E-16 | 1.08E-17 | 9.45 | 29.305291  | 1.99E-01 | 135827395 | 135827518 | NC_000008.10 |
| cg02173969 | 3.74E-16 | 1.08E-17 | 9.45 | 29.3034166 | 1.34E-01 | 28882863  | 28882986  | NC_000006.11 |
| cg07811634 | 3.74E-16 | 1.09E-17 | 9.45 | 29.3018847 | 4.16E-02 | 97857989  | 97858112  | NC_000007.13 |
| cg06365535 | 3.75E-16 | 1.09E-17 | 9.45 | 29.299513  | 1.54E-01 | 59534102  | 59534225  | NC_000017.10 |
| cg21051580 | 3.75E-16 | 1.09E-17 | 9.45 | 29.2988588 | 1.91E-01 | 4998415   | 4998538   | NC_000007.13 |
| cg18988856 | 3.76E-16 | 1.09E-17 | 9.45 | 29.2959225 | 1.44E-01 | 99425577  | 99425700  | NC_000007.13 |
| cg02423064 | 3.76E-16 | 1.09E-17 | 9.45 | 29.2955093 | 1.87E-01 | 32484008  | 32484131  | NC_000017.10 |
| cg27652869 | 3.77E-16 | 1.10E-17 | 9.45 | 29.2933742 | 1.07E-01 | 172216846 | 172216969 | NC_000005.9  |
| cg23465650 | 3.77E-16 | 1.10E-17 | 9.45 | 29.293234  | 1.30E-01 | 158522899 | 158523022 | NC_000005.9  |
| cg01631277 | 3.79E-16 | 1.10E-17 | 9.45 | 29.2873784 | 1.93E-01 | 53203309  | 53203432  | NC_000014.8  |
| cg12069267 | 3.80E-16 | 1.10E-17 | 9.45 | 29.2864075 | 1.41E-01 | 1407858   | 1407981   | NC_000004.11 |
| cg21169914 | 3.82E-16 | 1.11E-17 | 9.45 | 29.2792841 | 2.08E-01 | 165304488 | 165304611 | NC_000004.11 |
| cg08885409 | 3.82E-16 | 1.11E-17 | 9.45 | 29.2787314 | 1.06E-01 | 55969571  | 55969694  | NC_000017.10 |

|            |          |          |      |            |          |           |           |              |
|------------|----------|----------|------|------------|----------|-----------|-----------|--------------|
| cg23664385 | 3.85E-16 | 1.12E-17 | 9.44 | 29.2720966 | 1.63E-01 | 187467427 | 187467550 | NC_000003.11 |
| cg24283289 | 3.86E-16 | 1.12E-17 | 9.44 | 29.2695992 | 1.25E-01 | 19016892  | 19017015  | NC_000022.10 |
| cg19674032 | 3.88E-16 | 1.13E-17 | 9.44 | 29.2641658 | 1.05E-01 | 111682796 | 111682919 | NC_000013.10 |
| cg12940822 | 3.88E-16 | 1.13E-17 | 9.44 | 29.2635551 | 2.58E-01 | 127873397 | 127873520 | NC_000005.9  |
| cg02897005 | 3.88E-16 | 1.13E-17 | 9.44 | 29.2622379 | 2.12E-01 | 47064129  | 47064252  | NC_000021.8  |
| cg00175709 | 3.88E-16 | 1.13E-17 | 9.44 | 29.26216   | 2.07E-01 | 207670014 | 207670137 | NC_000001.10 |
| cg24871414 | 3.91E-16 | 1.14E-17 | 9.44 | 29.2542751 | 2.12E-01 | 95663987  | 95664110  | NC_000002.11 |
| cg20113824 | 3.92E-16 | 1.14E-17 | 9.44 | 29.2525639 | 2.08E-01 | 70946946  | 70947069  | NC_000008.10 |
| cg14373923 | 3.92E-16 | 1.14E-17 | 9.44 | 29.2521743 | 2.24E-01 | 61638433  | 61638556  | NC_000020.10 |
| cg17669365 | 3.94E-16 | 1.15E-17 | 9.44 | 29.247776  | 7.40E-02 | 71163953  | 71164076  | NC_000002.11 |
| cg14354327 | 3.94E-16 | 1.15E-17 | 9.44 | 29.2455677 | 1.42E-01 | 131763676 | 131763799 | NC_000010.10 |
| cg19821713 | 3.98E-16 | 1.16E-17 | 9.44 | 29.2351424 | 1.24E-01 | 96909816  | 96909939  | NC_000015.9  |
| cg22457238 | 4.00E-16 | 1.17E-17 | 9.44 | 29.2307869 | 2.07E-01 | 58570995  | 58571118  | NC_000019.9  |
| cg17031944 | 4.00E-16 | 1.17E-17 | 9.44 | 29.2300943 | 6.96E-02 | 21614078  | 21614201  | NC_000001.10 |
| cg03275201 | 4.00E-16 | 1.17E-17 | 9.44 | 29.2298128 | 1.48E-01 | 80602016  | 80602139  | NC_000017.10 |
| cg11557382 | 4.01E-16 | 1.17E-17 | 9.44 | 29.2290493 | 2.13E-01 | 153446256 | 153446379 | NC_000007.13 |
| cg21367811 | 4.01E-16 | 1.17E-17 | 9.44 | 29.2288212 | 2.07E-01 | 27169136  | 27169259  | NC_000007.13 |
| cg24818418 | 4.04E-16 | 1.18E-17 | 9.44 | 29.2191664 | 1.48E-01 | 110834590 | 110834713 | NC_000004.11 |
| cg08870743 | 4.05E-16 | 1.18E-17 | 9.44 | 29.2168194 | 2.74E-01 | 34398199  | 34398322  | NC_000021.8  |
| cg24136205 | 4.06E-16 | 1.19E-17 | 9.44 | 29.2150336 | 1.52E-01 | 100624293 | 100624416 | NC_000013.10 |
| cg21484228 | 4.07E-16 | 1.19E-17 | 9.44 | 29.2124367 | 2.29E-01 | 32859417  | 32859540  | NC_000003.11 |
| cg22154659 | 4.08E-16 | 1.19E-17 | 9.43 | 29.2085498 | 1.86E-01 | 27134369  | 27134492  | NC_000007.13 |
| cg04847275 | 4.10E-16 | 1.20E-17 | 9.43 | 29.2054282 | 2.09E-01 | 95693828  | 95693951  | NC_000014.8  |
| cg00775939 | 4.12E-16 | 1.21E-17 | 9.43 | 29.1984444 | 1.51E-01 | 118301448 | 118301571 | NC_000010.10 |
| cg11716272 | 4.13E-16 | 1.21E-17 | 9.43 | 29.197004  | 2.10E-01 | 5837348   | 5837471   | NC_000002.11 |

|            |          |          |      |            |          |           |           |              |
|------------|----------|----------|------|------------|----------|-----------|-----------|--------------|
| cg00906476 | 4.13E-16 | 1.21E-17 | 9.43 | 29.1966291 | 9.87E-02 | 139046200 | 139046323 | NC_000005.9  |
| cg06584433 | 4.15E-16 | 1.21E-17 | 9.43 | 29.1918976 | 1.88E-01 | 124605905 | 124606028 | NC_000010.10 |
| cg04353095 | 4.15E-16 | 1.21E-17 | 9.43 | 29.1915509 | 2.95E-01 | 140770588 | 140770711 | NC_000003.11 |
| cg05232118 | 4.17E-16 | 1.22E-17 | 9.43 | 29.1855826 | 1.04E-01 | 216660598 | 216660721 | NC_000002.11 |
| cg12682032 | 4.22E-16 | 1.24E-17 | 9.43 | 29.1748175 | 1.83E-01 | 83617937  | 83618060  | NC_000015.9  |
| cg25866143 | 4.22E-16 | 1.24E-17 | 9.43 | 29.1747437 | 1.69E-01 | 27183262  | 27183385  | NC_000007.13 |
| cg14830367 | 4.23E-16 | 1.24E-17 | 9.43 | 29.1717691 | 1.03E-01 | 178459176 | 178459299 | NC_000001.10 |
| cg00632019 | 4.23E-16 | 1.24E-17 | 9.43 | 29.17152   | 1.01E-01 | 27217587  | 27217710  | NC_000016.9  |
| cg09054633 | 4.23E-16 | 1.24E-17 | 9.43 | 29.1713816 | 1.92E-01 | 136834294 | 136834417 | NC_000005.9  |
| cg17642941 | 4.24E-16 | 1.24E-17 | 9.43 | 29.1689178 | 1.80E-01 | 27198429  | 27198552  | NC_000007.13 |
| cg01662158 | 4.25E-16 | 1.25E-17 | 9.43 | 29.1663742 | 4.44E-02 | 156030265 | 156030388 | NC_000006.11 |
| cg23619399 | 4.27E-16 | 1.25E-17 | 9.43 | 29.1626453 | 2.28E-01 | 79169753  | 79169876  | NC_000013.10 |
| cg05233288 | 4.28E-16 | 1.25E-17 | 9.43 | 29.1603574 | 1.31E-01 | 10534164  | 10534287  | NC_000001.10 |
| cg24019371 | 4.29E-16 | 1.26E-17 | 9.43 | 29.1558794 | 2.47E-01 | 4716554   | 4716677   | NC_000001.10 |
| cg06685968 | 4.29E-16 | 1.26E-17 | 9.43 | 29.1558526 | 3.05E-01 | 27192246  | 27192369  | NC_000007.13 |
| cg27512659 | 4.31E-16 | 1.26E-17 | 9.43 | 29.152959  | 1.03E-01 | 4697405   | 4697528   | NC_000010.10 |
| cg03894892 | 4.33E-16 | 1.27E-17 | 9.43 | 29.1464216 | 1.68E-01 | 153445197 | 153445320 | NC_000007.13 |
| cg19630629 | 4.34E-16 | 1.27E-17 | 9.42 | 29.1454366 | 2.27E-01 | 136556193 | 136556316 | NC_000007.13 |
| cg19156875 | 4.36E-16 | 1.28E-17 | 9.42 | 29.1396882 | 2.69E-01 | 43974446  | 43974569  | NC_000017.10 |
| cg03092399 | 4.36E-16 | 1.28E-17 | 9.42 | 29.1396575 | 1.02E-01 | 108149307 | 108149430 | NC_000011.9  |
| cg10495997 | 4.36E-16 | 1.28E-17 | 9.42 | 29.1393583 | 9.47E-02 | 72438402  | 72438525  | NC_000011.9  |
| cg00441573 | 4.37E-16 | 1.28E-17 | 9.42 | 29.1378159 | 1.71E-01 | 43428471  | 43428594  | NC_000010.10 |
| cg04074001 | 4.40E-16 | 1.29E-17 | 9.42 | 29.1312999 | 1.05E-01 | 148861409 | 148861532 | NC_000004.11 |
| cg00305996 | 4.42E-16 | 1.30E-17 | 9.42 | 29.1256656 | 1.70E-01 | 227655319 | 227655442 | NC_000002.11 |
| cg05740668 | 4.43E-16 | 1.30E-17 | 9.42 | 29.1237274 | 6.52E-02 | 132203203 | 132203326 | NC_000002.11 |

|            |          |          |      |            |          |           |           |              |
|------------|----------|----------|------|------------|----------|-----------|-----------|--------------|
| cg01811674 | 4.44E-16 | 1.30E-17 | 9.42 | 29.1214092 | 1.73E-01 | 150697210 | 150697333 | NC_000006.11 |
| cg09735896 | 4.45E-16 | 1.31E-17 | 9.42 | 29.1192498 | 8.67E-02 | 39019978  | 39020101  | NC_000017.10 |
| cg03164275 | 4.45E-16 | 1.31E-17 | 9.42 | 29.1175036 | 2.67E-01 | 219826805 | 219826928 | NC_000002.11 |
| cg16277843 | 4.48E-16 | 1.32E-17 | 9.42 | 29.1124748 | 1.10E-01 | 169671468 | 169671591 | NC_000006.11 |
| cg04223553 | 4.48E-16 | 1.32E-17 | 9.42 | 29.1117457 | 1.80E-01 | 153852934 | 153853057 | NC_000005.9  |
| cg10996039 | 4.48E-16 | 1.32E-17 | 9.42 | 29.1115814 | 2.04E-01 | 27178861  | 27178984  | NC_000007.13 |
| cg15922693 | 4.48E-16 | 1.32E-17 | 9.42 | 29.1107619 | 1.64E-01 | 51610688  | 51610811  | NC_000012.11 |
| cg25616547 | 4.49E-16 | 1.32E-17 | 9.42 | 29.108136  | 2.14E-01 | 115134344 | 115134467 | NC_000012.11 |
| cg21512644 | 4.50E-16 | 1.32E-17 | 9.42 | 29.1056739 | 2.21E-01 | 156130016 | 156130139 | NC_000004.11 |
| cg17228900 | 4.52E-16 | 1.33E-17 | 9.42 | 29.1021159 | 2.81E-01 | 391764    | 391887    | NC_000006.11 |
| cg21092551 | 4.52E-16 | 1.33E-17 | 9.42 | 29.1016747 | 2.19E-01 | 29993498  | 29993621  | NC_000015.9  |
| cg05513616 | 4.52E-16 | 1.33E-17 | 9.42 | 29.101172  | 3.28E-02 | 1538510   | 1538633   | NC_000005.9  |
| cg13618880 | 4.53E-16 | 1.33E-17 | 9.42 | 29.099705  | 1.76E-01 | 170579474 | 170579597 | NC_000006.11 |
| cg02475871 | 4.54E-16 | 1.34E-17 | 9.42 | 29.0966779 | 3.37E-02 | 5684969   | 5685092   | NC_000019.9  |
| cg01955203 | 4.54E-16 | 1.34E-17 | 9.42 | 29.0964898 | 1.34E-01 | 124515502 | 124515625 | NC_000008.10 |
| cg04168670 | 4.56E-16 | 1.34E-17 | 9.42 | 29.0920726 | 1.62E-01 | 124782817 | 124782940 | NC_000002.11 |
| cg01351783 | 4.58E-16 | 1.35E-17 | 9.42 | 29.0885779 | 8.74E-02 | 7220085   | 7220208   | NC_000006.11 |
| cg20655099 | 4.58E-16 | 1.35E-17 | 9.42 | 29.0885559 | 1.35E-01 | 5394889   | 5395012   | NC_000007.13 |
| cg08452658 | 4.58E-16 | 1.35E-17 | 9.42 | 29.0881556 | 3.01E-01 | 83776271  | 83776394  | NC_000015.9  |
| cg26464586 | 4.59E-16 | 1.35E-17 | 9.42 | 29.0843436 | 1.44E-01 | 43921712  | 43921835  | NC_000006.11 |
| cg16347811 | 4.61E-16 | 1.36E-17 | 9.42 | 29.0812515 | 1.25E-01 | 29322804  | 29322927  | NC_000007.13 |
| cg12880658 | 4.62E-16 | 1.36E-17 | 9.41 | 29.0784686 | 2.38E-01 | 115152386 | 115152509 | NC_000005.9  |
| cg10659480 | 4.64E-16 | 1.37E-17 | 9.41 | 29.0733679 | 6.44E-02 | 34055800  | 34055923  | NC_000003.11 |
| cg09967440 | 4.65E-16 | 1.37E-17 | 9.41 | 29.0722792 | 1.93E-01 | 127444969 | 127445092 | NC_000010.10 |
| cg21945949 | 4.67E-16 | 1.38E-17 | 9.41 | 29.0682433 | 1.48E-01 | 64683610  | 64683733  | NC_000002.11 |



|            |          |          |      |            |          |           |           |              |
|------------|----------|----------|------|------------|----------|-----------|-----------|--------------|
| cg10512951 | 4.72E-16 | 1.39E-17 | 9.41 | 29.0566228 | 2.03E-01 | 70500634  | 70500757  | NC_000006.11 |
| cg05348776 | 4.75E-16 | 1.40E-17 | 9.41 | 29.0493792 | 2.19E-01 | 95693784  | 95693907  | NC_000014.8  |
| cg24000873 | 4.75E-16 | 1.40E-17 | 9.41 | 29.0484774 | 2.14E-01 | 24813653  | 24813776  | NC_000008.10 |
| cg23863891 | 4.76E-16 | 1.41E-17 | 9.41 | 29.0472588 | 1.75E-01 | 155363328 | 155363451 | NC_000007.13 |
| cg06545143 | 4.77E-16 | 1.41E-17 | 9.41 | 29.0451843 | 1.87E-01 | 166402638 | 166402761 | NC_000006.11 |
| cg15415136 | 4.78E-16 | 1.41E-17 | 9.41 | 29.0426156 | 1.81E-01 | 38042418  | 38042541  | NC_000019.9  |
| cg23715830 | 4.79E-16 | 1.42E-17 | 9.41 | 29.0400758 | 2.60E-01 | 13974614  | 13974737  | NC_000003.11 |
| cg15889057 | 4.81E-16 | 1.42E-17 | 9.41 | 29.0368176 | 1.49E-01 | 53602179  | 53602302  | NC_000012.11 |
| cg27345762 | 4.82E-16 | 1.42E-17 | 9.41 | 29.0335226 | 1.81E-01 | 30734041  | 30734164  | NC_000007.13 |
| cg10767336 | 4.83E-16 | 1.43E-17 | 9.41 | 29.0318345 | 1.88E-01 | 5019066   | 5019189   | NC_000012.11 |
| cg19095000 | 4.83E-16 | 1.43E-17 | 9.41 | 29.0306945 | 1.39E-01 | 11711141  | 11711264  | NC_000001.10 |
| cg01696114 | 4.84E-16 | 1.43E-17 | 9.41 | 29.0300617 | 1.22E-01 | 1616448   | 1616571   | NC_000004.11 |
| cg01566199 | 4.84E-16 | 1.43E-17 | 9.41 | 29.0298025 | 1.53E-01 | 26197239  | 26197362  | NC_000001.10 |
| cg04245645 | 4.85E-16 | 1.44E-17 | 9.41 | 29.0262134 | 2.59E-01 | 96343016  | 96343139  | NC_000014.8  |
| cg07978472 | 4.86E-16 | 1.44E-17 | 9.41 | 29.0254716 | 2.59E-01 | 122686493 | 122686616 | NC_000004.11 |
| cg02463418 | 4.86E-16 | 1.44E-17 | 9.41 | 29.0245668 | 2.33E-01 | 66535575  | 66535698  | NC_000004.11 |
| cg22117468 | 4.89E-16 | 1.45E-17 | 9.41 | 29.0188984 | 1.11E-01 | 70176293  | 70176416  | NC_000002.11 |
| cg06069030 | 4.89E-16 | 1.45E-17 | 9.41 | 29.0186203 | 8.92E-02 | 89920590  | 89920713  | NC_000016.9  |
| cg15201291 | 4.89E-16 | 1.45E-17 | 9.41 | 29.0185541 | 1.45E-01 | 96830102  | 96830225  | NC_000010.10 |
| cg12083852 | 4.90E-16 | 1.45E-17 | 9.4  | 29.0158092 | 1.37E-01 | 151282686 | 151282809 | NC_000001.10 |
| cg12689506 | 4.91E-16 | 1.45E-17 | 9.4  | 29.0140404 | 1.43E-01 | 100607835 | 100607958 | NC_000007.13 |
| cg20270188 | 4.93E-16 | 1.46E-17 | 9.4  | 29.0099876 | 1.67E-01 | 156611963 | 156612086 | NC_000001.10 |
| cg22514987 | 4.97E-16 | 1.47E-17 | 9.4  | 29.0017148 | 8.59E-02 | 52271182  | 52271305  | NC_000006.11 |
| cg04971534 | 4.98E-16 | 1.47E-17 | 9.4  | 28.9992559 | 2.16E-01 | 27333432  | 27333555  | NC_000017.10 |
| cg18473544 | 5.00E-16 | 1.48E-17 | 9.4  | 28.9950334 | 1.23E-01 | 14409599  | 14409722  | NC_000003.11 |

|            |          |          |      |            |          |           |           |              |
|------------|----------|----------|------|------------|----------|-----------|-----------|--------------|
| cg22379472 | 5.00E-16 | 1.48E-17 | 9.4  | 28.9936911 | 2.48E-01 | 47413617  | 47413740  | NC_000007.13 |
| cg24089936 | 5.01E-16 | 1.48E-17 | 9.4  | 28.992671  | 1.28E-01 | 49341594  | 49341717  | NC_000001.10 |
| cg11002404 | 5.02E-16 | 1.49E-17 | 9.4  | 28.991127  | 2.67E-01 | 11060038  | 11060161  | NC_000010.10 |
| cg18773260 | 5.02E-16 | 1.49E-17 | 9.4  | 28.9902292 | 1.17E-01 | 46685292  | 46685415  | NC_000017.10 |
| cg15445725 | 5.02E-16 | 1.49E-17 | 9.4  | 28.9898512 | 1.53E-01 | 194469106 | 194469229 | NC_000003.11 |
| cg06274159 | 5.05E-16 | 1.50E-17 | 9.4  | 28.9846168 | 2.68E-01 | 188916867 | 188916990 | NC_000004.11 |
| cg26128092 | 5.05E-16 | 1.50E-17 | 9.4  | 28.9845597 | 1.99E-01 | 3567550   | 3567673   | NC_000001.10 |
| cg01168289 | 5.07E-16 | 1.51E-17 | 9.4  | 28.9786366 | 1.62E-01 | 32421514  | 32421637  | NC_000011.9  |
| cg10365563 | 5.08E-16 | 1.51E-17 | 9.4  | 28.9773608 | 1.99E-01 | 21469772  | 21469895  | NC_000007.13 |
| cg12927617 | 5.08E-16 | 1.51E-17 | 9.4  | 28.9769386 | 1.41E-01 | 117084602 | 117084725 | NC_000009.11 |
| cg08585669 | 5.09E-16 | 1.51E-17 | 9.4  | 28.9755369 | 5.85E-02 | 37853032  | 37853155  | NC_000017.10 |
| cg02677947 | 5.13E-16 | 1.52E-17 | 9.4  | 28.9680264 | 1.32E-01 | 739463    | 739586    | NC_000016.9  |
| cg04068980 | 5.14E-16 | 1.53E-17 | 9.4  | 28.9656218 | 2.47E-01 | 50674203  | 50674326  | NC_000005.9  |
| cg22067676 | 5.15E-16 | 1.53E-17 | 9.4  | 28.9639897 | 2.03E-01 | 126281331 | 126281454 | NC_000006.11 |
| cg19329644 | 5.16E-16 | 1.53E-17 | 9.4  | 28.9608936 | 8.95E-02 | 135010873 | 135010996 | NC_000010.10 |
| cg19963602 | 5.17E-16 | 1.53E-17 | 9.4  | 28.9596914 | 3.60E-02 | 94975601  | 94975724  | NC_000012.11 |
| cg01969701 | 5.19E-16 | 1.54E-17 | 9.4  | 28.9542024 | 2.21E-01 | 69286145  | 69286268  | NC_000011.9  |
| cg19125370 | 5.20E-16 | 1.55E-17 | 9.4  | 28.9524795 | 1.74E-01 | 10390532  | 10390655  | NC_000006.11 |
| cg15948088 | 5.21E-16 | 1.55E-17 | 9.39 | 28.9503074 | 2.13E-01 | 109293068 | 109293191 | NC_000011.9  |
| cg12547839 | 5.21E-16 | 1.55E-17 | 9.39 | 28.9499542 | 7.54E-02 | 74416551  | 74416674  | NC_000017.10 |
| cg18753541 | 5.22E-16 | 1.55E-17 | 9.39 | 28.9482103 | 1.45E-01 | 121841743 | 121841866 | NC_000004.11 |
| cg10320659 | 5.24E-16 | 1.56E-17 | 9.39 | 28.9445819 | 1.74E-01 | 62959262  | 62959385  | NC_000020.10 |
| cg04360049 | 5.26E-16 | 1.56E-17 | 9.39 | 28.9407927 | 2.95E-01 | 158150797 | 158150920 | NC_000001.10 |
| cg12478381 | 5.26E-16 | 1.56E-17 | 9.39 | 28.9406206 | 2.59E-01 | 26565249  | 26565372  | NC_000022.10 |
| cg21384402 | 5.26E-16 | 1.56E-17 | 9.39 | 28.940537  | 2.54E-01 | 105036701 | 105036824 | NC_000010.10 |

|            |          |          |      |            |          |           |           |              |
|------------|----------|----------|------|------------|----------|-----------|-----------|--------------|
| cg05294930 | 5.26E-16 | 1.57E-17 | 9.39 | 28.9398218 | 7.33E-02 | 72220937  | 72221060  | NC_000014.8  |
| cg08406370 | 5.28E-16 | 1.57E-17 | 9.39 | 28.9372209 | 2.72E-01 | 23846893  | 23847016  | NC_000016.9  |
| cg03363161 | 5.28E-16 | 1.57E-17 | 9.39 | 28.9358089 | 2.08E-01 | 147139184 | 147139307 | NC_000003.11 |
| cg07137606 | 5.29E-16 | 1.57E-17 | 9.39 | 28.9345117 | 2.10E-01 | 242687018 | 242687141 | NC_000001.10 |
| cg03265074 | 5.33E-16 | 1.59E-17 | 9.39 | 28.9264948 | 1.36E-01 | 52603300  | 52603423  | NC_000012.11 |
| cg26382551 | 5.33E-16 | 1.59E-17 | 9.39 | 28.9260319 | 2.02E-01 | 11047284  | 11047407  | NC_000010.10 |
| cg12648074 | 5.33E-16 | 1.59E-17 | 9.39 | 28.9256028 | 1.89E-01 | 140864474 | 140864597 | NC_000005.9  |
| cg14972654 | 5.34E-16 | 1.59E-17 | 9.39 | 28.9248917 | 1.33E-01 | 111771263 | 111771386 | NC_000010.10 |
| cg26846409 | 5.34E-16 | 1.59E-17 | 9.39 | 28.9248489 | 1.41E-01 | 21640304  | 21640427  | NC_000008.10 |
| cg09605164 | 5.35E-16 | 1.59E-17 | 9.39 | 28.9227688 | 2.59E-01 | 152622787 | 152622910 | NC_000007.13 |
| cg05158165 | 5.37E-16 | 1.60E-17 | 9.39 | 28.9186827 | 4.16E-02 | 108965753 | 108965876 | NC_000006.11 |
| cg03907016 | 5.38E-16 | 1.60E-17 | 9.39 | 28.9172003 | 1.83E-01 | 6534760   | 6534883   | NC_000019.9  |
| cg22191326 | 5.39E-16 | 1.61E-17 | 9.39 | 28.9136523 | 2.42E-01 | 98836379  | 98836502  | NC_000015.9  |
| cg22737473 | 5.41E-16 | 1.61E-17 | 9.39 | 28.9106411 | 1.43E-01 | 200823609 | 200823732 | NC_000002.11 |
| cg27645498 | 5.41E-16 | 1.61E-17 | 9.39 | 28.9098173 | 1.49E-01 | 125145553 | 125145676 | NC_000012.11 |
| cg01728554 | 5.44E-16 | 1.62E-17 | 9.39 | 28.9047924 | 1.80E-01 | 155107661 | 155107784 | NC_000005.9  |
| cg25529304 | 5.47E-16 | 1.63E-17 | 9.39 | 28.8983046 | 1.11E-01 | 43034529  | 43034652  | NC_000005.9  |
| cg13842237 | 5.49E-16 | 1.64E-17 | 9.39 | 28.894964  | 2.03E-01 | 47064079  | 47064202  | NC_000021.8  |
| cg02466815 | 5.51E-16 | 1.65E-17 | 9.39 | 28.890242  | 2.47E-01 | 177054573 | 177054696 | NC_000002.11 |
| cg23625660 | 5.56E-16 | 1.66E-17 | 9.38 | 28.8813519 | 1.92E-01 | 135266516 | 135266639 | NC_000005.9  |
| cg13702005 | 5.58E-16 | 1.67E-17 | 9.38 | 28.8774384 | 2.86E-01 | 103889789 | 103889912 | NC_000012.11 |
| cg23207077 | 5.60E-16 | 1.67E-17 | 9.38 | 28.8741446 | 1.63E-01 | 905988    | 906111    | NC_000001.10 |
| cg11732321 | 5.70E-16 | 1.70E-17 | 9.38 | 28.856361  | 4.37E-02 | 99841169  | 99841292  | NC_000008.10 |
| cg04207084 | 5.71E-16 | 1.71E-17 | 9.38 | 28.8536886 | 1.67E-01 | 157477846 | 157477969 | NC_000007.13 |
| cg10242602 | 5.72E-16 | 1.71E-17 | 9.38 | 28.851745  | 2.09E-01 | 188916875 | 188916998 | NC_000004.11 |

|            |          |          |      |            |          |           |           |              |
|------------|----------|----------|------|------------|----------|-----------|-----------|--------------|
| cg05080154 | 5.75E-16 | 1.72E-17 | 9.38 | 28.8459179 | 1.92E-01 | 76739409  | 76739532  | NC_000018.9  |
| cg16662785 | 5.78E-16 | 1.73E-17 | 9.38 | 28.8415006 | 1.81E-01 | 36246115  | 36246238  | NC_000022.10 |
| cg01115565 | 5.80E-16 | 1.74E-17 | 9.38 | 28.8375831 | 8.03E-02 | 29584222  | 29584345  | NC_000001.10 |
| cg10715092 | 5.80E-16 | 1.74E-17 | 9.38 | 28.8369887 | 2.18E-01 | 26190354  | 26190477  | NC_000020.10 |
| cg08322102 | 5.83E-16 | 1.75E-17 | 9.38 | 28.8316139 | 3.03E-01 | 77595321  | 77595444  | NC_000008.10 |
| cg10363246 | 5.84E-16 | 1.75E-17 | 9.38 | 28.8303952 | 2.78E-01 | 5019482   | 5019605   | NC_000012.11 |
| cg19147218 | 5.85E-16 | 1.75E-17 | 9.38 | 28.8291617 | 2.53E-01 | 27197555  | 27197678  | NC_000007.13 |
| cg27240402 | 5.87E-16 | 1.76E-17 | 9.38 | 28.8254031 | 7.57E-02 | 1364170   | 1364293   | NC_000004.11 |
| cg07664198 | 5.90E-16 | 1.77E-17 | 9.37 | 28.8189695 | 1.93E-01 | 136553882 | 136554005 | NC_000007.13 |
| cg22397673 | 5.92E-16 | 1.77E-17 | 9.37 | 28.8161796 | 5.94E-02 | 31851106  | 31851229  | NC_000006.11 |
| cg25612428 | 5.92E-16 | 1.78E-17 | 9.37 | 28.8150478 | 1.08E-01 | 10649867  | 10649990  | NC_000005.9  |
| cg19942495 | 5.93E-16 | 1.78E-17 | 9.37 | 28.8143921 | 1.68E-01 | 32484027  | 32484150  | NC_000017.10 |
| cg19706534 | 5.93E-16 | 1.78E-17 | 9.37 | 28.8134087 | 1.23E-01 | 120197644 | 120197767 | NC_000002.11 |
| cg07609844 | 5.97E-16 | 1.79E-17 | 9.37 | 28.8069683 | 1.26E-01 | 151389355 | 151389478 | NC_000002.11 |
| cg12741420 | 5.98E-16 | 1.79E-17 | 9.37 | 28.8056658 | 2.40E-01 | 392131    | 392254    | NC_000006.11 |
| cg26257969 | 5.99E-16 | 1.80E-17 | 9.37 | 28.80379   | 9.09E-02 | 48722474  | 48722597  | NC_000012.11 |
| cg20439473 | 5.99E-16 | 1.80E-17 | 9.37 | 28.8023871 | 9.96E-02 | 56061070  | 56061193  | NC_000017.10 |
| cg21003981 | 5.99E-16 | 1.80E-17 | 9.37 | 28.8021841 | 1.79E-02 | 9649299   | 9649422   | NC_000001.10 |
| cg03168029 | 6.01E-16 | 1.80E-17 | 9.37 | 28.7999439 | 1.27E-01 | 1221398   | 1221521   | NC_000011.9  |
| cg13654525 | 6.04E-16 | 1.82E-17 | 9.37 | 28.7934224 | 1.57E-01 | 65360509  | 65360632  | NC_000011.9  |
| cg09370594 | 6.05E-16 | 1.82E-17 | 9.37 | 28.7929632 | 1.20E-01 | 2291872   | 2291995   | NC_000019.9  |
| cg03226000 | 6.07E-16 | 1.82E-17 | 9.37 | 28.7895316 | 2.47E-01 | 55690378  | 55690501  | NC_000016.9  |
| cg05209584 | 6.07E-16 | 1.82E-17 | 9.37 | 28.7894965 | 2.55E-01 | 127873283 | 127873406 | NC_000005.9  |
| cg20841748 | 6.09E-16 | 1.83E-17 | 9.37 | 28.784884  | 1.40E-01 | 40838078  | 40838201  | NC_000017.10 |
| cg05888551 | 6.09E-16 | 1.83E-17 | 9.37 | 28.7846403 | 6.67E-02 | 56750788  | 56750911  | NC_000020.10 |

|            |          |          |      |            |          |           |           |              |
|------------|----------|----------|------|------------|----------|-----------|-----------|--------------|
| cg17694795 | 6.10E-16 | 1.83E-17 | 9.37 | 28.7833201 | 1.99E-01 | 67874366  | 67874489  | NC_000008.10 |
| cg00260235 | 6.12E-16 | 1.84E-17 | 9.37 | 28.7800909 | 3.92E-02 | 69931262  | 69931385  | NC_000011.9  |
| cg26925231 | 6.12E-16 | 1.84E-17 | 9.37 | 28.7792381 | 1.96E-01 | 15094380  | 15094503  | NC_000008.10 |
| cg24772525 | 6.13E-16 | 1.84E-17 | 9.37 | 28.7790018 | 1.56E-01 | 172014861 | 172014984 | NC_000002.11 |
| cg08536805 | 6.16E-16 | 1.85E-17 | 9.37 | 28.7734961 | 7.18E-02 | 107748222 | 107748345 | NC_000003.11 |
| cg03970036 | 6.19E-16 | 1.86E-17 | 9.37 | 28.7682432 | 2.48E-01 | 220174232 | 220174355 | NC_000002.11 |
| cg25307665 | 6.20E-16 | 1.87E-17 | 9.37 | 28.765584  | 1.82E-01 | 27183694  | 27183817  | NC_000007.13 |
| cg12206317 | 6.20E-16 | 1.87E-17 | 9.37 | 28.7651887 | 1.12E-01 | 224026237 | 224026360 | NC_000001.10 |
| cg03376794 | 6.21E-16 | 1.87E-17 | 9.37 | 28.7641293 | 2.95E-01 | 25704507  | 25704630  | NC_000016.9  |
| cg09543255 | 6.24E-16 | 1.88E-17 | 9.37 | 28.7596077 | 2.36E-01 | 170302640 | 170302763 | NC_000003.11 |
| cg16945378 | 6.24E-16 | 1.88E-17 | 9.37 | 28.7592873 | 6.06E-02 | 37451213  | 37451336  | NC_000022.10 |
| cg00486340 | 6.24E-16 | 1.88E-17 | 9.37 | 28.7590857 | 2.09E-01 | 4860026   | 4860149   | NC_000004.11 |
| cg22205276 | 6.26E-16 | 1.89E-17 | 9.36 | 28.7544942 | 1.56E-01 | 60052372  | 60052495  | NC_000018.9  |
| cg22959054 | 6.32E-16 | 1.90E-17 | 9.36 | 28.7459432 | 1.27E-01 | 16761114  | 16761237  | NC_000012.11 |
| cg25555059 | 6.33E-16 | 1.91E-17 | 9.36 | 28.7441068 | 1.98E-01 | 128301488 | 128301611 | NC_000005.9  |
| cg21477176 | 6.33E-16 | 1.91E-17 | 9.36 | 28.7428742 | 2.02E-01 | 54445888  | 54446011  | NC_000019.9  |
| cg16848624 | 6.35E-16 | 1.92E-17 | 9.36 | 28.7395097 | 2.26E-01 | 45614290  | 45614413  | NC_000007.13 |
| cg02878244 | 6.38E-16 | 1.92E-17 | 9.36 | 28.7359956 | 2.01E-01 | 20181911  | 20182034  | NC_000011.9  |
| cg02397552 | 6.39E-16 | 1.93E-17 | 9.36 | 28.7341406 | 1.20E-01 | 77576078  | 77576201  | NC_000013.10 |
| cg02611934 | 6.40E-16 | 1.93E-17 | 9.36 | 28.7316492 | 1.53E-01 | 88329407  | 88329530  | NC_000013.10 |
| cg07899681 | 6.40E-16 | 1.93E-17 | 9.36 | 28.7314682 | 1.69E-01 | 22444714  | 22444837  | NC_000019.9  |
| cg18103859 | 6.43E-16 | 1.94E-17 | 9.36 | 28.7266741 | 3.34E-01 | 61110002  | 61110125  | NC_000014.8  |
| cg13919438 | 6.43E-16 | 1.94E-17 | 9.36 | 28.7263849 | 2.14E-01 | 39995546  | 39995669  | NC_000020.10 |
| cg01482645 | 6.45E-16 | 1.95E-17 | 9.36 | 28.7239036 | 2.29E-01 | 104513024 | 104513147 | NC_000008.10 |
| cg04227961 | 6.46E-16 | 1.95E-17 | 9.36 | 28.7221921 | 2.31E-01 | 113541993 | 113542116 | NC_000012.11 |

|            |          |          |      |            |          |           |           |              |
|------------|----------|----------|------|------------|----------|-----------|-----------|--------------|
| cg14835443 | 6.46E-16 | 1.95E-17 | 9.36 | 28.7221042 | 2.09E-01 | 47225543  | 47225666  | NC_000012.11 |
| cg23641560 | 6.47E-16 | 1.96E-17 | 9.36 | 28.7200017 | 1.11E-01 | 182755044 | 182755167 | NC_000002.11 |
| cg09972259 | 6.47E-16 | 1.96E-17 | 9.36 | 28.7192091 | 2.15E-01 | 112711854 | 112711977 | NC_000013.10 |
| cg04109655 | 6.48E-16 | 1.96E-17 | 9.36 | 28.7181632 | 9.11E-02 | 2114887   | 2115010   | NC_000007.13 |
| cg07612562 | 6.55E-16 | 1.98E-17 | 9.36 | 28.7065439 | 2.41E-01 | 145813915 | 145814038 | NC_000007.13 |
| cg16204414 | 6.57E-16 | 1.99E-17 | 9.36 | 28.7041455 | 1.93E-01 | 10325494  | 10325617  | NC_000003.11 |
| cg07808555 | 6.58E-16 | 1.99E-17 | 9.36 | 28.7022253 | 2.70E-01 | 111217712 | 111217835 | NC_000001.10 |
| cg09022422 | 6.58E-16 | 1.99E-17 | 9.36 | 28.7019698 | 2.32E-01 | 10857798  | 10857921  | NC_000003.11 |
| cg18343881 | 6.61E-16 | 2.00E-17 | 9.36 | 28.6968621 | 1.57E-01 | 83016717  | 83016840  | NC_000005.9  |
| cg13362636 | 6.66E-16 | 2.02E-17 | 9.35 | 28.6888622 | 1.82E-01 | 82289309  | 82289432  | NC_000002.11 |
| cg26835683 | 6.68E-16 | 2.02E-17 | 9.35 | 28.686121  | 1.13E-01 | 160180434 | 160180557 | NC_000001.10 |
| cg15032142 | 6.71E-16 | 2.03E-17 | 9.35 | 28.6812893 | 2.11E-01 | 28414780  | 28414903  | NC_000006.11 |
| cg13680388 | 6.72E-16 | 2.04E-17 | 9.35 | 28.6797715 | 2.00E-01 | 57471844  | 57471967  | NC_000020.10 |
| cg04611203 | 6.75E-16 | 2.05E-17 | 9.35 | 28.6744019 | 1.94E-01 | 2781438   | 2781561   | NC_000020.10 |
| cg21045464 | 6.78E-16 | 2.05E-17 | 9.35 | 28.670859  | 2.45E-01 | 115135057 | 115135180 | NC_000012.11 |
| cg19839281 | 6.79E-16 | 2.06E-17 | 9.35 | 28.6689721 | 1.34E-01 | 238362492 | 238362615 | NC_000002.11 |
| cg10244666 | 6.81E-16 | 2.06E-17 | 9.35 | 28.6660662 | 2.44E-01 | 32421808  | 32421931  | NC_000011.9  |
| cg14123942 | 6.85E-16 | 2.08E-17 | 9.35 | 28.6592489 | 2.48E-01 | 104500322 | 104500445 | NC_000009.11 |
| cg11893763 | 6.85E-16 | 2.08E-17 | 9.35 | 28.6590205 | 1.91E-01 | 125425688 | 125425811 | NC_000010.10 |
| cg27444994 | 6.85E-16 | 2.08E-17 | 9.35 | 28.6589023 | 2.51E-01 | 62070072  | 62070195  | NC_000016.9  |
| cg06829686 | 6.88E-16 | 2.09E-17 | 9.35 | 28.6553759 | 2.69E-01 | 47910843  | 47910966  | NC_000001.10 |
| cg00154357 | 6.89E-16 | 2.09E-17 | 9.35 | 28.6532488 | 1.23E-01 | 147111280 | 147111403 | NC_000003.11 |
| cg12060744 | 6.92E-16 | 2.10E-17 | 9.35 | 28.6488164 | 2.57E-01 | 58095581  | 58095704  | NC_000019.9  |
| cg00788025 | 6.94E-16 | 2.11E-17 | 9.35 | 28.6454995 | 9.76E-02 | 962749    | 962872    | NC_000004.11 |
| cg14672084 | 6.95E-16 | 2.11E-17 | 9.35 | 28.6443284 | 2.00E-01 | 140857941 | 140858064 | NC_000005.9  |

|            |          |          |      |            |          |           |           |              |
|------------|----------|----------|------|------------|----------|-----------|-----------|--------------|
| cg25718223 | 6.97E-16 | 2.12E-17 | 9.35 | 28.6402803 | 1.21E-01 | 13915877  | 13916000  | NC_000019.9  |
| cg11124652 | 6.98E-16 | 2.12E-17 | 9.35 | 28.6395621 | 1.25E-01 | 62462782  | 62462905  | NC_000002.11 |
| cg21683069 | 6.98E-16 | 2.12E-17 | 9.35 | 28.6387939 | 1.78E-01 | 147781600 | 147781723 | NC_000001.10 |
| cg11323255 | 7.00E-16 | 2.13E-17 | 9.35 | 28.6357597 | 1.49E-01 | 1493168   | 1493291   | NC_000019.9  |
| cg16256390 | 7.00E-16 | 2.13E-17 | 9.35 | 28.635739  | 2.35E-01 | 99712336  | 99712459  | NC_000014.8  |
| cg27174778 | 7.01E-16 | 2.13E-17 | 9.35 | 28.6351537 | 9.90E-02 | 44186519  | 44186642  | NC_000007.13 |
| cg05883442 | 7.01E-16 | 2.13E-17 | 9.35 | 28.63432   | 1.26E-01 | 67476137  | 67476260  | NC_000016.9  |
| cg17722002 | 7.06E-16 | 2.15E-17 | 9.34 | 28.6267592 | 1.85E-01 | 121940381 | 121940504 | NC_000007.13 |
| cg09127607 | 7.07E-16 | 2.15E-17 | 9.34 | 28.624983  | 2.12E-01 | 69914213  | 69914336  | NC_000010.10 |
| cg01348055 | 7.08E-16 | 2.16E-17 | 9.34 | 28.6235543 | 1.30E-01 | 10272788  | 10272911  | NC_000016.9  |
| cg07372195 | 7.13E-16 | 2.17E-17 | 9.34 | 28.6160886 | 1.38E-01 | 67310842  | 67310965  | NC_000017.10 |
| cg13672348 | 7.20E-16 | 2.19E-17 | 9.34 | 28.6069377 | 5.88E-02 | 140588475 | 140588598 | NC_000009.11 |
| cg05783915 | 7.22E-16 | 2.20E-17 | 9.34 | 28.604593  | 2.47E-01 | 119302062 | 119302185 | NC_000010.10 |
| cg09567180 | 7.23E-16 | 2.20E-17 | 9.34 | 28.6030419 | 1.45E-01 | 124609416 | 124609539 | NC_000010.10 |
| cg25730685 | 7.24E-16 | 2.21E-17 | 9.34 | 28.6009992 | 2.73E-01 | 2375010   | 2375133   | NC_000001.10 |
| cg03882967 | 7.25E-16 | 2.21E-17 | 9.34 | 28.6001475 | 1.00E-01 | 182117858 | 182117981 | NC_000003.11 |
| cg14852384 | 7.25E-16 | 2.21E-17 | 9.34 | 28.598988  | 1.66E-01 | 229569877 | 229570000 | NC_000001.10 |
| cg10581811 | 7.28E-16 | 2.22E-17 | 9.34 | 28.5954006 | 3.37E-02 | 58257267  | 58257390  | NC_000012.11 |
| cg05087577 | 7.29E-16 | 2.22E-17 | 9.34 | 28.5927098 | 5.19E-02 | 43532611  | 43532734  | NC_000001.10 |
| cg16935061 | 7.31E-16 | 2.23E-17 | 9.34 | 28.590217  | 1.86E-01 | 1395278   | 1395401   | NC_000006.11 |
| cg20293594 | 7.32E-16 | 2.23E-17 | 9.34 | 28.5889573 | 2.66E-01 | 27196296  | 27196419  | NC_000007.13 |
| cg05495949 | 7.39E-16 | 2.25E-17 | 9.34 | 28.5789947 | 2.77E-01 | 4923140   | 4923263   | NC_000007.13 |
| cg08802533 | 7.40E-16 | 2.26E-17 | 9.34 | 28.5771148 | 1.27E-01 | 27073253  | 27073376  | NC_000002.11 |
| cg24932457 | 7.41E-16 | 2.26E-17 | 9.34 | 28.5758757 | 1.99E-01 | 175568559 | 175568682 | NC_000001.10 |
| cg12924936 | 7.42E-16 | 2.27E-17 | 9.34 | 28.5742364 | 2.51E-01 | 2279098   | 2279221   | NC_000005.9  |

|            |          |          |      |            |          |           |           |              |
|------------|----------|----------|------|------------|----------|-----------|-----------|--------------|
| cg05471509 | 7.49E-16 | 2.29E-17 | 9.34 | 28.5657877 | 1.10E-01 | 114109420 | 114109543 | NC_000013.10 |
| cg01947130 | 7.49E-16 | 2.29E-17 | 9.34 | 28.565495  | 2.34E-01 | 60287196  | 60287319  | NC_000015.9  |
| cg22560214 | 7.49E-16 | 2.29E-17 | 9.34 | 28.5643722 | 1.47E-01 | 13531213  | 13531336  | NC_000004.11 |
| cg23383138 | 7.50E-16 | 2.29E-17 | 9.34 | 28.5636556 | 1.38E-01 | 30885012  | 30885135  | NC_000022.10 |
| cg16685313 | 7.51E-16 | 2.30E-17 | 9.33 | 28.561229  | 1.63E-01 | 233036012 | 233036135 | NC_000001.10 |
| cg15839448 | 7.53E-16 | 2.30E-17 | 9.33 | 28.5596427 | 1.92E-01 | 41166530  | 41166653  | NC_000008.10 |
| cg14800197 | 7.62E-16 | 2.33E-17 | 9.33 | 28.5471599 | 1.35E-01 | 121735681 | 121735804 | NC_000002.11 |
| cg26913576 | 7.62E-16 | 2.33E-17 | 9.33 | 28.5466352 | 9.46E-02 | 2151698   | 2151821   | NC_000011.9  |
| cg04572969 | 7.62E-16 | 2.33E-17 | 9.33 | 28.5465318 | 8.71E-02 | 3503480   | 3503603   | NC_000001.10 |
| cg14335816 | 7.64E-16 | 2.34E-17 | 9.33 | 28.543352  | 1.05E-01 | 1069505   | 1069628   | NC_000017.10 |
| cg12451155 | 7.73E-16 | 2.37E-17 | 9.33 | 28.531361  | 1.45E-01 | 29065427  | 29065550  | NC_000001.10 |
| cg21452281 | 7.74E-16 | 2.37E-17 | 9.33 | 28.5293928 | 1.76E-01 | 189203965 | 189204088 | NC_000004.11 |
| cg25632105 | 7.75E-16 | 2.37E-17 | 9.33 | 28.5287355 | 1.85E-01 | 136553728 | 136553851 | NC_000007.13 |
| cg08112737 | 7.76E-16 | 2.38E-17 | 9.33 | 28.5274832 | 9.99E-02 | 57178051  | 57178174  | NC_000004.11 |
| cg14155184 | 7.77E-16 | 2.38E-17 | 9.33 | 28.5258312 | 8.54E-02 | 44120425  | 44120548  | NC_000006.11 |
| cg10357909 | 7.77E-16 | 2.38E-17 | 9.33 | 28.5252686 | 6.87E-02 | 479994    | 480117    | NC_000016.9  |
| cg19656282 | 7.77E-16 | 2.38E-17 | 9.33 | 28.525073  | 2.01E-01 | 74742786  | 74742909  | NC_000002.11 |
| cg16472050 | 7.78E-16 | 2.38E-17 | 9.33 | 28.5245787 | 1.75E-01 | 172945698 | 172945821 | NC_000002.11 |
| cg05525743 | 7.79E-16 | 2.39E-17 | 9.33 | 28.5222868 | 2.58E-01 | 30716524  | 30716647  | NC_000019.9  |
| cg24953703 | 7.82E-16 | 2.39E-17 | 9.33 | 28.5194722 | 1.63E-01 | 41236975  | 41237098  | NC_000015.9  |
| cg03149432 | 7.82E-16 | 2.40E-17 | 9.33 | 28.5188098 | 1.85E-01 | 37498721  | 37498844  | NC_000001.10 |
| cg18788664 | 7.84E-16 | 2.40E-17 | 9.33 | 28.5165283 | 2.36E-01 | 221068171 | 221068294 | NC_000001.10 |
| cg16730825 | 7.86E-16 | 2.41E-17 | 9.33 | 28.5129323 | 1.71E-01 | 928439    | 928562    | NC_000011.9  |
| cg12288551 | 7.87E-16 | 2.41E-17 | 9.33 | 28.512378  | 1.24E-01 | 50801220  | 50801343  | NC_000007.13 |
| cg05991454 | 7.87E-16 | 2.41E-17 | 9.33 | 28.5115825 | 2.12E-01 | 147558435 | 147558558 | NC_000004.11 |



|            |          |          |      |            |          |           |           |              |
|------------|----------|----------|------|------------|----------|-----------|-----------|--------------|
| cg05732394 | 7.90E-16 | 2.42E-17 | 9.33 | 28.5081056 | 1.04E-01 | 44255249  | 44255372  | NC_000007.13 |
| cg03242458 | 7.92E-16 | 2.43E-17 | 9.33 | 28.5052643 | 9.68E-02 | 30135644  | 30135767  | NC_000006.11 |
| cg05011265 | 8.00E-16 | 2.46E-17 | 9.32 | 28.4942382 | 8.01E-02 | 22958399  | 22958522  | NC_000014.8  |
| cg13191508 | 8.01E-16 | 2.46E-17 | 9.32 | 28.4934853 | 1.37E-01 | 144600686 | 144600809 | NC_000008.10 |
| cg21100077 | 8.03E-16 | 2.47E-17 | 9.32 | 28.4901043 | 1.66E-01 | 100627366 | 100627489 | NC_000013.10 |
| cg11709905 | 8.05E-16 | 2.47E-17 | 9.32 | 28.487292  | 9.70E-02 | 736287    | 736410    | NC_000011.9  |
| cg06946708 | 8.05E-16 | 2.47E-17 | 9.32 | 28.4872669 | 2.12E-01 | 125732373 | 125732496 | NC_000010.10 |
| cg21097354 | 8.07E-16 | 2.48E-17 | 9.32 | 28.4854572 | 1.93E-01 | 27179161  | 27179284  | NC_000007.13 |
| cg06170425 | 8.09E-16 | 2.49E-17 | 9.32 | 28.4823683 | 1.05E-01 | 4164087   | 4164210   | NC_000016.9  |
| cg14427009 | 8.13E-16 | 2.50E-17 | 9.32 | 28.4776409 | 1.63E-01 | 58207058  | 58207181  | NC_000013.10 |
| cg16518590 | 8.19E-16 | 2.52E-17 | 9.32 | 28.4699313 | 4.76E-02 | 51104801  | 51104924  | NC_000007.13 |
| cg02885007 | 8.23E-16 | 2.53E-17 | 9.32 | 28.4652229 | 1.42E-01 | 176987605 | 176987728 | NC_000002.11 |
| cg01002253 | 8.23E-16 | 2.53E-17 | 9.32 | 28.4647687 | 2.33E-01 | 164264914 | 164265037 | NC_000004.11 |
| cg00652274 | 8.23E-16 | 2.53E-17 | 9.32 | 28.4646903 | 1.67E-01 | 115576803 | 115576926 | NC_000003.11 |
| cg02728050 | 8.24E-16 | 2.53E-17 | 9.32 | 28.4638597 | 2.13E-01 | 50818153  | 50818276  | NC_000010.10 |
| cg06311863 | 8.25E-16 | 2.54E-17 | 9.32 | 28.4616163 | 2.13E-01 | 55508686  | 55508809  | NC_000003.11 |
| cg26848718 | 8.26E-16 | 2.54E-17 | 9.32 | 28.4603561 | 1.82E-01 | 32454975  | 32455098  | NC_000011.9  |
| cg16347256 | 8.27E-16 | 2.54E-17 | 9.32 | 28.4599046 | 1.57E-01 | 57285160  | 57285283  | NC_000001.10 |
| cg16730509 | 8.31E-16 | 2.56E-17 | 9.32 | 28.4542981 | 1.27E-01 | 102787588 | 102787711 | NC_000014.8  |
| cg19265000 | 8.32E-16 | 2.56E-17 | 9.32 | 28.4532708 | 1.10E-01 | 49460706  | 49460829  | NC_000012.11 |
| cg05924171 | 8.32E-16 | 2.56E-17 | 9.32 | 28.4530025 | 6.12E-02 | 67471737  | 67471860  | NC_000011.9  |
| cg06898293 | 8.33E-16 | 2.56E-17 | 9.32 | 28.451656  | 2.03E-01 | 114750703 | 114750826 | NC_000007.13 |
| cg04317399 | 8.36E-16 | 2.58E-17 | 9.32 | 28.447389  | 1.94E-01 | 27170313  | 27170436  | NC_000007.13 |
| cg13352750 | 8.37E-16 | 2.58E-17 | 9.32 | 28.4459248 | 2.41E-01 | 27225123  | 27225246  | NC_000007.13 |
| cg14386999 | 8.40E-16 | 2.59E-17 | 9.32 | 28.4420974 | 7.41E-02 | 44906672  | 44906795  | NC_000021.8  |

|            |          |          |      |            |          |           |           |              |
|------------|----------|----------|------|------------|----------|-----------|-----------|--------------|
| cg25593565 | 8.41E-16 | 2.59E-17 | 9.32 | 28.4419659 | 1.00E-01 | 5646827   | 5646950   | NC_000007.13 |
| cg24145007 | 8.44E-16 | 2.60E-17 | 9.32 | 28.437773  | 8.50E-02 | 245869090 | 245869213 | NC_000001.10 |
| cg10410852 | 8.47E-16 | 2.61E-17 | 9.31 | 28.4332919 | 1.15E-01 | 74714308  | 74714431  | NC_000010.10 |
| cg11348701 | 8.50E-16 | 2.62E-17 | 9.31 | 28.4304772 | 9.80E-02 | 171704223 | 171704346 | NC_000002.11 |
| cg03184290 | 8.53E-16 | 2.63E-17 | 9.31 | 28.4265314 | 2.33E-01 | 111550666 | 111550789 | NC_000004.11 |
| cg05018513 | 8.54E-16 | 2.63E-17 | 9.31 | 28.4253251 | 1.37E-01 | 105173980 | 105174103 | NC_000014.8  |
| cg04404540 | 8.54E-16 | 2.63E-17 | 9.31 | 28.4251919 | 2.19E-01 | 72270444  | 72270567  | NC_000017.10 |
| cg15925365 | 8.57E-16 | 2.64E-17 | 9.31 | 28.4219686 | 2.10E-01 | 52858998  | 52859121  | NC_000006.11 |
| cg02232208 | 8.57E-16 | 2.64E-17 | 9.31 | 28.4211377 | 2.21E-01 | 147137147 | 147137270 | NC_000003.11 |
| cg04269530 | 8.60E-16 | 2.65E-17 | 9.31 | 28.4185692 | 1.49E-01 | 48919401  | 48919524  | NC_000019.9  |
| cg20392607 | 8.60E-16 | 2.65E-17 | 9.31 | 28.4184807 | 2.77E-01 | 5018798   | 5018921   | NC_000012.11 |
| cg18434588 | 8.65E-16 | 2.67E-17 | 9.31 | 28.4117199 | 1.13E-01 | 80095132  | 80095255  | NC_000005.9  |
| cg04279449 | 8.68E-16 | 2.68E-17 | 9.31 | 28.4078375 | 1.19E-01 | 703918    | 704041    | NC_000011.9  |
| cg18336674 | 8.70E-16 | 2.69E-17 | 9.31 | 28.4059225 | 1.41E-01 | 170735264 | 170735387 | NC_000005.9  |
| cg17252960 | 8.71E-16 | 2.69E-17 | 9.31 | 28.4052647 | 2.37E-01 | 19837350  | 19837473  | NC_000006.11 |
| cg06070644 | 8.72E-16 | 2.69E-17 | 9.31 | 28.4032201 | 8.67E-02 | 25677759  | 25677882  | NC_000004.11 |
| cg14930075 | 8.79E-16 | 2.72E-17 | 9.31 | 28.3949301 | 2.79E-01 | 140715018 | 140715141 | NC_000008.10 |
| cg06538872 | 8.80E-16 | 2.72E-17 | 9.31 | 28.3939434 | 8.29E-02 | 947343    | 947466    | NC_000001.10 |
| cg21546184 | 8.83E-16 | 2.73E-17 | 9.31 | 28.3898705 | 2.40E-01 | 65283649  | 65283772  | NC_000008.10 |
| cg03646189 | 8.84E-16 | 2.73E-17 | 9.31 | 28.3893287 | 2.46E-01 | 2756101   | 2756224   | NC_000005.9  |
| cg10731700 | 8.87E-16 | 2.74E-17 | 9.31 | 28.3858655 | 2.65E-01 | 1760259   | 1760382   | NC_000019.9  |
| cg26432350 | 8.89E-16 | 2.75E-17 | 9.31 | 28.3828117 | 1.36E-01 | 47040357  | 47040480  | NC_000003.11 |
| cg18252309 | 8.89E-16 | 2.75E-17 | 9.31 | 28.3827387 | 2.28E-01 | 153583867 | 153583990 | NC_000007.13 |
| cg01520105 | 8.89E-16 | 2.75E-17 | 9.31 | 28.3827284 | 1.06E-01 | 111887243 | 111887366 | NC_000006.11 |
| cg06735554 | 8.92E-16 | 2.76E-17 | 9.31 | 28.379153  | 1.19E-01 | 1221726   | 1221849   | NC_000011.9  |

|            |          |          |      |            |          |           |           |              |
|------------|----------|----------|------|------------|----------|-----------|-----------|--------------|
| cg23484785 | 8.93E-16 | 2.76E-17 | 9.31 | 28.3780072 | 1.26E-01 | 105343352 | 105343475 | NC_000004.11 |
| cg12395726 | 8.93E-16 | 2.76E-17 | 9.31 | 28.3772318 | 5.63E-02 | 33248687  | 33248810  | NC_000006.11 |
| cg24812837 | 8.98E-16 | 2.78E-17 | 9.31 | 28.3721546 | 2.53E-01 | 102894120 | 102894243 | NC_000010.10 |
| cg06616093 | 8.99E-16 | 2.78E-17 | 9.31 | 28.3703832 | 6.63E-02 | 134828082 | 134828205 | NC_000010.10 |
| cg06737561 | 9.05E-16 | 2.80E-17 | 9.3  | 28.3634675 | 1.85E-01 | 50821518  | 50821641  | NC_000010.10 |
| cg24890294 | 9.08E-16 | 2.81E-17 | 9.3  | 28.3597868 | 7.22E-02 | 31617322  | 31617445  | NC_000006.11 |
| cg05314639 | 9.11E-16 | 2.82E-17 | 9.3  | 28.3572024 | 1.21E-01 | 114109729 | 114109852 | NC_000013.10 |
| cg04168853 | 9.12E-16 | 2.83E-17 | 9.3  | 28.3554285 | 2.20E-01 | 38346023  | 38346146  | NC_000019.9  |
| cg15265853 | 9.13E-16 | 2.83E-17 | 9.3  | 28.3542027 | 5.25E-02 | 29401371  | 29401494  | NC_000017.10 |
| cg07618409 | 9.18E-16 | 2.85E-17 | 9.3  | 28.3482271 | 1.01E-01 | 55742491  | 55742614  | NC_000017.10 |
| cg12304520 | 9.21E-16 | 2.85E-17 | 9.3  | 28.3455833 | 2.25E-01 | 140810123 | 140810246 | NC_000005.9  |
| cg07642170 | 9.23E-16 | 2.86E-17 | 9.3  | 28.3430635 | 5.77E-02 | 44218746  | 44218869  | NC_000019.9  |
| cg23921338 | 9.25E-16 | 2.87E-17 | 9.3  | 28.3408338 | 7.83E-02 | 70206922  | 70207045  | NC_000002.11 |
| cg19253850 | 9.31E-16 | 2.89E-17 | 9.3  | 28.3344777 | 1.29E-01 | 129796229 | 129796352 | NC_000010.10 |
| cg08492619 | 9.32E-16 | 2.89E-17 | 9.3  | 28.3334741 | 2.72E-01 | 88324193  | 88324316  | NC_000013.10 |
| cg09221867 | 9.40E-16 | 2.92E-17 | 9.3  | 28.3244407 | 2.54E-01 | 134071663 | 134071786 | NC_000004.11 |
| cg11630404 | 9.41E-16 | 2.92E-17 | 9.3  | 28.3221938 | 2.63E-01 | 113442346 | 113442469 | NC_000004.11 |
| cg24333629 | 9.43E-16 | 2.93E-17 | 9.3  | 28.320208  | 2.32E-01 | 229045958 | 229046081 | NC_000002.11 |
| cg24317217 | 9.43E-16 | 2.93E-17 | 9.3  | 28.3201026 | 1.90E-01 | 70231495  | 70231618  | NC_000003.11 |
| cg07180307 | 9.44E-16 | 2.93E-17 | 9.3  | 28.3194934 | 2.53E-01 | 109294168 | 109294291 | NC_000011.9  |
| cg25950235 | 9.52E-16 | 2.96E-17 | 9.3  | 28.3110067 | 2.63E-01 | 89910753  | 89910876  | NC_000015.9  |
| cg23266743 | 9.53E-16 | 2.96E-17 | 9.3  | 28.309802  | 2.18E-01 | 130388198 | 130388321 | NC_000012.11 |
| cg09417809 | 9.53E-16 | 2.96E-17 | 9.3  | 28.309119  | 1.92E-01 | 115131223 | 115131346 | NC_000012.11 |
| cg24389054 | 9.54E-16 | 2.96E-17 | 9.3  | 28.3084065 | 1.65E-01 | 27194013  | 27194136  | NC_000007.13 |
| cg03679755 | 9.55E-16 | 2.97E-17 | 9.3  | 28.3074492 | 2.12E-01 | 101875035 | 101875158 | NC_000010.10 |

|            |          |          |      |            |          |           |           |              |
|------------|----------|----------|------|------------|----------|-----------|-----------|--------------|
| cg13950829 | 9.55E-16 | 2.97E-17 | 9.3  | 28.306717  | 2.87E-01 | 11060652  | 11060775  | NC_000010.10 |
| cg10124710 | 9.58E-16 | 2.98E-17 | 9.29 | 28.3036039 | 1.63E-01 | 146544267 | 146544390 | NC_000001.10 |
| cg23683588 | 9.71E-16 | 3.02E-17 | 9.29 | 28.2902833 | 2.04E-01 | 37136283  | 37136406  | NC_000014.8  |
| cg18722086 | 9.73E-16 | 3.03E-17 | 9.29 | 28.2879729 | 1.48E-01 | 113380072 | 113380195 | NC_000003.11 |
| cg08097882 | 9.73E-16 | 3.03E-17 | 9.29 | 28.2878898 | 2.35E-01 | 79177516  | 79177639  | NC_000013.10 |
| cg06745684 | 9.75E-16 | 3.03E-17 | 9.29 | 28.2860526 | 9.02E-02 | 37949239  | 37949362  | NC_000021.8  |
| cg12924956 | 9.75E-16 | 3.03E-17 | 9.29 | 28.2859063 | 1.61E-01 | 24600569  | 24600692  | NC_000014.8  |
| cg20100910 | 9.75E-16 | 3.03E-17 | 9.29 | 28.285119  | 2.44E-01 | 102475429 | 102475552 | NC_000010.10 |
| cg10615414 | 9.78E-16 | 3.04E-17 | 9.29 | 28.2824554 | 2.36E-01 | 37353096  | 37353219  | NC_000020.10 |
| cg17840132 | 9.79E-16 | 3.05E-17 | 9.29 | 28.2808808 | 3.69E-02 | 39380842  | 39380965  | NC_000005.9  |
| cg13407456 | 9.84E-16 | 3.06E-17 | 9.29 | 28.2756806 | 2.68E-01 | 69243398  | 69243521  | NC_000008.10 |
| cg09765089 | 9.87E-16 | 3.07E-17 | 9.29 | 28.2729387 | 2.95E-01 | 27291346  | 27291469  | NC_000007.13 |
| cg07659054 | 9.88E-16 | 3.07E-17 | 9.29 | 28.2720322 | 2.14E-01 | 27134225  | 27134348  | NC_000007.13 |
| cg26730369 | 1.01E-15 | 3.15E-17 | 9.29 | 28.2490267 | 2.54E-01 | 26724001  | 26724124  | NC_000008.10 |
| cg16590466 | 1.01E-15 | 3.15E-17 | 9.29 | 28.2483966 | 7.19E-02 | 30795267  | 30795390  | NC_000016.9  |
| cg25693769 | 1.02E-15 | 3.17E-17 | 9.28 | 28.2406103 | 1.49E-01 | 33261112  | 33261235  | NC_000003.11 |
| cg19877064 | 1.02E-15 | 3.18E-17 | 9.28 | 28.2375272 | 5.90E-02 | 30435467  | 30435590  | NC_000003.11 |
| cg05837769 | 1.02E-15 | 3.19E-17 | 9.28 | 28.2369544 | 1.44E-01 | 65358078  | 65358201  | NC_000011.9  |
| cg04304705 | 1.02E-15 | 3.19E-17 | 9.28 | 28.2362122 | 1.88E-01 | 48884960  | 48885083  | NC_000022.10 |
| cg02765731 | 1.02E-15 | 3.20E-17 | 9.28 | 28.233842  | 1.77E-01 | 83436797  | 83436920  | NC_000012.11 |
| cg03888064 | 1.03E-15 | 3.20E-17 | 9.28 | 28.233003  | 1.68E-01 | 156305656 | 156305779 | NC_000001.10 |
| cg01142635 | 1.03E-15 | 3.20E-17 | 9.28 | 28.2319377 | 1.87E-01 | 6224117   | 6224240   | NC_000004.11 |
| cg16690757 | 1.03E-15 | 3.21E-17 | 9.28 | 28.2305213 | 1.86E-01 | 26680932  | 26681055  | NC_000010.10 |
| cg20276585 | 1.03E-15 | 3.21E-17 | 9.28 | 28.2281191 | 2.84E-01 | 81952330  | 81952453  | NC_000004.11 |
| cg12431879 | 1.03E-15 | 3.21E-17 | 9.28 | 28.2279043 | 1.73E-01 | 17082787  | 17082910  | NC_000022.10 |

|            |          |          |      |            |          |           |           |              |
|------------|----------|----------|------|------------|----------|-----------|-----------|--------------|
| cg01995743 | 1.03E-15 | 3.22E-17 | 9.28 | 28.2277348 | 2.43E-01 | 118229732 | 118229855 | NC_000006.11 |
| cg05159909 | 1.03E-15 | 3.22E-17 | 9.28 | 28.2256422 | 6.77E-02 | 56515094  | 56515217  | NC_000012.11 |
| cg18349911 | 1.04E-15 | 3.24E-17 | 9.28 | 28.22051   | 2.15E-01 | 1877135   | 1877258   | NC_000005.9  |
| cg26916764 | 1.04E-15 | 3.24E-17 | 9.28 | 28.2189597 | 5.24E-02 | 115268937 | 115269060 | NC_000001.10 |
| cg26433102 | 1.04E-15 | 3.25E-17 | 9.28 | 28.2177317 | 2.42E-01 | 391441    | 391564    | NC_000006.11 |
| cg07492143 | 1.04E-15 | 3.25E-17 | 9.28 | 28.2172845 | 1.12E-01 | 67695812  | 67695935  | NC_000016.9  |
| cg04842426 | 1.04E-15 | 3.26E-17 | 9.28 | 28.2142324 | 2.09E-01 | 136555777 | 136555900 | NC_000007.13 |
| cg00321644 | 1.04E-15 | 3.26E-17 | 9.28 | 28.213613  | 6.51E-02 | 977110    | 977233    | NC_000012.11 |
| cg20035362 | 1.04E-15 | 3.26E-17 | 9.28 | 28.2134768 | 9.98E-02 | 10161366  | 10161489  | NC_000003.11 |
| cg08026818 | 1.05E-15 | 3.27E-17 | 9.28 | 28.2115872 | 2.65E-01 | 77823221  | 77823344  | NC_000016.9  |
| cg09131151 | 1.05E-15 | 3.30E-17 | 9.28 | 28.2031089 | 1.35E-01 | 133782453 | 133782576 | NC_000011.9  |
| cg14338246 | 1.06E-15 | 3.31E-17 | 9.28 | 28.1991902 | 7.39E-02 | 75960767  | 75960890  | NC_000017.10 |
| cg06073141 | 1.07E-15 | 3.35E-17 | 9.28 | 28.1877213 | 4.56E-02 | 190105762 | 190105885 | NC_000003.11 |
| cg05697849 | 1.07E-15 | 3.35E-17 | 9.28 | 28.1870681 | 1.72E-01 | 50513766  | 50513889  | NC_000001.10 |
| cg05932360 | 1.07E-15 | 3.35E-17 | 9.28 | 28.1859183 | 1.14E-01 | 15313285  | 15313408  | NC_000006.11 |
| cg00597931 | 1.08E-15 | 3.37E-17 | 9.28 | 28.1804736 | 1.49E-01 | 142179697 | 142179820 | NC_000008.10 |
| cg20936854 | 1.08E-15 | 3.38E-17 | 9.28 | 28.1792687 | 5.79E-02 | 44527408  | 44527531  | NC_000020.10 |
| cg09806671 | 1.08E-15 | 3.38E-17 | 9.28 | 28.1790579 | 1.24E-01 | 165324679 | 165324802 | NC_000001.10 |
| cg16781502 | 1.08E-15 | 3.38E-17 | 9.28 | 28.1777009 | 1.62E-01 | 134774214 | 134774337 | NC_000010.10 |
| cg11544647 | 1.08E-15 | 3.40E-17 | 9.27 | 28.1737616 | 9.07E-02 | 6659957   | 6660080   | NC_000019.9  |
| cg00929376 | 1.08E-15 | 3.40E-17 | 9.27 | 28.1735742 | 1.57E-01 | 25258236  | 25258359  | NC_000001.10 |
| cg16440561 | 1.09E-15 | 3.40E-17 | 9.27 | 28.1726748 | 2.49E-01 | 220312854 | 220312977 | NC_000002.11 |
| cg13928102 | 1.09E-15 | 3.40E-17 | 9.27 | 28.1710351 | 1.65E-01 | 76360050  | 76360173  | NC_000005.9  |
| cg16945186 | 1.09E-15 | 3.41E-17 | 9.27 | 28.1686798 | 2.09E-01 | 115103960 | 115104083 | NC_000012.11 |
| cg16150752 | 1.09E-15 | 3.42E-17 | 9.27 | 28.1660718 | 2.74E-01 | 16180072  | 16180195  | NC_000005.9  |

|            |          |          |      |            |          |           |           |              |
|------------|----------|----------|------|------------|----------|-----------|-----------|--------------|
| cg27464184 | 1.09E-15 | 3.42E-17 | 9.27 | 28.1659312 | 2.87E-01 | 114075881 | 114076004 | NC_000012.11 |
| cg23474501 | 1.09E-15 | 3.43E-17 | 9.27 | 28.164177  | 2.14E-01 | 134902168 | 134902291 | NC_000010.10 |
| cg22488256 | 1.10E-15 | 3.46E-17 | 9.27 | 28.1557625 | 2.35E-01 | 66258046  | 66258169  | NC_000001.10 |
| cg13588946 | 1.10E-15 | 3.46E-17 | 9.27 | 28.1554067 | 1.46E-01 | 69678511  | 69678634  | NC_000014.8  |
| cg16509192 | 1.11E-15 | 3.47E-17 | 9.27 | 28.1515931 | 1.25E-01 | 122107024 | 122107147 | NC_000003.11 |
| cg18750960 | 1.11E-15 | 3.47E-17 | 9.27 | 28.1514596 | 2.07E-01 | 177016417 | 177016540 | NC_000002.11 |
| cg01382489 | 1.11E-15 | 3.48E-17 | 9.27 | 28.1497622 | 5.73E-02 | 44949625  | 44949748  | NC_000021.8  |
| cg17966167 | 1.11E-15 | 3.48E-17 | 9.27 | 28.1484143 | 2.69E-01 | 37488564  | 37488687  | NC_000007.13 |
| cg06894723 | 1.12E-15 | 3.51E-17 | 9.27 | 28.1408615 | 1.07E-01 | 110398142 | 110398265 | NC_000013.10 |
| cg18430128 | 1.12E-15 | 3.51E-17 | 9.27 | 28.1400777 | 2.33E-01 | 58570491  | 58570614  | NC_000019.9  |
| cg22206608 | 1.12E-15 | 3.51E-17 | 9.27 | 28.1399521 | 2.11E-01 | 125732632 | 125732755 | NC_000010.10 |
| cg27041794 | 1.13E-15 | 3.55E-17 | 9.27 | 28.1309002 | 2.70E-01 | 11059708  | 11059831  | NC_000010.10 |
| cg11838639 | 1.13E-15 | 3.55E-17 | 9.27 | 28.1283184 | 6.94E-02 | 3512917   | 3513040   | NC_000010.10 |
| cg14212180 | 1.14E-15 | 3.57E-17 | 9.27 | 28.1239393 | 4.01E-02 | 3365201   | 3365324   | NC_000019.9  |
| cg09582952 | 1.14E-15 | 3.57E-17 | 9.27 | 28.1231864 | 2.39E-01 | 29033187  | 29033310  | NC_000017.10 |
| cg13686795 | 1.14E-15 | 3.57E-17 | 9.27 | 28.1229571 | 7.67E-02 | 151522573 | 151522696 | NC_000007.13 |
| cg10615842 | 1.14E-15 | 3.59E-17 | 9.27 | 28.118046  | 2.45E-01 | 20619158  | 20619281  | NC_000011.9  |
| cg11342468 | 1.15E-15 | 3.60E-17 | 9.27 | 28.114929  | 1.95E-01 | 103889784 | 103889907 | NC_000012.11 |
| cg08705882 | 1.15E-15 | 3.60E-17 | 9.27 | 28.1148844 | 6.62E-02 | 94337576  | 94337699  | NC_000010.10 |
| cg13323416 | 1.15E-15 | 3.61E-17 | 9.27 | 28.1128208 | 1.31E-01 | 45609367  | 45609490  | NC_000006.11 |
| cg27340506 | 1.15E-15 | 3.61E-17 | 9.27 | 28.1125965 | 1.31E-01 | 87082045  | 87082168  | NC_000008.10 |
| cg11861308 | 1.15E-15 | 3.61E-17 | 9.27 | 28.1121982 | 5.85E-02 | 17002043  | 17002166  | NC_000022.10 |
| cg12226006 | 1.15E-15 | 3.61E-17 | 9.27 | 28.1119528 | 9.19E-02 | 123350909 | 123351032 | NC_000010.10 |
| cg22374057 | 1.16E-15 | 3.64E-17 | 9.26 | 28.1046423 | 1.72E-01 | 11148682  | 11148805  | NC_000018.9  |
| cg05446615 | 1.16E-15 | 3.64E-17 | 9.26 | 28.1043142 | 6.44E-02 | 88547861  | 88547984  | NC_000016.9  |

|            |          |          |      |            |          |           |           |              |
|------------|----------|----------|------|------------|----------|-----------|-----------|--------------|
| cg21053982 | 1.16E-15 | 3.64E-17 | 9.26 | 28.1035917 | 3.33E-02 | 90578774  | 90578897  | NC_000005.9  |
| cg06837746 | 1.16E-15 | 3.66E-17 | 9.26 | 28.0992034 | 7.42E-02 | 8774972   | 8775095   | NC_000003.11 |
| cg02814289 | 1.16E-15 | 3.66E-17 | 9.26 | 28.0984508 | 5.42E-02 | 717213    | 717336    | NC_000016.9  |
| cg05655106 | 1.17E-15 | 3.67E-17 | 9.26 | 28.0978165 | 1.25E-01 | 353905    | 354028    | NC_000005.9  |
| cg13344169 | 1.17E-15 | 3.70E-17 | 9.26 | 28.0899234 | 2.27E-01 | 71161178  | 71161301  | NC_000017.10 |
| cg23610736 | 1.18E-15 | 3.70E-17 | 9.26 | 28.088312  | 1.18E-01 | 186957729 | 186957852 | NC_000001.10 |
| cg13096407 | 1.18E-15 | 3.73E-17 | 9.26 | 28.080916  | 7.18E-02 | 32885502  | 32885625  | NC_000013.10 |
| cg25654952 | 1.19E-15 | 3.76E-17 | 9.26 | 28.0719033 | 1.12E-01 | 7861342   | 7861465   | NC_000007.13 |
| cg02182795 | 1.19E-15 | 3.76E-17 | 9.26 | 28.0718767 | 2.53E-01 | 57069688  | 57069811  | NC_000008.10 |
| cg22167267 | 1.20E-15 | 3.78E-17 | 9.26 | 28.0665289 | 1.14E-01 | 80132832  | 80132955  | NC_000017.10 |
| cg10575652 | 1.20E-15 | 3.78E-17 | 9.26 | 28.0664661 | 7.97E-02 | 123351652 | 123351775 | NC_000012.11 |
| cg01033865 | 1.20E-15 | 3.79E-17 | 9.26 | 28.0655622 | 2.35E-01 | 115630896 | 115631019 | NC_000011.9  |
| cg14485004 | 1.20E-15 | 3.79E-17 | 9.26 | 28.0638846 | 2.39E-01 | 75524913  | 75525036  | NC_000017.10 |
| cg06857316 | 1.20E-15 | 3.79E-17 | 9.26 | 28.0638739 | 8.16E-02 | 97846357  | 97846480  | NC_000007.13 |
| cg00810939 | 1.20E-15 | 3.80E-17 | 9.26 | 28.0633845 | 1.79E-01 | 24463749  | 24463872  | NC_000001.10 |
| cg24378227 | 1.21E-15 | 3.81E-17 | 9.26 | 28.0603707 | 1.63E-01 | 1396771   | 1396894   | NC_000006.11 |
| cg05502103 | 1.21E-15 | 3.82E-17 | 9.26 | 28.0571531 | 1.09E-01 | 588936    | 589059    | NC_000007.13 |
| cg16801887 | 1.21E-15 | 3.83E-17 | 9.26 | 28.0554489 | 2.80E-01 | 86541480  | 86541603  | NC_000016.9  |
| cg09729848 | 1.22E-15 | 3.83E-17 | 9.26 | 28.0536504 | 2.55E-01 | 178770998 | 178771121 | NC_000005.9  |
| cg15858959 | 1.22E-15 | 3.85E-17 | 9.26 | 28.0487279 | 1.23E-01 | 71863687  | 71863810  | NC_000014.8  |
| cg04194457 | 1.23E-15 | 3.88E-17 | 9.25 | 28.0414552 | 8.65E-02 | 52493238  | 52493361  | NC_000020.10 |
| cg08439930 | 1.23E-15 | 3.89E-17 | 9.25 | 28.0392432 | 2.92E-01 | 51185060  | 51185183  | NC_000016.9  |
| cg07684152 | 1.23E-15 | 3.89E-17 | 9.25 | 28.0380399 | 4.51E-02 | 130670760 | 130670883 | NC_000012.11 |
| cg15646778 | 1.23E-15 | 3.90E-17 | 9.25 | 28.0370448 | 1.21E-01 | 33376062  | 33376185  | NC_000006.11 |
| cg07042546 | 1.24E-15 | 3.90E-17 | 9.25 | 28.0355631 | 1.49E-01 | 117104996 | 117105119 | NC_000011.9  |

|            |          |          |      |            |          |           |           |              |
|------------|----------|----------|------|------------|----------|-----------|-----------|--------------|
| cg19161330 | 1.24E-15 | 3.91E-17 | 9.25 | 28.0335991 | 8.43E-02 | 184290643 | 184290766 | NC_000003.11 |
| cg18676967 | 1.24E-15 | 3.92E-17 | 9.25 | 28.0312508 | 1.38E-01 | 233217476 | 233217599 | NC_000002.11 |
| cg24928181 | 1.25E-15 | 3.94E-17 | 9.25 | 28.0252942 | 1.04E-01 | 151424835 | 151424958 | NC_000002.11 |
| cg02970836 | 1.25E-15 | 3.95E-17 | 9.25 | 28.0240904 | 2.54E-01 | 3237991   | 3238114   | NC_000016.9  |
| cg06533244 | 1.25E-15 | 3.96E-17 | 9.25 | 28.0213174 | 1.75E-01 | 27258460  | 27258583  | NC_000006.11 |
| cg16886487 | 1.26E-15 | 3.97E-17 | 9.25 | 28.0180853 | 1.13E-01 | 50944575  | 50944698  | NC_000022.10 |
| cg14236662 | 1.26E-15 | 3.98E-17 | 9.25 | 28.0166733 | 2.53E-01 | 176988284 | 176988407 | NC_000002.11 |
| cg01323104 | 1.26E-15 | 4.00E-17 | 9.25 | 28.0117324 | 1.58E-01 | 87958903  | 87959026  | NC_000004.11 |
| cg20691140 | 1.27E-15 | 4.00E-17 | 9.25 | 28.0106398 | 2.18E-01 | 137522667 | 137522790 | NC_000002.11 |
| cg12836959 | 1.27E-15 | 4.01E-17 | 9.25 | 28.0091942 | 2.47E-01 | 147098568 | 147098691 | NC_000003.11 |
| cg26462212 | 1.27E-15 | 4.01E-17 | 9.25 | 28.0079649 | 3.43E-02 | 339544    | 339667    | NC_000016.9  |
| cg27564715 | 1.27E-15 | 4.02E-17 | 9.25 | 28.0073939 | 1.17E-01 | 1773758   | 1773881   | NC_000008.10 |
| cg12487153 | 1.27E-15 | 4.03E-17 | 9.25 | 28.0033571 | 8.98E-02 | 13560875  | 13560998  | NC_000006.11 |
| cg24865955 | 1.28E-15 | 4.04E-17 | 9.25 | 28.0023444 | 6.12E-02 | 141576963 | 141577086 | NC_000005.9  |
| cg08471734 | 1.28E-15 | 4.05E-17 | 9.25 | 27.9995938 | 8.73E-02 | 15808817  | 15808940  | NC_000001.10 |
| cg12854979 | 1.28E-15 | 4.05E-17 | 9.25 | 27.9994721 | 1.03E-01 | 78134143  | 78134266  | NC_000017.10 |
| cg02781618 | 1.28E-15 | 4.06E-17 | 9.25 | 27.9958693 | 2.04E-01 | 42153695  | 42153818  | NC_000004.11 |
| cg20462512 | 1.28E-15 | 4.07E-17 | 9.25 | 27.9954858 | 1.85E-01 | 5543155   | 5543278   | NC_000012.11 |
| cg16960943 | 1.28E-15 | 4.07E-17 | 9.25 | 27.9954378 | 8.86E-02 | 236417185 | 236417308 | NC_000002.11 |
| cg13088368 | 1.28E-15 | 4.07E-17 | 9.25 | 27.9950863 | 1.90E-01 | 42544716  | 42544839  | NC_000020.10 |
| cg23290121 | 1.28E-15 | 4.07E-17 | 9.25 | 27.9946679 | 1.18E-01 | 241612069 | 241612192 | NC_000002.11 |
| cg26385172 | 1.29E-15 | 4.09E-17 | 9.25 | 27.9886027 | 2.36E-01 | 115135169 | 115135292 | NC_000012.11 |
| cg06325515 | 1.29E-15 | 4.09E-17 | 9.25 | 27.9884003 | 5.76E-02 | 75610567  | 75610690  | NC_000016.9  |
| cg23317501 | 1.29E-15 | 4.09E-17 | 9.25 | 27.988313  | 1.94E-01 | 35991215  | 35991338  | NC_000005.9  |
| cg03577655 | 1.30E-15 | 4.11E-17 | 9.25 | 27.9858611 | 2.61E-01 | 49815365  | 49815488  | NC_000007.13 |



|            |          |          |      |            |          |           |           |              |
|------------|----------|----------|------|------------|----------|-----------|-----------|--------------|
| cg02116996 | 1.30E-15 | 4.12E-17 | 9.24 | 27.9813996 | 3.36E-02 | 30126364  | 30126487  | NC_000006.11 |
| cg03445516 | 1.30E-15 | 4.13E-17 | 9.24 | 27.978919  | 1.58E-01 | 95664233  | 95664356  | NC_000002.11 |
| cg15207742 | 1.30E-15 | 4.13E-17 | 9.24 | 27.9789168 | 2.50E-01 | 43438809  | 43438932  | NC_000020.10 |
| cg17463655 | 1.30E-15 | 4.14E-17 | 9.24 | 27.9781171 | 1.41E-01 | 97846790  | 97846913  | NC_000007.13 |
| cg06994787 | 1.31E-15 | 4.14E-17 | 9.24 | 27.977848  | 1.90E-01 | 11834960  | 11835083  | NC_000016.9  |
| cg14780632 | 1.31E-15 | 4.14E-17 | 9.24 | 27.9764317 | 2.54E-01 | 65816521  | 65816644  | NC_000011.9  |
| cg22521696 | 1.31E-15 | 4.15E-17 | 9.24 | 27.9761047 | 1.96E-01 | 38183210  | 38183333  | NC_000019.9  |
| cg00461022 | 1.32E-15 | 4.18E-17 | 9.24 | 27.9690652 | 1.21E-01 | 16618052  | 16618175  | NC_000005.9  |
| cg23771603 | 1.32E-15 | 4.18E-17 | 9.24 | 27.9688825 | 2.53E-01 | 26223310  | 26223433  | NC_000010.10 |
| cg00897799 | 1.32E-15 | 4.18E-17 | 9.24 | 27.9681262 | 9.84E-02 | 47367897  | 47368020  | NC_000013.10 |
| cg13542964 | 1.32E-15 | 4.18E-17 | 9.24 | 27.9675744 | 2.06E-01 | 10458667  | 10458790  | NC_000004.11 |
| cg14633892 | 1.32E-15 | 4.19E-17 | 9.24 | 27.9663825 | 1.08E-01 | 56810749  | 56810872  | NC_000003.11 |
| cg22546168 | 1.32E-15 | 4.19E-17 | 9.24 | 27.9652352 | 1.94E-01 | 135050326 | 135050449 | NC_000010.10 |
| cg25685456 | 1.33E-15 | 4.21E-17 | 9.24 | 27.9612483 | 8.78E-02 | 143269881 | 143270004 | NC_000006.11 |
| cg09083627 | 1.33E-15 | 4.21E-17 | 9.24 | 27.9608012 | 2.76E-01 | 88324597  | 88324720  | NC_000013.10 |
| cg09159223 | 1.33E-15 | 4.22E-17 | 9.24 | 27.9595272 | 8.03E-02 | 36018688  | 36018811  | NC_000007.13 |
| cg03483150 | 1.33E-15 | 4.22E-17 | 9.24 | 27.959358  | 2.01E-01 | 57358651  | 57358774  | NC_000008.10 |
| cg25886621 | 1.33E-15 | 4.22E-17 | 9.24 | 27.9581726 | 1.66E-01 | 93130251  | 93130374  | NC_000012.11 |
| cg16635592 | 1.33E-15 | 4.23E-17 | 9.24 | 27.9561562 | 1.36E-01 | 66870371  | 66870494  | NC_000003.11 |
| cg02391713 | 1.34E-15 | 4.25E-17 | 9.24 | 27.950565  | 2.61E-01 | 105400985 | 105401108 | NC_000006.11 |
| cg24979233 | 1.34E-15 | 4.26E-17 | 9.24 | 27.949684  | 1.30E-01 | 1800284   | 1800407   | NC_000004.11 |
| cg24703706 | 1.35E-15 | 4.28E-17 | 9.24 | 27.9455598 | 1.13E-01 | 47408658  | 47408781  | NC_000007.13 |
| cg17697739 | 1.35E-15 | 4.28E-17 | 9.24 | 27.9453501 | 1.26E-01 | 1873340   | 1873463   | NC_000006.11 |
| cg05131623 | 1.35E-15 | 4.28E-17 | 9.24 | 27.9451254 | 2.72E-01 | 179755285 | 179755408 | NC_000003.11 |
| cg24610236 | 1.35E-15 | 4.28E-17 | 9.24 | 27.943838  | 3.41E-01 | 30722114  | 30722237  | NC_000007.13 |

|            |          |          |      |            |          |           |           |              |
|------------|----------|----------|------|------------|----------|-----------|-----------|--------------|
| cg21511365 | 1.35E-15 | 4.29E-17 | 9.24 | 27.9419275 | 2.36E-01 | 9763739   | 9763862   | NC_000008.10 |
| cg08753373 | 1.35E-15 | 4.30E-17 | 9.24 | 27.940464  | 2.60E-01 | 134000124 | 134000247 | NC_000010.10 |
| cg26790818 | 1.35E-15 | 4.30E-17 | 9.24 | 27.9394488 | 1.21E-01 | 187786456 | 187786579 | NC_000003.11 |
| cg17653824 | 1.35E-15 | 4.30E-17 | 9.24 | 27.9390907 | 1.64E-01 | 5153054   | 5153177   | NC_000012.11 |
| cg04596004 | 1.36E-15 | 4.31E-17 | 9.24 | 27.936874  | 1.81E-01 | 112710155 | 112710278 | NC_000013.10 |
| cg15554023 | 1.36E-15 | 4.33E-17 | 9.24 | 27.9322332 | 1.63E-01 | 144008937 | 144009060 | NC_000001.10 |
| cg11137321 | 1.36E-15 | 4.34E-17 | 9.24 | 27.9308853 | 6.90E-02 | 148010015 | 148010138 | NC_000001.10 |
| cg09971562 | 1.37E-15 | 4.35E-17 | 9.24 | 27.9296054 | 1.33E-01 | 128694679 | 128694802 | NC_000011.9  |
| cg05718036 | 1.37E-15 | 4.35E-17 | 9.24 | 27.929019  | 2.68E-01 | 81952593  | 81952716  | NC_000004.11 |
| cg13814720 | 1.37E-15 | 4.36E-17 | 9.24 | 27.9267231 | 6.64E-02 | 91193175  | 91193298  | NC_000009.11 |
| cg12658374 | 1.37E-15 | 4.36E-17 | 9.24 | 27.92654   | 1.23E-01 | 37323563  | 37323686  | NC_000017.10 |
| cg11438428 | 1.37E-15 | 4.36E-17 | 9.24 | 27.9258834 | 1.90E-01 | 23481594  | 23481717  | NC_000010.10 |
| cg14601251 | 1.37E-15 | 4.36E-17 | 9.24 | 27.9258734 | 6.35E-02 | 65913984  | 65914107  | NC_000015.9  |
| cg15732768 | 1.37E-15 | 4.37E-17 | 9.24 | 27.9249612 | 1.97E-01 | 96651537  | 96651660  | NC_000007.13 |
| cg18785679 | 1.37E-15 | 4.37E-17 | 9.24 | 27.9243831 | 1.58E-01 | 135032504 | 135032627 | NC_000010.10 |
| cg04733537 | 1.37E-15 | 4.38E-17 | 9.24 | 27.9226502 | 2.15E-01 | 130388748 | 130388871 | NC_000012.11 |
| cg26123532 | 1.37E-15 | 4.38E-17 | 9.24 | 27.922286  | 8.64E-02 | 158027027 | 158027150 | NC_000002.11 |
| cg01993818 | 1.38E-15 | 4.38E-17 | 9.24 | 27.9217115 | 1.27E-01 | 34270437  | 34270560  | NC_000014.8  |
| cg00886598 | 1.38E-15 | 4.38E-17 | 9.24 | 27.9209165 | 1.09E-01 | 42812844  | 42812967  | NC_000005.9  |
| cg11302943 | 1.38E-15 | 4.40E-17 | 9.23 | 27.9179678 | 2.33E-01 | 99790596  | 99790719  | NC_000010.10 |
| cg04039957 | 1.38E-15 | 4.40E-17 | 9.23 | 27.9176871 | 1.08E-01 | 143013207 | 143013330 | NC_000007.13 |
| cg03708680 | 1.38E-15 | 4.40E-17 | 9.23 | 27.9163029 | 1.08E-01 | 134829025 | 134829148 | NC_000010.10 |
| cg25981315 | 1.39E-15 | 4.44E-17 | 9.23 | 27.908727  | 1.62E-01 | 39806701  | 39806824  | NC_000008.10 |
| cg17397592 | 1.39E-15 | 4.44E-17 | 9.23 | 27.9082969 | 2.14E-01 | 237416338 | 237416461 | NC_000002.11 |
| cg26789064 | 1.39E-15 | 4.44E-17 | 9.23 | 27.9073227 | 2.19E-01 | 4866130   | 4866253   | NC_000004.11 |

|            |          |          |      |            |          |           |           |              |
|------------|----------|----------|------|------------|----------|-----------|-----------|--------------|
| cg16054280 | 1.39E-15 | 4.45E-17 | 9.23 | 27.9066789 | 1.41E-01 | 122517974 | 122518097 | NC_000003.11 |
| cg16151651 | 1.40E-15 | 4.46E-17 | 9.23 | 27.9047453 | 1.56E-01 | 1609119   | 1609242   | NC_000002.11 |
| cg27180492 | 1.40E-15 | 4.47E-17 | 9.23 | 27.9022137 | 1.73E-01 | 27442106  | 27442229  | NC_000006.11 |
| cg08223984 | 1.40E-15 | 4.47E-17 | 9.23 | 27.9020054 | 1.09E-01 | 195476016 | 195476139 | NC_000003.11 |
| cg27516568 | 1.40E-15 | 4.47E-17 | 9.23 | 27.9014563 | 1.64E-01 | 122686667 | 122686790 | NC_000004.11 |
| cg18812579 | 1.40E-15 | 4.47E-17 | 9.23 | 27.9012386 | 9.04E-02 | 85906252  | 85906375  | NC_000011.9  |
| cg06755297 | 1.40E-15 | 4.48E-17 | 9.23 | 27.8989974 | 3.78E-02 | 220441097 | 220441220 | NC_000001.10 |
| cg09639715 | 1.41E-15 | 4.48E-17 | 9.23 | 27.8984106 | 1.03E-01 | 42994008  | 42994131  | NC_000017.10 |
| cg18249634 | 1.41E-15 | 4.49E-17 | 9.23 | 27.8979954 | 2.43E-01 | 32860467  | 32860590  | NC_000003.11 |
| cg23619431 | 1.41E-15 | 4.52E-17 | 9.23 | 27.891479  | 8.67E-02 | 74536068  | 74536191  | NC_000017.10 |
| cg01525538 | 1.42E-15 | 4.54E-17 | 9.23 | 27.8865702 | 1.71E-01 | 228785987 | 228786110 | NC_000001.10 |
| cg03323462 | 1.42E-15 | 4.54E-17 | 9.23 | 27.886233  | 1.95E-01 | 35300677  | 35300800  | NC_000017.10 |
| cg21585100 | 1.42E-15 | 4.55E-17 | 9.23 | 27.8844075 | 1.31E-01 | 55922747  | 55922870  | NC_000018.9  |
| cg07603511 | 1.42E-15 | 4.55E-17 | 9.23 | 27.8842813 | 1.69E-01 | 174160335 | 174160458 | NC_000005.9  |
| cg25445101 | 1.44E-15 | 4.59E-17 | 9.23 | 27.8752941 | 8.02E-02 | 26878566  | 26878689  | NC_000017.10 |
| cg21883598 | 1.44E-15 | 4.59E-17 | 9.23 | 27.8742873 | 1.91E-01 | 45404157  | 45404280  | NC_000015.9  |
| cg16171849 | 1.44E-15 | 4.60E-17 | 9.23 | 27.8739587 | 1.56E-01 | 139254260 | 139254383 | NC_000003.11 |
| cg24872610 | 1.44E-15 | 4.61E-17 | 9.23 | 27.8721276 | 1.57E-01 | 3158994   | 3159117   | NC_000010.10 |
| cg20977794 | 1.44E-15 | 4.61E-17 | 9.23 | 27.8713136 | 2.03E-01 | 51560748  | 51560871  | NC_000014.8  |
| cg02941135 | 1.45E-15 | 4.64E-17 | 9.23 | 27.8647114 | 1.16E-01 | 81122314  | 81122437  | NC_000004.11 |
| cg14110073 | 1.45E-15 | 4.64E-17 | 9.23 | 27.8638343 | 2.99E-01 | 51071328  | 51071451  | NC_000019.9  |
| cg07605229 | 1.45E-15 | 4.65E-17 | 9.23 | 27.8629644 | 1.56E-01 | 210467524 | 210467647 | NC_000002.11 |
| cg27140914 | 1.45E-15 | 4.65E-17 | 9.23 | 27.8628732 | 1.67E-01 | 39095348  | 39095471  | NC_000003.11 |
| cg02011374 | 1.46E-15 | 4.68E-17 | 9.23 | 27.8552144 | 1.95E-01 | 1761780   | 1761903   | NC_000019.9  |
| cg00503840 | 1.47E-15 | 4.69E-17 | 9.22 | 27.8531244 | 1.55E-01 | 96650509  | 96650632  | NC_000007.13 |

|            |          |          |      |            |          |           |           |              |
|------------|----------|----------|------|------------|----------|-----------|-----------|--------------|
| cg17108209 | 1.47E-15 | 4.70E-17 | 9.22 | 27.8527625 | 9.68E-02 | 117484306 | 117484429 | NC_000012.11 |
| cg05028087 | 1.47E-15 | 4.70E-17 | 9.22 | 27.8516328 | 2.77E-01 | 2757221   | 2757344   | NC_000005.9  |
| cg12485185 | 1.47E-15 | 4.72E-17 | 9.22 | 27.8486849 | 2.25E-01 | 34782820  | 34782943  | NC_000015.9  |
| cg03075662 | 1.47E-15 | 4.72E-17 | 9.22 | 27.846794  | 5.47E-02 | 146213648 | 146213771 | NC_000003.11 |
| cg21036840 | 1.49E-15 | 4.77E-17 | 9.22 | 27.8382866 | 7.37E-02 | 169400357 | 169400480 | NC_000006.11 |
| cg05829782 | 1.49E-15 | 4.77E-17 | 9.22 | 27.8373002 | 3.02E-01 | 74707911  | 74708034  | NC_000014.8  |
| cg14093715 | 1.49E-15 | 4.78E-17 | 9.22 | 27.8349552 | 2.43E-01 | 126776180 | 126776303 | NC_000009.11 |
| cg07880943 | 1.49E-15 | 4.78E-17 | 9.22 | 27.834793  | 1.46E-01 | 46744500  | 46744623  | NC_000013.10 |
| cg17537177 | 1.49E-15 | 4.79E-17 | 9.22 | 27.8329354 | 2.46E-01 | 130646129 | 130646252 | NC_000012.11 |
| cg16206460 | 1.49E-15 | 4.79E-17 | 9.22 | 27.8326783 | 2.97E-01 | 15580700  | 15580823  | NC_000019.9  |
| cg04474190 | 1.50E-15 | 4.83E-17 | 9.22 | 27.8255583 | 1.39E-01 | 188868788 | 188868911 | NC_000003.11 |
| cg26709285 | 1.51E-15 | 4.84E-17 | 9.22 | 27.8228612 | 1.75E-01 | 48099146  | 48099269  | NC_000020.10 |
| cg05770240 | 1.51E-15 | 4.85E-17 | 9.22 | 27.8213745 | 9.64E-02 | 124502244 | 124502367 | NC_000011.9  |
| cg16348470 | 1.51E-15 | 4.86E-17 | 9.22 | 27.8189288 | 2.31E-01 | 34642609  | 34642732  | NC_000001.10 |
| cg04672706 | 1.52E-15 | 4.88E-17 | 9.22 | 27.8150781 | 2.14E-01 | 55370423  | 55370546  | NC_000008.10 |
| cg05037662 | 1.52E-15 | 4.88E-17 | 9.22 | 27.8147055 | 2.15E-01 | 25704296  | 25704419  | NC_000016.9  |
| cg22868282 | 1.53E-15 | 4.90E-17 | 9.22 | 27.8107381 | 2.37E-01 | 47224954  | 47225077  | NC_000012.11 |
| cg24073466 | 1.53E-15 | 4.90E-17 | 9.22 | 27.8098483 | 2.50E-01 | 60937031  | 60937154  | NC_000010.10 |
| cg26149275 | 1.53E-15 | 4.91E-17 | 9.22 | 27.8092072 | 1.94E-01 | 176950007 | 176950130 | NC_000002.11 |
| cg21719361 | 1.53E-15 | 4.92E-17 | 9.22 | 27.8070409 | 1.51E-01 | 50944355  | 50944478  | NC_000022.10 |
| cg18239431 | 1.53E-15 | 4.92E-17 | 9.22 | 27.8058668 | 1.60E-01 | 25898220  | 25898343  | NC_000008.10 |
| cg14600384 | 1.53E-15 | 4.93E-17 | 9.22 | 27.805036  | 1.11E-01 | 131769364 | 131769487 | NC_000012.11 |
| cg22879667 | 1.54E-15 | 4.94E-17 | 9.22 | 27.802323  | 1.86E-01 | 4868441   | 4868564   | NC_000004.11 |
| cg18771839 | 1.55E-15 | 4.97E-17 | 9.22 | 27.7965297 | 5.36E-02 | 69931206  | 69931329  | NC_000011.9  |
| cg06972213 | 1.55E-15 | 4.98E-17 | 9.22 | 27.7955302 | 1.12E-01 | 39643395  | 39643518  | NC_000017.10 |

|            |          |          |      |            |          |           |           |              |
|------------|----------|----------|------|------------|----------|-----------|-----------|--------------|
| cg16015712 | 1.55E-15 | 4.99E-17 | 9.22 | 27.7917654 | 2.38E-01 | 53308597  | 53308720  | NC_000001.10 |
| cg05659097 | 1.56E-15 | 5.02E-17 | 9.21 | 27.7869394 | 2.76E-01 | 2757244   | 2757367   | NC_000005.9  |
| cg16197717 | 1.57E-15 | 5.05E-17 | 9.21 | 27.7805398 | 1.89E-01 | 125650957 | 125651080 | NC_000010.10 |
| cg16437087 | 1.58E-15 | 5.10E-17 | 9.21 | 27.7719749 | 7.82E-02 | 193919045 | 193919168 | NC_000003.11 |
| cg05350411 | 1.58E-15 | 5.10E-17 | 9.21 | 27.7716787 | 2.00E-01 | 569174    | 569297    | NC_000004.11 |
| cg11121935 | 1.59E-15 | 5.11E-17 | 9.21 | 27.7700197 | 1.15E-01 | 105359964 | 105360087 | NC_000014.8  |
| cg09409539 | 1.59E-15 | 5.11E-17 | 9.21 | 27.7687971 | 1.88E-01 | 95664243  | 95664366  | NC_000002.11 |
| cg20230721 | 1.59E-15 | 5.13E-17 | 9.21 | 27.7647916 | 3.32E-01 | 93519855  | 93519978  | NC_000007.13 |
| cg20073893 | 1.60E-15 | 5.14E-17 | 9.21 | 27.7627709 | 1.51E-01 | 22945457  | 22945580  | NC_000014.8  |
| cg20121142 | 1.61E-15 | 5.18E-17 | 9.21 | 27.7563242 | 2.21E-01 | 19158001  | 19158124  | NC_000007.13 |
| cg25778535 | 1.61E-15 | 5.18E-17 | 9.21 | 27.7561988 | 2.69E-01 | 8190572   | 8190695   | NC_000011.9  |
| cg25656283 | 1.61E-15 | 5.20E-17 | 9.21 | 27.7512774 | 1.23E-01 | 50733196  | 50733319  | NC_000010.10 |
| cg02111741 | 1.61E-15 | 5.20E-17 | 9.21 | 27.751204  | 1.10E-01 | 26683554  | 26683677  | NC_000017.10 |
| cg24526587 | 1.62E-15 | 5.22E-17 | 9.21 | 27.748237  | 9.50E-02 | 164587676 | 164587799 | NC_000001.10 |
| cg11739399 | 1.62E-15 | 5.22E-17 | 9.21 | 27.7480422 | 1.53E-01 | 206669785 | 206669908 | NC_000001.10 |
| cg14923370 | 1.62E-15 | 5.22E-17 | 9.21 | 27.7479398 | 1.25E-01 | 134622540 | 134622663 | NC_000010.10 |
| cg09774787 | 1.62E-15 | 5.23E-17 | 9.21 | 27.746831  | 2.76E-01 | 55690381  | 55690504  | NC_000016.9  |
| cg06455422 | 1.63E-15 | 5.25E-17 | 9.21 | 27.7423393 | 1.88E-01 | 98875360  | 98875483  | NC_000013.10 |
| cg04246113 | 1.63E-15 | 5.26E-17 | 9.21 | 27.7413088 | 1.80E-01 | 120316152 | 120316275 | NC_000001.10 |
| cg05959346 | 1.65E-15 | 5.31E-17 | 9.21 | 27.7309543 | 1.31E-01 | 40102679  | 40102802  | NC_000001.10 |
| cg11233163 | 1.66E-15 | 5.34E-17 | 9.2  | 27.7253714 | 1.89E-01 | 23955549  | 23955672  | NC_000003.11 |
| cg11898646 | 1.68E-15 | 5.41E-17 | 9.2  | 27.7126888 | 1.62E-01 | 158522427 | 158522550 | NC_000005.9  |
| cg27456185 | 1.68E-15 | 5.42E-17 | 9.2  | 27.7117296 | 1.77E-01 | 93196011  | 93196134  | NC_000015.9  |
| cg00082664 | 1.68E-15 | 5.42E-17 | 9.2  | 27.7099529 | 2.78E-01 | 154710796 | 154710919 | NC_000004.11 |
| cg20044410 | 1.68E-15 | 5.43E-17 | 9.2  | 27.7094694 | 2.14E-01 | 10463350  | 10463473  | NC_000004.11 |

|            |          |          |      |            |          |           |           |              |
|------------|----------|----------|------|------------|----------|-----------|-----------|--------------|
| cg18322569 | 1.69E-15 | 5.45E-17 | 9.2  | 27.7053896 | 2.43E-01 | 91182777  | 91182900  | NC_000001.10 |
| cg14384093 | 1.69E-15 | 5.45E-17 | 9.2  | 27.7046062 | 1.79E-01 | 111878565 | 111878688 | NC_000009.11 |
| cg27546237 | 1.69E-15 | 5.47E-17 | 9.2  | 27.7012103 | 2.47E-01 | 110960452 | 110960575 | NC_000013.10 |
| cg26354128 | 1.69E-15 | 5.48E-17 | 9.2  | 27.7006815 | 2.58E-01 | 93897195  | 93897318  | NC_000014.8  |
| cg21852408 | 1.70E-15 | 5.48E-17 | 9.2  | 27.7001764 | 2.26E-01 | 109294190 | 109294313 | NC_000011.9  |
| cg16006349 | 1.70E-15 | 5.48E-17 | 9.2  | 27.6993945 | 1.94E-01 | 54360460  | 54360583  | NC_000012.11 |
| cg25001845 | 1.70E-15 | 5.50E-17 | 9.2  | 27.6965704 | 6.21E-02 | 75201709  | 75201832  | NC_000014.8  |
| cg21236414 | 1.71E-15 | 5.52E-17 | 9.2  | 27.6932122 | 1.19E-01 | 894185    | 894308    | NC_000004.11 |
| cg24471254 | 1.72E-15 | 5.58E-17 | 9.2  | 27.6819918 | 1.87E-01 | 100253792 | 100253915 | NC_000007.13 |
| cg25789533 | 1.73E-15 | 5.59E-17 | 9.2  | 27.6807449 | 9.04E-02 | 47104483  | 47104606  | NC_000019.9  |
| cg17326994 | 1.73E-15 | 5.60E-17 | 9.2  | 27.6789864 | 6.78E-02 | 32511779  | 32511902  | NC_000017.10 |
| cg27504802 | 1.73E-15 | 5.61E-17 | 9.2  | 27.6773545 | 2.70E-01 | 231298651 | 231298774 | NC_000001.10 |
| cg01627492 | 1.73E-15 | 5.61E-17 | 9.2  | 27.6770942 | 6.95E-02 | 18916400  | 18916523  | NC_000017.10 |
| cg15861694 | 1.73E-15 | 5.61E-17 | 9.2  | 27.677067  | 7.10E-02 | 2706745   | 2706868   | NC_000011.9  |
| cg05292954 | 1.73E-15 | 5.61E-17 | 9.2  | 27.6764356 | 2.94E-01 | 57050620  | 57050743  | NC_000019.9  |
| cg13894719 | 1.73E-15 | 5.62E-17 | 9.2  | 27.675552  | 1.09E-01 | 56534223  | 56534346  | NC_000004.11 |
| cg22164539 | 1.74E-15 | 5.64E-17 | 9.2  | 27.6709439 | 9.31E-02 | 32081613  | 32081736  | NC_000006.11 |
| cg10377644 | 1.76E-15 | 5.68E-17 | 9.2  | 27.6636635 | 3.35E-02 | 590582    | 590705    | NC_000016.9  |
| cg20051292 | 1.76E-15 | 5.70E-17 | 9.2  | 27.6617273 | 2.17E-01 | 101118512 | 101118635 | NC_000008.10 |
| cg03025148 | 1.77E-15 | 5.72E-17 | 9.19 | 27.6576424 | 5.40E-02 | 26936997  | 26937120  | NC_000022.10 |
| cg19725343 | 1.77E-15 | 5.74E-17 | 9.19 | 27.653587  | 2.85E-01 | 51830960  | 51831083  | NC_000019.9  |
| cg14820653 | 1.78E-15 | 5.76E-17 | 9.19 | 27.6505256 | 6.02E-02 | 173046018 | 173046141 | NC_000002.11 |
| cg24954895 | 1.79E-15 | 5.79E-17 | 9.19 | 27.6454812 | 2.24E-01 | 140800761 | 140800884 | NC_000005.9  |
| cg06239593 | 1.79E-15 | 5.82E-17 | 9.19 | 27.6402007 | 7.00E-02 | 130748639 | 130748762 | NC_000003.11 |
| cg05587627 | 1.80E-15 | 5.83E-17 | 9.19 | 27.6390849 | 1.79E-01 | 118657363 | 118657486 | NC_000011.9  |

|            |          |          |      |            |          |           |           |              |
|------------|----------|----------|------|------------|----------|-----------|-----------|--------------|
| cg09441069 | 1.80E-15 | 5.84E-17 | 9.19 | 27.6367976 | 1.25E-01 | 47569479  | 47569602  | NC_000021.8  |
| cg07336617 | 1.80E-15 | 5.85E-17 | 9.19 | 27.6347658 | 1.77E-01 | 76935080  | 76935203  | NC_000005.9  |
| cg27635976 | 1.82E-15 | 5.91E-17 | 9.19 | 27.6245406 | 1.55E-01 | 88984067  | 88984190  | NC_000016.9  |
| cg23202496 | 1.83E-15 | 5.93E-17 | 9.19 | 27.6219918 | 6.41E-02 | 35488318  | 35488441  | NC_000020.10 |
| cg09017619 | 1.83E-15 | 5.95E-17 | 9.19 | 27.6187756 | 2.49E-01 | 27196320  | 27196443  | NC_000007.13 |
| cg04658772 | 1.83E-15 | 5.96E-17 | 9.19 | 27.6172531 | 2.13E-01 | 77822433  | 77822556  | NC_000016.9  |
| cg18490614 | 1.84E-15 | 5.97E-17 | 9.19 | 27.6147348 | 1.65E-01 | 27213362  | 27213485  | NC_000015.9  |
| cg14804903 | 1.84E-15 | 5.99E-17 | 9.19 | 27.6122288 | 1.24E-01 | 86418754  | 86418877  | NC_000002.11 |
| cg14936938 | 1.84E-15 | 5.99E-17 | 9.19 | 27.6114991 | 1.91E-01 | 122118171 | 122118294 | NC_000008.10 |
| cg09693765 | 1.85E-15 | 6.00E-17 | 9.19 | 27.61014   | 1.12E-01 | 45075639  | 45075762  | NC_000021.8  |
| cg06998224 | 1.85E-15 | 6.03E-17 | 9.19 | 27.6060052 | 1.29E-01 | 128113907 | 128114030 | NC_000005.9  |
| cg15992648 | 1.86E-15 | 6.06E-17 | 9.19 | 27.6004045 | 1.05E-01 | 155640784 | 155640907 | NC_000007.13 |
| cg07803375 | 1.88E-15 | 6.12E-17 | 9.18 | 27.5907936 | 2.49E-01 | 811206    | 811329    | NC_000007.13 |
| cg01559597 | 1.88E-15 | 6.12E-17 | 9.18 | 27.5905636 | 1.32E-01 | 14716193  | 14716316  | NC_000006.11 |
| cg07831164 | 1.88E-15 | 6.13E-17 | 9.18 | 27.5884957 | 1.51E-01 | 10836225  | 10836348  | NC_000016.9  |
| cg11947981 | 1.88E-15 | 6.14E-17 | 9.18 | 27.5880775 | 2.77E-01 | 182322749 | 182322872 | NC_000002.11 |
| cg09252495 | 1.89E-15 | 6.14E-17 | 9.18 | 27.5870646 | 2.52E-01 | 21503898  | 21504021  | NC_000020.10 |
| cg10527010 | 1.91E-15 | 6.22E-17 | 9.18 | 27.5751907 | 2.21E-01 | 10857795  | 10857918  | NC_000003.11 |
| cg09193347 | 1.92E-15 | 6.25E-17 | 9.18 | 27.5703832 | 1.96E-01 | 79381867  | 79381990  | NC_000015.9  |
| cg27096416 | 1.92E-15 | 6.26E-17 | 9.18 | 27.5688437 | 6.97E-02 | 140599947 | 140600070 | NC_000007.13 |
| cg04107939 | 1.92E-15 | 6.27E-17 | 9.18 | 27.5664759 | 2.06E-01 | 171520494 | 171520617 | NC_000003.11 |
| cg13989664 | 1.93E-15 | 6.28E-17 | 9.18 | 27.5644432 | 1.86E-01 | 126374295 | 126374418 | NC_000012.11 |
| cg20812722 | 1.93E-15 | 6.29E-17 | 9.18 | 27.5633392 | 1.05E-01 | 25525951  | 25526074  | NC_000001.10 |
| cg27065876 | 1.93E-15 | 6.29E-17 | 9.18 | 27.5627616 | 1.01E-01 | 1840421   | 1840544   | NC_000016.9  |
| cg25356621 | 1.93E-15 | 6.31E-17 | 9.18 | 27.5610307 | 8.06E-02 | 74686282  | 74686405  | NC_000012.11 |

|            |          |          |      |            |          |           |           |              |
|------------|----------|----------|------|------------|----------|-----------|-----------|--------------|
| cg08063125 | 1.94E-15 | 6.32E-17 | 9.18 | 27.5592721 | 2.89E-01 | 56989543  | 56989666  | NC_000019.9  |
| cg00293996 | 1.94E-15 | 6.32E-17 | 9.18 | 27.5583334 | 1.07E-01 | 37915391  | 37915514  | NC_000021.8  |
| cg07040894 | 1.94E-15 | 6.33E-17 | 9.18 | 27.55779   | 1.02E-01 | 128291985 | 128292108 | NC_000002.11 |
| cg04194947 | 1.95E-15 | 6.37E-17 | 9.18 | 27.5511702 | 1.81E-01 | 177012191 | 177012314 | NC_000002.11 |
| cg22931725 | 1.95E-15 | 6.37E-17 | 9.18 | 27.5503213 | 1.65E-01 | 240255627 | 240255750 | NC_000001.10 |
| cg26437826 | 1.96E-15 | 6.39E-17 | 9.18 | 27.5482555 | 1.81E-01 | 76936361  | 76936484  | NC_000005.9  |
| cg02459519 | 1.96E-15 | 6.39E-17 | 9.18 | 27.5481499 | 8.27E-02 | 62401855  | 62401978  | NC_000017.10 |
| cg08214995 | 1.96E-15 | 6.41E-17 | 9.18 | 27.545271  | 1.75E-01 | 22826243  | 22826366  | NC_000016.9  |
| cg20463526 | 1.96E-15 | 6.41E-17 | 9.18 | 27.5449955 | 2.85E-01 | 91191001  | 91191124  | NC_000001.10 |
| cg03834919 | 1.97E-15 | 6.43E-17 | 9.18 | 27.5422987 | 1.58E-01 | 862427    | 862550    | NC_000007.13 |
| cg04522596 | 1.97E-15 | 6.43E-17 | 9.18 | 27.5413714 | 1.64E-01 | 98878060  | 98878183  | NC_000012.11 |
| cg05201777 | 1.97E-15 | 6.44E-17 | 9.18 | 27.5409455 | 1.31E-01 | 112598561 | 112598684 | NC_000010.10 |
| cg02387745 | 1.97E-15 | 6.44E-17 | 9.18 | 27.5406994 | 1.45E-01 | 74317457  | 74317580  | NC_000004.11 |
| cg27630192 | 1.97E-15 | 6.44E-17 | 9.18 | 27.5404777 | 1.48E-01 | 108213750 | 108213873 | NC_000007.13 |
| cg06399302 | 1.98E-15 | 6.46E-17 | 9.18 | 27.5375917 | 2.46E-01 | 34113214  | 34113337  | NC_000019.9  |
| cg23491743 | 1.98E-15 | 6.46E-17 | 9.18 | 27.5364982 | 1.55E-01 | 241989271 | 241989394 | NC_000002.11 |
| cg04870949 | 1.98E-15 | 6.47E-17 | 9.18 | 27.536308  | 1.24E-01 | 114109857 | 114109980 | NC_000013.10 |
| cg17074989 | 1.99E-15 | 6.50E-17 | 9.17 | 27.5305631 | 1.51E-01 | 58880752  | 58880875  | NC_000015.9  |
| cg04900080 | 2.00E-15 | 6.53E-17 | 9.17 | 27.5263948 | 1.79E-01 | 229570665 | 229570788 | NC_000001.10 |
| cg15418593 | 2.00E-15 | 6.53E-17 | 9.17 | 27.5257292 | 1.70E-01 | 97492133  | 97492256  | NC_000014.8  |
| cg04342092 | 2.00E-15 | 6.54E-17 | 9.17 | 27.5256451 | 2.11E-01 | 58095468  | 58095591  | NC_000019.9  |
| cg14801038 | 2.00E-15 | 6.54E-17 | 9.17 | 27.5252746 | 1.67E-01 | 134214307 | 134214430 | NC_000006.11 |
| cg18877506 | 2.00E-15 | 6.54E-17 | 9.17 | 27.5250897 | 2.18E-01 | 13910555  | 13910678  | NC_000001.10 |
| cg27557796 | 2.01E-15 | 6.57E-17 | 9.17 | 27.5199657 | 7.98E-02 | 31688702  | 31688825  | NC_000006.11 |
| cg21126583 | 2.01E-15 | 6.57E-17 | 9.17 | 27.5199398 | 2.90E-01 | 145813421 | 145813544 | NC_000007.13 |



|            |          |          |      |            |          |           |           |              |
|------------|----------|----------|------|------------|----------|-----------|-----------|--------------|
| cg03225817 | 2.01E-15 | 6.59E-17 | 9.17 | 27.5174894 | 2.52E-01 | 105481317 | 105481440 | NC_000011.9  |
| cg08291024 | 2.02E-15 | 6.60E-17 | 9.17 | 27.5154003 | 2.26E-01 | 165324411 | 165324534 | NC_000001.10 |
| cg25372296 | 2.02E-15 | 6.60E-17 | 9.17 | 27.5152947 | 2.04E-01 | 98510328  | 98510451  | NC_000001.10 |
| cg06012215 | 2.02E-15 | 6.62E-17 | 9.17 | 27.5122285 | 1.12E-01 | 111216867 | 111216990 | NC_000010.10 |
| cg14838600 | 2.03E-15 | 6.66E-17 | 9.17 | 27.5069998 | 1.32E-01 | 151442967 | 151443090 | NC_000007.13 |
| cg22190437 | 2.04E-15 | 6.68E-17 | 9.17 | 27.5038491 | 1.84E-01 | 229045417 | 229045540 | NC_000002.11 |
| cg18790597 | 2.04E-15 | 6.70E-17 | 9.17 | 27.501416  | 2.44E-01 | 17783331  | 17783454  | NC_000004.11 |
| cg27369542 | 2.05E-15 | 6.70E-17 | 9.17 | 27.5004579 | 9.38E-02 | 14207890  | 14208013  | NC_000017.10 |
| cg01468220 | 2.05E-15 | 6.71E-17 | 9.17 | 27.5002939 | 1.40E-01 | 779026    | 779149    | NC_000016.9  |
| cg23291280 | 2.05E-15 | 6.71E-17 | 9.17 | 27.4996426 | 2.15E-01 | 31847970  | 31848093  | NC_000019.9  |
| cg08720786 | 2.05E-15 | 6.72E-17 | 9.17 | 27.497723  | 1.06E-01 | 48981581  | 48981704  | NC_000010.10 |
| cg16887264 | 2.05E-15 | 6.72E-17 | 9.17 | 27.4975467 | 2.28E-01 | 147561775 | 147561898 | NC_000004.11 |
| cg17029354 | 2.06E-15 | 6.77E-17 | 9.17 | 27.4911248 | 2.07E-01 | 115134904 | 115135027 | NC_000012.11 |
| cg05415871 | 2.06E-15 | 6.77E-17 | 9.17 | 27.4900424 | 1.76E-01 | 1008188   | 1008311   | NC_000008.10 |
| cg10640072 | 2.07E-15 | 6.78E-17 | 9.17 | 27.4896238 | 1.74E-01 | 99985888  | 99986011  | NC_000008.10 |
| cg02765535 | 2.07E-15 | 6.78E-17 | 9.17 | 27.4895987 | 1.43E-01 | 96149803  | 96149926  | NC_000012.11 |
| cg21782511 | 2.07E-15 | 6.79E-17 | 9.17 | 27.4882582 | 6.67E-02 | 1808376   | 1808499   | NC_000004.11 |
| cg00160886 | 2.07E-15 | 6.80E-17 | 9.17 | 27.4864565 | 1.34E-01 | 157216105 | 157216228 | NC_000003.11 |
| cg00017437 | 2.08E-15 | 6.84E-17 | 9.17 | 27.4811533 | 2.00E-01 | 2706335   | 2706458   | NC_000001.10 |
| cg00853103 | 2.08E-15 | 6.84E-17 | 9.17 | 27.4804578 | 2.17E-01 | 6533789   | 6533912   | NC_000016.9  |
| cg01970904 | 2.09E-15 | 6.86E-17 | 9.17 | 27.4778377 | 1.35E-01 | 172014013 | 172014136 | NC_000002.11 |
| cg01826138 | 2.09E-15 | 6.87E-17 | 9.17 | 27.4767368 | 4.39E-02 | 181843183 | 181843306 | NC_000002.11 |
| cg04618897 | 2.10E-15 | 6.90E-17 | 9.17 | 27.4724284 | 6.91E-02 | 4829256   | 4829379   | NC_000007.13 |
| cg13211324 | 2.11E-15 | 6.95E-17 | 9.16 | 27.4648405 | 1.37E-01 | 113373736 | 113373859 | NC_000003.11 |
| cg06896909 | 2.11E-15 | 6.95E-17 | 9.16 | 27.4646483 | 1.64E-01 | 19813297  | 19813420  | NC_000007.13 |

|            |          |          |      |            |          |           |           |              |
|------------|----------|----------|------|------------|----------|-----------|-----------|--------------|
| cg16782974 | 2.12E-15 | 6.95E-17 | 9.16 | 27.464247  | 1.35E-01 | 98290350  | 98290473  | NC_000010.10 |
| cg03018771 | 2.12E-15 | 6.96E-17 | 9.16 | 27.4638811 | 1.56E-01 | 27940619  | 27940742  | NC_000001.10 |
| cg14477581 | 2.12E-15 | 6.97E-17 | 9.16 | 27.4618641 | 1.25E-01 | 72899321  | 72899444  | NC_000009.11 |
| cg18670076 | 2.12E-15 | 6.97E-17 | 9.16 | 27.4616426 | 1.12E-01 | 189675162 | 189675285 | NC_000003.11 |
| cg05656251 | 2.13E-15 | 6.99E-17 | 9.16 | 27.4588322 | 6.86E-02 | 3125906   | 3126029   | NC_000001.10 |
| cg18729001 | 2.13E-15 | 7.02E-17 | 9.16 | 27.4546645 | 1.99E-01 | 45443808  | 45443931  | NC_000012.11 |
| cg12062936 | 2.14E-15 | 7.04E-17 | 9.16 | 27.4516867 | 1.24E-01 | 18801087  | 18801210  | NC_000007.13 |
| cg23208513 | 2.14E-15 | 7.05E-17 | 9.16 | 27.4508878 | 2.18E-01 | 101118377 | 101118500 | NC_000008.10 |
| cg26024843 | 2.14E-15 | 7.06E-17 | 9.16 | 27.4498672 | 2.30E-01 | 137533949 | 137534072 | NC_000009.11 |
| cg06674731 | 2.15E-15 | 7.06E-17 | 9.16 | 27.4488508 | 1.83E-01 | 154335014 | 154335137 | NC_000002.11 |
| cg17762554 | 2.15E-15 | 7.07E-17 | 9.16 | 27.4483235 | 1.54E-01 | 112435953 | 112436076 | NC_000002.11 |
| cg02497558 | 2.15E-15 | 7.07E-17 | 9.16 | 27.4474411 | 1.27E-01 | 46608570  | 46608693  | NC_000017.10 |
| cg23254031 | 2.16E-15 | 7.10E-17 | 9.16 | 27.4436506 | 1.94E-01 | 48144765  | 48144888  | NC_000014.8  |
| cg26831087 | 2.16E-15 | 7.12E-17 | 9.16 | 27.4408388 | 1.23E-01 | 1259070   | 1259193   | NC_000001.10 |
| cg17951138 | 2.16E-15 | 7.12E-17 | 9.16 | 27.4401955 | 2.03E-01 | 92908392  | 92908515  | NC_000005.9  |
| cg24741563 | 2.16E-15 | 7.13E-17 | 9.16 | 27.439679  | 9.21E-02 | 58545335  | 58545458  | NC_000017.10 |
| cg09537792 | 2.17E-15 | 7.15E-17 | 9.16 | 27.4372509 | 1.32E-01 | 89438892  | 89439015  | NC_000016.9  |
| cg14446622 | 2.19E-15 | 7.21E-17 | 9.16 | 27.4288643 | 8.07E-02 | 100894501 | 100894624 | NC_000009.11 |
| cg02390588 | 2.19E-15 | 7.22E-17 | 9.16 | 27.4272792 | 9.62E-02 | 53722253  | 53722376  | NC_000012.11 |
| cg15867939 | 2.21E-15 | 7.27E-17 | 9.16 | 27.4195989 | 1.97E-01 | 140770523 | 140770646 | NC_000003.11 |
| cg09619271 | 2.21E-15 | 7.28E-17 | 9.16 | 27.4185619 | 2.32E-01 | 45961289  | 45961412  | NC_000007.13 |
| cg15965716 | 2.21E-15 | 7.29E-17 | 9.16 | 27.4173823 | 1.62E-01 | 164688315 | 164688438 | NC_000001.10 |
| cg25020820 | 2.23E-15 | 7.34E-17 | 9.16 | 27.4100996 | 1.00E-01 | 43230751  | 43230874  | NC_000006.11 |
| cg06915270 | 2.23E-15 | 7.36E-17 | 9.16 | 27.4087113 | 7.04E-02 | 183891360 | 183891483 | NC_000001.10 |
| cg08530237 | 2.26E-15 | 7.45E-17 | 9.15 | 27.3957946 | 2.45E-01 | 22094563  | 22094686  | NC_000012.11 |

|            |          |          |      |            |          |           |           |              |
|------------|----------|----------|------|------------|----------|-----------|-----------|--------------|
| cg14685796 | 2.27E-15 | 7.49E-17 | 9.15 | 27.3911406 | 1.94E-01 | 50265660  | 50265783  | NC_000005.9  |
| cg02438611 | 2.27E-15 | 7.49E-17 | 9.15 | 27.3904954 | 1.77E-01 | 55828107  | 55828230  | NC_000017.10 |
| cg07990546 | 2.27E-15 | 7.51E-17 | 9.15 | 27.3885544 | 2.30E-01 | 74742309  | 74742432  | NC_000002.11 |
| cg17486097 | 2.28E-15 | 7.53E-17 | 9.15 | 27.3851515 | 1.87E-01 | 35093411  | 35093534  | NC_000008.10 |
| cg04618528 | 2.28E-15 | 7.54E-17 | 9.15 | 27.3842788 | 5.31E-02 | 39645876  | 39645999  | NC_000017.10 |
| cg06310816 | 2.28E-15 | 7.54E-17 | 9.15 | 27.3838879 | 2.63E-01 | 42267719  | 42267842  | NC_000007.13 |
| cg03714619 | 2.28E-15 | 7.54E-17 | 9.15 | 27.3837825 | 2.61E-01 | 45160445  | 45160568  | NC_000002.11 |
| cg00246932 | 2.28E-15 | 7.54E-17 | 9.15 | 27.3836219 | 2.78E-01 | 56228498  | 56228621  | NC_000016.9  |
| cg00581154 | 2.28E-15 | 7.55E-17 | 9.15 | 27.3828187 | 1.47E-01 | 3123695   | 3123818   | NC_000001.10 |
| cg24873562 | 2.29E-15 | 7.55E-17 | 9.15 | 27.3822022 | 2.50E-01 | 124902349 | 124902472 | NC_000010.10 |
| cg14078092 | 2.29E-15 | 7.58E-17 | 9.15 | 27.3792369 | 9.49E-02 | 123463530 | 123463653 | NC_000012.11 |
| cg07583894 | 2.29E-15 | 7.58E-17 | 9.15 | 27.3792178 | 2.58E-01 | 12936512  | 12936635  | NC_000019.9  |
| cg25573386 | 2.29E-15 | 7.58E-17 | 9.15 | 27.3782902 | 1.47E-01 | 18890579  | 18890702  | NC_000012.11 |
| cg16242629 | 2.30E-15 | 7.60E-17 | 9.15 | 27.3760017 | 2.05E-01 | 30354246  | 30354369  | NC_000012.11 |
| cg22177840 | 2.30E-15 | 7.61E-17 | 9.15 | 27.3750726 | 1.05E-01 | 90139296  | 90139419  | NC_000003.11 |
| cg07960450 | 2.30E-15 | 7.61E-17 | 9.15 | 27.3747568 | 1.91E-01 | 45614300  | 45614423  | NC_000007.13 |
| cg00848392 | 2.32E-15 | 7.66E-17 | 9.15 | 27.3683786 | 1.27E-01 | 31734401  | 31734524  | NC_000006.11 |
| cg01360618 | 2.32E-15 | 7.66E-17 | 9.15 | 27.3682066 | 2.89E-01 | 69591659  | 69591782  | NC_000003.11 |
| cg07132449 | 2.32E-15 | 7.69E-17 | 9.15 | 27.3650496 | 4.41E-02 | 189432110 | 189432233 | NC_000003.11 |
| cg01359200 | 2.33E-15 | 7.71E-17 | 9.15 | 27.3621086 | 7.87E-02 | 194763212 | 194763335 | NC_000003.11 |
| cg08358166 | 2.33E-15 | 7.72E-17 | 9.15 | 27.3609146 | 2.37E-01 | 18538271  | 18538394  | NC_000017.10 |
| cg10827094 | 2.33E-15 | 7.73E-17 | 9.15 | 27.3597128 | 1.37E-01 | 117468061 | 117468184 | NC_000012.11 |
| cg26483578 | 2.34E-15 | 7.76E-17 | 9.15 | 27.3558749 | 2.80E-01 | 130686708 | 130686831 | NC_000006.11 |
| cg14135814 | 2.35E-15 | 7.78E-17 | 9.15 | 27.3535805 | 2.36E-01 | 119419329 | 119419452 | NC_000012.11 |
| cg15440688 | 2.35E-15 | 7.79E-17 | 9.15 | 27.3517029 | 1.55E-01 | 95237637  | 95237760  | NC_000014.8  |

|            |          |          |      |            |          |           |           |              |
|------------|----------|----------|------|------------|----------|-----------|-----------|--------------|
| cg21528112 | 2.36E-15 | 7.81E-17 | 9.15 | 27.3492384 | 2.29E-01 | 11034978  | 11035101  | NC_000003.11 |
| cg09243147 | 2.36E-15 | 7.82E-17 | 9.15 | 27.3476898 | 8.34E-02 | 101399998 | 101400121 | NC_000003.11 |
| cg11877129 | 2.37E-15 | 7.86E-17 | 9.15 | 27.3427321 | 2.32E-01 | 128752356 | 128752479 | NC_000012.11 |
| cg15383705 | 2.37E-15 | 7.87E-17 | 9.15 | 27.3419653 | 1.17E-01 | 114699120 | 114699243 | NC_000010.10 |
| cg04223420 | 2.38E-15 | 7.87E-17 | 9.15 | 27.3412862 | 1.98E-01 | 134363877 | 134364000 | NC_000005.9  |
| cg01382072 | 2.38E-15 | 7.89E-17 | 9.14 | 27.3394066 | 1.23E-01 | 86787277  | 86787400  | NC_000016.9  |
| cg26452056 | 2.38E-15 | 7.90E-17 | 9.14 | 27.338196  | 2.04E-01 | 131770909 | 131771032 | NC_000010.10 |
| cg07502829 | 2.39E-15 | 7.94E-17 | 9.14 | 27.333583  | 1.66E-01 | 112708288 | 112708411 | NC_000013.10 |
| cg02667667 | 2.41E-15 | 8.00E-17 | 9.14 | 27.3257518 | 2.67E-01 | 56228505  | 56228628  | NC_000016.9  |
| cg27615388 | 2.42E-15 | 8.02E-17 | 9.14 | 27.323328  | 2.02E-01 | 63257092  | 63257215  | NC_000005.9  |
| cg21488279 | 2.42E-15 | 8.02E-17 | 9.14 | 27.3228154 | 1.13E-01 | 122434178 | 122434301 | NC_000005.9  |
| cg05471296 | 2.42E-15 | 8.03E-17 | 9.14 | 27.3216856 | 2.62E-01 | 27196302  | 27196425  | NC_000007.13 |
| cg00840332 | 2.43E-15 | 8.05E-17 | 9.14 | 27.3190753 | 1.85E-01 | 127881269 | 127881392 | NC_000007.13 |
| cg01085837 | 2.44E-15 | 8.09E-17 | 9.14 | 27.314703  | 2.37E-01 | 22094461  | 22094584  | NC_000012.11 |
| cg26940910 | 2.44E-15 | 8.09E-17 | 9.14 | 27.314678  | 5.47E-02 | 206627837 | 206627960 | NC_000001.10 |
| cg17847723 | 2.44E-15 | 8.09E-17 | 9.14 | 27.3144127 | 1.95E-01 | 114075981 | 114076104 | NC_000012.11 |
| cg10379472 | 2.44E-15 | 8.10E-17 | 9.14 | 27.3134339 | 1.23E-01 | 71475452  | 71475575  | NC_000016.9  |
| cg05048377 | 2.44E-15 | 8.12E-17 | 9.14 | 27.3113464 | 2.06E-01 | 3237964   | 3238087   | NC_000016.9  |
| cg03356595 | 2.45E-15 | 8.14E-17 | 9.14 | 27.3086101 | 2.36E-01 | 51187807  | 51187930  | NC_000016.9  |
| cg20021204 | 2.46E-15 | 8.16E-17 | 9.14 | 27.3065006 | 1.08E-01 | 77413730  | 77413853  | NC_000015.9  |
| cg14650610 | 2.47E-15 | 8.19E-17 | 9.14 | 27.3019212 | 3.28E-01 | 136834492 | 136834615 | NC_000005.9  |
| cg07167946 | 2.47E-15 | 8.21E-17 | 9.14 | 27.3000711 | 1.89E-01 | 1878205   | 1878328   | NC_000005.9  |
| cg09683350 | 2.49E-15 | 8.27E-17 | 9.14 | 27.2925873 | 2.33E-01 | 89914466  | 89914589  | NC_000015.9  |
| cg14216068 | 2.49E-15 | 8.27E-17 | 9.14 | 27.2921921 | 1.85E-01 | 27146445  | 27146568  | NC_000007.13 |
| cg00393837 | 2.50E-15 | 8.31E-17 | 9.14 | 27.2883793 | 2.20E-01 | 105470050 | 105470173 | NC_000002.11 |

|            |          |          |      |            |          |           |           |              |
|------------|----------|----------|------|------------|----------|-----------|-----------|--------------|
| cg26429655 | 2.50E-15 | 8.32E-17 | 9.14 | 27.2865562 | 2.79E-01 | 178772390 | 178772513 | NC_000005.9  |
| cg02264079 | 2.51E-15 | 8.35E-17 | 9.14 | 27.283111  | 1.54E-01 | 31053489  | 31053612  | NC_000016.9  |
| cg06898168 | 2.52E-15 | 8.39E-17 | 9.14 | 27.2779956 | 1.31E-01 | 5447353   | 5447476   | NC_000007.13 |
| cg09685096 | 2.53E-15 | 8.42E-17 | 9.13 | 27.2746275 | 1.25E-01 | 86157111  | 86157234  | NC_000001.10 |
| cg06410849 | 2.53E-15 | 8.43E-17 | 9.13 | 27.2741035 | 1.20E-01 | 66955988  | 66956111  | NC_000016.9  |
| cg22898797 | 2.54E-15 | 8.46E-17 | 9.13 | 27.2699747 | 2.86E-01 | 102484232 | 102484355 | NC_000010.10 |
| cg16577707 | 2.54E-15 | 8.47E-17 | 9.13 | 27.269603  | 6.08E-02 | 154181866 | 154181989 | NC_000005.9  |
| cg04134748 | 2.55E-15 | 8.48E-17 | 9.13 | 27.2678174 | 1.81E-01 | 3052175   | 3052298   | NC_000001.10 |
| cg19884262 | 2.57E-15 | 8.58E-17 | 9.13 | 27.2567831 | 1.97E-01 | 129535968 | 129536091 | NC_000010.10 |
| cg06888121 | 2.62E-15 | 8.72E-17 | 9.13 | 27.2407384 | 1.62E-01 | 27169068  | 27169191  | NC_000007.13 |
| cg23596808 | 2.63E-15 | 8.76E-17 | 9.13 | 27.2352737 | 5.92E-02 | 45349963  | 45350086  | NC_000006.11 |
| cg01206259 | 2.63E-15 | 8.77E-17 | 9.13 | 27.2348014 | 1.03E-01 | 121167974 | 121168097 | NC_000010.10 |
| cg03250019 | 2.64E-15 | 8.80E-17 | 9.13 | 27.2312351 | 2.14E-01 | 5197066   | 5197189   | NC_000018.9  |
| cg06488505 | 2.64E-15 | 8.80E-17 | 9.13 | 27.2310205 | 7.37E-02 | 28934075  | 28934198  | NC_000017.10 |
| cg13010161 | 2.64E-15 | 8.82E-17 | 9.13 | 27.2294284 | 1.42E-01 | 121488902 | 121489025 | NC_000002.11 |
| cg12131827 | 2.65E-15 | 8.82E-17 | 9.13 | 27.2290018 | 1.34E-01 | 21640270  | 21640393  | NC_000008.10 |
| cg22830113 | 2.66E-15 | 8.86E-17 | 9.13 | 27.2249179 | 3.44E-01 | 127783168 | 127783291 | NC_000002.11 |
| cg07745624 | 2.66E-15 | 8.88E-17 | 9.13 | 27.2219622 | 1.51E-01 | 21950952  | 21951075  | NC_000004.11 |
| cg23965109 | 2.66E-15 | 8.89E-17 | 9.13 | 27.2214861 | 8.80E-02 | 186739029 | 186739152 | NC_000003.11 |
| cg14306683 | 2.67E-15 | 8.89E-17 | 9.13 | 27.2208674 | 4.68E-02 | 43300632  | 43300755  | NC_000022.10 |
| cg01517185 | 2.67E-15 | 8.90E-17 | 9.13 | 27.2202472 | 5.95E-02 | 358490    | 358613    | NC_000016.9  |
| cg09522056 | 2.69E-15 | 8.99E-17 | 9.12 | 27.2105823 | 1.72E-01 | 31830979  | 31831102  | NC_000016.9  |
| cg01110440 | 2.69E-15 | 8.99E-17 | 9.12 | 27.2103821 | 1.35E-01 | 110707714 | 110707837 | NC_000006.11 |
| cg20457275 | 2.71E-15 | 9.05E-17 | 9.12 | 27.2031628 | 1.43E-01 | 1394071   | 1394194   | NC_000006.11 |
| cg13930388 | 2.71E-15 | 9.05E-17 | 9.12 | 27.2030858 | 1.34E-01 | 133799399 | 133799522 | NC_000009.11 |

|            |          |          |      |            |          |           |           |              |
|------------|----------|----------|------|------------|----------|-----------|-----------|--------------|
| cg22717227 | 2.71E-15 | 9.06E-17 | 9.12 | 27.2028077 | 1.89E-01 | 50887568  | 50887691  | NC_000010.10 |
| cg17591595 | 2.72E-15 | 9.09E-17 | 9.12 | 27.19883   | 1.62E-01 | 27171051  | 27171174  | NC_000007.13 |
| cg23596233 | 2.72E-15 | 9.10E-17 | 9.12 | 27.1982385 | 2.80E-01 | 134281663 | 134281786 | NC_000011.9  |
| cg02854229 | 2.73E-15 | 9.11E-17 | 9.12 | 27.1969437 | 1.29E-01 | 101962994 | 101963117 | NC_000014.8  |
| cg04837847 | 2.74E-15 | 9.15E-17 | 9.12 | 27.1923868 | 1.14E-01 | 178482132 | 178482255 | NC_000001.10 |
| cg07713705 | 2.74E-15 | 9.17E-17 | 9.12 | 27.1906268 | 1.45E-01 | 128712399 | 128712522 | NC_000011.9  |
| cg06697380 | 2.75E-15 | 9.19E-17 | 9.12 | 27.1882982 | 1.09E-01 | 126634803 | 126634926 | NC_000005.9  |
| cg07876051 | 2.75E-15 | 9.21E-17 | 9.12 | 27.1867028 | 1.47E-01 | 3159145   | 3159268   | NC_000010.10 |
| cg06913501 | 2.77E-15 | 9.25E-17 | 9.12 | 27.1824084 | 2.10E-01 | 180101143 | 180101266 | NC_000005.9  |
| cg15230781 | 2.77E-15 | 9.26E-17 | 9.12 | 27.1811525 | 2.29E-01 | 37353700  | 37353823  | NC_000020.10 |
| cg11230940 | 2.77E-15 | 9.27E-17 | 9.12 | 27.179347  | 1.72E-01 | 3103774   | 3103897   | NC_000005.9  |
| cg07653901 | 2.78E-15 | 9.30E-17 | 9.12 | 27.1765527 | 1.11E-01 | 50250238  | 50250361  | NC_000022.10 |
| cg21313071 | 2.78E-15 | 9.31E-17 | 9.12 | 27.175247  | 1.38E-01 | 49640589  | 49640712  | NC_000020.10 |
| cg01718447 | 2.79E-15 | 9.32E-17 | 9.12 | 27.1741977 | 2.39E-01 | 30722327  | 30722450  | NC_000007.13 |
| cg19601666 | 2.79E-15 | 9.34E-17 | 9.12 | 27.1725697 | 1.04E-01 | 71172089  | 71172212  | NC_000001.10 |
| cg21399832 | 2.81E-15 | 9.39E-17 | 9.12 | 27.1670609 | 1.70E-01 | 117847410 | 117847533 | NC_000004.11 |
| cg12407978 | 2.81E-15 | 9.41E-17 | 9.12 | 27.1649711 | 1.31E-01 | 10590159  | 10590282  | NC_000011.9  |
| cg17279551 | 2.82E-15 | 9.44E-17 | 9.12 | 27.1621081 | 9.22E-02 | 139970459 | 139970582 | NC_000005.9  |
| cg11384848 | 2.82E-15 | 9.45E-17 | 9.12 | 27.1602104 | 2.45E-01 | 140770864 | 140770987 | NC_000003.11 |
| cg09914742 | 2.83E-15 | 9.49E-17 | 9.12 | 27.1561554 | 2.08E-01 | 5296943   | 5297066   | NC_000020.10 |
| cg03132773 | 2.83E-15 | 9.50E-17 | 9.12 | 27.1556269 | 2.47E-01 | 22824877  | 22825000  | NC_000016.9  |
| cg01708273 | 2.84E-15 | 9.50E-17 | 9.12 | 27.1551314 | 2.02E-01 | 176974060 | 176974183 | NC_000002.11 |
| cg22445447 | 2.84E-15 | 9.51E-17 | 9.12 | 27.1547186 | 7.48E-02 | 41712591  | 41712714  | NC_000015.9  |
| cg22097425 | 2.84E-15 | 9.52E-17 | 9.12 | 27.1530921 | 2.50E-01 | 125774311 | 125774434 | NC_000011.9  |
| cg16615154 | 2.85E-15 | 9.55E-17 | 9.12 | 27.1501734 | 1.44E-01 | 40567553  | 40567676  | NC_000006.11 |

|            |          |          |      |            |          |           |           |              |
|------------|----------|----------|------|------------|----------|-----------|-----------|--------------|
| cg17199800 | 2.86E-15 | 9.60E-17 | 9.11 | 27.1455952 | 2.21E-01 | 96632777  | 96632900  | NC_000007.13 |
| cg07730329 | 2.87E-15 | 9.63E-17 | 9.11 | 27.1424158 | 1.93E-01 | 140810137 | 140810260 | NC_000005.9  |
| cg20014988 | 2.88E-15 | 9.65E-17 | 9.11 | 27.1403398 | 1.79E-01 | 52363132  | 52363255  | NC_000010.10 |
| cg08837627 | 2.90E-15 | 9.74E-17 | 9.11 | 27.1307129 | 1.68E-01 | 22715300  | 22715423  | NC_000019.9  |
| cg25636182 | 2.91E-15 | 9.75E-17 | 9.11 | 27.1296736 | 1.32E-01 | 8122559   | 8122682   | NC_000004.11 |
| cg02746725 | 2.91E-15 | 9.75E-17 | 9.11 | 27.1295031 | 2.12E-01 | 177054306 | 177054429 | NC_000002.11 |
| cg18264383 | 2.92E-15 | 9.80E-17 | 9.11 | 27.1245341 | 3.00E-02 | 45730917  | 45731040  | NC_000003.11 |
| cg06099465 | 2.93E-15 | 9.84E-17 | 9.11 | 27.1210062 | 1.34E-01 | 1631034   | 1631157   | NC_000017.10 |
| cg12394567 | 2.94E-15 | 9.88E-17 | 9.11 | 27.1169357 | 3.67E-02 | 3143783   | 3143906   | NC_000010.10 |
| cg15413269 | 2.94E-15 | 9.89E-17 | 9.11 | 27.1161554 | 1.20E-01 | 106784011 | 106784134 | NC_000008.10 |
| cg15173079 | 2.95E-15 | 9.91E-17 | 9.11 | 27.1132661 | 8.53E-02 | 3154078   | 3154201   | NC_000006.11 |
| cg13453747 | 2.95E-15 | 9.93E-17 | 9.11 | 27.1121801 | 1.28E-01 | 137038185 | 137038308 | NC_000009.11 |
| cg19849478 | 2.97E-15 | 9.99E-17 | 9.11 | 27.1052726 | 1.41E-01 | 122592277 | 122592400 | NC_000012.11 |
| cg24899806 | 2.98E-15 | 1.00E-16 | 9.11 | 27.1040584 | 1.44E-01 | 119914282 | 119914405 | NC_000007.13 |
| cg00099240 | 2.98E-15 | 1.00E-16 | 9.11 | 27.1036429 | 1.41E-01 | 33454632  | 33454755  | NC_000022.10 |
| cg14768164 | 2.98E-15 | 1.00E-16 | 9.11 | 27.1017848 | 2.00E-01 | 145025049 | 145025172 | NC_000002.11 |
| cg00809969 | 2.98E-15 | 1.00E-16 | 9.11 | 27.1015257 | 1.42E-01 | 27181067  | 27181190  | NC_000007.13 |
| cg20058043 | 2.99E-15 | 1.01E-16 | 9.11 | 27.0986617 | 2.68E-01 | 130646370 | 130646493 | NC_000012.11 |
| cg15778457 | 3.00E-15 | 1.01E-16 | 9.11 | 27.0965123 | 2.48E-01 | 155165295 | 155165418 | NC_000007.13 |
| cg13320436 | 3.00E-15 | 1.01E-16 | 9.11 | 27.0951954 | 1.64E-01 | 55138014  | 55138137  | NC_000008.10 |
| cg04774711 | 3.01E-15 | 1.01E-16 | 9.11 | 27.0920314 | 2.16E-01 | 21684138  | 21684261  | NC_000020.10 |
| cg20014398 | 3.02E-15 | 1.01E-16 | 9.11 | 27.0902147 | 2.37E-01 | 31825792  | 31825915  | NC_000011.9  |
| cg23712342 | 3.03E-15 | 1.02E-16 | 9.11 | 27.0857961 | 2.02E-01 | 60936794  | 60936917  | NC_000010.10 |
| cg00955035 | 3.03E-15 | 1.02E-16 | 9.11 | 27.0846202 | 1.34E-01 | 233253378 | 233253501 | NC_000002.11 |
| cg15541630 | 3.03E-15 | 1.02E-16 | 9.11 | 27.0844844 | 1.62E-01 | 87081770  | 87081893  | NC_000008.10 |

|            |          |          |     |            |          |           |           |              |
|------------|----------|----------|-----|------------|----------|-----------|-----------|--------------|
| cg26960012 | 3.04E-15 | 1.02E-16 | 9.1 | 27.0833159 | 8.63E-02 | 2889915   | 2890038   | NC_000016.9  |
| cg21085022 | 3.04E-15 | 1.02E-16 | 9.1 | 27.0831817 | 1.62E-01 | 34648170  | 34648293  | NC_000006.11 |
| cg03585720 | 3.04E-15 | 1.02E-16 | 9.1 | 27.0803693 | 1.64E-01 | 235048762 | 235048885 | NC_000001.10 |
| cg00804525 | 3.05E-15 | 1.03E-16 | 9.1 | 27.0783196 | 1.31E-01 | 68943500  | 68943623  | NC_000016.9  |
| cg22990888 | 3.05E-15 | 1.03E-16 | 9.1 | 27.0780083 | 9.80E-02 | 30585904  | 30586027  | NC_000008.10 |
| cg03698009 | 3.06E-15 | 1.03E-16 | 9.1 | 27.0764815 | 2.35E-01 | 27204349  | 27204472  | NC_000007.13 |
| cg09061207 | 3.07E-15 | 1.04E-16 | 9.1 | 27.0703931 | 1.51E-01 | 31504181  | 31504304  | NC_000006.11 |
| cg25039722 | 3.07E-15 | 1.04E-16 | 9.1 | 27.0702618 | 2.45E-01 | 50236344  | 50236467  | NC_000017.10 |
| cg06580943 | 3.07E-15 | 1.04E-16 | 9.1 | 27.0701115 | 1.02E-01 | 168405834 | 168405957 | NC_000006.11 |
| cg18194945 | 3.08E-15 | 1.04E-16 | 9.1 | 27.0688314 | 2.02E-01 | 157820591 | 157820714 | NC_000003.11 |
| cg10067970 | 3.08E-15 | 1.04E-16 | 9.1 | 27.0678963 | 2.69E-01 | 95359666  | 95359789  | NC_000013.10 |
| cg09059319 | 3.09E-15 | 1.04E-16 | 9.1 | 27.0642032 | 1.68E-01 | 99986175  | 99986298  | NC_000008.10 |
| cg09726866 | 3.09E-15 | 1.04E-16 | 9.1 | 27.0641005 | 1.06E-01 | 79083545  | 79083668  | NC_000004.11 |
| cg06018240 | 3.10E-15 | 1.05E-16 | 9.1 | 27.0595597 | 6.76E-02 | 150768388 | 150768511 | NC_000007.13 |
| cg09088437 | 3.12E-15 | 1.05E-16 | 9.1 | 27.0539898 | 9.14E-02 | 109559012 | 109559135 | NC_000002.11 |
| cg00803758 | 3.12E-15 | 1.05E-16 | 9.1 | 27.0534687 | 1.64E-01 | 184539762 | 184539885 | NC_000004.11 |
| cg06638723 | 3.14E-15 | 1.06E-16 | 9.1 | 27.0481712 | 1.05E-01 | 186447018 | 186447141 | NC_000001.10 |
| cg20826165 | 3.14E-15 | 1.06E-16 | 9.1 | 27.0470311 | 1.86E-01 | 64491841  | 64491964  | NC_000012.11 |
| cg25817701 | 3.14E-15 | 1.06E-16 | 9.1 | 27.0463585 | 1.70E-01 | 2140143   | 2140266   | NC_000007.13 |
| cg09996597 | 3.15E-15 | 1.06E-16 | 9.1 | 27.0444136 | 1.76E-01 | 1844927   | 1845050   | NC_000016.9  |
| cg00371453 | 3.15E-15 | 1.06E-16 | 9.1 | 27.0428929 | 2.21E-01 | 7854482   | 7854605   | NC_000019.9  |
| cg14935646 | 3.19E-15 | 1.08E-16 | 9.1 | 27.0324286 | 1.51E-01 | 27215464  | 27215587  | NC_000007.13 |
| cg04922810 | 3.19E-15 | 1.08E-16 | 9.1 | 27.0323793 | 2.24E-01 | 30721888  | 30722011  | NC_000007.13 |
| cg06266962 | 3.19E-15 | 1.08E-16 | 9.1 | 27.0316364 | 9.94E-02 | 20871424  | 20871547  | NC_000016.9  |
| cg01597641 | 3.22E-15 | 1.09E-16 | 9.1 | 27.0226039 | 2.49E-01 | 155241970 | 155242093 | NC_000007.13 |



|            |          |          |      |            |          |           |           |              |
|------------|----------|----------|------|------------|----------|-----------|-----------|--------------|
| cg03387135 | 3.22E-15 | 1.09E-16 | 9.1  | 27.0221767 | 2.57E-01 | 61809827  | 61809950  | NC_000020.10 |
| cg01534316 | 3.22E-15 | 1.09E-16 | 9.1  | 27.0208299 | 1.38E-01 | 112061221 | 112061344 | NC_000001.10 |
| cg04667180 | 3.22E-15 | 1.09E-16 | 9.09 | 27.0199222 | 1.08E-01 | 150389906 | 150390029 | NC_000007.13 |
| cg11426800 | 3.23E-15 | 1.09E-16 | 9.09 | 27.018653  | 1.43E-01 | 23710000  | 23710123  | NC_000002.11 |
| cg25818697 | 3.23E-15 | 1.09E-16 | 9.09 | 27.0178285 | 1.43E-01 | 69934795  | 69934918  | NC_000011.9  |
| cg06546806 | 3.23E-15 | 1.09E-16 | 9.09 | 27.0176171 | 2.73E-01 | 237078704 | 237078827 | NC_000002.11 |
| cg22721334 | 3.25E-15 | 1.10E-16 | 9.09 | 27.0108275 | 2.96E-01 | 58609618  | 58609741  | NC_000019.9  |
| cg26698580 | 3.25E-15 | 1.10E-16 | 9.09 | 27.0107291 | 8.11E-02 | 67695984  | 67696107  | NC_000016.9  |
| cg07402669 | 3.27E-15 | 1.11E-16 | 9.09 | 27.004572  | 2.17E-01 | 57090015  | 57090138  | NC_000020.10 |
| cg19343464 | 3.28E-15 | 1.11E-16 | 9.09 | 27.0017322 | 2.62E-01 | 105481509 | 105481632 | NC_000011.9  |
| cg08095196 | 3.28E-15 | 1.11E-16 | 9.09 | 27.0009232 | 2.41E-01 | 35047023  | 35047146  | NC_000015.9  |
| cg11267630 | 3.28E-15 | 1.11E-16 | 9.09 | 27.0000599 | 2.46E-01 | 46811527  | 46811650  | NC_000017.10 |
| cg16594299 | 3.29E-15 | 1.11E-16 | 9.09 | 26.998453  | 4.81E-02 | 40324054  | 40324177  | NC_000001.10 |
| cg26254045 | 3.29E-15 | 1.11E-16 | 9.09 | 26.9982555 | 1.73E-01 | 38886658  | 38886781  | NC_000019.9  |
| cg13721404 | 3.30E-15 | 1.12E-16 | 9.09 | 26.9953299 | 2.26E-01 | 31739202  | 31739325  | NC_000018.9  |
| cg09633129 | 3.30E-15 | 1.12E-16 | 9.09 | 26.9949675 | 5.04E-02 | 2936284   | 2936407   | NC_000004.11 |
| cg00571033 | 3.30E-15 | 1.12E-16 | 9.09 | 26.9945609 | 1.53E-01 | 9760957   | 9761080   | NC_000008.10 |
| cg15104644 | 3.30E-15 | 1.12E-16 | 9.09 | 26.9930639 | 2.30E-01 | 231297103 | 231297226 | NC_000001.10 |
| cg09427718 | 3.31E-15 | 1.12E-16 | 9.09 | 26.9923438 | 1.29E-01 | 23819929  | 23820052  | NC_000004.11 |
| cg09941601 | 3.31E-15 | 1.12E-16 | 9.09 | 26.9909427 | 1.72E-01 | 86606899  | 86607022  | NC_000016.9  |
| cg23086243 | 3.32E-15 | 1.12E-16 | 9.09 | 26.9885367 | 7.82E-02 | 34954931  | 34955054  | NC_000017.10 |
| cg23645199 | 3.33E-15 | 1.13E-16 | 9.09 | 26.9836713 | 1.83E-01 | 233498625 | 233498748 | NC_000002.11 |
| cg16422098 | 3.34E-15 | 1.13E-16 | 9.09 | 26.9823582 | 2.69E-01 | 15761881  | 15762004  | NC_000010.10 |
| cg23034757 | 3.35E-15 | 1.13E-16 | 9.09 | 26.9799742 | 1.99E-01 | 140787864 | 140787987 | NC_000005.9  |
| cg04902729 | 3.35E-15 | 1.14E-16 | 9.09 | 26.9780611 | 2.66E-01 | 181452707 | 181452830 | NC_000001.10 |

|            |          |          |      |            |          |           |           |              |
|------------|----------|----------|------|------------|----------|-----------|-----------|--------------|
| cg02640173 | 3.36E-15 | 1.14E-16 | 9.09 | 26.9749037 | 9.75E-02 | 121605707 | 121605830 | NC_000002.11 |
| cg02119363 | 3.37E-15 | 1.14E-16 | 9.09 | 26.9726579 | 2.16E-01 | 179754603 | 179754726 | NC_000003.11 |
| cg10269365 | 3.37E-15 | 1.14E-16 | 9.09 | 26.9709181 | 1.76E-01 | 223166989 | 223167112 | NC_000002.11 |
| cg07350078 | 3.38E-15 | 1.15E-16 | 9.09 | 26.9678332 | 5.58E-02 | 206637459 | 206637582 | NC_000001.10 |
| cg14038731 | 3.40E-15 | 1.15E-16 | 9.09 | 26.9636984 | 1.36E-01 | 110732536 | 110732659 | NC_000006.11 |
| cg03072621 | 3.40E-15 | 1.15E-16 | 9.09 | 26.9632504 | 2.16E-01 | 6069929   | 6070052   | NC_000016.9  |
| cg11502555 | 3.41E-15 | 1.16E-16 | 9.09 | 26.961086  | 1.86E-01 | 100627341 | 100627464 | NC_000013.10 |
| cg00903371 | 3.41E-15 | 1.16E-16 | 9.09 | 26.9593621 | 1.39E-01 | 238360134 | 238360257 | NC_000002.11 |
| cg11324219 | 3.41E-15 | 1.16E-16 | 9.09 | 26.958628  | 7.22E-02 | 97857356  | 97857479  | NC_000007.13 |
| cg22428147 | 3.42E-15 | 1.16E-16 | 9.09 | 26.9566351 | 2.22E-01 | 137531791 | 137531914 | NC_000007.13 |
| cg17948913 | 3.42E-15 | 1.16E-16 | 9.09 | 26.9565462 | 1.33E-01 | 572064    | 572187    | NC_000005.9  |
| cg03940684 | 3.42E-15 | 1.16E-16 | 9.08 | 26.9559127 | 2.28E-01 | 239733    | 239856    | NC_000003.11 |
| cg15463538 | 3.44E-15 | 1.17E-16 | 9.08 | 26.9493338 | 5.10E-02 | 13315209  | 13315332  | NC_000019.9  |
| cg18449120 | 3.46E-15 | 1.17E-16 | 9.08 | 26.9460948 | 1.61E-01 | 5832882   | 5833005   | NC_000002.11 |
| cg02807849 | 3.46E-15 | 1.17E-16 | 9.08 | 26.9455313 | 1.22E-01 | 48908102  | 48908225  | NC_000019.9  |
| cg00950846 | 3.46E-15 | 1.18E-16 | 9.08 | 26.9430903 | 2.21E-01 | 62069317  | 62069440  | NC_000016.9  |
| cg12215739 | 3.47E-15 | 1.18E-16 | 9.08 | 26.9428614 | 1.94E-01 | 177014966 | 177015089 | NC_000002.11 |
| cg20317521 | 3.49E-15 | 1.19E-16 | 9.08 | 26.9356769 | 8.88E-02 | 79026312  | 79026435  | NC_000017.10 |
| cg23806894 | 3.51E-15 | 1.19E-16 | 9.08 | 26.9303944 | 2.39E-01 | 111535528 | 111535651 | NC_000004.11 |
| cg00411072 | 3.53E-15 | 1.20E-16 | 9.08 | 26.9241617 | 1.31E-01 | 46660940  | 46661063  | NC_000017.10 |
| cg07703790 | 3.55E-15 | 1.21E-16 | 9.08 | 26.9187755 | 1.51E-01 | 28897214  | 28897337  | NC_000018.9  |
| cg19019849 | 3.56E-15 | 1.21E-16 | 9.08 | 26.9148568 | 1.73E-01 | 13533145  | 13533268  | NC_000004.11 |
| cg27446570 | 3.60E-15 | 1.22E-16 | 9.08 | 26.9047584 | 8.45E-02 | 3809532   | 3809655   | NC_000001.10 |
| cg26656287 | 3.60E-15 | 1.23E-16 | 9.08 | 26.9031077 | 8.51E-02 | 1120889   | 1121012   | NC_000011.9  |
| cg04487296 | 3.61E-15 | 1.23E-16 | 9.08 | 26.9003361 | 1.73E-01 | 149389669 | 149389792 | NC_000007.13 |

|            |          |          |      |            |          |           |           |              |
|------------|----------|----------|------|------------|----------|-----------|-----------|--------------|
| cg04303439 | 3.62E-15 | 1.23E-16 | 9.08 | 26.8990582 | 1.21E-01 | 1124847   | 1124970   | NC_000005.9  |
| cg01691827 | 3.62E-15 | 1.23E-16 | 9.08 | 26.8983583 | 1.37E-01 | 86599189  | 86599312  | NC_000016.9  |
| cg14186641 | 3.63E-15 | 1.24E-16 | 9.08 | 26.8945997 | 3.30E-01 | 88876741  | 88876864  | NC_000006.11 |
| cg11526778 | 3.64E-15 | 1.24E-16 | 9.07 | 26.8919516 | 1.21E-01 | 28115783  | 28115906  | NC_000007.13 |
| cg09938049 | 3.64E-15 | 1.24E-16 | 9.07 | 26.8910639 | 1.33E-01 | 54747206  | 54747329  | NC_000012.11 |
| cg18435449 | 3.65E-15 | 1.24E-16 | 9.07 | 26.8894123 | 2.58E-01 | 58095445  | 58095568  | NC_000019.9  |
| cg15264904 | 3.66E-15 | 1.25E-16 | 9.07 | 26.8864157 | 8.81E-02 | 180218509 | 180218632 | NC_000005.9  |
| cg08001256 | 3.67E-15 | 1.25E-16 | 9.07 | 26.8842556 | 7.52E-02 | 90611340  | 90611463  | NC_000015.9  |
| cg18792031 | 3.71E-15 | 1.27E-16 | 9.07 | 26.870605  | 1.43E-01 | 94574750  | 94574873  | NC_000008.10 |
| cg11387088 | 3.74E-15 | 1.28E-16 | 9.07 | 26.8640011 | 6.73E-02 | 55962574  | 55962697  | NC_000017.10 |
| cg04787888 | 3.74E-15 | 1.28E-16 | 9.07 | 26.863838  | 2.03E-01 | 86547322  | 86547445  | NC_000016.9  |
| cg10232395 | 3.75E-15 | 1.28E-16 | 9.07 | 26.8608934 | 1.69E-01 | 61613721  | 61613844  | NC_000008.10 |
| cg26267340 | 3.75E-15 | 1.28E-16 | 9.07 | 26.8594611 | 1.80E-01 | 31497829  | 31497952  | NC_000008.10 |
| cg20248516 | 3.76E-15 | 1.28E-16 | 9.07 | 26.8589341 | 1.77E-01 | 119602901 | 119603024 | NC_000002.11 |
| cg08251037 | 3.77E-15 | 1.29E-16 | 9.07 | 26.8555725 | 1.75E-01 | 70597778  | 70597901  | NC_000007.13 |
| cg08481873 | 3.78E-15 | 1.29E-16 | 9.07 | 26.8530057 | 1.49E-01 | 241653301 | 241653424 | NC_000002.11 |
| cg19237294 | 3.78E-15 | 1.29E-16 | 9.07 | 26.8514091 | 1.81E-01 | 35065236  | 35065359  | NC_000018.9  |
| cg01541645 | 3.84E-15 | 1.31E-16 | 9.07 | 26.8356244 | 1.99E-01 | 61104329  | 61104452  | NC_000014.8  |
| cg01813393 | 3.86E-15 | 1.32E-16 | 9.07 | 26.8308379 | 1.40E-01 | 62729423  | 62729546  | NC_000001.10 |
| cg16418810 | 3.86E-15 | 1.32E-16 | 9.07 | 26.8289403 | 2.46E-01 | 5713100   | 5713223   | NC_000004.11 |
| cg00179921 | 3.88E-15 | 1.33E-16 | 9.06 | 26.8252608 | 1.10E-01 | 39927437  | 39927560  | NC_000022.10 |
| cg14458834 | 3.88E-15 | 1.33E-16 | 9.06 | 26.8251287 | 3.53E-01 | 46655394  | 46655517  | NC_000017.10 |
| cg13767135 | 3.88E-15 | 1.33E-16 | 9.06 | 26.8247005 | 1.09E-01 | 69949459  | 69949582  | NC_000011.9  |
| cg15466177 | 3.89E-15 | 1.33E-16 | 9.06 | 26.8225125 | 6.01E-02 | 102675179 | 102675302 | NC_000014.8  |
| cg05342467 | 3.89E-15 | 1.33E-16 | 9.06 | 26.8221193 | 4.74E-02 | 2029732   | 2029855   | NC_000007.13 |

|            |          |          |      |            |          |           |           |              |
|------------|----------|----------|------|------------|----------|-----------|-----------|--------------|
| cg16360372 | 3.89E-15 | 1.33E-16 | 9.06 | 26.8205472 | 8.86E-02 | 147212728 | 147212851 | NC_000005.9  |
| cg06568323 | 3.90E-15 | 1.34E-16 | 9.06 | 26.8176549 | 1.05E-01 | 100745507 | 100745630 | NC_000013.10 |
| cg09528825 | 3.91E-15 | 1.34E-16 | 9.06 | 26.8172713 | 2.96E-01 | 28074388  | 28074511  | NC_000016.9  |
| cg06233731 | 3.92E-15 | 1.34E-16 | 9.06 | 26.8145387 | 1.08E-01 | 18890872  | 18890995  | NC_000012.11 |
| cg20762480 | 3.94E-15 | 1.35E-16 | 9.06 | 26.8075403 | 1.48E-01 | 39538854  | 39538977  | NC_000012.11 |
| cg16399049 | 3.94E-15 | 1.35E-16 | 9.06 | 26.8071782 | 1.72E-01 | 22825843  | 22825966  | NC_000016.9  |
| cg17840719 | 3.95E-15 | 1.35E-16 | 9.06 | 26.8063912 | 2.57E-01 | 178368253 | 178368376 | NC_000005.9  |
| cg08267591 | 3.97E-15 | 1.36E-16 | 9.06 | 26.8007936 | 1.58E-01 | 165693745 | 165693868 | NC_000002.11 |
| cg04850284 | 3.97E-15 | 1.36E-16 | 9.06 | 26.7997562 | 1.44E-01 | 15707786  | 15707909  | NC_000001.10 |
| cg13201808 | 3.98E-15 | 1.36E-16 | 9.06 | 26.7969014 | 2.81E-01 | 43569269  | 43569392  | NC_000011.9  |
| cg00614182 | 3.98E-15 | 1.37E-16 | 9.06 | 26.7965049 | 2.19E-01 | 31498006  | 31498129  | NC_000008.10 |
| cg13090007 | 3.99E-15 | 1.37E-16 | 9.06 | 26.7946318 | 1.22E-01 | 142981593 | 142981716 | NC_000008.10 |
| cg19301960 | 4.01E-15 | 1.38E-16 | 9.06 | 26.7891688 | 1.47E-01 | 1271312   | 1271435   | NC_000019.9  |
| cg13313226 | 4.01E-15 | 1.38E-16 | 9.06 | 26.7889417 | 1.27E-01 | 124665869 | 124665992 | NC_000011.9  |
| cg21857375 | 4.02E-15 | 1.38E-16 | 9.06 | 26.7881711 | 4.52E-02 | 182781107 | 182781230 | NC_000002.11 |
| cg02610222 | 4.03E-15 | 1.38E-16 | 9.06 | 26.7846497 | 1.86E-01 | 147560282 | 147560405 | NC_000004.11 |
| cg17054060 | 4.03E-15 | 1.38E-16 | 9.06 | 26.784146  | 1.77E-01 | 3606081   | 3606204   | NC_000005.9  |
| cg22802813 | 4.04E-15 | 1.39E-16 | 9.06 | 26.7819248 | 2.30E-01 | 95942761  | 95942884  | NC_000012.11 |
| cg14640592 | 4.05E-15 | 1.39E-16 | 9.06 | 26.7794521 | 1.52E-01 | 203044726 | 203044849 | NC_000001.10 |
| cg22227034 | 4.06E-15 | 1.39E-16 | 9.06 | 26.7773642 | 1.33E-01 | 12252976  | 12253099  | NC_000001.10 |
| cg07190914 | 4.07E-15 | 1.39E-16 | 9.06 | 26.7754479 | 1.60E-01 | 4500072   | 4500195   | NC_000010.10 |
| cg16826777 | 4.07E-15 | 1.40E-16 | 9.06 | 26.774432  | 1.56E-01 | 43376882  | 43377005  | NC_000017.10 |
| cg09159022 | 4.07E-15 | 1.40E-16 | 9.06 | 26.7742473 | 2.37E-01 | 4849522   | 4849645   | NC_000008.10 |
| cg10453425 | 4.08E-15 | 1.40E-16 | 9.06 | 26.772175  | 2.35E-01 | 87636594  | 87636717  | NC_000016.9  |
| cg23842255 | 4.08E-15 | 1.40E-16 | 9.06 | 26.7721456 | 1.58E-01 | 29876363  | 29876486  | NC_000022.10 |

|            |          |          |      |            |          |           |           |              |
|------------|----------|----------|------|------------|----------|-----------|-----------|--------------|
| cg20406460 | 4.09E-15 | 1.41E-16 | 9.06 | 26.7677011 | 2.24E-01 | 3606489   | 3606612   | NC_000005.9  |
| cg08136772 | 4.10E-15 | 1.41E-16 | 9.06 | 26.7670592 | 1.56E-01 | 53420933  | 53421056  | NC_000013.10 |
| cg14309093 | 4.10E-15 | 1.41E-16 | 9.06 | 26.7654747 | 7.43E-02 | 133529722 | 133529845 | NC_000010.10 |
| cg11143671 | 4.12E-15 | 1.42E-16 | 9.05 | 26.7612763 | 1.22E-01 | 180904018 | 180904141 | NC_000001.10 |
| cg11248413 | 4.12E-15 | 1.42E-16 | 9.05 | 26.7603038 | 2.35E-01 | 134871658 | 134871781 | NC_000005.9  |
| cg08529882 | 4.12E-15 | 1.42E-16 | 9.05 | 26.7598797 | 1.97E-01 | 124902456 | 124902579 | NC_000010.10 |
| cg12357484 | 4.13E-15 | 1.42E-16 | 9.05 | 26.7594912 | 1.23E-01 | 69987414  | 69987537  | NC_000011.9  |
| cg15672768 | 4.14E-15 | 1.42E-16 | 9.05 | 26.7563567 | 1.53E-01 | 140741220 | 140741343 | NC_000005.9  |
| cg09385093 | 4.14E-15 | 1.42E-16 | 9.05 | 26.7558263 | 2.71E-01 | 119607885 | 119608008 | NC_000002.11 |
| cg09598437 | 4.14E-15 | 1.42E-16 | 9.05 | 26.7551324 | 1.60E-01 | 52643118  | 52643241  | NC_000012.11 |
| cg05532446 | 4.15E-15 | 1.43E-16 | 9.05 | 26.7522479 | 8.31E-02 | 47173093  | 47173216  | NC_000016.9  |
| cg04778012 | 4.17E-15 | 1.43E-16 | 9.05 | 26.7485835 | 1.60E-01 | 99775508  | 99775631  | NC_000007.13 |
| cg19502744 | 4.17E-15 | 1.43E-16 | 9.05 | 26.748475  | 1.92E-01 | 31805915  | 31806038  | NC_000002.11 |
| cg08423575 | 4.17E-15 | 1.43E-16 | 9.05 | 26.7479465 | 1.51E-01 | 22826800  | 22826923  | NC_000001.10 |
| cg10526277 | 4.17E-15 | 1.43E-16 | 9.05 | 26.7474575 | 2.37E-01 | 157813363 | 157813486 | NC_000003.11 |
| cg15170605 | 4.17E-15 | 1.44E-16 | 9.05 | 26.7473786 | 3.49E-01 | 70995459  | 70995582  | NC_000002.11 |
| cg00578304 | 4.17E-15 | 1.44E-16 | 9.05 | 26.7473334 | 1.21E-01 | 2968627   | 2968750   | NC_000007.13 |
| cg08401657 | 4.17E-15 | 1.44E-16 | 9.05 | 26.746908  | 1.12E-01 | 10399046  | 10399169  | NC_000006.11 |
| cg06563713 | 4.18E-15 | 1.44E-16 | 9.05 | 26.7455826 | 1.22E-01 | 11950917  | 11951040  | NC_000018.9  |
| cg17257947 | 4.18E-15 | 1.44E-16 | 9.05 | 26.7455514 | 4.54E-02 | 22541476  | 22541599  | NC_000008.10 |
| cg11930477 | 4.18E-15 | 1.44E-16 | 9.05 | 26.7447637 | 1.60E-01 | 31841980  | 31842103  | NC_000011.9  |
| cg16757724 | 4.18E-15 | 1.44E-16 | 9.05 | 26.7440369 | 1.49E-01 | 43935528  | 43935651  | NC_000020.10 |
| cg18894648 | 4.19E-15 | 1.44E-16 | 9.05 | 26.7428794 | 2.80E-01 | 87974446  | 87974569  | NC_000005.9  |
| cg13077930 | 4.20E-15 | 1.44E-16 | 9.05 | 26.7412416 | 1.51E-01 | 74269525  | 74269648  | NC_000004.11 |
| cg20684197 | 4.20E-15 | 1.45E-16 | 9.05 | 26.7404058 | 1.19E-01 | 142066938 | 142067061 | NC_000005.9  |

|            |          |          |      |            |          |           |           |              |
|------------|----------|----------|------|------------|----------|-----------|-----------|--------------|
| cg03755123 | 4.20E-15 | 1.45E-16 | 9.05 | 26.7397057 | 1.84E-01 | 135043508 | 135043631 | NC_000010.10 |
| cg23544007 | 4.21E-15 | 1.45E-16 | 9.05 | 26.7385144 | 1.46E-01 | 88913736  | 88913859  | NC_000002.11 |
| cg22512438 | 4.21E-15 | 1.45E-16 | 9.05 | 26.7380926 | 2.36E-01 | 129693489 | 129693612 | NC_000003.11 |
| cg08611331 | 4.21E-15 | 1.45E-16 | 9.05 | 26.7370288 | 6.91E-02 | 30853476  | 30853599  | NC_000016.9  |
| cg04088969 | 4.21E-15 | 1.45E-16 | 9.05 | 26.7367394 | 2.84E-01 | 11060048  | 11060171  | NC_000010.10 |
| cg14757311 | 4.22E-15 | 1.45E-16 | 9.05 | 26.7350343 | 1.69E-01 | 962818    | 962941    | NC_000016.9  |
| cg19274703 | 4.22E-15 | 1.45E-16 | 9.05 | 26.7344063 | 1.73E-01 | 41806451  | 41806574  | NC_000022.10 |
| cg23938553 | 4.22E-15 | 1.46E-16 | 9.05 | 26.7336564 | 4.22E-02 | 48591529  | 48591652  | NC_000017.10 |
| cg20637609 | 4.23E-15 | 1.46E-16 | 9.05 | 26.7320302 | 1.72E-01 | 46825011  | 46825134  | NC_000017.10 |
| cg00003298 | 4.24E-15 | 1.46E-16 | 9.05 | 26.7308054 | 2.70E-01 | 113901210 | 113901333 | NC_000012.11 |
| cg20585038 | 4.26E-15 | 1.47E-16 | 9.05 | 26.7258069 | 1.66E-01 | 89148933  | 89149056  | NC_000015.9  |
| cg23603789 | 4.26E-15 | 1.47E-16 | 9.05 | 26.7252098 | 3.44E-02 | 242572545 | 242572668 | NC_000002.11 |
| cg19407095 | 4.26E-15 | 1.47E-16 | 9.05 | 26.7251567 | 1.54E-01 | 112721778 | 112721901 | NC_000013.10 |
| cg13950603 | 4.26E-15 | 1.47E-16 | 9.05 | 26.7236339 | 2.55E-01 | 7795619   | 7795742   | NC_000019.9  |
| cg06050631 | 4.28E-15 | 1.47E-16 | 9.05 | 26.7206176 | 1.68E-01 | 140098850 | 140098973 | NC_000006.11 |
| cg10964388 | 4.28E-15 | 1.48E-16 | 9.05 | 26.7193851 | 1.36E-01 | 96069024  | 96069147  | NC_000012.11 |
| cg11743349 | 4.28E-15 | 1.48E-16 | 9.05 | 26.7188018 | 1.78E-01 | 21950864  | 21950987  | NC_000004.11 |
| cg04425920 | 4.29E-15 | 1.48E-16 | 9.05 | 26.7175458 | 2.30E-01 | 50604518  | 50604641  | NC_000010.10 |
| cg06675478 | 4.30E-15 | 1.48E-16 | 9.05 | 26.7153257 | 1.29E-01 | 112721786 | 112721909 | NC_000013.10 |
| cg20132590 | 4.30E-15 | 1.48E-16 | 9.05 | 26.7143485 | 1.70E-01 | 73673893  | 73674016  | NC_000003.11 |
| cg14270687 | 4.31E-15 | 1.49E-16 | 9.05 | 26.7120063 | 1.77E-01 | 32953574  | 32953697  | NC_000017.10 |
| cg17254405 | 4.31E-15 | 1.49E-16 | 9.05 | 26.7114062 | 5.85E-02 | 68514089  | 68514212  | NC_000011.9  |
| cg04285318 | 4.32E-15 | 1.49E-16 | 9.05 | 26.710679  | 7.91E-02 | 192016481 | 192016604 | NC_000002.11 |
| cg15221604 | 4.33E-15 | 1.49E-16 | 9.05 | 26.7078119 | 2.58E-01 | 124738735 | 124738858 | NC_000011.9  |
| cg01080368 | 4.41E-15 | 1.52E-16 | 9.04 | 26.6881716 | 1.29E-01 | 135480456 | 135480579 | NC_000002.11 |

|            |          |          |      |            |          |           |           |              |
|------------|----------|----------|------|------------|----------|-----------|-----------|--------------|
| cg15569451 | 4.42E-15 | 1.53E-16 | 9.04 | 26.686326  | 5.16E-02 | 44041324  | 44041447  | NC_000020.10 |
| cg10325088 | 4.44E-15 | 1.53E-16 | 9.04 | 26.6815707 | 4.05E-02 | 217724849 | 217724972 | NC_000001.10 |
| cg08404546 | 4.45E-15 | 1.54E-16 | 9.04 | 26.6785915 | 1.25E-01 | 37910993  | 37911116  | NC_000022.10 |
| cg10512745 | 4.45E-15 | 1.54E-16 | 9.04 | 26.6780265 | 2.97E-01 | 50884480  | 50884603  | NC_000001.10 |
| cg07850527 | 4.46E-15 | 1.54E-16 | 9.04 | 26.6761108 | 3.07E-01 | 89268040  | 89268163  | NC_000016.9  |
| cg27116912 | 4.50E-15 | 1.55E-16 | 9.04 | 26.6685465 | 2.30E-01 | 176947940 | 176948063 | NC_000002.11 |
| cg00287737 | 4.50E-15 | 1.56E-16 | 9.04 | 26.6671134 | 1.34E-01 | 894070    | 894193    | NC_000004.11 |
| cg22561647 | 4.53E-15 | 1.57E-16 | 9.04 | 26.6611666 | 1.57E-01 | 60747596  | 60747719  | NC_000017.10 |
| cg08492173 | 4.53E-15 | 1.57E-16 | 9.04 | 26.6598875 | 1.91E-01 | 3597311   | 3597434   | NC_000005.9  |
| cg04480285 | 4.54E-15 | 1.57E-16 | 9.04 | 26.6587984 | 7.94E-02 | 61097029  | 61097152  | NC_000011.9  |
| cg14091493 | 4.55E-15 | 1.57E-16 | 9.04 | 26.6559919 | 8.67E-02 | 136796914 | 136797037 | NC_000009.11 |
| cg08475379 | 4.57E-15 | 1.58E-16 | 9.04 | 26.6522753 | 1.59E-01 | 37302989  | 37303112  | NC_000020.10 |
| cg12563372 | 4.57E-15 | 1.58E-16 | 9.04 | 26.6514643 | 2.04E-01 | 25908503  | 25908626  | NC_000008.10 |
| cg08941080 | 4.58E-15 | 1.58E-16 | 9.04 | 26.6495666 | 5.01E-02 | 66494112  | 66494235  | NC_000005.9  |
| cg01052879 | 4.60E-15 | 1.59E-16 | 9.04 | 26.6452898 | 2.26E-01 | 61809830  | 61809953  | NC_000020.10 |
| cg19030579 | 4.60E-15 | 1.59E-16 | 9.04 | 26.645135  | 2.63E-01 | 50888710  | 50888833  | NC_000001.10 |
| cg16668896 | 4.60E-15 | 1.59E-16 | 9.04 | 26.6446503 | 1.46E-01 | 54900801  | 54900924  | NC_000007.13 |
| cg11935896 | 4.60E-15 | 1.59E-16 | 9.04 | 26.6438476 | 6.43E-02 | 148409702 | 148409825 | NC_000005.9  |
| cg25952964 | 4.62E-15 | 1.60E-16 | 9.04 | 26.6403976 | 1.31E-01 | 109607272 | 109607395 | NC_000002.11 |
| cg02856026 | 4.62E-15 | 1.60E-16 | 9.04 | 26.6403058 | 1.37E-01 | 22328339  | 22328462  | NC_000001.10 |
| cg15203618 | 4.62E-15 | 1.60E-16 | 9.04 | 26.6389138 | 7.36E-02 | 85646125  | 85646248  | NC_000011.9  |
| cg23954541 | 4.63E-15 | 1.60E-16 | 9.04 | 26.6378812 | 7.50E-02 | 16969609  | 16969732  | NC_000001.10 |
| cg04852339 | 4.63E-15 | 1.60E-16 | 9.04 | 26.6376069 | 1.14E-01 | 159841571 | 159841694 | NC_000002.11 |
| cg05065879 | 4.64E-15 | 1.61E-16 | 9.03 | 26.6358317 | 1.71E-01 | 123229471 | 123229594 | NC_000011.9  |
| cg00629117 | 4.64E-15 | 1.61E-16 | 9.03 | 26.6348847 | 1.98E-01 | 1844932   | 1845055   | NC_000016.9  |

|            |          |          |      |            |          |           |           |              |
|------------|----------|----------|------|------------|----------|-----------|-----------|--------------|
| cg21266559 | 4.64E-15 | 1.61E-16 | 9.03 | 26.6347275 | 2.22E-01 | 34114285  | 34114408  | NC_000019.9  |
| cg02332936 | 4.65E-15 | 1.61E-16 | 9.03 | 26.6338048 | 1.93E-01 | 115140584 | 115140707 | NC_000009.11 |
| cg25081106 | 4.67E-15 | 1.62E-16 | 9.03 | 26.629498  | 3.00E-01 | 88324169  | 88324292  | NC_000013.10 |
| cg16907558 | 4.68E-15 | 1.62E-16 | 9.03 | 26.6267956 | 1.88E-01 | 71017637  | 71017760  | NC_000002.11 |
| cg07371029 | 4.68E-15 | 1.62E-16 | 9.03 | 26.6256279 | 1.22E-01 | 134743011 | 134743134 | NC_000010.10 |
| cg07440398 | 4.68E-15 | 1.62E-16 | 9.03 | 26.6250562 | 1.54E-01 | 99712966  | 99713089  | NC_000014.8  |
| cg21245816 | 4.69E-15 | 1.63E-16 | 9.03 | 26.6232837 | 1.42E-01 | 43044675  | 43044798  | NC_000005.9  |
| cg03205584 | 4.72E-15 | 1.64E-16 | 9.03 | 26.6173481 | 3.00E-01 | 79258407  | 79258530  | NC_000012.11 |
| cg12591770 | 4.76E-15 | 1.65E-16 | 9.03 | 26.6095843 | 1.63E-01 | 100913571 | 100913694 | NC_000015.9  |
| cg14891410 | 4.76E-15 | 1.65E-16 | 9.03 | 26.6080945 | 1.59E-01 | 32458769  | 32458892  | NC_000011.9  |
| cg16018002 | 4.77E-15 | 1.65E-16 | 9.03 | 26.6068136 | 1.11E-01 | 11251104  | 11251227  | NC_000006.11 |
| cg14810242 | 4.78E-15 | 1.66E-16 | 9.03 | 26.6030225 | 7.44E-02 | 102087008 | 102087131 | NC_000002.11 |
| cg23318063 | 4.78E-15 | 1.66E-16 | 9.03 | 26.6030179 | 2.41E-01 | 58332751  | 58332874  | NC_000014.8  |
| cg11794956 | 4.80E-15 | 1.67E-16 | 9.03 | 26.5990543 | 2.10E-01 | 92443321  | 92443444  | NC_000005.9  |
| cg13680844 | 4.80E-15 | 1.67E-16 | 9.03 | 26.5988585 | 5.51E-02 | 52255405  | 52255528  | NC_000003.11 |
| cg15710961 | 4.82E-15 | 1.67E-16 | 9.03 | 26.5954955 | 4.63E-02 | 56572591  | 56572714  | NC_000006.11 |
| cg04521004 | 4.83E-15 | 1.68E-16 | 9.03 | 26.5939057 | 1.90E-01 | 157821262 | 157821385 | NC_000003.11 |
| cg21093192 | 4.85E-15 | 1.68E-16 | 9.03 | 26.5891332 | 2.60E-01 | 54412993  | 54413116  | NC_000019.9  |
| cg15959715 | 4.86E-15 | 1.69E-16 | 9.03 | 26.5862199 | 2.53E-01 | 26506713  | 26506836  | NC_000010.10 |
| cg01178680 | 4.87E-15 | 1.69E-16 | 9.03 | 26.584336  | 1.23E-01 | 74425552  | 74425675  | NC_000015.9  |
| cg12554268 | 4.89E-15 | 1.70E-16 | 9.03 | 26.5814049 | 1.01E-01 | 27338633  | 27338756  | NC_000007.13 |
| cg02052905 | 4.89E-15 | 1.70E-16 | 9.03 | 26.5802719 | 1.38E-01 | 88796355  | 88796478  | NC_000011.9  |
| cg23398332 | 4.90E-15 | 1.70E-16 | 9.03 | 26.5789759 | 7.90E-02 | 128485943 | 128486066 | NC_000008.10 |
| cg11144641 | 4.91E-15 | 1.71E-16 | 9.03 | 26.5764841 | 1.92E-01 | 134871566 | 134871689 | NC_000005.9  |
| cg00470641 | 4.91E-15 | 1.71E-16 | 9.03 | 26.5751791 | 1.36E-01 | 3096219   | 3096342   | NC_000010.10 |



|            |          |          |      |            |          |           |           |              |
|------------|----------|----------|------|------------|----------|-----------|-----------|--------------|
| cg08036309 | 4.92E-15 | 1.71E-16 | 9.03 | 26.5738855 | 1.85E-01 | 13536991  | 13537114  | NC_000004.11 |
| cg27639104 | 4.92E-15 | 1.71E-16 | 9.02 | 26.5728474 | 2.92E-02 | 2482929   | 2483052   | NC_000011.9  |
| cg22460443 | 4.93E-15 | 1.71E-16 | 9.02 | 26.5721028 | 8.51E-02 | 90610983  | 90611106  | NC_000015.9  |
| cg27512716 | 4.95E-15 | 1.72E-16 | 9.02 | 26.5663168 | 1.41E-01 | 44219675  | 44219798  | NC_000019.9  |
| cg15267232 | 4.97E-15 | 1.73E-16 | 9.02 | 26.5620242 | 2.43E-01 | 8097689   | 8097812   | NC_000010.10 |
| cg04652943 | 4.98E-15 | 1.73E-16 | 9.02 | 26.5612717 | 1.22E-01 | 3750565   | 3750688   | NC_000002.11 |
| cg25640822 | 4.98E-15 | 1.73E-16 | 9.02 | 26.5600885 | 2.76E-01 | 134871645 | 134871768 | NC_000005.9  |
| cg00910518 | 4.98E-15 | 1.73E-16 | 9.02 | 26.5598491 | 1.62E-01 | 91195213  | 91195336  | NC_000001.10 |
| cg07681938 | 5.00E-15 | 1.74E-16 | 9.02 | 26.5562757 | 1.95E-01 | 62070234  | 62070357  | NC_000016.9  |
| cg20023231 | 5.01E-15 | 1.74E-16 | 9.02 | 26.5549243 | 1.97E-01 | 22825282  | 22825405  | NC_000016.9  |
| cg22661893 | 5.01E-15 | 1.75E-16 | 9.02 | 26.5535551 | 2.00E-01 | 89224559  | 89224682  | NC_000011.9  |
| cg14855519 | 5.02E-15 | 1.75E-16 | 9.02 | 26.5521082 | 1.63E-01 | 25898191  | 25898314  | NC_000008.10 |
| cg17665601 | 5.04E-15 | 1.76E-16 | 9.02 | 26.5474784 | 4.15E-02 | 131162292 | 131162415 | NC_000008.10 |
| cg12651914 | 5.05E-15 | 1.76E-16 | 9.02 | 26.5463861 | 1.96E-01 | 130642779 | 130642902 | NC_000012.11 |
| cg20567847 | 5.06E-15 | 1.76E-16 | 9.02 | 26.5435889 | 2.84E-01 | 155167038 | 155167161 | NC_000007.13 |
| cg27530352 | 5.09E-15 | 1.78E-16 | 9.02 | 26.5364548 | 9.03E-02 | 11294188  | 11294311  | NC_000003.11 |
| cg04096767 | 5.12E-15 | 1.78E-16 | 9.02 | 26.5321599 | 1.51E-01 | 32449450  | 32449573  | NC_000011.9  |
| cg08688393 | 5.12E-15 | 1.79E-16 | 9.02 | 26.5310857 | 1.52E-01 | 70371326  | 70371449  | NC_000015.9  |
| cg01240823 | 5.14E-15 | 1.79E-16 | 9.02 | 26.5275711 | 1.04E-01 | 92667819  | 92667942  | NC_000015.9  |
| cg14916150 | 5.16E-15 | 1.80E-16 | 9.02 | 26.5233307 | 2.12E-01 | 4868983   | 4869106   | NC_000004.11 |
| cg11416384 | 5.20E-15 | 1.82E-16 | 9.02 | 26.5148708 | 3.08E-01 | 37246827  | 37246950  | NC_000004.11 |
| cg12728623 | 5.21E-15 | 1.82E-16 | 9.02 | 26.5141047 | 1.27E-01 | 19938992  | 19939115  | NC_000022.10 |
| cg06794441 | 5.21E-15 | 1.82E-16 | 9.02 | 26.5138851 | 1.18E-01 | 67520733  | 67520856  | NC_000001.10 |
| cg19202601 | 5.22E-15 | 1.82E-16 | 9.02 | 26.5120433 | 7.81E-02 | 30070168  | 30070291  | NC_000022.10 |
| cg23669876 | 5.22E-15 | 1.82E-16 | 9.02 | 26.5114873 | 1.12E-01 | 36489276  | 36489399  | NC_000001.10 |

|            |          |          |      |            |          |           |           |              |
|------------|----------|----------|------|------------|----------|-----------|-----------|--------------|
| cg21986027 | 5.22E-15 | 1.82E-16 | 9.02 | 26.5107097 | 1.83E-01 | 169238138 | 169238261 | NC_000006.11 |
| cg25644556 | 5.24E-15 | 1.83E-16 | 9.01 | 26.5065483 | 2.68E-01 | 27209582  | 27209705  | NC_000007.13 |
| cg17482963 | 5.28E-15 | 1.84E-16 | 9.01 | 26.4998773 | 1.58E-01 | 27591911  | 27592034  | NC_000008.10 |
| cg26344747 | 5.30E-15 | 1.85E-16 | 9.01 | 26.496355  | 1.46E-01 | 21193332  | 21193455  | NC_000017.10 |
| cg02906863 | 5.30E-15 | 1.85E-16 | 9.01 | 26.4954487 | 1.39E-01 | 22275386  | 22275509  | NC_000022.10 |
| cg24176563 | 5.30E-15 | 1.85E-16 | 9.01 | 26.4954171 | 2.20E-01 | 133562776 | 133562899 | NC_000006.11 |
| cg20731875 | 5.33E-15 | 1.86E-16 | 9.01 | 26.4905757 | 1.48E-01 | 14207701  | 14207824  | NC_000017.10 |
| cg18710784 | 5.33E-15 | 1.86E-16 | 9.01 | 26.4885159 | 2.50E-01 | 132813563 | 132813686 | NC_000011.9  |
| cg08490115 | 5.34E-15 | 1.87E-16 | 9.01 | 26.487242  | 2.41E-01 | 30038675  | 30038798  | NC_000011.9  |
| cg02909298 | 5.34E-15 | 1.87E-16 | 9.01 | 26.4867735 | 1.09E-01 | 56207327  | 56207450  | NC_000014.8  |
| cg02597493 | 5.37E-15 | 1.88E-16 | 9.01 | 26.4818071 | 8.29E-02 | 79298637  | 79298760  | NC_000015.9  |
| cg17669581 | 5.38E-15 | 1.88E-16 | 9.01 | 26.479898  | 1.67E-01 | 54968251  | 54968374  | NC_000004.11 |
| cg25841625 | 5.38E-15 | 1.88E-16 | 9.01 | 26.4791671 | 1.79E-01 | 77119588  | 77119711  | NC_000004.11 |
| cg26813561 | 5.39E-15 | 1.89E-16 | 9.01 | 26.4773733 | 7.26E-02 | 112171802 | 112171925 | NC_000012.11 |
| cg08901867 | 5.39E-15 | 1.89E-16 | 9.01 | 26.4771151 | 1.21E-01 | 46871042  | 46871165  | NC_000017.10 |
| cg04201744 | 5.40E-15 | 1.89E-16 | 9.01 | 26.4761547 | 6.63E-02 | 178976295 | 178976418 | NC_000002.11 |
| cg00153106 | 5.42E-15 | 1.89E-16 | 9.01 | 26.472526  | 2.21E-01 | 172671561 | 172671684 | NC_000005.9  |
| cg11530678 | 5.42E-15 | 1.89E-16 | 9.01 | 26.4723896 | 6.93E-02 | 67081012  | 67081135  | NC_000015.9  |
| cg02773399 | 5.44E-15 | 1.90E-16 | 9.01 | 26.4673458 | 4.74E-02 | 110226215 | 110226338 | NC_000009.11 |
| cg00661855 | 5.45E-15 | 1.91E-16 | 9.01 | 26.4647789 | 1.19E-01 | 3152428   | 3152551   | NC_000006.11 |
| cg15768103 | 5.47E-15 | 1.92E-16 | 9.01 | 26.4618491 | 2.58E-01 | 127413936 | 127414059 | NC_000002.11 |
| cg19993589 | 5.48E-15 | 1.92E-16 | 9.01 | 26.4597011 | 2.07E-01 | 177140510 | 177140633 | NC_000001.10 |
| cg27434509 | 5.51E-15 | 1.93E-16 | 9.01 | 26.4540342 | 2.12E-01 | 5710337   | 5710460   | NC_000004.11 |
| cg11214140 | 5.55E-15 | 1.94E-16 | 9.01 | 26.447605  | 1.82E-01 | 55370429  | 55370552  | NC_000008.10 |
| cg04036366 | 5.55E-15 | 1.95E-16 | 9.01 | 26.4464139 | 1.17E-01 | 79976900  | 79977023  | NC_000017.10 |

|            |          |          |   |            |          |           |           |              |
|------------|----------|----------|---|------------|----------|-----------|-----------|--------------|
| cg21463349 | 5.56E-15 | 1.95E-16 | 9 | 26.4453416 | 1.64E-01 | 119600948 | 119601071 | NC_000002.11 |
| cg18035229 | 5.56E-15 | 1.95E-16 | 9 | 26.4447483 | 2.21E-01 | 70984270  | 70984393  | NC_000008.10 |
| cg09403666 | 5.57E-15 | 1.95E-16 | 9 | 26.4433334 | 1.92E-01 | 23461493  | 23461616  | NC_000010.10 |
| cg09548799 | 5.60E-15 | 1.96E-16 | 9 | 26.4367315 | 1.00E-01 | 67839134  | 67839257  | NC_000008.10 |
| cg10523671 | 5.60E-15 | 1.96E-16 | 9 | 26.4366782 | 1.46E-01 | 121612956 | 121613079 | NC_000003.11 |
| cg05965387 | 5.62E-15 | 1.97E-16 | 9 | 26.4330542 | 1.47E-01 | 51418053  | 51418176  | NC_000013.10 |
| cg14523847 | 5.64E-15 | 1.98E-16 | 9 | 26.4301832 | 2.25E-01 | 153584597 | 153584720 | NC_000007.13 |
| cg27157482 | 5.64E-15 | 1.98E-16 | 9 | 26.4301455 | 1.86E-01 | 27215606  | 27215729  | NC_000007.13 |
| cg24626674 | 5.65E-15 | 1.98E-16 | 9 | 26.428524  | 7.96E-02 | 57958333  | 57958456  | NC_000011.9  |
| cg13506166 | 5.66E-15 | 1.99E-16 | 9 | 26.4263661 | 3.71E-02 | 81404956  | 81405079  | NC_000014.8  |
| cg02814641 | 5.70E-15 | 2.00E-16 | 9 | 26.4185587 | 1.68E-01 | 167832664 | 167832787 | NC_000006.11 |
| cg02519879 | 5.70E-15 | 2.00E-16 | 9 | 26.4184488 | 1.32E-01 | 122286677 | 122286800 | NC_000003.11 |
| cg23939866 | 5.75E-15 | 2.02E-16 | 9 | 26.410164  | 6.27E-02 | 154181852 | 154181975 | NC_000005.9  |
| cg21095561 | 5.76E-15 | 2.02E-16 | 9 | 26.4075831 | 2.19E-01 | 42733994  | 42734117  | NC_000017.10 |
| cg20725704 | 5.79E-15 | 2.03E-16 | 9 | 26.40281   | 7.54E-02 | 10950238  | 10950361  | NC_000002.11 |
| cg24632241 | 5.79E-15 | 2.03E-16 | 9 | 26.4027117 | 2.75E-01 | 80530431  | 80530554  | NC_000002.11 |
| cg19144684 | 5.79E-15 | 2.03E-16 | 9 | 26.4023884 | 2.10E-01 | 137522960 | 137523083 | NC_000002.11 |
| cg13596833 | 5.80E-15 | 2.04E-16 | 9 | 26.400134  | 2.45E-01 | 31827899  | 31828022  | NC_000011.9  |
| cg16536329 | 5.82E-15 | 2.05E-16 | 9 | 26.3961277 | 2.12E-01 | 178368185 | 178368308 | NC_000005.9  |
| cg23623622 | 5.84E-15 | 2.05E-16 | 9 | 26.3940098 | 1.94E-01 | 30139880  | 30140003  | NC_000006.11 |
| cg11722553 | 5.86E-15 | 2.06E-16 | 9 | 26.3905484 | 5.90E-02 | 10829162  | 10829285  | NC_000012.11 |
| cg05740045 | 5.86E-15 | 2.06E-16 | 9 | 26.3901286 | 1.75E-01 | 65499926  | 65500049  | NC_000008.10 |
| cg26889572 | 5.86E-15 | 2.06E-16 | 9 | 26.3895435 | 1.08E-01 | 106126690 | 106126813 | NC_000002.11 |
| cg21230493 | 5.88E-15 | 2.07E-16 | 9 | 26.3864299 | 2.02E-01 | 26722496  | 26722619  | NC_000008.10 |
| cg13885535 | 5.88E-15 | 2.07E-16 | 9 | 26.3862082 | 1.23E-01 | 124315614 | 124315737 | NC_000009.11 |

|            |          |          |      |            |          |           |           |              |
|------------|----------|----------|------|------------|----------|-----------|-----------|--------------|
| cg17892178 | 5.89E-15 | 2.07E-16 | 9    | 26.3838212 | 2.24E-01 | 6902824   | 6902947   | NC_000003.11 |
| cg22290117 | 5.90E-15 | 2.08E-16 | 8.99 | 26.3821067 | 1.18E-01 | 57427173  | 57427296  | NC_000020.10 |
| cg06838985 | 5.92E-15 | 2.08E-16 | 8.99 | 26.3786776 | 1.72E-01 | 101453871 | 101453994 | NC_000011.9  |
| cg21581504 | 5.93E-15 | 2.09E-16 | 8.99 | 26.3765491 | 1.53E-01 | 68545960  | 68546083  | NC_000002.11 |
| cg10726463 | 5.95E-15 | 2.09E-16 | 8.99 | 26.3736959 | 1.06E-01 | 38243770  | 38243893  | NC_000022.10 |
| cg13540960 | 5.99E-15 | 2.11E-16 | 8.99 | 26.3662208 | 2.07E-01 | 32450244  | 32450367  | NC_000011.9  |
| cg08534653 | 6.01E-15 | 2.12E-16 | 8.99 | 26.3625834 | 2.17E-01 | 1747700   | 1747823   | NC_000002.11 |
| cg23692680 | 6.02E-15 | 2.12E-16 | 8.99 | 26.3606984 | 1.90E-01 | 101445897 | 101446020 | NC_000008.10 |
| cg04317962 | 6.03E-15 | 2.12E-16 | 8.99 | 26.3603459 | 1.99E-01 | 79623625  | 79623748  | NC_000016.9  |
| cg27334919 | 6.03E-15 | 2.12E-16 | 8.99 | 26.3592204 | 1.95E-01 | 19158378  | 19158501  | NC_000007.13 |
| cg25963041 | 6.05E-15 | 2.13E-16 | 8.99 | 26.3564572 | 3.27E-01 | 57049777  | 57049900  | NC_000019.9  |
| cg15991405 | 6.05E-15 | 2.13E-16 | 8.99 | 26.3558978 | 1.89E-01 | 176988480 | 176988603 | NC_000002.11 |
| cg03092191 | 6.06E-15 | 2.13E-16 | 8.99 | 26.3548071 | 2.29E-01 | 1272710   | 1272833   | NC_000007.13 |
| cg14008883 | 6.08E-15 | 2.14E-16 | 8.99 | 26.351086  | 1.54E-01 | 50818911  | 50819034  | NC_000010.10 |
| cg08273957 | 6.08E-15 | 2.14E-16 | 8.99 | 26.3502848 | 2.22E-01 | 29227941  | 29228064  | NC_000014.8  |
| cg10321393 | 6.09E-15 | 2.15E-16 | 8.99 | 26.3492076 | 9.76E-02 | 15905387  | 15905510  | NC_000001.10 |
| cg26224652 | 6.09E-15 | 2.15E-16 | 8.99 | 26.3490077 | 5.60E-02 | 57181252  | 57181375  | NC_000004.11 |
| cg16064793 | 6.09E-15 | 2.15E-16 | 8.99 | 26.3486607 | 1.69E-01 | 157021142 | 157021265 | NC_000005.9  |
| cg21101386 | 6.12E-15 | 2.16E-16 | 8.99 | 26.3439519 | 1.31E-01 | 35125857  | 35125980  | NC_000020.10 |
| cg09227138 | 6.12E-15 | 2.16E-16 | 8.99 | 26.3437298 | 2.07E-01 | 84419244  | 84419367  | NC_000006.11 |
| cg21502786 | 6.14E-15 | 2.17E-16 | 8.99 | 26.3398691 | 2.39E-01 | 56234476  | 56234599  | NC_000017.10 |
| cg13381984 | 6.15E-15 | 2.17E-16 | 8.99 | 26.3388757 | 1.50E-01 | 127881344 | 127881467 | NC_000007.13 |
| cg04059773 | 6.15E-15 | 2.17E-16 | 8.99 | 26.3387682 | 2.46E-01 | 53561563  | 53561686  | NC_000019.9  |
| cg04495995 | 6.16E-15 | 2.17E-16 | 8.99 | 26.3366256 | 2.90E-01 | 19147157  | 19147280  | NC_000007.13 |
| cg06704093 | 6.16E-15 | 2.18E-16 | 8.99 | 26.3359005 | 2.13E-01 | 110226132 | 110226255 | NC_000010.10 |

|            |          |          |      |            |          |           |           |              |
|------------|----------|----------|------|------------|----------|-----------|-----------|--------------|
| cg09679642 | 6.17E-15 | 2.18E-16 | 8.99 | 26.3352311 | 6.95E-02 | 79805210  | 79805333  | NC_000017.10 |
| cg20244327 | 6.17E-15 | 2.18E-16 | 8.99 | 26.3349119 | 1.51E-01 | 3283946   | 3284069   | NC_000010.10 |
| cg11363444 | 6.18E-15 | 2.18E-16 | 8.99 | 26.3324416 | 1.16E-01 | 153079618 | 153079741 | NC_000002.11 |
| cg07080358 | 6.19E-15 | 2.19E-16 | 8.99 | 26.3312456 | 2.53E-01 | 68546507  | 68546630  | NC_000002.11 |
| cg18729086 | 6.19E-15 | 2.19E-16 | 8.99 | 26.3303034 | 9.75E-02 | 101187440 | 101187563 | NC_000010.10 |
| cg17415381 | 6.20E-15 | 2.19E-16 | 8.99 | 26.3297242 | 1.37E-01 | 61514690  | 61514813  | NC_000017.10 |
| cg25209111 | 6.25E-15 | 2.21E-16 | 8.99 | 26.3208118 | 1.43E-01 | 104009148 | 104009271 | NC_000010.10 |
| cg15718811 | 6.25E-15 | 2.21E-16 | 8.99 | 26.3203694 | 1.53E-01 | 120427810 | 120427933 | NC_000008.10 |
| cg21214293 | 6.26E-15 | 2.21E-16 | 8.99 | 26.3189411 | 1.55E-01 | 145713882 | 145714005 | NC_000005.9  |
| cg24847685 | 6.28E-15 | 2.22E-16 | 8.98 | 26.3154837 | 2.59E-01 | 147087653 | 147087776 | NC_000003.11 |
| cg04949206 | 6.30E-15 | 2.23E-16 | 8.98 | 26.3128156 | 1.95E-01 | 176971971 | 176972094 | NC_000002.11 |
| cg13874817 | 6.33E-15 | 2.24E-16 | 8.98 | 26.3078152 | 2.27E-01 | 140770751 | 140770874 | NC_000003.11 |
| cg01556677 | 6.34E-15 | 2.24E-16 | 8.98 | 26.3050142 | 7.17E-02 | 80534871  | 80534994  | NC_000007.13 |
| cg06002288 | 6.38E-15 | 2.26E-16 | 8.98 | 26.2988425 | 1.94E-01 | 44500261  | 44500384  | NC_000018.9  |
| cg05333146 | 6.41E-15 | 2.27E-16 | 8.98 | 26.2939427 | 1.47E-01 | 67183725  | 67183848  | NC_000016.9  |
| cg23305365 | 6.43E-15 | 2.27E-16 | 8.98 | 26.2916761 | 1.09E-01 | 105379392 | 105379515 | NC_000008.10 |
| cg26512459 | 6.43E-15 | 2.28E-16 | 8.98 | 26.2906108 | 6.71E-02 | 3435203   | 3435326   | NC_000011.9  |
| cg18106668 | 6.45E-15 | 2.28E-16 | 8.98 | 26.2886331 | 2.15E-01 | 24323261  | 24323384  | NC_000007.13 |
| cg01024444 | 6.46E-15 | 2.29E-16 | 8.98 | 26.2861904 | 1.96E-01 | 52222446  | 52222569  | NC_000019.9  |
| cg08149459 | 6.49E-15 | 2.30E-16 | 8.98 | 26.2818876 | 1.13E-01 | 77304195  | 77304318  | NC_000014.8  |
| cg09825979 | 6.49E-15 | 2.30E-16 | 8.98 | 26.281802  | 1.61E-01 | 27179432  | 27179555  | NC_000007.13 |
| cg23615741 | 6.50E-15 | 2.30E-16 | 8.98 | 26.280049  | 2.02E-01 | 101297642 | 101297765 | NC_000010.10 |
| cg15670863 | 6.50E-15 | 2.30E-16 | 8.98 | 26.2798886 | 8.92E-02 | 49110292  | 49110415  | NC_000019.9  |
| cg07865267 | 6.52E-15 | 2.31E-16 | 8.98 | 26.2763522 | 1.29E-01 | 1421517   | 1421640   | NC_000017.10 |
| cg14802355 | 6.53E-15 | 2.31E-16 | 8.98 | 26.2755384 | 1.58E-01 | 103683140 | 103683263 | NC_000004.11 |

|            |          |          |      |            |          |           |           |              |
|------------|----------|----------|------|------------|----------|-----------|-----------|--------------|
| cg19814174 | 6.54E-15 | 2.32E-16 | 8.98 | 26.2740963 | 1.50E-01 | 213704987 | 213705110 | NC_000001.10 |
| cg14732324 | 6.58E-15 | 2.33E-16 | 8.98 | 26.2665881 | 2.91E-01 | 528621    | 528744    | NC_000005.9  |
| cg05258261 | 6.59E-15 | 2.34E-16 | 8.98 | 26.2652252 | 2.37E-01 | 140770608 | 140770731 | NC_000003.11 |
| cg04876124 | 6.60E-15 | 2.34E-16 | 8.98 | 26.2633651 | 1.31E-01 | 3160911   | 3161034   | NC_000001.10 |
| cg10314760 | 6.60E-15 | 2.34E-16 | 8.98 | 26.263147  | 1.35E-01 | 123353654 | 123353777 | NC_000010.10 |
| cg21871232 | 6.61E-15 | 2.34E-16 | 8.98 | 26.2625665 | 1.88E-01 | 95693881  | 95694004  | NC_000014.8  |
| cg19003326 | 6.61E-15 | 2.35E-16 | 8.98 | 26.2613737 | 1.30E-01 | 60720320  | 60720443  | NC_000005.9  |
| cg25312935 | 6.62E-15 | 2.35E-16 | 8.98 | 26.2598372 | 5.45E-02 | 211860642 | 211860765 | NC_000001.10 |
| cg09788586 | 6.63E-15 | 2.35E-16 | 8.98 | 26.2596173 | 1.75E-01 | 114337676 | 114337799 | NC_000012.11 |
| cg00413617 | 6.63E-15 | 2.35E-16 | 8.98 | 26.2591411 | 1.36E-01 | 17757415  | 17757538  | NC_000011.9  |
| cg15092219 | 6.63E-15 | 2.35E-16 | 8.98 | 26.2588604 | 1.56E-01 | 247511364 | 247511487 | NC_000001.10 |
| cg07746943 | 6.63E-15 | 2.35E-16 | 8.98 | 26.2585816 | 2.82E-01 | 238615    | 238738    | NC_000003.11 |
| cg13475333 | 6.63E-15 | 2.35E-16 | 8.98 | 26.258176  | 1.96E-01 | 139585616 | 139585739 | NC_000009.11 |
| cg26079753 | 6.64E-15 | 2.36E-16 | 8.98 | 26.2571976 | 2.51E-01 | 54355528  | 54355651  | NC_000012.11 |
| cg10537450 | 6.65E-15 | 2.36E-16 | 8.98 | 26.2557617 | 1.34E-01 | 147789973 | 147790096 | NC_000001.10 |
| cg22660933 | 6.65E-15 | 2.36E-16 | 8.97 | 26.2547495 | 1.03E-01 | 46608355  | 46608478  | NC_000017.10 |
| cg01394052 | 6.71E-15 | 2.38E-16 | 8.97 | 26.2460253 | 3.79E-02 | 27684997  | 27685120  | NC_000001.10 |
| cg18836576 | 6.72E-15 | 2.39E-16 | 8.97 | 26.2444856 | 5.85E-02 | 33677751  | 33677874  | NC_000006.11 |
| cg00962755 | 6.72E-15 | 2.39E-16 | 8.97 | 26.2430684 | 1.49E-01 | 201439001 | 201439124 | NC_000001.10 |
| cg21161253 | 6.73E-15 | 2.39E-16 | 8.97 | 26.2417833 | 2.55E-01 | 61638149  | 61638272  | NC_000020.10 |
| cg09444060 | 6.84E-15 | 2.43E-16 | 8.97 | 26.2257712 | 5.58E-02 | 28887940  | 28888063  | NC_000006.11 |
| cg12072560 | 6.85E-15 | 2.43E-16 | 8.97 | 26.2245799 | 2.59E-01 | 12254173  | 12254296  | NC_000018.9  |
| cg22242857 | 6.90E-15 | 2.45E-16 | 8.97 | 26.2163926 | 1.85E-01 | 76751952  | 76752075  | NC_000018.9  |
| cg12166610 | 6.93E-15 | 2.46E-16 | 8.97 | 26.2127148 | 1.91E-01 | 31498256  | 31498379  | NC_000008.10 |
| cg18855674 | 6.93E-15 | 2.47E-16 | 8.97 | 26.2118207 | 1.92E-01 | 72469553  | 72469676  | NC_000008.10 |

|            |          |          |      |            |          |           |           |              |
|------------|----------|----------|------|------------|----------|-----------|-----------|--------------|
| cg18451814 | 6.97E-15 | 2.48E-16 | 8.97 | 26.2063377 | 1.98E-01 | 57278188  | 57278311  | NC_000014.8  |
| cg16620392 | 7.00E-15 | 2.49E-16 | 8.97 | 26.2023041 | 1.24E-01 | 131765379 | 131765502 | NC_000010.10 |
| cg21999939 | 7.03E-15 | 2.50E-16 | 8.97 | 26.1975167 | 2.73E-01 | 2755004   | 2755127   | NC_000005.9  |
| cg12500949 | 7.03E-15 | 2.50E-16 | 8.97 | 26.1972854 | 9.95E-02 | 88357920  | 88358043  | NC_000002.11 |
| cg11468819 | 7.04E-15 | 2.51E-16 | 8.97 | 26.1961003 | 1.72E-01 | 4942612   | 4942735   | NC_000005.9  |
| cg18837713 | 7.04E-15 | 2.51E-16 | 8.97 | 26.1949235 | 1.21E-01 | 77159365  | 77159488  | NC_000012.11 |
| cg18408326 | 7.05E-15 | 2.51E-16 | 8.97 | 26.194599  | 2.35E-01 | 18429037  | 18429160  | NC_000010.10 |
| cg01191815 | 7.07E-15 | 2.52E-16 | 8.97 | 26.1917943 | 7.01E-02 | 63084959  | 63085082  | NC_000015.9  |
| cg04763554 | 7.09E-15 | 2.52E-16 | 8.96 | 26.1886312 | 2.76E-01 | 98511258  | 98511381  | NC_000001.10 |
| cg25756435 | 7.12E-15 | 2.54E-16 | 8.96 | 26.183234  | 2.10E-01 | 12952129  | 12952252  | NC_000019.9  |
| cg24535046 | 7.14E-15 | 2.54E-16 | 8.96 | 26.1811553 | 5.87E-02 | 21730858  | 21730981  | NC_000017.10 |
| cg18098400 | 7.15E-15 | 2.55E-16 | 8.96 | 26.1798193 | 2.29E-01 | 25621328  | 25621451  | NC_000013.10 |
| cg17156983 | 7.15E-15 | 2.55E-16 | 8.96 | 26.1791674 | 1.69E-01 | 18951159  | 18951282  | NC_000010.10 |
| cg08629267 | 7.18E-15 | 2.56E-16 | 8.96 | 26.1749548 | 1.33E-01 | 239014798 | 239014921 | NC_000002.11 |
| cg09873584 | 7.18E-15 | 2.56E-16 | 8.96 | 26.1749334 | 1.41E-01 | 60348937  | 60349060  | NC_000010.10 |
| cg10310457 | 7.23E-15 | 2.58E-16 | 8.96 | 26.1684718 | 1.75E-01 | 5217523   | 5217646   | NC_000016.9  |
| cg14880894 | 7.24E-15 | 2.58E-16 | 8.96 | 26.1668655 | 1.88E-01 | 78697859  | 78697982  | NC_000004.11 |
| cg25975712 | 7.25E-15 | 2.59E-16 | 8.96 | 26.1643638 | 2.74E-01 | 48971051  | 48971174  | NC_000022.10 |
| cg23487201 | 7.29E-15 | 2.60E-16 | 8.96 | 26.1598547 | 1.87E-01 | 57090122  | 57090245  | NC_000020.10 |
| cg11747897 | 7.29E-15 | 2.60E-16 | 8.96 | 26.1598141 | 6.23E-02 | 46860105  | 46860228  | NC_000022.10 |
| cg12154110 | 7.30E-15 | 2.60E-16 | 8.96 | 26.158055  | 1.14E-01 | 49254220  | 49254343  | NC_000019.9  |
| cg03275648 | 7.36E-15 | 2.63E-16 | 8.96 | 26.1488356 | 9.60E-02 | 96940848  | 96940971  | NC_000009.11 |
| cg05994320 | 7.37E-15 | 2.63E-16 | 8.96 | 26.1482446 | 1.74E-01 | 113727753 | 113727876 | NC_000007.13 |
| cg24380053 | 7.37E-15 | 2.63E-16 | 8.96 | 26.1474448 | 1.62E-01 | 13028632  | 13028755  | NC_000003.11 |
| cg06001519 | 7.39E-15 | 2.64E-16 | 8.96 | 26.1454745 | 2.13E-01 | 23500838  | 23500961  | NC_000013.10 |

|            |          |          |      |            |          |           |           |              |
|------------|----------|----------|------|------------|----------|-----------|-----------|--------------|
| cg04331756 | 7.43E-15 | 2.65E-16 | 8.96 | 26.1394621 | 1.18E-01 | 8546532   | 8546655   | NC_000010.10 |
| cg23230158 | 7.45E-15 | 2.66E-16 | 8.96 | 26.1372488 | 1.44E-01 | 230260837 | 230260960 | NC_000001.10 |
| cg22356083 | 7.47E-15 | 2.67E-16 | 8.96 | 26.1346361 | 8.84E-02 | 55861964  | 55862087  | NC_000019.9  |
| cg03002848 | 7.47E-15 | 2.67E-16 | 8.96 | 26.1340355 | 2.10E-01 | 135050343 | 135050466 | NC_000010.10 |
| cg18857369 | 7.49E-15 | 2.67E-16 | 8.96 | 26.1319397 | 1.24E-01 | 105518248 | 105518371 | NC_000014.8  |
| cg12250896 | 7.49E-15 | 2.68E-16 | 8.96 | 26.1306925 | 2.63E-01 | 134001112 | 134001235 | NC_000010.10 |
| cg17712694 | 7.54E-15 | 2.69E-16 | 8.95 | 26.1241321 | 2.56E-01 | 16180068  | 16180191  | NC_000005.9  |
| cg17598190 | 7.55E-15 | 2.70E-16 | 8.95 | 26.1227996 | 4.28E-02 | 3162054   | 3162177   | NC_000010.10 |
| cg07124126 | 7.56E-15 | 2.70E-16 | 8.95 | 26.1221959 | 7.70E-02 | 81927346  | 81927469  | NC_000016.9  |
| cg01340163 | 7.57E-15 | 2.70E-16 | 8.95 | 26.1208251 | 1.56E-01 | 55990582  | 55990705  | NC_000004.11 |
| cg21615397 | 7.57E-15 | 2.71E-16 | 8.95 | 26.1199068 | 1.85E-01 | 55714393  | 55714516  | NC_000018.9  |
| cg12425321 | 7.59E-15 | 2.71E-16 | 8.95 | 26.1180394 | 9.73E-02 | 31733914  | 31734037  | NC_000006.11 |
| cg05203809 | 7.59E-15 | 2.71E-16 | 8.95 | 26.1169217 | 1.56E-01 | 12281858  | 12281981  | NC_000016.9  |
| cg05079049 | 7.60E-15 | 2.72E-16 | 8.95 | 26.1165876 | 1.47E-01 | 55364843  | 55364966  | NC_000016.9  |
| cg19369022 | 7.60E-15 | 2.72E-16 | 8.95 | 26.1159697 | 2.33E-01 | 51111388  | 51111511  | NC_000019.9  |
| cg21282630 | 7.62E-15 | 2.72E-16 | 8.95 | 26.1138221 | 2.60E-01 | 27945125  | 27945248  | NC_000021.8  |
| cg10410142 | 7.62E-15 | 2.72E-16 | 8.95 | 26.1130821 | 2.45E-01 | 158141542 | 158141665 | NC_000004.11 |
| cg12746120 | 7.63E-15 | 2.73E-16 | 8.95 | 26.1115311 | 8.96E-02 | 110398188 | 110398311 | NC_000013.10 |
| cg07972135 | 7.63E-15 | 2.73E-16 | 8.95 | 26.111067  | 2.47E-01 | 105481322 | 105481445 | NC_000011.9  |
| cg13962153 | 7.64E-15 | 2.73E-16 | 8.95 | 26.1104339 | 1.58E-01 | 36644157  | 36644280  | NC_000001.10 |
| cg09323727 | 7.69E-15 | 2.75E-16 | 8.95 | 26.1034996 | 2.60E-01 | 176936436 | 176936559 | NC_000002.11 |
| cg09637449 | 7.77E-15 | 2.78E-16 | 8.95 | 26.0929074 | 6.40E-02 | 73479754  | 73479877  | NC_000010.10 |
| cg09042277 | 7.79E-15 | 2.79E-16 | 8.95 | 26.0901398 | 2.13E-01 | 114840854 | 114840977 | NC_000012.11 |
| cg13983640 | 7.80E-15 | 2.79E-16 | 8.95 | 26.0895024 | 1.61E-01 | 41010223  | 41010346  | NC_000006.11 |
| cg26282731 | 7.80E-15 | 2.79E-16 | 8.95 | 26.0890132 | 1.90E-01 | 148939288 | 148939411 | NC_000004.11 |



|            |          |          |      |            |          |           |           |              |
|------------|----------|----------|------|------------|----------|-----------|-----------|--------------|
| cg04390523 | 7.81E-15 | 2.80E-16 | 8.95 | 26.0875048 | 2.33E-01 | 78493100  | 78493223  | NC_000013.10 |
| cg19580344 | 7.82E-15 | 2.80E-16 | 8.95 | 26.0862444 | 1.23E-01 | 16669915  | 16670038  | NC_000005.9  |
| cg09767658 | 7.84E-15 | 2.81E-16 | 8.95 | 26.0833274 | 1.30E-01 | 8433089   | 8433212   | NC_000001.10 |
| cg09576978 | 7.84E-15 | 2.81E-16 | 8.95 | 26.0830386 | 9.65E-02 | 41554080  | 41554203  | NC_000008.10 |
| cg26589665 | 7.87E-15 | 2.82E-16 | 8.95 | 26.0798344 | 1.10E-01 | 71623290  | 71623413  | NC_000015.9  |
| cg07495363 | 7.88E-15 | 2.82E-16 | 8.95 | 26.0783317 | 2.83E-01 | 198651076 | 198651199 | NC_000002.11 |
| cg02810149 | 7.88E-15 | 2.82E-16 | 8.95 | 26.078032  | 1.13E-01 | 45608938  | 45609061  | NC_000006.11 |
| cg14323928 | 7.90E-15 | 2.83E-16 | 8.95 | 26.0760152 | 6.21E-02 | 31393845  | 31393968  | NC_000015.9  |
| cg12379145 | 7.90E-15 | 2.83E-16 | 8.95 | 26.0748812 | 1.31E-01 | 14030611  | 14030734  | NC_000001.10 |
| cg07704151 | 7.90E-15 | 2.83E-16 | 8.95 | 26.0746516 | 1.13E-01 | 100327897 | 100328020 | NC_000003.11 |
| cg06563089 | 7.91E-15 | 2.83E-16 | 8.95 | 26.07416   | 1.66E-01 | 75601157  | 75601280  | NC_000012.11 |
| cg01995480 | 7.92E-15 | 2.84E-16 | 8.95 | 26.0720469 | 2.68E-01 | 45405827  | 45405950  | NC_000022.10 |
| cg18805066 | 7.94E-15 | 2.85E-16 | 8.95 | 26.069768  | 2.14E-01 | 27134259  | 27134382  | NC_000007.13 |
| cg01687878 | 7.94E-15 | 2.85E-16 | 8.95 | 26.0694261 | 1.64E-01 | 123616817 | 123616940 | NC_000012.11 |
| cg24636944 | 7.95E-15 | 2.85E-16 | 8.95 | 26.0678132 | 1.25E-01 | 92615296  | 92615419  | NC_000005.9  |
| cg00281664 | 7.96E-15 | 2.85E-16 | 8.95 | 26.0673803 | 1.31E-01 | 113384048 | 113384171 | NC_000013.10 |
| cg26707887 | 7.98E-15 | 2.86E-16 | 8.94 | 26.064042  | 1.29E-01 | 67027311  | 67027434  | NC_000005.9  |
| cg22815766 | 7.98E-15 | 2.86E-16 | 8.94 | 26.064037  | 1.08E-01 | 134022784 | 134022907 | NC_000011.9  |
| cg14223293 | 8.00E-15 | 2.87E-16 | 8.94 | 26.0618413 | 2.13E-01 | 3602272   | 3602395   | NC_000005.9  |
| cg14995475 | 8.04E-15 | 2.88E-16 | 8.94 | 26.0568969 | 1.80E-01 | 6534774   | 6534897   | NC_000019.9  |
| cg21464565 | 8.05E-15 | 2.89E-16 | 8.94 | 26.0548351 | 1.88E-01 | 27141139  | 27141262  | NC_000007.13 |
| cg19952303 | 8.06E-15 | 2.89E-16 | 8.94 | 26.054047  | 1.93E-01 | 85306323  | 85306446  | NC_000012.11 |
| cg16009129 | 8.07E-15 | 2.90E-16 | 8.94 | 26.0521132 | 4.72E-02 | 6106379   | 6106502   | NC_000019.9  |
| cg05076914 | 8.08E-15 | 2.90E-16 | 8.94 | 26.0506316 | 1.69E-01 | 168842302 | 168842425 | NC_000006.11 |
| cg26348902 | 8.11E-15 | 2.91E-16 | 8.94 | 26.0466159 | 1.90E-01 | 1399938   | 1400061   | NC_000004.11 |

|            |          |          |      |            |          |           |           |              |
|------------|----------|----------|------|------------|----------|-----------|-----------|--------------|
| cg03951219 | 8.13E-15 | 2.92E-16 | 8.94 | 26.0447512 | 2.94E-01 | 159141440 | 159141563 | NC_000001.10 |
| cg18356785 | 8.15E-15 | 2.93E-16 | 8.94 | 26.0418973 | 1.76E-01 | 47611780  | 47611903  | NC_000011.9  |
| cg10980774 | 8.17E-15 | 2.93E-16 | 8.94 | 26.0396276 | 2.81E-01 | 112832547 | 112832670 | NC_000011.9  |
| cg17477818 | 8.18E-15 | 2.94E-16 | 8.94 | 26.0381691 | 1.17E-01 | 10203128  | 10203251  | NC_000019.9  |
| cg26838023 | 8.21E-15 | 2.95E-16 | 8.94 | 26.0345688 | 1.04E-01 | 30072314  | 30072437  | NC_000020.10 |
| cg07520506 | 8.22E-15 | 2.95E-16 | 8.94 | 26.0328981 | 1.81E-01 | 7593007   | 7593130   | NC_000012.11 |
| cg22946150 | 8.29E-15 | 2.98E-16 | 8.94 | 26.0244717 | 2.61E-01 | 84116107  | 84116230  | NC_000015.9  |
| cg26094789 | 8.32E-15 | 2.99E-16 | 8.94 | 26.0208436 | 1.62E-01 | 37135586  | 37135709  | NC_000014.8  |
| cg23933759 | 8.34E-15 | 3.00E-16 | 8.94 | 26.0172449 | 1.19E-01 | 37836671  | 37836794  | NC_000021.8  |
| cg04250451 | 8.36E-15 | 3.01E-16 | 8.94 | 26.0147477 | 1.18E-01 | 25257784  | 25257907  | NC_000001.10 |
| cg09249675 | 8.37E-15 | 3.01E-16 | 8.94 | 26.0135838 | 1.54E-01 | 3401572   | 3401695   | NC_000019.9  |
| cg16134430 | 8.37E-15 | 3.01E-16 | 8.94 | 26.0133922 | 4.74E-02 | 34636155  | 34636278  | NC_000021.8  |
| cg07047831 | 8.37E-15 | 3.01E-16 | 8.94 | 26.0132652 | 8.59E-02 | 186918647 | 186918770 | NC_000003.11 |
| cg13188098 | 8.38E-15 | 3.02E-16 | 8.94 | 26.0127646 | 1.42E-01 | 4918335   | 4918458   | NC_000012.11 |
| cg09304047 | 8.38E-15 | 3.02E-16 | 8.94 | 26.0126035 | 1.76E-01 | 53747541  | 53747664  | NC_000002.11 |
| cg19955823 | 8.38E-15 | 3.02E-16 | 8.94 | 26.0124949 | 3.94E-02 | 90428806  | 90428929  | NC_000014.8  |
| cg19227031 | 8.38E-15 | 3.02E-16 | 8.94 | 26.0122146 | 1.13E-01 | 32118315  | 32118438  | NC_000006.11 |
| cg00516513 | 8.39E-15 | 3.02E-16 | 8.94 | 26.0105069 | 2.69E-01 | 41753803  | 41753926  | NC_000004.11 |
| cg15630907 | 8.39E-15 | 3.02E-16 | 8.94 | 26.0103981 | 1.88E-01 | 115630921 | 115631044 | NC_000011.9  |
| cg19988235 | 8.41E-15 | 3.03E-16 | 8.94 | 26.0086131 | 1.24E-01 | 9945589   | 9945712   | NC_000002.11 |
| cg13262687 | 8.41E-15 | 3.03E-16 | 8.94 | 26.008009  | 2.40E-01 | 147559579 | 147559702 | NC_000004.11 |
| cg00153110 | 8.41E-15 | 3.03E-16 | 8.94 | 26.0078483 | 2.23E-01 | 175201062 | 175201185 | NC_000002.11 |
| cg03983645 | 8.42E-15 | 3.03E-16 | 8.94 | 26.0072222 | 2.07E-01 | 20181887  | 20182010  | NC_000011.9  |
| cg04656171 | 8.45E-15 | 3.05E-16 | 8.94 | 26.0030367 | 1.36E-01 | 42211689  | 42211812  | NC_000015.9  |
| cg16635010 | 8.47E-15 | 3.05E-16 | 8.94 | 26.000938  | 5.89E-02 | 179563497 | 179563620 | NC_000005.9  |

|            |          |          |      |            |          |           |           |              |
|------------|----------|----------|------|------------|----------|-----------|-----------|--------------|
| cg00711088 | 8.47E-15 | 3.05E-16 | 8.93 | 26.0007867 | 2.08E-01 | 1401409   | 1401532   | NC_000004.11 |
| cg15800722 | 8.47E-15 | 3.05E-16 | 8.93 | 26.000311  | 1.88E-01 | 42144929  | 42145052  | NC_000017.10 |
| cg14447703 | 8.48E-15 | 3.06E-16 | 8.93 | 25.9986222 | 9.35E-02 | 30846517  | 30846640  | NC_000006.11 |
| cg16089796 | 8.55E-15 | 3.08E-16 | 8.93 | 25.9903874 | 9.08E-02 | 128382383 | 128382506 | NC_000002.11 |
| cg01613249 | 8.59E-15 | 3.10E-16 | 8.93 | 25.9861935 | 1.23E-01 | 54727293  | 54727416  | NC_000002.11 |
| cg05593336 | 8.59E-15 | 3.10E-16 | 8.93 | 25.9853788 | 1.56E-01 | 85361633  | 85361756  | NC_000006.11 |
| cg10101109 | 8.62E-15 | 3.11E-16 | 8.93 | 25.9818907 | 1.28E-01 | 112455255 | 112455378 | NC_000012.11 |
| cg16664996 | 8.63E-15 | 3.11E-16 | 8.93 | 25.9812022 | 9.62E-02 | 88385249  | 88385372  | NC_000016.9  |
| cg12172720 | 8.65E-15 | 3.12E-16 | 8.93 | 25.9778863 | 1.82E-01 | 150019603 | 150019726 | NC_000005.9  |
| cg20723705 | 8.66E-15 | 3.13E-16 | 8.93 | 25.9774745 | 1.94E-01 | 122118676 | 122118799 | NC_000011.9  |
| cg01010285 | 8.66E-15 | 3.13E-16 | 8.93 | 25.9767195 | 7.49E-02 | 70176103  | 70176226  | NC_000002.11 |
| cg26068180 | 8.66E-15 | 3.13E-16 | 8.93 | 25.976684  | 8.02E-02 | 46053650  | 46053773  | NC_000001.10 |
| cg10528576 | 8.72E-15 | 3.15E-16 | 8.93 | 25.9703934 | 2.32E-01 | 101192913 | 101193036 | NC_000014.8  |
| cg04726439 | 8.77E-15 | 3.17E-16 | 8.93 | 25.9641324 | 9.99E-02 | 18898394  | 18898517  | NC_000019.9  |
| cg18185987 | 8.78E-15 | 3.17E-16 | 8.93 | 25.9630397 | 1.34E-01 | 88477518  | 88477641  | NC_000014.8  |
| cg26191586 | 8.80E-15 | 3.18E-16 | 8.93 | 25.9603233 | 8.65E-02 | 53794760  | 53794883  | NC_000001.10 |
| cg03885098 | 8.87E-15 | 3.21E-16 | 8.93 | 25.9519063 | 1.55E-01 | 207991780 | 207991903 | NC_000001.10 |
| cg06507987 | 8.88E-15 | 3.21E-16 | 8.93 | 25.9512117 | 1.38E-01 | 27686768  | 27686891  | NC_000001.10 |
| cg23816347 | 8.88E-15 | 3.21E-16 | 8.93 | 25.9503874 | 2.20E-01 | 126113640 | 126113763 | NC_000003.11 |
| cg13932450 | 8.91E-15 | 3.22E-16 | 8.93 | 25.9475153 | 1.83E-01 | 43879598  | 43879721  | NC_000006.11 |
| cg06859084 | 8.92E-15 | 3.22E-16 | 8.93 | 25.9464331 | 2.05E-01 | 137523042 | 137523165 | NC_000002.11 |
| cg24531255 | 8.98E-15 | 3.25E-16 | 8.93 | 25.9388228 | 2.96E-01 | 93520012  | 93520135  | NC_000007.13 |
| cg05872540 | 9.04E-15 | 3.27E-16 | 8.92 | 25.9327602 | 4.63E-02 | 17673325  | 17673448  | NC_000020.10 |
| cg07179825 | 9.05E-15 | 3.27E-16 | 8.92 | 25.9315667 | 1.84E-01 | 119635157 | 119635280 | NC_000001.10 |
| cg14741366 | 9.05E-15 | 3.27E-16 | 8.92 | 25.9314387 | 5.68E-02 | 49571568  | 49571691  | NC_000020.10 |

|            |          |          |      |            |          |           |           |              |
|------------|----------|----------|------|------------|----------|-----------|-----------|--------------|
| cg04845915 | 9.05E-15 | 3.28E-16 | 8.92 | 25.9311428 | 1.42E-01 | 140802804 | 140802927 | NC_000005.9  |
| cg14772925 | 9.05E-15 | 3.28E-16 | 8.92 | 25.9305029 | 1.50E-01 | 100998943 | 100999066 | NC_000011.9  |
| cg17555825 | 9.10E-15 | 3.29E-16 | 8.92 | 25.925862  | 1.65E-01 | 76924190  | 76924313  | NC_000005.9  |
| cg19656577 | 9.10E-15 | 3.29E-16 | 8.92 | 25.9253596 | 2.55E-01 | 3600229   | 3600352   | NC_000012.11 |
| cg19742492 | 9.12E-15 | 3.30E-16 | 8.92 | 25.9227721 | 9.12E-02 | 69937541  | 69937664  | NC_000011.9  |
| cg18016181 | 9.12E-15 | 3.30E-16 | 8.92 | 25.9223838 | 2.13E-01 | 117608    | 117731    | NC_000009.11 |
| cg14056306 | 9.13E-15 | 3.31E-16 | 8.92 | 25.9220672 | 3.50E-02 | 73997820  | 73997943  | NC_000017.10 |
| cg25377605 | 9.14E-15 | 3.31E-16 | 8.92 | 25.9208699 | 8.73E-02 | 10513717  | 10513840  | NC_000008.10 |
| cg14153069 | 9.20E-15 | 3.33E-16 | 8.92 | 25.9139667 | 1.02E-01 | 131683257 | 131683380 | NC_000009.11 |
| cg14910055 | 9.21E-15 | 3.34E-16 | 8.92 | 25.9129823 | 9.77E-02 | 43266228  | 43266351  | NC_000022.10 |
| cg27291304 | 9.27E-15 | 3.36E-16 | 8.92 | 25.9053785 | 2.02E-01 | 22193479  | 22193602  | NC_000019.9  |
| cg11894856 | 9.30E-15 | 3.37E-16 | 8.92 | 25.9024437 | 3.09E-02 | 93327173  | 93327296  | NC_000012.11 |
| cg19543317 | 9.30E-15 | 3.37E-16 | 8.92 | 25.9023084 | 1.13E-01 | 75918155  | 75918278  | NC_000014.8  |
| cg13324546 | 9.32E-15 | 3.38E-16 | 8.92 | 25.9001082 | 1.94E-01 | 23564031  | 23564154  | NC_000008.10 |
| cg01834022 | 9.32E-15 | 3.38E-16 | 8.92 | 25.8991983 | 2.40E-01 | 5710411   | 5710534   | NC_000004.11 |
| cg23093589 | 9.34E-15 | 3.39E-16 | 8.92 | 25.896932  | 1.87E-01 | 20824932  | 20825055  | NC_000007.13 |
| cg12523526 | 9.38E-15 | 3.41E-16 | 8.92 | 25.8925954 | 2.67E-01 | 2756005   | 2756128   | NC_000005.9  |
| cg24517501 | 9.39E-15 | 3.41E-16 | 8.92 | 25.8913669 | 1.36E-01 | 92952702  | 92952825  | NC_000001.10 |
| cg08085772 | 9.39E-15 | 3.41E-16 | 8.92 | 25.8913107 | 3.97E-02 | 12218160  | 12218283  | NC_000003.11 |
| cg08228703 | 9.40E-15 | 3.41E-16 | 8.92 | 25.8908318 | 2.49E-01 | 74893097  | 74893220  | NC_000014.8  |
| cg22418909 | 9.44E-15 | 3.43E-16 | 8.92 | 25.8859812 | 1.87E-01 | 41166738  | 41166861  | NC_000008.10 |
| cg12693436 | 9.46E-15 | 3.43E-16 | 8.92 | 25.8840733 | 8.27E-02 | 47130971  | 47131094  | NC_000010.10 |
| cg17805540 | 9.47E-15 | 3.44E-16 | 8.92 | 25.8835334 | 1.82E-01 | 13543730  | 13543853  | NC_000004.11 |
| cg00497967 | 9.47E-15 | 3.44E-16 | 8.92 | 25.8828971 | 1.89E-01 | 77822438  | 77822561  | NC_000016.9  |
| cg17046577 | 9.47E-15 | 3.44E-16 | 8.92 | 25.8825336 | 2.04E-01 | 84815361  | 84815484  | NC_000007.13 |

|            |          |          |      |            |          |           |           |              |
|------------|----------|----------|------|------------|----------|-----------|-----------|--------------|
| cg22570288 | 9.49E-15 | 3.45E-16 | 8.92 | 25.8808617 | 5.17E-02 | 15970272  | 15970395  | NC_000004.11 |
| cg01721450 | 9.51E-15 | 3.45E-16 | 8.92 | 25.8784223 | 8.75E-02 | 127788457 | 127788580 | NC_000003.11 |
| cg23813156 | 9.53E-15 | 3.46E-16 | 8.92 | 25.8760349 | 2.26E-01 | 47935243  | 47935366  | NC_000020.10 |
| cg04986934 | 9.56E-15 | 3.47E-16 | 8.91 | 25.8731975 | 5.61E-02 | 39019908  | 39020031  | NC_000017.10 |
| cg11184748 | 9.57E-15 | 3.48E-16 | 8.91 | 25.8717661 | 1.57E-01 | 36806179  | 36806302  | NC_000003.11 |
| cg25340966 | 9.57E-15 | 3.48E-16 | 8.91 | 25.8717094 | 2.21E-01 | 119532195 | 119532318 | NC_000001.10 |
| cg10441628 | 9.59E-15 | 3.48E-16 | 8.91 | 25.870145  | 1.58E-01 | 159399432 | 159399555 | NC_000005.9  |
| cg03951603 | 9.59E-15 | 3.48E-16 | 8.91 | 25.8699859 | 2.01E-01 | 89903565  | 89903688  | NC_000015.9  |
| cg01346596 | 9.59E-15 | 3.48E-16 | 8.91 | 25.8699275 | 1.98E-01 | 11868146  | 11868269  | NC_000010.10 |
| cg02320543 | 9.61E-15 | 3.49E-16 | 8.91 | 25.8673923 | 2.14E-01 | 61109545  | 61109668  | NC_000014.8  |
| cg09616494 | 9.65E-15 | 3.51E-16 | 8.91 | 25.8627311 | 6.43E-02 | 36333625  | 36333748  | NC_000004.11 |
| cg21437208 | 9.66E-15 | 3.51E-16 | 8.91 | 25.8618261 | 2.38E-02 | 79935213  | 79935336  | NC_000017.10 |
| cg01959730 | 9.67E-15 | 3.52E-16 | 8.91 | 25.8607191 | 2.18E-01 | 119548825 | 119548948 | NC_000001.10 |
| cg27060240 | 9.70E-15 | 3.53E-16 | 8.91 | 25.8572556 | 9.59E-02 | 62412324  | 62412447  | NC_000002.11 |
| cg10297792 | 9.76E-15 | 3.55E-16 | 8.91 | 25.8511331 | 1.77E-01 | 115129446 | 115129569 | NC_000012.11 |
| cg09175749 | 9.78E-15 | 3.56E-16 | 8.91 | 25.8494184 | 2.07E-01 | 4715467   | 4715590   | NC_000001.10 |
| cg01997272 | 9.78E-15 | 3.56E-16 | 8.91 | 25.8491282 | 1.68E-01 | 103740476 | 103740599 | NC_000014.8  |
| cg11277087 | 9.81E-15 | 3.57E-16 | 8.91 | 25.8454733 | 1.96E-01 | 23258096  | 23258219  | NC_000019.9  |
| cg17498773 | 9.81E-15 | 3.57E-16 | 8.91 | 25.8453643 | 2.48E-01 | 107799532 | 107799655 | NC_000011.9  |
| cg21521683 | 9.83E-15 | 3.58E-16 | 8.91 | 25.8437411 | 3.20E-01 | 22487682  | 22487805  | NC_000012.11 |
| cg10741153 | 9.86E-15 | 3.59E-16 | 8.91 | 25.8406245 | 1.88E-01 | 29284353  | 29284476  | NC_000019.9  |
| cg21068030 | 9.87E-15 | 3.59E-16 | 8.91 | 25.8390326 | 1.05E-01 | 7762413   | 7762536   | NC_000017.10 |
| cg11793699 | 9.89E-15 | 3.60E-16 | 8.91 | 25.8373701 | 1.69E-01 | 156814901 | 156815024 | NC_000001.10 |
| cg12446446 | 9.91E-15 | 3.61E-16 | 8.91 | 25.8347709 | 1.30E-01 | 161865479 | 161865602 | NC_000006.11 |
| cg09822423 | 9.92E-15 | 3.61E-16 | 8.91 | 25.8342799 | 7.03E-02 | 192509700 | 192509823 | NC_000001.10 |

|            |          |          |      |            |          |           |           |              |
|------------|----------|----------|------|------------|----------|-----------|-----------|--------------|
| cg07884222 | 9.95E-15 | 3.63E-16 | 8.91 | 25.8302979 | 1.56E-01 | 60302404  | 60302527  | NC_000015.9  |
| cg00433861 | 9.97E-15 | 3.63E-16 | 8.91 | 25.8282189 | 1.41E-01 | 67070170  | 67070293  | NC_000018.9  |
| cg00344801 | 9.98E-15 | 3.64E-16 | 8.91 | 25.8275077 | 1.01E-01 | 46685728  | 46685851  | NC_000022.10 |
| cg00159100 | 9.98E-15 | 3.64E-16 | 8.91 | 25.827089  | 3.09E-01 | 37487633  | 37487756  | NC_000007.13 |
| cg25439758 | 9.99E-15 | 3.64E-16 | 8.91 | 25.8260869 | 9.44E-02 | 67817606  | 67817729  | NC_000011.9  |
| cg07445112 | 1.00E-14 | 3.66E-16 | 8.91 | 25.8222678 | 3.69E-02 | 45628839  | 45628962  | NC_000022.10 |
| cg21507078 | 1.00E-14 | 3.66E-16 | 8.91 | 25.821036  | 1.97E-01 | 138444145 | 138444268 | NC_000005.9  |
| cg03547757 | 1.01E-14 | 3.67E-16 | 8.91 | 25.8198492 | 1.10E-01 | 57425515  | 57425638  | NC_000020.10 |
| cg24715245 | 1.01E-14 | 3.68E-16 | 8.91 | 25.8170721 | 1.67E-01 | 41258794  | 41258917  | NC_000004.11 |
| cg17349389 | 1.01E-14 | 3.68E-16 | 8.91 | 25.8161262 | 2.26E-01 | 80530770  | 80530893  | NC_000002.11 |
| cg21997986 | 1.01E-14 | 3.70E-16 | 8.9  | 25.8102237 | 1.10E-01 | 102745414 | 102745537 | NC_000004.11 |
| cg24524352 | 1.02E-14 | 3.71E-16 | 8.9  | 25.8078431 | 2.58E-01 | 95522876  | 95522999  | NC_000002.11 |
| cg08893109 | 1.02E-14 | 3.71E-16 | 8.9  | 25.8069984 | 1.97E-01 | 6313050   | 6313173   | NC_000007.13 |
| cg05667379 | 1.02E-14 | 3.73E-16 | 8.9  | 25.8017922 | 2.12E-01 | 115920764 | 115920887 | NC_000002.11 |
| cg04748834 | 1.03E-14 | 3.75E-16 | 8.9  | 25.7982102 | 2.53E-01 | 239229    | 239352    | NC_000003.11 |
| cg09009536 | 1.03E-14 | 3.75E-16 | 8.9  | 25.7974167 | 1.95E-01 | 66535383  | 66535506  | NC_000004.11 |
| cg26772847 | 1.03E-14 | 3.75E-16 | 8.9  | 25.7968381 | 1.48E-01 | 62589487  | 62589610  | NC_000015.9  |
| cg22983083 | 1.03E-14 | 3.76E-16 | 8.9  | 25.7952737 | 2.14E-01 | 8656852   | 8656975   | NC_000019.9  |
| cg25553279 | 1.03E-14 | 3.76E-16 | 8.9  | 25.7951287 | 1.20E-01 | 29203014  | 29203137  | NC_000002.11 |
| cg22771960 | 1.03E-14 | 3.77E-16 | 8.9  | 25.7912301 | 1.31E-01 | 3961667   | 3961790   | NC_000019.9  |
| cg15562912 | 1.04E-14 | 3.79E-16 | 8.9  | 25.7877023 | 2.17E-01 | 140770617 | 140770740 | NC_000003.11 |
| cg05784193 | 1.04E-14 | 3.79E-16 | 8.9  | 25.7871544 | 1.83E-01 | 192847589 | 192847712 | NC_000001.10 |
| cg19234613 | 1.04E-14 | 3.79E-16 | 8.9  | 25.7857565 | 8.02E-02 | 107832502 | 107832625 | NC_000012.11 |
| cg05667348 | 1.04E-14 | 3.79E-16 | 8.9  | 25.7855058 | 2.46E-01 | 118892581 | 118892704 | NC_000010.10 |
| cg26659079 | 1.04E-14 | 3.80E-16 | 8.9  | 25.7842497 | 1.88E-01 | 5836181   | 5836304   | NC_000002.11 |

|            |          |          |      |            |          |           |           |              |
|------------|----------|----------|------|------------|----------|-----------|-----------|--------------|
| cg14271531 | 1.04E-14 | 3.81E-16 | 8.9  | 25.7815798 | 2.19E-01 | 19837622  | 19837745  | NC_000006.11 |
| cg06794543 | 1.05E-14 | 3.85E-16 | 8.9  | 25.7713728 | 1.62E-01 | 42749748  | 42749871  | NC_000015.9  |
| cg25024920 | 1.05E-14 | 3.85E-16 | 8.9  | 25.7700857 | 5.91E-02 | 60783915  | 60784038  | NC_000017.10 |
| cg19203065 | 1.06E-14 | 3.89E-16 | 8.9  | 25.7613982 | 5.98E-02 | 11598968  | 11599091  | NC_000002.11 |
| cg24805411 | 1.07E-14 | 3.90E-16 | 8.9  | 25.7592921 | 1.76E-01 | 56158851  | 56158974  | NC_000019.9  |
| cg12989085 | 1.07E-14 | 3.90E-16 | 8.9  | 25.7592377 | 5.61E-02 | 1367637   | 1367760   | NC_000017.10 |
| cg10613684 | 1.07E-14 | 3.92E-16 | 8.9  | 25.7539115 | 1.01E-01 | 245849102 | 245849225 | NC_000001.10 |
| cg19836431 | 1.08E-14 | 3.94E-16 | 8.9  | 25.7487377 | 9.33E-02 | 66620018  | 66620141  | NC_000011.9  |
| cg15762032 | 1.08E-14 | 3.95E-16 | 8.89 | 25.7454698 | 2.03E-01 | 26506933  | 26507056  | NC_000010.10 |
| cg01748892 | 1.08E-14 | 3.96E-16 | 8.89 | 25.7423449 | 1.34E-01 | 27184667  | 27184790  | NC_000007.13 |
| cg22622477 | 1.09E-14 | 3.99E-16 | 8.89 | 25.7356461 | 1.44E-01 | 46685442  | 46685565  | NC_000017.10 |
| cg14932016 | 1.09E-14 | 3.99E-16 | 8.89 | 25.7355986 | 2.81E-01 | 236849653 | 236849776 | NC_000001.10 |
| cg20980783 | 1.09E-14 | 4.00E-16 | 8.89 | 25.7328669 | 2.25E-01 | 67874178  | 67874301  | NC_000008.10 |
| cg17030173 | 1.09E-14 | 4.00E-16 | 8.89 | 25.7324076 | 2.54E-01 | 16180062  | 16180185  | NC_000005.9  |
| cg23093116 | 1.10E-14 | 4.03E-16 | 8.89 | 25.7266555 | 6.23E-02 | 117489843 | 117489966 | NC_000001.10 |
| cg26053547 | 1.10E-14 | 4.04E-16 | 8.89 | 25.7241972 | 6.78E-02 | 77549871  | 77549994  | NC_000018.9  |
| cg22834052 | 1.10E-14 | 4.04E-16 | 8.89 | 25.7241436 | 1.30E-01 | 86362424  | 86362547  | NC_000002.11 |
| cg17059658 | 1.10E-14 | 4.04E-16 | 8.89 | 25.7239761 | 2.60E-01 | 905101    | 905224    | NC_000018.9  |
| cg17763260 | 1.10E-14 | 4.04E-16 | 8.89 | 25.7233509 | 6.97E-02 | 12969611  | 12969734  | NC_000019.9  |
| cg01910938 | 1.11E-14 | 4.06E-16 | 8.89 | 25.7195756 | 3.40E-02 | 136729091 | 136729214 | NC_000003.11 |
| cg13831540 | 1.11E-14 | 4.06E-16 | 8.89 | 25.7195066 | 1.30E-01 | 130128420 | 130128543 | NC_000007.13 |
| cg05341781 | 1.11E-14 | 4.06E-16 | 8.89 | 25.7185853 | 1.87E-01 | 164723567 | 164723690 | NC_000001.10 |
| cg21743182 | 1.11E-14 | 4.07E-16 | 8.89 | 25.7156317 | 1.92E-01 | 90339132  | 90339255  | NC_000007.13 |
| cg24219966 | 1.11E-14 | 4.08E-16 | 8.89 | 25.7146191 | 9.85E-02 | 224950887 | 224951010 | NC_000002.11 |
| cg08511818 | 1.11E-14 | 4.08E-16 | 8.89 | 25.7129929 | 1.45E-01 | 30104637  | 30104760  | NC_000020.10 |

|            |          |          |      |            |          |           |           |              |
|------------|----------|----------|------|------------|----------|-----------|-----------|--------------|
| cg06310927 | 1.11E-14 | 4.08E-16 | 8.89 | 25.71279   | 1.47E-01 | 114292220 | 114292343 | NC_000013.10 |
| cg20219457 | 1.11E-14 | 4.09E-16 | 8.89 | 25.7120728 | 3.23E-01 | 36705446  | 36705569  | NC_000013.10 |
| cg22448090 | 1.12E-14 | 4.09E-16 | 8.89 | 25.7107807 | 7.07E-02 | 200978598 | 200978721 | NC_000001.10 |
| cg13521620 | 1.12E-14 | 4.10E-16 | 8.89 | 25.708901  | 1.89E-01 | 57410687  | 57410810  | NC_000017.10 |
| cg11644424 | 1.12E-14 | 4.10E-16 | 8.89 | 25.7088186 | 8.78E-02 | 157258856 | 157258979 | NC_000006.11 |
| cg14074285 | 1.12E-14 | 4.11E-16 | 8.89 | 25.7063338 | 2.19E-01 | 4868908   | 4869031   | NC_000004.11 |
| cg03013554 | 1.13E-14 | 4.14E-16 | 8.89 | 25.6982498 | 1.02E-01 | 46320816  | 46320939  | NC_000021.8  |
| cg02570644 | 1.13E-14 | 4.17E-16 | 8.89 | 25.6931743 | 1.08E-01 | 68123248  | 68123371  | NC_000016.9  |
| cg05522774 | 1.14E-14 | 4.17E-16 | 8.89 | 25.6917696 | 2.22E-01 | 34443443  | 34443566  | NC_000021.8  |
| cg26643142 | 1.14E-14 | 4.17E-16 | 8.89 | 25.6917457 | 1.75E-01 | 54399494  | 54399617  | NC_000012.11 |
| cg02743070 | 1.14E-14 | 4.18E-16 | 8.89 | 25.6889278 | 1.63E-01 | 80834309  | 80834432  | NC_000010.10 |
| cg27502580 | 1.14E-14 | 4.19E-16 | 8.89 | 25.6879698 | 7.98E-02 | 169247421 | 169247544 | NC_000003.11 |
| cg25241823 | 1.14E-14 | 4.19E-16 | 8.89 | 25.6872913 | 1.27E-01 | 18983753  | 18983876  | NC_000019.9  |
| cg14078730 | 1.14E-14 | 4.20E-16 | 8.89 | 25.6839655 | 1.54E-01 | 63896557  | 63896680  | NC_000011.9  |
| cg21113776 | 1.15E-14 | 4.21E-16 | 8.88 | 25.6816071 | 1.01E-01 | 2499915   | 2500038   | NC_000007.13 |
| cg00340850 | 1.15E-14 | 4.22E-16 | 8.88 | 25.6809899 | 1.88E-01 | 55500523  | 55500646  | NC_000020.10 |
| cg06572465 | 1.15E-14 | 4.22E-16 | 8.88 | 25.6803243 | 2.32E-01 | 140800929 | 140801052 | NC_000005.9  |
| cg05496377 | 1.15E-14 | 4.22E-16 | 8.88 | 25.6802825 | 1.86E-01 | 1776225   | 1776348   | NC_000019.9  |
| cg22284043 | 1.15E-14 | 4.22E-16 | 8.88 | 25.6799901 | 2.25E-01 | 92051576  | 92051699  | NC_000013.10 |
| cg18127922 | 1.15E-14 | 4.23E-16 | 8.88 | 25.678933  | 1.42E-01 | 46672255  | 46672378  | NC_000017.10 |
| cg25305887 | 1.15E-14 | 4.23E-16 | 8.88 | 25.6773567 | 6.73E-02 | 8555579   | 8555702   | NC_000010.10 |
| cg02653557 | 1.16E-14 | 4.25E-16 | 8.88 | 25.6741182 | 2.54E-01 | 58095424  | 58095547  | NC_000019.9  |
| cg17997363 | 1.16E-14 | 4.25E-16 | 8.88 | 25.6733006 | 9.36E-02 | 123353337 | 123353460 | NC_000010.10 |
| cg02508229 | 1.16E-14 | 4.25E-16 | 8.88 | 25.6728509 | 1.78E-01 | 27336989  | 27337112  | NC_000001.10 |
| cg17103314 | 1.16E-14 | 4.26E-16 | 8.88 | 25.671509  | 8.05E-02 | 51487968  | 51488091  | NC_000019.9  |



|            |          |          |      |            |          |           |           |              |
|------------|----------|----------|------|------------|----------|-----------|-----------|--------------|
| cg22598744 | 1.16E-14 | 4.26E-16 | 8.88 | 25.6714339 | 1.17E-01 | 5890866   | 5890989   | NC_000009.11 |
| cg00120810 | 1.16E-14 | 4.29E-16 | 8.88 | 25.6651412 | 9.79E-02 | 11195317  | 11195440  | NC_000003.11 |
| cg11114242 | 1.17E-14 | 4.30E-16 | 8.88 | 25.6608769 | 1.64E-01 | 136756541 | 136756664 | NC_000006.11 |
| cg05224741 | 1.17E-14 | 4.32E-16 | 8.88 | 25.6563266 | 2.70E-01 | 10422322  | 10422445  | NC_000006.11 |
| cg20889445 | 1.18E-14 | 4.33E-16 | 8.88 | 25.6557976 | 1.90E-01 | 111029566 | 111029689 | NC_000012.11 |
| cg23147373 | 1.18E-14 | 4.33E-16 | 8.88 | 25.6553157 | 1.02E-01 | 64954212  | 64954335  | NC_000014.8  |
| cg02205073 | 1.18E-14 | 4.33E-16 | 8.88 | 25.6551777 | 1.81E-01 | 19175822  | 19175945  | NC_000016.9  |
| cg01583131 | 1.18E-14 | 4.34E-16 | 8.88 | 25.6531849 | 1.91E-01 | 27744675  | 27744798  | NC_000011.9  |
| cg07200060 | 1.18E-14 | 4.34E-16 | 8.88 | 25.6520977 | 1.76E-01 | 78483672  | 78483795  | NC_000010.10 |
| cg08966413 | 1.18E-14 | 4.35E-16 | 8.88 | 25.651389  | 6.37E-02 | 23154937  | 23155060  | NC_000016.9  |
| cg10084644 | 1.18E-14 | 4.35E-16 | 8.88 | 25.6502062 | 1.93E-01 | 99775521  | 99775644  | NC_000007.13 |
| cg05620165 | 1.18E-14 | 4.36E-16 | 8.88 | 25.6472061 | 9.06E-02 | 105583493 | 105583616 | NC_000010.10 |
| cg09147777 | 1.19E-14 | 4.37E-16 | 8.88 | 25.6459836 | 1.88E-01 | 105480771 | 105480894 | NC_000011.9  |
| cg11015251 | 1.19E-14 | 4.37E-16 | 8.88 | 25.645714  | 1.40E-01 | 27170554  | 27170677  | NC_000007.13 |
| cg19358877 | 1.19E-14 | 4.40E-16 | 8.88 | 25.6397802 | 2.84E-01 | 57019279  | 57019402  | NC_000019.9  |
| cg25264948 | 1.19E-14 | 4.40E-16 | 8.88 | 25.6397036 | 1.29E-01 | 31734232  | 31734355  | NC_000006.11 |
| cg19628456 | 1.19E-14 | 4.40E-16 | 8.88 | 25.6387638 | 8.17E-02 | 31779381  | 31779504  | NC_000006.11 |
| cg05262549 | 1.19E-14 | 4.40E-16 | 8.88 | 25.6381785 | 1.51E-01 | 183256588 | 183256711 | NC_000001.10 |
| cg21768835 | 1.20E-14 | 4.41E-16 | 8.88 | 25.6369239 | 1.16E-01 | 97857938  | 97858061  | NC_000007.13 |
| cg12050054 | 1.20E-14 | 4.41E-16 | 8.88 | 25.6367393 | 6.79E-02 | 105963656 | 105963779 | NC_000014.8  |
| cg12369869 | 1.20E-14 | 4.41E-16 | 8.88 | 25.6367146 | 1.68E-01 | 184035508 | 184035631 | NC_000003.11 |
| cg06307046 | 1.20E-14 | 4.41E-16 | 8.88 | 25.6359286 | 7.39E-02 | 16685776  | 16685899  | NC_000007.13 |
| cg01856455 | 1.20E-14 | 4.42E-16 | 8.88 | 25.635456  | 6.63E-02 | 22289520  | 22289643  | NC_000022.10 |
| cg15402529 | 1.20E-14 | 4.45E-16 | 8.88 | 25.628808  | 1.82E-01 | 115135333 | 115135456 | NC_000012.11 |
| cg12493761 | 1.21E-14 | 4.45E-16 | 8.88 | 25.6283256 | 1.62E-01 | 43253257  | 43253380  | NC_000012.11 |

|            |          |          |      |            |          |           |           |              |
|------------|----------|----------|------|------------|----------|-----------|-----------|--------------|
| cg15029248 | 1.21E-14 | 4.46E-16 | 8.88 | 25.6260712 | 8.50E-02 | 2379937   | 2380060   | NC_000001.10 |
| cg05663573 | 1.21E-14 | 4.46E-16 | 8.88 | 25.6258779 | 2.46E-01 | 170302890 | 170303013 | NC_000003.11 |
| cg13716840 | 1.21E-14 | 4.46E-16 | 8.88 | 25.6247869 | 1.10E-01 | 956576    | 956699    | NC_000005.9  |
| cg21145136 | 1.21E-14 | 4.47E-16 | 8.88 | 25.6227184 | 2.84E-01 | 84116115  | 84116238  | NC_000015.9  |
| cg10784341 | 1.21E-14 | 4.48E-16 | 8.88 | 25.622332  | 1.22E-01 | 143929300 | 143929423 | NC_000006.11 |
| cg18954144 | 1.21E-14 | 4.48E-16 | 8.88 | 25.6211233 | 1.68E-01 | 5896473   | 5896596   | NC_000002.11 |
| cg00039480 | 1.21E-14 | 4.48E-16 | 8.88 | 25.6205115 | 7.85E-02 | 19620267  | 19620390  | NC_000017.10 |
| cg19076587 | 1.22E-14 | 4.49E-16 | 8.87 | 25.6182069 | 9.62E-02 | 46079554  | 46079677  | NC_000011.9  |
| cg11484576 | 1.22E-14 | 4.50E-16 | 8.87 | 25.6159499 | 1.89E-01 | 63272554  | 63272677  | NC_000011.9  |
| cg07875993 | 1.22E-14 | 4.51E-16 | 8.87 | 25.6137435 | 1.19E-01 | 79096535  | 79096658  | NC_000004.11 |
| cg09034695 | 1.22E-14 | 4.52E-16 | 8.87 | 25.6127097 | 9.92E-02 | 4272875   | 4272998   | NC_000017.10 |
| cg04467618 | 1.23E-14 | 4.53E-16 | 8.87 | 25.609462  | 1.78E-01 | 134210946 | 134211069 | NC_000006.11 |
| cg00006626 | 1.23E-14 | 4.55E-16 | 8.87 | 25.6069208 | 1.02E-01 | 154127462 | 154127585 | NC_000001.10 |
| cg13965272 | 1.23E-14 | 4.55E-16 | 8.87 | 25.6060919 | 1.12E-01 | 117993982 | 117994105 | NC_000009.11 |
| cg16854606 | 1.23E-14 | 4.55E-16 | 8.87 | 25.6053576 | 1.38E-01 | 13080743  | 13080866  | NC_000019.9  |
| cg26279070 | 1.24E-14 | 4.60E-16 | 8.87 | 25.5956423 | 1.52E-01 | 130971343 | 130971466 | NC_000002.11 |
| cg19610529 | 1.24E-14 | 4.60E-16 | 8.87 | 25.5955862 | 2.02E-01 | 61108807  | 61108930  | NC_000014.8  |
| cg07244354 | 1.25E-14 | 4.61E-16 | 8.87 | 25.5932639 | 1.25E-01 | 131757801 | 131757924 | NC_000010.10 |
| cg19449377 | 1.25E-14 | 4.61E-16 | 8.87 | 25.5927923 | 1.07E-01 | 39041199  | 39041322  | NC_000017.10 |
| cg13219127 | 1.25E-14 | 4.62E-16 | 8.87 | 25.5912875 | 2.13E-01 | 1322131   | 1322254   | NC_000011.9  |
| cg02362439 | 1.25E-14 | 4.62E-16 | 8.87 | 25.5904606 | 6.66E-02 | 33171324  | 33171447  | NC_000006.11 |
| cg27376072 | 1.25E-14 | 4.63E-16 | 8.87 | 25.5886375 | 5.13E-02 | 18101567  | 18101690  | NC_000017.10 |
| cg03267742 | 1.26E-14 | 4.65E-16 | 8.87 | 25.5844408 | 1.46E-01 | 686545    | 686668    | NC_000017.10 |
| cg25482786 | 1.26E-14 | 4.65E-16 | 8.87 | 25.5835445 | 2.29E-01 | 238496    | 238619    | NC_000003.11 |
| cg18445088 | 1.26E-14 | 4.66E-16 | 8.87 | 25.5827963 | 1.41E-01 | 40081812  | 40081935  | NC_000022.10 |

|            |          |          |      |            |          |           |           |              |
|------------|----------|----------|------|------------|----------|-----------|-----------|--------------|
| cg13492692 | 1.26E-14 | 4.67E-16 | 8.87 | 25.5809551 | 1.79E-01 | 126777673 | 126777796 | NC_000009.11 |
| cg25368116 | 1.26E-14 | 4.67E-16 | 8.87 | 25.5800355 | 1.26E-01 | 87064843  | 87064966  | NC_000011.9  |
| cg27301032 | 1.26E-14 | 4.68E-16 | 8.87 | 25.5789083 | 2.48E-01 | 112721425 | 112721548 | NC_000013.10 |
| cg07246273 | 1.26E-14 | 4.68E-16 | 8.87 | 25.5788492 | 2.57E-01 | 119212313 | 119212436 | NC_000012.11 |
| cg12973118 | 1.27E-14 | 4.69E-16 | 8.87 | 25.5749723 | 1.73E-01 | 223168941 | 223169064 | NC_000002.11 |
| cg09062462 | 1.27E-14 | 4.71E-16 | 8.87 | 25.5720054 | 7.00E-02 | 85220242  | 85220365  | NC_000001.10 |
| cg03064067 | 1.27E-14 | 4.71E-16 | 8.87 | 25.5716029 | 2.47E-01 | 85306916  | 85307039  | NC_000012.11 |
| cg01381795 | 1.27E-14 | 4.72E-16 | 8.87 | 25.5700122 | 1.15E-01 | 54496611  | 54496734  | NC_000019.9  |
| cg09890775 | 1.28E-14 | 4.73E-16 | 8.87 | 25.5670278 | 1.54E-01 | 131758694 | 131758817 | NC_000010.10 |
| cg00024280 | 1.29E-14 | 4.77E-16 | 8.87 | 25.5599663 | 1.87E-01 | 17501257  | 17501380  | NC_000019.9  |
| cg01148073 | 1.29E-14 | 4.78E-16 | 8.87 | 25.5574091 | 1.30E-01 | 82126267  | 82126390  | NC_000016.9  |
| cg16230141 | 1.30E-14 | 4.81E-16 | 8.86 | 25.5501967 | 2.46E-01 | 37488162  | 37488285  | NC_000007.13 |
| cg10823473 | 1.30E-14 | 4.82E-16 | 8.86 | 25.5488299 | 1.48E-01 | 76630514  | 76630637  | NC_000015.9  |
| cg10989897 | 1.30E-14 | 4.83E-16 | 8.86 | 25.5468851 | 2.30E-01 | 50513645  | 50513768  | NC_000001.10 |
| cg14151976 | 1.31E-14 | 4.85E-16 | 8.86 | 25.5435572 | 1.17E-01 | 37565559  | 37565682  | NC_000009.11 |
| cg21982950 | 1.31E-14 | 4.85E-16 | 8.86 | 25.5424911 | 1.86E-01 | 1876200   | 1876323   | NC_000005.9  |
| cg14062537 | 1.31E-14 | 4.87E-16 | 8.86 | 25.5387712 | 1.55E-01 | 93272333  | 93272456  | NC_000010.10 |
| cg07698121 | 1.31E-14 | 4.87E-16 | 8.86 | 25.538176  | 1.84E-01 | 85659946  | 85660069  | NC_000016.9  |
| cg05111081 | 1.31E-14 | 4.88E-16 | 8.86 | 25.537073  | 1.20E-01 | 92425496  | 92425619  | NC_000015.9  |
| cg12075445 | 1.32E-14 | 4.89E-16 | 8.86 | 25.5343803 | 2.84E-01 | 132906010 | 132906133 | NC_000012.11 |
| cg12524640 | 1.32E-14 | 4.90E-16 | 8.86 | 25.5329727 | 1.47E-01 | 2983056   | 2983179   | NC_000001.10 |
| cg15829622 | 1.32E-14 | 4.91E-16 | 8.86 | 25.5313535 | 4.81E-02 | 45730731  | 45730854  | NC_000021.8  |
| cg21100518 | 1.32E-14 | 4.91E-16 | 8.86 | 25.5305704 | 1.29E-01 | 29595002  | 29595125  | NC_000006.11 |
| cg03512426 | 1.32E-14 | 4.92E-16 | 8.86 | 25.5289599 | 1.36E-01 | 131763683 | 131763806 | NC_000010.10 |
| cg04431946 | 1.33E-14 | 4.93E-16 | 8.86 | 25.5262005 | 2.67E-01 | 47797569  | 47797692  | NC_000002.11 |

|            |          |          |      |            |          |           |           |              |
|------------|----------|----------|------|------------|----------|-----------|-----------|--------------|
| cg12935350 | 1.33E-14 | 4.96E-16 | 8.86 | 25.5203264 | 1.81E-01 | 105697777 | 105697900 | NC_000002.11 |
| cg09792881 | 1.33E-14 | 4.96E-16 | 8.86 | 25.5201473 | 2.29E-01 | 50884544  | 50884667  | NC_000001.10 |
| cg20808078 | 1.33E-14 | 4.96E-16 | 8.86 | 25.5200168 | 6.61E-02 | 68515209  | 68515332  | NC_000001.10 |
| cg25482091 | 1.34E-14 | 4.99E-16 | 8.86 | 25.515621  | 8.18E-02 | 143478766 | 143478889 | NC_000002.11 |
| cg13208922 | 1.34E-14 | 4.99E-16 | 8.86 | 25.5142578 | 1.87E-01 | 299022    | 299145    | NC_000004.11 |
| cg08963972 | 1.34E-14 | 5.00E-16 | 8.86 | 25.5136725 | 8.75E-02 | 5021694   | 5021817   | NC_000004.11 |
| cg26092180 | 1.35E-14 | 5.01E-16 | 8.86 | 25.5106426 | 4.30E-02 | 108310912 | 108311035 | NC_000003.11 |
| cg21907850 | 1.35E-14 | 5.02E-16 | 8.86 | 25.5095781 | 1.44E-01 | 186130024 | 186130147 | NC_000004.11 |
| cg19836595 | 1.35E-14 | 5.02E-16 | 8.86 | 25.5083865 | 8.53E-02 | 115395513 | 115395636 | NC_000003.11 |
| cg15680755 | 1.35E-14 | 5.03E-16 | 8.86 | 25.507187  | 2.25E-01 | 54411668  | 54411791  | NC_000019.9  |
| cg20332645 | 1.35E-14 | 5.03E-16 | 8.86 | 25.5059882 | 1.71E-01 | 1400869   | 1400992   | NC_000004.11 |
| cg18406934 | 1.35E-14 | 5.04E-16 | 8.86 | 25.505178  | 1.41E-01 | 23183238  | 23183361  | NC_000008.10 |
| cg07370496 | 1.35E-14 | 5.04E-16 | 8.86 | 25.5051509 | 1.13E-01 | 36806213  | 36806336  | NC_000003.11 |
| cg00991875 | 1.35E-14 | 5.04E-16 | 8.86 | 25.5050868 | 2.09E-01 | 161100376 | 161100499 | NC_000006.11 |
| cg13609167 | 1.35E-14 | 5.04E-16 | 8.86 | 25.5044463 | 7.55E-02 | 2827061   | 2827184   | NC_000004.11 |
| cg22070991 | 1.36E-14 | 5.05E-16 | 8.86 | 25.503075  | 1.89E-01 | 4856904   | 4857027   | NC_000004.11 |
| cg27454136 | 1.36E-14 | 5.05E-16 | 8.86 | 25.5026237 | 2.60E-01 | 5889876   | 5889999   | NC_000004.11 |
| cg04598121 | 1.36E-14 | 5.06E-16 | 8.86 | 25.5017636 | 1.78E-01 | 57358505  | 57358628  | NC_000008.10 |
| cg08862890 | 1.36E-14 | 5.06E-16 | 8.86 | 25.5005751 | 3.42E-01 | 169064451 | 169064574 | NC_000005.9  |
| cg11197258 | 1.36E-14 | 5.07E-16 | 8.86 | 25.4997347 | 2.26E-01 | 124845001 | 124845124 | NC_000012.11 |
| cg23597629 | 1.37E-14 | 5.10E-16 | 8.85 | 25.4930874 | 1.71E-01 | 229569670 | 229569793 | NC_000001.10 |
| cg21565421 | 1.37E-14 | 5.10E-16 | 8.85 | 25.4927275 | 1.36E-01 | 74592665  | 74592788  | NC_000015.9  |
| cg16357388 | 1.37E-14 | 5.10E-16 | 8.85 | 25.4923514 | 2.11E-01 | 5892083   | 5892206   | NC_000004.11 |
| cg08441170 | 1.37E-14 | 5.11E-16 | 8.85 | 25.49099   | 2.72E-01 | 26223100  | 26223223  | NC_000010.10 |
| cg05058758 | 1.37E-14 | 5.12E-16 | 8.85 | 25.4896475 | 1.78E-01 | 143784246 | 143784369 | NC_000002.11 |

|            |          |          |      |            |          |           |           |              |
|------------|----------|----------|------|------------|----------|-----------|-----------|--------------|
| cg24996709 | 1.38E-14 | 5.16E-16 | 8.85 | 25.4807102 | 1.28E-01 | 33170838  | 33170961  | NC_000006.11 |
| cg21889448 | 1.39E-14 | 5.17E-16 | 8.85 | 25.4799929 | 1.53E-01 | 62637815  | 62637938  | NC_000004.11 |
| cg17307442 | 1.39E-14 | 5.17E-16 | 8.85 | 25.4796138 | 2.38E-01 | 119302053 | 119302176 | NC_000010.10 |
| cg01240056 | 1.39E-14 | 5.20E-16 | 8.85 | 25.4734035 | 2.45E-01 | 1263927   | 1264050   | NC_000007.13 |
| cg07676859 | 1.39E-14 | 5.20E-16 | 8.85 | 25.4729999 | 2.61E-01 | 23015932  | 23016055  | NC_000020.10 |
| cg14662355 | 1.40E-14 | 5.21E-16 | 8.85 | 25.4716573 | 2.29E-01 | 165324810 | 165324933 | NC_000001.10 |
| cg20746830 | 1.40E-14 | 5.22E-16 | 8.85 | 25.4692731 | 8.41E-02 | 94586670  | 94586793  | NC_000001.10 |
| cg07022343 | 1.40E-14 | 5.23E-16 | 8.85 | 25.4684505 | 1.57E-01 | 230208170 | 230208293 | NC_000001.10 |
| cg21301879 | 1.41E-14 | 5.25E-16 | 8.85 | 25.4652076 | 6.13E-02 | 128148379 | 128148502 | NC_000002.11 |
| cg10799327 | 1.41E-14 | 5.25E-16 | 8.85 | 25.4644487 | 1.30E-01 | 170484840 | 170484963 | NC_000003.11 |
| cg02760031 | 1.41E-14 | 5.25E-16 | 8.85 | 25.4639206 | 2.13E-01 | 591151    | 591274    | NC_000020.10 |
| cg13316720 | 1.41E-14 | 5.27E-16 | 8.85 | 25.4613441 | 1.29E-01 | 25840984  | 25841107  | NC_000017.10 |
| cg04961466 | 1.41E-14 | 5.27E-16 | 8.85 | 25.4610718 | 2.00E-01 | 164264985 | 164265108 | NC_000004.11 |
| cg19971655 | 1.41E-14 | 5.27E-16 | 8.85 | 25.4608194 | 6.74E-02 | 55464927  | 55465050  | NC_000001.10 |
| cg02915259 | 1.42E-14 | 5.29E-16 | 8.85 | 25.4575461 | 5.57E-02 | 60224185  | 60224308  | NC_000001.10 |
| cg01860778 | 1.42E-14 | 5.30E-16 | 8.85 | 25.4558301 | 9.62E-02 | 26189510  | 26189633  | NC_000020.10 |
| cg05203875 | 1.42E-14 | 5.30E-16 | 8.85 | 25.4545349 | 1.20E-01 | 1801294   | 1801417   | NC_000004.11 |
| cg03057083 | 1.42E-14 | 5.31E-16 | 8.85 | 25.4535063 | 2.78E-01 | 12995300  | 12995423  | NC_000016.9  |
| cg00589850 | 1.42E-14 | 5.31E-16 | 8.85 | 25.4528225 | 1.72E-01 | 140857995 | 140858118 | NC_000005.9  |
| cg00247557 | 1.42E-14 | 5.32E-16 | 8.85 | 25.4512881 | 1.86E-01 | 5197071   | 5197194   | NC_000018.9  |
| cg25773223 | 1.42E-14 | 5.32E-16 | 8.85 | 25.4505707 | 9.32E-02 | 3680061   | 3680184   | NC_000010.10 |
| cg14741726 | 1.43E-14 | 5.34E-16 | 8.85 | 25.4482662 | 1.08E-01 | 3475262   | 3475385   | NC_000004.11 |
| cg03936436 | 1.43E-14 | 5.34E-16 | 8.85 | 25.447426  | 7.52E-02 | 67962191  | 67962314  | NC_000016.9  |
| cg18328792 | 1.44E-14 | 5.39E-16 | 8.85 | 25.4387424 | 1.10E-01 | 90417102  | 90417225  | NC_000014.8  |
| cg26562772 | 1.44E-14 | 5.40E-16 | 8.85 | 25.4369644 | 2.11E-01 | 221890431 | 221890554 | NC_000001.10 |

|            |          |          |      |            |          |           |           |              |
|------------|----------|----------|------|------------|----------|-----------|-----------|--------------|
| cg04418162 | 1.44E-14 | 5.40E-16 | 8.85 | 25.4367687 | 1.41E-01 | 125687269 | 125687392 | NC_000003.11 |
| cg10277836 | 1.45E-14 | 5.42E-16 | 8.85 | 25.4329377 | 1.47E-01 | 32446172  | 32446295  | NC_000002.11 |
| cg00295382 | 1.46E-14 | 5.45E-16 | 8.84 | 25.427753  | 1.81E-01 | 40364870  | 40364993  | NC_000001.10 |
| cg11711057 | 1.46E-14 | 5.48E-16 | 8.84 | 25.4228652 | 1.66E-01 | 107974444 | 107974567 | NC_000012.11 |
| cg12636882 | 1.46E-14 | 5.48E-16 | 8.84 | 25.4226727 | 1.56E-01 | 3180930   | 3181053   | NC_000004.11 |
| cg17336584 | 1.47E-14 | 5.49E-16 | 8.84 | 25.4206739 | 1.95E-01 | 12750256  | 12750379  | NC_000006.11 |
| cg12926104 | 1.47E-14 | 5.51E-16 | 8.84 | 25.4160665 | 2.40E-01 | 19157339  | 19157462  | NC_000007.13 |
| cg00130866 | 1.47E-14 | 5.52E-16 | 8.84 | 25.4140461 | 7.73E-02 | 124052565 | 124052688 | NC_000008.10 |
| cg14543200 | 1.48E-14 | 5.54E-16 | 8.84 | 25.4111419 | 1.30E-01 | 61977951  | 61978074  | NC_000014.8  |
| cg23650423 | 1.48E-14 | 5.54E-16 | 8.84 | 25.4106311 | 2.53E-01 | 101454676 | 101454799 | NC_000011.9  |
| cg04569082 | 1.48E-14 | 5.55E-16 | 8.84 | 25.4099364 | 2.50E-01 | 127940323 | 127940446 | NC_000012.11 |
| cg05619892 | 1.49E-14 | 5.58E-16 | 8.84 | 25.4046225 | 2.46E-01 | 40755187  | 40755310  | NC_000008.10 |
| cg18034859 | 1.51E-14 | 5.67E-16 | 8.84 | 25.3881891 | 6.44E-02 | 30406688  | 30406811  | NC_000020.10 |
| cg04574459 | 1.52E-14 | 5.69E-16 | 8.84 | 25.3850283 | 2.63E-01 | 47010768  | 47010891  | NC_000021.8  |
| cg14619806 | 1.53E-14 | 5.73E-16 | 8.84 | 25.3779648 | 1.07E-01 | 125768098 | 125768221 | NC_000010.10 |
| cg02798576 | 1.53E-14 | 5.73E-16 | 8.84 | 25.377711  | 2.07E-01 | 101290168 | 101290291 | NC_000010.10 |
| cg15543616 | 1.53E-14 | 5.75E-16 | 8.84 | 25.3751055 | 2.13E-01 | 5019024   | 5019147   | NC_000012.11 |
| cg03603018 | 1.53E-14 | 5.76E-16 | 8.84 | 25.3726963 | 8.68E-02 | 25298714  | 25298837  | NC_000001.10 |
| cg06243393 | 1.54E-14 | 5.79E-16 | 8.84 | 25.3683104 | 4.47E-02 | 9885015   | 9885138   | NC_000018.9  |
| cg08732352 | 1.54E-14 | 5.79E-16 | 8.84 | 25.3675209 | 2.35E-01 | 35298391  | 35298514  | NC_000007.13 |
| cg06520279 | 1.55E-14 | 5.83E-16 | 8.83 | 25.3609368 | 9.79E-02 | 44236918  | 44237041  | NC_000018.9  |
| cg12463703 | 1.55E-14 | 5.83E-16 | 8.83 | 25.3603701 | 9.03E-02 | 127007401 | 127007524 | NC_000003.11 |
| cg11596779 | 1.55E-14 | 5.84E-16 | 8.83 | 25.3593938 | 8.14E-02 | 77188947  | 77189070  | NC_000005.9  |
| cg17165841 | 1.56E-14 | 5.85E-16 | 8.83 | 25.3568016 | 2.10E-01 | 207507001 | 207507124 | NC_000002.11 |
| cg07161721 | 1.56E-14 | 5.88E-16 | 8.83 | 25.3519674 | 2.50E-01 | 72459953  | 72460076  | NC_000008.10 |

|            |          |          |      |            |          |           |           |              |
|------------|----------|----------|------|------------|----------|-----------|-----------|--------------|
| cg16679297 | 1.56E-14 | 5.89E-16 | 8.83 | 25.3507931 | 1.76E-01 | 168534069 | 168534192 | NC_000005.9  |
| cg11957331 | 1.57E-14 | 5.90E-16 | 8.83 | 25.3493008 | 2.67E-01 | 42828156  | 42828279  | NC_000019.9  |
| cg17066932 | 1.57E-14 | 5.91E-16 | 8.83 | 25.347777  | 1.07E-01 | 4312184   | 4312307   | NC_000010.10 |
| cg03572760 | 1.57E-14 | 5.91E-16 | 8.83 | 25.3472326 | 9.93E-02 | 42287595  | 42287718  | NC_000017.10 |
| cg15479964 | 1.57E-14 | 5.91E-16 | 8.83 | 25.3467302 | 4.65E-02 | 99341525  | 99341648  | NC_000010.10 |
| cg24481035 | 1.57E-14 | 5.92E-16 | 8.83 | 25.3463414 | 6.15E-02 | 54388422  | 54388545  | NC_000019.9  |
| cg01105140 | 1.58E-14 | 5.94E-16 | 8.83 | 25.341509  | 1.77E-01 | 149137869 | 149137992 | NC_000001.10 |
| cg12306833 | 1.58E-14 | 5.96E-16 | 8.83 | 25.3395948 | 7.86E-02 | 50227389  | 50227512  | NC_000003.11 |
| cg23036678 | 1.58E-14 | 5.97E-16 | 8.83 | 25.3381621 | 1.12E-01 | 70002831  | 70002954  | NC_000011.9  |
| cg05748163 | 1.58E-14 | 5.97E-16 | 8.83 | 25.3375808 | 1.62E-01 | 25897763  | 25897886  | NC_000008.10 |
| cg15291740 | 1.59E-14 | 6.00E-16 | 8.83 | 25.3331575 | 1.79E-01 | 48478766  | 48478889  | NC_000017.10 |
| cg11213369 | 1.59E-14 | 6.00E-16 | 8.83 | 25.332614  | 1.96E-01 | 1270925   | 1271048   | NC_000007.13 |
| cg25560398 | 1.59E-14 | 6.00E-16 | 8.83 | 25.3318686 | 8.42E-02 | 233252170 | 233252293 | NC_000002.11 |
| cg26764362 | 1.60E-14 | 6.03E-16 | 8.83 | 25.3281032 | 7.91E-02 | 45451585  | 45451708  | NC_000006.11 |
| cg16101806 | 1.61E-14 | 6.06E-16 | 8.83 | 25.323123  | 4.24E-02 | 10701439  | 10701562  | NC_000005.9  |
| cg07936950 | 1.61E-14 | 6.06E-16 | 8.83 | 25.322763  | 2.33E-01 | 172953134 | 172953257 | NC_000002.11 |
| cg24129390 | 1.61E-14 | 6.07E-16 | 8.83 | 25.3201071 | 1.74E-01 | 33780205  | 33780328  | NC_000013.10 |
| cg03984866 | 1.62E-14 | 6.12E-16 | 8.83 | 25.3127494 | 1.80E-01 | 8161776   | 8161899   | NC_000004.11 |
| cg27600205 | 1.63E-14 | 6.14E-16 | 8.83 | 25.3089615 | 2.24E-01 | 134070416 | 134070539 | NC_000004.11 |
| cg16599703 | 1.63E-14 | 6.15E-16 | 8.83 | 25.3078919 | 1.96E-01 | 37500358  | 37500481  | NC_000001.10 |
| cg05356754 | 1.63E-14 | 6.16E-16 | 8.83 | 25.306771  | 9.37E-02 | 24685985  | 24686108  | NC_000014.8  |
| cg10366093 | 1.65E-14 | 6.21E-16 | 8.82 | 25.2977498 | 2.10E-01 | 57414457  | 57414580  | NC_000011.9  |
| cg01823510 | 1.65E-14 | 6.22E-16 | 8.82 | 25.2971372 | 2.01E-01 | 242776354 | 242776477 | NC_000002.11 |
| cg23037403 | 1.65E-14 | 6.22E-16 | 8.82 | 25.2969968 | 2.03E-01 | 178368183 | 178368306 | NC_000005.9  |
| cg02402744 | 1.65E-14 | 6.22E-16 | 8.82 | 25.2959919 | 1.31E-01 | 88261612  | 88261735  | NC_000016.9  |

|            |          |          |      |            |          |           |           |              |
|------------|----------|----------|------|------------|----------|-----------|-----------|--------------|
| cg17478228 | 1.65E-14 | 6.23E-16 | 8.82 | 25.2946332 | 1.32E-01 | 11591593  | 11591716  | NC_000019.9  |
| cg07034660 | 1.65E-14 | 6.24E-16 | 8.82 | 25.2929911 | 2.55E-01 | 38670412  | 38670535  | NC_000007.13 |
| cg13422257 | 1.67E-14 | 6.30E-16 | 8.82 | 25.2839324 | 4.85E-02 | 125801889 | 125802012 | NC_000010.10 |
| cg20870512 | 1.67E-14 | 6.32E-16 | 8.82 | 25.2804385 | 2.76E-01 | 1272515   | 1272638   | NC_000007.13 |
| cg08123207 | 1.68E-14 | 6.35E-16 | 8.82 | 25.2769164 | 1.16E-01 | 32118312  | 32118435  | NC_000006.11 |
| cg13693652 | 1.68E-14 | 6.35E-16 | 8.82 | 25.2768048 | 4.84E-02 | 86888629  | 86888752  | NC_000001.10 |
| cg21786381 | 1.68E-14 | 6.35E-16 | 8.82 | 25.2759526 | 1.34E-01 | 75234078  | 75234201  | NC_000011.9  |
| cg03261948 | 1.68E-14 | 6.37E-16 | 8.82 | 25.2735227 | 1.10E-01 | 30140417  | 30140540  | NC_000006.11 |
| cg09233651 | 1.69E-14 | 6.39E-16 | 8.82 | 25.2696881 | 2.06E-01 | 114838567 | 114838690 | NC_000012.11 |
| cg15082473 | 1.69E-14 | 6.40E-16 | 8.82 | 25.269063  | 5.24E-02 | 114801587 | 114801710 | NC_000013.10 |
| cg12052661 | 1.70E-14 | 6.42E-16 | 8.82 | 25.2652027 | 1.30E-01 | 140772545 | 140772668 | NC_000009.11 |
| cg23833588 | 1.70E-14 | 6.44E-16 | 8.82 | 25.2616495 | 3.05E-01 | 46961583  | 46961706  | NC_000013.10 |
| cg14392740 | 1.70E-14 | 6.45E-16 | 8.82 | 25.2605139 | 4.93E-02 | 44832616  | 44832739  | NC_000015.9  |
| cg15627072 | 1.71E-14 | 6.47E-16 | 8.82 | 25.257434  | 1.04E-01 | 2432621   | 2432744   | NC_000001.10 |
| cg12032648 | 1.71E-14 | 6.48E-16 | 8.82 | 25.2569439 | 1.97E-01 | 166676897 | 166677020 | NC_000002.11 |
| cg01401365 | 1.71E-14 | 6.49E-16 | 8.82 | 25.2541781 | 5.31E-02 | 75314761  | 75314884  | NC_000015.9  |
| cg06439005 | 1.72E-14 | 6.51E-16 | 8.82 | 25.2518647 | 1.48E-01 | 172754848 | 172754971 | NC_000005.9  |
| cg15904939 | 1.72E-14 | 6.51E-16 | 8.82 | 25.2512951 | 9.30E-02 | 1828124   | 1828247   | NC_000019.9  |
| cg15953602 | 1.73E-14 | 6.57E-16 | 8.82 | 25.2426012 | 2.04E-01 | 75896720  | 75896843  | NC_000008.10 |
| cg06833732 | 1.73E-14 | 6.57E-16 | 8.82 | 25.242041  | 2.51E-01 | 175299035 | 175299158 | NC_000005.9  |
| cg08432727 | 1.73E-14 | 6.58E-16 | 8.82 | 25.2411355 | 1.86E-01 | 5831722   | 5831845   | NC_000002.11 |
| cg13519194 | 1.74E-14 | 6.59E-16 | 8.81 | 25.2394177 | 1.06E-01 | 43539572  | 43539695  | NC_000010.10 |
| cg01223193 | 1.74E-14 | 6.61E-16 | 8.81 | 25.2360625 | 7.14E-02 | 89002822  | 89002945  | NC_000015.9  |
| cg15961092 | 1.74E-14 | 6.62E-16 | 8.81 | 25.2350486 | 4.49E-02 | 45681130  | 45681253  | NC_000014.8  |
| cg15353031 | 1.75E-14 | 6.63E-16 | 8.81 | 25.2338352 | 2.00E-01 | 50887632  | 50887755  | NC_000010.10 |



|            |          |          |      |            |          |           |           |              |
|------------|----------|----------|------|------------|----------|-----------|-----------|--------------|
| cg16605327 | 1.75E-14 | 6.63E-16 | 8.81 | 25.2337787 | 2.28E-01 | 114846849 | 114846972 | NC_000012.11 |
| cg24971209 | 1.75E-14 | 6.63E-16 | 8.81 | 25.2333897 | 2.32E-01 | 144242106 | 144242229 | NC_000008.10 |
| cg26349474 | 1.75E-14 | 6.65E-16 | 8.81 | 25.2314234 | 1.78E-01 | 46705637  | 46705760  | NC_000017.10 |
| cg11017065 | 1.75E-14 | 6.66E-16 | 8.81 | 25.2290393 | 3.62E-01 | 128564874 | 128564997 | NC_000011.9  |
| cg12799666 | 1.76E-14 | 6.68E-16 | 8.81 | 25.2260567 | 1.23E-01 | 44066402  | 44066525  | NC_000015.9  |
| cg05583014 | 1.76E-14 | 6.69E-16 | 8.81 | 25.224735  | 1.08E-01 | 48509019  | 48509142  | NC_000003.11 |
| cg15961473 | 1.76E-14 | 6.70E-16 | 8.81 | 25.2231054 | 8.05E-02 | 36646362  | 36646485  | NC_000017.10 |
| cg11994115 | 1.77E-14 | 6.71E-16 | 8.81 | 25.2217172 | 9.60E-02 | 40360856  | 40360979  | NC_000019.9  |
| cg18425434 | 1.77E-14 | 6.72E-16 | 8.81 | 25.2198609 | 1.85E-01 | 118429648 | 118429771 | NC_000010.10 |
| cg06935856 | 1.77E-14 | 6.73E-16 | 8.81 | 25.218971  | 7.02E-02 | 7701546   | 7701669   | NC_000017.10 |
| cg04027805 | 1.78E-14 | 6.76E-16 | 8.81 | 25.2149359 | 1.50E-01 | 4715479   | 4715602   | NC_000001.10 |
| cg02941385 | 1.78E-14 | 6.76E-16 | 8.81 | 25.2140226 | 9.51E-02 | 69284017  | 69284140  | NC_000014.8  |
| cg14970666 | 1.78E-14 | 6.76E-16 | 8.81 | 25.2139759 | 2.03E-01 | 2038989   | 2039112   | NC_000005.9  |
| cg09743950 | 1.78E-14 | 6.78E-16 | 8.81 | 25.2113855 | 1.84E-01 | 31341875  | 31341998  | NC_000016.9  |
| cg09969797 | 1.79E-14 | 6.80E-16 | 8.81 | 25.2086502 | 8.86E-02 | 150543360 | 150543483 | NC_000007.13 |
| cg11664500 | 1.79E-14 | 6.80E-16 | 8.81 | 25.208441  | 2.63E-01 | 133562479 | 133562602 | NC_000006.11 |
| cg14037665 | 1.79E-14 | 6.82E-16 | 8.81 | 25.2054491 | 2.24E-01 | 1748617   | 1748740   | NC_000002.11 |
| cg04539515 | 1.80E-14 | 6.84E-16 | 8.81 | 25.2033061 | 1.62E-01 | 221068794 | 221068917 | NC_000001.10 |
| cg04642105 | 1.80E-14 | 6.85E-16 | 8.81 | 25.2013149 | 1.54E-01 | 1239119   | 1239242   | NC_000004.11 |
| cg20704028 | 1.81E-14 | 6.87E-16 | 8.81 | 25.1982977 | 7.03E-02 | 121493706 | 121493829 | NC_000010.10 |
| cg04622125 | 1.81E-14 | 6.87E-16 | 8.81 | 25.1980018 | 9.38E-02 | 46876658  | 46876781  | NC_000021.8  |
| cg06536868 | 1.81E-14 | 6.88E-16 | 8.81 | 25.19739   | 1.58E-01 | 27530884  | 27531007  | NC_000002.11 |
| cg01486814 | 1.81E-14 | 6.88E-16 | 8.81 | 25.1970167 | 1.71E-01 | 88799186  | 88799309  | NC_000011.9  |
| cg26055812 | 1.81E-14 | 6.88E-16 | 8.81 | 25.1965872 | 1.35E-01 | 52198580  | 52198703  | NC_000001.10 |
| cg07466788 | 1.81E-14 | 6.89E-16 | 8.81 | 25.1949503 | 1.27E-01 | 80194552  | 80194675  | NC_000017.10 |

|            |          |          |      |            |          |           |           |              |
|------------|----------|----------|------|------------|----------|-----------|-----------|--------------|
| cg13677149 | 1.81E-14 | 6.90E-16 | 8.81 | 25.1936859 | 1.92E-01 | 27284789  | 27284912  | NC_000007.13 |
| cg03734874 | 1.82E-14 | 6.93E-16 | 8.81 | 25.1903602 | 2.06E-01 | 105071382 | 105071505 | NC_000014.8  |
| cg11561737 | 1.82E-14 | 6.95E-16 | 8.81 | 25.186676  | 1.91E-01 | 46796908  | 46797031  | NC_000017.10 |
| cg02145319 | 1.83E-14 | 6.99E-16 | 8.81 | 25.1807989 | 4.94E-02 | 339492    | 339615    | NC_000016.9  |
| cg13281139 | 1.84E-14 | 7.02E-16 | 8.8  | 25.1776957 | 2.55E-01 | 20255061  | 20255184  | NC_000004.11 |
| cg18553305 | 1.84E-14 | 7.02E-16 | 8.8  | 25.1771105 | 5.36E-02 | 3112665   | 3112788   | NC_000012.11 |
| cg27049766 | 1.84E-14 | 7.02E-16 | 8.8  | 25.176512  | 2.72E-01 | 58220516  | 58220639  | NC_000019.9  |
| cg07212778 | 1.85E-14 | 7.05E-16 | 8.8  | 25.1730193 | 2.05E-01 | 119916510 | 119916633 | NC_000002.11 |
| cg14491284 | 1.85E-14 | 7.06E-16 | 8.8  | 25.1711064 | 1.11E-01 | 74846046  | 74846169  | NC_000004.11 |
| cg25473201 | 1.87E-14 | 7.12E-16 | 8.8  | 25.1634683 | 7.13E-02 | 168677942 | 168678065 | NC_000006.11 |
| cg13577778 | 1.87E-14 | 7.13E-16 | 8.8  | 25.1620424 | 6.93E-02 | 69481517  | 69481640  | NC_000014.8  |
| cg06940614 | 1.87E-14 | 7.13E-16 | 8.8  | 25.1613345 | 2.43E-01 | 38182773  | 38182896  | NC_000019.9  |
| cg06566087 | 1.87E-14 | 7.14E-16 | 8.8  | 25.1609847 | 9.89E-02 | 234655709 | 234655832 | NC_000002.11 |
| cg15377283 | 1.87E-14 | 7.15E-16 | 8.8  | 25.159257  | 2.11E-01 | 55371369  | 55371492  | NC_000008.10 |
| cg21853871 | 1.87E-14 | 7.15E-16 | 8.8  | 25.1584843 | 1.60E-01 | 46628717  | 46628840  | NC_000017.10 |
| cg04319462 | 1.87E-14 | 7.16E-16 | 8.8  | 25.1581793 | 1.45E-01 | 33284965  | 33285088  | NC_000006.11 |
| cg19161124 | 1.88E-14 | 7.18E-16 | 8.8  | 25.154683  | 1.43E-01 | 153583563 | 153583686 | NC_000007.13 |
| cg02216394 | 1.88E-14 | 7.19E-16 | 8.8  | 25.1539157 | 9.06E-02 | 30178715  | 30178838  | NC_000006.11 |
| cg18141888 | 1.89E-14 | 7.22E-16 | 8.8  | 25.148956  | 1.72E-01 | 21487412  | 21487535  | NC_000020.10 |
| cg07052737 | 1.89E-14 | 7.22E-16 | 8.8  | 25.1488755 | 1.31E-01 | 26224428  | 26224551  | NC_000002.11 |
| cg21817858 | 1.89E-14 | 7.23E-16 | 8.8  | 25.1481902 | 2.00E-01 | 141133337 | 141133460 | NC_000005.9  |
| cg12599275 | 1.89E-14 | 7.23E-16 | 8.8  | 25.1479421 | 9.89E-02 | 3011274   | 3011397   | NC_000001.10 |
| cg24830559 | 1.90E-14 | 7.24E-16 | 8.8  | 25.1462063 | 7.48E-02 | 7048926   | 7049049   | NC_000004.11 |
| cg08709276 | 1.90E-14 | 7.26E-16 | 8.8  | 25.1433465 | 1.15E-01 | 41020450  | 41020573  | NC_000006.11 |
| cg05533326 | 1.91E-14 | 7.28E-16 | 8.8  | 25.1406543 | 3.12E-02 | 29128686  | 29128809  | NC_000016.9  |

|            |          |          |      |            |          |           |           |              |
|------------|----------|----------|------|------------|----------|-----------|-----------|--------------|
| cg24622589 | 1.91E-14 | 7.29E-16 | 8.8  | 25.1402613 | 1.68E-01 | 58613446  | 58613569  | NC_000003.11 |
| cg06445348 | 1.91E-14 | 7.29E-16 | 8.8  | 25.1399088 | 3.01E-01 | 166917009 | 166917132 | NC_000001.10 |
| cg19380001 | 1.91E-14 | 7.30E-16 | 8.8  | 25.1389425 | 2.09E-01 | 50889427  | 50889550  | NC_000001.10 |
| cg16445423 | 1.91E-14 | 7.31E-16 | 8.8  | 25.1376306 | 1.49E-01 | 98609870  | 98609993  | NC_000002.11 |
| cg15231989 | 1.91E-14 | 7.31E-16 | 8.8  | 25.1372305 | 1.59E-01 | 2742433   | 2742556   | NC_000007.13 |
| cg15044957 | 1.92E-14 | 7.32E-16 | 8.8  | 25.1352952 | 2.25E-01 | 30038672  | 30038795  | NC_000011.9  |
| cg13481132 | 1.92E-14 | 7.32E-16 | 8.8  | 25.135249  | 2.13E-01 | 138606811 | 138606934 | NC_000009.11 |
| cg06745378 | 1.92E-14 | 7.32E-16 | 8.8  | 25.1351759 | 1.25E-01 | 55841452  | 55841575  | NC_000002.11 |
| cg23448584 | 1.92E-14 | 7.34E-16 | 8.8  | 25.1335077 | 2.66E-01 | 2781316   | 2781439   | NC_000020.10 |
| cg01070209 | 1.92E-14 | 7.35E-16 | 8.8  | 25.132159  | 2.35E-01 | 119419331 | 119419454 | NC_000012.11 |
| cg12236088 | 1.92E-14 | 7.35E-16 | 8.8  | 25.1311953 | 1.20E-01 | 105275812 | 105275935 | NC_000002.11 |
| cg18487598 | 1.93E-14 | 7.38E-16 | 8.8  | 25.1279793 | 1.19E-01 | 178735372 | 178735495 | NC_000005.9  |
| cg21858380 | 1.93E-14 | 7.38E-16 | 8.8  | 25.1275219 | 2.08E-01 | 119916486 | 119916609 | NC_000002.11 |
| cg09232478 | 1.93E-14 | 7.39E-16 | 8.8  | 25.1263975 | 2.09E-01 | 119548852 | 119548975 | NC_000001.10 |
| cg18237607 | 1.93E-14 | 7.40E-16 | 8.8  | 25.1245761 | 2.64E-01 | 37840075  | 37840198  | NC_000005.9  |
| cg24692310 | 1.94E-14 | 7.42E-16 | 8.8  | 25.1229466 | 1.57E-01 | 60915630  | 60915753  | NC_000011.9  |
| cg00382227 | 1.94E-14 | 7.43E-16 | 8.8  | 25.1216224 | 1.49E-01 | 334557    | 334680    | NC_000016.9  |
| cg00091285 | 1.95E-14 | 7.45E-16 | 8.8  | 25.1180719 | 2.00E-01 | 98511031  | 98511154  | NC_000001.10 |
| cg21921016 | 1.95E-14 | 7.48E-16 | 8.79 | 25.1145624 | 1.35E-01 | 42330638  | 42330761  | NC_000008.10 |
| cg19753174 | 1.95E-14 | 7.48E-16 | 8.79 | 25.1142061 | 1.32E-01 | 219351218 | 219351341 | NC_000001.10 |
| cg03251349 | 1.95E-14 | 7.49E-16 | 8.79 | 25.1133453 | 6.20E-02 | 30104916  | 30105039  | NC_000006.11 |
| cg16764637 | 1.96E-14 | 7.50E-16 | 8.79 | 25.1123553 | 1.52E-01 | 27194731  | 27194854  | NC_000007.13 |
| cg27444913 | 1.96E-14 | 7.50E-16 | 8.79 | 25.1118669 | 1.21E-01 | 230244525 | 230244648 | NC_000001.10 |
| cg26149682 | 1.97E-14 | 7.54E-16 | 8.79 | 25.1059899 | 1.41E-01 | 10417663  | 10417786  | NC_000006.11 |
| cg12114834 | 1.97E-14 | 7.57E-16 | 8.79 | 25.1031032 | 2.27E-01 | 122848518 | 122848641 | NC_000011.9  |

|            |          |          |      |            |          |           |           |              |
|------------|----------|----------|------|------------|----------|-----------|-----------|--------------|
| cg04598517 | 1.97E-14 | 7.57E-16 | 8.79 | 25.1022099 | 2.57E-01 | 1445542   | 1445665   | NC_000005.9  |
| cg15362695 | 1.98E-14 | 7.58E-16 | 8.79 | 25.1009476 | 6.52E-02 | 156954183 | 156954306 | NC_000006.11 |
| cg12071888 | 1.98E-14 | 7.58E-16 | 8.79 | 25.1008872 | 2.07E-01 | 91195159  | 91195282  | NC_000001.10 |
| cg15798385 | 1.98E-14 | 7.61E-16 | 8.79 | 25.0968499 | 1.78E-01 | 27281569  | 27281692  | NC_000007.13 |
| cg14961476 | 1.99E-14 | 7.64E-16 | 8.79 | 25.0931279 | 2.11E-01 | 9130738   | 9130861   | NC_000001.10 |
| cg20279673 | 2.00E-14 | 7.66E-16 | 8.79 | 25.0904023 | 2.29E-01 | 17850431  | 17850554  | NC_000022.10 |
| cg03190944 | 2.01E-14 | 7.71E-16 | 8.79 | 25.0839634 | 9.14E-02 | 88388231  | 88388354  | NC_000016.9  |
| cg19897071 | 2.01E-14 | 7.72E-16 | 8.79 | 25.0831122 | 1.57E-01 | 35991382  | 35991505  | NC_000005.9  |
| cg16182986 | 2.02E-14 | 7.74E-16 | 8.79 | 25.0810721 | 1.95E-01 | 16180419  | 16180542  | NC_000005.9  |
| cg17029062 | 2.02E-14 | 7.75E-16 | 8.79 | 25.0798776 | 2.21E-01 | 32859445  | 32859568  | NC_000003.11 |
| cg19025113 | 2.02E-14 | 7.75E-16 | 8.79 | 25.0787664 | 1.87E-01 | 45155201  | 45155324  | NC_000002.11 |
| cg05756220 | 2.02E-14 | 7.76E-16 | 8.79 | 25.0785909 | 2.06E-01 | 30038685  | 30038808  | NC_000011.9  |
| cg02640041 | 2.02E-14 | 7.77E-16 | 8.79 | 25.0767424 | 2.07E-01 | 33936520  | 33936643  | NC_000005.9  |
| cg27348223 | 2.03E-14 | 7.81E-16 | 8.79 | 25.0719036 | 2.07E-01 | 1445354   | 1445477   | NC_000005.9  |
| cg01569660 | 2.04E-14 | 7.82E-16 | 8.79 | 25.0703798 | 8.39E-02 | 65369213  | 65369336  | NC_000015.9  |
| cg27337021 | 2.04E-14 | 7.85E-16 | 8.79 | 25.0661744 | 4.83E-02 | 139947627 | 139947750 | NC_000005.9  |
| cg19127283 | 2.05E-14 | 7.86E-16 | 8.79 | 25.0652371 | 2.51E-01 | 32859407  | 32859530  | NC_000003.11 |
| cg15149095 | 2.05E-14 | 7.86E-16 | 8.79 | 25.0650301 | 1.96E-01 | 210111672 | 210111795 | NC_000001.10 |
| cg07239452 | 2.05E-14 | 7.87E-16 | 8.79 | 25.0646067 | 3.55E-02 | 1864422   | 1864545   | NC_000008.10 |
| cg05507514 | 2.05E-14 | 7.88E-16 | 8.79 | 25.062455  | 1.07E-01 | 153842846 | 153842969 | NC_000003.11 |
| cg18274480 | 2.06E-14 | 7.91E-16 | 8.79 | 25.0593898 | 1.74E-01 | 145713863 | 145713986 | NC_000005.9  |
| cg08951901 | 2.07E-14 | 7.95E-16 | 8.79 | 25.0535352 | 6.92E-02 | 32052293  | 32052416  | NC_000006.11 |
| cg21244177 | 2.07E-14 | 7.97E-16 | 8.79 | 25.0522633 | 1.56E-01 | 63795848  | 63795971  | NC_000001.10 |
| cg17341170 | 2.07E-14 | 7.98E-16 | 8.78 | 25.0501078 | 9.11E-02 | 2481545   | 2481668   | NC_000011.9  |
| cg15044699 | 2.08E-14 | 8.01E-16 | 8.78 | 25.0472537 | 5.94E-02 | 100081382 | 100081505 | NC_000010.10 |

|            |          |          |      |            |          |           |           |              |
|------------|----------|----------|------|------------|----------|-----------|-----------|--------------|
| cg26530498 | 2.08E-14 | 8.01E-16 | 8.78 | 25.0464349 | 2.07E-01 | 119916431 | 119916554 | NC_000002.11 |
| cg04453180 | 2.10E-14 | 8.06E-16 | 8.78 | 25.0401524 | 2.09E-01 | 140856330 | 140856453 | NC_000005.9  |
| cg20495476 | 2.10E-14 | 8.08E-16 | 8.78 | 25.0374894 | 9.36E-02 | 32506497  | 32506620  | NC_000022.10 |
| cg19285478 | 2.10E-14 | 8.09E-16 | 8.78 | 25.0364207 | 1.57E-01 | 63849412  | 63849535  | NC_000011.9  |
| cg08934976 | 2.10E-14 | 8.10E-16 | 8.78 | 25.0357692 | 6.07E-02 | 1264529   | 1264652   | NC_000005.9  |
| cg02051616 | 2.11E-14 | 8.13E-16 | 8.78 | 25.0316662 | 1.56E-01 | 172661132 | 172661255 | NC_000005.9  |
| cg24543937 | 2.13E-14 | 8.20E-16 | 8.78 | 25.0238372 | 1.35E-01 | 71282102  | 71282225  | NC_000017.10 |
| cg10822665 | 2.13E-14 | 8.21E-16 | 8.78 | 25.0224026 | 1.08E-01 | 1028394   | 1028517   | NC_000017.10 |
| cg05313771 | 2.14E-14 | 8.23E-16 | 8.78 | 25.0201208 | 1.87E-01 | 1762435   | 1762558   | NC_000019.9  |
| cg15699267 | 2.14E-14 | 8.25E-16 | 8.78 | 25.0180021 | 2.44E-01 | 61809557  | 61809680  | NC_000020.10 |
| cg08579468 | 2.14E-14 | 8.25E-16 | 8.78 | 25.0173229 | 8.71E-02 | 81324215  | 81324338  | NC_000016.9  |
| cg22129809 | 2.14E-14 | 8.25E-16 | 8.78 | 25.0169831 | 8.25E-02 | 139260099 | 139260222 | NC_000003.11 |
| cg15712559 | 2.15E-14 | 8.29E-16 | 8.78 | 25.0130372 | 2.66E-01 | 58180616  | 58180739  | NC_000020.10 |
| cg02256631 | 2.15E-14 | 8.29E-16 | 8.78 | 25.0122322 | 2.80E-01 | 31342952  | 31343075  | NC_000016.9  |
| cg01574663 | 2.15E-14 | 8.30E-16 | 8.78 | 25.01131   | 1.51E-01 | 22825769  | 22825892  | NC_000016.9  |
| cg24249925 | 2.16E-14 | 8.31E-16 | 8.78 | 25.0104094 | 1.51E-01 | 162702571 | 162702694 | NC_000001.10 |
| cg05392323 | 2.16E-14 | 8.32E-16 | 8.78 | 25.0097019 | 1.47E-01 | 23698143  | 23698266  | NC_000001.10 |
| cg00469207 | 2.16E-14 | 8.32E-16 | 8.78 | 25.0087283 | 2.76E-01 | 152622455 | 152622578 | NC_000007.13 |
| cg24292761 | 2.16E-14 | 8.33E-16 | 8.78 | 25.0074332 | 1.71E-01 | 117584665 | 117584788 | NC_000006.11 |
| cg10443049 | 2.17E-14 | 8.35E-16 | 8.78 | 25.0053391 | 2.58E-01 | 8481537   | 8481660   | NC_000007.13 |
| cg13445199 | 2.17E-14 | 8.36E-16 | 8.78 | 25.0049889 | 2.63E-01 | 10459132  | 10459255  | NC_000004.11 |
| cg20985014 | 2.17E-14 | 8.38E-16 | 8.78 | 25.0022931 | 6.03E-02 | 112374151 | 112374274 | NC_000006.11 |
| cg06845853 | 2.17E-14 | 8.38E-16 | 8.78 | 25.0021113 | 1.90E-01 | 32461240  | 32461363  | NC_000011.9  |
| cg17284168 | 2.18E-14 | 8.42E-16 | 8.78 | 24.9979155 | 2.19E-01 | 134491531 | 134491654 | NC_000006.11 |
| cg11390378 | 2.18E-14 | 8.42E-16 | 8.78 | 24.9971862 | 2.35E-01 | 147576227 | 147576350 | NC_000004.11 |

|            |          |          |      |            |          |           |           |              |
|------------|----------|----------|------|------------|----------|-----------|-----------|--------------|
| cg23918610 | 2.19E-14 | 8.47E-16 | 8.78 | 24.9917523 | 3.50E-02 | 119018141 | 119018264 | NC_000008.10 |
| cg26018544 | 2.19E-14 | 8.47E-16 | 8.78 | 24.9912286 | 6.03E-02 | 25230915  | 25231038  | NC_000001.10 |
| cg23054883 | 2.20E-14 | 8.49E-16 | 8.78 | 24.9897107 | 1.84E-01 | 130647580 | 130647703 | NC_000012.11 |
| cg17839324 | 2.20E-14 | 8.51E-16 | 8.77 | 24.987154  | 1.22E-01 | 3123500   | 3123623   | NC_000001.10 |
| cg16712637 | 2.22E-14 | 8.57E-16 | 8.77 | 24.9794099 | 1.78E-01 | 103352000 | 103352123 | NC_000012.11 |
| cg23901967 | 2.23E-14 | 8.61E-16 | 8.77 | 24.9753761 | 1.26E-01 | 36890321  | 36890444  | NC_000017.10 |
| cg13163930 | 2.24E-14 | 8.65E-16 | 8.77 | 24.9707969 | 2.58E-01 | 27647896  | 27648019  | NC_000006.11 |
| cg14328457 | 2.24E-14 | 8.66E-16 | 8.77 | 24.9692619 | 2.14E-01 | 37381475  | 37381598  | NC_000017.10 |
| cg03707749 | 2.25E-14 | 8.69E-16 | 8.77 | 24.9655808 | 1.85E-01 | 86240461  | 86240584  | NC_000012.11 |
| cg19524723 | 2.25E-14 | 8.70E-16 | 8.77 | 24.964551  | 1.29E-01 | 60052048  | 60052171  | NC_000018.9  |
| cg03874199 | 2.25E-14 | 8.71E-16 | 8.77 | 24.9642631 | 1.91E-01 | 176964456 | 176964579 | NC_000002.11 |
| cg07716052 | 2.26E-14 | 8.73E-16 | 8.77 | 24.9616045 | 1.43E-01 | 32454748  | 32454871  | NC_000011.9  |
| cg23075337 | 2.27E-14 | 8.76E-16 | 8.77 | 24.9582884 | 2.19E-01 | 8481460   | 8481583   | NC_000007.13 |
| cg09088193 | 2.27E-14 | 8.78E-16 | 8.77 | 24.9557284 | 9.96E-02 | 39122765  | 39122888  | NC_000017.10 |
| cg02722434 | 2.28E-14 | 8.82E-16 | 8.77 | 24.9519745 | 8.35E-02 | 91362469  | 91362592  | NC_000015.9  |
| cg17224937 | 2.29E-14 | 8.86E-16 | 8.77 | 24.9464897 | 1.51E-01 | 125055879 | 125056002 | NC_000005.9  |
| cg16007456 | 2.30E-14 | 8.90E-16 | 8.77 | 24.9426798 | 2.92E-01 | 101004638 | 101004761 | NC_000001.10 |
| cg20535425 | 2.30E-14 | 8.91E-16 | 8.77 | 24.9418926 | 1.08E-01 | 57458955  | 57459078  | NC_000004.11 |
| cg07125412 | 2.31E-14 | 8.93E-16 | 8.77 | 24.9387818 | 1.33E-01 | 60770205  | 60770328  | NC_000014.8  |
| cg00378510 | 2.31E-14 | 8.96E-16 | 8.77 | 24.9358271 | 1.90E-01 | 2291020   | 2291143   | NC_000019.9  |
| cg16656895 | 2.32E-14 | 8.98E-16 | 8.77 | 24.9342124 | 1.43E-01 | 119305317 | 119305440 | NC_000010.10 |
| cg21715599 | 2.32E-14 | 9.00E-16 | 8.77 | 24.9319538 | 1.04E-01 | 92463554  | 92463677  | NC_000015.9  |
| cg27513573 | 2.33E-14 | 9.01E-16 | 8.77 | 24.9307934 | 2.21E-01 | 131768098 | 131768221 | NC_000010.10 |
| cg02084912 | 2.33E-14 | 9.01E-16 | 8.77 | 24.9302687 | 4.48E-02 | 10325711  | 10325834  | NC_000003.11 |
| cg25037595 | 2.33E-14 | 9.02E-16 | 8.77 | 24.9289204 | 1.51E-01 | 2756320   | 2756443   | NC_000005.9  |

|            |          |          |      |            |          |           |           |              |
|------------|----------|----------|------|------------|----------|-----------|-----------|--------------|
| cg03934713 | 2.33E-14 | 9.03E-16 | 8.77 | 24.9287069 | 1.55E-01 | 6069198   | 6069321   | NC_000016.9  |
| cg17352045 | 2.33E-14 | 9.03E-16 | 8.77 | 24.9284909 | 1.25E-01 | 32847702  | 32847825  | NC_000006.11 |
| cg27479396 | 2.34E-14 | 9.07E-16 | 8.76 | 24.9241281 | 1.13E-01 | 56215568  | 56215691  | NC_000019.9  |
| cg21170752 | 2.34E-14 | 9.08E-16 | 8.76 | 24.9222027 | 3.86E-02 | 148291514 | 148291637 | NC_000005.9  |
| cg07087457 | 2.35E-14 | 9.10E-16 | 8.76 | 24.9207248 | 1.57E-01 | 135032461 | 135032584 | NC_000010.10 |
| cg07380026 | 2.35E-14 | 9.11E-16 | 8.76 | 24.9191359 | 1.39E-01 | 1296007   | 1296130   | NC_000005.9  |
| cg09899185 | 2.35E-14 | 9.13E-16 | 8.76 | 24.9178353 | 2.16E-01 | 50695720  | 50695843  | NC_000005.9  |
| cg27578381 | 2.36E-14 | 9.14E-16 | 8.76 | 24.916476  | 1.55E-01 | 76814686  | 76814809  | NC_000017.10 |
| cg01572434 | 2.36E-14 | 9.15E-16 | 8.76 | 24.915087  | 1.33E-01 | 130219926 | 130220049 | NC_000005.9  |
| cg27227281 | 2.36E-14 | 9.15E-16 | 8.76 | 24.9148646 | 1.13E-01 | 105026171 | 105026294 | NC_000007.13 |
| cg11418477 | 2.36E-14 | 9.17E-16 | 8.76 | 24.9129119 | 1.53E-01 | 175199741 | 175199864 | NC_000002.11 |
| cg19709146 | 2.37E-14 | 9.18E-16 | 8.76 | 24.9122603 | 1.22E-01 | 47745115  | 47745238  | NC_000011.9  |
| cg05095591 | 2.37E-14 | 9.19E-16 | 8.76 | 24.9111348 | 2.39E-01 | 147129184 | 147129307 | NC_000003.11 |
| cg26937267 | 2.37E-14 | 9.20E-16 | 8.76 | 24.9096914 | 5.96E-02 | 1315171   | 1315294   | NC_000011.9  |
| cg13246235 | 2.38E-14 | 9.22E-16 | 8.76 | 24.907768  | 2.17E-01 | 12749978  | 12750101  | NC_000006.11 |
| cg27510182 | 2.38E-14 | 9.22E-16 | 8.76 | 24.9076221 | 2.51E-01 | 58715553  | 58715676  | NC_000001.10 |
| cg06010032 | 2.38E-14 | 9.25E-16 | 8.76 | 24.904681  | 1.86E-01 | 139508813 | 139508936 | NC_000008.10 |
| cg18836626 | 2.39E-14 | 9.29E-16 | 8.76 | 24.9005168 | 2.02E-01 | 26042746  | 26042869  | NC_000013.10 |
| cg08619712 | 2.39E-14 | 9.29E-16 | 8.76 | 24.9004074 | 9.43E-02 | 2288051   | 2288174   | NC_000011.9  |
| cg15006869 | 2.40E-14 | 9.31E-16 | 8.76 | 24.8976683 | 1.07E-01 | 49141173  | 49141296  | NC_000022.10 |
| cg03985727 | 2.40E-14 | 9.32E-16 | 8.76 | 24.8968781 | 2.32E-01 | 15727525  | 15727648  | NC_000007.13 |
| cg20239565 | 2.41E-14 | 9.35E-16 | 8.76 | 24.8942864 | 1.20E-01 | 80394416  | 80394539  | NC_000017.10 |
| cg27247697 | 2.41E-14 | 9.35E-16 | 8.76 | 24.8940519 | 2.28E-01 | 87018054  | 87018177  | NC_000002.11 |
| cg05309948 | 2.41E-14 | 9.35E-16 | 8.76 | 24.8933278 | 2.50E-01 | 2292447   | 2292570   | NC_000011.9  |
| cg14380840 | 2.41E-14 | 9.36E-16 | 8.76 | 24.8929551 | 1.01E-01 | 3600710   | 3600833   | NC_000010.10 |

|            |          |          |      |            |          |           |           |              |
|------------|----------|----------|------|------------|----------|-----------|-----------|--------------|
| cg00803910 | 2.41E-14 | 9.38E-16 | 8.76 | 24.8904953 | 1.45E-01 | 197896800 | 197896923 | NC_000003.11 |
| cg06496885 | 2.43E-14 | 9.43E-16 | 8.76 | 24.8848814 | 7.47E-02 | 3354972   | 3355095   | NC_000010.10 |
| cg15128876 | 2.43E-14 | 9.45E-16 | 8.76 | 24.8833077 | 1.19E-01 | 161146073 | 161146196 | NC_000001.10 |
| cg16696270 | 2.44E-14 | 9.48E-16 | 8.76 | 24.8801857 | 2.01E-01 | 132052934 | 132053057 | NC_000008.10 |
| cg03328107 | 2.44E-14 | 9.49E-16 | 8.76 | 24.8790762 | 8.67E-02 | 3413994   | 3414117   | NC_000001.10 |
| cg03888033 | 2.44E-14 | 9.50E-16 | 8.76 | 24.8782854 | 1.75E-01 | 156818905 | 156819028 | NC_000001.10 |
| cg19633390 | 2.45E-14 | 9.53E-16 | 8.76 | 24.8748628 | 1.74E-01 | 110381307 | 110381430 | NC_000013.10 |
| cg27535885 | 2.47E-14 | 9.59E-16 | 8.76 | 24.8684526 | 8.86E-02 | 47070807  | 47070930  | NC_000001.10 |
| cg05926586 | 2.48E-14 | 9.64E-16 | 8.76 | 24.8634408 | 1.61E-01 | 74592786  | 74592909  | NC_000015.9  |
| cg24863175 | 2.48E-14 | 9.64E-16 | 8.76 | 24.8633443 | 1.25E-01 | 186840433 | 186840556 | NC_000001.10 |
| cg09979478 | 2.50E-14 | 9.71E-16 | 8.75 | 24.8559906 | 2.47E-01 | 145925997 | 145926120 | NC_000008.10 |
| cg11631547 | 2.50E-14 | 9.74E-16 | 8.75 | 24.8534671 | 1.49E-01 | 113669901 | 113670024 | NC_000011.9  |
| cg19718563 | 2.51E-14 | 9.77E-16 | 8.75 | 24.8502442 | 1.47E-01 | 37266748  | 37266871  | NC_000019.9  |
| cg26516080 | 2.51E-14 | 9.78E-16 | 8.75 | 24.8497254 | 7.14E-02 | 124776158 | 124776281 | NC_000012.11 |
| cg10741478 | 2.52E-14 | 9.82E-16 | 8.75 | 24.8450057 | 2.03E-01 | 35687300  | 35687423  | NC_000007.13 |
| cg05570831 | 2.52E-14 | 9.83E-16 | 8.75 | 24.8440212 | 2.61E-02 | 75513561  | 75513684  | NC_000016.9  |
| cg11540358 | 2.53E-14 | 9.84E-16 | 8.75 | 24.8431517 | 3.58E-02 | 133003684 | 133003807 | NC_000006.11 |
| cg19517718 | 2.53E-14 | 9.85E-16 | 8.75 | 24.8424507 | 1.67E-01 | 1747082   | 1747205   | NC_000002.11 |
| cg17082347 | 2.54E-14 | 9.90E-16 | 8.75 | 24.8372577 | 2.14E-01 | 68118006  | 68118129  | NC_000015.9  |
| cg21366688 | 2.55E-14 | 9.95E-16 | 8.75 | 24.831984  | 2.22E-01 | 134491421 | 134491544 | NC_000006.11 |
| cg21355828 | 2.57E-14 | 1.00E-15 | 8.75 | 24.8259222 | 1.65E-01 | 149389814 | 149389937 | NC_000007.13 |
| cg11708136 | 2.58E-14 | 1.01E-15 | 8.75 | 24.8197491 | 1.63E-01 | 88799191  | 88799314  | NC_000011.9  |
| cg20204986 | 2.60E-14 | 1.01E-15 | 8.75 | 24.8152809 | 1.84E-01 | 32448067  | 32448190  | NC_000011.9  |
| cg07877229 | 2.60E-14 | 1.02E-15 | 8.75 | 24.8124782 | 1.12E-01 | 142554307 | 142554430 | NC_000007.13 |
| cg05784532 | 2.62E-14 | 1.02E-15 | 8.75 | 24.8049385 | 1.48E-01 | 230284198 | 230284321 | NC_000001.10 |



|            |          |          |      |            |          |           |           |              |
|------------|----------|----------|------|------------|----------|-----------|-----------|--------------|
| cg24377495 | 2.62E-14 | 1.02E-15 | 8.75 | 24.8046551 | 1.47E-01 | 6660075   | 6660198   | NC_000019.9  |
| cg27313147 | 2.63E-14 | 1.03E-15 | 8.75 | 24.8010094 | 1.20E-01 | 155679151 | 155679274 | NC_000007.13 |
| cg02730156 | 2.63E-14 | 1.03E-15 | 8.75 | 24.7999145 | 1.98E-01 | 38069950  | 38070073  | NC_000021.8  |
| cg06243084 | 2.63E-14 | 1.03E-15 | 8.74 | 24.7998344 | 1.78E-01 | 63990629  | 63990752  | NC_000011.9  |
| cg01543173 | 2.64E-14 | 1.03E-15 | 8.74 | 24.7992    | 2.78E-01 | 34442534  | 34442657  | NC_000021.8  |
| cg11229862 | 2.64E-14 | 1.03E-15 | 8.74 | 24.7969076 | 1.76E-01 | 126113682 | 126113805 | NC_000003.11 |
| cg22882665 | 2.65E-14 | 1.03E-15 | 8.74 | 24.7954216 | 2.60E-01 | 45241110  | 45241233  | NC_000002.11 |
| cg00022911 | 2.65E-14 | 1.04E-15 | 8.74 | 24.793157  | 2.45E-01 | 19372392  | 19372515  | NC_000019.9  |
| cg01610632 | 2.66E-14 | 1.04E-15 | 8.74 | 24.7906593 | 1.86E-01 | 147127579 | 147127702 | NC_000003.11 |
| cg12544557 | 2.66E-14 | 1.04E-15 | 8.74 | 24.7886225 | 1.26E-01 | 39019545  | 39019668  | NC_000017.10 |
| cg02798181 | 2.67E-14 | 1.04E-15 | 8.74 | 24.7872428 | 9.73E-02 | 72820074  | 72820197  | NC_000010.10 |
| cg04638468 | 2.67E-14 | 1.04E-15 | 8.74 | 24.7858488 | 2.79E-01 | 122686453 | 122686576 | NC_000004.11 |
| cg06596654 | 2.70E-14 | 1.05E-15 | 8.74 | 24.774898  | 1.39E-01 | 86527923  | 86528046  | NC_000016.9  |
| cg12821278 | 2.70E-14 | 1.05E-15 | 8.74 | 24.7744164 | 2.84E-01 | 122131895 | 122132018 | NC_000009.11 |
| cg16206678 | 2.70E-14 | 1.06E-15 | 8.74 | 24.7741652 | 1.25E-01 | 30122152  | 30122275  | NC_000006.11 |
| cg01500055 | 2.70E-14 | 1.06E-15 | 8.74 | 24.7739916 | 1.33E-01 | 46143709  | 46143832  | NC_000017.10 |
| cg00298065 | 2.71E-14 | 1.06E-15 | 8.74 | 24.7690042 | 1.57E-01 | 58715577  | 58715700  | NC_000019.9  |
| cg10922935 | 2.71E-14 | 1.06E-15 | 8.74 | 24.7684099 | 2.82E-01 | 78452048  | 78452171  | NC_000017.10 |
| cg20925841 | 2.73E-14 | 1.07E-15 | 8.74 | 24.7625513 | 3.06E-01 | 121104400 | 121104523 | NC_000002.11 |
| cg25951981 | 2.73E-14 | 1.07E-15 | 8.74 | 24.7613198 | 1.77E-01 | 46995743  | 46995866  | NC_000004.11 |
| cg18925664 | 2.75E-14 | 1.07E-15 | 8.74 | 24.7558558 | 1.07E-01 | 95785126  | 95785249  | NC_000011.9  |
| cg19443075 | 2.75E-14 | 1.08E-15 | 8.74 | 24.7547811 | 1.70E-01 | 2161403   | 2161526   | NC_000011.9  |
| cg26381514 | 2.75E-14 | 1.08E-15 | 8.74 | 24.7538227 | 1.59E-01 | 26963489  | 26963612  | NC_000012.11 |
| cg11199713 | 2.75E-14 | 1.08E-15 | 8.74 | 24.7523721 | 1.55E-01 | 112721773 | 112721896 | NC_000013.10 |
| cg15648239 | 2.75E-14 | 1.08E-15 | 8.74 | 24.7523265 | 9.69E-02 | 119248136 | 119248259 | NC_000011.9  |

|            |          |          |      |            |          |           |           |              |
|------------|----------|----------|------|------------|----------|-----------|-----------|--------------|
| cg05824757 | 2.76E-14 | 1.08E-15 | 8.74 | 24.7492807 | 9.86E-02 | 72574568  | 72574691  | NC_000010.10 |
| cg12247536 | 2.77E-14 | 1.08E-15 | 8.74 | 24.7469753 | 8.35E-02 | 113428107 | 113428230 | NC_000012.11 |
| cg04220881 | 2.79E-14 | 1.09E-15 | 8.74 | 24.7387592 | 1.74E-01 | 152524814 | 152524937 | NC_000007.13 |
| cg09655666 | 2.79E-14 | 1.10E-15 | 8.74 | 24.7375644 | 1.68E-01 | 34820190  | 34820313  | NC_000017.10 |
| cg18177414 | 2.80E-14 | 1.10E-15 | 8.73 | 24.7365596 | 2.24E-01 | 149389929 | 149390052 | NC_000007.13 |
| cg19368911 | 2.80E-14 | 1.10E-15 | 8.73 | 24.7363987 | 1.28E-01 | 245541456 | 245541579 | NC_000001.10 |
| cg16704073 | 2.81E-14 | 1.10E-15 | 8.73 | 24.7315331 | 1.22E-01 | 64702921  | 64703044  | NC_000011.9  |
| cg11992015 | 2.81E-14 | 1.10E-15 | 8.73 | 24.7301056 | 4.29E-02 | 110876674 | 110876797 | NC_000002.11 |
| cg23921871 | 2.81E-14 | 1.10E-15 | 8.73 | 24.7300539 | 1.10E-01 | 109577383 | 109577506 | NC_000012.11 |
| cg22910462 | 2.81E-14 | 1.10E-15 | 8.73 | 24.7298742 | 1.36E-01 | 17680578  | 17680701  | NC_000022.10 |
| cg11209521 | 2.82E-14 | 1.10E-15 | 8.73 | 24.7290037 | 1.65E-01 | 68209155  | 68209278  | NC_000001.10 |
| cg07090539 | 2.85E-14 | 1.12E-15 | 8.73 | 24.71874   | 1.16E-01 | 70619853  | 70619976  | NC_000017.10 |
| cg19965031 | 2.85E-14 | 1.12E-15 | 8.73 | 24.7175121 | 1.14E-01 | 100038389 | 100038512 | NC_000014.8  |
| cg11727383 | 2.85E-14 | 1.12E-15 | 8.73 | 24.715798  | 1.92E-01 | 102988389 | 102988512 | NC_000010.10 |
| cg06256858 | 2.85E-14 | 1.12E-15 | 8.73 | 24.7157325 | 1.66E-01 | 5890289   | 5890412   | NC_000004.11 |
| cg07462540 | 2.85E-14 | 1.12E-15 | 8.73 | 24.7155413 | 2.58E-01 | 8473279   | 8473402   | NC_000007.13 |
| cg06668555 | 2.86E-14 | 1.12E-15 | 8.73 | 24.7141544 | 1.87E-01 | 139509129 | 139509252 | NC_000008.10 |
| cg14752336 | 2.86E-14 | 1.12E-15 | 8.73 | 24.7125831 | 1.63E-01 | 106400454 | 106400577 | NC_000010.10 |
| cg23180235 | 2.88E-14 | 1.13E-15 | 8.73 | 24.7056524 | 8.89E-02 | 8577752   | 8577875   | NC_000003.11 |
| cg22486834 | 2.88E-14 | 1.13E-15 | 8.73 | 24.7047135 | 2.13E-01 | 52859107  | 52859230  | NC_000006.11 |
| cg10120807 | 2.89E-14 | 1.14E-15 | 8.73 | 24.7020813 | 1.82E-01 | 69350190  | 69350313  | NC_000016.9  |
| cg01935405 | 2.89E-14 | 1.14E-15 | 8.73 | 24.7020081 | 1.45E-01 | 88569083  | 88569206  | NC_000016.9  |
| cg16887170 | 2.90E-14 | 1.14E-15 | 8.73 | 24.6989043 | 7.96E-02 | 19451180  | 19451303  | NC_000017.10 |
| cg01466121 | 2.90E-14 | 1.14E-15 | 8.73 | 24.6986749 | 1.00E-01 | 202136483 | 202136606 | NC_000002.11 |
| cg27160395 | 2.91E-14 | 1.14E-15 | 8.73 | 24.6960174 | 1.86E-01 | 177014949 | 177015072 | NC_000002.11 |

|            |          |          |      |            |          |           |           |              |
|------------|----------|----------|------|------------|----------|-----------|-----------|--------------|
| cg16332701 | 2.91E-14 | 1.14E-15 | 8.73 | 24.6959771 | 6.37E-02 | 3502815   | 3502938   | NC_000002.11 |
| cg03024760 | 2.91E-14 | 1.14E-15 | 8.73 | 24.6959383 | 2.36E-01 | 27215997  | 27216120  | NC_000015.9  |
| cg00892368 | 2.91E-14 | 1.14E-15 | 8.73 | 24.6953656 | 1.18E-01 | 32847704  | 32847827  | NC_000006.11 |
| cg07315755 | 2.93E-14 | 1.15E-15 | 8.73 | 24.6859309 | 7.88E-02 | 90611414  | 90611537  | NC_000015.9  |
| cg21106486 | 2.95E-14 | 1.16E-15 | 8.73 | 24.6787345 | 1.71E-01 | 207843084 | 207843207 | NC_000001.10 |
| cg24896649 | 2.96E-14 | 1.16E-15 | 8.73 | 24.6781645 | 2.02E-01 | 188916726 | 188916849 | NC_000004.11 |
| cg14410016 | 2.96E-14 | 1.16E-15 | 8.73 | 24.6772644 | 1.39E-01 | 176986659 | 176986782 | NC_000002.11 |
| cg26142412 | 2.97E-14 | 1.17E-15 | 8.72 | 24.6721515 | 2.44E-01 | 20185077  | 20185200  | NC_000011.9  |
| cg20900557 | 2.97E-14 | 1.17E-15 | 8.72 | 24.6716498 | 9.66E-02 | 232283631 | 232283754 | NC_000002.11 |
| cg26656135 | 2.98E-14 | 1.17E-15 | 8.72 | 24.6701313 | 2.44E-01 | 133562774 | 133562897 | NC_000006.11 |
| cg01099448 | 2.99E-14 | 1.18E-15 | 8.72 | 24.6677953 | 7.76E-02 | 214182538 | 214182661 | NC_000002.11 |
| cg07552182 | 2.99E-14 | 1.18E-15 | 8.72 | 24.667001  | 1.16E-01 | 89458394  | 89458517  | NC_000005.9  |
| cg03762760 | 3.00E-14 | 1.18E-15 | 8.72 | 24.661699  | 1.01E-01 | 33031216  | 33031339  | NC_000012.11 |
| cg03391684 | 3.01E-14 | 1.18E-15 | 8.72 | 24.6609003 | 2.19E-01 | 14925524  | 14925647  | NC_000001.10 |
| cg06344553 | 3.01E-14 | 1.18E-15 | 8.72 | 24.66069   | 1.20E-01 | 131684893 | 131685016 | NC_000010.10 |
| cg21415530 | 3.01E-14 | 1.19E-15 | 8.72 | 24.6593998 | 1.63E-01 | 140715802 | 140715925 | NC_000008.10 |
| cg13496660 | 3.01E-14 | 1.19E-15 | 8.72 | 24.6582551 | 1.38E-01 | 2424182   | 2424305   | NC_000019.9  |
| cg00824767 | 3.02E-14 | 1.19E-15 | 8.72 | 24.6570992 | 2.30E-01 | 23488272  | 23488395  | NC_000010.10 |
| cg12907598 | 3.02E-14 | 1.19E-15 | 8.72 | 24.6563231 | 7.71E-02 | 6676673   | 6676796   | NC_000001.10 |
| cg11466131 | 3.02E-14 | 1.19E-15 | 8.72 | 24.6539288 | 1.46E-01 | 37954778  | 37954901  | NC_000022.10 |
| cg01670677 | 3.03E-14 | 1.19E-15 | 8.72 | 24.6534674 | 2.48E-01 | 71955322  | 71955445  | NC_000011.9  |
| cg09310891 | 3.03E-14 | 1.19E-15 | 8.72 | 24.6528365 | 2.55E-01 | 7854403   | 7854526   | NC_000019.9  |
| cg14888916 | 3.04E-14 | 1.20E-15 | 8.72 | 24.6493879 | 2.16E-01 | 99951420  | 99951543  | NC_000008.10 |
| cg06954368 | 3.04E-14 | 1.20E-15 | 8.72 | 24.6475968 | 1.29E-01 | 38930080  | 38930203  | NC_000005.9  |
| cg06161299 | 3.04E-14 | 1.20E-15 | 8.72 | 24.6475074 | 1.06E-01 | 74633150  | 74633273  | NC_000018.9  |

|            |          |          |      |            |          |           |           |              |
|------------|----------|----------|------|------------|----------|-----------|-----------|--------------|
| cg23346462 | 3.05E-14 | 1.20E-15 | 8.72 | 24.6448211 | 2.51E-01 | 179754533 | 179754656 | NC_000003.11 |
| cg04281464 | 3.05E-14 | 1.20E-15 | 8.72 | 24.6446515 | 2.71E-01 | 70014873  | 70014996  | NC_000014.8  |
| cg11523712 | 3.06E-14 | 1.21E-15 | 8.72 | 24.6427408 | 2.15E-01 | 176957055 | 176957178 | NC_000002.11 |
| cg07211140 | 3.07E-14 | 1.21E-15 | 8.72 | 24.6390394 | 1.66E-01 | 32455025  | 32455148  | NC_000011.9  |
| cg06602871 | 3.11E-14 | 1.23E-15 | 8.72 | 24.6251714 | 1.09E-01 | 66466186  | 66466309  | NC_000016.9  |
| cg01795199 | 3.12E-14 | 1.23E-15 | 8.72 | 24.6216525 | 4.97E-02 | 1808807   | 1808930   | NC_000004.11 |
| cg24125828 | 3.14E-14 | 1.24E-15 | 8.72 | 24.6147961 | 1.69E-01 | 32117049  | 32117172  | NC_000006.11 |
| cg16330450 | 3.15E-14 | 1.24E-15 | 8.71 | 24.6108965 | 2.55E-01 | 53852030  | 53852153  | NC_000008.10 |
| cg21487550 | 3.15E-14 | 1.25E-15 | 8.71 | 24.6105278 | 1.34E-01 | 127056955 | 127057078 | NC_000003.11 |
| cg12594635 | 3.16E-14 | 1.25E-15 | 8.71 | 24.6087198 | 1.77E-01 | 54129457  | 54129580  | NC_000012.11 |
| cg00421139 | 3.17E-14 | 1.25E-15 | 8.71 | 24.6046906 | 2.91E-01 | 97172961  | 97173084  | NC_000008.10 |
| cg02510267 | 3.17E-14 | 1.25E-15 | 8.71 | 24.6040259 | 2.31E-01 | 20690807  | 20690930  | NC_000011.9  |
| cg03442425 | 3.17E-14 | 1.25E-15 | 8.71 | 24.6035772 | 2.00E-01 | 32907639  | 32907762  | NC_000017.10 |
| cg26444528 | 3.18E-14 | 1.25E-15 | 8.71 | 24.6028729 | 1.52E-01 | 58207859  | 58207982  | NC_000013.10 |
| cg20834681 | 3.18E-14 | 1.26E-15 | 8.71 | 24.6021592 | 1.32E-01 | 5153947   | 5154070   | NC_000012.11 |
| cg04973669 | 3.18E-14 | 1.26E-15 | 8.71 | 24.6014054 | 8.89E-02 | 33272928  | 33273051  | NC_000006.11 |
| cg11081638 | 3.18E-14 | 1.26E-15 | 8.71 | 24.5998973 | 6.03E-02 | 58619867  | 58619990  | NC_000003.11 |
| cg15748490 | 3.19E-14 | 1.26E-15 | 8.71 | 24.5996345 | 2.34E-01 | 240254960 | 240255083 | NC_000001.10 |
| cg05687174 | 3.19E-14 | 1.26E-15 | 8.71 | 24.5986127 | 1.60E-01 | 31382507  | 31382630  | NC_000005.9  |
| cg03959937 | 3.20E-14 | 1.26E-15 | 8.71 | 24.5959404 | 9.88E-02 | 10910819  | 10910942  | NC_000016.9  |
| cg26644049 | 3.20E-14 | 1.27E-15 | 8.71 | 24.5945225 | 1.31E-01 | 57276917  | 57277040  | NC_000019.9  |
| cg07103129 | 3.20E-14 | 1.27E-15 | 8.71 | 24.5937207 | 1.88E-01 | 50787964  | 50788087  | NC_000006.11 |
| cg24637252 | 3.22E-14 | 1.27E-15 | 8.71 | 24.5899999 | 9.82E-02 | 71402902  | 71403025  | NC_000015.9  |
| cg03238075 | 3.22E-14 | 1.27E-15 | 8.71 | 24.5891269 | 2.25E-01 | 21113363  | 21113486  | NC_000017.10 |
| cg09500565 | 3.22E-14 | 1.27E-15 | 8.71 | 24.587451  | 3.74E-02 | 100061911 | 100062034 | NC_000002.11 |

|            |          |          |      |            |          |           |           |              |
|------------|----------|----------|------|------------|----------|-----------|-----------|--------------|
| cg03078363 | 3.23E-14 | 1.28E-15 | 8.71 | 24.5860418 | 2.24E-01 | 54408664  | 54408787  | NC_000012.11 |
| cg14658804 | 3.24E-14 | 1.28E-15 | 8.71 | 24.5824069 | 2.89E-01 | 168728213 | 168728336 | NC_000005.9  |
| cg09610766 | 3.24E-14 | 1.28E-15 | 8.71 | 24.5813686 | 1.38E-01 | 105166570 | 105166693 | NC_000003.11 |
| cg15778745 | 3.25E-14 | 1.29E-15 | 8.71 | 24.5787581 | 2.86E-01 | 88324570  | 88324693  | NC_000013.10 |
| cg03062549 | 3.26E-14 | 1.29E-15 | 8.71 | 24.5754193 | 2.34E-01 | 34786594  | 34786717  | NC_000015.9  |
| cg14002960 | 3.26E-14 | 1.29E-15 | 8.71 | 24.5741322 | 1.91E-01 | 31739423  | 31739546  | NC_000018.9  |
| cg18291939 | 3.29E-14 | 1.30E-15 | 8.71 | 24.5668055 | 7.61E-02 | 1219407   | 1219530   | NC_000011.9  |
| cg17153133 | 3.29E-14 | 1.30E-15 | 8.71 | 24.5667097 | 1.27E-01 | 134482010 | 134482133 | NC_000006.11 |
| cg08980987 | 3.29E-14 | 1.30E-15 | 8.71 | 24.5663369 | 1.28E-01 | 25054905  | 25055028  | NC_000012.11 |
| cg00530925 | 3.29E-14 | 1.30E-15 | 8.71 | 24.5648331 | 2.54E-01 | 23463094  | 23463217  | NC_000010.10 |
| cg01703291 | 3.30E-14 | 1.31E-15 | 8.71 | 24.5634168 | 1.50E-01 | 85574661  | 85574784  | NC_000015.9  |
| cg13413955 | 3.30E-14 | 1.31E-15 | 8.71 | 24.5626679 | 1.73E-01 | 842914    | 843037    | NC_000009.11 |
| cg12616421 | 3.30E-14 | 1.31E-15 | 8.71 | 24.5620307 | 6.13E-02 | 32017224  | 32017347  | NC_000006.11 |
| cg17958132 | 3.30E-14 | 1.31E-15 | 8.71 | 24.5618885 | 9.98E-02 | 915739    | 915862    | NC_000017.10 |
| cg11606826 | 3.31E-14 | 1.31E-15 | 8.71 | 24.5607928 | 1.61E-01 | 30540994  | 30541117  | NC_000006.11 |
| cg18197808 | 3.32E-14 | 1.31E-15 | 8.71 | 24.5572266 | 1.73E-01 | 46776356  | 46776479  | NC_000012.11 |
| cg02643054 | 3.32E-14 | 1.31E-15 | 8.71 | 24.5570719 | 2.38E-01 | 27206544  | 27206667  | NC_000007.13 |
| cg23655210 | 3.32E-14 | 1.32E-15 | 8.71 | 24.5561905 | 1.55E-01 | 14129214  | 14129337  | NC_000018.9  |
| cg08620267 | 3.33E-14 | 1.32E-15 | 8.71 | 24.5547986 | 7.01E-02 | 85126437  | 85126560  | NC_000016.9  |
| cg20732478 | 3.33E-14 | 1.32E-15 | 8.71 | 24.5522445 | 1.51E-01 | 176993643 | 176993766 | NC_000002.11 |
| cg26630231 | 3.33E-14 | 1.32E-15 | 8.71 | 24.5521519 | 2.13E-01 | 112726482 | 112726605 | NC_000013.10 |
| cg09450097 | 3.33E-14 | 1.32E-15 | 8.71 | 24.5517202 | 9.94E-02 | 62194059  | 62194182  | NC_000004.11 |
| cg07959138 | 3.35E-14 | 1.33E-15 | 8.7  | 24.5474305 | 1.00E-01 | 87601970  | 87602093  | NC_000001.10 |
| cg18627360 | 3.35E-14 | 1.33E-15 | 8.7  | 24.5468177 | 2.50E-01 | 61809834  | 61809957  | NC_000020.10 |
| cg25570913 | 3.37E-14 | 1.33E-15 | 8.7  | 24.542065  | 2.79E-01 | 112759893 | 112760016 | NC_000013.10 |

|            |          |          |      |            |          |           |           |              |
|------------|----------|----------|------|------------|----------|-----------|-----------|--------------|
| cg18213472 | 3.37E-14 | 1.33E-15 | 8.7  | 24.5417864 | 2.52E-01 | 84419189  | 84419312  | NC_000006.11 |
| cg23876292 | 3.37E-14 | 1.34E-15 | 8.7  | 24.5416591 | 1.56E-01 | 57024517  | 57024640  | NC_000018.9  |
| cg18326819 | 3.37E-14 | 1.34E-15 | 8.7  | 24.541492  | 1.24E-01 | 46801257  | 46801380  | NC_000021.8  |
| cg22591040 | 3.38E-14 | 1.34E-15 | 8.7  | 24.5366039 | 9.05E-02 | 58106772  | 58106895  | NC_000003.11 |
| cg17875845 | 3.39E-14 | 1.35E-15 | 8.7  | 24.5340804 | 1.47E-01 | 87932378  | 87932501  | NC_000004.11 |
| cg08383315 | 3.39E-14 | 1.35E-15 | 8.7  | 24.5326625 | 2.48E-01 | 8190565   | 8190688   | NC_000011.9  |
| cg25457200 | 3.41E-14 | 1.35E-15 | 8.7  | 24.5279299 | 1.26E-01 | 65811116  | 65811239  | NC_000015.9  |
| cg06830971 | 3.41E-14 | 1.36E-15 | 8.7  | 24.5267334 | 6.54E-02 | 76890776  | 76890899  | NC_000017.10 |
| cg03557916 | 3.42E-14 | 1.36E-15 | 8.7  | 24.5256575 | 1.14E-01 | 114109949 | 114110072 | NC_000013.10 |
| cg21077559 | 3.44E-14 | 1.36E-15 | 8.7  | 24.5200635 | 2.02E-01 | 122686319 | 122686442 | NC_000004.11 |
| cg02467024 | 3.45E-14 | 1.37E-15 | 8.7  | 24.5144154 | 1.17E-01 | 8187972   | 8188095   | NC_000012.11 |
| cg05113373 | 3.47E-14 | 1.38E-15 | 8.7  | 24.5090614 | 1.06E-01 | 962823    | 962946    | NC_000016.9  |
| cg06889975 | 3.47E-14 | 1.38E-15 | 8.7  | 24.5084364 | 8.59E-02 | 22558722  | 22558845  | NC_000008.10 |
| cg03532040 | 3.48E-14 | 1.38E-15 | 8.7  | 24.5072017 | 1.15E-01 | 51301449  | 51301572  | NC_000019.9  |
| cg23191956 | 3.48E-14 | 1.38E-15 | 8.7  | 24.5063493 | 1.86E-01 | 29235123  | 29235246  | NC_000014.8  |
| cg14225678 | 3.48E-14 | 1.38E-15 | 8.7  | 24.5060531 | 2.95E-01 | 54612325  | 54612448  | NC_000007.13 |
| cg21707187 | 3.48E-14 | 1.39E-15 | 8.7  | 24.5052175 | 2.45E-01 | 54345862  | 54345985  | NC_000012.11 |
| cg13882284 | 3.50E-14 | 1.39E-15 | 8.7  | 24.5012883 | 1.45E-01 | 4859996   | 4860119   | NC_000004.11 |
| cg06324719 | 3.50E-14 | 1.39E-15 | 8.7  | 24.4989652 | 1.05E-01 | 70118762  | 70118885  | NC_000015.9  |
| cg10841552 | 3.52E-14 | 1.40E-15 | 8.7  | 24.4948185 | 1.65E-01 | 20622931  | 20623054  | NC_000011.9  |
| cg09591830 | 3.54E-14 | 1.41E-15 | 8.7  | 24.4893394 | 9.25E-02 | 74975236  | 74975359  | NC_000002.11 |
| cg02522041 | 3.54E-14 | 1.41E-15 | 8.7  | 24.4885576 | 9.19E-02 | 1249008   | 1249131   | NC_000011.9  |
| cg25146557 | 3.54E-14 | 1.41E-15 | 8.7  | 24.4879713 | 1.77E-01 | 207507421 | 207507544 | NC_000002.11 |
| cg23531049 | 3.55E-14 | 1.41E-15 | 8.69 | 24.4855167 | 7.40E-02 | 42075277  | 42075400  | NC_000015.9  |
| cg16805094 | 3.56E-14 | 1.42E-15 | 8.69 | 24.4824301 | 1.43E-01 | 169629875 | 169629998 | NC_000006.11 |

|            |          |          |      |            |          |           |           |              |
|------------|----------|----------|------|------------|----------|-----------|-----------|--------------|
| cg27507261 | 3.57E-14 | 1.42E-15 | 8.69 | 24.4808203 | 1.67E-01 | 5403053   | 5403176   | NC_000017.10 |
| cg12573849 | 3.57E-14 | 1.42E-15 | 8.69 | 24.4797093 | 1.69E-01 | 105470711 | 105470834 | NC_000002.11 |
| cg26827852 | 3.58E-14 | 1.43E-15 | 8.69 | 24.4766899 | 4.26E-02 | 89887630  | 89887753  | NC_000001.10 |
| cg10134425 | 3.59E-14 | 1.43E-15 | 8.69 | 24.4745992 | 1.10E-01 | 153934955 | 153935078 | NC_000004.11 |
| cg08911275 | 3.59E-14 | 1.43E-15 | 8.69 | 24.4744545 | 3.04E-01 | 176957462 | 176957585 | NC_000002.11 |
| cg12890291 | 3.60E-14 | 1.43E-15 | 8.69 | 24.472061  | 9.44E-02 | 22234163  | 22234286  | NC_000007.13 |
| cg20684251 | 3.60E-14 | 1.43E-15 | 8.69 | 24.4718679 | 4.07E-02 | 51840554  | 51840677  | NC_000019.9  |
| cg23989963 | 3.60E-14 | 1.43E-15 | 8.69 | 24.4705949 | 1.96E-01 | 83952420  | 83952543  | NC_000015.9  |
| cg10448808 | 3.61E-14 | 1.44E-15 | 8.69 | 24.4691385 | 2.44E-01 | 86599745  | 86599868  | NC_000016.9  |
| cg01455981 | 3.62E-14 | 1.44E-15 | 8.69 | 24.4662406 | 9.87E-02 | 20511095  | 20511218  | NC_000001.10 |
| cg09642925 | 3.62E-14 | 1.44E-15 | 8.69 | 24.4661321 | 1.72E-01 | 114261793 | 114261916 | NC_000002.11 |
| cg02597299 | 3.64E-14 | 1.45E-15 | 8.69 | 24.4604245 | 1.92E-01 | 151304559 | 151304682 | NC_000005.9  |
| cg24181605 | 3.64E-14 | 1.45E-15 | 8.69 | 24.4602916 | 1.56E-01 | 62458847  | 62458970  | NC_000015.9  |
| cg06020207 | 3.64E-14 | 1.45E-15 | 8.69 | 24.4599275 | 1.54E-01 | 131766412 | 131766535 | NC_000010.10 |
| cg23311929 | 3.64E-14 | 1.45E-15 | 8.69 | 24.4595903 | 7.31E-02 | 126698647 | 126698770 | NC_000010.10 |
| cg07439546 | 3.64E-14 | 1.45E-15 | 8.69 | 24.4592814 | 1.71E-01 | 8813357   | 8813480   | NC_000016.9  |
| cg07609788 | 3.65E-14 | 1.45E-15 | 8.69 | 24.4574324 | 1.86E-01 | 39995652  | 39995775  | NC_000020.10 |
| cg18991611 | 3.65E-14 | 1.46E-15 | 8.69 | 24.4549036 | 3.32E-01 | 49468828  | 49468951  | NC_000008.10 |
| cg26879349 | 3.66E-14 | 1.46E-15 | 8.69 | 24.4526709 | 8.35E-02 | 26109215  | 26109338  | NC_000015.9  |
| cg02582957 | 3.66E-14 | 1.46E-15 | 8.69 | 24.4523839 | 1.87E-01 | 182547955 | 182548078 | NC_000002.11 |
| cg10127275 | 3.67E-14 | 1.46E-15 | 8.69 | 24.4511325 | 1.93E-01 | 165304496 | 165304619 | NC_000004.11 |
| cg26406401 | 3.67E-14 | 1.46E-15 | 8.69 | 24.4506181 | 5.98E-02 | 3499759   | 3499882   | NC_000001.10 |
| cg21776417 | 3.69E-14 | 1.47E-15 | 8.69 | 24.4456179 | 2.23E-01 | 147142415 | 147142538 | NC_000003.11 |
| cg24793584 | 3.69E-14 | 1.47E-15 | 8.69 | 24.4455686 | 5.39E-02 | 80557532  | 80557655  | NC_000017.10 |
| cg05347845 | 3.69E-14 | 1.47E-15 | 8.69 | 24.4440664 | 3.36E-01 | 229569892 | 229570015 | NC_000001.10 |

|            |          |          |      |            |          |           |           |              |
|------------|----------|----------|------|------------|----------|-----------|-----------|--------------|
| cg18680788 | 3.70E-14 | 1.48E-15 | 8.69 | 24.4414134 | 2.95E-01 | 172754896 | 172755019 | NC_000005.9  |
| cg19699140 | 3.70E-14 | 1.48E-15 | 8.69 | 24.4409352 | 9.14E-02 | 53302900  | 53303023  | NC_000013.10 |
| cg26834713 | 3.71E-14 | 1.48E-15 | 8.69 | 24.4395642 | 6.17E-02 | 241567666 | 241567789 | NC_000002.11 |
| cg14638883 | 3.71E-14 | 1.48E-15 | 8.69 | 24.4387101 | 2.85E-01 | 166582201 | 166582324 | NC_000006.11 |
| cg08845023 | 3.74E-14 | 1.49E-15 | 8.69 | 24.4307614 | 5.93E-02 | 125767421 | 125767544 | NC_000010.10 |
| cg08206156 | 3.75E-14 | 1.50E-15 | 8.69 | 24.4282158 | 6.61E-02 | 240658646 | 240658769 | NC_000002.11 |
| cg24211976 | 3.75E-14 | 1.50E-15 | 8.69 | 24.4280312 | 1.70E-01 | 60285744  | 60285867  | NC_000015.9  |
| cg24326021 | 3.76E-14 | 1.50E-15 | 8.69 | 24.4249291 | 1.56E-01 | 56188459  | 56188582  | NC_000019.9  |
| cg21761355 | 3.76E-14 | 1.50E-15 | 8.69 | 24.4234635 | 1.15E-01 | 131930674 | 131930797 | NC_000012.11 |
| cg18849102 | 3.77E-14 | 1.51E-15 | 8.68 | 24.4204911 | 1.56E-01 | 4859935   | 4860058   | NC_000004.11 |
| cg20099968 | 3.78E-14 | 1.51E-15 | 8.68 | 24.4200171 | 9.27E-02 | 1364147   | 1364270   | NC_000004.11 |
| cg18956933 | 3.78E-14 | 1.51E-15 | 8.68 | 24.4195084 | 2.28E-01 | 147136904 | 147137027 | NC_000003.11 |
| cg14629665 | 3.79E-14 | 1.52E-15 | 8.68 | 24.415815  | 8.28E-02 | 136819477 | 136819600 | NC_000009.11 |
| cg23460843 | 3.79E-14 | 1.52E-15 | 8.68 | 24.4157319 | 3.02E-01 | 127644075 | 127644198 | NC_000002.11 |
| cg03281661 | 3.79E-14 | 1.52E-15 | 8.68 | 24.4148053 | 2.04E-01 | 3239458   | 3239581   | NC_000016.9  |
| cg25666233 | 3.81E-14 | 1.52E-15 | 8.68 | 24.4110223 | 1.68E-01 | 74424975  | 74425098  | NC_000015.9  |
| cg02402214 | 3.82E-14 | 1.53E-15 | 8.68 | 24.4064284 | 9.21E-02 | 32046950  | 32047073  | NC_000006.11 |
| cg09463220 | 3.83E-14 | 1.53E-15 | 8.68 | 24.4051091 | 1.21E-01 | 129349316 | 129349439 | NC_000003.11 |
| cg10317138 | 3.83E-14 | 1.53E-15 | 8.68 | 24.4048972 | 2.96E-01 | 128075923 | 128076046 | NC_000010.10 |
| cg15442037 | 3.83E-14 | 1.53E-15 | 8.68 | 24.4043967 | 1.51E-01 | 69286293  | 69286416  | NC_000011.9  |
| cg18514065 | 3.84E-14 | 1.54E-15 | 8.68 | 24.4019374 | 1.13E-01 | 104165052 | 104165175 | NC_000014.8  |
| cg13450437 | 3.85E-14 | 1.54E-15 | 8.68 | 24.3999449 | 9.47E-02 | 133797391 | 133797514 | NC_000009.11 |
| cg20847039 | 3.85E-14 | 1.54E-15 | 8.68 | 24.3992471 | 1.42E-01 | 48388426  | 48388549  | NC_000013.10 |
| cg27392850 | 3.85E-14 | 1.54E-15 | 8.68 | 24.3990842 | 2.68E-01 | 9764073   | 9764196   | NC_000008.10 |
| cg03338754 | 3.85E-14 | 1.54E-15 | 8.68 | 24.3981222 | 1.88E-01 | 113765397 | 113765520 | NC_000013.10 |



|            |          |          |      |            |          |           |           |              |
|------------|----------|----------|------|------------|----------|-----------|-----------|--------------|
| cg03463411 | 3.86E-14 | 1.54E-15 | 8.68 | 24.3973934 | 1.68E-01 | 81118188  | 81118311  | NC_000004.11 |
| cg15452970 | 3.87E-14 | 1.55E-15 | 8.68 | 24.3941795 | 1.24E-01 | 91190620  | 91190743  | NC_000001.10 |
| cg17233506 | 3.87E-14 | 1.55E-15 | 8.68 | 24.3937851 | 1.68E-01 | 46608293  | 46608416  | NC_000017.10 |
| cg01943414 | 3.88E-14 | 1.55E-15 | 8.68 | 24.3915149 | 4.88E-02 | 60757632  | 60757755  | NC_000017.10 |
| cg10633051 | 3.88E-14 | 1.55E-15 | 8.68 | 24.3913122 | 1.30E-01 | 168042982 | 168043105 | NC_000002.11 |
| cg10958086 | 3.88E-14 | 1.56E-15 | 8.68 | 24.3904373 | 2.08E-02 | 952903    | 953026    | NC_000017.10 |
| cg19244312 | 3.90E-14 | 1.56E-15 | 8.68 | 24.3859931 | 1.02E-01 | 171964315 | 171964438 | NC_000003.11 |
| cg23022999 | 3.90E-14 | 1.56E-15 | 8.68 | 24.3852145 | 1.30E-01 | 39368345  | 39368468  | NC_000019.9  |
| cg24688502 | 3.91E-14 | 1.57E-15 | 8.68 | 24.3811943 | 1.06E-01 | 62159885  | 62160008  | NC_000004.11 |
| cg27226147 | 3.92E-14 | 1.57E-15 | 8.68 | 24.380991  | 1.28E-01 | 27447492  | 27447615  | NC_000006.11 |
| cg27192990 | 3.92E-14 | 1.57E-15 | 8.68 | 24.3793395 | 5.18E-02 | 129479024 | 129479147 | NC_000006.11 |
| cg08482436 | 3.92E-14 | 1.57E-15 | 8.68 | 24.3790802 | 2.32E-01 | 96647888  | 96648011  | NC_000007.13 |
| cg11256132 | 3.92E-14 | 1.57E-15 | 8.68 | 24.37826   | 7.04E-02 | 244515893 | 244516016 | NC_000001.10 |
| cg10849498 | 3.93E-14 | 1.58E-15 | 8.68 | 24.3768857 | 1.11E-01 | 31829800  | 31829923  | NC_000006.11 |
| cg07755245 | 3.93E-14 | 1.58E-15 | 8.68 | 24.3767728 | 1.13E-01 | 4891238   | 4891361   | NC_000019.9  |
| cg08948225 | 3.93E-14 | 1.58E-15 | 8.68 | 24.3759181 | 4.39E-02 | 27288300  | 27288423  | NC_000008.10 |
| cg16072304 | 3.94E-14 | 1.58E-15 | 8.68 | 24.3744645 | 1.78E-01 | 153859646 | 153859769 | NC_000005.9  |
| cg00970313 | 3.96E-14 | 1.59E-15 | 8.68 | 24.3684907 | 2.30E-01 | 37125914  | 37126037  | NC_000014.8  |
| cg15313740 | 3.97E-14 | 1.60E-15 | 8.68 | 24.3652556 | 1.51E-01 | 171625337 | 171625460 | NC_000002.11 |
| cg20989480 | 3.99E-14 | 1.60E-15 | 8.68 | 24.3613908 | 9.46E-02 | 32451461  | 32451584  | NC_000011.9  |
| cg12476242 | 4.01E-14 | 1.61E-15 | 8.67 | 24.3558642 | 1.38E-01 | 127813395 | 127813518 | NC_000003.11 |
| cg18318649 | 4.02E-14 | 1.61E-15 | 8.67 | 24.3537814 | 2.52E-01 | 87974369  | 87974492  | NC_000005.9  |
| cg11797430 | 4.02E-14 | 1.62E-15 | 8.67 | 24.3528668 | 1.00E-01 | 2761364   | 2761487   | NC_000012.11 |
| cg15819352 | 4.05E-14 | 1.63E-15 | 8.67 | 24.3450398 | 8.71E-02 | 1845940   | 1846063   | NC_000001.10 |
| cg08553437 | 4.06E-14 | 1.63E-15 | 8.67 | 24.3429727 | 2.48E-01 | 122686456 | 122686579 | NC_000004.11 |

|            |          |          |      |            |          |           |           |              |
|------------|----------|----------|------|------------|----------|-----------|-----------|--------------|
| cg25898111 | 4.06E-14 | 1.63E-15 | 8.67 | 24.34149   | 9.79E-02 | 3316292   | 3316415   | NC_000010.10 |
| cg22214414 | 4.07E-14 | 1.64E-15 | 8.67 | 24.3399753 | 9.98E-02 | 58507232  | 58507355  | NC_000020.10 |
| cg20764212 | 4.07E-14 | 1.64E-15 | 8.67 | 24.3397802 | 8.77E-02 | 6331035   | 6331158   | NC_000004.11 |
| cg13843613 | 4.07E-14 | 1.64E-15 | 8.67 | 24.3395974 | 2.16E-01 | 177140126 | 177140249 | NC_000001.10 |
| cg17816173 | 4.08E-14 | 1.64E-15 | 8.67 | 24.3373659 | 1.49E-01 | 158377440 | 158377563 | NC_000007.13 |
| cg09615505 | 4.08E-14 | 1.64E-15 | 8.67 | 24.3370448 | 2.00E-01 | 176977285 | 176977408 | NC_000002.11 |
| cg24483767 | 4.09E-14 | 1.64E-15 | 8.67 | 24.3360416 | 1.46E-01 | 46850840  | 46850963  | NC_000021.8  |
| cg00090261 | 4.10E-14 | 1.65E-15 | 8.67 | 24.3327972 | 2.16E-01 | 101118548 | 101118671 | NC_000008.10 |
| cg02828785 | 4.11E-14 | 1.66E-15 | 8.67 | 24.3286223 | 1.41E-01 | 12846546  | 12846669  | NC_000012.11 |
| cg03487040 | 4.13E-14 | 1.66E-15 | 8.67 | 24.3257004 | 1.00E-01 | 55511435  | 55511558  | NC_000002.11 |
| cg12314713 | 4.13E-14 | 1.66E-15 | 8.67 | 24.324747  | 2.63E-01 | 47074576  | 47074699  | NC_000017.10 |
| cg22916722 | 4.13E-14 | 1.66E-15 | 8.67 | 24.3240154 | 2.37E-01 | 76605056  | 76605179  | NC_000014.8  |
| cg15084543 | 4.13E-14 | 1.66E-15 | 8.67 | 24.3238343 | 2.01E-01 | 79472408  | 79472531  | NC_000001.10 |
| cg07096883 | 4.13E-14 | 1.66E-15 | 8.67 | 24.3238093 | 1.75E-01 | 149979234 | 149979357 | NC_000007.13 |
| cg05331731 | 4.14E-14 | 1.67E-15 | 8.67 | 24.3223507 | 1.49E-01 | 11147146  | 11147269  | NC_000018.9  |
| cg23540210 | 4.14E-14 | 1.67E-15 | 8.67 | 24.3212406 | 1.39E-01 | 180332054 | 180332177 | NC_000003.11 |
| cg26727693 | 4.15E-14 | 1.67E-15 | 8.67 | 24.3198467 | 1.80E-01 | 63544175  | 63544298  | NC_000012.11 |
| cg02234120 | 4.15E-14 | 1.67E-15 | 8.67 | 24.3190326 | 8.33E-02 | 234626351 | 234626474 | NC_000002.11 |
| cg14408465 | 4.15E-14 | 1.67E-15 | 8.67 | 24.3187969 | 2.31E-01 | 48143434  | 48143557  | NC_000014.8  |
| cg25836061 | 4.15E-14 | 1.67E-15 | 8.67 | 24.3182584 | 1.17E-01 | 19939028  | 19939151  | NC_000022.10 |
| cg21124530 | 4.16E-14 | 1.68E-15 | 8.67 | 24.3172079 | 4.20E-02 | 17689373  | 17689496  | NC_000007.13 |
| cg04386759 | 4.20E-14 | 1.69E-15 | 8.67 | 24.3067306 | 2.18E-01 | 170554795 | 170554918 | NC_000006.11 |
| cg07834249 | 4.22E-14 | 1.70E-15 | 8.67 | 24.3012018 | 7.34E-02 | 495271    | 495394    | NC_000005.9  |
| cg06338562 | 4.23E-14 | 1.71E-15 | 8.67 | 24.2988039 | 2.06E-01 | 37488645  | 37488768  | NC_000007.13 |
| cg00423153 | 4.24E-14 | 1.71E-15 | 8.66 | 24.2961595 | 2.22E-01 | 229046785 | 229046908 | NC_000002.11 |

|            |          |          |      |            |          |           |           |              |
|------------|----------|----------|------|------------|----------|-----------|-----------|--------------|
| cg14273116 | 4.24E-14 | 1.71E-15 | 8.66 | 24.2960471 | 1.75E-01 | 107897    | 108020    | NC_000004.11 |
| cg19115882 | 4.25E-14 | 1.72E-15 | 8.66 | 24.2934183 | 1.45E-01 | 26919145  | 26919268  | NC_000002.11 |
| cg01664666 | 4.26E-14 | 1.72E-15 | 8.66 | 24.2904805 | 2.56E-01 | 242687465 | 242687588 | NC_000001.10 |
| cg06686995 | 4.27E-14 | 1.72E-15 | 8.66 | 24.289162  | 8.73E-02 | 179228489 | 179228612 | NC_000005.9  |
| cg10239098 | 4.28E-14 | 1.73E-15 | 8.66 | 24.2868498 | 2.41E-01 | 176995556 | 176995679 | NC_000002.11 |
| cg09740313 | 4.28E-14 | 1.73E-15 | 8.66 | 24.2862671 | 7.83E-02 | 115540541 | 115540664 | NC_000010.10 |
| cg19305604 | 4.28E-14 | 1.73E-15 | 8.66 | 24.285509  | 8.22E-02 | 132958038 | 132958161 | NC_000012.11 |
| cg18238908 | 4.29E-14 | 1.73E-15 | 8.66 | 24.2850107 | 1.37E-01 | 33893978  | 33894101  | NC_000001.10 |
| cg11064738 | 4.29E-14 | 1.73E-15 | 8.66 | 24.2848513 | 1.22E-01 | 68985557  | 68985680  | NC_000014.8  |
| cg11866396 | 4.29E-14 | 1.73E-15 | 8.66 | 24.2834324 | 7.34E-02 | 5322940   | 5323063   | NC_000017.10 |
| cg13801656 | 4.30E-14 | 1.74E-15 | 8.66 | 24.2819968 | 6.94E-02 | 4685060   | 4685183   | NC_000009.11 |
| cg22715837 | 4.32E-14 | 1.75E-15 | 8.66 | 24.2757846 | 2.37E-01 | 113723162 | 113723285 | NC_000007.13 |
| cg25316120 | 4.35E-14 | 1.76E-15 | 8.66 | 24.2704397 | 1.01E-01 | 106986197 | 106986320 | NC_000002.11 |
| cg04344565 | 4.38E-14 | 1.77E-15 | 8.66 | 24.2636705 | 2.11E-01 | 140715646 | 140715769 | NC_000008.10 |
| cg23156916 | 4.38E-14 | 1.77E-15 | 8.66 | 24.261611  | 1.96E-01 | 688132    | 688255    | NC_000008.10 |
| cg04670857 | 4.39E-14 | 1.77E-15 | 8.66 | 24.2610741 | 2.23E-01 | 79740208  | 79740331  | NC_000002.11 |
| cg08198773 | 4.39E-14 | 1.77E-15 | 8.66 | 24.2604194 | 1.05E-01 | 1697536   | 1697659   | NC_000008.10 |
| cg22624278 | 4.39E-14 | 1.78E-15 | 8.66 | 24.25945   | 1.07E-01 | 131237708 | 131237831 | NC_000012.11 |
| cg00998387 | 4.40E-14 | 1.78E-15 | 8.66 | 24.2584163 | 2.28E-01 | 65281572  | 65281695  | NC_000008.10 |
| cg10967350 | 4.40E-14 | 1.78E-15 | 8.66 | 24.2572397 | 1.72E-01 | 2141304   | 2141427   | NC_000003.11 |
| cg00031013 | 4.40E-14 | 1.78E-15 | 8.66 | 24.2566041 | 1.03E-01 | 7757933   | 7758056   | NC_000017.10 |
| cg13960084 | 4.41E-14 | 1.78E-15 | 8.66 | 24.2554164 | 2.01E-01 | 140773147 | 140773270 | NC_000009.11 |
| cg09364590 | 4.41E-14 | 1.78E-15 | 8.66 | 24.2553496 | 1.07E-01 | 155537901 | 155538024 | NC_000006.11 |
| cg09834794 | 4.43E-14 | 1.79E-15 | 8.66 | 24.2496737 | 2.15E-01 | 147087702 | 147087825 | NC_000003.11 |
| cg13669804 | 4.43E-14 | 1.79E-15 | 8.66 | 24.2494421 | 4.72E-02 | 148712659 | 148712782 | NC_000003.11 |

|            |          |          |      |            |          |           |           |              |
|------------|----------|----------|------|------------|----------|-----------|-----------|--------------|
| cg19046904 | 4.45E-14 | 1.80E-15 | 8.66 | 24.2444344 | 1.09E-01 | 46426201  | 46426324  | NC_000022.10 |
| cg01636354 | 4.47E-14 | 1.81E-15 | 8.66 | 24.2406663 | 7.36E-02 | 134078647 | 134078770 | NC_000003.11 |
| cg13222752 | 4.47E-14 | 1.81E-15 | 8.66 | 24.2403067 | 2.31E-01 | 74892569  | 74892692  | NC_000014.8  |
| cg11573679 | 4.48E-14 | 1.81E-15 | 8.66 | 24.2385339 | 2.80E-01 | 68546467  | 68546590  | NC_000002.11 |
| cg07522372 | 4.52E-14 | 1.83E-15 | 8.65 | 24.2299367 | 1.01E-01 | 13390440  | 13390563  | NC_000018.9  |
| cg17018096 | 4.52E-14 | 1.83E-15 | 8.65 | 24.2291013 | 1.51E-01 | 8657692   | 8657815   | NC_000019.9  |
| cg06969129 | 4.52E-14 | 1.83E-15 | 8.65 | 24.2286857 | 8.88E-02 | 5645984   | 5646107   | NC_000007.13 |
| cg05107535 | 4.52E-14 | 1.83E-15 | 8.65 | 24.2278002 | 1.71E-01 | 3242850   | 3242973   | NC_000016.9  |
| cg21701379 | 4.53E-14 | 1.84E-15 | 8.65 | 24.2259893 | 1.98E-01 | 31079694  | 31079817  | NC_000012.11 |
| cg17269633 | 4.53E-14 | 1.84E-15 | 8.65 | 24.2255158 | 1.73E-01 | 42733600  | 42733723  | NC_000017.10 |
| cg24004139 | 4.54E-14 | 1.84E-15 | 8.65 | 24.223198  | 7.31E-02 | 26670703  | 26670826  | NC_000001.10 |
| cg08535373 | 4.55E-14 | 1.84E-15 | 8.65 | 24.2225363 | 2.37E-01 | 37352612  | 37352735  | NC_000020.10 |
| cg27272235 | 4.55E-14 | 1.85E-15 | 8.65 | 24.2208668 | 2.03E-01 | 221061070 | 221061193 | NC_000001.10 |
| cg06525347 | 4.56E-14 | 1.85E-15 | 8.65 | 24.2191437 | 1.86E-01 | 133561630 | 133561753 | NC_000006.11 |
| cg03380645 | 4.56E-14 | 1.85E-15 | 8.65 | 24.2184931 | 1.39E-01 | 85895048  | 85895171  | NC_000002.11 |
| cg15674181 | 4.57E-14 | 1.85E-15 | 8.65 | 24.2183631 | 7.37E-02 | 3158688   | 3158811   | NC_000010.10 |
| cg22187630 | 4.57E-14 | 1.85E-15 | 8.65 | 24.2181974 | 1.95E-01 | 13616871  | 13616994  | NC_000019.9  |
| cg27477373 | 4.57E-14 | 1.85E-15 | 8.65 | 24.2174515 | 2.93E-01 | 56879645  | 56879768  | NC_000019.9  |
| cg20098875 | 4.57E-14 | 1.86E-15 | 8.65 | 24.2160441 | 1.17E-01 | 5093370   | 5093493   | NC_000019.9  |
| cg00375589 | 4.58E-14 | 1.86E-15 | 8.65 | 24.2148714 | 8.70E-02 | 15898759  | 15898882  | NC_000003.11 |
| cg13457172 | 4.60E-14 | 1.87E-15 | 8.65 | 24.2111952 | 2.43E-01 | 118897847 | 118897970 | NC_000010.10 |
| cg12700904 | 4.60E-14 | 1.87E-15 | 8.65 | 24.2111485 | 2.25E-01 | 13590720  | 13590843  | NC_000003.11 |
| cg06536988 | 4.60E-14 | 1.87E-15 | 8.65 | 24.2096337 | 7.77E-02 | 153586440 | 153586563 | NC_000004.11 |
| cg02878544 | 4.61E-14 | 1.87E-15 | 8.65 | 24.2071759 | 1.18E-01 | 2559709   | 2559832   | NC_000016.9  |
| cg15590989 | 4.61E-14 | 1.87E-15 | 8.65 | 24.2068812 | 1.91E-01 | 183062460 | 183062583 | NC_000004.11 |

|            |          |          |      |            |          |           |           |              |
|------------|----------|----------|------|------------|----------|-----------|-----------|--------------|
| cg13172637 | 4.62E-14 | 1.88E-15 | 8.65 | 24.2050895 | 2.64E-01 | 97685823  | 97685946  | NC_000014.8  |
| cg06432036 | 4.64E-14 | 1.88E-15 | 8.65 | 24.2016441 | 1.73E-01 | 170595385 | 170595508 | NC_000006.11 |
| cg03699182 | 4.67E-14 | 1.90E-15 | 8.65 | 24.1945747 | 2.61E-01 | 121104187 | 121104310 | NC_000002.11 |
| cg27485730 | 4.68E-14 | 1.90E-15 | 8.65 | 24.1916267 | 7.60E-02 | 46857675  | 46857798  | NC_000022.10 |
| cg06239923 | 4.69E-14 | 1.91E-15 | 8.65 | 24.1899212 | 1.05E-01 | 55923774  | 55923897  | NC_000020.10 |
| cg20891301 | 4.69E-14 | 1.91E-15 | 8.65 | 24.1896182 | 1.22E-01 | 4864711   | 4864834   | NC_000004.11 |
| cg25865542 | 4.70E-14 | 1.91E-15 | 8.65 | 24.1881049 | 7.98E-02 | 32495794  | 32495917  | NC_000003.11 |
| cg11799589 | 4.70E-14 | 1.91E-15 | 8.65 | 24.1877702 | 1.28E-01 | 44443270  | 44443393  | NC_000001.10 |
| cg06672560 | 4.71E-14 | 1.92E-15 | 8.65 | 24.1849585 | 1.92E-01 | 54580175  | 54580298  | NC_000020.10 |
| cg01202666 | 4.72E-14 | 1.92E-15 | 8.65 | 24.1829093 | 1.72E-01 | 19157650  | 19157773  | NC_000007.13 |
| cg24232092 | 4.73E-14 | 1.93E-15 | 8.65 | 24.1796718 | 1.05E-01 | 1364344   | 1364467   | NC_000004.11 |
| cg02013838 | 4.75E-14 | 1.93E-15 | 8.65 | 24.1769156 | 2.40E-01 | 105460715 | 105460838 | NC_000002.11 |
| cg17134770 | 4.75E-14 | 1.93E-15 | 8.65 | 24.1760378 | 1.19E-01 | 183390353 | 183390476 | NC_000001.10 |
| cg07931411 | 4.78E-14 | 1.94E-15 | 8.64 | 24.170223  | 2.60E-01 | 15580721  | 15580844  | NC_000019.9  |
| cg24519147 | 4.78E-14 | 1.94E-15 | 8.64 | 24.1701651 | 1.43E-01 | 188916496 | 188916619 | NC_000004.11 |
| cg02769743 | 4.78E-14 | 1.94E-15 | 8.64 | 24.1699968 | 1.19E-01 | 9668402   | 9668525   | NC_000001.10 |
| cg00589371 | 4.80E-14 | 1.95E-15 | 8.64 | 24.1659308 | 2.03E-01 | 63417783  | 63417906  | NC_000018.9  |
| cg17621718 | 4.80E-14 | 1.95E-15 | 8.64 | 24.1658621 | 2.23E-01 | 42306737  | 42306860  | NC_000003.11 |
| cg08279008 | 4.80E-14 | 1.95E-15 | 8.64 | 24.1647831 | 2.43E-01 | 86263224  | 86263347  | NC_000002.11 |
| cg13186590 | 4.80E-14 | 1.96E-15 | 8.64 | 24.1642411 | 1.91E-01 | 5928013   | 5928136   | NC_000004.11 |
| cg03217253 | 4.82E-14 | 1.96E-15 | 8.64 | 24.1612137 | 2.30E-01 | 53758055  | 53758178  | NC_000019.9  |
| cg10498703 | 4.83E-14 | 1.97E-15 | 8.64 | 24.1578628 | 1.48E-01 | 64680996  | 64681119  | NC_000014.8  |
| cg26228014 | 4.84E-14 | 1.97E-15 | 8.64 | 24.1573752 | 1.36E-01 | 47073138  | 47073261  | NC_000001.10 |
| cg18537027 | 4.84E-14 | 1.97E-15 | 8.64 | 24.1565943 | 1.28E-01 | 64601816  | 64601939  | NC_000005.9  |
| cg19212391 | 4.85E-14 | 1.97E-15 | 8.64 | 24.1548391 | 2.21E-01 | 72432790  | 72432913  | NC_000017.10 |

|            |          |          |      |            |          |           |           |              |
|------------|----------|----------|------|------------|----------|-----------|-----------|--------------|
| cg19408626 | 4.86E-14 | 1.98E-15 | 8.64 | 24.1528619 | 1.51E-01 | 12189773  | 12189896  | NC_000001.10 |
| cg23824713 | 4.87E-14 | 1.98E-15 | 8.64 | 24.1503891 | 1.20E-01 | 61157738  | 61157861  | NC_000018.9  |
| cg15310492 | 4.89E-14 | 1.99E-15 | 8.64 | 24.1451505 | 2.01E-01 | 30038677  | 30038800  | NC_000011.9  |
| cg06581175 | 4.89E-14 | 1.99E-15 | 8.64 | 24.1449325 | 2.12E-01 | 96632635  | 96632758  | NC_000007.13 |
| cg17802600 | 4.90E-14 | 2.00E-15 | 8.64 | 24.1432986 | 2.32E-01 | 30717501  | 30717624  | NC_000019.9  |
| cg08407434 | 4.91E-14 | 2.00E-15 | 8.64 | 24.1420951 | 8.44E-02 | 43001691  | 43001814  | NC_000020.10 |
| cg16412609 | 4.91E-14 | 2.00E-15 | 8.64 | 24.140939  | 1.12E-01 | 31579805  | 31579928  | NC_000016.9  |
| cg13188011 | 4.91E-14 | 2.00E-15 | 8.64 | 24.140243  | 1.88E-01 | 39319326  | 39319449  | NC_000020.10 |
| cg02302165 | 4.92E-14 | 2.01E-15 | 8.64 | 24.1391239 | 7.57E-02 | 178751288 | 178751411 | NC_000001.10 |
| cg23719508 | 4.93E-14 | 2.01E-15 | 8.64 | 24.1371903 | 1.40E-01 | 2623999   | 2624122   | NC_000007.13 |
| cg23217946 | 4.99E-14 | 2.04E-15 | 8.64 | 24.1248488 | 2.29E-01 | 22817039  | 22817162  | NC_000019.9  |
| cg08629884 | 5.01E-14 | 2.05E-15 | 8.64 | 24.1200957 | 1.95E-01 | 1719983   | 1720106   | NC_000004.11 |
| cg25331550 | 5.02E-14 | 2.05E-15 | 8.64 | 24.1185557 | 1.24E-01 | 3471397   | 3471520   | NC_000004.11 |
| cg27227797 | 5.04E-14 | 2.06E-15 | 8.64 | 24.1132547 | 1.28E-01 | 375831    | 375954    | NC_000019.9  |
| cg00741609 | 5.05E-14 | 2.06E-15 | 8.64 | 24.1116407 | 1.81E-01 | 102893925 | 102894048 | NC_000010.10 |
| cg08004425 | 5.09E-14 | 2.08E-15 | 8.63 | 24.1038804 | 2.35E-01 | 37499547  | 37499670  | NC_000001.10 |
| cg02920216 | 5.10E-14 | 2.08E-15 | 8.63 | 24.1011661 | 1.94E-01 | 19616939  | 19617062  | NC_000021.8  |
| cg00745735 | 5.11E-14 | 2.09E-15 | 8.63 | 24.0989372 | 9.80E-02 | 69868860  | 69868983  | NC_000010.10 |
| cg14510812 | 5.11E-14 | 2.09E-15 | 8.63 | 24.0986983 | 2.17E-01 | 85306797  | 85306920  | NC_000012.11 |
| cg16851046 | 5.12E-14 | 2.09E-15 | 8.63 | 24.0974764 | 1.68E-01 | 21291173  | 21291296  | NC_000013.10 |
| cg15000279 | 5.13E-14 | 2.09E-15 | 8.63 | 24.0964676 | 2.11E-01 | 29285009  | 29285132  | NC_000019.9  |
| cg26850144 | 5.13E-14 | 2.09E-15 | 8.63 | 24.0963727 | 1.05E-01 | 69635508  | 69635631  | NC_000011.9  |
| cg19847945 | 5.13E-14 | 2.10E-15 | 8.63 | 24.0950159 | 1.71E-01 | 60783784  | 60783907  | NC_000017.10 |
| cg13597544 | 5.16E-14 | 2.11E-15 | 8.63 | 24.0900739 | 1.12E-01 | 79365635  | 79365758  | NC_000017.10 |
| cg18309817 | 5.16E-14 | 2.11E-15 | 8.63 | 24.0896802 | 1.72E-01 | 12254153  | 12254276  | NC_000018.9  |

|            |          |          |      |            |          |           |           |              |
|------------|----------|----------|------|------------|----------|-----------|-----------|--------------|
| cg02550218 | 5.17E-14 | 2.11E-15 | 8.63 | 24.0869247 | 1.49E-01 | 89767709  | 89767832  | NC_000005.9  |
| cg15950251 | 5.17E-14 | 2.12E-15 | 8.63 | 24.0863766 | 8.45E-02 | 139658345 | 139658468 | NC_000007.13 |
| cg13909534 | 5.21E-14 | 2.13E-15 | 8.63 | 24.0800778 | 2.13E-01 | 178772372 | 178772495 | NC_000005.9  |
| cg22574825 | 5.21E-14 | 2.13E-15 | 8.63 | 24.0789    | 2.47E-01 | 29068987  | 29069110  | NC_000013.10 |
| cg21042456 | 5.22E-14 | 2.13E-15 | 8.63 | 24.077623  | 2.43E-01 | 1270558   | 1270681   | NC_000007.13 |
| cg08668790 | 5.22E-14 | 2.14E-15 | 8.63 | 24.077475  | 2.65E-01 | 58220662  | 58220785  | NC_000019.9  |
| cg24863335 | 5.24E-14 | 2.14E-15 | 8.63 | 24.0734636 | 2.33E-01 | 70535406  | 70535529  | NC_000018.9  |
| cg15012678 | 5.25E-14 | 2.15E-15 | 8.63 | 24.07069   | 1.29E-01 | 197285336 | 197285459 | NC_000003.11 |
| cg00132208 | 5.26E-14 | 2.15E-15 | 8.63 | 24.069711  | 5.90E-02 | 10120780  | 10120903  | NC_000004.11 |
| cg03307465 | 5.26E-14 | 2.15E-15 | 8.63 | 24.0689293 | 2.93E-01 | 40679519  | 40679642  | NC_000002.11 |
| cg26248537 | 5.26E-14 | 2.15E-15 | 8.63 | 24.0689119 | 4.73E-02 | 8376216   | 8376339   | NC_000001.10 |
| cg26698460 | 5.27E-14 | 2.16E-15 | 8.63 | 24.0661271 | 1.69E-01 | 58716004  | 58716127  | NC_000019.9  |
| cg08845721 | 5.28E-14 | 2.16E-15 | 8.63 | 24.0644864 | 1.81E-01 | 142780693 | 142780816 | NC_000005.9  |
| cg24408656 | 5.28E-14 | 2.16E-15 | 8.63 | 24.0643736 | 2.31E-01 | 21503861  | 21503984  | NC_000020.10 |
| cg06990571 | 5.31E-14 | 2.17E-15 | 8.63 | 24.0599206 | 1.76E-01 | 132986509 | 132986632 | NC_000008.10 |
| cg12860391 | 5.31E-14 | 2.18E-15 | 8.63 | 24.0589307 | 2.16E-01 | 33602821  | 33602944  | NC_000015.9  |
| cg18415687 | 5.33E-14 | 2.18E-15 | 8.63 | 24.0555208 | 2.57E-01 | 35047411  | 35047534  | NC_000015.9  |
| cg12149795 | 5.34E-14 | 2.19E-15 | 8.63 | 24.053757  | 1.79E-01 | 47882121  | 47882244  | NC_000021.8  |
| cg13881299 | 5.34E-14 | 2.19E-15 | 8.63 | 24.0535435 | 4.21E-02 | 122684632 | 122684755 | NC_000012.11 |
| cg01192077 | 5.35E-14 | 2.19E-15 | 8.63 | 24.0518391 | 1.46E-01 | 158523507 | 158523630 | NC_000005.9  |
| cg26170604 | 5.37E-14 | 2.20E-15 | 8.62 | 24.0467077 | 2.68E-01 | 8482614   | 8482737   | NC_000007.13 |
| cg13572145 | 5.38E-14 | 2.20E-15 | 8.62 | 24.0462896 | 1.77E-01 | 80529621  | 80529744  | NC_000002.11 |
| cg26578726 | 5.39E-14 | 2.21E-15 | 8.62 | 24.0440859 | 1.42E-01 | 56289611  | 56289734  | NC_000014.8  |
| cg13068215 | 5.39E-14 | 2.21E-15 | 8.62 | 24.0429061 | 2.10E-01 | 240286481 | 240286604 | NC_000001.10 |
| cg17437939 | 5.39E-14 | 2.21E-15 | 8.62 | 24.042682  | 2.64E-01 | 97361252  | 97361375  | NC_000007.13 |

|            |          |          |      |            |          |           |           |              |
|------------|----------|----------|------|------------|----------|-----------|-----------|--------------|
| cg00795341 | 5.39E-14 | 2.21E-15 | 8.62 | 24.0425616 | 2.27E-01 | 79330929  | 79331052  | NC_000005.9  |
| cg10601026 | 5.42E-14 | 2.22E-15 | 8.62 | 24.0383307 | 1.25E-01 | 64579140  | 64579263  | NC_000010.10 |
| cg23979876 | 5.43E-14 | 2.23E-15 | 8.62 | 24.0352632 | 1.11E-01 | 141299001 | 141299124 | NC_000004.11 |
| cg09553380 | 5.44E-14 | 2.23E-15 | 8.62 | 24.0336832 | 2.71E-01 | 207308829 | 207308952 | NC_000002.11 |
| cg14287112 | 5.44E-14 | 2.23E-15 | 8.62 | 24.0333904 | 2.59E-01 | 133562485 | 133562608 | NC_000006.11 |
| cg23967544 | 5.44E-14 | 2.23E-15 | 8.62 | 24.0327084 | 1.59E-01 | 172672684 | 172672807 | NC_000005.9  |
| cg17003736 | 5.45E-14 | 2.24E-15 | 8.62 | 24.0318211 | 1.63E-01 | 147111308 | 147111431 | NC_000003.11 |
| cg14212402 | 5.45E-14 | 2.24E-15 | 8.62 | 24.030185  | 8.89E-02 | 236300937 | 236301060 | NC_000002.11 |
| cg05349039 | 5.46E-14 | 2.24E-15 | 8.62 | 24.0292489 | 7.48E-02 | 46845110  | 46845233  | NC_000021.8  |
| cg25990363 | 5.48E-14 | 2.25E-15 | 8.62 | 24.0258231 | 1.22E-01 | 4144783   | 4144906   | NC_000004.11 |
| cg20263853 | 5.50E-14 | 2.26E-15 | 8.62 | 24.0214228 | 1.37E-01 | 8824177   | 8824300   | NC_000001.10 |
| cg05089090 | 5.51E-14 | 2.26E-15 | 8.62 | 24.0196595 | 2.82E-01 | 37005570  | 37005693  | NC_000013.10 |
| cg21613389 | 5.51E-14 | 2.27E-15 | 8.62 | 24.0190321 | 1.57E-01 | 2807593   | 2807716   | NC_000017.10 |
| cg05214685 | 5.52E-14 | 2.27E-15 | 8.62 | 24.0186055 | 1.72E-01 | 223177493 | 223177616 | NC_000002.11 |
| cg00951108 | 5.53E-14 | 2.27E-15 | 8.62 | 24.0149537 | 4.64E-02 | 110416982 | 110417105 | NC_000001.10 |
| cg16635314 | 5.55E-14 | 2.28E-15 | 8.62 | 24.0126924 | 2.09E-01 | 31580299  | 31580422  | NC_000016.9  |
| cg06052479 | 5.55E-14 | 2.28E-15 | 8.62 | 24.0125704 | 8.65E-02 | 1050258   | 1050381   | NC_000016.9  |
| cg21930842 | 5.56E-14 | 2.29E-15 | 8.62 | 24.009329  | 1.44E-01 | 241631663 | 241631786 | NC_000002.11 |
| cg21745612 | 5.59E-14 | 2.30E-15 | 8.62 | 24.0038026 | 1.91E-01 | 32907636  | 32907759  | NC_000017.10 |
| cg12460765 | 5.60E-14 | 2.30E-15 | 8.62 | 24.0026119 | 2.65E-02 | 2415105   | 2415228   | NC_000007.13 |
| cg13462129 | 5.61E-14 | 2.31E-15 | 8.62 | 24.0000526 | 2.05E-01 | 96651281  | 96651404  | NC_000007.13 |
| cg16381449 | 5.62E-14 | 2.31E-15 | 8.62 | 23.9980081 | 4.38E-02 | 44281505  | 44281628  | NC_000015.9  |
| cg00920668 | 5.63E-14 | 2.32E-15 | 8.62 | 23.9967292 | 1.80E-01 | 207991122 | 207991245 | NC_000001.10 |
| cg14693804 | 5.63E-14 | 2.32E-15 | 8.62 | 23.9966607 | 7.41E-02 | 92757970  | 92758093  | NC_000005.9  |
| cg06260709 | 5.63E-14 | 2.32E-15 | 8.62 | 23.9965757 | 1.17E-01 | 48626621  | 48626744  | NC_000020.10 |



|            |          |          |      |            |          |           |           |              |
|------------|----------|----------|------|------------|----------|-----------|-----------|--------------|
| cg04131898 | 5.65E-14 | 2.32E-15 | 8.62 | 23.9937342 | 1.93E-01 | 32459428  | 32459551  | NC_000011.9  |
| cg07992340 | 5.65E-14 | 2.32E-15 | 8.62 | 23.993521  | 9.86E-02 | 70320238  | 70320361  | NC_000016.9  |
| cg12124922 | 5.66E-14 | 2.33E-15 | 8.62 | 23.9913807 | 2.92E-01 | 158150649 | 158150772 | NC_000001.10 |
| cg03386971 | 5.66E-14 | 2.33E-15 | 8.62 | 23.990733  | 1.09E-01 | 46328304  | 46328427  | NC_000022.10 |
| cg02808379 | 5.66E-14 | 2.33E-15 | 8.62 | 23.9902448 | 8.28E-02 | 3502739   | 3502862   | NC_000002.11 |
| cg01944655 | 5.68E-14 | 2.34E-15 | 8.62 | 23.9877276 | 2.00E-01 | 119418804 | 119418927 | NC_000012.11 |
| cg23632985 | 5.70E-14 | 2.35E-15 | 8.61 | 23.9838451 | 2.36E-01 | 20184637  | 20184760  | NC_000011.9  |
| cg13490403 | 5.70E-14 | 2.35E-15 | 8.61 | 23.9831309 | 2.08E-01 | 124982413 | 124982536 | NC_000009.11 |
| cg01419567 | 5.70E-14 | 2.35E-15 | 8.61 | 23.9828706 | 2.40E-01 | 77594595  | 77594718  | NC_000008.10 |
| cg16079541 | 5.70E-14 | 2.35E-15 | 8.61 | 23.9825998 | 7.54E-02 | 30848846  | 30848969  | NC_000006.11 |
| cg27111463 | 5.71E-14 | 2.35E-15 | 8.61 | 23.9823334 | 2.21E-01 | 88751405  | 88751528  | NC_000002.11 |
| cg20331241 | 5.71E-14 | 2.35E-15 | 8.61 | 23.9810867 | 4.81E-02 | 32052409  | 32052532  | NC_000006.11 |
| cg05238769 | 5.71E-14 | 2.35E-15 | 8.61 | 23.9807285 | 2.03E-01 | 34399260  | 34399383  | NC_000021.8  |
| cg23865240 | 5.73E-14 | 2.36E-15 | 8.61 | 23.9771848 | 1.84E-01 | 27134109  | 27134232  | NC_000007.13 |
| cg10887069 | 5.73E-14 | 2.36E-15 | 8.61 | 23.9769064 | 1.28E-01 | 178993698 | 178993821 | NC_000001.10 |
| cg06463958 | 5.75E-14 | 2.37E-15 | 8.61 | 23.9746695 | 3.08E-01 | 166582393 | 166582516 | NC_000006.11 |
| cg04702989 | 5.79E-14 | 2.39E-15 | 8.61 | 23.9672241 | 1.08E-01 | 31053962  | 31054085  | NC_000016.9  |
| cg17946668 | 5.79E-14 | 2.39E-15 | 8.61 | 23.966609  | 3.69E-02 | 231006796 | 231006919 | NC_000001.10 |
| cg09684066 | 5.80E-14 | 2.39E-15 | 8.61 | 23.9657857 | 1.17E-01 | 183891565 | 183891688 | NC_000001.10 |
| cg17014436 | 5.80E-14 | 2.39E-15 | 8.61 | 23.9650142 | 6.42E-02 | 45206948  | 45207071  | NC_000021.8  |
| cg09813248 | 5.80E-14 | 2.39E-15 | 8.61 | 23.9641744 | 1.73E-01 | 121164194 | 121164317 | NC_000012.11 |
| cg23971170 | 5.81E-14 | 2.40E-15 | 8.61 | 23.9630888 | 2.09E-01 | 165326269 | 165326392 | NC_000001.10 |
| cg24736989 | 5.82E-14 | 2.40E-15 | 8.61 | 23.9607813 | 2.13E-01 | 60973904  | 60974027  | NC_000014.8  |
| cg03994318 | 5.86E-14 | 2.42E-15 | 8.61 | 23.954737  | 2.66E-01 | 109147921 | 109148044 | NC_000013.10 |
| cg08704302 | 5.87E-14 | 2.42E-15 | 8.61 | 23.9527172 | 1.24E-01 | 65373833  | 65373956  | NC_000015.9  |

|            |          |          |      |            |          |           |           |              |
|------------|----------|----------|------|------------|----------|-----------|-----------|--------------|
| cg14772639 | 5.89E-14 | 2.43E-15 | 8.61 | 23.9482553 | 1.36E-01 | 128711564 | 128711687 | NC_000002.11 |
| cg03847373 | 5.90E-14 | 2.44E-15 | 8.61 | 23.9465053 | 2.39E-01 | 50265767  | 50265890  | NC_000005.9  |
| cg10457689 | 5.91E-14 | 2.44E-15 | 8.61 | 23.9442265 | 1.27E-01 | 66621696  | 66621819  | NC_000008.10 |
| cg10056132 | 5.92E-14 | 2.45E-15 | 8.61 | 23.9432733 | 1.66E-01 | 50887731  | 50887854  | NC_000010.10 |
| cg07922843 | 5.94E-14 | 2.46E-15 | 8.61 | 23.9393374 | 1.69E-01 | 92083173  | 92083296  | NC_000001.10 |
| cg23052568 | 5.95E-14 | 2.46E-15 | 8.61 | 23.9382153 | 2.86E-01 | 42995527  | 42995650  | NC_000005.9  |
| cg16706905 | 5.96E-14 | 2.46E-15 | 8.61 | 23.9364601 | 4.59E-02 | 2650027   | 2650150   | NC_000007.13 |
| cg16460383 | 5.97E-14 | 2.47E-15 | 8.61 | 23.9346586 | 1.76E-01 | 818890    | 819013    | NC_000017.10 |
| cg00699993 | 6.02E-14 | 2.49E-15 | 8.61 | 23.9258881 | 2.05E-01 | 158141570 | 158141693 | NC_000004.11 |
| cg16851417 | 6.02E-14 | 2.49E-15 | 8.61 | 23.9248976 | 2.03E-01 | 38077042  | 38077165  | NC_000021.8  |
| cg10859327 | 6.02E-14 | 2.49E-15 | 8.61 | 23.9244794 | 1.45E-01 | 101704782 | 101704905 | NC_000010.10 |
| cg13638420 | 6.04E-14 | 2.50E-15 | 8.61 | 23.9223918 | 1.83E-01 | 32448293  | 32448416  | NC_000011.9  |
| cg13976823 | 6.04E-14 | 2.50E-15 | 8.61 | 23.9221985 | 8.39E-02 | 137396107 | 137396230 | NC_000009.11 |
| cg02333960 | 6.05E-14 | 2.51E-15 | 8.6  | 23.919018  | 1.33E-01 | 1012935   | 1013058   | NC_000007.13 |
| cg13561879 | 6.09E-14 | 2.52E-15 | 8.6  | 23.9134283 | 1.76E-01 | 35092687  | 35092810  | NC_000008.10 |
| cg19810598 | 6.10E-14 | 2.53E-15 | 8.6  | 23.9117039 | 2.13E-01 | 50892674  | 50892797  | NC_000001.10 |
| cg19472098 | 6.11E-14 | 2.53E-15 | 8.6  | 23.9093034 | 1.97E-01 | 175809    | 175932    | NC_000012.11 |
| cg21546671 | 6.11E-14 | 2.53E-15 | 8.6  | 23.9088592 | 2.91E-01 | 46655387  | 46655510  | NC_000017.10 |
| cg05109569 | 6.12E-14 | 2.54E-15 | 8.6  | 23.9073392 | 1.57E-01 | 27146430  | 27146553  | NC_000007.13 |
| cg02960016 | 6.14E-14 | 2.54E-15 | 8.6  | 23.9046824 | 8.97E-02 | 11192067  | 11192190  | NC_000003.11 |
| cg18808076 | 6.15E-14 | 2.55E-15 | 8.6  | 23.9032533 | 4.83E-02 | 3074184   | 3074307   | NC_000011.9  |
| cg16471110 | 6.15E-14 | 2.55E-15 | 8.6  | 23.9024281 | 3.47E-02 | 77133818  | 77133941  | NC_000018.9  |
| cg00933415 | 6.16E-14 | 2.56E-15 | 8.6  | 23.8999309 | 6.56E-02 | 33135453  | 33135576  | NC_000006.11 |
| cg18520696 | 6.19E-14 | 2.57E-15 | 8.6  | 23.8947944 | 1.51E-01 | 4631822   | 4631945   | NC_000017.10 |
| cg00288463 | 6.20E-14 | 2.57E-15 | 8.6  | 23.8945715 | 1.21E-01 | 223382426 | 223382549 | NC_000002.11 |

|            |          |          |      |            |          |           |           |              |
|------------|----------|----------|------|------------|----------|-----------|-----------|--------------|
| cg19047670 | 6.20E-14 | 2.57E-15 | 8.6  | 23.8936078 | 7.10E-02 | 69461451  | 69461574  | NC_000011.9  |
| cg04553307 | 6.21E-14 | 2.58E-15 | 8.6  | 23.8920757 | 1.26E-01 | 922775    | 922898    | NC_000007.13 |
| cg15980539 | 6.21E-14 | 2.58E-15 | 8.6  | 23.8914987 | 1.96E-01 | 152128865 | 152128988 | NC_000006.11 |
| cg09096555 | 6.22E-14 | 2.58E-15 | 8.6  | 23.8909015 | 1.33E-01 | 72848358  | 72848481  | NC_000017.10 |
| cg20631104 | 6.22E-14 | 2.58E-15 | 8.6  | 23.8904787 | 2.44E-01 | 81951446  | 81951569  | NC_000004.11 |
| cg21220614 | 6.23E-14 | 2.59E-15 | 8.6  | 23.8885508 | 9.59E-02 | 43266108  | 43266231  | NC_000022.10 |
| cg07879474 | 6.24E-14 | 2.59E-15 | 8.6  | 23.8867352 | 8.26E-02 | 139064216 | 139064339 | NC_000005.9  |
| cg25741259 | 6.24E-14 | 2.59E-15 | 8.6  | 23.8864993 | 1.11E-01 | 6022752   | 6022875   | NC_000019.9  |
| cg24957532 | 6.25E-14 | 2.59E-15 | 8.6  | 23.8856608 | 8.94E-02 | 118730026 | 118730149 | NC_000005.9  |
| cg01216877 | 6.26E-14 | 2.60E-15 | 8.6  | 23.8831949 | 1.37E-01 | 24869928  | 24870051  | NC_000003.11 |
| cg07969619 | 6.26E-14 | 2.60E-15 | 8.6  | 23.8831005 | 2.09E-01 | 115136279 | 115136402 | NC_000012.11 |
| cg07722657 | 6.27E-14 | 2.60E-15 | 8.6  | 23.88206   | 1.64E-01 | 221060360 | 221060483 | NC_000001.10 |
| cg03159124 | 6.30E-14 | 2.62E-15 | 8.6  | 23.8767552 | 2.51E-01 | 7118077   | 7118200   | NC_000018.9  |
| cg14817655 | 6.30E-14 | 2.62E-15 | 8.6  | 23.8765628 | 2.02E-01 | 188916724 | 188916847 | NC_000004.11 |
| cg03001098 | 6.31E-14 | 2.62E-15 | 8.6  | 23.8747423 | 1.22E-01 | 55712097  | 55712220  | NC_000007.13 |
| cg07126525 | 6.33E-14 | 2.63E-15 | 8.6  | 23.8716527 | 2.35E-01 | 166218519 | 166218642 | NC_000006.11 |
| cg09538603 | 6.35E-14 | 2.64E-15 | 8.6  | 23.8685335 | 5.81E-02 | 11219986  | 11220109  | NC_000016.9  |
| cg26608174 | 6.35E-14 | 2.64E-15 | 8.6  | 23.8681837 | 1.63E-01 | 46711035  | 46711158  | NC_000017.10 |
| cg17816394 | 6.36E-14 | 2.64E-15 | 8.6  | 23.8667229 | 2.40E-01 | 235814009 | 235814132 | NC_000001.10 |
| cg18110483 | 6.37E-14 | 2.65E-15 | 8.6  | 23.8642013 | 2.00E-01 | 79330959  | 79331082  | NC_000005.9  |
| cg03995968 | 6.38E-14 | 2.65E-15 | 8.6  | 23.8632268 | 2.08E-01 | 65953812  | 65953935  | NC_000016.9  |
| cg01307461 | 6.38E-14 | 2.65E-15 | 8.6  | 23.8629958 | 5.57E-02 | 177963966 | 177964089 | NC_000003.11 |
| cg06730250 | 6.38E-14 | 2.65E-15 | 8.6  | 23.8623411 | 9.65E-02 | 177821870 | 177821993 | NC_000005.9  |
| cg03314029 | 6.38E-14 | 2.65E-15 | 8.6  | 23.8621789 | 2.25E-01 | 88496788  | 88496911  | NC_000016.9  |
| cg11649268 | 6.40E-14 | 2.66E-15 | 8.59 | 23.8589089 | 5.90E-02 | 2322610   | 2322733   | NC_000017.10 |

|            |          |          |      |            |          |           |           |              |
|------------|----------|----------|------|------------|----------|-----------|-----------|--------------|
| cg07993372 | 6.41E-14 | 2.67E-15 | 8.59 | 23.85816   | 2.92E-02 | 427084    | 427207    | NC_000016.9  |
| cg07255841 | 6.43E-14 | 2.67E-15 | 8.59 | 23.8548093 | 1.66E-01 | 531305    | 531428    | NC_000005.9  |
| cg01186062 | 6.44E-14 | 2.68E-15 | 8.59 | 23.8533177 | 4.42E-02 | 66420823  | 66420946  | NC_000007.13 |
| cg15715477 | 6.45E-14 | 2.68E-15 | 8.59 | 23.8512899 | 2.41E-01 | 65283042  | 65283165  | NC_000008.10 |
| cg21019662 | 6.45E-14 | 2.68E-15 | 8.59 | 23.8512825 | 1.20E-01 | 107176420 | 107176543 | NC_000012.11 |
| cg08865099 | 6.47E-14 | 2.69E-15 | 8.59 | 23.848356  | 1.54E-01 | 27281581  | 27281704  | NC_000007.13 |
| cg21711132 | 6.47E-14 | 2.69E-15 | 8.59 | 23.8481618 | 2.00E-01 | 27215952  | 27216075  | NC_000015.9  |
| cg08560111 | 6.48E-14 | 2.70E-15 | 8.59 | 23.8455199 | 2.23E-01 | 19147487  | 19147610  | NC_000007.13 |
| cg25903143 | 6.50E-14 | 2.71E-15 | 8.59 | 23.8434976 | 1.41E-01 | 68920466  | 68920589  | NC_000011.9  |
| cg20498414 | 6.50E-14 | 2.71E-15 | 8.59 | 23.8426104 | 2.89E-01 | 43439400  | 43439523  | NC_000020.10 |
| cg18675097 | 6.51E-14 | 2.71E-15 | 8.59 | 23.8412599 | 1.81E-01 | 28227127  | 28227250  | NC_000006.11 |
| cg14789818 | 6.52E-14 | 2.72E-15 | 8.59 | 23.8388775 | 1.50E-01 | 227748712 | 227748835 | NC_000001.10 |
| cg26555310 | 6.55E-14 | 2.73E-15 | 8.59 | 23.834318  | 1.19E-01 | 68914717  | 68914840  | NC_000001.10 |
| cg17214381 | 6.57E-14 | 2.74E-15 | 8.59 | 23.8319145 | 2.14E-01 | 188916668 | 188916791 | NC_000004.11 |
| cg15843567 | 6.57E-14 | 2.74E-15 | 8.59 | 23.8312371 | 2.59E-01 | 26223206  | 26223329  | NC_000010.10 |
| cg24529858 | 6.58E-14 | 2.74E-15 | 8.59 | 23.8292252 | 1.87E-01 | 187186949 | 187187072 | NC_000004.11 |
| cg06018296 | 6.61E-14 | 2.76E-15 | 8.59 | 23.8248517 | 1.10E-01 | 52707138  | 52707261  | NC_000013.10 |
| cg12120861 | 6.61E-14 | 2.76E-15 | 8.59 | 23.8245323 | 1.21E-01 | 61815378  | 61815501  | NC_000017.10 |
| cg23640615 | 6.61E-14 | 2.76E-15 | 8.59 | 23.8244518 | 1.60E-01 | 40034517  | 40034640  | NC_000001.10 |
| cg01972418 | 6.63E-14 | 2.76E-15 | 8.59 | 23.8226469 | 2.14E-01 | 37125430  | 37125553  | NC_000014.8  |
| cg11282657 | 6.63E-14 | 2.76E-15 | 8.59 | 23.8222636 | 1.50E-01 | 79615101  | 79615224  | NC_000017.10 |
| cg24736380 | 6.64E-14 | 2.77E-15 | 8.59 | 23.8198481 | 5.53E-02 | 3144101   | 3144224   | NC_000010.10 |
| cg11312896 | 6.66E-14 | 2.78E-15 | 8.59 | 23.816481  | 2.60E-01 | 58545122  | 58545245  | NC_000019.9  |
| cg00467553 | 6.68E-14 | 2.79E-15 | 8.59 | 23.8143143 | 1.11E-01 | 38391432  | 38391555  | NC_000009.11 |
| cg26300652 | 6.68E-14 | 2.79E-15 | 8.59 | 23.8141702 | 2.41E-01 | 33593004  | 33593127  | NC_000012.11 |

|            |          |          |      |            |          |           |           |              |
|------------|----------|----------|------|------------|----------|-----------|-----------|--------------|
| cg27170782 | 6.70E-14 | 2.80E-15 | 8.59 | 23.8113092 | 2.27E-01 | 46800028  | 46800151  | NC_000017.10 |
| cg01757312 | 6.74E-14 | 2.81E-15 | 8.59 | 23.805171  | 1.73E-01 | 112720565 | 112720688 | NC_000013.10 |
| cg21128568 | 6.75E-14 | 2.82E-15 | 8.59 | 23.8038173 | 1.32E-01 | 216411327 | 216411450 | NC_000002.11 |
| cg20743280 | 6.77E-14 | 2.83E-15 | 8.59 | 23.8002805 | 2.43E-01 | 22930884  | 22931007  | NC_000018.9  |
| cg14055896 | 6.77E-14 | 2.83E-15 | 8.59 | 23.7999226 | 2.44E-01 | 54481859  | 54481982  | NC_000019.9  |
| cg08421685 | 6.78E-14 | 2.83E-15 | 8.59 | 23.7987199 | 2.28E-01 | 238611    | 238734    | NC_000003.11 |
| cg18799217 | 6.78E-14 | 2.83E-15 | 8.59 | 23.7979852 | 1.53E-01 | 87985589  | 87985712  | NC_000005.9  |
| cg26198463 | 6.80E-14 | 2.84E-15 | 8.58 | 23.7959732 | 1.69E-01 | 72987744  | 72987867  | NC_000008.10 |
| cg05184882 | 6.83E-14 | 2.85E-15 | 8.58 | 23.7913032 | 7.64E-02 | 55509593  | 55509716  | NC_000017.10 |
| cg02323356 | 6.86E-14 | 2.87E-15 | 8.58 | 23.7868226 | 1.26E-01 | 220313153 | 220313276 | NC_000002.11 |
| cg00836482 | 6.86E-14 | 2.87E-15 | 8.58 | 23.7861285 | 2.59E-01 | 119528956 | 119529079 | NC_000003.11 |
| cg22871668 | 6.87E-14 | 2.87E-15 | 8.58 | 23.7850332 | 2.66E-01 | 133562492 | 133562615 | NC_000006.11 |
| cg16393742 | 6.89E-14 | 2.88E-15 | 8.58 | 23.7824707 | 1.62E-01 | 132922227 | 132922350 | NC_000012.11 |
| cg10813720 | 6.89E-14 | 2.88E-15 | 8.58 | 23.781833  | 6.62E-02 | 26670374  | 26670497  | NC_000001.10 |
| cg04141813 | 6.89E-14 | 2.88E-15 | 8.58 | 23.7814066 | 2.30E-01 | 216450    | 216573    | NC_000016.9  |
| cg08958294 | 6.90E-14 | 2.88E-15 | 8.58 | 23.7805809 | 2.44E-01 | 146350131 | 146350254 | NC_000006.11 |
| cg15941948 | 6.90E-14 | 2.88E-15 | 8.58 | 23.7803556 | 1.67E-01 | 2751552   | 2751675   | NC_000005.9  |
| cg19676553 | 6.91E-14 | 2.89E-15 | 8.58 | 23.7786836 | 1.48E-01 | 105751629 | 105751752 | NC_000014.8  |
| cg09853371 | 6.91E-14 | 2.89E-15 | 8.58 | 23.7781202 | 2.78E-01 | 57522145  | 57522268  | NC_000004.11 |
| cg13371883 | 6.93E-14 | 2.90E-15 | 8.58 | 23.7750172 | 1.55E-01 | 101511926 | 101512049 | NC_000002.11 |
| cg02240013 | 6.94E-14 | 2.90E-15 | 8.58 | 23.7739456 | 5.23E-02 | 48680392  | 48680515  | NC_000003.11 |
| cg26526374 | 6.96E-14 | 2.91E-15 | 8.58 | 23.7712579 | 2.39E-01 | 109674854 | 109674977 | NC_000010.10 |
| cg05934012 | 7.05E-14 | 2.95E-15 | 8.58 | 23.7579053 | 1.91E-01 | 1533852   | 1533975   | NC_000001.10 |
| cg01197831 | 7.06E-14 | 2.96E-15 | 8.58 | 23.7560951 | 1.19E-01 | 97355941  | 97356064  | NC_000009.11 |
| cg08195247 | 7.07E-14 | 2.96E-15 | 8.58 | 23.7552013 | 2.18E-01 | 176933286 | 176933409 | NC_000002.11 |

|            |          |          |      |            |          |           |           |              |
|------------|----------|----------|------|------------|----------|-----------|-----------|--------------|
| cg21830459 | 7.07E-14 | 2.96E-15 | 8.58 | 23.7543765 | 1.47E-01 | 17680563  | 17680686  | NC_000022.10 |
| cg02052915 | 7.10E-14 | 2.97E-15 | 8.58 | 23.750782  | 1.42E-01 | 46797568  | 46797691  | NC_000017.10 |
| cg25326048 | 7.15E-14 | 2.99E-15 | 8.58 | 23.7432968 | 1.85E-01 | 153446106 | 153446229 | NC_000007.13 |
| cg13210467 | 7.15E-14 | 3.00E-15 | 8.58 | 23.7428073 | 1.32E-01 | 99775443  | 99775566  | NC_000007.13 |
| cg26051135 | 7.15E-14 | 3.00E-15 | 8.58 | 23.7424583 | 6.51E-02 | 47087133  | 47087256  | NC_000010.10 |
| cg14608424 | 7.16E-14 | 3.00E-15 | 8.58 | 23.740847  | 5.27E-02 | 1079641   | 1079764   | NC_000017.10 |
| cg11273250 | 7.18E-14 | 3.01E-15 | 8.58 | 23.7387473 | 6.63E-02 | 42716703  | 42716826  | NC_000006.11 |
| cg17922359 | 7.18E-14 | 3.01E-15 | 8.58 | 23.7383252 | 1.77E-01 | 13530923  | 13531046  | NC_000004.11 |
| cg12877723 | 7.18E-14 | 3.01E-15 | 8.58 | 23.7381149 | 2.03E-01 | 57358312  | 57358435  | NC_000008.10 |
| cg20527270 | 7.19E-14 | 3.02E-15 | 8.58 | 23.7364134 | 2.78E-01 | 49468688  | 49468811  | NC_000008.10 |
| cg17338208 | 7.21E-14 | 3.02E-15 | 8.57 | 23.7340519 | 2.90E-01 | 93520024  | 93520147  | NC_000007.13 |
| cg15973818 | 7.21E-14 | 3.02E-15 | 8.57 | 23.733548  | 1.22E-01 | 53623995  | 53624118  | NC_000008.10 |
| cg18552380 | 7.21E-14 | 3.03E-15 | 8.57 | 23.7329635 | 2.28E-01 | 97685945  | 97686068  | NC_000014.8  |
| cg25038926 | 7.24E-14 | 3.04E-15 | 8.57 | 23.7291559 | 6.86E-02 | 111556206 | 111556329 | NC_000002.11 |
| cg10531355 | 7.26E-14 | 3.05E-15 | 8.57 | 23.7266726 | 1.54E-01 | 79489249  | 79489372  | NC_000005.9  |
| cg15347189 | 7.27E-14 | 3.05E-15 | 8.57 | 23.7251714 | 1.88E-01 | 187387999 | 187388122 | NC_000003.11 |
| cg01342746 | 7.27E-14 | 3.05E-15 | 8.57 | 23.7243975 | 1.52E-01 | 44449571  | 44449694  | NC_000004.11 |
| cg16791016 | 7.28E-14 | 3.05E-15 | 8.57 | 23.7238832 | 4.49E-02 | 85354618  | 85354741  | NC_000016.9  |
| cg16614288 | 7.30E-14 | 3.06E-15 | 8.57 | 23.720936  | 1.05E-01 | 17608110  | 17608233  | NC_000019.9  |
| cg14367229 | 7.31E-14 | 3.07E-15 | 8.57 | 23.7193131 | 1.78E-01 | 28367741  | 28367864  | NC_000013.10 |
| cg12411964 | 7.31E-14 | 3.07E-15 | 8.57 | 23.7186484 | 6.08E-02 | 66818958  | 66819081  | NC_000001.10 |
| cg18689332 | 7.33E-14 | 3.08E-15 | 8.57 | 23.7164421 | 1.70E-01 | 114837666 | 114837789 | NC_000012.11 |
| cg04452534 | 7.34E-14 | 3.08E-15 | 8.57 | 23.7147241 | 1.40E-01 | 56133370  | 56133493  | NC_000005.9  |
| cg22665696 | 7.34E-14 | 3.08E-15 | 8.57 | 23.7139173 | 2.17E-01 | 131768755 | 131768878 | NC_000010.10 |
| cg09740598 | 7.35E-14 | 3.09E-15 | 8.57 | 23.7132957 | 1.30E-01 | 26808425  | 26808548  | NC_000017.10 |

|            |          |          |      |            |          |           |           |              |
|------------|----------|----------|------|------------|----------|-----------|-----------|--------------|
| cg21959090 | 7.38E-14 | 3.10E-15 | 8.57 | 23.7091133 | 7.10E-02 | 45744435  | 45744558  | NC_000019.9  |
| cg10427452 | 7.38E-14 | 3.10E-15 | 8.57 | 23.708901  | 2.63E-01 | 3122030   | 3122153   | NC_000005.9  |
| cg12882697 | 7.39E-14 | 3.11E-15 | 8.57 | 23.7074054 | 1.82E-01 | 1445549   | 1445672   | NC_000005.9  |
| cg04575427 | 7.40E-14 | 3.11E-15 | 8.57 | 23.7059628 | 1.19E-01 | 44144711  | 44144834  | NC_000020.10 |
| cg20894457 | 7.44E-14 | 3.12E-15 | 8.57 | 23.7010988 | 8.80E-02 | 24584366  | 24584489  | NC_000022.10 |
| cg09527126 | 7.47E-14 | 3.14E-15 | 8.57 | 23.6961729 | 2.67E-01 | 128675283 | 128675406 | NC_000012.11 |
| cg25198120 | 7.52E-14 | 3.16E-15 | 8.57 | 23.6902577 | 1.31E-01 | 121708646 | 121708769 | NC_000003.11 |
| cg14604066 | 7.52E-14 | 3.16E-15 | 8.57 | 23.6891346 | 1.56E-01 | 139590572 | 139590695 | NC_000009.11 |
| cg11413576 | 7.55E-14 | 3.18E-15 | 8.57 | 23.6853116 | 1.04E-01 | 59650783  | 59650906  | NC_000008.10 |
| cg16884902 | 7.57E-14 | 3.18E-15 | 8.57 | 23.6831405 | 1.90E-01 | 20617974  | 20618097  | NC_000011.9  |
| cg18564075 | 7.58E-14 | 3.19E-15 | 8.57 | 23.6818616 | 8.57E-02 | 116705063 | 116705186 | NC_000012.11 |
| cg10770742 | 7.58E-14 | 3.19E-15 | 8.57 | 23.6818378 | 2.65E-01 | 151107285 | 151107408 | NC_000007.13 |
| cg23279152 | 7.61E-14 | 3.20E-15 | 8.57 | 23.6772794 | 8.49E-02 | 75856823  | 75856946  | NC_000004.11 |
| cg07166291 | 7.62E-14 | 3.21E-15 | 8.57 | 23.6752128 | 1.50E-01 | 95971994  | 95972117  | NC_000002.11 |
| cg16136290 | 7.63E-14 | 3.21E-15 | 8.57 | 23.6738448 | 7.81E-02 | 112280233 | 112280356 | NC_000001.10 |
| cg13450005 | 7.63E-14 | 3.21E-15 | 8.57 | 23.6732975 | 2.28E-01 | 32457257  | 32457380  | NC_000011.9  |
| cg07447431 | 7.63E-14 | 3.21E-15 | 8.57 | 23.6732939 | 4.39E-02 | 27795808  | 27795931  | NC_000010.10 |
| cg01019587 | 7.64E-14 | 3.21E-15 | 8.57 | 23.6730903 | 2.04E-01 | 53286921  | 53287044  | NC_000007.13 |
| cg04712635 | 7.69E-14 | 3.24E-15 | 8.56 | 23.6653249 | 9.54E-02 | 141203013 | 141203136 | NC_000005.9  |
| cg25993718 | 7.71E-14 | 3.25E-15 | 8.56 | 23.66293   | 1.77E-01 | 54580196  | 54580319  | NC_000020.10 |
| cg11129341 | 7.72E-14 | 3.25E-15 | 8.56 | 23.6621072 | 1.29E-01 | 19870761  | 19870884  | NC_000011.9  |
| cg04935449 | 7.72E-14 | 3.25E-15 | 8.56 | 23.6613061 | 1.77E-01 | 139208871 | 139208994 | NC_000007.13 |
| cg20823772 | 7.73E-14 | 3.26E-15 | 8.56 | 23.6605168 | 1.77E-01 | 99962013  | 99962136  | NC_000008.10 |
| cg14832406 | 7.73E-14 | 3.26E-15 | 8.56 | 23.6597638 | 1.61E-01 | 75602451  | 75602574  | NC_000001.10 |
| cg20435370 | 7.73E-14 | 3.26E-15 | 8.56 | 23.6594914 | 2.00E-01 | 80646370  | 80646493  | NC_000009.11 |

|            |          |          |      |            |          |           |           |              |
|------------|----------|----------|------|------------|----------|-----------|-----------|--------------|
| cg02145310 | 7.76E-14 | 3.27E-15 | 8.56 | 23.6560184 | 1.21E-01 | 80844809  | 80844932  | NC_000010.10 |
| cg20677171 | 7.77E-14 | 3.28E-15 | 8.56 | 23.6539207 | 1.03E-01 | 56608297  | 56608420  | NC_000019.9  |
| cg14978637 | 7.78E-14 | 3.28E-15 | 8.56 | 23.6532021 | 1.31E-01 | 41950817  | 41950940  | NC_000001.10 |
| cg09628488 | 7.78E-14 | 3.28E-15 | 8.56 | 23.6527291 | 1.11E-01 | 122598941 | 122599064 | NC_000008.10 |
| cg26171271 | 7.79E-14 | 3.28E-15 | 8.56 | 23.6521081 | 8.42E-02 | 36518358  | 36518481  | NC_000006.11 |
| cg20617977 | 7.79E-14 | 3.29E-15 | 8.56 | 23.651359  | 9.44E-02 | 38053457  | 38053580  | NC_000004.11 |
| cg26736812 | 7.79E-14 | 3.29E-15 | 8.56 | 23.6511529 | 2.02E-01 | 48042353  | 48042476  | NC_000017.10 |
| cg09935495 | 7.79E-14 | 3.29E-15 | 8.56 | 23.6507491 | 9.27E-02 | 31690157  | 31690280  | NC_000006.11 |
| cg06295238 | 7.80E-14 | 3.29E-15 | 8.56 | 23.650004  | 6.16E-02 | 1205447   | 1205570   | NC_000004.11 |
| cg19134568 | 7.80E-14 | 3.29E-15 | 8.56 | 23.6493355 | 1.42E-01 | 147561339 | 147561462 | NC_000004.11 |
| cg10943359 | 7.81E-14 | 3.30E-15 | 8.56 | 23.6484726 | 1.64E-01 | 165304531 | 165304654 | NC_000004.11 |
| cg04115680 | 7.82E-14 | 3.30E-15 | 8.56 | 23.6473708 | 2.50E-01 | 75889229  | 75889352  | NC_000007.13 |
| cg08195921 | 7.82E-14 | 3.30E-15 | 8.56 | 23.6468276 | 9.79E-02 | 131701622 | 131701745 | NC_000012.11 |
| cg16616521 | 7.85E-14 | 3.31E-15 | 8.56 | 23.643902  | 2.40E-01 | 31821388  | 31821511  | NC_000011.9  |
| cg02252323 | 7.88E-14 | 3.33E-15 | 8.56 | 23.6388452 | 1.76E-01 | 22414339  | 22414462  | NC_000003.11 |
| cg10193069 | 7.89E-14 | 3.33E-15 | 8.56 | 23.6380295 | 1.57E-01 | 50058971  | 50059094  | NC_000019.9  |
| cg12679749 | 7.95E-14 | 3.36E-15 | 8.56 | 23.6306704 | 9.55E-02 | 81101251  | 81101374  | NC_000004.11 |
| cg27621129 | 7.96E-14 | 3.36E-15 | 8.56 | 23.6291751 | 1.68E-01 | 19152121  | 19152244  | NC_000007.13 |
| cg19724555 | 7.97E-14 | 3.37E-15 | 8.56 | 23.6272498 | 1.96E-01 | 132906439 | 132906562 | NC_000012.11 |
| cg09403956 | 7.97E-14 | 3.37E-15 | 8.56 | 23.6268176 | 1.02E-01 | 31324774  | 31324897  | NC_000010.10 |
| cg05327864 | 7.98E-14 | 3.37E-15 | 8.56 | 23.6261092 | 2.45E-01 | 136554352 | 136554475 | NC_000007.13 |
| cg20182232 | 8.00E-14 | 3.38E-15 | 8.56 | 23.6240681 | 8.69E-02 | 118865365 | 118865488 | NC_000003.11 |
| cg25729445 | 8.06E-14 | 3.41E-15 | 8.56 | 23.6156058 | 1.83E-01 | 29595347  | 29595470  | NC_000006.11 |
| cg20080983 | 8.07E-14 | 3.41E-15 | 8.56 | 23.6144842 | 8.10E-02 | 29430271  | 29430394  | NC_000022.10 |
| cg09137718 | 8.09E-14 | 3.42E-15 | 8.56 | 23.6116582 | 1.15E-01 | 140239682 | 140239805 | NC_000007.13 |



|            |          |          |      |            |          |           |           |              |
|------------|----------|----------|------|------------|----------|-----------|-----------|--------------|
| cg03790422 | 8.09E-14 | 3.42E-15 | 8.56 | 23.6114792 | 3.77E-02 | 39552818  | 39552941  | NC_000017.10 |
| cg15237494 | 8.10E-14 | 3.43E-15 | 8.55 | 23.6101049 | 2.21E-01 | 28339334  | 28339457  | NC_000021.8  |
| cg00920572 | 8.11E-14 | 3.43E-15 | 8.55 | 23.6094412 | 1.29E-01 | 54349349  | 54349472  | NC_000012.11 |
| cg13764991 | 8.13E-14 | 3.44E-15 | 8.55 | 23.6065938 | 2.19E-01 | 1052046   | 1052169   | NC_000009.11 |
| cg23508264 | 8.16E-14 | 3.45E-15 | 8.55 | 23.6025874 | 1.73E-01 | 62415024  | 62415147  | NC_000011.9  |
| cg24658517 | 8.17E-14 | 3.45E-15 | 8.55 | 23.6018875 | 1.65E-01 | 221065322 | 221065445 | NC_000001.10 |
| cg13791131 | 8.21E-14 | 3.47E-15 | 8.55 | 23.5966953 | 2.35E-01 | 2161892   | 2162015   | NC_000011.9  |
| cg14016236 | 8.23E-14 | 3.48E-15 | 8.55 | 23.593749  | 2.19E-01 | 171792545 | 171792668 | NC_000003.11 |
| cg08468187 | 8.24E-14 | 3.49E-15 | 8.55 | 23.5930987 | 1.30E-01 | 54963323  | 54963446  | NC_000019.9  |
| cg17424999 | 8.28E-14 | 3.50E-15 | 8.55 | 23.5881064 | 1.85E-01 | 20622988  | 20623111  | NC_000011.9  |
| cg07139668 | 8.29E-14 | 3.51E-15 | 8.55 | 23.5858535 | 3.35E-02 | 46686806  | 46686929  | NC_000001.10 |
| cg05783139 | 8.30E-14 | 3.52E-15 | 8.55 | 23.5847574 | 2.22E-01 | 198650985 | 198651108 | NC_000002.11 |
| cg01022121 | 8.31E-14 | 3.52E-15 | 8.55 | 23.583067  | 1.07E-01 | 2410885   | 2411008   | NC_000001.10 |
| cg10755973 | 8.32E-14 | 3.52E-15 | 8.55 | 23.582475  | 2.65E-01 | 126773879 | 126774002 | NC_000009.11 |
| cg04339613 | 8.32E-14 | 3.53E-15 | 8.55 | 23.5820188 | 1.28E-01 | 131757303 | 131757426 | NC_000010.10 |
| cg06219206 | 8.33E-14 | 3.53E-15 | 8.55 | 23.5807246 | 1.26E-01 | 24383177  | 24383300  | NC_000012.11 |
| cg08363794 | 8.34E-14 | 3.54E-15 | 8.55 | 23.5791284 | 1.69E-01 | 176986460 | 176986583 | NC_000002.11 |
| cg02244431 | 8.35E-14 | 3.54E-15 | 8.55 | 23.5789623 | 1.80E-01 | 236588226 | 236588349 | NC_000002.11 |
| cg00408285 | 8.35E-14 | 3.54E-15 | 8.55 | 23.5784006 | 1.51E-01 | 85670262  | 85670385  | NC_000016.9  |
| cg06879152 | 8.39E-14 | 3.56E-15 | 8.55 | 23.5734585 | 1.62E-01 | 60937041  | 60937164  | NC_000010.10 |
| cg26188621 | 8.39E-14 | 3.56E-15 | 8.55 | 23.5727993 | 1.41E-01 | 76983413  | 76983536  | NC_000010.10 |
| cg11925066 | 8.40E-14 | 3.56E-15 | 8.55 | 23.5717962 | 1.24E-01 | 132182304 | 132182427 | NC_000002.11 |
| cg25321212 | 8.43E-14 | 3.57E-15 | 8.55 | 23.5684978 | 9.25E-02 | 128993187 | 128993310 | NC_000010.10 |
| cg25953146 | 8.43E-14 | 3.57E-15 | 8.55 | 23.5683005 | 6.13E-02 | 132558939 | 132559062 | NC_000002.11 |
| cg18417954 | 8.45E-14 | 3.59E-15 | 8.55 | 23.565359  | 1.52E-01 | 55672513  | 55672636  | NC_000019.9  |

|            |          |          |      |            |          |           |           |              |
|------------|----------|----------|------|------------|----------|-----------|-----------|--------------|
| cg16172329 | 8.48E-14 | 3.60E-15 | 8.55 | 23.5615339 | 1.71E-01 | 162907368 | 162907491 | NC_000002.11 |
| cg07483638 | 8.49E-14 | 3.60E-15 | 8.55 | 23.5604991 | 5.95E-02 | 155674621 | 155674744 | NC_000007.13 |
| cg20631014 | 8.51E-14 | 3.61E-15 | 8.55 | 23.5582548 | 2.05E-01 | 84419242  | 84419365  | NC_000006.11 |
| cg12600556 | 8.51E-14 | 3.61E-15 | 8.55 | 23.5578521 | 8.96E-02 | 94504969  | 94505092  | NC_000001.10 |
| cg06598987 | 8.51E-14 | 3.61E-15 | 8.55 | 23.5578416 | 6.26E-02 | 25846548  | 25846671  | NC_000017.10 |
| cg13382504 | 8.54E-14 | 3.62E-15 | 8.55 | 23.5544344 | 4.43E-02 | 112170902 | 112171025 | NC_000006.11 |
| cg00122851 | 8.55E-14 | 3.63E-15 | 8.55 | 23.5537211 | 6.13E-02 | 1413159   | 1413282   | NC_000016.9  |
| cg21539229 | 8.57E-14 | 3.64E-15 | 8.55 | 23.5506408 | 1.30E-01 | 48413146  | 48413269  | NC_000003.11 |
| cg11791452 | 8.61E-14 | 3.66E-15 | 8.54 | 23.5460394 | 1.14E-01 | 121663137 | 121663260 | NC_000002.11 |
| cg04154911 | 8.62E-14 | 3.66E-15 | 8.54 | 23.5443729 | 8.21E-02 | 36725928  | 36726051  | NC_000002.11 |
| cg23262897 | 8.64E-14 | 3.67E-15 | 8.54 | 23.5419037 | 1.52E-01 | 140718655 | 140718778 | NC_000005.9  |
| cg19673418 | 8.67E-14 | 3.68E-15 | 8.54 | 23.5386448 | 4.54E-02 | 31600630  | 31600753  | NC_000006.11 |
| cg18777299 | 8.67E-14 | 3.68E-15 | 8.54 | 23.5385682 | 1.52E-01 | 26994740  | 26994863  | NC_000004.11 |
| cg02837536 | 8.67E-14 | 3.68E-15 | 8.54 | 23.5383178 | 2.12E-01 | 4771682   | 4771805   | NC_000001.10 |
| cg04188273 | 8.67E-14 | 3.69E-15 | 8.54 | 23.5378895 | 2.47E-01 | 110223830 | 110223953 | NC_000004.11 |
| cg08415508 | 8.69E-14 | 3.69E-15 | 8.54 | 23.5357612 | 9.81E-02 | 144303645 | 144303768 | NC_000008.10 |
| cg10586423 | 8.73E-14 | 3.71E-15 | 8.54 | 23.5318726 | 8.79E-02 | 111015513 | 111015636 | NC_000001.10 |
| cg02829688 | 8.73E-14 | 3.71E-15 | 8.54 | 23.5308273 | 1.65E-01 | 119527008 | 119527131 | NC_000001.10 |
| cg23427269 | 8.75E-14 | 3.72E-15 | 8.54 | 23.5290285 | 2.75E-01 | 70995444  | 70995567  | NC_000002.11 |
| cg04481096 | 8.76E-14 | 3.72E-15 | 8.54 | 23.5277597 | 2.26E-01 | 27142100  | 27142223  | NC_000007.13 |
| cg05527869 | 8.78E-14 | 3.73E-15 | 8.54 | 23.52523   | 3.17E-01 | 35294476  | 35294599  | NC_000017.10 |
| cg27582240 | 8.81E-14 | 3.75E-15 | 8.54 | 23.5216518 | 1.30E-01 | 75380514  | 75380637  | NC_000018.9  |
| cg14700684 | 8.82E-14 | 3.75E-15 | 8.54 | 23.52087   | 1.11E-01 | 22086413  | 22086536  | NC_000008.10 |
| cg11410718 | 8.85E-14 | 3.77E-15 | 8.54 | 23.5168117 | 1.93E-01 | 27170412  | 27170535  | NC_000007.13 |
| cg06734979 | 8.85E-14 | 3.77E-15 | 8.54 | 23.5164794 | 7.62E-02 | 88457445  | 88457568  | NC_000016.9  |

|            |          |          |      |            |          |           |           |              |
|------------|----------|----------|------|------------|----------|-----------|-----------|--------------|
| cg24408200 | 8.88E-14 | 3.78E-15 | 8.54 | 23.5128245 | 1.10E-01 | 80914695  | 80914818  | NC_000017.10 |
| cg26186727 | 8.89E-14 | 3.79E-15 | 8.54 | 23.5117021 | 1.92E-01 | 70534534  | 70534657  | NC_000018.9  |
| cg03718025 | 8.93E-14 | 3.80E-15 | 8.54 | 23.5075193 | 1.45E-01 | 12038128  | 12038251  | NC_000018.9  |
| cg08478121 | 8.94E-14 | 3.80E-15 | 8.54 | 23.5066547 | 1.31E-01 | 88545571  | 88545694  | NC_000016.9  |
| cg15990629 | 8.94E-14 | 3.81E-15 | 8.54 | 23.5062988 | 1.09E-01 | 25054873  | 25054996  | NC_000012.11 |
| cg02191909 | 8.96E-14 | 3.81E-15 | 8.54 | 23.5045452 | 7.70E-02 | 33273716  | 33273839  | NC_000006.11 |
| cg14907769 | 8.98E-14 | 3.82E-15 | 8.54 | 23.5021745 | 2.30E-01 | 49468941  | 49469064  | NC_000008.10 |
| cg24835238 | 9.03E-14 | 3.85E-15 | 8.54 | 23.4958453 | 1.38E-01 | 34872733  | 34872856  | NC_000015.9  |
| cg05726756 | 9.04E-14 | 3.85E-15 | 8.54 | 23.4952204 | 1.86E-01 | 46608288  | 46608411  | NC_000017.10 |
| cg21942576 | 9.04E-14 | 3.85E-15 | 8.54 | 23.4950527 | 9.97E-02 | 46126885  | 46127008  | NC_000001.10 |
| cg02745211 | 9.04E-14 | 3.85E-15 | 8.54 | 23.4945845 | 2.67E-01 | 132757106 | 132757229 | NC_000003.11 |
| cg07102450 | 9.05E-14 | 3.86E-15 | 8.54 | 23.493627  | 8.99E-02 | 4355464   | 4355587   | NC_000016.9  |
| cg09573795 | 9.05E-14 | 3.86E-15 | 8.54 | 23.4934297 | 1.63E-01 | 4863874   | 4863997   | NC_000004.11 |
| cg24928938 | 9.07E-14 | 3.86E-15 | 8.54 | 23.4915928 | 6.61E-02 | 4371934   | 4372057   | NC_000019.9  |
| cg10539928 | 9.07E-14 | 3.87E-15 | 8.54 | 23.4909841 | 4.80E-02 | 164693462 | 164693585 | NC_000001.10 |
| cg03437186 | 9.09E-14 | 3.87E-15 | 8.54 | 23.4891772 | 2.32E-01 | 45614848  | 45614971  | NC_000007.13 |
| cg01998213 | 9.10E-14 | 3.88E-15 | 8.54 | 23.4877929 | 1.96E-01 | 19149989  | 19150112  | NC_000007.13 |
| cg13589108 | 9.11E-14 | 3.88E-15 | 8.54 | 23.4864957 | 2.39E-01 | 177140680 | 177140803 | NC_000001.10 |
| cg05524354 | 9.12E-14 | 3.89E-15 | 8.53 | 23.4850282 | 1.55E-01 | 129797760 | 129797883 | NC_000010.10 |
| cg10157936 | 9.17E-14 | 3.91E-15 | 8.53 | 23.4798249 | 1.01E-01 | 105220767 | 105220890 | NC_000014.8  |
| cg24216506 | 9.18E-14 | 3.91E-15 | 8.53 | 23.4785737 | 8.66E-02 | 3572257   | 3572380   | NC_000010.10 |
| cg10985956 | 9.18E-14 | 3.92E-15 | 8.53 | 23.4783326 | 6.94E-02 | 87774698  | 87774821  | NC_000001.10 |
| cg12300724 | 9.19E-14 | 3.92E-15 | 8.53 | 23.4774768 | 2.37E-01 | 72460135  | 72460258  | NC_000008.10 |
| cg05787507 | 9.19E-14 | 3.92E-15 | 8.53 | 23.4772191 | 4.74E-02 | 32751472  | 32751595  | NC_000001.10 |
| cg04249522 | 9.19E-14 | 3.92E-15 | 8.53 | 23.4771361 | 2.09E-01 | 166218512 | 166218635 | NC_000006.11 |

|            |          |          |      |            |          |           |           |              |
|------------|----------|----------|------|------------|----------|-----------|-----------|--------------|
| cg15725639 | 9.20E-14 | 3.92E-15 | 8.53 | 23.4762204 | 1.62E-01 | 47856924  | 47857047  | NC_000019.9  |
| cg17612681 | 9.21E-14 | 3.93E-15 | 8.53 | 23.474699  | 1.36E-01 | 66298197  | 66298320  | NC_000002.11 |
| cg02463137 | 9.23E-14 | 3.94E-15 | 8.53 | 23.4720142 | 7.74E-02 | 125778039 | 125778162 | NC_000010.10 |
| cg08732466 | 9.25E-14 | 3.95E-15 | 8.53 | 23.4699347 | 1.44E-01 | 2982592   | 2982715   | NC_000001.10 |
| cg08337773 | 9.25E-14 | 3.95E-15 | 8.53 | 23.4697916 | 7.58E-02 | 72100575  | 72100698  | NC_000015.9  |
| cg14695492 | 9.28E-14 | 3.96E-15 | 8.53 | 23.4660971 | 1.51E-01 | 143545574 | 143545697 | NC_000008.10 |
| cg17208528 | 9.31E-14 | 3.97E-15 | 8.53 | 23.4637843 | 2.54E-01 | 134211114 | 134211237 | NC_000006.11 |
| cg06720014 | 9.31E-14 | 3.98E-15 | 8.53 | 23.4630928 | 7.46E-02 | 19390728  | 19390851  | NC_000001.10 |
| cg23646375 | 9.33E-14 | 3.98E-15 | 8.53 | 23.4612431 | 1.62E-01 | 209847618 | 209847741 | NC_000001.10 |
| cg18539122 | 9.34E-14 | 3.99E-15 | 8.53 | 23.4599997 | 2.00E-01 | 79169872  | 79169995  | NC_000013.10 |
| cg23538468 | 9.34E-14 | 3.99E-15 | 8.53 | 23.4599071 | 9.76E-02 | 140588019 | 140588142 | NC_000009.11 |
| cg25938646 | 9.35E-14 | 3.99E-15 | 8.53 | 23.4587059 | 1.94E-01 | 84456681  | 84456804  | NC_000013.10 |
| cg06337342 | 9.37E-14 | 4.00E-15 | 8.53 | 23.4565273 | 7.55E-02 | 27963567  | 27963690  | NC_000007.13 |
| cg11724970 | 9.40E-14 | 4.02E-15 | 8.53 | 23.4528918 | 1.51E-01 | 27182493  | 27182616  | NC_000007.13 |
| cg02662828 | 9.41E-14 | 4.02E-15 | 8.53 | 23.4521115 | 1.13E-01 | 48492848  | 48492971  | NC_000004.11 |
| cg26101942 | 9.44E-14 | 4.04E-15 | 8.53 | 23.4480403 | 7.10E-02 | 28232176  | 28232299  | NC_000008.10 |
| cg12689205 | 9.44E-14 | 4.04E-15 | 8.53 | 23.44778   | 1.30E-01 | 110321674 | 110321797 | NC_000013.10 |
| cg22769941 | 9.46E-14 | 4.04E-15 | 8.53 | 23.4463515 | 2.42E-01 | 20690628  | 20690751  | NC_000011.9  |
| cg17322443 | 9.47E-14 | 4.05E-15 | 8.53 | 23.4453842 | 1.76E-01 | 152133420 | 152133543 | NC_000007.13 |
| cg12143789 | 9.49E-14 | 4.06E-15 | 8.53 | 23.4433179 | 2.26E-01 | 72594461  | 72594584  | NC_000005.9  |
| cg10931190 | 9.52E-14 | 4.07E-15 | 8.53 | 23.4396485 | 1.91E-01 | 110406506 | 110406629 | NC_000005.9  |
| cg09316122 | 9.52E-14 | 4.07E-15 | 8.53 | 23.439088  | 2.31E-01 | 228195522 | 228195645 | NC_000001.10 |
| cg17039236 | 9.54E-14 | 4.08E-15 | 8.53 | 23.4369768 | 2.12E-01 | 77548049  | 77548172  | NC_000018.9  |
| cg12467749 | 9.55E-14 | 4.08E-15 | 8.53 | 23.4364402 | 2.12E-01 | 35294430  | 35294553  | NC_000007.13 |
| cg10984178 | 9.56E-14 | 4.09E-15 | 8.53 | 23.4349596 | 1.15E-01 | 946099    | 946222    | NC_000001.10 |

|            |          |          |      |            |          |           |           |              |
|------------|----------|----------|------|------------|----------|-----------|-----------|--------------|
| cg13914354 | 9.56E-14 | 4.09E-15 | 8.53 | 23.4348173 | 1.02E-01 | 139118767 | 139118890 | NC_000009.11 |
| cg10602135 | 9.57E-14 | 4.09E-15 | 8.53 | 23.4341294 | 4.94E-02 | 167645394 | 167645517 | NC_000005.9  |
| cg14473327 | 9.57E-14 | 4.10E-15 | 8.53 | 23.4339526 | 2.40E-01 | 976634    | 976757    | NC_000009.11 |
| cg22157015 | 9.58E-14 | 4.10E-15 | 8.53 | 23.4324812 | 4.29E-02 | 38120891  | 38121014  | NC_000006.11 |
| cg15465878 | 9.59E-14 | 4.11E-15 | 8.53 | 23.4310911 | 4.26E-02 | 45183988  | 45184111  | NC_000001.10 |
| cg13929627 | 9.60E-14 | 4.11E-15 | 8.53 | 23.4308308 | 1.71E-01 | 79635445  | 79635568  | NC_000009.11 |
| cg19815574 | 9.60E-14 | 4.11E-15 | 8.53 | 23.4302119 | 1.23E-01 | 47152384  | 47152507  | NC_000019.9  |
| cg19861858 | 9.61E-14 | 4.11E-15 | 8.53 | 23.4292941 | 1.25E-01 | 1019352   | 1019475   | NC_000008.10 |
| cg03882167 | 9.61E-14 | 4.12E-15 | 8.53 | 23.4291218 | 2.28E-01 | 131514163 | 131514286 | NC_000002.11 |
| cg24228819 | 9.61E-14 | 4.12E-15 | 8.53 | 23.4289788 | 2.34E-01 | 136553868 | 136553991 | NC_000007.13 |
| cg14361001 | 9.64E-14 | 4.13E-15 | 8.53 | 23.4257011 | 1.21E-01 | 83989198  | 83989321  | NC_000009.11 |
| cg09234518 | 9.66E-14 | 4.14E-15 | 8.53 | 23.4238542 | 1.98E-01 | 24771114  | 24771237  | NC_000008.10 |
| cg16654801 | 9.73E-14 | 4.17E-15 | 8.52 | 23.4162403 | 1.75E-01 | 119301763 | 119301886 | NC_000010.10 |
| cg01637244 | 9.74E-14 | 4.18E-15 | 8.52 | 23.4146351 | 1.54E-01 | 25833304  | 25833427  | NC_000003.11 |
| cg02437766 | 9.75E-14 | 4.18E-15 | 8.52 | 23.4132255 | 9.76E-02 | 53483018  | 53483141  | NC_000005.9  |
| cg15123428 | 9.78E-14 | 4.19E-15 | 8.52 | 23.4108969 | 1.88E-01 | 10186139  | 10186262  | NC_000002.11 |
| cg03526459 | 9.79E-14 | 4.20E-15 | 8.52 | 23.4093985 | 1.95E-01 | 146549940 | 146550063 | NC_000001.10 |
| cg13023870 | 9.80E-14 | 4.21E-15 | 8.52 | 23.4076362 | 2.26E-01 | 37124018  | 37124141  | NC_000014.8  |
| cg13808012 | 9.80E-14 | 4.21E-15 | 8.52 | 23.4075574 | 1.41E-01 | 244094935 | 244095058 | NC_000001.10 |
| cg03323696 | 9.81E-14 | 4.21E-15 | 8.52 | 23.4073785 | 1.86E-01 | 59189120  | 59189243  | NC_000005.9  |
| cg05134015 | 9.81E-14 | 4.21E-15 | 8.52 | 23.4072464 | 1.80E-01 | 36973365  | 36973488  | NC_000014.8  |
| cg14172137 | 9.84E-14 | 4.22E-15 | 8.52 | 23.4041026 | 9.95E-02 | 114725242 | 114725365 | NC_000006.11 |
| cg11642106 | 9.85E-14 | 4.23E-15 | 8.52 | 23.4026425 | 2.08E-01 | 27772805  | 27772928  | NC_000003.11 |
| cg12877251 | 9.85E-14 | 4.23E-15 | 8.52 | 23.4022773 | 2.72E-01 | 9760880   | 9761003   | NC_000008.10 |
| cg06723694 | 9.85E-14 | 4.23E-15 | 8.52 | 23.402136  | 6.01E-02 | 1034059   | 1034182   | NC_000016.9  |

|            |          |          |      |            |          |           |           |              |
|------------|----------|----------|------|------------|----------|-----------|-----------|--------------|
| cg04439561 | 9.87E-14 | 4.24E-15 | 8.52 | 23.4002489 | 1.72E-01 | 5541403   | 5541526   | NC_000012.11 |
| cg03485909 | 9.89E-14 | 4.25E-15 | 8.52 | 23.3983199 | 1.33E-01 | 121033957 | 121034080 | NC_000007.13 |
| cg11549166 | 9.89E-14 | 4.25E-15 | 8.52 | 23.3975881 | 6.14E-02 | 1846098   | 1846221   | NC_000001.10 |
| cg15839088 | 9.90E-14 | 4.25E-15 | 8.52 | 23.3967025 | 1.46E-01 | 71316797  | 71316920  | NC_000005.9  |
| cg11940973 | 9.92E-14 | 4.26E-15 | 8.52 | 23.3947396 | 1.19E-01 | 145939975 | 145940098 | NC_000005.9  |
| cg06817534 | 9.93E-14 | 4.27E-15 | 8.52 | 23.3937573 | 5.17E-02 | 12025211  | 12025334  | NC_000006.11 |
| cg10857427 | 9.93E-14 | 4.27E-15 | 8.52 | 23.3928631 | 1.65E-01 | 15091492  | 15091615  | NC_000012.11 |
| cg04543289 | 9.94E-14 | 4.27E-15 | 8.52 | 23.392601  | 1.78E-01 | 24267559  | 24267682  | NC_000016.9  |
| cg24437715 | 9.95E-14 | 4.28E-15 | 8.52 | 23.3914125 | 2.05E-01 | 237072391 | 237072514 | NC_000002.11 |
| cg10522607 | 9.95E-14 | 4.28E-15 | 8.52 | 23.3908325 | 1.65E-01 | 1595933   | 1596056   | NC_000002.11 |
| cg02706881 | 9.95E-14 | 4.28E-15 | 8.52 | 23.3906084 | 8.34E-02 | 46845775  | 46845898  | NC_000021.8  |
| cg03782202 | 9.97E-14 | 4.28E-15 | 8.52 | 23.3894174 | 1.43E-01 | 176971820 | 176971943 | NC_000002.11 |
| cg01638592 | 1.00E-13 | 4.31E-15 | 8.52 | 23.3844949 | 3.01E-01 | 111472183 | 111472306 | NC_000012.11 |
| cg19068510 | 1.00E-13 | 4.31E-15 | 8.52 | 23.3842683 | 2.44E-01 | 100642106 | 100642229 | NC_000013.10 |
| cg08095183 | 1.00E-13 | 4.31E-15 | 8.52 | 23.3825088 | 9.09E-02 | 69947048  | 69947171  | NC_000011.9  |
| cg02071005 | 1.00E-13 | 4.32E-15 | 8.52 | 23.3805622 | 2.17E-01 | 175200844 | 175200967 | NC_000002.11 |
| cg23008562 | 1.01E-13 | 4.33E-15 | 8.52 | 23.3790905 | 9.45E-02 | 2891065   | 2891188   | NC_000011.9  |
| cg25050447 | 1.01E-13 | 4.33E-15 | 8.52 | 23.3782394 | 1.04E-01 | 78165522  | 78165645  | NC_000017.10 |
| cg25256538 | 1.01E-13 | 4.34E-15 | 8.52 | 23.3764888 | 6.39E-02 | 159343074 | 159343197 | NC_000006.11 |
| cg15067806 | 1.01E-13 | 4.34E-15 | 8.52 | 23.3759067 | 2.10E-01 | 149146748 | 149146871 | NC_000001.10 |
| cg20984812 | 1.01E-13 | 4.35E-15 | 8.52 | 23.3737618 | 4.87E-02 | 171765992 | 171766115 | NC_000001.10 |
| cg15191648 | 1.01E-13 | 4.36E-15 | 8.52 | 23.3723654 | 1.71E-01 | 76740262  | 76740385  | NC_000018.9  |
| cg03433597 | 1.01E-13 | 4.36E-15 | 8.52 | 23.3720754 | 1.40E-01 | 22806448  | 22806571  | NC_000019.9  |
| cg09083359 | 1.02E-13 | 4.37E-15 | 8.52 | 23.3695161 | 1.79E-01 | 3854537   | 3854660   | NC_000005.9  |
| cg13491296 | 1.03E-13 | 4.42E-15 | 8.51 | 23.3587746 | 1.96E-01 | 156390613 | 156390736 | NC_000001.10 |

|            |          |          |      |            |          |           |           |              |
|------------|----------|----------|------|------------|----------|-----------|-----------|--------------|
| cg08602190 | 1.03E-13 | 4.43E-15 | 8.51 | 23.35657   | 2.34E-01 | 128076260 | 128076383 | NC_000010.10 |
| cg18443359 | 1.03E-13 | 4.43E-15 | 8.51 | 23.3559092 | 1.81E-01 | 134374693 | 134374816 | NC_000005.9  |
| cg02181287 | 1.03E-13 | 4.43E-15 | 8.51 | 23.355712  | 1.13E-01 | 77785784  | 77785907  | NC_000014.8  |
| cg13807341 | 1.03E-13 | 4.44E-15 | 8.51 | 23.3549918 | 9.16E-02 | 118445984 | 118446107 | NC_000011.9  |
| cg14488962 | 1.03E-13 | 4.45E-15 | 8.51 | 23.350854  | 1.24E-01 | 131510278 | 131510401 | NC_000011.9  |
| cg27375286 | 1.04E-13 | 4.47E-15 | 8.51 | 23.3477374 | 1.36E-01 | 11518493  | 11518616  | NC_000002.11 |
| cg23936031 | 1.05E-13 | 4.51E-15 | 8.51 | 23.3376049 | 1.56E-01 | 27183133  | 27183256  | NC_000007.13 |
| cg23727983 | 1.05E-13 | 4.53E-15 | 8.51 | 23.3345292 | 2.60E-01 | 125774082 | 125774205 | NC_000011.9  |
| cg06687091 | 1.05E-13 | 4.53E-15 | 8.51 | 23.3342412 | 1.92E-01 | 43912991  | 43913114  | NC_000018.9  |
| cg27034819 | 1.05E-13 | 4.53E-15 | 8.51 | 23.3334205 | 1.92E-01 | 88799526  | 88799649  | NC_000015.9  |
| cg10344832 | 1.05E-13 | 4.54E-15 | 8.51 | 23.3327189 | 1.57E-01 | 68119609  | 68119732  | NC_000015.9  |
| cg06186330 | 1.05E-13 | 4.54E-15 | 8.51 | 23.3323329 | 7.67E-02 | 46522513  | 46522636  | NC_000017.10 |
| cg22849427 | 1.05E-13 | 4.54E-15 | 8.51 | 23.3320662 | 2.24E-01 | 155108695 | 155108818 | NC_000005.9  |
| cg26325430 | 1.05E-13 | 4.55E-15 | 8.51 | 23.3301034 | 9.17E-02 | 33639059  | 33639182  | NC_000013.10 |
| cg25961952 | 1.06E-13 | 4.55E-15 | 8.51 | 23.3290452 | 1.53E-01 | 134523470 | 134523593 | NC_000005.9  |
| cg01610231 | 1.06E-13 | 4.56E-15 | 8.51 | 23.3278063 | 2.00E-01 | 111555314 | 111555437 | NC_000004.11 |
| cg19514381 | 1.06E-13 | 4.57E-15 | 8.51 | 23.3263508 | 1.63E-01 | 25899118  | 25899241  | NC_000007.13 |
| cg13537774 | 1.06E-13 | 4.57E-15 | 8.51 | 23.3254283 | 1.47E-01 | 84088338  | 84088461  | NC_000009.11 |
| cg24693189 | 1.06E-13 | 4.57E-15 | 8.51 | 23.3252005 | 6.58E-02 | 33165288  | 33165411  | NC_000001.10 |
| cg11115235 | 1.06E-13 | 4.57E-15 | 8.51 | 23.3247785 | 2.38E-01 | 6247215   | 6247338   | NC_000004.11 |
| cg13062406 | 1.06E-13 | 4.58E-15 | 8.51 | 23.3243889 | 2.63E-01 | 18813544  | 18813667  | NC_000011.9  |
| cg00705730 | 1.06E-13 | 4.59E-15 | 8.51 | 23.3204177 | 1.22E-01 | 106438120 | 106438243 | NC_000002.11 |
| cg14708905 | 1.06E-13 | 4.59E-15 | 8.51 | 23.3203205 | 1.24E-01 | 30113074  | 30113197  | NC_000006.11 |
| cg02371121 | 1.07E-13 | 4.61E-15 | 8.51 | 23.3162704 | 1.15E-01 | 1050484   | 1050607   | NC_000016.9  |
| cg08145949 | 1.07E-13 | 4.61E-15 | 8.51 | 23.3160698 | 8.43E-02 | 1798209   | 1798332   | NC_000004.11 |

|            |          |          |      |            |          |           |           |              |
|------------|----------|----------|------|------------|----------|-----------|-----------|--------------|
| cg13248581 | 1.07E-13 | 4.64E-15 | 8.51 | 23.3111132 | 1.44E-01 | 17680545  | 17680668  | NC_000022.10 |
| cg07857243 | 1.08E-13 | 4.65E-15 | 8.51 | 23.308345  | 2.28E-01 | 77822441  | 77822564  | NC_000016.9  |
| cg22728186 | 1.08E-13 | 4.66E-15 | 8.51 | 23.3061682 | 8.26E-02 | 10712967  | 10713090  | NC_000001.10 |
| cg19035993 | 1.08E-13 | 4.66E-15 | 8.51 | 23.3052681 | 6.09E-02 | 32108701  | 32108824  | NC_000022.10 |
| cg07035165 | 1.08E-13 | 4.67E-15 | 8.51 | 23.3046337 | 2.00E-01 | 113698506 | 113698629 | NC_000005.9  |
| cg03772567 | 1.09E-13 | 4.69E-15 | 8.51 | 23.2997086 | 1.90E-01 | 55676815  | 55676938  | NC_000001.10 |
| cg08426444 | 1.09E-13 | 4.70E-15 | 8.5  | 23.2969695 | 1.88E-01 | 73164019  | 73164142  | NC_000008.10 |
| cg13143349 | 1.09E-13 | 4.71E-15 | 8.5  | 23.2965414 | 1.91E-01 | 1931544   | 1931667   | NC_000005.9  |
| cg20673721 | 1.09E-13 | 4.71E-15 | 8.5  | 23.2958917 | 1.31E-01 | 25859382  | 25859505  | NC_000017.10 |
| cg11511443 | 1.09E-13 | 4.71E-15 | 8.5  | 23.2958241 | 1.40E-01 | 16761406  | 16761529  | NC_000012.11 |
| cg24592546 | 1.09E-13 | 4.71E-15 | 8.5  | 23.2957301 | 1.30E-01 | 30136790  | 30136913  | NC_000006.11 |
| cg15638239 | 1.09E-13 | 4.73E-15 | 8.5  | 23.2908347 | 8.50E-02 | 3025736   | 3025859   | NC_000007.13 |
| cg21059392 | 1.10E-13 | 4.74E-15 | 8.5  | 23.2895788 | 9.11E-02 | 101922750 | 101922873 | NC_000014.8  |
| cg01879723 | 1.10E-13 | 4.74E-15 | 8.5  | 23.2883957 | 1.56E-01 | 141119262 | 141119385 | NC_000003.11 |
| cg16079312 | 1.10E-13 | 4.76E-15 | 8.5  | 23.2854202 | 1.22E-01 | 3016476   | 3016599   | NC_000011.9  |
| cg14534277 | 1.10E-13 | 4.77E-15 | 8.5  | 23.284229  | 1.35E-01 | 28623874  | 28623997  | NC_000018.9  |
| cg12947035 | 1.10E-13 | 4.77E-15 | 8.5  | 23.2841197 | 9.98E-02 | 41644902  | 41645025  | NC_000019.9  |
| cg23178364 | 1.10E-13 | 4.77E-15 | 8.5  | 23.2833129 | 1.45E-01 | 165425105 | 165425228 | NC_000002.11 |
| cg13319711 | 1.10E-13 | 4.77E-15 | 8.5  | 23.283169  | 1.66E-01 | 39015544  | 39015667  | NC_000007.13 |
| cg02955098 | 1.10E-13 | 4.77E-15 | 8.5  | 23.2825821 | 1.42E-01 | 3473665   | 3473788   | NC_000001.10 |
| cg23578346 | 1.11E-13 | 4.79E-15 | 8.5  | 23.2797961 | 1.69E-01 | 3750973   | 3751096   | NC_000002.11 |
| cg04699462 | 1.11E-13 | 4.79E-15 | 8.5  | 23.2780883 | 7.34E-02 | 101328918 | 101329041 | NC_000007.13 |
| cg19595835 | 1.12E-13 | 4.83E-15 | 8.5  | 23.2707683 | 2.03E-01 | 158150945 | 158151068 | NC_000001.10 |
| cg04181542 | 1.12E-13 | 4.85E-15 | 8.5  | 23.2665716 | 9.66E-02 | 100584390 | 100584513 | NC_000006.11 |
| cg09371439 | 1.12E-13 | 4.85E-15 | 8.5  | 23.2662156 | 1.60E-01 | 84322594  | 84322717  | NC_000015.9  |



|            |          |          |      |            |          |           |           |              |
|------------|----------|----------|------|------------|----------|-----------|-----------|--------------|
| cg22711009 | 1.12E-13 | 4.86E-15 | 8.5  | 23.2642129 | 8.67E-02 | 118576132 | 118576255 | NC_000010.10 |
| cg10795666 | 1.13E-13 | 4.88E-15 | 8.5  | 23.2608619 | 2.30E-01 | 49794635  | 49794758  | NC_000013.10 |
| cg01927921 | 1.13E-13 | 4.91E-15 | 8.5  | 23.2546796 | 1.23E-01 | 3787906   | 3788029   | NC_000005.9  |
| cg14507146 | 1.14E-13 | 4.92E-15 | 8.5  | 23.2520295 | 1.80E-01 | 34043333  | 34043456  | NC_000005.9  |
| cg09366312 | 1.14E-13 | 4.94E-15 | 8.5  | 23.248637  | 2.16E-01 | 5891001   | 5891124   | NC_000018.9  |
| cg02119348 | 1.14E-13 | 4.94E-15 | 8.5  | 23.2476448 | 1.39E-01 | 6069731   | 6069854   | NC_000016.9  |
| cg13922494 | 1.14E-13 | 4.96E-15 | 8.5  | 23.2443708 | 8.43E-02 | 106890760 | 106890883 | NC_000005.9  |
| cg15922080 | 1.15E-13 | 5.00E-15 | 8.5  | 23.2370987 | 8.69E-02 | 32046906  | 32047029  | NC_000006.11 |
| cg18421360 | 1.15E-13 | 5.00E-15 | 8.49 | 23.2368899 | 5.58E-02 | 90415181  | 90415304  | NC_000005.9  |
| cg27471124 | 1.16E-13 | 5.02E-15 | 8.49 | 23.2327486 | 1.21E-01 | 109292789 | 109292912 | NC_000011.9  |
| cg00182202 | 1.16E-13 | 5.02E-15 | 8.49 | 23.2321463 | 4.28E-02 | 4257902   | 4258025   | NC_000016.9  |
| cg07303275 | 1.16E-13 | 5.03E-15 | 8.49 | 23.2301007 | 8.26E-02 | 75499416  | 75499539  | NC_000016.9  |
| cg09464883 | 1.16E-13 | 5.03E-15 | 8.49 | 23.2300177 | 1.09E-01 | 79689621  | 79689744  | NC_000004.11 |
| cg24151755 | 1.16E-13 | 5.04E-15 | 8.49 | 23.2289706 | 1.13E-01 | 230238754 | 230238877 | NC_000001.10 |
| cg08125821 | 1.16E-13 | 5.05E-15 | 8.49 | 23.2275333 | 2.15E-01 | 114445779 | 114445902 | NC_000008.10 |
| cg25677092 | 1.17E-13 | 5.07E-15 | 8.49 | 23.22367   | 1.26E-01 | 120398684 | 120398807 | NC_000003.11 |
| cg20588069 | 1.17E-13 | 5.07E-15 | 8.49 | 23.2223299 | 1.82E-01 | 4860439   | 4860562   | NC_000004.11 |
| cg04856896 | 1.17E-13 | 5.09E-15 | 8.49 | 23.2194661 | 1.58E-01 | 32665450  | 32665573  | NC_000001.10 |
| cg21697851 | 1.18E-13 | 5.11E-15 | 8.49 | 23.2152022 | 2.00E-01 | 38076869  | 38076992  | NC_000021.8  |
| cg23077820 | 1.18E-13 | 5.12E-15 | 8.49 | 23.2124182 | 1.25E-01 | 223154176 | 223154299 | NC_000002.11 |
| cg27344859 | 1.18E-13 | 5.13E-15 | 8.49 | 23.2114085 | 1.90E-01 | 61808313  | 61808436  | NC_000020.10 |
| cg12827405 | 1.18E-13 | 5.14E-15 | 8.49 | 23.2099332 | 1.17E-01 | 10431475  | 10431598  | NC_000006.11 |
| cg10445315 | 1.18E-13 | 5.14E-15 | 8.49 | 23.2095828 | 2.49E-01 | 38066047  | 38066170  | NC_000021.8  |
| cg03496122 | 1.18E-13 | 5.14E-15 | 8.49 | 23.2092824 | 2.15E-01 | 26664404  | 26664527  | NC_000003.11 |
| cg01967586 | 1.19E-13 | 5.15E-15 | 8.49 | 23.2075876 | 9.06E-02 | 228894546 | 228894669 | NC_000001.10 |

|            |          |          |      |            |          |           |           |              |
|------------|----------|----------|------|------------|----------|-----------|-----------|--------------|
| cg14265823 | 1.19E-13 | 5.15E-15 | 8.49 | 23.2065588 | 2.07E-01 | 223163326 | 223163449 | NC_000002.11 |
| cg11946503 | 1.19E-13 | 5.19E-15 | 8.49 | 23.1991549 | 1.62E-01 | 134870514 | 134870637 | NC_000005.9  |
| cg07049167 | 1.20E-13 | 5.22E-15 | 8.49 | 23.1949681 | 8.82E-02 | 166818506 | 166818629 | NC_000001.10 |
| cg13546308 | 1.20E-13 | 5.22E-15 | 8.49 | 23.1947038 | 1.15E-01 | 153366155 | 153366278 | NC_000003.11 |
| cg19746565 | 1.20E-13 | 5.23E-15 | 8.49 | 23.1928134 | 1.07E-01 | 11742488  | 11742611  | NC_000008.10 |
| cg03595755 | 1.21E-13 | 5.26E-15 | 8.49 | 23.1858733 | 2.12E-01 | 1931251   | 1931374   | NC_000005.9  |
| cg25577842 | 1.21E-13 | 5.27E-15 | 8.49 | 23.1840136 | 1.70E-01 | 32459760  | 32459883  | NC_000011.9  |
| cg06950634 | 1.21E-13 | 5.27E-15 | 8.49 | 23.1839957 | 1.28E-01 | 304351    | 304474    | NC_000011.9  |
| cg02128112 | 1.21E-13 | 5.28E-15 | 8.49 | 23.1822608 | 1.42E-01 | 48844757  | 48844880  | NC_000016.9  |
| cg00298357 | 1.22E-13 | 5.30E-15 | 8.49 | 23.1797773 | 6.55E-02 | 148758791 | 148758914 | NC_000005.9  |
| cg02938172 | 1.22E-13 | 5.31E-15 | 8.49 | 23.1772964 | 1.82E-01 | 185152    | 185275    | NC_000017.10 |
| cg21150271 | 1.22E-13 | 5.32E-15 | 8.49 | 23.1759904 | 1.33E-01 | 21553912  | 21554035  | NC_000008.10 |
| cg12173558 | 1.23E-13 | 5.34E-15 | 8.48 | 23.172119  | 1.65E-01 | 69244734  | 69244857  | NC_000008.10 |
| cg23584308 | 1.23E-13 | 5.35E-15 | 8.48 | 23.1700282 | 8.46E-02 | 105352991 | 105353114 | NC_000014.8  |
| cg27338202 | 1.23E-13 | 5.37E-15 | 8.48 | 23.1662607 | 1.41E-01 | 187481967 | 187482090 | NC_000003.11 |
| cg15131808 | 1.24E-13 | 5.38E-15 | 8.48 | 23.1634266 | 2.75E-01 | 528580    | 528703    | NC_000005.9  |
| cg06873498 | 1.24E-13 | 5.39E-15 | 8.48 | 23.1618055 | 1.32E-01 | 85652969  | 85653092  | NC_000016.9  |
| cg23239647 | 1.24E-13 | 5.39E-15 | 8.48 | 23.1617828 | 9.10E-02 | 105273411 | 105273534 | NC_000002.11 |
| cg03448619 | 1.24E-13 | 5.39E-15 | 8.48 | 23.1617795 | 5.37E-02 | 45840784  | 45840907  | NC_000003.11 |
| cg16317291 | 1.24E-13 | 5.40E-15 | 8.48 | 23.1604922 | 9.85E-02 | 7076865   | 7076988   | NC_000012.11 |
| cg17633576 | 1.24E-13 | 5.40E-15 | 8.48 | 23.1602326 | 1.68E-01 | 16726789  | 16726912  | NC_000012.11 |
| cg04742515 | 1.24E-13 | 5.42E-15 | 8.48 | 23.1566248 | 1.31E-01 | 239949301 | 239949424 | NC_000002.11 |
| cg24228040 | 1.25E-13 | 5.44E-15 | 8.48 | 23.1531698 | 2.00E-01 | 50496857  | 50496980  | NC_000022.10 |
| cg20574415 | 1.26E-13 | 5.47E-15 | 8.48 | 23.1474207 | 1.86E-01 | 79382807  | 79382930  | NC_000015.9  |
| cg01175812 | 1.26E-13 | 5.48E-15 | 8.48 | 23.1469932 | 1.58E-01 | 4919001   | 4919124   | NC_000012.11 |

|            |          |          |      |            |          |           |           |              |
|------------|----------|----------|------|------------|----------|-----------|-----------|--------------|
| cg23318156 | 1.26E-13 | 5.49E-15 | 8.48 | 23.1445226 | 7.27E-02 | 35392306  | 35392429  | NC_000006.11 |
| cg15643703 | 1.26E-13 | 5.49E-15 | 8.48 | 23.1445036 | 1.06E-01 | 46722806  | 46722929  | NC_000021.8  |
| cg13298841 | 1.27E-13 | 5.54E-15 | 8.48 | 23.1352671 | 2.34E-01 | 43152021  | 43152144  | NC_000007.13 |
| cg10761315 | 1.28E-13 | 5.57E-15 | 8.48 | 23.1297453 | 1.66E-01 | 104552034 | 104552157 | NC_000014.8  |
| cg26272220 | 1.28E-13 | 5.59E-15 | 8.48 | 23.1272887 | 2.73E-01 | 81471884  | 81472007  | NC_000012.11 |
| cg04084026 | 1.28E-13 | 5.59E-15 | 8.48 | 23.1268918 | 1.97E-01 | 57832309  | 57832432  | NC_000016.9  |
| cg04460747 | 1.29E-13 | 5.63E-15 | 8.48 | 23.1202856 | 7.63E-02 | 52469005  | 52469128  | NC_000006.11 |
| cg21307628 | 1.29E-13 | 5.63E-15 | 8.48 | 23.1190666 | 1.34E-01 | 112360952 | 112361075 | NC_000003.11 |
| cg12688965 | 1.29E-13 | 5.64E-15 | 8.48 | 23.1174449 | 1.31E-01 | 144582077 | 144582200 | NC_000008.10 |
| cg24328816 | 1.29E-13 | 5.64E-15 | 8.48 | 23.1174281 | 6.04E-02 | 73096502  | 73096625  | NC_000017.10 |
| cg02875118 | 1.29E-13 | 5.65E-15 | 8.48 | 23.1164557 | 2.09E-01 | 112833009 | 112833132 | NC_000011.9  |
| cg06052090 | 1.30E-13 | 5.66E-15 | 8.48 | 23.1147481 | 8.45E-02 | 55100608  | 55100731  | NC_000007.13 |
| cg25772365 | 1.30E-13 | 5.66E-15 | 8.48 | 23.1138528 | 1.48E-01 | 140762224 | 140762347 | NC_000006.11 |
| cg01604051 | 1.30E-13 | 5.67E-15 | 8.47 | 23.1122224 | 1.02E-01 | 50851503  | 50851626  | NC_000007.13 |
| cg23372684 | 1.30E-13 | 5.68E-15 | 8.47 | 23.1106665 | 1.25E-01 | 178004685 | 178004808 | NC_000005.9  |
| cg19416570 | 1.31E-13 | 5.70E-15 | 8.47 | 23.106726  | 1.49E-01 | 58715677  | 58715800  | NC_000019.9  |
| cg26281476 | 1.31E-13 | 5.71E-15 | 8.47 | 23.1062237 | 8.93E-02 | 62719007  | 62719130  | NC_000004.11 |
| cg02347249 | 1.31E-13 | 5.74E-15 | 8.47 | 23.1009907 | 1.05E-01 | 90268539  | 90268662  | NC_000012.11 |
| cg16413030 | 1.32E-13 | 5.76E-15 | 8.47 | 23.0964087 | 1.60E-01 | 176937704 | 176937827 | NC_000002.11 |
| cg09056876 | 1.33E-13 | 5.82E-15 | 8.47 | 23.086136  | 1.31E-01 | 156718398 | 156718521 | NC_000006.11 |
| cg00963378 | 1.33E-13 | 5.83E-15 | 8.47 | 23.085102  | 2.06E-01 | 20716638  | 20716761  | NC_000013.10 |
| cg17754510 | 1.34E-13 | 5.86E-15 | 8.47 | 23.0790589 | 2.78E-01 | 10391412  | 10391535  | NC_000006.11 |
| cg03352106 | 1.34E-13 | 5.87E-15 | 8.47 | 23.0781476 | 2.29E-01 | 21926476  | 21926599  | NC_000012.11 |
| cg19665362 | 1.34E-13 | 5.87E-15 | 8.47 | 23.0779686 | 2.58E-01 | 83316838  | 83316961  | NC_000015.9  |
| cg06570224 | 1.34E-13 | 5.88E-15 | 8.47 | 23.0766257 | 1.44E-01 | 157812475 | 157812598 | NC_000003.11 |

|            |          |          |      |            |          |           |           |              |
|------------|----------|----------|------|------------|----------|-----------|-----------|--------------|
| cg05235540 | 1.34E-13 | 5.88E-15 | 8.47 | 23.0763926 | 1.06E-01 | 30582174  | 30582297  | NC_000006.11 |
| cg26046467 | 1.35E-13 | 5.91E-15 | 8.47 | 23.0709001 | 1.44E-01 | 59000498  | 59000621  | NC_000018.9  |
| cg23971440 | 1.35E-13 | 5.92E-15 | 8.47 | 23.0701266 | 1.05E-01 | 73007729  | 73007852  | NC_000011.9  |
| cg02828023 | 1.35E-13 | 5.93E-15 | 8.47 | 23.0685337 | 2.44E-01 | 107503834 | 107503957 | NC_000002.11 |
| cg18010718 | 1.35E-13 | 5.93E-15 | 8.47 | 23.0682165 | 2.25E-01 | 74075195  | 74075318  | NC_000017.10 |
| cg04209911 | 1.35E-13 | 5.93E-15 | 8.47 | 23.0680412 | 2.00E-01 | 177140145 | 177140268 | NC_000001.10 |
| cg15200412 | 1.36E-13 | 5.94E-15 | 8.47 | 23.0667854 | 8.98E-02 | 990294    | 990417    | NC_000019.9  |
| cg22333868 | 1.36E-13 | 5.95E-15 | 8.47 | 23.0642353 | 1.60E-01 | 79611355  | 79611478  | NC_000012.11 |
| cg00458754 | 1.36E-13 | 5.98E-15 | 8.47 | 23.0605175 | 1.26E-01 | 88427813  | 88427936  | NC_000010.10 |
| cg06046431 | 1.36E-13 | 5.98E-15 | 8.47 | 23.0604931 | 1.75E-01 | 27744490  | 27744613  | NC_000011.9  |
| cg19946641 | 1.37E-13 | 5.99E-15 | 8.47 | 23.058915  | 8.50E-02 | 130909093 | 130909216 | NC_000012.11 |
| cg11166453 | 1.37E-13 | 5.99E-15 | 8.47 | 23.0576296 | 1.42E-01 | 247681781 | 247681904 | NC_000001.10 |
| cg12544191 | 1.37E-13 | 6.01E-15 | 8.47 | 23.0543074 | 1.53E-01 | 172671754 | 172671877 | NC_000005.9  |
| cg13984173 | 1.37E-13 | 6.03E-15 | 8.47 | 23.0519748 | 1.66E-01 | 40674438  | 40674561  | NC_000015.9  |
| cg03537802 | 1.37E-13 | 6.03E-15 | 8.47 | 23.0518924 | 7.86E-02 | 101868388 | 101868511 | NC_000011.9  |
| cg18023041 | 1.37E-13 | 6.03E-15 | 8.47 | 23.0516662 | 1.04E-01 | 19831490  | 19831613  | NC_000011.9  |
| cg25940202 | 1.38E-13 | 6.04E-15 | 8.46 | 23.0503855 | 4.67E-02 | 207984794 | 207984917 | NC_000001.10 |
| cg05520988 | 1.38E-13 | 6.04E-15 | 8.46 | 23.0501398 | 1.67E-01 | 31506568  | 31506691  | NC_000006.11 |
| cg24177393 | 1.38E-13 | 6.05E-15 | 8.46 | 23.0483702 | 1.66E-01 | 43037517  | 43037640  | NC_000005.9  |
| cg02384251 | 1.39E-13 | 6.08E-15 | 8.46 | 23.0429483 | 1.18E-01 | 1205914   | 1206037   | NC_000004.11 |
| cg13069211 | 1.39E-13 | 6.09E-15 | 8.46 | 23.0424248 | 8.01E-02 | 134878340 | 134878463 | NC_000010.10 |
| cg02483701 | 1.39E-13 | 6.11E-15 | 8.46 | 23.0384659 | 1.64E-01 | 27215610  | 27215733  | NC_000007.13 |
| cg02900183 | 1.39E-13 | 6.11E-15 | 8.46 | 23.0383464 | 1.09E-01 | 16284421  | 16284544  | NC_000019.9  |
| cg20778451 | 1.40E-13 | 6.15E-15 | 8.46 | 23.0326734 | 1.86E-01 | 178368205 | 178368328 | NC_000005.9  |
| cg01301138 | 1.40E-13 | 6.15E-15 | 8.46 | 23.0322494 | 1.44E-01 | 82660630  | 82660753  | NC_000016.9  |

|            |          |          |      |            |          |           |           |              |
|------------|----------|----------|------|------------|----------|-----------|-----------|--------------|
| cg01106989 | 1.40E-13 | 6.15E-15 | 8.46 | 23.0320018 | 1.28E-01 | 52858459  | 52858582  | NC_000006.11 |
| cg23683501 | 1.40E-13 | 6.17E-15 | 8.46 | 23.0296873 | 8.01E-02 | 52270108  | 52270231  | NC_000006.11 |
| cg01795955 | 1.40E-13 | 6.17E-15 | 8.46 | 23.0290856 | 1.47E-01 | 200468626 | 200468749 | NC_000002.11 |
| cg05490233 | 1.41E-13 | 6.19E-15 | 8.46 | 23.0252922 | 1.26E-01 | 129321847 | 129321970 | NC_000003.11 |
| cg26836233 | 1.41E-13 | 6.19E-15 | 8.46 | 23.0252504 | 2.04E-01 | 10857800  | 10857923  | NC_000003.11 |
| cg10821845 | 1.41E-13 | 6.20E-15 | 8.46 | 23.0244235 | 2.42E-01 | 144241104 | 144241227 | NC_000008.10 |
| cg25078444 | 1.41E-13 | 6.20E-15 | 8.46 | 23.0243876 | 2.29E-01 | 29235193  | 29235316  | NC_000014.8  |
| cg12810096 | 1.41E-13 | 6.21E-15 | 8.46 | 23.0231597 | 2.08E-01 | 32484112  | 32484235  | NC_000017.10 |
| cg25078150 | 1.42E-13 | 6.23E-15 | 8.46 | 23.0187588 | 2.68E-01 | 118922841 | 118922964 | NC_000010.10 |
| cg16086559 | 1.42E-13 | 6.24E-15 | 8.46 | 23.0184839 | 1.81E-01 | 96911531  | 96911654  | NC_000015.9  |
| cg11704005 | 1.42E-13 | 6.25E-15 | 8.46 | 23.015583  | 1.69E-01 | 19002948  | 19003071  | NC_000001.10 |
| cg01791587 | 1.43E-13 | 6.28E-15 | 8.46 | 23.0120421 | 1.67E-01 | 110693985 | 110694108 | NC_000001.10 |
| cg04338871 | 1.43E-13 | 6.28E-15 | 8.46 | 23.0110834 | 1.39E-01 | 70002333  | 70002456  | NC_000011.9  |
| cg09974780 | 1.43E-13 | 6.31E-15 | 8.46 | 23.0065238 | 1.29E-01 | 61601128  | 61601251  | NC_000005.9  |
| cg21290313 | 1.44E-13 | 6.32E-15 | 8.46 | 23.0053209 | 1.05E-01 | 20158232  | 20158355  | NC_000007.13 |
| cg03882242 | 1.44E-13 | 6.34E-15 | 8.46 | 23.0016323 | 2.38E-01 | 103889798 | 103889921 | NC_000012.11 |
| cg19701087 | 1.45E-13 | 6.37E-15 | 8.46 | 22.9978545 | 1.92E-01 | 52859008  | 52859131  | NC_000006.11 |
| cg15575538 | 1.45E-13 | 6.38E-15 | 8.46 | 22.9965081 | 1.57E-01 | 25894005  | 25894128  | NC_000007.13 |
| cg18049569 | 1.45E-13 | 6.38E-15 | 8.46 | 22.9955396 | 5.21E-02 | 3154105   | 3154228   | NC_000006.11 |
| cg03191794 | 1.45E-13 | 6.39E-15 | 8.46 | 22.9950964 | 1.23E-01 | 83102075  | 83102198  | NC_000012.11 |
| cg12181459 | 1.45E-13 | 6.40E-15 | 8.46 | 22.992517  | 1.37E-01 | 8098328   | 8098451   | NC_000010.10 |
| cg02538579 | 1.46E-13 | 6.42E-15 | 8.46 | 22.9901597 | 4.77E-02 | 43513399  | 43513522  | NC_000005.9  |
| cg02190597 | 1.46E-13 | 6.43E-15 | 8.46 | 22.9888166 | 5.29E-02 | 88821234  | 88821357  | NC_000016.9  |
| cg21170658 | 1.46E-13 | 6.43E-15 | 8.45 | 22.9879093 | 1.46E-01 | 137515695 | 137515818 | NC_000009.11 |
| cg22638505 | 1.46E-13 | 6.43E-15 | 8.45 | 22.9874985 | 1.23E-01 | 21541772  | 21541895  | NC_000019.9  |

|            |          |          |      |            |          |           |           |              |
|------------|----------|----------|------|------------|----------|-----------|-----------|--------------|
| cg19006302 | 1.46E-13 | 6.45E-15 | 8.45 | 22.9852594 | 1.06E-01 | 54058767  | 54058890  | NC_000019.9  |
| cg15775138 | 1.46E-13 | 6.45E-15 | 8.45 | 22.9849619 | 2.61E-01 | 127744389 | 127744512 | NC_000007.13 |
| cg24369185 | 1.46E-13 | 6.45E-15 | 8.45 | 22.9844908 | 2.32E-01 | 41341601  | 41341724  | NC_000006.11 |
| cg24768365 | 1.47E-13 | 6.49E-15 | 8.45 | 22.9784064 | 1.34E-01 | 43944652  | 43944775  | NC_000012.11 |
| cg18301583 | 1.47E-13 | 6.50E-15 | 8.45 | 22.9779873 | 2.42E-01 | 53635967  | 53636090  | NC_000019.9  |
| cg24845274 | 1.47E-13 | 6.50E-15 | 8.45 | 22.9772526 | 1.71E-01 | 136555697 | 136555820 | NC_000007.13 |
| cg11308277 | 1.47E-13 | 6.50E-15 | 8.45 | 22.9772143 | 1.80E-01 | 75603343  | 75603466  | NC_000012.11 |
| cg12793525 | 1.48E-13 | 6.51E-15 | 8.45 | 22.976695  | 1.43E-01 | 44875989  | 44876112  | NC_000010.10 |
| cg12492087 | 1.48E-13 | 6.51E-15 | 8.45 | 22.9765987 | 1.50E-01 | 42749885  | 42750008  | NC_000015.9  |
| cg05214690 | 1.48E-13 | 6.51E-15 | 8.45 | 22.9762147 | 2.70E-01 | 178772203 | 178772326 | NC_000005.9  |
| cg17419731 | 1.48E-13 | 6.51E-15 | 8.45 | 22.9759481 | 1.37E-01 | 5535731   | 5535854   | NC_000007.13 |
| cg19261306 | 1.48E-13 | 6.54E-15 | 8.45 | 22.9717657 | 1.44E-01 | 59234911  | 59235034  | NC_000001.10 |
| cg08758850 | 1.49E-13 | 6.55E-15 | 8.45 | 22.9695217 | 1.10E-01 | 127533554 | 127533677 | NC_000009.11 |
| cg16935734 | 1.49E-13 | 6.55E-15 | 8.45 | 22.96947   | 1.28E-01 | 77901368  | 77901491  | NC_000018.9  |
| cg25431366 | 1.49E-13 | 6.55E-15 | 8.45 | 22.9694009 | 1.09E-01 | 238887209 | 238887332 | NC_000002.11 |
| cg08964780 | 1.49E-13 | 6.56E-15 | 8.45 | 22.9684567 | 2.16E-01 | 27209463  | 27209586  | NC_000007.13 |
| cg15736524 | 1.50E-13 | 6.60E-15 | 8.45 | 22.9624958 | 1.82E-01 | 43568922  | 43569045  | NC_000011.9  |
| cg08521987 | 1.50E-13 | 6.61E-15 | 8.45 | 22.9613286 | 3.05E-01 | 119000927 | 119001050 | NC_000010.10 |
| cg08832227 | 1.50E-13 | 6.62E-15 | 8.45 | 22.9595285 | 1.85E-01 | 5020693   | 5020816   | NC_000012.11 |
| cg12193277 | 1.50E-13 | 6.62E-15 | 8.45 | 22.9588546 | 1.16E-01 | 39547181  | 39547304  | NC_000022.10 |
| cg20523169 | 1.50E-13 | 6.62E-15 | 8.45 | 22.9587914 | 1.55E-01 | 75880269  | 75880392  | NC_000017.10 |
| cg27211576 | 1.50E-13 | 6.63E-15 | 8.45 | 22.9584301 | 1.07E-01 | 75093165  | 75093288  | NC_000015.9  |
| cg13080379 | 1.51E-13 | 6.65E-15 | 8.45 | 22.9549776 | 1.77E-01 | 119527156 | 119527279 | NC_000001.10 |
| cg10939004 | 1.51E-13 | 6.65E-15 | 8.45 | 22.9542548 | 1.06E-01 | 194072233 | 194072356 | NC_000003.11 |
| cg00444151 | 1.51E-13 | 6.67E-15 | 8.45 | 22.9514361 | 1.48E-01 | 33823619  | 33823742  | NC_000017.10 |

|            |          |          |      |            |          |           |           |              |
|------------|----------|----------|------|------------|----------|-----------|-----------|--------------|
| cg26860935 | 1.51E-13 | 6.69E-15 | 8.45 | 22.9494802 | 2.11E-01 | 1407989   | 1408112   | NC_000004.11 |
| cg12285988 | 1.52E-13 | 6.72E-15 | 8.45 | 22.9441028 | 1.63E-01 | 50890701  | 50890824  | NC_000001.10 |
| cg16553435 | 1.52E-13 | 6.73E-15 | 8.45 | 22.9432888 | 2.08E-01 | 89267943  | 89268066  | NC_000016.9  |
| cg12972705 | 1.53E-13 | 6.75E-15 | 8.45 | 22.9397849 | 1.87E-01 | 1915076   | 1915199   | NC_000008.10 |
| cg13532463 | 1.53E-13 | 6.75E-15 | 8.45 | 22.9395601 | 1.53E-01 | 101126107 | 101126230 | NC_000009.11 |
| cg23048481 | 1.53E-13 | 6.76E-15 | 8.45 | 22.9383406 | 2.29E-01 | 39044196  | 39044319  | NC_000001.10 |
| cg26557834 | 1.54E-13 | 6.79E-15 | 8.45 | 22.9343679 | 1.48E-01 | 134570471 | 134570594 | NC_000006.11 |
| cg01261798 | 1.54E-13 | 6.80E-15 | 8.45 | 22.9332094 | 2.56E-01 | 134000034 | 134000157 | NC_000010.10 |
| cg02452944 | 1.54E-13 | 6.81E-15 | 8.45 | 22.9312737 | 1.92E-01 | 140810109 | 140810232 | NC_000005.9  |
| cg13589559 | 1.54E-13 | 6.81E-15 | 8.45 | 22.9309422 | 2.86E-02 | 111786616 | 111786739 | NC_000009.11 |
| cg08881785 | 1.54E-13 | 6.82E-15 | 8.45 | 22.9304109 | 1.17E-01 | 155465076 | 155465199 | NC_000003.11 |
| cg25426743 | 1.55E-13 | 6.84E-15 | 8.45 | 22.9268579 | 9.71E-02 | 27166103  | 27166226  | NC_000007.13 |
| cg01831743 | 1.55E-13 | 6.88E-15 | 8.44 | 22.9220263 | 1.18E-01 | 110352941 | 110353064 | NC_000012.11 |
| cg20712489 | 1.55E-13 | 6.88E-15 | 8.44 | 22.9220187 | 1.10E-01 | 228475395 | 228475518 | NC_000002.11 |
| cg15427906 | 1.55E-13 | 6.88E-15 | 8.44 | 22.9217237 | 2.56E-01 | 20825216  | 20825339  | NC_000007.13 |
| cg13930892 | 1.55E-13 | 6.88E-15 | 8.44 | 22.9208777 | 2.68E-01 | 2292000   | 2292123   | NC_000011.9  |
| cg23388392 | 1.56E-13 | 6.89E-15 | 8.44 | 22.9200906 | 1.14E-01 | 39577117  | 39577240  | NC_000017.10 |
| cg17542408 | 1.56E-13 | 6.90E-15 | 8.44 | 22.9180042 | 1.93E-01 | 78673100  | 78673223  | NC_000011.9  |
| cg04549333 | 1.56E-13 | 6.91E-15 | 8.44 | 22.9175038 | 2.02E-01 | 44325823  | 44325946  | NC_000011.9  |
| cg05085230 | 1.56E-13 | 6.92E-15 | 8.44 | 22.9153408 | 2.15E-01 | 133562461 | 133562584 | NC_000006.11 |
| cg23289079 | 1.56E-13 | 6.92E-15 | 8.44 | 22.9150643 | 1.89E-01 | 122430476 | 122430599 | NC_000005.9  |
| cg08491681 | 1.57E-13 | 6.96E-15 | 8.44 | 22.9099472 | 1.56E-01 | 33781288  | 33781411  | NC_000013.10 |
| cg19761272 | 1.58E-13 | 6.99E-15 | 8.44 | 22.9049978 | 2.21E-01 | 76605176  | 76605299  | NC_000014.8  |
| cg27279301 | 1.59E-13 | 7.03E-15 | 8.44 | 22.8995975 | 1.28E-01 | 105945287 | 105945410 | NC_000014.8  |
| cg26396370 | 1.59E-13 | 7.04E-15 | 8.44 | 22.8987727 | 9.22E-02 | 10194752  | 10194875  | NC_000002.11 |

|            |          |          |      |            |          |           |           |              |
|------------|----------|----------|------|------------|----------|-----------|-----------|--------------|
| cg23051261 | 1.59E-13 | 7.06E-15 | 8.44 | 22.8962551 | 5.86E-02 | 10799025  | 10799148  | NC_000001.10 |
| cg08620044 | 1.59E-13 | 7.07E-15 | 8.44 | 22.894815  | 2.06E-01 | 87980976  | 87981099  | NC_000005.9  |
| cg08282037 | 1.60E-13 | 7.08E-15 | 8.44 | 22.8932164 | 8.51E-02 | 55595978  | 55596101  | NC_000019.9  |
| cg09884341 | 1.60E-13 | 7.09E-15 | 8.44 | 22.892055  | 2.24E-01 | 87974464  | 87974587  | NC_000005.9  |
| cg12300353 | 1.60E-13 | 7.09E-15 | 8.44 | 22.8914225 | 2.20E-01 | 44450358  | 44450481  | NC_000004.11 |
| cg11197630 | 1.60E-13 | 7.10E-15 | 8.44 | 22.8897442 | 1.36E-01 | 56712591  | 56712714  | NC_000005.9  |
| cg21328033 | 1.60E-13 | 7.11E-15 | 8.44 | 22.8891344 | 1.83E-01 | 50236765  | 50236888  | NC_000017.10 |
| cg02039271 | 1.61E-13 | 7.12E-15 | 8.44 | 22.8872006 | 4.50E-02 | 156008127 | 156008250 | NC_000003.11 |
| cg18692678 | 1.61E-13 | 7.14E-15 | 8.44 | 22.884761  | 1.84E-01 | 114838772 | 114838895 | NC_000012.11 |
| cg01586208 | 1.61E-13 | 7.16E-15 | 8.44 | 22.8822933 | 1.20E-01 | 22806647  | 22806770  | NC_000019.9  |
| cg23335460 | 1.61E-13 | 7.16E-15 | 8.44 | 22.8814245 | 2.08E-01 | 99790593  | 99790716  | NC_000010.10 |
| cg12668482 | 1.61E-13 | 7.17E-15 | 8.44 | 22.8811014 | 1.98E-01 | 72987762  | 72987885  | NC_000008.10 |
| cg21748836 | 1.62E-13 | 7.17E-15 | 8.44 | 22.8807664 | 6.99E-02 | 239313057 | 239313180 | NC_000002.11 |
| cg17494585 | 1.62E-13 | 7.18E-15 | 8.44 | 22.8787161 | 1.62E-01 | 117705743 | 117705866 | NC_000001.10 |
| cg25317941 | 1.63E-13 | 7.24E-15 | 8.44 | 22.8711661 | 1.44E-01 | 233351153 | 233351276 | NC_000002.11 |
| cg24002183 | 1.63E-13 | 7.25E-15 | 8.44 | 22.8702757 | 1.16E-01 | 15568574  | 15568697  | NC_000019.9  |
| cg05887092 | 1.64E-13 | 7.27E-15 | 8.44 | 22.866619  | 1.21E-01 | 76393375  | 76393498  | NC_000017.10 |
| cg13876809 | 1.64E-13 | 7.27E-15 | 8.44 | 22.8665859 | 7.82E-02 | 101005971 | 101006094 | NC_000001.10 |
| cg06167664 | 1.64E-13 | 7.28E-15 | 8.44 | 22.8659619 | 2.42E-01 | 27072564  | 27072687  | NC_000002.11 |
| cg17775899 | 1.64E-13 | 7.28E-15 | 8.44 | 22.8659077 | 1.38E-01 | 27179426  | 27179549  | NC_000007.13 |
| cg04562217 | 1.64E-13 | 7.30E-15 | 8.43 | 22.8630908 | 1.87E-01 | 79815718  | 79815841  | NC_000003.11 |
| cg01731023 | 1.65E-13 | 7.35E-15 | 8.43 | 22.8564915 | 8.45E-02 | 1363486   | 1363609   | NC_000004.11 |
| cg02266732 | 1.65E-13 | 7.35E-15 | 8.43 | 22.8564681 | 1.87E-01 | 63257710  | 63257833  | NC_000005.9  |
| cg16918989 | 1.65E-13 | 7.35E-15 | 8.43 | 22.8562783 | 2.65E-01 | 8869213   | 8869336   | NC_000017.10 |
| cg04063345 | 1.66E-13 | 7.36E-15 | 8.43 | 22.8547102 | 1.87E-01 | 152130058 | 152130181 | NC_000006.11 |



|            |          |          |      |            |          |           |           |              |
|------------|----------|----------|------|------------|----------|-----------|-----------|--------------|
| cg07013734 | 1.66E-13 | 7.36E-15 | 8.43 | 22.8545265 | 2.49E-01 | 101454683 | 101454806 | NC_000011.9  |
| cg07861603 | 1.66E-13 | 7.37E-15 | 8.43 | 22.8536893 | 1.46E-01 | 3085246   | 3085369   | NC_000016.9  |
| cg26259537 | 1.66E-13 | 7.40E-15 | 8.43 | 22.8500114 | 2.40E-01 | 27209247  | 27209370  | NC_000007.13 |
| cg01489926 | 1.66E-13 | 7.40E-15 | 8.43 | 22.8489613 | 9.05E-02 | 84423960  | 84424083  | NC_000016.9  |
| cg22668218 | 1.67E-13 | 7.43E-15 | 8.43 | 22.846045  | 1.85E-01 | 161100017 | 161100140 | NC_000006.11 |
| cg03202545 | 1.67E-13 | 7.43E-15 | 8.43 | 22.8455149 | 8.00E-02 | 139359312 | 139359435 | NC_000007.13 |
| cg23689712 | 1.67E-13 | 7.45E-15 | 8.43 | 22.8423756 | 1.98E-01 | 165205314 | 165205437 | NC_000001.10 |
| cg18921980 | 1.68E-13 | 7.46E-15 | 8.43 | 22.8420519 | 2.14E-01 | 175594943 | 175595066 | NC_000002.11 |
| cg10173932 | 1.68E-13 | 7.46E-15 | 8.43 | 22.8414675 | 1.36E-01 | 130950761 | 130950884 | NC_000012.11 |
| cg04261138 | 1.68E-13 | 7.48E-15 | 8.43 | 22.8392016 | 1.85E-01 | 87968636  | 87968759  | NC_000005.9  |
| cg07397481 | 1.68E-13 | 7.48E-15 | 8.43 | 22.8389106 | 8.21E-02 | 81927366  | 81927489  | NC_000016.9  |
| cg08931404 | 1.68E-13 | 7.50E-15 | 8.43 | 22.8367638 | 4.18E-02 | 29227083  | 29227206  | NC_000013.10 |
| cg07175883 | 1.69E-13 | 7.54E-15 | 8.43 | 22.8315159 | 2.24E-01 | 176957908 | 176958031 | NC_000002.11 |
| cg10543634 | 1.69E-13 | 7.54E-15 | 8.43 | 22.8302572 | 1.84E-01 | 67651491  | 67651614  | NC_000015.9  |
| cg02970384 | 1.70E-13 | 7.56E-15 | 8.43 | 22.8282062 | 1.64E-01 | 229567560 | 229567683 | NC_000001.10 |
| cg19051015 | 1.70E-13 | 7.57E-15 | 8.43 | 22.8264249 | 1.54E-01 | 46697414  | 46697537  | NC_000017.10 |
| cg07379434 | 1.70E-13 | 7.58E-15 | 8.43 | 22.8259663 | 2.08E-01 | 49814597  | 49814720  | NC_000007.13 |
| cg17957186 | 1.70E-13 | 7.58E-15 | 8.43 | 22.8250817 | 2.08E-01 | 79177895  | 79178018  | NC_000013.10 |
| cg08223003 | 1.70E-13 | 7.59E-15 | 8.43 | 22.824967  | 1.14E-01 | 134285320 | 134285443 | NC_000008.10 |
| cg05797224 | 1.71E-13 | 7.63E-15 | 8.43 | 22.8197698 | 6.84E-02 | 94277532  | 94277655  | NC_000001.10 |
| cg14590098 | 1.71E-13 | 7.64E-15 | 8.43 | 22.8184518 | 1.96E-01 | 65290848  | 65290971  | NC_000008.10 |
| cg25191725 | 1.71E-13 | 7.64E-15 | 8.43 | 22.8178243 | 1.31E-01 | 26554221  | 26554344  | NC_000017.10 |
| cg08644980 | 1.71E-13 | 7.64E-15 | 8.43 | 22.8176956 | 9.34E-02 | 1265487   | 1265610   | NC_000016.9  |
| cg18815647 | 1.72E-13 | 7.64E-15 | 8.43 | 22.8176001 | 1.84E-01 | 25744676  | 25744799  | NC_000013.10 |
| cg07706352 | 1.72E-13 | 7.64E-15 | 8.43 | 22.8172498 | 1.31E-01 | 10077245  | 10077368  | NC_000019.9  |

|            |          |          |      |            |          |           |           |              |
|------------|----------|----------|------|------------|----------|-----------|-----------|--------------|
| cg20263686 | 1.72E-13 | 7.64E-15 | 8.43 | 22.8172401 | 8.15E-02 | 41643429  | 41643552  | NC_000008.10 |
| cg13364624 | 1.72E-13 | 7.66E-15 | 8.43 | 22.8147691 | 1.10E-01 | 111250761 | 111250884 | NC_000013.10 |
| cg11795276 | 1.73E-13 | 7.70E-15 | 8.43 | 22.8094887 | 1.45E-01 | 54454252  | 54454375  | NC_000012.11 |
| cg13917578 | 1.73E-13 | 7.72E-15 | 8.43 | 22.8080864 | 1.16E-01 | 143547850 | 143547973 | NC_000005.9  |
| cg02833919 | 1.73E-13 | 7.72E-15 | 8.43 | 22.8076682 | 8.24E-02 | 143210645 | 143210768 | NC_000008.10 |
| cg21670003 | 1.73E-13 | 7.73E-15 | 8.43 | 22.8066576 | 1.18E-01 | 68867965  | 68868088  | NC_000011.9  |
| cg12865888 | 1.73E-13 | 7.74E-15 | 8.43 | 22.8053634 | 2.29E-01 | 141220177 | 141220300 | NC_000008.10 |
| cg24838010 | 1.73E-13 | 7.74E-15 | 8.43 | 22.8052801 | 1.94E-01 | 78194695  | 78194818  | NC_000017.10 |
| cg15533075 | 1.74E-13 | 7.74E-15 | 8.43 | 22.8047611 | 1.52E-01 | 172734843 | 172734966 | NC_000004.11 |
| cg19024969 | 1.74E-13 | 7.77E-15 | 8.42 | 22.8013098 | 2.34E-01 | 32905966  | 32906089  | NC_000017.10 |
| cg16907527 | 1.75E-13 | 7.79E-15 | 8.42 | 22.7989899 | 1.67E-01 | 43744388  | 43744511  | NC_000006.11 |
| cg09463204 | 1.75E-13 | 7.80E-15 | 8.42 | 22.7978888 | 1.14E-01 | 33177867  | 33177990  | NC_000015.9  |
| cg21956337 | 1.75E-13 | 7.80E-15 | 8.42 | 22.7975491 | 2.46E-01 | 88799707  | 88799830  | NC_000015.9  |
| cg00400448 | 1.75E-13 | 7.80E-15 | 8.42 | 22.7969231 | 1.59E-01 | 60285691  | 60285814  | NC_000015.9  |
| cg17508941 | 1.75E-13 | 7.81E-15 | 8.42 | 22.7965986 | 1.64E-01 | 19183280  | 19183403  | NC_000007.13 |
| cg27023727 | 1.76E-13 | 7.84E-15 | 8.42 | 22.7925755 | 1.29E-01 | 71687739  | 71687862  | NC_000014.8  |
| cg06543087 | 1.76E-13 | 7.84E-15 | 8.42 | 22.7925227 | 2.26E-01 | 108508548 | 108508671 | NC_000001.10 |
| cg08383399 | 1.76E-13 | 7.87E-15 | 8.42 | 22.7882831 | 1.90E-01 | 4852488   | 4852611   | NC_000008.10 |
| cg02866628 | 1.76E-13 | 7.88E-15 | 8.42 | 22.7878268 | 2.02E-01 | 54612475  | 54612598  | NC_000007.13 |
| cg14302308 | 1.77E-13 | 7.90E-15 | 8.42 | 22.7842332 | 1.34E-01 | 38694110  | 38694233  | NC_000009.11 |
| cg11950383 | 1.78E-13 | 7.95E-15 | 8.42 | 22.7791268 | 1.69E-01 | 34400072  | 34400195  | NC_000021.8  |
| cg24935332 | 1.78E-13 | 7.95E-15 | 8.42 | 22.7781786 | 1.41E-01 | 31846819  | 31846942  | NC_000011.9  |
| cg00444360 | 1.78E-13 | 7.96E-15 | 8.42 | 22.7770021 | 1.19E-01 | 88270612  | 88270735  | NC_000011.9  |
| cg10575261 | 1.78E-13 | 7.97E-15 | 8.42 | 22.7765574 | 2.07E-01 | 178368160 | 178368283 | NC_000005.9  |
| cg13685951 | 1.79E-13 | 7.98E-15 | 8.42 | 22.7743649 | 1.91E-01 | 177140322 | 177140445 | NC_000001.10 |

|            |          |          |      |            |          |           |           |              |
|------------|----------|----------|------|------------|----------|-----------|-----------|--------------|
| cg14546497 | 1.79E-13 | 8.00E-15 | 8.42 | 22.77265   | 9.07E-02 | 119538353 | 119538476 | NC_000011.9  |
| cg14409941 | 1.79E-13 | 8.02E-15 | 8.42 | 22.7695717 | 2.56E-01 | 178771781 | 178771904 | NC_000005.9  |
| cg12836011 | 1.80E-13 | 8.03E-15 | 8.42 | 22.7681848 | 2.19E-01 | 166795260 | 166795383 | NC_000004.11 |
| cg16804284 | 1.80E-13 | 8.05E-15 | 8.42 | 22.7658898 | 2.22E-01 | 29237480  | 29237603  | NC_000014.8  |
| cg27555582 | 1.81E-13 | 8.10E-15 | 8.42 | 22.7597004 | 2.44E-01 | 22094009  | 22094132  | NC_000012.11 |
| cg25013052 | 1.82E-13 | 8.13E-15 | 8.42 | 22.756882  | 7.10E-02 | 31838774  | 31838897  | NC_000006.11 |
| cg03938516 | 1.82E-13 | 8.16E-15 | 8.42 | 22.7532523 | 3.19E-02 | 53731693  | 53731816  | NC_000001.10 |
| cg11457640 | 1.82E-13 | 8.16E-15 | 8.42 | 22.7522119 | 1.59E-01 | 40567376  | 40567499  | NC_000006.11 |
| cg21769619 | 1.83E-13 | 8.18E-15 | 8.42 | 22.7506904 | 1.29E-01 | 32454768  | 32454891  | NC_000011.9  |
| cg00681365 | 1.83E-13 | 8.19E-15 | 8.42 | 22.7487323 | 5.49E-02 | 62387003  | 62387126  | NC_000004.11 |
| cg09733312 | 1.84E-13 | 8.24E-15 | 8.42 | 22.7427371 | 4.06E-02 | 63863556  | 63863679  | NC_000010.10 |
| cg15874877 | 1.84E-13 | 8.25E-15 | 8.42 | 22.7424975 | 1.44E-01 | 140799572 | 140799695 | NC_000005.9  |
| cg02630854 | 1.84E-13 | 8.26E-15 | 8.41 | 22.7411915 | 1.08E-01 | 177652347 | 177652470 | NC_000003.11 |
| cg08712932 | 1.85E-13 | 8.27E-15 | 8.41 | 22.7394289 | 2.16E-01 | 133562463 | 133562586 | NC_000006.11 |
| cg23660949 | 1.85E-13 | 8.29E-15 | 8.41 | 22.7377185 | 1.06E-01 | 79072761  | 79072884  | NC_000017.10 |
| cg16857825 | 1.85E-13 | 8.29E-15 | 8.41 | 22.7370506 | 1.30E-01 | 35994825  | 35994948  | NC_000006.11 |
| cg23513966 | 1.85E-13 | 8.29E-15 | 8.41 | 22.7366694 | 1.10E-01 | 76630209  | 76630332  | NC_000015.9  |
| cg25164624 | 1.85E-13 | 8.30E-15 | 8.41 | 22.7356815 | 2.63E-01 | 3641641   | 3641764   | NC_000020.10 |
| cg08000065 | 1.86E-13 | 8.34E-15 | 8.41 | 22.7312418 | 2.08E-01 | 35092823  | 35092946  | NC_000008.10 |
| cg19446165 | 1.86E-13 | 8.36E-15 | 8.41 | 22.7292605 | 1.40E-01 | 185756    | 185879    | NC_000017.10 |
| cg19224201 | 1.87E-13 | 8.36E-15 | 8.41 | 22.72901   | 1.66E-01 | 119615015 | 119615138 | NC_000002.11 |
| cg24558112 | 1.87E-13 | 8.40E-15 | 8.41 | 22.7238747 | 8.37E-02 | 26364710  | 26364833  | NC_000008.10 |
| cg09477453 | 1.87E-13 | 8.40E-15 | 8.41 | 22.723844  | 1.68E-01 | 1276617   | 1276740   | NC_000007.13 |
| cg08229320 | 1.88E-13 | 8.41E-15 | 8.41 | 22.7228609 | 1.48E-01 | 45941351  | 45941474  | NC_000010.10 |
| cg25066972 | 1.88E-13 | 8.43E-15 | 8.41 | 22.721112  | 1.87E-01 | 82002568  | 82002691  | NC_000014.8  |

|            |          |          |      |            |          |           |           |              |
|------------|----------|----------|------|------------|----------|-----------|-----------|--------------|
| cg19545040 | 1.88E-13 | 8.44E-15 | 8.41 | 22.7198974 | 5.35E-02 | 103700513 | 103700636 | NC_000010.10 |
| cg10169241 | 1.88E-13 | 8.45E-15 | 8.41 | 22.7182628 | 1.45E-01 | 1467032   | 1467155   | NC_000019.9  |
| cg23514417 | 1.89E-13 | 8.46E-15 | 8.41 | 22.7172022 | 1.27E-01 | 31938533  | 31938656  | NC_000006.11 |
| cg04568492 | 1.89E-13 | 8.46E-15 | 8.41 | 22.7170981 | 2.44E-01 | 229568252 | 229568375 | NC_000001.10 |
| cg06132727 | 1.89E-13 | 8.48E-15 | 8.41 | 22.714948  | 1.45E-01 | 174422191 | 174422314 | NC_000004.11 |
| cg05994094 | 1.89E-13 | 8.49E-15 | 8.41 | 22.7134724 | 2.32E-01 | 31020806  | 31020929  | NC_000018.9  |
| cg22641350 | 1.89E-13 | 8.50E-15 | 8.41 | 22.7129138 | 1.60E-01 | 1008191   | 1008314   | NC_000008.10 |
| cg10663408 | 1.90E-13 | 8.51E-15 | 8.41 | 22.7116721 | 1.92E-01 | 130021651 | 130021774 | NC_000007.13 |
| cg20076842 | 1.90E-13 | 8.51E-15 | 8.41 | 22.7112403 | 1.75E-01 | 28617743  | 28617866  | NC_000003.11 |
| cg04920358 | 1.90E-13 | 8.51E-15 | 8.41 | 22.7108266 | 2.37E-01 | 49468800  | 49468923  | NC_000008.10 |
| cg22136329 | 1.90E-13 | 8.53E-15 | 8.41 | 22.7088596 | 3.14E-02 | 27296033  | 27296156  | NC_000007.13 |
| cg11229101 | 1.90E-13 | 8.54E-15 | 8.41 | 22.7078656 | 1.14E-01 | 134230885 | 134231008 | NC_000010.10 |
| cg08698580 | 1.91E-13 | 8.57E-15 | 8.41 | 22.7047935 | 9.07E-02 | 233708989 | 233709112 | NC_000002.11 |
| cg06787004 | 1.91E-13 | 8.57E-15 | 8.41 | 22.7042973 | 1.14E-01 | 19938981  | 19939104  | NC_000022.10 |
| cg02978421 | 1.91E-13 | 8.59E-15 | 8.41 | 22.7016976 | 2.42E-01 | 27135780  | 27135903  | NC_000007.13 |
| cg04330683 | 1.92E-13 | 8.62E-15 | 8.41 | 22.6989982 | 1.55E-01 | 22715410  | 22715533  | NC_000019.9  |
| cg23530707 | 1.92E-13 | 8.62E-15 | 8.41 | 22.6988451 | 7.40E-02 | 72983995  | 72984118  | NC_000007.13 |
| cg15447540 | 1.92E-13 | 8.64E-15 | 8.41 | 22.6961819 | 1.83E-01 | 132054713 | 132054836 | NC_000008.10 |
| cg13350783 | 1.92E-13 | 8.64E-15 | 8.41 | 22.6959462 | 5.63E-02 | 39661354  | 39661477  | NC_000017.10 |
| cg07125905 | 1.93E-13 | 8.65E-15 | 8.41 | 22.6955633 | 1.55E-01 | 140767364 | 140767487 | NC_000005.9  |
| cg14777244 | 1.93E-13 | 8.66E-15 | 8.41 | 22.6938166 | 7.62E-02 | 49110198  | 49110321  | NC_000019.9  |
| cg14972743 | 1.94E-13 | 8.69E-15 | 8.41 | 22.6901343 | 2.23E-01 | 58609960  | 58610083  | NC_000019.9  |
| cg08171336 | 1.94E-13 | 8.70E-15 | 8.41 | 22.6894839 | 1.19E-01 | 144682400 | 144682523 | NC_000008.10 |
| cg10787911 | 1.94E-13 | 8.74E-15 | 8.41 | 22.6854743 | 9.06E-02 | 142368316 | 142368439 | NC_000008.10 |
| cg16674020 | 1.95E-13 | 8.77E-15 | 8.41 | 22.6819549 | 1.58E-01 | 4174482   | 4174605   | NC_000007.13 |

|            |          |          |     |            |          |           |           |              |
|------------|----------|----------|-----|------------|----------|-----------|-----------|--------------|
| cg12699647 | 1.96E-13 | 8.81E-15 | 8.4 | 22.6767254 | 1.68E-01 | 80401857  | 80401980  | NC_000017.10 |
| cg19728382 | 1.97E-13 | 8.84E-15 | 8.4 | 22.6736975 | 1.45E-01 | 172757276 | 172757399 | NC_000005.9  |
| cg15252243 | 1.97E-13 | 8.84E-15 | 8.4 | 22.6735613 | 1.75E-01 | 90031538  | 90031661  | NC_000004.11 |
| cg18770669 | 1.99E-13 | 8.93E-15 | 8.4 | 22.6638153 | 1.30E-01 | 5541220   | 5541343   | NC_000012.11 |
| cg24104241 | 1.99E-13 | 8.94E-15 | 8.4 | 22.66249   | 2.13E-01 | 229567626 | 229567749 | NC_000001.10 |
| cg23102483 | 1.99E-13 | 8.94E-15 | 8.4 | 22.6623837 | 2.88E-02 | 47267132  | 47267255  | NC_000011.9  |
| cg06092815 | 1.99E-13 | 8.94E-15 | 8.4 | 22.6622223 | 1.79E-01 | 229046406 | 229046529 | NC_000002.11 |
| cg22571664 | 1.99E-13 | 8.96E-15 | 8.4 | 22.6608351 | 1.82E-01 | 32713112  | 32713235  | NC_000005.9  |
| cg12782992 | 2.00E-13 | 8.99E-15 | 8.4 | 22.6568099 | 2.20E-01 | 9026055   | 9026178   | NC_000011.9  |
| cg13921308 | 2.00E-13 | 8.99E-15 | 8.4 | 22.6567165 | 8.25E-02 | 214166160 | 214166283 | NC_000001.10 |
| cg17462107 | 2.00E-13 | 9.00E-15 | 8.4 | 22.6555273 | 1.11E-01 | 66199867  | 66199990  | NC_000005.9  |
| cg18708502 | 2.00E-13 | 9.02E-15 | 8.4 | 22.654046  | 1.32E-01 | 21588555  | 21588678  | NC_000013.10 |
| cg13454407 | 2.01E-13 | 9.03E-15 | 8.4 | 22.652934  | 2.04E-01 | 110986982 | 110987105 | NC_000008.10 |
| cg14156314 | 2.01E-13 | 9.05E-15 | 8.4 | 22.6507428 | 7.16E-02 | 139959160 | 139959283 | NC_000009.11 |
| cg14094447 | 2.01E-13 | 9.06E-15 | 8.4 | 22.6496839 | 2.51E-02 | 74383399  | 74383522  | NC_000009.11 |
| cg08640634 | 2.01E-13 | 9.06E-15 | 8.4 | 22.6494116 | 2.52E-01 | 108486450 | 108486573 | NC_000006.11 |
| cg16348254 | 2.03E-13 | 9.12E-15 | 8.4 | 22.6427044 | 6.52E-02 | 43837992  | 43838115  | NC_000010.10 |
| cg13525837 | 2.03E-13 | 9.13E-15 | 8.4 | 22.6414675 | 2.22E-01 | 110986371 | 110986494 | NC_000008.10 |
| cg19388032 | 2.03E-13 | 9.17E-15 | 8.4 | 22.6378881 | 1.16E-01 | 33171491  | 33171614  | NC_000006.11 |
| cg10362591 | 2.04E-13 | 9.17E-15 | 8.4 | 22.6370791 | 2.21E-01 | 55689865  | 55689988  | NC_000016.9  |
| cg08116263 | 2.04E-13 | 9.18E-15 | 8.4 | 22.6369667 | 4.88E-02 | 132837117 | 132837240 | NC_000006.11 |
| cg11671688 | 2.04E-13 | 9.18E-15 | 8.4 | 22.6360933 | 1.62E-01 | 110301075 | 110301198 | NC_000006.11 |
| cg23374312 | 2.05E-13 | 9.22E-15 | 8.4 | 22.6317458 | 9.51E-02 | 21565335  | 21565458  | NC_000014.8  |
| cg05895545 | 2.05E-13 | 9.24E-15 | 8.4 | 22.6305075 | 1.50E-01 | 50695337  | 50695460  | NC_000005.9  |
| cg03942855 | 2.06E-13 | 9.27E-15 | 8.4 | 22.6264702 | 2.09E-01 | 110210925 | 110211048 | NC_000001.10 |

|            |          |          |      |            |          |           |           |              |
|------------|----------|----------|------|------------|----------|-----------|-----------|--------------|
| cg05037024 | 2.06E-13 | 9.31E-15 | 8.4  | 22.6226221 | 8.34E-02 | 155848920 | 155849043 | NC_000005.9  |
| cg03981954 | 2.07E-13 | 9.32E-15 | 8.4  | 22.6213041 | 2.10E-01 | 121942010 | 121942133 | NC_000007.13 |
| cg10148473 | 2.07E-13 | 9.33E-15 | 8.4  | 22.6208315 | 2.59E-01 | 75601824  | 75601947  | NC_000012.11 |
| cg14928719 | 2.07E-13 | 9.34E-15 | 8.4  | 22.6193945 | 9.41E-02 | 139079940 | 139080063 | NC_000002.11 |
| cg10332723 | 2.07E-13 | 9.35E-15 | 8.4  | 22.6181304 | 6.19E-02 | 84600152  | 84600275  | NC_000016.9  |
| cg27111150 | 2.08E-13 | 9.37E-15 | 8.39 | 22.6157525 | 1.40E-01 | 97183248  | 97183371  | NC_000010.10 |
| cg04021502 | 2.08E-13 | 9.38E-15 | 8.39 | 22.6153059 | 7.99E-02 | 1270598   | 1270721   | NC_000005.9  |
| cg27016494 | 2.08E-13 | 9.39E-15 | 8.39 | 22.613796  | 1.75E-01 | 96651586  | 96651709  | NC_000007.13 |
| cg20286200 | 2.08E-13 | 9.39E-15 | 8.39 | 22.6137415 | 2.57E-01 | 133562267 | 133562390 | NC_000006.11 |
| cg00625939 | 2.08E-13 | 9.40E-15 | 8.39 | 22.6131908 | 9.60E-02 | 189028032 | 189028155 | NC_000004.11 |
| cg04340928 | 2.08E-13 | 9.41E-15 | 8.39 | 22.61231   | 1.29E-01 | 55067613  | 55067736  | NC_000016.9  |
| cg03983008 | 2.09E-13 | 9.42E-15 | 8.39 | 22.611018  | 1.04E-01 | 179002268 | 179002391 | NC_000005.9  |
| cg22559002 | 2.09E-13 | 9.44E-15 | 8.39 | 22.6086377 | 9.33E-02 | 63898392  | 63898515  | NC_000017.10 |
| cg16696002 | 2.09E-13 | 9.44E-15 | 8.39 | 22.60849   | 1.60E-01 | 172189728 | 172189851 | NC_000001.10 |
| cg14914238 | 2.09E-13 | 9.45E-15 | 8.39 | 22.6077997 | 2.02E-01 | 83620321  | 83620444  | NC_000015.9  |
| cg02442509 | 2.10E-13 | 9.47E-15 | 8.39 | 22.6055265 | 1.93E-01 | 45156207  | 45156330  | NC_000002.11 |
| cg05043349 | 2.10E-13 | 9.49E-15 | 8.39 | 22.6034303 | 2.41E-01 | 65290113  | 65290236  | NC_000008.10 |
| cg13620526 | 2.11E-13 | 9.52E-15 | 8.39 | 22.6001102 | 4.97E-02 | 24629560  | 24629683  | NC_000014.8  |
| cg00104348 | 2.11E-13 | 9.54E-15 | 8.39 | 22.5989947 | 7.52E-02 | 10772424  | 10772547  | NC_000012.11 |
| cg15146859 | 2.11E-13 | 9.54E-15 | 8.39 | 22.5980602 | 2.59E-01 | 74961737  | 74961860  | NC_000018.9  |
| cg00569418 | 2.11E-13 | 9.55E-15 | 8.39 | 22.5978738 | 5.47E-02 | 50192100  | 50192223  | NC_000019.9  |
| cg00290506 | 2.11E-13 | 9.55E-15 | 8.39 | 22.597816  | 2.52E-01 | 224804226 | 224804349 | NC_000001.10 |
| cg15069295 | 2.11E-13 | 9.55E-15 | 8.39 | 22.5975448 | 1.82E-01 | 137522461 | 137522584 | NC_000002.11 |
| cg13255208 | 2.12E-13 | 9.57E-15 | 8.39 | 22.595533  | 1.19E-01 | 104165183 | 104165306 | NC_000014.8  |
| cg22200649 | 2.12E-13 | 9.59E-15 | 8.39 | 22.5931792 | 5.52E-02 | 65961644  | 65961767  | NC_000012.11 |

|            |          |          |      |            |          |           |           |              |
|------------|----------|----------|------|------------|----------|-----------|-----------|--------------|
| cg09570682 | 2.12E-13 | 9.60E-15 | 8.39 | 22.592768  | 2.46E-01 | 106429443 | 106429566 | NC_000006.11 |
| cg13614229 | 2.14E-13 | 9.68E-15 | 8.39 | 22.5845728 | 1.49E-01 | 131217218 | 131217341 | NC_000012.11 |
| cg02317400 | 2.14E-13 | 9.68E-15 | 8.39 | 22.5845587 | 1.86E-01 | 135050345 | 135050468 | NC_000010.10 |
| cg15952725 | 2.14E-13 | 9.70E-15 | 8.39 | 22.582376  | 1.64E-01 | 15783190  | 15783313  | NC_000001.10 |
| cg24335984 | 2.15E-13 | 9.70E-15 | 8.39 | 22.5817227 | 8.12E-02 | 50361554  | 50361677  | NC_000003.11 |
| cg22447539 | 2.15E-13 | 9.73E-15 | 8.39 | 22.5786104 | 1.76E-01 | 5633086   | 5633209   | NC_000007.13 |
| cg16793187 | 2.16E-13 | 9.79E-15 | 8.39 | 22.5725311 | 1.53E-01 | 115530431 | 115530554 | NC_000011.9  |
| cg17131044 | 2.18E-13 | 9.85E-15 | 8.39 | 22.5672799 | 1.83E-01 | 20619012  | 20619135  | NC_000011.9  |
| cg24022656 | 2.19E-13 | 9.90E-15 | 8.39 | 22.5623926 | 1.87E-01 | 157291349 | 157291472 | NC_000007.13 |
| cg04689058 | 2.20E-13 | 9.95E-15 | 8.39 | 22.5567588 | 1.36E-01 | 66953825  | 66953948  | NC_000016.9  |
| cg07552868 | 2.20E-13 | 9.98E-15 | 8.38 | 22.5536547 | 8.38E-02 | 144994826 | 144994949 | NC_000001.10 |
| cg13493652 | 2.21E-13 | 1.00E-14 | 8.38 | 22.5523444 | 8.85E-02 | 6385721   | 6385844   | NC_000007.13 |
| cg12967666 | 2.22E-13 | 1.00E-14 | 8.38 | 22.548621  | 9.26E-02 | 53745145  | 53745268  | NC_000014.8  |
| cg26344227 | 2.22E-13 | 1.00E-14 | 8.38 | 22.5479259 | 2.10E-01 | 53287126  | 53287249  | NC_000007.13 |
| cg01800521 | 2.22E-13 | 1.01E-14 | 8.38 | 22.5446188 | 2.17E-01 | 21503456  | 21503579  | NC_000020.10 |
| cg18710412 | 2.23E-13 | 1.01E-14 | 8.38 | 22.5435328 | 1.06E-01 | 90654191  | 90654314  | NC_000005.9  |
| cg26983710 | 2.23E-13 | 1.01E-14 | 8.38 | 22.5432009 | 2.30E-01 | 154728202 | 154728325 | NC_000002.11 |
| cg14428048 | 2.23E-13 | 1.01E-14 | 8.38 | 22.5426047 | 1.75E-01 | 121940344 | 121940467 | NC_000007.13 |
| cg00333226 | 2.23E-13 | 1.01E-14 | 8.38 | 22.5409975 | 1.70E-01 | 49813763  | 49813886  | NC_000007.13 |
| cg13927454 | 2.23E-13 | 1.01E-14 | 8.38 | 22.5396028 | 1.33E-01 | 90798982  | 90799105  | NC_000009.11 |
| cg08876932 | 2.24E-13 | 1.01E-14 | 8.38 | 22.5373442 | 2.10E-01 | 71955547  | 71955670  | NC_000011.9  |
| cg27655158 | 2.25E-13 | 1.02E-14 | 8.38 | 22.5342281 | 2.64E-01 | 1396593   | 1396716   | NC_000004.11 |
| cg09662162 | 2.25E-13 | 1.02E-14 | 8.38 | 22.5306055 | 7.26E-02 | 1212457   | 1212580   | NC_000016.9  |
| cg26808747 | 2.26E-13 | 1.03E-14 | 8.38 | 22.525728  | 1.13E-01 | 128077376 | 128077499 | NC_000010.10 |
| cg26720125 | 2.27E-13 | 1.03E-14 | 8.38 | 22.5228264 | 2.23E-01 | 38077673  | 38077796  | NC_000021.8  |

|            |          |          |      |            |          |           |           |              |
|------------|----------|----------|------|------------|----------|-----------|-----------|--------------|
| cg24632756 | 2.27E-13 | 1.03E-14 | 8.38 | 22.5216786 | 1.83E-01 | 33603026  | 33603149  | NC_000015.9  |
| cg22455694 | 2.28E-13 | 1.03E-14 | 8.38 | 22.5205888 | 1.44E-01 | 176974001 | 176974124 | NC_000002.11 |
| cg17631357 | 2.28E-13 | 1.03E-14 | 8.38 | 22.518661  | 5.80E-02 | 79298234  | 79298357  | NC_000015.9  |
| cg23069057 | 2.29E-13 | 1.04E-14 | 8.38 | 22.5139969 | 1.27E-01 | 14867316  | 14867439  | NC_000004.11 |
| cg09661632 | 2.29E-13 | 1.04E-14 | 8.38 | 22.5127084 | 6.43E-02 | 59525666  | 59525789  | NC_000017.10 |
| cg27219874 | 2.29E-13 | 1.04E-14 | 8.38 | 22.5116182 | 6.88E-02 | 67696095  | 67696218  | NC_000016.9  |
| cg24463471 | 2.30E-13 | 1.04E-14 | 8.38 | 22.5112983 | 1.55E-01 | 25257978  | 25258101  | NC_000001.10 |
| cg10024876 | 2.30E-13 | 1.04E-14 | 8.38 | 22.5112445 | 1.95E-01 | 69592049  | 69592172  | NC_000003.11 |
| cg15824707 | 2.30E-13 | 1.05E-14 | 8.38 | 22.5073763 | 1.02E-01 | 45403733  | 45403856  | NC_000015.9  |
| cg05141924 | 2.31E-13 | 1.05E-14 | 8.38 | 22.5031541 | 5.48E-02 | 28669866  | 28669989  | NC_000002.11 |
| cg18279134 | 2.31E-13 | 1.05E-14 | 8.38 | 22.5022595 | 1.13E-01 | 16394568  | 16394691  | NC_000001.10 |
| cg14507868 | 2.32E-13 | 1.06E-14 | 8.38 | 22.4983671 | 2.33E-01 | 107503819 | 107503942 | NC_000002.11 |
| cg17287155 | 2.33E-13 | 1.06E-14 | 8.38 | 22.4964895 | 9.20E-02 | 393347    | 393470    | NC_000005.9  |
| cg10763247 | 2.33E-13 | 1.06E-14 | 8.38 | 22.4954056 | 7.76E-02 | 61066614  | 61066737  | NC_000003.11 |
| cg24334591 | 2.33E-13 | 1.06E-14 | 8.37 | 22.4940144 | 2.53E-01 | 37005562  | 37005685  | NC_000013.10 |
| cg23016129 | 2.34E-13 | 1.06E-14 | 8.37 | 22.4917508 | 1.30E-01 | 22634224  | 22634347  | NC_000010.10 |
| cg09780241 | 2.34E-13 | 1.06E-14 | 8.37 | 22.4907859 | 2.49E-01 | 111535597 | 111535720 | NC_000004.11 |
| cg05250768 | 2.35E-13 | 1.07E-14 | 8.37 | 22.4880827 | 2.67E-01 | 27209270  | 27209393  | NC_000007.13 |
| cg17727929 | 2.35E-13 | 1.07E-14 | 8.37 | 22.4878667 | 2.24E-01 | 38069338  | 38069461  | NC_000021.8  |
| cg02803819 | 2.35E-13 | 1.07E-14 | 8.37 | 22.4861083 | 2.09E-01 | 27141067  | 27141190  | NC_000007.13 |
| cg10307076 | 2.36E-13 | 1.07E-14 | 8.37 | 22.4834688 | 2.78E-02 | 3572221   | 3572344   | NC_000010.10 |
| cg18813020 | 2.36E-13 | 1.07E-14 | 8.37 | 22.4808896 | 1.67E-01 | 122434472 | 122434595 | NC_000005.9  |
| cg06916740 | 2.37E-13 | 1.08E-14 | 8.37 | 22.4786982 | 9.90E-02 | 91188911  | 91189034  | NC_000006.11 |
| cg06448705 | 2.37E-13 | 1.08E-14 | 8.37 | 22.478484  | 1.84E-01 | 135701094 | 135701217 | NC_000005.9  |
| cg16014492 | 2.37E-13 | 1.08E-14 | 8.37 | 22.4756644 | 6.98E-02 | 88018953  | 88019076  | NC_000016.9  |



|            |          |          |      |            |          |           |           |              |
|------------|----------|----------|------|------------|----------|-----------|-----------|--------------|
| cg06228507 | 2.37E-13 | 1.08E-14 | 8.37 | 22.4748343 | 1.67E-01 | 61637360  | 61637483  | NC_000020.10 |
| cg18731327 | 2.39E-13 | 1.09E-14 | 8.37 | 22.4700119 | 1.40E-01 | 147114352 | 147114475 | NC_000003.11 |
| cg24346905 | 2.39E-13 | 1.09E-14 | 8.37 | 22.4698053 | 1.91E-01 | 108023249 | 108023372 | NC_000001.10 |
| cg11419814 | 2.39E-13 | 1.09E-14 | 8.37 | 22.4680543 | 1.63E-01 | 22056533  | 22056656  | NC_000013.10 |
| cg05854217 | 2.39E-13 | 1.09E-14 | 8.37 | 22.4674538 | 1.64E-01 | 1595819   | 1595942   | NC_000002.11 |
| cg14522150 | 2.39E-13 | 1.09E-14 | 8.37 | 22.4668819 | 1.17E-01 | 50616478  | 50616601  | NC_000010.10 |
| cg22677260 | 2.40E-13 | 1.09E-14 | 8.37 | 22.4657074 | 7.31E-02 | 55814218  | 55814341  | NC_000019.9  |
| cg05791938 | 2.40E-13 | 1.09E-14 | 8.37 | 22.4645296 | 5.98E-02 | 97229682  | 97229805  | NC_000010.10 |
| cg05845376 | 2.40E-13 | 1.10E-14 | 8.37 | 22.4616102 | 1.67E-01 | 140683632 | 140683755 | NC_000005.9  |
| cg22974462 | 2.41E-13 | 1.10E-14 | 8.37 | 22.4601194 | 5.54E-02 | 29177553  | 29177676  | NC_000008.10 |
| cg13924554 | 2.42E-13 | 1.10E-14 | 8.37 | 22.4562793 | 5.33E-02 | 50710952  | 50711075  | NC_000013.10 |
| cg15278646 | 2.42E-13 | 1.10E-14 | 8.37 | 22.4546144 | 2.09E-01 | 28341980  | 28342103  | NC_000015.9  |
| cg16896079 | 2.42E-13 | 1.10E-14 | 8.37 | 22.4533839 | 2.65E-01 | 41582362  | 41582485  | NC_000012.11 |
| cg06117072 | 2.43E-13 | 1.11E-14 | 8.37 | 22.4510654 | 1.66E-01 | 50791385  | 50791508  | NC_000006.11 |
| cg12848065 | 2.43E-13 | 1.11E-14 | 8.37 | 22.4485473 | 1.89E-01 | 207507528 | 207507651 | NC_000002.11 |
| cg08954761 | 2.44E-13 | 1.11E-14 | 8.37 | 22.4480006 | 6.20E-02 | 88294101  | 88294224  | NC_000016.9  |
| cg24362812 | 2.44E-13 | 1.11E-14 | 8.37 | 22.4467672 | 2.61E-01 | 11148769  | 11148892  | NC_000018.9  |
| cg05743885 | 2.44E-13 | 1.11E-14 | 8.37 | 22.4455827 | 1.94E-01 | 27196365  | 27196488  | NC_000007.13 |
| cg21859781 | 2.44E-13 | 1.11E-14 | 8.37 | 22.4454789 | 2.49E-01 | 97173034  | 97173157  | NC_000008.10 |
| cg01881265 | 2.44E-13 | 1.12E-14 | 8.37 | 22.4439651 | 9.52E-02 | 934534    | 934657    | NC_000017.10 |
| cg21938148 | 2.45E-13 | 1.12E-14 | 8.37 | 22.4433538 | 2.89E-01 | 110958977 | 110959100 | NC_000013.10 |
| cg01769468 | 2.45E-13 | 1.12E-14 | 8.37 | 22.4431408 | 9.85E-02 | 86888585  | 86888708  | NC_000001.10 |
| cg21523719 | 2.45E-13 | 1.12E-14 | 8.37 | 22.440571  | 1.16E-01 | 24128335  | 24128458  | NC_000001.10 |
| cg25056510 | 2.46E-13 | 1.12E-14 | 8.37 | 22.4376545 | 9.74E-02 | 32729745  | 32729868  | NC_000015.9  |
| cg06089606 | 2.46E-13 | 1.12E-14 | 8.37 | 22.4374592 | 9.97E-02 | 89909180  | 89909303  | NC_000003.11 |

|            |          |          |      |            |          |           |           |              |
|------------|----------|----------|------|------------|----------|-----------|-----------|--------------|
| cg11100481 | 2.46E-13 | 1.12E-14 | 8.37 | 22.4365951 | 1.27E-01 | 149867577 | 149867700 | NC_000005.9  |
| cg20052718 | 2.46E-13 | 1.12E-14 | 8.37 | 22.4363024 | 1.69E-01 | 19156902  | 19157025  | NC_000007.13 |
| cg09890213 | 2.47E-13 | 1.13E-14 | 8.36 | 22.4321002 | 1.12E-01 | 52409033  | 52409156  | NC_000012.11 |
| cg26156448 | 2.47E-13 | 1.13E-14 | 8.36 | 22.4318046 | 1.75E-01 | 21378200  | 21378323  | NC_000020.10 |
| cg19787644 | 2.48E-13 | 1.13E-14 | 8.36 | 22.430763  | 1.02E-01 | 94532246  | 94532369  | NC_000012.11 |
| cg02344820 | 2.48E-13 | 1.13E-14 | 8.36 | 22.4301445 | 1.40E-01 | 155167511 | 155167634 | NC_000007.13 |
| cg01283863 | 2.48E-13 | 1.13E-14 | 8.36 | 22.4300447 | 4.85E-02 | 33863759  | 33863882  | NC_000020.10 |
| cg26355072 | 2.48E-13 | 1.13E-14 | 8.36 | 22.4271979 | 5.34E-02 | 141674679 | 141674802 | NC_000005.9  |
| cg20269729 | 2.48E-13 | 1.14E-14 | 8.36 | 22.4265555 | 4.58E-02 | 33152008  | 33152131  | NC_000006.11 |
| cg27569174 | 2.49E-13 | 1.14E-14 | 8.36 | 22.4262287 | 7.44E-02 | 177952602 | 177952725 | NC_000001.10 |
| cg05187193 | 2.50E-13 | 1.14E-14 | 8.36 | 22.4211203 | 8.80E-02 | 168397037 | 168397160 | NC_000006.11 |
| cg21176263 | 2.50E-13 | 1.14E-14 | 8.36 | 22.4206735 | 6.13E-02 | 129455497 | 129455620 | NC_000009.11 |
| cg06714088 | 2.51E-13 | 1.15E-14 | 8.36 | 22.4166172 | 7.76E-02 | 167093800 | 167093923 | NC_000001.10 |
| cg13551330 | 2.51E-13 | 1.15E-14 | 8.36 | 22.4157962 | 5.34E-02 | 32388149  | 32388272  | NC_000009.11 |
| cg22108374 | 2.51E-13 | 1.15E-14 | 8.36 | 22.4154952 | 1.46E-01 | 74557527  | 74557650  | NC_000015.9  |
| cg26118906 | 2.52E-13 | 1.15E-14 | 8.36 | 22.41332   | 1.92E-01 | 58332488  | 58332611  | NC_000014.8  |
| cg04523867 | 2.52E-13 | 1.15E-14 | 8.36 | 22.413313  | 9.75E-02 | 56667262  | 56667385  | NC_000016.9  |
| cg25622154 | 2.52E-13 | 1.15E-14 | 8.36 | 22.4096566 | 1.84E-01 | 228657536 | 228657659 | NC_000001.10 |
| cg05720454 | 2.53E-13 | 1.16E-14 | 8.36 | 22.4080348 | 2.13E-01 | 34442511  | 34442634  | NC_000021.8  |
| cg22868951 | 2.53E-13 | 1.16E-14 | 8.36 | 22.4077854 | 1.54E-01 | 129767588 | 129767711 | NC_000004.11 |
| cg13717541 | 2.53E-13 | 1.16E-14 | 8.36 | 22.4055599 | 2.15E-01 | 95727643  | 95727766  | NC_000014.8  |
| cg16945312 | 2.54E-13 | 1.16E-14 | 8.36 | 22.4038572 | 2.09E-01 | 1393028   | 1393151   | NC_000006.11 |
| cg18266257 | 2.54E-13 | 1.16E-14 | 8.36 | 22.4017222 | 6.79E-02 | 32803444  | 32803567  | NC_000006.11 |
| cg16903885 | 2.55E-13 | 1.17E-14 | 8.36 | 22.4006395 | 1.06E-01 | 134795548 | 134795671 | NC_000010.10 |
| cg07904028 | 2.55E-13 | 1.17E-14 | 8.36 | 22.3983216 | 9.81E-02 | 6328508   | 6328631   | NC_000004.11 |

|            |          |          |      |            |          |           |           |              |
|------------|----------|----------|------|------------|----------|-----------|-----------|--------------|
| cg24502901 | 2.55E-13 | 1.17E-14 | 8.36 | 22.3979287 | 6.15E-02 | 24086220  | 24086343  | NC_000001.10 |
| cg22171758 | 2.56E-13 | 1.17E-14 | 8.36 | 22.3968348 | 8.74E-02 | 54146133  | 54146256  | NC_000012.11 |
| cg19109431 | 2.56E-13 | 1.17E-14 | 8.36 | 22.3939204 | 1.26E-01 | 44234511  | 44234634  | NC_000006.11 |
| cg25970377 | 2.57E-13 | 1.18E-14 | 8.36 | 22.3925931 | 1.70E-01 | 57089933  | 57090056  | NC_000020.10 |
| cg07517893 | 2.58E-13 | 1.18E-14 | 8.36 | 22.3881714 | 1.98E-01 | 45889164  | 45889287  | NC_000019.9  |
| cg07647164 | 2.58E-13 | 1.18E-14 | 8.36 | 22.3874676 | 1.98E-01 | 214360690 | 214360813 | NC_000001.10 |
| cg09188385 | 2.60E-13 | 1.19E-14 | 8.36 | 22.3784701 | 1.06E-01 | 5645728   | 5645851   | NC_000007.13 |
| cg04345475 | 2.60E-13 | 1.19E-14 | 8.36 | 22.3782768 | 1.08E-01 | 6501591   | 6501714   | NC_000011.9  |
| cg00012762 | 2.60E-13 | 1.19E-14 | 8.36 | 22.3779107 | 2.83E-02 | 72744649  | 72744772  | NC_000017.10 |
| cg22855968 | 2.60E-13 | 1.19E-14 | 8.36 | 22.3776087 | 9.93E-02 | 134673162 | 134673285 | NC_000006.11 |
| cg10755235 | 2.61E-13 | 1.20E-14 | 8.36 | 22.3743351 | 2.13E-01 | 60974039  | 60974162  | NC_000014.8  |
| cg26274166 | 2.63E-13 | 1.21E-14 | 8.35 | 22.3661192 | 1.50E-01 | 50060174  | 50060297  | NC_000019.9  |
| cg17403512 | 2.63E-13 | 1.21E-14 | 8.35 | 22.3658963 | 9.65E-02 | 28700396  | 28700519  | NC_000015.9  |
| cg13852234 | 2.64E-13 | 1.21E-14 | 8.35 | 22.3624877 | 8.67E-02 | 7952192   | 7952315   | NC_000017.10 |
| cg07996594 | 2.64E-13 | 1.21E-14 | 8.35 | 22.3608968 | 1.49E-01 | 25257505  | 25257628  | NC_000001.10 |
| cg14045327 | 2.65E-13 | 1.21E-14 | 8.35 | 22.3602142 | 1.38E-01 | 387968    | 388091    | NC_000019.9  |
| cg07274716 | 2.66E-13 | 1.22E-14 | 8.35 | 22.3567732 | 1.73E-01 | 134363973 | 134364096 | NC_000005.9  |
| cg23245942 | 2.66E-13 | 1.22E-14 | 8.35 | 22.3543095 | 1.78E-01 | 46698973  | 46699096  | NC_000017.10 |
| cg07800665 | 2.67E-13 | 1.23E-14 | 8.35 | 22.3507533 | 2.55E-01 | 21657926  | 21658049  | NC_000019.9  |
| cg05586304 | 2.68E-13 | 1.23E-14 | 8.35 | 22.3485729 | 2.14E-01 | 75629039  | 75629162  | NC_000003.11 |
| cg07799386 | 2.68E-13 | 1.23E-14 | 8.35 | 22.3471399 | 1.34E-01 | 122430821 | 122430944 | NC_000005.9  |
| cg12892506 | 2.70E-13 | 1.24E-14 | 8.35 | 22.3402569 | 2.26E-01 | 147113918 | 147114041 | NC_000003.11 |
| cg24892510 | 2.70E-13 | 1.24E-14 | 8.35 | 22.3400164 | 2.12E-01 | 53636309  | 53636432  | NC_000019.9  |
| cg03231647 | 2.70E-13 | 1.24E-14 | 8.35 | 22.3398264 | 1.64E-01 | 237081650 | 237081773 | NC_000002.11 |
| cg19202813 | 2.70E-13 | 1.24E-14 | 8.35 | 22.3394105 | 1.33E-01 | 189216616 | 189216739 | NC_000002.11 |

|            |          |          |      |            |          |           |           |              |
|------------|----------|----------|------|------------|----------|-----------|-----------|--------------|
| cg22916586 | 2.70E-13 | 1.24E-14 | 8.35 | 22.337132  | 1.53E-01 | 12686957  | 12687080  | NC_000012.11 |
| cg04293733 | 2.71E-13 | 1.25E-14 | 8.35 | 22.3348769 | 2.39E-01 | 98511629  | 98511752  | NC_000001.10 |
| cg18723560 | 2.71E-13 | 1.25E-14 | 8.35 | 22.3344541 | 2.19E-01 | 51228831  | 51228954  | NC_000019.9  |
| cg03717503 | 2.72E-13 | 1.25E-14 | 8.35 | 22.3321362 | 1.15E-01 | 86734176  | 86734299  | NC_000016.9  |
| cg09606807 | 2.73E-13 | 1.25E-14 | 8.35 | 22.327971  | 1.69E-01 | 96579908  | 96580031  | NC_000015.9  |
| cg17382918 | 2.73E-13 | 1.26E-14 | 8.35 | 22.3274865 | 1.23E-01 | 57042544  | 57042667  | NC_000020.10 |
| cg10702770 | 2.73E-13 | 1.26E-14 | 8.35 | 22.3268912 | 1.30E-01 | 39283780  | 39283903  | NC_000001.10 |
| cg12055515 | 2.73E-13 | 1.26E-14 | 8.35 | 22.3259999 | 1.66E-01 | 66735203  | 66735326  | NC_000002.11 |
| cg07150062 | 2.74E-13 | 1.26E-14 | 8.35 | 22.324462  | 2.10E-01 | 104552032 | 104552155 | NC_000014.8  |
| cg18639233 | 2.74E-13 | 1.26E-14 | 8.35 | 22.3222621 | 2.41E-01 | 60975846  | 60975969  | NC_000014.8  |
| cg00936187 | 2.75E-13 | 1.26E-14 | 8.35 | 22.3212149 | 9.41E-02 | 88801685  | 88801808  | NC_000016.9  |
| cg14146657 | 2.75E-13 | 1.27E-14 | 8.35 | 22.3192328 | 1.35E-01 | 128412220 | 128412343 | NC_000009.11 |
| cg22138430 | 2.75E-13 | 1.27E-14 | 8.35 | 22.31857   | 2.08E-01 | 92789500  | 92789623  | NC_000014.8  |
| cg02705681 | 2.76E-13 | 1.27E-14 | 8.35 | 22.3155859 | 9.89E-02 | 102118300 | 102118423 | NC_000007.13 |
| cg11873482 | 2.76E-13 | 1.27E-14 | 8.35 | 22.3149871 | 2.60E-01 | 97361244  | 97361367  | NC_000007.13 |
| cg18740429 | 2.77E-13 | 1.28E-14 | 8.35 | 22.3118013 | 1.81E-01 | 134844716 | 134844839 | NC_000010.10 |
| cg26564815 | 2.77E-13 | 1.28E-14 | 8.35 | 22.3107271 | 9.68E-02 | 74350933  | 74351056  | NC_000011.9  |
| cg18828619 | 2.77E-13 | 1.28E-14 | 8.35 | 22.3103818 | 9.09E-02 | 56615077  | 56615200  | NC_000014.8  |
| cg03365311 | 2.78E-13 | 1.28E-14 | 8.35 | 22.3098223 | 2.14E-01 | 43602965  | 43603088  | NC_000011.9  |
| cg20644626 | 2.78E-13 | 1.28E-14 | 8.34 | 22.3072174 | 1.01E-01 | 74274353  | 74274476  | NC_000004.11 |
| cg11990902 | 2.79E-13 | 1.29E-14 | 8.34 | 22.3031803 | 4.28E-02 | 44196412  | 44196535  | NC_000006.11 |
| cg04846243 | 2.81E-13 | 1.29E-14 | 8.34 | 22.297854  | 2.61E-01 | 47074883  | 47075006  | NC_000017.10 |
| cg13718100 | 2.81E-13 | 1.30E-14 | 8.34 | 22.2962562 | 1.04E-01 | 133796449 | 133796572 | NC_000009.11 |
| cg02628840 | 2.82E-13 | 1.30E-14 | 8.34 | 22.2951495 | 1.04E-01 | 46860579  | 46860702  | NC_000021.8  |
| cg27601873 | 2.82E-13 | 1.30E-14 | 8.34 | 22.2947866 | 5.73E-02 | 2163879   | 2164002   | NC_000016.9  |

|            |          |          |      |            |          |           |           |              |
|------------|----------|----------|------|------------|----------|-----------|-----------|--------------|
| cg19623360 | 2.82E-13 | 1.30E-14 | 8.34 | 22.2939454 | 1.58E-01 | 27191914  | 27192037  | NC_000007.13 |
| cg25655854 | 2.82E-13 | 1.30E-14 | 8.34 | 22.2931418 | 1.13E-01 | 99772732  | 99772855  | NC_000004.11 |
| cg06107104 | 2.82E-13 | 1.30E-14 | 8.34 | 22.2927409 | 1.29E-01 | 73617762  | 73617885  | NC_000017.10 |
| cg14802400 | 2.83E-13 | 1.30E-14 | 8.34 | 22.2901592 | 9.77E-02 | 104608583 | 104608706 | NC_000012.11 |
| cg04807108 | 2.83E-13 | 1.31E-14 | 8.34 | 22.2881239 | 1.13E-01 | 78697933  | 78698056  | NC_000015.9  |
| cg02970297 | 2.84E-13 | 1.31E-14 | 8.34 | 22.2868948 | 1.95E-01 | 102920962 | 102921085 | NC_000007.13 |
| cg19115393 | 2.84E-13 | 1.31E-14 | 8.34 | 22.286314  | 2.31E-01 | 59829060  | 59829183  | NC_000020.10 |
| cg05640128 | 2.84E-13 | 1.31E-14 | 8.34 | 22.2860995 | 1.95E-01 | 154002270 | 154002393 | NC_000007.13 |
| cg06568783 | 2.84E-13 | 1.31E-14 | 8.34 | 22.286042  | 8.04E-02 | 45388128  | 45388251  | NC_000017.10 |
| cg22547775 | 2.84E-13 | 1.31E-14 | 8.34 | 22.2846482 | 1.24E-01 | 2537634   | 2537757   | NC_000005.9  |
| cg23698950 | 2.85E-13 | 1.31E-14 | 8.34 | 22.2818331 | 1.06E-01 | 30110123  | 30110246  | NC_000006.11 |
| cg20443451 | 2.85E-13 | 1.32E-14 | 8.34 | 22.2808984 | 1.41E-01 | 31497233  | 31497356  | NC_000006.11 |
| cg08580032 | 2.86E-13 | 1.32E-14 | 8.34 | 22.2797045 | 1.01E-01 | 77562500  | 77562623  | NC_000018.9  |
| cg14127567 | 2.87E-13 | 1.33E-14 | 8.34 | 22.2734562 | 5.44E-02 | 60817041  | 60817164  | NC_000017.10 |
| cg26465206 | 2.87E-13 | 1.33E-14 | 8.34 | 22.2734292 | 1.40E-01 | 13670022  | 13670145  | NC_000010.10 |
| cg16138150 | 2.88E-13 | 1.33E-14 | 8.34 | 22.2717131 | 2.43E-01 | 37839684  | 37839807  | NC_000005.9  |
| cg03610729 | 2.88E-13 | 1.33E-14 | 8.34 | 22.271428  | 9.78E-02 | 168199897 | 168200020 | NC_000005.9  |
| cg24080247 | 2.88E-13 | 1.33E-14 | 8.34 | 22.2704707 | 2.24E-01 | 38082613  | 38082736  | NC_000021.8  |
| cg20890210 | 2.88E-13 | 1.33E-14 | 8.34 | 22.2703352 | 2.06E-01 | 73450181  | 73450304  | NC_000008.10 |
| cg07831417 | 2.88E-13 | 1.33E-14 | 8.34 | 22.2703058 | 2.23E-01 | 122848204 | 122848327 | NC_000011.9  |
| cg07188591 | 2.89E-13 | 1.33E-14 | 8.34 | 22.2678675 | 2.50E-01 | 148854315 | 148854438 | NC_000001.10 |
| cg04465731 | 2.90E-13 | 1.34E-14 | 8.34 | 22.2628326 | 6.43E-02 | 85398200  | 85398323  | NC_000011.9  |
| cg16284437 | 2.91E-13 | 1.34E-14 | 8.34 | 22.2600061 | 1.20E-01 | 76751616  | 76751739  | NC_000018.9  |
| cg08652487 | 2.93E-13 | 1.36E-14 | 8.34 | 22.2518512 | 1.64E-01 | 229569795 | 229569918 | NC_000001.10 |
| cg04072323 | 2.93E-13 | 1.36E-14 | 8.34 | 22.2516888 | 2.53E-01 | 229046325 | 229046448 | NC_000002.11 |

|            |          |          |      |            |          |           |           |              |
|------------|----------|----------|------|------------|----------|-----------|-----------|--------------|
| cg00985983 | 2.94E-13 | 1.36E-14 | 8.33 | 22.2475506 | 1.39E-01 | 30728510  | 30728633  | NC_000022.10 |
| cg24315340 | 2.95E-13 | 1.36E-14 | 8.33 | 22.2458644 | 1.41E-01 | 146058215 | 146058338 | NC_000006.11 |
| cg02311794 | 2.95E-13 | 1.37E-14 | 8.33 | 22.2443128 | 1.20E-01 | 86302971  | 86303094  | NC_000015.9  |
| cg16484042 | 2.96E-13 | 1.37E-14 | 8.33 | 22.240371  | 1.39E-01 | 14403405  | 14403528  | NC_000016.9  |
| cg00704780 | 2.97E-13 | 1.37E-14 | 8.33 | 22.237654  | 1.26E-01 | 242207920 | 242208043 | NC_000002.11 |
| cg06493207 | 2.97E-13 | 1.38E-14 | 8.33 | 22.2372877 | 1.08E-01 | 174160825 | 174160948 | NC_000005.9  |
| cg15173134 | 2.98E-13 | 1.38E-14 | 8.33 | 22.2347868 | 2.90E-01 | 119000638 | 119000761 | NC_000010.10 |
| cg10808783 | 2.98E-13 | 1.38E-14 | 8.33 | 22.2337198 | 2.18E-01 | 1467921   | 1468044   | NC_000019.9  |
| cg08285415 | 2.99E-13 | 1.38E-14 | 8.33 | 22.2316959 | 5.57E-02 | 78283681  | 78283804  | NC_000015.9  |
| cg16428251 | 3.00E-13 | 1.39E-14 | 8.33 | 22.2289877 | 2.17E-01 | 137483479 | 137483602 | NC_000003.11 |
| cg09473315 | 3.00E-13 | 1.39E-14 | 8.33 | 22.2276572 | 1.42E-01 | 76228233  | 76228356  | NC_000017.10 |
| cg19389397 | 3.01E-13 | 1.39E-14 | 8.33 | 22.2256585 | 1.15E-01 | 42973877  | 42974000  | NC_000022.10 |
| cg13356896 | 3.01E-13 | 1.39E-14 | 8.33 | 22.223322  | 2.60E-01 | 198650987 | 198651110 | NC_000002.11 |
| cg23620184 | 3.01E-13 | 1.39E-14 | 8.33 | 22.2232949 | 1.41E-01 | 23772616  | 23772739  | NC_000014.8  |
| cg14628071 | 3.02E-13 | 1.40E-14 | 8.33 | 22.2199369 | 5.30E-02 | 138670633 | 138670756 | NC_000009.11 |
| cg14639185 | 3.02E-13 | 1.40E-14 | 8.33 | 22.2196064 | 8.83E-02 | 108634147 | 108634270 | NC_000012.11 |
| cg13924432 | 3.03E-13 | 1.40E-14 | 8.33 | 22.2186007 | 1.55E-01 | 220223283 | 220223406 | NC_000002.11 |
| cg18112235 | 3.03E-13 | 1.40E-14 | 8.33 | 22.2176446 | 8.87E-02 | 196451226 | 196451349 | NC_000002.11 |
| cg23963517 | 3.03E-13 | 1.41E-14 | 8.33 | 22.2159276 | 1.61E-01 | 60473872  | 60473995  | NC_000010.10 |
| cg19075081 | 3.04E-13 | 1.41E-14 | 8.33 | 22.2148873 | 8.94E-02 | 70714378  | 70714501  | NC_000016.9  |
| cg25262548 | 3.05E-13 | 1.41E-14 | 8.33 | 22.2116007 | 1.39E-01 | 158982975 | 158983098 | NC_000006.11 |
| cg20556402 | 3.05E-13 | 1.41E-14 | 8.33 | 22.2115342 | 1.28E-01 | 41616858  | 41616981  | NC_000006.11 |
| cg11774346 | 3.06E-13 | 1.42E-14 | 8.33 | 22.2066878 | 1.57E-01 | 46797899  | 46798022  | NC_000021.8  |
| cg07549278 | 3.06E-13 | 1.42E-14 | 8.33 | 22.2062981 | 1.61E-01 | 1204244   | 1204367   | NC_000016.9  |
| cg18391611 | 3.06E-13 | 1.42E-14 | 8.33 | 22.2062284 | 8.43E-02 | 56042991  | 56043114  | NC_000019.9  |

|            |          |          |      |            |          |           |           |              |
|------------|----------|----------|------|------------|----------|-----------|-----------|--------------|
| cg19317211 | 3.06E-13 | 1.42E-14 | 8.33 | 22.2061604 | 2.47E-01 | 2801711   | 2801834   | NC_000020.10 |
| cg02761480 | 3.07E-13 | 1.42E-14 | 8.33 | 22.2036274 | 2.41E-01 | 77822771  | 77822894  | NC_000016.9  |
| cg05622465 | 3.07E-13 | 1.42E-14 | 8.33 | 22.2023228 | 2.11E-01 | 110613072 | 110613195 | NC_000001.10 |
| cg15175377 | 3.08E-13 | 1.43E-14 | 8.33 | 22.2000008 | 1.48E-01 | 68920434  | 68920557  | NC_000011.9  |
| cg05738240 | 3.08E-13 | 1.43E-14 | 8.33 | 22.1985653 | 1.79E-01 | 114337927 | 114338050 | NC_000012.11 |
| cg16631199 | 3.09E-13 | 1.44E-14 | 8.33 | 22.1951913 | 1.64E-01 | 101841253 | 101841376 | NC_000010.10 |
| cg12615535 | 3.10E-13 | 1.44E-14 | 8.33 | 22.1939249 | 1.95E-01 | 139257713 | 139257836 | NC_000003.11 |
| cg08405910 | 3.10E-13 | 1.44E-14 | 8.33 | 22.1938117 | 9.96E-02 | 106501075 | 106501198 | NC_000002.11 |
| cg01646268 | 3.10E-13 | 1.44E-14 | 8.33 | 22.1932373 | 1.46E-01 | 14367071  | 14367194  | NC_000011.9  |
| cg24174232 | 3.11E-13 | 1.44E-14 | 8.33 | 22.1914364 | 1.17E-01 | 29818175  | 29818298  | NC_000017.10 |
| cg16459364 | 3.11E-13 | 1.44E-14 | 8.33 | 22.1899519 | 1.73E-01 | 24771125  | 24771248  | NC_000008.10 |
| cg10390058 | 3.13E-13 | 1.45E-14 | 8.32 | 22.1846501 | 2.26E-01 | 74962794  | 74962917  | NC_000018.9  |
| cg24675150 | 3.13E-13 | 1.46E-14 | 8.32 | 22.1815484 | 2.57E-01 | 119212160 | 119212283 | NC_000012.11 |
| cg18787401 | 3.14E-13 | 1.46E-14 | 8.32 | 22.1809304 | 2.42E-01 | 56879559  | 56879682  | NC_000019.9  |
| cg01787574 | 3.14E-13 | 1.46E-14 | 8.32 | 22.1798808 | 1.87E-01 | 16758057  | 16758180  | NC_000012.11 |
| cg22937632 | 3.14E-13 | 1.46E-14 | 8.32 | 22.1784111 | 8.40E-02 | 33563946  | 33564069  | NC_000011.9  |
| cg16294566 | 3.14E-13 | 1.46E-14 | 8.32 | 22.1781613 | 2.20E-01 | 32458656  | 32458779  | NC_000011.9  |
| cg13235366 | 3.15E-13 | 1.46E-14 | 8.32 | 22.1756621 | 8.58E-02 | 44032202  | 44032325  | NC_000001.10 |
| cg01307130 | 3.16E-13 | 1.47E-14 | 8.32 | 22.1746642 | 2.57E-01 | 71329040  | 71329163  | NC_000010.10 |
| cg13464448 | 3.16E-13 | 1.47E-14 | 8.32 | 22.1741583 | 2.03E-01 | 130297513 | 130297636 | NC_000011.9  |
| cg18026588 | 3.16E-13 | 1.47E-14 | 8.32 | 22.1734249 | 1.99E-01 | 27018037  | 27018160  | NC_000015.9  |
| cg11710887 | 3.16E-13 | 1.47E-14 | 8.32 | 22.1720374 | 8.03E-02 | 158748803 | 158748926 | NC_000007.13 |
| cg20429172 | 3.16E-13 | 1.47E-14 | 8.32 | 22.1714938 | 2.00E-01 | 248020436 | 248020559 | NC_000001.10 |
| cg09914773 | 3.17E-13 | 1.47E-14 | 8.32 | 22.1700845 | 9.11E-02 | 99383224  | 99383347  | NC_000007.13 |
| cg16364121 | 3.18E-13 | 1.48E-14 | 8.32 | 22.1677984 | 2.93E-01 | 35291924  | 35292047  | NC_000017.10 |

|            |          |          |      |            |          |           |           |              |
|------------|----------|----------|------|------------|----------|-----------|-----------|--------------|
| cg19574193 | 3.18E-13 | 1.48E-14 | 8.32 | 22.1672525 | 9.68E-02 | 20136824  | 20136947  | NC_000014.8  |
| cg17052466 | 3.18E-13 | 1.48E-14 | 8.32 | 22.166598  | 8.36E-02 | 2423382   | 2423505   | NC_000011.9  |
| cg03144922 | 3.18E-13 | 1.48E-14 | 8.32 | 22.1663811 | 1.78E-01 | 111540992 | 111541115 | NC_000004.11 |
| cg00168118 | 3.18E-13 | 1.48E-14 | 8.32 | 22.1655669 | 1.53E-01 | 85669675  | 85669798  | NC_000016.9  |
| cg17082640 | 3.18E-13 | 1.48E-14 | 8.32 | 22.1649437 | 1.11E-01 | 57205380  | 57205503  | NC_000008.10 |
| cg17827020 | 3.19E-13 | 1.48E-14 | 8.32 | 22.1622567 | 1.94E-01 | 180202784 | 180202907 | NC_000001.10 |
| cg01661742 | 3.20E-13 | 1.49E-14 | 8.32 | 22.1607367 | 1.07E-01 | 142141192 | 142141315 | NC_000004.11 |
| cg13422870 | 3.21E-13 | 1.49E-14 | 8.32 | 22.1559954 | 8.29E-02 | 102671668 | 102671791 | NC_000009.11 |
| cg09856107 | 3.21E-13 | 1.50E-14 | 8.32 | 22.1547917 | 9.64E-02 | 12701776  | 12701899  | NC_000003.11 |
| cg17924936 | 3.22E-13 | 1.50E-14 | 8.32 | 22.1532712 | 2.24E-01 | 1763800   | 1763923   | NC_000019.9  |
| cg09862721 | 3.22E-13 | 1.50E-14 | 8.32 | 22.1516499 | 4.06E-02 | 152155003 | 152155126 | NC_000002.11 |
| cg03605361 | 3.22E-13 | 1.50E-14 | 8.32 | 22.1512189 | 6.45E-02 | 179715673 | 179715796 | NC_000005.9  |
| cg16300838 | 3.23E-13 | 1.50E-14 | 8.32 | 22.151044  | 6.06E-02 | 135109211 | 135109334 | NC_000010.10 |
| cg12971867 | 3.23E-13 | 1.50E-14 | 8.32 | 22.1483869 | 8.70E-02 | 50528564  | 50528687  | NC_000022.10 |
| cg13890379 | 3.23E-13 | 1.51E-14 | 8.32 | 22.1480217 | 1.42E-01 | 67070324  | 67070447  | NC_000018.9  |
| cg25089587 | 3.24E-13 | 1.51E-14 | 8.32 | 22.1476695 | 9.00E-02 | 104184551 | 104184674 | NC_000014.8  |
| cg08587321 | 3.24E-13 | 1.51E-14 | 8.32 | 22.145488  | 7.60E-02 | 31473811  | 31473934  | NC_000016.9  |
| cg19925849 | 3.25E-13 | 1.51E-14 | 8.32 | 22.1427969 | 1.67E-01 | 54445377  | 54445500  | NC_000019.9  |
| cg16921310 | 3.25E-13 | 1.51E-14 | 8.32 | 22.1418792 | 2.20E-01 | 103351987 | 103352110 | NC_000012.11 |
| cg01209655 | 3.26E-13 | 1.52E-14 | 8.32 | 22.1412107 | 4.13E-02 | 30041081  | 30041204  | NC_000006.11 |
| cg06388730 | 3.27E-13 | 1.52E-14 | 8.32 | 22.1382482 | 1.62E-01 | 35297699  | 35297822  | NC_000007.13 |
| cg23055707 | 3.28E-13 | 1.53E-14 | 8.32 | 22.1350719 | 1.27E-01 | 1681153   | 1681276   | NC_000002.11 |
| cg17095728 | 3.28E-13 | 1.53E-14 | 8.32 | 22.1345392 | 2.34E-01 | 231297516 | 231297639 | NC_000001.10 |
| cg02000882 | 3.28E-13 | 1.53E-14 | 8.32 | 22.1329044 | 2.29E-01 | 86542113  | 86542236  | NC_000016.9  |
| cg10831607 | 3.29E-13 | 1.53E-14 | 8.32 | 22.1317783 | 2.26E-01 | 115134374 | 115134497 | NC_000012.11 |



|            |          |          |      |            |          |           |           |              |
|------------|----------|----------|------|------------|----------|-----------|-----------|--------------|
| cg04434339 | 3.29E-13 | 1.53E-14 | 8.32 | 22.1313458 | 2.40E-01 | 107503547 | 107503670 | NC_000002.11 |
| cg09151131 | 3.29E-13 | 1.53E-14 | 8.32 | 22.1305918 | 1.38E-01 | 48552276  | 48552399  | NC_000017.10 |
| cg06825039 | 3.29E-13 | 1.53E-14 | 8.32 | 22.129405  | 1.81E-01 | 20824905  | 20825028  | NC_000007.13 |
| cg16686174 | 3.31E-13 | 1.54E-14 | 8.32 | 22.1246611 | 1.25E-01 | 75373081  | 75373204  | NC_000017.10 |
| cg00364956 | 3.31E-13 | 1.54E-14 | 8.31 | 22.1232996 | 1.16E-01 | 33777219  | 33777342  | NC_000017.10 |
| cg05433657 | 3.32E-13 | 1.55E-14 | 8.31 | 22.1210259 | 5.10E-02 | 71006703  | 71006826  | NC_000010.10 |
| cg18239481 | 3.32E-13 | 1.55E-14 | 8.31 | 22.1208222 | 4.98E-02 | 5600805   | 5600928   | NC_000010.10 |
| cg03237868 | 3.33E-13 | 1.55E-14 | 8.31 | 22.1187187 | 7.72E-02 | 52919914  | 52920037  | NC_000004.11 |
| cg17460447 | 3.35E-13 | 1.56E-14 | 8.31 | 22.1109748 | 2.98E-01 | 5712937   | 5713060   | NC_000004.11 |
| cg08040824 | 3.35E-13 | 1.56E-14 | 8.31 | 22.1103248 | 7.09E-02 | 189420438 | 189420561 | NC_000003.11 |
| cg22481263 | 3.35E-13 | 1.56E-14 | 8.31 | 22.1102832 | 1.03E-01 | 906493    | 906616    | NC_000001.10 |
| cg03705299 | 3.36E-13 | 1.57E-14 | 8.31 | 22.1094844 | 6.08E-02 | 8721021   | 8721144   | NC_000011.9  |
| cg24921186 | 3.36E-13 | 1.57E-14 | 8.31 | 22.1089335 | 7.64E-02 | 43045001  | 43045124  | NC_000005.9  |
| cg05732832 | 3.36E-13 | 1.57E-14 | 8.31 | 22.1075895 | 2.11E-01 | 4868723   | 4868846   | NC_000004.11 |
| cg13458210 | 3.37E-13 | 1.57E-14 | 8.31 | 22.105465  | 9.46E-02 | 161010071 | 161010194 | NC_000001.10 |
| cg00052482 | 3.37E-13 | 1.57E-14 | 8.31 | 22.1035012 | 1.47E-01 | 151226139 | 151226262 | NC_000001.10 |
| cg07095230 | 3.37E-13 | 1.58E-14 | 8.31 | 22.1032969 | 2.20E-01 | 59480730  | 59480853  | NC_000017.10 |
| cg13566648 | 3.38E-13 | 1.58E-14 | 8.31 | 22.1030235 | 1.78E-01 | 12750030  | 12750153  | NC_000006.11 |
| cg03515663 | 3.39E-13 | 1.58E-14 | 8.31 | 22.0984981 | 1.70E-01 | 157478510 | 157478633 | NC_000007.13 |
| cg22111442 | 3.40E-13 | 1.59E-14 | 8.31 | 22.0967798 | 1.17E-01 | 31441196  | 31441319  | NC_000001.10 |
| cg10732215 | 3.40E-13 | 1.59E-14 | 8.31 | 22.0954702 | 2.85E-01 | 22625465  | 22625588  | NC_000010.10 |
| cg25961733 | 3.41E-13 | 1.59E-14 | 8.31 | 22.0927398 | 3.96E-02 | 134228239 | 134228362 | NC_000010.10 |
| cg21306006 | 3.41E-13 | 1.59E-14 | 8.31 | 22.0917876 | 1.92E-01 | 166402081 | 166402204 | NC_000006.11 |
| cg01369750 | 3.41E-13 | 1.59E-14 | 8.31 | 22.0917506 | 2.05E-01 | 688018    | 688141    | NC_000008.10 |
| cg27361370 | 3.42E-13 | 1.60E-14 | 8.31 | 22.0901339 | 1.95E-01 | 157813327 | 157813450 | NC_000003.11 |

|            |          |          |      |            |          |           |           |              |
|------------|----------|----------|------|------------|----------|-----------|-----------|--------------|
| cg00926400 | 3.42E-13 | 1.60E-14 | 8.31 | 22.0891846 | 2.21E-01 | 198651498 | 198651621 | NC_000002.11 |
| cg15013830 | 3.44E-13 | 1.61E-14 | 8.31 | 22.0824272 | 5.43E-02 | 24581791  | 24581914  | NC_000022.10 |
| cg08985063 | 3.45E-13 | 1.61E-14 | 8.31 | 22.0802311 | 1.60E-01 | 4866800   | 4866923   | NC_000004.11 |
| cg23038560 | 3.45E-13 | 1.61E-14 | 8.31 | 22.0792454 | 6.81E-02 | 94582513  | 94582636  | NC_000014.8  |
| cg02990869 | 3.46E-13 | 1.62E-14 | 8.31 | 22.0781234 | 1.95E-01 | 165304842 | 165304965 | NC_000004.11 |
| cg19049194 | 3.46E-13 | 1.62E-14 | 8.31 | 22.0767336 | 1.81E-01 | 175193754 | 175193877 | NC_000002.11 |
| cg04868962 | 3.47E-13 | 1.62E-14 | 8.31 | 22.0744227 | 1.77E-01 | 180427177 | 180427300 | NC_000002.11 |
| cg04623131 | 3.47E-13 | 1.62E-14 | 8.31 | 22.0730319 | 1.14E-01 | 97564564  | 97564687  | NC_000002.11 |
| cg18354370 | 3.48E-13 | 1.63E-14 | 8.31 | 22.0702539 | 9.65E-02 | 50393044  | 50393167  | NC_000003.11 |
| cg14552982 | 3.49E-13 | 1.63E-14 | 8.31 | 22.0689135 | 1.07E-01 | 133568226 | 133568349 | NC_000009.11 |
| cg25393009 | 3.49E-13 | 1.63E-14 | 8.31 | 22.0678636 | 1.62E-01 | 14691641  | 14691764  | NC_000011.9  |
| cg08705958 | 3.49E-13 | 1.63E-14 | 8.31 | 22.0674675 | 6.90E-02 | 113497324 | 113497447 | NC_000013.10 |
| cg25944168 | 3.50E-13 | 1.64E-14 | 8.31 | 22.0657373 | 1.05E-01 | 88862221  | 88862344  | NC_000002.11 |
| cg19794395 | 3.51E-13 | 1.64E-14 | 8.3  | 22.0627426 | 6.75E-02 | 58158293  | 58158416  | NC_000012.11 |
| cg26184391 | 3.51E-13 | 1.64E-14 | 8.3  | 22.0627401 | 1.07E-01 | 24004643  | 24004766  | NC_000004.11 |
| cg12461677 | 3.52E-13 | 1.65E-14 | 8.3  | 22.0595111 | 1.34E-01 | 58862089  | 58862212  | NC_000019.9  |
| cg26584983 | 3.52E-13 | 1.65E-14 | 8.3  | 22.0589425 | 1.36E-01 | 93798975  | 93799098  | NC_000012.11 |
| cg25426203 | 3.52E-13 | 1.65E-14 | 8.3  | 22.0581137 | 1.22E-01 | 88600793  | 88600916  | NC_000010.10 |
| cg02155884 | 3.52E-13 | 1.65E-14 | 8.3  | 22.0579831 | 2.07E-01 | 112715454 | 112715577 | NC_000013.10 |
| cg20737554 | 3.53E-13 | 1.65E-14 | 8.3  | 22.0567423 | 1.64E-01 | 115612464 | 115612587 | NC_000010.10 |
| cg12778178 | 3.53E-13 | 1.65E-14 | 8.3  | 22.0563559 | 4.91E-02 | 62583555  | 62583678  | NC_000020.10 |
| cg08624445 | 3.53E-13 | 1.65E-14 | 8.3  | 22.0561575 | 8.22E-02 | 46306688  | 46306811  | NC_000021.8  |
| cg21250061 | 3.53E-13 | 1.65E-14 | 8.3  | 22.0555837 | 1.38E-01 | 37463344  | 37463467  | NC_000009.11 |
| cg14131755 | 3.54E-13 | 1.66E-14 | 8.3  | 22.0544236 | 2.39E-01 | 50606043  | 50606166  | NC_000010.10 |
| cg22457642 | 3.54E-13 | 1.66E-14 | 8.3  | 22.0525137 | 1.20E-01 | 109307774 | 109307897 | NC_000006.11 |

|            |          |          |     |            |          |           |           |              |
|------------|----------|----------|-----|------------|----------|-----------|-----------|--------------|
| cg16822666 | 3.55E-13 | 1.66E-14 | 8.3 | 22.050537  | 1.77E-01 | 35656660  | 35656783  | NC_000017.10 |
| cg16883063 | 3.55E-13 | 1.66E-14 | 8.3 | 22.0494034 | 1.70E-01 | 1801495   | 1801618   | NC_000007.13 |
| cg05417127 | 3.55E-13 | 1.66E-14 | 8.3 | 22.0484948 | 2.67E-01 | 1968709   | 1968832   | NC_000016.9  |
| cg03156260 | 3.56E-13 | 1.67E-14 | 8.3 | 22.0478875 | 9.91E-02 | 75721361  | 75721484  | NC_000004.11 |
| cg24436715 | 3.56E-13 | 1.67E-14 | 8.3 | 22.0471181 | 2.10E-01 | 31848130  | 31848253  | NC_000019.9  |
| cg14582400 | 3.56E-13 | 1.67E-14 | 8.3 | 22.046291  | 1.80E-01 | 112726118 | 112726241 | NC_000013.10 |
| cg07035046 | 3.57E-13 | 1.67E-14 | 8.3 | 22.0436161 | 1.15E-01 | 79791064  | 79791187  | NC_000009.11 |
| cg06237151 | 3.58E-13 | 1.68E-14 | 8.3 | 22.0420832 | 1.22E-01 | 46123153  | 46123276  | NC_000010.10 |
| cg14157417 | 3.60E-13 | 1.69E-14 | 8.3 | 22.0359326 | 6.86E-02 | 158265485 | 158265608 | NC_000007.13 |
| cg24851364 | 3.60E-13 | 1.69E-14 | 8.3 | 22.0347537 | 2.35E-01 | 57390306  | 57390429  | NC_000010.10 |
| cg16256902 | 3.60E-13 | 1.69E-14 | 8.3 | 22.0346698 | 1.32E-01 | 183826405 | 183826528 | NC_000004.11 |
| cg26917694 | 3.60E-13 | 1.69E-14 | 8.3 | 22.0338183 | 1.83E-01 | 221061058 | 221061181 | NC_000001.10 |
| cg16522412 | 3.61E-13 | 1.69E-14 | 8.3 | 22.033152  | 6.81E-02 | 33926811  | 33926934  | NC_000013.10 |
| cg22399458 | 3.61E-13 | 1.69E-14 | 8.3 | 22.0329245 | 5.31E-02 | 112038039 | 112038162 | NC_000011.9  |
| cg04077662 | 3.61E-13 | 1.70E-14 | 8.3 | 22.0305785 | 2.00E-01 | 77333229  | 77333352  | NC_000001.10 |
| cg02909136 | 3.62E-13 | 1.70E-14 | 8.3 | 22.0300345 | 2.09E-01 | 44941542  | 44941665  | NC_000020.10 |
| cg16426537 | 3.62E-13 | 1.70E-14 | 8.3 | 22.029019  | 2.49E-01 | 18813556  | 18813679  | NC_000011.9  |
| cg16984485 | 3.62E-13 | 1.70E-14 | 8.3 | 22.0287879 | 4.28E-02 | 3218116   | 3218239   | NC_000003.11 |
| cg14761227 | 3.63E-13 | 1.70E-14 | 8.3 | 22.025778  | 1.51E-01 | 130021088 | 130021211 | NC_000007.13 |
| cg01440497 | 3.64E-13 | 1.71E-14 | 8.3 | 22.0245717 | 7.60E-02 | 1273484   | 1273607   | NC_000016.9  |
| cg14180004 | 3.64E-13 | 1.71E-14 | 8.3 | 22.0224138 | 1.09E-01 | 46722777  | 46722900  | NC_000021.8  |
| cg12993163 | 3.65E-13 | 1.71E-14 | 8.3 | 22.0215349 | 2.06E-01 | 157821407 | 157821530 | NC_000003.11 |
| cg17982346 | 3.65E-13 | 1.71E-14 | 8.3 | 22.0215199 | 6.78E-02 | 58512825  | 58512948  | NC_000017.10 |
| cg12343182 | 3.65E-13 | 1.71E-14 | 8.3 | 22.0209208 | 3.21E-01 | 43439387  | 43439510  | NC_000020.10 |
| cg11232868 | 3.65E-13 | 1.71E-14 | 8.3 | 22.0198401 | 1.35E-01 | 12495801  | 12495924  | NC_000003.11 |

|            |          |          |      |            |          |           |           |              |
|------------|----------|----------|------|------------|----------|-----------|-----------|--------------|
| cg03456651 | 3.65E-13 | 1.71E-14 | 8.3  | 22.0193745 | 6.07E-02 | 73479833  | 73479956  | NC_000010.10 |
| cg18146843 | 3.65E-13 | 1.72E-14 | 8.3  | 22.0190889 | 2.01E-01 | 53099248  | 53099371  | NC_000001.10 |
| cg12939425 | 3.66E-13 | 1.72E-14 | 8.3  | 22.0168386 | 1.11E-01 | 130344188 | 130344311 | NC_000005.9  |
| cg11628880 | 3.67E-13 | 1.72E-14 | 8.3  | 22.0152995 | 1.75E-01 | 37852492  | 37852615  | NC_000021.8  |
| cg10625575 | 3.67E-13 | 1.72E-14 | 8.3  | 22.0149212 | 9.77E-02 | 4645224   | 4645347   | NC_000012.11 |
| cg14651705 | 3.69E-13 | 1.73E-14 | 8.3  | 22.008768  | 5.93E-02 | 136226035 | 136226158 | NC_000009.11 |
| cg19633004 | 3.69E-13 | 1.73E-14 | 8.3  | 22.0079671 | 2.11E-01 | 10704044  | 10704167  | NC_000005.9  |
| cg09579310 | 3.71E-13 | 1.74E-14 | 8.3  | 22.0046797 | 2.49E-01 | 10395947  | 10396070  | NC_000006.11 |
| cg17480760 | 3.71E-13 | 1.74E-14 | 8.3  | 22.0042053 | 1.69E-01 | 86350889  | 86351012  | NC_000008.10 |
| cg11539780 | 3.71E-13 | 1.74E-14 | 8.3  | 22.0033996 | 2.66E-01 | 57019016  | 57019139  | NC_000019.9  |
| cg10008947 | 3.71E-13 | 1.74E-14 | 8.3  | 22.0031551 | 9.68E-02 | 73500739  | 73500862  | NC_000017.10 |
| cg25442600 | 3.71E-13 | 1.74E-14 | 8.3  | 22.0030107 | 1.54E-01 | 1888033   | 1888156   | NC_000005.9  |
| cg01818151 | 3.72E-13 | 1.75E-14 | 8.29 | 21.9999185 | 1.73E-01 | 46797042  | 46797165  | NC_000017.10 |
| cg26649504 | 3.74E-13 | 1.76E-14 | 8.29 | 21.9946072 | 1.14E-01 | 112196397 | 112196520 | NC_000012.11 |
| cg09968723 | 3.75E-13 | 1.76E-14 | 8.29 | 21.9923483 | 2.71E-01 | 143545789 | 143545912 | NC_000008.10 |
| cg08507422 | 3.75E-13 | 1.76E-14 | 8.29 | 21.991561  | 2.35E-01 | 1272512   | 1272635   | NC_000007.13 |
| cg26609631 | 3.76E-13 | 1.77E-14 | 8.29 | 21.9906165 | 2.45E-01 | 28366814  | 28366937  | NC_000013.10 |
| cg00333512 | 3.76E-13 | 1.77E-14 | 8.29 | 21.9882164 | 2.20E-01 | 25909599  | 25909722  | NC_000008.10 |
| cg17896776 | 3.77E-13 | 1.77E-14 | 8.29 | 21.9869098 | 2.07E-01 | 172733760 | 172733883 | NC_000004.11 |
| cg11326255 | 3.77E-13 | 1.77E-14 | 8.29 | 21.98572   | 1.79E-01 | 3786583   | 3786706   | NC_000019.9  |
| cg17889618 | 3.78E-13 | 1.78E-14 | 8.29 | 21.98456   | 8.02E-02 | 233085132 | 233085255 | NC_000001.10 |
| cg17463083 | 3.79E-13 | 1.78E-14 | 8.29 | 21.9800902 | 1.64E-01 | 62153284  | 62153407  | NC_000017.10 |
| cg11532431 | 3.81E-13 | 1.79E-14 | 8.29 | 21.9767163 | 2.12E-01 | 27169674  | 27169797  | NC_000007.13 |
| cg07135732 | 3.81E-13 | 1.79E-14 | 8.29 | 21.9764269 | 1.83E-01 | 91184290  | 91184413  | NC_000001.10 |
| cg16845394 | 3.81E-13 | 1.79E-14 | 8.29 | 21.9744919 | 2.42E-01 | 109096007 | 109096130 | NC_000008.10 |

|            |          |          |      |            |          |           |           |              |
|------------|----------|----------|------|------------|----------|-----------|-----------|--------------|
| cg23807215 | 3.82E-13 | 1.80E-14 | 8.29 | 21.9716879 | 3.56E-02 | 101666942 | 101667065 | NC_000002.11 |
| cg00249511 | 3.83E-13 | 1.80E-14 | 8.29 | 21.9688617 | 2.45E-01 | 627152    | 627275    | NC_000011.9  |
| cg02441747 | 3.84E-13 | 1.81E-14 | 8.29 | 21.9669195 | 2.29E-01 | 110223646 | 110223769 | NC_000004.11 |
| cg03222176 | 3.85E-13 | 1.81E-14 | 8.29 | 21.9659113 | 1.18E-01 | 96948323  | 96948446  | NC_000001.10 |
| cg13434411 | 3.87E-13 | 1.82E-14 | 8.29 | 21.9590147 | 1.91E-01 | 970297    | 970420    | NC_000009.11 |
| cg18449734 | 3.87E-13 | 1.82E-14 | 8.29 | 21.9586834 | 1.88E-01 | 7853429   | 7853552   | NC_000019.9  |
| cg11880367 | 3.88E-13 | 1.83E-14 | 8.29 | 21.9572108 | 1.16E-01 | 80141181  | 80141304  | NC_000010.10 |
| cg00795616 | 3.90E-13 | 1.84E-14 | 8.29 | 21.9516282 | 1.04E-01 | 6867074   | 6867197   | NC_000007.13 |
| cg08332074 | 3.91E-13 | 1.84E-14 | 8.29 | 21.9482273 | 2.13E-01 | 51189941  | 51190064  | NC_000016.9  |
| cg15039102 | 3.91E-13 | 1.84E-14 | 8.29 | 21.9474515 | 1.89E-01 | 3121953   | 3122076   | NC_000005.9  |
| cg00395625 | 3.94E-13 | 1.86E-14 | 8.29 | 21.9417566 | 1.43E-01 | 138664249 | 138664372 | NC_000007.13 |
| cg22605415 | 3.94E-13 | 1.86E-14 | 8.29 | 21.9411575 | 1.65E-01 | 175135997 | 175136120 | NC_000004.11 |
| cg11781977 | 3.94E-13 | 1.86E-14 | 8.29 | 21.9406042 | 5.85E-02 | 40123107  | 40123230  | NC_000021.8  |
| cg01520571 | 3.95E-13 | 1.86E-14 | 8.28 | 21.9387267 | 2.19E-01 | 35296481  | 35296604  | NC_000017.10 |
| cg13149573 | 3.95E-13 | 1.86E-14 | 8.28 | 21.9385592 | 3.77E-02 | 3234519   | 3234642   | NC_000004.11 |
| cg12292648 | 3.95E-13 | 1.86E-14 | 8.28 | 21.9366859 | 8.19E-02 | 11207723  | 11207846  | NC_000008.10 |
| cg05596265 | 3.96E-13 | 1.87E-14 | 8.28 | 21.9351435 | 1.76E-01 | 2141382   | 2141505   | NC_000003.11 |
| cg10234511 | 3.97E-13 | 1.87E-14 | 8.28 | 21.9322163 | 8.12E-02 | 10788801  | 10788924  | NC_000001.10 |
| cg25781162 | 3.98E-13 | 1.88E-14 | 8.28 | 21.9290886 | 1.50E-01 | 44065996  | 44066119  | NC_000002.11 |
| cg22679728 | 3.99E-13 | 1.88E-14 | 8.28 | 21.9276778 | 2.08E-01 | 242688523 | 242688646 | NC_000001.10 |
| cg20744625 | 4.00E-13 | 1.89E-14 | 8.28 | 21.9250221 | 2.32E-01 | 64578469  | 64578592  | NC_000010.10 |
| cg06866140 | 4.00E-13 | 1.89E-14 | 8.28 | 21.9248839 | 1.05E-01 | 16993566  | 16993689  | NC_000019.9  |
| cg10287461 | 4.01E-13 | 1.89E-14 | 8.28 | 21.9230039 | 7.33E-02 | 119510240 | 119510363 | NC_000011.9  |
| cg17451493 | 4.01E-13 | 1.89E-14 | 8.28 | 21.9224631 | 8.21E-02 | 131132745 | 131132868 | NC_000010.10 |
| cg25092681 | 4.01E-13 | 1.89E-14 | 8.28 | 21.9209965 | 2.12E-01 | 16180033  | 16180156  | NC_000005.9  |

|            |          |          |      |            |          |           |           |              |
|------------|----------|----------|------|------------|----------|-----------|-----------|--------------|
| cg02481498 | 4.02E-13 | 1.90E-14 | 8.28 | 21.9190779 | 6.45E-02 | 101956421 | 101956544 | NC_000002.11 |
| cg00839579 | 4.02E-13 | 1.90E-14 | 8.28 | 21.9178051 | 2.46E-01 | 15727441  | 15727564  | NC_000007.13 |
| cg06746118 | 4.03E-13 | 1.90E-14 | 8.28 | 21.9168303 | 2.53E-01 | 118922887 | 118923010 | NC_000010.10 |
| cg27267617 | 4.04E-13 | 1.91E-14 | 8.28 | 21.9138299 | 9.32E-02 | 42445462  | 42445585  | NC_000019.9  |
| cg13985135 | 4.08E-13 | 1.93E-14 | 8.28 | 21.9032162 | 1.60E-01 | 155641827 | 155641950 | NC_000001.10 |
| cg13285698 | 4.09E-13 | 1.93E-14 | 8.28 | 21.9014297 | 8.41E-02 | 141455681 | 141455804 | NC_000008.10 |
| cg19018435 | 4.10E-13 | 1.94E-14 | 8.28 | 21.8998516 | 1.50E-01 | 183797630 | 183797753 | NC_000001.10 |
| cg26411367 | 4.10E-13 | 1.94E-14 | 8.28 | 21.8984143 | 5.38E-02 | 155988060 | 155988183 | NC_000001.10 |
| cg04950301 | 4.10E-13 | 1.94E-14 | 8.28 | 21.8976014 | 1.55E-01 | 12750392  | 12750515  | NC_000006.11 |
| cg24982697 | 4.10E-13 | 1.94E-14 | 8.28 | 21.8975809 | 9.19E-02 | 113521532 | 113521655 | NC_000013.10 |
| cg00125455 | 4.11E-13 | 1.94E-14 | 8.28 | 21.8951349 | 1.51E-01 | 44574271  | 44574394  | NC_000020.10 |
| cg19764599 | 4.12E-13 | 1.95E-14 | 8.28 | 21.8933124 | 2.14E-01 | 75601276  | 75601399  | NC_000001.10 |
| cg25580656 | 4.12E-13 | 1.95E-14 | 8.28 | 21.8929926 | 2.37E-01 | 104197160 | 104197283 | NC_000014.8  |
| cg16280141 | 4.13E-13 | 1.95E-14 | 8.28 | 21.8917119 | 1.84E-01 | 63257753  | 63257876  | NC_000005.9  |
| cg21190038 | 4.13E-13 | 1.95E-14 | 8.28 | 21.8904789 | 1.27E-01 | 44086848  | 44086971  | NC_000015.9  |
| cg05288253 | 4.15E-13 | 1.96E-14 | 8.28 | 21.8869512 | 1.44E-01 | 89552259  | 89552382  | NC_000016.9  |
| cg26967100 | 4.15E-13 | 1.96E-14 | 8.28 | 21.8853577 | 1.28E-01 | 61104032  | 61104155  | NC_000014.8  |
| cg25345178 | 4.16E-13 | 1.97E-14 | 8.28 | 21.8843196 | 2.18E-01 | 72459908  | 72460031  | NC_000008.10 |
| cg18037808 | 4.16E-13 | 1.97E-14 | 8.28 | 21.8840157 | 5.16E-02 | 109059679 | 109059802 | NC_000012.11 |
| cg02672332 | 4.16E-13 | 1.97E-14 | 8.28 | 21.8823489 | 1.52E-01 | 134723970 | 134724093 | NC_000010.10 |
| cg09444036 | 4.17E-13 | 1.97E-14 | 8.28 | 21.8814211 | 1.44E-01 | 658638    | 658761    | NC_000010.10 |
| cg06015733 | 4.17E-13 | 1.97E-14 | 8.28 | 21.8802296 | 1.23E-01 | 38090440  | 38090563  | NC_000008.10 |
| cg00964997 | 4.18E-13 | 1.98E-14 | 8.27 | 21.8783105 | 1.52E-01 | 13531195  | 13531318  | NC_000004.11 |
| cg10639428 | 4.20E-13 | 1.99E-14 | 8.27 | 21.8731738 | 1.04E-01 | 25138879  | 25139002  | NC_000002.11 |
| cg00984146 | 4.21E-13 | 1.99E-14 | 8.27 | 21.8702458 | 2.59E-01 | 38258333  | 38258456  | NC_000005.9  |

|            |          |          |      |            |          |           |           |              |
|------------|----------|----------|------|------------|----------|-----------|-----------|--------------|
| cg04479219 | 4.22E-13 | 2.00E-14 | 8.27 | 21.8685066 | 1.76E-01 | 88326918  | 88327041  | NC_000013.10 |
| cg14603046 | 4.23E-13 | 2.00E-14 | 8.27 | 21.8665026 | 2.06E-01 | 152157902 | 152158025 | NC_000007.13 |
| cg01719433 | 4.24E-13 | 2.01E-14 | 8.27 | 21.8624964 | 3.78E-02 | 62583564  | 62583687  | NC_000020.10 |
| cg20963741 | 4.24E-13 | 2.01E-14 | 8.27 | 21.8620172 | 1.87E-01 | 95359162  | 95359285  | NC_000013.10 |
| cg07687548 | 4.25E-13 | 2.01E-14 | 8.27 | 21.8604788 | 2.31E-01 | 172965280 | 172965403 | NC_000002.11 |
| cg22236485 | 4.25E-13 | 2.02E-14 | 8.27 | 21.8592121 | 6.67E-02 | 128742664 | 128742787 | NC_000008.10 |
| cg07330481 | 4.26E-13 | 2.02E-14 | 8.27 | 21.8589703 | 1.82E-01 | 37322330  | 37322453  | NC_000017.10 |
| cg06002516 | 4.26E-13 | 2.02E-14 | 8.27 | 21.858215  | 1.26E-01 | 57666521  | 57666644  | NC_000012.11 |
| cg09395562 | 4.26E-13 | 2.02E-14 | 8.27 | 21.8581995 | 1.16E-01 | 123501051 | 123501174 | NC_000003.11 |
| cg10813908 | 4.26E-13 | 2.02E-14 | 8.27 | 21.8576937 | 6.85E-02 | 138863041 | 138863164 | NC_000005.9  |
| cg24683222 | 4.27E-13 | 2.02E-14 | 8.27 | 21.8554645 | 1.38E-01 | 41880440  | 41880563  | NC_000004.11 |
| cg17159890 | 4.27E-13 | 2.03E-14 | 8.27 | 21.854613  | 1.07E-01 | 105233093 | 105233216 | NC_000010.10 |
| cg09792204 | 4.28E-13 | 2.03E-14 | 8.27 | 21.852812  | 2.14E-01 | 28342183  | 28342306  | NC_000015.9  |
| cg13831570 | 4.29E-13 | 2.03E-14 | 8.27 | 21.8503549 | 6.73E-02 | 39020053  | 39020176  | NC_000017.10 |
| cg02861380 | 4.30E-13 | 2.04E-14 | 8.27 | 21.8472031 | 1.88E-01 | 75596758  | 75596881  | NC_000001.10 |
| cg16014725 | 4.32E-13 | 2.05E-14 | 8.27 | 21.8434518 | 1.38E-01 | 70124422  | 70124545  | NC_000017.10 |
| cg10141715 | 4.32E-13 | 2.05E-14 | 8.27 | 21.8420937 | 1.87E-01 | 101603453 | 101603576 | NC_000012.11 |
| cg10624122 | 4.35E-13 | 2.07E-14 | 8.27 | 21.8357585 | 2.04E-01 | 19158747  | 19158870  | NC_000007.13 |
| cg01914621 | 4.36E-13 | 2.07E-14 | 8.27 | 21.8330963 | 2.10E-01 | 155260474 | 155260597 | NC_000007.13 |
| cg19707040 | 4.37E-13 | 2.07E-14 | 8.27 | 21.8318843 | 2.03E-01 | 79740185  | 79740308  | NC_000002.11 |
| cg18521914 | 4.37E-13 | 2.07E-14 | 8.27 | 21.8317245 | 1.57E-01 | 50887566  | 50887689  | NC_000010.10 |
| cg16516919 | 4.37E-13 | 2.08E-14 | 8.27 | 21.8298839 | 1.35E-01 | 203297711 | 203297834 | NC_000001.10 |
| cg01940297 | 4.38E-13 | 2.08E-14 | 8.27 | 21.8289584 | 1.38E-01 | 129061191 | 129061314 | NC_000008.10 |
| cg14492337 | 4.38E-13 | 2.08E-14 | 8.27 | 21.8275508 | 1.67E-01 | 79813507  | 79813630  | NC_000017.10 |
| cg08992499 | 4.40E-13 | 2.09E-14 | 8.27 | 21.8240354 | 9.58E-02 | 63956514  | 63956637  | NC_000003.11 |

|            |          |          |      |            |          |           |           |              |
|------------|----------|----------|------|------------|----------|-----------|-----------|--------------|
| cg06759374 | 4.40E-13 | 2.09E-14 | 8.27 | 21.8238715 | 1.62E-01 | 22414364  | 22414487  | NC_000003.11 |
| cg06194960 | 4.42E-13 | 2.10E-14 | 8.27 | 21.8201607 | 9.37E-02 | 111362    | 111485    | NC_000016.9  |
| cg21001487 | 4.42E-13 | 2.10E-14 | 8.27 | 21.8180084 | 2.43E-01 | 53853112  | 53853235  | NC_000008.10 |
| cg17112076 | 4.43E-13 | 2.10E-14 | 8.26 | 21.8173722 | 1.20E-01 | 33170692  | 33170815  | NC_000006.11 |
| cg11281641 | 4.43E-13 | 2.10E-14 | 8.26 | 21.8170846 | 2.83E-01 | 171674855 | 171674978 | NC_000002.11 |
| cg09073398 | 4.45E-13 | 2.12E-14 | 8.26 | 21.8116453 | 2.91E-01 | 168727762 | 168727885 | NC_000005.9  |
| cg04945331 | 4.45E-13 | 2.12E-14 | 8.26 | 21.8106602 | 2.41E-01 | 137483992 | 137484115 | NC_000003.11 |
| cg00058329 | 4.46E-13 | 2.12E-14 | 8.26 | 21.8084152 | 2.52E-01 | 133195094 | 133195217 | NC_000012.11 |
| cg08149193 | 4.47E-13 | 2.12E-14 | 8.26 | 21.8077389 | 2.32E-01 | 44333067  | 44333190  | NC_000011.9  |
| cg04281204 | 4.47E-13 | 2.13E-14 | 8.26 | 21.8075228 | 1.52E-01 | 115612802 | 115612925 | NC_000010.10 |
| cg07127888 | 4.47E-13 | 2.13E-14 | 8.26 | 21.8072551 | 2.25E-01 | 41400789  | 41400912  | NC_000008.10 |
| cg17972100 | 4.47E-13 | 2.13E-14 | 8.26 | 21.8070715 | 1.57E-01 | 8046547   | 8046670   | NC_000004.11 |
| cg00088797 | 4.48E-13 | 2.13E-14 | 8.26 | 21.8052029 | 1.69E-01 | 12976288  | 12976411  | NC_000003.11 |
| cg03874978 | 4.48E-13 | 2.13E-14 | 8.26 | 21.8051712 | 1.20E-01 | 1800448   | 1800571   | NC_000004.11 |
| cg20120512 | 4.48E-13 | 2.13E-14 | 8.26 | 21.8044231 | 1.43E-01 | 47151769  | 47151892  | NC_000019.9  |
| cg07095995 | 4.48E-13 | 2.13E-14 | 8.26 | 21.8037336 | 2.43E-01 | 110223980 | 110224103 | NC_000004.11 |
| cg19706803 | 4.49E-13 | 2.14E-14 | 8.26 | 21.8013283 | 1.13E-01 | 3126033   | 3126156   | NC_000001.10 |
| cg12836958 | 4.51E-13 | 2.15E-14 | 8.26 | 21.7983016 | 1.96E-01 | 186132412 | 186132535 | NC_000004.11 |
| cg08947167 | 4.51E-13 | 2.15E-14 | 8.26 | 21.7973641 | 1.07E-01 | 63671692  | 63671815  | NC_000015.9  |
| cg17003293 | 4.54E-13 | 2.16E-14 | 8.26 | 21.7893719 | 2.34E-01 | 36003826  | 36003949  | NC_000014.8  |
| cg22021022 | 4.55E-13 | 2.17E-14 | 8.26 | 21.7883102 | 1.12E-01 | 183275320 | 183275443 | NC_000001.10 |
| cg25588274 | 4.55E-13 | 2.17E-14 | 8.26 | 21.7883018 | 1.85E-01 | 4230567   | 4230690   | NC_000005.9  |
| cg23437459 | 4.55E-13 | 2.17E-14 | 8.26 | 21.7882425 | 1.95E-01 | 124907457 | 124907580 | NC_000010.10 |
| cg26307359 | 4.55E-13 | 2.17E-14 | 8.26 | 21.7872099 | 2.33E-01 | 27332646  | 27332769  | NC_000017.10 |
| cg18077387 | 4.55E-13 | 2.17E-14 | 8.26 | 21.7870323 | 1.05E-01 | 70699636  | 70699759  | NC_000015.9  |



|            |          |          |      |            |          |           |           |              |
|------------|----------|----------|------|------------|----------|-----------|-----------|--------------|
| cg26591066 | 4.56E-13 | 2.17E-14 | 8.26 | 21.7863853 | 1.06E-01 | 3922863   | 3922986   | NC_000017.10 |
| cg12908522 | 4.57E-13 | 2.18E-14 | 8.26 | 21.7825066 | 1.91E-01 | 5019091   | 5019214   | NC_000012.11 |
| cg22941086 | 4.58E-13 | 2.18E-14 | 8.26 | 21.7816243 | 9.31E-02 | 40019883  | 40020006  | NC_000012.11 |
| cg04775890 | 4.58E-13 | 2.18E-14 | 8.26 | 21.7810493 | 8.23E-02 | 19586046  | 19586169  | NC_000019.9  |
| cg12818557 | 4.59E-13 | 2.19E-14 | 8.26 | 21.7794795 | 2.52E-01 | 89340139  | 89340262  | NC_000008.10 |
| cg25119743 | 4.59E-13 | 2.19E-14 | 8.26 | 21.7777306 | 1.42E-01 | 11059290  | 11059413  | NC_000010.10 |
| cg10935498 | 4.61E-13 | 2.20E-14 | 8.26 | 21.7743398 | 1.24E-01 | 79898777  | 79898900  | NC_000006.11 |
| cg10507508 | 4.62E-13 | 2.20E-14 | 8.26 | 21.7731886 | 2.46E-01 | 30719828  | 30719951  | NC_000019.9  |
| cg23595601 | 4.63E-13 | 2.21E-14 | 8.26 | 21.7707607 | 4.90E-02 | 47690213  | 47690336  | NC_000007.13 |
| cg07799157 | 4.63E-13 | 2.21E-14 | 8.26 | 21.7705034 | 6.28E-02 | 2475103   | 2475226   | NC_000004.11 |
| cg25088758 | 4.63E-13 | 2.21E-14 | 8.26 | 21.7701856 | 2.17E-01 | 110223598 | 110223721 | NC_000004.11 |
| cg22748799 | 4.63E-13 | 2.21E-14 | 8.26 | 21.7697343 | 2.43E-01 | 58570790  | 58570913  | NC_000019.9  |
| cg10074775 | 4.64E-13 | 2.21E-14 | 8.26 | 21.7682425 | 2.18E-01 | 77595027  | 77595150  | NC_000008.10 |
| cg00204748 | 4.64E-13 | 2.21E-14 | 8.26 | 21.7674878 | 1.31E-01 | 29376779  | 29376902  | NC_000012.11 |
| cg05328670 | 4.64E-13 | 2.21E-14 | 8.26 | 21.7673034 | 1.23E-01 | 84096367  | 84096490  | NC_000016.9  |
| cg16962683 | 4.64E-13 | 2.21E-14 | 8.26 | 21.7671937 | 1.63E-01 | 97602671  | 97602794  | NC_000008.10 |
| cg27562682 | 4.64E-13 | 2.21E-14 | 8.26 | 21.7667275 | 2.10E-01 | 243053865 | 243053988 | NC_000001.10 |
| cg20553016 | 4.66E-13 | 2.22E-14 | 8.26 | 21.7633404 | 5.07E-02 | 235950085 | 235950208 | NC_000002.11 |
| cg02759846 | 4.66E-13 | 2.22E-14 | 8.26 | 21.7631987 | 2.14E-01 | 51227943  | 51228066  | NC_000019.9  |
| cg18143243 | 4.66E-13 | 2.22E-14 | 8.26 | 21.7623528 | 2.73E-01 | 54155663  | 54155786  | NC_000003.11 |
| cg26822782 | 4.67E-13 | 2.23E-14 | 8.26 | 21.7613645 | 1.10E-01 | 130621905 | 130622028 | NC_000010.10 |
| cg14645721 | 4.67E-13 | 2.23E-14 | 8.26 | 21.7597376 | 4.30E-02 | 78163589  | 78163712  | NC_000017.10 |
| cg06682185 | 4.69E-13 | 2.24E-14 | 8.25 | 21.7557046 | 1.10E-01 | 61157615  | 61157738  | NC_000018.9  |
| cg12352960 | 4.69E-13 | 2.24E-14 | 8.25 | 21.7550991 | 2.15E-01 | 43428578  | 43428701  | NC_000010.10 |
| cg17270257 | 4.70E-13 | 2.24E-14 | 8.25 | 21.7547195 | 2.23E-01 | 166074870 | 166074993 | NC_000006.11 |

|            |          |          |      |            |          |           |           |              |
|------------|----------|----------|------|------------|----------|-----------|-----------|--------------|
| cg07815836 | 4.71E-13 | 2.25E-14 | 8.25 | 21.7518487 | 1.25E-01 | 58715351  | 58715474  | NC_000019.9  |
| cg12162138 | 4.72E-13 | 2.25E-14 | 8.25 | 21.7502882 | 2.35E-01 | 78673073  | 78673196  | NC_000011.9  |
| cg13405887 | 4.73E-13 | 2.26E-14 | 8.25 | 21.7481015 | 2.90E-01 | 132382812 | 132382935 | NC_000009.11 |
| cg23712594 | 4.74E-13 | 2.27E-14 | 8.25 | 21.7445663 | 1.29E-01 | 226591890 | 226592013 | NC_000001.10 |
| cg03716313 | 4.76E-13 | 2.28E-14 | 8.25 | 21.7401444 | 5.94E-02 | 19355725  | 19355848  | NC_000017.10 |
| cg02081006 | 4.77E-13 | 2.28E-14 | 8.25 | 21.7392391 | 2.14E-01 | 122430434 | 122430557 | NC_000005.9  |
| cg25763393 | 4.77E-13 | 2.28E-14 | 8.25 | 21.7390338 | 2.10E-01 | 52956832  | 52956955  | NC_000019.9  |
| cg25951210 | 4.78E-13 | 2.29E-14 | 8.25 | 21.7350175 | 1.07E-01 | 177016619 | 177016742 | NC_000002.11 |
| cg22851781 | 4.79E-13 | 2.29E-14 | 8.25 | 21.7331183 | 1.08E-01 | 133799053 | 133799176 | NC_000009.11 |
| cg05452406 | 4.81E-13 | 2.30E-14 | 8.25 | 21.7292356 | 2.24E-01 | 10881891  | 10882014  | NC_000006.11 |
| cg14344955 | 4.81E-13 | 2.30E-14 | 8.25 | 21.7291065 | 1.40E-01 | 71744725  | 71744848  | NC_000017.10 |
| cg08745329 | 4.82E-13 | 2.31E-14 | 8.25 | 21.7268677 | 5.72E-02 | 6189073   | 6189196   | NC_000010.10 |
| cg27430637 | 4.83E-13 | 2.31E-14 | 8.25 | 21.7259614 | 1.15E-01 | 26646801  | 26646924  | NC_000001.10 |
| cg17889439 | 4.83E-13 | 2.31E-14 | 8.25 | 21.7239832 | 6.44E-02 | 77501954  | 77502077  | NC_000013.10 |
| cg26667205 | 4.83E-13 | 2.31E-14 | 8.25 | 21.7239146 | 2.10E-01 | 56803778  | 56803901  | NC_000020.10 |
| cg04290586 | 4.84E-13 | 2.32E-14 | 8.25 | 21.7220865 | 1.76E-01 | 108168987 | 108169110 | NC_000012.11 |
| cg18700013 | 4.85E-13 | 2.32E-14 | 8.25 | 21.7209191 | 1.55E-01 | 29285119  | 29285242  | NC_000019.9  |
| cg08144931 | 4.85E-13 | 2.32E-14 | 8.25 | 21.7205233 | 5.91E-02 | 39115589  | 39115712  | NC_000012.11 |
| cg18325622 | 4.85E-13 | 2.32E-14 | 8.25 | 21.7201427 | 1.90E-01 | 16180259  | 16180382  | NC_000005.9  |
| cg00885682 | 4.85E-13 | 2.32E-14 | 8.25 | 21.7200763 | 1.81E-01 | 22825749  | 22825872  | NC_000016.9  |
| cg04849842 | 4.85E-13 | 2.32E-14 | 8.25 | 21.7193654 | 2.03E-01 | 140714610 | 140714733 | NC_000008.10 |
| cg08276289 | 4.87E-13 | 2.33E-14 | 8.25 | 21.7165036 | 2.17E-01 | 28617854  | 28617977  | NC_000003.11 |
| cg23288078 | 4.87E-13 | 2.33E-14 | 8.25 | 21.7163063 | 3.48E-02 | 124268173 | 124268296 | NC_000008.10 |
| cg15308062 | 4.87E-13 | 2.33E-14 | 8.25 | 21.7160495 | 2.37E-01 | 21680981  | 21681104  | NC_000012.11 |
| cg10187894 | 4.87E-13 | 2.33E-14 | 8.25 | 21.7153377 | 1.62E-01 | 38015525  | 38015648  | NC_000010.10 |

|            |          |          |      |            |          |           |           |              |
|------------|----------|----------|------|------------|----------|-----------|-----------|--------------|
| cg01506806 | 4.88E-13 | 2.34E-14 | 8.25 | 21.7133155 | 7.61E-02 | 119956180 | 119956303 | NC_000004.11 |
| cg05420994 | 4.91E-13 | 2.35E-14 | 8.25 | 21.707915  | 1.05E-01 | 32807296  | 32807419  | NC_000006.11 |
| cg25769043 | 4.92E-13 | 2.36E-14 | 8.25 | 21.7057957 | 1.71E-01 | 57035948  | 57036071  | NC_000004.11 |
| cg14684434 | 4.92E-13 | 2.36E-14 | 8.25 | 21.7055964 | 1.60E-01 | 53829957  | 53830080  | NC_000005.9  |
| cg05547777 | 4.92E-13 | 2.36E-14 | 8.25 | 21.7054101 | 1.97E-01 | 50694888  | 50695011  | NC_000005.9  |
| cg10546977 | 4.93E-13 | 2.36E-14 | 8.25 | 21.7030904 | 1.30E-01 | 13915689  | 13915812  | NC_000019.9  |
| cg18772588 | 4.93E-13 | 2.36E-14 | 8.25 | 21.7030143 | 2.23E-01 | 61809932  | 61810055  | NC_000020.10 |
| cg06020661 | 4.93E-13 | 2.36E-14 | 8.25 | 21.7026181 | 5.42E-02 | 47472138  | 47472261  | NC_000013.10 |
| cg24496841 | 4.94E-13 | 2.37E-14 | 8.25 | 21.7015844 | 2.45E-01 | 19152017  | 19152140  | NC_000007.13 |
| cg12811072 | 4.94E-13 | 2.37E-14 | 8.25 | 21.7005942 | 9.47E-02 | 53849892  | 53850015  | NC_000012.11 |
| cg23990435 | 4.94E-13 | 2.37E-14 | 8.25 | 21.6999672 | 3.36E-02 | 139043443 | 139043566 | NC_000005.9  |
| cg09830575 | 4.96E-13 | 2.38E-14 | 8.25 | 21.6972781 | 7.93E-02 | 71444937  | 71445060  | NC_000015.9  |
| cg00654888 | 4.96E-13 | 2.38E-14 | 8.25 | 21.6966888 | 1.21E-01 | 119603133 | 119603256 | NC_000002.11 |
| cg09072052 | 4.96E-13 | 2.38E-14 | 8.25 | 21.695914  | 5.94E-02 | 144070960 | 144071083 | NC_000008.10 |
| cg03215422 | 4.97E-13 | 2.39E-14 | 8.24 | 21.6934878 | 1.70E-01 | 135266509 | 135266632 | NC_000005.9  |
| cg13558371 | 4.97E-13 | 2.39E-14 | 8.24 | 21.6934278 | 1.36E-01 | 126135610 | 126135733 | NC_000009.11 |
| cg10295609 | 4.97E-13 | 2.39E-14 | 8.24 | 21.6929507 | 1.37E-01 | 143132934 | 143133057 | NC_000006.11 |
| cg23306464 | 4.97E-13 | 2.39E-14 | 8.24 | 21.6929169 | 1.73E-01 | 4868356   | 4868479   | NC_000004.11 |
| cg02268225 | 4.98E-13 | 2.39E-14 | 8.24 | 21.6920695 | 2.20E-01 | 100437639 | 100437762 | NC_000014.8  |
| cg24676817 | 4.98E-13 | 2.39E-14 | 8.24 | 21.6912281 | 2.80E-01 | 42995369  | 42995492  | NC_000005.9  |
| cg04961101 | 4.98E-13 | 2.39E-14 | 8.24 | 21.6910459 | 1.59E-01 | 37303484  | 37303607  | NC_000020.10 |
| cg23371436 | 4.98E-13 | 2.39E-14 | 8.24 | 21.6908669 | 1.27E-01 | 20111534  | 20111657  | NC_000011.9  |
| cg04043795 | 4.99E-13 | 2.39E-14 | 8.24 | 21.6895972 | 1.77E-01 | 5836366   | 5836489   | NC_000002.11 |
| cg22289581 | 4.99E-13 | 2.40E-14 | 8.24 | 21.6889849 | 1.89E-01 | 122850227 | 122850350 | NC_000011.9  |
| cg05945059 | 5.00E-13 | 2.40E-14 | 8.24 | 21.6869217 | 1.70E-01 | 56940463  | 56940586  | NC_000018.9  |

|            |          |          |      |            |          |           |           |              |
|------------|----------|----------|------|------------|----------|-----------|-----------|--------------|
| cg25225340 | 5.05E-13 | 2.42E-14 | 8.24 | 21.6777092 | 2.15E-02 | 26937534  | 26937657  | NC_000022.10 |
| cg08410604 | 5.06E-13 | 2.43E-14 | 8.24 | 21.6757764 | 8.08E-02 | 138556982 | 138557105 | NC_000007.13 |
| cg17298516 | 5.06E-13 | 2.43E-14 | 8.24 | 21.675508  | 9.58E-02 | 94131533  | 94131656  | NC_000001.10 |
| cg21002957 | 5.06E-13 | 2.43E-14 | 8.24 | 21.6752021 | 2.09E-01 | 15568894  | 15569017  | NC_000019.9  |
| cg23945382 | 5.06E-13 | 2.43E-14 | 8.24 | 21.6739075 | 8.26E-02 | 51748922  | 51749045  | NC_000018.9  |
| cg01157070 | 5.07E-13 | 2.44E-14 | 8.24 | 21.6718357 | 2.17E-01 | 56228511  | 56228634  | NC_000016.9  |
| cg10652393 | 5.09E-13 | 2.45E-14 | 8.24 | 21.6686904 | 2.27E-01 | 27112430  | 27112553  | NC_000015.9  |
| cg16096531 | 5.10E-13 | 2.45E-14 | 8.24 | 21.6672344 | 1.10E-01 | 53722216  | 53722339  | NC_000012.11 |
| cg01802380 | 5.10E-13 | 2.45E-14 | 8.24 | 21.666984  | 9.08E-02 | 107865407 | 107865530 | NC_000013.10 |
| cg11437784 | 5.10E-13 | 2.45E-14 | 8.24 | 21.6662226 | 2.14E-01 | 112710823 | 112710946 | NC_000013.10 |
| cg18621091 | 5.11E-13 | 2.46E-14 | 8.24 | 21.6642038 | 2.01E-01 | 75612056  | 75612179  | NC_000018.9  |
| cg20140735 | 5.11E-13 | 2.46E-14 | 8.24 | 21.6639835 | 1.40E-01 | 1494726   | 1494849   | NC_000001.10 |
| cg00596508 | 5.12E-13 | 2.46E-14 | 8.24 | 21.6620713 | 2.13E-01 | 41086800  | 41086923  | NC_000012.11 |
| cg25463688 | 5.13E-13 | 2.46E-14 | 8.24 | 21.6613214 | 8.52E-02 | 235254025 | 235254148 | NC_000001.10 |
| cg12270822 | 5.13E-13 | 2.47E-14 | 8.24 | 21.6607156 | 2.35E-01 | 87229722  | 87229845  | NC_000007.13 |
| cg06251181 | 5.15E-13 | 2.48E-14 | 8.24 | 21.656775  | 6.82E-02 | 109046825 | 109046948 | NC_000012.11 |
| cg24611446 | 5.16E-13 | 2.48E-14 | 8.24 | 21.6546655 | 2.20E-01 | 113917737 | 113917860 | NC_000012.11 |
| cg13762320 | 5.16E-13 | 2.48E-14 | 8.24 | 21.6545568 | 1.26E-01 | 2292905   | 2293028   | NC_000011.9  |
| cg02111951 | 5.16E-13 | 2.48E-14 | 8.24 | 21.6545557 | 1.27E-01 | 61544854  | 61544977  | NC_000011.9  |
| cg23571839 | 5.21E-13 | 2.51E-14 | 8.24 | 21.6431879 | 1.95E-01 | 1431343   | 1431466   | NC_000011.9  |
| cg07777790 | 5.22E-13 | 2.51E-14 | 8.24 | 21.6413896 | 1.89E-01 | 229570188 | 229570311 | NC_000001.10 |
| cg27473895 | 5.22E-13 | 2.52E-14 | 8.24 | 21.6410435 | 1.91E-01 | 102497354 | 102497477 | NC_000010.10 |
| cg15009331 | 5.23E-13 | 2.52E-14 | 8.24 | 21.6402101 | 6.23E-02 | 80502431  | 80502554  | NC_000010.10 |
| cg18225412 | 5.23E-13 | 2.52E-14 | 8.24 | 21.6397814 | 7.45E-02 | 240927227 | 240927350 | NC_000001.10 |
| cg03565241 | 5.24E-13 | 2.52E-14 | 8.24 | 21.6376494 | 1.08E-01 | 9286157   | 9286280   | NC_000002.11 |

|            |          |          |      |            |          |           |           |              |
|------------|----------|----------|------|------------|----------|-----------|-----------|--------------|
| cg09413950 | 5.24E-13 | 2.53E-14 | 8.24 | 21.6371555 | 1.53E-01 | 49582872  | 49582995  | NC_000011.9  |
| cg08657492 | 5.26E-13 | 2.53E-14 | 8.23 | 21.6337597 | 1.51E-01 | 27170832  | 27170955  | NC_000007.13 |
| cg11438134 | 5.26E-13 | 2.53E-14 | 8.23 | 21.6336987 | 7.65E-02 | 46269016  | 46269139  | NC_000021.8  |
| cg06161915 | 5.26E-13 | 2.53E-14 | 8.23 | 21.6334701 | 4.00E-02 | 127451984 | 127452107 | NC_000007.13 |
| cg09208611 | 5.26E-13 | 2.54E-14 | 8.23 | 21.6328245 | 1.76E-01 | 63544319  | 63544442  | NC_000012.11 |
| cg17178268 | 5.27E-13 | 2.54E-14 | 8.23 | 21.6307502 | 1.05E-01 | 90048444  | 90048567  | NC_000015.9  |
| cg07164047 | 5.29E-13 | 2.55E-14 | 8.23 | 21.6266175 | 6.51E-02 | 236486625 | 236486748 | NC_000002.11 |
| cg27265170 | 5.30E-13 | 2.55E-14 | 8.23 | 21.6260435 | 1.61E-01 | 50889510  | 50889633  | NC_000001.10 |
| cg01566213 | 5.32E-13 | 2.56E-14 | 8.23 | 21.6224504 | 9.66E-02 | 1579287   | 1579410   | NC_000004.11 |
| cg02773188 | 5.32E-13 | 2.56E-14 | 8.23 | 21.622357  | 5.05E-02 | 152332936 | 152333059 | NC_000004.11 |
| cg14475381 | 5.33E-13 | 2.57E-14 | 8.23 | 21.6193936 | 1.31E-01 | 131401268 | 131401391 | NC_000010.10 |
| cg06479254 | 5.33E-13 | 2.57E-14 | 8.23 | 21.6192912 | 1.09E-01 | 176983285 | 176983408 | NC_000002.11 |
| cg21045915 | 5.33E-13 | 2.57E-14 | 8.23 | 21.6186306 | 8.44E-02 | 98629374  | 98629497  | NC_000014.8  |
| cg03863908 | 5.34E-13 | 2.58E-14 | 8.23 | 21.6173602 | 7.24E-02 | 1123738   | 1123861   | NC_000005.9  |
| cg04034583 | 5.37E-13 | 2.59E-14 | 8.23 | 21.6121361 | 9.59E-02 | 119603108 | 119603231 | NC_000002.11 |
| cg06195293 | 5.38E-13 | 2.60E-14 | 8.23 | 21.6100034 | 6.14E-02 | 30104885  | 30105008  | NC_000006.11 |
| cg24761507 | 5.39E-13 | 2.60E-14 | 8.23 | 21.6085341 | 2.65E-01 | 35293930  | 35294053  | NC_000017.10 |
| cg11074814 | 5.41E-13 | 2.61E-14 | 8.23 | 21.6033728 | 2.15E-01 | 43601969  | 43602092  | NC_000011.9  |
| cg26694724 | 5.42E-13 | 2.62E-14 | 8.23 | 21.602045  | 4.65E-02 | 1992028   | 1992151   | NC_000007.13 |
| cg18263365 | 5.43E-13 | 2.62E-14 | 8.23 | 21.5996767 | 1.71E-01 | 136834453 | 136834576 | NC_000005.9  |
| cg19988426 | 5.44E-13 | 2.62E-14 | 8.23 | 21.5990197 | 1.79E-01 | 130064021 | 130064144 | NC_000010.10 |
| cg07783282 | 5.44E-13 | 2.63E-14 | 8.23 | 21.597751  | 2.57E-01 | 95942964  | 95943087  | NC_000012.11 |
| cg01360628 | 5.44E-13 | 2.63E-14 | 8.23 | 21.5975997 | 1.57E-01 | 89156118  | 89156241  | NC_000003.11 |
| cg08912058 | 5.46E-13 | 2.64E-14 | 8.23 | 21.5939535 | 4.32E-02 | 6313858   | 6313981   | NC_000001.10 |
| cg24961583 | 5.48E-13 | 2.65E-14 | 8.23 | 21.5900666 | 2.41E-01 | 27765409  | 27765532  | NC_000003.11 |

|            |          |          |      |            |          |           |           |              |
|------------|----------|----------|------|------------|----------|-----------|-----------|--------------|
| cg10541517 | 5.48E-13 | 2.65E-14 | 8.23 | 21.5900051 | 2.00E-01 | 128753103 | 128753226 | NC_000012.11 |
| cg26025557 | 5.48E-13 | 2.65E-14 | 8.23 | 21.5895004 | 1.21E-01 | 42842344  | 42842467  | NC_000003.11 |
| cg08650890 | 5.49E-13 | 2.65E-14 | 8.23 | 21.588411  | 1.67E-01 | 32064613  | 32064736  | NC_000006.11 |
| cg12352896 | 5.52E-13 | 2.67E-14 | 8.23 | 21.5821824 | 9.65E-02 | 77271034  | 77271157  | NC_000018.9  |
| cg24387472 | 5.52E-13 | 2.67E-14 | 8.23 | 21.582081  | 1.96E-01 | 142528745 | 142528868 | NC_000008.10 |
| cg21591624 | 5.53E-13 | 2.67E-14 | 8.23 | 21.5813575 | 1.21E-01 | 20623199  | 20623322  | NC_000011.9  |
| cg08288406 | 5.53E-13 | 2.67E-14 | 8.23 | 21.5811376 | 2.75E-01 | 1523917   | 1524040   | NC_000019.9  |
| cg21129253 | 5.54E-13 | 2.68E-14 | 8.23 | 21.5795819 | 1.05E-01 | 36638564  | 36638687  | NC_000014.8  |
| cg11569159 | 5.55E-13 | 2.69E-14 | 8.23 | 21.5764927 | 1.81E-01 | 115172959 | 115173082 | NC_000012.11 |
| cg26282384 | 5.58E-13 | 2.70E-14 | 8.22 | 21.5721868 | 2.04E-01 | 140767200 | 140767323 | NC_000005.9  |
| cg04316624 | 5.58E-13 | 2.70E-14 | 8.22 | 21.5716885 | 1.37E-01 | 177036809 | 177036932 | NC_000002.11 |
| cg23060747 | 5.60E-13 | 2.71E-14 | 8.22 | 21.5685105 | 1.08E-01 | 239962958 | 239963081 | NC_000002.11 |
| cg01049530 | 5.61E-13 | 2.72E-14 | 8.22 | 21.5649354 | 2.83E-01 | 81952008  | 81952131  | NC_000004.11 |
| cg07136998 | 5.62E-13 | 2.72E-14 | 8.22 | 21.5640395 | 3.06E-01 | 168728081 | 168728204 | NC_000005.9  |
| cg24051786 | 5.65E-13 | 2.74E-14 | 8.22 | 21.5578823 | 1.81E-01 | 47514673  | 47514796  | NC_000003.11 |
| cg13652513 | 5.67E-13 | 2.74E-14 | 8.22 | 21.5550881 | 1.70E-01 | 70654597  | 70654720  | NC_000014.8  |
| cg14029580 | 5.67E-13 | 2.75E-14 | 8.22 | 21.5547499 | 1.04E-01 | 1363708   | 1363831   | NC_000004.11 |
| cg15461413 | 5.71E-13 | 2.77E-14 | 8.22 | 21.547595  | 8.51E-02 | 62160543  | 62160666  | NC_000020.10 |
| cg24909548 | 5.72E-13 | 2.77E-14 | 8.22 | 21.5453404 | 2.03E-01 | 36736272  | 36736395  | NC_000019.9  |
| cg19001226 | 5.72E-13 | 2.77E-14 | 8.22 | 21.5453255 | 2.76E-01 | 177053345 | 177053468 | NC_000002.11 |
| cg14243778 | 5.73E-13 | 2.78E-14 | 8.22 | 21.5429078 | 1.92E-01 | 41086879  | 41087002  | NC_000012.11 |
| cg22285438 | 5.74E-13 | 2.78E-14 | 8.22 | 21.5414572 | 9.47E-02 | 915895    | 916018    | NC_000017.10 |
| cg04452311 | 5.75E-13 | 2.79E-14 | 8.22 | 21.5394788 | 1.59E-01 | 176936377 | 176936500 | NC_000002.11 |
| cg04543077 | 5.76E-13 | 2.79E-14 | 8.22 | 21.5377738 | 6.91E-02 | 2879544   | 2879667   | NC_000016.9  |
| cg02377021 | 5.76E-13 | 2.79E-14 | 8.22 | 21.5372409 | 8.72E-02 | 71537334  | 71537457  | NC_000005.9  |

|            |          |          |      |            |          |           |           |              |
|------------|----------|----------|------|------------|----------|-----------|-----------|--------------|
| cg13954457 | 5.77E-13 | 2.80E-14 | 8.22 | 21.535153  | 2.08E-01 | 167956819 | 167956942 | NC_000005.9  |
| cg23913679 | 5.78E-13 | 2.80E-14 | 8.22 | 21.5345807 | 2.42E-01 | 7116700   | 7116823   | NC_000018.9  |
| cg10111292 | 5.80E-13 | 2.81E-14 | 8.22 | 21.5309035 | 1.92E-01 | 106975112 | 106975235 | NC_000012.11 |
| cg25362630 | 5.80E-13 | 2.82E-14 | 8.22 | 21.5297865 | 1.99E-01 | 42544650  | 42544773  | NC_000020.10 |
| cg02459389 | 5.81E-13 | 2.82E-14 | 8.22 | 21.5295951 | 7.31E-02 | 3923012   | 3923135   | NC_000017.10 |
| cg17966560 | 5.82E-13 | 2.82E-14 | 8.22 | 21.5270432 | 1.42E-01 | 156357871 | 156357994 | NC_000001.10 |
| cg19698137 | 5.82E-13 | 2.82E-14 | 8.22 | 21.5268481 | 1.27E-01 | 35990997  | 35991120  | NC_000005.9  |
| cg17123690 | 5.82E-13 | 2.82E-14 | 8.22 | 21.5267333 | 1.66E-01 | 55951801  | 55951924  | NC_000019.9  |
| cg12268575 | 5.83E-13 | 2.83E-14 | 8.22 | 21.524803  | 1.64E-01 | 177133536 | 177133659 | NC_000001.10 |
| cg23929194 | 5.86E-13 | 2.84E-14 | 8.22 | 21.519644  | 1.85E-01 | 44662296  | 44662419  | NC_000007.13 |
| cg24198558 | 5.87E-13 | 2.85E-14 | 8.22 | 21.5189664 | 2.31E-01 | 132757102 | 132757225 | NC_000003.11 |
| cg02387554 | 5.87E-13 | 2.85E-14 | 8.22 | 21.5183413 | 1.13E-01 | 1233285   | 1233408   | NC_000007.13 |
| cg08217589 | 5.87E-13 | 2.85E-14 | 8.22 | 21.5176378 | 1.11E-01 | 31025866  | 31025989  | NC_000020.10 |
| cg16697438 | 5.87E-13 | 2.85E-14 | 8.22 | 21.5172705 | 1.65E-01 | 72043538  | 72043661  | NC_000010.10 |
| cg09540629 | 5.88E-13 | 2.85E-14 | 8.22 | 21.5168619 | 1.62E-01 | 134981759 | 134981882 | NC_000010.10 |
| cg15106420 | 5.88E-13 | 2.86E-14 | 8.22 | 21.5160302 | 7.07E-02 | 109042237 | 109042360 | NC_000005.9  |
| cg25106645 | 5.88E-13 | 2.86E-14 | 8.22 | 21.5155588 | 1.62E-01 | 115135560 | 115135683 | NC_000012.11 |
| cg09183671 | 5.89E-13 | 2.86E-14 | 8.22 | 21.5148075 | 1.48E-01 | 112630780 | 112630903 | NC_000010.10 |
| cg00767948 | 5.90E-13 | 2.87E-14 | 8.22 | 21.5124932 | 1.25E-01 | 61940979  | 61941102  | NC_000003.11 |
| cg01817364 | 5.92E-13 | 2.87E-14 | 8.21 | 21.5098483 | 1.96E-01 | 43037411  | 43037534  | NC_000005.9  |
| cg23365071 | 5.92E-13 | 2.88E-14 | 8.21 | 21.5087698 | 5.04E-02 | 30793845  | 30793968  | NC_000016.9  |
| cg09852619 | 5.92E-13 | 2.88E-14 | 8.21 | 21.5082486 | 8.19E-02 | 25217537  | 25217660  | NC_000008.10 |
| cg02530022 | 5.93E-13 | 2.88E-14 | 8.21 | 21.5080552 | 2.25E-01 | 96642708  | 96642831  | NC_000007.13 |
| cg14331619 | 5.93E-13 | 2.88E-14 | 8.21 | 21.5076745 | 6.31E-02 | 35909996  | 35910119  | NC_000009.11 |
| cg25266888 | 5.94E-13 | 2.88E-14 | 8.21 | 21.5061716 | 1.71E-01 | 2482594   | 2482717   | NC_000011.9  |

|            |          |          |      |            |          |           |           |              |
|------------|----------|----------|------|------------|----------|-----------|-----------|--------------|
| cg12598606 | 5.94E-13 | 2.88E-14 | 8.21 | 21.5059673 | 1.30E-01 | 155018256 | 155018379 | NC_000007.13 |
| cg01876531 | 5.94E-13 | 2.89E-14 | 8.21 | 21.5049388 | 1.63E-01 | 208405868 | 208405991 | NC_000001.10 |
| cg21707172 | 5.96E-13 | 2.89E-14 | 8.21 | 21.5023691 | 1.50E-01 | 155537944 | 155538067 | NC_000006.11 |
| cg02355885 | 5.96E-13 | 2.90E-14 | 8.21 | 21.5013801 | 2.03E-01 | 30142990  | 30143113  | NC_000002.11 |
| cg13716619 | 5.99E-13 | 2.91E-14 | 8.21 | 21.4972145 | 1.00E-01 | 31829895  | 31830018  | NC_000006.11 |
| cg01957901 | 6.00E-13 | 2.92E-14 | 8.21 | 21.4950843 | 1.01E-01 | 132116174 | 132116297 | NC_000011.9  |
| cg16689609 | 6.02E-13 | 2.92E-14 | 8.21 | 21.4923798 | 7.29E-02 | 144682208 | 144682331 | NC_000006.11 |
| cg18832348 | 6.02E-13 | 2.93E-14 | 8.21 | 21.4910086 | 9.61E-02 | 94844511  | 94844634  | NC_000005.9  |
| cg17877704 | 6.03E-13 | 2.93E-14 | 8.21 | 21.4900352 | 1.82E-01 | 127940483 | 127940606 | NC_000012.11 |
| cg20987369 | 6.03E-13 | 2.93E-14 | 8.21 | 21.4899404 | 1.14E-01 | 1579572   | 1579695   | NC_000004.11 |
| cg14657525 | 6.04E-13 | 2.94E-14 | 8.21 | 21.4884576 | 2.32E-01 | 32859099  | 32859222  | NC_000003.11 |
| cg13818654 | 6.04E-13 | 2.94E-14 | 8.21 | 21.4871636 | 2.16E-01 | 78493126  | 78493249  | NC_000013.10 |
| cg10789281 | 6.05E-13 | 2.94E-14 | 8.21 | 21.4864149 | 2.21E-01 | 81471882  | 81472005  | NC_000012.11 |
| cg17362861 | 6.07E-13 | 2.95E-14 | 8.21 | 21.4821987 | 3.03E-01 | 151107257 | 151107380 | NC_000007.13 |
| cg06841832 | 6.07E-13 | 2.96E-14 | 8.21 | 21.4821053 | 8.42E-02 | 140175142 | 140175265 | NC_000006.11 |
| cg10701252 | 6.08E-13 | 2.96E-14 | 8.21 | 21.4810741 | 1.32E-01 | 55508585  | 55508708  | NC_000003.11 |
| cg04485988 | 6.10E-13 | 2.97E-14 | 8.21 | 21.4776931 | 1.15E-01 | 118168275 | 118168398 | NC_000001.10 |
| cg00268840 | 6.10E-13 | 2.97E-14 | 8.21 | 21.4775482 | 2.86E-01 | 44332653  | 44332776  | NC_000011.9  |
| cg16661209 | 6.10E-13 | 2.97E-14 | 8.21 | 21.4775298 | 2.61E-01 | 29107069  | 29107192  | NC_000013.10 |
| cg13729816 | 6.11E-13 | 2.98E-14 | 8.21 | 21.4750123 | 1.44E-01 | 52954722  | 52954845  | NC_000019.9  |
| cg09338032 | 6.12E-13 | 2.98E-14 | 8.21 | 21.4748389 | 1.76E-01 | 113916609 | 113916732 | NC_000012.11 |
| cg12459514 | 6.13E-13 | 2.98E-14 | 8.21 | 21.4726712 | 4.55E-02 | 23914071  | 23914194  | NC_000002.11 |
| cg15784124 | 6.13E-13 | 2.99E-14 | 8.21 | 21.4716129 | 1.78E-01 | 111543114 | 111543237 | NC_000004.11 |
| cg02214096 | 6.13E-13 | 2.99E-14 | 8.21 | 21.4714966 | 1.80E-01 | 77822350  | 77822473  | NC_000016.9  |
| cg26071016 | 6.14E-13 | 2.99E-14 | 8.21 | 21.4706586 | 1.97E-01 | 111217785 | 111217908 | NC_000001.10 |



|            |          |          |      |            |          |           |           |              |
|------------|----------|----------|------|------------|----------|-----------|-----------|--------------|
| cg13726463 | 6.14E-13 | 2.99E-14 | 8.21 | 21.4700392 | 6.84E-02 | 31439681  | 31439804  | NC_000016.9  |
| cg04891961 | 6.14E-13 | 2.99E-14 | 8.21 | 21.470028  | 1.45E-01 | 27939900  | 27940023  | NC_000017.10 |
| cg10089801 | 6.14E-13 | 2.99E-14 | 8.21 | 21.4694587 | 1.32E-01 | 203036235 | 203036358 | NC_000002.11 |
| cg20600210 | 6.15E-13 | 3.00E-14 | 8.21 | 21.4679283 | 1.85E-01 | 57090013  | 57090136  | NC_000020.10 |
| cg19277389 | 6.15E-13 | 3.00E-14 | 8.21 | 21.4678008 | 6.44E-02 | 7802545   | 7802668   | NC_000004.11 |
| cg09823576 | 6.16E-13 | 3.00E-14 | 8.21 | 21.4673063 | 1.30E-01 | 164640367 | 164640490 | NC_000001.10 |
| cg10863741 | 6.16E-13 | 3.00E-14 | 8.21 | 21.46668   | 2.33E-01 | 122686038 | 122686161 | NC_000004.11 |
| cg21194776 | 6.16E-13 | 3.00E-14 | 8.21 | 21.4664757 | 4.17E-02 | 75314128  | 75314251  | NC_000010.10 |
| cg21170796 | 6.19E-13 | 3.01E-14 | 8.21 | 21.4622902 | 1.67E-01 | 119528164 | 119528287 | NC_000001.10 |
| cg20099830 | 6.19E-13 | 3.02E-14 | 8.21 | 21.4609298 | 2.04E-01 | 114842031 | 114842154 | NC_000012.11 |
| cg09267051 | 6.19E-13 | 3.02E-14 | 8.21 | 21.4608926 | 2.49E-01 | 100943468 | 100943591 | NC_000007.13 |
| cg14631386 | 6.20E-13 | 3.02E-14 | 8.21 | 21.4598299 | 1.94E-01 | 93114305  | 93114428  | NC_000008.10 |
| cg07830534 | 6.22E-13 | 3.03E-14 | 8.21 | 21.4569102 | 1.10E-01 | 38953285  | 38953408  | NC_000017.10 |
| cg09354309 | 6.24E-13 | 3.04E-14 | 8.21 | 21.4532415 | 2.46E-01 | 22487437  | 22487560  | NC_000012.11 |
| cg16458868 | 6.24E-13 | 3.04E-14 | 8.21 | 21.4528718 | 5.16E-02 | 88260834  | 88260957  | NC_000016.9  |
| cg19718882 | 6.26E-13 | 3.05E-14 | 8.21 | 21.4505569 | 1.91E-01 | 32458714  | 32458837  | NC_000011.9  |
| cg11034763 | 6.26E-13 | 3.05E-14 | 8.21 | 21.4504355 | 8.16E-02 | 963020    | 963143    | NC_000005.9  |
| cg02069715 | 6.28E-13 | 3.07E-14 | 8.2  | 21.4459894 | 1.82E-01 | 27215962  | 27216085  | NC_000015.9  |
| cg25303831 | 6.30E-13 | 3.07E-14 | 8.2  | 21.4429294 | 1.44E-01 | 31544911  | 31545034  | NC_000013.10 |
| cg13069237 | 6.32E-13 | 3.08E-14 | 8.2  | 21.4403345 | 7.49E-02 | 6063456   | 6063579   | NC_000001.10 |
| cg02079908 | 6.34E-13 | 3.09E-14 | 8.2  | 21.4366031 | 5.19E-02 | 42411760  | 42411883  | NC_000002.11 |
| cg13823136 | 6.34E-13 | 3.10E-14 | 8.2  | 21.4361971 | 3.01E-01 | 77333138  | 77333261  | NC_000001.10 |
| cg04032066 | 6.39E-13 | 3.12E-14 | 8.2  | 21.4292863 | 1.91E-01 | 20622721  | 20622844  | NC_000011.9  |
| cg02259047 | 6.40E-13 | 3.12E-14 | 8.2  | 21.4274635 | 5.56E-02 | 104175555 | 104175678 | NC_000014.8  |
| cg15775921 | 6.40E-13 | 3.13E-14 | 8.2  | 21.4260056 | 1.58E-01 | 223156136 | 223156259 | NC_000002.11 |

|            |          |          |      |            |          |           |           |              |
|------------|----------|----------|------|------------|----------|-----------|-----------|--------------|
| cg02339542 | 6.41E-13 | 3.13E-14 | 8.2  | 21.4254474 | 9.56E-02 | 92823161  | 92823284  | NC_000012.11 |
| cg02350767 | 6.42E-13 | 3.13E-14 | 8.2  | 21.4241543 | 7.73E-02 | 99250527  | 99250650  | NC_000015.9  |
| cg16307705 | 6.42E-13 | 3.13E-14 | 8.2  | 21.4240073 | 2.29E-01 | 3602025   | 3602148   | NC_000011.9  |
| cg01591037 | 6.44E-13 | 3.15E-14 | 8.2  | 21.4203641 | 1.17E-01 | 15134481  | 15134604  | NC_000012.11 |
| cg08115732 | 6.44E-13 | 3.15E-14 | 8.2  | 21.419939  | 1.39E-01 | 76171794  | 76171917  | NC_000017.10 |
| cg10068417 | 6.45E-13 | 3.15E-14 | 8.2  | 21.4178896 | 1.62E-01 | 50706583  | 50706706  | NC_000013.10 |
| cg10079740 | 6.46E-13 | 3.16E-14 | 8.2  | 21.416265  | 2.12E-01 | 55513480  | 55513603  | NC_000016.9  |
| cg18783033 | 6.49E-13 | 3.17E-14 | 8.2  | 21.4125421 | 9.09E-02 | 90488297  | 90488420  | NC_000010.10 |
| cg10521851 | 6.49E-13 | 3.17E-14 | 8.2  | 21.4121867 | 2.08E-01 | 130297771 | 130297894 | NC_000011.9  |
| cg20791178 | 6.53E-13 | 3.19E-14 | 8.2  | 21.4059806 | 6.48E-02 | 38246696  | 38246819  | NC_000008.10 |
| cg05676622 | 6.53E-13 | 3.19E-14 | 8.2  | 21.4054714 | 1.24E-01 | 66410998  | 66411121  | NC_000011.9  |
| cg15306794 | 6.54E-13 | 3.20E-14 | 8.2  | 21.404875  | 8.78E-02 | 16998450  | 16998573  | NC_000011.9  |
| cg05728754 | 6.54E-13 | 3.20E-14 | 8.2  | 21.4040816 | 2.35E-01 | 47225326  | 47225449  | NC_000012.11 |
| cg12080391 | 6.55E-13 | 3.20E-14 | 8.2  | 21.4022494 | 2.15E-01 | 5018984   | 5019107   | NC_000012.11 |
| cg20400592 | 6.57E-13 | 3.22E-14 | 8.2  | 21.3987617 | 1.25E-01 | 51418041  | 51418164  | NC_000013.10 |
| cg16732787 | 6.59E-13 | 3.22E-14 | 8.2  | 21.3958731 | 1.39E-01 | 228785992 | 228786115 | NC_000001.10 |
| cg17489750 | 6.64E-13 | 3.25E-14 | 8.19 | 21.3882667 | 1.54E-01 | 54504774  | 54504897  | NC_000008.10 |
| cg00039441 | 6.65E-13 | 3.25E-14 | 8.19 | 21.3869775 | 2.75E-01 | 176957473 | 176957596 | NC_000002.11 |
| cg02172492 | 6.65E-13 | 3.26E-14 | 8.19 | 21.3863616 | 1.55E-01 | 19553422  | 19553545  | NC_000002.11 |
| cg01159623 | 6.65E-13 | 3.26E-14 | 8.19 | 21.3862654 | 1.68E-01 | 70596377  | 70596500  | NC_000007.13 |
| cg14682419 | 6.66E-13 | 3.26E-14 | 8.19 | 21.3857155 | 9.89E-02 | 141994495 | 141994618 | NC_000005.9  |
| cg06093355 | 6.66E-13 | 3.26E-14 | 8.19 | 21.3855177 | 2.00E-01 | 46547693  | 46547816  | NC_000002.11 |
| cg23004527 | 6.66E-13 | 3.26E-14 | 8.19 | 21.3841477 | 1.36E-01 | 3390353   | 3390476   | NC_000019.9  |
| cg26057971 | 6.67E-13 | 3.27E-14 | 8.19 | 21.3826786 | 1.45E-01 | 62898351  | 62898474  | NC_000001.10 |
| cg12973591 | 6.69E-13 | 3.28E-14 | 8.19 | 21.3805882 | 2.66E-01 | 93519473  | 93519596  | NC_000007.13 |

|            |          |          |      |            |          |           |           |              |
|------------|----------|----------|------|------------|----------|-----------|-----------|--------------|
| cg07014126 | 6.69E-13 | 3.28E-14 | 8.19 | 21.3804491 | 1.49E-01 | 169717713 | 169717836 | NC_000006.11 |
| cg20929476 | 6.70E-13 | 3.28E-14 | 8.19 | 21.3784552 | 1.32E-01 | 56284168  | 56284291  | NC_000015.9  |
| cg11876524 | 6.73E-13 | 3.30E-14 | 8.19 | 21.3742954 | 6.92E-02 | 82177159  | 82177282  | NC_000010.10 |
| cg15728861 | 6.74E-13 | 3.30E-14 | 8.19 | 21.3732197 | 2.11E-01 | 46961008  | 46961131  | NC_000013.10 |
| cg10959198 | 6.74E-13 | 3.30E-14 | 8.19 | 21.3718935 | 2.21E-01 | 93632896  | 93633019  | NC_000015.9  |
| cg16318271 | 6.75E-13 | 3.30E-14 | 8.19 | 21.371721  | 2.19E-01 | 41748193  | 41748316  | NC_000004.11 |
| cg07111988 | 6.75E-13 | 3.31E-14 | 8.19 | 21.3713231 | 1.75E-01 | 24971764  | 24971887  | NC_000001.10 |
| cg06460568 | 6.75E-13 | 3.31E-14 | 8.19 | 21.3713017 | 2.03E-01 | 2162211   | 2162334   | NC_000011.9  |
| cg10794439 | 6.77E-13 | 3.32E-14 | 8.19 | 21.36837   | 7.42E-02 | 41518051  | 41518174  | NC_000008.10 |
| cg17924021 | 6.78E-13 | 3.32E-14 | 8.19 | 21.3663036 | 7.46E-02 | 53638473  | 53638596  | NC_000017.10 |
| cg04184744 | 6.78E-13 | 3.32E-14 | 8.19 | 21.3660422 | 1.46E-01 | 31562255  | 31562378  | NC_000014.8  |
| cg12964647 | 6.80E-13 | 3.33E-14 | 8.19 | 21.3630478 | 7.09E-02 | 46234525  | 46234648  | NC_000017.10 |
| cg21851351 | 6.81E-13 | 3.34E-14 | 8.19 | 21.3616189 | 1.95E-01 | 28368087  | 28368210  | NC_000013.10 |
| cg21905819 | 6.82E-13 | 3.34E-14 | 8.19 | 21.3603235 | 8.89E-02 | 5972032   | 5972155   | NC_000017.10 |
| cg25267072 | 6.82E-13 | 3.34E-14 | 8.19 | 21.3597413 | 1.88E-01 | 23299889  | 23300012  | NC_000019.9  |
| cg01297020 | 6.83E-13 | 3.35E-14 | 8.19 | 21.3593062 | 1.44E-01 | 106117425 | 106117548 | NC_000013.10 |
| cg06263250 | 6.83E-13 | 3.35E-14 | 8.19 | 21.3591795 | 9.37E-02 | 10930482  | 10930605  | NC_000011.9  |
| cg09601175 | 6.83E-13 | 3.35E-14 | 8.19 | 21.3585129 | 1.33E-01 | 177025608 | 177025731 | NC_000002.11 |
| cg14311495 | 6.83E-13 | 3.35E-14 | 8.19 | 21.3585114 | 4.85E-02 | 95764742  | 95764865  | NC_000009.11 |
| cg07609862 | 6.85E-13 | 3.36E-14 | 8.19 | 21.3549995 | 1.36E-01 | 92702912  | 92703035  | NC_000011.9  |
| cg13273396 | 6.85E-13 | 3.36E-14 | 8.19 | 21.3549121 | 2.61E-01 | 81471867  | 81471990  | NC_000012.11 |
| cg02416510 | 6.86E-13 | 3.36E-14 | 8.19 | 21.3543701 | 1.46E-01 | 54791763  | 54791886  | NC_000008.10 |
| cg27084654 | 6.86E-13 | 3.37E-14 | 8.19 | 21.3532654 | 1.11E-01 | 141118615 | 141118738 | NC_000003.11 |
| cg01278387 | 6.88E-13 | 3.38E-14 | 8.19 | 21.3501005 | 1.80E-01 | 58152281  | 58152404  | NC_000020.10 |
| cg20014049 | 6.89E-13 | 3.38E-14 | 8.19 | 21.3492642 | 2.53E-01 | 23481385  | 23481508  | NC_000010.10 |

|            |          |          |      |            |          |           |           |              |
|------------|----------|----------|------|------------|----------|-----------|-----------|--------------|
| cg19190699 | 6.91E-13 | 3.39E-14 | 8.19 | 21.3466222 | 1.18E-01 | 101514156 | 101514279 | NC_000015.9  |
| cg00376480 | 6.92E-13 | 3.39E-14 | 8.19 | 21.3455798 | 9.85E-02 | 46892832  | 46892955  | NC_000021.8  |
| cg26759954 | 6.92E-13 | 3.40E-14 | 8.19 | 21.3449801 | 2.06E-01 | 13925420  | 13925543  | NC_000006.11 |
| cg03223076 | 6.93E-13 | 3.40E-14 | 8.19 | 21.3427301 | 1.36E-01 | 48698558  | 48698681  | NC_000003.11 |
| cg08812889 | 6.94E-13 | 3.41E-14 | 8.19 | 21.3420367 | 1.29E-01 | 174439925 | 174440048 | NC_000004.11 |
| cg26721264 | 6.94E-13 | 3.41E-14 | 8.19 | 21.3414489 | 2.20E-01 | 74961727  | 74961850  | NC_000018.9  |
| cg13484329 | 6.96E-13 | 3.42E-14 | 8.19 | 21.3384593 | 9.04E-02 | 110342823 | 110342946 | NC_000012.11 |
| cg04184232 | 6.96E-13 | 3.42E-14 | 8.19 | 21.3381177 | 2.10E-01 | 29243234  | 29243357  | NC_000014.8  |
| cg15202738 | 6.97E-13 | 3.42E-14 | 8.19 | 21.3377237 | 2.71E-01 | 53636108  | 53636231  | NC_000019.9  |
| cg00145253 | 6.97E-13 | 3.42E-14 | 8.19 | 21.3374239 | 1.34E-01 | 75602857  | 75602980  | NC_000001.10 |
| cg17312004 | 6.98E-13 | 3.43E-14 | 8.19 | 21.3361139 | 1.94E-01 | 43569076  | 43569199  | NC_000011.9  |
| cg15699226 | 6.99E-13 | 3.43E-14 | 8.19 | 21.3343994 | 1.60E-01 | 78492678  | 78492801  | NC_000013.10 |
| cg17524637 | 7.01E-13 | 3.45E-14 | 8.19 | 21.3303867 | 2.14E-01 | 10458454  | 10458577  | NC_000004.11 |
| cg07286357 | 7.02E-13 | 3.45E-14 | 8.19 | 21.3296934 | 5.68E-02 | 96675199  | 96675322  | NC_000002.11 |
| cg18085117 | 7.02E-13 | 3.45E-14 | 8.19 | 21.3290853 | 7.18E-02 | 125806214 | 125806337 | NC_000010.10 |
| cg08787769 | 7.03E-13 | 3.46E-14 | 8.18 | 21.327601  | 7.01E-02 | 2869479   | 2869602   | NC_000016.9  |
| cg04078195 | 7.04E-13 | 3.46E-14 | 8.18 | 21.3270578 | 8.29E-02 | 20641735  | 20641858  | NC_000022.10 |
| cg24189904 | 7.06E-13 | 3.47E-14 | 8.18 | 21.3239903 | 1.98E-01 | 9473781   | 9473904   | NC_000019.9  |
| cg15773539 | 7.06E-13 | 3.47E-14 | 8.18 | 21.3234996 | 1.16E-01 | 61520112  | 61520235  | NC_000017.10 |
| cg24563570 | 7.08E-13 | 3.48E-14 | 8.18 | 21.3212804 | 1.82E-01 | 60936801  | 60936924  | NC_000010.10 |
| cg25563456 | 7.08E-13 | 3.48E-14 | 8.18 | 21.3211033 | 1.66E-01 | 32456069  | 32456192  | NC_000011.9  |
| cg01274324 | 7.08E-13 | 3.48E-14 | 8.18 | 21.3209188 | 6.46E-02 | 33948002  | 33948125  | NC_000021.8  |
| cg10203922 | 7.09E-13 | 3.49E-14 | 8.18 | 21.3191679 | 1.72E-01 | 145566200 | 145566323 | NC_000004.11 |
| cg07482257 | 7.09E-13 | 3.49E-14 | 8.18 | 21.3182308 | 1.62E-01 | 174135761 | 174135884 | NC_000005.9  |
| cg01183965 | 7.11E-13 | 3.50E-14 | 8.18 | 21.3163191 | 6.64E-02 | 134855243 | 134855366 | NC_000010.10 |

|            |          |          |      |            |          |           |           |              |
|------------|----------|----------|------|------------|----------|-----------|-----------|--------------|
| cg19149681 | 7.12E-13 | 3.50E-14 | 8.18 | 21.3151335 | 1.95E-01 | 57359399  | 57359522  | NC_000008.10 |
| cg26947831 | 7.12E-13 | 3.50E-14 | 8.18 | 21.3148391 | 1.08E-01 | 86018811  | 86018934  | NC_000016.9  |
| cg06153765 | 7.13E-13 | 3.51E-14 | 8.18 | 21.3125172 | 9.44E-02 | 106638076 | 106638199 | NC_000012.11 |
| cg01860459 | 7.13E-13 | 3.51E-14 | 8.18 | 21.3124402 | 7.42E-02 | 123419554 | 123419677 | NC_000003.11 |
| cg12488111 | 7.16E-13 | 3.52E-14 | 8.18 | 21.3086626 | 1.12E-01 | 105945699 | 105945822 | NC_000014.8  |
| cg03713642 | 7.20E-13 | 3.54E-14 | 8.18 | 21.3032775 | 2.10E-01 | 22825100  | 22825223  | NC_000016.9  |
| cg19650157 | 7.21E-13 | 3.55E-14 | 8.18 | 21.3018987 | 2.43E-01 | 78493297  | 78493420  | NC_000013.10 |
| cg05345448 | 7.21E-13 | 3.55E-14 | 8.18 | 21.3011458 | 8.16E-02 | 105688412 | 105688535 | NC_000014.8  |
| cg25189808 | 7.22E-13 | 3.56E-14 | 8.18 | 21.2994697 | 9.82E-02 | 45802621  | 45802744  | NC_000007.13 |
| cg13663793 | 7.25E-13 | 3.57E-14 | 8.18 | 21.2951831 | 2.49E-01 | 32457124  | 32457247  | NC_000011.9  |
| cg02478907 | 7.26E-13 | 3.57E-14 | 8.18 | 21.294662  | 1.81E-01 | 143545940 | 143546063 | NC_000008.10 |
| cg13924715 | 7.26E-13 | 3.58E-14 | 8.18 | 21.2937627 | 1.55E-01 | 10750890  | 10751013  | NC_000011.9  |
| cg17240815 | 7.27E-13 | 3.58E-14 | 8.18 | 21.2921467 | 1.90E-01 | 55039382  | 55039505  | NC_000006.11 |
| cg07805777 | 7.28E-13 | 3.58E-14 | 8.18 | 21.2915467 | 1.57E-01 | 15962932  | 15963055  | NC_000011.9  |
| cg16288089 | 7.28E-13 | 3.58E-14 | 8.18 | 21.2914575 | 2.25E-01 | 97361408  | 97361531  | NC_000007.13 |
| cg02426611 | 7.29E-13 | 3.59E-14 | 8.18 | 21.2889195 | 1.53E-01 | 87681276  | 87681399  | NC_000016.9  |
| cg09791743 | 7.30E-13 | 3.60E-14 | 8.18 | 21.2876708 | 9.94E-02 | 42898508  | 42898631  | NC_000006.11 |
| cg09123431 | 7.31E-13 | 3.60E-14 | 8.18 | 21.2865621 | 1.66E-01 | 52209811  | 52209934  | NC_000020.10 |
| cg14192957 | 7.32E-13 | 3.61E-14 | 8.18 | 21.2848538 | 2.45E-01 | 133536793 | 133536916 | NC_000009.11 |
| cg17881203 | 7.34E-13 | 3.62E-14 | 8.18 | 21.2824654 | 8.53E-02 | 990398    | 990521    | NC_000019.9  |
| cg03903246 | 7.34E-13 | 3.62E-14 | 8.18 | 21.2819142 | 1.32E-01 | 240257032 | 240257155 | NC_000001.10 |
| cg13418631 | 7.34E-13 | 3.62E-14 | 8.18 | 21.2818053 | 4.39E-02 | 39636904  | 39637027  | NC_000017.10 |
| cg18370682 | 7.35E-13 | 3.63E-14 | 8.18 | 21.280376  | 9.17E-02 | 158239759 | 158239882 | NC_000005.9  |
| cg11942956 | 7.36E-13 | 3.63E-14 | 8.18 | 21.2788084 | 2.00E-01 | 133562470 | 133562593 | NC_000006.11 |
| cg05290820 | 7.37E-13 | 3.63E-14 | 8.18 | 21.2786115 | 1.88E-01 | 137392877 | 137393000 | NC_000009.11 |

|            |          |          |      |            |          |           |           |              |
|------------|----------|----------|------|------------|----------|-----------|-----------|--------------|
| cg26980244 | 7.37E-13 | 3.63E-14 | 8.18 | 21.2776778 | 1.76E-01 | 24772513  | 24772636  | NC_000008.10 |
| cg26442210 | 7.39E-13 | 3.64E-14 | 8.18 | 21.2754381 | 5.03E-02 | 129932033 | 129932156 | NC_000007.13 |
| cg23835476 | 7.40E-13 | 3.65E-14 | 8.18 | 21.2734582 | 6.29E-02 | 155633298 | 155633421 | NC_000007.13 |
| cg12018140 | 7.42E-13 | 3.66E-14 | 8.18 | 21.2710987 | 1.17E-01 | 122434326 | 122434449 | NC_000005.9  |
| cg23518039 | 7.43E-13 | 3.66E-14 | 8.18 | 21.2696143 | 9.72E-02 | 148579190 | 148579313 | NC_000005.9  |
| cg16574154 | 7.46E-13 | 3.68E-14 | 8.17 | 21.2651577 | 1.50E-01 | 10652376  | 10652499  | NC_000001.10 |
| cg26247841 | 7.48E-13 | 3.69E-14 | 8.17 | 21.262866  | 1.62E-01 | 114252967 | 114253090 | NC_000004.11 |
| cg18087266 | 7.50E-13 | 3.70E-14 | 8.17 | 21.2603979 | 1.39E-01 | 25257629  | 25257752  | NC_000001.10 |
| cg15042811 | 7.51E-13 | 3.71E-14 | 8.17 | 21.2582346 | 2.32E-01 | 144621971 | 144622094 | NC_000004.11 |
| cg04503318 | 7.52E-13 | 3.71E-14 | 8.17 | 21.2570756 | 1.15E-01 | 15789862  | 15789985  | NC_000001.10 |
| cg10864603 | 7.52E-13 | 3.71E-14 | 8.17 | 21.256731  | 8.84E-02 | 122302722 | 122302845 | NC_000008.10 |
| cg24466241 | 7.53E-13 | 3.72E-14 | 8.17 | 21.256164  | 1.39E-01 | 53308908  | 53309031  | NC_000001.10 |
| cg13054534 | 7.54E-13 | 3.72E-14 | 8.17 | 21.2541852 | 1.12E-01 | 113980128 | 113980251 | NC_000013.10 |
| cg03705912 | 7.54E-13 | 3.72E-14 | 8.17 | 21.2535822 | 1.75E-01 | 16179210  | 16179333  | NC_000005.9  |
| cg13563903 | 7.55E-13 | 3.73E-14 | 8.17 | 21.2530401 | 2.11E-01 | 108924132 | 108924255 | NC_000010.10 |
| cg05384102 | 7.55E-13 | 3.73E-14 | 8.17 | 21.2522186 | 2.24E-01 | 84419329  | 84419452  | NC_000006.11 |
| cg04025150 | 7.56E-13 | 3.73E-14 | 8.17 | 21.2509179 | 1.96E-01 | 34642862  | 34642985  | NC_000001.10 |
| cg05348321 | 7.57E-13 | 3.74E-14 | 8.17 | 21.2493219 | 5.73E-02 | 121666879 | 121667002 | NC_000012.11 |
| cg03960424 | 7.58E-13 | 3.74E-14 | 8.17 | 21.2490836 | 1.24E-01 | 57042304  | 57042427  | NC_000020.10 |
| cg20348858 | 7.59E-13 | 3.75E-14 | 8.17 | 21.2473562 | 1.35E-01 | 119305335 | 119305458 | NC_000010.10 |
| cg21255438 | 7.62E-13 | 3.76E-14 | 8.17 | 21.2432975 | 1.43E-01 | 70983760  | 70983883  | NC_000008.10 |
| cg16319192 | 7.62E-13 | 3.77E-14 | 8.17 | 21.2429189 | 5.96E-02 | 142251291 | 142251414 | NC_000008.10 |
| cg16137147 | 7.62E-13 | 3.77E-14 | 8.17 | 21.2425044 | 1.74E-01 | 221067896 | 221068019 | NC_000001.10 |
| cg24655669 | 7.62E-13 | 3.77E-14 | 8.17 | 21.2423078 | 9.37E-02 | 2151788   | 2151911   | NC_000007.13 |
| cg04167903 | 7.65E-13 | 3.78E-14 | 8.17 | 21.2388526 | 2.43E-01 | 27135746  | 27135869  | NC_000007.13 |

|            |          |          |      |            |          |           |           |              |
|------------|----------|----------|------|------------|----------|-----------|-----------|--------------|
| cg17978293 | 7.65E-13 | 3.78E-14 | 8.17 | 21.238359  | 1.04E-01 | 217614    | 217737    | NC_000017.10 |
| cg06726820 | 7.66E-13 | 3.79E-14 | 8.17 | 21.2376143 | 1.92E-01 | 139259742 | 139259865 | NC_000003.11 |
| cg12317601 | 7.67E-13 | 3.79E-14 | 8.17 | 21.2364833 | 1.97E-01 | 119301760 | 119301883 | NC_000010.10 |
| cg14542554 | 7.67E-13 | 3.79E-14 | 8.17 | 21.236452  | 1.78E-01 | 61122327  | 61122450  | NC_000014.8  |
| cg26632409 | 7.68E-13 | 3.80E-14 | 8.17 | 21.2341047 | 1.23E-01 | 134886312 | 134886435 | NC_000010.10 |
| cg15644756 | 7.69E-13 | 3.80E-14 | 8.17 | 21.2326358 | 2.02E-01 | 69198743  | 69198866  | NC_000012.11 |
| cg14377152 | 7.71E-13 | 3.82E-14 | 8.17 | 21.2298316 | 9.96E-02 | 45431690  | 45431813  | NC_000015.9  |
| cg21124497 | 7.72E-13 | 3.82E-14 | 8.17 | 21.2289645 | 1.87E-01 | 32859377  | 32859500  | NC_000003.11 |
| cg22950163 | 7.74E-13 | 3.83E-14 | 8.17 | 21.2258309 | 1.63E-01 | 55513525  | 55513648  | NC_000016.9  |
| cg26973607 | 7.74E-13 | 3.83E-14 | 8.17 | 21.2257484 | 1.27E-01 | 1549475   | 1549598   | NC_000005.9  |
| cg10264692 | 7.76E-13 | 3.84E-14 | 8.17 | 21.2234797 | 7.99E-02 | 61314827  | 61314950  | NC_000020.10 |
| cg13437581 | 7.79E-13 | 3.86E-14 | 8.17 | 21.2191794 | 1.86E-01 | 44777799  | 44777922  | NC_000018.9  |
| cg21768604 | 7.79E-13 | 3.86E-14 | 8.17 | 21.2191447 | 1.61E-01 | 2742325   | 2742448   | NC_000007.13 |
| cg09427417 | 7.80E-13 | 3.86E-14 | 8.17 | 21.218536  | 7.96E-02 | 112194570 | 112194693 | NC_000012.11 |
| cg00525681 | 7.82E-13 | 3.87E-14 | 8.17 | 21.2151272 | 1.29E-01 | 88329151  | 88329274  | NC_000013.10 |
| cg25118879 | 7.82E-13 | 3.87E-14 | 8.17 | 21.2147266 | 5.79E-02 | 72094780  | 72094903  | NC_000015.9  |
| cg05399244 | 7.83E-13 | 3.88E-14 | 8.17 | 21.2143265 | 1.19E-01 | 179611    | 179734    | NC_000017.10 |
| cg06501366 | 7.83E-13 | 3.88E-14 | 8.17 | 21.2141042 | 1.22E-01 | 78365687  | 78365810  | NC_000005.9  |
| cg11370259 | 7.83E-13 | 3.88E-14 | 8.17 | 21.2139848 | 1.30E-01 | 145580736 | 145580859 | NC_000008.10 |
| cg24626079 | 7.84E-13 | 3.88E-14 | 8.17 | 21.2126464 | 2.58E-01 | 4382171   | 4382294   | NC_000012.11 |
| cg15967847 | 7.85E-13 | 3.89E-14 | 8.17 | 21.211073  | 2.07E-01 | 15090746  | 15090869  | NC_000019.9  |
| cg22989103 | 7.85E-13 | 3.89E-14 | 8.17 | 21.2108644 | 1.93E-01 | 48972331  | 48972454  | NC_000022.10 |
| cg22052056 | 7.87E-13 | 3.90E-14 | 8.17 | 21.2088967 | 8.96E-02 | 31351813  | 31351936  | NC_000020.10 |
| cg19854521 | 7.90E-13 | 3.91E-14 | 8.16 | 21.2050224 | 2.08E-01 | 93520452  | 93520575  | NC_000007.13 |
| cg21424940 | 7.92E-13 | 3.92E-14 | 8.16 | 21.2020975 | 1.78E-01 | 19158666  | 19158789  | NC_000007.13 |

|            |          |          |      |            |          |           |           |              |
|------------|----------|----------|------|------------|----------|-----------|-----------|--------------|
| cg07628855 | 7.92E-13 | 3.93E-14 | 8.16 | 21.2017368 | 1.38E-01 | 25100356  | 25100479  | NC_000007.13 |
| cg14159026 | 7.94E-13 | 3.94E-14 | 8.16 | 21.1989989 | 2.92E-01 | 105584551 | 105584674 | NC_000006.11 |
| cg09117841 | 7.94E-13 | 3.94E-14 | 8.16 | 21.1989815 | 3.32E-02 | 38654722  | 38654845  | NC_000006.11 |
| cg09488200 | 7.96E-13 | 3.95E-14 | 8.16 | 21.1966065 | 5.68E-02 | 213781204 | 213781327 | NC_000002.11 |
| cg26130023 | 7.96E-13 | 3.95E-14 | 8.16 | 21.1956918 | 7.57E-02 | 45453609  | 45453732  | NC_000018.9  |
| cg08828036 | 7.97E-13 | 3.95E-14 | 8.16 | 21.194933  | 1.37E-01 | 26109204  | 26109327  | NC_000015.9  |
| cg10797737 | 7.98E-13 | 3.96E-14 | 8.16 | 21.1938537 | 9.04E-02 | 105965379 | 105965502 | NC_000014.8  |
| cg10018233 | 8.02E-13 | 3.98E-14 | 8.16 | 21.1886404 | 1.42E-01 | 150070692 | 150070815 | NC_000007.13 |
| cg12373659 | 8.04E-13 | 3.99E-14 | 8.16 | 21.1860439 | 8.95E-02 | 178973820 | 178973943 | NC_000005.9  |
| cg26266934 | 8.05E-13 | 4.00E-14 | 8.16 | 21.184349  | 8.03E-02 | 93199519  | 93199642  | NC_000015.9  |
| cg04134755 | 8.06E-13 | 4.00E-14 | 8.16 | 21.1830649 | 1.08E-01 | 80828253  | 80828376  | NC_000017.10 |
| cg04228468 | 8.06E-13 | 4.00E-14 | 8.16 | 21.1827488 | 1.70E-01 | 164913627 | 164913750 | NC_000003.11 |
| cg14186066 | 8.07E-13 | 4.01E-14 | 8.16 | 21.1813995 | 2.10E-01 | 60976115  | 60976238  | NC_000014.8  |
| cg10448438 | 8.07E-13 | 4.01E-14 | 8.16 | 21.1813198 | 8.52E-02 | 121515019 | 121515142 | NC_000011.9  |
| cg09074938 | 8.09E-13 | 4.02E-14 | 8.16 | 21.1792755 | 8.12E-02 | 144757347 | 144757470 | NC_000008.10 |
| cg17156227 | 8.11E-13 | 4.02E-14 | 8.16 | 21.1771512 | 6.34E-02 | 3209945   | 3210068   | NC_000020.10 |
| cg12433277 | 8.12E-13 | 4.03E-14 | 8.16 | 21.1757056 | 2.00E-01 | 151106990 | 151107113 | NC_000007.13 |
| cg14969899 | 8.12E-13 | 4.03E-14 | 8.16 | 21.1749838 | 8.89E-02 | 104569581 | 104569704 | NC_000014.8  |
| cg08259168 | 8.13E-13 | 4.04E-14 | 8.16 | 21.1740193 | 1.57E-01 | 78509494  | 78509617  | NC_000001.10 |
| cg12417775 | 8.17E-13 | 4.06E-14 | 8.16 | 21.1692342 | 1.65E-01 | 212463238 | 212463361 | NC_000001.10 |
| cg06895103 | 8.19E-13 | 4.07E-14 | 8.16 | 21.1668404 | 4.10E-02 | 30160580  | 30160703  | NC_000006.11 |
| cg05334656 | 8.19E-13 | 4.07E-14 | 8.16 | 21.1663382 | 1.74E-01 | 4866047   | 4866170   | NC_000004.11 |
| cg02126753 | 8.19E-13 | 4.07E-14 | 8.16 | 21.166125  | 2.37E-01 | 44143998  | 44144121  | NC_000007.13 |
| cg24192660 | 8.21E-13 | 4.08E-14 | 8.16 | 21.1639285 | 1.60E-01 | 17439877  | 17440000  | NC_000019.9  |
| cg22534145 | 8.21E-13 | 4.08E-14 | 8.16 | 21.1639191 | 2.11E-01 | 23015936  | 23016059  | NC_000020.10 |



|            |          |          |      |            |          |           |           |              |
|------------|----------|----------|------|------------|----------|-----------|-----------|--------------|
| cg27315341 | 8.23E-13 | 4.09E-14 | 8.16 | 21.1614147 | 1.65E-01 | 97887034  | 97887157  | NC_000012.11 |
| cg22287492 | 8.24E-13 | 4.09E-14 | 8.16 | 21.1603524 | 1.88E-01 | 2161411   | 2161534   | NC_000011.9  |
| cg00830252 | 8.26E-13 | 4.10E-14 | 8.16 | 21.1580848 | 1.78E-01 | 16039824  | 16039947  | NC_000012.11 |
| cg14519150 | 8.26E-13 | 4.10E-14 | 8.16 | 21.1577068 | 1.15E-01 | 20985249  | 20985372  | NC_000001.10 |
| cg18140268 | 8.26E-13 | 4.11E-14 | 8.16 | 21.1573342 | 1.61E-01 | 147781827 | 147781950 | NC_000001.10 |
| cg12951849 | 8.27E-13 | 4.11E-14 | 8.16 | 21.1566178 | 2.03E-01 | 11148932  | 11149055  | NC_000018.9  |
| cg26699569 | 8.28E-13 | 4.12E-14 | 8.16 | 21.1547035 | 2.08E-01 | 81952653  | 81952776  | NC_000004.11 |
| cg03556669 | 8.28E-13 | 4.12E-14 | 8.16 | 21.1545057 | 1.51E-01 | 32064497  | 32064620  | NC_000006.11 |
| cg16345915 | 8.30E-13 | 4.13E-14 | 8.16 | 21.1522909 | 1.04E-01 | 80371099  | 80371222  | NC_000017.10 |
| cg21144941 | 8.33E-13 | 4.14E-14 | 8.16 | 21.1489763 | 1.35E-01 | 17680575  | 17680698  | NC_000022.10 |
| cg19426594 | 8.34E-13 | 4.15E-14 | 8.16 | 21.1472726 | 1.19E-01 | 490116    | 490239    | NC_000005.9  |
| cg19267457 | 8.34E-13 | 4.15E-14 | 8.16 | 21.1471934 | 1.67E-01 | 64394702  | 64394825  | NC_000001.10 |
| cg22738219 | 8.36E-13 | 4.16E-14 | 8.15 | 21.144887  | 2.66E-01 | 13043313  | 13043436  | NC_000010.10 |
| cg09410453 | 8.36E-13 | 4.16E-14 | 8.15 | 21.1443441 | 1.78E-01 | 8815355   | 8815478   | NC_000016.9  |
| cg09692428 | 8.37E-13 | 4.16E-14 | 8.15 | 21.1439037 | 1.25E-01 | 84967481  | 84967604  | NC_000016.9  |
| cg05102668 | 8.37E-13 | 4.16E-14 | 8.15 | 21.1436627 | 1.11E-01 | 76541148  | 76541271  | NC_000018.9  |
| cg08380005 | 8.37E-13 | 4.17E-14 | 8.15 | 21.1432155 | 1.02E-01 | 816149    | 816272    | NC_000016.9  |
| cg17373442 | 8.38E-13 | 4.17E-14 | 8.15 | 21.1423469 | 2.94E-01 | 142839991 | 142840114 | NC_000003.11 |
| cg04106647 | 8.38E-13 | 4.17E-14 | 8.15 | 21.1419512 | 2.36E-01 | 12995603  | 12995726  | NC_000016.9  |
| cg05113927 | 8.38E-13 | 4.17E-14 | 8.15 | 21.1416562 | 1.19E-01 | 27531244  | 27531367  | NC_000002.11 |
| cg06873590 | 8.39E-13 | 4.18E-14 | 8.15 | 21.1403949 | 1.35E-01 | 167545249 | 167545372 | NC_000005.9  |
| cg22709008 | 8.44E-13 | 4.20E-14 | 8.15 | 21.135201  | 8.25E-02 | 45998083  | 45998206  | NC_000019.9  |
| cg09907439 | 8.44E-13 | 4.20E-14 | 8.15 | 21.1351812 | 7.73E-02 | 109031953 | 109032076 | NC_000012.11 |
| cg22134325 | 8.46E-13 | 4.21E-14 | 8.15 | 21.1328438 | 1.41E-01 | 66188745  | 66188868  | NC_000011.9  |
| cg01290710 | 8.47E-13 | 4.22E-14 | 8.15 | 21.1308945 | 9.79E-02 | 40889978  | 40890101  | NC_000019.9  |

|            |          |          |      |            |          |           |           |              |
|------------|----------|----------|------|------------|----------|-----------|-----------|--------------|
| cg20171396 | 8.49E-13 | 4.22E-14 | 8.15 | 21.1292416 | 1.84E-01 | 13536910  | 13537033  | NC_000004.11 |
| cg15024592 | 8.50E-13 | 4.23E-14 | 8.15 | 21.1275513 | 5.83E-02 | 27771383  | 27771506  | NC_000006.11 |
| cg18921771 | 8.50E-13 | 4.23E-14 | 8.15 | 21.1272607 | 2.20E-01 | 60952196  | 60952319  | NC_000014.8  |
| cg11423556 | 8.51E-13 | 4.24E-14 | 8.15 | 21.1261948 | 1.10E-01 | 69728114  | 69728237  | NC_000002.11 |
| cg12380743 | 8.52E-13 | 4.24E-14 | 8.15 | 21.1254171 | 1.57E-01 | 149334007 | 149334130 | NC_000001.10 |
| cg09833545 | 8.52E-13 | 4.24E-14 | 8.15 | 21.1248335 | 1.51E-01 | 117160235 | 117160358 | NC_000011.9  |
| cg14361458 | 8.52E-13 | 4.24E-14 | 8.15 | 21.1246395 | 1.74E-01 | 189203962 | 189204085 | NC_000004.11 |
| cg13935577 | 8.54E-13 | 4.25E-14 | 8.15 | 21.1227264 | 1.08E-01 | 107974897 | 107975020 | NC_000012.11 |
| cg05860723 | 8.54E-13 | 4.26E-14 | 8.15 | 21.1221048 | 1.82E-01 | 81102486  | 81102609  | NC_000012.11 |
| cg01442601 | 8.54E-13 | 4.26E-14 | 8.15 | 21.1219015 | 2.01E-01 | 102030727 | 102030850 | NC_000014.8  |
| cg08034077 | 8.55E-13 | 4.26E-14 | 8.15 | 21.1211978 | 2.48E-01 | 50236087  | 50236210  | NC_000017.10 |
| cg13352836 | 8.56E-13 | 4.26E-14 | 8.15 | 21.120285  | 2.29E-01 | 31228263  | 31228386  | NC_000016.9  |
| cg05976168 | 8.58E-13 | 4.28E-14 | 8.15 | 21.1168184 | 5.43E-02 | 611508    | 611631    | NC_000012.11 |
| cg03308092 | 8.59E-13 | 4.28E-14 | 8.15 | 21.1157832 | 1.84E-01 | 17488275  | 17488398  | NC_000022.10 |
| cg08287175 | 8.59E-13 | 4.28E-14 | 8.15 | 21.1157332 | 1.13E-01 | 46895422  | 46895545  | NC_000021.8  |
| cg01076708 | 8.63E-13 | 4.30E-14 | 8.15 | 21.1116349 | 5.38E-02 | 129689897 | 129690020 | NC_000011.9  |
| cg10635895 | 8.63E-13 | 4.30E-14 | 8.15 | 21.1113434 | 1.97E-01 | 2339439   | 2339562   | NC_000012.11 |
| cg00714170 | 8.65E-13 | 4.31E-14 | 8.15 | 21.1091503 | 6.63E-02 | 195477854 | 195477977 | NC_000003.11 |
| cg10387551 | 8.65E-13 | 4.31E-14 | 8.15 | 21.1090063 | 2.11E-01 | 30038615  | 30038738  | NC_000011.9  |
| cg04910921 | 8.66E-13 | 4.32E-14 | 8.15 | 21.1078664 | 1.84E-01 | 26674563  | 26674686  | NC_000014.8  |
| cg23909834 | 8.66E-13 | 4.32E-14 | 8.15 | 21.1072573 | 6.00E-02 | 45838906  | 45839029  | NC_000020.10 |
| cg10803218 | 8.69E-13 | 4.33E-14 | 8.15 | 21.1045409 | 8.12E-02 | 177544994 | 177545117 | NC_000005.9  |
| cg06151165 | 8.69E-13 | 4.33E-14 | 8.15 | 21.1041511 | 2.44E-01 | 25062254  | 25062377  | NC_000020.10 |
| cg04384987 | 8.70E-13 | 4.34E-14 | 8.15 | 21.1029545 | 1.13E-01 | 81020862  | 81020985  | NC_000016.9  |
| cg05075562 | 8.70E-13 | 4.34E-14 | 8.15 | 21.1024301 | 1.14E-01 | 42123725  | 42123848  | NC_000002.11 |

|            |          |          |      |            |          |           |           |              |
|------------|----------|----------|------|------------|----------|-----------|-----------|--------------|
| cg14290904 | 8.72E-13 | 4.35E-14 | 8.15 | 21.1006512 | 2.02E-01 | 36986585  | 36986708  | NC_000014.8  |
| cg23889730 | 8.72E-13 | 4.35E-14 | 8.15 | 21.1005244 | 1.35E-01 | 94254131  | 94254254  | NC_000014.8  |
| cg12991609 | 8.74E-13 | 4.36E-14 | 8.15 | 21.0978854 | 1.23E-01 | 1101551   | 1101674   | NC_000008.10 |
| cg04195548 | 8.76E-13 | 4.37E-14 | 8.15 | 21.0957556 | 1.03E-01 | 1206004   | 1206127   | NC_000004.11 |
| cg01866955 | 8.76E-13 | 4.37E-14 | 8.15 | 21.0955312 | 1.85E-01 | 19692217  | 19692340  | NC_000006.11 |
| cg24928391 | 8.80E-13 | 4.39E-14 | 8.15 | 21.090332  | 2.68E-01 | 55370336  | 55370459  | NC_000008.10 |
| cg13321077 | 8.81E-13 | 4.40E-14 | 8.15 | 21.0899481 | 1.33E-01 | 220196755 | 220196878 | NC_000002.11 |
| cg08215918 | 8.81E-13 | 4.40E-14 | 8.15 | 21.0891041 | 2.15E-01 | 37005557  | 37005680  | NC_000013.10 |
| cg13944468 | 8.82E-13 | 4.41E-14 | 8.15 | 21.0876868 | 2.28E-01 | 2753852   | 2753975   | NC_000005.9  |
| cg09126569 | 8.83E-13 | 4.41E-14 | 8.15 | 21.0871587 | 1.72E-01 | 93618390  | 93618513  | NC_000008.10 |
| cg17957183 | 8.84E-13 | 4.41E-14 | 8.15 | 21.0860019 | 1.03E-01 | 93803321  | 93803444  | NC_000012.11 |
| cg11108676 | 8.84E-13 | 4.41E-14 | 8.15 | 21.0858317 | 2.43E-01 | 88801004  | 88801127  | NC_000015.9  |
| cg24820783 | 8.86E-13 | 4.42E-14 | 8.14 | 21.0835704 | 2.08E-01 | 26504969  | 26505092  | NC_000010.10 |
| cg05524144 | 8.86E-13 | 4.43E-14 | 8.14 | 21.0835301 | 8.87E-02 | 134679383 | 134679506 | NC_000010.10 |
| cg02944007 | 8.87E-13 | 4.43E-14 | 8.14 | 21.082349  | 1.76E-01 | 79614795  | 79614918  | NC_000017.10 |
| cg04857033 | 8.89E-13 | 4.44E-14 | 8.14 | 21.0802465 | 1.66E-01 | 120258412 | 120258535 | NC_000001.10 |
| cg17746023 | 8.90E-13 | 4.45E-14 | 8.14 | 21.0785691 | 4.88E-02 | 46918393  | 46918516  | NC_000021.8  |
| cg02508651 | 8.92E-13 | 4.46E-14 | 8.14 | 21.076495  | 1.44E-01 | 46604554  | 46604677  | NC_000017.10 |
| cg26983874 | 8.93E-13 | 4.47E-14 | 8.14 | 21.0743558 | 1.45E-01 | 16736532  | 16736655  | NC_000019.9  |
| cg02961004 | 8.94E-13 | 4.47E-14 | 8.14 | 21.0740242 | 1.75E-01 | 57387702  | 57387825  | NC_000010.10 |
| cg00118229 | 8.97E-13 | 4.48E-14 | 8.14 | 21.0705637 | 8.80E-02 | 44088420  | 44088543  | NC_000021.8  |
| cg17953764 | 8.98E-13 | 4.49E-14 | 8.14 | 21.0694381 | 1.05E-01 | 48492845  | 48492968  | NC_000004.11 |
| cg21880079 | 8.98E-13 | 4.49E-14 | 8.14 | 21.0687488 | 3.18E-02 | 8419587   | 8419710   | NC_000008.10 |
| cg08252804 | 8.99E-13 | 4.50E-14 | 8.14 | 21.0678233 | 5.47E-02 | 202788592 | 202788715 | NC_000002.11 |
| cg00196414 | 9.00E-13 | 4.50E-14 | 8.14 | 21.0665969 | 1.88E-01 | 176947764 | 176947887 | NC_000002.11 |

|            |          |          |      |            |          |           |           |              |
|------------|----------|----------|------|------------|----------|-----------|-----------|--------------|
| cg17735563 | 9.02E-13 | 4.51E-14 | 8.14 | 21.0642113 | 1.00E-01 | 33738079  | 33738202  | NC_000002.11 |
| cg02720691 | 9.02E-13 | 4.51E-14 | 8.14 | 21.0639015 | 1.57E-01 | 39366468  | 39366591  | NC_000004.11 |
| cg10435849 | 9.05E-13 | 4.53E-14 | 8.14 | 21.0613137 | 2.76E-01 | 47518747  | 47518870  | NC_000021.8  |
| cg24458300 | 9.05E-13 | 4.53E-14 | 8.14 | 21.0612859 | 3.94E-02 | 1302168   | 1302291   | NC_000011.9  |
| cg20455175 | 9.05E-13 | 4.53E-14 | 8.14 | 21.0605625 | 5.93E-02 | 304191    | 304314    | NC_000011.9  |
| cg00883123 | 9.07E-13 | 4.54E-14 | 8.14 | 21.0587137 | 1.05E-01 | 154373513 | 154373636 | NC_000004.11 |
| cg10838260 | 9.08E-13 | 4.55E-14 | 8.14 | 21.0567824 | 5.16E-02 | 88110197  | 88110320  | NC_000016.9  |
| cg00579520 | 9.09E-13 | 4.55E-14 | 8.14 | 21.0564957 | 1.63E-01 | 128752586 | 128752709 | NC_000012.11 |
| cg23239870 | 9.09E-13 | 4.55E-14 | 8.14 | 21.0559096 | 1.28E-01 | 3313940   | 3314063   | NC_000002.11 |
| cg17742359 | 9.10E-13 | 4.55E-14 | 8.14 | 21.0550219 | 7.83E-02 | 6312102   | 6312225   | NC_000001.10 |
| cg08283882 | 9.10E-13 | 4.56E-14 | 8.14 | 21.0542723 | 2.59E-01 | 25901017  | 25901140  | NC_000008.10 |
| cg24838839 | 9.10E-13 | 4.56E-14 | 8.14 | 21.0540253 | 6.02E-02 | 61031569  | 61031692  | NC_000005.9  |
| cg13845049 | 9.11E-13 | 4.56E-14 | 8.14 | 21.0530538 | 1.60E-01 | 77701327  | 77701450  | NC_000009.11 |
| cg06420903 | 9.11E-13 | 4.56E-14 | 8.14 | 21.0529307 | 1.64E-01 | 88186669  | 88186792  | NC_000016.9  |
| cg16905199 | 9.11E-13 | 4.56E-14 | 8.14 | 21.0528542 | 8.25E-02 | 149676378 | 149676501 | NC_000001.10 |
| cg26877715 | 9.12E-13 | 4.57E-14 | 8.14 | 21.0523598 | 2.18E-01 | 37353907  | 37354030  | NC_000020.10 |
| cg08962087 | 9.12E-13 | 4.57E-14 | 8.14 | 21.051742  | 1.80E-01 | 29107120  | 29107243  | NC_000013.10 |
| cg10402804 | 9.14E-13 | 4.58E-14 | 8.14 | 21.0493732 | 9.94E-02 | 105522348 | 105522471 | NC_000014.8  |
| cg03168582 | 9.16E-13 | 4.59E-14 | 8.14 | 21.0471921 | 2.60E-01 | 841850    | 841973    | NC_000009.11 |
| cg10526374 | 9.17E-13 | 4.60E-14 | 8.14 | 21.0459103 | 2.12E-01 | 2292525   | 2292648   | NC_000011.9  |
| cg25941299 | 9.20E-13 | 4.61E-14 | 8.14 | 21.0426377 | 1.63E-01 | 113727916 | 113728039 | NC_000007.13 |
| cg23076299 | 9.21E-13 | 4.61E-14 | 8.14 | 21.0423817 | 2.19E-01 | 85954312  | 85954435  | NC_000010.10 |
| cg19008133 | 9.22E-13 | 4.62E-14 | 8.14 | 21.0409445 | 8.26E-02 | 123124015 | 123124138 | NC_000003.11 |
| cg05306903 | 9.22E-13 | 4.62E-14 | 8.14 | 21.0408481 | 1.53E-01 | 109551804 | 109551927 | NC_000012.11 |
| cg17657179 | 9.22E-13 | 4.62E-14 | 8.14 | 21.0402804 | 1.84E-01 | 52227309  | 52227432  | NC_000019.9  |

|            |          |          |      |            |          |           |           |              |
|------------|----------|----------|------|------------|----------|-----------|-----------|--------------|
| cg04700292 | 9.23E-13 | 4.63E-14 | 8.14 | 21.0398843 | 1.61E-01 | 73090723  | 73090846  | NC_000016.9  |
| cg19878194 | 9.24E-13 | 4.63E-14 | 8.14 | 21.0381509 | 1.49E-01 | 172744882 | 172745005 | NC_000005.9  |
| cg01873311 | 9.25E-13 | 4.64E-14 | 8.14 | 21.0368865 | 2.46E-01 | 89268689  | 89268812  | NC_000016.9  |
| cg04297067 | 9.25E-13 | 4.64E-14 | 8.14 | 21.0367028 | 1.24E-01 | 86550450  | 86550573  | NC_000016.9  |
| cg18581378 | 9.26E-13 | 4.64E-14 | 8.14 | 21.0363386 | 1.89E-01 | 11059443  | 11059566  | NC_000010.10 |
| cg04213910 | 9.26E-13 | 4.65E-14 | 8.14 | 21.0356514 | 4.82E-02 | 43238881  | 43239004  | NC_000017.10 |
| cg01025774 | 9.29E-13 | 4.66E-14 | 8.14 | 21.0327862 | 1.43E-01 | 42944457  | 42944580  | NC_000005.9  |
| cg04145890 | 9.29E-13 | 4.66E-14 | 8.14 | 21.0322087 | 5.48E-02 | 1007657   | 1007780   | NC_000004.11 |
| cg02176858 | 9.30E-13 | 4.66E-14 | 8.14 | 21.031916  | 9.21E-02 | 122286796 | 122286919 | NC_000002.11 |
| cg24659171 | 9.31E-13 | 4.67E-14 | 8.14 | 21.0305877 | 8.03E-02 | 67817691  | 67817814  | NC_000011.9  |
| cg21276413 | 9.31E-13 | 4.67E-14 | 8.14 | 21.0305598 | 2.02E-01 | 27112287  | 27112410  | NC_000015.9  |
| cg19624444 | 9.31E-13 | 4.67E-14 | 8.14 | 21.0296788 | 8.18E-02 | 2048497   | 2048620   | NC_000007.13 |
| cg25266629 | 9.32E-13 | 4.67E-14 | 8.14 | 21.0293761 | 2.34E-01 | 102894148 | 102894271 | NC_000010.10 |
| cg09317403 | 9.32E-13 | 4.68E-14 | 8.14 | 21.0284573 | 7.19E-02 | 92994936  | 92995059  | NC_000014.8  |
| cg11514604 | 9.33E-13 | 4.68E-14 | 8.14 | 21.0276611 | 1.53E-01 | 122901047 | 122901170 | NC_000011.9  |
| cg16277169 | 9.33E-13 | 4.68E-14 | 8.14 | 21.0274243 | 1.34E-01 | 115112189 | 115112312 | NC_000012.11 |
| cg07168204 | 9.34E-13 | 4.69E-14 | 8.14 | 21.0264022 | 8.58E-02 | 149864599 | 149864722 | NC_000005.9  |
| cg27308329 | 9.35E-13 | 4.69E-14 | 8.14 | 21.0256444 | 2.38E-01 | 48886043  | 48886166  | NC_000022.10 |
| cg13482308 | 9.35E-13 | 4.69E-14 | 8.14 | 21.0254934 | 2.00E-01 | 37002685  | 37002808  | NC_000009.11 |
| cg08924415 | 9.36E-13 | 4.70E-14 | 8.14 | 21.024685  | 1.16E-01 | 144902836 | 144902959 | NC_000008.10 |
| cg03318667 | 9.37E-13 | 4.71E-14 | 8.13 | 21.0227678 | 1.30E-01 | 104975516 | 104975639 | NC_000012.11 |
| cg15730491 | 9.39E-13 | 4.71E-14 | 8.13 | 21.0213367 | 1.71E-01 | 221068834 | 221068957 | NC_000001.10 |
| cg00836007 | 9.43E-13 | 4.74E-14 | 8.13 | 21.0164979 | 1.02E-01 | 52801982  | 52802105  | NC_000008.10 |
| cg02026062 | 9.47E-13 | 4.76E-14 | 8.13 | 21.0124616 | 1.99E-01 | 117086479 | 117086602 | NC_000006.11 |
| cg14984684 | 9.47E-13 | 4.76E-14 | 8.13 | 21.0123445 | 2.22E-01 | 79382708  | 79382831  | NC_000015.9  |

|            |          |          |      |            |          |           |           |              |
|------------|----------|----------|------|------------|----------|-----------|-----------|--------------|
| cg18938204 | 9.47E-13 | 4.76E-14 | 8.13 | 21.0117081 | 2.05E-01 | 39994857  | 39994980  | NC_000020.10 |
| cg25723050 | 9.48E-13 | 4.76E-14 | 8.13 | 21.0105469 | 3.13E-01 | 224804222 | 224804345 | NC_000001.10 |
| cg08704536 | 9.52E-13 | 4.78E-14 | 8.13 | 21.0067829 | 1.33E-01 | 53638566  | 53638689  | NC_000017.10 |
| cg12412079 | 9.52E-13 | 4.78E-14 | 8.13 | 21.006746  | 2.34E-01 | 68981877  | 68982000  | NC_000003.11 |
| cg13610769 | 9.59E-13 | 4.82E-14 | 8.13 | 20.998856  | 4.66E-02 | 202484583 | 202484706 | NC_000002.11 |
| cg26116950 | 9.60E-13 | 4.82E-14 | 8.13 | 20.9984881 | 2.08E-01 | 41582017  | 41582140  | NC_000012.11 |
| cg00971369 | 9.64E-13 | 4.85E-14 | 8.13 | 20.9940344 | 8.41E-02 | 142263802 | 142263925 | NC_000008.10 |
| cg24842086 | 9.64E-13 | 4.85E-14 | 8.13 | 20.9937677 | 1.88E-01 | 119531857 | 119531980 | NC_000001.10 |
| cg07627556 | 9.64E-13 | 4.85E-14 | 8.13 | 20.9935782 | 1.88E-01 | 115530590 | 115530713 | NC_000011.9  |
| cg02488942 | 9.64E-13 | 4.85E-14 | 8.13 | 20.9933245 | 1.38E-01 | 105480687 | 105480810 | NC_000002.11 |
| cg11435225 | 9.67E-13 | 4.86E-14 | 8.13 | 20.9908411 | 9.37E-02 | 32014422  | 32014545  | NC_000022.10 |
| cg17137424 | 9.68E-13 | 4.87E-14 | 8.13 | 20.9891433 | 1.35E-01 | 231299352 | 231299475 | NC_000001.10 |
| cg26403494 | 9.68E-13 | 4.87E-14 | 8.13 | 20.9889503 | 5.79E-02 | 231360004 | 231360127 | NC_000001.10 |
| cg11830436 | 9.70E-13 | 4.88E-14 | 8.13 | 20.9869853 | 1.83E-01 | 34943260  | 34943383  | NC_000010.10 |
| cg19064523 | 9.70E-13 | 4.88E-14 | 8.13 | 20.9868603 | 1.62E-01 | 19158210  | 19158333  | NC_000007.13 |
| cg06694734 | 9.72E-13 | 4.89E-14 | 8.13 | 20.984578  | 1.61E-01 | 4871166   | 4871289   | NC_000004.11 |
| cg25092670 | 9.77E-13 | 4.92E-14 | 8.13 | 20.9798869 | 1.45E-01 | 108837620 | 108837743 | NC_000003.11 |
| cg14276286 | 9.78E-13 | 4.92E-14 | 8.13 | 20.9786681 | 1.86E-01 | 111782364 | 111782487 | NC_000011.9  |
| cg07709314 | 9.79E-13 | 4.93E-14 | 8.13 | 20.9769322 | 4.28E-02 | 114882877 | 114883000 | NC_000013.10 |
| cg18775702 | 9.82E-13 | 4.94E-14 | 8.13 | 20.9746008 | 9.21E-02 | 75501277  | 75501400  | NC_000015.9  |
| cg26639906 | 9.87E-13 | 4.97E-14 | 8.13 | 20.9691092 | 1.13E-01 | 48680554  | 48680677  | NC_000017.10 |
| cg19075717 | 9.90E-13 | 4.99E-14 | 8.13 | 20.9657848 | 1.64E-01 | 48670940  | 48671063  | NC_000017.10 |
| cg18334915 | 9.90E-13 | 4.99E-14 | 8.13 | 20.965695  | 1.44E-01 | 46758194  | 46758317  | NC_000022.10 |
| cg01856145 | 9.92E-13 | 5.00E-14 | 8.13 | 20.9638599 | 6.97E-02 | 63952230  | 63952353  | NC_000003.11 |
| cg21532913 | 9.94E-13 | 5.01E-14 | 8.12 | 20.9617499 | 5.10E-02 | 98950148  | 98950271  | NC_000002.11 |

|            |          |          |      |            |          |           |           |              |
|------------|----------|----------|------|------------|----------|-----------|-----------|--------------|
| cg11600596 | 9.94E-13 | 5.01E-14 | 8.12 | 20.9611353 | 2.20E-01 | 2617199   | 2617322   | NC_000002.11 |
| cg19005102 | 9.95E-13 | 5.01E-14 | 8.12 | 20.960703  | 6.79E-02 | 168758843 | 168758966 | NC_000006.11 |
| cg02527199 | 9.96E-13 | 5.02E-14 | 8.12 | 20.9599038 | 1.63E-01 | 175085245 | 175085368 | NC_000005.9  |
| cg15565065 | 9.97E-13 | 5.02E-14 | 8.12 | 20.9587105 | 2.58E-01 | 46655476  | 46655599  | NC_000017.10 |
| cg24718971 | 9.98E-13 | 5.03E-14 | 8.12 | 20.9574773 | 2.37E-01 | 80256166  | 80256289  | NC_000005.9  |
| cg27042584 | 9.98E-13 | 5.03E-14 | 8.12 | 20.9572405 | 1.85E-01 | 51168485  | 51168608  | NC_000016.9  |
| cg03507218 | 1.00E-12 | 5.04E-14 | 8.12 | 20.9556594 | 1.37E-01 | 75736090  | 75736213  | NC_000014.8  |
| cg26786893 | 1.00E-12 | 5.05E-14 | 8.12 | 20.9530146 | 1.24E-01 | 43705792  | 43705915  | NC_000011.9  |
| cg06549216 | 1.00E-12 | 5.05E-14 | 8.12 | 20.9524677 | 2.00E-01 | 154710224 | 154710347 | NC_000004.11 |
| cg12188526 | 1.00E-12 | 5.06E-14 | 8.12 | 20.9515065 | 6.00E-02 | 71896386  | 71896509  | NC_000014.8  |
| cg20920097 | 1.01E-12 | 5.07E-14 | 8.12 | 20.9490686 | 1.13E-01 | 127057149 | 127057272 | NC_000003.11 |
| cg17526175 | 1.01E-12 | 5.08E-14 | 8.12 | 20.9482616 | 1.78E-01 | 33624542  | 33624665  | NC_000019.9  |
| cg12810152 | 1.01E-12 | 5.08E-14 | 8.12 | 20.9468149 | 5.52E-02 | 141994213 | 141994336 | NC_000005.9  |
| cg02527112 | 1.01E-12 | 5.08E-14 | 8.12 | 20.9464978 | 1.90E-01 | 176971353 | 176971476 | NC_000002.11 |
| cg02996570 | 1.01E-12 | 5.10E-14 | 8.12 | 20.9440611 | 5.63E-02 | 70001114  | 70001237  | NC_000011.9  |
| cg04700930 | 1.01E-12 | 5.10E-14 | 8.12 | 20.9438501 | 1.17E-01 | 98030706  | 98030829  | NC_000012.11 |
| cg21167761 | 1.01E-12 | 5.10E-14 | 8.12 | 20.9436736 | 1.57E-01 | 77903617  | 77903740  | NC_000011.9  |
| cg00566320 | 1.01E-12 | 5.10E-14 | 8.12 | 20.9429238 | 1.42E-01 | 32172204  | 32172327  | NC_000001.10 |
| cg04591469 | 1.01E-12 | 5.11E-14 | 8.12 | 20.9418824 | 1.71E-01 | 17810299  | 17810422  | NC_000005.9  |
| cg26551913 | 1.01E-12 | 5.11E-14 | 8.12 | 20.9414598 | 2.38E-01 | 102508286 | 102508409 | NC_000010.10 |
| cg04062040 | 1.01E-12 | 5.11E-14 | 8.12 | 20.9411797 | 1.93E-01 | 103343421 | 103343544 | NC_000002.11 |
| cg24191821 | 1.02E-12 | 5.12E-14 | 8.12 | 20.9388344 | 8.63E-02 | 73008025  | 73008148  | NC_000011.9  |
| cg06614044 | 1.02E-12 | 5.14E-14 | 8.12 | 20.9364128 | 1.64E-01 | 42324631  | 42324754  | NC_000018.9  |
| cg26012482 | 1.02E-12 | 5.14E-14 | 8.12 | 20.936195  | 6.89E-02 | 8423155   | 8423278   | NC_000002.11 |
| cg05538980 | 1.02E-12 | 5.14E-14 | 8.12 | 20.9348063 | 7.57E-02 | 41581845  | 41581968  | NC_000008.10 |

|            |          |          |      |            |          |           |           |              |
|------------|----------|----------|------|------------|----------|-----------|-----------|--------------|
| cg02649597 | 1.02E-12 | 5.15E-14 | 8.12 | 20.9340946 | 1.64E-01 | 45171621  | 45171744  | NC_000002.11 |
| cg13426632 | 1.02E-12 | 5.16E-14 | 8.12 | 20.9319229 | 9.00E-02 | 94858277  | 94858400  | NC_000008.10 |
| cg10945079 | 1.02E-12 | 5.16E-14 | 8.12 | 20.9312584 | 1.64E-01 | 162283856 | 162283979 | NC_000002.11 |
| cg24710309 | 1.03E-12 | 5.18E-14 | 8.12 | 20.9279403 | 1.27E-01 | 235423736 | 235423859 | NC_000001.10 |
| cg14612428 | 1.03E-12 | 5.18E-14 | 8.12 | 20.9277078 | 1.71E-01 | 11751566  | 11751689  | NC_000018.9  |
| cg02700360 | 1.03E-12 | 5.19E-14 | 8.12 | 20.9265932 | 1.68E-01 | 11874932  | 11875055  | NC_000003.11 |
| cg05377041 | 1.03E-12 | 5.19E-14 | 8.12 | 20.9257741 | 1.28E-01 | 88473713  | 88473836  | NC_000016.9  |
| cg04660422 | 1.03E-12 | 5.19E-14 | 8.12 | 20.9254777 | 1.43E-01 | 4860551   | 4860674   | NC_000004.11 |
| cg15235798 | 1.03E-12 | 5.22E-14 | 8.12 | 20.9202054 | 1.86E-01 | 112720244 | 112720367 | NC_000013.10 |
| cg21158087 | 1.04E-12 | 5.24E-14 | 8.12 | 20.9167863 | 1.30E-01 | 58216415  | 58216538  | NC_000017.10 |
| cg20160996 | 1.04E-12 | 5.25E-14 | 8.12 | 20.9154679 | 1.39E-01 | 63990575  | 63990698  | NC_000011.9  |
| cg23097534 | 1.04E-12 | 5.25E-14 | 8.12 | 20.9154134 | 2.28E-01 | 37836748  | 37836871  | NC_000005.9  |
| cg23884241 | 1.04E-12 | 5.25E-14 | 8.12 | 20.9146092 | 9.21E-02 | 27169957  | 27170080  | NC_000007.13 |
| cg21167905 | 1.04E-12 | 5.27E-14 | 8.12 | 20.9118886 | 1.18E-01 | 172505895 | 172506018 | NC_000001.10 |
| cg15282819 | 1.04E-12 | 5.27E-14 | 8.12 | 20.9112021 | 2.43E-01 | 12997592  | 12997715  | NC_000016.9  |
| cg03630821 | 1.04E-12 | 5.27E-14 | 8.12 | 20.910307  | 1.34E-01 | 58861702  | 58861825  | NC_000019.9  |
| cg08063745 | 1.05E-12 | 5.30E-14 | 8.12 | 20.9048365 | 4.48E-02 | 44690652  | 44690775  | NC_000020.10 |
| cg24057218 | 1.05E-12 | 5.31E-14 | 8.12 | 20.9038899 | 9.84E-02 | 68660680  | 68660803  | NC_000014.8  |
| cg19475870 | 1.05E-12 | 5.31E-14 | 8.12 | 20.9036924 | 1.64E-01 | 27038605  | 27038728  | NC_000005.9  |
| cg05186311 | 1.05E-12 | 5.33E-14 | 8.11 | 20.9007341 | 1.60E-01 | 131758454 | 131758577 | NC_000010.10 |
| cg04009342 | 1.05E-12 | 5.33E-14 | 8.11 | 20.9006731 | 8.02E-02 | 25204113  | 25204236  | NC_000012.11 |
| cg24033330 | 1.05E-12 | 5.33E-14 | 8.11 | 20.8993315 | 1.98E-01 | 39317034  | 39317157  | NC_000020.10 |
| cg19264163 | 1.05E-12 | 5.34E-14 | 8.11 | 20.8987373 | 8.51E-02 | 19316990  | 19317113  | NC_000003.11 |
| cg02081733 | 1.06E-12 | 5.34E-14 | 8.11 | 20.8976821 | 1.47E-01 | 68120412  | 68120535  | NC_000015.9  |
| cg23520688 | 1.06E-12 | 5.35E-14 | 8.11 | 20.895777  | 2.16E-01 | 103294740 | 103294863 | NC_000014.8  |



|            |          |          |      |            |          |           |           |              |
|------------|----------|----------|------|------------|----------|-----------|-----------|--------------|
| cg10319942 | 1.06E-12 | 5.37E-14 | 8.11 | 20.8927848 | 6.44E-02 | 127441767 | 127441890 | NC_000003.11 |
| cg12065366 | 1.06E-12 | 5.37E-14 | 8.11 | 20.8917487 | 2.30E-01 | 238618    | 238741    | NC_000003.11 |
| cg18639956 | 1.07E-12 | 5.41E-14 | 8.11 | 20.8859183 | 1.03E-01 | 77927982  | 77928105  | NC_000017.10 |
| cg17822911 | 1.07E-12 | 5.41E-14 | 8.11 | 20.8858141 | 9.09E-02 | 145625497 | 145625620 | NC_000008.10 |
| cg02318567 | 1.07E-12 | 5.42E-14 | 8.11 | 20.8834692 | 1.58E-01 | 31548908  | 31549031  | NC_000016.9  |
| cg26716839 | 1.07E-12 | 5.43E-14 | 8.11 | 20.8813669 | 5.94E-02 | 121146848 | 121146971 | NC_000012.11 |
| cg04156606 | 1.08E-12 | 5.46E-14 | 8.11 | 20.876174  | 1.77E-01 | 134859458 | 134859581 | NC_000010.10 |
| cg23814691 | 1.08E-12 | 5.46E-14 | 8.11 | 20.8752758 | 2.01E-02 | 50649161  | 50649284  | NC_000003.11 |
| cg25922637 | 1.08E-12 | 5.47E-14 | 8.11 | 20.8750643 | 1.38E-01 | 128076308 | 128076431 | NC_000010.10 |
| cg17357285 | 1.08E-12 | 5.47E-14 | 8.11 | 20.8745792 | 2.78E-01 | 28602938  | 28603061  | NC_000006.11 |
| cg06094607 | 1.08E-12 | 5.48E-14 | 8.11 | 20.8730405 | 1.32E-01 | 144561886 | 144562009 | NC_000008.10 |
| cg22348290 | 1.08E-12 | 5.48E-14 | 8.11 | 20.8727778 | 1.16E-01 | 72459499  | 72459622  | NC_000008.10 |
| cg10524033 | 1.08E-12 | 5.49E-14 | 8.11 | 20.87161   | 2.21E-01 | 134070433 | 134070556 | NC_000004.11 |
| cg24913868 | 1.08E-12 | 5.49E-14 | 8.11 | 20.8708607 | 1.72E-01 | 101296069 | 101296192 | NC_000010.10 |
| cg27505273 | 1.08E-12 | 5.49E-14 | 8.11 | 20.870759  | 1.78E-01 | 137483543 | 137483666 | NC_000003.11 |
| cg20925955 | 1.08E-12 | 5.49E-14 | 8.11 | 20.8705118 | 5.76E-02 | 155412182 | 155412305 | NC_000006.11 |
| cg26983177 | 1.08E-12 | 5.49E-14 | 8.11 | 20.8701102 | 1.83E-01 | 35395973  | 35396096  | NC_000019.9  |
| cg04641171 | 1.08E-12 | 5.50E-14 | 8.11 | 20.8691563 | 1.78E-01 | 79381805  | 79381928  | NC_000015.9  |
| cg24499516 | 1.09E-12 | 5.53E-14 | 8.11 | 20.8635456 | 7.85E-02 | 49638562  | 49638685  | NC_000020.10 |
| cg15012214 | 1.09E-12 | 5.54E-14 | 8.11 | 20.8625004 | 1.15E-01 | 56810320  | 56810443  | NC_000003.11 |
| cg00532455 | 1.09E-12 | 5.54E-14 | 8.11 | 20.8609992 | 1.11E-01 | 148617336 | 148617459 | NC_000002.11 |
| cg24978630 | 1.10E-12 | 5.57E-14 | 8.11 | 20.8568453 | 2.07E-01 | 57389676  | 57389799  | NC_000010.10 |
| cg21325485 | 1.10E-12 | 5.57E-14 | 8.11 | 20.8560507 | 1.21E-01 | 158364932 | 158365055 | NC_000007.13 |
| cg09726726 | 1.10E-12 | 5.57E-14 | 8.11 | 20.8556971 | 7.61E-02 | 23850540  | 23850663  | NC_000002.11 |
| cg06703635 | 1.10E-12 | 5.60E-14 | 8.11 | 20.8507386 | 7.97E-02 | 201488410 | 201488533 | NC_000001.10 |

|            |          |          |      |            |          |           |           |              |
|------------|----------|----------|------|------------|----------|-----------|-----------|--------------|
| cg24035245 | 1.10E-12 | 5.60E-14 | 8.11 | 20.8505705 | 1.95E-01 | 119535928 | 119536051 | NC_000001.10 |
| cg13491584 | 1.11E-12 | 5.63E-14 | 8.11 | 20.8456632 | 2.43E-01 | 88752836  | 88752959  | NC_000002.11 |
| cg12694372 | 1.11E-12 | 5.64E-14 | 8.11 | 20.8445704 | 1.99E-01 | 32064582  | 32064705  | NC_000006.11 |
| cg09347306 | 1.11E-12 | 5.64E-14 | 8.11 | 20.8441379 | 6.06E-02 | 79078315  | 79078438  | NC_000017.10 |
| cg13075444 | 1.11E-12 | 5.64E-14 | 8.11 | 20.8436587 | 7.22E-02 | 33680427  | 33680550  | NC_000011.9  |
| cg20464804 | 1.11E-12 | 5.65E-14 | 8.11 | 20.8420938 | 2.24E-01 | 33454491  | 33454614  | NC_000022.10 |
| cg10366797 | 1.11E-12 | 5.66E-14 | 8.1  | 20.8407192 | 1.39E-01 | 54441509  | 54441632  | NC_000012.11 |
| cg15777781 | 1.11E-12 | 5.66E-14 | 8.1  | 20.8406615 | 1.75E-01 | 11047271  | 11047394  | NC_000010.10 |
| cg08317694 | 1.11E-12 | 5.66E-14 | 8.1  | 20.8403175 | 1.55E-01 | 78632144  | 78632267  | NC_000015.9  |
| cg12869688 | 1.11E-12 | 5.66E-14 | 8.1  | 20.8401871 | 4.71E-02 | 90169025  | 90169148  | NC_000015.9  |
| cg16361649 | 1.12E-12 | 5.67E-14 | 8.1  | 20.83883   | 7.45E-02 | 47424543  | 47424666  | NC_000021.8  |
| cg12339328 | 1.12E-12 | 5.68E-14 | 8.1  | 20.8374892 | 1.36E-01 | 18491484  | 18491607  | NC_000020.10 |
| cg26291543 | 1.12E-12 | 5.68E-14 | 8.1  | 20.8368022 | 5.92E-02 | 26895578  | 26895701  | NC_000022.10 |
| cg22024657 | 1.12E-12 | 5.68E-14 | 8.1  | 20.8367103 | 8.82E-02 | 122839955 | 122840078 | NC_000007.13 |
| cg25662463 | 1.12E-12 | 5.70E-14 | 8.1  | 20.8342668 | 2.18E-01 | 118897857 | 118897980 | NC_000010.10 |
| cg19461621 | 1.12E-12 | 5.71E-14 | 8.1  | 20.8327912 | 2.61E-01 | 500979    | 501102    | NC_000018.9  |
| cg05132222 | 1.12E-12 | 5.71E-14 | 8.1  | 20.8319109 | 1.44E-01 | 41304870  | 41304993  | NC_000015.9  |
| cg18181607 | 1.12E-12 | 5.72E-14 | 8.1  | 20.8310583 | 1.51E-01 | 155109364 | 155109487 | NC_000005.9  |
| cg01815529 | 1.13E-12 | 5.74E-14 | 8.1  | 20.8265094 | 2.32E-01 | 17206946  | 17207069  | NC_000020.10 |
| cg25131551 | 1.13E-12 | 5.76E-14 | 8.1  | 20.823795  | 7.35E-02 | 110607342 | 110607465 | NC_000001.10 |
| cg08214192 | 1.13E-12 | 5.76E-14 | 8.1  | 20.8237321 | 8.64E-02 | 189841723 | 189841846 | NC_000003.11 |
| cg21706183 | 1.14E-12 | 5.78E-14 | 8.1  | 20.8198719 | 1.40E-01 | 124785827 | 124785950 | NC_000012.11 |
| cg02256049 | 1.14E-12 | 5.79E-14 | 8.1  | 20.8179544 | 2.18E-01 | 115531001 | 115531124 | NC_000011.9  |
| cg22028785 | 1.14E-12 | 5.80E-14 | 8.1  | 20.8173001 | 1.08E-01 | 45678406  | 45678529  | NC_000021.8  |
| cg08523865 | 1.14E-12 | 5.80E-14 | 8.1  | 20.8164684 | 1.65E-01 | 124782253 | 124782376 | NC_000002.11 |

|            |          |          |      |            |          |           |           |              |
|------------|----------|----------|------|------------|----------|-----------|-----------|--------------|
| cg23523535 | 1.15E-12 | 5.86E-14 | 8.1  | 20.806908  | 8.50E-02 | 161572308 | 161572431 | NC_000002.11 |
| cg04031411 | 1.15E-12 | 5.86E-14 | 8.1  | 20.806884  | 5.18E-02 | 11043956  | 11044079  | NC_000016.9  |
| cg01139861 | 1.15E-12 | 5.87E-14 | 8.1  | 20.8054076 | 1.33E-01 | 50343298  | 50343421  | NC_000007.13 |
| cg01156392 | 1.16E-12 | 5.89E-14 | 8.1  | 20.8017057 | 1.36E-01 | 5850005   | 5850128   | NC_000006.11 |
| cg05924540 | 1.16E-12 | 5.89E-14 | 8.1  | 20.801124  | 1.99E-01 | 140200723 | 140200846 | NC_000004.11 |
| cg23809442 | 1.16E-12 | 5.90E-14 | 8.1  | 20.799808  | 2.39E-01 | 102569876 | 102569999 | NC_000013.10 |
| cg12684209 | 1.16E-12 | 5.93E-14 | 8.1  | 20.7946752 | 2.05E-01 | 393110    | 393233    | NC_000006.11 |
| cg03585912 | 1.17E-12 | 5.94E-14 | 8.1  | 20.792961  | 1.94E-01 | 10385776  | 10385899  | NC_000006.11 |
| cg10520672 | 1.17E-12 | 5.95E-14 | 8.1  | 20.7908937 | 1.44E-01 | 86018680  | 86018803  | NC_000016.9  |
| cg13225427 | 1.17E-12 | 5.96E-14 | 8.1  | 20.7893714 | 4.19E-02 | 77797899  | 77798022  | NC_000014.8  |
| cg24390913 | 1.17E-12 | 5.97E-14 | 8.1  | 20.7882279 | 1.76E-01 | 118899788 | 118899911 | NC_000010.10 |
| cg25334575 | 1.17E-12 | 5.97E-14 | 8.1  | 20.7880788 | 1.77E-01 | 100641744 | 100641867 | NC_000013.10 |
| cg15836635 | 1.17E-12 | 5.97E-14 | 8.1  | 20.7877063 | 2.87E-01 | 57025662  | 57025785  | NC_000008.10 |
| cg08049853 | 1.17E-12 | 5.98E-14 | 8.1  | 20.7855672 | 1.85E-01 | 41875784  | 41875907  | NC_000004.11 |
| cg24150949 | 1.18E-12 | 5.99E-14 | 8.1  | 20.7841424 | 4.54E-02 | 36623419  | 36623542  | NC_000017.10 |
| cg26345916 | 1.18E-12 | 6.01E-14 | 8.1  | 20.7807218 | 1.57E-01 | 193815787 | 193815910 | NC_000003.11 |
| cg19444925 | 1.18E-12 | 6.02E-14 | 8.09 | 20.7801883 | 3.38E-02 | 62507590  | 62507713  | NC_000020.10 |
| cg04723401 | 1.18E-12 | 6.03E-14 | 8.09 | 20.7788876 | 1.82E-01 | 29229249  | 29229372  | NC_000014.8  |
| cg13242070 | 1.18E-12 | 6.03E-14 | 8.09 | 20.7786976 | 1.48E-01 | 228652067 | 228652190 | NC_000001.10 |
| cg21590264 | 1.18E-12 | 6.03E-14 | 8.09 | 20.7775653 | 1.57E-01 | 37834850  | 37834973  | NC_000005.9  |
| cg06943420 | 1.18E-12 | 6.04E-14 | 8.09 | 20.777216  | 2.29E-01 | 1566699   | 1566822   | NC_000001.10 |
| cg16084830 | 1.19E-12 | 6.05E-14 | 8.09 | 20.7747352 | 8.43E-02 | 134734693 | 134734816 | NC_000010.10 |
| cg02036261 | 1.19E-12 | 6.07E-14 | 8.09 | 20.7723396 | 1.94E-01 | 57276057  | 57276180  | NC_000014.8  |
| cg02881570 | 1.19E-12 | 6.07E-14 | 8.09 | 20.7714079 | 2.59E-01 | 77737495  | 77737618  | NC_000014.8  |
| cg26822097 | 1.19E-12 | 6.07E-14 | 8.09 | 20.7712442 | 1.65E-01 | 17082581  | 17082704  | NC_000022.10 |

|            |          |          |      |            |          |           |           |              |
|------------|----------|----------|------|------------|----------|-----------|-----------|--------------|
| cg21915313 | 1.20E-12 | 6.10E-14 | 8.09 | 20.7667634 | 1.54E-01 | 140774426 | 140774549 | NC_000005.9  |
| cg03306615 | 1.20E-12 | 6.10E-14 | 8.09 | 20.766738  | 1.05E-01 | 2292890   | 2293013   | NC_000011.9  |
| cg09827433 | 1.20E-12 | 6.10E-14 | 8.09 | 20.7661415 | 1.53E-01 | 177215619 | 177215742 | NC_000001.10 |
| cg14580287 | 1.20E-12 | 6.10E-14 | 8.09 | 20.7661026 | 5.25E-02 | 25173338  | 25173461  | NC_000010.10 |
| cg09735723 | 1.20E-12 | 6.12E-14 | 8.09 | 20.7627505 | 2.27E-01 | 106402042 | 106402165 | NC_000010.10 |
| cg21537915 | 1.20E-12 | 6.14E-14 | 8.09 | 20.7598936 | 1.03E-01 | 7882943   | 7883066   | NC_000006.11 |
| cg04955877 | 1.21E-12 | 6.16E-14 | 8.09 | 20.7565977 | 6.30E-02 | 123856590 | 123856713 | NC_000008.10 |
| cg17333767 | 1.21E-12 | 6.16E-14 | 8.09 | 20.7565258 | 1.46E-01 | 17680561  | 17680684  | NC_000022.10 |
| cg14974749 | 1.21E-12 | 6.18E-14 | 8.09 | 20.7539989 | 1.71E-01 | 27181480  | 27181603  | NC_000007.13 |
| cg02009585 | 1.21E-12 | 6.20E-14 | 8.09 | 20.7504375 | 1.84E-01 | 179754529 | 179754652 | NC_000003.11 |
| cg00282249 | 1.21E-12 | 6.20E-14 | 8.09 | 20.7502151 | 2.62E-01 | 37005566  | 37005689  | NC_000013.10 |
| cg02071795 | 1.22E-12 | 6.22E-14 | 8.09 | 20.7479397 | 5.38E-02 | 23442517  | 23442640  | NC_000014.8  |
| cg25898550 | 1.22E-12 | 6.22E-14 | 8.09 | 20.7477544 | 1.63E-01 | 110225930 | 110226053 | NC_000010.10 |
| cg17838816 | 1.22E-12 | 6.23E-14 | 8.09 | 20.746285  | 8.43E-02 | 135015675 | 135015798 | NC_000010.10 |
| cg00954875 | 1.22E-12 | 6.25E-14 | 8.09 | 20.7431194 | 5.86E-02 | 245628858 | 245628981 | NC_000001.10 |
| cg00375146 | 1.22E-12 | 6.25E-14 | 8.09 | 20.7429686 | 1.01E-01 | 1221812   | 1221935   | NC_000011.9  |
| cg07782808 | 1.23E-12 | 6.26E-14 | 8.09 | 20.7406395 | 6.65E-02 | 39479702  | 39479825  | NC_000017.10 |
| cg15911806 | 1.23E-12 | 6.29E-14 | 8.09 | 20.7363098 | 2.50E-01 | 97685576  | 97685699  | NC_000014.8  |
| cg01819512 | 1.23E-12 | 6.29E-14 | 8.09 | 20.7360006 | 1.48E-01 | 27207996  | 27208119  | NC_000007.13 |
| cg14240300 | 1.24E-12 | 6.32E-14 | 8.09 | 20.7310832 | 1.57E-01 | 46705018  | 46705141  | NC_000017.10 |
| cg22883919 | 1.24E-12 | 6.34E-14 | 8.09 | 20.7294448 | 6.34E-02 | 48154459  | 48154582  | NC_000012.11 |
| cg19969104 | 1.24E-12 | 6.34E-14 | 8.09 | 20.7285377 | 9.70E-02 | 493746    | 493869    | NC_000005.9  |
| cg03694713 | 1.24E-12 | 6.34E-14 | 8.09 | 20.7281665 | 1.96E-01 | 23564156  | 23564279  | NC_000008.10 |
| cg00935653 | 1.24E-12 | 6.35E-14 | 8.09 | 20.7273793 | 1.26E-01 | 25897725  | 25897848  | NC_000007.13 |
| cg19509303 | 1.24E-12 | 6.35E-14 | 8.09 | 20.7266852 | 5.08E-02 | 101318703 | 101318826 | NC_000014.8  |

|            |          |          |      |            |          |           |           |              |
|------------|----------|----------|------|------------|----------|-----------|-----------|--------------|
| cg09992746 | 1.25E-12 | 6.41E-14 | 8.08 | 20.7183382 | 1.48E-01 | 60285821  | 60285944  | NC_000015.9  |
| cg13899017 | 1.25E-12 | 6.42E-14 | 8.08 | 20.7166742 | 2.31E-01 | 159158444 | 159158567 | NC_000001.10 |
| cg04602007 | 1.25E-12 | 6.42E-14 | 8.08 | 20.7163583 | 1.83E-01 | 87080824  | 87080947  | NC_000016.9  |
| cg07125469 | 1.26E-12 | 6.43E-14 | 8.08 | 20.7141909 | 8.88E-02 | 125623573 | 125623696 | NC_000006.11 |
| cg05800416 | 1.26E-12 | 6.45E-14 | 8.08 | 20.7120078 | 1.36E-01 | 19460097  | 19460220  | NC_000008.10 |
| cg03970899 | 1.27E-12 | 6.48E-14 | 8.08 | 20.7066338 | 1.36E-01 | 19710091  | 19710214  | NC_000022.10 |
| cg19914620 | 1.27E-12 | 6.50E-14 | 8.08 | 20.7048215 | 9.15E-02 | 134811603 | 134811726 | NC_000010.10 |
| cg13655674 | 1.27E-12 | 6.50E-14 | 8.08 | 20.7039501 | 2.08E-01 | 119522386 | 119522509 | NC_000001.10 |
| cg01704198 | 1.27E-12 | 6.51E-14 | 8.08 | 20.7030448 | 1.51E-01 | 33757893  | 33758016  | NC_000003.11 |
| cg19511386 | 1.27E-12 | 6.51E-14 | 8.08 | 20.7028231 | 9.24E-02 | 192535635 | 192535758 | NC_000003.11 |
| cg27576241 | 1.27E-12 | 6.51E-14 | 8.08 | 20.7026556 | 1.37E-01 | 155034570 | 155034693 | NC_000001.10 |
| cg03245632 | 1.27E-12 | 6.53E-14 | 8.08 | 20.6998527 | 1.74E-01 | 12254148  | 12254271  | NC_000018.9  |
| cg00674679 | 1.27E-12 | 6.53E-14 | 8.08 | 20.699466  | 2.12E-01 | 176931680 | 176931803 | NC_000002.11 |
| cg19729338 | 1.28E-12 | 6.54E-14 | 8.08 | 20.6976502 | 5.29E-02 | 54909872  | 54909995  | NC_000014.8  |
| cg05406791 | 1.28E-12 | 6.55E-14 | 8.08 | 20.6966417 | 1.14E-01 | 10875874  | 10875997  | NC_000012.11 |
| cg07954075 | 1.28E-12 | 6.55E-14 | 8.08 | 20.6964105 | 7.49E-02 | 1633258   | 1633381   | NC_000012.11 |
| cg19811761 | 1.28E-12 | 6.56E-14 | 8.08 | 20.6951015 | 2.22E-01 | 57019022  | 57019145  | NC_000019.9  |
| cg03983058 | 1.29E-12 | 6.59E-14 | 8.08 | 20.6898163 | 1.39E-01 | 77369724  | 77369847  | NC_000016.9  |
| cg16334004 | 1.29E-12 | 6.60E-14 | 8.08 | 20.6893177 | 1.14E-01 | 134722168 | 134722291 | NC_000010.10 |
| cg10047595 | 1.29E-12 | 6.61E-14 | 8.08 | 20.6876679 | 2.33E-01 | 15500913  | 15501036  | NC_000005.9  |
| cg07622493 | 1.29E-12 | 6.62E-14 | 8.08 | 20.6862189 | 1.96E-01 | 93114294  | 93114417  | NC_000008.10 |
| cg13518270 | 1.29E-12 | 6.64E-14 | 8.08 | 20.6834826 | 1.39E-01 | 50415588  | 50415711  | NC_000020.10 |
| cg00314966 | 1.29E-12 | 6.64E-14 | 8.08 | 20.68314   | 2.41E-01 | 86544346  | 86544469  | NC_000016.9  |
| cg02785870 | 1.30E-12 | 6.68E-14 | 8.08 | 20.677731  | 3.07E-02 | 24744825  | 24744948  | NC_000016.9  |
| cg03779241 | 1.30E-12 | 6.68E-14 | 8.08 | 20.6770618 | 2.73E-01 | 45405061  | 45405184  | NC_000022.10 |

|            |          |          |      |            |          |           |           |              |
|------------|----------|----------|------|------------|----------|-----------|-----------|--------------|
| cg05588496 | 1.30E-12 | 6.68E-14 | 8.08 | 20.6766672 | 1.73E-01 | 67067721  | 67067844  | NC_000018.9  |
| cg01784128 | 1.30E-12 | 6.69E-14 | 8.08 | 20.6753876 | 5.37E-02 | 66519888  | 66520011  | NC_000016.9  |
| cg13012868 | 1.30E-12 | 6.69E-14 | 8.08 | 20.675284  | 7.27E-02 | 91720578  | 91720701  | NC_000014.8  |
| cg26014391 | 1.31E-12 | 6.72E-14 | 8.08 | 20.6712043 | 1.87E-01 | 60936451  | 60936574  | NC_000010.10 |
| cg11842610 | 1.31E-12 | 6.73E-14 | 8.08 | 20.6701223 | 2.28E-01 | 118033762 | 118033885 | NC_000010.10 |
| cg05128922 | 1.31E-12 | 6.75E-14 | 8.08 | 20.6666343 | 1.71E-01 | 114882879 | 114883002 | NC_000012.11 |
| cg00766964 | 1.32E-12 | 6.76E-14 | 8.08 | 20.6646862 | 1.60E-01 | 24693844  | 24693967  | NC_000013.10 |
| cg20249071 | 1.32E-12 | 6.78E-14 | 8.08 | 20.6631542 | 1.49E-01 | 122684258 | 122684381 | NC_000011.9  |
| cg09568464 | 1.32E-12 | 6.78E-14 | 8.08 | 20.6627095 | 2.75E-01 | 56904901  | 56905024  | NC_000019.9  |
| cg10037494 | 1.32E-12 | 6.78E-14 | 8.08 | 20.6620423 | 2.48E-01 | 2161135   | 2161258   | NC_000011.9  |
| cg21515305 | 1.32E-12 | 6.79E-14 | 8.08 | 20.6612937 | 1.17E-01 | 37769171  | 37769294  | NC_000022.10 |
| cg08497530 | 1.32E-12 | 6.80E-14 | 8.08 | 20.6602011 | 1.77E-01 | 82660434  | 82660557  | NC_000016.9  |
| cg13802013 | 1.33E-12 | 6.82E-14 | 8.07 | 20.6560767 | 1.27E-01 | 37303351  | 37303474  | NC_000020.10 |
| cg12398314 | 1.33E-12 | 6.83E-14 | 8.07 | 20.654832  | 7.78E-02 | 71172133  | 71172256  | NC_000001.10 |
| cg24828322 | 1.34E-12 | 6.87E-14 | 8.07 | 20.6496397 | 1.30E-01 | 96830111  | 96830234  | NC_000010.10 |
| cg21928406 | 1.34E-12 | 6.88E-14 | 8.07 | 20.6486111 | 9.65E-02 | 140802669 | 140802792 | NC_000005.9  |
| cg12539415 | 1.34E-12 | 6.88E-14 | 8.07 | 20.6484737 | 1.75E-01 | 177016167 | 177016290 | NC_000002.11 |
| cg16457786 | 1.34E-12 | 6.88E-14 | 8.07 | 20.6483053 | 2.40E-01 | 904851    | 904974    | NC_000018.9  |
| cg25532099 | 1.34E-12 | 6.89E-14 | 8.07 | 20.6472753 | 2.69E-01 | 127874466 | 127874589 | NC_000005.9  |
| cg26456435 | 1.34E-12 | 6.89E-14 | 8.07 | 20.6471821 | 1.19E-01 | 31053788  | 31053911  | NC_000016.9  |
| cg23086519 | 1.34E-12 | 6.89E-14 | 8.07 | 20.646799  | 8.44E-02 | 75703717  | 75703840  | NC_000014.8  |
| cg09758273 | 1.34E-12 | 6.90E-14 | 8.07 | 20.6454513 | 1.49E-01 | 1237995   | 1238118   | NC_000004.11 |
| cg20801476 | 1.34E-12 | 6.91E-14 | 8.07 | 20.6441185 | 1.58E-01 | 27281465  | 27281588  | NC_000007.13 |
| cg24754689 | 1.34E-12 | 6.91E-14 | 8.07 | 20.6439382 | 1.20E-01 | 77702997  | 77703120  | NC_000017.10 |
| cg09201151 | 1.35E-12 | 6.95E-14 | 8.07 | 20.6385461 | 2.70E-01 | 84116151  | 84116274  | NC_000015.9  |

|            |          |          |      |            |          |           |           |              |
|------------|----------|----------|------|------------|----------|-----------|-----------|--------------|
| cg06800040 | 1.35E-12 | 6.95E-14 | 8.07 | 20.6384712 | 7.81E-02 | 42427647  | 42427770  | NC_000017.10 |
| cg20214477 | 1.35E-12 | 6.95E-14 | 8.07 | 20.6381009 | 2.34E-01 | 166795401 | 166795524 | NC_000004.11 |
| cg19777067 | 1.35E-12 | 6.96E-14 | 8.07 | 20.6359303 | 1.72E-01 | 174440103 | 174440226 | NC_000004.11 |
| cg15092168 | 1.36E-12 | 6.98E-14 | 8.07 | 20.6338016 | 2.40E-01 | 63257873  | 63257996  | NC_000005.9  |
| cg08149747 | 1.36E-12 | 6.98E-14 | 8.07 | 20.6336739 | 1.71E-01 | 33761600  | 33761723  | NC_000006.11 |
| cg13940693 | 1.36E-12 | 6.99E-14 | 8.07 | 20.6324184 | 2.43E-01 | 907605    | 907728    | NC_000018.9  |
| cg25987923 | 1.36E-12 | 7.02E-14 | 8.07 | 20.6283084 | 1.61E-01 | 119302050 | 119302173 | NC_000010.10 |
| cg09283154 | 1.36E-12 | 7.03E-14 | 8.07 | 20.6269004 | 1.64E-01 | 118229641 | 118229764 | NC_000006.11 |
| cg24469980 | 1.37E-12 | 7.04E-14 | 8.07 | 20.6254648 | 1.44E-01 | 221064953 | 221065076 | NC_000001.10 |
| cg11357746 | 1.37E-12 | 7.05E-14 | 8.07 | 20.6240146 | 1.94E-01 | 114837887 | 114838010 | NC_000012.11 |
| cg08390877 | 1.37E-12 | 7.06E-14 | 8.07 | 20.6223626 | 1.81E-01 | 119615998 | 119616121 | NC_000002.11 |
| cg00020052 | 1.37E-12 | 7.07E-14 | 8.07 | 20.6218279 | 2.51E-01 | 68546899  | 68547022  | NC_000002.11 |
| cg17149103 | 1.38E-12 | 7.10E-14 | 8.07 | 20.6173845 | 1.27E-01 | 147789480 | 147789603 | NC_000001.10 |
| cg14270292 | 1.38E-12 | 7.10E-14 | 8.07 | 20.6163725 | 2.46E-01 | 133562494 | 133562617 | NC_000006.11 |
| cg13049432 | 1.38E-12 | 7.11E-14 | 8.07 | 20.6153782 | 6.07E-02 | 40141809  | 40141932  | NC_000021.8  |
| cg02279719 | 1.38E-12 | 7.11E-14 | 8.07 | 20.6152424 | 1.92E-01 | 204474    | 204597    | NC_000016.9  |
| cg00974598 | 1.38E-12 | 7.11E-14 | 8.07 | 20.6151095 | 4.99E-02 | 44223902  | 44224025  | NC_000019.9  |
| cg13961142 | 1.38E-12 | 7.12E-14 | 8.07 | 20.6143828 | 7.00E-02 | 11712098  | 11712221  | NC_000019.9  |
| cg22623133 | 1.38E-12 | 7.13E-14 | 8.07 | 20.6127913 | 2.03E-01 | 27195960  | 27196083  | NC_000007.13 |
| cg00290355 | 1.39E-12 | 7.15E-14 | 8.07 | 20.609683  | 1.22E-01 | 150996599 | 150996722 | NC_000003.11 |
| cg02378847 | 1.39E-12 | 7.16E-14 | 8.07 | 20.60821   | 2.07E-01 | 74422750  | 74422873  | NC_000015.9  |
| cg16294013 | 1.39E-12 | 7.17E-14 | 8.07 | 20.6076298 | 1.96E-01 | 66258022  | 66258145  | NC_000001.10 |
| cg16990168 | 1.39E-12 | 7.18E-14 | 8.07 | 20.6052672 | 1.62E-01 | 119526060 | 119526183 | NC_000001.10 |
| cg01648784 | 1.39E-12 | 7.19E-14 | 8.07 | 20.6042787 | 7.70E-02 | 30385444  | 30385567  | NC_000016.9  |
| cg07117311 | 1.40E-12 | 7.20E-14 | 8.07 | 20.6032295 | 1.23E-01 | 67966314  | 67966437  | NC_000016.9  |

|            |          |          |      |            |          |           |           |              |
|------------|----------|----------|------|------------|----------|-----------|-----------|--------------|
| cg00505045 | 1.40E-12 | 7.20E-14 | 8.07 | 20.6028127 | 1.63E-01 | 147561669 | 147561792 | NC_000004.11 |
| cg12334488 | 1.40E-12 | 7.21E-14 | 8.07 | 20.6011226 | 1.08E-01 | 20871173  | 20871296  | NC_000002.11 |
| cg14725719 | 1.40E-12 | 7.24E-14 | 8.06 | 20.5975679 | 8.20E-02 | 43601916  | 43602039  | NC_000010.10 |
| cg11248896 | 1.41E-12 | 7.28E-14 | 8.06 | 20.5919915 | 1.98E-01 | 177003747 | 177003870 | NC_000002.11 |
| cg20189244 | 1.41E-12 | 7.28E-14 | 8.06 | 20.5916942 | 1.62E-01 | 96648205  | 96648328  | NC_000007.13 |
| cg07068674 | 1.41E-12 | 7.29E-14 | 8.06 | 20.5913299 | 2.02E-01 | 37123778  | 37123901  | NC_000014.8  |
| cg07438617 | 1.41E-12 | 7.29E-14 | 8.06 | 20.5912055 | 2.94E-01 | 46655289  | 46655412  | NC_000017.10 |
| cg26552477 | 1.41E-12 | 7.30E-14 | 8.06 | 20.5891053 | 1.65E-01 | 143029    | 143152    | NC_000007.13 |
| cg00765828 | 1.41E-12 | 7.31E-14 | 8.06 | 20.5888151 | 2.58E-01 | 130389013 | 130389136 | NC_000012.11 |
| cg14573448 | 1.41E-12 | 7.31E-14 | 8.06 | 20.58844   | 1.84E-01 | 27165187  | 27165310  | NC_000007.13 |
| cg12590346 | 1.42E-12 | 7.32E-14 | 8.06 | 20.587303  | 1.33E-01 | 1327962   | 1328085   | NC_000011.9  |
| cg12417685 | 1.42E-12 | 7.34E-14 | 8.06 | 20.5843963 | 2.37E-01 | 68981852  | 68981975  | NC_000003.11 |
| cg17290136 | 1.42E-12 | 7.36E-14 | 8.06 | 20.5819638 | 1.22E-01 | 79823345  | 79823468  | NC_000017.10 |
| cg02763671 | 1.43E-12 | 7.37E-14 | 8.06 | 20.5802085 | 1.14E-01 | 20103541  | 20103664  | NC_000022.10 |
| cg25740602 | 1.43E-12 | 7.39E-14 | 8.06 | 20.5776138 | 9.32E-02 | 60052464  | 60052587  | NC_000018.9  |
| cg12417071 | 1.43E-12 | 7.40E-14 | 8.06 | 20.5767974 | 2.50E-01 | 37005489  | 37005612  | NC_000013.10 |
| cg14307443 | 1.43E-12 | 7.42E-14 | 8.06 | 20.5740621 | 1.81E-01 | 172734507 | 172734630 | NC_000004.11 |
| cg14648534 | 1.44E-12 | 7.45E-14 | 8.06 | 20.5695422 | 1.31E-01 | 132315842 | 132315965 | NC_000009.11 |
| cg01826858 | 1.45E-12 | 7.50E-14 | 8.06 | 20.5633439 | 7.30E-02 | 30958494  | 30958617  | NC_000016.9  |
| cg11215296 | 1.46E-12 | 7.53E-14 | 8.06 | 20.5585609 | 4.26E-02 | 206224554 | 206224677 | NC_000001.10 |
| cg11229513 | 1.46E-12 | 7.56E-14 | 8.06 | 20.5547053 | 1.85E-01 | 70984559  | 70984682  | NC_000008.10 |
| cg10146008 | 1.46E-12 | 7.58E-14 | 8.06 | 20.5530073 | 6.39E-02 | 3042310   | 3042433   | NC_000001.10 |
| cg16491960 | 1.47E-12 | 7.61E-14 | 8.06 | 20.5481643 | 1.54E-01 | 56297490  | 56297613  | NC_000007.13 |
| cg16927416 | 1.47E-12 | 7.62E-14 | 8.06 | 20.5473052 | 7.84E-02 | 142295141 | 142295264 | NC_000008.10 |
| cg02471897 | 1.48E-12 | 7.64E-14 | 8.06 | 20.5443029 | 2.55E-01 | 1281200   | 1281323   | NC_000007.13 |



|            |          |          |      |            |          |           |           |              |
|------------|----------|----------|------|------------|----------|-----------|-----------|--------------|
| cg27593384 | 1.48E-12 | 7.65E-14 | 8.06 | 20.542987  | 2.14E-01 | 25755608  | 25755731  | NC_000018.9  |
| cg26271895 | 1.48E-12 | 7.67E-14 | 8.06 | 20.5407498 | 3.43E-02 | 36629950  | 36630073  | NC_000002.11 |
| cg18096722 | 1.49E-12 | 7.71E-14 | 8.05 | 20.5357907 | 2.08E-01 | 70947218  | 70947341  | NC_000008.10 |
| cg09016610 | 1.49E-12 | 7.73E-14 | 8.05 | 20.5327682 | 1.36E-01 | 246203591 | 246203714 | NC_000001.10 |
| cg06264922 | 1.49E-12 | 7.74E-14 | 8.05 | 20.5319956 | 9.51E-02 | 1319648   | 1319771   | NC_000011.9  |
| cg22872478 | 1.49E-12 | 7.74E-14 | 8.05 | 20.5314521 | 1.35E-01 | 52030685  | 52030808  | NC_000015.9  |
| cg26899113 | 1.49E-12 | 7.74E-14 | 8.05 | 20.5312446 | 1.21E-01 | 22625733  | 22625856  | NC_000010.10 |
| cg01245966 | 1.50E-12 | 7.75E-14 | 8.05 | 20.5299874 | 2.10E-01 | 132053823 | 132053946 | NC_000008.10 |
| cg00715696 | 1.50E-12 | 7.76E-14 | 8.05 | 20.5296077 | 1.75E-01 | 85660534  | 85660657  | NC_000016.9  |
| cg14101302 | 1.50E-12 | 7.77E-14 | 8.05 | 20.5281828 | 2.37E-01 | 72596557  | 72596680  | NC_000006.11 |
| cg24490133 | 1.50E-12 | 7.78E-14 | 8.05 | 20.5271782 | 1.69E-01 | 245607970 | 245608093 | NC_000001.10 |
| cg06122871 | 1.50E-12 | 7.78E-14 | 8.05 | 20.526443  | 2.00E-01 | 85476210  | 85476333  | NC_000006.11 |
| cg26252167 | 1.50E-12 | 7.78E-14 | 8.05 | 20.5262806 | 1.60E-01 | 110300573 | 110300696 | NC_000006.11 |
| cg03369382 | 1.50E-12 | 7.79E-14 | 8.05 | 20.5250492 | 1.84E-01 | 139427635 | 139427758 | NC_000007.13 |
| cg07555125 | 1.51E-12 | 7.82E-14 | 8.05 | 20.5219857 | 7.68E-02 | 140175691 | 140175814 | NC_000005.9  |
| cg21402921 | 1.51E-12 | 7.84E-14 | 8.05 | 20.5196567 | 2.58E-01 | 27112305  | 27112428  | NC_000015.9  |
| cg15093216 | 1.51E-12 | 7.84E-14 | 8.05 | 20.5196354 | 6.30E-02 | 951747    | 951870    | NC_000017.10 |
| cg14830748 | 1.51E-12 | 7.85E-14 | 8.05 | 20.5184871 | 9.03E-02 | 97592199  | 97592322  | NC_000008.10 |
| cg18944010 | 1.51E-12 | 7.85E-14 | 8.05 | 20.5182119 | 1.84E-01 | 119522855 | 119522978 | NC_000001.10 |
| cg25762974 | 1.51E-12 | 7.85E-14 | 8.05 | 20.5173368 | 9.44E-02 | 50293815  | 50293938  | NC_000012.11 |
| cg07906331 | 1.52E-12 | 7.87E-14 | 8.05 | 20.5152279 | 1.34E-01 | 15783158  | 15783281  | NC_000001.10 |
| cg08840441 | 1.52E-12 | 7.87E-14 | 8.05 | 20.514904  | 8.69E-02 | 19748461  | 19748584  | NC_000019.9  |
| cg18936550 | 1.52E-12 | 7.88E-14 | 8.05 | 20.5145282 | 7.02E-02 | 3368447   | 3368570   | NC_000001.10 |
| cg07780095 | 1.52E-12 | 7.88E-14 | 8.05 | 20.5141255 | 2.37E-01 | 85674296  | 85674419  | NC_000012.11 |
| cg12673774 | 1.52E-12 | 7.88E-14 | 8.05 | 20.5135781 | 1.16E-01 | 114960970 | 114961093 | NC_000013.10 |

|            |          |          |      |            |          |           |           |              |
|------------|----------|----------|------|------------|----------|-----------|-----------|--------------|
| cg03200537 | 1.52E-12 | 7.89E-14 | 8.05 | 20.5128812 | 1.20E-01 | 87022121  | 87022244  | NC_000016.9  |
| cg09360770 | 1.52E-12 | 7.89E-14 | 8.05 | 20.5123774 | 2.62E-01 | 86600326  | 86600449  | NC_000016.9  |
| cg07702100 | 1.52E-12 | 7.90E-14 | 8.05 | 20.5111008 | 5.82E-02 | 88178390  | 88178513  | NC_000011.9  |
| cg03394150 | 1.53E-12 | 7.92E-14 | 8.05 | 20.509298  | 3.25E-01 | 28074384  | 28074507  | NC_000016.9  |
| cg00158122 | 1.53E-12 | 7.92E-14 | 8.05 | 20.5092038 | 9.53E-02 | 101290029 | 101290152 | NC_000010.10 |
| cg02671880 | 1.53E-12 | 7.93E-14 | 8.05 | 20.5080033 | 2.09E-01 | 95355117  | 95355240  | NC_000013.10 |
| cg24908814 | 1.53E-12 | 7.95E-14 | 8.05 | 20.5057503 | 2.90E-01 | 132947725 | 132947848 | NC_000005.9  |
| cg02298220 | 1.53E-12 | 7.96E-14 | 8.05 | 20.5046676 | 1.07E-01 | 35914908  | 35915031  | NC_000020.10 |
| cg07444323 | 1.53E-12 | 7.97E-14 | 8.05 | 20.5033433 | 1.22E-01 | 3654504   | 3654627   | NC_000020.10 |
| cg26034516 | 1.53E-12 | 7.97E-14 | 8.05 | 20.5031964 | 2.31E-01 | 76228121  | 76228244  | NC_000017.10 |
| cg03329976 | 1.53E-12 | 7.97E-14 | 8.05 | 20.5027916 | 1.80E-01 | 55370283  | 55370406  | NC_000008.10 |
| cg17832364 | 1.54E-12 | 7.97E-14 | 8.05 | 20.5026978 | 7.09E-02 | 94847294  | 94847417  | NC_000010.10 |
| cg04213384 | 1.54E-12 | 7.98E-14 | 8.05 | 20.5012814 | 2.12E-01 | 98960589  | 98960712  | NC_000013.10 |
| cg11750592 | 1.54E-12 | 8.01E-14 | 8.05 | 20.4974952 | 1.67E-01 | 65289227  | 65289350  | NC_000008.10 |
| cg22459630 | 1.54E-12 | 8.02E-14 | 8.05 | 20.4962171 | 1.85E-01 | 68121028  | 68121151  | NC_000015.9  |
| cg20598039 | 1.54E-12 | 8.02E-14 | 8.05 | 20.4962155 | 5.90E-02 | 61914343  | 61914466  | NC_000011.9  |
| cg14428146 | 1.54E-12 | 8.03E-14 | 8.05 | 20.4959166 | 1.95E-01 | 23563925  | 23564048  | NC_000008.10 |
| cg15014975 | 1.55E-12 | 8.05E-14 | 8.05 | 20.4935248 | 1.68E-01 | 25257547  | 25257670  | NC_000001.10 |
| cg08520148 | 1.55E-12 | 8.06E-14 | 8.05 | 20.4917819 | 4.06E-02 | 42662138  | 42662261  | NC_000022.10 |
| cg11115431 | 1.55E-12 | 8.06E-14 | 8.05 | 20.4914631 | 1.03E-01 | 168661137 | 168661260 | NC_000006.11 |
| cg19470290 | 1.55E-12 | 8.07E-14 | 8.05 | 20.4911066 | 7.78E-02 | 98926570  | 98926693  | NC_000013.10 |
| cg11311843 | 1.55E-12 | 8.07E-14 | 8.05 | 20.4900647 | 1.32E-01 | 47302003  | 47302126  | NC_000017.10 |
| cg01292846 | 1.55E-12 | 8.08E-14 | 8.05 | 20.4895198 | 1.29E-01 | 33672543  | 33672666  | NC_000017.10 |
| cg06657852 | 1.55E-12 | 8.08E-14 | 8.05 | 20.4894697 | 4.92E-02 | 86786582  | 86786705  | NC_000016.9  |
| cg05130129 | 1.56E-12 | 8.09E-14 | 8.05 | 20.4881241 | 7.58E-02 | 185122266 | 185122389 | NC_000004.11 |

|            |          |          |      |            |          |           |           |              |
|------------|----------|----------|------|------------|----------|-----------|-----------|--------------|
| cg19951663 | 1.56E-12 | 8.09E-14 | 8.05 | 20.4880739 | 1.84E-01 | 134871634 | 134871757 | NC_000005.9  |
| cg08404009 | 1.56E-12 | 8.09E-14 | 8.05 | 20.4875987 | 1.79E-01 | 109793152 | 109793275 | NC_000013.10 |
| cg21301240 | 1.56E-12 | 8.11E-14 | 8.05 | 20.4861932 | 8.83E-02 | 117727493 | 117727616 | NC_000008.10 |
| cg15679813 | 1.56E-12 | 8.11E-14 | 8.05 | 20.4858244 | 3.03E-01 | 45405627  | 45405750  | NC_000022.10 |
| cg25241559 | 1.56E-12 | 8.13E-14 | 8.05 | 20.4835573 | 1.30E-01 | 241989379 | 241989502 | NC_000002.11 |
| cg15060599 | 1.56E-12 | 8.13E-14 | 8.05 | 20.4831923 | 1.45E-01 | 13974467  | 13974590  | NC_000003.11 |
| cg00094585 | 1.56E-12 | 8.14E-14 | 8.05 | 20.4822379 | 1.11E-01 | 53631322  | 53631445  | NC_000001.10 |
| cg19026817 | 1.57E-12 | 8.15E-14 | 8.05 | 20.4804173 | 1.17E-01 | 56782259  | 56782382  | NC_000020.10 |
| cg02043159 | 1.57E-12 | 8.19E-14 | 8.04 | 20.4764    | 2.04E-01 | 134070235 | 134070358 | NC_000004.11 |
| cg27494087 | 1.57E-12 | 8.19E-14 | 8.04 | 20.4762708 | 2.00E-01 | 74070431  | 74070554  | NC_000017.10 |
| cg14479198 | 1.58E-12 | 8.24E-14 | 8.04 | 20.470441  | 7.38E-02 | 80255793  | 80255916  | NC_000005.9  |
| cg20636352 | 1.59E-12 | 8.26E-14 | 8.04 | 20.4682177 | 1.73E-01 | 200468832 | 200468955 | NC_000002.11 |
| cg08411443 | 1.59E-12 | 8.26E-14 | 8.04 | 20.4681381 | 8.80E-02 | 43958160  | 43958283  | NC_000011.9  |
| cg11891843 | 1.59E-12 | 8.27E-14 | 8.04 | 20.4659018 | 1.17E-01 | 61403381  | 61403504  | NC_000020.10 |
| cg12743359 | 1.59E-12 | 8.28E-14 | 8.04 | 20.4655794 | 8.47E-02 | 31980043  | 31980166  | NC_000006.11 |
| cg02451691 | 1.59E-12 | 8.29E-14 | 8.04 | 20.4643951 | 1.04E-01 | 105721586 | 105721709 | NC_000006.11 |
| cg08833577 | 1.60E-12 | 8.32E-14 | 8.04 | 20.4600449 | 1.80E-01 | 118899288 | 118899411 | NC_000010.10 |
| cg08876441 | 1.60E-12 | 8.33E-14 | 8.04 | 20.4591159 | 2.27E-01 | 190447421 | 190447544 | NC_000001.10 |
| cg07333191 | 1.61E-12 | 8.36E-14 | 8.04 | 20.4552729 | 1.70E-01 | 13526769  | 13526892  | NC_000004.11 |
| cg08280383 | 1.61E-12 | 8.37E-14 | 8.04 | 20.4545673 | 1.77E-01 | 20085358  | 20085481  | NC_000016.9  |
| cg10903903 | 1.61E-12 | 8.40E-14 | 8.04 | 20.4506852 | 2.79E-01 | 27647843  | 27647966  | NC_000006.11 |
| cg12486498 | 1.61E-12 | 8.41E-14 | 8.04 | 20.4501214 | 7.29E-02 | 230975106 | 230975229 | NC_000001.10 |
| cg23284720 | 1.62E-12 | 8.43E-14 | 8.04 | 20.4480204 | 1.49E-01 | 2862144   | 2862267   | NC_000012.11 |
| cg04936030 | 1.62E-12 | 8.43E-14 | 8.04 | 20.4476415 | 4.81E-02 | 63935046  | 63935169  | NC_000011.9  |
| cg20973720 | 1.62E-12 | 8.44E-14 | 8.04 | 20.4469095 | 2.96E-01 | 79383167  | 79383290  | NC_000015.9  |

|            |          |          |      |            |          |           |           |              |
|------------|----------|----------|------|------------|----------|-----------|-----------|--------------|
| cg14494620 | 1.62E-12 | 8.44E-14 | 8.04 | 20.4463579 | 1.68E-01 | 96904912  | 96905035  | NC_000015.9  |
| cg11445123 | 1.62E-12 | 8.45E-14 | 8.04 | 20.4450306 | 2.18E-01 | 2781478   | 2781601   | NC_000020.10 |
| cg03472349 | 1.62E-12 | 8.46E-14 | 8.04 | 20.4440192 | 1.72E-01 | 31319218  | 31319341  | NC_000015.9  |
| cg07026560 | 1.62E-12 | 8.47E-14 | 8.04 | 20.4433932 | 1.38E-01 | 823839    | 823962    | NC_000011.9  |
| cg02315271 | 1.63E-12 | 8.51E-14 | 8.04 | 20.4382515 | 2.08E-01 | 72469987  | 72470110  | NC_000008.10 |
| cg23318812 | 1.63E-12 | 8.53E-14 | 8.04 | 20.4355434 | 2.66E-01 | 66123127  | 66123250  | NC_000012.11 |
| cg17677402 | 1.64E-12 | 8.55E-14 | 8.04 | 20.4339113 | 7.87E-02 | 61889979  | 61890102  | NC_000011.9  |
| cg13149442 | 1.64E-12 | 8.56E-14 | 8.04 | 20.4328899 | 1.26E-01 | 43303777  | 43303900  | NC_000018.9  |
| cg06306791 | 1.64E-12 | 8.56E-14 | 8.04 | 20.4322158 | 1.38E-01 | 32854970  | 32855093  | NC_000006.11 |
| cg24180975 | 1.64E-12 | 8.56E-14 | 8.04 | 20.4319145 | 9.96E-02 | 53883752  | 53883875  | NC_000006.11 |
| cg08247921 | 1.65E-12 | 8.59E-14 | 8.04 | 20.4285696 | 1.29E-01 | 103683115 | 103683238 | NC_000004.11 |
| cg20633956 | 1.65E-12 | 8.59E-14 | 8.04 | 20.4285649 | 3.30E-02 | 95353748  | 95353871  | NC_000010.10 |
| cg18338046 | 1.65E-12 | 8.61E-14 | 8.04 | 20.4264214 | 1.12E-01 | 133452188 | 133452311 | NC_000005.9  |
| cg25471802 | 1.65E-12 | 8.62E-14 | 8.04 | 20.4258888 | 1.07E-01 | 168193840 | 168193963 | NC_000006.11 |
| cg01386735 | 1.65E-12 | 8.63E-14 | 8.04 | 20.4240887 | 1.20E-01 | 70501081  | 70501204  | NC_000006.11 |
| cg22629762 | 1.65E-12 | 8.65E-14 | 8.04 | 20.4226087 | 4.01E-02 | 1864390   | 1864513   | NC_000008.10 |
| cg13764248 | 1.66E-12 | 8.65E-14 | 8.04 | 20.4216989 | 4.00E-02 | 3234933   | 3235056   | NC_000004.11 |
| cg14375924 | 1.66E-12 | 8.67E-14 | 8.04 | 20.4200931 | 9.31E-02 | 24168200  | 24168323  | NC_000012.11 |
| cg11124364 | 1.66E-12 | 8.68E-14 | 8.04 | 20.4192263 | 2.08E-01 | 19812850  | 19812973  | NC_000007.13 |
| cg18391747 | 1.67E-12 | 8.72E-14 | 8.03 | 20.4138389 | 7.05E-02 | 161375390 | 161375513 | NC_000001.10 |
| cg26425305 | 1.67E-12 | 8.73E-14 | 8.03 | 20.4133823 | 1.44E-01 | 3592526   | 3592649   | NC_000005.9  |
| cg06896987 | 1.67E-12 | 8.73E-14 | 8.03 | 20.4131498 | 2.03E-01 | 177003735 | 177003858 | NC_000002.11 |
| cg25060243 | 1.67E-12 | 8.73E-14 | 8.03 | 20.4129998 | 7.89E-02 | 234626464 | 234626587 | NC_000002.11 |
| cg07714757 | 1.67E-12 | 8.74E-14 | 8.03 | 20.4113887 | 1.92E-01 | 143532138 | 143532261 | NC_000008.10 |
| cg04528240 | 1.68E-12 | 8.77E-14 | 8.03 | 20.4088698 | 1.08E-01 | 56504657  | 56504780  | NC_000004.11 |

|            |          |          |      |            |          |           |           |              |
|------------|----------|----------|------|------------|----------|-----------|-----------|--------------|
| cg09701582 | 1.68E-12 | 8.78E-14 | 8.03 | 20.4071499 | 1.29E-01 | 177017797 | 177017920 | NC_000002.11 |
| cg15864104 | 1.69E-12 | 8.82E-14 | 8.03 | 20.4028264 | 1.69E-01 | 55254508  | 55254631  | NC_000018.9  |
| cg00299105 | 1.69E-12 | 8.83E-14 | 8.03 | 20.4019684 | 6.59E-02 | 113243817 | 113243940 | NC_000011.9  |
| cg12777730 | 1.70E-12 | 8.91E-14 | 8.03 | 20.3924656 | 1.52E-01 | 63657985  | 63658108  | NC_000010.10 |
| cg16348742 | 1.71E-12 | 8.94E-14 | 8.03 | 20.3898923 | 6.10E-02 | 2584446   | 2584569   | NC_000011.9  |
| cg01689438 | 1.71E-12 | 8.97E-14 | 8.03 | 20.3863787 | 2.32E-01 | 147140930 | 147141053 | NC_000003.11 |
| cg00926267 | 1.71E-12 | 8.97E-14 | 8.03 | 20.3860094 | 1.21E-01 | 41030561  | 41030684  | NC_000022.10 |
| cg00690148 | 1.71E-12 | 8.98E-14 | 8.03 | 20.3857121 | 2.55E-01 | 119916017 | 119916140 | NC_000002.11 |
| cg12974545 | 1.72E-12 | 9.01E-14 | 8.03 | 20.3817609 | 1.36E-01 | 11198695  | 11198818  | NC_000003.11 |
| cg23460809 | 1.72E-12 | 9.01E-14 | 8.03 | 20.3817518 | 1.07E-01 | 134472105 | 134472228 | NC_000010.10 |
| cg11315991 | 1.72E-12 | 9.02E-14 | 8.03 | 20.3810893 | 1.88E-01 | 601283    | 601406    | NC_000007.13 |
| cg05234958 | 1.72E-12 | 9.03E-14 | 8.03 | 20.3791944 | 1.02E-01 | 41557710  | 41557833  | NC_000008.10 |
| cg12242474 | 1.73E-12 | 9.05E-14 | 8.03 | 20.3779226 | 7.21E-02 | 1293682   | 1293805   | NC_000020.10 |
| cg01794426 | 1.73E-12 | 9.05E-14 | 8.03 | 20.3778762 | 1.93E-01 | 37132490  | 37132613  | NC_000014.8  |
| cg11500797 | 1.73E-12 | 9.06E-14 | 8.03 | 20.376977  | 2.18E-01 | 96652123  | 96652246  | NC_000007.13 |
| cg23619577 | 1.73E-12 | 9.06E-14 | 8.03 | 20.3764577 | 8.11E-02 | 65297524  | 65297647  | NC_000001.10 |
| cg16703956 | 1.74E-12 | 9.09E-14 | 8.03 | 20.3728872 | 2.36E-01 | 1446217   | 1446340   | NC_000005.9  |
| cg07264726 | 1.74E-12 | 9.11E-14 | 8.03 | 20.370749  | 1.22E-01 | 142666293 | 142666416 | NC_000003.11 |
| cg24080008 | 1.74E-12 | 9.13E-14 | 8.03 | 20.3691612 | 1.46E-01 | 38600199  | 38600322  | NC_000001.10 |
| cg05485968 | 1.74E-12 | 9.13E-14 | 8.03 | 20.3686329 | 7.82E-02 | 79681568  | 79681691  | NC_000017.10 |
| cg14370314 | 1.75E-12 | 9.16E-14 | 8.03 | 20.3659013 | 1.82E-01 | 23834891  | 23835014  | NC_000014.8  |
| cg02631468 | 1.75E-12 | 9.16E-14 | 8.03 | 20.3652263 | 2.21E-01 | 25062777  | 25062900  | NC_000020.10 |
| cg26721877 | 1.75E-12 | 9.17E-14 | 8.03 | 20.3648811 | 1.69E-01 | 172757074 | 172757197 | NC_000005.9  |
| cg06803257 | 1.75E-12 | 9.19E-14 | 8.03 | 20.3624622 | 4.79E-02 | 67999044  | 67999167  | NC_000016.9  |
| cg15355341 | 1.76E-12 | 9.22E-14 | 8.03 | 20.3595535 | 8.28E-02 | 50430136  | 50430259  | NC_000012.11 |

|            |          |          |      |            |          |           |           |              |
|------------|----------|----------|------|------------|----------|-----------|-----------|--------------|
| cg15095581 | 1.76E-12 | 9.22E-14 | 8.03 | 20.3590346 | 9.35E-02 | 46776775  | 46776898  | NC_000003.11 |
| cg04098866 | 1.76E-12 | 9.22E-14 | 8.03 | 20.3586657 | 1.78E-01 | 51190201  | 51190324  | NC_000016.9  |
| cg20399965 | 1.77E-12 | 9.27E-14 | 8.02 | 20.3542822 | 1.09E-01 | 6471712   | 6471835   | NC_000004.11 |
| cg23733386 | 1.77E-12 | 9.27E-14 | 8.02 | 20.3539926 | 4.21E-02 | 169630505 | 169630628 | NC_000001.10 |
| cg24148931 | 1.77E-12 | 9.28E-14 | 8.02 | 20.3531764 | 7.82E-02 | 169290459 | 169290582 | NC_000006.11 |
| cg11246938 | 1.77E-12 | 9.28E-14 | 8.02 | 20.3523452 | 1.77E-01 | 115112433 | 115112556 | NC_000012.11 |
| cg09982510 | 1.77E-12 | 9.30E-14 | 8.02 | 20.3507457 | 5.48E-02 | 233565164 | 233565287 | NC_000002.11 |
| cg13279673 | 1.77E-12 | 9.31E-14 | 8.02 | 20.3491692 | 1.95E-01 | 50674522  | 50674645  | NC_000006.11 |
| cg03345925 | 1.78E-12 | 9.34E-14 | 8.02 | 20.346028  | 9.55E-02 | 144599347 | 144599470 | NC_000008.10 |
| cg12647837 | 1.78E-12 | 9.35E-14 | 8.02 | 20.345409  | 6.13E-02 | 61820842  | 61820965  | NC_000007.13 |
| cg24041541 | 1.78E-12 | 9.36E-14 | 8.02 | 20.3443205 | 1.86E-01 | 77586395  | 77586518  | NC_000008.10 |
| cg10853543 | 1.78E-12 | 9.36E-14 | 8.02 | 20.3441971 | 1.47E-01 | 60763626  | 60763749  | NC_000002.11 |
| cg21639114 | 1.79E-12 | 9.39E-14 | 8.02 | 20.3413871 | 1.74E-01 | 130687884 | 130688007 | NC_000006.11 |
| cg14351526 | 1.79E-12 | 9.39E-14 | 8.02 | 20.3407362 | 1.20E-01 | 72086737  | 72086860  | NC_000006.11 |
| cg26673975 | 1.79E-12 | 9.41E-14 | 8.02 | 20.3393656 | 9.58E-02 | 66420974  | 66421097  | NC_000016.9  |
| cg08969532 | 1.80E-12 | 9.43E-14 | 8.02 | 20.336524  | 2.37E-01 | 99790438  | 99790561  | NC_000010.10 |
| cg16374093 | 1.80E-12 | 9.44E-14 | 8.02 | 20.3360259 | 5.64E-02 | 69931514  | 69931637  | NC_000011.9  |
| cg23130254 | 1.80E-12 | 9.46E-14 | 8.02 | 20.3334695 | 1.66E-01 | 176964588 | 176964711 | NC_000002.11 |
| cg23676682 | 1.81E-12 | 9.49E-14 | 8.02 | 20.3310615 | 1.53E-01 | 105480792 | 105480915 | NC_000011.9  |
| cg06578800 | 1.81E-12 | 9.50E-14 | 8.02 | 20.3301714 | 5.62E-02 | 21368039  | 21368162  | NC_000017.10 |
| cg12065138 | 1.81E-12 | 9.50E-14 | 8.02 | 20.3296024 | 1.96E-01 | 4771201   | 4771324   | NC_000001.10 |
| cg27090062 | 1.82E-12 | 9.56E-14 | 8.02 | 20.3239606 | 1.42E-01 | 92939842  | 92939965  | NC_000005.9  |
| cg26556624 | 1.82E-12 | 9.57E-14 | 8.02 | 20.322328  | 1.07E-01 | 9099862   | 9099985   | NC_000018.9  |
| cg23493016 | 1.82E-12 | 9.59E-14 | 8.02 | 20.3207789 | 1.90E-01 | 106440778 | 106440901 | NC_000010.10 |
| cg00982919 | 1.83E-12 | 9.60E-14 | 8.02 | 20.3190411 | 1.91E-01 | 126775263 | 126775386 | NC_000009.11 |

|            |          |          |      |            |          |           |           |              |
|------------|----------|----------|------|------------|----------|-----------|-----------|--------------|
| cg15183083 | 1.83E-12 | 9.61E-14 | 8.02 | 20.3178245 | 2.03E-01 | 30038310  | 30038433  | NC_000011.9  |
| cg06134471 | 1.83E-12 | 9.64E-14 | 8.02 | 20.315186  | 9.49E-02 | 51560134  | 51560257  | NC_000014.8  |
| cg10134509 | 1.84E-12 | 9.67E-14 | 8.02 | 20.3122512 | 5.84E-02 | 33171319  | 33171442  | NC_000006.11 |
| cg07441518 | 1.84E-12 | 9.70E-14 | 8.02 | 20.3095701 | 1.50E-01 | 31846849  | 31846972  | NC_000011.9  |
| cg04093932 | 1.85E-12 | 9.71E-14 | 8.02 | 20.3078776 | 2.04E-01 | 77179778  | 77179901  | NC_000017.10 |
| cg10778337 | 1.85E-12 | 9.74E-14 | 8.02 | 20.3048013 | 7.98E-02 | 8786784   | 8786907   | NC_000003.11 |
| cg19091245 | 1.86E-12 | 9.77E-14 | 8.02 | 20.3025056 | 9.46E-02 | 133508648 | 133508771 | NC_000010.10 |
| cg11291712 | 1.86E-12 | 9.77E-14 | 8.02 | 20.302074  | 8.07E-02 | 95328682  | 95328805  | NC_000004.11 |
| cg13207326 | 1.86E-12 | 9.78E-14 | 8.02 | 20.300757  | 1.76E-01 | 4860190   | 4860313   | NC_000004.11 |
| cg15245095 | 1.86E-12 | 9.78E-14 | 8.02 | 20.3005375 | 2.14E-01 | 79258438  | 79258561  | NC_000012.11 |
| cg23893898 | 1.86E-12 | 9.79E-14 | 8.02 | 20.2999761 | 1.83E-01 | 6247571   | 6247694   | NC_000004.11 |
| cg21419585 | 1.86E-12 | 9.80E-14 | 8.02 | 20.2994246 | 1.57E-01 | 118166117 | 118166240 | NC_000001.10 |
| cg02894966 | 1.86E-12 | 9.80E-14 | 8.02 | 20.299283  | 4.45E-02 | 192700717 | 192700840 | NC_000002.11 |
| cg02764571 | 1.86E-12 | 9.80E-14 | 8.02 | 20.2990506 | 7.75E-02 | 42894332  | 42894455  | NC_000005.9  |
| cg09626193 | 1.86E-12 | 9.80E-14 | 8.02 | 20.2985819 | 1.96E-01 | 55370192  | 55370315  | NC_000008.10 |
| cg03366858 | 1.87E-12 | 9.83E-14 | 8.02 | 20.296153  | 1.02E-01 | 53742322  | 53742445  | NC_000001.10 |
| cg20416874 | 1.87E-12 | 9.85E-14 | 8.01 | 20.2943469 | 1.79E-01 | 8611966   | 8612089   | NC_000001.10 |
| cg04035209 | 1.87E-12 | 9.85E-14 | 8.01 | 20.2940575 | 2.10E-01 | 134069670 | 134069793 | NC_000004.11 |
| cg13102348 | 1.87E-12 | 9.85E-14 | 8.01 | 20.2936357 | 1.65E-01 | 97629221  | 97629344  | NC_000015.9  |
| cg21185686 | 1.87E-12 | 9.87E-14 | 8.01 | 20.2924257 | 1.93E-01 | 140810433 | 140810556 | NC_000005.9  |
| cg13875506 | 1.88E-12 | 9.91E-14 | 8.01 | 20.2878046 | 1.51E-01 | 16943573  | 16943696  | NC_000011.9  |
| cg19145710 | 1.89E-12 | 9.96E-14 | 8.01 | 20.283372  | 7.09E-02 | 36758130  | 36758253  | NC_000002.11 |
| cg04057238 | 1.90E-12 | 1.00E-13 | 8.01 | 20.2792361 | 6.71E-02 | 71713446  | 71713569  | NC_000005.9  |
| cg08370082 | 1.90E-12 | 1.00E-13 | 8.01 | 20.2780702 | 7.96E-02 | 196616876 | 196616999 | NC_000003.11 |
| cg23424003 | 1.90E-12 | 1.00E-13 | 8.01 | 20.2776903 | 1.98E-01 | 101006035 | 101006158 | NC_000007.13 |

|            |          |          |      |            |          |           |           |              |
|------------|----------|----------|------|------------|----------|-----------|-----------|--------------|
| cg03625109 | 1.90E-12 | 1.00E-13 | 8.01 | 20.2776632 | 2.00E-01 | 122132103 | 122132226 | NC_000009.11 |
| cg00454862 | 1.90E-12 | 1.00E-13 | 8.01 | 20.2765489 | 1.45E-01 | 192983012 | 192983135 | NC_000001.10 |
| cg09341491 | 1.90E-12 | 1.00E-13 | 8.01 | 20.2760114 | 1.31E-01 | 50707795  | 50707918  | NC_000016.9  |
| cg15949044 | 1.91E-12 | 1.01E-13 | 8.01 | 20.2733618 | 2.06E-01 | 140864549 | 140864672 | NC_000005.9  |
| cg26708319 | 1.91E-12 | 1.01E-13 | 8.01 | 20.2719148 | 1.98E-01 | 111552040 | 111552163 | NC_000004.11 |
| cg20130213 | 1.91E-12 | 1.01E-13 | 8.01 | 20.2708561 | 2.27E-01 | 13934169  | 13934292  | NC_000010.10 |
| cg12511214 | 1.91E-12 | 1.01E-13 | 8.01 | 20.2703585 | 2.32E-01 | 40058293  | 40058416  | NC_000022.10 |
| cg09569850 | 1.91E-12 | 1.01E-13 | 8.01 | 20.2703092 | 1.70E-01 | 64955034  | 64955157  | NC_000002.11 |
| cg25391117 | 1.91E-12 | 1.01E-13 | 8.01 | 20.2693618 | 1.45E-01 | 34043284  | 34043407  | NC_000005.9  |
| cg24317827 | 1.92E-12 | 1.01E-13 | 8.01 | 20.2660617 | 1.10E-01 | 45106404  | 45106527  | NC_000001.10 |
| cg26336790 | 1.93E-12 | 1.02E-13 | 8.01 | 20.2620686 | 6.79E-02 | 1264568   | 1264691   | NC_000005.9  |
| cg10043865 | 1.94E-12 | 1.02E-13 | 8.01 | 20.2568806 | 3.14E-01 | 35294481  | 35294604  | NC_000017.10 |
| cg17422774 | 1.94E-12 | 1.02E-13 | 8.01 | 20.2562519 | 1.92E-01 | 124901928 | 124902051 | NC_000010.10 |
| cg13390101 | 1.94E-12 | 1.02E-13 | 8.01 | 20.2556891 | 7.23E-02 | 117557209 | 117557332 | NC_000009.11 |
| cg16042149 | 1.94E-12 | 1.02E-13 | 8.01 | 20.2554392 | 2.07E-01 | 29875947  | 29876070  | NC_000022.10 |
| cg12606911 | 1.94E-12 | 1.02E-13 | 8.01 | 20.2551701 | 1.82E-01 | 87036626  | 87036749  | NC_000002.11 |
| cg07837260 | 1.94E-12 | 1.03E-13 | 8.01 | 20.2536573 | 2.22E-01 | 19788564  | 19788687  | NC_000009.11 |
| cg11436222 | 1.95E-12 | 1.03E-13 | 8.01 | 20.2507792 | 9.09E-02 | 26225520  | 26225643  | NC_000006.11 |
| cg08835113 | 1.95E-12 | 1.03E-13 | 8.01 | 20.2505401 | 2.35E-01 | 96650192  | 96650315  | NC_000007.13 |
| cg08888487 | 1.95E-12 | 1.03E-13 | 8.01 | 20.2503113 | 1.14E-01 | 1124759   | 1124882   | NC_000005.9  |
| cg04005793 | 1.95E-12 | 1.03E-13 | 8.01 | 20.2487072 | 6.04E-02 | 56622893  | 56623016  | NC_000012.11 |
| cg27282264 | 1.96E-12 | 1.04E-13 | 8.01 | 20.2430637 | 2.04E-01 | 7353499   | 7353622   | NC_000016.9  |
| cg23469417 | 1.97E-12 | 1.04E-13 | 8.01 | 20.241114  | 1.02E-01 | 95041542  | 95041665  | NC_000012.11 |
| cg20805407 | 1.97E-12 | 1.04E-13 | 8.01 | 20.2381933 | 1.27E-01 | 156878319 | 156878442 | NC_000001.10 |
| cg09070142 | 1.97E-12 | 1.04E-13 | 8.01 | 20.2372548 | 1.49E-01 | 121532396 | 121532519 | NC_000007.13 |



|            |          |          |   |            |          |           |           |              |
|------------|----------|----------|---|------------|----------|-----------|-----------|--------------|
| cg18541254 | 1.98E-12 | 1.05E-13 | 8 | 20.2330058 | 1.42E-01 | 112709550 | 112709673 | NC_000013.10 |
| cg15285250 | 1.98E-12 | 1.05E-13 | 8 | 20.2325472 | 2.25E-01 | 8482107   | 8482230   | NC_000007.13 |
| cg24876345 | 1.98E-12 | 1.05E-13 | 8 | 20.2324021 | 1.09E-01 | 56798053  | 56798176  | NC_000004.11 |
| cg13128937 | 1.98E-12 | 1.05E-13 | 8 | 20.2320128 | 1.76E-01 | 95357743  | 95357866  | NC_000013.10 |
| cg18023283 | 1.99E-12 | 1.05E-13 | 8 | 20.2289414 | 2.62E-01 | 85306828  | 85306951  | NC_000012.11 |
| cg15045292 | 1.99E-12 | 1.05E-13 | 8 | 20.2286125 | 1.27E-01 | 5403149   | 5403272   | NC_000017.10 |
| cg07213145 | 2.00E-12 | 1.06E-13 | 8 | 20.2238883 | 7.47E-02 | 72893945  | 72894068  | NC_000016.9  |
| cg15299997 | 2.00E-12 | 1.06E-13 | 8 | 20.2224257 | 8.58E-02 | 234620463 | 234620586 | NC_000002.11 |
| cg17453460 | 2.00E-12 | 1.06E-13 | 8 | 20.2222122 | 2.10E-01 | 118369423 | 118369546 | NC_000010.10 |
| cg07428136 | 2.00E-12 | 1.06E-13 | 8 | 20.221885  | 1.80E-01 | 46811492  | 46811615  | NC_000017.10 |
| cg10666926 | 2.01E-12 | 1.06E-13 | 8 | 20.2186797 | 6.66E-02 | 173945243 | 173945366 | NC_000005.9  |
| cg17786697 | 2.01E-12 | 1.07E-13 | 8 | 20.2169199 | 1.43E-01 | 122430509 | 122430632 | NC_000005.9  |
| cg04560225 | 2.01E-12 | 1.07E-13 | 8 | 20.2154004 | 1.94E-01 | 91195336  | 91195459  | NC_000001.10 |
| cg02855576 | 2.02E-12 | 1.07E-13 | 8 | 20.2143431 | 1.19E-01 | 153749964 | 153750087 | NC_000007.13 |
| cg07962620 | 2.02E-12 | 1.07E-13 | 8 | 20.2138562 | 8.00E-02 | 229415135 | 229415258 | NC_000001.10 |
| cg20077169 | 2.02E-12 | 1.07E-13 | 8 | 20.2130345 | 2.24E-02 | 71632188  | 71632311  | NC_000003.11 |
| cg11592503 | 2.02E-12 | 1.07E-13 | 8 | 20.2124541 | 2.30E-01 | 145813417 | 145813540 | NC_000007.13 |
| cg18682731 | 2.02E-12 | 1.07E-13 | 8 | 20.2114528 | 7.03E-02 | 134680867 | 134680990 | NC_000010.10 |
| cg24513224 | 2.02E-12 | 1.07E-13 | 8 | 20.2104712 | 1.92E-01 | 10102439  | 10102562  | NC_000017.10 |
| cg11192191 | 2.03E-12 | 1.08E-13 | 8 | 20.2066294 | 6.75E-02 | 69291998  | 69292121  | NC_000011.9  |
| cg01663016 | 2.03E-12 | 1.08E-13 | 8 | 20.2065742 | 2.42E-01 | 168727752 | 168727875 | NC_000005.9  |
| cg26624914 | 2.04E-12 | 1.08E-13 | 8 | 20.2018429 | 1.34E-01 | 33448382  | 33448505  | NC_000009.11 |
| cg27005794 | 2.04E-12 | 1.08E-13 | 8 | 20.2009938 | 2.38E-01 | 109746251 | 109746374 | NC_000002.11 |
| cg17371081 | 2.04E-12 | 1.08E-13 | 8 | 20.1996422 | 2.61E-01 | 20690957  | 20691080  | NC_000011.9  |
| cg18574396 | 2.04E-12 | 1.08E-13 | 8 | 20.1993942 | 6.69E-02 | 166245546 | 166245669 | NC_000004.11 |

|            |          |          |      |            |          |           |           |              |
|------------|----------|----------|------|------------|----------|-----------|-----------|--------------|
| cg03392571 | 2.05E-12 | 1.09E-13 | 8    | 20.1956801 | 1.30E-01 | 46367939  | 46368062  | NC_000021.8  |
| cg20787173 | 2.05E-12 | 1.09E-13 | 8    | 20.1942775 | 1.90E-01 | 133562475 | 133562598 | NC_000006.11 |
| cg11325970 | 2.06E-12 | 1.09E-13 | 8    | 20.1913987 | 1.68E-01 | 87979642  | 87979765  | NC_000005.9  |
| cg18278744 | 2.07E-12 | 1.10E-13 | 8    | 20.1848766 | 3.38E-02 | 32085092  | 32085215  | NC_000006.11 |
| cg03501539 | 2.08E-12 | 1.10E-13 | 8    | 20.1833977 | 2.06E-01 | 114760598 | 114760721 | NC_000011.9  |
| cg25371634 | 2.08E-12 | 1.10E-13 | 8    | 20.1829743 | 2.09E-01 | 176981422 | 176981545 | NC_000002.11 |
| cg09246749 | 2.08E-12 | 1.10E-13 | 8    | 20.1822687 | 4.40E-02 | 79926242  | 79926365  | NC_000006.11 |
| cg00250743 | 2.08E-12 | 1.10E-13 | 8    | 20.1816688 | 7.38E-02 | 123264130 | 123264253 | NC_000010.10 |
| cg15265085 | 2.09E-12 | 1.11E-13 | 8    | 20.1768693 | 1.83E-01 | 32064588  | 32064711  | NC_000006.11 |
| cg26339943 | 2.09E-12 | 1.11E-13 | 7.99 | 20.1748401 | 1.34E-01 | 145571234 | 145571357 | NC_000004.11 |
| cg17926940 | 2.10E-12 | 1.11E-13 | 7.99 | 20.1733602 | 2.24E-01 | 97685060  | 97685183  | NC_000014.8  |
| cg08083009 | 2.10E-12 | 1.11E-13 | 7.99 | 20.1732486 | 4.87E-02 | 123826474 | 123826597 | NC_000012.11 |
| cg09548051 | 2.10E-12 | 1.12E-13 | 7.99 | 20.1716527 | 2.24E-01 | 1286324   | 1286447   | NC_000007.13 |
| cg08506931 | 2.11E-12 | 1.12E-13 | 7.99 | 20.1674838 | 1.58E-01 | 223168861 | 223168984 | NC_000002.11 |
| cg17974166 | 2.11E-12 | 1.12E-13 | 7.99 | 20.1661375 | 1.68E-01 | 23280069  | 23280192  | NC_000001.10 |
| cg09187936 | 2.11E-12 | 1.12E-13 | 7.99 | 20.1646664 | 7.43E-02 | 122268950 | 122269073 | NC_000012.11 |
| cg02173970 | 2.12E-12 | 1.12E-13 | 7.99 | 20.163963  | 1.38E-01 | 134723505 | 134723628 | NC_000010.10 |
| cg13208438 | 2.12E-12 | 1.13E-13 | 7.99 | 20.1604486 | 1.70E-01 | 78296041  | 78296164  | NC_000015.9  |
| cg24411961 | 2.13E-12 | 1.13E-13 | 7.99 | 20.1575326 | 1.59E-01 | 34642396  | 34642519  | NC_000001.10 |
| cg24804195 | 2.13E-12 | 1.13E-13 | 7.99 | 20.1559902 | 2.16E-01 | 87968844  | 87968967  | NC_000005.9  |
| cg17669334 | 2.13E-12 | 1.13E-13 | 7.99 | 20.1555101 | 8.96E-02 | 22474634  | 22474757  | NC_000007.13 |
| cg03789420 | 2.14E-12 | 1.14E-13 | 7.99 | 20.1534481 | 2.25E-01 | 159141717 | 159141840 | NC_000001.10 |
| cg21844856 | 2.14E-12 | 1.14E-13 | 7.99 | 20.153228  | 1.72E-01 | 75896645  | 75896768  | NC_000008.10 |
| cg12531838 | 2.14E-12 | 1.14E-13 | 7.99 | 20.1526533 | 1.35E-01 | 531914    | 532037    | NC_000010.10 |
| cg12541478 | 2.14E-12 | 1.14E-13 | 7.99 | 20.1526068 | 1.59E-01 | 52444020  | 52444143  | NC_000012.11 |

|            |          |          |      |            |          |           |           |              |
|------------|----------|----------|------|------------|----------|-----------|-----------|--------------|
| cg16391955 | 2.14E-12 | 1.14E-13 | 7.99 | 20.1508161 | 1.69E-01 | 50881185  | 50881308  | NC_000001.10 |
| cg04980590 | 2.14E-12 | 1.14E-13 | 7.99 | 20.1492659 | 1.79E-01 | 3590820   | 3590943   | NC_000005.9  |
| cg22175873 | 2.14E-12 | 1.14E-13 | 7.99 | 20.1489564 | 1.72E-01 | 140801482 | 140801605 | NC_000005.9  |
| cg19716643 | 2.15E-12 | 1.14E-13 | 7.99 | 20.1465952 | 1.90E-01 | 52735026  | 52735149  | NC_000014.8  |
| cg02157467 | 2.15E-12 | 1.14E-13 | 7.99 | 20.1459002 | 1.87E-01 | 36004888  | 36005011  | NC_000014.8  |
| cg09229061 | 2.15E-12 | 1.15E-13 | 7.99 | 20.1452405 | 9.89E-02 | 29789103  | 29789226  | NC_000016.9  |
| cg08550785 | 2.15E-12 | 1.15E-13 | 7.99 | 20.1445189 | 2.55E-01 | 104513909 | 104514032 | NC_000008.10 |
| cg19463199 | 2.16E-12 | 1.15E-13 | 7.99 | 20.1437507 | 1.24E-01 | 197401858 | 197401981 | NC_000003.11 |
| cg15706424 | 2.16E-12 | 1.15E-13 | 7.99 | 20.1428488 | 1.31E-01 | 469781    | 469904    | NC_000002.11 |
| cg03399271 | 2.16E-12 | 1.15E-13 | 7.99 | 20.141764  | 2.24E-01 | 56228385  | 56228508  | NC_000016.9  |
| cg00983904 | 2.16E-12 | 1.15E-13 | 7.99 | 20.1416077 | 2.07E-01 | 6665288   | 6665411   | NC_000012.11 |
| cg26731327 | 2.16E-12 | 1.15E-13 | 7.99 | 20.1407739 | 2.25E-01 | 143591819 | 143591942 | NC_000008.10 |
| cg07014523 | 2.16E-12 | 1.15E-13 | 7.99 | 20.1401854 | 2.09E-01 | 50721313  | 50721436  | NC_000020.10 |
| cg11314569 | 2.17E-12 | 1.15E-13 | 7.99 | 20.1384233 | 1.47E-01 | 33419158  | 33419281  | NC_000017.10 |
| cg01385679 | 2.17E-12 | 1.15E-13 | 7.99 | 20.1377066 | 1.32E-01 | 45033155  | 45033278  | NC_000020.10 |
| cg17078253 | 2.17E-12 | 1.16E-13 | 7.99 | 20.1349295 | 1.95E-01 | 176944273 | 176944396 | NC_000002.11 |
| cg03797660 | 2.18E-12 | 1.16E-13 | 7.99 | 20.1336087 | 8.24E-02 | 89035228  | 89035351  | NC_000016.9  |
| cg04268624 | 2.18E-12 | 1.16E-13 | 7.99 | 20.1313032 | 1.87E-01 | 43037285  | 43037408  | NC_000005.9  |
| cg21988465 | 2.18E-12 | 1.16E-13 | 7.99 | 20.1303208 | 1.09E-01 | 57429277  | 57429400  | NC_000020.10 |
| cg01119875 | 2.18E-12 | 1.16E-13 | 7.99 | 20.1297191 | 1.54E-01 | 159737324 | 159737447 | NC_000005.9  |
| cg10604993 | 2.18E-12 | 1.16E-13 | 7.99 | 20.1294679 | 4.69E-02 | 33255569  | 33255692  | NC_000006.11 |
| cg07965326 | 2.18E-12 | 1.16E-13 | 7.99 | 20.1291781 | 1.02E-01 | 157522398 | 157522521 | NC_000006.11 |
| cg10804656 | 2.18E-12 | 1.16E-13 | 7.99 | 20.1291643 | 1.25E-01 | 22623460  | 22623583  | NC_000010.10 |
| cg13667638 | 2.19E-12 | 1.16E-13 | 7.99 | 20.128613  | 1.80E-01 | 5831147   | 5831270   | NC_000002.11 |
| cg19792599 | 2.19E-12 | 1.17E-13 | 7.99 | 20.1264864 | 1.85E-01 | 125774406 | 125774529 | NC_000011.9  |

|            |          |          |      |            |          |           |           |              |
|------------|----------|----------|------|------------|----------|-----------|-----------|--------------|
| cg20669572 | 2.19E-12 | 1.17E-13 | 7.99 | 20.1255828 | 1.08E-01 | 140773483 | 140773606 | NC_000009.11 |
| cg06594404 | 2.19E-12 | 1.17E-13 | 7.99 | 20.1246301 | 1.89E-01 | 380396    | 380519    | NC_000004.11 |
| cg04012266 | 2.20E-12 | 1.17E-13 | 7.99 | 20.1218571 | 2.35E-01 | 20522384  | 20522507  | NC_000012.11 |
| cg08758887 | 2.20E-12 | 1.17E-13 | 7.99 | 20.1209952 | 1.31E-01 | 154373479 | 154373602 | NC_000004.11 |
| cg13707729 | 2.21E-12 | 1.18E-13 | 7.99 | 20.1183301 | 7.95E-02 | 123326490 | 123326613 | NC_000010.10 |
| cg24161311 | 2.21E-12 | 1.18E-13 | 7.99 | 20.116073  | 4.68E-02 | 69407863  | 69407986  | NC_000011.9  |
| cg13706544 | 2.21E-12 | 1.18E-13 | 7.99 | 20.1157381 | 1.71E-01 | 103969268 | 103969391 | NC_000007.13 |
| cg04673590 | 2.21E-12 | 1.18E-13 | 7.98 | 20.1150502 | 2.50E-01 | 27136191  | 27136314  | NC_000007.13 |
| cg09120987 | 2.21E-12 | 1.18E-13 | 7.98 | 20.1148074 | 1.32E-01 | 33813708  | 33813831  | NC_000010.10 |
| cg09447924 | 2.22E-12 | 1.18E-13 | 7.98 | 20.1137508 | 6.82E-02 | 48697823  | 48697946  | NC_000003.11 |
| cg25825488 | 2.22E-12 | 1.18E-13 | 7.98 | 20.1132581 | 2.28E-01 | 15761876  | 15761999  | NC_000010.10 |
| cg06159603 | 2.22E-12 | 1.18E-13 | 7.98 | 20.1119385 | 2.41E-02 | 122526836 | 122526959 | NC_000007.13 |
| cg13400168 | 2.22E-12 | 1.19E-13 | 7.98 | 20.1114995 | 1.92E-01 | 54481620  | 54481743  | NC_000019.9  |
| cg18035255 | 2.22E-12 | 1.19E-13 | 7.98 | 20.1106605 | 1.61E-01 | 76933375  | 76933498  | NC_000005.9  |
| cg14917589 | 2.23E-12 | 1.19E-13 | 7.98 | 20.105976  | 6.42E-02 | 31692760  | 31692883  | NC_000006.11 |
| cg19029181 | 2.24E-12 | 1.19E-13 | 7.98 | 20.1044136 | 1.65E-01 | 147130536 | 147130659 | NC_000003.11 |
| cg01412518 | 2.24E-12 | 1.19E-13 | 7.98 | 20.1042539 | 8.43E-02 | 3456118   | 3456241   | NC_000001.10 |
| cg10451262 | 2.24E-12 | 1.20E-13 | 7.98 | 20.1026509 | 1.47E-01 | 124284176 | 124284299 | NC_000008.10 |
| cg04744409 | 2.24E-12 | 1.20E-13 | 7.98 | 20.1021307 | 1.58E-01 | 105388191 | 105388314 | NC_000006.11 |
| cg10052561 | 2.25E-12 | 1.20E-13 | 7.98 | 20.0991953 | 1.87E-01 | 40137185  | 40137308  | NC_000001.10 |
| cg26973414 | 2.25E-12 | 1.20E-13 | 7.98 | 20.0984423 | 1.38E-01 | 169290629 | 169290752 | NC_000006.11 |
| cg12847240 | 2.26E-12 | 1.21E-13 | 7.98 | 20.0933224 | 1.20E-01 | 10382088  | 10382211  | NC_000006.11 |
| cg00803827 | 2.27E-12 | 1.21E-13 | 7.98 | 20.0887995 | 1.76E-01 | 43393846  | 43393969  | NC_000010.10 |
| cg06528559 | 2.28E-12 | 1.22E-13 | 7.98 | 20.0851302 | 1.76E-01 | 63275509  | 63275632  | NC_000002.11 |
| cg06428196 | 2.29E-12 | 1.22E-13 | 7.98 | 20.0805591 | 1.43E-01 | 19338174  | 19338297  | NC_000002.11 |

|            |          |          |      |            |          |           |           |              |
|------------|----------|----------|------|------------|----------|-----------|-----------|--------------|
| cg07931391 | 2.29E-12 | 1.22E-13 | 7.98 | 20.0803495 | 2.50E-01 | 100608263 | 100608386 | NC_000013.10 |
| cg17710536 | 2.29E-12 | 1.22E-13 | 7.98 | 20.0800587 | 5.57E-02 | 43918101  | 43918224  | NC_000007.13 |
| cg21656751 | 2.29E-12 | 1.22E-13 | 7.98 | 20.0797392 | 1.75E-01 | 43153201  | 43153324  | NC_000007.13 |
| cg23557906 | 2.30E-12 | 1.23E-13 | 7.98 | 20.0737187 | 1.15E-01 | 467112    | 467235    | NC_000002.11 |
| cg23248357 | 2.31E-12 | 1.23E-13 | 7.98 | 20.0729525 | 1.75E-01 | 2755376   | 2755499   | NC_000005.9  |
| cg04306992 | 2.31E-12 | 1.23E-13 | 7.98 | 20.0723181 | 1.35E-01 | 4712355   | 4712478   | NC_000001.10 |
| cg04206351 | 2.31E-12 | 1.23E-13 | 7.98 | 20.0711085 | 1.47E-01 | 49582375  | 49582498  | NC_000011.9  |
| cg18673954 | 2.31E-12 | 1.23E-13 | 7.98 | 20.0710461 | 2.39E-01 | 105036611 | 105036734 | NC_000010.10 |
| cg01939274 | 2.32E-12 | 1.24E-13 | 7.98 | 20.0670167 | 2.81E-01 | 127874478 | 127874601 | NC_000005.9  |
| cg10877086 | 2.32E-12 | 1.24E-13 | 7.98 | 20.0655811 | 1.54E-01 | 114881844 | 114881967 | NC_000012.11 |
| cg07379550 | 2.32E-12 | 1.24E-13 | 7.98 | 20.0651039 | 1.86E-01 | 227204743 | 227204866 | NC_000001.10 |
| cg00511674 | 2.32E-12 | 1.24E-13 | 7.98 | 20.0650476 | 1.48E-01 | 78080068  | 78080191  | NC_000016.9  |
| cg08806153 | 2.33E-12 | 1.25E-13 | 7.98 | 20.0605852 | 1.79E-01 | 176971961 | 176972084 | NC_000002.11 |
| cg11245719 | 2.34E-12 | 1.25E-13 | 7.98 | 20.0578892 | 5.43E-02 | 8194731   | 8194854   | NC_000017.10 |
| cg18656708 | 2.34E-12 | 1.25E-13 | 7.98 | 20.0566637 | 1.11E-01 | 153859973 | 153860096 | NC_000005.9  |
| cg03583979 | 2.34E-12 | 1.25E-13 | 7.98 | 20.0557567 | 1.53E-01 | 3032345   | 3032468   | NC_000001.10 |
| cg11161150 | 2.34E-12 | 1.25E-13 | 7.98 | 20.0552524 | 1.08E-01 | 98119892  | 98120015  | NC_000005.9  |
| cg10096177 | 2.35E-12 | 1.26E-13 | 7.98 | 20.054922  | 2.75E-01 | 103889516 | 103889639 | NC_000012.11 |
| cg02085786 | 2.35E-12 | 1.26E-13 | 7.97 | 20.0532213 | 1.11E-01 | 16797770  | 16797893  | NC_000007.13 |
| cg02980079 | 2.35E-12 | 1.26E-13 | 7.97 | 20.0508024 | 2.51E-01 | 50323244  | 50323367  | NC_000010.10 |
| cg24617504 | 2.36E-12 | 1.26E-13 | 7.97 | 20.0495507 | 1.24E-01 | 155164762 | 155164885 | NC_000007.13 |
| cg09221951 | 2.36E-12 | 1.26E-13 | 7.97 | 20.0482548 | 1.07E-01 | 224543865 | 224543988 | NC_000001.10 |
| cg22894301 | 2.36E-12 | 1.26E-13 | 7.97 | 20.0473482 | 1.60E-01 | 147077665 | 147077788 | NC_000003.11 |
| cg21200539 | 2.36E-12 | 1.27E-13 | 7.97 | 20.0468434 | 2.47E-01 | 147562073 | 147562196 | NC_000004.11 |
| cg07814886 | 2.37E-12 | 1.27E-13 | 7.97 | 20.0447581 | 9.94E-02 | 36086032  | 36086155  | NC_000007.13 |

|            |          |          |      |            |          |           |           |              |
|------------|----------|----------|------|------------|----------|-----------|-----------|--------------|
| cg12614105 | 2.37E-12 | 1.27E-13 | 7.97 | 20.0431605 | 2.02E-01 | 24324435  | 24324558  | NC_000007.13 |
| cg00590139 | 2.38E-12 | 1.27E-13 | 7.97 | 20.0411938 | 2.50E-01 | 7354254   | 7354377   | NC_000016.9  |
| cg11751707 | 2.38E-12 | 1.27E-13 | 7.97 | 20.0410219 | 1.84E-01 | 38302587  | 38302710  | NC_000002.11 |
| cg16580499 | 2.38E-12 | 1.27E-13 | 7.97 | 20.0408876 | 1.79E-01 | 76739559  | 76739682  | NC_000018.9  |
| cg19118812 | 2.38E-12 | 1.27E-13 | 7.97 | 20.0405686 | 2.68E-01 | 37488438  | 37488561  | NC_000007.13 |
| cg00532157 | 2.38E-12 | 1.27E-13 | 7.97 | 20.0400083 | 2.31E-01 | 178771329 | 178771452 | NC_000005.9  |
| cg24696183 | 2.38E-12 | 1.28E-13 | 7.97 | 20.0393106 | 1.28E-01 | 2891360   | 2891483   | NC_000011.9  |
| cg07092985 | 2.38E-12 | 1.28E-13 | 7.97 | 20.0378804 | 1.01E-01 | 55533887  | 55534010  | NC_000008.10 |
| cg03983336 | 2.38E-12 | 1.28E-13 | 7.97 | 20.0375917 | 1.39E-01 | 108602542 | 108602665 | NC_000002.11 |
| cg01686617 | 2.38E-12 | 1.28E-13 | 7.97 | 20.0374953 | 3.42E-02 | 4127256   | 4127379   | NC_000020.10 |
| cg05257275 | 2.39E-12 | 1.28E-13 | 7.97 | 20.0363885 | 1.39E-01 | 65547049  | 65547172  | NC_000011.9  |
| cg18143296 | 2.39E-12 | 1.28E-13 | 7.97 | 20.0361471 | 1.71E-01 | 157812763 | 157812886 | NC_000003.11 |
| cg11644479 | 2.39E-12 | 1.28E-13 | 7.97 | 20.0356952 | 1.07E-01 | 2292914   | 2293037   | NC_000011.9  |
| cg14644846 | 2.39E-12 | 1.28E-13 | 7.97 | 20.0354444 | 1.55E-01 | 128073866 | 128073989 | NC_000003.11 |
| cg11385338 | 2.39E-12 | 1.28E-13 | 7.97 | 20.0348674 | 1.54E-01 | 63250817  | 63250940  | NC_000007.13 |
| cg18146152 | 2.39E-12 | 1.28E-13 | 7.97 | 20.0336131 | 1.00E-01 | 1400772   | 1400895   | NC_000016.9  |
| cg19846622 | 2.39E-12 | 1.28E-13 | 7.97 | 20.0332978 | 1.25E-01 | 4859960   | 4860083   | NC_000004.11 |
| cg03355524 | 2.39E-12 | 1.28E-13 | 7.97 | 20.0331068 | 1.90E-01 | 54578898  | 54579021  | NC_000020.10 |
| cg12079322 | 2.40E-12 | 1.29E-13 | 7.97 | 20.0303976 | 2.74E-01 | 154728468 | 154728591 | NC_000002.11 |
| cg22336004 | 2.40E-12 | 1.29E-13 | 7.97 | 20.0288803 | 2.11E-01 | 66258035  | 66258158  | NC_000001.10 |
| cg07787450 | 2.40E-12 | 1.29E-13 | 7.97 | 20.0286933 | 1.20E-01 | 61405614  | 61405737  | NC_000020.10 |
| cg12948543 | 2.40E-12 | 1.29E-13 | 7.97 | 20.0285141 | 7.38E-02 | 105851564 | 105851687 | NC_000014.8  |
| cg11947423 | 2.41E-12 | 1.29E-13 | 7.97 | 20.0248615 | 8.12E-02 | 42329660  | 42329783  | NC_000008.10 |
| cg06010588 | 2.42E-12 | 1.30E-13 | 7.97 | 20.0233562 | 2.18E-01 | 35092876  | 35092999  | NC_000008.10 |
| cg16172031 | 2.42E-12 | 1.30E-13 | 7.97 | 20.021035  | 7.79E-02 | 39718940  | 39719063  | NC_000022.10 |

|            |          |          |      |            |          |           |           |              |
|------------|----------|----------|------|------------|----------|-----------|-----------|--------------|
| cg27645345 | 2.43E-12 | 1.30E-13 | 7.97 | 20.0176451 | 1.02E-01 | 31829840  | 31829963  | NC_000006.11 |
| cg09221269 | 2.43E-12 | 1.30E-13 | 7.97 | 20.017571  | 1.88E-02 | 36402132  | 36402255  | NC_000021.8  |
| cg05379302 | 2.43E-12 | 1.30E-13 | 7.97 | 20.0173373 | 1.95E-01 | 11540200  | 11540323  | NC_000001.10 |
| cg20800117 | 2.43E-12 | 1.30E-13 | 7.97 | 20.0168146 | 9.68E-02 | 7308366   | 7308489   | NC_000001.10 |
| cg24882324 | 2.43E-12 | 1.31E-13 | 7.97 | 20.0164338 | 1.77E-01 | 32064508  | 32064631  | NC_000006.11 |
| cg01634458 | 2.43E-12 | 1.31E-13 | 7.97 | 20.0150003 | 2.33E-01 | 51168553  | 51168676  | NC_000016.9  |
| cg10656664 | 2.43E-12 | 1.31E-13 | 7.97 | 20.014781  | 6.09E-02 | 853447    | 853570    | NC_000005.9  |
| cg21547690 | 2.44E-12 | 1.31E-13 | 7.97 | 20.0130409 | 1.86E-01 | 42077327  | 42077450  | NC_000014.8  |
| cg18323912 | 2.45E-12 | 1.31E-13 | 7.97 | 20.0102169 | 2.65E-01 | 42994709  | 42994832  | NC_000005.9  |
| cg09636024 | 2.45E-12 | 1.31E-13 | 7.97 | 20.0096915 | 5.95E-02 | 1067228   | 1067351   | NC_000017.10 |
| cg26476173 | 2.45E-12 | 1.32E-13 | 7.97 | 20.0074283 | 1.25E-01 | 48334459  | 48334582  | NC_000016.9  |
| cg02505681 | 2.45E-12 | 1.32E-13 | 7.97 | 20.0071537 | 9.91E-02 | 39615285  | 39615408  | NC_000019.9  |
| cg16318253 | 2.46E-12 | 1.32E-13 | 7.97 | 20.0054112 | 1.45E-01 | 75377474  | 75377597  | NC_000018.9  |
| cg05771459 | 2.46E-12 | 1.32E-13 | 7.97 | 20.0045986 | 1.22E-01 | 144994318 | 144994441 | NC_000001.10 |
| cg20552236 | 2.46E-12 | 1.32E-13 | 7.97 | 20.0038954 | 1.23E-01 | 75090958  | 75091081  | NC_000015.9  |
| cg00494735 | 2.49E-12 | 1.34E-13 | 7.96 | 19.9920408 | 6.70E-02 | 2293593   | 2293716   | NC_000011.9  |
| cg08860622 | 2.49E-12 | 1.34E-13 | 7.96 | 19.991229  | 9.43E-02 | 43141679  | 43141802  | NC_000017.10 |
| cg06641366 | 2.49E-12 | 1.34E-13 | 7.96 | 19.9911633 | 2.12E-01 | 90097604  | 90097727  | NC_000001.10 |
| cg12498181 | 2.50E-12 | 1.34E-13 | 7.96 | 19.9890753 | 9.04E-02 | 113436309 | 113436432 | NC_000013.10 |
| cg13631916 | 2.50E-12 | 1.35E-13 | 7.96 | 19.9860338 | 2.54E-01 | 117086931 | 117087054 | NC_000006.11 |
| cg04839897 | 2.51E-12 | 1.35E-13 | 7.96 | 19.9844152 | 9.56E-02 | 28589957  | 28590080  | NC_000001.10 |
| cg05791173 | 2.51E-12 | 1.35E-13 | 7.96 | 19.9834434 | 1.13E-01 | 130508478 | 130508601 | NC_000010.10 |
| cg15845792 | 2.51E-12 | 1.35E-13 | 7.96 | 19.9824934 | 2.15E-01 | 28175446  | 28175569  | NC_000006.11 |
| cg06330593 | 2.51E-12 | 1.35E-13 | 7.96 | 19.9821058 | 1.09E-01 | 39537455  | 39537578  | NC_000017.10 |
| cg07037852 | 2.52E-12 | 1.35E-13 | 7.96 | 19.9794247 | 1.62E-01 | 41109565  | 41109688  | NC_000013.10 |

|            |          |          |      |            |          |           |           |              |
|------------|----------|----------|------|------------|----------|-----------|-----------|--------------|
| cg22637867 | 2.52E-12 | 1.36E-13 | 7.96 | 19.9791699 | 1.71E-01 | 12624466  | 12624589  | NC_000019.9  |
| cg12219082 | 2.52E-12 | 1.36E-13 | 7.96 | 19.9789693 | 2.13E-01 | 68981854  | 68981977  | NC_000003.11 |
| cg01064265 | 2.52E-12 | 1.36E-13 | 7.96 | 19.9779891 | 2.09E-01 | 55363058  | 55363181  | NC_000016.9  |
| cg00615473 | 2.52E-12 | 1.36E-13 | 7.96 | 19.9778384 | 2.66E-01 | 32930423  | 32930546  | NC_000021.8  |
| cg22500428 | 2.52E-12 | 1.36E-13 | 7.96 | 19.9774773 | 2.92E-01 | 4381882   | 4382005   | NC_000012.11 |
| cg25942940 | 2.52E-12 | 1.36E-13 | 7.96 | 19.9763141 | 6.43E-02 | 8270645   | 8270768   | NC_000001.10 |
| cg21222350 | 2.53E-12 | 1.36E-13 | 7.96 | 19.9742516 | 1.36E-01 | 127602615 | 127602738 | NC_000009.11 |
| cg23332586 | 2.54E-12 | 1.37E-13 | 7.96 | 19.970841  | 1.21E-01 | 49042468  | 49042591  | NC_000022.10 |
| cg06040811 | 2.54E-12 | 1.37E-13 | 7.96 | 19.9702206 | 1.63E-01 | 88018605  | 88018728  | NC_000005.9  |
| cg21678461 | 2.54E-12 | 1.37E-13 | 7.96 | 19.9687798 | 2.02E-01 | 20180700  | 20180823  | NC_000011.9  |
| cg27539806 | 2.55E-12 | 1.37E-13 | 7.96 | 19.9666012 | 3.66E-02 | 88829700  | 88829823  | NC_000016.9  |
| cg18501647 | 2.55E-12 | 1.37E-13 | 7.96 | 19.9654002 | 9.82E-02 | 32117379  | 32117502  | NC_000006.11 |
| cg14602530 | 2.55E-12 | 1.38E-13 | 7.96 | 19.9645146 | 1.93E-01 | 4859772   | 4859895   | NC_000004.11 |
| cg19048251 | 2.55E-12 | 1.38E-13 | 7.96 | 19.9643551 | 1.78E-01 | 119311636 | 119311759 | NC_000010.10 |
| cg02624701 | 2.56E-12 | 1.38E-13 | 7.96 | 19.9625351 | 1.47E-01 | 49937176  | 49937299  | NC_000019.9  |
| cg03726556 | 2.56E-12 | 1.38E-13 | 7.96 | 19.9615034 | 1.57E-01 | 119607379 | 119607502 | NC_000002.11 |
| cg02022733 | 2.56E-12 | 1.38E-13 | 7.96 | 19.9614038 | 1.83E-01 | 140864578 | 140864701 | NC_000005.9  |
| cg09011256 | 2.56E-12 | 1.38E-13 | 7.96 | 19.9605991 | 7.68E-02 | 37074631  | 37074754  | NC_000020.10 |
| cg06475633 | 2.56E-12 | 1.38E-13 | 7.96 | 19.9599585 | 2.00E-01 | 3805065   | 3805188   | NC_000017.10 |
| cg16606320 | 2.56E-12 | 1.38E-13 | 7.96 | 19.9599573 | 1.97E-01 | 56685972  | 56686095  | NC_000004.11 |
| cg09695430 | 2.56E-12 | 1.38E-13 | 7.96 | 19.9596651 | 1.58E-01 | 32447944  | 32448067  | NC_000011.9  |
| cg05347158 | 2.57E-12 | 1.38E-13 | 7.96 | 19.9591039 | 5.29E-02 | 32148832  | 32148955  | NC_000001.10 |
| cg12133554 | 2.57E-12 | 1.39E-13 | 7.96 | 19.9559895 | 1.18E-01 | 299309    | 299432    | NC_000004.11 |
| cg18369516 | 2.59E-12 | 1.39E-13 | 7.96 | 19.9511868 | 1.76E-01 | 62406721  | 62406844  | NC_000020.10 |
| cg02969141 | 2.59E-12 | 1.39E-13 | 7.96 | 19.9509478 | 2.16E-01 | 15727598  | 15727721  | NC_000007.13 |



|            |          |          |      |            |          |           |           |              |
|------------|----------|----------|------|------------|----------|-----------|-----------|--------------|
| cg09840386 | 2.60E-12 | 1.40E-13 | 7.96 | 19.9461207 | 1.50E-01 | 79058751  | 79058874  | NC_000017.10 |
| cg04606861 | 2.61E-12 | 1.41E-13 | 7.96 | 19.9419559 | 1.49E-01 | 132905735 | 132905858 | NC_000012.11 |
| cg09010107 | 2.61E-12 | 1.41E-13 | 7.96 | 19.9416132 | 1.90E-01 | 170638807 | 170638930 | NC_000001.10 |
| cg13641591 | 2.61E-12 | 1.41E-13 | 7.96 | 19.9411179 | 1.46E-01 | 75528534  | 75528657  | NC_000011.9  |
| cg06821075 | 2.61E-12 | 1.41E-13 | 7.96 | 19.9404684 | 7.81E-02 | 99933209  | 99933332  | NC_000010.10 |
| cg16718710 | 2.61E-12 | 1.41E-13 | 7.96 | 19.9400627 | 8.76E-02 | 2249145   | 2249268   | NC_000004.11 |
| cg12253830 | 2.62E-12 | 1.42E-13 | 7.96 | 19.9359546 | 2.05E-01 | 22487668  | 22487791  | NC_000012.11 |
| cg16705627 | 2.62E-12 | 1.42E-13 | 7.96 | 19.9356747 | 1.60E-01 | 112721950 | 112722073 | NC_000013.10 |
| cg22002216 | 2.62E-12 | 1.42E-13 | 7.96 | 19.9353969 | 6.66E-02 | 48502923  | 48503046  | NC_000017.10 |
| cg12368612 | 2.63E-12 | 1.42E-13 | 7.96 | 19.9348356 | 1.71E-01 | 115135999 | 115136122 | NC_000012.11 |
| cg15143788 | 2.63E-12 | 1.42E-13 | 7.95 | 19.9335672 | 1.53E-01 | 92909434  | 92909557  | NC_000005.9  |
| cg18609078 | 2.63E-12 | 1.42E-13 | 7.95 | 19.9333912 | 1.67E-01 | 13538807  | 13538930  | NC_000004.11 |
| cg24154271 | 2.63E-12 | 1.42E-13 | 7.95 | 19.9326675 | 1.17E-01 | 140957775 | 140957898 | NC_000006.11 |
| cg03302801 | 2.63E-12 | 1.42E-13 | 7.95 | 19.932559  | 8.15E-02 | 241567835 | 241567958 | NC_000002.11 |
| cg18007463 | 2.63E-12 | 1.42E-13 | 7.95 | 19.9322411 | 2.14E-01 | 166795913 | 166796036 | NC_000004.11 |
| cg11725101 | 2.63E-12 | 1.42E-13 | 7.95 | 19.9319122 | 8.46E-02 | 148739457 | 148739580 | NC_000001.10 |
| cg00602326 | 2.64E-12 | 1.42E-13 | 7.95 | 19.9308852 | 8.46E-02 | 31427700  | 31427823  | NC_000005.9  |
| cg09887220 | 2.64E-12 | 1.42E-13 | 7.95 | 19.9305195 | 1.47E-01 | 95356202  | 95356325  | NC_000013.10 |
| cg15602633 | 2.64E-12 | 1.43E-13 | 7.95 | 19.9277242 | 6.03E-02 | 134698661 | 134698784 | NC_000010.10 |
| cg15576918 | 2.64E-12 | 1.43E-13 | 7.95 | 19.9274499 | 1.22E-01 | 45834369  | 45834492  | NC_000003.11 |
| cg16894439 | 2.64E-12 | 1.43E-13 | 7.95 | 19.927351  | 7.90E-02 | 228634806 | 228634929 | NC_000001.10 |
| cg14623754 | 2.65E-12 | 1.43E-13 | 7.95 | 19.9266457 | 1.06E-01 | 117228122 | 117228245 | NC_000009.11 |
| cg25645268 | 2.65E-12 | 1.43E-13 | 7.95 | 19.9236901 | 2.18E-01 | 154710598 | 154710721 | NC_000004.11 |
| cg04658615 | 2.66E-12 | 1.44E-13 | 7.95 | 19.9224961 | 8.56E-02 | 53181709  | 53181832  | NC_000006.11 |
| cg20882455 | 2.66E-12 | 1.44E-13 | 7.95 | 19.9222868 | 8.76E-02 | 107777859 | 107777982 | NC_000006.11 |

|            |          |          |      |            |          |           |           |              |
|------------|----------|----------|------|------------|----------|-----------|-----------|--------------|
| cg02719956 | 2.67E-12 | 1.44E-13 | 7.95 | 19.9172512 | 5.33E-02 | 306324    | 306447    | NC_000011.9  |
| cg21147648 | 2.67E-12 | 1.45E-13 | 7.95 | 19.9157836 | 1.27E-01 | 68118964  | 68119087  | NC_000015.9  |
| cg02357541 | 2.67E-12 | 1.45E-13 | 7.95 | 19.9151802 | 1.61E-01 | 127769619 | 127769742 | NC_000003.11 |
| cg09698471 | 2.68E-12 | 1.45E-13 | 7.95 | 19.914032  | 1.43E-01 | 63257847  | 63257970  | NC_000005.9  |
| cg09077319 | 2.68E-12 | 1.45E-13 | 7.95 | 19.9137361 | 1.04E-01 | 69285899  | 69286022  | NC_000011.9  |
| cg14213517 | 2.68E-12 | 1.45E-13 | 7.95 | 19.9134906 | 7.49E-02 | 102972205 | 102972328 | NC_000002.11 |
| cg16656232 | 2.71E-12 | 1.46E-13 | 7.95 | 19.9026408 | 6.36E-02 | 167543888 | 167544011 | NC_000005.9  |
| cg05346963 | 2.71E-12 | 1.46E-13 | 7.95 | 19.9024325 | 8.82E-02 | 77892772  | 77892895  | NC_000004.11 |
| cg26885268 | 2.71E-12 | 1.47E-13 | 7.95 | 19.9004809 | 1.58E-01 | 149389941 | 149390064 | NC_000007.13 |
| cg26383057 | 2.72E-12 | 1.47E-13 | 7.95 | 19.899612  | 6.57E-02 | 168591386 | 168591509 | NC_000006.11 |
| cg18550381 | 2.72E-12 | 1.47E-13 | 7.95 | 19.8977344 | 1.55E-01 | 97844391  | 97844514  | NC_000007.13 |
| cg21587238 | 2.72E-12 | 1.47E-13 | 7.95 | 19.8976328 | 2.14E-01 | 42953590  | 42953713  | NC_000005.9  |
| cg09656363 | 2.72E-12 | 1.47E-13 | 7.95 | 19.8972847 | 1.21E-01 | 53775035  | 53775158  | NC_000013.10 |
| cg26019584 | 2.73E-12 | 1.48E-13 | 7.95 | 19.8940378 | 1.18E-01 | 1302689   | 1302812   | NC_000019.9  |
| cg21591742 | 2.73E-12 | 1.48E-13 | 7.95 | 19.8935539 | 2.28E-01 | 176980998 | 176981121 | NC_000002.11 |
| cg21815337 | 2.74E-12 | 1.48E-13 | 7.95 | 19.8913817 | 1.21E-01 | 4348344   | 4348467   | NC_000003.11 |
| cg24724664 | 2.74E-12 | 1.48E-13 | 7.95 | 19.8911437 | 1.46E-01 | 172945383 | 172945506 | NC_000002.11 |
| cg14208839 | 2.74E-12 | 1.48E-13 | 7.95 | 19.8907694 | 2.60E-02 | 128080980 | 128081103 | NC_000003.11 |
| cg18361098 | 2.76E-12 | 1.49E-13 | 7.95 | 19.8836822 | 2.03E-01 | 37136391  | 37136514  | NC_000014.8  |
| cg15965134 | 2.76E-12 | 1.49E-13 | 7.95 | 19.8831984 | 1.53E-01 | 137480671 | 137480794 | NC_000003.11 |
| cg22850587 | 2.76E-12 | 1.49E-13 | 7.95 | 19.8831267 | 1.74E-01 | 4867638   | 4867761   | NC_000004.11 |
| cg05290780 | 2.77E-12 | 1.50E-13 | 7.95 | 19.8788108 | 1.56E-01 | 39609377  | 39609500  | NC_000013.10 |
| cg15760257 | 2.78E-12 | 1.51E-13 | 7.95 | 19.8753594 | 2.86E-01 | 26699169  | 26699292  | NC_000017.10 |
| cg25585712 | 2.79E-12 | 1.51E-13 | 7.94 | 19.8709141 | 1.77E-01 | 41869213  | 41869336  | NC_000004.11 |
| cg14419187 | 2.79E-12 | 1.51E-13 | 7.94 | 19.8699264 | 2.42E-01 | 210637094 | 210637217 | NC_000002.11 |

|            |          |          |      |            |          |           |           |              |
|------------|----------|----------|------|------------|----------|-----------|-----------|--------------|
| cg04508575 | 2.80E-12 | 1.52E-13 | 7.94 | 19.8670357 | 1.27E-01 | 31323107  | 31323230  | NC_000005.9  |
| cg26140120 | 2.80E-12 | 1.52E-13 | 7.94 | 19.8662143 | 1.25E-01 | 124219575 | 124219698 | NC_000008.10 |
| cg17391620 | 2.81E-12 | 1.52E-13 | 7.94 | 19.8653682 | 1.16E-01 | 31734471  | 31734594  | NC_000006.11 |
| cg06567373 | 2.81E-12 | 1.52E-13 | 7.94 | 19.86439   | 1.45E-01 | 102483843 | 102483966 | NC_000010.10 |
| cg13921352 | 2.81E-12 | 1.52E-13 | 7.94 | 19.8633993 | 2.45E-01 | 68981890  | 68982013  | NC_000003.11 |
| cg05349062 | 2.81E-12 | 1.53E-13 | 7.94 | 19.8624231 | 2.25E-01 | 74741853  | 74741976  | NC_000002.11 |
| cg16665335 | 2.81E-12 | 1.53E-13 | 7.94 | 19.8618894 | 2.82E-02 | 205775    | 205898    | NC_000005.9  |
| cg03108697 | 2.82E-12 | 1.53E-13 | 7.94 | 19.8605502 | 5.46E-02 | 9732066   | 9732189   | NC_000011.9  |
| cg23504022 | 2.82E-12 | 1.53E-13 | 7.94 | 19.8595111 | 2.96E-02 | 35227391  | 35227514  | NC_000006.11 |
| cg05458079 | 2.83E-12 | 1.53E-13 | 7.94 | 19.8568113 | 2.62E-01 | 68119521  | 68119644  | NC_000015.9  |
| cg27323784 | 2.83E-12 | 1.54E-13 | 7.94 | 19.8551792 | 2.36E-01 | 116451730 | 116451853 | NC_000011.9  |
| cg15235999 | 2.83E-12 | 1.54E-13 | 7.94 | 19.8546037 | 1.92E-01 | 52996352  | 52996475  | NC_000019.9  |
| cg27443071 | 2.84E-12 | 1.54E-13 | 7.94 | 19.853587  | 1.92E-01 | 190939090 | 190939213 | NC_000004.11 |
| cg25092838 | 2.84E-12 | 1.54E-13 | 7.94 | 19.851486  | 1.99E-01 | 57279115  | 57279238  | NC_000014.8  |
| cg02151120 | 2.84E-12 | 1.54E-13 | 7.94 | 19.8504303 | 1.08E-01 | 71724287  | 71724410  | NC_000011.9  |
| cg15412759 | 2.85E-12 | 1.55E-13 | 7.94 | 19.8490221 | 2.27E-01 | 50683213  | 50683336  | NC_000006.11 |
| cg02165355 | 2.85E-12 | 1.55E-13 | 7.94 | 19.8478296 | 2.14E-01 | 178368071 | 178368194 | NC_000005.9  |
| cg27633530 | 2.86E-12 | 1.55E-13 | 7.94 | 19.8454101 | 2.35E-01 | 50344294  | 50344417  | NC_000007.13 |
| cg07033624 | 2.86E-12 | 1.55E-13 | 7.94 | 19.8448873 | 1.77E-01 | 112716623 | 112716746 | NC_000013.10 |
| cg07251046 | 2.86E-12 | 1.55E-13 | 7.94 | 19.8446997 | 1.26E-01 | 97791023  | 97791146  | NC_000012.11 |
| cg06838584 | 2.86E-12 | 1.55E-13 | 7.94 | 19.8442993 | 1.98E-01 | 2504581   | 2504704   | NC_000011.9  |
| cg24529500 | 2.86E-12 | 1.55E-13 | 7.94 | 19.8439746 | 1.39E-01 | 30540984  | 30541107  | NC_000006.11 |
| cg15829969 | 2.86E-12 | 1.55E-13 | 7.94 | 19.8439108 | 1.33E-01 | 147801025 | 147801148 | NC_000001.10 |
| cg06936155 | 2.87E-12 | 1.56E-13 | 7.94 | 19.8404818 | 1.43E-01 | 91192451  | 91192574  | NC_000001.10 |
| cg25937155 | 2.88E-12 | 1.56E-13 | 7.94 | 19.8376414 | 4.46E-02 | 20408772  | 20408895  | NC_000017.10 |

|            |          |          |      |            |          |           |           |              |
|------------|----------|----------|------|------------|----------|-----------|-----------|--------------|
| cg01391022 | 2.88E-12 | 1.57E-13 | 7.94 | 19.8370319 | 8.26E-02 | 122360665 | 122360788 | NC_000012.11 |
| cg10057940 | 2.89E-12 | 1.57E-13 | 7.94 | 19.8352954 | 1.63E-01 | 6805506   | 6805629   | NC_000010.10 |
| cg03227184 | 2.89E-12 | 1.57E-13 | 7.94 | 19.8344286 | 2.55E-01 | 122686432 | 122686555 | NC_000004.11 |
| cg07935902 | 2.89E-12 | 1.57E-13 | 7.94 | 19.8330209 | 1.00E-01 | 10024364  | 10024487  | NC_000004.11 |
| cg21894728 | 2.89E-12 | 1.57E-13 | 7.94 | 19.8329578 | 8.68E-02 | 47453656  | 47453779  | NC_000021.8  |
| cg19394047 | 2.89E-12 | 1.57E-13 | 7.94 | 19.8329083 | 1.57E-01 | 131223487 | 131223610 | NC_000010.10 |
| cg06482019 | 2.89E-12 | 1.57E-13 | 7.94 | 19.8325464 | 2.10E-01 | 51147902  | 51148025  | NC_000016.9  |
| cg12218771 | 2.89E-12 | 1.57E-13 | 7.94 | 19.8321393 | 5.63E-02 | 6696166   | 6696289   | NC_000001.10 |
| cg06182584 | 2.90E-12 | 1.57E-13 | 7.94 | 19.8313358 | 1.37E-01 | 30614329  | 30614452  | NC_000006.11 |
| cg21390082 | 2.91E-12 | 1.58E-13 | 7.94 | 19.8264068 | 1.36E-01 | 33842255  | 33842378  | NC_000017.10 |
| cg09141965 | 2.94E-12 | 1.60E-13 | 7.94 | 19.8176627 | 1.49E-01 | 1269385   | 1269508   | NC_000007.13 |
| cg26623263 | 2.94E-12 | 1.60E-13 | 7.94 | 19.8149232 | 4.77E-02 | 202987140 | 202987263 | NC_000002.11 |
| cg03731131 | 2.95E-12 | 1.60E-13 | 7.93 | 19.813203  | 1.54E-01 | 44278274  | 44278397  | NC_000019.9  |
| cg22327646 | 2.95E-12 | 1.60E-13 | 7.93 | 19.8129136 | 1.85E-01 | 114878570 | 114878693 | NC_000012.11 |
| cg15800975 | 2.95E-12 | 1.61E-13 | 7.93 | 19.8111878 | 1.54E-01 | 21541652  | 21541775  | NC_000013.10 |
| cg09465698 | 2.96E-12 | 1.61E-13 | 7.93 | 19.8082337 | 1.88E-01 | 140787623 | 140787746 | NC_000005.9  |
| cg06772736 | 2.97E-12 | 1.62E-13 | 7.93 | 19.8062069 | 7.64E-02 | 93397394  | 93397517  | NC_000012.11 |
| cg01843946 | 2.97E-12 | 1.62E-13 | 7.93 | 19.8049762 | 1.64E-01 | 37124434  | 37124557  | NC_000014.8  |
| cg23462956 | 2.97E-12 | 1.62E-13 | 7.93 | 19.804883  | 1.72E-01 | 61119262  | 61119385  | NC_000014.8  |
| cg18895476 | 2.98E-12 | 1.62E-13 | 7.93 | 19.8009383 | 7.89E-02 | 26962071  | 26962194  | NC_000022.10 |
| cg18185554 | 2.99E-12 | 1.63E-13 | 7.93 | 19.7998993 | 1.68E-01 | 103294574 | 103294697 | NC_000014.8  |
| cg19475108 | 2.99E-12 | 1.63E-13 | 7.93 | 19.799588  | 4.05E-02 | 33758486  | 33758609  | NC_000020.10 |
| cg22473973 | 3.00E-12 | 1.63E-13 | 7.93 | 19.7964316 | 2.38E-01 | 133794911 | 133795034 | NC_000010.10 |
| cg11934170 | 3.00E-12 | 1.63E-13 | 7.93 | 19.7958433 | 1.65E-01 | 155254326 | 155254449 | NC_000004.11 |
| cg24054525 | 3.00E-12 | 1.63E-13 | 7.93 | 19.7950291 | 6.00E-02 | 49685846  | 49685969  | NC_000019.9  |

|            |          |          |      |            |          |           |           |              |
|------------|----------|----------|------|------------|----------|-----------|-----------|--------------|
| cg15403900 | 3.00E-12 | 1.63E-13 | 7.93 | 19.7941727 | 1.09E-01 | 85667849  | 85667972  | NC_000016.9  |
| cg20146105 | 3.00E-12 | 1.64E-13 | 7.93 | 19.7940307 | 7.94E-02 | 205547082 | 205547205 | NC_000001.10 |
| cg20690922 | 3.00E-12 | 1.64E-13 | 7.93 | 19.7940072 | 1.24E-01 | 74498083  | 74498206  | NC_000017.10 |
| cg14214262 | 3.00E-12 | 1.64E-13 | 7.93 | 19.7930971 | 1.64E-01 | 114843188 | 114843311 | NC_000012.11 |
| cg13523818 | 3.01E-12 | 1.64E-13 | 7.93 | 19.7924107 | 9.25E-02 | 19371900  | 19372023  | NC_000019.9  |
| cg23030069 | 3.01E-12 | 1.64E-13 | 7.93 | 19.7911173 | 2.35E-01 | 2162183   | 2162306   | NC_000011.9  |
| cg05703996 | 3.01E-12 | 1.64E-13 | 7.93 | 19.790679  | 1.67E-01 | 335830    | 335953    | NC_000016.9  |
| cg00574913 | 3.01E-12 | 1.64E-13 | 7.93 | 19.7900148 | 1.09E-01 | 13761579  | 13761702  | NC_000020.10 |
| cg26324366 | 3.01E-12 | 1.64E-13 | 7.93 | 19.7898606 | 1.19E-01 | 99283652  | 99283775  | NC_000006.11 |
| cg25740301 | 3.01E-12 | 1.64E-13 | 7.93 | 19.7896526 | 4.38E-02 | 128403710 | 128403833 | NC_000002.11 |
| cg11605835 | 3.03E-12 | 1.65E-13 | 7.93 | 19.7856001 | 1.65E-01 | 3597695   | 3597818   | NC_000005.9  |
| cg15307022 | 3.03E-12 | 1.65E-13 | 7.93 | 19.7848083 | 1.21E-01 | 108675287 | 108675410 | NC_000011.9  |
| cg03430846 | 3.03E-12 | 1.65E-13 | 7.93 | 19.7830001 | 2.28E-01 | 31497082  | 31497205  | NC_000008.10 |
| cg05735547 | 3.06E-12 | 1.67E-13 | 7.93 | 19.7751555 | 7.42E-02 | 41830291  | 41830414  | NC_000017.10 |
| cg21718267 | 3.06E-12 | 1.67E-13 | 7.93 | 19.7743419 | 2.02E-01 | 113916473 | 113916596 | NC_000012.11 |
| cg26631178 | 3.07E-12 | 1.67E-13 | 7.93 | 19.7721514 | 4.46E-02 | 45773680  | 45773803  | NC_000017.10 |
| cg11837391 | 3.07E-12 | 1.68E-13 | 7.93 | 19.7690748 | 7.28E-02 | 128199781 | 128199904 | NC_000003.11 |
| cg09943716 | 3.08E-12 | 1.68E-13 | 7.93 | 19.7679825 | 1.98E-01 | 55202236  | 55202359  | NC_000020.10 |
| cg00366037 | 3.09E-12 | 1.68E-13 | 7.93 | 19.7656087 | 1.68E-01 | 76781121  | 76781244  | NC_000010.10 |
| cg14508508 | 3.09E-12 | 1.69E-13 | 7.93 | 19.7640857 | 1.70E-01 | 27113322  | 27113445  | NC_000015.9  |
| cg16492597 | 3.09E-12 | 1.69E-13 | 7.93 | 19.7626032 | 1.68E-01 | 133332095 | 133332218 | NC_000005.9  |
| cg04476839 | 3.10E-12 | 1.69E-13 | 7.93 | 19.7605796 | 5.99E-02 | 66014369  | 66014492  | NC_000012.11 |
| cg01718322 | 3.11E-12 | 1.70E-13 | 7.93 | 19.7565672 | 2.22E-01 | 96342365  | 96342488  | NC_000014.8  |
| cg10415122 | 3.11E-12 | 1.70E-13 | 7.93 | 19.7565632 | 4.87E-02 | 75981489  | 75981612  | NC_000015.9  |
| cg19773855 | 3.13E-12 | 1.71E-13 | 7.92 | 19.7502811 | 1.97E-01 | 172754417 | 172754540 | NC_000005.9  |

|            |          |          |      |            |          |           |           |              |
|------------|----------|----------|------|------------|----------|-----------|-----------|--------------|
| cg14636534 | 3.13E-12 | 1.71E-13 | 7.92 | 19.7499845 | 1.80E-01 | 87968528  | 87968651  | NC_000005.9  |
| cg13103303 | 3.13E-12 | 1.71E-13 | 7.92 | 19.7493805 | 2.69E-01 | 71955113  | 71955236  | NC_000011.9  |
| cg06095631 | 3.13E-12 | 1.71E-13 | 7.92 | 19.749115  | 3.24E-02 | 4230707   | 4230830   | NC_000010.10 |
| cg16257051 | 3.14E-12 | 1.71E-13 | 7.92 | 19.7480895 | 2.03E-01 | 153862183 | 153862306 | NC_000005.9  |
| cg04656327 | 3.14E-12 | 1.72E-13 | 7.92 | 19.7467801 | 7.57E-02 | 58505303  | 58505426  | NC_000020.10 |
| cg04842472 | 3.14E-12 | 1.72E-13 | 7.92 | 19.7465349 | 8.68E-02 | 39872851  | 39872974  | NC_000007.13 |
| cg04003051 | 3.16E-12 | 1.72E-13 | 7.92 | 19.741811  | 7.11E-02 | 1219430   | 1219553   | NC_000016.9  |
| cg20954460 | 3.16E-12 | 1.73E-13 | 7.92 | 19.7410307 | 9.30E-02 | 239594118 | 239594241 | NC_000002.11 |
| cg19793376 | 3.16E-12 | 1.73E-13 | 7.92 | 19.7407789 | 1.97E-01 | 135462522 | 135462645 | NC_000009.11 |
| cg15964309 | 3.16E-12 | 1.73E-13 | 7.92 | 19.7407322 | 1.96E-01 | 114886561 | 114886684 | NC_000012.11 |
| cg18689958 | 3.16E-12 | 1.73E-13 | 7.92 | 19.7395497 | 2.57E-01 | 33936232  | 33936355  | NC_000005.9  |
| cg26387689 | 3.17E-12 | 1.73E-13 | 7.92 | 19.7380476 | 1.92E-01 | 20521814  | 20521937  | NC_000012.11 |
| cg19622581 | 3.18E-12 | 1.74E-13 | 7.92 | 19.7352383 | 4.40E-02 | 3305106   | 3305229   | NC_000011.9  |
| cg17928883 | 3.18E-12 | 1.74E-13 | 7.92 | 19.7344517 | 1.85E-01 | 2038528   | 2038651   | NC_000005.9  |
| cg05842480 | 3.18E-12 | 1.74E-13 | 7.92 | 19.7338708 | 1.84E-01 | 7795192   | 7795315   | NC_000019.9  |
| cg01994205 | 3.18E-12 | 1.74E-13 | 7.92 | 19.7333173 | 2.01E-01 | 79177467  | 79177590  | NC_000013.10 |
| cg20291855 | 3.19E-12 | 1.74E-13 | 7.92 | 19.7312739 | 2.15E-01 | 13524143  | 13524266  | NC_000004.11 |
| cg26174583 | 3.19E-12 | 1.74E-13 | 7.92 | 19.7303656 | 1.30E-01 | 1392624   | 1392747   | NC_000006.11 |
| cg04267526 | 3.19E-12 | 1.74E-13 | 7.92 | 19.7300127 | 1.70E-01 | 109674297 | 109674420 | NC_000010.10 |
| cg05787556 | 3.20E-12 | 1.75E-13 | 7.92 | 19.7283622 | 1.48E-01 | 170735186 | 170735309 | NC_000005.9  |
| cg00618450 | 3.21E-12 | 1.75E-13 | 7.92 | 19.7242707 | 1.81E-01 | 26565951  | 26566074  | NC_000022.10 |
| cg25889711 | 3.23E-12 | 1.76E-13 | 7.92 | 19.7188745 | 1.53E-01 | 102473609 | 102473732 | NC_000010.10 |
| cg20375342 | 3.23E-12 | 1.77E-13 | 7.92 | 19.7179876 | 2.28E-01 | 68981895  | 68982018  | NC_000003.11 |
| cg07618462 | 3.23E-12 | 1.77E-13 | 7.92 | 19.7170711 | 9.74E-02 | 142499847 | 142499970 | NC_000005.9  |
| cg16421616 | 3.23E-12 | 1.77E-13 | 7.92 | 19.716184  | 8.02E-02 | 151444499 | 151444622 | NC_000002.11 |

|            |          |          |      |            |          |           |           |              |
|------------|----------|----------|------|------------|----------|-----------|-----------|--------------|
| cg02621130 | 3.24E-12 | 1.77E-13 | 7.92 | 19.7144238 | 1.75E-01 | 166267729 | 166267852 | NC_000006.11 |
| cg06497612 | 3.24E-12 | 1.77E-13 | 7.92 | 19.7135693 | 7.44E-02 | 239140610 | 239140733 | NC_000002.11 |
| cg16660899 | 3.24E-12 | 1.77E-13 | 7.92 | 19.7135239 | 6.81E-02 | 167095593 | 167095716 | NC_000001.10 |
| cg23008238 | 3.24E-12 | 1.78E-13 | 7.92 | 19.7129405 | 2.25E-01 | 2112459   | 2112582   | NC_000005.9  |
| cg01479738 | 3.25E-12 | 1.78E-13 | 7.92 | 19.7107898 | 5.87E-02 | 60741560  | 60741683  | NC_000013.10 |
| cg22300619 | 3.25E-12 | 1.78E-13 | 7.92 | 19.7097944 | 1.31E-01 | 40699809  | 40699932  | NC_000017.10 |
| cg25682299 | 3.26E-12 | 1.78E-13 | 7.92 | 19.7078957 | 1.56E-01 | 79177886  | 79178009  | NC_000013.10 |
| cg00620476 | 3.26E-12 | 1.79E-13 | 7.92 | 19.7071459 | 7.63E-02 | 31938176  | 31938299  | NC_000006.11 |
| cg11599981 | 3.26E-12 | 1.79E-13 | 7.92 | 19.707073  | 1.24E-01 | 6475902   | 6476025   | NC_000019.9  |
| cg02818409 | 3.27E-12 | 1.79E-13 | 7.92 | 19.7053452 | 5.27E-02 | 143116253 | 143116376 | NC_000007.13 |
| cg12031863 | 3.27E-12 | 1.79E-13 | 7.92 | 19.7046966 | 1.86E-01 | 4587854   | 4587977   | NC_000016.9  |
| cg22375610 | 3.27E-12 | 1.79E-13 | 7.92 | 19.704207  | 1.17E-01 | 41021161  | 41021284  | NC_000006.11 |
| cg03532026 | 3.27E-12 | 1.79E-13 | 7.92 | 19.7037258 | 1.29E-01 | 57829153  | 57829276  | NC_000019.9  |
| cg04395377 | 3.28E-12 | 1.80E-13 | 7.92 | 19.7019525 | 1.63E-01 | 17841862  | 17841985  | NC_000016.9  |
| cg02562761 | 3.28E-12 | 1.80E-13 | 7.92 | 19.6997442 | 1.11E-01 | 4307906   | 4308029   | NC_000016.9  |
| cg11908453 | 3.29E-12 | 1.80E-13 | 7.92 | 19.6985375 | 1.39E-01 | 242209506 | 242209629 | NC_000002.11 |
| cg20028827 | 3.29E-12 | 1.80E-13 | 7.92 | 19.6977517 | 1.49E-01 | 79169823  | 79169946  | NC_000013.10 |
| cg07832473 | 3.29E-12 | 1.80E-13 | 7.92 | 19.6976762 | 2.41E-01 | 33936253  | 33936376  | NC_000005.9  |
| cg04838147 | 3.29E-12 | 1.80E-13 | 7.92 | 19.696558  | 1.88E-01 | 26505069  | 26505192  | NC_000010.10 |
| cg11713800 | 3.30E-12 | 1.81E-13 | 7.92 | 19.6962634 | 1.28E-01 | 41620951  | 41621074  | NC_000006.11 |
| cg26684131 | 3.30E-12 | 1.81E-13 | 7.92 | 19.6949031 | 1.13E-01 | 32410365  | 32410488  | NC_000006.11 |
| cg05078091 | 3.30E-12 | 1.81E-13 | 7.92 | 19.6943046 | 1.16E-01 | 129984345 | 129984468 | NC_000011.9  |
| cg23004758 | 3.30E-12 | 1.81E-13 | 7.92 | 19.694249  | 2.47E-01 | 58204221  | 58204344  | NC_000013.10 |
| cg13733008 | 3.30E-12 | 1.81E-13 | 7.91 | 19.6932252 | 6.57E-02 | 78088735  | 78088858  | NC_000004.11 |
| cg27019929 | 3.31E-12 | 1.81E-13 | 7.91 | 19.6929212 | 1.49E-01 | 32421518  | 32421641  | NC_000011.9  |

|            |          |          |      |            |          |           |           |              |
|------------|----------|----------|------|------------|----------|-----------|-----------|--------------|
| cg13040816 | 3.32E-12 | 1.82E-13 | 7.91 | 19.6894956 | 3.65E-02 | 30681089  | 30681212  | NC_000006.11 |
| cg13837295 | 3.32E-12 | 1.82E-13 | 7.91 | 19.6886038 | 1.02E-01 | 134826531 | 134826654 | NC_000010.10 |
| cg03712816 | 3.32E-12 | 1.82E-13 | 7.91 | 19.6884932 | 1.87E-01 | 76741157  | 76741280  | NC_000018.9  |
| cg07827420 | 3.33E-12 | 1.83E-13 | 7.91 | 19.684956  | 1.18E-01 | 75371764  | 75371887  | NC_000017.10 |
| cg04747226 | 3.33E-12 | 1.83E-13 | 7.91 | 19.6834698 | 2.36E-01 | 105481319 | 105481442 | NC_000011.9  |
| cg00418216 | 3.35E-12 | 1.84E-13 | 7.91 | 19.6787525 | 2.12E-01 | 27227847  | 27227970  | NC_000007.13 |
| cg25952581 | 3.36E-12 | 1.84E-13 | 7.91 | 19.6753647 | 1.55E-01 | 27170961  | 27171084  | NC_000007.13 |
| cg26935685 | 3.36E-12 | 1.85E-13 | 7.91 | 19.6746943 | 1.38E-01 | 15502881  | 15503004  | NC_000001.10 |
| cg14205791 | 3.36E-12 | 1.85E-13 | 7.91 | 19.6742485 | 6.80E-02 | 124800227 | 124800350 | NC_000012.11 |
| cg25462190 | 3.38E-12 | 1.85E-13 | 7.91 | 19.6700194 | 8.11E-02 | 177547067 | 177547190 | NC_000005.9  |
| cg15605746 | 3.38E-12 | 1.86E-13 | 7.91 | 19.6684865 | 1.37E-01 | 52584919  | 52585042  | NC_000015.9  |
| cg20859731 | 3.40E-12 | 1.86E-13 | 7.91 | 19.6646936 | 1.55E-01 | 36226820  | 36226943  | NC_000020.10 |
| cg07215504 | 3.40E-12 | 1.86E-13 | 7.91 | 19.6644942 | 1.89E-01 | 88497007  | 88497130  | NC_000016.9  |
| cg15089219 | 3.41E-12 | 1.87E-13 | 7.91 | 19.6597354 | 1.72E-01 | 119915368 | 119915491 | NC_000002.11 |
| cg08327884 | 3.41E-12 | 1.87E-13 | 7.91 | 19.6590894 | 1.51E-01 | 84798113  | 84798236  | NC_000006.11 |
| cg01717727 | 3.42E-12 | 1.88E-13 | 7.91 | 19.6585187 | 1.70E-01 | 5140406   | 5140529   | NC_000005.9  |
| cg06715976 | 3.43E-12 | 1.88E-13 | 7.91 | 19.6544825 | 2.54E-01 | 27135769  | 27135892  | NC_000007.13 |
| cg17767285 | 3.43E-12 | 1.88E-13 | 7.91 | 19.6539916 | 2.39E-01 | 84419202  | 84419325  | NC_000006.11 |
| cg24282829 | 3.43E-12 | 1.88E-13 | 7.91 | 19.6539371 | 5.58E-02 | 8596320   | 8596443   | NC_000012.11 |
| cg10725720 | 3.44E-12 | 1.89E-13 | 7.91 | 19.6518636 | 2.04E-01 | 55039232  | 55039355  | NC_000006.11 |
| cg20646280 | 3.44E-12 | 1.89E-13 | 7.91 | 19.651173  | 2.14E-01 | 44449738  | 44449861  | NC_000004.11 |
| cg15924285 | 3.44E-12 | 1.89E-13 | 7.91 | 19.650481  | 1.50E-01 | 93465688  | 93465811  | NC_000011.9  |
| cg13915566 | 3.44E-12 | 1.89E-13 | 7.91 | 19.6501811 | 5.87E-02 | 2286006   | 2286129   | NC_000011.9  |
| cg19577779 | 3.44E-12 | 1.89E-13 | 7.91 | 19.6499675 | 2.65E-01 | 88326635  | 88326758  | NC_000013.10 |
| cg19786627 | 3.45E-12 | 1.90E-13 | 7.91 | 19.6483988 | 1.51E-01 | 29235904  | 29236027  | NC_000014.8  |



|            |          |          |      |            |          |           |           |              |
|------------|----------|----------|------|------------|----------|-----------|-----------|--------------|
| cg06292124 | 3.45E-12 | 1.90E-13 | 7.91 | 19.6483631 | 6.56E-02 | 52408520  | 52408643  | NC_000012.11 |
| cg05560333 | 3.45E-12 | 1.90E-13 | 7.91 | 19.6464523 | 1.17E-01 | 233432602 | 233432725 | NC_000001.10 |
| cg17632299 | 3.46E-12 | 1.90E-13 | 7.91 | 19.6451361 | 2.07E-01 | 53312966  | 53313089  | NC_000013.10 |
| cg13610307 | 3.47E-12 | 1.91E-13 | 7.91 | 19.6416575 | 1.66E-01 | 140917431 | 140917554 | NC_000009.11 |
| cg01382864 | 3.47E-12 | 1.91E-13 | 7.91 | 19.641514  | 1.37E-01 | 220174251 | 220174374 | NC_000002.11 |
| cg16433156 | 3.47E-12 | 1.91E-13 | 7.91 | 19.6409327 | 2.00E-01 | 76740091  | 76740214  | NC_000018.9  |
| cg16057262 | 3.47E-12 | 1.91E-13 | 7.91 | 19.6400899 | 1.95E-01 | 182322699 | 182322822 | NC_000002.11 |
| cg18484679 | 3.48E-12 | 1.91E-13 | 7.91 | 19.6396659 | 1.14E-01 | 142740314 | 142740437 | NC_000005.9  |
| cg02115041 | 3.48E-12 | 1.92E-13 | 7.91 | 19.6381795 | 1.58E-01 | 53852101  | 53852224  | NC_000008.10 |
| cg22619784 | 3.48E-12 | 1.92E-13 | 7.91 | 19.6376865 | 1.27E-01 | 32793355  | 32793478  | NC_000006.11 |
| cg10454246 | 3.49E-12 | 1.92E-13 | 7.91 | 19.6362937 | 2.45E-01 | 41883890  | 41884013  | NC_000004.11 |
| cg09133026 | 3.49E-12 | 1.92E-13 | 7.91 | 19.6359179 | 6.17E-02 | 75388105  | 75388228  | NC_000014.8  |
| cg20784098 | 3.49E-12 | 1.92E-13 | 7.91 | 19.6358522 | 6.12E-02 | 32157059  | 32157182  | NC_000001.10 |
| cg15066337 | 3.49E-12 | 1.92E-13 | 7.91 | 19.6354744 | 4.24E-02 | 190105668 | 190105791 | NC_000003.11 |
| cg10919664 | 3.49E-12 | 1.92E-13 | 7.91 | 19.6353067 | 1.89E-01 | 28945322  | 28945445  | NC_000006.11 |
| cg18013765 | 3.49E-12 | 1.92E-13 | 7.9  | 19.6338468 | 4.44E-02 | 4499993   | 4500116   | NC_000010.10 |
| cg18948125 | 3.51E-12 | 1.93E-13 | 7.9  | 19.6304997 | 1.40E-01 | 31805970  | 31806093  | NC_000002.11 |
| cg24713204 | 3.51E-12 | 1.93E-13 | 7.9  | 19.6290102 | 1.58E-01 | 57019373  | 57019496  | NC_000019.9  |
| cg18519264 | 3.51E-12 | 1.93E-13 | 7.9  | 19.6282801 | 3.36E-02 | 169666498 | 169666621 | NC_000002.11 |
| cg02534659 | 3.52E-12 | 1.94E-13 | 7.9  | 19.6264395 | 2.31E-01 | 2112561   | 2112684   | NC_000005.9  |
| cg17525102 | 3.52E-12 | 1.94E-13 | 7.9  | 19.6262351 | 1.93E-01 | 29236221  | 29236344  | NC_000014.8  |
| cg07676002 | 3.52E-12 | 1.94E-13 | 7.9  | 19.6257516 | 1.32E-01 | 44880000  | 44880123  | NC_000020.10 |
| cg17386911 | 3.52E-12 | 1.94E-13 | 7.9  | 19.6252975 | 8.21E-02 | 176523180 | 176523303 | NC_000005.9  |
| cg10239860 | 3.56E-12 | 1.96E-13 | 7.9  | 19.6153036 | 8.70E-02 | 71172023  | 71172146  | NC_000001.10 |
| cg09764984 | 3.56E-12 | 1.96E-13 | 7.9  | 19.6144358 | 7.29E-02 | 3702447   | 3702570   | NC_000016.9  |

|            |          |          |     |            |          |           |           |              |
|------------|----------|----------|-----|------------|----------|-----------|-----------|--------------|
| cg14041283 | 3.56E-12 | 1.96E-13 | 7.9 | 19.6136828 | 1.96E-01 | 17906338  | 17906461  | NC_000009.11 |
| cg23964057 | 3.56E-12 | 1.96E-13 | 7.9 | 19.6136606 | 1.94E-01 | 69590113  | 69590236  | NC_000011.9  |
| cg03324821 | 3.56E-12 | 1.96E-13 | 7.9 | 19.6132201 | 2.61E-01 | 51142933  | 51143056  | NC_000019.9  |
| cg18761549 | 3.57E-12 | 1.97E-13 | 7.9 | 19.6113893 | 1.91E-01 | 115134391 | 115134514 | NC_000012.11 |
| cg11601523 | 3.57E-12 | 1.97E-13 | 7.9 | 19.6100933 | 2.03E-01 | 2756361   | 2756484   | NC_000005.9  |
| cg14749465 | 3.58E-12 | 1.97E-13 | 7.9 | 19.6082168 | 2.21E-01 | 20690720  | 20690843  | NC_000011.9  |
| cg21551182 | 3.58E-12 | 1.97E-13 | 7.9 | 19.608204  | 4.02E-02 | 106399873 | 106399996 | NC_000002.11 |
| cg00581595 | 3.58E-12 | 1.97E-13 | 7.9 | 19.6080094 | 8.11E-02 | 58545346  | 58545469  | NC_000016.9  |
| cg18907363 | 3.59E-12 | 1.98E-13 | 7.9 | 19.6064273 | 8.89E-02 | 100067361 | 100067484 | NC_000014.8  |
| cg00908197 | 3.59E-12 | 1.98E-13 | 7.9 | 19.6038458 | 4.49E-02 | 41619666  | 41619789  | NC_000006.11 |
| cg23217097 | 3.60E-12 | 1.99E-13 | 7.9 | 19.6017702 | 1.84E-01 | 42074635  | 42074758  | NC_000014.8  |
| cg05330604 | 3.61E-12 | 1.99E-13 | 7.9 | 19.600059  | 1.14E-01 | 91837300  | 91837423  | NC_000015.9  |
| cg07009376 | 3.61E-12 | 1.99E-13 | 7.9 | 19.6000034 | 2.32E-01 | 28793219  | 28793342  | NC_000006.11 |
| cg21139046 | 3.61E-12 | 1.99E-13 | 7.9 | 19.5998359 | 1.34E-01 | 14339700  | 14339823  | NC_000003.11 |
| cg04552470 | 3.62E-12 | 2.00E-13 | 7.9 | 19.5978318 | 1.51E-01 | 20669792  | 20669915  | NC_000001.10 |
| cg10201141 | 3.62E-12 | 2.00E-13 | 7.9 | 19.595736  | 1.42E-01 | 7032793   | 7032916   | NC_000012.11 |
| cg05225634 | 3.63E-12 | 2.00E-13 | 7.9 | 19.593834  | 1.07E-01 | 156718288 | 156718411 | NC_000006.11 |
| cg11985360 | 3.63E-12 | 2.01E-13 | 7.9 | 19.5926997 | 2.11E-01 | 19138209  | 19138332  | NC_000022.10 |
| cg05944477 | 3.64E-12 | 2.01E-13 | 7.9 | 19.5918146 | 1.15E-01 | 205189476 | 205189599 | NC_000002.11 |
| cg12601945 | 3.64E-12 | 2.01E-13 | 7.9 | 19.5911586 | 2.05E-01 | 18958924  | 18959047  | NC_000001.10 |
| cg14445507 | 3.65E-12 | 2.01E-13 | 7.9 | 19.5888149 | 1.97E-01 | 152890360 | 152890483 | NC_000007.13 |
| cg23874437 | 3.65E-12 | 2.02E-13 | 7.9 | 19.5879321 | 1.94E-01 | 38886110  | 38886233  | NC_000019.9  |
| cg14484885 | 3.67E-12 | 2.03E-13 | 7.9 | 19.5823722 | 8.26E-02 | 111540404 | 111540527 | NC_000013.10 |
| cg06926314 | 3.67E-12 | 2.03E-13 | 7.9 | 19.5809892 | 1.38E-01 | 10650351  | 10650474  | NC_000005.9  |
| cg04804618 | 3.68E-12 | 2.04E-13 | 7.9 | 19.5782219 | 2.20E-01 | 131761386 | 131761509 | NC_000010.10 |

|            |          |          |      |            |          |           |           |              |
|------------|----------|----------|------|------------|----------|-----------|-----------|--------------|
| cg07160277 | 3.70E-12 | 2.04E-13 | 7.9  | 19.5744903 | 1.59E-01 | 165304855 | 165304978 | NC_000004.11 |
| cg11739758 | 3.70E-12 | 2.04E-13 | 7.89 | 19.5735163 | 2.02E-01 | 46670663  | 46670786  | NC_000017.10 |
| cg03767531 | 3.71E-12 | 2.05E-13 | 7.89 | 19.5709077 | 1.56E-01 | 182545572 | 182545695 | NC_000002.11 |
| cg16875711 | 3.71E-12 | 2.05E-13 | 7.89 | 19.5708266 | 4.80E-02 | 51798822  | 51798945  | NC_000018.9  |
| cg10742917 | 3.71E-12 | 2.05E-13 | 7.89 | 19.5706677 | 1.28E-01 | 56242801  | 56242924  | NC_000007.13 |
| cg26067203 | 3.71E-12 | 2.05E-13 | 7.89 | 19.5699374 | 2.37E-01 | 1935289   | 1935412   | NC_000001.10 |
| cg08455099 | 3.72E-12 | 2.06E-13 | 7.89 | 19.5669494 | 1.84E-01 | 95663959  | 95664082  | NC_000002.11 |
| cg01833122 | 3.73E-12 | 2.06E-13 | 7.89 | 19.5659344 | 8.34E-02 | 167436541 | 167436664 | NC_000001.10 |
| cg21859594 | 3.73E-12 | 2.06E-13 | 7.89 | 19.5648005 | 1.42E-01 | 4872801   | 4872924   | NC_000012.11 |
| cg23503075 | 3.74E-12 | 2.07E-13 | 7.89 | 19.5625226 | 4.80E-02 | 3564803   | 3564926   | NC_000010.10 |
| cg18803251 | 3.75E-12 | 2.08E-13 | 7.89 | 19.5583747 | 5.49E-02 | 7374622   | 7374745   | NC_000004.11 |
| cg13587180 | 3.76E-12 | 2.08E-13 | 7.89 | 19.5555732 | 1.37E-01 | 42403248  | 42403371  | NC_000004.11 |
| cg22615203 | 3.77E-12 | 2.08E-13 | 7.89 | 19.5550732 | 1.20E-01 | 41111493  | 41111616  | NC_000013.10 |
| cg20495645 | 3.77E-12 | 2.08E-13 | 7.89 | 19.5550561 | 2.57E-01 | 45405624  | 45405747  | NC_000022.10 |
| cg24242823 | 3.77E-12 | 2.08E-13 | 7.89 | 19.5549531 | 2.33E-01 | 24323675  | 24323798  | NC_000007.13 |
| cg14734994 | 3.77E-12 | 2.09E-13 | 7.89 | 19.5538265 | 4.97E-02 | 88468372  | 88468495  | NC_000002.11 |
| cg10380328 | 3.77E-12 | 2.09E-13 | 7.89 | 19.5533223 | 2.11E-01 | 188953126 | 188953249 | NC_000004.11 |
| cg17019070 | 3.77E-12 | 2.09E-13 | 7.89 | 19.5529707 | 1.23E-01 | 73466639  | 73466762  | NC_000010.10 |
| cg09728607 | 3.78E-12 | 2.09E-13 | 7.89 | 19.5515257 | 1.45E-01 | 51190065  | 51190188  | NC_000016.9  |
| cg17904129 | 3.78E-12 | 2.09E-13 | 7.89 | 19.5499688 | 3.59E-02 | 54195800  | 54195923  | NC_000001.10 |
| cg10151685 | 3.78E-12 | 2.09E-13 | 7.89 | 19.5498077 | 1.71E-01 | 89312863  | 89312986  | NC_000015.9  |
| cg05991820 | 3.79E-12 | 2.10E-13 | 7.89 | 19.5491211 | 1.54E-01 | 11785161  | 11785284  | NC_000010.10 |
| cg16478737 | 3.79E-12 | 2.10E-13 | 7.89 | 19.5473584 | 1.13E-01 | 1442040   | 1442163   | NC_000016.9  |
| cg01646718 | 3.79E-12 | 2.10E-13 | 7.89 | 19.5471362 | 1.77E-01 | 145580727 | 145580850 | NC_000008.10 |
| cg22010052 | 3.80E-12 | 2.10E-13 | 7.89 | 19.5462167 | 1.09E-01 | 115298704 | 115298827 | NC_000005.9  |

|            |          |          |      |            |          |           |           |              |
|------------|----------|----------|------|------------|----------|-----------|-----------|--------------|
| cg07260592 | 3.80E-12 | 2.10E-13 | 7.89 | 19.5460208 | 1.57E-01 | 161100122 | 161100245 | NC_000006.11 |
| cg01378812 | 3.81E-12 | 2.11E-13 | 7.89 | 19.5409096 | 1.57E-01 | 36004794  | 36004917  | NC_000017.10 |
| cg14633910 | 3.82E-12 | 2.11E-13 | 7.89 | 19.5403694 | 1.16E-01 | 10897204  | 10897327  | NC_000006.11 |
| cg21139325 | 3.82E-12 | 2.12E-13 | 7.89 | 19.5400874 | 8.83E-02 | 32729470  | 32729593  | NC_000006.11 |
| cg17648101 | 3.82E-12 | 2.12E-13 | 7.89 | 19.539726  | 8.55E-02 | 17438324  | 17438447  | NC_000019.9  |
| cg06575391 | 3.82E-12 | 2.12E-13 | 7.89 | 19.5394926 | 3.93E-02 | 100023123 | 100023246 | NC_000008.10 |
| cg21630370 | 3.82E-12 | 2.12E-13 | 7.89 | 19.5386062 | 4.09E-02 | 45141979  | 45142102  | NC_000007.13 |
| cg13933080 | 3.83E-12 | 2.12E-13 | 7.89 | 19.5377375 | 1.27E-01 | 22634145  | 22634268  | NC_000010.10 |
| cg02738641 | 3.84E-12 | 2.13E-13 | 7.89 | 19.5343207 | 1.31E-01 | 114303736 | 114303859 | NC_000013.10 |
| cg06506966 | 3.84E-12 | 2.13E-13 | 7.89 | 19.5336083 | 2.30E-01 | 53758289  | 53758412  | NC_000019.9  |
| cg06610259 | 3.85E-12 | 2.14E-13 | 7.89 | 19.5304845 | 1.35E-01 | 122515332 | 122515455 | NC_000012.11 |
| cg16043357 | 3.85E-12 | 2.14E-13 | 7.89 | 19.5301938 | 1.47E-01 | 118897904 | 118898027 | NC_000010.10 |
| cg13944871 | 3.86E-12 | 2.14E-13 | 7.89 | 19.5292544 | 8.15E-02 | 3461718   | 3461841   | NC_000001.10 |
| cg27025384 | 3.86E-12 | 2.14E-13 | 7.89 | 19.5279848 | 8.88E-02 | 90386331  | 90386454  | NC_000005.9  |
| cg07531228 | 3.88E-12 | 2.15E-13 | 7.89 | 19.5231805 | 1.31E-01 | 149745299 | 149745422 | NC_000007.13 |
| cg05484788 | 3.88E-12 | 2.15E-13 | 7.89 | 19.5229798 | 2.30E-01 | 58180357  | 58180480  | NC_000020.10 |
| cg18653282 | 3.88E-12 | 2.15E-13 | 7.89 | 19.5228993 | 1.81E-01 | 104604739 | 104604862 | NC_000014.8  |
| cg07813142 | 3.89E-12 | 2.16E-13 | 7.89 | 19.5211564 | 1.89E-01 | 171573223 | 171573346 | NC_000002.11 |
| cg16236779 | 3.89E-12 | 2.16E-13 | 7.89 | 19.521089  | 1.51E-01 | 104905387 | 104905510 | NC_000010.10 |
| cg16701059 | 3.89E-12 | 2.16E-13 | 7.89 | 19.5198456 | 1.31E-01 | 101513798 | 101513921 | NC_000015.9  |
| cg09953583 | 3.89E-12 | 2.16E-13 | 7.89 | 19.5188595 | 7.65E-02 | 22974144  | 22974267  | NC_000014.8  |
| cg08575537 | 3.90E-12 | 2.16E-13 | 7.89 | 19.5183943 | 2.06E-01 | 100318626 | 100318749 | NC_000007.13 |
| cg09223489 | 3.90E-12 | 2.16E-13 | 7.89 | 19.5181932 | 8.42E-02 | 86785970  | 86786093  | NC_000016.9  |
| cg00600617 | 3.90E-12 | 2.16E-13 | 7.89 | 19.5176606 | 1.46E-01 | 107221887 | 107222010 | NC_000006.11 |
| cg10332700 | 3.90E-12 | 2.17E-13 | 7.89 | 19.5161969 | 2.32E-01 | 53636077  | 53636200  | NC_000019.9  |

|            |          |          |      |            |          |           |           |              |
|------------|----------|----------|------|------------|----------|-----------|-----------|--------------|
| cg24889512 | 3.91E-12 | 2.17E-13 | 7.89 | 19.5155274 | 2.07E-01 | 22816950  | 22817073  | NC_000019.9  |
| cg16277479 | 3.91E-12 | 2.17E-13 | 7.89 | 19.5144809 | 2.46E-01 | 13910209  | 13910332  | NC_000001.10 |
| cg02100008 | 3.92E-12 | 2.18E-13 | 7.88 | 19.5117703 | 6.73E-02 | 56658357  | 56658480  | NC_000004.11 |
| cg21297493 | 3.92E-12 | 2.18E-13 | 7.88 | 19.5114449 | 1.63E-01 | 156357905 | 156358028 | NC_000001.10 |
| cg01030406 | 3.92E-12 | 2.18E-13 | 7.88 | 19.5110617 | 1.10E-01 | 113374553 | 113374676 | NC_000004.11 |
| cg09367901 | 3.93E-12 | 2.18E-13 | 7.88 | 19.5092577 | 1.97E-01 | 54418851  | 54418974  | NC_000014.8  |
| cg13490729 | 3.93E-12 | 2.19E-13 | 7.88 | 19.5077135 | 6.32E-02 | 23779307  | 23779430  | NC_000014.8  |
| cg09071040 | 3.94E-12 | 2.19E-13 | 7.88 | 19.5074479 | 5.39E-02 | 49358690  | 49358813  | NC_000012.11 |
| cg03596113 | 3.94E-12 | 2.19E-13 | 7.88 | 19.506707  | 3.71E-02 | 3129969   | 3130092   | NC_000001.10 |
| cg19203333 | 3.94E-12 | 2.19E-13 | 7.88 | 19.5060466 | 1.80E-01 | 134175398 | 134175521 | NC_000006.11 |
| cg17680089 | 3.94E-12 | 2.19E-13 | 7.88 | 19.5058859 | 1.60E-01 | 228346338 | 228346461 | NC_000001.10 |
| cg00852414 | 3.94E-12 | 2.19E-13 | 7.88 | 19.5053837 | 1.26E-01 | 101543050 | 101543173 | NC_000014.8  |
| cg16952918 | 3.94E-12 | 2.19E-13 | 7.88 | 19.5050775 | 4.77E-02 | 69078072  | 69078195  | NC_000012.11 |
| cg00601368 | 3.95E-12 | 2.19E-13 | 7.88 | 19.5047311 | 1.14E-01 | 149318081 | 149318204 | NC_000007.13 |
| cg09048530 | 3.95E-12 | 2.19E-13 | 7.88 | 19.5038347 | 2.38E-01 | 130646022 | 130646145 | NC_000012.11 |
| cg05678033 | 3.96E-12 | 2.20E-13 | 7.88 | 19.5016638 | 1.67E-01 | 115104591 | 115104714 | NC_000012.11 |
| cg14400886 | 3.96E-12 | 2.20E-13 | 7.88 | 19.5013674 | 2.14E-01 | 134070441 | 134070564 | NC_000004.11 |
| cg19082560 | 3.96E-12 | 2.20E-13 | 7.88 | 19.4997957 | 1.44E-01 | 3603280   | 3603403   | NC_000005.9  |
| cg09229912 | 3.98E-12 | 2.21E-13 | 7.88 | 19.4963245 | 2.30E-01 | 111471963 | 111472086 | NC_000012.11 |
| cg10201791 | 3.98E-12 | 2.21E-13 | 7.88 | 19.4955705 | 4.45E-02 | 111855154 | 111855277 | NC_000007.13 |
| cg27273310 | 3.98E-12 | 2.21E-13 | 7.88 | 19.4951079 | 8.89E-02 | 131642913 | 131643036 | NC_000010.10 |
| cg14490428 | 3.99E-12 | 2.22E-13 | 7.88 | 19.4934777 | 1.74E-01 | 89841521  | 89841644  | NC_000010.10 |
| cg22190438 | 3.99E-12 | 2.22E-13 | 7.88 | 19.493322  | 1.38E-01 | 42733976  | 42734099  | NC_000017.10 |
| cg07921384 | 4.00E-12 | 2.22E-13 | 7.88 | 19.4910037 | 2.55E-01 | 220299740 | 220299863 | NC_000002.11 |
| cg08864310 | 4.01E-12 | 2.23E-13 | 7.88 | 19.4876225 | 9.72E-02 | 64402469  | 64402592  | NC_000005.9  |

|            |          |          |      |            |          |           |           |              |
|------------|----------|----------|------|------------|----------|-----------|-----------|--------------|
| cg21057266 | 4.02E-12 | 2.24E-13 | 7.88 | 19.4848865 | 9.56E-02 | 189200528 | 189200651 | NC_000004.11 |
| cg00376979 | 4.04E-12 | 2.25E-13 | 7.88 | 19.4803504 | 1.32E-01 | 34350727  | 34350850  | NC_000021.8  |
| cg19041857 | 4.05E-12 | 2.25E-13 | 7.88 | 19.4784985 | 1.21E-01 | 27730383  | 27730506  | NC_000006.11 |
| cg23063647 | 4.05E-12 | 2.25E-13 | 7.88 | 19.4783569 | 1.84E-01 | 206339    | 206462    | NC_000004.11 |
| cg18237616 | 4.05E-12 | 2.25E-13 | 7.88 | 19.4776196 | 1.69E-01 | 151191667 | 151191790 | NC_000007.13 |
| cg11355658 | 4.05E-12 | 2.25E-13 | 7.88 | 19.4772271 | 1.20E-01 | 132453670 | 132453793 | NC_000006.11 |
| cg05368341 | 4.05E-12 | 2.26E-13 | 7.88 | 19.4760153 | 1.99E-01 | 114696465 | 114696588 | NC_000001.10 |
| cg20011402 | 4.05E-12 | 2.26E-13 | 7.88 | 19.4759946 | 3.16E-01 | 17496239  | 17496362  | NC_000010.10 |
| cg18036763 | 4.07E-12 | 2.26E-13 | 7.88 | 19.4731698 | 2.32E-01 | 45404910  | 45405033  | NC_000022.10 |
| cg18446069 | 4.07E-12 | 2.26E-13 | 7.88 | 19.4730944 | 1.11E-01 | 111644279 | 111644402 | NC_000013.10 |
| cg02101773 | 4.07E-12 | 2.26E-13 | 7.88 | 19.4730193 | 1.95E-01 | 20347593  | 20347716  | NC_000020.10 |
| cg05455720 | 4.08E-12 | 2.27E-13 | 7.88 | 19.4692292 | 1.89E-01 | 65291703  | 65291826  | NC_000008.10 |
| cg25657713 | 4.08E-12 | 2.27E-13 | 7.88 | 19.4691053 | 1.49E-01 | 100038708 | 100038831 | NC_000006.11 |
| cg05678100 | 4.10E-12 | 2.28E-13 | 7.88 | 19.4656048 | 1.44E-01 | 172734031 | 172734154 | NC_000004.11 |
| cg08535058 | 4.12E-12 | 2.30E-13 | 7.88 | 19.4589229 | 1.23E-01 | 12920991  | 12921114  | NC_000019.9  |
| cg10815835 | 4.13E-12 | 2.30E-13 | 7.88 | 19.4574232 | 1.08E-01 | 170396327 | 170396450 | NC_000006.11 |
| cg20892260 | 4.14E-12 | 2.31E-13 | 7.87 | 19.4543088 | 1.72E-01 | 23564025  | 23564148  | NC_000008.10 |
| cg24900963 | 4.14E-12 | 2.31E-13 | 7.87 | 19.4541235 | 1.03E-01 | 28948266  | 28948389  | NC_000016.9  |
| cg20738665 | 4.14E-12 | 2.31E-13 | 7.87 | 19.4531199 | 9.09E-02 | 61874249  | 61874372  | NC_000020.10 |
| cg23685953 | 4.14E-12 | 2.31E-13 | 7.87 | 19.4530459 | 6.66E-02 | 52216479  | 52216602  | NC_000014.8  |
| cg27436952 | 4.15E-12 | 2.31E-13 | 7.87 | 19.4524148 | 1.30E-01 | 8895870   | 8895993   | NC_000016.9  |
| cg22274813 | 4.15E-12 | 2.31E-13 | 7.87 | 19.4520204 | 1.92E-01 | 38067101  | 38067224  | NC_000021.8  |
| cg15420634 | 4.15E-12 | 2.31E-13 | 7.87 | 19.4515556 | 8.79E-02 | 485359    | 485482    | NC_000005.9  |
| cg01398502 | 4.16E-12 | 2.32E-13 | 7.87 | 19.4493413 | 1.05E-01 | 85990190  | 85990313  | NC_000016.9  |
| cg01951637 | 4.18E-12 | 2.33E-13 | 7.87 | 19.4446079 | 2.69E-01 | 89007466  | 89007589  | NC_000016.9  |

|            |          |          |      |            |          |           |           |              |
|------------|----------|----------|------|------------|----------|-----------|-----------|--------------|
| cg10534507 | 4.18E-12 | 2.33E-13 | 7.87 | 19.4442711 | 1.66E-01 | 82336761  | 82336884  | NC_000015.9  |
| cg12182408 | 4.18E-12 | 2.33E-13 | 7.87 | 19.4439949 | 1.19E-01 | 104618441 | 104618564 | NC_000014.8  |
| cg19829856 | 4.19E-12 | 2.34E-13 | 7.87 | 19.4417983 | 1.14E-01 | 44237658  | 44237781  | NC_000018.9  |
| cg14419975 | 4.19E-12 | 2.34E-13 | 7.87 | 19.441196  | 2.52E-01 | 91196332  | 91196455  | NC_000001.10 |
| cg11373604 | 4.20E-12 | 2.34E-13 | 7.87 | 19.4389139 | 1.58E-01 | 2291260   | 2291383   | NC_000011.9  |
| cg17566175 | 4.21E-12 | 2.35E-13 | 7.87 | 19.4349664 | 1.35E-01 | 56389866  | 56389989  | NC_000006.11 |
| cg18705776 | 4.22E-12 | 2.36E-13 | 7.87 | 19.4337396 | 6.72E-02 | 5565829   | 5565952   | NC_000010.10 |
| cg17367901 | 4.22E-12 | 2.36E-13 | 7.87 | 19.4335037 | 5.85E-02 | 619032    | 619155    | NC_000019.9  |
| cg08850461 | 4.22E-12 | 2.36E-13 | 7.87 | 19.4328486 | 2.22E-01 | 87990082  | 87990205  | NC_000005.9  |
| cg07592254 | 4.23E-12 | 2.36E-13 | 7.87 | 19.4312803 | 1.55E-01 | 63444750  | 63444873  | NC_000008.10 |
| cg05624932 | 4.24E-12 | 2.37E-13 | 7.87 | 19.4288118 | 2.47E-01 | 75897310  | 75897433  | NC_000008.10 |
| cg14601981 | 4.24E-12 | 2.37E-13 | 7.87 | 19.4279913 | 1.39E-01 | 79145228  | 79145351  | NC_000010.10 |
| cg16018474 | 4.24E-12 | 2.37E-13 | 7.87 | 19.4279094 | 2.46E-01 | 158119501 | 158119624 | NC_000001.10 |
| cg05200250 | 4.24E-12 | 2.37E-13 | 7.87 | 19.4272767 | 1.08E-01 | 75264574  | 75264697  | NC_000016.9  |
| cg10013343 | 4.25E-12 | 2.37E-13 | 7.87 | 19.4268446 | 2.28E-01 | 29106503  | 29106626  | NC_000013.10 |
| cg20982735 | 4.25E-12 | 2.37E-13 | 7.87 | 19.4266861 | 1.45E-01 | 87082023  | 87082146  | NC_000008.10 |
| cg11321433 | 4.25E-12 | 2.37E-13 | 7.87 | 19.4262515 | 1.83E-01 | 32338542  | 32338665  | NC_000007.13 |
| cg03490331 | 4.25E-12 | 2.37E-13 | 7.87 | 19.4260629 | 1.32E-01 | 172672817 | 172672940 | NC_000005.9  |
| cg18358136 | 4.25E-12 | 2.38E-13 | 7.87 | 19.4252128 | 1.49E-01 | 46119636  | 46119759  | NC_000019.9  |
| cg20557801 | 4.25E-12 | 2.38E-13 | 7.87 | 19.4248673 | 1.69E-01 | 68121177  | 68121300  | NC_000015.9  |
| cg00851770 | 4.26E-12 | 2.38E-13 | 7.87 | 19.422538  | 2.36E-01 | 12254175  | 12254298  | NC_000018.9  |
| cg08190291 | 4.27E-12 | 2.39E-13 | 7.87 | 19.4212962 | 2.38E-01 | 28339442  | 28339565  | NC_000021.8  |
| cg12080492 | 4.27E-12 | 2.39E-13 | 7.87 | 19.420908  | 1.27E-01 | 203145656 | 203145779 | NC_000001.10 |
| cg08295543 | 4.27E-12 | 2.39E-13 | 7.87 | 19.4201162 | 1.43E-01 | 55357842  | 55357965  | NC_000016.9  |
| cg21230745 | 4.27E-12 | 2.39E-13 | 7.87 | 19.4201149 | 2.16E-01 | 87974414  | 87974537  | NC_000005.9  |

|            |          |          |      |            |          |           |           |              |
|------------|----------|----------|------|------------|----------|-----------|-----------|--------------|
| cg12213062 | 4.27E-12 | 2.39E-13 | 7.87 | 19.4198781 | 1.85E-01 | 220299653 | 220299776 | NC_000002.11 |
| cg18744668 | 4.28E-12 | 2.39E-13 | 7.87 | 19.41938   | 7.69E-02 | 99962347  | 99962470  | NC_000008.10 |
| cg19959917 | 4.28E-12 | 2.39E-13 | 7.87 | 19.4181249 | 1.10E-01 | 44878373  | 44878496  | NC_000010.10 |
| cg24996278 | 4.28E-12 | 2.39E-13 | 7.87 | 19.4178939 | 3.65E-02 | 235327092 | 235327215 | NC_000001.10 |
| cg11854491 | 4.29E-12 | 2.40E-13 | 7.87 | 19.4160004 | 2.26E-01 | 46961115  | 46961238  | NC_000013.10 |
| cg03909500 | 4.29E-12 | 2.40E-13 | 7.87 | 19.4155245 | 1.56E-01 | 33936597  | 33936720  | NC_000005.9  |
| cg16295725 | 4.29E-12 | 2.40E-13 | 7.87 | 19.4147829 | 2.54E-01 | 10459219  | 10459342  | NC_000004.11 |
| cg02943604 | 4.31E-12 | 2.41E-13 | 7.87 | 19.4098845 | 1.47E-01 | 122217348 | 122217471 | NC_000010.10 |
| cg23720732 | 4.32E-12 | 2.42E-13 | 7.87 | 19.4083524 | 2.51E-01 | 44650380  | 44650503  | NC_000020.10 |
| cg18498241 | 4.32E-12 | 2.42E-13 | 7.87 | 19.4071372 | 1.21E-01 | 69286352  | 69286475  | NC_000011.9  |
| cg08214518 | 4.34E-12 | 2.43E-13 | 7.87 | 19.4025249 | 6.88E-02 | 1990114   | 1990237   | NC_000007.13 |
| cg17026582 | 4.35E-12 | 2.43E-13 | 7.87 | 19.4013808 | 6.04E-02 | 1298573   | 1298696   | NC_000005.9  |
| cg02726819 | 4.36E-12 | 2.44E-13 | 7.87 | 19.3985809 | 1.24E-01 | 158800869 | 158800992 | NC_000007.13 |
| cg02000318 | 4.36E-12 | 2.44E-13 | 7.87 | 19.3979801 | 2.01E-01 | 27197713  | 27197836  | NC_000007.13 |
| cg03830490 | 4.37E-12 | 2.45E-13 | 7.87 | 19.3970692 | 9.56E-02 | 45926669  | 45926792  | NC_000003.11 |
| cg26763877 | 4.37E-12 | 2.45E-13 | 7.87 | 19.3956791 | 1.83E-01 | 4851751   | 4851874   | NC_000008.10 |
| cg06925060 | 4.38E-12 | 2.45E-13 | 7.87 | 19.3948976 | 7.54E-02 | 10489288  | 10489411  | NC_000001.10 |
| cg25633678 | 4.38E-12 | 2.46E-13 | 7.86 | 19.3931487 | 2.11E-01 | 65284473  | 65284596  | NC_000008.10 |
| cg22052659 | 4.38E-12 | 2.46E-13 | 7.86 | 19.3929694 | 2.14E-01 | 114444989 | 114445112 | NC_000008.10 |
| cg00713567 | 4.39E-12 | 2.46E-13 | 7.86 | 19.3908518 | 1.51E-01 | 143545949 | 143546072 | NC_000008.10 |
| cg09501959 | 4.39E-12 | 2.46E-13 | 7.86 | 19.3902841 | 1.36E-01 | 193058203 | 193058326 | NC_000002.11 |
| cg01871526 | 4.40E-12 | 2.46E-13 | 7.86 | 19.3896839 | 4.93E-02 | 23867258  | 23867381  | NC_000002.11 |
| cg01663563 | 4.41E-12 | 2.47E-13 | 7.86 | 19.3872742 | 1.23E-01 | 90775513  | 90775636  | NC_000015.9  |
| cg08750504 | 4.41E-12 | 2.47E-13 | 7.86 | 19.3861416 | 1.42E-01 | 172946193 | 172946316 | NC_000002.11 |
| cg25316512 | 4.42E-12 | 2.48E-13 | 7.86 | 19.3842548 | 1.15E-01 | 7032991   | 7033114   | NC_000012.11 |



|            |          |          |      |            |          |           |           |              |
|------------|----------|----------|------|------------|----------|-----------|-----------|--------------|
| cg03212183 | 4.43E-12 | 2.48E-13 | 7.86 | 19.3821442 | 8.77E-02 | 81565917  | 81566040  | NC_000016.9  |
| cg04466022 | 4.43E-12 | 2.48E-13 | 7.86 | 19.3817503 | 9.91E-02 | 37618123  | 37618246  | NC_000006.11 |
| cg01145544 | 4.44E-12 | 2.49E-13 | 7.86 | 19.3802078 | 7.90E-02 | 46889296  | 46889419  | NC_000021.8  |
| cg17131837 | 4.44E-12 | 2.49E-13 | 7.86 | 19.3785933 | 1.43E-01 | 66251661  | 66251784  | NC_000012.11 |
| cg21500133 | 4.45E-12 | 2.49E-13 | 7.86 | 19.3776641 | 2.82E-01 | 43439451  | 43439574  | NC_000020.10 |
| cg02086307 | 4.45E-12 | 2.50E-13 | 7.86 | 19.3761334 | 1.62E-01 | 53390878  | 53391001  | NC_000001.10 |
| cg03905134 | 4.46E-12 | 2.50E-13 | 7.86 | 19.3757823 | 1.15E-01 | 76146565  | 76146688  | NC_000012.11 |
| cg22234419 | 4.46E-12 | 2.50E-13 | 7.86 | 19.3748372 | 1.55E-01 | 145875907 | 145876030 | NC_000003.11 |
| cg05803265 | 4.47E-12 | 2.51E-13 | 7.86 | 19.3730928 | 6.36E-02 | 54352207  | 54352330  | NC_000001.10 |
| cg01876288 | 4.47E-12 | 2.51E-13 | 7.86 | 19.3725144 | 1.26E-01 | 158800934 | 158801057 | NC_000007.13 |
| cg18451114 | 4.47E-12 | 2.51E-13 | 7.86 | 19.3714505 | 1.40E-01 | 38511677  | 38511800  | NC_000001.10 |
| cg01656470 | 4.49E-12 | 2.52E-13 | 7.86 | 19.3688089 | 1.01E-01 | 57350096  | 57350219  | NC_000019.9  |
| cg01843018 | 4.50E-12 | 2.52E-13 | 7.86 | 19.366445  | 1.52E-01 | 123813144 | 123813267 | NC_000009.11 |
| cg02161292 | 4.51E-12 | 2.53E-13 | 7.86 | 19.364038  | 1.22E-01 | 140821687 | 140821810 | NC_000005.9  |
| cg15174552 | 4.51E-12 | 2.53E-13 | 7.86 | 19.3632407 | 1.60E-01 | 118982352 | 118982475 | NC_000002.11 |
| cg04130185 | 4.52E-12 | 2.54E-13 | 7.86 | 19.3608039 | 1.63E-01 | 102988251 | 102988374 | NC_000010.10 |
| cg13400209 | 4.52E-12 | 2.54E-13 | 7.86 | 19.3602913 | 4.90E-02 | 117813666 | 117813789 | NC_000002.11 |
| cg08710861 | 4.53E-12 | 2.54E-13 | 7.86 | 19.358789  | 7.26E-02 | 128493066 | 128493189 | NC_000007.13 |
| cg00627846 | 4.54E-12 | 2.55E-13 | 7.86 | 19.3560581 | 1.01E-01 | 49141122  | 49141245  | NC_000022.10 |
| cg18832738 | 4.55E-12 | 2.55E-13 | 7.86 | 19.3539362 | 1.40E-01 | 95210053  | 95210176  | NC_000012.11 |
| cg23808270 | 4.55E-12 | 2.56E-13 | 7.86 | 19.3536638 | 7.74E-02 | 223148963 | 223149086 | NC_000001.10 |
| cg10140638 | 4.57E-12 | 2.57E-13 | 7.86 | 19.3495755 | 1.47E-01 | 220174207 | 220174330 | NC_000002.11 |
| cg08691159 | 4.57E-12 | 2.57E-13 | 7.86 | 19.349054  | 1.32E-01 | 85635763  | 85635886  | NC_000016.9  |
| cg26205771 | 4.58E-12 | 2.57E-13 | 7.86 | 19.3472111 | 2.23E-01 | 53851156  | 53851279  | NC_000008.10 |
| cg07329360 | 4.58E-12 | 2.57E-13 | 7.86 | 19.3470616 | 1.68E-01 | 31841768  | 31841891  | NC_000011.9  |

|            |          |          |      |            |          |           |           |              |
|------------|----------|----------|------|------------|----------|-----------|-----------|--------------|
| cg21434530 | 4.59E-12 | 2.58E-13 | 7.86 | 19.3456773 | 1.88E-01 | 4870486   | 4870609   | NC_000004.11 |
| cg07309238 | 4.59E-12 | 2.58E-13 | 7.86 | 19.344201  | 7.33E-02 | 110229803 | 110229926 | NC_000005.9  |
| cg21858485 | 4.60E-12 | 2.59E-13 | 7.86 | 19.3420664 | 2.27E-01 | 130236027 | 130236150 | NC_000003.11 |
| cg09890891 | 4.60E-12 | 2.59E-13 | 7.86 | 19.341954  | 1.15E-01 | 96904723  | 96904846  | NC_000015.9  |
| cg19316405 | 4.61E-12 | 2.59E-13 | 7.86 | 19.3398247 | 4.39E-02 | 770410    | 770533    | NC_000011.9  |
| cg00286188 | 4.61E-12 | 2.59E-13 | 7.86 | 19.3394406 | 9.95E-02 | 33493596  | 33493719  | NC_000002.11 |
| cg16209664 | 4.63E-12 | 2.60E-13 | 7.86 | 19.3364786 | 1.30E-01 | 147131146 | 147131269 | NC_000003.11 |
| cg06550340 | 4.63E-12 | 2.60E-13 | 7.86 | 19.3354552 | 2.02E-01 | 61638420  | 61638543  | NC_000020.10 |
| cg12845990 | 4.63E-12 | 2.60E-13 | 7.86 | 19.335023  | 3.20E-02 | 33391288  | 33391411  | NC_000006.11 |
| cg13728003 | 4.63E-12 | 2.60E-13 | 7.86 | 19.3348925 | 1.76E-01 | 1387836   | 1387959   | NC_000006.11 |
| cg01313313 | 4.64E-12 | 2.61E-13 | 7.85 | 19.333963  | 1.92E-01 | 43040590  | 43040713  | NC_000005.9  |
| cg16359550 | 4.65E-12 | 2.61E-13 | 7.85 | 19.3320379 | 2.02E-01 | 109292809 | 109292932 | NC_000011.9  |
| cg18689614 | 4.65E-12 | 2.61E-13 | 7.85 | 19.3311614 | 5.96E-02 | 77029386  | 77029509  | NC_000017.10 |
| cg25944479 | 4.65E-12 | 2.61E-13 | 7.85 | 19.3311368 | 1.17E-01 | 8195062   | 8195185   | NC_000006.11 |
| cg15836374 | 4.65E-12 | 2.62E-13 | 7.85 | 19.3301471 | 7.89E-02 | 132938027 | 132938150 | NC_000012.11 |
| cg21072457 | 4.66E-12 | 2.62E-13 | 7.85 | 19.3293001 | 6.38E-02 | 151192481 | 151192604 | NC_000005.9  |
| cg15936446 | 4.66E-12 | 2.62E-13 | 7.85 | 19.3287277 | 1.89E-01 | 42952369  | 42952492  | NC_000005.9  |
| cg23542449 | 4.66E-12 | 2.62E-13 | 7.85 | 19.3284775 | 1.33E-01 | 22602447  | 22602570  | NC_000012.11 |
| cg19695166 | 4.66E-12 | 2.62E-13 | 7.85 | 19.3277053 | 9.66E-02 | 16462492  | 16462615  | NC_000005.9  |
| cg07618581 | 4.66E-12 | 2.62E-13 | 7.85 | 19.3273808 | 1.27E-01 | 92512048  | 92512171  | NC_000015.9  |
| cg05840573 | 4.67E-12 | 2.63E-13 | 7.85 | 19.3262217 | 1.65E-01 | 24124045  | 24124168  | NC_000018.9  |
| cg00034468 | 4.67E-12 | 2.63E-13 | 7.85 | 19.3251471 | 1.41E-01 | 229568077 | 229568200 | NC_000001.10 |
| cg19595505 | 4.68E-12 | 2.63E-13 | 7.85 | 19.3237373 | 1.84E-01 | 155596322 | 155596445 | NC_000007.13 |
| cg21500166 | 4.69E-12 | 2.64E-13 | 7.85 | 19.3225776 | 1.23E-01 | 75603184  | 75603307  | NC_000012.11 |
| cg04732596 | 4.69E-12 | 2.64E-13 | 7.85 | 19.3205402 | 1.32E-01 | 66789740  | 66789863  | NC_000002.11 |

|            |          |          |      |            |          |           |           |              |
|------------|----------|----------|------|------------|----------|-----------|-----------|--------------|
| cg17011276 | 4.72E-12 | 2.66E-13 | 7.85 | 19.3158357 | 1.84E-01 | 140797521 | 140797644 | NC_000005.9  |
| cg17943279 | 4.72E-12 | 2.66E-13 | 7.85 | 19.3150072 | 1.35E-01 | 72469560  | 72469683  | NC_000008.10 |
| cg05859308 | 4.73E-12 | 2.66E-13 | 7.85 | 19.3125835 | 1.20E-01 | 71712645  | 71712768  | NC_000014.8  |
| cg17207266 | 4.73E-12 | 2.67E-13 | 7.85 | 19.3120042 | 1.29E-01 | 25562957  | 25563080  | NC_000002.11 |
| cg23953290 | 4.74E-12 | 2.67E-13 | 7.85 | 19.3113372 | 4.09E-02 | 111048024 | 111048147 | NC_000012.11 |
| cg00303641 | 4.74E-12 | 2.67E-13 | 7.85 | 19.3112757 | 7.61E-02 | 23712764  | 23712887  | NC_000016.9  |
| cg00114132 | 4.74E-12 | 2.67E-13 | 7.85 | 19.3094294 | 1.02E-01 | 8657945   | 8658068   | NC_000018.9  |
| cg07602740 | 4.74E-12 | 2.67E-13 | 7.85 | 19.3093881 | 9.35E-02 | 32025960  | 32026083  | NC_000006.11 |
| cg00458395 | 4.74E-12 | 2.67E-13 | 7.85 | 19.309359  | 5.55E-02 | 13104674  | 13104797  | NC_000019.9  |
| cg06696905 | 4.75E-12 | 2.68E-13 | 7.85 | 19.3080606 | 1.01E-01 | 57539284  | 57539407  | NC_000003.11 |
| cg11338643 | 4.75E-12 | 2.68E-13 | 7.85 | 19.3077978 | 2.46E-01 | 166580983 | 166581106 | NC_000006.11 |
| cg14489474 | 4.76E-12 | 2.68E-13 | 7.85 | 19.3064888 | 1.48E-01 | 905611    | 905734    | NC_000018.9  |
| cg03801902 | 4.76E-12 | 2.68E-13 | 7.85 | 19.3055547 | 2.81E-01 | 4381800   | 4381923   | NC_000012.11 |
| cg22130262 | 4.76E-12 | 2.68E-13 | 7.85 | 19.3052677 | 1.80E-01 | 57026502  | 57026625  | NC_000008.10 |
| cg02696910 | 4.77E-12 | 2.69E-13 | 7.85 | 19.303413  | 9.79E-02 | 234683776 | 234683899 | NC_000002.11 |
| cg27377339 | 4.77E-12 | 2.69E-13 | 7.85 | 19.3032951 | 8.66E-02 | 155952301 | 155952424 | NC_000007.13 |
| cg02013148 | 4.78E-12 | 2.70E-13 | 7.85 | 19.301272  | 1.41E-01 | 149238478 | 149238601 | NC_000003.11 |
| cg18082638 | 4.78E-12 | 2.70E-13 | 7.85 | 19.3005446 | 1.95E-01 | 31827757  | 31827880  | NC_000011.9  |
| cg02483484 | 4.78E-12 | 2.70E-13 | 7.85 | 19.3002945 | 2.03E-01 | 4716537   | 4716660   | NC_000001.10 |
| cg15694715 | 4.79E-12 | 2.70E-13 | 7.85 | 19.2997593 | 2.18E-01 | 118402280 | 118402403 | NC_000011.9  |
| cg13334277 | 4.79E-12 | 2.70E-13 | 7.85 | 19.2993858 | 1.04E-01 | 88757878  | 88758001  | NC_000006.11 |
| cg06997381 | 4.79E-12 | 2.70E-13 | 7.85 | 19.2988152 | 2.65E-01 | 6449090   | 6449213   | NC_000005.9  |
| cg19079845 | 4.81E-12 | 2.71E-13 | 7.85 | 19.2948954 | 1.97E-01 | 21686308  | 21686431  | NC_000020.10 |
| cg23381863 | 4.81E-12 | 2.71E-13 | 7.85 | 19.2947864 | 5.83E-02 | 147165164 | 147165287 | NC_000004.11 |
| cg24862548 | 4.82E-12 | 2.72E-13 | 7.85 | 19.2919727 | 5.09E-02 | 97346037  | 97346160  | NC_000008.10 |

|            |          |          |      |            |          |           |           |              |
|------------|----------|----------|------|------------|----------|-----------|-----------|--------------|
| cg10996058 | 4.82E-12 | 2.72E-13 | 7.85 | 19.2918858 | 1.69E-01 | 119915729 | 119915852 | NC_000002.11 |
| cg00708598 | 4.83E-12 | 2.73E-13 | 7.85 | 19.2901691 | 1.53E-01 | 53313895  | 53314018  | NC_000013.10 |
| cg26613361 | 4.83E-12 | 2.73E-13 | 7.85 | 19.2897905 | 1.23E-01 | 31830668  | 31830791  | NC_000016.9  |
| cg17291500 | 4.83E-12 | 2.73E-13 | 7.85 | 19.2893665 | 5.24E-02 | 550508    | 550631    | NC_000007.13 |
| cg05371498 | 4.84E-12 | 2.73E-13 | 7.85 | 19.2884157 | 9.93E-02 | 10989530  | 10989653  | NC_000016.9  |
| cg13914083 | 4.84E-12 | 2.73E-13 | 7.85 | 19.2878206 | 2.08E-01 | 158141526 | 158141649 | NC_000004.11 |
| cg25272065 | 4.84E-12 | 2.73E-13 | 7.85 | 19.2875474 | 1.83E-01 | 77334678  | 77334801  | NC_000001.10 |
| cg09194778 | 4.84E-12 | 2.73E-13 | 7.85 | 19.2874044 | 5.98E-02 | 792749    | 792872    | NC_000006.11 |
| cg16028175 | 4.84E-12 | 2.73E-13 | 7.85 | 19.2870083 | 1.76E-01 | 50059164  | 50059287  | NC_000019.9  |
| cg24580782 | 4.85E-12 | 2.74E-13 | 7.85 | 19.2845299 | 1.83E-01 | 27240365  | 27240488  | NC_000001.10 |
| cg21733531 | 4.86E-12 | 2.74E-13 | 7.85 | 19.2836815 | 1.12E-01 | 63560711  | 63560834  | NC_000007.13 |
| cg13211683 | 4.86E-12 | 2.75E-13 | 7.85 | 19.282708  | 2.15E-01 | 97171827  | 97171950  | NC_000008.10 |
| cg03646291 | 4.87E-12 | 2.75E-13 | 7.85 | 19.2819106 | 1.27E-01 | 41109598  | 41109721  | NC_000013.10 |
| cg22907258 | 4.87E-12 | 2.75E-13 | 7.85 | 19.2808761 | 3.82E-02 | 75141096  | 75141219  | NC_000017.10 |
| cg07964097 | 4.87E-12 | 2.75E-13 | 7.85 | 19.2798322 | 4.67E-02 | 131708081 | 131708204 | NC_000012.11 |
| cg19530178 | 4.88E-12 | 2.75E-13 | 7.85 | 19.2797435 | 6.09E-02 | 37578528  | 37578651  | NC_000022.10 |
| cg17902947 | 4.88E-12 | 2.75E-13 | 7.85 | 19.2796666 | 1.02E-01 | 57040807  | 57040930  | NC_000001.10 |
| cg13327545 | 4.88E-12 | 2.76E-13 | 7.85 | 19.279155  | 1.09E-01 | 22623548  | 22623671  | NC_000010.10 |
| cg15514848 | 4.88E-12 | 2.76E-13 | 7.85 | 19.2775527 | 1.80E-01 | 171217555 | 171217678 | NC_000001.10 |
| cg10514714 | 4.89E-12 | 2.77E-13 | 7.85 | 19.2754892 | 8.38E-02 | 111015299 | 111015422 | NC_000001.10 |
| cg18110883 | 4.90E-12 | 2.77E-13 | 7.84 | 19.2735231 | 5.10E-02 | 9009066   | 9009189   | NC_000003.11 |
| cg11113066 | 4.91E-12 | 2.78E-13 | 7.84 | 19.2716566 | 1.26E-01 | 101281981 | 101282104 | NC_000010.10 |
| cg05771369 | 4.92E-12 | 2.79E-13 | 7.84 | 19.2688312 | 1.52E-01 | 58021713  | 58021836  | NC_000012.11 |
| cg19227485 | 4.93E-12 | 2.79E-13 | 7.84 | 19.2672266 | 4.63E-02 | 33773898  | 33774021  | NC_000017.10 |
| cg22735419 | 4.93E-12 | 2.79E-13 | 7.84 | 19.2670904 | 3.82E-02 | 1360208   | 1360331   | NC_000019.9  |

|            |          |          |      |            |          |           |           |              |
|------------|----------|----------|------|------------|----------|-----------|-----------|--------------|
| cg05375309 | 4.93E-12 | 2.79E-13 | 7.84 | 19.2669879 | 1.15E-01 | 79621517  | 79621640  | NC_000006.11 |
| cg10099105 | 4.94E-12 | 2.80E-13 | 7.84 | 19.265229  | 1.10E-01 | 155093457 | 155093580 | NC_000007.13 |
| cg21114773 | 4.94E-12 | 2.80E-13 | 7.84 | 19.2652157 | 2.15E-01 | 12254452  | 12254575  | NC_000018.9  |
| cg25631688 | 4.94E-12 | 2.80E-13 | 7.84 | 19.2645361 | 1.08E-01 | 93502004  | 93502127  | NC_000012.11 |
| cg13187820 | 4.95E-12 | 2.80E-13 | 7.84 | 19.2635187 | 1.19E-01 | 98960562  | 98960685  | NC_000013.10 |
| cg24154937 | 4.95E-12 | 2.80E-13 | 7.84 | 19.2630439 | 1.43E-01 | 5153711   | 5153834   | NC_000012.11 |
| cg04154502 | 4.95E-12 | 2.80E-13 | 7.84 | 19.262398  | 7.20E-02 | 3831293   | 3831416   | NC_000019.9  |
| cg20524972 | 4.96E-12 | 2.80E-13 | 7.84 | 19.2620569 | 4.96E-02 | 107219895 | 107220018 | NC_000013.10 |
| cg07717083 | 4.96E-12 | 2.81E-13 | 7.84 | 19.2615354 | 1.25E-01 | 32051857  | 32051980  | NC_000006.11 |
| cg22273168 | 4.96E-12 | 2.81E-13 | 7.84 | 19.2606572 | 5.98E-02 | 60827525  | 60827648  | NC_000017.10 |
| cg03821418 | 4.96E-12 | 2.81E-13 | 7.84 | 19.2602346 | 9.93E-02 | 124859683 | 124859806 | NC_000012.11 |
| cg12631713 | 4.96E-12 | 2.81E-13 | 7.84 | 19.2600732 | 7.98E-02 | 4771985   | 4772108   | NC_000001.10 |
| cg11670651 | 4.97E-12 | 2.81E-13 | 7.84 | 19.2596731 | 2.43E-01 | 119419106 | 119419229 | NC_000012.11 |
| cg22645209 | 4.97E-12 | 2.81E-13 | 7.84 | 19.259454  | 3.72E-02 | 97300809  | 97300932  | NC_000002.11 |
| cg20345915 | 4.97E-12 | 2.81E-13 | 7.84 | 19.2591967 | 1.11E-01 | 121296042 | 121296165 | NC_000010.10 |
| cg00027083 | 4.97E-12 | 2.81E-13 | 7.84 | 19.258828  | 2.24E-01 | 5543801   | 5543924   | NC_000018.9  |
| cg12505146 | 4.97E-12 | 2.82E-13 | 7.84 | 19.2577908 | 2.49E-01 | 72322388  | 72322511  | NC_000017.10 |
| cg22029275 | 4.98E-12 | 2.82E-13 | 7.84 | 19.2575741 | 2.83E-01 | 25745784  | 25745907  | NC_000013.10 |
| cg16197202 | 4.99E-12 | 2.83E-13 | 7.84 | 19.2546144 | 7.49E-02 | 133643702 | 133643825 | NC_000010.10 |
| cg26649904 | 4.99E-12 | 2.83E-13 | 7.84 | 19.2538669 | 1.92E-01 | 236407361 | 236407484 | NC_000002.11 |
| cg08928882 | 4.99E-12 | 2.83E-13 | 7.84 | 19.2537103 | 2.22E-01 | 77593362  | 77593485  | NC_000008.10 |
| cg12315466 | 5.02E-12 | 2.84E-13 | 7.84 | 19.2490995 | 7.44E-02 | 233923814 | 233923937 | NC_000002.11 |
| cg13069385 | 5.02E-12 | 2.84E-13 | 7.84 | 19.2490208 | 1.17E-01 | 38822397  | 38822520  | NC_000017.10 |
| cg12899423 | 5.03E-12 | 2.85E-13 | 7.84 | 19.2464941 | 1.17E-01 | 44328154  | 44328277  | NC_000011.9  |
| cg04307561 | 5.04E-12 | 2.86E-13 | 7.84 | 19.2434585 | 2.66E-01 | 72460119  | 72460242  | NC_000008.10 |

|            |          |          |      |            |          |           |           |              |
|------------|----------|----------|------|------------|----------|-----------|-----------|--------------|
| cg16766249 | 5.06E-12 | 2.87E-13 | 7.84 | 19.2393224 | 1.95E-01 | 79745154  | 79745277  | NC_000014.8  |
| cg09657963 | 5.07E-12 | 2.87E-13 | 7.84 | 19.2387433 | 2.14E-01 | 124790875 | 124790998 | NC_000011.9  |
| cg09305096 | 5.07E-12 | 2.87E-13 | 7.84 | 19.2379041 | 1.51E-01 | 189191655 | 189191778 | NC_000002.11 |
| cg16424082 | 5.08E-12 | 2.88E-13 | 7.84 | 19.235963  | 8.75E-02 | 51323740  | 51323863  | NC_000012.11 |
| cg08082810 | 5.08E-12 | 2.88E-13 | 7.84 | 19.2350504 | 1.51E-01 | 61108391  | 61108514  | NC_000014.8  |
| cg10274108 | 5.09E-12 | 2.88E-13 | 7.84 | 19.2342667 | 1.25E-01 | 38082931  | 38083054  | NC_000004.11 |
| cg08086724 | 5.10E-12 | 2.89E-13 | 7.84 | 19.2316473 | 1.83E-01 | 36973204  | 36973327  | NC_000014.8  |
| cg08512345 | 5.10E-12 | 2.89E-13 | 7.84 | 19.2314871 | 2.02E-02 | 112043275 | 112043398 | NC_000005.9  |
| cg23633700 | 5.11E-12 | 2.90E-13 | 7.84 | 19.2304614 | 1.47E-01 | 48016735  | 48016858  | NC_000007.13 |
| cg14129589 | 5.14E-12 | 2.91E-13 | 7.84 | 19.2240795 | 1.15E-01 | 3240109   | 3240232   | NC_000012.11 |
| cg26620450 | 5.15E-12 | 2.92E-13 | 7.84 | 19.2216619 | 1.93E-01 | 133195061 | 133195184 | NC_000012.11 |
| cg20820063 | 5.16E-12 | 2.93E-13 | 7.84 | 19.2191893 | 1.74E-01 | 31020627  | 31020750  | NC_000018.9  |
| cg15067340 | 5.17E-12 | 2.93E-13 | 7.84 | 19.2187195 | 2.39E-01 | 37488671  | 37488794  | NC_000007.13 |
| cg22711111 | 5.17E-12 | 2.93E-13 | 7.84 | 19.2184232 | 1.86E-01 | 30139979  | 30140102  | NC_000006.11 |
| cg12279518 | 5.18E-12 | 2.94E-13 | 7.84 | 19.215574  | 1.28E-01 | 85190400  | 85190523  | NC_000001.10 |
| cg04420991 | 5.19E-12 | 2.94E-13 | 7.83 | 19.2141059 | 6.59E-02 | 77067214  | 77067337  | NC_000004.11 |
| cg08309183 | 5.19E-12 | 2.95E-13 | 7.83 | 19.2128677 | 1.25E-01 | 150674375 | 150674498 | NC_000007.13 |
| cg06682197 | 5.19E-12 | 2.95E-13 | 7.83 | 19.2128609 | 2.04E-01 | 88324879  | 88325002  | NC_000013.10 |
| cg15020425 | 5.20E-12 | 2.95E-13 | 7.83 | 19.2119021 | 1.68E-01 | 69633716  | 69633839  | NC_000011.9  |
| cg02646491 | 5.22E-12 | 2.96E-13 | 7.83 | 19.2074302 | 1.41E-01 | 2890710   | 2890833   | NC_000011.9  |
| cg13644317 | 5.24E-12 | 2.97E-13 | 7.83 | 19.2048504 | 1.83E-01 | 70536461  | 70536584  | NC_000018.9  |
| cg03120091 | 5.24E-12 | 2.97E-13 | 7.83 | 19.204227  | 1.96E-01 | 132052779 | 132052902 | NC_000008.10 |
| cg22123464 | 5.24E-12 | 2.97E-13 | 7.83 | 19.2041285 | 2.11E-01 | 47974901  | 47975024  | NC_000019.9  |
| cg08512702 | 5.25E-12 | 2.98E-13 | 7.83 | 19.2018121 | 2.35E-01 | 13548915  | 13549038  | NC_000004.11 |
| cg23708361 | 5.25E-12 | 2.98E-13 | 7.83 | 19.20123   | 2.17E-01 | 145813432 | 145813555 | NC_000007.13 |

|            |          |          |      |            |          |           |           |              |
|------------|----------|----------|------|------------|----------|-----------|-----------|--------------|
| cg26210445 | 5.26E-12 | 2.99E-13 | 7.83 | 19.1999881 | 2.39E-01 | 162273326 | 162273449 | NC_000002.11 |
| cg13590117 | 5.27E-12 | 2.99E-13 | 7.83 | 19.1986803 | 1.13E-01 | 138057965 | 138058088 | NC_000009.11 |
| cg05658491 | 5.28E-12 | 3.00E-13 | 7.83 | 19.1964345 | 1.78E-01 | 240256014 | 240256137 | NC_000001.10 |
| cg04653893 | 5.28E-12 | 3.00E-13 | 7.83 | 19.1952741 | 1.03E-01 | 20996560  | 20996683  | NC_000016.9  |
| cg02379973 | 5.29E-12 | 3.00E-13 | 7.83 | 19.1941634 | 9.52E-02 | 57478107  | 57478230  | NC_000012.11 |
| cg19003797 | 5.31E-12 | 3.01E-13 | 7.83 | 19.1907178 | 1.99E-01 | 137819267 | 137819390 | NC_000006.11 |
| cg24645214 | 5.31E-12 | 3.02E-13 | 7.83 | 19.1895043 | 2.24E-01 | 54789978  | 54790101  | NC_000008.10 |
| cg11138769 | 5.32E-12 | 3.02E-13 | 7.83 | 19.1879608 | 3.90E-02 | 134117039 | 134117162 | NC_000011.9  |
| cg22976218 | 5.32E-12 | 3.02E-13 | 7.83 | 19.1875696 | 1.91E-01 | 182544321 | 182544444 | NC_000002.11 |
| cg26464221 | 5.32E-12 | 3.02E-13 | 7.83 | 19.1875259 | 1.75E-01 | 119801431 | 119801554 | NC_000005.9  |
| cg03269976 | 5.33E-12 | 3.03E-13 | 7.83 | 19.1866222 | 8.15E-02 | 240658243 | 240658366 | NC_000002.11 |
| cg21296676 | 5.33E-12 | 3.03E-13 | 7.83 | 19.1865295 | 1.41E-01 | 133561660 | 133561783 | NC_000006.11 |
| cg08996678 | 5.33E-12 | 3.03E-13 | 7.83 | 19.1853592 | 7.94E-02 | 30113783  | 30113906  | NC_000006.11 |
| cg05855917 | 5.33E-12 | 3.03E-13 | 7.83 | 19.1851774 | 2.52E-01 | 147113700 | 147113823 | NC_000003.11 |
| cg01678091 | 5.34E-12 | 3.03E-13 | 7.83 | 19.1843777 | 1.11E-01 | 23890686  | 23890809  | NC_000015.9  |
| cg22400703 | 5.34E-12 | 3.04E-13 | 7.83 | 19.1839213 | 1.48E-01 | 68545995  | 68546118  | NC_000002.11 |
| cg07790279 | 5.34E-12 | 3.04E-13 | 7.83 | 19.183539  | 1.28E-01 | 125851132 | 125851255 | NC_000010.10 |
| cg06897145 | 5.34E-12 | 3.04E-13 | 7.83 | 19.1831139 | 1.22E-01 | 3238937   | 3239060   | NC_000016.9  |
| cg23973626 | 5.35E-12 | 3.04E-13 | 7.83 | 19.1820191 | 2.15E-02 | 18451326  | 18451449  | NC_000019.9  |
| cg07035659 | 5.37E-12 | 3.05E-13 | 7.83 | 19.1781322 | 1.45E-01 | 4859975   | 4860098   | NC_000004.11 |
| cg22631350 | 5.37E-12 | 3.06E-13 | 7.83 | 19.1773635 | 7.63E-02 | 22555243  | 22555366  | NC_000008.10 |
| cg26717983 | 5.38E-12 | 3.06E-13 | 7.83 | 19.1762875 | 1.89E-01 | 72596472  | 72596595  | NC_000006.11 |
| cg01045835 | 5.38E-12 | 3.06E-13 | 7.83 | 19.1760806 | 1.01E-01 | 82969530  | 82969653  | NC_000005.9  |
| cg10297191 | 5.39E-12 | 3.06E-13 | 7.83 | 19.1749187 | 9.41E-02 | 46620661  | 46620784  | NC_000006.11 |
| cg25460731 | 5.40E-12 | 3.07E-13 | 7.83 | 19.172847  | 9.58E-02 | 67549363  | 67549486  | NC_000002.11 |

|            |          |          |      |            |          |           |           |              |
|------------|----------|----------|------|------------|----------|-----------|-----------|--------------|
| cg25913520 | 5.41E-12 | 3.08E-13 | 7.83 | 19.1697092 | 1.43E-01 | 13524041  | 13524164  | NC_000004.11 |
| cg15400629 | 5.42E-12 | 3.08E-13 | 7.83 | 19.1683958 | 1.44E-01 | 13548243  | 13548366  | NC_000004.11 |
| cg24891539 | 5.42E-12 | 3.08E-13 | 7.83 | 19.1683898 | 1.95E-01 | 55370407  | 55370530  | NC_000008.10 |
| cg07464977 | 5.44E-12 | 3.10E-13 | 7.83 | 19.1647784 | 1.90E-01 | 2097136   | 2097259   | NC_000005.9  |
| cg14660788 | 5.45E-12 | 3.10E-13 | 7.83 | 19.1630688 | 9.45E-02 | 3625312   | 3625435   | NC_000001.10 |
| cg11919837 | 5.45E-12 | 3.10E-13 | 7.83 | 19.1618245 | 1.38E-01 | 57350735  | 57350858  | NC_000008.10 |
| cg14553338 | 5.47E-12 | 3.11E-13 | 7.83 | 19.1590662 | 8.70E-02 | 66689807  | 66689930  | NC_000002.11 |
| cg21920775 | 5.47E-12 | 3.11E-13 | 7.83 | 19.1586714 | 2.25E-01 | 114696641 | 114696764 | NC_000001.10 |
| cg11850773 | 5.47E-12 | 3.12E-13 | 7.83 | 19.1581687 | 2.05E-01 | 904963    | 905086    | NC_000018.9  |
| cg11718030 | 5.47E-12 | 3.12E-13 | 7.83 | 19.1580083 | 1.97E-01 | 27744363  | 27744486  | NC_000011.9  |
| cg12625300 | 5.48E-12 | 3.12E-13 | 7.83 | 19.156765  | 3.94E-02 | 2959621   | 2959744   | NC_000006.11 |
| cg11929898 | 5.50E-12 | 3.13E-13 | 7.82 | 19.1531034 | 1.14E-01 | 111760010 | 111760133 | NC_000003.11 |
| cg17004711 | 5.51E-12 | 3.14E-13 | 7.82 | 19.1509694 | 7.79E-02 | 4875911   | 4876034   | NC_000007.13 |
| cg11346128 | 5.51E-12 | 3.14E-13 | 7.82 | 19.1505667 | 9.28E-02 | 142465233 | 142465356 | NC_000006.11 |
| cg19754554 | 5.52E-12 | 3.14E-13 | 7.82 | 19.149381  | 1.73E-01 | 66258687  | 66258810  | NC_000001.10 |
| cg02228111 | 5.53E-12 | 3.15E-13 | 7.82 | 19.1472684 | 2.14E-01 | 132905819 | 132905942 | NC_000012.11 |
| cg17838420 | 5.53E-12 | 3.15E-13 | 7.82 | 19.1472327 | 1.44E-01 | 1877906   | 1878029   | NC_000005.9  |
| cg13294846 | 5.54E-12 | 3.16E-13 | 7.82 | 19.1458526 | 2.39E-01 | 2112351   | 2112474   | NC_000005.9  |
| cg08301572 | 5.54E-12 | 3.16E-13 | 7.82 | 19.1450546 | 2.26E-01 | 23300243  | 23300366  | NC_000019.9  |
| cg09879526 | 5.55E-12 | 3.16E-13 | 7.82 | 19.1429292 | 3.56E-02 | 243652762 | 243652885 | NC_000001.10 |
| cg25367890 | 5.57E-12 | 3.18E-13 | 7.82 | 19.1395356 | 2.99E-02 | 67815048  | 67815171  | NC_000011.9  |
| cg01519784 | 5.57E-12 | 3.18E-13 | 7.82 | 19.1391891 | 1.83E-01 | 36450896  | 36451019  | NC_000019.9  |
| cg12930573 | 5.57E-12 | 3.18E-13 | 7.82 | 19.1389442 | 2.08E-02 | 182971009 | 182971132 | NC_000003.11 |
| cg27648738 | 5.57E-12 | 3.18E-13 | 7.82 | 19.1388594 | 2.99E-01 | 84115811  | 84115934  | NC_000015.9  |
| cg20611276 | 5.58E-12 | 3.18E-13 | 7.82 | 19.1368464 | 1.77E-01 | 133561866 | 133561989 | NC_000006.11 |



|            |          |          |      |            |          |           |           |              |
|------------|----------|----------|------|------------|----------|-----------|-----------|--------------|
| cg01791874 | 5.59E-12 | 3.19E-13 | 7.82 | 19.1360276 | 2.23E-01 | 16180055  | 16180178  | NC_000005.9  |
| cg22052948 | 5.59E-12 | 3.19E-13 | 7.82 | 19.135513  | 1.79E-01 | 140778342 | 140778465 | NC_000005.9  |
| cg22717825 | 5.59E-12 | 3.19E-13 | 7.82 | 19.1353622 | 7.87E-02 | 20250298  | 20250421  | NC_000001.10 |
| cg16208657 | 5.62E-12 | 3.21E-13 | 7.82 | 19.130315  | 1.42E-01 | 68119293  | 68119416  | NC_000015.9  |
| cg13210260 | 5.62E-12 | 3.21E-13 | 7.82 | 19.1296157 | 1.76E-01 | 50889294  | 50889417  | NC_000001.10 |
| cg03935956 | 5.63E-12 | 3.21E-13 | 7.82 | 19.1278849 | 1.00E-01 | 23511855  | 23511978  | NC_000016.9  |
| cg21688264 | 5.64E-12 | 3.22E-13 | 7.82 | 19.1264834 | 2.19E-01 | 84418724  | 84418847  | NC_000006.11 |
| cg08084616 | 5.64E-12 | 3.22E-13 | 7.82 | 19.1256316 | 1.83E-01 | 132110831 | 132110954 | NC_000002.11 |
| cg23407561 | 5.65E-12 | 3.22E-13 | 7.82 | 19.1248243 | 6.54E-02 | 113544232 | 113544355 | NC_000002.11 |
| cg26123605 | 5.65E-12 | 3.22E-13 | 7.82 | 19.1244631 | 2.09E-01 | 147141614 | 147141737 | NC_000003.11 |
| cg17479280 | 5.66E-12 | 3.23E-13 | 7.82 | 19.1228764 | 1.24E-01 | 156466088 | 156466211 | NC_000001.10 |
| cg19580752 | 5.66E-12 | 3.23E-13 | 7.82 | 19.1226972 | 2.50E-01 | 135050355 | 135050478 | NC_000010.10 |
| cg05735384 | 5.69E-12 | 3.25E-13 | 7.82 | 19.1176065 | 1.67E-01 | 32639426  | 32639549  | NC_000015.9  |
| cg18848394 | 5.69E-12 | 3.25E-13 | 7.82 | 19.1173462 | 1.13E-01 | 39597909  | 39598032  | NC_000017.10 |
| cg02039465 | 5.69E-12 | 3.25E-13 | 7.82 | 19.1172989 | 7.18E-02 | 252450    | 252573    | NC_000012.11 |
| cg17457637 | 5.69E-12 | 3.25E-13 | 7.82 | 19.1159525 | 1.58E-01 | 27170717  | 27170840  | NC_000007.13 |
| cg02644867 | 5.69E-12 | 3.25E-13 | 7.82 | 19.1158427 | 1.63E-01 | 1271057   | 1271180   | NC_000019.9  |
| cg02964287 | 5.70E-12 | 3.26E-13 | 7.82 | 19.1141273 | 9.51E-02 | 28887830  | 28887953  | NC_000016.9  |
| cg25175900 | 5.71E-12 | 3.26E-13 | 7.82 | 19.1129599 | 8.50E-02 | 22854001  | 22854124  | NC_000012.11 |
| cg15213604 | 5.71E-12 | 3.26E-13 | 7.82 | 19.1128824 | 1.17E-01 | 79890769  | 79890892  | NC_000017.10 |
| cg23089838 | 5.71E-12 | 3.26E-13 | 7.82 | 19.1128682 | 1.91E-01 | 13424419  | 13424542  | NC_000008.10 |
| cg12676149 | 5.71E-12 | 3.26E-13 | 7.82 | 19.1123301 | 1.93E-01 | 30139634  | 30139757  | NC_000006.11 |
| cg07639287 | 5.73E-12 | 3.27E-13 | 7.82 | 19.1098568 | 1.50E-01 | 17850911  | 17851034  | NC_000022.10 |
| cg01891966 | 5.73E-12 | 3.28E-13 | 7.82 | 19.109121  | 1.37E-01 | 27202344  | 27202467  | NC_000007.13 |
| cg26498616 | 5.74E-12 | 3.28E-13 | 7.82 | 19.1079382 | 1.24E-01 | 1223240   | 1223363   | NC_000005.9  |

|            |          |          |      |            |          |           |           |              |
|------------|----------|----------|------|------------|----------|-----------|-----------|--------------|
| cg01972843 | 5.74E-12 | 3.28E-13 | 7.82 | 19.107504  | 1.26E-01 | 17680706  | 17680829  | NC_000022.10 |
| cg00923458 | 5.75E-12 | 3.29E-13 | 7.82 | 19.1057104 | 4.09E-02 | 168514532 | 168514655 | NC_000001.10 |
| cg12246165 | 5.77E-12 | 3.30E-13 | 7.82 | 19.1014556 | 5.45E-02 | 46972489  | 46972612  | NC_000021.8  |
| cg20996351 | 5.78E-12 | 3.31E-13 | 7.82 | 19.100049  | 1.45E-01 | 27687232  | 27687355  | NC_000001.10 |
| cg19084726 | 5.79E-12 | 3.31E-13 | 7.82 | 19.0991397 | 1.98E-01 | 145075538 | 145075661 | NC_000001.10 |
| cg09809416 | 5.80E-12 | 3.32E-13 | 7.82 | 19.0960364 | 1.34E-01 | 151970131 | 151970254 | NC_000001.10 |
| cg04854226 | 5.81E-12 | 3.32E-13 | 7.81 | 19.0947672 | 1.56E-01 | 96910513  | 96910636  | NC_000015.9  |
| cg03835158 | 5.82E-12 | 3.33E-13 | 7.81 | 19.0935508 | 3.68E-02 | 52773607  | 52773730  | NC_000008.10 |
| cg19445269 | 5.84E-12 | 3.34E-13 | 7.81 | 19.089954  | 7.97E-02 | 39171830  | 39171953  | NC_000002.11 |
| cg08202494 | 5.84E-12 | 3.34E-13 | 7.81 | 19.0896745 | 1.41E-01 | 99961545  | 99961668  | NC_000008.10 |
| cg24843380 | 5.84E-12 | 3.34E-13 | 7.81 | 19.0891045 | 2.48E-01 | 178367827 | 178367950 | NC_000005.9  |
| cg04217778 | 5.86E-12 | 3.35E-13 | 7.81 | 19.0865213 | 1.96E-01 | 5111916   | 5112039   | NC_000007.13 |
| cg23055499 | 5.87E-12 | 3.36E-13 | 7.81 | 19.0840959 | 9.21E-02 | 51847363  | 51847486  | NC_000012.11 |
| cg21645973 | 5.87E-12 | 3.36E-13 | 7.81 | 19.0840405 | 9.52E-02 | 17914070  | 17914193  | NC_000001.10 |
| cg05470523 | 5.87E-12 | 3.36E-13 | 7.81 | 19.0836238 | 1.55E-01 | 49814781  | 49814904  | NC_000007.13 |
| cg15617139 | 5.89E-12 | 3.37E-13 | 7.81 | 19.0805565 | 4.19E-02 | 130731583 | 130731706 | NC_000011.9  |
| cg10989326 | 5.90E-12 | 3.38E-13 | 7.81 | 19.0793302 | 6.29E-02 | 93258908  | 93259031  | NC_000001.10 |
| cg10082589 | 5.90E-12 | 3.38E-13 | 7.81 | 19.0789556 | 1.18E-01 | 192712920 | 192713043 | NC_000002.11 |
| cg24985672 | 5.90E-12 | 3.38E-13 | 7.81 | 19.0777798 | 1.41E-01 | 67600231  | 67600354  | NC_000015.9  |
| cg06800421 | 5.91E-12 | 3.38E-13 | 7.81 | 19.0769081 | 5.78E-02 | 93854668  | 93854791  | NC_000010.10 |
| cg18404513 | 5.91E-12 | 3.39E-13 | 7.81 | 19.0760524 | 1.00E-01 | 48587440  | 48587563  | NC_000008.10 |
| cg27134816 | 5.92E-12 | 3.39E-13 | 7.81 | 19.0758857 | 1.96E-01 | 102569815 | 102569938 | NC_000013.10 |
| cg07326665 | 5.92E-12 | 3.39E-13 | 7.81 | 19.075253  | 1.14E-01 | 334445    | 334568    | NC_000016.9  |
| cg01352175 | 5.92E-12 | 3.39E-13 | 7.81 | 19.0751607 | 1.50E-01 | 44773985  | 44774108  | NC_000018.9  |
| cg22043168 | 5.92E-12 | 3.39E-13 | 7.81 | 19.0742633 | 2.19E-01 | 27741077  | 27741200  | NC_000011.9  |

|            |          |          |      |            |          |           |           |              |
|------------|----------|----------|------|------------|----------|-----------|-----------|--------------|
| cg24359109 | 5.94E-12 | 3.40E-13 | 7.81 | 19.0715125 | 1.60E-01 | 245772794 | 245772917 | NC_000001.10 |
| cg19397321 | 5.94E-12 | 3.40E-13 | 7.81 | 19.0710739 | 3.02E-02 | 43404741  | 43404864  | NC_000018.9  |
| cg06607919 | 5.94E-12 | 3.40E-13 | 7.81 | 19.0707723 | 1.75E-01 | 80549797  | 80549920  | NC_000002.11 |
| cg08884928 | 5.94E-12 | 3.41E-13 | 7.81 | 19.070597  | 1.53E-01 | 57431996  | 57432119  | NC_000017.10 |
| cg26220673 | 5.96E-12 | 3.42E-13 | 7.81 | 19.0674799 | 1.49E-01 | 221064700 | 221064823 | NC_000001.10 |
| cg04178266 | 5.97E-12 | 3.42E-13 | 7.81 | 19.0665898 | 1.77E-01 | 41258790  | 41258913  | NC_000004.11 |
| cg05393563 | 5.97E-12 | 3.42E-13 | 7.81 | 19.0659208 | 1.65E-02 | 45672071  | 45672194  | NC_000001.10 |
| cg13404421 | 5.97E-12 | 3.42E-13 | 7.81 | 19.0654522 | 2.62E-01 | 4382181   | 4382304   | NC_000012.11 |
| cg15190742 | 5.98E-12 | 3.43E-13 | 7.81 | 19.0647581 | 2.07E-01 | 42154140  | 42154263  | NC_000004.11 |
| cg06129556 | 5.98E-12 | 3.43E-13 | 7.81 | 19.0643187 | 3.94E-02 | 64634880  | 64635003  | NC_000015.9  |
| cg18646207 | 5.99E-12 | 3.43E-13 | 7.81 | 19.0631019 | 1.92E-01 | 118897836 | 118897959 | NC_000010.10 |
| cg03982801 | 5.99E-12 | 3.43E-13 | 7.81 | 19.0622436 | 1.33E-01 | 27168688  | 27168811  | NC_000007.13 |
| cg00133595 | 5.99E-12 | 3.44E-13 | 7.81 | 19.0617271 | 2.65E-01 | 31228059  | 31228182  | NC_000016.9  |
| cg04875212 | 6.00E-12 | 3.44E-13 | 7.81 | 19.0612234 | 1.02E-01 | 67830554  | 67830677  | NC_000014.8  |
| cg00436254 | 6.01E-12 | 3.44E-13 | 7.81 | 19.0595703 | 1.12E-01 | 127862614 | 127862737 | NC_000002.11 |
| cg16103732 | 6.01E-12 | 3.45E-13 | 7.81 | 19.0585577 | 4.81E-02 | 86370663  | 86370786  | NC_000013.10 |
| cg15805540 | 6.03E-12 | 3.46E-13 | 7.81 | 19.055385  | 1.87E-01 | 64286415  | 64286538  | NC_000006.11 |
| cg21293902 | 6.03E-12 | 3.46E-13 | 7.81 | 19.0550701 | 1.11E-01 | 49994097  | 49994220  | NC_000019.9  |
| cg19529273 | 6.08E-12 | 3.49E-13 | 7.81 | 19.0477542 | 4.41E-02 | 63274743  | 63274866  | NC_000011.9  |
| cg24842760 | 6.08E-12 | 3.49E-13 | 7.81 | 19.0476616 | 1.63E-01 | 133561719 | 133561842 | NC_000006.11 |
| cg07197785 | 6.09E-12 | 3.49E-13 | 7.81 | 19.0459375 | 1.94E-01 | 111813690 | 111813813 | NC_000001.10 |
| cg04886672 | 6.09E-12 | 3.49E-13 | 7.81 | 19.0457896 | 3.75E-02 | 79215047  | 79215170  | NC_000017.10 |
| cg01755562 | 6.09E-12 | 3.49E-13 | 7.81 | 19.0454105 | 1.97E-01 | 139653545 | 139653668 | NC_000003.11 |
| cg26522297 | 6.09E-12 | 3.50E-13 | 7.81 | 19.0443456 | 1.46E-01 | 115829838 | 115829961 | NC_000011.9  |
| cg10680051 | 6.10E-12 | 3.50E-13 | 7.81 | 19.0436215 | 2.50E-01 | 124735089 | 124735212 | NC_000011.9  |

|            |          |          |      |            |          |           |           |              |
|------------|----------|----------|------|------------|----------|-----------|-----------|--------------|
| cg11142705 | 6.12E-12 | 3.51E-13 | 7.81 | 19.0401623 | 2.12E-01 | 42306974  | 42307097  | NC_000003.11 |
| cg08916646 | 6.12E-12 | 3.51E-13 | 7.81 | 19.0400243 | 6.52E-02 | 122526031 | 122526154 | NC_000008.10 |
| cg15790526 | 6.15E-12 | 3.53E-13 | 7.8  | 19.03428   | 1.36E-01 | 123711842 | 123711965 | NC_000003.11 |
| cg01650245 | 6.15E-12 | 3.53E-13 | 7.8  | 19.0340437 | 7.43E-02 | 105626788 | 105626911 | NC_000012.11 |
| cg01883425 | 6.16E-12 | 3.54E-13 | 7.8  | 19.0337344 | 1.47E-01 | 41606770  | 41606893  | NC_000006.11 |
| cg11231143 | 6.16E-12 | 3.54E-13 | 7.8  | 19.0336306 | 1.11E-01 | 26554245  | 26554368  | NC_000017.10 |
| cg00339556 | 6.16E-12 | 3.54E-13 | 7.8  | 19.0331813 | 2.21E-01 | 16180048  | 16180171  | NC_000005.9  |
| cg08506654 | 6.20E-12 | 3.56E-13 | 7.8  | 19.0267196 | 1.50E-01 | 172673098 | 172673221 | NC_000005.9  |
| cg17633592 | 6.21E-12 | 3.57E-13 | 7.8  | 19.0241992 | 1.84E-01 | 112758599 | 112758722 | NC_000013.10 |
| cg00041641 | 6.21E-12 | 3.57E-13 | 7.8  | 19.0237972 | 7.09E-02 | 151024614 | 151024737 | NC_000001.10 |
| cg27107094 | 6.23E-12 | 3.58E-13 | 7.8  | 19.0220676 | 1.04E-01 | 37768915  | 37769038  | NC_000022.10 |
| cg17453780 | 6.24E-12 | 3.59E-13 | 7.8  | 19.0187684 | 2.08E-01 | 113013048 | 113013171 | NC_000012.11 |
| cg13389502 | 6.26E-12 | 3.60E-13 | 7.8  | 19.0165059 | 1.11E-01 | 1961440   | 1961563   | NC_000017.10 |
| cg18063493 | 6.26E-12 | 3.60E-13 | 7.8  | 19.0153649 | 2.23E-02 | 43196221  | 43196344  | NC_000017.10 |
| cg26866452 | 6.28E-12 | 3.61E-13 | 7.8  | 19.0126561 | 8.52E-02 | 77857909  | 77858032  | NC_000015.9  |
| cg06457317 | 6.29E-12 | 3.62E-13 | 7.8  | 19.0106071 | 2.71E-01 | 20185267  | 20185390  | NC_000011.9  |
| cg25881804 | 6.31E-12 | 3.63E-13 | 7.8  | 19.0081662 | 2.43E-01 | 21081901  | 21082024  | NC_000020.10 |
| cg08702941 | 6.33E-12 | 3.64E-13 | 7.8  | 19.004687  | 8.43E-02 | 42155308  | 42155431  | NC_000004.11 |
| cg22601348 | 6.34E-12 | 3.64E-13 | 7.8  | 19.0036358 | 2.39E-01 | 69243904  | 69244027  | NC_000008.10 |
| cg16499166 | 6.35E-12 | 3.65E-13 | 7.8  | 19.00099   | 4.20E-02 | 88808981  | 88809104  | NC_000016.9  |
| cg11754900 | 6.35E-12 | 3.66E-13 | 7.8  | 19.0007388 | 6.86E-02 | 101758860 | 101758983 | NC_000004.11 |
| cg26236177 | 6.37E-12 | 3.66E-13 | 7.8  | 18.9982185 | 1.95E-01 | 61110649  | 61110772  | NC_000014.8  |
| cg27072996 | 6.37E-12 | 3.67E-13 | 7.8  | 18.9981483 | 1.93E-01 | 822635    | 822758    | NC_000019.9  |
| cg22340747 | 6.39E-12 | 3.68E-13 | 7.8  | 18.9952833 | 1.44E-01 | 45683210  | 45683333  | NC_000015.9  |
| cg06103218 | 6.40E-12 | 3.69E-13 | 7.8  | 18.9925657 | 1.58E-01 | 2073751   | 2073874   | NC_000004.11 |

|            |          |          |      |            |          |           |           |              |
|------------|----------|----------|------|------------|----------|-----------|-----------|--------------|
| cg25114781 | 6.41E-12 | 3.69E-13 | 7.8  | 18.990574  | 1.45E-01 | 92996919  | 92997042  | NC_000014.8  |
| cg13543106 | 6.42E-12 | 3.70E-13 | 7.8  | 18.9899862 | 1.27E-01 | 90086806  | 90086929  | NC_000003.11 |
| cg17037101 | 6.42E-12 | 3.70E-13 | 7.8  | 18.989655  | 2.09E-01 | 2161314   | 2161437   | NC_000011.9  |
| cg01287975 | 6.45E-12 | 3.71E-13 | 7.8  | 18.9851856 | 2.14E-01 | 97361241  | 97361364  | NC_000007.13 |
| cg25144111 | 6.46E-12 | 3.72E-13 | 7.8  | 18.9834062 | 6.28E-02 | 127796312 | 127796435 | NC_000006.11 |
| cg27345346 | 6.47E-12 | 3.73E-13 | 7.8  | 18.9813509 | 7.82E-02 | 36259144  | 36259267  | NC_000019.9  |
| cg12612393 | 6.48E-12 | 3.73E-13 | 7.8  | 18.9803599 | 1.35E-01 | 3474376   | 3474499   | NC_000001.10 |
| cg07872979 | 6.50E-12 | 3.75E-13 | 7.79 | 18.9761723 | 1.09E-01 | 94771165  | 94771288  | NC_000011.9  |
| cg13951074 | 6.52E-12 | 3.76E-13 | 7.79 | 18.9730561 | 1.47E-01 | 1045628   | 1045751   | NC_000009.11 |
| cg11655243 | 6.52E-12 | 3.76E-13 | 7.79 | 18.9726921 | 1.82E-01 | 140778396 | 140778519 | NC_000005.9  |
| cg09832102 | 6.53E-12 | 3.77E-13 | 7.79 | 18.9713194 | 1.26E-01 | 75503269  | 75503392  | NC_000017.10 |
| cg20411075 | 6.53E-12 | 3.77E-13 | 7.79 | 18.9711476 | 4.18E-02 | 21677723  | 21677846  | NC_000013.10 |
| cg26202847 | 6.54E-12 | 3.77E-13 | 7.79 | 18.9696893 | 1.68E-01 | 153855353 | 153855476 | NC_000005.9  |
| cg11732619 | 6.55E-12 | 3.77E-13 | 7.79 | 18.9692316 | 2.10E-01 | 168728076 | 168728199 | NC_000005.9  |
| cg17192381 | 6.55E-12 | 3.78E-13 | 7.79 | 18.9688136 | 1.19E-01 | 60792598  | 60792721  | NC_000018.9  |
| cg23434186 | 6.55E-12 | 3.78E-13 | 7.79 | 18.9684143 | 1.38E-01 | 67068730  | 67068853  | NC_000018.9  |
| cg04419610 | 6.56E-12 | 3.78E-13 | 7.79 | 18.9676697 | 1.88E-01 | 48946564  | 48946687  | NC_000019.9  |
| cg20887073 | 6.56E-12 | 3.78E-13 | 7.79 | 18.9671799 | 1.63E-01 | 10381764  | 10381887  | NC_000006.11 |
| cg17856495 | 6.57E-12 | 3.79E-13 | 7.79 | 18.9654613 | 5.33E-02 | 1691867   | 1691990   | NC_000012.11 |
| cg24977338 | 6.57E-12 | 3.79E-13 | 7.79 | 18.9652271 | 1.15E-01 | 113188963 | 113189086 | NC_000002.11 |
| cg02509825 | 6.59E-12 | 3.80E-13 | 7.79 | 18.9618897 | 1.55E-01 | 56015399  | 56015522  | NC_000008.10 |
| cg20139338 | 6.59E-12 | 3.80E-13 | 7.79 | 18.9617154 | 1.74E-01 | 64120656  | 64120779  | NC_000011.9  |
| cg10217445 | 6.59E-12 | 3.80E-13 | 7.79 | 18.9613866 | 1.65E-01 | 34397784  | 34397907  | NC_000021.8  |
| cg17018021 | 6.60E-12 | 3.81E-13 | 7.79 | 18.9608631 | 7.43E-02 | 1029394   | 1029517   | NC_000017.10 |
| cg21748223 | 6.62E-12 | 3.82E-13 | 7.79 | 18.9578896 | 1.96E-01 | 164264853 | 164264976 | NC_000004.11 |

|            |          |          |      |            |          |           |           |              |
|------------|----------|----------|------|------------|----------|-----------|-----------|--------------|
| cg02005600 | 6.62E-12 | 3.82E-13 | 7.79 | 18.957879  | 1.51E-01 | 27183686  | 27183809  | NC_000007.13 |
| cg11573170 | 6.62E-12 | 3.82E-13 | 7.79 | 18.9568379 | 1.40E-01 | 556762    | 556885    | NC_000010.10 |
| cg02216246 | 6.64E-12 | 3.83E-13 | 7.79 | 18.9540047 | 2.20E-01 | 128564756 | 128564879 | NC_000011.9  |
| cg17277892 | 6.67E-12 | 3.85E-13 | 7.79 | 18.9499048 | 2.14E-01 | 69591803  | 69591926  | NC_000003.11 |
| cg00997079 | 6.67E-12 | 3.85E-13 | 7.79 | 18.949453  | 1.55E-01 | 80529990  | 80530113  | NC_000002.11 |
| cg06959053 | 6.67E-12 | 3.85E-13 | 7.79 | 18.949224  | 1.98E-01 | 79382548  | 79382671  | NC_000015.9  |
| cg07895132 | 6.67E-12 | 3.85E-13 | 7.79 | 18.9490992 | 1.28E-01 | 33825172  | 33825295  | NC_000017.10 |
| cg25967612 | 6.67E-12 | 3.85E-13 | 7.79 | 18.9486821 | 9.08E-02 | 59482691  | 59482814  | NC_000011.9  |
| cg27599792 | 6.68E-12 | 3.85E-13 | 7.79 | 18.9483882 | 1.22E-01 | 140792992 | 140793115 | NC_000005.9  |
| cg07751669 | 6.68E-12 | 3.86E-13 | 7.79 | 18.9482244 | 1.28E-01 | 114546247 | 114546370 | NC_000009.11 |
| cg26638505 | 6.68E-12 | 3.86E-13 | 7.79 | 18.9477145 | 1.27E-01 | 31806183  | 31806306  | NC_000002.11 |
| cg27129048 | 6.69E-12 | 3.86E-13 | 7.79 | 18.9461412 | 1.46E-01 | 92938576  | 92938699  | NC_000015.9  |
| cg14549051 | 6.69E-12 | 3.87E-13 | 7.79 | 18.9457272 | 7.60E-02 | 201131810 | 201131933 | NC_000002.11 |
| cg19819285 | 6.69E-12 | 3.87E-13 | 7.79 | 18.9455909 | 1.59E-01 | 58545290  | 58545413  | NC_000019.9  |
| cg26282762 | 6.71E-12 | 3.88E-13 | 7.79 | 18.9430877 | 1.50E-01 | 1356444   | 1356567   | NC_000019.9  |
| cg10967023 | 6.72E-12 | 3.88E-13 | 7.79 | 18.9408988 | 2.12E-01 | 115134886 | 115135009 | NC_000012.11 |
| cg14492293 | 6.74E-12 | 3.90E-13 | 7.79 | 18.9374329 | 1.83E-01 | 139093852 | 139093975 | NC_000009.11 |
| cg22063654 | 6.75E-12 | 3.90E-13 | 7.79 | 18.9372354 | 1.60E-01 | 72758701  | 72758824  | NC_000008.10 |
| cg22544416 | 6.75E-12 | 3.90E-13 | 7.79 | 18.9370042 | 6.41E-02 | 46859899  | 46860022  | NC_000022.10 |
| cg26988213 | 6.77E-12 | 3.91E-13 | 7.79 | 18.9340018 | 8.30E-02 | 128496531 | 128496654 | NC_000007.13 |
| cg13891768 | 6.78E-12 | 3.92E-13 | 7.79 | 18.932195  | 1.97E-01 | 111536024 | 111536147 | NC_000004.11 |
| cg19418922 | 6.78E-12 | 3.92E-13 | 7.79 | 18.932072  | 6.56E-02 | 44265840  | 44265963  | NC_000011.9  |
| cg06302566 | 6.79E-12 | 3.92E-13 | 7.79 | 18.9307531 | 1.29E-01 | 121150686 | 121150809 | NC_000012.11 |
| cg22867315 | 6.79E-12 | 3.92E-13 | 7.79 | 18.9306744 | 9.06E-02 | 153476415 | 153476538 | NC_000006.11 |
| cg01667646 | 6.80E-12 | 3.93E-13 | 7.79 | 18.9288573 | 2.06E-01 | 84116018  | 84116141  | NC_000015.9  |

|            |          |          |      |            |          |           |           |              |
|------------|----------|----------|------|------------|----------|-----------|-----------|--------------|
| cg13790906 | 6.80E-12 | 3.93E-13 | 7.79 | 18.928251  | 4.60E-02 | 20564145  | 20564268  | NC_000015.9  |
| cg09491536 | 6.80E-12 | 3.93E-13 | 7.79 | 18.9281937 | 1.36E-01 | 3787915   | 3788038   | NC_000005.9  |
| cg18257839 | 6.81E-12 | 3.94E-13 | 7.79 | 18.9276345 | 4.33E-02 | 63369284  | 63369407  | NC_000015.9  |
| cg20249252 | 6.81E-12 | 3.94E-13 | 7.79 | 18.9271176 | 2.10E-01 | 114852308 | 114852431 | NC_000012.11 |
| cg23272088 | 6.82E-12 | 3.95E-13 | 7.79 | 18.9255898 | 2.23E-01 | 2504813   | 2504936   | NC_000011.9  |
| cg01255486 | 6.83E-12 | 3.95E-13 | 7.79 | 18.9247691 | 1.42E-01 | 112199323 | 112199446 | NC_000005.9  |
| cg25461249 | 6.83E-12 | 3.95E-13 | 7.79 | 18.9241373 | 1.54E-01 | 1019317   | 1019440   | NC_000008.10 |
| cg17081489 | 6.86E-12 | 3.97E-13 | 7.79 | 18.919865  | 7.78E-02 | 177953700 | 177953823 | NC_000001.10 |
| cg19846491 | 6.86E-12 | 3.97E-13 | 7.79 | 18.9191881 | 1.62E-01 | 79322924  | 79323047  | NC_000017.10 |
| cg20727555 | 6.88E-12 | 3.98E-13 | 7.78 | 18.9165163 | 4.57E-02 | 57910480  | 57910603  | NC_000012.11 |
| cg16512661 | 6.88E-12 | 3.98E-13 | 7.78 | 18.9163744 | 1.24E-01 | 2743620   | 2743743   | NC_000005.9  |
| cg18693395 | 6.89E-12 | 3.99E-13 | 7.78 | 18.9148474 | 2.37E-01 | 52735421  | 52735544  | NC_000014.8  |
| cg03417156 | 6.89E-12 | 3.99E-13 | 7.78 | 18.9148031 | 8.70E-02 | 14043646  | 14043769  | NC_000019.9  |
| cg00768993 | 6.89E-12 | 3.99E-13 | 7.78 | 18.9144629 | 1.90E-01 | 200335874 | 200335997 | NC_000002.11 |
| cg20449726 | 6.90E-12 | 3.99E-13 | 7.78 | 18.9137508 | 1.33E-01 | 15276987  | 15277110  | NC_000001.10 |
| cg06204735 | 6.90E-12 | 3.99E-13 | 7.78 | 18.9133223 | 2.50E-01 | 74892986  | 74893109  | NC_000014.8  |
| cg14925024 | 6.90E-12 | 4.00E-13 | 7.78 | 18.9126764 | 1.56E-01 | 228291705 | 228291828 | NC_000001.10 |
| cg09246253 | 6.91E-12 | 4.00E-13 | 7.78 | 18.9117798 | 8.40E-02 | 5643021   | 5643144   | NC_000007.13 |
| cg14392725 | 6.92E-12 | 4.01E-13 | 7.78 | 18.9106278 | 7.58E-02 | 109893226 | 109893349 | NC_000009.11 |
| cg00326251 | 6.92E-12 | 4.01E-13 | 7.78 | 18.9096919 | 1.33E-01 | 23262648  | 23262771  | NC_000008.10 |
| cg19613624 | 6.93E-12 | 4.01E-13 | 7.78 | 18.9085124 | 8.68E-02 | 56223757  | 56223880  | NC_000020.10 |
| cg02936752 | 6.93E-12 | 4.01E-13 | 7.78 | 18.9083082 | 1.37E-01 | 54963326  | 54963449  | NC_000019.9  |
| cg00178562 | 6.96E-12 | 4.03E-13 | 7.78 | 18.9041343 | 7.77E-02 | 16966354  | 16966477  | NC_000001.10 |
| cg13939055 | 6.96E-12 | 4.03E-13 | 7.78 | 18.9039127 | 1.25E-01 | 244094869 | 244094992 | NC_000001.10 |
| cg24345260 | 6.97E-12 | 4.04E-13 | 7.78 | 18.9018951 | 5.62E-02 | 2952979   | 2953102   | NC_000007.13 |

|            |          |          |      |            |          |           |           |              |
|------------|----------|----------|------|------------|----------|-----------|-----------|--------------|
| cg22398359 | 6.98E-12 | 4.05E-13 | 7.78 | 18.9008576 | 5.73E-02 | 53558066  | 53558189  | NC_000001.10 |
| cg19707326 | 6.99E-12 | 4.05E-13 | 7.78 | 18.8991686 | 7.77E-02 | 24787611  | 24787734  | NC_000014.8  |
| cg23730788 | 6.99E-12 | 4.05E-13 | 7.78 | 18.8988054 | 8.97E-02 | 241581277 | 241581400 | NC_000002.11 |
| cg26276327 | 7.00E-12 | 4.06E-13 | 7.78 | 18.8977153 | 1.49E-01 | 247511469 | 247511592 | NC_000001.10 |
| cg19807257 | 7.01E-12 | 4.06E-13 | 7.78 | 18.8970624 | 2.32E-01 | 46951354  | 46951477  | NC_000001.10 |
| cg15126179 | 7.01E-12 | 4.06E-13 | 7.78 | 18.8968222 | 1.27E-01 | 79181338  | 79181461  | NC_000013.10 |
| cg12277789 | 7.02E-12 | 4.07E-13 | 7.78 | 18.8954544 | 1.13E-01 | 125033770 | 125033893 | NC_000010.10 |
| cg07828169 | 7.02E-12 | 4.07E-13 | 7.78 | 18.895129  | 1.14E-01 | 132114623 | 132114746 | NC_000005.9  |
| cg26368049 | 7.03E-12 | 4.08E-13 | 7.78 | 18.8932742 | 9.60E-02 | 49572730  | 49572853  | NC_000003.11 |
| cg11973479 | 7.06E-12 | 4.09E-13 | 7.78 | 18.8892958 | 1.66E-01 | 19152073  | 19152196  | NC_000007.13 |
| cg24651824 | 7.07E-12 | 4.10E-13 | 7.78 | 18.8874501 | 4.91E-02 | 104117048 | 104117171 | NC_000004.11 |
| cg19103770 | 7.09E-12 | 4.11E-13 | 7.78 | 18.8850808 | 1.71E-01 | 93520566  | 93520689  | NC_000007.13 |
| cg04396462 | 7.09E-12 | 4.11E-13 | 7.78 | 18.8850609 | 3.56E-02 | 63082613  | 63082736  | NC_000003.11 |
| cg20275739 | 7.10E-12 | 4.12E-13 | 7.78 | 18.8829097 | 5.09E-02 | 26692284  | 26692407  | NC_000017.10 |
| cg22265452 | 7.11E-12 | 4.12E-13 | 7.78 | 18.8821273 | 7.42E-02 | 213697031 | 213697154 | NC_000002.11 |
| cg05707116 | 7.11E-12 | 4.12E-13 | 7.78 | 18.8821115 | 1.11E-01 | 88924001  | 88924124  | NC_000002.11 |
| cg06539804 | 7.11E-12 | 4.13E-13 | 7.78 | 18.8812372 | 2.31E-01 | 2781489   | 2781612   | NC_000020.10 |
| cg12616941 | 7.11E-12 | 4.13E-13 | 7.78 | 18.8809018 | 1.63E-01 | 22612797  | 22612920  | NC_000010.10 |
| cg06889951 | 7.15E-12 | 4.15E-13 | 7.78 | 18.8759927 | 4.42E-02 | 69625218  | 69625341  | NC_000011.9  |
| cg00011459 | 7.15E-12 | 4.15E-13 | 7.78 | 18.8759272 | 4.67E-02 | 8890425   | 8890548   | NC_000016.9  |
| cg03202077 | 7.15E-12 | 4.15E-13 | 7.78 | 18.8752675 | 1.99E-01 | 28338836  | 28338959  | NC_000021.8  |
| cg01986717 | 7.17E-12 | 4.17E-13 | 7.78 | 18.871889  | 1.34E-01 | 35535021  | 35535144  | NC_000019.9  |
| cg06132028 | 7.19E-12 | 4.17E-13 | 7.78 | 18.8699023 | 1.96E-01 | 133562466 | 133562589 | NC_000006.11 |
| cg15917438 | 7.19E-12 | 4.18E-13 | 7.78 | 18.8696601 | 1.16E-01 | 170169088 | 170169211 | NC_000005.9  |
| cg26649384 | 7.19E-12 | 4.18E-13 | 7.78 | 18.8694124 | 2.11E-01 | 154334651 | 154334774 | NC_000002.11 |



|            |          |          |      |            |          |           |           |              |
|------------|----------|----------|------|------------|----------|-----------|-----------|--------------|
| cg07595776 | 7.20E-12 | 4.18E-13 | 7.78 | 18.8675554 | 1.55E-01 | 77253990  | 77254113  | NC_000005.9  |
| cg06377964 | 7.21E-12 | 4.19E-13 | 7.78 | 18.866929  | 7.05E-02 | 129429172 | 129429295 | NC_000012.11 |
| cg17426084 | 7.21E-12 | 4.19E-13 | 7.78 | 18.8666529 | 1.07E-01 | 2293552   | 2293675   | NC_000011.9  |
| cg00557959 | 7.21E-12 | 4.19E-13 | 7.78 | 18.8663769 | 1.65E-01 | 113296414 | 113296537 | NC_000013.10 |
| cg21127999 | 7.22E-12 | 4.19E-13 | 7.78 | 18.8653044 | 7.69E-02 | 168476501 | 168476624 | NC_000006.11 |
| cg20987323 | 7.22E-12 | 4.20E-13 | 7.78 | 18.864855  | 7.89E-02 | 1474011   | 1474134   | NC_000007.13 |
| cg05467160 | 7.23E-12 | 4.20E-13 | 7.78 | 18.8643831 | 1.65E-01 | 176945526 | 176945649 | NC_000002.11 |
| cg21112485 | 7.23E-12 | 4.20E-13 | 7.78 | 18.8642337 | 2.52E-02 | 11808413  | 11808536  | NC_000001.10 |
| cg03428109 | 7.23E-12 | 4.20E-13 | 7.78 | 18.8641859 | 8.84E-02 | 207118288 | 207118411 | NC_000002.11 |
| cg06942701 | 7.23E-12 | 4.20E-13 | 7.78 | 18.8628827 | 1.04E-01 | 162280009 | 162280132 | NC_000002.11 |
| cg13301733 | 7.25E-12 | 4.21E-13 | 7.78 | 18.8613245 | 6.90E-02 | 114050884 | 114051007 | NC_000002.11 |
| cg27569203 | 7.26E-12 | 4.22E-13 | 7.78 | 18.8597949 | 4.64E-02 | 46835135  | 46835258  | NC_000022.10 |
| cg08697689 | 7.27E-12 | 4.23E-13 | 7.77 | 18.8575855 | 1.68E-01 | 84457340  | 84457463  | NC_000013.10 |
| cg19675103 | 7.30E-12 | 4.24E-13 | 7.77 | 18.8537515 | 1.08E-01 | 47513375  | 47513498  | NC_000004.11 |
| cg06053376 | 7.30E-12 | 4.25E-13 | 7.77 | 18.8528623 | 6.23E-02 | 139055122 | 139055245 | NC_000005.9  |
| cg16406892 | 7.31E-12 | 4.25E-13 | 7.77 | 18.852282  | 1.77E-01 | 115118777 | 115118900 | NC_000012.11 |
| cg22686132 | 7.35E-12 | 4.28E-13 | 7.77 | 18.8460083 | 2.00E-01 | 28725957  | 28726080  | NC_000006.11 |
| cg00905524 | 7.38E-12 | 4.29E-13 | 7.77 | 18.8422431 | 1.08E-01 | 27206907  | 27207030  | NC_000007.13 |
| cg02562431 | 7.38E-12 | 4.30E-13 | 7.77 | 18.8417321 | 2.17E-01 | 134070369 | 134070492 | NC_000004.11 |
| cg17307479 | 7.40E-12 | 4.31E-13 | 7.77 | 18.8386583 | 2.11E-01 | 65494101  | 65494224  | NC_000008.10 |
| cg18394881 | 7.40E-12 | 4.31E-13 | 7.77 | 18.8384643 | 6.25E-02 | 3512777   | 3512900   | NC_000001.10 |
| cg10636403 | 7.41E-12 | 4.31E-13 | 7.77 | 18.8377726 | 2.16E-01 | 27136486  | 27136609  | NC_000007.13 |
| cg15180789 | 7.42E-12 | 4.32E-13 | 7.77 | 18.8359058 | 1.43E-01 | 159557797 | 159557920 | NC_000003.11 |
| cg02339752 | 7.43E-12 | 4.32E-13 | 7.77 | 18.8353709 | 9.82E-02 | 86549705  | 86549828  | NC_000016.9  |
| cg09418063 | 7.43E-12 | 4.32E-13 | 7.77 | 18.8352786 | 1.91E-01 | 22193540  | 22193663  | NC_000019.9  |

|            |          |          |      |            |          |           |           |              |
|------------|----------|----------|------|------------|----------|-----------|-----------|--------------|
| cg07546139 | 7.43E-12 | 4.33E-13 | 7.77 | 18.8345743 | 1.66E-01 | 92907553  | 92907676  | NC_000005.9  |
| cg09788416 | 7.44E-12 | 4.33E-13 | 7.77 | 18.8332833 | 2.08E-01 | 39539408  | 39539531  | NC_000012.11 |
| cg17039428 | 7.45E-12 | 4.34E-13 | 7.77 | 18.8314671 | 1.60E-01 | 115190758 | 115190881 | NC_000012.11 |
| cg13910989 | 7.45E-12 | 4.34E-13 | 7.77 | 18.8311583 | 8.53E-02 | 176020401 | 176020524 | NC_000005.9  |
| cg03846892 | 7.46E-12 | 4.34E-13 | 7.77 | 18.8310003 | 3.90E-02 | 178675021 | 178675144 | NC_000001.10 |
| cg01106926 | 7.47E-12 | 4.35E-13 | 7.77 | 18.8290325 | 1.50E-01 | 13539255  | 13539378  | NC_000004.11 |
| cg08010619 | 7.47E-12 | 4.35E-13 | 7.77 | 18.8285739 | 6.14E-02 | 9769192   | 9769315   | NC_000011.9  |
| cg25971347 | 7.49E-12 | 4.36E-13 | 7.77 | 18.8264996 | 2.47E-01 | 86544339  | 86544462  | NC_000016.9  |
| cg01567634 | 7.51E-12 | 4.38E-13 | 7.77 | 18.8231751 | 1.53E-01 | 114696671 | 114696794 | NC_000001.10 |
| cg03213967 | 7.54E-12 | 4.39E-13 | 7.77 | 18.8195164 | 5.28E-02 | 227729463 | 227729586 | NC_000001.10 |
| cg14765959 | 7.55E-12 | 4.40E-13 | 7.77 | 18.8173281 | 2.36E-01 | 106429316 | 106429439 | NC_000006.11 |
| cg24805559 | 7.56E-12 | 4.41E-13 | 7.77 | 18.8168225 | 5.09E-02 | 115786178 | 115786301 | NC_000012.11 |
| cg20699463 | 7.58E-12 | 4.42E-13 | 7.77 | 18.8131584 | 6.21E-02 | 23785143  | 23785266  | NC_000002.11 |
| cg24740218 | 7.60E-12 | 4.43E-13 | 7.77 | 18.8113703 | 1.42E-01 | 114075947 | 114076070 | NC_000012.11 |
| cg08528826 | 7.60E-12 | 4.43E-13 | 7.77 | 18.8109958 | 2.09E-01 | 139168305 | 139168428 | NC_000007.13 |
| cg27232145 | 7.60E-12 | 4.43E-13 | 7.77 | 18.8108758 | 1.59E-01 | 130647289 | 130647412 | NC_000012.11 |
| cg26483809 | 7.60E-12 | 4.44E-13 | 7.77 | 18.8102309 | 6.11E-02 | 90377257  | 90377380  | NC_000015.9  |
| cg27570892 | 7.62E-12 | 4.44E-13 | 7.77 | 18.8086366 | 1.33E-01 | 14160542  | 14160665  | NC_000003.11 |
| cg15657785 | 7.63E-12 | 4.45E-13 | 7.77 | 18.8059976 | 7.85E-02 | 155613360 | 155613483 | NC_000007.13 |
| cg20347882 | 7.66E-12 | 4.47E-13 | 7.77 | 18.8030989 | 1.85E-01 | 155166554 | 155166677 | NC_000007.13 |
| cg01458605 | 7.69E-12 | 4.48E-13 | 7.77 | 18.7992729 | 2.01E-01 | 147128679 | 147128802 | NC_000003.11 |
| cg09012125 | 7.69E-12 | 4.48E-13 | 7.77 | 18.7992193 | 1.55E-01 | 128779608 | 128779731 | NC_000011.9  |
| cg16544704 | 7.69E-12 | 4.49E-13 | 7.77 | 18.7990218 | 1.10E-01 | 44037277  | 44037400  | NC_000021.8  |
| cg03133987 | 7.69E-12 | 4.49E-13 | 7.77 | 18.7988727 | 1.19E-01 | 2053563   | 2053686   | NC_000016.9  |
| cg16770832 | 7.69E-12 | 4.49E-13 | 7.76 | 18.7980504 | 1.39E-01 | 56604516  | 56604639  | NC_000014.8  |

|            |          |          |      |            |          |           |           |              |
|------------|----------|----------|------|------------|----------|-----------|-----------|--------------|
| cg05801246 | 7.71E-12 | 4.50E-13 | 7.76 | 18.7960476 | 1.67E-01 | 125651549 | 125651672 | NC_000010.10 |
| cg26790247 | 7.72E-12 | 4.50E-13 | 7.76 | 18.7949953 | 1.81E-01 | 147108512 | 147108635 | NC_000003.11 |
| cg21609339 | 7.72E-12 | 4.51E-13 | 7.76 | 18.7944976 | 1.45E-01 | 44650270  | 44650393  | NC_000020.10 |
| cg16001495 | 7.72E-12 | 4.51E-13 | 7.76 | 18.7940409 | 1.85E-01 | 38080526  | 38080649  | NC_000021.8  |
| cg13502741 | 7.73E-12 | 4.51E-13 | 7.76 | 18.793296  | 2.04E-01 | 31848488  | 31848611  | NC_000011.9  |
| cg06649639 | 7.75E-12 | 4.52E-13 | 7.76 | 18.7908592 | 1.03E-01 | 154983995 | 154984118 | NC_000001.10 |
| cg19694010 | 7.76E-12 | 4.53E-13 | 7.76 | 18.7886684 | 2.43E-01 | 130645520 | 130645643 | NC_000012.11 |
| cg08944029 | 7.79E-12 | 4.55E-13 | 7.76 | 18.7852961 | 1.37E-01 | 112553445 | 112553568 | NC_000005.9  |
| cg17211890 | 7.80E-12 | 4.55E-13 | 7.76 | 18.7841519 | 1.37E-01 | 94906892  | 94907015  | NC_000010.10 |
| cg00674681 | 7.80E-12 | 4.55E-13 | 7.76 | 18.7840134 | 8.59E-02 | 50517357  | 50517480  | NC_000014.8  |
| cg13013975 | 7.82E-12 | 4.57E-13 | 7.76 | 18.7803606 | 3.73E-02 | 98581010  | 98581133  | NC_000007.13 |
| cg19537969 | 7.83E-12 | 4.57E-13 | 7.76 | 18.7801015 | 1.06E-01 | 91357909  | 91358032  | NC_000012.11 |
| cg13411015 | 7.83E-12 | 4.57E-13 | 7.76 | 18.7798958 | 1.65E-01 | 57274900  | 57275023  | NC_000014.8  |
| cg12746059 | 7.83E-12 | 4.58E-13 | 7.76 | 18.7792888 | 1.94E-01 | 134070389 | 134070512 | NC_000004.11 |
| cg10586883 | 7.83E-12 | 4.58E-13 | 7.76 | 18.7791055 | 1.04E-01 | 79312681  | 79312804  | NC_000017.10 |
| cg05476568 | 7.83E-12 | 4.58E-13 | 7.76 | 18.7787545 | 2.14E-01 | 153840109 | 153840232 | NC_000003.11 |
| cg11943209 | 7.85E-12 | 4.59E-13 | 7.76 | 18.7769966 | 1.40E-01 | 19553321  | 19553444  | NC_000002.11 |
| cg00676030 | 7.85E-12 | 4.59E-13 | 7.76 | 18.7768239 | 1.03E-01 | 38307962  | 38308085  | NC_000008.10 |
| cg23502639 | 7.85E-12 | 4.59E-13 | 7.76 | 18.7761411 | 1.56E-01 | 5402883   | 5403006   | NC_000017.10 |
| cg17746625 | 7.88E-12 | 4.61E-13 | 7.76 | 18.7725686 | 1.17E-01 | 150247007 | 150247130 | NC_000006.11 |
| cg13786089 | 7.89E-12 | 4.61E-13 | 7.76 | 18.771266  | 1.56E-01 | 3869086   | 3869209   | NC_000019.9  |
| cg04032181 | 7.91E-12 | 4.63E-13 | 7.76 | 18.7687901 | 7.37E-02 | 49382422  | 49382545  | NC_000008.10 |
| cg12907702 | 7.92E-12 | 4.63E-13 | 7.76 | 18.767736  | 1.50E-01 | 177133734 | 177133857 | NC_000001.10 |
| cg23076550 | 7.93E-12 | 4.64E-13 | 7.76 | 18.7663141 | 9.87E-02 | 5843661   | 5843784   | NC_000019.9  |
| cg26348254 | 7.93E-12 | 4.64E-13 | 7.76 | 18.7662391 | 6.56E-02 | 49265006  | 49265129  | NC_000015.9  |

|            |          |          |      |            |          |           |           |              |
|------------|----------|----------|------|------------|----------|-----------|-----------|--------------|
| cg18268547 | 7.94E-12 | 4.64E-13 | 7.76 | 18.7651232 | 1.65E-01 | 79615552  | 79615675  | NC_000017.10 |
| cg25121513 | 7.94E-12 | 4.64E-13 | 7.76 | 18.7647961 | 1.50E-01 | 25898206  | 25898329  | NC_000007.13 |
| cg04180823 | 7.96E-12 | 4.66E-13 | 7.76 | 18.761614  | 7.88E-02 | 167652028 | 167652151 | NC_000006.11 |
| cg04618219 | 7.97E-12 | 4.66E-13 | 7.76 | 18.7609846 | 5.66E-02 | 144902581 | 144902704 | NC_000008.10 |
| cg13434989 | 7.99E-12 | 4.68E-13 | 7.76 | 18.7581314 | 2.54E-01 | 78493305  | 78493428  | NC_000013.10 |
| cg10126234 | 8.02E-12 | 4.69E-13 | 7.76 | 18.7546898 | 1.41E-01 | 104195533 | 104195656 | NC_000014.8  |
| cg05230054 | 8.03E-12 | 4.70E-13 | 7.76 | 18.7527105 | 1.91E-01 | 34175419  | 34175542  | NC_000019.9  |
| cg23244790 | 8.03E-12 | 4.70E-13 | 7.76 | 18.7526678 | 1.99E-01 | 140811102 | 140811225 | NC_000005.9  |
| cg24722073 | 8.09E-12 | 4.73E-13 | 7.76 | 18.74575   | 1.81E-01 | 41882163  | 41882286  | NC_000004.11 |
| cg05396987 | 8.09E-12 | 4.74E-13 | 7.76 | 18.7454767 | 1.92E-01 | 122686269 | 122686392 | NC_000004.11 |
| cg20936172 | 8.09E-12 | 4.74E-13 | 7.76 | 18.7454625 | 8.11E-02 | 142533635 | 142533758 | NC_000008.10 |
| cg13042636 | 8.10E-12 | 4.74E-13 | 7.76 | 18.7442287 | 4.66E-02 | 122218807 | 122218930 | NC_000012.11 |
| cg19721867 | 8.10E-12 | 4.74E-13 | 7.76 | 18.7441221 | 2.15E-01 | 119001066 | 119001189 | NC_000010.10 |
| cg16392691 | 8.11E-12 | 4.75E-13 | 7.76 | 18.7429424 | 1.46E-01 | 28587771  | 28587894  | NC_000001.10 |
| cg16500497 | 8.11E-12 | 4.75E-13 | 7.76 | 18.7419801 | 8.70E-02 | 42427639  | 42427762  | NC_000017.10 |
| cg08582701 | 8.12E-12 | 4.75E-13 | 7.76 | 18.7417664 | 1.50E-01 | 6070005   | 6070128   | NC_000016.9  |
| cg03785456 | 8.13E-12 | 4.76E-13 | 7.76 | 18.7405064 | 9.42E-02 | 134255543 | 134255666 | NC_000002.11 |
| cg02380878 | 8.13E-12 | 4.76E-13 | 7.76 | 18.7404138 | 9.77E-02 | 1136618   | 1136741   | NC_000005.9  |
| cg21819468 | 8.13E-12 | 4.76E-13 | 7.76 | 18.740398  | 2.16E-01 | 13910569  | 13910692  | NC_000001.10 |
| cg25514273 | 8.15E-12 | 4.78E-13 | 7.75 | 18.7372464 | 1.84E-01 | 70681804  | 70681927  | NC_000013.10 |
| cg09551147 | 8.15E-12 | 4.78E-13 | 7.75 | 18.7368224 | 2.07E-01 | 106399957 | 106400080 | NC_000010.10 |
| cg25959472 | 8.16E-12 | 4.78E-13 | 7.75 | 18.7357283 | 1.46E-01 | 171384415 | 171384538 | NC_000005.9  |
| cg26584743 | 8.17E-12 | 4.79E-13 | 7.75 | 18.7348431 | 6.27E-02 | 31711736  | 31711859  | NC_000006.11 |
| cg04211018 | 8.17E-12 | 4.79E-13 | 7.75 | 18.7341027 | 1.30E-01 | 62783533  | 62783656  | NC_000001.10 |
| cg12964065 | 8.19E-12 | 4.80E-13 | 7.75 | 18.7315612 | 5.01E-02 | 77638022  | 77638145  | NC_000018.9  |

|            |          |          |      |            |          |           |           |              |
|------------|----------|----------|------|------------|----------|-----------|-----------|--------------|
| cg00650809 | 8.21E-12 | 4.81E-13 | 7.75 | 18.7294255 | 1.72E-01 | 17439339  | 17439462  | NC_000019.9  |
| cg22022798 | 8.23E-12 | 4.83E-13 | 7.75 | 18.7268561 | 1.56E-01 | 221065961 | 221066084 | NC_000001.10 |
| cg14914552 | 8.26E-12 | 4.84E-13 | 7.75 | 18.7232784 | 1.88E-01 | 97340188  | 97340311  | NC_000008.10 |
| cg13890706 | 8.26E-12 | 4.85E-13 | 7.75 | 18.7227086 | 2.24E-01 | 118033115 | 118033238 | NC_000010.10 |
| cg05074517 | 8.28E-12 | 4.85E-13 | 7.75 | 18.721122  | 9.16E-02 | 133901760 | 133901883 | NC_000009.11 |
| cg04210082 | 8.29E-12 | 4.86E-13 | 7.75 | 18.7199772 | 4.21E-02 | 109459746 | 109459869 | NC_000008.10 |
| cg06911487 | 8.29E-12 | 4.87E-13 | 7.75 | 18.7189435 | 1.41E-01 | 10024282  | 10024405  | NC_000019.9  |
| cg10059942 | 8.30E-12 | 4.87E-13 | 7.75 | 18.7184853 | 1.92E-01 | 124908488 | 124908611 | NC_000010.10 |
| cg15215348 | 8.31E-12 | 4.87E-13 | 7.75 | 18.7170021 | 1.64E-01 | 18344520  | 18344643  | NC_000019.9  |
| cg00609966 | 8.31E-12 | 4.88E-13 | 7.75 | 18.716975  | 2.43E-01 | 1202819   | 1202942   | NC_000016.9  |
| cg04198308 | 8.31E-12 | 4.88E-13 | 7.75 | 18.716233  | 2.24E-01 | 48971959  | 48972082  | NC_000022.10 |
| cg06221712 | 8.32E-12 | 4.88E-13 | 7.75 | 18.7157025 | 7.38E-02 | 29169423  | 29169546  | NC_000016.9  |
| cg02460314 | 8.32E-12 | 4.88E-13 | 7.75 | 18.7153789 | 1.83E-01 | 101841285 | 101841408 | NC_000010.10 |
| cg24494114 | 8.33E-12 | 4.89E-13 | 7.75 | 18.713901  | 1.29E-01 | 131769343 | 131769466 | NC_000012.11 |
| cg04380873 | 8.34E-12 | 4.90E-13 | 7.75 | 18.712697  | 1.05E-01 | 184089743 | 184089866 | NC_000003.11 |
| cg04914126 | 8.37E-12 | 4.91E-13 | 7.75 | 18.7094716 | 1.66E-01 | 143086405 | 143086528 | NC_000008.10 |
| cg08979895 | 8.42E-12 | 4.94E-13 | 7.75 | 18.7034614 | 1.43E-01 | 111540126 | 111540249 | NC_000004.11 |
| cg16055159 | 8.42E-12 | 4.94E-13 | 7.75 | 18.7033488 | 3.79E-02 | 101446936 | 101447059 | NC_000003.11 |
| cg21481021 | 8.47E-12 | 4.97E-13 | 7.75 | 18.6972124 | 7.13E-02 | 21037291  | 21037414  | NC_000018.9  |
| cg06288251 | 8.47E-12 | 4.97E-13 | 7.75 | 18.6970108 | 2.21E-01 | 132757087 | 132757210 | NC_000003.11 |
| cg22837767 | 8.49E-12 | 4.99E-13 | 7.75 | 18.6946258 | 2.35E-01 | 21686251  | 21686374  | NC_000020.10 |
| cg16910830 | 8.53E-12 | 5.01E-13 | 7.75 | 18.6899338 | 2.37E-01 | 145813437 | 145813560 | NC_000007.13 |
| cg11532863 | 8.53E-12 | 5.01E-13 | 7.75 | 18.689336  | 1.07E-01 | 19613430  | 19613553  | NC_000001.10 |
| cg00837677 | 8.55E-12 | 5.02E-13 | 7.75 | 18.6872104 | 2.81E-02 | 48372681  | 48372804  | NC_000010.10 |
| cg00984540 | 8.56E-12 | 5.03E-13 | 7.75 | 18.6859534 | 7.92E-02 | 155589293 | 155589416 | NC_000007.13 |

|            |          |          |      |            |          |           |           |              |
|------------|----------|----------|------|------------|----------|-----------|-----------|--------------|
| cg27319123 | 8.57E-12 | 5.04E-13 | 7.75 | 18.6846273 | 2.10E-01 | 30038286  | 30038409  | NC_000011.9  |
| cg08091601 | 8.60E-12 | 5.05E-13 | 7.75 | 18.6812863 | 1.65E-01 | 38248464  | 38248587  | NC_000022.10 |
| cg03603951 | 8.61E-12 | 5.06E-13 | 7.75 | 18.6797165 | 2.44E-01 | 47797488  | 47797611  | NC_000002.11 |
| cg25019648 | 8.62E-12 | 5.07E-13 | 7.74 | 18.6785477 | 2.23E-01 | 72353261  | 72353384  | NC_000017.10 |
| cg13066658 | 8.62E-12 | 5.07E-13 | 7.74 | 18.6777721 | 1.83E-01 | 32449163  | 32449286  | NC_000011.9  |
| cg16420199 | 8.65E-12 | 5.09E-13 | 7.74 | 18.6742735 | 2.09E-01 | 19797965  | 19798088  | NC_000008.10 |
| cg07076845 | 8.66E-12 | 5.09E-13 | 7.74 | 18.6738634 | 1.01E-01 | 103553804 | 103553927 | NC_000014.8  |
| cg08396985 | 8.67E-12 | 5.10E-13 | 7.74 | 18.6721374 | 1.69E-01 | 5896489   | 5896612   | NC_000002.11 |
| cg24364282 | 8.69E-12 | 5.11E-13 | 7.74 | 18.6703649 | 7.24E-02 | 114126759 | 114126882 | NC_000006.11 |
| cg24277791 | 8.69E-12 | 5.11E-13 | 7.74 | 18.6698041 | 1.53E-01 | 103968615 | 103968738 | NC_000007.13 |
| cg13544027 | 8.69E-12 | 5.11E-13 | 7.74 | 18.6697339 | 8.21E-02 | 20465288  | 20465411  | NC_000011.9  |
| cg21713614 | 8.70E-12 | 5.12E-13 | 7.74 | 18.6681622 | 1.17E-01 | 79126719  | 79126842  | NC_000004.11 |
| cg01769521 | 8.71E-12 | 5.12E-13 | 7.74 | 18.6679764 | 1.32E-01 | 142179603 | 142179726 | NC_000008.10 |
| cg02072532 | 8.71E-12 | 5.13E-13 | 7.74 | 18.6674327 | 3.56E-02 | 53926416  | 53926539  | NC_000014.8  |
| cg26552621 | 8.73E-12 | 5.14E-13 | 7.74 | 18.6656163 | 1.70E-01 | 1271019   | 1271142   | NC_000019.9  |
| cg13435820 | 8.73E-12 | 5.14E-13 | 7.74 | 18.6653367 | 1.08E-01 | 115907128 | 115907251 | NC_000012.11 |
| cg04030615 | 8.73E-12 | 5.14E-13 | 7.74 | 18.6647108 | 2.64E-01 | 229569902 | 229570025 | NC_000001.10 |
| cg22337128 | 8.75E-12 | 5.15E-13 | 7.74 | 18.6631278 | 2.17E-01 | 29243404  | 29243527  | NC_000014.8  |
| cg13193455 | 8.75E-12 | 5.15E-13 | 7.74 | 18.6630875 | 1.76E-01 | 38511455  | 38511578  | NC_000001.10 |
| cg06081917 | 8.83E-12 | 5.20E-13 | 7.74 | 18.6529111 | 7.32E-02 | 14762377  | 14762500  | NC_000016.9  |
| cg05466469 | 8.84E-12 | 5.21E-13 | 7.74 | 18.651672  | 6.28E-02 | 157278622 | 157278745 | NC_000006.11 |
| cg23679332 | 8.86E-12 | 5.22E-13 | 7.74 | 18.6495011 | 1.30E-01 | 38129652  | 38129775  | NC_000008.10 |
| cg26843110 | 8.86E-12 | 5.22E-13 | 7.74 | 18.6494725 | 1.82E-01 | 74935742  | 74935865  | NC_000015.9  |
| cg05045332 | 8.91E-12 | 5.25E-13 | 7.74 | 18.6435826 | 8.13E-02 | 32012897  | 32013020  | NC_000006.11 |
| cg25291004 | 8.92E-12 | 5.26E-13 | 7.74 | 18.6427568 | 1.64E-01 | 165305314 | 165305437 | NC_000004.11 |

|            |          |          |      |            |          |           |           |              |
|------------|----------|----------|------|------------|----------|-----------|-----------|--------------|
| cg02569509 | 8.94E-12 | 5.27E-13 | 7.74 | 18.6405135 | 1.34E-01 | 142423070 | 142423193 | NC_000007.13 |
| cg13575339 | 8.94E-12 | 5.27E-13 | 7.74 | 18.6398505 | 1.82E-01 | 74708313  | 74708436  | NC_000014.8  |
| cg24041917 | 8.96E-12 | 5.28E-13 | 7.74 | 18.637581  | 1.84E-01 | 119535986 | 119536109 | NC_000001.10 |
| cg24895052 | 8.98E-12 | 5.29E-13 | 7.74 | 18.6356734 | 1.10E-01 | 41909601  | 41909724  | NC_000017.10 |
| cg24856658 | 8.98E-12 | 5.30E-13 | 7.74 | 18.6352319 | 1.82E-01 | 78533917  | 78534040  | NC_000005.9  |
| cg10230442 | 8.99E-12 | 5.30E-13 | 7.74 | 18.6346223 | 1.39E-01 | 186383752 | 186383875 | NC_000003.11 |
| cg07142201 | 8.99E-12 | 5.30E-13 | 7.74 | 18.6341003 | 2.01E-01 | 109293216 | 109293339 | NC_000011.9  |
| cg03495340 | 9.00E-12 | 5.31E-13 | 7.74 | 18.6327029 | 1.71E-01 | 97685551  | 97685674  | NC_000014.8  |
| cg05487954 | 9.04E-12 | 5.33E-13 | 7.74 | 18.6285445 | 1.30E-01 | 38144887  | 38145010  | NC_000010.10 |
| cg18151410 | 9.06E-12 | 5.34E-13 | 7.74 | 18.6264027 | 1.50E-01 | 92367692  | 92367815  | NC_000015.9  |
| cg05184395 | 9.09E-12 | 5.37E-13 | 7.74 | 18.622559  | 1.10E-01 | 169192573 | 169192696 | NC_000006.11 |
| cg18530551 | 9.11E-12 | 5.38E-13 | 7.74 | 18.6204784 | 2.13E-01 | 172670879 | 172671002 | NC_000005.9  |
| cg14012310 | 9.11E-12 | 5.38E-13 | 7.73 | 18.6202599 | 1.41E-01 | 79181947  | 79182070  | NC_000013.10 |
| cg26595643 | 9.11E-12 | 5.38E-13 | 7.73 | 18.6201708 | 1.69E-01 | 118899291 | 118899414 | NC_000010.10 |
| cg01181227 | 9.13E-12 | 5.39E-13 | 7.73 | 18.6185133 | 2.02E-01 | 1399135   | 1399258   | NC_000004.11 |
| cg00150837 | 9.14E-12 | 5.40E-13 | 7.73 | 18.616874  | 1.09E-01 | 52721831  | 52721954  | NC_000003.11 |
| cg26796679 | 9.14E-12 | 5.40E-13 | 7.73 | 18.6168616 | 2.53E-01 | 17849639  | 17849762  | NC_000022.10 |
| cg13267931 | 9.14E-12 | 5.40E-13 | 7.73 | 18.6164266 | 2.53E-01 | 101006308 | 101006431 | NC_000007.13 |
| cg07539798 | 9.15E-12 | 5.40E-13 | 7.73 | 18.6157087 | 1.41E-01 | 140811312 | 140811435 | NC_000005.9  |
| cg09893305 | 9.17E-12 | 5.41E-13 | 7.73 | 18.6138689 | 1.15E-01 | 83017184  | 83017307  | NC_000005.9  |
| cg12565585 | 9.18E-12 | 5.42E-13 | 7.73 | 18.6129012 | 1.81E-01 | 105235943 | 105236066 | NC_000008.10 |
| cg12825070 | 9.19E-12 | 5.43E-13 | 7.73 | 18.6115983 | 2.57E-01 | 148033708 | 148033831 | NC_000005.9  |
| cg22750155 | 9.20E-12 | 5.43E-13 | 7.73 | 18.610185  | 2.13E-01 | 80524253  | 80524376  | NC_000008.10 |
| cg22958047 | 9.21E-12 | 5.44E-13 | 7.73 | 18.6090548 | 1.24E-01 | 96909322  | 96909445  | NC_000015.9  |
| cg00368687 | 9.23E-12 | 5.45E-13 | 7.73 | 18.6068086 | 2.01E-01 | 112758379 | 112758502 | NC_000013.10 |

|            |          |          |      |            |          |           |           |              |
|------------|----------|----------|------|------------|----------|-----------|-----------|--------------|
| cg18106312 | 9.23E-12 | 5.45E-13 | 7.73 | 18.6067201 | 2.09E-01 | 51560488  | 51560611  | NC_000014.8  |
| cg23662448 | 9.23E-12 | 5.45E-13 | 7.73 | 18.6067019 | 5.54E-02 | 109797184 | 109797307 | NC_000012.11 |
| cg20839206 | 9.23E-12 | 5.45E-13 | 7.73 | 18.6062784 | 1.17E-01 | 28584121  | 28584244  | NC_000006.11 |
| cg16537483 | 9.23E-12 | 5.46E-13 | 7.73 | 18.60599   | 1.42E-01 | 152019539 | 152019662 | NC_000003.11 |
| cg06172939 | 9.24E-12 | 5.46E-13 | 7.73 | 18.6045706 | 8.38E-02 | 88127334  | 88127457  | NC_000016.9  |
| cg07961015 | 9.25E-12 | 5.47E-13 | 7.73 | 18.6033761 | 1.90E-01 | 1876215   | 1876338   | NC_000005.9  |
| cg01552711 | 9.29E-12 | 5.49E-13 | 7.73 | 18.5992014 | 1.42E-01 | 21291353  | 21291476  | NC_000013.10 |
| cg20070618 | 9.30E-12 | 5.50E-13 | 7.73 | 18.5986596 | 1.68E-01 | 17934070  | 17934193  | NC_000006.11 |
| cg10056096 | 9.30E-12 | 5.50E-13 | 7.73 | 18.5976672 | 7.58E-02 | 9450411   | 9450534   | NC_000011.9  |
| cg22471726 | 9.32E-12 | 5.51E-13 | 7.73 | 18.5961765 | 1.91E-01 | 46719276  | 46719399  | NC_000017.10 |
| cg01088410 | 9.33E-12 | 5.52E-13 | 7.73 | 18.5943958 | 2.78E-01 | 170739179 | 170739302 | NC_000005.9  |
| cg21805880 | 9.34E-12 | 5.53E-13 | 7.73 | 18.593571  | 1.30E-01 | 4464294   | 4464417   | NC_000017.10 |
| cg26612735 | 9.35E-12 | 5.53E-13 | 7.73 | 18.592073  | 1.76E-01 | 56988806  | 56988929  | NC_000019.9  |
| cg21217024 | 9.39E-12 | 5.55E-13 | 7.73 | 18.5887794 | 2.29E-01 | 105481406 | 105481529 | NC_000011.9  |
| cg05481243 | 9.39E-12 | 5.56E-13 | 7.73 | 18.5878102 | 6.95E-02 | 18258640  | 18258763  | NC_000022.10 |
| cg08587845 | 9.40E-12 | 5.56E-13 | 7.73 | 18.5875516 | 1.37E-01 | 134870506 | 134870629 | NC_000005.9  |
| cg16568131 | 9.41E-12 | 5.57E-13 | 7.73 | 18.5864159 | 1.28E-01 | 28983079  | 28983202  | NC_000006.11 |
| cg17663463 | 9.41E-12 | 5.57E-13 | 7.73 | 18.5858782 | 9.95E-02 | 57349709  | 57349832  | NC_000019.9  |
| cg15311814 | 9.44E-12 | 5.59E-13 | 7.73 | 18.582896  | 1.78E-01 | 35296213  | 35296336  | NC_000007.13 |
| cg24553170 | 9.44E-12 | 5.59E-13 | 7.73 | 18.5826441 | 1.36E-01 | 49243472  | 49243595  | NC_000001.10 |
| cg23453372 | 9.44E-12 | 5.59E-13 | 7.73 | 18.5821391 | 1.45E-01 | 4866619   | 4866742   | NC_000004.11 |
| cg02038213 | 9.46E-12 | 5.60E-13 | 7.73 | 18.5800003 | 7.10E-02 | 95662442  | 95662565  | NC_000002.11 |
| cg07405021 | 9.46E-12 | 5.60E-13 | 7.73 | 18.5798763 | 1.63E-01 | 115152019 | 115152142 | NC_000005.9  |
| cg10241484 | 9.46E-12 | 5.60E-13 | 7.73 | 18.5797643 | 1.61E-01 | 62070219  | 62070342  | NC_000016.9  |
| cg02245378 | 9.47E-12 | 5.61E-13 | 7.73 | 18.5786266 | 1.54E-01 | 223161771 | 223161894 | NC_000002.11 |



|            |          |          |      |            |          |           |           |              |
|------------|----------|----------|------|------------|----------|-----------|-----------|--------------|
| cg03229561 | 9.49E-12 | 5.62E-13 | 7.73 | 18.5769214 | 1.31E-01 | 63498186  | 63498309  | NC_000007.13 |
| cg15648859 | 9.52E-12 | 5.64E-13 | 7.73 | 18.5739406 | 9.08E-02 | 124986509 | 124986632 | NC_000012.11 |
| cg13321605 | 9.53E-12 | 5.64E-13 | 7.73 | 18.5725953 | 1.13E-01 | 91298666  | 91298789  | NC_000005.9  |
| cg07907386 | 9.53E-12 | 5.64E-13 | 7.73 | 18.5725415 | 2.10E-01 | 41749443  | 41749566  | NC_000004.11 |
| cg11056406 | 9.53E-12 | 5.65E-13 | 7.73 | 18.5719298 | 3.25E-02 | 144903651 | 144903774 | NC_000008.10 |
| cg00955307 | 9.53E-12 | 5.65E-13 | 7.73 | 18.5717222 | 1.16E-01 | 166889789 | 166889912 | NC_000001.10 |
| cg27552679 | 9.54E-12 | 5.65E-13 | 7.73 | 18.5716066 | 1.57E-01 | 74425757  | 74425880  | NC_000015.9  |
| cg27047243 | 9.54E-12 | 5.65E-13 | 7.73 | 18.5712434 | 1.99E-01 | 214360753 | 214360876 | NC_000001.10 |
| cg27638196 | 9.54E-12 | 5.65E-13 | 7.73 | 18.5709798 | 1.99E-01 | 219826870 | 219826993 | NC_000002.11 |
| cg07992457 | 9.55E-12 | 5.66E-13 | 7.73 | 18.5696067 | 1.42E-01 | 71744924  | 71745047  | NC_000017.10 |
| cg14389139 | 9.56E-12 | 5.67E-13 | 7.73 | 18.5686059 | 9.11E-02 | 1007218   | 1007341   | NC_000011.9  |
| cg10630680 | 9.57E-12 | 5.67E-13 | 7.73 | 18.5678734 | 2.50E-02 | 30521320  | 30521443  | NC_000006.11 |
| cg04574034 | 9.59E-12 | 5.68E-13 | 7.73 | 18.566002  | 1.76E-01 | 46799745  | 46799868  | NC_000017.10 |
| cg10808414 | 9.60E-12 | 5.69E-13 | 7.73 | 18.5647936 | 6.10E-02 | 77942302  | 77942425  | NC_000014.8  |
| cg22874255 | 9.60E-12 | 5.69E-13 | 7.73 | 18.5640512 | 1.71E-01 | 1768630   | 1768753   | NC_000019.9  |
| cg14321743 | 9.60E-12 | 5.69E-13 | 7.73 | 18.5639455 | 9.60E-02 | 20445662  | 20445785  | NC_000001.10 |
| cg04254681 | 9.61E-12 | 5.70E-13 | 7.73 | 18.5636193 | 1.09E-01 | 9679744   | 9679867   | NC_000002.11 |
| cg18844382 | 9.61E-12 | 5.70E-13 | 7.73 | 18.5634082 | 2.12E-01 | 23834977  | 23835100  | NC_000014.8  |
| cg15723536 | 9.62E-12 | 5.71E-13 | 7.73 | 18.5616405 | 2.18E-01 | 54926617  | 54926740  | NC_000019.9  |
| cg23540651 | 9.63E-12 | 5.71E-13 | 7.72 | 18.5609447 | 8.29E-02 | 89490034  | 89490157  | NC_000001.10 |
| cg26855689 | 9.63E-12 | 5.71E-13 | 7.72 | 18.560694  | 9.76E-02 | 79668668  | 79668791  | NC_000017.10 |
| cg02708185 | 9.63E-12 | 5.71E-13 | 7.72 | 18.5606518 | 1.32E-01 | 146620097 | 146620220 | NC_000002.11 |
| cg08836199 | 9.64E-12 | 5.72E-13 | 7.72 | 18.5594458 | 1.62E-01 | 194469052 | 194469175 | NC_000003.11 |
| cg16651126 | 9.69E-12 | 5.75E-13 | 7.72 | 18.5539655 | 1.23E-01 | 27170552  | 27170675  | NC_000007.13 |
| cg12641165 | 9.71E-12 | 5.76E-13 | 7.72 | 18.5526096 | 1.38E-01 | 3051529   | 3051652   | NC_000001.10 |

|            |          |          |      |            |          |           |           |              |
|------------|----------|----------|------|------------|----------|-----------|-----------|--------------|
| cg04131583 | 9.71E-12 | 5.76E-13 | 7.72 | 18.552471  | 1.59E-01 | 86529961  | 86530084  | NC_000016.9  |
| cg11430783 | 9.71E-12 | 5.76E-13 | 7.72 | 18.552266  | 7.71E-02 | 3703792   | 3703915   | NC_000001.10 |
| cg04065304 | 9.71E-12 | 5.76E-13 | 7.72 | 18.5517438 | 6.11E-02 | 53322501  | 53322624  | NC_000008.10 |
| cg09728487 | 9.72E-12 | 5.77E-13 | 7.72 | 18.5514317 | 1.49E-01 | 141079462 | 141079585 | NC_000004.11 |
| cg14413996 | 9.73E-12 | 5.78E-13 | 7.72 | 18.5494796 | 8.02E-02 | 138592162 | 138592285 | NC_000009.11 |
| cg09947844 | 9.75E-12 | 5.79E-13 | 7.72 | 18.5480507 | 1.34E-01 | 4163819   | 4163942   | NC_000016.9  |
| cg13390484 | 9.75E-12 | 5.79E-13 | 7.72 | 18.5472611 | 4.98E-02 | 80765924  | 80766047  | NC_000009.11 |
| cg15986555 | 9.76E-12 | 5.80E-13 | 7.72 | 18.5462192 | 1.30E-01 | 123243400 | 123243523 | NC_000010.10 |
| cg26237003 | 9.78E-12 | 5.81E-13 | 7.72 | 18.5443319 | 1.00E-01 | 43413209  | 43413332  | NC_000005.9  |
| cg22544863 | 9.79E-12 | 5.81E-13 | 7.72 | 18.5432481 | 1.83E-01 | 15580400  | 15580523  | NC_000019.9  |
| cg09636525 | 9.82E-12 | 5.83E-13 | 7.72 | 18.5400481 | 1.71E-01 | 7052612   | 7052735   | NC_000004.11 |
| cg10956056 | 9.82E-12 | 5.83E-13 | 7.72 | 18.5399208 | 1.10E-01 | 35890214  | 35890337  | NC_000017.10 |
| cg20249882 | 9.83E-12 | 5.84E-13 | 7.72 | 18.539623  | 9.29E-02 | 1364046   | 1364169   | NC_000004.11 |
| cg18239753 | 9.86E-12 | 5.86E-13 | 7.72 | 18.5364496 | 2.01E-01 | 62995963  | 62996086  | NC_000006.11 |
| cg09821218 | 9.89E-12 | 5.87E-13 | 7.72 | 18.5334063 | 1.09E-01 | 68691561  | 68691684  | NC_000016.9  |
| cg14830601 | 9.90E-12 | 5.88E-13 | 7.72 | 18.5323666 | 1.59E-01 | 118893602 | 118893725 | NC_000010.10 |
| cg25249539 | 9.90E-12 | 5.88E-13 | 7.72 | 18.5314978 | 1.40E-01 | 56803358  | 56803481  | NC_000020.10 |
| cg13753550 | 9.90E-12 | 5.89E-13 | 7.72 | 18.5313232 | 3.56E-02 | 79892876  | 79892999  | NC_000017.10 |
| cg14843030 | 9.91E-12 | 5.89E-13 | 7.72 | 18.5306141 | 1.26E-01 | 32716051  | 32716174  | NC_000001.10 |
| cg21099419 | 9.91E-12 | 5.89E-13 | 7.72 | 18.530451  | 2.19E-01 | 97844473  | 97844596  | NC_000007.13 |
| cg11881754 | 9.91E-12 | 5.89E-13 | 7.72 | 18.5303162 | 2.18E-01 | 75889293  | 75889416  | NC_000007.13 |
| cg14714046 | 9.91E-12 | 5.89E-13 | 7.72 | 18.5301765 | 1.75E-01 | 41341654  | 41341777  | NC_000006.11 |
| cg16440299 | 9.98E-12 | 5.93E-13 | 7.72 | 18.5236936 | 1.50E-01 | 56779141  | 56779264  | NC_000016.9  |
| cg24724633 | 9.98E-12 | 5.94E-13 | 7.72 | 18.5230145 | 2.79E-01 | 36909413  | 36909536  | NC_000019.9  |
| cg03854198 | 9.99E-12 | 5.94E-13 | 7.72 | 18.5224477 | 1.32E-01 | 5541311   | 5541434   | NC_000012.11 |

|            |          |          |      |            |          |           |           |              |
|------------|----------|----------|------|------------|----------|-----------|-----------|--------------|
| cg09664054 | 1.00E-11 | 5.95E-13 | 7.72 | 18.5203569 | 1.11E-01 | 42179097  | 42179220  | NC_000001.10 |
| cg11374732 | 1.00E-11 | 5.96E-13 | 7.72 | 18.5195921 | 9.97E-02 | 234113197 | 234113320 | NC_000002.11 |
| cg00468846 | 1.00E-11 | 5.96E-13 | 7.72 | 18.5185621 | 7.07E-02 | 31831421  | 31831544  | NC_000016.9  |
| cg16620608 | 1.00E-11 | 5.97E-13 | 7.72 | 18.5175617 | 8.01E-02 | 100841473 | 100841596 | NC_000007.13 |
| cg26083752 | 1.00E-11 | 5.98E-13 | 7.72 | 18.516274  | 4.25E-02 | 10590587  | 10590710  | NC_000011.9  |
| cg15506157 | 1.00E-11 | 5.98E-13 | 7.72 | 18.515779  | 3.09E-01 | 139168484 | 139168607 | NC_000007.13 |
| cg13174898 | 1.01E-11 | 5.99E-13 | 7.72 | 18.514312  | 1.31E-01 | 202104055 | 202104178 | NC_000001.10 |
| cg09870004 | 1.01E-11 | 5.99E-13 | 7.72 | 18.5135453 | 5.90E-02 | 88050251  | 88050374  | NC_000016.9  |
| cg03293976 | 1.01E-11 | 6.00E-13 | 7.72 | 18.5130024 | 1.07E-01 | 152554195 | 152554318 | NC_000003.11 |
| cg15990972 | 1.01E-11 | 6.00E-13 | 7.72 | 18.5129095 | 1.60E-01 | 177012372 | 177012495 | NC_000002.11 |
| cg27533288 | 1.01E-11 | 6.00E-13 | 7.72 | 18.5123197 | 2.45E-01 | 118896776 | 118896899 | NC_000010.10 |
| cg20325850 | 1.01E-11 | 6.01E-13 | 7.72 | 18.5113845 | 2.65E-02 | 56977724  | 56977847  | NC_000001.10 |
| cg02070077 | 1.01E-11 | 6.02E-13 | 7.72 | 18.5096418 | 7.57E-02 | 168199753 | 168199876 | NC_000006.11 |
| cg04521583 | 1.01E-11 | 6.02E-13 | 7.72 | 18.5090967 | 1.48E-01 | 44087089  | 44087212  | NC_000015.9  |
| cg10058779 | 1.01E-11 | 6.03E-13 | 7.72 | 18.5066407 | 1.90E-01 | 23821435  | 23821558  | NC_000014.8  |
| cg26619043 | 1.01E-11 | 6.04E-13 | 7.72 | 18.5059066 | 1.01E-01 | 66287492  | 66287615  | NC_000017.10 |
| cg18161327 | 1.02E-11 | 6.05E-13 | 7.72 | 18.5046577 | 1.82E-01 | 100627703 | 100627826 | NC_000013.10 |
| cg05660670 | 1.02E-11 | 6.05E-13 | 7.72 | 18.5043332 | 2.17E-01 | 20521635  | 20521758  | NC_000012.11 |
| cg00333919 | 1.02E-11 | 6.06E-13 | 7.72 | 18.502931  | 1.38E-01 | 155087199 | 155087322 | NC_000007.13 |
| cg01939562 | 1.02E-11 | 6.06E-13 | 7.72 | 18.5025108 | 2.46E-01 | 3105012   | 3105135   | NC_000005.9  |
| cg00626856 | 1.02E-11 | 6.07E-13 | 7.71 | 18.5006168 | 1.78E-01 | 1885950   | 1886073   | NC_000005.9  |
| cg18502142 | 1.02E-11 | 6.07E-13 | 7.71 | 18.5005033 | 2.15E-01 | 96622709  | 96622832  | NC_000007.13 |
| cg19057986 | 1.02E-11 | 6.09E-13 | 7.71 | 18.4980124 | 2.20E-01 | 46802871  | 46802994  | NC_000017.10 |
| cg16970851 | 1.02E-11 | 6.09E-13 | 7.71 | 18.4977118 | 2.17E-01 | 22487658  | 22487781  | NC_000012.11 |
| cg20169913 | 1.03E-11 | 6.11E-13 | 7.71 | 18.4949514 | 1.40E-01 | 184014083 | 184014206 | NC_000003.11 |

|            |          |          |      |            |          |           |           |              |
|------------|----------|----------|------|------------|----------|-----------|-----------|--------------|
| cg23325963 | 1.03E-11 | 6.12E-13 | 7.71 | 18.4928467 | 1.96E-01 | 45160093  | 45160216  | NC_000002.11 |
| cg06032735 | 1.03E-11 | 6.13E-13 | 7.71 | 18.4908577 | 6.77E-02 | 84227227  | 84227350  | NC_000006.11 |
| cg12668953 | 1.03E-11 | 6.14E-13 | 7.71 | 18.4891718 | 1.09E-01 | 138679653 | 138679776 | NC_000005.9  |
| cg18810983 | 1.03E-11 | 6.15E-13 | 7.71 | 18.48828   | 1.13E-01 | 192632111 | 192632234 | NC_000003.11 |
| cg10176110 | 1.03E-11 | 6.15E-13 | 7.71 | 18.4881537 | 1.68E-01 | 168841653 | 168841776 | NC_000006.11 |
| cg23954787 | 1.03E-11 | 6.15E-13 | 7.71 | 18.4878893 | 1.80E-01 | 72470700  | 72470823  | NC_000008.10 |
| cg01336878 | 1.03E-11 | 6.17E-13 | 7.71 | 18.4851795 | 1.53E-01 | 54963396  | 54963519  | NC_000019.9  |
| cg26857670 | 1.03E-11 | 6.17E-13 | 7.71 | 18.4850954 | 1.87E-01 | 27225448  | 27225571  | NC_000007.13 |
| cg00970558 | 1.04E-11 | 6.18E-13 | 7.71 | 18.4827577 | 2.03E-01 | 7854469   | 7854592   | NC_000019.9  |
| cg13814990 | 1.04E-11 | 6.19E-13 | 7.71 | 18.4822718 | 5.55E-02 | 46016683  | 46016806  | NC_000007.13 |
| cg19871940 | 1.04E-11 | 6.19E-13 | 7.71 | 18.4822531 | 2.00E-01 | 57264287  | 57264410  | NC_000014.8  |
| cg00621899 | 1.04E-11 | 6.19E-13 | 7.71 | 18.4817278 | 1.54E-01 | 100486423 | 100486546 | NC_000007.13 |
| cg08431529 | 1.04E-11 | 6.20E-13 | 7.71 | 18.4807901 | 6.80E-02 | 6619138   | 6619261   | NC_000012.11 |
| cg07205670 | 1.04E-11 | 6.20E-13 | 7.71 | 18.4795975 | 7.81E-02 | 87442901  | 87443024  | NC_000016.9  |
| cg22604316 | 1.04E-11 | 6.20E-13 | 7.71 | 18.4794237 | 2.21E-01 | 46958801  | 46958924  | NC_000001.10 |
| cg23810282 | 1.04E-11 | 6.23E-13 | 7.71 | 18.4759297 | 1.62E-01 | 43037519  | 43037642  | NC_000005.9  |
| cg18632637 | 1.04E-11 | 6.23E-13 | 7.71 | 18.47484   | 1.51E-01 | 134893591 | 134893714 | NC_000010.10 |
| cg21213430 | 1.05E-11 | 6.24E-13 | 7.71 | 18.4741729 | 7.79E-02 | 35859254  | 35859377  | NC_000009.11 |
| cg14615946 | 1.05E-11 | 6.24E-13 | 7.71 | 18.4732933 | 7.21E-02 | 74466087  | 74466210  | NC_000017.10 |
| cg13829680 | 1.05E-11 | 6.25E-13 | 7.71 | 18.4725289 | 1.89E-01 | 136746975 | 136747098 | NC_000009.11 |
| cg18249580 | 1.05E-11 | 6.26E-13 | 7.71 | 18.4708827 | 2.37E-01 | 65281496  | 65281619  | NC_000008.10 |
| cg16251457 | 1.05E-11 | 6.27E-13 | 7.71 | 18.4697012 | 5.82E-02 | 79210394  | 79210517  | NC_000017.10 |
| cg16620382 | 1.05E-11 | 6.28E-13 | 7.71 | 18.4671055 | 2.93E-01 | 43211213  | 43211336  | NC_000006.11 |
| cg25089357 | 1.05E-11 | 6.29E-13 | 7.71 | 18.4653635 | 1.63E-01 | 131649255 | 131649378 | NC_000010.10 |
| cg01794802 | 1.06E-11 | 6.31E-13 | 7.71 | 18.4629401 | 1.80E-01 | 31096931  | 31097054  | NC_000006.11 |

|            |          |          |      |            |          |           |           |              |
|------------|----------|----------|------|------------|----------|-----------|-----------|--------------|
| cg17264670 | 1.06E-11 | 6.31E-13 | 7.71 | 18.462055  | 2.81E-01 | 153452732 | 153452855 | NC_000006.11 |
| cg25635251 | 1.06E-11 | 6.32E-13 | 7.71 | 18.4611041 | 1.29E-01 | 2234043   | 2234166   | NC_000011.9  |
| cg18826572 | 1.06E-11 | 6.34E-13 | 7.71 | 18.4586218 | 1.69E-01 | 144510343 | 144510466 | NC_000008.10 |
| cg15762399 | 1.06E-11 | 6.34E-13 | 7.71 | 18.4577714 | 1.08E-01 | 80109047  | 80109170  | NC_000013.10 |
| cg25950112 | 1.07E-11 | 6.37E-13 | 7.71 | 18.4534415 | 1.99E-01 | 170740870 | 170740993 | NC_000005.9  |
| cg23986620 | 1.07E-11 | 6.38E-13 | 7.71 | 18.451375  | 1.68E-01 | 177012706 | 177012829 | NC_000002.11 |
| cg04863892 | 1.07E-11 | 6.39E-13 | 7.71 | 18.4505422 | 1.81E-01 | 27183375  | 27183498  | NC_000007.13 |
| cg20426532 | 1.07E-11 | 6.41E-13 | 7.71 | 18.4479133 | 8.81E-02 | 64185918  | 64186041  | NC_000006.11 |
| cg13416889 | 1.07E-11 | 6.41E-13 | 7.71 | 18.44787   | 1.66E-01 | 64814395  | 64814518  | NC_000015.9  |
| cg16067696 | 1.07E-11 | 6.41E-13 | 7.71 | 18.4467745 | 4.96E-02 | 119522486 | 119522609 | NC_000011.9  |
| cg07392385 | 1.08E-11 | 6.43E-13 | 7.71 | 18.4445111 | 7.60E-02 | 108925222 | 108925345 | NC_000010.10 |
| cg00909646 | 1.08E-11 | 6.43E-13 | 7.71 | 18.4444861 | 2.17E-01 | 67874250  | 67874373  | NC_000008.10 |
| cg03769939 | 1.08E-11 | 6.44E-13 | 7.7  | 18.4425817 | 1.41E-01 | 25254129  | 25254252  | NC_000001.10 |
| cg13611347 | 1.08E-11 | 6.44E-13 | 7.7  | 18.4421266 | 1.95E-01 | 31739207  | 31739330  | NC_000018.9  |
| cg12201988 | 1.08E-11 | 6.44E-13 | 7.7  | 18.4419346 | 1.07E-01 | 19982870  | 19982993  | NC_000020.10 |
| cg05272349 | 1.08E-11 | 6.45E-13 | 7.7  | 18.4409102 | 1.41E-01 | 122434379 | 122434502 | NC_000005.9  |
| cg10751726 | 1.08E-11 | 6.45E-13 | 7.7  | 18.4407993 | 1.67E-01 | 132121314 | 132121437 | NC_000002.11 |
| cg11857997 | 1.08E-11 | 6.47E-13 | 7.7  | 18.4384512 | 2.53E-01 | 3591992   | 3592115   | NC_000005.9  |
| cg04092437 | 1.08E-11 | 6.47E-13 | 7.7  | 18.4384488 | 7.84E-02 | 92971269  | 92971392  | NC_000010.10 |
| cg10606834 | 1.08E-11 | 6.47E-13 | 7.7  | 18.4377676 | 1.69E-01 | 59532197  | 59532320  | NC_000017.10 |
| cg16142855 | 1.09E-11 | 6.50E-13 | 7.7  | 18.433985  | 1.59E-01 | 379900    | 380023    | NC_000004.11 |
| cg06459847 | 1.09E-11 | 6.50E-13 | 7.7  | 18.4327565 | 1.97E-01 | 204601    | 204724    | NC_000016.9  |
| cg17757602 | 1.09E-11 | 6.51E-13 | 7.7  | 18.4325026 | 2.01E-01 | 42952113  | 42952236  | NC_000005.9  |
| cg23239840 | 1.09E-11 | 6.51E-13 | 7.7  | 18.4322624 | 4.23E-02 | 114052325 | 114052448 | NC_000002.11 |
| cg14902389 | 1.09E-11 | 6.53E-13 | 7.7  | 18.4289718 | 1.24E-01 | 99342685  | 99342808  | NC_000002.11 |

|            |          |          |     |            |          |           |           |              |
|------------|----------|----------|-----|------------|----------|-----------|-----------|--------------|
| cg27242132 | 1.09E-11 | 6.55E-13 | 7.7 | 18.426272  | 1.67E-01 | 81119178  | 81119301  | NC_000004.11 |
| cg02182210 | 1.10E-11 | 6.56E-13 | 7.7 | 18.4238999 | 1.16E-01 | 30619096  | 30619219  | NC_000020.10 |
| cg18199753 | 1.10E-11 | 6.57E-13 | 7.7 | 18.4234224 | 9.46E-02 | 245755356 | 245755479 | NC_000001.10 |
| cg07491828 | 1.10E-11 | 6.57E-13 | 7.7 | 18.4232122 | 1.14E-01 | 14227116  | 14227239  | NC_000016.9  |
| cg07388347 | 1.10E-11 | 6.57E-13 | 7.7 | 18.4229607 | 1.74E-01 | 133481466 | 133481589 | NC_000012.11 |
| cg23367608 | 1.10E-11 | 6.57E-13 | 7.7 | 18.4226954 | 2.18E-01 | 117086601 | 117086724 | NC_000006.11 |
| cg05274650 | 1.10E-11 | 6.58E-13 | 7.7 | 18.4210065 | 3.82E-02 | 17928213  | 17928336  | NC_000011.9  |
| cg25143359 | 1.10E-11 | 6.60E-13 | 7.7 | 18.4190837 | 1.32E-01 | 245533949 | 245534072 | NC_000001.10 |
| cg13565138 | 1.10E-11 | 6.60E-13 | 7.7 | 18.4189302 | 1.18E-01 | 91614156  | 91614279  | NC_000009.11 |
| cg06261500 | 1.10E-11 | 6.61E-13 | 7.7 | 18.4176318 | 9.98E-02 | 127484663 | 127484786 | NC_000007.13 |
| cg24066316 | 1.10E-11 | 6.61E-13 | 7.7 | 18.4165505 | 1.70E-01 | 37132764  | 37132887  | NC_000014.8  |
| cg23219859 | 1.11E-11 | 6.63E-13 | 7.7 | 18.4138259 | 2.66E-01 | 50799316  | 50799439  | NC_000001.10 |
| cg10201402 | 1.11E-11 | 6.63E-13 | 7.7 | 18.4133932 | 1.07E-01 | 31938527  | 31938650  | NC_000006.11 |
| cg16925678 | 1.11E-11 | 6.65E-13 | 7.7 | 18.410839  | 7.37E-02 | 61871067  | 61871190  | NC_000020.10 |
| cg07145531 | 1.11E-11 | 6.66E-13 | 7.7 | 18.4090154 | 7.05E-02 | 141993716 | 141993839 | NC_000005.9  |
| cg19544662 | 1.11E-11 | 6.67E-13 | 7.7 | 18.4081358 | 3.00E-01 | 88752056  | 88752179  | NC_000002.11 |
| cg16646743 | 1.11E-11 | 6.68E-13 | 7.7 | 18.4065494 | 1.65E-01 | 9608947   | 9609070   | NC_000019.9  |
| cg21099470 | 1.11E-11 | 6.68E-13 | 7.7 | 18.4063223 | 1.92E-01 | 10459141  | 10459264  | NC_000004.11 |
| cg09373511 | 1.12E-11 | 6.68E-13 | 7.7 | 18.405872  | 8.96E-02 | 127560294 | 127560417 | NC_000010.10 |
| cg08446824 | 1.12E-11 | 6.69E-13 | 7.7 | 18.4055293 | 1.94E-01 | 1720184   | 1720307   | NC_000004.11 |
| cg03794213 | 1.12E-11 | 6.69E-13 | 7.7 | 18.4048974 | 1.22E-01 | 22220727  | 22220850  | NC_000016.9  |
| cg14348706 | 1.12E-11 | 6.69E-13 | 7.7 | 18.4044459 | 1.06E-01 | 33170405  | 33170528  | NC_000006.11 |
| cg19347790 | 1.12E-11 | 6.71E-13 | 7.7 | 18.4023487 | 1.06E-01 | 81332050  | 81332173  | NC_000012.11 |
| cg11064034 | 1.12E-11 | 6.71E-13 | 7.7 | 18.4019201 | 1.90E-01 | 114877421 | 114877544 | NC_000012.11 |
| cg00467420 | 1.12E-11 | 6.74E-13 | 7.7 | 18.3984739 | 2.09E-01 | 1779432   | 1779555   | NC_000010.10 |

|            |          |          |      |            |          |           |           |              |
|------------|----------|----------|------|------------|----------|-----------|-----------|--------------|
| cg20504856 | 1.13E-11 | 6.75E-13 | 7.7  | 18.3957225 | 1.60E-01 | 19692011  | 19692134  | NC_000006.11 |
| cg03202564 | 1.13E-11 | 6.75E-13 | 7.7  | 18.3956991 | 1.20E-01 | 50977130  | 50977253  | NC_000010.10 |
| cg07137336 | 1.13E-11 | 6.77E-13 | 7.7  | 18.3936028 | 1.66E-01 | 501137    | 501260    | NC_000018.9  |
| cg04545398 | 1.13E-11 | 6.77E-13 | 7.7  | 18.3932704 | 5.20E-02 | 105819003 | 105819126 | NC_000010.10 |
| cg08234507 | 1.13E-11 | 6.78E-13 | 7.7  | 18.3922461 | 5.07E-02 | 64990959  | 64991082  | NC_000011.9  |
| cg15649193 | 1.13E-11 | 6.78E-13 | 7.7  | 18.3919781 | 2.61E-02 | 14640403  | 14640526  | NC_000019.9  |
| cg25750389 | 1.13E-11 | 6.78E-13 | 7.7  | 18.3915755 | 1.90E-01 | 111544016 | 111544139 | NC_000004.11 |
| cg22700148 | 1.13E-11 | 6.78E-13 | 7.7  | 18.3913992 | 1.01E-01 | 65041201  | 65041324  | NC_000017.10 |
| cg16609297 | 1.13E-11 | 6.79E-13 | 7.7  | 18.3910038 | 9.11E-02 | 66437039  | 66437162  | NC_000016.9  |
| cg15527308 | 1.13E-11 | 6.79E-13 | 7.7  | 18.3897577 | 1.01E-01 | 54813067  | 54813190  | NC_000018.9  |
| cg26203336 | 1.13E-11 | 6.80E-13 | 7.7  | 18.3883231 | 5.61E-02 | 303166    | 303289    | NC_000011.9  |
| cg07919775 | 1.14E-11 | 6.82E-13 | 7.7  | 18.385729  | 1.42E-01 | 991161    | 991284    | NC_000019.9  |
| cg09516476 | 1.14E-11 | 6.83E-13 | 7.7  | 18.3840497 | 1.87E-01 | 10881925  | 10882048  | NC_000006.11 |
| cg25213546 | 1.14E-11 | 6.84E-13 | 7.69 | 18.3830505 | 2.62E-01 | 84116920  | 84117043  | NC_000015.9  |
| cg19999212 | 1.15E-11 | 6.88E-13 | 7.69 | 18.3778627 | 8.94E-02 | 131096964 | 131097087 | NC_000003.11 |
| cg24975564 | 1.15E-11 | 6.89E-13 | 7.69 | 18.3757938 | 2.48E-01 | 20522236  | 20522359  | NC_000012.11 |
| cg17386977 | 1.15E-11 | 6.90E-13 | 7.69 | 18.3745042 | 9.17E-02 | 44109743  | 44109866  | NC_000021.8  |
| cg04622775 | 1.15E-11 | 6.91E-13 | 7.69 | 18.3735288 | 6.24E-02 | 89442186  | 89442309  | NC_000015.9  |
| cg01764252 | 1.15E-11 | 6.92E-13 | 7.69 | 18.3720399 | 2.07E-01 | 87991071  | 87991194  | NC_000005.9  |
| cg18067859 | 1.15E-11 | 6.93E-13 | 7.69 | 18.3709402 | 1.50E-01 | 33776345  | 33776468  | NC_000017.10 |
| cg11785240 | 1.15E-11 | 6.94E-13 | 7.69 | 18.3692278 | 7.24E-02 | 240049338 | 240049461 | NC_000002.11 |
| cg08346159 | 1.16E-11 | 6.95E-13 | 7.69 | 18.3672346 | 2.55E-01 | 164265012 | 164265135 | NC_000004.11 |
| cg20174393 | 1.16E-11 | 6.96E-13 | 7.69 | 18.3659547 | 1.23E-01 | 106258511 | 106258634 | NC_000007.13 |
| cg16235582 | 1.16E-11 | 6.96E-13 | 7.69 | 18.3654983 | 1.65E-01 | 78673212  | 78673335  | NC_000011.9  |
| cg03127416 | 1.16E-11 | 6.97E-13 | 7.69 | 18.3653202 | 1.52E-01 | 22548006  | 22548129  | NC_000008.10 |

|            |          |          |      |            |          |           |           |              |
|------------|----------|----------|------|------------|----------|-----------|-----------|--------------|
| cg18132228 | 1.16E-11 | 6.97E-13 | 7.69 | 18.3652492 | 1.18E-01 | 56035476  | 56035599  | NC_000015.9  |
| cg09643544 | 1.16E-11 | 6.98E-13 | 7.69 | 18.3634676 | 1.49E-01 | 9473696   | 9473819   | NC_000019.9  |
| cg21485303 | 1.16E-11 | 6.99E-13 | 7.69 | 18.3614849 | 1.95E-01 | 22094699  | 22094822  | NC_000012.11 |
| cg27517681 | 1.17E-11 | 7.01E-13 | 7.69 | 18.3597118 | 1.58E-01 | 119528848 | 119528971 | NC_000001.10 |
| cg18138206 | 1.17E-11 | 7.01E-13 | 7.69 | 18.3590044 | 1.87E-01 | 133110731 | 133110854 | NC_000010.10 |
| cg03315869 | 1.17E-11 | 7.02E-13 | 7.69 | 18.3581817 | 2.99E-01 | 134146676 | 134146799 | NC_000011.9  |
| cg05403655 | 1.17E-11 | 7.03E-13 | 7.69 | 18.3565911 | 1.81E-01 | 125215457 | 125215580 | NC_000011.9  |
| cg17761419 | 1.17E-11 | 7.03E-13 | 7.69 | 18.3558939 | 9.56E-02 | 57350749  | 57350872  | NC_000008.10 |
| cg13788381 | 1.17E-11 | 7.05E-13 | 7.69 | 18.3540133 | 1.93E-01 | 17907265  | 17907388  | NC_000001.10 |
| cg02663382 | 1.17E-11 | 7.05E-13 | 7.69 | 18.3537121 | 2.17E-01 | 38308458  | 38308581  | NC_000019.9  |
| cg24502027 | 1.17E-11 | 7.05E-13 | 7.69 | 18.3534771 | 9.42E-02 | 556470    | 556593    | NC_000010.10 |
| cg14095438 | 1.17E-11 | 7.05E-13 | 7.69 | 18.353236  | 2.03E-01 | 49468684  | 49468807  | NC_000008.10 |
| cg08208899 | 1.17E-11 | 7.07E-13 | 7.69 | 18.3509967 | 1.52E-01 | 181931215 | 181931338 | NC_000002.11 |
| cg05478407 | 1.18E-11 | 7.09E-13 | 7.69 | 18.3474088 | 1.14E-01 | 60554897  | 60555020  | NC_000017.10 |
| cg22867608 | 1.18E-11 | 7.10E-13 | 7.69 | 18.3471362 | 6.33E-02 | 64573356  | 64573479  | NC_000010.10 |
| cg18396042 | 1.18E-11 | 7.10E-13 | 7.69 | 18.3461654 | 9.81E-02 | 1567137   | 1567260   | NC_000002.11 |
| cg09935282 | 1.18E-11 | 7.11E-13 | 7.69 | 18.3446862 | 2.45E-01 | 118897280 | 118897403 | NC_000010.10 |
| cg04155086 | 1.18E-11 | 7.12E-13 | 7.69 | 18.343191  | 1.20E-01 | 69207281  | 69207404  | NC_000004.11 |
| cg02633036 | 1.18E-11 | 7.13E-13 | 7.69 | 18.342956  | 1.47E-01 | 92661549  | 92661672  | NC_000015.9  |
| cg09913956 | 1.19E-11 | 7.14E-13 | 7.69 | 18.3409346 | 1.80E-01 | 1776600   | 1776723   | NC_000019.9  |
| cg24005685 | 1.19E-11 | 7.15E-13 | 7.69 | 18.3401795 | 1.93E-01 | 111549880 | 111550003 | NC_000004.11 |
| cg16254309 | 1.19E-11 | 7.15E-13 | 7.69 | 18.3400122 | 2.11E-01 | 145814152 | 145814275 | NC_000007.13 |
| cg02457312 | 1.19E-11 | 7.18E-13 | 7.69 | 18.3351348 | 4.97E-02 | 60347626  | 60347749  | NC_000017.10 |
| cg22823122 | 1.19E-11 | 7.19E-13 | 7.69 | 18.3339228 | 2.91E-02 | 170034076 | 170034199 | NC_000004.11 |
| cg02450613 | 1.20E-11 | 7.21E-13 | 7.69 | 18.3319754 | 2.19E-01 | 37840089  | 37840212  | NC_000005.9  |



|            |          |          |      |            |          |           |           |              |
|------------|----------|----------|------|------------|----------|-----------|-----------|--------------|
| cg01066451 | 1.20E-11 | 7.23E-13 | 7.69 | 18.3287776 | 4.06E-02 | 79083504  | 79083627  | NC_000017.10 |
| cg05415020 | 1.20E-11 | 7.24E-13 | 7.69 | 18.3276951 | 2.38E-01 | 110797797 | 110797920 | NC_000006.11 |
| cg25679864 | 1.20E-11 | 7.24E-13 | 7.69 | 18.3266943 | 1.64E-01 | 134844753 | 134844876 | NC_000010.10 |
| cg13066682 | 1.21E-11 | 7.26E-13 | 7.68 | 18.3241368 | 7.43E-02 | 69786026  | 69786149  | NC_000009.11 |
| cg16533767 | 1.21E-11 | 7.27E-13 | 7.68 | 18.3226813 | 1.44E-01 | 23736552  | 23736675  | NC_000002.11 |
| cg26536401 | 1.21E-11 | 7.28E-13 | 7.68 | 18.322395  | 4.02E-02 | 6956432   | 6956555   | NC_000012.11 |
| cg23369685 | 1.21E-11 | 7.29E-13 | 7.68 | 18.3203563 | 1.22E-01 | 235442529 | 235442652 | NC_000001.10 |
| cg12686847 | 1.21E-11 | 7.31E-13 | 7.68 | 18.318241  | 6.19E-02 | 31779716  | 31779839  | NC_000006.11 |
| cg22685409 | 1.22E-11 | 7.33E-13 | 7.68 | 18.3155624 | 1.76E-01 | 30038692  | 30038815  | NC_000011.9  |
| cg20337384 | 1.22E-11 | 7.34E-13 | 7.68 | 18.3142745 | 2.44E-01 | 39015705  | 39015828  | NC_000007.13 |
| cg16600634 | 1.22E-11 | 7.34E-13 | 7.68 | 18.3138202 | 1.51E-01 | 92907881  | 92908004  | NC_000005.9  |
| cg04684246 | 1.22E-11 | 7.34E-13 | 7.68 | 18.3136006 | 8.59E-02 | 110385989 | 110386112 | NC_000012.11 |
| cg12402555 | 1.22E-11 | 7.35E-13 | 7.68 | 18.3121291 | 5.25E-02 | 17281819  | 17281942  | NC_000001.10 |
| cg02842227 | 1.22E-11 | 7.36E-13 | 7.68 | 18.3106681 | 1.64E-01 | 22370444  | 22370567  | NC_000021.8  |
| cg03257575 | 1.22E-11 | 7.37E-13 | 7.68 | 18.3096861 | 2.35E-01 | 46951318  | 46951441  | NC_000001.10 |
| cg21553182 | 1.22E-11 | 7.37E-13 | 7.68 | 18.3092788 | 1.64E-01 | 52956821  | 52956944  | NC_000019.9  |
| cg03202804 | 1.22E-11 | 7.39E-13 | 7.68 | 18.3073405 | 2.27E-01 | 154710353 | 154710476 | NC_000004.11 |
| cg03237606 | 1.23E-11 | 7.40E-13 | 7.68 | 18.305899  | 1.61E-01 | 63212265  | 63212388  | NC_000010.10 |
| cg01407254 | 1.23E-11 | 7.40E-13 | 7.68 | 18.3053756 | 1.47E-01 | 71787808  | 71787931  | NC_000002.11 |
| cg14993464 | 1.23E-11 | 7.42E-13 | 7.68 | 18.3029327 | 4.68E-02 | 236867278 | 236867401 | NC_000002.11 |
| cg18028483 | 1.23E-11 | 7.43E-13 | 7.68 | 18.3021827 | 1.10E-01 | 109307801 | 109307924 | NC_000006.11 |
| cg13351143 | 1.23E-11 | 7.44E-13 | 7.68 | 18.3000991 | 5.76E-02 | 69292064  | 69292187  | NC_000011.9  |
| cg12077664 | 1.23E-11 | 7.45E-13 | 7.68 | 18.2993478 | 1.02E-01 | 125145446 | 125145569 | NC_000012.11 |
| cg03804272 | 1.24E-11 | 7.46E-13 | 7.68 | 18.2979251 | 1.61E-01 | 59189375  | 59189498  | NC_000005.9  |
| cg08698796 | 1.24E-11 | 7.48E-13 | 7.68 | 18.2956361 | 1.17E-01 | 47561199  | 47561322  | NC_000011.9  |

|            |          |          |      |            |          |           |           |              |
|------------|----------|----------|------|------------|----------|-----------|-----------|--------------|
| cg22910449 | 1.24E-11 | 7.48E-13 | 7.68 | 18.2955097 | 1.51E-01 | 7274234   | 7274357   | NC_000011.9  |
| cg03146993 | 1.24E-11 | 7.48E-13 | 7.68 | 18.2953218 | 2.15E-01 | 35297146  | 35297269  | NC_000017.10 |
| cg13106484 | 1.24E-11 | 7.48E-13 | 7.68 | 18.2946197 | 1.59E-01 | 157692127 | 157692250 | NC_000007.13 |
| cg01982597 | 1.24E-11 | 7.49E-13 | 7.68 | 18.2936134 | 5.21E-02 | 50733420  | 50733543  | NC_000010.10 |
| cg09380135 | 1.24E-11 | 7.49E-13 | 7.68 | 18.2932837 | 1.63E-01 | 40789866  | 40789989  | NC_000019.9  |
| cg04627496 | 1.24E-11 | 7.50E-13 | 7.68 | 18.2919994 | 1.72E-01 | 88799973  | 88800096  | NC_000015.9  |
| cg04249559 | 1.24E-11 | 7.51E-13 | 7.68 | 18.2908641 | 1.31E-01 | 655964    | 656087    | NC_000012.11 |
| cg19284039 | 1.24E-11 | 7.52E-13 | 7.68 | 18.2899424 | 1.23E-01 | 2292895   | 2293018   | NC_000011.9  |
| cg18342866 | 1.24E-11 | 7.52E-13 | 7.68 | 18.2898702 | 1.06E-01 | 114468988 | 114469111 | NC_000001.10 |
| cg25079102 | 1.25E-11 | 7.54E-13 | 7.68 | 18.2869522 | 1.95E-01 | 114843435 | 114843558 | NC_000012.11 |
| cg00346951 | 1.25E-11 | 7.56E-13 | 7.68 | 18.2850861 | 3.77E-02 | 108979731 | 108979854 | NC_000002.11 |
| cg06086198 | 1.25E-11 | 7.57E-13 | 7.68 | 18.2838713 | 1.46E-01 | 29021552  | 29021675  | NC_000012.11 |
| cg08330224 | 1.25E-11 | 7.57E-13 | 7.68 | 18.2829601 | 2.32E-01 | 12996889  | 12997012  | NC_000016.9  |
| cg05535398 | 1.26E-11 | 7.59E-13 | 7.68 | 18.2809831 | 1.08E-01 | 43034257  | 43034380  | NC_000005.9  |
| cg21283167 | 1.26E-11 | 7.60E-13 | 7.68 | 18.2799996 | 8.55E-02 | 47986245  | 47986368  | NC_000001.10 |
| cg00993881 | 1.26E-11 | 7.62E-13 | 7.68 | 18.2771946 | 8.43E-02 | 59681199  | 59681322  | NC_000014.8  |
| cg02886408 | 1.26E-11 | 7.62E-13 | 7.68 | 18.2769316 | 1.90E-01 | 133796164 | 133796287 | NC_000010.10 |
| cg08901089 | 1.26E-11 | 7.62E-13 | 7.68 | 18.2764302 | 4.20E-02 | 148895445 | 148895568 | NC_000007.13 |
| cg19007200 | 1.26E-11 | 7.63E-13 | 7.68 | 18.275456  | 1.16E-01 | 24553899  | 24554022  | NC_000013.10 |
| cg17287235 | 1.26E-11 | 7.63E-13 | 7.68 | 18.2754325 | 1.70E-01 | 131768149 | 131768272 | NC_000010.10 |
| cg14667505 | 1.26E-11 | 7.65E-13 | 7.68 | 18.273487  | 1.21E-01 | 7734159   | 7734282   | NC_000017.10 |
| cg00848728 | 1.27E-11 | 7.65E-13 | 7.68 | 18.2724253 | 1.47E-01 | 58716018  | 58716141  | NC_000001.10 |
| cg23367107 | 1.27E-11 | 7.67E-13 | 7.68 | 18.2701837 | 1.81E-01 | 115136287 | 115136410 | NC_000012.11 |
| cg17859502 | 1.27E-11 | 7.67E-13 | 7.68 | 18.2700353 | 6.73E-02 | 71586893  | 71587016  | NC_000015.9  |
| cg07861373 | 1.27E-11 | 7.69E-13 | 7.68 | 18.2676998 | 7.46E-02 | 73501230  | 73501353  | NC_000017.10 |

|            |          |          |      |            |          |           |           |              |
|------------|----------|----------|------|------------|----------|-----------|-----------|--------------|
| cg11552585 | 1.28E-11 | 7.73E-13 | 7.67 | 18.262119  | 6.75E-02 | 3196206   | 3196329   | NC_000019.9  |
| cg23932873 | 1.28E-11 | 7.74E-13 | 7.67 | 18.2609475 | 1.63E-01 | 113615136 | 113615259 | NC_000001.10 |
| cg17891759 | 1.28E-11 | 7.74E-13 | 7.67 | 18.2609042 | 1.64E-01 | 299121    | 299244    | NC_000004.11 |
| cg22861116 | 1.28E-11 | 7.75E-13 | 7.67 | 18.2606074 | 1.89E-01 | 140762582 | 140762705 | NC_000005.9  |
| cg03171361 | 1.28E-11 | 7.75E-13 | 7.67 | 18.2600944 | 1.86E-01 | 47075758  | 47075881  | NC_000017.10 |
| cg17846334 | 1.28E-11 | 7.76E-13 | 7.67 | 18.2590239 | 1.97E-01 | 49639134  | 49639257  | NC_000020.10 |
| cg03627350 | 1.28E-11 | 7.78E-13 | 7.67 | 18.2569605 | 1.26E-01 | 134694425 | 134694548 | NC_000010.10 |
| cg20612128 | 1.28E-11 | 7.78E-13 | 7.67 | 18.2567384 | 1.05E-01 | 56290261  | 56290384  | NC_000015.9  |
| cg07605285 | 1.29E-11 | 7.78E-13 | 7.67 | 18.256108  | 1.46E-01 | 26680729  | 26680852  | NC_000010.10 |
| cg19628148 | 1.29E-11 | 7.79E-13 | 7.67 | 18.2550904 | 1.68E-01 | 126113918 | 126114041 | NC_000003.11 |
| cg08076158 | 1.29E-11 | 7.81E-13 | 7.67 | 18.2520003 | 1.65E-01 | 86539022  | 86539145  | NC_000016.9  |
| cg10123293 | 1.29E-11 | 7.83E-13 | 7.67 | 18.2498826 | 1.31E-01 | 99228465  | 99228588  | NC_000002.11 |
| cg27434368 | 1.29E-11 | 7.84E-13 | 7.67 | 18.2490286 | 1.30E-01 | 19650978  | 19651101  | NC_000019.9  |
| cg14500776 | 1.29E-11 | 7.84E-13 | 7.67 | 18.2488518 | 8.21E-02 | 27256176  | 27256299  | NC_000007.13 |
| cg18076755 | 1.29E-11 | 7.84E-13 | 7.67 | 18.248299  | 5.16E-02 | 133743453 | 133743576 | NC_000010.10 |
| cg13807970 | 1.30E-11 | 7.86E-13 | 7.67 | 18.2466185 | 2.58E-01 | 145274441 | 145274564 | NC_000002.11 |
| cg19137748 | 1.30E-11 | 7.86E-13 | 7.67 | 18.2461591 | 1.30E-01 | 69466054  | 69466177  | NC_000011.9  |
| cg25915982 | 1.30E-11 | 7.86E-13 | 7.67 | 18.2459854 | 1.30E-01 | 50849415  | 50849538  | NC_000007.13 |
| cg07943548 | 1.30E-11 | 7.86E-13 | 7.67 | 18.2457057 | 1.07E-01 | 86304357  | 86304480  | NC_000015.9  |
| cg23082339 | 1.30E-11 | 7.87E-13 | 7.67 | 18.2454549 | 2.39E-01 | 140810051 | 140810174 | NC_000005.9  |
| cg04620091 | 1.30E-11 | 7.87E-13 | 7.67 | 18.2452547 | 2.30E-01 | 134871805 | 134871928 | NC_000005.9  |
| cg08638184 | 1.30E-11 | 7.87E-13 | 7.67 | 18.2450745 | 1.56E-01 | 19183563  | 19183686  | NC_000007.13 |
| cg03893692 | 1.30E-11 | 7.91E-13 | 7.67 | 18.2404025 | 1.13E-01 | 149669484 | 149669607 | NC_000005.9  |
| cg27112565 | 1.31E-11 | 7.92E-13 | 7.67 | 18.238232  | 2.14E-01 | 51259552  | 51259675  | NC_000002.11 |
| cg01663407 | 1.31E-11 | 7.94E-13 | 7.67 | 18.2361083 | 1.35E-01 | 64754308  | 64754431  | NC_000002.11 |

|            |          |          |      |            |          |           |           |              |
|------------|----------|----------|------|------------|----------|-----------|-----------|--------------|
| cg02264082 | 1.31E-11 | 7.97E-13 | 7.67 | 18.2321161 | 1.95E-01 | 130235850 | 130235973 | NC_000003.11 |
| cg24110839 | 1.32E-11 | 7.99E-13 | 7.67 | 18.2305796 | 5.16E-02 | 36896577  | 36896700  | NC_000017.10 |
| cg27125849 | 1.32E-11 | 8.00E-13 | 7.67 | 18.2290935 | 1.63E-01 | 59473674  | 59473797  | NC_000017.10 |
| cg24152605 | 1.32E-11 | 8.00E-13 | 7.67 | 18.2283361 | 2.66E-01 | 57050359  | 57050482  | NC_000019.9  |
| cg03729337 | 1.32E-11 | 8.01E-13 | 7.67 | 18.2281932 | 1.42E-01 | 122430019 | 122430142 | NC_000005.9  |
| cg17494034 | 1.32E-11 | 8.01E-13 | 7.67 | 18.2280079 | 1.50E-01 | 12513497  | 12513620  | NC_000001.10 |
| cg03631065 | 1.32E-11 | 8.01E-13 | 7.67 | 18.227045  | 1.38E-01 | 96672440  | 96672563  | NC_000013.10 |
| cg08648286 | 1.32E-11 | 8.02E-13 | 7.67 | 18.225918  | 9.94E-02 | 23549467  | 23549590  | NC_000020.10 |
| cg12394777 | 1.32E-11 | 8.03E-13 | 7.67 | 18.2253896 | 1.17E-01 | 171224431 | 171224554 | NC_000002.11 |
| cg05707833 | 1.33E-11 | 8.06E-13 | 7.67 | 18.221538  | 9.40E-02 | 77203371  | 77203494  | NC_000018.9  |
| cg13442811 | 1.33E-11 | 8.08E-13 | 7.67 | 18.2194375 | 8.99E-02 | 86131100  | 86131223  | NC_000010.10 |
| cg10824107 | 1.33E-11 | 8.09E-13 | 7.67 | 18.2184364 | 1.10E-01 | 10382069  | 10382192  | NC_000006.11 |
| cg25839023 | 1.33E-11 | 8.10E-13 | 7.67 | 18.2165869 | 1.46E-01 | 22414349  | 22414472  | NC_000003.11 |
| cg09307530 | 1.33E-11 | 8.10E-13 | 7.67 | 18.2161925 | 1.49E-01 | 2739257   | 2739380   | NC_000005.9  |
| cg15126544 | 1.33E-11 | 8.10E-13 | 7.67 | 18.2160966 | 2.14E-01 | 171678954 | 171679077 | NC_000002.11 |
| cg16737409 | 1.34E-11 | 8.11E-13 | 7.67 | 18.2154524 | 8.80E-02 | 57428366  | 57428489  | NC_000020.10 |
| cg08145262 | 1.34E-11 | 8.14E-13 | 7.67 | 18.2121589 | 8.43E-02 | 69869974  | 69870097  | NC_000012.11 |
| cg03828874 | 1.34E-11 | 8.14E-13 | 7.67 | 18.2115222 | 1.51E-01 | 3605954   | 3606077   | NC_000005.9  |
| cg12272198 | 1.34E-11 | 8.15E-13 | 7.67 | 18.2109269 | 1.09E-01 | 47808805  | 47808928  | NC_000018.9  |
| cg03921753 | 1.34E-11 | 8.15E-13 | 7.67 | 18.2103361 | 2.33E-01 | 28074670  | 28074793  | NC_000016.9  |
| cg08421768 | 1.34E-11 | 8.16E-13 | 7.67 | 18.209559  | 1.25E-01 | 123797144 | 123797267 | NC_000004.11 |
| cg04617640 | 1.35E-11 | 8.18E-13 | 7.67 | 18.207032  | 1.50E-01 | 46874243  | 46874366  | NC_000021.8  |
| cg26345105 | 1.35E-11 | 8.19E-13 | 7.67 | 18.206299  | 1.31E-01 | 228634265 | 228634388 | NC_000001.10 |
| cg11686427 | 1.35E-11 | 8.20E-13 | 7.66 | 18.2044368 | 1.85E-01 | 140777473 | 140777596 | NC_000005.9  |
| cg18294610 | 1.35E-11 | 8.20E-13 | 7.66 | 18.204369  | 9.01E-02 | 18138837  | 18138960  | NC_000011.9  |

|            |          |          |      |            |          |           |           |              |
|------------|----------|----------|------|------------|----------|-----------|-----------|--------------|
| cg25636665 | 1.35E-11 | 8.21E-13 | 7.66 | 18.2036013 | 2.09E-01 | 80549579  | 80549702  | NC_000002.11 |
| cg23337631 | 1.35E-11 | 8.21E-13 | 7.66 | 18.2034691 | 1.11E-01 | 52994933  | 52995056  | NC_000012.11 |
| cg18806980 | 1.35E-11 | 8.23E-13 | 7.66 | 18.2007618 | 8.61E-02 | 84438123  | 84438246  | NC_000016.9  |
| cg06083330 | 1.36E-11 | 8.24E-13 | 7.66 | 18.1999322 | 2.04E-01 | 147561203 | 147561326 | NC_000004.11 |
| cg21776577 | 1.36E-11 | 8.24E-13 | 7.66 | 18.1998827 | 1.61E-01 | 180811774 | 180811897 | NC_000001.10 |
| cg11212312 | 1.36E-11 | 8.26E-13 | 7.66 | 18.1977198 | 9.55E-02 | 131395683 | 131395806 | NC_000005.9  |
| cg25230117 | 1.36E-11 | 8.26E-13 | 7.66 | 18.197598  | 1.08E-01 | 146104495 | 146104618 | NC_000004.11 |
| cg14411266 | 1.36E-11 | 8.27E-13 | 7.66 | 18.1960525 | 1.82E-01 | 40679582  | 40679705  | NC_000002.11 |
| cg12551635 | 1.36E-11 | 8.28E-13 | 7.66 | 18.1947556 | 5.75E-02 | 27994779  | 27994902  | NC_000001.10 |
| cg03181618 | 1.36E-11 | 8.29E-13 | 7.66 | 18.1935577 | 1.28E-01 | 160113343 | 160113466 | NC_000002.11 |
| cg26161820 | 1.36E-11 | 8.29E-13 | 7.66 | 18.1934407 | 5.83E-02 | 37792777  | 37792900  | NC_000017.10 |
| cg08575722 | 1.36E-11 | 8.29E-13 | 7.66 | 18.1933339 | 1.60E-01 | 32421845  | 32421968  | NC_000011.9  |
| cg19270505 | 1.37E-11 | 8.32E-13 | 7.66 | 18.1901395 | 2.29E-01 | 25256705  | 25256828  | NC_000001.10 |
| cg26787096 | 1.37E-11 | 8.32E-13 | 7.66 | 18.1901328 | 7.26E-02 | 72094989  | 72095112  | NC_000015.9  |
| cg09406856 | 1.37E-11 | 8.33E-13 | 7.66 | 18.1895338 | 1.25E-01 | 66491863  | 66491986  | NC_000003.11 |
| cg04455430 | 1.37E-11 | 8.33E-13 | 7.66 | 18.1890311 | 1.30E-01 | 50886920  | 50887043  | NC_000001.10 |
| cg04883903 | 1.37E-11 | 8.34E-13 | 7.66 | 18.1883346 | 2.03E-01 | 117798954 | 117799077 | NC_000012.11 |
| cg26333224 | 1.37E-11 | 8.35E-13 | 7.66 | 18.1863684 | 1.21E-01 | 57388283  | 57388406  | NC_000010.10 |
| cg10287814 | 1.37E-11 | 8.36E-13 | 7.66 | 18.1853034 | 7.59E-02 | 74019633  | 74019756  | NC_000017.10 |
| cg07466705 | 1.37E-11 | 8.36E-13 | 7.66 | 18.1852345 | 1.68E-01 | 11034749  | 11034872  | NC_000003.11 |
| cg18252903 | 1.37E-11 | 8.37E-13 | 7.66 | 18.1847003 | 1.95E-01 | 147072643 | 147072766 | NC_000003.11 |
| cg21225430 | 1.38E-11 | 8.37E-13 | 7.66 | 18.1838647 | 9.36E-02 | 39792959  | 39793082  | NC_000022.10 |
| cg26292442 | 1.38E-11 | 8.40E-13 | 7.66 | 18.1813226 | 1.14E-01 | 10693912  | 10694035  | NC_000019.9  |
| cg06780703 | 1.38E-11 | 8.40E-13 | 7.66 | 18.1808399 | 3.91E-02 | 161358133 | 161358256 | NC_000001.10 |
| cg15870334 | 1.38E-11 | 8.40E-13 | 7.66 | 18.1807244 | 1.65E-01 | 5891982   | 5892105   | NC_000004.11 |

|            |          |          |      |            |          |           |           |              |
|------------|----------|----------|------|------------|----------|-----------|-----------|--------------|
| cg03227021 | 1.38E-11 | 8.41E-13 | 7.66 | 18.1800867 | 1.44E-01 | 112711380 | 112711503 | NC_000013.10 |
| cg27522078 | 1.38E-11 | 8.42E-13 | 7.66 | 18.1782454 | 1.07E-01 | 22290005  | 22290128  | NC_000001.10 |
| cg04130427 | 1.38E-11 | 8.43E-13 | 7.66 | 18.1772487 | 1.66E-01 | 77113915  | 77114038  | NC_000009.11 |
| cg01363324 | 1.39E-11 | 8.44E-13 | 7.66 | 18.175866  | 1.29E-01 | 124979353 | 124979476 | NC_000009.11 |
| cg23170850 | 1.39E-11 | 8.44E-13 | 7.66 | 18.1756964 | 1.80E-01 | 134145889 | 134146012 | NC_000011.9  |
| cg00840310 | 1.39E-11 | 8.45E-13 | 7.66 | 18.1754284 | 2.16E-01 | 74061514  | 74061637  | NC_000009.11 |
| cg19759481 | 1.39E-11 | 8.46E-13 | 7.66 | 18.1736793 | 1.81E-01 | 27183401  | 27183524  | NC_000007.13 |
| cg20980055 | 1.39E-11 | 8.47E-13 | 7.66 | 18.1726952 | 1.93E-01 | 133562258 | 133562381 | NC_000006.11 |
| cg25888561 | 1.39E-11 | 8.48E-13 | 7.66 | 18.1710711 | 1.49E-01 | 44163067  | 44163190  | NC_000010.10 |
| cg02178032 | 1.40E-11 | 8.50E-13 | 7.66 | 18.1687063 | 8.14E-02 | 11213424  | 11213547  | NC_000008.10 |
| cg24878115 | 1.40E-11 | 8.51E-13 | 7.66 | 18.1680341 | 1.24E-01 | 18545062  | 18545185  | NC_000019.9  |
| cg26822480 | 1.40E-11 | 8.53E-13 | 7.66 | 18.1653525 | 8.52E-02 | 84341323  | 84341446  | NC_000016.9  |
| cg01238073 | 1.40E-11 | 8.55E-13 | 7.66 | 18.1631443 | 8.40E-02 | 50766441  | 50766564  | NC_000007.13 |
| cg18582342 | 1.40E-11 | 8.55E-13 | 7.66 | 18.1631439 | 1.34E-01 | 11591989  | 11592112  | NC_000019.9  |
| cg19239040 | 1.40E-11 | 8.56E-13 | 7.66 | 18.1625757 | 1.46E-01 | 35298664  | 35298787  | NC_000007.13 |
| cg27089736 | 1.41E-11 | 8.58E-13 | 7.66 | 18.1603299 | 5.25E-02 | 3714278   | 3714401   | NC_000002.11 |
| cg01572884 | 1.41E-11 | 8.59E-13 | 7.66 | 18.1590065 | 1.14E-01 | 110610266 | 110610389 | NC_000001.10 |
| cg02093902 | 1.41E-11 | 8.60E-13 | 7.66 | 18.1572835 | 2.05E-01 | 45501532  | 45501655  | NC_000002.11 |
| cg14470398 | 1.41E-11 | 8.62E-13 | 7.66 | 18.1551978 | 2.07E-01 | 657536    | 657659    | NC_000004.11 |
| cg16435923 | 1.41E-11 | 8.62E-13 | 7.66 | 18.1549352 | 9.40E-02 | 140744155 | 140744278 | NC_000005.9  |
| cg03355526 | 1.41E-11 | 8.63E-13 | 7.66 | 18.1546913 | 1.44E-01 | 178368415 | 178368538 | NC_000005.9  |
| cg09970120 | 1.42E-11 | 8.63E-13 | 7.66 | 18.154028  | 1.83E-01 | 155167844 | 155167967 | NC_000007.13 |
| cg00026546 | 1.42E-11 | 8.64E-13 | 7.66 | 18.1533645 | 5.79E-02 | 33354785  | 33354908  | NC_000001.10 |
| cg14273502 | 1.42E-11 | 8.65E-13 | 7.66 | 18.1519346 | 1.21E-01 | 113013494 | 113013617 | NC_000012.11 |
| cg12864235 | 1.42E-11 | 8.67E-13 | 7.66 | 18.1501565 | 2.07E-01 | 27038782  | 27038905  | NC_000005.9  |

|            |          |          |      |            |          |           |           |              |
|------------|----------|----------|------|------------|----------|-----------|-----------|--------------|
| cg01090089 | 1.43E-11 | 8.71E-13 | 7.65 | 18.1447975 | 2.00E-01 | 6570974   | 6571097   | NC_000007.13 |
| cg16435571 | 1.43E-11 | 8.71E-13 | 7.65 | 18.1446953 | 1.93E-01 | 10858003  | 10858126  | NC_000003.11 |
| cg26661718 | 1.44E-11 | 8.76E-13 | 7.65 | 18.1389079 | 9.51E-02 | 36718014  | 36718137  | NC_000001.10 |
| cg24650501 | 1.44E-11 | 8.77E-13 | 7.65 | 18.1381897 | 1.77E-01 | 165324990 | 165325113 | NC_000001.10 |
| cg02348151 | 1.44E-11 | 8.77E-13 | 7.65 | 18.1380812 | 2.03E-01 | 34442257  | 34442380  | NC_000021.8  |
| cg24975581 | 1.44E-11 | 8.78E-13 | 7.65 | 18.1376802 | 1.33E-01 | 121128268 | 121128391 | NC_000012.11 |
| cg01076459 | 1.44E-11 | 8.78E-13 | 7.65 | 18.1372151 | 1.28E-01 | 2908230   | 2908353   | NC_000017.10 |
| cg07887163 | 1.44E-11 | 8.78E-13 | 7.65 | 18.1367223 | 5.17E-02 | 65958288  | 65958411  | NC_000012.11 |
| cg22635491 | 1.44E-11 | 8.80E-13 | 7.65 | 18.1348931 | 1.85E-01 | 115109934 | 115110057 | NC_000012.11 |
| cg19364068 | 1.44E-11 | 8.80E-13 | 7.65 | 18.1346917 | 1.13E-01 | 46734104  | 46734227  | NC_000019.9  |
| cg00646019 | 1.45E-11 | 8.83E-13 | 7.65 | 18.1319676 | 1.69E-01 | 29034163  | 29034286  | NC_000015.9  |
| cg12252868 | 1.45E-11 | 8.83E-13 | 7.65 | 18.1311126 | 9.35E-02 | 112383396 | 112383519 | NC_000002.11 |
| cg26541867 | 1.45E-11 | 8.84E-13 | 7.65 | 18.1305428 | 2.56E-01 | 37246688  | 37246811  | NC_000004.11 |
| cg24287189 | 1.45E-11 | 8.84E-13 | 7.65 | 18.1303906 | 5.31E-02 | 98676253  | 98676376  | NC_000007.13 |
| cg01297721 | 1.45E-11 | 8.86E-13 | 7.65 | 18.1282909 | 1.68E-01 | 19373566  | 19373689  | NC_000019.9  |
| cg20924470 | 1.45E-11 | 8.86E-13 | 7.65 | 18.1279489 | 2.08E-01 | 135265849 | 135265972 | NC_000005.9  |
| cg22624827 | 1.45E-11 | 8.88E-13 | 7.65 | 18.1261149 | 1.39E-01 | 64058180  | 64058303  | NC_000001.10 |
| cg11525643 | 1.45E-11 | 8.88E-13 | 7.65 | 18.1260182 | 2.09E-01 | 35046765  | 35046888  | NC_000015.9  |
| cg13978542 | 1.45E-11 | 8.88E-13 | 7.65 | 18.1259776 | 6.51E-02 | 138973152 | 138973275 | NC_000009.11 |
| cg16997312 | 1.46E-11 | 8.90E-13 | 7.65 | 18.1237705 | 6.25E-02 | 160314505 | 160314628 | NC_000001.10 |
| cg09022943 | 1.46E-11 | 8.93E-13 | 7.65 | 18.1205747 | 1.79E-01 | 98511210  | 98511333  | NC_000001.10 |
| cg19058585 | 1.46E-11 | 8.94E-13 | 7.65 | 18.1188867 | 4.60E-02 | 112944983 | 112945106 | NC_000002.11 |
| cg03130248 | 1.46E-11 | 8.95E-13 | 7.65 | 18.1183986 | 1.48E-01 | 245524538 | 245524661 | NC_000001.10 |
| cg09744068 | 1.47E-11 | 9.01E-13 | 7.65 | 18.1117137 | 1.38E-01 | 125732787 | 125732910 | NC_000010.10 |
| cg17080163 | 1.48E-11 | 9.03E-13 | 7.65 | 18.1097443 | 1.89E-01 | 123418757 | 123418880 | NC_000002.11 |

|            |          |          |      |            |          |           |           |              |
|------------|----------|----------|------|------------|----------|-----------|-----------|--------------|
| cg09674093 | 1.48E-11 | 9.06E-13 | 7.65 | 18.1063592 | 6.26E-02 | 23646462  | 23646585  | NC_000002.11 |
| cg21947116 | 1.48E-11 | 9.06E-13 | 7.65 | 18.1059682 | 4.87E-02 | 46918189  | 46918312  | NC_000021.8  |
| cg14855877 | 1.48E-11 | 9.07E-13 | 7.65 | 18.1054115 | 2.94E-02 | 12905834  | 12905957  | NC_000017.10 |
| cg24119717 | 1.48E-11 | 9.08E-13 | 7.65 | 18.1042977 | 1.59E-01 | 139488731 | 139488854 | NC_000005.9  |
| cg14977066 | 1.49E-11 | 9.09E-13 | 7.65 | 18.1034156 | 2.18E-01 | 50891195  | 50891318  | NC_000001.10 |
| cg21893358 | 1.49E-11 | 9.09E-13 | 7.65 | 18.1028702 | 1.15E-01 | 120434880 | 120435003 | NC_000011.9  |
| cg22745397 | 1.49E-11 | 9.10E-13 | 7.65 | 18.1022068 | 1.46E-01 | 42122161  | 42122284  | NC_000004.11 |
| cg12864185 | 1.49E-11 | 9.11E-13 | 7.65 | 18.1012911 | 1.60E-01 | 240160972 | 240161095 | NC_000001.10 |
| cg26872137 | 1.49E-11 | 9.12E-13 | 7.65 | 18.0993786 | 1.84E-01 | 35092870  | 35092993  | NC_000008.10 |
| cg24298311 | 1.49E-11 | 9.13E-13 | 7.65 | 18.098162  | 2.12E-01 | 158119610 | 158119733 | NC_000001.10 |
| cg17442776 | 1.49E-11 | 9.14E-13 | 7.65 | 18.0971523 | 8.85E-02 | 147718540 | 147718663 | NC_000001.10 |
| cg07919443 | 1.50E-11 | 9.15E-13 | 7.65 | 18.0964937 | 2.00E-01 | 102419409 | 102419532 | NC_000010.10 |
| cg18789663 | 1.50E-11 | 9.17E-13 | 7.65 | 18.094235  | 2.24E-01 | 242688591 | 242688714 | NC_000001.10 |
| cg02446647 | 1.50E-11 | 9.18E-13 | 7.65 | 18.0933718 | 1.98E-01 | 133562101 | 133562224 | NC_000006.11 |
| cg07147166 | 1.50E-11 | 9.18E-13 | 7.65 | 18.0930443 | 1.68E-01 | 147569185 | 147569308 | NC_000004.11 |
| cg15428578 | 1.50E-11 | 9.18E-13 | 7.65 | 18.0929358 | 2.21E-01 | 33603312  | 33603435  | NC_000015.9  |
| cg00802168 | 1.50E-11 | 9.19E-13 | 7.65 | 18.091812  | 5.14E-02 | 32047005  | 32047128  | NC_000006.11 |
| cg13675957 | 1.50E-11 | 9.20E-13 | 7.65 | 18.0914475 | 3.18E-02 | 39672463  | 39672586  | NC_000017.10 |
| cg17277529 | 1.50E-11 | 9.21E-13 | 7.65 | 18.0898238 | 1.78E-01 | 69633959  | 69634082  | NC_000011.9  |
| cg25366582 | 1.51E-11 | 9.23E-13 | 7.64 | 18.0882932 | 2.58E-01 | 25621027  | 25621150  | NC_000013.10 |
| cg22274539 | 1.51E-11 | 9.23E-13 | 7.64 | 18.0880522 | 1.84E-01 | 103696209 | 103696332 | NC_000012.11 |
| cg23323341 | 1.51E-11 | 9.24E-13 | 7.64 | 18.0869801 | 7.96E-02 | 46722583  | 46722706  | NC_000021.8  |
| cg07291445 | 1.51E-11 | 9.24E-13 | 7.64 | 18.0863774 | 1.89E-01 | 39015928  | 39016051  | NC_000007.13 |
| cg14526047 | 1.51E-11 | 9.25E-13 | 7.64 | 18.0858689 | 1.85E-01 | 50887616  | 50887739  | NC_000010.10 |
| cg17827208 | 1.52E-11 | 9.31E-13 | 7.64 | 18.0799847 | 1.12E-01 | 99470414  | 99470537  | NC_000015.9  |



|            |          |          |      |            |          |           |           |              |
|------------|----------|----------|------|------------|----------|-----------|-----------|--------------|
| cg26016241 | 1.52E-11 | 9.33E-13 | 7.64 | 18.0772217 | 7.29E-02 | 17571656  | 17571779  | NC_000019.9  |
| cg10797129 | 1.53E-11 | 9.37E-13 | 7.64 | 18.0735394 | 4.92E-02 | 100745314 | 100745437 | NC_000011.9  |
| cg13702053 | 1.53E-11 | 9.37E-13 | 7.64 | 18.0730291 | 1.61E-01 | 2752601   | 2752724   | NC_000005.9  |
| cg24366314 | 1.53E-11 | 9.38E-13 | 7.64 | 18.0715794 | 1.46E-01 | 88329680  | 88329803  | NC_000013.10 |
| cg17918002 | 1.54E-11 | 9.41E-13 | 7.64 | 18.0685295 | 1.81E-01 | 28035719  | 28035842  | NC_000010.10 |
| cg17478016 | 1.54E-11 | 9.42E-13 | 7.64 | 18.0674132 | 9.61E-02 | 169846686 | 169846809 | NC_000006.11 |
| cg03724423 | 1.55E-11 | 9.47E-13 | 7.64 | 18.0624118 | 1.51E-01 | 27170755  | 27170878  | NC_000007.13 |
| cg07092157 | 1.55E-11 | 9.48E-13 | 7.64 | 18.0611944 | 4.11E-02 | 89353329  | 89353452  | NC_000012.11 |
| cg25494992 | 1.55E-11 | 9.49E-13 | 7.64 | 18.0609766 | 6.12E-02 | 130757650 | 130757773 | NC_000010.10 |
| cg16191088 | 1.55E-11 | 9.49E-13 | 7.64 | 18.0603745 | 9.57E-02 | 8654389   | 8654512   | NC_000019.9  |
| cg17152436 | 1.55E-11 | 9.50E-13 | 7.64 | 18.0595605 | 1.29E-01 | 1318418   | 1318541   | NC_000011.9  |
| cg07798593 | 1.55E-11 | 9.50E-13 | 7.64 | 18.0594852 | 7.40E-02 | 80890238  | 80890361  | NC_000010.10 |
| cg03151319 | 1.55E-11 | 9.50E-13 | 7.64 | 18.0593996 | 5.58E-02 | 31637636  | 31637759  | NC_000006.11 |
| cg14871414 | 1.55E-11 | 9.52E-13 | 7.64 | 18.0579439 | 2.51E-01 | 130687581 | 130687704 | NC_000006.11 |
| cg27325190 | 1.55E-11 | 9.52E-13 | 7.64 | 18.0569895 | 4.70E-02 | 74668981  | 74669104  | NC_000011.9  |
| cg26791464 | 1.55E-11 | 9.53E-13 | 7.64 | 18.0569565 | 9.56E-02 | 40769744  | 40769867  | NC_000001.10 |
| cg15212418 | 1.55E-11 | 9.53E-13 | 7.64 | 18.0565768 | 1.15E-01 | 155045    | 155168    | NC_000017.10 |
| cg12786548 | 1.55E-11 | 9.53E-13 | 7.64 | 18.0564103 | 2.04E-01 | 102507733 | 102507856 | NC_000010.10 |
| cg12307237 | 1.56E-11 | 9.55E-13 | 7.64 | 18.0542965 | 1.38E-01 | 178735241 | 178735364 | NC_000005.9  |
| cg02981663 | 1.56E-11 | 9.55E-13 | 7.64 | 18.054152  | 1.52E-01 | 28232083  | 28232206  | NC_000013.10 |
| cg16994506 | 1.56E-11 | 9.56E-13 | 7.64 | 18.0538095 | 2.35E-01 | 4383724   | 4383847   | NC_000012.11 |
| cg08985029 | 1.56E-11 | 9.56E-13 | 7.64 | 18.0529796 | 2.33E-01 | 114843296 | 114843419 | NC_000012.11 |
| cg06911354 | 1.57E-11 | 9.62E-13 | 7.64 | 18.0469714 | 2.05E-01 | 27197455  | 27197578  | NC_000007.13 |
| cg08607209 | 1.57E-11 | 9.62E-13 | 7.64 | 18.0469473 | 1.71E-01 | 52610808  | 52610931  | NC_000006.11 |
| cg02065182 | 1.57E-11 | 9.65E-13 | 7.64 | 18.044554  | 4.63E-02 | 2637029   | 2637152   | NC_000006.11 |

|            |          |          |      |            |          |           |           |              |
|------------|----------|----------|------|------------|----------|-----------|-----------|--------------|
| cg17676835 | 1.57E-11 | 9.65E-13 | 7.64 | 18.0438576 | 4.36E-02 | 1007395   | 1007518   | NC_000011.9  |
| cg04178787 | 1.58E-11 | 9.68E-13 | 7.64 | 18.0412932 | 1.98E-01 | 123418787 | 123418910 | NC_000002.11 |
| cg06498720 | 1.58E-11 | 9.68E-13 | 7.64 | 18.0406323 | 1.46E-01 | 73147481  | 73147604  | NC_000002.11 |
| cg00656603 | 1.59E-11 | 9.74E-13 | 7.64 | 18.0351349 | 1.35E-01 | 1070957   | 1071080   | NC_000016.9  |
| cg02536995 | 1.59E-11 | 9.75E-13 | 7.64 | 18.0338296 | 5.74E-02 | 107222842 | 107222965 | NC_000006.11 |
| cg12167688 | 1.59E-11 | 9.75E-13 | 7.64 | 18.0336073 | 1.02E-01 | 2771225   | 2771348   | NC_000017.10 |
| cg02420615 | 1.59E-11 | 9.76E-13 | 7.64 | 18.033174  | 3.72E-02 | 149150718 | 149150841 | NC_000007.13 |
| cg07531356 | 1.59E-11 | 9.76E-13 | 7.64 | 18.0325976 | 1.10E-01 | 5185951   | 5186074   | NC_000009.11 |
| cg01942816 | 1.59E-11 | 9.77E-13 | 7.64 | 18.0322938 | 1.61E-01 | 5535463   | 5535586   | NC_000007.13 |
| cg14558529 | 1.59E-11 | 9.77E-13 | 7.64 | 18.0315398 | 1.84E-01 | 27648341  | 27648464  | NC_000006.11 |
| cg14442746 | 1.59E-11 | 9.79E-13 | 7.64 | 18.0294966 | 5.70E-02 | 56264572  | 56264695  | NC_000014.8  |
| cg14768785 | 1.59E-11 | 9.80E-13 | 7.63 | 18.0292076 | 1.99E-01 | 172166517 | 172166640 | NC_000003.11 |
| cg07994987 | 1.59E-11 | 9.80E-13 | 7.63 | 18.0286428 | 2.06E-01 | 6007769   | 6007892   | NC_000006.11 |
| cg10381520 | 1.60E-11 | 9.81E-13 | 7.63 | 18.0283264 | 4.98E-02 | 33396942  | 33397065  | NC_000010.10 |
| cg14101623 | 1.60E-11 | 9.81E-13 | 7.63 | 18.0283011 | 5.92E-02 | 138350387 | 138350510 | NC_000007.13 |
| cg26917367 | 1.60E-11 | 9.81E-13 | 7.63 | 18.0276988 | 9.01E-02 | 57352807  | 57352930  | NC_000019.9  |
| cg05375680 | 1.60E-11 | 9.83E-13 | 7.63 | 18.0260268 | 4.61E-02 | 53521504  | 53521627  | NC_000017.10 |
| cg13926358 | 1.60E-11 | 9.86E-13 | 7.63 | 18.0228142 | 1.24E-01 | 13915659  | 13915782  | NC_000019.9  |
| cg07498275 | 1.60E-11 | 9.87E-13 | 7.63 | 18.0222735 | 1.69E-01 | 51184886  | 51185009  | NC_000016.9  |
| cg15549216 | 1.60E-11 | 9.87E-13 | 7.63 | 18.0220889 | 1.45E-01 | 118368264 | 118368387 | NC_000010.10 |
| cg12301921 | 1.61E-11 | 9.89E-13 | 7.63 | 18.01993   | 9.54E-02 | 1122879   | 1123002   | NC_000005.9  |
| cg21448471 | 1.62E-11 | 9.95E-13 | 7.63 | 18.0142529 | 9.79E-02 | 10407538  | 10407661  | NC_000019.9  |
| cg07676709 | 1.62E-11 | 9.95E-13 | 7.63 | 18.0141227 | 1.57E-01 | 46673442  | 46673565  | NC_000017.10 |
| cg11689813 | 1.62E-11 | 9.95E-13 | 7.63 | 18.0139306 | 2.39E-01 | 229570052 | 229570175 | NC_000001.10 |
| cg10324224 | 1.62E-11 | 9.96E-13 | 7.63 | 18.0132805 | 9.49E-02 | 231115997 | 231116120 | NC_000001.10 |

|            |          |          |      |            |          |           |           |              |
|------------|----------|----------|------|------------|----------|-----------|-----------|--------------|
| cg18328894 | 1.62E-11 | 9.96E-13 | 7.63 | 18.013176  | 2.21E-01 | 175224563 | 175224686 | NC_000005.9  |
| cg09559950 | 1.62E-11 | 9.98E-13 | 7.63 | 18.0113572 | 1.36E-01 | 4873514   | 4873637   | NC_000004.11 |
| cg24873464 | 1.62E-11 | 9.98E-13 | 7.63 | 18.0107746 | 2.20E-01 | 2139977   | 2140100   | NC_000003.11 |
| cg23676551 | 1.62E-11 | 9.99E-13 | 7.63 | 18.0095845 | 1.82E-01 | 2161374   | 2161497   | NC_000011.9  |
| cg11398452 | 1.62E-11 | 1.00E-12 | 7.63 | 18.0091705 | 2.36E-01 | 118896755 | 118896878 | NC_000010.10 |
| cg13283952 | 1.62E-11 | 1.00E-12 | 7.63 | 18.0090411 | 1.30E-01 | 121412005 | 121412128 | NC_000002.11 |
| cg09412850 | 1.63E-11 | 1.00E-12 | 7.63 | 18.006505  | 5.82E-02 | 132835834 | 132835957 | NC_000012.11 |
| cg18591945 | 1.63E-11 | 1.00E-12 | 7.63 | 18.0064802 | 1.24E-01 | 105962171 | 105962294 | NC_000014.8  |
| cg13842293 | 1.63E-11 | 1.00E-12 | 7.63 | 18.0052632 | 1.07E-01 | 35859090  | 35859213  | NC_000009.11 |
| cg11532513 | 1.63E-11 | 1.01E-12 | 7.63 | 18.0039691 | 1.24E-01 | 54962242  | 54962365  | NC_000003.11 |
| cg20016673 | 1.63E-11 | 1.01E-12 | 7.63 | 18.0029524 | 1.40E-01 | 108023366 | 108023489 | NC_000001.10 |
| cg08196642 | 1.64E-11 | 1.01E-12 | 7.63 | 18.0022995 | 1.09E-01 | 138515409 | 138515532 | NC_000005.9  |
| cg05859777 | 1.64E-11 | 1.01E-12 | 7.63 | 18.001899  | 2.03E-01 | 2161102   | 2161225   | NC_000011.9  |
| cg04069351 | 1.64E-11 | 1.01E-12 | 7.63 | 18.001018  | 1.11E-01 | 46732972  | 46733095  | NC_000022.10 |
| cg11260904 | 1.64E-11 | 1.01E-12 | 7.63 | 17.9996232 | 1.96E-01 | 134872029 | 134872152 | NC_000005.9  |
| cg04711622 | 1.65E-11 | 1.01E-12 | 7.63 | 17.9946189 | 1.20E-01 | 64578638  | 64578761  | NC_000005.9  |
| cg04908789 | 1.65E-11 | 1.02E-12 | 7.63 | 17.9930935 | 1.84E-01 | 59001676  | 59001799  | NC_000018.9  |
| cg22762492 | 1.65E-11 | 1.02E-12 | 7.63 | 17.9925804 | 1.83E-01 | 3591171   | 3591294   | NC_000005.9  |
| cg27279508 | 1.66E-11 | 1.02E-12 | 7.63 | 17.9894842 | 9.66E-02 | 31476672  | 31476795  | NC_000013.10 |
| cg07775420 | 1.66E-11 | 1.02E-12 | 7.63 | 17.9850759 | 7.27E-02 | 110159458 | 110159581 | NC_000012.11 |
| cg19287858 | 1.66E-11 | 1.03E-12 | 7.63 | 17.9838383 | 1.25E-01 | 130181841 | 130181964 | NC_000011.9  |
| cg26473844 | 1.67E-11 | 1.03E-12 | 7.63 | 17.9834516 | 1.24E-01 | 37834909  | 37835032  | NC_000005.9  |
| cg10883064 | 1.67E-11 | 1.03E-12 | 7.63 | 17.9821926 | 1.71E-01 | 60757346  | 60757469  | NC_000017.10 |
| cg07071978 | 1.67E-11 | 1.03E-12 | 7.63 | 17.9810167 | 2.12E-01 | 13933652  | 13933775  | NC_000010.10 |
| cg23829949 | 1.67E-11 | 1.03E-12 | 7.63 | 17.9805726 | 1.76E-01 | 244214679 | 244214802 | NC_000001.10 |

|            |          |          |      |            |          |           |           |              |
|------------|----------|----------|------|------------|----------|-----------|-----------|--------------|
| cg09000583 | 1.67E-11 | 1.03E-12 | 7.63 | 17.9785434 | 2.37E-01 | 46802888  | 46803011  | NC_000017.10 |
| cg16137498 | 1.67E-11 | 1.03E-12 | 7.63 | 17.9781396 | 1.29E-01 | 101286541 | 101286664 | NC_000010.10 |
| cg18409732 | 1.68E-11 | 1.03E-12 | 7.63 | 17.9758474 | 1.60E-01 | 4866454   | 4866577   | NC_000004.11 |
| cg07373578 | 1.68E-11 | 1.04E-12 | 7.63 | 17.9738713 | 8.01E-02 | 55993519  | 55993642  | NC_000017.10 |
| cg18476557 | 1.68E-11 | 1.04E-12 | 7.63 | 17.9728468 | 9.62E-02 | 77386989  | 77387112  | NC_000018.9  |
| cg12047941 | 1.69E-11 | 1.04E-12 | 7.62 | 17.9703378 | 1.17E-01 | 315908    | 316031    | NC_000011.9  |
| cg23541422 | 1.69E-11 | 1.04E-12 | 7.62 | 17.9696771 | 1.42E-01 | 8714363   | 8714486   | NC_000002.11 |
| cg17939805 | 1.70E-11 | 1.05E-12 | 7.62 | 17.9646749 | 1.51E-01 | 44773988  | 44774111  | NC_000018.9  |
| cg14645017 | 1.70E-11 | 1.05E-12 | 7.62 | 17.9614947 | 1.55E-01 | 132977408 | 132977531 | NC_000010.10 |
| cg19240319 | 1.70E-11 | 1.05E-12 | 7.62 | 17.9601014 | 8.92E-02 | 161427101 | 161427224 | NC_000001.10 |
| cg25903072 | 1.70E-11 | 1.05E-12 | 7.62 | 17.9588535 | 9.82E-02 | 63334703  | 63334826  | NC_000015.9  |
| cg21532325 | 1.71E-11 | 1.05E-12 | 7.62 | 17.9582678 | 2.27E-01 | 151107400 | 151107523 | NC_000007.13 |
| cg10919204 | 1.71E-11 | 1.05E-12 | 7.62 | 17.9577817 | 1.36E-01 | 31193340  | 31193463  | NC_000005.9  |
| cg16321280 | 1.71E-11 | 1.05E-12 | 7.62 | 17.957717  | 1.64E-01 | 44332972  | 44333095  | NC_000011.9  |
| cg08569517 | 1.71E-11 | 1.05E-12 | 7.62 | 17.956661  | 1.09E-01 | 2424793   | 2424916   | NC_000019.9  |
| cg13604337 | 1.71E-11 | 1.06E-12 | 7.62 | 17.9557836 | 1.93E-01 | 54321653  | 54321776  | NC_000012.11 |
| cg02539855 | 1.71E-11 | 1.06E-12 | 7.62 | 17.9530442 | 2.33E-01 | 144241434 | 144241557 | NC_000008.10 |
| cg25142390 | 1.72E-11 | 1.06E-12 | 7.62 | 17.9523774 | 9.21E-02 | 6534951   | 6535074   | NC_000001.10 |
| cg23524195 | 1.72E-11 | 1.06E-12 | 7.62 | 17.9516315 | 1.94E-01 | 118034031 | 118034154 | NC_000010.10 |
| cg19685491 | 1.72E-11 | 1.06E-12 | 7.62 | 17.9515477 | 1.47E-01 | 2800278   | 2800401   | NC_000012.11 |
| cg12113984 | 1.72E-11 | 1.06E-12 | 7.62 | 17.9513678 | 2.10E-01 | 108238461 | 108238584 | NC_000012.11 |
| cg10815420 | 1.72E-11 | 1.06E-12 | 7.62 | 17.9497507 | 1.16E-01 | 105599835 | 105599958 | NC_000008.10 |
| cg27423216 | 1.72E-11 | 1.06E-12 | 7.62 | 17.9488514 | 1.53E-01 | 5543269   | 5543392   | NC_000012.11 |
| cg13392861 | 1.73E-11 | 1.07E-12 | 7.62 | 17.9455838 | 8.77E-02 | 37914861  | 37914984  | NC_000009.11 |
| cg15286180 | 1.73E-11 | 1.07E-12 | 7.62 | 17.9444987 | 1.06E-01 | 134679435 | 134679558 | NC_000010.10 |

|            |          |          |      |            |          |           |           |              |
|------------|----------|----------|------|------------|----------|-----------|-----------|--------------|
| cg19746567 | 1.73E-11 | 1.07E-12 | 7.62 | 17.9443126 | 1.01E-01 | 228495111 | 228495234 | NC_000001.10 |
| cg07345734 | 1.73E-11 | 1.07E-12 | 7.62 | 17.9442948 | 2.67E-01 | 36986363  | 36986486  | NC_000014.8  |
| cg15089111 | 1.73E-11 | 1.07E-12 | 7.62 | 17.943825  | 1.40E-01 | 34270113  | 34270236  | NC_000014.8  |
| cg06133145 | 1.74E-11 | 1.07E-12 | 7.62 | 17.9401665 | 2.15E-01 | 94254351  | 94254474  | NC_000014.8  |
| cg24239329 | 1.74E-11 | 1.07E-12 | 7.62 | 17.9399674 | 2.59E-01 | 36705622  | 36705745  | NC_000013.10 |
| cg11362010 | 1.74E-11 | 1.08E-12 | 7.62 | 17.9354708 | 2.09E-01 | 181442713 | 181442836 | NC_000003.11 |
| cg11988604 | 1.75E-11 | 1.08E-12 | 7.62 | 17.9328031 | 1.25E-01 | 48551938  | 48552061  | NC_000017.10 |
| cg02635449 | 1.75E-11 | 1.08E-12 | 7.62 | 17.9306483 | 1.16E-01 | 109926    | 110049    | NC_000017.10 |
| cg25802465 | 1.75E-11 | 1.08E-12 | 7.62 | 17.9301201 | 7.54E-02 | 107865768 | 107865891 | NC_000013.10 |
| cg23588462 | 1.76E-11 | 1.09E-12 | 7.62 | 17.928198  | 1.79E-01 | 95357223  | 95357346  | NC_000013.10 |
| cg14496450 | 1.76E-11 | 1.09E-12 | 7.62 | 17.9277353 | 2.19E-01 | 77178924  | 77179047  | NC_000017.10 |
| cg14405924 | 1.76E-11 | 1.09E-12 | 7.62 | 17.9271617 | 1.27E-01 | 131758112 | 131758235 | NC_000010.10 |
| cg01870995 | 1.76E-11 | 1.09E-12 | 7.62 | 17.9263946 | 2.10E-01 | 3602546   | 3602669   | NC_000012.11 |
| cg13671919 | 1.76E-11 | 1.09E-12 | 7.62 | 17.924741  | 1.35E-01 | 5196874   | 5196997   | NC_000018.9  |
| cg07547000 | 1.76E-11 | 1.09E-12 | 7.62 | 17.9247082 | 2.05E-01 | 154728210 | 154728333 | NC_000002.11 |
| cg23373966 | 1.76E-11 | 1.09E-12 | 7.62 | 17.9246544 | 7.51E-02 | 20668719  | 20668842  | NC_000006.11 |
| cg13912115 | 1.76E-11 | 1.09E-12 | 7.62 | 17.9230534 | 2.19E-01 | 33936362  | 33936485  | NC_000005.9  |
| cg01810713 | 1.77E-11 | 1.09E-12 | 7.62 | 17.9205545 | 8.54E-02 | 85966031  | 85966154  | NC_000016.9  |
| cg08393041 | 1.77E-11 | 1.10E-12 | 7.62 | 17.9190453 | 1.83E-01 | 147109426 | 147109549 | NC_000003.11 |
| cg05694095 | 1.77E-11 | 1.10E-12 | 7.62 | 17.9188606 | 1.13E-01 | 169659745 | 169659868 | NC_000005.9  |
| cg16202340 | 1.77E-11 | 1.10E-12 | 7.62 | 17.9185519 | 1.58E-01 | 4867839   | 4867962   | NC_000004.11 |
| cg16163765 | 1.77E-11 | 1.10E-12 | 7.62 | 17.9183466 | 1.22E-01 | 40365499  | 40365622  | NC_000001.10 |
| cg08422054 | 1.77E-11 | 1.10E-12 | 7.62 | 17.9181688 | 1.39E-01 | 100875565 | 100875688 | NC_000003.11 |
| cg00324748 | 1.77E-11 | 1.10E-12 | 7.62 | 17.9179846 | 1.83E-01 | 80505324  | 80505447  | NC_000010.10 |
| cg08875705 | 1.78E-11 | 1.10E-12 | 7.62 | 17.9135925 | 2.18E-01 | 6665330   | 6665453   | NC_000012.11 |

|            |          |          |      |            |          |           |           |              |
|------------|----------|----------|------|------------|----------|-----------|-----------|--------------|
| cg11523290 | 1.78E-11 | 1.10E-12 | 7.62 | 17.9130216 | 2.06E-01 | 10463256  | 10463379  | NC_000004.11 |
| cg18274896 | 1.78E-11 | 1.10E-12 | 7.62 | 17.9129198 | 7.59E-02 | 140395754 | 140395877 | NC_000009.11 |
| cg12389397 | 1.78E-11 | 1.10E-12 | 7.62 | 17.9127377 | 5.23E-02 | 110313543 | 110313666 | NC_000001.10 |
| cg12847373 | 1.78E-11 | 1.10E-12 | 7.62 | 17.9127102 | 1.95E-01 | 78493349  | 78493472  | NC_000013.10 |
| cg14100973 | 1.78E-11 | 1.10E-12 | 7.61 | 17.9107936 | 1.64E-01 | 87280816  | 87280939  | NC_000004.11 |
| cg17634650 | 1.78E-11 | 1.10E-12 | 7.61 | 17.910691  | 8.20E-02 | 10966220  | 10966343  | NC_000004.11 |
| cg19430967 | 1.79E-11 | 1.11E-12 | 7.61 | 17.9097364 | 1.91E-01 | 132757741 | 132757864 | NC_000003.11 |
| cg24056153 | 1.79E-11 | 1.11E-12 | 7.61 | 17.909355  | 2.48E-02 | 90988694  | 90988817  | NC_000014.8  |
| cg00589550 | 1.79E-11 | 1.11E-12 | 7.61 | 17.9086233 | 2.30E-02 | 57099057  | 57099180  | NC_000016.9  |
| cg05031741 | 1.79E-11 | 1.11E-12 | 7.61 | 17.9080803 | 2.24E-01 | 89314419  | 89314542  | NC_000016.9  |
| cg05423392 | 1.79E-11 | 1.11E-12 | 7.61 | 17.9075578 | 1.15E-01 | 34586837  | 34586960  | NC_000016.9  |
| cg17194154 | 1.79E-11 | 1.11E-12 | 7.61 | 17.907356  | 1.66E-01 | 95359974  | 95360097  | NC_000013.10 |
| cg18436984 | 1.79E-11 | 1.11E-12 | 7.61 | 17.906281  | 1.53E-01 | 27198374  | 27198497  | NC_000007.13 |
| cg14688579 | 1.80E-11 | 1.11E-12 | 7.61 | 17.9042946 | 1.79E-01 | 223168453 | 223168576 | NC_000002.11 |
| cg04622777 | 1.80E-11 | 1.12E-12 | 7.61 | 17.9013059 | 1.90E-01 | 55357776  | 55357899  | NC_000016.9  |
| cg05832509 | 1.80E-11 | 1.12E-12 | 7.61 | 17.9002281 | 7.94E-02 | 99515080  | 99515203  | NC_000007.13 |
| cg18651870 | 1.80E-11 | 1.12E-12 | 7.61 | 17.8999122 | 1.49E-01 | 70535005  | 70535128  | NC_000018.9  |
| cg00185566 | 1.80E-11 | 1.12E-12 | 7.61 | 17.8995271 | 2.35E-01 | 14925856  | 14925979  | NC_000001.10 |
| cg01396176 | 1.80E-11 | 1.12E-12 | 7.61 | 17.8992951 | 1.56E-01 | 114881783 | 114881906 | NC_000012.11 |
| cg01831805 | 1.80E-11 | 1.12E-12 | 7.61 | 17.8986747 | 4.64E-02 | 24254624  | 24254747  | NC_000022.10 |
| cg04794372 | 1.81E-11 | 1.12E-12 | 7.61 | 17.8984311 | 8.37E-02 | 113773201 | 113773324 | NC_000003.11 |
| cg00931558 | 1.81E-11 | 1.12E-12 | 7.61 | 17.8982281 | 2.06E-01 | 77594664  | 77594787  | NC_000008.10 |
| cg14244013 | 1.81E-11 | 1.12E-12 | 7.61 | 17.8966388 | 1.16E-01 | 59473124  | 59473247  | NC_000017.10 |
| cg03763508 | 1.81E-11 | 1.12E-12 | 7.61 | 17.8956139 | 1.86E-01 | 27140942  | 27141065  | NC_000007.13 |
| cg02409090 | 1.81E-11 | 1.12E-12 | 7.61 | 17.8946696 | 9.52E-02 | 709725    | 709848    | NC_000006.11 |

|            |          |          |      |            |          |           |           |              |
|------------|----------|----------|------|------------|----------|-----------|-----------|--------------|
| cg16332936 | 1.81E-11 | 1.12E-12 | 7.61 | 17.8945014 | 1.59E-01 | 19748910  | 19749033  | NC_000022.10 |
| cg22749589 | 1.81E-11 | 1.12E-12 | 7.61 | 17.8934523 | 1.92E-01 | 21501710  | 21501833  | NC_000020.10 |
| cg12851526 | 1.82E-11 | 1.13E-12 | 7.61 | 17.8908183 | 1.28E-01 | 100609034 | 100609157 | NC_000007.13 |
| cg24196693 | 1.82E-11 | 1.13E-12 | 7.61 | 17.8881527 | 1.96E-01 | 85954958  | 85955081  | NC_000010.10 |
| cg18349835 | 1.82E-11 | 1.13E-12 | 7.61 | 17.888029  | 1.74E-01 | 158937107 | 158937230 | NC_000007.13 |
| cg26263234 | 1.82E-11 | 1.13E-12 | 7.61 | 17.8872183 | 2.00E-01 | 26666060  | 26666183  | NC_000003.11 |
| cg16783478 | 1.83E-11 | 1.13E-12 | 7.61 | 17.8862572 | 9.46E-02 | 9943657   | 9943780   | NC_000016.9  |
| cg00030420 | 1.83E-11 | 1.13E-12 | 7.61 | 17.8852101 | 7.55E-02 | 140683772 | 140683895 | NC_000005.9  |
| cg21360079 | 1.83E-11 | 1.13E-12 | 7.61 | 17.884879  | 1.17E-01 | 107162445 | 107162568 | NC_000012.11 |
| cg23686983 | 1.83E-11 | 1.14E-12 | 7.61 | 17.8835199 | 6.92E-02 | 101880640 | 101880763 | NC_000007.13 |
| cg02108033 | 1.83E-11 | 1.14E-12 | 7.61 | 17.8834018 | 2.20E-01 | 17783294  | 17783417  | NC_000004.11 |
| cg00569447 | 1.83E-11 | 1.14E-12 | 7.61 | 17.8831107 | 1.42E-01 | 50695224  | 50695347  | NC_000005.9  |
| cg24864413 | 1.83E-11 | 1.14E-12 | 7.61 | 17.8825016 | 1.05E-01 | 160542732 | 160542855 | NC_000006.11 |
| cg21747876 | 1.83E-11 | 1.14E-12 | 7.61 | 17.8813662 | 1.51E-01 | 178687984 | 178688107 | NC_000005.9  |
| cg01307684 | 1.84E-11 | 1.14E-12 | 7.61 | 17.8805674 | 4.46E-02 | 80886143  | 80886266  | NC_000004.11 |
| cg05255522 | 1.84E-11 | 1.14E-12 | 7.61 | 17.8789098 | 1.87E-01 | 50682710  | 50682833  | NC_000006.11 |
| cg01072388 | 1.84E-11 | 1.14E-12 | 7.61 | 17.8782457 | 1.11E-01 | 85620244  | 85620367  | NC_000016.9  |
| cg04307702 | 1.84E-11 | 1.14E-12 | 7.61 | 17.8778646 | 6.03E-02 | 3714315   | 3714438   | NC_000002.11 |
| cg12939049 | 1.84E-11 | 1.14E-12 | 7.61 | 17.8776557 | 9.89E-02 | 10602753  | 10602876  | NC_000004.11 |
| cg14845689 | 1.84E-11 | 1.14E-12 | 7.61 | 17.8761891 | 1.58E-01 | 119306193 | 119306316 | NC_000010.10 |
| cg10091994 | 1.84E-11 | 1.14E-12 | 7.61 | 17.8761699 | 2.29E-01 | 4381803   | 4381926   | NC_000012.11 |
| cg15133041 | 1.84E-11 | 1.15E-12 | 7.61 | 17.8754948 | 5.05E-02 | 761765    | 761888    | NC_000019.9  |
| cg06322218 | 1.85E-11 | 1.15E-12 | 7.61 | 17.8742548 | 1.14E-01 | 9044663   | 9044786   | NC_000016.9  |
| cg13209298 | 1.85E-11 | 1.15E-12 | 7.61 | 17.8738486 | 1.11E-01 | 50303807  | 50303930  | NC_000003.11 |
| cg22471517 | 1.85E-11 | 1.15E-12 | 7.61 | 17.8719404 | 1.66E-01 | 136553682 | 136553805 | NC_000007.13 |

|            |          |          |      |            |          |           |           |              |
|------------|----------|----------|------|------------|----------|-----------|-----------|--------------|
| cg00449067 | 1.85E-11 | 1.15E-12 | 7.61 | 17.8711806 | 1.15E-01 | 188269443 | 188269566 | NC_000002.11 |
| cg04840051 | 1.86E-11 | 1.15E-12 | 7.61 | 17.8684121 | 1.41E-01 | 112582591 | 112582714 | NC_000010.10 |
| cg21186708 | 1.86E-11 | 1.16E-12 | 7.61 | 17.8660734 | 2.06E-01 | 112716728 | 112716851 | NC_000013.10 |
| cg16123707 | 1.86E-11 | 1.16E-12 | 7.61 | 17.8658779 | 3.88E-02 | 134049802 | 134049925 | NC_000010.10 |
| cg14856220 | 1.86E-11 | 1.16E-12 | 7.61 | 17.8655001 | 9.34E-02 | 123353500 | 123353623 | NC_000010.10 |
| cg20499290 | 1.86E-11 | 1.16E-12 | 7.61 | 17.8654745 | 1.29E-01 | 38015579  | 38015702  | NC_000010.10 |
| cg09273030 | 1.87E-11 | 1.16E-12 | 7.61 | 17.860547  | 4.20E-02 | 242566905 | 242567028 | NC_000002.11 |
| cg17255450 | 1.87E-11 | 1.16E-12 | 7.61 | 17.8601304 | 2.06E-01 | 5710372   | 5710495   | NC_000004.11 |
| cg21656685 | 1.87E-11 | 1.16E-12 | 7.61 | 17.8600506 | 9.75E-02 | 2947843   | 2947966   | NC_000018.9  |
| cg04453140 | 1.87E-11 | 1.16E-12 | 7.61 | 17.8595233 | 1.65E-01 | 46692021  | 46692144  | NC_000017.10 |
| cg19599451 | 1.87E-11 | 1.17E-12 | 7.61 | 17.8582721 | 4.31E-02 | 11374377  | 11374500  | NC_000004.11 |
| cg25347264 | 1.88E-11 | 1.17E-12 | 7.61 | 17.8560785 | 1.88E-01 | 5540220   | 5540343   | NC_000012.11 |
| cg15888663 | 1.88E-11 | 1.17E-12 | 7.61 | 17.8543827 | 5.35E-02 | 207992084 | 207992207 | NC_000001.10 |
| cg16697024 | 1.88E-11 | 1.17E-12 | 7.61 | 17.8535215 | 4.92E-02 | 126715891 | 126716014 | NC_000010.10 |
| cg24720571 | 1.89E-11 | 1.17E-12 | 7.6  | 17.8517768 | 1.85E-01 | 6004328   | 6004451   | NC_000006.11 |
| cg22974236 | 1.89E-11 | 1.18E-12 | 7.6  | 17.8492456 | 1.56E-01 | 4867979   | 4868102   | NC_000004.11 |
| cg02252795 | 1.89E-11 | 1.18E-12 | 7.6  | 17.848979  | 7.38E-02 | 85877243  | 85877366  | NC_000016.9  |
| cg11213520 | 1.89E-11 | 1.18E-12 | 7.6  | 17.8484293 | 2.35E-01 | 113901529 | 113901652 | NC_000012.11 |
| cg25649039 | 1.90E-11 | 1.18E-12 | 7.6  | 17.8457774 | 1.71E-01 | 64335475  | 64335598  | NC_000017.10 |
| cg12821804 | 1.90E-11 | 1.18E-12 | 7.6  | 17.8456962 | 1.61E-01 | 2890705   | 2890828   | NC_000011.9  |
| cg15786900 | 1.90E-11 | 1.18E-12 | 7.6  | 17.8434726 | 1.29E-01 | 44333131  | 44333254  | NC_000011.9  |
| cg04779860 | 1.90E-11 | 1.18E-12 | 7.6  | 17.842328  | 1.26E-01 | 131763929 | 131764052 | NC_000010.10 |
| cg11731238 | 1.91E-11 | 1.19E-12 | 7.6  | 17.8378098 | 9.96E-02 | 69603848  | 69603971  | NC_000011.9  |
| cg15808426 | 1.91E-11 | 1.19E-12 | 7.6  | 17.8372134 | 1.56E-01 | 57154302  | 57154425  | NC_000019.9  |
| cg23007574 | 1.91E-11 | 1.19E-12 | 7.6  | 17.837041  | 8.36E-02 | 41942070  | 41942193  | NC_000019.9  |



|            |          |          |     |            |          |           |           |              |
|------------|----------|----------|-----|------------|----------|-----------|-----------|--------------|
| cg17470095 | 1.92E-11 | 1.19E-12 | 7.6 | 17.8341386 | 7.08E-02 | 21318106  | 21318229  | NC_000022.10 |
| cg05844247 | 1.92E-11 | 1.20E-12 | 7.6 | 17.8326336 | 1.73E-01 | 21694428  | 21694551  | NC_000020.10 |
| cg00048759 | 1.92E-11 | 1.20E-12 | 7.6 | 17.8321841 | 9.55E-02 | 99775422  | 99775545  | NC_000007.13 |
| cg08374596 | 1.92E-11 | 1.20E-12 | 7.6 | 17.8319247 | 3.18E-02 | 50744349  | 50744472  | NC_000016.9  |
| cg18191688 | 1.92E-11 | 1.20E-12 | 7.6 | 17.8309696 | 6.78E-02 | 144994933 | 144995056 | NC_000001.10 |
| cg03718620 | 1.93E-11 | 1.20E-12 | 7.6 | 17.8300243 | 6.15E-02 | 8771680   | 8771803   | NC_000016.9  |
| cg15630071 | 1.93E-11 | 1.20E-12 | 7.6 | 17.8281571 | 1.11E-01 | 32861318  | 32861441  | NC_000003.11 |
| cg24934400 | 1.93E-11 | 1.20E-12 | 7.6 | 17.8276624 | 2.13E-01 | 4873966   | 4874089   | NC_000004.11 |
| cg09896622 | 1.93E-11 | 1.21E-12 | 7.6 | 17.8251072 | 1.88E-01 | 102568555 | 102568678 | NC_000013.10 |
| cg20552688 | 1.94E-11 | 1.21E-12 | 7.6 | 17.8246166 | 2.38E-02 | 105956371 | 105956494 | NC_000014.8  |
| cg15889913 | 1.94E-11 | 1.21E-12 | 7.6 | 17.8226323 | 1.56E-01 | 131770762 | 131770885 | NC_000010.10 |
| cg14349667 | 1.95E-11 | 1.21E-12 | 7.6 | 17.818858  | 1.84E-01 | 81189706  | 81189829  | NC_000004.11 |
| cg18920423 | 1.95E-11 | 1.21E-12 | 7.6 | 17.8187057 | 2.07E-01 | 23481389  | 23481512  | NC_000010.10 |
| cg21595409 | 1.95E-11 | 1.21E-12 | 7.6 | 17.8179453 | 1.40E-01 | 81014522  | 81014645  | NC_000008.10 |
| cg20388729 | 1.95E-11 | 1.22E-12 | 7.6 | 17.8169261 | 1.28E-01 | 99200492  | 99200615  | NC_000015.9  |
| cg17786496 | 1.95E-11 | 1.22E-12 | 7.6 | 17.8167383 | 1.01E-01 | 22051566  | 22051689  | NC_000017.10 |
| cg04880138 | 1.95E-11 | 1.22E-12 | 7.6 | 17.8148215 | 1.59E-01 | 1007119   | 1007242   | NC_000011.9  |
| cg16747109 | 1.95E-11 | 1.22E-12 | 7.6 | 17.814706  | 1.99E-01 | 111544463 | 111544586 | NC_000004.11 |
| cg01882535 | 1.96E-11 | 1.22E-12 | 7.6 | 17.8140377 | 1.08E-01 | 56643145  | 56643268  | NC_000011.9  |
| cg21187554 | 1.96E-11 | 1.22E-12 | 7.6 | 17.8121098 | 1.24E-01 | 38620311  | 38620434  | NC_000009.11 |
| cg00474713 | 1.96E-11 | 1.22E-12 | 7.6 | 17.8119778 | 7.33E-02 | 28888747  | 28888870  | NC_000016.9  |
| cg25203704 | 1.96E-11 | 1.22E-12 | 7.6 | 17.8113902 | 2.01E-01 | 17216922  | 17217045  | NC_000005.9  |
| cg24064506 | 1.96E-11 | 1.22E-12 | 7.6 | 17.8111372 | 1.03E-01 | 117052397 | 117052520 | NC_000011.9  |
| cg06739029 | 1.96E-11 | 1.22E-12 | 7.6 | 17.8099221 | 1.69E-01 | 19837421  | 19837544  | NC_000006.11 |
| cg13295262 | 1.98E-11 | 1.23E-12 | 7.6 | 17.8029054 | 1.75E-01 | 177355072 | 177355195 | NC_000002.11 |

|            |          |          |      |            |          |           |           |              |
|------------|----------|----------|------|------------|----------|-----------|-----------|--------------|
| cg10023530 | 1.98E-11 | 1.23E-12 | 7.6  | 17.8020601 | 1.88E-01 | 11148783  | 11148906  | NC_000018.9  |
| cg08153621 | 1.98E-11 | 1.23E-12 | 7.6  | 17.801531  | 1.22E-01 | 53561441  | 53561564  | NC_000019.9  |
| cg08400962 | 1.98E-11 | 1.24E-12 | 7.6  | 17.8008371 | 1.70E-01 | 34112316  | 34112439  | NC_000019.9  |
| cg16815850 | 1.98E-11 | 1.24E-12 | 7.6  | 17.7995597 | 1.62E-01 | 4577320   | 4577443   | NC_000001.10 |
| cg27641532 | 1.99E-11 | 1.24E-12 | 7.6  | 17.7974647 | 1.59E-01 | 27648317  | 27648440  | NC_000006.11 |
| cg11442877 | 1.99E-11 | 1.24E-12 | 7.6  | 17.796293  | 1.30E-01 | 25961909  | 25962032  | NC_000015.9  |
| cg05579549 | 1.99E-11 | 1.24E-12 | 7.6  | 17.7943003 | 5.80E-02 | 75889403  | 75889526  | NC_000017.10 |
| cg01997590 | 1.99E-11 | 1.24E-12 | 7.59 | 17.7942522 | 1.40E-01 | 223177473 | 223177596 | NC_000002.11 |
| cg13304274 | 1.99E-11 | 1.25E-12 | 7.59 | 17.7927926 | 2.00E-01 | 36909606  | 36909729  | NC_000019.9  |
| cg23331484 | 1.99E-11 | 1.25E-12 | 7.59 | 17.792789  | 1.34E-01 | 33718148  | 33718271  | NC_000019.9  |
| cg25386426 | 2.00E-11 | 1.25E-12 | 7.59 | 17.7916793 | 9.06E-02 | 2459224   | 2459347   | NC_000001.10 |
| cg10019916 | 2.00E-11 | 1.25E-12 | 7.59 | 17.7895359 | 2.09E-01 | 228196376 | 228196499 | NC_000001.10 |
| cg02625536 | 2.00E-11 | 1.25E-12 | 7.59 | 17.7885217 | 1.19E-01 | 47749901  | 47750024  | NC_000020.10 |
| cg23210521 | 2.00E-11 | 1.25E-12 | 7.59 | 17.7874711 | 1.50E-01 | 95680414  | 95680537  | NC_000004.11 |
| cg15331500 | 2.01E-11 | 1.25E-12 | 7.59 | 17.7870854 | 1.63E-01 | 41779351  | 41779474  | NC_000022.10 |
| cg08482531 | 2.01E-11 | 1.25E-12 | 7.59 | 17.7870132 | 1.44E-01 | 8078127   | 8078250   | NC_000010.10 |
| cg09596722 | 2.01E-11 | 1.26E-12 | 7.59 | 17.7852542 | 1.75E-01 | 232525772 | 232525895 | NC_000002.11 |
| cg03547797 | 2.01E-11 | 1.26E-12 | 7.59 | 17.7839081 | 1.69E-01 | 22689644  | 22689767  | NC_000011.9  |
| cg24385568 | 2.01E-11 | 1.26E-12 | 7.59 | 17.7838969 | 5.72E-02 | 53547962  | 53548085  | NC_000012.11 |
| cg11751213 | 2.02E-11 | 1.26E-12 | 7.59 | 17.7820131 | 1.29E-01 | 65547023  | 65547146  | NC_000011.9  |
| cg21235151 | 2.02E-11 | 1.26E-12 | 7.59 | 17.7810537 | 2.43E-01 | 177001256 | 177001379 | NC_000002.11 |
| cg10662314 | 2.02E-11 | 1.26E-12 | 7.59 | 17.7785564 | 2.41E-01 | 54384666  | 54384789  | NC_000012.11 |
| cg23549358 | 2.02E-11 | 1.26E-12 | 7.59 | 17.7778564 | 1.70E-01 | 20692791  | 20692914  | NC_000011.9  |
| cg24483247 | 2.03E-11 | 1.27E-12 | 7.59 | 17.7769001 | 2.17E-01 | 5890411   | 5890534   | NC_000004.11 |
| cg08000731 | 2.03E-11 | 1.27E-12 | 7.59 | 17.776247  | 1.28E-01 | 316247    | 316370    | NC_000011.9  |

|            |          |          |      |            |          |           |           |              |
|------------|----------|----------|------|------------|----------|-----------|-----------|--------------|
| cg11700800 | 2.03E-11 | 1.27E-12 | 7.59 | 17.7744603 | 1.50E-01 | 92906633  | 92906756  | NC_000005.9  |
| cg27619646 | 2.03E-11 | 1.27E-12 | 7.59 | 17.7742381 | 1.05E-01 | 41583018  | 41583141  | NC_000008.10 |
| cg10486998 | 2.04E-11 | 1.27E-12 | 7.59 | 17.771175  | 2.14E-01 | 74961787  | 74961910  | NC_000018.9  |
| cg06055873 | 2.04E-11 | 1.27E-12 | 7.59 | 17.7703182 | 1.62E-01 | 27142204  | 27142327  | NC_000007.13 |
| cg02946934 | 2.04E-11 | 1.28E-12 | 7.59 | 17.768171  | 2.11E-01 | 17496681  | 17496804  | NC_000010.10 |
| cg02637318 | 2.04E-11 | 1.28E-12 | 7.59 | 17.7667427 | 2.36E-01 | 38965252  | 38965375  | NC_000008.10 |
| cg27567761 | 2.05E-11 | 1.28E-12 | 7.59 | 17.7656883 | 4.98E-02 | 64573184  | 64573307  | NC_000010.10 |
| cg21306240 | 2.05E-11 | 1.29E-12 | 7.59 | 17.7619543 | 2.31E-01 | 38230845  | 38230968  | NC_000001.10 |
| cg11718886 | 2.06E-11 | 1.29E-12 | 7.59 | 17.7585213 | 7.83E-02 | 219345052 | 219345175 | NC_000001.10 |
| cg22948684 | 2.06E-11 | 1.29E-12 | 7.59 | 17.7583493 | 7.40E-02 | 15222078  | 15222201  | NC_000001.10 |
| cg24428099 | 2.06E-11 | 1.29E-12 | 7.59 | 17.7580683 | 5.50E-02 | 25065702  | 25065825  | NC_000002.11 |
| cg26949694 | 2.07E-11 | 1.29E-12 | 7.59 | 17.7557481 | 1.56E-01 | 27742060  | 27742183  | NC_000011.9  |
| cg09259595 | 2.07E-11 | 1.29E-12 | 7.59 | 17.75558   | 7.55E-02 | 1779056   | 1779179   | NC_000008.10 |
| cg03577505 | 2.07E-11 | 1.29E-12 | 7.59 | 17.75474   | 4.40E-02 | 159486976 | 159487099 | NC_000003.11 |
| cg27159583 | 2.07E-11 | 1.29E-12 | 7.59 | 17.754553  | 1.91E-01 | 38289905  | 38290028  | NC_000021.8  |
| cg14209823 | 2.07E-11 | 1.30E-12 | 7.59 | 17.754052  | 6.72E-02 | 136029078 | 136029201 | NC_000009.11 |
| cg19971716 | 2.07E-11 | 1.30E-12 | 7.59 | 17.7534411 | 2.18E-01 | 122301740 | 122301863 | NC_000004.11 |
| cg10923662 | 2.07E-11 | 1.30E-12 | 7.59 | 17.7529811 | 2.01E-01 | 32064258  | 32064381  | NC_000006.11 |
| cg12433423 | 2.08E-11 | 1.30E-12 | 7.59 | 17.7499238 | 4.91E-02 | 225659296 | 225659419 | NC_000001.10 |
| cg24042242 | 2.08E-11 | 1.30E-12 | 7.59 | 17.7498031 | 1.92E-01 | 43044660  | 43044783  | NC_000017.10 |
| cg11439671 | 2.08E-11 | 1.30E-12 | 7.59 | 17.7476653 | 4.29E-02 | 73515429  | 73515552  | NC_000017.10 |
| cg12618475 | 2.08E-11 | 1.30E-12 | 7.59 | 17.7473997 | 8.08E-02 | 110732361 | 110732484 | NC_000006.11 |
| cg07142797 | 2.08E-11 | 1.31E-12 | 7.59 | 17.74678   | 1.93E-01 | 50605613  | 50605736  | NC_000010.10 |
| cg07012926 | 2.08E-11 | 1.31E-12 | 7.59 | 17.7462269 | 1.87E-01 | 151304488 | 151304611 | NC_000005.9  |
| cg24550525 | 2.09E-11 | 1.31E-12 | 7.59 | 17.7459186 | 1.29E-01 | 69181420  | 69181543  | NC_000002.11 |

|            |          |          |      |            |          |           |           |              |
|------------|----------|----------|------|------------|----------|-----------|-----------|--------------|
| cg23648991 | 2.09E-11 | 1.31E-12 | 7.59 | 17.744917  | 5.44E-02 | 158586534 | 158586657 | NC_000006.11 |
| cg04478223 | 2.09E-11 | 1.31E-12 | 7.59 | 17.7441912 | 7.79E-02 | 49699726  | 49699849  | NC_000005.9  |
| cg18127481 | 2.09E-11 | 1.31E-12 | 7.59 | 17.7440984 | 1.11E-01 | 49880645  | 49880768  | NC_000005.9  |
| cg12252412 | 2.09E-11 | 1.31E-12 | 7.59 | 17.7439287 | 3.10E-02 | 26513782  | 26513905  | NC_000008.10 |
| cg03760589 | 2.09E-11 | 1.31E-12 | 7.59 | 17.7434758 | 1.48E-01 | 170630397 | 170630520 | NC_000001.10 |
| cg25793387 | 2.10E-11 | 1.31E-12 | 7.59 | 17.7404187 | 9.65E-02 | 56554318  | 56554441  | NC_000017.10 |
| cg13147664 | 2.10E-11 | 1.32E-12 | 7.59 | 17.73869   | 9.02E-02 | 1029744   | 1029867   | NC_000017.10 |
| cg18271789 | 2.10E-11 | 1.32E-12 | 7.59 | 17.7367404 | 1.16E-01 | 4832112   | 4832235   | NC_000007.13 |
| cg01291920 | 2.10E-11 | 1.32E-12 | 7.59 | 17.7367318 | 8.41E-02 | 31915077  | 31915200  | NC_000006.11 |
| cg11917579 | 2.11E-11 | 1.32E-12 | 7.58 | 17.7347466 | 1.46E-01 | 2815429   | 2815552   | NC_000010.10 |
| cg03219768 | 2.11E-11 | 1.32E-12 | 7.58 | 17.7328547 | 4.98E-02 | 76641090  | 76641213  | NC_000017.10 |
| cg20718170 | 2.11E-11 | 1.32E-12 | 7.58 | 17.7325772 | 6.72E-02 | 123322268 | 123322391 | NC_000007.13 |
| cg07554664 | 2.11E-11 | 1.32E-12 | 7.58 | 17.7322894 | 1.11E-01 | 68431982  | 68432105  | NC_000016.9  |
| cg07688213 | 2.12E-11 | 1.33E-12 | 7.58 | 17.7305093 | 5.20E-02 | 76013203  | 76013326  | NC_000014.8  |
| cg00197006 | 2.12E-11 | 1.33E-12 | 7.58 | 17.7283006 | 1.21E-01 | 84616559  | 84616682  | NC_000016.9  |
| cg27441182 | 2.12E-11 | 1.33E-12 | 7.58 | 17.7272989 | 1.39E-01 | 44484200  | 44484323  | NC_000015.9  |
| cg27509347 | 2.12E-11 | 1.33E-12 | 7.58 | 17.726908  | 1.40E-01 | 28385657  | 28385780  | NC_000001.10 |
| cg03497399 | 2.12E-11 | 1.33E-12 | 7.58 | 17.7264642 | 1.48E-01 | 33260934  | 33261057  | NC_000003.11 |
| cg10314411 | 2.13E-11 | 1.33E-12 | 7.58 | 17.7258842 | 2.57E-02 | 206279954 | 206280077 | NC_000001.10 |
| cg19098268 | 2.13E-11 | 1.34E-12 | 7.58 | 17.7241368 | 1.07E-01 | 57352269  | 57352392  | NC_000019.9  |
| cg19814400 | 2.13E-11 | 1.34E-12 | 7.58 | 17.722891  | 1.80E-01 | 158936632 | 158936755 | NC_000007.13 |
| cg01189604 | 2.13E-11 | 1.34E-12 | 7.58 | 17.7222513 | 5.17E-02 | 134391939 | 134392062 | NC_000010.10 |
| cg10228777 | 2.14E-11 | 1.34E-12 | 7.58 | 17.7205008 | 1.98E-01 | 14925424  | 14925547  | NC_000001.10 |
| cg15825417 | 2.14E-11 | 1.34E-12 | 7.58 | 17.7186443 | 7.94E-02 | 15689957  | 15690080  | NC_000017.10 |
| cg10247840 | 2.14E-11 | 1.34E-12 | 7.58 | 17.7176488 | 1.49E-01 | 40034535  | 40034658  | NC_000001.10 |

|            |          |          |      |            |          |           |           |              |
|------------|----------|----------|------|------------|----------|-----------|-----------|--------------|
| cg26181334 | 2.14E-11 | 1.35E-12 | 7.58 | 17.7170521 | 1.07E-01 | 4832535   | 4832658   | NC_000007.13 |
| cg15882353 | 2.14E-11 | 1.35E-12 | 7.58 | 17.7164856 | 5.80E-02 | 67023811  | 67023934  | NC_000008.10 |
| cg17362661 | 2.15E-11 | 1.35E-12 | 7.58 | 17.7144018 | 1.13E-01 | 100210490 | 100210613 | NC_000002.11 |
| cg06714480 | 2.15E-11 | 1.35E-12 | 7.58 | 17.7111132 | 2.03E-01 | 182544307 | 182544430 | NC_000002.11 |
| cg26570233 | 2.16E-11 | 1.35E-12 | 7.58 | 17.7103552 | 2.02E-01 | 93475962  | 93476085  | NC_000011.9  |
| cg20474425 | 2.16E-11 | 1.35E-12 | 7.58 | 17.710227  | 1.16E-01 | 54746067  | 54746190  | NC_000012.11 |
| cg26988423 | 2.16E-11 | 1.36E-12 | 7.58 | 17.7083159 | 1.68E-01 | 3238423   | 3238546   | NC_000016.9  |
| cg24884703 | 2.16E-11 | 1.36E-12 | 7.58 | 17.7071293 | 2.15E-01 | 91185422  | 91185545  | NC_000001.10 |
| cg05866021 | 2.17E-11 | 1.36E-12 | 7.58 | 17.7046845 | 1.11E-01 | 57285278  | 57285401  | NC_000001.10 |
| cg24464397 | 2.17E-11 | 1.37E-12 | 7.58 | 17.7018216 | 1.67E-01 | 56988778  | 56988901  | NC_000019.9  |
| cg24394856 | 2.17E-11 | 1.37E-12 | 7.58 | 17.7018074 | 1.73E-01 | 134175900 | 134176023 | NC_000006.11 |
| cg12743978 | 2.18E-11 | 1.37E-12 | 7.58 | 17.7005548 | 1.44E-01 | 19617145  | 19617268  | NC_000021.8  |
| cg05345286 | 2.18E-11 | 1.37E-12 | 7.58 | 17.6993714 | 1.55E-01 | 41606641  | 41606764  | NC_000006.11 |
| cg15637527 | 2.18E-11 | 1.37E-12 | 7.58 | 17.6984862 | 8.76E-02 | 46700234  | 46700357  | NC_000011.9  |
| cg00036788 | 2.18E-11 | 1.37E-12 | 7.58 | 17.6967563 | 1.37E-01 | 54974682  | 54974805  | NC_000004.11 |
| cg11758945 | 2.19E-11 | 1.37E-12 | 7.58 | 17.6959442 | 2.79E-01 | 143533532 | 143533655 | NC_000008.10 |
| cg18023096 | 2.19E-11 | 1.37E-12 | 7.58 | 17.6954675 | 1.37E-01 | 17090586  | 17090709  | NC_000022.10 |
| cg10343742 | 2.19E-11 | 1.38E-12 | 7.58 | 17.6927259 | 1.12E-01 | 137483506 | 137483629 | NC_000003.11 |
| cg20846447 | 2.19E-11 | 1.38E-12 | 7.58 | 17.6924582 | 1.55E-01 | 177140305 | 177140428 | NC_000001.10 |
| cg09562045 | 2.19E-11 | 1.38E-12 | 7.58 | 17.6920774 | 2.57E-01 | 5890424   | 5890547   | NC_000004.11 |
| cg05733181 | 2.20E-11 | 1.38E-12 | 7.58 | 17.6913481 | 1.85E-01 | 117847088 | 117847211 | NC_000004.11 |
| cg20552282 | 2.20E-11 | 1.38E-12 | 7.58 | 17.6911301 | 1.69E-01 | 21686728  | 21686851  | NC_000020.10 |
| cg26149244 | 2.20E-11 | 1.38E-12 | 7.58 | 17.6911152 | 2.28E-01 | 80329964  | 80330087  | NC_000017.10 |
| cg10036918 | 2.20E-11 | 1.38E-12 | 7.58 | 17.6884959 | 1.72E-01 | 103969166 | 103969289 | NC_000007.13 |
| cg08145698 | 2.21E-11 | 1.39E-12 | 7.58 | 17.6845465 | 1.59E-01 | 87636539  | 87636662  | NC_000016.9  |

|            |          |          |      |            |          |           |           |              |
|------------|----------|----------|------|------------|----------|-----------|-----------|--------------|
| cg26666835 | 2.22E-11 | 1.40E-12 | 7.58 | 17.6805922 | 1.77E-01 | 170742118 | 170742241 | NC_000005.9  |
| cg13938187 | 2.22E-11 | 1.40E-12 | 7.58 | 17.6803403 | 9.69E-02 | 64980038  | 64980161  | NC_000015.9  |
| cg00890363 | 2.22E-11 | 1.40E-12 | 7.58 | 17.6796119 | 1.70E-01 | 13540673  | 13540796  | NC_000004.11 |
| cg20668644 | 2.23E-11 | 1.40E-12 | 7.57 | 17.6767782 | 3.08E-01 | 38347603  | 38347726  | NC_000017.10 |
| cg04726360 | 2.23E-11 | 1.40E-12 | 7.57 | 17.6766439 | 1.09E-01 | 71708613  | 71708736  | NC_000004.11 |
| cg15202353 | 2.23E-11 | 1.40E-12 | 7.57 | 17.676317  | 8.87E-02 | 162831613 | 162831736 | NC_000001.10 |
| cg27650540 | 2.24E-11 | 1.41E-12 | 7.57 | 17.6723857 | 1.08E-01 | 111664582 | 111664705 | NC_000012.11 |
| cg21493633 | 2.24E-11 | 1.41E-12 | 7.57 | 17.671558  | 1.85E-01 | 166795596 | 166795719 | NC_000004.11 |
| cg03114255 | 2.24E-11 | 1.41E-12 | 7.57 | 17.6714181 | 2.25E-01 | 150358985 | 150359108 | NC_000006.11 |
| cg24361256 | 2.24E-11 | 1.41E-12 | 7.57 | 17.6696397 | 6.52E-02 | 50637945  | 50638068  | NC_000022.10 |
| cg19492047 | 2.24E-11 | 1.41E-12 | 7.57 | 17.6689138 | 1.94E-01 | 217236040 | 217236163 | NC_000002.11 |
| cg14714797 | 2.25E-11 | 1.42E-12 | 7.57 | 17.6655933 | 1.77E-01 | 343927    | 344050    | NC_000005.9  |
| cg17303756 | 2.25E-11 | 1.42E-12 | 7.57 | 17.6642572 | 1.94E-01 | 99279108  | 99279231  | NC_000006.11 |
| cg08093277 | 2.25E-11 | 1.42E-12 | 7.57 | 17.664085  | 1.02E-01 | 29595299  | 29595422  | NC_000006.11 |
| cg07995570 | 2.26E-11 | 1.42E-12 | 7.57 | 17.6619239 | 1.49E-01 | 91192025  | 91192148  | NC_000001.10 |
| cg07913430 | 2.26E-11 | 1.42E-12 | 7.57 | 17.6612962 | 1.21E-01 | 115609343 | 115609466 | NC_000004.11 |
| cg11641702 | 2.27E-11 | 1.43E-12 | 7.57 | 17.6582949 | 3.48E-02 | 107601656 | 107601779 | NC_000007.13 |
| cg04864807 | 2.27E-11 | 1.43E-12 | 7.57 | 17.6555938 | 1.27E-01 | 121412139 | 121412262 | NC_000002.11 |
| cg05597504 | 2.27E-11 | 1.43E-12 | 7.57 | 17.6553432 | 6.70E-02 | 150210742 | 150210865 | NC_000007.13 |
| cg12299478 | 2.27E-11 | 1.43E-12 | 7.57 | 17.6545362 | 1.36E-01 | 111935236 | 111935359 | NC_000010.10 |
| cg04227278 | 2.27E-11 | 1.43E-12 | 7.57 | 17.6545346 | 1.23E-01 | 134301020 | 134301143 | NC_000008.10 |
| cg18404112 | 2.28E-11 | 1.43E-12 | 7.57 | 17.6534366 | 4.32E-02 | 144893173 | 144893296 | NC_000008.10 |
| cg16038120 | 2.28E-11 | 1.44E-12 | 7.57 | 17.6525907 | 1.88E-01 | 29235196  | 29235319  | NC_000014.8  |
| cg27580953 | 2.28E-11 | 1.44E-12 | 7.57 | 17.6514126 | 5.01E-02 | 134119745 | 134119868 | NC_000010.10 |
| cg09473282 | 2.29E-11 | 1.44E-12 | 7.57 | 17.648968  | 1.07E-01 | 35115955  | 35116078  | NC_000006.11 |

|            |          |          |      |            |          |           |           |              |
|------------|----------|----------|------|------------|----------|-----------|-----------|--------------|
| cg09913449 | 2.29E-11 | 1.44E-12 | 7.57 | 17.6487623 | 3.72E-02 | 42400586  | 42400709  | NC_000008.10 |
| cg08254399 | 2.29E-11 | 1.44E-12 | 7.57 | 17.6473954 | 5.66E-02 | 45671659  | 45671782  | NC_000006.11 |
| cg25435255 | 2.29E-11 | 1.44E-12 | 7.57 | 17.6472261 | 4.93E-02 | 104086857 | 104086980 | NC_000010.10 |
| cg17311074 | 2.29E-11 | 1.45E-12 | 7.57 | 17.6456173 | 1.11E-01 | 71507695  | 71507818  | NC_000015.9  |
| cg03032214 | 2.30E-11 | 1.45E-12 | 7.57 | 17.6445729 | 2.06E-01 | 74961809  | 74961932  | NC_000018.9  |
| cg20914464 | 2.30E-11 | 1.45E-12 | 7.57 | 17.6440432 | 1.47E-01 | 31803674  | 31803797  | NC_000018.9  |
| cg18091615 | 2.30E-11 | 1.45E-12 | 7.57 | 17.6437681 | 1.13E-01 | 137675881 | 137676004 | NC_000007.13 |
| cg13550802 | 2.30E-11 | 1.45E-12 | 7.57 | 17.6437569 | 6.53E-02 | 134935854 | 134935977 | NC_000010.10 |
| cg00144335 | 2.30E-11 | 1.45E-12 | 7.57 | 17.6427795 | 1.23E-01 | 107176    | 107299    | NC_000004.11 |
| cg12450016 | 2.30E-11 | 1.45E-12 | 7.57 | 17.6423789 | 1.69E-01 | 98112437  | 98112560  | NC_000005.9  |
| cg11567608 | 2.30E-11 | 1.45E-12 | 7.57 | 17.6417065 | 1.33E-01 | 135271518 | 135271641 | NC_000006.11 |
| cg23733384 | 2.30E-11 | 1.45E-12 | 7.57 | 17.64086   | 1.51E-01 | 228346347 | 228346470 | NC_000001.10 |
| cg02681442 | 2.30E-11 | 1.45E-12 | 7.57 | 17.640568  | 1.81E-01 | 29236008  | 29236131  | NC_000014.8  |
| cg14947466 | 2.30E-11 | 1.45E-12 | 7.57 | 17.6400879 | 5.34E-02 | 2583705   | 2583828   | NC_000011.9  |
| cg24453600 | 2.31E-11 | 1.46E-12 | 7.57 | 17.6388122 | 7.24E-02 | 71921678  | 71921801  | NC_000015.9  |
| cg01546793 | 2.31E-11 | 1.46E-12 | 7.57 | 17.6380397 | 1.34E-01 | 116913720 | 116913843 | NC_000011.9  |
| cg04670802 | 2.31E-11 | 1.46E-12 | 7.57 | 17.6364262 | 1.66E-01 | 100050812 | 100050935 | NC_000006.11 |
| cg00541104 | 2.31E-11 | 1.46E-12 | 7.57 | 17.6362429 | 1.64E-01 | 158359935 | 158360058 | NC_000007.13 |
| cg22809920 | 2.31E-11 | 1.46E-12 | 7.57 | 17.6355652 | 1.53E-01 | 43935551  | 43935674  | NC_000020.10 |
| cg12744722 | 2.32E-11 | 1.46E-12 | 7.57 | 17.6348631 | 1.66E-01 | 111473809 | 111473932 | NC_000012.11 |
| cg03414318 | 2.32E-11 | 1.46E-12 | 7.57 | 17.6330873 | 2.75E-01 | 34894648  | 34894771  | NC_000020.10 |
| cg23982890 | 2.32E-11 | 1.47E-12 | 7.57 | 17.6325409 | 4.75E-02 | 68869531  | 68869654  | NC_000011.9  |
| cg09648467 | 2.33E-11 | 1.47E-12 | 7.57 | 17.6284171 | 1.61E-01 | 156955280 | 156955403 | NC_000005.9  |
| cg20002207 | 2.33E-11 | 1.47E-12 | 7.57 | 17.626903  | 1.00E-01 | 57957811  | 57957934  | NC_000004.11 |
| cg24465685 | 2.34E-11 | 1.48E-12 | 7.57 | 17.6224622 | 1.73E-01 | 47009809  | 47009932  | NC_000001.10 |

|            |          |          |      |            |          |           |           |              |
|------------|----------|----------|------|------------|----------|-----------|-----------|--------------|
| cg01142710 | 2.34E-11 | 1.48E-12 | 7.57 | 17.6224608 | 1.72E-01 | 145713754 | 145713877 | NC_000005.9  |
| cg01540949 | 2.34E-11 | 1.48E-12 | 7.57 | 17.6219841 | 1.06E-01 | 126736629 | 126736752 | NC_000011.9  |
| cg08495617 | 2.35E-11 | 1.48E-12 | 7.57 | 17.6197497 | 1.79E-01 | 171791143 | 171791266 | NC_000003.11 |
| cg13943217 | 2.35E-11 | 1.49E-12 | 7.57 | 17.618541  | 2.19E-01 | 133542125 | 133542248 | NC_000009.11 |
| cg01650904 | 2.35E-11 | 1.49E-12 | 7.56 | 17.6176136 | 1.64E-01 | 37354889  | 37355012  | NC_000020.10 |
| cg23217126 | 2.36E-11 | 1.49E-12 | 7.56 | 17.6158886 | 1.73E-01 | 67068268  | 67068391  | NC_000018.9  |
| cg01409163 | 2.36E-11 | 1.49E-12 | 7.56 | 17.6157036 | 4.61E-02 | 670353    | 670476    | NC_000008.10 |
| cg17448335 | 2.36E-11 | 1.49E-12 | 7.56 | 17.6131771 | 2.22E-01 | 76249776  | 76249899  | NC_000005.9  |
| cg14566959 | 2.37E-11 | 1.50E-12 | 7.56 | 17.6126447 | 1.10E-01 | 140772681 | 140772804 | NC_000005.9  |
| cg19628343 | 2.37E-11 | 1.50E-12 | 7.56 | 17.6125052 | 7.20E-02 | 17873806  | 17873929  | NC_000019.9  |
| cg26569771 | 2.37E-11 | 1.50E-12 | 7.56 | 17.6113823 | 7.85E-02 | 4448522   | 4448645   | NC_000019.9  |
| cg09827048 | 2.37E-11 | 1.50E-12 | 7.56 | 17.6111478 | 9.60E-02 | 46113067  | 46113190  | NC_000001.10 |
| cg16392754 | 2.37E-11 | 1.50E-12 | 7.56 | 17.6110003 | 8.25E-02 | 172388746 | 172388869 | NC_000005.9  |
| cg03429689 | 2.38E-11 | 1.50E-12 | 7.56 | 17.6069649 | 9.10E-02 | 93199536  | 93199659  | NC_000015.9  |
| cg26069745 | 2.38E-11 | 1.50E-12 | 7.56 | 17.6065615 | 1.53E-01 | 27142200  | 27142323  | NC_000007.13 |
| cg25743486 | 2.39E-11 | 1.51E-12 | 7.56 | 17.603924  | 5.10E-02 | 1051843   | 1051966   | NC_000017.10 |
| cg02858606 | 2.39E-11 | 1.51E-12 | 7.56 | 17.6026683 | 1.81E-01 | 62068447  | 62068570  | NC_000016.9  |
| cg05935800 | 2.39E-11 | 1.51E-12 | 7.56 | 17.601986  | 1.61E-01 | 226023590 | 226023713 | NC_000001.10 |
| cg01454487 | 2.39E-11 | 1.51E-12 | 7.56 | 17.6011781 | 1.64E-01 | 45427577  | 45427700  | NC_000015.9  |
| cg18669209 | 2.39E-11 | 1.51E-12 | 7.56 | 17.6004726 | 2.26E-01 | 44777736  | 44777859  | NC_000018.9  |
| cg25887739 | 2.39E-11 | 1.51E-12 | 7.56 | 17.6002694 | 2.73E-02 | 101675766 | 101675889 | NC_000002.11 |
| cg03425110 | 2.40E-11 | 1.52E-12 | 7.56 | 17.5994623 | 2.10E-01 | 71333037  | 71333160  | NC_000010.10 |
| cg20892990 | 2.40E-11 | 1.52E-12 | 7.56 | 17.5989463 | 1.67E-01 | 69589460  | 69589583  | NC_000011.9  |
| cg00486604 | 2.40E-11 | 1.52E-12 | 7.56 | 17.5971954 | 1.24E-01 | 43739515  | 43739638  | NC_000003.11 |
| cg15060366 | 2.40E-11 | 1.52E-12 | 7.56 | 17.5968953 | 2.34E-01 | 17206529  | 17206652  | NC_000020.10 |



|            |          |          |      |            |          |           |           |              |
|------------|----------|----------|------|------------|----------|-----------|-----------|--------------|
| cg17217421 | 2.41E-11 | 1.52E-12 | 7.56 | 17.5937719 | 4.43E-02 | 244504355 | 244504478 | NC_000001.10 |
| cg21270847 | 2.41E-11 | 1.52E-12 | 7.56 | 17.5936979 | 2.39E-01 | 164604806 | 164604929 | NC_000001.10 |
| cg02066682 | 2.41E-11 | 1.52E-12 | 7.56 | 17.5933714 | 1.39E-01 | 79634037  | 79634160  | NC_000009.11 |
| cg21156684 | 2.41E-11 | 1.53E-12 | 7.56 | 17.5930043 | 5.35E-02 | 6411612   | 6411735   | NC_000001.10 |
| cg11494841 | 2.41E-11 | 1.53E-12 | 7.56 | 17.5908986 | 8.78E-02 | 80402750  | 80402873  | NC_000017.10 |
| cg11832543 | 2.42E-11 | 1.53E-12 | 7.56 | 17.590647  | 4.43E-02 | 178481818 | 178481941 | NC_000001.10 |
| cg00092644 | 2.42E-11 | 1.53E-12 | 7.56 | 17.5903083 | 5.23E-02 | 95360379  | 95360502  | NC_000001.10 |
| cg22161784 | 2.42E-11 | 1.53E-12 | 7.56 | 17.5901512 | 1.41E-01 | 78337534  | 78337657  | NC_000017.10 |
| cg15648792 | 2.42E-11 | 1.53E-12 | 7.56 | 17.58984   | 1.13E-01 | 11146255  | 11146378  | NC_000018.9  |
| cg01106338 | 2.42E-11 | 1.53E-12 | 7.56 | 17.5876684 | 1.29E-01 | 44790514  | 44790637  | NC_000018.9  |
| cg04828133 | 2.42E-11 | 1.53E-12 | 7.56 | 17.5873587 | 2.47E-01 | 155259845 | 155259968 | NC_000007.13 |
| cg20482521 | 2.42E-11 | 1.54E-12 | 7.56 | 17.5867055 | 2.10E-01 | 106400667 | 106400790 | NC_000010.10 |
| cg17251713 | 2.43E-11 | 1.54E-12 | 7.56 | 17.5821248 | 1.80E-01 | 61443038  | 61443161  | NC_000018.9  |
| cg03799283 | 2.44E-11 | 1.54E-12 | 7.56 | 17.5809722 | 1.22E-01 | 96910011  | 96910134  | NC_000015.9  |
| cg24814707 | 2.44E-11 | 1.55E-12 | 7.56 | 17.5804096 | 1.66E-01 | 57035957  | 57036080  | NC_000004.11 |
| cg02484391 | 2.44E-11 | 1.55E-12 | 7.56 | 17.5795616 | 1.70E-01 | 22889301  | 22889424  | NC_000001.10 |
| cg05212802 | 2.44E-11 | 1.55E-12 | 7.56 | 17.5786378 | 1.78E-01 | 142053623 | 142053746 | NC_000004.11 |
| cg10042106 | 2.44E-11 | 1.55E-12 | 7.56 | 17.5785624 | 1.71E-01 | 57274739  | 57274862  | NC_000014.8  |
| cg19600750 | 2.45E-11 | 1.55E-12 | 7.56 | 17.5775445 | 1.43E-01 | 57274677  | 57274800  | NC_000014.8  |
| cg19258062 | 2.46E-11 | 1.56E-12 | 7.56 | 17.5729248 | 1.22E-01 | 152133423 | 152133546 | NC_000007.13 |
| cg11101926 | 2.46E-11 | 1.56E-12 | 7.56 | 17.5725473 | 1.62E-01 | 32483711  | 32483834  | NC_000017.10 |
| cg09167553 | 2.46E-11 | 1.56E-12 | 7.56 | 17.5721485 | 2.41E-01 | 70034475  | 70034598  | NC_000001.10 |
| cg08204023 | 2.46E-11 | 1.56E-12 | 7.56 | 17.5717785 | 1.91E-01 | 37835109  | 37835232  | NC_000005.9  |
| cg26747317 | 2.46E-11 | 1.56E-12 | 7.56 | 17.5709465 | 1.23E-01 | 31829793  | 31829916  | NC_000006.11 |
| cg21495612 | 2.47E-11 | 1.56E-12 | 7.56 | 17.5685502 | 2.24E-01 | 96342250  | 96342373  | NC_000014.8  |

|            |          |          |      |            |          |           |           |              |
|------------|----------|----------|------|------------|----------|-----------|-----------|--------------|
| cg04128880 | 2.47E-11 | 1.57E-12 | 7.56 | 17.5668839 | 4.28E-02 | 22198056  | 22198179  | NC_000016.9  |
| cg21096050 | 2.48E-11 | 1.57E-12 | 7.56 | 17.5649563 | 5.68E-02 | 85502665  | 85502788  | NC_000004.11 |
| cg20912770 | 2.48E-11 | 1.57E-12 | 7.56 | 17.5642412 | 1.77E-01 | 2292428   | 2292551   | NC_000011.9  |
| cg26621770 | 2.49E-11 | 1.58E-12 | 7.56 | 17.5600712 | 1.66E-01 | 115131447 | 115131570 | NC_000012.11 |
| cg17295225 | 2.49E-11 | 1.58E-12 | 7.55 | 17.5568538 | 1.34E-01 | 137814971 | 137815094 | NC_000006.11 |
| cg22183731 | 2.50E-11 | 1.58E-12 | 7.55 | 17.5558519 | 8.81E-02 | 102221100 | 102221223 | NC_000011.9  |
| cg09614724 | 2.50E-11 | 1.59E-12 | 7.55 | 17.5536298 | 2.31E-01 | 30719547  | 30719670  | NC_000019.9  |
| cg21931419 | 2.51E-11 | 1.59E-12 | 7.55 | 17.5511769 | 1.64E-01 | 74893169  | 74893292  | NC_000014.8  |
| cg13031171 | 2.51E-11 | 1.59E-12 | 7.55 | 17.5511725 | 1.90E-01 | 29106870  | 29106993  | NC_000013.10 |
| cg03650282 | 2.51E-11 | 1.59E-12 | 7.55 | 17.5503748 | 6.17E-02 | 64451448  | 64451571  | NC_000017.10 |
| cg01427575 | 2.51E-11 | 1.59E-12 | 7.55 | 17.5497065 | 1.74E-01 | 51171712  | 51171835  | NC_000019.9  |
| cg18578080 | 2.52E-11 | 1.60E-12 | 7.55 | 17.5480744 | 7.24E-02 | 82405786  | 82405909  | NC_000006.11 |
| cg24074033 | 2.52E-11 | 1.60E-12 | 7.55 | 17.5477615 | 1.92E-01 | 20180437  | 20180560  | NC_000011.9  |
| cg16026922 | 2.52E-11 | 1.60E-12 | 7.55 | 17.5475225 | 1.19E-01 | 41259044  | 41259167  | NC_000004.11 |
| cg23929344 | 2.52E-11 | 1.60E-12 | 7.55 | 17.5469403 | 1.69E-01 | 36975402  | 36975525  | NC_000014.8  |
| cg16257029 | 2.52E-11 | 1.60E-12 | 7.55 | 17.546904  | 1.23E-01 | 128077369 | 128077492 | NC_000010.10 |
| cg19019371 | 2.52E-11 | 1.60E-12 | 7.55 | 17.545529  | 1.58E-01 | 140770984 | 140771107 | NC_000003.11 |
| cg24785473 | 2.53E-11 | 1.61E-12 | 7.55 | 17.5428666 | 1.16E-01 | 35681883  | 35682006  | NC_000003.11 |
| cg12710552 | 2.53E-11 | 1.61E-12 | 7.55 | 17.5423173 | 7.57E-02 | 18270955  | 18271078  | NC_000011.9  |
| cg04946910 | 2.53E-11 | 1.61E-12 | 7.55 | 17.5410743 | 8.86E-02 | 3243392   | 3243515   | NC_000016.9  |
| cg14116122 | 2.54E-11 | 1.61E-12 | 7.55 | 17.5386097 | 1.94E-01 | 85673884  | 85674007  | NC_000012.11 |
| cg00501711 | 2.54E-11 | 1.62E-12 | 7.55 | 17.5367165 | 7.45E-02 | 43538180  | 43538303  | NC_000020.10 |
| cg22012299 | 2.54E-11 | 1.62E-12 | 7.55 | 17.5360854 | 6.86E-02 | 102360643 | 102360766 | NC_000013.10 |
| cg16629702 | 2.54E-11 | 1.62E-12 | 7.55 | 17.5360731 | 1.96E-01 | 55690248  | 55690371  | NC_000016.9  |
| cg18813599 | 2.55E-11 | 1.62E-12 | 7.55 | 17.5351328 | 1.39E-01 | 29937472  | 29937595  | NC_000008.10 |

|            |          |          |      |            |          |           |           |              |
|------------|----------|----------|------|------------|----------|-----------|-----------|--------------|
| cg15852891 | 2.56E-11 | 1.63E-12 | 7.55 | 17.530507  | 1.79E-01 | 76934946  | 76935069  | NC_000005.9  |
| cg16852955 | 2.56E-11 | 1.63E-12 | 7.55 | 17.5303751 | 1.11E-01 | 227773531 | 227773654 | NC_000002.11 |
| cg08089301 | 2.56E-11 | 1.63E-12 | 7.55 | 17.5280106 | 2.48E-01 | 46655561  | 46655684  | NC_000017.10 |
| cg18112708 | 2.57E-11 | 1.63E-12 | 7.55 | 17.527519  | 7.13E-02 | 160169450 | 160169573 | NC_000006.11 |
| cg13915754 | 2.57E-11 | 1.63E-12 | 7.55 | 17.526039  | 2.05E-01 | 37355965  | 37356088  | NC_000020.10 |
| cg16831361 | 2.57E-11 | 1.63E-12 | 7.55 | 17.5250543 | 1.07E-01 | 39668954  | 39669077  | NC_000021.8  |
| cg12353207 | 2.57E-11 | 1.64E-12 | 7.55 | 17.5247494 | 1.87E-01 | 113444295 | 113444418 | NC_000004.11 |
| cg00432789 | 2.57E-11 | 1.64E-12 | 7.55 | 17.5238115 | 8.19E-02 | 211650394 | 211650517 | NC_000001.10 |
| cg26104293 | 2.58E-11 | 1.64E-12 | 7.55 | 17.5208315 | 1.12E-01 | 91499812  | 91499935  | NC_000006.11 |
| cg15428435 | 2.58E-11 | 1.64E-12 | 7.55 | 17.5195408 | 2.19E-01 | 102247681 | 102247804 | NC_000014.8  |
| cg01224715 | 2.59E-11 | 1.64E-12 | 7.55 | 17.5191487 | 1.32E-01 | 140811520 | 140811643 | NC_000005.9  |
| cg19092317 | 2.59E-11 | 1.64E-12 | 7.55 | 17.51891   | 1.71E-01 | 72739768  | 72739891  | NC_000005.9  |
| cg09622420 | 2.59E-11 | 1.65E-12 | 7.55 | 17.5177337 | 6.60E-02 | 11033670  | 11033793  | NC_000016.9  |
| cg00284386 | 2.59E-11 | 1.65E-12 | 7.55 | 17.5164024 | 1.01E-01 | 1786207   | 1786330   | NC_000008.10 |
| cg02939292 | 2.59E-11 | 1.65E-12 | 7.55 | 17.5151006 | 5.54E-02 | 60716250  | 60716373  | NC_000011.9  |
| cg09059267 | 2.60E-11 | 1.65E-12 | 7.55 | 17.5139213 | 1.48E-01 | 220223082 | 220223205 | NC_000002.11 |
| cg22660120 | 2.60E-11 | 1.66E-12 | 7.55 | 17.5115326 | 4.19E-02 | 33424102  | 33424225  | NC_000006.11 |
| cg21667878 | 2.61E-11 | 1.66E-12 | 7.55 | 17.5093242 | 2.37E-01 | 2160980   | 2161103   | NC_000011.9  |
| cg04030444 | 2.62E-11 | 1.67E-12 | 7.55 | 17.506171  | 1.20E-01 | 170581971 | 170582094 | NC_000006.11 |
| cg22902505 | 2.62E-11 | 1.67E-12 | 7.55 | 17.5055384 | 1.56E-01 | 81119473  | 81119596  | NC_000004.11 |
| cg05153474 | 2.63E-11 | 1.67E-12 | 7.55 | 17.5023059 | 7.17E-02 | 39884449  | 39884572  | NC_000022.10 |
| cg26098399 | 2.63E-11 | 1.67E-12 | 7.55 | 17.5013569 | 6.05E-02 | 56716944  | 56717067  | NC_000004.11 |
| cg13071208 | 2.63E-11 | 1.68E-12 | 7.54 | 17.4998458 | 1.23E-01 | 145686887 | 145687010 | NC_000008.10 |
| cg10016380 | 2.64E-11 | 1.68E-12 | 7.54 | 17.498607  | 2.23E-01 | 78493313  | 78493436  | NC_000013.10 |
| cg04575524 | 2.64E-11 | 1.68E-12 | 7.54 | 17.4966943 | 8.48E-02 | 84820574  | 84820697  | NC_000016.9  |

|            |          |          |      |            |          |           |           |              |
|------------|----------|----------|------|------------|----------|-----------|-----------|--------------|
| cg13325066 | 2.64E-11 | 1.68E-12 | 7.54 | 17.4966321 | 1.07E-01 | 2499932   | 2500055   | NC_000007.13 |
| cg08111446 | 2.64E-11 | 1.68E-12 | 7.54 | 17.4960169 | 2.40E-01 | 61886079  | 61886202  | NC_000020.10 |
| cg07028533 | 2.64E-11 | 1.68E-12 | 7.54 | 17.4958942 | 2.34E-01 | 145813439 | 145813562 | NC_000007.13 |
| cg07589773 | 2.64E-11 | 1.68E-12 | 7.54 | 17.4951049 | 2.57E-01 | 50343883  | 50344006  | NC_000007.13 |
| cg06740372 | 2.65E-11 | 1.69E-12 | 7.54 | 17.4941479 | 1.44E-01 | 7957779   | 7957902   | NC_000003.11 |
| cg19623717 | 2.65E-11 | 1.69E-12 | 7.54 | 17.493962  | 2.17E-01 | 5296442   | 5296565   | NC_000020.10 |
| cg15452135 | 2.65E-11 | 1.69E-12 | 7.54 | 17.4929439 | 5.54E-02 | 105233106 | 105233229 | NC_000010.10 |
| cg10517535 | 2.65E-11 | 1.69E-12 | 7.54 | 17.4914108 | 1.70E-01 | 9929698   | 9929821   | NC_000017.10 |
| cg21765359 | 2.66E-11 | 1.69E-12 | 7.54 | 17.4907056 | 8.92E-02 | 75246756  | 75246879  | NC_000017.10 |
| cg10934407 | 2.66E-11 | 1.69E-12 | 7.54 | 17.4900264 | 7.43E-02 | 168053081 | 168053204 | NC_000006.11 |
| cg02745636 | 2.66E-11 | 1.70E-12 | 7.54 | 17.488813  | 1.72E-01 | 61104571  | 61104694  | NC_000014.8  |
| cg13234863 | 2.67E-11 | 1.70E-12 | 7.54 | 17.4856458 | 1.74E-01 | 130389138 | 130389261 | NC_000012.11 |
| cg21848407 | 2.67E-11 | 1.70E-12 | 7.54 | 17.4851305 | 1.05E-01 | 61499094  | 61499217  | NC_000017.10 |
| cg01208537 | 2.67E-11 | 1.70E-12 | 7.54 | 17.4849454 | 8.23E-02 | 64597387  | 64597510  | NC_000011.9  |
| cg09430445 | 2.67E-11 | 1.70E-12 | 7.54 | 17.4847291 | 1.59E-01 | 42918546  | 42918669  | NC_000003.11 |
| cg23036804 | 2.67E-11 | 1.70E-12 | 7.54 | 17.4837459 | 1.70E-01 | 23734763  | 23734886  | NC_000013.10 |
| cg21156851 | 2.69E-11 | 1.71E-12 | 7.54 | 17.4788015 | 3.19E-02 | 45607281  | 45607404  | NC_000006.11 |
| cg05599109 | 2.69E-11 | 1.71E-12 | 7.54 | 17.4786949 | 7.29E-02 | 6348943   | 6349066   | NC_000010.10 |
| cg25023596 | 2.69E-11 | 1.71E-12 | 7.54 | 17.4782348 | 1.84E-01 | 118627943 | 118628066 | NC_000012.11 |
| cg09471204 | 2.69E-11 | 1.71E-12 | 7.54 | 17.4779214 | 1.19E-01 | 42347991  | 42348114  | NC_000022.10 |
| cg26130488 | 2.70E-11 | 1.72E-12 | 7.54 | 17.4751653 | 1.79E-01 | 59530104  | 59530227  | NC_000017.10 |
| cg01328444 | 2.70E-11 | 1.72E-12 | 7.54 | 17.4747209 | 1.38E-01 | 155967739 | 155967862 | NC_000006.11 |
| cg04557184 | 2.70E-11 | 1.72E-12 | 7.54 | 17.4744857 | 1.17E-01 | 42971330  | 42971453  | NC_000005.9  |
| cg11766283 | 2.70E-11 | 1.72E-12 | 7.54 | 17.4722256 | 7.09E-02 | 24525070  | 24525193  | NC_000013.10 |
| cg12028548 | 2.71E-11 | 1.73E-12 | 7.54 | 17.4707517 | 1.71E-01 | 590799    | 590922    | NC_000020.10 |

|            |          |          |      |            |          |           |           |              |
|------------|----------|----------|------|------------|----------|-----------|-----------|--------------|
| cg24477315 | 2.71E-11 | 1.73E-12 | 7.54 | 17.4689873 | 1.24E-01 | 164570052 | 164570175 | NC_000001.10 |
| cg00324366 | 2.71E-11 | 1.73E-12 | 7.54 | 17.468853  | 1.32E-01 | 32199183  | 32199306  | NC_000008.10 |
| cg04201750 | 2.72E-11 | 1.74E-12 | 7.54 | 17.4662145 | 1.47E-01 | 3591012   | 3591135   | NC_000005.9  |
| cg02469871 | 2.72E-11 | 1.74E-12 | 7.54 | 17.464883  | 2.00E-01 | 103218581 | 103218704 | NC_000012.11 |
| cg03014829 | 2.73E-11 | 1.74E-12 | 7.54 | 17.4637523 | 1.31E-01 | 55516872  | 55516995  | NC_000007.13 |
| cg09003833 | 2.73E-11 | 1.74E-12 | 7.54 | 17.4629947 | 1.56E-01 | 147079053 | 147079176 | NC_000003.11 |
| cg26266308 | 2.73E-11 | 1.74E-12 | 7.54 | 17.4627314 | 6.47E-02 | 66701194  | 66701317  | NC_000008.10 |
| cg09942248 | 2.73E-11 | 1.74E-12 | 7.54 | 17.4617955 | 1.90E-01 | 182545625 | 182545748 | NC_000002.11 |
| cg20404387 | 2.73E-11 | 1.74E-12 | 7.54 | 17.4617366 | 1.82E-01 | 20879296  | 20879419  | NC_000001.10 |
| cg14312661 | 2.73E-11 | 1.75E-12 | 7.54 | 17.4599907 | 5.92E-02 | 3064385   | 3064508   | NC_000011.9  |
| cg16929041 | 2.73E-11 | 1.75E-12 | 7.54 | 17.4598329 | 1.51E-01 | 26648951  | 26649074  | NC_000017.10 |
| cg18877285 | 2.74E-11 | 1.75E-12 | 7.54 | 17.4591398 | 1.76E-01 | 124790815 | 124790938 | NC_000011.9  |
| cg03006175 | 2.74E-11 | 1.75E-12 | 7.54 | 17.4570858 | 4.38E-02 | 105412417 | 105412540 | NC_000014.8  |
| cg24058446 | 2.74E-11 | 1.75E-12 | 7.54 | 17.4568875 | 8.11E-02 | 147834002 | 147834125 | NC_000006.11 |
| cg16172814 | 2.74E-11 | 1.75E-12 | 7.54 | 17.456732  | 2.06E-01 | 50969997  | 50970120  | NC_000010.10 |
| cg19360104 | 2.74E-11 | 1.75E-12 | 7.54 | 17.4560602 | 1.23E-01 | 154475269 | 154475392 | NC_000001.10 |
| cg24046864 | 2.75E-11 | 1.75E-12 | 7.54 | 17.455235  | 7.71E-02 | 54427219  | 54427342  | NC_000014.8  |
| cg22767348 | 2.75E-11 | 1.76E-12 | 7.54 | 17.4545249 | 6.78E-02 | 4669484   | 4669607   | NC_000004.11 |
| cg12714746 | 2.76E-11 | 1.76E-12 | 7.54 | 17.4496343 | 6.89E-02 | 4509054   | 4509177   | NC_000017.10 |
| cg18348494 | 2.76E-11 | 1.77E-12 | 7.54 | 17.4493084 | 1.27E-01 | 62781737  | 62781860  | NC_000001.10 |
| cg02408850 | 2.77E-11 | 1.77E-12 | 7.54 | 17.4481912 | 9.52E-02 | 79793206  | 79793329  | NC_000017.10 |
| cg11287292 | 2.77E-11 | 1.77E-12 | 7.54 | 17.447262  | 8.77E-02 | 178277261 | 178277384 | NC_000004.11 |
| cg22674717 | 2.77E-11 | 1.77E-12 | 7.54 | 17.4467419 | 1.73E-01 | 51185394  | 51185517  | NC_000016.9  |
| cg15072319 | 2.77E-11 | 1.77E-12 | 7.54 | 17.446262  | 2.81E-01 | 156405924 | 156406047 | NC_000001.10 |
| cg05629821 | 2.77E-11 | 1.77E-12 | 7.54 | 17.4462595 | 8.30E-02 | 113436400 | 113436523 | NC_000013.10 |

|            |          |          |      |            |          |           |           |              |
|------------|----------|----------|------|------------|----------|-----------|-----------|--------------|
| cg17088290 | 2.77E-11 | 1.77E-12 | 7.54 | 17.4456454 | 2.54E-02 | 53818182  | 53818305  | NC_000012.11 |
| cg09976876 | 2.77E-11 | 1.77E-12 | 7.54 | 17.4452983 | 5.13E-02 | 57184713  | 57184836  | NC_000016.9  |
| cg06573787 | 2.77E-11 | 1.77E-12 | 7.54 | 17.4449362 | 2.31E-01 | 143070187 | 143070310 | NC_000008.10 |
| cg18947175 | 2.78E-11 | 1.78E-12 | 7.54 | 17.4433817 | 1.53E-01 | 77093804  | 77093927  | NC_000017.10 |
| cg07873155 | 2.79E-11 | 1.78E-12 | 7.53 | 17.439344  | 1.13E-01 | 28197499  | 28197622  | NC_000013.10 |
| cg04936639 | 2.79E-11 | 1.78E-12 | 7.53 | 17.4385084 | 7.17E-02 | 48922035  | 48922158  | NC_000011.9  |
| cg05056133 | 2.80E-11 | 1.79E-12 | 7.53 | 17.4338463 | 9.30E-02 | 220491676 | 220491799 | NC_000002.11 |
| cg09558850 | 2.80E-11 | 1.79E-12 | 7.53 | 17.4336801 | 1.94E-01 | 93520445  | 93520568  | NC_000007.13 |
| cg11831711 | 2.80E-11 | 1.79E-12 | 7.53 | 17.4336714 | 1.11E-02 | 91966971  | 91967094  | NC_000001.10 |
| cg22095604 | 2.81E-11 | 1.80E-12 | 7.53 | 17.432498  | 1.67E-01 | 31803241  | 31803364  | NC_000018.9  |
| cg02095401 | 2.81E-11 | 1.80E-12 | 7.53 | 17.4318608 | 1.15E-01 | 167545264 | 167545387 | NC_000005.9  |
| cg20175390 | 2.81E-11 | 1.80E-12 | 7.53 | 17.4317715 | 1.32E-01 | 119599459 | 119599582 | NC_000002.11 |
| cg02423014 | 2.81E-11 | 1.80E-12 | 7.53 | 17.4316971 | 8.53E-02 | 64404647  | 64404770  | NC_000015.9  |
| cg05047908 | 2.81E-11 | 1.80E-12 | 7.53 | 17.4296297 | 9.08E-02 | 157084809 | 157084932 | NC_000007.13 |
| cg27385729 | 2.82E-11 | 1.80E-12 | 7.53 | 17.4284193 | 5.83E-02 | 118619582 | 118619705 | NC_000011.9  |
| cg11763866 | 2.82E-11 | 1.81E-12 | 7.53 | 17.4262027 | 1.22E-01 | 70310112  | 70310235  | NC_000011.9  |
| cg26102801 | 2.83E-11 | 1.81E-12 | 7.53 | 17.4254249 | 7.38E-02 | 155793769 | 155793892 | NC_000007.13 |
| cg01369033 | 2.83E-11 | 1.81E-12 | 7.53 | 17.422796  | 1.13E-01 | 3292386   | 3292509   | NC_000004.11 |
| cg09405238 | 2.84E-11 | 1.82E-12 | 7.53 | 17.419362  | 6.98E-02 | 183994500 | 183994623 | NC_000003.11 |
| cg20529344 | 2.85E-11 | 1.82E-12 | 7.53 | 17.4172595 | 1.20E-01 | 50707427  | 50707550  | NC_000013.10 |
| cg17967577 | 2.85E-11 | 1.82E-12 | 7.53 | 17.4172312 | 2.32E-01 | 88324711  | 88324834  | NC_000013.10 |
| cg01950845 | 2.85E-11 | 1.83E-12 | 7.53 | 17.4162471 | 2.63E-01 | 93632730  | 93632853  | NC_000015.9  |
| cg03843978 | 2.86E-11 | 1.83E-12 | 7.53 | 17.4127099 | 1.10E-01 | 4864625   | 4864748   | NC_000004.11 |
| cg02649987 | 2.87E-11 | 1.84E-12 | 7.53 | 17.4082619 | 2.00E-01 | 106888392 | 106888515 | NC_000011.9  |
| cg07744841 | 2.88E-11 | 1.84E-12 | 7.53 | 17.4065003 | 1.79E-01 | 10857703  | 10857826  | NC_000003.11 |

|            |          |          |      |            |          |           |           |              |
|------------|----------|----------|------|------------|----------|-----------|-----------|--------------|
| cg18607529 | 2.89E-11 | 1.85E-12 | 7.53 | 17.4036881 | 2.41E-01 | 50343869  | 50343992  | NC_000007.13 |
| cg07183447 | 2.89E-11 | 1.85E-12 | 7.53 | 17.4036775 | 1.53E-01 | 102484107 | 102484230 | NC_000010.10 |
| cg15626350 | 2.89E-11 | 1.85E-12 | 7.53 | 17.4032062 | 1.67E-01 | 152130207 | 152130330 | NC_000006.11 |
| cg17715521 | 2.89E-11 | 1.85E-12 | 7.53 | 17.4028069 | 9.50E-02 | 45417414  | 45417537  | NC_000015.9  |
| cg25061701 | 2.89E-11 | 1.85E-12 | 7.53 | 17.4021073 | 7.71E-02 | 62608856  | 62608979  | NC_000017.10 |
| cg15126975 | 2.89E-11 | 1.85E-12 | 7.53 | 17.4004494 | 2.63E-01 | 175208605 | 175208728 | NC_000002.11 |
| cg26276395 | 2.90E-11 | 1.86E-12 | 7.53 | 17.3976884 | 1.20E-01 | 107496342 | 107496465 | NC_000001.10 |
| cg03924483 | 2.91E-11 | 1.87E-12 | 7.53 | 17.394965  | 1.11E-01 | 26553567  | 26553690  | NC_000017.10 |
| cg14262681 | 2.91E-11 | 1.87E-12 | 7.53 | 17.3934781 | 2.52E-01 | 21084420  | 21084543  | NC_000020.10 |
| cg08668316 | 2.92E-11 | 1.87E-12 | 7.53 | 17.3902246 | 1.33E-01 | 380157    | 380280    | NC_000004.11 |
| cg10764918 | 2.92E-11 | 1.88E-12 | 7.53 | 17.389473  | 1.59E-01 | 113541683 | 113541806 | NC_000012.11 |
| cg00092551 | 2.93E-11 | 1.88E-12 | 7.53 | 17.3880981 | 3.33E-02 | 127371565 | 127371688 | NC_000007.13 |
| cg08496953 | 2.94E-11 | 1.88E-12 | 7.53 | 17.385396  | 1.49E-01 | 42733527  | 42733650  | NC_000017.10 |
| cg26175428 | 2.94E-11 | 1.89E-12 | 7.53 | 17.3844457 | 7.62E-02 | 77631756  | 77631879  | NC_000018.9  |
| cg24524057 | 2.94E-11 | 1.89E-12 | 7.52 | 17.3841559 | 1.46E-01 | 125732842 | 125732965 | NC_000010.10 |
| cg07928255 | 2.94E-11 | 1.89E-12 | 7.52 | 17.3822588 | 8.30E-02 | 11343164  | 11343287  | NC_000016.9  |
| cg20976694 | 2.94E-11 | 1.89E-12 | 7.52 | 17.382043  | 1.69E-01 | 55714052  | 55714175  | NC_000018.9  |
| cg27320658 | 2.95E-11 | 1.89E-12 | 7.52 | 17.3817907 | 6.47E-02 | 176519389 | 176519512 | NC_000005.9  |
| cg13799919 | 2.95E-11 | 1.89E-12 | 7.52 | 17.3800874 | 1.18E-01 | 28212848  | 28212971  | NC_000013.10 |
| cg26449787 | 2.96E-11 | 1.90E-12 | 7.52 | 17.3771048 | 2.13E-01 | 133562087 | 133562210 | NC_000006.11 |
| cg20449590 | 2.96E-11 | 1.90E-12 | 7.52 | 17.376182  | 2.09E-01 | 146551201 | 146551324 | NC_000001.10 |
| cg07769732 | 2.96E-11 | 1.90E-12 | 7.52 | 17.3754133 | 8.66E-02 | 8815465   | 8815588   | NC_000002.11 |
| cg09705759 | 2.97E-11 | 1.91E-12 | 7.52 | 17.3727765 | 3.95E-02 | 140555532 | 140555655 | NC_000004.11 |
| cg05079767 | 2.98E-11 | 1.92E-12 | 7.52 | 17.3680194 | 7.04E-02 | 37770944  | 37771067  | NC_000022.10 |
| cg04147272 | 2.99E-11 | 1.92E-12 | 7.52 | 17.3670633 | 1.30E-01 | 79261496  | 79261619  | NC_000015.9  |

|            |          |          |      |            |          |           |           |              |
|------------|----------|----------|------|------------|----------|-----------|-----------|--------------|
| cg00209038 | 2.99E-11 | 1.92E-12 | 7.52 | 17.366461  | 1.94E-01 | 48982683  | 48982806  | NC_000002.11 |
| cg01211137 | 2.99E-11 | 1.92E-12 | 7.52 | 17.3663828 | 1.67E-01 | 13993807  | 13993930  | NC_000011.9  |
| cg19269666 | 2.99E-11 | 1.92E-12 | 7.52 | 17.3643977 | 1.77E-01 | 229046590 | 229046713 | NC_000002.11 |
| cg06579738 | 3.00E-11 | 1.93E-12 | 7.52 | 17.3638006 | 9.38E-02 | 111165311 | 111165434 | NC_000011.9  |
| cg01881308 | 3.00E-11 | 1.93E-12 | 7.52 | 17.3632137 | 9.93E-02 | 1389301   | 1389424   | NC_000016.9  |
| cg15697036 | 3.00E-11 | 1.93E-12 | 7.52 | 17.3623732 | 7.62E-02 | 1808923   | 1809046   | NC_000004.11 |
| cg06479755 | 3.00E-11 | 1.93E-12 | 7.52 | 17.3622695 | 2.03E-01 | 27012313  | 27012436  | NC_000021.8  |
| cg09444818 | 3.01E-11 | 1.93E-12 | 7.52 | 17.3606215 | 1.22E-01 | 102097226 | 102097349 | NC_000004.11 |
| cg10029842 | 3.02E-11 | 1.94E-12 | 7.52 | 17.3562492 | 1.75E-01 | 75595919  | 75596042  | NC_000001.10 |
| cg22977397 | 3.02E-11 | 1.94E-12 | 7.52 | 17.3557101 | 3.99E-02 | 141542551 | 141542674 | NC_000008.10 |
| cg25925252 | 3.02E-11 | 1.94E-12 | 7.52 | 17.3551154 | 1.18E-01 | 178913683 | 178913806 | NC_000005.9  |
| cg06513139 | 3.03E-11 | 1.95E-12 | 7.52 | 17.3536353 | 1.54E-01 | 4455923   | 4456046   | NC_000019.9  |
| cg06611922 | 3.03E-11 | 1.95E-12 | 7.52 | 17.3535663 | 1.81E-01 | 118893174 | 118893297 | NC_000010.10 |
| cg14861089 | 3.03E-11 | 1.95E-12 | 7.52 | 17.3535502 | 2.64E-01 | 102895043 | 102895166 | NC_000010.10 |
| cg01630925 | 3.03E-11 | 1.95E-12 | 7.52 | 17.3519163 | 8.60E-02 | 7615827   | 7615950   | NC_000019.9  |
| cg24309040 | 3.04E-11 | 1.95E-12 | 7.52 | 17.3492762 | 1.56E-01 | 111664600 | 111664723 | NC_000012.11 |
| cg09354454 | 3.04E-11 | 1.96E-12 | 7.52 | 17.348182  | 1.19E-01 | 86795853  | 86795976  | NC_000016.9  |
| cg17982165 | 3.05E-11 | 1.96E-12 | 7.52 | 17.3465716 | 1.56E-01 | 30484753  | 30484876  | NC_000015.9  |
| cg07661899 | 3.05E-11 | 1.96E-12 | 7.52 | 17.3460278 | 1.52E-01 | 53443057  | 53443180  | NC_000012.11 |
| cg26843074 | 3.05E-11 | 1.96E-12 | 7.52 | 17.344351  | 2.12E-01 | 36422061  | 36422184  | NC_000003.11 |
| cg21269062 | 3.06E-11 | 1.97E-12 | 7.52 | 17.342238  | 6.26E-02 | 159898557 | 159898680 | NC_000001.10 |
| cg09549073 | 3.06E-11 | 1.97E-12 | 7.52 | 17.3416166 | 1.55E-01 | 27183274  | 27183397  | NC_000007.13 |
| cg24556660 | 3.07E-11 | 1.98E-12 | 7.52 | 17.3369041 | 1.68E-01 | 106842632 | 106842755 | NC_000007.13 |
| cg02361878 | 3.08E-11 | 1.98E-12 | 7.52 | 17.3360338 | 1.40E-01 | 165326327 | 165326450 | NC_000001.10 |
| cg07539601 | 3.08E-11 | 1.98E-12 | 7.52 | 17.3339936 | 9.34E-02 | 8277249   | 8277372   | NC_000010.10 |



|            |          |          |      |            |          |           |           |              |
|------------|----------|----------|------|------------|----------|-----------|-----------|--------------|
| cg15814157 | 3.08E-11 | 1.98E-12 | 7.52 | 17.3337498 | 5.22E-02 | 56041511  | 56041634  | NC_000019.9  |
| cg19742623 | 3.08E-11 | 1.98E-12 | 7.52 | 17.3337374 | 6.34E-02 | 109810228 | 109810351 | NC_000013.10 |
| cg04760604 | 3.08E-11 | 1.99E-12 | 7.52 | 17.3336993 | 9.24E-02 | 22436179  | 22436302  | NC_000016.9  |
| cg17469276 | 3.09E-11 | 1.99E-12 | 7.52 | 17.3320968 | 1.13E-01 | 116925411 | 116925534 | NC_000001.10 |
| cg12969193 | 3.09E-11 | 1.99E-12 | 7.52 | 17.3319642 | 1.71E-01 | 176988505 | 176988628 | NC_000002.11 |
| cg09016806 | 3.10E-11 | 2.00E-12 | 7.52 | 17.3280681 | 4.25E-02 | 30120365  | 30120488  | NC_000006.11 |
| cg00418068 | 3.10E-11 | 2.00E-12 | 7.52 | 17.3267447 | 1.33E-01 | 33895505  | 33895628  | NC_000001.10 |
| cg23141355 | 3.11E-11 | 2.00E-12 | 7.51 | 17.3253663 | 2.34E-01 | 44063593  | 44063716  | NC_000003.11 |
| cg08571918 | 3.11E-11 | 2.00E-12 | 7.51 | 17.3245039 | 1.01E-01 | 105275920 | 105276043 | NC_000002.11 |
| cg23671279 | 3.12E-11 | 2.01E-12 | 7.51 | 17.3225752 | 1.70E-01 | 140969608 | 140969731 | NC_000008.10 |
| cg03495660 | 3.12E-11 | 2.01E-12 | 7.51 | 17.3220651 | 1.17E-01 | 1074500   | 1074623   | NC_000016.9  |
| cg09659661 | 3.12E-11 | 2.01E-12 | 7.51 | 17.3208786 | 1.80E-01 | 55358072  | 55358195  | NC_000016.9  |
| cg08811309 | 3.12E-11 | 2.01E-12 | 7.51 | 17.3208246 | 1.81E-01 | 87968749  | 87968872  | NC_000005.9  |
| cg02002583 | 3.13E-11 | 2.01E-12 | 7.51 | 17.3192165 | 2.03E-01 | 53811940  | 53812063  | NC_000019.9  |
| cg11227822 | 3.13E-11 | 2.02E-12 | 7.51 | 17.3174994 | 6.69E-02 | 53774359  | 53774482  | NC_000013.10 |
| cg01775921 | 3.13E-11 | 2.02E-12 | 7.51 | 17.316608  | 8.67E-02 | 30138213  | 30138336  | NC_000006.11 |
| cg23080354 | 3.14E-11 | 2.02E-12 | 7.51 | 17.315913  | 2.70E-01 | 45405880  | 45406003  | NC_000022.10 |
| cg19290410 | 3.14E-11 | 2.02E-12 | 7.51 | 17.3149571 | 2.07E-01 | 114847438 | 114847561 | NC_000012.11 |
| cg10484756 | 3.14E-11 | 2.03E-12 | 7.51 | 17.3140845 | 9.20E-02 | 139614104 | 139614227 | NC_000006.11 |
| cg10462643 | 3.14E-11 | 2.03E-12 | 7.51 | 17.3133585 | 1.78E-01 | 127296973 | 127297096 | NC_000006.11 |
| cg06272611 | 3.15E-11 | 2.03E-12 | 7.51 | 17.3115814 | 2.22E-01 | 29068567  | 29068690  | NC_000013.10 |
| cg07019315 | 3.15E-11 | 2.03E-12 | 7.51 | 17.3111292 | 1.31E-01 | 93344381  | 93344504  | NC_000014.8  |
| cg07360021 | 3.17E-11 | 2.04E-12 | 7.51 | 17.3053921 | 3.30E-02 | 151186904 | 151187027 | NC_000006.11 |
| cg08132837 | 3.18E-11 | 2.05E-12 | 7.51 | 17.3007443 | 1.60E-01 | 60975811  | 60975934  | NC_000014.8  |
| cg11882304 | 3.19E-11 | 2.05E-12 | 7.51 | 17.2996149 | 1.29E-01 | 159456907 | 159457030 | NC_000005.9  |

|            |          |          |      |            |          |           |           |              |
|------------|----------|----------|------|------------|----------|-----------|-----------|--------------|
| cg15906675 | 3.19E-11 | 2.06E-12 | 7.51 | 17.2991107 | 1.28E-01 | 90171420  | 90171543  | NC_000004.11 |
| cg09545894 | 3.19E-11 | 2.06E-12 | 7.51 | 17.2986113 | 7.50E-02 | 24008532  | 24008655  | NC_000013.10 |
| cg14210862 | 3.19E-11 | 2.06E-12 | 7.51 | 17.2980762 | 1.36E-01 | 91193195  | 91193318  | NC_000009.11 |
| cg04401986 | 3.19E-11 | 2.06E-12 | 7.51 | 17.2979026 | 1.95E-01 | 81189927  | 81190050  | NC_000004.11 |
| cg14520424 | 3.19E-11 | 2.06E-12 | 7.51 | 17.2977805 | 2.30E-01 | 70034491  | 70034614  | NC_000001.10 |
| cg02726739 | 3.19E-11 | 2.06E-12 | 7.51 | 17.2973385 | 7.91E-02 | 40745035  | 40745158  | NC_000015.9  |
| cg20146536 | 3.19E-11 | 2.06E-12 | 7.51 | 17.2972695 | 1.14E-01 | 102096205 | 102096328 | NC_000002.11 |
| cg01779043 | 3.20E-11 | 2.06E-12 | 7.51 | 17.2961222 | 7.83E-02 | 21456586  | 21456709  | NC_000014.8  |
| cg18121355 | 3.20E-11 | 2.06E-12 | 7.51 | 17.2960813 | 2.09E-01 | 37840438  | 37840561  | NC_000005.9  |
| cg00089091 | 3.20E-11 | 2.06E-12 | 7.51 | 17.2952333 | 2.48E-01 | 115919950 | 115920073 | NC_000002.11 |
| cg00823843 | 3.20E-11 | 2.07E-12 | 7.51 | 17.2939517 | 1.16E-01 | 244094885 | 244095008 | NC_000001.10 |
| cg11366849 | 3.21E-11 | 2.07E-12 | 7.51 | 17.2921228 | 1.99E-01 | 42267547  | 42267670  | NC_000007.13 |
| cg19536929 | 3.21E-11 | 2.07E-12 | 7.51 | 17.2919324 | 1.66E-01 | 115134594 | 115134717 | NC_000012.11 |
| cg08721908 | 3.21E-11 | 2.07E-12 | 7.51 | 17.2914243 | 1.42E-01 | 95522902  | 95523025  | NC_000002.11 |
| cg21765730 | 3.21E-11 | 2.08E-12 | 7.51 | 17.289978  | 1.38E-01 | 155777175 | 155777298 | NC_000006.11 |
| cg09854828 | 3.22E-11 | 2.08E-12 | 7.51 | 17.2892813 | 4.42E-02 | 88841557  | 88841680  | NC_000016.9  |
| cg24218295 | 3.22E-11 | 2.08E-12 | 7.51 | 17.2883649 | 1.73E-01 | 30015820  | 30015943  | NC_000019.9  |
| cg00573338 | 3.23E-11 | 2.09E-12 | 7.51 | 17.2848294 | 1.08E-01 | 38479099  | 38479222  | NC_000022.10 |
| cg05139043 | 3.23E-11 | 2.09E-12 | 7.51 | 17.2842245 | 4.31E-02 | 72979531  | 72979654  | NC_000011.9  |
| cg24112562 | 3.23E-11 | 2.09E-12 | 7.51 | 17.2841208 | 1.25E-01 | 38070041  | 38070164  | NC_000021.8  |
| cg25555087 | 3.23E-11 | 2.09E-12 | 7.51 | 17.2832579 | 9.12E-02 | 20148758  | 20148881  | NC_000015.9  |
| cg13296809 | 3.24E-11 | 2.09E-12 | 7.51 | 17.2830389 | 7.16E-02 | 69709095  | 69709218  | NC_000011.9  |
| cg04550737 | 3.24E-11 | 2.09E-12 | 7.51 | 17.2826169 | 2.79E-01 | 119530600 | 119530723 | NC_000001.10 |
| cg14400672 | 3.24E-11 | 2.09E-12 | 7.51 | 17.2820821 | 1.12E-01 | 21393116  | 21393239  | NC_000009.11 |
| cg05201145 | 3.24E-11 | 2.09E-12 | 7.51 | 17.2817683 | 1.44E-01 | 259373    | 259496    | NC_000012.11 |

|            |          |          |      |            |          |           |           |              |
|------------|----------|----------|------|------------|----------|-----------|-----------|--------------|
| cg12120326 | 3.24E-11 | 2.09E-12 | 7.51 | 17.2815745 | 4.27E-02 | 30237309  | 30237432  | NC_000022.10 |
| cg04044720 | 3.24E-11 | 2.09E-12 | 7.51 | 17.2810263 | 1.56E-01 | 22413680  | 22413803  | NC_000003.11 |
| cg17619823 | 3.24E-11 | 2.10E-12 | 7.51 | 17.279698  | 1.68E-01 | 37823475  | 37823598  | NC_000008.10 |
| cg09354241 | 3.25E-11 | 2.10E-12 | 7.51 | 17.2789161 | 2.06E-01 | 13540850  | 13540973  | NC_000004.11 |
| cg03303640 | 3.26E-11 | 2.11E-12 | 7.51 | 17.275685  | 9.44E-02 | 94840650  | 94840773  | NC_000010.10 |
| cg11856542 | 3.26E-11 | 2.11E-12 | 7.51 | 17.2746625 | 2.22E-01 | 37245707  | 37245830  | NC_000004.11 |
| cg04225551 | 3.26E-11 | 2.11E-12 | 7.51 | 17.2736553 | 1.52E-01 | 102526827 | 102526950 | NC_000008.10 |
| cg07020690 | 3.27E-11 | 2.11E-12 | 7.51 | 17.2723445 | 7.64E-02 | 92057672  | 92057795  | NC_000015.9  |
| cg13139972 | 3.27E-11 | 2.12E-12 | 7.51 | 17.2702669 | 2.12E-01 | 107957430 | 107957553 | NC_000004.11 |
| cg02065637 | 3.28E-11 | 2.12E-12 | 7.51 | 17.2684389 | 1.64E-01 | 61809035  | 61809158  | NC_000020.10 |
| cg06926146 | 3.28E-11 | 2.12E-12 | 7.51 | 17.2681169 | 1.62E-01 | 170629502 | 170629625 | NC_000001.10 |
| cg00731886 | 3.28E-11 | 2.12E-12 | 7.51 | 17.2678146 | 7.63E-02 | 1363008   | 1363131   | NC_000004.11 |
| cg18424634 | 3.29E-11 | 2.13E-12 | 7.5  | 17.2634699 | 1.62E-01 | 147127097 | 147127220 | NC_000003.11 |
| cg00683332 | 3.30E-11 | 2.14E-12 | 7.5  | 17.2607407 | 1.58E-01 | 51188697  | 51188820  | NC_000016.9  |
| cg08285446 | 3.31E-11 | 2.14E-12 | 7.5  | 17.2581833 | 1.21E-01 | 1273856   | 1273979   | NC_000008.10 |
| cg06797925 | 3.33E-11 | 2.16E-12 | 7.5  | 17.252161  | 2.44E-01 | 8548978   | 8549101   | NC_000012.11 |
| cg01643624 | 3.33E-11 | 2.16E-12 | 7.5  | 17.2515938 | 6.87E-02 | 8954893   | 8955016   | NC_000011.9  |
| cg20072171 | 3.33E-11 | 2.16E-12 | 7.5  | 17.2515388 | 2.44E-01 | 62356962  | 62357085  | NC_000003.11 |
| cg16430099 | 3.34E-11 | 2.16E-12 | 7.5  | 17.2503331 | 9.38E-02 | 118049898 | 118050021 | NC_000001.10 |
| cg13725172 | 3.34E-11 | 2.16E-12 | 7.5  | 17.2501489 | 1.31E-01 | 109267293 | 109267416 | NC_000006.11 |
| cg24129193 | 3.34E-11 | 2.16E-12 | 7.5  | 17.2501127 | 1.18E-01 | 89428192  | 89428315  | NC_000015.9  |
| cg13424940 | 3.35E-11 | 2.17E-12 | 7.5  | 17.2468374 | 1.17E-01 | 136844397 | 136844520 | NC_000009.11 |
| cg11481223 | 3.35E-11 | 2.17E-12 | 7.5  | 17.2464255 | 8.28E-02 | 147625024 | 147625147 | NC_000002.11 |
| cg26277657 | 3.36E-11 | 2.17E-12 | 7.5  | 17.2438119 | 6.12E-02 | 110430371 | 110430494 | NC_000012.11 |
| cg09032973 | 3.36E-11 | 2.18E-12 | 7.5  | 17.2429068 | 1.14E-01 | 140165998 | 140166121 | NC_000005.9  |

|            |          |          |     |            |          |           |           |              |
|------------|----------|----------|-----|------------|----------|-----------|-----------|--------------|
| cg17191518 | 3.36E-11 | 2.18E-12 | 7.5 | 17.242337  | 2.93E-02 | 52468850  | 52468973  | NC_000015.9  |
| cg00957516 | 3.36E-11 | 2.18E-12 | 7.5 | 17.2417182 | 1.68E-01 | 159141747 | 159141870 | NC_000001.10 |
| cg01249384 | 3.37E-11 | 2.18E-12 | 7.5 | 17.2392257 | 5.36E-02 | 11374254  | 11374377  | NC_000004.11 |
| cg17363629 | 3.38E-11 | 2.19E-12 | 7.5 | 17.2371724 | 1.40E-01 | 47704221  | 47704344  | NC_000015.9  |
| cg16915576 | 3.38E-11 | 2.19E-12 | 7.5 | 17.2368266 | 5.79E-02 | 89978468  | 89978591  | NC_000007.13 |
| cg10411146 | 3.38E-11 | 2.19E-12 | 7.5 | 17.2360087 | 1.43E-01 | 289966    | 290089    | NC_000011.9  |
| cg08981421 | 3.39E-11 | 2.20E-12 | 7.5 | 17.2345832 | 1.46E-01 | 27199956  | 27200079  | NC_000007.13 |
| cg08183074 | 3.39E-11 | 2.20E-12 | 7.5 | 17.2331708 | 1.10E-01 | 113296369 | 113296492 | NC_000013.10 |
| cg12149986 | 3.39E-11 | 2.20E-12 | 7.5 | 17.2321337 | 1.84E-01 | 50059027  | 50059150  | NC_000019.9  |
| cg03263618 | 3.40E-11 | 2.21E-12 | 7.5 | 17.2294566 | 1.63E-01 | 71802574  | 71802697  | NC_000007.13 |
| cg01824349 | 3.41E-11 | 2.21E-12 | 7.5 | 17.228041  | 7.26E-02 | 98260405  | 98260528  | NC_000005.9  |
| cg03289548 | 3.41E-11 | 2.21E-12 | 7.5 | 17.2262592 | 1.24E-01 | 114580989 | 114581112 | NC_000010.10 |
| cg15313459 | 3.41E-11 | 2.21E-12 | 7.5 | 17.2258528 | 2.35E-01 | 68547052  | 68547175  | NC_000002.11 |
| cg11452391 | 3.42E-11 | 2.22E-12 | 7.5 | 17.2249405 | 1.72E-01 | 16180315  | 16180438  | NC_000005.9  |
| cg09223396 | 3.42E-11 | 2.22E-12 | 7.5 | 17.2248282 | 5.22E-02 | 72893924  | 72894047  | NC_000016.9  |
| cg13138552 | 3.43E-11 | 2.22E-12 | 7.5 | 17.2224277 | 1.13E-01 | 66305468  | 66305591  | NC_000012.11 |
| cg20339692 | 3.43E-11 | 2.23E-12 | 7.5 | 17.2204917 | 6.83E-02 | 28886062  | 28886185  | NC_000017.10 |
| cg27403635 | 3.44E-11 | 2.23E-12 | 7.5 | 17.2182156 | 2.06E-01 | 113698291 | 113698414 | NC_000005.9  |
| cg01514490 | 3.44E-11 | 2.23E-12 | 7.5 | 17.2173958 | 1.55E-01 | 7455338   | 7455461   | NC_000010.10 |
| cg16496217 | 3.45E-11 | 2.24E-12 | 7.5 | 17.21625   | 1.09E-01 | 134651975 | 134652098 | NC_000010.10 |
| cg02725370 | 3.45E-11 | 2.24E-12 | 7.5 | 17.2155564 | 1.85E-01 | 111551829 | 111551952 | NC_000004.11 |
| cg12657297 | 3.45E-11 | 2.24E-12 | 7.5 | 17.2151032 | 1.29E-01 | 234667363 | 234667486 | NC_000001.10 |
| cg12112529 | 3.45E-11 | 2.24E-12 | 7.5 | 17.2149107 | 2.43E-01 | 118922736 | 118922859 | NC_000010.10 |
| cg22276258 | 3.45E-11 | 2.24E-12 | 7.5 | 17.214619  | 5.30E-02 | 65179503  | 65179626  | NC_000012.11 |
| cg10389936 | 3.46E-11 | 2.25E-12 | 7.5 | 17.2115348 | 1.44E-01 | 115741652 | 115741775 | NC_000001.10 |

|            |          |          |      |            |          |           |           |              |
|------------|----------|----------|------|------------|----------|-----------|-----------|--------------|
| cg25723866 | 3.46E-11 | 2.25E-12 | 7.5  | 17.2110914 | 7.56E-02 | 41099080  | 41099203  | NC_000019.9  |
| cg15579567 | 3.47E-11 | 2.25E-12 | 7.5  | 17.2099315 | 3.93E-02 | 138952482 | 138952605 | NC_000003.11 |
| cg00717995 | 3.47E-11 | 2.25E-12 | 7.5  | 17.2094209 | 1.03E-01 | 44819838  | 44819961  | NC_000001.10 |
| cg01882870 | 3.47E-11 | 2.25E-12 | 7.49 | 17.2085923 | 1.80E-01 | 89910748  | 89910871  | NC_000015.9  |
| cg10904109 | 3.48E-11 | 2.26E-12 | 7.49 | 17.2057858 | 1.51E-01 | 146755494 | 146755617 | NC_000006.11 |
| cg05006349 | 3.48E-11 | 2.26E-12 | 7.49 | 17.2053692 | 2.26E-01 | 14925517  | 14925640  | NC_000001.10 |
| cg18535611 | 3.49E-11 | 2.27E-12 | 7.49 | 17.2030179 | 8.88E-02 | 28505434  | 28505557  | NC_000013.10 |
| cg10143811 | 3.49E-11 | 2.27E-12 | 7.49 | 17.202269  | 2.14E-01 | 16757985  | 16758108  | NC_000012.11 |
| cg05437823 | 3.50E-11 | 2.27E-12 | 7.49 | 17.2006114 | 1.64E-01 | 50813676  | 50813799  | NC_000006.11 |
| cg22060073 | 3.50E-11 | 2.28E-12 | 7.49 | 17.1990105 | 1.87E-01 | 132052942 | 132053065 | NC_000008.10 |
| cg24122068 | 3.51E-11 | 2.28E-12 | 7.49 | 17.197326  | 1.34E-01 | 23845240  | 23845363  | NC_000003.11 |
| cg10166277 | 3.51E-11 | 2.28E-12 | 7.49 | 17.1963367 | 1.42E-01 | 104752828 | 104752951 | NC_000007.13 |
| cg09170553 | 3.51E-11 | 2.28E-12 | 7.49 | 17.1960952 | 1.11E-01 | 298743    | 298866    | NC_000004.11 |
| cg15295166 | 3.51E-11 | 2.28E-12 | 7.49 | 17.1952462 | 4.89E-02 | 36040771  | 36040894  | NC_000021.8  |
| cg04673825 | 3.52E-11 | 2.29E-12 | 7.49 | 17.1930878 | 2.33E-01 | 10459183  | 10459306  | NC_000004.11 |
| cg19269029 | 3.52E-11 | 2.29E-12 | 7.49 | 17.1929651 | 7.69E-02 | 143614797 | 143614920 | NC_000008.10 |
| cg22138735 | 3.52E-11 | 2.29E-12 | 7.49 | 17.19288   | 1.77E-01 | 62679713  | 62679836  | NC_000020.10 |
| cg23201008 | 3.52E-11 | 2.29E-12 | 7.49 | 17.1924527 | 1.23E-01 | 99939568  | 99939691  | NC_000014.8  |
| cg21282549 | 3.52E-11 | 2.29E-12 | 7.49 | 17.1921386 | 2.73E-01 | 51925128  | 51925251  | NC_000019.9  |
| cg15158086 | 3.54E-11 | 2.30E-12 | 7.49 | 17.187934  | 1.05E-01 | 1221572   | 1221695   | NC_000011.9  |
| cg22506548 | 3.54E-11 | 2.31E-12 | 7.49 | 17.1864114 | 1.45E-01 | 2996949   | 2997072   | NC_000001.10 |
| cg09089421 | 3.54E-11 | 2.31E-12 | 7.49 | 17.1862878 | 1.45E-01 | 127803668 | 127803791 | NC_000003.11 |
| cg13397057 | 3.56E-11 | 2.31E-12 | 7.49 | 17.1823771 | 1.48E-01 | 62070246  | 62070369  | NC_000016.9  |
| cg08836825 | 3.56E-11 | 2.32E-12 | 7.49 | 17.1822643 | 9.52E-02 | 82726757  | 82726880  | NC_000006.11 |
| cg25045746 | 3.56E-11 | 2.32E-12 | 7.49 | 17.180391  | 1.61E-01 | 98963768  | 98963891  | NC_000002.11 |

|            |          |          |      |            |          |           |           |              |
|------------|----------|----------|------|------------|----------|-----------|-----------|--------------|
| cg19184449 | 3.56E-11 | 2.32E-12 | 7.49 | 17.1801962 | 2.76E-02 | 52700707  | 52700830  | NC_000012.11 |
| cg14292870 | 3.56E-11 | 2.32E-12 | 7.49 | 17.1801865 | 1.48E-01 | 6887543   | 6887666   | NC_000012.11 |
| cg27183007 | 3.56E-11 | 2.32E-12 | 7.49 | 17.180087  | 1.01E-01 | 50132975  | 50133098  | NC_000007.13 |
| cg01615333 | 3.57E-11 | 2.32E-12 | 7.49 | 17.1784894 | 1.04E-01 | 127765195 | 127765318 | NC_000012.11 |
| cg07403228 | 3.57E-11 | 2.33E-12 | 7.49 | 17.177334  | 1.04E-01 | 61792641  | 61792764  | NC_000017.10 |
| cg08965744 | 3.57E-11 | 2.33E-12 | 7.49 | 17.1766815 | 6.72E-02 | 6993580   | 6993703   | NC_000012.11 |
| cg20365867 | 3.58E-11 | 2.33E-12 | 7.49 | 17.1761267 | 8.56E-02 | 42917340  | 42917463  | NC_000003.11 |
| cg22986947 | 3.59E-11 | 2.34E-12 | 7.49 | 17.1728848 | 9.53E-02 | 7907918   | 7908041   | NC_000006.11 |
| cg04386206 | 3.59E-11 | 2.34E-12 | 7.49 | 17.1727559 | 1.80E-01 | 170303640 | 170303763 | NC_000003.11 |
| cg26963356 | 3.59E-11 | 2.34E-12 | 7.49 | 17.1721988 | 2.17E-01 | 55443833  | 55443956  | NC_000006.11 |
| cg14999001 | 3.59E-11 | 2.34E-12 | 7.49 | 17.1717836 | 2.62E-01 | 45197441  | 45197564  | NC_000007.13 |
| cg20645601 | 3.60E-11 | 2.35E-12 | 7.49 | 17.1682002 | 1.45E-01 | 2742371   | 2742494   | NC_000007.13 |
| cg23253448 | 3.60E-11 | 2.35E-12 | 7.49 | 17.1677307 | 1.08E-01 | 22548828  | 22548951  | NC_000008.10 |
| cg10152449 | 3.61E-11 | 2.35E-12 | 7.49 | 17.1665473 | 1.26E-01 | 2444534   | 2444657   | NC_000007.13 |
| cg14644752 | 3.61E-11 | 2.36E-12 | 7.49 | 17.1654148 | 2.15E-01 | 89340331  | 89340454  | NC_000008.10 |
| cg03760839 | 3.61E-11 | 2.36E-12 | 7.49 | 17.1650523 | 1.11E-01 | 119531718 | 119531841 | NC_000001.10 |
| cg03331175 | 3.62E-11 | 2.36E-12 | 7.49 | 17.1644117 | 8.48E-02 | 99069044  | 99069167  | NC_000007.13 |
| cg12958813 | 3.62E-11 | 2.36E-12 | 7.49 | 17.1637959 | 1.25E-01 | 198509669 | 198509792 | NC_000001.10 |
| cg21113740 | 3.62E-11 | 2.36E-12 | 7.49 | 17.1627399 | 1.41E-01 | 79472343  | 79472466  | NC_000001.10 |
| cg01557549 | 3.62E-11 | 2.36E-12 | 7.49 | 17.1616606 | 1.50E-01 | 53168665  | 53168788  | NC_000003.11 |
| cg23284338 | 3.63E-11 | 2.36E-12 | 7.49 | 17.1612651 | 9.28E-02 | 73569605  | 73569728  | NC_000010.10 |
| cg04478905 | 3.63E-11 | 2.37E-12 | 7.49 | 17.1598851 | 1.44E-01 | 37915091  | 37915214  | NC_000021.8  |
| cg09311683 | 3.65E-11 | 2.38E-12 | 7.49 | 17.1556803 | 1.86E-01 | 2801995   | 2802118   | NC_000020.10 |
| cg15433534 | 3.65E-11 | 2.38E-12 | 7.49 | 17.1553649 | 2.66E-01 | 75612223  | 75612346  | NC_000018.9  |
| cg11755405 | 3.65E-11 | 2.38E-12 | 7.49 | 17.1548903 | 2.07E-01 | 63511872  | 63511995  | NC_000014.8  |

|            |          |          |      |            |          |           |           |              |
|------------|----------|----------|------|------------|----------|-----------|-----------|--------------|
| cg20176142 | 3.65E-11 | 2.38E-12 | 7.49 | 17.1546867 | 1.65E-01 | 81408357  | 81408480  | NC_000008.10 |
| cg02268156 | 3.65E-11 | 2.38E-12 | 7.49 | 17.1539626 | 1.28E-01 | 66162107  | 66162230  | NC_000016.9  |
| cg26164907 | 3.65E-11 | 2.39E-12 | 7.49 | 17.1528177 | 5.56E-02 | 155616192 | 155616315 | NC_000007.13 |
| cg25449440 | 3.66E-11 | 2.39E-12 | 7.49 | 17.1517788 | 1.52E-01 | 147116420 | 147116543 | NC_000003.11 |
| cg18720151 | 3.66E-11 | 2.39E-12 | 7.49 | 17.1516209 | 1.48E-01 | 16763480  | 16763603  | NC_000012.11 |
| cg13537237 | 3.66E-11 | 2.39E-12 | 7.49 | 17.1515081 | 1.59E-01 | 241908681 | 241908804 | NC_000002.11 |
| cg27361577 | 3.66E-11 | 2.39E-12 | 7.48 | 17.1500933 | 8.49E-02 | 234662759 | 234662882 | NC_000002.11 |
| cg05194552 | 3.67E-11 | 2.40E-12 | 7.48 | 17.148776  | 5.18E-02 | 3873444   | 3873567   | NC_000016.9  |
| cg12041387 | 3.70E-11 | 2.42E-12 | 7.48 | 17.1403619 | 2.10E-01 | 96650171  | 96650294  | NC_000007.13 |
| cg27103296 | 3.71E-11 | 2.42E-12 | 7.48 | 17.1384316 | 2.49E-01 | 121940951 | 121941074 | NC_000007.13 |
| cg05133706 | 3.71E-11 | 2.43E-12 | 7.48 | 17.1360228 | 1.06E-01 | 234667230 | 234667353 | NC_000001.10 |
| cg08234308 | 3.73E-11 | 2.44E-12 | 7.48 | 17.1309497 | 2.63E-01 | 65991176  | 65991299  | NC_000001.10 |
| cg26195495 | 3.74E-11 | 2.44E-12 | 7.48 | 17.1298832 | 1.51E-01 | 1906338   | 1906461   | NC_000008.10 |
| cg10725227 | 3.74E-11 | 2.44E-12 | 7.48 | 17.129254  | 5.81E-02 | 107012207 | 107012330 | NC_000006.11 |
| cg13102079 | 3.74E-11 | 2.44E-12 | 7.48 | 17.1285973 | 1.42E-01 | 136554731 | 136554854 | NC_000007.13 |
| cg08115682 | 3.74E-11 | 2.45E-12 | 7.48 | 17.1284775 | 1.32E-01 | 5153729   | 5153852   | NC_000012.11 |
| cg22305346 | 3.74E-11 | 2.45E-12 | 7.48 | 17.127896  | 3.69E-02 | 7830039   | 7830162   | NC_000017.10 |
| cg25042860 | 3.75E-11 | 2.45E-12 | 7.48 | 17.1259303 | 9.88E-02 | 62467034  | 62467157  | NC_000017.10 |
| cg03671597 | 3.75E-11 | 2.45E-12 | 7.48 | 17.1257035 | 1.64E-01 | 27333463  | 27333586  | NC_000017.10 |
| cg24838174 | 3.75E-11 | 2.45E-12 | 7.48 | 17.125293  | 6.47E-02 | 15990592  | 15990715  | NC_000019.9  |
| cg09176256 | 3.76E-11 | 2.46E-12 | 7.48 | 17.1241687 | 1.33E-01 | 119293967 | 119294090 | NC_000010.10 |
| cg26417713 | 3.76E-11 | 2.46E-12 | 7.48 | 17.1233307 | 9.14E-02 | 36497719  | 36497842  | NC_000017.10 |
| cg27067575 | 3.76E-11 | 2.46E-12 | 7.48 | 17.1224198 | 9.42E-02 | 41866725  | 41866848  | NC_000005.9  |
| cg19161859 | 3.76E-11 | 2.46E-12 | 7.48 | 17.1219334 | 1.25E-01 | 84327426  | 84327549  | NC_000001.10 |
| cg11562502 | 3.77E-11 | 2.46E-12 | 7.48 | 17.1207915 | 2.11E-01 | 113441626 | 113441749 | NC_000004.11 |

|            |          |          |      |            |          |           |           |              |
|------------|----------|----------|------|------------|----------|-----------|-----------|--------------|
| cg19480263 | 3.77E-11 | 2.46E-12 | 7.48 | 17.1207246 | 9.30E-02 | 5743854   | 5743977   | NC_000007.13 |
| cg21535000 | 3.78E-11 | 2.47E-12 | 7.48 | 17.1185849 | 2.41E-01 | 9760877   | 9761000   | NC_000008.10 |
| cg19095600 | 3.78E-11 | 2.47E-12 | 7.48 | 17.1178614 | 1.73E-01 | 155108933 | 155109056 | NC_000005.9  |
| cg05320944 | 3.79E-11 | 2.48E-12 | 7.48 | 17.1145525 | 1.09E-01 | 76018865  | 76018988  | NC_000014.8  |
| cg17534564 | 3.79E-11 | 2.48E-12 | 7.48 | 17.1142941 | 7.38E-02 | 124600518 | 124600641 | NC_000012.11 |
| cg22569496 | 3.79E-11 | 2.48E-12 | 7.48 | 17.1132291 | 1.13E-01 | 13409671  | 13409794  | NC_000019.9  |
| cg27043010 | 3.80E-11 | 2.49E-12 | 7.48 | 17.1121274 | 1.61E-01 | 99712380  | 99712503  | NC_000014.8  |
| cg20172627 | 3.80E-11 | 2.49E-12 | 7.48 | 17.1119646 | 2.79E-01 | 25439110  | 25439233  | NC_000002.11 |
| cg19400601 | 3.80E-11 | 2.49E-12 | 7.48 | 17.1112897 | 8.31E-02 | 117691210 | 117691333 | NC_000011.9  |
| cg05112120 | 3.80E-11 | 2.49E-12 | 7.48 | 17.1104578 | 1.37E-01 | 10119723  | 10119846  | NC_000017.10 |
| cg13242000 | 3.81E-11 | 2.49E-12 | 7.48 | 17.1096738 | 1.42E-01 | 74426086  | 74426209  | NC_000015.9  |
| cg04888037 | 3.81E-11 | 2.49E-12 | 7.48 | 17.1086387 | 1.24E-01 | 126677203 | 126677326 | NC_000012.11 |
| cg12475507 | 3.82E-11 | 2.50E-12 | 7.48 | 17.1062804 | 1.32E-01 | 3567852   | 3567975   | NC_000001.10 |
| cg13792596 | 3.82E-11 | 2.50E-12 | 7.48 | 17.1062259 | 8.28E-02 | 64660940  | 64661063  | NC_000014.8  |
| cg05911990 | 3.82E-11 | 2.50E-12 | 7.48 | 17.1059506 | 1.50E-01 | 112063449 | 112063572 | NC_000007.13 |
| cg16664496 | 3.82E-11 | 2.50E-12 | 7.48 | 17.1055883 | 6.59E-02 | 87740413  | 87740536  | NC_000016.9  |
| cg15836660 | 3.82E-11 | 2.50E-12 | 7.48 | 17.105559  | 1.83E-01 | 78493128  | 78493251  | NC_000013.10 |
| cg23420260 | 3.82E-11 | 2.50E-12 | 7.48 | 17.1053644 | 2.45E-01 | 177053285 | 177053408 | NC_000002.11 |
| cg14823763 | 3.82E-11 | 2.50E-12 | 7.48 | 17.1048473 | 1.93E-01 | 1884365   | 1884488   | NC_000005.9  |
| cg27199820 | 3.83E-11 | 2.51E-12 | 7.48 | 17.1044976 | 1.91E-01 | 6903019   | 6903142   | NC_000003.11 |
| cg18774195 | 3.83E-11 | 2.51E-12 | 7.48 | 17.104303  | 1.70E-01 | 170303830 | 170303953 | NC_000003.11 |
| cg01906054 | 3.83E-11 | 2.51E-12 | 7.48 | 17.1042554 | 4.45E-02 | 14683649  | 14683772  | NC_000017.10 |
| cg14056644 | 3.83E-11 | 2.51E-12 | 7.48 | 17.1023099 | 1.44E-01 | 111559105 | 111559228 | NC_000004.11 |
| cg17398252 | 3.84E-11 | 2.51E-12 | 7.48 | 17.101826  | 2.75E-01 | 105585179 | 105585302 | NC_000006.11 |
| cg23241914 | 3.84E-11 | 2.52E-12 | 7.48 | 17.1002618 | 9.38E-02 | 161193393 | 161193516 | NC_000001.10 |



|            |          |          |      |            |          |           |           |              |
|------------|----------|----------|------|------------|----------|-----------|-----------|--------------|
| cg09662034 | 3.85E-11 | 2.52E-12 | 7.48 | 17.0988023 | 1.35E-01 | 55206467  | 55206590  | NC_000020.10 |
| cg21060817 | 3.85E-11 | 2.52E-12 | 7.48 | 17.0983479 | 3.54E-02 | 28792031  | 28792154  | NC_000002.11 |
| cg04243827 | 3.85E-11 | 2.52E-12 | 7.48 | 17.0973914 | 1.81E-01 | 3103718   | 3103841   | NC_000005.9  |
| cg04062391 | 3.85E-11 | 2.52E-12 | 7.48 | 17.0968624 | 1.87E-01 | 9609204   | 9609327   | NC_000019.9  |
| cg02694427 | 3.86E-11 | 2.53E-12 | 7.48 | 17.0953268 | 1.64E-01 | 176964512 | 176964635 | NC_000002.11 |
| cg02320740 | 3.87E-11 | 2.54E-12 | 7.47 | 17.0920435 | 1.91E-01 | 106400259 | 106400382 | NC_000010.10 |
| cg09538809 | 3.88E-11 | 2.55E-12 | 7.47 | 17.0889034 | 1.04E-01 | 140782948 | 140783071 | NC_000005.9  |
| cg01726792 | 3.88E-11 | 2.55E-12 | 7.47 | 17.088606  | 9.68E-02 | 21509062  | 21509185  | NC_000014.8  |
| cg05682333 | 3.89E-11 | 2.55E-12 | 7.47 | 17.0861253 | 8.77E-02 | 233274291 | 233274414 | NC_000002.11 |
| cg09753749 | 3.89E-11 | 2.55E-12 | 7.47 | 17.0859438 | 8.02E-02 | 184359437 | 184359560 | NC_000001.10 |
| cg16560824 | 3.90E-11 | 2.55E-12 | 7.47 | 17.0852676 | 2.19E-01 | 142189535 | 142189658 | NC_000008.10 |
| cg15708175 | 3.90E-11 | 2.56E-12 | 7.47 | 17.0841485 | 5.57E-02 | 145814244 | 145814367 | NC_000008.10 |
| cg18984809 | 3.90E-11 | 2.56E-12 | 7.47 | 17.0838733 | 5.70E-02 | 973184    | 973307    | NC_000017.10 |
| cg15037137 | 3.91E-11 | 2.56E-12 | 7.47 | 17.0827287 | 1.20E-01 | 27144302  | 27144425  | NC_000007.13 |
| cg04328762 | 3.91E-11 | 2.56E-12 | 7.47 | 17.0822257 | 1.99E-01 | 19706186  | 19706309  | NC_000022.10 |
| cg27532847 | 3.91E-11 | 2.56E-12 | 7.47 | 17.0821673 | 2.24E-01 | 35047401  | 35047524  | NC_000015.9  |
| cg14014964 | 3.91E-11 | 2.56E-12 | 7.47 | 17.0817892 | 1.16E-01 | 94443692  | 94443815  | NC_000009.11 |
| cg19030607 | 3.91E-11 | 2.56E-12 | 7.47 | 17.0815828 | 1.36E-01 | 48885506  | 48885629  | NC_000022.10 |
| cg04178316 | 3.91E-11 | 2.57E-12 | 7.47 | 17.0804713 | 1.61E-01 | 170738059 | 170738182 | NC_000005.9  |
| cg00960395 | 3.93E-11 | 2.58E-12 | 7.47 | 17.0769272 | 1.79E-01 | 46799948  | 46800071  | NC_000017.10 |
| cg06263341 | 3.93E-11 | 2.58E-12 | 7.47 | 17.0768341 | 1.75E-01 | 75525151  | 75525274  | NC_000017.10 |
| cg19675288 | 3.93E-11 | 2.58E-12 | 7.47 | 17.0764152 | 2.51E-01 | 166582206 | 166582329 | NC_000006.11 |
| cg06032349 | 3.93E-11 | 2.58E-12 | 7.47 | 17.0750485 | 1.21E-01 | 40032331  | 40032454  | NC_000021.8  |
| cg10589825 | 3.94E-11 | 2.58E-12 | 7.47 | 17.0740504 | 1.14E-01 | 105362890 | 105363013 | NC_000002.11 |
| cg08441822 | 3.94E-11 | 2.59E-12 | 7.47 | 17.0730171 | 1.39E-01 | 58723879  | 58724002  | NC_000015.9  |

|            |          |          |      |            |          |           |           |              |
|------------|----------|----------|------|------------|----------|-----------|-----------|--------------|
| cg03169018 | 3.94E-11 | 2.59E-12 | 7.47 | 17.0721589 | 1.65E-01 | 24772435  | 24772558  | NC_000008.10 |
| cg05027554 | 3.95E-11 | 2.59E-12 | 7.47 | 17.0705264 | 1.12E-01 | 646579    | 646702    | NC_000016.9  |
| cg26560222 | 3.95E-11 | 2.59E-12 | 7.47 | 17.0704366 | 1.89E-01 | 50888826  | 50888949  | NC_000001.10 |
| cg04028634 | 3.95E-11 | 2.59E-12 | 7.47 | 17.0700479 | 1.39E-01 | 45613825  | 45613948  | NC_000007.13 |
| cg19855489 | 3.95E-11 | 2.60E-12 | 7.47 | 17.0695692 | 4.95E-02 | 132257551 | 132257674 | NC_000003.11 |
| cg06832406 | 3.95E-11 | 2.60E-12 | 7.47 | 17.069525  | 1.05E-01 | 4230482   | 4230605   | NC_000010.10 |
| cg00201192 | 3.96E-11 | 2.60E-12 | 7.47 | 17.06875   | 8.50E-02 | 48829788  | 48829911  | NC_000004.11 |
| cg03085321 | 3.96E-11 | 2.60E-12 | 7.47 | 17.0685404 | 9.51E-02 | 140133752 | 140133875 | NC_000009.11 |
| cg11418681 | 3.96E-11 | 2.60E-12 | 7.47 | 17.0675588 | 1.27E-01 | 14855132  | 14855255  | NC_000003.11 |
| cg02345060 | 3.96E-11 | 2.60E-12 | 7.47 | 17.0668063 | 5.77E-02 | 3165341   | 3165464   | NC_000010.10 |
| cg01591369 | 3.96E-11 | 2.60E-12 | 7.47 | 17.0667002 | 6.13E-02 | 10687325  | 10687448  | NC_000006.11 |
| cg00444059 | 3.97E-11 | 2.61E-12 | 7.47 | 17.0656233 | 7.50E-02 | 31439672  | 31439795  | NC_000016.9  |
| cg11983612 | 3.97E-11 | 2.61E-12 | 7.47 | 17.0651591 | 7.85E-02 | 123442240 | 123442363 | NC_000010.10 |
| cg09062663 | 3.99E-11 | 2.62E-12 | 7.47 | 17.0608594 | 8.75E-02 | 10262804  | 10262927  | NC_000005.9  |
| cg14398860 | 3.99E-11 | 2.62E-12 | 7.47 | 17.0604401 | 1.17E-01 | 134491205 | 134491328 | NC_000010.10 |
| cg17310600 | 3.99E-11 | 2.63E-12 | 7.47 | 17.058513  | 1.53E-01 | 165305334 | 165305457 | NC_000004.11 |
| cg26717554 | 4.00E-11 | 2.63E-12 | 7.47 | 17.0577518 | 1.42E-01 | 853334    | 853457    | NC_000019.9  |
| cg20033070 | 4.00E-11 | 2.63E-12 | 7.47 | 17.0573875 | 1.03E-01 | 24685656  | 24685779  | NC_000014.8  |
| cg01838443 | 4.00E-11 | 2.63E-12 | 7.47 | 17.0572715 | 1.09E-01 | 15752932  | 15753055  | NC_000021.8  |
| cg18448949 | 4.01E-11 | 2.64E-12 | 7.47 | 17.0543819 | 2.22E-01 | 176993089 | 176993212 | NC_000002.11 |
| cg01397057 | 4.01E-11 | 2.64E-12 | 7.47 | 17.0540579 | 4.59E-02 | 130344094 | 130344217 | NC_000005.9  |
| cg13371788 | 4.01E-11 | 2.64E-12 | 7.47 | 17.0535495 | 2.10E-01 | 117586817 | 117586940 | NC_000006.11 |
| cg06961473 | 4.01E-11 | 2.64E-12 | 7.47 | 17.0532522 | 1.18E-01 | 65369801  | 65369924  | NC_000015.9  |
| cg08370178 | 4.01E-11 | 2.64E-12 | 7.47 | 17.0531362 | 1.35E-01 | 43034043  | 43034166  | NC_000005.9  |
| cg15046304 | 4.01E-11 | 2.64E-12 | 7.47 | 17.0530277 | 9.11E-02 | 75205489  | 75205612  | NC_000017.10 |

|            |          |          |      |            |          |           |           |              |
|------------|----------|----------|------|------------|----------|-----------|-----------|--------------|
| cg17434309 | 4.02E-11 | 2.64E-12 | 7.47 | 17.052404  | 2.42E-01 | 2161079   | 2161202   | NC_000011.9  |
| cg05114861 | 4.02E-11 | 2.65E-12 | 7.47 | 17.0502952 | 1.48E-01 | 15366034  | 15366157  | NC_000003.11 |
| cg06722407 | 4.03E-11 | 2.65E-12 | 7.47 | 17.049011  | 1.72E-01 | 19918586  | 19918709  | NC_000013.10 |
| cg08301307 | 4.03E-11 | 2.65E-12 | 7.47 | 17.0484502 | 7.58E-02 | 103599204 | 103599327 | NC_000014.8  |
| cg01449266 | 4.03E-11 | 2.65E-12 | 7.47 | 17.0482435 | 6.55E-02 | 2109999   | 2110122   | NC_000001.10 |
| cg05065572 | 4.04E-11 | 2.66E-12 | 7.47 | 17.047327  | 1.86E-01 | 114833912 | 114834035 | NC_000012.11 |
| cg06143897 | 4.04E-11 | 2.66E-12 | 7.47 | 17.0472176 | 1.73E-01 | 112404754 | 112404877 | NC_000010.10 |
| cg00089798 | 4.04E-11 | 2.66E-12 | 7.47 | 17.0460293 | 2.02E-01 | 62585204  | 62585327  | NC_000012.11 |
| cg22961278 | 4.04E-11 | 2.66E-12 | 7.47 | 17.0459531 | 1.67E-01 | 81107087  | 81107210  | NC_000004.11 |
| cg08254359 | 4.04E-11 | 2.66E-12 | 7.47 | 17.0455134 | 1.78E-01 | 54398518  | 54398641  | NC_000012.11 |
| cg11060276 | 4.05E-11 | 2.66E-12 | 7.47 | 17.0440091 | 1.69E-01 | 57359414  | 57359537  | NC_000008.10 |
| cg02034102 | 4.06E-11 | 2.67E-12 | 7.47 | 17.0409466 | 1.68E-01 | 37026739  | 37026862  | NC_000009.11 |
| cg11591516 | 4.06E-11 | 2.67E-12 | 7.47 | 17.0403658 | 2.49E-01 | 85954316  | 85954439  | NC_000010.10 |
| cg24032056 | 4.07E-11 | 2.68E-12 | 7.47 | 17.0376751 | 6.32E-02 | 75961704  | 75961827  | NC_000012.11 |
| cg26531286 | 4.07E-11 | 2.68E-12 | 7.47 | 17.0376719 | 1.29E-01 | 98799358  | 98799481  | NC_000013.10 |
| cg13839391 | 4.07E-11 | 2.68E-12 | 7.47 | 17.0371513 | 6.79E-02 | 121719066 | 121719189 | NC_000012.11 |
| cg15622556 | 4.09E-11 | 2.69E-12 | 7.46 | 17.0340641 | 1.29E-01 | 12251820  | 12251943  | NC_000001.10 |
| cg14415034 | 4.09E-11 | 2.69E-12 | 7.46 | 17.0338144 | 2.42E-02 | 45730717  | 45730840  | NC_000003.11 |
| cg26770200 | 4.09E-11 | 2.69E-12 | 7.46 | 17.0337114 | 5.32E-02 | 119752914 | 119753037 | NC_000008.10 |
| cg27117509 | 4.09E-11 | 2.69E-12 | 7.46 | 17.0330788 | 1.68E-01 | 19551398  | 19551521  | NC_000002.11 |
| cg00037457 | 4.09E-11 | 2.69E-12 | 7.46 | 17.0327182 | 1.51E-01 | 59531744  | 59531867  | NC_000017.10 |
| cg15922174 | 4.09E-11 | 2.70E-12 | 7.46 | 17.0318927 | 2.54E-01 | 126135998 | 126136121 | NC_000009.11 |
| cg25549459 | 4.10E-11 | 2.70E-12 | 7.46 | 17.0298813 | 1.76E-01 | 105471252 | 105471375 | NC_000002.11 |
| cg18161956 | 4.10E-11 | 2.70E-12 | 7.46 | 17.0296412 | 1.34E-01 | 115112626 | 115112749 | NC_000012.11 |
| cg06101841 | 4.11E-11 | 2.71E-12 | 7.46 | 17.0282481 | 9.20E-02 | 48758048  | 48758171  | NC_000003.11 |

|            |          |          |      |            |          |           |           |              |
|------------|----------|----------|------|------------|----------|-----------|-----------|--------------|
| cg22374233 | 4.11E-11 | 2.71E-12 | 7.46 | 17.0277304 | 1.64E-01 | 906726    | 906849    | NC_000018.9  |
| cg21850852 | 4.12E-11 | 2.72E-12 | 7.46 | 17.0249051 | 1.01E-01 | 73746186  | 73746309  | NC_000017.10 |
| cg19944763 | 4.13E-11 | 2.72E-12 | 7.46 | 17.0240827 | 2.21E-01 | 15761854  | 15761977  | NC_000010.10 |
| cg03249890 | 4.13E-11 | 2.72E-12 | 7.46 | 17.0226878 | 1.33E-01 | 175199803 | 175199926 | NC_000002.11 |
| cg16937268 | 4.14E-11 | 2.73E-12 | 7.46 | 17.0210878 | 2.06E-01 | 21684417  | 21684540  | NC_000020.10 |
| cg22047387 | 4.14E-11 | 2.73E-12 | 7.46 | 17.0202164 | 1.97E-01 | 55413872  | 55413995  | NC_000012.11 |
| cg19099050 | 4.15E-11 | 2.74E-12 | 7.46 | 17.018017  | 1.97E-01 | 9594382   | 9594505   | NC_000003.11 |
| cg24709745 | 4.17E-11 | 2.75E-12 | 7.46 | 17.0135851 | 3.02E-02 | 1049864   | 1049987   | NC_000001.10 |
| cg05171933 | 4.17E-11 | 2.75E-12 | 7.46 | 17.0135849 | 1.40E-01 | 147205668 | 147205791 | NC_000005.9  |
| cg13280612 | 4.17E-11 | 2.75E-12 | 7.46 | 17.0135787 | 3.16E-02 | 126133599 | 126133722 | NC_000010.10 |
| cg04067139 | 4.17E-11 | 2.75E-12 | 7.46 | 17.0134084 | 2.58E-01 | 58673167  | 58673290  | NC_000011.9  |
| cg12597281 | 4.18E-11 | 2.76E-12 | 7.46 | 17.0106388 | 4.18E-02 | 208266216 | 208266339 | NC_000001.10 |
| cg05630016 | 4.18E-11 | 2.76E-12 | 7.46 | 17.0104436 | 2.29E-01 | 51815281  | 51815404  | NC_000019.9  |
| cg25901381 | 4.18E-11 | 2.76E-12 | 7.46 | 17.009499  | 1.65E-01 | 27225485  | 27225608  | NC_000007.13 |
| cg00376022 | 4.20E-11 | 2.77E-12 | 7.46 | 17.0064119 | 1.56E-01 | 19183880  | 19184003  | NC_000007.13 |
| cg11689732 | 4.20E-11 | 2.77E-12 | 7.46 | 17.0046491 | 1.13E-01 | 79139096  | 79139219  | NC_000017.10 |
| cg11525479 | 4.21E-11 | 2.78E-12 | 7.46 | 17.0025147 | 1.44E-01 | 88799523  | 88799646  | NC_000015.9  |
| cg00709112 | 4.22E-11 | 2.79E-12 | 7.46 | 16.999503  | 1.45E-01 | 118369983 | 118370106 | NC_000010.10 |
| cg25648436 | 4.23E-11 | 2.79E-12 | 7.46 | 16.9984191 | 1.43E-01 | 58554527  | 58554650  | NC_000019.9  |
| cg09141300 | 4.23E-11 | 2.79E-12 | 7.46 | 16.9983653 | 7.33E-02 | 30346020  | 30346143  | NC_000005.9  |
| cg17455088 | 4.23E-11 | 2.79E-12 | 7.46 | 16.9982795 | 1.38E-01 | 206551466 | 206551589 | NC_000002.11 |
| cg08603125 | 4.23E-11 | 2.79E-12 | 7.46 | 16.9981089 | 1.44E-01 | 35890197  | 35890320  | NC_000006.11 |
| cg01328892 | 4.24E-11 | 2.80E-12 | 7.46 | 16.9962529 | 2.33E-01 | 133562332 | 133562455 | NC_000006.11 |
| cg25201047 | 4.24E-11 | 2.80E-12 | 7.46 | 16.9958011 | 1.40E-01 | 1282630   | 1282753   | NC_000007.13 |
| cg27573549 | 4.24E-11 | 2.80E-12 | 7.46 | 16.9952379 | 7.62E-02 | 56189952  | 56190075  | NC_000019.9  |

|            |          |          |      |            |          |           |           |              |
|------------|----------|----------|------|------------|----------|-----------|-----------|--------------|
| cg09317928 | 4.24E-11 | 2.80E-12 | 7.46 | 16.9949725 | 1.17E-01 | 61716830  | 61716953  | NC_000011.9  |
| cg09834343 | 4.24E-11 | 2.80E-12 | 7.46 | 16.9949215 | 2.15E-01 | 32942910  | 32943033  | NC_000015.9  |
| cg05686379 | 4.24E-11 | 2.80E-12 | 7.46 | 16.9947079 | 6.82E-02 | 36101779  | 36101902  | NC_000007.13 |
| cg03514545 | 4.24E-11 | 2.80E-12 | 7.46 | 16.9946029 | 1.93E-01 | 114696698 | 114696821 | NC_000001.10 |
| cg23141855 | 4.25E-11 | 2.80E-12 | 7.46 | 16.9937174 | 2.14E-01 | 93519892  | 93520015  | NC_000007.13 |
| cg13801381 | 4.25E-11 | 2.81E-12 | 7.46 | 16.9919032 | 2.24E-01 | 4384022   | 4384145   | NC_000012.11 |
| cg21908972 | 4.26E-11 | 2.81E-12 | 7.46 | 16.9905526 | 9.00E-02 | 281291    | 281414    | NC_000019.9  |
| cg05527856 | 4.26E-11 | 2.81E-12 | 7.46 | 16.9903742 | 8.54E-02 | 11603196  | 11603319  | NC_000011.9  |
| cg16397021 | 4.26E-11 | 2.82E-12 | 7.46 | 16.9894085 | 1.30E-01 | 25953388  | 25953511  | NC_000015.9  |
| cg06928695 | 4.27E-11 | 2.82E-12 | 7.46 | 16.9884993 | 7.47E-02 | 6384119   | 6384242   | NC_000017.10 |
| cg10672108 | 4.27E-11 | 2.82E-12 | 7.46 | 16.9870052 | 1.22E-01 | 58389987  | 58390110  | NC_000011.9  |
| cg06701796 | 4.28E-11 | 2.83E-12 | 7.46 | 16.9842004 | 5.43E-02 | 47745582  | 47745705  | NC_000019.9  |
| cg09346993 | 4.29E-11 | 2.83E-12 | 7.46 | 16.9838967 | 7.42E-02 | 31938358  | 31938481  | NC_000006.11 |
| cg26126740 | 4.30E-11 | 2.84E-12 | 7.46 | 16.9809946 | 9.35E-02 | 42574332  | 42574455  | NC_000020.10 |
| cg26156687 | 4.30E-11 | 2.84E-12 | 7.46 | 16.9798061 | 1.79E-01 | 102586168 | 102586291 | NC_000010.10 |
| cg27484483 | 4.30E-11 | 2.84E-12 | 7.46 | 16.9794784 | 1.46E-01 | 103249853 | 103249976 | NC_000008.10 |
| cg19198993 | 4.30E-11 | 2.85E-12 | 7.46 | 16.9792313 | 5.83E-02 | 131708300 | 131708423 | NC_000012.11 |
| cg00970396 | 4.31E-11 | 2.85E-12 | 7.46 | 16.978704  | 1.91E-01 | 9107199   | 9107322   | NC_000016.9  |
| cg26795012 | 4.31E-11 | 2.85E-12 | 7.46 | 16.9785636 | 6.58E-02 | 245874750 | 245874873 | NC_000001.10 |
| cg02883229 | 4.31E-11 | 2.85E-12 | 7.46 | 16.9782298 | 7.43E-02 | 155616337 | 155616460 | NC_000007.13 |
| cg05529500 | 4.31E-11 | 2.85E-12 | 7.46 | 16.9776266 | 3.28E-02 | 79298678  | 79298801  | NC_000015.9  |
| cg24716664 | 4.31E-11 | 2.85E-12 | 7.46 | 16.9775586 | 1.51E-01 | 1006121   | 1006244   | NC_000011.9  |
| cg10038618 | 4.31E-11 | 2.85E-12 | 7.46 | 16.9768696 | 1.50E-01 | 3567719   | 3567842   | NC_000001.10 |
| cg08376020 | 4.32E-11 | 2.85E-12 | 7.45 | 16.9762211 | 8.79E-02 | 8154317   | 8154440   | NC_000004.11 |
| cg04049225 | 4.33E-11 | 2.86E-12 | 7.45 | 16.9731315 | 1.00E-01 | 85672175  | 85672298  | NC_000016.9  |

|            |          |          |      |            |          |           |           |              |
|------------|----------|----------|------|------------|----------|-----------|-----------|--------------|
| cg27331863 | 4.34E-11 | 2.87E-12 | 7.45 | 16.9703049 | 1.17E-01 | 66062176  | 66062299  | NC_000015.9  |
| cg24569447 | 4.35E-11 | 2.88E-12 | 7.45 | 16.9671889 | 1.98E-01 | 89312795  | 89312918  | NC_000015.9  |
| cg07230107 | 4.36E-11 | 2.88E-12 | 7.45 | 16.9659835 | 1.76E-01 | 224804396 | 224804519 | NC_000001.10 |
| cg08686425 | 4.36E-11 | 2.89E-12 | 7.45 | 16.9645195 | 7.28E-02 | 67722909  | 67723032  | NC_000011.9  |
| cg22398616 | 4.38E-11 | 2.90E-12 | 7.45 | 16.9620048 | 1.06E-01 | 53314203  | 53314326  | NC_000013.10 |
| cg04584301 | 4.39E-11 | 2.90E-12 | 7.45 | 16.9595641 | 2.12E-01 | 17208740  | 17208863  | NC_000020.10 |
| cg07748767 | 4.39E-11 | 2.90E-12 | 7.45 | 16.9594697 | 1.31E-01 | 112659978 | 112660101 | NC_000002.11 |
| cg26053346 | 4.40E-11 | 2.91E-12 | 7.45 | 16.9567868 | 1.19E-01 | 66454856  | 66454979  | NC_000003.11 |
| cg01864361 | 4.40E-11 | 2.92E-12 | 7.45 | 16.9548161 | 1.02E-01 | 54188647  | 54188770  | NC_000019.9  |
| cg17543488 | 4.41E-11 | 2.92E-12 | 7.45 | 16.9544421 | 1.75E-01 | 172672959 | 172673082 | NC_000005.9  |
| cg00854242 | 4.42E-11 | 2.92E-12 | 7.45 | 16.9521072 | 1.71E-01 | 74961724  | 74961847  | NC_000018.9  |
| cg08572734 | 4.42E-11 | 2.93E-12 | 7.45 | 16.9515477 | 1.93E-01 | 133485298 | 133485421 | NC_000012.11 |
| cg19046783 | 4.43E-11 | 2.94E-12 | 7.45 | 16.9484113 | 1.03E-01 | 99382086  | 99382209  | NC_000007.13 |
| cg14173476 | 4.43E-11 | 2.94E-12 | 7.45 | 16.9479668 | 5.91E-02 | 19190476  | 19190599  | NC_000017.10 |
| cg08472142 | 4.44E-11 | 2.94E-12 | 7.45 | 16.9471941 | 7.47E-02 | 155007166 | 155007289 | NC_000001.10 |
| cg04688351 | 4.44E-11 | 2.94E-12 | 7.45 | 16.947044  | 1.87E-01 | 223154140 | 223154263 | NC_000002.11 |
| cg20709984 | 4.44E-11 | 2.94E-12 | 7.45 | 16.9465688 | 4.48E-02 | 37922198  | 37922321  | NC_000017.10 |
| cg24912438 | 4.45E-11 | 2.95E-12 | 7.45 | 16.9451895 | 2.22E-01 | 122686564 | 122686687 | NC_000004.11 |
| cg12798775 | 4.45E-11 | 2.95E-12 | 7.45 | 16.9445996 | 1.15E-01 | 26350473  | 26350596  | NC_000011.9  |
| cg11092616 | 4.45E-11 | 2.95E-12 | 7.45 | 16.9437528 | 2.80E-01 | 72596493  | 72596616  | NC_000006.11 |
| cg00769012 | 4.45E-11 | 2.95E-12 | 7.45 | 16.9430251 | 4.63E-02 | 39776397  | 39776520  | NC_000022.10 |
| cg18984002 | 4.46E-11 | 2.95E-12 | 7.45 | 16.942506  | 1.38E-01 | 36876514  | 36876637  | NC_000017.10 |
| cg26019112 | 4.46E-11 | 2.96E-12 | 7.45 | 16.9418476 | 1.61E-01 | 31821313  | 31821436  | NC_000011.9  |
| cg19881992 | 4.46E-11 | 2.96E-12 | 7.45 | 16.9417251 | 9.99E-02 | 216491679 | 216491802 | NC_000002.11 |
| cg17254701 | 4.47E-11 | 2.96E-12 | 7.45 | 16.9392872 | 6.17E-02 | 78158076  | 78158199  | NC_000017.10 |

|            |          |          |      |            |          |           |           |              |
|------------|----------|----------|------|------------|----------|-----------|-----------|--------------|
| cg25073967 | 4.47E-11 | 2.97E-12 | 7.45 | 16.9385271 | 1.09E-01 | 105360327 | 105360450 | NC_000014.8  |
| cg12346874 | 4.48E-11 | 2.97E-12 | 7.45 | 16.9375949 | 1.81E-01 | 137523644 | 137523767 | NC_000002.11 |
| cg26832142 | 4.48E-11 | 2.97E-12 | 7.45 | 16.9363737 | 1.38E-01 | 66258441  | 66258564  | NC_000001.10 |
| cg00335735 | 4.48E-11 | 2.97E-12 | 7.45 | 16.9361218 | 1.42E-01 | 222355484 | 222355607 | NC_000002.11 |
| cg00397635 | 4.49E-11 | 2.98E-12 | 7.45 | 16.9337071 | 1.95E-01 | 53309162  | 53309285  | NC_000001.10 |
| cg22227621 | 4.50E-11 | 2.98E-12 | 7.45 | 16.9326806 | 9.04E-02 | 95464471  | 95464594  | NC_000001.10 |
| cg08274552 | 4.50E-11 | 2.98E-12 | 7.45 | 16.9326314 | 1.50E-01 | 220491834 | 220491957 | NC_000002.11 |
| cg12791492 | 4.51E-11 | 2.99E-12 | 7.45 | 16.9295812 | 2.05E-01 | 57522094  | 57522217  | NC_000004.11 |
| cg12630714 | 4.51E-11 | 2.99E-12 | 7.45 | 16.9294338 | 2.01E-01 | 54975894  | 54976017  | NC_000004.11 |
| cg15594205 | 4.52E-11 | 3.00E-12 | 7.45 | 16.9274023 | 2.34E-01 | 105470794 | 105470917 | NC_000002.11 |
| cg17616537 | 4.52E-11 | 3.00E-12 | 7.45 | 16.9269764 | 1.65E-01 | 46628663  | 46628786  | NC_000017.10 |
| cg25734198 | 4.52E-11 | 3.00E-12 | 7.45 | 16.9266948 | 1.11E-01 | 49670744  | 49670867  | NC_000006.11 |
| cg00908291 | 4.53E-11 | 3.01E-12 | 7.45 | 16.9253311 | 2.04E-01 | 140771786 | 140771909 | NC_000003.11 |
| cg04181150 | 4.53E-11 | 3.01E-12 | 7.45 | 16.924801  | 1.83E-01 | 33603883  | 33604006  | NC_000015.9  |
| cg12734852 | 4.54E-11 | 3.01E-12 | 7.45 | 16.9238319 | 8.15E-02 | 79410138  | 79410261  | NC_000010.10 |
| cg12627071 | 4.54E-11 | 3.01E-12 | 7.45 | 16.9236574 | 1.63E-01 | 237072673 | 237072796 | NC_000002.11 |
| cg10261191 | 4.54E-11 | 3.01E-12 | 7.45 | 16.9228347 | 1.51E-01 | 125364744 | 125364867 | NC_000011.9  |
| cg22693493 | 4.54E-11 | 3.01E-12 | 7.45 | 16.9222832 | 7.73E-02 | 172044942 | 172045065 | NC_000005.9  |
| cg19714132 | 4.54E-11 | 3.02E-12 | 7.45 | 16.9217593 | 2.01E-01 | 29235984  | 29236107  | NC_000014.8  |
| cg13379763 | 4.55E-11 | 3.02E-12 | 7.45 | 16.9214289 | 7.81E-02 | 219892516 | 219892639 | NC_000002.11 |
| cg22597340 | 4.55E-11 | 3.02E-12 | 7.45 | 16.919916  | 3.01E-02 | 3208678   | 3208801   | NC_000004.11 |
| cg23358479 | 4.55E-11 | 3.02E-12 | 7.45 | 16.9197234 | 6.89E-02 | 1110784   | 1110907   | NC_000007.13 |
| cg02710485 | 4.56E-11 | 3.03E-12 | 7.44 | 16.9179139 | 1.47E-01 | 21911128  | 21911251  | NC_000008.10 |
| cg14537179 | 4.56E-11 | 3.03E-12 | 7.44 | 16.9178218 | 1.25E-01 | 115915892 | 115916015 | NC_000009.11 |
| cg04996873 | 4.56E-11 | 3.03E-12 | 7.44 | 16.917497  | 2.23E-01 | 14925992  | 14926115  | NC_000001.10 |

|            |          |          |      |            |          |           |           |              |
|------------|----------|----------|------|------------|----------|-----------|-----------|--------------|
| cg10043313 | 4.57E-11 | 3.03E-12 | 7.44 | 16.9165843 | 7.49E-02 | 32212399  | 32212522  | NC_000016.9  |
| cg02960347 | 4.57E-11 | 3.04E-12 | 7.44 | 16.9149194 | 1.38E-01 | 61715662  | 61715785  | NC_000003.11 |
| cg05621259 | 4.58E-11 | 3.04E-12 | 7.44 | 16.913917  | 1.07E-01 | 39836007  | 39836130  | NC_000008.10 |
| cg17469434 | 4.58E-11 | 3.04E-12 | 7.44 | 16.9130176 | 6.69E-02 | 64748689  | 64748812  | NC_000002.11 |
| cg25490241 | 4.58E-11 | 3.04E-12 | 7.44 | 16.9126705 | 1.33E-01 | 65073816  | 65073939  | NC_000015.9  |
| cg02075820 | 4.59E-11 | 3.05E-12 | 7.44 | 16.9117245 | 1.88E-01 | 17300909  | 17301032  | NC_000011.9  |
| cg09342766 | 4.59E-11 | 3.05E-12 | 7.44 | 16.9108539 | 1.69E-01 | 72596291  | 72596414  | NC_000006.11 |
| cg11416338 | 4.60E-11 | 3.05E-12 | 7.44 | 16.9093543 | 1.96E-01 | 20523143  | 20523266  | NC_000012.11 |
| cg14929805 | 4.60E-11 | 3.06E-12 | 7.44 | 16.9089126 | 1.37E-01 | 134232964 | 134233087 | NC_000008.10 |
| cg07035503 | 4.61E-11 | 3.06E-12 | 7.44 | 16.906235  | 2.65E-01 | 134871966 | 134872089 | NC_000005.9  |
| cg24530250 | 4.63E-11 | 3.08E-12 | 7.44 | 16.9024512 | 2.38E-01 | 71955599  | 71955722  | NC_000011.9  |
| cg04302570 | 4.63E-11 | 3.08E-12 | 7.44 | 16.9014708 | 1.14E-01 | 21640162  | 21640285  | NC_000008.10 |
| cg17567560 | 4.64E-11 | 3.09E-12 | 7.44 | 16.8992518 | 2.35E-01 | 105036863 | 105036986 | NC_000010.10 |
| cg07142833 | 4.66E-11 | 3.10E-12 | 7.44 | 16.8962232 | 9.20E-02 | 48944598  | 48944721  | NC_000022.10 |
| cg13494489 | 4.66E-11 | 3.10E-12 | 7.44 | 16.8961451 | 1.04E-01 | 124535465 | 124535588 | NC_000009.11 |
| cg26106921 | 4.66E-11 | 3.10E-12 | 7.44 | 16.8957371 | 6.11E-02 | 44875053  | 44875176  | NC_000021.8  |
| cg20366397 | 4.66E-11 | 3.10E-12 | 7.44 | 16.8955958 | 1.27E-01 | 59759843  | 59759966  | NC_000003.11 |
| cg22310279 | 4.66E-11 | 3.10E-12 | 7.44 | 16.8945454 | 1.65E-01 | 78493232  | 78493355  | NC_000013.10 |
| cg26104752 | 4.66E-11 | 3.10E-12 | 7.44 | 16.8942738 | 1.72E-01 | 119527377 | 119527500 | NC_000001.10 |
| cg00481629 | 4.67E-11 | 3.10E-12 | 7.44 | 16.893838  | 1.94E-01 | 48972850  | 48972973  | NC_000022.10 |
| cg22512651 | 4.68E-11 | 3.11E-12 | 7.44 | 16.8911107 | 1.39E-01 | 42603117  | 42603240  | NC_000019.9  |
| cg15279413 | 4.68E-11 | 3.11E-12 | 7.44 | 16.8903572 | 8.04E-02 | 18961206  | 18961329  | NC_000022.10 |
| cg07651242 | 4.68E-11 | 3.11E-12 | 7.44 | 16.890198  | 1.74E-01 | 45614720  | 45614843  | NC_000007.13 |
| cg20933239 | 4.68E-11 | 3.11E-12 | 7.44 | 16.8901271 | 1.86E-01 | 2112381   | 2112504   | NC_000005.9  |
| cg01408654 | 4.70E-11 | 3.13E-12 | 7.44 | 16.8867281 | 2.16E-01 | 134070437 | 134070560 | NC_000004.11 |



|            |          |          |      |            |          |           |           |              |
|------------|----------|----------|------|------------|----------|-----------|-----------|--------------|
| cg02639634 | 4.70E-11 | 3.13E-12 | 7.44 | 16.8865388 | 1.89E-01 | 54792161  | 54792284  | NC_000008.10 |
| cg00601311 | 4.70E-11 | 3.13E-12 | 7.44 | 16.8864722 | 8.03E-02 | 2186129   | 2186252   | NC_000007.13 |
| cg16304215 | 4.70E-11 | 3.13E-12 | 7.44 | 16.8852269 | 1.94E-01 | 76928810  | 76928933  | NC_000005.9  |
| cg01274028 | 4.70E-11 | 3.13E-12 | 7.44 | 16.8847225 | 6.85E-02 | 66633768  | 66633891  | NC_000011.9  |
| cg25013011 | 4.71E-11 | 3.13E-12 | 7.44 | 16.8846174 | 2.26E-01 | 130389010 | 130389133 | NC_000012.11 |
| cg12087643 | 4.72E-11 | 3.14E-12 | 7.44 | 16.8824161 | 1.83E-01 | 118033370 | 118033493 | NC_000010.10 |
| cg12152919 | 4.72E-11 | 3.14E-12 | 7.44 | 16.8819262 | 1.63E-01 | 133561886 | 133562009 | NC_000006.11 |
| cg06410057 | 4.73E-11 | 3.15E-12 | 7.44 | 16.8802085 | 2.00E-01 | 25907218  | 25907341  | NC_000008.10 |
| cg05474726 | 4.73E-11 | 3.15E-12 | 7.44 | 16.8780959 | 1.93E-01 | 65291523  | 65291646  | NC_000008.10 |
| cg12037895 | 4.74E-11 | 3.15E-12 | 7.44 | 16.8776683 | 5.21E-02 | 3058175   | 3058298   | NC_000010.10 |
| cg24418063 | 4.74E-11 | 3.16E-12 | 7.44 | 16.8775035 | 9.77E-02 | 7050950   | 7051073   | NC_000012.11 |
| cg02568902 | 4.74E-11 | 3.16E-12 | 7.44 | 16.8766695 | 6.17E-02 | 6302992   | 6303115   | NC_000004.11 |
| cg01663052 | 4.74E-11 | 3.16E-12 | 7.44 | 16.8764079 | 9.15E-02 | 31923667  | 31923790  | NC_000014.8  |
| cg23812665 | 4.75E-11 | 3.16E-12 | 7.44 | 16.8754923 | 3.84E-02 | 117061545 | 117061668 | NC_000001.10 |
| cg26501369 | 4.75E-11 | 3.16E-12 | 7.44 | 16.8752684 | 1.73E-01 | 133561814 | 133561937 | NC_000006.11 |
| cg19715410 | 4.75E-11 | 3.17E-12 | 7.44 | 16.8740423 | 2.56E-01 | 29139021  | 29139144  | NC_000001.10 |
| cg05062192 | 4.76E-11 | 3.17E-12 | 7.44 | 16.8718333 | 1.02E-01 | 45678303  | 45678426  | NC_000021.8  |
| cg06650419 | 4.76E-11 | 3.17E-12 | 7.44 | 16.8713463 | 1.29E-01 | 177133946 | 177134069 | NC_000001.10 |
| cg24236409 | 4.77E-11 | 3.18E-12 | 7.44 | 16.8708401 | 1.88E-01 | 78493282  | 78493405  | NC_000013.10 |
| cg11723713 | 4.77E-11 | 3.18E-12 | 7.44 | 16.8705966 | 1.49E-01 | 131721477 | 131721600 | NC_000002.11 |
| cg13832669 | 4.77E-11 | 3.18E-12 | 7.44 | 16.8701051 | 2.08E-01 | 119609429 | 119609552 | NC_000002.11 |
| cg15039604 | 4.77E-11 | 3.18E-12 | 7.44 | 16.8698516 | 6.89E-02 | 3063192   | 3063315   | NC_000010.10 |
| cg26080154 | 4.77E-11 | 3.18E-12 | 7.44 | 16.8696019 | 5.18E-02 | 1314228   | 1314351   | NC_000011.9  |
| cg11084334 | 4.77E-11 | 3.18E-12 | 7.44 | 16.8694302 | 1.07E-01 | 9594264   | 9594387   | NC_000003.11 |
| cg06631944 | 4.78E-11 | 3.19E-12 | 7.44 | 16.8681636 | 1.51E-01 | 158365160 | 158365283 | NC_000007.13 |

|            |          |          |      |            |          |           |           |              |
|------------|----------|----------|------|------------|----------|-----------|-----------|--------------|
| cg19313408 | 4.78E-11 | 3.19E-12 | 7.44 | 16.8675753 | 1.02E-01 | 46827585  | 46827708  | NC_000021.8  |
| cg16597689 | 4.78E-11 | 3.19E-12 | 7.44 | 16.867199  | 5.22E-02 | 75848879  | 75849002  | NC_000017.10 |
| cg18265435 | 4.78E-11 | 3.19E-12 | 7.44 | 16.866812  | 5.67E-02 | 129828798 | 129828921 | NC_000010.10 |
| cg03901532 | 4.78E-11 | 3.19E-12 | 7.44 | 16.8666196 | 9.00E-02 | 36718460  | 36718583  | NC_000002.11 |
| cg06245037 | 4.80E-11 | 3.20E-12 | 7.44 | 16.8641864 | 1.93E-01 | 44332938  | 44333061  | NC_000011.9  |
| cg07291387 | 4.80E-11 | 3.20E-12 | 7.44 | 16.8622465 | 1.14E-01 | 3445288   | 3445411   | NC_000006.11 |
| cg23423423 | 4.82E-11 | 3.21E-12 | 7.43 | 16.8599014 | 6.76E-02 | 37603155  | 37603278  | NC_000022.10 |
| cg03226844 | 4.82E-11 | 3.21E-12 | 7.43 | 16.8591196 | 1.88E-01 | 185102    | 185225    | NC_000017.10 |
| cg07752026 | 4.82E-11 | 3.22E-12 | 7.43 | 16.858091  | 1.94E-01 | 3786483   | 3786606   | NC_000019.9  |
| cg05670717 | 4.83E-11 | 3.22E-12 | 7.43 | 16.8572937 | 1.30E-01 | 46368052  | 46368175  | NC_000021.8  |
| cg01436128 | 4.83E-11 | 3.22E-12 | 7.43 | 16.8571455 | 1.43E-01 | 22605186  | 22605309  | NC_000019.9  |
| cg14635586 | 4.83E-11 | 3.22E-12 | 7.43 | 16.85695   | 1.20E-01 | 91321898  | 91322021  | NC_000006.11 |
| cg13912573 | 4.83E-11 | 3.23E-12 | 7.43 | 16.8557675 | 1.26E-01 | 92293297  | 92293420  | NC_000009.11 |
| cg25154609 | 4.84E-11 | 3.23E-12 | 7.43 | 16.8555978 | 8.21E-02 | 57404184  | 57404307  | NC_000012.11 |
| cg11108474 | 4.84E-11 | 3.23E-12 | 7.43 | 16.8537932 | 9.48E-02 | 19919156  | 19919279  | NC_000013.10 |
| cg14301191 | 4.85E-11 | 3.24E-12 | 7.43 | 16.8516848 | 1.87E-01 | 158616065 | 158616188 | NC_000006.11 |
| cg23647616 | 4.85E-11 | 3.24E-12 | 7.43 | 16.851526  | 1.08E-01 | 169238245 | 169238368 | NC_000006.11 |
| cg10577511 | 4.86E-11 | 3.24E-12 | 7.43 | 16.8511954 | 1.21E-01 | 122277240 | 122277363 | NC_000002.11 |
| cg11908057 | 4.86E-11 | 3.24E-12 | 7.43 | 16.8504711 | 1.55E-01 | 27171154  | 27171277  | NC_000007.13 |
| cg09793619 | 4.87E-11 | 3.25E-12 | 7.43 | 16.8481759 | 1.21E-01 | 131650331 | 131650454 | NC_000010.10 |
| cg07428004 | 4.88E-11 | 3.26E-12 | 7.43 | 16.8456934 | 1.34E-01 | 127912372 | 127912495 | NC_000007.13 |
| cg17168456 | 4.88E-11 | 3.26E-12 | 7.43 | 16.8455139 | 2.03E-01 | 50717667  | 50717790  | NC_000001.10 |
| cg20011248 | 4.88E-11 | 3.26E-12 | 7.43 | 16.8454415 | 9.82E-02 | 227747268 | 227747391 | NC_000001.10 |
| cg09074113 | 4.88E-11 | 3.26E-12 | 7.43 | 16.8452346 | 1.12E-01 | 20870087  | 20870210  | NC_000002.11 |
| cg22224462 | 4.89E-11 | 3.26E-12 | 7.43 | 16.8438667 | 7.46E-02 | 6214772   | 6214895   | NC_000001.10 |

|            |          |          |      |            |          |           |           |              |
|------------|----------|----------|------|------------|----------|-----------|-----------|--------------|
| cg26963797 | 4.89E-11 | 3.27E-12 | 7.43 | 16.843212  | 1.79E-01 | 51189291  | 51189414  | NC_000016.9  |
| cg14056110 | 4.89E-11 | 3.27E-12 | 7.43 | 16.8430825 | 1.90E-01 | 50236465  | 50236588  | NC_000017.10 |
| cg02421962 | 4.90E-11 | 3.28E-12 | 7.43 | 16.8404849 | 8.64E-02 | 815975    | 816098    | NC_000016.9  |
| cg10308578 | 4.91E-11 | 3.28E-12 | 7.43 | 16.838425  | 9.75E-02 | 8053246   | 8053369   | NC_000011.9  |
| cg26139953 | 4.93E-11 | 3.29E-12 | 7.43 | 16.8355674 | 5.20E-02 | 237973085 | 237973208 | NC_000002.11 |
| cg14510333 | 4.94E-11 | 3.30E-12 | 7.43 | 16.8322354 | 1.80E-01 | 51168503  | 51168626  | NC_000016.9  |
| cg11142389 | 4.95E-11 | 3.31E-12 | 7.43 | 16.8300374 | 1.85E-01 | 147125765 | 147125888 | NC_000003.11 |
| cg17677678 | 4.96E-11 | 3.32E-12 | 7.43 | 16.8281828 | 5.00E-02 | 31735443  | 31735566  | NC_000006.11 |
| cg06908778 | 4.96E-11 | 3.32E-12 | 7.43 | 16.8280485 | 1.56E-01 | 22634602  | 22634725  | NC_000010.10 |
| cg21911021 | 4.96E-11 | 3.32E-12 | 7.43 | 16.8279649 | 1.65E-01 | 58095011  | 58095134  | NC_000019.9  |
| cg27112264 | 4.97E-11 | 3.32E-12 | 7.43 | 16.8277351 | 2.12E-01 | 58400504  | 58400627  | NC_000019.9  |
| cg25433222 | 4.97E-11 | 3.32E-12 | 7.43 | 16.8276357 | 6.44E-02 | 3155143   | 3155266   | NC_000006.11 |
| cg09180848 | 4.97E-11 | 3.32E-12 | 7.43 | 16.8265487 | 1.58E-01 | 83953780  | 83953903  | NC_000015.9  |
| cg15759937 | 4.98E-11 | 3.33E-12 | 7.43 | 16.8236847 | 2.49E-01 | 58400325  | 58400448  | NC_000019.9  |
| cg19291576 | 4.99E-11 | 3.33E-12 | 7.43 | 16.8231778 | 2.05E-01 | 969530    | 969653    | NC_000009.11 |
| cg13307880 | 4.99E-11 | 3.33E-12 | 7.43 | 16.8229356 | 1.67E-01 | 140744367 | 140744490 | NC_000005.9  |
| cg19518845 | 4.99E-11 | 3.34E-12 | 7.43 | 16.8227    | 5.46E-02 | 183338346 | 183338469 | NC_000001.10 |
| cg21590967 | 4.99E-11 | 3.34E-12 | 7.43 | 16.821519  | 1.57E-02 | 120517099 | 120517222 | NC_000002.11 |
| cg15765724 | 5.00E-11 | 3.34E-12 | 7.43 | 16.8208479 | 2.05E-01 | 237077151 | 237077274 | NC_000002.11 |
| cg06966113 | 5.01E-11 | 3.35E-12 | 7.43 | 16.8173588 | 1.38E-01 | 4873263   | 4873386   | NC_000004.11 |
| cg14582763 | 5.01E-11 | 3.35E-12 | 7.43 | 16.8170324 | 1.89E-01 | 52956683  | 52956806  | NC_000019.9  |
| cg26897313 | 5.02E-11 | 3.36E-12 | 7.43 | 16.8153093 | 1.93E-01 | 57903521  | 57903644  | NC_000015.9  |
| cg24304919 | 5.02E-11 | 3.36E-12 | 7.43 | 16.8151591 | 1.83E-01 | 113699194 | 113699317 | NC_000005.9  |
| cg07727170 | 5.02E-11 | 3.36E-12 | 7.43 | 16.8149697 | 1.63E-01 | 70458214  | 70458337  | NC_000015.9  |
| cg02154269 | 5.05E-11 | 3.38E-12 | 7.43 | 16.8098953 | 7.37E-02 | 4228637   | 4228760   | NC_000004.11 |

|            |          |          |      |            |          |           |           |              |
|------------|----------|----------|------|------------|----------|-----------|-----------|--------------|
| cg27069753 | 5.05E-11 | 3.38E-12 | 7.43 | 16.8092187 | 8.78E-02 | 22303571  | 22303694  | NC_000001.10 |
| cg09907521 | 5.05E-11 | 3.38E-12 | 7.43 | 16.8090516 | 7.32E-02 | 240566442 | 240566565 | NC_000002.11 |
| cg21135560 | 5.05E-11 | 3.38E-12 | 7.43 | 16.8089183 | 5.11E-02 | 144946659 | 144946782 | NC_000008.10 |
| cg27550984 | 5.06E-11 | 3.38E-12 | 7.43 | 16.8086755 | 8.11E-02 | 156027790 | 156027913 | NC_000001.10 |
| cg26354493 | 5.06E-11 | 3.38E-12 | 7.43 | 16.808447  | 1.72E-01 | 4305072   | 4305195   | NC_000019.9  |
| cg13912311 | 5.06E-11 | 3.38E-12 | 7.43 | 16.8083399 | 1.16E-01 | 127265348 | 127265471 | NC_000009.11 |
| cg24653263 | 5.07E-11 | 3.39E-12 | 7.43 | 16.8065581 | 1.94E-01 | 38258335  | 38258458  | NC_000005.9  |
| cg25017620 | 5.07E-11 | 3.39E-12 | 7.43 | 16.8055157 | 1.75E-01 | 247802802 | 247802925 | NC_000001.10 |
| cg24900666 | 5.07E-11 | 3.40E-12 | 7.43 | 16.8051951 | 8.82E-02 | 46608329  | 46608452  | NC_000017.10 |
| cg10160975 | 5.08E-11 | 3.40E-12 | 7.43 | 16.8045809 | 1.86E-01 | 42075810  | 42075933  | NC_000014.8  |
| cg23009921 | 5.08E-11 | 3.40E-12 | 7.43 | 16.8041792 | 5.62E-02 | 134219740 | 134219863 | NC_000010.10 |
| cg14409023 | 5.09E-11 | 3.41E-12 | 7.42 | 16.8019542 | 2.20E-01 | 57283436  | 57283559  | NC_000014.8  |
| cg01901262 | 5.09E-11 | 3.41E-12 | 7.42 | 16.8016327 | 2.32E-01 | 54966837  | 54966960  | NC_000016.9  |
| cg02109605 | 5.09E-11 | 3.41E-12 | 7.42 | 16.8014715 | 1.37E-01 | 13028573  | 13028696  | NC_000003.11 |
| cg11403046 | 5.10E-11 | 3.41E-12 | 7.42 | 16.799902  | 5.84E-02 | 40628070  | 40628193  | NC_000020.10 |
| cg07532353 | 5.10E-11 | 3.42E-12 | 7.42 | 16.7989186 | 1.10E-01 | 85608659  | 85608782  | NC_000016.9  |
| cg04797496 | 5.10E-11 | 3.42E-12 | 7.42 | 16.7984272 | 1.07E-01 | 141339086 | 141339209 | NC_000005.9  |
| cg08659667 | 5.11E-11 | 3.42E-12 | 7.42 | 16.7980386 | 2.10E-01 | 242688226 | 242688349 | NC_000001.10 |
| cg21548955 | 5.12E-11 | 3.43E-12 | 7.42 | 16.7953514 | 1.17E-01 | 140794993 | 140795116 | NC_000005.9  |
| cg16792842 | 5.12E-11 | 3.43E-12 | 7.42 | 16.7952648 | 1.69E-01 | 25899459  | 25899582  | NC_000008.10 |
| cg17495719 | 5.14E-11 | 3.44E-12 | 7.42 | 16.7917688 | 2.12E-01 | 144621945 | 144622068 | NC_000004.11 |
| cg14659346 | 5.14E-11 | 3.45E-12 | 7.42 | 16.7909496 | 2.05E-01 | 233246431 | 233246554 | NC_000002.11 |
| cg15104081 | 5.14E-11 | 3.45E-12 | 7.42 | 16.7909225 | 7.05E-02 | 77560291  | 77560414  | NC_000018.9  |
| cg06569421 | 5.14E-11 | 3.45E-12 | 7.42 | 16.7908173 | 4.12E-02 | 101509114 | 101509237 | NC_000007.13 |
| cg11199172 | 5.14E-11 | 3.45E-12 | 7.42 | 16.7907999 | 1.62E-01 | 46707338  | 46707461  | NC_000017.10 |

|            |          |          |      |            |          |           |           |              |
|------------|----------|----------|------|------------|----------|-----------|-----------|--------------|
| cg03382304 | 5.14E-11 | 3.45E-12 | 7.42 | 16.7899586 | 2.28E-01 | 27012176  | 27012299  | NC_000021.8  |
| cg19602485 | 5.17E-11 | 3.46E-12 | 7.42 | 16.7853368 | 1.24E-01 | 84327319  | 84327442  | NC_000001.10 |
| cg03020554 | 5.17E-11 | 3.47E-12 | 7.42 | 16.7845441 | 1.79E-01 | 99951730  | 99951853  | NC_000008.10 |
| cg11251215 | 5.17E-11 | 3.47E-12 | 7.42 | 16.784101  | 9.04E-02 | 45103933  | 45104056  | NC_000001.10 |
| cg26225694 | 5.17E-11 | 3.47E-12 | 7.42 | 16.7840627 | 1.76E-01 | 180205253 | 180205376 | NC_000001.10 |
| cg05433039 | 5.17E-11 | 3.47E-12 | 7.42 | 16.7840517 | 1.55E-01 | 79397075  | 79397198  | NC_000010.10 |
| cg07224726 | 5.18E-11 | 3.47E-12 | 7.42 | 16.7835687 | 1.78E-01 | 115298511 | 115298634 | NC_000005.9  |
| cg26517262 | 5.18E-11 | 3.47E-12 | 7.42 | 16.7834261 | 3.96E-02 | 109774738 | 109774861 | NC_000006.11 |
| cg09410830 | 5.18E-11 | 3.47E-12 | 7.42 | 16.7831223 | 8.18E-02 | 112041335 | 112041458 | NC_000006.11 |
| cg22536150 | 5.19E-11 | 3.48E-12 | 7.42 | 16.7800611 | 1.40E-01 | 142840129 | 142840252 | NC_000003.11 |
| cg06330323 | 5.19E-11 | 3.48E-12 | 7.42 | 16.7800515 | 1.87E-01 | 2132315   | 2132438   | NC_000016.9  |
| cg27021357 | 5.20E-11 | 3.49E-12 | 7.42 | 16.779389  | 2.34E-01 | 84115969  | 84116092  | NC_000015.9  |
| cg22838882 | 5.20E-11 | 3.49E-12 | 7.42 | 16.7783118 | 1.10E-01 | 138952118 | 138952241 | NC_000003.11 |
| cg02621694 | 5.21E-11 | 3.50E-12 | 7.42 | 16.7767513 | 2.40E-01 | 81951472  | 81951595  | NC_000004.11 |
| cg10698355 | 5.22E-11 | 3.50E-12 | 7.42 | 16.7752695 | 1.53E-01 | 119801193 | 119801316 | NC_000005.9  |
| cg20304988 | 5.23E-11 | 3.51E-12 | 7.42 | 16.7726255 | 1.39E-01 | 29237766  | 29237889  | NC_000007.13 |
| cg00318347 | 5.23E-11 | 3.51E-12 | 7.42 | 16.7720174 | 1.01E-01 | 25812500  | 25812623  | NC_000008.10 |
| cg22920418 | 5.24E-11 | 3.51E-12 | 7.42 | 16.7714064 | 1.22E-01 | 58902394  | 58902517  | NC_000019.9  |
| cg17296482 | 5.24E-11 | 3.52E-12 | 7.42 | 16.7708319 | 2.39E-01 | 4382188   | 4382311   | NC_000012.11 |
| cg11389011 | 5.24E-11 | 3.52E-12 | 7.42 | 16.7703815 | 2.87E-02 | 30576923  | 30577046  | NC_000006.11 |
| cg09621472 | 5.25E-11 | 3.52E-12 | 7.42 | 16.7691019 | 7.19E-02 | 113439314 | 113439437 | NC_000003.11 |
| cg22005656 | 5.26E-11 | 3.53E-12 | 7.42 | 16.7663702 | 6.35E-02 | 159691948 | 159692071 | NC_000005.9  |
| cg26855234 | 5.26E-11 | 3.53E-12 | 7.42 | 16.7658381 | 5.83E-02 | 33798089  | 33798212  | NC_000019.9  |
| cg16161135 | 5.27E-11 | 3.53E-12 | 7.42 | 16.765638  | 2.38E-02 | 179330491 | 179330614 | NC_000005.9  |
| cg11645631 | 5.27E-11 | 3.54E-12 | 7.42 | 16.7641644 | 2.20E-01 | 63986656  | 63986779  | NC_000005.9  |

|            |          |          |      |            |          |           |           |              |
|------------|----------|----------|------|------------|----------|-----------|-----------|--------------|
| cg05311410 | 5.28E-11 | 3.54E-12 | 7.42 | 16.7635073 | 2.38E-01 | 27225523  | 27225646  | NC_000007.13 |
| cg07877257 | 5.28E-11 | 3.54E-12 | 7.42 | 16.7634651 | 8.96E-02 | 125411922 | 125412045 | NC_000012.11 |
| cg18869700 | 5.28E-11 | 3.55E-12 | 7.42 | 16.7626941 | 6.36E-02 | 20907205  | 20907328  | NC_000014.8  |
| cg10813070 | 5.28E-11 | 3.55E-12 | 7.42 | 16.7616871 | 7.78E-02 | 2228344   | 2228467   | NC_000016.9  |
| cg24006721 | 5.29E-11 | 3.55E-12 | 7.42 | 16.7605088 | 1.27E-01 | 25258225  | 25258348  | NC_000001.10 |
| cg13554714 | 5.32E-11 | 3.58E-12 | 7.42 | 16.7543264 | 6.48E-02 | 15698215  | 15698338  | NC_000012.11 |
| cg23756251 | 5.32E-11 | 3.58E-12 | 7.42 | 16.7538993 | 1.79E-01 | 179754521 | 179754644 | NC_000003.11 |
| cg16973098 | 5.33E-11 | 3.58E-12 | 7.42 | 16.7534533 | 1.63E-01 | 95359203  | 95359326  | NC_000013.10 |
| cg16186001 | 5.33E-11 | 3.58E-12 | 7.42 | 16.7534252 | 7.08E-02 | 159448398 | 159448521 | NC_000005.9  |
| cg14292834 | 5.34E-11 | 3.59E-12 | 7.42 | 16.7502971 | 1.16E-01 | 36691116  | 36691239  | NC_000014.8  |
| cg05630812 | 5.35E-11 | 3.59E-12 | 7.42 | 16.7492541 | 9.16E-02 | 202612712 | 202612835 | NC_000001.10 |
| cg10648179 | 5.36E-11 | 3.60E-12 | 7.42 | 16.7470332 | 1.49E-01 | 73986783  | 73986906  | NC_000002.11 |
| cg11245681 | 5.36E-11 | 3.60E-12 | 7.42 | 16.7468521 | 1.46E-01 | 176166754 | 176166877 | NC_000005.9  |
| cg05123019 | 5.37E-11 | 3.61E-12 | 7.42 | 16.7447774 | 9.16E-02 | 97417411  | 97417534  | NC_000010.10 |
| cg08114265 | 5.37E-11 | 3.61E-12 | 7.42 | 16.7443257 | 4.70E-02 | 112052356 | 112052479 | NC_000006.11 |
| cg04157587 | 5.40E-11 | 3.63E-12 | 7.41 | 16.7397102 | 1.24E-01 | 25895751  | 25895874  | NC_000007.13 |
| cg22494346 | 5.40E-11 | 3.63E-12 | 7.41 | 16.7393385 | 1.64E-01 | 68852996  | 68853119  | NC_000005.9  |
| cg05232496 | 5.40E-11 | 3.64E-12 | 7.41 | 16.7378395 | 1.03E-01 | 1438225   | 1438348   | NC_000005.9  |
| cg14932124 | 5.43E-11 | 3.65E-12 | 7.41 | 16.7337624 | 3.45E-02 | 32885430  | 32885553  | NC_000013.10 |
| cg00622837 | 5.43E-11 | 3.65E-12 | 7.41 | 16.7334504 | 1.67E-01 | 166421992 | 166422115 | NC_000006.11 |
| cg26339504 | 5.44E-11 | 3.66E-12 | 7.41 | 16.73046   | 1.63E-01 | 118897859 | 118897982 | NC_000010.10 |
| cg11606570 | 5.44E-11 | 3.66E-12 | 7.41 | 16.730439  | 1.25E-01 | 117126698 | 117126821 | NC_000007.13 |
| cg00816936 | 5.44E-11 | 3.66E-12 | 7.41 | 16.7303297 | 3.12E-02 | 68631105  | 68631228  | NC_000001.10 |
| cg12457683 | 5.44E-11 | 3.67E-12 | 7.41 | 16.7300181 | 8.66E-02 | 221393426 | 221393549 | NC_000002.11 |
| cg09317239 | 5.45E-11 | 3.67E-12 | 7.41 | 16.7291436 | 9.44E-02 | 21818060  | 21818183  | NC_000010.10 |

|            |          |          |      |            |          |           |           |              |
|------------|----------|----------|------|------------|----------|-----------|-----------|--------------|
| cg26618618 | 5.45E-11 | 3.67E-12 | 7.41 | 16.7281106 | 7.51E-02 | 95661178  | 95661301  | NC_000011.9  |
| cg24743310 | 5.46E-11 | 3.68E-12 | 7.41 | 16.7263659 | 4.01E-02 | 19619905  | 19620028  | NC_000017.10 |
| cg08497917 | 5.47E-11 | 3.69E-12 | 7.41 | 16.7245274 | 1.15E-01 | 101880285 | 101880408 | NC_000004.11 |
| cg09838442 | 5.48E-11 | 3.69E-12 | 7.41 | 16.7236028 | 9.74E-02 | 74875644  | 74875767  | NC_000017.10 |
| cg06358218 | 5.48E-11 | 3.69E-12 | 7.41 | 16.7228851 | 1.54E-01 | 15766930  | 15767053  | NC_000001.10 |
| cg03336086 | 5.48E-11 | 3.69E-12 | 7.41 | 16.722557  | 1.85E-01 | 79331047  | 79331170  | NC_000005.9  |
| cg20294962 | 5.48E-11 | 3.69E-12 | 7.41 | 16.7223594 | 8.88E-02 | 135126559 | 135126682 | NC_000010.10 |
| cg14843337 | 5.50E-11 | 3.70E-12 | 7.41 | 16.719467  | 5.19E-02 | 12194691  | 12194814  | NC_000003.11 |
| cg12099546 | 5.50E-11 | 3.71E-12 | 7.41 | 16.7187564 | 7.26E-02 | 72763849  | 72763972  | NC_000015.9  |
| cg12873928 | 5.51E-11 | 3.71E-12 | 7.41 | 16.7174048 | 7.60E-02 | 112120720 | 112120843 | NC_000006.11 |
| cg02835823 | 5.52E-11 | 3.72E-12 | 7.41 | 16.7164081 | 9.04E-02 | 85979060  | 85979183  | NC_000016.9  |
| cg05874806 | 5.52E-11 | 3.72E-12 | 7.41 | 16.7152188 | 1.19E-01 | 102350276 | 102350399 | NC_000002.11 |
| cg00002145 | 5.52E-11 | 3.72E-12 | 7.41 | 16.7150224 | 8.18E-02 | 238249536 | 238249659 | NC_000002.11 |
| cg20089491 | 5.52E-11 | 3.72E-12 | 7.41 | 16.7149027 | 1.25E-01 | 92257477  | 92257600  | NC_000012.11 |
| cg22679316 | 5.54E-11 | 3.73E-12 | 7.41 | 16.7122264 | 1.39E-01 | 54396990  | 54397113  | NC_000012.11 |
| cg25205699 | 5.54E-11 | 3.74E-12 | 7.41 | 16.7113423 | 1.83E-01 | 37246280  | 37246403  | NC_000004.11 |
| cg20568045 | 5.55E-11 | 3.74E-12 | 7.41 | 16.7095818 | 3.04E-02 | 169642014 | 169642137 | NC_000006.11 |
| cg14081737 | 5.55E-11 | 3.74E-12 | 7.41 | 16.7092177 | 1.30E-01 | 116111377 | 116111500 | NC_000009.11 |
| cg26048630 | 5.56E-11 | 3.75E-12 | 7.41 | 16.7078399 | 1.90E-01 | 170640675 | 170640798 | NC_000001.10 |
| cg07086492 | 5.56E-11 | 3.75E-12 | 7.41 | 16.7071825 | 1.36E-01 | 17439938  | 17440061  | NC_000019.9  |
| cg15059743 | 5.57E-11 | 3.75E-12 | 7.41 | 16.7063229 | 8.66E-02 | 39580880  | 39581003  | NC_000017.10 |
| cg15325373 | 5.58E-11 | 3.76E-12 | 7.41 | 16.7047719 | 1.34E-01 | 119302275 | 119302398 | NC_000010.10 |
| cg27135510 | 5.58E-11 | 3.76E-12 | 7.41 | 16.7044357 | 7.82E-02 | 2423571   | 2423694   | NC_000011.9  |
| cg09868336 | 5.58E-11 | 3.76E-12 | 7.41 | 16.7042429 | 2.31E-01 | 68981866  | 68981989  | NC_000003.11 |
| cg02522906 | 5.61E-11 | 3.78E-12 | 7.41 | 16.6991478 | 9.16E-02 | 123450196 | 123450319 | NC_000010.10 |

|            |          |          |      |            |          |           |           |              |
|------------|----------|----------|------|------------|----------|-----------|-----------|--------------|
| cg19950556 | 5.61E-11 | 3.78E-12 | 7.41 | 16.6990831 | 7.66E-02 | 46439470  | 46439593  | NC_000021.8  |
| cg25136408 | 5.62E-11 | 3.79E-12 | 7.41 | 16.697193  | 1.22E-01 | 5265254   | 5265377   | NC_000017.10 |
| cg08024992 | 5.62E-11 | 3.79E-12 | 7.41 | 16.6964389 | 3.56E-02 | 2133441   | 2133564   | NC_000007.13 |
| cg06371452 | 5.62E-11 | 3.79E-12 | 7.41 | 16.6960749 | 5.21E-02 | 38109879  | 38110002  | NC_000010.10 |
| cg14627348 | 5.62E-11 | 3.80E-12 | 7.41 | 16.6957087 | 2.09E-01 | 79630987  | 79631110  | NC_000009.11 |
| cg07060006 | 5.64E-11 | 3.80E-12 | 7.41 | 16.6937241 | 1.95E-01 | 60296469  | 60296592  | NC_000015.9  |
| cg23730181 | 5.64E-11 | 3.80E-12 | 7.41 | 16.693585  | 2.27E-01 | 70033739  | 70033862  | NC_000001.10 |
| cg00502665 | 5.66E-11 | 3.82E-12 | 7.41 | 16.6901113 | 1.81E-01 | 56988813  | 56988936  | NC_000019.9  |
| cg11789740 | 5.66E-11 | 3.82E-12 | 7.41 | 16.6895838 | 1.86E-01 | 33602824  | 33602947  | NC_000015.9  |
| cg14507337 | 5.66E-11 | 3.82E-12 | 7.41 | 16.6893397 | 2.18E-01 | 60978161  | 60978284  | NC_000014.8  |
| cg02248486 | 5.66E-11 | 3.82E-12 | 7.41 | 16.6885987 | 1.62E-01 | 27183196  | 27183319  | NC_000007.13 |
| cg04697262 | 5.66E-11 | 3.82E-12 | 7.41 | 16.6885597 | 1.62E-01 | 130338886 | 130339009 | NC_000010.10 |
| cg06860555 | 5.70E-11 | 3.85E-12 | 7.4  | 16.6823781 | 8.03E-02 | 112672711 | 112672834 | NC_000010.10 |
| cg27259320 | 5.70E-11 | 3.85E-12 | 7.4  | 16.6822406 | 1.34E-01 | 32460587  | 32460710  | NC_000011.9  |
| cg19911801 | 5.71E-11 | 3.85E-12 | 7.4  | 16.680635  | 9.06E-02 | 2435632   | 2435755   | NC_000001.10 |
| cg03723247 | 5.71E-11 | 3.85E-12 | 7.4  | 16.6804412 | 1.56E-01 | 115135238 | 115135361 | NC_000012.11 |
| cg11128216 | 5.71E-11 | 3.85E-12 | 7.4  | 16.6804073 | 1.93E-01 | 31825833  | 31825956  | NC_000011.9  |
| cg18032190 | 5.71E-11 | 3.86E-12 | 7.4  | 16.6801608 | 2.03E-01 | 78493229  | 78493352  | NC_000013.10 |
| cg18209212 | 5.71E-11 | 3.86E-12 | 7.4  | 16.6794588 | 2.47E-01 | 130646256 | 130646379 | NC_000012.11 |
| cg03524083 | 5.71E-11 | 3.86E-12 | 7.4  | 16.6793091 | 1.63E-01 | 70534316  | 70534439  | NC_000018.9  |
| cg15885628 | 5.71E-11 | 3.86E-12 | 7.4  | 16.6792358 | 1.18E-01 | 28344718  | 28344841  | NC_000015.9  |
| cg19677607 | 5.73E-11 | 3.87E-12 | 7.4  | 16.6762566 | 1.54E-01 | 24772270  | 24772393  | NC_000008.10 |
| cg00120505 | 5.74E-11 | 3.88E-12 | 7.4  | 16.6748857 | 9.95E-02 | 5655609   | 5655732   | NC_000009.11 |
| cg24177433 | 5.74E-11 | 3.88E-12 | 7.4  | 16.6742564 | 1.13E-01 | 123535751 | 123535874 | NC_000006.11 |
| cg26333618 | 5.74E-11 | 3.88E-12 | 7.4  | 16.6735777 | 1.19E-01 | 48336655  | 48336778  | NC_000012.11 |



|            |          |          |     |            |          |           |           |              |
|------------|----------|----------|-----|------------|----------|-----------|-----------|--------------|
| cg04291079 | 5.75E-11 | 3.89E-12 | 7.4 | 16.6720044 | 8.61E-02 | 101294430 | 101294553 | NC_000014.8  |
| cg13398291 | 5.75E-11 | 3.89E-12 | 7.4 | 16.6715983 | 1.62E-01 | 41166169  | 41166292  | NC_000008.10 |
| cg10290764 | 5.76E-11 | 3.89E-12 | 7.4 | 16.671007  | 1.77E-01 | 4849399   | 4849522   | NC_000008.10 |
| cg25094126 | 5.77E-11 | 3.90E-12 | 7.4 | 16.6690041 | 1.31E-01 | 5541253   | 5541376   | NC_000012.11 |
| cg06308258 | 5.78E-11 | 3.91E-12 | 7.4 | 16.6673465 | 1.13E-01 | 117069282 | 117069405 | NC_000012.11 |
| cg04020079 | 5.78E-11 | 3.91E-12 | 7.4 | 16.666678  | 1.37E-01 | 68546688  | 68546811  | NC_000002.11 |
| cg17138769 | 5.78E-11 | 3.91E-12 | 7.4 | 16.666415  | 2.00E-01 | 118892211 | 118892334 | NC_000010.10 |
| cg14925328 | 5.79E-11 | 3.91E-12 | 7.4 | 16.665749  | 1.25E-01 | 207913718 | 207913841 | NC_000002.11 |
| cg23371746 | 5.79E-11 | 3.91E-12 | 7.4 | 16.6652246 | 1.51E-01 | 119532925 | 119533048 | NC_000001.10 |
| cg00395501 | 5.79E-11 | 3.92E-12 | 7.4 | 16.664532  | 1.19E-01 | 93296860  | 93296983  | NC_000001.10 |
| cg09737421 | 5.80E-11 | 3.92E-12 | 7.4 | 16.6641227 | 1.71E-01 | 7855622   | 7855745   | NC_000016.9  |
| cg18506390 | 5.81E-11 | 3.93E-12 | 7.4 | 16.6613642 | 1.86E-01 | 25903554  | 25903677  | NC_000008.10 |
| cg22248052 | 5.82E-11 | 3.94E-12 | 7.4 | 16.6598391 | 1.82E-01 | 50791419  | 50791542  | NC_000006.11 |
| cg04875614 | 5.82E-11 | 3.94E-12 | 7.4 | 16.6593986 | 7.77E-02 | 2008706   | 2008829   | NC_000004.11 |
| cg16896031 | 5.84E-11 | 3.95E-12 | 7.4 | 16.6570076 | 5.77E-02 | 26148105  | 26148228  | NC_000008.10 |
| cg08464190 | 5.84E-11 | 3.95E-12 | 7.4 | 16.6563089 | 2.38E-01 | 49315302  | 49315425  | NC_000016.9  |
| cg13677800 | 5.84E-11 | 3.95E-12 | 7.4 | 16.65627   | 8.33E-02 | 125426598 | 125426721 | NC_000010.10 |
| cg23503101 | 5.84E-11 | 3.95E-12 | 7.4 | 16.6557032 | 5.33E-02 | 1056579   | 1056702   | NC_000005.9  |
| cg10279872 | 5.84E-11 | 3.95E-12 | 7.4 | 16.65563   | 1.03E-01 | 120118684 | 120118807 | NC_000008.10 |
| cg07822928 | 5.84E-11 | 3.95E-12 | 7.4 | 16.6556198 | 1.03E-01 | 616454    | 616577    | NC_000019.9  |
| cg27528660 | 5.86E-11 | 3.97E-12 | 7.4 | 16.6523248 | 1.76E-01 | 72987924  | 72988047  | NC_000008.10 |
| cg19370054 | 5.86E-11 | 3.97E-12 | 7.4 | 16.6516884 | 2.17E-01 | 98964186  | 98964309  | NC_000002.11 |
| cg09109520 | 5.87E-11 | 3.97E-12 | 7.4 | 16.6510733 | 1.33E-01 | 57673258  | 57673381  | NC_000016.9  |
| cg24787130 | 5.88E-11 | 3.98E-12 | 7.4 | 16.6488142 | 1.22E-01 | 146948683 | 146948806 | NC_000005.9  |
| cg17486860 | 5.89E-11 | 3.98E-12 | 7.4 | 16.648019  | 1.73E-01 | 32454840  | 32454963  | NC_000011.9  |

|            |          |          |      |            |          |           |           |              |
|------------|----------|----------|------|------------|----------|-----------|-----------|--------------|
| cg06294856 | 5.89E-11 | 3.99E-12 | 7.4  | 16.6475904 | 1.15E-01 | 18776340  | 18776463  | NC_000009.11 |
| cg27361134 | 5.89E-11 | 3.99E-12 | 7.4  | 16.6466463 | 2.36E-01 | 43439545  | 43439668  | NC_000020.10 |
| cg12442902 | 5.90E-11 | 4.00E-12 | 7.4  | 16.6448324 | 1.03E-01 | 7427446   | 7427569   | NC_000004.11 |
| cg03816687 | 5.91E-11 | 4.00E-12 | 7.4  | 16.643897  | 1.64E-01 | 21683745  | 21683868  | NC_000020.10 |
| cg07342845 | 5.91E-11 | 4.00E-12 | 7.4  | 16.6438638 | 6.34E-02 | 60555591  | 60555714  | NC_000020.10 |
| cg13758543 | 5.92E-11 | 4.01E-12 | 7.4  | 16.6417261 | 1.69E-01 | 79169714  | 79169837  | NC_000013.10 |
| cg11751806 | 5.93E-11 | 4.01E-12 | 7.4  | 16.6408224 | 1.95E-01 | 43945680  | 43945803  | NC_000012.11 |
| cg12065562 | 5.98E-11 | 4.05E-12 | 7.4  | 16.6321356 | 7.54E-02 | 140615656 | 140615779 | NC_000005.9  |
| cg03591285 | 5.98E-11 | 4.05E-12 | 7.4  | 16.6315703 | 1.60E-01 | 1667404   | 1667527   | NC_000002.11 |
| cg13419986 | 5.98E-11 | 4.05E-12 | 7.4  | 16.6312882 | 1.09E-01 | 218769406 | 218769529 | NC_000002.11 |
| cg18507138 | 5.98E-11 | 4.05E-12 | 7.4  | 16.6307222 | 1.54E-01 | 26665242  | 26665365  | NC_000003.11 |
| cg02004723 | 6.00E-11 | 4.06E-12 | 7.39 | 16.6284182 | 7.80E-02 | 42574341  | 42574464  | NC_000020.10 |
| cg23695133 | 6.00E-11 | 4.06E-12 | 7.39 | 16.6282533 | 2.47E-01 | 21087075  | 21087198  | NC_000020.10 |
| cg18625538 | 6.00E-11 | 4.07E-12 | 7.39 | 16.6271075 | 1.29E-01 | 87832609  | 87832732  | NC_000006.11 |
| cg09563777 | 6.01E-11 | 4.07E-12 | 7.39 | 16.6261209 | 1.31E-01 | 55885870  | 55885993  | NC_000004.11 |
| cg04546041 | 6.02E-11 | 4.08E-12 | 7.39 | 16.6252833 | 2.07E-01 | 57863210  | 57863333  | NC_000019.9  |
| cg15364355 | 6.03E-11 | 4.08E-12 | 7.39 | 16.6235008 | 1.32E-01 | 127567722 | 127567845 | NC_000007.13 |
| cg01588748 | 6.03E-11 | 4.09E-12 | 7.39 | 16.6218915 | 1.71E-01 | 79258386  | 79258509  | NC_000012.11 |
| cg04891086 | 6.03E-11 | 4.09E-12 | 7.39 | 16.6218693 | 2.10E-01 | 5018513   | 5018636   | NC_000012.11 |
| cg16374906 | 6.04E-11 | 4.09E-12 | 7.39 | 16.6214531 | 6.92E-02 | 221838383 | 221838506 | NC_000001.10 |
| cg17002645 | 6.05E-11 | 4.10E-12 | 7.39 | 16.6189269 | 1.35E-01 | 6717799   | 6717922   | NC_000005.9  |
| cg18860812 | 6.05E-11 | 4.10E-12 | 7.39 | 16.6188852 | 4.64E-02 | 6423371   | 6423494   | NC_000004.11 |
| cg00447018 | 6.06E-11 | 4.11E-12 | 7.39 | 16.6179385 | 1.18E-01 | 106938320 | 106938443 | NC_000014.8  |
| cg13231921 | 6.06E-11 | 4.11E-12 | 7.39 | 16.6176884 | 1.60E-01 | 95360542  | 95360665  | NC_000013.10 |
| cg03464473 | 6.06E-11 | 4.11E-12 | 7.39 | 16.6175487 | 4.61E-02 | 72343742  | 72343865  | NC_000007.13 |

|            |          |          |      |            |          |           |           |              |
|------------|----------|----------|------|------------|----------|-----------|-----------|--------------|
| cg11927738 | 6.06E-11 | 4.11E-12 | 7.39 | 16.6174631 | 3.88E-02 | 68850580  | 68850703  | NC_000011.9  |
| cg26425256 | 6.06E-11 | 4.11E-12 | 7.39 | 16.6171547 | 1.32E-01 | 119611362 | 119611485 | NC_000002.11 |
| cg24696861 | 6.06E-11 | 4.11E-12 | 7.39 | 16.6168253 | 5.00E-02 | 46871582  | 46871705  | NC_000017.10 |
| cg22714668 | 6.06E-11 | 4.11E-12 | 7.39 | 16.6165863 | 1.06E-01 | 145453107 | 145453230 | NC_000005.9  |
| cg25405145 | 6.08E-11 | 4.12E-12 | 7.39 | 16.6145629 | 1.60E-01 | 51142580  | 51142703  | NC_000019.9  |
| cg14295306 | 6.08E-11 | 4.12E-12 | 7.39 | 16.6142843 | 7.45E-02 | 71355182  | 71355305  | NC_000017.10 |
| cg19406736 | 6.08E-11 | 4.12E-12 | 7.39 | 16.6140603 | 2.14E-01 | 37096010  | 37096133  | NC_000019.9  |
| cg16669607 | 6.08E-11 | 4.13E-12 | 7.39 | 16.6135318 | 1.26E-01 | 202965759 | 202965882 | NC_000002.11 |
| cg19188855 | 6.08E-11 | 4.13E-12 | 7.39 | 16.6132891 | 1.56E-01 | 54355476  | 54355599  | NC_000012.11 |
| cg24934408 | 6.10E-11 | 4.14E-12 | 7.39 | 16.6108504 | 7.86E-02 | 17530321  | 17530444  | NC_000001.10 |
| cg24842733 | 6.10E-11 | 4.14E-12 | 7.39 | 16.6103417 | 1.65E-01 | 84419237  | 84419360  | NC_000006.11 |
| cg17942639 | 6.10E-11 | 4.14E-12 | 7.39 | 16.610281  | 2.72E-01 | 154335184 | 154335307 | NC_000002.11 |
| cg08310608 | 6.15E-11 | 4.17E-12 | 7.39 | 16.6020144 | 2.94E-02 | 133278223 | 133278346 | NC_000012.11 |
| cg10452060 | 6.15E-11 | 4.17E-12 | 7.39 | 16.6019001 | 7.57E-02 | 154617645 | 154617768 | NC_000006.11 |
| cg00452257 | 6.15E-11 | 4.17E-12 | 7.39 | 16.6018801 | 2.40E-01 | 40006451  | 40006574  | NC_000019.9  |
| cg10963949 | 6.16E-11 | 4.18E-12 | 7.39 | 16.6005359 | 1.34E-01 | 173445463 | 173445586 | NC_000001.10 |
| cg26128079 | 6.16E-11 | 4.18E-12 | 7.39 | 16.599634  | 1.54E-01 | 127212416 | 127212539 | NC_000012.11 |
| cg09384610 | 6.16E-11 | 4.19E-12 | 7.39 | 16.5993051 | 1.84E-01 | 113229534 | 113229657 | NC_000012.11 |
| cg10981909 | 6.17E-11 | 4.19E-12 | 7.39 | 16.5985438 | 2.57E-01 | 63986392  | 63986515  | NC_000005.9  |
| cg08622369 | 6.17E-11 | 4.19E-12 | 7.39 | 16.5978645 | 1.03E-01 | 23724130  | 23724253  | NC_000002.11 |
| cg04897041 | 6.17E-11 | 4.19E-12 | 7.39 | 16.5976195 | 5.79E-02 | 1536462   | 1536585   | NC_000016.9  |
| cg03917492 | 6.20E-11 | 4.21E-12 | 7.39 | 16.5938527 | 8.50E-02 | 49663159  | 49663282  | NC_000010.10 |
| cg02895639 | 6.20E-11 | 4.22E-12 | 7.39 | 16.5923934 | 2.27E-01 | 48970993  | 48971116  | NC_000022.10 |
| cg21807313 | 6.21E-11 | 4.22E-12 | 7.39 | 16.591766  | 6.33E-02 | 176931111 | 176931234 | NC_000005.9  |
| cg21026830 | 6.21E-11 | 4.22E-12 | 7.39 | 16.5917615 | 2.33E-01 | 60973517  | 60973640  | NC_000014.8  |

|            |          |          |      |            |          |           |           |              |
|------------|----------|----------|------|------------|----------|-----------|-----------|--------------|
| cg10153214 | 6.21E-11 | 4.22E-12 | 7.39 | 16.5917211 | 8.13E-02 | 71571146  | 71571269  | NC_000016.9  |
| cg03117544 | 6.21E-11 | 4.22E-12 | 7.39 | 16.5915202 | 5.83E-02 | 27526147  | 27526270  | NC_000001.10 |
| cg04534926 | 6.21E-11 | 4.22E-12 | 7.39 | 16.5914152 | 1.88E-01 | 49314257  | 49314380  | NC_000016.9  |
| cg25567594 | 6.23E-11 | 4.23E-12 | 7.39 | 16.5883205 | 2.18E-01 | 21683478  | 21683601  | NC_000020.10 |
| cg09746736 | 6.23E-11 | 4.24E-12 | 7.39 | 16.5876113 | 2.32E-01 | 55690130  | 55690253  | NC_000016.9  |
| cg20347647 | 6.23E-11 | 4.24E-12 | 7.39 | 16.5871673 | 2.88E-02 | 69364031  | 69364154  | NC_000015.9  |
| cg03465861 | 6.25E-11 | 4.25E-12 | 7.39 | 16.5850774 | 1.46E-01 | 76630660  | 76630783  | NC_000015.9  |
| cg22278296 | 6.25E-11 | 4.25E-12 | 7.39 | 16.5848005 | 2.25E-01 | 154335199 | 154335322 | NC_000002.11 |
| cg02140171 | 6.27E-11 | 4.27E-12 | 7.39 | 16.5804025 | 9.17E-02 | 9509896   | 9510019   | NC_000004.11 |
| cg17641861 | 6.28E-11 | 4.27E-12 | 7.39 | 16.578803  | 2.36E-01 | 570361    | 570484    | NC_000004.11 |
| cg21407117 | 6.28E-11 | 4.27E-12 | 7.39 | 16.5787928 | 1.24E-01 | 228548708 | 228548831 | NC_000001.10 |
| cg00745389 | 6.29E-11 | 4.28E-12 | 7.39 | 16.5784963 | 1.65E-01 | 32467435  | 32467558  | NC_000007.13 |
| cg20965743 | 6.30E-11 | 4.28E-12 | 7.39 | 16.5765893 | 1.27E-01 | 104552209 | 104552332 | NC_000014.8  |
| cg21158633 | 6.31E-11 | 4.29E-12 | 7.39 | 16.57451   | 1.65E-01 | 1272526   | 1272649   | NC_000007.13 |
| cg02852670 | 6.33E-11 | 4.30E-12 | 7.39 | 16.5718661 | 1.38E-01 | 20903410  | 20903533  | NC_000014.8  |
| cg11272874 | 6.33E-11 | 4.31E-12 | 7.38 | 16.5704021 | 5.05E-02 | 44264948  | 44265071  | NC_000011.9  |
| cg23125492 | 6.34E-11 | 4.32E-12 | 7.38 | 16.5687571 | 1.34E-01 | 31821298  | 31821421  | NC_000011.9  |
| cg20618622 | 6.35E-11 | 4.32E-12 | 7.38 | 16.568017  | 2.35E-01 | 164265004 | 164265127 | NC_000004.11 |
| cg19939997 | 6.36E-11 | 4.33E-12 | 7.38 | 16.5668411 | 2.08E-01 | 97173335  | 97173458  | NC_000008.10 |
| cg08920252 | 6.36E-11 | 4.33E-12 | 7.38 | 16.5658622 | 1.09E-01 | 85262820  | 85262943  | NC_000016.9  |
| cg20064452 | 6.37E-11 | 4.34E-12 | 7.38 | 16.5646984 | 1.43E-01 | 59807178  | 59807301  | NC_000014.8  |
| cg09676860 | 6.37E-11 | 4.34E-12 | 7.38 | 16.5637116 | 1.64E-01 | 130737664 | 130737787 | NC_000002.11 |
| cg05222924 | 6.38E-11 | 4.34E-12 | 7.38 | 16.5631205 | 1.56E-01 | 32450486  | 32450609  | NC_000011.9  |
| cg13844591 | 6.38E-11 | 4.35E-12 | 7.38 | 16.5620948 | 1.72E-01 | 158150675 | 158150798 | NC_000001.10 |
| cg20887241 | 6.41E-11 | 4.36E-12 | 7.38 | 16.5586434 | 9.59E-02 | 23522636  | 23522759  | NC_000001.10 |

|            |          |          |      |            |          |           |           |              |
|------------|----------|----------|------|------------|----------|-----------|-----------|--------------|
| cg02925556 | 6.41E-11 | 4.37E-12 | 7.38 | 16.5574457 | 3.90E-02 | 132414758 | 132414881 | NC_000002.11 |
| cg04543938 | 6.42E-11 | 4.37E-12 | 7.38 | 16.5568876 | 2.52E-01 | 28956426  | 28956549  | NC_000006.11 |
| cg15661415 | 6.42E-11 | 4.37E-12 | 7.38 | 16.5560713 | 1.35E-01 | 54825247  | 54825370  | NC_000007.13 |
| cg05328547 | 6.42E-11 | 4.38E-12 | 7.38 | 16.555477  | 2.02E-01 | 19185139  | 19185262  | NC_000007.13 |
| cg15794859 | 6.43E-11 | 4.38E-12 | 7.38 | 16.5548115 | 1.64E-01 | 134214134 | 134214257 | NC_000006.11 |
| cg06638913 | 6.43E-11 | 4.38E-12 | 7.38 | 16.5547532 | 1.20E-01 | 235883680 | 235883803 | NC_000002.11 |
| cg18906596 | 6.43E-11 | 4.38E-12 | 7.38 | 16.5544645 | 1.21E-01 | 4151473   | 4151596   | NC_000017.10 |
| cg10775733 | 6.43E-11 | 4.38E-12 | 7.38 | 16.5538822 | 7.77E-02 | 110498910 | 110499033 | NC_000006.11 |
| cg19632594 | 6.44E-11 | 4.39E-12 | 7.38 | 16.5531445 | 1.51E-01 | 15500077  | 15500200  | NC_000005.9  |
| cg06756436 | 6.44E-11 | 4.39E-12 | 7.38 | 16.5530962 | 1.62E-01 | 615936    | 616059    | NC_000018.9  |
| cg21024112 | 6.45E-11 | 4.39E-12 | 7.38 | 16.5518016 | 6.95E-02 | 41376993  | 41377116  | NC_000006.11 |
| cg18085407 | 6.47E-11 | 4.41E-12 | 7.38 | 16.5472572 | 1.07E-01 | 244080114 | 244080237 | NC_000001.10 |
| cg10783149 | 6.48E-11 | 4.41E-12 | 7.38 | 16.5471406 | 1.01E-01 | 55707866  | 55707989  | NC_000014.8  |
| cg17714025 | 6.48E-11 | 4.41E-12 | 7.38 | 16.5470865 | 1.73E-01 | 30038619  | 30038742  | NC_000011.9  |
| cg06578117 | 6.48E-11 | 4.42E-12 | 7.38 | 16.5467294 | 1.18E-01 | 61444070  | 61444193  | NC_000010.10 |
| cg15738933 | 6.49E-11 | 4.43E-12 | 7.38 | 16.5444503 | 1.17E-01 | 75181373  | 75181496  | NC_000017.10 |
| cg24057615 | 6.50E-11 | 4.43E-12 | 7.38 | 16.5429488 | 1.52E-01 | 43732208  | 43732331  | NC_000021.8  |
| cg17809748 | 6.50E-11 | 4.43E-12 | 7.38 | 16.5426432 | 1.50E-01 | 13548336  | 13548459  | NC_000004.11 |
| cg24186674 | 6.50E-11 | 4.43E-12 | 7.38 | 16.5425565 | 2.35E-01 | 115631116 | 115631239 | NC_000011.9  |
| cg14486346 | 6.50E-11 | 4.43E-12 | 7.38 | 16.5424443 | 9.46E-02 | 102000131 | 102000254 | NC_000002.11 |
| cg02162286 | 6.51E-11 | 4.44E-12 | 7.38 | 16.5414083 | 1.71E-01 | 5887361   | 5887484   | NC_000005.9  |
| cg17932810 | 6.51E-11 | 4.44E-12 | 7.38 | 16.541295  | 1.05E-01 | 46602117  | 46602240  | NC_000001.10 |
| cg07073391 | 6.52E-11 | 4.45E-12 | 7.38 | 16.5389935 | 1.99E-01 | 15761869  | 15761992  | NC_000010.10 |
| cg07826574 | 6.53E-11 | 4.45E-12 | 7.38 | 16.5381556 | 7.28E-02 | 241581281 | 241581404 | NC_000002.11 |
| cg12138450 | 6.54E-11 | 4.46E-12 | 7.38 | 16.5359348 | 1.36E-01 | 34320864  | 34320987  | NC_000014.8  |

|            |          |          |      |            |          |           |           |              |
|------------|----------|----------|------|------------|----------|-----------|-----------|--------------|
| cg24463006 | 6.55E-11 | 4.47E-12 | 7.38 | 16.534676  | 1.60E-01 | 37303096  | 37303219  | NC_000020.10 |
| cg19726546 | 6.55E-11 | 4.47E-12 | 7.38 | 16.5343601 | 1.41E-01 | 979220    | 979343    | NC_000008.10 |
| cg01226811 | 6.56E-11 | 4.47E-12 | 7.38 | 16.5338785 | 1.61E-01 | 21927612  | 21927735  | NC_000012.11 |
| cg20586163 | 6.57E-11 | 4.49E-12 | 7.38 | 16.531018  | 1.08E-01 | 1136538   | 1136661   | NC_000008.10 |
| cg02860732 | 6.58E-11 | 4.49E-12 | 7.38 | 16.5303454 | 2.29E-01 | 12995292  | 12995415  | NC_000016.9  |
| cg09125430 | 6.58E-11 | 4.49E-12 | 7.38 | 16.5295604 | 2.81E-01 | 21927433  | 21927556  | NC_000012.11 |
| cg05721839 | 6.58E-11 | 4.49E-12 | 7.38 | 16.5292727 | 6.19E-02 | 134751598 | 134751721 | NC_000010.10 |
| cg20219100 | 6.58E-11 | 4.49E-12 | 7.38 | 16.5292375 | 9.18E-02 | 63776397  | 63776520  | NC_000011.9  |
| cg02370605 | 6.59E-11 | 4.50E-12 | 7.38 | 16.5285374 | 1.71E-01 | 63417776  | 63417899  | NC_000018.9  |
| cg15930596 | 6.59E-11 | 4.50E-12 | 7.38 | 16.5282244 | 1.81E-01 | 5018229   | 5018352   | NC_000012.11 |
| cg25481073 | 6.60E-11 | 4.50E-12 | 7.38 | 16.5274287 | 1.74E-01 | 39995542  | 39995665  | NC_000020.10 |
| cg02203711 | 6.60E-11 | 4.50E-12 | 7.38 | 16.5272617 | 6.80E-02 | 39855863  | 39855986  | NC_000022.10 |
| cg13281868 | 6.60E-11 | 4.51E-12 | 7.38 | 16.526167  | 7.91E-02 | 53883888  | 53884011  | NC_000006.11 |
| cg06239616 | 6.60E-11 | 4.51E-12 | 7.38 | 16.5259702 | 2.16E-01 | 154705941 | 154706064 | NC_000007.13 |
| cg12724384 | 6.61E-11 | 4.51E-12 | 7.38 | 16.5254828 | 9.05E-02 | 71267300  | 71267423  | NC_000008.10 |
| cg19999645 | 6.61E-11 | 4.51E-12 | 7.38 | 16.5247607 | 2.04E-01 | 35047394  | 35047517  | NC_000015.9  |
| cg25652029 | 6.63E-11 | 4.53E-12 | 7.38 | 16.5215264 | 1.94E-01 | 182321786 | 182321909 | NC_000002.11 |
| cg23457166 | 6.65E-11 | 4.54E-12 | 7.38 | 16.5185652 | 5.68E-02 | 127797286 | 127797409 | NC_000006.11 |
| cg10375890 | 6.66E-11 | 4.55E-12 | 7.38 | 16.5175711 | 2.29E-01 | 50892511  | 50892634  | NC_000001.10 |
| cg09940861 | 6.66E-11 | 4.55E-12 | 7.38 | 16.517377  | 9.55E-02 | 101201649 | 101201772 | NC_000014.8  |
| cg08207378 | 6.67E-11 | 4.56E-12 | 7.38 | 16.5159458 | 4.56E-02 | 6313762   | 6313885   | NC_000001.10 |
| cg02106385 | 6.68E-11 | 4.57E-12 | 7.38 | 16.5137281 | 9.43E-02 | 36202339  | 36202462  | NC_000001.10 |
| cg14021523 | 6.69E-11 | 4.57E-12 | 7.37 | 16.5126337 | 6.58E-02 | 92959873  | 92959996  | NC_000014.8  |
| cg07934812 | 6.69E-11 | 4.57E-12 | 7.37 | 16.5126085 | 1.84E-01 | 133109013 | 133109136 | NC_000010.10 |
| cg01596674 | 6.70E-11 | 4.58E-12 | 7.37 | 16.5117472 | 1.40E-01 | 130342290 | 130342413 | NC_000009.11 |

|            |          |          |      |            |          |           |           |              |
|------------|----------|----------|------|------------|----------|-----------|-----------|--------------|
| cg27349460 | 6.70E-11 | 4.58E-12 | 7.37 | 16.5115541 | 8.02E-02 | 76000984  | 76001107  | NC_000018.9  |
| cg03841638 | 6.71E-11 | 4.58E-12 | 7.37 | 16.5100267 | 1.23E-01 | 77911850  | 77911973  | NC_000017.10 |
| cg04897683 | 6.71E-11 | 4.58E-12 | 7.37 | 16.5099453 | 1.87E-01 | 134871462 | 134871585 | NC_000005.9  |
| cg18371424 | 6.71E-11 | 4.59E-12 | 7.37 | 16.5094024 | 1.29E-01 | 64654259  | 64654382  | NC_000014.8  |
| cg19479744 | 6.73E-11 | 4.60E-12 | 7.37 | 16.5065727 | 6.27E-02 | 156022315 | 156022438 | NC_000006.11 |
| cg15908093 | 6.73E-11 | 4.60E-12 | 7.37 | 16.5055616 | 7.61E-02 | 175463643 | 175463766 | NC_000005.9  |
| cg16000017 | 6.76E-11 | 4.62E-12 | 7.37 | 16.5023599 | 6.85E-02 | 95639346  | 95639469  | NC_000001.10 |
| cg02363202 | 6.76E-11 | 4.62E-12 | 7.37 | 16.5013171 | 1.43E-01 | 57653226  | 57653349  | NC_000012.11 |
| cg11841394 | 6.77E-11 | 4.63E-12 | 7.37 | 16.500804  | 2.28E-01 | 114841536 | 114841659 | NC_000012.11 |
| cg16443866 | 6.78E-11 | 4.63E-12 | 7.37 | 16.4993933 | 2.74E-01 | 172756558 | 172756681 | NC_000005.9  |
| cg03425785 | 6.78E-11 | 4.64E-12 | 7.37 | 16.4984442 | 1.40E-01 | 62221387  | 62221510  | NC_000020.10 |
| cg11841771 | 6.79E-11 | 4.64E-12 | 7.37 | 16.4973313 | 1.60E-01 | 115134956 | 115135079 | NC_000012.11 |
| cg07658280 | 6.81E-11 | 4.66E-12 | 7.37 | 16.4937558 | 1.74E-01 | 145728490 | 145728613 | NC_000008.10 |
| cg16316394 | 6.83E-11 | 4.67E-12 | 7.37 | 16.4911067 | 1.37E-01 | 140805841 | 140805964 | NC_000005.9  |
| cg11388325 | 6.84E-11 | 4.68E-12 | 7.37 | 16.4900842 | 1.70E-01 | 5018815   | 5018938   | NC_000012.11 |
| cg02745719 | 6.84E-11 | 4.68E-12 | 7.37 | 16.4892116 | 6.93E-02 | 112251076 | 112251199 | NC_000005.9  |
| cg16658020 | 6.85E-11 | 4.69E-12 | 7.37 | 16.4878623 | 1.21E-01 | 39203641  | 39203764  | NC_000017.10 |
| cg02179455 | 6.85E-11 | 4.69E-12 | 7.37 | 16.4876238 | 2.08E-01 | 19183732  | 19183855  | NC_000007.13 |
| cg01565291 | 6.87E-11 | 4.70E-12 | 7.37 | 16.4855553 | 1.73E-01 | 245812674 | 245812797 | NC_000001.10 |
| cg11352339 | 6.87E-11 | 4.70E-12 | 7.37 | 16.4850209 | 7.19E-02 | 43482436  | 43482559  | NC_000006.11 |
| cg25969984 | 6.87E-11 | 4.70E-12 | 7.37 | 16.484827  | 1.20E-01 | 683832    | 683955    | NC_000008.10 |
| cg14256587 | 6.87E-11 | 4.70E-12 | 7.37 | 16.4842699 | 1.98E-01 | 946010    | 946133    | NC_000002.11 |
| cg25021182 | 6.88E-11 | 4.71E-12 | 7.37 | 16.4832052 | 1.20E-01 | 15802594  | 15802717  | NC_000001.10 |
| cg03607359 | 6.88E-11 | 4.71E-12 | 7.37 | 16.4830296 | 2.43E-01 | 176057465 | 176057588 | NC_000005.9  |
| cg02786019 | 6.89E-11 | 4.71E-12 | 7.37 | 16.4824237 | 1.51E-01 | 142582859 | 142582982 | NC_000007.13 |

|            |          |          |      |            |          |           |           |              |
|------------|----------|----------|------|------------|----------|-----------|-----------|--------------|
| cg05625471 | 6.90E-11 | 4.72E-12 | 7.37 | 16.4806568 | 1.48E-01 | 31342748  | 31342871  | NC_000016.9  |
| cg18944176 | 6.90E-11 | 4.72E-12 | 7.37 | 16.4802859 | 9.53E-02 | 27271688  | 27271811  | NC_000007.13 |
| cg18793661 | 6.90E-11 | 4.73E-12 | 7.37 | 16.479848  | 1.20E-01 | 192897    | 193020    | NC_000011.9  |
| cg21215550 | 6.90E-11 | 4.73E-12 | 7.37 | 16.4794561 | 2.35E-01 | 969544    | 969667    | NC_000009.11 |
| cg12232463 | 6.91E-11 | 4.73E-12 | 7.37 | 16.4788812 | 1.30E-01 | 100926650 | 100926773 | NC_000002.11 |
| cg23900070 | 6.91E-11 | 4.73E-12 | 7.37 | 16.4786886 | 7.67E-02 | 68853595  | 68853718  | NC_000014.8  |
| cg17489939 | 6.91E-11 | 4.73E-12 | 7.37 | 16.478066  | 1.22E-01 | 176981919 | 176982042 | NC_000002.11 |
| cg13412545 | 6.92E-11 | 4.74E-12 | 7.37 | 16.4766775 | 1.26E-01 | 172175765 | 172175888 | NC_000005.9  |
| cg08132931 | 6.93E-11 | 4.75E-12 | 7.37 | 16.4748887 | 1.85E-01 | 70994962  | 70995085  | NC_000002.11 |
| cg09998861 | 6.94E-11 | 4.76E-12 | 7.37 | 16.473635  | 1.37E-01 | 86538106  | 86538229  | NC_000016.9  |
| cg18646864 | 6.95E-11 | 4.76E-12 | 7.37 | 16.4721653 | 4.60E-02 | 52866643  | 52866766  | NC_000001.10 |
| cg04154276 | 6.95E-11 | 4.76E-12 | 7.37 | 16.4717244 | 1.97E-01 | 23983888  | 23984011  | NC_000010.10 |
| cg14156650 | 6.97E-11 | 4.78E-12 | 7.37 | 16.4693226 | 1.28E-01 | 2054287   | 2054410   | NC_000016.9  |
| cg25638626 | 7.02E-11 | 4.81E-12 | 7.37 | 16.4624572 | 1.84E-01 | 68117903  | 68118026  | NC_000015.9  |
| cg22013966 | 7.02E-11 | 4.81E-12 | 7.37 | 16.462265  | 1.37E-01 | 95106170  | 95106293  | NC_000014.8  |
| cg12202913 | 7.02E-11 | 4.82E-12 | 7.37 | 16.4612413 | 8.03E-02 | 12846618  | 12846741  | NC_000019.9  |
| cg19678828 | 7.02E-11 | 4.82E-12 | 7.37 | 16.4611887 | 1.46E-01 | 27945413  | 27945536  | NC_000021.8  |
| cg05617551 | 7.03E-11 | 4.82E-12 | 7.37 | 16.4601803 | 1.59E-01 | 54209183  | 54209306  | NC_000016.9  |
| cg01002529 | 7.04E-11 | 4.83E-12 | 7.37 | 16.4585522 | 1.90E-01 | 69591807  | 69591930  | NC_000003.11 |
| cg09671060 | 7.05E-11 | 4.84E-12 | 7.37 | 16.4570303 | 1.84E-01 | 47062953  | 47063076  | NC_000021.8  |
| cg01210642 | 7.06E-11 | 4.84E-12 | 7.37 | 16.4560034 | 1.06E-01 | 36921499  | 36921622  | NC_000006.11 |
| cg20225749 | 7.06E-11 | 4.84E-12 | 7.37 | 16.4554949 | 2.28E-01 | 946127    | 946250    | NC_000002.11 |
| cg08620606 | 7.07E-11 | 4.85E-12 | 7.36 | 16.4548882 | 1.47E-01 | 40005611  | 40005734  | NC_000019.9  |
| cg06759189 | 7.08E-11 | 4.85E-12 | 7.36 | 16.4533532 | 2.01E-01 | 77777947  | 77778070  | NC_000017.10 |
| cg07169289 | 7.08E-11 | 4.86E-12 | 7.36 | 16.453044  | 3.80E-02 | 136534480 | 136534603 | NC_000006.11 |



|            |          |          |      |            |          |           |           |              |
|------------|----------|----------|------|------------|----------|-----------|-----------|--------------|
| cg23768829 | 7.09E-11 | 4.86E-12 | 7.36 | 16.4513609 | 1.33E-01 | 8089653   | 8089776   | NC_000010.10 |
| cg00196787 | 7.09E-11 | 4.87E-12 | 7.36 | 16.4509776 | 1.82E-01 | 32907132  | 32907255  | NC_000017.10 |
| cg00361017 | 7.10E-11 | 4.87E-12 | 7.36 | 16.4503164 | 1.20E-01 | 166073666 | 166073789 | NC_000006.11 |
| cg25480336 | 7.10E-11 | 4.87E-12 | 7.36 | 16.4500618 | 2.26E-01 | 50720908  | 50721031  | NC_000020.10 |
| cg27362525 | 7.11E-11 | 4.88E-12 | 7.36 | 16.4488092 | 1.81E-01 | 5019638   | 5019761   | NC_000017.10 |
| cg12053971 | 7.11E-11 | 4.88E-12 | 7.36 | 16.4477376 | 8.34E-02 | 134917266 | 134917389 | NC_000010.10 |
| cg03700135 | 7.11E-11 | 4.88E-12 | 7.36 | 16.4477125 | 1.39E-01 | 707059    | 707182    | NC_000017.10 |
| cg09347413 | 7.12E-11 | 4.89E-12 | 7.36 | 16.4466939 | 2.57E-01 | 23734299  | 23734422  | NC_000013.10 |
| cg01150936 | 7.14E-11 | 4.90E-12 | 7.36 | 16.4442773 | 5.37E-02 | 67235960  | 67236083  | NC_000016.9  |
| cg24288310 | 7.14E-11 | 4.90E-12 | 7.36 | 16.4440865 | 1.94E-01 | 92936678  | 92936801  | NC_000015.9  |
| cg17306116 | 7.14E-11 | 4.90E-12 | 7.36 | 16.4437341 | 2.94E-02 | 77528194  | 77528317  | NC_000014.8  |
| cg07675169 | 7.14E-11 | 4.90E-12 | 7.36 | 16.4436811 | 1.77E-01 | 61886262  | 61886385  | NC_000020.10 |
| cg04439218 | 7.14E-11 | 4.91E-12 | 7.36 | 16.4429409 | 1.33E-01 | 37839407  | 37839530  | NC_000005.9  |
| cg25474372 | 7.15E-11 | 4.91E-12 | 7.36 | 16.4417421 | 1.89E-01 | 28762125  | 28762248  | NC_000006.11 |
| cg25103417 | 7.16E-11 | 4.92E-12 | 7.36 | 16.440659  | 1.42E-01 | 157812018 | 157812141 | NC_000003.11 |
| cg05950570 | 7.17E-11 | 4.93E-12 | 7.36 | 16.4391764 | 2.53E-01 | 132261418 | 132261541 | NC_000007.13 |
| cg02805814 | 7.17E-11 | 4.93E-12 | 7.36 | 16.4385731 | 8.11E-02 | 53088482  | 53088605  | NC_000019.9  |
| cg26815414 | 7.17E-11 | 4.93E-12 | 7.36 | 16.4384105 | 8.42E-02 | 113300120 | 113300243 | NC_000013.10 |
| cg20072442 | 7.19E-11 | 4.94E-12 | 7.36 | 16.4362406 | 2.23E-01 | 80530255  | 80530378  | NC_000002.11 |
| cg25429672 | 7.19E-11 | 4.94E-12 | 7.36 | 16.4358693 | 1.50E-01 | 73692155  | 73692278  | NC_000011.9  |
| cg14689623 | 7.20E-11 | 4.95E-12 | 7.36 | 16.4342544 | 2.67E-01 | 20691161  | 20691284  | NC_000011.9  |
| cg20114732 | 7.21E-11 | 4.95E-12 | 7.36 | 16.4338298 | 2.06E-01 | 166579135 | 166579258 | NC_000006.11 |
| cg16757332 | 7.21E-11 | 4.95E-12 | 7.36 | 16.4338223 | 9.05E-02 | 92956197  | 92956320  | NC_000014.8  |
| cg09520393 | 7.21E-11 | 4.96E-12 | 7.36 | 16.4331158 | 1.31E-01 | 9783059   | 9783182   | NC_000004.11 |
| cg00228708 | 7.21E-11 | 4.96E-12 | 7.36 | 16.4328121 | 7.11E-02 | 135048062 | 135048185 | NC_000010.10 |

|            |          |          |      |            |          |           |           |              |
|------------|----------|----------|------|------------|----------|-----------|-----------|--------------|
| cg09528449 | 7.22E-11 | 4.96E-12 | 7.36 | 16.4324533 | 1.63E-01 | 144241120 | 144241243 | NC_000008.10 |
| cg22250390 | 7.23E-11 | 4.97E-12 | 7.36 | 16.4309301 | 7.53E-02 | 5246986   | 5247109   | NC_000003.11 |
| cg04043571 | 7.24E-11 | 4.98E-12 | 7.36 | 16.4288398 | 1.38E-01 | 127265989 | 127266112 | NC_000009.11 |
| cg23706449 | 7.25E-11 | 4.99E-12 | 7.36 | 16.4271165 | 7.19E-02 | 47046101  | 47046224  | NC_000008.10 |
| cg19596297 | 7.26E-11 | 4.99E-12 | 7.36 | 16.4257796 | 8.02E-02 | 45021974  | 45022097  | NC_000003.11 |
| cg22138627 | 7.27E-11 | 5.00E-12 | 7.36 | 16.4251028 | 4.38E-02 | 42163505  | 42163628  | NC_000006.11 |
| cg16436782 | 7.28E-11 | 5.01E-12 | 7.36 | 16.4228029 | 9.92E-02 | 110917824 | 110917947 | NC_000013.10 |
| cg02985445 | 7.29E-11 | 5.01E-12 | 7.36 | 16.4214294 | 1.31E-01 | 97908505  | 97908628  | NC_000007.13 |
| cg09110241 | 7.30E-11 | 5.02E-12 | 7.36 | 16.4207222 | 6.23E-02 | 227079364 | 227079487 | NC_000002.11 |
| cg24987745 | 7.31E-11 | 5.02E-12 | 7.36 | 16.4196399 | 9.72E-02 | 17819167  | 17819290  | NC_000002.11 |
| cg21126844 | 7.31E-11 | 5.03E-12 | 7.36 | 16.4187682 | 3.71E-02 | 69254520  | 69254643  | NC_000011.9  |
| cg02446487 | 7.34E-11 | 5.05E-12 | 7.36 | 16.4145619 | 3.55E-02 | 49177504  | 49177627  | NC_000019.9  |
| cg21004604 | 7.34E-11 | 5.05E-12 | 7.36 | 16.4143287 | 7.06E-02 | 4378085   | 4378208   | NC_000017.10 |
| cg25865467 | 7.36E-11 | 5.07E-12 | 7.36 | 16.4114103 | 1.58E-01 | 73673231  | 73673354  | NC_000003.11 |
| cg02641288 | 7.36E-11 | 5.07E-12 | 7.36 | 16.4112018 | 9.94E-02 | 1883011   | 1883134   | NC_000005.9  |
| cg27462210 | 7.37E-11 | 5.07E-12 | 7.36 | 16.4104263 | 6.49E-02 | 44905012  | 44905135  | NC_000021.8  |
| cg03642328 | 7.37E-11 | 5.07E-12 | 7.36 | 16.4104225 | 6.88E-02 | 69624973  | 69625096  | NC_000011.9  |
| cg15556781 | 7.39E-11 | 5.09E-12 | 7.36 | 16.4074663 | 7.50E-02 | 25756688  | 25756811  | NC_000022.10 |
| cg14209344 | 7.39E-11 | 5.09E-12 | 7.36 | 16.4073604 | 7.67E-02 | 87886892  | 87887015  | NC_000004.11 |
| cg00107772 | 7.42E-11 | 5.11E-12 | 7.36 | 16.4033361 | 1.69E-01 | 57261886  | 57262009  | NC_000014.8  |
| cg09798090 | 7.43E-11 | 5.11E-12 | 7.36 | 16.4025056 | 5.60E-02 | 47472140  | 47472263  | NC_000013.10 |
| cg08495115 | 7.44E-11 | 5.12E-12 | 7.36 | 16.4007899 | 2.19E-01 | 33010399  | 33010522  | NC_000015.9  |
| cg18824585 | 7.44E-11 | 5.12E-12 | 7.36 | 16.400113  | 1.71E-01 | 114445084 | 114445207 | NC_000008.10 |
| cg21760040 | 7.45E-11 | 5.13E-12 | 7.36 | 16.3990689 | 7.75E-02 | 19813493  | 19813616  | NC_000007.13 |
| cg10176687 | 7.45E-11 | 5.13E-12 | 7.36 | 16.3989953 | 1.94E-01 | 123229073 | 123229196 | NC_000011.9  |

|            |          |          |      |            |          |           |           |              |
|------------|----------|----------|------|------------|----------|-----------|-----------|--------------|
| cg03623178 | 7.45E-11 | 5.13E-12 | 7.36 | 16.3989584 | 2.01E-01 | 28175578  | 28175701  | NC_000006.11 |
| cg19125584 | 7.45E-11 | 5.13E-12 | 7.36 | 16.3986452 | 9.81E-02 | 601828    | 601951    | NC_000007.13 |
| cg24410255 | 7.46E-11 | 5.14E-12 | 7.36 | 16.3973804 | 1.17E-01 | 218098593 | 218098716 | NC_000001.10 |
| cg09765463 | 7.47E-11 | 5.14E-12 | 7.35 | 16.3967769 | 1.28E-01 | 65393430  | 65393553  | NC_000001.10 |
| cg16085649 | 7.47E-11 | 5.14E-12 | 7.35 | 16.3964971 | 1.14E-01 | 86186011  | 86186134  | NC_000015.9  |
| cg01055099 | 7.48E-11 | 5.15E-12 | 7.35 | 16.3947714 | 8.00E-02 | 3516099   | 3516222   | NC_000016.9  |
| cg00280345 | 7.50E-11 | 5.17E-12 | 7.35 | 16.3921673 | 1.27E-01 | 145728388 | 145728511 | NC_000008.10 |
| cg02005873 | 7.55E-11 | 5.20E-12 | 7.35 | 16.3848774 | 1.92E-01 | 10385839  | 10385962  | NC_000006.11 |
| cg06733347 | 7.55E-11 | 5.21E-12 | 7.35 | 16.3845178 | 5.36E-02 | 72453427  | 72453550  | NC_000015.9  |
| cg17743939 | 7.56E-11 | 5.21E-12 | 7.35 | 16.3835117 | 3.11E-02 | 46444050  | 46444173  | NC_000019.9  |
| cg01937650 | 7.59E-11 | 5.23E-12 | 7.35 | 16.3801098 | 1.97E-01 | 75896836  | 75896959  | NC_000008.10 |
| cg19615102 | 7.59E-11 | 5.23E-12 | 7.35 | 16.3792393 | 8.61E-02 | 104335436 | 104335559 | NC_000012.11 |
| cg04645914 | 7.60E-11 | 5.24E-12 | 7.35 | 16.3777475 | 1.73E-01 | 52452317  | 52452440  | NC_000019.9  |
| cg25470148 | 7.63E-11 | 5.26E-12 | 7.35 | 16.3744471 | 1.51E-01 | 25257931  | 25258054  | NC_000001.10 |
| cg04367345 | 7.68E-11 | 5.30E-12 | 7.35 | 16.3675915 | 1.32E-01 | 44332636  | 44332759  | NC_000011.9  |
| cg15745284 | 7.69E-11 | 5.30E-12 | 7.35 | 16.3665313 | 1.62E-01 | 32064923  | 32065046  | NC_000006.11 |
| cg15174623 | 7.69E-11 | 5.30E-12 | 7.35 | 16.3662113 | 1.37E-01 | 35494345  | 35494468  | NC_000007.13 |
| cg23902471 | 7.69E-11 | 5.31E-12 | 7.35 | 16.3658121 | 1.12E-01 | 49039001  | 49039124  | NC_000022.10 |
| cg22925751 | 7.70E-11 | 5.31E-12 | 7.35 | 16.3646271 | 8.74E-02 | 93509137  | 93509260  | NC_000012.11 |
| cg21980107 | 7.70E-11 | 5.32E-12 | 7.35 | 16.3640134 | 5.63E-02 | 42520181  | 42520304  | NC_000021.8  |
| cg23291886 | 7.70E-11 | 5.32E-12 | 7.35 | 16.3639292 | 1.37E-01 | 174440681 | 174440804 | NC_000004.11 |
| cg01942962 | 7.71E-11 | 5.32E-12 | 7.35 | 16.3627612 | 1.95E-01 | 158143439 | 158143562 | NC_000004.11 |
| cg12780678 | 7.71E-11 | 5.32E-12 | 7.35 | 16.3626049 | 1.70E-01 | 1746846   | 1746969   | NC_000002.11 |
| cg22878622 | 7.72E-11 | 5.33E-12 | 7.35 | 16.3619078 | 1.98E-01 | 67873476  | 67873599  | NC_000008.10 |
| cg09355771 | 7.73E-11 | 5.33E-12 | 7.35 | 16.3607176 | 1.89E-01 | 177043147 | 177043270 | NC_000002.11 |

|            |          |          |      |            |          |           |           |              |
|------------|----------|----------|------|------------|----------|-----------|-----------|--------------|
| cg24595510 | 7.73E-11 | 5.34E-12 | 7.35 | 16.3603974 | 2.29E-01 | 644302    | 644425    | NC_000020.10 |
| cg16914674 | 7.74E-11 | 5.35E-12 | 7.35 | 16.3583518 | 2.35E-01 | 90349662  | 90349785  | NC_000015.9  |
| cg19054219 | 7.74E-11 | 5.35E-12 | 7.35 | 16.3582525 | 3.54E-02 | 46805820  | 46805943  | NC_000022.10 |
| cg18482892 | 7.76E-11 | 5.36E-12 | 7.35 | 16.3560726 | 1.56E-01 | 56833426  | 56833549  | NC_000003.11 |
| cg05605603 | 7.77E-11 | 5.37E-12 | 7.35 | 16.3546378 | 1.60E-01 | 35602594  | 35602717  | NC_000011.9  |
| cg20599066 | 7.77E-11 | 5.37E-12 | 7.35 | 16.3544481 | 1.35E-01 | 23287420  | 23287543  | NC_000007.13 |
| cg18845960 | 7.78E-11 | 5.37E-12 | 7.35 | 16.3536478 | 1.23E-01 | 37387350  | 37387473  | NC_000002.11 |
| cg00914726 | 7.78E-11 | 5.37E-12 | 7.35 | 16.353253  | 2.01E-01 | 60539400  | 60539523  | NC_000001.10 |
| cg06120379 | 7.78E-11 | 5.38E-12 | 7.35 | 16.3525897 | 3.90E-02 | 197357859 | 197357982 | NC_000003.11 |
| cg02092141 | 7.79E-11 | 5.38E-12 | 7.35 | 16.3516207 | 1.15E-01 | 66411184  | 66411307  | NC_000011.9  |
| cg15743922 | 7.80E-11 | 5.39E-12 | 7.35 | 16.3505945 | 1.88E-01 | 22930545  | 22930668  | NC_000018.9  |
| cg13891539 | 7.81E-11 | 5.39E-12 | 7.35 | 16.3497225 | 1.43E-01 | 30322730  | 30322853  | NC_000012.11 |
| cg15559979 | 7.81E-11 | 5.40E-12 | 7.35 | 16.3494686 | 5.36E-02 | 49049574  | 49049697  | NC_000003.11 |
| cg18511930 | 7.81E-11 | 5.40E-12 | 7.35 | 16.3493605 | 4.59E-02 | 42371788  | 42371911  | NC_000004.11 |
| cg25461801 | 7.82E-11 | 5.41E-12 | 7.35 | 16.3476623 | 1.38E-01 | 100630316 | 100630439 | NC_000013.10 |
| cg06029846 | 7.82E-11 | 5.41E-12 | 7.35 | 16.3472765 | 1.88E-01 | 3600317   | 3600440   | NC_000012.11 |
| cg10334354 | 7.83E-11 | 5.41E-12 | 7.35 | 16.3463659 | 1.63E-01 | 66535203  | 66535326  | NC_000004.11 |
| cg07805604 | 7.83E-11 | 5.41E-12 | 7.35 | 16.34636   | 1.67E-01 | 56158885  | 56159008  | NC_000019.9  |
| cg20886017 | 7.84E-11 | 5.42E-12 | 7.35 | 16.3455288 | 1.48E-01 | 131002896 | 131003019 | NC_000003.11 |
| cg02613418 | 7.85E-11 | 5.43E-12 | 7.35 | 16.3439329 | 1.78E-01 | 68723914  | 68724037  | NC_000015.9  |
| cg03530744 | 7.87E-11 | 5.44E-12 | 7.35 | 16.3412265 | 1.31E-01 | 111270991 | 111271114 | NC_000013.10 |
| cg20664313 | 7.87E-11 | 5.44E-12 | 7.35 | 16.3409841 | 1.46E-01 | 133071297 | 133071420 | NC_000012.11 |
| cg15212349 | 7.87E-11 | 5.44E-12 | 7.35 | 16.3408288 | 1.45E-01 | 1444852   | 1444975   | NC_000005.9  |
| cg05038288 | 7.87E-11 | 5.44E-12 | 7.35 | 16.3408038 | 9.26E-02 | 41800491  | 41800614  | NC_000017.10 |
| cg07929029 | 7.88E-11 | 5.45E-12 | 7.35 | 16.3403288 | 1.40E-01 | 150623203 | 150623326 | NC_000001.10 |

|            |          |          |      |            |          |           |           |              |
|------------|----------|----------|------|------------|----------|-----------|-----------|--------------|
| cg27486624 | 7.89E-11 | 5.45E-12 | 7.34 | 16.3390961 | 7.93E-02 | 43542382  | 43542505  | NC_000006.11 |
| cg27320005 | 7.89E-11 | 5.46E-12 | 7.34 | 16.3380815 | 1.15E-01 | 140683767 | 140683890 | NC_000005.9  |
| cg06490627 | 7.90E-11 | 5.46E-12 | 7.34 | 16.3373585 | 9.17E-02 | 50344198  | 50344321  | NC_000016.9  |
| cg08050115 | 7.90E-11 | 5.46E-12 | 7.34 | 16.3372957 | 1.34E-01 | 31341479  | 31341602  | NC_000016.9  |
| cg23001370 | 7.93E-11 | 5.48E-12 | 7.34 | 16.3337241 | 1.05E-01 | 53817073  | 53817196  | NC_000005.9  |
| cg23161999 | 7.93E-11 | 5.49E-12 | 7.34 | 16.3331328 | 2.03E-01 | 162283189 | 162283312 | NC_000002.11 |
| cg08716217 | 7.94E-11 | 5.49E-12 | 7.34 | 16.3323513 | 3.27E-02 | 2483719   | 2483842   | NC_000001.10 |
| cg18679410 | 7.94E-11 | 5.50E-12 | 7.34 | 16.331414  | 1.86E-01 | 26664308  | 26664431  | NC_000003.11 |
| cg20655220 | 7.95E-11 | 5.50E-12 | 7.34 | 16.3308619 | 1.24E-01 | 102246737 | 102246860 | NC_000005.9  |
| cg13338137 | 7.95E-11 | 5.50E-12 | 7.34 | 16.3307749 | 1.69E-01 | 79169966  | 79170089  | NC_000013.10 |
| cg01838004 | 7.95E-11 | 5.50E-12 | 7.34 | 16.3305983 | 1.35E-01 | 100070007 | 100070130 | NC_000009.11 |
| cg10724940 | 7.95E-11 | 5.50E-12 | 7.34 | 16.3305576 | 5.33E-02 | 50656595  | 50656718  | NC_000022.10 |
| cg00210249 | 7.96E-11 | 5.51E-12 | 7.34 | 16.3289839 | 1.83E-01 | 71135679  | 71135802  | NC_000010.10 |
| cg02257517 | 7.97E-11 | 5.52E-12 | 7.34 | 16.3273048 | 5.58E-02 | 136340262 | 136340385 | NC_000009.11 |
| cg19593680 | 7.99E-11 | 5.53E-12 | 7.34 | 16.325795  | 9.56E-02 | 7374669   | 7374792   | NC_000004.11 |
| cg19023320 | 7.99E-11 | 5.53E-12 | 7.34 | 16.3257754 | 1.53E-01 | 13033587  | 13033710  | NC_000003.11 |
| cg02943074 | 7.99E-11 | 5.53E-12 | 7.34 | 16.3248238 | 4.95E-02 | 79906185  | 79906308  | NC_000017.10 |
| cg13875518 | 7.99E-11 | 5.53E-12 | 7.34 | 16.3246085 | 1.93E-01 | 21502218  | 21502341  | NC_000020.10 |
| cg17218713 | 7.99E-11 | 5.53E-12 | 7.34 | 16.3244495 | 2.28E-01 | 71513114  | 71513237  | NC_000001.10 |
| cg16048781 | 8.00E-11 | 5.54E-12 | 7.34 | 16.3239977 | 7.01E-02 | 15296155  | 15296278  | NC_000019.9  |
| cg06082745 | 8.00E-11 | 5.54E-12 | 7.34 | 16.3239426 | 2.17E-01 | 133795139 | 133795262 | NC_000010.10 |
| cg05722981 | 8.00E-11 | 5.54E-12 | 7.34 | 16.3238541 | 1.44E-01 | 111533509 | 111533632 | NC_000004.11 |
| cg06201642 | 8.00E-11 | 5.54E-12 | 7.34 | 16.3237185 | 1.91E-01 | 77333198  | 77333321  | NC_000001.10 |
| cg09155219 | 8.01E-11 | 5.54E-12 | 7.34 | 16.3225596 | 1.22E-01 | 48144280  | 48144403  | NC_000014.8  |
| cg21047695 | 8.02E-11 | 5.55E-12 | 7.34 | 16.3207682 | 1.62E-01 | 63614552  | 63614675  | NC_000008.10 |

|            |          |          |      |            |          |           |           |              |
|------------|----------|----------|------|------------|----------|-----------|-----------|--------------|
| cg10769146 | 8.04E-11 | 5.57E-12 | 7.34 | 16.3186803 | 1.65E-01 | 214156644 | 214156767 | NC_000001.10 |
| cg02653559 | 8.04E-11 | 5.57E-12 | 7.34 | 16.3179968 | 2.26E-01 | 147112081 | 147112204 | NC_000003.11 |
| cg18405727 | 8.06E-11 | 5.58E-12 | 7.34 | 16.3157152 | 1.75E-01 | 32860004  | 32860127  | NC_000003.11 |
| cg12420104 | 8.06E-11 | 5.58E-12 | 7.34 | 16.3156558 | 2.03E-01 | 977109    | 977232    | NC_000009.11 |
| cg11155579 | 8.07E-11 | 5.59E-12 | 7.34 | 16.3141486 | 7.21E-02 | 87582125  | 87582248  | NC_000001.10 |
| cg26239984 | 8.08E-11 | 5.60E-12 | 7.34 | 16.3127179 | 1.58E-01 | 1278428   | 1278551   | NC_000007.13 |
| cg09994035 | 8.11E-11 | 5.62E-12 | 7.34 | 16.308887  | 1.50E-01 | 241826199 | 241826322 | NC_000002.11 |
| cg22523852 | 8.13E-11 | 5.63E-12 | 7.34 | 16.3073758 | 1.90E-01 | 27112049  | 27112172  | NC_000015.9  |
| cg19193956 | 8.13E-11 | 5.63E-12 | 7.34 | 16.3070732 | 1.76E-01 | 19148187  | 19148310  | NC_000007.13 |
| cg17189167 | 8.14E-11 | 5.64E-12 | 7.34 | 16.3053844 | 7.99E-02 | 161087506 | 161087629 | NC_000006.11 |
| cg25306579 | 8.16E-11 | 5.65E-12 | 7.34 | 16.3034479 | 1.02E-01 | 134468976 | 134469099 | NC_000010.10 |
| cg04018622 | 8.16E-11 | 5.65E-12 | 7.34 | 16.3033561 | 1.51E-01 | 3602291   | 3602414   | NC_000012.11 |
| cg16703762 | 8.16E-11 | 5.66E-12 | 7.34 | 16.3025215 | 1.48E-01 | 76932047  | 76932170  | NC_000005.9  |
| cg14701597 | 8.17E-11 | 5.66E-12 | 7.34 | 16.3022547 | 7.30E-02 | 130757617 | 130757740 | NC_000010.10 |
| cg20740249 | 8.17E-11 | 5.66E-12 | 7.34 | 16.3018101 | 6.05E-02 | 130018834 | 130018957 | NC_000007.13 |
| cg16647921 | 8.18E-11 | 5.67E-12 | 7.34 | 16.300438  | 2.11E-01 | 41867533  | 41867656  | NC_000004.11 |
| cg00162231 | 8.20E-11 | 5.69E-12 | 7.34 | 16.2973523 | 1.79E-01 | 11035357  | 11035480  | NC_000003.11 |
| cg02019774 | 8.20E-11 | 5.69E-12 | 7.34 | 16.2972075 | 1.84E-01 | 138658470 | 138658593 | NC_000003.11 |
| cg05022105 | 8.21E-11 | 5.70E-12 | 7.34 | 16.2961905 | 1.44E-01 | 32460980  | 32461103  | NC_000011.9  |
| cg12938003 | 8.22E-11 | 5.70E-12 | 7.34 | 16.2951202 | 2.34E-01 | 109092724 | 109092847 | NC_000004.11 |
| cg13888886 | 8.23E-11 | 5.71E-12 | 7.34 | 16.2940254 | 6.50E-02 | 55904640  | 55904763  | NC_000020.10 |
| cg24749866 | 8.24E-11 | 5.72E-12 | 7.34 | 16.2921138 | 1.33E-01 | 235883655 | 235883778 | NC_000002.11 |
| cg27420236 | 8.25E-11 | 5.72E-12 | 7.34 | 16.2911794 | 1.85E-01 | 154334716 | 154334839 | NC_000002.11 |
| cg01214573 | 8.25E-11 | 5.73E-12 | 7.34 | 16.2909198 | 7.24E-02 | 49257931  | 49258054  | NC_000015.9  |
| cg10155304 | 8.26E-11 | 5.73E-12 | 7.34 | 16.2898885 | 1.12E-01 | 109107559 | 109107682 | NC_000012.11 |

|            |          |          |      |            |          |           |           |              |
|------------|----------|----------|------|------------|----------|-----------|-----------|--------------|
| cg08692733 | 8.26E-11 | 5.73E-12 | 7.34 | 16.2897248 | 1.53E-01 | 112404738 | 112404861 | NC_000010.10 |
| cg16880856 | 8.30E-11 | 5.76E-12 | 7.34 | 16.2845967 | 1.57E-01 | 152133898 | 152134021 | NC_000007.13 |
| cg14597534 | 8.33E-11 | 5.79E-12 | 7.33 | 16.2808051 | 2.56E-01 | 43601442  | 43601565  | NC_000011.9  |
| cg00182534 | 8.33E-11 | 5.79E-12 | 7.33 | 16.2805382 | 1.30E-01 | 5541234   | 5541357   | NC_000012.11 |
| cg03157531 | 8.33E-11 | 5.79E-12 | 7.33 | 16.280531  | 2.19E-01 | 133795006 | 133795129 | NC_000010.10 |
| cg07171111 | 8.33E-11 | 5.79E-12 | 7.33 | 16.2803239 | 1.57E-01 | 10462903  | 10463026  | NC_000004.11 |
| cg25654705 | 8.34E-11 | 5.79E-12 | 7.33 | 16.2800014 | 1.03E-01 | 174424942 | 174425065 | NC_000004.11 |
| cg03384579 | 8.34E-11 | 5.79E-12 | 7.33 | 16.2797873 | 2.08E-01 | 70995440  | 70995563  | NC_000002.11 |
| cg18482164 | 8.36E-11 | 5.80E-12 | 7.33 | 16.2776284 | 1.90E-01 | 37764118  | 37764241  | NC_000017.10 |
| cg26721627 | 8.36E-11 | 5.81E-12 | 7.33 | 16.2767165 | 1.11E-01 | 1319713   | 1319836   | NC_000011.9  |
| cg02487331 | 8.37E-11 | 5.82E-12 | 7.33 | 16.2753694 | 1.58E-01 | 146550467 | 146550590 | NC_000001.10 |
| cg04536844 | 8.38E-11 | 5.82E-12 | 7.33 | 16.2750251 | 1.12E-01 | 155724260 | 155724383 | NC_000007.13 |
| cg25399352 | 8.39E-11 | 5.83E-12 | 7.33 | 16.2728622 | 1.73E-01 | 114837572 | 114837695 | NC_000012.11 |
| cg27053177 | 8.41E-11 | 5.84E-12 | 7.33 | 16.2713958 | 6.43E-02 | 169508778 | 169508901 | NC_000002.11 |
| cg00527805 | 8.41E-11 | 5.85E-12 | 7.33 | 16.2705229 | 6.97E-02 | 76541071  | 76541194  | NC_000018.9  |
| cg00902104 | 8.42E-11 | 5.85E-12 | 7.33 | 16.2694725 | 2.09E-01 | 124901908 | 124902031 | NC_000010.10 |
| cg27366617 | 8.42E-11 | 5.85E-12 | 7.33 | 16.2691537 | 1.59E-01 | 76459785  | 76459908  | NC_000018.9  |
| cg15810304 | 8.43E-11 | 5.86E-12 | 7.33 | 16.2681235 | 9.13E-02 | 57183618  | 57183741  | NC_000004.11 |
| cg22827833 | 8.44E-11 | 5.86E-12 | 7.33 | 16.2677072 | 6.32E-02 | 13295841  | 13295964  | NC_000011.9  |
| cg06837568 | 8.44E-11 | 5.87E-12 | 7.33 | 16.2666604 | 1.35E-01 | 108634212 | 108634335 | NC_000012.11 |
| cg17554604 | 8.45E-11 | 5.87E-12 | 7.33 | 16.2664683 | 2.20E-01 | 140774522 | 140774645 | NC_000007.13 |
| cg18764804 | 8.45E-11 | 5.87E-12 | 7.33 | 16.2663218 | 1.14E-01 | 226596668 | 226596791 | NC_000001.10 |
| cg22619018 | 8.45E-11 | 5.87E-12 | 7.33 | 16.2656469 | 2.35E-01 | 4852624   | 4852747   | NC_000008.10 |
| cg18801045 | 8.46E-11 | 5.88E-12 | 7.33 | 16.2645974 | 1.61E-01 | 10751081  | 10751204  | NC_000005.9  |
| cg19408467 | 8.46E-11 | 5.88E-12 | 7.33 | 16.264071  | 6.24E-02 | 43232908  | 43233031  | NC_000006.11 |

|            |          |          |      |            |          |           |           |              |
|------------|----------|----------|------|------------|----------|-----------|-----------|--------------|
| cg01541178 | 8.47E-11 | 5.89E-12 | 7.33 | 16.2628748 | 1.32E-01 | 95358498  | 95358621  | NC_000013.10 |
| cg18811597 | 8.48E-11 | 5.90E-12 | 7.33 | 16.2618847 | 7.62E-02 | 39873001  | 39873124  | NC_000007.13 |
| cg26123256 | 8.50E-11 | 5.91E-12 | 7.33 | 16.260024  | 1.33E-01 | 27530670  | 27530793  | NC_000002.11 |
| cg09341793 | 8.50E-11 | 5.91E-12 | 7.33 | 16.2592122 | 2.00E-01 | 94405681  | 94405804  | NC_000014.8  |
| cg14356190 | 8.53E-11 | 5.93E-12 | 7.33 | 16.2561372 | 1.42E-01 | 14908132  | 14908255  | NC_000009.11 |
| cg19974854 | 8.55E-11 | 5.95E-12 | 7.33 | 16.253699  | 1.67E-01 | 145718491 | 145718614 | NC_000005.9  |
| cg22630755 | 8.57E-11 | 5.96E-12 | 7.33 | 16.2516139 | 2.82E-01 | 134871807 | 134871930 | NC_000005.9  |
| cg11986861 | 8.58E-11 | 5.97E-12 | 7.33 | 16.2492834 | 1.24E-01 | 29284199  | 29284322  | NC_000022.10 |
| cg08655760 | 8.59E-11 | 5.98E-12 | 7.33 | 16.2481271 | 5.38E-02 | 116941251 | 116941374 | NC_000001.10 |
| cg15779837 | 8.60E-11 | 5.98E-12 | 7.33 | 16.2474384 | 2.33E-01 | 48918116  | 48918239  | NC_000019.9  |
| cg22883332 | 8.60E-11 | 5.99E-12 | 7.33 | 16.2472061 | 1.02E-01 | 5566260   | 5566383   | NC_000010.10 |
| cg19601293 | 8.64E-11 | 6.02E-12 | 7.33 | 16.2424131 | 2.14E-02 | 2029752   | 2029875   | NC_000007.13 |
| cg15863598 | 8.64E-11 | 6.02E-12 | 7.33 | 16.242217  | 1.15E-01 | 76708663  | 76708786  | NC_000010.10 |
| cg23275776 | 8.64E-11 | 6.02E-12 | 7.33 | 16.242213  | 5.09E-02 | 102496501 | 102496624 | NC_000011.9  |
| cg12187687 | 8.65E-11 | 6.02E-12 | 7.33 | 16.241285  | 9.95E-02 | 27253834  | 27253957  | NC_000007.13 |
| cg05298458 | 8.65E-11 | 6.03E-12 | 7.33 | 16.2406627 | 1.35E-01 | 19749188  | 19749311  | NC_000022.10 |
| cg21384797 | 8.67E-11 | 6.04E-12 | 7.33 | 16.2388726 | 8.64E-02 | 163054771 | 163054894 | NC_000002.11 |
| cg09918296 | 8.68E-11 | 6.05E-12 | 7.33 | 16.2374915 | 1.88E-01 | 54024649  | 54024772  | NC_000019.9  |
| cg14218374 | 8.68E-11 | 6.05E-12 | 7.33 | 16.2374708 | 7.24E-02 | 33747192  | 33747315  | NC_000006.11 |
| cg05139788 | 8.70E-11 | 6.06E-12 | 7.33 | 16.2355908 | 1.92E-01 | 50690647  | 50690770  | NC_000006.11 |
| cg22399133 | 8.70E-11 | 6.06E-12 | 7.33 | 16.2354217 | 2.23E-01 | 208989248 | 208989371 | NC_000002.11 |
| cg23890204 | 8.72E-11 | 6.07E-12 | 7.33 | 16.2331092 | 4.82E-02 | 26247238  | 26247361  | NC_000006.11 |
| cg00790098 | 8.74E-11 | 6.09E-12 | 7.33 | 16.2309417 | 1.99E-01 | 223167400 | 223167523 | NC_000002.11 |
| cg03896611 | 8.74E-11 | 6.09E-12 | 7.33 | 16.2302091 | 1.34E-01 | 99986344  | 99986467  | NC_000008.10 |
| cg08512142 | 8.76E-11 | 6.10E-12 | 7.33 | 16.2284779 | 1.77E-01 | 88796227  | 88796350  | NC_000011.9  |



|            |          |          |      |            |          |           |           |              |
|------------|----------|----------|------|------------|----------|-----------|-----------|--------------|
| cg20699586 | 8.78E-11 | 6.12E-12 | 7.33 | 16.2260807 | 1.36E-01 | 227748719 | 227748842 | NC_000001.10 |
| cg14703605 | 8.78E-11 | 6.12E-12 | 7.33 | 16.2255888 | 1.93E-01 | 72987916  | 72988039  | NC_000008.10 |
| cg23445461 | 8.79E-11 | 6.12E-12 | 7.33 | 16.2247155 | 1.84E-01 | 140864733 | 140864856 | NC_000005.9  |
| cg06745753 | 8.79E-11 | 6.13E-12 | 7.32 | 16.2244491 | 7.36E-02 | 45190297  | 45190420  | NC_000001.10 |
| cg08384637 | 8.79E-11 | 6.13E-12 | 7.32 | 16.22442   | 2.79E-01 | 86601133  | 86601256  | NC_000016.9  |
| cg23221737 | 8.79E-11 | 6.13E-12 | 7.32 | 16.2243379 | 1.06E-01 | 34543055  | 34543178  | NC_000006.11 |
| cg08332990 | 8.80E-11 | 6.13E-12 | 7.32 | 16.2234815 | 1.15E-01 | 997351    | 997474    | NC_000004.11 |
| cg14285365 | 8.80E-11 | 6.13E-12 | 7.32 | 16.223439  | 1.16E-01 | 36643743  | 36643866  | NC_000001.10 |
| cg02416781 | 8.80E-11 | 6.13E-12 | 7.32 | 16.2233152 | 1.20E-01 | 82331856  | 82331979  | NC_000005.9  |
| cg24626310 | 8.80E-11 | 6.14E-12 | 7.32 | 16.2229641 | 1.28E-01 | 25276739  | 25276862  | NC_000020.10 |
| cg09047290 | 8.80E-11 | 6.14E-12 | 7.32 | 16.2229555 | 3.71E-02 | 81978370  | 81978493  | NC_000016.9  |
| cg01487195 | 8.82E-11 | 6.15E-12 | 7.32 | 16.2204242 | 3.33E-02 | 88529573  | 88529696  | NC_000010.10 |
| cg08477106 | 8.83E-11 | 6.16E-12 | 7.32 | 16.2194244 | 1.45E-01 | 75895596  | 75895719  | NC_000004.11 |
| cg26637881 | 8.84E-11 | 6.16E-12 | 7.32 | 16.2184077 | 7.76E-02 | 87879698  | 87879821  | NC_000016.9  |
| cg16790849 | 8.87E-11 | 6.19E-12 | 7.32 | 16.2144923 | 6.34E-02 | 31829511  | 31829634  | NC_000006.11 |
| cg18185958 | 8.87E-11 | 6.19E-12 | 7.32 | 16.2143083 | 1.43E-01 | 223176899 | 223177022 | NC_000002.11 |
| cg14251870 | 8.88E-11 | 6.19E-12 | 7.32 | 16.2137571 | 1.88E-01 | 137809529 | 137809652 | NC_000006.11 |
| cg16102793 | 8.88E-11 | 6.20E-12 | 7.32 | 16.2131233 | 2.88E-02 | 117484975 | 117485098 | NC_000012.11 |
| cg20330472 | 8.89E-11 | 6.20E-12 | 7.32 | 16.2125657 | 2.04E-01 | 133561932 | 133562055 | NC_000006.11 |
| cg08977371 | 8.90E-11 | 6.21E-12 | 7.32 | 16.2109253 | 1.39E-01 | 82660490  | 82660613  | NC_000016.9  |
| cg15840638 | 8.91E-11 | 6.22E-12 | 7.32 | 16.2099756 | 2.67E-02 | 79298691  | 79298814  | NC_000015.9  |
| cg13264394 | 8.91E-11 | 6.22E-12 | 7.32 | 16.2093336 | 7.64E-02 | 152066605 | 152066728 | NC_000003.11 |
| cg05681560 | 8.92E-11 | 6.23E-12 | 7.32 | 16.2083677 | 1.02E-01 | 164288814 | 164288937 | NC_000006.11 |
| cg13463054 | 8.93E-11 | 6.23E-12 | 7.32 | 16.2076384 | 2.22E-01 | 77333159  | 77333282  | NC_000001.10 |
| cg21123160 | 8.93E-11 | 6.23E-12 | 7.32 | 16.2074612 | 1.39E-01 | 10857719  | 10857842  | NC_000003.11 |

|            |          |          |      |            |          |           |           |              |
|------------|----------|----------|------|------------|----------|-----------|-----------|--------------|
| cg07547549 | 8.94E-11 | 6.24E-12 | 7.32 | 16.2068271 | 1.44E-01 | 44658225  | 44658348  | NC_000020.10 |
| cg10109590 | 8.94E-11 | 6.24E-12 | 7.32 | 16.2065233 | 5.97E-02 | 93090866  | 93090989  | NC_000014.8  |
| cg18115215 | 8.95E-11 | 6.24E-12 | 7.32 | 16.2056554 | 2.10E-01 | 132757090 | 132757213 | NC_000003.11 |
| cg01599925 | 8.95E-11 | 6.25E-12 | 7.32 | 16.205519  | 9.91E-02 | 35488024  | 35488147  | NC_000020.10 |
| cg07352438 | 8.95E-11 | 6.25E-12 | 7.32 | 16.2049818 | 2.91E-01 | 5543548   | 5543671   | NC_000018.9  |
| cg02114924 | 8.97E-11 | 6.26E-12 | 7.32 | 16.2027609 | 1.55E-01 | 134069304 | 134069427 | NC_000004.11 |
| cg14866595 | 8.98E-11 | 6.27E-12 | 7.32 | 16.2020555 | 1.89E-01 | 4873442   | 4873565   | NC_000004.11 |
| cg25590826 | 8.98E-11 | 6.27E-12 | 7.32 | 16.2011014 | 1.43E-01 | 74557537  | 74557660  | NC_000015.9  |
| cg06871074 | 8.99E-11 | 6.28E-12 | 7.32 | 16.200508  | 1.39E-01 | 146551565 | 146551688 | NC_000001.10 |
| cg17023149 | 8.99E-11 | 6.28E-12 | 7.32 | 16.2001583 | 1.52E-01 | 13536504  | 13536627  | NC_000004.11 |
| cg01717201 | 9.00E-11 | 6.28E-12 | 7.32 | 16.199352  | 8.13E-02 | 48174262  | 48174385  | NC_000017.10 |
| cg15638055 | 9.01E-11 | 6.30E-12 | 7.32 | 16.1976609 | 1.62E-01 | 110986974 | 110987097 | NC_000008.10 |
| cg15522957 | 9.02E-11 | 6.30E-12 | 7.32 | 16.1964861 | 1.33E-01 | 44324925  | 44325048  | NC_000011.9  |
| cg14709826 | 9.03E-11 | 6.31E-12 | 7.32 | 16.1957404 | 1.18E-01 | 151267707 | 151267830 | NC_000002.11 |
| cg13745279 | 9.04E-11 | 6.31E-12 | 7.32 | 16.1949185 | 8.95E-02 | 111788810 | 111788933 | NC_000011.9  |
| cg06651450 | 9.04E-11 | 6.32E-12 | 7.32 | 16.1945028 | 6.86E-02 | 32860909  | 32861032  | NC_000003.11 |
| cg25535257 | 9.05E-11 | 6.32E-12 | 7.32 | 16.1938433 | 6.03E-02 | 4936114   | 4936237   | NC_000017.10 |
| cg20084504 | 9.05E-11 | 6.32E-12 | 7.32 | 16.1936176 | 1.60E-01 | 28369514  | 28369637  | NC_000013.10 |
| cg24509898 | 9.05E-11 | 6.32E-12 | 7.32 | 16.1931992 | 1.04E-01 | 185070553 | 185070676 | NC_000001.10 |
| cg17891968 | 9.05E-11 | 6.33E-12 | 7.32 | 16.1927237 | 1.00E-01 | 17673737  | 17673860  | NC_000020.10 |
| cg21287054 | 9.10E-11 | 6.36E-12 | 7.32 | 16.1874885 | 1.76E-01 | 54928012  | 54928135  | NC_000019.9  |
| cg11598178 | 9.12E-11 | 6.38E-12 | 7.32 | 16.1851421 | 8.99E-02 | 8602619   | 8602742   | NC_000004.11 |
| cg05194864 | 9.13E-11 | 6.38E-12 | 7.32 | 16.1845488 | 1.58E-01 | 15100977  | 15101100  | NC_000012.11 |
| cg16818395 | 9.14E-11 | 6.39E-12 | 7.32 | 16.1827863 | 1.69E-01 | 128274084 | 128274207 | NC_000003.11 |
| cg16924337 | 9.19E-11 | 6.43E-12 | 7.32 | 16.1771973 | 2.36E-01 | 153452724 | 153452847 | NC_000006.11 |

|            |          |          |      |            |          |           |           |              |
|------------|----------|----------|------|------------|----------|-----------|-----------|--------------|
| cg01150982 | 9.20E-11 | 6.43E-12 | 7.32 | 16.1763798 | 7.51E-02 | 33664555  | 33664678  | NC_000021.8  |
| cg15622891 | 9.20E-11 | 6.44E-12 | 7.32 | 16.1757854 | 1.57E-01 | 163862445 | 163862568 | NC_000006.11 |
| cg00755751 | 9.21E-11 | 6.44E-12 | 7.32 | 16.1752527 | 7.58E-02 | 64677007  | 64677130  | NC_000014.8  |
| cg23543123 | 9.23E-11 | 6.46E-12 | 7.32 | 16.1727072 | 1.50E-01 | 48485569  | 48485692  | NC_000004.11 |
| cg04812475 | 9.24E-11 | 6.46E-12 | 7.32 | 16.1717145 | 2.43E-01 | 17906561  | 17906684  | NC_000009.11 |
| cg00525277 | 9.24E-11 | 6.46E-12 | 7.32 | 16.1715763 | 1.63E-01 | 32064239  | 32064362  | NC_000006.11 |
| cg24072474 | 9.27E-11 | 6.48E-12 | 7.32 | 16.1686812 | 1.25E-01 | 140770013 | 140770136 | NC_000003.11 |
| cg22694191 | 9.27E-11 | 6.49E-12 | 7.32 | 16.1680481 | 1.88E-01 | 19373575  | 19373698  | NC_000019.9  |
| cg19156335 | 9.29E-11 | 6.50E-12 | 7.31 | 16.1663029 | 3.57E-02 | 158497539 | 158497662 | NC_000007.13 |
| cg15105326 | 9.29E-11 | 6.50E-12 | 7.31 | 16.1660727 | 1.15E-01 | 147108916 | 147109039 | NC_000003.11 |
| cg25819026 | 9.33E-11 | 6.53E-12 | 7.31 | 16.1620332 | 1.24E-01 | 41060392  | 41060515  | NC_000019.9  |
| cg20421482 | 9.36E-11 | 6.56E-12 | 7.31 | 16.1577072 | 1.22E-01 | 132169009 | 132169132 | NC_000012.11 |
| cg08595804 | 9.37E-11 | 6.56E-12 | 7.31 | 16.1566263 | 1.57E-01 | 112712424 | 112712547 | NC_000013.10 |
| cg22295864 | 9.38E-11 | 6.57E-12 | 7.31 | 16.1559844 | 1.25E-01 | 74233472  | 74233595  | NC_000011.9  |
| cg05616122 | 9.39E-11 | 6.57E-12 | 7.31 | 16.1550939 | 7.02E-02 | 77982987  | 77983110  | NC_000017.10 |
| cg12977135 | 9.39E-11 | 6.58E-12 | 7.31 | 16.1544366 | 7.20E-02 | 119036478 | 119036601 | NC_000008.10 |
| cg11612852 | 9.41E-11 | 6.59E-12 | 7.31 | 16.1528977 | 1.35E-01 | 21699745  | 21699868  | NC_000004.11 |
| cg21390624 | 9.41E-11 | 6.59E-12 | 7.31 | 16.1528033 | 1.47E-01 | 133561677 | 133561800 | NC_000006.11 |
| cg01078989 | 9.42E-11 | 6.59E-12 | 7.31 | 16.1519663 | 1.53E-01 | 15761657  | 15761780  | NC_000010.10 |
| cg13565656 | 9.42E-11 | 6.60E-12 | 7.31 | 16.151882  | 2.61E-01 | 94543449  | 94543572  | NC_000012.11 |
| cg11700356 | 9.46E-11 | 6.63E-12 | 7.31 | 16.1468498 | 1.42E-01 | 23287560  | 23287683  | NC_000007.13 |
| cg08826251 | 9.47E-11 | 6.64E-12 | 7.31 | 16.1458244 | 2.16E-01 | 58332909  | 58333032  | NC_000014.8  |
| cg23213872 | 9.48E-11 | 6.65E-12 | 7.31 | 16.1443222 | 1.27E-01 | 242613203 | 242613326 | NC_000001.10 |
| cg19662846 | 9.49E-11 | 6.65E-12 | 7.31 | 16.1434393 | 1.30E-01 | 8650410   | 8650533   | NC_000019.9  |
| cg09919917 | 9.50E-11 | 6.66E-12 | 7.31 | 16.1423461 | 1.47E-01 | 242834074 | 242834197 | NC_000002.11 |

|            |          |          |      |            |          |           |           |              |
|------------|----------|----------|------|------------|----------|-----------|-----------|--------------|
| cg21290042 | 9.50E-11 | 6.66E-12 | 7.31 | 16.1421575 | 2.14E-01 | 224804053 | 224804176 | NC_000001.10 |
| cg10059660 | 9.51E-11 | 6.67E-12 | 7.31 | 16.1411586 | 1.86E-01 | 44450234  | 44450357  | NC_000004.11 |
| cg06086731 | 9.52E-11 | 6.67E-12 | 7.31 | 16.1400886 | 1.81E-01 | 38942075  | 38942198  | NC_000001.10 |
| cg06389888 | 9.52E-11 | 6.68E-12 | 7.31 | 16.1400197 | 1.42E-01 | 135011991 | 135012114 | NC_000002.11 |
| cg10600647 | 9.55E-11 | 6.69E-12 | 7.31 | 16.1374814 | 1.27E-01 | 60763808  | 60763931  | NC_000002.11 |
| cg12382902 | 9.55E-11 | 6.70E-12 | 7.31 | 16.1366047 | 2.25E-01 | 4383699   | 4383822   | NC_000012.11 |
| cg14031402 | 9.56E-11 | 6.70E-12 | 7.31 | 16.1362751 | 1.57E-01 | 30353957  | 30354080  | NC_000012.11 |
| cg20303399 | 9.57E-11 | 6.71E-12 | 7.31 | 16.1350115 | 1.59E-01 | 26722965  | 26723088  | NC_000008.10 |
| cg04796828 | 9.58E-11 | 6.72E-12 | 7.31 | 16.1334595 | 9.86E-02 | 10452854  | 10452977  | NC_000008.10 |
| cg03099291 | 9.59E-11 | 6.72E-12 | 7.31 | 16.133121  | 5.41E-02 | 6809939   | 6810062   | NC_000012.11 |
| cg01310875 | 9.60E-11 | 6.73E-12 | 7.31 | 16.131753  | 9.14E-02 | 27938995  | 27939118  | NC_000008.10 |
| cg12460187 | 9.62E-11 | 6.75E-12 | 7.31 | 16.1289176 | 7.35E-02 | 36318437  | 36318560  | NC_000011.9  |
| cg03716908 | 9.63E-11 | 6.75E-12 | 7.31 | 16.1285463 | 6.17E-02 | 81149002  | 81149125  | NC_000005.9  |
| cg25769127 | 9.66E-11 | 6.78E-12 | 7.31 | 16.1253199 | 1.04E-01 | 61543023  | 61543146  | NC_000003.11 |
| cg24463664 | 9.66E-11 | 6.78E-12 | 7.31 | 16.1252636 | 1.09E-01 | 38160704  | 38160827  | NC_000008.10 |
| cg27392802 | 9.66E-11 | 6.78E-12 | 7.31 | 16.1252468 | 1.64E-01 | 332705    | 332828    | NC_000016.9  |
| cg11315168 | 9.70E-11 | 6.81E-12 | 7.31 | 16.1204314 | 1.22E-01 | 129905368 | 129905491 | NC_000007.13 |
| cg27100227 | 9.74E-11 | 6.84E-12 | 7.31 | 16.1166016 | 1.88E-01 | 27281687  | 27281810  | NC_000007.13 |
| cg01307526 | 9.76E-11 | 6.85E-12 | 7.31 | 16.1142556 | 7.25E-02 | 122252471 | 122252594 | NC_000012.11 |
| cg14769792 | 9.77E-11 | 6.86E-12 | 7.31 | 16.1135692 | 3.67E-02 | 89629747  | 89629870  | NC_000004.11 |
| cg25976257 | 9.77E-11 | 6.86E-12 | 7.31 | 16.1127398 | 1.99E-01 | 45405621  | 45405744  | NC_000022.10 |
| cg02138264 | 9.78E-11 | 6.86E-12 | 7.31 | 16.1126192 | 1.82E-01 | 172754465 | 172754588 | NC_000005.9  |
| cg23976499 | 9.78E-11 | 6.87E-12 | 7.31 | 16.1120951 | 1.99E-01 | 11207527  | 11207650  | NC_000010.10 |
| cg09704152 | 9.79E-11 | 6.88E-12 | 7.31 | 16.1105311 | 4.40E-02 | 100028166 | 100028289 | NC_000008.10 |
| cg05511722 | 9.80E-11 | 6.88E-12 | 7.31 | 16.1102117 | 1.88E-01 | 55379566  | 55379689  | NC_000008.10 |

|            |          |          |     |            |          |           |           |              |
|------------|----------|----------|-----|------------|----------|-----------|-----------|--------------|
| cg16448037 | 9.82E-11 | 6.90E-12 | 7.3 | 16.1081038 | 2.85E-02 | 72172333  | 72172456  | NC_000010.10 |
| cg00492118 | 9.82E-11 | 6.90E-12 | 7.3 | 16.1080638 | 1.50E-01 | 140771184 | 140771307 | NC_000003.11 |
| cg11016563 | 9.82E-11 | 6.90E-12 | 7.3 | 16.1076503 | 1.78E-01 | 101454626 | 101454749 | NC_000011.9  |
| cg07957294 | 9.83E-11 | 6.90E-12 | 7.3 | 16.1068448 | 1.77E-01 | 170638917 | 170639040 | NC_000001.10 |
| cg26014036 | 9.84E-11 | 6.92E-12 | 7.3 | 16.1051502 | 1.92E-01 | 147112096 | 147112219 | NC_000003.11 |
| cg26784596 | 9.85E-11 | 6.92E-12 | 7.3 | 16.1040315 | 1.17E-01 | 140769814 | 140769937 | NC_000003.11 |
| cg10439742 | 9.85E-11 | 6.92E-12 | 7.3 | 16.1038797 | 1.39E-01 | 83845465  | 83845588  | NC_000016.9  |
| cg08182191 | 9.86E-11 | 6.93E-12 | 7.3 | 16.1035807 | 3.50E-02 | 106714396 | 106714519 | NC_000002.11 |
| cg10634182 | 9.88E-11 | 6.94E-12 | 7.3 | 16.1015119 | 7.83E-02 | 572373    | 572496    | NC_000005.9  |
| cg08116462 | 9.88E-11 | 6.94E-12 | 7.3 | 16.1012842 | 1.88E-01 | 31823141  | 31823264  | NC_000011.9  |
| cg14228146 | 9.88E-11 | 6.95E-12 | 7.3 | 16.1010059 | 1.42E-01 | 119607395 | 119607518 | NC_000002.11 |
| cg26938597 | 9.90E-11 | 6.96E-12 | 7.3 | 16.0992796 | 1.80E-01 | 44778021  | 44778144  | NC_000018.9  |
| cg05236348 | 9.91E-11 | 6.96E-12 | 7.3 | 16.0983409 | 4.45E-02 | 73767717  | 73767840  | NC_000010.10 |
| cg05422049 | 9.91E-11 | 6.96E-12 | 7.3 | 16.0982712 | 1.57E-01 | 1595734   | 1595857   | NC_000002.11 |
| cg04982193 | 9.91E-11 | 6.96E-12 | 7.3 | 16.0982352 | 7.76E-02 | 146278795 | 146278918 | NC_000008.10 |
| cg00021476 | 9.93E-11 | 6.98E-12 | 7.3 | 16.0956092 | 1.56E-01 | 85660215  | 85660338  | NC_000016.9  |
| cg17171215 | 9.93E-11 | 6.98E-12 | 7.3 | 16.0955794 | 1.84E-01 | 237078223 | 237078346 | NC_000002.11 |
| cg25912911 | 9.94E-11 | 6.99E-12 | 7.3 | 16.095039  | 1.91E-01 | 20523121  | 20523244  | NC_000012.11 |
| cg06678594 | 9.94E-11 | 6.99E-12 | 7.3 | 16.094367  | 6.59E-02 | 43573198  | 43573321  | NC_000002.11 |
| cg26694386 | 9.95E-11 | 7.00E-12 | 7.3 | 16.0936101 | 1.35E-01 | 244868765 | 244868888 | NC_000001.10 |
| cg26802291 | 9.95E-11 | 7.00E-12 | 7.3 | 16.0935565 | 1.99E-01 | 19372387  | 19372510  | NC_000019.9  |
| cg10520887 | 9.96E-11 | 7.01E-12 | 7.3 | 16.0924351 | 2.20E-01 | 96470094  | 96470217  | NC_000004.11 |
| cg19688761 | 9.97E-11 | 7.01E-12 | 7.3 | 16.0916611 | 8.15E-02 | 129785464 | 129785587 | NC_000010.10 |
| cg01984304 | 9.98E-11 | 7.02E-12 | 7.3 | 16.0906805 | 1.68E-01 | 91191813  | 91191936  | NC_000001.10 |
| cg24367850 | 9.99E-11 | 7.03E-12 | 7.3 | 16.089443  | 5.28E-02 | 27217401  | 27217524  | NC_000001.10 |

|            |          |          |     |            |          |           |           |              |
|------------|----------|----------|-----|------------|----------|-----------|-----------|--------------|
| cg23018092 | 9.99E-11 | 7.03E-12 | 7.3 | 16.0890094 | 1.66E-01 | 126626364 | 126626487 | NC_000005.9  |
| cg04830191 | 9.99E-11 | 7.03E-12 | 7.3 | 16.0889052 | 8.90E-02 | 212868520 | 212868643 | NC_000001.10 |
| cg20632871 | 1.00E-10 | 7.04E-12 | 7.3 | 16.0873414 | 5.18E-02 | 2318918   | 2319041   | NC_000001.10 |
| cg23688510 | 1.00E-10 | 7.04E-12 | 7.3 | 16.0870855 | 2.55E-01 | 166581929 | 166582052 | NC_000006.11 |
| cg02564291 | 1.00E-10 | 7.05E-12 | 7.3 | 16.0858965 | 1.54E-01 | 122430235 | 122430358 | NC_000005.9  |
| cg22240704 | 1.00E-10 | 7.06E-12 | 7.3 | 16.0844217 | 4.15E-02 | 20202403  | 20202526  | NC_000003.11 |
| cg10094078 | 1.01E-10 | 7.08E-12 | 7.3 | 16.0815616 | 1.44E-01 | 1467925   | 1468048   | NC_000019.9  |
| cg00723275 | 1.01E-10 | 7.10E-12 | 7.3 | 16.0794636 | 9.31E-02 | 216973091 | 216973214 | NC_000002.11 |
| cg07886195 | 1.01E-10 | 7.11E-12 | 7.3 | 16.0781988 | 1.76E-01 | 11263615  | 11263738  | NC_000019.9  |
| cg09382096 | 1.01E-10 | 7.11E-12 | 7.3 | 16.077788  | 1.61E-01 | 31827593  | 31827716  | NC_000011.9  |
| cg05595832 | 1.01E-10 | 7.11E-12 | 7.3 | 16.0775407 | 1.90E-01 | 104567372 | 104567495 | NC_000007.13 |
| cg00601711 | 1.01E-10 | 7.11E-12 | 7.3 | 16.0774148 | 1.56E-01 | 1089507   | 1089630   | NC_000005.9  |
| cg06821079 | 1.01E-10 | 7.11E-12 | 7.3 | 16.07724   | 1.46E-01 | 39143567  | 39143690  | NC_000017.10 |
| cg14289246 | 1.01E-10 | 7.12E-12 | 7.3 | 16.0762552 | 1.59E-01 | 154710475 | 154710598 | NC_000004.11 |
| cg10715265 | 1.01E-10 | 7.12E-12 | 7.3 | 16.0760204 | 2.13E-01 | 58715499  | 58715622  | NC_000001.10 |
| cg06288154 | 1.01E-10 | 7.13E-12 | 7.3 | 16.0756879 | 1.52E-01 | 130737494 | 130737617 | NC_000002.11 |
| cg01523474 | 1.01E-10 | 7.13E-12 | 7.3 | 16.0748407 | 1.59E-01 | 45365651  | 45365774  | NC_000014.8  |
| cg15880016 | 1.01E-10 | 7.15E-12 | 7.3 | 16.0725485 | 8.36E-02 | 100661648 | 100661771 | NC_000011.9  |
| cg08640361 | 1.02E-10 | 7.16E-12 | 7.3 | 16.0712392 | 1.61E-01 | 134494620 | 134494743 | NC_000006.11 |
| cg01835308 | 1.02E-10 | 7.17E-12 | 7.3 | 16.0701734 | 2.26E-01 | 12997160  | 12997283  | NC_000016.9  |
| cg18706841 | 1.02E-10 | 7.20E-12 | 7.3 | 16.0657902 | 6.65E-02 | 77186157  | 77186280  | NC_000012.11 |
| cg23881458 | 1.02E-10 | 7.20E-12 | 7.3 | 16.0650528 | 1.25E-01 | 42754477  | 42754600  | NC_000006.11 |
| cg13888600 | 1.02E-10 | 7.21E-12 | 7.3 | 16.0645302 | 1.57E-01 | 89911317  | 89911440  | NC_000015.9  |
| cg07468782 | 1.02E-10 | 7.21E-12 | 7.3 | 16.0639563 | 8.02E-02 | 5023846   | 5023969   | NC_000017.10 |
| cg02117086 | 1.02E-10 | 7.22E-12 | 7.3 | 16.0628398 | 1.29E-01 | 232265670 | 232265793 | NC_000002.11 |

|            |          |          |      |            |          |           |           |              |
|------------|----------|----------|------|------------|----------|-----------|-----------|--------------|
| cg09567439 | 1.02E-10 | 7.22E-12 | 7.3  | 16.0626884 | 2.08E-01 | 60297694  | 60297817  | NC_000015.9  |
| cg24530147 | 1.03E-10 | 7.23E-12 | 7.3  | 16.0612298 | 1.34E-01 | 138763894 | 138764017 | NC_000003.11 |
| cg05229403 | 1.03E-10 | 7.26E-12 | 7.3  | 16.0577211 | 2.05E-01 | 133252433 | 133252556 | NC_000010.10 |
| cg12315391 | 1.03E-10 | 7.26E-12 | 7.3  | 16.05749   | 1.47E-01 | 157815145 | 157815268 | NC_000003.11 |
| cg00362285 | 1.03E-10 | 7.28E-12 | 7.3  | 16.0546321 | 1.55E-01 | 236444212 | 236444335 | NC_000001.10 |
| cg10192893 | 1.03E-10 | 7.29E-12 | 7.3  | 16.0527157 | 1.90E-01 | 41747895  | 41748018  | NC_000004.11 |
| cg25895961 | 1.03E-10 | 7.30E-12 | 7.3  | 16.0523335 | 1.74E-01 | 29106422  | 29106545  | NC_000013.10 |
| cg15753178 | 1.03E-10 | 7.30E-12 | 7.3  | 16.05231   | 4.72E-02 | 124535611 | 124535734 | NC_000009.11 |
| cg18470456 | 1.04E-10 | 7.31E-12 | 7.29 | 16.0512812 | 1.93E-01 | 96204493  | 96204616  | NC_000013.10 |
| cg26089160 | 1.04E-10 | 7.32E-12 | 7.29 | 16.0498953 | 1.59E-01 | 104170217 | 104170340 | NC_000010.10 |
| cg12470092 | 1.04E-10 | 7.33E-12 | 7.29 | 16.0483323 | 1.02E-01 | 37948808  | 37948931  | NC_000021.8  |
| cg11979589 | 1.04E-10 | 7.33E-12 | 7.29 | 16.0480169 | 2.40E-01 | 110223967 | 110224090 | NC_000004.11 |
| cg27516404 | 1.04E-10 | 7.33E-12 | 7.29 | 16.0479909 | 1.10E-01 | 155640019 | 155640142 | NC_000007.13 |
| cg11023989 | 1.04E-10 | 7.33E-12 | 7.29 | 16.0476953 | 6.46E-02 | 168758239 | 168758362 | NC_000006.11 |
| cg25552435 | 1.04E-10 | 7.33E-12 | 7.29 | 16.0473674 | 2.33E-01 | 178017300 | 178017423 | NC_000005.9  |
| cg15805568 | 1.04E-10 | 7.34E-12 | 7.29 | 16.0460123 | 1.36E-01 | 51199000  | 51199123  | NC_000019.9  |
| cg16834823 | 1.04E-10 | 7.34E-12 | 7.29 | 16.045974  | 1.79E-01 | 32064218  | 32064341  | NC_000006.11 |
| cg05797097 | 1.04E-10 | 7.35E-12 | 7.29 | 16.0457372 | 1.14E-01 | 14720183  | 14720306  | NC_000006.11 |
| cg12035092 | 1.04E-10 | 7.35E-12 | 7.29 | 16.0455475 | 2.43E-01 | 149633226 | 149633349 | NC_000002.11 |
| cg01386831 | 1.04E-10 | 7.35E-12 | 7.29 | 16.0453372 | 4.83E-02 | 79906364  | 79906487  | NC_000017.10 |
| cg16055052 | 1.04E-10 | 7.36E-12 | 7.29 | 16.0444171 | 7.02E-02 | 30657275  | 30657398  | NC_000006.11 |
| cg24361162 | 1.04E-10 | 7.36E-12 | 7.29 | 16.0432735 | 1.63E-01 | 156358116 | 156358239 | NC_000001.10 |
| cg13955436 | 1.04E-10 | 7.37E-12 | 7.29 | 16.0430297 | 1.98E-01 | 6449153   | 6449276   | NC_000005.9  |
| cg05998109 | 1.04E-10 | 7.37E-12 | 7.29 | 16.0428421 | 7.28E-02 | 5644940   | 5645063   | NC_000007.13 |
| cg22827250 | 1.05E-10 | 7.38E-12 | 7.29 | 16.0416092 | 1.06E-01 | 134363823 | 134363946 | NC_000005.9  |

|            |          |          |      |            |          |           |           |              |
|------------|----------|----------|------|------------|----------|-----------|-----------|--------------|
| cg03310503 | 1.05E-10 | 7.39E-12 | 7.29 | 16.0396201 | 6.46E-02 | 45609836  | 45609959  | NC_000006.11 |
| cg05663341 | 1.05E-10 | 7.40E-12 | 7.29 | 16.0392503 | 2.60E-01 | 96634660  | 96634783  | NC_000007.13 |
| cg04553838 | 1.05E-10 | 7.40E-12 | 7.29 | 16.0388477 | 1.59E-01 | 101454733 | 101454856 | NC_000011.9  |
| cg01477985 | 1.05E-10 | 7.40E-12 | 7.29 | 16.0387292 | 2.02E-01 | 112727160 | 112727283 | NC_000013.10 |
| cg06805348 | 1.05E-10 | 7.40E-12 | 7.29 | 16.0384261 | 1.18E-01 | 37245195  | 37245318  | NC_000004.11 |
| cg14752361 | 1.05E-10 | 7.40E-12 | 7.29 | 16.0379464 | 9.33E-02 | 20205176  | 20205299  | NC_000007.13 |
| cg14991764 | 1.05E-10 | 7.41E-12 | 7.29 | 16.0372035 | 1.03E-01 | 133486947 | 133487070 | NC_000006.11 |
| cg07124117 | 1.05E-10 | 7.41E-12 | 7.29 | 16.0371894 | 1.92E-01 | 31827775  | 31827898  | NC_000011.9  |
| cg26654798 | 1.05E-10 | 7.41E-12 | 7.29 | 16.0371633 | 1.27E-01 | 83953864  | 83953987  | NC_000015.9  |
| cg27634876 | 1.05E-10 | 7.42E-12 | 7.29 | 16.036532  | 1.83E-01 | 52735485  | 52735608  | NC_000014.8  |
| cg21279601 | 1.05E-10 | 7.42E-12 | 7.29 | 16.0365085 | 1.27E-01 | 9782931   | 9783054   | NC_000004.11 |
| cg16023545 | 1.05E-10 | 7.42E-12 | 7.29 | 16.0360502 | 1.74E-01 | 237076726 | 237076849 | NC_000002.11 |
| cg06419761 | 1.05E-10 | 7.42E-12 | 7.29 | 16.0359147 | 2.11E-01 | 72043661  | 72043784  | NC_000010.10 |
| cg02501779 | 1.05E-10 | 7.43E-12 | 7.29 | 16.0351693 | 1.46E-01 | 54579355  | 54579478  | NC_000020.10 |
| cg27205687 | 1.05E-10 | 7.43E-12 | 7.29 | 16.0342024 | 2.38E-01 | 106888787 | 106888910 | NC_000011.9  |
| cg02765859 | 1.05E-10 | 7.44E-12 | 7.29 | 16.0339315 | 1.90E-01 | 58152311  | 58152434  | NC_000020.10 |
| cg07586272 | 1.05E-10 | 7.44E-12 | 7.29 | 16.0333201 | 1.98E-01 | 94134580  | 94134703  | NC_000011.9  |
| cg05943996 | 1.05E-10 | 7.45E-12 | 7.29 | 16.0323523 | 1.73E-01 | 42075975  | 42076098  | NC_000014.8  |
| cg23994112 | 1.05E-10 | 7.45E-12 | 7.29 | 16.0319951 | 1.90E-01 | 75373457  | 75373580  | NC_000017.10 |
| cg26465405 | 1.05E-10 | 7.45E-12 | 7.29 | 16.0314381 | 1.44E-01 | 3039745   | 3039868   | NC_000019.9  |
| cg22948791 | 1.06E-10 | 7.46E-12 | 7.29 | 16.0302157 | 7.26E-02 | 71404101  | 71404224  | NC_000015.9  |
| cg08002883 | 1.06E-10 | 7.47E-12 | 7.29 | 16.029237  | 2.85E-01 | 192127457 | 192127580 | NC_000003.11 |
| cg15947096 | 1.06E-10 | 7.48E-12 | 7.29 | 16.0280109 | 2.70E-01 | 37488835  | 37488958  | NC_000007.13 |
| cg26337020 | 1.06E-10 | 7.48E-12 | 7.29 | 16.0277331 | 1.84E-01 | 100239022 | 100239145 | NC_000005.9  |
| cg01417432 | 1.06E-10 | 7.49E-12 | 7.29 | 16.0261017 | 6.57E-02 | 63913731  | 63913854  | NC_000010.10 |



|            |          |          |      |            |          |           |           |              |
|------------|----------|----------|------|------------|----------|-----------|-----------|--------------|
| cg15787744 | 1.06E-10 | 7.50E-12 | 7.29 | 16.02519   | 1.08E-01 | 44234175  | 44234298  | NC_000006.11 |
| cg04509682 | 1.06E-10 | 7.50E-12 | 7.29 | 16.0250894 | 1.33E-01 | 41056288  | 41056411  | NC_000013.10 |
| cg13420320 | 1.06E-10 | 7.51E-12 | 7.29 | 16.0236689 | 1.18E-01 | 131193104 | 131193227 | NC_000010.10 |
| cg21150026 | 1.06E-10 | 7.53E-12 | 7.29 | 16.021798  | 1.36E-01 | 207904284 | 207904407 | NC_000002.11 |
| cg05489292 | 1.07E-10 | 7.56E-12 | 7.29 | 16.0170394 | 1.62E-01 | 112331187 | 112331310 | NC_000012.11 |
| cg01265068 | 1.07E-10 | 7.58E-12 | 7.29 | 16.014983  | 1.84E-01 | 52052945  | 52053068  | NC_000013.10 |
| cg04666975 | 1.07E-10 | 7.59E-12 | 7.29 | 16.0134143 | 1.58E-01 | 60977353  | 60977476  | NC_000014.8  |
| cg00129651 | 1.07E-10 | 7.60E-12 | 7.29 | 16.0123677 | 2.58E-01 | 38347710  | 38347833  | NC_000017.10 |
| cg10716862 | 1.08E-10 | 7.61E-12 | 7.29 | 16.0108699 | 1.07E-01 | 65674876  | 65674999  | NC_000001.10 |
| cg27213024 | 1.08E-10 | 7.62E-12 | 7.29 | 16.0102644 | 6.92E-02 | 143913327 | 143913450 | NC_000006.11 |
| cg05967403 | 1.08E-10 | 7.62E-12 | 7.29 | 16.0097385 | 1.39E-01 | 28367245  | 28367368  | NC_000013.10 |
| cg26135388 | 1.08E-10 | 7.64E-12 | 7.29 | 16.0066589 | 1.55E-01 | 130831162 | 130831285 | NC_000010.10 |
| cg16582419 | 1.08E-10 | 7.66E-12 | 7.29 | 16.0046391 | 1.08E-01 | 30038998  | 30039121  | NC_000006.11 |
| cg19818271 | 1.08E-10 | 7.66E-12 | 7.29 | 16.0041932 | 1.24E-01 | 77468418  | 77468541  | NC_000007.13 |
| cg01775414 | 1.09E-10 | 7.69E-12 | 7.29 | 16.001204  | 2.21E-01 | 45405404  | 45405527  | NC_000022.10 |
| cg08033114 | 1.09E-10 | 7.69E-12 | 7.29 | 16.0007353 | 1.76E-01 | 32907919  | 32908042  | NC_000017.10 |
| cg10602757 | 1.09E-10 | 7.70E-12 | 7.29 | 15.998886  | 1.40E-01 | 114256781 | 114256904 | NC_000002.11 |
| cg24229589 | 1.09E-10 | 7.72E-12 | 7.29 | 15.9970547 | 1.40E-01 | 19651962  | 19652085  | NC_000019.9  |
| cg00003305 | 1.09E-10 | 7.72E-12 | 7.29 | 15.9967164 | 2.06E-01 | 30715645  | 30715768  | NC_000019.9  |
| cg10982364 | 1.09E-10 | 7.72E-12 | 7.29 | 15.9963449 | 1.62E-01 | 200329670 | 200329793 | NC_000002.11 |
| cg13503268 | 1.09E-10 | 7.73E-12 | 7.29 | 15.9954435 | 4.02E-02 | 74387214  | 74387337  | NC_000009.11 |
| cg05674475 | 1.09E-10 | 7.73E-12 | 7.29 | 15.9954375 | 1.72E-01 | 42154385  | 42154508  | NC_000004.11 |
| cg04760348 | 1.09E-10 | 7.73E-12 | 7.29 | 15.9950502 | 1.04E-01 | 86608910  | 86609033  | NC_000016.9  |
| cg11186405 | 1.09E-10 | 7.74E-12 | 7.29 | 15.9947912 | 1.96E-01 | 112728206 | 112728329 | NC_000013.10 |
| cg16566400 | 1.09E-10 | 7.74E-12 | 7.28 | 15.9942579 | 2.42E-01 | 119293869 | 119293992 | NC_000011.9  |

|            |          |          |      |            |          |           |           |              |
|------------|----------|----------|------|------------|----------|-----------|-----------|--------------|
| cg02078690 | 1.10E-10 | 7.76E-12 | 7.28 | 15.9915815 | 1.95E-01 | 122852454 | 122852577 | NC_000011.9  |
| cg15915658 | 1.10E-10 | 7.78E-12 | 7.28 | 15.9898011 | 1.29E-01 | 65262358  | 65262481  | NC_000011.9  |
| cg26332740 | 1.10E-10 | 7.78E-12 | 7.28 | 15.9892139 | 1.72E-01 | 228196227 | 228196350 | NC_000001.10 |
| cg16830930 | 1.10E-10 | 7.78E-12 | 7.28 | 15.9889168 | 1.11E-01 | 55371392  | 55371515  | NC_000008.10 |
| cg02846316 | 1.10E-10 | 7.80E-12 | 7.28 | 15.9873255 | 1.08E-01 | 31340340  | 31340463  | NC_000016.9  |
| cg17035996 | 1.10E-10 | 7.80E-12 | 7.28 | 15.9870181 | 1.02E-01 | 63985489  | 63985612  | NC_000005.9  |
| cg17432748 | 1.10E-10 | 7.80E-12 | 7.28 | 15.9863091 | 1.47E-01 | 235959556 | 235959679 | NC_000002.11 |
| cg22517020 | 1.10E-10 | 7.80E-12 | 7.28 | 15.9862818 | 6.38E-02 | 193082085 | 193082208 | NC_000001.10 |
| cg17695504 | 1.10E-10 | 7.81E-12 | 7.28 | 15.9856529 | 9.85E-02 | 29923120  | 29923243  | NC_000007.13 |
| cg21517792 | 1.10E-10 | 7.81E-12 | 7.28 | 15.9852388 | 1.04E-01 | 105885531 | 105885654 | NC_000014.8  |
| cg10109500 | 1.10E-10 | 7.82E-12 | 7.28 | 15.9838656 | 1.95E-01 | 172165884 | 172166007 | NC_000003.11 |
| cg19839825 | 1.10E-10 | 7.83E-12 | 7.28 | 15.9833059 | 1.50E-01 | 7616011   | 7616134   | NC_000019.9  |
| cg00507008 | 1.10E-10 | 7.83E-12 | 7.28 | 15.982756  | 1.84E-01 | 115131421 | 115131544 | NC_000012.11 |
| cg10091144 | 1.10E-10 | 7.84E-12 | 7.28 | 15.9821476 | 1.00E-01 | 105966148 | 105966271 | NC_000014.8  |
| cg03923071 | 1.11E-10 | 7.84E-12 | 7.28 | 15.9815118 | 1.39E-01 | 153852929 | 153853052 | NC_000005.9  |
| cg13542368 | 1.11E-10 | 7.85E-12 | 7.28 | 15.9804575 | 1.07E-01 | 95049539  | 95049662  | NC_000010.10 |
| cg07057177 | 1.11E-10 | 7.86E-12 | 7.28 | 15.9791692 | 2.17E-01 | 132261393 | 132261516 | NC_000007.13 |
| cg03839714 | 1.11E-10 | 7.86E-12 | 7.28 | 15.9791393 | 1.07E-01 | 31361534  | 31361657  | NC_000010.10 |
| cg23684973 | 1.11E-10 | 7.87E-12 | 7.28 | 15.9782963 | 2.19E-01 | 1780003   | 1780126   | NC_000010.10 |
| cg09807215 | 1.11E-10 | 7.87E-12 | 7.28 | 15.9782318 | 1.70E-01 | 144510884 | 144511007 | NC_000008.10 |
| cg06654537 | 1.11E-10 | 7.87E-12 | 7.28 | 15.9780711 | 1.42E-01 | 100641317 | 100641440 | NC_000013.10 |
| cg06730678 | 1.11E-10 | 7.87E-12 | 7.28 | 15.9779171 | 1.34E-01 | 6166943   | 6167066   | NC_000012.11 |
| cg26934034 | 1.11E-10 | 7.88E-12 | 7.28 | 15.976572  | 8.07E-02 | 113861110 | 113861233 | NC_000012.11 |
| cg01073765 | 1.11E-10 | 7.90E-12 | 7.28 | 15.974011  | 8.67E-02 | 20568217  | 20568340  | NC_000001.10 |
| cg00814733 | 1.11E-10 | 7.90E-12 | 7.28 | 15.9737631 | 1.79E-01 | 4382051   | 4382174   | NC_000012.11 |

|            |          |          |      |            |          |           |           |              |
|------------|----------|----------|------|------------|----------|-----------|-----------|--------------|
| cg13677415 | 1.11E-10 | 7.90E-12 | 7.28 | 15.9737205 | 1.96E-01 | 35291900  | 35292023  | NC_000017.10 |
| cg04531425 | 1.11E-10 | 7.91E-12 | 7.28 | 15.9725181 | 1.59E-01 | 182322841 | 182322964 | NC_000002.11 |
| cg03075050 | 1.12E-10 | 7.92E-12 | 7.28 | 15.9720986 | 8.58E-02 | 46462790  | 46462913  | NC_000016.9  |
| cg24772753 | 1.12E-10 | 7.92E-12 | 7.28 | 15.9715403 | 1.43E-01 | 171573419 | 171573542 | NC_000002.11 |
| cg11368281 | 1.12E-10 | 7.94E-12 | 7.28 | 15.969098  | 5.91E-02 | 35170588  | 35170711  | NC_000019.9  |
| cg02319149 | 1.12E-10 | 7.96E-12 | 7.28 | 15.9668609 | 1.47E-01 | 99336246  | 99336369  | NC_000013.10 |
| cg08711858 | 1.12E-10 | 7.97E-12 | 7.28 | 15.9661883 | 2.58E-01 | 172756550 | 172756673 | NC_000005.9  |
| cg07442409 | 1.12E-10 | 7.98E-12 | 7.28 | 15.9641192 | 1.41E-01 | 60973773  | 60973896  | NC_000014.8  |
| cg10724965 | 1.13E-10 | 8.00E-12 | 7.28 | 15.962075  | 9.42E-02 | 25543202  | 25543325  | NC_000008.10 |
| cg23434461 | 1.13E-10 | 8.00E-12 | 7.28 | 15.9620546 | 9.14E-02 | 119803683 | 119803806 | NC_000008.10 |
| cg13526221 | 1.13E-10 | 8.00E-12 | 7.28 | 15.9614278 | 1.27E-01 | 987389    | 987512    | NC_000008.10 |
| cg24092282 | 1.13E-10 | 8.00E-12 | 7.28 | 15.9614005 | 1.57E-01 | 54413371  | 54413494  | NC_000014.8  |
| cg20386316 | 1.13E-10 | 8.01E-12 | 7.28 | 15.9612205 | 1.93E-01 | 72470982  | 72471105  | NC_000008.10 |
| cg20748533 | 1.13E-10 | 8.01E-12 | 7.28 | 15.9603077 | 1.41E-01 | 51189975  | 51190098  | NC_000019.9  |
| cg19594840 | 1.13E-10 | 8.02E-12 | 7.28 | 15.9600198 | 1.21E-01 | 157934391 | 157934514 | NC_000006.11 |
| cg11439390 | 1.13E-10 | 8.04E-12 | 7.28 | 15.9566789 | 7.99E-02 | 7506552   | 7506675   | NC_000006.11 |
| cg19870698 | 1.13E-10 | 8.06E-12 | 7.28 | 15.9549782 | 1.87E-01 | 95239570  | 95239693  | NC_000014.8  |
| cg02362467 | 1.13E-10 | 8.06E-12 | 7.28 | 15.9545309 | 1.72E-01 | 104513683 | 104513806 | NC_000008.10 |
| cg18293662 | 1.13E-10 | 8.06E-12 | 7.28 | 15.9543207 | 1.74E-01 | 27766054  | 27766177  | NC_000003.11 |
| cg17750109 | 1.14E-10 | 8.09E-12 | 7.28 | 15.9508939 | 1.01E-01 | 115844232 | 115844355 | NC_000001.10 |
| cg03769383 | 1.14E-10 | 8.10E-12 | 7.28 | 15.9501268 | 1.76E-01 | 41583367  | 41583490  | NC_000012.11 |
| cg01271485 | 1.14E-10 | 8.10E-12 | 7.28 | 15.9498596 | 1.26E-01 | 55650017  | 55650140  | NC_000002.11 |
| cg11959316 | 1.14E-10 | 8.10E-12 | 7.28 | 15.9496998 | 1.74E-01 | 57001742  | 57001865  | NC_000001.10 |
| cg04578774 | 1.14E-10 | 8.12E-12 | 7.28 | 15.9471895 | 2.31E-01 | 44332664  | 44332787  | NC_000011.9  |
| cg17381030 | 1.14E-10 | 8.12E-12 | 7.28 | 15.9470428 | 1.10E-01 | 118369843 | 118369966 | NC_000010.10 |

|            |          |          |      |            |          |           |           |              |
|------------|----------|----------|------|------------|----------|-----------|-----------|--------------|
| cg19631064 | 1.14E-10 | 8.14E-12 | 7.28 | 15.9448799 | 1.13E-01 | 197807355 | 197807478 | NC_000003.11 |
| cg25728362 | 1.15E-10 | 8.16E-12 | 7.28 | 15.9428145 | 4.75E-02 | 105222945 | 105223068 | NC_000007.13 |
| cg06868481 | 1.15E-10 | 8.17E-12 | 7.28 | 15.9408938 | 9.72E-02 | 29192086  | 29192209  | NC_000001.10 |
| cg04285275 | 1.15E-10 | 8.17E-12 | 7.28 | 15.9406719 | 1.78E-01 | 31549141  | 31549264  | NC_000016.9  |
| cg25886284 | 1.15E-10 | 8.18E-12 | 7.28 | 15.9400331 | 2.36E-01 | 36909418  | 36909541  | NC_000019.9  |
| cg23665824 | 1.15E-10 | 8.19E-12 | 7.28 | 15.9390132 | 1.72E-01 | 80530701  | 80530824  | NC_000002.11 |
| cg11076668 | 1.15E-10 | 8.19E-12 | 7.28 | 15.9389106 | 3.29E-02 | 82336109  | 82336232  | NC_000015.9  |
| cg26739849 | 1.15E-10 | 8.19E-12 | 7.28 | 15.9388479 | 5.94E-02 | 111165419 | 111165542 | NC_000013.10 |
| cg05358729 | 1.16E-10 | 8.24E-12 | 7.27 | 15.9322305 | 1.79E-01 | 29719159  | 29719282  | NC_000017.10 |
| cg17912835 | 1.16E-10 | 8.25E-12 | 7.27 | 15.9311654 | 1.53E-01 | 105478804 | 105478927 | NC_000002.11 |
| cg07381141 | 1.16E-10 | 8.26E-12 | 7.27 | 15.9301549 | 1.20E-01 | 15783239  | 15783362  | NC_000001.10 |
| cg00916536 | 1.16E-10 | 8.26E-12 | 7.27 | 15.9298827 | 2.05E-01 | 87017419  | 87017542  | NC_000002.11 |
| cg23335916 | 1.16E-10 | 8.27E-12 | 7.27 | 15.929216  | 1.03E-01 | 42578842  | 42578965  | NC_000008.10 |
| cg12211161 | 1.16E-10 | 8.27E-12 | 7.27 | 15.9288183 | 1.24E-01 | 157448659 | 157448782 | NC_000007.13 |
| cg00287096 | 1.16E-10 | 8.28E-12 | 7.27 | 15.9283277 | 1.15E-01 | 63642709  | 63642832  | NC_000007.13 |
| cg06793562 | 1.16E-10 | 8.29E-12 | 7.27 | 15.9271953 | 1.96E-01 | 85482570  | 85482693  | NC_000006.11 |
| cg22927788 | 1.17E-10 | 8.31E-12 | 7.27 | 15.9239734 | 1.60E-01 | 20521984  | 20522107  | NC_000012.11 |
| cg13818075 | 1.17E-10 | 8.32E-12 | 7.27 | 15.9236628 | 1.16E-01 | 48391043  | 48391166  | NC_000013.10 |
| cg08008088 | 1.17E-10 | 8.32E-12 | 7.27 | 15.9235538 | 1.25E-01 | 143609509 | 143609632 | NC_000008.10 |
| cg14460403 | 1.17E-10 | 8.32E-12 | 7.27 | 15.9235491 | 1.42E-01 | 119301766 | 119301889 | NC_000010.10 |
| cg08750534 | 1.17E-10 | 8.32E-12 | 7.27 | 15.9233253 | 1.32E-01 | 65630259  | 65630382  | NC_000002.11 |
| cg01210554 | 1.17E-10 | 8.34E-12 | 7.27 | 15.921372  | 1.78E-01 | 27191564  | 27191687  | NC_000007.13 |
| cg03322752 | 1.17E-10 | 8.34E-12 | 7.27 | 15.9204491 | 8.67E-02 | 54824520  | 54824643  | NC_000007.13 |
| cg15448736 | 1.17E-10 | 8.36E-12 | 7.27 | 15.9188715 | 8.17E-02 | 132852389 | 132852512 | NC_000012.11 |
| cg12921750 | 1.17E-10 | 8.36E-12 | 7.27 | 15.918633  | 1.60E-01 | 70535336  | 70535459  | NC_000018.9  |

|            |          |          |      |            |          |           |           |              |
|------------|----------|----------|------|------------|----------|-----------|-----------|--------------|
| cg01156374 | 1.17E-10 | 8.37E-12 | 7.27 | 15.9179919 | 1.36E-01 | 4130800   | 4130923   | NC_000006.11 |
| cg12320750 | 1.17E-10 | 8.37E-12 | 7.27 | 15.9176908 | 7.22E-02 | 17944975  | 17945098  | NC_000017.10 |
| cg06262098 | 1.17E-10 | 8.37E-12 | 7.27 | 15.9176585 | 7.57E-02 | 5413872   | 5413995   | NC_000007.13 |
| cg19333100 | 1.17E-10 | 8.37E-12 | 7.27 | 15.9176374 | 1.69E-01 | 123229032 | 123229155 | NC_000011.9  |
| cg15697019 | 1.18E-10 | 8.37E-12 | 7.27 | 15.9169444 | 1.03E-01 | 77357984  | 77358107  | NC_000007.13 |
| cg04822518 | 1.18E-10 | 8.38E-12 | 7.27 | 15.9157398 | 1.44E-01 | 29936075  | 29936198  | NC_000012.11 |
| cg11319389 | 1.18E-10 | 8.41E-12 | 7.27 | 15.9124212 | 1.82E-01 | 42544648  | 42544771  | NC_000020.10 |
| cg19924619 | 1.18E-10 | 8.42E-12 | 7.27 | 15.9112924 | 1.63E-01 | 165323692 | 165323815 | NC_000001.10 |
| cg20717123 | 1.18E-10 | 8.43E-12 | 7.27 | 15.910906  | 1.99E-01 | 133195520 | 133195643 | NC_000012.11 |
| cg03290827 | 1.18E-10 | 8.44E-12 | 7.27 | 15.9089746 | 1.08E-01 | 75180760  | 75180883  | NC_000017.10 |
| cg18392016 | 1.19E-10 | 8.45E-12 | 7.27 | 15.9077009 | 2.19E-01 | 117591684 | 117591807 | NC_000006.11 |
| cg13946520 | 1.19E-10 | 8.45E-12 | 7.27 | 15.9074986 | 2.03E-01 | 87017689  | 87017812  | NC_000002.11 |
| cg25228422 | 1.19E-10 | 8.48E-12 | 7.27 | 15.9051133 | 1.90E-01 | 19152335  | 19152458  | NC_000007.13 |
| cg07704934 | 1.19E-10 | 8.48E-12 | 7.27 | 15.9042572 | 1.63E-01 | 44332940  | 44333063  | NC_000011.9  |
| cg11805552 | 1.19E-10 | 8.49E-12 | 7.27 | 15.903876  | 1.08E-01 | 16175128  | 16175251  | NC_000006.11 |
| cg05093169 | 1.19E-10 | 8.49E-12 | 7.27 | 15.9036764 | 1.76E-01 | 71955401  | 71955524  | NC_000011.9  |
| cg13425135 | 1.19E-10 | 8.49E-12 | 7.27 | 15.9036117 | 7.00E-02 | 137330570 | 137330693 | NC_000009.11 |
| cg16325502 | 1.19E-10 | 8.49E-12 | 7.27 | 15.903432  | 1.45E-01 | 223166435 | 223166558 | NC_000002.11 |
| cg22095128 | 1.19E-10 | 8.50E-12 | 7.27 | 15.9022713 | 1.44E-01 | 33754450  | 33754573  | NC_000013.10 |
| cg10237419 | 1.19E-10 | 8.50E-12 | 7.27 | 15.9020234 | 1.66E-01 | 110224235 | 110224358 | NC_000004.11 |
| cg04079301 | 1.19E-10 | 8.51E-12 | 7.27 | 15.9006437 | 1.59E-01 | 147106635 | 147106758 | NC_000003.11 |
| cg09914029 | 1.20E-10 | 8.53E-12 | 7.27 | 15.8991225 | 1.02E-01 | 117859175 | 117859298 | NC_000008.10 |
| cg24725933 | 1.20E-10 | 8.54E-12 | 7.27 | 15.8979653 | 5.41E-02 | 98999128  | 98999251  | NC_000002.11 |
| cg26396815 | 1.20E-10 | 8.55E-12 | 7.27 | 15.896891  | 4.11E-02 | 102878132 | 102878255 | NC_000004.11 |
| cg18448695 | 1.20E-10 | 8.55E-12 | 7.27 | 15.8960988 | 7.90E-02 | 56781117  | 56781240  | NC_000020.10 |

|            |          |          |      |            |          |           |           |              |
|------------|----------|----------|------|------------|----------|-----------|-----------|--------------|
| cg25580634 | 1.20E-10 | 8.56E-12 | 7.27 | 15.8956443 | 3.71E-02 | 205947    | 206070    | NC_000005.9  |
| cg17960934 | 1.20E-10 | 8.56E-12 | 7.27 | 15.89553   | 1.16E-01 | 70096791  | 70096914  | NC_000007.13 |
| cg19433697 | 1.20E-10 | 8.58E-12 | 7.27 | 15.8930631 | 2.16E-01 | 60294787  | 60294910  | NC_000015.9  |
| cg00563824 | 1.20E-10 | 8.58E-12 | 7.27 | 15.8925201 | 1.74E-01 | 209405064 | 209405187 | NC_000001.10 |
| cg19635505 | 1.20E-10 | 8.59E-12 | 7.27 | 15.8914129 | 1.22E-01 | 20903555  | 20903678  | NC_000014.8  |
| cg21016855 | 1.21E-10 | 8.62E-12 | 7.27 | 15.8881605 | 1.64E-01 | 31819444  | 31819567  | NC_000011.9  |
| cg01658421 | 1.21E-10 | 8.63E-12 | 7.27 | 15.8877605 | 1.58E-01 | 176945899 | 176946022 | NC_000002.11 |
| cg13486820 | 1.21E-10 | 8.63E-12 | 7.27 | 15.8876289 | 1.40E-01 | 91182288  | 91182411  | NC_000001.10 |
| cg08765199 | 1.21E-10 | 8.68E-12 | 7.27 | 15.8821953 | 1.52E-01 | 130021519 | 130021642 | NC_000007.13 |
| cg12653796 | 1.22E-10 | 8.70E-12 | 7.26 | 15.8791085 | 1.54E-01 | 87016720  | 87016843  | NC_000002.11 |
| cg26616526 | 1.22E-10 | 8.71E-12 | 7.26 | 15.8779586 | 9.79E-02 | 3165100   | 3165223   | NC_000010.10 |
| cg09681167 | 1.22E-10 | 8.72E-12 | 7.26 | 15.8775945 | 2.22E-01 | 237078026 | 237078149 | NC_000002.11 |
| cg12064276 | 1.22E-10 | 8.73E-12 | 7.26 | 15.8763216 | 1.38E-01 | 79182205  | 79182328  | NC_000013.10 |
| cg15562022 | 1.22E-10 | 8.74E-12 | 7.26 | 15.8754027 | 8.15E-02 | 31167427  | 31167550  | NC_000006.11 |
| cg14004602 | 1.22E-10 | 8.74E-12 | 7.26 | 15.874731  | 9.67E-02 | 34330410  | 34330533  | NC_000017.10 |
| cg07241917 | 1.22E-10 | 8.74E-12 | 7.26 | 15.8747087 | 1.16E-01 | 221069699 | 221069822 | NC_000001.10 |
| cg21336288 | 1.22E-10 | 8.74E-12 | 7.26 | 15.8745332 | 1.43E-01 | 117742444 | 117742567 | NC_000008.10 |
| cg11367354 | 1.23E-10 | 8.76E-12 | 7.26 | 15.8721119 | 1.35E-01 | 96651983  | 96652106  | NC_000007.13 |
| cg03445310 | 1.23E-10 | 8.78E-12 | 7.26 | 15.8698984 | 8.21E-02 | 39728478  | 39728601  | NC_000017.10 |
| cg04855961 | 1.23E-10 | 8.79E-12 | 7.26 | 15.869633  | 1.03E-01 | 159719849 | 159719972 | NC_000003.11 |
| cg25122369 | 1.23E-10 | 8.79E-12 | 7.26 | 15.869447  | 1.01E-01 | 168801790 | 168801913 | NC_000003.11 |
| cg20192747 | 1.23E-10 | 8.80E-12 | 7.26 | 15.8679449 | 1.15E-01 | 44774846  | 44774969  | NC_000018.9  |
| cg22682811 | 1.24E-10 | 8.83E-12 | 7.26 | 15.864404  | 1.53E-01 | 21372462  | 21372585  | NC_000020.10 |
| cg07589393 | 1.24E-10 | 8.84E-12 | 7.26 | 15.8640374 | 1.40E-01 | 26984305  | 26984428  | NC_000007.13 |
| cg10039163 | 1.24E-10 | 8.85E-12 | 7.26 | 15.8628751 | 5.31E-02 | 144593087 | 144593210 | NC_000008.10 |

|            |          |          |      |            |          |           |           |              |
|------------|----------|----------|------|------------|----------|-----------|-----------|--------------|
| cg22753340 | 1.24E-10 | 8.86E-12 | 7.26 | 15.8615433 | 2.37E-01 | 31831489  | 31831612  | NC_000006.11 |
| cg22392666 | 1.24E-10 | 8.87E-12 | 7.26 | 15.8607786 | 1.59E-01 | 35634167  | 35634290  | NC_000019.9  |
| cg03826688 | 1.24E-10 | 8.87E-12 | 7.26 | 15.8606215 | 6.68E-02 | 16756662  | 16756785  | NC_000012.11 |
| cg00852921 | 1.24E-10 | 8.88E-12 | 7.26 | 15.8591506 | 1.17E-01 | 62120544  | 62120667  | NC_000020.10 |
| cg13928709 | 1.24E-10 | 8.88E-12 | 7.26 | 15.8590889 | 2.89E-01 | 176237221 | 176237344 | NC_000005.9  |
| cg08271804 | 1.24E-10 | 8.89E-12 | 7.26 | 15.8579896 | 2.00E-01 | 22816896  | 22817019  | NC_000019.9  |
| cg04988216 | 1.24E-10 | 8.90E-12 | 7.26 | 15.8573977 | 1.07E-01 | 64471626  | 64471749  | NC_000001.10 |
| cg25026755 | 1.24E-10 | 8.91E-12 | 7.26 | 15.8563509 | 1.08E-01 | 57702195  | 57702318  | NC_000005.9  |
| cg05229355 | 1.25E-10 | 8.93E-12 | 7.26 | 15.8542206 | 1.61E-01 | 132052702 | 132052825 | NC_000008.10 |
| cg20510600 | 1.25E-10 | 8.93E-12 | 7.26 | 15.8536546 | 6.94E-02 | 54820824  | 54820947  | NC_000001.10 |
| cg15828353 | 1.25E-10 | 8.95E-12 | 7.26 | 15.8515618 | 7.77E-02 | 114004106 | 114004229 | NC_000013.10 |
| cg10266060 | 1.25E-10 | 8.95E-12 | 7.26 | 15.8513243 | 1.50E-01 | 28043215  | 28043338  | NC_000015.9  |
| cg16961816 | 1.25E-10 | 8.95E-12 | 7.26 | 15.8512251 | 1.29E-01 | 96633530  | 96633653  | NC_000007.13 |
| cg27040709 | 1.25E-10 | 8.96E-12 | 7.26 | 15.8508428 | 1.23E-01 | 19191723  | 19191846  | NC_000016.9  |
| cg11822175 | 1.25E-10 | 8.97E-12 | 7.26 | 15.8493299 | 1.54E-01 | 102637177 | 102637300 | NC_000010.10 |
| cg01104724 | 1.25E-10 | 8.98E-12 | 7.26 | 15.8477859 | 1.97E-01 | 56297564  | 56297687  | NC_000007.13 |
| cg04195774 | 1.26E-10 | 9.00E-12 | 7.26 | 15.8465129 | 1.57E-01 | 118677172 | 118677295 | NC_000005.9  |
| cg10983544 | 1.26E-10 | 9.00E-12 | 7.26 | 15.8464555 | 1.86E-01 | 248020377 | 248020500 | NC_000001.10 |
| cg01037890 | 1.26E-10 | 9.00E-12 | 7.26 | 15.8463998 | 1.70E-01 | 60937048  | 60937171  | NC_000010.10 |
| cg21041447 | 1.26E-10 | 9.00E-12 | 7.26 | 15.8461161 | 9.60E-02 | 42924694  | 42924817  | NC_000005.9  |
| cg07719077 | 1.26E-10 | 9.02E-12 | 7.26 | 15.8435925 | 4.93E-02 | 57178318  | 57178441  | NC_000004.11 |
| cg16812621 | 1.26E-10 | 9.04E-12 | 7.26 | 15.8414784 | 5.43E-02 | 19888434  | 19888557  | NC_000014.8  |
| cg05525305 | 1.26E-10 | 9.05E-12 | 7.26 | 15.8400575 | 5.11E-02 | 14459174  | 14459297  | NC_000018.9  |
| cg05034973 | 1.26E-10 | 9.06E-12 | 7.26 | 15.8399816 | 1.79E-01 | 119294332 | 119294455 | NC_000010.10 |
| cg03480337 | 1.26E-10 | 9.06E-12 | 7.26 | 15.8392307 | 1.93E-01 | 65284519  | 65284642  | NC_000008.10 |

|            |          |          |      |            |          |           |           |              |
|------------|----------|----------|------|------------|----------|-----------|-----------|--------------|
| cg05952786 | 1.26E-10 | 9.07E-12 | 7.26 | 15.8387703 | 3.70E-02 | 48559485  | 48559608  | NC_000017.10 |
| cg07220032 | 1.27E-10 | 9.07E-12 | 7.26 | 15.8386338 | 1.30E-01 | 24742701  | 24742824  | NC_000013.10 |
| cg26885858 | 1.27E-10 | 9.08E-12 | 7.26 | 15.8377211 | 9.95E-02 | 21766368  | 21766491  | NC_000001.10 |
| cg25084878 | 1.27E-10 | 9.09E-12 | 7.26 | 15.8365164 | 2.16E-01 | 127873711 | 127873834 | NC_000005.9  |
| cg20274006 | 1.27E-10 | 9.11E-12 | 7.26 | 15.8340359 | 6.73E-02 | 29778956  | 29779079  | NC_000008.10 |
| cg14306734 | 1.27E-10 | 9.11E-12 | 7.26 | 15.8338377 | 2.50E-01 | 34833938  | 34834061  | NC_000018.9  |
| cg03978514 | 1.27E-10 | 9.13E-12 | 7.26 | 15.8314176 | 6.62E-02 | 241494647 | 241494770 | NC_000002.11 |
| cg18880500 | 1.27E-10 | 9.14E-12 | 7.26 | 15.8311699 | 1.21E-01 | 53392492  | 53392615  | NC_000001.10 |
| cg03067613 | 1.27E-10 | 9.14E-12 | 7.26 | 15.8308405 | 9.10E-02 | 1785527   | 1785650   | NC_000019.9  |
| cg17295053 | 1.27E-10 | 9.14E-12 | 7.26 | 15.8307093 | 1.33E-01 | 101194096 | 101194219 | NC_000010.10 |
| cg26641935 | 1.27E-10 | 9.14E-12 | 7.26 | 15.8304218 | 9.23E-02 | 74423256  | 74423379  | NC_000006.11 |
| cg02377941 | 1.28E-10 | 9.15E-12 | 7.26 | 15.8295761 | 1.06E-01 | 54973385  | 54973508  | NC_000016.9  |
| cg04881642 | 1.28E-10 | 9.15E-12 | 7.26 | 15.8294587 | 5.15E-02 | 69048156  | 69048279  | NC_000004.11 |
| cg25479732 | 1.28E-10 | 9.16E-12 | 7.26 | 15.8292437 | 1.32E-01 | 80528698  | 80528821  | NC_000005.9  |
| cg24299740 | 1.28E-10 | 9.16E-12 | 7.26 | 15.8285032 | 1.05E-01 | 134252804 | 134252927 | NC_000011.9  |
| cg16277306 | 1.28E-10 | 9.18E-12 | 7.26 | 15.8266503 | 8.57E-02 | 105351751 | 105351874 | NC_000012.11 |
| cg11530960 | 1.28E-10 | 9.19E-12 | 7.26 | 15.8254363 | 1.67E-01 | 1052239   | 1052362   | NC_000009.11 |
| cg11556846 | 1.28E-10 | 9.20E-12 | 7.26 | 15.8248191 | 1.44E-01 | 200468728 | 200468851 | NC_000002.11 |
| cg08533773 | 1.28E-10 | 9.20E-12 | 7.26 | 15.8241495 | 1.57E-01 | 113392004 | 113392127 | NC_000005.9  |
| cg15895543 | 1.28E-10 | 9.21E-12 | 7.26 | 15.8231595 | 2.91E-02 | 105516255 | 105516378 | NC_000014.8  |
| cg03639897 | 1.28E-10 | 9.22E-12 | 7.25 | 15.8224878 | 1.23E-01 | 897545    | 897668    | NC_000020.10 |
| cg14042851 | 1.29E-10 | 9.23E-12 | 7.25 | 15.8207568 | 2.12E-01 | 57019005  | 57019128  | NC_000019.9  |
| cg09821685 | 1.29E-10 | 9.24E-12 | 7.25 | 15.8201101 | 4.81E-02 | 109034944 | 109035067 | NC_000003.11 |
| cg02331262 | 1.29E-10 | 9.26E-12 | 7.25 | 15.8184578 | 1.63E-01 | 87988631  | 87988754  | NC_000016.9  |
| cg19429599 | 1.29E-10 | 9.26E-12 | 7.25 | 15.8181588 | 1.46E-01 | 50266099  | 50266222  | NC_000005.9  |



|            |          |          |      |            |          |           |           |              |
|------------|----------|----------|------|------------|----------|-----------|-----------|--------------|
| cg02340083 | 1.29E-10 | 9.26E-12 | 7.25 | 15.8179464 | 2.04E-01 | 50882006  | 50882129  | NC_000001.10 |
| cg10365769 | 1.29E-10 | 9.27E-12 | 7.25 | 15.8172481 | 7.89E-02 | 7589937   | 7590060   | NC_000004.11 |
| cg16804165 | 1.29E-10 | 9.27E-12 | 7.25 | 15.8170076 | 9.91E-02 | 43989074  | 43989197  | NC_000015.9  |
| cg15347156 | 1.29E-10 | 9.28E-12 | 7.25 | 15.8159161 | 7.84E-02 | 88702795  | 88702918  | NC_000010.10 |
| cg07861790 | 1.29E-10 | 9.29E-12 | 7.25 | 15.8148973 | 1.09E-01 | 112761844 | 112761967 | NC_000013.10 |
| cg00910616 | 1.30E-10 | 9.30E-12 | 7.25 | 15.8134279 | 7.41E-02 | 41245733  | 41245856  | NC_000001.10 |
| cg20667964 | 1.30E-10 | 9.31E-12 | 7.25 | 15.8127935 | 7.44E-02 | 139553002 | 139553125 | NC_000007.13 |
| cg20208394 | 1.30E-10 | 9.31E-12 | 7.25 | 15.8126009 | 1.25E-01 | 7052425   | 7052548   | NC_000004.11 |
| cg23984434 | 1.30E-10 | 9.32E-12 | 7.25 | 15.812162  | 2.52E-01 | 106888656 | 106888779 | NC_000011.9  |
| cg26660654 | 1.30E-10 | 9.32E-12 | 7.25 | 15.8119223 | 5.05E-02 | 90580274  | 90580397  | NC_000010.10 |
| cg27579233 | 1.30E-10 | 9.34E-12 | 7.25 | 15.8097439 | 1.37E-01 | 22827348  | 22827471  | NC_000001.10 |
| cg25206536 | 1.30E-10 | 9.37E-12 | 7.25 | 15.8059361 | 1.47E-01 | 11369007  | 11369130  | NC_000004.11 |
| cg08296191 | 1.31E-10 | 9.38E-12 | 7.25 | 15.8054636 | 1.41E-01 | 51159555  | 51159678  | NC_000022.10 |
| cg26917673 | 1.31E-10 | 9.41E-12 | 7.25 | 15.8019924 | 2.72E-01 | 81952024  | 81952147  | NC_000004.11 |
| cg05166820 | 1.31E-10 | 9.41E-12 | 7.25 | 15.8017462 | 1.40E-01 | 55444153  | 55444276  | NC_000006.11 |
| cg02620013 | 1.31E-10 | 9.42E-12 | 7.25 | 15.80124   | 1.38E-01 | 49794681  | 49794804  | NC_000013.10 |
| cg22524998 | 1.31E-10 | 9.42E-12 | 7.25 | 15.8010474 | 1.25E-01 | 17877846  | 17877969  | NC_000019.9  |
| cg06852058 | 1.31E-10 | 9.43E-12 | 7.25 | 15.7998569 | 1.11E-01 | 34498249  | 34498372  | NC_000015.9  |
| cg20181739 | 1.31E-10 | 9.44E-12 | 7.25 | 15.7993529 | 9.63E-02 | 109907962 | 109908085 | NC_000002.11 |
| cg22524061 | 1.31E-10 | 9.44E-12 | 7.25 | 15.7986245 | 1.61E-01 | 99959430  | 99959553  | NC_000008.10 |
| cg13898875 | 1.31E-10 | 9.45E-12 | 7.25 | 15.797688  | 1.05E-01 | 36980923  | 36981046  | NC_000002.11 |
| cg01410615 | 1.32E-10 | 9.46E-12 | 7.25 | 15.7970402 | 1.10E-01 | 242164067 | 242164190 | NC_000002.11 |
| cg16145209 | 1.32E-10 | 9.46E-12 | 7.25 | 15.7970074 | 1.35E-01 | 2481909   | 2482032   | NC_000011.9  |
| cg16985652 | 1.32E-10 | 9.50E-12 | 7.25 | 15.7931396 | 1.26E-01 | 27241897  | 27242020  | NC_000001.10 |
| cg16046833 | 1.32E-10 | 9.50E-12 | 7.25 | 15.7925169 | 9.32E-02 | 99136054  | 99136177  | NC_000001.10 |

|            |          |          |      |            |          |           |           |              |
|------------|----------|----------|------|------------|----------|-----------|-----------|--------------|
| cg17380661 | 1.32E-10 | 9.52E-12 | 7.25 | 15.7911402 | 2.39E-01 | 100912946 | 100913069 | NC_000006.11 |
| cg01072076 | 1.32E-10 | 9.52E-12 | 7.25 | 15.7906538 | 1.93E-01 | 1930801   | 1930924   | NC_000005.9  |
| cg25950325 | 1.33E-10 | 9.53E-12 | 7.25 | 15.789279  | 1.90E-01 | 41753712  | 41753835  | NC_000004.11 |
| cg27553162 | 1.33E-10 | 9.54E-12 | 7.25 | 15.7886553 | 1.58E-01 | 30582980  | 30583103  | NC_000020.10 |
| cg08231710 | 1.33E-10 | 9.54E-12 | 7.25 | 15.7884899 | 1.25E-01 | 1566687   | 1566810   | NC_000001.10 |
| cg24845595 | 1.33E-10 | 9.54E-12 | 7.25 | 15.7884614 | 1.16E-01 | 156814488 | 156814611 | NC_000001.10 |
| cg00134776 | 1.33E-10 | 9.55E-12 | 7.25 | 15.7875018 | 1.64E-01 | 139653573 | 139653696 | NC_000003.11 |
| cg03442378 | 1.33E-10 | 9.56E-12 | 7.25 | 15.7871185 | 1.64E-01 | 44332385  | 44332508  | NC_000011.9  |
| cg02381539 | 1.33E-10 | 9.56E-12 | 7.25 | 15.7865689 | 2.00E-01 | 65290109  | 65290232  | NC_000008.10 |
| cg17696160 | 1.33E-10 | 9.58E-12 | 7.25 | 15.7842295 | 1.56E-01 | 37136192  | 37136315  | NC_000014.8  |
| cg10050816 | 1.33E-10 | 9.59E-12 | 7.25 | 15.7839571 | 1.39E-01 | 86549237  | 86549360  | NC_000016.9  |
| cg18560204 | 1.33E-10 | 9.60E-12 | 7.25 | 15.7827633 | 1.30E-01 | 83953709  | 83953832  | NC_000015.9  |
| cg03540912 | 1.33E-10 | 9.60E-12 | 7.25 | 15.7826187 | 1.65E-01 | 71792711  | 71792834  | NC_000016.9  |
| cg01420765 | 1.33E-10 | 9.60E-12 | 7.25 | 15.7825213 | 5.46E-02 | 54971610  | 54971733  | NC_000001.10 |
| cg16558432 | 1.34E-10 | 9.64E-12 | 7.25 | 15.7789363 | 2.09E-01 | 5403805   | 5403928   | NC_000017.10 |
| cg10119075 | 1.34E-10 | 9.65E-12 | 7.25 | 15.7777187 | 1.97E-01 | 7709738   | 7709861   | NC_000010.10 |
| cg05001145 | 1.34E-10 | 9.66E-12 | 7.25 | 15.7769428 | 5.02E-02 | 95297731  | 95297854  | NC_000005.9  |
| cg08642771 | 1.34E-10 | 9.67E-12 | 7.25 | 15.775872  | 1.15E-01 | 198392758 | 198392881 | NC_000001.10 |
| cg07463541 | 1.35E-10 | 9.69E-12 | 7.25 | 15.773     | 1.30E-01 | 140181074 | 140181197 | NC_000005.9  |
| cg00073244 | 1.35E-10 | 9.70E-12 | 7.25 | 15.7719804 | 8.96E-02 | 3529108   | 3529231   | NC_000001.10 |
| cg22957360 | 1.35E-10 | 9.71E-12 | 7.25 | 15.7715521 | 1.37E-01 | 101282572 | 101282695 | NC_000010.10 |
| cg09803262 | 1.35E-10 | 9.71E-12 | 7.25 | 15.7714227 | 1.72E-01 | 96622608  | 96622731  | NC_000007.13 |
| cg12186618 | 1.36E-10 | 9.77E-12 | 7.24 | 15.7648934 | 1.32E-01 | 54515274  | 54515397  | NC_000019.9  |
| cg18197392 | 1.36E-10 | 9.78E-12 | 7.24 | 15.7645053 | 2.30E-01 | 23015908  | 23016031  | NC_000020.10 |
| cg05325182 | 1.36E-10 | 9.78E-12 | 7.24 | 15.764353  | 1.22E-01 | 13915751  | 13915874  | NC_000019.9  |

|            |          |          |      |            |          |           |           |              |
|------------|----------|----------|------|------------|----------|-----------|-----------|--------------|
| cg03134573 | 1.36E-10 | 9.79E-12 | 7.24 | 15.7632253 | 6.54E-02 | 144457905 | 144458028 | NC_000008.10 |
| cg19554461 | 1.36E-10 | 9.80E-12 | 7.24 | 15.7626094 | 2.15E-01 | 4998470   | 4998593   | NC_000007.13 |
| cg07032488 | 1.36E-10 | 9.80E-12 | 7.24 | 15.7618786 | 7.88E-02 | 48201121  | 48201244  | NC_000016.9  |
| cg13011388 | 1.36E-10 | 9.80E-12 | 7.24 | 15.7617831 | 1.56E-01 | 23834909  | 23835032  | NC_000014.8  |
| cg02552945 | 1.36E-10 | 9.82E-12 | 7.24 | 15.7604357 | 1.35E-01 | 123811614 | 123811737 | NC_000009.11 |
| cg08120263 | 1.37E-10 | 9.85E-12 | 7.24 | 15.7574366 | 1.65E-01 | 29236013  | 29236136  | NC_000014.8  |
| cg00705613 | 1.37E-10 | 9.85E-12 | 7.24 | 15.757331  | 8.01E-02 | 132661528 | 132661651 | NC_000012.11 |
| cg01720455 | 1.37E-10 | 9.85E-12 | 7.24 | 15.7572187 | 1.61E-01 | 176948343 | 176948466 | NC_000002.11 |
| cg12647497 | 1.37E-10 | 9.86E-12 | 7.24 | 15.7558331 | 1.28E-01 | 110210265 | 110210388 | NC_000001.10 |
| cg27389185 | 1.37E-10 | 9.89E-12 | 7.24 | 15.7537119 | 1.27E-01 | 38042123  | 38042246  | NC_000019.9  |
| cg16918905 | 1.38E-10 | 9.95E-12 | 7.24 | 15.7476571 | 1.48E-01 | 220361609 | 220361732 | NC_000002.11 |
| cg00548268 | 1.38E-10 | 9.97E-12 | 7.24 | 15.745418  | 1.14E-01 | 98245830  | 98245953  | NC_000007.13 |
| cg15082983 | 1.38E-10 | 9.99E-12 | 7.24 | 15.7438107 | 1.25E-01 | 39894780  | 39894903  | NC_000017.10 |
| cg22366088 | 1.39E-10 | 9.99E-12 | 7.24 | 15.7430789 | 2.18E-01 | 154713789 | 154713912 | NC_000004.11 |
| cg01880541 | 1.39E-10 | 1.00E-11 | 7.24 | 15.7424282 | 1.32E-01 | 2146870   | 2146993   | NC_000008.10 |
| cg18313661 | 1.39E-10 | 1.00E-11 | 7.24 | 15.7413013 | 1.16E-01 | 63560590  | 63560713  | NC_000007.13 |
| cg04324666 | 1.39E-10 | 1.00E-11 | 7.24 | 15.7410374 | 1.26E-01 | 23386784  | 23386907  | NC_000019.9  |
| cg20525183 | 1.39E-10 | 1.00E-11 | 7.24 | 15.7410272 | 2.38E-01 | 45405768  | 45405891  | NC_000022.10 |
| cg16799926 | 1.39E-10 | 1.00E-11 | 7.24 | 15.7394559 | 1.55E-01 | 70546695  | 70546818  | NC_000014.8  |
| cg21634100 | 1.39E-10 | 1.00E-11 | 7.24 | 15.7378512 | 9.99E-02 | 55254527  | 55254650  | NC_000018.9  |
| cg05865769 | 1.39E-10 | 1.01E-11 | 7.24 | 15.7372165 | 9.66E-02 | 11943841  | 11943964  | NC_000017.10 |
| cg16122796 | 1.39E-10 | 1.01E-11 | 7.24 | 15.7370638 | 6.68E-02 | 32145414  | 32145537  | NC_000001.10 |
| cg16540704 | 1.39E-10 | 1.01E-11 | 7.24 | 15.7365422 | 6.86E-02 | 117067416 | 117067539 | NC_000007.13 |
| cg05679108 | 1.39E-10 | 1.01E-11 | 7.24 | 15.7357404 | 1.60E-01 | 1395061   | 1395184   | NC_000006.11 |
| cg26823535 | 1.39E-10 | 1.01E-11 | 7.24 | 15.7355333 | 4.61E-02 | 11881420  | 11881543  | NC_000002.11 |

|            |          |          |      |            |          |           |           |              |
|------------|----------|----------|------|------------|----------|-----------|-----------|--------------|
| cg12444450 | 1.40E-10 | 1.01E-11 | 7.24 | 15.7330746 | 1.03E-01 | 45763846  | 45763969  | NC_000001.10 |
| cg26199241 | 1.40E-10 | 1.01E-11 | 7.24 | 15.7306035 | 2.08E-01 | 59529486  | 59529609  | NC_000017.10 |
| cg16444701 | 1.40E-10 | 1.01E-11 | 7.24 | 15.7303404 | 7.69E-02 | 134790855 | 134790978 | NC_000010.10 |
| cg10756127 | 1.40E-10 | 1.01E-11 | 7.24 | 15.7288973 | 2.53E-01 | 166795524 | 166795647 | NC_000004.11 |
| cg15408073 | 1.40E-10 | 1.01E-11 | 7.24 | 15.7288751 | 1.87E-01 | 33936322  | 33936445  | NC_000005.9  |
| cg08244181 | 1.40E-10 | 1.01E-11 | 7.24 | 15.7281667 | 1.52E-01 | 130021807 | 130021930 | NC_000007.13 |
| cg13168877 | 1.41E-10 | 1.02E-11 | 7.24 | 15.7254113 | 8.29E-02 | 1896470   | 1896593   | NC_000001.10 |
| cg16536450 | 1.41E-10 | 1.02E-11 | 7.24 | 15.7252785 | 8.71E-02 | 139658896 | 139659019 | NC_000009.11 |
| cg03556497 | 1.41E-10 | 1.02E-11 | 7.24 | 15.7239346 | 1.69E-01 | 37352792  | 37352915  | NC_000020.10 |
| cg02697402 | 1.41E-10 | 1.02E-11 | 7.24 | 15.7218231 | 1.09E-01 | 87616984  | 87617107  | NC_000016.9  |
| cg27206367 | 1.41E-10 | 1.02E-11 | 7.24 | 15.7216314 | 1.08E-01 | 76398311  | 76398434  | NC_000018.9  |
| cg08095770 | 1.41E-10 | 1.02E-11 | 7.24 | 15.7214693 | 3.22E-02 | 7619558   | 7619681   | NC_000019.9  |
| cg09562322 | 1.41E-10 | 1.02E-11 | 7.24 | 15.7211833 | 1.70E-01 | 119419143 | 119419266 | NC_000012.11 |
| cg09815769 | 1.41E-10 | 1.02E-11 | 7.24 | 15.7209157 | 1.20E-01 | 119539738 | 119539861 | NC_000001.10 |
| cg01345315 | 1.42E-10 | 1.02E-11 | 7.24 | 15.7202433 | 1.49E-01 | 43945998  | 43946121  | NC_000012.11 |
| cg04916485 | 1.42E-10 | 1.02E-11 | 7.24 | 15.7193564 | 4.46E-02 | 126128143 | 126128266 | NC_000009.11 |
| cg26654934 | 1.42E-10 | 1.03E-11 | 7.24 | 15.7167785 | 2.49E-01 | 28603230  | 28603353  | NC_000006.11 |
| cg19909239 | 1.42E-10 | 1.03E-11 | 7.24 | 15.7152358 | 1.40E-01 | 111555503 | 111555626 | NC_000004.11 |
| cg18848917 | 1.42E-10 | 1.03E-11 | 7.24 | 15.7141547 | 3.17E-02 | 110359164 | 110359287 | NC_000004.11 |
| cg14200170 | 1.42E-10 | 1.03E-11 | 7.24 | 15.7139112 | 2.01E-01 | 905252    | 905375    | NC_000018.9  |
| cg08270023 | 1.42E-10 | 1.03E-11 | 7.24 | 15.7136546 | 1.53E-01 | 132619174 | 132619297 | NC_000012.11 |
| cg03234186 | 1.43E-10 | 1.03E-11 | 7.24 | 15.7128489 | 2.12E-01 | 58220657  | 58220780  | NC_000019.9  |
| cg08697503 | 1.43E-10 | 1.03E-11 | 7.24 | 15.7111398 | 1.43E-01 | 223166946 | 223167069 | NC_000002.11 |
| cg24285903 | 1.43E-10 | 1.04E-11 | 7.23 | 15.7083698 | 1.25E-01 | 25187166  | 25187289  | NC_000006.11 |
| cg22633280 | 1.43E-10 | 1.04E-11 | 7.23 | 15.7081444 | 1.68E-01 | 110671907 | 110672030 | NC_000010.10 |

|            |          |          |      |            |          |           |           |              |
|------------|----------|----------|------|------------|----------|-----------|-----------|--------------|
| cg17448336 | 1.43E-10 | 1.04E-11 | 7.23 | 15.7080501 | 1.34E-01 | 147141588 | 147141711 | NC_000003.11 |
| cg23557788 | 1.43E-10 | 1.04E-11 | 7.23 | 15.7074633 | 7.07E-02 | 74119120  | 74119243  | NC_000002.11 |
| cg21852117 | 1.43E-10 | 1.04E-11 | 7.23 | 15.7069953 | 1.29E-01 | 25898296  | 25898419  | NC_000007.13 |
| cg22586996 | 1.44E-10 | 1.04E-11 | 7.23 | 15.7054717 | 1.39E-01 | 158523907 | 158524030 | NC_000005.9  |
| cg04312119 | 1.44E-10 | 1.04E-11 | 7.23 | 15.7045886 | 1.17E-01 | 116839146 | 116839269 | NC_000006.11 |
| cg09778596 | 1.44E-10 | 1.04E-11 | 7.23 | 15.7038656 | 1.15E-01 | 162282922 | 162283045 | NC_000002.11 |
| cg10877183 | 1.44E-10 | 1.04E-11 | 7.23 | 15.7018997 | 7.14E-02 | 133528844 | 133528967 | NC_000010.10 |
| cg21751085 | 1.44E-10 | 1.04E-11 | 7.23 | 15.7011786 | 6.32E-02 | 43935439  | 43935562  | NC_000002.11 |
| cg08644365 | 1.44E-10 | 1.04E-11 | 7.23 | 15.6997895 | 8.99E-02 | 203120194 | 203120317 | NC_000001.10 |
| cg20084577 | 1.44E-10 | 1.04E-11 | 7.23 | 15.6997598 | 1.71E-01 | 33780913  | 33781036  | NC_000013.10 |
| cg24245418 | 1.44E-10 | 1.04E-11 | 7.23 | 15.6995526 | 2.33E-01 | 24324976  | 24325099  | NC_000007.13 |
| cg13696436 | 1.44E-10 | 1.04E-11 | 7.23 | 15.6995268 | 5.01E-02 | 131695094 | 131695217 | NC_000010.10 |
| cg03899315 | 1.45E-10 | 1.05E-11 | 7.23 | 15.6966569 | 7.75E-02 | 117149598 | 117149721 | NC_000001.10 |
| cg06206902 | 1.45E-10 | 1.05E-11 | 7.23 | 15.6963457 | 1.75E-01 | 27191226  | 27191349  | NC_000007.13 |
| cg23319012 | 1.45E-10 | 1.05E-11 | 7.23 | 15.6948128 | 5.45E-02 | 134007935 | 134008058 | NC_000011.9  |
| cg00919016 | 1.45E-10 | 1.05E-11 | 7.23 | 15.6944664 | 2.02E-01 | 139168487 | 139168610 | NC_000007.13 |
| cg11475550 | 1.45E-10 | 1.05E-11 | 7.23 | 15.6939232 | 1.94E-01 | 24324570  | 24324693  | NC_000007.13 |
| cg12562479 | 1.45E-10 | 1.05E-11 | 7.23 | 15.6937884 | 6.22E-02 | 63479057  | 63479180  | NC_000015.9  |
| cg17458693 | 1.45E-10 | 1.05E-11 | 7.23 | 15.6937645 | 9.40E-02 | 6543527   | 6543650   | NC_000012.11 |
| cg24844423 | 1.45E-10 | 1.05E-11 | 7.23 | 15.691107  | 1.09E-01 | 57352465  | 57352588  | NC_000019.9  |
| cg12128839 | 1.46E-10 | 1.06E-11 | 7.23 | 15.6895892 | 1.84E-01 | 27183436  | 27183559  | NC_000007.13 |
| cg02675083 | 1.46E-10 | 1.06E-11 | 7.23 | 15.689531  | 5.75E-02 | 16972917  | 16973040  | NC_000001.10 |
| cg19598567 | 1.46E-10 | 1.06E-11 | 7.23 | 15.6893025 | 1.77E-01 | 141931207 | 141931330 | NC_000005.9  |
| cg25485734 | 1.46E-10 | 1.06E-11 | 7.23 | 15.6874284 | 9.09E-02 | 30981289  | 30981412  | NC_000010.10 |
| cg07910986 | 1.46E-10 | 1.06E-11 | 7.23 | 15.6873904 | 1.56E-01 | 45961311  | 45961434  | NC_000007.13 |

|            |          |          |      |            |          |           |           |              |
|------------|----------|----------|------|------------|----------|-----------|-----------|--------------|
| cg19008693 | 1.46E-10 | 1.06E-11 | 7.23 | 15.6849244 | 2.02E-02 | 48270864  | 48270987  | NC_000012.11 |
| cg11876022 | 1.46E-10 | 1.06E-11 | 7.23 | 15.6842645 | 2.08E-01 | 19812479  | 19812602  | NC_000007.13 |
| cg08613597 | 1.46E-10 | 1.06E-11 | 7.23 | 15.6841619 | 2.21E-01 | 56224627  | 56224750  | NC_000016.9  |
| cg21202529 | 1.46E-10 | 1.06E-11 | 7.23 | 15.6837895 | 1.15E-01 | 20656503  | 20656626  | NC_000007.13 |
| cg16154416 | 1.47E-10 | 1.06E-11 | 7.23 | 15.6820414 | 1.14E-01 | 79382767  | 79382890  | NC_000015.9  |
| cg01941585 | 1.47E-10 | 1.06E-11 | 7.23 | 15.6815428 | 3.94E-02 | 66240388  | 66240511  | NC_000012.11 |
| cg03234732 | 1.47E-10 | 1.07E-11 | 7.23 | 15.6794269 | 2.02E-01 | 178368123 | 178368246 | NC_000005.9  |
| cg01024168 | 1.47E-10 | 1.07E-11 | 7.23 | 15.6789607 | 2.07E-01 | 27209281  | 27209404  | NC_000007.13 |
| cg26032198 | 1.47E-10 | 1.07E-11 | 7.23 | 15.6780486 | 2.01E-01 | 27192339  | 27192462  | NC_000007.13 |
| cg02952809 | 1.48E-10 | 1.07E-11 | 7.23 | 15.6739146 | 1.12E-01 | 128094710 | 128094833 | NC_000007.13 |
| cg23833461 | 1.48E-10 | 1.07E-11 | 7.23 | 15.6728775 | 1.43E-01 | 9929528   | 9929651   | NC_000017.10 |
| cg19122901 | 1.49E-10 | 1.08E-11 | 7.23 | 15.6688495 | 1.57E-01 | 101293790 | 101293913 | NC_000010.10 |
| cg17832029 | 1.49E-10 | 1.08E-11 | 7.23 | 15.6671432 | 2.06E-02 | 98574111  | 98574234  | NC_000007.13 |
| cg14476745 | 1.49E-10 | 1.08E-11 | 7.23 | 15.666497  | 1.35E-01 | 124979356 | 124979479 | NC_000009.11 |
| cg23045602 | 1.49E-10 | 1.08E-11 | 7.23 | 15.6652762 | 1.85E-01 | 140770213 | 140770336 | NC_000003.11 |
| cg22846067 | 1.49E-10 | 1.08E-11 | 7.23 | 15.6651772 | 1.19E-01 | 75252565  | 75252688  | NC_000015.9  |
| cg27540038 | 1.49E-10 | 1.08E-11 | 7.23 | 15.6630906 | 5.42E-02 | 71385496  | 71385619  | NC_000015.9  |
| cg19925639 | 1.50E-10 | 1.09E-11 | 7.23 | 15.6616822 | 7.74E-02 | 75470039  | 75470162  | NC_000005.9  |
| cg21928701 | 1.50E-10 | 1.09E-11 | 7.23 | 15.6597273 | 2.41E-01 | 822086    | 822209    | NC_000019.9  |
| cg07664027 | 1.50E-10 | 1.09E-11 | 7.23 | 15.6591257 | 7.17E-02 | 49990137  | 49990260  | NC_000019.9  |
| cg21608519 | 1.50E-10 | 1.09E-11 | 7.23 | 15.6588427 | 1.67E-01 | 27199752  | 27199875  | NC_000007.13 |
| cg16618417 | 1.50E-10 | 1.09E-11 | 7.23 | 15.657245  | 5.35E-02 | 7535526   | 7535649   | NC_000019.9  |
| cg08060353 | 1.50E-10 | 1.09E-11 | 7.23 | 15.6571031 | 5.73E-02 | 77889974  | 77890097  | NC_000015.9  |
| cg16385939 | 1.50E-10 | 1.09E-11 | 7.23 | 15.6562873 | 9.56E-02 | 144513999 | 144514122 | NC_000001.10 |
| cg05451094 | 1.50E-10 | 1.09E-11 | 7.23 | 15.6552468 | 1.66E-01 | 26557385  | 26557508  | NC_000017.10 |

|            |          |          |      |            |          |           |           |              |
|------------|----------|----------|------|------------|----------|-----------|-----------|--------------|
| cg00351047 | 1.51E-10 | 1.09E-11 | 7.23 | 15.6541396 | 1.22E-01 | 15234963  | 15235086  | NC_000019.9  |
| cg27480727 | 1.51E-10 | 1.09E-11 | 7.23 | 15.6541363 | 1.66E-01 | 223164831 | 223164954 | NC_000002.11 |
| cg20647690 | 1.51E-10 | 1.09E-11 | 7.23 | 15.6541053 | 6.45E-02 | 107191808 | 107191931 | NC_000013.10 |
| cg00317879 | 1.51E-10 | 1.09E-11 | 7.23 | 15.653621  | 1.19E-01 | 68920611  | 68920734  | NC_000011.9  |
| cg20253172 | 1.51E-10 | 1.09E-11 | 7.23 | 15.6534806 | 1.01E-01 | 3107290   | 3107413   | NC_000001.10 |
| cg20968821 | 1.51E-10 | 1.10E-11 | 7.23 | 15.6515708 | 9.03E-02 | 105522684 | 105522807 | NC_000014.8  |
| cg04510512 | 1.51E-10 | 1.10E-11 | 7.22 | 15.6511207 | 2.39E-01 | 86601520  | 86601643  | NC_000016.9  |
| cg21453840 | 1.51E-10 | 1.10E-11 | 7.22 | 15.648379  | 1.63E-01 | 1101471   | 1101594   | NC_000008.10 |
| cg15988950 | 1.51E-10 | 1.10E-11 | 7.22 | 15.6479866 | 6.77E-02 | 166128633 | 166128756 | NC_000006.11 |
| cg10999780 | 1.52E-10 | 1.10E-11 | 7.22 | 15.6470088 | 7.48E-02 | 18464717  | 18464840  | NC_000022.10 |
| cg02311725 | 1.52E-10 | 1.10E-11 | 7.22 | 15.6458065 | 1.18E-01 | 30639816  | 30639939  | NC_000020.10 |
| cg18397405 | 1.52E-10 | 1.10E-11 | 7.22 | 15.6452674 | 9.91E-02 | 94965245  | 94965368  | NC_000013.10 |
| cg07499259 | 1.52E-10 | 1.11E-11 | 7.22 | 15.6438842 | 4.74E-02 | 12188502  | 12188625  | NC_000001.10 |
| cg12699728 | 1.52E-10 | 1.11E-11 | 7.22 | 15.6434976 | 9.82E-02 | 45461636  | 45461759  | NC_000015.9  |
| cg17869514 | 1.53E-10 | 1.11E-11 | 7.22 | 15.6396476 | 1.75E-01 | 1042770   | 1042893   | NC_000009.11 |
| cg09019936 | 1.53E-10 | 1.11E-11 | 7.22 | 15.6389748 | 2.05E-01 | 162283434 | 162283557 | NC_000002.11 |
| cg25653995 | 1.53E-10 | 1.11E-11 | 7.22 | 15.6377675 | 4.72E-02 | 32015707  | 32015830  | NC_000006.11 |
| cg18175690 | 1.53E-10 | 1.11E-11 | 7.22 | 15.6373007 | 1.00E-01 | 40580770  | 40580893  | NC_000015.9  |
| cg23293999 | 1.53E-10 | 1.11E-11 | 7.22 | 15.6360699 | 7.02E-02 | 106826042 | 106826165 | NC_000007.13 |
| cg06426416 | 1.53E-10 | 1.11E-11 | 7.22 | 15.6353733 | 1.71E-01 | 5710403   | 5710526   | NC_000004.11 |
| cg20148210 | 1.53E-10 | 1.12E-11 | 7.22 | 15.6348387 | 1.56E-01 | 38326358  | 38326481  | NC_000008.10 |
| cg20771595 | 1.54E-10 | 1.12E-11 | 7.22 | 15.6338077 | 1.00E-01 | 80523387  | 80523510  | NC_000007.13 |
| cg24463320 | 1.54E-10 | 1.12E-11 | 7.22 | 15.6335269 | 6.90E-02 | 33121236  | 33121359  | NC_000001.10 |
| cg12552771 | 1.54E-10 | 1.12E-11 | 7.22 | 15.6332678 | 1.58E-01 | 29709320  | 29709443  | NC_000022.10 |
| cg16643851 | 1.54E-10 | 1.12E-11 | 7.22 | 15.6302123 | 2.10E-01 | 8542839   | 8542962   | NC_000012.11 |

|            |          |          |      |            |          |           |           |              |
|------------|----------|----------|------|------------|----------|-----------|-----------|--------------|
| cg18105179 | 1.54E-10 | 1.12E-11 | 7.22 | 15.6280051 | 6.66E-02 | 242741407 | 242741530 | NC_000002.11 |
| cg17863312 | 1.54E-10 | 1.12E-11 | 7.22 | 15.6279052 | 1.17E-01 | 14207968  | 14208091  | NC_000017.10 |
| cg03315649 | 1.55E-10 | 1.12E-11 | 7.22 | 15.6271765 | 1.10E-01 | 5093541   | 5093664   | NC_000019.9  |
| cg13032463 | 1.55E-10 | 1.13E-11 | 7.22 | 15.6262072 | 2.20E-01 | 166582585 | 166582708 | NC_000006.11 |
| cg08079580 | 1.55E-10 | 1.13E-11 | 7.22 | 15.6238597 | 1.80E-01 | 133795885 | 133796008 | NC_000010.10 |
| cg12521267 | 1.55E-10 | 1.13E-11 | 7.22 | 15.6233432 | 1.29E-01 | 52412667  | 52412790  | NC_000012.11 |
| cg08203284 | 1.55E-10 | 1.13E-11 | 7.22 | 15.6229091 | 1.68E-01 | 27171528  | 27171651  | NC_000007.13 |
| cg23510026 | 1.55E-10 | 1.13E-11 | 7.22 | 15.621453  | 6.89E-02 | 134915537 | 134915660 | NC_000005.9  |
| cg26207423 | 1.56E-10 | 1.13E-11 | 7.22 | 15.6191477 | 1.31E-01 | 28787952  | 28788075  | NC_000008.10 |
| cg08448589 | 1.56E-10 | 1.13E-11 | 7.22 | 15.6185234 | 1.95E-01 | 69242921  | 69243044  | NC_000008.10 |
| cg21408915 | 1.56E-10 | 1.13E-11 | 7.22 | 15.6178852 | 1.18E-01 | 69286231  | 69286354  | NC_000011.9  |
| cg16626580 | 1.56E-10 | 1.14E-11 | 7.22 | 15.6173879 | 7.52E-02 | 89713163  | 89713286  | NC_000011.9  |
| cg10538797 | 1.56E-10 | 1.14E-11 | 7.22 | 15.6153144 | 1.26E-01 | 105480546 | 105480669 | NC_000002.11 |
| cg07448060 | 1.56E-10 | 1.14E-11 | 7.22 | 15.6152295 | 1.53E-01 | 79083753  | 79083876  | NC_000007.13 |
| cg23275958 | 1.56E-10 | 1.14E-11 | 7.22 | 15.6150863 | 1.25E-01 | 75503249  | 75503372  | NC_000017.10 |
| cg13759674 | 1.57E-10 | 1.14E-11 | 7.22 | 15.6134006 | 2.60E-01 | 140051205 | 140051328 | NC_000009.11 |
| cg14283758 | 1.57E-10 | 1.14E-11 | 7.22 | 15.6132964 | 1.87E-01 | 299370    | 299493    | NC_000004.11 |
| cg17924366 | 1.57E-10 | 1.14E-11 | 7.22 | 15.6115359 | 1.23E-01 | 25042656  | 25042779  | NC_000020.10 |
| cg14306956 | 1.57E-10 | 1.15E-11 | 7.22 | 15.6090152 | 2.20E-01 | 37027384  | 37027507  | NC_000009.11 |
| cg21522988 | 1.57E-10 | 1.15E-11 | 7.22 | 15.6088817 | 1.25E-01 | 29376872  | 29376995  | NC_000012.11 |
| cg26381878 | 1.57E-10 | 1.15E-11 | 7.22 | 15.6081068 | 1.07E-01 | 45071340  | 45071463  | NC_000022.10 |
| cg15910662 | 1.57E-10 | 1.15E-11 | 7.22 | 15.6080932 | 1.72E-01 | 105460108 | 105460231 | NC_000002.11 |
| cg01729717 | 1.57E-10 | 1.15E-11 | 7.22 | 15.607284  | 1.84E-01 | 84456486  | 84456609  | NC_000013.10 |
| cg20008332 | 1.58E-10 | 1.15E-11 | 7.22 | 15.603749  | 1.66E-01 | 5833169   | 5833292   | NC_000002.11 |
| cg19478371 | 1.58E-10 | 1.15E-11 | 7.22 | 15.6029109 | 4.56E-02 | 102310830 | 102310953 | NC_000014.8  |



|            |          |          |      |            |          |           |           |              |
|------------|----------|----------|------|------------|----------|-----------|-----------|--------------|
| cg09552213 | 1.58E-10 | 1.15E-11 | 7.22 | 15.6015999 | 1.76E-01 | 87636782  | 87636905  | NC_000016.9  |
| cg24638819 | 1.58E-10 | 1.15E-11 | 7.22 | 15.6015503 | 2.87E-02 | 33515115  | 33515238  | NC_000010.10 |
| cg11809014 | 1.58E-10 | 1.15E-11 | 7.22 | 15.6013263 | 5.12E-02 | 39067081  | 39067204  | NC_000017.10 |
| cg01892547 | 1.58E-10 | 1.15E-11 | 7.22 | 15.6012276 | 8.16E-02 | 47040292  | 47040415  | NC_000003.11 |
| cg11021744 | 1.59E-10 | 1.16E-11 | 7.22 | 15.5999938 | 1.63E-01 | 11034279  | 11034402  | NC_000003.11 |
| cg27252696 | 1.59E-10 | 1.16E-11 | 7.22 | 15.5990332 | 2.56E-01 | 100912940 | 100913063 | NC_000006.11 |
| cg08589354 | 1.59E-10 | 1.16E-11 | 7.22 | 15.5960844 | 1.65E-01 | 86548895  | 86549018  | NC_000016.9  |
| cg24865270 | 1.59E-10 | 1.16E-11 | 7.22 | 15.5958141 | 1.45E-01 | 10422447  | 10422570  | NC_000006.11 |
| cg05763664 | 1.59E-10 | 1.16E-11 | 7.22 | 15.5944837 | 6.25E-02 | 67816794  | 67816917  | NC_000011.9  |
| cg21902160 | 1.59E-10 | 1.16E-11 | 7.21 | 15.5941497 | 8.54E-02 | 29689075  | 29689198  | NC_000007.13 |
| cg22732749 | 1.60E-10 | 1.16E-11 | 7.21 | 15.5938142 | 2.05E-01 | 140624888 | 140625011 | NC_000005.9  |
| cg05151803 | 1.60E-10 | 1.16E-11 | 7.21 | 15.5930803 | 1.81E-01 | 155167283 | 155167406 | NC_000007.13 |
| cg27529004 | 1.60E-10 | 1.16E-11 | 7.21 | 15.5927161 | 1.34E-01 | 237490808 | 237490931 | NC_000002.11 |
| cg03788227 | 1.60E-10 | 1.16E-11 | 7.21 | 15.5923133 | 1.26E-01 | 88155031  | 88155154  | NC_000016.9  |
| cg20497704 | 1.60E-10 | 1.17E-11 | 7.21 | 15.5916294 | 1.47E-01 | 43913147  | 43913270  | NC_000018.9  |
| cg17279125 | 1.60E-10 | 1.17E-11 | 7.21 | 15.5886487 | 1.19E-01 | 8736209   | 8736332   | NC_000017.10 |
| cg23767994 | 1.61E-10 | 1.17E-11 | 7.21 | 15.587311  | 1.50E-01 | 96621323  | 96621446  | NC_000007.13 |
| cg08787251 | 1.61E-10 | 1.17E-11 | 7.21 | 15.5845733 | 1.61E-01 | 27281964  | 27282087  | NC_000007.13 |
| cg07058694 | 1.61E-10 | 1.18E-11 | 7.21 | 15.5829221 | 7.30E-02 | 111909145 | 111909268 | NC_000012.11 |
| cg26897717 | 1.61E-10 | 1.18E-11 | 7.21 | 15.582861  | 1.47E-01 | 39691363  | 39691486  | NC_000019.9  |
| cg14750066 | 1.62E-10 | 1.18E-11 | 7.21 | 15.5794799 | 1.56E-01 | 41582063  | 41582186  | NC_000012.11 |
| cg03722184 | 1.62E-10 | 1.18E-11 | 7.21 | 15.5765395 | 4.50E-02 | 51353941  | 51354064  | NC_000013.10 |
| cg18505401 | 1.63E-10 | 1.19E-11 | 7.21 | 15.5742021 | 2.33E-01 | 19812570  | 19812693  | NC_000007.13 |
| cg05044185 | 1.63E-10 | 1.19E-11 | 7.21 | 15.5708059 | 1.62E-01 | 27112197  | 27112320  | NC_000015.9  |
| cg10378032 | 1.63E-10 | 1.19E-11 | 7.21 | 15.570301  | 1.36E-01 | 65214497  | 65214620  | NC_000001.10 |

|            |          |          |      |            |          |           |           |              |
|------------|----------|----------|------|------------|----------|-----------|-----------|--------------|
| cg14665523 | 1.63E-10 | 1.19E-11 | 7.21 | 15.5702474 | 1.29E-01 | 89421684  | 89421807  | NC_000010.10 |
| cg08472243 | 1.63E-10 | 1.19E-11 | 7.21 | 15.570029  | 4.53E-02 | 427912    | 428035    | NC_000016.9  |
| cg23498106 | 1.63E-10 | 1.19E-11 | 7.21 | 15.5694213 | 1.01E-01 | 208280643 | 208280766 | NC_000002.11 |
| cg10680235 | 1.64E-10 | 1.19E-11 | 7.21 | 15.5678871 | 8.69E-02 | 85430038  | 85430161  | NC_000015.9  |
| cg27341472 | 1.64E-10 | 1.20E-11 | 7.21 | 15.5667335 | 1.93E-01 | 19812592  | 19812715  | NC_000007.13 |
| cg18252360 | 1.64E-10 | 1.20E-11 | 7.21 | 15.5665544 | 1.69E-01 | 105461192 | 105461315 | NC_000002.11 |
| cg13826890 | 1.64E-10 | 1.20E-11 | 7.21 | 15.5649884 | 1.87E-01 | 57275282  | 57275405  | NC_000014.8  |
| cg25985263 | 1.64E-10 | 1.20E-11 | 7.21 | 15.5635972 | 9.87E-02 | 134996895 | 134997018 | NC_000010.10 |
| cg14790860 | 1.64E-10 | 1.20E-11 | 7.21 | 15.5624633 | 2.51E-02 | 66433618  | 66433741  | NC_000003.11 |
| cg21316236 | 1.64E-10 | 1.20E-11 | 7.21 | 15.562094  | 9.18E-02 | 40125781  | 40125904  | NC_000017.10 |
| cg02582754 | 1.64E-10 | 1.20E-11 | 7.21 | 15.5617681 | 8.10E-02 | 160327345 | 160327468 | NC_000006.11 |
| cg07955752 | 1.65E-10 | 1.21E-11 | 7.21 | 15.5587171 | 1.88E-01 | 30018436  | 30018559  | NC_000019.9  |
| cg12122041 | 1.65E-10 | 1.21E-11 | 7.21 | 15.5563691 | 5.20E-02 | 3234814   | 3234937   | NC_000004.11 |
| cg19620724 | 1.66E-10 | 1.21E-11 | 7.21 | 15.5552128 | 1.58E-01 | 50810852  | 50810975  | NC_000006.11 |
| cg14103680 | 1.66E-10 | 1.22E-11 | 7.21 | 15.5501422 | 2.50E-01 | 28603059  | 28603182  | NC_000006.11 |
| cg22871870 | 1.66E-10 | 1.22E-11 | 7.21 | 15.5493277 | 1.14E-01 | 77348431  | 77348554  | NC_000015.9  |
| cg06690644 | 1.67E-10 | 1.22E-11 | 7.21 | 15.548529  | 2.74E-02 | 93454869  | 93454992  | NC_000011.9  |
| cg03232620 | 1.67E-10 | 1.22E-11 | 7.21 | 15.547608  | 2.14E-01 | 27197879  | 27198002  | NC_000007.13 |
| cg27012396 | 1.67E-10 | 1.22E-11 | 7.21 | 15.5468122 | 7.33E-02 | 240233043 | 240233166 | NC_000002.11 |
| cg02134720 | 1.67E-10 | 1.22E-11 | 7.21 | 15.5462563 | 8.56E-02 | 119948501 | 119948624 | NC_000008.10 |
| cg12639663 | 1.67E-10 | 1.22E-11 | 7.21 | 15.5459991 | 5.85E-02 | 207063173 | 207063296 | NC_000001.10 |
| cg23933241 | 1.67E-10 | 1.22E-11 | 7.21 | 15.5456692 | 1.55E-01 | 33823690  | 33823813  | NC_000017.10 |
| cg06487194 | 1.67E-10 | 1.22E-11 | 7.21 | 15.5447825 | 1.53E-01 | 15345097  | 15345220  | NC_000006.11 |
| cg00688810 | 1.67E-10 | 1.22E-11 | 7.21 | 15.5432151 | 1.08E-01 | 7517138   | 7517261   | NC_000017.10 |
| cg04549679 | 1.68E-10 | 1.23E-11 | 7.21 | 15.541918  | 6.22E-02 | 3524425   | 3524548   | NC_000001.10 |

|            |          |          |      |            |          |           |           |              |
|------------|----------|----------|------|------------|----------|-----------|-----------|--------------|
| cg14907310 | 1.68E-10 | 1.23E-11 | 7.21 | 15.5412367 | 1.09E-01 | 2287734   | 2287857   | NC_000011.9  |
| cg05477823 | 1.68E-10 | 1.23E-11 | 7.21 | 15.5410685 | 1.62E-01 | 59481085  | 59481208  | NC_000017.10 |
| cg09292354 | 1.68E-10 | 1.23E-11 | 7.21 | 15.539955  | 9.00E-02 | 134956328 | 134956451 | NC_000010.10 |
| cg22007163 | 1.68E-10 | 1.23E-11 | 7.21 | 15.5384288 | 1.83E-01 | 28602927  | 28603050  | NC_000006.11 |
| cg04255044 | 1.69E-10 | 1.24E-11 | 7.2  | 15.534131  | 1.58E-01 | 87415168  | 87415291  | NC_000016.9  |
| cg18295183 | 1.69E-10 | 1.24E-11 | 7.2  | 15.5321563 | 1.66E-01 | 161494711 | 161494834 | NC_000005.9  |
| cg24903887 | 1.69E-10 | 1.24E-11 | 7.2  | 15.5316681 | 1.95E-01 | 4580777   | 4580900   | NC_000019.9  |
| cg24594293 | 1.69E-10 | 1.24E-11 | 7.2  | 15.5308244 | 6.28E-02 | 156564330 | 156564453 | NC_000001.10 |
| cg05062333 | 1.70E-10 | 1.24E-11 | 7.2  | 15.5302785 | 1.90E-01 | 133562269 | 133562392 | NC_000006.11 |
| cg16462462 | 1.70E-10 | 1.24E-11 | 7.2  | 15.5300284 | 2.46E-01 | 117950825 | 117950948 | NC_000008.10 |
| cg06197024 | 1.70E-10 | 1.24E-11 | 7.2  | 15.5281346 | 5.84E-02 | 134940464 | 134940587 | NC_000010.10 |
| cg01250490 | 1.70E-10 | 1.24E-11 | 7.2  | 15.5280625 | 1.04E-01 | 12251718  | 12251841  | NC_000001.10 |
| cg09524508 | 1.70E-10 | 1.24E-11 | 7.2  | 15.5276985 | 1.33E-01 | 49202530  | 49202653  | NC_000003.11 |
| cg18122493 | 1.70E-10 | 1.24E-11 | 7.2  | 15.5274587 | 1.27E-01 | 149380909 | 149381032 | NC_000001.10 |
| cg25346915 | 1.70E-10 | 1.24E-11 | 7.2  | 15.5273684 | 2.12E-01 | 49230036  | 49230159  | NC_000011.9  |
| cg04163637 | 1.70E-10 | 1.25E-11 | 7.2  | 15.5267591 | 4.47E-02 | 203869223 | 203869346 | NC_000001.10 |
| cg03746851 | 1.70E-10 | 1.25E-11 | 7.2  | 15.5264195 | 1.27E-01 | 21282502  | 21282625  | NC_000017.10 |
| cg02023345 | 1.70E-10 | 1.25E-11 | 7.2  | 15.5259125 | 2.10E-01 | 63212226  | 63212349  | NC_000010.10 |
| cg21836370 | 1.70E-10 | 1.25E-11 | 7.2  | 15.5240684 | 1.48E-01 | 85667451  | 85667574  | NC_000012.11 |
| cg22797270 | 1.70E-10 | 1.25E-11 | 7.2  | 15.5240187 | 1.13E-01 | 64398015  | 64398138  | NC_000011.9  |
| cg18319612 | 1.71E-10 | 1.25E-11 | 7.2  | 15.5229696 | 1.50E-01 | 203257946 | 203258069 | NC_000001.10 |
| cg01245224 | 1.71E-10 | 1.25E-11 | 7.2  | 15.5217284 | 1.52E-01 | 101313190 | 101313313 | NC_000011.9  |
| cg00802855 | 1.71E-10 | 1.25E-11 | 7.2  | 15.5205253 | 1.04E-01 | 134911097 | 134911220 | NC_000010.10 |
| cg09603381 | 1.71E-10 | 1.25E-11 | 7.2  | 15.5203857 | 9.24E-02 | 49954066  | 49954189  | NC_000010.10 |
| cg23517116 | 1.71E-10 | 1.25E-11 | 7.2  | 15.5200961 | 1.11E-01 | 65499841  | 65499964  | NC_000008.10 |

|            |          |          |     |            |          |           |           |              |
|------------|----------|----------|-----|------------|----------|-----------|-----------|--------------|
| cg19742055 | 1.72E-10 | 1.26E-11 | 7.2 | 15.5169632 | 1.80E-01 | 78493365  | 78493488  | NC_000013.10 |
| cg23237276 | 1.72E-10 | 1.26E-11 | 7.2 | 15.5157431 | 1.08E-01 | 101827449 | 101827572 | NC_000014.8  |
| cg02384857 | 1.72E-10 | 1.26E-11 | 7.2 | 15.514424  | 2.20E-01 | 27197614  | 27197737  | NC_000007.13 |
| cg22676401 | 1.72E-10 | 1.26E-11 | 7.2 | 15.5141214 | 1.79E-01 | 21496507  | 21496630  | NC_000020.10 |
| cg17190608 | 1.72E-10 | 1.26E-11 | 7.2 | 15.5128096 | 1.77E-01 | 111471489 | 111471612 | NC_000012.11 |
| cg25182501 | 1.73E-10 | 1.27E-11 | 7.2 | 15.5103267 | 6.69E-02 | 74747143  | 74747266  | NC_000002.11 |
| cg21063758 | 1.73E-10 | 1.27E-11 | 7.2 | 15.5101655 | 1.55E-01 | 74422761  | 74422884  | NC_000015.9  |
| cg11099684 | 1.73E-10 | 1.27E-11 | 7.2 | 15.5075979 | 1.53E-01 | 26402889  | 26403012  | NC_000004.11 |
| cg13811168 | 1.73E-10 | 1.27E-11 | 7.2 | 15.5063264 | 6.38E-02 | 1581473   | 1581596   | NC_000011.9  |
| cg26465391 | 1.74E-10 | 1.27E-11 | 7.2 | 15.5051068 | 1.82E-01 | 58220773  | 58220896  | NC_000019.9  |
| cg04936274 | 1.74E-10 | 1.28E-11 | 7.2 | 15.5022422 | 8.79E-02 | 134672412 | 134672535 | NC_000010.10 |
| cg27244482 | 1.74E-10 | 1.28E-11 | 7.2 | 15.5019586 | 1.36E-01 | 149669488 | 149669611 | NC_000005.9  |
| cg04897900 | 1.75E-10 | 1.28E-11 | 7.2 | 15.4985168 | 1.26E-01 | 157245108 | 157245231 | NC_000003.11 |
| cg14522034 | 1.75E-10 | 1.29E-11 | 7.2 | 15.4948904 | 1.06E-01 | 46706759  | 46706882  | NC_000021.8  |
| cg03892356 | 1.76E-10 | 1.29E-11 | 7.2 | 15.4933216 | 2.30E-01 | 54420837  | 54420960  | NC_000012.11 |
| cg14861857 | 1.76E-10 | 1.29E-11 | 7.2 | 15.4932038 | 1.81E-02 | 24584179  | 24584302  | NC_000022.10 |
| cg12901917 | 1.76E-10 | 1.29E-11 | 7.2 | 15.4924461 | 8.99E-02 | 116196207 | 116196330 | NC_000012.11 |
| cg14955103 | 1.76E-10 | 1.29E-11 | 7.2 | 15.4916056 | 8.03E-02 | 31864106  | 31864229  | NC_000006.11 |
| cg24989181 | 1.76E-10 | 1.29E-11 | 7.2 | 15.489694  | 8.72E-02 | 30781821  | 30781944  | NC_000020.10 |
| cg13239420 | 1.76E-10 | 1.29E-11 | 7.2 | 15.4882823 | 2.19E-01 | 240161249 | 240161372 | NC_000001.10 |
| cg01790083 | 1.77E-10 | 1.30E-11 | 7.2 | 15.4875265 | 1.27E-01 | 33671181  | 33671304  | NC_000021.8  |
| cg16269488 | 1.77E-10 | 1.30E-11 | 7.2 | 15.4862456 | 5.67E-02 | 1858639   | 1858762   | NC_000007.13 |
| cg15425541 | 1.77E-10 | 1.30E-11 | 7.2 | 15.4857555 | 2.30E-01 | 61118751  | 61118874  | NC_000014.8  |
| cg04954559 | 1.77E-10 | 1.30E-11 | 7.2 | 15.4846329 | 2.03E-01 | 22365428  | 22365551  | NC_000011.9  |
| cg00692780 | 1.77E-10 | 1.30E-11 | 7.2 | 15.4842346 | 1.04E-01 | 222434778 | 222434901 | NC_000002.11 |

|            |          |          |      |            |          |           |           |              |
|------------|----------|----------|------|------------|----------|-----------|-----------|--------------|
| cg07159023 | 1.78E-10 | 1.30E-11 | 7.2  | 15.4810259 | 1.39E-01 | 39615988  | 39616111  | NC_000017.10 |
| cg13862210 | 1.78E-10 | 1.31E-11 | 7.19 | 15.4800666 | 1.08E-02 | 11796076  | 11796199  | NC_000001.10 |
| cg25560333 | 1.78E-10 | 1.31E-11 | 7.19 | 15.4787307 | 1.65E-01 | 11060104  | 11060227  | NC_000010.10 |
| cg03940525 | 1.78E-10 | 1.31E-11 | 7.19 | 15.477004  | 4.48E-02 | 61698089  | 61698212  | NC_000005.9  |
| cg16589299 | 1.79E-10 | 1.31E-11 | 7.19 | 15.4754055 | 1.80E-01 | 131758786 | 131758909 | NC_000010.10 |
| cg08675717 | 1.79E-10 | 1.31E-11 | 7.19 | 15.4753647 | 2.35E-01 | 58180241  | 58180364  | NC_000020.10 |
| cg24818566 | 1.79E-10 | 1.31E-11 | 7.19 | 15.4749097 | 9.51E-02 | 122132054 | 122132177 | NC_000009.11 |
| cg11148130 | 1.79E-10 | 1.31E-11 | 7.19 | 15.4734091 | 1.81E-01 | 73674068  | 73674191  | NC_000003.11 |
| cg25705519 | 1.79E-10 | 1.32E-11 | 7.19 | 15.4728479 | 1.31E-01 | 159557552 | 159557675 | NC_000003.11 |
| cg01749213 | 1.79E-10 | 1.32E-11 | 7.19 | 15.4724492 | 8.99E-02 | 219906749 | 219906872 | NC_000002.11 |
| cg16535144 | 1.79E-10 | 1.32E-11 | 7.19 | 15.4721506 | 2.07E-01 | 155259524 | 155259647 | NC_000007.13 |
| cg18312113 | 1.79E-10 | 1.32E-11 | 7.19 | 15.4713987 | 7.10E-02 | 1487538   | 1487661   | NC_000001.10 |
| cg19610905 | 1.80E-10 | 1.32E-11 | 7.19 | 15.4689498 | 1.95E-01 | 61596333  | 61596456  | NC_000011.9  |
| cg20562147 | 1.80E-10 | 1.32E-11 | 7.19 | 15.4679831 | 1.87E-01 | 143086459 | 143086582 | NC_000008.10 |
| cg22979783 | 1.80E-10 | 1.32E-11 | 7.19 | 15.4668852 | 1.34E-01 | 72371261  | 72371384  | NC_000002.11 |
| cg01525017 | 1.80E-10 | 1.32E-11 | 7.19 | 15.4667742 | 1.12E-01 | 181182210 | 181182333 | NC_000003.11 |
| cg27549878 | 1.80E-10 | 1.32E-11 | 7.19 | 15.4660806 | 1.69E-01 | 38886554  | 38886677  | NC_000019.9  |
| cg08996579 | 1.80E-10 | 1.33E-11 | 7.19 | 15.4652988 | 2.33E-01 | 50817804  | 50817927  | NC_000010.10 |
| cg07483462 | 1.80E-10 | 1.33E-11 | 7.19 | 15.4649561 | 1.12E-01 | 104928289 | 104928412 | NC_000014.8  |
| cg16772035 | 1.80E-10 | 1.33E-11 | 7.19 | 15.4647058 | 1.38E-01 | 87229880  | 87230003  | NC_000007.13 |
| cg00219282 | 1.80E-10 | 1.33E-11 | 7.19 | 15.4643444 | 1.26E-01 | 159654898 | 159655021 | NC_000006.11 |
| cg16968596 | 1.81E-10 | 1.33E-11 | 7.19 | 15.4636002 | 2.67E-01 | 89346629  | 89346752  | NC_000015.9  |
| cg00078259 | 1.81E-10 | 1.33E-11 | 7.19 | 15.4635954 | 4.75E-02 | 2656232   | 2656355   | NC_000006.11 |
| cg11657203 | 1.81E-10 | 1.33E-11 | 7.19 | 15.4613772 | 1.70E-01 | 41087101  | 41087224  | NC_000012.11 |
| cg10085824 | 1.81E-10 | 1.33E-11 | 7.19 | 15.4606418 | 5.66E-02 | 71800315  | 71800438  | NC_000016.9  |

|            |          |          |      |            |          |           |           |              |
|------------|----------|----------|------|------------|----------|-----------|-----------|--------------|
| cg13019143 | 1.81E-10 | 1.33E-11 | 7.19 | 15.4590381 | 1.44E-01 | 96633060  | 96633183  | NC_000007.13 |
| cg15148691 | 1.82E-10 | 1.34E-11 | 7.19 | 15.4572995 | 8.05E-02 | 29404733  | 29404856  | NC_000006.11 |
| cg04657000 | 1.82E-10 | 1.34E-11 | 7.19 | 15.4567905 | 6.73E-02 | 112115430 | 112115553 | NC_000006.11 |
| cg08260406 | 1.82E-10 | 1.34E-11 | 7.19 | 15.4554037 | 1.54E-01 | 248100407 | 248100530 | NC_000001.10 |
| cg04798919 | 1.82E-10 | 1.34E-11 | 7.19 | 15.4546654 | 9.90E-02 | 44039475  | 44039598  | NC_000019.9  |
| cg08644463 | 1.83E-10 | 1.34E-11 | 7.19 | 15.4521468 | 1.09E-01 | 110106962 | 110107085 | NC_000001.10 |
| cg23066159 | 1.83E-10 | 1.34E-11 | 7.19 | 15.4519564 | 1.18E-01 | 51481472  | 51481595  | NC_000019.9  |
| cg05896193 | 1.83E-10 | 1.35E-11 | 7.19 | 15.449319  | 1.08E-01 | 25563141  | 25563264  | NC_000002.11 |
| cg05492075 | 1.83E-10 | 1.35E-11 | 7.19 | 15.4478107 | 6.50E-02 | 12881563  | 12881686  | NC_000010.10 |
| cg17514558 | 1.83E-10 | 1.35E-11 | 7.19 | 15.4474339 | 1.59E-01 | 140621375 | 140621498 | NC_000005.9  |
| cg23300372 | 1.84E-10 | 1.35E-11 | 7.19 | 15.4465229 | 1.89E-01 | 71015432  | 71015555  | NC_000005.9  |
| cg12149299 | 1.84E-10 | 1.36E-11 | 7.19 | 15.4433203 | 1.30E-01 | 96762309  | 96762432  | NC_000012.11 |
| cg11980129 | 1.85E-10 | 1.36E-11 | 7.19 | 15.4399641 | 1.75E-01 | 79815639  | 79815762  | NC_000003.11 |
| cg25090499 | 1.85E-10 | 1.36E-11 | 7.19 | 15.4396367 | 1.85E-01 | 26043165  | 26043288  | NC_000013.10 |
| cg13559439 | 1.85E-10 | 1.36E-11 | 7.19 | 15.4393276 | 1.55E-01 | 12989237  | 12989360  | NC_000008.10 |
| cg20732160 | 1.85E-10 | 1.36E-11 | 7.19 | 15.4386376 | 1.17E-01 | 48590040  | 48590163  | NC_000003.11 |
| cg08597067 | 1.85E-10 | 1.36E-11 | 7.19 | 15.4383624 | 1.01E-01 | 53147641  | 53147764  | NC_000006.11 |
| cg01038597 | 1.86E-10 | 1.37E-11 | 7.19 | 15.4355811 | 1.10E-01 | 31120649  | 31120772  | NC_000016.9  |
| cg01519508 | 1.86E-10 | 1.37E-11 | 7.19 | 15.4344318 | 1.15E-01 | 86411222  | 86411345  | NC_000016.9  |
| cg22982368 | 1.86E-10 | 1.37E-11 | 7.19 | 15.4339333 | 1.71E-01 | 31825969  | 31826092  | NC_000011.9  |
| cg08610862 | 1.86E-10 | 1.37E-11 | 7.19 | 15.4335416 | 1.83E-01 | 197888469 | 197888592 | NC_000001.10 |
| cg07396817 | 1.86E-10 | 1.37E-11 | 7.19 | 15.4315151 | 1.28E-01 | 185453355 | 185453478 | NC_000003.11 |
| cg11555666 | 1.87E-10 | 1.38E-11 | 7.19 | 15.4292164 | 8.64E-02 | 78172397  | 78172520  | NC_000017.10 |
| cg04645150 | 1.87E-10 | 1.38E-11 | 7.19 | 15.4283326 | 1.71E-01 | 28584172  | 28584295  | NC_000006.11 |
| cg10606059 | 1.87E-10 | 1.38E-11 | 7.19 | 15.4283311 | 1.55E-01 | 72987838  | 72987961  | NC_000008.10 |

|            |          |          |      |            |          |           |           |              |
|------------|----------|----------|------|------------|----------|-----------|-----------|--------------|
| cg10370599 | 1.87E-10 | 1.38E-11 | 7.19 | 15.427353  | 1.37E-01 | 22825158  | 22825281  | NC_000016.9  |
| cg18274510 | 1.87E-10 | 1.38E-11 | 7.19 | 15.427001  | 1.49E-01 | 69736743  | 69736866  | NC_000010.10 |
| cg06829830 | 1.87E-10 | 1.38E-11 | 7.19 | 15.4260693 | 1.97E-01 | 80256087  | 80256210  | NC_000005.9  |
| cg24184636 | 1.87E-10 | 1.38E-11 | 7.19 | 15.4254757 | 1.64E-01 | 25906789  | 25906912  | NC_000008.10 |
| cg13318256 | 1.87E-10 | 1.38E-11 | 7.19 | 15.4254264 | 1.61E-01 | 67885605  | 67885728  | NC_000011.9  |
| cg09561125 | 1.88E-10 | 1.38E-11 | 7.19 | 15.423824  | 1.42E-01 | 108097477 | 108097600 | NC_000007.13 |
| cg08361684 | 1.88E-10 | 1.38E-11 | 7.19 | 15.4236737 | 2.21E-01 | 35641255  | 35641378  | NC_000011.9  |
| cg09400566 | 1.88E-10 | 1.38E-11 | 7.18 | 15.4232343 | 1.44E-01 | 1271371   | 1271494   | NC_000019.9  |
| cg13000912 | 1.88E-10 | 1.38E-11 | 7.18 | 15.4225735 | 1.83E-01 | 100056060 | 100056183 | NC_000006.11 |
| cg04001802 | 1.88E-10 | 1.39E-11 | 7.18 | 15.4221072 | 1.28E-01 | 15085279  | 15085402  | NC_000010.10 |
| cg07213060 | 1.88E-10 | 1.39E-11 | 7.18 | 15.4215238 | 1.85E-01 | 21694827  | 21694950  | NC_000020.10 |
| cg13586599 | 1.88E-10 | 1.39E-11 | 7.18 | 15.4207669 | 1.65E-01 | 25652383  | 25652506  | NC_000006.11 |
| cg22053159 | 1.88E-10 | 1.39E-11 | 7.18 | 15.420052  | 1.38E-01 | 2478543   | 2478666   | NC_000006.11 |
| cg24592972 | 1.89E-10 | 1.39E-11 | 7.18 | 15.4154077 | 4.96E-02 | 134828571 | 134828694 | NC_000010.10 |
| cg02589791 | 1.89E-10 | 1.39E-11 | 7.18 | 15.415131  | 1.42E-01 | 63955666  | 63955789  | NC_000007.13 |
| cg04191300 | 1.89E-10 | 1.40E-11 | 7.18 | 15.4147777 | 1.34E-01 | 128729652 | 128729775 | NC_000011.9  |
| cg13789236 | 1.89E-10 | 1.40E-11 | 7.18 | 15.4135745 | 3.64E-02 | 79009433  | 79009556  | NC_000009.11 |
| cg14275836 | 1.90E-10 | 1.40E-11 | 7.18 | 15.4131268 | 4.19E-02 | 2941313   | 2941436   | NC_000011.9  |
| cg18355533 | 1.90E-10 | 1.40E-11 | 7.18 | 15.4123695 | 6.35E-02 | 3961679   | 3961802   | NC_000019.9  |
| cg06556929 | 1.90E-10 | 1.40E-11 | 7.18 | 15.4118151 | 7.45E-02 | 142368169 | 142368292 | NC_000008.10 |
| cg07095836 | 1.90E-10 | 1.40E-11 | 7.18 | 15.4090932 | 6.24E-02 | 62574925  | 62575048  | NC_000007.13 |
| cg09802627 | 1.91E-10 | 1.41E-11 | 7.18 | 15.4075519 | 5.69E-02 | 228613207 | 228613330 | NC_000001.10 |
| cg27119877 | 1.91E-10 | 1.41E-11 | 7.18 | 15.406919  | 5.24E-02 | 30122036  | 30122159  | NC_000006.11 |
| cg00709966 | 1.91E-10 | 1.41E-11 | 7.18 | 15.4053593 | 1.11E-01 | 27253143  | 27253266  | NC_000007.13 |
| cg27020216 | 1.91E-10 | 1.41E-11 | 7.18 | 15.4048    | 1.49E-01 | 153840347 | 153840470 | NC_000003.11 |

|            |          |          |      |            |          |           |           |              |
|------------|----------|----------|------|------------|----------|-----------|-----------|--------------|
| cg26332310 | 1.91E-10 | 1.41E-11 | 7.18 | 15.4036452 | 1.83E-01 | 91182305  | 91182428  | NC_000001.10 |
| cg24718866 | 1.91E-10 | 1.41E-11 | 7.18 | 15.402712  | 1.85E-01 | 25391274  | 25391397  | NC_000002.11 |
| cg05021643 | 1.91E-10 | 1.41E-11 | 7.18 | 15.4024018 | 1.11E-01 | 177029608 | 177029731 | NC_000002.11 |
| cg18644235 | 1.92E-10 | 1.41E-11 | 7.18 | 15.4015619 | 1.02E-01 | 57352746  | 57352869  | NC_000019.9  |
| cg02335141 | 1.92E-10 | 1.41E-11 | 7.18 | 15.4010783 | 5.59E-02 | 167551083 | 167551206 | NC_000006.11 |
| cg22557662 | 1.92E-10 | 1.42E-11 | 7.18 | 15.4004896 | 2.14E-01 | 38747374  | 38747497  | NC_000019.9  |
| cg00060715 | 1.92E-10 | 1.42E-11 | 7.18 | 15.3997187 | 5.33E-02 | 214779657 | 214779780 | NC_000001.10 |
| cg06424097 | 1.92E-10 | 1.42E-11 | 7.18 | 15.3993772 | 1.52E-01 | 122848244 | 122848367 | NC_000011.9  |
| cg07104209 | 1.92E-10 | 1.42E-11 | 7.18 | 15.3979789 | 1.72E-01 | 27281872  | 27281995  | NC_000007.13 |
| cg22167065 | 1.92E-10 | 1.42E-11 | 7.18 | 15.3979142 | 9.66E-02 | 61814422  | 61814545  | NC_000020.10 |
| cg12276203 | 1.92E-10 | 1.42E-11 | 7.18 | 15.3968539 | 1.03E-01 | 46917565  | 46917688  | NC_000021.8  |
| cg12635937 | 1.93E-10 | 1.42E-11 | 7.18 | 15.3958605 | 1.08E-01 | 81184925  | 81185048  | NC_000004.11 |
| cg06480138 | 1.93E-10 | 1.43E-11 | 7.18 | 15.3938696 | 8.18E-02 | 91477148  | 91477271  | NC_000015.9  |
| cg23316599 | 1.93E-10 | 1.43E-11 | 7.18 | 15.3935288 | 1.04E-01 | 57271379  | 57271502  | NC_000007.13 |
| cg01904169 | 1.93E-10 | 1.43E-11 | 7.18 | 15.3925357 | 6.43E-02 | 27884654  | 27884777  | NC_000002.11 |
| cg26296364 | 1.93E-10 | 1.43E-11 | 7.18 | 15.3922893 | 1.62E-01 | 63212206  | 63212329  | NC_000010.10 |
| cg15116918 | 1.94E-10 | 1.43E-11 | 7.18 | 15.3909141 | 1.47E-01 | 78669552  | 78669675  | NC_000017.10 |
| cg21982455 | 1.94E-10 | 1.43E-11 | 7.18 | 15.3894247 | 1.65E-01 | 2757976   | 2758099   | NC_000005.9  |
| cg21813063 | 1.94E-10 | 1.44E-11 | 7.18 | 15.3866633 | 5.59E-02 | 10264192  | 10264315  | NC_000012.11 |
| cg13962212 | 1.95E-10 | 1.44E-11 | 7.18 | 15.3848815 | 1.55E-01 | 30325907  | 30326030  | NC_000006.11 |
| cg24329658 | 1.95E-10 | 1.44E-11 | 7.18 | 15.3845048 | 4.45E-02 | 30122023  | 30122146  | NC_000006.11 |
| cg16370491 | 1.95E-10 | 1.44E-11 | 7.18 | 15.3844525 | 2.02E-01 | 75601928  | 75602051  | NC_000012.11 |
| cg24341611 | 1.95E-10 | 1.44E-11 | 7.18 | 15.3840522 | 2.14E-01 | 50235279  | 50235402  | NC_000017.10 |
| cg08552214 | 1.95E-10 | 1.44E-11 | 7.18 | 15.3829863 | 1.81E-01 | 176931864 | 176931987 | NC_000002.11 |
| cg20831708 | 1.95E-10 | 1.44E-11 | 7.18 | 15.3828877 | 1.61E-01 | 102279373 | 102279496 | NC_000010.10 |



|            |          |          |      |            |          |           |           |              |
|------------|----------|----------|------|------------|----------|-----------|-----------|--------------|
| cg02548290 | 1.95E-10 | 1.44E-11 | 7.18 | 15.3825548 | 4.64E-02 | 25126153  | 25126276  | NC_000016.9  |
| cg06518233 | 1.95E-10 | 1.44E-11 | 7.18 | 15.381297  | 2.91E-02 | 102765350 | 102765473 | NC_000010.10 |
| cg12613383 | 1.96E-10 | 1.45E-11 | 7.18 | 15.3800104 | 1.63E-01 | 242688681 | 242688804 | NC_000001.10 |
| cg20116099 | 1.96E-10 | 1.45E-11 | 7.18 | 15.3775747 | 1.02E-01 | 25416204  | 25416327  | NC_000017.10 |
| cg10130718 | 1.96E-10 | 1.45E-11 | 7.18 | 15.3774328 | 7.33E-02 | 53925368  | 53925491  | NC_000001.10 |
| cg04616218 | 1.96E-10 | 1.45E-11 | 7.18 | 15.3764672 | 4.85E-02 | 29789904  | 29790027  | NC_000016.9  |
| cg22489153 | 1.96E-10 | 1.45E-11 | 7.18 | 15.37636   | 1.55E-01 | 115136175 | 115136298 | NC_000012.11 |
| cg10866298 | 1.96E-10 | 1.45E-11 | 7.18 | 15.3756188 | 2.11E-01 | 9760869   | 9760992   | NC_000008.10 |
| cg25008858 | 1.96E-10 | 1.45E-11 | 7.18 | 15.3754116 | 1.09E-01 | 220313657 | 220313780 | NC_000002.11 |
| cg24304249 | 1.96E-10 | 1.45E-11 | 7.18 | 15.3748899 | 1.56E-01 | 181455181 | 181455304 | NC_000001.10 |
| cg09052626 | 1.97E-10 | 1.45E-11 | 7.18 | 15.3745567 | 1.56E-01 | 86603583  | 86603706  | NC_000016.9  |
| cg26239391 | 1.97E-10 | 1.46E-11 | 7.18 | 15.373616  | 1.97E-01 | 8869285   | 8869408   | NC_000017.10 |
| cg16198450 | 1.97E-10 | 1.46E-11 | 7.18 | 15.3727419 | 6.30E-02 | 159655853 | 159655976 | NC_000005.9  |
| cg10156366 | 1.97E-10 | 1.46E-11 | 7.18 | 15.3727379 | 2.26E-01 | 79220381  | 79220504  | NC_000002.11 |
| cg24562814 | 1.97E-10 | 1.46E-11 | 7.18 | 15.3723845 | 9.00E-02 | 26375698  | 26375821  | NC_000008.10 |
| cg18963171 | 1.97E-10 | 1.46E-11 | 7.18 | 15.3718549 | 1.01E-01 | 43442940  | 43443063  | NC_000021.8  |
| cg01311170 | 1.97E-10 | 1.46E-11 | 7.18 | 15.3712562 | 7.90E-02 | 39169407  | 39169530  | NC_000017.10 |
| cg10453420 | 1.97E-10 | 1.46E-11 | 7.18 | 15.3700405 | 1.79E-01 | 3874006   | 3874129   | NC_000004.11 |
| cg01187920 | 1.98E-10 | 1.46E-11 | 7.18 | 15.3683564 | 1.58E-01 | 71015162  | 71015285  | NC_000005.9  |
| cg01718116 | 1.98E-10 | 1.46E-11 | 7.18 | 15.3683058 | 2.18E-01 | 115919829 | 115919952 | NC_000002.11 |
| cg06235438 | 1.98E-10 | 1.46E-11 | 7.18 | 15.3675664 | 8.38E-02 | 30485966  | 30486089  | NC_000016.9  |
| cg23189410 | 1.98E-10 | 1.46E-11 | 7.18 | 15.3669668 | 1.95E-01 | 147125712 | 147125835 | NC_000003.11 |
| cg25670060 | 1.98E-10 | 1.47E-11 | 7.17 | 15.3659342 | 2.51E-01 | 98891544  | 98891667  | NC_000011.9  |
| cg24314877 | 1.98E-10 | 1.47E-11 | 7.17 | 15.3655549 | 8.82E-02 | 128656055 | 128656178 | NC_000008.10 |
| cg21251140 | 1.98E-10 | 1.47E-11 | 7.17 | 15.3644267 | 8.69E-02 | 181544642 | 181544765 | NC_000002.11 |

|            |          |          |      |            |          |           |           |              |
|------------|----------|----------|------|------------|----------|-----------|-----------|--------------|
| cg26108017 | 1.98E-10 | 1.47E-11 | 7.17 | 15.3641097 | 7.01E-02 | 97548061  | 97548184  | NC_000002.11 |
| cg09466667 | 1.98E-10 | 1.47E-11 | 7.17 | 15.364054  | 5.87E-02 | 42140775  | 42140898  | NC_000003.11 |
| cg01886514 | 1.98E-10 | 1.47E-11 | 7.17 | 15.3638862 | 1.29E-01 | 105478395 | 105478518 | NC_000002.11 |
| cg21215767 | 1.98E-10 | 1.47E-11 | 7.17 | 15.3638006 | 1.55E-01 | 119599819 | 119599942 | NC_000002.11 |
| cg09675604 | 1.99E-10 | 1.48E-11 | 7.17 | 15.3597926 | 1.22E-01 | 107591096 | 107591219 | NC_000007.13 |
| cg04441477 | 1.99E-10 | 1.48E-11 | 7.17 | 15.3592608 | 2.11E-01 | 24267399  | 24267522  | NC_000016.9  |
| cg09473180 | 2.00E-10 | 1.48E-11 | 7.17 | 15.3583914 | 9.64E-02 | 217403190 | 217403313 | NC_000002.11 |
| cg15665203 | 2.00E-10 | 1.48E-11 | 7.17 | 15.3579789 | 1.14E-01 | 112282481 | 112282604 | NC_000013.10 |
| cg20268522 | 2.00E-10 | 1.48E-11 | 7.17 | 15.3571583 | 1.94E-01 | 112832152 | 112832275 | NC_000011.9  |
| cg01596963 | 2.00E-10 | 1.48E-11 | 7.17 | 15.3569366 | 1.06E-01 | 62455830  | 62455953  | NC_000011.9  |
| cg16081457 | 2.00E-10 | 1.48E-11 | 7.17 | 15.3551205 | 1.13E-01 | 81103680  | 81103803  | NC_000012.11 |
| cg18341512 | 2.00E-10 | 1.48E-11 | 7.17 | 15.3547618 | 1.43E-01 | 2757023   | 2757146   | NC_000005.9  |
| cg05050657 | 2.02E-10 | 1.49E-11 | 7.17 | 15.3479079 | 1.71E-01 | 46957105  | 46957228  | NC_000001.10 |
| cg24462247 | 2.02E-10 | 1.50E-11 | 7.17 | 15.3460758 | 9.31E-02 | 1770837   | 1770960   | NC_000004.11 |
| cg13580382 | 2.02E-10 | 1.50E-11 | 7.17 | 15.3448146 | 1.22E-01 | 140081032 | 140081155 | NC_000009.11 |
| cg19875375 | 2.02E-10 | 1.50E-11 | 7.17 | 15.3442596 | 1.34E-01 | 46740666  | 46740789  | NC_000011.9  |
| cg20442232 | 2.02E-10 | 1.50E-11 | 7.17 | 15.3438092 | 1.10E-01 | 134465552 | 134465675 | NC_000005.9  |
| cg21133251 | 2.03E-10 | 1.50E-11 | 7.17 | 15.3426374 | 2.94E-02 | 242566890 | 242567013 | NC_000002.11 |
| cg01105375 | 2.03E-10 | 1.50E-11 | 7.17 | 15.3424362 | 7.88E-02 | 20748025  | 20748148  | NC_000013.10 |
| cg02337614 | 2.03E-10 | 1.50E-11 | 7.17 | 15.3407348 | 1.29E-01 | 112609986 | 112610109 | NC_000013.10 |
| cg13224075 | 2.03E-10 | 1.51E-11 | 7.17 | 15.3392357 | 3.02E-02 | 30107081  | 30107204  | NC_000013.10 |
| cg13097816 | 2.03E-10 | 1.51E-11 | 7.17 | 15.3389057 | 8.83E-02 | 241568439 | 241568562 | NC_000002.11 |
| cg16154629 | 2.03E-10 | 1.51E-11 | 7.17 | 15.3385165 | 4.71E-02 | 15125907  | 15126030  | NC_000012.11 |
| cg17949813 | 2.04E-10 | 1.51E-11 | 7.17 | 15.3371887 | 2.03E-01 | 1801521   | 1801644   | NC_000007.13 |
| cg20366906 | 2.04E-10 | 1.51E-11 | 7.17 | 15.3357727 | 1.15E-01 | 53422381  | 53422504  | NC_000013.10 |

|            |          |          |      |            |          |           |           |              |
|------------|----------|----------|------|------------|----------|-----------|-----------|--------------|
| cg25875953 | 2.04E-10 | 1.51E-11 | 7.17 | 15.3350878 | 4.09E-02 | 3001128   | 3001251   | NC_000001.10 |
| cg00303989 | 2.04E-10 | 1.51E-11 | 7.17 | 15.3348265 | 4.70E-02 | 8302769   | 8302892   | NC_000010.10 |
| cg10486439 | 2.04E-10 | 1.52E-11 | 7.17 | 15.3337326 | 5.29E-02 | 68919970  | 68920093  | NC_000011.9  |
| cg13256308 | 2.04E-10 | 1.52E-11 | 7.17 | 15.333513  | 7.60E-02 | 93106286  | 93106409  | NC_000014.8  |
| cg00574530 | 2.04E-10 | 1.52E-11 | 7.17 | 15.3325551 | 1.74E-01 | 134872064 | 134872187 | NC_000005.9  |
| cg02720618 | 2.05E-10 | 1.52E-11 | 7.17 | 15.3317342 | 1.70E-01 | 152129791 | 152129914 | NC_000006.11 |
| cg07709475 | 2.05E-10 | 1.52E-11 | 7.17 | 15.331293  | 7.67E-02 | 105423558 | 105423681 | NC_000010.10 |
| cg17130982 | 2.05E-10 | 1.52E-11 | 7.17 | 15.3311585 | 1.08E-01 | 1946008   | 1946131   | NC_000001.10 |
| cg12014886 | 2.05E-10 | 1.53E-11 | 7.17 | 15.3269528 | 4.98E-02 | 132890865 | 132890988 | NC_000010.10 |
| cg12069446 | 2.06E-10 | 1.53E-11 | 7.17 | 15.3263926 | 4.45E-02 | 118420562 | 118420685 | NC_000001.10 |
| cg06806958 | 2.06E-10 | 1.53E-11 | 7.17 | 15.3257425 | 2.04E-01 | 23983686  | 23983809  | NC_000010.10 |
| cg24679043 | 2.06E-10 | 1.53E-11 | 7.17 | 15.3257304 | 8.13E-02 | 30128404  | 30128527  | NC_000006.11 |
| cg25290307 | 2.06E-10 | 1.53E-11 | 7.17 | 15.3255828 | 1.27E-01 | 101005910 | 101006033 | NC_000007.13 |
| cg22300615 | 2.06E-10 | 1.53E-11 | 7.17 | 15.3245749 | 7.35E-02 | 57620819  | 57620942  | NC_000020.10 |
| cg10159630 | 2.06E-10 | 1.53E-11 | 7.17 | 15.3245724 | 1.82E-01 | 177037364 | 177037487 | NC_000002.11 |
| cg11572080 | 2.06E-10 | 1.53E-11 | 7.17 | 15.3224168 | 1.34E-01 | 111925158 | 111925281 | NC_000006.11 |
| cg03431738 | 2.07E-10 | 1.53E-11 | 7.17 | 15.3213871 | 1.05E-01 | 40031295  | 40031418  | NC_000021.8  |
| cg03077492 | 2.07E-10 | 1.54E-11 | 7.17 | 15.3203446 | 7.23E-02 | 43413095  | 43413218  | NC_000005.9  |
| cg25820062 | 2.07E-10 | 1.54E-11 | 7.17 | 15.3186126 | 9.89E-02 | 3730325   | 3730448   | NC_000020.10 |
| cg04495670 | 2.07E-10 | 1.54E-11 | 7.17 | 15.3171197 | 2.01E-01 | 69634296  | 69634419  | NC_000011.9  |
| cg15249639 | 2.07E-10 | 1.54E-11 | 7.17 | 15.3169764 | 2.19E-01 | 4382174   | 4382297   | NC_000012.11 |
| cg18154954 | 2.08E-10 | 1.54E-11 | 7.17 | 15.3156831 | 1.03E-01 | 39055500  | 39055623  | NC_000019.9  |
| cg11982577 | 2.08E-10 | 1.55E-11 | 7.17 | 15.3132546 | 6.74E-02 | 1299755   | 1299878   | NC_000019.9  |
| cg22385702 | 2.08E-10 | 1.55E-11 | 7.17 | 15.3132176 | 1.25E-01 | 45175881  | 45176004  | NC_000002.11 |
| cg12662072 | 2.08E-10 | 1.55E-11 | 7.17 | 15.3126041 | 2.56E-01 | 63986793  | 63986916  | NC_000005.9  |

|            |          |          |      |            |          |           |           |              |
|------------|----------|----------|------|------------|----------|-----------|-----------|--------------|
| cg02869459 | 2.09E-10 | 1.55E-11 | 7.16 | 15.309007  | 2.28E-01 | 220349208 | 220349331 | NC_000002.11 |
| cg20374595 | 2.09E-10 | 1.55E-11 | 7.16 | 15.3087467 | 1.33E-01 | 100627956 | 100628079 | NC_000013.10 |
| cg00891278 | 2.09E-10 | 1.56E-11 | 7.16 | 15.3069115 | 1.60E-01 | 126113784 | 126113907 | NC_000003.11 |
| cg20568196 | 2.09E-10 | 1.56E-11 | 7.16 | 15.3067907 | 2.58E-01 | 45811015  | 45811138  | NC_000017.10 |
| cg18602919 | 2.10E-10 | 1.56E-11 | 7.16 | 15.3062622 | 7.30E-02 | 23931674  | 23931797  | NC_000015.9  |
| cg06381463 | 2.10E-10 | 1.56E-11 | 7.16 | 15.3056801 | 3.80E-02 | 129100506 | 129100629 | NC_000009.11 |
| cg11473876 | 2.10E-10 | 1.56E-11 | 7.16 | 15.3046912 | 2.02E-01 | 109292803 | 109292926 | NC_000011.9  |
| cg13198321 | 2.10E-10 | 1.56E-11 | 7.16 | 15.3032635 | 2.18E-01 | 58357891  | 58358014  | NC_000015.9  |
| cg08286196 | 2.11E-10 | 1.57E-11 | 7.16 | 15.3005647 | 1.45E-01 | 114847882 | 114848005 | NC_000013.10 |
| cg16521605 | 2.11E-10 | 1.57E-11 | 7.16 | 15.2998889 | 1.39E-01 | 46363340  | 46363463  | NC_000019.9  |
| cg19590445 | 2.11E-10 | 1.57E-11 | 7.16 | 15.2998258 | 7.14E-02 | 174155345 | 174155468 | NC_000005.9  |
| cg04200411 | 2.11E-10 | 1.57E-11 | 7.16 | 15.2971402 | 4.52E-02 | 80449551  | 80449674  | NC_000017.10 |
| cg24805875 | 2.11E-10 | 1.57E-11 | 7.16 | 15.2968013 | 2.10E-01 | 117086941 | 117087064 | NC_000006.11 |
| cg06449094 | 2.11E-10 | 1.57E-11 | 7.16 | 15.2964388 | 1.08E-01 | 822397    | 822520    | NC_000011.9  |
| cg23520119 | 2.12E-10 | 1.57E-11 | 7.16 | 15.2958236 | 1.04E-01 | 121249868 | 121249991 | NC_000010.10 |
| cg14803869 | 2.12E-10 | 1.58E-11 | 7.16 | 15.2945153 | 1.26E-01 | 131237682 | 131237805 | NC_000012.11 |
| cg06970510 | 2.12E-10 | 1.58E-11 | 7.16 | 15.293173  | 1.70E-01 | 52401448  | 52401571  | NC_000012.11 |
| cg15908627 | 2.12E-10 | 1.58E-11 | 7.16 | 15.2931175 | 1.13E-01 | 1007420   | 1007543   | NC_000011.9  |
| cg08528231 | 2.12E-10 | 1.58E-11 | 7.16 | 15.2929354 | 1.88E-01 | 12997261  | 12997384  | NC_000016.9  |
| cg16297171 | 2.12E-10 | 1.58E-11 | 7.16 | 15.2918624 | 1.26E-01 | 99017690  | 99017813  | NC_000008.10 |
| cg15063116 | 2.13E-10 | 1.58E-11 | 7.16 | 15.2911272 | 1.71E-01 | 12254365  | 12254488  | NC_000018.9  |
| cg13954022 | 2.13E-10 | 1.59E-11 | 7.16 | 15.2881206 | 4.61E-02 | 106825650 | 106825773 | NC_000013.10 |
| cg23814714 | 2.13E-10 | 1.59E-11 | 7.16 | 15.2871498 | 7.28E-02 | 32056735  | 32056858  | NC_000006.11 |
| cg07405182 | 2.14E-10 | 1.59E-11 | 7.16 | 15.2861997 | 1.61E-01 | 40598455  | 40598578  | NC_000001.10 |
| cg26802289 | 2.14E-10 | 1.59E-11 | 7.16 | 15.28568   | 2.58E-01 | 20817859  | 20817982  | NC_000007.13 |

|            |          |          |      |            |          |           |           |              |
|------------|----------|----------|------|------------|----------|-----------|-----------|--------------|
| cg14520944 | 2.14E-10 | 1.59E-11 | 7.16 | 15.2846251 | 5.85E-02 | 169256780 | 169256903 | NC_000006.11 |
| cg17754769 | 2.14E-10 | 1.59E-11 | 7.16 | 15.284295  | 9.43E-02 | 50735417  | 50735540  | NC_000022.10 |
| cg00757082 | 2.14E-10 | 1.60E-11 | 7.16 | 15.2828586 | 2.26E-01 | 30719149  | 30719272  | NC_000019.9  |
| cg05621401 | 2.15E-10 | 1.60E-11 | 7.16 | 15.2812886 | 2.73E-01 | 43572065  | 43572188  | NC_000010.10 |
| cg13822256 | 2.15E-10 | 1.60E-11 | 7.16 | 15.2804036 | 1.08E-01 | 24811266  | 24811389  | NC_000008.10 |
| cg03634479 | 2.15E-10 | 1.60E-11 | 7.16 | 15.2801922 | 1.44E-01 | 18430412  | 18430535  | NC_000010.10 |
| cg17200320 | 2.15E-10 | 1.60E-11 | 7.16 | 15.2800377 | 4.72E-02 | 176931422 | 176931545 | NC_000005.9  |
| cg26157451 | 2.15E-10 | 1.60E-11 | 7.16 | 15.2782223 | 6.88E-02 | 89547102  | 89547225  | NC_000015.9  |
| cg01678383 | 2.15E-10 | 1.60E-11 | 7.16 | 15.2774866 | 5.71E-02 | 187903164 | 187903287 | NC_000003.11 |
| cg27434245 | 2.15E-10 | 1.61E-11 | 7.16 | 15.2767025 | 2.64E-01 | 89007493  | 89007616  | NC_000016.9  |
| cg20337815 | 2.16E-10 | 1.61E-11 | 7.16 | 15.2762004 | 7.41E-02 | 8736232   | 8736355   | NC_000002.11 |
| cg02792168 | 2.16E-10 | 1.61E-11 | 7.16 | 15.2744744 | 1.61E-01 | 101281924 | 101282047 | NC_000010.10 |
| cg23551455 | 2.16E-10 | 1.61E-11 | 7.16 | 15.273838  | 4.21E-02 | 80977010  | 80977133  | NC_000017.10 |
| cg13512069 | 2.16E-10 | 1.61E-11 | 7.16 | 15.2735797 | 1.36E-01 | 82555113  | 82555236  | NC_000015.9  |
| cg08041350 | 2.16E-10 | 1.61E-11 | 7.16 | 15.2731254 | 1.17E-01 | 25819112  | 25819235  | NC_000017.10 |
| cg21384645 | 2.16E-10 | 1.61E-11 | 7.16 | 15.2726002 | 1.57E-01 | 176957304 | 176957427 | NC_000002.11 |
| cg02979203 | 2.17E-10 | 1.61E-11 | 7.16 | 15.2715688 | 1.13E-01 | 118365961 | 118366084 | NC_000010.10 |
| cg09271882 | 2.17E-10 | 1.62E-11 | 7.16 | 15.2706463 | 4.85E-02 | 6214849   | 6214972   | NC_000001.10 |
| cg10474350 | 2.17E-10 | 1.62E-11 | 7.16 | 15.2704791 | 2.02E-01 | 27196555  | 27196678  | NC_000007.13 |
| cg09835239 | 2.17E-10 | 1.62E-11 | 7.16 | 15.267888  | 2.18E-01 | 66188203  | 66188326  | NC_000011.9  |
| cg04103250 | 2.18E-10 | 1.62E-11 | 7.16 | 15.2667782 | 1.48E-01 | 29840320  | 29840443  | NC_000010.10 |
| cg22851295 | 2.18E-10 | 1.62E-11 | 7.16 | 15.2667077 | 1.58E-01 | 10881949  | 10882072  | NC_000006.11 |
| cg21022447 | 2.18E-10 | 1.62E-11 | 7.16 | 15.2666641 | 3.88E-02 | 30521181  | 30521304  | NC_000006.11 |
| cg23148701 | 2.18E-10 | 1.62E-11 | 7.16 | 15.2659403 | 1.89E-01 | 64062498  | 64062621  | NC_000012.11 |
| cg01781662 | 2.18E-10 | 1.62E-11 | 7.16 | 15.2657164 | 1.42E-01 | 132387805 | 132387928 | NC_000009.11 |

|            |          |          |      |            |          |           |           |              |
|------------|----------|----------|------|------------|----------|-----------|-----------|--------------|
| cg26744375 | 2.18E-10 | 1.62E-11 | 7.16 | 15.2652255 | 2.37E-01 | 27135723  | 27135846  | NC_000007.13 |
| cg07145988 | 2.18E-10 | 1.63E-11 | 7.16 | 15.2643827 | 7.94E-02 | 8692312   | 8692435   | NC_000001.10 |
| cg13496492 | 2.18E-10 | 1.63E-11 | 7.16 | 15.2635396 | 7.65E-02 | 132463186 | 132463309 | NC_000009.11 |
| cg15309953 | 2.19E-10 | 1.63E-11 | 7.16 | 15.2593356 | 1.47E-01 | 5813258   | 5813381   | NC_000002.11 |
| cg02166450 | 2.19E-10 | 1.64E-11 | 7.16 | 15.2581007 | 1.86E-01 | 112712795 | 112712918 | NC_000013.10 |
| cg00632188 | 2.19E-10 | 1.64E-11 | 7.16 | 15.2577578 | 4.82E-02 | 31730389  | 31730512  | NC_000006.11 |
| cg06043908 | 2.19E-10 | 1.64E-11 | 7.16 | 15.2572355 | 1.04E-01 | 49467831  | 49467954  | NC_000008.10 |
| cg26398921 | 2.20E-10 | 1.64E-11 | 7.16 | 15.2567281 | 1.63E-01 | 221065480 | 221065603 | NC_000001.10 |
| cg04844692 | 2.20E-10 | 1.64E-11 | 7.16 | 15.2566464 | 6.41E-02 | 117157450 | 117157573 | NC_000012.11 |
| cg21806832 | 2.20E-10 | 1.64E-11 | 7.16 | 15.2562571 | 5.26E-02 | 21262831  | 21262954  | NC_000017.10 |
| cg08814405 | 2.20E-10 | 1.64E-11 | 7.16 | 15.2553296 | 2.22E-01 | 19183753  | 19183876  | NC_000007.13 |
| cg25391162 | 2.20E-10 | 1.64E-11 | 7.16 | 15.254238  | 1.01E-01 | 118091    | 118214    | NC_000009.11 |
| cg20156659 | 2.20E-10 | 1.64E-11 | 7.16 | 15.254124  | 1.64E-01 | 48982832  | 48982955  | NC_000002.11 |
| cg07395354 | 2.20E-10 | 1.65E-11 | 7.15 | 15.2524252 | 1.98E-01 | 15727127  | 15727250  | NC_000007.13 |
| cg26866482 | 2.21E-10 | 1.65E-11 | 7.15 | 15.2519862 | 2.54E-01 | 103351443 | 103351566 | NC_000012.11 |
| cg05106058 | 2.21E-10 | 1.65E-11 | 7.15 | 15.2507845 | 1.03E-01 | 172735924 | 172736047 | NC_000004.11 |
| cg15685941 | 2.21E-10 | 1.65E-11 | 7.15 | 15.2492485 | 8.02E-02 | 52723104  | 52723227  | NC_000003.11 |
| cg15923139 | 2.21E-10 | 1.65E-11 | 7.15 | 15.2490366 | 1.57E-01 | 186801896 | 186802019 | NC_000004.11 |
| cg25738714 | 2.21E-10 | 1.65E-11 | 7.15 | 15.2484294 | 2.06E-01 | 50893658  | 50893781  | NC_000001.10 |
| cg20090194 | 2.22E-10 | 1.65E-11 | 7.15 | 15.2471157 | 8.44E-02 | 75401258  | 75401381  | NC_000010.10 |
| cg12274508 | 2.22E-10 | 1.66E-11 | 7.15 | 15.244599  | 6.48E-02 | 33170770  | 33170893  | NC_000006.11 |
| cg02706018 | 2.22E-10 | 1.66E-11 | 7.15 | 15.2444216 | 1.24E-01 | 27168780  | 27168903  | NC_000007.13 |
| cg21541833 | 2.22E-10 | 1.66E-11 | 7.15 | 15.2438214 | 2.17E-01 | 207507096 | 207507219 | NC_000002.11 |
| cg06553975 | 2.22E-10 | 1.66E-11 | 7.15 | 15.2432872 | 6.37E-02 | 133085262 | 133085385 | NC_000012.11 |
| cg06721255 | 2.23E-10 | 1.66E-11 | 7.15 | 15.2423902 | 1.99E-01 | 114878877 | 114879000 | NC_000012.11 |

|            |          |          |      |            |          |           |           |              |
|------------|----------|----------|------|------------|----------|-----------|-----------|--------------|
| cg12523924 | 2.23E-10 | 1.66E-11 | 7.15 | 15.2412209 | 1.81E-01 | 63255359  | 63255482  | NC_000005.9  |
| cg05959980 | 2.23E-10 | 1.67E-11 | 7.15 | 15.2409521 | 8.29E-02 | 182083019 | 182083142 | NC_000001.10 |
| cg25796050 | 2.23E-10 | 1.67E-11 | 7.15 | 15.2407543 | 1.24E-01 | 234621572 | 234621695 | NC_000002.11 |
| cg02240936 | 2.23E-10 | 1.67E-11 | 7.15 | 15.2401202 | 7.05E-02 | 134584660 | 134584783 | NC_000010.10 |
| cg21182616 | 2.23E-10 | 1.67E-11 | 7.15 | 15.2401096 | 5.21E-02 | 1363182   | 1363305   | NC_000004.11 |
| cg04047221 | 2.23E-10 | 1.67E-11 | 7.15 | 15.2385536 | 1.61E-01 | 112723477 | 112723600 | NC_000013.10 |
| cg09579081 | 2.23E-10 | 1.67E-11 | 7.15 | 15.2380304 | 7.03E-02 | 81109237  | 81109360  | NC_000015.9  |
| cg13763061 | 2.24E-10 | 1.67E-11 | 7.15 | 15.2373404 | 1.78E-01 | 84814656  | 84814779  | NC_000007.13 |
| cg06709756 | 2.24E-10 | 1.67E-11 | 7.15 | 15.2362335 | 1.65E-01 | 1339049   | 1339172   | NC_000008.10 |
| cg12601909 | 2.24E-10 | 1.67E-11 | 7.15 | 15.235823  | 1.46E-01 | 1324478   | 1324601   | NC_000011.9  |
| cg10827650 | 2.25E-10 | 1.68E-11 | 7.15 | 15.2327907 | 5.24E-02 | 139511    | 139634    | NC_000017.10 |
| cg27665860 | 2.25E-10 | 1.68E-11 | 7.15 | 15.232535  | 5.92E-02 | 68970673  | 68970796  | NC_000011.9  |
| cg19002907 | 2.25E-10 | 1.68E-11 | 7.15 | 15.2314633 | 1.22E-01 | 115939579 | 115939702 | NC_000010.10 |
| cg20703261 | 2.25E-10 | 1.68E-11 | 7.15 | 15.2310128 | 4.85E-02 | 41375153  | 41375276  | NC_000006.11 |
| cg22967542 | 2.25E-10 | 1.68E-11 | 7.15 | 15.2294531 | 1.32E-01 | 96647483  | 96647606  | NC_000007.13 |
| cg05941819 | 2.25E-10 | 1.69E-11 | 7.15 | 15.2291006 | 2.03E-02 | 32568405  | 32568528  | NC_000001.10 |
| cg01145054 | 2.25E-10 | 1.69E-11 | 7.15 | 15.2289536 | 2.20E-01 | 47063285  | 47063408  | NC_000021.8  |
| cg14037937 | 2.26E-10 | 1.69E-11 | 7.15 | 15.2275126 | 1.06E-01 | 7987530   | 7987653   | NC_000004.11 |
| cg24286765 | 2.26E-10 | 1.69E-11 | 7.15 | 15.2267798 | 1.65E-01 | 137361532 | 137361655 | NC_000003.11 |
| cg10908752 | 2.26E-10 | 1.69E-11 | 7.15 | 15.2252665 | 5.68E-02 | 98044144  | 98044267  | NC_000013.10 |
| cg08399444 | 2.26E-10 | 1.69E-11 | 7.15 | 15.2247532 | 1.25E-01 | 13248548  | 13248671  | NC_000012.11 |
| cg05036656 | 2.26E-10 | 1.69E-11 | 7.15 | 15.2240535 | 1.63E-01 | 41875470  | 41875593  | NC_000004.11 |
| cg24133115 | 2.27E-10 | 1.70E-11 | 7.15 | 15.222806  | 2.14E-01 | 166075520 | 166075643 | NC_000006.11 |
| cg16091162 | 2.27E-10 | 1.70E-11 | 7.15 | 15.2193337 | 3.53E-02 | 71850401  | 71850524  | NC_000004.11 |
| cg27397850 | 2.28E-10 | 1.70E-11 | 7.15 | 15.2188922 | 1.84E-01 | 27281941  | 27282064  | NC_000007.13 |

|            |          |          |      |            |          |           |           |              |
|------------|----------|----------|------|------------|----------|-----------|-----------|--------------|
| cg24659538 | 2.28E-10 | 1.71E-11 | 7.15 | 15.21593   | 3.00E-02 | 160222618 | 160222741 | NC_000001.10 |
| cg05164933 | 2.29E-10 | 1.71E-11 | 7.15 | 15.2140179 | 1.95E-01 | 154710418 | 154710541 | NC_000004.11 |
| cg03301200 | 2.29E-10 | 1.72E-11 | 7.15 | 15.210773  | 2.05E-01 | 99954557  | 99954680  | NC_000008.10 |
| cg26186239 | 2.30E-10 | 1.72E-11 | 7.15 | 15.2095711 | 1.34E-01 | 62119492  | 62119615  | NC_000020.10 |
| cg23933044 | 2.30E-10 | 1.72E-11 | 7.15 | 15.208992  | 1.36E-01 | 37249909  | 37250032  | NC_000005.9  |
| cg25153629 | 2.30E-10 | 1.72E-11 | 7.15 | 15.2072707 | 8.14E-02 | 3135375   | 3135498   | NC_000001.10 |
| cg05099387 | 2.30E-10 | 1.73E-11 | 7.15 | 15.2058465 | 2.19E-01 | 177053292 | 177053415 | NC_000002.11 |
| cg06539116 | 2.31E-10 | 1.73E-11 | 7.15 | 15.2054687 | 1.32E-01 | 148597365 | 148597488 | NC_000005.9  |
| cg12388007 | 2.31E-10 | 1.73E-11 | 7.15 | 15.204934  | 1.56E-01 | 147110499 | 147110622 | NC_000003.11 |
| cg26467918 | 2.31E-10 | 1.73E-11 | 7.15 | 15.2048391 | 7.99E-02 | 63932088  | 63932211  | NC_000011.9  |
| cg13291704 | 2.31E-10 | 1.73E-11 | 7.15 | 15.2047801 | 1.84E-01 | 15761498  | 15761621  | NC_000010.10 |
| cg04921989 | 2.31E-10 | 1.73E-11 | 7.15 | 15.2039915 | 2.26E-01 | 132183100 | 132183223 | NC_000002.11 |
| cg12818107 | 2.31E-10 | 1.73E-11 | 7.15 | 15.2035334 | 1.25E-01 | 142852265 | 142852388 | NC_000008.10 |
| cg11388320 | 2.31E-10 | 1.73E-11 | 7.15 | 15.2028962 | 8.97E-02 | 81119299  | 81119422  | NC_000004.11 |
| cg24033224 | 2.31E-10 | 1.73E-11 | 7.15 | 15.2020818 | 1.30E-01 | 131438016 | 131438139 | NC_000012.11 |
| cg06738242 | 2.31E-10 | 1.73E-11 | 7.15 | 15.2017949 | 1.78E-01 | 239755703 | 239755826 | NC_000002.11 |
| cg14329039 | 2.31E-10 | 1.73E-11 | 7.15 | 15.2011535 | 3.12E-02 | 3058109   | 3058232   | NC_000010.10 |
| cg24116870 | 2.32E-10 | 1.73E-11 | 7.15 | 15.2008518 | 1.82E-01 | 43946284  | 43946407  | NC_000012.11 |
| cg12454814 | 2.32E-10 | 1.73E-11 | 7.15 | 15.200846  | 1.60E-01 | 58332480  | 58332603  | NC_000014.8  |
| cg02115911 | 2.32E-10 | 1.73E-11 | 7.15 | 15.200815  | 2.11E-01 | 34395548  | 34395671  | NC_000021.8  |
| cg20295353 | 2.32E-10 | 1.74E-11 | 7.15 | 15.2003994 | 7.59E-02 | 64989846  | 64989969  | NC_000014.8  |
| cg14051662 | 2.33E-10 | 1.74E-11 | 7.14 | 15.1950231 | 1.64E-01 | 137279180 | 137279303 | NC_000009.11 |
| cg13544883 | 2.33E-10 | 1.75E-11 | 7.14 | 15.1947273 | 9.72E-02 | 7852051   | 7852174   | NC_000019.9  |
| cg15888290 | 2.33E-10 | 1.75E-11 | 7.14 | 15.1929652 | 1.78E-01 | 119600348 | 119600471 | NC_000002.11 |
| cg10851698 | 2.34E-10 | 1.75E-11 | 7.14 | 15.1910491 | 1.67E-01 | 54024744  | 54024867  | NC_000019.9  |



|            |          |          |      |            |          |           |           |              |
|------------|----------|----------|------|------------|----------|-----------|-----------|--------------|
| cg13939185 | 2.34E-10 | 1.75E-11 | 7.14 | 15.1908675 | 1.34E-01 | 77116084  | 77116207  | NC_000009.11 |
| cg04765483 | 2.34E-10 | 1.75E-11 | 7.14 | 15.1897717 | 1.30E-01 | 134288552 | 134288675 | NC_000011.9  |
| cg20643952 | 2.34E-10 | 1.75E-11 | 7.14 | 15.1893289 | 2.27E-01 | 54398809  | 54398932  | NC_000012.11 |
| cg01037683 | 2.34E-10 | 1.76E-11 | 7.14 | 15.1882736 | 7.94E-02 | 20056493  | 20056616  | NC_000017.10 |
| cg03196627 | 2.35E-10 | 1.76E-11 | 7.14 | 15.1873342 | 3.40E-02 | 79298606  | 79298729  | NC_000015.9  |
| cg23151024 | 2.35E-10 | 1.76E-11 | 7.14 | 15.1867656 | 2.01E-01 | 84815940  | 84816063  | NC_000007.13 |
| cg23259813 | 2.35E-10 | 1.76E-11 | 7.14 | 15.186374  | 5.51E-02 | 18572503  | 18572626  | NC_000019.9  |
| cg05336698 | 2.35E-10 | 1.76E-11 | 7.14 | 15.1860526 | 1.96E-01 | 102497298 | 102497421 | NC_000010.10 |
| cg11662340 | 2.35E-10 | 1.76E-11 | 7.14 | 15.1855228 | 8.53E-02 | 32166839  | 32166962  | NC_000006.11 |
| cg21195256 | 2.35E-10 | 1.76E-11 | 7.14 | 15.1838911 | 1.85E-01 | 29244278  | 29244401  | NC_000014.8  |
| cg24500832 | 2.35E-10 | 1.76E-11 | 7.14 | 15.1838102 | 2.01E-01 | 54394212  | 54394335  | NC_000012.11 |
| cg21653184 | 2.36E-10 | 1.77E-11 | 7.14 | 15.1828741 | 2.56E-01 | 58609361  | 58609484  | NC_000019.9  |
| cg11708721 | 2.36E-10 | 1.77E-11 | 7.14 | 15.1816563 | 1.28E-01 | 117530009 | 117530132 | NC_000001.10 |
| cg17583413 | 2.36E-10 | 1.77E-11 | 7.14 | 15.1806783 | 1.67E-01 | 71332804  | 71332927  | NC_000010.10 |
| cg01565438 | 2.36E-10 | 1.77E-11 | 7.14 | 15.1799495 | 1.32E-01 | 33776554  | 33776677  | NC_000017.10 |
| cg00412805 | 2.36E-10 | 1.77E-11 | 7.14 | 15.1795328 | 4.28E-02 | 42726970  | 42727093  | NC_000003.11 |
| cg01325552 | 2.36E-10 | 1.77E-11 | 7.14 | 15.1786772 | 1.57E-01 | 187025420 | 187025543 | NC_000004.11 |
| cg03625287 | 2.37E-10 | 1.78E-11 | 7.14 | 15.1775424 | 1.72E-01 | 24121359  | 24121482  | NC_000013.10 |
| cg26687406 | 2.37E-10 | 1.78E-11 | 7.14 | 15.1773335 | 1.36E-01 | 169717976 | 169718099 | NC_000006.11 |
| cg14358699 | 2.37E-10 | 1.78E-11 | 7.14 | 15.1770101 | 8.67E-02 | 133521882 | 133522005 | NC_000010.10 |
| cg23526504 | 2.37E-10 | 1.78E-11 | 7.14 | 15.1769758 | 9.07E-02 | 29186780  | 29186903  | NC_000010.10 |
| cg02845071 | 2.37E-10 | 1.78E-11 | 7.14 | 15.1767763 | 5.10E-02 | 18571145  | 18571268  | NC_000017.10 |
| cg06263193 | 2.37E-10 | 1.78E-11 | 7.14 | 15.1753298 | 7.90E-02 | 28622912  | 28623035  | NC_000018.9  |
| cg23067299 | 2.37E-10 | 1.78E-11 | 7.14 | 15.1742457 | 1.13E-01 | 323907    | 324030    | NC_000005.9  |
| cg15799353 | 2.38E-10 | 1.79E-11 | 7.14 | 15.1719592 | 1.19E-01 | 363112    | 363235    | NC_000020.10 |

|            |          |          |      |            |          |           |           |              |
|------------|----------|----------|------|------------|----------|-----------|-----------|--------------|
| cg09020927 | 2.38E-10 | 1.79E-11 | 7.14 | 15.1704008 | 4.59E-02 | 150058090 | 150058213 | NC_000005.9  |
| cg12383964 | 2.39E-10 | 1.79E-11 | 7.14 | 15.169217  | 4.16E-02 | 134681298 | 134681421 | NC_000010.10 |
| cg18984724 | 2.39E-10 | 1.79E-11 | 7.14 | 15.1679433 | 1.15E-01 | 220299604 | 220299727 | NC_000002.11 |
| cg18335068 | 2.39E-10 | 1.80E-11 | 7.14 | 15.166418  | 2.04E-01 | 53757910  | 53758033  | NC_000019.9  |
| cg15055817 | 2.40E-10 | 1.80E-11 | 7.14 | 15.1635492 | 2.08E-01 | 186079142 | 186079265 | NC_000003.11 |
| cg18431910 | 2.40E-10 | 1.80E-11 | 7.14 | 15.1624346 | 9.34E-02 | 78614239  | 78614362  | NC_000011.9  |
| cg25137711 | 2.41E-10 | 1.81E-11 | 7.14 | 15.1595784 | 1.38E-01 | 48059173  | 48059296  | NC_000001.10 |
| cg06993118 | 2.41E-10 | 1.81E-11 | 7.14 | 15.1595375 | 2.73E-01 | 127873980 | 127874103 | NC_000005.9  |
| cg18568534 | 2.41E-10 | 1.81E-11 | 7.14 | 15.1584747 | 1.40E-01 | 23240117  | 23240240  | NC_000014.8  |
| cg13056524 | 2.41E-10 | 1.81E-11 | 7.14 | 15.1575035 | 8.19E-02 | 15448614  | 15448737  | NC_000006.11 |
| cg13307782 | 2.41E-10 | 1.81E-11 | 7.14 | 15.156876  | 6.57E-02 | 77291146  | 77291269  | NC_000005.9  |
| cg02388319 | 2.41E-10 | 1.81E-11 | 7.14 | 15.1566454 | 1.15E-01 | 155019321 | 155019444 | NC_000007.13 |
| cg24033278 | 2.41E-10 | 1.81E-11 | 7.14 | 15.1564984 | 4.51E-02 | 41510272  | 41510395  | NC_000019.9  |
| cg11932225 | 2.42E-10 | 1.82E-11 | 7.14 | 15.1523988 | 2.98E-02 | 7802347   | 7802470   | NC_000004.11 |
| cg19788371 | 2.42E-10 | 1.82E-11 | 7.14 | 15.1519592 | 1.63E-01 | 143086298 | 143086421 | NC_000008.10 |
| cg06444755 | 2.43E-10 | 1.82E-11 | 7.14 | 15.1511819 | 1.57E-01 | 8473990   | 8474113   | NC_000007.13 |
| cg18302637 | 2.43E-10 | 1.83E-11 | 7.14 | 15.1503501 | 6.34E-02 | 1254777   | 1254900   | NC_000005.9  |
| cg08501735 | 2.43E-10 | 1.83E-11 | 7.14 | 15.1495214 | 4.02E-02 | 172992719 | 172992842 | NC_000003.11 |
| cg18402615 | 2.43E-10 | 1.83E-11 | 7.14 | 15.1495159 | 1.99E-01 | 124896659 | 124896782 | NC_000010.10 |
| cg11325267 | 2.43E-10 | 1.83E-11 | 7.14 | 15.148284  | 1.26E-01 | 137480853 | 137480976 | NC_000003.11 |
| cg27470208 | 2.43E-10 | 1.83E-11 | 7.14 | 15.1475032 | 6.49E-02 | 8373416   | 8373539   | NC_000010.10 |
| cg13870866 | 2.44E-10 | 1.83E-11 | 7.14 | 15.1470236 | 1.53E-01 | 35293130  | 35293253  | NC_000007.13 |
| cg00873601 | 2.44E-10 | 1.83E-11 | 7.14 | 15.1455811 | 1.37E-01 | 116044025 | 116044148 | NC_000012.11 |
| cg26958838 | 2.44E-10 | 1.84E-11 | 7.14 | 15.1453515 | 1.27E-01 | 2416025   | 2416148   | NC_000005.9  |
| cg08969274 | 2.44E-10 | 1.84E-11 | 7.14 | 15.1450407 | 1.09E-01 | 75848810  | 75848933  | NC_000017.10 |

|            |          |          |      |            |          |           |           |              |
|------------|----------|----------|------|------------|----------|-----------|-----------|--------------|
| cg11850508 | 2.45E-10 | 1.84E-11 | 7.14 | 15.1418862 | 7.51E-02 | 78172311  | 78172434  | NC_000017.10 |
| cg19035496 | 2.46E-10 | 1.85E-11 | 7.13 | 15.1369178 | 9.12E-02 | 67090792  | 67090915  | NC_000008.10 |
| cg01256089 | 2.46E-10 | 1.85E-11 | 7.13 | 15.1364292 | 1.80E-01 | 77822500  | 77822623  | NC_000016.9  |
| cg00017489 | 2.46E-10 | 1.85E-11 | 7.13 | 15.1356831 | 1.76E-01 | 153583318 | 153583441 | NC_000007.13 |
| cg14747563 | 2.47E-10 | 1.86E-11 | 7.13 | 15.1340645 | 2.33E-01 | 134871962 | 134872085 | NC_000005.9  |
| cg03265991 | 2.47E-10 | 1.86E-11 | 7.13 | 15.1328802 | 3.25E-02 | 66646895  | 66647018  | NC_000016.9  |
| cg26597242 | 2.47E-10 | 1.86E-11 | 7.13 | 15.1323847 | 1.98E-01 | 161274540 | 161274663 | NC_000005.9  |
| cg03847768 | 2.47E-10 | 1.86E-11 | 7.13 | 15.1313347 | 8.74E-02 | 32111398  | 32111521  | NC_000012.11 |
| cg07434271 | 2.48E-10 | 1.87E-11 | 7.13 | 15.1267991 | 1.54E-01 | 31840698  | 31840821  | NC_000011.9  |
| cg10715460 | 2.48E-10 | 1.87E-11 | 7.13 | 15.1266788 | 1.06E-01 | 21278879  | 21279002  | NC_000017.10 |
| cg15151929 | 2.49E-10 | 1.87E-11 | 7.13 | 15.1250625 | 7.86E-02 | 1896429   | 1896552   | NC_000001.10 |
| cg02222728 | 2.49E-10 | 1.87E-11 | 7.13 | 15.1248186 | 1.36E-01 | 55371829  | 55371952  | NC_000008.10 |
| cg23827284 | 2.49E-10 | 1.88E-11 | 7.13 | 15.1239256 | 1.41E-01 | 30407145  | 30407268  | NC_000020.10 |
| cg25732462 | 2.49E-10 | 1.88E-11 | 7.13 | 15.1237263 | 2.27E-01 | 44324898  | 44325021  | NC_000019.9  |
| cg10583000 | 2.49E-10 | 1.88E-11 | 7.13 | 15.1234537 | 1.70E-01 | 98963134  | 98963257  | NC_000002.11 |
| cg06991392 | 2.49E-10 | 1.88E-11 | 7.13 | 15.1231791 | 1.22E-01 | 147789842 | 147789965 | NC_000001.10 |
| cg21433231 | 2.49E-10 | 1.88E-11 | 7.13 | 15.1231517 | 1.30E-01 | 34820712  | 34820835  | NC_000017.10 |
| cg17306747 | 2.49E-10 | 1.88E-11 | 7.13 | 15.1229766 | 1.68E-01 | 1446165   | 1446288   | NC_000005.9  |
| cg19226007 | 2.50E-10 | 1.88E-11 | 7.13 | 15.1218208 | 1.13E-01 | 43045068  | 43045191  | NC_000017.10 |
| cg19905251 | 2.50E-10 | 1.88E-11 | 7.13 | 15.1196689 | 1.08E-01 | 168728495 | 168728618 | NC_000005.9  |
| cg10909790 | 2.51E-10 | 1.89E-11 | 7.13 | 15.1174155 | 1.24E-01 | 45925455  | 45925578  | NC_000010.10 |
| cg19504702 | 2.51E-10 | 1.89E-11 | 7.13 | 15.1164683 | 1.62E-01 | 153862394 | 153862517 | NC_000005.9  |
| cg13688769 | 2.51E-10 | 1.89E-11 | 7.13 | 15.1160095 | 1.48E-01 | 73674363  | 73674486  | NC_000003.11 |
| cg11085282 | 2.51E-10 | 1.90E-11 | 7.13 | 15.1138584 | 1.70E-01 | 46262203  | 46262326  | NC_000022.10 |
| cg22507154 | 2.52E-10 | 1.90E-11 | 7.13 | 15.1122676 | 1.32E-01 | 91185233  | 91185356  | NC_000001.10 |

|            |          |          |      |            |          |           |           |              |
|------------|----------|----------|------|------------|----------|-----------|-----------|--------------|
| cg00522588 | 2.52E-10 | 1.90E-11 | 7.13 | 15.1116063 | 1.53E-01 | 49449063  | 49449186  | NC_000012.11 |
| cg12089570 | 2.52E-10 | 1.90E-11 | 7.13 | 15.1099775 | 1.36E-01 | 9473715   | 9473838   | NC_000019.9  |
| cg14130459 | 2.52E-10 | 1.90E-11 | 7.13 | 15.1099632 | 9.75E-02 | 60718568  | 60718691  | NC_000011.9  |
| cg13050556 | 2.53E-10 | 1.90E-11 | 7.13 | 15.1087885 | 4.79E-02 | 80180068  | 80180191  | NC_000017.10 |
| cg14069928 | 2.53E-10 | 1.91E-11 | 7.13 | 15.108347  | 1.22E-01 | 136845816 | 136845939 | NC_000009.11 |
| cg10717463 | 2.53E-10 | 1.91E-11 | 7.13 | 15.1082398 | 1.51E-01 | 76740962  | 76741085  | NC_000018.9  |
| cg02188358 | 2.53E-10 | 1.91E-11 | 7.13 | 15.1081465 | 1.65E-01 | 29068150  | 29068273  | NC_000013.10 |
| cg13681800 | 2.53E-10 | 1.91E-11 | 7.13 | 15.1069951 | 1.41E-01 | 168498470 | 168498593 | NC_000006.11 |
| cg08422172 | 2.54E-10 | 1.91E-11 | 7.13 | 15.1046267 | 2.04E-01 | 11886668  | 11886791  | NC_000016.9  |
| cg05432034 | 2.54E-10 | 1.91E-11 | 7.13 | 15.1045604 | 9.85E-02 | 86743939  | 86744062  | NC_000016.9  |
| cg14453201 | 2.54E-10 | 1.91E-11 | 7.13 | 15.1038827 | 2.07E-01 | 320888    | 321011    | NC_000005.9  |
| cg04290835 | 2.54E-10 | 1.92E-11 | 7.13 | 15.1032903 | 5.71E-02 | 5350284   | 5350407   | NC_000017.10 |
| cg01797106 | 2.54E-10 | 1.92E-11 | 7.13 | 15.1023542 | 9.81E-02 | 129431954 | 129432077 | NC_000012.11 |
| cg14448169 | 2.55E-10 | 1.92E-11 | 7.13 | 15.0998117 | 1.73E-01 | 120968904 | 120969027 | NC_000007.13 |
| cg25759507 | 2.55E-10 | 1.93E-11 | 7.13 | 15.0981277 | 3.83E-02 | 12008553  | 12008676  | NC_000011.9  |
| cg19133958 | 2.55E-10 | 1.93E-11 | 7.13 | 15.0976084 | 4.83E-02 | 59560599  | 59560722  | NC_000017.10 |
| cg26794997 | 2.56E-10 | 1.93E-11 | 7.13 | 15.095072  | 8.90E-02 | 76189257  | 76189380  | NC_000018.9  |
| cg03774463 | 2.56E-10 | 1.93E-11 | 7.13 | 15.0947733 | 1.53E-01 | 96636616  | 96636739  | NC_000007.13 |
| cg21983192 | 2.56E-10 | 1.93E-11 | 7.13 | 15.0940898 | 5.83E-02 | 28935651  | 28935774  | NC_000018.9  |
| cg13096405 | 2.56E-10 | 1.93E-11 | 7.13 | 15.0934207 | 6.52E-02 | 1120954   | 1121077   | NC_000011.9  |
| cg09705456 | 2.57E-10 | 1.94E-11 | 7.13 | 15.0919275 | 1.25E-01 | 63839479  | 63839602  | NC_000011.9  |
| cg02229261 | 2.58E-10 | 1.94E-11 | 7.13 | 15.0883606 | 1.34E-01 | 52222431  | 52222554  | NC_000019.9  |
| cg04866029 | 2.58E-10 | 1.95E-11 | 7.13 | 15.0875995 | 6.98E-02 | 2707161   | 2707284   | NC_000001.10 |
| cg13187764 | 2.58E-10 | 1.95E-11 | 7.13 | 15.0873632 | 2.21E-01 | 28677521  | 28677644  | NC_000006.11 |
| cg13546514 | 2.58E-10 | 1.95E-11 | 7.13 | 15.0867189 | 8.97E-02 | 9712113   | 9712236   | NC_000003.11 |

|            |          |          |      |            |          |           |           |              |
|------------|----------|----------|------|------------|----------|-----------|-----------|--------------|
| cg10108296 | 2.58E-10 | 1.95E-11 | 7.13 | 15.0866466 | 1.42E-01 | 30139592  | 30139715  | NC_000006.11 |
| cg07962143 | 2.58E-10 | 1.95E-11 | 7.13 | 15.0853053 | 1.99E-01 | 57149436  | 57149559  | NC_000019.9  |
| cg03421195 | 2.59E-10 | 1.96E-11 | 7.12 | 15.0815536 | 1.80E-01 | 7517215   | 7517338   | NC_000010.10 |
| cg08284926 | 2.60E-10 | 1.97E-11 | 7.12 | 15.0773749 | 1.03E-01 | 134826760 | 134826883 | NC_000010.10 |
| cg05852143 | 2.60E-10 | 1.97E-11 | 7.12 | 15.0765803 | 1.85E-01 | 5540116   | 5540239   | NC_000012.11 |
| cg11824639 | 2.61E-10 | 1.97E-11 | 7.12 | 15.0759615 | 1.69E-01 | 67218080  | 67218203  | NC_000001.10 |
| cg23662142 | 2.61E-10 | 1.97E-11 | 7.12 | 15.0754643 | 1.60E-01 | 55199914  | 55200037  | NC_000020.10 |
| cg12226948 | 2.61E-10 | 1.97E-11 | 7.12 | 15.0752349 | 1.38E-01 | 153504453 | 153504576 | NC_000002.11 |
| cg15897102 | 2.61E-10 | 1.97E-11 | 7.12 | 15.0750139 | 1.26E-01 | 115677211 | 115677334 | NC_000001.10 |
| cg02318784 | 2.61E-10 | 1.97E-11 | 7.12 | 15.0739003 | 1.52E-01 | 27213174  | 27213297  | NC_000015.9  |
| cg21127068 | 2.61E-10 | 1.97E-11 | 7.12 | 15.0735029 | 1.58E-01 | 147124417 | 147124540 | NC_000003.11 |
| cg26647200 | 2.61E-10 | 1.97E-11 | 7.12 | 15.0734901 | 8.48E-02 | 2482775   | 2482898   | NC_000016.9  |
| cg01489177 | 2.61E-10 | 1.97E-11 | 7.12 | 15.073336  | 8.07E-02 | 55828178  | 55828301  | NC_000019.9  |
| cg13723431 | 2.62E-10 | 1.98E-11 | 7.12 | 15.0684798 | 1.13E-01 | 1444395   | 1444518   | NC_000005.9  |
| cg13361749 | 2.62E-10 | 1.98E-11 | 7.12 | 15.0683682 | 4.78E-02 | 5824196   | 5824319   | NC_000019.9  |
| cg04771413 | 2.63E-10 | 1.99E-11 | 7.12 | 15.0677924 | 1.52E-01 | 5896549   | 5896672   | NC_000002.11 |
| cg09616857 | 2.63E-10 | 1.99E-11 | 7.12 | 15.0675192 | 4.73E-02 | 169122917 | 169123040 | NC_000003.11 |
| cg04605987 | 2.63E-10 | 1.99E-11 | 7.12 | 15.0666175 | 1.38E-01 | 200007403 | 200007526 | NC_000001.10 |
| cg07084163 | 2.63E-10 | 1.99E-11 | 7.12 | 15.0661874 | 1.28E-01 | 36066783  | 36066906  | NC_000005.9  |
| cg15998779 | 2.63E-10 | 1.99E-11 | 7.12 | 15.0659628 | 1.51E-01 | 159756690 | 159756813 | NC_000003.11 |
| cg07537370 | 2.63E-10 | 1.99E-11 | 7.12 | 15.0658498 | 1.06E-01 | 27531124  | 27531247  | NC_000002.11 |
| cg14515032 | 2.63E-10 | 1.99E-11 | 7.12 | 15.0652029 | 7.26E-02 | 2900269   | 2900392   | NC_000017.10 |
| cg20710709 | 2.64E-10 | 2.00E-11 | 7.12 | 15.0623071 | 1.40E-01 | 37135671  | 37135794  | NC_000014.8  |
| cg14144305 | 2.64E-10 | 2.00E-11 | 7.12 | 15.0615724 | 1.27E-01 | 44325960  | 44326083  | NC_000011.9  |
| cg07612928 | 2.64E-10 | 2.00E-11 | 7.12 | 15.0613405 | 1.11E-01 | 51956044  | 51956167  | NC_000014.8  |

|            |          |          |      |            |          |           |           |              |
|------------|----------|----------|------|------------|----------|-----------|-----------|--------------|
| cg15140798 | 2.64E-10 | 2.00E-11 | 7.12 | 15.0606877 | 1.16E-01 | 46782485  | 46782608  | NC_000021.8  |
| cg23553912 | 2.64E-10 | 2.00E-11 | 7.12 | 15.0601057 | 1.41E-01 | 159558031 | 159558154 | NC_000003.11 |
| cg21678377 | 2.65E-10 | 2.00E-11 | 7.12 | 15.0594646 | 2.50E-01 | 115919009 | 115919132 | NC_000002.11 |
| cg13828758 | 2.65E-10 | 2.00E-11 | 7.12 | 15.0592804 | 8.96E-02 | 23932373  | 23932496  | NC_000015.9  |
| cg00527489 | 2.65E-10 | 2.00E-11 | 7.12 | 15.0588972 | 2.02E-01 | 214360954 | 214361077 | NC_000001.10 |
| cg25724837 | 2.65E-10 | 2.01E-11 | 7.12 | 15.0574962 | 3.63E-02 | 123493091 | 123493214 | NC_000010.10 |
| cg16828491 | 2.65E-10 | 2.01E-11 | 7.12 | 15.0568813 | 1.05E-01 | 8230829   | 8230952   | NC_000004.11 |
| cg09451457 | 2.66E-10 | 2.01E-11 | 7.12 | 15.0552776 | 1.60E-01 | 87440246  | 87440369  | NC_000005.9  |
| cg20892492 | 2.66E-10 | 2.01E-11 | 7.12 | 15.0551827 | 9.67E-02 | 129300912 | 129301035 | NC_000004.11 |
| cg05131483 | 2.66E-10 | 2.01E-11 | 7.12 | 15.0549321 | 1.67E-01 | 23706242  | 23706365  | NC_000016.9  |
| cg27664390 | 2.66E-10 | 2.02E-11 | 7.12 | 15.0530921 | 2.01E-02 | 59171928  | 59172051  | NC_000015.9  |
| cg06756919 | 2.66E-10 | 2.02E-11 | 7.12 | 15.0528303 | 1.60E-01 | 37135898  | 37136021  | NC_000014.8  |
| cg15057046 | 2.66E-10 | 2.02E-11 | 7.12 | 15.0522104 | 5.81E-02 | 4483078   | 4483201   | NC_000006.11 |
| cg02633600 | 2.67E-10 | 2.02E-11 | 7.12 | 15.0506655 | 8.11E-02 | 1074159   | 1074282   | NC_000016.9  |
| cg26124318 | 2.67E-10 | 2.02E-11 | 7.12 | 15.0490222 | 1.84E-01 | 38965122  | 38965245  | NC_000008.10 |
| cg21069500 | 2.67E-10 | 2.02E-11 | 7.12 | 15.0487891 | 1.12E-01 | 139050159 | 139050282 | NC_000005.9  |
| cg17864046 | 2.67E-10 | 2.03E-11 | 7.12 | 15.0485966 | 1.52E-01 | 166422341 | 166422464 | NC_000006.11 |
| cg25655234 | 2.67E-10 | 2.03E-11 | 7.12 | 15.0483028 | 1.96E-01 | 7194841   | 7194964   | NC_000004.11 |
| cg02662277 | 2.68E-10 | 2.03E-11 | 7.12 | 15.0476638 | 1.61E-01 | 60936383  | 60936506  | NC_000010.10 |
| cg03634394 | 2.68E-10 | 2.03E-11 | 7.12 | 15.0453539 | 6.50E-02 | 16144375  | 16144498  | NC_000019.9  |
| cg07710481 | 2.68E-10 | 2.03E-11 | 7.12 | 15.0451425 | 2.37E-01 | 88325384  | 88325507  | NC_000013.10 |
| cg02350677 | 2.68E-10 | 2.03E-11 | 7.12 | 15.0451251 | 1.58E-01 | 23254381  | 23254504  | NC_000019.9  |
| cg06997259 | 2.68E-10 | 2.03E-11 | 7.12 | 15.0447458 | 7.51E-02 | 235956326 | 235956449 | NC_000002.11 |
| cg19916212 | 2.68E-10 | 2.03E-11 | 7.12 | 15.0440533 | 2.24E-01 | 78493203  | 78493326  | NC_000013.10 |
| cg09092054 | 2.69E-10 | 2.04E-11 | 7.12 | 15.0423958 | 2.15E-01 | 19511987  | 19512110  | NC_000022.10 |

|            |          |          |      |            |          |           |           |              |
|------------|----------|----------|------|------------|----------|-----------|-----------|--------------|
| cg06554200 | 2.69E-10 | 2.04E-11 | 7.12 | 15.0423833 | 1.45E-01 | 1270134   | 1270257   | NC_000007.13 |
| cg25829961 | 2.69E-10 | 2.04E-11 | 7.12 | 15.0420746 | 6.43E-02 | 46900754  | 46900877  | NC_000021.8  |
| cg07636952 | 2.69E-10 | 2.04E-11 | 7.12 | 15.0420616 | 5.68E-02 | 124596397 | 124596520 | NC_000010.10 |
| cg26014905 | 2.69E-10 | 2.04E-11 | 7.12 | 15.0419832 | 3.07E-02 | 50601263  | 50601386  | NC_000003.11 |
| cg08797892 | 2.70E-10 | 2.04E-11 | 7.12 | 15.039553  | 2.98E-02 | 119885187 | 119885310 | NC_000003.11 |
| cg27474175 | 2.70E-10 | 2.05E-11 | 7.12 | 15.0376825 | 1.50E-01 | 80363992  | 80364115  | NC_000015.9  |
| cg17527819 | 2.71E-10 | 2.05E-11 | 7.12 | 15.0358385 | 1.10E-01 | 30140409  | 30140532  | NC_000006.11 |
| cg15074709 | 2.71E-10 | 2.06E-11 | 7.12 | 15.0325006 | 1.15E-01 | 112547653 | 112547776 | NC_000013.10 |
| cg22687748 | 2.72E-10 | 2.06E-11 | 7.12 | 15.0317868 | 1.72E-01 | 71017211  | 71017334  | NC_000002.11 |
| cg13169072 | 2.72E-10 | 2.06E-11 | 7.12 | 15.0310202 | 2.69E-02 | 36350271  | 36350394  | NC_000014.8  |
| cg12426234 | 2.72E-10 | 2.07E-11 | 7.12 | 15.0292452 | 1.72E-01 | 22370347  | 22370470  | NC_000021.8  |
| cg19011844 | 2.73E-10 | 2.07E-11 | 7.12 | 15.0277257 | 2.19E-01 | 10102232  | 10102355  | NC_000017.10 |
| cg23760687 | 2.73E-10 | 2.07E-11 | 7.12 | 15.027494  | 1.44E-01 | 25621735  | 25621858  | NC_000013.10 |
| cg12728097 | 2.73E-10 | 2.07E-11 | 7.12 | 15.0269148 | 8.37E-02 | 28154501  | 28154624  | NC_000001.10 |
| cg23367392 | 2.74E-10 | 2.08E-11 | 7.11 | 15.0238748 | 1.45E-01 | 42267337  | 42267460  | NC_000007.13 |
| cg26055770 | 2.75E-10 | 2.08E-11 | 7.11 | 15.0204619 | 1.77E-01 | 73674070  | 73674193  | NC_000003.11 |
| cg18893528 | 2.76E-10 | 2.09E-11 | 7.11 | 15.0168446 | 7.15E-02 | 4296406   | 4296529   | NC_000010.10 |
| cg23859051 | 2.76E-10 | 2.10E-11 | 7.11 | 15.015173  | 1.15E-01 | 1478585   | 1478708   | NC_000017.10 |
| cg11346837 | 2.76E-10 | 2.10E-11 | 7.11 | 15.0135552 | 1.67E-01 | 147077671 | 147077794 | NC_000003.11 |
| cg15444648 | 2.76E-10 | 2.10E-11 | 7.11 | 15.0134867 | 1.51E-01 | 92907851  | 92907974  | NC_000005.9  |
| cg07057434 | 2.76E-10 | 2.10E-11 | 7.11 | 15.0133873 | 5.65E-02 | 70372625  | 70372748  | NC_000008.10 |
| cg27318318 | 2.77E-10 | 2.10E-11 | 7.11 | 15.0129865 | 1.37E-01 | 44332849  | 44332972  | NC_000011.9  |
| cg14150751 | 2.77E-10 | 2.10E-11 | 7.11 | 15.0129614 | 5.72E-02 | 76341733  | 76341856  | NC_000006.11 |
| cg25349034 | 2.77E-10 | 2.10E-11 | 7.11 | 15.0127444 | 9.24E-02 | 149265300 | 149265423 | NC_000003.11 |
| cg27315742 | 2.77E-10 | 2.10E-11 | 7.11 | 15.012664  | 1.67E-01 | 117586681 | 117586804 | NC_000006.11 |

|            |          |          |      |            |          |           |           |              |
|------------|----------|----------|------|------------|----------|-----------|-----------|--------------|
| cg24216555 | 2.77E-10 | 2.10E-11 | 7.11 | 15.0112264 | 1.26E-01 | 55814143  | 55814266  | NC_000019.9  |
| cg18683586 | 2.78E-10 | 2.11E-11 | 7.11 | 15.0080266 | 5.81E-02 | 155620659 | 155620782 | NC_000007.13 |
| cg23440816 | 2.78E-10 | 2.11E-11 | 7.11 | 15.0071845 | 8.04E-02 | 223948910 | 223949033 | NC_000001.10 |
| cg01999539 | 2.78E-10 | 2.11E-11 | 7.11 | 15.0071096 | 1.42E-01 | 150259860 | 150259983 | NC_000006.11 |
| cg09825093 | 2.78E-10 | 2.11E-11 | 7.11 | 15.0068543 | 1.53E-01 | 82660505  | 82660628  | NC_000016.9  |
| cg15699085 | 2.78E-10 | 2.11E-11 | 7.11 | 15.0065516 | 1.45E-01 | 140457609 | 140457732 | NC_000005.9  |
| cg01785568 | 2.79E-10 | 2.12E-11 | 7.11 | 15.0027742 | 1.29E-01 | 4864833   | 4864956   | NC_000004.11 |
| cg11800117 | 2.80E-10 | 2.13E-11 | 7.11 | 15.0006057 | 1.43E-01 | 93270375  | 93270498  | NC_000011.9  |
| cg22177309 | 2.80E-10 | 2.13E-11 | 7.11 | 15.000099  | 8.04E-02 | 48260285  | 48260408  | NC_000019.9  |
| cg08014499 | 2.80E-10 | 2.13E-11 | 7.11 | 14.9987292 | 1.33E-01 | 2162545   | 2162668   | NC_000011.9  |
| cg02118194 | 2.80E-10 | 2.13E-11 | 7.11 | 14.9982159 | 8.73E-02 | 46404538  | 46404661  | NC_000019.9  |
| cg18073471 | 2.81E-10 | 2.13E-11 | 7.11 | 14.9967392 | 1.41E-01 | 81119198  | 81119321  | NC_000004.11 |
| cg14744743 | 2.81E-10 | 2.14E-11 | 7.11 | 14.9960092 | 1.28E-01 | 13871595  | 13871718  | NC_000018.9  |
| cg26922697 | 2.81E-10 | 2.14E-11 | 7.11 | 14.9959781 | 8.82E-02 | 33284542  | 33284665  | NC_000006.11 |
| cg26829322 | 2.81E-10 | 2.14E-11 | 7.11 | 14.9948017 | 1.49E-01 | 11713867  | 11713990  | NC_000001.10 |
| cg09353985 | 2.82E-10 | 2.14E-11 | 7.11 | 14.9922958 | 8.34E-02 | 207062674 | 207062797 | NC_000001.10 |
| cg10471437 | 2.82E-10 | 2.15E-11 | 7.11 | 14.9912811 | 2.78E-01 | 28074462  | 28074585  | NC_000016.9  |
| cg22909138 | 2.82E-10 | 2.15E-11 | 7.11 | 14.990817  | 2.51E-02 | 79803493  | 79803616  | NC_000017.10 |
| cg16931822 | 2.82E-10 | 2.15E-11 | 7.11 | 14.9907463 | 8.35E-02 | 66475150  | 66475273  | NC_000003.11 |
| cg27053763 | 2.83E-10 | 2.15E-11 | 7.11 | 14.9881473 | 3.00E-02 | 180653815 | 180653938 | NC_000005.9  |
| cg14483771 | 2.83E-10 | 2.15E-11 | 7.11 | 14.9877368 | 5.61E-02 | 134998463 | 134998586 | NC_000010.10 |
| cg14884793 | 2.83E-10 | 2.16E-11 | 7.11 | 14.987348  | 1.58E-01 | 109148553 | 109148676 | NC_000013.10 |
| cg12995800 | 2.84E-10 | 2.16E-11 | 7.11 | 14.9863174 | 1.96E-01 | 151304312 | 151304435 | NC_000005.9  |
| cg26530758 | 2.84E-10 | 2.16E-11 | 7.11 | 14.9857344 | 2.97E-01 | 41754060  | 41754183  | NC_000008.10 |
| cg05375728 | 2.84E-10 | 2.16E-11 | 7.11 | 14.9852549 | 2.10E-01 | 58715539  | 58715662  | NC_000001.10 |



|            |          |          |      |            |          |           |           |              |
|------------|----------|----------|------|------------|----------|-----------|-----------|--------------|
| cg04008601 | 2.84E-10 | 2.16E-11 | 7.11 | 14.9845479 | 1.68E-01 | 103696126 | 103696249 | NC_000012.11 |
| cg17062917 | 2.84E-10 | 2.16E-11 | 7.11 | 14.983113  | 4.65E-02 | 70054539  | 70054662  | NC_000015.9  |
| cg00716257 | 2.85E-10 | 2.16E-11 | 7.11 | 14.9829854 | 1.73E-01 | 75897417  | 75897540  | NC_000014.8  |
| cg18262937 | 2.85E-10 | 2.17E-11 | 7.11 | 14.9811761 | 8.72E-02 | 17002291  | 17002414  | NC_000022.10 |
| cg01586959 | 2.85E-10 | 2.17E-11 | 7.11 | 14.97969   | 1.80E-01 | 86541607  | 86541730  | NC_000016.9  |
| cg12796916 | 2.85E-10 | 2.17E-11 | 7.11 | 14.9796887 | 5.73E-02 | 67471698  | 67471821  | NC_000011.9  |
| cg25623524 | 2.85E-10 | 2.17E-11 | 7.11 | 14.9793477 | 1.25E-01 | 58862063  | 58862186  | NC_000019.9  |
| cg12926938 | 2.86E-10 | 2.18E-11 | 7.11 | 14.9777191 | 2.01E-01 | 93114150  | 93114273  | NC_000008.10 |
| cg09854011 | 2.86E-10 | 2.18E-11 | 7.11 | 14.9767101 | 1.89E-01 | 17907024  | 17907147  | NC_000001.10 |
| cg05327835 | 2.86E-10 | 2.18E-11 | 7.11 | 14.9762885 | 2.36E-01 | 996175    | 996298    | NC_000004.11 |
| cg07416237 | 2.86E-10 | 2.18E-11 | 7.11 | 14.9761007 | 1.13E-01 | 100548078 | 100548201 | NC_000013.10 |
| cg03804255 | 2.87E-10 | 2.18E-11 | 7.11 | 14.9748183 | 9.97E-02 | 90278335  | 90278458  | NC_000012.11 |
| cg22534621 | 2.87E-10 | 2.19E-11 | 7.11 | 14.9735812 | 1.09E-01 | 82276730  | 82276853  | NC_000001.10 |
| cg14230397 | 2.87E-10 | 2.19E-11 | 7.11 | 14.9735229 | 1.72E-01 | 46799986  | 46800109  | NC_000017.10 |
| cg24937675 | 2.87E-10 | 2.19E-11 | 7.11 | 14.9729927 | 1.46E-01 | 134639482 | 134639605 | NC_000006.11 |
| cg27583671 | 2.88E-10 | 2.19E-11 | 7.11 | 14.9701776 | 7.63E-02 | 151670624 | 151670747 | NC_000006.11 |
| cg07883722 | 2.88E-10 | 2.19E-11 | 7.11 | 14.9700159 | 3.58E-02 | 95246404  | 95246527  | NC_000005.9  |
| cg24920126 | 2.88E-10 | 2.20E-11 | 7.1  | 14.9690904 | 8.58E-02 | 5087266   | 5087389   | NC_000006.11 |
| cg05707655 | 2.88E-10 | 2.20E-11 | 7.1  | 14.9685995 | 1.55E-01 | 908690    | 908813    | NC_000017.10 |
| cg19752627 | 2.89E-10 | 2.20E-11 | 7.1  | 14.9675557 | 2.52E-01 | 98467380  | 98467503  | NC_000007.13 |
| cg12459280 | 2.89E-10 | 2.20E-11 | 7.1  | 14.9667102 | 4.59E-02 | 36165083  | 36165206  | NC_000021.8  |
| cg07839533 | 2.90E-10 | 2.21E-11 | 7.1  | 14.964459  | 2.16E-01 | 63257885  | 63258008  | NC_000005.9  |
| cg08119884 | 2.90E-10 | 2.21E-11 | 7.1  | 14.9619637 | 1.98E-01 | 79739863  | 79739986  | NC_000002.11 |
| cg18372548 | 2.90E-10 | 2.21E-11 | 7.1  | 14.9613248 | 2.84E-02 | 26913852  | 26913975  | NC_000004.11 |
| cg01937068 | 2.91E-10 | 2.22E-11 | 7.1  | 14.9599572 | 1.72E-01 | 156406349 | 156406472 | NC_000001.10 |

|            |          |          |     |            |          |           |           |              |
|------------|----------|----------|-----|------------|----------|-----------|-----------|--------------|
| cg06567920 | 2.91E-10 | 2.22E-11 | 7.1 | 14.9599494 | 1.05E-01 | 129582864 | 129582987 | NC_000004.11 |
| cg19519747 | 2.91E-10 | 2.22E-11 | 7.1 | 14.9597915 | 1.28E-01 | 177014555 | 177014678 | NC_000002.11 |
| cg01181415 | 2.91E-10 | 2.22E-11 | 7.1 | 14.9592275 | 1.44E-01 | 16757954  | 16758077  | NC_000012.11 |
| cg24024424 | 2.91E-10 | 2.22E-11 | 7.1 | 14.9581228 | 1.39E-01 | 140858046 | 140858169 | NC_000005.9  |
| cg18468394 | 2.92E-10 | 2.22E-11 | 7.1 | 14.9567936 | 1.38E-01 | 170736021 | 170736144 | NC_000005.9  |
| cg06293049 | 2.92E-10 | 2.22E-11 | 7.1 | 14.9564564 | 3.70E-02 | 53622101  | 53622224  | NC_000012.11 |
| cg13119928 | 2.92E-10 | 2.22E-11 | 7.1 | 14.9562217 | 6.60E-02 | 53228661  | 53228784  | NC_000012.11 |
| cg02723372 | 2.92E-10 | 2.23E-11 | 7.1 | 14.955146  | 4.61E-02 | 25228582  | 25228705  | NC_000001.10 |
| cg03677056 | 2.93E-10 | 2.23E-11 | 7.1 | 14.9539916 | 1.51E-01 | 33817217  | 33817340  | NC_000017.10 |
| cg26800786 | 2.93E-10 | 2.23E-11 | 7.1 | 14.9522101 | 1.54E-01 | 105922059 | 105922182 | NC_000011.9  |
| cg10157251 | 2.93E-10 | 2.24E-11 | 7.1 | 14.9505559 | 1.71E-01 | 89914608  | 89914731  | NC_000015.9  |
| cg20648149 | 2.94E-10 | 2.24E-11 | 7.1 | 14.949094  | 1.42E-01 | 64319089  | 64319212  | NC_000014.8  |
| cg12341314 | 2.94E-10 | 2.24E-11 | 7.1 | 14.9486051 | 1.18E-01 | 229568467 | 229568590 | NC_000001.10 |
| cg01910869 | 2.94E-10 | 2.24E-11 | 7.1 | 14.9484988 | 1.52E-01 | 78493182  | 78493305  | NC_000013.10 |
| cg08464003 | 2.94E-10 | 2.24E-11 | 7.1 | 14.9474925 | 1.52E-01 | 139623012 | 139623135 | NC_000005.9  |
| cg18221336 | 2.95E-10 | 2.25E-11 | 7.1 | 14.9464241 | 5.52E-02 | 31215287  | 31215410  | NC_000001.10 |
| cg24394631 | 2.95E-10 | 2.25E-11 | 7.1 | 14.9459983 | 1.59E-01 | 43863000  | 43863123  | NC_000017.10 |
| cg13450944 | 2.95E-10 | 2.25E-11 | 7.1 | 14.9448379 | 1.24E-01 | 66533056  | 66533179  | NC_000003.11 |
| cg17528559 | 2.96E-10 | 2.25E-11 | 7.1 | 14.9432192 | 6.92E-02 | 113571025 | 113571148 | NC_000002.11 |
| cg07232003 | 2.96E-10 | 2.25E-11 | 7.1 | 14.9431549 | 1.54E-01 | 28971331  | 28971454  | NC_000010.10 |
| cg22522939 | 2.96E-10 | 2.26E-11 | 7.1 | 14.94263   | 7.96E-02 | 144210636 | 144210759 | NC_000008.10 |
| cg18597940 | 2.96E-10 | 2.26E-11 | 7.1 | 14.9400839 | 7.00E-02 | 76327105  | 76327228  | NC_000014.8  |
| cg11465466 | 2.97E-10 | 2.26E-11 | 7.1 | 14.9386978 | 1.23E-01 | 39549192  | 39549315  | NC_000017.10 |
| cg22378717 | 2.97E-10 | 2.27E-11 | 7.1 | 14.9369528 | 6.14E-02 | 143200284 | 143200407 | NC_000008.10 |
| cg24171907 | 2.98E-10 | 2.27E-11 | 7.1 | 14.9356586 | 2.55E-01 | 68546579  | 68546702  | NC_000002.11 |

|            |          |          |      |            |          |           |           |              |
|------------|----------|----------|------|------------|----------|-----------|-----------|--------------|
| cg14102880 | 2.98E-10 | 2.27E-11 | 7.1  | 14.9349365 | 1.09E-01 | 915634    | 915757    | NC_000017.10 |
| cg24161501 | 2.98E-10 | 2.28E-11 | 7.1  | 14.9340105 | 1.58E-01 | 67218275  | 67218398  | NC_000001.10 |
| cg07760204 | 2.98E-10 | 2.28E-11 | 7.1  | 14.933389  | 1.56E-01 | 147576547 | 147576670 | NC_000004.11 |
| cg14641018 | 2.99E-10 | 2.28E-11 | 7.1  | 14.9318378 | 5.35E-02 | 42676114  | 42676237  | NC_000021.8  |
| cg04607032 | 2.99E-10 | 2.28E-11 | 7.1  | 14.9301706 | 6.07E-02 | 75503069  | 75503192  | NC_000017.10 |
| cg06571387 | 3.01E-10 | 2.30E-11 | 7.1  | 14.9243321 | 1.25E-01 | 176964101 | 176964224 | NC_000002.11 |
| cg11788234 | 3.02E-10 | 2.31E-11 | 7.1  | 14.9209908 | 1.69E-01 | 29393811  | 29393934  | NC_000013.10 |
| cg13833437 | 3.02E-10 | 2.31E-11 | 7.1  | 14.9209074 | 1.12E-01 | 27531236  | 27531359  | NC_000002.11 |
| cg13694749 | 3.03E-10 | 2.31E-11 | 7.1  | 14.9177149 | 1.06E-01 | 62050038  | 62050161  | NC_000017.10 |
| cg04350645 | 3.03E-10 | 2.31E-11 | 7.1  | 14.9171542 | 1.01E-01 | 26620797  | 26620920  | NC_000013.10 |
| cg01733599 | 3.03E-10 | 2.31E-11 | 7.1  | 14.9171183 | 1.50E-01 | 58723851  | 58723974  | NC_000015.9  |
| cg13389958 | 3.03E-10 | 2.32E-11 | 7.1  | 14.9167743 | 1.34E-01 | 27280924  | 27281047  | NC_000007.13 |
| cg21757872 | 3.04E-10 | 2.32E-11 | 7.1  | 14.9154717 | 1.18E-01 | 107974453 | 107974576 | NC_000012.11 |
| cg20964248 | 3.04E-10 | 2.32E-11 | 7.1  | 14.914632  | 1.80E-01 | 111564787 | 111564910 | NC_000011.9  |
| cg19671533 | 3.04E-10 | 2.32E-11 | 7.1  | 14.9138539 | 1.56E-01 | 84419234  | 84419357  | NC_000006.11 |
| cg14218542 | 3.04E-10 | 2.32E-11 | 7.1  | 14.9133927 | 9.91E-02 | 134853281 | 134853404 | NC_000010.10 |
| cg14559422 | 3.04E-10 | 2.32E-11 | 7.1  | 14.9129682 | 9.26E-02 | 26148138  | 26148261  | NC_000001.10 |
| cg13784080 | 3.05E-10 | 2.33E-11 | 7.09 | 14.9108465 | 2.03E-01 | 57275413  | 57275536  | NC_000014.8  |
| cg21339581 | 3.05E-10 | 2.33E-11 | 7.09 | 14.9100304 | 6.10E-02 | 1800987   | 1801110   | NC_000004.11 |
| cg26714129 | 3.05E-10 | 2.33E-11 | 7.09 | 14.909836  | 9.00E-02 | 142310710 | 142310833 | NC_000008.10 |
| cg15637465 | 3.05E-10 | 2.33E-11 | 7.09 | 14.9097782 | 2.07E-01 | 168728270 | 168728393 | NC_000005.9  |
| cg07927072 | 3.05E-10 | 2.33E-11 | 7.09 | 14.9092366 | 7.71E-02 | 28117087  | 28117210  | NC_000002.11 |
| cg22345692 | 3.06E-10 | 2.34E-11 | 7.09 | 14.9086303 | 1.45E-01 | 32712879  | 32713002  | NC_000005.9  |
| cg22143289 | 3.06E-10 | 2.34E-11 | 7.09 | 14.9075046 | 1.84E-01 | 30019898  | 30020021  | NC_000019.9  |
| cg25482132 | 3.06E-10 | 2.34E-11 | 7.09 | 14.9072546 | 5.99E-02 | 41873172  | 41873295  | NC_000006.11 |

|            |          |          |      |            |          |           |           |              |
|------------|----------|----------|------|------------|----------|-----------|-----------|--------------|
| cg02936553 | 3.06E-10 | 2.34E-11 | 7.09 | 14.9058944 | 9.05E-02 | 3134745   | 3134868   | NC_000017.10 |
| cg14499413 | 3.07E-10 | 2.34E-11 | 7.09 | 14.9051966 | 1.82E-01 | 10749947  | 10750070  | NC_000003.11 |
| cg27328839 | 3.07E-10 | 2.35E-11 | 7.09 | 14.9034628 | 9.31E-02 | 79679462  | 79679585  | NC_000010.10 |
| cg03927893 | 3.07E-10 | 2.35E-11 | 7.09 | 14.9025612 | 2.01E-01 | 17850130  | 17850253  | NC_000022.10 |
| cg02524954 | 3.08E-10 | 2.35E-11 | 7.09 | 14.901013  | 1.21E-01 | 32454964  | 32455087  | NC_000011.9  |
| cg17400476 | 3.09E-10 | 2.36E-11 | 7.09 | 14.8978914 | 1.83E-01 | 27231491  | 27231614  | NC_000007.13 |
| cg22874988 | 3.10E-10 | 2.37E-11 | 7.09 | 14.8947495 | 1.78E-01 | 111451090 | 111451213 | NC_000003.11 |
| cg21346679 | 3.10E-10 | 2.37E-11 | 7.09 | 14.8934304 | 1.14E-01 | 169888373 | 169888496 | NC_000002.11 |
| cg25970832 | 3.11E-10 | 2.38E-11 | 7.09 | 14.8906071 | 1.69E-01 | 28621651  | 28621774  | NC_000018.9  |
| cg06181518 | 3.11E-10 | 2.38E-11 | 7.09 | 14.8898654 | 2.39E-01 | 133562196 | 133562319 | NC_000006.11 |
| cg11107116 | 3.11E-10 | 2.38E-11 | 7.09 | 14.8896384 | 1.00E-01 | 100804081 | 100804204 | NC_000015.9  |
| cg21117426 | 3.11E-10 | 2.38E-11 | 7.09 | 14.8895976 | 7.38E-02 | 126162682 | 126162805 | NC_000011.9  |
| cg23831876 | 3.12E-10 | 2.39E-11 | 7.09 | 14.8871085 | 1.29E-01 | 65225988  | 65226111  | NC_000002.11 |
| cg16486132 | 3.12E-10 | 2.39E-11 | 7.09 | 14.8867194 | 8.58E-02 | 74400946  | 74401069  | NC_000016.9  |
| cg18100702 | 3.12E-10 | 2.39E-11 | 7.09 | 14.8855653 | 1.45E-01 | 3600572   | 3600695   | NC_000005.9  |
| cg01464484 | 3.13E-10 | 2.39E-11 | 7.09 | 14.884992  | 7.52E-02 | 67089352  | 67089475  | NC_000011.9  |
| cg07347645 | 3.13E-10 | 2.39E-11 | 7.09 | 14.8846074 | 8.97E-02 | 58507171  | 58507294  | NC_000020.10 |
| cg08222293 | 3.13E-10 | 2.39E-11 | 7.09 | 14.8840753 | 7.02E-02 | 180628689 | 180628812 | NC_000005.9  |
| cg10601940 | 3.13E-10 | 2.40E-11 | 7.09 | 14.8817581 | 1.29E-01 | 223159305 | 223159428 | NC_000002.11 |
| cg05724240 | 3.13E-10 | 2.40E-11 | 7.09 | 14.8817426 | 4.60E-02 | 134822001 | 134822124 | NC_000010.10 |
| cg02487987 | 3.14E-10 | 2.40E-11 | 7.09 | 14.8803802 | 1.16E-01 | 52153575  | 52153698  | NC_000005.9  |
| cg17214502 | 3.14E-10 | 2.41E-11 | 7.09 | 14.8791224 | 2.19E-01 | 4869172   | 4869295   | NC_000004.11 |
| cg05537653 | 3.14E-10 | 2.41E-11 | 7.09 | 14.8791206 | 1.34E-01 | 47612070  | 47612193  | NC_000011.9  |
| cg02149965 | 3.14E-10 | 2.41E-11 | 7.09 | 14.8787226 | 1.10E-01 | 30883203  | 30883326  | NC_000006.11 |
| cg19771465 | 3.15E-10 | 2.41E-11 | 7.09 | 14.8759439 | 1.68E-01 | 237145587 | 237145710 | NC_000002.11 |

|            |          |          |      |            |          |           |           |              |
|------------|----------|----------|------|------------|----------|-----------|-----------|--------------|
| cg24252708 | 3.15E-10 | 2.41E-11 | 7.09 | 14.8758103 | 2.78E-02 | 32046663  | 32046786  | NC_000006.11 |
| cg01461410 | 3.16E-10 | 2.42E-11 | 7.09 | 14.874669  | 1.96E-01 | 85473773  | 85473896  | NC_000006.11 |
| cg06878741 | 3.16E-10 | 2.42E-11 | 7.09 | 14.8744287 | 1.58E-01 | 601349    | 601472    | NC_000007.13 |
| cg10422233 | 3.16E-10 | 2.42E-11 | 7.09 | 14.872375  | 1.17E-01 | 103565915 | 103566038 | NC_000014.8  |
| cg05926722 | 3.16E-10 | 2.42E-11 | 7.09 | 14.8715474 | 1.41E-01 | 26674202  | 26674325  | NC_000014.8  |
| cg01410314 | 3.17E-10 | 2.43E-11 | 7.09 | 14.870844  | 1.45E-01 | 77641437  | 77641560  | NC_000009.11 |
| cg16206813 | 3.17E-10 | 2.43E-11 | 7.09 | 14.8686713 | 1.90E-01 | 3122162   | 3122285   | NC_000005.9  |
| cg07369094 | 3.18E-10 | 2.43E-11 | 7.09 | 14.8676294 | 1.10E-01 | 107471174 | 107471297 | NC_000005.9  |
| cg01569346 | 3.18E-10 | 2.44E-11 | 7.09 | 14.8673676 | 1.08E-01 | 32064148  | 32064271  | NC_000006.11 |
| cg07642499 | 3.18E-10 | 2.44E-11 | 7.09 | 14.8650832 | 1.45E-01 | 69957602  | 69957725  | NC_000011.9  |
| cg06115835 | 3.19E-10 | 2.44E-11 | 7.09 | 14.864721  | 5.47E-02 | 110259173 | 110259296 | NC_000002.11 |
| cg05455234 | 3.19E-10 | 2.44E-11 | 7.09 | 14.8637346 | 3.31E-02 | 47847919  | 47848042  | NC_000021.8  |
| cg00457403 | 3.19E-10 | 2.45E-11 | 7.09 | 14.8628385 | 1.75E-01 | 187387734 | 187387857 | NC_000003.11 |
| cg14062977 | 3.19E-10 | 2.45E-11 | 7.09 | 14.8620348 | 1.11E-01 | 135380213 | 135380336 | NC_000009.11 |
| cg26582803 | 3.20E-10 | 2.45E-11 | 7.09 | 14.8609471 | 4.48E-02 | 32259626  | 32259749  | NC_000020.10 |
| cg00904966 | 3.20E-10 | 2.45E-11 | 7.09 | 14.8599356 | 2.31E-01 | 1122937   | 1123060   | NC_000016.9  |
| cg12528713 | 3.20E-10 | 2.46E-11 | 7.09 | 14.8593552 | 1.98E-01 | 81187605  | 81187728  | NC_000004.11 |
| cg15245038 | 3.20E-10 | 2.46E-11 | 7.09 | 14.8590627 | 2.55E-02 | 138917011 | 138917134 | NC_000006.11 |
| cg26454433 | 3.21E-10 | 2.46E-11 | 7.09 | 14.8576714 | 1.28E-01 | 237084695 | 237084818 | NC_000002.11 |
| cg18516833 | 3.21E-10 | 2.46E-11 | 7.09 | 14.8574866 | 6.44E-02 | 57350313  | 57350436  | NC_000019.9  |
| cg23556443 | 3.21E-10 | 2.46E-11 | 7.08 | 14.8564003 | 1.80E-01 | 11148776  | 11148899  | NC_000018.9  |
| cg22398259 | 3.21E-10 | 2.47E-11 | 7.08 | 14.8550427 | 6.36E-02 | 144255688 | 144255811 | NC_000008.10 |
| cg13816321 | 3.22E-10 | 2.47E-11 | 7.08 | 14.853752  | 1.61E-01 | 973198    | 973321    | NC_000009.11 |
| cg00781110 | 3.22E-10 | 2.47E-11 | 7.08 | 14.8535364 | 1.76E-01 | 74421535  | 74421658  | NC_000015.9  |
| cg11236727 | 3.22E-10 | 2.47E-11 | 7.08 | 14.8526554 | 2.26E-01 | 119609592 | 119609715 | NC_000002.11 |

|            |          |          |      |            |          |           |           |              |
|------------|----------|----------|------|------------|----------|-----------|-----------|--------------|
| cg18759960 | 3.22E-10 | 2.47E-11 | 7.08 | 14.8520345 | 1.71E-01 | 23481776  | 23481899  | NC_000010.10 |
| cg02345991 | 3.23E-10 | 2.48E-11 | 7.08 | 14.8509539 | 2.06E-01 | 119418676 | 119418799 | NC_000012.11 |
| cg23637385 | 3.23E-10 | 2.48E-11 | 7.08 | 14.8503028 | 1.92E-01 | 45161510  | 45161633  | NC_000002.11 |
| cg18565783 | 3.23E-10 | 2.48E-11 | 7.08 | 14.8500129 | 1.82E-01 | 57390704  | 57390827  | NC_000010.10 |
| cg01152168 | 3.23E-10 | 2.48E-11 | 7.08 | 14.8487725 | 7.43E-02 | 18280011  | 18280134  | NC_000017.10 |
| cg26938561 | 3.24E-10 | 2.49E-11 | 7.08 | 14.8472714 | 1.41E-01 | 22193724  | 22193847  | NC_000019.9  |
| cg21389119 | 3.24E-10 | 2.49E-11 | 7.08 | 14.8468401 | 1.02E-01 | 202848791 | 202848914 | NC_000002.11 |
| cg04741853 | 3.24E-10 | 2.49E-11 | 7.08 | 14.8463524 | 2.50E-01 | 44037189  | 44037312  | NC_000003.11 |
| cg25148589 | 3.24E-10 | 2.49E-11 | 7.08 | 14.8460757 | 1.41E-01 | 158141936 | 158142059 | NC_000004.11 |
| cg26043460 | 3.24E-10 | 2.49E-11 | 7.08 | 14.8459938 | 1.15E-01 | 39593631  | 39593754  | NC_000017.10 |
| cg05701791 | 3.25E-10 | 2.50E-11 | 7.08 | 14.8434236 | 1.46E-01 | 97172825  | 97172948  | NC_000008.10 |
| cg06633061 | 3.25E-10 | 2.50E-11 | 7.08 | 14.8431269 | 1.52E-01 | 57261601  | 57261724  | NC_000014.8  |
| cg12400664 | 3.25E-10 | 2.50E-11 | 7.08 | 14.8423169 | 5.34E-02 | 31779521  | 31779644  | NC_000006.11 |
| cg25678815 | 3.25E-10 | 2.50E-11 | 7.08 | 14.8422758 | 2.09E-01 | 85673915  | 85674038  | NC_000012.11 |
| cg08313393 | 3.25E-10 | 2.50E-11 | 7.08 | 14.8422477 | 1.28E-01 | 216637593 | 216637716 | NC_000002.11 |
| cg19883384 | 3.25E-10 | 2.50E-11 | 7.08 | 14.841726  | 1.81E-01 | 25905478  | 25905601  | NC_000008.10 |
| cg06593507 | 3.26E-10 | 2.51E-11 | 7.08 | 14.8394546 | 1.35E-01 | 5290324   | 5290447   | NC_000016.9  |
| cg25617725 | 3.26E-10 | 2.51E-11 | 7.08 | 14.8392058 | 1.54E-01 | 118033290 | 118033413 | NC_000010.10 |
| cg24354101 | 3.26E-10 | 2.51E-11 | 7.08 | 14.8390893 | 1.56E-01 | 124383535 | 124383658 | NC_000003.11 |
| cg05990479 | 3.27E-10 | 2.51E-11 | 7.08 | 14.8375472 | 7.61E-02 | 50575784  | 50575907  | NC_000005.9  |
| cg18395499 | 3.27E-10 | 2.51E-11 | 7.08 | 14.8366359 | 1.04E-01 | 149194510 | 149194633 | NC_000001.10 |
| cg15134033 | 3.28E-10 | 2.52E-11 | 7.08 | 14.8345389 | 1.23E-01 | 10274415  | 10274538  | NC_000016.9  |
| cg13952556 | 3.28E-10 | 2.52E-11 | 7.08 | 14.8343709 | 1.66E-01 | 109294044 | 109294167 | NC_000011.9  |
| cg14548272 | 3.28E-10 | 2.52E-11 | 7.08 | 14.8326521 | 1.59E-01 | 99961122  | 99961245  | NC_000008.10 |
| cg17543296 | 3.29E-10 | 2.53E-11 | 7.08 | 14.8314379 | 1.86E-01 | 20880378  | 20880501  | NC_000001.10 |

|            |          |          |      |            |          |           |           |              |
|------------|----------|----------|------|------------|----------|-----------|-----------|--------------|
| cg00803088 | 3.29E-10 | 2.53E-11 | 7.08 | 14.8307175 | 2.72E-01 | 43600706  | 43600829  | NC_000010.10 |
| cg10429922 | 3.29E-10 | 2.53E-11 | 7.08 | 14.8293918 | 1.37E-01 | 33010143  | 33010266  | NC_000015.9  |
| cg07493435 | 3.29E-10 | 2.53E-11 | 7.08 | 14.8292268 | 9.41E-02 | 128556140 | 128556263 | NC_000007.13 |
| cg07102705 | 3.30E-10 | 2.54E-11 | 7.08 | 14.8262819 | 1.98E-01 | 148033896 | 148034019 | NC_000005.9  |
| cg02840199 | 3.30E-10 | 2.54E-11 | 7.08 | 14.8259415 | 1.11E-01 | 4165257   | 4165380   | NC_000016.9  |
| cg25182716 | 3.31E-10 | 2.54E-11 | 7.08 | 14.8240784 | 7.91E-02 | 13622875  | 13622998  | NC_000020.10 |
| cg15810859 | 3.31E-10 | 2.55E-11 | 7.08 | 14.8233482 | 3.65E-02 | 127628206 | 127628329 | NC_000007.13 |
| cg09231862 | 3.31E-10 | 2.55E-11 | 7.08 | 14.8232325 | 2.05E-01 | 29235376  | 29235499  | NC_000014.8  |
| cg17725019 | 3.31E-10 | 2.55E-11 | 7.08 | 14.8226189 | 3.08E-02 | 31677931  | 31678054  | NC_000022.10 |
| cg05584235 | 3.31E-10 | 2.55E-11 | 7.08 | 14.8225737 | 5.97E-02 | 111183275 | 111183398 | NC_000002.11 |
| cg06760710 | 3.32E-10 | 2.55E-11 | 7.08 | 14.8215888 | 1.67E-01 | 46692008  | 46692131  | NC_000017.10 |
| cg17852221 | 3.32E-10 | 2.55E-11 | 7.08 | 14.821242  | 8.50E-02 | 140263655 | 140263778 | NC_000005.9  |
| cg10601616 | 3.32E-10 | 2.56E-11 | 7.08 | 14.8194711 | 2.20E-01 | 106400702 | 106400825 | NC_000010.10 |
| cg22899100 | 3.33E-10 | 2.56E-11 | 7.08 | 14.8187918 | 2.52E-01 | 23462237  | 23462360  | NC_000010.10 |
| cg01811325 | 3.33E-10 | 2.57E-11 | 7.08 | 14.8159161 | 1.22E-01 | 131757672 | 131757795 | NC_000010.10 |
| cg13260278 | 3.34E-10 | 2.57E-11 | 7.08 | 14.8149637 | 6.64E-02 | 121265587 | 121265710 | NC_000010.10 |
| cg26235490 | 3.34E-10 | 2.57E-11 | 7.08 | 14.8140688 | 1.08E-01 | 1047567   | 1047690   | NC_000017.10 |
| cg25707805 | 3.34E-10 | 2.57E-11 | 7.08 | 14.8138874 | 1.11E-01 | 113285387 | 113285510 | NC_000001.10 |
| cg20974609 | 3.34E-10 | 2.57E-11 | 7.08 | 14.8129147 | 1.50E-01 | 27181671  | 27181794  | NC_000007.13 |
| cg02502025 | 3.35E-10 | 2.58E-11 | 7.08 | 14.8115121 | 1.13E-01 | 42151282  | 42151405  | NC_000004.11 |
| cg13536757 | 3.35E-10 | 2.58E-11 | 7.08 | 14.8112186 | 1.95E-01 | 185463583 | 185463706 | NC_000002.11 |
| cg14094983 | 3.35E-10 | 2.58E-11 | 7.08 | 14.8106454 | 1.65E-01 | 8482099   | 8482222   | NC_000007.13 |
| cg24263062 | 3.35E-10 | 2.58E-11 | 7.08 | 14.8104279 | 1.39E-01 | 2730191   | 2730314   | NC_000020.10 |
| cg03662064 | 3.35E-10 | 2.58E-11 | 7.08 | 14.8098992 | 1.67E-01 | 29069888  | 29070011  | NC_000013.10 |
| cg03819089 | 3.36E-10 | 2.59E-11 | 7.08 | 14.8071987 | 1.09E-01 | 66298217  | 66298340  | NC_000002.11 |

|            |          |          |      |            |          |           |           |              |
|------------|----------|----------|------|------------|----------|-----------|-----------|--------------|
| cg05484508 | 3.36E-10 | 2.59E-11 | 7.08 | 14.8071353 | 4.26E-02 | 89589025  | 89589148  | NC_000016.9  |
| cg24605023 | 3.36E-10 | 2.59E-11 | 7.08 | 14.8069483 | 1.05E-01 | 62654733  | 62654856  | NC_000003.11 |
| cg00027114 | 3.37E-10 | 2.60E-11 | 7.08 | 14.8046586 | 1.61E-01 | 42740486  | 42740609  | NC_000007.13 |
| cg17775765 | 3.37E-10 | 2.60E-11 | 7.08 | 14.8044707 | 8.87E-02 | 95354021  | 95354144  | NC_000013.10 |
| cg21998983 | 3.37E-10 | 2.60E-11 | 7.08 | 14.8042209 | 1.89E-01 | 154727925 | 154728048 | NC_000002.11 |
| cg12980692 | 3.38E-10 | 2.60E-11 | 7.08 | 14.8024061 | 1.62E-01 | 51142613  | 51142736  | NC_000019.9  |
| cg17783244 | 3.38E-10 | 2.60E-11 | 7.08 | 14.8018856 | 1.24E-01 | 31738549  | 31738672  | NC_000022.10 |
| cg06491139 | 3.38E-10 | 2.60E-11 | 7.08 | 14.8012317 | 2.87E-02 | 74467828  | 74467951  | NC_000017.10 |
| cg12494277 | 3.38E-10 | 2.61E-11 | 7.08 | 14.8008231 | 4.35E-02 | 9514840   | 9514963   | NC_000004.11 |
| cg08274518 | 3.38E-10 | 2.61E-11 | 7.08 | 14.8003426 | 8.34E-02 | 33758023  | 33758146  | NC_000003.11 |
| cg04506928 | 3.39E-10 | 2.61E-11 | 7.07 | 14.7992273 | 8.76E-02 | 31647876  | 31647999  | NC_000013.10 |
| cg20415809 | 3.39E-10 | 2.61E-11 | 7.07 | 14.799192  | 2.35E-01 | 182321855 | 182321978 | NC_000002.11 |
| cg21636168 | 3.39E-10 | 2.61E-11 | 7.07 | 14.7976998 | 3.98E-02 | 61914232  | 61914355  | NC_000011.9  |
| cg21833107 | 3.40E-10 | 2.62E-11 | 7.07 | 14.7962776 | 4.83E-02 | 194057457 | 194057580 | NC_000003.11 |
| cg19266635 | 3.40E-10 | 2.62E-11 | 7.07 | 14.7948293 | 1.87E-01 | 46776389  | 46776512  | NC_000012.11 |
| cg07680965 | 3.40E-10 | 2.62E-11 | 7.07 | 14.7939929 | 8.51E-02 | 41563429  | 41563552  | NC_000008.10 |
| cg27563985 | 3.40E-10 | 2.62E-11 | 7.07 | 14.7939108 | 1.95E-01 | 54580677  | 54580800  | NC_000020.10 |
| cg03671700 | 3.41E-10 | 2.63E-11 | 7.07 | 14.7932766 | 1.51E-01 | 62068673  | 62068796  | NC_000016.9  |
| cg22983290 | 3.41E-10 | 2.63E-11 | 7.07 | 14.7925829 | 4.92E-02 | 134593727 | 134593850 | NC_000010.10 |
| cg14331316 | 3.41E-10 | 2.63E-11 | 7.07 | 14.7910259 | 1.14E-01 | 99139396  | 99139519  | NC_000009.11 |
| cg20712263 | 3.42E-10 | 2.64E-11 | 7.07 | 14.7894855 | 1.85E-01 | 131438527 | 131438650 | NC_000012.11 |
| cg24530041 | 3.42E-10 | 2.64E-11 | 7.07 | 14.7891693 | 1.49E-01 | 90349551  | 90349674  | NC_000015.9  |
| cg07335294 | 3.42E-10 | 2.64E-11 | 7.07 | 14.788752  | 2.09E-01 | 84417933  | 84418056  | NC_000006.11 |
| cg05007697 | 3.42E-10 | 2.64E-11 | 7.07 | 14.7885907 | 1.03E-01 | 169718132 | 169718255 | NC_000006.11 |
| cg09195198 | 3.43E-10 | 2.64E-11 | 7.07 | 14.7873864 | 2.05E-01 | 86602083  | 86602206  | NC_000016.9  |



|            |          |          |      |            |          |           |           |              |
|------------|----------|----------|------|------------|----------|-----------|-----------|--------------|
| cg05499272 | 3.43E-10 | 2.64E-11 | 7.07 | 14.7872624 | 6.64E-02 | 32020587  | 32020710  | NC_000006.11 |
| cg17611193 | 3.43E-10 | 2.64E-11 | 7.07 | 14.7866375 | 1.57E-01 | 35395942  | 35396065  | NC_000019.9  |
| cg13877260 | 3.43E-10 | 2.64E-11 | 7.07 | 14.7862782 | 3.14E-02 | 105885896 | 105886019 | NC_000002.11 |
| cg25853960 | 3.43E-10 | 2.65E-11 | 7.07 | 14.785494  | 9.74E-02 | 34650841  | 34650964  | NC_000013.10 |
| cg17222500 | 3.44E-10 | 2.65E-11 | 7.07 | 14.7834216 | 1.56E-01 | 85306741  | 85306864  | NC_000012.11 |
| cg05100846 | 3.44E-10 | 2.65E-11 | 7.07 | 14.7826664 | 6.66E-02 | 102647731 | 102647854 | NC_000014.8  |
| cg12180613 | 3.45E-10 | 2.66E-11 | 7.07 | 14.7807083 | 1.21E-01 | 132158560 | 132158683 | NC_000005.9  |
| cg17772028 | 3.46E-10 | 2.67E-11 | 7.07 | 14.7780745 | 2.20E-01 | 61806651  | 61806774  | NC_000020.10 |
| cg18538958 | 3.46E-10 | 2.67E-11 | 7.07 | 14.7777548 | 1.80E-01 | 104640662 | 104640785 | NC_000004.11 |
| cg22185643 | 3.46E-10 | 2.67E-11 | 7.07 | 14.7767952 | 9.46E-02 | 72961     | 73084     | NC_000009.11 |
| cg12152384 | 3.47E-10 | 2.68E-11 | 7.07 | 14.7743838 | 1.59E-01 | 47164566  | 47164689  | NC_000012.11 |
| cg09107912 | 3.47E-10 | 2.68E-11 | 7.07 | 14.7740169 | 2.08E-01 | 159590059 | 159590182 | NC_000006.11 |
| cg07893575 | 3.47E-10 | 2.68E-11 | 7.07 | 14.7738798 | 1.35E-01 | 65289751  | 65289874  | NC_000008.10 |
| cg03532037 | 3.47E-10 | 2.68E-11 | 7.07 | 14.7726913 | 9.30E-02 | 106959205 | 106959328 | NC_000002.11 |
| cg03682421 | 3.49E-10 | 2.69E-11 | 7.07 | 14.7681386 | 1.55E-01 | 14320549  | 14320672  | NC_000019.9  |
| cg02743342 | 3.49E-10 | 2.70E-11 | 7.07 | 14.7676516 | 1.36E-01 | 126984564 | 126984687 | NC_000005.9  |
| cg25044651 | 3.49E-10 | 2.70E-11 | 7.07 | 14.7664936 | 1.18E-01 | 115298720 | 115298843 | NC_000005.9  |
| cg05544500 | 3.50E-10 | 2.70E-11 | 7.07 | 14.7662622 | 1.02E-01 | 54324346  | 54324469  | NC_000016.9  |
| cg11286436 | 3.50E-10 | 2.70E-11 | 7.07 | 14.7644738 | 1.68E-01 | 88798582  | 88798705  | NC_000015.9  |
| cg00126889 | 3.51E-10 | 2.71E-11 | 7.07 | 14.7620096 | 1.13E-01 | 42103037  | 42103160  | NC_000008.10 |
| cg12841525 | 3.51E-10 | 2.71E-11 | 7.07 | 14.7619545 | 5.60E-02 | 38953403  | 38953526  | NC_000017.10 |
| cg08667569 | 3.52E-10 | 2.72E-11 | 7.07 | 14.7601128 | 1.59E-01 | 147240402 | 147240525 | NC_000005.9  |
| cg05578056 | 3.52E-10 | 2.72E-11 | 7.07 | 14.7577685 | 1.41E-01 | 962909    | 963032    | NC_000016.9  |
| cg14051973 | 3.53E-10 | 2.73E-11 | 7.07 | 14.7563926 | 7.08E-02 | 1973545   | 1973668   | NC_000011.9  |
| cg24368848 | 3.53E-10 | 2.73E-11 | 7.07 | 14.756239  | 2.13E-01 | 58545160  | 58545283  | NC_000019.9  |

|            |          |          |      |            |          |           |           |              |
|------------|----------|----------|------|------------|----------|-----------|-----------|--------------|
| cg10991599 | 3.54E-10 | 2.73E-11 | 7.07 | 14.7541051 | 1.38E-01 | 26506539  | 26506662  | NC_000010.10 |
| cg15180867 | 3.54E-10 | 2.73E-11 | 7.07 | 14.7539698 | 1.24E-01 | 591076    | 591199    | NC_000020.10 |
| cg02228403 | 3.54E-10 | 2.74E-11 | 7.07 | 14.7514368 | 9.72E-02 | 11522965  | 11523088  | NC_000003.11 |
| cg03182917 | 3.56E-10 | 2.75E-11 | 7.07 | 14.7482499 | 1.71E-01 | 176944601 | 176944724 | NC_000002.11 |
| cg16211684 | 3.56E-10 | 2.75E-11 | 7.07 | 14.7480884 | 1.82E-01 | 85954622  | 85954745  | NC_000010.10 |
| cg21007852 | 3.56E-10 | 2.75E-11 | 7.07 | 14.7473226 | 1.38E-01 | 27203546  | 27203669  | NC_000007.13 |
| cg19547319 | 3.56E-10 | 2.76E-11 | 7.07 | 14.7457612 | 1.45E-01 | 102987993 | 102988116 | NC_000010.10 |
| cg13356709 | 3.57E-10 | 2.76E-11 | 7.07 | 14.7451363 | 1.20E-01 | 35338762  | 35338885  | NC_000005.9  |
| cg11202634 | 3.57E-10 | 2.76E-11 | 7.07 | 14.7438758 | 7.86E-02 | 37184569  | 37184692  | NC_000008.10 |
| cg13290745 | 3.57E-10 | 2.76E-11 | 7.06 | 14.743188  | 5.82E-02 | 159655866 | 159655989 | NC_000005.9  |
| cg03109101 | 3.58E-10 | 2.77E-11 | 7.06 | 14.7416644 | 1.37E-01 | 119305095 | 119305218 | NC_000010.10 |
| cg26567423 | 3.58E-10 | 2.77E-11 | 7.06 | 14.7408553 | 1.82E-01 | 54500619  | 54500742  | NC_000012.11 |
| cg06869796 | 3.58E-10 | 2.77E-11 | 7.06 | 14.7402623 | 7.89E-02 | 135412196 | 135412319 | NC_000007.13 |
| cg15292275 | 3.58E-10 | 2.77E-11 | 7.06 | 14.7397335 | 2.22E-01 | 109149011 | 109149134 | NC_000013.10 |
| cg07492910 | 3.59E-10 | 2.77E-11 | 7.06 | 14.7393636 | 9.44E-02 | 27235514  | 27235637  | NC_000010.10 |
| cg05529899 | 3.59E-10 | 2.77E-11 | 7.06 | 14.7393031 | 5.95E-02 | 45206768  | 45206891  | NC_000021.8  |
| cg17418463 | 3.59E-10 | 2.78E-11 | 7.06 | 14.7380116 | 2.26E-01 | 35395541  | 35395664  | NC_000001.10 |
| cg00102726 | 3.59E-10 | 2.78E-11 | 7.06 | 14.7372651 | 9.18E-02 | 46897181  | 46897304  | NC_000021.8  |
| cg19628603 | 3.59E-10 | 2.78E-11 | 7.06 | 14.7368868 | 1.08E-01 | 32847596  | 32847719  | NC_000006.11 |
| cg25472589 | 3.60E-10 | 2.79E-11 | 7.06 | 14.7335898 | 1.33E-01 | 107995927 | 107996050 | NC_000011.9  |
| cg21973405 | 3.61E-10 | 2.79E-11 | 7.06 | 14.7325346 | 6.26E-02 | 54826547  | 54826670  | NC_000005.9  |
| cg21319323 | 3.62E-10 | 2.80E-11 | 7.06 | 14.7292537 | 1.81E-01 | 177001263 | 177001386 | NC_000002.11 |
| cg26866174 | 3.62E-10 | 2.81E-11 | 7.06 | 14.7280663 | 7.34E-02 | 71177163  | 71177286  | NC_000010.10 |
| cg18027632 | 3.63E-10 | 2.81E-11 | 7.06 | 14.7272226 | 3.69E-02 | 142278163 | 142278286 | NC_000008.10 |
| cg05667158 | 3.63E-10 | 2.81E-11 | 7.06 | 14.7271431 | 2.08E-01 | 4381890   | 4382013   | NC_000012.11 |

|            |          |          |      |            |          |           |           |              |
|------------|----------|----------|------|------------|----------|-----------|-----------|--------------|
| cg08717880 | 3.63E-10 | 2.81E-11 | 7.06 | 14.7264015 | 1.39E-01 | 177014849 | 177014972 | NC_000002.11 |
| cg24740531 | 3.63E-10 | 2.81E-11 | 7.06 | 14.7254762 | 2.22E-01 | 60985732  | 60985855  | NC_000018.9  |
| cg26975086 | 3.64E-10 | 2.82E-11 | 7.06 | 14.7222631 | 1.73E-01 | 42533282  | 42533405  | NC_000007.13 |
| cg09231171 | 3.65E-10 | 2.82E-11 | 7.06 | 14.7220241 | 2.00E-01 | 49518414  | 49518537  | NC_000016.9  |
| cg03929570 | 3.66E-10 | 2.83E-11 | 7.06 | 14.7181226 | 1.16E-01 | 70484978  | 70485101  | NC_000016.9  |
| cg01622930 | 3.66E-10 | 2.84E-11 | 7.06 | 14.7178072 | 4.95E-02 | 3960266   | 3960389   | NC_000004.11 |
| cg09542210 | 3.66E-10 | 2.84E-11 | 7.06 | 14.7172672 | 2.01E-01 | 157821536 | 157821659 | NC_000003.11 |
| cg09775582 | 3.66E-10 | 2.84E-11 | 7.06 | 14.7164624 | 2.95E-01 | 45810865  | 45810988  | NC_000017.10 |
| cg16324314 | 3.67E-10 | 2.84E-11 | 7.06 | 14.7158249 | 1.35E-01 | 77480847  | 77480970  | NC_000014.8  |
| cg22369879 | 3.67E-10 | 2.84E-11 | 7.06 | 14.7155697 | 1.73E-01 | 137228636 | 137228759 | NC_000003.11 |
| cg11946666 | 3.67E-10 | 2.85E-11 | 7.06 | 14.7142835 | 1.06E-01 | 3247595   | 3247718   | NC_000001.10 |
| cg15678861 | 3.67E-10 | 2.85E-11 | 7.06 | 14.7140365 | 5.60E-02 | 144462502 | 144462625 | NC_000008.10 |
| cg16543094 | 3.67E-10 | 2.85E-11 | 7.06 | 14.7133562 | 1.90E-01 | 20229517  | 20229640  | NC_000011.9  |
| cg22355517 | 3.67E-10 | 2.85E-11 | 7.06 | 14.713113  | 1.57E-01 | 20522674  | 20522797  | NC_000012.11 |
| cg20905516 | 3.68E-10 | 2.85E-11 | 7.06 | 14.7127949 | 2.49E-01 | 106889364 | 106889487 | NC_000011.9  |
| cg27422759 | 3.68E-10 | 2.85E-11 | 7.06 | 14.7119201 | 5.19E-02 | 69970464  | 69970587  | NC_000011.9  |
| cg01101663 | 3.68E-10 | 2.85E-11 | 7.06 | 14.7118252 | 1.13E-01 | 140564161 | 140564284 | NC_000005.9  |
| cg14568217 | 3.70E-10 | 2.87E-11 | 7.06 | 14.7059801 | 1.98E-01 | 176057061 | 176057184 | NC_000005.9  |
| cg26132511 | 3.70E-10 | 2.87E-11 | 7.06 | 14.7059112 | 7.94E-02 | 38045143  | 38045266  | NC_000006.11 |
| cg22891500 | 3.70E-10 | 2.87E-11 | 7.06 | 14.705466  | 1.93E-01 | 23653996  | 23654119  | NC_000019.9  |
| cg00648020 | 3.71E-10 | 2.88E-11 | 7.06 | 14.7040475 | 9.79E-02 | 134992340 | 134992463 | NC_000010.10 |
| cg18030960 | 3.71E-10 | 2.88E-11 | 7.06 | 14.7025829 | 1.60E-01 | 13530948  | 13531071  | NC_000004.11 |
| cg19547547 | 3.71E-10 | 2.88E-11 | 7.06 | 14.7019233 | 1.04E-01 | 140166059 | 140166182 | NC_000005.9  |
| cg27440715 | 3.71E-10 | 2.88E-11 | 7.06 | 14.7018789 | 1.72E-01 | 165325169 | 165325292 | NC_000001.10 |
| cg04558424 | 3.73E-10 | 2.89E-11 | 7.06 | 14.6986215 | 9.56E-02 | 85743497  | 85743620  | NC_000016.9  |

|            |          |          |      |            |          |           |           |              |
|------------|----------|----------|------|------------|----------|-----------|-----------|--------------|
| cg10397765 | 3.73E-10 | 2.89E-11 | 7.06 | 14.6980415 | 2.05E-01 | 61113109  | 61113232  | NC_000014.8  |
| cg16240162 | 3.74E-10 | 2.91E-11 | 7.06 | 14.6936348 | 1.70E-01 | 147106890 | 147107013 | NC_000003.11 |
| cg09986292 | 3.74E-10 | 2.91E-11 | 7.06 | 14.6935486 | 1.29E-01 | 13525605  | 13525728  | NC_000004.11 |
| cg00816406 | 3.75E-10 | 2.91E-11 | 7.06 | 14.6920864 | 1.94E-01 | 240286626 | 240286749 | NC_000001.10 |
| cg20440891 | 3.75E-10 | 2.91E-11 | 7.06 | 14.6916221 | 1.13E-01 | 28448103  | 28448226  | NC_000007.13 |
| cg11417701 | 3.75E-10 | 2.91E-11 | 7.06 | 14.6913485 | 1.48E-01 | 401311    | 401434    | NC_000006.11 |
| cg10029213 | 3.76E-10 | 2.92E-11 | 7.06 | 14.6905513 | 1.98E-01 | 117716312 | 117716435 | NC_000003.11 |
| cg04651781 | 3.76E-10 | 2.92E-11 | 7.06 | 14.6896597 | 1.77E-01 | 1398798   | 1398921   | NC_000004.11 |
| cg23337845 | 3.76E-10 | 2.92E-11 | 7.06 | 14.6896579 | 4.04E-02 | 170641374 | 170641497 | NC_000004.11 |
| cg13882665 | 3.78E-10 | 2.93E-11 | 7.05 | 14.6846958 | 6.21E-02 | 169560079 | 169560202 | NC_000006.11 |
| cg23627057 | 3.78E-10 | 2.94E-11 | 7.05 | 14.6833206 | 5.83E-02 | 140154394 | 140154517 | NC_000007.13 |
| cg18087672 | 3.78E-10 | 2.94E-11 | 7.05 | 14.6825066 | 2.03E-01 | 46824915  | 46825038  | NC_000017.10 |
| cg26692818 | 3.79E-10 | 2.94E-11 | 7.05 | 14.681644  | 6.01E-02 | 87108066  | 87108189  | NC_000001.10 |
| cg22704696 | 3.79E-10 | 2.94E-11 | 7.05 | 14.6815516 | 1.02E-01 | 47302476  | 47302599  | NC_000017.10 |
| cg07139946 | 3.80E-10 | 2.95E-11 | 7.05 | 14.6786805 | 8.87E-02 | 32037339  | 32037462  | NC_000006.11 |
| cg08312626 | 3.80E-10 | 2.95E-11 | 7.05 | 14.6784306 | 1.78E-01 | 27534137  | 27534260  | NC_000006.11 |
| cg17795158 | 3.80E-10 | 2.95E-11 | 7.05 | 14.6781169 | 1.69E-01 | 124908427 | 124908550 | NC_000010.10 |
| cg13067553 | 3.80E-10 | 2.95E-11 | 7.05 | 14.6774022 | 1.93E-01 | 147782452 | 147782575 | NC_000001.10 |
| cg06757662 | 3.80E-10 | 2.95E-11 | 7.05 | 14.6773679 | 1.83E-01 | 101924596 | 101924719 | NC_000014.8  |
| cg00992850 | 3.81E-10 | 2.96E-11 | 7.05 | 14.6758257 | 1.62E-01 | 25900703  | 25900826  | NC_000007.13 |
| cg01598007 | 3.81E-10 | 2.96E-11 | 7.05 | 14.6757299 | 1.02E-01 | 167063581 | 167063704 | NC_000001.10 |
| cg10890302 | 3.81E-10 | 2.96E-11 | 7.05 | 14.6746877 | 1.86E-01 | 32064246  | 32064369  | NC_000006.11 |
| cg00861610 | 3.82E-10 | 2.97E-11 | 7.05 | 14.6724159 | 1.36E-01 | 62065095  | 62065218  | NC_000004.11 |
| cg05843457 | 3.82E-10 | 2.97E-11 | 7.05 | 14.6718588 | 1.94E-01 | 158147849 | 158147972 | NC_000001.10 |
| cg23256459 | 3.83E-10 | 2.97E-11 | 7.05 | 14.6709341 | 6.05E-02 | 66713103  | 66713226  | NC_000005.9  |

|            |          |          |      |            |          |           |           |              |
|------------|----------|----------|------|------------|----------|-----------|-----------|--------------|
| cg00493304 | 3.83E-10 | 2.98E-11 | 7.05 | 14.6705755 | 1.01E-01 | 48844908  | 48845031  | NC_000002.11 |
| cg25405962 | 3.84E-10 | 2.98E-11 | 7.05 | 14.66779   | 1.37E-01 | 9852785   | 9852908   | NC_000001.10 |
| cg26517663 | 3.84E-10 | 2.98E-11 | 7.05 | 14.6674372 | 1.61E-01 | 60295294  | 60295417  | NC_000015.9  |
| cg02615582 | 3.84E-10 | 2.99E-11 | 7.05 | 14.6670866 | 1.16E-01 | 49939549  | 49939672  | NC_000019.9  |
| cg20406528 | 3.84E-10 | 2.99E-11 | 7.05 | 14.6667948 | 6.70E-02 | 94980962  | 94981085  | NC_000010.10 |
| cg13634602 | 3.84E-10 | 2.99E-11 | 7.05 | 14.6656744 | 2.16E-01 | 76739226  | 76739349  | NC_000018.9  |
| cg16170346 | 3.85E-10 | 2.99E-11 | 7.05 | 14.6655773 | 1.09E-01 | 2424006   | 2424129   | NC_000019.9  |
| cg14197923 | 3.86E-10 | 3.00E-11 | 7.05 | 14.6622264 | 1.93E-01 | 81187906  | 81188029  | NC_000004.11 |
| cg13755204 | 3.86E-10 | 3.00E-11 | 7.05 | 14.6622026 | 1.02E-01 | 136844768 | 136844891 | NC_000009.11 |
| cg14978307 | 3.86E-10 | 3.00E-11 | 7.05 | 14.6621156 | 1.33E-01 | 155242684 | 155242807 | NC_000007.13 |
| cg06672163 | 3.86E-10 | 3.00E-11 | 7.05 | 14.6617395 | 9.93E-02 | 88455674  | 88455797  | NC_000016.9  |
| cg26657675 | 3.86E-10 | 3.00E-11 | 7.05 | 14.6615373 | 1.04E-01 | 85575407  | 85575530  | NC_000016.9  |
| cg00733780 | 3.86E-10 | 3.01E-11 | 7.05 | 14.6604924 | 2.11E-01 | 26505127  | 26505250  | NC_000010.10 |
| cg21749556 | 3.87E-10 | 3.01E-11 | 7.05 | 14.6600054 | 1.21E-01 | 51680555  | 51680678  | NC_000007.13 |
| cg03719026 | 3.87E-10 | 3.01E-11 | 7.05 | 14.6594305 | 3.48E-02 | 6619479   | 6619602   | NC_000012.11 |
| cg15122993 | 3.87E-10 | 3.01E-11 | 7.05 | 14.6590802 | 1.07E-01 | 140256817 | 140256940 | NC_000005.9  |
| cg13264183 | 3.87E-10 | 3.01E-11 | 7.05 | 14.6581605 | 7.60E-02 | 126194992 | 126195115 | NC_000003.11 |
| cg23306526 | 3.87E-10 | 3.01E-11 | 7.05 | 14.6581517 | 1.44E-01 | 45171583  | 45171706  | NC_000002.11 |
| cg03753331 | 3.87E-10 | 3.01E-11 | 7.05 | 14.6575673 | 2.30E-01 | 115919006 | 115919129 | NC_000002.11 |
| cg16698674 | 3.88E-10 | 3.02E-11 | 7.05 | 14.6572272 | 7.81E-02 | 230272358 | 230272481 | NC_000001.10 |
| cg07636117 | 3.88E-10 | 3.02E-11 | 7.05 | 14.6559427 | 1.37E-01 | 237072957 | 237073080 | NC_000002.11 |
| cg05315047 | 3.89E-10 | 3.03E-11 | 7.05 | 14.6540337 | 8.08E-02 | 137766727 | 137766850 | NC_000003.11 |
| cg20528583 | 3.89E-10 | 3.03E-11 | 7.05 | 14.6530732 | 2.03E-01 | 81187610  | 81187733  | NC_000004.11 |
| cg15726245 | 3.89E-10 | 3.03E-11 | 7.05 | 14.652598  | 6.93E-02 | 27333506  | 27333629  | NC_000013.10 |
| cg01406506 | 3.89E-10 | 3.03E-11 | 7.05 | 14.652292  | 1.23E-01 | 147938667 | 147938790 | NC_000005.9  |

|            |          |          |      |            |          |           |           |              |
|------------|----------|----------|------|------------|----------|-----------|-----------|--------------|
| cg05659187 | 3.90E-10 | 3.03E-11 | 7.05 | 14.6513693 | 1.99E-01 | 70995522  | 70995645  | NC_000002.11 |
| cg23387863 | 3.90E-10 | 3.04E-11 | 7.05 | 14.650005  | 1.34E-01 | 77472416  | 77472539  | NC_000015.9  |
| cg02304353 | 3.90E-10 | 3.04E-11 | 7.05 | 14.6494604 | 9.01E-02 | 79215938  | 79216061  | NC_000017.10 |
| cg24680632 | 3.90E-10 | 3.04E-11 | 7.05 | 14.64922   | 1.60E-01 | 116044032 | 116044155 | NC_000012.11 |
| cg13699245 | 3.91E-10 | 3.04E-11 | 7.05 | 14.6479258 | 1.19E-01 | 137485382 | 137485505 | NC_000009.11 |
| cg21693015 | 3.91E-10 | 3.05E-11 | 7.05 | 14.647584  | 3.23E-02 | 30303537  | 30303660  | NC_000006.11 |
| cg14565439 | 3.91E-10 | 3.05E-11 | 7.05 | 14.6471582 | 4.73E-02 | 107702185 | 107702308 | NC_000005.9  |
| cg23197945 | 3.91E-10 | 3.05E-11 | 7.05 | 14.6471303 | 1.80E-01 | 101841303 | 101841426 | NC_000010.10 |
| cg22175764 | 3.91E-10 | 3.05E-11 | 7.05 | 14.6468745 | 2.11E-01 | 56803964  | 56804087  | NC_000020.10 |
| cg03446973 | 3.91E-10 | 3.05E-11 | 7.05 | 14.6463467 | 2.50E-02 | 186524572 | 186524695 | NC_000003.11 |
| cg09658678 | 3.92E-10 | 3.05E-11 | 7.05 | 14.6450911 | 8.30E-02 | 148448256 | 148448379 | NC_000003.11 |
| cg22195627 | 3.92E-10 | 3.06E-11 | 7.05 | 14.6438865 | 2.16E-01 | 12305869  | 12305992  | NC_000019.9  |
| cg14319235 | 3.92E-10 | 3.06E-11 | 7.05 | 14.6436717 | 1.55E-01 | 79472282  | 79472405  | NC_000001.10 |
| cg19713959 | 3.93E-10 | 3.06E-11 | 7.05 | 14.6431257 | 5.93E-02 | 112092994 | 112093117 | NC_000006.11 |
| cg07252933 | 3.94E-10 | 3.07E-11 | 7.05 | 14.6408147 | 9.56E-02 | 44184114  | 44184237  | NC_000006.11 |
| cg24094706 | 3.94E-10 | 3.07E-11 | 7.05 | 14.6406771 | 1.85E-01 | 48972536  | 48972659  | NC_000022.10 |
| cg12376271 | 3.95E-10 | 3.08E-11 | 7.05 | 14.6375722 | 4.83E-02 | 95799144  | 95799267  | NC_000011.9  |
| cg23848624 | 3.95E-10 | 3.08E-11 | 7.05 | 14.6370872 | 1.89E-01 | 100622582 | 100622705 | NC_000013.10 |
| cg00842299 | 3.95E-10 | 3.08E-11 | 7.05 | 14.6360263 | 1.40E-01 | 147129278 | 147129401 | NC_000003.11 |
| cg04012282 | 3.95E-10 | 3.08E-11 | 7.05 | 14.635743  | 8.65E-02 | 138739807 | 138739930 | NC_000003.11 |
| cg09166898 | 3.95E-10 | 3.08E-11 | 7.05 | 14.6356903 | 5.19E-02 | 41167165  | 41167288  | NC_000015.9  |
| cg26385256 | 3.95E-10 | 3.08E-11 | 7.05 | 14.6356103 | 1.88E-01 | 38326334  | 38326457  | NC_000008.10 |
| cg22225179 | 3.96E-10 | 3.08E-11 | 7.05 | 14.6351437 | 8.44E-02 | 56072363  | 56072486  | NC_000017.10 |
| cg17896808 | 3.96E-10 | 3.09E-11 | 7.05 | 14.6338622 | 7.86E-02 | 22992842  | 22992965  | NC_000015.9  |
| cg22060087 | 3.96E-10 | 3.09E-11 | 7.05 | 14.6336197 | 3.65E-02 | 32892208  | 32892331  | NC_000020.10 |

|            |          |          |      |            |          |           |           |              |
|------------|----------|----------|------|------------|----------|-----------|-----------|--------------|
| cg21319053 | 3.96E-10 | 3.09E-11 | 7.05 | 14.6336041 | 1.84E-01 | 37840725  | 37840848  | NC_000005.9  |
| cg04375784 | 3.96E-10 | 3.09E-11 | 7.05 | 14.6331977 | 1.07E-01 | 133137810 | 133137933 | NC_000006.11 |
| cg11518846 | 3.98E-10 | 3.10E-11 | 7.04 | 14.6298562 | 1.88E-01 | 133562246 | 133562369 | NC_000006.11 |
| cg22692507 | 3.98E-10 | 3.10E-11 | 7.04 | 14.6291986 | 7.14E-02 | 81446503  | 81446626  | NC_000005.9  |
| cg03182688 | 3.99E-10 | 3.11E-11 | 7.04 | 14.6275387 | 1.29E-01 | 33825300  | 33825423  | NC_000017.10 |
| cg25831075 | 3.99E-10 | 3.11E-11 | 7.04 | 14.6266326 | 1.65E-01 | 164915196 | 164915319 | NC_000003.11 |
| cg05417162 | 3.99E-10 | 3.11E-11 | 7.04 | 14.6264052 | 1.56E-01 | 89959854  | 89959977  | NC_000015.9  |
| cg01445580 | 3.99E-10 | 3.12E-11 | 7.04 | 14.62512   | 1.94E-01 | 34631891  | 34632014  | NC_000001.10 |
| cg03294619 | 3.99E-10 | 3.12E-11 | 7.04 | 14.6250236 | 1.72E-01 | 172661803 | 172661926 | NC_000005.9  |
| cg23174932 | 3.99E-10 | 3.12E-11 | 7.04 | 14.625009  | 2.34E-01 | 31831502  | 31831625  | NC_000006.11 |
| cg22160472 | 4.00E-10 | 3.12E-11 | 7.04 | 14.6238678 | 1.33E-01 | 42944494  | 42944617  | NC_000005.9  |
| cg06940705 | 4.00E-10 | 3.12E-11 | 7.04 | 14.6232639 | 1.68E-01 | 14924712  | 14924835  | NC_000001.10 |
| cg02921923 | 4.01E-10 | 3.13E-11 | 7.04 | 14.6211941 | 1.45E-01 | 92651425  | 92651548  | NC_000011.9  |
| cg24399395 | 4.01E-10 | 3.13E-11 | 7.04 | 14.6199574 | 1.79E-01 | 34392203  | 34392326  | NC_000021.8  |
| cg25558103 | 4.02E-10 | 3.14E-11 | 7.04 | 14.6190829 | 1.53E-01 | 42835859  | 42835982  | NC_000017.10 |
| cg19719547 | 4.02E-10 | 3.14E-11 | 7.04 | 14.6170237 | 1.95E-01 | 242688144 | 242688267 | NC_000001.10 |
| cg19392831 | 4.03E-10 | 3.14E-11 | 7.04 | 14.6159861 | 9.28E-02 | 120355756 | 120355879 | NC_000010.10 |
| cg11460364 | 4.03E-10 | 3.15E-11 | 7.04 | 14.6156967 | 9.84E-02 | 162931397 | 162931520 | NC_000002.11 |
| cg24884519 | 4.03E-10 | 3.15E-11 | 7.04 | 14.6153169 | 2.35E-01 | 27209790  | 27209913  | NC_000007.13 |
| cg22339356 | 4.04E-10 | 3.15E-11 | 7.04 | 14.6137833 | 1.98E-01 | 8473385   | 8473508   | NC_000007.13 |
| cg16939112 | 4.04E-10 | 3.15E-11 | 7.04 | 14.6136812 | 1.16E-01 | 1807305   | 1807428   | NC_000012.11 |
| cg11870560 | 4.04E-10 | 3.16E-11 | 7.04 | 14.6125261 | 1.81E-01 | 112709480 | 112709603 | NC_000013.10 |
| cg08381013 | 4.05E-10 | 3.16E-11 | 7.04 | 14.6108797 | 3.69E-02 | 1862572   | 1862695   | NC_000008.10 |
| cg03791159 | 4.05E-10 | 3.16E-11 | 7.04 | 14.6106466 | 1.29E-01 | 155018144 | 155018267 | NC_000007.13 |
| cg02180189 | 4.05E-10 | 3.16E-11 | 7.04 | 14.6103039 | 1.10E-01 | 2710486   | 2710609   | NC_000011.9  |

|            |          |          |      |            |          |           |           |              |
|------------|----------|----------|------|------------|----------|-----------|-----------|--------------|
| cg18434718 | 4.05E-10 | 3.17E-11 | 7.04 | 14.6095284 | 2.13E-01 | 15090872  | 15090995  | NC_000019.9  |
| cg27256528 | 4.06E-10 | 3.17E-11 | 7.04 | 14.6085805 | 1.72E-01 | 6533667   | 6533790   | NC_000016.9  |
| cg14015706 | 4.06E-10 | 3.17E-11 | 7.04 | 14.6068917 | 2.53E-01 | 132382433 | 132382556 | NC_000009.11 |
| cg18499321 | 4.07E-10 | 3.18E-11 | 7.04 | 14.6055335 | 1.41E-01 | 130941214 | 130941337 | NC_000012.11 |
| cg17231999 | 4.07E-10 | 3.18E-11 | 7.04 | 14.6037076 | 2.21E-01 | 41882564  | 41882687  | NC_000004.11 |
| cg00945234 | 4.08E-10 | 3.19E-11 | 7.04 | 14.6025769 | 1.62E-01 | 50886411  | 50886534  | NC_000001.10 |
| cg20627174 | 4.09E-10 | 3.20E-11 | 7.04 | 14.5994669 | 1.80E-01 | 119599744 | 119599867 | NC_000002.11 |
| cg03622666 | 4.09E-10 | 3.20E-11 | 7.04 | 14.5993078 | 9.28E-02 | 49499091  | 49499214  | NC_000016.9  |
| cg08134803 | 4.10E-10 | 3.20E-11 | 7.04 | 14.5975676 | 6.07E-02 | 1218913   | 1219036   | NC_000011.9  |
| cg22272713 | 4.11E-10 | 3.21E-11 | 7.04 | 14.5947358 | 1.37E-01 | 21780820  | 21780943  | NC_000008.10 |
| cg06899530 | 4.11E-10 | 3.22E-11 | 7.04 | 14.5942005 | 1.59E-01 | 166916866 | 166916989 | NC_000001.10 |
| cg25194720 | 4.11E-10 | 3.22E-11 | 7.04 | 14.5939303 | 1.24E-01 | 128712417 | 128712540 | NC_000011.9  |
| cg26181818 | 4.12E-10 | 3.22E-11 | 7.04 | 14.5932983 | 1.33E-01 | 233323935 | 233324058 | NC_000002.11 |
| cg21901718 | 4.12E-10 | 3.22E-11 | 7.04 | 14.5932332 | 2.09E-01 | 16180076  | 16180199  | NC_000005.9  |
| cg00040427 | 4.12E-10 | 3.22E-11 | 7.04 | 14.5926013 | 9.35E-02 | 14044197  | 14044320  | NC_000019.9  |
| cg04425632 | 4.12E-10 | 3.22E-11 | 7.04 | 14.5924185 | 1.83E-01 | 137531612 | 137531735 | NC_000007.13 |
| cg08828403 | 4.12E-10 | 3.22E-11 | 7.04 | 14.592142  | 1.69E-01 | 21681006  | 21681129  | NC_000012.11 |
| cg00395579 | 4.13E-10 | 3.23E-11 | 7.04 | 14.5897505 | 1.58E-01 | 103243598 | 103243721 | NC_000008.10 |
| cg18359596 | 4.13E-10 | 3.23E-11 | 7.04 | 14.5896152 | 7.96E-02 | 89875471  | 89875594  | NC_000014.8  |
| cg16019558 | 4.14E-10 | 3.24E-11 | 7.04 | 14.5880052 | 8.46E-02 | 110104633 | 110104756 | NC_000006.11 |
| cg21347353 | 4.14E-10 | 3.24E-11 | 7.04 | 14.5869507 | 1.94E-01 | 25678439  | 25678562  | NC_000022.10 |
| cg08370882 | 4.14E-10 | 3.24E-11 | 7.04 | 14.5869133 | 1.36E-01 | 219522648 | 219522771 | NC_000002.11 |
| cg08595806 | 4.15E-10 | 3.25E-11 | 7.04 | 14.583388  | 7.44E-02 | 160512464 | 160512587 | NC_000006.11 |
| cg02332525 | 4.16E-10 | 3.25E-11 | 7.04 | 14.5830297 | 1.28E-01 | 6903153   | 6903276   | NC_000003.11 |
| cg00402352 | 4.17E-10 | 3.26E-11 | 7.04 | 14.579569  | 9.54E-02 | 134373160 | 134373283 | NC_000011.9  |



|            |          |          |      |            |          |           |           |              |
|------------|----------|----------|------|------------|----------|-----------|-----------|--------------|
| cg19947439 | 4.17E-10 | 3.27E-11 | 7.04 | 14.578655  | 1.09E-01 | 186795552 | 186795675 | NC_000003.11 |
| cg03152428 | 4.19E-10 | 3.28E-11 | 7.03 | 14.5738672 | 1.08E-01 | 46850691  | 46850814  | NC_000021.8  |
| cg13833923 | 4.19E-10 | 3.28E-11 | 7.03 | 14.5735854 | 1.92E-01 | 79746627  | 79746750  | NC_000014.8  |
| cg02741229 | 4.20E-10 | 3.29E-11 | 7.03 | 14.5728784 | 1.86E-01 | 140767197 | 140767320 | NC_000005.9  |
| cg15412401 | 4.20E-10 | 3.29E-11 | 7.03 | 14.5727907 | 6.37E-02 | 33170699  | 33170822  | NC_000006.11 |
| cg21342910 | 4.20E-10 | 3.29E-11 | 7.03 | 14.5727581 | 1.76E-01 | 48042779  | 48042902  | NC_000017.10 |
| cg16475255 | 4.20E-10 | 3.29E-11 | 7.03 | 14.5723851 | 6.52E-02 | 72671985  | 72672108  | NC_000015.9  |
| cg10306035 | 4.21E-10 | 3.30E-11 | 7.03 | 14.5691095 | 1.06E-01 | 23464518  | 23464641  | NC_000010.10 |
| cg00333703 | 4.22E-10 | 3.30E-11 | 7.03 | 14.5681384 | 1.56E-01 | 123384406 | 123384529 | NC_000007.13 |
| cg03969515 | 4.23E-10 | 3.31E-11 | 7.03 | 14.5649452 | 1.20E-01 | 16553267  | 16553390  | NC_000001.10 |
| cg00907505 | 4.23E-10 | 3.31E-11 | 7.03 | 14.5645757 | 6.90E-02 | 77715338  | 77715461  | NC_000017.10 |
| cg14765646 | 4.24E-10 | 3.32E-11 | 7.03 | 14.5615348 | 2.15E-01 | 154334450 | 154334573 | NC_000002.11 |
| cg23916167 | 4.25E-10 | 3.33E-11 | 7.03 | 14.560221  | 2.14E-01 | 37027267  | 37027390  | NC_000009.11 |
| cg09303778 | 4.25E-10 | 3.33E-11 | 7.03 | 14.5592361 | 5.65E-02 | 33269832  | 33269955  | NC_000006.11 |
| cg26363038 | 4.26E-10 | 3.33E-11 | 7.03 | 14.5585307 | 7.30E-02 | 155970301 | 155970424 | NC_000007.13 |
| cg05291588 | 4.26E-10 | 3.33E-11 | 7.03 | 14.5583496 | 9.40E-02 | 1607090   | 1607213   | NC_000002.11 |
| cg01541600 | 4.26E-10 | 3.34E-11 | 7.03 | 14.5578566 | 9.59E-02 | 87988715  | 87988838  | NC_000016.9  |
| cg11021321 | 4.26E-10 | 3.34E-11 | 7.03 | 14.5574082 | 1.19E-01 | 57471660  | 57471783  | NC_000020.10 |
| cg19280364 | 4.26E-10 | 3.34E-11 | 7.03 | 14.5572926 | 1.09E-01 | 73077442  | 73077565  | NC_000015.9  |
| cg12530503 | 4.27E-10 | 3.34E-11 | 7.03 | 14.5558495 | 1.17E-01 | 89911148  | 89911271  | NC_000015.9  |
| cg15657100 | 4.27E-10 | 3.34E-11 | 7.03 | 14.5558434 | 1.23E-01 | 161420987 | 161421110 | NC_000002.11 |
| cg22848598 | 4.29E-10 | 3.36E-11 | 7.03 | 14.5508847 | 2.25E-01 | 38965026  | 38965149  | NC_000008.10 |
| cg13320291 | 4.29E-10 | 3.36E-11 | 7.03 | 14.5499995 | 2.25E-01 | 118030970 | 118031093 | NC_000010.10 |
| cg19252741 | 4.29E-10 | 3.36E-11 | 7.03 | 14.5499121 | 1.89E-01 | 68456607  | 68456730  | NC_000011.9  |
| cg01458510 | 4.29E-10 | 3.36E-11 | 7.03 | 14.5499119 | 1.23E-01 | 109752622 | 109752745 | NC_000002.11 |

|            |          |          |      |            |          |           |           |              |
|------------|----------|----------|------|------------|----------|-----------|-----------|--------------|
| cg15373880 | 4.29E-10 | 3.37E-11 | 7.03 | 14.5492839 | 1.03E-01 | 3783345   | 3783468   | NC_000006.11 |
| cg02749843 | 4.30E-10 | 3.37E-11 | 7.03 | 14.5479917 | 8.21E-02 | 19712623  | 19712746  | NC_000022.10 |
| cg08864344 | 4.30E-10 | 3.37E-11 | 7.03 | 14.5473429 | 1.22E-01 | 33772997  | 33773120  | NC_000001.10 |
| cg12829687 | 4.31E-10 | 3.38E-11 | 7.03 | 14.5450209 | 1.14E-01 | 114581004 | 114581127 | NC_000010.10 |
| cg10385303 | 4.32E-10 | 3.39E-11 | 7.03 | 14.5426637 | 1.64E-01 | 36983146  | 36983269  | NC_000014.8  |
| cg01161204 | 4.32E-10 | 3.39E-11 | 7.03 | 14.5412928 | 1.68E-01 | 115530932 | 115531055 | NC_000011.9  |
| cg00865541 | 4.33E-10 | 3.40E-11 | 7.03 | 14.5404381 | 8.44E-02 | 56279934  | 56280057  | NC_000018.9  |
| cg02122467 | 4.33E-10 | 3.40E-11 | 7.03 | 14.540394  | 3.71E-02 | 43027820  | 43027943  | NC_000015.9  |
| cg25495735 | 4.33E-10 | 3.40E-11 | 7.03 | 14.5399208 | 5.26E-02 | 169284053 | 169284176 | NC_000006.11 |
| cg06824157 | 4.33E-10 | 3.40E-11 | 7.03 | 14.5396039 | 1.31E-01 | 14457501  | 14457624  | NC_000005.9  |
| cg05475524 | 4.33E-10 | 3.40E-11 | 7.03 | 14.5392852 | 1.84E-01 | 66326798  | 66326921  | NC_000011.9  |
| cg19946376 | 4.34E-10 | 3.40E-11 | 7.03 | 14.5380528 | 1.05E-01 | 184035137 | 184035260 | NC_000003.11 |
| cg16526961 | 4.34E-10 | 3.41E-11 | 7.03 | 14.5374823 | 8.40E-02 | 43965849  | 43965972  | NC_000012.11 |
| cg12699286 | 4.34E-10 | 3.41E-11 | 7.03 | 14.5362976 | 2.18E-01 | 54394194  | 54394317  | NC_000012.11 |
| cg20086208 | 4.35E-10 | 3.42E-11 | 7.03 | 14.5345162 | 1.99E-01 | 20085214  | 20085337  | NC_000016.9  |
| cg02773588 | 4.35E-10 | 3.42E-11 | 7.03 | 14.5341786 | 9.65E-02 | 48698519  | 48698642  | NC_000003.11 |
| cg26194089 | 4.36E-10 | 3.42E-11 | 7.03 | 14.532854  | 1.25E-01 | 2862360   | 2862483   | NC_000012.11 |
| cg00728907 | 4.37E-10 | 3.43E-11 | 7.03 | 14.5313812 | 5.75E-02 | 1285487   | 1285610   | NC_000005.9  |
| cg23563866 | 4.38E-10 | 3.44E-11 | 7.03 | 14.5288445 | 1.19E-01 | 22246575  | 22246698  | NC_000008.10 |
| cg13551706 | 4.38E-10 | 3.44E-11 | 7.03 | 14.5277768 | 7.56E-02 | 46323481  | 46323604  | NC_000020.10 |
| cg15976883 | 4.39E-10 | 3.45E-11 | 7.03 | 14.525613  | 1.02E-01 | 54960972  | 54961095  | NC_000004.11 |
| cg21932452 | 4.39E-10 | 3.45E-11 | 7.03 | 14.5244859 | 6.38E-02 | 150702471 | 150702594 | NC_000007.13 |
| cg15929698 | 4.40E-10 | 3.46E-11 | 7.03 | 14.5235438 | 1.52E-01 | 24323792  | 24323915  | NC_000007.13 |
| cg08551532 | 4.40E-10 | 3.46E-11 | 7.03 | 14.5234529 | 1.70E-01 | 39998270  | 39998393  | NC_000019.9  |
| cg16531275 | 4.40E-10 | 3.46E-11 | 7.03 | 14.5233332 | 1.07E-01 | 89927907  | 89928030  | NC_000016.9  |

|            |          |          |      |            |          |           |           |              |
|------------|----------|----------|------|------------|----------|-----------|-----------|--------------|
| cg23030159 | 4.40E-10 | 3.46E-11 | 7.03 | 14.5227906 | 8.63E-02 | 1358467   | 1358590   | NC_000007.13 |
| cg10793234 | 4.42E-10 | 3.47E-11 | 7.03 | 14.5192649 | 5.13E-02 | 194062061 | 194062184 | NC_000003.11 |
| cg06161964 | 4.42E-10 | 3.47E-11 | 7.03 | 14.5190707 | 1.54E-01 | 1884513   | 1884636   | NC_000005.9  |
| cg18335607 | 4.43E-10 | 3.48E-11 | 7.02 | 14.5169356 | 1.50E-01 | 172755413 | 172755536 | NC_000005.9  |
| cg05928053 | 4.43E-10 | 3.48E-11 | 7.02 | 14.5165449 | 1.46E-01 | 182549565 | 182549688 | NC_000002.11 |
| cg17412258 | 4.44E-10 | 3.49E-11 | 7.02 | 14.5133664 | 1.39E-01 | 101193017 | 101193140 | NC_000014.8  |
| cg09780768 | 4.44E-10 | 3.49E-11 | 7.02 | 14.5133354 | 1.18E-01 | 54498824  | 54498947  | NC_000019.9  |
| cg12378888 | 4.44E-10 | 3.49E-11 | 7.02 | 14.5128583 | 1.83E-01 | 4867102   | 4867225   | NC_000004.11 |
| cg03612765 | 4.45E-10 | 3.50E-11 | 7.02 | 14.5114634 | 5.24E-02 | 89552576  | 89552699  | NC_000001.10 |
| cg01957732 | 4.46E-10 | 3.50E-11 | 7.02 | 14.5100043 | 1.70E-01 | 133561716 | 133561839 | NC_000006.11 |
| cg04048339 | 4.46E-10 | 3.51E-11 | 7.02 | 14.509263  | 8.33E-02 | 31496644  | 31496767  | NC_000006.11 |
| cg11123303 | 4.46E-10 | 3.51E-11 | 7.02 | 14.5082643 | 9.05E-02 | 132946216 | 132946339 | NC_000006.11 |
| cg07033549 | 4.46E-10 | 3.51E-11 | 7.02 | 14.508009  | 3.96E-02 | 101944576 | 101944699 | NC_000014.8  |
| cg25472539 | 4.47E-10 | 3.52E-11 | 7.02 | 14.50573   | 9.62E-02 | 32037978  | 32038101  | NC_000006.11 |
| cg06008912 | 4.48E-10 | 3.52E-11 | 7.02 | 14.5045962 | 2.37E-01 | 193059645 | 193059768 | NC_000002.11 |
| cg13485685 | 4.48E-10 | 3.52E-11 | 7.02 | 14.5043415 | 1.38E-01 | 20255805  | 20255928  | NC_000004.11 |
| cg15169469 | 4.49E-10 | 3.53E-11 | 7.02 | 14.502737  | 8.01E-02 | 21398575  | 21398698  | NC_000022.10 |
| cg24549161 | 4.49E-10 | 3.53E-11 | 7.02 | 14.5016267 | 9.56E-02 | 120278049 | 120278172 | NC_000002.11 |
| cg13844402 | 4.50E-10 | 3.54E-11 | 7.02 | 14.4993683 | 1.41E-01 | 112716025 | 112716148 | NC_000013.10 |
| cg00535403 | 4.51E-10 | 3.55E-11 | 7.02 | 14.497515  | 9.96E-02 | 120570282 | 120570405 | NC_000002.11 |
| cg21038156 | 4.51E-10 | 3.55E-11 | 7.02 | 14.497394  | 1.53E-01 | 158936739 | 158936862 | NC_000007.13 |
| cg19680222 | 4.51E-10 | 3.55E-11 | 7.02 | 14.4964555 | 4.85E-02 | 160253463 | 160253586 | NC_000001.10 |
| cg23144681 | 4.51E-10 | 3.55E-11 | 7.02 | 14.4964296 | 1.92E-01 | 23488710  | 23488833  | NC_000010.10 |
| cg08682532 | 4.51E-10 | 3.55E-11 | 7.02 | 14.4961719 | 1.38E-01 | 74427499  | 74427622  | NC_000015.9  |
| cg17223809 | 4.52E-10 | 3.55E-11 | 7.02 | 14.4959677 | 1.20E-01 | 86620676  | 86620799  | NC_000001.10 |

|            |          |          |      |            |          |           |           |              |
|------------|----------|----------|------|------------|----------|-----------|-----------|--------------|
| cg03290530 | 4.52E-10 | 3.56E-11 | 7.02 | 14.4950988 | 1.70E-01 | 137361526 | 137361649 | NC_000003.11 |
| cg13243168 | 4.52E-10 | 3.56E-11 | 7.02 | 14.4947589 | 1.13E-01 | 61915833  | 61915956  | NC_000017.10 |
| cg18452695 | 4.52E-10 | 3.56E-11 | 7.02 | 14.4946277 | 1.50E-01 | 9608637   | 9608760   | NC_000019.9  |
| cg24956250 | 4.53E-10 | 3.57E-11 | 7.02 | 14.4928061 | 2.05E-01 | 139168481 | 139168604 | NC_000007.13 |
| cg19656950 | 4.53E-10 | 3.57E-11 | 7.02 | 14.4922096 | 8.60E-02 | 100607772 | 100607895 | NC_000013.10 |
| cg16649888 | 4.54E-10 | 3.57E-11 | 7.02 | 14.4911547 | 1.34E-01 | 96302476  | 96302599  | NC_000010.10 |
| cg12411917 | 4.54E-10 | 3.57E-11 | 7.02 | 14.4903132 | 7.80E-02 | 8014323   | 8014446   | NC_000006.11 |
| cg15451075 | 4.54E-10 | 3.58E-11 | 7.02 | 14.4900079 | 6.12E-02 | 148966942 | 148967065 | NC_000003.11 |
| cg06740600 | 4.54E-10 | 3.58E-11 | 7.02 | 14.4892949 | 2.23E-01 | 38924436  | 38924559  | NC_000019.9  |
| cg00710196 | 4.55E-10 | 3.58E-11 | 7.02 | 14.4885762 | 3.96E-02 | 36870572  | 36870695  | NC_000017.10 |
| cg15975122 | 4.55E-10 | 3.58E-11 | 7.02 | 14.4878559 | 5.45E-02 | 195379862 | 195379985 | NC_000003.11 |
| cg05929882 | 4.55E-10 | 3.58E-11 | 7.02 | 14.4877168 | 1.92E-01 | 114847508 | 114847631 | NC_000012.11 |
| cg05269473 | 4.55E-10 | 3.59E-11 | 7.02 | 14.4871116 | 3.96E-02 | 224801070 | 224801193 | NC_000002.11 |
| cg05207973 | 4.55E-10 | 3.59E-11 | 7.02 | 14.4867022 | 8.89E-02 | 176823642 | 176823765 | NC_000005.9  |
| cg19700380 | 4.55E-10 | 3.59E-11 | 7.02 | 14.4866473 | 8.10E-02 | 36897562  | 36897685  | NC_000017.10 |
| cg07018645 | 4.56E-10 | 3.59E-11 | 7.02 | 14.4864103 | 8.60E-02 | 75108826  | 75108949  | NC_000015.9  |
| cg17603689 | 4.57E-10 | 3.60E-11 | 7.02 | 14.4841707 | 1.25E-01 | 50883013  | 50883136  | NC_000001.10 |
| cg01625087 | 4.57E-10 | 3.60E-11 | 7.02 | 14.4822703 | 1.69E-01 | 101841008 | 101841131 | NC_000006.11 |
| cg08663552 | 4.59E-10 | 3.62E-11 | 7.02 | 14.4788389 | 1.16E-01 | 20755508  | 20755631  | NC_000017.10 |
| cg17028658 | 4.59E-10 | 3.62E-11 | 7.02 | 14.4786353 | 1.27E-01 | 186321177 | 186321300 | NC_000004.11 |
| cg09198601 | 4.59E-10 | 3.62E-11 | 7.02 | 14.4782556 | 1.06E-01 | 10319180  | 10319303  | NC_000006.11 |
| cg25300694 | 4.59E-10 | 3.62E-11 | 7.02 | 14.4782047 | 1.14E-01 | 151184358 | 151184481 | NC_000002.11 |
| cg01082843 | 4.60E-10 | 3.62E-11 | 7.02 | 14.4770041 | 2.00E-01 | 210636844 | 210636967 | NC_000002.11 |
| cg00718418 | 4.60E-10 | 3.63E-11 | 7.02 | 14.4752069 | 1.03E-01 | 50678441  | 50678564  | NC_000012.11 |
| cg06176201 | 4.61E-10 | 3.63E-11 | 7.02 | 14.4738816 | 2.65E-02 | 40963033  | 40963156  | NC_000017.10 |

|            |          |          |      |            |          |           |           |              |
|------------|----------|----------|------|------------|----------|-----------|-----------|--------------|
| cg20392615 | 4.61E-10 | 3.63E-11 | 7.02 | 14.4738345 | 1.36E-01 | 125732565 | 125732688 | NC_000008.10 |
| cg22282405 | 4.61E-10 | 3.64E-11 | 7.02 | 14.473651  | 2.02E-01 | 50810682  | 50810805  | NC_000006.11 |
| cg06462347 | 4.61E-10 | 3.64E-11 | 7.02 | 14.4736028 | 2.18E-01 | 5404508   | 5404631   | NC_000017.10 |
| cg22517388 | 4.62E-10 | 3.64E-11 | 7.02 | 14.4727419 | 1.02E-01 | 71014918  | 71015041  | NC_000005.9  |
| cg08194313 | 4.62E-10 | 3.65E-11 | 7.02 | 14.4706232 | 2.36E-01 | 118032892 | 118033015 | NC_000010.10 |
| cg10455938 | 4.63E-10 | 3.65E-11 | 7.02 | 14.4705708 | 2.14E-01 | 40058150  | 40058273  | NC_000022.10 |
| cg00065215 | 4.63E-10 | 3.65E-11 | 7.02 | 14.4701    | 2.20E-01 | 18959268  | 18959391  | NC_000001.10 |
| cg06017559 | 4.64E-10 | 3.66E-11 | 7.02 | 14.4662036 | 9.25E-02 | 1026760   | 1026883   | NC_000016.9  |
| cg06912966 | 4.65E-10 | 3.67E-11 | 7.02 | 14.464888  | 2.11E-01 | 114852359 | 114852482 | NC_000012.11 |
| cg00573235 | 4.65E-10 | 3.67E-11 | 7.02 | 14.4639589 | 1.26E-01 | 56883532  | 56883655  | NC_000016.9  |
| cg12427264 | 4.66E-10 | 3.68E-11 | 7.02 | 14.4624986 | 5.95E-02 | 144508349 | 144508472 | NC_000006.11 |
| cg06971129 | 4.66E-10 | 3.68E-11 | 7.01 | 14.461753  | 2.74E-01 | 78493066  | 78493189  | NC_000013.10 |
| cg24725789 | 4.67E-10 | 3.68E-11 | 7.01 | 14.4613299 | 1.91E-01 | 119310288 | 119310411 | NC_000010.10 |
| cg20015986 | 4.67E-10 | 3.68E-11 | 7.01 | 14.4610654 | 1.17E-01 | 62072253  | 62072376  | NC_000004.11 |
| cg17886536 | 4.67E-10 | 3.68E-11 | 7.01 | 14.4610004 | 4.20E-02 | 16320218  | 16320341  | NC_000003.11 |
| cg03775416 | 4.67E-10 | 3.69E-11 | 7.01 | 14.4597303 | 9.77E-02 | 19368775  | 19368898  | NC_000019.9  |
| cg17015844 | 4.68E-10 | 3.69E-11 | 7.01 | 14.458752  | 1.29E-01 | 103352694 | 103352817 | NC_000012.11 |
| cg17101165 | 4.68E-10 | 3.70E-11 | 7.01 | 14.4574819 | 1.52E-01 | 115136226 | 115136349 | NC_000012.11 |
| cg04181032 | 4.69E-10 | 3.70E-11 | 7.01 | 14.4554287 | 1.17E-01 | 147165097 | 147165220 | NC_000004.11 |
| cg21549415 | 4.69E-10 | 3.70E-11 | 7.01 | 14.455326  | 2.07E-02 | 79803535  | 79803658  | NC_000017.10 |
| cg07129803 | 4.69E-10 | 3.70E-11 | 7.01 | 14.455312  | 9.14E-02 | 88370583  | 88370706  | NC_000016.9  |
| cg09961254 | 4.69E-10 | 3.71E-11 | 7.01 | 14.4546532 | 8.02E-02 | 627679    | 627802    | NC_000010.10 |
| cg24314474 | 4.72E-10 | 3.72E-11 | 7.01 | 14.4501522 | 4.63E-02 | 40627134  | 40627257  | NC_000003.11 |
| cg18479593 | 4.73E-10 | 3.74E-11 | 7.01 | 14.4468412 | 2.25E-01 | 57265560  | 57265683  | NC_000014.8  |
| cg06558502 | 4.73E-10 | 3.74E-11 | 7.01 | 14.4462335 | 1.39E-01 | 57610699  | 57610822  | NC_000019.9  |

|            |          |          |      |            |          |           |           |              |
|------------|----------|----------|------|------------|----------|-----------|-----------|--------------|
| cg05859076 | 4.75E-10 | 3.75E-11 | 7.01 | 14.4433786 | 1.33E-01 | 128838350 | 128838473 | NC_000003.11 |
| cg26492514 | 4.75E-10 | 3.75E-11 | 7.01 | 14.4430704 | 1.76E-01 | 168728236 | 168728359 | NC_000005.9  |
| cg02211449 | 4.76E-10 | 3.76E-11 | 7.01 | 14.4415045 | 2.04E-01 | 110671609 | 110671732 | NC_000010.10 |
| cg08110874 | 4.76E-10 | 3.76E-11 | 7.01 | 14.4414628 | 1.88E-01 | 36704955  | 36705078  | NC_000013.10 |
| cg11564981 | 4.76E-10 | 3.76E-11 | 7.01 | 14.439352  | 1.87E-01 | 6007670   | 6007793   | NC_000006.11 |
| cg08061040 | 4.76E-10 | 3.76E-11 | 7.01 | 14.4393464 | 9.60E-02 | 149746077 | 149746200 | NC_000007.13 |
| cg04171052 | 4.77E-10 | 3.77E-11 | 7.01 | 14.4385921 | 5.76E-02 | 87879581  | 87879704  | NC_000016.9  |
| cg04600170 | 4.77E-10 | 3.77E-11 | 7.01 | 14.4385176 | 1.80E-01 | 102484499 | 102484622 | NC_000010.10 |
| cg27128734 | 4.77E-10 | 3.77E-11 | 7.01 | 14.4380147 | 8.42E-02 | 51411940  | 51412063  | NC_000019.9  |
| cg03290281 | 4.77E-10 | 3.77E-11 | 7.01 | 14.4379012 | 1.06E-01 | 2632607   | 2632730   | NC_000006.11 |
| cg24010859 | 4.77E-10 | 3.77E-11 | 7.01 | 14.4376307 | 1.28E-01 | 110868153 | 110868276 | NC_000012.11 |
| cg07090057 | 4.78E-10 | 3.77E-11 | 7.01 | 14.4366109 | 8.51E-02 | 108837484 | 108837607 | NC_000003.11 |
| cg19507206 | 4.78E-10 | 3.78E-11 | 7.01 | 14.4361084 | 2.27E-01 | 103044008 | 103044131 | NC_000010.10 |
| cg22235018 | 4.78E-10 | 3.78E-11 | 7.01 | 14.4351134 | 2.19E-01 | 50692150  | 50692273  | NC_000006.11 |
| cg25725843 | 4.78E-10 | 3.78E-11 | 7.01 | 14.4348727 | 1.19E-01 | 107504169 | 107504292 | NC_000002.11 |
| cg11802553 | 4.79E-10 | 3.79E-11 | 7.01 | 14.4333375 | 1.61E-01 | 65203330  | 65203453  | NC_000014.8  |
| cg05640361 | 4.80E-10 | 3.79E-11 | 7.01 | 14.4324321 | 5.40E-02 | 79073545  | 79073668  | NC_000017.10 |
| cg05647503 | 4.80E-10 | 3.79E-11 | 7.01 | 14.4322044 | 4.09E-02 | 10475589  | 10475712  | NC_000011.9  |
| cg08263708 | 4.80E-10 | 3.80E-11 | 7.01 | 14.430912  | 1.55E-01 | 85476373  | 85476496  | NC_000006.11 |
| cg25512912 | 4.81E-10 | 3.80E-11 | 7.01 | 14.4299415 | 4.51E-02 | 64791606  | 64791729  | NC_000015.9  |
| cg16879608 | 4.81E-10 | 3.80E-11 | 7.01 | 14.429627  | 8.97E-02 | 13356921  | 13357044  | NC_000012.11 |
| cg23009508 | 4.81E-10 | 3.80E-11 | 7.01 | 14.4294576 | 6.99E-02 | 23913568  | 23913691  | NC_000002.11 |
| cg02522485 | 4.82E-10 | 3.81E-11 | 7.01 | 14.4273328 | 3.32E-02 | 49531973  | 49532096  | NC_000003.11 |
| cg11536474 | 4.82E-10 | 3.81E-11 | 7.01 | 14.4264068 | 2.38E-01 | 63286049  | 63286172  | NC_000002.11 |
| cg00558702 | 4.83E-10 | 3.82E-11 | 7.01 | 14.4255242 | 1.15E-01 | 16726818  | 16726941  | NC_000012.11 |

|            |          |          |      |            |          |           |           |              |
|------------|----------|----------|------|------------|----------|-----------|-----------|--------------|
| cg03450948 | 4.83E-10 | 3.82E-11 | 7.01 | 14.4243039 | 2.05E-01 | 177053274 | 177053397 | NC_000002.11 |
| cg07807395 | 4.84E-10 | 3.83E-11 | 7.01 | 14.4226293 | 1.35E-01 | 4698416   | 4698539   | NC_000001.10 |
| cg12592691 | 4.84E-10 | 3.83E-11 | 7.01 | 14.4224695 | 1.36E-01 | 51102023  | 51102146  | NC_000007.13 |
| cg18524739 | 4.84E-10 | 3.83E-11 | 7.01 | 14.421845  | 1.42E-01 | 105471348 | 105471471 | NC_000002.11 |
| cg10132917 | 4.85E-10 | 3.84E-11 | 7.01 | 14.4202056 | 1.50E-01 | 30951801  | 30951924  | NC_000007.13 |
| cg10384245 | 4.86E-10 | 3.84E-11 | 7.01 | 14.4191692 | 1.83E-01 | 909086    | 909209    | NC_000018.9  |
| cg26298855 | 4.86E-10 | 3.85E-11 | 7.01 | 14.4181925 | 7.41E-02 | 99635663  | 99635786  | NC_000010.10 |
| cg22350070 | 4.86E-10 | 3.85E-11 | 7.01 | 14.4181615 | 1.95E-01 | 79738639  | 79738762  | NC_000002.11 |
| cg10614856 | 4.86E-10 | 3.85E-11 | 7.01 | 14.4175495 | 9.38E-02 | 50025115  | 50025238  | NC_000019.9  |
| cg01014029 | 4.87E-10 | 3.85E-11 | 7.01 | 14.4166477 | 5.71E-02 | 5646477   | 5646600   | NC_000007.13 |
| cg05086314 | 4.87E-10 | 3.85E-11 | 7.01 | 14.4163362 | 8.17E-02 | 122648997 | 122649120 | NC_000004.11 |
| cg02402565 | 4.87E-10 | 3.86E-11 | 7.01 | 14.4155514 | 1.08E-01 | 57590030  | 57590153  | NC_000015.9  |
| cg22983903 | 4.88E-10 | 3.86E-11 | 7.01 | 14.4134999 | 1.54E-01 | 5140935   | 5141058   | NC_000005.9  |
| cg07209931 | 4.88E-10 | 3.87E-11 | 7.01 | 14.4129003 | 6.96E-02 | 176304988 | 176305111 | NC_000005.9  |
| cg03325407 | 4.88E-10 | 3.87E-11 | 7.01 | 14.412877  | 1.52E-01 | 114423726 | 114423849 | NC_000001.10 |
| cg18884037 | 4.89E-10 | 3.87E-11 | 7.01 | 14.4125988 | 1.97E-01 | 62996214  | 62996337  | NC_000006.11 |
| cg15372603 | 4.89E-10 | 3.87E-11 | 7.01 | 14.4121877 | 1.73E-01 | 27197239  | 27197362  | NC_000007.13 |
| cg13433891 | 4.90E-10 | 3.88E-11 | 7.01 | 14.410532  | 1.15E-01 | 26264492  | 26264615  | NC_000012.11 |
| cg22277567 | 4.90E-10 | 3.88E-11 | 7.01 | 14.4104641 | 1.60E-01 | 240226201 | 240226324 | NC_000002.11 |
| cg17492965 | 4.90E-10 | 3.88E-11 | 7.01 | 14.4087073 | 9.35E-02 | 8602594   | 8602717   | NC_000004.11 |
| cg10103266 | 4.90E-10 | 3.88E-11 | 7.01 | 14.4084605 | 1.49E-01 | 176977458 | 176977581 | NC_000002.11 |
| cg26478297 | 4.91E-10 | 3.89E-11 | 7.01 | 14.4076187 | 1.50E-01 | 54387435  | 54387558  | NC_000019.9  |
| cg18139178 | 4.92E-10 | 3.90E-11 | 7    | 14.405185  | 8.08E-02 | 134997342 | 134997465 | NC_000010.10 |
| cg18290624 | 4.92E-10 | 3.90E-11 | 7    | 14.4051331 | 1.51E-01 | 10857699  | 10857822  | NC_000003.11 |
| cg12614213 | 4.93E-10 | 3.91E-11 | 7    | 14.4030838 | 1.93E-01 | 38324613  | 38324736  | NC_000008.10 |

|            |          |          |   |            |          |           |           |              |
|------------|----------|----------|---|------------|----------|-----------|-----------|--------------|
| cg26263664 | 4.93E-10 | 3.91E-11 | 7 | 14.4022453 | 7.56E-02 | 73501058  | 73501181  | NC_000017.10 |
| cg26481402 | 4.94E-10 | 3.91E-11 | 7 | 14.4017997 | 7.50E-02 | 28853050  | 28853173  | NC_000006.11 |
| cg23509641 | 4.94E-10 | 3.91E-11 | 7 | 14.4009636 | 1.33E-01 | 30583001  | 30583124  | NC_000020.10 |
| cg21814870 | 4.94E-10 | 3.92E-11 | 7 | 14.4000587 | 1.50E-01 | 62383240  | 62383363  | NC_000004.11 |
| cg18020547 | 4.94E-10 | 3.92E-11 | 7 | 14.4000551 | 1.10E-01 | 223538957 | 223539080 | NC_000001.10 |
| cg10486098 | 4.95E-10 | 3.93E-11 | 7 | 14.3980259 | 9.96E-02 | 147826960 | 147827083 | NC_000001.10 |
| cg06878709 | 4.96E-10 | 3.93E-11 | 7 | 14.3975816 | 1.05E-01 | 95862342  | 95862465  | NC_000010.10 |
| cg00629116 | 4.96E-10 | 3.93E-11 | 7 | 14.3958883 | 6.23E-02 | 4705360   | 4705483   | NC_000020.10 |
| cg00816770 | 4.96E-10 | 3.93E-11 | 7 | 14.395882  | 1.50E-01 | 144621089 | 144621212 | NC_000004.11 |
| cg10716518 | 4.96E-10 | 3.93E-11 | 7 | 14.3958271 | 9.54E-02 | 32166722  | 32166845  | NC_000006.11 |
| cg20026576 | 4.97E-10 | 3.94E-11 | 7 | 14.3952111 | 1.01E-01 | 4481538   | 4481661   | NC_000006.11 |
| cg19352193 | 4.97E-10 | 3.94E-11 | 7 | 14.39402   | 2.24E-01 | 46425508  | 46425631  | NC_000013.10 |
| cg16954727 | 4.99E-10 | 3.96E-11 | 7 | 14.3906062 | 1.16E-01 | 3440330   | 3440453   | NC_000010.10 |
| cg08618204 | 4.99E-10 | 3.96E-11 | 7 | 14.3906036 | 1.41E-01 | 115135076 | 115135199 | NC_000012.11 |
| cg19122389 | 4.99E-10 | 3.96E-11 | 7 | 14.3899375 | 1.41E-01 | 21687378  | 21687501  | NC_000020.10 |
| cg06531379 | 5.01E-10 | 3.97E-11 | 7 | 14.3871103 | 1.91E-01 | 47911449  | 47911572  | NC_000001.10 |
| cg21781988 | 5.01E-10 | 3.97E-11 | 7 | 14.3870434 | 1.71E-01 | 101287742 | 101287865 | NC_000010.10 |
| cg02076785 | 5.01E-10 | 3.97E-11 | 7 | 14.3864247 | 1.78E-01 | 98963582  | 98963705  | NC_000002.11 |
| cg06632797 | 5.02E-10 | 3.98E-11 | 7 | 14.3834518 | 9.98E-02 | 68968215  | 68968338  | NC_000011.9  |
| cg24729221 | 5.02E-10 | 3.99E-11 | 7 | 14.383193  | 1.05E-01 | 63497644  | 63497767  | NC_000007.13 |
| cg05900538 | 5.03E-10 | 3.99E-11 | 7 | 14.3828376 | 9.57E-02 | 95756907  | 95757030  | NC_000011.9  |
| cg06648455 | 5.03E-10 | 3.99E-11 | 7 | 14.382828  | 9.16E-02 | 69962465  | 69962588  | NC_000011.9  |
| cg02295992 | 5.03E-10 | 3.99E-11 | 7 | 14.3828203 | 1.03E-01 | 205255619 | 205255742 | NC_000001.10 |
| cg20618826 | 5.03E-10 | 3.99E-11 | 7 | 14.3823645 | 8.21E-02 | 81148896  | 81149019  | NC_000010.10 |
| cg05616379 | 5.04E-10 | 4.00E-11 | 7 | 14.3809115 | 1.18E-01 | 26943660  | 26943783  | NC_000002.11 |



|            |          |          |      |            |          |           |           |              |
|------------|----------|----------|------|------------|----------|-----------|-----------|--------------|
| cg26405128 | 5.04E-10 | 4.00E-11 | 7    | 14.3808056 | 1.15E-01 | 31655265  | 31655388  | NC_000003.11 |
| cg16562275 | 5.04E-10 | 4.00E-11 | 7    | 14.3790817 | 1.85E-01 | 133481390 | 133481513 | NC_000012.11 |
| cg00595030 | 5.06E-10 | 4.01E-11 | 7    | 14.3765668 | 9.47E-02 | 10398582  | 10398705  | NC_000019.9  |
| cg01953289 | 5.06E-10 | 4.01E-11 | 7    | 14.3760483 | 6.30E-02 | 60874239  | 60874362  | NC_000020.10 |
| cg04740046 | 5.06E-10 | 4.02E-11 | 7    | 14.3756772 | 6.47E-02 | 55330842  | 55330965  | NC_000017.10 |
| cg04616566 | 5.06E-10 | 4.02E-11 | 7    | 14.374804  | 3.99E-02 | 72020560  | 72020683  | NC_000015.9  |
| cg13408597 | 5.07E-10 | 4.02E-11 | 7    | 14.3746522 | 1.29E-01 | 97865092  | 97865215  | NC_000009.11 |
| cg17210933 | 5.07E-10 | 4.02E-11 | 7    | 14.3739695 | 1.86E-01 | 3428696   | 3428819   | NC_000005.9  |
| cg05595088 | 5.11E-10 | 4.06E-11 | 7    | 14.3654547 | 8.47E-02 | 3243426   | 3243549   | NC_000016.9  |
| cg20668096 | 5.13E-10 | 4.07E-11 | 7    | 14.3615424 | 1.27E-01 | 151500192 | 151500315 | NC_000004.11 |
| cg22932482 | 5.13E-10 | 4.08E-11 | 7    | 14.361173  | 1.13E-01 | 144790992 | 144791115 | NC_000008.10 |
| cg11554266 | 5.13E-10 | 4.08E-11 | 7    | 14.3608852 | 1.51E-01 | 99288473  | 99288596  | NC_000012.11 |
| cg23065934 | 5.15E-10 | 4.09E-11 | 7    | 14.3570619 | 1.96E-01 | 16180266  | 16180389  | NC_000005.9  |
| cg15380511 | 5.18E-10 | 4.12E-11 | 7    | 14.3518523 | 6.92E-02 | 124835828 | 124835951 | NC_000005.9  |
| cg02363960 | 5.18E-10 | 4.12E-11 | 7    | 14.3513828 | 1.37E-01 | 79080535  | 79080658  | NC_000007.13 |
| cg13451356 | 5.20E-10 | 4.13E-11 | 6.99 | 14.3474462 | 1.01E-01 | 40598648  | 40598771  | NC_000001.10 |
| cg19455306 | 5.21E-10 | 4.14E-11 | 6.99 | 14.345708  | 8.04E-02 | 45154734  | 45154857  | NC_000003.11 |
| cg14041462 | 5.21E-10 | 4.14E-11 | 6.99 | 14.3448929 | 6.49E-02 | 130551579 | 130551702 | NC_000009.11 |
| cg04591032 | 5.22E-10 | 4.15E-11 | 6.99 | 14.3446447 | 1.78E-01 | 46827458  | 46827581  | NC_000017.10 |
| cg24047810 | 5.22E-10 | 4.15E-11 | 6.99 | 14.3430937 | 9.83E-02 | 2162341   | 2162464   | NC_000011.9  |
| cg00733328 | 5.23E-10 | 4.15E-11 | 6.99 | 14.3424642 | 1.05E-01 | 101001145 | 101001268 | NC_000014.8  |
| cg24017995 | 5.23E-10 | 4.16E-11 | 6.99 | 14.3422422 | 1.45E-01 | 65652792  | 65652915  | NC_000014.8  |
| cg19209066 | 5.23E-10 | 4.16E-11 | 6.99 | 14.3408727 | 2.22E-01 | 8085349   | 8085472   | NC_000010.10 |
| cg09072859 | 5.25E-10 | 4.17E-11 | 6.99 | 14.338803  | 1.87E-01 | 132934128 | 132934251 | NC_000011.9  |
| cg21231964 | 5.25E-10 | 4.17E-11 | 6.99 | 14.3378393 | 1.11E-01 | 77505378  | 77505501  | NC_000017.10 |

|            |          |          |      |            |          |           |           |              |
|------------|----------|----------|------|------------|----------|-----------|-----------|--------------|
| cg04393060 | 5.25E-10 | 4.18E-11 | 6.99 | 14.3368924 | 4.88E-02 | 35919432  | 35919555  | NC_000001.10 |
| cg17025841 | 5.26E-10 | 4.18E-11 | 6.99 | 14.335918  | 1.11E-01 | 11575501  | 11575624  | NC_000003.11 |
| cg06003187 | 5.26E-10 | 4.19E-11 | 6.99 | 14.335254  | 9.78E-02 | 42629798  | 42629921  | NC_000001.10 |
| cg17032989 | 5.28E-10 | 4.20E-11 | 6.99 | 14.3323579 | 9.61E-02 | 153259061 | 153259184 | NC_000002.11 |
| cg26132493 | 5.29E-10 | 4.20E-11 | 6.99 | 14.330652  | 1.11E-01 | 108634275 | 108634398 | NC_000012.11 |
| cg16104384 | 5.29E-10 | 4.21E-11 | 6.99 | 14.33032   | 1.13E-01 | 49935689  | 49935812  | NC_000022.10 |
| cg01831896 | 5.29E-10 | 4.21E-11 | 6.99 | 14.3298774 | 1.39E-01 | 32638319  | 32638442  | NC_000015.9  |
| cg02348751 | 5.30E-10 | 4.22E-11 | 6.99 | 14.3279055 | 2.20E-01 | 183064035 | 183064158 | NC_000004.11 |
| cg02163943 | 5.31E-10 | 4.23E-11 | 6.99 | 14.3254438 | 1.43E-01 | 42217859  | 42217982  | NC_000020.10 |
| cg13081009 | 5.31E-10 | 4.23E-11 | 6.99 | 14.3253439 | 1.75E-01 | 8430745   | 8430868   | NC_000001.10 |
| cg07566931 | 5.32E-10 | 4.23E-11 | 6.99 | 14.3250734 | 7.94E-02 | 39374990  | 39375113  | NC_000005.9  |
| cg01064903 | 5.32E-10 | 4.23E-11 | 6.99 | 14.3238163 | 5.61E-02 | 8001477   | 8001600   | NC_000019.9  |
| cg04496204 | 5.32E-10 | 4.23E-11 | 6.99 | 14.3236843 | 5.77E-02 | 72249085  | 72249208  | NC_000013.10 |
| cg12003026 | 5.33E-10 | 4.24E-11 | 6.99 | 14.3229019 | 9.31E-02 | 26273370  | 26273493  | NC_000006.11 |
| cg21680474 | 5.33E-10 | 4.24E-11 | 6.99 | 14.3221965 | 9.45E-02 | 28463306  | 28463429  | NC_000001.10 |
| cg18335796 | 5.33E-10 | 4.24E-11 | 6.99 | 14.3217203 | 1.31E-01 | 91094472  | 91094595  | NC_000008.10 |
| cg01126576 | 5.35E-10 | 4.26E-11 | 6.99 | 14.318626  | 9.58E-02 | 120949145 | 120949268 | NC_000010.10 |
| cg02517686 | 5.35E-10 | 4.26E-11 | 6.99 | 14.3177867 | 9.44E-02 | 132900761 | 132900884 | NC_000012.11 |
| cg05298922 | 5.36E-10 | 4.27E-11 | 6.99 | 14.3166818 | 2.86E-01 | 175191045 | 175191168 | NC_000002.11 |
| cg18841298 | 5.37E-10 | 4.28E-11 | 6.99 | 14.3141588 | 1.22E-01 | 101604258 | 101604381 | NC_000012.11 |
| cg05835982 | 5.38E-10 | 4.28E-11 | 6.99 | 14.3127777 | 1.88E-01 | 129693791 | 129693914 | NC_000003.11 |
| cg07740640 | 5.38E-10 | 4.28E-11 | 6.99 | 14.3126706 | 1.06E-01 | 97841941  | 97842064  | NC_000007.13 |
| cg03127713 | 5.38E-10 | 4.28E-11 | 6.99 | 14.3122035 | 2.38E-01 | 224804071 | 224804194 | NC_000001.10 |
| cg06141004 | 5.38E-10 | 4.29E-11 | 6.99 | 14.3118165 | 1.06E-01 | 6867070   | 6867193   | NC_000007.13 |
| cg07738031 | 5.39E-10 | 4.29E-11 | 6.99 | 14.3105645 | 6.52E-02 | 61871027  | 61871150  | NC_000020.10 |

|            |          |          |      |            |          |           |           |              |
|------------|----------|----------|------|------------|----------|-----------|-----------|--------------|
| cg19414591 | 5.40E-10 | 4.30E-11 | 6.99 | 14.3084198 | 1.52E-01 | 91190582  | 91190705  | NC_000001.10 |
| cg17306661 | 5.40E-10 | 4.30E-11 | 6.99 | 14.3078787 | 3.88E-02 | 6888415   | 6888538   | NC_000007.13 |
| cg06972188 | 5.40E-10 | 4.30E-11 | 6.99 | 14.3077952 | 1.21E-01 | 81565706  | 81565829  | NC_000016.9  |
| cg13927566 | 5.41E-10 | 4.31E-11 | 6.99 | 14.3069329 | 1.62E-01 | 91172288  | 91172411  | NC_000001.10 |
| cg23603003 | 5.41E-10 | 4.31E-11 | 6.99 | 14.3061031 | 4.57E-02 | 147760353 | 147760476 | NC_000001.10 |
| cg10238972 | 5.41E-10 | 4.31E-11 | 6.99 | 14.3060724 | 1.63E-01 | 10398754  | 10398877  | NC_000006.11 |
| cg11062417 | 5.41E-10 | 4.31E-11 | 6.99 | 14.3055222 | 1.45E-01 | 76578232  | 76578355  | NC_000005.9  |
| cg25308742 | 5.42E-10 | 4.31E-11 | 6.99 | 14.3053136 | 1.56E-01 | 3590983   | 3591106   | NC_000005.9  |
| cg10171357 | 5.42E-10 | 4.32E-11 | 6.99 | 14.3051105 | 1.51E-01 | 96910540  | 96910663  | NC_000015.9  |
| cg15893895 | 5.42E-10 | 4.32E-11 | 6.99 | 14.3047371 | 9.99E-02 | 51104413  | 51104536  | NC_000007.13 |
| cg02063560 | 5.42E-10 | 4.32E-11 | 6.99 | 14.3044545 | 5.66E-02 | 62120405  | 62120528  | NC_000001.10 |
| cg02935338 | 5.42E-10 | 4.32E-11 | 6.99 | 14.3040788 | 1.56E-01 | 25755847  | 25755970  | NC_000018.9  |
| cg05656566 | 5.45E-10 | 4.35E-11 | 6.99 | 14.2977034 | 8.08E-02 | 178593924 | 178594047 | NC_000005.9  |
| cg00359110 | 5.47E-10 | 4.36E-11 | 6.99 | 14.2951577 | 7.35E-02 | 75699252  | 75699375  | NC_000012.11 |
| cg26690075 | 5.47E-10 | 4.36E-11 | 6.99 | 14.2949355 | 1.34E-01 | 120968919 | 120969042 | NC_000007.13 |
| cg13187827 | 5.47E-10 | 4.36E-11 | 6.99 | 14.2947447 | 1.11E-01 | 31734192  | 31734315  | NC_000006.11 |
| cg05029822 | 5.47E-10 | 4.36E-11 | 6.99 | 14.2943922 | 8.71E-02 | 2891118   | 2891241   | NC_000011.9  |
| cg00909993 | 5.48E-10 | 4.37E-11 | 6.98 | 14.2934925 | 1.41E-01 | 120516537 | 120516660 | NC_000002.11 |
| cg21011621 | 5.48E-10 | 4.37E-11 | 6.98 | 14.2932477 | 1.03E-01 | 48471643  | 48471766  | NC_000017.10 |
| cg26620530 | 5.48E-10 | 4.37E-11 | 6.98 | 14.2928946 | 1.85E-01 | 115102726 | 115102849 | NC_000012.11 |
| cg01416563 | 5.48E-10 | 4.37E-11 | 6.98 | 14.2928717 | 1.09E-01 | 140237151 | 140237274 | NC_000005.9  |
| cg05387399 | 5.52E-10 | 4.40E-11 | 6.98 | 14.2860074 | 1.45E-01 | 124893766 | 124893889 | NC_000010.10 |
| cg23792093 | 5.52E-10 | 4.40E-11 | 6.98 | 14.2853766 | 6.24E-02 | 47012437  | 47012560  | NC_000013.10 |
| cg22771904 | 5.52E-10 | 4.40E-11 | 6.98 | 14.28527   | 1.49E-01 | 169051407 | 169051530 | NC_000006.11 |
| cg07519816 | 5.52E-10 | 4.40E-11 | 6.98 | 14.2850049 | 1.86E-01 | 53447596  | 53447719  | NC_000018.9  |

|            |          |          |      |            |          |           |           |              |
|------------|----------|----------|------|------------|----------|-----------|-----------|--------------|
| cg26958236 | 5.52E-10 | 4.41E-11 | 6.98 | 14.2847757 | 9.95E-02 | 46785338  | 46785461  | NC_000021.8  |
| cg23805360 | 5.53E-10 | 4.41E-11 | 6.98 | 14.2835645 | 2.16E-01 | 976947    | 977070    | NC_000009.11 |
| cg15248835 | 5.53E-10 | 4.41E-11 | 6.98 | 14.2829075 | 2.09E-01 | 9761171   | 9761294   | NC_000008.10 |
| cg21199093 | 5.54E-10 | 4.42E-11 | 6.98 | 14.2820674 | 1.46E-01 | 35836009  | 35836132  | NC_000001.10 |
| cg18115248 | 5.54E-10 | 4.42E-11 | 6.98 | 14.2808139 | 6.57E-02 | 41495942  | 41496065  | NC_000019.9  |
| cg26099164 | 5.55E-10 | 4.43E-11 | 6.98 | 14.2794468 | 1.35E-01 | 7574782   | 7574905   | NC_000010.10 |
| cg24677321 | 5.55E-10 | 4.43E-11 | 6.98 | 14.2794214 | 6.05E-02 | 25116377  | 25116500  | NC_000003.11 |
| cg01218896 | 5.57E-10 | 4.45E-11 | 6.98 | 14.2751162 | 1.22E-01 | 96911988  | 96912111  | NC_000015.9  |
| cg15218775 | 5.58E-10 | 4.46E-11 | 6.98 | 14.2734484 | 1.72E-01 | 27135679  | 27135802  | NC_000007.13 |
| cg08442334 | 5.59E-10 | 4.46E-11 | 6.98 | 14.2728421 | 9.20E-02 | 66411384  | 66411507  | NC_000011.9  |
| cg01204927 | 5.59E-10 | 4.46E-11 | 6.98 | 14.2727719 | 1.34E-01 | 28505394  | 28505517  | NC_000006.11 |
| cg23647410 | 5.59E-10 | 4.46E-11 | 6.98 | 14.2720452 | 8.12E-02 | 221051066 | 221051189 | NC_000001.10 |
| cg14768459 | 5.60E-10 | 4.47E-11 | 6.98 | 14.2708481 | 9.49E-02 | 19672432  | 19672555  | NC_000002.11 |
| cg06967496 | 5.60E-10 | 4.47E-11 | 6.98 | 14.2704921 | 4.36E-02 | 71677658  | 71677781  | NC_000005.9  |
| cg01685883 | 5.61E-10 | 4.48E-11 | 6.98 | 14.2688172 | 1.68E-01 | 155254497 | 155254620 | NC_000004.11 |
| cg10022526 | 5.62E-10 | 4.49E-11 | 6.98 | 14.2664736 | 1.89E-01 | 27744557  | 27744680  | NC_000011.9  |
| cg00304388 | 5.63E-10 | 4.49E-11 | 6.98 | 14.2653626 | 1.74E-01 | 181454744 | 181454867 | NC_000001.10 |
| cg06049868 | 5.63E-10 | 4.49E-11 | 6.98 | 14.2653379 | 1.50E-01 | 112717707 | 112717830 | NC_000013.10 |
| cg08244443 | 5.63E-10 | 4.49E-11 | 6.98 | 14.2653164 | 1.24E-01 | 58013900  | 58014023  | NC_000012.11 |
| cg02503981 | 5.63E-10 | 4.50E-11 | 6.98 | 14.2638125 | 1.98E-01 | 112720182 | 112720305 | NC_000013.10 |
| cg04794430 | 5.64E-10 | 4.50E-11 | 6.98 | 14.2634967 | 1.52E-01 | 3290071   | 3290194   | NC_000017.10 |
| cg20871586 | 5.64E-10 | 4.51E-11 | 6.98 | 14.2618325 | 1.70E-01 | 134175678 | 134175801 | NC_000006.11 |
| cg12883980 | 5.64E-10 | 4.51E-11 | 6.98 | 14.261778  | 1.18E-01 | 50707586  | 50707709  | NC_000013.10 |
| cg13910746 | 5.65E-10 | 4.51E-11 | 6.98 | 14.2616716 | 6.06E-02 | 144365795 | 144365918 | NC_000008.10 |
| cg24169822 | 5.65E-10 | 4.52E-11 | 6.98 | 14.2604101 | 1.49E-01 | 27170994  | 27171117  | NC_000007.13 |

|            |          |          |      |            |          |           |           |              |
|------------|----------|----------|------|------------|----------|-----------|-----------|--------------|
| cg04961235 | 5.66E-10 | 4.52E-11 | 6.98 | 14.2592266 | 1.27E-01 | 4901628   | 4901751   | NC_000007.13 |
| cg25743819 | 5.66E-10 | 4.52E-11 | 6.98 | 14.259015  | 1.50E-01 | 173245704 | 173245827 | NC_000002.11 |
| cg01936839 | 5.66E-10 | 4.52E-11 | 6.98 | 14.2588236 | 1.05E-01 | 27198896  | 27199019  | NC_000007.13 |
| cg23986671 | 5.68E-10 | 4.54E-11 | 6.98 | 14.2550395 | 2.01E-01 | 28339262  | 28339385  | NC_000021.8  |
| cg15619820 | 5.69E-10 | 4.55E-11 | 6.98 | 14.2531164 | 1.12E-01 | 3133763   | 3133886   | NC_000001.10 |
| cg17851748 | 5.70E-10 | 4.56E-11 | 6.98 | 14.2516971 | 6.33E-02 | 83264140  | 83264263  | NC_000012.11 |
| cg00797142 | 5.70E-10 | 4.56E-11 | 6.98 | 14.2512018 | 5.40E-02 | 90998279  | 90998402  | NC_000008.10 |
| cg02803775 | 5.70E-10 | 4.56E-11 | 6.98 | 14.2509328 | 7.94E-02 | 41937252  | 41937375  | NC_000022.10 |
| cg01769968 | 5.71E-10 | 4.57E-11 | 6.98 | 14.2494736 | 1.43E-01 | 155891244 | 155891367 | NC_000001.10 |
| cg06294766 | 5.72E-10 | 4.57E-11 | 6.98 | 14.2481298 | 1.00E-01 | 154680314 | 154680437 | NC_000004.11 |
| cg00383384 | 5.72E-10 | 4.58E-11 | 6.98 | 14.247573  | 1.46E-01 | 57391271  | 57391394  | NC_000010.10 |
| cg08155325 | 5.72E-10 | 4.58E-11 | 6.98 | 14.2471982 | 1.23E-01 | 140857813 | 140857936 | NC_000005.9  |
| cg04850976 | 5.74E-10 | 4.59E-11 | 6.98 | 14.2446906 | 9.62E-02 | 3782990   | 3783113   | NC_000016.9  |
| cg20260127 | 5.74E-10 | 4.59E-11 | 6.98 | 14.2444151 | 1.08E-01 | 56355681  | 56355804  | NC_000007.13 |
| cg24830738 | 5.74E-10 | 4.59E-11 | 6.98 | 14.2438798 | 1.55E-01 | 113698445 | 113698568 | NC_000005.9  |
| cg20353780 | 5.75E-10 | 4.60E-11 | 6.98 | 14.2433447 | 6.83E-02 | 118588556 | 118588679 | NC_000012.11 |
| cg08058544 | 5.75E-10 | 4.60E-11 | 6.98 | 14.2416322 | 1.73E-01 | 237080267 | 237080390 | NC_000002.11 |
| cg00031105 | 5.75E-10 | 4.60E-11 | 6.98 | 14.2415828 | 1.06E-01 | 33166117  | 33166240  | NC_000006.11 |
| cg02283366 | 5.76E-10 | 4.60E-11 | 6.98 | 14.2414485 | 1.81E-01 | 63785544  | 63785667  | NC_000001.10 |
| cg15835091 | 5.77E-10 | 4.62E-11 | 6.98 | 14.2391743 | 5.14E-02 | 16468340  | 16468463  | NC_000022.10 |
| cg07906632 | 5.77E-10 | 4.62E-11 | 6.98 | 14.2390369 | 2.01E-01 | 147074073 | 147074196 | NC_000003.11 |
| cg22344727 | 5.77E-10 | 4.62E-11 | 6.98 | 14.2389872 | 1.68E-01 | 81102035  | 81102158  | NC_000012.11 |
| cg03764965 | 5.77E-10 | 4.62E-11 | 6.98 | 14.2389861 | 1.20E-01 | 117971251 | 117971374 | NC_000002.11 |
| cg10491556 | 5.78E-10 | 4.62E-11 | 6.97 | 14.2377101 | 2.31E-01 | 124895886 | 124896009 | NC_000010.10 |
| cg16993043 | 5.78E-10 | 4.62E-11 | 6.97 | 14.2373888 | 2.29E-01 | 200008026 | 200008149 | NC_000001.10 |

|            |          |          |      |            |          |           |           |              |
|------------|----------|----------|------|------------|----------|-----------|-----------|--------------|
| cg20297360 | 5.78E-10 | 4.62E-11 | 6.97 | 14.2372311 | 5.43E-02 | 2976098   | 2976221   | NC_000017.10 |
| cg06248560 | 5.78E-10 | 4.62E-11 | 6.97 | 14.2372249 | 1.82E-01 | 35104681  | 35104804  | NC_000018.9  |
| cg25837277 | 5.78E-10 | 4.63E-11 | 6.97 | 14.2367526 | 6.04E-02 | 46999366  | 46999489  | NC_000019.9  |
| cg02151752 | 5.78E-10 | 4.63E-11 | 6.97 | 14.2366582 | 3.68E-02 | 32798417  | 32798540  | NC_000006.11 |
| cg16202331 | 5.79E-10 | 4.63E-11 | 6.97 | 14.2349748 | 1.86E-01 | 13532655  | 13532778  | NC_000004.11 |
| cg09479783 | 5.79E-10 | 4.64E-11 | 6.97 | 14.2343938 | 3.73E-02 | 124796409 | 124796532 | NC_000012.11 |
| cg25984524 | 5.79E-10 | 4.64E-11 | 6.97 | 14.2341192 | 1.18E-01 | 104871849 | 104871972 | NC_000010.10 |
| cg18579879 | 5.80E-10 | 4.64E-11 | 6.97 | 14.2336972 | 1.27E-01 | 120968913 | 120969036 | NC_000007.13 |
| cg16268315 | 5.80E-10 | 4.64E-11 | 6.97 | 14.2331124 | 1.41E-01 | 103491087 | 103491210 | NC_000008.10 |
| cg23208791 | 5.80E-10 | 4.64E-11 | 6.97 | 14.2331034 | 8.50E-02 | 99123733  | 99123856  | NC_000001.10 |
| cg21135533 | 5.81E-10 | 4.65E-11 | 6.97 | 14.2319533 | 1.65E-01 | 70982935  | 70983058  | NC_000008.10 |
| cg10672343 | 5.82E-10 | 4.66E-11 | 6.97 | 14.2288177 | 6.13E-02 | 169718117 | 169718240 | NC_000006.11 |
| cg26390660 | 5.83E-10 | 4.67E-11 | 6.97 | 14.227047  | 1.35E-01 | 110344165 | 110344288 | NC_000003.11 |
| cg27426442 | 5.84E-10 | 4.67E-11 | 6.97 | 14.2267725 | 6.79E-02 | 35181113  | 35181236  | NC_000006.11 |
| cg00585714 | 5.84E-10 | 4.68E-11 | 6.97 | 14.2255641 | 1.18E-01 | 97156859  | 97156982  | NC_000008.10 |
| cg21429087 | 5.85E-10 | 4.69E-11 | 6.97 | 14.223474  | 1.96E-01 | 166074814 | 166074937 | NC_000006.11 |
| cg14216940 | 5.85E-10 | 4.69E-11 | 6.97 | 14.2233005 | 1.16E-01 | 50343131  | 50343254  | NC_000007.13 |
| cg21184115 | 5.87E-10 | 4.70E-11 | 6.97 | 14.2213866 | 3.58E-02 | 108931012 | 108931135 | NC_000006.11 |
| cg22218447 | 5.87E-10 | 4.70E-11 | 6.97 | 14.2212772 | 4.67E-02 | 21221791  | 21221914  | NC_000017.10 |
| cg01800455 | 5.87E-10 | 4.70E-11 | 6.97 | 14.2208457 | 3.48E-02 | 20996671  | 20996794  | NC_000016.9  |
| cg10852177 | 5.87E-10 | 4.70E-11 | 6.97 | 14.2207493 | 2.02E-01 | 84816454  | 84816577  | NC_000007.13 |
| cg23483069 | 5.88E-10 | 4.71E-11 | 6.97 | 14.2194533 | 5.38E-02 | 17825778  | 17825901  | NC_000002.11 |
| cg11268834 | 5.89E-10 | 4.72E-11 | 6.97 | 14.2173678 | 1.58E-01 | 224824500 | 224824623 | NC_000002.11 |
| cg25098068 | 5.90E-10 | 4.73E-11 | 6.97 | 14.2156222 | 5.06E-02 | 62462051  | 62462174  | NC_000017.10 |
| cg23302570 | 5.90E-10 | 4.73E-11 | 6.97 | 14.2148532 | 1.80E-01 | 139538601 | 139538724 | NC_000002.11 |

|            |          |          |      |            |          |           |           |              |
|------------|----------|----------|------|------------|----------|-----------|-----------|--------------|
| cg27050763 | 5.91E-10 | 4.73E-11 | 6.97 | 14.2141595 | 8.00E-02 | 247081594 | 247081717 | NC_000001.10 |
| cg00397479 | 5.91E-10 | 4.74E-11 | 6.97 | 14.2131673 | 2.19E-01 | 31831510  | 31831633  | NC_000006.11 |
| cg23226129 | 5.92E-10 | 4.74E-11 | 6.97 | 14.2124609 | 1.72E-01 | 39995539  | 39995662  | NC_000020.10 |
| cg04565337 | 5.92E-10 | 4.74E-11 | 6.97 | 14.2124391 | 1.38E-01 | 38071768  | 38071891  | NC_000014.8  |
| cg20756891 | 5.92E-10 | 4.75E-11 | 6.97 | 14.2115594 | 1.44E-01 | 170743951 | 170744074 | NC_000005.9  |
| cg26157386 | 5.92E-10 | 4.75E-11 | 6.97 | 14.21133   | 1.85E-01 | 36994270  | 36994393  | NC_000014.8  |
| cg23181844 | 5.93E-10 | 4.76E-11 | 6.97 | 14.2096643 | 1.77E-01 | 19812548  | 19812671  | NC_000007.13 |
| cg18612627 | 5.93E-10 | 4.76E-11 | 6.97 | 14.2095713 | 1.22E-01 | 14135203  | 14135326  | NC_000012.11 |
| cg10055471 | 5.94E-10 | 4.76E-11 | 6.97 | 14.2080088 | 1.48E-01 | 27240319  | 27240442  | NC_000001.10 |
| cg19994157 | 5.95E-10 | 4.77E-11 | 6.97 | 14.2066238 | 3.08E-02 | 32825852  | 32825975  | NC_000006.11 |
| cg21375294 | 5.95E-10 | 4.77E-11 | 6.97 | 14.2061747 | 1.53E-01 | 35065040  | 35065163  | NC_000018.9  |
| cg15182939 | 5.95E-10 | 4.78E-11 | 6.97 | 14.2056931 | 4.02E-02 | 67701995  | 67702118  | NC_000003.11 |
| cg02227188 | 5.95E-10 | 4.78E-11 | 6.97 | 14.2055174 | 2.04E-01 | 54396354  | 54396477  | NC_000012.11 |
| cg15829642 | 5.97E-10 | 4.79E-11 | 6.97 | 14.2034155 | 1.37E-01 | 140744983 | 140745106 | NC_000005.9  |
| cg09504874 | 5.97E-10 | 4.79E-11 | 6.97 | 14.2024653 | 3.06E-02 | 224713    | 224836    | NC_000006.11 |
| cg23338503 | 5.97E-10 | 4.79E-11 | 6.97 | 14.2023649 | 1.97E-01 | 169064530 | 169064653 | NC_000005.9  |
| cg06183256 | 5.98E-10 | 4.80E-11 | 6.97 | 14.2013978 | 9.91E-02 | 53124971  | 53125094  | NC_000003.11 |
| cg19909679 | 5.98E-10 | 4.80E-11 | 6.97 | 14.200519  | 1.36E-01 | 9812135   | 9812258   | NC_000017.10 |
| cg15215830 | 5.98E-10 | 4.80E-11 | 6.97 | 14.200396  | 1.09E-01 | 125999805 | 125999928 | NC_000011.9  |
| cg18867480 | 5.98E-10 | 4.80E-11 | 6.97 | 14.2003276 | 1.62E-01 | 27744816  | 27744939  | NC_000011.9  |
| cg18128969 | 5.98E-10 | 4.80E-11 | 6.97 | 14.2001805 | 1.36E-01 | 22369908  | 22370031  | NC_000021.8  |
| cg10675138 | 5.98E-10 | 4.80E-11 | 6.97 | 14.1998652 | 1.91E-01 | 166075504 | 166075627 | NC_000006.11 |
| cg09431525 | 5.98E-10 | 4.80E-11 | 6.97 | 14.1998202 | 8.18E-02 | 39993313  | 39993436  | NC_000019.9  |
| cg13835436 | 6.00E-10 | 4.82E-11 | 6.97 | 14.1969799 | 6.58E-02 | 69809807  | 69809930  | NC_000011.9  |
| cg02919936 | 6.01E-10 | 4.82E-11 | 6.97 | 14.1962734 | 1.94E-01 | 70982285  | 70982408  | NC_000008.10 |

|            |          |          |      |            |          |           |           |              |
|------------|----------|----------|------|------------|----------|-----------|-----------|--------------|
| cg12610239 | 6.01E-10 | 4.82E-11 | 6.97 | 14.1958206 | 6.26E-02 | 2382748   | 2382871   | NC_000001.10 |
| cg17183752 | 6.01E-10 | 4.83E-11 | 6.97 | 14.1953524 | 8.87E-02 | 3508884   | 3509007   | NC_000001.10 |
| cg08581953 | 6.01E-10 | 4.83E-11 | 6.97 | 14.1952173 | 1.09E-01 | 25593057  | 25593180  | NC_000013.10 |
| cg12859211 | 6.02E-10 | 4.83E-11 | 6.97 | 14.1938777 | 2.39E-01 | 124735105 | 124735228 | NC_000011.9  |
| cg16499415 | 6.03E-10 | 4.84E-11 | 6.97 | 14.1925808 | 4.51E-02 | 61669675  | 61669798  | NC_000014.8  |
| cg00635522 | 6.03E-10 | 4.84E-11 | 6.97 | 14.1922677 | 5.17E-02 | 45396744  | 45396867  | NC_000013.10 |
| cg11635029 | 6.05E-10 | 4.86E-11 | 6.97 | 14.1878996 | 1.20E-01 | 130830829 | 130830952 | NC_000010.10 |
| cg05313279 | 6.06E-10 | 4.87E-11 | 6.97 | 14.1872809 | 5.44E-02 | 234627401 | 234627524 | NC_000002.11 |
| cg20417527 | 6.06E-10 | 4.87E-11 | 6.97 | 14.187066  | 1.41E-01 | 128300708 | 128300831 | NC_000005.9  |
| cg02058924 | 6.07E-10 | 4.88E-11 | 6.97 | 14.1850868 | 6.24E-02 | 133465592 | 133465715 | NC_000012.11 |
| cg18808506 | 6.07E-10 | 4.88E-11 | 6.97 | 14.184914  | 1.00E-01 | 142078020 | 142078143 | NC_000005.9  |
| cg07379703 | 6.07E-10 | 4.88E-11 | 6.97 | 14.1843592 | 1.20E-01 | 78279424  | 78279547  | NC_000005.9  |
| cg07930539 | 6.08E-10 | 4.88E-11 | 6.97 | 14.1834847 | 1.59E-01 | 177025975 | 177026098 | NC_000002.11 |
| cg15323936 | 6.08E-10 | 4.89E-11 | 6.97 | 14.1827485 | 9.37E-02 | 194996295 | 194996418 | NC_000003.11 |
| cg07439157 | 6.09E-10 | 4.90E-11 | 6.96 | 14.1809792 | 2.92E-02 | 74527263  | 74527386  | NC_000017.10 |
| cg20577477 | 6.10E-10 | 4.90E-11 | 6.96 | 14.1807349 | 1.36E-01 | 11668491  | 11668614  | NC_000008.10 |
| cg23232188 | 6.10E-10 | 4.90E-11 | 6.96 | 14.1804781 | 9.86E-02 | 121556543 | 121556666 | NC_000003.11 |
| cg22433574 | 6.10E-10 | 4.90E-11 | 6.96 | 14.1794728 | 1.80E-02 | 35849808  | 35849931  | NC_000017.10 |
| cg04131153 | 6.10E-10 | 4.91E-11 | 6.96 | 14.1793015 | 7.45E-02 | 19614541  | 19614664  | NC_000014.8  |
| cg04297507 | 6.11E-10 | 4.91E-11 | 6.96 | 14.1778204 | 1.07E-01 | 108749432 | 108749555 | NC_000004.11 |
| cg06962768 | 6.12E-10 | 4.92E-11 | 6.96 | 14.1770374 | 8.26E-02 | 37959782  | 37959905  | NC_000007.13 |
| cg22308726 | 6.12E-10 | 4.92E-11 | 6.96 | 14.176331  | 1.46E-01 | 4566575   | 4566698   | NC_000019.9  |
| cg11389960 | 6.12E-10 | 4.92E-11 | 6.96 | 14.1759391 | 1.09E-01 | 31277661  | 31277784  | NC_000015.9  |
| cg12577003 | 6.14E-10 | 4.93E-11 | 6.96 | 14.1736971 | 6.46E-02 | 2261337   | 2261460   | NC_000007.13 |
| cg03276401 | 6.14E-10 | 4.93E-11 | 6.96 | 14.1735458 | 1.27E-01 | 62225407  | 62225530  | NC_000017.10 |



|            |          |          |      |            |          |           |           |              |
|------------|----------|----------|------|------------|----------|-----------|-----------|--------------|
| cg08356522 | 6.14E-10 | 4.94E-11 | 6.96 | 14.1727546 | 7.72E-02 | 4445948   | 4446071   | NC_000010.10 |
| cg26532358 | 6.14E-10 | 4.94E-11 | 6.96 | 14.1721917 | 2.30E-01 | 118228871 | 118228994 | NC_000006.11 |
| cg10497345 | 6.15E-10 | 4.95E-11 | 6.96 | 14.170969  | 1.16E-01 | 90172038  | 90172161  | NC_000004.11 |
| cg17146473 | 6.15E-10 | 4.95E-11 | 6.96 | 14.1709564 | 4.95E-02 | 32052428  | 32052551  | NC_000006.11 |
| cg07523788 | 6.15E-10 | 4.95E-11 | 6.96 | 14.1705815 | 2.66E-02 | 242572342 | 242572465 | NC_000002.11 |
| cg26576890 | 6.17E-10 | 4.96E-11 | 6.96 | 14.1685897 | 1.17E-01 | 41374939  | 41375062  | NC_000006.11 |
| cg05328667 | 6.17E-10 | 4.96E-11 | 6.96 | 14.1685196 | 8.73E-02 | 28015357  | 28015480  | NC_000015.9  |
| cg00743269 | 6.17E-10 | 4.96E-11 | 6.96 | 14.1678674 | 9.79E-02 | 60747654  | 60747777  | NC_000017.10 |
| cg03164800 | 6.17E-10 | 4.96E-11 | 6.96 | 14.1677823 | 5.31E-02 | 80836552  | 80836675  | NC_000004.11 |
| cg15531403 | 6.17E-10 | 4.96E-11 | 6.96 | 14.167677  | 1.95E-01 | 53852184  | 53852307  | NC_000008.10 |
| cg22672282 | 6.17E-10 | 4.97E-11 | 6.96 | 14.1670089 | 1.20E-01 | 44222974  | 44223097  | NC_000019.9  |
| cg04145134 | 6.18E-10 | 4.97E-11 | 6.96 | 14.1659231 | 1.46E-01 | 99697672  | 99697795  | NC_000014.8  |
| cg22605303 | 6.18E-10 | 4.98E-11 | 6.96 | 14.1652809 | 1.64E-01 | 91172472  | 91172595  | NC_000001.10 |
| cg07695835 | 6.20E-10 | 4.99E-11 | 6.96 | 14.1627701 | 1.76E-01 | 20985984  | 20986107  | NC_000004.11 |
| cg26014723 | 6.20E-10 | 4.99E-11 | 6.96 | 14.1626181 | 1.29E-01 | 71055476  | 71055599  | NC_000002.11 |
| cg15343119 | 6.21E-10 | 5.00E-11 | 6.96 | 14.1611747 | 1.83E-01 | 74961785  | 74961908  | NC_000018.9  |
| cg03834286 | 6.21E-10 | 5.00E-11 | 6.96 | 14.1611393 | 1.42E-01 | 3590482   | 3590605   | NC_000005.9  |
| cg11337915 | 6.21E-10 | 5.00E-11 | 6.96 | 14.1607684 | 1.27E-01 | 40719088  | 40719211  | NC_000021.8  |
| cg00449767 | 6.22E-10 | 5.00E-11 | 6.96 | 14.1597387 | 1.05E-01 | 45737603  | 45737726  | NC_000019.9  |
| cg09298920 | 6.22E-10 | 5.00E-11 | 6.96 | 14.1596975 | 7.70E-02 | 35859139  | 35859262  | NC_000009.11 |
| cg01445399 | 6.22E-10 | 5.00E-11 | 6.96 | 14.1596691 | 1.14E-01 | 87596934  | 87597057  | NC_000001.10 |
| cg24172509 | 6.22E-10 | 5.01E-11 | 6.96 | 14.159217  | 1.62E-01 | 140778424 | 140778547 | NC_000005.9  |
| cg00630237 | 6.23E-10 | 5.01E-11 | 6.96 | 14.1580711 | 2.80E-02 | 91433507  | 91433630  | NC_000015.9  |
| cg25324047 | 6.25E-10 | 5.03E-11 | 6.96 | 14.154719  | 2.03E-01 | 22765840  | 22765963  | NC_000010.10 |
| cg16332927 | 6.25E-10 | 5.03E-11 | 6.96 | 14.1541569 | 1.31E-01 | 37461350  | 37461473  | NC_000006.11 |

|            |          |          |      |            |          |           |           |              |
|------------|----------|----------|------|------------|----------|-----------|-----------|--------------|
| cg00162806 | 6.25E-10 | 5.04E-11 | 6.96 | 14.1536028 | 1.25E-01 | 135051929 | 135052052 | NC_000010.10 |
| cg05680531 | 6.26E-10 | 5.04E-11 | 6.96 | 14.1533315 | 1.91E-01 | 136553327 | 136553450 | NC_000007.13 |
| cg15131934 | 6.26E-10 | 5.04E-11 | 6.96 | 14.1526045 | 1.02E-01 | 53659328  | 53659451  | NC_000001.10 |
| cg09571082 | 6.27E-10 | 5.05E-11 | 6.96 | 14.1508747 | 1.49E-01 | 14549941  | 14550064  | NC_000006.11 |
| cg10454766 | 6.27E-10 | 5.05E-11 | 6.96 | 14.1507016 | 1.87E-01 | 109293945 | 109294068 | NC_000011.9  |
| cg05296773 | 6.27E-10 | 5.05E-11 | 6.96 | 14.1502292 | 6.03E-02 | 93449339  | 93449462  | NC_000012.11 |
| cg02155048 | 6.28E-10 | 5.06E-11 | 6.96 | 14.1497004 | 7.78E-02 | 10721597  | 10721720  | NC_000016.9  |
| cg25787956 | 6.28E-10 | 5.06E-11 | 6.96 | 14.1492577 | 9.13E-02 | 77548882  | 77549005  | NC_000018.9  |
| cg02186782 | 6.28E-10 | 5.06E-11 | 6.96 | 14.1483696 | 1.69E-01 | 33602817  | 33602940  | NC_000015.9  |
| cg07927308 | 6.29E-10 | 5.07E-11 | 6.96 | 14.1477175 | 6.72E-02 | 84886961  | 84887084  | NC_000016.9  |
| cg27587310 | 6.30E-10 | 5.07E-11 | 6.96 | 14.1463173 | 1.10E-01 | 29204994  | 29205117  | NC_000016.9  |
| cg08141424 | 6.30E-10 | 5.08E-11 | 6.96 | 14.1458171 | 1.63E-01 | 73674087  | 73674210  | NC_000003.11 |
| cg16930746 | 6.30E-10 | 5.08E-11 | 6.96 | 14.1451394 | 1.38E-01 | 33780951  | 33781074  | NC_000013.10 |
| cg02732804 | 6.32E-10 | 5.09E-11 | 6.96 | 14.1422979 | 2.31E-01 | 28075269  | 28075392  | NC_000016.9  |
| cg04237666 | 6.32E-10 | 5.09E-11 | 6.96 | 14.1421864 | 1.28E-01 | 83674615  | 83674738  | NC_000004.11 |
| cg15921949 | 6.33E-10 | 5.10E-11 | 6.96 | 14.141342  | 1.71E-01 | 137486213 | 137486336 | NC_000003.11 |
| cg07422329 | 6.33E-10 | 5.10E-11 | 6.96 | 14.1411204 | 1.21E-01 | 186642182 | 186642305 | NC_000001.10 |
| cg16737018 | 6.34E-10 | 5.11E-11 | 6.96 | 14.13986   | 8.07E-02 | 103914581 | 103914704 | NC_000014.8  |
| cg06529761 | 6.34E-10 | 5.11E-11 | 6.96 | 14.1389147 | 9.22E-02 | 3702486   | 3702609   | NC_000016.9  |
| cg26775087 | 6.35E-10 | 5.11E-11 | 6.96 | 14.1382657 | 6.51E-02 | 15382808  | 15382931  | NC_000003.11 |
| cg14868994 | 6.35E-10 | 5.12E-11 | 6.96 | 14.1378515 | 1.60E-01 | 45155672  | 45155795  | NC_000002.11 |
| cg21657955 | 6.35E-10 | 5.12E-11 | 6.96 | 14.1374707 | 1.85E-01 | 19812578  | 19812701  | NC_000007.13 |
| cg07542000 | 6.36E-10 | 5.13E-11 | 6.96 | 14.1351974 | 5.90E-02 | 31258602  | 31258725  | NC_000017.10 |
| cg03701266 | 6.38E-10 | 5.14E-11 | 6.96 | 14.133409  | 6.99E-02 | 10649678  | 10649801  | NC_000005.9  |
| cg05418042 | 6.38E-10 | 5.14E-11 | 6.96 | 14.1329514 | 1.15E-01 | 16063771  | 16063894  | NC_000012.11 |

|            |          |          |      |            |          |           |           |              |
|------------|----------|----------|------|------------|----------|-----------|-----------|--------------|
| cg18231690 | 6.38E-10 | 5.15E-11 | 6.96 | 14.1320875 | 6.29E-02 | 85294586  | 85294709  | NC_000015.9  |
| cg11229185 | 6.40E-10 | 5.16E-11 | 6.96 | 14.1297185 | 1.40E-01 | 22625274  | 22625397  | NC_000010.10 |
| cg22675745 | 6.41E-10 | 5.17E-11 | 6.96 | 14.1276296 | 9.42E-02 | 218577902 | 218578025 | NC_000002.11 |
| cg06110297 | 6.41E-10 | 5.17E-11 | 6.96 | 14.1270102 | 1.49E-01 | 22589830  | 22589953  | NC_000007.13 |
| cg04901179 | 6.41E-10 | 5.17E-11 | 6.96 | 14.1270008 | 5.89E-02 | 111430583 | 111430706 | NC_000007.13 |
| cg06330691 | 6.42E-10 | 5.18E-11 | 6.96 | 14.126595  | 1.81E-01 | 78673290  | 78673413  | NC_000011.9  |
| cg19876232 | 6.42E-10 | 5.18E-11 | 6.95 | 14.1260768 | 2.26E-02 | 52174504  | 52174627  | NC_000010.10 |
| cg13548946 | 6.43E-10 | 5.18E-11 | 6.95 | 14.1251957 | 9.06E-02 | 123350077 | 123350200 | NC_000012.11 |
| cg02655195 | 6.43E-10 | 5.18E-11 | 6.95 | 14.1249812 | 1.01E-01 | 166511914 | 166512037 | NC_000006.11 |
| cg21051964 | 6.44E-10 | 5.19E-11 | 6.95 | 14.1231127 | 5.70E-02 | 58022620  | 58022743  | NC_000012.11 |
| cg18182111 | 6.44E-10 | 5.20E-11 | 6.95 | 14.1224494 | 1.76E-01 | 37835111  | 37835234  | NC_000005.9  |
| cg26618965 | 6.44E-10 | 5.20E-11 | 6.95 | 14.1220955 | 1.91E-01 | 67874206  | 67874329  | NC_000008.10 |
| cg14573411 | 6.45E-10 | 5.20E-11 | 6.95 | 14.1217247 | 2.11E-01 | 126135992 | 126136115 | NC_000009.11 |
| cg08776908 | 6.45E-10 | 5.20E-11 | 6.95 | 14.1216092 | 1.63E-01 | 157898347 | 157898470 | NC_000005.9  |
| cg14339043 | 6.46E-10 | 5.21E-11 | 6.95 | 14.1199858 | 1.83E-01 | 4198058   | 4198181   | NC_000019.9  |
| cg24971112 | 6.47E-10 | 5.22E-11 | 6.95 | 14.1174076 | 1.25E-01 | 153385052 | 153385175 | NC_000003.11 |
| cg08247297 | 6.49E-10 | 5.24E-11 | 6.95 | 14.1150658 | 8.06E-02 | 46917541  | 46917664  | NC_000021.8  |
| cg05297328 | 6.49E-10 | 5.24E-11 | 6.95 | 14.1145493 | 5.02E-02 | 101532225 | 101532348 | NC_000014.8  |
| cg05928290 | 6.52E-10 | 5.26E-11 | 6.95 | 14.1104668 | 1.27E-01 | 54418728  | 54418851  | NC_000014.8  |
| cg10318313 | 6.52E-10 | 5.26E-11 | 6.95 | 14.1101346 | 6.78E-02 | 3014937   | 3015060   | NC_000011.9  |
| cg25148347 | 6.52E-10 | 5.26E-11 | 6.95 | 14.1101055 | 6.25E-02 | 42074193  | 42074316  | NC_000006.11 |
| cg00847277 | 6.54E-10 | 5.28E-11 | 6.95 | 14.1071642 | 1.47E-01 | 142528956 | 142529079 | NC_000008.10 |
| cg04836851 | 6.54E-10 | 5.28E-11 | 6.95 | 14.1071202 | 1.14E-01 | 140562819 | 140562942 | NC_000005.9  |
| cg15272362 | 6.54E-10 | 5.29E-11 | 6.95 | 14.1059316 | 1.84E-01 | 25062823  | 25062946  | NC_000020.10 |
| cg25225155 | 6.55E-10 | 5.29E-11 | 6.95 | 14.1050461 | 9.70E-02 | 140222253 | 140222376 | NC_000005.9  |

|            |          |          |      |            |          |           |           |              |
|------------|----------|----------|------|------------|----------|-----------|-----------|--------------|
| cg00779065 | 6.56E-10 | 5.30E-11 | 6.95 | 14.1035899 | 1.83E-01 | 61119218  | 61119341  | NC_000014.8  |
| cg05403433 | 6.57E-10 | 5.31E-11 | 6.95 | 14.1018282 | 1.17E-01 | 87088843  | 87088966  | NC_000002.11 |
| cg21053529 | 6.57E-10 | 5.31E-11 | 6.95 | 14.1012465 | 1.74E-01 | 35046760  | 35046883  | NC_000015.9  |
| cg00044796 | 6.57E-10 | 5.31E-11 | 6.95 | 14.1011017 | 1.67E-01 | 146552390 | 146552513 | NC_000001.10 |
| cg00264591 | 6.57E-10 | 5.31E-11 | 6.95 | 14.1009968 | 1.54E-01 | 1883514   | 1883637   | NC_000005.9  |
| cg24521010 | 6.58E-10 | 5.31E-11 | 6.95 | 14.1007445 | 3.21E-02 | 16155290  | 16155413  | NC_000022.10 |
| cg02641337 | 6.58E-10 | 5.31E-11 | 6.95 | 14.1006455 | 2.17E-01 | 4867387   | 4867510   | NC_000004.11 |
| cg17958315 | 6.58E-10 | 5.32E-11 | 6.95 | 14.0995921 | 1.92E-01 | 127873552 | 127873675 | NC_000005.9  |
| cg00693401 | 6.58E-10 | 5.32E-11 | 6.95 | 14.0993562 | 3.24E-02 | 80655583  | 80655706  | NC_000017.10 |
| cg24981593 | 6.59E-10 | 5.32E-11 | 6.95 | 14.0991447 | 2.11E-01 | 45160253  | 45160376  | NC_000002.11 |
| cg15020132 | 6.59E-10 | 5.32E-11 | 6.95 | 14.0986767 | 1.06E-01 | 34122682  | 34122805  | NC_000007.13 |
| cg12581627 | 6.59E-10 | 5.33E-11 | 6.95 | 14.0980692 | 1.88E-01 | 61987935  | 61988058  | NC_000013.10 |
| cg03087912 | 6.59E-10 | 5.33E-11 | 6.95 | 14.0980135 | 1.63E-01 | 55379034  | 55379157  | NC_000008.10 |
| cg26051413 | 6.59E-10 | 5.33E-11 | 6.95 | 14.097849  | 1.26E-01 | 2292902   | 2293025   | NC_000011.9  |
| cg11586570 | 6.62E-10 | 5.35E-11 | 6.95 | 14.0932594 | 1.47E-01 | 63498133  | 63498256  | NC_000007.13 |
| cg22719241 | 6.63E-10 | 5.36E-11 | 6.95 | 14.0925127 | 1.41E-01 | 36524058  | 36524181  | NC_000019.9  |
| cg17431391 | 6.64E-10 | 5.37E-11 | 6.95 | 14.0900234 | 1.14E-01 | 38042109  | 38042232  | NC_000019.9  |
| cg02593924 | 6.64E-10 | 5.37E-11 | 6.95 | 14.0899371 | 1.11E-01 | 1844998   | 1845121   | NC_000016.9  |
| cg16584393 | 6.65E-10 | 5.38E-11 | 6.95 | 14.0887946 | 1.32E-01 | 14747888  | 14748011  | NC_000018.9  |
| cg06218338 | 6.66E-10 | 5.38E-11 | 6.95 | 14.0881291 | 1.45E-01 | 27231894  | 27232017  | NC_000007.13 |
| cg19594666 | 6.66E-10 | 5.39E-11 | 6.95 | 14.0868279 | 1.06E-01 | 127881280 | 127881403 | NC_000007.13 |
| cg05063374 | 6.67E-10 | 5.40E-11 | 6.95 | 14.0858268 | 5.86E-02 | 38953512  | 38953635  | NC_000017.10 |
| cg22710398 | 6.67E-10 | 5.40E-11 | 6.95 | 14.0856225 | 5.34E-02 | 86349279  | 86349402  | NC_000006.11 |
| cg03826642 | 6.68E-10 | 5.40E-11 | 6.95 | 14.0846438 | 1.66E-01 | 10268858  | 10268981  | NC_000006.11 |
| cg16051195 | 6.69E-10 | 5.41E-11 | 6.95 | 14.0826236 | 1.55E-01 | 166268183 | 166268306 | NC_000006.11 |

|            |          |          |      |            |          |           |           |              |
|------------|----------|----------|------|------------|----------|-----------|-----------|--------------|
| cg01231921 | 6.70E-10 | 5.42E-11 | 6.95 | 14.0807677 | 1.11E-01 | 241611991 | 241612114 | NC_000002.11 |
| cg15553500 | 6.71E-10 | 5.42E-11 | 6.95 | 14.0804263 | 1.07E-01 | 41880987  | 41881110  | NC_000004.11 |
| cg16384492 | 6.71E-10 | 5.43E-11 | 6.95 | 14.0797641 | 1.40E-01 | 40034481  | 40034604  | NC_000001.10 |
| cg23602453 | 6.71E-10 | 5.43E-11 | 6.95 | 14.079627  | 1.04E-01 | 246958862 | 246958985 | NC_000001.10 |
| cg18035571 | 6.71E-10 | 5.43E-11 | 6.95 | 14.079058  | 7.75E-02 | 176580675 | 176580798 | NC_000005.9  |
| cg11248812 | 6.73E-10 | 5.44E-11 | 6.95 | 14.0768115 | 6.54E-02 | 75502917  | 75503040  | NC_000017.10 |
| cg22856324 | 6.73E-10 | 5.45E-11 | 6.95 | 14.0763542 | 1.21E-01 | 72371255  | 72371378  | NC_000002.11 |
| cg12456799 | 6.73E-10 | 5.45E-11 | 6.95 | 14.0762351 | 1.81E-01 | 106441036 | 106441159 | NC_000010.10 |
| cg00183067 | 6.73E-10 | 5.45E-11 | 6.95 | 14.0757164 | 1.13E-01 | 151075493 | 151075616 | NC_000006.11 |
| cg07498975 | 6.74E-10 | 5.45E-11 | 6.95 | 14.0751101 | 4.00E-02 | 101338750 | 101338873 | NC_000001.10 |
| cg14529086 | 6.74E-10 | 5.46E-11 | 6.95 | 14.0741368 | 7.36E-02 | 35226828  | 35226951  | NC_000019.9  |
| cg01998089 | 6.75E-10 | 5.47E-11 | 6.95 | 14.0728895 | 5.40E-02 | 91205834  | 91205957  | NC_000014.8  |
| cg22707381 | 6.76E-10 | 5.47E-11 | 6.95 | 14.0724387 | 8.43E-02 | 66458942  | 66459065  | NC_000011.9  |
| cg07637213 | 6.76E-10 | 5.47E-11 | 6.95 | 14.071483  | 1.07E-01 | 50820604  | 50820727  | NC_000010.10 |
| cg00359590 | 6.77E-10 | 5.49E-11 | 6.94 | 14.0694824 | 1.12E-01 | 27469673  | 27469796  | NC_000008.10 |
| cg19049860 | 6.79E-10 | 5.49E-11 | 6.94 | 14.067864  | 1.01E-01 | 53040267  | 53040390  | NC_000006.11 |
| cg08729318 | 6.79E-10 | 5.50E-11 | 6.94 | 14.0676145 | 2.25E-01 | 29936839  | 29936962  | NC_000012.11 |
| cg07592136 | 6.79E-10 | 5.50E-11 | 6.94 | 14.066821  | 8.38E-02 | 51473480  | 51473603  | NC_000019.9  |
| cg11219883 | 6.79E-10 | 5.50E-11 | 6.94 | 14.0667413 | 7.67E-02 | 130501758 | 130501881 | NC_000012.11 |
| cg08580014 | 6.79E-10 | 5.50E-11 | 6.94 | 14.0665423 | 1.32E-01 | 118368634 | 118368757 | NC_000010.10 |
| cg03192598 | 6.80E-10 | 5.51E-11 | 6.94 | 14.0659113 | 2.43E-01 | 12305854  | 12305977  | NC_000019.9  |
| cg11403027 | 6.80E-10 | 5.51E-11 | 6.94 | 14.0657183 | 8.64E-02 | 42971411  | 42971534  | NC_000005.9  |
| cg01433520 | 6.80E-10 | 5.51E-11 | 6.94 | 14.0656157 | 2.30E-02 | 10363474  | 10363597  | NC_000003.11 |
| cg22799141 | 6.80E-10 | 5.51E-11 | 6.94 | 14.0650841 | 1.90E-01 | 114885621 | 114885744 | NC_000012.11 |
| cg05281894 | 6.81E-10 | 5.52E-11 | 6.94 | 14.0636107 | 2.07E-01 | 13910698  | 13910821  | NC_000001.10 |

|            |          |          |      |            |          |           |           |              |
|------------|----------|----------|------|------------|----------|-----------|-----------|--------------|
| cg15624376 | 6.81E-10 | 5.52E-11 | 6.94 | 14.0635752 | 1.51E-01 | 27171391  | 27171514  | NC_000007.13 |
| cg20820996 | 6.81E-10 | 5.52E-11 | 6.94 | 14.0630402 | 6.55E-02 | 33749849  | 33749972  | NC_000001.10 |
| cg07986943 | 6.83E-10 | 5.53E-11 | 6.94 | 14.0611225 | 1.20E-01 | 176932579 | 176932702 | NC_000002.11 |
| cg17777676 | 6.83E-10 | 5.53E-11 | 6.94 | 14.0608105 | 1.25E-01 | 140186895 | 140187018 | NC_000005.9  |
| cg05457075 | 6.83E-10 | 5.54E-11 | 6.94 | 14.06046   | 3.17E-02 | 1676296   | 1676419   | NC_000016.9  |
| cg15028514 | 6.84E-10 | 5.54E-11 | 6.94 | 14.0592598 | 1.67E-01 | 61809841  | 61809964  | NC_000020.10 |
| cg14094639 | 6.84E-10 | 5.54E-11 | 6.94 | 14.0592136 | 1.09E-01 | 1309477   | 1309600   | NC_000001.10 |
| cg16035667 | 6.84E-10 | 5.55E-11 | 6.94 | 14.0586668 | 5.31E-02 | 197359987 | 197360110 | NC_000003.11 |
| cg18044383 | 6.86E-10 | 5.57E-11 | 6.94 | 14.055332  | 1.30E-01 | 59001158  | 59001281  | NC_000018.9  |
| cg07616499 | 6.87E-10 | 5.57E-11 | 6.94 | 14.0540025 | 1.04E-01 | 30324789  | 30324912  | NC_000010.10 |
| cg24494227 | 6.89E-10 | 5.58E-11 | 6.94 | 14.0519472 | 1.17E-01 | 168070460 | 168070583 | NC_000006.11 |
| cg10832304 | 6.89E-10 | 5.59E-11 | 6.94 | 14.0512192 | 2.09E-01 | 39998018  | 39998141  | NC_000019.9  |
| cg21390574 | 6.90E-10 | 5.60E-11 | 6.94 | 14.0499794 | 9.57E-02 | 122675597 | 122675720 | NC_000003.11 |
| cg03461296 | 6.90E-10 | 5.60E-11 | 6.94 | 14.0497819 | 6.38E-02 | 60637948  | 60638071  | NC_000020.10 |
| cg05121480 | 6.90E-10 | 5.60E-11 | 6.94 | 14.0489892 | 1.68E-01 | 187387601 | 187387724 | NC_000003.11 |
| cg11522612 | 6.91E-10 | 5.61E-11 | 6.94 | 14.0476707 | 9.11E-02 | 31687637  | 31687760  | NC_000006.11 |
| cg14504259 | 6.92E-10 | 5.61E-11 | 6.94 | 14.046918  | 1.31E-01 | 970882    | 971005    | NC_000009.11 |
| cg23064554 | 6.92E-10 | 5.62E-11 | 6.94 | 14.0462709 | 1.05E-01 | 15764095  | 15764218  | NC_000001.10 |
| cg19589939 | 6.93E-10 | 5.62E-11 | 6.94 | 14.0458462 | 1.86E-01 | 103355326 | 103355449 | NC_000012.11 |
| cg05402793 | 6.93E-10 | 5.62E-11 | 6.94 | 14.0455421 | 1.39E-01 | 149633660 | 149633783 | NC_000002.11 |
| cg11345811 | 6.93E-10 | 5.62E-11 | 6.94 | 14.0454388 | 1.07E-01 | 3283643   | 3283766   | NC_000010.10 |
| cg14032025 | 6.93E-10 | 5.62E-11 | 6.94 | 14.0448371 | 2.17E-01 | 50721129  | 50721252  | NC_000020.10 |
| cg23895340 | 6.93E-10 | 5.63E-11 | 6.94 | 14.0447965 | 1.74E-01 | 176973275 | 176973398 | NC_000002.11 |
| cg04853284 | 6.93E-10 | 5.63E-11 | 6.94 | 14.0447075 | 2.87E-02 | 91435964  | 91436087  | NC_000015.9  |
| cg07755203 | 6.94E-10 | 5.63E-11 | 6.94 | 14.044098  | 6.54E-02 | 150177004 | 150177127 | NC_000002.11 |

|                 |          |          |      |            |          |           |           |              |
|-----------------|----------|----------|------|------------|----------|-----------|-----------|--------------|
| cg02259324      | 6.94E-10 | 5.63E-11 | 6.94 | 14.0433646 | 1.64E-01 | 78111196  | 78111319  | NC_000015.9  |
| cg11557636      | 6.96E-10 | 5.65E-11 | 6.94 | 14.0408782 | 1.99E-01 | 37246751  | 37246874  | NC_000004.11 |
| cg21435375      | 6.96E-10 | 5.65E-11 | 6.94 | 14.0408208 | 9.30E-02 | 172878103 | 172878226 | NC_000002.11 |
| cg13021619      | 6.98E-10 | 5.66E-11 | 6.94 | 14.0380729 | 1.82E-01 | 23563859  | 23563982  | NC_000008.10 |
| cg08545287      | 6.99E-10 | 5.67E-11 | 6.94 | 14.0364973 | 1.55E-01 | 6069047   | 6069170   | NC_000016.9  |
| cg01181485      | 6.99E-10 | 5.67E-11 | 6.94 | 14.0362367 | 8.47E-02 | 153454027 | 153454150 | NC_000004.11 |
| cg07118985      | 6.99E-10 | 5.68E-11 | 6.94 | 14.036116  | 9.75E-02 | 51424481  | 51424604  | NC_000003.11 |
| cg18952647      | 6.99E-10 | 5.68E-11 | 6.94 | 14.0360997 | 1.65E-01 | 83953744  | 83953867  | NC_000015.9  |
| ch.2.216208170F | 6.99E-10 | 5.68E-11 | 6.94 | 14.035607  | 6.07E-02 | 216499925 | 216500048 | NC_000002.11 |
| cg26232187      | 7.00E-10 | 5.68E-11 | 6.94 | 14.0347441 | 1.71E-01 | 88799300  | 88799423  | NC_000015.9  |
| cg16386984      | 7.01E-10 | 5.69E-11 | 6.94 | 14.0333667 | 3.17E-02 | 187216224 | 187216347 | NC_000004.11 |
| cg25019989      | 7.01E-10 | 5.69E-11 | 6.94 | 14.0329243 | 1.62E-01 | 54961835  | 54961958  | NC_000004.11 |
| cg01508023      | 7.02E-10 | 5.70E-11 | 6.94 | 14.0312769 | 1.89E-01 | 82136116  | 82136239  | NC_000004.11 |
| cg26217572      | 7.02E-10 | 5.71E-11 | 6.94 | 14.0308113 | 1.09E-01 | 27540240  | 27540363  | NC_000013.10 |
| cg27398401      | 7.03E-10 | 5.71E-11 | 6.94 | 14.0303108 | 1.13E-01 | 56976548  | 56976671  | NC_000001.10 |
| cg04370634      | 7.03E-10 | 5.71E-11 | 6.94 | 14.0298061 | 1.21E-01 | 31721446  | 31721569  | NC_000003.11 |
| cg24608684      | 7.04E-10 | 5.72E-11 | 6.94 | 14.028679  | 2.36E-01 | 130686865 | 130686988 | NC_000006.11 |
| cg27264049      | 7.05E-10 | 5.73E-11 | 6.94 | 14.0274563 | 1.79E-01 | 13537872  | 13537995  | NC_000004.11 |
| cg24705960      | 7.05E-10 | 5.73E-11 | 6.94 | 14.0267308 | 1.76E-01 | 62359456  | 62359579  | NC_000003.11 |
| cg10056728      | 7.06E-10 | 5.73E-11 | 6.94 | 14.0260731 | 8.76E-02 | 56497073  | 56497196  | NC_000012.11 |
| cg09960109      | 7.06E-10 | 5.74E-11 | 6.94 | 14.0251319 | 1.33E-01 | 134072237 | 134072360 | NC_000004.11 |
| cg12424785      | 7.06E-10 | 5.74E-11 | 6.94 | 14.0247364 | 1.47E-01 | 154728133 | 154728256 | NC_000002.11 |
| cg18762727      | 7.07E-10 | 5.74E-11 | 6.94 | 14.0244979 | 1.81E-01 | 101006089 | 101006212 | NC_000007.13 |
| cg07369950      | 7.07E-10 | 5.74E-11 | 6.94 | 14.0241339 | 1.81E-01 | 58609987  | 58610110  | NC_000019.9  |
| cg12158272      | 7.08E-10 | 5.75E-11 | 6.94 | 14.0228949 | 1.45E-01 | 119800972 | 119801095 | NC_000005.9  |

|            |          |          |      |            |          |           |           |              |
|------------|----------|----------|------|------------|----------|-----------|-----------|--------------|
| cg20962532 | 7.09E-10 | 5.76E-11 | 6.94 | 14.0216621 | 1.30E-01 | 128712462 | 128712585 | NC_000011.9  |
| cg00314343 | 7.09E-10 | 5.76E-11 | 6.94 | 14.0213302 | 6.61E-02 | 92428182  | 92428305  | NC_000015.9  |
| cg04832466 | 7.10E-10 | 5.77E-11 | 6.94 | 14.0195285 | 1.50E-01 | 112760088 | 112760211 | NC_000013.10 |
| cg09396704 | 7.11E-10 | 5.78E-11 | 6.94 | 14.0184541 | 1.30E-01 | 203045229 | 203045352 | NC_000001.10 |
| cg04365721 | 7.11E-10 | 5.78E-11 | 6.94 | 14.0178472 | 1.34E-01 | 3600391   | 3600514   | NC_000005.9  |
| cg22076941 | 7.11E-10 | 5.78E-11 | 6.94 | 14.0173373 | 1.07E-01 | 70036106  | 70036229  | NC_000001.10 |
| cg06632762 | 7.12E-10 | 5.79E-11 | 6.94 | 14.0171055 | 2.18E-01 | 110230545 | 110230668 | NC_000001.10 |
| cg09906145 | 7.12E-10 | 5.79E-11 | 6.94 | 14.0169675 | 1.02E-01 | 67562424  | 67562547  | NC_000016.9  |
| cg03632245 | 7.13E-10 | 5.80E-11 | 6.93 | 14.0148587 | 8.26E-02 | 72590921  | 72591044  | NC_000005.9  |
| cg00070680 | 7.13E-10 | 5.80E-11 | 6.93 | 14.0146835 | 1.83E-01 | 137531956 | 137532079 | NC_000007.13 |
| cg03672342 | 7.14E-10 | 5.80E-11 | 6.93 | 14.0142373 | 2.13E-01 | 8094093   | 8094216   | NC_000010.10 |
| cg24669786 | 7.15E-10 | 5.81E-11 | 6.93 | 14.0127218 | 7.80E-02 | 92731118  | 92731241  | NC_000007.13 |
| cg07109453 | 7.15E-10 | 5.82E-11 | 6.93 | 14.0120652 | 1.74E-01 | 234669825 | 234669948 | NC_000001.10 |
| cg22876812 | 7.15E-10 | 5.82E-11 | 6.93 | 14.0120243 | 1.88E-01 | 71116188  | 71116311  | NC_000002.11 |
| cg04920689 | 7.15E-10 | 5.82E-11 | 6.93 | 14.0117886 | 1.60E-01 | 88800510  | 88800633  | NC_000015.9  |
| cg06697536 | 7.16E-10 | 5.82E-11 | 6.93 | 14.0105564 | 1.63E-01 | 177053496 | 177053619 | NC_000002.11 |
| cg20357628 | 7.16E-10 | 5.83E-11 | 6.93 | 14.010461  | 2.30E-01 | 58179847  | 58179970  | NC_000020.10 |
| cg08570686 | 7.16E-10 | 5.83E-11 | 6.93 | 14.0101653 | 6.80E-02 | 2287843   | 2287966   | NC_000011.9  |
| cg18783886 | 7.17E-10 | 5.83E-11 | 6.93 | 14.0096751 | 4.06E-02 | 148964538 | 148964661 | NC_000007.13 |
| cg10211298 | 7.17E-10 | 5.83E-11 | 6.93 | 14.0094411 | 1.46E-01 | 132757894 | 132758017 | NC_000003.11 |
| cg05266564 | 7.17E-10 | 5.83E-11 | 6.93 | 14.0088572 | 1.39E-01 | 177024502 | 177024625 | NC_000002.11 |
| cg15399466 | 7.19E-10 | 5.85E-11 | 6.93 | 14.0059446 | 1.40E-01 | 50696059  | 50696182  | NC_000005.9  |
| cg14823851 | 7.21E-10 | 5.87E-11 | 6.93 | 14.0033668 | 1.04E-01 | 59532306  | 59532429  | NC_000017.10 |
| cg10765171 | 7.21E-10 | 5.87E-11 | 6.93 | 14.0029735 | 8.95E-02 | 23270757  | 23270880  | NC_000013.10 |
| cg07598580 | 7.21E-10 | 5.87E-11 | 6.93 | 14.0027744 | 1.06E-01 | 86620525  | 86620648  | NC_000001.10 |



|            |          |          |      |            |          |           |           |              |
|------------|----------|----------|------|------------|----------|-----------|-----------|--------------|
| cg22549437 | 7.22E-10 | 5.88E-11 | 6.93 | 14.001828  | 1.14E-01 | 18466223  | 18466346  | NC_000006.11 |
| cg04974290 | 7.22E-10 | 5.88E-11 | 6.93 | 14.0013544 | 1.75E-01 | 5001047   | 5001170   | NC_000017.10 |
| cg08599259 | 7.24E-10 | 5.89E-11 | 6.93 | 13.9990442 | 1.81E-01 | 38510933  | 38511056  | NC_000001.10 |
| cg24844202 | 7.24E-10 | 5.89E-11 | 6.93 | 13.9988894 | 3.10E-02 | 95072875  | 95072998  | NC_000008.10 |
| cg07923686 | 7.24E-10 | 5.90E-11 | 6.93 | 13.9986032 | 1.73E-01 | 65491318  | 65491441  | NC_000008.10 |
| cg00842325 | 7.24E-10 | 5.90E-11 | 6.93 | 13.9982086 | 1.89E-01 | 21503536  | 21503659  | NC_000020.10 |
| cg09784428 | 7.27E-10 | 5.92E-11 | 6.93 | 13.9949685 | 1.08E-01 | 134791450 | 134791573 | NC_000010.10 |
| cg22538780 | 7.27E-10 | 5.92E-11 | 6.93 | 13.9943846 | 1.75E-01 | 77585448  | 77585571  | NC_000008.10 |
| cg06847624 | 7.27E-10 | 5.92E-11 | 6.93 | 13.9943673 | 1.76E-01 | 176827671 | 176827794 | NC_000005.9  |
| cg20284937 | 7.27E-10 | 5.92E-11 | 6.93 | 13.9942129 | 3.62E-02 | 45002564  | 45002687  | NC_000001.10 |
| cg12973930 | 7.28E-10 | 5.93E-11 | 6.93 | 13.9927118 | 2.29E-01 | 57049695  | 57049818  | NC_000019.9  |
| cg11152033 | 7.29E-10 | 5.94E-11 | 6.93 | 13.9911913 | 3.67E-02 | 61542496  | 61542619  | NC_000020.10 |
| cg04865110 | 7.30E-10 | 5.94E-11 | 6.93 | 13.9905602 | 2.46E-01 | 6202558   | 6202681   | NC_000004.11 |
| cg12894776 | 7.31E-10 | 5.95E-11 | 6.93 | 13.9889505 | 4.64E-02 | 79792334  | 79792457  | NC_000017.10 |
| cg00949635 | 7.31E-10 | 5.95E-11 | 6.93 | 13.9888665 | 1.49E-01 | 103634624 | 103634747 | NC_000004.11 |
| cg04756597 | 7.31E-10 | 5.96E-11 | 6.93 | 13.9884381 | 7.65E-02 | 44730607  | 44730730  | NC_000022.10 |
| cg19109538 | 7.31E-10 | 5.96E-11 | 6.93 | 13.9882457 | 2.08E-01 | 88325263  | 88325386  | NC_000013.10 |
| cg04918696 | 7.31E-10 | 5.96E-11 | 6.93 | 13.9881863 | 1.34E-01 | 1004106   | 1004229   | NC_000008.10 |
| cg10739095 | 7.32E-10 | 5.97E-11 | 6.93 | 13.986854  | 1.96E-01 | 139653928 | 139654051 | NC_000003.11 |
| cg05390356 | 7.36E-10 | 5.99E-11 | 6.93 | 13.9823109 | 1.35E-01 | 10277983  | 10278106  | NC_000001.10 |
| cg14283944 | 7.36E-10 | 6.00E-11 | 6.93 | 13.9820962 | 1.93E-01 | 114883316 | 114883439 | NC_000012.11 |
| cg22987590 | 7.36E-10 | 6.00E-11 | 6.93 | 13.9815883 | 1.74E-01 | 21645524  | 21645647  | NC_000008.10 |
| cg14476670 | 7.37E-10 | 6.01E-11 | 6.93 | 13.9796331 | 9.67E-02 | 21352224  | 21352347  | NC_000013.10 |
| cg19579167 | 7.38E-10 | 6.01E-11 | 6.93 | 13.9792261 | 2.24E-01 | 5543878   | 5544001   | NC_000018.9  |
| cg14329508 | 7.38E-10 | 6.02E-11 | 6.93 | 13.978995  | 4.89E-02 | 18168289  | 18168412  | NC_000020.10 |

|            |          |          |      |            |          |           |           |              |
|------------|----------|----------|------|------------|----------|-----------|-----------|--------------|
| cg11626195 | 7.39E-10 | 6.02E-11 | 6.93 | 13.9774345 | 3.65E-02 | 4823045   | 4823168   | NC_000007.13 |
| cg11368643 | 7.39E-10 | 6.03E-11 | 6.93 | 13.9769762 | 1.42E-01 | 140625059 | 140625182 | NC_000005.9  |
| cg11999288 | 7.41E-10 | 6.04E-11 | 6.93 | 13.9750332 | 4.72E-02 | 31637244  | 31637367  | NC_000006.11 |
| cg05860190 | 7.41E-10 | 6.04E-11 | 6.93 | 13.9746488 | 1.13E-01 | 30794065  | 30794188  | NC_000020.10 |
| cg27136844 | 7.41E-10 | 6.04E-11 | 6.93 | 13.9745334 | 1.80E-01 | 147142355 | 147142478 | NC_000003.11 |
| cg02442900 | 7.43E-10 | 6.06E-11 | 6.93 | 13.9712427 | 1.31E-01 | 234296642 | 234296765 | NC_000002.11 |
| cg23444265 | 7.44E-10 | 6.07E-11 | 6.93 | 13.9705083 | 1.98E-01 | 48918205  | 48918328  | NC_000019.9  |
| cg09042791 | 7.45E-10 | 6.08E-11 | 6.93 | 13.9692056 | 1.07E-01 | 235904300 | 235904423 | NC_000002.11 |
| cg01889284 | 7.46E-10 | 6.09E-11 | 6.93 | 13.9673596 | 9.23E-02 | 81890512  | 81890635  | NC_000005.9  |
| cg27116061 | 7.47E-10 | 6.10E-11 | 6.93 | 13.9659463 | 1.99E-01 | 3239638   | 3239761   | NC_000016.9  |
| cg00436633 | 7.47E-10 | 6.10E-11 | 6.93 | 13.9657823 | 3.90E-02 | 73061407  | 73061530  | NC_000007.13 |
| cg02718516 | 7.48E-10 | 6.10E-11 | 6.93 | 13.9651139 | 1.72E-01 | 13424094  | 13424217  | NC_000008.10 |
| cg03036592 | 7.48E-10 | 6.10E-11 | 6.93 | 13.9650836 | 1.65E-01 | 101287839 | 101287962 | NC_000010.10 |
| cg19358493 | 7.49E-10 | 6.11E-11 | 6.93 | 13.9637608 | 1.50E-01 | 119300942 | 119301065 | NC_000010.10 |
| cg27207796 | 7.49E-10 | 6.11E-11 | 6.93 | 13.9630742 | 1.96E-01 | 17783322  | 17783445  | NC_000004.11 |
| cg21929183 | 7.50E-10 | 6.12E-11 | 6.93 | 13.962251  | 1.60E-01 | 140807225 | 140807348 | NC_000005.9  |
| cg18121601 | 7.50E-10 | 6.12E-11 | 6.93 | 13.9618807 | 5.29E-02 | 1462838   | 1462961   | NC_000017.10 |
| cg14904115 | 7.50E-10 | 6.12E-11 | 6.93 | 13.9617417 | 4.41E-02 | 113488382 | 113488505 | NC_000013.10 |
| cg18987491 | 7.54E-10 | 6.15E-11 | 6.92 | 13.956879  | 1.07E-01 | 135033926 | 135034049 | NC_000010.10 |
| cg02110411 | 7.54E-10 | 6.15E-11 | 6.92 | 13.9566324 | 3.62E-02 | 38659139  | 38659262  | NC_000017.10 |
| cg23673980 | 7.55E-10 | 6.16E-11 | 6.92 | 13.9555897 | 5.58E-02 | 5641966   | 5642089   | NC_000007.13 |
| cg16306898 | 7.55E-10 | 6.16E-11 | 6.92 | 13.9554263 | 1.98E-01 | 1475675   | 1475798   | NC_000001.10 |
| cg12109455 | 7.55E-10 | 6.16E-11 | 6.92 | 13.9553034 | 1.49E-01 | 134000737 | 134000860 | NC_000010.10 |
| cg08768569 | 7.55E-10 | 6.17E-11 | 6.92 | 13.9543775 | 2.03E-01 | 106400565 | 106400688 | NC_000010.10 |
| cg12521353 | 7.57E-10 | 6.18E-11 | 6.92 | 13.9527117 | 2.49E-01 | 55204593  | 55204716  | NC_000020.10 |

|            |          |          |      |            |          |           |           |              |
|------------|----------|----------|------|------------|----------|-----------|-----------|--------------|
| cg02758612 | 7.57E-10 | 6.18E-11 | 6.92 | 13.9526745 | 2.09E-01 | 53541186  | 53541309  | NC_000019.9  |
| cg08157228 | 7.57E-10 | 6.18E-11 | 6.92 | 13.9519314 | 1.71E-01 | 86544308  | 86544431  | NC_000016.9  |
| cg22368664 | 7.57E-10 | 6.18E-11 | 6.92 | 13.9518295 | 2.06E-01 | 133195196 | 133195319 | NC_000012.11 |
| cg01571977 | 7.59E-10 | 6.20E-11 | 6.92 | 13.9498674 | 8.54E-02 | 2337318   | 2337441   | NC_000019.9  |
| cg18420965 | 7.59E-10 | 6.20E-11 | 6.92 | 13.9494682 | 1.91E-01 | 66535145  | 66535268  | NC_000004.11 |
| cg05324776 | 7.59E-10 | 6.20E-11 | 6.92 | 13.9489995 | 9.60E-02 | 70002020  | 70002143  | NC_000011.9  |
| cg07256732 | 7.59E-10 | 6.20E-11 | 6.92 | 13.9488567 | 1.17E-01 | 621771    | 621894    | NC_000016.9  |
| cg05574272 | 7.63E-10 | 6.23E-11 | 6.92 | 13.943948  | 1.05E-01 | 33938213  | 33938336  | NC_000005.9  |
| cg21960859 | 7.64E-10 | 6.24E-11 | 6.92 | 13.9425219 | 2.00E-01 | 166795649 | 166795772 | NC_000004.11 |
| cg14148055 | 7.65E-10 | 6.25E-11 | 6.92 | 13.941892  | 2.38E-01 | 54411773  | 54411896  | NC_000019.9  |
| cg15372218 | 7.65E-10 | 6.25E-11 | 6.92 | 13.9406514 | 1.24E-01 | 156837707 | 156837830 | NC_000007.13 |
| cg17557284 | 7.66E-10 | 6.26E-11 | 6.92 | 13.939852  | 1.14E-01 | 93865479  | 93865602  | NC_000003.11 |
| cg11396585 | 7.67E-10 | 6.26E-11 | 6.92 | 13.9390431 | 6.14E-02 | 33273477  | 33273600  | NC_000006.11 |
| cg13654588 | 7.67E-10 | 6.27E-11 | 6.92 | 13.9389631 | 1.31E-01 | 120354081 | 120354204 | NC_000010.10 |
| cg00019678 | 7.68E-10 | 6.28E-11 | 6.92 | 13.9373814 | 9.46E-02 | 110154229 | 110154352 | NC_000012.11 |
| cg14030940 | 7.68E-10 | 6.28E-11 | 6.92 | 13.9373492 | 7.91E-02 | 101906274 | 101906397 | NC_000014.8  |
| cg24723331 | 7.68E-10 | 6.28E-11 | 6.92 | 13.9371167 | 1.81E-01 | 22487219  | 22487342  | NC_000012.11 |
| cg17362052 | 7.71E-10 | 6.30E-11 | 6.92 | 13.9334613 | 1.97E-01 | 107955762 | 107955885 | NC_000004.11 |
| cg05520940 | 7.71E-10 | 6.30E-11 | 6.92 | 13.9333054 | 1.55E-01 | 119534765 | 119534888 | NC_000011.9  |
| cg20824189 | 7.72E-10 | 6.31E-11 | 6.92 | 13.9312203 | 2.08E-01 | 1704082   | 1704205   | NC_000007.13 |
| cg07591403 | 7.73E-10 | 6.32E-11 | 6.92 | 13.9308669 | 2.10E-01 | 89267679  | 89267802  | NC_000016.9  |
| cg12568898 | 7.73E-10 | 6.32E-11 | 6.92 | 13.9308521 | 1.58E-01 | 53424049  | 53424172  | NC_000013.10 |
| cg04843067 | 7.73E-10 | 6.32E-11 | 6.92 | 13.9305986 | 1.24E-01 | 177016037 | 177016160 | NC_000002.11 |
| cg00920970 | 7.73E-10 | 6.32E-11 | 6.92 | 13.9299352 | 1.90E-01 | 152129388 | 152129511 | NC_000006.11 |
| cg24857620 | 7.74E-10 | 6.32E-11 | 6.92 | 13.9296525 | 2.14E-01 | 53851707  | 53851830  | NC_000008.10 |

|            |          |          |      |            |          |           |           |              |
|------------|----------|----------|------|------------|----------|-----------|-----------|--------------|
| cg14286208 | 7.74E-10 | 6.33E-11 | 6.92 | 13.9294885 | 1.07E-01 | 20903445  | 20903568  | NC_000014.8  |
| cg25353171 | 7.74E-10 | 6.33E-11 | 6.92 | 13.9284859 | 1.35E-01 | 9755804   | 9755927   | NC_000008.10 |
| cg08160350 | 7.75E-10 | 6.34E-11 | 6.92 | 13.9278053 | 1.94E-01 | 996052    | 996175    | NC_000004.11 |
| cg02800810 | 7.75E-10 | 6.34E-11 | 6.92 | 13.9275982 | 1.24E-01 | 28340139  | 28340262  | NC_000021.8  |
| cg07903370 | 7.76E-10 | 6.34E-11 | 6.92 | 13.9266903 | 1.39E-01 | 3595106   | 3595229   | NC_000005.9  |
| cg17288397 | 7.76E-10 | 6.34E-11 | 6.92 | 13.9265904 | 1.77E-01 | 72715731  | 72715854  | NC_000005.9  |
| cg18438777 | 7.76E-10 | 6.35E-11 | 6.92 | 13.9260314 | 2.33E-01 | 164265745 | 164265868 | NC_000004.11 |
| cg04503968 | 7.76E-10 | 6.35E-11 | 6.92 | 13.9256254 | 1.43E-01 | 122423530 | 122423653 | NC_000005.9  |
| cg03792491 | 7.78E-10 | 6.36E-11 | 6.92 | 13.9236616 | 3.14E-02 | 95324966  | 95325089  | NC_000010.10 |
| cg16108230 | 7.78E-10 | 6.37E-11 | 6.92 | 13.9232506 | 1.45E-01 | 117584815 | 117584938 | NC_000006.11 |
| cg22001110 | 7.79E-10 | 6.37E-11 | 6.92 | 13.9221679 | 6.69E-02 | 31626313  | 31626436  | NC_000006.11 |
| cg26352161 | 7.81E-10 | 6.39E-11 | 6.92 | 13.9200891 | 9.13E-02 | 43071742  | 43071865  | NC_000006.11 |
| cg04272011 | 7.83E-10 | 6.40E-11 | 6.92 | 13.9175072 | 2.01E-01 | 79746359  | 79746482  | NC_000014.8  |
| cg11343449 | 7.84E-10 | 6.42E-11 | 6.92 | 13.9157234 | 2.54E-02 | 203001461 | 203001584 | NC_000002.11 |
| cg23820885 | 7.85E-10 | 6.42E-11 | 6.92 | 13.9146427 | 1.53E-01 | 114840942 | 114841065 | NC_000012.11 |
| cg27082921 | 7.86E-10 | 6.43E-11 | 6.92 | 13.9129308 | 1.51E-01 | 1800150   | 1800273   | NC_000019.9  |
| cg06652199 | 7.86E-10 | 6.44E-11 | 6.92 | 13.9126157 | 2.15E-01 | 5018715   | 5018838   | NC_000012.11 |
| cg02104456 | 7.86E-10 | 6.44E-11 | 6.92 | 13.9125935 | 7.76E-02 | 83726483  | 83726606  | NC_000015.9  |
| cg01518607 | 7.87E-10 | 6.44E-11 | 6.92 | 13.9116378 | 1.81E-01 | 27235891  | 27236014  | NC_000006.11 |
| cg07077013 | 7.87E-10 | 6.44E-11 | 6.92 | 13.9114928 | 1.34E-01 | 177025198 | 177025321 | NC_000002.11 |
| cg03552025 | 7.87E-10 | 6.44E-11 | 6.92 | 13.9112528 | 7.51E-02 | 52437451  | 52437574  | NC_000012.11 |
| cg06753057 | 7.87E-10 | 6.45E-11 | 6.92 | 13.9109975 | 6.80E-02 | 2382774   | 2382897   | NC_000001.10 |
| cg13797670 | 7.88E-10 | 6.45E-11 | 6.92 | 13.9104944 | 7.91E-02 | 116135281 | 116135404 | NC_000009.11 |
| cg13882606 | 7.88E-10 | 6.45E-11 | 6.92 | 13.9104839 | 9.12E-02 | 17101011  | 17101134  | NC_000021.8  |
| cg03775422 | 7.88E-10 | 6.45E-11 | 6.92 | 13.9102796 | 1.97E-01 | 54610192  | 54610315  | NC_000007.13 |

|            |          |          |      |            |          |           |           |              |
|------------|----------|----------|------|------------|----------|-----------|-----------|--------------|
| cg04532057 | 7.88E-10 | 6.45E-11 | 6.92 | 13.9102634 | 1.08E-01 | 48704329  | 48704452  | NC_000017.10 |
| cg05348870 | 7.88E-10 | 6.45E-11 | 6.92 | 13.9097961 | 6.53E-02 | 6671045   | 6671168   | NC_000019.9  |
| cg06784991 | 7.91E-10 | 6.48E-11 | 6.92 | 13.9056722 | 1.13E-01 | 53308768  | 53308891  | NC_000001.10 |
| cg00187933 | 7.92E-10 | 6.48E-11 | 6.92 | 13.9054256 | 1.81E-01 | 996785    | 996908    | NC_000004.11 |
| cg11122195 | 7.92E-10 | 6.48E-11 | 6.92 | 13.9051252 | 6.12E-02 | 40732511  | 40732634  | NC_000017.10 |
| cg20855565 | 7.93E-10 | 6.50E-11 | 6.91 | 13.9033034 | 1.79E-01 | 248020350 | 248020473 | NC_000001.10 |
| cg27202646 | 7.93E-10 | 6.50E-11 | 6.91 | 13.9029694 | 6.04E-02 | 112071383 | 112071506 | NC_000006.11 |
| cg23760574 | 7.94E-10 | 6.50E-11 | 6.91 | 13.9027304 | 7.92E-02 | 32038097  | 32038220  | NC_000006.11 |
| cg02767613 | 7.95E-10 | 6.51E-11 | 6.91 | 13.9010698 | 2.08E-01 | 229569894 | 229570017 | NC_000001.10 |
| cg10161743 | 7.95E-10 | 6.52E-11 | 6.91 | 13.9004512 | 1.23E-01 | 48917816  | 48917939  | NC_000019.9  |
| cg16438688 | 7.96E-10 | 6.52E-11 | 6.91 | 13.8996433 | 1.16E-01 | 156815529 | 156815652 | NC_000001.10 |
| cg03209130 | 7.96E-10 | 6.52E-11 | 6.91 | 13.8993362 | 9.39E-02 | 107621307 | 107621430 | NC_000011.9  |
| cg16710348 | 7.96E-10 | 6.52E-11 | 6.91 | 13.8993242 | 1.30E-01 | 121660655 | 121660778 | NC_000003.11 |
| cg03295417 | 7.97E-10 | 6.53E-11 | 6.91 | 13.8983605 | 1.40E-01 | 14397892  | 14398015  | NC_000016.9  |
| cg18839609 | 7.97E-10 | 6.53E-11 | 6.91 | 13.8976197 | 1.22E-01 | 60936070  | 60936193  | NC_000010.10 |
| cg06974388 | 7.99E-10 | 6.55E-11 | 6.91 | 13.8951844 | 3.01E-02 | 161065862 | 161065985 | NC_000001.10 |
| cg09087087 | 8.01E-10 | 6.56E-11 | 6.91 | 13.8934062 | 8.09E-02 | 1656273   | 1656396   | NC_000012.11 |
| cg15911612 | 8.01E-10 | 6.57E-11 | 6.91 | 13.8926747 | 3.00E-02 | 25516343  | 25516466  | NC_000014.8  |
| cg01644518 | 8.01E-10 | 6.57E-11 | 6.91 | 13.8923802 | 1.04E-01 | 40889848  | 40889971  | NC_000019.9  |
| cg18998365 | 8.02E-10 | 6.57E-11 | 6.91 | 13.8916035 | 1.46E-01 | 142781532 | 142781655 | NC_000005.9  |
| cg20930366 | 8.03E-10 | 6.58E-11 | 6.91 | 13.8908414 | 1.48E-01 | 113698847 | 113698970 | NC_000005.9  |
| cg05923197 | 8.03E-10 | 6.58E-11 | 6.91 | 13.8907914 | 1.47E-01 | 54418804  | 54418927  | NC_000014.8  |
| cg07775293 | 8.04E-10 | 6.59E-11 | 6.91 | 13.8894638 | 5.79E-02 | 25572639  | 25572762  | NC_000018.9  |
| cg08980837 | 8.05E-10 | 6.60E-11 | 6.91 | 13.887352  | 1.58E-01 | 91172337  | 91172460  | NC_000001.10 |
| cg09639964 | 8.05E-10 | 6.60E-11 | 6.91 | 13.8872009 | 1.63E-01 | 909300    | 909423    | NC_000017.10 |

|            |          |          |      |            |          |           |           |              |
|------------|----------|----------|------|------------|----------|-----------|-----------|--------------|
| cg19302831 | 8.05E-10 | 6.60E-11 | 6.91 | 13.8871594 | 1.56E-01 | 107502251 | 107502374 | NC_000002.11 |
| cg23248205 | 8.05E-10 | 6.61E-11 | 6.91 | 13.8869531 | 4.96E-02 | 24475283  | 24475406  | NC_000013.10 |
| cg19524824 | 8.07E-10 | 6.62E-11 | 6.91 | 13.8846759 | 1.20E-01 | 50023313  | 50023436  | NC_000012.11 |
| cg06550629 | 8.07E-10 | 6.62E-11 | 6.91 | 13.8844249 | 1.30E-01 | 131439172 | 131439295 | NC_000012.11 |
| cg23867997 | 8.08E-10 | 6.63E-11 | 6.91 | 13.8834454 | 2.32E-01 | 61810624  | 61810747  | NC_000020.10 |
| cg15557878 | 8.12E-10 | 6.66E-11 | 6.91 | 13.8790103 | 1.36E-01 | 110406049 | 110406172 | NC_000005.9  |
| cg13472735 | 8.13E-10 | 6.67E-11 | 6.91 | 13.8774921 | 5.20E-02 | 1215781   | 1215904   | NC_000011.9  |
| cg09759699 | 8.14E-10 | 6.68E-11 | 6.91 | 13.8757346 | 1.15E-01 | 23334250  | 23334373  | NC_000011.9  |
| cg12023513 | 8.15E-10 | 6.69E-11 | 6.91 | 13.8749927 | 5.46E-02 | 72483686  | 72483809  | NC_000007.13 |
| cg20027296 | 8.15E-10 | 6.69E-11 | 6.91 | 13.8746271 | 1.37E-01 | 170737396 | 170737519 | NC_000005.9  |
| cg22696426 | 8.15E-10 | 6.69E-11 | 6.91 | 13.8744513 | 1.24E-01 | 121250007 | 121250130 | NC_000010.10 |
| cg19094243 | 8.16E-10 | 6.70E-11 | 6.91 | 13.8735586 | 1.66E-01 | 193058628 | 193058751 | NC_000002.11 |
| cg15312264 | 8.17E-10 | 6.71E-11 | 6.91 | 13.8716319 | 1.66E-01 | 55907299  | 55907422  | NC_000014.8  |
| cg02168436 | 8.17E-10 | 6.71E-11 | 6.91 | 13.8715563 | 9.50E-02 | 37644675  | 37644798  | NC_000014.8  |
| cg27313642 | 8.18E-10 | 6.71E-11 | 6.91 | 13.8711298 | 1.55E-01 | 65291542  | 65291665  | NC_000008.10 |
| cg20518362 | 8.20E-10 | 6.73E-11 | 6.91 | 13.8687644 | 9.33E-02 | 80039295  | 80039418  | NC_000011.9  |
| cg12045715 | 8.20E-10 | 6.73E-11 | 6.91 | 13.8681468 | 4.44E-02 | 901805    | 901928    | NC_000019.9  |
| cg18491080 | 8.20E-10 | 6.73E-11 | 6.91 | 13.8680361 | 1.80E-01 | 60286463  | 60286586  | NC_000015.9  |
| cg02899206 | 8.21E-10 | 6.74E-11 | 6.91 | 13.8671788 | 2.33E-01 | 1779835   | 1779958   | NC_000010.10 |
| cg14298200 | 8.21E-10 | 6.74E-11 | 6.91 | 13.8667975 | 1.49E-01 | 65498812  | 65498935  | NC_000008.10 |
| cg08448886 | 8.21E-10 | 6.74E-11 | 6.91 | 13.8665733 | 4.16E-02 | 68560728  | 68560851  | NC_000016.9  |
| cg18139575 | 8.21E-10 | 6.75E-11 | 6.91 | 13.8662407 | 4.84E-02 | 195354978 | 195355101 | NC_000003.11 |
| cg04881036 | 8.23E-10 | 6.76E-11 | 6.91 | 13.864655  | 5.18E-02 | 65179732  | 65179855  | NC_000012.11 |
| cg27125439 | 8.24E-10 | 6.76E-11 | 6.91 | 13.8636723 | 1.10E-01 | 29311888  | 29312011  | NC_000010.10 |
| cg00745606 | 8.24E-10 | 6.77E-11 | 6.91 | 13.8627132 | 1.88E-01 | 89268847  | 89268970  | NC_000016.9  |

|            |          |          |      |            |          |           |           |              |
|------------|----------|----------|------|------------|----------|-----------|-----------|--------------|
| cg03001942 | 8.25E-10 | 6.78E-11 | 6.91 | 13.8621064 | 1.60E-01 | 71115787  | 71115910  | NC_000002.11 |
| cg03502630 | 8.26E-10 | 6.79E-11 | 6.91 | 13.8605436 | 1.32E-01 | 126306654 | 126306777 | NC_000006.11 |
| cg27175491 | 8.27E-10 | 6.79E-11 | 6.91 | 13.8596632 | 2.77E-02 | 70425656  | 70425779  | NC_000012.11 |
| cg01097071 | 8.27E-10 | 6.79E-11 | 6.91 | 13.8596599 | 7.36E-02 | 77643816  | 77643939  | NC_000018.9  |
| cg19507160 | 8.27E-10 | 6.79E-11 | 6.91 | 13.8596507 | 1.27E-01 | 28227321  | 28227444  | NC_000008.10 |
| cg14522800 | 8.30E-10 | 6.82E-11 | 6.91 | 13.8558451 | 9.84E-02 | 4648566   | 4648689   | NC_000017.10 |
| cg22908000 | 8.31E-10 | 6.83E-11 | 6.91 | 13.8546256 | 1.52E-01 | 237489107 | 237489230 | NC_000002.11 |
| cg00177875 | 8.31E-10 | 6.83E-11 | 6.91 | 13.8537769 | 7.15E-02 | 75478404  | 75478527  | NC_000011.9  |
| cg14224762 | 8.33E-10 | 6.84E-11 | 6.91 | 13.8523599 | 1.52E-01 | 72596566  | 72596689  | NC_000006.11 |
| cg07138793 | 8.34E-10 | 6.85E-11 | 6.91 | 13.8510447 | 8.44E-02 | 28148330  | 28148453  | NC_000015.9  |
| cg15621651 | 8.35E-10 | 6.86E-11 | 6.91 | 13.8495945 | 4.74E-02 | 129796199 | 129796322 | NC_000010.10 |
| cg18208742 | 8.35E-10 | 6.86E-11 | 6.91 | 13.8495665 | 5.25E-02 | 42992872  | 42992995  | NC_000017.10 |
| cg10982031 | 8.36E-10 | 6.87E-11 | 6.91 | 13.8482615 | 6.84E-02 | 129330389 | 129330512 | NC_000012.11 |
| cg18021286 | 8.37E-10 | 6.88E-11 | 6.9  | 13.8467637 | 1.43E-01 | 115530371 | 115530494 | NC_000011.9  |
| cg23300659 | 8.37E-10 | 6.88E-11 | 6.9  | 13.8465635 | 1.63E-01 | 136553822 | 136553945 | NC_000007.13 |
| cg20770516 | 8.38E-10 | 6.89E-11 | 6.9  | 13.8456576 | 1.05E-01 | 104681396 | 104681519 | NC_000007.13 |
| cg26653392 | 8.40E-10 | 6.91E-11 | 6.9  | 13.8430825 | 1.12E-01 | 53001117  | 53001240  | NC_000015.9  |
| cg13101087 | 8.40E-10 | 6.91E-11 | 6.9  | 13.8427759 | 1.86E-01 | 154729059 | 154729182 | NC_000002.11 |
| cg09528660 | 8.41E-10 | 6.92E-11 | 6.9  | 13.8418095 | 8.19E-02 | 89568662  | 89568785  | NC_000004.11 |
| cg05227131 | 8.42E-10 | 6.92E-11 | 6.9  | 13.8409426 | 1.81E-01 | 21378220  | 21378343  | NC_000020.10 |
| cg09146197 | 8.42E-10 | 6.92E-11 | 6.9  | 13.8406916 | 1.40E-01 | 118033581 | 118033704 | NC_000010.10 |
| cg10421002 | 8.43E-10 | 6.93E-11 | 6.9  | 13.8392944 | 1.47E-01 | 33603610  | 33603733  | NC_000015.9  |
| cg08481543 | 8.43E-10 | 6.94E-11 | 6.9  | 13.8387574 | 7.92E-02 | 44223976  | 44224099  | NC_000019.9  |
| cg23288973 | 8.44E-10 | 6.95E-11 | 6.9  | 13.8374298 | 1.81E-01 | 135701050 | 135701173 | NC_000005.9  |
| cg15242330 | 8.45E-10 | 6.95E-11 | 6.9  | 13.837234  | 4.85E-02 | 27422532  | 27422655  | NC_000002.11 |

|            |          |          |     |            |          |           |           |              |
|------------|----------|----------|-----|------------|----------|-----------|-----------|--------------|
| cg02064106 | 8.45E-10 | 6.95E-11 | 6.9 | 13.8366096 | 2.24E-01 | 165722858 | 165722981 | NC_000006.11 |
| cg12670347 | 8.47E-10 | 6.97E-11 | 6.9 | 13.8346569 | 1.22E-01 | 114847578 | 114847701 | NC_000012.11 |
| cg06384463 | 8.48E-10 | 6.98E-11 | 6.9 | 13.8330902 | 1.49E-01 | 91182708  | 91182831  | NC_000001.10 |
| cg04154986 | 8.49E-10 | 6.99E-11 | 6.9 | 13.8319773 | 8.83E-02 | 16734819  | 16734942  | NC_000017.10 |
| cg17099397 | 8.49E-10 | 6.99E-11 | 6.9 | 13.8318054 | 2.00E-01 | 108508185 | 108508308 | NC_000001.10 |
| cg02663265 | 8.49E-10 | 6.99E-11 | 6.9 | 13.831764  | 1.96E-01 | 104513186 | 104513309 | NC_000008.10 |
| cg23922454 | 8.49E-10 | 6.99E-11 | 6.9 | 13.8316666 | 1.83E-01 | 113910545 | 113910668 | NC_000012.11 |
| cg03587978 | 8.50E-10 | 6.99E-11 | 6.9 | 13.8309272 | 1.31E-01 | 172165696 | 172165819 | NC_000003.11 |
| cg24549277 | 8.50E-10 | 7.00E-11 | 6.9 | 13.8307197 | 1.79E-01 | 28778121  | 28778244  | NC_000006.11 |
| cg02606327 | 8.50E-10 | 7.00E-11 | 6.9 | 13.830491  | 1.63E-01 | 31079406  | 31079529  | NC_000012.11 |
| cg18712755 | 8.50E-10 | 7.00E-11 | 6.9 | 13.8299278 | 2.34E-02 | 31600642  | 31600765  | NC_000006.11 |
| cg01695225 | 8.52E-10 | 7.01E-11 | 6.9 | 13.8283658 | 1.72E-01 | 73152672  | 73152795  | NC_000002.11 |
| cg03052301 | 8.54E-10 | 7.03E-11 | 6.9 | 13.8257504 | 1.64E-01 | 32459954  | 32460077  | NC_000011.9  |
| cg18424776 | 8.57E-10 | 7.06E-11 | 6.9 | 13.8215022 | 9.51E-02 | 8456316   | 8456439   | NC_000019.9  |
| cg16564033 | 8.59E-10 | 7.08E-11 | 6.9 | 13.8193309 | 1.90E-01 | 38067741  | 38067864  | NC_000021.8  |
| cg07362003 | 8.60E-10 | 7.08E-11 | 6.9 | 13.8186797 | 1.16E-01 | 157682747 | 157682870 | NC_000002.11 |
| cg19741945 | 8.60E-10 | 7.08E-11 | 6.9 | 13.8183268 | 1.70E-01 | 32859587  | 32859710  | NC_000003.11 |
| cg13977320 | 8.63E-10 | 7.11E-11 | 6.9 | 13.8148657 | 8.24E-02 | 116859631 | 116859754 | NC_000009.11 |
| cg01904776 | 8.63E-10 | 7.11E-11 | 6.9 | 13.8147948 | 4.15E-02 | 2153834   | 2153957   | NC_000016.9  |
| cg05571905 | 8.63E-10 | 7.11E-11 | 6.9 | 13.8144413 | 7.16E-02 | 125767795 | 125767918 | NC_000010.10 |
| cg13020868 | 8.64E-10 | 7.12E-11 | 6.9 | 13.8132959 | 1.60E-01 | 25522307  | 25522430  | NC_000014.8  |
| cg21032564 | 8.67E-10 | 7.15E-11 | 6.9 | 13.8093749 | 1.11E-01 | 65381956  | 65382079  | NC_000015.9  |
| cg19883813 | 8.68E-10 | 7.15E-11 | 6.9 | 13.8090963 | 1.52E-01 | 8098005   | 8098128   | NC_000010.10 |
| cg26553789 | 8.68E-10 | 7.16E-11 | 6.9 | 13.808234  | 5.08E-02 | 1616767   | 1616890   | NC_000008.10 |
| cg14028400 | 8.68E-10 | 7.16E-11 | 6.9 | 13.8081533 | 1.57E-01 | 28793656  | 28793779  | NC_000006.11 |



|            |          |          |      |            |          |           |           |              |
|------------|----------|----------|------|------------|----------|-----------|-----------|--------------|
| cg19117365 | 8.70E-10 | 7.17E-11 | 6.9  | 13.8065291 | 1.64E-01 | 139653915 | 139654038 | NC_000003.11 |
| cg20521389 | 8.71E-10 | 7.18E-11 | 6.9  | 13.8052706 | 1.86E-01 | 21645509  | 21645632  | NC_000008.10 |
| cg23883058 | 8.74E-10 | 7.21E-11 | 6.9  | 13.801712  | 1.54E-01 | 5813866   | 5813989   | NC_000002.11 |
| cg09257824 | 8.74E-10 | 7.21E-11 | 6.9  | 13.8016578 | 1.65E-01 | 32455642  | 32455765  | NC_000011.9  |
| cg08737296 | 8.74E-10 | 7.21E-11 | 6.9  | 13.8014679 | 1.95E-01 | 61808691  | 61808814  | NC_000020.10 |
| cg25191332 | 8.74E-10 | 7.21E-11 | 6.9  | 13.8012734 | 1.41E-01 | 112062419 | 112062542 | NC_000007.13 |
| cg16786808 | 8.75E-10 | 7.21E-11 | 6.9  | 13.8004733 | 1.53E-01 | 222434497 | 222434620 | NC_000002.11 |
| cg15085447 | 8.76E-10 | 7.22E-11 | 6.9  | 13.79926   | 1.61E-01 | 137490846 | 137490969 | NC_000003.11 |
| cg01331196 | 8.77E-10 | 7.23E-11 | 6.9  | 13.7982931 | 1.28E-01 | 11287078  | 11287201  | NC_000003.11 |
| cg18066515 | 8.78E-10 | 7.24E-11 | 6.9  | 13.7971184 | 3.79E-02 | 124791616 | 124791739 | NC_000012.11 |
| cg11127874 | 8.78E-10 | 7.25E-11 | 6.9  | 13.7961995 | 6.71E-02 | 62214996  | 62215119  | NC_000011.9  |
| cg22216302 | 8.79E-10 | 7.25E-11 | 6.9  | 13.7960446 | 1.23E-01 | 33468207  | 33468330  | NC_000020.10 |
| cg03048654 | 8.79E-10 | 7.25E-11 | 6.9  | 13.7958326 | 2.09E-01 | 118893138 | 118893261 | NC_000010.10 |
| cg01456626 | 8.80E-10 | 7.26E-11 | 6.9  | 13.7947441 | 8.38E-02 | 38611497  | 38611620  | NC_000017.10 |
| cg24082871 | 8.80E-10 | 7.26E-11 | 6.9  | 13.7944888 | 1.51E-01 | 27333407  | 27333530  | NC_000017.10 |
| cg10864319 | 8.80E-10 | 7.26E-11 | 6.9  | 13.7944787 | 2.09E-01 | 164593498 | 164593621 | NC_000002.11 |
| cg13297560 | 8.80E-10 | 7.26E-11 | 6.9  | 13.7939846 | 1.73E-01 | 99320054  | 99320177  | NC_000015.9  |
| cg23725321 | 8.82E-10 | 7.27E-11 | 6.89 | 13.7922707 | 1.14E-01 | 102279690 | 102279813 | NC_000010.10 |
| cg09854003 | 8.82E-10 | 7.28E-11 | 6.89 | 13.7921436 | 1.76E-01 | 170743459 | 170743582 | NC_000005.9  |
| cg26369484 | 8.84E-10 | 7.29E-11 | 6.89 | 13.7898081 | 7.82E-02 | 46522464  | 46522587  | NC_000017.10 |
| cg14570291 | 8.85E-10 | 7.30E-11 | 6.89 | 13.7888607 | 1.40E-01 | 110672231 | 110672354 | NC_000010.10 |
| cg09416908 | 8.85E-10 | 7.30E-11 | 6.89 | 13.7884644 | 1.47E-01 | 86384670  | 86384793  | NC_000011.9  |
| cg20019163 | 8.86E-10 | 7.31E-11 | 6.89 | 13.7873906 | 5.67E-02 | 133809962 | 133810085 | NC_000010.10 |
| cg10157715 | 8.86E-10 | 7.31E-11 | 6.89 | 13.7871425 | 1.28E-01 | 35060679  | 35060802  | NC_000017.10 |
| cg07781035 | 8.86E-10 | 7.31E-11 | 6.89 | 13.7870202 | 2.27E-01 | 134871778 | 134871901 | NC_000005.9  |

|            |          |          |      |            |          |           |           |              |
|------------|----------|----------|------|------------|----------|-----------|-----------|--------------|
| cg19284211 | 8.87E-10 | 7.32E-11 | 6.89 | 13.786028  | 1.41E-01 | 20347495  | 20347618  | NC_000020.10 |
| cg03940688 | 8.87E-10 | 7.32E-11 | 6.89 | 13.7858166 | 7.06E-02 | 46988236  | 46988359  | NC_000020.10 |
| cg01466017 | 8.88E-10 | 7.33E-11 | 6.89 | 13.7847775 | 2.26E-01 | 17496720  | 17496843  | NC_000010.10 |
| cg13906669 | 8.90E-10 | 7.35E-11 | 6.89 | 13.7819926 | 1.60E-01 | 100999399 | 100999522 | NC_000011.9  |
| cg08217234 | 8.91E-10 | 7.35E-11 | 6.89 | 13.7815232 | 1.24E-01 | 4042688   | 4042811   | NC_000019.9  |
| cg24357161 | 8.91E-10 | 7.36E-11 | 6.89 | 13.7809419 | 9.50E-02 | 9810114   | 9810237   | NC_000017.10 |
| cg03208044 | 8.94E-10 | 7.38E-11 | 6.89 | 13.7777488 | 5.78E-02 | 113337251 | 113337374 | NC_000001.10 |
| cg12069856 | 8.95E-10 | 7.39E-11 | 6.89 | 13.776852  | 3.60E-02 | 89438504  | 89438627  | NC_000016.9  |
| cg03874542 | 8.95E-10 | 7.40E-11 | 6.89 | 13.7760432 | 1.49E-01 | 8338503   | 8338626   | NC_000010.10 |
| cg14171414 | 8.97E-10 | 7.41E-11 | 6.89 | 13.774368  | 1.29E-01 | 53422474  | 53422597  | NC_000013.10 |
| cg23683620 | 8.97E-10 | 7.41E-11 | 6.89 | 13.7741038 | 7.48E-02 | 2753457   | 2753580   | NC_000019.9  |
| cg01285926 | 8.97E-10 | 7.41E-11 | 6.89 | 13.7737361 | 1.05E-01 | 56242554  | 56242677  | NC_000007.13 |
| cg13004587 | 8.98E-10 | 7.42E-11 | 6.89 | 13.7731514 | 2.46E-01 | 180017349 | 180017472 | NC_000005.9  |
| cg13288164 | 8.99E-10 | 7.43E-11 | 6.89 | 13.7721886 | 1.56E-01 | 140501380 | 140501503 | NC_000005.9  |
| cg19215671 | 8.99E-10 | 7.43E-11 | 6.89 | 13.7721022 | 1.52E-01 | 237081839 | 237081962 | NC_000002.11 |
| cg04146259 | 9.00E-10 | 7.43E-11 | 6.89 | 13.7710787 | 1.29E-01 | 85058259  | 85058382  | NC_000014.8  |
| cg16363146 | 9.02E-10 | 7.45E-11 | 6.89 | 13.7687512 | 1.01E-01 | 22689281  | 22689404  | NC_000011.9  |
| cg02841875 | 9.04E-10 | 7.47E-11 | 6.89 | 13.7660015 | 4.11E-02 | 6056063   | 6056186   | NC_000001.10 |
| cg22589822 | 9.05E-10 | 7.48E-11 | 6.89 | 13.7654423 | 6.01E-02 | 91912699  | 91912822  | NC_000015.9  |
| cg14023737 | 9.05E-10 | 7.48E-11 | 6.89 | 13.7645219 | 1.16E-01 | 132386878 | 132387001 | NC_000009.11 |
| cg07304923 | 9.06E-10 | 7.49E-11 | 6.89 | 13.7639876 | 9.60E-02 | 10323048  | 10323171  | NC_000006.11 |
| cg24754598 | 9.06E-10 | 7.49E-11 | 6.89 | 13.7637617 | 7.60E-02 | 95966488  | 95966611  | NC_000014.8  |
| cg18320917 | 9.08E-10 | 7.50E-11 | 6.89 | 13.7617309 | 5.29E-02 | 20644440  | 20644563  | NC_000015.9  |
| cg01148781 | 9.08E-10 | 7.51E-11 | 6.89 | 13.7613376 | 1.61E-01 | 99963021  | 99963144  | NC_000008.10 |
| cg14180839 | 9.09E-10 | 7.51E-11 | 6.89 | 13.7604801 | 1.26E-01 | 139142049 | 139142172 | NC_000009.11 |

|            |          |          |      |            |          |           |           |              |
|------------|----------|----------|------|------------|----------|-----------|-----------|--------------|
| cg21000072 | 9.11E-10 | 7.53E-11 | 6.89 | 13.758846  | 1.27E-01 | 3567408   | 3567531   | NC_000001.10 |
| cg17368254 | 9.11E-10 | 7.53E-11 | 6.89 | 13.7582468 | 2.29E-01 | 95942847  | 95942970  | NC_000012.11 |
| cg02630045 | 9.11E-10 | 7.53E-11 | 6.89 | 13.7577882 | 4.54E-02 | 30303579  | 30303702  | NC_000006.11 |
| cg12950645 | 9.12E-10 | 7.54E-11 | 6.89 | 13.7573028 | 1.28E-01 | 71410605  | 71410728  | NC_000015.9  |
| cg10472919 | 9.12E-10 | 7.54E-11 | 6.89 | 13.75658   | 1.56E-01 | 135266805 | 135266928 | NC_000005.9  |
| cg11460282 | 9.14E-10 | 7.56E-11 | 6.89 | 13.7549735 | 1.37E-01 | 56297661  | 56297784  | NC_000007.13 |
| cg15091407 | 9.16E-10 | 7.57E-11 | 6.89 | 13.7527529 | 1.93E-01 | 57149499  | 57149622  | NC_000019.9  |
| cg22640193 | 9.16E-10 | 7.57E-11 | 6.89 | 13.7525773 | 8.51E-02 | 74884487  | 74884610  | NC_000017.10 |
| cg00569982 | 9.17E-10 | 7.59E-11 | 6.89 | 13.7510999 | 9.85E-02 | 75947572  | 75947695  | NC_000006.11 |
| cg12781568 | 9.17E-10 | 7.59E-11 | 6.89 | 13.750824  | 9.16E-02 | 32452038  | 32452161  | NC_000011.9  |
| cg18971671 | 9.18E-10 | 7.60E-11 | 6.89 | 13.7498844 | 5.46E-02 | 49401721  | 49401844  | NC_000019.9  |
| cg21446000 | 9.19E-10 | 7.61E-11 | 6.89 | 13.7484176 | 1.23E-01 | 115641974 | 115642097 | NC_000004.11 |
| cg20495183 | 9.20E-10 | 7.61E-11 | 6.89 | 13.7480868 | 1.57E-01 | 132814206 | 132814329 | NC_000011.9  |
| cg09813301 | 9.20E-10 | 7.62E-11 | 6.89 | 13.7471827 | 6.36E-02 | 411182    | 411305    | NC_000016.9  |
| cg11857704 | 9.22E-10 | 7.63E-11 | 6.89 | 13.7451554 | 1.73E-01 | 3750952   | 3751075   | NC_000002.11 |
| cg24886076 | 9.23E-10 | 7.64E-11 | 6.89 | 13.7442822 | 6.13E-02 | 192542576 | 192542699 | NC_000001.10 |
| cg19081437 | 9.23E-10 | 7.64E-11 | 6.89 | 13.7441832 | 1.78E-01 | 46655796  | 46655919  | NC_000017.10 |
| cg06908550 | 9.24E-10 | 7.65E-11 | 6.89 | 13.7433558 | 9.98E-02 | 222279701 | 222279824 | NC_000001.10 |
| cg14614811 | 9.24E-10 | 7.65E-11 | 6.89 | 13.7427765 | 1.74E-01 | 159399681 | 159399804 | NC_000005.9  |
| cg10612285 | 9.25E-10 | 7.65E-11 | 6.89 | 13.7423661 | 2.70E-02 | 59394689  | 59394812  | NC_000015.9  |
| cg01792403 | 9.25E-10 | 7.66E-11 | 6.89 | 13.7417864 | 1.58E-01 | 100626995 | 100627118 | NC_000013.10 |
| cg12486635 | 9.26E-10 | 7.67E-11 | 6.89 | 13.740899  | 9.02E-02 | 57828461  | 57828584  | NC_000012.11 |
| cg11194118 | 9.26E-10 | 7.67E-11 | 6.89 | 13.7407775 | 1.01E-01 | 134790922 | 134791045 | NC_000010.10 |
| cg12308631 | 9.26E-10 | 7.67E-11 | 6.89 | 13.7406851 | 7.03E-02 | 158454502 | 158454625 | NC_000006.11 |
| cg21872037 | 9.26E-10 | 7.67E-11 | 6.89 | 13.7402953 | 1.72E-01 | 6617470   | 6617593   | NC_000017.10 |

|            |          |          |      |            |          |           |           |              |
|------------|----------|----------|------|------------|----------|-----------|-----------|--------------|
| cg22799321 | 9.27E-10 | 7.68E-11 | 6.89 | 13.739536  | 2.43E-01 | 93519621  | 93519744  | NC_000007.13 |
| cg24269991 | 9.27E-10 | 7.68E-11 | 6.89 | 13.7393998 | 7.09E-02 | 141069186 | 141069309 | NC_000004.11 |
| cg10687936 | 9.28E-10 | 7.69E-11 | 6.89 | 13.7378194 | 1.66E-01 | 125085322 | 125085445 | NC_000003.11 |
| cg17538280 | 9.28E-10 | 7.69E-11 | 6.89 | 13.7377542 | 2.00E-01 | 49812836  | 49812959  | NC_000007.13 |
| cg11499970 | 9.29E-10 | 7.70E-11 | 6.88 | 13.7366221 | 2.06E-01 | 167956581 | 167956704 | NC_000005.9  |
| cg13369817 | 9.31E-10 | 7.71E-11 | 6.88 | 13.7354628 | 9.96E-02 | 55116866  | 55116989  | NC_000001.10 |
| cg17188046 | 9.32E-10 | 7.72E-11 | 6.88 | 13.7335102 | 2.11E-01 | 166582197 | 166582320 | NC_000006.11 |
| cg00054971 | 9.33E-10 | 7.73E-11 | 6.88 | 13.7332422 | 5.21E-02 | 129796937 | 129797060 | NC_000010.10 |
| cg05374756 | 9.33E-10 | 7.73E-11 | 6.88 | 13.7327603 | 5.33E-02 | 37586943  | 37587066  | NC_000020.10 |
| cg08635822 | 9.33E-10 | 7.73E-11 | 6.88 | 13.7326609 | 9.27E-02 | 82958259  | 82958382  | NC_000004.11 |
| cg08110693 | 9.34E-10 | 7.74E-11 | 6.88 | 13.7319109 | 1.69E-01 | 36407533  | 36407656  | NC_000006.11 |
| cg17647597 | 9.34E-10 | 7.74E-11 | 6.88 | 13.7315494 | 3.52E-02 | 20935799  | 20935922  | NC_000012.11 |
| cg14210765 | 9.35E-10 | 7.75E-11 | 6.88 | 13.730343  | 7.61E-02 | 73628830  | 73628953  | NC_000018.9  |
| cg02884176 | 9.36E-10 | 7.76E-11 | 6.88 | 13.7294314 | 2.24E-01 | 88752219  | 88752342  | NC_000002.11 |
| cg02062404 | 9.37E-10 | 7.77E-11 | 6.88 | 13.7280556 | 3.21E-02 | 228295382 | 228295505 | NC_000001.10 |
| cg22885558 | 9.37E-10 | 7.77E-11 | 6.88 | 13.7276801 | 1.73E-01 | 137484220 | 137484343 | NC_000003.11 |
| cg12388397 | 9.38E-10 | 7.78E-11 | 6.88 | 13.7268022 | 4.72E-02 | 79517983  | 79518106  | NC_000017.10 |
| cg15157241 | 9.39E-10 | 7.78E-11 | 6.88 | 13.725842  | 1.18E-01 | 44396204  | 44396327  | NC_000021.8  |
| cg27172488 | 9.40E-10 | 7.79E-11 | 6.88 | 13.7251905 | 5.82E-02 | 157219499 | 157219622 | NC_000007.13 |
| cg01198033 | 9.42E-10 | 7.81E-11 | 6.88 | 13.7223632 | 1.54E-01 | 155302342 | 155302465 | NC_000007.13 |
| cg10577241 | 9.43E-10 | 7.82E-11 | 6.88 | 13.7212976 | 1.45E-01 | 77456283  | 77456406  | NC_000015.9  |
| cg27341926 | 9.44E-10 | 7.83E-11 | 6.88 | 13.7198249 | 2.31E-01 | 118032905 | 118033028 | NC_000010.10 |
| cg13033990 | 9.45E-10 | 7.83E-11 | 6.88 | 13.7194898 | 1.90E-01 | 28617304  | 28617427  | NC_000003.11 |
| cg18062333 | 9.45E-10 | 7.84E-11 | 6.88 | 13.7186942 | 1.23E-01 | 110446221 | 110446344 | NC_000003.11 |
| cg01899911 | 9.48E-10 | 7.86E-11 | 6.88 | 13.7157212 | 7.95E-02 | 1039070   | 1039193   | NC_000007.13 |

|            |          |          |      |            |          |           |           |              |
|------------|----------|----------|------|------------|----------|-----------|-----------|--------------|
| cg24198889 | 9.48E-10 | 7.87E-11 | 6.88 | 13.715586  | 7.82E-02 | 2423215   | 2423338   | NC_000011.9  |
| cg11705975 | 9.49E-10 | 7.87E-11 | 6.88 | 13.7147942 | 7.92E-02 | 120354248 | 120354371 | NC_000010.10 |
| cg10490742 | 9.51E-10 | 7.89E-11 | 6.88 | 13.7120827 | 1.08E-01 | 127765504 | 127765627 | NC_000012.11 |
| cg13298963 | 9.52E-10 | 7.90E-11 | 6.88 | 13.7116025 | 1.77E-01 | 32483938  | 32484061  | NC_000017.10 |
| cg07401378 | 9.52E-10 | 7.90E-11 | 6.88 | 13.7113097 | 1.64E-01 | 37248675  | 37248798  | NC_000013.10 |
| cg02445664 | 9.52E-10 | 7.90E-11 | 6.88 | 13.7110266 | 1.78E-01 | 47210599  | 47210722  | NC_000017.10 |
| cg22734397 | 9.52E-10 | 7.90E-11 | 6.88 | 13.7108276 | 2.03E-01 | 134871942 | 134872065 | NC_000005.9  |
| cg16852704 | 9.53E-10 | 7.91E-11 | 6.88 | 13.7106377 | 1.29E-01 | 74743243  | 74743366  | NC_000002.11 |
| cg05843621 | 9.53E-10 | 7.91E-11 | 6.88 | 13.7102888 | 1.14E-01 | 80231999  | 80232122  | NC_000017.10 |
| cg25238480 | 9.56E-10 | 7.94E-11 | 6.88 | 13.7066836 | 1.19E-01 | 11335633  | 11335756  | NC_000011.9  |
| cg07875818 | 9.57E-10 | 7.94E-11 | 6.88 | 13.70622   | 2.73E-01 | 132261765 | 132261888 | NC_000007.13 |
| cg17677030 | 9.57E-10 | 7.94E-11 | 6.88 | 13.7061538 | 1.92E-01 | 50575069  | 50575192  | NC_000002.11 |
| cg21784383 | 9.57E-10 | 7.94E-11 | 6.88 | 13.7058041 | 1.69E-01 | 217311172 | 217311295 | NC_000001.10 |
| cg14950072 | 9.59E-10 | 7.96E-11 | 6.88 | 13.7039343 | 1.78E-01 | 7118122   | 7118245   | NC_000018.9  |
| cg06187770 | 9.60E-10 | 7.98E-11 | 6.88 | 13.7019933 | 1.64E-01 | 85484863  | 85484986  | NC_000006.11 |
| cg20595271 | 9.60E-10 | 7.98E-11 | 6.88 | 13.7019452 | 1.02E-01 | 111889200 | 111889323 | NC_000012.11 |
| cg20570313 | 9.63E-10 | 8.00E-11 | 6.88 | 13.6988441 | 8.05E-02 | 68772808  | 68772931  | NC_000011.9  |
| cg19175386 | 9.66E-10 | 8.02E-11 | 6.88 | 13.6961211 | 1.79E-01 | 115134496 | 115134619 | NC_000012.11 |
| cg01944044 | 9.66E-10 | 8.03E-11 | 6.88 | 13.6958339 | 1.72E-01 | 20084851  | 20084974  | NC_000016.9  |
| cg07618048 | 9.67E-10 | 8.03E-11 | 6.88 | 13.6949138 | 7.03E-02 | 75024638  | 75024761  | NC_000007.13 |
| cg09802835 | 9.67E-10 | 8.03E-11 | 6.88 | 13.694805  | 1.36E-01 | 71952131  | 71952254  | NC_000011.9  |
| cg07047280 | 9.68E-10 | 8.04E-11 | 6.88 | 13.6935651 | 1.28E-01 | 41516394  | 41516517  | NC_000021.8  |
| cg24018520 | 9.69E-10 | 8.05E-11 | 6.88 | 13.6931529 | 1.56E-01 | 175133103 | 175133226 | NC_000004.11 |
| cg27158341 | 9.69E-10 | 8.05E-11 | 6.88 | 13.6929861 | 4.42E-02 | 52959510  | 52959633  | NC_000006.11 |
| cg05981335 | 9.70E-10 | 8.06E-11 | 6.88 | 13.6920877 | 1.43E-01 | 81102562  | 81102685  | NC_000012.11 |

|            |          |          |      |            |          |           |           |              |
|------------|----------|----------|------|------------|----------|-----------|-----------|--------------|
| cg09659227 | 9.70E-10 | 8.06E-11 | 6.88 | 13.6918463 | 1.57E-01 | 46797291  | 46797414  | NC_000017.10 |
| cg24511738 | 9.70E-10 | 8.06E-11 | 6.88 | 13.6911211 | 1.62E-01 | 9762716   | 9762839   | NC_000008.10 |
| cg09764761 | 9.72E-10 | 8.07E-11 | 6.88 | 13.6898492 | 1.22E-01 | 44105544  | 44105667  | NC_000017.10 |
| cg12409982 | 9.72E-10 | 8.08E-11 | 6.88 | 13.6895582 | 1.51E-01 | 137489312 | 137489435 | NC_000003.11 |
| cg19542816 | 9.73E-10 | 8.09E-11 | 6.88 | 13.688165  | 2.02E-01 | 177053295 | 177053418 | NC_000002.11 |
| cg07733257 | 9.75E-10 | 8.10E-11 | 6.88 | 13.6862225 | 1.36E-01 | 1882520   | 1882643   | NC_000005.9  |
| cg02763409 | 9.78E-10 | 8.13E-11 | 6.88 | 13.6834884 | 7.63E-02 | 239695552 | 239695675 | NC_000002.11 |
| cg25611723 | 9.78E-10 | 8.13E-11 | 6.88 | 13.6830474 | 8.12E-02 | 10453624  | 10453747  | NC_000018.9  |
| cg27439396 | 9.80E-10 | 8.15E-11 | 6.87 | 13.6805906 | 2.04E-02 | 21304091  | 21304214  | NC_000013.10 |
| cg05949020 | 9.81E-10 | 8.16E-11 | 6.87 | 13.6800854 | 1.70E-01 | 110693757 | 110693880 | NC_000001.10 |
| cg09435415 | 9.82E-10 | 8.17E-11 | 6.87 | 13.6785194 | 1.35E-01 | 105479383 | 105479506 | NC_000008.10 |
| cg05875410 | 9.83E-10 | 8.18E-11 | 6.87 | 13.6774169 | 1.32E-01 | 51187572  | 51187695  | NC_000016.9  |
| cg22819171 | 9.84E-10 | 8.18E-11 | 6.87 | 13.6771436 | 1.08E-01 | 53742252  | 53742375  | NC_000001.10 |
| cg07941953 | 9.84E-10 | 8.18E-11 | 6.87 | 13.6769327 | 9.76E-02 | 10508668  | 10508791  | NC_000020.10 |
| cg25160286 | 9.88E-10 | 8.22E-11 | 6.87 | 13.6728972 | 1.61E-01 | 27282308  | 27282431  | NC_000007.13 |
| cg24998791 | 9.89E-10 | 8.23E-11 | 6.87 | 13.6713007 | 9.69E-02 | 10454100  | 10454223  | NC_000008.10 |
| cg16108388 | 9.91E-10 | 8.24E-11 | 6.87 | 13.6697458 | 8.17E-02 | 41704631  | 41704754  | NC_000006.11 |
| cg03004999 | 9.91E-10 | 8.24E-11 | 6.87 | 13.6697075 | 1.19E-01 | 43152125  | 43152248  | NC_000007.13 |
| cg05005577 | 9.91E-10 | 8.24E-11 | 6.87 | 13.6695291 | 4.63E-02 | 18669132  | 18669255  | NC_000022.10 |
| cg01580681 | 9.91E-10 | 8.25E-11 | 6.87 | 13.6692799 | 1.67E-01 | 174450016 | 174450139 | NC_000004.11 |
| cg00259618 | 9.92E-10 | 8.25E-11 | 6.87 | 13.6686347 | 1.99E-01 | 103889655 | 103889778 | NC_000012.11 |
| cg05091519 | 9.92E-10 | 8.26E-11 | 6.87 | 13.6680045 | 1.67E-01 | 31839552  | 31839675  | NC_000011.9  |
| cg13585586 | 9.93E-10 | 8.26E-11 | 6.87 | 13.6674375 | 1.44E-01 | 104199266 | 104199389 | NC_000009.11 |
| cg07598199 | 9.95E-10 | 8.28E-11 | 6.87 | 13.6649236 | 1.06E-01 | 120056829 | 120056952 | NC_000004.11 |
| cg12869912 | 9.96E-10 | 8.29E-11 | 6.87 | 13.6643257 | 2.10E-01 | 58152803  | 58152926  | NC_000020.10 |

|            |          |          |      |            |          |           |           |              |
|------------|----------|----------|------|------------|----------|-----------|-----------|--------------|
| cg14327228 | 9.96E-10 | 8.29E-11 | 6.87 | 13.6636806 | 9.90E-02 | 36343530  | 36343653  | NC_000019.9  |
| cg23421023 | 9.97E-10 | 8.30E-11 | 6.87 | 13.6626077 | 1.71E-01 | 40755165  | 40755288  | NC_000008.10 |
| cg13466809 | 9.98E-10 | 8.31E-11 | 6.87 | 13.6617488 | 7.26E-02 | 160542944 | 160543067 | NC_000006.11 |
| cg07419968 | 9.99E-10 | 8.31E-11 | 6.87 | 13.6613456 | 6.05E-02 | 106339081 | 106339204 | NC_000001.10 |
| cg06329574 | 1.00E-09 | 8.32E-11 | 6.87 | 13.6600822 | 1.70E-01 | 69634334  | 69634457  | NC_000011.9  |
| cg11196175 | 1.00E-09 | 8.34E-11 | 6.87 | 13.6586389 | 7.10E-02 | 21560541  | 21560664  | NC_000014.8  |
| cg22581933 | 1.00E-09 | 8.34E-11 | 6.87 | 13.6584977 | 5.38E-02 | 109797277 | 109797400 | NC_000012.11 |
| cg10277811 | 1.00E-09 | 8.35E-11 | 6.87 | 13.6569151 | 1.34E-01 | 68049474  | 68049597  | NC_000017.10 |
| cg10325478 | 1.00E-09 | 8.36E-11 | 6.87 | 13.6558325 | 1.77E-01 | 88793021  | 88793144  | NC_000014.8  |
| cg08749917 | 1.00E-09 | 8.36E-11 | 6.87 | 13.6557948 | 8.88E-02 | 186915320 | 186915443 | NC_000003.11 |
| cg11488401 | 1.01E-09 | 8.37E-11 | 6.87 | 13.654244  | 9.73E-02 | 77468373  | 77468496  | NC_000016.9  |
| cg25562106 | 1.01E-09 | 8.38E-11 | 6.87 | 13.6534227 | 7.61E-02 | 149891579 | 149891702 | NC_000006.11 |
| cg27483455 | 1.01E-09 | 8.38E-11 | 6.87 | 13.653392  | 8.31E-02 | 50475360  | 50475483  | NC_000012.11 |
| cg27279583 | 1.01E-09 | 8.39E-11 | 6.87 | 13.6526071 | 1.26E-01 | 61514753  | 61514876  | NC_000017.10 |
| cg18485627 | 1.01E-09 | 8.40E-11 | 6.87 | 13.6515522 | 3.61E-02 | 101340188 | 101340311 | NC_000014.8  |
| cg24151423 | 1.01E-09 | 8.40E-11 | 6.87 | 13.6514834 | 3.15E-02 | 61270712  | 61270835  | NC_000020.10 |
| cg17108388 | 1.01E-09 | 8.40E-11 | 6.87 | 13.651429  | 7.31E-02 | 204226566 | 204226689 | NC_000001.10 |
| cg04460847 | 1.01E-09 | 8.42E-11 | 6.87 | 13.6489807 | 1.36E-01 | 127841335 | 127841458 | NC_000007.13 |
| cg01653005 | 1.01E-09 | 8.43E-11 | 6.87 | 13.6473774 | 2.23E-01 | 8869105   | 8869228   | NC_000017.10 |
| cg00953201 | 1.01E-09 | 8.44E-11 | 6.87 | 13.6461046 | 1.68E-01 | 30156486  | 30156609  | NC_000013.10 |
| cg01015662 | 1.01E-09 | 8.44E-11 | 6.87 | 13.6460722 | 8.43E-02 | 40598394  | 40598517  | NC_000001.10 |
| cg22390041 | 1.01E-09 | 8.45E-11 | 6.87 | 13.6451552 | 1.32E-01 | 19226319  | 19226442  | NC_000001.10 |
| cg18543610 | 1.01E-09 | 8.46E-11 | 6.87 | 13.6442246 | 9.90E-02 | 100627929 | 100628052 | NC_000013.10 |
| cg14645027 | 1.02E-09 | 8.46E-11 | 6.87 | 13.6436063 | 1.00E-01 | 52642706  | 52642829  | NC_000012.11 |
| cg15335860 | 1.02E-09 | 8.47E-11 | 6.87 | 13.6429766 | 4.91E-02 | 56879323  | 56879446  | NC_000007.13 |

|            |          |          |      |            |          |           |           |              |
|------------|----------|----------|------|------------|----------|-----------|-----------|--------------|
| cg07223180 | 1.02E-09 | 8.47E-11 | 6.87 | 13.6429724 | 9.25E-02 | 20989142  | 20989265  | NC_000013.10 |
| cg10553204 | 1.02E-09 | 8.47E-11 | 6.87 | 13.6429516 | 1.25E-01 | 20871195  | 20871318  | NC_000002.11 |
| cg10000952 | 1.02E-09 | 8.47E-11 | 6.87 | 13.6426212 | 1.72E-01 | 116451628 | 116451751 | NC_000011.9  |
| cg01033191 | 1.02E-09 | 8.49E-11 | 6.87 | 13.6408615 | 1.57E-01 | 62488850  | 62488973  | NC_000010.10 |
| cg23405575 | 1.02E-09 | 8.50E-11 | 6.87 | 13.6398469 | 1.78E-01 | 11034281  | 11034404  | NC_000003.11 |
| cg07827796 | 1.02E-09 | 8.51E-11 | 6.87 | 13.6385415 | 5.29E-02 | 33622959  | 33623082  | NC_000019.9  |
| cg21217540 | 1.02E-09 | 8.51E-11 | 6.87 | 13.6384305 | 1.09E-01 | 110752307 | 110752430 | NC_000001.10 |
| cg20122586 | 1.02E-09 | 8.51E-11 | 6.87 | 13.6381176 | 1.29E-01 | 53522821  | 53522944  | NC_000004.11 |
| cg12432236 | 1.02E-09 | 8.55E-11 | 6.87 | 13.6342392 | 1.55E-01 | 58209133  | 58209256  | NC_000013.10 |
| cg06091094 | 1.03E-09 | 8.55E-11 | 6.87 | 13.6335936 | 7.33E-02 | 44927766  | 44927889  | NC_000011.9  |
| cg00919971 | 1.03E-09 | 8.56E-11 | 6.87 | 13.6328894 | 1.43E-01 | 1286149   | 1286272   | NC_000007.13 |
| cg23765754 | 1.03E-09 | 8.56E-11 | 6.87 | 13.6324936 | 1.40E-01 | 30717766  | 30717889  | NC_000019.9  |
| cg20792294 | 1.03E-09 | 8.57E-11 | 6.87 | 13.6310926 | 1.77E-01 | 2165425   | 2165548   | NC_000011.9  |
| cg26575637 | 1.03E-09 | 8.58E-11 | 6.87 | 13.6306019 | 8.42E-02 | 16760056  | 16760179  | NC_000012.11 |
| cg03817667 | 1.03E-09 | 8.59E-11 | 6.87 | 13.6293942 | 1.87E-01 | 54609953  | 54610076  | NC_000007.13 |
| cg12106728 | 1.03E-09 | 8.59E-11 | 6.87 | 13.6291293 | 2.02E-01 | 115136258 | 115136381 | NC_000012.11 |
| cg00272971 | 1.03E-09 | 8.59E-11 | 6.87 | 13.6290407 | 1.74E-01 | 102419564 | 102419687 | NC_000010.10 |
| cg24827660 | 1.03E-09 | 8.60E-11 | 6.87 | 13.6279874 | 2.09E-01 | 58179538  | 58179661  | NC_000020.10 |
| cg17545182 | 1.03E-09 | 8.60E-11 | 6.87 | 13.6276479 | 1.21E-01 | 247694041 | 247694164 | NC_000001.10 |
| cg25121292 | 1.03E-09 | 8.61E-11 | 6.87 | 13.627237  | 1.07E-01 | 203036093 | 203036216 | NC_000002.11 |
| cg07817024 | 1.03E-09 | 8.62E-11 | 6.86 | 13.6258482 | 1.82E-01 | 119535500 | 119535623 | NC_000001.10 |
| cg04546557 | 1.04E-09 | 8.65E-11 | 6.86 | 13.6228198 | 1.14E-01 | 27262483  | 27262606  | NC_000007.13 |
| cg06088623 | 1.04E-09 | 8.65E-11 | 6.86 | 13.6225008 | 1.18E-01 | 8274890   | 8275013   | NC_000019.9  |
| cg08316825 | 1.04E-09 | 8.65E-11 | 6.86 | 13.622294  | 1.09E-01 | 151304547 | 151304670 | NC_000005.9  |
| cg20501434 | 1.04E-09 | 8.65E-11 | 6.86 | 13.6222653 | 1.23E-01 | 30868167  | 30868290  | NC_000022.10 |



|            |          |          |      |            |          |           |           |              |
|------------|----------|----------|------|------------|----------|-----------|-----------|--------------|
| cg18972811 | 1.04E-09 | 8.67E-11 | 6.86 | 13.6205214 | 1.53E-01 | 20254736  | 20254859  | NC_000004.11 |
| cg25782229 | 1.04E-09 | 8.68E-11 | 6.86 | 13.6190065 | 1.55E-01 | 32450692  | 32450815  | NC_000011.9  |
| cg07213870 | 1.04E-09 | 8.68E-11 | 6.86 | 13.6184745 | 9.76E-02 | 123613331 | 123613454 | NC_000011.9  |
| cg16946271 | 1.04E-09 | 8.69E-11 | 6.86 | 13.6177634 | 5.68E-02 | 119666271 | 119666394 | NC_000006.11 |
| cg08121453 | 1.04E-09 | 8.69E-11 | 6.86 | 13.6177565 | 8.51E-02 | 248855364 | 248855487 | NC_000001.10 |
| cg20337028 | 1.04E-09 | 8.69E-11 | 6.86 | 13.6174858 | 5.26E-02 | 75181836  | 75181959  | NC_000017.10 |
| cg04600411 | 1.04E-09 | 8.70E-11 | 6.86 | 13.6167031 | 3.13E-02 | 40269556  | 40269679  | NC_000017.10 |
| cg20634967 | 1.04E-09 | 8.71E-11 | 6.86 | 13.6151079 | 2.44E-01 | 58204224  | 58204347  | NC_000013.10 |
| cg01524278 | 1.04E-09 | 8.71E-11 | 6.86 | 13.6149711 | 1.42E-01 | 54355460  | 54355583  | NC_000012.11 |
| cg02985568 | 1.04E-09 | 8.72E-11 | 6.86 | 13.6139382 | 1.66E-01 | 15753565  | 15753688  | NC_000021.8  |
| cg26952362 | 1.05E-09 | 8.75E-11 | 6.86 | 13.6110869 | 6.29E-02 | 72820053  | 72820176  | NC_000010.10 |
| cg06173889 | 1.05E-09 | 8.75E-11 | 6.86 | 13.6109157 | 1.30E-01 | 5835853   | 5835976   | NC_000002.11 |
| cg08777316 | 1.05E-09 | 8.77E-11 | 6.86 | 13.6083697 | 1.23E-01 | 158531511 | 158531634 | NC_000005.9  |
| cg24855045 | 1.05E-09 | 8.78E-11 | 6.86 | 13.6081338 | 1.01E-01 | 18938449  | 18938572  | NC_000010.10 |
| cg24914278 | 1.05E-09 | 8.79E-11 | 6.86 | 13.606974  | 2.03E-01 | 109799739 | 109799862 | NC_000008.10 |
| cg03167413 | 1.05E-09 | 8.79E-11 | 6.86 | 13.6062467 | 1.82E-01 | 113723093 | 113723216 | NC_000007.13 |
| cg11469051 | 1.05E-09 | 8.81E-11 | 6.86 | 13.6042122 | 1.10E-01 | 24804131  | 24804254  | NC_000004.11 |
| cg10776230 | 1.06E-09 | 8.82E-11 | 6.86 | 13.6037057 | 1.29E-01 | 245851226 | 245851349 | NC_000001.10 |
| cg09536516 | 1.06E-09 | 8.82E-11 | 6.86 | 13.6033843 | 3.83E-02 | 30934475  | 30934598  | NC_000007.13 |
| cg10977667 | 1.06E-09 | 8.85E-11 | 6.86 | 13.5996638 | 1.07E-01 | 31053799  | 31053922  | NC_000016.9  |
| cg04123357 | 1.06E-09 | 8.85E-11 | 6.86 | 13.5992908 | 7.93E-02 | 46929500  | 46929623  | NC_000021.8  |
| cg22048474 | 1.06E-09 | 8.86E-11 | 6.86 | 13.5990842 | 1.70E-01 | 55366834  | 55366957  | NC_000008.10 |
| cg05033560 | 1.06E-09 | 8.86E-11 | 6.86 | 13.5987632 | 5.89E-02 | 172173145 | 172173268 | NC_000005.9  |
| cg14185341 | 1.06E-09 | 8.87E-11 | 6.86 | 13.5980596 | 6.27E-02 | 51829712  | 51829835  | NC_000010.10 |
| cg24928333 | 1.06E-09 | 8.88E-11 | 6.86 | 13.596991  | 1.80E-01 | 44790141  | 44790264  | NC_000018.9  |

|            |          |          |      |            |          |           |           |              |
|------------|----------|----------|------|------------|----------|-----------|-----------|--------------|
| cg01590753 | 1.06E-09 | 8.88E-11 | 6.86 | 13.5969057 | 1.90E-01 | 177714373 | 177714496 | NC_000004.11 |
| cg21948716 | 1.06E-09 | 8.88E-11 | 6.86 | 13.5967453 | 1.10E-01 | 145562756 | 145562879 | NC_000008.10 |
| cg03042281 | 1.06E-09 | 8.89E-11 | 6.86 | 13.5958915 | 8.00E-02 | 17608394  | 17608517  | NC_000019.9  |
| cg27109006 | 1.06E-09 | 8.89E-11 | 6.86 | 13.5956303 | 1.40E-01 | 61378423  | 61378546  | NC_000015.9  |
| cg09251429 | 1.06E-09 | 8.90E-11 | 6.86 | 13.5945551 | 1.62E-01 | 124735128 | 124735251 | NC_000011.9  |
| cg19850348 | 1.06E-09 | 8.90E-11 | 6.86 | 13.594229  | 2.05E-01 | 55880997  | 55881120  | NC_000015.9  |
| cg17152757 | 1.06E-09 | 8.90E-11 | 6.86 | 13.5940685 | 1.58E-01 | 172166258 | 172166381 | NC_000003.11 |
| cg21773872 | 1.07E-09 | 8.91E-11 | 6.86 | 13.592864  | 2.02E-01 | 30722320  | 30722443  | NC_000007.13 |
| cg11675630 | 1.07E-09 | 8.91E-11 | 6.86 | 13.5927069 | 7.85E-02 | 29255881  | 29256004  | NC_000002.11 |
| cg02153747 | 1.07E-09 | 8.92E-11 | 6.86 | 13.5922966 | 1.03E-01 | 29917507  | 29917630  | NC_000010.10 |
| cg06733215 | 1.07E-09 | 8.92E-11 | 6.86 | 13.5920084 | 3.11E-02 | 70317506  | 70317629  | NC_000016.9  |
| cg26990102 | 1.07E-09 | 8.94E-11 | 6.86 | 13.5900362 | 1.74E-01 | 119606746 | 119606869 | NC_000002.11 |
| cg03935991 | 1.07E-09 | 8.94E-11 | 6.86 | 13.5898611 | 5.39E-02 | 33592746  | 33592869  | NC_000010.10 |
| cg00147850 | 1.07E-09 | 8.96E-11 | 6.86 | 13.5878397 | 5.46E-02 | 144994715 | 144994838 | NC_000001.10 |
| cg15748507 | 1.07E-09 | 8.96E-11 | 6.86 | 13.587715  | 1.21E-01 | 120354627 | 120354750 | NC_000010.10 |
| cg13004897 | 1.07E-09 | 8.97E-11 | 6.86 | 13.5869988 | 8.64E-02 | 177225404 | 177225527 | NC_000005.9  |
| cg03734437 | 1.07E-09 | 8.97E-11 | 6.86 | 13.5868959 | 2.20E-01 | 97173526  | 97173649  | NC_000008.10 |
| cg14289511 | 1.07E-09 | 8.98E-11 | 6.86 | 13.585795  | 1.67E-01 | 24682446  | 24682569  | NC_000016.9  |
| cg06209197 | 1.07E-09 | 8.98E-11 | 6.86 | 13.5855922 | 5.72E-02 | 32106926  | 32107049  | NC_000001.10 |
| cg00863378 | 1.07E-09 | 8.98E-11 | 6.86 | 13.585579  | 1.02E-01 | 56549757  | 56549880  | NC_000016.9  |
| cg25173574 | 1.07E-09 | 8.98E-11 | 6.86 | 13.5853813 | 3.81E-02 | 154112549 | 154112672 | NC_000004.11 |
| cg04909529 | 1.07E-09 | 8.98E-11 | 6.86 | 13.5852517 | 5.17E-02 | 104218302 | 104218425 | NC_000012.11 |
| cg01824466 | 1.08E-09 | 9.00E-11 | 6.86 | 13.583716  | 1.70E-01 | 95959531  | 95959654  | NC_000008.10 |
| cg06014958 | 1.08E-09 | 9.00E-11 | 6.86 | 13.5836337 | 1.64E-01 | 10425553  | 10425676  | NC_000006.11 |
| cg23564700 | 1.08E-09 | 9.00E-11 | 6.86 | 13.5833287 | 2.17E-01 | 5544169   | 5544292   | NC_000018.9  |

|            |          |          |      |            |          |           |           |              |
|------------|----------|----------|------|------------|----------|-----------|-----------|--------------|
| cg08801446 | 1.08E-09 | 9.01E-11 | 6.86 | 13.5824933 | 1.17E-01 | 36626126  | 36626249  | NC_000002.11 |
| cg03151469 | 1.08E-09 | 9.01E-11 | 6.86 | 13.5824554 | 1.39E-01 | 176936091 | 176936214 | NC_000002.11 |
| cg24332743 | 1.08E-09 | 9.01E-11 | 6.86 | 13.5820348 | 1.39E-01 | 114610614 | 114610737 | NC_000010.10 |
| cg04175027 | 1.08E-09 | 9.01E-11 | 6.86 | 13.5819783 | 1.59E-01 | 123418722 | 123418845 | NC_000002.11 |
| cg17523945 | 1.08E-09 | 9.03E-11 | 6.86 | 13.5801894 | 1.28E-01 | 46732351  | 46732474  | NC_000019.9  |
| cg19523085 | 1.08E-09 | 9.04E-11 | 6.86 | 13.5792631 | 1.86E-01 | 28339477  | 28339600  | NC_000021.8  |
| cg13617198 | 1.08E-09 | 9.05E-11 | 6.86 | 13.5783057 | 1.83E-01 | 77594256  | 77594379  | NC_000008.10 |
| cg19803052 | 1.08E-09 | 9.06E-11 | 6.86 | 13.5771444 | 1.40E-01 | 19813244  | 19813367  | NC_000007.13 |
| cg01005365 | 1.08E-09 | 9.08E-11 | 6.86 | 13.5748533 | 1.47E-01 | 76029522  | 76029645  | NC_000005.9  |
| cg09916357 | 1.08E-09 | 9.08E-11 | 6.86 | 13.5743719 | 1.02E-01 | 157397131 | 157397254 | NC_000004.11 |
| cg14017655 | 1.09E-09 | 9.09E-11 | 6.86 | 13.5734152 | 2.32E-01 | 133562193 | 133562316 | NC_000006.11 |
| cg02923490 | 1.09E-09 | 9.10E-11 | 6.86 | 13.5726732 | 8.75E-02 | 37872019  | 37872142  | NC_000006.11 |
| cg22333214 | 1.09E-09 | 9.11E-11 | 6.86 | 13.5709301 | 2.36E-01 | 98511789  | 98511912  | NC_000001.10 |
| cg25950278 | 1.09E-09 | 9.12E-11 | 6.86 | 13.5708018 | 1.29E-01 | 49388412  | 49388535  | NC_000012.11 |
| cg27454064 | 1.09E-09 | 9.12E-11 | 6.85 | 13.5705199 | 1.28E-01 | 64215611  | 64215734  | NC_000012.11 |
| cg20573931 | 1.09E-09 | 9.12E-11 | 6.85 | 13.5704973 | 9.93E-02 | 79710803  | 79710926  | NC_000008.10 |
| cg00216693 | 1.09E-09 | 9.12E-11 | 6.85 | 13.5704381 | 5.91E-02 | 131913247 | 131913370 | NC_000002.11 |
| cg04405466 | 1.09E-09 | 9.12E-11 | 6.85 | 13.5698675 | 6.63E-02 | 105851087 | 105851210 | NC_000010.10 |
| cg14515453 | 1.09E-09 | 9.14E-11 | 6.85 | 13.568523  | 1.58E-01 | 19158041  | 19158164  | NC_000007.13 |
| cg25456468 | 1.09E-09 | 9.14E-11 | 6.85 | 13.5683019 | 2.12E-01 | 54394116  | 54394239  | NC_000012.11 |
| cg15659537 | 1.09E-09 | 9.14E-11 | 6.85 | 13.5678029 | 1.05E-01 | 75712028  | 75712151  | NC_000012.11 |
| cg04856042 | 1.09E-09 | 9.15E-11 | 6.85 | 13.5675564 | 6.68E-02 | 115752704 | 115752827 | NC_000003.11 |
| cg18594777 | 1.09E-09 | 9.15E-11 | 6.85 | 13.5673273 | 3.03E-02 | 53342353  | 53342476  | NC_000001.10 |
| cg13407144 | 1.09E-09 | 9.17E-11 | 6.85 | 13.5645264 | 5.28E-02 | 33468337  | 33468460  | NC_000010.10 |
| cg26157385 | 1.10E-09 | 9.18E-11 | 6.85 | 13.5634002 | 1.31E-01 | 248020641 | 248020764 | NC_000001.10 |

|            |          |          |      |            |          |           |           |              |
|------------|----------|----------|------|------------|----------|-----------|-----------|--------------|
| cg15993083 | 1.10E-09 | 9.19E-11 | 6.85 | 13.5630587 | 2.07E-01 | 4381788   | 4381911   | NC_000012.11 |
| cg08326300 | 1.10E-09 | 9.19E-11 | 6.85 | 13.5623399 | 9.07E-02 | 80319770  | 80319893  | NC_000010.10 |
| cg00056541 | 1.10E-09 | 9.20E-11 | 6.85 | 13.5621009 | 1.10E-01 | 164288623 | 164288746 | NC_000006.11 |
| cg23413924 | 1.10E-09 | 9.23E-11 | 6.85 | 13.5581259 | 9.61E-02 | 45427734  | 45427857  | NC_000015.9  |
| cg00648184 | 1.10E-09 | 9.25E-11 | 6.85 | 13.5566372 | 1.41E-01 | 60828157  | 60828280  | NC_000017.10 |
| cg09008705 | 1.10E-09 | 9.25E-11 | 6.85 | 13.5563246 | 2.32E-01 | 115880865 | 115880988 | NC_000001.10 |
| cg06392574 | 1.10E-09 | 9.26E-11 | 6.85 | 13.5552109 | 1.35E-01 | 37212272  | 37212395  | NC_000006.11 |
| cg17354303 | 1.11E-09 | 9.28E-11 | 6.85 | 13.5532388 | 1.04E-01 | 96716665  | 96716788  | NC_000009.11 |
| cg03175305 | 1.11E-09 | 9.29E-11 | 6.85 | 13.552721  | 1.56E-01 | 179754483 | 179754606 | NC_000003.11 |
| cg06110728 | 1.11E-09 | 9.29E-11 | 6.85 | 13.5521602 | 2.41E-01 | 45270886  | 45271009  | NC_000012.11 |
| cg08733933 | 1.11E-09 | 9.30E-11 | 6.85 | 13.5513239 | 1.08E-01 | 2954429   | 2954552   | NC_000001.10 |
| cg19003412 | 1.11E-09 | 9.30E-11 | 6.85 | 13.5512965 | 1.11E-01 | 74277799  | 74277922  | NC_000004.11 |
| cg19764326 | 1.11E-09 | 9.30E-11 | 6.85 | 13.5509825 | 4.74E-02 | 67509003  | 67509126  | NC_000001.10 |
| cg16698845 | 1.11E-09 | 9.31E-11 | 6.85 | 13.5499792 | 4.39E-02 | 588478    | 588601    | NC_000007.13 |
| cg18745131 | 1.11E-09 | 9.32E-11 | 6.85 | 13.5491178 | 1.28E-01 | 1269963   | 1270086   | NC_000007.13 |
| cg05921138 | 1.11E-09 | 9.32E-11 | 6.85 | 13.5486729 | 7.69E-02 | 121440849 | 121440972 | NC_000011.9  |
| cg09255966 | 1.11E-09 | 9.33E-11 | 6.85 | 13.548383  | 3.65E-02 | 2334136   | 2334259   | NC_000001.10 |
| cg17959850 | 1.11E-09 | 9.34E-11 | 6.85 | 13.5464456 | 3.67E-02 | 49708563  | 49708686  | NC_000005.9  |
| cg04606210 | 1.12E-09 | 9.38E-11 | 6.85 | 13.542937  | 2.04E-01 | 55205571  | 55205694  | NC_000020.10 |
| cg14646081 | 1.12E-09 | 9.38E-11 | 6.85 | 13.542435  | 1.03E-01 | 71691305  | 71691428  | NC_000009.11 |
| cg02965712 | 1.12E-09 | 9.39E-11 | 6.85 | 13.5416107 | 6.84E-02 | 77746028  | 77746151  | NC_000001.10 |
| cg11909748 | 1.12E-09 | 9.40E-11 | 6.85 | 13.5409855 | 1.49E-01 | 52956674  | 52956797  | NC_000019.9  |
| cg20635409 | 1.12E-09 | 9.42E-11 | 6.85 | 13.5382601 | 1.38E-01 | 103359273 | 103359396 | NC_000012.11 |
| cg15376615 | 1.12E-09 | 9.42E-11 | 6.85 | 13.5382102 | 2.11E-01 | 153858822 | 153858945 | NC_000005.9  |
| cg23473285 | 1.12E-09 | 9.43E-11 | 6.85 | 13.5380344 | 1.79E-01 | 72596698  | 72596821  | NC_000006.11 |

|            |          |          |      |            |          |           |           |              |
|------------|----------|----------|------|------------|----------|-----------|-----------|--------------|
| cg02746161 | 1.12E-09 | 9.44E-11 | 6.85 | 13.536724  | 2.45E-02 | 114117367 | 114117490 | NC_000010.10 |
| cg26923754 | 1.12E-09 | 9.44E-11 | 6.85 | 13.5363815 | 9.69E-02 | 16063122  | 16063245  | NC_000001.10 |
| cg09298852 | 1.12E-09 | 9.44E-11 | 6.85 | 13.5362188 | 5.08E-02 | 1574816   | 1574939   | NC_000019.9  |
| cg19352038 | 1.13E-09 | 9.45E-11 | 6.85 | 13.5357412 | 1.45E-01 | 223164869 | 223164992 | NC_000002.11 |
| cg25490475 | 1.13E-09 | 9.46E-11 | 6.85 | 13.5339358 | 7.24E-02 | 28702222  | 28702345  | NC_000011.9  |
| cg12465710 | 1.13E-09 | 9.47E-11 | 6.85 | 13.5337923 | 1.27E-01 | 135042885 | 135043008 | NC_000010.10 |
| cg05978864 | 1.13E-09 | 9.47E-11 | 6.85 | 13.5335196 | 3.28E-02 | 30105174  | 30105297  | NC_000006.11 |
| cg09694722 | 1.13E-09 | 9.47E-11 | 6.85 | 13.5331846 | 1.22E-01 | 2161318   | 2161441   | NC_000011.9  |
| cg20813996 | 1.13E-09 | 9.47E-11 | 6.85 | 13.5331106 | 1.97E-01 | 166422741 | 166422864 | NC_000006.11 |
| cg09825327 | 1.13E-09 | 9.47E-11 | 6.85 | 13.53308   | 1.30E-01 | 211503219 | 211503342 | NC_000001.10 |
| cg00647217 | 1.13E-09 | 9.48E-11 | 6.85 | 13.5328334 | 1.52E-01 | 165086866 | 165086989 | NC_000001.10 |
| cg23864514 | 1.13E-09 | 9.49E-11 | 6.85 | 13.5316516 | 8.64E-02 | 22882512  | 22882635  | NC_000007.13 |
| cg21678813 | 1.13E-09 | 9.50E-11 | 6.85 | 13.5305784 | 1.81E-01 | 20229879  | 20230002  | NC_000011.9  |
| cg13575161 | 1.13E-09 | 9.51E-11 | 6.85 | 13.5289441 | 2.26E-01 | 4381792   | 4381915   | NC_000012.11 |
| cg11635125 | 1.13E-09 | 9.51E-11 | 6.85 | 13.5288502 | 2.75E-02 | 108728931 | 108729054 | NC_000011.9  |
| cg08500128 | 1.14E-09 | 9.56E-11 | 6.85 | 13.5245136 | 1.29E-01 | 10763670  | 10763793  | NC_000012.11 |
| cg23262036 | 1.14E-09 | 9.56E-11 | 6.85 | 13.5244653 | 1.92E-01 | 96647021  | 96647144  | NC_000007.13 |
| cg25827102 | 1.14E-09 | 9.57E-11 | 6.85 | 13.5232389 | 5.06E-02 | 89880727  | 89880850  | NC_000015.9  |
| cg11200635 | 1.14E-09 | 9.57E-11 | 6.85 | 13.5226705 | 1.83E-01 | 43573195  | 43573318  | NC_000010.10 |
| cg16203271 | 1.14E-09 | 9.59E-11 | 6.85 | 13.5210523 | 6.01E-02 | 27306681  | 27306804  | NC_000002.11 |
| cg14611112 | 1.14E-09 | 9.59E-11 | 6.85 | 13.5210134 | 1.51E-01 | 139643351 | 139643474 | NC_000009.11 |
| cg10897631 | 1.14E-09 | 9.60E-11 | 6.85 | 13.5204941 | 1.15E-01 | 195773232 | 195773355 | NC_000003.11 |
| cg01403123 | 1.14E-09 | 9.60E-11 | 6.85 | 13.5201964 | 3.75E-02 | 240287795 | 240287918 | NC_000002.11 |
| cg27122213 | 1.14E-09 | 9.61E-11 | 6.85 | 13.5193943 | 1.87E-01 | 57274763  | 57274886  | NC_000014.8  |
| cg03284392 | 1.14E-09 | 9.61E-11 | 6.85 | 13.5191271 | 1.34E-01 | 141071438 | 141071561 | NC_000005.9  |

|            |          |          |      |            |          |           |           |              |
|------------|----------|----------|------|------------|----------|-----------|-----------|--------------|
| cg03545536 | 1.15E-09 | 9.64E-11 | 6.85 | 13.5162211 | 2.67E-02 | 99905334  | 99905457  | NC_000007.13 |
| cg09515953 | 1.15E-09 | 9.65E-11 | 6.84 | 13.515054  | 1.65E-01 | 38747355  | 38747478  | NC_000019.9  |
| cg27513979 | 1.15E-09 | 9.65E-11 | 6.84 | 13.5145189 | 1.73E-01 | 96743895  | 96744018  | NC_000013.10 |
| cg13478228 | 1.15E-09 | 9.67E-11 | 6.84 | 13.5131764 | 2.10E-01 | 70209432  | 70209555  | NC_000018.9  |
| cg21728840 | 1.15E-09 | 9.68E-11 | 6.84 | 13.5118393 | 1.18E-01 | 57829009  | 57829132  | NC_000019.9  |
| cg00320608 | 1.15E-09 | 9.68E-11 | 6.84 | 13.5116528 | 1.15E-01 | 29116256  | 29116379  | NC_000002.11 |
| cg04884908 | 1.15E-09 | 9.69E-11 | 6.84 | 13.5112914 | 1.77E-01 | 72374840  | 72374963  | NC_000002.11 |
| cg14306161 | 1.15E-09 | 9.69E-11 | 6.84 | 13.5105637 | 8.84E-02 | 71102111  | 71102234  | NC_000015.9  |
| cg08074528 | 1.15E-09 | 9.70E-11 | 6.84 | 13.5099066 | 6.48E-02 | 50528586  | 50528709  | NC_000022.10 |
| cg17016922 | 1.15E-09 | 9.71E-11 | 6.84 | 13.5090114 | 9.50E-02 | 141195365 | 141195488 | NC_000005.9  |
| cg04191403 | 1.15E-09 | 9.71E-11 | 6.84 | 13.5088056 | 1.45E-01 | 87637999  | 87638122  | NC_000016.9  |
| cg27628784 | 1.16E-09 | 9.74E-11 | 6.84 | 13.5059257 | 1.70E-01 | 131767387 | 131767510 | NC_000010.10 |
| cg23850212 | 1.16E-09 | 9.74E-11 | 6.84 | 13.5054287 | 2.14E-01 | 57049857  | 57049980  | NC_000019.9  |
| cg24625984 | 1.16E-09 | 9.75E-11 | 6.84 | 13.5049124 | 1.20E-01 | 130279707 | 130279830 | NC_000010.10 |
| cg25486757 | 1.16E-09 | 9.77E-11 | 6.84 | 13.5027557 | 1.60E-01 | 73674074  | 73674197  | NC_000003.11 |
| cg20492034 | 1.16E-09 | 9.78E-11 | 6.84 | 13.5021359 | 1.78E-01 | 6313058   | 6313181   | NC_000007.13 |
| cg10441640 | 1.16E-09 | 9.78E-11 | 6.84 | 13.5020194 | 5.69E-02 | 33031065  | 33031188  | NC_000012.11 |
| cg23732781 | 1.16E-09 | 9.79E-11 | 6.84 | 13.5006849 | 1.13E-01 | 29595016  | 29595139  | NC_000006.11 |
| cg00025647 | 1.16E-09 | 9.79E-11 | 6.84 | 13.5005736 | 1.43E-01 | 147077127 | 147077250 | NC_000003.11 |
| cg23098693 | 1.16E-09 | 9.79E-11 | 6.84 | 13.5004753 | 1.35E-01 | 118150813 | 118150936 | NC_000001.10 |
| cg19673705 | 1.16E-09 | 9.81E-11 | 6.84 | 13.4991938 | 3.62E-02 | 7532359   | 7532482   | NC_000011.9  |
| cg21529323 | 1.17E-09 | 9.81E-11 | 6.84 | 13.4986399 | 1.89E-01 | 89910860  | 89910983  | NC_000015.9  |
| cg18548400 | 1.17E-09 | 9.83E-11 | 6.84 | 13.4967947 | 6.78E-02 | 182506874 | 182506997 | NC_000003.11 |
| cg20550790 | 1.17E-09 | 9.84E-11 | 6.84 | 13.4953429 | 1.33E-01 | 92906240  | 92906363  | NC_000005.9  |
| cg14248715 | 1.17E-09 | 9.85E-11 | 6.84 | 13.494724  | 1.84E-01 | 57284096  | 57284219  | NC_000014.8  |

|            |          |          |      |            |          |           |           |              |
|------------|----------|----------|------|------------|----------|-----------|-----------|--------------|
| cg05966228 | 1.17E-09 | 9.85E-11 | 6.84 | 13.4945518 | 8.95E-02 | 67666442  | 67666565  | NC_000016.9  |
| cg24891434 | 1.17E-09 | 9.86E-11 | 6.84 | 13.4939676 | 1.13E-01 | 69934031  | 69934154  | NC_000011.9  |
| cg11743470 | 1.17E-09 | 9.86E-11 | 6.84 | 13.4936385 | 6.99E-02 | 74327277  | 74327400  | NC_000005.9  |
| cg24461964 | 1.17E-09 | 9.86E-11 | 6.84 | 13.4935272 | 2.08E-01 | 149633112 | 149633235 | NC_000002.11 |
| cg25456849 | 1.17E-09 | 9.86E-11 | 6.84 | 13.4935141 | 1.26E-01 | 79575334  | 79575457  | NC_000015.9  |
| cg08092513 | 1.17E-09 | 9.87E-11 | 6.84 | 13.4932009 | 3.75E-02 | 32886140  | 32886263  | NC_000013.10 |
| cg23542968 | 1.17E-09 | 9.89E-11 | 6.84 | 13.4903349 | 1.49E-01 | 36983129  | 36983252  | NC_000014.8  |
| cg11503274 | 1.17E-09 | 9.90E-11 | 6.84 | 13.4897762 | 1.18E-01 | 149546934 | 149547057 | NC_000005.9  |
| cg05970777 | 1.18E-09 | 9.91E-11 | 6.84 | 13.4889506 | 1.21E-01 | 34490033  | 34490156  | NC_000016.9  |
| cg12707907 | 1.18E-09 | 9.91E-11 | 6.84 | 13.4885046 | 7.41E-02 | 86370772  | 86370895  | NC_000013.10 |
| cg10859329 | 1.18E-09 | 9.92E-11 | 6.84 | 13.4877264 | 7.95E-02 | 54413218  | 54413341  | NC_000014.8  |
| cg24884142 | 1.18E-09 | 9.92E-11 | 6.84 | 13.4877039 | 1.45E-01 | 119532056 | 119532179 | NC_000001.10 |
| cg26308133 | 1.18E-09 | 9.93E-11 | 6.84 | 13.4865425 | 4.61E-02 | 8809360   | 8809483   | NC_000019.9  |
| cg19356082 | 1.18E-09 | 9.94E-11 | 6.84 | 13.4860166 | 6.03E-02 | 68862916  | 68863039  | NC_000012.11 |
| cg14486857 | 1.18E-09 | 9.97E-11 | 6.84 | 13.4831881 | 5.58E-02 | 977048    | 977171    | NC_000011.9  |
| cg18387156 | 1.18E-09 | 9.97E-11 | 6.84 | 13.4831382 | 1.56E-01 | 31496644  | 31496767  | NC_000008.10 |
| cg11260097 | 1.18E-09 | 9.98E-11 | 6.84 | 13.4822147 | 1.36E-01 | 121940647 | 121940770 | NC_000007.13 |
| cg11812928 | 1.19E-09 | 1.00E-10 | 6.84 | 13.4780517 | 7.49E-02 | 227164459 | 227164582 | NC_000001.10 |
| cg16175560 | 1.19E-09 | 1.00E-10 | 6.84 | 13.4763926 | 6.52E-02 | 119685050 | 119685173 | NC_000004.11 |
| cg00736523 | 1.19E-09 | 1.00E-10 | 6.84 | 13.4763413 | 1.44E-01 | 32783202  | 32783325  | NC_000009.11 |
| cg04675040 | 1.19E-09 | 1.00E-10 | 6.84 | 13.4756588 | 7.69E-02 | 93316104  | 93316227  | NC_000015.9  |
| cg15475851 | 1.19E-09 | 1.01E-10 | 6.84 | 13.4748991 | 1.39E-01 | 105037349 | 105037472 | NC_000010.10 |
| cg22058708 | 1.19E-09 | 1.01E-10 | 6.84 | 13.4742281 | 1.70E-01 | 28602970  | 28603093  | NC_000006.11 |
| cg11556489 | 1.19E-09 | 1.01E-10 | 6.84 | 13.4740336 | 1.33E-01 | 30178724  | 30178847  | NC_000006.11 |
| cg11235741 | 1.19E-09 | 1.01E-10 | 6.84 | 13.4732451 | 1.99E-01 | 82336869  | 82336992  | NC_000015.9  |

|            |          |          |      |            |          |           |           |              |
|------------|----------|----------|------|------------|----------|-----------|-----------|--------------|
| cg06664258 | 1.19E-09 | 1.01E-10 | 6.84 | 13.4726787 | 2.12E-01 | 103889903 | 103890026 | NC_000012.11 |
| cg26064247 | 1.19E-09 | 1.01E-10 | 6.84 | 13.4726723 | 7.45E-02 | 33792972  | 33793095  | NC_000011.9  |
| cg17879912 | 1.20E-09 | 1.01E-10 | 6.84 | 13.4713145 | 3.65E-02 | 118626530 | 118626653 | NC_000005.9  |
| cg08726446 | 1.20E-09 | 1.01E-10 | 6.84 | 13.4704137 | 1.52E-01 | 108237937 | 108238060 | NC_000012.11 |
| cg19683251 | 1.20E-09 | 1.01E-10 | 6.84 | 13.4698771 | 3.27E-02 | 60762219  | 60762342  | NC_000017.10 |
| cg20306574 | 1.20E-09 | 1.01E-10 | 6.84 | 13.4698033 | 1.18E-01 | 24601499  | 24601622  | NC_000014.8  |
| cg02604524 | 1.20E-09 | 1.01E-10 | 6.84 | 13.4685348 | 2.82E-01 | 128720884 | 128721007 | NC_000003.11 |
| cg08031211 | 1.20E-09 | 1.01E-10 | 6.84 | 13.4673541 | 7.00E-02 | 68751981  | 68752104  | NC_000012.11 |
| cg06808751 | 1.20E-09 | 1.01E-10 | 6.84 | 13.4664261 | 1.97E-01 | 54163693  | 54163816  | NC_000008.10 |
| cg10939650 | 1.20E-09 | 1.01E-10 | 6.84 | 13.4661561 | 3.26E-02 | 76013186  | 76013309  | NC_000014.8  |
| cg18493027 | 1.20E-09 | 1.01E-10 | 6.84 | 13.4659802 | 1.83E-01 | 70346151  | 70346274  | NC_000014.8  |
| cg16135698 | 1.20E-09 | 1.01E-10 | 6.84 | 13.4656411 | 1.59E-01 | 46825179  | 46825302  | NC_000017.10 |
| cg18032969 | 1.21E-09 | 1.02E-10 | 6.84 | 13.4624343 | 1.35E-01 | 145725385 | 145725508 | NC_000005.9  |
| cg20307896 | 1.21E-09 | 1.02E-10 | 6.84 | 13.4623062 | 1.63E-01 | 114883063 | 114883186 | NC_000012.11 |
| cg02329038 | 1.21E-09 | 1.02E-10 | 6.84 | 13.4620472 | 1.46E-01 | 46710001  | 46710124  | NC_000017.10 |
| cg23437733 | 1.21E-09 | 1.02E-10 | 6.84 | 13.4604534 | 2.43E-01 | 178017571 | 178017694 | NC_000005.9  |
| cg15604467 | 1.21E-09 | 1.02E-10 | 6.84 | 13.4601397 | 1.62E-01 | 79177925  | 79178048  | NC_000013.10 |
| cg16712438 | 1.21E-09 | 1.02E-10 | 6.83 | 13.4599583 | 9.41E-02 | 3187397   | 3187520   | NC_000011.9  |
| cg01287820 | 1.21E-09 | 1.02E-10 | 6.83 | 13.4588393 | 3.35E-02 | 1065285   | 1065408   | NC_000007.13 |
| cg02916312 | 1.21E-09 | 1.02E-10 | 6.83 | 13.4567777 | 2.17E-01 | 72596135  | 72596258  | NC_000006.11 |
| cg14563954 | 1.22E-09 | 1.03E-10 | 6.83 | 13.453593  | 1.39E-01 | 147141286 | 147141409 | NC_000003.11 |
| cg04461228 | 1.22E-09 | 1.03E-10 | 6.83 | 13.4524689 | 1.44E-01 | 92906678  | 92906801  | NC_000005.9  |
| cg00233943 | 1.22E-09 | 1.03E-10 | 6.83 | 13.4490218 | 7.32E-02 | 59553911  | 59554034  | NC_000017.10 |
| cg00403874 | 1.22E-09 | 1.03E-10 | 6.83 | 13.4484691 | 5.04E-02 | 57088851  | 57088974  | NC_000007.13 |
| cg19426522 | 1.22E-09 | 1.03E-10 | 6.83 | 13.4469109 | 1.26E-01 | 27766009  | 27766132  | NC_000003.11 |



|            |          |          |      |            |          |           |           |              |
|------------|----------|----------|------|------------|----------|-----------|-----------|--------------|
| cg09318375 | 1.22E-09 | 1.03E-10 | 6.83 | 13.4464866 | 1.55E-01 | 67218090  | 67218213  | NC_000001.10 |
| cg24761366 | 1.23E-09 | 1.04E-10 | 6.83 | 13.4444403 | 1.47E-01 | 60936866  | 60936989  | NC_000010.10 |
| cg23938300 | 1.23E-09 | 1.04E-10 | 6.83 | 13.4427382 | 1.46E-01 | 60292055  | 60292178  | NC_000015.9  |
| cg06912355 | 1.23E-09 | 1.04E-10 | 6.83 | 13.4423445 | 4.77E-02 | 90002255  | 90002378  | NC_000016.9  |
| cg11430157 | 1.23E-09 | 1.04E-10 | 6.83 | 13.4409562 | 2.59E-01 | 118228869 | 118228992 | NC_000006.11 |
| cg12601118 | 1.23E-09 | 1.04E-10 | 6.83 | 13.4401838 | 5.69E-02 | 9859123   | 9859246   | NC_000017.10 |
| cg13252583 | 1.23E-09 | 1.04E-10 | 6.83 | 13.4394441 | 2.35E-01 | 36909831  | 36909954  | NC_000019.9  |
| cg12742826 | 1.24E-09 | 1.04E-10 | 6.83 | 13.4369312 | 4.44E-02 | 26365331  | 26365454  | NC_000001.10 |
| cg11723565 | 1.24E-09 | 1.05E-10 | 6.83 | 13.4362423 | 3.05E-02 | 55990708  | 55990831  | NC_000019.9  |
| cg02387803 | 1.24E-09 | 1.05E-10 | 6.83 | 13.4356396 | 1.89E-01 | 147123457 | 147123580 | NC_000003.11 |
| cg09938462 | 1.24E-09 | 1.05E-10 | 6.83 | 13.4337518 | 2.00E-01 | 19706365  | 19706488  | NC_000022.10 |
| cg08460041 | 1.24E-09 | 1.05E-10 | 6.83 | 13.4329602 | 1.80E-01 | 165325136 | 165325259 | NC_000001.10 |
| cg20711695 | 1.24E-09 | 1.05E-10 | 6.83 | 13.4327982 | 3.19E-02 | 124698165 | 124698288 | NC_000004.11 |
| cg15740790 | 1.24E-09 | 1.05E-10 | 6.83 | 13.4322135 | 5.55E-02 | 22225034  | 22225157  | NC_000008.10 |
| cg07262139 | 1.24E-09 | 1.05E-10 | 6.83 | 13.4321215 | 1.04E-01 | 134253609 | 134253732 | NC_000011.9  |
| cg10603004 | 1.24E-09 | 1.05E-10 | 6.83 | 13.4319651 | 1.46E-01 | 23564294  | 23564417  | NC_000008.10 |
| cg16025492 | 1.24E-09 | 1.05E-10 | 6.83 | 13.4313005 | 1.01E-01 | 114764748 | 114764871 | NC_000005.9  |
| cg08436224 | 1.24E-09 | 1.05E-10 | 6.83 | 13.4306053 | 3.60E-02 | 1122753   | 1122876   | NC_000005.9  |
| cg10764068 | 1.24E-09 | 1.05E-10 | 6.83 | 13.429897  | 1.17E-01 | 27289829  | 27289952  | NC_000007.13 |
| cg04240553 | 1.24E-09 | 1.05E-10 | 6.83 | 13.4296133 | 8.71E-02 | 67188614  | 67188737  | NC_000016.9  |
| cg04850423 | 1.25E-09 | 1.05E-10 | 6.83 | 13.4286069 | 1.78E-01 | 20880461  | 20880584  | NC_000001.10 |
| cg14014955 | 1.25E-09 | 1.05E-10 | 6.83 | 13.4282365 | 1.31E-01 | 27183701  | 27183824  | NC_000007.13 |
| cg09263059 | 1.25E-09 | 1.06E-10 | 6.83 | 13.4273444 | 1.22E-01 | 43065876  | 43065999  | NC_000017.10 |
| cg10718130 | 1.25E-09 | 1.06E-10 | 6.83 | 13.4267267 | 9.74E-02 | 145539893 | 145540016 | NC_000008.10 |
| cg01716474 | 1.25E-09 | 1.06E-10 | 6.83 | 13.4260383 | 3.35E-02 | 56615274  | 56615397  | NC_000006.11 |

|            |          |          |      |            |          |           |           |              |
|------------|----------|----------|------|------------|----------|-----------|-----------|--------------|
| cg12640000 | 1.25E-09 | 1.06E-10 | 6.83 | 13.425233  | 1.30E-01 | 62660741  | 62660864  | NC_000001.10 |
| cg24584367 | 1.25E-09 | 1.06E-10 | 6.83 | 13.4246251 | 7.73E-02 | 156565633 | 156565756 | NC_000001.10 |
| cg15769764 | 1.25E-09 | 1.06E-10 | 6.83 | 13.42443   | 1.73E-01 | 996790    | 996913    | NC_000004.11 |
| cg13964105 | 1.25E-09 | 1.06E-10 | 6.83 | 13.4232593 | 1.70E-01 | 26663885  | 26664008  | NC_000003.11 |
| cg25026529 | 1.25E-09 | 1.06E-10 | 6.83 | 13.4218554 | 1.95E-01 | 91183051  | 91183174  | NC_000001.10 |
| cg17851134 | 1.25E-09 | 1.06E-10 | 6.83 | 13.4211514 | 7.78E-02 | 170622699 | 170622822 | NC_000006.11 |
| cg10806639 | 1.26E-09 | 1.07E-10 | 6.83 | 13.4168876 | 1.73E-01 | 33780078  | 33780201  | NC_000013.10 |
| cg26504422 | 1.26E-09 | 1.07E-10 | 6.83 | 13.4160388 | 8.07E-02 | 44277951  | 44278074  | NC_000019.9  |
| cg27356296 | 1.26E-09 | 1.07E-10 | 6.83 | 13.4157874 | 1.02E-01 | 134565928 | 134566051 | NC_000007.13 |
| cg25772658 | 1.26E-09 | 1.07E-10 | 6.83 | 13.4151297 | 8.18E-02 | 32038027  | 32038150  | NC_000006.11 |
| cg19461644 | 1.26E-09 | 1.07E-10 | 6.83 | 13.4140514 | 2.00E-01 | 101706617 | 101706740 | NC_000009.11 |
| cg07122245 | 1.26E-09 | 1.07E-10 | 6.83 | 13.412264  | 2.34E-01 | 37488428  | 37488551  | NC_000007.13 |
| cg03111114 | 1.27E-09 | 1.07E-10 | 6.83 | 13.4116693 | 9.41E-02 | 149886185 | 149886308 | NC_000005.9  |
| cg11022519 | 1.27E-09 | 1.07E-10 | 6.83 | 13.4115767 | 1.00E-01 | 135967896 | 135968019 | NC_000003.11 |
| cg22942846 | 1.27E-09 | 1.07E-10 | 6.83 | 13.4114854 | 1.06E-01 | 161646918 | 161647041 | NC_000001.10 |
| cg18935108 | 1.27E-09 | 1.07E-10 | 6.83 | 13.4114255 | 9.63E-02 | 113660932 | 113661055 | NC_000011.9  |
| cg21239317 | 1.27E-09 | 1.07E-10 | 6.83 | 13.4108927 | 8.69E-02 | 23640510  | 23640633  | NC_000007.13 |
| cg13574488 | 1.27E-09 | 1.07E-10 | 6.83 | 13.4102564 | 1.24E-01 | 119306246 | 119306369 | NC_000010.10 |
| cg16703135 | 1.27E-09 | 1.08E-10 | 6.83 | 13.4087879 | 1.05E-01 | 55517132  | 55517255  | NC_000007.13 |
| cg07622833 | 1.27E-09 | 1.08E-10 | 6.83 | 13.4075401 | 7.63E-02 | 33640167  | 33640290  | NC_000011.9  |
| cg23827572 | 1.27E-09 | 1.08E-10 | 6.83 | 13.4053642 | 2.19E-01 | 114846313 | 114846436 | NC_000012.11 |
| cg08291069 | 1.27E-09 | 1.08E-10 | 6.83 | 13.4053092 | 1.44E-01 | 10531543  | 10531666  | NC_000019.9  |
| cg00495775 | 1.27E-09 | 1.08E-10 | 6.83 | 13.4051942 | 1.24E-01 | 176972041 | 176972164 | NC_000002.11 |
| cg17610790 | 1.28E-09 | 1.08E-10 | 6.82 | 13.4034475 | 7.12E-02 | 32276752  | 32276875  | NC_000020.10 |
| cg04511041 | 1.28E-09 | 1.08E-10 | 6.82 | 13.4029622 | 1.88E-01 | 140613869 | 140613992 | NC_000005.9  |

|            |          |          |      |            |          |           |           |              |
|------------|----------|----------|------|------------|----------|-----------|-----------|--------------|
| cg13731636 | 1.28E-09 | 1.08E-10 | 6.82 | 13.4025002 | 6.68E-02 | 77287213  | 77287336  | NC_000018.9  |
| cg09557462 | 1.28E-09 | 1.08E-10 | 6.82 | 13.4010626 | 1.74E-01 | 26721736  | 26721859  | NC_000008.10 |
| cg03464224 | 1.28E-09 | 1.08E-10 | 6.82 | 13.4009871 | 1.65E-01 | 154439980 | 154440103 | NC_000004.11 |
| cg03486157 | 1.28E-09 | 1.08E-10 | 6.82 | 13.4006789 | 3.45E-02 | 29208275  | 29208398  | NC_000008.10 |
| cg08535260 | 1.28E-09 | 1.08E-10 | 6.82 | 13.4005816 | 1.89E-01 | 127643971 | 127644094 | NC_000002.11 |
| cg07592963 | 1.28E-09 | 1.09E-10 | 6.82 | 13.3998067 | 1.95E-01 | 2890649   | 2890772   | NC_000011.9  |
| cg20066391 | 1.28E-09 | 1.09E-10 | 6.82 | 13.3961258 | 3.82E-02 | 22853979  | 22854102  | NC_000012.11 |
| cg26415343 | 1.29E-09 | 1.09E-10 | 6.82 | 13.3955852 | 1.09E-01 | 30683404  | 30683527  | NC_000007.13 |
| cg04923928 | 1.29E-09 | 1.09E-10 | 6.82 | 13.3952022 | 1.46E-01 | 30721797  | 30721920  | NC_000007.13 |
| cg19153763 | 1.29E-09 | 1.09E-10 | 6.82 | 13.3942045 | 1.39E-01 | 27196371  | 27196494  | NC_000007.13 |
| cg03030984 | 1.29E-09 | 1.09E-10 | 6.82 | 13.3940212 | 8.58E-02 | 134833874 | 134833997 | NC_000010.10 |
| cg04954615 | 1.29E-09 | 1.09E-10 | 6.82 | 13.3940059 | 5.20E-02 | 56913133  | 56913256  | NC_000004.11 |
| cg02482497 | 1.29E-09 | 1.09E-10 | 6.82 | 13.3934572 | 1.90E-01 | 153610672 | 153610795 | NC_000001.10 |
| cg03911502 | 1.29E-09 | 1.09E-10 | 6.82 | 13.393407  | 2.09E-01 | 5890402   | 5890525   | NC_000004.11 |
| cg00015319 | 1.29E-09 | 1.09E-10 | 6.82 | 13.3925659 | 1.02E-01 | 54500832  | 54500955  | NC_000012.11 |
| cg23683254 | 1.29E-09 | 1.09E-10 | 6.82 | 13.3913954 | 1.74E-01 | 99584667  | 99584790  | NC_000014.8  |
| cg01823440 | 1.29E-09 | 1.09E-10 | 6.82 | 13.3912311 | 4.64E-02 | 120870729 | 120870852 | NC_000008.10 |
| cg25781202 | 1.29E-09 | 1.09E-10 | 6.82 | 13.39113   | 2.18E-02 | 33424350  | 33424473  | NC_000008.10 |
| cg07441319 | 1.29E-09 | 1.10E-10 | 6.82 | 13.3897588 | 1.18E-01 | 8117467   | 8117590   | NC_000010.10 |
| cg10454514 | 1.29E-09 | 1.10E-10 | 6.82 | 13.3892687 | 1.63E-01 | 136553778 | 136553901 | NC_000007.13 |
| cg09801824 | 1.30E-09 | 1.10E-10 | 6.82 | 13.3872344 | 1.19E-01 | 74076930  | 74077053  | NC_000010.10 |
| cg01684901 | 1.30E-09 | 1.10E-10 | 6.82 | 13.3866092 | 2.39E-02 | 184058405 | 184058528 | NC_000003.11 |
| cg14510359 | 1.30E-09 | 1.10E-10 | 6.82 | 13.3860325 | 1.81E-01 | 2559930   | 2560053   | NC_000001.10 |
| cg25856228 | 1.30E-09 | 1.10E-10 | 6.82 | 13.3851839 | 7.63E-02 | 73901184  | 73901307  | NC_000015.9  |
| cg03104309 | 1.30E-09 | 1.10E-10 | 6.82 | 13.3846248 | 6.22E-02 | 51052080  | 51052203  | NC_000019.9  |

|            |          |          |      |            |          |           |           |              |
|------------|----------|----------|------|------------|----------|-----------|-----------|--------------|
| cg26159541 | 1.30E-09 | 1.10E-10 | 6.82 | 13.3831881 | 1.18E-01 | 58326121  | 58326244  | NC_000020.10 |
| cg07420190 | 1.30E-09 | 1.11E-10 | 6.82 | 13.3811296 | 2.95E-01 | 220702225 | 220702348 | NC_000001.10 |
| cg05578358 | 1.30E-09 | 1.11E-10 | 6.82 | 13.3807651 | 1.99E-01 | 115631100 | 115631223 | NC_000011.9  |
| cg08561286 | 1.30E-09 | 1.11E-10 | 6.82 | 13.3807635 | 9.61E-02 | 121567875 | 121567998 | NC_000002.11 |
| cg07974511 | 1.30E-09 | 1.11E-10 | 6.82 | 13.3801254 | 1.63E-01 | 63283013  | 63283136  | NC_000002.11 |
| cg13713148 | 1.30E-09 | 1.11E-10 | 6.82 | 13.3798298 | 4.15E-02 | 22545322  | 22545445  | NC_000008.10 |
| cg07405771 | 1.30E-09 | 1.11E-10 | 6.82 | 13.3797523 | 1.43E-01 | 124930625 | 124930748 | NC_000003.11 |
| cg05435993 | 1.30E-09 | 1.11E-10 | 6.82 | 13.3793505 | 1.09E-01 | 50239406  | 50239529  | NC_000003.11 |
| cg23532828 | 1.30E-09 | 1.11E-10 | 6.82 | 13.3793338 | 7.77E-02 | 54544119  | 54544242  | NC_000019.9  |
| cg14964285 | 1.31E-09 | 1.11E-10 | 6.82 | 13.3791601 | 6.17E-02 | 4435533   | 4435656   | NC_000012.11 |
| cg23093016 | 1.31E-09 | 1.11E-10 | 6.82 | 13.3782427 | 4.11E-02 | 113486498 | 113486621 | NC_000002.11 |
| cg10765336 | 1.31E-09 | 1.11E-10 | 6.82 | 13.3781084 | 1.12E-01 | 359491    | 359614    | NC_000019.9  |
| cg00417823 | 1.31E-09 | 1.11E-10 | 6.82 | 13.3774273 | 9.39E-02 | 56330268  | 56330391  | NC_000016.9  |
| cg20689135 | 1.31E-09 | 1.11E-10 | 6.82 | 13.3771822 | 1.39E-01 | 113764225 | 113764348 | NC_000013.10 |
| cg08538258 | 1.31E-09 | 1.11E-10 | 6.82 | 13.3769049 | 1.62E-01 | 46706820  | 46706943  | NC_000021.8  |
| cg26272623 | 1.31E-09 | 1.11E-10 | 6.82 | 13.3753779 | 1.24E-01 | 119532320 | 119532443 | NC_000001.10 |
| cg23234261 | 1.31E-09 | 1.11E-10 | 6.82 | 13.3753443 | 1.02E-01 | 55582407  | 55582530  | NC_000014.8  |
| cg05618934 | 1.31E-09 | 1.11E-10 | 6.82 | 13.3740075 | 1.28E-01 | 1407592   | 1407715   | NC_000004.11 |
| cg05791136 | 1.31E-09 | 1.11E-10 | 6.82 | 13.3734707 | 1.94E-01 | 110223969 | 110224092 | NC_000004.11 |
| cg20472643 | 1.31E-09 | 1.12E-10 | 6.82 | 13.3727734 | 1.52E-01 | 33591899  | 33592022  | NC_000012.11 |
| cg14956197 | 1.32E-09 | 1.12E-10 | 6.82 | 13.3704254 | 1.91E-01 | 36993831  | 36993954  | NC_000014.8  |
| cg03631455 | 1.32E-09 | 1.12E-10 | 6.82 | 13.3689434 | 1.17E-01 | 140595072 | 140595195 | NC_000005.9  |
| cg02401978 | 1.32E-09 | 1.12E-10 | 6.82 | 13.3687885 | 1.05E-01 | 149195465 | 149195588 | NC_000007.13 |
| cg12700755 | 1.32E-09 | 1.12E-10 | 6.82 | 13.3685281 | 6.74E-02 | 2258373   | 2258496   | NC_000001.10 |
| cg00522018 | 1.32E-09 | 1.12E-10 | 6.82 | 13.3662937 | 1.88E-01 | 139091378 | 139091501 | NC_000009.11 |

|            |          |          |      |            |          |           |           |              |
|------------|----------|----------|------|------------|----------|-----------|-----------|--------------|
| cg06604249 | 1.32E-09 | 1.12E-10 | 6.82 | 13.3654202 | 1.42E-01 | 8814755   | 8814878   | NC_000016.9  |
| cg01113073 | 1.32E-09 | 1.12E-10 | 6.82 | 13.3645973 | 9.33E-02 | 155686868 | 155686991 | NC_000006.11 |
| cg10049708 | 1.32E-09 | 1.12E-10 | 6.82 | 13.3645378 | 1.60E-01 | 6201080   | 6201203   | NC_000004.11 |
| cg04762890 | 1.33E-09 | 1.13E-10 | 6.82 | 13.3624795 | 7.14E-02 | 58077795  | 58077918  | NC_000016.9  |
| cg10054984 | 1.33E-09 | 1.13E-10 | 6.82 | 13.3623208 | 5.47E-02 | 129329790 | 129329913 | NC_000012.11 |
| cg08316417 | 1.33E-09 | 1.13E-10 | 6.82 | 13.361805  | 2.12E-01 | 5890430   | 5890553   | NC_000004.11 |
| cg22841810 | 1.33E-09 | 1.13E-10 | 6.82 | 13.359447  | 1.79E-01 | 25902284  | 25902407  | NC_000008.10 |
| cg08854366 | 1.33E-09 | 1.13E-10 | 6.82 | 13.3594304 | 2.29E-02 | 142229820 | 142229943 | NC_000008.10 |
| cg16414660 | 1.33E-09 | 1.13E-10 | 6.82 | 13.3587973 | 1.07E-01 | 234338088 | 234338211 | NC_000002.11 |
| cg06651752 | 1.33E-09 | 1.13E-10 | 6.82 | 13.3583382 | 1.12E-01 | 3592976   | 3593099   | NC_000017.10 |
| cg00942495 | 1.33E-09 | 1.13E-10 | 6.82 | 13.3581546 | 1.33E-01 | 76214616  | 76214739  | NC_000015.9  |
| cg23189276 | 1.33E-09 | 1.13E-10 | 6.82 | 13.357231  | 1.65E-01 | 37245916  | 37246039  | NC_000004.11 |
| cg23685759 | 1.33E-09 | 1.13E-10 | 6.82 | 13.3558881 | 2.17E-01 | 98945131  | 98945254  | NC_000010.10 |
| cg20457544 | 1.34E-09 | 1.14E-10 | 6.82 | 13.3547635 | 9.48E-02 | 2920603   | 2920726   | NC_000001.10 |
| cg06377278 | 1.34E-09 | 1.14E-10 | 6.82 | 13.3546269 | 2.27E-01 | 25256369  | 25256492  | NC_000001.10 |
| cg18198999 | 1.34E-09 | 1.14E-10 | 6.82 | 13.3544485 | 1.85E-01 | 50890153  | 50890276  | NC_000001.10 |
| cg06535156 | 1.34E-09 | 1.14E-10 | 6.82 | 13.3516707 | 9.29E-02 | 155538055 | 155538178 | NC_000006.11 |
| cg15701208 | 1.34E-09 | 1.14E-10 | 6.82 | 13.3515615 | 5.95E-02 | 139465825 | 139465948 | NC_000002.11 |
| cg06003986 | 1.34E-09 | 1.14E-10 | 6.81 | 13.3487763 | 1.87E-01 | 35104868  | 35104991  | NC_000018.9  |
| cg01416521 | 1.34E-09 | 1.14E-10 | 6.81 | 13.3483366 | 7.08E-02 | 56047632  | 56047755  | NC_000019.9  |
| cg15136870 | 1.34E-09 | 1.14E-10 | 6.81 | 13.3478208 | 1.30E-01 | 18717036  | 18717159  | NC_000019.9  |
| cg04642306 | 1.34E-09 | 1.14E-10 | 6.81 | 13.3477949 | 1.12E-01 | 112834466 | 112834589 | NC_000011.9  |
| cg26095658 | 1.35E-09 | 1.15E-10 | 6.81 | 13.3461423 | 9.42E-02 | 71017887  | 71018010  | NC_000002.11 |
| cg23638252 | 1.35E-09 | 1.15E-10 | 6.81 | 13.3458839 | 1.36E-01 | 50891750  | 50891873  | NC_000001.10 |
| cg06233930 | 1.35E-09 | 1.15E-10 | 6.81 | 13.3440064 | 9.03E-02 | 76899379  | 76899502  | NC_000017.10 |

|            |          |          |      |            |          |           |           |              |
|------------|----------|----------|------|------------|----------|-----------|-----------|--------------|
| cg13086467 | 1.35E-09 | 1.15E-10 | 6.81 | 13.3431049 | 8.75E-02 | 12779373  | 12779496  | NC_000019.9  |
| cg20359994 | 1.35E-09 | 1.15E-10 | 6.81 | 13.3417693 | 1.44E-01 | 27599141  | 27599264  | NC_000006.11 |
| cg06724462 | 1.35E-09 | 1.15E-10 | 6.81 | 13.3412923 | 7.03E-02 | 41266297  | 41266420  | NC_000001.10 |
| cg23178550 | 1.35E-09 | 1.15E-10 | 6.81 | 13.3404662 | 1.12E-01 | 27127576  | 27127699  | NC_000007.13 |
| cg02715006 | 1.35E-09 | 1.15E-10 | 6.81 | 13.3403047 | 9.94E-02 | 140803130 | 140803253 | NC_000005.9  |
| cg18206017 | 1.36E-09 | 1.15E-10 | 6.81 | 13.3392775 | 1.90E-01 | 84563387  | 84563510  | NC_000006.11 |
| cg27344587 | 1.36E-09 | 1.15E-10 | 6.81 | 13.338609  | 1.18E-01 | 63275602  | 63275725  | NC_000002.11 |
| cg13678470 | 1.36E-09 | 1.16E-10 | 6.81 | 13.3369082 | 1.07E-01 | 140137615 | 140137738 | NC_000009.11 |
| cg20708909 | 1.36E-09 | 1.16E-10 | 6.81 | 13.3368567 | 9.24E-02 | 132812607 | 132812730 | NC_000011.9  |
| cg04407470 | 1.36E-09 | 1.16E-10 | 6.81 | 13.3367673 | 2.68E-01 | 108489977 | 108490100 | NC_000006.11 |
| cg08516217 | 1.36E-09 | 1.16E-10 | 6.81 | 13.3356434 | 9.69E-02 | 38887799  | 38887922  | NC_000019.9  |
| cg01836687 | 1.36E-09 | 1.16E-10 | 6.81 | 13.335435  | 1.71E-01 | 17081987  | 17082110  | NC_000022.10 |
| cg10121058 | 1.36E-09 | 1.16E-10 | 6.81 | 13.3348721 | 1.14E-01 | 84553063  | 84553186  | NC_000016.9  |
| cg27365825 | 1.36E-09 | 1.16E-10 | 6.81 | 13.3340209 | 1.90E-01 | 18059130  | 18059253  | NC_000002.11 |
| cg23132327 | 1.36E-09 | 1.16E-10 | 6.81 | 13.3330052 | 9.43E-02 | 80167599  | 80167722  | NC_000011.9  |
| cg05780883 | 1.37E-09 | 1.16E-10 | 6.81 | 13.3306216 | 6.07E-02 | 49883097  | 49883220  | NC_000022.10 |
| cg05961935 | 1.37E-09 | 1.17E-10 | 6.81 | 13.3298921 | 1.69E-01 | 145274125 | 145274248 | NC_000002.11 |
| cg10279055 | 1.37E-09 | 1.17E-10 | 6.81 | 13.3274702 | 4.20E-02 | 134117051 | 134117174 | NC_000011.9  |
| cg02026246 | 1.37E-09 | 1.17E-10 | 6.81 | 13.3266126 | 1.12E-01 | 22687589  | 22687712  | NC_000011.9  |
| cg14063945 | 1.37E-09 | 1.17E-10 | 6.81 | 13.3256351 | 5.39E-02 | 24470966  | 24471089  | NC_000013.10 |
| cg14377593 | 1.38E-09 | 1.17E-10 | 6.81 | 13.3234873 | 1.95E-01 | 93520183  | 93520306  | NC_000007.13 |
| cg08377398 | 1.38E-09 | 1.17E-10 | 6.81 | 13.3228155 | 2.60E-01 | 6202553   | 6202676   | NC_000004.11 |
| cg03746765 | 1.38E-09 | 1.18E-10 | 6.81 | 13.3207095 | 1.08E-01 | 15288099  | 15288222  | NC_000017.10 |
| cg16557178 | 1.38E-09 | 1.18E-10 | 6.81 | 13.3206285 | 1.57E-01 | 46804309  | 46804432  | NC_000017.10 |
| cg06621480 | 1.38E-09 | 1.18E-10 | 6.81 | 13.3206224 | 8.35E-02 | 49812410  | 49812533  | NC_000022.10 |

|            |          |          |      |            |          |           |           |              |
|------------|----------|----------|------|------------|----------|-----------|-----------|--------------|
| cg09515947 | 1.38E-09 | 1.18E-10 | 6.81 | 13.3203384 | 1.61E-01 | 62070005  | 62070128  | NC_000016.9  |
| cg00131983 | 1.38E-09 | 1.18E-10 | 6.81 | 13.3195672 | 1.75E-01 | 4867424   | 4867547   | NC_000004.11 |
| cg15729404 | 1.38E-09 | 1.18E-10 | 6.81 | 13.3193974 | 1.66E-01 | 133561614 | 133561737 | NC_000006.11 |
| cg21533331 | 1.38E-09 | 1.18E-10 | 6.81 | 13.3190476 | 1.54E-01 | 31848049  | 31848172  | NC_000019.9  |
| cg25513073 | 1.38E-09 | 1.18E-10 | 6.81 | 13.3189883 | 1.29E-01 | 2481641   | 2481764   | NC_000011.9  |
| cg19049837 | 1.38E-09 | 1.18E-10 | 6.81 | 13.3175871 | 1.02E-01 | 85293337  | 85293460  | NC_000002.11 |
| cg20586076 | 1.38E-09 | 1.18E-10 | 6.81 | 13.3175025 | 1.19E-01 | 133252332 | 133252455 | NC_000010.10 |
| cg18710462 | 1.38E-09 | 1.18E-10 | 6.81 | 13.3173118 | 1.42E-01 | 108486123 | 108486246 | NC_000006.11 |
| cg26823505 | 1.39E-09 | 1.18E-10 | 6.81 | 13.3149543 | 1.09E-01 | 35765589  | 35765712  | NC_000006.11 |
| cg04504062 | 1.39E-09 | 1.18E-10 | 6.81 | 13.3144833 | 5.21E-02 | 8840829   | 8840952   | NC_000005.9  |
| cg26266274 | 1.39E-09 | 1.18E-10 | 6.81 | 13.3144527 | 9.70E-02 | 132482399 | 132482522 | NC_000009.11 |
| cg04560545 | 1.39E-09 | 1.18E-10 | 6.81 | 13.3134528 | 2.48E-02 | 66448589  | 66448712  | NC_000003.11 |
| cg02696327 | 1.39E-09 | 1.19E-10 | 6.81 | 13.312879  | 1.53E-01 | 49312543  | 49312666  | NC_000016.9  |
| cg21349674 | 1.39E-09 | 1.19E-10 | 6.81 | 13.3128575 | 1.99E-01 | 50323369  | 50323492  | NC_000010.10 |
| cg07926895 | 1.39E-09 | 1.19E-10 | 6.81 | 13.3120049 | 1.68E-01 | 200005833 | 200005956 | NC_000001.10 |
| cg20833090 | 1.39E-09 | 1.19E-10 | 6.81 | 13.3115571 | 1.05E-01 | 143053037 | 143053160 | NC_000007.13 |
| cg04076968 | 1.40E-09 | 1.20E-10 | 6.81 | 13.3048202 | 4.81E-02 | 61289326  | 61289449  | NC_000002.11 |
| cg20576153 | 1.40E-09 | 1.20E-10 | 6.81 | 13.3045127 | 1.67E-01 | 60975841  | 60975964  | NC_000014.8  |
| cg02192204 | 1.40E-09 | 1.20E-10 | 6.81 | 13.303758  | 1.05E-01 | 88947943  | 88948066  | NC_000016.9  |
| cg15255946 | 1.40E-09 | 1.20E-10 | 6.81 | 13.3036522 | 1.22E-01 | 32729563  | 32729686  | NC_000006.11 |
| cg14241879 | 1.40E-09 | 1.20E-10 | 6.81 | 13.3032879 | 5.08E-02 | 1048922   | 1049045   | NC_000007.13 |
| cg26517004 | 1.40E-09 | 1.20E-10 | 6.81 | 13.3026542 | 8.00E-02 | 110903494 | 110903617 | NC_000012.11 |
| cg12128119 | 1.40E-09 | 1.20E-10 | 6.81 | 13.302646  | 3.54E-02 | 134212891 | 134213014 | NC_000011.9  |
| cg26494542 | 1.41E-09 | 1.20E-10 | 6.81 | 13.3009338 | 8.28E-02 | 963219    | 963342    | NC_000016.9  |
| cg09424526 | 1.41E-09 | 1.20E-10 | 6.81 | 13.3006215 | 1.97E-01 | 223163809 | 223163932 | NC_000002.11 |

|            |          |          |      |            |          |           |           |              |
|------------|----------|----------|------|------------|----------|-----------|-----------|--------------|
| cg09179347 | 1.41E-09 | 1.20E-10 | 6.81 | 13.3005229 | 3.97E-02 | 67517453  | 67517576  | NC_000016.9  |
| cg14569778 | 1.41E-09 | 1.20E-10 | 6.81 | 13.3003552 | 3.70E-02 | 28952111  | 28952234  | NC_000017.10 |
| cg11563844 | 1.41E-09 | 1.20E-10 | 6.81 | 13.2992239 | 1.75E-01 | 33780307  | 33780430  | NC_000013.10 |
| cg05442408 | 1.41E-09 | 1.20E-10 | 6.81 | 13.2986022 | 1.60E-01 | 2706173   | 2706296   | NC_000001.10 |
| cg16913789 | 1.41E-09 | 1.20E-10 | 6.81 | 13.2980839 | 1.61E-01 | 27204005  | 27204128  | NC_000007.13 |
| cg04272613 | 1.41E-09 | 1.20E-10 | 6.81 | 13.2975124 | 1.49E-01 | 59721173  | 59721296  | NC_000014.8  |
| cg01236132 | 1.41E-09 | 1.21E-10 | 6.81 | 13.2968857 | 1.48E-01 | 112723581 | 112723704 | NC_000013.10 |
| cg26724232 | 1.41E-09 | 1.21E-10 | 6.81 | 13.2963237 | 9.94E-02 | 60885912  | 60886035  | NC_000015.9  |
| cg12782180 | 1.41E-09 | 1.21E-10 | 6.81 | 13.2962504 | 1.13E-01 | 127880932 | 127881055 | NC_000007.13 |
| cg26282299 | 1.41E-09 | 1.21E-10 | 6.81 | 13.2961176 | 8.92E-02 | 142189729 | 142189852 | NC_000008.10 |
| cg13959523 | 1.41E-09 | 1.21E-10 | 6.8  | 13.2945754 | 1.69E-01 | 34175481  | 34175604  | NC_000019.9  |
| cg22245862 | 1.41E-09 | 1.21E-10 | 6.8  | 13.2938234 | 9.59E-02 | 942544    | 942667    | NC_000004.11 |
| cg23371877 | 1.41E-09 | 1.21E-10 | 6.8  | 13.293646  | 1.31E-01 | 152067904 | 152068027 | NC_000007.13 |
| cg17955761 | 1.41E-09 | 1.21E-10 | 6.8  | 13.2935367 | 9.38E-02 | 11628430  | 11628553  | NC_000008.10 |
| cg18118685 | 1.42E-09 | 1.22E-10 | 6.8  | 13.2869445 | 2.11E-01 | 154729622 | 154729745 | NC_000002.11 |
| cg07249459 | 1.43E-09 | 1.22E-10 | 6.8  | 13.2850203 | 1.80E-01 | 86600309  | 86600432  | NC_000016.9  |
| cg01355739 | 1.43E-09 | 1.22E-10 | 6.8  | 13.282925  | 8.79E-02 | 57416888  | 57417011  | NC_000020.10 |
| cg04935434 | 1.43E-09 | 1.22E-10 | 6.8  | 13.2815173 | 1.12E-01 | 177024947 | 177025070 | NC_000002.11 |
| cg22604188 | 1.43E-09 | 1.22E-10 | 6.8  | 13.2813922 | 8.31E-02 | 140774054 | 140774177 | NC_000005.9  |
| cg04427498 | 1.43E-09 | 1.23E-10 | 6.8  | 13.2804422 | 1.27E-01 | 20830657  | 20830780  | NC_000007.13 |
| cg01466678 | 1.43E-09 | 1.23E-10 | 6.8  | 13.2802683 | 2.05E-01 | 58497395  | 58497518  | NC_000016.9  |
| cg08874512 | 1.43E-09 | 1.23E-10 | 6.8  | 13.2800591 | 1.62E-01 | 51831274  | 51831397  | NC_000019.9  |
| cg11827910 | 1.43E-09 | 1.23E-10 | 6.8  | 13.2796642 | 1.81E-01 | 31825756  | 31825879  | NC_000011.9  |
| cg13453374 | 1.43E-09 | 1.23E-10 | 6.8  | 13.2791132 | 1.61E-01 | 147072597 | 147072720 | NC_000003.11 |
| cg22510337 | 1.43E-09 | 1.23E-10 | 6.8  | 13.2791058 | 2.21E-01 | 58399967  | 58400090  | NC_000019.9  |



|            |          |          |     |            |          |           |           |              |
|------------|----------|----------|-----|------------|----------|-----------|-----------|--------------|
| cg05488770 | 1.44E-09 | 1.23E-10 | 6.8 | 13.2785361 | 1.73E-01 | 103969940 | 103970063 | NC_000007.13 |
| cg08363193 | 1.44E-09 | 1.23E-10 | 6.8 | 13.2778015 | 1.33E-01 | 89690234  | 89690357  | NC_000010.10 |
| cg15055553 | 1.44E-09 | 1.23E-10 | 6.8 | 13.2774721 | 1.18E-01 | 1697406   | 1697529   | NC_000012.11 |
| cg14655590 | 1.44E-09 | 1.23E-10 | 6.8 | 13.2771886 | 1.51E-01 | 95993065  | 95993188  | NC_000009.11 |
| cg04551776 | 1.44E-09 | 1.23E-10 | 6.8 | 13.2769423 | 1.02E-01 | 393366    | 393489    | NC_000005.9  |
| cg23618344 | 1.44E-09 | 1.23E-10 | 6.8 | 13.2766782 | 1.64E-01 | 54423428  | 54423551  | NC_000012.11 |
| cg11657744 | 1.44E-09 | 1.23E-10 | 6.8 | 13.2742191 | 2.51E-02 | 33236869  | 33236992  | NC_000006.11 |
| cg01569601 | 1.44E-09 | 1.23E-10 | 6.8 | 13.2741928 | 9.56E-02 | 46811242  | 46811365  | NC_000021.8  |
| cg10785263 | 1.44E-09 | 1.23E-10 | 6.8 | 13.2735984 | 1.85E-01 | 63785867  | 63785990  | NC_000001.10 |
| cg18143566 | 1.44E-09 | 1.24E-10 | 6.8 | 13.2720514 | 1.19E-01 | 77398897  | 77399020  | NC_000018.9  |
| cg00933210 | 1.44E-09 | 1.24E-10 | 6.8 | 13.2718409 | 1.36E-01 | 3233117   | 3233240   | NC_000016.9  |
| cg26413683 | 1.44E-09 | 1.24E-10 | 6.8 | 13.271423  | 9.89E-02 | 89520886  | 89521009  | NC_000011.9  |
| cg05544940 | 1.45E-09 | 1.24E-10 | 6.8 | 13.2707297 | 1.10E-01 | 33170339  | 33170462  | NC_000006.11 |
| cg02809707 | 1.45E-09 | 1.24E-10 | 6.8 | 13.2692284 | 2.56E-01 | 175191069 | 175191192 | NC_000002.11 |
| cg14401466 | 1.45E-09 | 1.24E-10 | 6.8 | 13.2682206 | 1.43E-01 | 166405523 | 166405646 | NC_000005.9  |
| cg18044663 | 1.45E-09 | 1.24E-10 | 6.8 | 13.2670752 | 2.34E-01 | 118032081 | 118032204 | NC_000010.10 |
| cg06689045 | 1.45E-09 | 1.24E-10 | 6.8 | 13.2669719 | 5.92E-02 | 120025420 | 120025543 | NC_000003.11 |
| cg03368634 | 1.45E-09 | 1.24E-10 | 6.8 | 13.2667053 | 1.03E-01 | 3824553   | 3824676   | NC_000016.9  |
| cg12861034 | 1.45E-09 | 1.24E-10 | 6.8 | 13.2657673 | 2.53E-01 | 38347816  | 38347939  | NC_000017.10 |
| cg10116864 | 1.45E-09 | 1.25E-10 | 6.8 | 13.2642694 | 1.79E-01 | 219826743 | 219826866 | NC_000002.11 |
| cg22504898 | 1.45E-09 | 1.25E-10 | 6.8 | 13.2641943 | 4.93E-02 | 52294622  | 52294745  | NC_000012.11 |
| cg23508701 | 1.46E-09 | 1.25E-10 | 6.8 | 13.2633157 | 5.54E-02 | 76331877  | 76332000  | NC_000012.11 |
| cg11228052 | 1.46E-09 | 1.25E-10 | 6.8 | 13.2626677 | 1.48E-01 | 103350170 | 103350293 | NC_000012.11 |
| cg11971789 | 1.46E-09 | 1.25E-10 | 6.8 | 13.2621227 | 5.78E-02 | 42545623  | 42545746  | NC_000019.9  |
| cg00559963 | 1.46E-09 | 1.25E-10 | 6.8 | 13.2611094 | 3.18E-02 | 40424484  | 40424607  | NC_000001.10 |

|            |          |          |     |            |          |           |           |              |
|------------|----------|----------|-----|------------|----------|-----------|-----------|--------------|
| cg07850592 | 1.46E-09 | 1.25E-10 | 6.8 | 13.260806  | 1.65E-01 | 231299396 | 231299519 | NC_000001.10 |
| cg10016770 | 1.46E-09 | 1.25E-10 | 6.8 | 13.2597521 | 4.51E-02 | 244805996 | 244806119 | NC_000001.10 |
| cg13652336 | 1.46E-09 | 1.25E-10 | 6.8 | 13.2593051 | 1.88E-01 | 68864012  | 68864135  | NC_000008.10 |
| cg10501976 | 1.46E-09 | 1.25E-10 | 6.8 | 13.2592554 | 1.33E-01 | 10883834  | 10883957  | NC_000006.11 |
| cg11480800 | 1.46E-09 | 1.25E-10 | 6.8 | 13.2583931 | 2.00E-01 | 55881075  | 55881198  | NC_000015.9  |
| cg19627145 | 1.46E-09 | 1.25E-10 | 6.8 | 13.2579243 | 3.21E-02 | 145662110 | 145662233 | NC_000008.10 |
| cg08785317 | 1.46E-09 | 1.25E-10 | 6.8 | 13.2574521 | 7.77E-02 | 86604854  | 86604977  | NC_000016.9  |
| cg01630940 | 1.47E-09 | 1.26E-10 | 6.8 | 13.2561409 | 4.23E-02 | 32020498  | 32020621  | NC_000006.11 |
| cg15737177 | 1.47E-09 | 1.26E-10 | 6.8 | 13.2557925 | 1.33E-01 | 8717467   | 8717590   | NC_000012.11 |
| cg10081304 | 1.47E-09 | 1.26E-10 | 6.8 | 13.2554816 | 4.97E-02 | 177952737 | 177952860 | NC_000005.9  |
| cg14123543 | 1.47E-09 | 1.26E-10 | 6.8 | 13.2543665 | 1.73E-01 | 114877063 | 114877186 | NC_000012.11 |
| cg24878374 | 1.47E-09 | 1.26E-10 | 6.8 | 13.2532343 | 9.61E-02 | 71946066  | 71946189  | NC_000017.10 |
| cg26937943 | 1.47E-09 | 1.26E-10 | 6.8 | 13.252313  | 1.80E-01 | 8800248   | 8800371   | NC_000018.9  |
| cg05617469 | 1.47E-09 | 1.26E-10 | 6.8 | 13.2516246 | 1.21E-01 | 100624281 | 100624404 | NC_000013.10 |
| cg06894334 | 1.47E-09 | 1.26E-10 | 6.8 | 13.251227  | 1.30E-01 | 1398599   | 1398722   | NC_000004.11 |
| cg05040472 | 1.47E-09 | 1.26E-10 | 6.8 | 13.2506915 | 1.51E-01 | 63255687  | 63255810  | NC_000005.9  |
| cg25218417 | 1.47E-09 | 1.26E-10 | 6.8 | 13.2499551 | 1.03E-01 | 12374100  | 12374223  | NC_000001.10 |
| cg23647248 | 1.48E-09 | 1.27E-10 | 6.8 | 13.2485136 | 7.90E-02 | 42265874  | 42265997  | NC_000008.10 |
| cg07592012 | 1.48E-09 | 1.27E-10 | 6.8 | 13.2471618 | 6.91E-02 | 79977307  | 79977430  | NC_000017.10 |
| cg02878284 | 1.48E-09 | 1.27E-10 | 6.8 | 13.2470723 | 8.85E-02 | 32825701  | 32825824  | NC_000006.11 |
| cg24068372 | 1.48E-09 | 1.27E-10 | 6.8 | 13.2467961 | 2.35E-01 | 151107261 | 151107384 | NC_000007.13 |
| cg19506535 | 1.48E-09 | 1.27E-10 | 6.8 | 13.2444407 | 5.77E-02 | 4853363   | 4853486   | NC_000017.10 |
| cg18652346 | 1.48E-09 | 1.27E-10 | 6.8 | 13.2444225 | 1.90E-01 | 28733673  | 28733796  | NC_000006.11 |
| cg04837104 | 1.48E-09 | 1.27E-10 | 6.8 | 13.2432073 | 1.55E-01 | 46129620  | 46129743  | NC_000021.8  |
| cg03912954 | 1.49E-09 | 1.28E-10 | 6.8 | 13.2409282 | 1.14E-01 | 140773129 | 140773252 | NC_000009.11 |

|            |          |          |      |            |          |           |           |              |
|------------|----------|----------|------|------------|----------|-----------|-----------|--------------|
| cg16554447 | 1.49E-09 | 1.28E-10 | 6.8  | 13.2395651 | 8.98E-02 | 54058452  | 54058575  | NC_000006.11 |
| cg25406138 | 1.49E-09 | 1.28E-10 | 6.79 | 13.2385859 | 1.80E-01 | 147560770 | 147560893 | NC_000004.11 |
| cg16400647 | 1.49E-09 | 1.28E-10 | 6.79 | 13.2382739 | 9.35E-02 | 150069707 | 150069830 | NC_000007.13 |
| cg25223771 | 1.49E-09 | 1.28E-10 | 6.79 | 13.2362633 | 1.32E-01 | 145105503 | 145105626 | NC_000008.10 |
| cg01317569 | 1.50E-09 | 1.28E-10 | 6.79 | 13.2342046 | 1.37E-01 | 60140824  | 60140947  | NC_000005.9  |
| cg12652634 | 1.50E-09 | 1.28E-10 | 6.79 | 13.2340853 | 6.76E-02 | 71310320  | 71310443  | NC_000005.9  |
| cg09568001 | 1.50E-09 | 1.29E-10 | 6.79 | 13.2334268 | 6.80E-02 | 114383949 | 114384072 | NC_000006.11 |
| cg22873539 | 1.50E-09 | 1.29E-10 | 6.79 | 13.233191  | 1.40E-01 | 147554210 | 147554333 | NC_000004.11 |
| cg02520281 | 1.50E-09 | 1.29E-10 | 6.79 | 13.2329989 | 1.23E-01 | 140535668 | 140535791 | NC_000005.9  |
| cg01364674 | 1.50E-09 | 1.29E-10 | 6.79 | 13.2325275 | 1.30E-01 | 24348512  | 24348635  | NC_000001.10 |
| cg05655837 | 1.50E-09 | 1.29E-10 | 6.79 | 13.2318782 | 2.13E-01 | 166582188 | 166582311 | NC_000006.11 |
| cg25012919 | 1.50E-09 | 1.29E-10 | 6.79 | 13.2311124 | 1.90E-01 | 36705606  | 36705729  | NC_000013.10 |
| cg14574066 | 1.50E-09 | 1.29E-10 | 6.79 | 13.22973   | 7.85E-02 | 68984142  | 68984265  | NC_000011.9  |
| cg25667490 | 1.50E-09 | 1.29E-10 | 6.79 | 13.2295297 | 2.03E-02 | 72052924  | 72053047  | NC_000004.11 |
| cg11811610 | 1.51E-09 | 1.29E-10 | 6.79 | 13.2283563 | 1.27E-01 | 10390811  | 10390934  | NC_000006.11 |
| cg00445591 | 1.51E-09 | 1.29E-10 | 6.79 | 13.2273589 | 6.47E-02 | 127999762 | 127999885 | NC_000003.11 |
| cg15345206 | 1.51E-09 | 1.29E-10 | 6.79 | 13.2267753 | 1.57E-01 | 23463706  | 23463829  | NC_000010.10 |
| cg15242630 | 1.51E-09 | 1.29E-10 | 6.79 | 13.2265742 | 5.13E-02 | 18488478  | 18488601  | NC_000022.10 |
| cg02147617 | 1.51E-09 | 1.30E-10 | 6.79 | 13.2251385 | 6.73E-02 | 45073463  | 45073586  | NC_000003.11 |
| cg01889237 | 1.51E-09 | 1.30E-10 | 6.79 | 13.2247179 | 1.12E-01 | 137816623 | 137816746 | NC_000006.11 |
| cg13988209 | 1.51E-09 | 1.30E-10 | 6.79 | 13.2246802 | 8.48E-02 | 69683043  | 69683166  | NC_000011.9  |
| cg26983835 | 1.51E-09 | 1.30E-10 | 6.79 | 13.2244379 | 1.48E-01 | 59481280  | 59481403  | NC_000017.10 |
| cg00713400 | 1.51E-09 | 1.30E-10 | 6.79 | 13.2241748 | 1.21E-01 | 22233206  | 22233329  | NC_000007.13 |
| cg05048475 | 1.51E-09 | 1.30E-10 | 6.79 | 13.2231975 | 1.23E-01 | 109926115 | 109926238 | NC_000001.10 |
| cg16658337 | 1.51E-09 | 1.30E-10 | 6.79 | 13.222707  | 5.99E-02 | 1468749   | 1468872   | NC_000005.9  |

|            |          |          |      |            |          |           |           |              |
|------------|----------|----------|------|------------|----------|-----------|-----------|--------------|
| cg16759952 | 1.51E-09 | 1.30E-10 | 6.79 | 13.222542  | 7.52E-02 | 7330658   | 7330781   | NC_000017.10 |
| cg25832305 | 1.51E-09 | 1.30E-10 | 6.79 | 13.2221688 | 1.33E-01 | 46860683  | 46860806  | NC_000021.8  |
| cg10451253 | 1.51E-09 | 1.30E-10 | 6.79 | 13.2219628 | 1.66E-01 | 32907705  | 32907828  | NC_000017.10 |
| cg13496979 | 1.52E-09 | 1.30E-10 | 6.79 | 13.2207957 | 2.06E-01 | 133308888 | 133309011 | NC_000009.11 |
| cg21745537 | 1.52E-09 | 1.30E-10 | 6.79 | 13.2203444 | 3.78E-02 | 121233743 | 121233866 | NC_000011.9  |
| cg21079946 | 1.52E-09 | 1.30E-10 | 6.79 | 13.2203133 | 1.00E-01 | 58622915  | 58623038  | NC_000003.11 |
| cg22605919 | 1.52E-09 | 1.30E-10 | 6.79 | 13.2196584 | 1.26E-01 | 42733542  | 42733665  | NC_000017.10 |
| cg02932314 | 1.52E-09 | 1.30E-10 | 6.79 | 13.2195812 | 1.13E-01 | 42733698  | 42733821  | NC_000017.10 |
| cg05314394 | 1.52E-09 | 1.30E-10 | 6.79 | 13.2190697 | 1.66E-01 | 96957070  | 96957193  | NC_000015.9  |
| cg14828404 | 1.52E-09 | 1.30E-10 | 6.79 | 13.2189852 | 1.24E-01 | 56267246  | 56267369  | NC_000002.11 |
| cg11334165 | 1.52E-09 | 1.30E-10 | 6.79 | 13.2189052 | 1.37E-01 | 145758782 | 145758905 | NC_000005.9  |
| cg14051264 | 1.52E-09 | 1.31E-10 | 6.79 | 13.2182622 | 1.34E-01 | 1886309   | 1886432   | NC_000005.9  |
| cg02058267 | 1.52E-09 | 1.31E-10 | 6.79 | 13.2163342 | 1.66E-01 | 76605088  | 76605211  | NC_000014.8  |
| cg14871932 | 1.53E-09 | 1.31E-10 | 6.79 | 13.2116524 | 1.17E-01 | 44185323  | 44185446  | NC_000007.13 |
| cg24642825 | 1.53E-09 | 1.31E-10 | 6.79 | 13.2112269 | 2.32E-01 | 89248793  | 89248916  | NC_000015.9  |
| cg08661751 | 1.53E-09 | 1.32E-10 | 6.79 | 13.2096827 | 8.96E-02 | 142001770 | 142001893 | NC_000005.9  |
| cg19736503 | 1.53E-09 | 1.32E-10 | 6.79 | 13.2085468 | 1.83E-01 | 84563604  | 84563727  | NC_000006.11 |
| cg24093176 | 1.54E-09 | 1.32E-10 | 6.79 | 13.2075602 | 7.53E-02 | 73716853  | 73716976  | NC_000014.8  |
| cg14270434 | 1.54E-09 | 1.32E-10 | 6.79 | 13.2073313 | 1.47E-01 | 100613647 | 100613770 | NC_000009.11 |
| cg26451188 | 1.54E-09 | 1.32E-10 | 6.79 | 13.2070942 | 9.08E-02 | 8295971   | 8296094   | NC_000017.10 |
| cg24173182 | 1.54E-09 | 1.32E-10 | 6.79 | 13.2066932 | 1.05E-01 | 1961286   | 1961409   | NC_000017.10 |
| cg24831051 | 1.54E-09 | 1.32E-10 | 6.79 | 13.2063516 | 1.59E-01 | 88018481  | 88018604  | NC_000005.9  |
| cg24058566 | 1.55E-09 | 1.33E-10 | 6.79 | 13.2004069 | 1.53E-01 | 87974100  | 87974223  | NC_000005.9  |
| cg23058901 | 1.55E-09 | 1.33E-10 | 6.79 | 13.2000282 | 1.08E-01 | 44324759  | 44324882  | NC_000011.9  |
| cg05264816 | 1.55E-09 | 1.33E-10 | 6.79 | 13.1991691 | 8.46E-02 | 44237023  | 44237146  | NC_000018.9  |

|            |          |          |      |            |          |           |           |              |
|------------|----------|----------|------|------------|----------|-----------|-----------|--------------|
| cg12691679 | 1.55E-09 | 1.33E-10 | 6.79 | 13.1987143 | 1.29E-01 | 41594904  | 41595027  | NC_000013.10 |
| cg18647989 | 1.55E-09 | 1.33E-10 | 6.79 | 13.1981231 | 1.25E-01 | 39260335  | 39260458  | NC_000022.10 |
| cg13891576 | 1.55E-09 | 1.33E-10 | 6.79 | 13.1970485 | 5.93E-02 | 136107649 | 136107772 | NC_000009.11 |
| cg13360215 | 1.55E-09 | 1.34E-10 | 6.79 | 13.1960792 | 8.83E-02 | 67997425  | 67997548  | NC_000018.9  |
| cg01109065 | 1.55E-09 | 1.34E-10 | 6.79 | 13.194981  | 9.79E-02 | 55508379  | 55508502  | NC_000003.11 |
| cg25200586 | 1.55E-09 | 1.34E-10 | 6.79 | 13.1948237 | 1.41E-01 | 148000763 | 148000886 | NC_000001.10 |
| cg14627172 | 1.56E-09 | 1.34E-10 | 6.79 | 13.1937458 | 2.37E-01 | 28510339  | 28510462  | NC_000006.11 |
| cg08971724 | 1.56E-09 | 1.34E-10 | 6.79 | 13.1937057 | 2.30E-02 | 2983426   | 2983549   | NC_000012.11 |
| cg22499215 | 1.56E-09 | 1.34E-10 | 6.79 | 13.1929269 | 3.49E-02 | 19772241  | 19772364  | NC_000022.10 |
| cg11885589 | 1.56E-09 | 1.34E-10 | 6.79 | 13.1926411 | 3.23E-02 | 155463114 | 155463237 | NC_000006.11 |
| cg08473752 | 1.56E-09 | 1.34E-10 | 6.79 | 13.1918703 | 1.31E-01 | 26517057  | 26517180  | NC_000017.10 |
| cg13558899 | 1.56E-09 | 1.34E-10 | 6.79 | 13.1909692 | 6.33E-02 | 55665232  | 55665355  | NC_000017.10 |
| cg06339542 | 1.56E-09 | 1.34E-10 | 6.79 | 13.1903187 | 1.89E-01 | 10102237  | 10102360  | NC_000017.10 |
| cg25053336 | 1.56E-09 | 1.34E-10 | 6.79 | 13.1898355 | 2.12E-01 | 45161333  | 45161456  | NC_000002.11 |
| cg09651522 | 1.56E-09 | 1.34E-10 | 6.79 | 13.1890317 | 1.50E-01 | 1384780   | 1384903   | NC_000006.11 |
| cg16405012 | 1.56E-09 | 1.35E-10 | 6.79 | 13.1880553 | 1.80E-01 | 5542395   | 5542518   | NC_000012.11 |
| cg13184019 | 1.56E-09 | 1.35E-10 | 6.79 | 13.1877248 | 8.69E-02 | 32169790  | 32169913  | NC_000006.11 |
| cg03190505 | 1.57E-09 | 1.35E-10 | 6.79 | 13.1859467 | 1.09E-01 | 137522287 | 137522410 | NC_000002.11 |
| cg00341950 | 1.57E-09 | 1.35E-10 | 6.79 | 13.1857945 | 1.53E-01 | 1431735   | 1431858   | NC_000011.9  |
| cg10944379 | 1.57E-09 | 1.35E-10 | 6.79 | 13.184913  | 2.76E-02 | 35744528  | 35744651  | NC_000010.10 |
| cg14933807 | 1.57E-09 | 1.35E-10 | 6.79 | 13.184775  | 5.58E-02 | 129883528 | 129883651 | NC_000010.10 |
| cg00032805 | 1.57E-09 | 1.35E-10 | 6.78 | 13.1843767 | 1.42E-01 | 165304473 | 165304596 | NC_000004.11 |
| cg07371530 | 1.57E-09 | 1.35E-10 | 6.78 | 13.1839937 | 9.51E-02 | 839581    | 839704    | NC_000016.9  |
| cg05024939 | 1.57E-09 | 1.35E-10 | 6.78 | 13.1839682 | 1.27E-01 | 113442251 | 113442374 | NC_000004.11 |
| cg24612124 | 1.57E-09 | 1.35E-10 | 6.78 | 13.1817729 | 5.87E-02 | 93106264  | 93106387  | NC_000014.8  |

|            |          |          |      |            |          |           |           |              |
|------------|----------|----------|------|------------|----------|-----------|-----------|--------------|
| cg07353303 | 1.58E-09 | 1.36E-10 | 6.78 | 13.1804105 | 1.63E-01 | 145713747 | 145713870 | NC_000005.9  |
| cg01461840 | 1.58E-09 | 1.36E-10 | 6.78 | 13.1797222 | 1.61E-01 | 130085088 | 130085211 | NC_000010.10 |
| cg18699337 | 1.58E-09 | 1.36E-10 | 6.78 | 13.1777155 | 1.16E-01 | 44159144  | 44159267  | NC_000017.10 |
| cg16580073 | 1.58E-09 | 1.36E-10 | 6.78 | 13.1769122 | 7.63E-02 | 64446603  | 64446726  | NC_000005.9  |
| cg13131329 | 1.58E-09 | 1.36E-10 | 6.78 | 13.1758526 | 7.95E-02 | 1801148   | 1801271   | NC_000004.11 |
| cg16234557 | 1.58E-09 | 1.36E-10 | 6.78 | 13.1756011 | 2.05E-01 | 119292062 | 119292185 | NC_000010.10 |
| cg02052895 | 1.58E-09 | 1.37E-10 | 6.78 | 13.1745335 | 1.58E-01 | 5540702   | 5540825   | NC_000012.11 |
| cg07003542 | 1.59E-09 | 1.37E-10 | 6.78 | 13.1733812 | 1.85E-01 | 176056682 | 176056805 | NC_000005.9  |
| cg02283487 | 1.59E-09 | 1.37E-10 | 6.78 | 13.1732416 | 6.27E-02 | 20904020  | 20904143  | NC_000014.8  |
| cg08342194 | 1.59E-09 | 1.37E-10 | 6.78 | 13.1732313 | 6.33E-02 | 31683075  | 31683198  | NC_000006.11 |
| cg26647524 | 1.59E-09 | 1.37E-10 | 6.78 | 13.1731594 | 6.03E-02 | 42726812  | 42726935  | NC_000003.11 |
| cg14452947 | 1.59E-09 | 1.37E-10 | 6.78 | 13.1730289 | 1.66E-01 | 87970640  | 87970763  | NC_000005.9  |
| cg10111115 | 1.59E-09 | 1.37E-10 | 6.78 | 13.1723957 | 1.22E-01 | 73674146  | 73674269  | NC_000003.11 |
| cg05969567 | 1.59E-09 | 1.37E-10 | 6.78 | 13.1723853 | 7.67E-02 | 169655497 | 169655620 | NC_000006.11 |
| cg03949391 | 1.59E-09 | 1.37E-10 | 6.78 | 13.1720869 | 1.68E-01 | 78956845  | 78956968  | NC_000001.10 |
| cg21817012 | 1.59E-09 | 1.37E-10 | 6.78 | 13.171618  | 6.42E-02 | 159924541 | 159924664 | NC_000001.10 |
| cg24186398 | 1.59E-09 | 1.37E-10 | 6.78 | 13.1706767 | 8.88E-02 | 1321530   | 1321653   | NC_000011.9  |
| cg03754403 | 1.59E-09 | 1.37E-10 | 6.78 | 13.1696147 | 1.56E-01 | 40567579  | 40567702  | NC_000006.11 |
| cg26363695 | 1.59E-09 | 1.37E-10 | 6.78 | 13.1692561 | 1.37E-01 | 80203299  | 80203422  | NC_000004.11 |
| cg10922530 | 1.59E-09 | 1.37E-10 | 6.78 | 13.1686205 | 2.96E-02 | 124457083 | 124457206 | NC_000012.11 |
| cg08017323 | 1.59E-09 | 1.37E-10 | 6.78 | 13.168145  | 1.20E-01 | 3240167   | 3240290   | NC_000012.11 |
| cg06042608 | 1.60E-09 | 1.38E-10 | 6.78 | 13.1670087 | 8.51E-02 | 46918356  | 46918479  | NC_000003.11 |
| cg17546247 | 1.60E-09 | 1.38E-10 | 6.78 | 13.1664418 | 1.43E-01 | 147125714 | 147125837 | NC_000003.11 |
| cg18809597 | 1.60E-09 | 1.38E-10 | 6.78 | 13.1653618 | 6.90E-02 | 151748660 | 151748783 | NC_000001.10 |
| cg25892587 | 1.60E-09 | 1.38E-10 | 6.78 | 13.1648152 | 1.10E-01 | 3666169   | 3666292   | NC_000010.10 |

|            |          |          |      |            |          |           |           |              |
|------------|----------|----------|------|------------|----------|-----------|-----------|--------------|
| cg09420439 | 1.60E-09 | 1.38E-10 | 6.78 | 13.1627509 | 2.60E-01 | 27136424  | 27136547  | NC_000007.13 |
| cg07678904 | 1.60E-09 | 1.38E-10 | 6.78 | 13.1621706 | 2.02E-01 | 4304577   | 4304700   | NC_000019.9  |
| cg05617027 | 1.60E-09 | 1.38E-10 | 6.78 | 13.1610392 | 3.73E-02 | 40437086  | 40437209  | NC_000004.11 |
| cg08691273 | 1.60E-09 | 1.38E-10 | 6.78 | 13.1608365 | 5.34E-02 | 144333467 | 144333590 | NC_000008.10 |
| cg09556043 | 1.60E-09 | 1.38E-10 | 6.78 | 13.1608239 | 1.87E-01 | 144621952 | 144622075 | NC_000004.11 |
| cg22967396 | 1.61E-09 | 1.38E-10 | 6.78 | 13.1604294 | 1.31E-01 | 57283942  | 57284065  | NC_000014.8  |
| cg09111482 | 1.61E-09 | 1.38E-10 | 6.78 | 13.1602706 | 1.02E-01 | 134890692 | 134890815 | NC_000010.10 |
| cg24482024 | 1.61E-09 | 1.39E-10 | 6.78 | 13.1597773 | 6.59E-02 | 74660566  | 74660689  | NC_000015.9  |
| cg21946667 | 1.61E-09 | 1.39E-10 | 6.78 | 13.1588167 | 6.17E-02 | 40839643  | 40839766  | NC_000017.10 |
| cg04599297 | 1.61E-09 | 1.39E-10 | 6.78 | 13.1587246 | 1.52E-01 | 26505442  | 26505565  | NC_000010.10 |
| cg05961272 | 1.61E-09 | 1.39E-10 | 6.78 | 13.1583787 | 5.51E-02 | 77399130  | 77399253  | NC_000013.10 |
| cg02543268 | 1.61E-09 | 1.39E-10 | 6.78 | 13.1579293 | 7.69E-02 | 160201261 | 160201384 | NC_000005.9  |
| cg20695433 | 1.62E-09 | 1.40E-10 | 6.78 | 13.1531871 | 1.63E-01 | 30019102  | 30019225  | NC_000019.9  |
| cg07105285 | 1.62E-09 | 1.40E-10 | 6.78 | 13.1529844 | 1.01E-01 | 92702663  | 92702786  | NC_000011.9  |
| cg06701529 | 1.62E-09 | 1.40E-10 | 6.78 | 13.1522254 | 1.29E-01 | 32008841  | 32008964  | NC_000011.9  |
| cg08495770 | 1.62E-09 | 1.40E-10 | 6.78 | 13.1518748 | 1.74E-01 | 106400824 | 106400947 | NC_000010.10 |
| cg12159837 | 1.62E-09 | 1.40E-10 | 6.78 | 13.1517193 | 3.55E-02 | 1069335   | 1069458   | NC_000017.10 |
| cg14994639 | 1.62E-09 | 1.40E-10 | 6.78 | 13.1506781 | 4.16E-02 | 121422921 | 121423044 | NC_000011.9  |
| cg00301033 | 1.62E-09 | 1.40E-10 | 6.78 | 13.1492636 | 6.33E-02 | 43390036  | 43390159  | NC_000011.9  |
| cg05696406 | 1.62E-09 | 1.40E-10 | 6.78 | 13.1490682 | 1.04E-01 | 27599888  | 27600011  | NC_000002.11 |
| cg13854495 | 1.62E-09 | 1.40E-10 | 6.78 | 13.1489395 | 1.21E-01 | 131846350 | 131846473 | NC_000009.11 |
| cg02318629 | 1.62E-09 | 1.40E-10 | 6.78 | 13.1482083 | 1.62E-01 | 47797415  | 47797538  | NC_000002.11 |
| cg25377802 | 1.62E-09 | 1.40E-10 | 6.78 | 13.148177  | 1.61E-01 | 28616847  | 28616970  | NC_000003.11 |
| cg26030804 | 1.63E-09 | 1.40E-10 | 6.78 | 13.1470289 | 1.79E-01 | 794764    | 794887    | NC_000011.9  |
| cg00594011 | 1.63E-09 | 1.41E-10 | 6.78 | 13.1446034 | 2.00E-01 | 107956556 | 107956679 | NC_000004.11 |

|            |          |          |      |            |          |           |           |              |
|------------|----------|----------|------|------------|----------|-----------|-----------|--------------|
| cg17875028 | 1.63E-09 | 1.41E-10 | 6.78 | 13.1421268 | 6.98E-02 | 233321828 | 233321951 | NC_000002.11 |
| cg10648197 | 1.63E-09 | 1.41E-10 | 6.78 | 13.1416659 | 1.76E-01 | 22634578  | 22634701  | NC_000010.10 |
| cg08053686 | 1.64E-09 | 1.41E-10 | 6.78 | 13.1408247 | 1.41E-01 | 6223581   | 6223704   | NC_000004.11 |
| cg14654613 | 1.64E-09 | 1.41E-10 | 6.78 | 13.1402908 | 1.29E-01 | 23185804  | 23185927  | NC_000019.9  |
| cg00177290 | 1.64E-09 | 1.42E-10 | 6.78 | 13.1391704 | 1.60E-01 | 110161285 | 110161408 | NC_000001.10 |
| cg11728738 | 1.64E-09 | 1.42E-10 | 6.78 | 13.1386579 | 1.53E-01 | 21711700  | 21711823  | NC_000006.11 |
| cg18128212 | 1.64E-09 | 1.42E-10 | 6.78 | 13.1382745 | 3.53E-02 | 26199190  | 26199313  | NC_000001.10 |
| cg17078427 | 1.64E-09 | 1.42E-10 | 6.78 | 13.1375572 | 1.59E-01 | 170137552 | 170137675 | NC_000003.11 |
| cg02894328 | 1.64E-09 | 1.42E-10 | 6.78 | 13.1373112 | 3.66E-02 | 30919516  | 30919639  | NC_000006.11 |
| cg00255759 | 1.64E-09 | 1.42E-10 | 6.78 | 13.1370296 | 4.25E-02 | 73699748  | 73699871  | NC_000010.10 |
| cg03401096 | 1.64E-09 | 1.42E-10 | 6.78 | 13.1367361 | 2.87E-01 | 123301171 | 123301294 | NC_000011.9  |
| cg06282596 | 1.64E-09 | 1.42E-10 | 6.78 | 13.1363826 | 1.00E-01 | 97175479  | 97175602  | NC_000010.10 |
| cg24970879 | 1.64E-09 | 1.42E-10 | 6.78 | 13.1345822 | 1.40E-01 | 38030068  | 38030191  | NC_000007.13 |
| cg00654296 | 1.65E-09 | 1.42E-10 | 6.78 | 13.1330459 | 7.84E-02 | 7230819   | 7230942   | NC_000017.10 |
| cg01656394 | 1.65E-09 | 1.42E-10 | 6.78 | 13.1326787 | 1.59E-01 | 244080781 | 244080904 | NC_000001.10 |
| cg07057579 | 1.65E-09 | 1.43E-10 | 6.78 | 13.132068  | 9.46E-02 | 95870112  | 95870235  | NC_000015.9  |
| cg00387941 | 1.65E-09 | 1.43E-10 | 6.78 | 13.1316321 | 4.60E-02 | 26661686  | 26661809  | NC_000001.10 |
| cg15641463 | 1.65E-09 | 1.43E-10 | 6.78 | 13.1312762 | 3.37E-02 | 30129346  | 30129469  | NC_000006.11 |
| cg10093805 | 1.65E-09 | 1.43E-10 | 6.78 | 13.1307256 | 9.55E-02 | 154296135 | 154296258 | NC_000001.10 |
| cg14362758 | 1.65E-09 | 1.43E-10 | 6.78 | 13.130253  | 1.76E-01 | 139090991 | 139091114 | NC_000009.11 |
| cg17662941 | 1.65E-09 | 1.43E-10 | 6.78 | 13.1299198 | 1.19E-01 | 63560973  | 63561096  | NC_000007.13 |
| cg05424678 | 1.65E-09 | 1.43E-10 | 6.78 | 13.1298411 | 8.41E-02 | 105910233 | 105910356 | NC_000007.13 |
| cg05176667 | 1.66E-09 | 1.43E-10 | 6.77 | 13.1277172 | 1.67E-01 | 102029207 | 102029330 | NC_000014.8  |
| cg20107759 | 1.66E-09 | 1.43E-10 | 6.77 | 13.1270259 | 2.30E-01 | 12936491  | 12936614  | NC_000019.9  |
| cg10828577 | 1.66E-09 | 1.43E-10 | 6.77 | 13.1268206 | 6.48E-02 | 61507612  | 61507735  | NC_000017.10 |



|            |          |          |      |            |          |           |           |              |
|------------|----------|----------|------|------------|----------|-----------|-----------|--------------|
| cg10543574 | 1.66E-09 | 1.43E-10 | 6.77 | 13.1266156 | 1.67E-01 | 9763159   | 9763282   | NC_000008.10 |
| cg01582980 | 1.66E-09 | 1.44E-10 | 6.77 | 13.1254325 | 1.48E-01 | 20825545  | 20825668  | NC_000007.13 |
| cg24599434 | 1.66E-09 | 1.44E-10 | 6.77 | 13.1253711 | 1.41E-01 | 172166242 | 172166365 | NC_000003.11 |
| cg23591139 | 1.66E-09 | 1.44E-10 | 6.77 | 13.1247831 | 5.57E-02 | 1120557   | 1120680   | NC_000017.10 |
| cg07842403 | 1.66E-09 | 1.44E-10 | 6.77 | 13.1241582 | 1.79E-01 | 134515143 | 134515266 | NC_000003.11 |
| cg10927449 | 1.66E-09 | 1.44E-10 | 6.77 | 13.1233167 | 1.40E-01 | 63286621  | 63286744  | NC_000002.11 |
| cg13631444 | 1.66E-09 | 1.44E-10 | 6.77 | 13.1218031 | 1.18E-01 | 110098866 | 110098989 | NC_000008.10 |
| cg22271921 | 1.66E-09 | 1.44E-10 | 6.77 | 13.1217627 | 1.41E-01 | 40755383  | 40755506  | NC_000008.10 |
| cg22242585 | 1.67E-09 | 1.44E-10 | 6.77 | 13.1211196 | 4.88E-02 | 216659791 | 216659914 | NC_000002.11 |
| cg05416180 | 1.67E-09 | 1.44E-10 | 6.77 | 13.1210705 | 6.08E-02 | 188920619 | 188920742 | NC_000003.11 |
| cg11312408 | 1.67E-09 | 1.44E-10 | 6.77 | 13.1198933 | 1.59E-01 | 58207013  | 58207136  | NC_000013.10 |
| cg03804500 | 1.67E-09 | 1.44E-10 | 6.77 | 13.1186698 | 8.02E-02 | 140081972 | 140082095 | NC_000009.11 |
| cg25420952 | 1.67E-09 | 1.45E-10 | 6.77 | 13.1173726 | 9.20E-02 | 116841084 | 116841207 | NC_000009.11 |
| cg13906377 | 1.67E-09 | 1.45E-10 | 6.77 | 13.1173458 | 2.01E-01 | 63792695  | 63792818  | NC_000001.10 |
| cg13893543 | 1.67E-09 | 1.45E-10 | 6.77 | 13.1172824 | 1.50E-01 | 224805631 | 224805754 | NC_000001.10 |
| cg05422683 | 1.67E-09 | 1.45E-10 | 6.77 | 13.1158422 | 1.40E-01 | 145814003 | 145814126 | NC_000007.13 |
| cg10711871 | 1.67E-09 | 1.45E-10 | 6.77 | 13.1156632 | 9.03E-02 | 13860812  | 13860935  | NC_000003.11 |
| cg04904385 | 1.67E-09 | 1.45E-10 | 6.77 | 13.1151636 | 1.54E-01 | 19158692  | 19158815  | NC_000007.13 |
| cg12493107 | 1.67E-09 | 1.45E-10 | 6.77 | 13.1150691 | 7.86E-02 | 23344079  | 23344202  | NC_000020.10 |
| cg25436152 | 1.67E-09 | 1.45E-10 | 6.77 | 13.1149486 | 7.08E-02 | 954490    | 954613    | NC_000017.10 |
| cg06793679 | 1.68E-09 | 1.45E-10 | 6.77 | 13.1142691 | 6.23E-02 | 103054085 | 103054208 | NC_000014.8  |
| cg14633742 | 1.68E-09 | 1.45E-10 | 6.77 | 13.1141561 | 1.51E-01 | 98032587  | 98032710  | NC_000009.11 |
| cg05491166 | 1.68E-09 | 1.45E-10 | 6.77 | 13.1120682 | 1.61E-01 | 19885901  | 19886024  | NC_000011.9  |
| cg27264051 | 1.68E-09 | 1.46E-10 | 6.77 | 13.1111281 | 6.84E-02 | 133383895 | 133384018 | NC_000003.11 |
| cg03460245 | 1.69E-09 | 1.46E-10 | 6.77 | 13.1086625 | 4.47E-02 | 31475984  | 31476107  | NC_000006.11 |

|            |          |          |      |            |          |           |           |              |
|------------|----------|----------|------|------------|----------|-----------|-----------|--------------|
| cg06598091 | 1.69E-09 | 1.46E-10 | 6.77 | 13.1081044 | 2.52E-01 | 11653600  | 11653723  | NC_000012.11 |
| cg21373739 | 1.69E-09 | 1.46E-10 | 6.77 | 13.1078002 | 1.59E-02 | 45730686  | 45730809  | NC_000003.11 |
| cg17315500 | 1.69E-09 | 1.46E-10 | 6.77 | 13.1077792 | 1.68E-01 | 103359572 | 103359695 | NC_000012.11 |
| cg00623774 | 1.69E-09 | 1.46E-10 | 6.77 | 13.1068793 | 5.82E-02 | 155674426 | 155674549 | NC_000007.13 |
| cg07749724 | 1.69E-09 | 1.46E-10 | 6.77 | 13.1061346 | 1.98E-01 | 112832480 | 112832603 | NC_000011.9  |
| cg05307923 | 1.69E-09 | 1.46E-10 | 6.77 | 13.1061288 | 1.82E-01 | 1779667   | 1779790   | NC_000010.10 |
| cg14216285 | 1.69E-09 | 1.47E-10 | 6.77 | 13.103626  | 1.73E-01 | 28778124  | 28778247  | NC_000006.11 |
| cg26660316 | 1.70E-09 | 1.47E-10 | 6.77 | 13.1012324 | 5.68E-02 | 110077272 | 110077395 | NC_000005.9  |
| cg09531729 | 1.70E-09 | 1.47E-10 | 6.77 | 13.1003308 | 6.29E-02 | 88124215  | 88124338  | NC_000016.9  |
| cg06737666 | 1.70E-09 | 1.47E-10 | 6.77 | 13.0986327 | 1.31E-01 | 78080026  | 78080149  | NC_000016.9  |
| cg01185626 | 1.70E-09 | 1.48E-10 | 6.77 | 13.0974814 | 1.76E-01 | 75594016  | 75594139  | NC_000001.10 |
| cg10994149 | 1.70E-09 | 1.48E-10 | 6.77 | 13.0971191 | 1.38E-01 | 43037123  | 43037246  | NC_000005.9  |
| cg01511557 | 1.70E-09 | 1.48E-10 | 6.77 | 13.0964329 | 1.14E-01 | 50514319  | 50514442  | NC_000001.10 |
| cg15907965 | 1.70E-09 | 1.48E-10 | 6.77 | 13.0963994 | 5.01E-02 | 89430272  | 89430395  | NC_000010.10 |
| cg11597131 | 1.71E-09 | 1.48E-10 | 6.77 | 13.0953145 | 1.72E-01 | 176988939 | 176989062 | NC_000002.11 |
| cg01549404 | 1.71E-09 | 1.48E-10 | 6.77 | 13.0942475 | 1.42E-01 | 55358636  | 55358759  | NC_000016.9  |
| cg22629111 | 1.71E-09 | 1.48E-10 | 6.77 | 13.0931233 | 1.54E-01 | 166135208 | 166135331 | NC_000001.10 |
| cg23733502 | 1.71E-09 | 1.48E-10 | 6.77 | 13.0929628 | 1.21E-01 | 577629    | 577752    | NC_000003.11 |
| cg23402821 | 1.71E-09 | 1.49E-10 | 6.77 | 13.0908457 | 1.65E-01 | 35292159  | 35292282  | NC_000017.10 |
| cg11735997 | 1.71E-09 | 1.49E-10 | 6.77 | 13.0907015 | 1.38E-01 | 30039113  | 30039236  | NC_000011.9  |
| cg17603132 | 1.72E-09 | 1.49E-10 | 6.77 | 13.0893019 | 1.65E-01 | 8190152   | 8190275   | NC_000011.9  |
| cg01644731 | 1.72E-09 | 1.49E-10 | 6.77 | 13.0884534 | 9.04E-02 | 58236712  | 58236835  | NC_000012.11 |
| cg06340987 | 1.72E-09 | 1.49E-10 | 6.77 | 13.0882487 | 1.59E-01 | 20182695  | 20182818  | NC_000011.9  |
| cg27383873 | 1.72E-09 | 1.49E-10 | 6.77 | 13.0881245 | 2.58E-02 | 50724286  | 50724409  | NC_000010.10 |
| cg00585733 | 1.72E-09 | 1.49E-10 | 6.77 | 13.0878715 | 1.52E-01 | 69064884  | 69065007  | NC_000007.13 |

|            |          |          |      |            |          |           |           |              |
|------------|----------|----------|------|------------|----------|-----------|-----------|--------------|
| cg02943578 | 1.72E-09 | 1.49E-10 | 6.77 | 13.0861174 | 1.98E-01 | 86600499  | 86600622  | NC_000016.9  |
| cg02048657 | 1.72E-09 | 1.49E-10 | 6.77 | 13.0858496 | 9.52E-02 | 1293231   | 1293354   | NC_000005.9  |
| cg21548464 | 1.73E-09 | 1.50E-10 | 6.77 | 13.0836445 | 2.82E-02 | 50707937  | 50708060  | NC_000013.10 |
| cg21871746 | 1.73E-09 | 1.50E-10 | 6.77 | 13.0827432 | 1.37E-01 | 99616820  | 99616943  | NC_000007.13 |
| cg06829299 | 1.73E-09 | 1.50E-10 | 6.77 | 13.0826873 | 1.58E-01 | 65286632  | 65286755  | NC_000008.10 |
| cg04081402 | 1.73E-09 | 1.50E-10 | 6.77 | 13.0821259 | 7.38E-02 | 31003587  | 31003710  | NC_000022.10 |
| cg19526568 | 1.73E-09 | 1.50E-10 | 6.77 | 13.0820278 | 1.11E-01 | 100643087 | 100643210 | NC_000013.10 |
| cg24948792 | 1.73E-09 | 1.50E-10 | 6.77 | 13.0815344 | 5.03E-02 | 102789961 | 102790084 | NC_000010.10 |
| cg08732659 | 1.74E-09 | 1.51E-10 | 6.77 | 13.0777158 | 9.74E-02 | 54973966  | 54974089  | NC_000016.9  |
| cg27263903 | 1.74E-09 | 1.51E-10 | 6.77 | 13.07675   | 1.23E-01 | 160314452 | 160314575 | NC_000001.10 |
| cg27467929 | 1.74E-09 | 1.51E-10 | 6.76 | 13.0730516 | 2.34E-01 | 68864529  | 68864652  | NC_000008.10 |
| cg22675937 | 1.74E-09 | 1.51E-10 | 6.76 | 13.0729787 | 1.45E-01 | 59481571  | 59481694  | NC_000017.10 |
| cg14905657 | 1.74E-09 | 1.51E-10 | 6.76 | 13.0726786 | 9.69E-02 | 16760048  | 16760171  | NC_000012.11 |
| cg23411869 | 1.74E-09 | 1.51E-10 | 6.76 | 13.0722982 | 1.41E-01 | 74846412  | 74846535  | NC_000017.10 |
| cg22060367 | 1.75E-09 | 1.52E-10 | 6.76 | 13.0702207 | 2.39E-02 | 161957720 | 161957843 | NC_000002.11 |
| cg15974867 | 1.75E-09 | 1.52E-10 | 6.76 | 13.0690047 | 7.74E-02 | 69464012  | 69464135  | NC_000011.9  |
| cg17967673 | 1.75E-09 | 1.52E-10 | 6.76 | 13.068957  | 1.19E-01 | 38040009  | 38040132  | NC_000019.9  |
| cg04618333 | 1.75E-09 | 1.52E-10 | 6.76 | 13.0687515 | 2.27E-01 | 46800674  | 46800797  | NC_000017.10 |
| cg22654517 | 1.75E-09 | 1.52E-10 | 6.76 | 13.0662081 | 7.54E-02 | 96458247  | 96458370  | NC_000002.11 |
| cg24496745 | 1.76E-09 | 1.53E-10 | 6.76 | 13.0655702 | 9.51E-02 | 57285156  | 57285279  | NC_000001.10 |
| cg03444245 | 1.76E-09 | 1.53E-10 | 6.76 | 13.0652143 | 1.84E-01 | 45377079  | 45377202  | NC_000011.9  |
| cg15707093 | 1.76E-09 | 1.53E-10 | 6.76 | 13.0651102 | 2.06E-01 | 174450353 | 174450476 | NC_000004.11 |
| cg10091996 | 1.76E-09 | 1.53E-10 | 6.76 | 13.0646544 | 1.16E-01 | 31548640  | 31548763  | NC_000016.9  |
| cg19357275 | 1.76E-09 | 1.53E-10 | 6.76 | 13.0646072 | 4.47E-02 | 248855040 | 248855163 | NC_000001.10 |
| cg14463912 | 1.76E-09 | 1.53E-10 | 6.76 | 13.0643702 | 7.94E-02 | 102789979 | 102790102 | NC_000010.10 |

|            |          |          |      |            |          |           |           |              |
|------------|----------|----------|------|------------|----------|-----------|-----------|--------------|
| cg03887163 | 1.76E-09 | 1.53E-10 | 6.76 | 13.0624862 | 1.46E-01 | 165324100 | 165324223 | NC_000001.10 |
| cg03510605 | 1.76E-09 | 1.53E-10 | 6.76 | 13.062047  | 1.28E-01 | 115104734 | 115104857 | NC_000012.11 |
| cg05158615 | 1.76E-09 | 1.53E-10 | 6.76 | 13.0616188 | 1.76E-01 | 24323559  | 24323682  | NC_000007.13 |
| cg01619107 | 1.76E-09 | 1.53E-10 | 6.76 | 13.0610432 | 7.49E-02 | 52515354  | 52515477  | NC_000012.11 |
| cg26348521 | 1.76E-09 | 1.53E-10 | 6.76 | 13.0609129 | 1.09E-01 | 1375657   | 1375780   | NC_000011.9  |
| cg08230105 | 1.76E-09 | 1.53E-10 | 6.76 | 13.0602907 | 1.13E-01 | 41692501  | 41692624  | NC_000017.10 |
| cg17507751 | 1.76E-09 | 1.53E-10 | 6.76 | 13.0601236 | 7.65E-02 | 41275792  | 41275915  | NC_000005.9  |
| cg19186145 | 1.77E-09 | 1.54E-10 | 6.76 | 13.0566485 | 2.64E-01 | 45169562  | 45169685  | NC_000002.11 |
| cg13415865 | 1.77E-09 | 1.54E-10 | 6.76 | 13.056072  | 9.27E-02 | 2831573   | 2831696   | NC_000017.10 |
| cg25745379 | 1.78E-09 | 1.54E-10 | 6.76 | 13.0539358 | 1.09E-01 | 27333481  | 27333604  | NC_000013.10 |
| cg13180920 | 1.78E-09 | 1.55E-10 | 6.76 | 13.0496194 | 8.88E-02 | 46896174  | 46896297  | NC_000021.8  |
| cg05385163 | 1.79E-09 | 1.55E-10 | 6.76 | 13.0477899 | 1.50E-01 | 96717349  | 96717472  | NC_000009.11 |
| cg14805347 | 1.79E-09 | 1.55E-10 | 6.76 | 13.0468547 | 1.89E-01 | 58357879  | 58358002  | NC_000015.9  |
| cg10394047 | 1.79E-09 | 1.56E-10 | 6.76 | 13.0462819 | 5.67E-02 | 47575416  | 47575539  | NC_000021.8  |
| cg02370232 | 1.79E-09 | 1.56E-10 | 6.76 | 13.0453483 | 9.59E-02 | 97175365  | 97175488  | NC_000010.10 |
| cg27423323 | 1.79E-09 | 1.56E-10 | 6.76 | 13.0443301 | 1.02E-01 | 2963112   | 2963235   | NC_000020.10 |
| cg02647941 | 1.79E-09 | 1.56E-10 | 6.76 | 13.0432223 | 1.49E-01 | 147127143 | 147127266 | NC_000003.11 |
| cg07712493 | 1.80E-09 | 1.56E-10 | 6.76 | 13.0419134 | 1.46E-01 | 115151427 | 115151550 | NC_000005.9  |
| cg20864608 | 1.80E-09 | 1.56E-10 | 6.76 | 13.041536  | 2.31E-01 | 143533499 | 143533622 | NC_000008.10 |
| cg20220255 | 1.80E-09 | 1.56E-10 | 6.76 | 13.0411406 | 5.61E-02 | 95228096  | 95228219  | NC_000012.11 |
| cg14561530 | 1.80E-09 | 1.56E-10 | 6.76 | 13.0404897 | 6.05E-02 | 3129958   | 3130081   | NC_000001.10 |
| cg19410796 | 1.80E-09 | 1.56E-10 | 6.76 | 13.0404055 | 2.78E-02 | 45966279  | 45966402  | NC_000013.10 |
| cg19308769 | 1.80E-09 | 1.57E-10 | 6.76 | 13.0397341 | 9.94E-02 | 31289850  | 31289973  | NC_000001.10 |
| cg04446501 | 1.80E-09 | 1.57E-10 | 6.76 | 13.0389381 | 6.17E-02 | 3742328   | 3742451   | NC_000004.11 |
| cg18404374 | 1.80E-09 | 1.57E-10 | 6.76 | 13.0383631 | 1.62E-01 | 26663551  | 26663674  | NC_000003.11 |

|            |          |          |      |            |          |           |           |              |
|------------|----------|----------|------|------------|----------|-----------|-----------|--------------|
| cg26619987 | 1.80E-09 | 1.57E-10 | 6.76 | 13.0368653 | 2.81E-02 | 78153772  | 78153895  | NC_000017.10 |
| cg23182200 | 1.81E-09 | 1.57E-10 | 6.76 | 13.0362361 | 9.09E-02 | 97345907  | 97346030  | NC_000008.10 |
| cg20688791 | 1.81E-09 | 1.57E-10 | 6.76 | 13.0359264 | 6.28E-02 | 154415062 | 154415185 | NC_000001.10 |
| cg09056181 | 1.81E-09 | 1.57E-10 | 6.76 | 13.0354217 | 1.76E-01 | 26505503  | 26505626  | NC_000010.10 |
| cg01291404 | 1.81E-09 | 1.57E-10 | 6.76 | 13.0353399 | 1.75E-01 | 48397872  | 48397995  | NC_000012.11 |
| cg02602455 | 1.81E-09 | 1.58E-10 | 6.76 | 13.0339518 | 1.36E-01 | 36739781  | 36739904  | NC_000009.11 |
| cg24448870 | 1.81E-09 | 1.58E-10 | 6.76 | 13.0336119 | 4.12E-02 | 126668133 | 126668256 | NC_000003.11 |
| cg27314569 | 1.81E-09 | 1.58E-10 | 6.76 | 13.0330008 | 1.66E-01 | 122852461 | 122852584 | NC_000011.9  |
| cg13661740 | 1.81E-09 | 1.58E-10 | 6.76 | 13.0321978 | 1.79E-01 | 79635912  | 79636035  | NC_000009.11 |
| cg13919631 | 1.82E-09 | 1.58E-10 | 6.76 | 13.0296906 | 7.47E-02 | 38071571  | 38071694  | NC_000001.10 |
| cg14614211 | 1.82E-09 | 1.58E-10 | 6.76 | 13.0287944 | 1.33E-01 | 28034247  | 28034370  | NC_000010.10 |
| cg25316663 | 1.82E-09 | 1.58E-10 | 6.76 | 13.0279817 | 2.01E-01 | 147569938 | 147570061 | NC_000004.11 |
| cg03796781 | 1.82E-09 | 1.59E-10 | 6.76 | 13.0271046 | 1.38E-01 | 137818836 | 137818959 | NC_000006.11 |
| cg05583608 | 1.82E-09 | 1.59E-10 | 6.76 | 13.0267703 | 1.51E-01 | 51147536  | 51147659  | NC_000016.9  |
| cg00916854 | 1.82E-09 | 1.59E-10 | 6.76 | 13.026417  | 1.02E-01 | 123350361 | 123350484 | NC_000012.11 |
| cg26953640 | 1.82E-09 | 1.59E-10 | 6.76 | 13.0260236 | 1.70E-01 | 1174473   | 1174596   | NC_000017.10 |
| cg09473826 | 1.82E-09 | 1.59E-10 | 6.76 | 13.0249703 | 9.70E-02 | 175568216 | 175568339 | NC_000001.10 |
| cg13996750 | 1.83E-09 | 1.59E-10 | 6.76 | 13.0246285 | 9.45E-02 | 139419958 | 139420081 | NC_000009.11 |
| cg14653284 | 1.83E-09 | 1.59E-10 | 6.76 | 13.0232555 | 1.47E-01 | 11679879  | 11680002  | NC_000002.11 |
| cg03320255 | 1.83E-09 | 1.59E-10 | 6.76 | 13.0231829 | 1.31E-01 | 38042154  | 38042277  | NC_000019.9  |
| cg15712323 | 1.83E-09 | 1.60E-10 | 6.76 | 13.0203354 | 1.13E-01 | 11565399  | 11565522  | NC_000019.9  |
| cg12492157 | 1.83E-09 | 1.60E-10 | 6.76 | 13.0202242 | 7.18E-02 | 27498310  | 27498433  | NC_000007.13 |
| cg14770827 | 1.83E-09 | 1.60E-10 | 6.76 | 13.0200364 | 1.17E-01 | 1775275   | 1775398   | NC_000019.9  |
| cg06489433 | 1.83E-09 | 1.60E-10 | 6.75 | 13.019478  | 3.99E-02 | 89491229  | 89491352  | NC_000016.9  |
| cg07147573 | 1.84E-09 | 1.60E-10 | 6.75 | 13.0186795 | 1.39E-01 | 42918806  | 42918929  | NC_000003.11 |

|            |          |          |      |            |          |           |           |              |
|------------|----------|----------|------|------------|----------|-----------|-----------|--------------|
| cg13918613 | 1.84E-09 | 1.60E-10 | 6.75 | 13.0167193 | 1.75E-01 | 18429126  | 18429249  | NC_000010.10 |
| cg02086467 | 1.84E-09 | 1.60E-10 | 6.75 | 13.0160918 | 1.53E-01 | 57276527  | 57276650  | NC_000014.8  |
| cg11694490 | 1.84E-09 | 1.61E-10 | 6.75 | 13.0140788 | 1.78E-01 | 21927823  | 21927946  | NC_000012.11 |
| cg12816979 | 1.84E-09 | 1.61E-10 | 6.75 | 13.0138541 | 1.26E-01 | 59001398  | 59001521  | NC_000018.9  |
| cg03160135 | 1.84E-09 | 1.61E-10 | 6.75 | 13.0137591 | 1.32E-01 | 117586918 | 117587041 | NC_000006.11 |
| cg27350402 | 1.85E-09 | 1.61E-10 | 6.75 | 13.0124727 | 1.44E-01 | 27550691  | 27550814  | NC_000006.11 |
| cg25985013 | 1.85E-09 | 1.61E-10 | 6.75 | 13.012099  | 1.05E-01 | 21925112  | 21925235  | NC_000008.10 |
| cg04002235 | 1.85E-09 | 1.61E-10 | 6.75 | 13.0117739 | 1.33E-01 | 128560443 | 128560566 | NC_000011.9  |
| cg17708167 | 1.85E-09 | 1.61E-10 | 6.75 | 13.0108479 | 1.69E-01 | 68117917  | 68118040  | NC_000015.9  |
| cg10581650 | 1.85E-09 | 1.61E-10 | 6.75 | 13.0105618 | 5.58E-02 | 100155032 | 100155155 | NC_000010.10 |
| cg23500122 | 1.85E-09 | 1.61E-10 | 6.75 | 13.0095764 | 1.82E-01 | 172167610 | 172167733 | NC_000003.11 |
| cg23602974 | 1.85E-09 | 1.62E-10 | 6.75 | 13.0090966 | 1.26E-01 | 35293884  | 35294007  | NC_000007.13 |
| cg07531516 | 1.86E-09 | 1.62E-10 | 6.75 | 13.0077044 | 9.93E-02 | 4566644   | 4566767   | NC_000019.9  |
| cg02630553 | 1.86E-09 | 1.62E-10 | 6.75 | 13.0068857 | 1.27E-01 | 60296809  | 60296932  | NC_000015.9  |
| cg16909495 | 1.86E-09 | 1.62E-10 | 6.75 | 13.0065185 | 1.50E-01 | 49940062  | 49940185  | NC_000019.9  |
| cg03015433 | 1.86E-09 | 1.62E-10 | 6.75 | 13.0054899 | 1.28E-01 | 56623111  | 56623234  | NC_000016.9  |
| cg15467646 | 1.86E-09 | 1.62E-10 | 6.75 | 13.0048285 | 1.99E-01 | 22141014  | 22141137  | NC_000001.10 |
| cg03057072 | 1.86E-09 | 1.62E-10 | 6.75 | 13.0046868 | 8.27E-02 | 32186554  | 32186677  | NC_000010.10 |
| cg03986574 | 1.86E-09 | 1.62E-10 | 6.75 | 13.004261  | 7.26E-02 | 64544080  | 64544203  | NC_000011.9  |
| cg26578682 | 1.86E-09 | 1.62E-10 | 6.75 | 13.0041635 | 1.30E-01 | 2750163   | 2750286   | NC_000005.9  |
| cg13140167 | 1.86E-09 | 1.63E-10 | 6.75 | 13.0026157 | 1.46E-01 | 33454504  | 33454627  | NC_000022.10 |
| cg16869622 | 1.86E-09 | 1.63E-10 | 6.75 | 13.0026026 | 3.81E-02 | 133102529 | 133102652 | NC_000012.11 |
| cg10972873 | 1.86E-09 | 1.63E-10 | 6.75 | 13.002309  | 1.90E-01 | 200007592 | 200007715 | NC_000001.10 |
| cg02571816 | 1.87E-09 | 1.63E-10 | 6.75 | 13.001689  | 1.81E-01 | 38747378  | 38747501  | NC_000019.9  |
| cg22783747 | 1.87E-09 | 1.63E-10 | 6.75 | 13.0005732 | 2.14E-02 | 69614817  | 69614940  | NC_000014.8  |

|            |          |          |      |            |          |           |           |              |
|------------|----------|----------|------|------------|----------|-----------|-----------|--------------|
| cg08468913 | 1.87E-09 | 1.63E-10 | 6.75 | 13.0003219 | 1.05E-01 | 122632352 | 122632475 | NC_000003.11 |
| cg13798842 | 1.87E-09 | 1.63E-10 | 6.75 | 13.0001929 | 6.83E-02 | 91450714  | 91450837  | NC_000015.9  |
| cg10243196 | 1.87E-09 | 1.63E-10 | 6.75 | 12.9999004 | 1.65E-01 | 23945996  | 23946119  | NC_000019.9  |
| cg08073312 | 1.87E-09 | 1.63E-10 | 6.75 | 12.9997432 | 1.59E-01 | 137483555 | 137483678 | NC_000003.11 |
| cg15911153 | 1.87E-09 | 1.63E-10 | 6.75 | 12.9989355 | 8.93E-02 | 138730783 | 138730906 | NC_000005.9  |
| cg02305723 | 1.87E-09 | 1.63E-10 | 6.75 | 12.9987675 | 1.25E-01 | 25093456  | 25093579  | NC_000015.9  |
| cg02920396 | 1.87E-09 | 1.63E-10 | 6.75 | 12.9978568 | 7.54E-02 | 68782211  | 68782334  | NC_000011.9  |
| cg16772031 | 1.88E-09 | 1.64E-10 | 6.75 | 12.9960403 | 9.27E-02 | 132600233 | 132600356 | NC_000010.10 |
| cg14700304 | 1.88E-09 | 1.64E-10 | 6.75 | 12.9959913 | 2.29E-01 | 105760890 | 105761013 | NC_000002.11 |
| cg15117739 | 1.88E-09 | 1.64E-10 | 6.75 | 12.995898  | 1.17E-01 | 46698881  | 46699004  | NC_000017.10 |
| cg20399871 | 1.88E-09 | 1.64E-10 | 6.75 | 12.9950997 | 1.38E-01 | 27204663  | 27204786  | NC_000007.13 |
| cg02380531 | 1.88E-09 | 1.64E-10 | 6.75 | 12.9949171 | 1.56E-01 | 99279097  | 99279220  | NC_000006.11 |
| cg05268122 | 1.88E-09 | 1.64E-10 | 6.75 | 12.9941701 | 9.03E-02 | 2288808   | 2288931   | NC_000016.9  |
| cg09660365 | 1.89E-09 | 1.65E-10 | 6.75 | 12.9907555 | 1.21E-01 | 10858395  | 10858518  | NC_000003.11 |
| cg25734951 | 1.89E-09 | 1.65E-10 | 6.75 | 12.9904319 | 4.67E-02 | 49526053  | 49526176  | NC_000004.11 |
| cg03724896 | 1.89E-09 | 1.65E-10 | 6.75 | 12.9888751 | 1.20E-01 | 3854465   | 3854588   | NC_000005.9  |
| cg22212691 | 1.89E-09 | 1.65E-10 | 6.75 | 12.9887627 | 2.19E-01 | 220417868 | 220417991 | NC_000002.11 |
| cg04961920 | 1.89E-09 | 1.65E-10 | 6.75 | 12.9869559 | 7.49E-02 | 71482267  | 71482390  | NC_000010.10 |
| cg03399210 | 1.89E-09 | 1.65E-10 | 6.75 | 12.9867807 | 9.99E-02 | 37616064  | 37616187  | NC_000008.10 |
| cg26419265 | 1.89E-09 | 1.65E-10 | 6.75 | 12.9866984 | 1.85E-01 | 151303982 | 151304105 | NC_000005.9  |
| cg11141380 | 1.89E-09 | 1.66E-10 | 6.75 | 12.9853304 | 1.88E-01 | 122852417 | 122852540 | NC_000011.9  |
| cg11385933 | 1.90E-09 | 1.66E-10 | 6.75 | 12.9848817 | 9.70E-02 | 45431839  | 45431962  | NC_000007.13 |
| cg20814312 | 1.90E-09 | 1.66E-10 | 6.75 | 12.9846874 | 1.30E-01 | 133339746 | 133339869 | NC_000002.11 |
| cg12328333 | 1.90E-09 | 1.66E-10 | 6.75 | 12.9846343 | 1.96E-01 | 36705041  | 36705164  | NC_000013.10 |
| cg27021368 | 1.90E-09 | 1.66E-10 | 6.75 | 12.9842219 | 9.48E-02 | 155639080 | 155639203 | NC_000006.11 |

|            |          |          |      |            |          |           |           |              |
|------------|----------|----------|------|------------|----------|-----------|-----------|--------------|
| cg20194811 | 1.90E-09 | 1.66E-10 | 6.75 | 12.9827586 | 1.39E-01 | 112720491 | 112720614 | NC_000013.10 |
| cg20581674 | 1.90E-09 | 1.66E-10 | 6.75 | 12.9824489 | 9.22E-02 | 24887420  | 24887543  | NC_000003.11 |
| cg14346872 | 1.90E-09 | 1.66E-10 | 6.75 | 12.9813477 | 3.26E-02 | 31500033  | 31500156  | NC_000014.8  |
| cg15594967 | 1.90E-09 | 1.66E-10 | 6.75 | 12.9810369 | 1.28E-01 | 55444079  | 55444202  | NC_000006.11 |
| cg01579950 | 1.90E-09 | 1.66E-10 | 6.75 | 12.9809425 | 1.94E-01 | 64481018  | 64481141  | NC_000011.9  |
| cg24073994 | 1.90E-09 | 1.66E-10 | 6.75 | 12.9808572 | 6.28E-02 | 38511770  | 38511893  | NC_000017.10 |
| cg00232735 | 1.90E-09 | 1.66E-10 | 6.75 | 12.9799139 | 2.04E-01 | 132934139 | 132934262 | NC_000011.9  |
| cg19179801 | 1.90E-09 | 1.66E-10 | 6.75 | 12.9796586 | 1.55E-01 | 37381836  | 37381959  | NC_000017.10 |
| cg22963915 | 1.90E-09 | 1.67E-10 | 6.75 | 12.9794078 | 1.38E-01 | 3785855   | 3785978   | NC_000019.9  |
| cg27010214 | 1.91E-09 | 1.67E-10 | 6.75 | 12.9792155 | 9.04E-02 | 74826663  | 74826786  | NC_000014.8  |
| cg05513806 | 1.91E-09 | 1.67E-10 | 6.75 | 12.9774423 | 1.71E-01 | 181438216 | 181438339 | NC_000003.11 |
| cg12697796 | 1.91E-09 | 1.67E-10 | 6.75 | 12.977217  | 1.18E-01 | 49954016  | 49954139  | NC_000010.10 |
| cg11076814 | 1.91E-09 | 1.67E-10 | 6.75 | 12.9756473 | 1.27E-01 | 11225303  | 11225426  | NC_000004.11 |
| cg00571870 | 1.91E-09 | 1.67E-10 | 6.75 | 12.9747872 | 8.40E-02 | 109349597 | 109349720 | NC_000006.11 |
| cg05985317 | 1.91E-09 | 1.67E-10 | 6.75 | 12.9745791 | 1.02E-01 | 32118208  | 32118331  | NC_000006.11 |
| cg09526758 | 1.92E-09 | 1.68E-10 | 6.75 | 12.9734768 | 1.54E-01 | 16758047  | 16758170  | NC_000012.11 |
| cg05856556 | 1.92E-09 | 1.68E-10 | 6.75 | 12.9723925 | 8.87E-02 | 150104705 | 150104828 | NC_000007.13 |
| cg09413529 | 1.92E-09 | 1.68E-10 | 6.75 | 12.9719396 | 1.39E-01 | 115112225 | 115112348 | NC_000012.11 |
| cg03268697 | 1.92E-09 | 1.68E-10 | 6.75 | 12.9690652 | 5.86E-02 | 75160330  | 75160453  | NC_000017.10 |
| cg01546568 | 1.93E-09 | 1.68E-10 | 6.75 | 12.968492  | 2.08E-01 | 79740322  | 79740445  | NC_000002.11 |
| cg02339891 | 1.93E-09 | 1.68E-10 | 6.75 | 12.9682434 | 1.46E-01 | 1704031   | 1704154   | NC_000007.13 |
| cg08797606 | 1.93E-09 | 1.69E-10 | 6.75 | 12.9673444 | 1.55E-01 | 87956769  | 87956892  | NC_000005.9  |
| cg22813366 | 1.93E-09 | 1.69E-10 | 6.75 | 12.9665288 | 1.23E-01 | 17440072  | 17440195  | NC_000019.9  |
| cg14649424 | 1.93E-09 | 1.69E-10 | 6.75 | 12.9661458 | 9.10E-02 | 98115754  | 98115877  | NC_000009.11 |
| cg15509361 | 1.93E-09 | 1.69E-10 | 6.75 | 12.9656664 | 1.28E-01 | 19183325  | 19183448  | NC_000007.13 |



|            |          |          |      |            |          |           |           |              |
|------------|----------|----------|------|------------|----------|-----------|-----------|--------------|
| cg14769991 | 1.93E-09 | 1.69E-10 | 6.75 | 12.9653056 | 8.36E-02 | 112688311 | 112688434 | NC_000006.11 |
| cg16259571 | 1.93E-09 | 1.69E-10 | 6.74 | 12.9643995 | 7.86E-02 | 220384841 | 220384964 | NC_000002.11 |
| cg09561029 | 1.94E-09 | 1.69E-10 | 6.74 | 12.9622485 | 4.56E-02 | 3273364   | 3273487   | NC_000006.11 |
| cg02252248 | 1.94E-09 | 1.70E-10 | 6.74 | 12.9617051 | 1.77E-01 | 47073164  | 47073287  | NC_000017.10 |
| cg06038944 | 1.94E-09 | 1.70E-10 | 6.74 | 12.9602433 | 8.84E-02 | 181010312 | 181010435 | NC_000002.11 |
| cg04723721 | 1.94E-09 | 1.70E-10 | 6.74 | 12.9594289 | 4.64E-02 | 139915388 | 139915511 | NC_000009.11 |
| cg13305657 | 1.94E-09 | 1.70E-10 | 6.74 | 12.959287  | 7.55E-02 | 25258181  | 25258304  | NC_000001.10 |
| cg07085827 | 1.94E-09 | 1.70E-10 | 6.74 | 12.9589907 | 1.99E-01 | 132121676 | 132121799 | NC_000002.11 |
| cg09497409 | 1.95E-09 | 1.70E-10 | 6.74 | 12.9566288 | 1.54E-01 | 8275083   | 8275206   | NC_000019.9  |
| cg23998650 | 1.95E-09 | 1.71E-10 | 6.74 | 12.9551661 | 1.38E-01 | 3787948   | 3788071   | NC_000005.9  |
| cg18557131 | 1.95E-09 | 1.71E-10 | 6.74 | 12.9544407 | 1.45E-01 | 100624207 | 100624330 | NC_000013.10 |
| cg01753198 | 1.95E-09 | 1.71E-10 | 6.74 | 12.9539343 | 1.20E-01 | 70560099  | 70560222  | NC_000016.9  |
| cg17374433 | 1.95E-09 | 1.71E-10 | 6.74 | 12.9538793 | 9.58E-02 | 119876327 | 119876450 | NC_000010.10 |
| cg09614300 | 1.96E-09 | 1.71E-10 | 6.74 | 12.9519851 | 1.54E-01 | 124894076 | 124894199 | NC_000010.10 |
| cg12338097 | 1.96E-09 | 1.71E-10 | 6.74 | 12.9518699 | 1.72E-01 | 22929407  | 22929530  | NC_000018.9  |
| cg18063312 | 1.96E-09 | 1.71E-10 | 6.74 | 12.9515708 | 1.61E-01 | 72740737  | 72740860  | NC_000005.9  |
| cg05470554 | 1.96E-09 | 1.72E-10 | 6.74 | 12.9499833 | 1.53E-01 | 120969079 | 120969202 | NC_000007.13 |
| cg01957629 | 1.96E-09 | 1.72E-10 | 6.74 | 12.9498617 | 1.10E-01 | 63613490  | 63613613  | NC_000011.9  |
| cg24987667 | 1.96E-09 | 1.72E-10 | 6.74 | 12.9488107 | 1.01E-01 | 8518709   | 8518832   | NC_000004.11 |
| cg04104489 | 1.96E-09 | 1.72E-10 | 6.74 | 12.9476884 | 8.00E-02 | 64063351  | 64063474  | NC_000001.10 |
| cg00018128 | 1.96E-09 | 1.72E-10 | 6.74 | 12.9474994 | 1.74E-01 | 162275746 | 162275869 | NC_000002.11 |
| cg26456021 | 1.97E-09 | 1.72E-10 | 6.74 | 12.9461838 | 2.46E-02 | 2580073   | 2580196   | NC_000016.9  |
| cg18180569 | 1.97E-09 | 1.72E-10 | 6.74 | 12.9452145 | 2.12E-01 | 44883362  | 44883485  | NC_000001.10 |
| cg12085812 | 1.97E-09 | 1.72E-10 | 6.74 | 12.9449157 | 2.48E-02 | 45768215  | 45768338  | NC_000001.10 |
| cg02367144 | 1.97E-09 | 1.73E-10 | 6.74 | 12.9440077 | 1.83E-01 | 237146137 | 237146260 | NC_000002.11 |

|            |          |          |      |            |          |           |           |              |
|------------|----------|----------|------|------------|----------|-----------|-----------|--------------|
| cg19078576 | 1.97E-09 | 1.73E-10 | 6.74 | 12.9439801 | 2.02E-01 | 17217877  | 17218000  | NC_000005.9  |
| cg23091758 | 1.97E-09 | 1.73E-10 | 6.74 | 12.9422689 | 1.68E-01 | 9025767   | 9025890   | NC_000011.9  |
| cg13778709 | 1.97E-09 | 1.73E-10 | 6.74 | 12.9416944 | 1.50E-01 | 57089961  | 57090084  | NC_000020.10 |
| cg05166490 | 1.98E-09 | 1.73E-10 | 6.74 | 12.9415311 | 1.88E-01 | 41754172  | 41754295  | NC_000008.10 |
| cg22374485 | 1.98E-09 | 1.73E-10 | 6.74 | 12.9411625 | 2.36E-01 | 21927425  | 21927548  | NC_000012.11 |
| cg21184415 | 1.98E-09 | 1.73E-10 | 6.74 | 12.9409531 | 9.49E-02 | 39996039  | 39996162  | NC_000020.10 |
| cg08522176 | 1.98E-09 | 1.74E-10 | 6.74 | 12.9390472 | 1.98E-01 | 124735398 | 124735521 | NC_000011.9  |
| cg17586860 | 1.98E-09 | 1.74E-10 | 6.74 | 12.938914  | 1.78E-01 | 23015906  | 23016029  | NC_000020.10 |
| cg18008880 | 1.98E-09 | 1.74E-10 | 6.74 | 12.9381783 | 4.80E-02 | 10132097  | 10132220  | NC_000018.9  |
| cg09414264 | 1.99E-09 | 1.74E-10 | 6.74 | 12.9353963 | 5.50E-02 | 3113709   | 3113832   | NC_000011.9  |
| cg05639246 | 1.99E-09 | 1.74E-10 | 6.74 | 12.9352063 | 2.28E-01 | 10393778  | 10393901  | NC_000006.11 |
| cg03692563 | 1.99E-09 | 1.74E-10 | 6.74 | 12.9342787 | 1.36E-01 | 31846414  | 31846537  | NC_000011.9  |
| cg08894131 | 1.99E-09 | 1.74E-10 | 6.74 | 12.9340137 | 6.08E-02 | 147231061 | 147231184 | NC_000001.10 |
| cg02401399 | 1.99E-09 | 1.75E-10 | 6.74 | 12.9329545 | 2.14E-01 | 36523584  | 36523707  | NC_000019.9  |
| cg17058616 | 1.99E-09 | 1.75E-10 | 6.74 | 12.9316227 | 1.40E-01 | 73102145  | 73102268  | NC_000017.10 |
| cg14212412 | 2.00E-09 | 1.75E-10 | 6.74 | 12.9301319 | 5.38E-02 | 105918992 | 105919115 | NC_000006.11 |
| cg06033268 | 2.00E-09 | 1.75E-10 | 6.74 | 12.929359  | 7.57E-02 | 174125205 | 174125328 | NC_000001.10 |
| cg12883523 | 2.00E-09 | 1.76E-10 | 6.74 | 12.9278485 | 1.37E-01 | 55372392  | 55372515  | NC_000008.10 |
| cg25328184 | 2.00E-09 | 1.76E-10 | 6.74 | 12.9275904 | 1.60E-01 | 110406414 | 110406537 | NC_000005.9  |
| cg24938830 | 2.01E-09 | 1.76E-10 | 6.74 | 12.9254242 | 2.09E-01 | 210636539 | 210636662 | NC_000002.11 |
| cg04108438 | 2.01E-09 | 1.76E-10 | 6.74 | 12.9246215 | 8.83E-02 | 64427959  | 64428082  | NC_000003.11 |
| cg04513214 | 2.01E-09 | 1.77E-10 | 6.74 | 12.922367  | 1.33E-01 | 17057446  | 17057569  | NC_000005.9  |
| cg07160420 | 2.01E-09 | 1.77E-10 | 6.74 | 12.9217243 | 6.15E-02 | 48863591  | 48863714  | NC_000017.10 |
| cg04001014 | 2.01E-09 | 1.77E-10 | 6.74 | 12.9216556 | 2.31E-01 | 238318    | 238441    | NC_000003.11 |
| cg05997350 | 2.01E-09 | 1.77E-10 | 6.74 | 12.9213667 | 1.59E-01 | 50817104  | 50817227  | NC_000010.10 |

|            |          |          |      |            |          |           |           |              |
|------------|----------|----------|------|------------|----------|-----------|-----------|--------------|
| cg22794704 | 2.02E-09 | 1.77E-10 | 6.74 | 12.9202861 | 1.75E-01 | 162273437 | 162273560 | NC_000002.11 |
| cg24648061 | 2.02E-09 | 1.77E-10 | 6.74 | 12.9195943 | 4.10E-02 | 107114615 | 107114738 | NC_000007.13 |
| cg11787346 | 2.02E-09 | 1.77E-10 | 6.74 | 12.9193153 | 2.08E-01 | 55367611  | 55367734  | NC_000008.10 |
| cg19860245 | 2.02E-09 | 1.77E-10 | 6.74 | 12.9191523 | 8.49E-02 | 74300557  | 74300680  | NC_000014.8  |
| cg00592781 | 2.02E-09 | 1.77E-10 | 6.74 | 12.9189049 | 1.61E-01 | 66122874  | 66122997  | NC_000012.11 |
| cg06733311 | 2.02E-09 | 1.77E-10 | 6.74 | 12.9176711 | 4.97E-02 | 33381680  | 33381803  | NC_000006.11 |
| cg13229857 | 2.03E-09 | 1.78E-10 | 6.74 | 12.9149524 | 1.25E-01 | 200006247 | 200006370 | NC_000001.10 |
| cg15727287 | 2.03E-09 | 1.78E-10 | 6.74 | 12.9143819 | 1.63E-01 | 176046980 | 176047103 | NC_000005.9  |
| cg14625175 | 2.03E-09 | 1.78E-10 | 6.74 | 12.9123453 | 2.41E-01 | 27214056  | 27214179  | NC_000007.13 |
| cg03733219 | 2.03E-09 | 1.78E-10 | 6.74 | 12.9120803 | 1.62E-01 | 38886319  | 38886442  | NC_000019.9  |
| cg15795787 | 2.04E-09 | 1.79E-10 | 6.73 | 12.9098771 | 1.45E-01 | 72470415  | 72470538  | NC_000008.10 |
| cg08050967 | 2.04E-09 | 1.79E-10 | 6.73 | 12.9098283 | 4.83E-02 | 3464931   | 3465054   | NC_000002.11 |
| cg09745791 | 2.04E-09 | 1.79E-10 | 6.73 | 12.9093432 | 9.84E-02 | 75252619  | 75252742  | NC_000016.9  |
| cg02727566 | 2.04E-09 | 1.79E-10 | 6.73 | 12.9091474 | 4.06E-02 | 40718426  | 40718549  | NC_000019.9  |
| cg10902717 | 2.04E-09 | 1.79E-10 | 6.73 | 12.9079097 | 1.63E-01 | 178368620 | 178368743 | NC_000005.9  |
| cg00779167 | 2.04E-09 | 1.79E-10 | 6.73 | 12.9076685 | 7.90E-02 | 109753001 | 109753124 | NC_000001.10 |
| cg10929873 | 2.04E-09 | 1.79E-10 | 6.73 | 12.9070224 | 5.46E-02 | 124972783 | 124972906 | NC_000012.11 |
| cg14810013 | 2.04E-09 | 1.80E-10 | 6.73 | 12.9054323 | 1.09E-01 | 66535412  | 66535535  | NC_000004.11 |
| cg14472366 | 2.04E-09 | 1.80E-10 | 6.73 | 12.9052983 | 1.24E-01 | 20875915  | 20876038  | NC_000013.10 |
| cg04730685 | 2.05E-09 | 1.80E-10 | 6.73 | 12.9047892 | 1.34E-01 | 95360278  | 95360401  | NC_000013.10 |
| cg04779631 | 2.05E-09 | 1.80E-10 | 6.73 | 12.9038678 | 2.36E-01 | 84115895  | 84116018  | NC_000015.9  |
| cg25673112 | 2.05E-09 | 1.80E-10 | 6.73 | 12.9029411 | 5.34E-02 | 126824398 | 126824521 | NC_000010.10 |
| cg02996801 | 2.05E-09 | 1.80E-10 | 6.73 | 12.9027401 | 1.65E-01 | 113441944 | 113442067 | NC_000004.11 |
| cg21296602 | 2.05E-09 | 1.80E-10 | 6.73 | 12.9021254 | 1.70E-01 | 93476060  | 93476183  | NC_000011.9  |
| cg07039180 | 2.05E-09 | 1.80E-10 | 6.73 | 12.9008806 | 1.98E-01 | 49814435  | 49814558  | NC_000007.13 |

|            |          |          |      |            |          |           |           |              |
|------------|----------|----------|------|------------|----------|-----------|-----------|--------------|
| cg16802159 | 2.06E-09 | 1.81E-10 | 6.73 | 12.8993633 | 1.48E-01 | 86457719  | 86457842  | NC_000016.9  |
| cg02014853 | 2.06E-09 | 1.81E-10 | 6.73 | 12.8992755 | 1.05E-01 | 29595335  | 29595458  | NC_000006.11 |
| cg11963233 | 2.06E-09 | 1.81E-10 | 6.73 | 12.8989421 | 1.38E-01 | 25754301  | 25754424  | NC_000018.9  |
| cg00656478 | 2.06E-09 | 1.81E-10 | 6.73 | 12.8982165 | 4.47E-02 | 132480963 | 132481086 | NC_000009.11 |
| cg05133323 | 2.06E-09 | 1.81E-10 | 6.73 | 12.8964017 | 9.37E-02 | 116682493 | 116682616 | NC_000012.11 |
| cg07560587 | 2.06E-09 | 1.81E-10 | 6.73 | 12.8952461 | 1.09E-01 | 88016574  | 88016697  | NC_000016.9  |
| cg09182138 | 2.06E-09 | 1.81E-10 | 6.73 | 12.8951925 | 1.16E-01 | 156612436 | 156612559 | NC_000001.10 |
| cg04264908 | 2.07E-09 | 1.82E-10 | 6.73 | 12.8933916 | 2.16E-01 | 35303330  | 35303453  | NC_000017.10 |
| cg23766724 | 2.07E-09 | 1.82E-10 | 6.73 | 12.8933842 | 1.09E-01 | 27172631  | 27172754  | NC_000007.13 |
| cg05670472 | 2.07E-09 | 1.82E-10 | 6.73 | 12.8933639 | 1.36E-01 | 140805732 | 140805855 | NC_000005.9  |
| cg13564533 | 2.07E-09 | 1.82E-10 | 6.73 | 12.8923252 | 1.68E-01 | 55379081  | 55379204  | NC_000008.10 |
| cg22536554 | 2.07E-09 | 1.82E-10 | 6.73 | 12.8923178 | 2.26E-01 | 94834201  | 94834324  | NC_000010.10 |
| cg16701893 | 2.07E-09 | 1.82E-10 | 6.73 | 12.8907346 | 5.62E-02 | 164670259 | 164670382 | NC_000001.10 |
| cg22340508 | 2.08E-09 | 1.83E-10 | 6.73 | 12.8866972 | 1.41E-01 | 22891978  | 22892101  | NC_000019.9  |
| cg06327407 | 2.08E-09 | 1.83E-10 | 6.73 | 12.88613   | 1.81E-01 | 2781399   | 2781522   | NC_000020.10 |
| cg14784009 | 2.09E-09 | 1.84E-10 | 6.73 | 12.8840845 | 6.65E-02 | 94964696  | 94964819  | NC_000012.11 |
| cg13986215 | 2.09E-09 | 1.84E-10 | 6.73 | 12.8835145 | 4.94E-02 | 129828770 | 129828893 | NC_000010.10 |
| cg15161225 | 2.09E-09 | 1.84E-10 | 6.73 | 12.8821736 | 6.68E-02 | 36013678  | 36013801  | NC_000022.10 |
| cg06773295 | 2.09E-09 | 1.84E-10 | 6.73 | 12.8814433 | 3.93E-02 | 3028577   | 3028700   | NC_000001.10 |
| cg12110677 | 2.09E-09 | 1.84E-10 | 6.73 | 12.8809525 | 1.34E-01 | 2781483   | 2781606   | NC_000020.10 |
| cg03349184 | 2.09E-09 | 1.84E-10 | 6.73 | 12.8800538 | 2.33E-01 | 28740982  | 28741105  | NC_000006.11 |
| cg08924917 | 2.09E-09 | 1.84E-10 | 6.73 | 12.8795906 | 5.86E-02 | 17054295  | 17054418  | NC_000003.11 |
| cg27311970 | 2.10E-09 | 1.84E-10 | 6.73 | 12.8789121 | 6.79E-02 | 54195830  | 54195953  | NC_000001.10 |
| cg07664005 | 2.10E-09 | 1.85E-10 | 6.73 | 12.8769511 | 1.20E-01 | 172671068 | 172671191 | NC_000005.9  |
| cg16834320 | 2.10E-09 | 1.85E-10 | 6.73 | 12.8755393 | 8.25E-02 | 195167302 | 195167425 | NC_000003.11 |

|            |          |          |      |            |          |           |           |              |
|------------|----------|----------|------|------------|----------|-----------|-----------|--------------|
| cg09034646 | 2.11E-09 | 1.85E-10 | 6.73 | 12.8746183 | 1.15E-01 | 1309654   | 1309777   | NC_000008.10 |
| cg18133300 | 2.11E-09 | 1.85E-10 | 6.73 | 12.8745977 | 2.77E-02 | 62376474  | 62376597  | NC_000011.9  |
| cg08130144 | 2.11E-09 | 1.85E-10 | 6.73 | 12.8741537 | 1.81E-01 | 41883493  | 41883616  | NC_000004.11 |
| cg14558568 | 2.11E-09 | 1.85E-10 | 6.73 | 12.8740445 | 1.17E-01 | 41621052  | 41621175  | NC_000006.11 |
| cg07008600 | 2.11E-09 | 1.85E-10 | 6.73 | 12.873743  | 1.30E-01 | 33261204  | 33261327  | NC_000003.11 |
| cg19556854 | 2.11E-09 | 1.86E-10 | 6.73 | 12.872962  | 1.04E-01 | 32945549  | 32945672  | NC_000006.11 |
| cg15854847 | 2.11E-09 | 1.86E-10 | 6.73 | 12.8728412 | 1.42E-01 | 23563970  | 23564093  | NC_000008.10 |
| cg24886267 | 2.11E-09 | 1.86E-10 | 6.73 | 12.8725805 | 1.66E-01 | 167956306 | 167956429 | NC_000005.9  |
| cg07518714 | 2.11E-09 | 1.86E-10 | 6.73 | 12.8725077 | 1.09E-01 | 32064945  | 32065068  | NC_000006.11 |
| cg21838979 | 2.11E-09 | 1.86E-10 | 6.73 | 12.8712726 | 1.20E-01 | 106681945 | 106682068 | NC_000002.11 |
| cg22408430 | 2.11E-09 | 1.86E-10 | 6.73 | 12.8709885 | 1.11E-01 | 63883266  | 63883389  | NC_000011.9  |
| cg11944480 | 2.11E-09 | 1.86E-10 | 6.73 | 12.8709677 | 1.11E-01 | 23452035  | 23452158  | NC_000007.13 |
| cg15996043 | 2.12E-09 | 1.86E-10 | 6.73 | 12.8691306 | 2.01E-01 | 70346221  | 70346344  | NC_000014.8  |
| cg20101398 | 2.12E-09 | 1.86E-10 | 6.73 | 12.868562  | 4.96E-02 | 114384045 | 114384168 | NC_000006.11 |
| cg15812020 | 2.12E-09 | 1.86E-10 | 6.73 | 12.8685174 | 1.13E-01 | 25506235  | 25506358  | NC_000013.10 |
| cg26499363 | 2.12E-09 | 1.87E-10 | 6.73 | 12.8682251 | 1.56E-01 | 46796119  | 46796242  | NC_000017.10 |
| cg08047376 | 2.12E-09 | 1.87E-10 | 6.73 | 12.8681088 | 1.83E-01 | 79739940  | 79740063  | NC_000002.11 |
| cg04716530 | 2.12E-09 | 1.87E-10 | 6.73 | 12.8680231 | 1.01E-01 | 30485684  | 30485807  | NC_000016.9  |
| cg18892424 | 2.12E-09 | 1.87E-10 | 6.73 | 12.8675218 | 1.13E-01 | 131034796 | 131034919 | NC_000010.10 |
| cg04751631 | 2.12E-09 | 1.87E-10 | 6.73 | 12.8675097 | 1.52E-01 | 149917170 | 149917293 | NC_000007.13 |
| cg17172761 | 2.12E-09 | 1.87E-10 | 6.73 | 12.8660128 | 9.63E-02 | 62120439  | 62120562  | NC_000017.10 |
| cg12270738 | 2.12E-09 | 1.87E-10 | 6.73 | 12.8650857 | 1.54E-02 | 19282546  | 19282669  | NC_000001.10 |
| cg16521213 | 2.12E-09 | 1.87E-10 | 6.73 | 12.8647873 | 5.36E-02 | 277384    | 277507    | NC_000002.11 |
| cg04674956 | 2.12E-09 | 1.87E-10 | 6.73 | 12.8646612 | 1.44E-01 | 65499048  | 65499171  | NC_000008.10 |
| cg26181583 | 2.13E-09 | 1.88E-10 | 6.73 | 12.8618847 | 7.87E-02 | 38907470  | 38907593  | NC_000017.10 |

|            |          |          |      |            |          |           |           |              |
|------------|----------|----------|------|------------|----------|-----------|-----------|--------------|
| cg18774692 | 2.13E-09 | 1.88E-10 | 6.73 | 12.8616734 | 9.39E-02 | 89033280  | 89033403  | NC_000012.11 |
| cg15075709 | 2.14E-09 | 1.89E-10 | 6.73 | 12.8577715 | 1.15E-01 | 1217335   | 1217458   | NC_000011.9  |
| cg18649503 | 2.14E-09 | 1.89E-10 | 6.73 | 12.8573995 | 8.61E-02 | 28187510  | 28187633  | NC_000006.11 |
| cg12243597 | 2.14E-09 | 1.89E-10 | 6.73 | 12.8558383 | 2.34E-01 | 62585877  | 62586000  | NC_000012.11 |
| cg04329125 | 2.15E-09 | 1.89E-10 | 6.72 | 12.854382  | 1.21E-01 | 105945022 | 105945145 | NC_000014.8  |
| cg16559361 | 2.15E-09 | 1.89E-10 | 6.72 | 12.8541355 | 1.12E-01 | 88543440  | 88543563  | NC_000016.9  |
| cg01450705 | 2.15E-09 | 1.89E-10 | 6.72 | 12.8540461 | 1.40E-01 | 175300027 | 175300150 | NC_000005.9  |
| cg18854392 | 2.15E-09 | 1.89E-10 | 6.72 | 12.8535837 | 1.49E-01 | 167191873 | 167191996 | NC_000003.11 |
| cg15946312 | 2.15E-09 | 1.89E-10 | 6.72 | 12.8535714 | 5.90E-02 | 180646880 | 180647003 | NC_000005.9  |
| cg17418784 | 2.15E-09 | 1.89E-10 | 6.72 | 12.8535136 | 8.30E-02 | 4004409   | 4004532   | NC_000001.10 |
| cg12848639 | 2.15E-09 | 1.90E-10 | 6.72 | 12.8523305 | 6.22E-02 | 1438375   | 1438498   | NC_000005.9  |
| cg14395791 | 2.15E-09 | 1.90E-10 | 6.72 | 12.8522469 | 3.81E-02 | 140166606 | 140166729 | NC_000009.11 |
| cg10319857 | 2.15E-09 | 1.90E-10 | 6.72 | 12.8515607 | 1.30E-01 | 69653345  | 69653468  | NC_000016.9  |
| cg05171693 | 2.15E-09 | 1.90E-10 | 6.72 | 12.8501687 | 6.92E-02 | 1117775   | 1117898   | NC_000007.13 |
| cg05208249 | 2.15E-09 | 1.90E-10 | 6.72 | 12.8497166 | 9.71E-02 | 81135497  | 81135620  | NC_000015.9  |
| cg25271672 | 2.16E-09 | 1.90E-10 | 6.72 | 12.8495518 | 1.03E-01 | 156462624 | 156462747 | NC_000001.10 |
| cg11698180 | 2.16E-09 | 1.90E-10 | 6.72 | 12.8483322 | 5.79E-02 | 46019376  | 46019499  | NC_000021.8  |
| cg03369269 | 2.16E-09 | 1.91E-10 | 6.72 | 12.8473151 | 1.65E-01 | 25745946  | 25746069  | NC_000013.10 |
| cg22244305 | 2.16E-09 | 1.91E-10 | 6.72 | 12.8470867 | 3.58E-02 | 33892662  | 33892785  | NC_000019.9  |
| cg23726408 | 2.16E-09 | 1.91E-10 | 6.72 | 12.8467113 | 1.19E-01 | 123498880 | 123499003 | NC_000003.11 |
| cg01727686 | 2.16E-09 | 1.91E-10 | 6.72 | 12.8462338 | 9.54E-02 | 63997306  | 63997429  | NC_000011.9  |
| cg05688651 | 2.16E-09 | 1.91E-10 | 6.72 | 12.8447867 | 1.85E-01 | 75612141  | 75612264  | NC_000018.9  |
| cg22584618 | 2.16E-09 | 1.91E-10 | 6.72 | 12.8447852 | 1.27E-01 | 35298212  | 35298335  | NC_000007.13 |
| cg07078225 | 2.17E-09 | 1.91E-10 | 6.72 | 12.844327  | 1.69E-01 | 52652377  | 52652500  | NC_000012.11 |
| cg27352992 | 2.17E-09 | 1.92E-10 | 6.72 | 12.841708  | 1.70E-01 | 41087092  | 41087215  | NC_000012.11 |

|            |          |          |      |            |          |           |           |              |
|------------|----------|----------|------|------------|----------|-----------|-----------|--------------|
| cg03506028 | 2.18E-09 | 1.92E-10 | 6.72 | 12.8397763 | 1.32E-01 | 35494689  | 35494812  | NC_000007.13 |
| cg10206882 | 2.18E-09 | 1.92E-10 | 6.72 | 12.839515  | 9.85E-02 | 25411743  | 25411866  | NC_000014.8  |
| cg03479211 | 2.18E-09 | 1.92E-10 | 6.72 | 12.8394745 | 1.20E-01 | 8117508   | 8117631   | NC_000010.10 |
| cg14385245 | 2.18E-09 | 1.92E-10 | 6.72 | 12.8388867 | 1.28E-01 | 83953765  | 83953888  | NC_000015.9  |
| cg07900958 | 2.18E-09 | 1.92E-10 | 6.72 | 12.8384847 | 1.15E-01 | 49139512  | 49139635  | NC_000022.10 |
| cg04685747 | 2.18E-09 | 1.92E-10 | 6.72 | 12.8375348 | 9.19E-02 | 8458793   | 8458916   | NC_000019.9  |
| cg17862113 | 2.18E-09 | 1.93E-10 | 6.72 | 12.8371364 | 1.36E-01 | 17743282  | 17743405  | NC_000011.9  |
| cg21540621 | 2.18E-09 | 1.93E-10 | 6.72 | 12.8366024 | 1.69E-01 | 115531033 | 115531156 | NC_000011.9  |
| cg00183415 | 2.18E-09 | 1.93E-10 | 6.72 | 12.8363997 | 4.64E-02 | 71008388  | 71008511  | NC_000010.10 |
| cg13689003 | 2.18E-09 | 1.93E-10 | 6.72 | 12.8356285 | 2.11E-01 | 156406102 | 156406225 | NC_000001.10 |
| cg15123692 | 2.18E-09 | 1.93E-10 | 6.72 | 12.8354088 | 1.77E-01 | 23886357  | 23886480  | NC_000002.11 |
| cg12170868 | 2.19E-09 | 1.93E-10 | 6.72 | 12.8336116 | 4.69E-02 | 33275470  | 33275593  | NC_000006.11 |
| cg12857541 | 2.20E-09 | 1.94E-10 | 6.72 | 12.8292293 | 1.19E-01 | 24583375  | 24583498  | NC_000004.11 |
| cg19706446 | 2.20E-09 | 1.94E-10 | 6.72 | 12.8289351 | 1.00E-01 | 3440313   | 3440436   | NC_000010.10 |
| cg04492459 | 2.20E-09 | 1.94E-10 | 6.72 | 12.8286899 | 6.76E-02 | 4520501   | 4520624   | NC_000017.10 |
| cg20467114 | 2.20E-09 | 1.94E-10 | 6.72 | 12.8279106 | 4.22E-02 | 3365744   | 3365867   | NC_000012.11 |
| cg23082773 | 2.20E-09 | 1.95E-10 | 6.72 | 12.8260692 | 4.53E-02 | 77445972  | 77446095  | NC_000011.9  |
| cg26405376 | 2.20E-09 | 1.95E-10 | 6.72 | 12.8257226 | 1.43E-01 | 175961105 | 175961228 | NC_000005.9  |
| cg06982190 | 2.21E-09 | 1.95E-10 | 6.72 | 12.8253314 | 1.43E-01 | 27199815  | 27199938  | NC_000007.13 |
| cg25234732 | 2.21E-09 | 1.95E-10 | 6.72 | 12.824327  | 1.48E-01 | 56183885  | 56184008  | NC_000007.13 |
| cg24924958 | 2.21E-09 | 1.95E-10 | 6.72 | 12.8238395 | 1.63E-01 | 142409993 | 142410116 | NC_000006.11 |
| cg22115168 | 2.21E-09 | 1.95E-10 | 6.72 | 12.8226611 | 6.95E-02 | 114567943 | 114568066 | NC_000006.11 |
| cg11108269 | 2.22E-09 | 1.96E-10 | 6.72 | 12.8204959 | 1.90E-01 | 36989404  | 36989527  | NC_000014.8  |
| cg08201421 | 2.22E-09 | 1.96E-10 | 6.72 | 12.8203336 | 5.02E-02 | 44456151  | 44456274  | NC_000020.10 |
| cg11442052 | 2.22E-09 | 1.96E-10 | 6.72 | 12.819712  | 1.30E-01 | 35723321  | 35723444  | NC_000003.11 |

|            |          |          |      |            |          |           |           |              |
|------------|----------|----------|------|------------|----------|-----------|-----------|--------------|
| cg23475625 | 2.22E-09 | 1.96E-10 | 6.72 | 12.8196472 | 1.73E-01 | 155259680 | 155259803 | NC_000007.13 |
| cg10111335 | 2.22E-09 | 1.96E-10 | 6.72 | 12.8177766 | 1.38E-01 | 105935915 | 105936038 | NC_000006.11 |
| cg19555331 | 2.22E-09 | 1.96E-10 | 6.72 | 12.8170958 | 1.81E-01 | 147561900 | 147562023 | NC_000004.11 |
| cg17361203 | 2.22E-09 | 1.97E-10 | 6.72 | 12.8168441 | 1.37E-01 | 117666889 | 117667012 | NC_000011.9  |
| cg00366531 | 2.23E-09 | 1.97E-10 | 6.72 | 12.8151039 | 9.75E-02 | 130970940 | 130971063 | NC_000002.11 |
| cg25957599 | 2.23E-09 | 1.97E-10 | 6.72 | 12.8150096 | 1.15E-01 | 166635593 | 166635716 | NC_000006.11 |
| cg07450037 | 2.23E-09 | 1.97E-10 | 6.72 | 12.8131086 | 1.75E-01 | 27135147  | 27135270  | NC_000007.13 |
| cg00073543 | 2.23E-09 | 1.97E-10 | 6.72 | 12.8126765 | 1.26E-01 | 38941882  | 38942005  | NC_000001.10 |
| cg00053086 | 2.23E-09 | 1.98E-10 | 6.72 | 12.8118446 | 3.36E-02 | 233119296 | 233119419 | NC_000001.10 |
| cg08569180 | 2.23E-09 | 1.98E-10 | 6.72 | 12.8117307 | 1.46E-01 | 2773427   | 2773550   | NC_000002.11 |
| cg04217082 | 2.23E-09 | 1.98E-10 | 6.72 | 12.8117188 | 1.37E-01 | 37889752  | 37889875  | NC_000008.10 |
| cg22204479 | 2.24E-09 | 1.98E-10 | 6.72 | 12.8109098 | 1.58E-01 | 21378227  | 21378350  | NC_000020.10 |
| cg18134312 | 2.24E-09 | 1.98E-10 | 6.72 | 12.8107676 | 1.68E-01 | 62996183  | 62996306  | NC_000006.11 |
| cg14909325 | 2.24E-09 | 1.98E-10 | 6.72 | 12.8084249 | 9.07E-02 | 1674770   | 1674893   | NC_000011.9  |
| cg19035186 | 2.25E-09 | 1.99E-10 | 6.72 | 12.8061916 | 8.29E-02 | 239948889 | 239949012 | NC_000002.11 |
| cg19178853 | 2.25E-09 | 1.99E-10 | 6.72 | 12.8060877 | 2.13E-01 | 174450408 | 174450531 | NC_000004.11 |
| cg03035213 | 2.25E-09 | 1.99E-10 | 6.72 | 12.8057135 | 2.51E-01 | 88497077  | 88497200  | NC_000016.9  |
| cg20695936 | 2.25E-09 | 1.99E-10 | 6.72 | 12.8047783 | 1.24E-01 | 25257624  | 25257747  | NC_000001.10 |
| cg17208467 | 2.25E-09 | 1.99E-10 | 6.72 | 12.8042956 | 7.28E-02 | 23025348  | 23025471  | NC_000008.10 |
| cg13644811 | 2.25E-09 | 1.99E-10 | 6.72 | 12.8037521 | 9.37E-02 | 90771714  | 90771837  | NC_000015.9  |
| cg01686933 | 2.25E-09 | 1.99E-10 | 6.72 | 12.8035874 | 8.81E-02 | 119596104 | 119596227 | NC_000011.9  |
| cg13101887 | 2.26E-09 | 2.00E-10 | 6.71 | 12.8007531 | 9.21E-02 | 29890938  | 29891061  | NC_000010.10 |
| cg23308184 | 2.26E-09 | 2.00E-10 | 6.71 | 12.80074   | 5.97E-02 | 132977221 | 132977344 | NC_000010.10 |
| cg18470427 | 2.26E-09 | 2.00E-10 | 6.71 | 12.8004787 | 1.41E-01 | 33842301  | 33842424  | NC_000017.10 |
| cg19003884 | 2.26E-09 | 2.00E-10 | 6.71 | 12.7998387 | 1.38E-01 | 100060945 | 100061068 | NC_000006.11 |



|            |          |          |      |            |          |           |           |              |
|------------|----------|----------|------|------------|----------|-----------|-----------|--------------|
| cg05552184 | 2.26E-09 | 2.01E-10 | 6.71 | 12.7969934 | 8.87E-02 | 71548685  | 71548808  | NC_000017.10 |
| cg14670629 | 2.26E-09 | 2.01E-10 | 6.71 | 12.7969104 | 7.28E-02 | 29769556  | 29769679  | NC_000010.10 |
| cg01464093 | 2.27E-09 | 2.01E-10 | 6.71 | 12.7949973 | 9.79E-02 | 125242501 | 125242624 | NC_000003.11 |
| cg00054771 | 2.27E-09 | 2.01E-10 | 6.71 | 12.7942334 | 1.60E-01 | 175202397 | 175202520 | NC_000002.11 |
| cg23295454 | 2.27E-09 | 2.01E-10 | 6.71 | 12.7930366 | 1.54E-01 | 100437951 | 100438074 | NC_000014.8  |
| cg10435816 | 2.27E-09 | 2.02E-10 | 6.71 | 12.7924455 | 1.75E-01 | 140797280 | 140797403 | NC_000005.9  |
| cg26864230 | 2.28E-09 | 2.02E-10 | 6.71 | 12.7921054 | 1.61E-01 | 47911508  | 47911631  | NC_000001.10 |
| cg13421062 | 2.28E-09 | 2.02E-10 | 6.71 | 12.7918343 | 1.72E-01 | 35301069  | 35301192  | NC_000007.13 |
| cg22315453 | 2.28E-09 | 2.02E-10 | 6.71 | 12.7916853 | 1.02E-01 | 10402330  | 10402453  | NC_000006.11 |
| cg17969084 | 2.28E-09 | 2.02E-10 | 6.71 | 12.7912015 | 1.94E-01 | 27191097  | 27191220  | NC_000007.13 |
| cg04523661 | 2.28E-09 | 2.02E-10 | 6.71 | 12.7906698 | 9.21E-02 | 1302808   | 1302931   | NC_000019.9  |
| cg21865844 | 2.28E-09 | 2.02E-10 | 6.71 | 12.7892663 | 6.89E-02 | 69661197  | 69661320  | NC_000011.9  |
| cg02881274 | 2.28E-09 | 2.02E-10 | 6.71 | 12.7888764 | 1.36E-01 | 49935948  | 49936071  | NC_000019.9  |
| cg05335975 | 2.28E-09 | 2.02E-10 | 6.71 | 12.7882195 | 9.72E-02 | 24045702  | 24045825  | NC_000014.8  |
| cg05396425 | 2.29E-09 | 2.03E-10 | 6.71 | 12.7857219 | 6.47E-02 | 4587038   | 4587161   | NC_000016.9  |
| cg05774290 | 2.29E-09 | 2.03E-10 | 6.71 | 12.7848909 | 8.67E-02 | 31811203  | 31811326  | NC_000012.11 |
| cg07488338 | 2.29E-09 | 2.03E-10 | 6.71 | 12.7831715 | 1.05E-01 | 89663024  | 89663147  | NC_000005.9  |
| cg04203587 | 2.30E-09 | 2.04E-10 | 6.71 | 12.7825036 | 1.23E-01 | 75895612  | 75895735  | NC_000004.11 |
| cg16122424 | 2.30E-09 | 2.04E-10 | 6.71 | 12.7824789 | 1.05E-01 | 41258337  | 41258460  | NC_000015.9  |
| cg06070229 | 2.30E-09 | 2.04E-10 | 6.71 | 12.7823856 | 3.76E-02 | 133348826 | 133348949 | NC_000007.13 |
| cg23405172 | 2.30E-09 | 2.04E-10 | 6.71 | 12.7814373 | 4.88E-02 | 49165394  | 49165517  | NC_000019.9  |
| cg12172441 | 2.30E-09 | 2.04E-10 | 6.71 | 12.7808278 | 1.80E-01 | 28176163  | 28176286  | NC_000006.11 |
| cg06943005 | 2.30E-09 | 2.04E-10 | 6.71 | 12.7797865 | 1.92E-02 | 144897576 | 144897699 | NC_000008.10 |
| cg01746118 | 2.30E-09 | 2.04E-10 | 6.71 | 12.7794128 | 4.50E-02 | 169569064 | 169569187 | NC_000006.11 |
| cg18215217 | 2.31E-09 | 2.04E-10 | 6.71 | 12.7784668 | 1.51E-01 | 84456410  | 84456533  | NC_000013.10 |

|            |          |          |      |            |          |           |           |              |
|------------|----------|----------|------|------------|----------|-----------|-----------|--------------|
| cg10625533 | 2.31E-09 | 2.04E-10 | 6.71 | 12.7782601 | 1.53E-01 | 233498682 | 233498805 | NC_000002.11 |
| cg08199013 | 2.31E-09 | 2.05E-10 | 6.71 | 12.7778128 | 1.05E-01 | 330010    | 330133    | NC_000016.9  |
| cg05452899 | 2.31E-09 | 2.05E-10 | 6.71 | 12.7767585 | 1.96E-01 | 2161133   | 2161256   | NC_000011.9  |
| cg24926465 | 2.31E-09 | 2.05E-10 | 6.71 | 12.7762372 | 1.40E-01 | 156007787 | 156007910 | NC_000003.11 |
| cg19404354 | 2.31E-09 | 2.05E-10 | 6.71 | 12.7753278 | 9.77E-02 | 202093479 | 202093602 | NC_000001.10 |
| cg22740492 | 2.31E-09 | 2.05E-10 | 6.71 | 12.7751934 | 1.38E-01 | 31820658  | 31820781  | NC_000011.9  |
| cg01149940 | 2.32E-09 | 2.06E-10 | 6.71 | 12.7699636 | 7.09E-02 | 50632967  | 50633090  | NC_000022.10 |
| cg13392078 | 2.32E-09 | 2.06E-10 | 6.71 | 12.7696927 | 1.74E-01 | 36036514  | 36036637  | NC_000009.11 |
| cg04932544 | 2.33E-09 | 2.06E-10 | 6.71 | 12.769051  | 1.53E-01 | 210111403 | 210111526 | NC_000001.10 |
| cg23432345 | 2.33E-09 | 2.07E-10 | 6.71 | 12.7667942 | 1.76E-01 | 27196153  | 27196276  | NC_000007.13 |
| cg00850481 | 2.33E-09 | 2.07E-10 | 6.71 | 12.7657602 | 7.61E-02 | 228891306 | 228891429 | NC_000001.10 |
| cg06856528 | 2.33E-09 | 2.07E-10 | 6.71 | 12.7657412 | 1.69E-01 | 193059405 | 193059528 | NC_000002.11 |
| cg08959182 | 2.33E-09 | 2.07E-10 | 6.71 | 12.7652869 | 1.36E-01 | 87661076  | 87661199  | NC_000005.9  |
| cg21566642 | 2.34E-09 | 2.08E-10 | 6.71 | 12.7636148 | 1.27E-01 | 233284661 | 233284784 | NC_000002.11 |
| cg22280475 | 2.34E-09 | 2.08E-10 | 6.71 | 12.7620112 | 1.43E-01 | 25897534  | 25897657  | NC_000008.10 |
| cg23330204 | 2.34E-09 | 2.08E-10 | 6.71 | 12.7608918 | 9.57E-02 | 91321677  | 91321800  | NC_000006.11 |
| cg09876519 | 2.34E-09 | 2.08E-10 | 6.71 | 12.7605142 | 1.49E-01 | 50675610  | 50675733  | NC_000006.11 |
| cg21242918 | 2.35E-09 | 2.08E-10 | 6.71 | 12.7596572 | 2.12E-01 | 118897194 | 118897317 | NC_000010.10 |
| cg16648632 | 2.35E-09 | 2.08E-10 | 6.71 | 12.7590602 | 1.42E-01 | 6003584   | 6003707   | NC_000006.11 |
| cg21582253 | 2.36E-09 | 2.09E-10 | 6.71 | 12.7546672 | 1.42E-01 | 16181039  | 16181162  | NC_000005.9  |
| cg21705897 | 2.36E-09 | 2.10E-10 | 6.71 | 12.7536926 | 2.13E-01 | 55444061  | 55444184  | NC_000006.11 |
| cg13534450 | 2.36E-09 | 2.10E-10 | 6.71 | 12.7522297 | 2.07E-01 | 75897297  | 75897420  | NC_000008.10 |
| cg02316596 | 2.37E-09 | 2.10E-10 | 6.71 | 12.750735  | 1.56E-01 | 120434979 | 120435102 | NC_000011.9  |
| cg03576469 | 2.37E-09 | 2.10E-10 | 6.71 | 12.7505564 | 2.02E-01 | 46917061  | 46917184  | NC_000019.9  |
| cg06307913 | 2.37E-09 | 2.10E-10 | 6.71 | 12.7503531 | 1.62E-01 | 81118794  | 81118917  | NC_000004.11 |

|            |          |          |      |            |          |           |           |              |
|------------|----------|----------|------|------------|----------|-----------|-----------|--------------|
| cg27318000 | 2.37E-09 | 2.10E-10 | 6.71 | 12.7501379 | 8.38E-02 | 3845667   | 3845790   | NC_000018.9  |
| cg26555777 | 2.37E-09 | 2.11E-10 | 6.71 | 12.7491225 | 1.01E-01 | 38885050  | 38885173  | NC_000019.9  |
| cg13860360 | 2.37E-09 | 2.11E-10 | 6.71 | 12.7487432 | 1.29E-01 | 33846010  | 33846133  | NC_000013.10 |
| cg07658503 | 2.37E-09 | 2.11E-10 | 6.71 | 12.748024  | 1.97E-01 | 30722177  | 30722300  | NC_000007.13 |
| cg09965733 | 2.38E-09 | 2.11E-10 | 6.71 | 12.7462576 | 1.92E-01 | 42079131  | 42079254  | NC_000014.8  |
| cg19721730 | 2.38E-09 | 2.11E-10 | 6.7  | 12.7454442 | 6.01E-02 | 50173685  | 50173808  | NC_000019.9  |
| cg22458832 | 2.38E-09 | 2.11E-10 | 6.7  | 12.7452815 | 1.16E-01 | 43506497  | 43506620  | NC_000017.10 |
| cg08465346 | 2.38E-09 | 2.11E-10 | 6.7  | 12.7450803 | 1.39E-01 | 54441458  | 54441581  | NC_000012.11 |
| cg21266547 | 2.38E-09 | 2.12E-10 | 6.7  | 12.7448127 | 5.04E-02 | 61654618  | 61654741  | NC_000018.9  |
| cg16376000 | 2.38E-09 | 2.12E-10 | 6.7  | 12.7442766 | 2.50E-01 | 192127330 | 192127453 | NC_000003.11 |
| cg01478234 | 2.38E-09 | 2.12E-10 | 6.7  | 12.7438909 | 1.03E-01 | 107975299 | 107975422 | NC_000012.11 |
| cg18720533 | 2.38E-09 | 2.12E-10 | 6.7  | 12.7431675 | 1.05E-01 | 134833372 | 134833495 | NC_000010.10 |
| cg22620111 | 2.38E-09 | 2.12E-10 | 6.7  | 12.7430651 | 1.04E-01 | 14849245  | 14849368  | NC_000003.11 |
| cg17623854 | 2.38E-09 | 2.12E-10 | 6.7  | 12.7428416 | 6.28E-02 | 134791660 | 134791783 | NC_000010.10 |
| cg02899219 | 2.38E-09 | 2.12E-10 | 6.7  | 12.7428233 | 1.06E-01 | 51448944  | 51449067  | NC_000014.8  |
| cg06457577 | 2.39E-09 | 2.12E-10 | 6.7  | 12.7412305 | 4.27E-02 | 74631030  | 74631153  | NC_000015.9  |
| cg06473363 | 2.39E-09 | 2.12E-10 | 6.7  | 12.7410674 | 1.26E-01 | 31631797  | 31631920  | NC_000006.11 |
| cg24625634 | 2.39E-09 | 2.13E-10 | 6.7  | 12.7400459 | 1.52E-02 | 117484948 | 117485071 | NC_000012.11 |
| cg03679715 | 2.39E-09 | 2.13E-10 | 6.7  | 12.7391651 | 4.75E-02 | 176295869 | 176295992 | NC_000005.9  |
| cg00500705 | 2.39E-09 | 2.13E-10 | 6.7  | 12.7390781 | 1.38E-01 | 114029659 | 114029782 | NC_000012.11 |
| cg13318787 | 2.39E-09 | 2.13E-10 | 6.7  | 12.738776  | 1.35E-01 | 50262177  | 50262300  | NC_000005.9  |
| cg24216701 | 2.40E-09 | 2.13E-10 | 6.7  | 12.7378376 | 7.41E-02 | 149545928 | 149546051 | NC_000005.9  |
| cg12983839 | 2.40E-09 | 2.13E-10 | 6.7  | 12.7363629 | 6.61E-02 | 2334615   | 2334738   | NC_000019.9  |
| cg03293883 | 2.40E-09 | 2.13E-10 | 6.7  | 12.7359782 | 5.63E-02 | 86124742  | 86124865  | NC_000006.11 |
| cg21213617 | 2.40E-09 | 2.14E-10 | 6.7  | 12.7353357 | 9.02E-02 | 124989241 | 124989364 | NC_000009.11 |

|            |          |          |     |            |          |           |           |              |
|------------|----------|----------|-----|------------|----------|-----------|-----------|--------------|
| cg21255942 | 2.40E-09 | 2.14E-10 | 6.7 | 12.733978  | 2.20E-01 | 39954186  | 39954309  | NC_000022.10 |
| cg02300114 | 2.41E-09 | 2.14E-10 | 6.7 | 12.733124  | 1.00E-01 | 130604047 | 130604170 | NC_000012.11 |
| cg05233155 | 2.41E-09 | 2.14E-10 | 6.7 | 12.733081  | 5.33E-02 | 10408528  | 10408651  | NC_000011.9  |
| cg07979271 | 2.41E-09 | 2.14E-10 | 6.7 | 12.7319217 | 1.07E-01 | 50921353  | 50921476  | NC_000019.9  |
| cg06984025 | 2.41E-09 | 2.14E-10 | 6.7 | 12.7312308 | 1.45E-01 | 971757    | 971880    | NC_000009.11 |
| cg16080876 | 2.41E-09 | 2.15E-10 | 6.7 | 12.7303794 | 1.48E-01 | 24813866  | 24813989  | NC_000008.10 |
| cg27105390 | 2.41E-09 | 2.15E-10 | 6.7 | 12.7302756 | 1.41E-01 | 23253316  | 23253439  | NC_000019.9  |
| cg01259029 | 2.41E-09 | 2.15E-10 | 6.7 | 12.7301493 | 1.50E-01 | 10564690  | 10564813  | NC_000005.9  |
| cg24776343 | 2.41E-09 | 2.15E-10 | 6.7 | 12.7301087 | 1.08E-01 | 24189786  | 24189909  | NC_000013.10 |
| cg03943081 | 2.42E-09 | 2.15E-10 | 6.7 | 12.7279898 | 1.37E-01 | 133110646 | 133110769 | NC_000010.10 |
| cg00942219 | 2.42E-09 | 2.15E-10 | 6.7 | 12.7276676 | 1.23E-01 | 85203635  | 85203758  | NC_000016.9  |
| cg19876649 | 2.42E-09 | 2.16E-10 | 6.7 | 12.7248147 | 1.18E-01 | 3220273   | 3220396   | NC_000018.9  |
| cg25593631 | 2.43E-09 | 2.16E-10 | 6.7 | 12.7239429 | 1.07E-01 | 9687880   | 9688003   | NC_000001.10 |
| cg05653707 | 2.43E-09 | 2.16E-10 | 6.7 | 12.7238712 | 1.90E-01 | 119304938 | 119305061 | NC_000010.10 |
| cg15835058 | 2.43E-09 | 2.16E-10 | 6.7 | 12.7227359 | 1.28E-01 | 39022380  | 39022503  | NC_000006.11 |
| cg14861047 | 2.43E-09 | 2.17E-10 | 6.7 | 12.7217255 | 6.30E-02 | 48657326  | 48657449  | NC_000003.11 |
| cg16977035 | 2.43E-09 | 2.17E-10 | 6.7 | 12.7213777 | 8.25E-02 | 44330474  | 44330597  | NC_000011.9  |
| cg14443467 | 2.44E-09 | 2.17E-10 | 6.7 | 12.7198366 | 1.32E-01 | 140604406 | 140604529 | NC_000005.9  |
| cg02285263 | 2.44E-09 | 2.17E-10 | 6.7 | 12.7194809 | 1.35E-01 | 152129749 | 152129872 | NC_000006.11 |
| cg09540565 | 2.44E-09 | 2.17E-10 | 6.7 | 12.7184434 | 4.01E-02 | 88212683  | 88212806  | NC_000016.9  |
| cg25966908 | 2.44E-09 | 2.17E-10 | 6.7 | 12.7182472 | 1.22E-01 | 55516751  | 55516874  | NC_000007.13 |
| cg11659501 | 2.44E-09 | 2.17E-10 | 6.7 | 12.7175189 | 1.89E-01 | 81471678  | 81471801  | NC_000012.11 |
| cg00306395 | 2.44E-09 | 2.18E-10 | 6.7 | 12.7169394 | 4.71E-02 | 45832603  | 45832726  | NC_000011.9  |
| cg26814075 | 2.44E-09 | 2.18E-10 | 6.7 | 12.7167291 | 9.75E-02 | 127881298 | 127881421 | NC_000007.13 |
| cg25911551 | 2.45E-09 | 2.18E-10 | 6.7 | 12.7147036 | 1.34E-01 | 144266241 | 144266364 | NC_000004.11 |

|            |          |          |      |            |          |           |           |              |
|------------|----------|----------|------|------------|----------|-----------|-----------|--------------|
| cg19435264 | 2.45E-09 | 2.18E-10 | 6.7  | 12.7139676 | 1.97E-01 | 149569537 | 149569660 | NC_000005.9  |
| cg00554173 | 2.45E-09 | 2.18E-10 | 6.7  | 12.7136074 | 8.68E-02 | 3149777   | 3149900   | NC_000020.10 |
| cg01454215 | 2.45E-09 | 2.19E-10 | 6.7  | 12.7129204 | 1.39E-01 | 27530363  | 27530486  | NC_000002.11 |
| cg05372242 | 2.46E-09 | 2.19E-10 | 6.7  | 12.7112573 | 1.50E-01 | 36983542  | 36983665  | NC_000014.8  |
| cg26115216 | 2.46E-09 | 2.19E-10 | 6.7  | 12.7098894 | 1.13E-01 | 138739916 | 138740039 | NC_000003.11 |
| cg07763376 | 2.46E-09 | 2.19E-10 | 6.7  | 12.7086297 | 1.25E-01 | 178016195 | 178016318 | NC_000005.9  |
| cg18304339 | 2.46E-09 | 2.20E-10 | 6.7  | 12.7080662 | 4.66E-02 | 52213734  | 52213857  | NC_000014.8  |
| cg14222245 | 2.46E-09 | 2.20E-10 | 6.7  | 12.7080489 | 1.11E-01 | 58861502  | 58861625  | NC_000019.9  |
| cg05715492 | 2.47E-09 | 2.20E-10 | 6.7  | 12.7069326 | 1.48E-01 | 98991138  | 98991261  | NC_000007.13 |
| cg07498624 | 2.47E-09 | 2.20E-10 | 6.7  | 12.7057642 | 1.58E-01 | 204831    | 204954    | NC_000016.9  |
| cg24975244 | 2.47E-09 | 2.20E-10 | 6.7  | 12.7055953 | 1.02E-01 | 106091410 | 106091533 | NC_000014.8  |
| cg08559648 | 2.47E-09 | 2.20E-10 | 6.7  | 12.7043406 | 5.31E-02 | 45889692  | 45889815  | NC_000013.10 |
| cg12757011 | 2.47E-09 | 2.21E-10 | 6.7  | 12.7030286 | 1.08E-01 | 162281111 | 162281234 | NC_000002.11 |
| cg23059310 | 2.48E-09 | 2.21E-10 | 6.7  | 12.7017705 | 4.94E-02 | 32807327  | 32807450  | NC_000006.11 |
| cg11310950 | 2.48E-09 | 2.21E-10 | 6.7  | 12.7001747 | 1.86E-01 | 71217407  | 71217530  | NC_000007.13 |
| cg08567000 | 2.48E-09 | 2.22E-10 | 6.7  | 12.6995924 | 3.91E-02 | 31084107  | 31084230  | NC_000006.11 |
| cg19442470 | 2.48E-09 | 2.22E-10 | 6.7  | 12.6994712 | 1.17E-01 | 27470225  | 27470348  | NC_000008.10 |
| cg27021722 | 2.48E-09 | 2.22E-10 | 6.7  | 12.6987917 | 7.53E-02 | 22999077  | 22999200  | NC_000004.11 |
| cg06876311 | 2.49E-09 | 2.22E-10 | 6.7  | 12.6959942 | 9.71E-02 | 38479181  | 38479304  | NC_000022.10 |
| cg20419735 | 2.50E-09 | 2.23E-10 | 6.7  | 12.6935298 | 1.44E-01 | 46824292  | 46824415  | NC_000017.10 |
| cg01911708 | 2.50E-09 | 2.23E-10 | 6.7  | 12.6919345 | 1.73E-01 | 61886082  | 61886205  | NC_000020.10 |
| cg04689048 | 2.50E-09 | 2.23E-10 | 6.69 | 12.6913298 | 1.18E-01 | 46999289  | 46999412  | NC_000019.9  |
| cg06541501 | 2.50E-09 | 2.23E-10 | 6.69 | 12.6911591 | 9.41E-02 | 25903852  | 25903975  | NC_000008.10 |
| cg06564388 | 2.50E-09 | 2.23E-10 | 6.69 | 12.6910911 | 1.02E-01 | 153855257 | 153855380 | NC_000005.9  |
| cg16495265 | 2.51E-09 | 2.24E-10 | 6.69 | 12.6894164 | 2.04E-01 | 46671010  | 46671133  | NC_000017.10 |

|            |          |          |      |            |          |           |           |              |
|------------|----------|----------|------|------------|----------|-----------|-----------|--------------|
| cg22399111 | 2.51E-09 | 2.24E-10 | 6.69 | 12.6893142 | 9.86E-02 | 142295325 | 142295448 | NC_000008.10 |
| cg09953520 | 2.51E-09 | 2.24E-10 | 6.69 | 12.6868573 | 9.57E-02 | 25812278  | 25812401  | NC_000008.10 |
| cg26202195 | 2.51E-09 | 2.24E-10 | 6.69 | 12.686521  | 1.01E-01 | 105379368 | 105379491 | NC_000008.10 |
| cg05970033 | 2.52E-09 | 2.25E-10 | 6.69 | 12.6855232 | 6.73E-02 | 78441950  | 78442073  | NC_000005.9  |
| cg13974394 | 2.52E-09 | 2.25E-10 | 6.69 | 12.6842548 | 1.16E-01 | 1882188   | 1882311   | NC_000005.9  |
| cg03849279 | 2.52E-09 | 2.25E-10 | 6.69 | 12.6840218 | 7.82E-02 | 67751821  | 67751944  | NC_000016.9  |
| cg04469059 | 2.52E-09 | 2.25E-10 | 6.69 | 12.6836641 | 1.83E-01 | 134872096 | 134872219 | NC_000005.9  |
| cg25756586 | 2.52E-09 | 2.25E-10 | 6.69 | 12.6826518 | 5.37E-02 | 78172613  | 78172736  | NC_000017.10 |
| cg17069590 | 2.53E-09 | 2.26E-10 | 6.69 | 12.6795706 | 1.10E-01 | 112647810 | 112647933 | NC_000003.11 |
| cg22942897 | 2.53E-09 | 2.26E-10 | 6.69 | 12.6795613 | 1.27E-01 | 3680345   | 3680468   | NC_000001.10 |
| cg21922574 | 2.53E-09 | 2.26E-10 | 6.69 | 12.678651  | 2.00E-01 | 70535925  | 70536048  | NC_000018.9  |
| cg08480826 | 2.54E-09 | 2.27E-10 | 6.69 | 12.6770133 | 1.83E-01 | 87981253  | 87981376  | NC_000005.9  |
| cg26981593 | 2.54E-09 | 2.27E-10 | 6.69 | 12.6752239 | 4.13E-02 | 33232239  | 33232362  | NC_000006.11 |
| cg09937190 | 2.54E-09 | 2.27E-10 | 6.69 | 12.6744848 | 1.14E-01 | 15177509  | 15177632  | NC_000020.10 |
| cg08241373 | 2.54E-09 | 2.27E-10 | 6.69 | 12.6738232 | 3.57E-02 | 33139529  | 33139652  | NC_000006.11 |
| cg25537993 | 2.55E-09 | 2.27E-10 | 6.69 | 12.6736863 | 1.82E-01 | 58545182  | 58545305  | NC_000019.9  |
| cg16657397 | 2.55E-09 | 2.28E-10 | 6.69 | 12.6723071 | 1.93E-01 | 186079367 | 186079490 | NC_000003.11 |
| cg13482432 | 2.55E-09 | 2.28E-10 | 6.69 | 12.6722906 | 1.99E-01 | 79633350  | 79633473  | NC_000009.11 |
| cg08367801 | 2.55E-09 | 2.28E-10 | 6.69 | 12.6714439 | 1.89E-01 | 98111529  | 98111652  | NC_000005.9  |
| cg10281977 | 2.55E-09 | 2.28E-10 | 6.69 | 12.6711063 | 1.98E-01 | 105070864 | 105070987 | NC_000014.8  |
| cg06818710 | 2.55E-09 | 2.28E-10 | 6.69 | 12.6710054 | 2.23E-01 | 28411271  | 28411394  | NC_000006.11 |
| cg06707286 | 2.55E-09 | 2.28E-10 | 6.69 | 12.6709526 | 6.52E-02 | 102010195 | 102010318 | NC_000015.9  |
| cg23718462 | 2.55E-09 | 2.28E-10 | 6.69 | 12.6707639 | 1.24E-01 | 25621118  | 25621241  | NC_000013.10 |
| cg07594636 | 2.55E-09 | 2.28E-10 | 6.69 | 12.6699503 | 2.19E-01 | 68547088  | 68547211  | NC_000002.11 |
| cg19700658 | 2.56E-09 | 2.29E-10 | 6.69 | 12.66776   | 4.64E-02 | 73719872  | 73719995  | NC_000011.9  |

|            |          |          |      |            |          |           |           |              |
|------------|----------|----------|------|------------|----------|-----------|-----------|--------------|
| cg04444661 | 2.56E-09 | 2.29E-10 | 6.69 | 12.6667678 | 9.75E-02 | 38552952  | 38553075  | NC_000005.9  |
| cg16255914 | 2.57E-09 | 2.30E-10 | 6.69 | 12.6644599 | 1.33E-01 | 53832438  | 53832561  | NC_000019.9  |
| cg19313043 | 2.57E-09 | 2.30E-10 | 6.69 | 12.6644287 | 1.95E-01 | 115880207 | 115880330 | NC_000001.10 |
| cg06324785 | 2.57E-09 | 2.30E-10 | 6.69 | 12.6642366 | 1.14E-01 | 25960219  | 25960342  | NC_000022.10 |
| cg20894270 | 2.57E-09 | 2.30E-10 | 6.69 | 12.6631999 | 6.07E-02 | 21200993  | 21201116  | NC_000018.9  |
| cg07791834 | 2.57E-09 | 2.30E-10 | 6.69 | 12.6622359 | 6.95E-02 | 48800382  | 48800505  | NC_000019.9  |
| cg01098939 | 2.58E-09 | 2.30E-10 | 6.69 | 12.6610481 | 4.80E-02 | 2742274   | 2742397   | NC_000007.13 |
| cg17610169 | 2.58E-09 | 2.30E-10 | 6.69 | 12.6610361 | 2.64E-02 | 10750973  | 10751096  | NC_000011.9  |
| cg14524956 | 2.58E-09 | 2.31E-10 | 6.69 | 12.6589877 | 1.01E-01 | 215804508 | 215804631 | NC_000001.10 |
| cg27530370 | 2.58E-09 | 2.31E-10 | 6.69 | 12.6587386 | 1.19E-01 | 154589288 | 154589411 | NC_000001.10 |
| cg08956010 | 2.58E-09 | 2.31E-10 | 6.69 | 12.6580794 | 8.05E-02 | 4479889   | 4480012   | NC_000012.11 |
| cg25770267 | 2.59E-09 | 2.31E-10 | 6.69 | 12.6567874 | 8.46E-02 | 7596685   | 7596808   | NC_000001.10 |
| cg05860313 | 2.59E-09 | 2.32E-10 | 6.69 | 12.655325  | 2.29E-01 | 35395663  | 35395786  | NC_000001.10 |
| cg07858908 | 2.59E-09 | 2.32E-10 | 6.69 | 12.6549719 | 1.64E-01 | 76733537  | 76733660  | NC_000018.9  |
| cg21651328 | 2.60E-09 | 2.32E-10 | 6.69 | 12.6531912 | 1.82E-01 | 21657756  | 21657879  | NC_000019.9  |
| cg11328303 | 2.60E-09 | 2.32E-10 | 6.69 | 12.6526179 | 1.66E-01 | 26505440  | 26505563  | NC_000010.10 |
| cg06954658 | 2.60E-09 | 2.32E-10 | 6.69 | 12.6525553 | 1.73E-01 | 76740093  | 76740216  | NC_000018.9  |
| cg25095187 | 2.60E-09 | 2.33E-10 | 6.69 | 12.6517282 | 1.06E-01 | 29335792  | 29335915  | NC_000002.11 |
| cg09714379 | 2.60E-09 | 2.33E-10 | 6.69 | 12.6504427 | 1.51E-01 | 135044040 | 135044163 | NC_000010.10 |
| cg19763461 | 2.60E-09 | 2.33E-10 | 6.69 | 12.6500503 | 1.87E-01 | 63284557  | 63284680  | NC_000002.11 |
| cg00303982 | 2.60E-09 | 2.33E-10 | 6.69 | 12.6499977 | 2.21E-01 | 145556952 | 145557075 | NC_000008.10 |
| cg11005250 | 2.61E-09 | 2.33E-10 | 6.69 | 12.6486079 | 1.70E-01 | 108297742 | 108297865 | NC_000012.11 |
| cg19402371 | 2.61E-09 | 2.34E-10 | 6.69 | 12.6470795 | 9.89E-02 | 55889013  | 55889136  | NC_000019.9  |
| cg10879397 | 2.61E-09 | 2.34E-10 | 6.69 | 12.6462402 | 7.09E-02 | 148555266 | 148555389 | NC_000005.9  |
| cg08612384 | 2.61E-09 | 2.34E-10 | 6.69 | 12.646111  | 5.83E-02 | 27228511  | 27228634  | NC_000017.10 |

|            |          |          |      |            |          |           |           |              |
|------------|----------|----------|------|------------|----------|-----------|-----------|--------------|
| cg02736395 | 2.62E-09 | 2.34E-10 | 6.69 | 12.6451192 | 1.01E-01 | 227748424 | 227748547 | NC_000001.10 |
| cg02565715 | 2.62E-09 | 2.35E-10 | 6.69 | 12.6423742 | 2.07E-01 | 75525001  | 75525124  | NC_000017.10 |
| cg20647257 | 2.62E-09 | 2.35E-10 | 6.69 | 12.6417739 | 1.22E-01 | 601713    | 601836    | NC_000007.13 |
| cg21970789 | 2.62E-09 | 2.35E-10 | 6.69 | 12.6417737 | 9.60E-02 | 134826388 | 134826511 | NC_000005.9  |
| cg09804380 | 2.62E-09 | 2.35E-10 | 6.69 | 12.6414424 | 2.07E-01 | 13910700  | 13910823  | NC_000001.10 |
| cg24452128 | 2.63E-09 | 2.35E-10 | 6.69 | 12.6410041 | 1.92E-01 | 10390919  | 10391042  | NC_000006.11 |
| cg18119735 | 2.63E-09 | 2.35E-10 | 6.69 | 12.6396995 | 9.89E-02 | 236850308 | 236850431 | NC_000001.10 |
| cg20568390 | 2.63E-09 | 2.36E-10 | 6.69 | 12.6391979 | 6.69E-02 | 54723340  | 54723463  | NC_000001.10 |
| cg02952984 | 2.63E-09 | 2.36E-10 | 6.69 | 12.6375347 | 1.80E-01 | 58724041  | 58724164  | NC_000015.9  |
| cg02593932 | 2.64E-09 | 2.36E-10 | 6.68 | 12.6363051 | 1.56E-01 | 154728308 | 154728431 | NC_000002.11 |
| cg10323051 | 2.64E-09 | 2.36E-10 | 6.68 | 12.6361713 | 5.18E-02 | 92570771  | 92570894  | NC_000015.9  |
| cg09697644 | 2.64E-09 | 2.36E-10 | 6.68 | 12.6357659 | 7.11E-02 | 34375039  | 34375162  | NC_000016.9  |
| cg21971807 | 2.64E-09 | 2.37E-10 | 6.68 | 12.6353116 | 7.80E-02 | 57471654  | 57471777  | NC_000020.10 |
| cg05332960 | 2.64E-09 | 2.37E-10 | 6.68 | 12.6350698 | 1.58E-01 | 31020418  | 31020541  | NC_000018.9  |
| cg05791946 | 2.64E-09 | 2.37E-10 | 6.68 | 12.6350127 | 1.08E-01 | 3160851   | 3160974   | NC_000001.10 |
| cg17368114 | 2.65E-09 | 2.37E-10 | 6.68 | 12.6327247 | 7.28E-02 | 138268312 | 138268435 | NC_000005.9  |
| cg14002226 | 2.65E-09 | 2.37E-10 | 6.68 | 12.6324556 | 1.23E-01 | 138676624 | 138676747 | NC_000009.11 |
| cg03706436 | 2.65E-09 | 2.37E-10 | 6.68 | 12.6321619 | 1.86E-01 | 30717225  | 30717348  | NC_000019.9  |
| cg25229306 | 2.65E-09 | 2.37E-10 | 6.68 | 12.6316386 | 1.00E-01 | 57426374  | 57426497  | NC_000020.10 |
| cg03007524 | 2.65E-09 | 2.38E-10 | 6.68 | 12.6307289 | 8.97E-02 | 50620975  | 50621098  | NC_000022.10 |
| cg19851909 | 2.66E-09 | 2.38E-10 | 6.68 | 12.627384  | 1.81E-01 | 94134827  | 94134950  | NC_000011.9  |
| cg21494680 | 2.67E-09 | 2.39E-10 | 6.68 | 12.625527  | 1.09E-01 | 375849    | 375972    | NC_000019.9  |
| cg02940165 | 2.67E-09 | 2.39E-10 | 6.68 | 12.6242594 | 1.58E-01 | 57149563  | 57149686  | NC_000019.9  |
| cg14586939 | 2.67E-09 | 2.40E-10 | 6.68 | 12.6223268 | 1.71E-01 | 156130206 | 156130329 | NC_000004.11 |
| cg04166913 | 2.68E-09 | 2.40E-10 | 6.68 | 12.6208929 | 1.18E-01 | 32945336  | 32945459  | NC_000006.11 |



|            |          |          |      |            |          |           |           |              |
|------------|----------|----------|------|------------|----------|-----------|-----------|--------------|
| cg17975177 | 2.68E-09 | 2.40E-10 | 6.68 | 12.6199295 | 5.46E-02 | 53816548  | 53816671  | NC_000001.10 |
| cg00059737 | 2.68E-09 | 2.40E-10 | 6.68 | 12.6193105 | 1.23E-01 | 12400434  | 12400557  | NC_000001.10 |
| cg01973394 | 2.68E-09 | 2.41E-10 | 6.68 | 12.6180726 | 9.62E-02 | 82335947  | 82336070  | NC_000015.9  |
| cg04115740 | 2.69E-09 | 2.41E-10 | 6.68 | 12.6160214 | 1.45E-01 | 6690948   | 6691071   | NC_000017.10 |
| cg10934129 | 2.69E-09 | 2.42E-10 | 6.68 | 12.6148314 | 1.67E-01 | 172655841 | 172655964 | NC_000005.9  |
| cg26660800 | 2.70E-09 | 2.42E-10 | 6.68 | 12.6133251 | 1.24E-01 | 59480926  | 59481049  | NC_000017.10 |
| cg15100100 | 2.70E-09 | 2.42E-10 | 6.68 | 12.6129444 | 2.17E-01 | 77332993  | 77333116  | NC_000001.10 |
| cg01938476 | 2.70E-09 | 2.42E-10 | 6.68 | 12.6116965 | 1.19E-01 | 7076853   | 7076976   | NC_000012.11 |
| cg22090592 | 2.71E-09 | 2.43E-10 | 6.68 | 12.6098404 | 8.16E-02 | 105174642 | 105174765 | NC_000014.8  |
| cg11804932 | 2.71E-09 | 2.43E-10 | 6.68 | 12.60939   | 1.19E-01 | 106402507 | 106402630 | NC_000010.10 |
| cg21582956 | 2.71E-09 | 2.43E-10 | 6.68 | 12.6081712 | 6.69E-02 | 57422435  | 57422558  | NC_000012.11 |
| cg24669528 | 2.71E-09 | 2.43E-10 | 6.68 | 12.6081386 | 1.83E-01 | 37248838  | 37248961  | NC_000013.10 |
| cg13582542 | 2.71E-09 | 2.44E-10 | 6.68 | 12.6066885 | 7.49E-02 | 132795405 | 132795528 | NC_000002.11 |
| cg01410472 | 2.72E-09 | 2.44E-10 | 6.68 | 12.6060856 | 1.53E-01 | 75896975  | 75897098  | NC_000008.10 |
| cg24006667 | 2.72E-09 | 2.44E-10 | 6.68 | 12.6055007 | 1.18E-01 | 86758571  | 86758694  | NC_000007.13 |
| cg27627493 | 2.72E-09 | 2.44E-10 | 6.68 | 12.6037844 | 1.46E-01 | 63767360  | 63767483  | NC_000015.9  |
| cg19095981 | 2.72E-09 | 2.44E-10 | 6.68 | 12.6036385 | 1.60E-01 | 53516701  | 53516824  | NC_000005.9  |
| cg21507528 | 2.72E-09 | 2.44E-10 | 6.68 | 12.6028089 | 4.07E-02 | 18747315  | 18747438  | NC_000011.9  |
| cg13436968 | 2.73E-09 | 2.45E-10 | 6.68 | 12.5993819 | 1.31E-01 | 54622973  | 54623096  | NC_000007.13 |
| cg04091712 | 2.74E-09 | 2.46E-10 | 6.68 | 12.5975701 | 6.44E-02 | 4563767   | 4563890   | NC_000016.9  |
| cg11185802 | 2.74E-09 | 2.46E-10 | 6.68 | 12.596955  | 5.84E-02 | 9494396   | 9494519   | NC_000004.11 |
| cg08718490 | 2.74E-09 | 2.46E-10 | 6.68 | 12.5968617 | 1.64E-01 | 52943099  | 52943222  | NC_000004.11 |
| cg02520639 | 2.74E-09 | 2.46E-10 | 6.68 | 12.5954149 | 1.50E-01 | 82021210  | 82021333  | NC_000008.10 |
| cg23601515 | 2.74E-09 | 2.46E-10 | 6.68 | 12.5951825 | 7.42E-02 | 74017805  | 74017928  | NC_000017.10 |
| cg01514341 | 2.74E-09 | 2.46E-10 | 6.68 | 12.5951638 | 8.45E-02 | 29142291  | 29142414  | NC_000016.9  |

|            |          |          |      |            |          |           |           |              |
|------------|----------|----------|------|------------|----------|-----------|-----------|--------------|
| cg24495052 | 2.74E-09 | 2.46E-10 | 6.68 | 12.5950256 | 6.26E-02 | 8189468   | 8189591   | NC_000017.10 |
| cg04788769 | 2.75E-09 | 2.47E-10 | 6.68 | 12.5934127 | 7.61E-02 | 102800604 | 102800727 | NC_000002.11 |
| cg14611174 | 2.75E-09 | 2.47E-10 | 6.68 | 12.5923639 | 1.68E-01 | 60975837  | 60975960  | NC_000014.8  |
| cg02919615 | 2.75E-09 | 2.47E-10 | 6.68 | 12.5920102 | 1.21E-01 | 1295656   | 1295779   | NC_000019.9  |
| cg00870778 | 2.76E-09 | 2.48E-10 | 6.68 | 12.5900731 | 1.36E-01 | 97598492  | 97598615  | NC_000007.13 |
| cg09226986 | 2.76E-09 | 2.48E-10 | 6.68 | 12.5891682 | 1.05E-01 | 160852328 | 160852451 | NC_000006.11 |
| cg19760917 | 2.76E-09 | 2.48E-10 | 6.68 | 12.5888022 | 6.47E-02 | 2411643   | 2411766   | NC_000001.10 |
| cg23264443 | 2.76E-09 | 2.48E-10 | 6.68 | 12.5883109 | 2.96E-02 | 4854690   | 4854813   | NC_000019.9  |
| cg16139785 | 2.76E-09 | 2.48E-10 | 6.68 | 12.588195  | 1.03E-01 | 103088924 | 103089047 | NC_000014.8  |
| cg10311806 | 2.76E-09 | 2.48E-10 | 6.68 | 12.5881705 | 2.49E-01 | 7708670   | 7708793   | NC_000010.10 |
| cg15391359 | 2.76E-09 | 2.48E-10 | 6.68 | 12.5874533 | 1.78E-01 | 14995536  | 14995659  | NC_000011.9  |
| cg14196143 | 2.77E-09 | 2.49E-10 | 6.68 | 12.5865266 | 2.78E-02 | 13711924  | 13712047  | NC_000006.11 |
| cg23243982 | 2.77E-09 | 2.49E-10 | 6.68 | 12.5856311 | 1.02E-01 | 132974568 | 132974691 | NC_000012.11 |
| cg08811259 | 2.77E-09 | 2.49E-10 | 6.68 | 12.5832874 | 1.20E-01 | 56878665  | 56878788  | NC_000006.11 |
| cg10800833 | 2.78E-09 | 2.50E-10 | 6.67 | 12.5815595 | 2.05E-01 | 57521657  | 57521780  | NC_000004.11 |
| cg13386839 | 2.78E-09 | 2.50E-10 | 6.67 | 12.5814383 | 3.34E-02 | 12250343  | 12250466  | NC_000001.10 |
| cg03082580 | 2.78E-09 | 2.50E-10 | 6.67 | 12.5810445 | 1.01E-01 | 89911298  | 89911421  | NC_000015.9  |
| cg21084260 | 2.78E-09 | 2.50E-10 | 6.67 | 12.5796355 | 6.44E-02 | 195311868 | 195311991 | NC_000003.11 |
| cg15504461 | 2.79E-09 | 2.51E-10 | 6.67 | 12.5786758 | 1.31E-01 | 147140880 | 147141003 | NC_000003.11 |
| cg23153481 | 2.79E-09 | 2.51E-10 | 6.67 | 12.5772777 | 1.55E-01 | 112547871 | 112547994 | NC_000013.10 |
| cg16594581 | 2.79E-09 | 2.51E-10 | 6.67 | 12.5761345 | 6.96E-02 | 140531865 | 140531988 | NC_000005.9  |
| cg19950455 | 2.79E-09 | 2.51E-10 | 6.67 | 12.5759005 | 2.03E-01 | 44495595  | 44495718  | NC_000021.8  |
| cg27383651 | 2.79E-09 | 2.51E-10 | 6.67 | 12.5758391 | 1.10E-01 | 28888809  | 28888932  | NC_000006.11 |
| cg21402417 | 2.80E-09 | 2.51E-10 | 6.67 | 12.5754914 | 4.90E-02 | 234926093 | 234926216 | NC_000002.11 |
| cg07803284 | 2.80E-09 | 2.51E-10 | 6.67 | 12.575396  | 7.86E-02 | 185812471 | 185812594 | NC_000003.11 |

|            |          |          |      |            |          |           |           |              |
|------------|----------|----------|------|------------|----------|-----------|-----------|--------------|
| cg19828791 | 2.80E-09 | 2.52E-10 | 6.67 | 12.5738267 | 1.07E-01 | 100823400 | 100823523 | NC_000007.13 |
| cg00469814 | 2.80E-09 | 2.52E-10 | 6.67 | 12.5738243 | 1.61E-01 | 188953677 | 188953800 | NC_000004.11 |
| cg00924685 | 2.80E-09 | 2.52E-10 | 6.67 | 12.5732511 | 7.98E-02 | 17475656  | 17475779  | NC_000001.10 |
| cg20027133 | 2.80E-09 | 2.52E-10 | 6.67 | 12.5731372 | 1.65E-01 | 35547514  | 35547637  | NC_000011.9  |
| cg26781392 | 2.80E-09 | 2.52E-10 | 6.67 | 12.5723724 | 8.68E-02 | 126984891 | 126985014 | NC_000006.11 |
| cg22300320 | 2.80E-09 | 2.52E-10 | 6.67 | 12.571998  | 2.80E-02 | 79027117  | 79027240  | NC_000017.10 |
| cg25915307 | 2.81E-09 | 2.52E-10 | 6.67 | 12.5713929 | 2.06E-01 | 50064736  | 50064859  | NC_000022.10 |
| cg09415639 | 2.81E-09 | 2.53E-10 | 6.67 | 12.5707738 | 1.30E-01 | 72987836  | 72987959  | NC_000008.10 |
| cg10511467 | 2.81E-09 | 2.53E-10 | 6.67 | 12.5707209 | 4.47E-02 | 81529963  | 81530086  | NC_000016.9  |
| cg15414924 | 2.81E-09 | 2.53E-10 | 6.67 | 12.5684129 | 1.08E-01 | 36291501  | 36291624  | NC_000014.8  |
| cg12104689 | 2.82E-09 | 2.53E-10 | 6.67 | 12.5681076 | 3.86E-02 | 58600131  | 58600254  | NC_000017.10 |
| cg13526007 | 2.82E-09 | 2.53E-10 | 6.67 | 12.5679368 | 1.79E-01 | 42076710  | 42076833  | NC_000014.8  |
| cg15746583 | 2.82E-09 | 2.53E-10 | 6.67 | 12.5679226 | 1.18E-01 | 87088834  | 87088957  | NC_000002.11 |
| cg15199678 | 2.82E-09 | 2.54E-10 | 6.67 | 12.5671641 | 1.55E-01 | 96642510  | 96642633  | NC_000007.13 |
| cg00414354 | 2.82E-09 | 2.54E-10 | 6.67 | 12.5662371 | 4.92E-02 | 174788002 | 174788125 | NC_000002.11 |
| cg25544164 | 2.82E-09 | 2.54E-10 | 6.67 | 12.5655019 | 1.31E-01 | 5824159   | 5824282   | NC_000019.9  |
| cg11192416 | 2.82E-09 | 2.54E-10 | 6.67 | 12.5648271 | 1.48E-01 | 231296968 | 231297091 | NC_000001.10 |
| cg09736968 | 2.83E-09 | 2.54E-10 | 6.67 | 12.5641808 | 1.68E-01 | 233351609 | 233351732 | NC_000002.11 |
| cg11672037 | 2.83E-09 | 2.54E-10 | 6.67 | 12.5641128 | 2.30E-01 | 48010808  | 48010931  | NC_000015.9  |
| cg04662609 | 2.83E-09 | 2.54E-10 | 6.67 | 12.5637822 | 8.27E-02 | 180646976 | 180647099 | NC_000005.9  |
| cg06163425 | 2.84E-09 | 2.56E-10 | 6.67 | 12.5584304 | 1.67E-01 | 131761150 | 131761273 | NC_000010.10 |
| cg11739633 | 2.84E-09 | 2.56E-10 | 6.67 | 12.5575894 | 1.24E-01 | 156459986 | 156460109 | NC_000001.10 |
| cg08678851 | 2.84E-09 | 2.56E-10 | 6.67 | 12.5574986 | 7.21E-02 | 91710951  | 91711074  | NC_000005.9  |
| cg00254133 | 2.85E-09 | 2.56E-10 | 6.67 | 12.5563053 | 1.87E-01 | 61340542  | 61340665  | NC_000020.10 |
| cg17139666 | 2.85E-09 | 2.56E-10 | 6.67 | 12.5562569 | 1.12E-01 | 174421440 | 174421563 | NC_000004.11 |

|            |          |          |      |            |          |           |           |              |
|------------|----------|----------|------|------------|----------|-----------|-----------|--------------|
| cg13846998 | 2.85E-09 | 2.57E-10 | 6.67 | 12.5547238 | 1.44E-01 | 45406295  | 45406418  | NC_000010.10 |
| cg23673761 | 2.85E-09 | 2.57E-10 | 6.67 | 12.5546452 | 1.39E-01 | 196865686 | 196865809 | NC_000001.10 |
| cg17299899 | 2.85E-09 | 2.57E-10 | 6.67 | 12.5535718 | 1.65E-01 | 76738478  | 76738601  | NC_000018.9  |
| cg10762626 | 2.85E-09 | 2.57E-10 | 6.67 | 12.553422  | 1.63E-01 | 28344715  | 28344838  | NC_000015.9  |
| cg06507579 | 2.86E-09 | 2.57E-10 | 6.67 | 12.5526561 | 1.63E-01 | 1282819   | 1282942   | NC_000007.13 |
| cg20312179 | 2.86E-09 | 2.57E-10 | 6.67 | 12.5520437 | 1.03E-01 | 51981505  | 51981628  | NC_000001.10 |
| cg02639927 | 2.86E-09 | 2.58E-10 | 6.67 | 12.5518744 | 1.42E-01 | 77334748  | 77334871  | NC_000001.10 |
| cg18476690 | 2.86E-09 | 2.58E-10 | 6.67 | 12.550723  | 4.26E-02 | 61125255  | 61125378  | NC_000011.9  |
| cg09314708 | 2.86E-09 | 2.58E-10 | 6.67 | 12.5498678 | 1.36E-01 | 132812991 | 132813114 | NC_000011.9  |
| cg05030481 | 2.87E-09 | 2.58E-10 | 6.67 | 12.5489462 | 1.83E-01 | 1445593   | 1445716   | NC_000005.9  |
| cg04355077 | 2.87E-09 | 2.59E-10 | 6.67 | 12.5469539 | 1.84E-01 | 50059946  | 50060069  | NC_000019.9  |
| cg05620923 | 2.87E-09 | 2.59E-10 | 6.67 | 12.5462589 | 7.71E-02 | 1466647   | 1466770   | NC_000019.9  |
| cg18646979 | 2.88E-09 | 2.59E-10 | 6.67 | 12.5459666 | 2.60E-02 | 72012470  | 72012593  | NC_000010.10 |
| cg20586900 | 2.88E-09 | 2.59E-10 | 6.67 | 12.5450665 | 6.56E-02 | 156256229 | 156256352 | NC_000003.11 |
| cg15513163 | 2.88E-09 | 2.59E-10 | 6.67 | 12.5448907 | 1.06E-01 | 70034139  | 70034262  | NC_000001.10 |
| cg21253087 | 2.88E-09 | 2.59E-10 | 6.67 | 12.5447322 | 7.99E-02 | 139290292 | 139290415 | NC_000009.11 |
| cg09619624 | 2.88E-09 | 2.60E-10 | 6.67 | 12.543792  | 1.44E-01 | 18985632  | 18985755  | NC_000022.10 |
| cg12769519 | 2.88E-09 | 2.60E-10 | 6.67 | 12.5425132 | 5.15E-02 | 76249217  | 76249340  | NC_000017.10 |
| cg05890785 | 2.89E-09 | 2.60E-10 | 6.67 | 12.541116  | 1.65E-01 | 53811704  | 53811827  | NC_000019.9  |
| cg09151754 | 2.90E-09 | 2.62E-10 | 6.67 | 12.5358144 | 1.27E-01 | 5019310   | 5019433   | NC_000017.10 |
| cg13503413 | 2.90E-09 | 2.62E-10 | 6.67 | 12.5354989 | 1.46E-01 | 60937257  | 60937380  | NC_000010.10 |
| cg09271277 | 2.91E-09 | 2.62E-10 | 6.67 | 12.5351306 | 4.24E-02 | 6590947   | 6591070   | NC_000007.13 |
| cg09872088 | 2.91E-09 | 2.62E-10 | 6.67 | 12.5349143 | 3.61E-02 | 121265893 | 121266016 | NC_000010.10 |
| cg27155163 | 2.91E-09 | 2.62E-10 | 6.67 | 12.5342093 | 5.25E-02 | 151026011 | 151026134 | NC_000007.13 |
| cg02207386 | 2.91E-09 | 2.62E-10 | 6.67 | 12.5341606 | 1.43E-01 | 25895834  | 25895957  | NC_000007.13 |

|            |          |          |      |            |          |           |           |              |
|------------|----------|----------|------|------------|----------|-----------|-----------|--------------|
| cg25140773 | 2.91E-09 | 2.62E-10 | 6.67 | 12.5338023 | 9.73E-02 | 128448807 | 128448930 | NC_000005.9  |
| cg11676902 | 2.91E-09 | 2.62E-10 | 6.67 | 12.5334756 | 1.75E-01 | 100061972 | 100062095 | NC_000006.11 |
| cg16795066 | 2.91E-09 | 2.62E-10 | 6.67 | 12.5330749 | 8.14E-02 | 66437078  | 66437201  | NC_000016.9  |
| cg24351410 | 2.91E-09 | 2.63E-10 | 6.67 | 12.5323346 | 1.68E-01 | 58716033  | 58716156  | NC_000001.10 |
| cg16403344 | 2.92E-09 | 2.63E-10 | 6.67 | 12.5306899 | 2.10E-01 | 113229392 | 113229515 | NC_000012.11 |
| cg03906434 | 2.92E-09 | 2.63E-10 | 6.67 | 12.5293876 | 1.53E-01 | 27231819  | 27231942  | NC_000007.13 |
| cg03454705 | 2.92E-09 | 2.64E-10 | 6.67 | 12.528465  | 7.75E-02 | 80535428  | 80535551  | NC_000017.10 |
| cg08780398 | 2.92E-09 | 2.64E-10 | 6.67 | 12.5284522 | 1.40E-01 | 77585381  | 77585504  | NC_000008.10 |
| cg11496364 | 2.92E-09 | 2.64E-10 | 6.66 | 12.5279749 | 8.49E-02 | 114258120 | 114258243 | NC_000002.11 |
| cg00143362 | 2.93E-09 | 2.64E-10 | 6.66 | 12.5277286 | 5.36E-02 | 15000025  | 15000148  | NC_000010.10 |
| cg13660942 | 2.93E-09 | 2.64E-10 | 6.66 | 12.5275731 | 1.04E-01 | 2031922   | 2032045   | NC_000012.11 |
| cg16117653 | 2.93E-09 | 2.64E-10 | 6.66 | 12.5269174 | 1.33E-01 | 4891192   | 4891315   | NC_000019.9  |
| cg12188410 | 2.93E-09 | 2.64E-10 | 6.66 | 12.5268979 | 1.24E-01 | 112460467 | 112460590 | NC_000006.11 |
| cg13769223 | 2.93E-09 | 2.64E-10 | 6.66 | 12.5268186 | 1.95E-01 | 27011963  | 27012086  | NC_000021.8  |
| cg16344173 | 2.93E-09 | 2.64E-10 | 6.66 | 12.5259546 | 6.18E-02 | 2158623   | 2158746   | NC_000007.13 |
| cg03347444 | 2.93E-09 | 2.65E-10 | 6.66 | 12.5246846 | 1.42E-01 | 32926880  | 32927003  | NC_000011.9  |
| cg12514789 | 2.93E-09 | 2.65E-10 | 6.66 | 12.524384  | 1.58E-01 | 19158123  | 19158246  | NC_000007.13 |
| cg20387341 | 2.93E-09 | 2.65E-10 | 6.66 | 12.524315  | 1.77E-01 | 44389282  | 44389405  | NC_000005.9  |
| cg14870792 | 2.94E-09 | 2.65E-10 | 6.66 | 12.523286  | 1.59E-01 | 2163532   | 2163655   | NC_000012.11 |
| cg06872514 | 2.95E-09 | 2.66E-10 | 6.66 | 12.5203031 | 8.30E-02 | 139746715 | 139746838 | NC_000009.11 |
| cg01104047 | 2.95E-09 | 2.66E-10 | 6.66 | 12.5190506 | 1.33E-01 | 136834155 | 136834278 | NC_000005.9  |
| cg09829551 | 2.95E-09 | 2.66E-10 | 6.66 | 12.5188183 | 1.35E-01 | 86599111  | 86599234  | NC_000016.9  |
| cg12163132 | 2.95E-09 | 2.67E-10 | 6.66 | 12.5178925 | 9.46E-02 | 59475917  | 59476040  | NC_000017.10 |
| cg13153708 | 2.95E-09 | 2.67E-10 | 6.66 | 12.5172916 | 1.39E-01 | 65078521  | 65078644  | NC_000014.8  |
| cg13489127 | 2.95E-09 | 2.67E-10 | 6.66 | 12.5172403 | 4.08E-02 | 33781501  | 33781624  | NC_000021.8  |

|            |          |          |      |            |          |           |           |              |
|------------|----------|----------|------|------------|----------|-----------|-----------|--------------|
| cg22533573 | 2.96E-09 | 2.67E-10 | 6.66 | 12.516833  | 1.06E-01 | 32452771  | 32452894  | NC_000011.9  |
| cg01791778 | 2.97E-09 | 2.68E-10 | 6.66 | 12.5132996 | 7.27E-02 | 583901    | 584024    | NC_000002.11 |
| cg06043419 | 2.97E-09 | 2.68E-10 | 6.66 | 12.5130955 | 1.50E-01 | 80256137  | 80256260  | NC_000005.9  |
| cg01557332 | 2.97E-09 | 2.68E-10 | 6.66 | 12.5128032 | 8.45E-02 | 169641045 | 169641168 | NC_000006.11 |
| cg03348397 | 2.97E-09 | 2.68E-10 | 6.66 | 12.51276   | 1.60E-01 | 54789648  | 54789771  | NC_000008.10 |
| cg10129041 | 2.97E-09 | 2.69E-10 | 6.66 | 12.5101501 | 1.33E-01 | 129494526 | 129494649 | NC_000002.11 |
| cg01405404 | 2.98E-09 | 2.69E-10 | 6.66 | 12.5093937 | 1.69E-01 | 37282556  | 37282679  | NC_000019.9  |
| cg23905216 | 2.98E-09 | 2.70E-10 | 6.66 | 12.5068551 | 1.55E-01 | 2161390   | 2161513   | NC_000011.9  |
| cg21769640 | 2.99E-09 | 2.70E-10 | 6.66 | 12.5060666 | 1.03E-01 | 23300066  | 23300189  | NC_000019.9  |
| cg11910759 | 2.99E-09 | 2.70E-10 | 6.66 | 12.504681  | 8.64E-02 | 7011519   | 7011642   | NC_000017.10 |
| cg05492170 | 2.99E-09 | 2.70E-10 | 6.66 | 12.5042589 | 1.35E-01 | 111536341 | 111536464 | NC_000004.11 |
| cg04539957 | 2.99E-09 | 2.70E-10 | 6.66 | 12.5042506 | 7.80E-02 | 44650068  | 44650191  | NC_000020.10 |
| cg19346371 | 3.00E-09 | 2.71E-10 | 6.66 | 12.5021249 | 1.75E-01 | 115120789 | 115120912 | NC_000012.11 |
| cg15744026 | 3.01E-09 | 2.72E-10 | 6.66 | 12.4979022 | 9.58E-02 | 32258302  | 32258425  | NC_000017.10 |
| cg03048432 | 3.01E-09 | 2.72E-10 | 6.66 | 12.4972627 | 1.47E-01 | 51290751  | 51290874  | NC_000014.8  |
| cg04651603 | 3.01E-09 | 2.72E-10 | 6.66 | 12.496418  | 1.50E-01 | 54321302  | 54321425  | NC_000012.11 |
| cg16672956 | 3.02E-09 | 2.73E-10 | 6.66 | 12.4958025 | 9.47E-02 | 88091767  | 88091890  | NC_000016.9  |
| cg12385482 | 3.03E-09 | 2.74E-10 | 6.66 | 12.4927171 | 6.00E-02 | 125802442 | 125802565 | NC_000011.9  |
| cg03958798 | 3.03E-09 | 2.74E-10 | 6.66 | 12.4910316 | 1.95E-01 | 106400686 | 106400809 | NC_000010.10 |
| cg21300719 | 3.04E-09 | 2.75E-10 | 6.66 | 12.4889817 | 1.38E-01 | 201097122 | 201097245 | NC_000001.10 |
| cg18031880 | 3.04E-09 | 2.75E-10 | 6.66 | 12.4878317 | 1.46E-01 | 115829932 | 115830055 | NC_000011.9  |
| cg00089100 | 3.04E-09 | 2.75E-10 | 6.66 | 12.4877821 | 3.82E-02 | 26922951  | 26923074  | NC_000022.10 |
| cg27554156 | 3.04E-09 | 2.75E-10 | 6.66 | 12.4872535 | 1.57E-01 | 13248725  | 13248848  | NC_000012.11 |
| cg22346073 | 3.04E-09 | 2.75E-10 | 6.66 | 12.4871251 | 1.12E-01 | 122402890 | 122403013 | NC_000002.11 |
| cg18045133 | 3.04E-09 | 2.75E-10 | 6.66 | 12.4859081 | 7.16E-02 | 133183688 | 133183811 | NC_000012.11 |

|            |          |          |      |            |          |           |           |              |
|------------|----------|----------|------|------------|----------|-----------|-----------|--------------|
| cg07547695 | 3.05E-09 | 2.76E-10 | 6.66 | 12.4832124 | 1.24E-01 | 111881075 | 111881198 | NC_000002.11 |
| cg18416585 | 3.05E-09 | 2.76E-10 | 6.66 | 12.4827675 | 1.05E-01 | 62756100  | 62756223  | NC_000004.11 |
| cg22934200 | 3.06E-09 | 2.77E-10 | 6.66 | 12.4814414 | 1.13E-01 | 61407270  | 61407393  | NC_000002.11 |
| cg04140663 | 3.06E-09 | 2.77E-10 | 6.66 | 12.4814308 | 1.56E-01 | 83315922  | 83316045  | NC_000015.9  |
| cg20124587 | 3.06E-09 | 2.77E-10 | 6.66 | 12.4810635 | 1.66E-01 | 176971355 | 176971478 | NC_000002.11 |
| cg18043195 | 3.07E-09 | 2.78E-10 | 6.66 | 12.4781139 | 9.97E-02 | 19033231  | 19033354  | NC_000009.11 |
| cg24234899 | 3.07E-09 | 2.78E-10 | 6.66 | 12.4762891 | 2.00E-01 | 118922493 | 118922616 | NC_000010.10 |
| cg09830083 | 3.08E-09 | 2.79E-10 | 6.66 | 12.4750457 | 9.60E-02 | 131561058 | 131561181 | NC_000005.9  |
| cg22920300 | 3.08E-09 | 2.79E-10 | 6.66 | 12.4749911 | 1.82E-01 | 181441364 | 181441487 | NC_000003.11 |
| cg17173166 | 3.08E-09 | 2.79E-10 | 6.66 | 12.4745089 | 4.91E-02 | 129692887 | 129693010 | NC_000003.11 |
| cg23786545 | 3.08E-09 | 2.79E-10 | 6.66 | 12.4744596 | 7.47E-02 | 130580518 | 130580641 | NC_000011.9  |
| cg22147660 | 3.08E-09 | 2.79E-10 | 6.66 | 12.4740099 | 1.74E-01 | 5895006   | 5895129   | NC_000018.9  |
| cg27308754 | 3.09E-09 | 2.79E-10 | 6.65 | 12.4720172 | 1.09E-01 | 123318999 | 123319122 | NC_000006.11 |
| cg14618923 | 3.09E-09 | 2.80E-10 | 6.65 | 12.4711343 | 1.52E-01 | 108978075 | 108978198 | NC_000006.11 |
| cg06721601 | 3.09E-09 | 2.80E-10 | 6.65 | 12.4707373 | 1.20E-01 | 101762633 | 101762756 | NC_000007.13 |
| cg12562967 | 3.09E-09 | 2.80E-10 | 6.65 | 12.4698427 | 2.02E-01 | 40006192  | 40006315  | NC_000019.9  |
| cg14780990 | 3.09E-09 | 2.80E-10 | 6.65 | 12.4692555 | 1.18E-01 | 93181182  | 93181305  | NC_000015.9  |
| cg02390569 | 3.10E-09 | 2.81E-10 | 6.65 | 12.4674458 | 4.93E-02 | 145624983 | 145625106 | NC_000008.10 |
| cg14493920 | 3.10E-09 | 2.81E-10 | 6.65 | 12.4668733 | 1.63E-01 | 37038053  | 37038176  | NC_000009.11 |
| cg14724471 | 3.11E-09 | 2.81E-10 | 6.65 | 12.4653791 | 1.38E-01 | 57089461  | 57089584  | NC_000020.10 |
| cg10634317 | 3.11E-09 | 2.81E-10 | 6.65 | 12.4649957 | 2.86E-02 | 56657854  | 56657977  | NC_000019.9  |
| cg02626307 | 3.11E-09 | 2.81E-10 | 6.65 | 12.4645684 | 7.19E-02 | 156305725 | 156305848 | NC_000001.10 |
| cg12248614 | 3.12E-09 | 2.82E-10 | 6.65 | 12.4617867 | 2.30E-01 | 41018880  | 41019003  | NC_000019.9  |
| cg09403249 | 3.12E-09 | 2.82E-10 | 6.65 | 12.4615902 | 1.61E-01 | 45444203  | 45444326  | NC_000012.11 |
| cg17331296 | 3.12E-09 | 2.83E-10 | 6.65 | 12.4604946 | 2.27E-01 | 41754181  | 41754304  | NC_000008.10 |

|            |          |          |      |            |          |           |           |              |
|------------|----------|----------|------|------------|----------|-----------|-----------|--------------|
| cg08262496 | 3.12E-09 | 2.83E-10 | 6.65 | 12.4592645 | 8.77E-02 | 22023163  | 22023286  | NC_000016.9  |
| cg06212471 | 3.13E-09 | 2.84E-10 | 6.65 | 12.4558877 | 5.60E-02 | 72458478  | 72458601  | NC_000004.11 |
| cg05423257 | 3.14E-09 | 2.85E-10 | 6.65 | 12.4539603 | 2.66E-02 | 233321600 | 233321723 | NC_000002.11 |
| cg07153966 | 3.15E-09 | 2.85E-10 | 6.65 | 12.4516419 | 1.36E-01 | 27147590  | 27147713  | NC_000007.13 |
| cg11877726 | 3.15E-09 | 2.85E-10 | 6.65 | 12.4515817 | 2.50E-02 | 99637027  | 99637150  | NC_000014.8  |
| cg24430580 | 3.15E-09 | 2.85E-10 | 6.65 | 12.451067  | 1.55E-01 | 111544235 | 111544358 | NC_000004.11 |
| cg19035107 | 3.16E-09 | 2.86E-10 | 6.65 | 12.4484728 | 1.50E-01 | 26745662  | 26745785  | NC_000006.11 |
| cg11659025 | 3.16E-09 | 2.86E-10 | 6.65 | 12.4480154 | 4.02E-02 | 147767989 | 147768112 | NC_000001.10 |
| cg23401210 | 3.16E-09 | 2.86E-10 | 6.65 | 12.4479896 | 5.55E-02 | 57630628  | 57630751  | NC_000019.9  |
| cg19764540 | 3.16E-09 | 2.87E-10 | 6.65 | 12.447174  | 9.74E-02 | 26782423  | 26782546  | NC_000002.11 |
| cg16790847 | 3.16E-09 | 2.87E-10 | 6.65 | 12.4458404 | 1.11E-01 | 147123429 | 147123552 | NC_000003.11 |
| cg07143418 | 3.17E-09 | 2.87E-10 | 6.65 | 12.4444738 | 1.97E-01 | 23567548  | 23567671  | NC_000008.10 |
| cg06274671 | 3.17E-09 | 2.88E-10 | 6.65 | 12.4437927 | 1.27E-01 | 51185236  | 51185359  | NC_000016.9  |
| cg27067781 | 3.18E-09 | 2.88E-10 | 6.65 | 12.4418518 | 1.56E-01 | 32116853  | 32116976  | NC_000006.11 |
| cg04142555 | 3.18E-09 | 2.89E-10 | 6.65 | 12.4399359 | 1.00E-01 | 23892656  | 23892779  | NC_000015.9  |
| cg01604138 | 3.18E-09 | 2.89E-10 | 6.65 | 12.4393449 | 4.65E-02 | 71202794  | 71202917  | NC_000011.9  |
| cg20318156 | 3.18E-09 | 2.89E-10 | 6.65 | 12.4390779 | 8.41E-02 | 99469323  | 99469446  | NC_000001.10 |
| cg21859603 | 3.19E-09 | 2.90E-10 | 6.65 | 12.4357988 | 7.40E-02 | 33247092  | 33247215  | NC_000006.11 |
| cg23886314 | 3.20E-09 | 2.90E-10 | 6.65 | 12.4354557 | 8.14E-02 | 116272127 | 116272250 | NC_000007.13 |
| cg23509896 | 3.20E-09 | 2.90E-10 | 6.65 | 12.4339219 | 1.79E-01 | 62680345  | 62680468  | NC_000020.10 |
| cg17520027 | 3.20E-09 | 2.91E-10 | 6.65 | 12.4327024 | 1.40E-01 | 200010708 | 200010831 | NC_000001.10 |
| cg15996950 | 3.21E-09 | 2.91E-10 | 6.65 | 12.4318879 | 9.58E-02 | 112282703 | 112282826 | NC_000013.10 |
| cg21764921 | 3.21E-09 | 2.91E-10 | 6.65 | 12.43057   | 3.92E-02 | 32825040  | 32825163  | NC_000006.11 |
| cg18888520 | 3.21E-09 | 2.92E-10 | 6.65 | 12.4299838 | 2.13E-01 | 58609806  | 58609929  | NC_000019.9  |
| cg19078067 | 3.21E-09 | 2.92E-10 | 6.65 | 12.4296937 | 1.19E-01 | 71586227  | 71586350  | NC_000017.10 |



|            |          |          |      |            |          |           |           |              |
|------------|----------|----------|------|------------|----------|-----------|-----------|--------------|
| cg23818921 | 3.22E-09 | 2.92E-10 | 6.65 | 12.4288161 | 6.33E-02 | 76871621  | 76871744  | NC_000004.11 |
| cg03587843 | 3.22E-09 | 2.92E-10 | 6.65 | 12.4286171 | 1.36E-01 | 1885516   | 1885639   | NC_000005.9  |
| cg27413632 | 3.22E-09 | 2.93E-10 | 6.65 | 12.4268976 | 3.75E-02 | 63963913  | 63964036  | NC_000003.11 |
| cg01696226 | 3.22E-09 | 2.93E-10 | 6.65 | 12.4266053 | 1.60E-01 | 79448527  | 79448650  | NC_000017.10 |
| cg21532103 | 3.22E-09 | 2.93E-10 | 6.65 | 12.4264703 | 7.33E-02 | 238535538 | 238535661 | NC_000002.11 |
| cg18099189 | 3.23E-09 | 2.93E-10 | 6.65 | 12.4255267 | 1.06E-01 | 54960259  | 54960382  | NC_000004.11 |
| cg18030133 | 3.23E-09 | 2.93E-10 | 6.65 | 12.4251058 | 8.72E-02 | 143929406 | 143929529 | NC_000006.11 |
| cg00205340 | 3.23E-09 | 2.94E-10 | 6.65 | 12.4230509 | 5.19E-02 | 79044277  | 79044400  | NC_000015.9  |
| cg16808373 | 3.24E-09 | 2.94E-10 | 6.65 | 12.4222212 | 1.39E-01 | 122850140 | 122850263 | NC_000011.9  |
| cg03053597 | 3.24E-09 | 2.94E-10 | 6.65 | 12.4211524 | 1.09E-01 | 17231486  | 17231609  | NC_000001.10 |
| cg20313969 | 3.24E-09 | 2.94E-10 | 6.65 | 12.420985  | 1.20E-01 | 112939562 | 112939685 | NC_000002.11 |
| cg07301944 | 3.24E-09 | 2.94E-10 | 6.65 | 12.4206863 | 1.16E-01 | 82660464  | 82660587  | NC_000016.9  |
| cg11112161 | 3.24E-09 | 2.95E-10 | 6.65 | 12.4202305 | 1.55E-01 | 33823004  | 33823127  | NC_000017.10 |
| cg24534926 | 3.24E-09 | 2.95E-10 | 6.65 | 12.4202192 | 1.31E-01 | 36667484  | 36667607  | NC_000017.10 |
| cg07782451 | 3.24E-09 | 2.95E-10 | 6.65 | 12.4201992 | 1.55E-01 | 494156    | 494279    | NC_000008.10 |
| cg23781495 | 3.25E-09 | 2.95E-10 | 6.64 | 12.4189239 | 1.38E-01 | 118917109 | 118917232 | NC_000009.11 |
| cg22586192 | 3.25E-09 | 2.95E-10 | 6.64 | 12.4185766 | 1.36E-02 | 57146928  | 57147051  | NC_000012.11 |
| cg14108380 | 3.25E-09 | 2.95E-10 | 6.64 | 12.4174274 | 8.56E-02 | 139299357 | 139299480 | NC_000009.11 |
| cg17062109 | 3.25E-09 | 2.95E-10 | 6.64 | 12.417115  | 1.77E-01 | 46670029  | 46670152  | NC_000017.10 |
| cg07073096 | 3.26E-09 | 2.96E-10 | 6.64 | 12.4160535 | 1.05E-01 | 2870441   | 2870564   | NC_000007.13 |
| cg20817902 | 3.26E-09 | 2.96E-10 | 6.64 | 12.4156457 | 2.37E-01 | 81124121  | 81124244  | NC_000004.11 |
| cg08601899 | 3.26E-09 | 2.96E-10 | 6.64 | 12.4155066 | 4.64E-02 | 114379217 | 114379340 | NC_000006.11 |
| cg14807945 | 3.26E-09 | 2.96E-10 | 6.64 | 12.4152448 | 9.60E-02 | 145189102 | 145189225 | NC_000002.11 |
| cg23861668 | 3.26E-09 | 2.96E-10 | 6.64 | 12.4150526 | 2.50E-01 | 20691126  | 20691249  | NC_000011.9  |
| cg06602847 | 3.26E-09 | 2.96E-10 | 6.64 | 12.4144235 | 1.34E-01 | 122131497 | 122131620 | NC_000009.11 |

|            |          |          |      |            |          |           |           |              |
|------------|----------|----------|------|------------|----------|-----------|-----------|--------------|
| cg04609859 | 3.27E-09 | 2.97E-10 | 6.64 | 12.4115599 | 1.74E-01 | 46655736  | 46655859  | NC_000017.10 |
| cg00703513 | 3.27E-09 | 2.97E-10 | 6.64 | 12.4111849 | 9.98E-02 | 145925258 | 145925381 | NC_000008.10 |
| cg01555907 | 3.28E-09 | 2.98E-10 | 6.64 | 12.4097498 | 9.78E-02 | 32571504  | 32571627  | NC_000009.11 |
| cg27287745 | 3.28E-09 | 2.98E-10 | 6.64 | 12.4085288 | 1.36E-01 | 61104967  | 61105090  | NC_000014.8  |
| cg12545687 | 3.28E-09 | 2.98E-10 | 6.64 | 12.4082663 | 1.58E-01 | 53423262  | 53423385  | NC_000013.10 |
| cg00577070 | 3.28E-09 | 2.98E-10 | 6.64 | 12.4078639 | 2.55E-02 | 47049880  | 47050003  | NC_000003.11 |
| cg08200869 | 3.29E-09 | 2.99E-10 | 6.64 | 12.4058878 | 8.23E-02 | 140807666 | 140807789 | NC_000005.9  |
| cg22858210 | 3.29E-09 | 2.99E-10 | 6.64 | 12.4039453 | 7.04E-02 | 65685787  | 65685910  | NC_000011.9  |
| cg23978968 | 3.29E-09 | 2.99E-10 | 6.64 | 12.4038091 | 1.05E-01 | 101704656 | 101704779 | NC_000001.10 |
| cg12426652 | 3.29E-09 | 3.00E-10 | 6.64 | 12.4034275 | 1.53E-01 | 37915056  | 37915179  | NC_000021.8  |
| cg18965213 | 3.30E-09 | 3.00E-10 | 6.64 | 12.4020735 | 4.51E-02 | 62989995  | 62990118  | NC_000015.9  |
| cg16681268 | 3.30E-09 | 3.00E-10 | 6.64 | 12.4015789 | 6.98E-02 | 117067616 | 117067739 | NC_000007.13 |
| cg11686208 | 3.30E-09 | 3.00E-10 | 6.64 | 12.4009294 | 8.76E-02 | 60763357  | 60763480  | NC_000002.11 |
| cg09895009 | 3.30E-09 | 3.01E-10 | 6.64 | 12.400487  | 8.33E-02 | 152595992 | 152596115 | NC_000001.10 |
| cg23952663 | 3.31E-09 | 3.01E-10 | 6.64 | 12.3998842 | 1.54E-01 | 75601120  | 75601243  | NC_000001.10 |
| cg12571423 | 3.31E-09 | 3.01E-10 | 6.64 | 12.3990697 | 1.32E-01 | 37006748  | 37006871  | NC_000013.10 |
| cg06535308 | 3.31E-09 | 3.01E-10 | 6.64 | 12.398889  | 1.56E-01 | 17497693  | 17497816  | NC_000011.9  |
| cg20253551 | 3.31E-09 | 3.01E-10 | 6.64 | 12.3986541 | 1.69E-01 | 152129400 | 152129523 | NC_000006.11 |
| cg18277764 | 3.31E-09 | 3.01E-10 | 6.64 | 12.3986142 | 1.75E-01 | 239188    | 239311    | NC_000003.11 |
| cg11630154 | 3.31E-09 | 3.01E-10 | 6.64 | 12.3973952 | 1.76E-01 | 137484364 | 137484487 | NC_000003.11 |
| cg03731303 | 3.31E-09 | 3.02E-10 | 6.64 | 12.3968996 | 1.60E-01 | 181443009 | 181443132 | NC_000003.11 |
| cg20405893 | 3.32E-09 | 3.02E-10 | 6.64 | 12.3956336 | 1.91E-01 | 50822158  | 50822281  | NC_000010.10 |
| cg26676559 | 3.32E-09 | 3.02E-10 | 6.64 | 12.395476  | 2.10E-01 | 14995167  | 14995290  | NC_000011.9  |
| cg11706835 | 3.32E-09 | 3.02E-10 | 6.64 | 12.3947521 | 1.33E-01 | 31580560  | 31580683  | NC_000016.9  |
| cg01749436 | 3.34E-09 | 3.04E-10 | 6.64 | 12.3904448 | 1.69E-01 | 9756178   | 9756301   | NC_000008.10 |

|            |          |          |      |            |          |           |           |              |
|------------|----------|----------|------|------------|----------|-----------|-----------|--------------|
| cg10089028 | 3.35E-09 | 3.04E-10 | 6.64 | 12.3876001 | 7.32E-02 | 95286216  | 95286339  | NC_000013.10 |
| cg00981837 | 3.35E-09 | 3.05E-10 | 6.64 | 12.3855374 | 1.80E-01 | 33936262  | 33936385  | NC_000005.9  |
| cg15742840 | 3.35E-09 | 3.05E-10 | 6.64 | 12.3848834 | 7.90E-02 | 21935133  | 21935256  | NC_000017.10 |
| cg01403246 | 3.35E-09 | 3.05E-10 | 6.64 | 12.3845091 | 1.30E-01 | 144512192 | 144512315 | NC_000008.10 |
| cg19694200 | 3.37E-09 | 3.07E-10 | 6.64 | 12.3797472 | 2.21E-01 | 55204351  | 55204474  | NC_000020.10 |
| cg22403273 | 3.37E-09 | 3.07E-10 | 6.64 | 12.378627  | 2.16E-01 | 81951956  | 81952079  | NC_000004.11 |
| cg04005969 | 3.38E-09 | 3.07E-10 | 6.64 | 12.3782149 | 1.77E-01 | 51171247  | 51171370  | NC_000019.9  |
| cg01566235 | 3.38E-09 | 3.08E-10 | 6.64 | 12.3755691 | 1.54E-01 | 36991101  | 36991224  | NC_000014.8  |
| cg01139553 | 3.39E-09 | 3.08E-10 | 6.64 | 12.3752763 | 6.00E-02 | 193493033 | 193493156 | NC_000003.11 |
| cg14074305 | 3.39E-09 | 3.08E-10 | 6.64 | 12.3748944 | 1.64E-01 | 106260513 | 106260636 | NC_000002.11 |
| cg16617817 | 3.39E-09 | 3.09E-10 | 6.64 | 12.3744607 | 8.69E-02 | 1582686   | 1582809   | NC_000007.13 |
| cg21932416 | 3.39E-09 | 3.09E-10 | 6.64 | 12.3741871 | 1.79E-01 | 176997707 | 176997830 | NC_000002.11 |
| cg04837832 | 3.39E-09 | 3.09E-10 | 6.64 | 12.3728679 | 1.41E-01 | 101290958 | 101291081 | NC_000010.10 |
| cg10741308 | 3.40E-09 | 3.10E-10 | 6.64 | 12.3707292 | 7.75E-02 | 97175272  | 97175395  | NC_000010.10 |
| cg14757228 | 3.40E-09 | 3.10E-10 | 6.64 | 12.3705628 | 1.78E-01 | 32116858  | 32116981  | NC_000006.11 |
| cg17979595 | 3.41E-09 | 3.10E-10 | 6.64 | 12.3688003 | 8.52E-02 | 175995850 | 175995973 | NC_000005.9  |
| cg13223938 | 3.41E-09 | 3.11E-10 | 6.64 | 12.3678982 | 4.52E-02 | 132171201 | 132171324 | NC_000012.11 |
| cg04988476 | 3.41E-09 | 3.11E-10 | 6.64 | 12.3669433 | 1.64E-01 | 192444985 | 192445108 | NC_000003.11 |
| cg25657218 | 3.41E-09 | 3.11E-10 | 6.64 | 12.3662866 | 1.13E-01 | 22017062  | 22017185  | NC_000017.10 |
| cg19134945 | 3.42E-09 | 3.11E-10 | 6.64 | 12.3655534 | 2.10E-01 | 111558566 | 111558689 | NC_000004.11 |
| cg13290643 | 3.42E-09 | 3.12E-10 | 6.63 | 12.3645313 | 4.96E-02 | 2093631   | 2093754   | NC_000011.9  |
| cg17234150 | 3.42E-09 | 3.12E-10 | 6.63 | 12.3645202 | 1.75E-01 | 24266905  | 24267028  | NC_000016.9  |
| cg06397845 | 3.42E-09 | 3.12E-10 | 6.63 | 12.3635844 | 7.41E-02 | 35732737  | 35732860  | NC_000017.10 |
| cg24951286 | 3.42E-09 | 3.12E-10 | 6.63 | 12.3633561 | 1.50E-01 | 140625068 | 140625191 | NC_000005.9  |
| cg17202109 | 3.43E-09 | 3.12E-10 | 6.63 | 12.3629322 | 2.93E-02 | 77508977  | 77509100  | NC_000017.10 |

|            |          |          |      |            |          |           |           |              |
|------------|----------|----------|------|------------|----------|-----------|-----------|--------------|
| cg25950625 | 3.43E-09 | 3.13E-10 | 6.63 | 12.3612708 | 2.12E-01 | 41510116  | 41510239  | NC_000005.9  |
| cg07015195 | 3.43E-09 | 3.13E-10 | 6.63 | 12.3611059 | 1.55E-01 | 109093450 | 109093573 | NC_000008.10 |
| cg01466330 | 3.43E-09 | 3.13E-10 | 6.63 | 12.3603463 | 8.24E-02 | 39835697  | 39835820  | NC_000008.10 |
| cg13653963 | 3.43E-09 | 3.13E-10 | 6.63 | 12.3599472 | 8.83E-02 | 135632595 | 135632718 | NC_000009.11 |
| cg05462359 | 3.43E-09 | 3.13E-10 | 6.63 | 12.3599164 | 1.83E-01 | 37837788  | 37837911  | NC_000005.9  |
| cg23573900 | 3.44E-09 | 3.14E-10 | 6.63 | 12.3583376 | 1.30E-01 | 139056794 | 139056917 | NC_000005.9  |
| cg22614787 | 3.44E-09 | 3.14E-10 | 6.63 | 12.3580073 | 4.66E-02 | 13919708  | 13919831  | NC_000019.9  |
| cg09784259 | 3.44E-09 | 3.14E-10 | 6.63 | 12.3577261 | 6.52E-02 | 169703422 | 169703545 | NC_000001.10 |
| cg18803257 | 3.44E-09 | 3.14E-10 | 6.63 | 12.3573267 | 8.25E-02 | 77158025  | 77158148  | NC_000010.10 |
| cg06842954 | 3.45E-09 | 3.15E-10 | 6.63 | 12.3546942 | 1.58E-01 | 111559066 | 111559189 | NC_000004.11 |
| cg06391932 | 3.45E-09 | 3.15E-10 | 6.63 | 12.354643  | 1.28E-01 | 45159894  | 45160017  | NC_000002.11 |
| cg00146249 | 3.45E-09 | 3.15E-10 | 6.63 | 12.3539302 | 2.04E-02 | 79042364  | 79042487  | NC_000017.10 |
| cg22797653 | 3.46E-09 | 3.15E-10 | 6.63 | 12.3536801 | 5.11E-02 | 33466255  | 33466378  | NC_000003.11 |
| cg17929687 | 3.46E-09 | 3.15E-10 | 6.63 | 12.3536635 | 1.87E-01 | 52734325  | 52734448  | NC_000014.8  |
| cg25600049 | 3.46E-09 | 3.15E-10 | 6.63 | 12.3533113 | 1.68E-01 | 53419729  | 53419852  | NC_000013.10 |
| cg10238917 | 3.46E-09 | 3.15E-10 | 6.63 | 12.3530894 | 5.60E-02 | 30942621  | 30942744  | NC_000016.9  |
| cg19643097 | 3.46E-09 | 3.16E-10 | 6.63 | 12.3525358 | 5.40E-02 | 105794085 | 105794208 | NC_000014.8  |
| cg23818621 | 3.46E-09 | 3.16E-10 | 6.63 | 12.3513472 | 1.94E-01 | 4850551   | 4850674   | NC_000008.10 |
| cg13117164 | 3.46E-09 | 3.16E-10 | 6.63 | 12.3509259 | 1.60E-01 | 54960232  | 54960355  | NC_000004.11 |
| cg18366919 | 3.47E-09 | 3.16E-10 | 6.63 | 12.3502078 | 1.48E-01 | 15344364  | 15344487  | NC_000019.9  |
| cg10143543 | 3.47E-09 | 3.17E-10 | 6.63 | 12.3496054 | 6.31E-02 | 76437005  | 76437128  | NC_000004.11 |
| cg22656521 | 3.47E-09 | 3.17E-10 | 6.63 | 12.3494278 | 6.30E-02 | 19118165  | 19118288  | NC_000022.10 |
| cg14975429 | 3.47E-09 | 3.17E-10 | 6.63 | 12.3480406 | 1.20E-01 | 182549604 | 182549727 | NC_000002.11 |
| cg18534345 | 3.48E-09 | 3.17E-10 | 6.63 | 12.3472927 | 1.39E-01 | 120355342 | 120355465 | NC_000010.10 |
| cg08990926 | 3.48E-09 | 3.18E-10 | 6.63 | 12.3463137 | 1.70E-01 | 41086365  | 41086488  | NC_000012.11 |

|            |          |          |      |            |          |           |           |              |
|------------|----------|----------|------|------------|----------|-----------|-----------|--------------|
| cg23554956 | 3.48E-09 | 3.18E-10 | 6.63 | 12.3453223 | 2.03E-01 | 65489040  | 65489163  | NC_000008.10 |
| cg07347205 | 3.49E-09 | 3.19E-10 | 6.63 | 12.3432115 | 1.34E-01 | 87159274  | 87159397  | NC_000016.9  |
| cg21201099 | 3.49E-09 | 3.19E-10 | 6.63 | 12.3431711 | 1.34E-01 | 59482446  | 59482569  | NC_000017.10 |
| cg19961480 | 3.49E-09 | 3.19E-10 | 6.63 | 12.3427379 | 1.55E-01 | 88877216  | 88877339  | NC_000006.11 |
| cg01653446 | 3.49E-09 | 3.19E-10 | 6.63 | 12.3426119 | 4.24E-02 | 20904169  | 20904292  | NC_000014.8  |
| cg04063906 | 3.49E-09 | 3.19E-10 | 6.63 | 12.3424744 | 5.59E-02 | 588539    | 588662    | NC_000007.13 |
| cg23527920 | 3.49E-09 | 3.19E-10 | 6.63 | 12.3422352 | 6.66E-02 | 32906857  | 32906980  | NC_000006.11 |
| cg25387861 | 3.49E-09 | 3.19E-10 | 6.63 | 12.3422186 | 5.87E-02 | 234731684 | 234731807 | NC_000001.10 |
| cg14778576 | 3.49E-09 | 3.19E-10 | 6.63 | 12.3421834 | 3.86E-02 | 160477458 | 160477581 | NC_000003.11 |
| cg23432707 | 3.49E-09 | 3.19E-10 | 6.63 | 12.3421557 | 9.28E-02 | 97278556  | 97278679  | NC_000008.10 |
| cg00319545 | 3.49E-09 | 3.19E-10 | 6.63 | 12.3420982 | 1.35E-01 | 177133737 | 177133860 | NC_000001.10 |
| cg17098255 | 3.49E-09 | 3.19E-10 | 6.63 | 12.341833  | 4.69E-02 | 92636767  | 92636890  | NC_000006.11 |
| cg15698066 | 3.50E-09 | 3.19E-10 | 6.63 | 12.3415047 | 2.08E-01 | 100438647 | 100438770 | NC_000014.8  |
| cg19694460 | 3.50E-09 | 3.20E-10 | 6.63 | 12.3391944 | 8.91E-02 | 6797497   | 6797620   | NC_000007.13 |
| cg05444816 | 3.51E-09 | 3.20E-10 | 6.63 | 12.3376069 | 1.37E-01 | 2162406   | 2162529   | NC_000011.9  |
| cg18811621 | 3.51E-09 | 3.21E-10 | 6.63 | 12.3373141 | 7.21E-02 | 208207188 | 208207311 | NC_000002.11 |
| cg23816049 | 3.51E-09 | 3.21E-10 | 6.63 | 12.3372952 | 2.27E-01 | 224804081 | 224804204 | NC_000001.10 |
| cg05634149 | 3.51E-09 | 3.21E-10 | 6.63 | 12.3369906 | 1.98E-01 | 34395317  | 34395440  | NC_000021.8  |
| cg04422562 | 3.51E-09 | 3.21E-10 | 6.63 | 12.3365347 | 1.33E-01 | 155247170 | 155247293 | NC_000007.13 |
| cg08555552 | 3.51E-09 | 3.21E-10 | 6.63 | 12.3364228 | 1.49E-01 | 13536409  | 13536532  | NC_000004.11 |
| cg27160130 | 3.51E-09 | 3.21E-10 | 6.63 | 12.3357209 | 1.65E-01 | 237073518 | 237073641 | NC_000002.11 |
| cg03397031 | 3.52E-09 | 3.21E-10 | 6.63 | 12.3351625 | 4.89E-02 | 29189308  | 29189431  | NC_000001.10 |
| cg21050013 | 3.52E-09 | 3.21E-10 | 6.63 | 12.3349902 | 7.00E-02 | 48306664  | 48306787  | NC_000019.9  |
| cg04974130 | 3.52E-09 | 3.21E-10 | 6.63 | 12.3346027 | 1.17E-01 | 21951046  | 21951169  | NC_000004.11 |
| cg02867216 | 3.52E-09 | 3.21E-10 | 6.63 | 12.334367  | 1.60E-01 | 72925513  | 72925636  | NC_000018.9  |

|            |          |          |      |            |          |           |           |              |
|------------|----------|----------|------|------------|----------|-----------|-----------|--------------|
| cg03648116 | 3.52E-09 | 3.21E-10 | 6.63 | 12.3343271 | 5.44E-02 | 105945234 | 105945357 | NC_000011.9  |
| cg08697092 | 3.52E-09 | 3.22E-10 | 6.63 | 12.334092  | 1.94E-01 | 56879933  | 56880056  | NC_000019.9  |
| cg00192136 | 3.52E-09 | 3.22E-10 | 6.63 | 12.3334437 | 1.90E-01 | 20178496  | 20178619  | NC_000011.9  |
| cg09071155 | 3.53E-09 | 3.22E-10 | 6.63 | 12.3314977 | 1.48E-01 | 27280914  | 27281037  | NC_000007.13 |
| cg06284231 | 3.53E-09 | 3.23E-10 | 6.63 | 12.331158  | 1.59E-01 | 38724255  | 38724378  | NC_000014.8  |
| cg09781028 | 3.53E-09 | 3.23E-10 | 6.63 | 12.330339  | 1.35E-01 | 90355905  | 90356028  | NC_000007.13 |
| cg23448348 | 3.53E-09 | 3.23E-10 | 6.63 | 12.3302231 | 1.66E-01 | 139257907 | 139258030 | NC_000003.11 |
| cg26195583 | 3.53E-09 | 3.23E-10 | 6.63 | 12.3299239 | 1.60E-01 | 41869348  | 41869471  | NC_000004.11 |
| cg23658462 | 3.54E-09 | 3.23E-10 | 6.63 | 12.3285665 | 1.15E-01 | 1290552   | 1290675   | NC_000019.9  |
| cg10811426 | 3.54E-09 | 3.24E-10 | 6.63 | 12.3273116 | 1.32E-01 | 234667461 | 234667584 | NC_000001.10 |
| cg17319774 | 3.54E-09 | 3.24E-10 | 6.63 | 12.3271931 | 1.49E-01 | 79171053  | 79171176  | NC_000013.10 |
| cg09355652 | 3.54E-09 | 3.24E-10 | 6.63 | 12.32652   | 4.69E-02 | 64668475  | 64668598  | NC_000011.9  |
| cg07105117 | 3.55E-09 | 3.24E-10 | 6.63 | 12.3261763 | 3.85E-02 | 234652601 | 234652724 | NC_000002.11 |
| cg09234672 | 3.55E-09 | 3.24E-10 | 6.63 | 12.3258261 | 1.24E-01 | 51187750  | 51187873  | NC_000016.9  |
| cg01341655 | 3.55E-09 | 3.25E-10 | 6.63 | 12.3239952 | 1.19E-01 | 62202294  | 62202417  | NC_000004.11 |
| cg04629595 | 3.56E-09 | 3.26E-10 | 6.63 | 12.3219363 | 1.08E-01 | 74592566  | 74592689  | NC_000015.9  |
| cg15832905 | 3.57E-09 | 3.26E-10 | 6.63 | 12.3203232 | 3.54E-02 | 1707625   | 1707748   | NC_000011.9  |
| cg06907391 | 3.57E-09 | 3.26E-10 | 6.63 | 12.320081  | 1.84E-01 | 161275138 | 161275261 | NC_000005.9  |
| cg10321146 | 3.57E-09 | 3.26E-10 | 6.63 | 12.3195235 | 1.34E-01 | 6822469   | 6822592   | NC_000019.9  |
| cg22340475 | 3.57E-09 | 3.26E-10 | 6.63 | 12.3195176 | 1.27E-01 | 55529845  | 55529968  | NC_000008.10 |
| cg11240043 | 3.58E-09 | 3.27E-10 | 6.63 | 12.3173911 | 8.09E-02 | 20250501  | 20250624  | NC_000001.10 |
| cg04066265 | 3.58E-09 | 3.27E-10 | 6.63 | 12.3171704 | 1.35E-01 | 19460243  | 19460366  | NC_000008.10 |
| cg07265743 | 3.58E-09 | 3.27E-10 | 6.63 | 12.3166387 | 2.32E-01 | 59535253  | 59535376  | NC_000017.10 |
| cg09103619 | 3.58E-09 | 3.27E-10 | 6.63 | 12.3161894 | 2.15E-01 | 79575048  | 79575171  | NC_000015.9  |
| cg02984614 | 3.58E-09 | 3.28E-10 | 6.63 | 12.3153565 | 2.31E-01 | 31618409  | 31618532  | NC_000017.10 |

|            |          |          |      |            |          |           |           |              |
|------------|----------|----------|------|------------|----------|-----------|-----------|--------------|
| cg10567498 | 3.59E-09 | 3.28E-10 | 6.63 | 12.3144176 | 8.22E-02 | 41020537  | 41020660  | NC_000006.11 |
| cg24181062 | 3.59E-09 | 3.28E-10 | 6.63 | 12.3138789 | 1.02E-01 | 115705401 | 115705524 | NC_000003.11 |
| cg13981287 | 3.59E-09 | 3.29E-10 | 6.63 | 12.3129831 | 3.93E-02 | 207081344 | 207081467 | NC_000001.10 |
| cg08250918 | 3.59E-09 | 3.29E-10 | 6.63 | 12.3126031 | 1.07E-01 | 50467921  | 50468044  | NC_000007.13 |
| cg27179353 | 3.60E-09 | 3.29E-10 | 6.63 | 12.3113222 | 1.11E-01 | 156364125 | 156364248 | NC_000004.11 |
| cg24582338 | 3.60E-09 | 3.29E-10 | 6.62 | 12.3107641 | 6.62E-02 | 106594431 | 106594554 | NC_000006.11 |
| cg11665613 | 3.60E-09 | 3.29E-10 | 6.62 | 12.31057   | 7.24E-02 | 12268883  | 12269006  | NC_000001.10 |
| cg18315960 | 3.60E-09 | 3.30E-10 | 6.62 | 12.3100968 | 1.57E-01 | 58204028  | 58204151  | NC_000013.10 |
| cg18217632 | 3.61E-09 | 3.30E-10 | 6.62 | 12.3086597 | 1.36E-01 | 3602937   | 3603060   | NC_000012.11 |
| cg12908399 | 3.61E-09 | 3.30E-10 | 6.62 | 12.3082349 | 1.25E-01 | 229570288 | 229570411 | NC_000001.10 |
| cg09851650 | 3.61E-09 | 3.30E-10 | 6.62 | 12.3079323 | 5.71E-02 | 20465286  | 20465409  | NC_000001.10 |
| cg18399218 | 3.61E-09 | 3.30E-10 | 6.62 | 12.3075237 | 1.06E-01 | 170561359 | 170561482 | NC_000004.11 |
| cg25184481 | 3.61E-09 | 3.30E-10 | 6.62 | 12.3074329 | 1.53E-01 | 19813001  | 19813124  | NC_000007.13 |
| cg19478558 | 3.61E-09 | 3.31E-10 | 6.62 | 12.307141  | 7.09E-02 | 44260048  | 44260171  | NC_000018.9  |
| cg19223129 | 3.62E-09 | 3.31E-10 | 6.62 | 12.3055561 | 1.29E-01 | 7052403   | 7052526   | NC_000004.11 |
| cg12493218 | 3.62E-09 | 3.31E-10 | 6.62 | 12.3050842 | 1.37E-01 | 101453358 | 101453481 | NC_000011.9  |
| cg21476463 | 3.62E-09 | 3.31E-10 | 6.62 | 12.3046497 | 5.04E-02 | 139259926 | 139260049 | NC_000003.11 |
| cg04898026 | 3.62E-09 | 3.32E-10 | 6.62 | 12.3039958 | 8.56E-02 | 149487677 | 149487800 | NC_000007.13 |
| cg08408994 | 3.62E-09 | 3.32E-10 | 6.62 | 12.3035596 | 2.20E-01 | 44330958  | 44331081  | NC_000011.9  |
| cg01322214 | 3.62E-09 | 3.32E-10 | 6.62 | 12.3030212 | 1.27E-01 | 25219198  | 25219321  | NC_000007.13 |
| cg05157791 | 3.63E-09 | 3.33E-10 | 6.62 | 12.3008659 | 8.63E-02 | 113551036 | 113551159 | NC_000012.11 |
| cg08172044 | 3.63E-09 | 3.33E-10 | 6.62 | 12.300847  | 5.05E-02 | 126070462 | 126070585 | NC_000006.11 |
| cg10826043 | 3.63E-09 | 3.33E-10 | 6.62 | 12.3002325 | 1.53E-01 | 17100121  | 17100244  | NC_000006.11 |
| cg26020513 | 3.64E-09 | 3.33E-10 | 6.62 | 12.2996513 | 1.25E-01 | 11568356  | 11568479  | NC_000008.10 |
| cg26332285 | 3.64E-09 | 3.33E-10 | 6.62 | 12.2991579 | 7.80E-02 | 134915746 | 134915869 | NC_000010.10 |

|            |          |          |      |            |          |           |           |              |
|------------|----------|----------|------|------------|----------|-----------|-----------|--------------|
| cg12940886 | 3.64E-09 | 3.33E-10 | 6.62 | 12.299102  | 1.60E-01 | 59989928  | 59990051  | NC_000013.10 |
| cg09996789 | 3.64E-09 | 3.33E-10 | 6.62 | 12.2984651 | 1.06E-01 | 1310584   | 1310707   | NC_000016.9  |
| cg11969556 | 3.65E-09 | 3.34E-10 | 6.62 | 12.2967567 | 1.03E-01 | 176994498 | 176994621 | NC_000002.11 |
| cg27228433 | 3.65E-09 | 3.34E-10 | 6.62 | 12.2963342 | 9.66E-02 | 71475716  | 71475839  | NC_000016.9  |
| cg21756485 | 3.65E-09 | 3.34E-10 | 6.62 | 12.2956912 | 1.53E-01 | 36805370  | 36805493  | NC_000003.11 |
| cg16366685 | 3.65E-09 | 3.35E-10 | 6.62 | 12.2951353 | 7.29E-02 | 80535398  | 80535521  | NC_000017.10 |
| cg05616010 | 3.66E-09 | 3.35E-10 | 6.62 | 12.2935641 | 1.05E-01 | 58630089  | 58630212  | NC_000019.9  |
| cg02095498 | 3.66E-09 | 3.35E-10 | 6.62 | 12.2933584 | 4.90E-02 | 142368264 | 142368387 | NC_000008.10 |
| cg15381162 | 3.66E-09 | 3.36E-10 | 6.62 | 12.2922444 | 2.47E-02 | 23517736  | 23517859  | NC_000014.8  |
| cg07549735 | 3.67E-09 | 3.36E-10 | 6.62 | 12.2895913 | 1.68E-02 | 6495256   | 6495379   | NC_000011.9  |
| cg07090701 | 3.67E-09 | 3.37E-10 | 6.62 | 12.28902   | 1.53E-01 | 119914553 | 119914676 | NC_000002.11 |
| cg20125971 | 3.68E-09 | 3.37E-10 | 6.62 | 12.2886318 | 8.84E-02 | 56458333  | 56458456  | NC_000004.11 |
| cg08031492 | 3.68E-09 | 3.37E-10 | 6.62 | 12.2873059 | 1.33E-01 | 469214    | 469337    | NC_000002.11 |
| cg06741594 | 3.68E-09 | 3.38E-10 | 6.62 | 12.2863672 | 2.01E-01 | 132260475 | 132260598 | NC_000007.13 |
| cg19740353 | 3.68E-09 | 3.38E-10 | 6.62 | 12.2862546 | 5.15E-02 | 53394492  | 53394615  | NC_000006.11 |
| cg02988984 | 3.68E-09 | 3.38E-10 | 6.62 | 12.2858944 | 1.12E-01 | 180579844 | 180579967 | NC_000001.10 |
| cg22989843 | 3.69E-09 | 3.38E-10 | 6.62 | 12.2854598 | 2.10E-01 | 223154201 | 223154324 | NC_000002.11 |
| cg22793136 | 3.69E-09 | 3.38E-10 | 6.62 | 12.2842743 | 1.67E-01 | 94543560  | 94543683  | NC_000012.11 |
| cg05619587 | 3.69E-09 | 3.38E-10 | 6.62 | 12.2839323 | 1.80E-01 | 85306021  | 85306144  | NC_000012.11 |
| cg04344749 | 3.70E-09 | 3.39E-10 | 6.62 | 12.282492  | 8.72E-02 | 25871814  | 25871937  | NC_000001.10 |
| cg21684012 | 3.70E-09 | 3.39E-10 | 6.62 | 12.2816062 | 1.84E-01 | 100912906 | 100913029 | NC_000006.11 |
| cg06976250 | 3.70E-09 | 3.39E-10 | 6.62 | 12.2811955 | 2.26E-01 | 113258750 | 113258873 | NC_000011.9  |
| cg04091180 | 3.70E-09 | 3.39E-10 | 6.62 | 12.2809542 | 5.60E-02 | 38822199  | 38822322  | NC_000017.10 |
| cg03401738 | 3.70E-09 | 3.40E-10 | 6.62 | 12.2808372 | 1.67E-01 | 65991664  | 65991787  | NC_000001.10 |
| cg18255550 | 3.70E-09 | 3.40E-10 | 6.62 | 12.2804223 | 8.48E-02 | 35246954  | 35247077  | NC_000017.10 |



|            |          |          |      |            |          |           |           |              |
|------------|----------|----------|------|------------|----------|-----------|-----------|--------------|
| cg03811905 | 3.70E-09 | 3.40E-10 | 6.62 | 12.2802701 | 5.07E-02 | 239070208 | 239070331 | NC_000002.11 |
| cg12717612 | 3.71E-09 | 3.40E-10 | 6.62 | 12.2795681 | 8.14E-02 | 56321500  | 56321623  | NC_000020.10 |
| cg00513100 | 3.71E-09 | 3.40E-10 | 6.62 | 12.2781033 | 4.51E-02 | 66487501  | 66487624  | NC_000003.11 |
| cg08233331 | 3.73E-09 | 3.42E-10 | 6.62 | 12.2744103 | 7.57E-02 | 1359656   | 1359779   | NC_000018.9  |
| cg04037585 | 3.73E-09 | 3.42E-10 | 6.62 | 12.2729296 | 1.26E-01 | 56231292  | 56231415  | NC_000016.9  |
| cg17136073 | 3.73E-09 | 3.42E-10 | 6.62 | 12.2725344 | 9.20E-02 | 23310675  | 23310798  | NC_000013.10 |
| cg06728579 | 3.74E-09 | 3.43E-10 | 6.62 | 12.2715714 | 2.83E-01 | 56224901  | 56225024  | NC_000016.9  |
| cg12820681 | 3.74E-09 | 3.43E-10 | 6.62 | 12.2712538 | 1.86E-01 | 155166290 | 155166413 | NC_000007.13 |
| cg05269013 | 3.74E-09 | 3.43E-10 | 6.62 | 12.2712316 | 1.08E-01 | 56728520  | 56728643  | NC_000020.10 |
| cg17971015 | 3.74E-09 | 3.43E-10 | 6.62 | 12.2711142 | 1.82E-01 | 12306198  | 12306321  | NC_000019.9  |
| cg25652953 | 3.74E-09 | 3.43E-10 | 6.62 | 12.2708466 | 4.64E-02 | 106713261 | 106713384 | NC_000005.9  |
| cg17630392 | 3.74E-09 | 3.43E-10 | 6.62 | 12.2708418 | 1.29E-01 | 32712623  | 32712746  | NC_000005.9  |
| cg17526483 | 3.74E-09 | 3.43E-10 | 6.62 | 12.2704773 | 1.15E-01 | 27281404  | 27281527  | NC_000007.13 |
| cg08842907 | 3.74E-09 | 3.43E-10 | 6.62 | 12.2697537 | 8.79E-02 | 62470818  | 62470941  | NC_000011.9  |
| cg24829430 | 3.74E-09 | 3.44E-10 | 6.62 | 12.2690754 | 5.08E-02 | 44471057  | 44471180  | NC_000007.13 |
| cg15546071 | 3.74E-09 | 3.44E-10 | 6.62 | 12.2689453 | 7.03E-02 | 135691756 | 135691879 | NC_000002.11 |
| cg07150036 | 3.75E-09 | 3.44E-10 | 6.62 | 12.2684744 | 5.73E-02 | 90017616  | 90017739  | NC_000016.9  |
| cg17561452 | 3.75E-09 | 3.44E-10 | 6.62 | 12.2684603 | 6.80E-02 | 84224707  | 84224830  | NC_000016.9  |
| cg13537240 | 3.76E-09 | 3.45E-10 | 6.62 | 12.2650381 | 1.06E-01 | 2761549   | 2761672   | NC_000012.11 |
| cg15108727 | 3.76E-09 | 3.45E-10 | 6.62 | 12.2640843 | 1.47E-01 | 3104873   | 3104996   | NC_000005.9  |
| cg22286936 | 3.76E-09 | 3.45E-10 | 6.62 | 12.263756  | 1.53E-01 | 50683593  | 50683716  | NC_000006.11 |
| cg02212009 | 3.77E-09 | 3.46E-10 | 6.62 | 12.2620063 | 1.44E-01 | 12820860  | 12820983  | NC_000011.9  |
| cg02902882 | 3.78E-09 | 3.47E-10 | 6.62 | 12.2598602 | 9.19E-02 | 798345    | 798468    | NC_000016.9  |
| cg27491557 | 3.78E-09 | 3.47E-10 | 6.62 | 12.2598577 | 1.08E-01 | 3165885   | 3166008   | NC_000006.11 |
| cg01690182 | 3.78E-09 | 3.47E-10 | 6.62 | 12.2590922 | 1.58E-01 | 27018874  | 27018997  | NC_000015.9  |

|            |          |          |      |            |          |           |           |              |
|------------|----------|----------|------|------------|----------|-----------|-----------|--------------|
| cg06836725 | 3.78E-09 | 3.47E-10 | 6.62 | 12.2588273 | 9.22E-02 | 217515425 | 217515548 | NC_000002.11 |
| cg11826327 | 3.78E-09 | 3.47E-10 | 6.62 | 12.2587299 | 6.01E-02 | 1669926   | 1670049   | NC_000011.9  |
| cg13692655 | 3.78E-09 | 3.47E-10 | 6.62 | 12.25869   | 1.14E-01 | 130713088 | 130713211 | NC_000009.11 |
| cg06849452 | 3.79E-09 | 3.48E-10 | 6.62 | 12.257001  | 2.67E-02 | 68732297  | 68732420  | NC_000016.9  |
| cg15815435 | 3.79E-09 | 3.48E-10 | 6.61 | 12.2556282 | 1.10E-01 | 11605526  | 11605649  | NC_000004.11 |
| cg00592871 | 3.79E-09 | 3.49E-10 | 6.61 | 12.2550845 | 7.62E-02 | 118738517 | 118738640 | NC_000008.10 |
| cg09693004 | 3.80E-09 | 3.49E-10 | 6.61 | 12.2536466 | 1.19E-01 | 134072931 | 134073054 | NC_000004.11 |
| cg23998071 | 3.80E-09 | 3.49E-10 | 6.61 | 12.2530327 | 1.90E-01 | 27289669  | 27289792  | NC_000007.13 |
| cg07253769 | 3.81E-09 | 3.50E-10 | 6.61 | 12.250657  | 1.11E-01 | 113447342 | 113447465 | NC_000012.11 |
| cg18531176 | 3.81E-09 | 3.51E-10 | 6.61 | 12.2495749 | 8.03E-02 | 131706744 | 131706867 | NC_000010.10 |
| cg16960402 | 3.81E-09 | 3.51E-10 | 6.61 | 12.249312  | 8.68E-02 | 2032075   | 2032198   | NC_000007.13 |
| cg10098582 | 3.82E-09 | 3.51E-10 | 6.61 | 12.2471778 | 6.52E-02 | 28877881  | 28878004  | NC_000016.9  |
| cg19696317 | 3.82E-09 | 3.52E-10 | 6.61 | 12.2465861 | 2.16E-01 | 84456171  | 84456294  | NC_000013.10 |
| cg25496947 | 3.83E-09 | 3.52E-10 | 6.61 | 12.2462439 | 3.09E-02 | 46192911  | 46193034  | NC_000007.13 |
| cg18739950 | 3.84E-09 | 3.53E-10 | 6.61 | 12.2426578 | 1.45E-01 | 95870440  | 95870563  | NC_000015.9  |
| cg21962423 | 3.84E-09 | 3.53E-10 | 6.61 | 12.2417494 | 1.42E-01 | 113913887 | 113914010 | NC_000012.11 |
| cg03886898 | 3.84E-09 | 3.53E-10 | 6.61 | 12.241406  | 4.92E-02 | 54359132  | 54359255  | NC_000001.10 |
| cg05930000 | 3.85E-09 | 3.54E-10 | 6.61 | 12.2395668 | 8.86E-02 | 23691424  | 23691547  | NC_000002.11 |
| cg00966398 | 3.85E-09 | 3.54E-10 | 6.61 | 12.2384891 | 1.40E-01 | 3602933   | 3603056   | NC_000012.11 |
| cg17929065 | 3.86E-09 | 3.55E-10 | 6.61 | 12.2372551 | 1.26E-01 | 192747379 | 192747502 | NC_000002.11 |
| cg11974937 | 3.86E-09 | 3.55E-10 | 6.61 | 12.2367531 | 6.69E-02 | 22052128  | 22052251  | NC_000017.10 |
| cg12364786 | 3.86E-09 | 3.55E-10 | 6.61 | 12.2365541 | 1.40E-01 | 64056664  | 64056787  | NC_000015.9  |
| cg11267829 | 3.86E-09 | 3.55E-10 | 6.61 | 12.2361893 | 1.98E-01 | 60289417  | 60289540  | NC_000015.9  |
| cg22810684 | 3.86E-09 | 3.55E-10 | 6.61 | 12.2361813 | 9.69E-02 | 80401665  | 80401788  | NC_000017.10 |
| cg19402039 | 3.86E-09 | 3.55E-10 | 6.61 | 12.2358247 | 1.25E-01 | 7546211   | 7546334   | NC_000006.11 |

|            |          |          |      |            |          |           |           |              |
|------------|----------|----------|------|------------|----------|-----------|-----------|--------------|
| cg12451099 | 3.86E-09 | 3.56E-10 | 6.61 | 12.23569   | 1.36E-01 | 37356466  | 37356589  | NC_000020.10 |
| cg00426486 | 3.87E-09 | 3.56E-10 | 6.61 | 12.2341057 | 1.27E-01 | 86605100  | 86605223  | NC_000016.9  |
| cg26189021 | 3.87E-09 | 3.56E-10 | 6.61 | 12.2338584 | 1.14E-01 | 110757770 | 110757893 | NC_000001.10 |
| cg06509598 | 3.87E-09 | 3.56E-10 | 6.61 | 12.2334027 | 5.62E-02 | 129436051 | 129436174 | NC_000003.11 |
| cg04511534 | 3.87E-09 | 3.56E-10 | 6.61 | 12.2333575 | 1.46E-01 | 4463371   | 4463494   | NC_000017.10 |
| cg11764900 | 3.87E-09 | 3.56E-10 | 6.61 | 12.2331221 | 1.59E-01 | 38683035  | 38683158  | NC_000006.11 |
| cg10997906 | 3.88E-09 | 3.57E-10 | 6.61 | 12.2322912 | 1.24E-01 | 178753803 | 178753926 | NC_000005.9  |
| cg01618914 | 3.88E-09 | 3.57E-10 | 6.61 | 12.23128   | 3.45E-02 | 33267907  | 33268030  | NC_000020.10 |
| cg27013696 | 3.88E-09 | 3.57E-10 | 6.61 | 12.2306533 | 1.21E-01 | 19158030  | 19158153  | NC_000007.13 |
| cg20634288 | 3.88E-09 | 3.57E-10 | 6.61 | 12.2303466 | 5.23E-02 | 239834567 | 239834690 | NC_000002.11 |
| cg05365320 | 3.89E-09 | 3.58E-10 | 6.61 | 12.2301228 | 1.45E-01 | 200971339 | 200971462 | NC_000001.10 |
| cg24945701 | 3.89E-09 | 3.58E-10 | 6.61 | 12.2300547 | 1.36E-01 | 62362783  | 62362906  | NC_000003.11 |
| cg15837212 | 3.89E-09 | 3.58E-10 | 6.61 | 12.2295677 | 1.41E-01 | 63795970  | 63796093  | NC_000001.10 |
| cg27039662 | 3.90E-09 | 3.59E-10 | 6.61 | 12.2253917 | 1.52E-01 | 73163696  | 73163819  | NC_000008.10 |
| cg08627720 | 3.91E-09 | 3.60E-10 | 6.61 | 12.224289  | 1.56E-01 | 96959977  | 96960100  | NC_000015.9  |
| cg21383810 | 3.91E-09 | 3.60E-10 | 6.61 | 12.224029  | 2.32E-01 | 65515470  | 65515593  | NC_000012.11 |
| cg12632832 | 3.91E-09 | 3.60E-10 | 6.61 | 12.2239755 | 9.43E-02 | 157013346 | 157013469 | NC_000001.10 |
| cg20778071 | 3.91E-09 | 3.60E-10 | 6.61 | 12.2235328 | 7.27E-02 | 43729725  | 43729848  | NC_000006.11 |
| cg00682069 | 3.91E-09 | 3.60E-10 | 6.61 | 12.2222571 | 1.29E-01 | 1667458   | 1667581   | NC_000002.11 |
| cg14487379 | 3.92E-09 | 3.61E-10 | 6.61 | 12.2219647 | 9.97E-02 | 135481870 | 135481993 | NC_000009.11 |
| cg06962275 | 3.92E-09 | 3.61E-10 | 6.61 | 12.2207819 | 8.80E-02 | 30010203  | 30010326  | NC_000006.11 |
| cg01718222 | 3.92E-09 | 3.61E-10 | 6.61 | 12.2199925 | 9.19E-02 | 298277    | 298400    | NC_000004.11 |
| cg09992387 | 3.92E-09 | 3.61E-10 | 6.61 | 12.2195077 | 1.01E-01 | 55331285  | 55331408  | NC_000001.10 |
| cg12214908 | 3.93E-09 | 3.62E-10 | 6.61 | 12.2184412 | 1.33E-01 | 47910549  | 47910672  | NC_000019.9  |
| cg19211851 | 3.93E-09 | 3.62E-10 | 6.61 | 12.217914  | 1.35E-01 | 43555466  | 43555589  | NC_000002.11 |

|            |          |          |      |            |          |           |           |              |
|------------|----------|----------|------|------------|----------|-----------|-----------|--------------|
| cg09176274 | 3.93E-09 | 3.62E-10 | 6.61 | 12.2176742 | 5.04E-02 | 32398912  | 32399035  | NC_000010.10 |
| cg06186727 | 3.93E-09 | 3.62E-10 | 6.61 | 12.2171727 | 7.11E-02 | 152591343 | 152591466 | NC_000007.13 |
| cg16702191 | 3.93E-09 | 3.62E-10 | 6.61 | 12.2167771 | 3.77E-02 | 195355586 | 195355709 | NC_000003.11 |
| cg24672116 | 3.94E-09 | 3.63E-10 | 6.61 | 12.2158722 | 1.13E-01 | 130124853 | 130124976 | NC_000010.10 |
| cg15561613 | 3.94E-09 | 3.63E-10 | 6.61 | 12.2158447 | 1.25E-01 | 245851610 | 245851733 | NC_000001.10 |
| cg19823847 | 3.94E-09 | 3.63E-10 | 6.61 | 12.2152504 | 8.61E-02 | 138539706 | 138539829 | NC_000006.11 |
| cg16709433 | 3.94E-09 | 3.63E-10 | 6.61 | 12.2151388 | 8.45E-02 | 53832593  | 53832716  | NC_000006.11 |
| cg20885782 | 3.94E-09 | 3.63E-10 | 6.61 | 12.2145863 | 1.52E-01 | 41875606  | 41875729  | NC_000004.11 |
| cg04276007 | 3.95E-09 | 3.64E-10 | 6.61 | 12.2137933 | 9.20E-02 | 107386512 | 107386635 | NC_000007.13 |
| cg08748948 | 3.95E-09 | 3.64E-10 | 6.61 | 12.2122895 | 1.88E-01 | 20792476  | 20792599  | NC_000022.10 |
| cg18482268 | 3.95E-09 | 3.64E-10 | 6.61 | 12.2116815 | 1.64E-01 | 145718965 | 145719088 | NC_000005.9  |
| cg00095859 | 3.96E-09 | 3.65E-10 | 6.61 | 12.210833  | 1.08E-01 | 1336729   | 1336852   | NC_000007.13 |
| cg11469061 | 3.96E-09 | 3.65E-10 | 6.61 | 12.2098173 | 1.68E-01 | 31826421  | 31826544  | NC_000011.9  |
| cg14215689 | 3.96E-09 | 3.65E-10 | 6.61 | 12.2091871 | 1.19E-01 | 139334807 | 139334930 | NC_000009.11 |
| cg05825073 | 3.96E-09 | 3.65E-10 | 6.61 | 12.2090443 | 1.92E-01 | 27282237  | 27282360  | NC_000007.13 |
| cg24083469 | 3.97E-09 | 3.65E-10 | 6.61 | 12.2086752 | 1.59E-01 | 85673879  | 85674002  | NC_000012.11 |
| cg16347279 | 3.97E-09 | 3.66E-10 | 6.61 | 12.2072341 | 1.49E-01 | 72667709  | 72667832  | NC_000017.10 |
| cg09414627 | 3.97E-09 | 3.66E-10 | 6.61 | 12.206818  | 8.69E-02 | 90225171  | 90225294  | NC_000001.10 |
| cg20198684 | 3.97E-09 | 3.66E-10 | 6.61 | 12.2065305 | 7.22E-02 | 45742032  | 45742155  | NC_000019.9  |
| cg15987088 | 3.97E-09 | 3.66E-10 | 6.61 | 12.206205  | 1.31E-01 | 172166234 | 172166357 | NC_000003.11 |
| cg08372051 | 3.97E-09 | 3.66E-10 | 6.61 | 12.2061771 | 2.91E-02 | 88294446  | 88294569  | NC_000016.9  |
| cg26035366 | 3.98E-09 | 3.67E-10 | 6.61 | 12.2049915 | 1.96E-01 | 26664621  | 26664744  | NC_000003.11 |
| cg19197905 | 3.98E-09 | 3.67E-10 | 6.61 | 12.2047464 | 1.01E-01 | 98716488  | 98716611  | NC_000010.10 |
| cg11723066 | 3.98E-09 | 3.67E-10 | 6.61 | 12.2045179 | 1.20E-01 | 133937475 | 133937598 | NC_000011.9  |
| cg02012576 | 3.98E-09 | 3.67E-10 | 6.61 | 12.2044183 | 2.10E-01 | 133485691 | 133485814 | NC_000012.11 |

|            |          |          |      |            |          |           |           |              |
|------------|----------|----------|------|------------|----------|-----------|-----------|--------------|
| cg06925502 | 3.98E-09 | 3.67E-10 | 6.61 | 12.2039253 | 3.63E-02 | 106848012 | 106848135 | NC_000005.9  |
| cg04277893 | 3.98E-09 | 3.67E-10 | 6.61 | 12.2037314 | 5.69E-02 | 208128984 | 208129107 | NC_000001.10 |
| cg25617340 | 3.98E-09 | 3.67E-10 | 6.61 | 12.2035603 | 1.38E-01 | 37128011  | 37128134  | NC_000014.8  |
| cg11959676 | 3.99E-09 | 3.68E-10 | 6.6  | 12.2023581 | 3.16E-02 | 49719536  | 49719659  | NC_000012.11 |
| cg10900455 | 3.99E-09 | 3.68E-10 | 6.6  | 12.2023371 | 1.48E-01 | 42545099  | 42545222  | NC_000020.10 |
| cg10074544 | 3.99E-09 | 3.68E-10 | 6.6  | 12.2020756 | 1.66E-01 | 110223700 | 110223823 | NC_000004.11 |
| cg15461335 | 4.00E-09 | 3.69E-10 | 6.6  | 12.200149  | 1.45E-01 | 88324432  | 88324555  | NC_000013.10 |
| cg25325949 | 4.00E-09 | 3.69E-10 | 6.6  | 12.2000029 | 7.46E-02 | 82969524  | 82969647  | NC_000005.9  |
| cg00919055 | 4.00E-09 | 3.69E-10 | 6.6  | 12.1995797 | 7.90E-02 | 149546946 | 149547069 | NC_000005.9  |
| cg24630195 | 4.00E-09 | 3.69E-10 | 6.6  | 12.1991971 | 1.37E-01 | 2748369   | 2748492   | NC_000005.9  |
| cg04446870 | 4.00E-09 | 3.69E-10 | 6.6  | 12.1989121 | 1.35E-01 | 64440273  | 64440396  | NC_000017.10 |
| cg10208609 | 4.01E-09 | 3.70E-10 | 6.6  | 12.1978483 | 6.32E-02 | 90331229  | 90331352  | NC_000001.10 |
| cg13690873 | 4.01E-09 | 3.70E-10 | 6.6  | 12.1960311 | 5.48E-02 | 36587439  | 36587562  | NC_000001.10 |
| cg02756106 | 4.01E-09 | 3.70E-10 | 6.6  | 12.1959736 | 2.50E-01 | 45270707  | 45270830  | NC_000012.11 |
| cg16134717 | 4.01E-09 | 3.70E-10 | 6.6  | 12.1958846 | 1.74E-01 | 11752494  | 11752617  | NC_000001.10 |
| cg08328513 | 4.01E-09 | 3.70E-10 | 6.6  | 12.1956022 | 1.28E-01 | 78365691  | 78365814  | NC_000005.9  |
| cg24612667 | 4.02E-09 | 3.70E-10 | 6.6  | 12.1952929 | 1.40E-01 | 124735554 | 124735677 | NC_000011.9  |
| cg15233681 | 4.02E-09 | 3.71E-10 | 6.6  | 12.1939116 | 3.75E-02 | 102770602 | 102770725 | NC_000002.11 |
| cg25437410 | 4.03E-09 | 3.71E-10 | 6.6  | 12.1927726 | 2.28E-01 | 178017578 | 178017701 | NC_000005.9  |
| cg14971597 | 4.03E-09 | 3.72E-10 | 6.6  | 12.1910254 | 2.04E-01 | 159590578 | 159590701 | NC_000006.11 |
| cg00423167 | 4.03E-09 | 3.72E-10 | 6.6  | 12.1904727 | 2.18E-02 | 31937355  | 31937478  | NC_000006.11 |
| cg11610754 | 4.04E-09 | 3.72E-10 | 6.6  | 12.1899923 | 1.99E-01 | 18722595  | 18722718  | NC_000019.9  |
| cg05584070 | 4.04E-09 | 3.73E-10 | 6.6  | 12.1895642 | 7.80E-02 | 111329221 | 111329344 | NC_000013.10 |
| cg06240465 | 4.04E-09 | 3.73E-10 | 6.6  | 12.1875853 | 1.12E-01 | 46853413  | 46853536  | NC_000021.8  |
| cg23291534 | 4.05E-09 | 3.74E-10 | 6.6  | 12.186588  | 2.24E-01 | 110988043 | 110988166 | NC_000008.10 |

|            |          |          |     |            |          |           |           |              |
|------------|----------|----------|-----|------------|----------|-----------|-----------|--------------|
| cg01910478 | 4.05E-09 | 3.74E-10 | 6.6 | 12.1858029 | 1.03E-01 | 76373678  | 76373801  | NC_000014.8  |
| cg04919234 | 4.06E-09 | 3.75E-10 | 6.6 | 12.1842051 | 1.49E-01 | 99392478  | 99392601  | NC_000006.11 |
| cg11089489 | 4.06E-09 | 3.75E-10 | 6.6 | 12.183937  | 1.46E-01 | 37124313  | 37124436  | NC_000014.8  |
| cg24269074 | 4.07E-09 | 3.76E-10 | 6.6 | 12.1819022 | 1.63E-01 | 119614489 | 119614612 | NC_000002.11 |
| cg17577122 | 4.07E-09 | 3.76E-10 | 6.6 | 12.1818965 | 1.80E-01 | 19511967  | 19512090  | NC_000022.10 |
| cg04439622 | 4.07E-09 | 3.76E-10 | 6.6 | 12.1818469 | 1.31E-01 | 105944942 | 105945065 | NC_000014.8  |
| cg00514284 | 4.07E-09 | 3.76E-10 | 6.6 | 12.180678  | 6.38E-02 | 106855077 | 106855200 | NC_000014.8  |
| cg21136104 | 4.08E-09 | 3.76E-10 | 6.6 | 12.1795236 | 1.67E-01 | 142666320 | 142666443 | NC_000003.11 |
| cg05901522 | 4.08E-09 | 3.77E-10 | 6.6 | 12.1789993 | 8.96E-02 | 82169480  | 82169603  | NC_000010.10 |
| cg07057320 | 4.08E-09 | 3.77E-10 | 6.6 | 12.1785938 | 1.41E-01 | 37852479  | 37852602  | NC_000021.8  |
| cg21672843 | 4.09E-09 | 3.78E-10 | 6.6 | 12.1762393 | 1.91E-01 | 41818905  | 41819028  | NC_000020.10 |
| cg22738281 | 4.10E-09 | 3.79E-10 | 6.6 | 12.1738162 | 2.74E-02 | 8248444   | 8248567   | NC_000004.11 |
| cg21047938 | 4.10E-09 | 3.79E-10 | 6.6 | 12.1736498 | 1.99E-02 | 10192422  | 10192545  | NC_000002.11 |
| cg04374393 | 4.11E-09 | 3.79E-10 | 6.6 | 12.172053  | 9.92E-02 | 137483503 | 137483626 | NC_000003.11 |
| cg09177131 | 4.11E-09 | 3.80E-10 | 6.6 | 12.1711562 | 1.46E-01 | 114696462 | 114696585 | NC_000001.10 |
| cg23239971 | 4.11E-09 | 3.80E-10 | 6.6 | 12.1704115 | 3.96E-02 | 169630201 | 169630324 | NC_000004.11 |
| cg22142205 | 4.12E-09 | 3.80E-10 | 6.6 | 12.1692477 | 5.73E-02 | 80132787  | 80132910  | NC_000017.10 |
| cg06000330 | 4.12E-09 | 3.81E-10 | 6.6 | 12.1677226 | 1.37E-01 | 19183231  | 19183354  | NC_000007.13 |
| cg19857737 | 4.13E-09 | 3.82E-10 | 6.6 | 12.1656843 | 9.27E-02 | 39044238  | 39044361  | NC_000001.10 |
| cg23997911 | 4.14E-09 | 3.82E-10 | 6.6 | 12.1641689 | 6.17E-02 | 161575382 | 161575505 | NC_000006.11 |
| cg20383794 | 4.14E-09 | 3.83E-10 | 6.6 | 12.1639589 | 7.93E-02 | 2445271   | 2445394   | NC_000011.9  |
| cg10197263 | 4.14E-09 | 3.83E-10 | 6.6 | 12.1626447 | 1.01E-01 | 61718852  | 61718975  | NC_000020.10 |
| cg12060499 | 4.15E-09 | 3.83E-10 | 6.6 | 12.1622838 | 1.32E-01 | 102172296 | 102172419 | NC_000014.8  |
| cg26954843 | 4.15E-09 | 3.84E-10 | 6.6 | 12.1609071 | 6.42E-02 | 4310489   | 4310612   | NC_000004.11 |
| cg16399589 | 4.16E-09 | 3.84E-10 | 6.6 | 12.1597271 | 1.16E-01 | 26824423  | 26824546  | NC_000017.10 |

|            |          |          |      |            |          |           |           |              |
|------------|----------|----------|------|------------|----------|-----------|-----------|--------------|
| cg01815567 | 4.16E-09 | 3.85E-10 | 6.6  | 12.1579508 | 1.50E-01 | 4866091   | 4866214   | NC_000004.11 |
| cg01273256 | 4.17E-09 | 3.85E-10 | 6.6  | 12.1565841 | 3.59E-02 | 251829    | 251952    | NC_000020.10 |
| cg00655498 | 4.18E-09 | 3.87E-10 | 6.6  | 12.1534747 | 9.32E-02 | 52022386  | 52022509  | NC_000013.10 |
| cg08659494 | 4.18E-09 | 3.87E-10 | 6.6  | 12.1529998 | 4.28E-02 | 89167990  | 89168113  | NC_000016.9  |
| cg01257889 | 4.18E-09 | 3.87E-10 | 6.6  | 12.1526794 | 1.51E-01 | 113230065 | 113230188 | NC_000012.11 |
| cg15939357 | 4.19E-09 | 3.87E-10 | 6.6  | 12.1522065 | 6.59E-02 | 44223465  | 44223588  | NC_000019.9  |
| cg23821145 | 4.19E-09 | 3.88E-10 | 6.6  | 12.1507239 | 8.23E-02 | 170696031 | 170696154 | NC_000004.11 |
| cg11367401 | 4.20E-09 | 3.88E-10 | 6.6  | 12.1495853 | 1.81E-02 | 134496777 | 134496900 | NC_000010.10 |
| cg17074353 | 4.21E-09 | 3.89E-10 | 6.59 | 12.1470829 | 9.57E-02 | 69590852  | 69590975  | NC_000015.9  |
| cg24603969 | 4.22E-09 | 3.90E-10 | 6.59 | 12.1447935 | 6.72E-02 | 143223013 | 143223136 | NC_000006.11 |
| cg21229079 | 4.22E-09 | 3.90E-10 | 6.59 | 12.1446006 | 1.43E-01 | 111158814 | 111158937 | NC_000013.10 |
| cg09995736 | 4.22E-09 | 3.90E-10 | 6.59 | 12.1436843 | 6.02E-02 | 95702136  | 95702259  | NC_000012.11 |
| cg26811852 | 4.23E-09 | 3.91E-10 | 6.59 | 12.1423007 | 1.27E-01 | 179051885 | 179052008 | NC_000005.9  |
| cg14556896 | 4.23E-09 | 3.91E-10 | 6.59 | 12.1420185 | 1.81E-01 | 22094963  | 22095086  | NC_000012.11 |
| cg19324698 | 4.23E-09 | 3.91E-10 | 6.59 | 12.1412322 | 3.07E-02 | 134652709 | 134652832 | NC_000010.10 |
| cg22289831 | 4.24E-09 | 3.92E-10 | 6.59 | 12.1392112 | 1.69E-01 | 38076709  | 38076832  | NC_000021.8  |
| cg13179074 | 4.24E-09 | 3.93E-10 | 6.59 | 12.138399  | 8.32E-02 | 167064091 | 167064214 | NC_000001.10 |
| cg08461451 | 4.24E-09 | 3.93E-10 | 6.59 | 12.1383633 | 1.30E-01 | 2295092   | 2295215   | NC_000019.9  |
| cg05872306 | 4.26E-09 | 3.94E-10 | 6.59 | 12.1346017 | 1.51E-01 | 29236535  | 29236658  | NC_000014.8  |
| cg00508158 | 4.26E-09 | 3.95E-10 | 6.59 | 12.1336286 | 8.83E-02 | 48189514  | 48189637  | NC_000001.10 |
| cg11723848 | 4.26E-09 | 3.95E-10 | 6.59 | 12.1334056 | 1.95E-01 | 96470286  | 96470409  | NC_000004.11 |
| cg19181479 | 4.26E-09 | 3.95E-10 | 6.59 | 12.132831  | 7.81E-02 | 48373736  | 48373859  | NC_000010.10 |
| cg23999695 | 4.26E-09 | 3.95E-10 | 6.59 | 12.1327052 | 2.25E-01 | 89943625  | 89943748  | NC_000015.9  |
| cg13308063 | 4.27E-09 | 3.95E-10 | 6.59 | 12.1321218 | 4.34E-02 | 32042344  | 32042467  | NC_000006.11 |
| cg07769957 | 4.27E-09 | 3.95E-10 | 6.59 | 12.1318553 | 1.06E-01 | 46443657  | 46443780  | NC_000019.9  |

|            |          |          |      |            |          |           |           |              |
|------------|----------|----------|------|------------|----------|-----------|-----------|--------------|
| cg04447756 | 4.27E-09 | 3.95E-10 | 6.59 | 12.1316348 | 9.95E-02 | 138644986 | 138645109 | NC_000005.9  |
| cg09514401 | 4.28E-09 | 3.97E-10 | 6.59 | 12.1282131 | 1.31E-01 | 72988022  | 72988145  | NC_000008.10 |
| cg27421117 | 4.29E-09 | 3.97E-10 | 6.59 | 12.1266457 | 1.47E-01 | 74215659  | 74215782  | NC_000002.11 |
| cg22698998 | 4.29E-09 | 3.97E-10 | 6.59 | 12.126494  | 5.69E-02 | 211344378 | 211344501 | NC_000002.11 |
| cg17330515 | 4.29E-09 | 3.98E-10 | 6.59 | 12.1254168 | 9.96E-02 | 13031369  | 13031492  | NC_000019.9  |
| cg12456269 | 4.29E-09 | 3.98E-10 | 6.59 | 12.1252281 | 2.01E-01 | 142887725 | 142887848 | NC_000002.11 |
| cg17875935 | 4.29E-09 | 3.98E-10 | 6.59 | 12.125068  | 1.35E-01 | 45666384  | 45666507  | NC_000015.9  |
| cg10750934 | 4.30E-09 | 3.98E-10 | 6.59 | 12.1244652 | 4.92E-02 | 45652975  | 45653098  | NC_000019.9  |
| cg14128735 | 4.31E-09 | 4.00E-10 | 6.59 | 12.1213306 | 1.06E-01 | 44324976  | 44325099  | NC_000011.9  |
| cg14757661 | 4.31E-09 | 4.00E-10 | 6.59 | 12.1205137 | 1.31E-01 | 92684308  | 92684431  | NC_000005.9  |
| cg06212670 | 4.33E-09 | 4.01E-10 | 6.59 | 12.1171128 | 1.27E-01 | 88543627  | 88543750  | NC_000016.9  |
| cg02704103 | 4.33E-09 | 4.02E-10 | 6.59 | 12.1164262 | 9.45E-02 | 72846991  | 72847114  | NC_000003.11 |
| cg17167920 | 4.34E-09 | 4.03E-10 | 6.59 | 12.1135896 | 9.02E-02 | 154127537 | 154127660 | NC_000001.10 |
| cg06830692 | 4.34E-09 | 4.03E-10 | 6.59 | 12.1135803 | 1.45E-01 | 44954192  | 44954315  | NC_000017.10 |
| cg25561904 | 4.34E-09 | 4.03E-10 | 6.59 | 12.1135546 | 1.24E-01 | 104165401 | 104165524 | NC_000014.8  |
| cg24836607 | 4.34E-09 | 4.03E-10 | 6.59 | 12.113246  | 6.97E-02 | 117067752 | 117067875 | NC_000007.13 |
| cg19078037 | 4.35E-09 | 4.03E-10 | 6.59 | 12.1119682 | 1.59E-01 | 77329049  | 77329172  | NC_000018.9  |
| cg10207181 | 4.35E-09 | 4.03E-10 | 6.59 | 12.1117753 | 7.75E-02 | 147801090 | 147801213 | NC_000001.10 |
| cg21827986 | 4.36E-09 | 4.04E-10 | 6.59 | 12.1105786 | 6.70E-02 | 105176581 | 105176704 | NC_000014.8  |
| cg09227150 | 4.36E-09 | 4.05E-10 | 6.59 | 12.1088324 | 1.61E-01 | 102475578 | 102475701 | NC_000010.10 |
| cg25425140 | 4.37E-09 | 4.05E-10 | 6.59 | 12.1079188 | 1.87E-01 | 147098450 | 147098573 | NC_000003.11 |
| cg19389884 | 4.37E-09 | 4.05E-10 | 6.59 | 12.1078514 | 1.54E-01 | 1358515   | 1358638   | NC_000011.9  |
| cg20546002 | 4.37E-09 | 4.05E-10 | 6.59 | 12.1078333 | 1.86E-01 | 178017376 | 178017499 | NC_000005.9  |
| cg19801921 | 4.38E-09 | 4.06E-10 | 6.59 | 12.1045954 | 1.83E-01 | 63784864  | 63784987  | NC_000001.10 |
| cg01934709 | 4.39E-09 | 4.07E-10 | 6.59 | 12.1032142 | 5.20E-02 | 39357454  | 39357577  | NC_000001.10 |



|            |          |          |      |            |          |           |           |              |
|------------|----------|----------|------|------------|----------|-----------|-----------|--------------|
| cg00629427 | 4.39E-09 | 4.07E-10 | 6.59 | 12.1023428 | 1.18E-01 | 95357638  | 95357761  | NC_000013.10 |
| cg25363679 | 4.39E-09 | 4.08E-10 | 6.59 | 12.1018705 | 7.55E-02 | 71031202  | 71031325  | NC_000012.11 |
| cg10964994 | 4.39E-09 | 4.08E-10 | 6.59 | 12.1015035 | 2.97E-02 | 79892921  | 79893044  | NC_000017.10 |
| cg27051315 | 4.40E-09 | 4.08E-10 | 6.59 | 12.099578  | 1.08E-01 | 238864959 | 238865082 | NC_000002.11 |
| cg04166812 | 4.41E-09 | 4.09E-10 | 6.59 | 12.0987291 | 1.53E-01 | 61122051  | 61122174  | NC_000014.8  |
| cg12506930 | 4.42E-09 | 4.10E-10 | 6.59 | 12.096091  | 2.04E-01 | 58220718  | 58220841  | NC_000019.9  |
| cg19141258 | 4.42E-09 | 4.10E-10 | 6.59 | 12.0954465 | 9.85E-02 | 183993368 | 183993491 | NC_000003.11 |
| cg16031338 | 4.42E-09 | 4.10E-10 | 6.59 | 12.0951994 | 6.05E-02 | 2430136   | 2430259   | NC_000001.10 |
| cg08933939 | 4.43E-09 | 4.11E-10 | 6.58 | 12.0930577 | 2.07E-01 | 100061504 | 100061627 | NC_000006.11 |
| cg21352158 | 4.43E-09 | 4.12E-10 | 6.58 | 12.092073  | 8.49E-02 | 832917    | 833040    | NC_000008.10 |
| cg20648847 | 4.44E-09 | 4.12E-10 | 6.58 | 12.0916741 | 1.57E-01 | 66326767  | 66326890  | NC_000011.9  |
| cg00472801 | 4.44E-09 | 4.12E-10 | 6.58 | 12.0916164 | 1.41E-01 | 62995876  | 62995999  | NC_000006.11 |
| cg08822616 | 4.44E-09 | 4.12E-10 | 6.58 | 12.0905501 | 7.85E-02 | 134257514 | 134257637 | NC_000011.9  |
| cg13661519 | 4.44E-09 | 4.12E-10 | 6.58 | 12.0904648 | 1.30E-01 | 27141088  | 27141211  | NC_000007.13 |
| cg05792861 | 4.45E-09 | 4.13E-10 | 6.58 | 12.0886288 | 5.10E-02 | 18145434  | 18145557  | NC_000003.11 |
| cg09149894 | 4.45E-09 | 4.14E-10 | 6.58 | 12.0873347 | 1.10E-01 | 32097233  | 32097356  | NC_000006.11 |
| cg10418524 | 4.46E-09 | 4.14E-10 | 6.58 | 12.0864084 | 1.77E-01 | 176956678 | 176956801 | NC_000002.11 |
| cg12582959 | 4.46E-09 | 4.14E-10 | 6.58 | 12.0852495 | 1.46E-01 | 56159199  | 56159322  | NC_000019.9  |
| cg06882544 | 4.46E-09 | 4.15E-10 | 6.58 | 12.0850104 | 7.10E-02 | 298926    | 299049    | NC_000004.11 |
| cg23237183 | 4.47E-09 | 4.15E-10 | 6.58 | 12.0830459 | 1.82E-01 | 73429791  | 73429914  | NC_000002.11 |
| cg03273420 | 4.48E-09 | 4.16E-10 | 6.58 | 12.0817379 | 8.63E-02 | 18166322  | 18166445  | NC_000017.10 |
| cg08332148 | 4.48E-09 | 4.16E-10 | 6.58 | 12.0816949 | 3.81E-02 | 75551697  | 75551820  | NC_000010.10 |
| cg20704330 | 4.49E-09 | 4.17E-10 | 6.58 | 12.079295  | 4.62E-02 | 131411549 | 131411672 | NC_000005.9  |
| cg06908244 | 4.50E-09 | 4.18E-10 | 6.58 | 12.0770628 | 1.64E-01 | 100126358 | 100126481 | NC_000014.8  |
| cg16590190 | 4.50E-09 | 4.18E-10 | 6.58 | 12.0764726 | 1.06E-01 | 13909522  | 13909645  | NC_000001.10 |

|            |          |          |      |            |          |           |           |              |
|------------|----------|----------|------|------------|----------|-----------|-----------|--------------|
| cg17694719 | 4.50E-09 | 4.19E-10 | 6.58 | 12.075693  | 6.23E-02 | 150554915 | 150555038 | NC_000007.13 |
| cg11100804 | 4.51E-09 | 4.19E-10 | 6.58 | 12.0745502 | 1.27E-01 | 140783173 | 140783296 | NC_000005.9  |
| cg00008564 | 4.52E-09 | 4.20E-10 | 6.58 | 12.0714199 | 9.52E-02 | 27830391  | 27830514  | NC_000006.11 |
| cg12007399 | 4.53E-09 | 4.21E-10 | 6.58 | 12.0707683 | 1.55E-01 | 3868876   | 3868999   | NC_000019.9  |
| cg06365303 | 4.53E-09 | 4.21E-10 | 6.58 | 12.068912  | 1.56E-01 | 2801844   | 2801967   | NC_000020.10 |
| cg14339760 | 4.54E-09 | 4.22E-10 | 6.58 | 12.0685895 | 3.91E-02 | 130550808 | 130550931 | NC_000009.11 |
| cg16049690 | 4.55E-09 | 4.23E-10 | 6.58 | 12.0664366 | 1.25E-01 | 180486679 | 180486802 | NC_000005.9  |
| cg24609884 | 4.55E-09 | 4.23E-10 | 6.58 | 12.064929  | 1.09E-01 | 208148998 | 208149121 | NC_000002.11 |
| cg18220921 | 4.55E-09 | 4.23E-10 | 6.58 | 12.0648175 | 1.25E-01 | 242687527 | 242687650 | NC_000001.10 |
| cg21679169 | 4.56E-09 | 4.24E-10 | 6.58 | 12.0639011 | 3.67E-02 | 150518766 | 150518889 | NC_000001.10 |
| cg25460563 | 4.56E-09 | 4.24E-10 | 6.58 | 12.063816  | 5.48E-02 | 53839886  | 53840009  | NC_000005.9  |
| cg14084056 | 4.56E-09 | 4.24E-10 | 6.58 | 12.0621309 | 2.25E-02 | 48744539  | 48744662  | NC_000012.11 |
| cg09275869 | 4.58E-09 | 4.26E-10 | 6.58 | 12.0582794 | 1.94E-01 | 44337099  | 44337222  | NC_000018.9  |
| cg21534423 | 4.58E-09 | 4.26E-10 | 6.58 | 12.0576226 | 1.92E-01 | 24154607  | 24154730  | NC_000019.9  |
| cg00860372 | 4.59E-09 | 4.27E-10 | 6.58 | 12.0568677 | 7.85E-02 | 13912327  | 13912450  | NC_000019.9  |
| cg04120171 | 4.59E-09 | 4.27E-10 | 6.58 | 12.0567963 | 2.00E-01 | 83775850  | 83775973  | NC_000015.9  |
| cg25902187 | 4.60E-09 | 4.28E-10 | 6.58 | 12.0547447 | 2.36E-01 | 55881044  | 55881167  | NC_000015.9  |
| cg14758740 | 4.60E-09 | 4.28E-10 | 6.58 | 12.0545044 | 5.84E-02 | 941872    | 941995    | NC_000017.10 |
| cg04551925 | 4.61E-09 | 4.29E-10 | 6.58 | 12.0515001 | 1.14E-01 | 30951740  | 30951863  | NC_000007.13 |
| cg03630832 | 4.62E-09 | 4.29E-10 | 6.58 | 12.0506274 | 6.56E-02 | 62443059  | 62443182  | NC_000016.9  |
| cg27277532 | 4.62E-09 | 4.29E-10 | 6.58 | 12.0504933 | 1.49E-01 | 86321612  | 86321735  | NC_000016.9  |
| cg05884032 | 4.62E-09 | 4.30E-10 | 6.58 | 12.0503086 | 1.57E-01 | 76740088  | 76740211  | NC_000018.9  |
| cg16302049 | 4.62E-09 | 4.30E-10 | 6.58 | 12.0501217 | 1.13E-01 | 175349051 | 175349174 | NC_000002.11 |
| cg21305475 | 4.62E-09 | 4.30E-10 | 6.58 | 12.0499122 | 5.48E-02 | 34595432  | 34595555  | NC_000017.10 |
| cg23117727 | 4.62E-09 | 4.30E-10 | 6.58 | 12.0497983 | 1.20E-01 | 23019450  | 23019573  | NC_000020.10 |

|            |          |          |      |            |          |           |           |              |
|------------|----------|----------|------|------------|----------|-----------|-----------|--------------|
| cg02091100 | 4.63E-09 | 4.31E-10 | 6.58 | 12.0479188 | 9.39E-02 | 42123029  | 42123152  | NC_000006.11 |
| cg06643056 | 4.63E-09 | 4.31E-10 | 6.58 | 12.0474284 | 6.04E-02 | 170875683 | 170875806 | NC_000005.9  |
| cg05085336 | 4.63E-09 | 4.31E-10 | 6.58 | 12.0473384 | 1.28E-01 | 73523729  | 73523852  | NC_000003.11 |
| cg22945387 | 4.63E-09 | 4.31E-10 | 6.58 | 12.0468516 | 1.31E-01 | 36983404  | 36983527  | NC_000014.8  |
| cg11334818 | 4.64E-09 | 4.32E-10 | 6.58 | 12.0454449 | 2.28E-01 | 18813191  | 18813314  | NC_000011.9  |
| cg25955816 | 4.65E-09 | 4.33E-10 | 6.58 | 12.0431637 | 5.79E-02 | 228612876 | 228612999 | NC_000001.10 |
| cg23357150 | 4.65E-09 | 4.33E-10 | 6.58 | 12.0428694 | 4.62E-02 | 134470225 | 134470348 | NC_000010.10 |
| cg15983520 | 4.65E-09 | 4.33E-10 | 6.58 | 12.0421849 | 1.31E-01 | 145729106 | 145729229 | NC_000008.10 |
| cg03186333 | 4.66E-09 | 4.34E-10 | 6.58 | 12.041258  | 1.54E-01 | 72470352  | 72470475  | NC_000008.10 |
| cg02578368 | 4.66E-09 | 4.34E-10 | 6.57 | 12.0406443 | 2.51E-01 | 26250744  | 26250867  | NC_000006.11 |
| cg19721065 | 4.68E-09 | 4.35E-10 | 6.57 | 12.0368408 | 8.58E-02 | 113549986 | 113550109 | NC_000012.11 |
| cg18083764 | 4.69E-09 | 4.37E-10 | 6.57 | 12.0344397 | 1.29E-01 | 4230848   | 4230971   | NC_000005.9  |
| cg13041244 | 4.69E-09 | 4.37E-10 | 6.57 | 12.0337459 | 1.24E-01 | 19284694  | 19284817  | NC_000011.9  |
| cg20653075 | 4.69E-09 | 4.37E-10 | 6.57 | 12.0335911 | 1.46E-01 | 65291682  | 65291805  | NC_000008.10 |
| cg01650618 | 4.69E-09 | 4.37E-10 | 6.57 | 12.0334135 | 5.43E-02 | 20210743  | 20210866  | NC_000013.10 |
| cg17625032 | 4.69E-09 | 4.37E-10 | 6.57 | 12.0330289 | 9.68E-02 | 57054740  | 57054863  | NC_000016.9  |
| cg12626956 | 4.69E-09 | 4.37E-10 | 6.57 | 12.0325748 | 1.38E-01 | 79634509  | 79634632  | NC_000009.11 |
| cg25558218 | 4.70E-09 | 4.38E-10 | 6.57 | 12.0318073 | 8.09E-02 | 51445694  | 51445817  | NC_000005.9  |
| cg12011136 | 4.70E-09 | 4.38E-10 | 6.57 | 12.0306703 | 1.12E-01 | 4901750   | 4901873   | NC_000007.13 |
| cg20703242 | 4.71E-09 | 4.39E-10 | 6.57 | 12.0300411 | 8.45E-02 | 230279135 | 230279258 | NC_000001.10 |
| cg05671386 | 4.71E-09 | 4.39E-10 | 6.57 | 12.0295157 | 1.20E-01 | 3550239   | 3550362   | NC_000016.9  |
| cg00660105 | 4.71E-09 | 4.39E-10 | 6.57 | 12.0289224 | 1.72E-01 | 82135784  | 82135907  | NC_000004.11 |
| cg22070855 | 4.72E-09 | 4.40E-10 | 6.57 | 12.027455  | 1.73E-01 | 172167527 | 172167650 | NC_000003.11 |
| cg06022179 | 4.72E-09 | 4.40E-10 | 6.57 | 12.0270636 | 1.29E-01 | 89903506  | 89903629  | NC_000015.9  |
| cg15161691 | 4.73E-09 | 4.41E-10 | 6.57 | 12.0250796 | 4.19E-02 | 134257429 | 134257552 | NC_000011.9  |

|            |          |          |      |            |          |           |           |              |
|------------|----------|----------|------|------------|----------|-----------|-----------|--------------|
| cg16729832 | 4.74E-09 | 4.42E-10 | 6.57 | 12.0221135 | 1.53E-01 | 21645078  | 21645201  | NC_000008.10 |
| cg03091752 | 4.74E-09 | 4.42E-10 | 6.57 | 12.0220266 | 1.79E-01 | 51221605  | 51221728  | NC_000019.9  |
| cg13740815 | 4.75E-09 | 4.43E-10 | 6.57 | 12.0205409 | 1.45E-01 | 51170356  | 51170479  | NC_000019.9  |
| cg05221167 | 4.75E-09 | 4.43E-10 | 6.57 | 12.019391  | 1.57E-01 | 9609397   | 9609520   | NC_000019.9  |
| cg05730365 | 4.76E-09 | 4.43E-10 | 6.57 | 12.0192752 | 2.04E-01 | 37838563  | 37838686  | NC_000005.9  |
| cg19149132 | 4.76E-09 | 4.43E-10 | 6.57 | 12.0190951 | 1.24E-01 | 130854436 | 130854559 | NC_000010.10 |
| cg02221765 | 4.76E-09 | 4.44E-10 | 6.57 | 12.0174    | 4.46E-02 | 89760916  | 89761039  | NC_000014.8  |
| cg16459735 | 4.77E-09 | 4.45E-10 | 6.57 | 12.0162639 | 1.30E-01 | 134999791 | 134999914 | NC_000010.10 |
| cg16596755 | 4.77E-09 | 4.45E-10 | 6.57 | 12.015971  | 1.08E-01 | 5021778   | 5021901   | NC_000004.11 |
| cg04554613 | 4.77E-09 | 4.45E-10 | 6.57 | 12.0153835 | 8.53E-02 | 169945470 | 169945593 | NC_000002.11 |
| cg05097899 | 4.77E-09 | 4.45E-10 | 6.57 | 12.0149289 | 3.37E-02 | 5080743   | 5080866   | NC_000020.10 |
| cg02472348 | 4.78E-09 | 4.46E-10 | 6.57 | 12.0140345 | 1.70E-01 | 22487781  | 22487904  | NC_000012.11 |
| cg22778957 | 4.78E-09 | 4.46E-10 | 6.57 | 12.0138193 | 1.10E-01 | 60639054  | 60639177  | NC_000020.10 |
| cg21575295 | 4.78E-09 | 4.46E-10 | 6.57 | 12.0130578 | 1.35E-01 | 101193432 | 101193555 | NC_000014.8  |
| cg01539133 | 4.78E-09 | 4.46E-10 | 6.57 | 12.0128541 | 1.49E-01 | 4607324   | 4607447   | NC_000019.9  |
| cg20981451 | 4.78E-09 | 4.46E-10 | 6.57 | 12.0127519 | 1.13E-01 | 52954615  | 52954738  | NC_000019.9  |
| cg13275321 | 4.79E-09 | 4.47E-10 | 6.57 | 12.011155  | 8.70E-02 | 307848    | 307971    | NC_000005.9  |
| cg03721362 | 4.80E-09 | 4.48E-10 | 6.57 | 12.0098208 | 2.22E-01 | 126626298 | 126626421 | NC_000005.9  |
| cg15055165 | 4.80E-09 | 4.48E-10 | 6.57 | 12.0091234 | 9.33E-02 | 2964849   | 2964972   | NC_000002.11 |
| cg25404650 | 4.80E-09 | 4.48E-10 | 6.57 | 12.0087102 | 2.11E-02 | 155616381 | 155616504 | NC_000007.13 |
| cg16573328 | 4.80E-09 | 4.48E-10 | 6.57 | 12.008291  | 1.91E-01 | 185463588 | 185463711 | NC_000002.11 |
| cg23056539 | 4.81E-09 | 4.49E-10 | 6.57 | 12.0076358 | 1.12E-01 | 242977619 | 242977742 | NC_000002.11 |
| cg15484988 | 4.81E-09 | 4.49E-10 | 6.57 | 12.0063536 | 1.79E-01 | 74961494  | 74961617  | NC_000018.9  |
| cg21539988 | 4.82E-09 | 4.50E-10 | 6.57 | 12.0054645 | 3.63E-02 | 118312424 | 118312547 | NC_000012.11 |
| cg08196032 | 4.82E-09 | 4.50E-10 | 6.57 | 12.0052114 | 1.71E-01 | 95239751  | 95239874  | NC_000014.8  |

|            |          |          |      |            |          |           |           |              |
|------------|----------|----------|------|------------|----------|-----------|-----------|--------------|
| cg11809342 | 4.82E-09 | 4.50E-10 | 6.57 | 12.0048414 | 1.65E-01 | 160007430 | 160007553 | NC_000002.11 |
| cg11433319 | 4.82E-09 | 4.50E-10 | 6.57 | 12.0047291 | 1.69E-01 | 19617873  | 19617996  | NC_000021.8  |
| cg06506868 | 4.82E-09 | 4.50E-10 | 6.57 | 12.0045833 | 6.56E-02 | 197648437 | 197648560 | NC_000003.11 |
| cg22510079 | 4.82E-09 | 4.50E-10 | 6.57 | 12.0038204 | 2.26E-02 | 32809403  | 32809526  | NC_000006.11 |
| cg05477514 | 4.82E-09 | 4.50E-10 | 6.57 | 12.0037718 | 1.23E-01 | 23564008  | 23564131  | NC_000008.10 |
| cg20669414 | 4.83E-09 | 4.51E-10 | 6.57 | 12.0034281 | 1.58E-01 | 37808629  | 37808752  | NC_000017.10 |
| cg13585776 | 4.83E-09 | 4.51E-10 | 6.57 | 12.0029614 | 1.09E-01 | 126783547 | 126783670 | NC_000009.11 |
| cg05512684 | 4.83E-09 | 4.51E-10 | 6.57 | 12.0019581 | 8.05E-02 | 37879858  | 37879981  | NC_000017.10 |
| cg27387239 | 4.84E-09 | 4.52E-10 | 6.57 | 12.0004973 | 1.33E-01 | 218667548 | 218667671 | NC_000001.10 |
| cg08889797 | 4.84E-09 | 4.52E-10 | 6.57 | 12.0002602 | 1.74E-01 | 147106489 | 147106612 | NC_000003.11 |
| cg08605458 | 4.84E-09 | 4.52E-10 | 6.57 | 12.0000287 | 1.14E-01 | 26949714  | 26949837  | NC_000002.11 |
| cg26718878 | 4.84E-09 | 4.52E-10 | 6.57 | 11.9994942 | 1.74E-01 | 96647882  | 96648005  | NC_000007.13 |
| cg18794475 | 4.85E-09 | 4.53E-10 | 6.57 | 11.9987913 | 6.49E-02 | 55533829  | 55533952  | NC_000008.10 |
| cg24037938 | 4.85E-09 | 4.53E-10 | 6.57 | 11.9985134 | 9.81E-02 | 4697967   | 4698090   | NC_000001.10 |
| cg16705138 | 4.85E-09 | 4.53E-10 | 6.57 | 11.9976572 | 7.24E-02 | 94508740  | 94508863  | NC_000014.8  |
| cg13718539 | 4.86E-09 | 4.54E-10 | 6.57 | 11.9966447 | 1.35E-01 | 140801354 | 140801477 | NC_000005.9  |
| cg09113440 | 4.86E-09 | 4.54E-10 | 6.57 | 11.9953343 | 5.85E-02 | 18999313  | 18999436  | NC_000010.10 |
| cg09571858 | 4.86E-09 | 4.54E-10 | 6.57 | 11.9952965 | 2.29E-01 | 17496221  | 17496344  | NC_000010.10 |
| cg10078898 | 4.87E-09 | 4.55E-10 | 6.57 | 11.9948685 | 5.97E-02 | 21491045  | 21491168  | NC_000014.8  |
| cg26105156 | 4.87E-09 | 4.55E-10 | 6.57 | 11.9947843 | 2.00E-01 | 81951953  | 81952076  | NC_000004.11 |
| cg02892367 | 4.87E-09 | 4.55E-10 | 6.57 | 11.9935342 | 1.17E-01 | 148724141 | 148724264 | NC_000007.13 |
| cg11241627 | 4.87E-09 | 4.55E-10 | 6.57 | 11.9933452 | 1.48E-01 | 19185165  | 19185288  | NC_000007.13 |
| cg04931256 | 4.87E-09 | 4.55E-10 | 6.57 | 11.9931662 | 1.36E-01 | 147077636 | 147077759 | NC_000003.11 |
| cg01268824 | 4.87E-09 | 4.55E-10 | 6.57 | 11.9928874 | 1.97E-01 | 58220818  | 58220941  | NC_000019.9  |
| cg25171856 | 4.88E-09 | 4.56E-10 | 6.57 | 11.9919611 | 3.39E-02 | 75402751  | 75402874  | NC_000010.10 |

|            |          |          |      |            |          |           |           |              |
|------------|----------|----------|------|------------|----------|-----------|-----------|--------------|
| cg23814172 | 4.88E-09 | 4.56E-10 | 6.57 | 11.9917309 | 1.02E-01 | 687493    | 687616    | NC_000010.10 |
| cg04774110 | 4.88E-09 | 4.57E-10 | 6.57 | 11.9906184 | 3.24E-02 | 80857351  | 80857474  | NC_000017.10 |
| cg17718960 | 4.90E-09 | 4.58E-10 | 6.57 | 11.9874327 | 1.12E-01 | 6063138   | 6063261   | NC_000001.10 |
| cg11793646 | 4.91E-09 | 4.59E-10 | 6.56 | 11.9860951 | 3.83E-02 | 44087129  | 44087252  | NC_000021.8  |
| cg09156097 | 4.91E-09 | 4.59E-10 | 6.56 | 11.9859841 | 1.42E-01 | 138729283 | 138729406 | NC_000005.9  |
| cg06573378 | 4.91E-09 | 4.59E-10 | 6.56 | 11.9850042 | 1.27E-01 | 66907862  | 66907985  | NC_000002.11 |
| cg20271517 | 4.92E-09 | 4.60E-10 | 6.56 | 11.9823033 | 1.98E-01 | 156129862 | 156129985 | NC_000004.11 |
| cg07249209 | 4.94E-09 | 4.62E-10 | 6.56 | 11.979595  | 6.65E-02 | 19183930  | 19184053  | NC_000013.10 |
| cg01476003 | 4.94E-09 | 4.62E-10 | 6.56 | 11.9785766 | 1.62E-01 | 71460486  | 71460609  | NC_000016.9  |
| cg01761256 | 4.94E-09 | 4.62E-10 | 6.56 | 11.9780375 | 6.53E-02 | 72243817  | 72243940  | NC_000014.8  |
| cg16081281 | 4.95E-09 | 4.63E-10 | 6.56 | 11.977178  | 1.55E-01 | 23559839  | 23559962  | NC_000008.10 |
| cg06371489 | 4.95E-09 | 4.63E-10 | 6.56 | 11.9770607 | 7.33E-02 | 86309582  | 86309705  | NC_000015.9  |
| cg00047501 | 4.95E-09 | 4.63E-10 | 6.56 | 11.9763022 | 6.17E-02 | 201680860 | 201680983 | NC_000002.11 |
| cg08259925 | 4.95E-09 | 4.63E-10 | 6.56 | 11.9760599 | 1.36E-01 | 63257813  | 63257936  | NC_000005.9  |
| cg14420668 | 4.95E-09 | 4.64E-10 | 6.56 | 11.9755532 | 4.70E-02 | 1054275   | 1054398   | NC_000007.13 |
| cg02231404 | 4.96E-09 | 4.64E-10 | 6.56 | 11.9753147 | 1.20E-01 | 62679635  | 62679758  | NC_000020.10 |
| cg01718065 | 4.96E-09 | 4.64E-10 | 6.56 | 11.9746921 | 1.05E-01 | 51774429  | 51774552  | NC_000019.9  |
| cg16868298 | 4.96E-09 | 4.64E-10 | 6.56 | 11.9746289 | 1.35E-01 | 120969033 | 120969156 | NC_000007.13 |
| cg26344392 | 4.96E-09 | 4.64E-10 | 6.56 | 11.9745484 | 8.98E-02 | 167825464 | 167825587 | NC_000001.10 |
| cg14078678 | 4.96E-09 | 4.64E-10 | 6.56 | 11.9744469 | 7.44E-02 | 46584148  | 46584271  | NC_000020.10 |
| cg17623793 | 4.96E-09 | 4.64E-10 | 6.56 | 11.9740904 | 1.21E-01 | 4230872   | 4230995   | NC_000005.9  |
| cg06046819 | 4.96E-09 | 4.64E-10 | 6.56 | 11.9737712 | 5.64E-02 | 4500281   | 4500404   | NC_000017.10 |
| cg24164238 | 4.98E-09 | 4.66E-10 | 6.56 | 11.9706218 | 7.30E-02 | 114199055 | 114199178 | NC_000013.10 |
| cg23381749 | 4.98E-09 | 4.66E-10 | 6.56 | 11.9702259 | 1.51E-01 | 130645423 | 130645546 | NC_000012.11 |
| cg11388277 | 4.99E-09 | 4.67E-10 | 6.56 | 11.9689553 | 1.15E-01 | 328132    | 328255    | NC_000004.11 |

|            |          |          |      |            |          |           |           |              |
|------------|----------|----------|------|------------|----------|-----------|-----------|--------------|
| cg10500406 | 4.99E-09 | 4.67E-10 | 6.56 | 11.9685534 | 1.74E-02 | 99036512  | 99036635  | NC_000007.13 |
| cg23237765 | 4.99E-09 | 4.67E-10 | 6.56 | 11.9677936 | 6.52E-02 | 921845    | 921968    | NC_000007.13 |
| cg26994225 | 5.00E-09 | 4.68E-10 | 6.56 | 11.9670285 | 1.46E-01 | 119616769 | 119616892 | NC_000002.11 |
| cg16810605 | 5.00E-09 | 4.68E-10 | 6.56 | 11.9664911 | 1.64E-01 | 65283263  | 65283386  | NC_000008.10 |
| cg09711746 | 5.00E-09 | 4.68E-10 | 6.56 | 11.9659343 | 1.25E-01 | 32460375  | 32460498  | NC_000011.9  |
| cg25020286 | 5.00E-09 | 4.68E-10 | 6.56 | 11.9659016 | 1.64E-01 | 18956947  | 18957070  | NC_000001.10 |
| cg04352272 | 5.00E-09 | 4.68E-10 | 6.56 | 11.9658115 | 1.45E-01 | 3289798   | 3289921   | NC_000017.10 |
| cg10835823 | 5.00E-09 | 4.69E-10 | 6.56 | 11.9650533 | 8.97E-02 | 169659763 | 169659886 | NC_000005.9  |
| cg21778348 | 5.01E-09 | 4.69E-10 | 6.56 | 11.9642465 | 1.31E-01 | 27194614  | 27194737  | NC_000007.13 |
| cg23913421 | 5.01E-09 | 4.69E-10 | 6.56 | 11.9640332 | 2.11E-01 | 50674663  | 50674786  | NC_000006.11 |
| cg12105941 | 5.01E-09 | 4.69E-10 | 6.56 | 11.9633677 | 1.63E-01 | 133657466 | 133657589 | NC_000011.9  |
| cg02104434 | 5.01E-09 | 4.69E-10 | 6.56 | 11.9632437 | 8.85E-02 | 247694406 | 247694529 | NC_000001.10 |
| cg06795523 | 5.01E-09 | 4.69E-10 | 6.56 | 11.9631144 | 1.11E-01 | 58358974  | 58359097  | NC_000002.11 |
| cg24393316 | 5.01E-09 | 4.70E-10 | 6.56 | 11.9630196 | 2.03E-01 | 100616469 | 100616592 | NC_000009.11 |
| cg11752440 | 5.02E-09 | 4.70E-10 | 6.56 | 11.9616902 | 2.02E-01 | 102980466 | 102980589 | NC_000011.9  |
| cg06202276 | 5.02E-09 | 4.71E-10 | 6.56 | 11.9610156 | 1.57E-01 | 154713333 | 154713456 | NC_000004.11 |
| cg04878000 | 5.03E-09 | 4.71E-10 | 6.56 | 11.9596589 | 2.24E-01 | 32237923  | 32238046  | NC_000001.10 |
| cg10202544 | 5.03E-09 | 4.71E-10 | 6.56 | 11.9595625 | 1.13E-01 | 92303685  | 92303808  | NC_000014.8  |
| cg23452498 | 5.03E-09 | 4.72E-10 | 6.56 | 11.9586567 | 1.59E-01 | 144889607 | 144889730 | NC_000005.9  |
| cg06809364 | 5.03E-09 | 4.72E-10 | 6.56 | 11.9584961 | 8.56E-02 | 152555206 | 152555329 | NC_000003.11 |
| cg25098479 | 5.04E-09 | 4.72E-10 | 6.56 | 11.9584146 | 7.19E-02 | 124763800 | 124763923 | NC_000012.11 |
| cg24167841 | 5.04E-09 | 4.72E-10 | 6.56 | 11.9581525 | 3.59E-02 | 57389041  | 57389164  | NC_000012.11 |
| cg08230910 | 5.04E-09 | 4.72E-10 | 6.56 | 11.9577999 | 5.02E-02 | 80507149  | 80507272  | NC_000007.13 |
| cg12945194 | 5.04E-09 | 4.72E-10 | 6.56 | 11.9573797 | 9.16E-02 | 64703312  | 64703435  | NC_000011.9  |
| cg24084681 | 5.04E-09 | 4.72E-10 | 6.56 | 11.9573113 | 2.15E-01 | 93520288  | 93520411  | NC_000007.13 |

|            |          |          |      |            |          |           |           |              |
|------------|----------|----------|------|------------|----------|-----------|-----------|--------------|
| cg27331241 | 5.04E-09 | 4.72E-10 | 6.56 | 11.9570763 | 2.09E-01 | 751830    | 751953    | NC_000007.13 |
| cg16056164 | 5.04E-09 | 4.73E-10 | 6.56 | 11.9566836 | 7.10E-02 | 233211572 | 233211695 | NC_000001.10 |
| cg05666607 | 5.04E-09 | 4.73E-10 | 6.56 | 11.9564575 | 1.40E-01 | 145718405 | 145718528 | NC_000005.9  |
| cg09583939 | 5.06E-09 | 4.75E-10 | 6.56 | 11.9525659 | 9.25E-02 | 140166213 | 140166336 | NC_000005.9  |
| cg17838029 | 5.06E-09 | 4.75E-10 | 6.56 | 11.9524513 | 1.25E-01 | 133562334 | 133562457 | NC_000006.11 |
| cg02046160 | 5.07E-09 | 4.75E-10 | 6.56 | 11.9521726 | 4.50E-02 | 88874667  | 88874790  | NC_000009.11 |
| cg02853358 | 5.07E-09 | 4.75E-10 | 6.56 | 11.9516332 | 5.87E-02 | 74010290  | 74010413  | NC_000002.11 |
| cg04210284 | 5.07E-09 | 4.75E-10 | 6.56 | 11.9515507 | 2.27E-01 | 1445561   | 1445684   | NC_000005.9  |
| cg23030903 | 5.07E-09 | 4.76E-10 | 6.56 | 11.9504096 | 5.06E-02 | 9908764   | 9908887   | NC_000003.11 |
| cg18549575 | 5.08E-09 | 4.76E-10 | 6.56 | 11.949709  | 4.03E-02 | 128494568 | 128494691 | NC_000007.13 |
| cg00158333 | 5.09E-09 | 4.77E-10 | 6.56 | 11.9469194 | 1.45E-01 | 47075855  | 47075978  | NC_000017.10 |
| cg04874129 | 5.09E-09 | 4.77E-10 | 6.56 | 11.9468914 | 1.35E-01 | 55690873  | 55690996  | NC_000016.9  |
| cg14741939 | 5.10E-09 | 4.78E-10 | 6.56 | 11.9452891 | 1.63E-01 | 147127137 | 147127260 | NC_000003.11 |
| cg00706802 | 5.10E-09 | 4.78E-10 | 6.56 | 11.9451571 | 6.29E-02 | 47322368  | 47322491  | NC_000003.11 |
| cg08932381 | 5.11E-09 | 4.79E-10 | 6.56 | 11.9433754 | 1.12E-01 | 138078989 | 138079112 | NC_000003.11 |
| cg01471384 | 5.11E-09 | 4.79E-10 | 6.56 | 11.9429977 | 1.62E-01 | 107957265 | 107957388 | NC_000004.11 |
| cg15831296 | 5.12E-09 | 4.80E-10 | 6.56 | 11.940606  | 6.00E-02 | 101192591 | 101192714 | NC_000014.8  |
| cg00460286 | 5.13E-09 | 4.81E-10 | 6.56 | 11.9391658 | 7.87E-02 | 77320261  | 77320384  | NC_000015.9  |
| cg09014354 | 5.13E-09 | 4.81E-10 | 6.56 | 11.9386052 | 1.86E-01 | 55413878  | 55414001  | NC_000012.11 |
| cg26250093 | 5.13E-09 | 4.81E-10 | 6.56 | 11.9385514 | 5.86E-02 | 24397649  | 24397772  | NC_000002.11 |
| cg09580592 | 5.14E-09 | 4.82E-10 | 6.56 | 11.936451  | 1.12E-01 | 907643    | 907766    | NC_000017.10 |
| cg07039560 | 5.15E-09 | 4.83E-10 | 6.56 | 11.935733  | 1.03E-01 | 140683681 | 140683804 | NC_000005.9  |
| cg17772342 | 5.15E-09 | 4.83E-10 | 6.56 | 11.9348487 | 1.57E-01 | 134871686 | 134871809 | NC_000005.9  |
| cg14146100 | 5.15E-09 | 4.84E-10 | 6.56 | 11.9340648 | 1.40E-01 | 134069236 | 134069359 | NC_000004.11 |
| cg06370771 | 5.16E-09 | 4.84E-10 | 6.56 | 11.9338466 | 1.91E-01 | 18960940  | 18961063  | NC_000001.10 |



|            |          |          |      |            |          |           |           |              |
|------------|----------|----------|------|------------|----------|-----------|-----------|--------------|
| cg10229905 | 5.16E-09 | 4.84E-10 | 6.56 | 11.9336337 | 7.62E-02 | 50715703  | 50715826  | NC_000019.9  |
| cg22131691 | 5.16E-09 | 4.84E-10 | 6.55 | 11.9328469 | 2.10E-01 | 32110988  | 32111111  | NC_000007.13 |
| cg13704497 | 5.17E-09 | 4.85E-10 | 6.55 | 11.9316224 | 1.25E-01 | 31590622  | 31590745  | NC_000006.11 |
| cg07538634 | 5.17E-09 | 4.85E-10 | 6.55 | 11.930294  | 1.05E-01 | 3825141   | 3825264   | NC_000019.9  |
| cg17807172 | 5.17E-09 | 4.86E-10 | 6.55 | 11.9300547 | 1.82E-01 | 122620929 | 122621052 | NC_000005.9  |
| cg07541744 | 5.18E-09 | 4.86E-10 | 6.55 | 11.9297206 | 1.68E-01 | 55363277  | 55363400  | NC_000016.9  |
| cg21600537 | 5.18E-09 | 4.86E-10 | 6.55 | 11.9295945 | 1.47E-01 | 8115260   | 8115383   | NC_000019.9  |
| cg03259887 | 5.18E-09 | 4.86E-10 | 6.55 | 11.9288905 | 1.01E-01 | 85608894  | 85609017  | NC_000016.9  |
| cg15179472 | 5.18E-09 | 4.86E-10 | 6.55 | 11.928335  | 3.28E-02 | 70736858  | 70736981  | NC_000015.9  |
| cg13859860 | 5.18E-09 | 4.87E-10 | 6.55 | 11.9281692 | 1.10E-01 | 51569878  | 51570001  | NC_000010.10 |
| cg15994026 | 5.18E-09 | 4.87E-10 | 6.55 | 11.9279825 | 2.50E-01 | 15780306  | 15780429  | NC_000004.11 |
| cg26856475 | 5.19E-09 | 4.87E-10 | 6.55 | 11.9269585 | 1.09E-01 | 140740503 | 140740626 | NC_000005.9  |
| cg06122148 | 5.20E-09 | 4.88E-10 | 6.55 | 11.9258425 | 2.45E-01 | 98891553  | 98891676  | NC_000011.9  |
| cg08397978 | 5.20E-09 | 4.88E-10 | 6.55 | 11.9251504 | 1.91E-01 | 89340205  | 89340328  | NC_000008.10 |
| cg04821895 | 5.20E-09 | 4.88E-10 | 6.55 | 11.9251102 | 1.26E-01 | 102462585 | 102462708 | NC_000015.9  |
| cg01414185 | 5.20E-09 | 4.88E-10 | 6.55 | 11.9243956 | 1.99E-01 | 177017449 | 177017572 | NC_000002.11 |
| cg19069039 | 5.20E-09 | 4.89E-10 | 6.55 | 11.9238853 | 5.38E-02 | 52238665  | 52238788  | NC_000012.11 |
| cg03383508 | 5.21E-09 | 4.89E-10 | 6.55 | 11.9233817 | 1.36E-01 | 119591097 | 119591220 | NC_000002.11 |
| cg05452066 | 5.21E-09 | 4.89E-10 | 6.55 | 11.9228559 | 3.97E-02 | 138298086 | 138298209 | NC_000005.9  |
| cg24778248 | 5.21E-09 | 4.89E-10 | 6.55 | 11.9222296 | 1.48E-01 | 98963062  | 98963185  | NC_000002.11 |
| cg21795221 | 5.22E-09 | 4.90E-10 | 6.55 | 11.9214204 | 1.25E-01 | 156718262 | 156718385 | NC_000006.11 |
| cg27171201 | 5.23E-09 | 4.91E-10 | 6.55 | 11.9195864 | 6.15E-02 | 3365137   | 3365260   | NC_000019.9  |
| cg01966891 | 5.23E-09 | 4.91E-10 | 6.55 | 11.9188278 | 1.31E-01 | 95870990  | 95871113  | NC_000015.9  |
| cg03299740 | 5.24E-09 | 4.92E-10 | 6.55 | 11.9175554 | 4.19E-02 | 17997779  | 17997902  | NC_000002.11 |
| cg21382800 | 5.24E-09 | 4.92E-10 | 6.55 | 11.9171276 | 1.84E-02 | 29661771  | 29661894  | NC_000022.10 |

|            |          |          |      |            |          |           |           |              |
|------------|----------|----------|------|------------|----------|-----------|-----------|--------------|
| cg22344703 | 5.24E-09 | 4.93E-10 | 6.55 | 11.9158761 | 1.42E-01 | 219736312 | 219736435 | NC_000002.11 |
| cg04737042 | 5.25E-09 | 4.93E-10 | 6.55 | 11.9150718 | 5.82E-02 | 29153994  | 29154117  | NC_000016.9  |
| cg14020278 | 5.25E-09 | 4.93E-10 | 6.55 | 11.9149763 | 2.59E-02 | 139727398 | 139727521 | NC_000009.11 |
| cg21472506 | 5.25E-09 | 4.93E-10 | 6.55 | 11.9145896 | 1.96E-01 | 63283967  | 63284090  | NC_000002.11 |
| cg15140703 | 5.25E-09 | 4.94E-10 | 6.55 | 11.9141694 | 1.71E-01 | 99775532  | 99775655  | NC_000007.13 |
| cg03270995 | 5.25E-09 | 4.94E-10 | 6.55 | 11.9141292 | 3.04E-02 | 4790537   | 4790660   | NC_000016.9  |
| cg19888509 | 5.26E-09 | 4.95E-10 | 6.55 | 11.9119127 | 1.03E-01 | 125145641 | 125145764 | NC_000012.11 |
| cg12345501 | 5.27E-09 | 4.95E-10 | 6.55 | 11.9115412 | 8.24E-02 | 180936706 | 180936829 | NC_000002.11 |
| cg19600494 | 5.27E-09 | 4.95E-10 | 6.55 | 11.9112931 | 9.50E-02 | 106959525 | 106959648 | NC_000002.11 |
| cg17174980 | 5.27E-09 | 4.95E-10 | 6.55 | 11.9106547 | 6.80E-02 | 14109514  | 14109637  | NC_000012.11 |
| cg23100720 | 5.28E-09 | 4.96E-10 | 6.55 | 11.9095519 | 1.31E-01 | 155770386 | 155770509 | NC_000006.11 |
| cg00971110 | 5.28E-09 | 4.96E-10 | 6.55 | 11.9087437 | 6.31E-02 | 84814140  | 84814263  | NC_000007.13 |
| cg17110559 | 5.29E-09 | 4.97E-10 | 6.55 | 11.9066537 | 9.85E-02 | 32111392  | 32111515  | NC_000012.11 |
| cg23288962 | 5.30E-09 | 4.98E-10 | 6.55 | 11.9048897 | 1.25E-01 | 35517516  | 35517639  | NC_000013.10 |
| cg19571106 | 5.31E-09 | 4.99E-10 | 6.55 | 11.903049  | 1.58E-01 | 9762850   | 9762973   | NC_000008.10 |
| cg18788932 | 5.31E-09 | 4.99E-10 | 6.55 | 11.9025357 | 1.57E-01 | 115135700 | 115135823 | NC_000012.11 |
| cg22622123 | 5.32E-09 | 5.00E-10 | 6.55 | 11.9015659 | 1.58E-01 | 118902351 | 118902474 | NC_000011.9  |
| cg23639692 | 5.32E-09 | 5.01E-10 | 6.55 | 11.8999787 | 1.26E-01 | 27175152  | 27175275  | NC_000007.13 |
| cg11134052 | 5.33E-09 | 5.01E-10 | 6.55 | 11.8997036 | 1.42E-01 | 61119625  | 61119748  | NC_000014.8  |
| cg14578500 | 5.34E-09 | 5.02E-10 | 6.55 | 11.8974858 | 5.30E-02 | 43191793  | 43191916  | NC_000017.10 |
| cg00582316 | 5.34E-09 | 5.02E-10 | 6.55 | 11.8966719 | 1.89E-01 | 175201430 | 175201553 | NC_000002.11 |
| cg02501166 | 5.34E-09 | 5.03E-10 | 6.55 | 11.8963642 | 1.42E-01 | 128866698 | 128866821 | NC_000012.11 |
| cg08655206 | 5.35E-09 | 5.03E-10 | 6.55 | 11.8952878 | 1.13E-01 | 221058198 | 221058321 | NC_000001.10 |
| cg09521719 | 5.35E-09 | 5.04E-10 | 6.55 | 11.8945155 | 1.47E-01 | 237416370 | 237416493 | NC_000002.11 |
| cg11825642 | 5.36E-09 | 5.05E-10 | 6.55 | 11.892475  | 1.64E-01 | 75798196  | 75798319  | NC_000017.10 |

|            |          |          |      |            |          |           |           |              |
|------------|----------|----------|------|------------|----------|-----------|-----------|--------------|
| cg05390968 | 5.37E-09 | 5.05E-10 | 6.55 | 11.89183   | 1.28E-01 | 86598792  | 86598915  | NC_000016.9  |
| cg22041590 | 5.38E-09 | 5.06E-10 | 6.55 | 11.8897166 | 6.16E-02 | 158747855 | 158747978 | NC_000002.11 |
| cg23605284 | 5.38E-09 | 5.06E-10 | 6.55 | 11.8896451 | 1.59E-01 | 131764280 | 131764403 | NC_000010.10 |
| cg06321962 | 5.38E-09 | 5.07E-10 | 6.55 | 11.8884451 | 9.61E-02 | 38528511  | 38528634  | NC_000022.10 |
| cg26669806 | 5.40E-09 | 5.08E-10 | 6.55 | 11.8854313 | 1.53E-01 | 18899483  | 18899606  | NC_000019.9  |
| cg10863075 | 5.40E-09 | 5.08E-10 | 6.55 | 11.8854292 | 1.32E-01 | 5296267   | 5296390   | NC_000020.10 |
| cg16065899 | 5.40E-09 | 5.08E-10 | 6.55 | 11.8850608 | 1.25E-01 | 44332958  | 44333081  | NC_000011.9  |
| cg13087761 | 5.40E-09 | 5.09E-10 | 6.55 | 11.8847118 | 1.36E-01 | 5645778   | 5645901   | NC_000007.13 |
| cg23085167 | 5.41E-09 | 5.10E-10 | 6.55 | 11.8828507 | 1.05E-01 | 3160739   | 3160862   | NC_000001.10 |
| cg24905248 | 5.42E-09 | 5.10E-10 | 6.55 | 11.8822385 | 8.05E-02 | 44219907  | 44220030  | NC_000002.11 |
| cg16457413 | 5.42E-09 | 5.10E-10 | 6.55 | 11.881477  | 5.79E-02 | 52269736  | 52269859  | NC_000003.11 |
| cg24730564 | 5.42E-09 | 5.11E-10 | 6.55 | 11.8810378 | 9.44E-02 | 106938322 | 106938445 | NC_000014.8  |
| cg06372015 | 5.42E-09 | 5.11E-10 | 6.55 | 11.8807238 | 2.05E-01 | 43602000  | 43602123  | NC_000011.9  |
| cg07212852 | 5.43E-09 | 5.11E-10 | 6.55 | 11.8799872 | 1.46E-01 | 21684348  | 21684471  | NC_000020.10 |
| cg20773033 | 5.43E-09 | 5.12E-10 | 6.54 | 11.8791045 | 1.16E-01 | 39635187  | 39635310  | NC_000022.10 |
| cg11431402 | 5.43E-09 | 5.12E-10 | 6.54 | 11.8789753 | 9.56E-02 | 126135408 | 126135531 | NC_000009.11 |
| cg00624617 | 5.43E-09 | 5.12E-10 | 6.54 | 11.8787849 | 9.46E-02 | 153852554 | 153852677 | NC_000005.9  |
| cg13192938 | 5.43E-09 | 5.12E-10 | 6.54 | 11.8785769 | 1.25E-01 | 105739124 | 105739247 | NC_000014.8  |
| cg27540865 | 5.43E-09 | 5.12E-10 | 6.54 | 11.8784116 | 1.33E-01 | 243053934 | 243054057 | NC_000001.10 |
| cg04936260 | 5.44E-09 | 5.13E-10 | 6.54 | 11.8765771 | 9.83E-02 | 74888889  | 74889012  | NC_000014.8  |
| cg24757553 | 5.45E-09 | 5.13E-10 | 6.54 | 11.8764269 | 1.08E-01 | 27127501  | 27127624  | NC_000007.13 |
| cg10080155 | 5.46E-09 | 5.14E-10 | 6.54 | 11.8744277 | 2.40E-01 | 45405904  | 45406027  | NC_000022.10 |
| cg21277243 | 5.47E-09 | 5.15E-10 | 6.54 | 11.8716252 | 1.38E-01 | 5996331   | 5996454   | NC_000006.11 |
| cg07922924 | 5.47E-09 | 5.16E-10 | 6.54 | 11.8709146 | 1.14E-01 | 11211274  | 11211397  | NC_000001.10 |
| cg15409712 | 5.48E-09 | 5.16E-10 | 6.54 | 11.8700598 | 1.17E-01 | 103426288 | 103426411 | NC_000004.11 |

|            |          |          |      |            |          |           |           |              |
|------------|----------|----------|------|------------|----------|-----------|-----------|--------------|
| cg17240133 | 5.48E-09 | 5.17E-10 | 6.54 | 11.8689334 | 1.20E-01 | 57977245  | 57977368  | NC_000015.9  |
| cg10123247 | 5.49E-09 | 5.18E-10 | 6.54 | 11.8670492 | 2.02E-01 | 117950929 | 117951052 | NC_000008.10 |
| cg10249507 | 5.50E-09 | 5.18E-10 | 6.54 | 11.86623   | 4.29E-02 | 17758229  | 17758352  | NC_000019.9  |
| cg06562644 | 5.50E-09 | 5.19E-10 | 6.54 | 11.8656219 | 1.00E-01 | 134992590 | 134992713 | NC_000010.10 |
| cg06005396 | 5.50E-09 | 5.19E-10 | 6.54 | 11.8655073 | 1.17E-01 | 590541    | 590664    | NC_000019.9  |
| cg22882539 | 5.51E-09 | 5.19E-10 | 6.54 | 11.8646255 | 1.52E-01 | 131438523 | 131438646 | NC_000012.11 |
| cg10170678 | 5.52E-09 | 5.20E-10 | 6.54 | 11.862829  | 3.89E-02 | 92994057  | 92994180  | NC_000014.8  |
| cg07742404 | 5.53E-09 | 5.21E-10 | 6.54 | 11.8612503 | 1.09E-01 | 130648987 | 130649110 | NC_000012.11 |
| cg20006729 | 5.53E-09 | 5.21E-10 | 6.54 | 11.8609368 | 1.15E-01 | 7033146   | 7033269   | NC_000012.11 |
| cg16424920 | 5.53E-09 | 5.21E-10 | 6.54 | 11.8603934 | 1.57E-01 | 9760855   | 9760978   | NC_000008.10 |
| cg12556586 | 5.53E-09 | 5.21E-10 | 6.54 | 11.8603728 | 4.22E-02 | 59733552  | 59733675  | NC_000015.9  |
| cg00630958 | 5.54E-09 | 5.22E-10 | 6.54 | 11.8591697 | 1.64E-01 | 65991461  | 65991584  | NC_000001.10 |
| cg22755445 | 5.54E-09 | 5.22E-10 | 6.54 | 11.8587029 | 1.19E-01 | 102772036 | 102772159 | NC_000002.11 |
| cg15426006 | 5.54E-09 | 5.22E-10 | 6.54 | 11.8584173 | 8.22E-02 | 99869897  | 99870020  | NC_000013.10 |
| cg06695286 | 5.54E-09 | 5.23E-10 | 6.54 | 11.8579261 | 1.17E-01 | 42880445  | 42880568  | NC_000012.11 |
| cg08069899 | 5.54E-09 | 5.23E-10 | 6.54 | 11.8578588 | 1.57E-01 | 4383770   | 4383893   | NC_000012.11 |
| cg20984972 | 5.56E-09 | 5.24E-10 | 6.54 | 11.8551535 | 1.50E-01 | 3390125   | 3390248   | NC_000019.9  |
| cg08563299 | 5.56E-09 | 5.25E-10 | 6.54 | 11.8542571 | 8.99E-02 | 16922592  | 16922715  | NC_000019.9  |
| cg24146349 | 5.57E-09 | 5.25E-10 | 6.54 | 11.853309  | 9.65E-02 | 1542769   | 1542892   | NC_000007.13 |
| cg20228495 | 5.57E-09 | 5.26E-10 | 6.54 | 11.8524818 | 4.95E-02 | 74945369  | 74945492  | NC_000002.11 |
| cg26429925 | 5.57E-09 | 5.26E-10 | 6.54 | 11.8520945 | 1.41E-01 | 83953775  | 83953898  | NC_000015.9  |
| cg23832237 | 5.57E-09 | 5.26E-10 | 6.54 | 11.8520394 | 1.17E-01 | 72667208  | 72667331  | NC_000017.10 |
| cg20639942 | 5.57E-09 | 5.26E-10 | 6.54 | 11.8519469 | 4.40E-02 | 54271958  | 54272081  | NC_000019.9  |
| cg24286165 | 5.58E-09 | 5.27E-10 | 6.54 | 11.8507515 | 1.72E-01 | 32458966  | 32459089  | NC_000011.9  |
| cg11666559 | 5.58E-09 | 5.27E-10 | 6.54 | 11.8503526 | 1.02E-01 | 221067662 | 221067785 | NC_000001.10 |

|            |          |          |      |            |          |           |           |              |
|------------|----------|----------|------|------------|----------|-----------|-----------|--------------|
| cg14857764 | 5.59E-09 | 5.27E-10 | 6.54 | 11.849701  | 1.55E-01 | 50706663  | 50706786  | NC_000013.10 |
| cg23448486 | 5.59E-09 | 5.27E-10 | 6.54 | 11.8492004 | 1.52E-01 | 147129213 | 147129336 | NC_000003.11 |
| cg04608722 | 5.59E-09 | 5.28E-10 | 6.54 | 11.8484324 | 6.89E-02 | 46919549  | 46919672  | NC_000022.10 |
| cg15456742 | 5.59E-09 | 5.28E-10 | 6.54 | 11.8480901 | 1.60E-01 | 207991729 | 207991852 | NC_000001.10 |
| cg22359606 | 5.60E-09 | 5.28E-10 | 6.54 | 11.847668  | 1.67E-01 | 182545492 | 182545615 | NC_000002.11 |
| cg09981884 | 5.60E-09 | 5.29E-10 | 6.54 | 11.8469822 | 1.22E-01 | 1720110   | 1720233   | NC_000004.11 |
| cg09737407 | 5.61E-09 | 5.29E-10 | 6.54 | 11.8457343 | 3.54E-02 | 31079698  | 31079821  | NC_000006.11 |
| cg10659382 | 5.61E-09 | 5.30E-10 | 6.54 | 11.8450736 | 2.31E-01 | 155166856 | 155166979 | NC_000007.13 |
| cg17174275 | 5.61E-09 | 5.30E-10 | 6.54 | 11.844758  | 9.85E-02 | 26109429  | 26109552  | NC_000015.9  |
| cg27260684 | 5.62E-09 | 5.30E-10 | 6.54 | 11.844001  | 1.39E-01 | 85063742  | 85063865  | NC_000016.9  |
| cg11257429 | 5.62E-09 | 5.30E-10 | 6.54 | 11.8439997 | 1.52E-01 | 178016796 | 178016919 | NC_000005.9  |
| cg25733898 | 5.62E-09 | 5.30E-10 | 6.54 | 11.8437788 | 5.64E-02 | 71330058  | 71330181  | NC_000015.9  |
| cg05457480 | 5.62E-09 | 5.31E-10 | 6.54 | 11.8433931 | 1.53E-01 | 139139201 | 139139324 | NC_000005.9  |
| cg16774479 | 5.63E-09 | 5.31E-10 | 6.54 | 11.8416751 | 1.14E-01 | 33529461  | 33529584  | NC_000018.9  |
| cg09462445 | 5.63E-09 | 5.32E-10 | 6.54 | 11.8407839 | 2.06E-01 | 217559131 | 217559254 | NC_000002.11 |
| cg00319168 | 5.63E-09 | 5.32E-10 | 6.54 | 11.8404501 | 1.46E-01 | 176958174 | 176958297 | NC_000002.11 |
| cg00958225 | 5.64E-09 | 5.32E-10 | 6.54 | 11.840365  | 8.61E-02 | 44972477  | 44972600  | NC_000001.10 |
| cg27327911 | 5.64E-09 | 5.33E-10 | 6.54 | 11.8395299 | 1.67E-01 | 54969146  | 54969269  | NC_000016.9  |
| cg13858975 | 5.65E-09 | 5.33E-10 | 6.54 | 11.8382548 | 5.80E-02 | 52016644  | 52016767  | NC_000015.9  |
| cg06509140 | 5.65E-09 | 5.33E-10 | 6.54 | 11.8379324 | 6.65E-02 | 1729975   | 1730098   | NC_000017.10 |
| cg10623853 | 5.65E-09 | 5.34E-10 | 6.54 | 11.8373249 | 8.88E-02 | 42573639  | 42573762  | NC_000020.10 |
| cg21054473 | 5.66E-09 | 5.35E-10 | 6.54 | 11.8359744 | 2.06E-01 | 100438957 | 100439080 | NC_000014.8  |
| cg10947457 | 5.67E-09 | 5.35E-10 | 6.54 | 11.8346948 | 6.87E-02 | 32096945  | 32097068  | NC_000006.11 |
| cg06934774 | 5.67E-09 | 5.36E-10 | 6.54 | 11.8338975 | 1.56E-01 | 27198025  | 27198148  | NC_000007.13 |
| cg21823149 | 5.68E-09 | 5.36E-10 | 6.54 | 11.8327675 | 1.68E-01 | 207309003 | 207309126 | NC_000002.11 |

|            |          |          |      |            |          |           |           |              |
|------------|----------|----------|------|------------|----------|-----------|-----------|--------------|
| cg05319305 | 5.70E-09 | 5.38E-10 | 6.54 | 11.8290228 | 1.98E-01 | 101111927 | 101112050 | NC_000004.11 |
| cg25781755 | 5.70E-09 | 5.39E-10 | 6.54 | 11.8285265 | 1.55E-01 | 13537089  | 13537212  | NC_000004.11 |
| cg03700171 | 5.71E-09 | 5.40E-10 | 6.54 | 11.8262915 | 4.72E-02 | 78748272  | 78748395  | NC_000015.9  |
| cg12878812 | 5.72E-09 | 5.41E-10 | 6.53 | 11.8249867 | 1.25E-01 | 119419696 | 119419819 | NC_000012.11 |
| cg22411207 | 5.72E-09 | 5.41E-10 | 6.53 | 11.8246386 | 1.05E-01 | 57026301  | 57026424  | NC_000008.10 |
| cg10988573 | 5.72E-09 | 5.41E-10 | 6.53 | 11.8246189 | 1.02E-01 | 61104928  | 61105051  | NC_000014.8  |
| cg10001374 | 5.72E-09 | 5.41E-10 | 6.53 | 11.8245001 | 7.59E-02 | 134254128 | 134254251 | NC_000011.9  |
| cg13160967 | 5.74E-09 | 5.43E-10 | 6.53 | 11.821402  | 1.11E-01 | 100730303 | 100730426 | NC_000006.11 |
| cg24218935 | 5.74E-09 | 5.43E-10 | 6.53 | 11.8204716 | 4.47E-02 | 1686150   | 1686273   | NC_000011.9  |
| cg23976464 | 5.75E-09 | 5.44E-10 | 6.53 | 11.8193842 | 1.79E-01 | 32483950  | 32484073  | NC_000017.10 |
| cg18404308 | 5.75E-09 | 5.44E-10 | 6.53 | 11.8191072 | 1.75E-01 | 98962900  | 98963023  | NC_000002.11 |
| cg22449370 | 5.76E-09 | 5.45E-10 | 6.53 | 11.8170862 | 9.61E-02 | 153586022 | 153586145 | NC_000007.13 |
| cg19563062 | 5.76E-09 | 5.45E-10 | 6.53 | 11.8170328 | 7.38E-02 | 34097075  | 34097198  | NC_000017.10 |
| cg05771261 | 5.77E-09 | 5.45E-10 | 6.53 | 11.8164922 | 1.30E-01 | 20879286  | 20879409  | NC_000001.10 |
| cg00470955 | 5.77E-09 | 5.46E-10 | 6.53 | 11.8157142 | 1.26E-01 | 7354432   | 7354555   | NC_000016.9  |
| cg14371590 | 5.77E-09 | 5.46E-10 | 6.53 | 11.8153998 | 1.07E-01 | 58013915  | 58014038  | NC_000012.11 |
| cg03683003 | 5.78E-09 | 5.46E-10 | 6.53 | 11.8147512 | 9.74E-02 | 138874004 | 138874127 | NC_000009.11 |
| cg09503234 | 5.78E-09 | 5.46E-10 | 6.53 | 11.8145558 | 1.26E-01 | 2151721   | 2151844   | NC_000011.9  |
| cg12758973 | 5.78E-09 | 5.47E-10 | 6.53 | 11.8139087 | 1.08E-01 | 247694275 | 247694398 | NC_000001.10 |
| cg05028467 | 5.78E-09 | 5.47E-10 | 6.53 | 11.8138999 | 1.80E-01 | 176057097 | 176057220 | NC_000005.9  |
| cg03860252 | 5.79E-09 | 5.48E-10 | 6.53 | 11.8118597 | 9.33E-02 | 1799705   | 1799828   | NC_000004.11 |
| cg15736169 | 5.79E-09 | 5.48E-10 | 6.53 | 11.8112021 | 1.83E-01 | 112761025 | 112761148 | NC_000013.10 |
| cg14225450 | 5.80E-09 | 5.49E-10 | 6.53 | 11.810299  | 8.70E-02 | 169637832 | 169637955 | NC_000006.11 |
| cg14319657 | 5.80E-09 | 5.49E-10 | 6.53 | 11.8095088 | 9.73E-02 | 48027921  | 48028044  | NC_000022.10 |
| cg26992603 | 5.81E-09 | 5.50E-10 | 6.53 | 11.8088233 | 1.58E-01 | 115130994 | 115131117 | NC_000012.11 |

|            |          |          |      |            |          |           |           |              |
|------------|----------|----------|------|------------|----------|-----------|-----------|--------------|
| cg04882273 | 5.81E-09 | 5.50E-10 | 6.53 | 11.8079716 | 1.37E-01 | 62070365  | 62070488  | NC_000016.9  |
| cg13242092 | 5.81E-09 | 5.50E-10 | 6.53 | 11.8079507 | 6.79E-02 | 46271421  | 46271544  | NC_000021.8  |
| cg17108748 | 5.81E-09 | 5.50E-10 | 6.53 | 11.8079481 | 1.18E-01 | 89065330  | 89065453  | NC_000002.11 |
| cg01070987 | 5.81E-09 | 5.50E-10 | 6.53 | 11.8075202 | 1.69E-01 | 149687002 | 149687125 | NC_000003.11 |
| cg21210758 | 5.81E-09 | 5.50E-10 | 6.53 | 11.8075009 | 1.89E-01 | 5713005   | 5713128   | NC_000004.11 |
| cg03350814 | 5.82E-09 | 5.51E-10 | 6.53 | 11.8057692 | 2.00E-01 | 104512423 | 104512546 | NC_000008.10 |
| cg25965185 | 5.82E-09 | 5.51E-10 | 6.53 | 11.8057123 | 5.79E-02 | 66480641  | 66480764  | NC_000014.8  |
| cg26685352 | 5.82E-09 | 5.51E-10 | 6.53 | 11.8056326 | 1.39E-01 | 48485328  | 48485451  | NC_000004.11 |
| cg02617791 | 5.83E-09 | 5.52E-10 | 6.53 | 11.8053362 | 6.47E-02 | 27235627  | 27235750  | NC_000010.10 |
| cg19457237 | 5.85E-09 | 5.54E-10 | 6.53 | 11.8016632 | 1.21E-01 | 34500585  | 34500708  | NC_000012.11 |
| cg01189783 | 5.85E-09 | 5.54E-10 | 6.53 | 11.8011881 | 1.34E-01 | 100441581 | 100441704 | NC_000006.11 |
| cg16245844 | 5.85E-09 | 5.54E-10 | 6.53 | 11.8005338 | 1.53E-02 | 1800488   | 1800611   | NC_000012.11 |
| cg24059119 | 5.86E-09 | 5.55E-10 | 6.53 | 11.7998885 | 1.65E-01 | 30715575  | 30715698  | NC_000019.9  |
| cg09018383 | 5.86E-09 | 5.55E-10 | 6.53 | 11.7997734 | 4.77E-02 | 31504385  | 31504508  | NC_000006.11 |
| cg02063817 | 5.86E-09 | 5.55E-10 | 6.53 | 11.7996739 | 1.00E-01 | 27253521  | 27253644  | NC_000007.13 |
| cg20747380 | 5.86E-09 | 5.55E-10 | 6.53 | 11.7987981 | 1.31E-01 | 27142275  | 27142398  | NC_000007.13 |
| cg06832820 | 5.86E-09 | 5.55E-10 | 6.53 | 11.7986647 | 1.04E-01 | 64543849  | 64543972  | NC_000011.9  |
| cg20938085 | 5.87E-09 | 5.55E-10 | 6.53 | 11.7982918 | 9.66E-02 | 140768230 | 140768353 | NC_000005.9  |
| cg15409616 | 5.87E-09 | 5.56E-10 | 6.53 | 11.7976949 | 5.48E-02 | 106936446 | 106936569 | NC_000014.8  |
| cg26209005 | 5.87E-09 | 5.56E-10 | 6.53 | 11.7975566 | 1.54E-01 | 132262526 | 132262649 | NC_000007.13 |
| cg26040761 | 5.87E-09 | 5.56E-10 | 6.53 | 11.796895  | 4.10E-02 | 110307829 | 110307952 | NC_000001.10 |
| cg03350439 | 5.87E-09 | 5.56E-10 | 6.53 | 11.7965306 | 1.11E-01 | 231299033 | 231299156 | NC_000001.10 |
| cg01837630 | 5.88E-09 | 5.57E-10 | 6.53 | 11.7950658 | 3.19E-02 | 128385752 | 128385875 | NC_000002.11 |
| cg08111284 | 5.88E-09 | 5.57E-10 | 6.53 | 11.7950577 | 1.21E-01 | 32057125  | 32057248  | NC_000006.11 |
| cg00318000 | 5.88E-09 | 5.57E-10 | 6.53 | 11.7949176 | 3.55E-02 | 151128630 | 151128753 | NC_000001.10 |

|            |          |          |      |            |          |           |           |              |
|------------|----------|----------|------|------------|----------|-----------|-----------|--------------|
| cg07665387 | 5.89E-09 | 5.58E-10 | 6.53 | 11.7943904 | 1.39E-01 | 134069388 | 134069511 | NC_000004.11 |
| cg04205655 | 5.89E-09 | 5.58E-10 | 6.53 | 11.7937422 | 1.10E-01 | 67965756  | 67965879  | NC_000016.9  |
| cg23378722 | 5.89E-09 | 5.58E-10 | 6.53 | 11.7935789 | 1.29E-01 | 49882500  | 49882623  | NC_000013.10 |
| cg22296612 | 5.89E-09 | 5.58E-10 | 6.53 | 11.7931899 | 3.26E-02 | 15457699  | 15457822  | NC_000006.11 |
| cg09295799 | 5.90E-09 | 5.59E-10 | 6.53 | 11.7924143 | 1.39E-01 | 5994235   | 5994358   | NC_000006.11 |
| cg08278741 | 5.90E-09 | 5.59E-10 | 6.53 | 11.7923412 | 1.90E-01 | 36736477  | 36736600  | NC_000019.9  |
| cg25758978 | 5.90E-09 | 5.59E-10 | 6.53 | 11.7922431 | 1.32E-01 | 8454161   | 8454284   | NC_000019.9  |
| cg20711812 | 5.90E-09 | 5.59E-10 | 6.53 | 11.7914827 | 1.32E-01 | 1775422   | 1775545   | NC_000019.9  |
| cg24411302 | 5.91E-09 | 5.60E-10 | 6.53 | 11.7904486 | 9.36E-02 | 74893183  | 74893306  | NC_000014.8  |
| cg27532621 | 5.91E-09 | 5.60E-10 | 6.53 | 11.7903192 | 6.03E-02 | 164593763 | 164593886 | NC_000001.10 |
| cg01085125 | 5.92E-09 | 5.61E-10 | 6.53 | 11.7885053 | 1.43E-01 | 122423433 | 122423556 | NC_000005.9  |
| cg15244223 | 5.92E-09 | 5.61E-10 | 6.53 | 11.7881717 | 1.82E-01 | 118228493 | 118228616 | NC_000006.11 |
| cg00068750 | 5.92E-09 | 5.62E-10 | 6.53 | 11.7874336 | 4.53E-02 | 2535955   | 2536078   | NC_000016.9  |
| cg01438868 | 5.92E-09 | 5.62E-10 | 6.53 | 11.7873506 | 1.40E-01 | 177802381 | 177802504 | NC_000003.11 |
| cg07682547 | 5.92E-09 | 5.62E-10 | 6.53 | 11.7872553 | 1.49E-01 | 153863417 | 153863540 | NC_000005.9  |
| cg08346922 | 5.93E-09 | 5.62E-10 | 6.53 | 11.7867338 | 1.05E-01 | 31228299  | 31228422  | NC_000016.9  |
| cg07063890 | 5.95E-09 | 5.64E-10 | 6.53 | 11.7826692 | 5.92E-02 | 88496241  | 88496364  | NC_000016.9  |
| cg23498221 | 5.96E-09 | 5.65E-10 | 6.53 | 11.7819001 | 3.01E-02 | 26681583  | 26681706  | NC_000017.10 |
| cg06118384 | 5.96E-09 | 5.65E-10 | 6.53 | 11.7816407 | 1.60E-01 | 149645798 | 149645921 | NC_000002.11 |
| cg06460717 | 5.96E-09 | 5.65E-10 | 6.53 | 11.7808475 | 1.69E-01 | 53420135  | 53420258  | NC_000013.10 |
| cg03486475 | 5.97E-09 | 5.66E-10 | 6.53 | 11.7800794 | 9.28E-02 | 140796240 | 140796363 | NC_000005.9  |
| cg00090936 | 5.97E-09 | 5.66E-10 | 6.53 | 11.7794635 | 1.72E-01 | 69592090  | 69592213  | NC_000003.11 |
| cg11539296 | 5.97E-09 | 5.66E-10 | 6.53 | 11.7794457 | 6.69E-02 | 140216145 | 140216268 | NC_000005.9  |
| cg11516654 | 5.98E-09 | 5.67E-10 | 6.53 | 11.7782314 | 4.38E-02 | 19783852  | 19783975  | NC_000011.9  |
| cg01856384 | 5.98E-09 | 5.67E-10 | 6.53 | 11.7779498 | 1.03E-01 | 41376904  | 41377027  | NC_000006.11 |



|            |          |          |      |            |          |           |           |              |
|------------|----------|----------|------|------------|----------|-----------|-----------|--------------|
| cg21331821 | 5.98E-09 | 5.67E-10 | 6.53 | 11.7778513 | 1.66E-01 | 58545149  | 58545272  | NC_000019.9  |
| cg13030332 | 5.99E-09 | 5.69E-10 | 6.53 | 11.7755022 | 1.07E-01 | 115117351 | 115117474 | NC_000012.11 |
| cg12013685 | 5.99E-09 | 5.69E-10 | 6.53 | 11.7751664 | 1.05E-01 | 63243220  | 63243343  | NC_000015.9  |
| cg02119755 | 6.00E-09 | 5.69E-10 | 6.53 | 11.7748343 | 1.01E-01 | 2589556   | 2589679   | NC_000016.9  |
| cg24407243 | 6.00E-09 | 5.69E-10 | 6.53 | 11.7742018 | 1.30E-01 | 21541756  | 21541879  | NC_000019.9  |
| cg25561792 | 6.00E-09 | 5.69E-10 | 6.53 | 11.7741343 | 7.95E-02 | 62050205  | 62050328  | NC_000017.10 |
| cg24939733 | 6.01E-09 | 5.70E-10 | 6.53 | 11.7726323 | 9.18E-02 | 85397684  | 85397807  | NC_000011.9  |
| cg08453036 | 6.01E-09 | 5.71E-10 | 6.52 | 11.7717729 | 1.52E-01 | 215255572 | 215255695 | NC_000001.10 |
| cg00302587 | 6.01E-09 | 5.71E-10 | 6.52 | 11.7714351 | 1.35E-01 | 51576241  | 51576364  | NC_000010.10 |
| cg24250393 | 6.02E-09 | 5.71E-10 | 6.52 | 11.7707716 | 1.18E-01 | 23846838  | 23846961  | NC_000016.9  |
| cg27278953 | 6.02E-09 | 5.71E-10 | 6.52 | 11.7706846 | 1.70E-01 | 77737661  | 77737784  | NC_000014.8  |
| cg11954332 | 6.02E-09 | 5.71E-10 | 6.52 | 11.7706046 | 1.67E-01 | 170639289 | 170639412 | NC_000001.10 |
| cg02186542 | 6.02E-09 | 5.71E-10 | 6.52 | 11.7705627 | 1.31E-01 | 77469167  | 77469290  | NC_000016.9  |
| cg08902698 | 6.02E-09 | 5.72E-10 | 6.52 | 11.770293  | 9.57E-02 | 1271174   | 1271297   | NC_000019.9  |
| cg27462519 | 6.03E-09 | 5.73E-10 | 6.52 | 11.7683084 | 1.15E-01 | 3242639   | 3242762   | NC_000016.9  |
| cg03146683 | 6.04E-09 | 5.73E-10 | 6.52 | 11.7674104 | 7.04E-02 | 22011878  | 22012001  | NC_000006.11 |
| cg21837669 | 6.04E-09 | 5.74E-10 | 6.52 | 11.7665905 | 9.78E-02 | 103889307 | 103889430 | NC_000012.11 |
| cg25285090 | 6.05E-09 | 5.74E-10 | 6.52 | 11.7658496 | 2.20E-01 | 28510313  | 28510436  | NC_000006.11 |
| cg20491726 | 6.05E-09 | 5.75E-10 | 6.52 | 11.7652971 | 7.65E-02 | 242820622 | 242820745 | NC_000002.11 |
| cg09988738 | 6.06E-09 | 5.75E-10 | 6.52 | 11.7637437 | 1.38E-01 | 4857255   | 4857378   | NC_000004.11 |
| cg02109484 | 6.06E-09 | 5.76E-10 | 6.52 | 11.763006  | 1.27E-01 | 74875253  | 74875376  | NC_000002.11 |
| cg10998570 | 6.07E-09 | 5.77E-10 | 6.52 | 11.761346  | 7.57E-02 | 965862    | 965985    | NC_000005.9  |
| cg09312576 | 6.07E-09 | 5.77E-10 | 6.52 | 11.7612357 | 1.09E-01 | 1385351   | 1385474   | NC_000006.11 |
| cg04716021 | 6.08E-09 | 5.78E-10 | 6.52 | 11.7592181 | 1.01E-01 | 80981119  | 80981242  | NC_000010.10 |
| cg18120979 | 6.09E-09 | 5.78E-10 | 6.52 | 11.7590815 | 1.02E-01 | 313464    | 313587    | NC_000006.11 |

|            |          |          |      |            |          |           |           |              |
|------------|----------|----------|------|------------|----------|-----------|-----------|--------------|
| cg11842953 | 6.09E-09 | 5.79E-10 | 6.52 | 11.7582545 | 5.51E-02 | 1218561   | 1218684   | NC_000005.9  |
| cg09866983 | 6.10E-09 | 5.80E-10 | 6.52 | 11.7563635 | 1.64E-01 | 46799755  | 46799878  | NC_000017.10 |
| cg00976097 | 6.11E-09 | 5.80E-10 | 6.52 | 11.7556958 | 8.89E-02 | 421733    | 421856    | NC_000005.9  |
| cg08819023 | 6.11E-09 | 5.81E-10 | 6.52 | 11.7548394 | 8.57E-02 | 6329091   | 6329214   | NC_000017.10 |
| cg10476112 | 6.12E-09 | 5.81E-10 | 6.52 | 11.7538534 | 1.82E-01 | 45241222  | 45241345  | NC_000002.11 |
| cg15908006 | 6.12E-09 | 5.82E-10 | 6.52 | 11.7526824 | 1.69E-01 | 4850180   | 4850303   | NC_000008.10 |
| cg25797887 | 6.13E-09 | 5.82E-10 | 6.52 | 11.7522854 | 1.47E-01 | 96627821  | 96627944  | NC_000007.13 |
| cg07229938 | 6.13E-09 | 5.83E-10 | 6.52 | 11.7515122 | 1.23E-01 | 124907600 | 124907723 | NC_000010.10 |
| cg04008703 | 6.16E-09 | 5.86E-10 | 6.52 | 11.7463787 | 1.52E-01 | 27280585  | 27280708  | NC_000007.13 |
| cg17825173 | 6.17E-09 | 5.87E-10 | 6.52 | 11.7450725 | 3.82E-02 | 71164116  | 71164239  | NC_000010.10 |
| cg18739865 | 6.17E-09 | 5.87E-10 | 6.52 | 11.7443629 | 1.42E-01 | 50684720  | 50684843  | NC_000005.9  |
| cg27084746 | 6.17E-09 | 5.87E-10 | 6.52 | 11.7442017 | 1.70E-01 | 31831532  | 31831655  | NC_000006.11 |
| cg08207660 | 6.18E-09 | 5.87E-10 | 6.52 | 11.743994  | 4.54E-02 | 71694874  | 71694997  | NC_000014.8  |
| cg26919347 | 6.19E-09 | 5.89E-10 | 6.52 | 11.7415194 | 6.24E-02 | 77231677  | 77231800  | NC_000004.11 |
| cg11711816 | 6.19E-09 | 5.89E-10 | 6.52 | 11.741129  | 1.16E-01 | 131764932 | 131765055 | NC_000010.10 |
| cg09061632 | 6.20E-09 | 5.89E-10 | 6.52 | 11.740542  | 1.14E-01 | 101923621 | 101923744 | NC_000014.8  |
| cg01620486 | 6.20E-09 | 5.89E-10 | 6.52 | 11.7405391 | 7.96E-02 | 47015640  | 47015763  | NC_000008.10 |
| cg09649610 | 6.20E-09 | 5.89E-10 | 6.52 | 11.7403572 | 2.04E-01 | 235814039 | 235814162 | NC_000001.10 |
| cg17291521 | 6.20E-09 | 5.89E-10 | 6.52 | 11.7403117 | 1.00E-01 | 50260045  | 50260168  | NC_000005.9  |
| cg23165899 | 6.20E-09 | 5.90E-10 | 6.52 | 11.7388627 | 1.94E-01 | 19837095  | 19837218  | NC_000006.11 |
| cg27231068 | 6.21E-09 | 5.91E-10 | 6.52 | 11.7381993 | 8.61E-02 | 19620291  | 19620414  | NC_000017.10 |
| cg06922606 | 6.23E-09 | 5.92E-10 | 6.52 | 11.7351888 | 1.65E-01 | 10274632  | 10274755  | NC_000016.9  |
| cg03547017 | 6.24E-09 | 5.94E-10 | 6.52 | 11.7329944 | 1.11E-01 | 37031281  | 37031404  | NC_000017.10 |
| cg03638172 | 6.25E-09 | 5.95E-10 | 6.52 | 11.7315138 | 2.00E-01 | 4922944   | 4923067   | NC_000007.13 |
| cg19850728 | 6.25E-09 | 5.95E-10 | 6.52 | 11.7308068 | 1.04E-01 | 97688465  | 97688588  | NC_000003.11 |

|            |          |          |      |            |          |           |           |              |
|------------|----------|----------|------|------------|----------|-----------|-----------|--------------|
| cg23904955 | 6.25E-09 | 5.95E-10 | 6.52 | 11.7305011 | 9.95E-02 | 101282759 | 101282882 | NC_000010.10 |
| cg22149137 | 6.26E-09 | 5.96E-10 | 6.52 | 11.7300563 | 1.51E-01 | 46804414  | 46804537  | NC_000017.10 |
| cg24353217 | 6.27E-09 | 5.97E-10 | 6.52 | 11.7279729 | 8.74E-02 | 111358188 | 111358311 | NC_000012.11 |
| cg22345214 | 6.27E-09 | 5.97E-10 | 6.52 | 11.7278903 | 1.36E-01 | 46995509  | 46995632  | NC_000004.11 |
| cg04609952 | 6.28E-09 | 5.97E-10 | 6.52 | 11.726915  | 4.51E-02 | 16085893  | 16086016  | NC_000002.11 |
| cg16775752 | 6.28E-09 | 5.98E-10 | 6.52 | 11.7267439 | 1.12E-01 | 49674530  | 49674653  | NC_000010.10 |
| cg10838385 | 6.28E-09 | 5.98E-10 | 6.52 | 11.7254949 | 1.46E-01 | 26674370  | 26674493  | NC_000014.8  |
| cg06493930 | 6.30E-09 | 5.99E-10 | 6.52 | 11.7236289 | 1.57E-01 | 22689814  | 22689937  | NC_000011.9  |
| cg15189764 | 6.30E-09 | 6.00E-10 | 6.52 | 11.723116  | 7.40E-02 | 27282064  | 27282187  | NC_000017.10 |
| cg07955004 | 6.30E-09 | 6.00E-10 | 6.52 | 11.72255   | 2.53E-02 | 79803515  | 79803638  | NC_000017.10 |
| cg01637289 | 6.30E-09 | 6.00E-10 | 6.52 | 11.7222441 | 6.86E-02 | 118769157 | 118769280 | NC_000011.9  |
| cg05509659 | 6.31E-09 | 6.01E-10 | 6.52 | 11.7218872 | 1.41E-01 | 124738871 | 124738994 | NC_000011.9  |
| cg14134497 | 6.31E-09 | 6.01E-10 | 6.52 | 11.7213745 | 1.63E-01 | 32074251  | 32074374  | NC_000018.9  |
| cg13633659 | 6.31E-09 | 6.01E-10 | 6.52 | 11.7211995 | 1.49E-01 | 98012426  | 98012549  | NC_000009.11 |
| cg14743594 | 6.32E-09 | 6.02E-10 | 6.52 | 11.720033  | 2.03E-01 | 167956394 | 167956517 | NC_000005.9  |
| cg17787084 | 6.33E-09 | 6.03E-10 | 6.52 | 11.7183515 | 1.37E-01 | 165323896 | 165324019 | NC_000001.10 |
| cg17466131 | 6.34E-09 | 6.04E-10 | 6.51 | 11.7162208 | 7.30E-02 | 186578190 | 186578313 | NC_000004.11 |
| cg19459876 | 6.34E-09 | 6.04E-10 | 6.51 | 11.7156328 | 1.48E-01 | 2292477   | 2292600   | NC_000011.9  |
| cg13930544 | 6.35E-09 | 6.05E-10 | 6.51 | 11.7144573 | 8.82E-02 | 247694061 | 247694184 | NC_000001.10 |
| cg00741624 | 6.36E-09 | 6.05E-10 | 6.51 | 11.7139307 | 1.59E-01 | 93897389  | 93897512  | NC_000014.8  |
| cg20616836 | 6.37E-09 | 6.07E-10 | 6.51 | 11.7121822 | 2.77E-02 | 3064281   | 3064404   | NC_000019.9  |
| cg14888369 | 6.37E-09 | 6.07E-10 | 6.51 | 11.7119655 | 3.67E-02 | 25039081  | 25039204  | NC_000008.10 |
| cg00532449 | 6.37E-09 | 6.07E-10 | 6.51 | 11.7115794 | 1.98E-01 | 2375420   | 2375543   | NC_000001.10 |
| cg13070193 | 6.38E-09 | 6.08E-10 | 6.51 | 11.7090394 | 1.53E-01 | 45613752  | 45613875  | NC_000007.13 |
| cg23346516 | 6.39E-09 | 6.09E-10 | 6.51 | 11.7089043 | 7.08E-02 | 76421646  | 76421769  | NC_000017.10 |

|            |          |          |      |            |          |           |           |              |
|------------|----------|----------|------|------------|----------|-----------|-----------|--------------|
| cg07901351 | 6.39E-09 | 6.09E-10 | 6.51 | 11.7078533 | 5.93E-02 | 224625023 | 224625146 | NC_000001.10 |
| cg01647314 | 6.40E-09 | 6.10E-10 | 6.51 | 11.7072954 | 1.13E-01 | 23280066  | 23280189  | NC_000001.10 |
| cg16198468 | 6.40E-09 | 6.10E-10 | 6.51 | 11.706797  | 1.58E-01 | 76708051  | 76708174  | NC_000010.10 |
| cg01626112 | 6.40E-09 | 6.10E-10 | 6.51 | 11.7065316 | 1.21E-01 | 76653220  | 76653343  | NC_000012.11 |
| cg01667319 | 6.42E-09 | 6.12E-10 | 6.51 | 11.7038398 | 1.80E-01 | 2161128   | 2161251   | NC_000011.9  |
| cg18097850 | 6.42E-09 | 6.12E-10 | 6.51 | 11.7036214 | 1.29E-01 | 40005602  | 40005725  | NC_000019.9  |
| cg03205252 | 6.43E-09 | 6.13E-10 | 6.51 | 11.7025701 | 1.51E-01 | 51187536  | 51187659  | NC_000016.9  |
| cg26674479 | 6.43E-09 | 6.13E-10 | 6.51 | 11.7021889 | 1.09E-01 | 27281415  | 27281538  | NC_000007.13 |
| cg14076024 | 6.45E-09 | 6.15E-10 | 6.51 | 11.6982606 | 3.75E-02 | 104897608 | 104897731 | NC_000014.8  |
| cg21811143 | 6.45E-09 | 6.15E-10 | 6.51 | 11.6980908 | 1.56E-01 | 119599748 | 119599871 | NC_000002.11 |
| cg12107189 | 6.46E-09 | 6.16E-10 | 6.51 | 11.6971948 | 6.40E-02 | 125765152 | 125765275 | NC_000008.10 |
| cg16523839 | 6.46E-09 | 6.16E-10 | 6.51 | 11.6968953 | 1.36E-01 | 10077134  | 10077257  | NC_000019.9  |
| cg20687825 | 6.46E-09 | 6.16E-10 | 6.51 | 11.6967589 | 5.05E-02 | 79005609  | 79005732  | NC_000004.11 |
| cg19247475 | 6.47E-09 | 6.17E-10 | 6.51 | 11.6959738 | 1.03E-01 | 140789745 | 140789868 | NC_000005.9  |
| cg11717054 | 6.47E-09 | 6.17E-10 | 6.51 | 11.6957074 | 1.81E-01 | 279423    | 279546    | NC_000011.9  |
| cg05127995 | 6.47E-09 | 6.17E-10 | 6.51 | 11.695472  | 4.98E-02 | 2735245   | 2735368   | NC_000004.11 |
| cg19955284 | 6.47E-09 | 6.17E-10 | 6.51 | 11.6950136 | 7.92E-02 | 31833747  | 31833870  | NC_000006.11 |
| cg17833265 | 6.47E-09 | 6.17E-10 | 6.51 | 11.694968  | 1.37E-01 | 48042135  | 48042258  | NC_000017.10 |
| cg09274961 | 6.48E-09 | 6.18E-10 | 6.51 | 11.6939434 | 1.19E-01 | 85243231  | 85243354  | NC_000016.9  |
| cg16273546 | 6.50E-09 | 6.20E-10 | 6.51 | 11.6900482 | 7.21E-02 | 123070392 | 123070515 | NC_000010.10 |
| cg19047265 | 6.50E-09 | 6.21E-10 | 6.51 | 11.6897393 | 1.72E-01 | 177025998 | 177026121 | NC_000002.11 |
| cg05490712 | 6.51E-09 | 6.21E-10 | 6.51 | 11.6892759 | 1.44E-01 | 31838674  | 31838797  | NC_000011.9  |
| cg20245520 | 6.51E-09 | 6.21E-10 | 6.51 | 11.6892184 | 7.24E-02 | 157185279 | 157185402 | NC_000007.13 |
| cg06213468 | 6.51E-09 | 6.21E-10 | 6.51 | 11.6889014 | 1.48E-01 | 129534411 | 129534534 | NC_000010.10 |
| cg19140834 | 6.53E-09 | 6.23E-10 | 6.51 | 11.6860223 | 6.84E-02 | 131217668 | 131217791 | NC_000007.13 |

|            |          |          |      |            |          |           |           |              |
|------------|----------|----------|------|------------|----------|-----------|-----------|--------------|
| cg24089118 | 6.53E-09 | 6.23E-10 | 6.51 | 11.6855208 | 1.53E-01 | 52734251  | 52734374  | NC_000014.8  |
| cg21097283 | 6.53E-09 | 6.24E-10 | 6.51 | 11.6847859 | 1.68E-01 | 76934461  | 76934584  | NC_000005.9  |
| cg10625851 | 6.54E-09 | 6.24E-10 | 6.51 | 11.6840627 | 4.05E-02 | 100084567 | 100084690 | NC_000007.13 |
| cg17080902 | 6.54E-09 | 6.24E-10 | 6.51 | 11.6838442 | 7.27E-02 | 51762495  | 51762618  | NC_000015.9  |
| cg27535380 | 6.57E-09 | 6.27E-10 | 6.51 | 11.6796313 | 6.12E-02 | 30795743  | 30795866  | NC_000016.9  |
| cg14188639 | 6.57E-09 | 6.27E-10 | 6.51 | 11.6794171 | 1.84E-01 | 2161544   | 2161667   | NC_000011.9  |
| cg15489250 | 6.57E-09 | 6.27E-10 | 6.51 | 11.6791156 | 2.29E-01 | 36994906  | 36995029  | NC_000014.8  |
| cg05545672 | 6.57E-09 | 6.27E-10 | 6.51 | 11.6789638 | 1.52E-01 | 170739541 | 170739664 | NC_000005.9  |
| cg19211915 | 6.57E-09 | 6.28E-10 | 6.51 | 11.6787722 | 1.13E-01 | 32452513  | 32452636  | NC_000011.9  |
| cg12002303 | 6.58E-09 | 6.28E-10 | 6.51 | 11.6774394 | 2.09E-01 | 68113478  | 68113601  | NC_000015.9  |
| cg16427239 | 6.58E-09 | 6.29E-10 | 6.51 | 11.6772321 | 8.81E-02 | 6623995   | 6624118   | NC_000016.9  |
| cg08015447 | 6.59E-09 | 6.29E-10 | 6.51 | 11.6764696 | 1.52E-01 | 6070188   | 6070311   | NC_000016.9  |
| cg20396436 | 6.59E-09 | 6.29E-10 | 6.51 | 11.6759885 | 1.54E-01 | 159173195 | 159173318 | NC_000006.11 |
| cg00316312 | 6.61E-09 | 6.31E-10 | 6.51 | 11.6732274 | 9.69E-02 | 134916087 | 134916210 | NC_000010.10 |
| cg12850078 | 6.61E-09 | 6.31E-10 | 6.51 | 11.6731302 | 1.83E-01 | 89922071  | 89922194  | NC_000015.9  |
| cg11959156 | 6.63E-09 | 6.33E-10 | 6.51 | 11.6699113 | 1.58E-01 | 62865391  | 62865514  | NC_000020.10 |
| cg27665767 | 6.63E-09 | 6.34E-10 | 6.51 | 11.6694267 | 1.00E-01 | 140764485 | 140764608 | NC_000005.9  |
| cg24639902 | 6.64E-09 | 6.34E-10 | 6.51 | 11.6682053 | 8.27E-02 | 22774971  | 22775094  | NC_000008.10 |
| cg26593267 | 6.64E-09 | 6.34E-10 | 6.51 | 11.6681781 | 1.90E-01 | 113764871 | 113764994 | NC_000013.10 |
| cg22441141 | 6.64E-09 | 6.34E-10 | 6.51 | 11.6681714 | 6.48E-02 | 63632453  | 63632576  | NC_000015.9  |
| cg17029156 | 6.65E-09 | 6.36E-10 | 6.51 | 11.6658998 | 1.96E-01 | 27070458  | 27070581  | NC_000002.11 |
| cg03144619 | 6.65E-09 | 6.36E-10 | 6.51 | 11.665724  | 4.05E-02 | 230415668 | 230415791 | NC_000001.10 |
| cg10284425 | 6.66E-09 | 6.36E-10 | 6.51 | 11.6652446 | 8.75E-02 | 86457686  | 86457809  | NC_000016.9  |
| cg26343001 | 6.66E-09 | 6.36E-10 | 6.51 | 11.6651662 | 1.51E-01 | 115104274 | 115104397 | NC_000012.11 |
| cg24938743 | 6.66E-09 | 6.37E-10 | 6.5  | 11.6645739 | 9.18E-02 | 98960620  | 98960743  | NC_000013.10 |

|            |          |          |     |            |          |           |           |              |
|------------|----------|----------|-----|------------|----------|-----------|-----------|--------------|
| cg13577628 | 6.66E-09 | 6.37E-10 | 6.5 | 11.664337  | 1.40E-01 | 119534899 | 119535022 | NC_000001.10 |
| cg01952742 | 6.67E-09 | 6.37E-10 | 6.5 | 11.6637608 | 7.80E-02 | 169558925 | 169559048 | NC_000001.10 |
| cg17913306 | 6.67E-09 | 6.38E-10 | 6.5 | 11.6627765 | 1.63E-01 | 92220385  | 92220508  | NC_000014.8  |
| cg11002686 | 6.68E-09 | 6.38E-10 | 6.5 | 11.6622777 | 1.13E-01 | 55412682  | 55412805  | NC_000007.13 |
| cg27207308 | 6.68E-09 | 6.38E-10 | 6.5 | 11.6619949 | 2.09E-01 | 47935683  | 47935806  | NC_000020.10 |
| cg26987597 | 6.69E-09 | 6.40E-10 | 6.5 | 11.6603127 | 2.07E-01 | 1391207   | 1391330   | NC_000006.11 |
| cg08533221 | 6.69E-09 | 6.40E-10 | 6.5 | 11.6600278 | 4.77E-02 | 112076633 | 112076756 | NC_000013.10 |
| cg24456365 | 6.69E-09 | 6.40E-10 | 6.5 | 11.6593711 | 1.79E-01 | 89340480  | 89340603  | NC_000008.10 |
| cg10426017 | 6.70E-09 | 6.41E-10 | 6.5 | 11.6580186 | 5.73E-02 | 167591040 | 167591163 | NC_000006.11 |
| cg04189838 | 6.71E-09 | 6.42E-10 | 6.5 | 11.6572036 | 6.08E-02 | 96523347  | 96523470  | NC_000010.10 |
| cg01974875 | 6.72E-09 | 6.43E-10 | 6.5 | 11.6555743 | 6.99E-02 | 6617580   | 6617703   | NC_000017.10 |
| cg21699252 | 6.72E-09 | 6.43E-10 | 6.5 | 11.6547254 | 3.67E-02 | 16079013  | 16079136  | NC_000002.11 |
| cg27000368 | 6.72E-09 | 6.43E-10 | 6.5 | 11.654625  | 4.34E-02 | 30122213  | 30122336  | NC_000006.11 |
| cg24224304 | 6.74E-09 | 6.45E-10 | 6.5 | 11.6525189 | 8.95E-02 | 89313120  | 89313243  | NC_000015.9  |
| cg16455972 | 6.75E-09 | 6.46E-10 | 6.5 | 11.6510276 | 8.05E-02 | 18286412  | 18286535  | NC_000017.10 |
| cg00117335 | 6.75E-09 | 6.46E-10 | 6.5 | 11.6505961 | 2.02E-02 | 117206442 | 117206565 | NC_000001.10 |
| cg00468146 | 6.76E-09 | 6.46E-10 | 6.5 | 11.6496936 | 1.49E-01 | 19838211  | 19838334  | NC_000006.11 |
| cg03308399 | 6.76E-09 | 6.47E-10 | 6.5 | 11.6485104 | 1.05E-01 | 27146237  | 27146360  | NC_000007.13 |
| cg26319169 | 6.77E-09 | 6.47E-10 | 6.5 | 11.6482958 | 4.89E-02 | 65870540  | 65870663  | NC_000015.9  |
| cg02717061 | 6.77E-09 | 6.47E-10 | 6.5 | 11.6482467 | 2.44E-01 | 110959356 | 110959479 | NC_000013.10 |
| cg01777812 | 6.78E-09 | 6.49E-10 | 6.5 | 11.6464191 | 1.28E-01 | 90117697  | 90117820  | NC_000004.11 |
| cg24061208 | 6.78E-09 | 6.49E-10 | 6.5 | 11.646128  | 1.67E-01 | 14748250  | 14748373  | NC_000018.9  |
| cg27169263 | 6.78E-09 | 6.49E-10 | 6.5 | 11.6454438 | 2.50E-02 | 1633373   | 1633496   | NC_000001.10 |
| cg23467079 | 6.79E-09 | 6.49E-10 | 6.5 | 11.6452308 | 1.09E-01 | 124219425 | 124219548 | NC_000008.10 |
| cg25303427 | 6.79E-09 | 6.49E-10 | 6.5 | 11.6451663 | 9.89E-02 | 128482679 | 128482802 | NC_000007.13 |

|            |          |          |     |            |          |           |           |              |
|------------|----------|----------|-----|------------|----------|-----------|-----------|--------------|
| cg19370653 | 6.79E-09 | 6.49E-10 | 6.5 | 11.6451425 | 1.81E-01 | 111550040 | 111550163 | NC_000004.11 |
| cg01617933 | 6.80E-09 | 6.51E-10 | 6.5 | 11.6435613 | 1.04E-01 | 29316555  | 29316678  | NC_000007.13 |
| cg15946904 | 6.80E-09 | 6.51E-10 | 6.5 | 11.6429881 | 2.73E-02 | 957248    | 957371    | NC_000017.10 |
| cg02480685 | 6.80E-09 | 6.51E-10 | 6.5 | 11.6422652 | 1.21E-01 | 96163530  | 96163653  | NC_000008.10 |
| cg09267787 | 6.81E-09 | 6.51E-10 | 6.5 | 11.6421255 | 4.03E-02 | 11200441  | 11200564  | NC_000006.11 |
| cg02388865 | 6.81E-09 | 6.52E-10 | 6.5 | 11.6418665 | 1.62E-01 | 26737318  | 26737441  | NC_000001.10 |
| cg24341452 | 6.83E-09 | 6.54E-10 | 6.5 | 11.6386912 | 1.45E-01 | 182911633 | 182911756 | NC_000001.10 |
| cg25559313 | 6.83E-09 | 6.54E-10 | 6.5 | 11.6383493 | 1.72E-01 | 19138267  | 19138390  | NC_000022.10 |
| cg23690528 | 6.83E-09 | 6.54E-10 | 6.5 | 11.6382618 | 2.02E-01 | 94285270  | 94285393  | NC_000007.13 |
| cg02120774 | 6.83E-09 | 6.54E-10 | 6.5 | 11.6382593 | 2.07E-01 | 45961473  | 45961596  | NC_000007.13 |
| cg21942490 | 6.83E-09 | 6.54E-10 | 6.5 | 11.6378302 | 1.36E-01 | 27206237  | 27206360  | NC_000007.13 |
| cg24049616 | 6.84E-09 | 6.55E-10 | 6.5 | 11.6370142 | 1.35E-01 | 55359029  | 55359152  | NC_000016.9  |
| cg14509403 | 6.85E-09 | 6.56E-10 | 6.5 | 11.6359529 | 1.06E-01 | 30476281  | 30476404  | NC_000022.10 |
| cg04787317 | 6.85E-09 | 6.56E-10 | 6.5 | 11.6347552 | 2.53E-02 | 38009934  | 38010057  | NC_000003.11 |
| cg23093609 | 6.85E-09 | 6.57E-10 | 6.5 | 11.6345197 | 1.28E-01 | 32572422  | 32572545  | NC_000022.10 |
| cg21075378 | 6.86E-09 | 6.57E-10 | 6.5 | 11.6339446 | 1.22E-01 | 44495876  | 44495999  | NC_000018.9  |
| cg03962821 | 6.86E-09 | 6.57E-10 | 6.5 | 11.6338256 | 7.99E-02 | 1315051   | 1315174   | NC_000007.13 |
| cg20239017 | 6.86E-09 | 6.57E-10 | 6.5 | 11.633306  | 9.53E-02 | 41961110  | 41961233  | NC_000001.10 |
| cg18326562 | 6.87E-09 | 6.59E-10 | 6.5 | 11.631447  | 1.01E-01 | 67413885  | 67414008  | NC_000017.10 |
| cg13736376 | 6.88E-09 | 6.59E-10 | 6.5 | 11.631247  | 1.35E-01 | 111539291 | 111539414 | NC_000004.11 |
| cg16428357 | 6.88E-09 | 6.59E-10 | 6.5 | 11.6306686 | 9.75E-02 | 34190258  | 34190381  | NC_000020.10 |
| cg00064336 | 6.88E-09 | 6.60E-10 | 6.5 | 11.6298805 | 1.10E-01 | 88143970  | 88144093  | NC_000016.9  |
| cg21550580 | 6.90E-09 | 6.62E-10 | 6.5 | 11.6271559 | 1.11E-01 | 65755382  | 65755505  | NC_000003.11 |
| cg06275859 | 6.91E-09 | 6.62E-10 | 6.5 | 11.6262722 | 1.39E-01 | 1407694   | 1407817   | NC_000004.11 |
| cg13884568 | 6.91E-09 | 6.62E-10 | 6.5 | 11.6257985 | 1.40E-01 | 79630305  | 79630428  | NC_000009.11 |

|            |          |          |      |            |          |           |           |              |
|------------|----------|----------|------|------------|----------|-----------|-----------|--------------|
| cg20833182 | 6.91E-09 | 6.63E-10 | 6.5  | 11.6254753 | 4.74E-02 | 7741012   | 7741135   | NC_000017.10 |
| cg02393907 | 6.93E-09 | 6.64E-10 | 6.5  | 11.6229981 | 1.08E-01 | 150011063 | 150011186 | NC_000007.13 |
| cg25035939 | 6.94E-09 | 6.65E-10 | 6.5  | 11.6221756 | 6.25E-02 | 245674287 | 245674410 | NC_000001.10 |
| cg15368455 | 6.94E-09 | 6.66E-10 | 6.5  | 11.6212001 | 1.11E-01 | 37835958  | 37836081  | NC_000005.9  |
| cg01121554 | 6.95E-09 | 6.66E-10 | 6.5  | 11.6203754 | 7.68E-02 | 23253797  | 23253920  | NC_000019.9  |
| cg17102807 | 6.96E-09 | 6.67E-10 | 6.5  | 11.6185629 | 5.15E-02 | 43483382  | 43483505  | NC_000006.11 |
| cg21609106 | 6.96E-09 | 6.67E-10 | 6.5  | 11.6185118 | 1.63E-01 | 38259214  | 38259337  | NC_000005.9  |
| cg20667845 | 6.96E-09 | 6.67E-10 | 6.5  | 11.6184142 | 1.09E-01 | 152132086 | 152132209 | NC_000007.13 |
| cg05743982 | 6.96E-09 | 6.68E-10 | 6.5  | 11.6182933 | 4.00E-02 | 30018158  | 30018281  | NC_000016.9  |
| cg15724417 | 6.96E-09 | 6.68E-10 | 6.5  | 11.6177758 | 3.50E-02 | 66433521  | 66433644  | NC_000003.11 |
| cg07997434 | 6.97E-09 | 6.68E-10 | 6.5  | 11.6174427 | 1.79E-01 | 238864969 | 238865092 | NC_000002.11 |
| cg03683946 | 6.97E-09 | 6.68E-10 | 6.5  | 11.6174117 | 7.25E-02 | 38051826  | 38051949  | NC_000022.10 |
| cg10095242 | 6.97E-09 | 6.68E-10 | 6.5  | 11.6173135 | 2.20E-01 | 54163622  | 54163745  | NC_000008.10 |
| cg23109174 | 6.98E-09 | 6.69E-10 | 6.5  | 11.6159559 | 4.69E-02 | 24998564  | 24998687  | NC_000022.10 |
| cg08654915 | 6.98E-09 | 6.70E-10 | 6.5  | 11.6147387 | 1.23E-01 | 157813417 | 157813540 | NC_000003.11 |
| cg22015128 | 6.98E-09 | 6.70E-10 | 6.5  | 11.6147307 | 9.22E-02 | 202612948 | 202613071 | NC_000001.10 |
| cg00035316 | 7.00E-09 | 6.71E-10 | 6.5  | 11.6125919 | 1.61E-01 | 176993017 | 176993140 | NC_000002.11 |
| cg23799901 | 7.00E-09 | 6.71E-10 | 6.5  | 11.6125055 | 1.56E-01 | 124404431 | 124404554 | NC_000007.13 |
| cg04112211 | 7.01E-09 | 6.73E-10 | 6.49 | 11.61083   | 1.60E-01 | 87436327  | 87436450  | NC_000005.9  |
| cg08789022 | 7.02E-09 | 6.73E-10 | 6.49 | 11.6097706 | 1.69E-01 | 27484942  | 27485065  | NC_000002.11 |
| cg02374745 | 7.03E-09 | 6.74E-10 | 6.49 | 11.608546  | 2.11E-01 | 6679564   | 6679687   | NC_000017.10 |
| cg11188483 | 7.03E-09 | 6.75E-10 | 6.49 | 11.608089  | 7.27E-02 | 39542821  | 39542944  | NC_000003.11 |
| cg05289253 | 7.03E-09 | 6.75E-10 | 6.49 | 11.607895  | 2.01E-01 | 123301674 | 123301797 | NC_000011.9  |
| cg22572159 | 7.03E-09 | 6.75E-10 | 6.49 | 11.6072519 | 2.02E-01 | 115880646 | 115880769 | NC_000001.10 |
| cg25538809 | 7.03E-09 | 6.75E-10 | 6.49 | 11.6071968 | 8.10E-02 | 21186789  | 21186912  | NC_000017.10 |



|            |          |          |      |            |          |           |           |              |
|------------|----------|----------|------|------------|----------|-----------|-----------|--------------|
| cg14204462 | 7.04E-09 | 6.75E-10 | 6.49 | 11.6071424 | 1.49E-01 | 119540044 | 119540167 | NC_000001.10 |
| cg07247419 | 7.04E-09 | 6.76E-10 | 6.49 | 11.6060407 | 1.38E-01 | 21376484  | 21376607  | NC_000020.10 |
| cg04089240 | 7.05E-09 | 6.76E-10 | 6.49 | 11.6052954 | 4.27E-02 | 2437789   | 2437912   | NC_000011.9  |
| cg24147428 | 7.06E-09 | 6.78E-10 | 6.49 | 11.6037112 | 1.11E-01 | 65409760  | 65409883  | NC_000011.9  |
| cg01060089 | 7.06E-09 | 6.78E-10 | 6.49 | 11.6036506 | 1.17E-01 | 131783940 | 131784063 | NC_000012.11 |
| cg01822600 | 7.06E-09 | 6.78E-10 | 6.49 | 11.6031725 | 5.49E-02 | 245751692 | 245751815 | NC_000001.10 |
| cg21910390 | 7.06E-09 | 6.78E-10 | 6.49 | 11.6028514 | 9.40E-02 | 52718946  | 52719069  | NC_000004.11 |
| cg04452785 | 7.07E-09 | 6.79E-10 | 6.49 | 11.6012976 | 3.63E-02 | 128809028 | 128809151 | NC_000003.11 |
| cg03532904 | 7.08E-09 | 6.80E-10 | 6.49 | 11.6005988 | 1.75E-01 | 114877894 | 114878017 | NC_000012.11 |
| cg09538651 | 7.10E-09 | 6.82E-10 | 6.49 | 11.5978156 | 6.30E-02 | 70001896  | 70002019  | NC_000011.9  |
| cg27345924 | 7.10E-09 | 6.82E-10 | 6.49 | 11.5972204 | 1.38E-01 | 2727758   | 2727881   | NC_000005.9  |
| cg16765487 | 7.11E-09 | 6.83E-10 | 6.49 | 11.5958771 | 9.32E-02 | 89548175  | 89548298  | NC_000016.9  |
| cg05363903 | 7.11E-09 | 6.83E-10 | 6.49 | 11.5954927 | 1.14E-01 | 237415899 | 237416022 | NC_000002.11 |
| cg02650317 | 7.12E-09 | 6.83E-10 | 6.49 | 11.5952793 | 2.45E-01 | 61808888  | 61809011  | NC_000020.10 |
| cg04569615 | 7.12E-09 | 6.84E-10 | 6.49 | 11.5943734 | 1.22E-01 | 20622198  | 20622321  | NC_000011.9  |
| cg06119016 | 7.13E-09 | 6.85E-10 | 6.49 | 11.5932554 | 8.56E-02 | 80373277  | 80373400  | NC_000017.10 |
| cg05864140 | 7.13E-09 | 6.85E-10 | 6.49 | 11.5930987 | 1.05E-01 | 220196530 | 220196653 | NC_000002.11 |
| cg05737535 | 7.13E-09 | 6.85E-10 | 6.49 | 11.5928168 | 1.20E-01 | 130316398 | 130316521 | NC_000010.10 |
| cg08032924 | 7.14E-09 | 6.86E-10 | 6.49 | 11.5916734 | 1.50E-01 | 66613096  | 66613219  | NC_000016.9  |
| cg03149560 | 7.15E-09 | 6.87E-10 | 6.49 | 11.5905261 | 1.71E-01 | 29796379  | 29796502  | NC_000006.11 |
| cg22677715 | 7.15E-09 | 6.87E-10 | 6.49 | 11.5901782 | 1.37E-01 | 162284644 | 162284767 | NC_000002.11 |
| cg08372619 | 7.16E-09 | 6.88E-10 | 6.49 | 11.588202  | 1.99E-01 | 109799518 | 109799641 | NC_000008.10 |
| cg15164708 | 7.16E-09 | 6.88E-10 | 6.49 | 11.5881667 | 1.14E-01 | 49936274  | 49936397  | NC_000019.9  |
| cg05099491 | 7.16E-09 | 6.88E-10 | 6.49 | 11.5880419 | 1.84E-01 | 165205352 | 165205475 | NC_000001.10 |
| cg17569124 | 7.17E-09 | 6.89E-10 | 6.49 | 11.5876247 | 1.42E-01 | 27183643  | 27183766  | NC_000007.13 |

|            |          |          |      |            |          |           |           |              |
|------------|----------|----------|------|------------|----------|-----------|-----------|--------------|
| cg03210257 | 7.17E-09 | 6.89E-10 | 6.49 | 11.5869206 | 1.28E-01 | 68118127  | 68118250  | NC_000015.9  |
| cg04549460 | 7.17E-09 | 6.89E-10 | 6.49 | 11.5867522 | 1.59E-01 | 109095975 | 109096098 | NC_000008.10 |
| cg00499237 | 7.17E-09 | 6.89E-10 | 6.49 | 11.586621  | 1.22E-01 | 97169033  | 97169156  | NC_000002.11 |
| cg23309947 | 7.17E-09 | 6.89E-10 | 6.49 | 11.5865915 | 5.28E-02 | 44129997  | 44130120  | NC_000021.8  |
| cg10117884 | 7.20E-09 | 6.92E-10 | 6.49 | 11.5834626 | 1.43E-01 | 166955898 | 166956021 | NC_000001.10 |
| cg10021878 | 7.21E-09 | 6.93E-10 | 6.49 | 11.5818139 | 1.46E-01 | 207669922 | 207670045 | NC_000001.10 |
| cg18463891 | 7.21E-09 | 6.93E-10 | 6.49 | 11.5816057 | 7.93E-02 | 593650    | 593773    | NC_000007.13 |
| cg15613761 | 7.21E-09 | 6.93E-10 | 6.49 | 11.5813084 | 8.56E-02 | 46404710  | 46404833  | NC_000019.9  |
| cg24714905 | 7.21E-09 | 6.93E-10 | 6.49 | 11.5812279 | 1.51E-01 | 100637241 | 100637364 | NC_000013.10 |
| cg27648006 | 7.22E-09 | 6.94E-10 | 6.49 | 11.580425  | 6.02E-02 | 131526535 | 131526658 | NC_000012.11 |
| cg21269934 | 7.23E-09 | 6.95E-10 | 6.49 | 11.5788419 | 1.46E-01 | 2060219   | 2060342   | NC_000004.11 |
| cg09207077 | 7.23E-09 | 6.95E-10 | 6.49 | 11.5785934 | 8.96E-02 | 62708202  | 62708325  | NC_000010.10 |
| cg26841114 | 7.23E-09 | 6.95E-10 | 6.49 | 11.5785425 | 6.08E-02 | 88871987  | 88872110  | NC_000016.9  |
| cg08815081 | 7.23E-09 | 6.96E-10 | 6.49 | 11.577812  | 1.51E-01 | 28035731  | 28035854  | NC_000010.10 |
| cg10319893 | 7.23E-09 | 6.96E-10 | 6.49 | 11.5776925 | 1.61E-01 | 37248953  | 37249076  | NC_000013.10 |
| cg10377921 | 7.25E-09 | 6.97E-10 | 6.49 | 11.5755404 | 1.37E-01 | 15391946  | 15392069  | NC_000019.9  |
| cg11435943 | 7.25E-09 | 6.98E-10 | 6.49 | 11.575219  | 1.05E-01 | 61222687  | 61222810  | NC_000018.9  |
| cg01922936 | 7.25E-09 | 6.98E-10 | 6.49 | 11.5750357 | 1.35E-01 | 100239017 | 100239140 | NC_000005.9  |
| cg11741356 | 7.26E-09 | 6.98E-10 | 6.49 | 11.5746271 | 9.13E-02 | 97490784  | 97490907  | NC_000015.9  |
| cg12354318 | 7.26E-09 | 6.98E-10 | 6.49 | 11.5738726 | 5.61E-02 | 14582415  | 14582538  | NC_000010.10 |
| cg14908170 | 7.27E-09 | 6.99E-10 | 6.49 | 11.5729961 | 1.19E-01 | 240405317 | 240405440 | NC_000002.11 |
| cg18840956 | 7.27E-09 | 6.99E-10 | 6.49 | 11.5728018 | 1.88E-01 | 95769005  | 95769128  | NC_000005.9  |
| cg10828337 | 7.28E-09 | 7.00E-10 | 6.49 | 11.5713468 | 1.49E-01 | 29236476  | 29236599  | NC_000014.8  |
| cg14716990 | 7.28E-09 | 7.01E-10 | 6.49 | 11.5704867 | 1.86E-01 | 129533731 | 129533854 | NC_000010.10 |
| cg07152755 | 7.29E-09 | 7.01E-10 | 6.49 | 11.5701476 | 1.47E-01 | 105474472 | 105474595 | NC_000002.11 |

|            |          |          |      |            |          |           |           |              |
|------------|----------|----------|------|------------|----------|-----------|-----------|--------------|
| cg20303561 | 7.29E-09 | 7.01E-10 | 6.49 | 11.5700498 | 1.26E-01 | 91881497  | 91881620  | NC_000014.8  |
| cg06650206 | 7.30E-09 | 7.03E-10 | 6.49 | 11.5681579 | 1.02E-01 | 166068485 | 166068608 | NC_000006.11 |
| cg24199834 | 7.31E-09 | 7.04E-10 | 6.49 | 11.5664456 | 1.38E-01 | 147560126 | 147560249 | NC_000004.11 |
| cg18466173 | 7.33E-09 | 7.05E-10 | 6.49 | 11.5646027 | 1.50E-01 | 46726267  | 46726390  | NC_000021.8  |
| cg19742687 | 7.33E-09 | 7.05E-10 | 6.49 | 11.5644889 | 1.01E-01 | 88025975  | 88026098  | NC_000011.9  |
| cg08941355 | 7.33E-09 | 7.06E-10 | 6.49 | 11.5636865 | 9.20E-02 | 27133106  | 27133229  | NC_000007.13 |
| cg01354961 | 7.34E-09 | 7.07E-10 | 6.49 | 11.5624948 | 1.64E-01 | 8473462   | 8473585   | NC_000007.13 |
| cg01656244 | 7.36E-09 | 7.09E-10 | 6.49 | 11.559388  | 1.74E-01 | 65284080  | 65284203  | NC_000008.10 |
| cg21467371 | 7.38E-09 | 7.10E-10 | 6.48 | 11.557539  | 9.38E-02 | 79648722  | 79648845  | NC_000017.10 |
| cg18780412 | 7.38E-09 | 7.10E-10 | 6.48 | 11.5574824 | 1.80E-01 | 179755086 | 179755209 | NC_000003.11 |
| cg07991479 | 7.38E-09 | 7.11E-10 | 6.48 | 11.5571043 | 3.77E-02 | 40265765  | 40265888  | NC_000017.10 |
| cg13269527 | 7.38E-09 | 7.11E-10 | 6.48 | 11.55692   | 5.88E-02 | 25572674  | 25572797  | NC_000018.9  |
| cg22054362 | 7.39E-09 | 7.12E-10 | 6.48 | 11.5556644 | 1.82E-01 | 57050367  | 57050490  | NC_000019.9  |
| cg10031614 | 7.39E-09 | 7.12E-10 | 6.48 | 11.5556238 | 1.56E-01 | 81187601  | 81187724  | NC_000004.11 |
| cg08314208 | 7.39E-09 | 7.12E-10 | 6.48 | 11.5554325 | 9.04E-02 | 67682810  | 67682933  | NC_000016.9  |
| cg08823240 | 7.39E-09 | 7.12E-10 | 6.48 | 11.555405  | 1.47E-01 | 43388897  | 43389020  | NC_000017.10 |
| cg05616550 | 7.41E-09 | 7.13E-10 | 6.48 | 11.5531724 | 1.75E-01 | 54675154  | 54675277  | NC_000017.10 |
| cg18325439 | 7.41E-09 | 7.14E-10 | 6.48 | 11.5529414 | 1.56E-01 | 71217320  | 71217443  | NC_000007.13 |
| cg09511846 | 7.41E-09 | 7.14E-10 | 6.48 | 11.5522476 | 2.22E-01 | 77332991  | 77333114  | NC_000001.10 |
| cg03535239 | 7.43E-09 | 7.16E-10 | 6.48 | 11.5499935 | 8.25E-02 | 77241424  | 77241547  | NC_000014.8  |
| cg24114014 | 7.44E-09 | 7.17E-10 | 6.48 | 11.5485584 | 1.58E-01 | 28584167  | 28584290  | NC_000006.11 |
| cg04970570 | 7.45E-09 | 7.18E-10 | 6.48 | 11.5473882 | 1.62E-01 | 87990145  | 87990268  | NC_000005.9  |
| cg23808946 | 7.46E-09 | 7.19E-10 | 6.48 | 11.5454577 | 2.33E-01 | 45169548  | 45169671  | NC_000002.11 |
| cg07295678 | 7.47E-09 | 7.20E-10 | 6.48 | 11.5444163 | 1.53E-01 | 134000009 | 134000132 | NC_000010.10 |
| cg09258813 | 7.47E-09 | 7.20E-10 | 6.48 | 11.5443903 | 2.33E-01 | 37823409  | 37823532  | NC_000008.10 |

|            |          |          |      |            |          |           |           |              |
|------------|----------|----------|------|------------|----------|-----------|-----------|--------------|
| cg14392929 | 7.47E-09 | 7.20E-10 | 6.48 | 11.5443315 | 7.14E-02 | 136758143 | 136758266 | NC_000009.11 |
| cg16195569 | 7.47E-09 | 7.20E-10 | 6.48 | 11.5439522 | 1.38E-01 | 57390536  | 57390659  | NC_000010.10 |
| cg01322405 | 7.48E-09 | 7.21E-10 | 6.48 | 11.5428863 | 1.20E-01 | 40757317  | 40757440  | NC_000021.8  |
| cg04166294 | 7.48E-09 | 7.21E-10 | 6.48 | 11.5426446 | 1.16E-01 | 54322984  | 54323107  | NC_000016.9  |
| cg18536148 | 7.50E-09 | 7.23E-10 | 6.48 | 11.5397877 | 1.13E-01 | 59533844  | 59533967  | NC_000017.10 |
| cg24310904 | 7.51E-09 | 7.24E-10 | 6.48 | 11.5389651 | 8.04E-02 | 47421270  | 47421393  | NC_000021.8  |
| cg22954645 | 7.51E-09 | 7.24E-10 | 6.48 | 11.538465  | 7.91E-02 | 168972438 | 168972561 | NC_000006.11 |
| cg02093692 | 7.51E-09 | 7.24E-10 | 6.48 | 11.5383979 | 1.23E-01 | 193798490 | 193798613 | NC_000003.11 |
| cg15805104 | 7.51E-09 | 7.24E-10 | 6.48 | 11.5383975 | 1.63E-01 | 56988935  | 56989058  | NC_000019.9  |
| cg07434402 | 7.51E-09 | 7.24E-10 | 6.48 | 11.5381916 | 2.13E-01 | 84431535  | 84431658  | NC_000011.9  |
| cg27329091 | 7.51E-09 | 7.25E-10 | 6.48 | 11.5380224 | 9.49E-02 | 213698049 | 213698172 | NC_000002.11 |
| cg12300382 | 7.51E-09 | 7.25E-10 | 6.48 | 11.5379043 | 8.80E-02 | 50467567  | 50467690  | NC_000007.13 |
| cg15759056 | 7.52E-09 | 7.26E-10 | 6.48 | 11.5363126 | 1.41E-01 | 87229552  | 87229675  | NC_000007.13 |
| cg10573018 | 7.53E-09 | 7.26E-10 | 6.48 | 11.5357328 | 1.79E-01 | 38100837  | 38100960  | NC_000001.10 |
| cg23164183 | 7.55E-09 | 7.28E-10 | 6.48 | 11.532697  | 1.23E-01 | 2754894   | 2755017   | NC_000005.9  |
| cg14048487 | 7.55E-09 | 7.28E-10 | 6.48 | 11.5326912 | 4.68E-02 | 41273439  | 41273562  | NC_000017.10 |
| cg19437183 | 7.56E-09 | 7.29E-10 | 6.48 | 11.5319768 | 1.82E-01 | 77585222  | 77585345  | NC_000008.10 |
| cg07558006 | 7.56E-09 | 7.30E-10 | 6.48 | 11.5311988 | 3.14E-02 | 132874263 | 132874386 | NC_000006.11 |
| cg00342530 | 7.56E-09 | 7.30E-10 | 6.48 | 11.5309983 | 1.25E-01 | 130027020 | 130027143 | NC_000009.11 |
| cg17991695 | 7.56E-09 | 7.30E-10 | 6.48 | 11.5308284 | 1.36E-01 | 10882974  | 10883097  | NC_000006.11 |
| cg23024136 | 7.57E-09 | 7.31E-10 | 6.48 | 11.5295838 | 1.32E-01 | 153853154 | 153853277 | NC_000005.9  |
| cg10678266 | 7.58E-09 | 7.31E-10 | 6.48 | 11.5288786 | 1.48E-01 | 24614348  | 24614471  | NC_000007.13 |
| cg12351433 | 7.58E-09 | 7.32E-10 | 6.48 | 11.5284595 | 1.82E-01 | 48982957  | 48983080  | NC_000002.11 |
| cg02185464 | 7.58E-09 | 7.32E-10 | 6.48 | 11.5279577 | 1.29E-01 | 84867338  | 84867461  | NC_000016.9  |
| cg06169131 | 7.59E-09 | 7.32E-10 | 6.48 | 11.5274858 | 1.24E-01 | 103536348 | 103536471 | NC_000010.10 |

|            |          |          |      |            |          |           |           |              |
|------------|----------|----------|------|------------|----------|-----------|-----------|--------------|
| cg10906284 | 7.59E-09 | 7.33E-10 | 6.48 | 11.5268904 | 1.08E-01 | 63544430  | 63544553  | NC_000012.11 |
| cg01028849 | 7.59E-09 | 7.33E-10 | 6.48 | 11.5268599 | 1.43E-01 | 65490422  | 65490545  | NC_000008.10 |
| cg11409285 | 7.60E-09 | 7.33E-10 | 6.48 | 11.5260838 | 9.14E-02 | 76641147  | 76641270  | NC_000017.10 |
| cg23847381 | 7.60E-09 | 7.34E-10 | 6.48 | 11.5251781 | 1.95E-01 | 5544031   | 5544154   | NC_000018.9  |
| cg20374054 | 7.60E-09 | 7.34E-10 | 6.48 | 11.5250863 | 1.46E-01 | 124735126 | 124735249 | NC_000011.9  |
| cg23820302 | 7.62E-09 | 7.36E-10 | 6.48 | 11.5225096 | 5.33E-02 | 19172577  | 19172700  | NC_000013.10 |
| cg26658465 | 7.63E-09 | 7.36E-10 | 6.48 | 11.5222412 | 1.82E-01 | 178594195 | 178594318 | NC_000005.9  |
| cg07908679 | 7.66E-09 | 7.40E-10 | 6.48 | 11.5173788 | 6.57E-02 | 156371426 | 156371549 | NC_000007.13 |
| cg12111758 | 7.66E-09 | 7.40E-10 | 6.48 | 11.517246  | 1.59E-01 | 111472375 | 111472498 | NC_000012.11 |
| cg00266286 | 7.67E-09 | 7.41E-10 | 6.48 | 11.5158359 | 1.49E-01 | 32713723  | 32713846  | NC_000005.9  |
| cg04157161 | 7.67E-09 | 7.41E-10 | 6.48 | 11.5157601 | 9.34E-02 | 7906847   | 7906970   | NC_000017.10 |
| cg17443668 | 7.68E-09 | 7.42E-10 | 6.48 | 11.5148179 | 9.41E-02 | 152130772 | 152130895 | NC_000001.10 |
| cg16690286 | 7.68E-09 | 7.42E-10 | 6.48 | 11.5146813 | 6.74E-02 | 31870244  | 31870367  | NC_000020.10 |
| cg13826749 | 7.69E-09 | 7.42E-10 | 6.48 | 11.5140528 | 5.03E-02 | 43867568  | 43867691  | NC_000021.8  |
| cg09919743 | 7.69E-09 | 7.43E-10 | 6.48 | 11.5135862 | 3.00E-02 | 31663851  | 31663974  | NC_000015.9  |
| cg26343532 | 7.69E-09 | 7.43E-10 | 6.48 | 11.513508  | 1.03E-01 | 144207101 | 144207224 | NC_000008.10 |
| cg19105442 | 7.70E-09 | 7.44E-10 | 6.48 | 11.5126348 | 7.70E-02 | 110965775 | 110965898 | NC_000013.10 |
| cg15778437 | 7.71E-09 | 7.45E-10 | 6.48 | 11.511044  | 2.04E-01 | 31839521  | 31839644  | NC_000011.9  |
| cg13062455 | 7.71E-09 | 7.45E-10 | 6.48 | 11.5105427 | 1.35E-01 | 81978021  | 81978144  | NC_000014.8  |
| cg21530453 | 7.72E-09 | 7.46E-10 | 6.48 | 11.509996  | 2.01E-01 | 56226346  | 56226469  | NC_000016.9  |
| cg06066137 | 7.73E-09 | 7.47E-10 | 6.48 | 11.508746  | 1.31E-01 | 57359200  | 57359323  | NC_000008.10 |
| cg23155932 | 7.73E-09 | 7.47E-10 | 6.48 | 11.5085418 | 4.21E-02 | 134877706 | 134877829 | NC_000010.10 |
| cg07802350 | 7.73E-09 | 7.47E-10 | 6.48 | 11.5078493 | 1.75E-01 | 176956573 | 176956696 | NC_000002.11 |
| cg13041355 | 7.73E-09 | 7.47E-10 | 6.48 | 11.507549  | 7.65E-02 | 178622080 | 178622203 | NC_000005.9  |
| cg01011748 | 7.73E-09 | 7.48E-10 | 6.48 | 11.5074536 | 2.16E-01 | 154729200 | 154729323 | NC_000002.11 |

|            |          |          |      |            |          |           |           |              |
|------------|----------|----------|------|------------|----------|-----------|-----------|--------------|
| cg21762788 | 7.74E-09 | 7.48E-10 | 6.48 | 11.5070293 | 1.60E-01 | 9756501   | 9756624   | NC_000008.10 |
| cg20296493 | 7.76E-09 | 7.50E-10 | 6.48 | 11.5044147 | 1.07E-01 | 124219725 | 124219848 | NC_000008.10 |
| cg17220749 | 7.76E-09 | 7.50E-10 | 6.48 | 11.5043217 | 1.17E-01 | 230249292 | 230249415 | NC_000001.10 |
| cg23409774 | 7.76E-09 | 7.50E-10 | 6.48 | 11.5042744 | 1.47E-01 | 175300141 | 175300264 | NC_000005.9  |
| cg16210375 | 7.76E-09 | 7.50E-10 | 6.47 | 11.5035461 | 3.42E-02 | 26682730  | 26682853  | NC_000002.11 |
| cg21591693 | 7.77E-09 | 7.51E-10 | 6.47 | 11.503181  | 6.62E-02 | 159647782 | 159647905 | NC_000004.11 |
| cg22399023 | 7.77E-09 | 7.51E-10 | 6.47 | 11.5029903 | 3.63E-02 | 5950951   | 5951074   | NC_000001.10 |
| cg09598590 | 7.77E-09 | 7.51E-10 | 6.47 | 11.502954  | 5.56E-02 | 46563704  | 46563827  | NC_000013.10 |
| cg07133479 | 7.77E-09 | 7.52E-10 | 6.47 | 11.5019999 | 4.61E-02 | 86420600  | 86420723  | NC_000002.11 |
| cg26843278 | 7.78E-09 | 7.52E-10 | 6.47 | 11.5015142 | 1.35E-01 | 131194523 | 131194646 | NC_000010.10 |
| cg10894566 | 7.78E-09 | 7.52E-10 | 6.47 | 11.5012267 | 1.54E-01 | 89905901  | 89906024  | NC_000015.9  |
| cg21251125 | 7.79E-09 | 7.53E-10 | 6.47 | 11.5002462 | 1.46E-01 | 126771781 | 126771904 | NC_000009.11 |
| cg08787039 | 7.79E-09 | 7.54E-10 | 6.47 | 11.4994673 | 1.03E-01 | 182921857 | 182921980 | NC_000001.10 |
| cg20194689 | 7.80E-09 | 7.54E-10 | 6.47 | 11.4988056 | 9.42E-02 | 178003633 | 178003756 | NC_000005.9  |
| cg02954212 | 7.80E-09 | 7.54E-10 | 6.47 | 11.4986459 | 2.02E-01 | 56226350  | 56226473  | NC_000016.9  |
| cg27662246 | 7.80E-09 | 7.55E-10 | 6.47 | 11.4983033 | 8.10E-02 | 107974539 | 107974662 | NC_000012.11 |
| cg22537280 | 7.80E-09 | 7.55E-10 | 6.47 | 11.497916  | 8.95E-02 | 54723213  | 54723336  | NC_000001.10 |
| cg03957235 | 7.80E-09 | 7.55E-10 | 6.47 | 11.4978244 | 6.83E-02 | 3512243   | 3512366   | NC_000001.10 |
| cg17466857 | 7.81E-09 | 7.55E-10 | 6.47 | 11.4975357 | 1.72E-01 | 27225528  | 27225651  | NC_000007.13 |
| cg00211337 | 7.81E-09 | 7.56E-10 | 6.47 | 11.496781  | 1.49E-01 | 230670550 | 230670673 | NC_000002.11 |
| cg14164099 | 7.81E-09 | 7.56E-10 | 6.47 | 11.4967397 | 1.27E-01 | 95870475  | 95870598  | NC_000015.9  |
| cg21869027 | 7.82E-09 | 7.56E-10 | 6.47 | 11.4963101 | 6.53E-02 | 29902402  | 29902525  | NC_000017.10 |
| cg22159514 | 7.82E-09 | 7.57E-10 | 6.47 | 11.4954935 | 1.95E-01 | 11591185  | 11591308  | NC_000019.9  |
| cg15972331 | 7.83E-09 | 7.58E-10 | 6.47 | 11.4941445 | 1.46E-01 | 102569894 | 102570017 | NC_000013.10 |
| cg25482900 | 7.83E-09 | 7.58E-10 | 6.47 | 11.4937103 | 1.31E-01 | 167956911 | 167957034 | NC_000005.9  |

|            |          |          |      |            |          |           |           |              |
|------------|----------|----------|------|------------|----------|-----------|-----------|--------------|
| cg06399148 | 7.83E-09 | 7.58E-10 | 6.47 | 11.4935848 | 1.89E-01 | 104153148 | 104153271 | NC_000008.10 |
| cg19905757 | 7.84E-09 | 7.58E-10 | 6.47 | 11.4934525 | 1.10E-01 | 68924127  | 68924250  | NC_000015.9  |
| cg15792957 | 7.84E-09 | 7.58E-10 | 6.47 | 11.4931972 | 9.33E-02 | 47604206  | 47604329  | NC_000002.11 |
| cg00406023 | 7.85E-09 | 7.59E-10 | 6.47 | 11.4920438 | 8.77E-02 | 120090023 | 120090146 | NC_000011.9  |
| cg11012061 | 7.87E-09 | 7.61E-10 | 6.47 | 11.489547  | 1.49E-01 | 145722468 | 145722591 | NC_000005.9  |
| cg08862830 | 7.87E-09 | 7.62E-10 | 6.47 | 11.4892762 | 9.38E-02 | 5507336   | 5507459   | NC_000019.9  |
| cg15239123 | 7.87E-09 | 7.62E-10 | 6.47 | 11.4891667 | 1.89E-01 | 70346413  | 70346536  | NC_000014.8  |
| cg26976732 | 7.87E-09 | 7.62E-10 | 6.47 | 11.4890026 | 2.12E-01 | 216100    | 216223    | NC_000016.9  |
| cg13651561 | 7.87E-09 | 7.62E-10 | 6.47 | 11.488966  | 5.99E-02 | 134663491 | 134663614 | NC_000009.11 |
| cg19838506 | 7.89E-09 | 7.64E-10 | 6.47 | 11.4861705 | 6.14E-02 | 13025242  | 13025365  | NC_000007.13 |
| cg15196197 | 7.90E-09 | 7.64E-10 | 6.47 | 11.4856218 | 1.67E-01 | 32064573  | 32064696  | NC_000006.11 |
| cg01532436 | 7.90E-09 | 7.65E-10 | 6.47 | 11.4853157 | 1.96E-01 | 48983942  | 48984065  | NC_000019.9  |
| cg02886806 | 7.90E-09 | 7.65E-10 | 6.47 | 11.4850442 | 7.56E-02 | 1906992   | 1907115   | NC_000002.11 |
| cg09447105 | 7.91E-09 | 7.66E-10 | 6.47 | 11.4839151 | 7.60E-02 | 15126020  | 15126143  | NC_000012.11 |
| cg26327666 | 7.92E-09 | 7.67E-10 | 6.47 | 11.4818729 | 1.55E-01 | 76937963  | 76938086  | NC_000005.9  |
| cg01255417 | 7.93E-09 | 7.68E-10 | 6.47 | 11.480914  | 1.32E-01 | 10422636  | 10422759  | NC_000006.11 |
| cg03754311 | 7.95E-09 | 7.70E-10 | 6.47 | 11.4788879 | 1.55E-01 | 20879029  | 20879152  | NC_000001.10 |
| cg06539449 | 7.95E-09 | 7.70E-10 | 6.47 | 11.4781242 | 8.67E-02 | 69461008  | 69461131  | NC_000011.9  |
| cg07647726 | 7.97E-09 | 7.72E-10 | 6.47 | 11.4760355 | 1.58E-01 | 109149171 | 109149294 | NC_000013.10 |
| cg16134678 | 7.97E-09 | 7.72E-10 | 6.47 | 11.4756792 | 1.13E-01 | 25670187  | 25670310  | NC_000013.10 |
| cg23071120 | 7.98E-09 | 7.73E-10 | 6.47 | 11.4749465 | 2.15E-01 | 13840480  | 13840603  | NC_000001.10 |
| cg17940495 | 7.98E-09 | 7.73E-10 | 6.47 | 11.4749178 | 8.94E-02 | 14282882  | 14283005  | NC_000006.11 |
| cg04299439 | 7.98E-09 | 7.73E-10 | 6.47 | 11.4745773 | 1.40E-01 | 182547599 | 182547722 | NC_000002.11 |
| cg22294267 | 7.98E-09 | 7.73E-10 | 6.47 | 11.4744338 | 7.91E-02 | 57352252  | 57352375  | NC_000019.9  |
| cg05812266 | 7.98E-09 | 7.73E-10 | 6.47 | 11.4740262 | 9.78E-02 | 29595194  | 29595317  | NC_000006.11 |

|            |          |          |      |            |          |           |           |              |
|------------|----------|----------|------|------------|----------|-----------|-----------|--------------|
| cg12514620 | 7.98E-09 | 7.74E-10 | 6.47 | 11.473838  | 7.89E-02 | 54871858  | 54871981  | NC_000001.10 |
| cg02214745 | 7.99E-09 | 7.74E-10 | 6.47 | 11.4732098 | 1.82E-01 | 130645645 | 130645768 | NC_000012.11 |
| cg01164789 | 7.99E-09 | 7.74E-10 | 6.47 | 11.4729327 | 2.32E-02 | 77424274  | 77424397  | NC_000012.11 |
| cg14270789 | 8.00E-09 | 7.75E-10 | 6.47 | 11.4723837 | 1.75E-01 | 25620954  | 25621077  | NC_000013.10 |
| cg14301844 | 8.00E-09 | 7.75E-10 | 6.47 | 11.4721917 | 6.38E-02 | 100904721 | 100904844 | NC_000014.8  |
| cg25400229 | 8.01E-09 | 7.76E-10 | 6.47 | 11.4711143 | 1.88E-01 | 11752592  | 11752715  | NC_000018.9  |
| cg26833667 | 8.02E-09 | 7.77E-10 | 6.47 | 11.4696211 | 1.63E-02 | 15005466  | 15005589  | NC_000004.11 |
| cg10481019 | 8.03E-09 | 7.78E-10 | 6.47 | 11.468069  | 5.00E-02 | 81095002  | 81095125  | NC_000016.9  |
| cg09232937 | 8.04E-09 | 7.79E-10 | 6.47 | 11.4670314 | 1.37E-01 | 3595970   | 3596093   | NC_000005.9  |
| cg24504927 | 8.04E-09 | 7.79E-10 | 6.47 | 11.4667611 | 1.98E-01 | 85667353  | 85667476  | NC_000012.11 |
| cg12298268 | 8.04E-09 | 7.79E-10 | 6.47 | 11.4664288 | 1.77E-01 | 139257866 | 139257989 | NC_000003.11 |
| cg24811864 | 8.05E-09 | 7.80E-10 | 6.47 | 11.4651889 | 1.50E-01 | 55019711  | 55019834  | NC_000018.9  |
| cg16786581 | 8.05E-09 | 7.81E-10 | 6.47 | 11.4650152 | 9.68E-02 | 10320712  | 10320835  | NC_000006.11 |
| cg14186846 | 8.06E-09 | 7.82E-10 | 6.47 | 11.4635198 | 1.14E-01 | 15256907  | 15257030  | NC_000006.11 |
| cg23563443 | 8.07E-09 | 7.83E-10 | 6.47 | 11.4623013 | 2.86E-02 | 22408989  | 22409112  | NC_000008.10 |
| cg06679347 | 8.08E-09 | 7.83E-10 | 6.47 | 11.4615032 | 2.00E-01 | 177714350 | 177714473 | NC_000004.11 |
| cg25035988 | 8.09E-09 | 7.85E-10 | 6.47 | 11.4599226 | 1.44E-01 | 57387978  | 57388101  | NC_000010.10 |
| cg17811167 | 8.09E-09 | 7.85E-10 | 6.47 | 11.4598449 | 1.14E-01 | 36861499  | 36861622  | NC_000017.10 |
| cg09359907 | 8.10E-09 | 7.85E-10 | 6.47 | 11.4593617 | 2.37E-01 | 8869099   | 8869222   | NC_000017.10 |
| cg19358442 | 8.11E-09 | 7.86E-10 | 6.47 | 11.4578744 | 1.13E-01 | 44325687  | 44325810  | NC_000011.9  |
| cg07520649 | 8.11E-09 | 7.86E-10 | 6.47 | 11.4578108 | 1.50E-01 | 140743575 | 140743698 | NC_000005.9  |
| cg25586361 | 8.11E-09 | 7.86E-10 | 6.47 | 11.4577729 | 1.11E-01 | 32455444  | 32455567  | NC_000011.9  |
| cg17880014 | 8.11E-09 | 7.87E-10 | 6.47 | 11.4573047 | 1.43E-01 | 71693165  | 71693288  | NC_000002.11 |
| cg06553513 | 8.12E-09 | 7.87E-10 | 6.47 | 11.456553  | 1.31E-01 | 131193272 | 131193395 | NC_000010.10 |
| cg12690369 | 8.12E-09 | 7.88E-10 | 6.47 | 11.4559892 | 1.72E-01 | 71314144  | 71314267  | NC_000012.11 |



|            |          |          |      |            |          |           |           |              |
|------------|----------|----------|------|------------|----------|-----------|-----------|--------------|
| cg16933248 | 8.12E-09 | 7.88E-10 | 6.47 | 11.4559016 | 1.03E-01 | 132932245 | 132932368 | NC_000012.11 |
| cg01384163 | 8.13E-09 | 7.88E-10 | 6.47 | 11.4553362 | 1.62E-01 | 47073969  | 47074092  | NC_000017.10 |
| cg07922007 | 8.13E-09 | 7.89E-10 | 6.47 | 11.4551063 | 2.10E-01 | 67874858  | 67874981  | NC_000008.10 |
| cg12110911 | 8.14E-09 | 7.89E-10 | 6.47 | 11.4542402 | 1.32E-01 | 207506991 | 207507114 | NC_000002.11 |
| cg05432213 | 8.14E-09 | 7.89E-10 | 6.47 | 11.4541381 | 7.73E-02 | 35086985  | 35087108  | NC_000015.9  |
| cg13824385 | 8.15E-09 | 7.91E-10 | 6.47 | 11.4519293 | 7.55E-02 | 132584750 | 132584873 | NC_000009.11 |
| cg23497569 | 8.16E-09 | 7.92E-10 | 6.47 | 11.4509819 | 1.70E-01 | 19417585  | 19417708  | NC_000007.13 |
| cg12405231 | 8.17E-09 | 7.93E-10 | 6.46 | 11.4493311 | 9.23E-02 | 211749023 | 211749146 | NC_000001.10 |
| cg16691196 | 8.18E-09 | 7.93E-10 | 6.46 | 11.4490793 | 6.38E-02 | 20508651  | 20508774  | NC_000001.10 |
| cg22147084 | 8.18E-09 | 7.94E-10 | 6.46 | 11.4487243 | 1.62E-01 | 179779664 | 179779787 | NC_000005.9  |
| cg02919960 | 8.19E-09 | 7.94E-10 | 6.46 | 11.4478552 | 1.22E-01 | 27192549  | 27192672  | NC_000007.13 |
| cg05306173 | 8.19E-09 | 7.94E-10 | 6.46 | 11.4477467 | 8.66E-02 | 118885636 | 118885759 | NC_000010.10 |
| cg22961241 | 8.19E-09 | 7.95E-10 | 6.46 | 11.4471586 | 1.08E-01 | 32917502  | 32917625  | NC_000006.11 |
| cg27534599 | 8.20E-09 | 7.96E-10 | 6.46 | 11.4461205 | 1.36E-01 | 17680477  | 17680600  | NC_000022.10 |
| cg18760835 | 8.20E-09 | 7.96E-10 | 6.46 | 11.4457528 | 1.09E-01 | 5996245   | 5996368   | NC_000006.11 |
| cg24252925 | 8.21E-09 | 7.97E-10 | 6.46 | 11.4449842 | 1.99E-01 | 116854028 | 116854151 | NC_000010.10 |
| cg23634417 | 8.21E-09 | 7.97E-10 | 6.46 | 11.4444946 | 2.41E-02 | 156255479 | 156255602 | NC_000001.10 |
| cg11078221 | 8.22E-09 | 7.98E-10 | 6.46 | 11.444043  | 1.52E-01 | 115135934 | 115136057 | NC_000012.11 |
| cg08550101 | 8.22E-09 | 7.98E-10 | 6.46 | 11.4432048 | 1.31E-01 | 20823981  | 20824104  | NC_000007.13 |
| cg13240116 | 8.22E-09 | 7.98E-10 | 6.46 | 11.4431331 | 9.74E-02 | 27147513  | 27147636  | NC_000007.13 |
| cg12600346 | 8.23E-09 | 7.99E-10 | 6.46 | 11.4426896 | 4.55E-02 | 82753800  | 82753923  | NC_000002.11 |
| cg23038594 | 8.23E-09 | 7.99E-10 | 6.46 | 11.4426869 | 1.41E-01 | 170254369 | 170254492 | NC_000001.10 |
| cg19888869 | 8.24E-09 | 8.00E-10 | 6.46 | 11.4404293 | 1.09E-01 | 54967674  | 54967797  | NC_000004.11 |
| cg12620706 | 8.24E-09 | 8.00E-10 | 6.46 | 11.4403982 | 6.29E-02 | 155917159 | 155917282 | NC_000007.13 |
| cg12042864 | 8.25E-09 | 8.01E-10 | 6.46 | 11.4393782 | 4.57E-02 | 99066260  | 99066383  | NC_000007.13 |

|            |          |          |      |            |          |           |           |              |
|------------|----------|----------|------|------------|----------|-----------|-----------|--------------|
| cg26410450 | 8.25E-09 | 8.01E-10 | 6.46 | 11.4392872 | 1.76E-01 | 17740967  | 17741090  | NC_000011.9  |
| cg17250160 | 8.25E-09 | 8.01E-10 | 6.46 | 11.4392499 | 1.13E-01 | 156919811 | 156919934 | NC_000006.11 |
| cg16479539 | 8.27E-09 | 8.03E-10 | 6.46 | 11.4377777 | 1.54E-01 | 54345212  | 54345335  | NC_000012.11 |
| cg02711212 | 8.27E-09 | 8.03E-10 | 6.46 | 11.4375046 | 1.68E-01 | 69854024  | 69854147  | NC_000015.9  |
| cg15684724 | 8.27E-09 | 8.03E-10 | 6.46 | 11.4369074 | 2.38E-01 | 67875033  | 67875156  | NC_000008.10 |
| cg11429658 | 8.28E-09 | 8.04E-10 | 6.46 | 11.4362854 | 1.34E-01 | 15646635  | 15646758  | NC_000021.8  |
| cg09909151 | 8.28E-09 | 8.04E-10 | 6.46 | 11.4358468 | 1.13E-01 | 47494258  | 47494381  | NC_000016.9  |
| cg25260543 | 8.28E-09 | 8.04E-10 | 6.46 | 11.4357711 | 1.43E-01 | 100946792 | 100946915 | NC_000007.13 |
| cg05523911 | 8.29E-09 | 8.06E-10 | 6.46 | 11.4342697 | 1.48E-01 | 152081002 | 152081125 | NC_000001.10 |
| cg17861230 | 8.30E-09 | 8.06E-10 | 6.46 | 11.4333407 | 1.33E-01 | 18343901  | 18344024  | NC_000019.9  |
| cg01016119 | 8.31E-09 | 8.08E-10 | 6.46 | 11.4317515 | 1.66E-01 | 56835282  | 56835405  | NC_000003.11 |
| cg27317433 | 8.33E-09 | 8.10E-10 | 6.46 | 11.4291072 | 1.99E-01 | 1401781   | 1401904   | NC_000019.9  |
| cg13686115 | 8.34E-09 | 8.10E-10 | 6.46 | 11.4284539 | 1.40E-01 | 60936626  | 60936749  | NC_000010.10 |
| cg12135286 | 8.34E-09 | 8.11E-10 | 6.46 | 11.4279359 | 7.27E-02 | 4035711   | 4035834   | NC_000010.10 |
| cg16099210 | 8.35E-09 | 8.11E-10 | 6.46 | 11.427308  | 1.75E-01 | 119001250 | 119001373 | NC_000010.10 |
| cg12031031 | 8.35E-09 | 8.11E-10 | 6.46 | 11.4270144 | 5.75E-02 | 103980882 | 103981005 | NC_000012.11 |
| cg12391690 | 8.36E-09 | 8.13E-10 | 6.46 | 11.4252305 | 1.71E-01 | 38100811  | 38100934  | NC_000001.10 |
| cg26341453 | 8.37E-09 | 8.13E-10 | 6.46 | 11.4248978 | 1.05E-01 | 28593732  | 28593855  | NC_000001.10 |
| cg09865386 | 8.38E-09 | 8.15E-10 | 6.46 | 11.4229252 | 4.98E-02 | 101192599 | 101192722 | NC_000014.8  |
| cg14102055 | 8.39E-09 | 8.16E-10 | 6.46 | 11.4220365 | 6.34E-02 | 133715238 | 133715361 | NC_000009.11 |
| cg00146655 | 8.39E-09 | 8.16E-10 | 6.46 | 11.4219388 | 7.41E-02 | 7517194   | 7517317   | NC_000003.11 |
| cg08882547 | 8.39E-09 | 8.16E-10 | 6.46 | 11.4215177 | 1.25E-01 | 45737792  | 45737915  | NC_000019.9  |
| cg12405265 | 8.39E-09 | 8.16E-10 | 6.46 | 11.4214987 | 4.57E-02 | 24655961  | 24656084  | NC_000001.10 |
| cg13494428 | 8.40E-09 | 8.16E-10 | 6.46 | 11.4213172 | 9.38E-02 | 19639494  | 19639617  | NC_000001.10 |
| cg26536189 | 8.40E-09 | 8.17E-10 | 6.46 | 11.4206349 | 1.95E-01 | 13840494  | 13840617  | NC_000001.10 |

|            |          |          |      |            |          |           |           |              |
|------------|----------|----------|------|------------|----------|-----------|-----------|--------------|
| cg25365014 | 8.41E-09 | 8.17E-10 | 6.46 | 11.4199583 | 1.30E-01 | 2727713   | 2727836   | NC_000005.9  |
| cg20289911 | 8.41E-09 | 8.18E-10 | 6.46 | 11.4195466 | 9.92E-02 | 816362    | 816485    | NC_000020.10 |
| cg21622568 | 8.43E-09 | 8.19E-10 | 6.46 | 11.4175523 | 3.53E-02 | 111091243 | 111091366 | NC_000013.10 |
| cg12129983 | 8.43E-09 | 8.20E-10 | 6.46 | 11.4165824 | 3.90E-02 | 69462660  | 69462783  | NC_000011.9  |
| cg08270734 | 8.44E-09 | 8.21E-10 | 6.46 | 11.4158208 | 2.23E-02 | 108951574 | 108951697 | NC_000012.11 |
| cg21483883 | 8.45E-09 | 8.21E-10 | 6.46 | 11.4151441 | 9.50E-02 | 37487352  | 37487475  | NC_000007.13 |
| cg06849515 | 8.46E-09 | 8.23E-10 | 6.46 | 11.4137538 | 1.76E-01 | 13549607  | 13549730  | NC_000004.11 |
| cg19511748 | 8.46E-09 | 8.23E-10 | 6.46 | 11.4136305 | 6.11E-02 | 94220272  | 94220395  | NC_000005.9  |
| cg14118515 | 8.46E-09 | 8.23E-10 | 6.46 | 11.4128643 | 1.96E-01 | 176948728 | 176948851 | NC_000002.11 |
| cg05193407 | 8.47E-09 | 8.24E-10 | 6.46 | 11.4123469 | 6.16E-02 | 57036298  | 57036421  | NC_000004.11 |
| cg17537466 | 8.47E-09 | 8.24E-10 | 6.46 | 11.4116472 | 1.08E-01 | 14673322  | 14673445  | NC_000005.9  |
| cg24601327 | 8.48E-09 | 8.25E-10 | 6.46 | 11.4106937 | 1.25E-01 | 96526353  | 96526476  | NC_000001.10 |
| cg23134869 | 8.48E-09 | 8.25E-10 | 6.46 | 11.4106462 | 1.60E-01 | 77593233  | 77593356  | NC_000008.10 |
| cg20390515 | 8.49E-09 | 8.26E-10 | 6.46 | 11.41008   | 2.00E-01 | 945697    | 945820    | NC_000002.11 |
| cg01204606 | 8.49E-09 | 8.26E-10 | 6.46 | 11.4092886 | 1.93E-01 | 116451788 | 116451911 | NC_000011.9  |
| cg19832521 | 8.49E-09 | 8.27E-10 | 6.46 | 11.4090468 | 2.01E-01 | 27065974  | 27066097  | NC_000014.8  |
| cg06497668 | 8.50E-09 | 8.27E-10 | 6.46 | 11.4083957 | 1.55E-01 | 45155703  | 45155826  | NC_000002.11 |
| cg02370395 | 8.50E-09 | 8.28E-10 | 6.46 | 11.4077259 | 1.84E-01 | 35641505  | 35641628  | NC_000011.9  |
| cg05778440 | 8.51E-09 | 8.28E-10 | 6.46 | 11.4070516 | 1.10E-01 | 66196160  | 66196283  | NC_000017.10 |
| cg10356657 | 8.51E-09 | 8.28E-10 | 6.46 | 11.4068525 | 1.02E-01 | 99978574  | 99978697  | NC_000014.8  |
| cg24801123 | 8.51E-09 | 8.28E-10 | 6.46 | 11.4068296 | 1.40E-01 | 45615503  | 45615626  | NC_000007.13 |
| cg04123685 | 8.51E-09 | 8.29E-10 | 6.46 | 11.4064173 | 2.87E-02 | 36897340  | 36897463  | NC_000022.10 |
| cg19389953 | 8.53E-09 | 8.31E-10 | 6.46 | 11.4041299 | 1.29E-01 | 121939827 | 121939950 | NC_000007.13 |
| cg05933997 | 8.55E-09 | 8.32E-10 | 6.46 | 11.402568  | 7.31E-02 | 86735122  | 86735245  | NC_000016.9  |
| cg00797104 | 8.55E-09 | 8.33E-10 | 6.46 | 11.4015863 | 1.03E-01 | 32847605  | 32847728  | NC_000006.11 |

|            |          |          |      |            |          |           |           |              |
|------------|----------|----------|------|------------|----------|-----------|-----------|--------------|
| cg14985989 | 8.55E-09 | 8.33E-10 | 6.46 | 11.4014194 | 2.01E-01 | 496428    | 496551    | NC_000019.9  |
| cg26986911 | 8.56E-09 | 8.34E-10 | 6.46 | 11.4007626 | 1.93E-01 | 33936292  | 33936415  | NC_000005.9  |
| cg24645221 | 8.56E-09 | 8.34E-10 | 6.46 | 11.4004796 | 1.03E-01 | 57358928  | 57359051  | NC_000008.10 |
| cg27326661 | 8.57E-09 | 8.35E-10 | 6.46 | 11.3996176 | 9.27E-02 | 80922579  | 80922702  | NC_000008.10 |
| cg05870140 | 8.57E-09 | 8.35E-10 | 6.46 | 11.399523  | 1.46E-01 | 101923427 | 101923550 | NC_000014.8  |
| cg14562851 | 8.57E-09 | 8.35E-10 | 6.46 | 11.3992444 | 4.98E-02 | 12660012  | 12660135  | NC_000001.10 |
| cg23752086 | 8.58E-09 | 8.36E-10 | 6.46 | 11.3981199 | 1.58E-01 | 20522177  | 20522300  | NC_000012.11 |
| cg23489627 | 8.58E-09 | 8.36E-10 | 6.46 | 11.3978137 | 1.22E-01 | 73674339  | 73674462  | NC_000003.11 |
| cg26780138 | 8.59E-09 | 8.37E-10 | 6.45 | 11.3967176 | 1.77E-01 | 477087    | 477210    | NC_000016.9  |
| cg17453671 | 8.61E-09 | 8.38E-10 | 6.45 | 11.3951465 | 4.13E-02 | 207109202 | 207109325 | NC_000001.10 |
| cg18932809 | 8.61E-09 | 8.39E-10 | 6.45 | 11.3946444 | 1.76E-01 | 130686826 | 130686949 | NC_000006.11 |
| cg07703364 | 8.61E-09 | 8.39E-10 | 6.45 | 11.3945915 | 2.20E-02 | 6992514   | 6992637   | NC_000012.11 |
| cg07413251 | 8.62E-09 | 8.40E-10 | 6.45 | 11.3933832 | 1.91E-01 | 27771667  | 27771790  | NC_000003.11 |
| cg02770983 | 8.63E-09 | 8.40E-10 | 6.45 | 11.3926944 | 1.37E-01 | 31822341  | 31822464  | NC_000011.9  |
| cg23526676 | 8.63E-09 | 8.41E-10 | 6.45 | 11.3925905 | 8.48E-02 | 31734458  | 31734581  | NC_000006.11 |
| cg15135914 | 8.63E-09 | 8.41E-10 | 6.45 | 11.392532  | 1.97E-02 | 65430544  | 65430667  | NC_000011.9  |
| cg24875029 | 8.63E-09 | 8.41E-10 | 6.45 | 11.3924714 | 1.43E-01 | 105471438 | 105471561 | NC_000002.11 |
| cg16664523 | 8.63E-09 | 8.41E-10 | 6.45 | 11.3924687 | 1.70E-01 | 67586170  | 67586293  | NC_000005.9  |
| cg14657728 | 8.63E-09 | 8.41E-10 | 6.45 | 11.3920034 | 2.20E-01 | 130498701 | 130498824 | NC_000012.11 |
| cg01308258 | 8.63E-09 | 8.41E-10 | 6.45 | 11.391749  | 1.22E-01 | 124783243 | 124783366 | NC_000002.11 |
| cg07351192 | 8.64E-09 | 8.42E-10 | 6.45 | 11.391292  | 1.42E-01 | 5137773   | 5137896   | NC_000003.11 |
| cg03345448 | 8.64E-09 | 8.42E-10 | 6.45 | 11.3909301 | 1.16E-01 | 40722516  | 40722639  | NC_000006.11 |
| cg23300486 | 8.65E-09 | 8.43E-10 | 6.45 | 11.3893431 | 1.98E-01 | 103294375 | 103294498 | NC_000014.8  |
| cg14716686 | 8.66E-09 | 8.44E-10 | 6.45 | 11.3885533 | 1.27E-01 | 30452862  | 30452985  | NC_000021.8  |
| cg14074052 | 8.67E-09 | 8.45E-10 | 6.45 | 11.3869809 | 1.25E-01 | 22094226  | 22094349  | NC_000012.11 |

|            |          |          |      |            |          |           |           |              |
|------------|----------|----------|------|------------|----------|-----------|-----------|--------------|
| cg22587479 | 8.67E-09 | 8.46E-10 | 6.45 | 11.3866998 | 1.22E-01 | 219738226 | 219738349 | NC_000002.11 |
| cg05340085 | 8.67E-09 | 8.46E-10 | 6.45 | 11.3866767 | 6.33E-02 | 47134186  | 47134309  | NC_000007.13 |
| cg04037640 | 8.68E-09 | 8.47E-10 | 6.45 | 11.3854518 | 9.93E-02 | 32065034  | 32065157  | NC_000006.11 |
| cg14921743 | 8.68E-09 | 8.47E-10 | 6.45 | 11.3854489 | 2.29E-01 | 44650449  | 44650572  | NC_000020.10 |
| cg05628390 | 8.69E-09 | 8.47E-10 | 6.45 | 11.3845697 | 4.49E-02 | 2259411   | 2259534   | NC_000001.10 |
| cg04755999 | 8.69E-09 | 8.48E-10 | 6.45 | 11.3844862 | 5.46E-02 | 39274491  | 39274614  | NC_000017.10 |
| cg14297966 | 8.70E-09 | 8.48E-10 | 6.45 | 11.3840445 | 6.94E-02 | 35101708  | 35101831  | NC_000009.11 |
| cg09885735 | 8.70E-09 | 8.49E-10 | 6.45 | 11.3831399 | 1.69E-01 | 60297747  | 60297870  | NC_000015.9  |
| cg07967630 | 8.71E-09 | 8.49E-10 | 6.45 | 11.3826894 | 1.16E-01 | 58149317  | 58149440  | NC_000006.11 |
| cg08344360 | 8.72E-09 | 8.51E-10 | 6.45 | 11.3808981 | 9.51E-02 | 34701049  | 34701172  | NC_000009.11 |
| cg02868244 | 8.72E-09 | 8.51E-10 | 6.45 | 11.3807803 | 6.07E-02 | 134855441 | 134855564 | NC_000010.10 |
| cg12748607 | 8.74E-09 | 8.53E-10 | 6.45 | 11.3786713 | 1.94E-01 | 40678691  | 40678814  | NC_000002.11 |
| cg05371438 | 8.76E-09 | 8.54E-10 | 6.45 | 11.3769677 | 9.14E-02 | 184234    | 184357    | NC_000012.11 |
| cg24336989 | 8.76E-09 | 8.55E-10 | 6.45 | 11.3758768 | 1.78E-01 | 10385903  | 10386026  | NC_000006.11 |
| cg19276343 | 8.76E-09 | 8.55E-10 | 6.45 | 11.3758143 | 9.90E-02 | 41303922  | 41304045  | NC_000001.10 |
| cg04880737 | 8.77E-09 | 8.56E-10 | 6.45 | 11.3752679 | 9.50E-02 | 238617378 | 238617501 | NC_000002.11 |
| cg07481380 | 8.77E-09 | 8.56E-10 | 6.45 | 11.3749731 | 5.22E-02 | 3834519   | 3834642   | NC_000019.9  |
| cg11365913 | 8.77E-09 | 8.56E-10 | 6.45 | 11.3745551 | 1.40E-01 | 19318160  | 19318283  | NC_000008.10 |
| cg19181160 | 8.78E-09 | 8.57E-10 | 6.45 | 11.3740792 | 3.27E-02 | 3187593   | 3187716   | NC_000011.9  |
| cg08784934 | 8.78E-09 | 8.57E-10 | 6.45 | 11.3738059 | 6.65E-02 | 664994    | 665117    | NC_000010.10 |
| cg24468955 | 8.79E-09 | 8.58E-10 | 6.45 | 11.3728649 | 5.73E-02 | 90577545  | 90577668  | NC_000008.10 |
| cg21602520 | 8.79E-09 | 8.58E-10 | 6.45 | 11.3723362 | 1.40E-01 | 60985380  | 60985503  | NC_000018.9  |
| cg23350350 | 8.80E-09 | 8.59E-10 | 6.45 | 11.3718367 | 1.48E-01 | 16652008  | 16652131  | NC_000008.10 |
| cg25185429 | 8.80E-09 | 8.59E-10 | 6.45 | 11.3718084 | 5.49E-02 | 4739461   | 4739584   | NC_000003.11 |
| cg22231400 | 8.80E-09 | 8.59E-10 | 6.45 | 11.3716431 | 1.01E-01 | 49935823  | 49935946  | NC_000019.9  |

|            |          |          |      |            |          |           |           |              |
|------------|----------|----------|------|------------|----------|-----------|-----------|--------------|
| cg09736669 | 8.81E-09 | 8.60E-10 | 6.45 | 11.3704654 | 1.55E-01 | 1851828   | 1851951   | NC_000005.9  |
| cg22530255 | 8.81E-09 | 8.60E-10 | 6.45 | 11.3698924 | 5.95E-02 | 3051692   | 3051815   | NC_000001.10 |
| cg02543772 | 8.82E-09 | 8.61E-10 | 6.45 | 11.3691201 | 1.72E-01 | 128850630 | 128850753 | NC_000012.11 |
| cg19115272 | 8.82E-09 | 8.61E-10 | 6.45 | 11.3690731 | 1.46E-01 | 30139538  | 30139661  | NC_000006.11 |
| cg09493063 | 8.82E-09 | 8.61E-10 | 6.45 | 11.3687298 | 2.71E-01 | 142494985 | 142495108 | NC_000007.13 |
| cg13300509 | 8.82E-09 | 8.61E-10 | 6.45 | 11.3685996 | 9.54E-02 | 57146833  | 57146956  | NC_000012.11 |
| cg10743378 | 8.84E-09 | 8.63E-10 | 6.45 | 11.3668262 | 5.54E-02 | 102028800 | 102028923 | NC_000010.10 |
| cg15829006 | 8.85E-09 | 8.64E-10 | 6.45 | 11.3655696 | 1.37E-01 | 137967652 | 137967775 | NC_000009.11 |
| cg27343616 | 8.86E-09 | 8.65E-10 | 6.45 | 11.3644995 | 9.78E-02 | 17207697  | 17207820  | NC_000020.10 |
| cg21596825 | 8.88E-09 | 8.67E-10 | 6.45 | 11.3625391 | 1.13E-01 | 3818723   | 3818846   | NC_000002.11 |
| cg17522727 | 8.89E-09 | 8.68E-10 | 6.45 | 11.3610663 | 1.59E-01 | 794867    | 794990    | NC_000011.9  |
| cg23675401 | 8.89E-09 | 8.68E-10 | 6.45 | 11.3608271 | 9.77E-02 | 4867481   | 4867604   | NC_000004.11 |
| cg00002809 | 8.91E-09 | 8.70E-10 | 6.45 | 11.3589705 | 3.31E-02 | 76482353  | 76482476  | NC_000017.10 |
| cg17633170 | 8.92E-09 | 8.71E-10 | 6.45 | 11.3580191 | 1.32E-01 | 131217151 | 131217274 | NC_000012.11 |
| cg23801969 | 8.92E-09 | 8.72E-10 | 6.45 | 11.3570698 | 7.44E-02 | 39051805  | 39051928  | NC_000019.9  |
| cg04920270 | 8.96E-09 | 8.76E-10 | 6.45 | 11.3523532 | 1.39E-01 | 112832249 | 112832372 | NC_000011.9  |
| cg16710124 | 8.97E-09 | 8.76E-10 | 6.45 | 11.3518484 | 7.62E-02 | 44716058  | 44716181  | NC_000001.10 |
| cg09420412 | 8.97E-09 | 8.76E-10 | 6.45 | 11.351598  | 8.60E-02 | 14683948  | 14684071  | NC_000017.10 |
| cg11052202 | 8.97E-09 | 8.77E-10 | 6.45 | 11.3515344 | 1.63E-01 | 99290546  | 99290669  | NC_000006.11 |
| cg07005778 | 8.97E-09 | 8.77E-10 | 6.45 | 11.3514095 | 1.42E-01 | 188953586 | 188953709 | NC_000004.11 |
| cg02601140 | 8.98E-09 | 8.78E-10 | 6.45 | 11.3500345 | 1.16E-01 | 63250517  | 63250640  | NC_000007.13 |
| cg13787438 | 8.98E-09 | 8.78E-10 | 6.45 | 11.3500247 | 1.55E-01 | 26664115  | 26664238  | NC_000003.11 |
| cg12661427 | 9.00E-09 | 8.80E-10 | 6.45 | 11.3479316 | 2.56E-02 | 44437166  | 44437289  | NC_000001.10 |
| cg11147215 | 9.00E-09 | 8.80E-10 | 6.45 | 11.3478807 | 8.64E-02 | 105379726 | 105379849 | NC_000008.10 |
| cg01460694 | 9.01E-09 | 8.80E-10 | 6.45 | 11.3471933 | 2.83E-02 | 97477428  | 97477551  | NC_000002.11 |

|            |          |          |      |            |          |           |           |              |
|------------|----------|----------|------|------------|----------|-----------|-----------|--------------|
| cg03979754 | 9.01E-09 | 8.81E-10 | 6.45 | 11.346934  | 1.44E-01 | 110703460 | 110703583 | NC_000008.10 |
| cg04588165 | 9.03E-09 | 8.83E-10 | 6.45 | 11.3442851 | 1.89E-01 | 35300874  | 35300997  | NC_000017.10 |
| cg11858450 | 9.04E-09 | 8.84E-10 | 6.44 | 11.343703  | 1.15E-01 | 15132184  | 15132307  | NC_000019.9  |
| cg07962128 | 9.04E-09 | 8.84E-10 | 6.44 | 11.3431808 | 1.77E-01 | 37004812  | 37004935  | NC_000013.10 |
| cg06804433 | 9.04E-09 | 8.84E-10 | 6.44 | 11.3430916 | 1.69E-01 | 50682485  | 50682608  | NC_000006.11 |
| cg15819780 | 9.05E-09 | 8.84E-10 | 6.44 | 11.3427721 | 1.13E-01 | 53038915  | 53039038  | NC_000017.10 |
| cg21488538 | 9.06E-09 | 8.86E-10 | 6.44 | 11.3413137 | 1.71E-01 | 98964436  | 98964559  | NC_000002.11 |
| cg00547441 | 9.07E-09 | 8.87E-10 | 6.44 | 11.3400915 | 1.63E-01 | 50344724  | 50344847  | NC_000007.13 |
| cg09560096 | 9.07E-09 | 8.87E-10 | 6.44 | 11.339988  | 8.06E-02 | 219527018 | 219527141 | NC_000002.11 |
| cg19043574 | 9.08E-09 | 8.88E-10 | 6.44 | 11.3390075 | 1.18E-01 | 99439533  | 99439656  | NC_000002.11 |
| cg06877669 | 9.09E-09 | 8.89E-10 | 6.44 | 11.3381681 | 1.57E-01 | 25904216  | 25904339  | NC_000008.10 |
| cg08160862 | 9.12E-09 | 8.92E-10 | 6.44 | 11.3348135 | 2.03E-02 | 1270137   | 1270260   | NC_000001.10 |
| cg22488849 | 9.12E-09 | 8.92E-10 | 6.44 | 11.3342404 | 1.14E-01 | 3607134   | 3607257   | NC_000005.9  |
| cg16168668 | 9.13E-09 | 8.93E-10 | 6.44 | 11.3331584 | 1.24E-01 | 19158566  | 19158689  | NC_000007.13 |
| cg24156796 | 9.14E-09 | 8.94E-10 | 6.44 | 11.3319858 | 1.35E-01 | 114029646 | 114029769 | NC_000012.11 |
| cg11597832 | 9.14E-09 | 8.95E-10 | 6.44 | 11.3315501 | 1.13E-01 | 105993747 | 105993870 | NC_000014.8  |
| cg23546750 | 9.15E-09 | 8.95E-10 | 6.44 | 11.3313501 | 1.47E-01 | 3716787   | 3716910   | NC_000020.10 |
| cg27157619 | 9.15E-09 | 8.95E-10 | 6.44 | 11.3307732 | 6.94E-02 | 74714463  | 74714586  | NC_000015.9  |
| cg21580016 | 9.15E-09 | 8.96E-10 | 6.44 | 11.3304293 | 6.04E-02 | 121887392 | 121887515 | NC_000012.11 |
| cg16946687 | 9.16E-09 | 8.96E-10 | 6.44 | 11.3298322 | 9.84E-02 | 133172465 | 133172588 | NC_000012.11 |
| cg08056990 | 9.17E-09 | 8.97E-10 | 6.44 | 11.3292048 | 2.61E-02 | 800186    | 800309    | NC_000011.9  |
| cg15825311 | 9.18E-09 | 8.98E-10 | 6.44 | 11.3281015 | 1.97E-02 | 49948429  | 49948552  | NC_000003.11 |
| cg14920503 | 9.19E-09 | 8.99E-10 | 6.44 | 11.3268575 | 4.83E-02 | 45429155  | 45429278  | NC_000021.8  |
| cg10615150 | 9.19E-09 | 8.99E-10 | 6.44 | 11.3265414 | 1.69E-01 | 30582838  | 30582961  | NC_000020.10 |
| cg04462627 | 9.19E-09 | 9.00E-10 | 6.44 | 11.325917  | 2.13E-01 | 58019123  | 58019246  | NC_000016.9  |

|            |          |          |      |            |          |           |           |              |
|------------|----------|----------|------|------------|----------|-----------|-----------|--------------|
| cg14614314 | 9.21E-09 | 9.01E-10 | 6.44 | 11.3245699 | 2.18E-01 | 135150428 | 135150551 | NC_000010.10 |
| cg26477573 | 9.22E-09 | 9.02E-10 | 6.44 | 11.3230323 | 2.17E-01 | 15342915  | 15343038  | NC_000019.9  |
| cg17167253 | 9.23E-09 | 9.03E-10 | 6.44 | 11.3219317 | 1.35E-01 | 119603383 | 119603506 | NC_000002.11 |
| cg07602571 | 9.23E-09 | 9.03E-10 | 6.44 | 11.3218707 | 4.36E-02 | 77644868  | 77644991  | NC_000007.13 |
| cg13340245 | 9.23E-09 | 9.04E-10 | 6.44 | 11.3214909 | 2.29E-02 | 239333713 | 239333836 | NC_000002.11 |
| cg10778441 | 9.24E-09 | 9.05E-10 | 6.44 | 11.3206359 | 1.53E-01 | 35293279  | 35293402  | NC_000007.13 |
| cg19447025 | 9.25E-09 | 9.05E-10 | 6.44 | 11.3197801 | 7.45E-02 | 33335436  | 33335559  | NC_000006.11 |
| cg15843929 | 9.25E-09 | 9.06E-10 | 6.44 | 11.3190931 | 1.05E-01 | 59182305  | 59182428  | NC_000002.11 |
| cg11197015 | 9.26E-09 | 9.06E-10 | 6.44 | 11.3187965 | 1.61E-01 | 133795796 | 133795919 | NC_000010.10 |
| cg21105319 | 9.27E-09 | 9.08E-10 | 6.44 | 11.316994  | 2.00E-02 | 118307072 | 118307195 | NC_000011.9  |
| cg00216061 | 9.28E-09 | 9.09E-10 | 6.44 | 11.3163305 | 5.96E-02 | 88547579  | 88547702  | NC_000016.9  |
| cg07892785 | 9.28E-09 | 9.09E-10 | 6.44 | 11.3160534 | 2.34E-01 | 39851788  | 39851911  | NC_000003.11 |
| cg24431667 | 9.28E-09 | 9.09E-10 | 6.44 | 11.3157635 | 1.33E-01 | 2162387   | 2162510   | NC_000011.9  |
| cg13973086 | 9.31E-09 | 9.12E-10 | 6.44 | 11.3127937 | 1.29E-01 | 469105    | 469228    | NC_000002.11 |
| cg12978433 | 9.31E-09 | 9.12E-10 | 6.44 | 11.3121426 | 1.85E-01 | 52789956  | 52790079  | NC_000020.10 |
| cg13448092 | 9.32E-09 | 9.14E-10 | 6.44 | 11.3110297 | 1.39E-01 | 181135878 | 181136001 | NC_000003.11 |
| cg07462053 | 9.32E-09 | 9.14E-10 | 6.44 | 11.310906  | 8.72E-02 | 32712829  | 32712952  | NC_000021.8  |
| cg02928664 | 9.33E-09 | 9.14E-10 | 6.44 | 11.3108083 | 1.49E-01 | 54976506  | 54976629  | NC_000019.9  |
| cg25717239 | 9.34E-09 | 9.16E-10 | 6.44 | 11.3087327 | 1.64E-01 | 43153595  | 43153718  | NC_000007.13 |
| cg14043803 | 9.35E-09 | 9.16E-10 | 6.44 | 11.3081942 | 7.55E-02 | 3627796   | 3627919   | NC_000010.10 |
| cg04083466 | 9.36E-09 | 9.17E-10 | 6.44 | 11.3074079 | 9.97E-02 | 25753732  | 25753855  | NC_000006.11 |
| cg12699044 | 9.36E-09 | 9.17E-10 | 6.44 | 11.3073922 | 3.54E-02 | 113703999 | 113704122 | NC_000012.11 |
| cg26293182 | 9.40E-09 | 9.22E-10 | 6.44 | 11.3022371 | 1.74E-01 | 57389779  | 57389902  | NC_000010.10 |
| cg11930908 | 9.42E-09 | 9.23E-10 | 6.44 | 11.3007061 | 1.60E-01 | 23500752  | 23500875  | NC_000013.10 |
| cg10390435 | 9.42E-09 | 9.23E-10 | 6.44 | 11.300482  | 6.07E-02 | 142368026 | 142368149 | NC_000008.10 |



|            |          |          |      |            |          |           |           |              |
|------------|----------|----------|------|------------|----------|-----------|-----------|--------------|
| cg04470984 | 9.42E-09 | 9.24E-10 | 6.44 | 11.3000194 | 7.14E-02 | 100692757 | 100692880 | NC_000011.9  |
| cg16423505 | 9.43E-09 | 9.24E-10 | 6.44 | 11.2996539 | 2.31E-01 | 92051400  | 92051523  | NC_000013.10 |
| cg21537383 | 9.43E-09 | 9.25E-10 | 6.44 | 11.2992468 | 2.03E-01 | 22034799  | 22034922  | NC_000019.9  |
| cg03586793 | 9.45E-09 | 9.26E-10 | 6.44 | 11.2976352 | 1.20E-01 | 104312558 | 104312681 | NC_000014.8  |
| cg22070406 | 9.45E-09 | 9.26E-10 | 6.44 | 11.2975305 | 1.47E-01 | 55019708  | 55019831  | NC_000018.9  |
| cg03563308 | 9.45E-09 | 9.27E-10 | 6.44 | 11.2965935 | 1.69E-01 | 56887279  | 56887402  | NC_000018.9  |
| cg05619622 | 9.51E-09 | 9.33E-10 | 6.43 | 11.2907787 | 5.83E-02 | 62365104  | 62365227  | NC_000011.9  |
| cg16307674 | 9.51E-09 | 9.33E-10 | 6.43 | 11.290729  | 1.86E-01 | 155170868 | 155170991 | NC_000007.13 |
| cg26811065 | 9.51E-09 | 9.33E-10 | 6.43 | 11.2906811 | 4.34E-02 | 32825360  | 32825483  | NC_000006.11 |
| cg11354906 | 9.51E-09 | 9.33E-10 | 6.43 | 11.2900625 | 1.92E-01 | 154710371 | 154710494 | NC_000004.11 |
| cg23737208 | 9.52E-09 | 9.34E-10 | 6.43 | 11.2896033 | 6.45E-02 | 25499464  | 25499587  | NC_000006.11 |
| cg15962336 | 9.52E-09 | 9.34E-10 | 6.43 | 11.2891603 | 9.19E-02 | 53932577  | 53932700  | NC_000001.10 |
| cg02155658 | 9.53E-09 | 9.35E-10 | 6.43 | 11.2884725 | 1.64E-01 | 21690036  | 21690159  | NC_000020.10 |
| cg21815258 | 9.53E-09 | 9.35E-10 | 6.43 | 11.2884537 | 3.58E-02 | 1336833   | 1336956   | NC_000005.9  |
| cg07871971 | 9.56E-09 | 9.38E-10 | 6.43 | 11.2852216 | 5.21E-02 | 40839766  | 40839889  | NC_000017.10 |
| cg01962676 | 9.56E-09 | 9.38E-10 | 6.43 | 11.2851346 | 1.79E-01 | 18436969  | 18437092  | NC_000001.10 |
| cg27030744 | 9.56E-09 | 9.38E-10 | 6.43 | 11.2846864 | 3.88E-02 | 44496130  | 44496253  | NC_000006.11 |
| cg23286081 | 9.57E-09 | 9.39E-10 | 6.43 | 11.2841367 | 4.82E-02 | 125775778 | 125775901 | NC_000010.10 |
| cg07519873 | 9.57E-09 | 9.39E-10 | 6.43 | 11.2838451 | 1.85E-01 | 54483188  | 54483311  | NC_000019.9  |
| cg24040751 | 9.58E-09 | 9.40E-10 | 6.43 | 11.2831156 | 3.10E-02 | 56661627  | 56661750  | NC_000014.8  |
| cg20014304 | 9.58E-09 | 9.41E-10 | 6.43 | 11.2823924 | 3.35E-02 | 79804327  | 79804450  | NC_000017.10 |
| cg16666329 | 9.60E-09 | 9.42E-10 | 6.43 | 11.2806334 | 1.28E-01 | 76932526  | 76932649  | NC_000005.9  |
| cg12145018 | 9.60E-09 | 9.42E-10 | 6.43 | 11.2806023 | 6.84E-02 | 103912507 | 103912630 | NC_000014.8  |
| cg25603409 | 9.61E-09 | 9.43E-10 | 6.43 | 11.2796275 | 3.72E-02 | 50532834  | 50532957  | NC_000019.9  |
| cg04599946 | 9.62E-09 | 9.44E-10 | 6.43 | 11.2783756 | 1.51E-01 | 85936480  | 85936603  | NC_000016.9  |

|            |          |          |      |            |          |           |           |              |
|------------|----------|----------|------|------------|----------|-----------|-----------|--------------|
| cg02721902 | 9.62E-09 | 9.45E-10 | 6.43 | 11.2781904 | 1.17E-01 | 46825371  | 46825494  | NC_000017.10 |
| cg06344952 | 9.64E-09 | 9.47E-10 | 6.43 | 11.2760547 | 4.38E-02 | 50707292  | 50707415  | NC_000016.9  |
| cg24085946 | 9.66E-09 | 9.49E-10 | 6.43 | 11.2741787 | 1.65E-01 | 204797839 | 204797962 | NC_000001.10 |
| cg01611862 | 9.67E-09 | 9.49E-10 | 6.43 | 11.2736722 | 1.29E-01 | 36982649  | 36982772  | NC_000014.8  |
| cg10341154 | 9.67E-09 | 9.50E-10 | 6.43 | 11.2728682 | 1.98E-01 | 164265442 | 164265565 | NC_000004.11 |
| cg21184206 | 9.68E-09 | 9.50E-10 | 6.43 | 11.2726783 | 8.22E-02 | 181769759 | 181769882 | NC_000002.11 |
| cg09271157 | 9.68E-09 | 9.50E-10 | 6.43 | 11.2726251 | 1.18E-01 | 122217376 | 122217499 | NC_000010.10 |
| cg09012411 | 9.68E-09 | 9.50E-10 | 6.43 | 11.2726195 | 1.00E-01 | 95167783  | 95167906  | NC_000001.10 |
| cg13951490 | 9.68E-09 | 9.51E-10 | 6.43 | 11.2721024 | 8.84E-02 | 140799290 | 140799413 | NC_000005.9  |
| cg05893614 | 9.68E-09 | 9.51E-10 | 6.43 | 11.2718311 | 1.86E-01 | 68981956  | 68982079  | NC_000003.11 |
| cg05099596 | 9.69E-09 | 9.52E-10 | 6.43 | 11.2710143 | 1.09E-01 | 108604750 | 108604873 | NC_000002.11 |
| cg14089267 | 9.70E-09 | 9.53E-10 | 6.43 | 11.2697589 | 1.37E-01 | 23412409  | 23412532  | NC_000013.10 |
| cg08005774 | 9.76E-09 | 9.59E-10 | 6.43 | 11.2636652 | 1.27E-01 | 18434106  | 18434229  | NC_000001.10 |
| cg07622877 | 9.76E-09 | 9.59E-10 | 6.43 | 11.2633298 | 1.00E-01 | 26434164  | 26434287  | NC_000004.11 |
| cg08996459 | 9.77E-09 | 9.59E-10 | 6.43 | 11.2631628 | 1.12E-01 | 125617230 | 125617353 | NC_000010.10 |
| cg14517390 | 9.77E-09 | 9.60E-10 | 6.43 | 11.2622395 | 2.94E-02 | 78463330  | 78463453  | NC_000015.9  |
| cg08276295 | 9.78E-09 | 9.61E-10 | 6.43 | 11.2617032 | 1.84E-01 | 27017174  | 27017297  | NC_000015.9  |
| cg09309112 | 9.78E-09 | 9.61E-10 | 6.43 | 11.2615685 | 6.14E-02 | 53571325  | 53571448  | NC_000017.10 |
| cg02853497 | 9.78E-09 | 9.61E-10 | 6.43 | 11.2613591 | 1.27E-01 | 46113000  | 46113123  | NC_000001.10 |
| cg25905674 | 9.78E-09 | 9.61E-10 | 6.43 | 11.2610789 | 2.21E-01 | 43047856  | 43047979  | NC_000017.10 |
| cg00512279 | 9.79E-09 | 9.62E-10 | 6.43 | 11.2604003 | 1.60E-01 | 119000991 | 119001114 | NC_000010.10 |
| cg01735384 | 9.79E-09 | 9.62E-10 | 6.43 | 11.2602076 | 1.97E-01 | 28603292  | 28603415  | NC_000006.11 |
| cg27310319 | 9.80E-09 | 9.63E-10 | 6.43 | 11.2593935 | 1.89E-01 | 160975978 | 160976101 | NC_000005.9  |
| cg21350073 | 9.80E-09 | 9.63E-10 | 6.43 | 11.2590323 | 6.60E-02 | 138724834 | 138724957 | NC_000003.11 |
| cg04061117 | 9.81E-09 | 9.64E-10 | 6.43 | 11.2582204 | 1.40E-01 | 9594385   | 9594508   | NC_000003.11 |

|            |          |          |      |            |          |           |           |              |
|------------|----------|----------|------|------------|----------|-----------|-----------|--------------|
| cg20140110 | 9.82E-09 | 9.65E-10 | 6.43 | 11.2577306 | 1.81E-01 | 29936845  | 29936968  | NC_000012.11 |
| cg00132008 | 9.82E-09 | 9.65E-10 | 6.43 | 11.2573783 | 3.43E-02 | 8752348   | 8752471   | NC_000008.10 |
| cg20095233 | 9.83E-09 | 9.66E-10 | 6.43 | 11.2563064 | 1.88E-01 | 118033902 | 118034025 | NC_000010.10 |
| cg04157263 | 9.83E-09 | 9.67E-10 | 6.43 | 11.2556743 | 1.46E-01 | 37752991  | 37753114  | NC_000017.10 |
| cg13264018 | 9.84E-09 | 9.67E-10 | 6.43 | 11.2553259 | 3.58E-02 | 127788509 | 127788632 | NC_000003.11 |
| cg13402635 | 9.85E-09 | 9.68E-10 | 6.43 | 11.2543913 | 1.37E-01 | 97669802  | 97669925  | NC_000009.11 |
| cg03808577 | 9.85E-09 | 9.68E-10 | 6.43 | 11.2541433 | 1.06E-01 | 100219429 | 100219552 | NC_000007.13 |
| cg02829680 | 9.85E-09 | 9.68E-10 | 6.43 | 11.2541227 | 1.57E-01 | 21086336  | 21086459  | NC_000020.10 |
| cg15251598 | 9.85E-09 | 9.69E-10 | 6.43 | 11.2535783 | 1.31E-01 | 131731416 | 131731539 | NC_000010.10 |
| cg23262218 | 9.86E-09 | 9.69E-10 | 6.43 | 11.2530701 | 1.41E-01 | 101290270 | 101290393 | NC_000010.10 |
| cg05724271 | 9.88E-09 | 9.71E-10 | 6.43 | 11.2510741 | 8.21E-02 | 8151066   | 8151189   | NC_000007.13 |
| cg19549469 | 9.91E-09 | 9.75E-10 | 6.43 | 11.2476915 | 1.89E-02 | 45668950  | 45669073  | NC_000012.11 |
| cg03610852 | 9.91E-09 | 9.75E-10 | 6.43 | 11.2474065 | 1.83E-01 | 65287050  | 65287173  | NC_000008.10 |
| cg26115667 | 9.95E-09 | 9.79E-10 | 6.43 | 11.2437243 | 1.67E-01 | 103294656 | 103294779 | NC_000014.8  |
| cg05143887 | 9.95E-09 | 9.79E-10 | 6.43 | 11.2431982 | 1.71E-01 | 81471938  | 81472061  | NC_000012.11 |
| cg22821908 | 9.96E-09 | 9.80E-10 | 6.43 | 11.2426396 | 1.55E-01 | 38510522  | 38510645  | NC_000001.10 |
| cg20050826 | 9.97E-09 | 9.81E-10 | 6.43 | 11.2415474 | 1.08E-01 | 52995295  | 52995418  | NC_000012.11 |
| cg01448155 | 9.97E-09 | 9.81E-10 | 6.43 | 11.241113  | 3.32E-02 | 3564782   | 3564905   | NC_000010.10 |
| cg24989962 | 9.98E-09 | 9.81E-10 | 6.43 | 11.2409058 | 1.58E-01 | 52734286  | 52734409  | NC_000014.8  |
| cg06958563 | 9.98E-09 | 9.82E-10 | 6.43 | 11.2407083 | 1.55E-01 | 87980911  | 87981034  | NC_000005.9  |
| cg22727965 | 1.00E-08 | 9.84E-10 | 6.43 | 11.2385119 | 1.05E-01 | 25898770  | 25898893  | NC_000007.13 |
| cg06951677 | 1.00E-08 | 9.84E-10 | 6.43 | 11.2384775 | 1.20E-01 | 221061837 | 221061960 | NC_000001.10 |
| cg14628260 | 1.00E-08 | 9.84E-10 | 6.43 | 11.2381934 | 9.70E-02 | 10449096  | 10449219  | NC_000008.10 |
| cg26301143 | 1.00E-08 | 9.85E-10 | 6.42 | 11.2375233 | 2.76E-02 | 52430120  | 52430243  | NC_000006.11 |
| cg00708580 | 1.00E-08 | 9.85E-10 | 6.42 | 11.2369472 | 1.98E-02 | 239333832 | 239333955 | NC_000002.11 |

|            |          |          |      |            |          |           |           |              |
|------------|----------|----------|------|------------|----------|-----------|-----------|--------------|
| cg01050266 | 1.00E-08 | 9.86E-10 | 6.42 | 11.2361375 | 9.39E-02 | 239948729 | 239948852 | NC_000002.11 |
| cg00489485 | 1.00E-08 | 9.86E-10 | 6.42 | 11.2359633 | 7.29E-02 | 84341364  | 84341487  | NC_000016.9  |
| cg15556599 | 1.00E-08 | 9.86E-10 | 6.42 | 11.2358911 | 8.75E-02 | 44733804  | 44733927  | NC_000011.9  |
| cg04057674 | 1.00E-08 | 9.87E-10 | 6.42 | 11.235749  | 5.77E-02 | 50708021  | 50708144  | NC_000016.9  |
| cg24100636 | 1.00E-08 | 9.89E-10 | 6.42 | 11.2334176 | 1.51E-01 | 3600087   | 3600210   | NC_000012.11 |
| cg23657185 | 1.01E-08 | 9.89E-10 | 6.42 | 11.2330018 | 2.05E-01 | 99272559  | 99272682  | NC_000006.11 |
| cg07370959 | 1.01E-08 | 9.90E-10 | 6.42 | 11.2324239 | 3.80E-02 | 51434293  | 51434416  | NC_000001.10 |
| cg02305377 | 1.01E-08 | 9.90E-10 | 6.42 | 11.2320503 | 1.84E-01 | 103355958 | 103356081 | NC_000012.11 |
| cg18129621 | 1.01E-08 | 9.91E-10 | 6.42 | 11.2310237 | 1.72E-01 | 29875991  | 29876114  | NC_000022.10 |
| cg15120882 | 1.01E-08 | 9.91E-10 | 6.42 | 11.2308613 | 6.46E-02 | 122257644 | 122257767 | NC_000012.11 |
| cg15473155 | 1.01E-08 | 9.91E-10 | 6.42 | 11.230834  | 1.01E-01 | 57349204  | 57349327  | NC_000019.9  |
| cg21387147 | 1.01E-08 | 9.93E-10 | 6.42 | 11.2291932 | 6.05E-02 | 43888271  | 43888394  | NC_000001.10 |
| cg12582965 | 1.01E-08 | 9.94E-10 | 6.42 | 11.2287955 | 9.29E-02 | 25972328  | 25972451  | NC_000015.9  |
| cg21997555 | 1.01E-08 | 9.94E-10 | 6.42 | 11.2283572 | 2.02E-02 | 78157897  | 78158020  | NC_000017.10 |
| cg07150445 | 1.01E-08 | 9.95E-10 | 6.42 | 11.2271757 | 1.19E-01 | 29235448  | 29235571  | NC_000014.8  |
| cg01657380 | 1.01E-08 | 9.97E-10 | 6.42 | 11.2258024 | 2.21E-02 | 53901523  | 53901646  | NC_000012.11 |
| cg10396546 | 1.01E-08 | 9.97E-10 | 6.42 | 11.2252779 | 1.95E-01 | 187713902 | 187714025 | NC_000002.11 |
| cg26724798 | 1.01E-08 | 9.97E-10 | 6.42 | 11.2249348 | 5.64E-02 | 113844828 | 113844951 | NC_000011.9  |
| cg21064916 | 1.02E-08 | 1.00E-09 | 6.42 | 11.2213196 | 1.60E-01 | 44340839  | 44340962  | NC_000011.9  |
| cg27505472 | 1.02E-08 | 1.00E-09 | 6.42 | 11.2212491 | 1.92E-02 | 121036705 | 121036828 | NC_000002.11 |
| cg11629830 | 1.02E-08 | 1.00E-09 | 6.42 | 11.2194586 | 1.46E-01 | 75701460  | 75701583  | NC_000005.9  |
| cg11312087 | 1.02E-08 | 1.00E-09 | 6.42 | 11.2194554 | 1.30E-01 | 100944053 | 100944176 | NC_000013.10 |
| cg00849713 | 1.02E-08 | 1.00E-09 | 6.42 | 11.2183322 | 1.54E-01 | 166267744 | 166267867 | NC_000006.11 |
| cg00531453 | 1.02E-08 | 1.00E-09 | 6.42 | 11.2181602 | 9.08E-02 | 123673926 | 123674049 | NC_000007.13 |
| cg01320748 | 1.02E-08 | 1.01E-09 | 6.42 | 11.2163965 | 8.55E-02 | 105681962 | 105682085 | NC_000004.11 |

|            |          |          |      |            |          |           |           |              |
|------------|----------|----------|------|------------|----------|-----------|-----------|--------------|
| cg03131298 | 1.02E-08 | 1.01E-09 | 6.42 | 11.2163016 | 1.15E-01 | 31580889  | 31581012  | NC_000016.9  |
| cg15909981 | 1.03E-08 | 1.01E-09 | 6.42 | 11.2121759 | 1.19E-01 | 37465178  | 37465301  | NC_000022.10 |
| cg04735481 | 1.03E-08 | 1.01E-09 | 6.42 | 11.2121248 | 7.97E-02 | 90172816  | 90172939  | NC_000016.9  |
| cg19070159 | 1.03E-08 | 1.01E-09 | 6.42 | 11.2109742 | 9.79E-02 | 31829644  | 31829767  | NC_000006.11 |
| cg25361850 | 1.03E-08 | 1.01E-09 | 6.42 | 11.2098694 | 1.22E-01 | 52391789  | 52391912  | NC_000019.9  |
| cg09515921 | 1.03E-08 | 1.01E-09 | 6.42 | 11.2093672 | 1.12E-01 | 221057558 | 221057681 | NC_000001.10 |
| cg17031926 | 1.03E-08 | 1.02E-09 | 6.42 | 11.2072183 | 1.22E-01 | 99830489  | 99830612  | NC_000004.11 |
| cg01550017 | 1.03E-08 | 1.02E-09 | 6.42 | 11.206852  | 7.96E-02 | 42924215  | 42924338  | NC_000005.9  |
| cg06333307 | 1.03E-08 | 1.02E-09 | 6.42 | 11.2064448 | 1.21E-01 | 43934146  | 43934269  | NC_000013.10 |
| cg12386721 | 1.03E-08 | 1.02E-09 | 6.42 | 11.2061796 | 1.21E-01 | 68265892  | 68266015  | NC_000011.9  |
| cg23589617 | 1.03E-08 | 1.02E-09 | 6.42 | 11.2058278 | 1.71E-01 | 43600728  | 43600851  | NC_000011.9  |
| cg23368787 | 1.03E-08 | 1.02E-09 | 6.42 | 11.2051041 | 9.46E-02 | 36049342  | 36049465  | NC_000019.9  |
| cg02675646 | 1.03E-08 | 1.02E-09 | 6.42 | 11.2043974 | 6.72E-02 | 40996118  | 40996241  | NC_000019.9  |
| cg19988449 | 1.03E-08 | 1.02E-09 | 6.42 | 11.2042415 | 1.73E-01 | 83952808  | 83952931  | NC_000015.9  |
| cg11811513 | 1.04E-08 | 1.02E-09 | 6.42 | 11.202304  | 1.81E-01 | 185462408 | 185462531 | NC_000002.11 |
| cg10997627 | 1.04E-08 | 1.02E-09 | 6.42 | 11.2000777 | 1.53E-01 | 97363080  | 97363203  | NC_000007.13 |
| cg00461685 | 1.04E-08 | 1.02E-09 | 6.42 | 11.1996816 | 9.10E-02 | 74198210  | 74198333  | NC_000008.10 |
| cg06687772 | 1.04E-08 | 1.02E-09 | 6.42 | 11.1996795 | 9.68E-02 | 46383540  | 46383663  | NC_000019.9  |
| cg16227072 | 1.04E-08 | 1.02E-09 | 6.42 | 11.1990624 | 4.88E-02 | 77320503  | 77320626  | NC_000011.9  |
| cg11684930 | 1.04E-08 | 1.03E-09 | 6.42 | 11.1981041 | 1.16E-01 | 135000940 | 135001063 | NC_000010.10 |
| cg26390156 | 1.04E-08 | 1.03E-09 | 6.42 | 11.1980372 | 1.14E-01 | 24101543  | 24101666  | NC_000014.8  |
| cg25381737 | 1.04E-08 | 1.03E-09 | 6.42 | 11.1974693 | 6.28E-02 | 111022774 | 111022897 | NC_000001.10 |
| cg03610849 | 1.04E-08 | 1.03E-09 | 6.42 | 11.1970861 | 1.35E-01 | 129080113 | 129080236 | NC_000011.9  |
| cg10398682 | 1.04E-08 | 1.03E-09 | 6.42 | 11.1970803 | 1.15E-01 | 83952019  | 83952142  | NC_000015.9  |
| cg15022308 | 1.04E-08 | 1.03E-09 | 6.42 | 11.1959188 | 7.43E-02 | 43447071  | 43447194  | NC_000010.10 |

|            |          |          |      |            |          |           |           |              |
|------------|----------|----------|------|------------|----------|-----------|-----------|--------------|
| cg21554569 | 1.04E-08 | 1.03E-09 | 6.42 | 11.1945907 | 7.48E-02 | 52586721  | 52586844  | NC_000005.9  |
| cg17393267 | 1.04E-08 | 1.03E-09 | 6.42 | 11.1945765 | 1.98E-01 | 192127356 | 192127479 | NC_000003.11 |
| cg23015155 | 1.04E-08 | 1.03E-09 | 6.42 | 11.1945534 | 2.91E-02 | 102698092 | 102698215 | NC_000014.8  |
| cg16896008 | 1.04E-08 | 1.03E-09 | 6.42 | 11.1937807 | 9.10E-02 | 24206177  | 24206300  | NC_000006.11 |
| cg10077401 | 1.04E-08 | 1.03E-09 | 6.42 | 11.1937208 | 1.88E-01 | 70346798  | 70346921  | NC_000014.8  |
| cg12817107 | 1.04E-08 | 1.03E-09 | 6.42 | 11.1930502 | 1.57E-01 | 157013368 | 157013491 | NC_000002.11 |
| cg11334822 | 1.04E-08 | 1.03E-09 | 6.42 | 11.1925967 | 7.31E-02 | 30128686  | 30128809  | NC_000006.11 |
| cg08258978 | 1.04E-08 | 1.03E-09 | 6.42 | 11.1924704 | 4.07E-02 | 6667276   | 6667399   | NC_000005.9  |
| cg27408184 | 1.04E-08 | 1.03E-09 | 6.42 | 11.1919417 | 8.25E-02 | 8015494   | 8015617   | NC_000017.10 |
| cg07580827 | 1.05E-08 | 1.03E-09 | 6.42 | 11.1915853 | 4.20E-02 | 111943186 | 111943309 | NC_000011.9  |
| cg11205072 | 1.05E-08 | 1.03E-09 | 6.42 | 11.1907617 | 2.21E-01 | 28510306  | 28510429  | NC_000006.11 |
| cg15404858 | 1.05E-08 | 1.03E-09 | 6.42 | 11.1905875 | 1.54E-01 | 21495476  | 21495599  | NC_000020.10 |
| cg06142324 | 1.05E-08 | 1.03E-09 | 6.42 | 11.1900802 | 7.65E-02 | 124805538 | 124805661 | NC_000011.9  |
| cg24460126 | 1.05E-08 | 1.03E-09 | 6.42 | 11.1896785 | 9.82E-02 | 179713828 | 179713951 | NC_000001.10 |
| cg11560672 | 1.05E-08 | 1.03E-09 | 6.42 | 11.1887895 | 7.43E-02 | 92526239  | 92526362  | NC_000006.11 |
| cg15961693 | 1.05E-08 | 1.04E-09 | 6.42 | 11.1879058 | 8.39E-02 | 139689053 | 139689176 | NC_000006.11 |
| cg24567600 | 1.05E-08 | 1.04E-09 | 6.42 | 11.1871301 | 8.47E-02 | 63154696  | 63154819  | NC_000007.13 |
| cg02957173 | 1.05E-08 | 1.04E-09 | 6.42 | 11.1859808 | 6.02E-02 | 208196958 | 208197081 | NC_000002.11 |
| cg07897169 | 1.05E-08 | 1.04E-09 | 6.42 | 11.1855114 | 1.53E-01 | 85549951  | 85550074  | NC_000016.9  |
| cg02613624 | 1.05E-08 | 1.04E-09 | 6.42 | 11.1851934 | 9.05E-02 | 2154386   | 2154509   | NC_000011.9  |
| cg02087289 | 1.05E-08 | 1.04E-09 | 6.41 | 11.1846174 | 6.02E-02 | 45622096  | 45622219  | NC_000021.8  |
| cg25585172 | 1.05E-08 | 1.04E-09 | 6.41 | 11.1835855 | 1.46E-01 | 181454975 | 181455098 | NC_000001.10 |
| cg01594233 | 1.05E-08 | 1.04E-09 | 6.41 | 11.1827837 | 1.55E-01 | 175135937 | 175136060 | NC_000004.11 |
| cg01881966 | 1.05E-08 | 1.04E-09 | 6.41 | 11.1827096 | 7.80E-02 | 177504062 | 177504185 | NC_000002.11 |
| cg27293357 | 1.05E-08 | 1.04E-09 | 6.41 | 11.1820441 | 1.15E-01 | 241174071 | 241174194 | NC_000001.10 |

|            |          |          |      |            |          |           |           |              |
|------------|----------|----------|------|------------|----------|-----------|-----------|--------------|
| cg07814541 | 1.06E-08 | 1.04E-09 | 6.41 | 11.1814045 | 8.59E-02 | 71329680  | 71329803  | NC_000005.9  |
| cg08428452 | 1.06E-08 | 1.04E-09 | 6.41 | 11.1813    | 1.41E-01 | 20255343  | 20255466  | NC_000004.11 |
| cg12601933 | 1.06E-08 | 1.04E-09 | 6.41 | 11.1798782 | 1.08E-01 | 12248895  | 12249018  | NC_000001.10 |
| cg07287444 | 1.06E-08 | 1.04E-09 | 6.41 | 11.1795665 | 6.07E-02 | 35717168  | 35717291  | NC_000007.13 |
| cg27580689 | 1.06E-08 | 1.05E-09 | 6.41 | 11.1791332 | 1.05E-01 | 115939651 | 115939774 | NC_000010.10 |
| cg18105529 | 1.06E-08 | 1.05E-09 | 6.41 | 11.1791156 | 1.21E-01 | 7643190   | 7643313   | NC_000017.10 |
| cg03450842 | 1.06E-08 | 1.05E-09 | 6.41 | 11.1785539 | 1.14E-01 | 80834947  | 80835070  | NC_000010.10 |
| cg20041710 | 1.06E-08 | 1.05E-09 | 6.41 | 11.1782535 | 1.47E-01 | 57729383  | 57729506  | NC_000015.9  |
| cg07841173 | 1.06E-08 | 1.05E-09 | 6.41 | 11.1774268 | 1.26E-01 | 128210150 | 128210273 | NC_000003.11 |
| cg00850505 | 1.06E-08 | 1.05E-09 | 6.41 | 11.1773435 | 1.65E-01 | 166580460 | 166580583 | NC_000006.11 |
| cg01247522 | 1.06E-08 | 1.05E-09 | 6.41 | 11.1758289 | 1.87E-01 | 140716991 | 140717114 | NC_000008.10 |
| cg13614286 | 1.06E-08 | 1.05E-09 | 6.41 | 11.1754939 | 1.00E-01 | 131038327 | 131038450 | NC_000009.11 |
| cg16555417 | 1.06E-08 | 1.05E-09 | 6.41 | 11.1744189 | 1.38E-01 | 40598772  | 40598895  | NC_000001.10 |
| cg17035770 | 1.06E-08 | 1.05E-09 | 6.41 | 11.1742262 | 1.53E-01 | 657538    | 657661    | NC_000004.11 |
| cg14430151 | 1.06E-08 | 1.05E-09 | 6.41 | 11.173176  | 1.26E-01 | 8440600   | 8440723   | NC_000004.11 |
| cg13237147 | 1.06E-08 | 1.05E-09 | 6.41 | 11.1728399 | 4.72E-02 | 188745304 | 188745427 | NC_000003.11 |
| cg27034576 | 1.06E-08 | 1.05E-09 | 6.41 | 11.1725483 | 1.67E-01 | 118031654 | 118031777 | NC_000010.10 |
| cg24039816 | 1.06E-08 | 1.05E-09 | 6.41 | 11.1722015 | 8.85E-02 | 51220098  | 51220221  | NC_000019.9  |
| cg17222000 | 1.07E-08 | 1.06E-09 | 6.41 | 11.1699717 | 9.41E-02 | 168937817 | 168937940 | NC_000004.11 |
| cg21503275 | 1.07E-08 | 1.06E-09 | 6.41 | 11.1694764 | 8.62E-02 | 68944441  | 68944564  | NC_000014.8  |
| cg00840960 | 1.07E-08 | 1.06E-09 | 6.41 | 11.1688181 | 1.85E-01 | 148034030 | 148034153 | NC_000005.9  |
| cg24405381 | 1.07E-08 | 1.06E-09 | 6.41 | 11.1678873 | 1.06E-01 | 52464193  | 52464316  | NC_000001.10 |
| cg26015416 | 1.07E-08 | 1.06E-09 | 6.41 | 11.1677339 | 1.43E-01 | 108023482 | 108023605 | NC_000001.10 |
| cg03774803 | 1.07E-08 | 1.06E-09 | 6.41 | 11.1667733 | 2.06E-01 | 198650880 | 198651003 | NC_000002.11 |
| cg13572093 | 1.07E-08 | 1.06E-09 | 6.41 | 11.1658944 | 6.23E-02 | 30333911  | 30334034  | NC_000015.9  |

|            |          |          |      |            |          |           |           |              |
|------------|----------|----------|------|------------|----------|-----------|-----------|--------------|
| cg04974913 | 1.07E-08 | 1.06E-09 | 6.41 | 11.1656659 | 1.22E-01 | 13839662  | 13839785  | NC_000001.10 |
| cg13439463 | 1.07E-08 | 1.06E-09 | 6.41 | 11.1655446 | 2.84E-02 | 100566588 | 100566711 | NC_000009.11 |
| cg16719466 | 1.07E-08 | 1.06E-09 | 6.41 | 11.1653194 | 1.73E-01 | 32338569  | 32338692  | NC_000007.13 |
| cg07555084 | 1.07E-08 | 1.06E-09 | 6.41 | 11.1642411 | 9.54E-02 | 27186199  | 27186322  | NC_000006.11 |
| cg18161950 | 1.07E-08 | 1.06E-09 | 6.41 | 11.1642164 | 1.94E-01 | 42995203  | 42995326  | NC_000005.9  |
| cg12666279 | 1.07E-08 | 1.06E-09 | 6.41 | 11.1639631 | 2.22E-01 | 115918745 | 115918868 | NC_000002.11 |
| cg06306198 | 1.07E-08 | 1.06E-09 | 6.41 | 11.1638659 | 1.31E-01 | 147128998 | 147129121 | NC_000003.11 |
| cg12303582 | 1.07E-08 | 1.06E-09 | 6.41 | 11.1638583 | 1.48E-01 | 3169516   | 3169639   | NC_000010.10 |
| cg09251680 | 1.07E-08 | 1.06E-09 | 6.41 | 11.1627706 | 6.94E-02 | 45801144  | 45801267  | NC_000003.11 |
| cg21869586 | 1.07E-08 | 1.06E-09 | 6.41 | 11.1618386 | 1.57E-01 | 3197992   | 3198115   | NC_000005.9  |
| cg15301316 | 1.08E-08 | 1.06E-09 | 6.41 | 11.1610342 | 1.49E-01 | 23461580  | 23461703  | NC_000010.10 |
| cg21607141 | 1.08E-08 | 1.06E-09 | 6.41 | 11.1608861 | 8.98E-02 | 119722917 | 119723040 | NC_000004.11 |
| cg16857858 | 1.08E-08 | 1.07E-09 | 6.41 | 11.1605638 | 2.40E-01 | 27213984  | 27214107  | NC_000007.13 |
| cg13365591 | 1.08E-08 | 1.07E-09 | 6.41 | 11.160163  | 1.12E-01 | 133930663 | 133930786 | NC_000010.10 |
| cg01490578 | 1.08E-08 | 1.07E-09 | 6.41 | 11.1583421 | 1.09E-01 | 148248077 | 148248200 | NC_000001.10 |
| cg08267489 | 1.08E-08 | 1.07E-09 | 6.41 | 11.1583305 | 1.97E-01 | 166400656 | 166400779 | NC_000006.11 |
| cg25335557 | 1.08E-08 | 1.07E-09 | 6.41 | 11.1582231 | 1.45E-01 | 237082393 | 237082516 | NC_000002.11 |
| cg02979923 | 1.08E-08 | 1.07E-09 | 6.41 | 11.1576645 | 1.73E-01 | 17207337  | 17207460  | NC_000020.10 |
| cg22251569 | 1.08E-08 | 1.07E-09 | 6.41 | 11.1575524 | 1.66E-01 | 22562236  | 22562359  | NC_000008.10 |
| cg17392043 | 1.08E-08 | 1.07E-09 | 6.41 | 11.1563149 | 6.13E-02 | 188495102 | 188495225 | NC_000003.11 |
| cg14263924 | 1.08E-08 | 1.07E-09 | 6.41 | 11.1562645 | 3.12E-02 | 33163202  | 33163325  | NC_000006.11 |
| cg26270899 | 1.08E-08 | 1.07E-09 | 6.41 | 11.1561079 | 1.14E-01 | 139590760 | 139590883 | NC_000009.11 |
| cg18538961 | 1.08E-08 | 1.07E-09 | 6.41 | 11.1560202 | 9.06E-02 | 101363192 | 101363315 | NC_000014.8  |
| cg04902669 | 1.08E-08 | 1.07E-09 | 6.41 | 11.1557912 | 9.76E-02 | 6329050   | 6329173   | NC_000017.10 |
| cg10794058 | 1.08E-08 | 1.07E-09 | 6.41 | 11.1557132 | 1.43E-01 | 85673918  | 85674041  | NC_000012.11 |



|            |          |          |      |            |          |           |           |              |
|------------|----------|----------|------|------------|----------|-----------|-----------|--------------|
| cg03659340 | 1.08E-08 | 1.07E-09 | 6.41 | 11.1550114 | 1.49E-01 | 73555254  | 73555377  | NC_000017.10 |
| cg07872448 | 1.08E-08 | 1.07E-09 | 6.41 | 11.1546508 | 2.40E-02 | 88806661  | 88806784  | NC_000016.9  |
| cg26525127 | 1.08E-08 | 1.07E-09 | 6.41 | 11.1544503 | 2.15E-01 | 233350365 | 233350488 | NC_000002.11 |
| cg00573330 | 1.08E-08 | 1.07E-09 | 6.41 | 11.1543972 | 2.37E-01 | 330651    | 330774    | NC_000004.11 |
| cg26660002 | 1.08E-08 | 1.07E-09 | 6.41 | 11.1532769 | 1.74E-01 | 154729763 | 154729886 | NC_000002.11 |
| cg26199445 | 1.08E-08 | 1.07E-09 | 6.41 | 11.153008  | 9.47E-02 | 134844771 | 134844894 | NC_000010.10 |
| cg23353952 | 1.08E-08 | 1.07E-09 | 6.41 | 11.1518994 | 1.53E-01 | 29876945  | 29877068  | NC_000022.10 |
| cg00305878 | 1.09E-08 | 1.08E-09 | 6.41 | 11.1509875 | 6.97E-02 | 45694301  | 45694424  | NC_000010.10 |
| cg26185859 | 1.09E-08 | 1.08E-09 | 6.41 | 11.150025  | 1.29E-01 | 60691266  | 60691389  | NC_000002.11 |
| cg04521510 | 1.09E-08 | 1.08E-09 | 6.41 | 11.1493173 | 1.92E-01 | 27242044  | 27242167  | NC_000007.13 |
| cg18661205 | 1.09E-08 | 1.08E-09 | 6.41 | 11.1481308 | 2.00E-01 | 140613884 | 140614007 | NC_000005.9  |
| cg12942690 | 1.09E-08 | 1.08E-09 | 6.41 | 11.1478965 | 4.31E-02 | 123957029 | 123957152 | NC_000012.11 |
| cg19696103 | 1.09E-08 | 1.08E-09 | 6.41 | 11.1476185 | 6.84E-02 | 132354130 | 132354253 | NC_000005.9  |
| cg06127801 | 1.09E-08 | 1.08E-09 | 6.41 | 11.1472354 | 1.31E-01 | 239625367 | 239625490 | NC_000002.11 |
| cg26585560 | 1.09E-08 | 1.08E-09 | 6.41 | 11.1472075 | 1.42E-01 | 139509708 | 139509831 | NC_000008.10 |
| cg03542938 | 1.09E-08 | 1.08E-09 | 6.41 | 11.146547  | 1.14E-01 | 62677009  | 62677132  | NC_000020.10 |
| cg03638905 | 1.09E-08 | 1.08E-09 | 6.41 | 11.1462191 | 1.05E-01 | 72595625  | 72595748  | NC_000005.9  |
| cg07185854 | 1.09E-08 | 1.08E-09 | 6.41 | 11.1459294 | 1.04E-01 | 65071589  | 65071712  | NC_000016.9  |
| cg20346284 | 1.09E-08 | 1.08E-09 | 6.41 | 11.1440853 | 1.08E-01 | 3280503   | 3280626   | NC_000006.11 |
| cg18723341 | 1.09E-08 | 1.09E-09 | 6.41 | 11.1425755 | 8.29E-02 | 2141614   | 2141737   | NC_000003.11 |
| cg22038700 | 1.09E-08 | 1.09E-09 | 6.41 | 11.1425078 | 5.02E-02 | 62654536  | 62654659  | NC_000015.9  |
| cg06398881 | 1.10E-08 | 1.09E-09 | 6.41 | 11.1416862 | 6.23E-02 | 28035524  | 28035647  | NC_000022.10 |
| cg02380585 | 1.10E-08 | 1.09E-09 | 6.41 | 11.1413144 | 1.48E-01 | 33776683  | 33776806  | NC_000017.10 |
| cg01263407 | 1.10E-08 | 1.09E-09 | 6.41 | 11.1412477 | 9.70E-02 | 8138058   | 8138181   | NC_000010.10 |
| cg05310990 | 1.10E-08 | 1.09E-09 | 6.41 | 11.1411611 | 1.27E-01 | 21106043  | 21106166  | NC_000019.9  |

|            |          |          |      |            |          |           |           |              |
|------------|----------|----------|------|------------|----------|-----------|-----------|--------------|
| cg07181528 | 1.10E-08 | 1.09E-09 | 6.41 | 11.1404819 | 8.96E-02 | 14552306  | 14552429  | NC_000016.9  |
| cg08768435 | 1.10E-08 | 1.09E-09 | 6.41 | 11.140384  | 5.70E-02 | 84215035  | 84215158  | NC_000016.9  |
| cg02758463 | 1.10E-08 | 1.09E-09 | 6.41 | 11.1403338 | 9.75E-02 | 89982122  | 89982245  | NC_000016.9  |
| cg05921820 | 1.10E-08 | 1.09E-09 | 6.41 | 11.1399712 | 3.68E-02 | 32141778  | 32141901  | NC_000006.11 |
| cg15143024 | 1.10E-08 | 1.09E-09 | 6.41 | 11.1399284 | 4.94E-02 | 91199642  | 91199765  | NC_000007.13 |
| cg02267483 | 1.10E-08 | 1.09E-09 | 6.41 | 11.1392499 | 1.41E-01 | 140810404 | 140810527 | NC_000005.9  |
| cg08016336 | 1.10E-08 | 1.09E-09 | 6.41 | 11.1389992 | 1.50E-01 | 41181318  | 41181441  | NC_000004.11 |
| cg02500806 | 1.10E-08 | 1.09E-09 | 6.41 | 11.1378965 | 2.54E-02 | 89349976  | 89350099  | NC_000016.9  |
| cg18983604 | 1.10E-08 | 1.09E-09 | 6.41 | 11.1377823 | 2.36E-01 | 1710516   | 1710639   | NC_000007.13 |
| cg13076829 | 1.10E-08 | 1.09E-09 | 6.41 | 11.1374148 | 1.09E-01 | 45530698  | 45530821  | NC_000018.9  |
| cg07829289 | 1.10E-08 | 1.09E-09 | 6.41 | 11.1365635 | 5.89E-02 | 158894390 | 158894513 | NC_000005.9  |
| cg10252600 | 1.10E-08 | 1.09E-09 | 6.41 | 11.1359337 | 6.31E-02 | 53897344  | 53897467  | NC_000012.11 |
| cg27642554 | 1.10E-08 | 1.09E-09 | 6.41 | 11.1358517 | 1.63E-01 | 146755622 | 146755745 | NC_000006.11 |
| cg21074959 | 1.10E-08 | 1.09E-09 | 6.41 | 11.134541  | 1.25E-01 | 203044287 | 203044410 | NC_000002.11 |
| cg24115032 | 1.10E-08 | 1.09E-09 | 6.41 | 11.1337698 | 1.27E-01 | 57089953  | 57090076  | NC_000020.10 |
| cg16052198 | 1.10E-08 | 1.10E-09 | 6.41 | 11.1335037 | 1.14E-01 | 52264411  | 52264534  | NC_000019.9  |
| cg00739139 | 1.11E-08 | 1.10E-09 | 6.41 | 11.1325529 | 6.91E-02 | 65233991  | 65234114  | NC_000007.13 |
| cg03495868 | 1.11E-08 | 1.10E-09 | 6.41 | 11.1325288 | 1.69E-01 | 78956905  | 78957028  | NC_000001.10 |
| cg25306277 | 1.11E-08 | 1.10E-09 | 6.4  | 11.1314902 | 1.26E-01 | 200003267 | 200003390 | NC_000001.10 |
| cg07382132 | 1.11E-08 | 1.10E-09 | 6.4  | 11.1314316 | 1.23E-01 | 101280887 | 101281010 | NC_000010.10 |
| cg09939375 | 1.11E-08 | 1.10E-09 | 6.4  | 11.1305775 | 4.02E-02 | 40755027  | 40755150  | NC_000004.11 |
| cg01750714 | 1.11E-08 | 1.10E-09 | 6.4  | 11.1300299 | 2.00E-01 | 119418367 | 119418490 | NC_000012.11 |
| cg07912003 | 1.11E-08 | 1.10E-09 | 6.4  | 11.1297462 | 1.07E-01 | 75797838  | 75797961  | NC_000002.11 |
| cg24830367 | 1.11E-08 | 1.10E-09 | 6.4  | 11.1284929 | 6.56E-02 | 108083606 | 108083729 | NC_000012.11 |
| cg06672696 | 1.11E-08 | 1.10E-09 | 6.4  | 11.1284303 | 1.40E-01 | 57774266  | 57774389  | NC_000003.11 |

|            |          |          |     |            |          |           |           |              |
|------------|----------|----------|-----|------------|----------|-----------|-----------|--------------|
| cg17214351 | 1.11E-08 | 1.10E-09 | 6.4 | 11.1278955 | 4.09E-02 | 3567533   | 3567656   | NC_000004.11 |
| cg01281904 | 1.11E-08 | 1.10E-09 | 6.4 | 11.1273789 | 1.12E-01 | 54164757  | 54164880  | NC_000008.10 |
| cg01501819 | 1.11E-08 | 1.11E-09 | 6.4 | 11.1242475 | 2.03E-01 | 49576200  | 49576323  | NC_000019.9  |
| cg08848774 | 1.11E-08 | 1.11E-09 | 6.4 | 11.1239325 | 2.38E-01 | 43047733  | 43047856  | NC_000017.10 |
| cg27047406 | 1.11E-08 | 1.11E-09 | 6.4 | 11.1234161 | 1.35E-01 | 55689534  | 55689657  | NC_000016.9  |
| cg15004938 | 1.12E-08 | 1.11E-09 | 6.4 | 11.1214718 | 7.57E-02 | 33195943  | 33196066  | NC_000022.10 |
| cg19091779 | 1.12E-08 | 1.11E-09 | 6.4 | 11.1212278 | 1.56E-01 | 13200089  | 13200212  | NC_000012.11 |
| cg17152135 | 1.12E-08 | 1.11E-09 | 6.4 | 11.1207923 | 4.36E-02 | 33381867  | 33381990  | NC_000006.11 |
| cg03171651 | 1.12E-08 | 1.11E-09 | 6.4 | 11.120709  | 7.35E-02 | 20409125  | 20409248  | NC_000017.10 |
| cg09544728 | 1.12E-08 | 1.11E-09 | 6.4 | 11.1192134 | 2.08E-01 | 601503    | 601626    | NC_000007.13 |
| cg23975975 | 1.12E-08 | 1.11E-09 | 6.4 | 11.1185278 | 1.40E-01 | 76192780  | 76192903  | NC_000018.9  |
| cg08463932 | 1.12E-08 | 1.11E-09 | 6.4 | 11.1182842 | 6.03E-02 | 31231488  | 31231611  | NC_000001.10 |
| cg21523908 | 1.12E-08 | 1.11E-09 | 6.4 | 11.1178305 | 1.64E-01 | 177140609 | 177140732 | NC_000001.10 |
| cg21292909 | 1.12E-08 | 1.11E-09 | 6.4 | 11.1176336 | 2.01E-01 | 50059937  | 50060060  | NC_000019.9  |
| cg21557030 | 1.12E-08 | 1.11E-09 | 6.4 | 11.1176325 | 1.61E-01 | 88793311  | 88793434  | NC_000014.8  |
| cg12559228 | 1.12E-08 | 1.11E-09 | 6.4 | 11.1173582 | 4.50E-02 | 50191882  | 50192005  | NC_000019.9  |
| cg17977173 | 1.12E-08 | 1.12E-09 | 6.4 | 11.115153  | 1.31E-01 | 129076335 | 129076458 | NC_000002.11 |
| cg18119885 | 1.12E-08 | 1.12E-09 | 6.4 | 11.1145906 | 1.94E-01 | 2617271   | 2617394   | NC_000002.11 |
| cg26292232 | 1.13E-08 | 1.12E-09 | 6.4 | 11.1122746 | 8.49E-02 | 74047853  | 74047976  | NC_000010.10 |
| cg25818292 | 1.13E-08 | 1.12E-09 | 6.4 | 11.1121    | 1.75E-01 | 22370758  | 22370881  | NC_000021.8  |
| cg13599062 | 1.13E-08 | 1.12E-09 | 6.4 | 11.1111883 | 6.36E-02 | 37985583  | 37985706  | NC_000009.11 |
| cg16209873 | 1.13E-08 | 1.12E-09 | 6.4 | 11.1105995 | 4.40E-02 | 6219739   | 6219862   | NC_000011.9  |
| cg12131906 | 1.13E-08 | 1.12E-09 | 6.4 | 11.1096684 | 1.28E-01 | 61360359  | 61360482  | NC_000001.10 |
| cg07217924 | 1.13E-08 | 1.12E-09 | 6.4 | 11.1096582 | 1.49E-01 | 18814078  | 18814201  | NC_000011.9  |
| cg09295573 | 1.13E-08 | 1.12E-09 | 6.4 | 11.1091578 | 1.71E-01 | 37245514  | 37245637  | NC_000004.11 |

|            |          |          |     |            |          |           |           |              |
|------------|----------|----------|-----|------------|----------|-----------|-----------|--------------|
| cg19741688 | 1.13E-08 | 1.12E-09 | 6.4 | 11.1087272 | 1.48E-01 | 70346849  | 70346972  | NC_000014.8  |
| cg27202641 | 1.13E-08 | 1.12E-09 | 6.4 | 11.1082736 | 1.09E-01 | 4383739   | 4383862   | NC_000007.13 |
| cg20021506 | 1.13E-08 | 1.13E-09 | 6.4 | 11.1060861 | 9.16E-02 | 156718546 | 156718669 | NC_000006.11 |
| cg18672939 | 1.13E-08 | 1.13E-09 | 6.4 | 11.1060179 | 2.35E-01 | 118032879 | 118033002 | NC_000010.10 |
| cg24362716 | 1.13E-08 | 1.13E-09 | 6.4 | 11.1045792 | 9.43E-02 | 1219189   | 1219312   | NC_000011.9  |
| cg12884605 | 1.14E-08 | 1.13E-09 | 6.4 | 11.1022114 | 1.26E-01 | 66123314  | 66123437  | NC_000012.11 |
| cg07468062 | 1.14E-08 | 1.13E-09 | 6.4 | 11.1020634 | 6.12E-02 | 128703912 | 128704035 | NC_000003.11 |
| cg08597345 | 1.14E-08 | 1.13E-09 | 6.4 | 11.101703  | 1.13E-01 | 18124823  | 18124946  | NC_000019.9  |
| cg17518825 | 1.14E-08 | 1.13E-09 | 6.4 | 11.1015286 | 1.12E-01 | 46523461  | 46523584  | NC_000002.11 |
| cg07256668 | 1.14E-08 | 1.13E-09 | 6.4 | 11.1015087 | 3.50E-02 | 64398137  | 64398260  | NC_000011.9  |
| cg01755551 | 1.14E-08 | 1.13E-09 | 6.4 | 11.0996999 | 1.16E-01 | 99615764  | 99615887  | NC_000009.11 |
| cg06826760 | 1.14E-08 | 1.13E-09 | 6.4 | 11.09942   | 6.93E-02 | 193076307 | 193076430 | NC_000001.10 |
| cg18101022 | 1.14E-08 | 1.14E-09 | 6.4 | 11.097699  | 1.81E-01 | 26916149  | 26916272  | NC_000002.11 |
| cg23224633 | 1.14E-08 | 1.14E-09 | 6.4 | 11.0974782 | 5.63E-02 | 19355762  | 19355885  | NC_000017.10 |
| cg16326674 | 1.14E-08 | 1.14E-09 | 6.4 | 11.097113  | 2.06E-01 | 122301816 | 122301939 | NC_000004.11 |
| cg18858331 | 1.15E-08 | 1.14E-09 | 6.4 | 11.0948689 | 1.13E-01 | 140857889 | 140858012 | NC_000005.9  |
| cg12570712 | 1.15E-08 | 1.14E-09 | 6.4 | 11.0943737 | 1.91E-01 | 54412885  | 54413008  | NC_000019.9  |
| cg15690696 | 1.15E-08 | 1.14E-09 | 6.4 | 11.0937209 | 1.28E-01 | 120217718 | 120217841 | NC_000011.9  |
| cg21236379 | 1.15E-08 | 1.14E-09 | 6.4 | 11.0932582 | 5.56E-02 | 132328596 | 132328719 | NC_000012.11 |
| cg11454719 | 1.15E-08 | 1.14E-09 | 6.4 | 11.0926872 | 1.74E-01 | 223155841 | 223155964 | NC_000002.11 |
| cg10026317 | 1.15E-08 | 1.14E-09 | 6.4 | 11.0926735 | 1.15E-01 | 47694919  | 47695042  | NC_000001.10 |
| cg17936495 | 1.15E-08 | 1.14E-09 | 6.4 | 11.09253   | 1.90E-02 | 155233051 | 155233174 | NC_000001.10 |
| cg12892747 | 1.15E-08 | 1.14E-09 | 6.4 | 11.0914445 | 6.40E-02 | 187813459 | 187813582 | NC_000004.11 |
| cg01182159 | 1.15E-08 | 1.15E-09 | 6.4 | 11.0890947 | 3.88E-02 | 89762169  | 89762292  | NC_000016.9  |
| cg04305319 | 1.15E-08 | 1.15E-09 | 6.4 | 11.0887275 | 7.62E-02 | 149698023 | 149698146 | NC_000005.9  |

|            |          |          |      |            |          |           |           |              |
|------------|----------|----------|------|------------|----------|-----------|-----------|--------------|
| cg02378335 | 1.15E-08 | 1.15E-09 | 6.4  | 11.0878446 | 3.31E-02 | 134449269 | 134449392 | NC_000005.9  |
| cg03199745 | 1.15E-08 | 1.15E-09 | 6.4  | 11.0870899 | 9.49E-02 | 54454445  | 54454568  | NC_000012.11 |
| cg02918557 | 1.15E-08 | 1.15E-09 | 6.4  | 11.0870394 | 1.02E-01 | 4901337   | 4901460   | NC_000007.13 |
| cg21165221 | 1.15E-08 | 1.15E-09 | 6.4  | 11.0868514 | 1.37E-01 | 237078166 | 237078289 | NC_000002.11 |
| cg06745656 | 1.15E-08 | 1.15E-09 | 6.4  | 11.0864386 | 7.95E-02 | 37305728  | 37305851  | NC_000017.10 |
| cg12534424 | 1.16E-08 | 1.15E-09 | 6.4  | 11.085459  | 1.26E-01 | 127992316 | 127992439 | NC_000007.13 |
| cg09816180 | 1.16E-08 | 1.15E-09 | 6.4  | 11.0852317 | 1.46E-01 | 72650088  | 72650211  | NC_000004.11 |
| cg04014889 | 1.16E-08 | 1.15E-09 | 6.4  | 11.0852051 | 8.54E-02 | 23890593  | 23890716  | NC_000015.9  |
| cg07559319 | 1.16E-08 | 1.15E-09 | 6.4  | 11.0848771 | 6.91E-02 | 2282854   | 2282977   | NC_000001.10 |
| cg03894242 | 1.16E-08 | 1.15E-09 | 6.4  | 11.0839664 | 3.44E-02 | 57513121  | 57513244  | NC_000012.11 |
| cg04220455 | 1.16E-08 | 1.15E-09 | 6.4  | 11.0837095 | 5.79E-02 | 151344746 | 151344869 | NC_000002.11 |
| cg26124242 | 1.16E-08 | 1.15E-09 | 6.4  | 11.0834525 | 1.92E-01 | 106888757 | 106888880 | NC_000011.9  |
| cg09168808 | 1.16E-08 | 1.15E-09 | 6.4  | 11.0831828 | 1.30E-01 | 115124584 | 115124707 | NC_000012.11 |
| cg27169020 | 1.16E-08 | 1.15E-09 | 6.4  | 11.0830499 | 9.01E-02 | 83954229  | 83954352  | NC_000015.9  |
| cg09576074 | 1.16E-08 | 1.15E-09 | 6.4  | 11.0828239 | 7.40E-02 | 84341327  | 84341450  | NC_000016.9  |
| cg13610138 | 1.16E-08 | 1.15E-09 | 6.4  | 11.0825699 | 1.06E-01 | 59281920  | 59282043  | NC_000012.11 |
| cg14347436 | 1.16E-08 | 1.15E-09 | 6.4  | 11.0824604 | 6.16E-02 | 92748248  | 92748371  | NC_000007.13 |
| cg11403823 | 1.16E-08 | 1.15E-09 | 6.4  | 11.0821621 | 1.00E-01 | 66856314  | 66856437  | NC_000007.13 |
| cg06483795 | 1.16E-08 | 1.15E-09 | 6.4  | 11.0821141 | 6.12E-02 | 511719    | 511842    | NC_000005.9  |
| cg01157046 | 1.16E-08 | 1.16E-09 | 6.4  | 11.0812249 | 1.20E-01 | 223419421 | 223419544 | NC_000002.11 |
| cg17475733 | 1.16E-08 | 1.16E-09 | 6.4  | 11.080588  | 1.13E-01 | 96830030  | 96830153  | NC_000001.10 |
| cg08052120 | 1.16E-08 | 1.16E-09 | 6.4  | 11.0793781 | 9.72E-02 | 52409580  | 52409703  | NC_000019.9  |
| cg24850445 | 1.16E-08 | 1.16E-09 | 6.39 | 11.0778912 | 4.31E-02 | 46306794  | 46306917  | NC_000021.8  |
| cg12111104 | 1.16E-08 | 1.16E-09 | 6.39 | 11.0767389 | 6.80E-02 | 33860756  | 33860879  | NC_000013.10 |
| cg02248514 | 1.17E-08 | 1.16E-09 | 6.39 | 11.0764983 | 4.50E-02 | 32842070  | 32842193  | NC_000014.8  |

|            |          |          |      |            |          |           |           |              |
|------------|----------|----------|------|------------|----------|-----------|-----------|--------------|
| cg27000659 | 1.17E-08 | 1.16E-09 | 6.39 | 11.0759652 | 4.53E-02 | 31617530  | 31617653  | NC_000006.11 |
| cg26186331 | 1.17E-08 | 1.16E-09 | 6.39 | 11.0749468 | 1.06E-01 | 39415351  | 39415474  | NC_000005.9  |
| cg13443797 | 1.17E-08 | 1.16E-09 | 6.39 | 11.0746542 | 6.72E-02 | 50133024  | 50133147  | NC_000007.13 |
| cg25268537 | 1.17E-08 | 1.16E-09 | 6.39 | 11.0745542 | 4.10E-02 | 72860402  | 72860525  | NC_000017.10 |
| cg12669271 | 1.17E-08 | 1.16E-09 | 6.39 | 11.0739623 | 6.93E-02 | 118987299 | 118987422 | NC_000008.10 |
| cg20624923 | 1.17E-08 | 1.16E-09 | 6.39 | 11.0739576 | 1.30E-01 | 120355427 | 120355550 | NC_000010.10 |
| cg03827835 | 1.17E-08 | 1.16E-09 | 6.39 | 11.0738166 | 1.33E-01 | 134388224 | 134388347 | NC_000005.9  |
| cg13975503 | 1.17E-08 | 1.17E-09 | 6.39 | 11.0728141 | 1.33E-01 | 91182215  | 91182338  | NC_000001.10 |
| cg22660147 | 1.17E-08 | 1.17E-09 | 6.39 | 11.0726225 | 1.72E-01 | 46656093  | 46656216  | NC_000017.10 |
| cg20630410 | 1.17E-08 | 1.17E-09 | 6.39 | 11.0713551 | 5.96E-02 | 78952751  | 78952874  | NC_000017.10 |
| cg26746936 | 1.17E-08 | 1.17E-09 | 6.39 | 11.0703286 | 1.20E-01 | 42503392  | 42503515  | NC_000019.9  |
| cg24591082 | 1.17E-08 | 1.17E-09 | 6.39 | 11.0691616 | 8.70E-02 | 56143542  | 56143665  | NC_000006.11 |
| cg01860378 | 1.18E-08 | 1.17E-09 | 6.39 | 11.0668909 | 9.16E-02 | 133792985 | 133793108 | NC_000009.11 |
| cg05241015 | 1.18E-08 | 1.17E-09 | 6.39 | 11.0667945 | 1.28E-01 | 1748876   | 1748999   | NC_000002.11 |
| cg15058253 | 1.18E-08 | 1.17E-09 | 6.39 | 11.0666869 | 1.12E-01 | 149744935 | 149745058 | NC_000007.13 |
| cg02499281 | 1.18E-08 | 1.17E-09 | 6.39 | 11.0666566 | 3.88E-02 | 155573752 | 155573875 | NC_000007.13 |
| cg27639782 | 1.18E-08 | 1.17E-09 | 6.39 | 11.0666464 | 6.81E-02 | 169241606 | 169241729 | NC_000006.11 |
| cg10918202 | 1.18E-08 | 1.17E-09 | 6.39 | 11.0663027 | 1.40E-01 | 104153173 | 104153296 | NC_000008.10 |
| cg26912105 | 1.18E-08 | 1.17E-09 | 6.39 | 11.0659814 | 6.69E-02 | 84553585  | 84553708  | NC_000016.9  |
| cg18382893 | 1.18E-08 | 1.17E-09 | 6.39 | 11.0647657 | 1.46E-01 | 30139641  | 30139764  | NC_000006.11 |
| cg00902417 | 1.18E-08 | 1.17E-09 | 6.39 | 11.0646921 | 9.81E-02 | 15492168  | 15492291  | NC_000017.10 |
| cg06977823 | 1.18E-08 | 1.18E-09 | 6.39 | 11.0635046 | 6.49E-02 | 69778399  | 69778522  | NC_000001.10 |
| cg10815625 | 1.18E-08 | 1.18E-09 | 6.39 | 11.0633097 | 1.36E-01 | 165323768 | 165323891 | NC_000001.10 |
| cg11100386 | 1.18E-08 | 1.18E-09 | 6.39 | 11.063246  | 1.69E-01 | 8093416   | 8093539   | NC_000010.10 |
| cg14700504 | 1.18E-08 | 1.18E-09 | 6.39 | 11.0630181 | 8.68E-02 | 64136222  | 64136345  | NC_000010.10 |

|            |          |          |      |            |          |           |           |              |
|------------|----------|----------|------|------------|----------|-----------|-----------|--------------|
| cg24495585 | 1.18E-08 | 1.18E-09 | 6.39 | 11.0625778 | 1.58E-01 | 56659985  | 56660108  | NC_000004.11 |
| cg25618731 | 1.18E-08 | 1.18E-09 | 6.39 | 11.0622487 | 1.16E-01 | 2848409   | 2848532   | NC_000016.9  |
| cg01210589 | 1.18E-08 | 1.18E-09 | 6.39 | 11.0621278 | 9.31E-02 | 89895742  | 89895865  | NC_000014.8  |
| cg01523600 | 1.18E-08 | 1.18E-09 | 6.39 | 11.0621147 | 6.69E-02 | 22959713  | 22959836  | NC_000008.10 |
| cg10103187 | 1.18E-08 | 1.18E-09 | 6.39 | 11.062001  | 4.09E-02 | 165183299 | 165183422 | NC_000001.10 |
| cg11599539 | 1.18E-08 | 1.18E-09 | 6.39 | 11.0605776 | 1.86E-01 | 72459614  | 72459737  | NC_000008.10 |
| cg16689238 | 1.18E-08 | 1.18E-09 | 6.39 | 11.0597463 | 5.36E-02 | 34649152  | 34649275  | NC_000016.9  |
| cg22593177 | 1.18E-08 | 1.18E-09 | 6.39 | 11.0594342 | 1.34E-01 | 82174376  | 82174499  | NC_000010.10 |
| cg05501958 | 1.19E-08 | 1.18E-09 | 6.39 | 11.0583082 | 2.16E-02 | 45411873  | 45411996  | NC_000019.9  |
| cg15556943 | 1.19E-08 | 1.18E-09 | 6.39 | 11.0581974 | 2.06E-01 | 21694617  | 21694740  | NC_000020.10 |
| cg17293161 | 1.19E-08 | 1.18E-09 | 6.39 | 11.0567565 | 1.12E-01 | 80141089  | 80141212  | NC_000010.10 |
| cg09068031 | 1.19E-08 | 1.19E-09 | 6.39 | 11.0556993 | 9.60E-02 | 11500492  | 11500615  | NC_000011.9  |
| cg10136216 | 1.19E-08 | 1.19E-09 | 6.39 | 11.0555176 | 1.02E-01 | 39623664  | 39623787  | NC_000022.10 |
| cg03156396 | 1.19E-08 | 1.19E-09 | 6.39 | 11.0552515 | 6.38E-02 | 816177    | 816300    | NC_000016.9  |
| cg05803596 | 1.19E-08 | 1.19E-09 | 6.39 | 11.0550196 | 8.42E-02 | 203098085 | 203098208 | NC_000001.10 |
| cg13478928 | 1.19E-08 | 1.19E-09 | 6.39 | 11.0545691 | 1.53E-01 | 75596724  | 75596847  | NC_000001.10 |
| cg14662009 | 1.19E-08 | 1.19E-09 | 6.39 | 11.054355  | 8.74E-02 | 50300243  | 50300366  | NC_000012.11 |
| cg07082452 | 1.19E-08 | 1.19E-09 | 6.39 | 11.053171  | 8.70E-02 | 22547688  | 22547811  | NC_000008.10 |
| cg18930976 | 1.19E-08 | 1.19E-09 | 6.39 | 11.0531653 | 1.19E-01 | 131697980 | 131698103 | NC_000010.10 |
| cg04100843 | 1.19E-08 | 1.19E-09 | 6.39 | 11.0525762 | 1.10E-01 | 4860655   | 4860778   | NC_000004.11 |
| cg04336159 | 1.19E-08 | 1.19E-09 | 6.39 | 11.0525471 | 4.79E-02 | 113609512 | 113609635 | NC_000002.11 |
| cg17628540 | 1.19E-08 | 1.19E-09 | 6.39 | 11.0508006 | 9.88E-02 | 27829199  | 27829322  | NC_000013.10 |
| cg21033116 | 1.20E-08 | 1.19E-09 | 6.39 | 11.0496676 | 4.58E-02 | 49265283  | 49265406  | NC_000015.9  |
| cg06324373 | 1.20E-08 | 1.19E-09 | 6.39 | 11.0495125 | 1.38E-01 | 99734805  | 99734928  | NC_000010.10 |
| cg22553634 | 1.20E-08 | 1.19E-09 | 6.39 | 11.0494791 | 5.95E-02 | 193489233 | 193489356 | NC_000003.11 |

|            |          |          |      |            |          |           |           |              |
|------------|----------|----------|------|------------|----------|-----------|-----------|--------------|
| cg07066369 | 1.20E-08 | 1.19E-09 | 6.39 | 11.049034  | 1.56E-01 | 4384888   | 4385011   | NC_000012.11 |
| cg06301178 | 1.20E-08 | 1.20E-09 | 6.39 | 11.0478938 | 1.23E-01 | 31580150  | 31580273  | NC_000016.9  |
| cg02020829 | 1.20E-08 | 1.20E-09 | 6.39 | 11.0473446 | 1.11E-01 | 92908771  | 92908894  | NC_000005.9  |
| cg07179872 | 1.20E-08 | 1.20E-09 | 6.39 | 11.0467012 | 1.29E-01 | 140802135 | 140802258 | NC_000005.9  |
| cg12310850 | 1.20E-08 | 1.20E-09 | 6.39 | 11.0465758 | 1.34E-01 | 6533700   | 6533823   | NC_000016.9  |
| cg06780839 | 1.20E-08 | 1.20E-09 | 6.39 | 11.0462517 | 1.32E-01 | 56228577  | 56228700  | NC_000016.9  |
| cg06452875 | 1.20E-08 | 1.20E-09 | 6.39 | 11.0451444 | 6.96E-02 | 72133551  | 72133674  | NC_000016.9  |
| cg25147622 | 1.20E-08 | 1.20E-09 | 6.39 | 11.0447109 | 1.08E-01 | 1403502   | 1403625   | NC_000008.10 |
| cg07362168 | 1.20E-08 | 1.20E-09 | 6.39 | 11.0439622 | 1.81E-01 | 50684985  | 50685108  | NC_000005.9  |
| cg13451048 | 1.20E-08 | 1.20E-09 | 6.39 | 11.0439188 | 7.57E-02 | 44820073  | 44820196  | NC_000001.10 |
| cg00684248 | 1.20E-08 | 1.20E-09 | 6.39 | 11.0437069 | 1.12E-01 | 124907409 | 124907532 | NC_000010.10 |
| cg22870092 | 1.20E-08 | 1.20E-09 | 6.39 | 11.0434024 | 4.38E-02 | 7918691   | 7918814   | NC_000004.11 |
| cg24481801 | 1.20E-08 | 1.20E-09 | 6.39 | 11.0425045 | 6.05E-02 | 110197235 | 110197358 | NC_000001.10 |
| cg24928687 | 1.20E-08 | 1.20E-09 | 6.39 | 11.0424042 | 1.70E-01 | 226012913 | 226013036 | NC_000001.10 |
| cg04101351 | 1.20E-08 | 1.20E-09 | 6.39 | 11.0420696 | 1.39E-01 | 20522672  | 20522795  | NC_000012.11 |
| cg05255275 | 1.20E-08 | 1.20E-09 | 6.39 | 11.0417803 | 1.88E-01 | 60952097  | 60952220  | NC_000014.8  |
| cg08454334 | 1.21E-08 | 1.20E-09 | 6.39 | 11.0400085 | 8.38E-02 | 175472678 | 175472801 | NC_000005.9  |
| cg15746696 | 1.21E-08 | 1.21E-09 | 6.39 | 11.0397059 | 2.21E-01 | 58400494  | 58400617  | NC_000019.9  |
| cg24946911 | 1.21E-08 | 1.21E-09 | 6.39 | 11.0386051 | 5.04E-02 | 2788654   | 2788777   | NC_000012.11 |
| cg02318282 | 1.21E-08 | 1.21E-09 | 6.39 | 11.0355062 | 6.73E-02 | 82789386  | 82789509  | NC_000005.9  |
| cg14267095 | 1.21E-08 | 1.21E-09 | 6.39 | 11.0339798 | 2.11E-01 | 37026445  | 37026568  | NC_000009.11 |
| cg04864990 | 1.21E-08 | 1.21E-09 | 6.39 | 11.0334682 | 5.66E-02 | 32168694  | 32168817  | NC_000006.11 |
| cg00820171 | 1.21E-08 | 1.21E-09 | 6.39 | 11.0328975 | 8.87E-02 | 31340805  | 31340928  | NC_000016.9  |
| cg21900624 | 1.21E-08 | 1.21E-09 | 6.39 | 11.0324528 | 1.48E-01 | 113013363 | 113013486 | NC_000012.11 |
| cg07428323 | 1.22E-08 | 1.22E-09 | 6.39 | 11.0311974 | 1.55E-01 | 109294233 | 109294356 | NC_000011.9  |



|            |          |          |      |            |          |           |           |              |
|------------|----------|----------|------|------------|----------|-----------|-----------|--------------|
| cg18445760 | 1.22E-08 | 1.22E-09 | 6.39 | 11.0307093 | 4.99E-02 | 31837445  | 31837568  | NC_000006.11 |
| cg24221541 | 1.22E-08 | 1.22E-09 | 6.39 | 11.0305217 | 1.89E-01 | 46974662  | 46974785  | NC_000019.9  |
| cg15889424 | 1.22E-08 | 1.22E-09 | 6.39 | 11.030521  | 7.77E-02 | 33749529  | 33749652  | NC_000021.8  |
| cg22852830 | 1.22E-08 | 1.22E-09 | 6.39 | 11.029644  | 1.21E-01 | 105989959 | 105990082 | NC_000002.11 |
| cg14755066 | 1.22E-08 | 1.22E-09 | 6.39 | 11.0291321 | 8.30E-02 | 74239328  | 74239451  | NC_000017.10 |
| cg27087622 | 1.22E-08 | 1.22E-09 | 6.39 | 11.0278006 | 2.39E-01 | 87970114  | 87970237  | NC_000005.9  |
| cg26132144 | 1.22E-08 | 1.22E-09 | 6.38 | 11.0254424 | 8.23E-02 | 120777192 | 120777315 | NC_000002.11 |
| cg04718304 | 1.22E-08 | 1.22E-09 | 6.38 | 11.0242678 | 9.93E-02 | 134703407 | 134703530 | NC_000010.10 |
| cg11293800 | 1.22E-08 | 1.23E-09 | 6.38 | 11.0237632 | 8.80E-02 | 48412924  | 48413047  | NC_000003.11 |
| cg06070625 | 1.22E-08 | 1.23E-09 | 6.38 | 11.0235763 | 9.19E-02 | 69812798  | 69812921  | NC_000003.11 |
| cg08055786 | 1.23E-08 | 1.23E-09 | 6.38 | 11.0232594 | 8.08E-02 | 206857579 | 206857702 | NC_000001.10 |
| cg02677946 | 1.23E-08 | 1.23E-09 | 6.38 | 11.019572  | 1.41E-01 | 132864357 | 132864480 | NC_000011.9  |
| cg25067242 | 1.23E-08 | 1.23E-09 | 6.38 | 11.0192977 | 1.13E-01 | 115881259 | 115881382 | NC_000001.10 |
| cg01003245 | 1.23E-08 | 1.23E-09 | 6.38 | 11.0189078 | 9.05E-02 | 151428287 | 151428410 | NC_000001.10 |
| cg18542304 | 1.23E-08 | 1.23E-09 | 6.38 | 11.0188612 | 8.71E-02 | 99288216  | 99288339  | NC_000015.9  |
| cg00484358 | 1.23E-08 | 1.23E-09 | 6.38 | 11.0173026 | 1.03E-01 | 110610995 | 110611118 | NC_000001.10 |
| cg06538774 | 1.23E-08 | 1.23E-09 | 6.38 | 11.0170705 | 1.27E-02 | 24584247  | 24584370  | NC_000022.10 |
| cg26828131 | 1.23E-08 | 1.23E-09 | 6.38 | 11.0163118 | 2.90E-02 | 249106207 | 249106330 | NC_000001.10 |
| cg08799997 | 1.23E-08 | 1.23E-09 | 6.38 | 11.015828  | 6.67E-02 | 167737937 | 167738060 | NC_000006.11 |
| cg07905119 | 1.24E-08 | 1.24E-09 | 6.38 | 11.014918  | 7.93E-02 | 1779084   | 1779207   | NC_000007.13 |
| cg23267987 | 1.24E-08 | 1.24E-09 | 6.38 | 11.0149166 | 6.18E-02 | 120414862 | 120414985 | NC_000001.10 |
| cg09074625 | 1.24E-08 | 1.24E-09 | 6.38 | 11.0149116 | 8.71E-02 | 143664102 | 143664225 | NC_000001.10 |
| cg01544213 | 1.24E-08 | 1.24E-09 | 6.38 | 11.0145853 | 8.98E-02 | 140774440 | 140774563 | NC_000005.9  |
| cg03760759 | 1.24E-08 | 1.24E-09 | 6.38 | 11.0135767 | 4.66E-02 | 156549533 | 156549656 | NC_000001.10 |
| cg17617843 | 1.24E-08 | 1.24E-09 | 6.38 | 11.0122775 | 1.57E-01 | 34043454  | 34043577  | NC_000005.9  |

|            |          |          |      |            |          |           |           |              |
|------------|----------|----------|------|------------|----------|-----------|-----------|--------------|
| cg08872064 | 1.24E-08 | 1.24E-09 | 6.38 | 11.0114144 | 8.92E-02 | 8787638   | 8787761   | NC_000003.11 |
| cg24635112 | 1.24E-08 | 1.24E-09 | 6.38 | 11.0094144 | 1.51E-01 | 114908901 | 114909024 | NC_000013.10 |
| cg02315483 | 1.24E-08 | 1.24E-09 | 6.38 | 11.0088481 | 5.53E-02 | 44487129  | 44487252  | NC_000019.9  |
| cg13866910 | 1.24E-08 | 1.24E-09 | 6.38 | 11.008708  | 8.23E-02 | 1222028   | 1222151   | NC_000016.9  |
| cg16781264 | 1.24E-08 | 1.25E-09 | 6.38 | 11.0077897 | 1.71E-01 | 101087575 | 101087698 | NC_000002.11 |
| cg16312972 | 1.24E-08 | 1.25E-09 | 6.38 | 11.0077685 | 9.87E-02 | 24302860  | 24302983  | NC_000001.10 |
| cg13975106 | 1.25E-08 | 1.25E-09 | 6.38 | 11.0065603 | 1.42E-01 | 106939472 | 106939595 | NC_000013.10 |
| cg10674476 | 1.25E-08 | 1.25E-09 | 6.38 | 11.0061099 | 5.38E-02 | 97498336  | 97498459  | NC_000002.11 |
| cg04212229 | 1.25E-08 | 1.26E-09 | 6.38 | 10.9996005 | 8.64E-02 | 148460131 | 148460254 | NC_000003.11 |
| cg16549957 | 1.25E-08 | 1.26E-09 | 6.38 | 10.999113  | 9.86E-02 | 12218933  | 12219056  | NC_000001.10 |
| cg03897139 | 1.26E-08 | 1.26E-09 | 6.38 | 10.9982912 | 6.24E-02 | 134018809 | 134018932 | NC_000010.10 |
| cg09424138 | 1.26E-08 | 1.26E-09 | 6.38 | 10.9981554 | 8.23E-02 | 143700425 | 143700548 | NC_000007.13 |
| cg26060583 | 1.26E-08 | 1.26E-09 | 6.38 | 10.9970699 | 5.06E-02 | 71311300  | 71311423  | NC_000008.10 |
| cg09199698 | 1.26E-08 | 1.26E-09 | 6.38 | 10.9961355 | 1.27E-01 | 31311797  | 31311920  | NC_000021.8  |
| cg02765328 | 1.26E-08 | 1.26E-09 | 6.38 | 10.9941596 | 1.76E-01 | 4383281   | 4383404   | NC_000012.11 |
| cg25236277 | 1.26E-08 | 1.26E-09 | 6.38 | 10.9940891 | 8.07E-02 | 119070599 | 119070722 | NC_000003.11 |
| cg02546690 | 1.26E-08 | 1.26E-09 | 6.38 | 10.9938417 | 7.95E-02 | 17834480  | 17834603  | NC_000011.9  |
| cg10988187 | 1.26E-08 | 1.26E-09 | 6.38 | 10.992962  | 6.98E-02 | 71031813  | 71031936  | NC_000012.11 |
| cg23655970 | 1.26E-08 | 1.27E-09 | 6.38 | 10.9909233 | 2.10E-01 | 37126582  | 37126705  | NC_000014.8  |
| cg07888205 | 1.26E-08 | 1.27E-09 | 6.38 | 10.9906277 | 7.77E-02 | 34257432  | 34257555  | NC_000016.9  |
| cg16367103 | 1.26E-08 | 1.27E-09 | 6.38 | 10.9906206 | 5.57E-02 | 105681416 | 105681539 | NC_000014.8  |
| cg23347399 | 1.27E-08 | 1.27E-09 | 6.38 | 10.9886341 | 1.34E-01 | 140766911 | 140767034 | NC_000005.9  |
| cg21607030 | 1.27E-08 | 1.27E-09 | 6.38 | 10.986706  | 2.12E-01 | 133563532 | 133563655 | NC_000006.11 |
| cg09062550 | 1.27E-08 | 1.27E-09 | 6.38 | 10.9865959 | 2.16E-01 | 20350481  | 20350604  | NC_000020.10 |
| cg06500337 | 1.27E-08 | 1.27E-09 | 6.38 | 10.9859428 | 2.05E-01 | 161100242 | 161100365 | NC_000006.11 |

|            |          |          |      |            |          |           |           |              |
|------------|----------|----------|------|------------|----------|-----------|-----------|--------------|
| cg08552198 | 1.27E-08 | 1.27E-09 | 6.38 | 10.9849333 | 1.23E-01 | 49309124  | 49309247  | NC_000016.9  |
| cg14836313 | 1.27E-08 | 1.27E-09 | 6.38 | 10.984761  | 8.08E-02 | 1975560   | 1975683   | NC_000011.9  |
| cg26072058 | 1.27E-08 | 1.28E-09 | 6.38 | 10.9845477 | 1.62E-01 | 91191055  | 91191178  | NC_000001.10 |
| cg04150055 | 1.27E-08 | 1.28E-09 | 6.38 | 10.9833008 | 1.65E-01 | 133536855 | 133536978 | NC_000009.11 |
| cg18439535 | 1.27E-08 | 1.28E-09 | 6.38 | 10.9830394 | 9.14E-02 | 131304342 | 131304465 | NC_000012.11 |
| cg23129930 | 1.27E-08 | 1.28E-09 | 6.38 | 10.9827726 | 1.15E-01 | 27186993  | 27187116  | NC_000007.13 |
| cg22541520 | 1.27E-08 | 1.28E-09 | 6.38 | 10.9822905 | 1.45E-01 | 6703533   | 6703656   | NC_000007.13 |
| cg06815630 | 1.27E-08 | 1.28E-09 | 6.38 | 10.9821747 | 5.73E-02 | 88156829  | 88156952  | NC_000016.9  |
| cg20516620 | 1.27E-08 | 1.28E-09 | 6.38 | 10.9819785 | 2.06E-02 | 99197040  | 99197163  | NC_000008.10 |
| cg03921860 | 1.27E-08 | 1.28E-09 | 6.38 | 10.9819168 | 8.76E-02 | 57458733  | 57458856  | NC_000004.11 |
| cg22843684 | 1.28E-08 | 1.28E-09 | 6.38 | 10.9785508 | 9.73E-02 | 10806114  | 10806237  | NC_000003.11 |
| cg17801930 | 1.28E-08 | 1.28E-09 | 6.38 | 10.9784581 | 1.58E-01 | 56009405  | 56009528  | NC_000005.9  |
| cg13531886 | 1.28E-08 | 1.28E-09 | 6.38 | 10.9776459 | 5.29E-02 | 3281434   | 3281557   | NC_000010.10 |
| cg04034767 | 1.28E-08 | 1.29E-09 | 6.38 | 10.9769153 | 2.53E-01 | 52400907  | 52401030  | NC_000012.11 |
| cg06679209 | 1.28E-08 | 1.29E-09 | 6.38 | 10.9768405 | 6.36E-02 | 1073679   | 1073802   | NC_000019.9  |
| cg20030310 | 1.28E-08 | 1.29E-09 | 6.38 | 10.976188  | 1.99E-01 | 158119489 | 158119612 | NC_000001.10 |
| cg08604097 | 1.28E-08 | 1.29E-09 | 6.38 | 10.975346  | 1.73E-01 | 8480865   | 8480988   | NC_000007.13 |
| cg26568372 | 1.28E-08 | 1.29E-09 | 6.38 | 10.9752737 | 1.58E-01 | 91190173  | 91190296  | NC_000001.10 |
| cg09917979 | 1.28E-08 | 1.29E-09 | 6.38 | 10.9751049 | 1.20E-01 | 1275630   | 1275753   | NC_000007.13 |
| cg27620681 | 1.29E-08 | 1.29E-09 | 6.38 | 10.9729263 | 7.82E-02 | 69349490  | 69349613  | NC_000016.9  |
| cg05936219 | 1.29E-08 | 1.29E-09 | 6.37 | 10.9726817 | 7.75E-02 | 4228644   | 4228767   | NC_000004.11 |
| cg12718579 | 1.29E-08 | 1.29E-09 | 6.37 | 10.9708278 | 9.19E-02 | 53322451  | 53322574  | NC_000008.10 |
| cg21106407 | 1.29E-08 | 1.30E-09 | 6.37 | 10.9678834 | 1.65E-01 | 57262177  | 57262300  | NC_000014.8  |
| cg03803071 | 1.29E-08 | 1.30E-09 | 6.37 | 10.967338  | 2.16E-01 | 22034523  | 22034646  | NC_000019.9  |
| cg23954465 | 1.29E-08 | 1.30E-09 | 6.37 | 10.9667625 | 1.78E-01 | 8078038   | 8078161   | NC_000010.10 |

|            |          |          |      |            |          |           |           |              |
|------------|----------|----------|------|------------|----------|-----------|-----------|--------------|
| cg09235562 | 1.29E-08 | 1.30E-09 | 6.37 | 10.9664351 | 1.32E-01 | 384251    | 384374    | NC_000019.9  |
| cg21715431 | 1.29E-08 | 1.30E-09 | 6.37 | 10.9658863 | 7.35E-02 | 8601423   | 8601546   | NC_000019.9  |
| cg21587472 | 1.29E-08 | 1.30E-09 | 6.37 | 10.9656331 | 7.29E-02 | 11705530  | 11705653  | NC_000019.9  |
| cg12742799 | 1.30E-08 | 1.30E-09 | 6.37 | 10.9652811 | 9.76E-02 | 62959193  | 62959316  | NC_000020.10 |
| cg13597574 | 1.30E-08 | 1.30E-09 | 6.37 | 10.9642062 | 3.97E-02 | 107696634 | 107696757 | NC_000009.11 |
| cg26697474 | 1.30E-08 | 1.30E-09 | 6.37 | 10.9640415 | 2.06E-02 | 62185223  | 62185346  | NC_000011.9  |
| cg14677698 | 1.30E-08 | 1.30E-09 | 6.37 | 10.9629933 | 1.87E-01 | 3197730   | 3197853   | NC_000005.9  |
| cg08883066 | 1.30E-08 | 1.31E-09 | 6.37 | 10.9608218 | 1.11E-01 | 114696822 | 114696945 | NC_000001.10 |
| cg23990012 | 1.30E-08 | 1.31E-09 | 6.37 | 10.9606091 | 1.46E-01 | 95870409  | 95870532  | NC_000015.9  |
| cg21875946 | 1.30E-08 | 1.31E-09 | 6.37 | 10.9589179 | 8.64E-02 | 206663985 | 206664108 | NC_000001.10 |
| cg05453358 | 1.30E-08 | 1.31E-09 | 6.37 | 10.95828   | 1.32E-01 | 47529280  | 47529403  | NC_000008.10 |
| cg12563644 | 1.30E-08 | 1.31E-09 | 6.37 | 10.958035  | 1.89E-01 | 87956996  | 87957119  | NC_000005.9  |
| cg03540794 | 1.31E-08 | 1.31E-09 | 6.37 | 10.956726  | 1.90E-01 | 2112109   | 2112232   | NC_000005.9  |
| cg14432910 | 1.31E-08 | 1.31E-09 | 6.37 | 10.9553731 | 1.34E-01 | 68121931  | 68122054  | NC_000015.9  |
| cg26419728 | 1.31E-08 | 1.31E-09 | 6.37 | 10.9551339 | 1.35E-01 | 43604860  | 43604983  | NC_000011.9  |
| cg24146331 | 1.31E-08 | 1.31E-09 | 6.37 | 10.9550246 | 1.11E-01 | 102590225 | 102590348 | NC_000010.10 |
| cg09387867 | 1.31E-08 | 1.31E-09 | 6.37 | 10.9547322 | 3.86E-02 | 144879954 | 144880077 | NC_000008.10 |
| cg05007549 | 1.31E-08 | 1.32E-09 | 6.37 | 10.9525666 | 1.14E-01 | 81103968  | 81104091  | NC_000004.11 |
| cg01150433 | 1.31E-08 | 1.32E-09 | 6.37 | 10.95193   | 1.23E-01 | 147142182 | 147142305 | NC_000003.11 |
| cg14382976 | 1.31E-08 | 1.32E-09 | 6.37 | 10.950151  | 7.77E-02 | 117067624 | 117067747 | NC_000007.13 |
| cg09561419 | 1.31E-08 | 1.32E-09 | 6.37 | 10.9496129 | 2.15E-02 | 57055798  | 57055921  | NC_000016.9  |
| cg24693341 | 1.32E-08 | 1.32E-09 | 6.37 | 10.9488883 | 1.69E-01 | 41746947  | 41747070  | NC_000004.11 |
| cg23737737 | 1.32E-08 | 1.32E-09 | 6.37 | 10.9474627 | 1.88E-01 | 6665370   | 6665493   | NC_000012.11 |
| cg09752583 | 1.32E-08 | 1.32E-09 | 6.37 | 10.9471508 | 7.68E-02 | 53058587  | 53058710  | NC_000006.11 |
| cg26886277 | 1.32E-08 | 1.33E-09 | 6.37 | 10.945093  | 6.90E-02 | 86566099  | 86566222  | NC_000002.11 |

|            |          |          |      |            |          |           |           |              |
|------------|----------|----------|------|------------|----------|-----------|-----------|--------------|
| cg07697895 | 1.32E-08 | 1.33E-09 | 6.37 | 10.9444402 | 2.32E-01 | 116963259 | 116963382 | NC_000007.13 |
| cg03434886 | 1.32E-08 | 1.33E-09 | 6.37 | 10.9443723 | 1.09E-01 | 48555361  | 48555484  | NC_000020.10 |
| cg08215400 | 1.32E-08 | 1.33E-09 | 6.37 | 10.944356  | 7.91E-02 | 7592407   | 7592530   | NC_000012.11 |
| cg05013064 | 1.32E-08 | 1.33E-09 | 6.37 | 10.9441472 | 2.10E-01 | 55204633  | 55204756  | NC_000020.10 |
| cg01656588 | 1.32E-08 | 1.33E-09 | 6.37 | 10.943114  | 1.14E-01 | 3187100   | 3187223   | NC_000005.9  |
| cg05722918 | 1.32E-08 | 1.33E-09 | 6.37 | 10.9425976 | 1.31E-01 | 101603929 | 101604052 | NC_000012.11 |
| cg18077160 | 1.32E-08 | 1.33E-09 | 6.37 | 10.9423554 | 3.37E-02 | 48987205  | 48987328  | NC_000019.9  |
| cg24954590 | 1.32E-08 | 1.33E-09 | 6.37 | 10.9415211 | 1.18E-01 | 140777611 | 140777734 | NC_000005.9  |
| cg21122466 | 1.33E-08 | 1.33E-09 | 6.37 | 10.940944  | 3.00E-02 | 99323548  | 99323671  | NC_000006.11 |
| cg24867601 | 1.33E-08 | 1.33E-09 | 6.37 | 10.9408166 | 2.41E-02 | 104758865 | 104758988 | NC_000007.13 |
| cg22539744 | 1.33E-08 | 1.34E-09 | 6.37 | 10.9385735 | 1.53E-01 | 64476370  | 64476493  | NC_000003.11 |
| cg13914708 | 1.34E-08 | 1.34E-09 | 6.37 | 10.9332464 | 1.11E-01 | 15804963  | 15805086  | NC_000002.11 |
| cg03506489 | 1.34E-08 | 1.35E-09 | 6.37 | 10.9312549 | 1.39E-01 | 30038788  | 30038911  | NC_000011.9  |
| cg03197992 | 1.34E-08 | 1.35E-09 | 6.37 | 10.9307281 | 1.01E-01 | 113990925 | 113991048 | NC_000002.11 |
| cg20209499 | 1.34E-08 | 1.35E-09 | 6.37 | 10.929858  | 9.89E-02 | 26929892  | 26930015  | NC_000002.11 |
| cg01655158 | 1.34E-08 | 1.35E-09 | 6.37 | 10.9293715 | 4.18E-02 | 98774467  | 98774590  | NC_000008.10 |
| cg10826197 | 1.34E-08 | 1.35E-09 | 6.37 | 10.9270622 | 2.34E-01 | 49468988  | 49469111  | NC_000008.10 |
| cg06015218 | 1.34E-08 | 1.35E-09 | 6.37 | 10.9269932 | 1.52E-01 | 146350434 | 146350557 | NC_000006.11 |
| cg26063563 | 1.35E-08 | 1.36E-09 | 6.37 | 10.9250538 | 2.03E-01 | 113697330 | 113697453 | NC_000005.9  |
| cg15473084 | 1.35E-08 | 1.36E-09 | 6.37 | 10.9250248 | 1.21E-01 | 50265600  | 50265723  | NC_000005.9  |
| cg21532432 | 1.35E-08 | 1.36E-09 | 6.37 | 10.9248614 | 1.48E-01 | 2165434   | 2165557   | NC_000011.9  |
| cg26892843 | 1.35E-08 | 1.36E-09 | 6.37 | 10.9244177 | 5.17E-02 | 43375618  | 43375741  | NC_000010.10 |
| cg18592174 | 1.35E-08 | 1.36E-09 | 6.37 | 10.9243913 | 1.24E-01 | 50817306  | 50817429  | NC_000010.10 |
| cg14468280 | 1.35E-08 | 1.36E-09 | 6.37 | 10.9242391 | 5.19E-02 | 47862976  | 47863099  | NC_000020.10 |
| cg13713293 | 1.35E-08 | 1.36E-09 | 6.37 | 10.9237272 | 1.59E-01 | 841636    | 841759    | NC_000009.11 |

|            |          |          |      |            |          |           |           |              |
|------------|----------|----------|------|------------|----------|-----------|-----------|--------------|
| cg09454187 | 1.35E-08 | 1.36E-09 | 6.37 | 10.9230013 | 1.02E-01 | 26109614  | 26109737  | NC_000015.9  |
| cg23251701 | 1.35E-08 | 1.36E-09 | 6.37 | 10.9228581 | 1.63E-01 | 2537228   | 2537351   | NC_000005.9  |
| cg03039002 | 1.35E-08 | 1.36E-09 | 6.37 | 10.9225437 | 1.17E-01 | 53776259  | 53776382  | NC_000013.10 |
| cg11960677 | 1.35E-08 | 1.36E-09 | 6.37 | 10.9217788 | 1.29E-01 | 32705760  | 32705883  | NC_000001.10 |
| cg05900347 | 1.35E-08 | 1.36E-09 | 6.37 | 10.9216897 | 1.29E-01 | 105461392 | 105461515 | NC_000002.11 |
| cg02831219 | 1.35E-08 | 1.36E-09 | 6.37 | 10.9216882 | 4.70E-02 | 49416516  | 49416639  | NC_000012.11 |
| cg21299542 | 1.35E-08 | 1.36E-09 | 6.37 | 10.9216715 | 1.36E-01 | 111550407 | 111550530 | NC_000004.11 |
| cg19312935 | 1.35E-08 | 1.36E-09 | 6.37 | 10.9209836 | 1.20E-02 | 42017417  | 42017540  | NC_000022.10 |
| cg01962428 | 1.35E-08 | 1.36E-09 | 6.37 | 10.9201416 | 1.81E-01 | 107957362 | 107957485 | NC_000004.11 |
| cg21899520 | 1.35E-08 | 1.36E-09 | 6.36 | 10.9189409 | 1.43E-01 | 71957896  | 71958019  | NC_000018.9  |
| cg09382601 | 1.36E-08 | 1.37E-09 | 6.36 | 10.9165653 | 7.41E-02 | 619659    | 619782    | NC_000004.11 |
| cg13035628 | 1.36E-08 | 1.37E-09 | 6.36 | 10.9164069 | 3.56E-02 | 78829362  | 78829485  | NC_000015.9  |
| cg06807928 | 1.36E-08 | 1.37E-09 | 6.36 | 10.9163641 | 1.57E-01 | 112610059 | 112610182 | NC_000013.10 |
| cg09524946 | 1.36E-08 | 1.37E-09 | 6.36 | 10.9156519 | 1.62E-01 | 50706810  | 50706933  | NC_000013.10 |
| cg21078198 | 1.36E-08 | 1.37E-09 | 6.36 | 10.9138787 | 8.96E-02 | 6189918   | 6190041   | NC_000007.13 |
| cg26708781 | 1.36E-08 | 1.37E-09 | 6.36 | 10.9134701 | 1.18E-01 | 87921477  | 87921600  | NC_000004.11 |
| cg23893332 | 1.36E-08 | 1.37E-09 | 6.36 | 10.9129863 | 1.10E-01 | 94576048  | 94576171  | NC_000014.8  |
| cg01120173 | 1.36E-08 | 1.37E-09 | 6.36 | 10.9118865 | 1.67E-01 | 5019669   | 5019792   | NC_000017.10 |
| cg03162823 | 1.36E-08 | 1.37E-09 | 6.36 | 10.9108285 | 1.20E-01 | 95941571  | 95941694  | NC_000012.11 |
| cg03388789 | 1.37E-08 | 1.38E-09 | 6.36 | 10.9093957 | 1.31E-01 | 147116135 | 147116258 | NC_000003.11 |
| cg14503935 | 1.37E-08 | 1.38E-09 | 6.36 | 10.9087106 | 1.16E-01 | 131864894 | 131865017 | NC_000012.11 |
| cg02278437 | 1.37E-08 | 1.38E-09 | 6.36 | 10.9078278 | 1.44E-01 | 59001691  | 59001814  | NC_000018.9  |
| cg20392764 | 1.37E-08 | 1.38E-09 | 6.36 | 10.9072678 | 1.01E-01 | 2293117   | 2293240   | NC_000011.9  |
| cg07057687 | 1.37E-08 | 1.38E-09 | 6.36 | 10.9054329 | 5.81E-02 | 2217386   | 2217509   | NC_000016.9  |
| cg13971232 | 1.37E-08 | 1.38E-09 | 6.36 | 10.9044009 | 3.31E-02 | 236901460 | 236901583 | NC_000002.11 |

|            |          |          |      |            |          |           |           |              |
|------------|----------|----------|------|------------|----------|-----------|-----------|--------------|
| cg14266927 | 1.37E-08 | 1.39E-09 | 6.36 | 10.903613  | 1.36E-01 | 75987682  | 75987805  | NC_000014.8  |
| cg16551520 | 1.37E-08 | 1.39E-09 | 6.36 | 10.9026554 | 1.47E-01 | 112610015 | 112610138 | NC_000013.10 |
| cg08222609 | 1.37E-08 | 1.39E-09 | 6.36 | 10.9024608 | 4.51E-02 | 24027960  | 24028083  | NC_000014.8  |
| cg07124687 | 1.38E-08 | 1.39E-09 | 6.36 | 10.9018622 | 2.24E-01 | 28956332  | 28956455  | NC_000006.11 |
| cg23751110 | 1.38E-08 | 1.39E-09 | 6.36 | 10.9012943 | 1.08E-01 | 19197380  | 19197503  | NC_000004.11 |
| cg14794428 | 1.38E-08 | 1.39E-09 | 6.36 | 10.9009822 | 1.86E-01 | 103351436 | 103351559 | NC_000012.11 |
| cg26239297 | 1.38E-08 | 1.39E-09 | 6.36 | 10.9008052 | 1.16E-01 | 51347240  | 51347363  | NC_000014.8  |
| cg18749309 | 1.38E-08 | 1.39E-09 | 6.36 | 10.9000635 | 1.43E-01 | 61434800  | 61434923  | NC_000011.9  |
| cg03145290 | 1.38E-08 | 1.39E-09 | 6.36 | 10.8997452 | 5.37E-02 | 32857923  | 32858046  | NC_000016.9  |
| cg09014626 | 1.38E-08 | 1.39E-09 | 6.36 | 10.8984956 | 1.96E-01 | 2990194   | 2990317   | NC_000005.9  |
| cg03294066 | 1.38E-08 | 1.39E-09 | 6.36 | 10.8984622 | 2.27E-01 | 494721    | 494844    | NC_000008.10 |
| cg02388378 | 1.38E-08 | 1.39E-09 | 6.36 | 10.8968254 | 1.85E-01 | 54968727  | 54968850  | NC_000016.9  |
| cg02694972 | 1.38E-08 | 1.40E-09 | 6.36 | 10.8963971 | 5.77E-02 | 43249501  | 43249624  | NC_000006.11 |
| cg13794993 | 1.38E-08 | 1.40E-09 | 6.36 | 10.8962248 | 1.31E-01 | 76740284  | 76740407  | NC_000018.9  |
| cg02969164 | 1.38E-08 | 1.40E-09 | 6.36 | 10.8952491 | 6.71E-02 | 128839899 | 128840022 | NC_000011.9  |
| cg11607952 | 1.39E-08 | 1.40E-09 | 6.36 | 10.894725  | 1.40E-01 | 5541814   | 5541937   | NC_000012.11 |
| cg08012278 | 1.39E-08 | 1.40E-09 | 6.36 | 10.8945599 | 1.26E-01 | 237068350 | 237068473 | NC_000002.11 |
| cg15019721 | 1.39E-08 | 1.40E-09 | 6.36 | 10.8936828 | 1.82E-01 | 17496675  | 17496798  | NC_000010.10 |
| cg08160462 | 1.39E-08 | 1.40E-09 | 6.36 | 10.8934681 | 7.01E-02 | 32238731  | 32238854  | NC_000001.10 |
| cg23955431 | 1.39E-08 | 1.40E-09 | 6.36 | 10.8929761 | 1.59E-01 | 42076492  | 42076615  | NC_000014.8  |
| cg16698828 | 1.39E-08 | 1.40E-09 | 6.36 | 10.892543  | 6.60E-02 | 124210107 | 124210230 | NC_000008.10 |
| cg00586644 | 1.39E-08 | 1.40E-09 | 6.36 | 10.8922305 | 1.71E-01 | 50822175  | 50822298  | NC_000010.10 |
| cg07031650 | 1.39E-08 | 1.40E-09 | 6.36 | 10.8920334 | 9.60E-02 | 69436767  | 69436890  | NC_000002.11 |
| cg07956434 | 1.39E-08 | 1.40E-09 | 6.36 | 10.8918091 | 1.04E-01 | 100220005 | 100220128 | NC_000007.13 |
| cg07173635 | 1.39E-08 | 1.40E-09 | 6.36 | 10.8912623 | 1.62E-01 | 971480    | 971603    | NC_000009.11 |

|            |          |          |      |            |          |           |           |              |
|------------|----------|----------|------|------------|----------|-----------|-----------|--------------|
| cg22664789 | 1.39E-08 | 1.40E-09 | 6.36 | 10.8903886 | 6.82E-02 | 23643119  | 23643242  | NC_000002.11 |
| cg12840502 | 1.39E-08 | 1.41E-09 | 6.36 | 10.889509  | 1.73E-01 | 30116919  | 30117042  | NC_000022.10 |
| cg18860954 | 1.39E-08 | 1.41E-09 | 6.36 | 10.8884499 | 1.65E-01 | 58400574  | 58400697  | NC_000019.9  |
| cg11412853 | 1.39E-08 | 1.41E-09 | 6.36 | 10.8876392 | 1.53E-01 | 115129801 | 115129924 | NC_000012.11 |
| cg26615813 | 1.40E-08 | 1.41E-09 | 6.36 | 10.8872034 | 1.62E-01 | 36422209  | 36422332  | NC_000003.11 |
| cg19063061 | 1.40E-08 | 1.41E-09 | 6.36 | 10.8866208 | 1.63E-01 | 49935893  | 49936016  | NC_000019.9  |
| cg10145246 | 1.40E-08 | 1.41E-09 | 6.36 | 10.8866108 | 1.41E-01 | 119527884 | 119528007 | NC_000001.10 |
| cg01315067 | 1.40E-08 | 1.41E-09 | 6.36 | 10.8858269 | 1.16E-01 | 51576232  | 51576355  | NC_000010.10 |
| cg09191626 | 1.40E-08 | 1.41E-09 | 6.36 | 10.8857114 | 1.45E-01 | 13983986  | 13984109  | NC_000011.9  |
| cg16304950 | 1.40E-08 | 1.41E-09 | 6.36 | 10.8856646 | 1.82E-01 | 5543945   | 5544068   | NC_000018.9  |
| cg13392957 | 1.40E-08 | 1.41E-09 | 6.36 | 10.8855495 | 1.20E-01 | 147782279 | 147782402 | NC_000001.10 |
| cg18519902 | 1.40E-08 | 1.42E-09 | 6.36 | 10.8822545 | 1.08E-01 | 95215417  | 95215540  | NC_000005.9  |
| cg01768001 | 1.40E-08 | 1.42E-09 | 6.36 | 10.882239  | 5.55E-02 | 24831147  | 24831270  | NC_000001.10 |
| cg13850380 | 1.40E-08 | 1.42E-09 | 6.36 | 10.8821221 | 1.09E-01 | 1475143   | 1475266   | NC_000001.10 |
| cg12034199 | 1.40E-08 | 1.42E-09 | 6.36 | 10.8804221 | 8.24E-02 | 75045307  | 75045430  | NC_000007.13 |
| cg00339682 | 1.40E-08 | 1.42E-09 | 6.36 | 10.880258  | 1.39E-01 | 13531163  | 13531286  | NC_000004.11 |
| cg00945238 | 1.40E-08 | 1.42E-09 | 6.36 | 10.8800366 | 1.54E-01 | 134069409 | 134069532 | NC_000004.11 |
| cg04861263 | 1.40E-08 | 1.42E-09 | 6.36 | 10.8799113 | 9.60E-02 | 60298043  | 60298166  | NC_000015.9  |
| cg23285825 | 1.41E-08 | 1.42E-09 | 6.36 | 10.8791308 | 1.19E-01 | 178016595 | 178016718 | NC_000005.9  |
| cg02018176 | 1.41E-08 | 1.42E-09 | 6.36 | 10.879052  | 8.16E-02 | 1364513   | 1364636   | NC_000004.11 |
| cg03365496 | 1.41E-08 | 1.42E-09 | 6.36 | 10.8775866 | 1.31E-01 | 60286384  | 60286507  | NC_000015.9  |
| cg13539424 | 1.41E-08 | 1.42E-09 | 6.36 | 10.877443  | 1.78E-01 | 101544221 | 101544344 | NC_000014.8  |
| cg02745398 | 1.41E-08 | 1.42E-09 | 6.36 | 10.8771128 | 7.45E-02 | 9445158   | 9445281   | NC_000004.11 |
| cg14780416 | 1.41E-08 | 1.42E-09 | 6.36 | 10.8768701 | 1.55E-01 | 27209338  | 27209461  | NC_000007.13 |
| cg03061682 | 1.41E-08 | 1.42E-09 | 6.36 | 10.8759454 | 2.77E-01 | 28352098  | 28352221  | NC_000015.9  |



|            |          |          |      |            |          |           |           |              |
|------------|----------|----------|------|------------|----------|-----------|-----------|--------------|
| cg19607165 | 1.41E-08 | 1.43E-09 | 6.36 | 10.8749558 | 1.63E-01 | 10390961  | 10391084  | NC_000006.11 |
| cg03111404 | 1.41E-08 | 1.43E-09 | 6.36 | 10.8741855 | 1.53E-01 | 28175984  | 28176107  | NC_000006.11 |
| cg16415870 | 1.41E-08 | 1.43E-09 | 6.36 | 10.8738794 | 1.81E-01 | 6904261   | 6904384   | NC_000003.11 |
| cg21896394 | 1.41E-08 | 1.43E-09 | 6.36 | 10.8727687 | 2.88E-02 | 129099476 | 129099599 | NC_000008.10 |
| cg21675115 | 1.42E-08 | 1.43E-09 | 6.36 | 10.8697444 | 1.95E-01 | 78493564  | 78493687  | NC_000013.10 |
| cg15082028 | 1.42E-08 | 1.44E-09 | 6.36 | 10.8687084 | 1.41E-01 | 19043507  | 19043630  | NC_000001.10 |
| cg09829869 | 1.42E-08 | 1.44E-09 | 6.36 | 10.8680116 | 1.33E-01 | 97857647  | 97857770  | NC_000007.13 |
| cg15887709 | 1.42E-08 | 1.44E-09 | 6.35 | 10.8671708 | 1.14E-01 | 1270976   | 1271099   | NC_000007.13 |
| cg16249035 | 1.42E-08 | 1.44E-09 | 6.35 | 10.8659456 | 1.30E-01 | 114843490 | 114843613 | NC_000012.11 |
| cg18042724 | 1.42E-08 | 1.44E-09 | 6.35 | 10.865937  | 1.23E-01 | 20627327  | 20627450  | NC_000011.9  |
| cg12758687 | 1.42E-08 | 1.44E-09 | 6.35 | 10.8653343 | 1.26E-01 | 113346327 | 113346450 | NC_000011.9  |
| cg12677436 | 1.43E-08 | 1.44E-09 | 6.35 | 10.8642854 | 6.24E-02 | 54785476  | 54785599  | NC_000002.11 |
| cg26647617 | 1.43E-08 | 1.44E-09 | 6.35 | 10.8638976 | 1.33E-01 | 73519343  | 73519466  | NC_000002.11 |
| cg11336061 | 1.43E-08 | 1.45E-09 | 6.35 | 10.8613452 | 9.22E-02 | 25254149  | 25254272  | NC_000001.10 |
| cg25201511 | 1.43E-08 | 1.45E-09 | 6.35 | 10.8605977 | 1.59E-01 | 2757137   | 2757260   | NC_000005.9  |
| cg00351283 | 1.43E-08 | 1.45E-09 | 6.35 | 10.8598483 | 7.57E-02 | 89448431  | 89448554  | NC_000001.10 |
| cg12438547 | 1.43E-08 | 1.45E-09 | 6.35 | 10.8597326 | 1.14E-01 | 100642971 | 100643094 | NC_000013.10 |
| cg04148089 | 1.43E-08 | 1.45E-09 | 6.35 | 10.8592979 | 1.64E-01 | 85673599  | 85673722  | NC_000016.9  |
| cg10775039 | 1.44E-08 | 1.45E-09 | 6.35 | 10.856707  | 1.33E-01 | 50507214  | 50507337  | NC_000010.10 |
| cg27192854 | 1.44E-08 | 1.45E-09 | 6.35 | 10.8566658 | 1.06E-01 | 166511877 | 166512000 | NC_000006.11 |
| cg09572195 | 1.44E-08 | 1.45E-09 | 6.35 | 10.8561165 | 1.23E-01 | 55202447  | 55202570  | NC_000020.10 |
| cg08039301 | 1.44E-08 | 1.46E-09 | 6.35 | 10.8550411 | 1.14E-01 | 47072907  | 47073030  | NC_000017.10 |
| cg24999858 | 1.44E-08 | 1.46E-09 | 6.35 | 10.854386  | 9.44E-02 | 214027718 | 214027841 | NC_000002.11 |
| cg07936800 | 1.44E-08 | 1.46E-09 | 6.35 | 10.8537752 | 4.94E-02 | 151558015 | 151558138 | NC_000002.11 |
| cg27403265 | 1.44E-08 | 1.46E-09 | 6.35 | 10.8528978 | 1.63E-01 | 22825621  | 22825744  | NC_000016.9  |

|            |          |          |      |            |          |           |           |              |
|------------|----------|----------|------|------------|----------|-----------|-----------|--------------|
| cg14865284 | 1.44E-08 | 1.46E-09 | 6.35 | 10.851627  | 7.32E-02 | 104688010 | 104688133 | NC_000007.13 |
| cg18320766 | 1.44E-08 | 1.46E-09 | 6.35 | 10.8513893 | 1.52E-01 | 55598782  | 55598905  | NC_000019.9  |
| cg27100436 | 1.45E-08 | 1.46E-09 | 6.35 | 10.8499087 | 1.33E-01 | 102920978 | 102921101 | NC_000007.13 |
| cg14085177 | 1.45E-08 | 1.46E-09 | 6.35 | 10.8498033 | 9.63E-02 | 133312912 | 133313035 | NC_000009.11 |
| cg15745900 | 1.45E-08 | 1.46E-09 | 6.35 | 10.8494957 | 2.10E-01 | 68864549  | 68864672  | NC_000008.10 |
| cg23513569 | 1.45E-08 | 1.46E-09 | 6.35 | 10.8491474 | 6.39E-02 | 132895543 | 132895666 | NC_000012.11 |
| cg10129768 | 1.45E-08 | 1.46E-09 | 6.35 | 10.8487132 | 7.38E-02 | 2411004   | 2411127   | NC_000001.10 |
| cg03884860 | 1.45E-08 | 1.46E-09 | 6.35 | 10.8486723 | 6.73E-02 | 76397484  | 76397607  | NC_000018.9  |
| cg20485733 | 1.45E-08 | 1.47E-09 | 6.35 | 10.8481143 | 1.40E-01 | 2798136   | 2798259   | NC_000017.10 |
| cg24679695 | 1.45E-08 | 1.47E-09 | 6.35 | 10.8479489 | 3.34E-02 | 9199102   | 9199225   | NC_000002.11 |
| cg16458494 | 1.45E-08 | 1.47E-09 | 6.35 | 10.846585  | 1.23E-01 | 95870262  | 95870385  | NC_000015.9  |
| cg13837335 | 1.45E-08 | 1.47E-09 | 6.35 | 10.8460204 | 8.42E-02 | 2191798   | 2191921   | NC_000009.11 |
| cg06610876 | 1.45E-08 | 1.47E-09 | 6.35 | 10.8458366 | 2.67E-02 | 89577551  | 89577674  | NC_000012.11 |
| cg03505117 | 1.45E-08 | 1.47E-09 | 6.35 | 10.8455832 | 1.52E-01 | 113441608 | 113441731 | NC_000004.11 |
| cg03223126 | 1.45E-08 | 1.47E-09 | 6.35 | 10.8448351 | 1.95E-01 | 111471192 | 111471315 | NC_000012.11 |
| cg18165065 | 1.45E-08 | 1.47E-09 | 6.35 | 10.8443477 | 1.39E-01 | 8130665   | 8130788   | NC_000001.10 |
| cg23920079 | 1.45E-08 | 1.47E-09 | 6.35 | 10.8442211 | 8.81E-02 | 20066303  | 20066426  | NC_000020.10 |
| cg27368828 | 1.45E-08 | 1.47E-09 | 6.35 | 10.8433096 | 4.07E-02 | 72358359  | 72358482  | NC_000010.10 |
| cg23462338 | 1.45E-08 | 1.47E-09 | 6.35 | 10.8431489 | 8.22E-02 | 132588323 | 132588446 | NC_000012.11 |
| cg17203063 | 1.45E-08 | 1.47E-09 | 6.35 | 10.8428694 | 1.64E-01 | 75601711  | 75601834  | NC_000012.11 |
| cg04838988 | 1.46E-08 | 1.47E-09 | 6.35 | 10.8428061 | 1.60E-01 | 70984437  | 70984560  | NC_000008.10 |
| cg14944538 | 1.46E-08 | 1.47E-09 | 6.35 | 10.8423242 | 1.22E-01 | 3220532   | 3220655   | NC_000018.9  |
| cg09731996 | 1.46E-08 | 1.47E-09 | 6.35 | 10.8422394 | 1.45E-01 | 3599090   | 3599213   | NC_000005.9  |
| cg03084350 | 1.46E-08 | 1.47E-09 | 6.35 | 10.8420924 | 6.90E-02 | 38065265  | 38065388  | NC_000003.11 |
| cg10871863 | 1.46E-08 | 1.48E-09 | 6.35 | 10.8417177 | 3.67E-02 | 93407968  | 93408091  | NC_000014.8  |

|            |          |          |      |            |          |           |           |              |
|------------|----------|----------|------|------------|----------|-----------|-----------|--------------|
| cg20747266 | 1.46E-08 | 1.48E-09 | 6.35 | 10.8396894 | 1.29E-01 | 142409507 | 142409630 | NC_000006.11 |
| cg21926708 | 1.46E-08 | 1.48E-09 | 6.35 | 10.8385683 | 1.37E-01 | 41582349  | 41582472  | NC_000012.11 |
| cg13822303 | 1.47E-08 | 1.49E-09 | 6.35 | 10.8345908 | 1.35E-01 | 130526930 | 130527053 | NC_000012.11 |
| cg20942099 | 1.47E-08 | 1.49E-09 | 6.35 | 10.8331173 | 4.06E-02 | 184007803 | 184007926 | NC_000001.10 |
| cg26290632 | 1.47E-08 | 1.49E-09 | 6.35 | 10.8326673 | 1.44E-01 | 91094847  | 91094970  | NC_000008.10 |
| cg14417172 | 1.47E-08 | 1.49E-09 | 6.35 | 10.8314595 | 6.74E-02 | 136439150 | 136439273 | NC_000008.10 |
| cg04937080 | 1.47E-08 | 1.49E-09 | 6.35 | 10.8313952 | 1.55E-01 | 58715532  | 58715655  | NC_000001.10 |
| cg07540103 | 1.47E-08 | 1.49E-09 | 6.35 | 10.8299968 | 2.11E-01 | 6679499   | 6679622   | NC_000017.10 |
| cg06708888 | 1.47E-08 | 1.49E-09 | 6.35 | 10.8288892 | 6.88E-02 | 19338688  | 19338811  | NC_000012.11 |
| cg09677082 | 1.48E-08 | 1.50E-09 | 6.35 | 10.8286922 | 9.65E-02 | 62514572  | 62514695  | NC_000007.13 |
| cg26517849 | 1.48E-08 | 1.50E-09 | 6.35 | 10.8285714 | 1.28E-01 | 2161141   | 2161264   | NC_000011.9  |
| cg24671344 | 1.48E-08 | 1.50E-09 | 6.35 | 10.8283448 | 1.81E-01 | 13910796  | 13910919  | NC_000001.10 |
| cg02646423 | 1.48E-08 | 1.50E-09 | 6.35 | 10.8280785 | 1.23E-01 | 27183794  | 27183917  | NC_000007.13 |
| cg03937440 | 1.48E-08 | 1.50E-09 | 6.35 | 10.8270431 | 8.29E-02 | 129660428 | 129660551 | NC_000006.11 |
| cg05471491 | 1.48E-08 | 1.50E-09 | 6.35 | 10.8267495 | 3.55E-02 | 83746888  | 83747011  | NC_000007.13 |
| cg02418535 | 1.48E-08 | 1.50E-09 | 6.35 | 10.8255864 | 6.81E-02 | 100052640 | 100052763 | NC_000003.11 |
| cg10208269 | 1.48E-08 | 1.50E-09 | 6.35 | 10.8250671 | 7.10E-02 | 111508999 | 111509122 | NC_000004.11 |
| cg01408558 | 1.48E-08 | 1.50E-09 | 6.35 | 10.8238977 | 4.97E-02 | 10563212  | 10563335  | NC_000019.9  |
| cg21346043 | 1.48E-08 | 1.50E-09 | 6.35 | 10.8232084 | 1.30E-01 | 86351067  | 86351190  | NC_000008.10 |
| cg22370480 | 1.48E-08 | 1.50E-09 | 6.35 | 10.8223389 | 1.85E-01 | 70995607  | 70995730  | NC_000002.11 |
| cg18525486 | 1.48E-08 | 1.51E-09 | 6.35 | 10.8221331 | 1.55E-01 | 62357176  | 62357299  | NC_000003.11 |
| cg25318296 | 1.48E-08 | 1.51E-09 | 6.35 | 10.8215363 | 1.42E-01 | 100547785 | 100547908 | NC_000013.10 |
| cg03306486 | 1.49E-08 | 1.51E-09 | 6.35 | 10.8214737 | 2.20E-01 | 1467952   | 1468075   | NC_000019.9  |
| cg10262744 | 1.49E-08 | 1.51E-09 | 6.35 | 10.8209779 | 1.06E-01 | 12599968  | 12600091  | NC_000003.11 |
| cg07823562 | 1.49E-08 | 1.51E-09 | 6.35 | 10.8208217 | 9.43E-02 | 76743501  | 76743624  | NC_000017.10 |

|            |          |          |      |            |          |           |           |              |
|------------|----------|----------|------|------------|----------|-----------|-----------|--------------|
| cg01337197 | 1.49E-08 | 1.51E-09 | 6.35 | 10.8203713 | 6.36E-02 | 43089547  | 43089670  | NC_000022.10 |
| cg09636202 | 1.49E-08 | 1.51E-09 | 6.35 | 10.8200306 | 1.56E-01 | 56243297  | 56243420  | NC_000007.13 |
| cg01759562 | 1.49E-08 | 1.51E-09 | 6.35 | 10.8197679 | 1.25E-01 | 114917826 | 114917949 | NC_000012.11 |
| cg03898631 | 1.49E-08 | 1.51E-09 | 6.35 | 10.8189568 | 1.94E-01 | 112761112 | 112761235 | NC_000013.10 |
| cg16962115 | 1.49E-08 | 1.51E-09 | 6.35 | 10.8184032 | 9.46E-02 | 236016383 | 236016506 | NC_000001.10 |
| cg01922095 | 1.49E-08 | 1.51E-09 | 6.35 | 10.8181421 | 1.23E-01 | 56516309  | 56516432  | NC_000007.13 |
| cg01198887 | 1.49E-08 | 1.51E-09 | 6.35 | 10.8181025 | 4.49E-02 | 166907883 | 166908006 | NC_000006.11 |
| cg24001345 | 1.49E-08 | 1.51E-09 | 6.35 | 10.8177028 | 6.61E-02 | 95372373  | 95372496  | NC_000010.10 |
| cg24695890 | 1.49E-08 | 1.51E-09 | 6.35 | 10.8168001 | 9.18E-02 | 47092254  | 47092377  | NC_000007.13 |
| cg06372303 | 1.49E-08 | 1.51E-09 | 6.35 | 10.8159386 | 1.37E-01 | 907092    | 907215    | NC_000018.9  |
| cg01987516 | 1.49E-08 | 1.52E-09 | 6.35 | 10.815371  | 1.36E-01 | 101282726 | 101282849 | NC_000010.10 |
| cg12078605 | 1.49E-08 | 1.52E-09 | 6.35 | 10.8152948 | 1.78E-01 | 80531500  | 80531623  | NC_000002.11 |
| cg13286590 | 1.50E-08 | 1.52E-09 | 6.34 | 10.8134978 | 6.59E-02 | 31778018  | 31778141  | NC_000006.11 |
| cg06644428 | 1.50E-08 | 1.52E-09 | 6.34 | 10.8122184 | 1.69E-01 | 233284112 | 233284235 | NC_000002.11 |
| cg24480227 | 1.50E-08 | 1.52E-09 | 6.34 | 10.8119348 | 5.83E-02 | 114489426 | 114489549 | NC_000010.10 |
| cg00815091 | 1.50E-08 | 1.52E-09 | 6.34 | 10.8114569 | 8.28E-02 | 55464045  | 55464168  | NC_000001.10 |
| cg04622802 | 1.50E-08 | 1.52E-09 | 6.34 | 10.8111872 | 1.46E-01 | 27015872  | 27015995  | NC_000011.9  |
| cg00838829 | 1.50E-08 | 1.53E-09 | 6.34 | 10.8089836 | 7.38E-02 | 54723426  | 54723549  | NC_000001.10 |
| cg03679521 | 1.50E-08 | 1.53E-09 | 6.34 | 10.8089601 | 1.30E-01 | 37764153  | 37764276  | NC_000017.10 |
| cg17834752 | 1.50E-08 | 1.53E-09 | 6.34 | 10.8085359 | 1.54E-01 | 140715239 | 140715362 | NC_000008.10 |
| cg03196097 | 1.50E-08 | 1.53E-09 | 6.34 | 10.808003  | 1.37E-01 | 4857441   | 4857564   | NC_000004.11 |
| cg01979489 | 1.51E-08 | 1.53E-09 | 6.34 | 10.8059287 | 9.06E-02 | 332603    | 332726    | NC_000016.9  |
| cg27424244 | 1.51E-08 | 1.53E-09 | 6.34 | 10.8055039 | 1.48E-01 | 2360282   | 2360405   | NC_000019.9  |
| cg08624180 | 1.51E-08 | 1.53E-09 | 6.34 | 10.8052547 | 2.09E-01 | 89339080  | 89339203  | NC_000008.10 |
| cg21845953 | 1.51E-08 | 1.53E-09 | 6.34 | 10.8043491 | 1.44E-01 | 77593360  | 77593483  | NC_000008.10 |

|            |          |          |      |            |          |           |           |              |
|------------|----------|----------|------|------------|----------|-----------|-----------|--------------|
| cg11471802 | 1.51E-08 | 1.53E-09 | 6.34 | 10.8041512 | 1.22E-01 | 47529015  | 47529138  | NC_000008.10 |
| cg05380921 | 1.51E-08 | 1.53E-09 | 6.34 | 10.804027  | 1.21E-01 | 46921663  | 46921786  | NC_000016.9  |
| cg12602112 | 1.51E-08 | 1.53E-09 | 6.34 | 10.8034669 | 1.80E-01 | 78493294  | 78493417  | NC_000013.10 |
| cg19748424 | 1.51E-08 | 1.54E-09 | 6.34 | 10.8026225 | 2.01E-01 | 6583601   | 6583724   | NC_000005.9  |
| cg23393356 | 1.51E-08 | 1.54E-09 | 6.34 | 10.8025435 | 6.31E-02 | 231774770 | 231774893 | NC_000002.11 |
| cg16678602 | 1.51E-08 | 1.54E-09 | 6.34 | 10.8023106 | 2.55E-01 | 85954331  | 85954454  | NC_000010.10 |
| cg02431780 | 1.51E-08 | 1.54E-09 | 6.34 | 10.8022281 | 6.92E-02 | 42971223  | 42971346  | NC_000005.9  |
| cg04159420 | 1.51E-08 | 1.54E-09 | 6.34 | 10.8010409 | 1.13E-01 | 106402908 | 106403031 | NC_000010.10 |
| cg27218548 | 1.51E-08 | 1.54E-09 | 6.34 | 10.8010334 | 6.05E-02 | 33255639  | 33255762  | NC_000006.11 |
| cg26365925 | 1.51E-08 | 1.54E-09 | 6.34 | 10.8009481 | 1.52E-01 | 44063315  | 44063438  | NC_000003.11 |
| cg11478197 | 1.51E-08 | 1.54E-09 | 6.34 | 10.8008535 | 4.13E-02 | 157106684 | 157106807 | NC_000007.13 |
| cg04509074 | 1.51E-08 | 1.54E-09 | 6.34 | 10.8007113 | 1.57E-01 | 2754274   | 2754397   | NC_000005.9  |
| cg04398526 | 1.52E-08 | 1.54E-09 | 6.34 | 10.7983441 | 7.55E-02 | 1035197   | 1035320   | NC_000016.9  |
| cg09293718 | 1.52E-08 | 1.54E-09 | 6.34 | 10.7977273 | 1.25E-01 | 87076603  | 87076726  | NC_000008.10 |
| cg19403014 | 1.52E-08 | 1.55E-09 | 6.34 | 10.7958969 | 2.03E-01 | 48982950  | 48983073  | NC_000002.11 |
| cg07820868 | 1.52E-08 | 1.55E-09 | 6.34 | 10.7956319 | 1.41E-01 | 119528638 | 119528761 | NC_000001.10 |
| cg25021598 | 1.52E-08 | 1.55E-09 | 6.34 | 10.7954508 | 2.72E-02 | 137518412 | 137518535 | NC_000005.9  |
| cg25410785 | 1.53E-08 | 1.55E-09 | 6.34 | 10.7914782 | 1.11E-01 | 3597760   | 3597883   | NC_000005.9  |
| cg05205647 | 1.53E-08 | 1.55E-09 | 6.34 | 10.7906959 | 1.13E-01 | 132218302 | 132218425 | NC_000002.11 |
| cg01177388 | 1.53E-08 | 1.56E-09 | 6.34 | 10.7900942 | 4.77E-02 | 32812704  | 32812827  | NC_000006.11 |
| cg04790084 | 1.53E-08 | 1.56E-09 | 6.34 | 10.7899688 | 2.30E-01 | 32906622  | 32906745  | NC_000017.10 |
| cg01954140 | 1.53E-08 | 1.56E-09 | 6.34 | 10.789831  | 2.05E-02 | 191043438 | 191043561 | NC_000003.11 |
| cg26144458 | 1.53E-08 | 1.56E-09 | 6.34 | 10.7879202 | 1.20E-01 | 38070148  | 38070271  | NC_000021.8  |
| cg03731661 | 1.53E-08 | 1.56E-09 | 6.34 | 10.7875307 | 1.00E-01 | 39337506  | 39337629  | NC_000001.10 |
| cg07653418 | 1.54E-08 | 1.56E-09 | 6.34 | 10.7849136 | 6.47E-02 | 3502415   | 3502538   | NC_000002.11 |

|            |          |          |      |            |          |           |           |              |
|------------|----------|----------|------|------------|----------|-----------|-----------|--------------|
| cg03817675 | 1.54E-08 | 1.56E-09 | 6.34 | 10.7846053 | 5.94E-02 | 139299053 | 139299176 | NC_000007.13 |
| cg26575633 | 1.54E-08 | 1.56E-09 | 6.34 | 10.7843854 | 9.92E-02 | 156846336 | 156846459 | NC_000001.10 |
| cg13824319 | 1.54E-08 | 1.57E-09 | 6.34 | 10.7825951 | 8.16E-02 | 121680822 | 121680945 | NC_000011.9  |
| cg03600094 | 1.54E-08 | 1.57E-09 | 6.34 | 10.7820231 | 9.34E-02 | 2481475   | 2481598   | NC_000011.9  |
| cg00755130 | 1.54E-08 | 1.57E-09 | 6.34 | 10.7812093 | 1.11E-01 | 32729587  | 32729710  | NC_000006.11 |
| cg23679471 | 1.54E-08 | 1.57E-09 | 6.34 | 10.779963  | 1.02E-01 | 102473810 | 102473933 | NC_000010.10 |
| cg10292376 | 1.54E-08 | 1.57E-09 | 6.34 | 10.7799585 | 9.80E-02 | 52995070  | 52995193  | NC_000012.11 |
| cg01809217 | 1.54E-08 | 1.57E-09 | 6.34 | 10.7798847 | 9.69E-02 | 240656342 | 240656465 | NC_000001.10 |
| cg23613882 | 1.55E-08 | 1.57E-09 | 6.34 | 10.779478  | 9.43E-02 | 123364813 | 123364936 | NC_000010.10 |
| cg12061127 | 1.55E-08 | 1.58E-09 | 6.34 | 10.7774597 | 4.80E-02 | 44259912  | 44260035  | NC_000020.10 |
| cg04510564 | 1.55E-08 | 1.58E-09 | 6.34 | 10.7773392 | 4.89E-02 | 27034796  | 27034919  | NC_000007.13 |
| cg07131413 | 1.55E-08 | 1.58E-09 | 6.34 | 10.7773067 | 2.69E-02 | 124827496 | 124827619 | NC_000011.9  |
| cg20984085 | 1.55E-08 | 1.58E-09 | 6.34 | 10.7771191 | 2.39E-01 | 56905032  | 56905155  | NC_000019.9  |
| cg02957799 | 1.55E-08 | 1.58E-09 | 6.34 | 10.7755642 | 1.03E-01 | 52003566  | 52003689  | NC_000019.9  |
| cg23086843 | 1.55E-08 | 1.58E-09 | 6.34 | 10.7752913 | 6.07E-02 | 3017674   | 3017797   | NC_000001.10 |
| cg00777627 | 1.55E-08 | 1.58E-09 | 6.34 | 10.7736844 | 1.82E-01 | 166075755 | 166075878 | NC_000006.11 |
| cg03539747 | 1.55E-08 | 1.58E-09 | 6.34 | 10.7735602 | 8.55E-02 | 44590825  | 44590948  | NC_000021.8  |
| cg17871749 | 1.56E-08 | 1.58E-09 | 6.34 | 10.7729819 | 1.41E-01 | 145718669 | 145718792 | NC_000005.9  |
| cg10425861 | 1.56E-08 | 1.58E-09 | 6.34 | 10.7725489 | 1.54E-01 | 60286540  | 60286663  | NC_000015.9  |
| cg24641276 | 1.56E-08 | 1.58E-09 | 6.34 | 10.7717413 | 1.27E-01 | 170743715 | 170743838 | NC_000005.9  |
| cg04469880 | 1.56E-08 | 1.59E-09 | 6.34 | 10.7707557 | 1.67E-01 | 36736565  | 36736688  | NC_000019.9  |
| cg23457588 | 1.56E-08 | 1.59E-09 | 6.34 | 10.7706228 | 1.05E-01 | 130508657 | 130508780 | NC_000010.10 |
| cg02152233 | 1.56E-08 | 1.59E-09 | 6.34 | 10.770611  | 8.94E-02 | 29189789  | 29189912  | NC_000001.10 |
| cg05909553 | 1.56E-08 | 1.59E-09 | 6.34 | 10.7704016 | 1.64E-02 | 145739024 | 145739147 | NC_000008.10 |
| cg27065217 | 1.56E-08 | 1.59E-09 | 6.34 | 10.7703986 | 1.18E-01 | 65499369  | 65499492  | NC_000008.10 |

|            |          |          |      |            |          |           |           |              |
|------------|----------|----------|------|------------|----------|-----------|-----------|--------------|
| cg19812613 | 1.56E-08 | 1.59E-09 | 6.34 | 10.7699448 | 1.29E-01 | 108672872 | 108672995 | NC_000003.11 |
| cg02471149 | 1.56E-08 | 1.59E-09 | 6.34 | 10.7691487 | 9.47E-02 | 98221756  | 98221879  | NC_000013.10 |
| cg16421359 | 1.56E-08 | 1.59E-09 | 6.34 | 10.7687465 | 1.41E-02 | 86585801  | 86585924  | NC_000016.9  |
| cg26786382 | 1.56E-08 | 1.59E-09 | 6.34 | 10.7684033 | 1.02E-01 | 61277328  | 61277451  | NC_000011.9  |
| cg07120174 | 1.56E-08 | 1.59E-09 | 6.34 | 10.7681487 | 6.24E-02 | 41351213  | 41351336  | NC_000008.10 |
| cg22121557 | 1.56E-08 | 1.59E-09 | 6.34 | 10.7681214 | 1.21E-01 | 28584138  | 28584261  | NC_000006.11 |
| cg03568957 | 1.56E-08 | 1.59E-09 | 6.34 | 10.7678257 | 3.16E-02 | 6155761   | 6155884   | NC_000012.11 |
| cg06239208 | 1.56E-08 | 1.59E-09 | 6.34 | 10.7673053 | 1.83E-01 | 42543422  | 42543545  | NC_000020.10 |
| cg22711082 | 1.56E-08 | 1.59E-09 | 6.34 | 10.7672097 | 1.22E-01 | 16396781  | 16396904  | NC_000001.10 |
| cg01607625 | 1.57E-08 | 1.60E-09 | 6.34 | 10.7652063 | 1.07E-01 | 32847830  | 32847953  | NC_000006.11 |
| cg10315800 | 1.57E-08 | 1.60E-09 | 6.34 | 10.7645651 | 1.01E-01 | 170728805 | 170728928 | NC_000006.11 |
| cg17340519 | 1.57E-08 | 1.60E-09 | 6.34 | 10.764537  | 1.43E-01 | 224805852 | 224805975 | NC_000001.10 |
| cg01729491 | 1.57E-08 | 1.60E-09 | 6.34 | 10.7641519 | 1.50E-01 | 27225772  | 27225895  | NC_000007.13 |
| cg18022224 | 1.57E-08 | 1.60E-09 | 6.34 | 10.7634967 | 1.29E-01 | 176964404 | 176964527 | NC_000002.11 |
| cg03753391 | 1.57E-08 | 1.60E-09 | 6.34 | 10.7629254 | 1.03E-01 | 59478958  | 59479081  | NC_000017.10 |
| cg01034973 | 1.57E-08 | 1.60E-09 | 6.34 | 10.7624992 | 4.88E-02 | 143459908 | 143460031 | NC_000008.10 |
| cg12034610 | 1.57E-08 | 1.60E-09 | 6.33 | 10.7613913 | 7.66E-02 | 41300769  | 41300892  | NC_000001.10 |
| cg13928649 | 1.57E-08 | 1.60E-09 | 6.33 | 10.7604481 | 1.07E-01 | 133540341 | 133540464 | NC_000009.11 |
| cg13154908 | 1.58E-08 | 1.61E-09 | 6.33 | 10.7588402 | 5.00E-02 | 178869001 | 178869124 | NC_000003.11 |
| cg23415052 | 1.58E-08 | 1.61E-09 | 6.33 | 10.7578781 | 6.07E-02 | 33778427  | 33778550  | NC_000017.10 |
| cg14439150 | 1.58E-08 | 1.61E-09 | 6.33 | 10.7569894 | 8.68E-02 | 1336193   | 1336316   | NC_000008.10 |
| cg13719084 | 1.58E-08 | 1.61E-09 | 6.33 | 10.7564712 | 8.98E-02 | 73697917  | 73698040  | NC_000011.9  |
| cg05308495 | 1.58E-08 | 1.61E-09 | 6.33 | 10.7558218 | 1.97E-01 | 54515169  | 54515292  | NC_000019.9  |
| cg27147819 | 1.58E-08 | 1.61E-09 | 6.33 | 10.755237  | 1.26E-01 | 21378074  | 21378197  | NC_000020.10 |
| cg16636114 | 1.58E-08 | 1.61E-09 | 6.33 | 10.7550338 | 5.51E-02 | 2249239   | 2249362   | NC_000019.9  |

|            |          |          |      |            |          |           |           |              |
|------------|----------|----------|------|------------|----------|-----------|-----------|--------------|
| cg07028914 | 1.58E-08 | 1.61E-09 | 6.33 | 10.754566  | 1.63E-01 | 85474090  | 85474213  | NC_000006.11 |
| cg13245152 | 1.58E-08 | 1.61E-09 | 6.33 | 10.7540638 | 1.39E-01 | 31823238  | 31823361  | NC_000011.9  |
| cg10663628 | 1.58E-08 | 1.62E-09 | 6.33 | 10.7530846 | 5.19E-02 | 23798452  | 23798575  | NC_000002.11 |
| cg02892402 | 1.59E-08 | 1.62E-09 | 6.33 | 10.7528613 | 6.79E-02 | 320613    | 320736    | NC_000016.9  |
| cg12773394 | 1.59E-08 | 1.62E-09 | 6.33 | 10.7527032 | 1.43E-01 | 5892965   | 5893088   | NC_000004.11 |
| cg10113191 | 1.59E-08 | 1.62E-09 | 6.33 | 10.7521072 | 6.43E-02 | 1974332   | 1974455   | NC_000011.9  |
| cg21911301 | 1.59E-08 | 1.62E-09 | 6.33 | 10.7507966 | 8.32E-02 | 43946518  | 43946641  | NC_000012.11 |
| cg09839592 | 1.59E-08 | 1.62E-09 | 6.33 | 10.750784  | 5.19E-02 | 239478514 | 239478637 | NC_000002.11 |
| cg02415014 | 1.59E-08 | 1.62E-09 | 6.33 | 10.7501739 | 7.98E-02 | 143852576 | 143852699 | NC_000008.10 |
| cg10743104 | 1.59E-08 | 1.62E-09 | 6.33 | 10.7498027 | 1.83E-01 | 13910206  | 13910329  | NC_000001.10 |
| cg02333517 | 1.59E-08 | 1.62E-09 | 6.33 | 10.7497331 | 7.73E-02 | 19975514  | 19975637  | NC_000003.11 |
| cg23965689 | 1.59E-08 | 1.62E-09 | 6.33 | 10.7487289 | 1.35E-01 | 42394004  | 42394127  | NC_000017.10 |
| cg17845532 | 1.59E-08 | 1.62E-09 | 6.33 | 10.7486432 | 1.71E-01 | 3786643   | 3786766   | NC_000019.9  |
| cg07649562 | 1.59E-08 | 1.63E-09 | 6.33 | 10.7471683 | 1.21E-01 | 132813504 | 132813627 | NC_000011.9  |
| cg27252164 | 1.59E-08 | 1.63E-09 | 6.33 | 10.7465996 | 1.08E-01 | 2292373   | 2292496   | NC_000011.9  |
| cg14025632 | 1.59E-08 | 1.63E-09 | 6.33 | 10.7464856 | 2.44E-02 | 132163023 | 132163146 | NC_000009.11 |
| cg02582203 | 1.59E-08 | 1.63E-09 | 6.33 | 10.7464347 | 1.32E-01 | 43604219  | 43604342  | NC_000011.9  |
| cg02419362 | 1.60E-08 | 1.63E-09 | 6.33 | 10.7440215 | 9.55E-02 | 121203948 | 121204071 | NC_000012.11 |
| cg11907797 | 1.60E-08 | 1.63E-09 | 6.33 | 10.7436642 | 1.36E-01 | 140763125 | 140763248 | NC_000005.9  |
| cg01673994 | 1.60E-08 | 1.63E-09 | 6.33 | 10.7421402 | 2.06E-01 | 89340750  | 89340873  | NC_000008.10 |
| cg22973459 | 1.60E-08 | 1.64E-09 | 6.33 | 10.7410283 | 1.17E-01 | 102637197 | 102637320 | NC_000010.10 |
| cg11558705 | 1.61E-08 | 1.64E-09 | 6.33 | 10.7396344 | 1.14E-01 | 113624596 | 113624719 | NC_000012.11 |
| cg08447324 | 1.61E-08 | 1.64E-09 | 6.33 | 10.7393438 | 2.18E-01 | 51170816  | 51170939  | NC_000019.9  |
| cg05635730 | 1.61E-08 | 1.64E-09 | 6.33 | 10.7387107 | 1.38E-01 | 147096075 | 147096198 | NC_000003.11 |
| cg15591386 | 1.61E-08 | 1.64E-09 | 6.33 | 10.7384467 | 8.72E-02 | 76265299  | 76265422  | NC_000001.10 |



|            |          |          |      |            |          |           |           |              |
|------------|----------|----------|------|------------|----------|-----------|-----------|--------------|
| cg17102325 | 1.61E-08 | 1.64E-09 | 6.33 | 10.7381575 | 5.82E-02 | 35223055  | 35223178  | NC_000001.10 |
| cg27662875 | 1.61E-08 | 1.64E-09 | 6.33 | 10.7378863 | 4.47E-02 | 50165232  | 50165355  | NC_000019.9  |
| cg12578575 | 1.61E-08 | 1.64E-09 | 6.33 | 10.7378247 | 9.99E-02 | 54135140  | 54135263  | NC_000019.9  |
| cg04326499 | 1.61E-08 | 1.64E-09 | 6.33 | 10.7377172 | 7.92E-02 | 45627080  | 45627203  | NC_000006.11 |
| cg00513316 | 1.61E-08 | 1.64E-09 | 6.33 | 10.7371434 | 1.23E-01 | 78632109  | 78632232  | NC_000015.9  |
| cg26003933 | 1.61E-08 | 1.65E-09 | 6.33 | 10.7350005 | 1.08E-01 | 6035549   | 6035672   | NC_000001.10 |
| cg10568624 | 1.61E-08 | 1.65E-09 | 6.33 | 10.7335719 | 1.64E-01 | 100619991 | 100620114 | NC_000009.11 |
| cg23522194 | 1.62E-08 | 1.65E-09 | 6.33 | 10.7326488 | 9.91E-02 | 48565189  | 48565312  | NC_000019.9  |
| cg27390229 | 1.62E-08 | 1.65E-09 | 6.33 | 10.7324609 | 2.07E-02 | 134672917 | 134673040 | NC_000010.10 |
| cg09086312 | 1.62E-08 | 1.65E-09 | 6.33 | 10.7316813 | 3.07E-02 | 80766090  | 80766213  | NC_000017.10 |
| cg10097295 | 1.62E-08 | 1.65E-09 | 6.33 | 10.7309009 | 1.01E-01 | 63789341  | 63789464  | NC_000001.10 |
| cg17459204 | 1.62E-08 | 1.66E-09 | 6.33 | 10.7291953 | 2.18E-01 | 68864523  | 68864646  | NC_000008.10 |
| cg22774681 | 1.62E-08 | 1.66E-09 | 6.33 | 10.7282728 | 1.29E-01 | 14320678  | 14320801  | NC_000019.9  |
| cg17331494 | 1.62E-08 | 1.66E-09 | 6.33 | 10.7280656 | 1.51E-01 | 20693027  | 20693150  | NC_000001.10 |
| cg25942596 | 1.62E-08 | 1.66E-09 | 6.33 | 10.727248  | 1.17E-01 | 82355828  | 82355951  | NC_000015.9  |
| cg15450098 | 1.63E-08 | 1.66E-09 | 6.33 | 10.7261585 | 1.07E-01 | 221057561 | 221057684 | NC_000001.10 |
| cg06911121 | 1.63E-08 | 1.66E-09 | 6.33 | 10.7258647 | 1.80E-01 | 114847164 | 114847287 | NC_000012.11 |
| cg23145322 | 1.63E-08 | 1.66E-09 | 6.33 | 10.7255103 | 5.64E-02 | 15674495  | 15674618  | NC_000003.11 |
| cg23476276 | 1.63E-08 | 1.66E-09 | 6.33 | 10.7254805 | 2.11E-02 | 90629219  | 90629342  | NC_000010.10 |
| cg27154394 | 1.63E-08 | 1.66E-09 | 6.33 | 10.7248204 | 3.82E-02 | 56671146  | 56671269  | NC_000019.9  |
| cg13228715 | 1.63E-08 | 1.66E-09 | 6.33 | 10.72482   | 2.25E-02 | 46037486  | 46037609  | NC_000022.10 |
| cg14845020 | 1.63E-08 | 1.66E-09 | 6.33 | 10.724764  | 1.24E-01 | 55833416  | 55833539  | NC_000020.10 |
| cg20228119 | 1.63E-08 | 1.66E-09 | 6.33 | 10.7235452 | 1.01E-01 | 99288695  | 99288818  | NC_000012.11 |
| cg01072217 | 1.63E-08 | 1.67E-09 | 6.33 | 10.7225171 | 1.65E-01 | 1275483   | 1275606   | NC_000007.13 |
| cg23179976 | 1.63E-08 | 1.67E-09 | 6.33 | 10.7224017 | 8.60E-02 | 122529707 | 122529830 | NC_000007.13 |

|            |          |          |      |            |          |           |           |              |
|------------|----------|----------|------|------------|----------|-----------|-----------|--------------|
| cg06656994 | 1.63E-08 | 1.67E-09 | 6.33 | 10.7223343 | 1.63E-01 | 179713176 | 179713299 | NC_000001.10 |
| cg25103492 | 1.63E-08 | 1.67E-09 | 6.33 | 10.7221102 | 1.87E-01 | 44388958  | 44389081  | NC_000005.9  |
| cg24214152 | 1.63E-08 | 1.67E-09 | 6.33 | 10.7217556 | 1.60E-01 | 85673860  | 85673983  | NC_000012.11 |
| cg13005999 | 1.63E-08 | 1.67E-09 | 6.33 | 10.721643  | 2.21E-01 | 104928055 | 104928178 | NC_000014.8  |
| cg05372597 | 1.63E-08 | 1.67E-09 | 6.33 | 10.7201262 | 2.17E-02 | 16972899  | 16973022  | NC_000001.10 |
| cg12453631 | 1.64E-08 | 1.67E-09 | 6.33 | 10.7198467 | 1.16E-01 | 157812226 | 157812349 | NC_000003.11 |
| cg09801621 | 1.64E-08 | 1.67E-09 | 6.33 | 10.7191927 | 3.42E-02 | 57499367  | 57499490  | NC_000016.9  |
| cg08502159 | 1.64E-08 | 1.67E-09 | 6.33 | 10.7189696 | 9.54E-02 | 31631638  | 31631761  | NC_000006.11 |
| cg07765621 | 1.64E-08 | 1.67E-09 | 6.33 | 10.7187513 | 2.06E-01 | 178018015 | 178018138 | NC_000005.9  |
| cg00333824 | 1.64E-08 | 1.67E-09 | 6.33 | 10.7178686 | 1.33E-01 | 63417605  | 63417728  | NC_000018.9  |
| cg02741216 | 1.64E-08 | 1.67E-09 | 6.33 | 10.7177251 | 1.98E-01 | 98945465  | 98945588  | NC_000010.10 |
| cg24937136 | 1.64E-08 | 1.67E-09 | 6.33 | 10.7176299 | 1.11E-01 | 226593346 | 226593469 | NC_000001.10 |
| cg14192935 | 1.64E-08 | 1.68E-09 | 6.33 | 10.7175005 | 1.10E-01 | 2571396   | 2571519   | NC_000009.11 |
| cg02989521 | 1.64E-08 | 1.68E-09 | 6.33 | 10.7172217 | 2.28E-01 | 107462437 | 107462560 | NC_000011.9  |
| cg22606941 | 1.64E-08 | 1.68E-09 | 6.33 | 10.7169482 | 3.95E-02 | 132872759 | 132872882 | NC_000012.11 |
| cg11420768 | 1.64E-08 | 1.68E-09 | 6.33 | 10.7151528 | 2.11E-01 | 59804421  | 59804544  | NC_000020.10 |
| cg14952359 | 1.64E-08 | 1.68E-09 | 6.33 | 10.7145136 | 8.20E-02 | 35791237  | 35791360  | NC_000019.9  |
| cg08749351 | 1.64E-08 | 1.68E-09 | 6.33 | 10.7143878 | 7.25E-02 | 76899423  | 76899546  | NC_000017.10 |
| cg09073799 | 1.65E-08 | 1.68E-09 | 6.33 | 10.7124693 | 1.21E-01 | 82336202  | 82336325  | NC_000015.9  |
| cg19835136 | 1.65E-08 | 1.69E-09 | 6.33 | 10.7098154 | 1.01E-01 | 17650995  | 17651118  | NC_000019.9  |
| cg23987137 | 1.66E-08 | 1.69E-09 | 6.32 | 10.7063801 | 1.12E-01 | 58653624  | 58653747  | NC_000005.9  |
| cg14897683 | 1.66E-08 | 1.70E-09 | 6.32 | 10.7045242 | 4.22E-02 | 55807184  | 55807307  | NC_000014.8  |
| cg12103265 | 1.66E-08 | 1.70E-09 | 6.32 | 10.7017537 | 1.81E-01 | 34114048  | 34114171  | NC_000019.9  |
| cg26279021 | 1.67E-08 | 1.70E-09 | 6.32 | 10.7009792 | 1.32E-01 | 19158349  | 19158472  | NC_000007.13 |
| cg05845403 | 1.67E-08 | 1.71E-09 | 6.32 | 10.6998538 | 1.06E-01 | 96293882  | 96294005  | NC_000013.10 |

|            |          |          |      |            |          |           |           |              |
|------------|----------|----------|------|------------|----------|-----------|-----------|--------------|
| cg19205994 | 1.67E-08 | 1.71E-09 | 6.32 | 10.699608  | 2.02E-01 | 242688081 | 242688204 | NC_000001.10 |
| cg06581830 | 1.67E-08 | 1.71E-09 | 6.32 | 10.6990619 | 1.24E-01 | 127389156 | 127389279 | NC_000005.9  |
| cg07940198 | 1.67E-08 | 1.71E-09 | 6.32 | 10.6986814 | 3.77E-02 | 74759644  | 74759767  | NC_000004.11 |
| cg27125044 | 1.67E-08 | 1.71E-09 | 6.32 | 10.6983638 | 1.45E-01 | 115134950 | 115135073 | NC_000012.11 |
| cg02916525 | 1.67E-08 | 1.71E-09 | 6.32 | 10.6978077 | 5.64E-02 | 11364202  | 11364325  | NC_000002.11 |
| cg16593242 | 1.67E-08 | 1.71E-09 | 6.32 | 10.6966424 | 5.00E-02 | 23334287  | 23334410  | NC_000020.10 |
| cg16503279 | 1.67E-08 | 1.71E-09 | 6.32 | 10.6964648 | 7.61E-02 | 67267614  | 67267737  | NC_000016.9  |
| cg02846841 | 1.67E-08 | 1.71E-09 | 6.32 | 10.6960139 | 1.26E-01 | 28945341  | 28945464  | NC_000006.11 |
| cg27612650 | 1.67E-08 | 1.71E-09 | 6.32 | 10.695774  | 6.76E-02 | 48352559  | 48352682  | NC_000018.9  |
| cg02037307 | 1.67E-08 | 1.71E-09 | 6.32 | 10.6951288 | 1.18E-01 | 134363562 | 134363685 | NC_000005.9  |
| cg01941881 | 1.68E-08 | 1.71E-09 | 6.32 | 10.6944821 | 4.22E-02 | 105793310 | 105793433 | NC_000014.8  |
| cg15087376 | 1.68E-08 | 1.72E-09 | 6.32 | 10.6944416 | 1.54E-01 | 149113539 | 149113662 | NC_000003.11 |
| cg10071824 | 1.68E-08 | 1.72E-09 | 6.32 | 10.6942442 | 2.12E-01 | 28366759  | 28366882  | NC_000013.10 |
| cg16086373 | 1.68E-08 | 1.72E-09 | 6.32 | 10.6939253 | 1.39E-01 | 5890838   | 5890961   | NC_000018.9  |
| cg14417974 | 1.68E-08 | 1.72E-09 | 6.32 | 10.6937362 | 6.97E-02 | 124058376 | 124058499 | NC_000009.11 |
| cg02719427 | 1.68E-08 | 1.72E-09 | 6.32 | 10.6931809 | 1.12E-01 | 2151725   | 2151848   | NC_000011.9  |
| cg22298430 | 1.68E-08 | 1.72E-09 | 6.32 | 10.6904427 | 1.87E-01 | 5404330   | 5404453   | NC_000017.10 |
| cg12010995 | 1.68E-08 | 1.72E-09 | 6.32 | 10.6899103 | 1.55E-01 | 59413152  | 59413275  | NC_000008.10 |
| cg23744121 | 1.68E-08 | 1.72E-09 | 6.32 | 10.6898809 | 8.07E-02 | 28247065  | 28247188  | NC_000015.9  |
| cg13951272 | 1.68E-08 | 1.72E-09 | 6.32 | 10.6895243 | 1.24E-01 | 135044676 | 135044799 | NC_000009.11 |
| cg02933679 | 1.68E-08 | 1.72E-09 | 6.32 | 10.6891003 | 1.33E-01 | 13910224  | 13910347  | NC_000001.10 |
| cg07146773 | 1.69E-08 | 1.73E-09 | 6.32 | 10.6881262 | 8.80E-02 | 80466042  | 80466165  | NC_000015.9  |
| cg02309594 | 1.69E-08 | 1.73E-09 | 6.32 | 10.6877583 | 9.34E-02 | 32084329  | 32084452  | NC_000001.10 |
| cg26706403 | 1.69E-08 | 1.73E-09 | 6.32 | 10.6871839 | 5.06E-02 | 47211491  | 47211614  | NC_000019.9  |
| cg06759309 | 1.69E-08 | 1.73E-09 | 6.32 | 10.6871816 | 6.39E-02 | 139699305 | 139699428 | NC_000006.11 |

|            |          |          |      |            |          |           |           |              |
|------------|----------|----------|------|------------|----------|-----------|-----------|--------------|
| cg07103068 | 1.69E-08 | 1.73E-09 | 6.32 | 10.6861398 | 9.77E-02 | 66706939  | 66707062  | NC_000002.11 |
| cg02384911 | 1.69E-08 | 1.73E-09 | 6.32 | 10.6845486 | 8.82E-02 | 907886    | 908009    | NC_000017.10 |
| cg24468070 | 1.69E-08 | 1.73E-09 | 6.32 | 10.684239  | 1.51E-01 | 54976501  | 54976624  | NC_000019.9  |
| cg22264930 | 1.69E-08 | 1.73E-09 | 6.32 | 10.6840981 | 1.44E-01 | 15244482  | 15244605  | NC_000017.10 |
| cg00699219 | 1.69E-08 | 1.73E-09 | 6.32 | 10.6835237 | 1.05E-01 | 174422442 | 174422565 | NC_000004.11 |
| cg15425280 | 1.69E-08 | 1.74E-09 | 6.32 | 10.6826788 | 1.44E-01 | 158141492 | 158141615 | NC_000004.11 |
| cg08158778 | 1.70E-08 | 1.74E-09 | 6.32 | 10.6814902 | 3.38E-02 | 49884703  | 49884826  | NC_000022.10 |
| cg03403065 | 1.70E-08 | 1.74E-09 | 6.32 | 10.6811872 | 2.13E-01 | 41818358  | 41818481  | NC_000020.10 |
| cg18733967 | 1.70E-08 | 1.74E-09 | 6.32 | 10.6802893 | 6.87E-02 | 76437211  | 76437334  | NC_000017.10 |
| cg07274618 | 1.70E-08 | 1.74E-09 | 6.32 | 10.6798898 | 1.05E-01 | 74070698  | 74070821  | NC_000017.10 |
| cg24730871 | 1.70E-08 | 1.74E-09 | 6.32 | 10.6794446 | 1.50E-02 | 19516902  | 19517025  | NC_000019.9  |
| cg04711998 | 1.70E-08 | 1.74E-09 | 6.32 | 10.6792593 | 1.79E-01 | 7708869   | 7708992   | NC_000010.10 |
| cg05469826 | 1.70E-08 | 1.74E-09 | 6.32 | 10.678454  | 3.96E-02 | 101844947 | 101845070 | NC_000007.13 |
| cg14629055 | 1.70E-08 | 1.74E-09 | 6.32 | 10.6783213 | 7.98E-02 | 10562978  | 10563101  | NC_000005.9  |
| cg24934063 | 1.70E-08 | 1.75E-09 | 6.32 | 10.6771937 | 1.35E-01 | 121944173 | 121944296 | NC_000007.13 |
| cg25325636 | 1.70E-08 | 1.75E-09 | 6.32 | 10.6769427 | 9.37E-02 | 57766896  | 57767019  | NC_000020.10 |
| cg18333694 | 1.70E-08 | 1.75E-09 | 6.32 | 10.6768702 | 5.10E-02 | 357882    | 358005    | NC_000011.9  |
| cg20007569 | 1.70E-08 | 1.75E-09 | 6.32 | 10.6762317 | 1.23E-01 | 62584726  | 62584849  | NC_000012.11 |
| cg02111032 | 1.71E-08 | 1.75E-09 | 6.32 | 10.6727331 | 2.02E-01 | 20818070  | 20818193  | NC_000007.13 |
| cg24862202 | 1.71E-08 | 1.75E-09 | 6.32 | 10.6726324 | 6.47E-02 | 114401224 | 114401347 | NC_000012.11 |
| cg10126715 | 1.71E-08 | 1.76E-09 | 6.32 | 10.6707733 | 1.05E-01 | 37500195  | 37500318  | NC_000001.10 |
| cg13973820 | 1.72E-08 | 1.76E-09 | 6.32 | 10.6698434 | 1.21E-01 | 55444072  | 55444195  | NC_000006.11 |
| cg13563725 | 1.72E-08 | 1.76E-09 | 6.32 | 10.6694886 | 1.41E-01 | 27212911  | 27213034  | NC_000015.9  |
| cg15690400 | 1.72E-08 | 1.76E-09 | 6.32 | 10.6690442 | 1.11E-01 | 12189847  | 12189970  | NC_000001.10 |
| cg03784436 | 1.72E-08 | 1.77E-09 | 6.32 | 10.6650657 | 1.71E-01 | 19145530  | 19145653  | NC_000007.13 |

|            |          |          |      |            |          |           |           |              |
|------------|----------|----------|------|------------|----------|-----------|-----------|--------------|
| cg26087117 | 1.72E-08 | 1.77E-09 | 6.32 | 10.664371  | 1.90E-01 | 53636229  | 53636352  | NC_000019.9  |
| cg14679607 | 1.72E-08 | 1.77E-09 | 6.32 | 10.664305  | 9.10E-02 | 34527230  | 34527353  | NC_000012.11 |
| cg01821058 | 1.73E-08 | 1.77E-09 | 6.32 | 10.6617305 | 1.94E-01 | 55512870  | 55512993  | NC_000016.9  |
| cg01164686 | 1.73E-08 | 1.78E-09 | 6.32 | 10.6600026 | 2.76E-02 | 2024593   | 2024716   | NC_000001.10 |
| cg08143343 | 1.73E-08 | 1.78E-09 | 6.32 | 10.6599573 | 1.55E-01 | 85307152  | 85307275  | NC_000012.11 |
| cg20360285 | 1.73E-08 | 1.78E-09 | 6.32 | 10.6594457 | 8.60E-02 | 47989345  | 47989468  | NC_000007.13 |
| cg24753998 | 1.73E-08 | 1.78E-09 | 6.32 | 10.6587126 | 1.06E-01 | 30452964  | 30453087  | NC_000021.8  |
| cg00642359 | 1.74E-08 | 1.78E-09 | 6.31 | 10.6561623 | 1.48E-01 | 114841708 | 114841831 | NC_000012.11 |
| cg21406271 | 1.74E-08 | 1.79E-09 | 6.31 | 10.6553148 | 1.33E-01 | 25258082  | 25258205  | NC_000001.10 |
| cg10120856 | 1.74E-08 | 1.79E-09 | 6.31 | 10.6544646 | 1.27E-01 | 157996959 | 157997082 | NC_000004.11 |
| cg22813950 | 1.74E-08 | 1.79E-09 | 6.31 | 10.6539552 | 1.12E-01 | 130645566 | 130645689 | NC_000012.11 |
| cg17737621 | 1.74E-08 | 1.79E-09 | 6.31 | 10.6539302 | 1.24E-01 | 21372480  | 21372603  | NC_000020.10 |
| cg24485954 | 1.74E-08 | 1.79E-09 | 6.31 | 10.6532918 | 2.25E-01 | 5293011   | 5293134   | NC_000019.9  |
| cg07581999 | 1.74E-08 | 1.79E-09 | 6.31 | 10.6531444 | 7.25E-02 | 109030597 | 109030720 | NC_000002.11 |
| cg00694258 | 1.74E-08 | 1.79E-09 | 6.31 | 10.6530506 | 1.13E-01 | 32038939  | 32039062  | NC_000010.10 |
| cg00993484 | 1.74E-08 | 1.79E-09 | 6.31 | 10.6527076 | 9.21E-02 | 1751169   | 1751292   | NC_000002.11 |
| cg16572603 | 1.75E-08 | 1.79E-09 | 6.31 | 10.6513598 | 8.35E-02 | 140725235 | 140725358 | NC_000005.9  |
| cg11142514 | 1.75E-08 | 1.79E-09 | 6.31 | 10.6509117 | 1.52E-01 | 70581427  | 70581550  | NC_000003.11 |
| cg02478023 | 1.75E-08 | 1.79E-09 | 6.31 | 10.6498774 | 1.05E-01 | 57351322  | 57351445  | NC_000019.9  |
| cg18391323 | 1.75E-08 | 1.80E-09 | 6.31 | 10.6496963 | 1.09E-01 | 20716432  | 20716555  | NC_000013.10 |
| cg06811295 | 1.75E-08 | 1.80E-09 | 6.31 | 10.6495116 | 1.13E-01 | 124905890 | 124906013 | NC_000010.10 |
| cg05446127 | 1.75E-08 | 1.80E-09 | 6.31 | 10.6494819 | 7.43E-02 | 75491527  | 75491650  | NC_000010.10 |
| cg06555246 | 1.75E-08 | 1.80E-09 | 6.31 | 10.6494063 | 5.78E-02 | 7991945   | 7992068   | NC_000019.9  |
| cg19863542 | 1.75E-08 | 1.80E-09 | 6.31 | 10.6492405 | 1.57E-01 | 85674140  | 85674263  | NC_000012.11 |
| cg05143633 | 1.75E-08 | 1.80E-09 | 6.31 | 10.6485935 | 1.34E-01 | 132905611 | 132905734 | NC_000012.11 |

|            |          |          |      |            |          |           |           |              |
|------------|----------|----------|------|------------|----------|-----------|-----------|--------------|
| cg20590643 | 1.75E-08 | 1.80E-09 | 6.31 | 10.6476985 | 5.48E-02 | 51766443  | 51766566  | NC_000014.8  |
| cg04281069 | 1.75E-08 | 1.80E-09 | 6.31 | 10.6471411 | 7.41E-02 | 144508118 | 144508241 | NC_000006.11 |
| cg14144025 | 1.75E-08 | 1.80E-09 | 6.31 | 10.6470539 | 1.25E-01 | 13536633  | 13536756  | NC_000004.11 |
| cg15132710 | 1.75E-08 | 1.80E-09 | 6.31 | 10.6462208 | 8.63E-02 | 44237801  | 44237924  | NC_000018.9  |
| cg00374839 | 1.75E-08 | 1.80E-09 | 6.31 | 10.6460908 | 1.43E-01 | 44332454  | 44332577  | NC_000011.9  |
| cg24454829 | 1.76E-08 | 1.81E-09 | 6.31 | 10.6438736 | 1.11E-01 | 22363053  | 22363176  | NC_000011.9  |
| cg06319822 | 1.76E-08 | 1.81E-09 | 6.31 | 10.6436942 | 2.08E-01 | 215960    | 216083    | NC_000016.9  |
| cg09336320 | 1.76E-08 | 1.81E-09 | 6.31 | 10.6434108 | 1.81E-01 | 175224635 | 175224758 | NC_000005.9  |
| cg03884132 | 1.76E-08 | 1.81E-09 | 6.31 | 10.6429882 | 1.88E-01 | 33009531  | 33009654  | NC_000015.9  |
| cg10749822 | 1.76E-08 | 1.81E-09 | 6.31 | 10.6414672 | 1.04E-01 | 44332913  | 44333036  | NC_000011.9  |
| cg07028821 | 1.76E-08 | 1.81E-09 | 6.31 | 10.6412986 | 2.73E-01 | 140773905 | 140774028 | NC_000007.13 |
| cg00130947 | 1.76E-08 | 1.81E-09 | 6.31 | 10.6405298 | 1.07E-01 | 129677367 | 129677490 | NC_000006.11 |
| cg15555527 | 1.76E-08 | 1.81E-09 | 6.31 | 10.6404115 | 1.39E-01 | 80885981  | 80886104  | NC_000004.11 |
| cg16768376 | 1.76E-08 | 1.81E-09 | 6.31 | 10.6402868 | 4.65E-02 | 20392608  | 20392731  | NC_000013.10 |
| cg08062273 | 1.76E-08 | 1.81E-09 | 6.31 | 10.6398929 | 1.10E-01 | 45641120  | 45641243  | NC_000003.11 |
| cg20850055 | 1.77E-08 | 1.82E-09 | 6.31 | 10.6364499 | 3.29E-02 | 101718959 | 101719082 | NC_000008.10 |
| cg09548241 | 1.77E-08 | 1.82E-09 | 6.31 | 10.636352  | 6.41E-02 | 33172509  | 33172632  | NC_000001.10 |
| cg16520288 | 1.77E-08 | 1.82E-09 | 6.31 | 10.6362859 | 1.78E-01 | 58014857  | 58014980  | NC_000012.11 |
| cg23532322 | 1.77E-08 | 1.82E-09 | 6.31 | 10.6359613 | 9.74E-02 | 79088325  | 79088448  | NC_000017.10 |
| cg06909254 | 1.77E-08 | 1.82E-09 | 6.31 | 10.6356147 | 9.09E-02 | 86092937  | 86093060  | NC_000002.11 |
| cg18921025 | 1.77E-08 | 1.82E-09 | 6.31 | 10.6351137 | 8.29E-02 | 30952064  | 30952187  | NC_000006.11 |
| cg19497501 | 1.78E-08 | 1.82E-09 | 6.31 | 10.6336752 | 1.30E-01 | 40755380  | 40755503  | NC_000008.10 |
| cg02894209 | 1.78E-08 | 1.83E-09 | 6.31 | 10.6335716 | 8.86E-02 | 43028463  | 43028586  | NC_000015.9  |
| cg10897223 | 1.78E-08 | 1.83E-09 | 6.31 | 10.6329329 | 8.59E-02 | 30113774  | 30113897  | NC_000006.11 |
| cg01782371 | 1.78E-08 | 1.83E-09 | 6.31 | 10.631981  | 1.82E-01 | 25946347  | 25946470  | NC_000013.10 |

|            |          |          |      |            |          |           |           |              |
|------------|----------|----------|------|------------|----------|-----------|-----------|--------------|
| cg15015920 | 1.78E-08 | 1.83E-09 | 6.31 | 10.6296174 | 1.39E-01 | 16179873  | 16179996  | NC_000005.9  |
| cg25573227 | 1.78E-08 | 1.83E-09 | 6.31 | 10.6291921 | 1.42E-01 | 53286592  | 53286715  | NC_000007.13 |
| cg25900280 | 1.78E-08 | 1.83E-09 | 6.31 | 10.6290278 | 1.68E-01 | 59534847  | 59534970  | NC_000017.10 |
| cg12807794 | 1.78E-08 | 1.83E-09 | 6.31 | 10.6284463 | 1.22E-01 | 591085    | 591208    | NC_000020.10 |
| cg05677184 | 1.78E-08 | 1.83E-09 | 6.31 | 10.6283586 | 4.32E-02 | 85966009  | 85966132  | NC_000016.9  |
| cg09970569 | 1.79E-08 | 1.84E-09 | 6.31 | 10.6269392 | 1.76E-01 | 109094032 | 109094155 | NC_000008.10 |
| cg26124860 | 1.79E-08 | 1.84E-09 | 6.31 | 10.6268955 | 1.38E-01 | 42918681  | 42918804  | NC_000003.11 |
| cg27236096 | 1.79E-08 | 1.84E-09 | 6.31 | 10.6268657 | 3.73E-02 | 2635862   | 2635985   | NC_000016.9  |
| cg04515996 | 1.79E-08 | 1.84E-09 | 6.31 | 10.6264432 | 2.15E-01 | 85474028  | 85474151  | NC_000006.11 |
| cg01343936 | 1.79E-08 | 1.84E-09 | 6.31 | 10.6262713 | 5.84E-02 | 24560026  | 24560149  | NC_000013.10 |
| cg06781608 | 1.79E-08 | 1.84E-09 | 6.31 | 10.6248206 | 1.06E-01 | 157361040 | 157361163 | NC_000007.13 |
| cg02417033 | 1.79E-08 | 1.84E-09 | 6.31 | 10.6243912 | 1.20E-01 | 37851847  | 37851970  | NC_000021.8  |
| cg02627403 | 1.79E-08 | 1.84E-09 | 6.31 | 10.6242387 | 1.05E-01 | 73823769  | 73823892  | NC_000017.10 |
| cg05849109 | 1.79E-08 | 1.84E-09 | 6.31 | 10.6239408 | 1.88E-01 | 180531288 | 180531411 | NC_000005.9  |
| cg04945434 | 1.79E-08 | 1.85E-09 | 6.31 | 10.6227115 | 4.97E-02 | 15668544  | 15668667  | NC_000011.9  |
| cg00987080 | 1.80E-08 | 1.85E-09 | 6.31 | 10.6218897 | 2.25E-01 | 32930837  | 32930960  | NC_000001.10 |
| cg01148441 | 1.80E-08 | 1.85E-09 | 6.31 | 10.6217495 | 1.98E-01 | 43807949  | 43808072  | NC_000022.10 |
| cg24139737 | 1.80E-08 | 1.85E-09 | 6.31 | 10.6214455 | 1.48E-01 | 50323708  | 50323831  | NC_000010.10 |
| cg19925204 | 1.80E-08 | 1.85E-09 | 6.31 | 10.6193218 | 1.54E-01 | 119307692 | 119307815 | NC_000010.10 |
| cg04472083 | 1.80E-08 | 1.85E-09 | 6.31 | 10.6184557 | 4.23E-02 | 34547115  | 34547238  | NC_000012.11 |
| cg24062526 | 1.80E-08 | 1.85E-09 | 6.31 | 10.6182896 | 4.42E-02 | 86255804  | 86255927  | NC_000002.11 |
| cg14128641 | 1.80E-08 | 1.86E-09 | 6.31 | 10.6174459 | 1.16E-01 | 19371927  | 19372050  | NC_000019.9  |
| cg09021626 | 1.81E-08 | 1.86E-09 | 6.31 | 10.6159686 | 1.95E-01 | 40679076  | 40679199  | NC_000002.11 |
| cg18861713 | 1.81E-08 | 1.86E-09 | 6.31 | 10.6127324 | 8.52E-02 | 9766266   | 9766389   | NC_000002.11 |
| cg11779019 | 1.81E-08 | 1.87E-09 | 6.31 | 10.6122441 | 1.19E-01 | 76641116  | 76641239  | NC_000017.10 |

|            |          |          |      |            |          |           |           |              |
|------------|----------|----------|------|------------|----------|-----------|-----------|--------------|
| cg07489502 | 1.81E-08 | 1.87E-09 | 6.31 | 10.6114976 | 1.73E-01 | 140811642 | 140811765 | NC_000005.9  |
| cg26989053 | 1.81E-08 | 1.87E-09 | 6.31 | 10.6109312 | 9.50E-02 | 15148607  | 15148730  | NC_000016.9  |
| cg21818713 | 1.81E-08 | 1.87E-09 | 6.31 | 10.6109224 | 1.58E-01 | 22413582  | 22413705  | NC_000003.11 |
| cg12190841 | 1.82E-08 | 1.88E-09 | 6.31 | 10.6068584 | 5.11E-02 | 38510610  | 38510733  | NC_000017.10 |
| cg03099208 | 1.83E-08 | 1.88E-09 | 6.31 | 10.604459  | 1.50E-01 | 8474544   | 8474667   | NC_000007.13 |
| cg09560953 | 1.83E-08 | 1.88E-09 | 6.3  | 10.6032964 | 1.13E-01 | 23846810  | 23846933  | NC_000003.11 |
| cg22183373 | 1.83E-08 | 1.88E-09 | 6.3  | 10.6022358 | 1.22E-01 | 24806777  | 24806900  | NC_000004.11 |
| cg27429663 | 1.83E-08 | 1.89E-09 | 6.3  | 10.6017008 | 5.75E-02 | 228333784 | 228333907 | NC_000002.11 |
| cg23520521 | 1.83E-08 | 1.89E-09 | 6.3  | 10.6015703 | 7.89E-02 | 131454827 | 131454950 | NC_000011.9  |
| cg25430507 | 1.83E-08 | 1.89E-09 | 6.3  | 10.6006341 | 3.84E-02 | 139539181 | 139539304 | NC_000002.11 |
| cg13777681 | 1.83E-08 | 1.89E-09 | 6.3  | 10.6004889 | 1.89E-01 | 115920221 | 115920344 | NC_000002.11 |
| cg04305943 | 1.84E-08 | 1.89E-09 | 6.3  | 10.5990517 | 4.57E-02 | 203697703 | 203697826 | NC_000001.10 |
| cg13349651 | 1.84E-08 | 1.89E-09 | 6.3  | 10.5983015 | 1.87E-01 | 33936307  | 33936430  | NC_000005.9  |
| cg18083595 | 1.84E-08 | 1.89E-09 | 6.3  | 10.5982857 | 8.02E-02 | 57630661  | 57630784  | NC_000019.9  |
| cg26315277 | 1.84E-08 | 1.89E-09 | 6.3  | 10.5976179 | 1.56E-01 | 31839549  | 31839672  | NC_000011.9  |
| cg22776687 | 1.84E-08 | 1.89E-09 | 6.3  | 10.5973862 | 4.50E-02 | 169326402 | 169326525 | NC_000006.11 |
| cg24293027 | 1.84E-08 | 1.89E-09 | 6.3  | 10.5970977 | 8.87E-02 | 45995039  | 45995162  | NC_000019.9  |
| cg08322240 | 1.84E-08 | 1.90E-09 | 6.3  | 10.5967066 | 1.64E-01 | 77595295  | 77595418  | NC_000008.10 |
| cg12230728 | 1.84E-08 | 1.90E-09 | 6.3  | 10.5965479 | 9.83E-02 | 58021569  | 58021692  | NC_000012.11 |
| cg07006091 | 1.84E-08 | 1.90E-09 | 6.3  | 10.5948219 | 1.39E-01 | 114878487 | 114878610 | NC_000012.11 |
| cg10694781 | 1.84E-08 | 1.90E-09 | 6.3  | 10.5941977 | 1.79E-01 | 132260289 | 132260412 | NC_000007.13 |
| cg10182151 | 1.85E-08 | 1.90E-09 | 6.3  | 10.5930811 | 5.92E-02 | 161575294 | 161575417 | NC_000006.11 |
| cg04075191 | 1.85E-08 | 1.90E-09 | 6.3  | 10.5930677 | 1.86E-01 | 115919785 | 115919908 | NC_000002.11 |
| cg25052040 | 1.85E-08 | 1.90E-09 | 6.3  | 10.5928948 | 4.06E-02 | 109557069 | 109557192 | NC_000002.11 |
| cg04642620 | 1.85E-08 | 1.90E-09 | 6.3  | 10.5926015 | 6.40E-02 | 131650358 | 131650481 | NC_000010.10 |



|            |          |          |     |            |          |           |           |              |
|------------|----------|----------|-----|------------|----------|-----------|-----------|--------------|
| cg14518847 | 1.85E-08 | 1.90E-09 | 6.3 | 10.5923025 | 6.18E-02 | 3417275   | 3417398   | NC_000001.10 |
| cg21800232 | 1.85E-08 | 1.90E-09 | 6.3 | 10.592271  | 1.49E-01 | 79866368  | 79866491  | NC_000005.9  |
| cg10752158 | 1.85E-08 | 1.91E-09 | 6.3 | 10.5911127 | 1.60E-01 | 81185022  | 81185145  | NC_000004.11 |
| cg18760534 | 1.85E-08 | 1.91E-09 | 6.3 | 10.5889485 | 1.23E-01 | 2964910   | 2965033   | NC_000002.11 |
| cg08970208 | 1.86E-08 | 1.91E-09 | 6.3 | 10.5877579 | 4.21E-02 | 129951597 | 129951720 | NC_000010.10 |
| cg07939836 | 1.86E-08 | 1.91E-09 | 6.3 | 10.5868412 | 1.26E-01 | 176949533 | 176949656 | NC_000002.11 |
| cg13878023 | 1.86E-08 | 1.92E-09 | 6.3 | 10.5853565 | 9.92E-02 | 43965985  | 43966108  | NC_000012.11 |
| cg10112854 | 1.86E-08 | 1.92E-09 | 6.3 | 10.5851758 | 1.03E-01 | 80839183  | 80839306  | NC_000016.9  |
| cg25800638 | 1.86E-08 | 1.92E-09 | 6.3 | 10.5844913 | 1.19E-01 | 24527092  | 24527215  | NC_000002.11 |
| cg00336220 | 1.86E-08 | 1.92E-09 | 6.3 | 10.5823734 | 5.76E-02 | 96940284  | 96940407  | NC_000002.11 |
| cg17227941 | 1.87E-08 | 1.93E-09 | 6.3 | 10.5813762 | 9.34E-02 | 132449554 | 132449677 | NC_000012.11 |
| cg20484322 | 1.87E-08 | 1.93E-09 | 6.3 | 10.5804707 | 7.44E-02 | 67817309  | 67817432  | NC_000011.9  |
| cg05355757 | 1.87E-08 | 1.93E-09 | 6.3 | 10.5801259 | 1.51E-01 | 16762831  | 16762954  | NC_000012.11 |
| cg07477792 | 1.87E-08 | 1.93E-09 | 6.3 | 10.5799814 | 1.57E-01 | 117716071 | 117716194 | NC_000003.11 |
| cg16987524 | 1.87E-08 | 1.93E-09 | 6.3 | 10.5798806 | 1.11E-01 | 112939425 | 112939548 | NC_000002.11 |
| cg14681511 | 1.87E-08 | 1.93E-09 | 6.3 | 10.5792269 | 1.13E-01 | 140805681 | 140805804 | NC_000005.9  |
| cg03460109 | 1.87E-08 | 1.93E-09 | 6.3 | 10.5791581 | 9.18E-02 | 7427313   | 7427436   | NC_000004.11 |
| cg08653112 | 1.87E-08 | 1.93E-09 | 6.3 | 10.5788288 | 4.00E-02 | 60284695  | 60284818  | NC_000001.10 |
| cg07204280 | 1.87E-08 | 1.93E-09 | 6.3 | 10.5788048 | 2.00E-01 | 12254551  | 12254674  | NC_000018.9  |
| cg25763036 | 1.87E-08 | 1.93E-09 | 6.3 | 10.5784831 | 1.49E-01 | 13540946  | 13541069  | NC_000004.11 |
| cg00797058 | 1.87E-08 | 1.93E-09 | 6.3 | 10.5778825 | 1.00E-01 | 8137978   | 8138101   | NC_000010.10 |
| cg05956452 | 1.88E-08 | 1.94E-09 | 6.3 | 10.5745467 | 1.13E-01 | 158018138 | 158018261 | NC_000006.11 |
| cg01756103 | 1.88E-08 | 1.94E-09 | 6.3 | 10.5738997 | 8.94E-02 | 40388578  | 40388701  | NC_000022.10 |
| cg22971191 | 1.88E-08 | 1.94E-09 | 6.3 | 10.5735393 | 8.56E-02 | 103719706 | 103719829 | NC_000013.10 |
| cg19413725 | 1.88E-08 | 1.94E-09 | 6.3 | 10.5733947 | 1.19E-01 | 152351973 | 152352096 | NC_000004.11 |

|            |          |          |     |            |          |           |           |              |
|------------|----------|----------|-----|------------|----------|-----------|-----------|--------------|
| cg22874188 | 1.88E-08 | 1.94E-09 | 6.3 | 10.5727725 | 4.86E-02 | 150555302 | 150555425 | NC_000007.13 |
| cg25351565 | 1.88E-08 | 1.94E-09 | 6.3 | 10.5713513 | 1.42E-01 | 118033273 | 118033396 | NC_000010.10 |
| cg11580948 | 1.89E-08 | 1.95E-09 | 6.3 | 10.5707608 | 1.65E-01 | 81188405  | 81188528  | NC_000004.11 |
| cg03882001 | 1.89E-08 | 1.95E-09 | 6.3 | 10.5706506 | 7.59E-02 | 72160214  | 72160337  | NC_000017.10 |
| cg20334116 | 1.89E-08 | 1.95E-09 | 6.3 | 10.5702075 | 4.76E-02 | 57458636  | 57458759  | NC_000004.11 |
| cg03724990 | 1.89E-08 | 1.95E-09 | 6.3 | 10.5691915 | 1.61E-01 | 85473195  | 85473318  | NC_000006.11 |
| cg08146717 | 1.89E-08 | 1.95E-09 | 6.3 | 10.5685952 | 3.40E-02 | 8975200   | 8975323   | NC_000001.10 |
| cg00195796 | 1.89E-08 | 1.95E-09 | 6.3 | 10.5678735 | 1.55E-01 | 181444131 | 181444254 | NC_000003.11 |
| cg07327468 | 1.89E-08 | 1.96E-09 | 6.3 | 10.5662423 | 1.35E-01 | 133561765 | 133561888 | NC_000006.11 |
| cg00003969 | 1.89E-08 | 1.96E-09 | 6.3 | 10.5656224 | 2.10E-02 | 82925333  | 82925456  | NC_000015.9  |
| cg00729656 | 1.90E-08 | 1.96E-09 | 6.3 | 10.5645312 | 5.74E-02 | 98552702  | 98552825  | NC_000007.13 |
| cg00983583 | 1.90E-08 | 1.96E-09 | 6.3 | 10.5627094 | 1.54E-01 | 117587155 | 117587278 | NC_000006.11 |
| cg14129397 | 1.90E-08 | 1.97E-09 | 6.3 | 10.5609826 | 1.64E-01 | 78451961  | 78452084  | NC_000017.10 |
| cg08054010 | 1.90E-08 | 1.97E-09 | 6.3 | 10.5609249 | 5.25E-02 | 194877369 | 194877492 | NC_000003.11 |
| cg25948328 | 1.91E-08 | 1.97E-09 | 6.3 | 10.5585182 | 7.11E-02 | 119768195 | 119768318 | NC_000010.10 |
| cg03900808 | 1.91E-08 | 1.98E-09 | 6.3 | 10.5560431 | 5.16E-02 | 149871453 | 149871576 | NC_000005.9  |
| cg20254790 | 1.91E-08 | 1.98E-09 | 6.3 | 10.5557756 | 8.28E-02 | 1084473   | 1084596   | NC_000001.10 |
| cg09601584 | 1.91E-08 | 1.98E-09 | 6.3 | 10.5546532 | 1.12E-01 | 46673910  | 46674033  | NC_000017.10 |
| cg09305047 | 1.91E-08 | 1.98E-09 | 6.3 | 10.554652  | 9.04E-02 | 33809215  | 33809338  | NC_000002.11 |
| cg05760765 | 1.92E-08 | 1.98E-09 | 6.3 | 10.5544541 | 1.43E-01 | 125243098 | 125243221 | NC_000012.11 |
| cg23291854 | 1.92E-08 | 1.98E-09 | 6.3 | 10.5536105 | 1.72E-01 | 88792913  | 88793036  | NC_000014.8  |
| cg13601496 | 1.92E-08 | 1.98E-09 | 6.3 | 10.5531522 | 1.47E-01 | 28339487  | 28339610  | NC_000021.8  |
| cg11027822 | 1.92E-08 | 1.98E-09 | 6.3 | 10.5528741 | 1.10E-01 | 173298550 | 173298673 | NC_000002.11 |
| cg24213719 | 1.92E-08 | 1.98E-09 | 6.3 | 10.5527072 | 1.79E-01 | 60263646  | 60263769  | NC_000018.9  |
| cg24139093 | 1.92E-08 | 1.98E-09 | 6.3 | 10.551849  | 1.38E-01 | 97491245  | 97491368  | NC_000015.9  |

|            |          |          |      |            |          |           |           |              |
|------------|----------|----------|------|------------|----------|-----------|-----------|--------------|
| cg13683516 | 1.92E-08 | 1.98E-09 | 6.29 | 10.5516523 | 1.38E-02 | 56618066  | 56618189  | NC_000012.11 |
| cg15562220 | 1.92E-08 | 1.99E-09 | 6.29 | 10.5509522 | 1.62E-01 | 25652395  | 25652518  | NC_000006.11 |
| cg23529138 | 1.92E-08 | 1.99E-09 | 6.29 | 10.5505382 | 1.29E-01 | 124739010 | 124739133 | NC_000011.9  |
| cg17854320 | 1.92E-08 | 1.99E-09 | 6.29 | 10.5502945 | 1.14E-01 | 24829245  | 24829368  | NC_000001.10 |
| cg19196221 | 1.92E-08 | 1.99E-09 | 6.29 | 10.5492313 | 1.07E-01 | 56215575  | 56215698  | NC_000019.9  |
| cg14126093 | 1.93E-08 | 1.99E-09 | 6.29 | 10.548312  | 3.68E-02 | 128905086 | 128905209 | NC_000006.11 |
| cg03335262 | 1.93E-08 | 1.99E-09 | 6.29 | 10.5480094 | 7.23E-02 | 140536920 | 140537043 | NC_000005.9  |
| cg20159193 | 1.93E-08 | 2.00E-09 | 6.29 | 10.5453056 | 5.77E-02 | 34352082  | 34352205  | NC_000006.11 |
| cg08761909 | 1.93E-08 | 2.00E-09 | 6.29 | 10.5448597 | 1.17E-01 | 95796595  | 95796718  | NC_000010.10 |
| cg09887007 | 1.93E-08 | 2.00E-09 | 6.29 | 10.5440907 | 1.49E-01 | 29069503  | 29069626  | NC_000013.10 |
| cg11405534 | 1.94E-08 | 2.00E-09 | 6.29 | 10.5433018 | 1.03E-01 | 50694849  | 50694972  | NC_000005.9  |
| cg20025656 | 1.94E-08 | 2.00E-09 | 6.29 | 10.5424575 | 1.24E-01 | 229570230 | 229570353 | NC_000001.10 |
| cg09514524 | 1.94E-08 | 2.00E-09 | 6.29 | 10.541994  | 1.71E-01 | 145729799 | 145729922 | NC_000008.10 |
| cg15724184 | 1.94E-08 | 2.00E-09 | 6.29 | 10.5419703 | 1.97E-01 | 70346477  | 70346600  | NC_000014.8  |
| cg04046669 | 1.94E-08 | 2.00E-09 | 6.29 | 10.5418136 | 1.19E-01 | 30476206  | 30476329  | NC_000022.10 |
| cg25078137 | 1.94E-08 | 2.00E-09 | 6.29 | 10.5416564 | 1.52E-01 | 46698598  | 46698721  | NC_000017.10 |
| cg17255150 | 1.94E-08 | 2.01E-09 | 6.29 | 10.540525  | 5.41E-02 | 20467917  | 20468040  | NC_000017.10 |
| cg12542670 | 1.94E-08 | 2.01E-09 | 6.29 | 10.5399264 | 7.94E-02 | 150379047 | 150379170 | NC_000006.11 |
| cg09542499 | 1.94E-08 | 2.01E-09 | 6.29 | 10.5387517 | 1.04E-01 | 118369938 | 118370061 | NC_000010.10 |
| cg17848763 | 1.94E-08 | 2.01E-09 | 6.29 | 10.5380907 | 1.57E-01 | 127414381 | 127414504 | NC_000002.11 |
| cg02093112 | 1.95E-08 | 2.02E-09 | 6.29 | 10.5364807 | 2.13E-01 | 6679495   | 6679618   | NC_000017.10 |
| cg03958979 | 1.95E-08 | 2.02E-09 | 6.29 | 10.5350796 | 1.17E-01 | 108486387 | 108486510 | NC_000006.11 |
| cg06374472 | 1.95E-08 | 2.02E-09 | 6.29 | 10.5350636 | 1.01E-01 | 132891457 | 132891580 | NC_000006.11 |
| cg04241342 | 1.95E-08 | 2.02E-09 | 6.29 | 10.5349768 | 7.75E-02 | 16336321  | 16336444  | NC_000001.10 |
| cg22152446 | 1.95E-08 | 2.02E-09 | 6.29 | 10.534817  | 7.41E-02 | 48754953  | 48755076  | NC_000004.11 |

|            |          |          |      |            |          |           |           |              |
|------------|----------|----------|------|------------|----------|-----------|-----------|--------------|
| cg01453281 | 1.95E-08 | 2.02E-09 | 6.29 | 10.534284  | 9.62E-02 | 105475049 | 105475172 | NC_000002.11 |
| cg26958735 | 1.95E-08 | 2.02E-09 | 6.29 | 10.533751  | 1.47E-01 | 130236259 | 130236382 | NC_000003.11 |
| cg25684640 | 1.95E-08 | 2.02E-09 | 6.29 | 10.5330427 | 1.41E-01 | 1277154   | 1277277   | NC_000007.13 |
| cg25150440 | 1.95E-08 | 2.02E-09 | 6.29 | 10.5330022 | 9.88E-02 | 136553088 | 136553211 | NC_000007.13 |
| cg21011616 | 1.96E-08 | 2.02E-09 | 6.29 | 10.532536  | 1.42E-01 | 177015992 | 177016115 | NC_000002.11 |
| cg07838603 | 1.96E-08 | 2.03E-09 | 6.29 | 10.528568  | 1.85E-01 | 28411030  | 28411153  | NC_000006.11 |
| cg18668821 | 1.96E-08 | 2.03E-09 | 6.29 | 10.5277962 | 5.24E-02 | 75425832  | 75425955  | NC_000002.11 |
| cg27260174 | 1.97E-08 | 2.04E-09 | 6.29 | 10.5251263 | 5.60E-02 | 41576763  | 41576886  | NC_000008.10 |
| cg24456130 | 1.97E-08 | 2.04E-09 | 6.29 | 10.5241265 | 1.06E-01 | 131768029 | 131768152 | NC_000010.10 |
| cg01545223 | 1.97E-08 | 2.05E-09 | 6.29 | 10.5222841 | 6.85E-02 | 22801034  | 22801157  | NC_000019.9  |
| cg08040012 | 1.98E-08 | 2.05E-09 | 6.29 | 10.521951  | 1.01E-01 | 37247586  | 37247709  | NC_000004.11 |
| cg06434255 | 1.98E-08 | 2.05E-09 | 6.29 | 10.5211201 | 6.67E-02 | 29556229  | 29556352  | NC_000006.11 |
| cg11495377 | 1.98E-08 | 2.05E-09 | 6.29 | 10.5210732 | 1.25E-01 | 545645    | 545768    | NC_000002.11 |
| cg14032667 | 1.98E-08 | 2.05E-09 | 6.29 | 10.5204576 | 4.99E-02 | 96707427  | 96707550  | NC_000014.8  |
| cg19858749 | 1.98E-08 | 2.05E-09 | 6.29 | 10.5200456 | 1.31E-01 | 114882068 | 114882191 | NC_000012.11 |
| cg23346625 | 1.98E-08 | 2.05E-09 | 6.29 | 10.5199387 | 4.14E-02 | 146619708 | 146619831 | NC_000005.9  |
| cg24044957 | 1.98E-08 | 2.05E-09 | 6.29 | 10.5197519 | 8.39E-02 | 69931461  | 69931584  | NC_000011.9  |
| cg12975597 | 1.98E-08 | 2.05E-09 | 6.29 | 10.5194524 | 1.07E-01 | 22897079  | 22897202  | NC_000006.11 |
| cg22648135 | 1.98E-08 | 2.05E-09 | 6.29 | 10.5180743 | 1.38E-01 | 140767318 | 140767441 | NC_000005.9  |
| cg13351141 | 1.98E-08 | 2.06E-09 | 6.29 | 10.5172139 | 9.05E-02 | 150802828 | 150802951 | NC_000003.11 |
| cg10683251 | 1.99E-08 | 2.06E-09 | 6.29 | 10.5165558 | 1.45E-01 | 686927    | 687050    | NC_000008.10 |
| cg20241256 | 1.99E-08 | 2.06E-09 | 6.29 | 10.5161631 | 2.01E-01 | 207139131 | 207139254 | NC_000002.11 |
| cg05581451 | 1.99E-08 | 2.06E-09 | 6.29 | 10.5159706 | 1.15E-01 | 111553999 | 111554122 | NC_000004.11 |
| cg19743545 | 1.99E-08 | 2.06E-09 | 6.29 | 10.5152014 | 1.16E-01 | 237085808 | 237085931 | NC_000002.11 |
| cg14165900 | 1.99E-08 | 2.06E-09 | 6.29 | 10.5148059 | 5.44E-02 | 203148900 | 203149023 | NC_000001.10 |

|            |          |          |      |            |          |           |           |              |
|------------|----------|----------|------|------------|----------|-----------|-----------|--------------|
| cg24788194 | 1.99E-08 | 2.06E-09 | 6.29 | 10.5144213 | 1.71E-01 | 3641652   | 3641775   | NC_000020.10 |
| cg15132673 | 1.99E-08 | 2.06E-09 | 6.29 | 10.5143623 | 1.56E-01 | 39998199  | 39998322  | NC_000019.9  |
| cg05023151 | 1.99E-08 | 2.06E-09 | 6.29 | 10.5142889 | 8.47E-02 | 45974392  | 45974515  | NC_000019.9  |
| cg01141459 | 1.99E-08 | 2.06E-09 | 6.29 | 10.5132087 | 1.23E-01 | 30476452  | 30476575  | NC_000022.10 |
| cg09184429 | 1.99E-08 | 2.06E-09 | 6.29 | 10.5131729 | 2.13E-01 | 62103400  | 62103523  | NC_000020.10 |
| cg16056272 | 1.99E-08 | 2.07E-09 | 6.29 | 10.5116253 | 9.17E-02 | 183616968 | 183617091 | NC_000001.10 |
| cg08923114 | 2.00E-08 | 2.07E-09 | 6.29 | 10.5101424 | 7.06E-02 | 57030880  | 57031003  | NC_000008.10 |
| cg20995055 | 2.00E-08 | 2.07E-09 | 6.29 | 10.5100405 | 1.81E-01 | 45270896  | 45271019  | NC_000012.11 |
| cg16563203 | 2.00E-08 | 2.07E-09 | 6.29 | 10.5098136 | 5.42E-02 | 49040786  | 49040909  | NC_000008.10 |
| cg18024167 | 2.00E-08 | 2.07E-09 | 6.29 | 10.5091907 | 1.20E-01 | 83016779  | 83016902  | NC_000005.9  |
| cg14953026 | 2.00E-08 | 2.08E-09 | 6.29 | 10.5075336 | 3.86E-02 | 144257685 | 144257808 | NC_000004.11 |
| cg01941895 | 2.01E-08 | 2.08E-09 | 6.29 | 10.5060513 | 1.22E-01 | 25062771  | 25062894  | NC_000020.10 |
| cg27189087 | 2.01E-08 | 2.08E-09 | 6.29 | 10.5060439 | 2.26E-01 | 56941246  | 56941369  | NC_000018.9  |
| cg08325191 | 2.01E-08 | 2.08E-09 | 6.29 | 10.5059177 | 1.88E-01 | 134756610 | 134756733 | NC_000010.10 |
| cg03548463 | 2.01E-08 | 2.08E-09 | 6.29 | 10.5054023 | 3.34E-02 | 1603847   | 1603970   | NC_000001.10 |
| cg27100471 | 2.01E-08 | 2.08E-09 | 6.29 | 10.5048384 | 1.33E-01 | 794834    | 794957    | NC_000011.9  |
| cg26911220 | 2.01E-08 | 2.08E-09 | 6.29 | 10.5046053 | 1.93E-01 | 228652478 | 228652601 | NC_000001.10 |
| cg06538709 | 2.01E-08 | 2.09E-09 | 6.29 | 10.5019717 | 1.16E-01 | 48654011  | 48654134  | NC_000008.10 |
| cg00590029 | 2.01E-08 | 2.09E-09 | 6.29 | 10.5017522 | 1.19E-01 | 114838618 | 114838741 | NC_000012.11 |
| cg06951011 | 2.02E-08 | 2.10E-09 | 6.28 | 10.4985237 | 3.83E-02 | 20996704  | 20996827  | NC_000016.9  |
| cg15400655 | 2.02E-08 | 2.10E-09 | 6.28 | 10.4978909 | 1.17E-01 | 107995    | 108118    | NC_000004.11 |
| cg26410821 | 2.02E-08 | 2.10E-09 | 6.28 | 10.4971358 | 3.94E-02 | 59660101  | 59660224  | NC_000014.8  |
| cg11611600 | 2.02E-08 | 2.10E-09 | 6.28 | 10.496888  | 1.48E-01 | 84323154  | 84323277  | NC_000015.9  |
| cg08734647 | 2.02E-08 | 2.10E-09 | 6.28 | 10.4961697 | 1.71E-01 | 1922400   | 1922523   | NC_000016.9  |
| cg00685480 | 2.03E-08 | 2.10E-09 | 6.28 | 10.4959027 | 5.65E-02 | 127950142 | 127950265 | NC_000009.11 |

|            |          |          |      |            |          |           |           |              |
|------------|----------|----------|------|------------|----------|-----------|-----------|--------------|
| cg12490835 | 2.03E-08 | 2.10E-09 | 6.28 | 10.4955239 | 1.17E-01 | 22623821  | 22623944  | NC_000010.10 |
| cg24792682 | 2.03E-08 | 2.10E-09 | 6.28 | 10.495283  | 1.64E-01 | 118031632 | 118031755 | NC_000010.10 |
| cg27183679 | 2.03E-08 | 2.10E-09 | 6.28 | 10.4952301 | 1.19E-01 | 111562545 | 111562668 | NC_000004.11 |
| cg03960220 | 2.03E-08 | 2.10E-09 | 6.28 | 10.4949523 | 3.44E-02 | 20428129  | 20428252  | NC_000002.11 |
| cg26068677 | 2.03E-08 | 2.10E-09 | 6.28 | 10.4941766 | 1.41E-01 | 92282995  | 92283118  | NC_000011.9  |
| cg26321840 | 2.03E-08 | 2.11E-09 | 6.28 | 10.4934305 | 9.37E-02 | 49241685  | 49241808  | NC_000008.10 |
| cg20925383 | 2.03E-08 | 2.11E-09 | 6.28 | 10.4932638 | 6.53E-02 | 50702410  | 50702533  | NC_000013.10 |
| cg22789515 | 2.04E-08 | 2.11E-09 | 6.28 | 10.4898701 | 7.48E-02 | 233432915 | 233433038 | NC_000001.10 |
| cg17094985 | 2.04E-08 | 2.11E-09 | 6.28 | 10.4898124 | 1.66E-01 | 159756929 | 159757052 | NC_000003.11 |
| cg23697546 | 2.04E-08 | 2.12E-09 | 6.28 | 10.4883429 | 2.05E-01 | 54424085  | 54424208  | NC_000012.11 |
| cg14686012 | 2.04E-08 | 2.12E-09 | 6.28 | 10.4863011 | 1.70E-01 | 40679086  | 40679209  | NC_000002.11 |
| cg10090861 | 2.05E-08 | 2.12E-09 | 6.28 | 10.4854625 | 6.22E-02 | 11829489  | 11829612  | NC_000016.9  |
| cg02120584 | 2.05E-08 | 2.13E-09 | 6.28 | 10.4841635 | 1.04E-01 | 45171340  | 45171463  | NC_000002.11 |
| cg01516851 | 2.05E-08 | 2.13E-09 | 6.28 | 10.4839174 | 1.42E-01 | 28945338  | 28945461  | NC_000006.11 |
| cg21184256 | 2.05E-08 | 2.13E-09 | 6.28 | 10.4821814 | 2.03E-01 | 124709796 | 124709919 | NC_000011.9  |
| cg01403811 | 2.05E-08 | 2.13E-09 | 6.28 | 10.4821802 | 5.18E-02 | 37771001  | 37771124  | NC_000022.10 |
| cg03353047 | 2.05E-08 | 2.13E-09 | 6.28 | 10.4821378 | 1.18E-01 | 24331904  | 24332027  | NC_000010.10 |
| cg19461519 | 2.05E-08 | 2.13E-09 | 6.28 | 10.4815913 | 4.62E-02 | 100141423 | 100141546 | NC_000014.8  |
| cg24733126 | 2.05E-08 | 2.13E-09 | 6.28 | 10.4810334 | 5.44E-02 | 9112214   | 9112337   | NC_000011.9  |
| cg03349020 | 2.05E-08 | 2.13E-09 | 6.28 | 10.4804557 | 2.01E-01 | 744861    | 744984    | NC_000016.9  |
| cg15899948 | 2.06E-08 | 2.14E-09 | 6.28 | 10.4799862 | 1.84E-01 | 128301146 | 128301269 | NC_000005.9  |
| cg19792099 | 2.06E-08 | 2.14E-09 | 6.28 | 10.4796541 | 5.55E-02 | 64935374  | 64935497  | NC_000014.8  |
| cg02164225 | 2.06E-08 | 2.14E-09 | 6.28 | 10.4792012 | 1.73E-01 | 176977773 | 176977896 | NC_000002.11 |
| cg06331333 | 2.06E-08 | 2.14E-09 | 6.28 | 10.4785003 | 9.80E-02 | 145938697 | 145938820 | NC_000008.10 |
| cg09143673 | 2.06E-08 | 2.14E-09 | 6.28 | 10.477351  | 1.32E-01 | 172664439 | 172664562 | NC_000005.9  |

|            |          |          |      |            |          |           |           |              |
|------------|----------|----------|------|------------|----------|-----------|-----------|--------------|
| cg05893674 | 2.06E-08 | 2.14E-09 | 6.28 | 10.4771158 | 6.17E-02 | 96495966  | 96496089  | NC_000003.11 |
| cg04945076 | 2.06E-08 | 2.14E-09 | 6.28 | 10.4767228 | 1.34E-01 | 131237654 | 131237777 | NC_000012.11 |
| cg23067466 | 2.06E-08 | 2.14E-09 | 6.28 | 10.4766755 | 7.96E-02 | 53117551  | 53117674  | NC_000003.11 |
| cg19425969 | 2.06E-08 | 2.14E-09 | 6.28 | 10.4757522 | 1.20E-01 | 157291474 | 157291597 | NC_000007.13 |
| cg11136386 | 2.07E-08 | 2.15E-09 | 6.28 | 10.4748079 | 8.58E-02 | 63419134  | 63419257  | NC_000010.10 |
| cg26014538 | 2.07E-08 | 2.15E-09 | 6.28 | 10.4740183 | 1.81E-01 | 147126763 | 147126886 | NC_000003.11 |
| cg12024050 | 2.07E-08 | 2.15E-09 | 6.28 | 10.4737641 | 1.75E-02 | 26435291  | 26435414  | NC_000008.10 |
| cg14445914 | 2.07E-08 | 2.15E-09 | 6.28 | 10.473411  | 9.47E-02 | 41556933  | 41557056  | NC_000008.10 |
| cg19029127 | 2.07E-08 | 2.15E-09 | 6.28 | 10.4729898 | 1.26E-01 | 37604497  | 37604620  | NC_000004.11 |
| cg10506057 | 2.07E-08 | 2.15E-09 | 6.28 | 10.4726417 | 6.34E-02 | 40951258  | 40951381  | NC_000017.10 |
| cg17223170 | 2.07E-08 | 2.15E-09 | 6.28 | 10.4723649 | 1.10E-01 | 50468642  | 50468765  | NC_000005.9  |
| cg04994084 | 2.07E-08 | 2.15E-09 | 6.28 | 10.4717996 | 1.87E-01 | 44941360  | 44941483  | NC_000020.10 |
| cg12403137 | 2.07E-08 | 2.15E-09 | 6.28 | 10.4716539 | 1.69E-01 | 89867809  | 89867932  | NC_000011.9  |
| cg13218903 | 2.07E-08 | 2.16E-09 | 6.28 | 10.4708013 | 2.06E-01 | 154335379 | 154335502 | NC_000002.11 |
| cg10526478 | 2.07E-08 | 2.16E-09 | 6.28 | 10.4704089 | 8.93E-02 | 85936211  | 85936334  | NC_000016.9  |
| cg27189803 | 2.07E-08 | 2.16E-09 | 6.28 | 10.4701381 | 8.26E-02 | 80416566  | 80416689  | NC_000010.10 |
| cg25851597 | 2.08E-08 | 2.16E-09 | 6.28 | 10.46824   | 1.62E-01 | 89248474  | 89248597  | NC_000015.9  |
| cg03612357 | 2.08E-08 | 2.16E-09 | 6.28 | 10.4666051 | 1.40E-01 | 227162127 | 227162250 | NC_000001.10 |
| cg19459349 | 2.08E-08 | 2.17E-09 | 6.28 | 10.466465  | 6.54E-02 | 19888327  | 19888450  | NC_000014.8  |
| cg09313436 | 2.08E-08 | 2.17E-09 | 6.28 | 10.4658105 | 2.24E-02 | 49960191  | 49960314  | NC_000012.11 |
| cg19824242 | 2.09E-08 | 2.17E-09 | 6.28 | 10.4631545 | 9.43E-02 | 105273432 | 105273555 | NC_000002.11 |
| cg23505303 | 2.09E-08 | 2.17E-09 | 6.28 | 10.4629428 | 1.58E-01 | 70534110  | 70534233  | NC_000018.9  |
| cg11328436 | 2.09E-08 | 2.17E-09 | 6.28 | 10.4626937 | 1.13E-01 | 54360511  | 54360634  | NC_000012.11 |
| cg02283662 | 2.09E-08 | 2.17E-09 | 6.28 | 10.4626592 | 3.69E-02 | 76106981  | 76107104  | NC_000017.10 |
| cg06834912 | 2.09E-08 | 2.17E-09 | 6.28 | 10.462125  | 1.34E-01 | 86547203  | 86547326  | NC_000016.9  |

|            |          |          |      |            |          |           |           |              |
|------------|----------|----------|------|------------|----------|-----------|-----------|--------------|
| cg23623252 | 2.09E-08 | 2.18E-09 | 6.28 | 10.4603537 | 1.02E-01 | 59386016  | 59386139  | NC_000014.8  |
| cg12368169 | 2.10E-08 | 2.18E-09 | 6.28 | 10.4587535 | 9.62E-02 | 27073192  | 27073315  | NC_000002.11 |
| cg16404040 | 2.10E-08 | 2.19E-09 | 6.28 | 10.4564553 | 1.48E-01 | 106974832 | 106974955 | NC_000012.11 |
| cg00339488 | 2.10E-08 | 2.19E-09 | 6.28 | 10.4558104 | 1.36E-01 | 155254194 | 155254317 | NC_000004.11 |
| cg17818471 | 2.10E-08 | 2.19E-09 | 6.28 | 10.4556385 | 1.05E-01 | 177012640 | 177012763 | NC_000002.11 |
| cg08173515 | 2.11E-08 | 2.19E-09 | 6.28 | 10.4539668 | 1.89E-01 | 21657529  | 21657652  | NC_000019.9  |
| cg17610800 | 2.11E-08 | 2.19E-09 | 6.28 | 10.4531994 | 1.24E-01 | 27281561  | 27281684  | NC_000007.13 |
| cg11113759 | 2.11E-08 | 2.20E-09 | 6.28 | 10.4529509 | 2.59E-02 | 105886081 | 105886204 | NC_000014.8  |
| cg23143313 | 2.11E-08 | 2.20E-09 | 6.28 | 10.4520641 | 1.09E-01 | 129251318 | 129251441 | NC_000006.11 |
| cg23042796 | 2.11E-08 | 2.20E-09 | 6.28 | 10.4518349 | 1.98E-01 | 89065350  | 89065473  | NC_000002.11 |
| cg07495755 | 2.11E-08 | 2.20E-09 | 6.28 | 10.4517636 | 4.97E-02 | 77562351  | 77562474  | NC_000018.9  |
| cg04014576 | 2.11E-08 | 2.20E-09 | 6.28 | 10.4508794 | 2.37E-01 | 34112818  | 34112941  | NC_000006.11 |
| cg22628281 | 2.11E-08 | 2.20E-09 | 6.28 | 10.450871  | 1.50E-01 | 114839007 | 114839130 | NC_000012.11 |
| cg25179685 | 2.12E-08 | 2.20E-09 | 6.28 | 10.4491169 | 9.65E-02 | 54154528  | 54154651  | NC_000008.10 |
| cg27494429 | 2.12E-08 | 2.21E-09 | 6.28 | 10.4477122 | 6.53E-02 | 997540    | 997663    | NC_000004.11 |
| cg07655636 | 2.12E-08 | 2.21E-09 | 6.28 | 10.4474033 | 2.26E-01 | 22034418  | 22034541  | NC_000019.9  |
| cg13457790 | 2.12E-08 | 2.21E-09 | 6.27 | 10.4467492 | 5.24E-02 | 1627485   | 1627608   | NC_000019.9  |
| cg07522981 | 2.12E-08 | 2.21E-09 | 6.27 | 10.4465578 | 2.10E-01 | 51071307  | 51071430  | NC_000019.9  |
| cg03269020 | 2.12E-08 | 2.21E-09 | 6.27 | 10.4462572 | 7.10E-02 | 109444752 | 109444875 | NC_000013.10 |
| cg16340446 | 2.12E-08 | 2.21E-09 | 6.27 | 10.4450685 | 2.71E-02 | 179318612 | 179318735 | NC_000003.11 |
| cg19333963 | 2.13E-08 | 2.22E-09 | 6.27 | 10.4437467 | 1.79E-01 | 1467979   | 1468102   | NC_000019.9  |
| cg20637688 | 2.13E-08 | 2.22E-09 | 6.27 | 10.4418343 | 1.28E-01 | 117036703 | 117036826 | NC_000012.11 |
| cg06712792 | 2.13E-08 | 2.22E-09 | 6.27 | 10.4412496 | 6.26E-02 | 8942512   | 8942635   | NC_000016.9  |
| cg26371061 | 2.13E-08 | 2.22E-09 | 6.27 | 10.4404342 | 1.54E-01 | 71014857  | 71014980  | NC_000005.9  |
| cg15237899 | 2.14E-08 | 2.22E-09 | 6.27 | 10.4398075 | 1.24E-01 | 79635402  | 79635525  | NC_000009.11 |



|            |          |          |      |            |          |           |           |              |
|------------|----------|----------|------|------------|----------|-----------|-----------|--------------|
| cg04293770 | 2.14E-08 | 2.23E-09 | 6.27 | 10.4394674 | 4.75E-02 | 148330536 | 148330659 | NC_000005.9  |
| cg15476528 | 2.14E-08 | 2.23E-09 | 6.27 | 10.4390415 | 2.23E-01 | 23821596  | 23821719  | NC_000014.8  |
| cg00910203 | 2.14E-08 | 2.23E-09 | 6.27 | 10.4388331 | 8.38E-02 | 21276802  | 21276925  | NC_000017.10 |
| cg06072036 | 2.14E-08 | 2.23E-09 | 6.27 | 10.4382131 | 1.27E-01 | 822402    | 822525    | NC_000011.9  |
| cg12204343 | 2.14E-08 | 2.23E-09 | 6.27 | 10.4380111 | 1.24E-01 | 87964048  | 87964171  | NC_000005.9  |
| cg10694030 | 2.14E-08 | 2.23E-09 | 6.27 | 10.4377567 | 1.79E-01 | 54393460  | 54393583  | NC_000012.11 |
| cg03719532 | 2.14E-08 | 2.23E-09 | 6.27 | 10.4375559 | 1.11E-01 | 55848210  | 55848333  | NC_000019.9  |
| cg13913015 | 2.14E-08 | 2.23E-09 | 6.27 | 10.4374149 | 2.74E-01 | 47797963  | 47798086  | NC_000002.11 |
| cg22975913 | 2.15E-08 | 2.24E-09 | 6.27 | 10.433398  | 2.21E-01 | 32457727  | 32457850  | NC_000011.9  |
| cg24157892 | 2.15E-08 | 2.24E-09 | 6.27 | 10.4332069 | 1.98E-01 | 59473707  | 59473830  | NC_000017.10 |
| cg02588107 | 2.15E-08 | 2.24E-09 | 6.27 | 10.4330212 | 2.06E-01 | 207669716 | 207669839 | NC_000001.10 |
| cg14889643 | 2.15E-08 | 2.24E-09 | 6.27 | 10.4324275 | 1.58E-01 | 60985636  | 60985759  | NC_000018.9  |
| cg23095192 | 2.15E-08 | 2.24E-09 | 6.27 | 10.4311873 | 1.22E-01 | 145271307 | 145271430 | NC_000002.11 |
| cg05771767 | 2.16E-08 | 2.25E-09 | 6.27 | 10.4298729 | 4.35E-02 | 30578981  | 30579104  | NC_000006.11 |
| cg04450599 | 2.16E-08 | 2.25E-09 | 6.27 | 10.4297531 | 8.80E-02 | 74277723  | 74277846  | NC_000004.11 |
| cg11279444 | 2.16E-08 | 2.25E-09 | 6.27 | 10.429602  | 2.17E-01 | 53099053  | 53099176  | NC_000001.10 |
| cg24073311 | 2.16E-08 | 2.25E-09 | 6.27 | 10.4293855 | 2.98E-02 | 77734959  | 77735082  | NC_000011.9  |
| cg03563630 | 2.16E-08 | 2.25E-09 | 6.27 | 10.4293142 | 1.53E-01 | 37435477  | 37435600  | NC_000020.10 |
| cg11290188 | 2.16E-08 | 2.25E-09 | 6.27 | 10.4288885 | 8.64E-02 | 62661012  | 62661135  | NC_000012.11 |
| cg27451843 | 2.16E-08 | 2.25E-09 | 6.27 | 10.4283333 | 7.77E-02 | 92779022  | 92779145  | NC_000007.13 |
| cg15719043 | 2.16E-08 | 2.25E-09 | 6.27 | 10.428063  | 5.59E-02 | 201120964 | 201121087 | NC_000001.10 |
| cg07520269 | 2.16E-08 | 2.25E-09 | 6.27 | 10.4268173 | 1.82E-01 | 84634188  | 84634311  | NC_000011.9  |
| cg16263887 | 2.16E-08 | 2.26E-09 | 6.27 | 10.4264922 | 1.77E-01 | 190939230 | 190939353 | NC_000004.11 |
| cg14804129 | 2.16E-08 | 2.26E-09 | 6.27 | 10.4261334 | 4.25E-02 | 5110798   | 5110921   | NC_000019.9  |
| cg09224821 | 2.17E-08 | 2.26E-09 | 6.27 | 10.4242434 | 1.68E-01 | 80329944  | 80330067  | NC_000017.10 |

|            |          |          |      |            |          |           |           |              |
|------------|----------|----------|------|------------|----------|-----------|-----------|--------------|
| cg11466449 | 2.17E-08 | 2.26E-09 | 6.27 | 10.4228876 | 1.36E-01 | 135842613 | 135842736 | NC_000008.10 |
| cg24643282 | 2.17E-08 | 2.27E-09 | 6.27 | 10.4220544 | 1.37E-01 | 240256019 | 240256142 | NC_000001.10 |
| cg26959655 | 2.17E-08 | 2.27E-09 | 6.27 | 10.4219828 | 1.34E-01 | 103379529 | 103379652 | NC_000008.10 |
| cg10095577 | 2.17E-08 | 2.27E-09 | 6.27 | 10.4208859 | 1.11E-01 | 75600421  | 75600544  | NC_000001.10 |
| cg06779469 | 2.18E-08 | 2.27E-09 | 6.27 | 10.420132  | 1.64E-01 | 142494744 | 142494867 | NC_000007.13 |
| cg01081346 | 2.18E-08 | 2.27E-09 | 6.27 | 10.4187243 | 9.22E-02 | 51017151  | 51017274  | NC_000022.10 |
| cg04236178 | 2.18E-08 | 2.27E-09 | 6.27 | 10.4186324 | 1.10E-01 | 217310572 | 217310695 | NC_000001.10 |
| cg16099846 | 2.18E-08 | 2.27E-09 | 6.27 | 10.4182415 | 9.09E-02 | 155860261 | 155860384 | NC_000001.10 |
| cg12862851 | 2.18E-08 | 2.28E-09 | 6.27 | 10.417329  | 1.59E-02 | 74203132  | 74203255  | NC_000018.9  |
| cg13153009 | 2.18E-08 | 2.28E-09 | 6.27 | 10.4167487 | 4.20E-02 | 144561626 | 144561749 | NC_000008.10 |
| cg11360755 | 2.19E-08 | 2.28E-09 | 6.27 | 10.4145201 | 8.22E-02 | 496069    | 496192    | NC_000005.9  |
| cg00852549 | 2.19E-08 | 2.28E-09 | 6.27 | 10.4142368 | 1.75E-01 | 8473457   | 8473580   | NC_000007.13 |
| cg03259038 | 2.20E-08 | 2.29E-09 | 6.27 | 10.410896  | 3.23E-02 | 41630690  | 41630813  | NC_000019.9  |
| cg25421111 | 2.20E-08 | 2.30E-09 | 6.27 | 10.4091897 | 1.07E-01 | 89018418  | 89018541  | NC_000005.9  |
| cg26475742 | 2.20E-08 | 2.30E-09 | 6.27 | 10.4089047 | 6.37E-02 | 150551373 | 150551496 | NC_000007.13 |
| cg27118059 | 2.20E-08 | 2.30E-09 | 6.27 | 10.408339  | 2.56E-01 | 32931471  | 32931594  | NC_000021.8  |
| cg03355781 | 2.21E-08 | 2.31E-09 | 6.27 | 10.4050033 | 3.45E-02 | 31485256  | 31485379  | NC_000016.9  |
| cg13093847 | 2.21E-08 | 2.31E-09 | 6.27 | 10.4046527 | 4.24E-02 | 52216460  | 52216583  | NC_000014.8  |
| cg18328998 | 2.21E-08 | 2.31E-09 | 6.27 | 10.4044682 | 7.66E-02 | 32857872  | 32857995  | NC_000016.9  |
| cg15126862 | 2.21E-08 | 2.31E-09 | 6.27 | 10.4034622 | 5.83E-02 | 100696271 | 100696394 | NC_000011.9  |
| cg24587297 | 2.21E-08 | 2.31E-09 | 6.27 | 10.4034543 | 1.41E-01 | 151534222 | 151534345 | NC_000002.11 |
| cg14722082 | 2.21E-08 | 2.31E-09 | 6.27 | 10.4028485 | 7.02E-02 | 134399375 | 134399498 | NC_000005.9  |
| cg24633027 | 2.21E-08 | 2.31E-09 | 6.27 | 10.4026579 | 6.44E-02 | 140754314 | 140754437 | NC_000005.9  |
| cg05788927 | 2.21E-08 | 2.31E-09 | 6.27 | 10.402569  | 1.03E-01 | 24532473  | 24532596  | NC_000011.9  |
| cg07486383 | 2.21E-08 | 2.31E-09 | 6.27 | 10.4019794 | 1.74E-01 | 37838363  | 37838486  | NC_000005.9  |

|            |          |          |      |            |          |           |           |              |
|------------|----------|----------|------|------------|----------|-----------|-----------|--------------|
| cg08618451 | 2.22E-08 | 2.32E-09 | 6.27 | 10.4006954 | 1.40E-01 | 96117388  | 96117511  | NC_000005.9  |
| cg05336115 | 2.22E-08 | 2.32E-09 | 6.27 | 10.4004581 | 1.92E-01 | 983104    | 983227    | NC_000020.10 |
| cg08111167 | 2.22E-08 | 2.32E-09 | 6.27 | 10.4002462 | 1.68E-01 | 82135987  | 82136110  | NC_000004.11 |
| cg08982904 | 2.22E-08 | 2.32E-09 | 6.27 | 10.3989889 | 5.31E-02 | 43127238  | 43127361  | NC_000008.10 |
| cg20008164 | 2.22E-08 | 2.32E-09 | 6.27 | 10.3989334 | 1.01E-01 | 54307529  | 54307652  | NC_000017.10 |
| cg26256401 | 2.22E-08 | 2.32E-09 | 6.27 | 10.3979234 | 1.93E-01 | 44037543  | 44037666  | NC_000003.11 |
| cg11733769 | 2.22E-08 | 2.32E-09 | 6.27 | 10.3974813 | 9.20E-02 | 77532565  | 77532688  | NC_000018.9  |
| cg05463307 | 2.22E-08 | 2.32E-09 | 6.27 | 10.3970041 | 4.46E-02 | 138729779 | 138729902 | NC_000006.11 |
| cg01100175 | 2.22E-08 | 2.32E-09 | 6.27 | 10.3968398 | 1.23E-01 | 149645880 | 149646003 | NC_000002.11 |
| cg08572336 | 2.22E-08 | 2.33E-09 | 6.27 | 10.3967006 | 7.84E-02 | 51165404  | 51165527  | NC_000019.9  |
| cg20211422 | 2.22E-08 | 2.33E-09 | 6.27 | 10.3966191 | 2.40E-02 | 66059599  | 66059722  | NC_000011.9  |
| cg26500934 | 2.23E-08 | 2.33E-09 | 6.27 | 10.3948675 | 2.29E-02 | 242566940 | 242567063 | NC_000002.11 |
| cg09425164 | 2.23E-08 | 2.33E-09 | 6.26 | 10.3946646 | 9.02E-02 | 85552114  | 85552237  | NC_000015.9  |
| cg13481638 | 2.23E-08 | 2.33E-09 | 6.26 | 10.3940967 | 1.62E-01 | 91957660  | 91957783  | NC_000011.9  |
| cg07370315 | 2.23E-08 | 2.33E-09 | 6.26 | 10.3931491 | 1.44E-01 | 44106937  | 44107060  | NC_000003.11 |
| cg13916740 | 2.24E-08 | 2.34E-09 | 6.26 | 10.3909546 | 2.41E-01 | 56904997  | 56905120  | NC_000019.9  |
| cg27027069 | 2.24E-08 | 2.34E-09 | 6.26 | 10.3905264 | 6.10E-02 | 76626770  | 76626893  | NC_000006.11 |
| cg09786098 | 2.24E-08 | 2.34E-09 | 6.26 | 10.3903958 | 1.15E-01 | 3016378   | 3016501   | NC_000016.9  |
| cg23873703 | 2.24E-08 | 2.34E-09 | 6.26 | 10.3894507 | 1.01E-01 | 155838625 | 155838748 | NC_000003.11 |
| cg06626786 | 2.24E-08 | 2.34E-09 | 6.26 | 10.3886995 | 4.92E-02 | 36094858  | 36094981  | NC_000021.8  |
| cg02860749 | 2.24E-08 | 2.34E-09 | 6.26 | 10.3884929 | 3.80E-02 | 18780299  | 18780422  | NC_000019.9  |
| cg09053611 | 2.24E-08 | 2.35E-09 | 6.26 | 10.3877946 | 1.01E-01 | 123196675 | 123196798 | NC_000007.13 |
| cg02776375 | 2.25E-08 | 2.35E-09 | 6.26 | 10.3866048 | 4.09E-02 | 219507531 | 219507654 | NC_000002.11 |
| cg18885872 | 2.25E-08 | 2.35E-09 | 6.26 | 10.3862716 | 8.40E-02 | 42973001  | 42973124  | NC_000010.10 |
| cg26717476 | 2.25E-08 | 2.35E-09 | 6.26 | 10.3856715 | 8.92E-02 | 45522509  | 45522632  | NC_000020.10 |

|            |          |          |      |            |          |           |           |              |
|------------|----------|----------|------|------------|----------|-----------|-----------|--------------|
| cg22620614 | 2.25E-08 | 2.35E-09 | 6.26 | 10.3849535 | 3.91E-02 | 70794709  | 70794832  | NC_000011.9  |
| cg02150867 | 2.25E-08 | 2.35E-09 | 6.26 | 10.3842709 | 1.35E-01 | 42075865  | 42075988  | NC_000014.8  |
| cg15681537 | 2.25E-08 | 2.36E-09 | 6.26 | 10.3837551 | 1.75E-01 | 22370733  | 22370856  | NC_000021.8  |
| cg00829961 | 2.25E-08 | 2.36E-09 | 6.26 | 10.3832285 | 1.78E-01 | 25909326  | 25909449  | NC_000008.10 |
| cg16023283 | 2.25E-08 | 2.36E-09 | 6.26 | 10.3831185 | 8.50E-02 | 106938234 | 106938357 | NC_000014.8  |
| cg24302412 | 2.25E-08 | 2.36E-09 | 6.26 | 10.3830599 | 8.88E-02 | 29595196  | 29595319  | NC_000006.11 |
| cg24663311 | 2.25E-08 | 2.36E-09 | 6.26 | 10.3828814 | 1.76E-01 | 191224886 | 191225009 | NC_000002.11 |
| cg01821088 | 2.25E-08 | 2.36E-09 | 6.26 | 10.3823103 | 1.04E-01 | 23832010  | 23832133  | NC_000002.11 |
| cg13052796 | 2.26E-08 | 2.36E-09 | 6.26 | 10.3801366 | 7.62E-02 | 37259802  | 37259925  | NC_000021.8  |
| cg12406822 | 2.26E-08 | 2.37E-09 | 6.26 | 10.3798314 | 8.09E-02 | 226033550 | 226033673 | NC_000001.10 |
| cg03288168 | 2.26E-08 | 2.37E-09 | 6.26 | 10.3791385 | 9.97E-02 | 10784468  | 10784591  | NC_000004.11 |
| cg17593512 | 2.26E-08 | 2.37E-09 | 6.26 | 10.3786194 | 1.19E-01 | 40441513  | 40441636  | NC_000004.11 |
| cg07949989 | 2.26E-08 | 2.37E-09 | 6.26 | 10.3779745 | 1.12E-01 | 26747075  | 26747198  | NC_000006.11 |
| cg15663348 | 2.27E-08 | 2.37E-09 | 6.26 | 10.3771195 | 4.79E-02 | 67617289  | 67617412  | NC_000018.9  |
| cg09247779 | 2.27E-08 | 2.37E-09 | 6.26 | 10.3766797 | 5.05E-02 | 5947349   | 5947472   | NC_000001.10 |
| cg23699098 | 2.27E-08 | 2.38E-09 | 6.26 | 10.3758549 | 5.73E-02 | 1008880   | 1009003   | NC_000011.9  |
| cg12334793 | 2.27E-08 | 2.38E-09 | 6.26 | 10.3756359 | 1.50E-01 | 102977342 | 102977465 | NC_000010.10 |
| cg03753683 | 2.27E-08 | 2.38E-09 | 6.26 | 10.3742872 | 1.19E-01 | 134791323 | 134791446 | NC_000010.10 |
| cg21754400 | 2.27E-08 | 2.38E-09 | 6.26 | 10.3735308 | 1.46E-01 | 81471649  | 81471772  | NC_000012.11 |
| cg08098598 | 2.28E-08 | 2.38E-09 | 6.26 | 10.372339  | 9.57E-02 | 74940334  | 74940457  | NC_000017.10 |
| cg00373397 | 2.28E-08 | 2.38E-09 | 6.26 | 10.3720017 | 7.59E-02 | 49146166  | 49146289  | NC_000022.10 |
| cg03630088 | 2.28E-08 | 2.39E-09 | 6.26 | 10.3716767 | 1.40E-01 | 125651526 | 125651649 | NC_000010.10 |
| cg24636477 | 2.28E-08 | 2.39E-09 | 6.26 | 10.3691051 | 2.07E-01 | 48439229  | 48439352  | NC_000010.10 |
| cg18242103 | 2.29E-08 | 2.40E-09 | 6.26 | 10.3676007 | 1.52E-01 | 52734253  | 52734376  | NC_000014.8  |
| cg03668835 | 2.29E-08 | 2.40E-09 | 6.26 | 10.3665459 | 4.90E-02 | 17784171  | 17784294  | NC_000003.11 |

|            |          |          |      |            |          |           |           |              |
|------------|----------|----------|------|------------|----------|-----------|-----------|--------------|
| cg04949308 | 2.29E-08 | 2.40E-09 | 6.26 | 10.3659468 | 6.25E-02 | 40778778  | 40778901  | NC_000015.9  |
| cg03631131 | 2.29E-08 | 2.40E-09 | 6.26 | 10.365361  | 1.26E-01 | 147115506 | 147115629 | NC_000003.11 |
| cg12089204 | 2.29E-08 | 2.40E-09 | 6.26 | 10.3648312 | 6.03E-02 | 1318605   | 1318728   | NC_000011.9  |
| cg23457518 | 2.29E-08 | 2.40E-09 | 6.26 | 10.3644964 | 8.24E-02 | 134810240 | 134810363 | NC_000010.10 |
| cg18682028 | 2.30E-08 | 2.41E-09 | 6.26 | 10.3620891 | 5.30E-02 | 46035439  | 46035562  | NC_000003.11 |
| cg03487507 | 2.30E-08 | 2.41E-09 | 6.26 | 10.3620745 | 5.49E-02 | 55994692  | 55994815  | NC_000019.9  |
| cg06695663 | 2.30E-08 | 2.41E-09 | 6.26 | 10.3618883 | 1.70E-01 | 19137968  | 19138091  | NC_000022.10 |
| cg07780114 | 2.30E-08 | 2.41E-09 | 6.26 | 10.3618877 | 8.14E-02 | 47549369  | 47549492  | NC_000021.8  |
| cg20390545 | 2.30E-08 | 2.41E-09 | 6.26 | 10.3616523 | 6.20E-02 | 133527210 | 133527333 | NC_000003.11 |
| cg22881652 | 2.30E-08 | 2.41E-09 | 6.26 | 10.3606772 | 1.30E-01 | 13532951  | 13533074  | NC_000004.11 |
| cg00800229 | 2.30E-08 | 2.41E-09 | 6.26 | 10.3599128 | 1.89E-01 | 22004993  | 22005116  | NC_000014.8  |
| cg08196106 | 2.31E-08 | 2.42E-09 | 6.26 | 10.3591343 | 1.64E-01 | 131400973 | 131401096 | NC_000012.11 |
| cg25592918 | 2.31E-08 | 2.42E-09 | 6.26 | 10.3587096 | 6.33E-02 | 132767707 | 132767830 | NC_000002.11 |
| cg19095988 | 2.31E-08 | 2.42E-09 | 6.26 | 10.3581693 | 4.89E-02 | 17728637  | 17728760  | NC_000019.9  |
| cg23350904 | 2.31E-08 | 2.42E-09 | 6.26 | 10.3573143 | 8.94E-02 | 4648580   | 4648703   | NC_000017.10 |
| cg26205131 | 2.31E-08 | 2.42E-09 | 6.26 | 10.3569258 | 1.10E-01 | 1444878   | 1445001   | NC_000005.9  |
| cg10581497 | 2.31E-08 | 2.42E-09 | 6.26 | 10.3566971 | 4.74E-02 | 44429627  | 44429750  | NC_000019.9  |
| cg24874180 | 2.31E-08 | 2.42E-09 | 6.26 | 10.3566793 | 1.50E-01 | 107956405 | 107956528 | NC_000004.11 |
| cg00347677 | 2.31E-08 | 2.42E-09 | 6.26 | 10.3566687 | 1.64E-01 | 63795636  | 63795759  | NC_000001.10 |
| cg04788926 | 2.31E-08 | 2.42E-09 | 6.26 | 10.3564655 | 8.99E-02 | 76617198  | 76617321  | NC_000018.9  |
| cg14127859 | 2.31E-08 | 2.42E-09 | 6.26 | 10.3560405 | 1.27E-01 | 96716928  | 96717051  | NC_000009.11 |
| cg14799519 | 2.31E-08 | 2.43E-09 | 6.26 | 10.3555098 | 1.29E-01 | 27490532  | 27490655  | NC_000012.11 |
| cg22671986 | 2.32E-08 | 2.43E-09 | 6.26 | 10.3544806 | 1.17E-01 | 62799523  | 62799646  | NC_000004.11 |
| cg02178957 | 2.32E-08 | 2.43E-09 | 6.26 | 10.3544107 | 9.45E-02 | 85964200  | 85964323  | NC_000016.9  |
| cg13923530 | 2.32E-08 | 2.43E-09 | 6.26 | 10.3540586 | 1.21E-01 | 494386    | 494509    | NC_000008.10 |

|            |          |          |      |            |          |           |           |              |
|------------|----------|----------|------|------------|----------|-----------|-----------|--------------|
| cg14843800 | 2.32E-08 | 2.43E-09 | 6.26 | 10.3535873 | 1.94E-01 | 119419786 | 119419909 | NC_000012.11 |
| cg27087614 | 2.32E-08 | 2.43E-09 | 6.26 | 10.352995  | 8.52E-02 | 63041518  | 63041641  | NC_000007.13 |
| cg01257975 | 2.32E-08 | 2.43E-09 | 6.26 | 10.3522694 | 1.14E-01 | 40058706  | 40058829  | NC_000022.10 |
| cg13547644 | 2.32E-08 | 2.43E-09 | 6.26 | 10.3519437 | 1.35E-01 | 229569608 | 229569731 | NC_000001.10 |
| cg21149967 | 2.32E-08 | 2.44E-09 | 6.26 | 10.3508984 | 5.12E-02 | 58224502  | 58224625  | NC_000012.11 |
| cg23113318 | 2.32E-08 | 2.44E-09 | 6.26 | 10.3500417 | 3.49E-02 | 51737867  | 51737990  | NC_000001.10 |
| cg16068490 | 2.33E-08 | 2.44E-09 | 6.26 | 10.3497868 | 4.25E-02 | 5139334   | 5139457   | NC_000005.9  |
| cg20128928 | 2.33E-08 | 2.44E-09 | 6.26 | 10.3494111 | 1.16E-01 | 104640560 | 104640683 | NC_000004.11 |
| cg25709679 | 2.33E-08 | 2.44E-09 | 6.26 | 10.3475913 | 6.79E-02 | 99206764  | 99206887  | NC_000015.9  |
| cg04088697 | 2.33E-08 | 2.45E-09 | 6.26 | 10.3468053 | 1.41E-01 | 96627050  | 96627173  | NC_000007.13 |
| cg23216292 | 2.33E-08 | 2.45E-09 | 6.26 | 10.346553  | 1.88E-01 | 21106053  | 21106176  | NC_000019.9  |
| cg14239592 | 2.33E-08 | 2.45E-09 | 6.26 | 10.3463748 | 8.65E-02 | 58715251  | 58715374  | NC_000019.9  |
| cg16516691 | 2.34E-08 | 2.45E-09 | 6.26 | 10.3441104 | 1.76E-01 | 187714055 | 187714178 | NC_000002.11 |
| cg01674405 | 2.34E-08 | 2.45E-09 | 6.26 | 10.3437308 | 7.81E-02 | 138871595 | 138871718 | NC_000009.11 |
| cg13988014 | 2.34E-08 | 2.46E-09 | 6.26 | 10.3433818 | 4.86E-02 | 139262676 | 139262799 | NC_000009.11 |
| cg01296360 | 2.34E-08 | 2.46E-09 | 6.26 | 10.3429784 | 1.11E-01 | 145925767 | 145925890 | NC_000008.10 |
| cg12085501 | 2.35E-08 | 2.46E-09 | 6.25 | 10.3410305 | 1.36E-01 | 94295390  | 94295513  | NC_000007.13 |
| cg23121156 | 2.35E-08 | 2.46E-09 | 6.25 | 10.3397296 | 1.47E-01 | 154710421 | 154710544 | NC_000004.11 |
| cg22086452 | 2.35E-08 | 2.47E-09 | 6.25 | 10.3386119 | 8.33E-02 | 156738170 | 156738293 | NC_000007.13 |
| cg04651548 | 2.36E-08 | 2.47E-09 | 6.25 | 10.3358493 | 1.12E-01 | 143085905 | 143086028 | NC_000008.10 |
| cg03475285 | 2.36E-08 | 2.48E-09 | 6.25 | 10.3353923 | 1.85E-01 | 54789207  | 54789330  | NC_000008.10 |
| cg07906520 | 2.36E-08 | 2.48E-09 | 6.25 | 10.3351541 | 1.58E-01 | 37435716  | 37435839  | NC_000020.10 |
| cg05628795 | 2.36E-08 | 2.48E-09 | 6.25 | 10.3350135 | 3.31E-02 | 110434089 | 110434212 | NC_000012.11 |
| cg22717323 | 2.36E-08 | 2.48E-09 | 6.25 | 10.3346991 | 3.36E-02 | 2094977   | 2095100   | NC_000007.13 |
| cg13576883 | 2.36E-08 | 2.48E-09 | 6.25 | 10.3330945 | 1.71E-01 | 130527038 | 130527161 | NC_000012.11 |

|            |          |          |      |            |          |           |           |              |
|------------|----------|----------|------|------------|----------|-----------|-----------|--------------|
| cg03463208 | 2.36E-08 | 2.48E-09 | 6.25 | 10.3329668 | 5.93E-02 | 792305    | 792428    | NC_000006.11 |
| cg16898239 | 2.36E-08 | 2.48E-09 | 6.25 | 10.3326818 | 1.63E-01 | 74070682  | 74070805  | NC_000017.10 |
| cg11772171 | 2.36E-08 | 2.48E-09 | 6.25 | 10.3326359 | 1.90E-01 | 2292544   | 2292667   | NC_000011.9  |
| cg19969606 | 2.36E-08 | 2.48E-09 | 6.25 | 10.3326061 | 1.37E-01 | 113901665 | 113901788 | NC_000012.11 |
| cg10501128 | 2.36E-08 | 2.48E-09 | 6.25 | 10.3324021 | 1.86E-01 | 29069100  | 29069223  | NC_000013.10 |
| cg02060566 | 2.37E-08 | 2.48E-09 | 6.25 | 10.3318279 | 1.23E-01 | 114878954 | 114879077 | NC_000012.11 |
| cg03858673 | 2.37E-08 | 2.49E-09 | 6.25 | 10.3311801 | 1.22E-01 | 28584155  | 28584278  | NC_000006.11 |
| cg23239891 | 2.37E-08 | 2.49E-09 | 6.25 | 10.3308867 | 6.28E-02 | 8808017   | 8808140   | NC_000019.9  |
| cg05971187 | 2.37E-08 | 2.49E-09 | 6.25 | 10.3289473 | 5.02E-02 | 124224754 | 124224877 | NC_000008.10 |
| cg09135016 | 2.37E-08 | 2.49E-09 | 6.25 | 10.3288393 | 2.07E-01 | 47697446  | 47697569  | NC_000001.10 |
| cg05629350 | 2.37E-08 | 2.49E-09 | 6.25 | 10.3280249 | 1.95E-02 | 40754188  | 40754311  | NC_000001.10 |
| cg24340081 | 2.38E-08 | 2.50E-09 | 6.25 | 10.3271544 | 1.42E-01 | 63614431  | 63614554  | NC_000008.10 |
| cg06091013 | 2.38E-08 | 2.50E-09 | 6.25 | 10.3268301 | 1.89E-01 | 6679482   | 6679605   | NC_000017.10 |
| cg11239506 | 2.38E-08 | 2.50E-09 | 6.25 | 10.3266592 | 9.51E-02 | 147735698 | 147735821 | NC_000001.10 |
| cg13528199 | 2.38E-08 | 2.50E-09 | 6.25 | 10.3259059 | 7.55E-02 | 134829644 | 134829767 | NC_000010.10 |
| cg00343312 | 2.38E-08 | 2.50E-09 | 6.25 | 10.3257041 | 2.01E-01 | 84816338  | 84816461  | NC_000007.13 |
| cg13444583 | 2.38E-08 | 2.50E-09 | 6.25 | 10.32537   | 9.08E-02 | 132600162 | 132600285 | NC_000010.10 |
| cg17138415 | 2.38E-08 | 2.50E-09 | 6.25 | 10.3249638 | 5.87E-02 | 107259568 | 107259691 | NC_000012.11 |
| cg01433297 | 2.38E-08 | 2.51E-09 | 6.25 | 10.3234006 | 1.46E-01 | 4151816   | 4151939   | NC_000020.10 |
| cg02246609 | 2.39E-08 | 2.51E-09 | 6.25 | 10.3224294 | 1.11E-01 | 28584003  | 28584126  | NC_000006.11 |
| cg04182215 | 2.39E-08 | 2.51E-09 | 6.25 | 10.3217695 | 3.90E-02 | 459900    | 460023    | NC_000011.9  |
| cg25390063 | 2.39E-08 | 2.51E-09 | 6.25 | 10.3210781 | 4.72E-02 | 66309226  | 66309349  | NC_000012.11 |
| cg01066602 | 2.39E-08 | 2.51E-09 | 6.25 | 10.3207774 | 1.39E-01 | 35299217  | 35299340  | NC_000007.13 |
| cg19056537 | 2.39E-08 | 2.52E-09 | 6.25 | 10.3189934 | 2.99E-02 | 132415749 | 132415872 | NC_000002.11 |
| cg26446913 | 2.40E-08 | 2.52E-09 | 6.25 | 10.318208  | 1.04E-01 | 45940055  | 45940178  | NC_000019.9  |

|            |          |          |      |            |          |           |           |              |
|------------|----------|----------|------|------------|----------|-----------|-----------|--------------|
| cg04754741 | 2.40E-08 | 2.52E-09 | 6.25 | 10.3164016 | 2.22E-02 | 64349163  | 64349286  | NC_000006.11 |
| cg22704037 | 2.40E-08 | 2.53E-09 | 6.25 | 10.3155517 | 5.00E-02 | 21988653  | 21988776  | NC_000022.10 |
| cg12849791 | 2.41E-08 | 2.53E-09 | 6.25 | 10.3146252 | 6.85E-02 | 38078307  | 38078430  | NC_000003.11 |
| cg10912240 | 2.41E-08 | 2.53E-09 | 6.25 | 10.3145771 | 1.06E-01 | 29235907  | 29236030  | NC_000014.8  |
| cg03086707 | 2.41E-08 | 2.53E-09 | 6.25 | 10.3145578 | 1.44E-01 | 140740607 | 140740730 | NC_000005.9  |
| cg23147393 | 2.41E-08 | 2.53E-09 | 6.25 | 10.3142973 | 1.00E-01 | 133373133 | 133373256 | NC_000010.10 |
| cg08853359 | 2.41E-08 | 2.53E-09 | 6.25 | 10.3127438 | 1.00E-01 | 331454    | 331577    | NC_000016.9  |
| cg06721137 | 2.41E-08 | 2.54E-09 | 6.25 | 10.3117769 | 1.39E-01 | 27643990  | 27644113  | NC_000015.9  |
| cg08278290 | 2.41E-08 | 2.54E-09 | 6.25 | 10.3106021 | 5.50E-02 | 88016208  | 88016331  | NC_000016.9  |
| cg03724238 | 2.42E-08 | 2.54E-09 | 6.25 | 10.310209  | 5.69E-02 | 21696666  | 21696789  | NC_000009.11 |
| cg01406647 | 2.42E-08 | 2.54E-09 | 6.25 | 10.3099665 | 4.62E-02 | 9508976   | 9509099   | NC_000004.11 |
| cg14440571 | 2.42E-08 | 2.54E-09 | 6.25 | 10.3092033 | 8.28E-02 | 71420161  | 71420284  | NC_000017.10 |
| cg19184415 | 2.42E-08 | 2.54E-09 | 6.25 | 10.3086938 | 9.37E-02 | 57363691  | 57363814  | NC_000018.9  |
| cg12211867 | 2.42E-08 | 2.54E-09 | 6.25 | 10.3084789 | 1.37E-01 | 108023441 | 108023564 | NC_000001.10 |
| cg00657415 | 2.42E-08 | 2.54E-09 | 6.25 | 10.3083688 | 4.12E-02 | 33454700  | 33454823  | NC_000010.10 |
| cg15570966 | 2.42E-08 | 2.55E-09 | 6.25 | 10.3079652 | 6.19E-02 | 12036981  | 12037104  | NC_000019.9  |
| cg03359516 | 2.42E-08 | 2.55E-09 | 6.25 | 10.3067858 | 1.22E-01 | 126771184 | 126771307 | NC_000009.11 |
| cg16184803 | 2.42E-08 | 2.55E-09 | 6.25 | 10.3066111 | 1.30E-01 | 111542444 | 111542567 | NC_000004.11 |
| cg09989644 | 2.43E-08 | 2.55E-09 | 6.25 | 10.3060162 | 1.27E-01 | 156358119 | 156358242 | NC_000001.10 |
| cg00512031 | 2.43E-08 | 2.55E-09 | 6.25 | 10.3058245 | 8.46E-02 | 5021976   | 5022099   | NC_000004.11 |
| cg12337988 | 2.43E-08 | 2.55E-09 | 6.25 | 10.3057162 | 1.19E-01 | 122395985 | 122396108 | NC_000003.11 |
| cg06220761 | 2.43E-08 | 2.55E-09 | 6.25 | 10.3055599 | 1.22E-01 | 7455518   | 7455641   | NC_000010.10 |
| cg05335955 | 2.43E-08 | 2.55E-09 | 6.25 | 10.3054231 | 2.20E-01 | 83349264  | 83349387  | NC_000015.9  |
| cg02002231 | 2.43E-08 | 2.55E-09 | 6.25 | 10.3046411 | 2.22E-01 | 81187798  | 81187921  | NC_000004.11 |
| cg04693787 | 2.43E-08 | 2.56E-09 | 6.25 | 10.3021317 | 3.83E-02 | 31936702  | 31936825  | NC_000006.11 |



|            |          |          |      |            |          |           |           |              |
|------------|----------|----------|------|------------|----------|-----------|-----------|--------------|
| cg05487664 | 2.44E-08 | 2.56E-09 | 6.25 | 10.3010978 | 9.50E-02 | 61277316  | 61277439  | NC_000011.9  |
| cg22416376 | 2.44E-08 | 2.56E-09 | 6.25 | 10.3010815 | 1.18E-01 | 17395271  | 17395394  | NC_000008.10 |
| cg07696033 | 2.44E-08 | 2.57E-09 | 6.25 | 10.3002199 | 1.14E-01 | 44326410  | 44326533  | NC_000011.9  |
| cg18165707 | 2.45E-08 | 2.58E-09 | 6.25 | 10.2962964 | 1.99E-01 | 142189543 | 142189666 | NC_000008.10 |
| cg16196812 | 2.45E-08 | 2.58E-09 | 6.25 | 10.2952608 | 1.18E-01 | 120355139 | 120355262 | NC_000010.10 |
| cg12121643 | 2.46E-08 | 2.59E-09 | 6.25 | 10.2928209 | 1.69E-01 | 185911796 | 185911919 | NC_000003.11 |
| cg20943372 | 2.46E-08 | 2.59E-09 | 6.25 | 10.2904537 | 1.01E-01 | 186993527 | 186993650 | NC_000003.11 |
| cg05012620 | 2.47E-08 | 2.60E-09 | 6.24 | 10.28803   | 7.19E-02 | 47886433  | 47886556  | NC_000017.10 |
| cg00959616 | 2.47E-08 | 2.60E-09 | 6.24 | 10.2863807 | 1.23E-01 | 128866668 | 128866791 | NC_000012.11 |
| cg02886838 | 2.47E-08 | 2.61E-09 | 6.24 | 10.2853002 | 1.20E-01 | 64576663  | 64576786  | NC_000014.8  |
| cg18069403 | 2.47E-08 | 2.61E-09 | 6.24 | 10.2848841 | 4.20E-02 | 112565651 | 112565774 | NC_000003.11 |
| cg09997714 | 2.48E-08 | 2.61E-09 | 6.24 | 10.2839843 | 9.96E-02 | 166061418 | 166061541 | NC_000006.11 |
| cg09916212 | 2.49E-08 | 2.62E-09 | 6.24 | 10.2796822 | 9.34E-02 | 2498390   | 2498513   | NC_000011.9  |
| cg20861822 | 2.49E-08 | 2.62E-09 | 6.24 | 10.2783111 | 1.01E-01 | 30406707  | 30406830  | NC_000020.10 |
| cg05138681 | 2.49E-08 | 2.62E-09 | 6.24 | 10.2781257 | 5.56E-02 | 98782756  | 98782879  | NC_000009.11 |
| cg16569147 | 2.49E-08 | 2.63E-09 | 6.24 | 10.277926  | 5.01E-02 | 816088    | 816211    | NC_000016.9  |
| cg21830122 | 2.49E-08 | 2.63E-09 | 6.24 | 10.2775847 | 6.11E-02 | 32037653  | 32037776  | NC_000006.11 |
| cg20483763 | 2.49E-08 | 2.63E-09 | 6.24 | 10.2768161 | 3.32E-02 | 67223174  | 67223297  | NC_000011.9  |
| cg17750959 | 2.49E-08 | 2.63E-09 | 6.24 | 10.2765489 | 1.40E-01 | 32907997  | 32908120  | NC_000017.10 |
| cg12184157 | 2.50E-08 | 2.63E-09 | 6.24 | 10.2758448 | 1.03E-01 | 23549495  | 23549618  | NC_000020.10 |
| cg11548303 | 2.50E-08 | 2.63E-09 | 6.24 | 10.2754694 | 1.37E-01 | 23567350  | 23567473  | NC_000008.10 |
| cg12912426 | 2.50E-08 | 2.63E-09 | 6.24 | 10.2752725 | 8.96E-02 | 14544500  | 14544623  | NC_000012.11 |
| cg18173235 | 2.50E-08 | 2.64E-09 | 6.24 | 10.2733167 | 1.59E-01 | 119612382 | 119612505 | NC_000002.11 |
| cg16411101 | 2.50E-08 | 2.64E-09 | 6.24 | 10.2725113 | 1.40E-01 | 54831653  | 54831776  | NC_000001.10 |
| cg18256769 | 2.51E-08 | 2.64E-09 | 6.24 | 10.2716449 | 6.15E-02 | 35012103  | 35012226  | NC_000017.10 |

|            |          |          |      |            |          |           |           |              |
|------------|----------|----------|------|------------|----------|-----------|-----------|--------------|
| cg02975667 | 2.51E-08 | 2.65E-09 | 6.24 | 10.2706026 | 7.45E-02 | 91583994  | 91584117  | NC_000011.9  |
| cg02964065 | 2.51E-08 | 2.65E-09 | 6.24 | 10.2697885 | 1.11E-01 | 32729545  | 32729668  | NC_000006.11 |
| cg20000805 | 2.51E-08 | 2.65E-09 | 6.24 | 10.2696117 | 1.32E-01 | 97046756  | 97046879  | NC_000001.10 |
| cg22140538 | 2.51E-08 | 2.65E-09 | 6.24 | 10.2687187 | 3.28E-02 | 500598    | 500721    | NC_000011.9  |
| cg10721149 | 2.52E-08 | 2.66E-09 | 6.24 | 10.2666625 | 1.45E-01 | 25652405  | 25652528  | NC_000006.11 |
| cg08934785 | 2.52E-08 | 2.66E-09 | 6.24 | 10.2666582 | 1.34E-01 | 27196759  | 27196882  | NC_000007.13 |
| cg01735991 | 2.52E-08 | 2.66E-09 | 6.24 | 10.266139  | 1.29E-01 | 70501068  | 70501191  | NC_000006.11 |
| cg24785225 | 2.53E-08 | 2.66E-09 | 6.24 | 10.2639915 | 8.95E-02 | 25068757  | 25068880  | NC_000015.9  |
| cg01054891 | 2.53E-08 | 2.66E-09 | 6.24 | 10.26392   | 1.05E-01 | 57352729  | 57352852  | NC_000019.9  |
| cg09571713 | 2.53E-08 | 2.66E-09 | 6.24 | 10.2636459 | 1.57E-01 | 168154775 | 168154898 | NC_000004.11 |
| cg21811021 | 2.53E-08 | 2.66E-09 | 6.24 | 10.2633836 | 5.55E-02 | 6659346   | 6659469   | NC_000004.11 |
| cg18332213 | 2.53E-08 | 2.67E-09 | 6.24 | 10.2628378 | 8.28E-02 | 169682412 | 169682535 | NC_000006.11 |
| cg19811087 | 2.53E-08 | 2.67E-09 | 6.24 | 10.2624883 | 1.08E-01 | 91184501  | 91184624  | NC_000001.10 |
| cg05992786 | 2.53E-08 | 2.67E-09 | 6.24 | 10.2612545 | 1.40E-01 | 54446308  | 54446431  | NC_000012.11 |
| cg05813673 | 2.53E-08 | 2.67E-09 | 6.24 | 10.2606819 | 1.08E-01 | 53862521  | 53862644  | NC_000004.11 |
| cg25459450 | 2.53E-08 | 2.67E-09 | 6.24 | 10.2603391 | 1.02E-01 | 99272622  | 99272745  | NC_000006.11 |
| cg26251398 | 2.54E-08 | 2.68E-09 | 6.24 | 10.2578032 | 8.95E-02 | 52985966  | 52986089  | NC_000017.10 |
| cg14665366 | 2.54E-08 | 2.68E-09 | 6.24 | 10.2573645 | 1.68E-01 | 90227740  | 90227863  | NC_000004.11 |
| cg16990474 | 2.54E-08 | 2.68E-09 | 6.24 | 10.2569933 | 7.62E-02 | 1506175   | 1506298   | NC_000010.10 |
| cg05053440 | 2.54E-08 | 2.68E-09 | 6.24 | 10.2569921 | 1.14E-01 | 227748442 | 227748565 | NC_000001.10 |
| cg12489964 | 2.54E-08 | 2.68E-09 | 6.24 | 10.2567599 | 2.79E-02 | 17062185  | 17062308  | NC_000017.10 |
| cg11712990 | 2.54E-08 | 2.68E-09 | 6.24 | 10.2566195 | 1.69E-01 | 87967845  | 87967968  | NC_000005.9  |
| cg27520319 | 2.55E-08 | 2.69E-09 | 6.24 | 10.253091  | 6.69E-02 | 58556185  | 58556308  | NC_000019.9  |
| cg07115542 | 2.55E-08 | 2.69E-09 | 6.24 | 10.2525839 | 2.25E-01 | 36988443  | 36988566  | NC_000014.8  |
| cg26711833 | 2.55E-08 | 2.69E-09 | 6.24 | 10.2525343 | 7.92E-02 | 47119319  | 47119442  | NC_000008.10 |

|            |          |          |      |            |          |           |           |              |
|------------|----------|----------|------|------------|----------|-----------|-----------|--------------|
| cg07819944 | 2.55E-08 | 2.69E-09 | 6.24 | 10.2524281 | 1.99E-01 | 124897153 | 124897276 | NC_000010.10 |
| cg25363559 | 2.55E-08 | 2.70E-09 | 6.24 | 10.2520075 | 7.41E-02 | 143086065 | 143086188 | NC_000008.10 |
| cg05712542 | 2.56E-08 | 2.70E-09 | 6.24 | 10.2505457 | 6.41E-02 | 22337575  | 22337698  | NC_000016.9  |
| cg22370006 | 2.56E-08 | 2.70E-09 | 6.24 | 10.250513  | 1.65E-01 | 154360344 | 154360467 | NC_000006.11 |
| cg25263238 | 2.56E-08 | 2.70E-09 | 6.24 | 10.2497216 | 1.18E-01 | 98031750  | 98031873  | NC_000010.10 |
| cg12476760 | 2.57E-08 | 2.71E-09 | 6.24 | 10.246684  | 2.33E-02 | 3704221   | 3704344   | NC_000019.9  |
| cg09450657 | 2.57E-08 | 2.72E-09 | 6.24 | 10.2446695 | 5.55E-02 | 8642776   | 8642899   | NC_000004.11 |
| cg00856825 | 2.57E-08 | 2.72E-09 | 6.24 | 10.2446267 | 9.14E-02 | 10327895  | 10328018  | NC_000003.11 |
| cg23780731 | 2.57E-08 | 2.72E-09 | 6.24 | 10.2445454 | 8.97E-02 | 28038320  | 28038443  | NC_000022.10 |
| cg16275183 | 2.59E-08 | 2.74E-09 | 6.23 | 10.237783  | 7.98E-02 | 38009281  | 38009404  | NC_000008.10 |
| cg10302472 | 2.59E-08 | 2.74E-09 | 6.23 | 10.2375108 | 9.78E-02 | 33165899  | 33166022  | NC_000006.11 |
| cg00146755 | 2.59E-08 | 2.74E-09 | 6.23 | 10.2373981 | 1.36E-01 | 45551519  | 45551642  | NC_000021.8  |
| cg03490759 | 2.59E-08 | 2.74E-09 | 6.23 | 10.2366136 | 1.03E-01 | 100141888 | 100142011 | NC_000014.8  |
| cg17511731 | 2.59E-08 | 2.74E-09 | 6.23 | 10.236405  | 1.57E-01 | 2278874   | 2278997   | NC_000005.9  |
| cg14602341 | 2.59E-08 | 2.74E-09 | 6.23 | 10.2361267 | 1.37E-01 | 30396500  | 30396623  | NC_000015.9  |
| cg21556223 | 2.60E-08 | 2.74E-09 | 6.23 | 10.2348514 | 1.27E-01 | 3357004   | 3357127   | NC_000006.11 |
| cg26948596 | 2.60E-08 | 2.75E-09 | 6.23 | 10.2324055 | 6.18E-02 | 93078627  | 93078750  | NC_000014.8  |
| cg20881942 | 2.60E-08 | 2.75E-09 | 6.23 | 10.2323704 | 1.28E-01 | 154710826 | 154710949 | NC_000004.11 |
| cg25547520 | 2.60E-08 | 2.75E-09 | 6.23 | 10.2318618 | 1.35E-01 | 67431285  | 67431408  | NC_000015.9  |
| cg07640800 | 2.61E-08 | 2.76E-09 | 6.23 | 10.229916  | 1.33E-01 | 80529315  | 80529438  | NC_000002.11 |
| cg04987335 | 2.61E-08 | 2.76E-09 | 6.23 | 10.2290759 | 1.28E-01 | 35288779  | 35288902  | NC_000011.9  |
| cg04735310 | 2.61E-08 | 2.76E-09 | 6.23 | 10.2288054 | 1.49E-01 | 46711051  | 46711174  | NC_000017.10 |
| cg21024311 | 2.61E-08 | 2.76E-09 | 6.23 | 10.2281544 | 9.75E-02 | 19406021  | 19406144  | NC_000018.9  |
| cg26614129 | 2.61E-08 | 2.76E-09 | 6.23 | 10.2280561 | 1.30E-01 | 130311289 | 130311412 | NC_000012.11 |
| cg03844894 | 2.62E-08 | 2.77E-09 | 6.23 | 10.2270593 | 8.38E-02 | 35086967  | 35087090  | NC_000015.9  |

|            |          |          |      |            |          |           |           |              |
|------------|----------|----------|------|------------|----------|-----------|-----------|--------------|
| cg00023808 | 2.62E-08 | 2.77E-09 | 6.23 | 10.226954  | 4.51E-02 | 101944556 | 101944679 | NC_000007.13 |
| cg02927346 | 2.62E-08 | 2.77E-09 | 6.23 | 10.2253588 | 1.47E-01 | 34059260  | 34059383  | NC_000017.10 |
| cg09120171 | 2.62E-08 | 2.77E-09 | 6.23 | 10.2252428 | 1.40E-01 | 26380792  | 26380915  | NC_000017.10 |
| cg06088360 | 2.62E-08 | 2.77E-09 | 6.23 | 10.2247324 | 8.82E-02 | 170538929 | 170539052 | NC_000006.11 |
| cg02477557 | 2.62E-08 | 2.77E-09 | 6.23 | 10.2246628 | 1.44E-01 | 45770390  | 45770513  | NC_000021.8  |
| cg02119134 | 2.62E-08 | 2.77E-09 | 6.23 | 10.2243628 | 9.51E-02 | 114257348 | 114257471 | NC_000002.11 |
| cg18368019 | 2.62E-08 | 2.77E-09 | 6.23 | 10.2242448 | 2.30E-01 | 43972978  | 43973101  | NC_000017.10 |
| cg24029414 | 2.62E-08 | 2.77E-09 | 6.23 | 10.224038  | 1.36E-01 | 128075852 | 128075975 | NC_000010.10 |
| cg06087473 | 2.62E-08 | 2.78E-09 | 6.23 | 10.2237159 | 5.04E-02 | 51931805  | 51931928  | NC_000003.11 |
| cg24785946 | 2.63E-08 | 2.78E-09 | 6.23 | 10.2226429 | 1.52E-01 | 8473234   | 8473357   | NC_000007.13 |
| cg22862526 | 2.63E-08 | 2.78E-09 | 6.23 | 10.2225994 | 1.48E-01 | 21156814  | 21156937  | NC_000014.8  |
| cg23906454 | 2.63E-08 | 2.78E-09 | 6.23 | 10.2211761 | 9.08E-02 | 108785671 | 108785794 | NC_000006.11 |
| cg15842722 | 2.63E-08 | 2.78E-09 | 6.23 | 10.2209436 | 1.00E-01 | 23499644  | 23499767  | NC_000020.10 |
| cg16731429 | 2.63E-08 | 2.78E-09 | 6.23 | 10.2208445 | 2.82E-02 | 122268654 | 122268777 | NC_000012.11 |
| cg18035534 | 2.63E-08 | 2.78E-09 | 6.23 | 10.2207539 | 7.16E-02 | 46958921  | 46959044  | NC_000021.8  |
| cg23154059 | 2.63E-08 | 2.79E-09 | 6.23 | 10.2199924 | 1.25E-01 | 219736250 | 219736373 | NC_000002.11 |
| cg09601912 | 2.63E-08 | 2.79E-09 | 6.23 | 10.2195617 | 1.65E-01 | 119591144 | 119591267 | NC_000002.11 |
| cg24541426 | 2.63E-08 | 2.79E-09 | 6.23 | 10.2195098 | 1.16E-01 | 177029459 | 177029582 | NC_000002.11 |
| cg04895616 | 2.63E-08 | 2.79E-09 | 6.23 | 10.2195001 | 1.13E-01 | 44331009  | 44331132  | NC_000019.9  |
| cg05065989 | 2.63E-08 | 2.79E-09 | 6.23 | 10.219471  | 1.25E-01 | 27205200  | 27205323  | NC_000007.13 |
| cg01270246 | 2.64E-08 | 2.79E-09 | 6.23 | 10.218573  | 1.68E-01 | 51228270  | 51228393  | NC_000019.9  |
| cg10205431 | 2.64E-08 | 2.79E-09 | 6.23 | 10.2178632 | 8.99E-02 | 140215762 | 140215885 | NC_000005.9  |
| cg20376581 | 2.64E-08 | 2.79E-09 | 6.23 | 10.2174803 | 6.17E-02 | 3239509   | 3239632   | NC_000011.9  |
| cg06785129 | 2.64E-08 | 2.79E-09 | 6.23 | 10.2174486 | 5.47E-02 | 32749939  | 32750062  | NC_000022.10 |
| cg10281002 | 2.64E-08 | 2.79E-09 | 6.23 | 10.2171867 | 1.63E-01 | 114846399 | 114846522 | NC_000012.11 |

|            |          |          |      |            |          |           |           |              |
|------------|----------|----------|------|------------|----------|-----------|-----------|--------------|
| cg03403991 | 2.64E-08 | 2.79E-09 | 6.23 | 10.2170991 | 6.88E-02 | 51167187  | 51167310  | NC_000022.10 |
| cg21291985 | 2.64E-08 | 2.80E-09 | 6.23 | 10.2165088 | 1.31E-01 | 62437035  | 62437158  | NC_000020.10 |
| cg09371059 | 2.65E-08 | 2.80E-09 | 6.23 | 10.2151273 | 1.22E-01 | 17842081  | 17842204  | NC_000016.9  |
| cg27131891 | 2.65E-08 | 2.80E-09 | 6.23 | 10.2150514 | 1.70E-01 | 27513414  | 27513537  | NC_000006.11 |
| cg12754722 | 2.65E-08 | 2.80E-09 | 6.23 | 10.2149034 | 7.63E-02 | 111631409 | 111631532 | NC_000012.11 |
| cg14851485 | 2.65E-08 | 2.81E-09 | 6.23 | 10.2131796 | 1.11E-01 | 100126685 | 100126808 | NC_000014.8  |
| cg16736964 | 2.65E-08 | 2.81E-09 | 6.23 | 10.2126978 | 1.29E-01 | 131690266 | 131690389 | NC_000006.11 |
| cg11419064 | 2.65E-08 | 2.81E-09 | 6.23 | 10.2122328 | 1.41E-01 | 2291264   | 2291387   | NC_000011.9  |
| cg06786372 | 2.65E-08 | 2.81E-09 | 6.23 | 10.2114217 | 1.30E-01 | 27141388  | 27141511  | NC_000007.13 |
| cg03578464 | 2.66E-08 | 2.81E-09 | 6.23 | 10.211251  | 2.01E-02 | 8928666   | 8928789   | NC_000003.11 |
| cg25351588 | 2.66E-08 | 2.81E-09 | 6.23 | 10.2110705 | 8.62E-02 | 116879492 | 116879615 | NC_000006.11 |
| cg07777344 | 2.66E-08 | 2.81E-09 | 6.23 | 10.2107019 | 1.44E-01 | 10757842  | 10757965  | NC_000005.9  |
| cg19116023 | 2.66E-08 | 2.81E-09 | 6.23 | 10.2100068 | 8.04E-02 | 184038421 | 184038544 | NC_000003.11 |
| cg00049047 | 2.66E-08 | 2.82E-09 | 6.23 | 10.2091426 | 1.62E-01 | 37838425  | 37838548  | NC_000005.9  |
| cg25317315 | 2.66E-08 | 2.82E-09 | 6.23 | 10.208151  | 5.39E-02 | 144995101 | 144995224 | NC_000001.10 |
| cg26069291 | 2.67E-08 | 2.82E-09 | 6.23 | 10.2068821 | 1.07E-01 | 42716310  | 42716433  | NC_000006.11 |
| cg07331725 | 2.67E-08 | 2.83E-09 | 6.23 | 10.2060984 | 4.93E-02 | 61157478  | 61157601  | NC_000018.9  |
| cg03611007 | 2.67E-08 | 2.83E-09 | 6.23 | 10.205397  | 2.40E-01 | 85954336  | 85954459  | NC_000010.10 |
| cg06103397 | 2.67E-08 | 2.83E-09 | 6.23 | 10.2049909 | 8.70E-02 | 77542585  | 77542708  | NC_000010.10 |
| cg26034531 | 2.67E-08 | 2.83E-09 | 6.23 | 10.2040222 | 1.21E-01 | 99469577  | 99469700  | NC_000001.10 |
| cg12686016 | 2.67E-08 | 2.83E-09 | 6.23 | 10.2036336 | 2.15E-01 | 27135477  | 27135600  | NC_000007.13 |
| cg17459215 | 2.67E-08 | 2.83E-09 | 6.23 | 10.2034755 | 1.41E-01 | 66298242  | 66298365  | NC_000002.11 |
| cg15954041 | 2.67E-08 | 2.83E-09 | 6.23 | 10.2033612 | 1.44E-01 | 97362308  | 97362431  | NC_000007.13 |
| cg05817118 | 2.68E-08 | 2.83E-09 | 6.23 | 10.2032402 | 1.01E-01 | 77389157  | 77389280  | NC_000018.9  |
| cg13608171 | 2.68E-08 | 2.84E-09 | 6.23 | 10.2022672 | 7.79E-02 | 169931831 | 169931954 | NC_000005.9  |

|            |          |          |      |            |          |           |           |              |
|------------|----------|----------|------|------------|----------|-----------|-----------|--------------|
| cg04353853 | 2.68E-08 | 2.84E-09 | 6.23 | 10.2017318 | 1.37E-01 | 40554669  | 40554792  | NC_000006.11 |
| cg21159778 | 2.68E-08 | 2.84E-09 | 6.23 | 10.2016797 | 1.51E-01 | 117266918 | 117267041 | NC_000009.11 |
| cg21656251 | 2.68E-08 | 2.84E-09 | 6.23 | 10.2016771 | 1.34E-01 | 240031700 | 240031823 | NC_000002.11 |
| cg05227556 | 2.68E-08 | 2.84E-09 | 6.23 | 10.2013552 | 7.45E-02 | 32037290  | 32037413  | NC_000006.11 |
| cg15444472 | 2.68E-08 | 2.84E-09 | 6.23 | 10.2011519 | 7.01E-02 | 54792610  | 54792733  | NC_000018.9  |
| cg06057566 | 2.69E-08 | 2.85E-09 | 6.23 | 10.1983251 | 1.49E-01 | 78493561  | 78493684  | NC_000013.10 |
| cg01124922 | 2.69E-08 | 2.85E-09 | 6.23 | 10.1979926 | 1.23E-01 | 92684412  | 92684535  | NC_000005.9  |
| cg09205595 | 2.69E-08 | 2.85E-09 | 6.23 | 10.197433  | 9.99E-02 | 150782539 | 150782662 | NC_000007.13 |
| cg18614735 | 2.69E-08 | 2.86E-09 | 6.23 | 10.1956522 | 1.36E-01 | 41583523  | 41583646  | NC_000008.10 |
| cg27553626 | 2.69E-08 | 2.86E-09 | 6.23 | 10.1955733 | 7.98E-02 | 28158892  | 28159015  | NC_000001.10 |
| cg20897830 | 2.70E-08 | 2.86E-09 | 6.23 | 10.195246  | 1.40E-01 | 56297579  | 56297702  | NC_000007.13 |
| cg16816603 | 2.70E-08 | 2.86E-09 | 6.23 | 10.1951504 | 1.43E-01 | 45403047  | 45403170  | NC_000022.10 |
| cg07781995 | 2.70E-08 | 2.86E-09 | 6.23 | 10.1949452 | 9.04E-02 | 87655840  | 87655963  | NC_000001.10 |
| cg05695007 | 2.70E-08 | 2.86E-09 | 6.23 | 10.1948032 | 1.18E-01 | 1565727   | 1565850   | NC_000002.11 |
| cg15320349 | 2.70E-08 | 2.86E-09 | 6.23 | 10.1946164 | 6.49E-02 | 37073004  | 37073127  | NC_000008.10 |
| cg21057907 | 2.70E-08 | 2.86E-09 | 6.23 | 10.1938129 | 1.08E-01 | 36977519  | 36977642  | NC_000014.8  |
| cg14325153 | 2.70E-08 | 2.86E-09 | 6.23 | 10.1936722 | 1.42E-01 | 138763899 | 138764022 | NC_000003.11 |
| cg01789743 | 2.70E-08 | 2.86E-09 | 6.23 | 10.1932655 | 1.27E-01 | 236159467 | 236159590 | NC_000001.10 |
| cg10683775 | 2.70E-08 | 2.86E-09 | 6.23 | 10.1932359 | 3.97E-02 | 143958167 | 143958290 | NC_000006.11 |
| cg12127282 | 2.70E-08 | 2.87E-09 | 6.23 | 10.1923467 | 1.55E-01 | 177014685 | 177014808 | NC_000002.11 |
| cg13205613 | 2.70E-08 | 2.87E-09 | 6.23 | 10.1921642 | 7.35E-02 | 32042351  | 32042474  | NC_000006.11 |
| cg08884611 | 2.70E-08 | 2.87E-09 | 6.23 | 10.1917076 | 9.31E-02 | 34256776  | 34256899  | NC_000016.9  |
| cg23226914 | 2.71E-08 | 2.87E-09 | 6.23 | 10.1913749 | 1.42E-01 | 247537224 | 247537347 | NC_000001.10 |
| cg27277859 | 2.71E-08 | 2.87E-09 | 6.23 | 10.1898859 | 6.76E-02 | 51165632  | 51165755  | NC_000019.9  |
| cg27115978 | 2.71E-08 | 2.87E-09 | 6.23 | 10.1897123 | 5.67E-02 | 88643407  | 88643530  | NC_000016.9  |

|            |          |          |      |            |          |           |           |              |
|------------|----------|----------|------|------------|----------|-----------|-----------|--------------|
| cg19272592 | 2.71E-08 | 2.88E-09 | 6.23 | 10.1886627 | 3.82E-02 | 129408521 | 129408644 | NC_000003.11 |
| cg20422505 | 2.71E-08 | 2.88E-09 | 6.23 | 10.1880112 | 2.39E-01 | 45270702  | 45270825  | NC_000012.11 |
| cg12122597 | 2.72E-08 | 2.88E-09 | 6.23 | 10.187161  | 1.74E-01 | 30039004  | 30039127  | NC_000011.9  |
| cg15337897 | 2.72E-08 | 2.88E-09 | 6.23 | 10.1868471 | 1.79E-01 | 69634400  | 69634523  | NC_000011.9  |
| cg05216029 | 2.72E-08 | 2.88E-09 | 6.22 | 10.1859221 | 8.17E-02 | 16766313  | 16766436  | NC_000001.10 |
| cg17034342 | 2.72E-08 | 2.89E-09 | 6.22 | 10.1854817 | 6.63E-02 | 132870388 | 132870511 | NC_000012.11 |
| cg11506658 | 2.72E-08 | 2.89E-09 | 6.22 | 10.1840981 | 5.21E-02 | 142765018 | 142765141 | NC_000006.11 |
| cg25987564 | 2.72E-08 | 2.89E-09 | 6.22 | 10.1839982 | 9.80E-02 | 6010075   | 6010198   | NC_000004.11 |
| cg11389868 | 2.73E-08 | 2.89E-09 | 6.22 | 10.1837719 | 1.30E-01 | 35991624  | 35991747  | NC_000005.9  |
| cg08400935 | 2.73E-08 | 2.89E-09 | 6.22 | 10.1833312 | 1.02E-01 | 18063022  | 18063145  | NC_000011.9  |
| cg04895345 | 2.74E-08 | 2.90E-09 | 6.22 | 10.1793731 | 1.43E-01 | 33780283  | 33780406  | NC_000013.10 |
| cg17333211 | 2.74E-08 | 2.91E-09 | 6.22 | 10.1783613 | 1.97E-01 | 141294016 | 141294139 | NC_000004.11 |
| cg27016990 | 2.74E-08 | 2.91E-09 | 6.22 | 10.1777588 | 2.46E-01 | 133492476 | 133492599 | NC_000008.10 |
| cg11935831 | 2.74E-08 | 2.91E-09 | 6.22 | 10.1775544 | 7.74E-02 | 80137075  | 80137198  | NC_000017.10 |
| cg21897315 | 2.74E-08 | 2.91E-09 | 6.22 | 10.1772835 | 1.50E-01 | 81811448  | 81811571  | NC_000003.11 |
| cg17507671 | 2.75E-08 | 2.91E-09 | 6.22 | 10.1758637 | 1.41E-01 | 111542063 | 111542186 | NC_000004.11 |
| cg09562563 | 2.75E-08 | 2.91E-09 | 6.22 | 10.1758598 | 1.17E-01 | 3854732   | 3854855   | NC_000005.9  |
| cg23416788 | 2.75E-08 | 2.92E-09 | 6.22 | 10.1755302 | 1.37E-01 | 47064307  | 47064430  | NC_000021.8  |
| cg24311236 | 2.75E-08 | 2.92E-09 | 6.22 | 10.1751915 | 1.21E-01 | 73381117  | 73381240  | NC_000001.10 |
| cg15915028 | 2.75E-08 | 2.92E-09 | 6.22 | 10.1749177 | 6.90E-02 | 27528084  | 27528207  | NC_000001.10 |
| cg16498913 | 2.75E-08 | 2.92E-09 | 6.22 | 10.1739938 | 1.79E-01 | 1851563   | 1851686   | NC_000005.9  |
| cg10832108 | 2.75E-08 | 2.92E-09 | 6.22 | 10.173347  | 1.19E-01 | 134870517 | 134870640 | NC_000005.9  |
| cg25561581 | 2.75E-08 | 2.92E-09 | 6.22 | 10.1733228 | 2.29E-01 | 45405899  | 45406022  | NC_000022.10 |
| cg09593184 | 2.75E-08 | 2.92E-09 | 6.22 | 10.1730139 | 1.57E-01 | 21082272  | 21082395  | NC_000020.10 |
| cg20658779 | 2.75E-08 | 2.92E-09 | 6.22 | 10.1729893 | 8.58E-02 | 1692458   | 1692581   | NC_000008.10 |

|            |          |          |      |            |          |           |           |              |
|------------|----------|----------|------|------------|----------|-----------|-----------|--------------|
| cg23204239 | 2.75E-08 | 2.92E-09 | 6.22 | 10.1724663 | 6.17E-02 | 91844025  | 91844148  | NC_000015.9  |
| cg11817309 | 2.76E-08 | 2.93E-09 | 6.22 | 10.1711815 | 1.13E-02 | 249152443 | 249152566 | NC_000001.10 |
| cg04577177 | 2.76E-08 | 2.93E-09 | 6.22 | 10.1711088 | 1.52E-01 | 28075183  | 28075306  | NC_000016.9  |
| cg11111460 | 2.76E-08 | 2.93E-09 | 6.22 | 10.1710986 | 1.53E-01 | 183063637 | 183063760 | NC_000004.11 |
| cg07712598 | 2.76E-08 | 2.93E-09 | 6.22 | 10.1699772 | 4.02E-02 | 242165230 | 242165353 | NC_000002.11 |
| cg24675735 | 2.77E-08 | 2.94E-09 | 6.22 | 10.1682387 | 8.76E-02 | 74878351  | 74878474  | NC_000017.10 |
| cg12302875 | 2.77E-08 | 2.94E-09 | 6.22 | 10.1680053 | 6.03E-02 | 2499975   | 2500098   | NC_000007.13 |
| cg04312999 | 2.77E-08 | 2.94E-09 | 6.22 | 10.166603  | 3.01E-02 | 45399400  | 45399523  | NC_000021.8  |
| cg06120945 | 2.77E-08 | 2.94E-09 | 6.22 | 10.1665209 | 1.54E-01 | 56622960  | 56623083  | NC_000016.9  |
| cg06600429 | 2.77E-08 | 2.94E-09 | 6.22 | 10.1664972 | 1.57E-01 | 160975956 | 160976079 | NC_000005.9  |
| cg18593317 | 2.77E-08 | 2.94E-09 | 6.22 | 10.1658255 | 1.32E-01 | 14198368  | 14198491  | NC_000017.10 |
| cg23200873 | 2.77E-08 | 2.95E-09 | 6.22 | 10.1655522 | 1.55E-01 | 167191837 | 167191960 | NC_000003.11 |
| cg07036524 | 2.77E-08 | 2.95E-09 | 6.22 | 10.1654748 | 1.86E-01 | 77557781  | 77557904  | NC_000018.9  |
| cg21678312 | 2.77E-08 | 2.95E-09 | 6.22 | 10.1654344 | 2.12E-01 | 71314587  | 71314710  | NC_000012.11 |
| cg02582963 | 2.77E-08 | 2.95E-09 | 6.22 | 10.1652147 | 1.12E-01 | 153840718 | 153840841 | NC_000003.11 |
| cg06839631 | 2.77E-08 | 2.95E-09 | 6.22 | 10.1649461 | 1.71E-01 | 102469948 | 102470071 | NC_000010.10 |
| cg14824536 | 2.77E-08 | 2.95E-09 | 6.22 | 10.1648316 | 1.48E-02 | 170885572 | 170885695 | NC_000002.11 |
| cg12984877 | 2.78E-08 | 2.95E-09 | 6.22 | 10.1644021 | 1.14E-01 | 146856745 | 146856868 | NC_000004.11 |
| cg10905736 | 2.78E-08 | 2.95E-09 | 6.22 | 10.1642827 | 5.59E-02 | 30101146  | 30101269  | NC_000013.10 |
| cg06114087 | 2.78E-08 | 2.95E-09 | 6.22 | 10.1632129 | 1.68E-01 | 53423940  | 53424063  | NC_000013.10 |
| cg19246197 | 2.78E-08 | 2.95E-09 | 6.22 | 10.1628212 | 1.37E-01 | 119231741 | 119231864 | NC_000011.9  |
| cg07696699 | 2.79E-08 | 2.96E-09 | 6.22 | 10.1599537 | 1.70E-01 | 17783502  | 17783625  | NC_000004.11 |
| cg24823679 | 2.79E-08 | 2.96E-09 | 6.22 | 10.1596827 | 1.01E-01 | 5093491   | 5093614   | NC_000019.9  |
| cg22960186 | 2.79E-08 | 2.97E-09 | 6.22 | 10.1583607 | 1.81E-01 | 178017260 | 178017383 | NC_000005.9  |
| cg18429048 | 2.80E-08 | 2.97E-09 | 6.22 | 10.1569846 | 9.08E-02 | 108975597 | 108975720 | NC_000012.11 |



|            |          |          |      |            |          |           |           |              |
|------------|----------|----------|------|------------|----------|-----------|-----------|--------------|
| cg02012731 | 2.80E-08 | 2.97E-09 | 6.22 | 10.1563304 | 1.31E-01 | 70994802  | 70994925  | NC_000002.11 |
| cg20381975 | 2.80E-08 | 2.97E-09 | 6.22 | 10.1563204 | 1.14E-01 | 25320750  | 25320873  | NC_000013.10 |
| cg13297960 | 2.80E-08 | 2.98E-09 | 6.22 | 10.155215  | 1.40E-01 | 22370237  | 22370360  | NC_000021.8  |
| cg15345477 | 2.80E-08 | 2.98E-09 | 6.22 | 10.1549658 | 9.90E-02 | 130279644 | 130279767 | NC_000010.10 |
| cg14558358 | 2.80E-08 | 2.98E-09 | 6.22 | 10.1548833 | 5.77E-02 | 14282817  | 14282940  | NC_000006.11 |
| cg16471850 | 2.80E-08 | 2.98E-09 | 6.22 | 10.153525  | 1.66E-01 | 98891811  | 98891934  | NC_000011.9  |
| cg24546942 | 2.81E-08 | 2.98E-09 | 6.22 | 10.1529891 | 4.48E-02 | 61310626  | 61310749  | NC_000018.9  |
| cg22020299 | 2.81E-08 | 2.98E-09 | 6.22 | 10.1525169 | 7.20E-02 | 44088275  | 44088398  | NC_000006.11 |
| cg18358723 | 2.81E-08 | 2.99E-09 | 6.22 | 10.1522302 | 1.44E-01 | 87955618  | 87955741  | NC_000005.9  |
| cg09083947 | 2.81E-08 | 2.99E-09 | 6.22 | 10.1518113 | 1.53E-01 | 66123496  | 66123619  | NC_000012.11 |
| cg17054969 | 2.81E-08 | 2.99E-09 | 6.22 | 10.1514458 | 2.28E-01 | 48398374  | 48398497  | NC_000012.11 |
| cg27415425 | 2.81E-08 | 2.99E-09 | 6.22 | 10.1500915 | 8.34E-02 | 95084766  | 95084889  | NC_000008.10 |
| cg17384380 | 2.82E-08 | 3.00E-09 | 6.22 | 10.1491085 | 1.20E-01 | 102419209 | 102419332 | NC_000010.10 |
| cg02470697 | 2.82E-08 | 3.00E-09 | 6.22 | 10.1484996 | 8.42E-02 | 48844916  | 48845039  | NC_000002.11 |
| cg12629991 | 2.82E-08 | 3.00E-09 | 6.22 | 10.1478547 | 1.25E-01 | 164627790 | 164627913 | NC_000001.10 |
| cg04637478 | 2.82E-08 | 3.00E-09 | 6.22 | 10.146333  | 1.33E-01 | 140753655 | 140753778 | NC_000005.9  |
| cg25425784 | 2.82E-08 | 3.00E-09 | 6.22 | 10.1463148 | 2.04E-01 | 39990055  | 39990178  | NC_000019.9  |
| cg18900649 | 2.82E-08 | 3.00E-09 | 6.22 | 10.1460979 | 1.38E-01 | 100062572 | 100062695 | NC_000006.11 |
| cg18021368 | 2.83E-08 | 3.01E-09 | 6.22 | 10.1439554 | 1.57E-01 | 140514944 | 140515067 | NC_000005.9  |
| cg22227345 | 2.83E-08 | 3.01E-09 | 6.22 | 10.1436989 | 1.20E-01 | 96952113  | 96952236  | NC_000015.9  |
| cg05947740 | 2.83E-08 | 3.01E-09 | 6.22 | 10.1436141 | 1.02E-01 | 22089778  | 22089901  | NC_000008.10 |
| cg02830749 | 2.83E-08 | 3.01E-09 | 6.22 | 10.143427  | 1.19E-01 | 154451068 | 154451191 | NC_000004.11 |
| cg14479139 | 2.83E-08 | 3.01E-09 | 6.22 | 10.1431827 | 7.71E-02 | 103720052 | 103720175 | NC_000013.10 |
| cg03045425 | 2.83E-08 | 3.02E-09 | 6.22 | 10.1423546 | 1.30E-01 | 31803633  | 31803756  | NC_000018.9  |
| cg15549231 | 2.83E-08 | 3.02E-09 | 6.22 | 10.142211  | 4.77E-02 | 49415761  | 49415884  | NC_000020.10 |

|            |          |          |      |            |          |           |           |              |
|------------|----------|----------|------|------------|----------|-----------|-----------|--------------|
| cg01091143 | 2.84E-08 | 3.02E-09 | 6.22 | 10.139905  | 8.23E-02 | 93822022  | 93822145  | NC_000011.9  |
| cg07986239 | 2.85E-08 | 3.03E-09 | 6.22 | 10.1375189 | 2.08E-01 | 61886142  | 61886265  | NC_000020.10 |
| cg19827780 | 2.86E-08 | 3.04E-09 | 6.22 | 10.1342566 | 1.93E-01 | 38347659  | 38347782  | NC_000017.10 |
| cg20705938 | 2.86E-08 | 3.04E-09 | 6.21 | 10.1332726 | 1.68E-01 | 111558988 | 111559111 | NC_000004.11 |
| cg08789970 | 2.86E-08 | 3.04E-09 | 6.21 | 10.1329949 | 1.05E-01 | 201050370 | 201050493 | NC_000002.11 |
| cg20510378 | 2.86E-08 | 3.05E-09 | 6.21 | 10.1323874 | 6.20E-02 | 31938207  | 31938330  | NC_000006.11 |
| cg06183559 | 2.86E-08 | 3.05E-09 | 6.21 | 10.1317732 | 1.37E-01 | 95357818  | 95357941  | NC_000013.10 |
| cg23664459 | 2.87E-08 | 3.05E-09 | 6.21 | 10.1304834 | 1.90E-01 | 36004097  | 36004220  | NC_000014.8  |
| cg07177867 | 2.87E-08 | 3.05E-09 | 6.21 | 10.1303556 | 1.12E-01 | 52030746  | 52030869  | NC_000015.9  |
| cg23726526 | 2.87E-08 | 3.05E-09 | 6.21 | 10.129777  | 1.79E-01 | 96711316  | 96711439  | NC_000009.11 |
| cg03136323 | 2.87E-08 | 3.06E-09 | 6.21 | 10.1296329 | 5.65E-02 | 19195100  | 19195223  | NC_000016.9  |
| cg18281743 | 2.87E-08 | 3.06E-09 | 6.21 | 10.1295695 | 1.18E-01 | 172755856 | 172755979 | NC_000005.9  |
| cg00144186 | 2.87E-08 | 3.06E-09 | 6.21 | 10.1284554 | 1.70E-01 | 35641054  | 35641177  | NC_000011.9  |
| cg18875371 | 2.87E-08 | 3.06E-09 | 6.21 | 10.127906  | 1.54E-01 | 29244185  | 29244308  | NC_000014.8  |
| cg07752820 | 2.88E-08 | 3.06E-09 | 6.21 | 10.1270491 | 5.11E-02 | 1300084   | 1300207   | NC_000008.10 |
| cg27107171 | 2.88E-08 | 3.07E-09 | 6.21 | 10.1258157 | 2.42E-01 | 119799864 | 119799987 | NC_000005.9  |
| cg11785625 | 2.88E-08 | 3.07E-09 | 6.21 | 10.1248452 | 1.29E-01 | 67521144  | 67521267  | NC_000008.10 |
| cg25870420 | 2.88E-08 | 3.07E-09 | 6.21 | 10.1244604 | 1.75E-01 | 37493949  | 37494072  | NC_000003.11 |
| cg07529658 | 2.89E-08 | 3.08E-09 | 6.21 | 10.1220675 | 9.82E-02 | 46845160  | 46845283  | NC_000021.8  |
| cg16404903 | 2.89E-08 | 3.08E-09 | 6.21 | 10.1220282 | 1.05E-01 | 1982283   | 1982406   | NC_000016.9  |
| cg13145289 | 2.90E-08 | 3.09E-09 | 6.21 | 10.1198153 | 9.27E-02 | 242210216 | 242210339 | NC_000002.11 |
| cg04223006 | 2.90E-08 | 3.09E-09 | 6.21 | 10.1194932 | 1.55E-01 | 82845599  | 82845722  | NC_000005.9  |
| cg24347070 | 2.90E-08 | 3.09E-09 | 6.21 | 10.1174009 | 1.03E-01 | 26382817  | 26382940  | NC_000006.11 |
| cg18669388 | 2.91E-08 | 3.10E-09 | 6.21 | 10.1140787 | 1.03E-01 | 168729015 | 168729138 | NC_000005.9  |
| cg14660839 | 2.91E-08 | 3.11E-09 | 6.21 | 10.1133556 | 2.24E-01 | 28674720  | 28674843  | NC_000013.10 |

|            |          |          |      |            |          |           |           |              |
|------------|----------|----------|------|------------|----------|-----------|-----------|--------------|
| cg27543672 | 2.92E-08 | 3.11E-09 | 6.21 | 10.1115293 | 1.25E-01 | 84541035  | 84541158  | NC_000001.10 |
| cg09657256 | 2.92E-08 | 3.11E-09 | 6.21 | 10.1110898 | 3.19E-02 | 42153683  | 42153806  | NC_000017.10 |
| cg20605061 | 2.92E-08 | 3.12E-09 | 6.21 | 10.1107208 | 1.51E-01 | 176973835 | 176973958 | NC_000002.11 |
| cg07010948 | 2.92E-08 | 3.12E-09 | 6.21 | 10.1106259 | 1.00E-01 | 79181613  | 79181736  | NC_000013.10 |
| cg14678099 | 2.92E-08 | 3.12E-09 | 6.21 | 10.1104946 | 1.76E-01 | 175299587 | 175299710 | NC_000005.9  |
| cg15917645 | 2.92E-08 | 3.12E-09 | 6.21 | 10.1100492 | 4.02E-02 | 41248049  | 41248172  | NC_000015.9  |
| cg15048660 | 2.93E-08 | 3.12E-09 | 6.21 | 10.109067  | 2.29E-01 | 192126935 | 192127058 | NC_000003.11 |
| cg05586800 | 2.93E-08 | 3.12E-09 | 6.21 | 10.109009  | 7.58E-02 | 170052878 | 170053001 | NC_000005.9  |
| cg07485305 | 2.93E-08 | 3.12E-09 | 6.21 | 10.1089725 | 7.00E-02 | 32044179  | 32044302  | NC_000006.11 |
| cg07563050 | 2.93E-08 | 3.12E-09 | 6.21 | 10.1086628 | 1.13E-01 | 169830652 | 169830775 | NC_000006.11 |
| cg10060065 | 2.93E-08 | 3.12E-09 | 6.21 | 10.1084242 | 6.54E-02 | 32366901  | 32367024  | NC_000017.10 |
| cg13374648 | 2.93E-08 | 3.12E-09 | 6.21 | 10.1080962 | 1.03E-01 | 57352785  | 57352908  | NC_000019.9  |
| cg15071923 | 2.93E-08 | 3.12E-09 | 6.21 | 10.1079358 | 8.41E-02 | 130623617 | 130623740 | NC_000012.11 |
| cg15921461 | 2.93E-08 | 3.13E-09 | 6.21 | 10.1064435 | 1.10E-01 | 158373792 | 158373915 | NC_000007.13 |
| cg25594486 | 2.94E-08 | 3.13E-09 | 6.21 | 10.105751  | 7.74E-02 | 51165441  | 51165564  | NC_000019.9  |
| cg20119106 | 2.94E-08 | 3.13E-09 | 6.21 | 10.1047039 | 9.16E-02 | 153750421 | 153750544 | NC_000007.13 |
| cg25028293 | 2.94E-08 | 3.13E-09 | 6.21 | 10.1046315 | 3.87E-02 | 6528261   | 6528384   | NC_000001.10 |
| cg14066865 | 2.94E-08 | 3.13E-09 | 6.21 | 10.1044908 | 5.60E-02 | 219909008 | 219909131 | NC_000002.11 |
| cg16321048 | 2.94E-08 | 3.14E-09 | 6.21 | 10.1035699 | 1.50E-01 | 104605295 | 104605418 | NC_000014.8  |
| cg13400512 | 2.94E-08 | 3.14E-09 | 6.21 | 10.1032164 | 1.29E-01 | 32064578  | 32064701  | NC_000006.11 |
| cg20038591 | 2.95E-08 | 3.15E-09 | 6.21 | 10.0995703 | 1.30E-01 | 119306659 | 119306782 | NC_000010.10 |
| cg17882660 | 2.95E-08 | 3.15E-09 | 6.21 | 10.0991665 | 1.32E-01 | 100637258 | 100637381 | NC_000013.10 |
| cg05710301 | 2.96E-08 | 3.16E-09 | 6.21 | 10.0978553 | 2.72E-02 | 68540704  | 68540827  | NC_000011.9  |
| cg00450990 | 2.96E-08 | 3.16E-09 | 6.21 | 10.0972133 | 7.43E-02 | 23751324  | 23751447  | NC_000002.11 |
| cg17459911 | 2.96E-08 | 3.16E-09 | 6.21 | 10.0968388 | 6.91E-02 | 71968614  | 71968737  | NC_000015.9  |

|            |          |          |      |            |          |           |           |              |
|------------|----------|----------|------|------------|----------|-----------|-----------|--------------|
| cg22232327 | 2.96E-08 | 3.16E-09 | 6.21 | 10.0955716 | 1.64E-01 | 53447594  | 53447717  | NC_000018.9  |
| cg14231871 | 2.97E-08 | 3.16E-09 | 6.21 | 10.0951784 | 1.84E-01 | 220702321 | 220702444 | NC_000001.10 |
| cg03203646 | 2.97E-08 | 3.17E-09 | 6.21 | 10.0941483 | 5.05E-02 | 40896064  | 40896187  | NC_000019.9  |
| cg04832767 | 2.97E-08 | 3.17E-09 | 6.21 | 10.093173  | 1.37E-01 | 96632841  | 96632964  | NC_000007.13 |
| cg14277392 | 2.97E-08 | 3.17E-09 | 6.21 | 10.0929072 | 1.56E-01 | 57018933  | 57019056  | NC_000019.9  |
| cg09924165 | 2.97E-08 | 3.18E-09 | 6.21 | 10.0919505 | 1.81E-01 | 217559417 | 217559540 | NC_000002.11 |
| cg11624345 | 2.98E-08 | 3.18E-09 | 6.21 | 10.091694  | 9.95E-02 | 44278551  | 44278674  | NC_000019.9  |
| cg03963327 | 2.98E-08 | 3.18E-09 | 6.21 | 10.0909475 | 1.73E-01 | 9025730   | 9025853   | NC_000011.9  |
| cg09696301 | 2.98E-08 | 3.18E-09 | 6.21 | 10.0901069 | 1.51E-01 | 20619598  | 20619721  | NC_000011.9  |
| cg16937583 | 2.98E-08 | 3.18E-09 | 6.21 | 10.0897572 | 9.90E-02 | 9997177   | 9997300   | NC_000003.11 |
| cg09723488 | 2.99E-08 | 3.19E-09 | 6.21 | 10.0880105 | 8.24E-02 | 124987896 | 124988019 | NC_000009.11 |
| cg10700564 | 2.99E-08 | 3.19E-09 | 6.21 | 10.0875661 | 1.61E-01 | 103350348 | 103350471 | NC_000012.11 |
| cg27529911 | 2.99E-08 | 3.19E-09 | 6.21 | 10.0873056 | 4.97E-02 | 33428326  | 33428449  | NC_000008.10 |
| cg12196573 | 2.99E-08 | 3.19E-09 | 6.21 | 10.0868622 | 1.38E-01 | 27195602  | 27195725  | NC_000007.13 |
| cg22021975 | 2.99E-08 | 3.19E-09 | 6.21 | 10.0866696 | 8.49E-02 | 30953064  | 30953187  | NC_000006.11 |
| cg04322210 | 2.99E-08 | 3.19E-09 | 6.21 | 10.0865901 | 3.52E-02 | 114987    | 115110    | NC_000016.9  |
| cg24000223 | 2.99E-08 | 3.19E-09 | 6.21 | 10.0865741 | 4.08E-02 | 134116844 | 134116967 | NC_000011.9  |
| cg18599790 | 2.99E-08 | 3.19E-09 | 6.21 | 10.0865138 | 1.25E-01 | 22817348  | 22817471  | NC_000019.9  |
| cg21521784 | 2.99E-08 | 3.20E-09 | 6.21 | 10.0855847 | 1.12E-01 | 30716329  | 30716452  | NC_000019.9  |
| cg15091323 | 3.00E-08 | 3.20E-09 | 6.21 | 10.0839732 | 1.69E-01 | 60780474  | 60780597  | NC_000002.11 |
| cg12412384 | 3.00E-08 | 3.20E-09 | 6.21 | 10.0839334 | 1.23E-01 | 12673025  | 12673148  | NC_000012.11 |
| cg13048512 | 3.00E-08 | 3.20E-09 | 6.21 | 10.0836947 | 1.58E-01 | 110693612 | 110693735 | NC_000001.10 |
| cg09521809 | 3.00E-08 | 3.20E-09 | 6.21 | 10.0835408 | 4.18E-02 | 48426818  | 48426941  | NC_000020.10 |
| cg19050990 | 3.00E-08 | 3.21E-09 | 6.21 | 10.082809  | 1.82E-01 | 98511523  | 98511646  | NC_000001.10 |
| cg25918947 | 3.00E-08 | 3.21E-09 | 6.2  | 10.0815184 | 1.11E-01 | 41365094  | 41365217  | NC_000017.10 |

|            |          |          |     |            |          |           |           |              |
|------------|----------|----------|-----|------------|----------|-----------|-----------|--------------|
| cg20058848 | 3.01E-08 | 3.21E-09 | 6.2 | 10.0810691 | 4.02E-02 | 96852116  | 96852239  | NC_000002.11 |
| cg07476030 | 3.01E-08 | 3.21E-09 | 6.2 | 10.0800285 | 9.88E-02 | 107078648 | 107078771 | NC_000006.11 |
| cg16289417 | 3.01E-08 | 3.22E-09 | 6.2 | 10.0796957 | 1.90E-01 | 166400665 | 166400788 | NC_000006.11 |
| cg19946694 | 3.01E-08 | 3.22E-09 | 6.2 | 10.0786602 | 9.35E-02 | 60093531  | 60093654  | NC_000014.8  |
| cg18412185 | 3.01E-08 | 3.22E-09 | 6.2 | 10.0782705 | 1.13E-01 | 16130102  | 16130225  | NC_000001.10 |
| cg00689612 | 3.01E-08 | 3.22E-09 | 6.2 | 10.0782693 | 8.25E-02 | 76899627  | 76899750  | NC_000017.10 |
| cg13691003 | 3.01E-08 | 3.22E-09 | 6.2 | 10.0779634 | 1.47E-01 | 75600399  | 75600522  | NC_000001.10 |
| cg19037454 | 3.02E-08 | 3.22E-09 | 6.2 | 10.077471  | 1.51E-01 | 165305238 | 165305361 | NC_000004.11 |
| cg14936269 | 3.02E-08 | 3.22E-09 | 6.2 | 10.0773478 | 2.03E-01 | 1968232   | 1968355   | NC_000016.9  |
| cg00157796 | 3.02E-08 | 3.22E-09 | 6.2 | 10.0769093 | 1.98E-01 | 159590231 | 159590354 | NC_000006.11 |
| cg03282345 | 3.02E-08 | 3.23E-09 | 6.2 | 10.0766274 | 8.58E-02 | 49934577  | 49934700  | NC_000019.9  |
| cg17288288 | 3.02E-08 | 3.23E-09 | 6.2 | 10.0756349 | 9.14E-02 | 51418092  | 51418215  | NC_000013.10 |
| cg23340214 | 3.02E-08 | 3.23E-09 | 6.2 | 10.0753949 | 1.11E-01 | 106974225 | 106974348 | NC_000012.11 |
| cg00517787 | 3.02E-08 | 3.23E-09 | 6.2 | 10.0752951 | 1.00E-01 | 154713235 | 154713358 | NC_000004.11 |
| cg15802263 | 3.02E-08 | 3.23E-09 | 6.2 | 10.075075  | 1.00E-01 | 54515245  | 54515368  | NC_000019.9  |
| cg05330121 | 3.02E-08 | 3.23E-09 | 6.2 | 10.0749515 | 1.18E-01 | 77166684  | 77166807  | NC_000010.10 |
| cg07778819 | 3.02E-08 | 3.23E-09 | 6.2 | 10.0744454 | 1.51E-01 | 43862927  | 43863050  | NC_000017.10 |
| cg17858697 | 3.02E-08 | 3.23E-09 | 6.2 | 10.0741413 | 6.80E-02 | 102794524 | 102794647 | NC_000010.10 |
| cg14558942 | 3.02E-08 | 3.23E-09 | 6.2 | 10.0741066 | 5.11E-02 | 67234346  | 67234469  | NC_000011.9  |
| cg22105145 | 3.02E-08 | 3.23E-09 | 6.2 | 10.0740606 | 1.51E-01 | 5196397   | 5196520   | NC_000018.9  |
| cg14614901 | 3.02E-08 | 3.23E-09 | 6.2 | 10.0739534 | 1.55E-01 | 32783463  | 32783586  | NC_000009.11 |
| cg08091023 | 3.03E-08 | 3.24E-09 | 6.2 | 10.0736034 | 2.93E-02 | 122258292 | 122258415 | NC_000008.10 |
| cg20581321 | 3.03E-08 | 3.24E-09 | 6.2 | 10.072018  | 1.72E-01 | 98963585  | 98963708  | NC_000002.11 |
| cg14323293 | 3.03E-08 | 3.24E-09 | 6.2 | 10.0717885 | 1.25E-01 | 98280076  | 98280199  | NC_000009.11 |
| cg24683695 | 3.04E-08 | 3.25E-09 | 6.2 | 10.0688026 | 8.95E-02 | 105882718 | 105882841 | NC_000011.9  |

|            |          |          |     |            |          |           |           |              |
|------------|----------|----------|-----|------------|----------|-----------|-----------|--------------|
| cg24444810 | 3.05E-08 | 3.26E-09 | 6.2 | 10.0661385 | 4.08E-02 | 14113156  | 14113279  | NC_000011.9  |
| cg04359558 | 3.05E-08 | 3.26E-09 | 6.2 | 10.0656314 | 1.69E-01 | 11648224  | 11648347  | NC_000016.9  |
| cg21869609 | 3.05E-08 | 3.26E-09 | 6.2 | 10.0654032 | 1.03E-01 | 2291613   | 2291736   | NC_000019.9  |
| cg01354588 | 3.05E-08 | 3.26E-09 | 6.2 | 10.0650299 | 9.22E-02 | 71657141  | 71657264  | NC_000015.9  |
| cg01766908 | 3.06E-08 | 3.27E-09 | 6.2 | 10.063073  | 1.70E-01 | 78080193  | 78080316  | NC_000016.9  |
| cg14475036 | 3.06E-08 | 3.27E-09 | 6.2 | 10.0629437 | 4.05E-02 | 61660412  | 61660535  | NC_000004.11 |
| cg12857945 | 3.06E-08 | 3.27E-09 | 6.2 | 10.0627884 | 1.47E-01 | 37127275  | 37127398  | NC_000014.8  |
| cg02681173 | 3.06E-08 | 3.27E-09 | 6.2 | 10.0626244 | 1.76E-01 | 130527106 | 130527229 | NC_000012.11 |
| cg00107579 | 3.06E-08 | 3.28E-09 | 6.2 | 10.0613827 | 9.20E-02 | 159398670 | 159398793 | NC_000005.9  |
| cg05488168 | 3.06E-08 | 3.28E-09 | 6.2 | 10.0613243 | 6.85E-02 | 13400637  | 13400760  | NC_000019.9  |
| cg23539933 | 3.06E-08 | 3.28E-09 | 6.2 | 10.0604536 | 2.27E-01 | 88752119  | 88752242  | NC_000002.11 |
| cg21897034 | 3.06E-08 | 3.28E-09 | 6.2 | 10.0601702 | 8.65E-02 | 38567652  | 38567775  | NC_000003.11 |
| cg06081518 | 3.07E-08 | 3.28E-09 | 6.2 | 10.0592742 | 1.64E-01 | 3220915   | 3221038   | NC_000016.9  |
| cg04398581 | 3.07E-08 | 3.28E-09 | 6.2 | 10.0590836 | 2.16E-01 | 62996627  | 62996750  | NC_000006.11 |
| cg22647407 | 3.07E-08 | 3.28E-09 | 6.2 | 10.0589968 | 2.22E-01 | 56904965  | 56905088  | NC_000019.9  |
| cg05957544 | 3.07E-08 | 3.29E-09 | 6.2 | 10.0577902 | 9.62E-02 | 45360804  | 45360927  | NC_000021.8  |
| cg22763680 | 3.08E-08 | 3.30E-09 | 6.2 | 10.0551856 | 1.48E-01 | 33815432  | 33815555  | NC_000017.10 |
| cg17310258 | 3.09E-08 | 3.31E-09 | 6.2 | 10.0526351 | 9.13E-02 | 31847173  | 31847296  | NC_000011.9  |
| cg06067884 | 3.09E-08 | 3.31E-09 | 6.2 | 10.0525431 | 5.55E-02 | 112086687 | 112086810 | NC_000011.9  |
| cg03175653 | 3.09E-08 | 3.31E-09 | 6.2 | 10.0522334 | 1.46E-01 | 74961798  | 74961921  | NC_000018.9  |
| cg09831026 | 3.09E-08 | 3.31E-09 | 6.2 | 10.0504711 | 1.90E-01 | 133485765 | 133485888 | NC_000012.11 |
| cg13170728 | 3.10E-08 | 3.32E-09 | 6.2 | 10.0478197 | 4.24E-02 | 91503707  | 91503830  | NC_000015.9  |
| cg22531183 | 3.11E-08 | 3.33E-09 | 6.2 | 10.0458542 | 2.26E-01 | 50554451  | 50554574  | NC_000019.9  |
| cg15215612 | 3.11E-08 | 3.33E-09 | 6.2 | 10.044349  | 1.63E-01 | 51231736  | 51231859  | NC_000019.9  |
| cg03885271 | 3.11E-08 | 3.34E-09 | 6.2 | 10.0437148 | 1.28E-01 | 61637547  | 61637670  | NC_000020.10 |

|            |          |          |      |            |          |           |           |              |
|------------|----------|----------|------|------------|----------|-----------|-----------|--------------|
| cg19696012 | 3.11E-08 | 3.34E-09 | 6.2  | 10.043632  | 4.02E-02 | 128745037 | 128745160 | NC_000008.10 |
| cg13452260 | 3.12E-08 | 3.34E-09 | 6.2  | 10.0417789 | 1.45E-01 | 44919192  | 44919315  | NC_000017.10 |
| cg25407557 | 3.12E-08 | 3.34E-09 | 6.2  | 10.0413014 | 8.46E-02 | 132168981 | 132169104 | NC_000012.11 |
| cg02522785 | 3.12E-08 | 3.35E-09 | 6.2  | 10.0409253 | 4.75E-02 | 31557320  | 31557443  | NC_000007.13 |
| cg13106389 | 3.12E-08 | 3.35E-09 | 6.2  | 10.0400172 | 1.17E-01 | 25257626  | 25257749  | NC_000001.10 |
| cg22395255 | 3.13E-08 | 3.35E-09 | 6.2  | 10.0394826 | 6.43E-02 | 71903974  | 71904097  | NC_000015.9  |
| cg06575772 | 3.13E-08 | 3.35E-09 | 6.2  | 10.0392166 | 3.39E-02 | 142309263 | 142309386 | NC_000008.10 |
| cg26839961 | 3.13E-08 | 3.35E-09 | 6.2  | 10.0382911 | 7.91E-02 | 43018548  | 43018671  | NC_000017.10 |
| cg19817126 | 3.13E-08 | 3.36E-09 | 6.2  | 10.037511  | 1.33E-01 | 93357526  | 93357649  | NC_000010.10 |
| cg07657465 | 3.13E-08 | 3.36E-09 | 6.2  | 10.0372246 | 1.09E-01 | 22193911  | 22194034  | NC_000019.9  |
| cg19561615 | 3.13E-08 | 3.36E-09 | 6.2  | 10.0371666 | 5.06E-02 | 66584218  | 66584341  | NC_000015.9  |
| cg19586881 | 3.13E-08 | 3.36E-09 | 6.2  | 10.0368938 | 1.28E-01 | 172756999 | 172757122 | NC_000005.9  |
| cg24603408 | 3.13E-08 | 3.36E-09 | 6.2  | 10.0368399 | 1.55E-01 | 22562397  | 22562520  | NC_000008.10 |
| cg18939241 | 3.13E-08 | 3.36E-09 | 6.2  | 10.0367159 | 9.36E-02 | 26109394  | 26109517  | NC_000015.9  |
| cg05493394 | 3.14E-08 | 3.37E-09 | 6.2  | 10.0346794 | 1.79E-01 | 133562035 | 133562158 | NC_000006.11 |
| cg06039355 | 3.14E-08 | 3.37E-09 | 6.2  | 10.0341589 | 1.75E-01 | 118032033 | 118032156 | NC_000010.10 |
| cg06534197 | 3.14E-08 | 3.37E-09 | 6.2  | 10.034118  | 3.72E-02 | 178069714 | 178069837 | NC_000002.11 |
| cg18423935 | 3.14E-08 | 3.37E-09 | 6.2  | 10.0337225 | 1.74E-01 | 120626667 | 120626790 | NC_000003.11 |
| cg09709592 | 3.14E-08 | 3.37E-09 | 6.2  | 10.033218  | 5.50E-02 | 2580833   | 2580956   | NC_000016.9  |
| cg12510614 | 3.14E-08 | 3.37E-09 | 6.2  | 10.0329547 | 6.60E-02 | 157782916 | 157783039 | NC_000007.13 |
| cg07122009 | 3.15E-08 | 3.38E-09 | 6.19 | 10.0298652 | 3.08E-02 | 1611802   | 1611925   | NC_000016.9  |
| cg07313155 | 3.15E-08 | 3.38E-09 | 6.19 | 10.02986   | 3.41E-02 | 38218601  | 38218724  | NC_000017.10 |
| cg27617058 | 3.16E-08 | 3.39E-09 | 6.19 | 10.0285112 | 4.96E-02 | 53392286  | 53392409  | NC_000008.10 |
| cg13930177 | 3.16E-08 | 3.39E-09 | 6.19 | 10.0274141 | 1.18E-01 | 5996654   | 5996777   | NC_000009.11 |
| cg14347088 | 3.16E-08 | 3.39E-09 | 6.19 | 10.0273937 | 1.43E-01 | 42078901  | 42079024  | NC_000014.8  |

|            |          |          |      |            |          |           |           |              |
|------------|----------|----------|------|------------|----------|-----------|-----------|--------------|
| cg20416110 | 3.16E-08 | 3.39E-09 | 6.19 | 10.0273027 | 1.43E-01 | 102508441 | 102508564 | NC_000010.10 |
| cg27458631 | 3.16E-08 | 3.39E-09 | 6.19 | 10.0267912 | 3.39E-02 | 30749857  | 30749980  | NC_000022.10 |
| cg11513637 | 3.16E-08 | 3.39E-09 | 6.19 | 10.0267648 | 1.99E-01 | 37005501  | 37005624  | NC_000013.10 |
| cg04024095 | 3.16E-08 | 3.39E-09 | 6.19 | 10.0266655 | 1.20E-01 | 54610139  | 54610262  | NC_000007.13 |
| cg19310322 | 3.16E-08 | 3.40E-09 | 6.19 | 10.0264542 | 6.44E-02 | 70648049  | 70648172  | NC_000004.11 |
| cg02440668 | 3.16E-08 | 3.40E-09 | 6.19 | 10.0262161 | 2.28E-01 | 77721989  | 77722112  | NC_000017.10 |
| cg26962778 | 3.17E-08 | 3.40E-09 | 6.19 | 10.0254014 | 9.89E-02 | 140740437 | 140740560 | NC_000005.9  |
| cg26818625 | 3.17E-08 | 3.40E-09 | 6.19 | 10.0250916 | 1.65E-01 | 72471153  | 72471276  | NC_000008.10 |
| cg13439299 | 3.17E-08 | 3.40E-09 | 6.19 | 10.0249828 | 4.57E-02 | 27498173  | 27498296  | NC_000002.11 |
| cg06460553 | 3.17E-08 | 3.41E-09 | 6.19 | 10.0235044 | 1.45E-01 | 49763530  | 49763653  | NC_000022.10 |
| cg25976242 | 3.17E-08 | 3.41E-09 | 6.19 | 10.0228475 | 1.60E-01 | 118241348 | 118241471 | NC_000006.11 |
| cg19020830 | 3.18E-08 | 3.41E-09 | 6.19 | 10.0208395 | 1.38E-01 | 44332332  | 44332455  | NC_000011.9  |
| cg09311778 | 3.18E-08 | 3.42E-09 | 6.19 | 10.0208174 | 2.53E-02 | 47863680  | 47863803  | NC_000017.10 |
| cg06439489 | 3.18E-08 | 3.42E-09 | 6.19 | 10.0207275 | 5.82E-02 | 176044620 | 176044743 | NC_000005.9  |
| cg14266251 | 3.18E-08 | 3.42E-09 | 6.19 | 10.0203202 | 1.42E-01 | 135462291 | 135462414 | NC_000009.11 |
| cg19712965 | 3.18E-08 | 3.42E-09 | 6.19 | 10.0201704 | 2.33E-01 | 244013006 | 244013129 | NC_000001.10 |
| cg18197963 | 3.19E-08 | 3.43E-09 | 6.19 | 10.0172539 | 3.28E-02 | 29195838  | 29195961  | NC_000008.10 |
| cg02637843 | 3.20E-08 | 3.43E-09 | 6.19 | 10.016205  | 4.94E-02 | 1226699   | 1226822   | NC_000017.10 |
| cg04532707 | 3.20E-08 | 3.43E-09 | 6.19 | 10.0161873 | 6.99E-02 | 145637525 | 145637648 | NC_000008.10 |
| cg11438039 | 3.20E-08 | 3.44E-09 | 6.19 | 10.0149105 | 1.22E-01 | 62145697  | 62145820  | NC_000003.11 |
| cg04714232 | 3.20E-08 | 3.44E-09 | 6.19 | 10.0147816 | 9.50E-02 | 61719054  | 61719177  | NC_000020.10 |
| cg10734218 | 3.20E-08 | 3.44E-09 | 6.19 | 10.0140805 | 7.88E-02 | 62514673  | 62514796  | NC_000007.13 |
| cg10836392 | 3.20E-08 | 3.44E-09 | 6.19 | 10.0137092 | 1.35E-01 | 44258132  | 44258255  | NC_000022.10 |
| cg08510182 | 3.20E-08 | 3.44E-09 | 6.19 | 10.0130714 | 3.39E-02 | 49110651  | 49110774  | NC_000019.9  |
| cg26309457 | 3.21E-08 | 3.44E-09 | 6.19 | 10.0127581 | 1.24E-01 | 166218237 | 166218360 | NC_000006.11 |



|            |          |          |      |            |          |           |           |              |
|------------|----------|----------|------|------------|----------|-----------|-----------|--------------|
| cg13338350 | 3.21E-08 | 3.44E-09 | 6.19 | 10.0123194 | 8.97E-02 | 53238337  | 53238460  | NC_000019.9  |
| cg22571530 | 3.21E-08 | 3.45E-09 | 6.19 | 10.0117965 | 1.62E-01 | 204797929 | 204798052 | NC_000001.10 |
| cg16621364 | 3.21E-08 | 3.45E-09 | 6.19 | 10.0106494 | 1.04E-01 | 140745340 | 140745463 | NC_000005.9  |
| cg13260012 | 3.22E-08 | 3.46E-09 | 6.19 | 10.0092047 | 1.54E-01 | 43603788  | 43603911  | NC_000011.9  |
| cg03453917 | 3.22E-08 | 3.46E-09 | 6.19 | 10.0083666 | 2.41E-01 | 124896232 | 124896355 | NC_000010.10 |
| cg08657341 | 3.22E-08 | 3.46E-09 | 6.19 | 10.0083344 | 1.08E-01 | 81240603  | 81240726  | NC_000007.13 |
| cg15540138 | 3.22E-08 | 3.46E-09 | 6.19 | 10.0082591 | 1.86E-01 | 166795622 | 166795745 | NC_000004.11 |
| cg07621046 | 3.22E-08 | 3.46E-09 | 6.19 | 10.0078471 | 1.22E-01 | 118429658 | 118429781 | NC_000010.10 |
| cg00908733 | 3.22E-08 | 3.46E-09 | 6.19 | 10.0073056 | 2.14E-01 | 51071294  | 51071417  | NC_000019.9  |
| cg15944060 | 3.23E-08 | 3.47E-09 | 6.19 | 10.0062009 | 1.01E-01 | 180248018 | 180248141 | NC_000005.9  |
| cg02937674 | 3.23E-08 | 3.47E-09 | 6.19 | 10.0060521 | 1.34E-01 | 49579997  | 49580120  | NC_000011.9  |
| cg03776662 | 3.23E-08 | 3.47E-09 | 6.19 | 10.0053095 | 9.10E-02 | 122430677 | 122430800 | NC_000005.9  |
| cg02125614 | 3.23E-08 | 3.47E-09 | 6.19 | 10.0047223 | 1.64E-01 | 21680848  | 21680971  | NC_000012.11 |
| cg03515897 | 3.23E-08 | 3.47E-09 | 6.19 | 10.0045111 | 8.47E-02 | 95980971  | 95981094  | NC_000014.8  |
| cg22593533 | 3.23E-08 | 3.47E-09 | 6.19 | 10.0039705 | 1.02E-01 | 34397654  | 34397777  | NC_000021.8  |
| cg01386185 | 3.23E-08 | 3.47E-09 | 6.19 | 10.0039382 | 1.58E-01 | 15935423  | 15935546  | NC_000003.11 |
| cg03374965 | 3.23E-08 | 3.47E-09 | 6.19 | 10.0038632 | 2.01E-01 | 72322460  | 72322583  | NC_000017.10 |
| cg19320275 | 3.23E-08 | 3.48E-09 | 6.19 | 10.0037034 | 1.73E-01 | 47063408  | 47063531  | NC_000021.8  |
| cg27314761 | 3.24E-08 | 3.48E-09 | 6.19 | 10.0022775 | 8.21E-02 | 196525457 | 196525580 | NC_000002.11 |
| cg17377066 | 3.24E-08 | 3.49E-09 | 6.19 | 9.9998847  | 8.26E-02 | 1481726   | 1481849   | NC_000019.9  |
| cg24711397 | 3.25E-08 | 3.49E-09 | 6.19 | 9.9992247  | 1.01E-01 | 64572927  | 64573050  | NC_000010.10 |
| cg14518098 | 3.25E-08 | 3.49E-09 | 6.19 | 9.9988187  | 6.62E-02 | 135085065 | 135085188 | NC_000009.11 |
| cg08033730 | 3.25E-08 | 3.49E-09 | 6.19 | 9.9985716  | 3.66E-02 | 7319125   | 7319248   | NC_000001.10 |
| cg02642822 | 3.25E-08 | 3.50E-09 | 6.19 | 9.9981183  | 1.41E-01 | 46666926  | 46667049  | NC_000017.10 |
| cg25957306 | 3.25E-08 | 3.50E-09 | 6.19 | 9.9977509  | 3.55E-02 | 57020274  | 57020397  | NC_000012.11 |

|            |          |          |      |           |          |           |           |              |
|------------|----------|----------|------|-----------|----------|-----------|-----------|--------------|
| cg10875499 | 3.25E-08 | 3.50E-09 | 6.19 | 9.9972741 | 9.53E-02 | 1428900   | 1429023   | NC_000007.13 |
| cg06640840 | 3.26E-08 | 3.50E-09 | 6.19 | 9.9959787 | 4.06E-02 | 74353954  | 74354077  | NC_000017.10 |
| cg16351010 | 3.26E-08 | 3.50E-09 | 6.19 | 9.9954112 | 6.11E-02 | 221513    | 221636    | NC_000005.9  |
| cg27657532 | 3.26E-08 | 3.51E-09 | 6.19 | 9.9940293 | 1.09E-01 | 2923847   | 2923970   | NC_000019.9  |
| cg05987823 | 3.27E-08 | 3.51E-09 | 6.19 | 9.99307   | 9.32E-02 | 54428592  | 54428715  | NC_000012.11 |
| cg13487156 | 3.27E-08 | 3.51E-09 | 6.19 | 9.9929137 | 6.93E-02 | 16467610  | 16467733  | NC_000003.11 |
| cg15662251 | 3.27E-08 | 3.51E-09 | 6.19 | 9.9928676 | 1.04E-01 | 26197855  | 26197978  | NC_000001.10 |
| cg22402852 | 3.27E-08 | 3.52E-09 | 6.19 | 9.9916657 | 1.71E-01 | 108853204 | 108853327 | NC_000004.11 |
| cg21739754 | 3.27E-08 | 3.52E-09 | 6.19 | 9.9909151 | 1.63E-01 | 185462847 | 185462970 | NC_000002.11 |
| cg06388647 | 3.28E-08 | 3.53E-09 | 6.19 | 9.988562  | 6.65E-02 | 121467863 | 121467986 | NC_000002.11 |
| cg07949597 | 3.28E-08 | 3.53E-09 | 6.19 | 9.9875228 | 1.53E-01 | 3355079   | 3355202   | NC_000016.9  |
| cg21730091 | 3.29E-08 | 3.54E-09 | 6.19 | 9.9866189 | 9.95E-02 | 5936877   | 5937000   | NC_000012.11 |
| cg18075011 | 3.29E-08 | 3.54E-09 | 6.19 | 9.984661  | 9.77E-02 | 52537803  | 52537926  | NC_000003.11 |
| cg12853633 | 3.30E-08 | 3.55E-09 | 6.19 | 9.9832442 | 1.43E-01 | 57264919  | 57265042  | NC_000014.8  |
| cg19413863 | 3.30E-08 | 3.55E-09 | 6.19 | 9.9828836 | 6.47E-02 | 128391540 | 128391663 | NC_000004.11 |
| cg17687493 | 3.30E-08 | 3.55E-09 | 6.19 | 9.9828456 | 1.63E-01 | 118229306 | 118229429 | NC_000006.11 |
| cg03013946 | 3.30E-08 | 3.55E-09 | 6.19 | 9.9826736 | 1.05E-01 | 44142512  | 44142635  | NC_000020.10 |
| cg16043144 | 3.30E-08 | 3.55E-09 | 6.19 | 9.9823012 | 1.43E-01 | 83316378  | 83316501  | NC_000015.9  |
| cg18701218 | 3.30E-08 | 3.55E-09 | 6.19 | 9.9816194 | 1.14E-01 | 4108947   | 4109070   | NC_000004.11 |
| cg00522056 | 3.31E-08 | 3.56E-09 | 6.19 | 9.9801702 | 2.21E-01 | 154335386 | 154335509 | NC_000002.11 |
| cg02126950 | 3.31E-08 | 3.56E-09 | 6.19 | 9.9800096 | 1.20E-01 | 48143384  | 48143507  | NC_000014.8  |
| cg01022250 | 3.31E-08 | 3.56E-09 | 6.19 | 9.9794244 | 2.86E-02 | 4685178   | 4685301   | NC_000017.10 |
| cg20616414 | 3.31E-08 | 3.56E-09 | 6.19 | 9.9793253 | 1.81E-01 | 95947396  | 95947519  | NC_000009.11 |
| cg25661892 | 3.31E-08 | 3.57E-09 | 6.18 | 9.9783616 | 8.59E-02 | 40567317  | 40567440  | NC_000006.11 |
| cg17802464 | 3.31E-08 | 3.57E-09 | 6.18 | 9.977558  | 1.03E-01 | 30868156  | 30868279  | NC_000022.10 |

|            |          |          |      |           |          |           |           |              |
|------------|----------|----------|------|-----------|----------|-----------|-----------|--------------|
| cg19294931 | 3.32E-08 | 3.57E-09 | 6.18 | 9.9774486 | 4.78E-02 | 43230558  | 43230681  | NC_000006.11 |
| cg12522060 | 3.32E-08 | 3.57E-09 | 6.18 | 9.9770912 | 4.34E-02 | 141499477 | 141499600 | NC_000003.11 |
| cg22418083 | 3.32E-08 | 3.57E-09 | 6.18 | 9.9766886 | 1.39E-01 | 42995283  | 42995406  | NC_000005.9  |
| cg03322328 | 3.32E-08 | 3.57E-09 | 6.18 | 9.9762521 | 8.70E-02 | 2295506   | 2295629   | NC_000002.11 |
| cg13355078 | 3.32E-08 | 3.58E-09 | 6.18 | 9.9751605 | 6.35E-02 | 2636363   | 2636486   | NC_000006.11 |
| cg26720545 | 3.32E-08 | 3.58E-09 | 6.18 | 9.974907  | 1.22E-01 | 37618009  | 37618132  | NC_000006.11 |
| cg04203646 | 3.32E-08 | 3.58E-09 | 6.18 | 9.9747632 | 1.29E-01 | 1467008   | 1467131   | NC_000019.9  |
| cg06470424 | 3.33E-08 | 3.59E-09 | 6.18 | 9.9732848 | 8.49E-02 | 1968456   | 1968579   | NC_000019.9  |
| cg19871722 | 3.33E-08 | 3.59E-09 | 6.18 | 9.9722245 | 1.01E-01 | 34226580  | 34226703  | NC_000010.10 |
| cg04719819 | 3.33E-08 | 3.59E-09 | 6.18 | 9.9713978 | 1.34E-01 | 30037696  | 30037819  | NC_000011.9  |
| cg19843449 | 3.33E-08 | 3.59E-09 | 6.18 | 9.9713137 | 7.32E-02 | 27217186  | 27217309  | NC_000015.9  |
| cg01635405 | 3.34E-08 | 3.60E-09 | 6.18 | 9.9700779 | 1.81E-01 | 124896713 | 124896836 | NC_000010.10 |
| cg02272814 | 3.34E-08 | 3.60E-09 | 6.18 | 9.9697038 | 5.71E-02 | 46655782  | 46655905  | NC_000006.11 |
| cg25079628 | 3.34E-08 | 3.60E-09 | 6.18 | 9.9686548 | 7.08E-02 | 3576868   | 3576991   | NC_000010.10 |
| cg17334018 | 3.34E-08 | 3.60E-09 | 6.18 | 9.9685492 | 1.70E-01 | 96470293  | 96470416  | NC_000004.11 |
| cg04436207 | 3.35E-08 | 3.60E-09 | 6.18 | 9.967975  | 1.31E-01 | 147136463 | 147136586 | NC_000003.11 |
| cg25798413 | 3.35E-08 | 3.61E-09 | 6.18 | 9.9665663 | 1.20E-01 | 86670630  | 86670753  | NC_000002.11 |
| cg16417588 | 3.35E-08 | 3.61E-09 | 6.18 | 9.9659627 | 5.11E-02 | 31093811  | 31093934  | NC_000015.9  |
| cg16419354 | 3.35E-08 | 3.61E-09 | 6.18 | 9.9653254 | 1.63E-01 | 179713349 | 179713472 | NC_000001.10 |
| cg01887440 | 3.36E-08 | 3.62E-09 | 6.18 | 9.964373  | 4.36E-02 | 11844845  | 11844968  | NC_000016.9  |
| cg03271997 | 3.36E-08 | 3.62E-09 | 6.18 | 9.9639966 | 6.07E-02 | 423683    | 423806    | NC_000006.11 |
| cg26612727 | 3.36E-08 | 3.62E-09 | 6.18 | 9.9628317 | 1.17E-01 | 38024636  | 38024759  | NC_000017.10 |
| cg19048331 | 3.36E-08 | 3.62E-09 | 6.18 | 9.9626454 | 1.20E-01 | 11897921  | 11898044  | NC_000020.10 |
| cg20171559 | 3.36E-08 | 3.63E-09 | 6.18 | 9.962398  | 1.16E-01 | 27127448  | 27127571  | NC_000007.13 |
| cg07091741 | 3.37E-08 | 3.63E-09 | 6.18 | 9.9618133 | 1.71E-02 | 15493097  | 15493220  | NC_000006.11 |

|            |          |          |      |           |          |           |           |              |
|------------|----------|----------|------|-----------|----------|-----------|-----------|--------------|
| cg08732418 | 3.37E-08 | 3.63E-09 | 6.18 | 9.9617701 | 7.55E-02 | 41228676  | 41228799  | NC_000015.9  |
| cg09277709 | 3.37E-08 | 3.63E-09 | 6.18 | 9.960116  | 1.34E-01 | 46224285  | 46224408  | NC_000019.9  |
| cg26435928 | 3.38E-08 | 3.64E-09 | 6.18 | 9.9582628 | 1.14E-01 | 75668758  | 75668881  | NC_000003.11 |
| cg11640378 | 3.38E-08 | 3.64E-09 | 6.18 | 9.9577992 | 1.45E-01 | 27282233  | 27282356  | NC_000007.13 |
| cg08991339 | 3.38E-08 | 3.65E-09 | 6.18 | 9.9565406 | 1.34E-01 | 19812327  | 19812450  | NC_000007.13 |
| cg10286380 | 3.38E-08 | 3.65E-09 | 6.18 | 9.955843  | 1.36E-01 | 51171847  | 51171970  | NC_000019.9  |
| cg05733135 | 3.39E-08 | 3.65E-09 | 6.18 | 9.9556018 | 1.74E-01 | 27740876  | 27740999  | NC_000011.9  |
| cg09053097 | 3.39E-08 | 3.65E-09 | 6.18 | 9.955266  | 1.02E-01 | 44914828  | 44914951  | NC_000011.9  |
| cg25997219 | 3.39E-08 | 3.65E-09 | 6.18 | 9.9552163 | 1.18E-01 | 170579332 | 170579455 | NC_000006.11 |
| cg09438147 | 3.39E-08 | 3.66E-09 | 6.18 | 9.953948  | 1.75E-01 | 210636533 | 210636656 | NC_000002.11 |
| cg13600489 | 3.39E-08 | 3.66E-09 | 6.18 | 9.9528091 | 1.76E-01 | 36988217  | 36988340  | NC_000014.8  |
| cg13751330 | 3.40E-08 | 3.66E-09 | 6.18 | 9.9525752 | 8.73E-02 | 134376826 | 134376949 | NC_000009.11 |
| cg06507072 | 3.40E-08 | 3.66E-09 | 6.18 | 9.9523254 | 3.18E-02 | 310683    | 310806    | NC_000016.9  |
| cg23112425 | 3.40E-08 | 3.67E-09 | 6.18 | 9.9513967 | 1.09E-01 | 547637    | 547760    | NC_000007.13 |
| cg04091555 | 3.40E-08 | 3.67E-09 | 6.18 | 9.9504157 | 1.11E-01 | 79417584  | 79417707  | NC_000004.11 |
| cg04269791 | 3.40E-08 | 3.67E-09 | 6.18 | 9.9494831 | 4.41E-02 | 159440541 | 159440664 | NC_000002.11 |
| cg13368519 | 3.41E-08 | 3.68E-09 | 6.18 | 9.948357  | 1.64E-01 | 50893149  | 50893272  | NC_000001.10 |
| cg25781595 | 3.41E-08 | 3.68E-09 | 6.18 | 9.9480688 | 1.85E-01 | 48918712  | 48918835  | NC_000019.9  |
| cg05300717 | 3.41E-08 | 3.68E-09 | 6.18 | 9.9472284 | 2.24E-02 | 65546210  | 65546333  | NC_000011.9  |
| cg09099868 | 3.41E-08 | 3.68E-09 | 6.18 | 9.9471011 | 1.04E-01 | 22622793  | 22622916  | NC_000010.10 |
| cg08744177 | 3.41E-08 | 3.68E-09 | 6.18 | 9.9470163 | 1.47E-01 | 1278508   | 1278631   | NC_000007.13 |
| cg11250773 | 3.42E-08 | 3.69E-09 | 6.18 | 9.9459114 | 1.60E-01 | 44288021  | 44288144  | NC_000022.10 |
| cg12153542 | 3.42E-08 | 3.69E-09 | 6.18 | 9.9448246 | 1.60E-01 | 30063129  | 30063252  | NC_000020.10 |
| cg24650785 | 3.42E-08 | 3.69E-09 | 6.18 | 9.94436   | 1.56E-01 | 27741916  | 27742039  | NC_000011.9  |
| cg04181546 | 3.42E-08 | 3.70E-09 | 6.18 | 9.943733  | 1.32E-01 | 79631748  | 79631871  | NC_000009.11 |

|            |          |          |      |           |          |           |           |              |
|------------|----------|----------|------|-----------|----------|-----------|-----------|--------------|
| cg09015433 | 3.42E-08 | 3.70E-09 | 6.18 | 9.9434587 | 1.33E-01 | 57359970  | 57360093  | NC_000008.10 |
| cg23051046 | 3.43E-08 | 3.70E-09 | 6.18 | 9.9421036 | 1.39E-01 | 223177574 | 223177697 | NC_000002.11 |
| cg14289093 | 3.43E-08 | 3.70E-09 | 6.18 | 9.9419714 | 4.77E-02 | 74233112  | 74233235  | NC_000017.10 |
| cg03940848 | 3.43E-08 | 3.70E-09 | 6.18 | 9.9419439 | 1.87E-01 | 229543112 | 229543235 | NC_000001.10 |
| cg00011740 | 3.43E-08 | 3.70E-09 | 6.18 | 9.9417291 | 1.75E-01 | 49311903  | 49312026  | NC_000016.9  |
| cg00810956 | 3.43E-08 | 3.71E-09 | 6.18 | 9.9411196 | 1.94E-01 | 27771766  | 27771889  | NC_000003.11 |
| cg23821337 | 3.43E-08 | 3.71E-09 | 6.18 | 9.9404225 | 5.02E-02 | 146710676 | 146710799 | NC_000001.10 |
| cg21227085 | 3.44E-08 | 3.71E-09 | 6.18 | 9.9398622 | 9.36E-02 | 7853851   | 7853974   | NC_000019.9  |
| cg02974928 | 3.44E-08 | 3.71E-09 | 6.18 | 9.9386045 | 2.39E-01 | 181452044 | 181452167 | NC_000001.10 |
| cg26337312 | 3.44E-08 | 3.72E-09 | 6.18 | 9.9378809 | 1.23E-01 | 165321741 | 165321864 | NC_000001.10 |
| cg07421806 | 3.45E-08 | 3.72E-09 | 6.18 | 9.9367238 | 1.47E-01 | 128301136 | 128301259 | NC_000005.9  |
| cg13355047 | 3.45E-08 | 3.72E-09 | 6.18 | 9.9365421 | 2.40E-01 | 4304554   | 4304677   | NC_000019.9  |
| cg07128111 | 3.45E-08 | 3.72E-09 | 6.18 | 9.9362283 | 1.53E-01 | 37840158  | 37840281  | NC_000005.9  |
| cg08003150 | 3.45E-08 | 3.73E-09 | 6.18 | 9.935364  | 1.84E-01 | 62103627  | 62103750  | NC_000020.10 |
| cg24754956 | 3.45E-08 | 3.73E-09 | 6.18 | 9.9349243 | 9.73E-02 | 1729851   | 1729974   | NC_000019.9  |
| cg19244662 | 3.45E-08 | 3.73E-09 | 6.18 | 9.9340555 | 7.40E-02 | 43320153  | 43320276  | NC_000018.9  |
| cg17842562 | 3.46E-08 | 3.74E-09 | 6.18 | 9.9326528 | 6.23E-02 | 122335472 | 122335595 | NC_000002.11 |
| cg01026196 | 3.47E-08 | 3.75E-09 | 6.18 | 9.9299838 | 7.17E-02 | 133798911 | 133799034 | NC_000009.11 |
| cg21233722 | 3.47E-08 | 3.75E-09 | 6.18 | 9.9294211 | 1.31E-01 | 169064660 | 169064783 | NC_000005.9  |
| cg11401794 | 3.47E-08 | 3.75E-09 | 6.18 | 9.9287891 | 1.04E-01 | 1016279   | 1016402   | NC_000005.9  |
| cg23097878 | 3.47E-08 | 3.75E-09 | 6.18 | 9.9287725 | 1.67E-01 | 45879730  | 45879853  | NC_000011.9  |
| cg17670890 | 3.48E-08 | 3.76E-09 | 6.18 | 9.9278595 | 7.26E-02 | 176011783 | 176011906 | NC_000005.9  |
| cg21081803 | 3.48E-08 | 3.76E-09 | 6.18 | 9.9271345 | 1.31E-01 | 2915236   | 2915359   | NC_000005.9  |
| cg05991539 | 3.48E-08 | 3.76E-09 | 6.18 | 9.9271082 | 7.30E-02 | 31692365  | 31692488  | NC_000006.11 |
| cg00977842 | 3.48E-08 | 3.76E-09 | 6.17 | 9.9264002 | 1.40E-01 | 82050793  | 82050916  | NC_000010.10 |

|            |          |          |      |           |          |           |           |              |
|------------|----------|----------|------|-----------|----------|-----------|-----------|--------------|
| cg21176643 | 3.48E-08 | 3.77E-09 | 6.17 | 9.9251509 | 1.88E-01 | 106979874 | 106979997 | NC_000012.11 |
| cg11935147 | 3.48E-08 | 3.77E-09 | 6.17 | 9.9249459 | 1.20E-01 | 145075831 | 145075954 | NC_000001.10 |
| cg21726079 | 3.49E-08 | 3.77E-09 | 6.17 | 9.9247438 | 1.63E-01 | 53424716  | 53424839  | NC_000013.10 |
| cg18755230 | 3.49E-08 | 3.77E-09 | 6.17 | 9.9238864 | 7.58E-02 | 150100785 | 150100908 | NC_000007.13 |
| cg08574564 | 3.49E-08 | 3.77E-09 | 6.17 | 9.923658  | 4.54E-02 | 20493503  | 20493626  | NC_000017.10 |
| cg17198308 | 3.49E-08 | 3.77E-09 | 6.17 | 9.923054  | 1.43E-01 | 6665108   | 6665231   | NC_000012.11 |
| cg25137436 | 3.49E-08 | 3.78E-09 | 6.17 | 9.9223783 | 3.20E-02 | 113299913 | 113300036 | NC_000013.10 |
| cg25975689 | 3.50E-08 | 3.79E-09 | 6.17 | 9.9190553 | 1.23E-01 | 54330354  | 54330477  | NC_000012.11 |
| cg26133736 | 3.50E-08 | 3.79E-09 | 6.17 | 9.9188833 | 1.99E-02 | 108879314 | 108879437 | NC_000006.11 |
| cg04892170 | 3.51E-08 | 3.80E-09 | 6.17 | 9.9170122 | 1.18E-01 | 128076910 | 128077033 | NC_000010.10 |
| cg14223646 | 3.52E-08 | 3.80E-09 | 6.17 | 9.9158118 | 8.57E-02 | 155855699 | 155855822 | NC_000007.13 |
| cg01089331 | 3.52E-08 | 3.80E-09 | 6.17 | 9.9155216 | 1.21E-01 | 18024929  | 18025052  | NC_000004.11 |
| cg03357547 | 3.52E-08 | 3.81E-09 | 6.17 | 9.9145289 | 1.06E-01 | 51165207  | 51165330  | NC_000019.9  |
| cg25731959 | 3.52E-08 | 3.81E-09 | 6.17 | 9.9136059 | 8.87E-02 | 1171952   | 1172075   | NC_000001.10 |
| cg14381623 | 3.52E-08 | 3.81E-09 | 6.17 | 9.9134425 | 1.23E-01 | 139091650 | 139091773 | NC_000009.11 |
| cg11028201 | 3.52E-08 | 3.81E-09 | 6.17 | 9.9133358 | 1.65E-01 | 41867562  | 41867685  | NC_000004.11 |
| cg20971220 | 3.53E-08 | 3.81E-09 | 6.17 | 9.9126567 | 1.68E-01 | 50554067  | 50554190  | NC_000019.9  |
| cg16384588 | 3.53E-08 | 3.82E-09 | 6.17 | 9.9122833 | 1.73E-01 | 44388949  | 44389072  | NC_000005.9  |
| cg18073390 | 3.53E-08 | 3.82E-09 | 6.17 | 9.9120744 | 9.41E-02 | 140166568 | 140166691 | NC_000005.9  |
| cg21258821 | 3.53E-08 | 3.82E-09 | 6.17 | 9.9119772 | 7.23E-02 | 41702795  | 41702918  | NC_000013.10 |
| cg20709008 | 3.53E-08 | 3.82E-09 | 6.17 | 9.9113916 | 1.40E-01 | 182545934 | 182546057 | NC_000002.11 |
| cg07320630 | 3.53E-08 | 3.82E-09 | 6.17 | 9.9108088 | 1.10E-01 | 57978054  | 57978177  | NC_000015.9  |
| cg05982485 | 3.53E-08 | 3.82E-09 | 6.17 | 9.910178  | 1.37E-01 | 161275449 | 161275572 | NC_000005.9  |
| cg06734985 | 3.53E-08 | 3.83E-09 | 6.17 | 9.9099502 | 1.40E-01 | 26849501  | 26849624  | NC_000011.9  |
| cg04159903 | 3.54E-08 | 3.83E-09 | 6.17 | 9.9095277 | 1.47E-01 | 42949799  | 42949922  | NC_000005.9  |

|            |          |          |      |           |          |           |           |              |
|------------|----------|----------|------|-----------|----------|-----------|-----------|--------------|
| cg09684106 | 3.54E-08 | 3.83E-09 | 6.17 | 9.9092959 | 1.03E-01 | 55640291  | 55640414  | NC_000011.9  |
| cg08358263 | 3.54E-08 | 3.83E-09 | 6.17 | 9.909121  | 1.07E-01 | 106557481 | 106557604 | NC_000006.11 |
| cg04541228 | 3.55E-08 | 3.84E-09 | 6.17 | 9.9062685 | 3.12E-02 | 11625883  | 11626006  | NC_000008.10 |
| cg02604211 | 3.55E-08 | 3.84E-09 | 6.17 | 9.9062104 | 1.01E-01 | 27453034  | 27453157  | NC_000011.9  |
| cg07142461 | 3.55E-08 | 3.84E-09 | 6.17 | 9.9055277 | 1.29E-01 | 32483912  | 32484035  | NC_000017.10 |
| cg05603610 | 3.55E-08 | 3.85E-09 | 6.17 | 9.9047505 | 6.36E-02 | 88442845  | 88442968  | NC_000016.9  |
| cg11440915 | 3.55E-08 | 3.85E-09 | 6.17 | 9.9040694 | 1.77E-01 | 76387161  | 76387284  | NC_000013.10 |
| cg25499067 | 3.55E-08 | 3.85E-09 | 6.17 | 9.9039142 | 1.15E-01 | 23559988  | 23560111  | NC_000008.10 |
| cg00662963 | 3.56E-08 | 3.85E-09 | 6.17 | 9.9037425 | 7.57E-02 | 138739722 | 138739845 | NC_000003.11 |
| cg00655147 | 3.56E-08 | 3.85E-09 | 6.17 | 9.9024513 | 1.10E-01 | 91292402  | 91292525  | NC_000010.10 |
| cg04083575 | 3.57E-08 | 3.86E-09 | 6.17 | 9.9002039 | 2.04E-01 | 153748818 | 153748941 | NC_000007.13 |
| cg07949011 | 3.57E-08 | 3.86E-09 | 6.17 | 9.8998819 | 1.14E-01 | 62729257  | 62729380  | NC_000001.10 |
| cg00281273 | 3.57E-08 | 3.87E-09 | 6.17 | 9.8992817 | 6.35E-02 | 1514511   | 1514634   | NC_000005.9  |
| cg20826576 | 3.57E-08 | 3.87E-09 | 6.17 | 9.8983305 | 1.11E-01 | 170636223 | 170636346 | NC_000001.10 |
| cg08051049 | 3.58E-08 | 3.87E-09 | 6.17 | 9.8974055 | 4.87E-02 | 1824719   | 1824842   | NC_000011.9  |
| cg03877332 | 3.58E-08 | 3.88E-09 | 6.17 | 9.8965155 | 1.12E-01 | 6247830   | 6247953   | NC_000004.11 |
| cg08362273 | 3.58E-08 | 3.88E-09 | 6.17 | 9.8962706 | 1.08E-01 | 46719577  | 46719700  | NC_000017.10 |
| cg26871875 | 3.58E-08 | 3.88E-09 | 6.17 | 9.89569   | 6.14E-02 | 1612664   | 1612787   | NC_000012.11 |
| cg05285244 | 3.58E-08 | 3.88E-09 | 6.17 | 9.8956684 | 1.14E-01 | 149412760 | 149412883 | NC_000007.13 |
| cg15707428 | 3.59E-08 | 3.89E-09 | 6.17 | 9.894268  | 1.28E-01 | 11679845  | 11679968  | NC_000002.11 |
| cg02340220 | 3.59E-08 | 3.89E-09 | 6.17 | 9.8932162 | 1.04E-01 | 28602958  | 28603081  | NC_000006.11 |
| cg08708229 | 3.59E-08 | 3.90E-09 | 6.17 | 9.8922449 | 1.95E-01 | 90758216  | 90758339  | NC_000004.11 |
| cg12806728 | 3.60E-08 | 3.90E-09 | 6.17 | 9.8903883 | 5.32E-02 | 26510580  | 26510703  | NC_000006.11 |
| cg15110917 | 3.60E-08 | 3.90E-09 | 6.17 | 9.8901113 | 1.06E-01 | 7959339   | 7959462   | NC_000007.13 |
| cg13461241 | 3.60E-08 | 3.91E-09 | 6.17 | 9.8896012 | 1.75E-01 | 52956771  | 52956894  | NC_000019.9  |

|            |          |          |      |           |          |           |           |              |
|------------|----------|----------|------|-----------|----------|-----------|-----------|--------------|
| cg27280904 | 3.61E-08 | 3.91E-09 | 6.17 | 9.8888489 | 1.89E-01 | 34443601  | 34443724  | NC_000021.8  |
| cg03117540 | 3.61E-08 | 3.91E-09 | 6.17 | 9.8876693 | 1.94E-02 | 3498927   | 3499050   | NC_000001.10 |
| cg03294557 | 3.61E-08 | 3.91E-09 | 6.17 | 9.8876088 | 6.82E-02 | 61312477  | 61312600  | NC_000018.9  |
| cg09098144 | 3.61E-08 | 3.92E-09 | 6.17 | 9.8865134 | 4.49E-02 | 186134757 | 186134880 | NC_000004.11 |
| cg25825506 | 3.62E-08 | 3.92E-09 | 6.17 | 9.8863137 | 1.64E-01 | 96626659  | 96626782  | NC_000007.13 |
| cg14793406 | 3.62E-08 | 3.92E-09 | 6.17 | 9.8862134 | 1.39E-01 | 115135906 | 115136029 | NC_000012.11 |
| cg07746427 | 3.62E-08 | 3.92E-09 | 6.17 | 9.8852348 | 1.50E-01 | 125485761 | 125485884 | NC_000003.11 |
| cg01617990 | 3.62E-08 | 3.93E-09 | 6.17 | 9.8844035 | 1.01E-01 | 1245967   | 1246090   | NC_000016.9  |
| cg26620157 | 3.62E-08 | 3.93E-09 | 6.17 | 9.884205  | 1.48E-01 | 37130297  | 37130420  | NC_000014.8  |
| cg24867215 | 3.62E-08 | 3.93E-09 | 6.17 | 9.8837346 | 1.16E-01 | 18709521  | 18709644  | NC_000019.9  |
| cg13883232 | 3.63E-08 | 3.93E-09 | 6.17 | 9.8833247 | 5.18E-02 | 139746122 | 139746245 | NC_000009.11 |
| cg01057196 | 3.64E-08 | 3.94E-09 | 6.17 | 9.8799015 | 1.12E-01 | 170254397 | 170254520 | NC_000001.10 |
| cg04703951 | 3.64E-08 | 3.94E-09 | 6.17 | 9.8798238 | 6.68E-02 | 43578652  | 43578775  | NC_000017.10 |
| cg13195690 | 3.64E-08 | 3.95E-09 | 6.17 | 9.8786138 | 4.03E-02 | 56232921  | 56233044  | NC_000014.8  |
| cg16956426 | 3.66E-08 | 3.97E-09 | 6.16 | 9.873754  | 1.46E-01 | 94285286  | 94285409  | NC_000007.13 |
| cg01446576 | 3.66E-08 | 3.97E-09 | 6.16 | 9.8735931 | 2.19E-02 | 160313037 | 160313160 | NC_000001.10 |
| cg05953100 | 3.66E-08 | 3.97E-09 | 6.16 | 9.8730908 | 1.23E-01 | 49309238  | 49309361  | NC_000016.9  |
| cg23352157 | 3.66E-08 | 3.97E-09 | 6.16 | 9.8729305 | 8.43E-02 | 3025689   | 3025812   | NC_000007.13 |
| cg21743830 | 3.66E-08 | 3.97E-09 | 6.16 | 9.8726423 | 5.18E-02 | 8117966   | 8118089   | NC_000019.9  |
| cg00782367 | 3.66E-08 | 3.97E-09 | 6.16 | 9.8725298 | 4.40E-02 | 98740667  | 98740790  | NC_000010.10 |
| cg20706536 | 3.67E-08 | 3.98E-09 | 6.16 | 9.8720564 | 3.30E-02 | 141388676 | 141388799 | NC_000007.13 |
| cg06959142 | 3.67E-08 | 3.98E-09 | 6.16 | 9.8720476 | 1.46E-01 | 91182731  | 91182854  | NC_000001.10 |
| cg02622052 | 3.67E-08 | 3.98E-09 | 6.16 | 9.87185   | 1.89E-01 | 41086274  | 41086397  | NC_000012.11 |
| cg00544557 | 3.67E-08 | 3.98E-09 | 6.16 | 9.8714229 | 6.51E-02 | 39578742  | 39578865  | NC_000021.8  |
| cg00003722 | 3.67E-08 | 3.98E-09 | 6.16 | 9.8709169 | 4.12E-02 | 4500434   | 4500557   | NC_000010.10 |



|            |          |          |      |           |          |           |           |              |
|------------|----------|----------|------|-----------|----------|-----------|-----------|--------------|
| cg22345878 | 3.67E-08 | 3.98E-09 | 6.16 | 9.8700786 | 9.57E-02 | 6234313   | 6234436   | NC_000012.11 |
| cg23912186 | 3.67E-08 | 3.98E-09 | 6.16 | 9.8699524 | 7.50E-02 | 207144812 | 207144935 | NC_000001.10 |
| cg00996847 | 3.67E-08 | 3.99E-09 | 6.16 | 9.869493  | 9.16E-02 | 59902528  | 59902651  | NC_000001.10 |
| cg13164087 | 3.68E-08 | 3.99E-09 | 6.16 | 9.8681427 | 9.59E-02 | 87832666  | 87832789  | NC_000006.11 |
| cg11215918 | 3.68E-08 | 3.99E-09 | 6.16 | 9.867688  | 1.60E-01 | 34395699  | 34395822  | NC_000021.8  |
| cg07380959 | 3.68E-08 | 4.00E-09 | 6.16 | 9.86725   | 2.02E-01 | 93520323  | 93520446  | NC_000007.13 |
| cg16625671 | 3.69E-08 | 4.00E-09 | 6.16 | 9.8658426 | 1.26E-01 | 157602665 | 157602788 | NC_000005.9  |
| cg00064261 | 3.69E-08 | 4.01E-09 | 6.16 | 9.8647575 | 1.29E-01 | 229570057 | 229570180 | NC_000001.10 |
| cg16650529 | 3.69E-08 | 4.01E-09 | 6.16 | 9.8640347 | 1.34E-01 | 182548750 | 182548873 | NC_000002.11 |
| cg04691829 | 3.70E-08 | 4.02E-09 | 6.16 | 9.8618934 | 1.20E-01 | 133510110 | 133510233 | NC_000005.9  |
| cg22974982 | 3.70E-08 | 4.02E-09 | 6.16 | 9.8616674 | 1.43E-01 | 30323251  | 30323374  | NC_000012.11 |
| cg20747073 | 3.70E-08 | 4.02E-09 | 6.16 | 9.8614498 | 7.95E-02 | 56148037  | 56148160  | NC_000019.9  |
| cg11901043 | 3.71E-08 | 4.02E-09 | 6.16 | 9.8604801 | 1.40E-01 | 22093960  | 22094083  | NC_000012.11 |
| cg19111378 | 3.71E-08 | 4.02E-09 | 6.16 | 9.8604733 | 1.57E-01 | 39844956  | 39845079  | NC_000008.10 |
| cg08644482 | 3.71E-08 | 4.03E-09 | 6.16 | 9.8601476 | 8.63E-02 | 24421423  | 24421546  | NC_000001.10 |
| cg05583398 | 3.71E-08 | 4.03E-09 | 6.16 | 9.8600831 | 1.43E-01 | 26664181  | 26664304  | NC_000003.11 |
| cg17701991 | 3.71E-08 | 4.03E-09 | 6.16 | 9.8589314 | 4.02E-02 | 29305699  | 29305822  | NC_000007.13 |
| cg13288195 | 3.71E-08 | 4.03E-09 | 6.16 | 9.8589148 | 1.14E-01 | 63889711  | 63889834  | NC_000015.9  |
| cg03472851 | 3.71E-08 | 4.03E-09 | 6.16 | 9.8586671 | 4.38E-02 | 149982378 | 149982501 | NC_000006.11 |
| cg03415617 | 3.71E-08 | 4.03E-09 | 6.16 | 9.8581574 | 1.36E-01 | 34726856  | 34726979  | NC_000016.9  |
| cg14314029 | 3.71E-08 | 4.03E-09 | 6.16 | 9.8579061 | 1.77E-01 | 121956643 | 121956766 | NC_000007.13 |
| cg05952494 | 3.72E-08 | 4.04E-09 | 6.16 | 9.8574711 | 2.00E-01 | 4378316   | 4378439   | NC_000012.11 |
| cg13850606 | 3.72E-08 | 4.04E-09 | 6.16 | 9.8567667 | 1.62E-01 | 229543554 | 229543677 | NC_000001.10 |
| cg12021814 | 3.73E-08 | 4.05E-09 | 6.16 | 9.8537637 | 1.57E-01 | 172973195 | 172973318 | NC_000002.11 |
| cg11071207 | 3.73E-08 | 4.05E-09 | 6.16 | 9.8532969 | 1.45E-01 | 110611218 | 110611341 | NC_000001.10 |

|            |          |          |      |           |          |           |           |              |
|------------|----------|----------|------|-----------|----------|-----------|-----------|--------------|
| cg22398879 | 3.73E-08 | 4.06E-09 | 6.16 | 9.852854  | 6.98E-02 | 49173419  | 49173542  | NC_000008.10 |
| cg06118571 | 3.74E-08 | 4.06E-09 | 6.16 | 9.8520004 | 9.80E-02 | 6137768   | 6137891   | NC_000001.10 |
| cg23323468 | 3.74E-08 | 4.06E-09 | 6.16 | 9.8519583 | 3.72E-02 | 228513073 | 228513196 | NC_000002.11 |
| cg03715143 | 3.74E-08 | 4.06E-09 | 6.16 | 9.8517373 | 1.28E-01 | 19837743  | 19837866  | NC_000006.11 |
| cg19148251 | 3.74E-08 | 4.06E-09 | 6.16 | 9.8505686 | 5.50E-02 | 64011238  | 64011361  | NC_000011.9  |
| cg16878214 | 3.74E-08 | 4.07E-09 | 6.16 | 9.8498314 | 1.07E-01 | 96167001  | 96167124  | NC_000008.10 |
| cg03408024 | 3.75E-08 | 4.07E-09 | 6.16 | 9.8484986 | 1.26E-01 | 147075042 | 147075165 | NC_000004.11 |
| cg24789682 | 3.75E-08 | 4.07E-09 | 6.16 | 9.8483044 | 1.38E-01 | 152217416 | 152217539 | NC_000004.11 |
| cg25201881 | 3.75E-08 | 4.08E-09 | 6.16 | 9.8469541 | 1.77E-01 | 114695527 | 114695650 | NC_000001.10 |
| cg10591652 | 3.76E-08 | 4.09E-09 | 6.16 | 9.8451481 | 1.46E-01 | 167956414 | 167956537 | NC_000005.9  |
| cg07442204 | 3.76E-08 | 4.09E-09 | 6.16 | 9.8447036 | 5.27E-02 | 18587943  | 18588066  | NC_000017.10 |
| cg15883603 | 3.77E-08 | 4.10E-09 | 6.16 | 9.8426465 | 8.75E-02 | 186622408 | 186622531 | NC_000004.11 |
| cg06049932 | 3.77E-08 | 4.10E-09 | 6.16 | 9.8423668 | 5.37E-02 | 33133485  | 33133608  | NC_000006.11 |
| cg14583673 | 3.77E-08 | 4.10E-09 | 6.16 | 9.8421644 | 1.65E-01 | 15499895  | 15500018  | NC_000005.9  |
| cg13988851 | 3.77E-08 | 4.10E-09 | 6.16 | 9.8417463 | 2.05E-01 | 84456722  | 84456845  | NC_000013.10 |
| cg07053697 | 3.78E-08 | 4.11E-09 | 6.16 | 9.8401396 | 1.18E-01 | 111374835 | 111374958 | NC_000012.11 |
| cg15861196 | 3.78E-08 | 4.11E-09 | 6.16 | 9.8399271 | 1.23E-01 | 20618308  | 20618431  | NC_000011.9  |
| cg24948499 | 3.78E-08 | 4.11E-09 | 6.16 | 9.8396019 | 6.59E-02 | 79224065  | 79224188  | NC_000017.10 |
| cg18568990 | 3.78E-08 | 4.11E-09 | 6.16 | 9.8393767 | 1.54E-01 | 78493712  | 78493835  | NC_000013.10 |
| cg17250701 | 3.78E-08 | 4.11E-09 | 6.16 | 9.8389828 | 1.19E-01 | 18813979  | 18814102  | NC_000011.9  |
| cg23191370 | 3.79E-08 | 4.12E-09 | 6.16 | 9.8376164 | 9.17E-02 | 31513261  | 31513384  | NC_000006.11 |
| cg00625334 | 3.79E-08 | 4.12E-09 | 6.16 | 9.8373494 | 1.23E-01 | 31020754  | 31020877  | NC_000018.9  |
| cg11891393 | 3.79E-08 | 4.12E-09 | 6.16 | 9.8373346 | 1.75E-01 | 100911727 | 100911850 | NC_000006.11 |
| cg16143559 | 3.79E-08 | 4.12E-09 | 6.16 | 9.8373234 | 5.20E-02 | 120387299 | 120387422 | NC_000001.10 |
| cg07097876 | 3.79E-08 | 4.12E-09 | 6.16 | 9.8362771 | 1.23E-01 | 71409997  | 71410120  | NC_000015.9  |

|            |          |          |      |           |          |           |           |              |
|------------|----------|----------|------|-----------|----------|-----------|-----------|--------------|
| cg17707126 | 3.79E-08 | 4.13E-09 | 6.16 | 9.8357632 | 9.49E-02 | 52711371  | 52711494  | NC_000006.11 |
| cg24448113 | 3.79E-08 | 4.13E-09 | 6.16 | 9.8357169 | 9.43E-02 | 140475611 | 140475734 | NC_000005.9  |
| cg16763270 | 3.79E-08 | 4.13E-09 | 6.16 | 9.8354508 | 2.36E-02 | 57131910  | 57132033  | NC_000003.11 |
| cg22276619 | 3.80E-08 | 4.13E-09 | 6.16 | 9.8348563 | 1.51E-01 | 21645332  | 21645455  | NC_000008.10 |
| cg17202313 | 3.80E-08 | 4.13E-09 | 6.16 | 9.8347429 | 2.33E-01 | 181444989 | 181445112 | NC_000003.11 |
| cg18753440 | 3.80E-08 | 4.13E-09 | 6.16 | 9.834428  | 1.47E-01 | 63955786  | 63955909  | NC_000007.13 |
| cg22196218 | 3.80E-08 | 4.13E-09 | 6.16 | 9.8338852 | 4.15E-02 | 169423832 | 169423955 | NC_000006.11 |
| cg09380594 | 3.80E-08 | 4.14E-09 | 6.16 | 9.8335187 | 8.55E-02 | 67980422  | 67980545  | NC_000014.8  |
| cg11524248 | 3.80E-08 | 4.14E-09 | 6.16 | 9.8334875 | 5.76E-02 | 149545907 | 149546030 | NC_000005.9  |
| cg04352704 | 3.80E-08 | 4.14E-09 | 6.16 | 9.8334606 | 3.64E-02 | 105239544 | 105239667 | NC_000014.8  |
| cg08409173 | 3.81E-08 | 4.14E-09 | 6.16 | 9.8324095 | 1.71E-01 | 7853544   | 7853667   | NC_000019.9  |
| cg01333350 | 3.81E-08 | 4.14E-09 | 6.16 | 9.8319772 | 1.76E-01 | 5712884   | 5713007   | NC_000004.11 |
| cg03707308 | 3.81E-08 | 4.14E-09 | 6.16 | 9.8317458 | 1.47E-01 | 6002766   | 6002889   | NC_000006.11 |
| cg08862148 | 3.81E-08 | 4.15E-09 | 6.16 | 9.8304531 | 8.31E-02 | 29595315  | 29595438  | NC_000006.11 |
| cg08748184 | 3.81E-08 | 4.15E-09 | 6.16 | 9.8304142 | 1.63E-01 | 741075    | 741198    | NC_000002.11 |
| cg05637536 | 3.81E-08 | 4.15E-09 | 6.16 | 9.8302371 | 8.81E-02 | 154475068 | 154475191 | NC_000001.10 |
| cg07325001 | 3.81E-08 | 4.15E-09 | 6.16 | 9.8299667 | 1.05E-01 | 46458783  | 46458906  | NC_000022.10 |
| cg25303540 | 3.82E-08 | 4.15E-09 | 6.16 | 9.8293513 | 9.36E-02 | 119206052 | 119206175 | NC_000011.9  |
| cg15492982 | 3.82E-08 | 4.16E-09 | 6.16 | 9.8289093 | 4.81E-02 | 116785892 | 116786015 | NC_000006.11 |
| cg19574203 | 3.82E-08 | 4.16E-09 | 6.16 | 9.8273788 | 2.94E-02 | 155058855 | 155058978 | NC_000006.11 |
| cg27304110 | 3.82E-08 | 4.16E-09 | 6.16 | 9.826973  | 1.85E-01 | 114695695 | 114695818 | NC_000001.10 |
| cg16358034 | 3.83E-08 | 4.17E-09 | 6.16 | 9.8262361 | 1.04E-01 | 53815303  | 53815426  | NC_000005.9  |
| cg13720048 | 3.83E-08 | 4.17E-09 | 6.16 | 9.825705  | 1.38E-01 | 55466071  | 55466194  | NC_000018.9  |
| cg05655885 | 3.83E-08 | 4.17E-09 | 6.16 | 9.8254479 | 1.21E-01 | 56515601  | 56515724  | NC_000007.13 |
| cg15161959 | 3.83E-08 | 4.18E-09 | 6.16 | 9.824164  | 1.43E-01 | 177020616 | 177020739 | NC_000002.11 |

|            |          |          |      |           |          |           |           |              |
|------------|----------|----------|------|-----------|----------|-----------|-----------|--------------|
| cg13139630 | 3.84E-08 | 4.19E-09 | 6.15 | 9.8220002 | 6.97E-02 | 46438065  | 46438188  | NC_000021.8  |
| cg02035060 | 3.84E-08 | 4.19E-09 | 6.15 | 9.8219364 | 2.02E-01 | 5889430   | 5889553   | NC_000004.11 |
| cg04260507 | 3.84E-08 | 4.19E-09 | 6.15 | 9.8219166 | 3.69E-02 | 123601    | 123724    | NC_000016.9  |
| cg17338834 | 3.85E-08 | 4.19E-09 | 6.15 | 9.8213775 | 2.22E-02 | 242126909 | 242127032 | NC_000002.11 |
| cg26509965 | 3.85E-08 | 4.19E-09 | 6.15 | 9.8210147 | 1.20E-01 | 8079271   | 8079394   | NC_000010.10 |
| cg10091102 | 3.85E-08 | 4.19E-09 | 6.15 | 9.8198025 | 1.57E-01 | 14134922  | 14135045  | NC_000012.11 |
| cg08166863 | 3.85E-08 | 4.20E-09 | 6.15 | 9.8196076 | 8.54E-02 | 57426391  | 57426514  | NC_000020.10 |
| cg22296593 | 3.85E-08 | 4.20E-09 | 6.15 | 9.8193903 | 1.22E-01 | 46608874  | 46608997  | NC_000017.10 |
| cg07520673 | 3.85E-08 | 4.20E-09 | 6.15 | 9.8190633 | 7.16E-02 | 32019556  | 32019679  | NC_000006.11 |
| cg06159548 | 3.86E-08 | 4.20E-09 | 6.15 | 9.8178882 | 6.39E-02 | 2481370   | 2481493   | NC_000011.9  |
| cg13866214 | 3.86E-08 | 4.21E-09 | 6.15 | 9.8171165 | 1.29E-01 | 12304803  | 12304926  | NC_000018.9  |
| cg03340466 | 3.86E-08 | 4.21E-09 | 6.15 | 9.8170992 | 1.80E-01 | 179712740 | 179712863 | NC_000001.10 |
| cg01621034 | 3.86E-08 | 4.21E-09 | 6.15 | 9.8170635 | 1.46E-01 | 26190175  | 26190298  | NC_000006.11 |
| cg17586154 | 3.86E-08 | 4.21E-09 | 6.15 | 9.8170341 | 8.57E-02 | 130469275 | 130469398 | NC_000003.11 |
| cg21130124 | 3.86E-08 | 4.21E-09 | 6.15 | 9.8163617 | 7.53E-02 | 5542328   | 5542451   | NC_000010.10 |
| cg06951626 | 3.87E-08 | 4.22E-09 | 6.15 | 9.8148864 | 1.19E-01 | 22095330  | 22095453  | NC_000012.11 |
| cg19747604 | 3.88E-08 | 4.23E-09 | 6.15 | 9.8119733 | 5.59E-02 | 46915570  | 46915693  | NC_000019.9  |
| cg15235306 | 3.88E-08 | 4.23E-09 | 6.15 | 9.8119167 | 7.64E-02 | 16440470  | 16440593  | NC_000021.8  |
| cg26215967 | 3.88E-08 | 4.23E-09 | 6.15 | 9.8117249 | 1.96E-01 | 84115897  | 84116020  | NC_000015.9  |
| cg20223950 | 3.88E-08 | 4.23E-09 | 6.15 | 9.8110728 | 7.14E-02 | 134917549 | 134917672 | NC_000010.10 |
| cg12204555 | 3.88E-08 | 4.23E-09 | 6.15 | 9.8109582 | 5.99E-02 | 128712645 | 128712768 | NC_000011.9  |
| cg25571414 | 3.88E-08 | 4.23E-09 | 6.15 | 9.8108257 | 7.27E-02 | 25659572  | 25659695  | NC_000004.11 |
| cg13193497 | 3.89E-08 | 4.24E-09 | 6.15 | 9.8097944 | 5.64E-02 | 159344810 | 159344933 | NC_000006.11 |
| cg10812684 | 3.89E-08 | 4.24E-09 | 6.15 | 9.8084708 | 7.92E-02 | 20251013  | 20251136  | NC_000001.10 |
| cg08199003 | 3.90E-08 | 4.25E-09 | 6.15 | 9.8075024 | 1.43E-01 | 127571375 | 127571498 | NC_000010.10 |

|            |          |          |      |           |          |           |           |              |
|------------|----------|----------|------|-----------|----------|-----------|-----------|--------------|
| cg10285897 | 3.90E-08 | 4.25E-09 | 6.15 | 9.8065515 | 1.42E-02 | 105223062 | 105223185 | NC_000014.8  |
| cg16137949 | 3.90E-08 | 4.25E-09 | 6.15 | 9.8059457 | 1.71E-01 | 945423    | 945546    | NC_000002.11 |
| cg21054194 | 3.90E-08 | 4.26E-09 | 6.15 | 9.8053867 | 4.35E-02 | 124749655 | 124749778 | NC_000005.9  |
| cg21615654 | 3.91E-08 | 4.26E-09 | 6.15 | 9.8050408 | 1.25E-01 | 4213084   | 4213207   | NC_000005.9  |
| cg20706778 | 3.92E-08 | 4.27E-09 | 6.15 | 9.8026998 | 1.26E-01 | 75798122  | 75798245  | NC_000002.11 |
| cg25025247 | 3.92E-08 | 4.27E-09 | 6.15 | 9.8022262 | 1.69E-01 | 34632118  | 34632241  | NC_000001.10 |
| cg01401376 | 3.92E-08 | 4.27E-09 | 6.15 | 9.8021547 | 1.83E-01 | 133563342 | 133563465 | NC_000006.11 |
| cg26421310 | 3.92E-08 | 4.27E-09 | 6.15 | 9.802146  | 1.97E-01 | 25257058  | 25257181  | NC_000001.10 |
| cg11353706 | 3.92E-08 | 4.27E-09 | 6.15 | 9.8020282 | 7.65E-02 | 100774810 | 100774933 | NC_000007.13 |
| cg07777540 | 3.92E-08 | 4.27E-09 | 6.15 | 9.8016055 | 4.54E-02 | 64524911  | 64525034  | NC_000003.11 |
| cg25900085 | 3.93E-08 | 4.28E-09 | 6.15 | 9.7995997 | 1.50E-01 | 65291513  | 65291636  | NC_000008.10 |
| cg04223424 | 3.94E-08 | 4.30E-09 | 6.15 | 9.796316  | 1.76E-01 | 42994776  | 42994899  | NC_000005.9  |
| cg14283939 | 3.94E-08 | 4.30E-09 | 6.15 | 9.7958496 | 2.20E-02 | 72020908  | 72021031  | NC_000015.9  |
| cg25523509 | 3.94E-08 | 4.30E-09 | 6.15 | 9.7954023 | 1.82E-01 | 102504039 | 102504162 | NC_000010.10 |
| cg08749305 | 3.94E-08 | 4.30E-09 | 6.15 | 9.7953655 | 1.83E-01 | 106441987 | 106442110 | NC_000006.11 |
| cg21610554 | 3.95E-08 | 4.31E-09 | 6.15 | 9.7929935 | 6.15E-02 | 31506093  | 31506216  | NC_000006.11 |
| cg02689863 | 3.95E-08 | 4.31E-09 | 6.15 | 9.7928869 | 1.29E-01 | 95357832  | 95357955  | NC_000013.10 |
| cg07761116 | 3.96E-08 | 4.32E-09 | 6.15 | 9.7919717 | 8.94E-02 | 23005837  | 23005960  | NC_000010.10 |
| cg21720618 | 3.96E-08 | 4.32E-09 | 6.15 | 9.7917264 | 7.69E-02 | 94771024  | 94771147  | NC_000011.9  |
| cg11497372 | 3.96E-08 | 4.32E-09 | 6.15 | 9.7916348 | 1.61E-01 | 27513092  | 27513215  | NC_000006.11 |
| cg11625005 | 3.96E-08 | 4.32E-09 | 6.15 | 9.7907692 | 1.05E-01 | 1295737   | 1295860   | NC_000005.9  |
| cg22168512 | 3.96E-08 | 4.32E-09 | 6.15 | 9.7907203 | 1.02E-01 | 74695224  | 74695347  | NC_000018.9  |
| cg20310501 | 3.96E-08 | 4.32E-09 | 6.15 | 9.7904224 | 4.05E-02 | 8778226   | 8778349   | NC_000002.11 |
| cg07194839 | 3.96E-08 | 4.32E-09 | 6.15 | 9.7903575 | 1.29E-01 | 131755775 | 131755898 | NC_000010.10 |
| cg13812731 | 3.96E-08 | 4.32E-09 | 6.15 | 9.7902987 | 6.26E-02 | 124615143 | 124615266 | NC_000011.9  |

|            |          |          |      |           |          |           |           |              |
|------------|----------|----------|------|-----------|----------|-----------|-----------|--------------|
| cg15628917 | 3.96E-08 | 4.33E-09 | 6.15 | 9.7896416 | 1.37E-01 | 60539559  | 60539682  | NC_000001.10 |
| cg00334863 | 3.97E-08 | 4.34E-09 | 6.15 | 9.787592  | 8.41E-02 | 42779093  | 42779216  | NC_000022.10 |
| cg12020179 | 3.97E-08 | 4.34E-09 | 6.15 | 9.7870744 | 1.03E-01 | 102496104 | 102496227 | NC_000011.9  |
| cg16056219 | 3.98E-08 | 4.34E-09 | 6.15 | 9.7859496 | 9.39E-02 | 75043777  | 75043900  | NC_000014.8  |
| cg18390528 | 3.98E-08 | 4.34E-09 | 6.15 | 9.7856546 | 9.88E-02 | 126294509 | 126294632 | NC_000011.9  |
| cg25701114 | 3.99E-08 | 4.35E-09 | 6.15 | 9.7837692 | 1.76E-01 | 26031939  | 26032062  | NC_000006.11 |
| cg03821443 | 3.99E-08 | 4.36E-09 | 6.15 | 9.7831321 | 1.60E-01 | 1320329   | 1320452   | NC_000011.9  |
| cg19830270 | 3.99E-08 | 4.36E-09 | 6.15 | 9.7825486 | 1.12E-01 | 22193349  | 22193472  | NC_000019.9  |
| cg24527382 | 4.00E-08 | 4.37E-09 | 6.15 | 9.7798136 | 9.54E-02 | 49631579  | 49631702  | NC_000002.11 |
| cg23892192 | 4.00E-08 | 4.37E-09 | 6.15 | 9.779566  | 1.27E-01 | 1801555   | 1801678   | NC_000007.13 |
| cg25219333 | 4.01E-08 | 4.38E-09 | 6.15 | 9.7786554 | 1.09E-01 | 6501594   | 6501717   | NC_000011.9  |
| cg14148862 | 4.01E-08 | 4.38E-09 | 6.15 | 9.7786207 | 1.44E-01 | 69244205  | 69244328  | NC_000008.10 |
| cg19041006 | 4.01E-08 | 4.38E-09 | 6.15 | 9.7769169 | 9.20E-02 | 57349679  | 57349802  | NC_000019.9  |
| cg12652174 | 4.02E-08 | 4.39E-09 | 6.15 | 9.7756283 | 2.09E-01 | 142494773 | 142494896 | NC_000007.13 |
| cg24557281 | 4.02E-08 | 4.39E-09 | 6.15 | 9.7754813 | 2.35E-02 | 4547745   | 4547868   | NC_000004.11 |
| cg08776832 | 4.02E-08 | 4.39E-09 | 6.15 | 9.774888  | 1.59E-01 | 31496699  | 31496822  | NC_000008.10 |
| cg13563132 | 4.03E-08 | 4.40E-09 | 6.15 | 9.774049  | 8.92E-02 | 98245640  | 98245763  | NC_000009.11 |
| cg12635578 | 4.03E-08 | 4.40E-09 | 6.15 | 9.7735816 | 6.21E-02 | 56780766  | 56780889  | NC_000020.10 |
| cg04249605 | 4.03E-08 | 4.40E-09 | 6.15 | 9.7735372 | 9.34E-02 | 33131560  | 33131683  | NC_000006.11 |
| cg11855516 | 4.03E-08 | 4.40E-09 | 6.15 | 9.7733651 | 1.57E-01 | 175207244 | 175207367 | NC_000002.11 |
| cg20500551 | 4.03E-08 | 4.40E-09 | 6.15 | 9.7731566 | 7.19E-02 | 158523431 | 158523554 | NC_000003.11 |
| cg22863920 | 4.03E-08 | 4.40E-09 | 6.15 | 9.7720845 | 1.35E-01 | 72470832  | 72470955  | NC_000008.10 |
| cg07473223 | 4.03E-08 | 4.41E-09 | 6.15 | 9.7718717 | 5.79E-02 | 105819210 | 105819333 | NC_000014.8  |
| cg19990373 | 4.03E-08 | 4.41E-09 | 6.14 | 9.7715161 | 5.13E-02 | 206508292 | 206508415 | NC_000002.11 |
| cg16101543 | 4.04E-08 | 4.41E-09 | 6.14 | 9.7712015 | 7.43E-02 | 131162896 | 131163019 | NC_000012.11 |

|            |          |          |      |           |          |           |           |              |
|------------|----------|----------|------|-----------|----------|-----------|-----------|--------------|
| cg07140497 | 4.04E-08 | 4.41E-09 | 6.14 | 9.7703312 | 7.98E-02 | 113550113 | 113550236 | NC_000012.11 |
| cg12711054 | 4.04E-08 | 4.41E-09 | 6.14 | 9.7702068 | 8.11E-02 | 65419231  | 65419354  | NC_000007.13 |
| cg01293179 | 4.04E-08 | 4.41E-09 | 6.14 | 9.7701938 | 1.56E-01 | 176996285 | 176996408 | NC_000002.11 |
| cg02133324 | 4.05E-08 | 4.42E-09 | 6.14 | 9.7685407 | 9.44E-02 | 15467447  | 15467570  | NC_000017.10 |
| cg00633552 | 4.05E-08 | 4.42E-09 | 6.14 | 9.7678724 | 9.79E-02 | 140742017 | 140742140 | NC_000005.9  |
| cg21811896 | 4.05E-08 | 4.42E-09 | 6.14 | 9.767705  | 8.05E-02 | 3465381   | 3465504   | NC_000001.10 |
| cg20450471 | 4.05E-08 | 4.43E-09 | 6.14 | 9.7667558 | 1.17E-01 | 28584061  | 28584184  | NC_000006.11 |
| cg22508969 | 4.06E-08 | 4.43E-09 | 6.14 | 9.766123  | 1.86E-01 | 55444091  | 55444214  | NC_000006.11 |
| cg01897496 | 4.06E-08 | 4.43E-09 | 6.14 | 9.7660027 | 1.46E-01 | 182545209 | 182545332 | NC_000002.11 |
| cg03257608 | 4.06E-08 | 4.43E-09 | 6.14 | 9.7654108 | 4.79E-02 | 238707021 | 238707144 | NC_000002.11 |
| cg05839235 | 4.06E-08 | 4.44E-09 | 6.14 | 9.7651421 | 1.45E-01 | 32712237  | 32712360  | NC_000005.9  |
| cg03134157 | 4.06E-08 | 4.44E-09 | 6.14 | 9.7650954 | 1.50E-01 | 145926089 | 145926212 | NC_000008.10 |
| cg19699170 | 4.06E-08 | 4.44E-09 | 6.14 | 9.7648507 | 1.26E-01 | 110402734 | 110402857 | NC_000002.11 |
| cg17147045 | 4.06E-08 | 4.44E-09 | 6.14 | 9.7646445 | 2.01E-01 | 68864546  | 68864669  | NC_000008.10 |
| cg18164362 | 4.06E-08 | 4.44E-09 | 6.14 | 9.764472  | 7.70E-02 | 49873118  | 49873241  | NC_000011.9  |
| cg25105060 | 4.06E-08 | 4.44E-09 | 6.14 | 9.7644143 | 6.14E-02 | 154166983 | 154167106 | NC_000005.9  |
| cg16505764 | 4.07E-08 | 4.44E-09 | 6.14 | 9.7632131 | 1.05E-01 | 140763254 | 140763377 | NC_000005.9  |
| cg24029640 | 4.07E-08 | 4.45E-09 | 6.14 | 9.7623704 | 5.74E-02 | 694166    | 694289    | NC_000004.11 |
| cg27106909 | 4.07E-08 | 4.45E-09 | 6.14 | 9.7618603 | 1.26E-01 | 30106897  | 30107020  | NC_000016.9  |
| cg13726504 | 4.08E-08 | 4.46E-09 | 6.14 | 9.7597614 | 6.22E-02 | 10884706  | 10884829  | NC_000006.11 |
| cg11284366 | 4.08E-08 | 4.46E-09 | 6.14 | 9.7592316 | 4.95E-02 | 45742253  | 45742376  | NC_000019.9  |
| cg06198892 | 4.08E-08 | 4.46E-09 | 6.14 | 9.7591904 | 1.45E-01 | 20833183  | 20833306  | NC_000007.13 |
| cg02531479 | 4.08E-08 | 4.46E-09 | 6.14 | 9.7590038 | 1.45E-01 | 2748066   | 2748189   | NC_000005.9  |
| cg04904388 | 4.09E-08 | 4.47E-09 | 6.14 | 9.7581246 | 8.67E-02 | 74772791  | 74772914  | NC_000002.11 |
| cg22455450 | 4.09E-08 | 4.47E-09 | 6.14 | 9.7580843 | 1.44E-01 | 53038972  | 53039095  | NC_000019.9  |

|            |          |          |      |           |          |           |           |              |
|------------|----------|----------|------|-----------|----------|-----------|-----------|--------------|
| cg25804146 | 4.09E-08 | 4.47E-09 | 6.14 | 9.7579824 | 8.55E-02 | 6822454   | 6822577   | NC_000019.9  |
| cg14403130 | 4.09E-08 | 4.47E-09 | 6.14 | 9.7578143 | 1.40E-01 | 44873057  | 44873180  | NC_000001.10 |
| cg08500200 | 4.09E-08 | 4.47E-09 | 6.14 | 9.7570859 | 1.08E-01 | 72892038  | 72892161  | NC_000006.11 |
| cg19917650 | 4.10E-08 | 4.48E-09 | 6.14 | 9.755719  | 1.13E-01 | 125033932 | 125034055 | NC_000010.10 |
| cg12619536 | 4.10E-08 | 4.48E-09 | 6.14 | 9.7556331 | 1.83E-01 | 108508067 | 108508190 | NC_000001.10 |
| cg26736540 | 4.10E-08 | 4.48E-09 | 6.14 | 9.7552768 | 1.69E-01 | 55204986  | 55205109  | NC_000020.10 |
| cg18630125 | 4.10E-08 | 4.49E-09 | 6.14 | 9.754061  | 3.75E-02 | 14677373  | 14677496  | NC_000006.11 |
| cg09819656 | 4.10E-08 | 4.49E-09 | 6.14 | 9.7536746 | 1.11E-01 | 34270090  | 34270213  | NC_000014.8  |
| cg00382463 | 4.10E-08 | 4.49E-09 | 6.14 | 9.7532323 | 2.33E-01 | 30718424  | 30718547  | NC_000019.9  |
| cg11320318 | 4.11E-08 | 4.50E-09 | 6.14 | 9.7518817 | 1.36E-01 | 111115795 | 111115918 | NC_000004.11 |
| cg16347317 | 4.11E-08 | 4.50E-09 | 6.14 | 9.7510116 | 1.01E-01 | 133562336 | 133562459 | NC_000006.11 |
| cg11095898 | 4.11E-08 | 4.50E-09 | 6.14 | 9.7508852 | 6.68E-02 | 93466424  | 93466547  | NC_000011.9  |
| cg21759907 | 4.12E-08 | 4.50E-09 | 6.14 | 9.7504522 | 4.82E-02 | 71630714  | 71630837  | NC_000015.9  |
| cg02694732 | 4.12E-08 | 4.51E-09 | 6.14 | 9.7496906 | 7.96E-02 | 46087057  | 46087180  | NC_000017.10 |
| cg21312554 | 4.12E-08 | 4.51E-09 | 6.14 | 9.7496309 | 7.16E-02 | 142310691 | 142310814 | NC_000008.10 |
| cg08166568 | 4.12E-08 | 4.51E-09 | 6.14 | 9.7489994 | 1.37E-01 | 1746647   | 1746770   | NC_000002.11 |
| cg10409753 | 4.12E-08 | 4.51E-09 | 6.14 | 9.7489317 | 1.13E-01 | 76655983  | 76656106  | NC_000006.11 |
| cg03477775 | 4.13E-08 | 4.52E-09 | 6.14 | 9.7477584 | 2.55E-02 | 99035225  | 99035348  | NC_000007.13 |
| cg17920479 | 4.13E-08 | 4.52E-09 | 6.14 | 9.7472893 | 1.22E-01 | 44650246  | 44650369  | NC_000020.10 |
| cg04936446 | 4.13E-08 | 4.52E-09 | 6.14 | 9.7462841 | 1.81E-02 | 26111348  | 26111471  | NC_000012.11 |
| cg05621131 | 4.13E-08 | 4.52E-09 | 6.14 | 9.7462687 | 6.86E-02 | 62444106  | 62444229  | NC_000011.9  |
| cg23236554 | 4.13E-08 | 4.52E-09 | 6.14 | 9.745914  | 2.12E-01 | 132947501 | 132947624 | NC_000005.9  |
| cg00263760 | 4.13E-08 | 4.53E-09 | 6.14 | 9.7455947 | 1.73E-01 | 118897366 | 118897489 | NC_000010.10 |
| cg06881040 | 4.14E-08 | 4.53E-09 | 6.14 | 9.7445708 | 6.29E-02 | 30040916  | 30041039  | NC_000016.9  |
| cg02623400 | 4.14E-08 | 4.53E-09 | 6.14 | 9.7445608 | 1.18E-01 | 50513749  | 50513872  | NC_000001.10 |



|            |          |          |      |           |          |           |           |              |
|------------|----------|----------|------|-----------|----------|-----------|-----------|--------------|
| cg16966815 | 4.14E-08 | 4.53E-09 | 6.14 | 9.7436626 | 1.50E-01 | 77333122  | 77333245  | NC_000001.10 |
| cg06235329 | 4.15E-08 | 4.54E-09 | 6.14 | 9.7425628 | 9.78E-02 | 4747168   | 4747291   | NC_000016.9  |
| cg25958098 | 4.15E-08 | 4.54E-09 | 6.14 | 9.7420513 | 9.43E-02 | 34612206  | 34612329  | NC_000015.9  |
| cg13692433 | 4.16E-08 | 4.55E-09 | 6.14 | 9.7404432 | 1.57E-01 | 112832159 | 112832282 | NC_000011.9  |
| cg00222341 | 4.16E-08 | 4.55E-09 | 6.14 | 9.7399659 | 1.20E-01 | 83951913  | 83952036  | NC_000015.9  |
| cg21250232 | 4.16E-08 | 4.55E-09 | 6.14 | 9.7398703 | 1.37E-01 | 81082895  | 81083018  | NC_000008.10 |
| cg18435476 | 4.16E-08 | 4.55E-09 | 6.14 | 9.7398528 | 1.35E-01 | 179459849 | 179459972 | NC_000001.10 |
| cg03303766 | 4.16E-08 | 4.55E-09 | 6.14 | 9.7396234 | 1.12E-01 | 88441346  | 88441469  | NC_000016.9  |
| cg20162599 | 4.16E-08 | 4.56E-09 | 6.14 | 9.738791  | 8.14E-02 | 63990138  | 63990261  | NC_000011.9  |
| cg01428408 | 4.17E-08 | 4.56E-09 | 6.14 | 9.7378094 | 3.52E-02 | 139293044 | 139293167 | NC_000009.11 |
| cg14004073 | 4.17E-08 | 4.56E-09 | 6.14 | 9.737804  | 2.18E-01 | 63986733  | 63986856  | NC_000005.9  |
| cg00743803 | 4.17E-08 | 4.57E-09 | 6.14 | 9.7364111 | 7.12E-02 | 48970600  | 48970723  | NC_000022.10 |
| cg06244510 | 4.17E-08 | 4.57E-09 | 6.14 | 9.7360776 | 4.45E-02 | 43336780  | 43336903  | NC_000011.9  |
| cg18694418 | 4.18E-08 | 4.57E-09 | 6.14 | 9.7353381 | 1.26E-01 | 2742484   | 2742607   | NC_000007.13 |
| cg18989709 | 4.18E-08 | 4.58E-09 | 6.14 | 9.7346569 | 1.66E-01 | 164915009 | 164915132 | NC_000003.11 |
| cg17594256 | 4.18E-08 | 4.58E-09 | 6.14 | 9.7344468 | 1.36E-01 | 46014654  | 46014777  | NC_000013.10 |
| cg13703253 | 4.18E-08 | 4.58E-09 | 6.14 | 9.7342217 | 5.85E-02 | 72104318  | 72104441  | NC_000015.9  |
| cg06036239 | 4.18E-08 | 4.58E-09 | 6.14 | 9.7341967 | 1.36E-01 | 59234929  | 59235052  | NC_000001.10 |
| cg20722537 | 4.18E-08 | 4.58E-09 | 6.14 | 9.7339085 | 1.75E-02 | 86422644  | 86422767  | NC_000002.11 |
| cg04517282 | 4.18E-08 | 4.58E-09 | 6.14 | 9.7336605 | 1.47E-01 | 2743260   | 2743383   | NC_000005.9  |
| cg14005139 | 4.19E-08 | 4.59E-09 | 6.14 | 9.7318835 | 2.08E-01 | 36989550  | 36989673  | NC_000014.8  |
| cg21009520 | 4.19E-08 | 4.59E-09 | 6.14 | 9.7313885 | 1.08E-01 | 13921205  | 13921328  | NC_000006.11 |
| cg07681935 | 4.19E-08 | 4.59E-09 | 6.14 | 9.7312336 | 1.50E-01 | 174452461 | 174452584 | NC_000004.11 |
| cg14222432 | 4.19E-08 | 4.60E-09 | 6.14 | 9.7306153 | 9.44E-02 | 29376421  | 29376544  | NC_000012.11 |
| cg02230103 | 4.20E-08 | 4.60E-09 | 6.14 | 9.7293545 | 6.53E-02 | 2848223   | 2848346   | NC_000016.9  |

|            |          |          |      |           |          |           |           |              |
|------------|----------|----------|------|-----------|----------|-----------|-----------|--------------|
| cg16590691 | 4.20E-08 | 4.60E-09 | 6.14 | 9.728819  | 1.68E-01 | 92507778  | 92507901  | NC_000014.8  |
| cg14120010 | 4.20E-08 | 4.61E-09 | 6.14 | 9.727827  | 1.44E-01 | 63418583  | 63418706  | NC_000018.9  |
| cg00442267 | 4.21E-08 | 4.61E-09 | 6.14 | 9.7267919 | 4.75E-02 | 46317840  | 46317963  | NC_000019.9  |
| cg02680050 | 4.21E-08 | 4.62E-09 | 6.14 | 9.7260567 | 1.01E-01 | 133179887 | 133180010 | NC_000012.11 |
| cg25195332 | 4.21E-08 | 4.62E-09 | 6.14 | 9.7258989 | 5.31E-02 | 56738588  | 56738711  | NC_000017.10 |
| cg00462104 | 4.21E-08 | 4.62E-09 | 6.14 | 9.7257902 | 8.28E-02 | 52628844  | 52628967  | NC_000006.11 |
| cg25616216 | 4.21E-08 | 4.62E-09 | 6.14 | 9.725515  | 1.57E-01 | 65601202  | 65601325  | NC_000011.9  |
| cg01527459 | 4.22E-08 | 4.62E-09 | 6.14 | 9.7247839 | 2.09E-01 | 82116571  | 82116694  | NC_000010.10 |
| cg25804359 | 4.22E-08 | 4.62E-09 | 6.14 | 9.724707  | 1.03E-01 | 2703296   | 2703419   | NC_000002.11 |
| cg07452777 | 4.22E-08 | 4.62E-09 | 6.14 | 9.7245453 | 2.75E-02 | 138725214 | 138725337 | NC_000003.11 |
| cg25609528 | 4.22E-08 | 4.63E-09 | 6.14 | 9.7241865 | 1.82E-01 | 38510182  | 38510305  | NC_000001.10 |
| cg19267554 | 4.22E-08 | 4.63E-09 | 6.14 | 9.7235209 | 8.08E-02 | 134672688 | 134672811 | NC_000010.10 |
| cg22610106 | 4.23E-08 | 4.64E-09 | 6.14 | 9.7219278 | 6.90E-02 | 167136367 | 167136490 | NC_000006.11 |
| cg16988166 | 4.23E-08 | 4.64E-09 | 6.14 | 9.7211527 | 3.08E-02 | 35503900  | 35504023  | NC_000010.10 |
| cg06550462 | 4.23E-08 | 4.64E-09 | 6.14 | 9.720689  | 1.59E-01 | 5544208   | 5544331   | NC_000018.9  |
| cg21649761 | 4.23E-08 | 4.64E-09 | 6.14 | 9.7204073 | 4.96E-02 | 8332152   | 8332275   | NC_000012.11 |
| cg06010020 | 4.24E-08 | 4.65E-09 | 6.13 | 9.7199998 | 1.33E-01 | 5112067   | 5112190   | NC_000007.13 |
| cg04906462 | 4.24E-08 | 4.65E-09 | 6.13 | 9.7199835 | 6.54E-02 | 130788305 | 130788428 | NC_000007.13 |
| cg22438522 | 4.24E-08 | 4.65E-09 | 6.13 | 9.7197405 | 3.07E-02 | 646293    | 646416    | NC_000004.11 |
| cg03316570 | 4.24E-08 | 4.65E-09 | 6.13 | 9.7197068 | 8.96E-02 | 43877657  | 43877780  | NC_000006.11 |
| cg26279253 | 4.24E-08 | 4.65E-09 | 6.13 | 9.7191338 | 1.45E-01 | 89475286  | 89475409  | NC_000012.11 |
| cg06951352 | 4.24E-08 | 4.65E-09 | 6.13 | 9.7189425 | 9.43E-02 | 2740160   | 2740283   | NC_000007.13 |
| cg06826671 | 4.24E-08 | 4.65E-09 | 6.13 | 9.7187398 | 5.70E-02 | 121827961 | 121828084 | NC_000008.10 |
| cg12461281 | 4.24E-08 | 4.65E-09 | 6.13 | 9.7186114 | 1.28E-01 | 148288661 | 148288784 | NC_000005.9  |
| cg23894086 | 4.24E-08 | 4.65E-09 | 6.13 | 9.7181519 | 1.39E-01 | 27128046  | 27128169  | NC_000007.13 |

|            |          |          |      |           |          |           |           |              |
|------------|----------|----------|------|-----------|----------|-----------|-----------|--------------|
| cg12901733 | 4.25E-08 | 4.66E-09 | 6.13 | 9.7169734 | 6.00E-02 | 235079808 | 235079931 | NC_000002.11 |
| cg27478961 | 4.25E-08 | 4.67E-09 | 6.13 | 9.7156041 | 1.58E-01 | 27944586  | 27944709  | NC_000021.8  |
| cg01992382 | 4.26E-08 | 4.67E-09 | 6.13 | 9.7149202 | 1.67E-01 | 32064212  | 32064335  | NC_000006.11 |
| cg26777456 | 4.26E-08 | 4.67E-09 | 6.13 | 9.714714  | 1.25E-01 | 54454250  | 54454373  | NC_000012.11 |
| cg20291436 | 4.26E-08 | 4.67E-09 | 6.13 | 9.7140846 | 1.44E-01 | 111539352 | 111539475 | NC_000004.11 |
| cg14484844 | 4.27E-08 | 4.68E-09 | 6.13 | 9.7125032 | 1.01E-01 | 139590683 | 139590806 | NC_000009.11 |
| cg06468908 | 4.27E-08 | 4.68E-09 | 6.13 | 9.7122256 | 1.61E-01 | 110223713 | 110223836 | NC_000004.11 |
| cg02690609 | 4.27E-08 | 4.68E-09 | 6.13 | 9.7119353 | 1.20E-01 | 127441060 | 127441183 | NC_000006.11 |
| cg22609784 | 4.27E-08 | 4.69E-09 | 6.13 | 9.7104832 | 1.19E-01 | 4863678   | 4863801   | NC_000004.11 |
| cg06918887 | 4.28E-08 | 4.69E-09 | 6.13 | 9.7101721 | 1.36E-01 | 5712840   | 5712963   | NC_000004.11 |
| cg25758217 | 4.28E-08 | 4.70E-09 | 6.13 | 9.7095686 | 1.01E-01 | 105478656 | 105478779 | NC_000002.11 |
| cg22049569 | 4.28E-08 | 4.70E-09 | 6.13 | 9.708682  | 1.51E-01 | 54466538  | 54466661  | NC_000019.9  |
| cg22400015 | 4.28E-08 | 4.70E-09 | 6.13 | 9.7086297 | 9.99E-02 | 220196714 | 220196837 | NC_000002.11 |
| cg10539069 | 4.28E-08 | 4.70E-09 | 6.13 | 9.7084602 | 1.99E-01 | 93520275  | 93520398  | NC_000007.13 |
| cg05270938 | 4.28E-08 | 4.70E-09 | 6.13 | 9.7079983 | 1.29E-01 | 119616568 | 119616691 | NC_000002.11 |
| cg22594214 | 4.29E-08 | 4.70E-09 | 6.13 | 9.7077552 | 1.23E-01 | 135842299 | 135842422 | NC_000008.10 |
| cg19453991 | 4.29E-08 | 4.71E-09 | 6.13 | 9.7075469 | 1.57E-01 | 137480102 | 137480225 | NC_000003.11 |
| cg20335293 | 4.29E-08 | 4.71E-09 | 6.13 | 9.7073956 | 1.01E-01 | 156586057 | 156586180 | NC_000002.11 |
| cg10036931 | 4.29E-08 | 4.71E-09 | 6.13 | 9.7063409 | 4.75E-02 | 4675509   | 4675632   | NC_000012.11 |
| cg12074025 | 4.29E-08 | 4.71E-09 | 6.13 | 9.7061579 | 2.57E-01 | 58238850  | 58238973  | NC_000019.9  |
| cg11972677 | 4.29E-08 | 4.71E-09 | 6.13 | 9.705807  | 1.15E-01 | 30605704  | 30605827  | NC_000011.9  |
| cg07475954 | 4.30E-08 | 4.72E-09 | 6.13 | 9.7049117 | 6.55E-02 | 52222198  | 52222321  | NC_000019.9  |
| cg04652932 | 4.30E-08 | 4.72E-09 | 6.13 | 9.7046842 | 7.81E-02 | 75496156  | 75496279  | NC_000007.13 |
| cg03117976 | 4.30E-08 | 4.72E-09 | 6.13 | 9.7041734 | 2.44E-01 | 11149435  | 11149558  | NC_000018.9  |
| cg12397802 | 4.30E-08 | 4.72E-09 | 6.13 | 9.7038447 | 4.47E-02 | 64573476  | 64573599  | NC_000010.10 |

|            |          |          |      |           |          |           |           |              |
|------------|----------|----------|------|-----------|----------|-----------|-----------|--------------|
| cg14006650 | 4.30E-08 | 4.72E-09 | 6.13 | 9.7037463 | 2.28E-02 | 3147474   | 3147597   | NC_000010.10 |
| cg03282153 | 4.30E-08 | 4.73E-09 | 6.13 | 9.7031874 | 4.91E-02 | 28702111  | 28702234  | NC_000015.9  |
| cg27590049 | 4.30E-08 | 4.73E-09 | 6.13 | 9.703174  | 2.14E-01 | 165205199 | 165205322 | NC_000001.10 |
| cg01302656 | 4.31E-08 | 4.73E-09 | 6.13 | 9.7026596 | 1.35E-01 | 29254853  | 29254976  | NC_000014.8  |
| cg04959297 | 4.31E-08 | 4.73E-09 | 6.13 | 9.7018663 | 9.84E-02 | 62381731  | 62381854  | NC_000011.9  |
| cg16306500 | 4.31E-08 | 4.74E-09 | 6.13 | 9.7009881 | 6.32E-02 | 42894395  | 42894518  | NC_000005.9  |
| cg05049390 | 4.31E-08 | 4.74E-09 | 6.13 | 9.7006912 | 5.14E-02 | 6108969   | 6109092   | NC_000003.11 |
| cg17611475 | 4.31E-08 | 4.74E-09 | 6.13 | 9.7006476 | 2.76E-02 | 58137179  | 58137302  | NC_000012.11 |
| cg06367702 | 4.32E-08 | 4.74E-09 | 6.13 | 9.7002903 | 1.67E-01 | 113435899 | 113436022 | NC_000004.11 |
| cg19674669 | 4.32E-08 | 4.74E-09 | 6.13 | 9.6994622 | 1.33E-01 | 134146910 | 134147033 | NC_000011.9  |
| cg19506309 | 4.32E-08 | 4.75E-09 | 6.13 | 9.6985795 | 3.27E-02 | 127562106 | 127562229 | NC_000002.11 |
| cg00145141 | 4.32E-08 | 4.75E-09 | 6.13 | 9.6985261 | 1.27E-01 | 4464022   | 4464145   | NC_000017.10 |
| cg16439198 | 4.33E-08 | 4.76E-09 | 6.13 | 9.6965674 | 1.35E-01 | 38302674  | 38302797  | NC_000002.11 |
| cg04149776 | 4.33E-08 | 4.76E-09 | 6.13 | 9.6963406 | 8.02E-02 | 48730185  | 48730308  | NC_000022.10 |
| cg08280468 | 4.33E-08 | 4.76E-09 | 6.13 | 9.6959967 | 1.15E-01 | 12997534  | 12997657  | NC_000016.9  |
| cg05036212 | 4.34E-08 | 4.77E-09 | 6.13 | 9.6950951 | 1.85E-01 | 119609691 | 119609814 | NC_000002.11 |
| cg13713830 | 4.34E-08 | 4.77E-09 | 6.13 | 9.6945703 | 1.48E-01 | 79631737  | 79631860  | NC_000009.11 |
| cg24720580 | 4.34E-08 | 4.77E-09 | 6.13 | 9.6942343 | 1.08E-01 | 74059005  | 74059128  | NC_000014.8  |
| cg27278500 | 4.34E-08 | 4.77E-09 | 6.13 | 9.6940652 | 8.05E-02 | 96765415  | 96765538  | NC_000002.11 |
| cg04609576 | 4.34E-08 | 4.77E-09 | 6.13 | 9.6933569 | 1.18E-01 | 126626362 | 126626485 | NC_000005.9  |
| cg20166027 | 4.35E-08 | 4.78E-09 | 6.13 | 9.6925726 | 1.43E-01 | 51576452  | 51576575  | NC_000010.10 |
| cg18397730 | 4.35E-08 | 4.78E-09 | 6.13 | 9.692312  | 7.48E-02 | 52439185  | 52439308  | NC_000006.11 |
| cg26785954 | 4.35E-08 | 4.78E-09 | 6.13 | 9.6913693 | 1.59E-01 | 63212815  | 63212938  | NC_000010.10 |
| cg14262374 | 4.35E-08 | 4.78E-09 | 6.13 | 9.6913641 | 9.51E-02 | 11780256  | 11780379  | NC_000001.10 |
| cg18950778 | 4.35E-08 | 4.78E-09 | 6.13 | 9.6913093 | 1.14E-01 | 32455362  | 32455485  | NC_000011.9  |

|            |          |          |      |           |          |           |           |              |
|------------|----------|----------|------|-----------|----------|-----------|-----------|--------------|
| cg05148717 | 4.35E-08 | 4.79E-09 | 6.13 | 9.690995  | 5.02E-02 | 28829171  | 28829294  | NC_000006.11 |
| cg26247508 | 4.35E-08 | 4.79E-09 | 6.13 | 9.6908212 | 6.72E-02 | 82299669  | 82299792  | NC_000010.10 |
| cg08491188 | 4.36E-08 | 4.79E-09 | 6.13 | 9.69047   | 1.22E-01 | 140777503 | 140777626 | NC_000005.9  |
| cg22311533 | 4.36E-08 | 4.79E-09 | 6.13 | 9.6895783 | 2.25E-02 | 132200008 | 132200131 | NC_000005.9  |
| cg03937966 | 4.36E-08 | 4.80E-09 | 6.13 | 9.6885098 | 9.28E-02 | 245753411 | 245753534 | NC_000001.10 |
| cg19300937 | 4.37E-08 | 4.80E-09 | 6.13 | 9.6879407 | 8.50E-02 | 43283685  | 43283808  | NC_000001.10 |
| cg26513930 | 4.37E-08 | 4.81E-09 | 6.13 | 9.6862507 | 7.37E-02 | 90162200  | 90162323  | NC_000016.9  |
| cg02636004 | 4.38E-08 | 4.82E-09 | 6.13 | 9.6847542 | 3.25E-02 | 119747339 | 119747462 | NC_000003.11 |
| cg22504204 | 4.38E-08 | 4.82E-09 | 6.13 | 9.684155  | 1.73E-01 | 17207562  | 17207685  | NC_000020.10 |
| cg10700847 | 4.39E-08 | 4.83E-09 | 6.13 | 9.682773  | 3.78E-02 | 2483727   | 2483850   | NC_000001.10 |
| cg07252753 | 4.39E-08 | 4.83E-09 | 6.13 | 9.6824237 | 7.78E-02 | 10594951  | 10595074  | NC_000003.11 |
| cg09397579 | 4.39E-08 | 4.83E-09 | 6.13 | 9.681832  | 8.26E-02 | 151511901 | 151512024 | NC_000007.13 |
| cg03825010 | 4.39E-08 | 4.83E-09 | 6.13 | 9.6815738 | 1.88E-01 | 159399506 | 159399629 | NC_000005.9  |
| cg11894422 | 4.39E-08 | 4.83E-09 | 6.13 | 9.6815619 | 1.02E-01 | 398758    | 398881    | NC_000005.9  |
| cg14304469 | 4.40E-08 | 4.84E-09 | 6.13 | 9.6805059 | 1.62E-01 | 54610320  | 54610443  | NC_000007.13 |
| cg03108229 | 4.40E-08 | 4.84E-09 | 6.13 | 9.6801706 | 1.95E-01 | 134146266 | 134146389 | NC_000011.9  |
| cg09727277 | 4.40E-08 | 4.84E-09 | 6.13 | 9.6800165 | 1.58E-01 | 155258828 | 155258951 | NC_000007.13 |
| cg08746900 | 4.40E-08 | 4.84E-09 | 6.13 | 9.6791539 | 1.80E-01 | 3598967   | 3599090   | NC_000005.9  |
| cg14114297 | 4.40E-08 | 4.85E-09 | 6.13 | 9.6789801 | 7.69E-02 | 81084231  | 81084354  | NC_000005.9  |
| cg11803043 | 4.40E-08 | 4.85E-09 | 6.13 | 9.678824  | 3.98E-02 | 158155378 | 158155501 | NC_000002.11 |
| cg08566449 | 4.41E-08 | 4.85E-09 | 6.13 | 9.6785576 | 1.05E-01 | 31631706  | 31631829  | NC_000006.11 |
| cg13723011 | 4.41E-08 | 4.85E-09 | 6.13 | 9.6783258 | 4.80E-02 | 52737693  | 52737816  | NC_000003.11 |
| cg02733081 | 4.41E-08 | 4.85E-09 | 6.13 | 9.6777996 | 1.30E-01 | 31061080  | 31061203  | NC_000013.10 |
| cg12330441 | 4.41E-08 | 4.85E-09 | 6.13 | 9.6775175 | 1.09E-01 | 30991811  | 30991934  | NC_000022.10 |
| cg20255775 | 4.41E-08 | 4.85E-09 | 6.13 | 9.6773633 | 2.13E-01 | 48398370  | 48398493  | NC_000012.11 |

|            |          |          |      |           |          |           |           |              |
|------------|----------|----------|------|-----------|----------|-----------|-----------|--------------|
| cg22353551 | 4.42E-08 | 4.86E-09 | 6.13 | 9.6752281 | 1.12E-01 | 156357839 | 156357962 | NC_000001.10 |
| cg19503351 | 4.42E-08 | 4.86E-09 | 6.13 | 9.675105  | 2.67E-02 | 143373735 | 143373858 | NC_000008.10 |
| cg19968840 | 4.42E-08 | 4.87E-09 | 6.13 | 9.674914  | 1.52E-01 | 45409319  | 45409442  | NC_000015.9  |
| cg02707071 | 4.42E-08 | 4.87E-09 | 6.13 | 9.6747545 | 1.18E-01 | 27143806  | 27143929  | NC_000007.13 |
| cg15634877 | 4.42E-08 | 4.87E-09 | 6.13 | 9.6741968 | 1.40E-01 | 220299643 | 220299766 | NC_000002.11 |
| cg10007777 | 4.42E-08 | 4.87E-09 | 6.13 | 9.6740102 | 8.82E-02 | 20107758  | 20107881  | NC_000008.10 |
| cg07341007 | 4.43E-08 | 4.87E-09 | 6.13 | 9.673009  | 9.34E-02 | 195489909 | 195490032 | NC_000003.11 |
| cg11990630 | 4.43E-08 | 4.88E-09 | 6.13 | 9.672638  | 1.14E-01 | 100641978 | 100642101 | NC_000013.10 |
| cg14839871 | 4.43E-08 | 4.88E-09 | 6.13 | 9.6724501 | 4.83E-02 | 82755955  | 82756078  | NC_000002.11 |
| cg02243714 | 4.43E-08 | 4.88E-09 | 6.13 | 9.6720527 | 1.70E-01 | 87635798  | 87635921  | NC_000016.9  |
| cg15379185 | 4.43E-08 | 4.88E-09 | 6.13 | 9.671686  | 1.83E-01 | 27282987  | 27283110  | NC_000007.13 |
| cg20640347 | 4.44E-08 | 4.89E-09 | 6.13 | 9.6694742 | 8.13E-02 | 49138252  | 49138375  | NC_000022.10 |
| cg21548029 | 4.44E-08 | 4.89E-09 | 6.13 | 9.6692278 | 8.03E-02 | 140515675 | 140515798 | NC_000005.9  |
| cg25756617 | 4.45E-08 | 4.90E-09 | 6.13 | 9.6687194 | 4.81E-02 | 43734917  | 43735040  | NC_000001.10 |
| cg19749660 | 4.45E-08 | 4.90E-09 | 6.12 | 9.667808  | 1.80E-01 | 65284514  | 65284637  | NC_000008.10 |
| cg27637738 | 4.46E-08 | 4.91E-09 | 6.12 | 9.6651079 | 1.52E-01 | 55148644  | 55148767  | NC_000007.13 |
| cg03729152 | 4.46E-08 | 4.91E-09 | 6.12 | 9.6650692 | 1.19E-01 | 19961027  | 19961150  | NC_000007.13 |
| cg27023638 | 4.46E-08 | 4.92E-09 | 6.12 | 9.6647726 | 7.68E-02 | 7288726   | 7288849   | NC_000006.11 |
| cg15375311 | 4.46E-08 | 4.92E-09 | 6.12 | 9.6644298 | 5.80E-02 | 25621615  | 25621738  | NC_000004.11 |
| cg03113878 | 4.47E-08 | 4.92E-09 | 6.12 | 9.6637085 | 1.34E-01 | 100091364 | 100091487 | NC_000007.13 |
| cg11061946 | 4.47E-08 | 4.92E-09 | 6.12 | 9.6633296 | 1.60E-01 | 43407460  | 43407583  | NC_000022.10 |
| cg06375628 | 4.47E-08 | 4.93E-09 | 6.12 | 9.6629097 | 1.51E-01 | 41883879  | 41884002  | NC_000004.11 |
| cg02772619 | 4.47E-08 | 4.93E-09 | 6.12 | 9.662442  | 6.98E-02 | 86753573  | 86753696  | NC_000009.11 |
| cg09703136 | 4.48E-08 | 4.93E-09 | 6.12 | 9.6617245 | 8.66E-02 | 173995054 | 173995177 | NC_000004.11 |
| cg03014326 | 4.48E-08 | 4.94E-09 | 6.12 | 9.6606716 | 1.83E-01 | 14748285  | 14748408  | NC_000018.9  |

|            |          |          |      |           |          |           |           |              |
|------------|----------|----------|------|-----------|----------|-----------|-----------|--------------|
| cg17508591 | 4.48E-08 | 4.94E-09 | 6.12 | 9.6599118 | 8.44E-02 | 140214138 | 140214261 | NC_000005.9  |
| cg11302624 | 4.49E-08 | 4.95E-09 | 6.12 | 9.6588431 | 4.05E-02 | 176788169 | 176788292 | NC_000005.9  |
| cg12948920 | 4.49E-08 | 4.95E-09 | 6.12 | 9.6586339 | 1.07E-01 | 8609706   | 8609829   | NC_000004.11 |
| cg01144933 | 4.49E-08 | 4.95E-09 | 6.12 | 9.6585663 | 1.84E-01 | 13840612  | 13840735  | NC_000001.10 |
| cg26268621 | 4.49E-08 | 4.95E-09 | 6.12 | 9.6585496 | 1.83E-01 | 60296159  | 60296282  | NC_000015.9  |
| cg09571376 | 4.49E-08 | 4.95E-09 | 6.12 | 9.6582261 | 1.10E-01 | 20044622  | 20044745  | NC_000011.9  |
| cg12434681 | 4.49E-08 | 4.95E-09 | 6.12 | 9.6575765 | 1.24E-01 | 27167364  | 27167487  | NC_000007.13 |
| cg09339194 | 4.49E-08 | 4.95E-09 | 6.12 | 9.6575052 | 2.03E-01 | 61051585  | 61051708  | NC_000020.10 |
| cg07815521 | 4.50E-08 | 4.95E-09 | 6.12 | 9.6572249 | 1.20E-01 | 40789857  | 40789980  | NC_000019.9  |
| cg05724110 | 4.50E-08 | 4.96E-09 | 6.12 | 9.656651  | 1.83E-01 | 34398532  | 34398655  | NC_000021.8  |
| cg26479630 | 4.50E-08 | 4.96E-09 | 6.12 | 9.6560541 | 1.21E-01 | 180486787 | 180486910 | NC_000005.9  |
| cg05265257 | 4.50E-08 | 4.96E-09 | 6.12 | 9.6560019 | 1.01E-01 | 51579950  | 51580073  | NC_000013.10 |
| cg06223797 | 4.50E-08 | 4.96E-09 | 6.12 | 9.6551297 | 9.00E-02 | 95644358  | 95644481  | NC_000012.11 |
| cg20434505 | 4.50E-08 | 4.96E-09 | 6.12 | 9.6551203 | 5.45E-02 | 48958216  | 48958339  | NC_000019.9  |
| cg26604232 | 4.50E-08 | 4.97E-09 | 6.12 | 9.6550528 | 6.09E-02 | 147760460 | 147760583 | NC_000001.10 |
| cg01942751 | 4.51E-08 | 4.97E-09 | 6.12 | 9.6534709 | 1.57E-01 | 240031635 | 240031758 | NC_000002.11 |
| cg05706117 | 4.51E-08 | 4.98E-09 | 6.12 | 9.6529689 | 1.46E-01 | 38258451  | 38258574  | NC_000005.9  |
| cg01676467 | 4.52E-08 | 4.99E-09 | 6.12 | 9.6510913 | 6.55E-02 | 45392065  | 45392188  | NC_000015.9  |
| cg10894807 | 4.52E-08 | 4.99E-09 | 6.12 | 9.6509714 | 2.51E-02 | 32803455  | 32803578  | NC_000006.11 |
| cg22846498 | 4.53E-08 | 4.99E-09 | 6.12 | 9.6496329 | 6.40E-02 | 3319217   | 3319340   | NC_000010.10 |
| cg21449966 | 4.53E-08 | 4.99E-09 | 6.12 | 9.6492188 | 3.40E-02 | 102863738 | 102863861 | NC_000002.11 |
| cg06928887 | 4.54E-08 | 5.00E-09 | 6.12 | 9.6476088 | 1.01E-01 | 88545340  | 88545463  | NC_000016.9  |
| cg11784623 | 4.54E-08 | 5.01E-09 | 6.12 | 9.6471635 | 1.19E-01 | 164264822 | 164264945 | NC_000004.11 |
| cg26534812 | 4.54E-08 | 5.01E-09 | 6.12 | 9.6463756 | 6.24E-02 | 75524155  | 75524278  | NC_000017.10 |
| cg24706992 | 4.54E-08 | 5.01E-09 | 6.12 | 9.6463146 | 8.13E-02 | 1833078   | 1833201   | NC_000001.10 |

|            |          |          |      |           |          |           |           |              |
|------------|----------|----------|------|-----------|----------|-----------|-----------|--------------|
| cg26029734 | 4.55E-08 | 5.01E-09 | 6.12 | 9.6453527 | 1.73E-01 | 31819380  | 31819503  | NC_000011.9  |
| cg06243556 | 4.55E-08 | 5.02E-09 | 6.12 | 9.6439389 | 1.74E-01 | 58609473  | 58609596  | NC_000019.9  |
| cg20945085 | 4.56E-08 | 5.03E-09 | 6.12 | 9.6428232 | 1.45E-01 | 74875227  | 74875350  | NC_000002.11 |
| cg20402783 | 4.57E-08 | 5.04E-09 | 6.12 | 9.6408932 | 1.56E-01 | 54381013  | 54381136  | NC_000012.11 |
| cg22448889 | 4.57E-08 | 5.04E-09 | 6.12 | 9.6403895 | 1.92E-01 | 7554681   | 7554804   | NC_000017.10 |
| cg01484915 | 4.57E-08 | 5.05E-09 | 6.12 | 9.6392089 | 1.01E-01 | 45458834  | 45458957  | NC_000010.10 |
| cg13763345 | 4.59E-08 | 5.06E-09 | 6.12 | 9.6362189 | 1.08E-01 | 91022295  | 91022418  | NC_000014.8  |
| cg04599612 | 4.59E-08 | 5.06E-09 | 6.12 | 9.6358385 | 9.79E-02 | 9086585   | 9086708   | NC_000001.10 |
| cg09555124 | 4.59E-08 | 5.07E-09 | 6.12 | 9.6350442 | 1.39E-01 | 160451213 | 160451336 | NC_000006.11 |
| cg15855970 | 4.59E-08 | 5.07E-09 | 6.12 | 9.6345735 | 1.44E-01 | 99273338  | 99273461  | NC_000006.11 |
| cg05882680 | 4.60E-08 | 5.08E-09 | 6.12 | 9.632742  | 1.34E-01 | 48042605  | 48042728  | NC_000017.10 |
| cg03781224 | 4.60E-08 | 5.08E-09 | 6.12 | 9.63214   | 1.13E-01 | 127481599 | 127481722 | NC_000003.11 |
| cg12400725 | 4.61E-08 | 5.09E-09 | 6.12 | 9.6316    | 1.00E-01 | 29240533  | 29240656  | NC_000001.10 |
| cg19752891 | 4.61E-08 | 5.09E-09 | 6.12 | 9.6314212 | 2.10E-01 | 4304573   | 4304696   | NC_000019.9  |
| cg04877901 | 4.61E-08 | 5.09E-09 | 6.12 | 9.6311663 | 2.38E-01 | 158083432 | 158083555 | NC_000001.10 |
| cg02728595 | 4.61E-08 | 5.09E-09 | 6.12 | 9.6303605 | 1.86E-01 | 196255632 | 196255755 | NC_000003.11 |
| cg10746936 | 4.62E-08 | 5.10E-09 | 6.12 | 9.6293736 | 1.55E-01 | 95240143  | 95240266  | NC_000014.8  |
| cg14092276 | 4.62E-08 | 5.10E-09 | 6.12 | 9.6282969 | 1.34E-01 | 101192852 | 101192975 | NC_000014.8  |
| cg17811778 | 4.62E-08 | 5.10E-09 | 6.12 | 9.6282862 | 1.46E-01 | 101293172 | 101293295 | NC_000010.10 |
| cg06767681 | 4.63E-08 | 5.12E-09 | 6.12 | 9.6259828 | 9.06E-02 | 77606648  | 77606771  | NC_000017.10 |
| cg10033746 | 4.63E-08 | 5.12E-09 | 6.12 | 9.6258165 | 3.14E-02 | 30920769  | 30920892  | NC_000006.11 |
| cg01089914 | 4.63E-08 | 5.12E-09 | 6.12 | 9.6250728 | 1.50E-01 | 218843229 | 218843352 | NC_000002.11 |
| cg17523253 | 4.64E-08 | 5.12E-09 | 6.12 | 9.6242105 | 4.55E-02 | 56072358  | 56072481  | NC_000017.10 |
| cg19248602 | 4.64E-08 | 5.12E-09 | 6.12 | 9.6241564 | 1.41E-01 | 46795931  | 46796054  | NC_000017.10 |
| cg16143796 | 4.64E-08 | 5.13E-09 | 6.12 | 9.6237534 | 2.51E-02 | 102607750 | 102607873 | NC_000002.11 |



|            |          |          |      |           |          |           |           |              |
|------------|----------|----------|------|-----------|----------|-----------|-----------|--------------|
| cg04525189 | 4.64E-08 | 5.13E-09 | 6.12 | 9.623518  | 1.68E-01 | 158936508 | 158936631 | NC_000007.13 |
| cg02909929 | 4.65E-08 | 5.14E-09 | 6.12 | 9.6216121 | 5.78E-02 | 72358510  | 72358633  | NC_000010.10 |
| cg04528054 | 4.65E-08 | 5.14E-09 | 6.12 | 9.6212282 | 6.92E-02 | 145955016 | 145955139 | NC_000008.10 |
| cg22094163 | 4.65E-08 | 5.14E-09 | 6.12 | 9.6210933 | 1.17E-01 | 86703710  | 86703833  | NC_000002.11 |
| cg04497354 | 4.65E-08 | 5.14E-09 | 6.12 | 9.6210458 | 4.22E-02 | 30109208  | 30109331  | NC_000006.11 |
| cg25734490 | 4.65E-08 | 5.14E-09 | 6.12 | 9.6205546 | 1.33E-01 | 103351188 | 103351311 | NC_000012.11 |
| cg06575035 | 4.66E-08 | 5.15E-09 | 6.12 | 9.6201562 | 9.55E-02 | 140744449 | 140744572 | NC_000005.9  |
| cg11362596 | 4.66E-08 | 5.15E-09 | 6.12 | 9.6197957 | 6.68E-02 | 108160271 | 108160394 | NC_000003.11 |
| cg18164791 | 4.66E-08 | 5.15E-09 | 6.12 | 9.6190531 | 4.00E-02 | 141174689 | 141174812 | NC_000005.9  |
| cg03208936 | 4.66E-08 | 5.15E-09 | 6.12 | 9.6186947 | 1.30E-01 | 98515087  | 98515210  | NC_000001.10 |
| cg15690822 | 4.66E-08 | 5.16E-09 | 6.12 | 9.6183486 | 9.52E-02 | 33391738  | 33391861  | NC_000017.10 |
| cg21565543 | 4.67E-08 | 5.16E-09 | 6.12 | 9.6174413 | 7.84E-02 | 19714951  | 19715074  | NC_000006.11 |
| cg25573915 | 4.67E-08 | 5.16E-09 | 6.11 | 9.6171203 | 7.34E-02 | 6704194   | 6704317   | NC_000007.13 |
| cg13975625 | 4.67E-08 | 5.16E-09 | 6.11 | 9.6170062 | 1.38E-01 | 164264796 | 164264919 | NC_000004.11 |
| cg01473249 | 4.67E-08 | 5.17E-09 | 6.11 | 9.6161768 | 9.64E-02 | 166219132 | 166219255 | NC_000006.11 |
| cg24134816 | 4.67E-08 | 5.17E-09 | 6.11 | 9.6157926 | 6.07E-02 | 7951330   | 7951453   | NC_000004.11 |
| cg23641852 | 4.68E-08 | 5.17E-09 | 6.11 | 9.6149365 | 2.12E-01 | 31841161  | 31841284  | NC_000019.9  |
| cg07690181 | 4.68E-08 | 5.18E-09 | 6.11 | 9.6144327 | 2.30E-01 | 83679643  | 83679766  | NC_000005.9  |
| cg15067870 | 4.69E-08 | 5.18E-09 | 6.11 | 9.6133707 | 5.15E-02 | 48183288  | 48183411  | NC_000017.10 |
| cg10928087 | 4.69E-08 | 5.19E-09 | 6.11 | 9.6123521 | 2.14E-01 | 46923937  | 46924060  | NC_000003.11 |
| cg26831566 | 4.69E-08 | 5.19E-09 | 6.11 | 9.6123316 | 1.12E-01 | 20693014  | 20693137  | NC_000001.10 |
| cg26170568 | 4.69E-08 | 5.19E-09 | 6.11 | 9.611856  | 5.21E-02 | 1681408   | 1681531   | NC_000008.10 |
| cg13745489 | 4.70E-08 | 5.20E-09 | 6.11 | 9.6102874 | 1.04E-01 | 45695038  | 45695161  | NC_000003.11 |
| cg14186937 | 4.70E-08 | 5.20E-09 | 6.11 | 9.6093617 | 1.33E-01 | 101454765 | 101454888 | NC_000011.9  |
| cg11685223 | 4.71E-08 | 5.20E-09 | 6.11 | 9.6090065 | 1.02E-01 | 23344170  | 23344293  | NC_000020.10 |

|            |          |          |      |           |          |           |           |              |
|------------|----------|----------|------|-----------|----------|-----------|-----------|--------------|
| cg25918303 | 4.71E-08 | 5.21E-09 | 6.11 | 9.6089377 | 2.14E-01 | 106889334 | 106889457 | NC_000011.9  |
| cg06740893 | 4.71E-08 | 5.21E-09 | 6.11 | 9.6089352 | 9.08E-02 | 12251869  | 12251992  | NC_000001.10 |
| cg17580045 | 4.71E-08 | 5.21E-09 | 6.11 | 9.607846  | 2.05E-01 | 4384890   | 4385013   | NC_000012.11 |
| cg08057136 | 4.71E-08 | 5.21E-09 | 6.11 | 9.6072366 | 1.46E-01 | 207506975 | 207507098 | NC_000002.11 |
| cg10958362 | 4.71E-08 | 5.22E-09 | 6.11 | 9.6068538 | 2.27E-01 | 2754016   | 2754139   | NC_000005.9  |
| cg27353689 | 4.72E-08 | 5.22E-09 | 6.11 | 9.6064921 | 8.42E-02 | 90033146  | 90033269  | NC_000015.9  |
| cg14706162 | 4.72E-08 | 5.22E-09 | 6.11 | 9.6063393 | 8.23E-02 | 1496411   | 1496534   | NC_000004.11 |
| cg24527776 | 4.72E-08 | 5.22E-09 | 6.11 | 9.6057983 | 7.38E-02 | 114426155 | 114426278 | NC_000002.11 |
| cg25947184 | 4.72E-08 | 5.22E-09 | 6.11 | 9.6052593 | 1.09E-01 | 1697459   | 1697582   | NC_000008.10 |
| cg12433713 | 4.72E-08 | 5.23E-09 | 6.11 | 9.6050651 | 1.87E-01 | 131770585 | 131770708 | NC_000010.10 |
| cg07803710 | 4.72E-08 | 5.23E-09 | 6.11 | 9.6050105 | 6.14E-02 | 132164660 | 132164783 | NC_000012.11 |
| cg19868631 | 4.73E-08 | 5.24E-09 | 6.11 | 9.6030948 | 1.93E-01 | 54609776  | 54609899  | NC_000007.13 |
| cg09301052 | 4.73E-08 | 5.24E-09 | 6.11 | 9.6030169 | 6.72E-02 | 31327376  | 31327499  | NC_000006.11 |
| cg24921140 | 4.73E-08 | 5.24E-09 | 6.11 | 9.6029201 | 9.74E-02 | 156260776 | 156260899 | NC_000003.11 |
| cg14011639 | 4.73E-08 | 5.24E-09 | 6.11 | 9.6026921 | 1.72E-01 | 140797234 | 140797357 | NC_000005.9  |
| cg05857941 | 4.74E-08 | 5.24E-09 | 6.11 | 9.6019982 | 1.22E-01 | 29229455  | 29229578  | NC_000014.8  |
| cg17787159 | 4.74E-08 | 5.24E-09 | 6.11 | 9.6017618 | 1.89E-01 | 46974908  | 46975031  | NC_000019.9  |
| cg02666556 | 4.74E-08 | 5.24E-09 | 6.11 | 9.6015807 | 9.44E-02 | 57791314  | 57791437  | NC_000011.9  |
| cg02374107 | 4.74E-08 | 5.25E-09 | 6.11 | 9.6004847 | 1.24E-01 | 4163907   | 4164030   | NC_000016.9  |
| cg03843972 | 4.74E-08 | 5.25E-09 | 6.11 | 9.6004663 | 1.39E-01 | 65286589  | 65286712  | NC_000008.10 |
| cg16092786 | 4.74E-08 | 5.25E-09 | 6.11 | 9.6003099 | 1.30E-01 | 32455735  | 32455858  | NC_000011.9  |
| cg27331828 | 4.75E-08 | 5.25E-09 | 6.11 | 9.5996305 | 4.62E-02 | 196619631 | 196619754 | NC_000001.10 |
| cg12429610 | 4.75E-08 | 5.26E-09 | 6.11 | 9.5986421 | 4.50E-02 | 234113122 | 234113245 | NC_000002.11 |
| cg13315147 | 4.75E-08 | 5.26E-09 | 6.11 | 9.5983622 | 1.37E-01 | 135341528 | 135341651 | NC_000010.10 |
| cg01568492 | 4.75E-08 | 5.26E-09 | 6.11 | 9.5982755 | 1.02E-01 | 130986964 | 130987087 | NC_000002.11 |

|            |          |          |      |           |          |           |           |              |
|------------|----------|----------|------|-----------|----------|-----------|-----------|--------------|
| cg13974632 | 4.75E-08 | 5.27E-09 | 6.11 | 9.597658  | 1.67E-01 | 27740813  | 27740936  | NC_000011.9  |
| cg25852200 | 4.76E-08 | 5.27E-09 | 6.11 | 9.5970729 | 8.40E-02 | 1328419   | 1328542   | NC_000011.9  |
| cg10297473 | 4.76E-08 | 5.28E-09 | 6.11 | 9.5954437 | 1.38E-01 | 51184152  | 51184275  | NC_000016.9  |
| cg27316886 | 4.77E-08 | 5.28E-09 | 6.11 | 9.5951133 | 1.16E-01 | 3600106   | 3600229   | NC_000012.11 |
| cg22014661 | 4.77E-08 | 5.28E-09 | 6.11 | 9.5943595 | 1.93E-01 | 62996130  | 62996253  | NC_000006.11 |
| cg09767675 | 4.77E-08 | 5.29E-09 | 6.11 | 9.5932955 | 9.30E-02 | 33183127  | 33183250  | NC_000001.10 |
| cg04529785 | 4.78E-08 | 5.29E-09 | 6.11 | 9.5923532 | 1.53E-01 | 117799083 | 117799206 | NC_000012.11 |
| cg17444738 | 4.78E-08 | 5.30E-09 | 6.11 | 9.5916876 | 1.10E-01 | 85417969  | 85418092  | NC_000004.11 |
| cg06151243 | 4.79E-08 | 5.30E-09 | 6.11 | 9.5907808 | 1.43E-01 | 5000872   | 5000995   | NC_000017.10 |
| cg25390243 | 4.79E-08 | 5.31E-09 | 6.11 | 9.5892635 | 9.97E-02 | 46912506  | 46912629  | NC_000021.8  |
| cg09049251 | 4.80E-08 | 5.32E-09 | 6.11 | 9.5884585 | 1.39E-01 | 50297477  | 50297600  | NC_000012.11 |
| cg18644703 | 4.80E-08 | 5.32E-09 | 6.11 | 9.5880516 | 1.46E-01 | 5887068   | 5887191   | NC_000005.9  |
| cg09308639 | 4.81E-08 | 5.33E-09 | 6.11 | 9.5860118 | 1.38E-01 | 103413023 | 103413146 | NC_000002.11 |
| cg19924334 | 4.81E-08 | 5.33E-09 | 6.11 | 9.5859598 | 8.34E-02 | 62197682  | 62197805  | NC_000020.10 |
| cg15664943 | 4.81E-08 | 5.33E-09 | 6.11 | 9.5859054 | 8.75E-02 | 9874188   | 9874311   | NC_000017.10 |
| cg13665060 | 4.81E-08 | 5.33E-09 | 6.11 | 9.5856992 | 9.29E-02 | 106959501 | 106959624 | NC_000002.11 |
| cg05634428 | 4.82E-08 | 5.34E-09 | 6.11 | 9.5842708 | 1.09E-01 | 531052    | 531175    | NC_000005.9  |
| cg01058294 | 4.82E-08 | 5.34E-09 | 6.11 | 9.5839557 | 1.67E-01 | 89148597  | 89148720  | NC_000015.9  |
| cg14835517 | 4.82E-08 | 5.34E-09 | 6.11 | 9.5830763 | 2.03E-01 | 113917417 | 113917540 | NC_000012.11 |
| cg05711235 | 4.83E-08 | 5.35E-09 | 6.11 | 9.5819601 | 1.32E-01 | 65498612  | 65498735  | NC_000008.10 |
| cg12612406 | 4.83E-08 | 5.36E-09 | 6.11 | 9.5810957 | 1.04E-01 | 30103459  | 30103582  | NC_000006.11 |
| cg24120696 | 4.83E-08 | 5.36E-09 | 6.11 | 9.5810201 | 1.91E-01 | 53853604  | 53853727  | NC_000008.10 |
| cg01090834 | 4.84E-08 | 5.36E-09 | 6.11 | 9.5798994 | 2.11E-01 | 38081193  | 38081316  | NC_000021.8  |
| cg26365534 | 4.85E-08 | 5.38E-09 | 6.11 | 9.5769967 | 1.49E-01 | 26664741  | 26664864  | NC_000003.11 |
| cg03138242 | 4.86E-08 | 5.38E-09 | 6.11 | 9.5759128 | 6.18E-02 | 87376812  | 87376935  | NC_000001.10 |

|            |          |          |      |           |          |           |           |              |
|------------|----------|----------|------|-----------|----------|-----------|-----------|--------------|
| cg18583910 | 4.86E-08 | 5.39E-09 | 6.11 | 9.5743082 | 9.78E-02 | 25670176  | 25670299  | NC_000013.10 |
| cg07379055 | 4.87E-08 | 5.40E-09 | 6.11 | 9.5738163 | 1.71E-01 | 12305553  | 12305676  | NC_000019.9  |
| cg16733705 | 4.87E-08 | 5.40E-09 | 6.11 | 9.5735143 | 1.32E-01 | 85667616  | 85667739  | NC_000012.11 |
| cg08164961 | 4.87E-08 | 5.40E-09 | 6.11 | 9.5732008 | 1.23E-01 | 60218428  | 60218551  | NC_000017.10 |
| cg14096353 | 4.88E-08 | 5.41E-09 | 6.11 | 9.571193  | 1.73E-01 | 102504236 | 102504359 | NC_000010.10 |
| cg13779795 | 4.88E-08 | 5.42E-09 | 6.11 | 9.5698411 | 8.50E-02 | 139943636 | 139943759 | NC_000009.11 |
| cg17032564 | 4.89E-08 | 5.42E-09 | 6.11 | 9.5687288 | 1.07E-01 | 158531394 | 158531517 | NC_000005.9  |
| cg07692529 | 4.89E-08 | 5.42E-09 | 6.11 | 9.5685308 | 3.49E-02 | 68720202  | 68720325  | NC_000016.9  |
| cg23815900 | 4.89E-08 | 5.43E-09 | 6.11 | 9.5680924 | 1.27E-01 | 60981978  | 60982101  | NC_000014.8  |
| cg09357140 | 4.89E-08 | 5.43E-09 | 6.11 | 9.5680078 | 1.21E-01 | 332745    | 332868    | NC_000016.9  |
| cg09570348 | 4.90E-08 | 5.43E-09 | 6.11 | 9.567268  | 1.10E-01 | 140768251 | 140768374 | NC_000005.9  |
| cg22282590 | 4.90E-08 | 5.44E-09 | 6.11 | 9.5659614 | 9.63E-02 | 17514117  | 17514240  | NC_000019.9  |
| cg14942863 | 4.91E-08 | 5.44E-09 | 6.1  | 9.5650456 | 8.28E-02 | 37894762  | 37894885  | NC_000019.9  |
| cg15711521 | 4.91E-08 | 5.45E-09 | 6.1  | 9.5647986 | 5.87E-02 | 167767619 | 167767742 | NC_000003.11 |
| cg23346622 | 4.91E-08 | 5.45E-09 | 6.1  | 9.5643078 | 1.52E-01 | 27289195  | 27289318  | NC_000007.13 |
| cg21547118 | 4.91E-08 | 5.45E-09 | 6.1  | 9.564198  | 8.97E-02 | 1447417   | 1447540   | NC_000007.13 |
| cg04215385 | 4.91E-08 | 5.45E-09 | 6.1  | 9.5636223 | 5.87E-02 | 37445335  | 37445458  | NC_000021.8  |
| cg13733314 | 4.92E-08 | 5.45E-09 | 6.1  | 9.5632144 | 1.15E-01 | 20830816  | 20830939  | NC_000007.13 |
| cg01190024 | 4.92E-08 | 5.46E-09 | 6.1  | 9.5628851 | 1.44E-01 | 8078357   | 8078480   | NC_000010.10 |
| cg19810038 | 4.92E-08 | 5.46E-09 | 6.1  | 9.5628084 | 1.81E-01 | 58179536  | 58179659  | NC_000020.10 |
| cg01268381 | 4.92E-08 | 5.46E-09 | 6.1  | 9.5626829 | 8.53E-02 | 42219771  | 42219894  | NC_000021.8  |
| cg22113065 | 4.92E-08 | 5.46E-09 | 6.1  | 9.5625504 | 3.12E-02 | 74672346  | 74672469  | NC_000005.9  |
| cg01492523 | 4.92E-08 | 5.46E-09 | 6.1  | 9.561679  | 1.10E-01 | 155413789 | 155413912 | NC_000004.11 |
| cg06113354 | 4.93E-08 | 5.47E-09 | 6.1  | 9.5602138 | 1.44E-01 | 57387636  | 57387759  | NC_000010.10 |
| cg16260700 | 4.93E-08 | 5.47E-09 | 6.1  | 9.5601037 | 1.03E-01 | 62414786  | 62414909  | NC_000011.9  |

|            |          |          |     |           |          |           |           |              |
|------------|----------|----------|-----|-----------|----------|-----------|-----------|--------------|
| cg05859929 | 4.93E-08 | 5.48E-09 | 6.1 | 9.5592617 | 5.58E-02 | 483459    | 483582    | NC_000005.9  |
| cg21023926 | 4.94E-08 | 5.48E-09 | 6.1 | 9.5586844 | 7.21E-02 | 194072143 | 194072266 | NC_000003.11 |
| cg18439861 | 4.94E-08 | 5.48E-09 | 6.1 | 9.55817   | 7.86E-02 | 140807423 | 140807546 | NC_000005.9  |
| cg09558195 | 4.94E-08 | 5.49E-09 | 6.1 | 9.55773   | 1.44E-01 | 146350585 | 146350708 | NC_000006.11 |
| cg03122674 | 4.94E-08 | 5.49E-09 | 6.1 | 9.5568649 | 9.71E-02 | 56515752  | 56515875  | NC_000007.13 |
| cg02676262 | 4.95E-08 | 5.49E-09 | 6.1 | 9.5566086 | 5.29E-02 | 134527606 | 134527729 | NC_000010.10 |
| cg25861066 | 4.95E-08 | 5.50E-09 | 6.1 | 9.5555817 | 1.21E-01 | 41768460  | 41768583  | NC_000007.13 |
| cg23082454 | 4.95E-08 | 5.50E-09 | 6.1 | 9.5552416 | 1.55E-01 | 105071313 | 105071436 | NC_000014.8  |
| cg10614021 | 4.96E-08 | 5.51E-09 | 6.1 | 9.553412  | 2.12E-01 | 14134486  | 14134609  | NC_000012.11 |
| cg17346650 | 4.96E-08 | 5.51E-09 | 6.1 | 9.5532788 | 6.50E-02 | 80929145  | 80929268  | NC_000017.10 |
| cg16704246 | 4.96E-08 | 5.51E-09 | 6.1 | 9.5529343 | 1.03E-01 | 112594670 | 112594793 | NC_000010.10 |
| cg02447304 | 4.97E-08 | 5.52E-09 | 6.1 | 9.551948  | 1.31E-01 | 74024628  | 74024751  | NC_000006.11 |
| cg25079568 | 4.98E-08 | 5.53E-09 | 6.1 | 9.5497227 | 1.59E-01 | 52989604  | 52989727  | NC_000018.9  |
| cg11963658 | 4.99E-08 | 5.55E-09 | 6.1 | 9.5468159 | 6.94E-02 | 111376030 | 111376153 | NC_000013.10 |
| cg06191454 | 5.00E-08 | 5.56E-09 | 6.1 | 9.5451587 | 1.17E-01 | 122850545 | 122850668 | NC_000011.9  |
| cg06797069 | 5.00E-08 | 5.56E-09 | 6.1 | 9.544813  | 1.26E-01 | 37328334  | 37328457  | NC_000017.10 |
| cg09173348 | 5.00E-08 | 5.56E-09 | 6.1 | 9.544573  | 1.19E-01 | 37322431  | 37322554  | NC_000017.10 |
| cg00656411 | 5.01E-08 | 5.56E-09 | 6.1 | 9.5438973 | 1.27E-01 | 140773422 | 140773545 | NC_000007.13 |
| cg01165752 | 5.01E-08 | 5.56E-09 | 6.1 | 9.5438957 | 7.99E-02 | 35029890  | 35030013  | NC_000016.9  |
| cg21937886 | 5.01E-08 | 5.57E-09 | 6.1 | 9.5434003 | 2.06E-01 | 179779954 | 179780077 | NC_000005.9  |
| cg23273418 | 5.01E-08 | 5.57E-09 | 6.1 | 9.5432313 | 6.86E-02 | 3042459   | 3042582   | NC_000001.10 |
| cg02229605 | 5.01E-08 | 5.57E-09 | 6.1 | 9.5432257 | 1.62E-01 | 61119122  | 61119245  | NC_000014.8  |
| cg26708235 | 5.01E-08 | 5.57E-09 | 6.1 | 9.5426183 | 2.00E-01 | 25946397  | 25946520  | NC_000013.10 |
| cg09523909 | 5.01E-08 | 5.57E-09 | 6.1 | 9.5425276 | 9.41E-02 | 243029532 | 243029655 | NC_000002.11 |
| cg26196385 | 5.01E-08 | 5.57E-09 | 6.1 | 9.5423174 | 1.27E-01 | 113392117 | 113392240 | NC_000005.9  |

|            |          |          |     |           |          |           |           |              |
|------------|----------|----------|-----|-----------|----------|-----------|-----------|--------------|
| cg18736063 | 5.03E-08 | 5.59E-09 | 6.1 | 9.5394068 | 1.53E-01 | 21378560  | 21378683  | NC_000020.10 |
| cg22804770 | 5.03E-08 | 5.59E-09 | 6.1 | 9.5392619 | 6.00E-02 | 2786316   | 2786439   | NC_000012.11 |
| cg22078805 | 5.03E-08 | 5.59E-09 | 6.1 | 9.5391457 | 1.23E-01 | 42432046  | 42432169  | NC_000017.10 |
| cg10787409 | 5.03E-08 | 5.59E-09 | 6.1 | 9.5385249 | 4.51E-02 | 144462631 | 144462754 | NC_000008.10 |
| cg16233210 | 5.04E-08 | 5.60E-09 | 6.1 | 9.5368634 | 2.84E-02 | 171778391 | 171778514 | NC_000003.11 |
| cg12075498 | 5.04E-08 | 5.61E-09 | 6.1 | 9.5364726 | 1.18E-01 | 65428216  | 65428339  | NC_000001.10 |
| cg22225943 | 5.05E-08 | 5.61E-09 | 6.1 | 9.535596  | 1.28E-01 | 2162536   | 2162659   | NC_000011.9  |
| cg05603881 | 5.05E-08 | 5.61E-09 | 6.1 | 9.5350039 | 1.51E-01 | 42401149  | 42401272  | NC_000004.11 |
| cg14051639 | 5.05E-08 | 5.62E-09 | 6.1 | 9.5345777 | 1.22E-01 | 30173283  | 30173406  | NC_000006.11 |
| cg08066129 | 5.06E-08 | 5.63E-09 | 6.1 | 9.5329484 | 1.47E-01 | 38077258  | 38077381  | NC_000021.8  |
| cg03740752 | 5.06E-08 | 5.63E-09 | 6.1 | 9.5322296 | 8.87E-02 | 89903046  | 89903169  | NC_000016.9  |
| cg13955851 | 5.07E-08 | 5.63E-09 | 6.1 | 9.5315315 | 3.49E-02 | 98553852  | 98553975  | NC_000007.13 |
| cg09160020 | 5.07E-08 | 5.64E-09 | 6.1 | 9.5311737 | 1.03E-01 | 72740748  | 72740871  | NC_000005.9  |
| cg02789870 | 5.07E-08 | 5.64E-09 | 6.1 | 9.5311046 | 5.85E-02 | 1681514   | 1681637   | NC_000008.10 |
| cg02492791 | 5.08E-08 | 5.65E-09 | 6.1 | 9.5296413 | 1.10E-01 | 85306548  | 85306671  | NC_000012.11 |
| cg02976699 | 5.08E-08 | 5.65E-09 | 6.1 | 9.5295361 | 1.17E-01 | 17907163  | 17907286  | NC_000009.11 |
| cg13759743 | 5.08E-08 | 5.65E-09 | 6.1 | 9.5290124 | 4.85E-02 | 72104228  | 72104351  | NC_000015.9  |
| cg05323533 | 5.08E-08 | 5.65E-09 | 6.1 | 9.5286386 | 1.30E-01 | 41750362  | 41750485  | NC_000004.11 |
| cg19201856 | 5.08E-08 | 5.65E-09 | 6.1 | 9.5284682 | 1.29E-02 | 73600995  | 73601118  | NC_000007.13 |
| cg18669948 | 5.09E-08 | 5.66E-09 | 6.1 | 9.5274138 | 7.10E-02 | 27702528  | 27702651  | NC_000010.10 |
| cg13578194 | 5.09E-08 | 5.66E-09 | 6.1 | 9.5267924 | 1.09E-01 | 41364383  | 41364506  | NC_000004.11 |
| cg09571420 | 5.09E-08 | 5.66E-09 | 6.1 | 9.5266361 | 1.92E-01 | 145813008 | 145813131 | NC_000007.13 |
| cg25079691 | 5.09E-08 | 5.67E-09 | 6.1 | 9.5259025 | 9.86E-02 | 25908057  | 25908180  | NC_000008.10 |
| cg26370016 | 5.10E-08 | 5.67E-09 | 6.1 | 9.5252115 | 4.08E-02 | 158761822 | 158761945 | NC_000005.9  |
| cg18586919 | 5.10E-08 | 5.67E-09 | 6.1 | 9.5246579 | 1.33E-01 | 40005649  | 40005772  | NC_000019.9  |

|            |          |          |      |           |          |           |           |              |
|------------|----------|----------|------|-----------|----------|-----------|-----------|--------------|
| cg20497668 | 5.10E-08 | 5.68E-09 | 6.1  | 9.5238603 | 6.61E-02 | 134624132 | 134624255 | NC_000010.10 |
| cg17245125 | 5.11E-08 | 5.68E-09 | 6.1  | 9.5236181 | 7.16E-02 | 23843711  | 23843834  | NC_000002.11 |
| cg21189054 | 5.11E-08 | 5.68E-09 | 6.1  | 9.5234881 | 1.15E-01 | 112831901 | 112832024 | NC_000011.9  |
| cg21761922 | 5.11E-08 | 5.68E-09 | 6.1  | 9.5234203 | 9.80E-02 | 16309088  | 16309211  | NC_000003.11 |
| cg23950724 | 5.11E-08 | 5.68E-09 | 6.1  | 9.5228566 | 1.16E-01 | 33593177  | 33593300  | NC_000012.11 |
| cg27230784 | 5.11E-08 | 5.69E-09 | 6.1  | 9.5220844 | 1.98E-01 | 5404337   | 5404460   | NC_000017.10 |
| cg17432061 | 5.11E-08 | 5.69E-09 | 6.1  | 9.5218674 | 1.05E-01 | 36924844  | 36924967  | NC_000017.10 |
| cg13773705 | 5.11E-08 | 5.69E-09 | 6.1  | 9.5216355 | 1.27E-01 | 88799820  | 88799943  | NC_000015.9  |
| cg14327531 | 5.12E-08 | 5.69E-09 | 6.1  | 9.5213494 | 1.66E-01 | 8097331   | 8097454   | NC_000010.10 |
| cg24678611 | 5.12E-08 | 5.69E-09 | 6.1  | 9.5212805 | 1.18E-01 | 3567732   | 3567855   | NC_000001.10 |
| cg12302428 | 5.12E-08 | 5.70E-09 | 6.1  | 9.5201508 | 7.84E-02 | 52408520  | 52408643  | NC_000019.9  |
| cg17768491 | 5.12E-08 | 5.70E-09 | 6.1  | 9.5199624 | 2.01E-01 | 41018876  | 41018999  | NC_000019.9  |
| cg00356183 | 5.12E-08 | 5.70E-09 | 6.1  | 9.5199026 | 1.89E-01 | 751833    | 751956    | NC_000007.13 |
| cg10008501 | 5.13E-08 | 5.71E-09 | 6.1  | 9.51792   | 1.72E-01 | 9763558   | 9763681   | NC_000008.10 |
| cg05156453 | 5.13E-08 | 5.72E-09 | 6.1  | 9.5175969 | 2.80E-02 | 71320617  | 71320740  | NC_000011.9  |
| cg18576013 | 5.14E-08 | 5.72E-09 | 6.1  | 9.5172297 | 2.37E-02 | 45403468  | 45403591  | NC_000021.8  |
| cg05513983 | 5.14E-08 | 5.72E-09 | 6.1  | 9.5166896 | 1.36E-01 | 181444512 | 181444635 | NC_000003.11 |
| cg02538169 | 5.14E-08 | 5.73E-09 | 6.1  | 9.5158164 | 2.59E-02 | 100287481 | 100287604 | NC_000007.13 |
| cg14248598 | 5.14E-08 | 5.73E-09 | 6.1  | 9.5154708 | 5.61E-02 | 7183873   | 7183996   | NC_000012.11 |
| cg04682850 | 5.15E-08 | 5.73E-09 | 6.1  | 9.5152959 | 4.54E-02 | 189155606 | 189155729 | NC_000002.11 |
| cg02479177 | 5.15E-08 | 5.73E-09 | 6.09 | 9.5144676 | 6.38E-02 | 113544826 | 113544949 | NC_000006.11 |
| cg11915650 | 5.15E-08 | 5.74E-09 | 6.09 | 9.5135591 | 1.56E-01 | 2161009   | 2161132   | NC_000011.9  |
| cg08172065 | 5.16E-08 | 5.74E-09 | 6.09 | 9.5130494 | 1.01E-01 | 70981796  | 70981919  | NC_000008.10 |
| cg02176280 | 5.16E-08 | 5.75E-09 | 6.09 | 9.5119678 | 5.55E-02 | 23646176  | 23646299  | NC_000002.11 |
| cg11696975 | 5.16E-08 | 5.75E-09 | 6.09 | 9.5114399 | 4.06E-02 | 3445330   | 3445453   | NC_000006.11 |

|            |          |          |      |           |          |           |           |              |
|------------|----------|----------|------|-----------|----------|-----------|-----------|--------------|
| cg09938408 | 5.17E-08 | 5.75E-09 | 6.09 | 9.51107   | 1.08E-01 | 42211840  | 42211963  | NC_000015.9  |
| cg26466587 | 5.17E-08 | 5.76E-09 | 6.09 | 9.5102096 | 1.67E-01 | 100442120 | 100442243 | NC_000006.11 |
| cg10116456 | 5.17E-08 | 5.76E-09 | 6.09 | 9.5100408 | 7.95E-02 | 231838098 | 231838221 | NC_000001.10 |
| cg05771518 | 5.17E-08 | 5.76E-09 | 6.09 | 9.5093285 | 1.30E-01 | 54339288  | 54339411  | NC_000012.11 |
| cg04116909 | 5.18E-08 | 5.77E-09 | 6.09 | 9.5086318 | 7.53E-02 | 157584121 | 157584244 | NC_000002.11 |
| cg18869404 | 5.18E-08 | 5.77E-09 | 6.09 | 9.5079713 | 1.13E-01 | 76937348  | 76937471  | NC_000005.9  |
| cg09450024 | 5.18E-08 | 5.77E-09 | 6.09 | 9.5076719 | 1.25E-01 | 45737623  | 45737746  | NC_000019.9  |
| cg11815199 | 5.19E-08 | 5.78E-09 | 6.09 | 9.5068274 | 9.73E-02 | 3280741   | 3280864   | NC_000010.10 |
| cg14896087 | 5.19E-08 | 5.79E-09 | 6.09 | 9.5057068 | 6.02E-02 | 46224715  | 46224838  | NC_000010.10 |
| cg21194448 | 5.19E-08 | 5.79E-09 | 6.09 | 9.5054423 | 1.49E-01 | 88323940  | 88324063  | NC_000013.10 |
| cg15506477 | 5.20E-08 | 5.79E-09 | 6.09 | 9.5051142 | 1.58E-01 | 133426129 | 133426252 | NC_000002.11 |
| cg17352891 | 5.20E-08 | 5.79E-09 | 6.09 | 9.504196  | 1.39E-01 | 24636625  | 24636748  | NC_000012.11 |
| cg05620980 | 5.21E-08 | 5.81E-09 | 6.09 | 9.5016962 | 1.38E-01 | 562844    | 562967    | NC_000007.13 |
| cg21237591 | 5.21E-08 | 5.81E-09 | 6.09 | 9.5016358 | 1.25E-01 | 2162510   | 2162633   | NC_000011.9  |
| cg20078466 | 5.21E-08 | 5.81E-09 | 6.09 | 9.5014473 | 2.00E-01 | 50344331  | 50344454  | NC_000007.13 |
| cg23681219 | 5.21E-08 | 5.81E-09 | 6.09 | 9.5014171 | 8.23E-02 | 62043583  | 62043706  | NC_000020.10 |
| cg17164093 | 5.21E-08 | 5.81E-09 | 6.09 | 9.5013831 | 8.84E-02 | 41393714  | 41393837  | NC_000008.10 |
| cg21231715 | 5.22E-08 | 5.81E-09 | 6.09 | 9.5007368 | 9.71E-02 | 23567941  | 23568064  | NC_000008.10 |
| cg20822426 | 5.23E-08 | 5.83E-09 | 6.09 | 9.4983611 | 9.23E-02 | 13154865  | 13154988  | NC_000012.11 |
| cg02270518 | 5.23E-08 | 5.83E-09 | 6.09 | 9.4982136 | 5.60E-02 | 29404728  | 29404851  | NC_000006.11 |
| cg13316854 | 5.23E-08 | 5.83E-09 | 6.09 | 9.4980941 | 1.02E-01 | 177027856 | 177027979 | NC_000002.11 |
| cg13327384 | 5.23E-08 | 5.83E-09 | 6.09 | 9.4975643 | 1.27E-01 | 4101090   | 4101213   | NC_000005.9  |
| cg02471153 | 5.23E-08 | 5.84E-09 | 6.09 | 9.4971681 | 1.07E-01 | 99440331  | 99440454  | NC_000008.10 |
| cg06522054 | 5.24E-08 | 5.84E-09 | 6.09 | 9.4968018 | 1.72E-01 | 11752538  | 11752661  | NC_000018.9  |
| cg23967169 | 5.24E-08 | 5.84E-09 | 6.09 | 9.4965321 | 1.54E-01 | 68981503  | 68981626  | NC_000003.11 |



|            |          |          |      |           |          |           |           |              |
|------------|----------|----------|------|-----------|----------|-----------|-----------|--------------|
| cg05606074 | 5.24E-08 | 5.84E-09 | 6.09 | 9.4962728 | 5.14E-02 | 9783965   | 9784088   | NC_000004.11 |
| cg19035792 | 5.25E-08 | 5.85E-09 | 6.09 | 9.4949581 | 6.54E-02 | 38382245  | 38382368  | NC_000022.10 |
| cg08818337 | 5.26E-08 | 5.87E-09 | 6.09 | 9.4922654 | 8.42E-02 | 149962501 | 149962624 | NC_000005.9  |
| cg10868875 | 5.26E-08 | 5.87E-09 | 6.09 | 9.4921774 | 2.04E-01 | 61596307  | 61596430  | NC_000011.9  |
| cg11673964 | 5.26E-08 | 5.87E-09 | 6.09 | 9.4920723 | 4.44E-02 | 145807673 | 145807796 | NC_000008.10 |
| cg26908109 | 5.26E-08 | 5.87E-09 | 6.09 | 9.4918482 | 1.05E-01 | 149162219 | 149162342 | NC_000001.10 |
| cg25368122 | 5.26E-08 | 5.87E-09 | 6.09 | 9.4910664 | 1.60E-01 | 75600685  | 75600808  | NC_000001.10 |
| cg14449051 | 5.26E-08 | 5.87E-09 | 6.09 | 9.4910182 | 1.74E-01 | 85306474  | 85306597  | NC_000012.11 |
| cg15087347 | 5.27E-08 | 5.88E-09 | 6.09 | 9.4898979 | 1.65E-01 | 41086227  | 41086350  | NC_000012.11 |
| cg05766802 | 5.28E-08 | 5.90E-09 | 6.09 | 9.4870756 | 2.00E-01 | 118982056 | 118982179 | NC_000002.11 |
| cg12245084 | 5.28E-08 | 5.90E-09 | 6.09 | 9.4869896 | 6.53E-02 | 78672632  | 78672755  | NC_000011.9  |
| cg11166600 | 5.28E-08 | 5.90E-09 | 6.09 | 9.4868687 | 1.12E-01 | 143695141 | 143695264 | NC_000003.11 |
| cg04956244 | 5.29E-08 | 5.90E-09 | 6.09 | 9.4865592 | 7.86E-02 | 38511592  | 38511715  | NC_000017.10 |
| cg18601229 | 5.29E-08 | 5.90E-09 | 6.09 | 9.4865243 | 2.97E-02 | 42192297  | 42192420  | NC_000015.9  |
| cg27573570 | 5.29E-08 | 5.91E-09 | 6.09 | 9.4856493 | 7.34E-02 | 28422839  | 28422962  | NC_000001.10 |
| cg13670833 | 5.29E-08 | 5.91E-09 | 6.09 | 9.4855174 | 1.56E-01 | 50833832  | 50833955  | NC_000019.9  |
| cg09467944 | 5.29E-08 | 5.91E-09 | 6.09 | 9.4849665 | 1.05E-01 | 102075026 | 102075149 | NC_000015.9  |
| cg19485539 | 5.30E-08 | 5.91E-09 | 6.09 | 9.4845711 | 2.20E-01 | 118031870 | 118031993 | NC_000010.10 |
| cg15149938 | 5.30E-08 | 5.91E-09 | 6.09 | 9.4845363 | 1.39E-01 | 50018392  | 50018515  | NC_000022.10 |
| cg16404865 | 5.30E-08 | 5.91E-09 | 6.09 | 9.4841288 | 1.52E-01 | 17756986  | 17757109  | NC_000011.9  |
| cg23805623 | 5.30E-08 | 5.92E-09 | 6.09 | 9.4839479 | 6.22E-02 | 130316046 | 130316169 | NC_000012.11 |
| cg08332071 | 5.31E-08 | 5.92E-09 | 6.09 | 9.4826774 | 1.39E-01 | 133937493 | 133937616 | NC_000011.9  |
| cg03167948 | 5.31E-08 | 5.93E-09 | 6.09 | 9.48147   | 9.39E-02 | 134740802 | 134740925 | NC_000010.10 |
| cg05090137 | 5.31E-08 | 5.93E-09 | 6.09 | 9.4810246 | 1.17E-01 | 3471901   | 3472024   | NC_000004.11 |
| cg18926108 | 5.31E-08 | 5.93E-09 | 6.09 | 9.4809113 | 9.69E-02 | 140773059 | 140773182 | NC_000005.9  |

|            |          |          |      |           |          |           |           |              |
|------------|----------|----------|------|-----------|----------|-----------|-----------|--------------|
| cg18119999 | 5.32E-08 | 5.94E-09 | 6.09 | 9.4797678 | 4.58E-02 | 130012918 | 130013041 | NC_000010.10 |
| cg05216536 | 5.32E-08 | 5.94E-09 | 6.09 | 9.4795564 | 6.41E-02 | 31505496  | 31505619  | NC_000006.11 |
| cg07969300 | 5.32E-08 | 5.94E-09 | 6.09 | 9.479351  | 1.04E-01 | 18709519  | 18709642  | NC_000019.9  |
| cg03165176 | 5.32E-08 | 5.94E-09 | 6.09 | 9.4791932 | 8.59E-02 | 1456886   | 1457009   | NC_000019.9  |
| cg23741520 | 5.33E-08 | 5.95E-09 | 6.09 | 9.4784149 | 6.61E-02 | 83954231  | 83954354  | NC_000015.9  |
| cg19719207 | 5.33E-08 | 5.96E-09 | 6.09 | 9.4774017 | 1.31E-01 | 121839493 | 121839616 | NC_000004.11 |
| cg20723355 | 5.33E-08 | 5.96E-09 | 6.09 | 9.4773448 | 1.77E-01 | 6679597   | 6679720   | NC_000017.10 |
| cg11569933 | 5.36E-08 | 5.99E-09 | 6.09 | 9.4720718 | 8.36E-02 | 31631675  | 31631798  | NC_000006.11 |
| cg23599385 | 5.36E-08 | 5.99E-09 | 6.09 | 9.4711087 | 9.87E-02 | 106637299 | 106637422 | NC_000002.11 |
| cg19223299 | 5.37E-08 | 6.00E-09 | 6.09 | 9.4705945 | 1.49E-01 | 100057160 | 100057283 | NC_000006.11 |
| cg17201760 | 5.38E-08 | 6.01E-09 | 6.09 | 9.4683647 | 1.51E-01 | 206562    | 206685    | NC_000004.11 |
| cg00585621 | 5.38E-08 | 6.02E-09 | 6.09 | 9.4674304 | 9.53E-02 | 100868748 | 100868871 | NC_000004.11 |
| cg05836184 | 5.39E-08 | 6.02E-09 | 6.09 | 9.4670942 | 1.15E-01 | 114686942 | 114687065 | NC_000007.13 |
| cg20764116 | 5.39E-08 | 6.02E-09 | 6.09 | 9.466997  | 1.56E-01 | 20692709  | 20692832  | NC_000011.9  |
| cg27506082 | 5.39E-08 | 6.02E-09 | 6.09 | 9.4664721 | 1.73E-01 | 207139431 | 207139554 | NC_000002.11 |
| cg24492749 | 5.39E-08 | 6.02E-09 | 6.09 | 9.4662354 | 7.51E-02 | 167063318 | 167063441 | NC_000006.11 |
| cg15452426 | 5.41E-08 | 6.05E-09 | 6.08 | 9.4625214 | 2.90E-02 | 10532230  | 10532353  | NC_000001.10 |
| cg15246693 | 5.41E-08 | 6.05E-09 | 6.08 | 9.4619359 | 1.09E-01 | 107075701 | 107075824 | NC_000013.10 |
| cg03117053 | 5.41E-08 | 6.05E-09 | 6.08 | 9.461903  | 1.11E-01 | 34263644  | 34263767  | NC_000019.9  |
| cg26036432 | 5.41E-08 | 6.05E-09 | 6.08 | 9.4614367 | 1.14E-01 | 1018384   | 1018507   | NC_000007.13 |
| cg01336781 | 5.42E-08 | 6.06E-09 | 6.08 | 9.4606277 | 1.32E-01 | 23563182  | 23563305  | NC_000008.10 |
| cg22914729 | 5.43E-08 | 6.07E-09 | 6.08 | 9.4590828 | 1.54E-01 | 111541339 | 111541462 | NC_000004.11 |
| cg11135021 | 5.43E-08 | 6.07E-09 | 6.08 | 9.4590684 | 1.65E-01 | 4382112   | 4382235   | NC_000012.11 |
| cg19305938 | 5.43E-08 | 6.07E-09 | 6.08 | 9.4581019 | 8.21E-02 | 28363767  | 28363890  | NC_000008.10 |
| cg23924370 | 5.43E-08 | 6.08E-09 | 6.08 | 9.457895  | 7.25E-02 | 88583805  | 88583928  | NC_000002.11 |

|            |          |          |      |           |          |           |           |              |
|------------|----------|----------|------|-----------|----------|-----------|-----------|--------------|
| cg25050175 | 5.43E-08 | 6.08E-09 | 6.08 | 9.4578738 | 8.17E-02 | 34809318  | 34809441  | NC_000016.9  |
| cg05120860 | 5.44E-08 | 6.08E-09 | 6.08 | 9.4567457 | 1.03E-01 | 35192071  | 35192194  | NC_000013.10 |
| cg26701242 | 5.44E-08 | 6.08E-09 | 6.08 | 9.4565305 | 1.65E-01 | 38077971  | 38078094  | NC_000021.8  |
| cg07143532 | 5.44E-08 | 6.09E-09 | 6.08 | 9.4562075 | 2.13E-01 | 86621354  | 86621477  | NC_000001.10 |
| cg22501793 | 5.44E-08 | 6.09E-09 | 6.08 | 9.4561882 | 1.43E-01 | 91173232  | 91173355  | NC_000001.10 |
| cg15668691 | 5.44E-08 | 6.09E-09 | 6.08 | 9.4557933 | 4.89E-02 | 119915484 | 119915607 | NC_000007.13 |
| cg01074325 | 5.45E-08 | 6.10E-09 | 6.08 | 9.4538166 | 1.31E-01 | 30138178  | 30138301  | NC_000006.11 |
| cg03829739 | 5.46E-08 | 6.10E-09 | 6.08 | 9.4531867 | 1.34E-01 | 56515510  | 56515633  | NC_000007.13 |
| cg05392527 | 5.46E-08 | 6.11E-09 | 6.08 | 9.4530536 | 6.88E-02 | 68394825  | 68394948  | NC_000016.9  |
| cg14725151 | 5.46E-08 | 6.11E-09 | 6.08 | 9.4528887 | 1.50E-01 | 46930115  | 46930238  | NC_000019.9  |
| cg22702741 | 5.48E-08 | 6.13E-09 | 6.08 | 9.4492438 | 1.20E-01 | 133706550 | 133706673 | NC_000007.13 |
| cg00651523 | 5.48E-08 | 6.13E-09 | 6.08 | 9.448996  | 1.94E-01 | 28411279  | 28411402  | NC_000006.11 |
| cg01809170 | 5.48E-08 | 6.14E-09 | 6.08 | 9.4482616 | 1.36E-01 | 184040176 | 184040299 | NC_000004.11 |
| cg16405019 | 5.48E-08 | 6.14E-09 | 6.08 | 9.4479732 | 1.22E-01 | 18959625  | 18959748  | NC_000001.10 |
| cg22735222 | 5.49E-08 | 6.14E-09 | 6.08 | 9.4476291 | 1.30E-01 | 101295724 | 101295847 | NC_000010.10 |
| cg01080600 | 5.49E-08 | 6.14E-09 | 6.08 | 9.4468908 | 1.29E-01 | 236443773 | 236443896 | NC_000002.11 |
| cg00529567 | 5.49E-08 | 6.14E-09 | 6.08 | 9.4468539 | 3.49E-02 | 124772735 | 124772858 | NC_000003.11 |
| cg03905819 | 5.49E-08 | 6.15E-09 | 6.08 | 9.446499  | 1.40E-01 | 54385275  | 54385398  | NC_000012.11 |
| cg08885224 | 5.49E-08 | 6.15E-09 | 6.08 | 9.4462998 | 7.70E-02 | 133561368 | 133561491 | NC_000006.11 |
| cg18154270 | 5.50E-08 | 6.15E-09 | 6.08 | 9.4456735 | 5.74E-02 | 31002624  | 31002747  | NC_000007.13 |
| cg06825478 | 5.50E-08 | 6.15E-09 | 6.08 | 9.4456567 | 6.92E-02 | 31546067  | 31546190  | NC_000006.11 |
| cg04882003 | 5.50E-08 | 6.16E-09 | 6.08 | 9.44502   | 1.41E-02 | 53441375  | 53441498  | NC_000012.11 |
| cg09812623 | 5.50E-08 | 6.16E-09 | 6.08 | 9.4446519 | 1.81E-01 | 215781    | 215904    | NC_000016.9  |
| cg16600876 | 5.50E-08 | 6.16E-09 | 6.08 | 9.4441546 | 7.36E-02 | 119751700 | 119751823 | NC_000008.10 |
| cg20046343 | 5.51E-08 | 6.16E-09 | 6.08 | 9.4439264 | 1.37E-01 | 41528785  | 41528908  | NC_000006.11 |

|            |          |          |      |           |          |           |           |              |
|------------|----------|----------|------|-----------|----------|-----------|-----------|--------------|
| cg13128052 | 5.51E-08 | 6.16E-09 | 6.08 | 9.4437394 | 3.11E-02 | 43988613  | 43988736  | NC_000021.8  |
| cg16036528 | 5.51E-08 | 6.17E-09 | 6.08 | 9.4434575 | 1.19E-01 | 25909472  | 25909595  | NC_000008.10 |
| cg14737286 | 5.52E-08 | 6.17E-09 | 6.08 | 9.4421605 | 1.24E-01 | 131761206 | 131761329 | NC_000010.10 |
| cg00462951 | 5.52E-08 | 6.18E-09 | 6.08 | 9.4414957 | 1.14E-01 | 5539736   | 5539859   | NC_000012.11 |
| cg24524285 | 5.53E-08 | 6.19E-09 | 6.08 | 9.4403048 | 1.07E-01 | 64405919  | 64406042  | NC_000011.9  |
| cg11986226 | 5.53E-08 | 6.19E-09 | 6.08 | 9.4395102 | 2.54E-02 | 40026390  | 40026513  | NC_000007.13 |
| cg05237114 | 5.54E-08 | 6.20E-09 | 6.08 | 9.4380972 | 1.09E-01 | 58905672  | 58905795  | NC_000008.10 |
| cg21618730 | 5.54E-08 | 6.20E-09 | 6.08 | 9.4375542 | 1.17E-01 | 112815899 | 112816022 | NC_000013.10 |
| cg20053158 | 5.54E-08 | 6.20E-09 | 6.08 | 9.43741   | 1.13E-01 | 103351206 | 103351329 | NC_000012.11 |
| cg15999750 | 5.54E-08 | 6.21E-09 | 6.08 | 9.4370745 | 7.52E-02 | 77543166  | 77543289  | NC_000018.9  |
| cg24625136 | 5.55E-08 | 6.21E-09 | 6.08 | 9.4364755 | 1.91E-01 | 138658554 | 138658677 | NC_000003.11 |
| cg23096689 | 5.55E-08 | 6.22E-09 | 6.08 | 9.4352295 | 1.43E-01 | 86599714  | 86599837  | NC_000016.9  |
| cg04323427 | 5.55E-08 | 6.22E-09 | 6.08 | 9.4351205 | 1.32E-01 | 34642899  | 34643022  | NC_000001.10 |
| cg16670245 | 5.55E-08 | 6.22E-09 | 6.08 | 9.4349906 | 5.21E-02 | 196274717 | 196274840 | NC_000002.11 |
| cg00737556 | 5.55E-08 | 6.22E-09 | 6.08 | 9.4349577 | 4.83E-02 | 76013302  | 76013425  | NC_000014.8  |
| cg16820616 | 5.56E-08 | 6.22E-09 | 6.08 | 9.4342597 | 8.52E-02 | 30605581  | 30605704  | NC_000011.9  |
| cg17198051 | 5.56E-08 | 6.22E-09 | 6.08 | 9.4341405 | 8.37E-02 | 130279674 | 130279797 | NC_000010.10 |
| cg25464265 | 5.56E-08 | 6.23E-09 | 6.08 | 9.4334763 | 9.20E-02 | 221063484 | 221063607 | NC_000001.10 |
| cg11295178 | 5.56E-08 | 6.23E-09 | 6.08 | 9.4333663 | 1.80E-01 | 114918693 | 114918816 | NC_000012.11 |
| cg13830506 | 5.57E-08 | 6.24E-09 | 6.08 | 9.431256  | 7.67E-02 | 27498285  | 27498408  | NC_000002.11 |
| cg08653904 | 5.57E-08 | 6.25E-09 | 6.08 | 9.4308752 | 2.10E-02 | 8497643   | 8497766   | NC_000001.10 |
| cg20468253 | 5.58E-08 | 6.25E-09 | 6.08 | 9.4302358 | 1.95E-01 | 106685977 | 106686100 | NC_000007.13 |
| cg15582661 | 5.58E-08 | 6.25E-09 | 6.08 | 9.4301571 | 4.35E-02 | 98983694  | 98983817  | NC_000012.11 |
| cg13782301 | 5.58E-08 | 6.25E-09 | 6.08 | 9.4296955 | 9.12E-02 | 32116875  | 32116998  | NC_000006.11 |
| cg04566147 | 5.58E-08 | 6.25E-09 | 6.08 | 9.4295457 | 6.63E-02 | 34778087  | 34778210  | NC_000016.9  |

|            |          |          |      |           |          |           |           |              |
|------------|----------|----------|------|-----------|----------|-----------|-----------|--------------|
| cg22545027 | 5.58E-08 | 6.26E-09 | 6.08 | 9.4288441 | 8.09E-02 | 73437363  | 73437486  | NC_000010.10 |
| cg01037523 | 5.59E-08 | 6.26E-09 | 6.08 | 9.42872   | 9.17E-02 | 187078716 | 187078839 | NC_000003.11 |
| cg07336350 | 5.59E-08 | 6.26E-09 | 6.08 | 9.428034  | 1.20E-01 | 54322127  | 54322250  | NC_000016.9  |
| cg09585968 | 5.60E-08 | 6.27E-09 | 6.08 | 9.4267415 | 7.17E-02 | 17713884  | 17714007  | NC_000011.9  |
| cg19891001 | 5.60E-08 | 6.28E-09 | 6.08 | 9.4259876 | 2.17E-01 | 100438221 | 100438344 | NC_000014.8  |
| cg17201542 | 5.60E-08 | 6.28E-09 | 6.08 | 9.4256829 | 4.53E-02 | 122818413 | 122818536 | NC_000003.11 |
| cg25054580 | 5.62E-08 | 6.30E-09 | 6.08 | 9.4224483 | 1.28E-01 | 54976019  | 54976142  | NC_000004.11 |
| cg03993463 | 5.62E-08 | 6.30E-09 | 6.08 | 9.4219902 | 7.98E-02 | 39627271  | 39627394  | NC_000021.8  |
| cg02363969 | 5.62E-08 | 6.30E-09 | 6.08 | 9.4218758 | 7.94E-02 | 56048075  | 56048198  | NC_000019.9  |
| cg11813810 | 5.62E-08 | 6.30E-09 | 6.08 | 9.4216991 | 4.68E-02 | 198621680 | 198621803 | NC_000001.10 |
| cg25793785 | 5.63E-08 | 6.31E-09 | 6.08 | 9.4205589 | 7.29E-02 | 38281423  | 38281546  | NC_000019.9  |
| cg10457539 | 5.64E-08 | 6.33E-09 | 6.08 | 9.4180215 | 1.31E-01 | 85418584  | 85418707  | NC_000004.11 |
| cg06713229 | 5.65E-08 | 6.33E-09 | 6.08 | 9.4176717 | 9.87E-02 | 134624679 | 134624802 | NC_000010.10 |
| cg00179795 | 5.65E-08 | 6.33E-09 | 6.08 | 9.4172368 | 9.57E-02 | 131695114 | 131695237 | NC_000010.10 |
| cg25608547 | 5.65E-08 | 6.34E-09 | 6.08 | 9.4169689 | 7.30E-02 | 129251071 | 129251194 | NC_000006.11 |
| cg06488256 | 5.65E-08 | 6.34E-09 | 6.08 | 9.4169161 | 1.19E-01 | 112725903 | 112726026 | NC_000013.10 |
| cg18715299 | 5.65E-08 | 6.34E-09 | 6.08 | 9.4163337 | 4.56E-02 | 53816275  | 53816398  | NC_000012.11 |
| cg18791205 | 5.65E-08 | 6.34E-09 | 6.08 | 9.4162991 | 1.49E-01 | 19146324  | 19146447  | NC_000007.13 |
| cg21555877 | 5.65E-08 | 6.34E-09 | 6.08 | 9.4162888 | 9.52E-02 | 77128445  | 77128568  | NC_000017.10 |
| cg12806121 | 5.65E-08 | 6.34E-09 | 6.08 | 9.4158415 | 5.06E-02 | 10601389  | 10601512  | NC_000001.10 |
| cg00854560 | 5.66E-08 | 6.35E-09 | 6.08 | 9.4149321 | 5.40E-02 | 31002430  | 31002553  | NC_000013.10 |
| cg16579158 | 5.66E-08 | 6.35E-09 | 6.08 | 9.414518  | 1.13E-01 | 140719142 | 140719265 | NC_000005.9  |
| cg15053248 | 5.66E-08 | 6.35E-09 | 6.08 | 9.4142481 | 7.95E-02 | 91322313  | 91322436  | NC_000006.11 |
| cg02303677 | 5.67E-08 | 6.36E-09 | 6.08 | 9.4134842 | 6.00E-02 | 71177158  | 71177281  | NC_000010.10 |
| cg23372544 | 5.67E-08 | 6.36E-09 | 6.08 | 9.4125626 | 1.06E-01 | 23387068  | 23387191  | NC_000019.9  |

|            |          |          |      |           |          |           |           |              |
|------------|----------|----------|------|-----------|----------|-----------|-----------|--------------|
| cg04745161 | 5.68E-08 | 6.38E-09 | 6.07 | 9.4108119 | 1.28E-01 | 130526916 | 130527039 | NC_000012.11 |
| cg16886672 | 5.69E-08 | 6.38E-09 | 6.07 | 9.4094666 | 4.57E-02 | 79668281  | 79668404  | NC_000017.10 |
| cg14923274 | 5.70E-08 | 6.39E-09 | 6.07 | 9.408476  | 2.11E-02 | 48725172  | 48725295  | NC_000003.11 |
| cg01609099 | 5.70E-08 | 6.40E-09 | 6.07 | 9.4076892 | 3.91E-02 | 141389201 | 141389324 | NC_000005.9  |
| cg05951221 | 5.70E-08 | 6.40E-09 | 6.07 | 9.4074146 | 1.15E-01 | 233284402 | 233284525 | NC_000002.11 |
| cg15696906 | 5.70E-08 | 6.40E-09 | 6.07 | 9.4068763 | 1.35E-01 | 38444134  | 38444257  | NC_000013.10 |
| cg09919570 | 5.70E-08 | 6.40E-09 | 6.07 | 9.4068143 | 1.43E-01 | 49311782  | 49311905  | NC_000016.9  |
| cg20159885 | 5.71E-08 | 6.41E-09 | 6.07 | 9.4056743 | 1.30E-01 | 155166619 | 155166742 | NC_000007.13 |
| cg00861009 | 5.71E-08 | 6.41E-09 | 6.07 | 9.4056685 | 1.28E-01 | 176973688 | 176973811 | NC_000002.11 |
| cg13702942 | 5.71E-08 | 6.41E-09 | 6.07 | 9.4055881 | 1.82E-01 | 178594374 | 178594497 | NC_000005.9  |
| cg15344419 | 5.72E-08 | 6.42E-09 | 6.07 | 9.4046949 | 2.24E-01 | 131769581 | 131769704 | NC_000010.10 |
| cg24642236 | 5.72E-08 | 6.42E-09 | 6.07 | 9.4043898 | 1.01E-01 | 156460304 | 156460427 | NC_000001.10 |
| cg19477706 | 5.72E-08 | 6.42E-09 | 6.07 | 9.4035016 | 1.07E-01 | 2686914   | 2687037   | NC_000005.9  |
| cg05291025 | 5.72E-08 | 6.43E-09 | 6.07 | 9.4031624 | 8.65E-02 | 233897149 | 233897272 | NC_000002.11 |
| cg19861138 | 5.73E-08 | 6.43E-09 | 6.07 | 9.4024577 | 1.92E-01 | 154335384 | 154335507 | NC_000002.11 |
| cg15324651 | 5.73E-08 | 6.43E-09 | 6.07 | 9.4021233 | 1.06E-01 | 137816620 | 137816743 | NC_000006.11 |
| cg19771589 | 5.73E-08 | 6.43E-09 | 6.07 | 9.401751  | 7.27E-02 | 57349815  | 57349938  | NC_000019.9  |
| cg25002570 | 5.73E-08 | 6.44E-09 | 6.07 | 9.4013669 | 4.30E-02 | 100444696 | 100444819 | NC_000007.13 |
| cg11581903 | 5.74E-08 | 6.44E-09 | 6.07 | 9.4009849 | 7.32E-02 | 46846468  | 46846591  | NC_000021.8  |
| cg08514530 | 5.74E-08 | 6.44E-09 | 6.07 | 9.4005865 | 1.09E-01 | 44163270  | 44163393  | NC_000010.10 |
| cg11638298 | 5.74E-08 | 6.44E-09 | 6.07 | 9.4004567 | 1.39E-01 | 188917173 | 188917296 | NC_000004.11 |
| cg00784153 | 5.75E-08 | 6.45E-09 | 6.07 | 9.3987302 | 1.13E-01 | 10077007  | 10077130  | NC_000019.9  |
| cg25501335 | 5.75E-08 | 6.46E-09 | 6.07 | 9.3985563 | 3.71E-02 | 52093899  | 52094022  | NC_000003.11 |
| cg20276962 | 5.75E-08 | 6.46E-09 | 6.07 | 9.3981182 | 5.77E-02 | 243651346 | 243651469 | NC_000001.10 |
| cg03707776 | 5.75E-08 | 6.46E-09 | 6.07 | 9.3980328 | 1.15E-01 | 8190448   | 8190571   | NC_000011.9  |

|            |          |          |      |           |          |           |           |              |
|------------|----------|----------|------|-----------|----------|-----------|-----------|--------------|
| cg23319171 | 5.76E-08 | 6.47E-09 | 6.07 | 9.3962064 | 3.40E-02 | 74804128  | 74804251  | NC_000018.9  |
| cg07297900 | 5.77E-08 | 6.48E-09 | 6.07 | 9.3946462 | 2.79E-02 | 72721621  | 72721744  | NC_000007.13 |
| cg03538326 | 5.77E-08 | 6.48E-09 | 6.07 | 9.3946433 | 6.71E-02 | 1375845   | 1375968   | NC_000001.10 |
| cg20185461 | 5.77E-08 | 6.48E-09 | 6.07 | 9.3944927 | 1.24E-01 | 18899082  | 18899205  | NC_000019.9  |
| cg09222577 | 5.78E-08 | 6.49E-09 | 6.07 | 9.393556  | 6.62E-02 | 89480222  | 89480345  | NC_000016.9  |
| cg12839363 | 5.78E-08 | 6.49E-09 | 6.07 | 9.3935039 | 7.94E-02 | 12650181  | 12650304  | NC_000011.9  |
| cg01034631 | 5.78E-08 | 6.49E-09 | 6.07 | 9.3931115 | 1.08E-01 | 101361004 | 101361127 | NC_000014.8  |
| cg15788369 | 5.78E-08 | 6.49E-09 | 6.07 | 9.3930363 | 1.34E-01 | 15833777  | 15833900  | NC_000019.9  |
| cg19714279 | 5.78E-08 | 6.50E-09 | 6.07 | 9.3921572 | 1.18E-01 | 237077920 | 237078043 | NC_000002.11 |
| cg18025446 | 5.79E-08 | 6.50E-09 | 6.07 | 9.3912402 | 4.60E-02 | 6885838   | 6885961   | NC_000007.13 |
| cg04011228 | 5.79E-08 | 6.51E-09 | 6.07 | 9.3907348 | 1.60E-01 | 154335250 | 154335373 | NC_000002.11 |
| cg13715590 | 5.79E-08 | 6.51E-09 | 6.07 | 9.390083  | 8.33E-02 | 68185630  | 68185753  | NC_000003.11 |
| cg04656222 | 5.81E-08 | 6.53E-09 | 6.07 | 9.387182  | 1.17E-01 | 7690529   | 7690652   | NC_000017.10 |
| cg05621843 | 5.82E-08 | 6.54E-09 | 6.07 | 9.3860715 | 1.42E-01 | 97806397  | 97806520  | NC_000009.11 |
| cg03611632 | 5.82E-08 | 6.54E-09 | 6.07 | 9.385899  | 9.37E-02 | 148932063 | 148932186 | NC_000005.9  |
| cg10002360 | 5.82E-08 | 6.54E-09 | 6.07 | 9.3852709 | 3.52E-02 | 74098869  | 74098992  | NC_000007.13 |
| cg07531093 | 5.82E-08 | 6.54E-09 | 6.07 | 9.3852221 | 3.88E-02 | 143777681 | 143777804 | NC_000008.10 |
| cg01494075 | 5.82E-08 | 6.54E-09 | 6.07 | 9.385202  | 5.76E-02 | 70103034  | 70103157  | NC_000017.10 |
| cg20518155 | 5.82E-08 | 6.55E-09 | 6.07 | 9.3848222 | 1.63E-01 | 55366610  | 55366733  | NC_000008.10 |
| cg24791025 | 5.83E-08 | 6.55E-09 | 6.07 | 9.3839686 | 1.11E-01 | 65285897  | 65286020  | NC_000008.10 |
| cg10300728 | 5.83E-08 | 6.55E-09 | 6.07 | 9.3837051 | 1.30E-01 | 112786133 | 112786256 | NC_000013.10 |
| cg27548595 | 5.84E-08 | 6.56E-09 | 6.07 | 9.3824884 | 1.33E-01 | 18904366  | 18904489  | NC_000017.10 |
| cg18220380 | 5.84E-08 | 6.57E-09 | 6.07 | 9.3818069 | 1.01E-01 | 142185447 | 142185570 | NC_000008.10 |
| cg06013769 | 5.84E-08 | 6.57E-09 | 6.07 | 9.3814876 | 8.26E-02 | 140530467 | 140530590 | NC_000005.9  |
| cg02860602 | 5.84E-08 | 6.57E-09 | 6.07 | 9.3812364 | 1.61E-01 | 103356060 | 103356183 | NC_000012.11 |

|            |          |          |      |           |          |           |           |              |
|------------|----------|----------|------|-----------|----------|-----------|-----------|--------------|
| cg06211872 | 5.85E-08 | 6.57E-09 | 6.07 | 9.380917  | 1.13E-01 | 115123251 | 115123374 | NC_000012.11 |
| cg17030238 | 5.85E-08 | 6.58E-09 | 6.07 | 9.3806492 | 4.06E-02 | 156180190 | 156180313 | NC_000001.10 |
| cg15465823 | 5.85E-08 | 6.58E-09 | 6.07 | 9.3799032 | 7.50E-02 | 48382534  | 48382657  | NC_000012.11 |
| cg02671171 | 5.85E-08 | 6.58E-09 | 6.07 | 9.3795139 | 1.35E-01 | 203087    | 203210    | NC_000017.10 |
| cg18713687 | 5.86E-08 | 6.59E-09 | 6.07 | 9.379026  | 8.74E-02 | 195489789 | 195489912 | NC_000003.11 |
| cg14305560 | 5.86E-08 | 6.59E-09 | 6.07 | 9.3787407 | 7.64E-02 | 139487958 | 139488081 | NC_000009.11 |
| cg24581326 | 5.86E-08 | 6.59E-09 | 6.07 | 9.3779848 | 1.21E-01 | 55204266  | 55204389  | NC_000020.10 |
| cg26739233 | 5.87E-08 | 6.60E-09 | 6.07 | 9.377143  | 1.06E-01 | 72724062  | 72724185  | NC_000011.9  |
| cg19841369 | 5.87E-08 | 6.60E-09 | 6.07 | 9.3766157 | 1.59E-01 | 64663928  | 64664051  | NC_000014.8  |
| cg17401780 | 5.87E-08 | 6.60E-09 | 6.07 | 9.3766056 | 8.49E-02 | 129949004 | 129949127 | NC_000010.10 |
| cg00774437 | 5.87E-08 | 6.61E-09 | 6.07 | 9.3761905 | 8.79E-02 | 7939674   | 7939797   | NC_000012.11 |
| cg23972474 | 5.87E-08 | 6.61E-09 | 6.07 | 9.375854  | 1.03E-01 | 70404320  | 70404443  | NC_000014.8  |
| cg22816343 | 5.88E-08 | 6.62E-09 | 6.07 | 9.3745991 | 7.90E-02 | 26243601  | 26243724  | NC_000008.10 |
| cg09960171 | 5.89E-08 | 6.62E-09 | 6.07 | 9.3738385 | 1.86E-01 | 73450576  | 73450699  | NC_000008.10 |
| cg10172432 | 5.89E-08 | 6.63E-09 | 6.07 | 9.3733031 | 1.25E-01 | 95357042  | 95357165  | NC_000013.10 |
| cg14560030 | 5.90E-08 | 6.64E-09 | 6.07 | 9.3709337 | 7.57E-02 | 33159572  | 33159695  | NC_000006.11 |
| cg00515437 | 5.90E-08 | 6.64E-09 | 6.07 | 9.370851  | 6.22E-02 | 83422206  | 83422329  | NC_000015.9  |
| cg03354108 | 5.91E-08 | 6.65E-09 | 6.07 | 9.3691212 | 1.04E-01 | 118968448 | 118968571 | NC_000008.10 |
| cg17689721 | 5.92E-08 | 6.66E-09 | 6.07 | 9.3686168 | 1.53E-01 | 102976904 | 102977027 | NC_000010.10 |
| cg10415616 | 5.92E-08 | 6.67E-09 | 6.07 | 9.3669143 | 3.88E-02 | 100841571 | 100841694 | NC_000006.11 |
| cg03013070 | 5.93E-08 | 6.67E-09 | 6.07 | 9.3666207 | 9.28E-02 | 95965579  | 95965702  | NC_000010.10 |
| cg08561732 | 5.93E-08 | 6.67E-09 | 6.07 | 9.3663768 | 1.08E-01 | 96909455  | 96909578  | NC_000015.9  |
| cg22566508 | 5.93E-08 | 6.67E-09 | 6.07 | 9.3663637 | 2.79E-02 | 125769697 | 125769820 | NC_000010.10 |
| cg22340526 | 5.93E-08 | 6.67E-09 | 6.07 | 9.3659951 | 7.60E-02 | 153586207 | 153586330 | NC_000007.13 |
| cg23250157 | 5.93E-08 | 6.68E-09 | 6.07 | 9.3657415 | 8.79E-02 | 64679961  | 64680084  | NC_000014.8  |



|            |          |          |      |           |          |           |           |              |
|------------|----------|----------|------|-----------|----------|-----------|-----------|--------------|
| cg00179906 | 5.93E-08 | 6.68E-09 | 6.07 | 9.3651314 | 6.35E-02 | 14208363  | 14208486  | NC_000017.10 |
| cg24144105 | 5.95E-08 | 6.70E-09 | 6.07 | 9.3625436 | 5.40E-02 | 111682365 | 111682488 | NC_000013.10 |
| cg09326404 | 5.95E-08 | 6.70E-09 | 6.07 | 9.3624619 | 1.76E-01 | 46956839  | 46956962  | NC_000001.10 |
| cg09860804 | 5.95E-08 | 6.70E-09 | 6.07 | 9.3621807 | 6.01E-02 | 122396633 | 122396756 | NC_000012.11 |
| cg14822490 | 5.96E-08 | 6.71E-09 | 6.07 | 9.3613438 | 1.11E-01 | 124909889 | 124910012 | NC_000010.10 |
| cg09991306 | 5.97E-08 | 6.72E-09 | 6.06 | 9.359249  | 1.21E-01 | 241975140 | 241975263 | NC_000002.11 |
| cg18171392 | 5.97E-08 | 6.72E-09 | 6.06 | 9.3592465 | 9.18E-02 | 24938255  | 24938378  | NC_000022.10 |
| cg24622209 | 5.97E-08 | 6.72E-09 | 6.06 | 9.3588934 | 6.36E-02 | 121531017 | 121531140 | NC_000002.11 |
| cg17413750 | 5.97E-08 | 6.73E-09 | 6.06 | 9.3584883 | 8.51E-02 | 174814067 | 174814190 | NC_000005.9  |
| cg27421298 | 5.97E-08 | 6.73E-09 | 6.06 | 9.3579435 | 1.20E-01 | 35303285  | 35303408  | NC_000017.10 |
| cg25685675 | 5.97E-08 | 6.73E-09 | 6.06 | 9.3579093 | 8.45E-02 | 1309331   | 1309454   | NC_000001.10 |
| cg07224221 | 5.98E-08 | 6.74E-09 | 6.06 | 9.3566691 | 8.87E-02 | 46539013  | 46539136  | NC_000003.11 |
| cg15993383 | 5.98E-08 | 6.74E-09 | 6.06 | 9.3563514 | 2.07E-01 | 123167507 | 123167630 | NC_000003.11 |
| cg00952814 | 5.99E-08 | 6.75E-09 | 6.06 | 9.3543492 | 4.79E-02 | 3379965   | 3380088   | NC_000002.11 |
| cg26590799 | 6.00E-08 | 6.76E-09 | 6.06 | 9.3537416 | 7.74E-02 | 26915257  | 26915380  | NC_000015.9  |
| cg20318726 | 6.00E-08 | 6.76E-09 | 6.06 | 9.3536422 | 1.45E-01 | 13549621  | 13549744  | NC_000004.11 |
| cg00773093 | 6.00E-08 | 6.76E-09 | 6.06 | 9.3536248 | 6.15E-02 | 135246653 | 135246776 | NC_000010.10 |
| cg12554290 | 6.00E-08 | 6.76E-09 | 6.06 | 9.353408  | 3.78E-02 | 24706172  | 24706295  | NC_000006.11 |
| cg05210904 | 6.01E-08 | 6.77E-09 | 6.06 | 9.3524692 | 1.21E-01 | 72459565  | 72459688  | NC_000008.10 |
| cg27343836 | 6.01E-08 | 6.78E-09 | 6.06 | 9.351256  | 7.31E-02 | 86549678  | 86549801  | NC_000016.9  |
| cg00613224 | 6.01E-08 | 6.78E-09 | 6.06 | 9.3510215 | 1.46E-01 | 46425712  | 46425835  | NC_000013.10 |
| cg17664099 | 6.01E-08 | 6.78E-09 | 6.06 | 9.3509447 | 9.76E-02 | 1460268   | 1460391   | NC_000008.10 |
| cg16689724 | 6.02E-08 | 6.78E-09 | 6.06 | 9.3503575 | 1.16E-01 | 112430512 | 112430635 | NC_000006.11 |
| cg15790037 | 6.02E-08 | 6.78E-09 | 6.06 | 9.3501989 | 1.85E-01 | 37321490  | 37321613  | NC_000017.10 |
| cg01789501 | 6.02E-08 | 6.78E-09 | 6.06 | 9.3500417 | 1.18E-01 | 101272300 | 101272423 | NC_000001.10 |

|            |          |          |      |           |          |           |           |              |
|------------|----------|----------|------|-----------|----------|-----------|-----------|--------------|
| cg16333846 | 6.02E-08 | 6.79E-09 | 6.06 | 9.3499149 | 1.04E-01 | 155538155 | 155538278 | NC_000006.11 |
| cg05282249 | 6.02E-08 | 6.79E-09 | 6.06 | 9.3495139 | 5.97E-02 | 62654494  | 62654617  | NC_000015.9  |
| cg04391718 | 6.02E-08 | 6.79E-09 | 6.06 | 9.3490079 | 1.57E-01 | 185911702 | 185911825 | NC_000003.11 |
| cg05847784 | 6.03E-08 | 6.79E-09 | 6.06 | 9.3487063 | 9.38E-02 | 108237749 | 108237872 | NC_000012.11 |
| cg16890796 | 6.03E-08 | 6.79E-09 | 6.06 | 9.3486876 | 1.11E-01 | 49937087  | 49937210  | NC_000019.9  |
| cg27294268 | 6.03E-08 | 6.80E-09 | 6.06 | 9.3483528 | 1.34E-01 | 36983518  | 36983641  | NC_000014.8  |
| cg15826006 | 6.03E-08 | 6.80E-09 | 6.06 | 9.3481519 | 6.90E-02 | 84528281  | 84528404  | NC_000009.11 |
| cg23685712 | 6.03E-08 | 6.80E-09 | 6.06 | 9.3475258 | 1.94E-01 | 52790063  | 52790186  | NC_000020.10 |
| cg12910797 | 6.03E-08 | 6.80E-09 | 6.06 | 9.3473905 | 1.65E-01 | 46651722  | 46651845  | NC_000017.10 |
| cg00632070 | 6.03E-08 | 6.80E-09 | 6.06 | 9.3472298 | 5.76E-02 | 31506324  | 31506447  | NC_000013.10 |
| cg20994254 | 6.03E-08 | 6.81E-09 | 6.06 | 9.3471033 | 1.60E-01 | 27227340  | 27227463  | NC_000007.13 |
| cg04402875 | 6.04E-08 | 6.81E-09 | 6.06 | 9.3470075 | 1.66E-01 | 43572795  | 43572918  | NC_000010.10 |
| cg03896836 | 6.04E-08 | 6.81E-09 | 6.06 | 9.3458341 | 1.74E-01 | 241760025 | 241760148 | NC_000002.11 |
| cg27406975 | 6.04E-08 | 6.82E-09 | 6.06 | 9.3454841 | 1.63E-01 | 172955512 | 172955635 | NC_000002.11 |
| cg17935297 | 6.05E-08 | 6.83E-09 | 6.06 | 9.3442391 | 1.24E-01 | 19651968  | 19652091  | NC_000019.9  |
| cg09480190 | 6.05E-08 | 6.83E-09 | 6.06 | 9.3441887 | 1.37E-01 | 85671771  | 85671894  | NC_000016.9  |
| cg01602166 | 6.06E-08 | 6.83E-09 | 6.06 | 9.3428501 | 6.58E-02 | 201856763 | 201856886 | NC_000001.10 |
| cg13399544 | 6.06E-08 | 6.84E-09 | 6.06 | 9.3426475 | 7.85E-02 | 144649678 | 144649801 | NC_000008.10 |
| cg08813349 | 6.06E-08 | 6.84E-09 | 6.06 | 9.3425142 | 1.29E-01 | 100630430 | 100630553 | NC_000013.10 |
| cg17267804 | 6.06E-08 | 6.84E-09 | 6.06 | 9.342238  | 3.30E-02 | 159735392 | 159735515 | NC_000005.9  |
| cg04898487 | 6.06E-08 | 6.84E-09 | 6.06 | 9.3421684 | 8.49E-02 | 10272607  | 10272730  | NC_000016.9  |
| cg02367696 | 6.07E-08 | 6.84E-09 | 6.06 | 9.3415407 | 1.11E-01 | 102996464 | 102996587 | NC_000010.10 |
| cg06003656 | 6.07E-08 | 6.85E-09 | 6.06 | 9.3406262 | 1.31E-01 | 166405676 | 166405799 | NC_000005.9  |
| cg10636490 | 6.08E-08 | 6.86E-09 | 6.06 | 9.3393575 | 1.36E-01 | 149687315 | 149687438 | NC_000003.11 |
| cg23811464 | 6.08E-08 | 6.86E-09 | 6.06 | 9.3392838 | 1.88E-01 | 24716204  | 24716327  | NC_000012.11 |

|            |          |          |      |           |          |           |           |              |
|------------|----------|----------|------|-----------|----------|-----------|-----------|--------------|
| cg18475643 | 6.08E-08 | 6.86E-09 | 6.06 | 9.3385858 | 2.20E-01 | 46956496  | 46956619  | NC_000001.10 |
| cg20889841 | 6.10E-08 | 6.88E-09 | 6.06 | 9.3359987 | 1.28E-01 | 58148898  | 58149021  | NC_000006.11 |
| cg21187667 | 6.10E-08 | 6.89E-09 | 6.06 | 9.3352526 | 1.07E-01 | 16438614  | 16438737  | NC_000017.10 |
| cg02264789 | 6.10E-08 | 6.89E-09 | 6.06 | 9.3349983 | 2.42E-02 | 133162431 | 133162554 | NC_000012.11 |
| cg18595065 | 6.11E-08 | 6.90E-09 | 6.06 | 9.3338063 | 1.25E-01 | 72597126  | 72597249  | NC_000005.9  |
| cg20708061 | 6.12E-08 | 6.90E-09 | 6.06 | 9.3331047 | 7.67E-02 | 131958981 | 131959104 | NC_000012.11 |
| cg06347739 | 6.12E-08 | 6.91E-09 | 6.06 | 9.3328208 | 1.68E-01 | 2292636   | 2292759   | NC_000011.9  |
| cg09762120 | 6.12E-08 | 6.91E-09 | 6.06 | 9.3326825 | 6.59E-02 | 30108301  | 30108424  | NC_000007.13 |
| cg24711649 | 6.12E-08 | 6.91E-09 | 6.06 | 9.3323322 | 1.46E-01 | 81472118  | 81472241  | NC_000012.11 |
| cg20051808 | 6.12E-08 | 6.91E-09 | 6.06 | 9.3323231 | 3.40E-02 | 169309725 | 169309848 | NC_000002.11 |
| cg14907788 | 6.12E-08 | 6.91E-09 | 6.06 | 9.3317111 | 4.92E-02 | 2555976   | 2556099   | NC_000019.9  |
| cg10331829 | 6.12E-08 | 6.91E-09 | 6.06 | 9.3315379 | 1.04E-01 | 35343789  | 35343912  | NC_000011.9  |
| cg12449813 | 6.13E-08 | 6.92E-09 | 6.06 | 9.331117  | 1.38E-01 | 69853608  | 69853731  | NC_000015.9  |
| cg02953559 | 6.13E-08 | 6.92E-09 | 6.06 | 9.331048  | 9.20E-02 | 123164964 | 123165087 | NC_000003.11 |
| cg05794480 | 6.13E-08 | 6.92E-09 | 6.06 | 9.331028  | 1.61E-01 | 75362920  | 75363043  | NC_000018.9  |
| cg21238002 | 6.14E-08 | 6.93E-09 | 6.06 | 9.3294181 | 1.35E-01 | 83496248  | 83496371  | NC_000009.11 |
| cg16330195 | 6.14E-08 | 6.94E-09 | 6.06 | 9.3285378 | 6.22E-02 | 113763393 | 113763516 | NC_000002.11 |
| cg09863252 | 6.14E-08 | 6.94E-09 | 6.06 | 9.3281328 | 1.42E-02 | 54872721  | 54872844  | NC_000001.10 |
| cg15630089 | 6.15E-08 | 6.94E-09 | 6.06 | 9.3275027 | 1.54E-01 | 165723034 | 165723157 | NC_000006.11 |
| cg05942128 | 6.15E-08 | 6.95E-09 | 6.06 | 9.3265874 | 1.22E-01 | 176972020 | 176972143 | NC_000002.11 |
| cg06107216 | 6.16E-08 | 6.95E-09 | 6.06 | 9.3258555 | 6.91E-02 | 40124363  | 40124486  | NC_000021.8  |
| cg27304225 | 6.17E-08 | 6.97E-09 | 6.06 | 9.3240929 | 7.18E-02 | 25068769  | 25068892  | NC_000015.9  |
| cg06466582 | 6.19E-08 | 6.99E-09 | 6.06 | 9.3213304 | 9.20E-02 | 159335312 | 159335435 | NC_000005.9  |
| cg05299387 | 6.19E-08 | 6.99E-09 | 6.06 | 9.3211435 | 1.43E-01 | 115631143 | 115631266 | NC_000011.9  |
| cg02303941 | 6.20E-08 | 7.00E-09 | 6.06 | 9.3193704 | 9.90E-02 | 94770616  | 94770739  | NC_000011.9  |

|            |          |          |      |           |          |           |           |              |
|------------|----------|----------|------|-----------|----------|-----------|-----------|--------------|
| cg16301924 | 6.21E-08 | 7.02E-09 | 6.06 | 9.3170476 | 8.17E-02 | 53314226  | 53314349  | NC_000013.10 |
| cg05181927 | 6.22E-08 | 7.03E-09 | 6.06 | 9.3158213 | 3.99E-02 | 79798897  | 79799020  | NC_000010.10 |
| cg25280433 | 6.23E-08 | 7.04E-09 | 6.06 | 9.3145506 | 1.59E-01 | 105584216 | 105584339 | NC_000006.11 |
| cg05213896 | 6.23E-08 | 7.04E-09 | 6.06 | 9.313865  | 1.22E-01 | 50393653  | 50393776  | NC_000019.9  |
| cg18944653 | 6.24E-08 | 7.05E-09 | 6.06 | 9.3128557 | 1.24E-01 | 81381353  | 81381476  | NC_000007.13 |
| cg23010693 | 6.24E-08 | 7.05E-09 | 6.06 | 9.312366  | 1.14E-01 | 103911341 | 103911464 | NC_000014.8  |
| cg25528121 | 6.25E-08 | 7.06E-09 | 6.06 | 9.3111832 | 1.39E-01 | 14860793  | 14860916  | NC_000003.11 |
| cg20740029 | 6.25E-08 | 7.07E-09 | 6.06 | 9.3101661 | 1.33E-01 | 101603835 | 101603958 | NC_000012.11 |
| cg13235761 | 6.25E-08 | 7.07E-09 | 6.06 | 9.3101565 | 7.08E-02 | 203561580 | 203561703 | NC_000001.10 |
| cg15442105 | 6.25E-08 | 7.07E-09 | 6.05 | 9.3096254 | 3.92E-02 | 99227437  | 99227560  | NC_000007.13 |
| cg15976636 | 6.26E-08 | 7.07E-09 | 6.05 | 9.3094508 | 1.09E-01 | 163147737 | 163147860 | NC_000006.11 |
| cg11343938 | 6.26E-08 | 7.08E-09 | 6.05 | 9.308416  | 3.12E-02 | 72978007  | 72978130  | NC_000003.11 |
| cg23387213 | 6.27E-08 | 7.09E-09 | 6.05 | 9.3072177 | 5.38E-02 | 122340281 | 122340404 | NC_000007.13 |
| cg16001165 | 6.27E-08 | 7.09E-09 | 6.05 | 9.3069921 | 1.25E-01 | 129581866 | 129581989 | NC_000004.11 |
| cg23691946 | 6.27E-08 | 7.09E-09 | 6.05 | 9.3065972 | 5.49E-02 | 21203444  | 21203567  | NC_000019.9  |
| cg03960589 | 6.27E-08 | 7.09E-09 | 6.05 | 9.3064015 | 8.23E-02 | 40840485  | 40840608  | NC_000017.10 |
| cg21598067 | 6.28E-08 | 7.10E-09 | 6.05 | 9.3060535 | 1.07E-01 | 18540642  | 18540765  | NC_000008.10 |
| cg18436810 | 6.28E-08 | 7.10E-09 | 6.05 | 9.3058514 | 6.56E-02 | 196619732 | 196619855 | NC_000001.10 |
| cg16705273 | 6.28E-08 | 7.11E-09 | 6.05 | 9.304757  | 9.39E-02 | 42262885  | 42263008  | NC_000018.9  |
| cg13053595 | 6.29E-08 | 7.12E-09 | 6.05 | 9.3029847 | 8.50E-02 | 133527122 | 133527245 | NC_000003.11 |
| cg24947764 | 6.30E-08 | 7.12E-09 | 6.05 | 9.30277   | 1.40E-01 | 41881359  | 41881482  | NC_000004.11 |
| cg16843423 | 6.31E-08 | 7.14E-09 | 6.05 | 9.3007971 | 1.31E-01 | 149569501 | 149569624 | NC_000005.9  |
| cg25011252 | 6.31E-08 | 7.14E-09 | 6.05 | 9.3004882 | 4.74E-02 | 61777859  | 61777982  | NC_000008.10 |
| cg14270857 | 6.31E-08 | 7.14E-09 | 6.05 | 9.3002482 | 1.28E-01 | 100996097 | 100996220 | NC_000010.10 |
| cg14009098 | 6.31E-08 | 7.14E-09 | 6.05 | 9.2999252 | 1.60E-01 | 234041306 | 234041429 | NC_000001.10 |

|            |          |          |      |           |          |           |           |              |
|------------|----------|----------|------|-----------|----------|-----------|-----------|--------------|
| cg00116092 | 6.31E-08 | 7.14E-09 | 6.05 | 9.2997859 | 1.39E-01 | 217313044 | 217313167 | NC_000001.10 |
| cg03634234 | 6.32E-08 | 7.15E-09 | 6.05 | 9.298676  | 9.03E-02 | 152132218 | 152132341 | NC_000007.13 |
| cg02731390 | 6.33E-08 | 7.16E-09 | 6.05 | 9.2976054 | 5.94E-02 | 98367715  | 98367838  | NC_000010.10 |
| cg09409930 | 6.33E-08 | 7.16E-09 | 6.05 | 9.2973821 | 4.36E-02 | 16268878  | 16269001  | NC_000001.10 |
| cg21860560 | 6.33E-08 | 7.16E-09 | 6.05 | 9.2968948 | 9.77E-02 | 113784438 | 113784561 | NC_000013.10 |
| cg10214421 | 6.33E-08 | 7.17E-09 | 6.05 | 9.2966522 | 1.50E-01 | 155174508 | 155174631 | NC_000007.13 |
| cg16875554 | 6.34E-08 | 7.17E-09 | 6.05 | 9.2955893 | 7.34E-02 | 6897731   | 6897854   | NC_000012.11 |
| cg10679688 | 6.34E-08 | 7.18E-09 | 6.05 | 9.2950499 | 1.32E-01 | 100624965 | 100625088 | NC_000013.10 |
| cg02646021 | 6.35E-08 | 7.18E-09 | 6.05 | 9.2945905 | 1.28E-01 | 223176846 | 223176969 | NC_000002.11 |
| cg14374781 | 6.35E-08 | 7.19E-09 | 6.05 | 9.293117  | 6.55E-02 | 17739956  | 17740079  | NC_000001.10 |
| cg00179217 | 6.35E-08 | 7.19E-09 | 6.05 | 9.2930241 | 1.92E-01 | 31831340  | 31831463  | NC_000006.11 |
| cg25740565 | 6.36E-08 | 7.20E-09 | 6.05 | 9.2926886 | 1.80E-01 | 200335101 | 200335224 | NC_000002.11 |
| cg22496809 | 6.36E-08 | 7.20E-09 | 6.05 | 9.2925805 | 1.46E-01 | 85472949  | 85473072  | NC_000006.11 |
| cg26196480 | 6.36E-08 | 7.20E-09 | 6.05 | 9.2920795 | 1.49E-01 | 114846347 | 114846470 | NC_000012.11 |
| cg12652641 | 6.36E-08 | 7.20E-09 | 6.05 | 9.2918607 | 1.12E-01 | 111533267 | 111533390 | NC_000004.11 |
| cg22581361 | 6.36E-08 | 7.20E-09 | 6.05 | 9.2918099 | 1.19E-01 | 137819108 | 137819231 | NC_000006.11 |
| cg23057009 | 6.36E-08 | 7.20E-09 | 6.05 | 9.2917103 | 1.04E-01 | 134844217 | 134844340 | NC_000010.10 |
| cg17386093 | 6.37E-08 | 7.21E-09 | 6.05 | 9.2911137 | 1.41E-01 | 168727686 | 168727809 | NC_000005.9  |
| cg07778534 | 6.37E-08 | 7.21E-09 | 6.05 | 9.2901736 | 9.16E-02 | 89601834  | 89601957  | NC_000016.9  |
| cg20094830 | 6.38E-08 | 7.22E-09 | 6.05 | 9.2891593 | 1.29E-01 | 46799845  | 46799968  | NC_000017.10 |
| cg18395355 | 6.39E-08 | 7.24E-09 | 6.05 | 9.2872136 | 1.19E-01 | 46796556  | 46796679  | NC_000017.10 |
| cg12337525 | 6.40E-08 | 7.25E-09 | 6.05 | 9.2859188 | 1.40E-01 | 81185228  | 81185351  | NC_000004.11 |
| cg04212047 | 6.40E-08 | 7.25E-09 | 6.05 | 9.2853051 | 9.14E-02 | 27511179  | 27511302  | NC_000006.11 |
| cg09605432 | 6.40E-08 | 7.25E-09 | 6.05 | 9.2850842 | 2.03E-01 | 130687139 | 130687262 | NC_000006.11 |
| cg05376505 | 6.40E-08 | 7.25E-09 | 6.05 | 9.284946  | 1.41E-01 | 3602286   | 3602409   | NC_000012.11 |

|            |          |          |      |           |          |           |           |              |
|------------|----------|----------|------|-----------|----------|-----------|-----------|--------------|
| cg00910715 | 6.41E-08 | 7.26E-09 | 6.05 | 9.2843336 | 8.27E-02 | 132218639 | 132218762 | NC_000002.11 |
| cg01546729 | 6.42E-08 | 7.27E-09 | 6.05 | 9.2828578 | 1.52E-01 | 106330540 | 106330663 | NC_000008.10 |
| cg00982312 | 6.42E-08 | 7.27E-09 | 6.05 | 9.2819294 | 1.66E-01 | 7354422   | 7354545   | NC_000016.9  |
| cg00956244 | 6.43E-08 | 7.28E-09 | 6.05 | 9.2812062 | 2.86E-02 | 88147326  | 88147449  | NC_000016.9  |
| cg09932758 | 6.43E-08 | 7.28E-09 | 6.05 | 9.2808381 | 6.51E-02 | 58022542  | 58022665  | NC_000012.11 |
| cg13845588 | 6.45E-08 | 7.30E-09 | 6.05 | 9.2781592 | 4.99E-02 | 138390647 | 138390770 | NC_000009.11 |
| cg02717251 | 6.45E-08 | 7.30E-09 | 6.05 | 9.2779049 | 5.02E-02 | 31617340  | 31617463  | NC_000006.11 |
| cg21255209 | 6.45E-08 | 7.31E-09 | 6.05 | 9.2767265 | 9.03E-02 | 22201822  | 22201945  | NC_000012.11 |
| cg13096208 | 6.46E-08 | 7.32E-09 | 6.05 | 9.2761635 | 1.93E-01 | 55019843  | 55019966  | NC_000018.9  |
| cg10205548 | 6.46E-08 | 7.32E-09 | 6.05 | 9.2755793 | 7.42E-02 | 18975719  | 18975842  | NC_000001.10 |
| cg23817643 | 6.47E-08 | 7.33E-09 | 6.05 | 9.2745575 | 2.38E-02 | 134164721 | 134164844 | NC_000010.10 |
| cg00573352 | 6.47E-08 | 7.33E-09 | 6.05 | 9.2744921 | 3.69E-02 | 35754300  | 35754423  | NC_000010.10 |
| cg16262173 | 6.47E-08 | 7.33E-09 | 6.05 | 9.2741794 | 1.20E-01 | 120766475 | 120766598 | NC_000012.11 |
| cg14388858 | 6.47E-08 | 7.33E-09 | 6.05 | 9.2741708 | 1.37E-01 | 94285520  | 94285643  | NC_000007.13 |
| cg20390500 | 6.47E-08 | 7.34E-09 | 6.05 | 9.2738626 | 6.43E-02 | 57072454  | 57072577  | NC_000011.9  |
| cg06041805 | 6.47E-08 | 7.34E-09 | 6.05 | 9.2738208 | 1.33E-01 | 29033104  | 29033227  | NC_000017.10 |
| cg26278454 | 6.47E-08 | 7.34E-09 | 6.05 | 9.2733874 | 1.06E-01 | 982623    | 982746    | NC_000020.10 |
| cg26307206 | 6.48E-08 | 7.34E-09 | 6.05 | 9.2731153 | 2.37E-02 | 74306978  | 74307101  | NC_000007.13 |
| cg00370179 | 6.49E-08 | 7.36E-09 | 6.05 | 9.2710255 | 1.23E-01 | 37005074  | 37005197  | NC_000013.10 |
| cg14630357 | 6.49E-08 | 7.36E-09 | 6.05 | 9.2707914 | 1.66E-01 | 154729917 | 154730040 | NC_000002.11 |
| cg14711433 | 6.49E-08 | 7.36E-09 | 6.05 | 9.2706873 | 8.71E-02 | 28585810  | 28585933  | NC_000008.10 |
| cg17622855 | 6.49E-08 | 7.36E-09 | 6.05 | 9.2705395 | 1.02E-01 | 157982358 | 157982481 | NC_000006.11 |
| cg03391776 | 6.49E-08 | 7.36E-09 | 6.05 | 9.2702714 | 5.31E-02 | 7159643   | 7159766   | NC_000006.11 |
| cg18816877 | 6.50E-08 | 7.36E-09 | 6.05 | 9.2699061 | 1.49E-01 | 1202923   | 1203046   | NC_000016.9  |
| cg24315257 | 6.50E-08 | 7.37E-09 | 6.05 | 9.2695897 | 5.34E-02 | 177352093 | 177352216 | NC_000003.11 |

|            |          |          |      |           |          |           |           |              |
|------------|----------|----------|------|-----------|----------|-----------|-----------|--------------|
| cg24493834 | 6.50E-08 | 7.37E-09 | 6.05 | 9.2691986 | 8.17E-02 | 129251011 | 129251134 | NC_000006.11 |
| cg14171369 | 6.50E-08 | 7.37E-09 | 6.05 | 9.2689959 | 8.26E-02 | 75447688  | 75447811  | NC_000014.8  |
| cg04922880 | 6.50E-08 | 7.37E-09 | 6.05 | 9.2687132 | 7.80E-02 | 133914287 | 133914410 | NC_000010.10 |
| cg12339834 | 6.51E-08 | 7.38E-09 | 6.05 | 9.2681606 | 1.18E-01 | 2914702   | 2914825   | NC_000005.9  |
| cg15431544 | 6.51E-08 | 7.38E-09 | 6.05 | 9.267572  | 1.27E-01 | 27225476  | 27225599  | NC_000007.13 |
| cg25789916 | 6.52E-08 | 7.39E-09 | 6.05 | 9.2659415 | 1.19E-01 | 74427239  | 74427362  | NC_000015.9  |
| cg18892212 | 6.52E-08 | 7.40E-09 | 6.05 | 9.2658818 | 1.22E-01 | 31499991  | 31500114  | NC_000016.9  |
| cg23346969 | 6.52E-08 | 7.40E-09 | 6.05 | 9.2657996 | 1.09E-01 | 1836719   | 1836842   | NC_000005.9  |
| cg19305527 | 6.53E-08 | 7.41E-09 | 6.05 | 9.2644973 | 9.57E-02 | 225434838 | 225434961 | NC_000002.11 |
| cg23012054 | 6.53E-08 | 7.41E-09 | 6.05 | 9.2637499 | 7.93E-02 | 125325970 | 125326093 | NC_000011.9  |
| cg08570574 | 6.54E-08 | 7.41E-09 | 6.05 | 9.2633144 | 8.62E-02 | 9086309   | 9086432   | NC_000006.11 |
| cg01369895 | 6.54E-08 | 7.42E-09 | 6.05 | 9.2629759 | 8.23E-02 | 177182762 | 177182885 | NC_000003.11 |
| cg11701604 | 6.54E-08 | 7.42E-09 | 6.05 | 9.2620954 | 1.02E-01 | 36095771  | 36095894  | NC_000011.9  |
| cg21123686 | 6.55E-08 | 7.43E-09 | 6.05 | 9.2610856 | 1.09E-01 | 64399755  | 64399878  | NC_000005.9  |
| cg06552356 | 6.55E-08 | 7.44E-09 | 6.05 | 9.26065   | 1.68E-01 | 85674531  | 85674654  | NC_000012.11 |
| cg09661370 | 6.56E-08 | 7.44E-09 | 6.05 | 9.260021  | 1.23E-01 | 27225299  | 27225422  | NC_000007.13 |
| cg07229301 | 6.56E-08 | 7.44E-09 | 6.05 | 9.2595387 | 3.29E-02 | 1487445   | 1487568   | NC_000001.10 |
| cg00477287 | 6.56E-08 | 7.45E-09 | 6.04 | 9.2586515 | 2.25E-02 | 19414441  | 19414564  | NC_000019.9  |
| cg02449694 | 6.57E-08 | 7.45E-09 | 6.04 | 9.2584839 | 7.11E-02 | 74878309  | 74878432  | NC_000017.10 |
| cg09319475 | 6.57E-08 | 7.45E-09 | 6.04 | 9.2583397 | 7.85E-02 | 99587888  | 99588011  | NC_000014.8  |
| cg09224393 | 6.57E-08 | 7.46E-09 | 6.04 | 9.2576434 | 7.31E-02 | 34268920  | 34269043  | NC_000014.8  |
| cg25516803 | 6.58E-08 | 7.47E-09 | 6.04 | 9.2561399 | 1.28E-01 | 42307519  | 42307642  | NC_000003.11 |
| cg04658405 | 6.59E-08 | 7.48E-09 | 6.04 | 9.2550529 | 1.23E-01 | 67443148  | 67443271  | NC_000002.11 |
| cg05701765 | 6.59E-08 | 7.48E-09 | 6.04 | 9.2542142 | 6.41E-02 | 31980052  | 31980175  | NC_000006.11 |
| cg05677041 | 6.60E-08 | 7.49E-09 | 6.04 | 9.2531681 | 1.37E-01 | 119418622 | 119418745 | NC_000012.11 |

|            |          |          |      |           |          |           |           |              |
|------------|----------|----------|------|-----------|----------|-----------|-----------|--------------|
| cg16846653 | 6.60E-08 | 7.50E-09 | 6.04 | 9.2526622 | 1.94E-01 | 22094034  | 22094157  | NC_000012.11 |
| cg00006081 | 6.60E-08 | 7.50E-09 | 6.04 | 9.2525585 | 1.14E-01 | 124908907 | 124909030 | NC_000010.10 |
| cg15125994 | 6.61E-08 | 7.50E-09 | 6.04 | 9.2522294 | 5.91E-02 | 61656234  | 61656357  | NC_000017.10 |
| cg00830492 | 6.61E-08 | 7.50E-09 | 6.04 | 9.2519001 | 1.45E-01 | 47432311  | 47432434  | NC_000007.13 |
| cg02135682 | 6.61E-08 | 7.51E-09 | 6.04 | 9.2509158 | 4.00E-02 | 74729465  | 74729588  | NC_000016.9  |
| cg15743907 | 6.62E-08 | 7.51E-09 | 6.04 | 9.2503346 | 8.74E-02 | 144994542 | 144994665 | NC_000001.10 |
| cg25031787 | 6.63E-08 | 7.53E-09 | 6.04 | 9.2480737 | 5.19E-02 | 12437     | 12560     | NC_000018.9  |
| cg02441149 | 6.63E-08 | 7.53E-09 | 6.04 | 9.2477169 | 5.04E-02 | 107159723 | 107159846 | NC_000013.10 |
| cg21127286 | 6.64E-08 | 7.54E-09 | 6.04 | 9.2470087 | 1.36E-01 | 136555154 | 136555277 | NC_000007.13 |
| cg13877715 | 6.64E-08 | 7.54E-09 | 6.04 | 9.2468416 | 1.17E-01 | 35914081  | 35914204  | NC_000001.10 |
| cg18709349 | 6.64E-08 | 7.54E-09 | 6.04 | 9.2468006 | 1.72E-01 | 46999274  | 46999397  | NC_000019.9  |
| cg10619318 | 6.64E-08 | 7.55E-09 | 6.04 | 9.2463112 | 9.94E-02 | 135470751 | 135470874 | NC_000005.9  |
| cg08079908 | 6.65E-08 | 7.56E-09 | 6.04 | 9.2449931 | 1.73E-01 | 176997277 | 176997400 | NC_000002.11 |
| cg19005281 | 6.65E-08 | 7.56E-09 | 6.04 | 9.2442955 | 1.44E-01 | 84116935  | 84117058  | NC_000015.9  |
| cg10961841 | 6.66E-08 | 7.56E-09 | 6.04 | 9.2438912 | 2.17E-01 | 47697429  | 47697552  | NC_000001.10 |
| cg05352321 | 6.66E-08 | 7.56E-09 | 6.04 | 9.2438836 | 2.22E-02 | 105406196 | 105406319 | NC_000010.10 |
| cg26160086 | 6.66E-08 | 7.56E-09 | 6.04 | 9.2438261 | 2.79E-02 | 157205545 | 157205668 | NC_000007.13 |
| cg04091822 | 6.66E-08 | 7.57E-09 | 6.04 | 9.243271  | 1.03E-01 | 54974287  | 54974410  | NC_000016.9  |
| cg14116509 | 6.66E-08 | 7.57E-09 | 6.04 | 9.2430588 | 6.68E-02 | 48911410  | 48911533  | NC_000017.10 |
| cg06668194 | 6.66E-08 | 7.57E-09 | 6.04 | 9.2426839 | 1.56E-01 | 35165439  | 35165562  | NC_000017.10 |
| cg03038520 | 6.67E-08 | 7.58E-09 | 6.04 | 9.2414915 | 5.17E-02 | 21309710  | 21309833  | NC_000016.9  |
| cg21150108 | 6.68E-08 | 7.59E-09 | 6.04 | 9.2408689 | 7.24E-02 | 34750105  | 34750228  | NC_000013.10 |
| cg08417620 | 6.68E-08 | 7.59E-09 | 6.04 | 9.2406191 | 1.53E-01 | 56013556  | 56013679  | NC_000008.10 |
| cg07810982 | 6.68E-08 | 7.59E-09 | 6.04 | 9.2402377 | 2.20E-02 | 30157765  | 30157888  | NC_000006.11 |
| cg20781421 | 6.68E-08 | 7.59E-09 | 6.04 | 9.2401956 | 1.11E-01 | 11866554  | 11866677  | NC_000011.9  |



|            |          |          |      |           |          |           |           |              |
|------------|----------|----------|------|-----------|----------|-----------|-----------|--------------|
| cg04596842 | 6.68E-08 | 7.59E-09 | 6.04 | 9.240095  | 6.06E-02 | 19686670  | 19686793  | NC_000014.8  |
| cg09187933 | 6.69E-08 | 7.60E-09 | 6.04 | 9.2389851 | 1.57E-01 | 127630812 | 127630935 | NC_000012.11 |
| cg27181199 | 6.69E-08 | 7.60E-09 | 6.04 | 9.2389464 | 3.47E-02 | 31945286  | 31945409  | NC_000012.11 |
| cg14358088 | 6.69E-08 | 7.61E-09 | 6.04 | 9.2384785 | 1.31E-01 | 2063957   | 2064080   | NC_000006.11 |
| cg22158462 | 6.70E-08 | 7.61E-09 | 6.04 | 9.2376688 | 1.05E-01 | 208232275 | 208232398 | NC_000001.10 |
| cg00529422 | 6.70E-08 | 7.61E-09 | 6.04 | 9.237592  | 2.74E-02 | 16285251  | 16285374  | NC_000001.10 |
| cg20059140 | 6.70E-08 | 7.61E-09 | 6.04 | 9.2375156 | 1.62E-01 | 11751516  | 11751639  | NC_000018.9  |
| cg14737994 | 6.70E-08 | 7.61E-09 | 6.04 | 9.2375076 | 9.91E-02 | 9474128   | 9474251   | NC_000019.9  |
| cg20714110 | 6.70E-08 | 7.62E-09 | 6.04 | 9.2368714 | 1.52E-01 | 137489672 | 137489795 | NC_000003.11 |
| cg05041871 | 6.71E-08 | 7.63E-09 | 6.04 | 9.2359424 | 1.32E-01 | 1732234   | 1732357   | NC_000002.11 |
| cg03102442 | 6.71E-08 | 7.63E-09 | 6.04 | 9.235347  | 1.66E-01 | 125738432 | 125738555 | NC_000008.10 |
| cg01979270 | 6.71E-08 | 7.63E-09 | 6.04 | 9.2351333 | 8.63E-02 | 2589773   | 2589896   | NC_000016.9  |
| cg00364557 | 6.71E-08 | 7.63E-09 | 6.04 | 9.2349333 | 6.58E-02 | 109524566 | 109524689 | NC_000012.11 |
| cg18465615 | 6.72E-08 | 7.65E-09 | 6.04 | 9.2334218 | 5.34E-02 | 40778656  | 40778779  | NC_000015.9  |
| cg13845351 | 6.72E-08 | 7.65E-09 | 6.04 | 9.2331909 | 1.03E-01 | 112073098 | 112073221 | NC_000009.11 |
| cg10294253 | 6.73E-08 | 7.65E-09 | 6.04 | 9.232848  | 1.23E-01 | 30181321  | 30181444  | NC_000015.9  |
| cg25650811 | 6.73E-08 | 7.65E-09 | 6.04 | 9.2322579 | 5.43E-02 | 31557075  | 31557198  | NC_000007.13 |
| cg04568564 | 6.73E-08 | 7.66E-09 | 6.04 | 9.2319132 | 1.11E-01 | 74075336  | 74075459  | NC_000017.10 |
| cg24476761 | 6.74E-08 | 7.67E-09 | 6.04 | 9.2304121 | 9.36E-02 | 51051861  | 51051984  | NC_000019.9  |
| cg19854666 | 6.75E-08 | 7.67E-09 | 6.04 | 9.2298364 | 9.07E-02 | 134797312 | 134797435 | NC_000010.10 |
| cg14182693 | 6.75E-08 | 7.68E-09 | 6.04 | 9.2292059 | 6.59E-02 | 27224189  | 27224312  | NC_000001.10 |
| cg26679785 | 6.75E-08 | 7.68E-09 | 6.04 | 9.228968  | 8.77E-02 | 182922263 | 182922386 | NC_000001.10 |
| cg25535316 | 6.76E-08 | 7.69E-09 | 6.04 | 9.2277258 | 9.18E-02 | 579198    | 579321    | NC_000011.9  |
| cg15909056 | 6.76E-08 | 7.70E-09 | 6.04 | 9.2268348 | 1.14E-01 | 71837175  | 71837298  | NC_000012.11 |
| cg09152866 | 6.77E-08 | 7.70E-09 | 6.04 | 9.2265859 | 1.10E-01 | 11714562  | 11714685  | NC_000006.11 |

|            |          |          |      |           |          |           |           |              |
|------------|----------|----------|------|-----------|----------|-----------|-----------|--------------|
| cg06872705 | 6.77E-08 | 7.70E-09 | 6.04 | 9.2262483 | 2.12E-01 | 165205201 | 165205324 | NC_000001.10 |
| cg10367707 | 6.77E-08 | 7.70E-09 | 6.04 | 9.2261717 | 1.30E-01 | 49380565  | 49380688  | NC_000022.10 |
| cg17630138 | 6.77E-08 | 7.71E-09 | 6.04 | 9.2254065 | 1.18E-01 | 155031033 | 155031156 | NC_000003.11 |
| cg10376814 | 6.78E-08 | 7.72E-09 | 6.04 | 9.2243338 | 8.78E-02 | 2310230   | 2310353   | NC_000001.10 |
| cg17470837 | 6.78E-08 | 7.72E-09 | 6.04 | 9.2239825 | 2.11E-01 | 6201430   | 6201553   | NC_000004.11 |
| cg14044465 | 6.78E-08 | 7.72E-09 | 6.04 | 9.2239247 | 1.19E-01 | 16875612  | 16875735  | NC_000009.11 |
| cg19867481 | 6.79E-08 | 7.72E-09 | 6.04 | 9.223353  | 4.53E-02 | 1282984   | 1283107   | NC_000005.9  |
| cg24606273 | 6.79E-08 | 7.73E-09 | 6.04 | 9.2222373 | 6.83E-02 | 128492991 | 128493114 | NC_000007.13 |
| cg18786782 | 6.79E-08 | 7.73E-09 | 6.04 | 9.2220822 | 9.07E-02 | 13936527  | 13936650  | NC_000003.11 |
| cg22706610 | 6.81E-08 | 7.75E-09 | 6.04 | 9.2201232 | 1.50E-01 | 59189724  | 59189847  | NC_000005.9  |
| cg19247841 | 6.81E-08 | 7.75E-09 | 6.04 | 9.2198954 | 1.70E-01 | 48485301  | 48485424  | NC_000004.11 |
| cg01787382 | 6.81E-08 | 7.75E-09 | 6.04 | 9.2198064 | 9.35E-02 | 169041586 | 169041709 | NC_000003.11 |
| cg11701471 | 6.81E-08 | 7.75E-09 | 6.04 | 9.2196289 | 2.18E-01 | 54164051  | 54164174  | NC_000008.10 |
| cg14059420 | 6.81E-08 | 7.76E-09 | 6.04 | 9.2193967 | 1.18E-01 | 43600495  | 43600618  | NC_000011.9  |
| cg16656826 | 6.82E-08 | 7.76E-09 | 6.04 | 9.2189385 | 9.04E-02 | 159343871 | 159343994 | NC_000005.9  |
| cg02538783 | 6.82E-08 | 7.76E-09 | 6.04 | 9.2187526 | 1.24E-01 | 35102505  | 35102628  | NC_000010.10 |
| cg18012760 | 6.82E-08 | 7.76E-09 | 6.04 | 9.2187173 | 1.64E-01 | 6449577   | 6449700   | NC_000005.9  |
| cg03898302 | 6.82E-08 | 7.76E-09 | 6.04 | 9.21854   | 5.36E-02 | 144188045 | 144188168 | NC_000008.10 |
| cg24818200 | 6.82E-08 | 7.76E-09 | 6.04 | 9.2183854 | 1.35E-01 | 140501365 | 140501488 | NC_000005.9  |
| cg01522083 | 6.83E-08 | 7.78E-09 | 6.04 | 9.2167021 | 8.54E-02 | 1400861   | 1400984   | NC_000016.9  |
| cg19861117 | 6.84E-08 | 7.79E-09 | 6.04 | 9.2146962 | 1.30E-01 | 46456325  | 46456448  | NC_000019.9  |
| cg16758813 | 6.85E-08 | 7.80E-09 | 6.04 | 9.2136209 | 1.37E-01 | 50818862  | 50818985  | NC_000006.11 |
| cg09478742 | 6.85E-08 | 7.81E-09 | 6.04 | 9.2130205 | 1.85E-01 | 43973311  | 43973434  | NC_000017.10 |
| cg02072400 | 6.85E-08 | 7.81E-09 | 6.04 | 9.2129496 | 1.43E-01 | 127630550 | 127630673 | NC_000012.11 |
| cg17662683 | 6.86E-08 | 7.81E-09 | 6.04 | 9.2120976 | 1.20E-01 | 32064146  | 32064269  | NC_000006.11 |

|            |          |          |      |           |          |           |           |              |
|------------|----------|----------|------|-----------|----------|-----------|-----------|--------------|
| cg10604476 | 6.87E-08 | 7.82E-09 | 6.04 | 9.2113272 | 1.64E-01 | 10403908  | 10404031  | NC_000019.9  |
| cg17093795 | 6.87E-08 | 7.83E-09 | 6.04 | 9.210231  | 1.33E-01 | 56887410  | 56887533  | NC_000018.9  |
| cg11220245 | 6.87E-08 | 7.83E-09 | 6.04 | 9.2101957 | 1.00E-01 | 26189665  | 26189788  | NC_000020.10 |
| cg23704517 | 6.88E-08 | 7.84E-09 | 6.04 | 9.2091085 | 1.54E-01 | 109147317 | 109147440 | NC_000013.10 |
| cg03298073 | 6.88E-08 | 7.84E-09 | 6.04 | 9.2090885 | 7.50E-02 | 209404846 | 209404969 | NC_000001.10 |
| cg15145341 | 6.88E-08 | 7.84E-09 | 6.04 | 9.209005  | 1.38E-01 | 25506340  | 25506463  | NC_000013.10 |
| cg04100532 | 6.88E-08 | 7.84E-09 | 6.04 | 9.2089672 | 1.88E-01 | 210636560 | 210636683 | NC_000002.11 |
| cg27663938 | 6.88E-08 | 7.84E-09 | 6.04 | 9.2087695 | 1.68E-01 | 103696381 | 103696504 | NC_000012.11 |
| cg10904699 | 6.89E-08 | 7.85E-09 | 6.03 | 9.2071166 | 1.75E-01 | 123301490 | 123301613 | NC_000011.9  |
| cg26495109 | 6.89E-08 | 7.86E-09 | 6.03 | 9.2066453 | 1.47E-01 | 56225952  | 56226075  | NC_000016.9  |
| cg20706049 | 6.90E-08 | 7.86E-09 | 6.03 | 9.2064555 | 1.01E-01 | 110026630 | 110026753 | NC_000002.11 |
| cg06182410 | 6.90E-08 | 7.87E-09 | 6.03 | 9.2054775 | 2.34E-02 | 67269519  | 67269642  | NC_000011.9  |
| cg03587042 | 6.90E-08 | 7.87E-09 | 6.03 | 9.2053566 | 6.99E-02 | 18689035  | 18689158  | NC_000010.10 |
| cg17124583 | 6.91E-08 | 7.87E-09 | 6.03 | 9.204971  | 8.78E-02 | 8097641   | 8097764   | NC_000010.10 |
| cg25535587 | 6.91E-08 | 7.87E-09 | 6.03 | 9.204944  | 2.41E-01 | 82116456  | 82116579  | NC_000010.10 |
| cg06374962 | 6.92E-08 | 7.89E-09 | 6.03 | 9.2026025 | 1.70E-01 | 111531926 | 111532049 | NC_000004.11 |
| cg21056723 | 6.92E-08 | 7.89E-09 | 6.03 | 9.202204  | 1.07E-01 | 56686117  | 56686240  | NC_000004.11 |
| cg18448581 | 6.92E-08 | 7.89E-09 | 6.03 | 9.202123  | 1.60E-01 | 70534767  | 70534890  | NC_000018.9  |
| cg15209029 | 6.93E-08 | 7.90E-09 | 6.03 | 9.2011528 | 7.88E-02 | 9982553   | 9982676   | NC_000001.10 |
| cg10379890 | 6.94E-08 | 7.91E-09 | 6.03 | 9.2001753 | 1.72E-01 | 391208    | 391331    | NC_000006.11 |
| cg17541025 | 6.94E-08 | 7.91E-09 | 6.03 | 9.1996745 | 3.72E-02 | 72978020  | 72978143  | NC_000003.11 |
| cg05556917 | 6.94E-08 | 7.92E-09 | 6.03 | 9.1994841 | 1.02E-01 | 36408633  | 36408756  | NC_000006.11 |
| cg11634496 | 6.94E-08 | 7.92E-09 | 6.03 | 9.1992656 | 1.34E-01 | 70961902  | 70962025  | NC_000011.9  |
| cg15957017 | 6.95E-08 | 7.93E-09 | 6.03 | 9.197733  | 1.13E-02 | 71571214  | 71571337  | NC_000004.11 |
| cg04123385 | 6.96E-08 | 7.94E-09 | 6.03 | 9.1961554 | 1.32E-01 | 37302636  | 37302759  | NC_000020.10 |

|            |          |          |      |           |          |           |           |              |
|------------|----------|----------|------|-----------|----------|-----------|-----------|--------------|
| cg24525176 | 6.96E-08 | 7.94E-09 | 6.03 | 9.1960202 | 1.17E-01 | 47909931  | 47910054  | NC_000001.10 |
| cg08062713 | 6.97E-08 | 7.95E-09 | 6.03 | 9.1954664 | 4.61E-02 | 34022008  | 34022131  | NC_000020.10 |
| cg01849466 | 6.97E-08 | 7.95E-09 | 6.03 | 9.1951571 | 2.33E-02 | 104193079 | 104193202 | NC_000014.8  |
| cg20643029 | 6.97E-08 | 7.95E-09 | 6.03 | 9.1950332 | 1.15E-01 | 37915044  | 37915167  | NC_000021.8  |
| cg18836844 | 6.97E-08 | 7.95E-09 | 6.03 | 9.194818  | 1.07E-01 | 998428    | 998551    | NC_000008.10 |
| cg05648629 | 6.97E-08 | 7.95E-09 | 6.03 | 9.194749  | 1.44E-01 | 4162203   | 4162326   | NC_000016.9  |
| cg26611765 | 6.97E-08 | 7.96E-09 | 6.03 | 9.1944806 | 1.44E-01 | 27199916  | 27200039  | NC_000007.13 |
| cg07368727 | 6.98E-08 | 7.96E-09 | 6.03 | 9.1941058 | 5.67E-02 | 88732672  | 88732795  | NC_000004.11 |
| cg10895875 | 6.99E-08 | 7.97E-09 | 6.03 | 9.1924468 | 1.15E-01 | 56242407  | 56242530  | NC_000007.13 |
| cg03740025 | 6.99E-08 | 7.97E-09 | 6.03 | 9.1922588 | 5.26E-02 | 127340829 | 127340952 | NC_000007.13 |
| cg21367187 | 6.99E-08 | 7.98E-09 | 6.03 | 9.1917577 | 1.01E-01 | 42744457  | 42744580  | NC_000020.10 |
| cg09222749 | 6.99E-08 | 7.98E-09 | 6.03 | 9.1917448 | 1.70E-01 | 75594053  | 75594176  | NC_000001.10 |
| cg11642382 | 7.00E-08 | 7.99E-09 | 6.03 | 9.1905585 | 1.69E-01 | 145813066 | 145813189 | NC_000007.13 |
| cg27355724 | 7.01E-08 | 8.00E-09 | 6.03 | 9.1890286 | 1.49E-01 | 2757457   | 2757580   | NC_000005.9  |
| cg22324487 | 7.01E-08 | 8.00E-09 | 6.03 | 9.1887446 | 4.30E-02 | 113816832 | 113816955 | NC_000002.11 |
| cg11667020 | 7.01E-08 | 8.00E-09 | 6.03 | 9.1887009 | 1.40E-01 | 21378045  | 21378168  | NC_000020.10 |
| cg20247455 | 7.02E-08 | 8.01E-09 | 6.03 | 9.1882263 | 6.73E-02 | 49579793  | 49579916  | NC_000022.10 |
| cg16339915 | 7.02E-08 | 8.01E-09 | 6.03 | 9.1880779 | 6.71E-02 | 134785391 | 134785514 | NC_000005.9  |
| cg12525474 | 7.02E-08 | 8.01E-09 | 6.03 | 9.1876898 | 1.74E-01 | 229046029 | 229046152 | NC_000002.11 |
| cg10245879 | 7.03E-08 | 8.02E-09 | 6.03 | 9.1865189 | 1.38E-01 | 98247758  | 98247881  | NC_000007.13 |
| cg23104184 | 7.03E-08 | 8.02E-09 | 6.03 | 9.1861105 | 9.49E-02 | 73437334  | 73437457  | NC_000010.10 |
| cg01241721 | 7.04E-08 | 8.03E-09 | 6.03 | 9.1853414 | 1.67E-01 | 143532012 | 143532135 | NC_000008.10 |
| cg13291283 | 7.04E-08 | 8.03E-09 | 6.03 | 9.1851574 | 1.40E-01 | 10101195  | 10101318  | NC_000017.10 |
| cg00481725 | 7.05E-08 | 8.05E-09 | 6.03 | 9.1830756 | 1.06E-01 | 98648111  | 98648234  | NC_000015.9  |
| cg19267596 | 7.05E-08 | 8.05E-09 | 6.03 | 9.1830386 | 1.68E-01 | 15334821  | 15334944  | NC_000019.9  |

|            |          |          |      |           |          |           |           |              |
|------------|----------|----------|------|-----------|----------|-----------|-----------|--------------|
| cg12530050 | 7.06E-08 | 8.06E-09 | 6.03 | 9.1813003 | 1.90E-01 | 115121354 | 115121477 | NC_000012.11 |
| cg25912023 | 7.07E-08 | 8.07E-09 | 6.03 | 9.1804608 | 8.31E-02 | 101801902 | 101802025 | NC_000002.11 |
| cg02976900 | 7.07E-08 | 8.08E-09 | 6.03 | 9.1797239 | 6.43E-02 | 77152474  | 77152597  | NC_000018.9  |
| cg22750254 | 7.08E-08 | 8.08E-09 | 6.03 | 9.1790432 | 2.07E-01 | 13043421  | 13043544  | NC_000010.10 |
| cg26927285 | 7.08E-08 | 8.09E-09 | 6.03 | 9.1781703 | 1.73E-02 | 46280688  | 46280811  | NC_000019.9  |
| cg21215218 | 7.09E-08 | 8.09E-09 | 6.03 | 9.1776481 | 6.99E-02 | 19011172  | 19011295  | NC_000001.10 |
| cg08514436 | 7.10E-08 | 8.11E-09 | 6.03 | 9.1763893 | 1.23E-01 | 185221104 | 185221227 | NC_000003.11 |
| cg08553601 | 7.10E-08 | 8.11E-09 | 6.03 | 9.1762992 | 1.13E-01 | 53729461  | 53729584  | NC_000004.11 |
| cg19088924 | 7.10E-08 | 8.11E-09 | 6.03 | 9.1761814 | 7.01E-02 | 78233699  | 78233822  | NC_000003.11 |
| cg15910594 | 7.11E-08 | 8.12E-09 | 6.03 | 9.1746945 | 8.08E-02 | 68747554  | 68747677  | NC_000011.9  |
| cg07859951 | 7.12E-08 | 8.13E-09 | 6.03 | 9.1730051 | 4.03E-02 | 110871748 | 110871871 | NC_000006.11 |
| cg18546622 | 7.12E-08 | 8.14E-09 | 6.03 | 9.1725786 | 1.43E-01 | 44325029  | 44325152  | NC_000011.9  |
| cg02644784 | 7.13E-08 | 8.14E-09 | 6.03 | 9.1717611 | 5.87E-02 | 10665926  | 10666049  | NC_000002.11 |
| cg18277979 | 7.14E-08 | 8.15E-09 | 6.03 | 9.1704593 | 1.38E-01 | 79630127  | 79630250  | NC_000009.11 |
| cg18186478 | 7.14E-08 | 8.15E-09 | 6.03 | 9.1704051 | 7.16E-02 | 23423960  | 23424083  | NC_000008.10 |
| cg00949661 | 7.15E-08 | 8.17E-09 | 6.03 | 9.168922  | 8.55E-02 | 50214496  | 50214619  | NC_000020.10 |
| cg22302929 | 7.15E-08 | 8.17E-09 | 6.03 | 9.1682569 | 1.35E-01 | 28554373  | 28554496  | NC_000006.11 |
| cg13698691 | 7.15E-08 | 8.17E-09 | 6.03 | 9.1682418 | 1.27E-01 | 32064660  | 32064783  | NC_000006.11 |
| cg20526432 | 7.15E-08 | 8.17E-09 | 6.03 | 9.1682098 | 4.46E-02 | 123925357 | 123925480 | NC_000012.11 |
| cg03543448 | 7.16E-08 | 8.18E-09 | 6.03 | 9.1675888 | 6.21E-02 | 4384967   | 4385090   | NC_000016.9  |
| cg08832069 | 7.16E-08 | 8.18E-09 | 6.03 | 9.1675779 | 1.01E-01 | 57387511  | 57387634  | NC_000010.10 |
| cg15479068 | 7.17E-08 | 8.20E-09 | 6.03 | 9.165472  | 1.53E-01 | 33454444  | 33454567  | NC_000022.10 |
| cg01014615 | 7.18E-08 | 8.21E-09 | 6.03 | 9.1642324 | 1.34E-01 | 177027621 | 177027744 | NC_000002.11 |
| cg06354392 | 7.18E-08 | 8.21E-09 | 6.03 | 9.1634889 | 1.68E-01 | 176970064 | 176970187 | NC_000002.11 |
| cg24029082 | 7.18E-08 | 8.21E-09 | 6.03 | 9.163409  | 8.61E-02 | 32057311  | 32057434  | NC_000006.11 |

|            |          |          |      |           |          |           |           |              |
|------------|----------|----------|------|-----------|----------|-----------|-----------|--------------|
| cg18596636 | 7.19E-08 | 8.22E-09 | 6.03 | 9.1630509 | 6.74E-02 | 26915732  | 26915855  | NC_000015.9  |
| cg15674193 | 7.19E-08 | 8.22E-09 | 6.03 | 9.1625779 | 2.15E-01 | 238535910 | 238536033 | NC_000002.11 |
| cg16742090 | 7.19E-08 | 8.23E-09 | 6.03 | 9.1619169 | 5.73E-02 | 55067650  | 55067773  | NC_000016.9  |
| cg24361385 | 7.19E-08 | 8.23E-09 | 6.03 | 9.1619028 | 1.29E-01 | 27164709  | 27164832  | NC_000007.13 |
| cg15098957 | 7.20E-08 | 8.24E-09 | 6.03 | 9.1607389 | 1.07E-01 | 39962116  | 39962239  | NC_000019.9  |
| cg26777729 | 7.20E-08 | 8.24E-09 | 6.03 | 9.1605299 | 1.60E-01 | 153840536 | 153840659 | NC_000003.11 |
| cg04553309 | 7.20E-08 | 8.24E-09 | 6.03 | 9.1604691 | 3.36E-02 | 17279609  | 17279732  | NC_000019.9  |
| cg25561382 | 7.21E-08 | 8.25E-09 | 6.03 | 9.1593055 | 9.34E-02 | 18795207  | 18795330  | NC_000019.9  |
| cg02862505 | 7.23E-08 | 8.27E-09 | 6.03 | 9.1571853 | 1.66E-01 | 114939167 | 114939290 | NC_000012.11 |
| cg15165122 | 7.24E-08 | 8.28E-09 | 6.02 | 9.1552139 | 1.54E-01 | 71206291  | 71206414  | NC_000002.11 |
| cg10056356 | 7.25E-08 | 8.29E-09 | 6.02 | 9.1538688 | 1.49E-01 | 144621898 | 144622021 | NC_000004.11 |
| cg17588585 | 7.28E-08 | 8.32E-09 | 6.02 | 9.1502908 | 5.80E-02 | 62574200  | 62574323  | NC_000007.13 |
| cg09674215 | 7.28E-08 | 8.33E-09 | 6.02 | 9.1491146 | 1.38E-01 | 19158134  | 19158257  | NC_000007.13 |
| cg16885511 | 7.29E-08 | 8.34E-09 | 6.02 | 9.1485628 | 4.63E-02 | 39502836  | 39502959  | NC_000017.10 |
| cg05950572 | 7.29E-08 | 8.34E-09 | 6.02 | 9.148066  | 1.20E-01 | 14004854  | 14004977  | NC_000011.9  |
| cg04807567 | 7.29E-08 | 8.34E-09 | 6.02 | 9.1479833 | 5.11E-02 | 171381284 | 171381407 | NC_000002.11 |
| cg03193589 | 7.31E-08 | 8.37E-09 | 6.02 | 9.1454483 | 1.49E-01 | 14864757  | 14864880  | NC_000003.11 |
| cg19563158 | 7.31E-08 | 8.37E-09 | 6.02 | 9.1451879 | 1.01E-01 | 112284205 | 112284328 | NC_000012.11 |
| cg11594452 | 7.31E-08 | 8.37E-09 | 6.02 | 9.144973  | 1.11E-01 | 29778415  | 29778538  | NC_000022.10 |
| cg00384632 | 7.32E-08 | 8.37E-09 | 6.02 | 9.1445492 | 3.90E-02 | 2194791   | 2194914   | NC_000007.13 |
| cg21783371 | 7.32E-08 | 8.38E-09 | 6.02 | 9.1441667 | 2.46E-02 | 23865706  | 23865829  | NC_000002.11 |
| cg02482624 | 7.33E-08 | 8.39E-09 | 6.02 | 9.1425963 | 3.04E-02 | 162186347 | 162186470 | NC_000001.10 |
| cg22736956 | 7.33E-08 | 8.39E-09 | 6.02 | 9.1421564 | 3.87E-02 | 64893575  | 64893698  | NC_000011.9  |
| cg11165752 | 7.33E-08 | 8.40E-09 | 6.02 | 9.1418943 | 1.17E-01 | 27198189  | 27198312  | NC_000007.13 |
| cg06511276 | 7.33E-08 | 8.40E-09 | 6.02 | 9.1418646 | 1.02E-01 | 27155069  | 27155192  | NC_000001.10 |

|            |          |          |      |           |          |           |           |              |
|------------|----------|----------|------|-----------|----------|-----------|-----------|--------------|
| cg15119027 | 7.35E-08 | 8.42E-09 | 6.02 | 9.1396669 | 1.77E-01 | 69634363  | 69634486  | NC_000011.9  |
| cg04244354 | 7.36E-08 | 8.43E-09 | 6.02 | 9.1385509 | 1.26E-01 | 25908279  | 25908402  | NC_000008.10 |
| cg18299578 | 7.36E-08 | 8.43E-09 | 6.02 | 9.1383005 | 1.12E-01 | 29235928  | 29236051  | NC_000014.8  |
| cg10857558 | 7.36E-08 | 8.43E-09 | 6.02 | 9.1379412 | 1.52E-01 | 90035421  | 90035544  | NC_000004.11 |
| cg13900008 | 7.37E-08 | 8.44E-09 | 6.02 | 9.136877  | 7.22E-02 | 49298580  | 49298703  | NC_000022.10 |
| cg23104439 | 7.37E-08 | 8.44E-09 | 6.02 | 9.1365478 | 3.70E-02 | 54412780  | 54412903  | NC_000014.8  |
| cg26458072 | 7.37E-08 | 8.45E-09 | 6.02 | 9.1361992 | 1.07E-01 | 102279694 | 102279817 | NC_000010.10 |
| cg10277651 | 7.38E-08 | 8.45E-09 | 6.02 | 9.1352594 | 1.73E-01 | 623361    | 623484    | NC_000020.10 |
| cg24237500 | 7.38E-08 | 8.45E-09 | 6.02 | 9.1352074 | 1.03E-01 | 157065152 | 157065275 | NC_000007.13 |
| cg27200833 | 7.39E-08 | 8.46E-09 | 6.02 | 9.1343358 | 1.12E-01 | 74421909  | 74422032  | NC_000015.9  |
| cg00252616 | 7.39E-08 | 8.46E-09 | 6.02 | 9.1342143 | 3.73E-02 | 698303    | 698426    | NC_000004.11 |
| cg15613292 | 7.39E-08 | 8.47E-09 | 6.02 | 9.1339581 | 5.56E-02 | 232481541 | 232481664 | NC_000002.11 |
| cg09284066 | 7.40E-08 | 8.47E-09 | 6.02 | 9.1331869 | 1.15E-01 | 25892407  | 25892530  | NC_000007.13 |
| cg03534031 | 7.40E-08 | 8.47E-09 | 6.02 | 9.1331353 | 1.06E-01 | 139139105 | 139139228 | NC_000005.9  |
| cg01452189 | 7.40E-08 | 8.48E-09 | 6.02 | 9.1319418 | 2.91E-02 | 25189426  | 25189549  | NC_000016.9  |
| cg03885264 | 7.41E-08 | 8.49E-09 | 6.02 | 9.1311725 | 3.03E-02 | 73275316  | 73275439  | NC_000007.13 |
| cg19851416 | 7.42E-08 | 8.50E-09 | 6.02 | 9.1299797 | 6.61E-02 | 102095578 | 102095701 | NC_000008.10 |
| cg16701124 | 7.42E-08 | 8.50E-09 | 6.02 | 9.1295332 | 1.24E-01 | 115406970 | 115407093 | NC_000004.11 |
| cg07461072 | 7.43E-08 | 8.51E-09 | 6.02 | 9.1288004 | 1.05E-01 | 28073940  | 28074063  | NC_000016.9  |
| cg22906273 | 7.44E-08 | 8.52E-09 | 6.02 | 9.127404  | 1.23E-01 | 21686253  | 21686376  | NC_000020.10 |
| cg13223402 | 7.44E-08 | 8.52E-09 | 6.02 | 9.1271327 | 1.45E-01 | 47797133  | 47797256  | NC_000002.11 |
| cg13231131 | 7.45E-08 | 8.53E-09 | 6.02 | 9.1261061 | 8.51E-02 | 167085220 | 167085343 | NC_000001.10 |
| cg02254574 | 7.45E-08 | 8.54E-09 | 6.02 | 9.1258727 | 1.31E-01 | 32483640  | 32483763  | NC_000017.10 |
| cg10172669 | 7.45E-08 | 8.54E-09 | 6.02 | 9.1257321 | 1.53E-01 | 42154840  | 42154963  | NC_000004.11 |
| cg22405226 | 7.45E-08 | 8.54E-09 | 6.02 | 9.1256134 | 5.15E-02 | 82616606  | 82616729  | NC_000006.11 |

|            |          |          |      |           |          |           |           |              |
|------------|----------|----------|------|-----------|----------|-----------|-----------|--------------|
| cg05099196 | 7.45E-08 | 8.54E-09 | 6.02 | 9.1255669 | 5.76E-02 | 16144282  | 16144405  | NC_000019.9  |
| cg16292773 | 7.45E-08 | 8.54E-09 | 6.02 | 9.1251462 | 4.29E-02 | 66211550  | 66211673  | NC_000012.11 |
| cg07315858 | 7.45E-08 | 8.55E-09 | 6.02 | 9.1247259 | 1.12E-01 | 13934368  | 13934491  | NC_000010.10 |
| cg12360046 | 7.46E-08 | 8.55E-09 | 6.02 | 9.1242289 | 7.36E-02 | 15568511  | 15568634  | NC_000019.9  |
| cg21027599 | 7.46E-08 | 8.56E-09 | 6.02 | 9.1235869 | 8.95E-02 | 159639549 | 159639672 | NC_000006.11 |
| cg04592505 | 7.46E-08 | 8.56E-09 | 6.02 | 9.1233379 | 7.08E-02 | 129828720 | 129828843 | NC_000010.10 |
| cg03506640 | 7.47E-08 | 8.56E-09 | 6.02 | 9.1228183 | 1.82E-01 | 85997753  | 85997876  | NC_000014.8  |
| cg13154413 | 7.47E-08 | 8.57E-09 | 6.02 | 9.1220109 | 1.05E-01 | 104195181 | 104195304 | NC_000014.8  |
| cg03605542 | 7.47E-08 | 8.57E-09 | 6.02 | 9.1220025 | 1.08E-01 | 59929339  | 59929462  | NC_000005.9  |
| cg18760621 | 7.50E-08 | 8.60E-09 | 6.02 | 9.1190643 | 1.99E-01 | 158083299 | 158083422 | NC_000001.10 |
| cg16983282 | 7.50E-08 | 8.60E-09 | 6.02 | 9.1186361 | 1.02E-01 | 9871831   | 9871954   | NC_000017.10 |
| cg17794299 | 7.50E-08 | 8.60E-09 | 6.02 | 9.1184565 | 2.37E-01 | 623187    | 623310    | NC_000020.10 |
| cg05016408 | 7.51E-08 | 8.61E-09 | 6.02 | 9.1176627 | 1.74E-01 | 150326174 | 150326297 | NC_000005.9  |
| cg20950011 | 7.51E-08 | 8.61E-09 | 6.02 | 9.1170387 | 1.51E-01 | 12254377  | 12254500  | NC_000018.9  |
| cg24767540 | 7.51E-08 | 8.62E-09 | 6.02 | 9.1166473 | 1.61E-01 | 102985714 | 102985837 | NC_000010.10 |
| cg05438320 | 7.51E-08 | 8.62E-09 | 6.02 | 9.116602  | 1.60E-01 | 25746120  | 25746243  | NC_000013.10 |
| cg02780988 | 7.53E-08 | 8.64E-09 | 6.02 | 9.1144776 | 5.07E-02 | 39646994  | 39647117  | NC_000017.10 |
| cg19292625 | 7.53E-08 | 8.64E-09 | 6.02 | 9.1138688 | 6.28E-02 | 105951315 | 105951438 | NC_000011.9  |
| cg09656389 | 7.54E-08 | 8.64E-09 | 6.02 | 9.1134588 | 1.12E-01 | 31839790  | 31839913  | NC_000011.9  |
| cg00223767 | 7.54E-08 | 8.65E-09 | 6.02 | 9.1132763 | 9.71E-02 | 75831715  | 75831838  | NC_000011.9  |
| cg22901664 | 7.55E-08 | 8.67E-09 | 6.02 | 9.1109577 | 3.39E-02 | 76005319  | 76005442  | NC_000007.13 |
| cg17804723 | 7.57E-08 | 8.68E-09 | 6.02 | 9.1093564 | 7.07E-02 | 114300030 | 114300153 | NC_000002.11 |
| cg16948082 | 7.57E-08 | 8.69E-09 | 6.02 | 9.1088965 | 2.33E-02 | 239197356 | 239197479 | NC_000002.11 |
| cg03072003 | 7.57E-08 | 8.69E-09 | 6.02 | 9.1084005 | 4.46E-02 | 133767993 | 133768116 | NC_000010.10 |
| cg06894687 | 7.58E-08 | 8.69E-09 | 6.02 | 9.1081301 | 1.50E-01 | 180123317 | 180123440 | NC_000001.10 |



|            |          |          |      |           |          |           |           |              |
|------------|----------|----------|------|-----------|----------|-----------|-----------|--------------|
| cg06498267 | 7.58E-08 | 8.70E-09 | 6.02 | 9.1072772 | 1.39E-01 | 45695922  | 45696045  | NC_000005.9  |
| cg10709432 | 7.59E-08 | 8.71E-09 | 6.02 | 9.1066526 | 2.46E-02 | 3361130   | 3361253   | NC_000001.10 |
| cg12539917 | 7.59E-08 | 8.71E-09 | 6.02 | 9.1060399 | 1.03E-01 | 48896415  | 48896538  | NC_000022.10 |
| cg24907075 | 7.60E-08 | 8.73E-09 | 6.01 | 9.1041558 | 9.15E-02 | 12515481  | 12515604  | NC_000019.9  |
| cg06478102 | 7.61E-08 | 8.73E-09 | 6.01 | 9.1036831 | 8.82E-02 | 73992274  | 73992397  | NC_000015.9  |
| cg00228118 | 7.62E-08 | 8.75E-09 | 6.01 | 9.1015476 | 2.06E-02 | 110478622 | 110478745 | NC_000009.11 |
| cg20034792 | 7.63E-08 | 8.75E-09 | 6.01 | 9.1014467 | 1.94E-01 | 29521781  | 29521904  | NC_000006.11 |
| cg27656658 | 7.63E-08 | 8.75E-09 | 6.01 | 9.1013608 | 1.55E-01 | 46628224  | 46628347  | NC_000017.10 |
| cg27586207 | 7.64E-08 | 8.77E-09 | 6.01 | 9.099869  | 7.96E-02 | 153666106 | 153666229 | NC_000001.10 |
| cg00735454 | 7.64E-08 | 8.77E-09 | 6.01 | 9.099677  | 1.06E-01 | 44595496  | 44595619  | NC_000013.10 |
| cg00718541 | 7.65E-08 | 8.78E-09 | 6.01 | 9.0987468 | 3.21E-02 | 2336855   | 2336978   | NC_000016.9  |
| cg17398677 | 7.65E-08 | 8.78E-09 | 6.01 | 9.0982181 | 1.04E-01 | 21376921  | 21377044  | NC_000020.10 |
| cg04469219 | 7.65E-08 | 8.78E-09 | 6.01 | 9.0981528 | 1.83E-01 | 112760929 | 112761052 | NC_000013.10 |
| cg17596731 | 7.65E-08 | 8.78E-09 | 6.01 | 9.0981499 | 4.77E-02 | 1726243   | 1726366   | NC_000005.9  |
| cg18220666 | 7.65E-08 | 8.78E-09 | 6.01 | 9.0979672 | 7.11E-02 | 75252994  | 75253117  | NC_000004.11 |
| cg23754320 | 7.65E-08 | 8.79E-09 | 6.01 | 9.0974528 | 1.39E-01 | 115135138 | 115135261 | NC_000012.11 |
| cg00221096 | 7.66E-08 | 8.79E-09 | 6.01 | 9.0969925 | 3.55E-02 | 67312052  | 67312175  | NC_000017.10 |
| cg24828975 | 7.66E-08 | 8.79E-09 | 6.01 | 9.0968759 | 4.44E-02 | 50422380  | 50422503  | NC_000012.11 |
| cg04503600 | 7.66E-08 | 8.79E-09 | 6.01 | 9.0968111 | 1.29E-01 | 140798188 | 140798311 | NC_000005.9  |
| cg27538091 | 7.66E-08 | 8.79E-09 | 6.01 | 9.0966896 | 6.61E-02 | 31246042  | 31246165  | NC_000001.10 |
| cg02543075 | 7.67E-08 | 8.81E-09 | 6.01 | 9.0950797 | 1.53E-01 | 217236425 | 217236548 | NC_000002.11 |
| cg16043635 | 7.67E-08 | 8.81E-09 | 6.01 | 9.0949464 | 6.30E-02 | 3416414   | 3416537   | NC_000001.10 |
| cg12625139 | 7.67E-08 | 8.81E-09 | 6.01 | 9.0948437 | 6.34E-02 | 160426951 | 160427074 | NC_000006.11 |
| cg17987176 | 7.67E-08 | 8.81E-09 | 6.01 | 9.0946488 | 1.75E-01 | 181452839 | 181452962 | NC_000001.10 |
| cg24729378 | 7.68E-08 | 8.82E-09 | 6.01 | 9.0937697 | 1.19E-01 | 43609431  | 43609554  | NC_000001.10 |

|            |          |          |      |           |          |           |           |              |
|------------|----------|----------|------|-----------|----------|-----------|-----------|--------------|
| cg16611005 | 7.68E-08 | 8.82E-09 | 6.01 | 9.0936869 | 1.76E-01 | 60296169  | 60296292  | NC_000015.9  |
| cg07503630 | 7.69E-08 | 8.83E-09 | 6.01 | 9.0932048 | 8.29E-02 | 233351564 | 233351687 | NC_000002.11 |
| cg20307885 | 7.69E-08 | 8.83E-09 | 6.01 | 9.0931076 | 1.26E-01 | 27130090  | 27130213  | NC_000007.13 |
| cg22332910 | 7.69E-08 | 8.83E-09 | 6.01 | 9.0929571 | 1.31E-01 | 35641226  | 35641349  | NC_000011.9  |
| cg16639692 | 7.69E-08 | 8.84E-09 | 6.01 | 9.0920587 | 1.14E-01 | 43037666  | 43037789  | NC_000005.9  |
| cg06149302 | 7.69E-08 | 8.84E-09 | 6.01 | 9.0920069 | 1.75E-01 | 134147143 | 134147266 | NC_000011.9  |
| cg21109744 | 7.70E-08 | 8.84E-09 | 6.01 | 9.0915952 | 1.22E-01 | 126113743 | 126113866 | NC_000003.11 |
| cg09321747 | 7.70E-08 | 8.85E-09 | 6.01 | 9.0904507 | 1.41E-01 | 23821445  | 23821568  | NC_000014.8  |
| cg25393388 | 7.70E-08 | 8.85E-09 | 6.01 | 9.0904267 | 5.89E-02 | 30454518  | 30454641  | NC_000006.11 |
| cg21004042 | 7.71E-08 | 8.86E-09 | 6.01 | 9.0896183 | 1.32E-01 | 70033902  | 70034025  | NC_000001.10 |
| cg10555583 | 7.72E-08 | 8.87E-09 | 6.01 | 9.0887794 | 1.65E-01 | 1784276   | 1784399   | NC_000020.10 |
| cg04051335 | 7.73E-08 | 8.88E-09 | 6.01 | 9.0876784 | 9.37E-02 | 150157442 | 150157565 | NC_000005.9  |
| cg07162905 | 7.73E-08 | 8.88E-09 | 6.01 | 9.0876346 | 1.40E-02 | 28887928  | 28888051  | NC_000006.11 |
| cg04267765 | 7.74E-08 | 8.89E-09 | 6.01 | 9.0861175 | 1.00E-01 | 95390267  | 95390390  | NC_000001.10 |
| cg06755825 | 7.74E-08 | 8.90E-09 | 6.01 | 9.0853487 | 1.20E-01 | 96959633  | 96959756  | NC_000015.9  |
| cg16036584 | 7.75E-08 | 8.90E-09 | 6.01 | 9.0850066 | 7.56E-02 | 102198453 | 102198576 | NC_000005.9  |
| cg16824901 | 7.75E-08 | 8.91E-09 | 6.01 | 9.0844334 | 6.46E-02 | 11302243  | 11302366  | NC_000008.10 |
| cg11423909 | 7.75E-08 | 8.91E-09 | 6.01 | 9.084147  | 1.04E-01 | 126010451 | 126010574 | NC_000003.11 |
| cg27119919 | 7.75E-08 | 8.91E-09 | 6.01 | 9.0839907 | 9.64E-02 | 60684332  | 60684455  | NC_000011.9  |
| cg06330055 | 7.75E-08 | 8.91E-09 | 6.01 | 9.0837271 | 4.21E-02 | 129564162 | 129564285 | NC_000011.9  |
| cg22875872 | 7.75E-08 | 8.91E-09 | 6.01 | 9.0836773 | 1.97E-01 | 44031756  | 44031879  | NC_000001.10 |
| cg11331739 | 7.78E-08 | 8.94E-09 | 6.01 | 9.0807262 | 6.76E-02 | 53734538  | 53734661  | NC_000004.11 |
| cg21729992 | 7.79E-08 | 8.95E-09 | 6.01 | 9.0791306 | 1.45E-01 | 55200370  | 55200493  | NC_000020.10 |
| cg16424078 | 7.79E-08 | 8.96E-09 | 6.01 | 9.0786249 | 1.45E-01 | 1384705   | 1384828   | NC_000006.11 |
| cg17285663 | 7.80E-08 | 8.96E-09 | 6.01 | 9.0782296 | 1.76E-01 | 43597210  | 43597333  | NC_000011.9  |

|            |          |          |      |           |          |           |           |              |
|------------|----------|----------|------|-----------|----------|-----------|-----------|--------------|
| cg10694727 | 7.80E-08 | 8.96E-09 | 6.01 | 9.078193  | 9.35E-02 | 143666890 | 143667013 | NC_000008.10 |
| cg11140305 | 7.80E-08 | 8.97E-09 | 6.01 | 9.0773986 | 3.28E-02 | 249106302 | 249106425 | NC_000001.10 |
| cg06243965 | 7.80E-08 | 8.97E-09 | 6.01 | 9.0771346 | 3.46E-02 | 2120669   | 2120792   | NC_000016.9  |
| cg24586758 | 7.81E-08 | 8.98E-09 | 6.01 | 9.0758754 | 1.34E-01 | 140480200 | 140480323 | NC_000005.9  |
| cg02227623 | 7.81E-08 | 8.99E-09 | 6.01 | 9.0755368 | 1.09E-01 | 79739918  | 79740041  | NC_000002.11 |
| cg06073351 | 7.81E-08 | 8.99E-09 | 6.01 | 9.0754977 | 1.28E-01 | 22625665  | 22625788  | NC_000010.10 |
| cg14424407 | 7.83E-08 | 9.01E-09 | 6.01 | 9.0732645 | 9.80E-02 | 36734838  | 36734961  | NC_000017.10 |
| cg11507713 | 7.83E-08 | 9.01E-09 | 6.01 | 9.0732054 | 7.62E-02 | 10180530  | 10180653  | NC_000017.10 |
| cg03126579 | 7.84E-08 | 9.02E-09 | 6.01 | 9.0724123 | 1.82E-01 | 3822189   | 3822312   | NC_000019.9  |
| cg24427504 | 7.85E-08 | 9.03E-09 | 6.01 | 9.0707771 | 1.32E-01 | 133481520 | 133481643 | NC_000012.11 |
| cg01715455 | 7.86E-08 | 9.04E-09 | 6.01 | 9.0701302 | 1.43E-01 | 25062827  | 25062950  | NC_000020.10 |
| cg22796509 | 7.86E-08 | 9.04E-09 | 6.01 | 9.0699306 | 1.06E-01 | 147110295 | 147110418 | NC_000003.11 |
| cg13842240 | 7.86E-08 | 9.04E-09 | 6.01 | 9.0698117 | 1.04E-01 | 13539213  | 13539336  | NC_000004.11 |
| cg22616430 | 7.86E-08 | 9.04E-09 | 6.01 | 9.0697856 | 8.19E-02 | 31759728  | 31759851  | NC_000006.11 |
| cg19617741 | 7.86E-08 | 9.04E-09 | 6.01 | 9.0692971 | 8.72E-02 | 217454810 | 217454933 | NC_000002.11 |
| cg11155356 | 7.87E-08 | 9.06E-09 | 6.01 | 9.0676882 | 7.16E-02 | 134114892 | 134115015 | NC_000008.10 |
| cg01749500 | 7.88E-08 | 9.07E-09 | 6.01 | 9.0669066 | 6.41E-02 | 68027075  | 68027198  | NC_000016.9  |
| cg23241473 | 7.89E-08 | 9.08E-09 | 6.01 | 9.06534   | 8.36E-02 | 58507227  | 58507350  | NC_000020.10 |
| cg24521756 | 7.89E-08 | 9.08E-09 | 6.01 | 9.0650703 | 8.54E-02 | 96912739  | 96912862  | NC_000015.9  |
| cg16409039 | 7.91E-08 | 9.10E-09 | 6.01 | 9.0633767 | 1.28E-01 | 101841526 | 101841649 | NC_000010.10 |
| cg22934849 | 7.91E-08 | 9.10E-09 | 6.01 | 9.0632586 | 1.06E-01 | 149066130 | 149066253 | NC_000006.11 |
| cg00173063 | 7.91E-08 | 9.11E-09 | 6.01 | 9.0627517 | 6.08E-02 | 144442437 | 144442560 | NC_000008.10 |
| cg16564135 | 7.92E-08 | 9.11E-09 | 6.01 | 9.0619174 | 7.95E-02 | 122628959 | 122629082 | NC_000011.9  |
| cg00178249 | 7.92E-08 | 9.12E-09 | 6.01 | 9.0610071 | 1.42E-01 | 77589908  | 77590031  | NC_000008.10 |
| cg24170248 | 7.92E-08 | 9.12E-09 | 6.01 | 9.0609984 | 1.12E-01 | 56015067  | 56015190  | NC_000019.9  |

|            |          |          |      |           |          |           |           |              |
|------------|----------|----------|------|-----------|----------|-----------|-----------|--------------|
| cg07787240 | 7.92E-08 | 9.12E-09 | 6.01 | 9.0609856 | 1.04E-01 | 9130576   | 9130699   | NC_000001.10 |
| cg01169610 | 7.92E-08 | 9.12E-09 | 6.01 | 9.0608795 | 4.93E-02 | 99135471  | 99135594  | NC_000002.11 |
| cg20751361 | 7.93E-08 | 9.13E-09 | 6.01 | 9.0597967 | 1.77E-01 | 37493945  | 37494068  | NC_000003.11 |
| cg05600740 | 7.93E-08 | 9.14E-09 | 6.01 | 9.059537  | 1.73E-01 | 58026010  | 58026133  | NC_000012.11 |
| cg22778503 | 7.94E-08 | 9.14E-09 | 6.01 | 9.0590503 | 8.05E-02 | 106857188 | 106857311 | NC_000014.8  |
| cg12932211 | 7.94E-08 | 9.14E-09 | 6.01 | 9.0589827 | 6.92E-02 | 156351010 | 156351133 | NC_000005.9  |
| cg24291461 | 7.94E-08 | 9.14E-09 | 6.01 | 9.058753  | 3.28E-02 | 102749544 | 102749667 | NC_000010.10 |
| cg02865068 | 7.94E-08 | 9.14E-09 | 6.01 | 9.0586714 | 1.03E-01 | 31848347  | 31848470  | NC_000011.9  |
| cg14091372 | 7.95E-08 | 9.15E-09 | 6.01 | 9.0578177 | 7.48E-02 | 80339751  | 80339874  | NC_000005.9  |
| cg00387200 | 7.96E-08 | 9.17E-09 | 6.01 | 9.0561905 | 5.91E-02 | 123442326 | 123442449 | NC_000010.10 |
| cg20436810 | 7.97E-08 | 9.18E-09 | 6.01 | 9.0552616 | 5.21E-02 | 48616351  | 48616474  | NC_000003.11 |
| cg19738283 | 7.98E-08 | 9.19E-09 | 6    | 9.0542455 | 1.53E-01 | 176976802 | 176976925 | NC_000002.11 |
| cg10962524 | 7.98E-08 | 9.20E-09 | 6    | 9.0531299 | 1.13E-01 | 83017009  | 83017132  | NC_000005.9  |
| cg21196860 | 7.99E-08 | 9.20E-09 | 6    | 9.0529927 | 8.27E-02 | 71431796  | 71431919  | NC_000017.10 |
| cg24485284 | 7.99E-08 | 9.20E-09 | 6    | 9.0523788 | 3.96E-02 | 30358536  | 30358659  | NC_000011.9  |
| cg13326048 | 7.99E-08 | 9.20E-09 | 6    | 9.052235  | 1.53E-01 | 28641863  | 28641986  | NC_000006.11 |
| cg17100528 | 7.99E-08 | 9.21E-09 | 6    | 9.0521506 | 4.20E-02 | 72099912  | 72100035  | NC_000015.9  |
| cg00885843 | 7.99E-08 | 9.21E-09 | 6    | 9.0521091 | 6.23E-02 | 131058072 | 131058195 | NC_000002.11 |
| cg07885289 | 8.00E-08 | 9.22E-09 | 6    | 9.0505136 | 1.43E-01 | 35294595  | 35294718  | NC_000017.10 |
| cg03766620 | 8.01E-08 | 9.22E-09 | 6    | 9.0504052 | 1.70E-01 | 127783082 | 127783205 | NC_000002.11 |
| cg10932086 | 8.01E-08 | 9.22E-09 | 6    | 9.0500648 | 4.70E-02 | 90041348  | 90041471  | NC_000014.8  |
| cg13750214 | 8.02E-08 | 9.24E-09 | 6    | 9.0487125 | 7.47E-02 | 1302619   | 1302742   | NC_000019.9  |
| cg18235734 | 8.02E-08 | 9.24E-09 | 6    | 9.0484863 | 1.11E-01 | 91301731  | 91301854  | NC_000001.10 |
| cg13206017 | 8.02E-08 | 9.24E-09 | 6    | 9.0482655 | 1.68E-01 | 187388225 | 187388348 | NC_000003.11 |
| cg17626385 | 8.03E-08 | 9.25E-09 | 6    | 9.0477203 | 8.55E-02 | 30909928  | 30910051  | NC_000006.11 |

|            |          |          |   |           |          |           |           |              |
|------------|----------|----------|---|-----------|----------|-----------|-----------|--------------|
| cg20339230 | 8.03E-08 | 9.25E-09 | 6 | 9.0473499 | 1.58E-01 | 92937360  | 92937483  | NC_000015.9  |
| cg18295744 | 8.03E-08 | 9.26E-09 | 6 | 9.046828  | 1.13E-01 | 80872926  | 80873049  | NC_000010.10 |
| cg18803104 | 8.03E-08 | 9.26E-09 | 6 | 9.0465934 | 1.97E-01 | 28956324  | 28956447  | NC_000006.11 |
| cg26422059 | 8.04E-08 | 9.26E-09 | 6 | 9.0460699 | 1.68E-01 | 237146110 | 237146233 | NC_000002.11 |
| cg26564172 | 8.04E-08 | 9.27E-09 | 6 | 9.0454746 | 9.99E-02 | 183728338 | 183728461 | NC_000001.10 |
| cg21359747 | 8.05E-08 | 9.28E-09 | 6 | 9.0443061 | 1.75E-01 | 101420636 | 101420759 | NC_000015.9  |
| cg14732998 | 8.05E-08 | 9.28E-09 | 6 | 9.0438504 | 2.27E-01 | 37997831  | 37997954  | NC_000019.9  |
| cg06652523 | 8.06E-08 | 9.29E-09 | 6 | 9.0433532 | 1.03E-01 | 57352723  | 57352846  | NC_000019.9  |
| cg13640145 | 8.06E-08 | 9.29E-09 | 6 | 9.0431457 | 1.42E-01 | 122685651 | 122685774 | NC_000004.11 |
| cg06785712 | 8.06E-08 | 9.29E-09 | 6 | 9.0430579 | 3.58E-02 | 86888624  | 86888747  | NC_000001.10 |
| cg04789125 | 8.06E-08 | 9.29E-09 | 6 | 9.0428476 | 6.91E-02 | 242798512 | 242798635 | NC_000002.11 |
| cg01612532 | 8.06E-08 | 9.30E-09 | 6 | 9.0426427 | 5.40E-02 | 23312026  | 23312149  | NC_000015.9  |
| cg25927375 | 8.06E-08 | 9.30E-09 | 6 | 9.0424814 | 7.14E-02 | 126294752 | 126294875 | NC_000011.9  |
| cg20815297 | 8.07E-08 | 9.30E-09 | 6 | 9.042142  | 8.69E-02 | 13541663  | 13541786  | NC_000004.11 |
| cg18973642 | 8.07E-08 | 9.30E-09 | 6 | 9.0416987 | 1.06E-01 | 92888042  | 92888165  | NC_000015.9  |
| cg06175955 | 8.07E-08 | 9.31E-09 | 6 | 9.0414645 | 1.04E-01 | 134703376 | 134703499 | NC_000010.10 |
| cg19355079 | 8.08E-08 | 9.32E-09 | 6 | 9.0402501 | 1.40E-01 | 23253218  | 23253341  | NC_000019.9  |
| cg02365360 | 8.08E-08 | 9.32E-09 | 6 | 9.0402347 | 1.09E-01 | 84455525  | 84455648  | NC_000013.10 |
| cg03380512 | 8.09E-08 | 9.32E-09 | 6 | 9.0395808 | 2.83E-02 | 107960476 | 107960599 | NC_000006.11 |
| cg27665327 | 8.11E-08 | 9.35E-09 | 6 | 9.0371382 | 7.51E-02 | 80866134  | 80866257  | NC_000015.9  |
| cg13988052 | 8.11E-08 | 9.35E-09 | 6 | 9.0370987 | 9.05E-02 | 83792237  | 83792360  | NC_000007.13 |
| cg16105687 | 8.11E-08 | 9.36E-09 | 6 | 9.0360485 | 1.32E-01 | 22805801  | 22805924  | NC_000019.9  |
| cg19248676 | 8.12E-08 | 9.37E-09 | 6 | 9.0348495 | 1.31E-01 | 115135926 | 115136049 | NC_000012.11 |
| cg26265820 | 8.13E-08 | 9.38E-09 | 6 | 9.0339547 | 3.05E-02 | 32825148  | 32825271  | NC_000006.11 |
| cg23085662 | 8.14E-08 | 9.39E-09 | 6 | 9.0330742 | 1.15E-01 | 59000860  | 59000983  | NC_000018.9  |

|            |          |          |   |           |          |           |           |              |
|------------|----------|----------|---|-----------|----------|-----------|-----------|--------------|
| cg01607569 | 8.15E-08 | 9.40E-09 | 6 | 9.0319843 | 3.40E-02 | 48696613  | 48696736  | NC_000003.11 |
| cg15947910 | 8.15E-08 | 9.40E-09 | 6 | 9.0318682 | 1.21E-01 | 55708795  | 55708918  | NC_000004.11 |
| cg06523022 | 8.16E-08 | 9.41E-09 | 6 | 9.03014   | 1.32E-01 | 86541766  | 86541889  | NC_000016.9  |
| cg14116463 | 8.16E-08 | 9.42E-09 | 6 | 9.0300215 | 9.85E-02 | 63641507  | 63641630  | NC_000007.13 |
| cg18121713 | 8.17E-08 | 9.43E-09 | 6 | 9.0287437 | 1.10E-01 | 17738759  | 17738882  | NC_000002.11 |
| cg20875427 | 8.17E-08 | 9.43E-09 | 6 | 9.0284498 | 1.35E-01 | 152585111 | 152585234 | NC_000002.11 |
| cg07788437 | 8.18E-08 | 9.44E-09 | 6 | 9.0275033 | 1.06E-01 | 1799952   | 1800075   | NC_000019.9  |
| cg03719793 | 8.19E-08 | 9.45E-09 | 6 | 9.0264251 | 9.66E-02 | 4557632   | 4557755   | NC_000005.9  |
| cg18729130 | 8.20E-08 | 9.46E-09 | 6 | 9.0255196 | 1.75E-02 | 66434530  | 66434653  | NC_000003.11 |
| cg27110886 | 8.20E-08 | 9.47E-09 | 6 | 9.0248596 | 9.23E-02 | 99734912  | 99735035  | NC_000010.10 |
| cg00025663 | 8.20E-08 | 9.47E-09 | 6 | 9.0247435 | 9.78E-02 | 10827685  | 10827808  | NC_000002.11 |
| cg01498609 | 8.21E-08 | 9.47E-09 | 6 | 9.0242219 | 1.95E-01 | 28733661  | 28733784  | NC_000006.11 |
| cg00862116 | 8.21E-08 | 9.48E-09 | 6 | 9.0238111 | 2.10E-01 | 87230344  | 87230467  | NC_000007.13 |
| cg11944933 | 8.21E-08 | 9.48E-09 | 6 | 9.0231415 | 5.72E-02 | 11320112  | 11320235  | NC_000008.10 |
| cg24318598 | 8.22E-08 | 9.49E-09 | 6 | 9.0228793 | 2.58E-02 | 70034186  | 70034309  | NC_000011.9  |
| cg19511590 | 8.22E-08 | 9.49E-09 | 6 | 9.022333  | 1.62E-01 | 51143207  | 51143330  | NC_000019.9  |
| cg10505024 | 8.23E-08 | 9.50E-09 | 6 | 9.0215881 | 9.22E-02 | 10602877  | 10603000  | NC_000019.9  |
| cg26672159 | 8.23E-08 | 9.50E-09 | 6 | 9.0213723 | 9.51E-02 | 30579650  | 30579773  | NC_000006.11 |
| cg14874337 | 8.23E-08 | 9.50E-09 | 6 | 9.0209212 | 1.05E-01 | 38864187  | 38864310  | NC_000019.9  |
| cg09252999 | 8.24E-08 | 9.51E-09 | 6 | 9.0198604 | 2.12E-01 | 31837429  | 31837552  | NC_000011.9  |
| cg17618987 | 8.26E-08 | 9.54E-09 | 6 | 9.0171384 | 6.85E-02 | 16190030  | 16190153  | NC_000022.10 |
| cg17019053 | 8.27E-08 | 9.55E-09 | 6 | 9.0165747 | 1.31E-01 | 74875263  | 74875386  | NC_000002.11 |
| cg21547708 | 8.27E-08 | 9.55E-09 | 6 | 9.016068  | 1.54E-01 | 71161160  | 71161283  | NC_000017.10 |
| cg11301060 | 8.27E-08 | 9.56E-09 | 6 | 9.015615  | 5.26E-02 | 79803202  | 79803325  | NC_000017.10 |
| cg11296759 | 8.28E-08 | 9.56E-09 | 6 | 9.0151355 | 1.02E-01 | 7592993   | 7593116   | NC_000012.11 |

|            |          |          |      |           |          |           |           |              |
|------------|----------|----------|------|-----------|----------|-----------|-----------|--------------|
| cg13516362 | 8.28E-08 | 9.56E-09 | 6    | 9.0150999 | 7.74E-02 | 11308987  | 11309110  | NC_000019.9  |
| cg18225991 | 8.29E-08 | 9.58E-09 | 6    | 9.0133811 | 4.74E-02 | 96851949  | 96852072  | NC_000014.8  |
| cg07018580 | 8.29E-08 | 9.58E-09 | 6    | 9.0132487 | 9.01E-02 | 59480501  | 59480624  | NC_000011.9  |
| cg23097402 | 8.31E-08 | 9.61E-09 | 6    | 9.0106265 | 1.31E-01 | 50883394  | 50883517  | NC_000001.10 |
| cg05006304 | 8.31E-08 | 9.61E-09 | 6    | 9.0105568 | 6.73E-02 | 111953944 | 111954067 | NC_000011.9  |
| cg02731554 | 8.32E-08 | 9.61E-09 | 6    | 9.0101922 | 5.29E-02 | 141694233 | 141694356 | NC_000005.9  |
| cg24441911 | 8.32E-08 | 9.61E-09 | 6    | 9.009812  | 3.76E-02 | 7280988   | 7281111   | NC_000012.11 |
| cg11941015 | 8.33E-08 | 9.63E-09 | 6    | 9.0085155 | 1.11E-01 | 191047984 | 191048107 | NC_000002.11 |
| cg17277615 | 8.34E-08 | 9.63E-09 | 6    | 9.007612  | 1.01E-01 | 22843847  | 22843970  | NC_000010.10 |
| cg03313945 | 8.34E-08 | 9.64E-09 | 6    | 9.007001  | 2.00E-01 | 100622158 | 100622281 | NC_000013.10 |
| cg06598461 | 8.34E-08 | 9.64E-09 | 6    | 9.006976  | 5.32E-02 | 49890873  | 49890996  | NC_000008.10 |
| cg18706888 | 8.34E-08 | 9.64E-09 | 6    | 9.0069612 | 9.52E-02 | 57352686  | 57352809  | NC_000019.9  |
| cg07376535 | 8.34E-08 | 9.65E-09 | 6    | 9.0065046 | 1.34E-01 | 905450    | 905573    | NC_000018.9  |
| cg24477567 | 8.36E-08 | 9.66E-09 | 6    | 9.0050475 | 1.05E-01 | 11495295  | 11495418  | NC_000019.9  |
| cg09795195 | 8.36E-08 | 9.67E-09 | 5.99 | 9.0042681 | 9.94E-02 | 57642628  | 57642751  | NC_000017.10 |
| cg06707765 | 8.37E-08 | 9.68E-09 | 5.99 | 9.0027975 | 1.03E-01 | 11604273  | 11604396  | NC_000008.10 |
| cg11043092 | 8.38E-08 | 9.69E-09 | 5.99 | 9.0018028 | 3.98E-02 | 6287904   | 6288027   | NC_000008.10 |
| cg04982308 | 8.39E-08 | 9.70E-09 | 5.99 | 9.0013133 | 1.50E-01 | 72353473  | 72353596  | NC_000017.10 |
| cg06660160 | 8.40E-08 | 9.71E-09 | 5.99 | 8.9998005 | 1.12E-01 | 139018890 | 139019013 | NC_000005.9  |
| cg10602908 | 8.41E-08 | 9.72E-09 | 5.99 | 8.9989734 | 6.85E-02 | 1348398   | 1348521   | NC_000008.10 |
| cg04304978 | 8.41E-08 | 9.72E-09 | 5.99 | 8.9985149 | 1.05E-01 | 8809772   | 8809895   | NC_000010.10 |
| cg21073212 | 8.41E-08 | 9.73E-09 | 5.99 | 8.9982062 | 1.01E-01 | 30866501  | 30866624  | NC_000020.10 |
| cg26283426 | 8.41E-08 | 9.73E-09 | 5.99 | 8.9980879 | 5.17E-02 | 41835937  | 41836060  | NC_000017.10 |
| cg17305266 | 8.41E-08 | 9.73E-09 | 5.99 | 8.9979146 | 1.86E-01 | 1391265   | 1391388   | NC_000006.11 |
| cg10120040 | 8.42E-08 | 9.74E-09 | 5.99 | 8.9966513 | 3.99E-02 | 43108769  | 43108892  | NC_000020.10 |

|            |          |          |      |           |          |           |           |              |
|------------|----------|----------|------|-----------|----------|-----------|-----------|--------------|
| cg16269733 | 8.43E-08 | 9.75E-09 | 5.99 | 8.9959223 | 1.29E-01 | 156616804 | 156616927 | NC_000001.10 |
| cg25903783 | 8.43E-08 | 9.75E-09 | 5.99 | 8.9955743 | 1.01E-01 | 59475486  | 59475609  | NC_000017.10 |
| cg05007325 | 8.44E-08 | 9.76E-09 | 5.99 | 8.995083  | 8.44E-02 | 34741493  | 34741616  | NC_000016.9  |
| cg17091301 | 8.44E-08 | 9.76E-09 | 5.99 | 8.9946981 | 5.59E-02 | 133171381 | 133171504 | NC_000002.11 |
| cg26879813 | 8.46E-08 | 9.78E-09 | 5.99 | 8.9927587 | 1.18E-01 | 180541897 | 180542020 | NC_000005.9  |
| cg13718418 | 8.46E-08 | 9.78E-09 | 5.99 | 8.9927084 | 1.20E-01 | 85672285  | 85672408  | NC_000012.11 |
| cg18182475 | 8.46E-08 | 9.78E-09 | 5.99 | 8.9925379 | 8.79E-02 | 26424383  | 26424506  | NC_000004.11 |
| cg02340826 | 8.46E-08 | 9.79E-09 | 5.99 | 8.99212   | 8.31E-02 | 121164646 | 121164769 | NC_000012.11 |
| cg21987356 | 8.48E-08 | 9.81E-09 | 5.99 | 8.9900417 | 6.71E-02 | 44199597  | 44199720  | NC_000007.13 |
| cg26349266 | 8.48E-08 | 9.81E-09 | 5.99 | 8.9896681 | 8.70E-02 | 57352074  | 57352197  | NC_000019.9  |
| cg05673098 | 8.50E-08 | 9.83E-09 | 5.99 | 8.9878007 | 1.50E-01 | 131752709 | 131752832 | NC_000003.11 |
| cg26988373 | 8.50E-08 | 9.84E-09 | 5.99 | 8.9874183 | 4.57E-02 | 32809450  | 32809573  | NC_000006.11 |
| cg20829967 | 8.50E-08 | 9.84E-09 | 5.99 | 8.9867965 | 7.21E-02 | 2191228   | 2191351   | NC_000007.13 |
| cg17673769 | 8.50E-08 | 9.84E-09 | 5.99 | 8.986633  | 1.96E-02 | 46707773  | 46707896  | NC_000002.11 |
| cg05825400 | 8.52E-08 | 9.86E-09 | 5.99 | 8.9850633 | 8.44E-02 | 982115    | 982238    | NC_000017.10 |
| cg09686308 | 8.52E-08 | 9.87E-09 | 5.99 | 8.9845155 | 7.48E-02 | 16284242  | 16284365  | NC_000019.9  |
| cg24121557 | 8.53E-08 | 9.87E-09 | 5.99 | 8.9839351 | 2.65E-02 | 33177819  | 33177942  | NC_000006.11 |
| cg04981940 | 8.54E-08 | 9.89E-09 | 5.99 | 8.9820082 | 7.53E-02 | 1398348   | 1398471   | NC_000001.10 |
| cg20019168 | 8.54E-08 | 9.89E-09 | 5.99 | 8.9818723 | 7.11E-02 | 54301570  | 54301693  | NC_000018.9  |
| cg16967640 | 8.55E-08 | 9.90E-09 | 5.99 | 8.9811633 | 1.13E-01 | 165205453 | 165205576 | NC_000001.10 |
| cg02824386 | 8.55E-08 | 9.90E-09 | 5.99 | 8.9810943 | 1.71E-01 | 114882603 | 114882726 | NC_000012.11 |
| cg15114013 | 8.55E-08 | 9.91E-09 | 5.99 | 8.9805062 | 7.61E-02 | 41159283  | 41159406  | NC_000001.10 |
| cg03248761 | 8.56E-08 | 9.91E-09 | 5.99 | 8.9798899 | 9.92E-02 | 81228965  | 81229088  | NC_000013.10 |
| cg08486875 | 8.56E-08 | 9.91E-09 | 5.99 | 8.9798193 | 1.09E-01 | 23386892  | 23387015  | NC_000019.9  |
| cg14179581 | 8.56E-08 | 9.92E-09 | 5.99 | 8.9792756 | 1.47E-01 | 50881502  | 50881625  | NC_000001.10 |



|            |          |          |      |           |          |           |           |              |
|------------|----------|----------|------|-----------|----------|-----------|-----------|--------------|
| cg10997718 | 8.57E-08 | 9.92E-09 | 5.99 | 8.978891  | 1.46E-01 | 162275690 | 162275813 | NC_000002.11 |
| cg18551225 | 8.57E-08 | 9.93E-09 | 5.99 | 8.9784199 | 7.75E-02 | 44695536  | 44695659  | NC_000006.11 |
| cg08561667 | 8.57E-08 | 9.93E-09 | 5.99 | 8.9783858 | 7.16E-02 | 54058440  | 54058563  | NC_000019.9  |
| cg04137702 | 8.58E-08 | 9.94E-09 | 5.99 | 8.977148  | 6.40E-02 | 50886878  | 50887001  | NC_000010.10 |
| cg01344518 | 8.59E-08 | 9.95E-09 | 5.99 | 8.9760046 | 8.85E-02 | 326728    | 326851    | NC_000016.9  |
| cg14595922 | 8.59E-08 | 9.96E-09 | 5.99 | 8.9755325 | 7.52E-02 | 140230251 | 140230374 | NC_000005.9  |
| cg02162069 | 8.60E-08 | 9.96E-09 | 5.99 | 8.9752726 | 8.17E-02 | 57352134  | 57352257  | NC_000019.9  |
| cg13840419 | 8.60E-08 | 9.96E-09 | 5.99 | 8.9750285 | 6.04E-02 | 97852983  | 97853106  | NC_000013.10 |
| cg26539524 | 8.60E-08 | 9.96E-09 | 5.99 | 8.9747311 | 1.93E-01 | 51221603  | 51221726  | NC_000019.9  |
| cg01324548 | 8.61E-08 | 9.97E-09 | 5.99 | 8.9740254 | 5.61E-02 | 1539318   | 1539441   | NC_000016.9  |
| cg14005246 | 8.61E-08 | 9.97E-09 | 5.99 | 8.9739956 | 1.23E-01 | 54413671  | 54413794  | NC_000014.8  |
| cg11265941 | 8.61E-08 | 9.97E-09 | 5.99 | 8.9738671 | 8.33E-02 | 25068738  | 25068861  | NC_000015.9  |
| cg17826753 | 8.61E-08 | 9.98E-09 | 5.99 | 8.9733043 | 1.76E-01 | 110987946 | 110988069 | NC_000008.10 |
| cg26259669 | 8.61E-08 | 9.98E-09 | 5.99 | 8.9732903 | 8.10E-02 | 22892221  | 22892344  | NC_000019.9  |
| cg21937969 | 8.62E-08 | 9.99E-09 | 5.99 | 8.9726857 | 7.11E-02 | 94155657  | 94155780  | NC_000001.10 |
| cg08260052 | 8.63E-08 | 1.00E-08 | 5.99 | 8.9711679 | 9.31E-02 | 3304449   | 3304572   | NC_000016.9  |
| cg21476494 | 8.63E-08 | 1.00E-08 | 5.99 | 8.9711135 | 1.20E-01 | 116043958 | 116044081 | NC_000012.11 |
| cg18807071 | 8.65E-08 | 1.00E-08 | 5.99 | 8.9681803 | 1.53E-01 | 207139408 | 207139531 | NC_000002.11 |
| cg08115183 | 8.65E-08 | 1.00E-08 | 5.99 | 8.9681448 | 1.62E-01 | 1705139   | 1705262   | NC_000007.13 |
| cg05140624 | 8.67E-08 | 1.00E-08 | 5.99 | 8.9668288 | 7.43E-02 | 129251445 | 129251568 | NC_000006.11 |
| cg24980413 | 8.67E-08 | 1.01E-08 | 5.99 | 8.9657833 | 8.40E-02 | 346987    | 347110    | NC_000005.9  |
| cg05357093 | 8.68E-08 | 1.01E-08 | 5.99 | 8.9650607 | 6.29E-02 | 169224907 | 169225030 | NC_000006.11 |
| cg26358338 | 8.68E-08 | 1.01E-08 | 5.99 | 8.9644335 | 1.27E-01 | 98891492  | 98891615  | NC_000011.9  |
| cg03998495 | 8.70E-08 | 1.01E-08 | 5.99 | 8.9631697 | 6.30E-02 | 107197949 | 107198072 | NC_000002.11 |
| cg14648916 | 8.70E-08 | 1.01E-08 | 5.99 | 8.9631651 | 1.70E-01 | 175224322 | 175224445 | NC_000005.9  |

|            |          |          |      |           |          |           |           |              |
|------------|----------|----------|------|-----------|----------|-----------|-----------|--------------|
| cg12072024 | 8.70E-08 | 1.01E-08 | 5.99 | 8.9629834 | 9.36E-02 | 172377981 | 172378104 | NC_000002.11 |
| cg12230289 | 8.70E-08 | 1.01E-08 | 5.99 | 8.9628342 | 1.50E-01 | 70946891  | 70947014  | NC_000008.10 |
| cg13707358 | 8.70E-08 | 1.01E-08 | 5.99 | 8.9628122 | 4.76E-02 | 30127389  | 30127512  | NC_000006.11 |
| cg18441661 | 8.70E-08 | 1.01E-08 | 5.99 | 8.9627656 | 1.47E-01 | 117586593 | 117586716 | NC_000006.11 |
| cg05342515 | 8.70E-08 | 1.01E-08 | 5.99 | 8.962465  | 1.12E-01 | 177024172 | 177024295 | NC_000002.11 |
| cg03110722 | 8.70E-08 | 1.01E-08 | 5.99 | 8.9621299 | 1.11E-01 | 51984816  | 51984939  | NC_000019.9  |
| cg07017901 | 8.71E-08 | 1.01E-08 | 5.99 | 8.9613021 | 1.26E-01 | 5541270   | 5541393   | NC_000012.11 |
| cg03934313 | 8.71E-08 | 1.01E-08 | 5.99 | 8.9612199 | 4.13E-02 | 67696043  | 67696166  | NC_000016.9  |
| cg11366131 | 8.72E-08 | 1.01E-08 | 5.99 | 8.9605068 | 5.96E-02 | 47260762  | 47260885  | NC_000011.9  |
| cg23400208 | 8.72E-08 | 1.01E-08 | 5.99 | 8.9601002 | 1.19E-01 | 60936031  | 60936154  | NC_000010.10 |
| cg21028352 | 8.73E-08 | 1.01E-08 | 5.99 | 8.959298  | 2.24E-02 | 23473004  | 23473127  | NC_000014.8  |
| cg05119467 | 8.73E-08 | 1.01E-08 | 5.99 | 8.958773  | 1.08E-01 | 1765440   | 1765563   | NC_000001.10 |
| cg03880458 | 8.73E-08 | 1.01E-08 | 5.99 | 8.958459  | 3.51E-02 | 100306854 | 100306977 | NC_000007.13 |
| cg11378389 | 8.75E-08 | 1.01E-08 | 5.99 | 8.9569717 | 4.24E-02 | 162043035 | 162043158 | NC_000001.10 |
| cg24459563 | 8.75E-08 | 1.02E-08 | 5.99 | 8.956115  | 5.18E-02 | 65040609  | 65040732  | NC_000017.10 |
| cg14682922 | 8.76E-08 | 1.02E-08 | 5.99 | 8.9548212 | 7.75E-02 | 1016768   | 1016891   | NC_000005.9  |
| cg27489939 | 8.77E-08 | 1.02E-08 | 5.98 | 8.953693  | 2.15E-01 | 89007818  | 89007941  | NC_000016.9  |
| cg11760389 | 8.78E-08 | 1.02E-08 | 5.98 | 8.952744  | 6.08E-02 | 29989120  | 29989243  | NC_000006.11 |
| cg02519751 | 8.80E-08 | 1.02E-08 | 5.98 | 8.9501818 | 1.57E-01 | 147126753 | 147126876 | NC_000003.11 |
| cg02406096 | 8.81E-08 | 1.02E-08 | 5.98 | 8.9496427 | 3.90E-02 | 141993182 | 141993305 | NC_000005.9  |
| cg21068911 | 8.82E-08 | 1.02E-08 | 5.98 | 8.9486414 | 1.91E-01 | 107462430 | 107462553 | NC_000011.9  |
| cg13073186 | 8.82E-08 | 1.02E-08 | 5.98 | 8.9483396 | 1.28E-01 | 112728349 | 112728472 | NC_000013.10 |
| cg06495131 | 8.83E-08 | 1.02E-08 | 5.98 | 8.9472464 | 1.35E-01 | 6003746   | 6003869   | NC_000006.11 |
| cg07632571 | 8.84E-08 | 1.03E-08 | 5.98 | 8.945922  | 2.44E-02 | 111697142 | 111697265 | NC_000013.10 |
| cg00259549 | 8.85E-08 | 1.03E-08 | 5.98 | 8.9448876 | 9.57E-02 | 689968    | 690091    | NC_000008.10 |

|            |          |          |      |           |          |           |           |              |
|------------|----------|----------|------|-----------|----------|-----------|-----------|--------------|
| cg00664205 | 8.86E-08 | 1.03E-08 | 5.98 | 8.9438028 | 7.04E-02 | 77397758  | 77397881  | NC_000017.10 |
| cg08210871 | 8.86E-08 | 1.03E-08 | 5.98 | 8.9436904 | 6.42E-02 | 105676846 | 105676969 | NC_000014.8  |
| cg25602543 | 8.87E-08 | 1.03E-08 | 5.98 | 8.9422193 | 1.15E-01 | 44507533  | 44507656  | NC_000020.10 |
| cg24429166 | 8.88E-08 | 1.03E-08 | 5.98 | 8.9417724 | 4.16E-02 | 50029562  | 50029685  | NC_000019.9  |
| cg03416601 | 8.88E-08 | 1.03E-08 | 5.98 | 8.9417239 | 6.27E-02 | 82132065  | 82132188  | NC_000016.9  |
| cg17271683 | 8.88E-08 | 1.03E-08 | 5.98 | 8.9416851 | 7.66E-02 | 73258     | 73381     | NC_000018.9  |
| cg20218073 | 8.88E-08 | 1.03E-08 | 5.98 | 8.9416504 | 7.99E-02 | 155832938 | 155833061 | NC_000007.13 |
| cg20396833 | 8.88E-08 | 1.03E-08 | 5.98 | 8.9406164 | 2.66E-02 | 197061366 | 197061489 | NC_000003.11 |
| cg23898073 | 8.89E-08 | 1.03E-08 | 5.98 | 8.9401295 | 1.69E-01 | 118032948 | 118033071 | NC_000010.10 |
| cg16845548 | 8.89E-08 | 1.03E-08 | 5.98 | 8.9399763 | 6.88E-02 | 39834993  | 39835116  | NC_000002.11 |
| cg27271486 | 8.89E-08 | 1.03E-08 | 5.98 | 8.9397314 | 1.55E-01 | 56227690  | 56227813  | NC_000016.9  |
| cg15706250 | 8.89E-08 | 1.03E-08 | 5.98 | 8.9395042 | 7.18E-02 | 41583321  | 41583444  | NC_000008.10 |
| cg23034014 | 8.91E-08 | 1.03E-08 | 5.98 | 8.9380146 | 4.03E-02 | 115485166 | 115485289 | NC_000003.11 |
| cg13052453 | 8.91E-08 | 1.04E-08 | 5.98 | 8.9370421 | 7.93E-02 | 105885138 | 105885261 | NC_000014.8  |
| cg25220537 | 8.92E-08 | 1.04E-08 | 5.98 | 8.9369109 | 9.82E-02 | 81298068  | 81298191  | NC_000015.9  |
| cg22055730 | 8.92E-08 | 1.04E-08 | 5.98 | 8.9368202 | 4.47E-02 | 124647228 | 124647351 | NC_000005.9  |
| cg13537226 | 8.92E-08 | 1.04E-08 | 5.98 | 8.9363896 | 8.36E-02 | 138660643 | 138660766 | NC_000009.11 |
| cg04069576 | 8.92E-08 | 1.04E-08 | 5.98 | 8.9358263 | 4.44E-02 | 124607120 | 124607243 | NC_000003.11 |
| cg19769760 | 8.93E-08 | 1.04E-08 | 5.98 | 8.9356963 | 1.44E-01 | 38511105  | 38511228  | NC_000001.10 |
| cg20634266 | 8.94E-08 | 1.04E-08 | 5.98 | 8.9345126 | 1.10E-01 | 91190493  | 91190616  | NC_000001.10 |
| cg16588492 | 8.94E-08 | 1.04E-08 | 5.98 | 8.9340377 | 1.08E-01 | 10103165  | 10103288  | NC_000012.11 |
| cg11199770 | 8.94E-08 | 1.04E-08 | 5.98 | 8.9337871 | 2.96E-01 | 31841663  | 31841786  | NC_000019.9  |
| cg24116534 | 8.95E-08 | 1.04E-08 | 5.98 | 8.9333516 | 1.42E-01 | 134176481 | 134176604 | NC_000006.11 |
| cg26038465 | 8.95E-08 | 1.04E-08 | 5.98 | 8.9327139 | 6.21E-02 | 38610514  | 38610637  | NC_000022.10 |
| cg14059822 | 8.96E-08 | 1.04E-08 | 5.98 | 8.9320716 | 9.14E-02 | 3285935   | 3286058   | NC_000005.9  |

|            |          |          |      |           |          |           |           |              |
|------------|----------|----------|------|-----------|----------|-----------|-----------|--------------|
| cg19029445 | 8.97E-08 | 1.04E-08 | 5.98 | 8.9309285 | 1.02E-01 | 907732    | 907855    | NC_000017.10 |
| cg26701390 | 8.99E-08 | 1.04E-08 | 5.98 | 8.9285326 | 8.74E-02 | 19551944  | 19552067  | NC_000002.11 |
| cg00212520 | 9.01E-08 | 1.05E-08 | 5.98 | 8.926579  | 8.00E-02 | 42451096  | 42451219  | NC_000003.11 |
| cg21887309 | 9.01E-08 | 1.05E-08 | 5.98 | 8.9263309 | 7.15E-02 | 140209490 | 140209613 | NC_000005.9  |
| cg16928066 | 9.02E-08 | 1.05E-08 | 5.98 | 8.9254372 | 9.97E-02 | 73147814  | 73147937  | NC_000002.11 |
| cg08190844 | 9.02E-08 | 1.05E-08 | 5.98 | 8.9250653 | 1.10E-01 | 2526203   | 2526326   | NC_000016.9  |
| cg01777861 | 9.02E-08 | 1.05E-08 | 5.98 | 8.9246758 | 1.10E-01 | 56023843  | 56023966  | NC_000004.11 |
| cg01045612 | 9.03E-08 | 1.05E-08 | 5.98 | 8.9238807 | 1.55E-01 | 100438192 | 100438315 | NC_000014.8  |
| cg19986876 | 9.03E-08 | 1.05E-08 | 5.98 | 8.9236596 | 9.09E-02 | 47423585  | 47423708  | NC_000003.11 |
| cg09782540 | 9.03E-08 | 1.05E-08 | 5.98 | 8.9234246 | 1.48E-01 | 10398698  | 10398821  | NC_000006.11 |
| cg13561807 | 9.03E-08 | 1.05E-08 | 5.98 | 8.923161  | 6.68E-02 | 44237619  | 44237742  | NC_000018.9  |
| cg13238909 | 9.03E-08 | 1.05E-08 | 5.98 | 8.9231149 | 7.06E-02 | 56974445  | 56974568  | NC_000018.9  |
| cg04930919 | 9.04E-08 | 1.05E-08 | 5.98 | 8.9228747 | 1.13E-01 | 84748862  | 84748985  | NC_000015.9  |
| cg17897626 | 9.04E-08 | 1.05E-08 | 5.98 | 8.9226038 | 1.12E-01 | 57155294  | 57155417  | NC_000019.9  |
| cg04963514 | 9.04E-08 | 1.05E-08 | 5.98 | 8.9219518 | 1.52E-01 | 44162879  | 44163002  | NC_000010.10 |
| cg15662768 | 9.04E-08 | 1.05E-08 | 5.98 | 8.921907  | 1.48E-01 | 60795818  | 60795941  | NC_000020.10 |
| cg11515873 | 9.05E-08 | 1.05E-08 | 5.98 | 8.9212811 | 1.15E-02 | 32117401  | 32117524  | NC_000006.11 |
| cg01178710 | 9.05E-08 | 1.05E-08 | 5.98 | 8.9208106 | 7.56E-02 | 100137031 | 100137154 | NC_000010.10 |
| cg17094718 | 9.06E-08 | 1.05E-08 | 5.98 | 8.9204558 | 5.14E-02 | 24915099  | 24915222  | NC_000013.10 |
| cg21092808 | 9.06E-08 | 1.05E-08 | 5.98 | 8.9203595 | 1.20E-01 | 177029850 | 177029973 | NC_000002.11 |
| cg04707863 | 9.06E-08 | 1.05E-08 | 5.98 | 8.9202872 | 1.81E-01 | 1706305   | 1706428   | NC_000007.13 |
| cg24497732 | 9.07E-08 | 1.05E-08 | 5.98 | 8.9192831 | 8.99E-02 | 42278077  | 42278200  | NC_000007.13 |
| cg13242661 | 9.08E-08 | 1.06E-08 | 5.98 | 8.9181336 | 1.31E-01 | 25961141  | 25961264  | NC_000022.10 |
| cg17969540 | 9.08E-08 | 1.06E-08 | 5.98 | 8.9174805 | 5.61E-02 | 48908179  | 48908302  | NC_000019.9  |
| cg01761478 | 9.09E-08 | 1.06E-08 | 5.98 | 8.9163916 | 5.48E-02 | 31746114  | 31746237  | NC_000006.11 |

|            |          |          |      |           |          |           |           |              |
|------------|----------|----------|------|-----------|----------|-----------|-----------|--------------|
| cg06451822 | 9.10E-08 | 1.06E-08 | 5.98 | 8.91594   | 1.17E-01 | 36108713  | 36108836  | NC_000017.10 |
| cg08021508 | 9.10E-08 | 1.06E-08 | 5.98 | 8.9156559 | 1.16E-01 | 61468123  | 61468246  | NC_000020.10 |
| cg24413339 | 9.10E-08 | 1.06E-08 | 5.98 | 8.9156141 | 7.47E-02 | 135237754 | 135237877 | NC_000010.10 |
| cg05552220 | 9.10E-08 | 1.06E-08 | 5.98 | 8.9154653 | 1.64E-01 | 97173466  | 97173589  | NC_000008.10 |
| cg21526847 | 9.13E-08 | 1.06E-08 | 5.98 | 8.9126796 | 1.86E-01 | 42075664  | 42075787  | NC_000014.8  |
| cg00327332 | 9.13E-08 | 1.06E-08 | 5.98 | 8.9125583 | 9.92E-02 | 23498993  | 23499116  | NC_000020.10 |
| cg19456953 | 9.13E-08 | 1.06E-08 | 5.98 | 8.9120771 | 1.61E-01 | 95768418  | 95768541  | NC_000005.9  |
| cg27600432 | 9.14E-08 | 1.06E-08 | 5.98 | 8.9107664 | 1.36E-01 | 13529102  | 13529225  | NC_000004.11 |
| cg10812708 | 9.14E-08 | 1.06E-08 | 5.98 | 8.9105352 | 1.55E-01 | 27647713  | 27647836  | NC_000006.11 |
| cg05013728 | 9.16E-08 | 1.07E-08 | 5.98 | 8.9089864 | 1.47E-01 | 129694057 | 129694180 | NC_000003.11 |
| cg04765277 | 9.16E-08 | 1.07E-08 | 5.98 | 8.9089859 | 1.31E-01 | 8094679   | 8094802   | NC_000010.10 |
| cg06444282 | 9.17E-08 | 1.07E-08 | 5.98 | 8.907449  | 1.63E-01 | 20669975  | 20670098  | NC_000001.10 |
| cg21969792 | 9.17E-08 | 1.07E-08 | 5.98 | 8.9071235 | 7.85E-02 | 1594995   | 1595118   | NC_000004.11 |
| cg27652464 | 9.18E-08 | 1.07E-08 | 5.98 | 8.906196  | 1.68E-01 | 48886775  | 48886898  | NC_000022.10 |
| cg18689295 | 9.19E-08 | 1.07E-08 | 5.98 | 8.9058409 | 7.94E-02 | 79258855  | 79258978  | NC_000012.11 |
| cg11054816 | 9.19E-08 | 1.07E-08 | 5.98 | 8.9054247 | 1.20E-01 | 117183853 | 117183976 | NC_000011.9  |
| cg19582614 | 9.19E-08 | 1.07E-08 | 5.98 | 8.9051487 | 1.54E-01 | 4381894   | 4382017   | NC_000012.11 |
| cg09123158 | 9.19E-08 | 1.07E-08 | 5.98 | 8.9049383 | 8.24E-02 | 57426264  | 57426387  | NC_000020.10 |
| cg02405329 | 9.19E-08 | 1.07E-08 | 5.98 | 8.9048747 | 7.89E-02 | 51063680  | 51063803  | NC_000022.10 |
| cg25019847 | 9.20E-08 | 1.07E-08 | 5.98 | 8.904392  | 4.93E-02 | 121212263 | 121212386 | NC_000010.10 |
| cg23995231 | 9.20E-08 | 1.07E-08 | 5.98 | 8.904281  | 4.55E-02 | 22469873  | 22469996  | NC_000022.10 |
| cg03748376 | 9.20E-08 | 1.07E-08 | 5.98 | 8.9039912 | 1.61E-01 | 248100585 | 248100708 | NC_000001.10 |
| cg02851873 | 9.21E-08 | 1.07E-08 | 5.97 | 8.9030389 | 8.38E-02 | 80907003  | 80907126  | NC_000010.10 |
| cg20083906 | 9.21E-08 | 1.07E-08 | 5.97 | 8.9029403 | 6.27E-02 | 34760450  | 34760573  | NC_000017.10 |
| cg23053008 | 9.21E-08 | 1.07E-08 | 5.97 | 8.9028654 | 9.02E-02 | 155094291 | 155094414 | NC_000007.13 |

|            |          |          |      |           |          |           |           |              |
|------------|----------|----------|------|-----------|----------|-----------|-----------|--------------|
| cg02831290 | 9.22E-08 | 1.07E-08 | 5.97 | 8.9022891 | 2.44E-02 | 74981833  | 74981956  | NC_000002.11 |
| cg05774054 | 9.22E-08 | 1.07E-08 | 5.97 | 8.9022832 | 5.33E-02 | 245770860 | 245770983 | NC_000001.10 |
| cg03485217 | 9.22E-08 | 1.07E-08 | 5.97 | 8.9018536 | 6.02E-02 | 10686300  | 10686423  | NC_000004.11 |
| cg07344338 | 9.23E-08 | 1.07E-08 | 5.97 | 8.9010434 | 1.17E-01 | 25101907  | 25102030  | NC_000003.11 |
| cg07791011 | 9.23E-08 | 1.08E-08 | 5.97 | 8.900403  | 1.27E-01 | 62363922  | 62364045  | NC_000003.11 |
| cg04902302 | 9.24E-08 | 1.08E-08 | 5.97 | 8.8994692 | 1.29E-01 | 175594739 | 175594862 | NC_000002.11 |
| cg25676890 | 9.25E-08 | 1.08E-08 | 5.97 | 8.8988505 | 6.27E-02 | 131814153 | 131814276 | NC_000012.11 |
| cg26511326 | 9.26E-08 | 1.08E-08 | 5.97 | 8.8968348 | 4.18E-02 | 43399379  | 43399502  | NC_000006.11 |
| cg07216112 | 9.26E-08 | 1.08E-08 | 5.97 | 8.8967709 | 1.51E-01 | 74421739  | 74421862  | NC_000015.9  |
| cg25154236 | 9.29E-08 | 1.08E-08 | 5.97 | 8.8945021 | 9.11E-02 | 44871372  | 44871495  | NC_000010.10 |
| cg08214455 | 9.29E-08 | 1.08E-08 | 5.97 | 8.8943687 | 9.30E-02 | 33817457  | 33817580  | NC_000016.9  |
| cg01554357 | 9.29E-08 | 1.08E-08 | 5.97 | 8.8937281 | 1.05E-01 | 164750454 | 164750577 | NC_000001.10 |
| cg11429111 | 9.29E-08 | 1.08E-08 | 5.97 | 8.8936749 | 9.77E-02 | 134813329 | 134813452 | NC_000005.9  |
| cg11851910 | 9.29E-08 | 1.08E-08 | 5.97 | 8.8934543 | 2.02E-01 | 34482086  | 34482209  | NC_000021.8  |
| cg23567366 | 9.30E-08 | 1.08E-08 | 5.97 | 8.8931024 | 7.33E-02 | 5646121   | 5646244   | NC_000007.13 |
| cg03815358 | 9.30E-08 | 1.08E-08 | 5.97 | 8.8927687 | 1.42E-01 | 84419352  | 84419475  | NC_000006.11 |
| cg26034799 | 9.30E-08 | 1.08E-08 | 5.97 | 8.8924533 | 9.64E-02 | 5185804   | 5185927   | NC_000009.11 |
| cg06689918 | 9.30E-08 | 1.08E-08 | 5.97 | 8.8923339 | 9.09E-02 | 3595907   | 3596030   | NC_000005.9  |
| cg19065831 | 9.31E-08 | 1.08E-08 | 5.97 | 8.8917112 | 1.82E-01 | 48485289  | 48485412  | NC_000004.11 |
| cg07433373 | 9.31E-08 | 1.09E-08 | 5.97 | 8.8915652 | 6.05E-02 | 79080588  | 79080711  | NC_000007.13 |
| cg16278996 | 9.32E-08 | 1.09E-08 | 5.97 | 8.8907346 | 7.75E-02 | 13715593  | 13715716  | NC_000006.11 |
| cg26010218 | 9.33E-08 | 1.09E-08 | 5.97 | 8.8896843 | 1.51E-01 | 78977223  | 78977346  | NC_000004.11 |
| cg09919901 | 9.33E-08 | 1.09E-08 | 5.97 | 8.8891643 | 3.85E-02 | 40367066  | 40367189  | NC_000015.9  |
| cg12723985 | 9.33E-08 | 1.09E-08 | 5.97 | 8.8891246 | 7.61E-02 | 20255908  | 20256031  | NC_000010.10 |
| cg14611628 | 9.34E-08 | 1.09E-08 | 5.97 | 8.8882448 | 8.32E-02 | 138415108 | 138415231 | NC_000009.11 |

|            |          |          |      |           |          |           |           |              |
|------------|----------|----------|------|-----------|----------|-----------|-----------|--------------|
| cg08419523 | 9.34E-08 | 1.09E-08 | 5.97 | 8.8881173 | 3.90E-02 | 3439378   | 3439501   | NC_000011.9  |
| cg02759635 | 9.35E-08 | 1.09E-08 | 5.97 | 8.8875715 | 5.39E-02 | 22560713  | 22560836  | NC_000015.9  |
| cg08938062 | 9.36E-08 | 1.09E-08 | 5.97 | 8.8863498 | 1.10E-01 | 5589042   | 5589165   | NC_000020.10 |
| cg02057782 | 9.36E-08 | 1.09E-08 | 5.97 | 8.885935  | 1.03E-01 | 26042598  | 26042721  | NC_000013.10 |
| cg02067022 | 9.36E-08 | 1.09E-08 | 5.97 | 8.8858226 | 8.60E-02 | 73795396  | 73795519  | NC_000006.11 |
| cg04229820 | 9.36E-08 | 1.09E-08 | 5.97 | 8.8855456 | 8.93E-02 | 192604828 | 192604951 | NC_000001.10 |
| cg01750341 | 9.37E-08 | 1.09E-08 | 5.97 | 8.8852644 | 1.83E-02 | 79290095  | 79290218  | NC_000004.11 |
| cg02153339 | 9.38E-08 | 1.09E-08 | 5.97 | 8.8839441 | 1.33E-01 | 121415499 | 121415622 | NC_000012.11 |
| cg12010198 | 9.38E-08 | 1.09E-08 | 5.97 | 8.8834219 | 1.00E-01 | 145939499 | 145939622 | NC_000008.10 |
| cg13492103 | 9.38E-08 | 1.09E-08 | 5.97 | 8.8833369 | 1.17E-01 | 75596827  | 75596950  | NC_000001.10 |
| cg01093800 | 9.40E-08 | 1.10E-08 | 5.97 | 8.8819284 | 6.83E-02 | 29149789  | 29149912  | NC_000016.9  |
| cg15484742 | 9.40E-08 | 1.10E-08 | 5.97 | 8.8811496 | 7.36E-02 | 23519884  | 23520007  | NC_000001.10 |
| cg22111078 | 9.41E-08 | 1.10E-08 | 5.97 | 8.8808229 | 1.60E-01 | 172655925 | 172656048 | NC_000005.9  |
| cg06751612 | 9.42E-08 | 1.10E-08 | 5.97 | 8.8790343 | 6.96E-02 | 88798854  | 88798977  | NC_000016.9  |
| cg00893471 | 9.43E-08 | 1.10E-08 | 5.97 | 8.8782499 | 1.30E-01 | 177029921 | 177030044 | NC_000002.11 |
| cg09676575 | 9.43E-08 | 1.10E-08 | 5.97 | 8.8778984 | 3.87E-02 | 153003705 | 153003828 | NC_000006.11 |
| cg03695871 | 9.44E-08 | 1.10E-08 | 5.97 | 8.8774673 | 1.49E-01 | 65547172  | 65547295  | NC_000011.9  |
| cg10999670 | 9.44E-08 | 1.10E-08 | 5.97 | 8.877189  | 3.56E-02 | 86870144  | 86870267  | NC_000016.9  |
| cg24319381 | 9.44E-08 | 1.10E-08 | 5.97 | 8.8766989 | 1.69E-01 | 83316911  | 83317034  | NC_000015.9  |
| cg13927938 | 9.45E-08 | 1.10E-08 | 5.97 | 8.8759891 | 3.55E-02 | 204459584 | 204459707 | NC_000001.10 |
| cg27490391 | 9.45E-08 | 1.10E-08 | 5.97 | 8.8759256 | 1.15E-01 | 40152187  | 40152310  | NC_000013.10 |
| cg02674870 | 9.45E-08 | 1.10E-08 | 5.97 | 8.8756809 | 5.50E-02 | 155856153 | 155856276 | NC_000007.13 |
| cg12141056 | 9.45E-08 | 1.10E-08 | 5.97 | 8.8756419 | 9.69E-02 | 184944785 | 184944908 | NC_000001.10 |
| cg25062797 | 9.45E-08 | 1.10E-08 | 5.97 | 8.8754193 | 1.83E-01 | 118893528 | 118893651 | NC_000010.10 |
| cg14204395 | 9.46E-08 | 1.10E-08 | 5.97 | 8.8748139 | 7.05E-02 | 131451149 | 131451272 | NC_000002.11 |

|            |          |          |      |           |          |           |           |              |
|------------|----------|----------|------|-----------|----------|-----------|-----------|--------------|
| cg15685144 | 9.46E-08 | 1.10E-08 | 5.97 | 8.8747563 | 1.04E-01 | 103740597 | 103740720 | NC_000014.8  |
| cg08144406 | 9.46E-08 | 1.10E-08 | 5.97 | 8.8745799 | 6.05E-02 | 51381086  | 51381209  | NC_000007.13 |
| cg03404143 | 9.47E-08 | 1.10E-08 | 5.97 | 8.8742138 | 1.80E-01 | 102986973 | 102987096 | NC_000010.10 |
| cg13056369 | 9.47E-08 | 1.11E-08 | 5.97 | 8.873742  | 1.28E-01 | 1906312   | 1906435   | NC_000008.10 |
| cg11160362 | 9.48E-08 | 1.11E-08 | 5.97 | 8.8729414 | 7.11E-02 | 130387821 | 130387944 | NC_000012.11 |
| cg11751645 | 9.50E-08 | 1.11E-08 | 5.97 | 8.8708894 | 1.41E-01 | 56947754  | 56947877  | NC_000011.9  |
| cg23228450 | 9.50E-08 | 1.11E-08 | 5.97 | 8.8705597 | 7.28E-02 | 205618102 | 205618225 | NC_000001.10 |
| cg20062681 | 9.50E-08 | 1.11E-08 | 5.97 | 8.8703492 | 8.96E-02 | 94988642  | 94988765  | NC_000011.9  |
| cg01503065 | 9.50E-08 | 1.11E-08 | 5.97 | 8.8701349 | 1.18E-01 | 155411806 | 155411929 | NC_000004.11 |
| cg15133564 | 9.50E-08 | 1.11E-08 | 5.97 | 8.8700608 | 1.33E-01 | 97658774  | 97658897  | NC_000008.10 |
| cg06551997 | 9.51E-08 | 1.11E-08 | 5.97 | 8.8695077 | 1.60E-01 | 33815451  | 33815574  | NC_000017.10 |
| cg23530064 | 9.51E-08 | 1.11E-08 | 5.97 | 8.86914   | 1.14E-01 | 30713266  | 30713389  | NC_000021.8  |
| cg07783843 | 9.52E-08 | 1.11E-08 | 5.97 | 8.8682103 | 1.51E-01 | 176997311 | 176997434 | NC_000002.11 |
| cg03084704 | 9.52E-08 | 1.11E-08 | 5.97 | 8.8678717 | 6.02E-02 | 86704486  | 86704609  | NC_000016.9  |
| cg09140593 | 9.52E-08 | 1.11E-08 | 5.97 | 8.8678101 | 3.60E-02 | 47360071  | 47360194  | NC_000011.9  |
| cg16430072 | 9.52E-08 | 1.11E-08 | 5.97 | 8.867734  | 2.16E-01 | 113696863 | 113696986 | NC_000005.9  |
| cg18864768 | 9.53E-08 | 1.11E-08 | 5.97 | 8.8668358 | 3.04E-02 | 44170024  | 44170147  | NC_000001.10 |
| cg07527729 | 9.54E-08 | 1.11E-08 | 5.97 | 8.866305  | 7.58E-02 | 134472187 | 134472310 | NC_000010.10 |
| cg02352240 | 9.54E-08 | 1.11E-08 | 5.97 | 8.8653826 | 7.91E-02 | 51188372  | 51188495  | NC_000016.9  |
| cg06862374 | 9.55E-08 | 1.11E-08 | 5.97 | 8.8651738 | 1.78E-01 | 219736549 | 219736672 | NC_000002.11 |
| cg19677267 | 9.56E-08 | 1.12E-08 | 5.97 | 8.8633424 | 1.05E-01 | 26645161  | 26645284  | NC_000001.10 |
| cg13220129 | 9.57E-08 | 1.12E-08 | 5.97 | 8.8626397 | 9.46E-02 | 2046193   | 2046316   | NC_000019.9  |
| cg19170021 | 9.57E-08 | 1.12E-08 | 5.97 | 8.8624946 | 4.66E-02 | 79077169  | 79077292  | NC_000017.10 |
| cg07590961 | 9.58E-08 | 1.12E-08 | 5.97 | 8.8619759 | 1.22E-01 | 154002312 | 154002435 | NC_000007.13 |
| cg03984347 | 9.59E-08 | 1.12E-08 | 5.97 | 8.8606367 | 7.62E-02 | 45190262  | 45190385  | NC_000001.10 |



|            |          |          |      |           |          |           |           |              |
|------------|----------|----------|------|-----------|----------|-----------|-----------|--------------|
| cg26723355 | 9.59E-08 | 1.12E-08 | 5.97 | 8.860391  | 2.10E-01 | 166076315 | 166076438 | NC_000006.11 |
| cg08183425 | 9.59E-08 | 1.12E-08 | 5.97 | 8.8600887 | 9.61E-02 | 86037857  | 86037980  | NC_000002.11 |
| cg14568105 | 9.60E-08 | 1.12E-08 | 5.97 | 8.8596504 | 1.53E-01 | 37282931  | 37283054  | NC_000019.9  |
| cg11725718 | 9.61E-08 | 1.12E-08 | 5.97 | 8.8581652 | 9.49E-02 | 380529    | 380652    | NC_000004.11 |
| cg21340230 | 9.62E-08 | 1.12E-08 | 5.97 | 8.85755   | 9.49E-02 | 89955105  | 89955228  | NC_000015.9  |
| cg10384919 | 9.62E-08 | 1.12E-08 | 5.97 | 8.8572346 | 1.47E-01 | 42095430  | 42095553  | NC_000022.10 |
| cg00783952 | 9.62E-08 | 1.12E-08 | 5.97 | 8.8570443 | 8.73E-02 | 134999606 | 134999729 | NC_000010.10 |
| cg05328057 | 9.63E-08 | 1.12E-08 | 5.97 | 8.8565428 | 7.87E-02 | 66436664  | 66436787  | NC_000016.9  |
| cg24945740 | 9.64E-08 | 1.13E-08 | 5.97 | 8.8550827 | 7.37E-02 | 11159610  | 11159733  | NC_000003.11 |
| cg04013650 | 9.65E-08 | 1.13E-08 | 5.97 | 8.8543946 | 1.16E-01 | 55471675  | 55471798  | NC_000008.10 |
| cg17838516 | 9.66E-08 | 1.13E-08 | 5.97 | 8.8525752 | 1.00E-01 | 92703536  | 92703659  | NC_000011.9  |
| cg12092090 | 9.66E-08 | 1.13E-08 | 5.96 | 8.8525368 | 1.78E-01 | 13617584  | 13617707  | NC_000019.9  |
| cg11119746 | 9.67E-08 | 1.13E-08 | 5.96 | 8.8522131 | 1.36E-01 | 42533133  | 42533256  | NC_000007.13 |
| cg09958940 | 9.67E-08 | 1.13E-08 | 5.96 | 8.8521254 | 1.19E-01 | 41108802  | 41108925  | NC_000013.10 |
| cg23185774 | 9.67E-08 | 1.13E-08 | 5.96 | 8.8520804 | 6.46E-02 | 36972163  | 36972286  | NC_000006.11 |
| cg05001964 | 9.67E-08 | 1.13E-08 | 5.96 | 8.8519232 | 1.80E-01 | 54318808  | 54318931  | NC_000016.9  |
| cg09065629 | 9.67E-08 | 1.13E-08 | 5.96 | 8.8517438 | 1.23E-01 | 1709722   | 1709845   | NC_000016.9  |
| cg08593949 | 9.67E-08 | 1.13E-08 | 5.96 | 8.8515569 | 1.45E-01 | 17218308  | 17218431  | NC_000005.9  |
| cg07820064 | 9.68E-08 | 1.13E-08 | 5.96 | 8.8510501 | 8.96E-02 | 220299584 | 220299707 | NC_000002.11 |
| cg19356117 | 9.68E-08 | 1.13E-08 | 5.96 | 8.8508919 | 1.61E-01 | 23734304  | 23734427  | NC_000013.10 |
| cg02901606 | 9.68E-08 | 1.13E-08 | 5.96 | 8.8504657 | 3.71E-02 | 46374519  | 46374642  | NC_000021.8  |
| cg02368058 | 9.69E-08 | 1.13E-08 | 5.96 | 8.8491007 | 1.55E-01 | 91191723  | 91191846  | NC_000001.10 |
| cg21013866 | 9.69E-08 | 1.13E-08 | 5.96 | 8.8490283 | 1.58E-01 | 23834985  | 23835108  | NC_000014.8  |
| cg00093851 | 9.70E-08 | 1.13E-08 | 5.96 | 8.848137  | 4.93E-02 | 123195258 | 123195381 | NC_000007.13 |
| cg27315191 | 9.71E-08 | 1.14E-08 | 5.96 | 8.8471953 | 1.12E-01 | 33593049  | 33593172  | NC_000012.11 |

|            |          |          |      |           |          |           |           |              |
|------------|----------|----------|------|-----------|----------|-----------|-----------|--------------|
| cg05317090 | 9.71E-08 | 1.14E-08 | 5.96 | 8.8470499 | 2.06E-01 | 54969706  | 54969829  | NC_000016.9  |
| cg04440182 | 9.72E-08 | 1.14E-08 | 5.96 | 8.8465654 | 1.11E-01 | 172963125 | 172963248 | NC_000002.11 |
| cg01128161 | 9.72E-08 | 1.14E-08 | 5.96 | 8.8459736 | 9.88E-02 | 122302680 | 122302803 | NC_000004.11 |
| cg23338029 | 9.73E-08 | 1.14E-08 | 5.96 | 8.8454465 | 5.84E-02 | 140621754 | 140621877 | NC_000005.9  |
| cg01926877 | 9.73E-08 | 1.14E-08 | 5.96 | 8.8450366 | 1.62E-01 | 96953051  | 96953174  | NC_000015.9  |
| cg07015911 | 9.73E-08 | 1.14E-08 | 5.96 | 8.8446588 | 1.82E-01 | 46655580  | 46655703  | NC_000017.10 |
| cg16078597 | 9.74E-08 | 1.14E-08 | 5.96 | 8.8445257 | 7.63E-02 | 170844404 | 170844527 | NC_000006.11 |
| cg02165799 | 9.74E-08 | 1.14E-08 | 5.96 | 8.8443878 | 1.88E-01 | 61885850  | 61885973  | NC_000020.10 |
| cg20966270 | 9.74E-08 | 1.14E-08 | 5.96 | 8.8439958 | 1.20E-01 | 110752047 | 110752170 | NC_000001.10 |
| cg05135288 | 9.75E-08 | 1.14E-08 | 5.96 | 8.8433399 | 9.21E-02 | 717707    | 717830    | NC_000016.9  |
| cg02106279 | 9.76E-08 | 1.14E-08 | 5.96 | 8.8418318 | 1.06E-01 | 75960530  | 75960653  | NC_000006.11 |
| cg06757585 | 9.76E-08 | 1.14E-08 | 5.96 | 8.8413885 | 1.24E-01 | 140753531 | 140753654 | NC_000005.9  |
| cg14464639 | 9.78E-08 | 1.14E-08 | 5.96 | 8.8402707 | 5.29E-02 | 131561175 | 131561298 | NC_000011.9  |
| cg26363555 | 9.78E-08 | 1.14E-08 | 5.96 | 8.8401143 | 1.20E-01 | 121973044 | 121973167 | NC_000011.9  |
| cg17611674 | 9.78E-08 | 1.14E-08 | 5.96 | 8.8396272 | 1.28E-01 | 8094431   | 8094554   | NC_000010.10 |
| cg11935021 | 9.79E-08 | 1.14E-08 | 5.96 | 8.8391853 | 1.14E-01 | 110223795 | 110223918 | NC_000004.11 |
| cg06369522 | 9.79E-08 | 1.15E-08 | 5.96 | 8.838929  | 1.51E-01 | 51412615  | 51412738  | NC_000019.9  |
| cg11590772 | 9.80E-08 | 1.15E-08 | 5.96 | 8.8381229 | 1.03E-01 | 8657916   | 8658039   | NC_000019.9  |
| cg22162281 | 9.80E-08 | 1.15E-08 | 5.96 | 8.8373641 | 1.86E-01 | 207139197 | 207139320 | NC_000002.11 |
| cg22203219 | 9.81E-08 | 1.15E-08 | 5.96 | 8.8370898 | 1.32E-01 | 6665335   | 6665458   | NC_000012.11 |
| cg13643914 | 9.81E-08 | 1.15E-08 | 5.96 | 8.8370095 | 1.84E-01 | 122302226 | 122302349 | NC_000004.11 |
| cg16180353 | 9.81E-08 | 1.15E-08 | 5.96 | 8.8369388 | 1.13E-01 | 31819219  | 31819342  | NC_000011.9  |
| cg08612570 | 9.81E-08 | 1.15E-08 | 5.96 | 8.8365387 | 6.35E-02 | 27868767  | 27868890  | NC_000007.13 |
| cg11957261 | 9.81E-08 | 1.15E-08 | 5.96 | 8.8360949 | 9.64E-02 | 119727631 | 119727754 | NC_000008.10 |
| cg04190807 | 9.83E-08 | 1.15E-08 | 5.96 | 8.8347252 | 1.75E-01 | 58497230  | 58497353  | NC_000016.9  |

|            |          |          |      |           |          |           |           |              |
|------------|----------|----------|------|-----------|----------|-----------|-----------|--------------|
| cg02909158 | 9.83E-08 | 1.15E-08 | 5.96 | 8.8340344 | 9.25E-02 | 100616256 | 100616379 | NC_000013.10 |
| cg11079992 | 9.83E-08 | 1.15E-08 | 5.96 | 8.8339937 | 4.43E-02 | 1216305   | 1216428   | NC_000011.9  |
| cg12593873 | 9.84E-08 | 1.15E-08 | 5.96 | 8.8335312 | 2.03E-02 | 27111162  | 27111285  | NC_000001.10 |
| cg18567924 | 9.84E-08 | 1.15E-08 | 5.96 | 8.8334363 | 1.57E-01 | 95870450  | 95870573  | NC_000015.9  |
| cg15600176 | 9.84E-08 | 1.15E-08 | 5.96 | 8.8328267 | 8.56E-02 | 107612551 | 107612674 | NC_000007.13 |
| cg19393314 | 9.84E-08 | 1.15E-08 | 5.96 | 8.8327864 | 3.80E-02 | 240007631 | 240007754 | NC_000002.11 |
| cg12204258 | 9.85E-08 | 1.15E-08 | 5.96 | 8.8325984 | 1.29E-01 | 147131178 | 147131301 | NC_000003.11 |
| cg21913319 | 9.85E-08 | 1.15E-08 | 5.96 | 8.8323403 | 1.96E-01 | 86622628  | 86622751  | NC_000001.10 |
| cg05288475 | 9.86E-08 | 1.15E-08 | 5.96 | 8.8315021 | 1.20E-01 | 66195804  | 66195927  | NC_000017.10 |
| cg22418829 | 9.86E-08 | 1.15E-08 | 5.96 | 8.8311195 | 1.06E-01 | 180486604 | 180486727 | NC_000005.9  |
| cg21452071 | 9.86E-08 | 1.15E-08 | 5.96 | 8.8307954 | 3.15E-02 | 53352275  | 53352398  | NC_000008.10 |
| cg20826345 | 9.86E-08 | 1.15E-08 | 5.96 | 8.8307878 | 6.78E-02 | 2350197   | 2350320   | NC_000001.10 |
| cg12317456 | 9.87E-08 | 1.16E-08 | 5.96 | 8.8300432 | 1.55E-01 | 55512868  | 55512991  | NC_000016.9  |
| cg12192797 | 9.87E-08 | 1.16E-08 | 5.96 | 8.8298081 | 7.51E-02 | 12228551  | 12228674  | NC_000019.9  |
| cg04811512 | 9.88E-08 | 1.16E-08 | 5.96 | 8.8286861 | 1.80E-01 | 21686080  | 21686203  | NC_000020.10 |
| cg00732810 | 9.88E-08 | 1.16E-08 | 5.96 | 8.8286693 | 5.60E-02 | 114875282 | 114875405 | NC_000013.10 |
| cg27255329 | 9.88E-08 | 1.16E-08 | 5.96 | 8.8284539 | 8.81E-02 | 51814354  | 51814477  | NC_000006.11 |
| cg14035771 | 9.90E-08 | 1.16E-08 | 5.96 | 8.8266489 | 1.44E-01 | 98515272  | 98515395  | NC_000001.10 |
| cg13776340 | 9.90E-08 | 1.16E-08 | 5.96 | 8.8264809 | 1.43E-01 | 80656888  | 80657011  | NC_000006.11 |
| cg04910313 | 9.90E-08 | 1.16E-08 | 5.96 | 8.826298  | 3.77E-02 | 24933212  | 24933335  | NC_000013.10 |
| cg23072973 | 9.91E-08 | 1.16E-08 | 5.96 | 8.8261512 | 7.05E-02 | 47183460  | 47183583  | NC_000011.9  |
| cg01185433 | 9.91E-08 | 1.16E-08 | 5.96 | 8.8259778 | 1.55E-01 | 175139081 | 175139204 | NC_000004.11 |
| cg21176398 | 9.92E-08 | 1.16E-08 | 5.96 | 8.8242773 | 7.39E-02 | 140771599 | 140771722 | NC_000009.11 |
| cg22535729 | 9.93E-08 | 1.16E-08 | 5.96 | 8.8238151 | 7.89E-02 | 55533955  | 55534078  | NC_000008.10 |
| cg11641840 | 9.93E-08 | 1.16E-08 | 5.96 | 8.8236948 | 5.62E-02 | 71431640  | 71431763  | NC_000017.10 |

|            |          |          |      |           |          |           |           |              |
|------------|----------|----------|------|-----------|----------|-----------|-----------|--------------|
| cg03053290 | 9.93E-08 | 1.16E-08 | 5.96 | 8.8234694 | 1.38E-01 | 95698378  | 95698501  | NC_000001.10 |
| cg18406792 | 9.94E-08 | 1.16E-08 | 5.96 | 8.8230131 | 7.14E-02 | 13620807  | 13620930  | NC_000018.9  |
| cg24706674 | 9.94E-08 | 1.16E-08 | 5.96 | 8.8229097 | 1.03E-01 | 134679704 | 134679827 | NC_000010.10 |
| cg02886522 | 9.95E-08 | 1.17E-08 | 5.96 | 8.8213401 | 1.78E-01 | 53636226  | 53636349  | NC_000019.9  |
| cg08592707 | 9.97E-08 | 1.17E-08 | 5.96 | 8.819557  | 1.47E-01 | 56833076  | 56833199  | NC_000017.10 |
| cg18277754 | 9.98E-08 | 1.17E-08 | 5.96 | 8.8182998 | 1.68E-01 | 30144152  | 30144275  | NC_000002.11 |
| cg11762968 | 9.98E-08 | 1.17E-08 | 5.96 | 8.8182723 | 1.11E-01 | 95354190  | 95354313  | NC_000013.10 |
| cg12508624 | 9.98E-08 | 1.17E-08 | 5.96 | 8.8182385 | 1.63E-01 | 119293780 | 119293903 | NC_000011.9  |
| cg13898605 | 9.99E-08 | 1.17E-08 | 5.96 | 8.8178143 | 6.00E-02 | 9675212   | 9675335   | NC_000017.10 |
| cg27230009 | 1.00E-07 | 1.17E-08 | 5.96 | 8.8165604 | 7.18E-02 | 11241399  | 11241522  | NC_000003.11 |
| cg10221856 | 1.00E-07 | 1.17E-08 | 5.96 | 8.8151225 | 6.56E-02 | 84323577  | 84323700  | NC_000001.10 |
| cg00294538 | 1.00E-07 | 1.18E-08 | 5.96 | 8.8130838 | 9.10E-02 | 114062109 | 114062232 | NC_000013.10 |
| cg08861369 | 1.00E-07 | 1.18E-08 | 5.96 | 8.8120928 | 1.33E-01 | 85671714  | 85671837  | NC_000016.9  |
| cg25698935 | 1.00E-07 | 1.18E-08 | 5.96 | 8.8119108 | 7.84E-02 | 112610681 | 112610804 | NC_000013.10 |
| cg06765956 | 1.01E-07 | 1.18E-08 | 5.96 | 8.8081227 | 1.03E-01 | 42074886  | 42075009  | NC_000014.8  |
| cg14780466 | 1.01E-07 | 1.18E-08 | 5.96 | 8.8080487 | 9.59E-02 | 20870812  | 20870935  | NC_000002.11 |
| cg20058999 | 1.01E-07 | 1.18E-08 | 5.96 | 8.8079976 | 4.47E-02 | 152063195 | 152063318 | NC_000007.13 |
| cg05999049 | 1.01E-07 | 1.18E-08 | 5.96 | 8.8076974 | 1.38E-01 | 46692859  | 46692982  | NC_000017.10 |
| cg17207690 | 1.01E-07 | 1.18E-08 | 5.96 | 8.8073898 | 6.88E-02 | 232393064 | 232393187 | NC_000002.11 |
| cg01474953 | 1.01E-07 | 1.18E-08 | 5.96 | 8.8061138 | 1.76E-02 | 150862828 | 150862951 | NC_000007.13 |
| cg17260180 | 1.01E-07 | 1.18E-08 | 5.96 | 8.8061078 | 6.93E-02 | 6610104   | 6610227   | NC_000017.10 |
| cg15230931 | 1.01E-07 | 1.19E-08 | 5.96 | 8.8051811 | 4.69E-02 | 122632501 | 122632624 | NC_000003.11 |
| cg15726426 | 1.01E-07 | 1.19E-08 | 5.96 | 8.8036224 | 1.24E-01 | 111216839 | 111216962 | NC_000001.10 |
| cg15649801 | 1.01E-07 | 1.19E-08 | 5.96 | 8.8031331 | 1.86E-01 | 93520269  | 93520392  | NC_000007.13 |
| cg13064679 | 1.01E-07 | 1.19E-08 | 5.95 | 8.8016946 | 1.02E-01 | 32049953  | 32050076  | NC_000006.11 |

|            |          |          |      |           |          |           |           |              |
|------------|----------|----------|------|-----------|----------|-----------|-----------|--------------|
| cg26390889 | 1.01E-07 | 1.19E-08 | 5.95 | 8.8009425 | 1.40E-01 | 33936462  | 33936585  | NC_000005.9  |
| cg14856052 | 1.01E-07 | 1.19E-08 | 5.95 | 8.8009289 | 6.22E-02 | 134845038 | 134845161 | NC_000011.9  |
| cg08667388 | 1.01E-07 | 1.19E-08 | 5.95 | 8.8008818 | 2.07E-02 | 113506810 | 113506933 | NC_000013.10 |
| cg10174482 | 1.02E-07 | 1.19E-08 | 5.95 | 8.8004824 | 7.84E-02 | 17932369  | 17932492  | NC_000019.9  |
| cg03146733 | 1.02E-07 | 1.19E-08 | 5.95 | 8.7987636 | 9.42E-02 | 10775897  | 10776020  | NC_000016.9  |
| cg17266275 | 1.02E-07 | 1.20E-08 | 5.95 | 8.7964888 | 4.08E-02 | 29084858  | 29084981  | NC_000010.10 |
| cg06142142 | 1.02E-07 | 1.20E-08 | 5.95 | 8.7963881 | 6.57E-02 | 115938512 | 115938635 | NC_000010.10 |
| cg17491850 | 1.02E-07 | 1.20E-08 | 5.95 | 8.7954503 | 1.43E-01 | 57888480  | 57888603  | NC_000001.10 |
| cg04577249 | 1.02E-07 | 1.20E-08 | 5.95 | 8.7951614 | 7.54E-02 | 172179102 | 172179225 | NC_000005.9  |
| cg25874123 | 1.02E-07 | 1.20E-08 | 5.95 | 8.7945825 | 1.08E-01 | 3220124   | 3220247   | NC_000018.9  |
| cg21590729 | 1.02E-07 | 1.20E-08 | 5.95 | 8.7944055 | 6.00E-02 | 9929065   | 9929188   | NC_000003.11 |
| cg05292082 | 1.02E-07 | 1.20E-08 | 5.95 | 8.7938201 | 9.86E-02 | 32928345  | 32928468  | NC_000021.8  |
| cg05116382 | 1.02E-07 | 1.20E-08 | 5.95 | 8.7933407 | 1.03E-01 | 66327000  | 66327123  | NC_000011.9  |
| cg00792849 | 1.02E-07 | 1.20E-08 | 5.95 | 8.7929293 | 1.23E-01 | 35046610  | 35046733  | NC_000015.9  |
| cg07035961 | 1.02E-07 | 1.20E-08 | 5.95 | 8.7920577 | 1.07E-01 | 140174841 | 140174964 | NC_000005.9  |
| cg04863968 | 1.02E-07 | 1.20E-08 | 5.95 | 8.7915324 | 1.18E-01 | 35762844  | 35762967  | NC_000006.11 |
| cg05479174 | 1.02E-07 | 1.20E-08 | 5.95 | 8.7905943 | 4.21E-02 | 132239000 | 132239123 | NC_000012.11 |
| cg24850474 | 1.03E-07 | 1.20E-08 | 5.95 | 8.7901382 | 7.28E-02 | 19772686  | 19772809  | NC_000019.9  |
| cg10675276 | 1.03E-07 | 1.20E-08 | 5.95 | 8.7900125 | 1.22E-01 | 133561898 | 133562021 | NC_000006.11 |
| cg14482474 | 1.03E-07 | 1.21E-08 | 5.95 | 8.7888775 | 8.42E-02 | 57426383  | 57426506  | NC_000020.10 |
| cg14829606 | 1.03E-07 | 1.21E-08 | 5.95 | 8.7878527 | 1.23E-01 | 166579974 | 166580097 | NC_000006.11 |
| cg26816636 | 1.03E-07 | 1.21E-08 | 5.95 | 8.7875937 | 1.16E-01 | 179495386 | 179495509 | NC_000005.9  |
| cg14908766 | 1.03E-07 | 1.21E-08 | 5.95 | 8.7875043 | 1.19E-01 | 76098020  | 76098143  | NC_000012.11 |
| cg07217951 | 1.03E-07 | 1.21E-08 | 5.95 | 8.7874718 | 6.75E-02 | 242945705 | 242945828 | NC_000002.11 |
| cg22082329 | 1.03E-07 | 1.21E-08 | 5.95 | 8.7870543 | 4.19E-02 | 78156552  | 78156675  | NC_000017.10 |

|            |          |          |      |           |          |           |           |              |
|------------|----------|----------|------|-----------|----------|-----------|-----------|--------------|
| cg00292701 | 1.03E-07 | 1.21E-08 | 5.95 | 8.7860243 | 1.42E-01 | 10463590  | 10463713  | NC_000004.11 |
| cg16731240 | 1.03E-07 | 1.21E-08 | 5.95 | 8.7854961 | 2.20E-01 | 52391250  | 52391373  | NC_000019.9  |
| cg02705837 | 1.03E-07 | 1.21E-08 | 5.95 | 8.7850049 | 1.72E-01 | 7554666   | 7554789   | NC_000017.10 |
| cg15116095 | 1.03E-07 | 1.21E-08 | 5.95 | 8.7838941 | 9.42E-02 | 140166589 | 140166712 | NC_000005.9  |
| cg23082862 | 1.03E-07 | 1.21E-08 | 5.95 | 8.783389  | 1.16E-01 | 128993115 | 128993238 | NC_000010.10 |
| cg23008230 | 1.03E-07 | 1.21E-08 | 5.95 | 8.782866  | 1.51E-01 | 687959    | 688082    | NC_000008.10 |
| cg10429508 | 1.03E-07 | 1.21E-08 | 5.95 | 8.7825753 | 6.34E-02 | 85608556  | 85608679  | NC_000016.9  |
| cg03489023 | 1.03E-07 | 1.21E-08 | 5.95 | 8.782219  | 1.14E-01 | 19557201  | 19557324  | NC_000002.11 |
| cg13594797 | 1.03E-07 | 1.21E-08 | 5.95 | 8.7819397 | 8.60E-02 | 97720753  | 97720876  | NC_000015.9  |
| cg16464483 | 1.03E-07 | 1.22E-08 | 5.95 | 8.7803778 | 1.50E-01 | 84749130  | 84749253  | NC_000015.9  |
| cg26979537 | 1.04E-07 | 1.22E-08 | 5.95 | 8.7791024 | 1.44E-01 | 48016860  | 48016983  | NC_000019.9  |
| cg13318241 | 1.04E-07 | 1.22E-08 | 5.95 | 8.7787868 | 9.33E-02 | 3455537   | 3455660   | NC_000006.11 |
| cg27601695 | 1.04E-07 | 1.22E-08 | 5.95 | 8.7778206 | 1.04E-01 | 21911015  | 21911138  | NC_000008.10 |
| cg03649796 | 1.04E-07 | 1.22E-08 | 5.95 | 8.7777907 | 9.35E-02 | 10106565  | 10106688  | NC_000001.10 |
| cg20113732 | 1.04E-07 | 1.22E-08 | 5.95 | 8.7777569 | 1.79E-01 | 20691180  | 20691303  | NC_000011.9  |
| cg04914323 | 1.04E-07 | 1.22E-08 | 5.95 | 8.776709  | 3.80E-02 | 102267358 | 102267481 | NC_000012.11 |
| cg04722722 | 1.04E-07 | 1.22E-08 | 5.95 | 8.7765082 | 1.22E-01 | 657842    | 657965    | NC_000004.11 |
| cg12145907 | 1.04E-07 | 1.22E-08 | 5.95 | 8.7759273 | 1.40E-01 | 140864834 | 140864957 | NC_000005.9  |
| cg27631817 | 1.04E-07 | 1.22E-08 | 5.95 | 8.7750574 | 1.45E-01 | 10060938  | 10061061  | NC_000006.11 |
| cg23397325 | 1.04E-07 | 1.22E-08 | 5.95 | 8.7745863 | 7.29E-02 | 1684270   | 1684393   | NC_000002.11 |
| cg02955229 | 1.04E-07 | 1.23E-08 | 5.95 | 8.7717176 | 6.11E-02 | 31765318  | 31765441  | NC_000001.10 |
| cg27324426 | 1.04E-07 | 1.23E-08 | 5.95 | 8.771028  | 1.66E-01 | 58220837  | 58220960  | NC_000019.9  |
| cg08097157 | 1.05E-07 | 1.23E-08 | 5.95 | 8.7699554 | 4.49E-02 | 31080048  | 31080171  | NC_000006.11 |
| cg11637721 | 1.05E-07 | 1.23E-08 | 5.95 | 8.7693605 | 1.04E-01 | 65486928  | 65487051  | NC_000011.9  |
| cg23500059 | 1.05E-07 | 1.23E-08 | 5.95 | 8.7690376 | 1.64E-01 | 41086277  | 41086400  | NC_000012.11 |

|            |          |          |      |           |          |           |           |              |
|------------|----------|----------|------|-----------|----------|-----------|-----------|--------------|
| cg26984805 | 1.05E-07 | 1.23E-08 | 5.95 | 8.7689844 | 8.86E-02 | 71176501  | 71176624  | NC_000010.10 |
| cg00644033 | 1.05E-07 | 1.23E-08 | 5.95 | 8.7688765 | 7.26E-02 | 100544704 | 100544827 | NC_000007.13 |
| cg00714531 | 1.05E-07 | 1.23E-08 | 5.95 | 8.7681498 | 3.79E-02 | 46955647  | 46955770  | NC_000021.8  |
| cg00135416 | 1.05E-07 | 1.23E-08 | 5.95 | 8.7679062 | 9.54E-02 | 78172177  | 78172300  | NC_000017.10 |
| cg01007828 | 1.05E-07 | 1.23E-08 | 5.95 | 8.7676192 | 1.20E-01 | 62070306  | 62070429  | NC_000016.9  |
| cg15361590 | 1.05E-07 | 1.23E-08 | 5.95 | 8.7668931 | 1.39E-01 | 140864701 | 140864824 | NC_000005.9  |
| cg11500467 | 1.05E-07 | 1.23E-08 | 5.95 | 8.7660395 | 1.57E-01 | 26504580  | 26504703  | NC_000010.10 |
| cg06307939 | 1.05E-07 | 1.24E-08 | 5.95 | 8.764819  | 1.02E-01 | 12984645  | 12984768  | NC_000019.9  |
| cg04759767 | 1.05E-07 | 1.24E-08 | 5.95 | 8.764756  | 1.19E-01 | 25320824  | 25320947  | NC_000013.10 |
| cg26822572 | 1.05E-07 | 1.24E-08 | 5.95 | 8.7644442 | 7.51E-02 | 50691611  | 50691734  | NC_000022.10 |
| cg03438490 | 1.05E-07 | 1.24E-08 | 5.95 | 8.7641378 | 8.69E-02 | 61515010  | 61515133  | NC_000017.10 |
| cg23993425 | 1.05E-07 | 1.24E-08 | 5.95 | 8.7636673 | 1.32E-01 | 20880591  | 20880714  | NC_000001.10 |
| cg20569287 | 1.05E-07 | 1.24E-08 | 5.95 | 8.7630941 | 2.04E-01 | 144511313 | 144511436 | NC_000008.10 |
| cg25927215 | 1.05E-07 | 1.24E-08 | 5.95 | 8.76244   | 1.56E-01 | 34677450  | 34677573  | NC_000006.11 |
| cg02015741 | 1.05E-07 | 1.24E-08 | 5.95 | 8.7614672 | 1.34E-01 | 3394050   | 3394173   | NC_000005.9  |
| cg12580665 | 1.05E-07 | 1.24E-08 | 5.95 | 8.7614307 | 7.14E-02 | 25896724  | 25896847  | NC_000007.13 |
| cg00174428 | 1.05E-07 | 1.24E-08 | 5.95 | 8.7613673 | 1.38E-01 | 165204791 | 165204914 | NC_000001.10 |
| cg16512885 | 1.05E-07 | 1.24E-08 | 5.95 | 8.7605448 | 1.04E-01 | 4697919   | 4698042   | NC_000001.10 |
| cg26053083 | 1.06E-07 | 1.24E-08 | 5.95 | 8.7598963 | 1.39E-01 | 14995770  | 14995893  | NC_000011.9  |
| cg01306410 | 1.06E-07 | 1.24E-08 | 5.95 | 8.759663  | 7.39E-02 | 69147338  | 69147461  | NC_000009.11 |
| cg26885488 | 1.06E-07 | 1.24E-08 | 5.95 | 8.7589167 | 9.60E-02 | 156462202 | 156462325 | NC_000001.10 |
| cg06911974 | 1.06E-07 | 1.25E-08 | 5.95 | 8.757257  | 4.66E-02 | 172260464 | 172260587 | NC_000005.9  |
| cg04969428 | 1.06E-07 | 1.25E-08 | 5.95 | 8.7568932 | 1.23E-01 | 67372805  | 67372928  | NC_000006.11 |
| cg02951766 | 1.06E-07 | 1.25E-08 | 5.95 | 8.7568634 | 4.79E-02 | 69354819  | 69354942  | NC_000014.8  |
| cg13464738 | 1.06E-07 | 1.25E-08 | 5.95 | 8.7563413 | 9.57E-02 | 30950779  | 30950902  | NC_000006.11 |

|            |          |          |      |           |          |           |           |              |
|------------|----------|----------|------|-----------|----------|-----------|-----------|--------------|
| cg02173455 | 1.06E-07 | 1.25E-08 | 5.95 | 8.755018  | 6.87E-02 | 6770940   | 6771063   | NC_000007.13 |
| cg11940136 | 1.06E-07 | 1.25E-08 | 5.95 | 8.7544733 | 5.81E-02 | 49071438  | 49071561  | NC_000011.9  |
| cg12999098 | 1.06E-07 | 1.25E-08 | 5.95 | 8.7542602 | 1.33E-01 | 66442718  | 66442841  | NC_000011.9  |
| cg06937832 | 1.06E-07 | 1.25E-08 | 5.95 | 8.7532884 | 9.08E-02 | 49141793  | 49141916  | NC_000022.10 |
| cg07821364 | 1.06E-07 | 1.25E-08 | 5.95 | 8.7530545 | 6.89E-02 | 2411137   | 2411260   | NC_000001.10 |
| cg26094990 | 1.06E-07 | 1.25E-08 | 5.95 | 8.7521191 | 6.72E-02 | 134771944 | 134772067 | NC_000010.10 |
| cg17043339 | 1.06E-07 | 1.25E-08 | 5.95 | 8.7517475 | 3.60E-02 | 211520133 | 211520256 | NC_000001.10 |
| cg01964852 | 1.06E-07 | 1.25E-08 | 5.94 | 8.7505609 | 1.04E-01 | 27146262  | 27146385  | NC_000007.13 |
| cg06889756 | 1.07E-07 | 1.26E-08 | 5.94 | 8.7482794 | 5.76E-02 | 47184939  | 47185062  | NC_000019.9  |
| cg11677857 | 1.07E-07 | 1.26E-08 | 5.94 | 8.7482641 | 2.00E-01 | 2560350   | 2560473   | NC_000001.10 |
| cg13400248 | 1.07E-07 | 1.26E-08 | 5.94 | 8.7473105 | 1.59E-01 | 35225412  | 35225535  | NC_000007.13 |
| cg21726372 | 1.07E-07 | 1.26E-08 | 5.94 | 8.7467013 | 1.58E-01 | 111540884 | 111541007 | NC_000004.11 |
| cg11898816 | 1.07E-07 | 1.26E-08 | 5.94 | 8.7457491 | 2.91E-02 | 134671276 | 134671399 | NC_000010.10 |
| cg04508482 | 1.07E-07 | 1.26E-08 | 5.94 | 8.7456952 | 1.93E-01 | 996280    | 996403    | NC_000004.11 |
| cg09915883 | 1.07E-07 | 1.26E-08 | 5.94 | 8.7436885 | 1.09E-01 | 53324934  | 53325057  | NC_000014.8  |
| cg08184159 | 1.07E-07 | 1.26E-08 | 5.94 | 8.7427617 | 1.23E-01 | 114837108 | 114837231 | NC_000012.11 |
| cg10363915 | 1.07E-07 | 1.26E-08 | 5.94 | 8.7426137 | 3.28E-02 | 57438680  | 57438803  | NC_000011.9  |
| cg20654875 | 1.07E-07 | 1.26E-08 | 5.94 | 8.7421476 | 8.97E-02 | 134739369 | 134739492 | NC_000010.10 |
| cg23692500 | 1.07E-07 | 1.26E-08 | 5.94 | 8.7420617 | 1.25E-01 | 101158159 | 101158282 | NC_000014.8  |
| cg05314142 | 1.07E-07 | 1.26E-08 | 5.94 | 8.7419337 | 7.19E-02 | 160542711 | 160542834 | NC_000006.11 |
| cg08212128 | 1.07E-07 | 1.27E-08 | 5.94 | 8.7415998 | 7.14E-02 | 184347978 | 184348101 | NC_000003.11 |
| cg01911239 | 1.07E-07 | 1.27E-08 | 5.94 | 8.7413367 | 9.95E-02 | 140744076 | 140744199 | NC_000005.9  |
| cg02710296 | 1.08E-07 | 1.27E-08 | 5.94 | 8.7396362 | 1.44E-01 | 182921851 | 182921974 | NC_000001.10 |
| cg11256387 | 1.08E-07 | 1.27E-08 | 5.94 | 8.739621  | 1.71E-01 | 178017879 | 178018002 | NC_000005.9  |
| cg19335327 | 1.08E-07 | 1.27E-08 | 5.94 | 8.7387622 | 7.81E-02 | 57351642  | 57351765  | NC_000019.9  |



|            |          |          |      |           |          |           |           |              |
|------------|----------|----------|------|-----------|----------|-----------|-----------|--------------|
| cg25019033 | 1.08E-07 | 1.27E-08 | 5.94 | 8.7377487 | 9.57E-02 | 957182    | 957305    | NC_000010.10 |
| cg18808261 | 1.08E-07 | 1.27E-08 | 5.94 | 8.7356849 | 1.27E-01 | 18464935  | 18465058  | NC_000003.11 |
| cg18790057 | 1.08E-07 | 1.27E-08 | 5.94 | 8.7349555 | 5.78E-02 | 204337    | 204460    | NC_000007.13 |
| cg05517610 | 1.08E-07 | 1.28E-08 | 5.94 | 8.7338294 | 1.31E-01 | 142626593 | 142626716 | NC_000008.10 |
| cg13999585 | 1.08E-07 | 1.28E-08 | 5.94 | 8.7325535 | 3.03E-02 | 44739765  | 44739888  | NC_000006.11 |
| cg14269973 | 1.08E-07 | 1.28E-08 | 5.94 | 8.7324528 | 1.55E-01 | 46425904  | 46426027  | NC_000013.10 |
| cg24594454 | 1.08E-07 | 1.28E-08 | 5.94 | 8.7314422 | 1.59E-01 | 13839128  | 13839251  | NC_000001.10 |
| cg16739463 | 1.09E-07 | 1.28E-08 | 5.94 | 8.7308293 | 7.16E-02 | 13514334  | 13514457  | NC_000011.9  |
| cg01563704 | 1.09E-07 | 1.28E-08 | 5.94 | 8.7302367 | 1.94E-01 | 26271816  | 26271939  | NC_000006.11 |
| cg13829104 | 1.09E-07 | 1.28E-08 | 5.94 | 8.7293017 | 1.20E-01 | 115118806 | 115118929 | NC_000012.11 |
| cg01873886 | 1.09E-07 | 1.28E-08 | 5.94 | 8.727986  | 1.99E-01 | 54419825  | 54419948  | NC_000014.8  |
| cg26117778 | 1.09E-07 | 1.28E-08 | 5.94 | 8.7272404 | 4.32E-02 | 106938335 | 106938458 | NC_000014.8  |
| cg14975238 | 1.09E-07 | 1.28E-08 | 5.94 | 8.7270566 | 1.09E-01 | 97841591  | 97841714  | NC_000007.13 |
| cg10175249 | 1.09E-07 | 1.28E-08 | 5.94 | 8.7270468 | 1.72E-01 | 130546259 | 130546382 | NC_000010.10 |
| cg05025612 | 1.09E-07 | 1.28E-08 | 5.94 | 8.7269785 | 1.49E-01 | 206641088 | 206641211 | NC_000002.11 |
| cg02179652 | 1.09E-07 | 1.29E-08 | 5.94 | 8.7249355 | 1.52E-01 | 122852429 | 122852552 | NC_000011.9  |
| cg03279985 | 1.09E-07 | 1.29E-08 | 5.94 | 8.7245925 | 6.70E-02 | 3825631   | 3825754   | NC_000020.10 |
| cg20278291 | 1.09E-07 | 1.29E-08 | 5.94 | 8.7245596 | 1.26E-01 | 57272340  | 57272463  | NC_000014.8  |
| cg23242862 | 1.09E-07 | 1.29E-08 | 5.94 | 8.7243601 | 1.25E-01 | 65491152  | 65491275  | NC_000008.10 |
| cg02493644 | 1.09E-07 | 1.29E-08 | 5.94 | 8.7241976 | 1.60E-01 | 84816314  | 84816437  | NC_000007.13 |
| cg08145617 | 1.09E-07 | 1.29E-08 | 5.94 | 8.7241861 | 1.75E-01 | 32858541  | 32858664  | NC_000003.11 |
| cg17491947 | 1.09E-07 | 1.29E-08 | 5.94 | 8.7241452 | 1.01E-01 | 46994956  | 46995079  | NC_000004.11 |
| cg10372829 | 1.09E-07 | 1.29E-08 | 5.94 | 8.724099  | 1.03E-01 | 20751257  | 20751380  | NC_000013.10 |
| cg06072743 | 1.09E-07 | 1.29E-08 | 5.94 | 8.7234205 | 4.46E-02 | 141496896 | 141497019 | NC_000003.11 |
| cg13126790 | 1.09E-07 | 1.29E-08 | 5.94 | 8.7225766 | 8.27E-02 | 160010346 | 160010469 | NC_000006.11 |

|            |          |          |      |           |          |           |           |              |
|------------|----------|----------|------|-----------|----------|-----------|-----------|--------------|
| cg06837765 | 1.09E-07 | 1.29E-08 | 5.94 | 8.7224867 | 9.00E-02 | 66326652  | 66326775  | NC_000011.9  |
| cg16133244 | 1.09E-07 | 1.29E-08 | 5.94 | 8.7218158 | 7.04E-02 | 1400833   | 1400956   | NC_000016.9  |
| cg08154066 | 1.10E-07 | 1.29E-08 | 5.94 | 8.7198623 | 9.62E-02 | 86327669  | 86327792  | NC_000016.9  |
| cg26170805 | 1.10E-07 | 1.29E-08 | 5.94 | 8.7196679 | 2.01E-01 | 5630016   | 5630139   | NC_000018.9  |
| cg02805028 | 1.10E-07 | 1.30E-08 | 5.94 | 8.7183428 | 6.29E-02 | 27899239  | 27899362  | NC_000016.9  |
| cg16806245 | 1.10E-07 | 1.30E-08 | 5.94 | 8.7176878 | 9.19E-02 | 169649046 | 169649169 | NC_000006.11 |
| cg20585869 | 1.10E-07 | 1.30E-08 | 5.94 | 8.7170728 | 1.35E-01 | 24772333  | 24772456  | NC_000008.10 |
| cg08843809 | 1.10E-07 | 1.30E-08 | 5.94 | 8.7169443 | 1.84E-01 | 6679484   | 6679607   | NC_000017.10 |
| cg02476510 | 1.10E-07 | 1.30E-08 | 5.94 | 8.7166707 | 1.94E-01 | 114445580 | 114445703 | NC_000008.10 |
| cg10098523 | 1.10E-07 | 1.30E-08 | 5.94 | 8.7165171 | 1.24E-01 | 200002343 | 200002466 | NC_000001.10 |
| cg27546065 | 1.10E-07 | 1.30E-08 | 5.94 | 8.7161637 | 1.68E-01 | 4923383   | 4923506   | NC_000007.13 |
| cg14795231 | 1.10E-07 | 1.30E-08 | 5.94 | 8.7161533 | 4.19E-02 | 116716214 | 116716337 | NC_000011.9  |
| cg01751802 | 1.10E-07 | 1.30E-08 | 5.94 | 8.715879  | 7.05E-02 | 11309639  | 11309762  | NC_000019.9  |
| cg00364016 | 1.10E-07 | 1.30E-08 | 5.94 | 8.7154061 | 1.33E-01 | 10113648  | 10113771  | NC_000006.11 |
| cg27177709 | 1.10E-07 | 1.30E-08 | 5.94 | 8.7146411 | 6.21E-02 | 80264770  | 80264893  | NC_000015.9  |
| cg09435266 | 1.10E-07 | 1.30E-08 | 5.94 | 8.7144319 | 6.65E-02 | 69292034  | 69292157  | NC_000011.9  |
| cg00903099 | 1.10E-07 | 1.30E-08 | 5.94 | 8.7140689 | 1.38E-01 | 154862441 | 154862564 | NC_000007.13 |
| cg17759921 | 1.10E-07 | 1.30E-08 | 5.94 | 8.7136473 | 5.57E-02 | 45458155  | 45458278  | NC_000006.11 |
| cg11393040 | 1.10E-07 | 1.30E-08 | 5.94 | 8.7127425 | 4.10E-02 | 47907054  | 47907177  | NC_000001.10 |
| cg07835424 | 1.10E-07 | 1.30E-08 | 5.94 | 8.7124049 | 1.52E-01 | 200327334 | 200327457 | NC_000002.11 |
| cg14058647 | 1.10E-07 | 1.30E-08 | 5.94 | 8.7119244 | 1.26E-01 | 88137909  | 88138032  | NC_000009.11 |
| cg21322436 | 1.11E-07 | 1.31E-08 | 5.94 | 8.7096349 | 1.28E-01 | 145812842 | 145812965 | NC_000007.13 |
| cg19266910 | 1.11E-07 | 1.31E-08 | 5.94 | 8.7093344 | 1.74E-01 | 107462445 | 107462568 | NC_000011.9  |
| cg19592829 | 1.11E-07 | 1.31E-08 | 5.94 | 8.7088149 | 9.47E-02 | 57426215  | 57426338  | NC_000020.10 |
| cg22425359 | 1.11E-07 | 1.31E-08 | 5.94 | 8.708585  | 6.06E-02 | 2415878   | 2416001   | NC_000005.9  |

|            |          |          |      |           |          |           |           |              |
|------------|----------|----------|------|-----------|----------|-----------|-----------|--------------|
| cg06508738 | 1.11E-07 | 1.31E-08 | 5.94 | 8.7084634 | 7.76E-02 | 138763852 | 138763975 | NC_000003.11 |
| cg16356837 | 1.11E-07 | 1.31E-08 | 5.94 | 8.7064072 | 1.71E-01 | 54393445  | 54393568  | NC_000012.11 |
| cg14389840 | 1.11E-07 | 1.31E-08 | 5.94 | 8.7058694 | 8.12E-02 | 72298704  | 72298827  | NC_000006.11 |
| cg08557649 | 1.11E-07 | 1.31E-08 | 5.94 | 8.7048794 | 1.24E-01 | 76639713  | 76639836  | NC_000015.9  |
| cg05490875 | 1.11E-07 | 1.32E-08 | 5.94 | 8.7034771 | 2.97E-02 | 100444627 | 100444750 | NC_000007.13 |
| cg10805564 | 1.11E-07 | 1.32E-08 | 5.94 | 8.7025463 | 8.31E-02 | 104851832 | 104851955 | NC_000014.8  |
| cg20233073 | 1.11E-07 | 1.32E-08 | 5.94 | 8.7024524 | 1.31E-01 | 54960226  | 54960349  | NC_000004.11 |
| cg17015506 | 1.12E-07 | 1.32E-08 | 5.94 | 8.701609  | 4.57E-02 | 44611387  | 44611510  | NC_000011.9  |
| cg23968456 | 1.12E-07 | 1.32E-08 | 5.93 | 8.7006913 | 2.73E-02 | 73521631  | 73521754  | NC_000010.10 |
| cg24019073 | 1.12E-07 | 1.32E-08 | 5.93 | 8.7005811 | 9.07E-02 | 4448726   | 4448849   | NC_000019.9  |
| cg02497758 | 1.12E-07 | 1.32E-08 | 5.93 | 8.7002615 | 1.53E-01 | 39317194  | 39317317  | NC_000020.10 |
| cg08101303 | 1.12E-07 | 1.32E-08 | 5.93 | 8.6991915 | 1.59E-01 | 96652222  | 96652345  | NC_000007.13 |
| cg05075118 | 1.12E-07 | 1.32E-08 | 5.93 | 8.6991291 | 1.90E-01 | 132756991 | 132757114 | NC_000003.11 |
| cg20992180 | 1.12E-07 | 1.32E-08 | 5.93 | 8.6985502 | 6.50E-02 | 71901864  | 71901987  | NC_000011.9  |
| cg08195943 | 1.12E-07 | 1.32E-08 | 5.93 | 8.6979436 | 1.54E-01 | 129694487 | 129694610 | NC_000003.11 |
| cg21719492 | 1.12E-07 | 1.32E-08 | 5.93 | 8.6975764 | 7.92E-02 | 112788669 | 112788792 | NC_000013.10 |
| cg21117330 | 1.12E-07 | 1.32E-08 | 5.93 | 8.6974405 | 1.13E-01 | 140772286 | 140772409 | NC_000005.9  |
| cg14880499 | 1.12E-07 | 1.33E-08 | 5.93 | 8.696558  | 1.44E-01 | 25745768  | 25745891  | NC_000013.10 |
| cg13550729 | 1.12E-07 | 1.33E-08 | 5.93 | 8.696053  | 4.83E-02 | 19983475  | 19983598  | NC_000001.10 |
| cg16583552 | 1.12E-07 | 1.33E-08 | 5.93 | 8.6957704 | 1.13E-01 | 140553150 | 140553273 | NC_000005.9  |
| cg06187080 | 1.12E-07 | 1.33E-08 | 5.93 | 8.6956646 | 6.30E-02 | 232573578 | 232573701 | NC_000001.10 |
| cg13449354 | 1.12E-07 | 1.33E-08 | 5.93 | 8.6956131 | 3.46E-02 | 1270923   | 1271046   | NC_000005.9  |
| cg14071179 | 1.12E-07 | 1.33E-08 | 5.93 | 8.6954942 | 1.42E-01 | 122435081 | 122435204 | NC_000005.9  |
| cg03899654 | 1.12E-07 | 1.33E-08 | 5.93 | 8.6936299 | 6.04E-02 | 45361964  | 45362087  | NC_000021.8  |
| cg08774969 | 1.12E-07 | 1.33E-08 | 5.93 | 8.6932676 | 2.72E-02 | 1006240   | 1006363   | NC_000004.11 |

|            |          |          |      |           |          |           |           |              |
|------------|----------|----------|------|-----------|----------|-----------|-----------|--------------|
| cg23418066 | 1.12E-07 | 1.33E-08 | 5.93 | 8.6930417 | 3.51E-02 | 113802956 | 113803079 | NC_000013.10 |
| cg13906811 | 1.13E-07 | 1.33E-08 | 5.93 | 8.6915946 | 1.34E-01 | 50575093  | 50575216  | NC_000002.11 |
| cg10285337 | 1.13E-07 | 1.33E-08 | 5.93 | 8.6914193 | 1.50E-01 | 84815543  | 84815666  | NC_000007.13 |
| cg22526531 | 1.13E-07 | 1.33E-08 | 5.93 | 8.6909663 | 7.45E-02 | 35913782  | 35913905  | NC_000001.10 |
| cg16198087 | 1.13E-07 | 1.33E-08 | 5.93 | 8.6902507 | 1.37E-01 | 124783254 | 124783377 | NC_000002.11 |
| cg22153407 | 1.13E-07 | 1.33E-08 | 5.93 | 8.6895518 | 8.20E-02 | 230290089 | 230290212 | NC_000001.10 |
| cg20435725 | 1.13E-07 | 1.34E-08 | 5.93 | 8.6880144 | 1.79E-01 | 107103716 | 107103839 | NC_000002.11 |
| cg27096807 | 1.13E-07 | 1.34E-08 | 5.93 | 8.6877745 | 5.86E-02 | 111442336 | 111442459 | NC_000003.11 |
| cg18806140 | 1.13E-07 | 1.34E-08 | 5.93 | 8.6858646 | 1.30E-01 | 79739278  | 79739401  | NC_000002.11 |
| cg14015226 | 1.13E-07 | 1.34E-08 | 5.93 | 8.6858413 | 3.72E-02 | 42317273  | 42317396  | NC_000004.11 |
| cg00250430 | 1.13E-07 | 1.34E-08 | 5.93 | 8.6850795 | 1.78E-01 | 1051579   | 1051702   | NC_000009.11 |
| cg11647681 | 1.13E-07 | 1.34E-08 | 5.93 | 8.685067  | 1.30E-01 | 140810161 | 140810284 | NC_000005.9  |
| cg21190804 | 1.13E-07 | 1.34E-08 | 5.93 | 8.6845465 | 1.01E-01 | 8398718   | 8398841   | NC_000012.11 |
| cg16419526 | 1.13E-07 | 1.34E-08 | 5.93 | 8.6844923 | 3.45E-02 | 61634294  | 61634417  | NC_000018.9  |
| cg25776440 | 1.13E-07 | 1.34E-08 | 5.93 | 8.6834134 | 3.37E-02 | 3613710   | 3613833   | NC_000010.10 |
| cg18303437 | 1.14E-07 | 1.34E-08 | 5.93 | 8.6832457 | 1.22E-01 | 137228423 | 137228546 | NC_000003.11 |
| cg25386954 | 1.14E-07 | 1.35E-08 | 5.93 | 8.6815397 | 4.82E-02 | 60640139  | 60640262  | NC_000005.9  |
| cg11122795 | 1.14E-07 | 1.35E-08 | 5.93 | 8.6812182 | 2.52E-02 | 194071770 | 194071893 | NC_000003.11 |
| cg05827312 | 1.14E-07 | 1.35E-08 | 5.93 | 8.6808123 | 1.36E-01 | 28394966  | 28395089  | NC_000013.10 |
| cg22770135 | 1.14E-07 | 1.35E-08 | 5.93 | 8.6796775 | 1.49E-01 | 135701240 | 135701363 | NC_000005.9  |
| cg25498489 | 1.14E-07 | 1.35E-08 | 5.93 | 8.6758314 | 1.65E-01 | 8230483   | 8230606   | NC_000017.10 |
| cg17726535 | 1.14E-07 | 1.36E-08 | 5.93 | 8.674679  | 1.21E-01 | 15441195  | 15441318  | NC_000019.9  |
| cg08977390 | 1.15E-07 | 1.36E-08 | 5.93 | 8.6742228 | 1.14E-01 | 30139594  | 30139717  | NC_000006.11 |
| cg19504005 | 1.15E-07 | 1.36E-08 | 5.93 | 8.6731628 | 1.63E-01 | 70346417  | 70346540  | NC_000014.8  |
| cg23902105 | 1.15E-07 | 1.36E-08 | 5.93 | 8.6729666 | 9.07E-02 | 22009091  | 22009214  | NC_000006.11 |

|            |          |          |      |           |          |           |           |              |
|------------|----------|----------|------|-----------|----------|-----------|-----------|--------------|
| cg13422767 | 1.15E-07 | 1.36E-08 | 5.93 | 8.6726878 | 3.56E-02 | 91156455  | 91156578  | NC_000009.11 |
| cg14544505 | 1.15E-07 | 1.36E-08 | 5.93 | 8.6722056 | 6.00E-02 | 12325956  | 12326079  | NC_000018.9  |
| cg26088662 | 1.15E-07 | 1.36E-08 | 5.93 | 8.6714026 | 1.22E-01 | 159399005 | 159399128 | NC_000005.9  |
| cg23035024 | 1.15E-07 | 1.36E-08 | 5.93 | 8.6710721 | 1.35E-01 | 221701682 | 221701805 | NC_000002.11 |
| cg18141828 | 1.15E-07 | 1.36E-08 | 5.93 | 8.6691448 | 1.68E-01 | 29139121  | 29139244  | NC_000001.10 |
| cg08606911 | 1.15E-07 | 1.36E-08 | 5.93 | 8.6682744 | 1.73E-01 | 165325231 | 165325354 | NC_000001.10 |
| cg05353884 | 1.15E-07 | 1.36E-08 | 5.93 | 8.6682297 | 9.00E-02 | 26226203  | 26226326  | NC_000006.11 |
| cg21779954 | 1.15E-07 | 1.36E-08 | 5.93 | 8.667997  | 6.17E-02 | 133681160 | 133681283 | NC_000005.9  |
| cg02602550 | 1.15E-07 | 1.37E-08 | 5.93 | 8.6651833 | 1.13E-01 | 55360333  | 55360456  | NC_000016.9  |
| cg14908994 | 1.15E-07 | 1.37E-08 | 5.93 | 8.6651683 | 9.30E-02 | 41695752  | 41695875  | NC_000019.9  |
| cg05025159 | 1.16E-07 | 1.37E-08 | 5.93 | 8.6650314 | 3.77E-02 | 241905733 | 241905856 | NC_000002.11 |
| cg00658161 | 1.16E-07 | 1.37E-08 | 5.93 | 8.6642978 | 4.51E-02 | 27279957  | 27280080  | NC_000008.10 |
| cg24388251 | 1.16E-07 | 1.37E-08 | 5.93 | 8.6639903 | 1.20E-01 | 55618220  | 55618343  | NC_000008.10 |
| cg02583633 | 1.16E-07 | 1.37E-08 | 5.93 | 8.663188  | 1.58E-01 | 175192013 | 175192136 | NC_000002.11 |
| cg26105076 | 1.16E-07 | 1.37E-08 | 5.93 | 8.6625558 | 8.29E-02 | 63561037  | 63561160  | NC_000007.13 |
| cg13548361 | 1.16E-07 | 1.37E-08 | 5.93 | 8.6616233 | 1.20E-01 | 104178949 | 104179072 | NC_000010.10 |
| cg07085962 | 1.16E-07 | 1.38E-08 | 5.93 | 8.6605322 | 1.05E-01 | 27280010  | 27280133  | NC_000006.11 |
| cg01283289 | 1.16E-07 | 1.38E-08 | 5.93 | 8.660217  | 1.28E-01 | 81472177  | 81472300  | NC_000012.11 |
| cg06187528 | 1.16E-07 | 1.38E-08 | 5.93 | 8.6600793 | 5.92E-02 | 200330607 | 200330730 | NC_000001.10 |
| cg12542255 | 1.16E-07 | 1.38E-08 | 5.93 | 8.6597761 | 1.51E-01 | 45976195  | 45976318  | NC_000019.9  |
| cg13343502 | 1.16E-07 | 1.38E-08 | 5.93 | 8.6593282 | 5.89E-02 | 29999887  | 30000010  | NC_000006.11 |
| cg02256455 | 1.16E-07 | 1.38E-08 | 5.93 | 8.6588178 | 7.63E-02 | 104165475 | 104165598 | NC_000014.8  |
| cg07277190 | 1.16E-07 | 1.38E-08 | 5.93 | 8.6579998 | 3.97E-02 | 48723631  | 48723754  | NC_000012.11 |
| cg17522241 | 1.16E-07 | 1.38E-08 | 5.93 | 8.6578994 | 5.90E-02 | 161355643 | 161355766 | NC_000001.10 |
| cg26735980 | 1.16E-07 | 1.38E-08 | 5.93 | 8.6567263 | 1.39E-01 | 83195465  | 83195588  | NC_000016.9  |

|            |          |          |      |           |          |           |           |              |
|------------|----------|----------|------|-----------|----------|-----------|-----------|--------------|
| cg01722493 | 1.16E-07 | 1.38E-08 | 5.93 | 8.6566645 | 8.88E-02 | 166570199 | 166570322 | NC_000006.11 |
| cg09009788 | 1.16E-07 | 1.38E-08 | 5.93 | 8.6566247 | 5.40E-02 | 77894098  | 77894221  | NC_000013.10 |
| cg01388649 | 1.16E-07 | 1.38E-08 | 5.93 | 8.6559985 | 1.25E-01 | 46810768  | 46810891  | NC_000017.10 |
| cg11638181 | 1.16E-07 | 1.38E-08 | 5.93 | 8.6558656 | 2.04E-01 | 43602420  | 43602543  | NC_000011.9  |
| cg15627347 | 1.16E-07 | 1.38E-08 | 5.93 | 8.6558396 | 9.77E-02 | 57472504  | 57472627  | NC_000007.13 |
| cg11540007 | 1.16E-07 | 1.38E-08 | 5.93 | 8.6556628 | 1.77E-01 | 145274975 | 145275098 | NC_000002.11 |
| cg06846819 | 1.17E-07 | 1.38E-08 | 5.93 | 8.6554776 | 8.36E-03 | 68850022  | 68850145  | NC_000011.9  |
| cg21435316 | 1.17E-07 | 1.38E-08 | 5.93 | 8.6551072 | 1.10E-01 | 32110718  | 32110841  | NC_000006.11 |
| cg11409659 | 1.17E-07 | 1.38E-08 | 5.93 | 8.6548097 | 1.80E-01 | 85305829  | 85305952  | NC_000012.11 |
| cg15912800 | 1.17E-07 | 1.38E-08 | 5.93 | 8.6547084 | 1.66E-01 | 27209197  | 27209320  | NC_000007.13 |
| cg22332577 | 1.17E-07 | 1.38E-08 | 5.93 | 8.6540668 | 5.00E-02 | 30925694  | 30925817  | NC_000008.10 |
| cg07718813 | 1.17E-07 | 1.38E-08 | 5.93 | 8.6535009 | 8.49E-02 | 6640976   | 6641099   | NC_000001.10 |
| cg15052214 | 1.17E-07 | 1.39E-08 | 5.93 | 8.6533655 | 5.58E-02 | 132426938 | 132427061 | NC_000012.11 |
| cg02008651 | 1.17E-07 | 1.39E-08 | 5.93 | 8.6532772 | 1.61E-01 | 29247148  | 29247271  | NC_000014.8  |
| cg13587621 | 1.17E-07 | 1.39E-08 | 5.93 | 8.6521069 | 5.94E-02 | 95497984  | 95498107  | NC_000009.11 |
| cg13027493 | 1.17E-07 | 1.39E-08 | 5.93 | 8.6516867 | 1.58E-01 | 43153392  | 43153515  | NC_000007.13 |
| cg00148355 | 1.17E-07 | 1.39E-08 | 5.93 | 8.6509824 | 6.17E-02 | 31538871  | 31538994  | NC_000016.9  |
| cg04260368 | 1.17E-07 | 1.39E-08 | 5.92 | 8.6508045 | 1.62E-01 | 1401775   | 1401898   | NC_000019.9  |
| cg05077122 | 1.17E-07 | 1.39E-08 | 5.92 | 8.6504311 | 3.96E-02 | 27737078  | 27737201  | NC_000008.10 |
| cg03682719 | 1.17E-07 | 1.39E-08 | 5.92 | 8.6500251 | 1.35E-01 | 28584103  | 28584226  | NC_000006.11 |
| cg24181771 | 1.17E-07 | 1.39E-08 | 5.92 | 8.6486769 | 1.81E-01 | 28706472  | 28706595  | NC_000006.11 |
| cg19812514 | 1.17E-07 | 1.39E-08 | 5.92 | 8.6484016 | 3.89E-02 | 1092200   | 1092323   | NC_000011.9  |
| cg26358950 | 1.17E-07 | 1.39E-08 | 5.92 | 8.6473168 | 6.40E-02 | 7301491   | 7301614   | NC_000004.11 |
| cg04988423 | 1.17E-07 | 1.39E-08 | 5.92 | 8.6468333 | 1.68E-01 | 44331577  | 44331700  | NC_000011.9  |
| cg12743419 | 1.18E-07 | 1.40E-08 | 5.92 | 8.6460706 | 9.23E-02 | 33464523  | 33464646  | NC_000010.10 |

|            |          |          |      |           |          |           |           |              |
|------------|----------|----------|------|-----------|----------|-----------|-----------|--------------|
| cg16115841 | 1.18E-07 | 1.40E-08 | 5.92 | 8.6439035 | 1.52E-01 | 107502023 | 107502146 | NC_000002.11 |
| cg05357131 | 1.18E-07 | 1.40E-08 | 5.92 | 8.6438158 | 5.50E-02 | 124535348 | 124535471 | NC_000009.11 |
| cg18373878 | 1.18E-07 | 1.40E-08 | 5.92 | 8.6432751 | 1.13E-01 | 101192860 | 101192983 | NC_000014.8  |
| cg14362630 | 1.18E-07 | 1.40E-08 | 5.92 | 8.6424563 | 1.89E-01 | 133308669 | 133308792 | NC_000009.11 |
| cg08478125 | 1.18E-07 | 1.40E-08 | 5.92 | 8.6419839 | 1.10E-01 | 44318634  | 44318757  | NC_000010.10 |
| cg14442421 | 1.18E-07 | 1.40E-08 | 5.92 | 8.6416051 | 1.55E-01 | 19788257  | 19788380  | NC_000009.11 |
| cg11988476 | 1.18E-07 | 1.40E-08 | 5.92 | 8.6411688 | 4.56E-02 | 46368090  | 46368213  | NC_000021.8  |
| cg19962750 | 1.18E-07 | 1.40E-08 | 5.92 | 8.6405609 | 1.52E-01 | 96655444  | 96655567  | NC_000007.13 |
| cg16134139 | 1.18E-07 | 1.41E-08 | 5.92 | 8.6389796 | 2.13E-02 | 20042353  | 20042476  | NC_000007.13 |
| cg09002358 | 1.18E-07 | 1.41E-08 | 5.92 | 8.638877  | 1.28E-01 | 57541568  | 57541691  | NC_000005.9  |
| cg15690342 | 1.18E-07 | 1.41E-08 | 5.92 | 8.6382591 | 1.82E-01 | 72594851  | 72594974  | NC_000005.9  |
| cg19256656 | 1.19E-07 | 1.41E-08 | 5.92 | 8.6373527 | 9.58E-02 | 30579560  | 30579683  | NC_000006.11 |
| cg02428056 | 1.19E-07 | 1.41E-08 | 5.92 | 8.6372088 | 1.10E-01 | 37125872  | 37125995  | NC_000014.8  |
| cg13972343 | 1.19E-07 | 1.41E-08 | 5.92 | 8.637188  | 1.40E-01 | 176932149 | 176932272 | NC_000002.11 |
| cg21039380 | 1.19E-07 | 1.41E-08 | 5.92 | 8.6371005 | 1.06E-01 | 30040152  | 30040275  | NC_000011.9  |
| cg11737232 | 1.19E-07 | 1.41E-08 | 5.92 | 8.6362366 | 1.65E-01 | 60981638  | 60981761  | NC_000014.8  |
| cg10988368 | 1.19E-07 | 1.41E-08 | 5.92 | 8.6360237 | 5.34E-02 | 2293305   | 2293428   | NC_000011.9  |
| cg04931238 | 1.19E-07 | 1.41E-08 | 5.92 | 8.6358644 | 1.27E-01 | 118361224 | 118361347 | NC_000002.11 |
| cg00369852 | 1.19E-07 | 1.41E-08 | 5.92 | 8.6356913 | 1.56E-01 | 25897148  | 25897271  | NC_000007.13 |
| cg07335915 | 1.19E-07 | 1.41E-08 | 5.92 | 8.6356157 | 9.20E-02 | 86528332  | 86528455  | NC_000016.9  |
| cg05290058 | 1.19E-07 | 1.41E-08 | 5.92 | 8.6347159 | 1.11E-01 | 2890551   | 2890674   | NC_000011.9  |
| cg24875250 | 1.19E-07 | 1.41E-08 | 5.92 | 8.6344605 | 6.73E-02 | 134735402 | 134735525 | NC_000010.10 |
| cg15233380 | 1.19E-07 | 1.41E-08 | 5.92 | 8.6340593 | 8.82E-02 | 26620612  | 26620735  | NC_000013.10 |
| cg26763155 | 1.19E-07 | 1.41E-08 | 5.92 | 8.6337017 | 6.30E-02 | 109276654 | 109276777 | NC_000013.10 |
| cg26635955 | 1.19E-07 | 1.41E-08 | 5.92 | 8.6334507 | 6.08E-02 | 19654258  | 19654381  | NC_000019.9  |

|            |          |          |      |           |          |           |           |              |
|------------|----------|----------|------|-----------|----------|-----------|-----------|--------------|
| cg01518188 | 1.19E-07 | 1.41E-08 | 5.92 | 8.6334145 | 2.01E-01 | 30718238  | 30718361  | NC_000019.9  |
| cg10323921 | 1.19E-07 | 1.41E-08 | 5.92 | 8.6329158 | 9.64E-02 | 127940906 | 127941029 | NC_000012.11 |
| cg09884107 | 1.20E-07 | 1.42E-08 | 5.92 | 8.6288855 | 1.03E-01 | 34609538  | 34609661  | NC_000010.10 |
| cg05991054 | 1.20E-07 | 1.42E-08 | 5.92 | 8.6284378 | 4.07E-02 | 67913221  | 67913344  | NC_000012.11 |
| cg24347098 | 1.20E-07 | 1.42E-08 | 5.92 | 8.6283969 | 7.04E-02 | 113456650 | 113456773 | NC_000001.10 |
| cg24114371 | 1.20E-07 | 1.42E-08 | 5.92 | 8.6280524 | 7.99E-02 | 2389665   | 2389788   | NC_000019.9  |
| cg22097249 | 1.20E-07 | 1.42E-08 | 5.92 | 8.6279321 | 1.10E-01 | 42122113  | 42122236  | NC_000004.11 |
| cg17512539 | 1.20E-07 | 1.42E-08 | 5.92 | 8.6270458 | 8.34E-02 | 29404724  | 29404847  | NC_000006.11 |
| cg05996052 | 1.20E-07 | 1.42E-08 | 5.92 | 8.6269377 | 1.60E-01 | 117950473 | 117950596 | NC_000008.10 |
| cg18855429 | 1.20E-07 | 1.42E-08 | 5.92 | 8.6264275 | 1.03E-01 | 134803138 | 134803261 | NC_000010.10 |
| cg27629977 | 1.20E-07 | 1.42E-08 | 5.92 | 8.6262084 | 1.48E-01 | 80531633  | 80531756  | NC_000002.11 |
| cg17397150 | 1.20E-07 | 1.43E-08 | 5.92 | 8.624963  | 1.37E-01 | 101840567 | 101840690 | NC_000006.11 |
| cg22336180 | 1.20E-07 | 1.43E-08 | 5.92 | 8.6244335 | 4.28E-02 | 48562943  | 48563066  | NC_000012.11 |
| cg04231427 | 1.20E-07 | 1.43E-08 | 5.92 | 8.6238743 | 9.78E-02 | 98039462  | 98039585  | NC_000014.8  |
| cg03896752 | 1.20E-07 | 1.43E-08 | 5.92 | 8.6237722 | 5.69E-02 | 245727658 | 245727781 | NC_000001.10 |
| cg13486354 | 1.20E-07 | 1.43E-08 | 5.92 | 8.623531  | 2.56E-01 | 32931082  | 32931205  | NC_000021.8  |
| cg10372525 | 1.20E-07 | 1.43E-08 | 5.92 | 8.6227686 | 4.93E-02 | 72542758  | 72542881  | NC_000017.10 |
| cg12659114 | 1.20E-07 | 1.43E-08 | 5.92 | 8.6222356 | 5.01E-02 | 75524062  | 75524185  | NC_000017.10 |
| cg14959580 | 1.20E-07 | 1.43E-08 | 5.92 | 8.6220976 | 1.27E-01 | 1402198   | 1402321   | NC_000004.11 |
| cg19349555 | 1.20E-07 | 1.43E-08 | 5.92 | 8.6214897 | 6.42E-02 | 20279436  | 20279559  | NC_000015.9  |
| cg16355785 | 1.20E-07 | 1.43E-08 | 5.92 | 8.6211506 | 1.63E-01 | 161274751 | 161274874 | NC_000005.9  |
| cg24001710 | 1.21E-07 | 1.43E-08 | 5.92 | 8.6191055 | 1.40E-01 | 119606695 | 119606818 | NC_000002.11 |
| cg11235498 | 1.21E-07 | 1.44E-08 | 5.92 | 8.6182843 | 1.71E-01 | 140771656 | 140771779 | NC_000003.11 |
| cg16221555 | 1.21E-07 | 1.44E-08 | 5.92 | 8.617598  | 7.36E-02 | 134694351 | 134694474 | NC_000010.10 |
| cg14338830 | 1.21E-07 | 1.44E-08 | 5.92 | 8.6174126 | 8.56E-02 | 169568946 | 169569069 | NC_000006.11 |



|            |          |          |      |           |          |           |           |              |
|------------|----------|----------|------|-----------|----------|-----------|-----------|--------------|
| cg26511321 | 1.21E-07 | 1.44E-08 | 5.92 | 8.6171455 | 1.25E-01 | 27196790  | 27196913  | NC_000007.13 |
| cg16491617 | 1.21E-07 | 1.44E-08 | 5.92 | 8.6165972 | 2.11E-01 | 54164391  | 54164514  | NC_000008.10 |
| cg14299483 | 1.21E-07 | 1.44E-08 | 5.92 | 8.6164681 | 8.19E-02 | 101967780 | 101967903 | NC_000014.8  |
| cg15665646 | 1.21E-07 | 1.44E-08 | 5.92 | 8.6158659 | 1.37E-01 | 27112119  | 27112242  | NC_000015.9  |
| cg13554086 | 1.21E-07 | 1.44E-08 | 5.92 | 8.6158162 | 1.74E-01 | 76507100  | 76507223  | NC_000005.9  |
| cg11737879 | 1.21E-07 | 1.44E-08 | 5.92 | 8.614912  | 1.35E-01 | 143779064 | 143779187 | NC_000006.11 |
| cg17774672 | 1.21E-07 | 1.44E-08 | 5.92 | 8.614714  | 1.04E-01 | 25898541  | 25898664  | NC_000007.13 |
| cg26406176 | 1.21E-07 | 1.44E-08 | 5.92 | 8.614445  | 9.00E-02 | 19919158  | 19919281  | NC_000013.10 |
| cg04348183 | 1.21E-07 | 1.44E-08 | 5.92 | 8.6142602 | 6.53E-02 | 31193990  | 31194113  | NC_000001.10 |
| cg13587449 | 1.21E-07 | 1.44E-08 | 5.92 | 8.6137597 | 4.11E-02 | 72240883  | 72241006  | NC_000010.10 |
| cg21152690 | 1.21E-07 | 1.44E-08 | 5.92 | 8.6136797 | 1.71E-01 | 81331660  | 81331783  | NC_000012.11 |
| cg25254825 | 1.21E-07 | 1.44E-08 | 5.92 | 8.6134643 | 1.51E-01 | 128850696 | 128850819 | NC_000012.11 |
| cg11788447 | 1.21E-07 | 1.44E-08 | 5.92 | 8.6131264 | 6.53E-02 | 142350581 | 142350704 | NC_000008.10 |
| cg23948391 | 1.22E-07 | 1.45E-08 | 5.92 | 8.6111028 | 1.35E-01 | 20150114  | 20150237  | NC_000015.9  |
| cg11867257 | 1.22E-07 | 1.45E-08 | 5.92 | 8.6107402 | 1.60E-01 | 89854334  | 89854457  | NC_000005.9  |
| cg19439706 | 1.22E-07 | 1.45E-08 | 5.92 | 8.6103412 | 1.70E-01 | 72987872  | 72987995  | NC_000008.10 |
| cg18208707 | 1.22E-07 | 1.45E-08 | 5.92 | 8.6082972 | 2.17E-01 | 47210318  | 47210441  | NC_000017.10 |
| cg13031611 | 1.22E-07 | 1.45E-08 | 5.92 | 8.608218  | 1.16E-01 | 115132761 | 115132884 | NC_000012.11 |
| cg22023448 | 1.22E-07 | 1.45E-08 | 5.92 | 8.6079875 | 3.38E-02 | 20446641  | 20446764  | NC_000001.10 |
| cg09430976 | 1.22E-07 | 1.45E-08 | 5.92 | 8.6078198 | 1.47E-01 | 25907314  | 25907437  | NC_000008.10 |
| cg19078334 | 1.22E-07 | 1.45E-08 | 5.92 | 8.6077014 | 1.89E-02 | 113019254 | 113019377 | NC_000009.11 |
| cg11597475 | 1.22E-07 | 1.45E-08 | 5.92 | 8.6072463 | 2.57E-01 | 57976431  | 57976554  | NC_000004.11 |
| cg18181196 | 1.22E-07 | 1.46E-08 | 5.92 | 8.6044446 | 1.25E-01 | 217308156 | 217308279 | NC_000001.10 |
| cg06966811 | 1.22E-07 | 1.46E-08 | 5.92 | 8.6042261 | 1.13E-01 | 57276789  | 57276912  | NC_000014.8  |
| cg19430164 | 1.22E-07 | 1.46E-08 | 5.92 | 8.6040283 | 1.19E-01 | 42130777  | 42130900  | NC_000017.10 |

|            |          |          |      |           |          |           |           |              |
|------------|----------|----------|------|-----------|----------|-----------|-----------|--------------|
| cg03959945 | 1.22E-07 | 1.46E-08 | 5.92 | 8.6039002 | 4.27E-02 | 208326650 | 208326773 | NC_000001.10 |
| cg10641939 | 1.22E-07 | 1.46E-08 | 5.92 | 8.6036951 | 8.97E-02 | 147973149 | 147973272 | NC_000002.11 |
| cg23760873 | 1.22E-07 | 1.46E-08 | 5.92 | 8.6035126 | 7.21E-02 | 53805086  | 53805209  | NC_000017.10 |
| cg13431464 | 1.22E-07 | 1.46E-08 | 5.92 | 8.6027463 | 9.71E-02 | 12880767  | 12880890  | NC_000018.9  |
| cg24047377 | 1.23E-07 | 1.46E-08 | 5.91 | 8.6005033 | 1.44E-01 | 156595178 | 156595301 | NC_000001.10 |
| cg09047034 | 1.23E-07 | 1.46E-08 | 5.91 | 8.5998728 | 8.00E-02 | 38762714  | 38762837  | NC_000002.11 |
| cg25218453 | 1.23E-07 | 1.46E-08 | 5.91 | 8.5996335 | 1.20E-01 | 28603027  | 28603150  | NC_000006.11 |
| cg15687746 | 1.23E-07 | 1.46E-08 | 5.91 | 8.599284  | 5.50E-02 | 5371153   | 5371276   | NC_000017.10 |
| cg22583148 | 1.23E-07 | 1.47E-08 | 5.91 | 8.5986188 | 1.21E-01 | 46674041  | 46674164  | NC_000017.10 |
| cg02434035 | 1.23E-07 | 1.47E-08 | 5.91 | 8.598124  | 1.48E-01 | 1273835   | 1273958   | NC_000007.13 |
| cg16181396 | 1.23E-07 | 1.47E-08 | 5.91 | 8.5976374 | 1.39E-01 | 147126206 | 147126329 | NC_000003.11 |
| cg04326854 | 1.23E-07 | 1.47E-08 | 5.91 | 8.5967022 | 1.49E-01 | 166075453 | 166075576 | NC_000006.11 |
| cg11893488 | 1.23E-07 | 1.47E-08 | 5.91 | 8.5963059 | 4.41E-02 | 111144464 | 111144587 | NC_000013.10 |
| cg13291666 | 1.24E-07 | 1.47E-08 | 5.91 | 8.5934063 | 6.78E-02 | 19279823  | 19279946  | NC_000017.10 |
| cg27442349 | 1.24E-07 | 1.47E-08 | 5.91 | 8.5930576 | 6.20E-02 | 39389219  | 39389342  | NC_000019.9  |
| cg22646995 | 1.24E-07 | 1.47E-08 | 5.91 | 8.5927145 | 1.22E-01 | 180541779 | 180541902 | NC_000005.9  |
| cg21852550 | 1.24E-07 | 1.47E-08 | 5.91 | 8.5923903 | 1.06E-01 | 1850447   | 1850570   | NC_000002.11 |
| cg09889477 | 1.24E-07 | 1.48E-08 | 5.91 | 8.591865  | 1.04E-01 | 75881093  | 75881216  | NC_000017.10 |
| cg26886708 | 1.24E-07 | 1.48E-08 | 5.91 | 8.5905968 | 1.16E-01 | 112550454 | 112550577 | NC_000013.10 |
| cg18512156 | 1.24E-07 | 1.48E-08 | 5.91 | 8.5900562 | 9.38E-02 | 172661970 | 172662093 | NC_000005.9  |
| cg15865892 | 1.24E-07 | 1.48E-08 | 5.91 | 8.5894753 | 6.56E-02 | 107201149 | 107201272 | NC_000002.11 |
| cg04749646 | 1.24E-07 | 1.48E-08 | 5.91 | 8.5883568 | 1.56E-01 | 217236630 | 217236753 | NC_000002.11 |
| cg10139151 | 1.24E-07 | 1.48E-08 | 5.91 | 8.5883246 | 5.10E-02 | 29549352  | 29549475  | NC_000006.11 |
| cg09320079 | 1.24E-07 | 1.48E-08 | 5.91 | 8.5878451 | 5.39E-02 | 29247076  | 29247199  | NC_000016.9  |
| cg07903918 | 1.24E-07 | 1.48E-08 | 5.91 | 8.5860109 | 1.38E-01 | 101471986 | 101472109 | NC_000009.11 |

|            |          |          |      |           |          |           |           |              |
|------------|----------|----------|------|-----------|----------|-----------|-----------|--------------|
| cg10655046 | 1.24E-07 | 1.48E-08 | 5.91 | 8.5857564 | 7.53E-02 | 114257020 | 114257143 | NC_000002.11 |
| cg14296446 | 1.25E-07 | 1.49E-08 | 5.91 | 8.5853067 | 3.10E-02 | 74683524  | 74683647  | NC_000014.8  |
| cg13009098 | 1.25E-07 | 1.49E-08 | 5.91 | 8.5852465 | 1.15E-01 | 130976551 | 130976674 | NC_000012.11 |
| cg13459764 | 1.25E-07 | 1.49E-08 | 5.91 | 8.5844724 | 3.87E-02 | 140510480 | 140510603 | NC_000009.11 |
| cg10781087 | 1.25E-07 | 1.49E-08 | 5.91 | 8.5825006 | 8.94E-02 | 25916755  | 25916878  | NC_000001.10 |
| cg05283685 | 1.25E-07 | 1.49E-08 | 5.91 | 8.5822843 | 8.93E-02 | 92001577  | 92001700  | NC_000011.9  |
| cg06139836 | 1.25E-07 | 1.49E-08 | 5.91 | 8.5822205 | 1.32E-01 | 131762961 | 131763084 | NC_000010.10 |
| cg27398720 | 1.25E-07 | 1.49E-08 | 5.91 | 8.5821666 | 9.24E-02 | 111541173 | 111541296 | NC_000004.11 |
| cg08943180 | 1.25E-07 | 1.49E-08 | 5.91 | 8.5813007 | 8.00E-02 | 244516022 | 244516145 | NC_000001.10 |
| cg22951263 | 1.25E-07 | 1.49E-08 | 5.91 | 8.5804661 | 1.71E-01 | 87985283  | 87985406  | NC_000005.9  |
| cg05316415 | 1.25E-07 | 1.49E-08 | 5.91 | 8.579568  | 9.73E-02 | 134999675 | 134999798 | NC_000010.10 |
| cg23780491 | 1.25E-07 | 1.49E-08 | 5.91 | 8.5793047 | 3.12E-02 | 33667492  | 33667615  | NC_000011.9  |
| cg10083898 | 1.25E-07 | 1.50E-08 | 5.91 | 8.5788965 | 1.80E-01 | 66123380  | 66123503  | NC_000012.11 |
| cg09591524 | 1.25E-07 | 1.50E-08 | 5.91 | 8.5780705 | 1.29E-01 | 27150031  | 27150154  | NC_000007.13 |
| cg03867003 | 1.25E-07 | 1.50E-08 | 5.91 | 8.5778412 | 7.66E-02 | 124751257 | 124751380 | NC_000011.9  |
| cg11615755 | 1.25E-07 | 1.50E-08 | 5.91 | 8.5776242 | 1.10E-01 | 63257867  | 63257990  | NC_000005.9  |
| cg13660655 | 1.26E-07 | 1.50E-08 | 5.91 | 8.5764567 | 1.59E-01 | 69062621  | 69062744  | NC_000007.13 |
| cg12980788 | 1.26E-07 | 1.50E-08 | 5.91 | 8.5750063 | 8.73E-02 | 55641084  | 55641207  | NC_000011.9  |
| cg01579289 | 1.26E-07 | 1.50E-08 | 5.91 | 8.5749133 | 2.10E-01 | 71503740  | 71503863  | NC_000002.11 |
| cg22003366 | 1.26E-07 | 1.50E-08 | 5.91 | 8.5748856 | 1.89E-01 | 119800143 | 119800266 | NC_000005.9  |
| cg12590600 | 1.26E-07 | 1.50E-08 | 5.91 | 8.5746892 | 7.56E-02 | 644758    | 644881    | NC_000020.10 |
| cg07776626 | 1.26E-07 | 1.50E-08 | 5.91 | 8.5746316 | 9.25E-02 | 57350775  | 57350898  | NC_000008.10 |
| cg10068300 | 1.26E-07 | 1.50E-08 | 5.91 | 8.5734753 | 1.65E-01 | 11752215  | 11752338  | NC_000018.9  |
| cg24937306 | 1.26E-07 | 1.50E-08 | 5.91 | 8.5732411 | 5.45E-02 | 34940794  | 34940917  | NC_000011.9  |
| cg01097180 | 1.26E-07 | 1.50E-08 | 5.91 | 8.5727194 | 9.13E-02 | 3225044   | 3225167   | NC_000016.9  |

|            |          |          |      |           |          |           |           |              |
|------------|----------|----------|------|-----------|----------|-----------|-----------|--------------|
| cg19759671 | 1.26E-07 | 1.50E-08 | 5.91 | 8.5726726 | 1.31E-01 | 183063459 | 183063582 | NC_000004.11 |
| cg18251035 | 1.26E-07 | 1.51E-08 | 5.91 | 8.5720646 | 3.72E-02 | 97922208  | 97922331  | NC_000007.13 |
| cg21245277 | 1.26E-07 | 1.51E-08 | 5.91 | 8.5720178 | 1.93E-01 | 185463218 | 185463341 | NC_000002.11 |
| cg05785155 | 1.26E-07 | 1.51E-08 | 5.91 | 8.5705151 | 1.31E-01 | 182547401 | 182547524 | NC_000002.11 |
| cg05963690 | 1.26E-07 | 1.51E-08 | 5.91 | 8.5690441 | 7.05E-02 | 71163466  | 71163589  | NC_000011.9  |
| cg14203158 | 1.27E-07 | 1.51E-08 | 5.91 | 8.5680116 | 9.59E-02 | 13206513  | 13206636  | NC_000010.10 |
| cg08171483 | 1.27E-07 | 1.52E-08 | 5.91 | 8.5638346 | 4.15E-02 | 38010391  | 38010514  | NC_000003.11 |
| cg07393736 | 1.27E-07 | 1.52E-08 | 5.91 | 8.5637415 | 1.94E-01 | 172167810 | 172167933 | NC_000003.11 |
| cg12918460 | 1.27E-07 | 1.52E-08 | 5.91 | 8.5635924 | 5.14E-02 | 31003719  | 31003842  | NC_000007.13 |
| cg00500229 | 1.27E-07 | 1.52E-08 | 5.91 | 8.5629065 | 1.44E-01 | 243054071 | 243054194 | NC_000001.10 |
| cg10458080 | 1.27E-07 | 1.52E-08 | 5.91 | 8.5623383 | 1.25E-01 | 112178900 | 112179023 | NC_000012.11 |
| cg21914290 | 1.27E-07 | 1.52E-08 | 5.91 | 8.5622016 | 1.44E-01 | 170635960 | 170636083 | NC_000001.10 |
| cg02650017 | 1.27E-07 | 1.52E-08 | 5.91 | 8.5617326 | 1.08E-01 | 47301614  | 47301737  | NC_000017.10 |
| cg10304637 | 1.27E-07 | 1.52E-08 | 5.91 | 8.5614456 | 1.74E-01 | 6003220   | 6003343   | NC_000006.11 |
| cg11383165 | 1.27E-07 | 1.52E-08 | 5.91 | 8.5608812 | 1.02E-01 | 56002283  | 56002406  | NC_000019.9  |
| cg25387865 | 1.28E-07 | 1.52E-08 | 5.91 | 8.5604668 | 4.34E-02 | 167717313 | 167717436 | NC_000006.11 |
| cg16876315 | 1.28E-07 | 1.52E-08 | 5.91 | 8.560182  | 1.47E-01 | 170947005 | 170947128 | NC_000004.11 |
| cg26715571 | 1.28E-07 | 1.52E-08 | 5.91 | 8.5599585 | 1.81E-01 | 50554280  | 50554403  | NC_000019.9  |
| cg08854397 | 1.28E-07 | 1.52E-08 | 5.91 | 8.5595663 | 1.82E-01 | 30716182  | 30716305  | NC_000019.9  |
| cg22390023 | 1.28E-07 | 1.53E-08 | 5.91 | 8.5594577 | 4.55E-02 | 95997732  | 95997855  | NC_000011.9  |
| cg01799521 | 1.28E-07 | 1.53E-08 | 5.91 | 8.5578665 | 2.74E-02 | 39305163  | 39305286  | NC_000001.10 |
| cg05759166 | 1.28E-07 | 1.53E-08 | 5.91 | 8.5577984 | 7.44E-02 | 10452896  | 10453019  | NC_000008.10 |
| cg02010196 | 1.28E-07 | 1.53E-08 | 5.91 | 8.5562701 | 1.56E-01 | 146889275 | 146889398 | NC_000005.9  |
| cg03612914 | 1.28E-07 | 1.53E-08 | 5.91 | 8.5562477 | 2.97E-02 | 44016176  | 44016299  | NC_000013.10 |
| cg02804087 | 1.28E-07 | 1.53E-08 | 5.91 | 8.5560623 | 2.06E-01 | 43972969  | 43973092  | NC_000017.10 |

|            |          |          |      |           |          |           |           |              |
|------------|----------|----------|------|-----------|----------|-----------|-----------|--------------|
| cg00480389 | 1.28E-07 | 1.53E-08 | 5.91 | 8.5558474 | 1.24E-01 | 54580133  | 54580256  | NC_000020.10 |
| cg01284666 | 1.28E-07 | 1.53E-08 | 5.91 | 8.5556738 | 1.47E-01 | 143070242 | 143070365 | NC_000008.10 |
| cg14651504 | 1.28E-07 | 1.53E-08 | 5.91 | 8.555216  | 9.15E-02 | 50961428  | 50961551  | NC_000013.10 |
| cg26588398 | 1.28E-07 | 1.53E-08 | 5.91 | 8.5550076 | 2.14E-02 | 22214346  | 22214469  | NC_000016.9  |
| cg09071889 | 1.28E-07 | 1.53E-08 | 5.91 | 8.5539939 | 1.46E-01 | 80523413  | 80523536  | NC_000008.10 |
| cg05021846 | 1.28E-07 | 1.53E-08 | 5.91 | 8.5534207 | 1.70E-01 | 48485293  | 48485416  | NC_000004.11 |
| cg04095923 | 1.29E-07 | 1.54E-08 | 5.91 | 8.5516629 | 2.16E-02 | 37839286  | 37839409  | NC_000021.8  |
| cg26672452 | 1.29E-07 | 1.54E-08 | 5.91 | 8.5504159 | 1.03E-01 | 88794582  | 88794705  | NC_000016.9  |
| cg24535918 | 1.29E-07 | 1.54E-08 | 5.9  | 8.5502042 | 9.46E-02 | 52429399  | 52429522  | NC_000001.10 |
| cg06375949 | 1.29E-07 | 1.54E-08 | 5.9  | 8.5497681 | 1.41E-01 | 4863356   | 4863479   | NC_000004.11 |
| cg18355902 | 1.29E-07 | 1.54E-08 | 5.9  | 8.5495115 | 1.91E-01 | 154681128 | 154681251 | NC_000004.11 |
| cg27041619 | 1.29E-07 | 1.54E-08 | 5.9  | 8.5494158 | 7.54E-02 | 164172504 | 164172627 | NC_000006.11 |
| cg21926804 | 1.29E-07 | 1.54E-08 | 5.9  | 8.5493294 | 5.93E-02 | 10555382  | 10555505  | NC_000008.10 |
| cg23248910 | 1.29E-07 | 1.54E-08 | 5.9  | 8.549102  | 1.04E-01 | 123270070 | 123270193 | NC_000010.10 |
| cg10570754 | 1.29E-07 | 1.54E-08 | 5.9  | 8.5489658 | 1.12E-01 | 5589444   | 5589567   | NC_000012.11 |
| cg23182239 | 1.29E-07 | 1.54E-08 | 5.9  | 8.5482924 | 3.35E-02 | 152157462 | 152157585 | NC_000004.11 |
| cg10195169 | 1.29E-07 | 1.54E-08 | 5.9  | 8.5480522 | 1.44E-01 | 130590294 | 130590417 | NC_000012.11 |
| cg17997207 | 1.29E-07 | 1.54E-08 | 5.9  | 8.5478031 | 5.21E-02 | 17711022  | 17711145  | NC_000004.11 |
| cg07911171 | 1.29E-07 | 1.54E-08 | 5.9  | 8.5477777 | 9.62E-02 | 7340656   | 7340779   | NC_000001.10 |
| cg23413066 | 1.29E-07 | 1.54E-08 | 5.9  | 8.5476066 | 1.32E-01 | 13548755  | 13548878  | NC_000004.11 |
| cg02504416 | 1.29E-07 | 1.54E-08 | 5.9  | 8.547147  | 1.85E-01 | 44331629  | 44331752  | NC_000011.9  |
| cg12920180 | 1.29E-07 | 1.54E-08 | 5.9  | 8.5470788 | 1.64E-01 | 31344444  | 31344567  | NC_000014.8  |
| cg20700719 | 1.29E-07 | 1.55E-08 | 5.9  | 8.5454509 | 3.27E-02 | 116410553 | 116410676 | NC_000012.11 |
| cg01433610 | 1.29E-07 | 1.55E-08 | 5.9  | 8.5452384 | 1.88E-01 | 5403879   | 5404002   | NC_000017.10 |
| cg11863380 | 1.29E-07 | 1.55E-08 | 5.9  | 8.5451506 | 1.41E-01 | 95094981  | 95095104  | NC_000005.9  |

|            |          |          |     |           |          |           |           |              |
|------------|----------|----------|-----|-----------|----------|-----------|-----------|--------------|
| cg23257289 | 1.29E-07 | 1.55E-08 | 5.9 | 8.5444515 | 1.22E-01 | 62490552  | 62490675  | NC_000012.11 |
| cg15778012 | 1.29E-07 | 1.55E-08 | 5.9 | 8.5443854 | 1.57E-01 | 43601125  | 43601248  | NC_000011.9  |
| cg14887335 | 1.29E-07 | 1.55E-08 | 5.9 | 8.5442257 | 3.94E-02 | 123761683 | 123761806 | NC_000004.11 |
| cg00783409 | 1.30E-07 | 1.55E-08 | 5.9 | 8.5427867 | 7.97E-02 | 1789288   | 1789411   | NC_000008.10 |
| cg00384537 | 1.30E-07 | 1.55E-08 | 5.9 | 8.5415888 | 5.63E-02 | 39637963  | 39638086  | NC_000017.10 |
| cg20617583 | 1.30E-07 | 1.55E-08 | 5.9 | 8.5415473 | 8.32E-02 | 124609317 | 124609440 | NC_000011.9  |
| cg01519877 | 1.30E-07 | 1.55E-08 | 5.9 | 8.5414743 | 1.74E-01 | 39989802  | 39989925  | NC_000019.9  |
| cg26075408 | 1.30E-07 | 1.55E-08 | 5.9 | 8.5412846 | 1.02E-01 | 203006406 | 203006529 | NC_000002.11 |
| cg23656322 | 1.30E-07 | 1.55E-08 | 5.9 | 8.5410223 | 7.90E-02 | 153533922 | 153534045 | NC_000001.10 |
| cg16235891 | 1.30E-07 | 1.56E-08 | 5.9 | 8.5403881 | 8.92E-02 | 158243546 | 158243669 | NC_000007.13 |
| cg11100117 | 1.30E-07 | 1.56E-08 | 5.9 | 8.5389124 | 3.81E-02 | 78973691  | 78973814  | NC_000017.10 |
| cg09194159 | 1.30E-07 | 1.56E-08 | 5.9 | 8.5388937 | 2.01E-01 | 46655588  | 46655711  | NC_000017.10 |
| cg13672200 | 1.30E-07 | 1.56E-08 | 5.9 | 8.5388451 | 1.11E-01 | 54387530  | 54387653  | NC_000012.11 |
| cg26761826 | 1.30E-07 | 1.56E-08 | 5.9 | 8.5386476 | 1.38E-01 | 67419572  | 67419695  | NC_000008.10 |
| cg14718250 | 1.30E-07 | 1.56E-08 | 5.9 | 8.5383397 | 1.03E-01 | 53359731  | 53359854  | NC_000006.11 |
| cg14858267 | 1.30E-07 | 1.56E-08 | 5.9 | 8.5377527 | 1.74E-01 | 44037760  | 44037883  | NC_000003.11 |
| cg27443779 | 1.30E-07 | 1.56E-08 | 5.9 | 8.5372536 | 1.11E-01 | 14664793  | 14664916  | NC_000011.9  |
| cg04282138 | 1.30E-07 | 1.56E-08 | 5.9 | 8.5371065 | 1.03E-01 | 98511226  | 98511349  | NC_000001.10 |
| cg09998591 | 1.30E-07 | 1.56E-08 | 5.9 | 8.5364435 | 6.77E-02 | 2891402   | 2891525   | NC_000011.9  |
| cg00353330 | 1.31E-07 | 1.56E-08 | 5.9 | 8.5358696 | 8.17E-02 | 101715708 | 101715831 | NC_000004.11 |
| cg27310219 | 1.31E-07 | 1.56E-08 | 5.9 | 8.534679  | 6.48E-02 | 81240445  | 81240568  | NC_000007.13 |
| cg22500738 | 1.31E-07 | 1.56E-08 | 5.9 | 8.5345336 | 1.07E-01 | 207928706 | 207928829 | NC_000001.10 |
| cg14372996 | 1.31E-07 | 1.57E-08 | 5.9 | 8.5339833 | 1.01E-01 | 140164191 | 140164314 | NC_000009.11 |
| cg19789755 | 1.31E-07 | 1.57E-08 | 5.9 | 8.5330339 | 4.64E-02 | 56950153  | 56950276  | NC_000007.13 |
| cg04304639 | 1.31E-07 | 1.57E-08 | 5.9 | 8.532659  | 3.77E-02 | 73836075  | 73836198  | NC_000017.10 |

|            |          |          |     |           |          |           |           |              |
|------------|----------|----------|-----|-----------|----------|-----------|-----------|--------------|
| cg12665669 | 1.31E-07 | 1.57E-08 | 5.9 | 8.5311925 | 1.68E-01 | 4716313   | 4716436   | NC_000001.10 |
| cg16331929 | 1.31E-07 | 1.57E-08 | 5.9 | 8.5308973 | 1.45E-01 | 185937863 | 185937986 | NC_000004.11 |
| cg16725721 | 1.31E-07 | 1.57E-08 | 5.9 | 8.5304307 | 1.15E-01 | 127233742 | 127233865 | NC_000007.13 |
| cg15081351 | 1.31E-07 | 1.57E-08 | 5.9 | 8.5300867 | 1.55E-01 | 26222922  | 26223045  | NC_000010.10 |
| cg24325551 | 1.31E-07 | 1.57E-08 | 5.9 | 8.5288343 | 1.20E-01 | 32421635  | 32421758  | NC_000011.9  |
| cg02115599 | 1.31E-07 | 1.57E-08 | 5.9 | 8.5284783 | 1.47E-01 | 27244564  | 27244687  | NC_000007.13 |
| cg03839322 | 1.32E-07 | 1.58E-08 | 5.9 | 8.5275123 | 7.14E-02 | 57816956  | 57817079  | NC_000016.9  |
| cg04773864 | 1.32E-07 | 1.58E-08 | 5.9 | 8.5275008 | 9.11E-02 | 140744763 | 140744886 | NC_000005.9  |
| cg03486986 | 1.32E-07 | 1.58E-08 | 5.9 | 8.5271225 | 1.34E-01 | 112986285 | 112986408 | NC_000013.10 |
| cg01925738 | 1.32E-07 | 1.58E-08 | 5.9 | 8.5270924 | 1.44E-01 | 140480770 | 140480893 | NC_000005.9  |
| cg25682080 | 1.32E-07 | 1.58E-08 | 5.9 | 8.5268764 | 1.16E-01 | 116663103 | 116663226 | NC_000011.9  |
| cg18111119 | 1.32E-07 | 1.58E-08 | 5.9 | 8.5229448 | 1.25E-01 | 143531582 | 143531705 | NC_000008.10 |
| cg22521269 | 1.32E-07 | 1.58E-08 | 5.9 | 8.5221093 | 1.47E-01 | 88793305  | 88793428  | NC_000014.8  |
| cg04473209 | 1.32E-07 | 1.59E-08 | 5.9 | 8.5208012 | 7.24E-02 | 95029042  | 95029165  | NC_000011.9  |
| cg11585605 | 1.33E-07 | 1.59E-08 | 5.9 | 8.5194657 | 8.90E-02 | 52401955  | 52402078  | NC_000001.10 |
| cg03287108 | 1.33E-07 | 1.59E-08 | 5.9 | 8.5192332 | 7.83E-02 | 28971003  | 28971126  | NC_000001.10 |
| cg02718825 | 1.33E-07 | 1.59E-08 | 5.9 | 8.5191737 | 1.22E-01 | 55202842  | 55202965  | NC_000020.10 |
| cg22970357 | 1.33E-07 | 1.59E-08 | 5.9 | 8.5185621 | 1.29E-01 | 119600408 | 119600531 | NC_000002.11 |
| cg14965220 | 1.33E-07 | 1.59E-08 | 5.9 | 8.517974  | 1.55E-01 | 28034091  | 28034214  | NC_000010.10 |
| cg12632249 | 1.33E-07 | 1.59E-08 | 5.9 | 8.5171002 | 7.78E-02 | 7449638   | 7449761   | NC_000004.11 |
| cg14364356 | 1.33E-07 | 1.59E-08 | 5.9 | 8.5159654 | 1.68E-01 | 44495495  | 44495618  | NC_000021.8  |
| cg08010362 | 1.33E-07 | 1.60E-08 | 5.9 | 8.5156806 | 1.82E-01 | 113723025 | 113723148 | NC_000007.13 |
| cg12392475 | 1.33E-07 | 1.60E-08 | 5.9 | 8.5155625 | 6.42E-02 | 140537692 | 140537815 | NC_000005.9  |
| cg24656271 | 1.33E-07 | 1.60E-08 | 5.9 | 8.5154619 | 1.16E-01 | 140793358 | 140793481 | NC_000005.9  |
| cg11771234 | 1.33E-07 | 1.60E-08 | 5.9 | 8.5150929 | 1.09E-01 | 908396    | 908519    | NC_000018.9  |

|            |          |          |     |           |          |           |           |              |
|------------|----------|----------|-----|-----------|----------|-----------|-----------|--------------|
| cg13646020 | 1.33E-07 | 1.60E-08 | 5.9 | 8.5150451 | 1.42E-01 | 41750390  | 41750513  | NC_000004.11 |
| cg20233228 | 1.33E-07 | 1.60E-08 | 5.9 | 8.5138907 | 1.65E-02 | 12903610  | 12903733  | NC_000011.9  |
| cg08926365 | 1.33E-07 | 1.60E-08 | 5.9 | 8.5132529 | 9.37E-02 | 112007564 | 112007687 | NC_000006.11 |
| cg02348119 | 1.33E-07 | 1.60E-08 | 5.9 | 8.5127994 | 8.59E-02 | 78003528  | 78003651  | NC_000017.10 |
| cg06878663 | 1.33E-07 | 1.60E-08 | 5.9 | 8.5125246 | 1.15E-01 | 158907110 | 158907233 | NC_000007.13 |
| cg20852364 | 1.34E-07 | 1.60E-08 | 5.9 | 8.5118937 | 9.90E-02 | 30301024  | 30301147  | NC_000003.11 |
| cg15656501 | 1.34E-07 | 1.60E-08 | 5.9 | 8.5117535 | 1.40E-01 | 38612762  | 38612885  | NC_000004.11 |
| cg13704200 | 1.34E-07 | 1.60E-08 | 5.9 | 8.5116258 | 4.39E-02 | 130501184 | 130501307 | NC_000009.11 |
| cg07780348 | 1.34E-07 | 1.60E-08 | 5.9 | 8.5114698 | 9.51E-02 | 118842413 | 118842536 | NC_000011.9  |
| cg20406347 | 1.34E-07 | 1.61E-08 | 5.9 | 8.5092446 | 2.41E-02 | 2288463   | 2288586   | NC_000001.10 |
| cg17583946 | 1.34E-07 | 1.61E-08 | 5.9 | 8.507839  | 1.05E-01 | 63275034  | 63275157  | NC_000002.11 |
| cg25104637 | 1.34E-07 | 1.61E-08 | 5.9 | 8.507704  | 7.52E-02 | 64405452  | 64405575  | NC_000011.9  |
| cg18915143 | 1.34E-07 | 1.61E-08 | 5.9 | 8.5076322 | 1.92E-02 | 149323959 | 149324082 | NC_000005.9  |
| cg20298015 | 1.34E-07 | 1.61E-08 | 5.9 | 8.5070708 | 2.07E-02 | 33316001  | 33316124  | NC_000003.11 |
| cg15898116 | 1.34E-07 | 1.61E-08 | 5.9 | 8.506919  | 5.98E-02 | 186653723 | 186653846 | NC_000001.10 |
| cg25681728 | 1.34E-07 | 1.61E-08 | 5.9 | 8.5068415 | 2.09E-02 | 233153284 | 233153407 | NC_000002.11 |
| cg13833185 | 1.34E-07 | 1.61E-08 | 5.9 | 8.5056524 | 5.60E-02 | 130959182 | 130959305 | NC_000009.11 |
| cg23845889 | 1.34E-07 | 1.61E-08 | 5.9 | 8.5054543 | 8.57E-02 | 17270608  | 17270731  | NC_000008.10 |
| cg19679865 | 1.35E-07 | 1.61E-08 | 5.9 | 8.5044538 | 1.27E-01 | 8467904   | 8468027   | NC_000001.10 |
| cg20660350 | 1.35E-07 | 1.61E-08 | 5.9 | 8.5041324 | 8.57E-02 | 235080297 | 235080420 | NC_000002.11 |
| cg08058213 | 1.35E-07 | 1.62E-08 | 5.9 | 8.5030347 | 8.05E-02 | 156715823 | 156715946 | NC_000004.11 |
| cg09490371 | 1.35E-07 | 1.62E-08 | 5.9 | 8.5024402 | 1.24E-01 | 233253024 | 233253147 | NC_000002.11 |
| cg13284026 | 1.35E-07 | 1.62E-08 | 5.9 | 8.5005991 | 2.57E-02 | 109792450 | 109792573 | NC_000013.10 |
| cg10389114 | 1.35E-07 | 1.62E-08 | 5.9 | 8.5005403 | 8.52E-02 | 58581355  | 58581478  | NC_000016.9  |
| cg09820150 | 1.35E-07 | 1.62E-08 | 5.9 | 8.5003174 | 1.35E-01 | 87985219  | 87985342  | NC_000005.9  |



|            |          |          |      |           |          |           |           |              |
|------------|----------|----------|------|-----------|----------|-----------|-----------|--------------|
| cg05937496 | 1.35E-07 | 1.62E-08 | 5.89 | 8.4979505 | 1.68E-01 | 108508207 | 108508330 | NC_000001.10 |
| cg17046247 | 1.35E-07 | 1.63E-08 | 5.89 | 8.4974691 | 6.09E-02 | 1210875   | 1210998   | NC_000012.11 |
| cg02106850 | 1.35E-07 | 1.63E-08 | 5.89 | 8.4969487 | 1.35E-01 | 85474093  | 85474216  | NC_000006.11 |
| cg27175311 | 1.36E-07 | 1.63E-08 | 5.89 | 8.4967286 | 1.34E-01 | 182106345 | 182106468 | NC_000001.10 |
| cg08162222 | 1.36E-07 | 1.63E-08 | 5.89 | 8.4959021 | 1.13E-01 | 115135282 | 115135405 | NC_000012.11 |
| cg23049079 | 1.36E-07 | 1.63E-08 | 5.89 | 8.4956472 | 3.55E-02 | 72430124  | 72430247  | NC_000010.10 |
| cg06804705 | 1.36E-07 | 1.63E-08 | 5.89 | 8.4956228 | 8.61E-02 | 40125580  | 40125703  | NC_000021.8  |
| cg10872457 | 1.36E-07 | 1.63E-08 | 5.89 | 8.4955668 | 3.90E-02 | 53636202  | 53636325  | NC_000012.11 |
| cg24109612 | 1.36E-07 | 1.63E-08 | 5.89 | 8.4948698 | 1.53E-01 | 19838817  | 19838940  | NC_000006.11 |
| cg14311597 | 1.36E-07 | 1.63E-08 | 5.89 | 8.4945721 | 1.34E-01 | 2652531   | 2652654   | NC_000017.10 |
| cg26444951 | 1.36E-07 | 1.63E-08 | 5.89 | 8.4941508 | 1.51E-01 | 13530269  | 13530392  | NC_000004.11 |
| cg02987481 | 1.36E-07 | 1.63E-08 | 5.89 | 8.4940983 | 8.70E-02 | 115881544 | 115881667 | NC_000001.10 |
| cg14644418 | 1.36E-07 | 1.63E-08 | 5.89 | 8.494089  | 1.14E-01 | 129536661 | 129536784 | NC_000010.10 |
| cg16633901 | 1.36E-07 | 1.63E-08 | 5.89 | 8.4933885 | 2.27E-01 | 140773736 | 140773859 | NC_000007.13 |
| cg16294152 | 1.36E-07 | 1.64E-08 | 5.89 | 8.4915428 | 9.07E-02 | 418696    | 418819    | NC_000005.9  |
| cg26877678 | 1.36E-07 | 1.64E-08 | 5.89 | 8.4907384 | 1.05E-01 | 25856540  | 25856663  | NC_000017.10 |
| cg13391079 | 1.36E-07 | 1.64E-08 | 5.89 | 8.4906005 | 9.82E-02 | 25212556  | 25212679  | NC_000013.10 |
| cg01383128 | 1.36E-07 | 1.64E-08 | 5.89 | 8.4899677 | 1.11E-01 | 208629716 | 208629839 | NC_000002.11 |
| cg01189926 | 1.36E-07 | 1.64E-08 | 5.89 | 8.4897483 | 5.94E-02 | 2734480   | 2734603   | NC_000006.11 |
| cg00416458 | 1.36E-07 | 1.64E-08 | 5.89 | 8.4892775 | 7.46E-02 | 1962776   | 1962899   | NC_000004.11 |
| cg07788167 | 1.37E-07 | 1.64E-08 | 5.89 | 8.488914  | 8.40E-02 | 57484272  | 57484395  | NC_000007.13 |
| cg26690999 | 1.37E-07 | 1.64E-08 | 5.89 | 8.4886268 | 5.42E-02 | 129193790 | 129193913 | NC_000011.9  |
| cg06355908 | 1.37E-07 | 1.64E-08 | 5.89 | 8.4878748 | 6.80E-02 | 134897731 | 134897854 | NC_000010.10 |
| cg23412630 | 1.37E-07 | 1.64E-08 | 5.89 | 8.4871004 | 5.62E-02 | 33264534  | 33264657  | NC_000006.11 |
| cg20475322 | 1.37E-07 | 1.64E-08 | 5.89 | 8.4859685 | 1.77E-01 | 121971232 | 121971355 | NC_000011.9  |

|            |          |          |      |           |          |           |           |              |
|------------|----------|----------|------|-----------|----------|-----------|-----------|--------------|
| cg14971327 | 1.37E-07 | 1.65E-08 | 5.89 | 8.4843712 | 1.41E-01 | 4230502   | 4230625   | NC_000005.9  |
| cg24643102 | 1.37E-07 | 1.65E-08 | 5.89 | 8.4843416 | 1.44E-01 | 6903921   | 6904044   | NC_000003.11 |
| cg25043050 | 1.37E-07 | 1.65E-08 | 5.89 | 8.4837909 | 1.09E-01 | 129534107 | 129534230 | NC_000010.10 |
| cg00702719 | 1.37E-07 | 1.65E-08 | 5.89 | 8.4836416 | 1.14E-01 | 74025019  | 74025142  | NC_000006.11 |
| cg13096592 | 1.37E-07 | 1.65E-08 | 5.89 | 8.4831914 | 7.71E-02 | 144222103 | 144222226 | NC_000008.10 |
| cg27630311 | 1.37E-07 | 1.65E-08 | 5.89 | 8.4825078 | 1.21E-01 | 115120847 | 115120970 | NC_000012.11 |
| cg02886132 | 1.37E-07 | 1.65E-08 | 5.89 | 8.4824702 | 9.49E-02 | 72296854  | 72296977  | NC_000007.13 |
| cg04182321 | 1.37E-07 | 1.65E-08 | 5.89 | 8.4821024 | 1.81E-01 | 107799979 | 107800102 | NC_000011.9  |
| cg18356799 | 1.38E-07 | 1.66E-08 | 5.89 | 8.4790926 | 7.06E-02 | 28742633  | 28742756  | NC_000018.9  |
| cg15769184 | 1.38E-07 | 1.66E-08 | 5.89 | 8.4785457 | 1.07E-01 | 73519034  | 73519157  | NC_000002.11 |
| cg20545896 | 1.38E-07 | 1.66E-08 | 5.89 | 8.477861  | 4.61E-02 | 141408315 | 141408438 | NC_000007.13 |
| cg04529388 | 1.38E-07 | 1.66E-08 | 5.89 | 8.4770174 | 4.24E-02 | 67678102  | 67678225  | NC_000016.9  |
| cg04273811 | 1.38E-07 | 1.66E-08 | 5.89 | 8.4768697 | 1.67E-01 | 36422059  | 36422182  | NC_000003.11 |
| cg26730416 | 1.38E-07 | 1.66E-08 | 5.89 | 8.4765594 | 1.58E-01 | 4233502   | 4233625   | NC_000011.9  |
| cg14967020 | 1.38E-07 | 1.66E-08 | 5.89 | 8.4755935 | 7.46E-02 | 45277475  | 45277598  | NC_000022.10 |
| cg07559273 | 1.38E-07 | 1.66E-08 | 5.89 | 8.475169  | 1.91E-01 | 27066404  | 27066527  | NC_000014.8  |
| cg08504659 | 1.38E-07 | 1.66E-08 | 5.89 | 8.4741984 | 1.13E-01 | 52734888  | 52735011  | NC_000014.8  |
| cg17597901 | 1.39E-07 | 1.67E-08 | 5.89 | 8.4734964 | 9.16E-02 | 39874082  | 39874205  | NC_000007.13 |
| cg00080188 | 1.39E-07 | 1.67E-08 | 5.89 | 8.4724311 | 6.93E-02 | 21558201  | 21558324  | NC_000010.10 |
| cg13804476 | 1.39E-07 | 1.67E-08 | 5.89 | 8.4714198 | 8.15E-02 | 113976694 | 113976817 | NC_000013.10 |
| cg03556653 | 1.39E-07 | 1.67E-08 | 5.89 | 8.4712702 | 1.76E-01 | 115231501 | 115231624 | NC_000003.11 |
| cg05638059 | 1.39E-07 | 1.67E-08 | 5.89 | 8.4704862 | 1.84E-02 | 79298651  | 79298774  | NC_000015.9  |
| cg18331004 | 1.39E-07 | 1.67E-08 | 5.89 | 8.4702728 | 1.54E-01 | 1784313   | 1784436   | NC_000020.10 |
| cg16167240 | 1.39E-07 | 1.67E-08 | 5.89 | 8.4694236 | 1.35E-01 | 122852284 | 122852407 | NC_000011.9  |
| cg20325092 | 1.39E-07 | 1.67E-08 | 5.89 | 8.4690068 | 3.91E-02 | 75699992  | 75700115  | NC_000012.11 |

|            |          |          |      |           |          |           |           |              |
|------------|----------|----------|------|-----------|----------|-----------|-----------|--------------|
| cg26717590 | 1.39E-07 | 1.67E-08 | 5.89 | 8.4690067 | 4.39E-02 | 139925559 | 139925682 | NC_000008.10 |
| cg00855990 | 1.39E-07 | 1.68E-08 | 5.89 | 8.4666531 | 1.11E-01 | 18959354  | 18959477  | NC_000001.10 |
| cg13442432 | 1.40E-07 | 1.68E-08 | 5.89 | 8.4653821 | 2.22E-01 | 43600779  | 43600902  | NC_000011.9  |
| cg19021383 | 1.40E-07 | 1.68E-08 | 5.89 | 8.4641622 | 1.52E-01 | 45922184  | 45922307  | NC_000011.9  |
| cg25266816 | 1.40E-07 | 1.68E-08 | 5.89 | 8.4637191 | 5.22E-02 | 51011701  | 51011824  | NC_000013.10 |
| cg01563031 | 1.40E-07 | 1.68E-08 | 5.89 | 8.4636274 | 1.58E-01 | 20691429  | 20691552  | NC_000011.9  |
| cg22873165 | 1.40E-07 | 1.68E-08 | 5.89 | 8.4635392 | 1.10E-01 | 143459992 | 143460115 | NC_000008.10 |
| cg25399333 | 1.40E-07 | 1.68E-08 | 5.89 | 8.4633518 | 5.92E-02 | 50856824  | 50856947  | NC_000013.10 |
| cg22068570 | 1.40E-07 | 1.68E-08 | 5.89 | 8.4633303 | 4.12E-02 | 20002133  | 20002256  | NC_000020.10 |
| cg05269678 | 1.40E-07 | 1.68E-08 | 5.89 | 8.462911  | 6.04E-02 | 5643158   | 5643281   | NC_000007.13 |
| cg11668053 | 1.40E-07 | 1.69E-08 | 5.89 | 8.4615262 | 1.31E-01 | 194469144 | 194469267 | NC_000003.11 |
| cg03486976 | 1.40E-07 | 1.69E-08 | 5.89 | 8.4611833 | 1.33E-01 | 202978069 | 202978192 | NC_000002.11 |
| cg24893509 | 1.40E-07 | 1.69E-08 | 5.89 | 8.4607051 | 7.39E-02 | 77547348  | 77547471  | NC_000018.9  |
| cg24728898 | 1.40E-07 | 1.69E-08 | 5.89 | 8.4606069 | 8.09E-02 | 94136384  | 94136507  | NC_000007.13 |
| cg18557707 | 1.40E-07 | 1.69E-08 | 5.89 | 8.4605495 | 5.48E-02 | 48922269  | 48922392  | NC_000011.9  |
| cg01820539 | 1.40E-07 | 1.69E-08 | 5.89 | 8.4602709 | 1.31E-01 | 229045122 | 229045245 | NC_000002.11 |
| cg20080624 | 1.40E-07 | 1.69E-08 | 5.89 | 8.4600021 | 1.41E-01 | 96651111  | 96651234  | NC_000007.13 |
| cg04098829 | 1.40E-07 | 1.69E-08 | 5.89 | 8.4597672 | 7.80E-02 | 92744116  | 92744239  | NC_000005.9  |
| cg21725954 | 1.40E-07 | 1.69E-08 | 5.89 | 8.4594494 | 1.58E-01 | 146348890 | 146349013 | NC_000006.11 |
| cg27143370 | 1.41E-07 | 1.69E-08 | 5.89 | 8.457959  | 1.30E-01 | 60795923  | 60796046  | NC_000020.10 |
| cg15270654 | 1.41E-07 | 1.69E-08 | 5.89 | 8.4579407 | 1.20E-01 | 97170666  | 97170789  | NC_000008.10 |
| cg10677245 | 1.41E-07 | 1.69E-08 | 5.89 | 8.4575936 | 5.45E-02 | 1155536   | 1155659   | NC_000011.9  |
| cg24894970 | 1.41E-07 | 1.70E-08 | 5.89 | 8.4559797 | 1.40E-01 | 122655638 | 122655761 | NC_000011.9  |
| cg17675288 | 1.41E-07 | 1.70E-08 | 5.89 | 8.4552287 | 6.86E-02 | 12228482  | 12228605  | NC_000019.9  |
| cg21422672 | 1.41E-07 | 1.70E-08 | 5.89 | 8.4544568 | 4.79E-02 | 46872319  | 46872442  | NC_000021.8  |

|            |          |          |      |           |          |           |           |              |
|------------|----------|----------|------|-----------|----------|-----------|-----------|--------------|
| cg22373508 | 1.41E-07 | 1.70E-08 | 5.89 | 8.452447  | 8.77E-02 | 133196647 | 133196770 | NC_000012.11 |
| cg01826682 | 1.41E-07 | 1.70E-08 | 5.89 | 8.4517286 | 1.28E-01 | 105459097 | 105459220 | NC_000002.11 |
| cg15660353 | 1.41E-07 | 1.70E-08 | 5.89 | 8.4514947 | 1.26E-01 | 133378888 | 133379011 | NC_000002.11 |
| cg05894566 | 1.42E-07 | 1.70E-08 | 5.89 | 8.4511965 | 5.10E-02 | 83209752  | 83209875  | NC_000004.11 |
| cg22256853 | 1.42E-07 | 1.70E-08 | 5.89 | 8.4511549 | 4.03E-02 | 111840865 | 111840988 | NC_000003.11 |
| cg22892860 | 1.42E-07 | 1.70E-08 | 5.89 | 8.4509027 | 1.54E-01 | 79746273  | 79746396  | NC_000014.8  |
| cg01729977 | 1.42E-07 | 1.71E-08 | 5.88 | 8.449474  | 1.24E-01 | 140802831 | 140802954 | NC_000005.9  |
| cg13008977 | 1.42E-07 | 1.71E-08 | 5.88 | 8.4491519 | 9.61E-02 | 168271613 | 168271736 | NC_000005.9  |
| cg01368812 | 1.42E-07 | 1.71E-08 | 5.88 | 8.445912  | 1.63E-01 | 11539801  | 11539924  | NC_000001.10 |
| cg24641186 | 1.42E-07 | 1.72E-08 | 5.88 | 8.4448592 | 1.25E-01 | 50804147  | 50804270  | NC_000006.11 |
| cg02580763 | 1.42E-07 | 1.72E-08 | 5.88 | 8.4445015 | 8.12E-02 | 140745892 | 140746015 | NC_000005.9  |
| cg01103582 | 1.43E-07 | 1.72E-08 | 5.88 | 8.4431096 | 7.10E-02 | 480412    | 480535    | NC_000005.9  |
| cg22349396 | 1.43E-07 | 1.72E-08 | 5.88 | 8.4418539 | 9.61E-02 | 4803684   | 4803807   | NC_000017.10 |
| cg07657463 | 1.43E-07 | 1.72E-08 | 5.88 | 8.4412263 | 1.09E-01 | 40753247  | 40753370  | NC_000004.11 |
| cg26197699 | 1.43E-07 | 1.72E-08 | 5.88 | 8.4393539 | 1.19E-01 | 43913755  | 43913878  | NC_000018.9  |
| cg03352427 | 1.44E-07 | 1.73E-08 | 5.88 | 8.4358964 | 6.20E-02 | 154127523 | 154127646 | NC_000001.10 |
| cg25780024 | 1.44E-07 | 1.73E-08 | 5.88 | 8.4357046 | 7.52E-02 | 14348251  | 14348374  | NC_000005.9  |
| cg00538381 | 1.44E-07 | 1.73E-08 | 5.88 | 8.4348731 | 7.87E-02 | 20864068  | 20864191  | NC_000002.11 |
| cg18755531 | 1.44E-07 | 1.74E-08 | 5.88 | 8.4326219 | 8.12E-02 | 110229987 | 110230110 | NC_000005.9  |
| cg04014105 | 1.44E-07 | 1.74E-08 | 5.88 | 8.4321439 | 1.53E-01 | 110797476 | 110797599 | NC_000006.11 |
| cg00321996 | 1.44E-07 | 1.74E-08 | 5.88 | 8.4320014 | 8.57E-02 | 177696327 | 177696450 | NC_000003.11 |
| cg24058805 | 1.44E-07 | 1.74E-08 | 5.88 | 8.4319915 | 3.05E-02 | 66777579  | 66777702  | NC_000001.10 |
| cg11823142 | 1.44E-07 | 1.74E-08 | 5.88 | 8.4306023 | 7.23E-02 | 27018041  | 27018164  | NC_000006.11 |
| cg18669186 | 1.45E-07 | 1.74E-08 | 5.88 | 8.4297598 | 1.69E-01 | 119614594 | 119614717 | NC_000002.11 |
| cg02660347 | 1.45E-07 | 1.74E-08 | 5.88 | 8.4281398 | 1.40E-01 | 64062505  | 64062628  | NC_000012.11 |

|            |          |          |      |           |          |           |           |              |
|------------|----------|----------|------|-----------|----------|-----------|-----------|--------------|
| cg02971555 | 1.45E-07 | 1.75E-08 | 5.88 | 8.4277458 | 6.50E-02 | 13935467  | 13935590  | NC_000007.13 |
| cg10311610 | 1.45E-07 | 1.75E-08 | 5.88 | 8.4275735 | 1.14E-01 | 25703900  | 25704023  | NC_000016.9  |
| cg19655557 | 1.45E-07 | 1.75E-08 | 5.88 | 8.4271366 | 7.05E-02 | 216818    | 216941    | NC_000005.9  |
| cg09835408 | 1.45E-07 | 1.75E-08 | 5.88 | 8.4270182 | 9.07E-02 | 31352399  | 31352522  | NC_000020.10 |
| cg22331862 | 1.45E-07 | 1.75E-08 | 5.88 | 8.4262629 | 1.06E-01 | 10857717  | 10857840  | NC_000003.11 |
| cg02921122 | 1.45E-07 | 1.75E-08 | 5.88 | 8.4262244 | 1.05E-01 | 126712074 | 126712197 | NC_000010.10 |
| cg13520026 | 1.45E-07 | 1.75E-08 | 5.88 | 8.4247128 | 2.04E-02 | 97810769  | 97810892  | NC_000009.11 |
| cg11354629 | 1.45E-07 | 1.75E-08 | 5.88 | 8.4239628 | 1.50E-01 | 28366598  | 28366721  | NC_000013.10 |
| cg17140103 | 1.45E-07 | 1.75E-08 | 5.88 | 8.4239227 | 7.08E-02 | 30472139  | 30472262  | NC_000017.10 |
| cg14091473 | 1.45E-07 | 1.75E-08 | 5.88 | 8.4239219 | 5.33E-02 | 103062981 | 103063104 | NC_000009.11 |
| cg11489765 | 1.46E-07 | 1.76E-08 | 5.88 | 8.42191   | 6.36E-02 | 169594942 | 169595065 | NC_000004.11 |
| cg05796331 | 1.46E-07 | 1.76E-08 | 5.88 | 8.4198427 | 2.86E-02 | 133768294 | 133768417 | NC_000010.10 |
| cg00226580 | 1.46E-07 | 1.76E-08 | 5.88 | 8.4185579 | 1.23E-01 | 89000691  | 89000814  | NC_000005.9  |
| cg11724055 | 1.46E-07 | 1.76E-08 | 5.88 | 8.4184087 | 1.14E-01 | 23667475  | 23667598  | NC_000001.10 |
| cg08918749 | 1.46E-07 | 1.76E-08 | 5.88 | 8.4174627 | 1.82E-01 | 19797445  | 19797568  | NC_000008.10 |
| cg04387240 | 1.46E-07 | 1.77E-08 | 5.88 | 8.4167985 | 1.33E-01 | 166402699 | 166402822 | NC_000006.11 |
| cg15486572 | 1.46E-07 | 1.77E-08 | 5.88 | 8.4167503 | 8.98E-02 | 70132171  | 70132294  | NC_000007.13 |
| cg17355329 | 1.46E-07 | 1.77E-08 | 5.88 | 8.4167223 | 9.49E-02 | 76937980  | 76938103  | NC_000005.9  |
| cg02750098 | 1.46E-07 | 1.77E-08 | 5.88 | 8.4166539 | 1.05E-01 | 172656021 | 172656144 | NC_000005.9  |
| cg10993470 | 1.46E-07 | 1.77E-08 | 5.88 | 8.416591  | 5.55E-02 | 55533939  | 55534062  | NC_000008.10 |
| cg26384903 | 1.46E-07 | 1.77E-08 | 5.88 | 8.4163286 | 9.08E-02 | 8620744   | 8620867   | NC_000019.9  |
| cg01138867 | 1.46E-07 | 1.77E-08 | 5.88 | 8.41599   | 1.56E-01 | 160975792 | 160975915 | NC_000005.9  |
| cg24727399 | 1.46E-07 | 1.77E-08 | 5.88 | 8.415772  | 1.97E-01 | 122302265 | 122302388 | NC_000004.11 |
| cg25943503 | 1.46E-07 | 1.77E-08 | 5.88 | 8.4157699 | 1.58E-01 | 36705608  | 36705731  | NC_000013.10 |
| cg13661793 | 1.47E-07 | 1.77E-08 | 5.88 | 8.4133838 | 7.06E-02 | 32399026  | 32399149  | NC_000010.10 |

|            |          |          |      |           |          |           |           |              |
|------------|----------|----------|------|-----------|----------|-----------|-----------|--------------|
| cg10032599 | 1.47E-07 | 1.77E-08 | 5.88 | 8.4130958 | 1.16E-01 | 51560612  | 51560735  | NC_000016.9  |
| cg04927931 | 1.47E-07 | 1.77E-08 | 5.88 | 8.4128486 | 2.03E-01 | 100911701 | 100911824 | NC_000006.11 |
| cg13911723 | 1.47E-07 | 1.78E-08 | 5.88 | 8.4111964 | 1.87E-01 | 6655120   | 6655243   | NC_000007.13 |
| cg08406486 | 1.47E-07 | 1.78E-08 | 5.88 | 8.4095343 | 1.54E-01 | 111474016 | 111474139 | NC_000012.11 |
| cg10136354 | 1.47E-07 | 1.78E-08 | 5.88 | 8.4092713 | 1.76E-01 | 73151457  | 73151580  | NC_000002.11 |
| cg17831791 | 1.48E-07 | 1.78E-08 | 5.88 | 8.4069327 | 1.53E-01 | 126712230 | 126712353 | NC_000010.10 |
| cg26967167 | 1.48E-07 | 1.78E-08 | 5.88 | 8.4069323 | 1.30E-01 | 42077061  | 42077184  | NC_000014.8  |
| cg00790126 | 1.48E-07 | 1.78E-08 | 5.88 | 8.4062538 | 1.38E-01 | 203636957 | 203637080 | NC_000002.11 |
| cg27616543 | 1.48E-07 | 1.79E-08 | 5.88 | 8.405773  | 5.11E-02 | 118773657 | 118773780 | NC_000011.9  |
| cg23322546 | 1.48E-07 | 1.79E-08 | 5.88 | 8.4056618 | 9.28E-02 | 177040094 | 177040217 | NC_000002.11 |
| cg23155717 | 1.48E-07 | 1.79E-08 | 5.88 | 8.4056187 | 1.04E-01 | 145033622 | 145033745 | NC_000008.10 |
| cg02247178 | 1.48E-07 | 1.79E-08 | 5.88 | 8.4054054 | 1.25E-01 | 31506687  | 31506810  | NC_000013.10 |
| cg01637233 | 1.48E-07 | 1.79E-08 | 5.88 | 8.4048051 | 1.23E-01 | 76933224  | 76933347  | NC_000005.9  |
| cg07850832 | 1.48E-07 | 1.79E-08 | 5.88 | 8.404672  | 7.97E-02 | 37378050  | 37378173  | NC_000005.9  |
| cg15274870 | 1.48E-07 | 1.79E-08 | 5.88 | 8.4041421 | 7.42E-02 | 71900970  | 71901093  | NC_000011.9  |
| cg07620039 | 1.48E-07 | 1.79E-08 | 5.88 | 8.4036433 | 1.59E-01 | 22034747  | 22034870  | NC_000019.9  |
| cg05577810 | 1.48E-07 | 1.79E-08 | 5.88 | 8.4021071 | 1.38E-01 | 79220510  | 79220633  | NC_000002.11 |
| cg15722526 | 1.48E-07 | 1.79E-08 | 5.88 | 8.4016606 | 6.55E-02 | 54180254  | 54180377  | NC_000005.9  |
| cg13788515 | 1.48E-07 | 1.79E-08 | 5.88 | 8.4015318 | 1.66E-01 | 207139445 | 207139568 | NC_000002.11 |
| cg11953775 | 1.48E-07 | 1.79E-08 | 5.88 | 8.4013708 | 1.10E-01 | 207597011 | 207597134 | NC_000001.10 |
| cg00383020 | 1.48E-07 | 1.79E-08 | 5.88 | 8.4010605 | 3.28E-02 | 23002541  | 23002664  | NC_000001.10 |
| cg12277225 | 1.49E-07 | 1.80E-08 | 5.87 | 8.3998068 | 1.07E-01 | 52734032  | 52734155  | NC_000013.10 |
| cg16135716 | 1.49E-07 | 1.80E-08 | 5.87 | 8.3996532 | 1.49E-01 | 14133887  | 14134010  | NC_000012.11 |
| cg05652533 | 1.49E-07 | 1.80E-08 | 5.87 | 8.3986528 | 1.40E-01 | 134000287 | 134000410 | NC_000010.10 |
| cg20347042 | 1.49E-07 | 1.80E-08 | 5.87 | 8.3980299 | 4.04E-02 | 2122685   | 2122808   | NC_000007.13 |

|            |          |          |      |           |          |           |           |              |
|------------|----------|----------|------|-----------|----------|-----------|-----------|--------------|
| cg27016776 | 1.49E-07 | 1.80E-08 | 5.87 | 8.3975624 | 7.67E-02 | 86411373  | 86411496  | NC_000016.9  |
| cg15889768 | 1.49E-07 | 1.80E-08 | 5.87 | 8.3974034 | 5.29E-02 | 42619247  | 42619370  | NC_000017.10 |
| cg10325668 | 1.49E-07 | 1.80E-08 | 5.87 | 8.3973414 | 3.94E-02 | 76565523  | 76565646  | NC_000014.8  |
| cg11241498 | 1.49E-07 | 1.80E-08 | 5.87 | 8.3972614 | 1.74E-01 | 14134816  | 14134939  | NC_000012.11 |
| cg18966597 | 1.49E-07 | 1.80E-08 | 5.87 | 8.3968817 | 1.55E-01 | 155246474 | 155246597 | NC_000007.13 |
| cg01089364 | 1.49E-07 | 1.80E-08 | 5.87 | 8.3956802 | 6.90E-02 | 246781432 | 246781555 | NC_000001.10 |
| cg24809072 | 1.49E-07 | 1.80E-08 | 5.87 | 8.3955532 | 1.37E-01 | 119419635 | 119419758 | NC_000012.11 |
| cg02289343 | 1.49E-07 | 1.80E-08 | 5.87 | 8.3953086 | 7.44E-02 | 9131622   | 9131745   | NC_000001.10 |
| cg26275431 | 1.49E-07 | 1.81E-08 | 5.87 | 8.3947667 | 1.27E-01 | 140773122 | 140773245 | NC_000005.9  |
| cg01795964 | 1.49E-07 | 1.81E-08 | 5.87 | 8.3941847 | 8.49E-02 | 137532857 | 137532980 | NC_000007.13 |
| cg11871050 | 1.49E-07 | 1.81E-08 | 5.87 | 8.3939484 | 1.28E-01 | 52477794  | 52477917  | NC_000015.9  |
| cg07200199 | 1.49E-07 | 1.81E-08 | 5.87 | 8.393931  | 3.23E-02 | 48795899  | 48796022  | NC_000017.10 |
| cg02873315 | 1.50E-07 | 1.81E-08 | 5.87 | 8.3935309 | 9.05E-02 | 131927449 | 131927572 | NC_000010.10 |
| cg00149716 | 1.50E-07 | 1.81E-08 | 5.87 | 8.3934306 | 9.91E-02 | 13200069  | 13200192  | NC_000020.10 |
| cg00157199 | 1.50E-07 | 1.81E-08 | 5.87 | 8.3928237 | 1.45E-01 | 29551622  | 29551745  | NC_000020.10 |
| cg25469314 | 1.50E-07 | 1.81E-08 | 5.87 | 8.3923037 | 7.01E-02 | 48704831  | 48704954  | NC_000001.10 |
| cg18858249 | 1.50E-07 | 1.81E-08 | 5.87 | 8.3918407 | 7.34E-02 | 77646929  | 77647052  | NC_000007.13 |
| cg04573316 | 1.50E-07 | 1.81E-08 | 5.87 | 8.3914416 | 1.62E-01 | 54216680  | 54216803  | NC_000019.9  |
| cg04986616 | 1.50E-07 | 1.81E-08 | 5.87 | 8.3906402 | 1.16E-01 | 63537378  | 63537501  | NC_000011.9  |
| cg18323466 | 1.50E-07 | 1.81E-08 | 5.87 | 8.3905388 | 2.05E-01 | 101702602 | 101702725 | NC_000001.10 |
| cg07056644 | 1.50E-07 | 1.81E-08 | 5.87 | 8.3903372 | 1.33E-01 | 86546785  | 86546908  | NC_000016.9  |
| cg20172795 | 1.50E-07 | 1.81E-08 | 5.87 | 8.3902458 | 1.27E-01 | 127441199 | 127441322 | NC_000006.11 |
| cg13694876 | 1.50E-07 | 1.82E-08 | 5.87 | 8.3897057 | 1.51E-01 | 184282720 | 184282843 | NC_000003.11 |
| cg08415977 | 1.50E-07 | 1.82E-08 | 5.87 | 8.3896889 | 9.33E-02 | 7463138   | 7463261   | NC_000004.11 |
| cg08938584 | 1.50E-07 | 1.82E-08 | 5.87 | 8.3891675 | 1.18E-01 | 140797509 | 140797632 | NC_000005.9  |

|            |          |          |      |           |          |           |           |              |
|------------|----------|----------|------|-----------|----------|-----------|-----------|--------------|
| cg12124386 | 1.50E-07 | 1.82E-08 | 5.87 | 8.3885647 | 1.76E-01 | 190444776 | 190444899 | NC_000001.10 |
| cg20125569 | 1.50E-07 | 1.82E-08 | 5.87 | 8.3883738 | 1.26E-01 | 82337202  | 82337325  | NC_000015.9  |
| cg13561477 | 1.50E-07 | 1.82E-08 | 5.87 | 8.3883399 | 1.66E-01 | 98891781  | 98891904  | NC_000011.9  |
| cg01878708 | 1.50E-07 | 1.82E-08 | 5.87 | 8.3873437 | 8.48E-02 | 227555410 | 227555533 | NC_000002.11 |
| cg05496514 | 1.50E-07 | 1.82E-08 | 5.87 | 8.3869209 | 1.19E-01 | 87985513  | 87985636  | NC_000005.9  |
| cg02269978 | 1.51E-07 | 1.82E-08 | 5.87 | 8.3867725 | 9.90E-02 | 32847585  | 32847708  | NC_000006.11 |
| cg22937320 | 1.51E-07 | 1.82E-08 | 5.87 | 8.3867208 | 8.32E-02 | 19032778  | 19032901  | NC_000009.11 |
| cg16030972 | 1.51E-07 | 1.82E-08 | 5.87 | 8.3865115 | 1.33E-01 | 42393514  | 42393637  | NC_000004.11 |
| cg15755476 | 1.51E-07 | 1.82E-08 | 5.87 | 8.3863494 | 1.21E-01 | 47510670  | 47510793  | NC_000011.9  |
| cg07888193 | 1.51E-07 | 1.82E-08 | 5.87 | 8.3859439 | 1.07E-01 | 1865662   | 1865785   | NC_000005.9  |
| cg12930422 | 1.51E-07 | 1.82E-08 | 5.87 | 8.3852179 | 8.62E-02 | 55968637  | 55968760  | NC_000015.9  |
| cg03897244 | 1.51E-07 | 1.82E-08 | 5.87 | 8.3850928 | 9.73E-02 | 58116898  | 58117021  | NC_000012.11 |
| cg18338311 | 1.51E-07 | 1.83E-08 | 5.87 | 8.3836756 | 1.53E-01 | 32907939  | 32908062  | NC_000017.10 |
| cg12907817 | 1.51E-07 | 1.83E-08 | 5.87 | 8.3831781 | 7.42E-02 | 6446895   | 6447018   | NC_000005.9  |
| cg07474494 | 1.51E-07 | 1.83E-08 | 5.87 | 8.3831098 | 1.74E-01 | 58446600  | 58446723  | NC_000019.9  |
| cg11260046 | 1.51E-07 | 1.83E-08 | 5.87 | 8.3826054 | 1.73E-01 | 42095536  | 42095659  | NC_000022.10 |
| cg13332538 | 1.51E-07 | 1.83E-08 | 5.87 | 8.3823738 | 7.85E-02 | 4858482   | 4858605   | NC_000004.11 |
| cg06426027 | 1.51E-07 | 1.83E-08 | 5.87 | 8.3814617 | 5.09E-02 | 33232644  | 33232767  | NC_000006.11 |
| cg26345401 | 1.51E-07 | 1.83E-08 | 5.87 | 8.3809926 | 7.72E-02 | 125538412 | 125538535 | NC_000008.10 |
| cg12664938 | 1.51E-07 | 1.83E-08 | 5.87 | 8.3806205 | 6.92E-02 | 40622688  | 40622811  | NC_000012.11 |
| cg10592734 | 1.51E-07 | 1.83E-08 | 5.87 | 8.3800284 | 8.53E-02 | 139570596 | 139570719 | NC_000007.13 |
| cg00162952 | 1.52E-07 | 1.83E-08 | 5.87 | 8.3795696 | 7.04E-02 | 132057821 | 132057944 | NC_000002.11 |
| cg24729792 | 1.52E-07 | 1.84E-08 | 5.87 | 8.3790568 | 7.71E-02 | 113192114 | 113192237 | NC_000002.11 |
| cg13482010 | 1.52E-07 | 1.84E-08 | 5.87 | 8.3777    | 7.92E-02 | 122703782 | 122703905 | NC_000003.11 |
| cg01674761 | 1.52E-07 | 1.84E-08 | 5.87 | 8.3776243 | 4.95E-02 | 50891767  | 50891890  | NC_000008.10 |



|            |          |          |      |           |          |           |           |              |
|------------|----------|----------|------|-----------|----------|-----------|-----------|--------------|
| cg13391664 | 1.52E-07 | 1.84E-08 | 5.87 | 8.3767306 | 3.54E-02 | 12260067  | 12260190  | NC_000001.10 |
| cg02785604 | 1.52E-07 | 1.84E-08 | 5.87 | 8.374979  | 6.34E-02 | 131676136 | 131676259 | NC_000002.11 |
| cg12386876 | 1.52E-07 | 1.84E-08 | 5.87 | 8.374906  | 6.13E-02 | 110352770 | 110352893 | NC_000012.11 |
| cg09596173 | 1.52E-07 | 1.84E-08 | 5.87 | 8.374842  | 2.63E-02 | 73761320  | 73761443  | NC_000017.10 |
| cg19325487 | 1.52E-07 | 1.84E-08 | 5.87 | 8.3742629 | 8.24E-02 | 113609544 | 113609667 | NC_000002.11 |
| cg01791371 | 1.52E-07 | 1.85E-08 | 5.87 | 8.3735325 | 1.64E-01 | 50817193  | 50817316  | NC_000006.11 |
| cg15755568 | 1.53E-07 | 1.85E-08 | 5.87 | 8.371866  | 7.99E-02 | 8403922   | 8404045   | NC_000019.9  |
| cg21422740 | 1.53E-07 | 1.85E-08 | 5.87 | 8.3718133 | 7.52E-02 | 1960689   | 1960812   | NC_000001.10 |
| cg11332163 | 1.53E-07 | 1.85E-08 | 5.87 | 8.371203  | 9.51E-02 | 54975593  | 54975716  | NC_000004.11 |
| cg01446894 | 1.53E-07 | 1.85E-08 | 5.87 | 8.370374  | 1.05E-01 | 21688203  | 21688326  | NC_000020.10 |
| cg06575144 | 1.53E-07 | 1.85E-08 | 5.87 | 8.369924  | 9.11E-02 | 30618966  | 30619089  | NC_000020.10 |
| cg16954341 | 1.53E-07 | 1.85E-08 | 5.87 | 8.3692095 | 1.38E-01 | 25652381  | 25652504  | NC_000006.11 |
| cg15893431 | 1.53E-07 | 1.85E-08 | 5.87 | 8.3690489 | 1.39E-01 | 34442183  | 34442306  | NC_000021.8  |
| cg00175895 | 1.53E-07 | 1.85E-08 | 5.87 | 8.3686405 | 5.94E-02 | 1578077   | 1578200   | NC_000004.11 |
| cg18994250 | 1.53E-07 | 1.85E-08 | 5.87 | 8.3685441 | 1.02E-01 | 6107021   | 6107144   | NC_000004.11 |
| cg02210279 | 1.53E-07 | 1.86E-08 | 5.87 | 8.3682081 | 6.31E-02 | 88133346  | 88133469  | NC_000016.9  |
| cg20693854 | 1.53E-07 | 1.86E-08 | 5.87 | 8.3671354 | 7.21E-02 | 2653005   | 2653128   | NC_000002.11 |
| cg13632816 | 1.53E-07 | 1.86E-08 | 5.87 | 8.3671185 | 1.87E-01 | 113341925 | 113342048 | NC_000009.11 |
| cg19135761 | 1.53E-07 | 1.86E-08 | 5.87 | 8.3662385 | 1.72E-01 | 3567214   | 3567337   | NC_000001.10 |
| cg26027690 | 1.54E-07 | 1.86E-08 | 5.87 | 8.3650634 | 6.53E-02 | 10917391  | 10917514  | NC_000001.10 |
| cg07258916 | 1.54E-07 | 1.86E-08 | 5.87 | 8.3642776 | 2.22E-01 | 132262353 | 132262476 | NC_000007.13 |
| cg07739205 | 1.54E-07 | 1.86E-08 | 5.87 | 8.3634985 | 1.98E-01 | 50823541  | 50823664  | NC_000008.10 |
| cg20377762 | 1.54E-07 | 1.86E-08 | 5.87 | 8.363346  | 6.43E-02 | 55447028  | 55447151  | NC_000001.10 |
| cg00555268 | 1.54E-07 | 1.87E-08 | 5.87 | 8.3628536 | 5.72E-02 | 62202358  | 62202481  | NC_000020.10 |
| cg22776578 | 1.54E-07 | 1.87E-08 | 5.87 | 8.36193   | 1.17E-01 | 175223497 | 175223620 | NC_000005.9  |

|            |          |          |      |           |          |           |           |              |
|------------|----------|----------|------|-----------|----------|-----------|-----------|--------------|
| cg14832223 | 1.54E-07 | 1.87E-08 | 5.87 | 8.3613724 | 4.32E-02 | 75490372  | 75490495  | NC_000015.9  |
| cg16563171 | 1.54E-07 | 1.87E-08 | 5.87 | 8.3596063 | 1.28E-01 | 223156106 | 223156229 | NC_000002.11 |
| cg25448067 | 1.55E-07 | 1.87E-08 | 5.87 | 8.3589441 | 5.49E-02 | 126109261 | 126109384 | NC_000005.9  |
| cg22598028 | 1.55E-07 | 1.87E-08 | 5.87 | 8.3584961 | 1.96E-01 | 44626492  | 44626615  | NC_000003.11 |
| cg12610207 | 1.55E-07 | 1.88E-08 | 5.87 | 8.3579749 | 1.70E-01 | 114833950 | 114834073 | NC_000012.11 |
| cg02030410 | 1.55E-07 | 1.88E-08 | 5.87 | 8.355375  | 1.17E-01 | 245646925 | 245647048 | NC_000001.10 |
| cg20891622 | 1.55E-07 | 1.88E-08 | 5.87 | 8.3553644 | 3.34E-02 | 52303511  | 52303634  | NC_000003.11 |
| cg17072087 | 1.55E-07 | 1.88E-08 | 5.87 | 8.3553181 | 8.74E-02 | 123350673 | 123350796 | NC_000012.11 |
| cg11791751 | 1.55E-07 | 1.88E-08 | 5.87 | 8.3539696 | 1.93E-01 | 13910138  | 13910261  | NC_000001.10 |
| cg10250623 | 1.55E-07 | 1.89E-08 | 5.87 | 8.3528022 | 6.81E-02 | 130828949 | 130829072 | NC_000010.10 |
| cg07999415 | 1.56E-07 | 1.89E-08 | 5.87 | 8.3501361 | 8.83E-02 | 71724338  | 71724461  | NC_000011.9  |
| cg04020211 | 1.56E-07 | 1.89E-08 | 5.86 | 8.349337  | 1.21E-01 | 179763432 | 179763555 | NC_000005.9  |
| cg07134541 | 1.56E-07 | 1.89E-08 | 5.86 | 8.3484772 | 8.57E-02 | 132956322 | 132956445 | NC_000012.11 |
| cg13576330 | 1.56E-07 | 1.90E-08 | 5.86 | 8.3468187 | 1.20E-01 | 92943267  | 92943390  | NC_000005.9  |
| cg21564242 | 1.57E-07 | 1.90E-08 | 5.86 | 8.3432985 | 9.31E-02 | 179754761 | 179754884 | NC_000003.11 |
| cg19971289 | 1.57E-07 | 1.90E-08 | 5.86 | 8.3425571 | 4.54E-02 | 33411967  | 33412090  | NC_000010.10 |
| cg18947553 | 1.57E-07 | 1.91E-08 | 5.86 | 8.3422721 | 9.72E-02 | 227747468 | 227747591 | NC_000001.10 |
| cg01463154 | 1.57E-07 | 1.91E-08 | 5.86 | 8.3422412 | 1.46E-01 | 65491938  | 65492061  | NC_000008.10 |
| cg19355929 | 1.57E-07 | 1.91E-08 | 5.86 | 8.3414885 | 1.45E-01 | 20618001  | 20618124  | NC_000011.9  |
| cg06111486 | 1.57E-07 | 1.91E-08 | 5.86 | 8.3412882 | 7.64E-02 | 30122051  | 30122174  | NC_000006.11 |
| cg04587084 | 1.57E-07 | 1.91E-08 | 5.86 | 8.3412288 | 1.08E-01 | 86323213  | 86323336  | NC_000016.9  |
| cg24113409 | 1.57E-07 | 1.91E-08 | 5.86 | 8.3412261 | 1.13E-01 | 10884314  | 10884437  | NC_000006.11 |
| cg07499241 | 1.58E-07 | 1.91E-08 | 5.86 | 8.3391699 | 1.98E-01 | 27053934  | 27054057  | NC_000022.10 |
| cg08655664 | 1.58E-07 | 1.91E-08 | 5.86 | 8.33765   | 3.53E-02 | 89921909  | 89922032  | NC_000016.9  |
| cg04056343 | 1.58E-07 | 1.91E-08 | 5.86 | 8.3375398 | 1.44E-01 | 7137080   | 7137203   | NC_000016.9  |

|            |          |          |      |           |          |           |           |              |
|------------|----------|----------|------|-----------|----------|-----------|-----------|--------------|
| cg16765268 | 1.58E-07 | 1.92E-08 | 5.86 | 8.3367511 | 2.57E-02 | 11229200  | 11229323  | NC_000016.9  |
| cg26313888 | 1.58E-07 | 1.92E-08 | 5.86 | 8.3362153 | 7.55E-02 | 72440429  | 72440552  | NC_000007.13 |
| cg14192573 | 1.58E-07 | 1.92E-08 | 5.86 | 8.3356375 | 2.43E-02 | 86281401  | 86281524  | NC_000002.11 |
| cg22108265 | 1.58E-07 | 1.92E-08 | 5.86 | 8.3355738 | 8.30E-02 | 73471972  | 73472095  | NC_000011.9  |
| cg09864050 | 1.58E-07 | 1.92E-08 | 5.86 | 8.3352457 | 1.47E-01 | 19150174  | 19150297  | NC_000007.13 |
| cg10336131 | 1.58E-07 | 1.92E-08 | 5.86 | 8.3351674 | 1.17E-01 | 66049756  | 66049879  | NC_000011.9  |
| cg26536750 | 1.58E-07 | 1.92E-08 | 5.86 | 8.3351274 | 1.15E-01 | 39998930  | 39999053  | NC_000019.9  |
| cg26706317 | 1.58E-07 | 1.92E-08 | 5.86 | 8.3347241 | 7.27E-02 | 242836370 | 242836493 | NC_000002.11 |
| cg00764099 | 1.58E-07 | 1.92E-08 | 5.86 | 8.3346786 | 7.08E-02 | 234650765 | 234650888 | NC_000002.11 |
| cg06179060 | 1.58E-07 | 1.92E-08 | 5.86 | 8.3338641 | 1.77E-01 | 78493012  | 78493135  | NC_000013.10 |
| cg16924702 | 1.58E-07 | 1.92E-08 | 5.86 | 8.3337783 | 1.84E-01 | 5544231   | 5544354   | NC_000018.9  |
| cg11640079 | 1.58E-07 | 1.92E-08 | 5.86 | 8.3335854 | 9.36E-02 | 4876815   | 4876938   | NC_000004.11 |
| cg21648202 | 1.58E-07 | 1.92E-08 | 5.86 | 8.3330056 | 1.10E-01 | 14171331  | 14171454  | NC_000019.9  |
| cg08990507 | 1.59E-07 | 1.93E-08 | 5.86 | 8.3317394 | 1.21E-01 | 55529213  | 55529336  | NC_000005.9  |
| cg06050784 | 1.59E-07 | 1.93E-08 | 5.86 | 8.3308802 | 6.50E-02 | 88016603  | 88016726  | NC_000016.9  |
| cg25183214 | 1.59E-07 | 1.93E-08 | 5.86 | 8.3305823 | 4.22E-02 | 222360426 | 222360549 | NC_000002.11 |
| cg01707127 | 1.59E-07 | 1.93E-08 | 5.86 | 8.3305368 | 5.18E-02 | 947051    | 947174    | NC_000016.9  |
| cg12642651 | 1.59E-07 | 1.93E-08 | 5.86 | 8.328108  | 1.21E-01 | 9861712   | 9861835   | NC_000017.10 |
| cg07941927 | 1.59E-07 | 1.93E-08 | 5.86 | 8.3275428 | 1.33E-01 | 100644041 | 100644164 | NC_000013.10 |
| cg20640433 | 1.59E-07 | 1.93E-08 | 5.86 | 8.3273392 | 1.73E-01 | 129204206 | 129204329 | NC_000006.11 |
| cg05332308 | 1.59E-07 | 1.94E-08 | 5.86 | 8.3270366 | 1.06E-01 | 62442964  | 62443087  | NC_000016.9  |
| cg21565130 | 1.59E-07 | 1.94E-08 | 5.86 | 8.3269095 | 1.81E-01 | 125365004 | 125365127 | NC_000011.9  |
| cg04496108 | 1.59E-07 | 1.94E-08 | 5.86 | 8.3268758 | 5.54E-02 | 31453121  | 31453244  | NC_000013.10 |
| cg02116953 | 1.59E-07 | 1.94E-08 | 5.86 | 8.3265883 | 1.67E-01 | 20346166  | 20346289  | NC_000020.10 |
| cg22959932 | 1.59E-07 | 1.94E-08 | 5.86 | 8.3265426 | 9.07E-02 | 8693706   | 8693829   | NC_000003.11 |

|            |          |          |      |           |          |           |           |              |
|------------|----------|----------|------|-----------|----------|-----------|-----------|--------------|
| cg26251506 | 1.59E-07 | 1.94E-08 | 5.86 | 8.3260402 | 1.49E-01 | 96642163  | 96642286  | NC_000007.13 |
| cg11188666 | 1.59E-07 | 1.94E-08 | 5.86 | 8.3259979 | 6.59E-02 | 83718165  | 83718288  | NC_000004.11 |
| cg19343034 | 1.60E-07 | 1.94E-08 | 5.86 | 8.3254816 | 8.76E-02 | 49223253  | 49223376  | NC_000019.9  |
| cg02805612 | 1.60E-07 | 1.94E-08 | 5.86 | 8.3247274 | 9.21E-02 | 137228231 | 137228354 | NC_000003.11 |
| cg13620881 | 1.60E-07 | 1.94E-08 | 5.86 | 8.3239176 | 5.48E-02 | 10888129  | 10888252  | NC_000006.11 |
| cg07339137 | 1.60E-07 | 1.94E-08 | 5.86 | 8.3235626 | 6.57E-02 | 87276419  | 87276542  | NC_000003.11 |
| cg22472304 | 1.60E-07 | 1.94E-08 | 5.86 | 8.3229796 | 9.12E-02 | 42829497  | 42829620  | NC_000022.10 |
| cg04347708 | 1.60E-07 | 1.95E-08 | 5.86 | 8.3219097 | 1.05E-01 | 128557965 | 128558088 | NC_000011.9  |
| cg11265516 | 1.60E-07 | 1.95E-08 | 5.86 | 8.3215841 | 5.13E-02 | 132328569 | 132328692 | NC_000012.11 |
| cg27456707 | 1.60E-07 | 1.95E-08 | 5.86 | 8.3213764 | 1.15E-01 | 63839511  | 63839634  | NC_000011.9  |
| cg17435182 | 1.60E-07 | 1.95E-08 | 5.86 | 8.3199446 | 4.74E-02 | 52933429  | 52933552  | NC_000019.9  |
| cg17183432 | 1.61E-07 | 1.95E-08 | 5.86 | 8.3188112 | 1.86E-01 | 102984681 | 102984804 | NC_000010.10 |
| cg04482825 | 1.61E-07 | 1.95E-08 | 5.86 | 8.3184279 | 1.04E-01 | 37190548  | 37190671  | NC_000015.9  |
| cg13768953 | 1.61E-07 | 1.95E-08 | 5.86 | 8.3181172 | 6.66E-02 | 7114967   | 7115090   | NC_000017.10 |
| cg01983725 | 1.61E-07 | 1.95E-08 | 5.86 | 8.3173825 | 7.61E-02 | 227161799 | 227161922 | NC_000001.10 |
| cg24292487 | 1.61E-07 | 1.96E-08 | 5.86 | 8.3172669 | 9.06E-02 | 54963304  | 54963427  | NC_000019.9  |
| cg01774159 | 1.61E-07 | 1.96E-08 | 5.86 | 8.3166989 | 1.63E-01 | 80524467  | 80524590  | NC_000008.10 |
| cg00060956 | 1.61E-07 | 1.96E-08 | 5.86 | 8.3164009 | 4.21E-02 | 43209576  | 43209699  | NC_000001.10 |
| cg09246570 | 1.61E-07 | 1.96E-08 | 5.86 | 8.3153157 | 5.57E-02 | 32797772  | 32797895  | NC_000014.8  |
| cg15110403 | 1.61E-07 | 1.96E-08 | 5.86 | 8.3150456 | 1.68E-01 | 17392923  | 17393046  | NC_000019.9  |
| cg15333426 | 1.61E-07 | 1.96E-08 | 5.86 | 8.3132607 | 1.43E-01 | 10463620  | 10463743  | NC_000004.11 |
| cg10982460 | 1.62E-07 | 1.97E-08 | 5.86 | 8.3117174 | 5.16E-02 | 114874494 | 114874617 | NC_000013.10 |
| cg23745444 | 1.62E-07 | 1.97E-08 | 5.86 | 8.3116307 | 9.62E-02 | 130624293 | 130624416 | NC_000012.11 |
| cg07122178 | 1.62E-07 | 1.97E-08 | 5.86 | 8.311597  | 1.27E-01 | 41168481  | 41168604  | NC_000008.10 |
| cg26515460 | 1.62E-07 | 1.97E-08 | 5.86 | 8.3113976 | 1.57E-01 | 983354    | 983477    | NC_000020.10 |

|            |          |          |      |           |          |           |           |              |
|------------|----------|----------|------|-----------|----------|-----------|-----------|--------------|
| cg08307753 | 1.62E-07 | 1.97E-08 | 5.86 | 8.3111757 | 7.54E-02 | 34404673  | 34404796  | NC_000016.9  |
| cg25764899 | 1.62E-07 | 1.97E-08 | 5.86 | 8.3111579 | 1.93E-01 | 47697948  | 47698071  | NC_000001.10 |
| cg01868405 | 1.62E-07 | 1.97E-08 | 5.86 | 8.3107267 | 1.86E-01 | 54204112  | 54204235  | NC_000001.10 |
| cg17344813 | 1.62E-07 | 1.97E-08 | 5.86 | 8.3095499 | 4.82E-02 | 46912545  | 46912668  | NC_000021.8  |
| cg08754124 | 1.62E-07 | 1.97E-08 | 5.86 | 8.3094134 | 5.82E-02 | 87022692  | 87022815  | NC_000016.9  |
| cg18295261 | 1.62E-07 | 1.98E-08 | 5.86 | 8.3071064 | 4.10E-02 | 55736570  | 55736693  | NC_000014.8  |
| cg26355755 | 1.62E-07 | 1.98E-08 | 5.86 | 8.3069722 | 1.44E-01 | 149156606 | 149156729 | NC_000001.10 |
| cg03468466 | 1.62E-07 | 1.98E-08 | 5.86 | 8.3065075 | 1.14E-01 | 27771914  | 27772037  | NC_000003.11 |
| cg18391972 | 1.63E-07 | 1.98E-08 | 5.86 | 8.3056073 | 6.55E-02 | 37458535  | 37458658  | NC_000006.11 |
| cg14938419 | 1.63E-07 | 1.98E-08 | 5.86 | 8.3049221 | 1.07E-01 | 3595702   | 3595825   | NC_000019.9  |
| cg24206884 | 1.63E-07 | 1.98E-08 | 5.86 | 8.3046742 | 3.70E-02 | 105007769 | 105007892 | NC_000010.10 |
| cg11651936 | 1.63E-07 | 1.98E-08 | 5.86 | 8.3044687 | 1.29E-01 | 121453730 | 121453853 | NC_000002.11 |
| cg17407677 | 1.63E-07 | 1.98E-08 | 5.86 | 8.3042299 | 1.13E-01 | 50266228  | 50266351  | NC_000005.9  |
| cg07276621 | 1.63E-07 | 1.98E-08 | 5.86 | 8.3038406 | 8.54E-02 | 10750870  | 10750993  | NC_000011.9  |
| cg11445242 | 1.63E-07 | 1.98E-08 | 5.86 | 8.3036126 | 4.30E-02 | 64878639  | 64878762  | NC_000015.9  |
| cg09236323 | 1.63E-07 | 1.98E-08 | 5.86 | 8.3035183 | 8.10E-02 | 76344398  | 76344521  | NC_000014.8  |
| cg03167683 | 1.63E-07 | 1.98E-08 | 5.86 | 8.3029791 | 2.06E-01 | 47210368  | 47210491  | NC_000017.10 |
| cg27583102 | 1.63E-07 | 1.99E-08 | 5.86 | 8.3017157 | 9.32E-02 | 51456055  | 51456178  | NC_000019.9  |
| cg03848675 | 1.63E-07 | 1.99E-08 | 5.86 | 8.3014057 | 1.26E-01 | 1389146   | 1389269   | NC_000006.11 |
| cg05841219 | 1.63E-07 | 1.99E-08 | 5.86 | 8.30133   | 5.50E-02 | 31840947  | 31841070  | NC_000006.11 |
| cg11576271 | 1.63E-07 | 1.99E-08 | 5.86 | 8.300894  | 2.69E-02 | 595347    | 595470    | NC_000005.9  |
| cg23524559 | 1.64E-07 | 1.99E-08 | 5.85 | 8.2992878 | 1.19E-01 | 130063978 | 130064101 | NC_000010.10 |
| cg14004847 | 1.64E-07 | 1.99E-08 | 5.85 | 8.2983392 | 2.82E-02 | 1930337   | 1930460   | NC_000007.13 |
| cg18465484 | 1.64E-07 | 1.99E-08 | 5.85 | 8.298266  | 1.73E-01 | 17138051  | 17138174  | NC_000019.9  |
| cg10825293 | 1.64E-07 | 1.99E-08 | 5.85 | 8.2979966 | 2.08E-02 | 144349292 | 144349415 | NC_000008.10 |

|            |          |          |      |           |          |           |           |              |
|------------|----------|----------|------|-----------|----------|-----------|-----------|--------------|
| cg06951245 | 1.64E-07 | 1.99E-08 | 5.85 | 8.297726  | 1.44E-01 | 209271875 | 209271998 | NC_000002.11 |
| cg25939644 | 1.64E-07 | 2.00E-08 | 5.85 | 8.2974946 | 5.04E-02 | 172434325 | 172434448 | NC_000005.9  |
| cg26234721 | 1.64E-07 | 2.00E-08 | 5.85 | 8.2957266 | 1.73E-01 | 88793252  | 88793375  | NC_000014.8  |
| cg27432699 | 1.64E-07 | 2.00E-08 | 5.85 | 8.2949722 | 6.66E-02 | 27873401  | 27873524  | NC_000002.11 |
| cg20098910 | 1.64E-07 | 2.00E-08 | 5.85 | 8.294484  | 3.04E-02 | 26643841  | 26643964  | NC_000017.10 |
| cg19960616 | 1.64E-07 | 2.00E-08 | 5.85 | 8.2935922 | 1.12E-01 | 19886939  | 19887062  | NC_000002.11 |
| cg00326719 | 1.65E-07 | 2.00E-08 | 5.85 | 8.2930803 | 1.43E-01 | 213401544 | 213401667 | NC_000002.11 |
| cg17451432 | 1.65E-07 | 2.00E-08 | 5.85 | 8.2929182 | 8.45E-02 | 47108510  | 47108633  | NC_000008.10 |
| cg18621852 | 1.65E-07 | 2.01E-08 | 5.85 | 8.2917211 | 7.50E-02 | 10150065  | 10150188  | NC_000003.11 |
| cg00997551 | 1.65E-07 | 2.01E-08 | 5.85 | 8.2912406 | 1.49E-01 | 109096151 | 109096274 | NC_000008.10 |
| cg03675047 | 1.65E-07 | 2.01E-08 | 5.85 | 8.2906461 | 1.01E-01 | 119566221 | 119566344 | NC_000002.11 |
| cg04704531 | 1.65E-07 | 2.01E-08 | 5.85 | 8.2891747 | 1.62E-01 | 54409491  | 54409614  | NC_000012.11 |
| cg07338549 | 1.65E-07 | 2.01E-08 | 5.85 | 8.2879449 | 5.70E-02 | 25140377  | 25140500  | NC_000006.11 |
| cg24418420 | 1.66E-07 | 2.02E-08 | 5.85 | 8.2858322 | 1.01E-01 | 85306574  | 85306697  | NC_000012.11 |
| cg23516425 | 1.66E-07 | 2.02E-08 | 5.85 | 8.2856676 | 5.85E-02 | 20186047  | 20186170  | NC_000002.11 |
| cg23881299 | 1.66E-07 | 2.02E-08 | 5.85 | 8.2856411 | 8.37E-02 | 121116990 | 121117113 | NC_000010.10 |
| cg21501724 | 1.66E-07 | 2.02E-08 | 5.85 | 8.2853853 | 1.09E-01 | 9818832   | 9818955   | NC_000020.10 |
| cg16063747 | 1.66E-07 | 2.02E-08 | 5.85 | 8.2851411 | 1.24E-01 | 119294173 | 119294296 | NC_000010.10 |
| cg16269236 | 1.66E-07 | 2.02E-08 | 5.85 | 8.285097  | 8.20E-02 | 53638963  | 53639086  | NC_000017.10 |
| cg25830696 | 1.66E-07 | 2.02E-08 | 5.85 | 8.2841898 | 2.21E-01 | 42030479  | 42030602  | NC_000017.10 |
| cg26650480 | 1.66E-07 | 2.02E-08 | 5.85 | 8.2838211 | 7.03E-02 | 4796176   | 4796299   | NC_000020.10 |
| cg08633560 | 1.66E-07 | 2.02E-08 | 5.85 | 8.2831324 | 4.36E-02 | 166571846 | 166571969 | NC_000006.11 |
| cg00007644 | 1.66E-07 | 2.02E-08 | 5.85 | 8.2831168 | 1.03E-01 | 20623259  | 20623382  | NC_000011.9  |
| cg00378730 | 1.66E-07 | 2.03E-08 | 5.85 | 8.281834  | 1.56E-01 | 50822650  | 50822773  | NC_000010.10 |
| cg04673465 | 1.66E-07 | 2.03E-08 | 5.85 | 8.2812844 | 1.34E-01 | 85570164  | 85570287  | NC_000004.11 |

|            |          |          |      |           |          |           |           |              |
|------------|----------|----------|------|-----------|----------|-----------|-----------|--------------|
| cg17872757 | 1.66E-07 | 2.03E-08 | 5.85 | 8.2810822 | 2.54E-01 | 128564180 | 128564303 | NC_000011.9  |
| cg13897468 | 1.66E-07 | 2.03E-08 | 5.85 | 8.2806461 | 6.53E-02 | 123258347 | 123258470 | NC_000012.11 |
| cg18888464 | 1.67E-07 | 2.03E-08 | 5.85 | 8.2796466 | 1.51E-01 | 76597657  | 76597780  | NC_000014.8  |
| cg13194899 | 1.67E-07 | 2.03E-08 | 5.85 | 8.2791272 | 6.50E-02 | 88150280  | 88150403  | NC_000010.10 |
| cg00347620 | 1.67E-07 | 2.03E-08 | 5.85 | 8.2785534 | 8.43E-02 | 115109730 | 115109853 | NC_000012.11 |
| cg00409434 | 1.67E-07 | 2.04E-08 | 5.85 | 8.2780847 | 1.16E-01 | 46414317  | 46414440  | NC_000002.11 |
| cg07442271 | 1.67E-07 | 2.04E-08 | 5.85 | 8.2778039 | 7.89E-02 | 140735359 | 140735482 | NC_000005.9  |
| cg20636351 | 1.67E-07 | 2.04E-08 | 5.85 | 8.2775344 | 9.67E-02 | 55087400  | 55087523  | NC_000008.10 |
| cg05415936 | 1.67E-07 | 2.04E-08 | 5.85 | 8.2774189 | 7.88E-02 | 43665740  | 43665863  | NC_000007.13 |
| cg02730139 | 1.67E-07 | 2.04E-08 | 5.85 | 8.2773643 | 7.96E-02 | 847575    | 847698    | NC_000008.10 |
| cg19423543 | 1.67E-07 | 2.04E-08 | 5.85 | 8.2768286 | 1.36E-01 | 172655948 | 172656071 | NC_000005.9  |
| cg14864542 | 1.67E-07 | 2.04E-08 | 5.85 | 8.2760254 | 1.22E-01 | 108937164 | 108937287 | NC_000012.11 |
| cg14462265 | 1.67E-07 | 2.04E-08 | 5.85 | 8.2753514 | 1.06E-01 | 23683888  | 23684011  | NC_000009.11 |
| cg04991036 | 1.68E-07 | 2.05E-08 | 5.85 | 8.2731698 | 9.50E-02 | 29243762  | 29243885  | NC_000014.8  |
| cg06379403 | 1.68E-07 | 2.05E-08 | 5.85 | 8.2726449 | 3.60E-02 | 155039432 | 155039555 | NC_000001.10 |
| cg20627546 | 1.68E-07 | 2.05E-08 | 5.85 | 8.2725824 | 3.90E-02 | 1451383   | 1451506   | NC_000001.10 |
| cg17057501 | 1.68E-07 | 2.05E-08 | 5.85 | 8.2725158 | 4.28E-02 | 64017641  | 64017764  | NC_000010.10 |
| cg15135365 | 1.68E-07 | 2.05E-08 | 5.85 | 8.2723401 | 8.01E-02 | 12267990  | 12268113  | NC_000018.9  |
| cg05624376 | 1.68E-07 | 2.05E-08 | 5.85 | 8.2708333 | 7.53E-02 | 169939876 | 169939999 | NC_000002.11 |
| cg27154343 | 1.68E-07 | 2.05E-08 | 5.85 | 8.2692377 | 1.87E-01 | 75603480  | 75603603  | NC_000012.11 |
| cg26368737 | 1.68E-07 | 2.06E-08 | 5.85 | 8.2685817 | 4.58E-02 | 144442073 | 144442196 | NC_000008.10 |
| cg25377206 | 1.68E-07 | 2.06E-08 | 5.85 | 8.2684724 | 1.10E-01 | 35294658  | 35294781  | NC_000007.13 |
| cg06365057 | 1.68E-07 | 2.06E-08 | 5.85 | 8.2683785 | 9.31E-02 | 50323706  | 50323829  | NC_000010.10 |
| cg26298979 | 1.69E-07 | 2.06E-08 | 5.85 | 8.2662755 | 1.28E-01 | 77558211  | 77558334  | NC_000018.9  |
| cg03379100 | 1.69E-07 | 2.06E-08 | 5.85 | 8.2658366 | 7.65E-02 | 128494225 | 128494348 | NC_000007.13 |

|            |          |          |      |           |          |           |           |              |
|------------|----------|----------|------|-----------|----------|-----------|-----------|--------------|
| cg02858449 | 1.69E-07 | 2.06E-08 | 5.85 | 8.2654457 | 8.59E-02 | 45936702  | 45936825  | NC_000021.8  |
| cg14305028 | 1.69E-07 | 2.06E-08 | 5.85 | 8.2650432 | 8.71E-02 | 140207118 | 140207241 | NC_000009.11 |
| cg10577329 | 1.69E-07 | 2.06E-08 | 5.85 | 8.2648381 | 4.53E-02 | 71327353  | 71327476  | NC_000011.9  |
| cg12759166 | 1.69E-07 | 2.06E-08 | 5.85 | 8.2646499 | 9.15E-02 | 77373718  | 77373841  | NC_000018.9  |
| cg09559242 | 1.69E-07 | 2.06E-08 | 5.85 | 8.2645158 | 7.02E-02 | 197402153 | 197402276 | NC_000003.11 |
| cg25623977 | 1.69E-07 | 2.06E-08 | 5.85 | 8.2643441 | 3.06E-02 | 71163428  | 71163551  | NC_000011.9  |
| cg07025949 | 1.69E-07 | 2.07E-08 | 5.85 | 8.2633233 | 1.68E-01 | 1778844   | 1778967   | NC_000010.10 |
| cg09639622 | 1.69E-07 | 2.07E-08 | 5.85 | 8.2632426 | 1.47E-01 | 66195307  | 66195430  | NC_000017.10 |
| cg14036981 | 1.69E-07 | 2.07E-08 | 5.85 | 8.2628417 | 1.08E-01 | 68920648  | 68920771  | NC_000011.9  |
| cg13828227 | 1.70E-07 | 2.07E-08 | 5.85 | 8.2598809 | 6.65E-02 | 130517095 | 130517218 | NC_000009.11 |
| cg09465746 | 1.71E-07 | 2.08E-08 | 5.85 | 8.2556027 | 1.20E-01 | 6904386   | 6904509   | NC_000003.11 |
| cg20939662 | 1.71E-07 | 2.08E-08 | 5.85 | 8.2554963 | 1.34E-01 | 126777160 | 126777283 | NC_000009.11 |
| cg14343214 | 1.71E-07 | 2.08E-08 | 5.85 | 8.2549547 | 1.76E-01 | 133562056 | 133562179 | NC_000006.11 |
| cg05184256 | 1.71E-07 | 2.09E-08 | 5.85 | 8.2543972 | 2.22E-02 | 88155593  | 88155716  | NC_000016.9  |
| cg25109530 | 1.71E-07 | 2.09E-08 | 5.85 | 8.2541017 | 2.73E-02 | 149170762 | 149170885 | NC_000007.13 |
| cg03835609 | 1.71E-07 | 2.09E-08 | 5.85 | 8.2534721 | 1.24E-01 | 140753418 | 140753541 | NC_000005.9  |
| cg00297721 | 1.71E-07 | 2.09E-08 | 5.85 | 8.2521792 | 1.14E-01 | 55200767  | 55200890  | NC_000020.10 |
| cg20725013 | 1.71E-07 | 2.09E-08 | 5.85 | 8.2520564 | 1.60E-01 | 27195036  | 27195159  | NC_000007.13 |
| cg01193368 | 1.71E-07 | 2.09E-08 | 5.85 | 8.2518406 | 1.13E-01 | 56855195  | 56855318  | NC_000007.13 |
| cg00956759 | 1.71E-07 | 2.09E-08 | 5.85 | 8.2511457 | 1.32E-01 | 30023399  | 30023522  | NC_000017.10 |
| cg03593419 | 1.71E-07 | 2.09E-08 | 5.85 | 8.250942  | 9.05E-02 | 46995474  | 46995597  | NC_000004.11 |
| cg07158747 | 1.72E-07 | 2.10E-08 | 5.84 | 8.2487596 | 1.33E-01 | 91196488  | 91196611  | NC_000001.10 |
| cg26494610 | 1.72E-07 | 2.10E-08 | 5.84 | 8.2486584 | 8.19E-02 | 240658469 | 240658592 | NC_000002.11 |
| cg12530864 | 1.72E-07 | 2.10E-08 | 5.84 | 8.2481977 | 1.36E-01 | 188953092 | 188953215 | NC_000004.11 |
| cg00544449 | 1.72E-07 | 2.10E-08 | 5.84 | 8.2479918 | 2.26E-01 | 79724802  | 79724925  | NC_000015.9  |



|            |          |          |      |           |          |           |           |              |
|------------|----------|----------|------|-----------|----------|-----------|-----------|--------------|
| cg21912203 | 1.72E-07 | 2.10E-08 | 5.84 | 8.2472101 | 1.21E-01 | 65003303  | 65003426  | NC_000001.10 |
| cg01122167 | 1.72E-07 | 2.10E-08 | 5.84 | 8.2452556 | 1.37E-01 | 149650243 | 149650366 | NC_000005.9  |
| cg14415616 | 1.72E-07 | 2.11E-08 | 5.84 | 8.2450967 | 1.67E-01 | 18486958  | 18487081  | NC_000003.11 |
| cg24867122 | 1.72E-07 | 2.11E-08 | 5.84 | 8.2447383 | 7.43E-02 | 41531634  | 41531757  | NC_000019.9  |
| cg13985436 | 1.72E-07 | 2.11E-08 | 5.84 | 8.2445747 | 2.23E-02 | 27705902  | 27706025  | NC_000001.10 |
| cg08685955 | 1.72E-07 | 2.11E-08 | 5.84 | 8.2445413 | 6.71E-02 | 48871461  | 48871584  | NC_000019.9  |
| cg27353899 | 1.72E-07 | 2.11E-08 | 5.84 | 8.2442765 | 9.55E-02 | 195488922 | 195489045 | NC_000003.11 |
| cg06592167 | 1.72E-07 | 2.11E-08 | 5.84 | 8.2437921 | 5.93E-02 | 110045869 | 110045992 | NC_000011.9  |
| cg05477521 | 1.72E-07 | 2.11E-08 | 5.84 | 8.2436288 | 3.99E-02 | 57412146  | 57412269  | NC_000017.10 |
| cg00030508 | 1.72E-07 | 2.11E-08 | 5.84 | 8.2435416 | 1.26E-01 | 30139542  | 30139665  | NC_000006.11 |
| cg07999732 | 1.73E-07 | 2.11E-08 | 5.84 | 8.2421627 | 8.48E-02 | 150080842 | 150080965 | NC_000007.13 |
| cg11786193 | 1.73E-07 | 2.11E-08 | 5.84 | 8.2407362 | 1.23E-01 | 4512242   | 4512365   | NC_000005.9  |
| cg23398487 | 1.73E-07 | 2.12E-08 | 5.84 | 8.2403668 | 1.13E-01 | 107408915 | 107409038 | NC_000013.10 |
| cg05638493 | 1.73E-07 | 2.12E-08 | 5.84 | 8.2396285 | 1.09E-01 | 140683367 | 140683490 | NC_000005.9  |
| cg03700462 | 1.73E-07 | 2.12E-08 | 5.84 | 8.2394814 | 1.43E-01 | 27135684  | 27135807  | NC_000007.13 |
| cg20063106 | 1.73E-07 | 2.12E-08 | 5.84 | 8.2393998 | 9.63E-02 | 23938147  | 23938270  | NC_000014.8  |
| cg21634365 | 1.73E-07 | 2.12E-08 | 5.84 | 8.239375  | 1.63E-01 | 74961463  | 74961586  | NC_000018.9  |
| cg10311020 | 1.73E-07 | 2.12E-08 | 5.84 | 8.2392141 | 5.21E-02 | 27146906  | 27147029  | NC_000010.10 |
| cg21145284 | 1.73E-07 | 2.12E-08 | 5.84 | 8.2391284 | 9.40E-02 | 2279451   | 2279574   | NC_000001.10 |
| cg19469357 | 1.73E-07 | 2.12E-08 | 5.84 | 8.2380637 | 1.11E-01 | 8474830   | 8474953   | NC_000007.13 |
| cg21621104 | 1.73E-07 | 2.12E-08 | 5.84 | 8.2376182 | 1.17E-01 | 66468921  | 66469044  | NC_000003.11 |
| cg21389309 | 1.73E-07 | 2.12E-08 | 5.84 | 8.2374693 | 1.19E-01 | 154002618 | 154002741 | NC_000007.13 |
| cg14937343 | 1.74E-07 | 2.12E-08 | 5.84 | 8.2367186 | 1.02E-01 | 26674391  | 26674514  | NC_000014.8  |
| cg25626611 | 1.74E-07 | 2.13E-08 | 5.84 | 8.23583   | 1.02E-01 | 115102065 | 115102188 | NC_000012.11 |
| cg02104112 | 1.74E-07 | 2.13E-08 | 5.84 | 8.2345964 | 3.32E-02 | 69418071  | 69418194  | NC_000011.9  |

|            |          |          |      |           |          |           |           |              |
|------------|----------|----------|------|-----------|----------|-----------|-----------|--------------|
| cg07874484 | 1.74E-07 | 2.13E-08 | 5.84 | 8.2339862 | 6.85E-02 | 1257807   | 1257930   | NC_000016.9  |
| cg17800708 | 1.74E-07 | 2.13E-08 | 5.84 | 8.2339309 | 1.17E-01 | 27148204  | 27148327  | NC_000007.13 |
| cg11938455 | 1.74E-07 | 2.13E-08 | 5.84 | 8.2337429 | 1.25E-01 | 15622032  | 15622155  | NC_000006.11 |
| cg14617562 | 1.74E-07 | 2.13E-08 | 5.84 | 8.2330827 | 9.30E-02 | 63386748  | 63386871  | NC_000007.13 |
| cg19018097 | 1.75E-07 | 2.14E-08 | 5.84 | 8.2313885 | 1.92E-01 | 65601328  | 65601451  | NC_000011.9  |
| cg26464701 | 1.75E-07 | 2.14E-08 | 5.84 | 8.2307495 | 5.78E-02 | 154092267 | 154092390 | NC_000004.11 |
| cg13606569 | 1.75E-07 | 2.14E-08 | 5.84 | 8.2304237 | 1.65E-01 | 113341525 | 113341648 | NC_000009.11 |
| cg16562776 | 1.75E-07 | 2.14E-08 | 5.84 | 8.2300451 | 1.01E-01 | 56606401  | 56606524  | NC_000007.13 |
| cg19265480 | 1.75E-07 | 2.14E-08 | 5.84 | 8.2281384 | 9.26E-02 | 147781887 | 147782010 | NC_000001.10 |
| cg10951736 | 1.75E-07 | 2.14E-08 | 5.84 | 8.2280711 | 4.80E-02 | 167095747 | 167095870 | NC_000001.10 |
| cg20847035 | 1.75E-07 | 2.14E-08 | 5.84 | 8.2279846 | 1.09E-01 | 22906124  | 22906247  | NC_000001.10 |
| cg08496276 | 1.75E-07 | 2.15E-08 | 5.84 | 8.2267517 | 1.56E-01 | 178017669 | 178017792 | NC_000005.9  |
| cg25845326 | 1.75E-07 | 2.15E-08 | 5.84 | 8.2266033 | 6.60E-02 | 3249789   | 3249912   | NC_000011.9  |
| cg07103093 | 1.75E-07 | 2.15E-08 | 5.84 | 8.226516  | 1.13E-01 | 35297752  | 35297875  | NC_000017.10 |
| cg10039523 | 1.75E-07 | 2.15E-08 | 5.84 | 8.2258686 | 9.27E-02 | 12517834  | 12517957  | NC_000001.10 |
| cg16756527 | 1.76E-07 | 2.15E-08 | 5.84 | 8.2252369 | 7.03E-02 | 35891075  | 35891198  | NC_000021.8  |
| cg22731204 | 1.76E-07 | 2.15E-08 | 5.84 | 8.2251154 | 3.33E-02 | 3382127   | 3382250   | NC_000019.9  |
| cg13316587 | 1.76E-07 | 2.15E-08 | 5.84 | 8.2251092 | 1.60E-01 | 134515856 | 134515979 | NC_000003.11 |
| cg03550129 | 1.76E-07 | 2.15E-08 | 5.84 | 8.2246197 | 9.13E-02 | 1596054   | 1596177   | NC_000002.11 |
| cg18079355 | 1.76E-07 | 2.16E-08 | 5.84 | 8.2218372 | 4.26E-02 | 74331325  | 74331448  | NC_000005.9  |
| cg15996534 | 1.76E-07 | 2.16E-08 | 5.84 | 8.2215371 | 9.10E-02 | 150325954 | 150326077 | NC_000005.9  |
| cg17507952 | 1.76E-07 | 2.16E-08 | 5.84 | 8.2209359 | 1.24E-01 | 16179012  | 16179135  | NC_000005.9  |
| cg07852825 | 1.76E-07 | 2.16E-08 | 5.84 | 8.2206367 | 1.01E-01 | 172166182 | 172166305 | NC_000003.11 |
| cg21669441 | 1.76E-07 | 2.16E-08 | 5.84 | 8.2199353 | 1.52E-01 | 83349864  | 83349987  | NC_000015.9  |
| cg08707123 | 1.76E-07 | 2.16E-08 | 5.84 | 8.2197119 | 3.79E-02 | 589874    | 589997    | NC_000016.9  |

|            |          |          |      |           |          |           |           |              |
|------------|----------|----------|------|-----------|----------|-----------|-----------|--------------|
| cg25298704 | 1.77E-07 | 2.16E-08 | 5.84 | 8.2192341 | 6.36E-02 | 63359181  | 63359304  | NC_000012.11 |
| cg05625362 | 1.77E-07 | 2.16E-08 | 5.84 | 8.2189715 | 1.24E-01 | 166795323 | 166795446 | NC_000004.11 |
| cg27054162 | 1.77E-07 | 2.16E-08 | 5.84 | 8.2188674 | 1.67E-01 | 54628834  | 54628957  | NC_000016.9  |
| cg02672759 | 1.77E-07 | 2.16E-08 | 5.84 | 8.2184851 | 9.11E-02 | 39739058  | 39739181  | NC_000019.9  |
| cg07464974 | 1.77E-07 | 2.17E-08 | 5.84 | 8.2171343 | 5.67E-02 | 12228618  | 12228741  | NC_000019.9  |
| cg14255471 | 1.77E-07 | 2.17E-08 | 5.84 | 8.2168546 | 8.59E-02 | 106660938 | 106661061 | NC_000014.8  |
| cg23225050 | 1.77E-07 | 2.17E-08 | 5.84 | 8.2160416 | 6.17E-02 | 23602765  | 23602888  | NC_000022.10 |
| cg21611775 | 1.77E-07 | 2.17E-08 | 5.84 | 8.215842  | 9.09E-02 | 11058836  | 11058959  | NC_000003.11 |
| cg13168820 | 1.77E-07 | 2.17E-08 | 5.84 | 8.2153492 | 1.77E-01 | 41818356  | 41818479  | NC_000020.10 |
| cg15587571 | 1.77E-07 | 2.17E-08 | 5.84 | 8.2150493 | 9.51E-02 | 181849325 | 181849448 | NC_000002.11 |
| cg07686479 | 1.77E-07 | 2.17E-08 | 5.84 | 8.2149649 | 8.99E-02 | 165325030 | 165325153 | NC_000001.10 |
| cg06643156 | 1.77E-07 | 2.17E-08 | 5.84 | 8.2148976 | 5.92E-02 | 58380774  | 58380897  | NC_000003.11 |
| cg04951131 | 1.77E-07 | 2.17E-08 | 5.84 | 8.2142687 | 3.81E-02 | 242168856 | 242168979 | NC_000002.11 |
| cg02634861 | 1.77E-07 | 2.17E-08 | 5.84 | 8.2140145 | 1.50E-01 | 10757954  | 10758077  | NC_000001.10 |
| cg16760485 | 1.77E-07 | 2.17E-08 | 5.84 | 8.2138976 | 1.09E-01 | 103565867 | 103565990 | NC_000014.8  |
| cg13799504 | 1.77E-07 | 2.17E-08 | 5.84 | 8.2138338 | 1.04E-01 | 139237889 | 139238012 | NC_000009.11 |
| cg07918174 | 1.78E-07 | 2.18E-08 | 5.84 | 8.2132425 | 5.68E-02 | 31003525  | 31003648  | NC_000007.13 |
| cg04478795 | 1.78E-07 | 2.18E-08 | 5.84 | 8.2119061 | 1.31E-01 | 128828120 | 128828243 | NC_000007.13 |
| cg17236709 | 1.78E-07 | 2.18E-08 | 5.84 | 8.2110248 | 1.80E-01 | 119293863 | 119293986 | NC_000011.9  |
| cg04252145 | 1.78E-07 | 2.18E-08 | 5.84 | 8.2106008 | 2.83E-02 | 67516319  | 67516442  | NC_000005.9  |
| cg15679219 | 1.78E-07 | 2.18E-08 | 5.84 | 8.2094113 | 3.38E-02 | 98354261  | 98354384  | NC_000002.11 |
| cg06119296 | 1.78E-07 | 2.18E-08 | 5.84 | 8.209152  | 2.73E-02 | 99349003  | 99349126  | NC_000010.10 |
| cg21582112 | 1.78E-07 | 2.19E-08 | 5.84 | 8.2082771 | 1.05E-01 | 54421335  | 54421458  | NC_000012.11 |
| cg18700428 | 1.78E-07 | 2.19E-08 | 5.84 | 8.2081558 | 8.87E-02 | 3243304   | 3243427   | NC_000016.9  |
| cg04058752 | 1.78E-07 | 2.19E-08 | 5.84 | 8.2077944 | 7.64E-02 | 76751369  | 76751492  | NC_000011.9  |

|            |          |          |      |           |          |           |           |              |
|------------|----------|----------|------|-----------|----------|-----------|-----------|--------------|
| cg27622506 | 1.79E-07 | 2.19E-08 | 5.84 | 8.2060002 | 3.82E-02 | 24537160  | 24537283  | NC_000003.11 |
| cg07506916 | 1.79E-07 | 2.20E-08 | 5.84 | 8.2042697 | 7.34E-02 | 42738538  | 42738661  | NC_000010.10 |
| cg23944572 | 1.79E-07 | 2.20E-08 | 5.84 | 8.204244  | 9.19E-02 | 154101659 | 154101782 | NC_000005.9  |
| cg14251622 | 1.79E-07 | 2.20E-08 | 5.84 | 8.203877  | 2.27E-01 | 36003741  | 36003864  | NC_000014.8  |
| cg17339905 | 1.79E-07 | 2.20E-08 | 5.84 | 8.202734  | 1.36E-01 | 135808617 | 135808740 | NC_000002.11 |
| cg00170037 | 1.79E-07 | 2.20E-08 | 5.84 | 8.202678  | 6.61E-02 | 78489359  | 78489482  | NC_000017.10 |
| cg26403580 | 1.79E-07 | 2.20E-08 | 5.84 | 8.2024137 | 9.91E-02 | 120936730 | 120936853 | NC_000010.10 |
| cg19636308 | 1.79E-07 | 2.20E-08 | 5.84 | 8.2019582 | 4.89E-02 | 17124699  | 17124822  | NC_000017.10 |
| cg00201468 | 1.80E-07 | 2.20E-08 | 5.84 | 8.200689  | 1.54E-01 | 88137984  | 88138107  | NC_000009.11 |
| cg23855121 | 1.80E-07 | 2.20E-08 | 5.84 | 8.2004694 | 9.33E-02 | 38784938  | 38785061  | NC_000004.11 |
| cg21067023 | 1.80E-07 | 2.20E-08 | 5.84 | 8.200464  | 1.05E-01 | 501513    | 501636    | NC_000018.9  |
| cg13149996 | 1.80E-07 | 2.21E-08 | 5.83 | 8.1983176 | 4.29E-02 | 21437982  | 21438105  | NC_000001.10 |
| cg06263495 | 1.80E-07 | 2.21E-08 | 5.83 | 8.197966  | 1.56E-01 | 2292004   | 2292127   | NC_000011.9  |
| cg02736969 | 1.80E-07 | 2.21E-08 | 5.83 | 8.1979578 | 1.43E-01 | 34442674  | 34442797  | NC_000021.8  |
| cg01273336 | 1.80E-07 | 2.21E-08 | 5.83 | 8.1975923 | 1.15E-01 | 67872416  | 67872539  | NC_000013.10 |
| cg14981253 | 1.80E-07 | 2.21E-08 | 5.83 | 8.1968203 | 1.09E-01 | 5112642   | 5112765   | NC_000007.13 |
| cg02243157 | 1.80E-07 | 2.21E-08 | 5.83 | 8.1967432 | 1.03E-01 | 64047802  | 64047925  | NC_000002.11 |
| cg04035064 | 1.80E-07 | 2.21E-08 | 5.83 | 8.1966856 | 6.10E-02 | 46243113  | 46243236  | NC_000002.11 |
| cg15137566 | 1.80E-07 | 2.21E-08 | 5.83 | 8.1965462 | 1.32E-01 | 13544301  | 13544424  | NC_000004.11 |
| cg16528511 | 1.80E-07 | 2.21E-08 | 5.83 | 8.1965148 | 2.00E-01 | 84562892  | 84563015  | NC_000006.11 |
| cg18810347 | 1.80E-07 | 2.21E-08 | 5.83 | 8.1964827 | 1.17E-01 | 50344242  | 50344365  | NC_000007.13 |
| cg25428553 | 1.80E-07 | 2.21E-08 | 5.83 | 8.1957161 | 9.86E-02 | 105275706 | 105275829 | NC_000002.11 |
| cg23920748 | 1.80E-07 | 2.21E-08 | 5.83 | 8.1956429 | 4.44E-02 | 5084771   | 5084894   | NC_000007.13 |
| cg07765674 | 1.80E-07 | 2.21E-08 | 5.83 | 8.1955843 | 8.47E-02 | 148494024 | 148494147 | NC_000005.9  |
| cg25978208 | 1.81E-07 | 2.22E-08 | 5.83 | 8.1955583 | 9.02E-02 | 25093244  | 25093367  | NC_000015.9  |

|            |          |          |      |           |          |           |           |              |
|------------|----------|----------|------|-----------|----------|-----------|-----------|--------------|
| cg23124486 | 1.81E-07 | 2.22E-08 | 5.83 | 8.1950814 | 9.01E-02 | 33166165  | 33166288  | NC_000006.11 |
| cg19752143 | 1.81E-07 | 2.22E-08 | 5.83 | 8.1946911 | 7.96E-02 | 44552508  | 44552631  | NC_000002.11 |
| cg09890930 | 1.81E-07 | 2.22E-08 | 5.83 | 8.1942233 | 5.50E-02 | 56149396  | 56149519  | NC_000012.11 |
| cg26456223 | 1.81E-07 | 2.22E-08 | 5.83 | 8.1933843 | 7.85E-02 | 13540430  | 13540553  | NC_000004.11 |
| cg00420510 | 1.81E-07 | 2.22E-08 | 5.83 | 8.1931122 | 9.50E-02 | 1089571   | 1089694   | NC_000005.9  |
| cg22896991 | 1.81E-07 | 2.22E-08 | 5.83 | 8.1929283 | 1.59E-01 | 47073994  | 47074117  | NC_000017.10 |
| cg09418267 | 1.81E-07 | 2.22E-08 | 5.83 | 8.1929036 | 5.90E-02 | 1555045   | 1555168   | NC_000019.9  |
| cg00262344 | 1.81E-07 | 2.22E-08 | 5.83 | 8.1922181 | 9.05E-02 | 23713741  | 23713864  | NC_000018.9  |
| cg19502812 | 1.81E-07 | 2.22E-08 | 5.83 | 8.1921558 | 3.14E-02 | 36803056  | 36803179  | NC_000022.10 |
| cg07529754 | 1.81E-07 | 2.22E-08 | 5.83 | 8.1914644 | 1.44E-01 | 50575098  | 50575221  | NC_000002.11 |
| cg17974674 | 1.81E-07 | 2.22E-08 | 5.83 | 8.191396  | 3.40E-02 | 241451567 | 241451690 | NC_000002.11 |
| cg09443484 | 1.81E-07 | 2.22E-08 | 5.83 | 8.191346  | 6.49E-02 | 33673943  | 33674066  | NC_000011.9  |
| cg19927715 | 1.81E-07 | 2.23E-08 | 5.83 | 8.1898052 | 3.03E-02 | 28459482  | 28459605  | NC_000015.9  |
| cg21134090 | 1.82E-07 | 2.23E-08 | 5.83 | 8.1896502 | 8.99E-02 | 455955    | 456078    | NC_000011.9  |
| cg18701970 | 1.82E-07 | 2.23E-08 | 5.83 | 8.1894326 | 7.48E-02 | 106349515 | 106349638 | NC_000012.11 |
| cg01958550 | 1.82E-07 | 2.23E-08 | 5.83 | 8.1892715 | 9.99E-02 | 217307910 | 217308033 | NC_000001.10 |
| cg21558545 | 1.82E-07 | 2.23E-08 | 5.83 | 8.1887806 | 4.38E-02 | 71834859  | 71834982  | NC_000012.11 |
| cg11320499 | 1.82E-07 | 2.23E-08 | 5.83 | 8.1873587 | 1.29E-01 | 183702886 | 183703009 | NC_000003.11 |
| cg18432099 | 1.82E-07 | 2.23E-08 | 5.83 | 8.1872547 | 1.59E-01 | 75427963  | 75428086  | NC_000002.11 |
| cg21545390 | 1.82E-07 | 2.23E-08 | 5.83 | 8.1872236 | 1.57E-01 | 96627190  | 96627313  | NC_000007.13 |
| cg04764012 | 1.82E-07 | 2.24E-08 | 5.83 | 8.1867806 | 1.17E-01 | 31580964  | 31581087  | NC_000016.9  |
| cg07017562 | 1.83E-07 | 2.24E-08 | 5.83 | 8.1834494 | 1.39E-01 | 60099815  | 60099938  | NC_000014.8  |
| cg10664112 | 1.83E-07 | 2.24E-08 | 5.83 | 8.1824545 | 1.49E-01 | 149645559 | 149645682 | NC_000002.11 |
| cg04167239 | 1.83E-07 | 2.25E-08 | 5.83 | 8.1819035 | 8.99E-02 | 3769468   | 3769591   | NC_000004.11 |
| cg10141174 | 1.83E-07 | 2.25E-08 | 5.83 | 8.1817263 | 4.44E-02 | 4482883   | 4483006   | NC_000006.11 |

|            |          |          |      |           |          |           |           |              |
|------------|----------|----------|------|-----------|----------|-----------|-----------|--------------|
| cg01994307 | 1.83E-07 | 2.25E-08 | 5.83 | 8.1814069 | 1.62E-01 | 113391568 | 113391691 | NC_000005.9  |
| cg05591741 | 1.83E-07 | 2.25E-08 | 5.83 | 8.1813445 | 7.02E-02 | 70053833  | 70053956  | NC_000017.10 |
| cg02924425 | 1.83E-07 | 2.25E-08 | 5.83 | 8.1812968 | 7.41E-02 | 77915548  | 77915671  | NC_000018.9  |
| cg17077610 | 1.83E-07 | 2.25E-08 | 5.83 | 8.1810147 | 9.48E-02 | 22766143  | 22766266  | NC_000010.10 |
| cg26416766 | 1.83E-07 | 2.25E-08 | 5.83 | 8.1792886 | 4.20E-02 | 28028981  | 28029104  | NC_000013.10 |
| cg22463553 | 1.83E-07 | 2.25E-08 | 5.83 | 8.1788117 | 1.02E-01 | 140788504 | 140788627 | NC_000005.9  |
| cg26213368 | 1.84E-07 | 2.25E-08 | 5.83 | 8.1781481 | 3.68E-02 | 62474978  | 62475101  | NC_000011.9  |
| cg19072083 | 1.84E-07 | 2.26E-08 | 5.83 | 8.1773215 | 1.22E-01 | 12402652  | 12402775  | NC_000002.11 |
| cg13938349 | 1.84E-07 | 2.26E-08 | 5.83 | 8.1764484 | 9.86E-02 | 44364084  | 44364207  | NC_000007.13 |
| cg19489804 | 1.84E-07 | 2.26E-08 | 5.83 | 8.1764469 | 4.48E-02 | 51240822  | 51240945  | NC_000014.8  |
| cg25490633 | 1.84E-07 | 2.26E-08 | 5.83 | 8.1756558 | 6.07E-02 | 134981479 | 134981602 | NC_000010.10 |
| cg04059146 | 1.84E-07 | 2.26E-08 | 5.83 | 8.175638  | 3.93E-02 | 102402233 | 102402356 | NC_000011.9  |
| cg00250123 | 1.84E-07 | 2.26E-08 | 5.83 | 8.1745972 | 8.57E-02 | 69048335  | 69048458  | NC_000004.11 |
| cg00297075 | 1.84E-07 | 2.26E-08 | 5.83 | 8.1745464 | 9.49E-02 | 79627672  | 79627795  | NC_000009.11 |
| cg05157516 | 1.84E-07 | 2.26E-08 | 5.83 | 8.1743119 | 1.07E-01 | 175085577 | 175085700 | NC_000005.9  |
| cg00767010 | 1.84E-07 | 2.26E-08 | 5.83 | 8.174309  | 1.60E-01 | 99482094  | 99482217  | NC_000009.11 |
| cg18517222 | 1.84E-07 | 2.26E-08 | 5.83 | 8.1739979 | 8.29E-02 | 113660756 | 113660879 | NC_000011.9  |
| cg03179500 | 1.84E-07 | 2.27E-08 | 5.83 | 8.1732546 | 3.82E-02 | 42969969  | 42970092  | NC_000007.13 |
| cg24924779 | 1.85E-07 | 2.27E-08 | 5.83 | 8.1717932 | 1.60E-01 | 49639998  | 49640121  | NC_000020.10 |
| cg20163115 | 1.85E-07 | 2.27E-08 | 5.83 | 8.170628  | 3.77E-02 | 3769728   | 3769851   | NC_000017.10 |
| cg10168330 | 1.85E-07 | 2.27E-08 | 5.83 | 8.1702609 | 5.65E-02 | 27262164  | 27262287  | NC_000008.10 |
| cg18027592 | 1.85E-07 | 2.27E-08 | 5.83 | 8.1698914 | 8.63E-02 | 76235074  | 76235197  | NC_000013.10 |
| cg06289583 | 1.85E-07 | 2.27E-08 | 5.83 | 8.1697242 | 1.07E-01 | 133309447 | 133309570 | NC_000009.11 |
| cg16724588 | 1.85E-07 | 2.27E-08 | 5.83 | 8.1695322 | 8.82E-02 | 6107131   | 6107254   | NC_000004.11 |
| cg13991568 | 1.85E-07 | 2.28E-08 | 5.83 | 8.1692141 | 5.81E-02 | 32795282  | 32795405  | NC_000006.11 |

|            |          |          |      |           |          |           |           |              |
|------------|----------|----------|------|-----------|----------|-----------|-----------|--------------|
| cg11797092 | 1.85E-07 | 2.28E-08 | 5.83 | 8.1687695 | 1.70E-01 | 84115932  | 84116055  | NC_000015.9  |
| cg25247976 | 1.85E-07 | 2.28E-08 | 5.83 | 8.1682426 | 8.74E-02 | 129239566 | 129239689 | NC_000010.10 |
| cg01407477 | 1.86E-07 | 2.28E-08 | 5.83 | 8.1666001 | 1.26E-01 | 99951151  | 99951274  | NC_000008.10 |
| cg09066326 | 1.86E-07 | 2.28E-08 | 5.83 | 8.1662195 | 1.69E-01 | 140753415 | 140753538 | NC_000005.9  |
| cg27639030 | 1.86E-07 | 2.28E-08 | 5.83 | 8.165823  | 1.34E-01 | 140858107 | 140858230 | NC_000005.9  |
| cg03760191 | 1.86E-07 | 2.28E-08 | 5.83 | 8.1656326 | 5.46E-02 | 22623047  | 22623170  | NC_000010.10 |
| cg14729980 | 1.86E-07 | 2.28E-08 | 5.83 | 8.1653594 | 9.40E-02 | 43415386  | 43415509  | NC_000018.9  |
| cg06847157 | 1.86E-07 | 2.29E-08 | 5.83 | 8.1648863 | 4.05E-02 | 2423426   | 2423549   | NC_000011.9  |
| cg19305488 | 1.86E-07 | 2.29E-08 | 5.83 | 8.1645017 | 1.25E-01 | 1468359   | 1468482   | NC_000019.9  |
| cg18090390 | 1.86E-07 | 2.29E-08 | 5.83 | 8.1643917 | 1.14E-01 | 56880606  | 56880729  | NC_000001.10 |
| cg08088801 | 1.86E-07 | 2.29E-08 | 5.83 | 8.1639812 | 7.61E-02 | 1614439   | 1614562   | NC_000012.11 |
| cg08650934 | 1.86E-07 | 2.29E-08 | 5.83 | 8.1629776 | 1.03E-01 | 45246252  | 45246375  | NC_000021.8  |
| cg14199090 | 1.86E-07 | 2.29E-08 | 5.83 | 8.1627976 | 4.28E-02 | 65990564  | 65990687  | NC_000001.10 |
| cg11344005 | 1.86E-07 | 2.29E-08 | 5.83 | 8.1626659 | 9.90E-02 | 50987527  | 50987650  | NC_000022.10 |
| cg16441550 | 1.86E-07 | 2.29E-08 | 5.83 | 8.162496  | 4.52E-02 | 180042144 | 180042267 | NC_000005.9  |
| cg18119485 | 1.86E-07 | 2.29E-08 | 5.83 | 8.1619465 | 1.06E-01 | 52196776  | 52196899  | NC_000001.10 |
| cg06551490 | 1.86E-07 | 2.29E-08 | 5.83 | 8.1618298 | 1.86E-01 | 54024806  | 54024929  | NC_000019.9  |
| cg02064275 | 1.86E-07 | 2.29E-08 | 5.83 | 8.1618227 | 6.38E-02 | 39465713  | 39465836  | NC_000017.10 |
| cg22376706 | 1.86E-07 | 2.29E-08 | 5.83 | 8.1616618 | 1.71E-01 | 71314612  | 71314735  | NC_000012.11 |
| cg18447419 | 1.86E-07 | 2.29E-08 | 5.83 | 8.1615159 | 1.33E-01 | 496299    | 496422    | NC_000005.9  |
| cg03732762 | 1.86E-07 | 2.29E-08 | 5.83 | 8.161308  | 1.82E-01 | 34443010  | 34443133  | NC_000021.8  |
| cg25562664 | 1.87E-07 | 2.30E-08 | 5.83 | 8.1603623 | 1.27E-01 | 119529148 | 119529271 | NC_000003.11 |
| cg09095525 | 1.87E-07 | 2.30E-08 | 5.83 | 8.1586444 | 1.37E-01 | 11852095  | 11852218  | NC_000016.9  |
| cg03152912 | 1.87E-07 | 2.30E-08 | 5.83 | 8.1582683 | 6.46E-02 | 132404851 | 132404974 | NC_000002.11 |
| cg05697754 | 1.87E-07 | 2.30E-08 | 5.83 | 8.1579525 | 4.55E-02 | 99576547  | 99576670  | NC_000007.13 |

|            |          |          |      |           |          |           |           |              |
|------------|----------|----------|------|-----------|----------|-----------|-----------|--------------|
| cg13513864 | 1.87E-07 | 2.30E-08 | 5.83 | 8.1575487 | 1.72E-01 | 30063249  | 30063372  | NC_000020.10 |
| cg08063317 | 1.87E-07 | 2.30E-08 | 5.83 | 8.1573178 | 1.48E-01 | 27019248  | 27019371  | NC_000015.9  |
| cg03504078 | 1.87E-07 | 2.30E-08 | 5.83 | 8.156864  | 9.73E-02 | 140480218 | 140480341 | NC_000005.9  |
| cg13125157 | 1.87E-07 | 2.31E-08 | 5.83 | 8.1557418 | 1.81E-01 | 50237403  | 50237526  | NC_000017.10 |
| cg13834623 | 1.88E-07 | 2.31E-08 | 5.83 | 8.1547626 | 1.49E-01 | 25652407  | 25652530  | NC_000006.11 |
| cg22058099 | 1.88E-07 | 2.31E-08 | 5.83 | 8.1547424 | 1.40E-01 | 9763552   | 9763675   | NC_000008.10 |
| cg08827274 | 1.88E-07 | 2.31E-08 | 5.83 | 8.1529629 | 3.75E-02 | 128441012 | 128441135 | NC_000003.11 |
| cg02902186 | 1.88E-07 | 2.32E-08 | 5.83 | 8.1518289 | 3.24E-02 | 118683119 | 118683242 | NC_000008.10 |
| cg05609536 | 1.88E-07 | 2.32E-08 | 5.83 | 8.1518139 | 7.21E-02 | 41019285  | 41019408  | NC_000019.9  |
| cg15258754 | 1.88E-07 | 2.32E-08 | 5.83 | 8.1517998 | 4.07E-02 | 87584651  | 87584774  | NC_000016.9  |
| cg04282694 | 1.88E-07 | 2.32E-08 | 5.83 | 8.1514119 | 1.45E-01 | 5996412   | 5996535   | NC_000006.11 |
| cg19791395 | 1.88E-07 | 2.32E-08 | 5.82 | 8.1505029 | 1.91E-01 | 51162508  | 51162631  | NC_000019.9  |
| cg27306777 | 1.88E-07 | 2.32E-08 | 5.82 | 8.149954  | 7.44E-02 | 172261294 | 172261417 | NC_000005.9  |
| cg12761421 | 1.89E-07 | 2.32E-08 | 5.82 | 8.1496946 | 5.97E-02 | 202171723 | 202171846 | NC_000001.10 |
| cg21376883 | 1.89E-07 | 2.32E-08 | 5.82 | 8.1493712 | 1.15E-01 | 236850232 | 236850355 | NC_000001.10 |
| cg04646674 | 1.89E-07 | 2.32E-08 | 5.82 | 8.1492804 | 7.86E-02 | 13113482  | 13113605  | NC_000019.9  |
| cg25946758 | 1.89E-07 | 2.32E-08 | 5.82 | 8.1486893 | 1.13E-01 | 60936025  | 60936148  | NC_000010.10 |
| cg07893512 | 1.89E-07 | 2.33E-08 | 5.82 | 8.1474798 | 1.36E-01 | 214776    | 214899    | NC_000016.9  |
| cg08673142 | 1.89E-07 | 2.33E-08 | 5.82 | 8.1456595 | 4.23E-02 | 13511451  | 13511574  | NC_000006.11 |
| cg15072405 | 1.89E-07 | 2.33E-08 | 5.82 | 8.145659  | 4.51E-02 | 63958176  | 63958299  | NC_000011.9  |
| cg14314533 | 1.89E-07 | 2.33E-08 | 5.82 | 8.1450855 | 3.73E-02 | 3577056   | 3577179   | NC_000010.10 |
| cg08936501 | 1.89E-07 | 2.33E-08 | 5.82 | 8.1450753 | 1.38E-01 | 117722652 | 117722775 | NC_000001.10 |
| cg18975948 | 1.90E-07 | 2.33E-08 | 5.82 | 8.1442227 | 2.91E-02 | 44106233  | 44106356  | NC_000021.8  |
| cg11137615 | 1.90E-07 | 2.34E-08 | 5.82 | 8.1432988 | 1.45E-01 | 69244343  | 69244466  | NC_000008.10 |
| cg09717352 | 1.90E-07 | 2.34E-08 | 5.82 | 8.142072  | 8.63E-02 | 89740889  | 89741012  | NC_000004.11 |



|            |          |          |      |           |          |           |           |              |
|------------|----------|----------|------|-----------|----------|-----------|-----------|--------------|
| cg17929859 | 1.90E-07 | 2.34E-08 | 5.82 | 8.1418454 | 8.52E-02 | 76587699  | 76587822  | NC_000017.10 |
| cg13466481 | 1.90E-07 | 2.34E-08 | 5.82 | 8.1417522 | 1.89E-01 | 17849848  | 17849971  | NC_000022.10 |
| cg02432274 | 1.90E-07 | 2.34E-08 | 5.82 | 8.1413033 | 3.80E-02 | 88378468  | 88378591  | NC_000016.9  |
| cg02345146 | 1.90E-07 | 2.34E-08 | 5.82 | 8.1407089 | 1.19E-01 | 85512957  | 85513080  | NC_000001.10 |
| cg17053591 | 1.90E-07 | 2.34E-08 | 5.82 | 8.1406736 | 5.33E-02 | 51918170  | 51918293  | NC_000015.9  |
| cg13866527 | 1.90E-07 | 2.35E-08 | 5.82 | 8.1399274 | 1.69E-01 | 55367627  | 55367750  | NC_000008.10 |
| cg09221382 | 1.90E-07 | 2.35E-08 | 5.82 | 8.1398688 | 2.09E-02 | 194324966 | 194325089 | NC_000003.11 |
| cg12794992 | 1.90E-07 | 2.35E-08 | 5.82 | 8.1398536 | 9.76E-02 | 121999785 | 121999908 | NC_000008.10 |
| cg24652281 | 1.90E-07 | 2.35E-08 | 5.82 | 8.1396775 | 9.61E-02 | 168970774 | 168970897 | NC_000006.11 |
| cg16733654 | 1.90E-07 | 2.35E-08 | 5.82 | 8.139276  | 2.01E-01 | 5293083   | 5293206   | NC_000019.9  |
| cg04112417 | 1.90E-07 | 2.35E-08 | 5.82 | 8.1392452 | 8.72E-02 | 17801501  | 17801624  | NC_000002.11 |
| cg11094938 | 1.90E-07 | 2.35E-08 | 5.82 | 8.1390642 | 4.63E-02 | 28888844  | 28888967  | NC_000016.9  |
| cg06952471 | 1.90E-07 | 2.35E-08 | 5.82 | 8.138633  | 1.17E-01 | 72596748  | 72596871  | NC_000006.11 |
| cg08586216 | 1.91E-07 | 2.35E-08 | 5.82 | 8.1381778 | 1.65E-02 | 35612351  | 35612474  | NC_000006.11 |
| cg22763649 | 1.91E-07 | 2.35E-08 | 5.82 | 8.1381769 | 1.22E-01 | 21694307  | 21694430  | NC_000020.10 |
| cg21826699 | 1.91E-07 | 2.35E-08 | 5.82 | 8.1380397 | 1.09E-01 | 80794439  | 80794562  | NC_000012.11 |
| cg18800329 | 1.91E-07 | 2.35E-08 | 5.82 | 8.1378659 | 2.30E-02 | 9132196   | 9132319   | NC_000001.10 |
| cg06553871 | 1.91E-07 | 2.35E-08 | 5.82 | 8.1367988 | 5.77E-02 | 40996006  | 40996129  | NC_000019.9  |
| cg19328583 | 1.91E-07 | 2.35E-08 | 5.82 | 8.1366593 | 6.36E-02 | 18874421  | 18874544  | NC_000017.10 |
| cg01165997 | 1.91E-07 | 2.36E-08 | 5.82 | 8.1354763 | 7.27E-02 | 200956235 | 200956358 | NC_000002.11 |
| cg00049892 | 1.91E-07 | 2.36E-08 | 5.82 | 8.1351184 | 1.12E-01 | 132162773 | 132162896 | NC_000006.11 |
| cg12598211 | 1.91E-07 | 2.36E-08 | 5.82 | 8.1345973 | 1.12E-01 | 123634384 | 123634507 | NC_000012.11 |
| cg14218042 | 1.91E-07 | 2.36E-08 | 5.82 | 8.134567  | 1.27E-01 | 4716578   | 4716701   | NC_000001.10 |
| cg00522403 | 1.91E-07 | 2.36E-08 | 5.82 | 8.1338086 | 7.60E-02 | 31453591  | 31453714  | NC_000016.9  |
| cg21438101 | 1.91E-07 | 2.36E-08 | 5.82 | 8.1337863 | 1.82E-01 | 904885    | 905008    | NC_000018.9  |

|            |          |          |      |           |          |           |           |              |
|------------|----------|----------|------|-----------|----------|-----------|-----------|--------------|
| cg02454750 | 1.91E-07 | 2.36E-08 | 5.82 | 8.1337438 | 5.63E-02 | 43089339  | 43089462  | NC_000022.10 |
| cg04865480 | 1.91E-07 | 2.36E-08 | 5.82 | 8.1336307 | 2.32E-02 | 173421027 | 173421150 | NC_000002.11 |
| cg00647046 | 1.92E-07 | 2.36E-08 | 5.82 | 8.132494  | 1.02E-01 | 134734612 | 134734735 | NC_000010.10 |
| cg16996682 | 1.92E-07 | 2.37E-08 | 5.82 | 8.1307831 | 1.15E-01 | 71830814  | 71830937  | NC_000001.10 |
| cg14482308 | 1.92E-07 | 2.37E-08 | 5.82 | 8.1301928 | 1.55E-01 | 18059109  | 18059232  | NC_000002.11 |
| cg13660477 | 1.92E-07 | 2.37E-08 | 5.82 | 8.1281082 | 8.36E-02 | 106388966 | 106389089 | NC_000002.11 |
| cg07838048 | 1.93E-07 | 2.38E-08 | 5.82 | 8.1273982 | 7.65E-02 | 70720440  | 70720563  | NC_000016.9  |
| cg05037725 | 1.93E-07 | 2.38E-08 | 5.82 | 8.1266177 | 1.37E-01 | 31639946  | 31640069  | NC_000005.9  |
| cg27018380 | 1.93E-07 | 2.38E-08 | 5.82 | 8.1263763 | 1.95E-01 | 93389876  | 93389999  | NC_000014.8  |
| cg16301728 | 1.93E-07 | 2.38E-08 | 5.82 | 8.1255153 | 1.04E-01 | 187717549 | 187717672 | NC_000002.11 |
| cg04537567 | 1.93E-07 | 2.38E-08 | 5.82 | 8.1235961 | 9.78E-02 | 99296068  | 99296191  | NC_000006.11 |
| cg24236591 | 1.93E-07 | 2.39E-08 | 5.82 | 8.1230773 | 1.28E-01 | 21082729  | 21082852  | NC_000020.10 |
| cg03656055 | 1.93E-07 | 2.39E-08 | 5.82 | 8.1226053 | 1.67E-01 | 21665155  | 21665278  | NC_000006.11 |
| cg25561762 | 1.94E-07 | 2.39E-08 | 5.82 | 8.1212835 | 1.51E-01 | 20876028  | 20876151  | NC_000013.10 |
| cg02981078 | 1.94E-07 | 2.39E-08 | 5.82 | 8.1212785 | 6.36E-02 | 88428011  | 88428134  | NC_000012.11 |
| cg04903883 | 1.94E-07 | 2.39E-08 | 5.82 | 8.1207966 | 6.48E-02 | 106321551 | 106321674 | NC_000014.8  |
| cg04582254 | 1.94E-07 | 2.40E-08 | 5.82 | 8.1190465 | 7.19E-02 | 131756487 | 131756610 | NC_000010.10 |
| cg06333012 | 1.94E-07 | 2.40E-08 | 5.82 | 8.1183453 | 5.69E-02 | 67192596  | 67192719  | NC_000011.9  |
| cg19062689 | 1.94E-07 | 2.40E-08 | 5.82 | 8.1181675 | 5.16E-02 | 23871092  | 23871215  | NC_000019.9  |
| cg23548627 | 1.94E-07 | 2.40E-08 | 5.82 | 8.1168454 | 1.24E-01 | 115138618 | 115138741 | NC_000012.11 |
| cg18629535 | 1.95E-07 | 2.40E-08 | 5.82 | 8.1166676 | 1.70E-01 | 113229362 | 113229485 | NC_000012.11 |
| cg17305181 | 1.95E-07 | 2.40E-08 | 5.82 | 8.116549  | 1.18E-01 | 67090581  | 67090704  | NC_000008.10 |
| cg00043819 | 1.95E-07 | 2.40E-08 | 5.82 | 8.1163293 | 1.50E-01 | 185942529 | 185942652 | NC_000004.11 |
| cg22511262 | 1.95E-07 | 2.40E-08 | 5.82 | 8.115733  | 1.09E-01 | 32455192  | 32455315  | NC_000011.9  |
| cg23331981 | 1.95E-07 | 2.41E-08 | 5.82 | 8.1148907 | 1.40E-01 | 7574780   | 7574903   | NC_000010.10 |

|            |          |          |      |           |          |           |           |              |
|------------|----------|----------|------|-----------|----------|-----------|-----------|--------------|
| cg20467957 | 1.95E-07 | 2.41E-08 | 5.82 | 8.1142894 | 1.03E-01 | 31845529  | 31845652  | NC_000011.9  |
| cg24691167 | 1.95E-07 | 2.41E-08 | 5.82 | 8.1141778 | 7.64E-02 | 10749371  | 10749494  | NC_000003.11 |
| cg17671005 | 1.95E-07 | 2.41E-08 | 5.82 | 8.1140358 | 1.50E-01 | 113391774 | 113391897 | NC_000005.9  |
| cg25815682 | 1.95E-07 | 2.41E-08 | 5.82 | 8.1135165 | 8.03E-02 | 30911250  | 30911373  | NC_000019.9  |
| cg04360519 | 1.95E-07 | 2.41E-08 | 5.82 | 8.1118757 | 3.03E-02 | 127996580 | 127996703 | NC_000003.11 |
| cg10165167 | 1.95E-07 | 2.41E-08 | 5.82 | 8.111841  | 1.32E-01 | 168728586 | 168728709 | NC_000005.9  |
| cg18231517 | 1.95E-07 | 2.41E-08 | 5.82 | 8.1114871 | 2.68E-02 | 243218706 | 243218829 | NC_000001.10 |
| cg18396987 | 1.96E-07 | 2.42E-08 | 5.82 | 8.11099   | 1.47E-01 | 115398073 | 115398196 | NC_000001.10 |
| cg23644960 | 1.96E-07 | 2.42E-08 | 5.82 | 8.1108971 | 1.66E-01 | 101454823 | 101454946 | NC_000011.9  |
| cg07011318 | 1.96E-07 | 2.42E-08 | 5.82 | 8.1097973 | 6.60E-02 | 2054944   | 2055067   | NC_000016.9  |
| cg24903006 | 1.96E-07 | 2.42E-08 | 5.82 | 8.1083036 | 2.36E-01 | 38347968  | 38348091  | NC_000017.10 |
| cg20804050 | 1.96E-07 | 2.42E-08 | 5.82 | 8.1081123 | 1.70E-01 | 119605441 | 119605564 | NC_000002.11 |
| cg11213690 | 1.96E-07 | 2.42E-08 | 5.82 | 8.1080445 | 1.49E-01 | 149112402 | 149112525 | NC_000007.13 |
| cg10737118 | 1.96E-07 | 2.42E-08 | 5.82 | 8.1075983 | 1.10E-01 | 37354790  | 37354913  | NC_000020.10 |
| cg22510362 | 1.97E-07 | 2.43E-08 | 5.82 | 8.1056587 | 4.83E-02 | 87251839  | 87251962  | NC_000016.9  |
| cg24585203 | 1.97E-07 | 2.43E-08 | 5.82 | 8.1052059 | 1.07E-01 | 27105814  | 27105937  | NC_000011.9  |
| cg10316490 | 1.97E-07 | 2.43E-08 | 5.82 | 8.104849  | 1.51E-01 | 190445197 | 190445320 | NC_000001.10 |
| cg11416492 | 1.97E-07 | 2.43E-08 | 5.82 | 8.1047882 | 1.34E-01 | 54206260  | 54206383  | NC_000010.10 |
| cg17861618 | 1.97E-07 | 2.44E-08 | 5.82 | 8.1031617 | 6.02E-02 | 134930343 | 134930466 | NC_000010.10 |
| cg00125306 | 1.97E-07 | 2.44E-08 | 5.82 | 8.1027976 | 3.34E-02 | 77811842  | 77811965  | NC_000017.10 |
| cg04087742 | 1.97E-07 | 2.44E-08 | 5.82 | 8.101606  | 1.75E-01 | 50264462  | 50264585  | NC_000005.9  |
| cg15862271 | 1.97E-07 | 2.44E-08 | 5.82 | 8.1014956 | 9.44E-03 | 26937371  | 26937494  | NC_000022.10 |
| cg13943333 | 1.97E-07 | 2.44E-08 | 5.82 | 8.1014806 | 1.25E-01 | 87959251  | 87959374  | NC_000004.11 |
| cg16713687 | 1.97E-07 | 2.44E-08 | 5.81 | 8.1007913 | 1.42E-01 | 55366538  | 55366661  | NC_000008.10 |
| cg09699039 | 1.97E-07 | 2.44E-08 | 5.81 | 8.1007695 | 1.67E-01 | 118241568 | 118241691 | NC_000006.11 |

|            |          |          |      |           |          |           |           |              |
|------------|----------|----------|------|-----------|----------|-----------|-----------|--------------|
| cg11687330 | 1.98E-07 | 2.44E-08 | 5.81 | 8.1000027 | 1.69E-01 | 132953239 | 132953362 | NC_000011.9  |
| cg07274204 | 1.98E-07 | 2.44E-08 | 5.81 | 8.0997434 | 4.85E-02 | 31100095  | 31100218  | NC_000016.9  |
| cg19048301 | 1.98E-07 | 2.44E-08 | 5.81 | 8.0997053 | 4.87E-02 | 32912601  | 32912724  | NC_000012.11 |
| cg07687798 | 1.98E-07 | 2.44E-08 | 5.81 | 8.0996301 | 7.35E-02 | 8347477   | 8347600   | NC_000004.11 |
| cg19537719 | 1.98E-07 | 2.45E-08 | 5.81 | 8.0988785 | 1.53E-01 | 41583498  | 41583621  | NC_000008.10 |
| cg22367191 | 1.98E-07 | 2.45E-08 | 5.81 | 8.0987009 | 1.41E-01 | 10425648  | 10425771  | NC_000006.11 |
| cg11055967 | 1.98E-07 | 2.45E-08 | 5.81 | 8.0977068 | 7.59E-02 | 16155342  | 16155465  | NC_000022.10 |
| cg15435900 | 1.98E-07 | 2.45E-08 | 5.81 | 8.0969773 | 7.98E-02 | 197401399 | 197401522 | NC_000003.11 |
| cg18280830 | 1.98E-07 | 2.45E-08 | 5.81 | 8.0969092 | 1.16E-01 | 57265875  | 57265998  | NC_000014.8  |
| cg01695255 | 1.98E-07 | 2.45E-08 | 5.81 | 8.096762  | 3.83E-02 | 35350760  | 35350883  | NC_000013.10 |
| cg11850861 | 1.98E-07 | 2.45E-08 | 5.81 | 8.0963471 | 4.27E-02 | 42273306  | 42273429  | NC_000001.10 |
| cg25678088 | 1.98E-07 | 2.45E-08 | 5.81 | 8.0959293 | 1.03E-01 | 96632460  | 96632583  | NC_000007.13 |
| cg20643945 | 1.99E-07 | 2.46E-08 | 5.81 | 8.0948546 | 8.27E-02 | 130927924 | 130928047 | NC_000012.11 |
| cg09367198 | 1.99E-07 | 2.46E-08 | 5.81 | 8.09432   | 1.00E-01 | 23541523  | 23541646  | NC_000014.8  |
| cg08713858 | 1.99E-07 | 2.46E-08 | 5.81 | 8.0941707 | 6.77E-02 | 67035388  | 67035511  | NC_000016.9  |
| cg23974473 | 1.99E-07 | 2.46E-08 | 5.81 | 8.0930279 | 7.93E-02 | 140625794 | 140625917 | NC_000005.9  |
| cg08352755 | 1.99E-07 | 2.46E-08 | 5.81 | 8.0930069 | 1.16E-01 | 145758879 | 145759002 | NC_000005.9  |
| cg26249873 | 1.99E-07 | 2.46E-08 | 5.81 | 8.0927296 | 1.24E-01 | 25465430  | 25465553  | NC_000010.10 |
| cg13545297 | 1.99E-07 | 2.46E-08 | 5.81 | 8.0923169 | 1.08E-01 | 54404315  | 54404438  | NC_000012.11 |
| cg02657611 | 1.99E-07 | 2.46E-08 | 5.81 | 8.0922969 | 9.83E-02 | 45814632  | 45814755  | NC_000001.10 |
| cg23028178 | 1.99E-07 | 2.46E-08 | 5.81 | 8.0920649 | 7.31E-02 | 236229267 | 236229390 | NC_000001.10 |
| cg17958577 | 1.99E-07 | 2.47E-08 | 5.81 | 8.0909825 | 6.72E-02 | 488589    | 488712    | NC_000005.9  |
| cg15325658 | 1.99E-07 | 2.47E-08 | 5.81 | 8.0909094 | 1.13E-01 | 79815782  | 79815905  | NC_000003.11 |
| cg22650617 | 1.99E-07 | 2.47E-08 | 5.81 | 8.0902886 | 1.24E-01 | 71017541  | 71017664  | NC_000002.11 |
| cg26621127 | 2.00E-07 | 2.47E-08 | 5.81 | 8.0896723 | 2.66E-02 | 65179687  | 65179810  | NC_000012.11 |

|            |          |          |      |           |          |           |           |              |
|------------|----------|----------|------|-----------|----------|-----------|-----------|--------------|
| cg25213928 | 2.00E-07 | 2.47E-08 | 5.81 | 8.0889966 | 1.19E-01 | 5712842   | 5712965   | NC_000004.11 |
| cg22038319 | 2.00E-07 | 2.47E-08 | 5.81 | 8.0889729 | 7.20E-02 | 154312023 | 154312146 | NC_000002.11 |
| cg10597997 | 2.00E-07 | 2.47E-08 | 5.81 | 8.0878082 | 4.40E-02 | 171479920 | 171480043 | NC_000005.9  |
| cg01876492 | 2.00E-07 | 2.47E-08 | 5.81 | 8.0877421 | 6.07E-02 | 112321788 | 112321911 | NC_000013.10 |
| cg01915283 | 2.00E-07 | 2.48E-08 | 5.81 | 8.0870984 | 1.30E-01 | 39711362  | 39711485  | NC_000022.10 |
| cg01823161 | 2.00E-07 | 2.48E-08 | 5.81 | 8.0869693 | 1.24E-01 | 64422261  | 64422384  | NC_000005.9  |
| cg14983586 | 2.00E-07 | 2.48E-08 | 5.81 | 8.0861225 | 1.40E-01 | 27206503  | 27206626  | NC_000006.11 |
| cg22266749 | 2.01E-07 | 2.48E-08 | 5.81 | 8.0845509 | 1.62E-01 | 110223959 | 110224082 | NC_000004.11 |
| cg26230285 | 2.01E-07 | 2.48E-08 | 5.81 | 8.0845413 | 2.18E-01 | 26108412  | 26108535  | NC_000015.9  |
| cg01448551 | 2.01E-07 | 2.49E-08 | 5.81 | 8.0828052 | 1.79E-02 | 32798482  | 32798605  | NC_000006.11 |
| cg21143428 | 2.01E-07 | 2.49E-08 | 5.81 | 8.0827379 | 1.07E-01 | 136640472 | 136640595 | NC_000005.9  |
| cg14631053 | 2.01E-07 | 2.49E-08 | 5.81 | 8.0819544 | 1.27E-01 | 23015899  | 23016022  | NC_000020.10 |
| cg21379851 | 2.01E-07 | 2.49E-08 | 5.81 | 8.0818632 | 4.81E-02 | 79890702  | 79890825  | NC_000017.10 |
| cg16933813 | 2.01E-07 | 2.49E-08 | 5.81 | 8.0816023 | 9.65E-02 | 32945317  | 32945440  | NC_000006.11 |
| cg12016437 | 2.01E-07 | 2.49E-08 | 5.81 | 8.0815599 | 1.65E-01 | 10459163  | 10459286  | NC_000004.11 |
| cg02518135 | 2.01E-07 | 2.49E-08 | 5.81 | 8.0805523 | 1.20E-01 | 247802739 | 247802862 | NC_000001.10 |
| cg13855454 | 2.01E-07 | 2.49E-08 | 5.81 | 8.0798551 | 9.38E-02 | 48232358  | 48232481  | NC_000012.11 |
| cg12146673 | 2.02E-07 | 2.50E-08 | 5.81 | 8.0786081 | 1.12E-01 | 187387555 | 187387678 | NC_000003.11 |
| cg08311610 | 2.02E-07 | 2.50E-08 | 5.81 | 8.0784609 | 1.73E-01 | 76506759  | 76506882  | NC_000005.9  |
| cg03065467 | 2.02E-07 | 2.50E-08 | 5.81 | 8.0782031 | 1.19E-01 | 109093243 | 109093366 | NC_000004.11 |
| cg03375056 | 2.02E-07 | 2.50E-08 | 5.81 | 8.0772799 | 9.34E-02 | 29062431  | 29062554  | NC_000001.10 |
| cg01085362 | 2.02E-07 | 2.50E-08 | 5.81 | 8.077113  | 1.25E-01 | 31848310  | 31848433  | NC_000019.9  |
| cg02966153 | 2.02E-07 | 2.50E-08 | 5.81 | 8.0770135 | 1.80E-01 | 1401767   | 1401890   | NC_000019.9  |
| cg06856889 | 2.02E-07 | 2.50E-08 | 5.81 | 8.0767757 | 9.91E-02 | 45929541  | 45929664  | NC_000011.9  |
| cg04939662 | 2.02E-07 | 2.51E-08 | 5.81 | 8.0748169 | 9.58E-02 | 5084338   | 5084461   | NC_000006.11 |

|            |          |          |      |           |          |           |           |              |
|------------|----------|----------|------|-----------|----------|-----------|-----------|--------------|
| cg05882426 | 2.03E-07 | 2.51E-08 | 5.81 | 8.0744248 | 9.24E-02 | 25961001  | 25961124  | NC_000022.10 |
| cg21066290 | 2.03E-07 | 2.51E-08 | 5.81 | 8.074095  | 6.11E-02 | 176757391 | 176757514 | NC_000005.9  |
| cg09497201 | 2.03E-07 | 2.51E-08 | 5.81 | 8.0738101 | 1.33E-01 | 25906243  | 25906366  | NC_000008.10 |
| cg14847818 | 2.03E-07 | 2.51E-08 | 5.81 | 8.0735477 | 3.75E-02 | 114328840 | 114328963 | NC_000003.11 |
| cg05506209 | 2.03E-07 | 2.51E-08 | 5.81 | 8.0735435 | 9.06E-02 | 123480969 | 123481092 | NC_000011.9  |
| cg13076940 | 2.03E-07 | 2.51E-08 | 5.81 | 8.073491  | 4.81E-02 | 19932946  | 19933069  | NC_000014.8  |
| cg00481216 | 2.03E-07 | 2.51E-08 | 5.81 | 8.0727371 | 6.88E-02 | 181971175 | 181971298 | NC_000002.11 |
| cg23685155 | 2.03E-07 | 2.51E-08 | 5.81 | 8.0721214 | 1.67E-01 | 54396440  | 54396563  | NC_000012.11 |
| cg06839854 | 2.03E-07 | 2.52E-08 | 5.81 | 8.0717176 | 8.98E-02 | 10536115  | 10536238  | NC_000002.11 |
| cg04892672 | 2.03E-07 | 2.52E-08 | 5.81 | 8.0716554 | 4.08E-02 | 29695164  | 29695287  | NC_000006.11 |
| cg00588720 | 2.03E-07 | 2.52E-08 | 5.81 | 8.0709064 | 1.89E-01 | 89267826  | 89267949  | NC_000016.9  |
| cg11634875 | 2.03E-07 | 2.52E-08 | 5.81 | 8.0703478 | 3.62E-02 | 31922863  | 31922986  | NC_000006.11 |
| cg17700835 | 2.03E-07 | 2.52E-08 | 5.81 | 8.0697466 | 8.23E-02 | 27390890  | 27391013  | NC_000006.11 |
| cg08827756 | 2.03E-07 | 2.52E-08 | 5.81 | 8.0695097 | 1.34E-01 | 6006770   | 6006893   | NC_000006.11 |
| cg02570643 | 2.04E-07 | 2.52E-08 | 5.81 | 8.0690764 | 1.41E-01 | 77531473  | 77531596  | NC_000005.9  |
| cg08501301 | 2.04E-07 | 2.52E-08 | 5.81 | 8.0689655 | 6.90E-02 | 2831746   | 2831869   | NC_000017.10 |
| cg10281378 | 2.04E-07 | 2.52E-08 | 5.81 | 8.0683339 | 1.04E-01 | 8651225   | 8651348   | NC_000004.11 |
| cg24122498 | 2.04E-07 | 2.53E-08 | 5.81 | 8.0650625 | 1.11E-01 | 4648682   | 4648805   | NC_000017.10 |
| cg26475541 | 2.04E-07 | 2.53E-08 | 5.81 | 8.0645411 | 7.61E-02 | 79026152  | 79026275  | NC_000017.10 |
| cg07201620 | 2.05E-07 | 2.54E-08 | 5.81 | 8.0634516 | 1.64E-01 | 83679941  | 83680064  | NC_000005.9  |
| cg07233838 | 2.05E-07 | 2.54E-08 | 5.81 | 8.0626457 | 6.81E-02 | 17472852  | 17472975  | NC_000001.10 |
| cg06416831 | 2.05E-07 | 2.54E-08 | 5.81 | 8.0626071 | 1.08E-01 | 138474152 | 138474275 | NC_000005.9  |
| cg26898754 | 2.05E-07 | 2.54E-08 | 5.81 | 8.0624992 | 3.06E-02 | 180216985 | 180217108 | NC_000005.9  |
| cg17892556 | 2.05E-07 | 2.54E-08 | 5.81 | 8.0623679 | 2.25E-01 | 12267464  | 12267587  | NC_000019.9  |
| cg19509778 | 2.05E-07 | 2.54E-08 | 5.81 | 8.0613342 | 1.29E-01 | 129537308 | 129537431 | NC_000010.10 |

|            |          |          |      |           |          |           |           |              |
|------------|----------|----------|------|-----------|----------|-----------|-----------|--------------|
| cg05142148 | 2.05E-07 | 2.54E-08 | 5.81 | 8.0613165 | 6.47E-02 | 90066396  | 90066519  | NC_000016.9  |
| cg10557948 | 2.05E-07 | 2.54E-08 | 5.81 | 8.0610303 | 5.95E-02 | 132404798 | 132404921 | NC_000002.11 |
| cg16072192 | 2.05E-07 | 2.54E-08 | 5.81 | 8.0605671 | 1.46E-01 | 2741047   | 2741170   | NC_000005.9  |
| cg14139935 | 2.05E-07 | 2.54E-08 | 5.81 | 8.0605042 | 4.91E-02 | 130258864 | 130258987 | NC_000009.11 |
| cg07706812 | 2.05E-07 | 2.54E-08 | 5.81 | 8.0602941 | 1.21E-01 | 71746357  | 71746480  | NC_000016.9  |
| cg21352720 | 2.05E-07 | 2.55E-08 | 5.81 | 8.0592707 | 6.02E-02 | 68596739  | 68596862  | NC_000006.11 |
| cg09669754 | 2.06E-07 | 2.55E-08 | 5.81 | 8.0589289 | 1.16E-01 | 78166148  | 78166271  | NC_000017.10 |
| cg02143877 | 2.06E-07 | 2.55E-08 | 5.81 | 8.0584567 | 2.01E-01 | 52790141  | 52790264  | NC_000020.10 |
| cg23467008 | 2.06E-07 | 2.55E-08 | 5.81 | 8.0580301 | 1.36E-01 | 152128537 | 152128660 | NC_000006.11 |
| cg18430044 | 2.06E-07 | 2.55E-08 | 5.81 | 8.057742  | 7.87E-02 | 77912021  | 77912144  | NC_000017.10 |
| cg00590670 | 2.06E-07 | 2.55E-08 | 5.81 | 8.0574332 | 1.54E-01 | 217559207 | 217559330 | NC_000002.11 |
| cg13610014 | 2.06E-07 | 2.56E-08 | 5.81 | 8.0562883 | 1.17E-01 | 188953178 | 188953301 | NC_000004.11 |
| cg21784917 | 2.06E-07 | 2.56E-08 | 5.81 | 8.0562503 | 1.23E-01 | 79084038  | 79084161  | NC_000007.13 |
| cg20623506 | 2.06E-07 | 2.56E-08 | 5.81 | 8.0558983 | 1.44E-01 | 79813410  | 79813533  | NC_000017.10 |
| cg01886385 | 2.06E-07 | 2.56E-08 | 5.81 | 8.0557052 | 7.76E-02 | 32037342  | 32037465  | NC_000006.11 |
| cg23603057 | 2.06E-07 | 2.56E-08 | 5.81 | 8.0553527 | 1.21E-01 | 167704808 | 167704931 | NC_000006.11 |
| cg23723194 | 2.06E-07 | 2.56E-08 | 5.81 | 8.0546556 | 2.75E-02 | 7318905   | 7319028   | NC_000001.10 |
| cg22795590 | 2.06E-07 | 2.56E-08 | 5.81 | 8.0545126 | 8.78E-02 | 213401801 | 213401924 | NC_000002.11 |
| cg11499699 | 2.06E-07 | 2.56E-08 | 5.81 | 8.0540793 | 7.84E-02 | 74382495  | 74382618  | NC_000017.10 |
| cg26116485 | 2.07E-07 | 2.56E-08 | 5.81 | 8.0532494 | 1.48E-01 | 55515411  | 55515534  | NC_000003.11 |
| cg09801894 | 2.07E-07 | 2.56E-08 | 5.81 | 8.0530165 | 1.05E-01 | 219738354 | 219738477 | NC_000001.10 |
| cg01565777 | 2.07E-07 | 2.57E-08 | 5.81 | 8.0525616 | 8.97E-02 | 138763424 | 138763547 | NC_000003.11 |
| cg10633040 | 2.07E-07 | 2.57E-08 | 5.81 | 8.0522486 | 9.69E-02 | 71915686  | 71915809  | NC_000005.9  |
| cg08688773 | 2.07E-07 | 2.57E-08 | 5.81 | 8.0519792 | 1.04E-01 | 23461301  | 23461424  | NC_000010.10 |
| cg25879514 | 2.07E-07 | 2.57E-08 | 5.8  | 8.0495051 | 8.58E-02 | 73347837  | 73347960  | NC_000017.10 |

|            |          |          |     |           |          |           |           |              |
|------------|----------|----------|-----|-----------|----------|-----------|-----------|--------------|
| cg17811608 | 2.07E-07 | 2.57E-08 | 5.8 | 8.0493899 | 1.57E-01 | 438197    | 438320    | NC_000002.11 |
| cg22228748 | 2.07E-07 | 2.57E-08 | 5.8 | 8.049237  | 6.80E-02 | 99385800  | 99385923  | NC_000001.10 |
| cg08110542 | 2.08E-07 | 2.58E-08 | 5.8 | 8.0485076 | 1.81E-01 | 131199936 | 131200059 | NC_000012.11 |
| cg25450335 | 2.08E-07 | 2.58E-08 | 5.8 | 8.0476118 | 3.95E-02 | 135058453 | 135058576 | NC_000005.9  |
| cg23278137 | 2.08E-07 | 2.58E-08 | 5.8 | 8.0474561 | 4.96E-02 | 106269670 | 106269793 | NC_000005.9  |
| cg02631462 | 2.08E-07 | 2.58E-08 | 5.8 | 8.0466622 | 1.54E-01 | 44324856  | 44324979  | NC_000019.9  |
| cg00566713 | 2.08E-07 | 2.58E-08 | 5.8 | 8.0466453 | 3.69E-02 | 1749774   | 1749897   | NC_000016.9  |
| cg19822251 | 2.08E-07 | 2.58E-08 | 5.8 | 8.0462868 | 1.50E-01 | 9595395   | 9595518   | NC_000003.11 |
| cg24428877 | 2.08E-07 | 2.58E-08 | 5.8 | 8.0453097 | 2.13E-01 | 21664652  | 21664775  | NC_000006.11 |
| cg10682299 | 2.08E-07 | 2.59E-08 | 5.8 | 8.0441133 | 1.70E-01 | 111550154 | 111550277 | NC_000004.11 |
| cg12021220 | 2.09E-07 | 2.59E-08 | 5.8 | 8.0427891 | 9.25E-02 | 78110106  | 78110229  | NC_000015.9  |
| cg23467713 | 2.09E-07 | 2.59E-08 | 5.8 | 8.0427272 | 8.58E-02 | 94291414  | 94291537  | NC_000014.8  |
| cg00796424 | 2.09E-07 | 2.59E-08 | 5.8 | 8.0426267 | 1.27E-01 | 54365966  | 54366089  | NC_000012.11 |
| cg00239025 | 2.09E-07 | 2.59E-08 | 5.8 | 8.0424978 | 7.20E-02 | 96937097  | 96937220  | NC_000002.11 |
| cg08070200 | 2.09E-07 | 2.59E-08 | 5.8 | 8.0424782 | 1.34E-01 | 187572960 | 187573083 | NC_000004.11 |
| cg06991391 | 2.09E-07 | 2.59E-08 | 5.8 | 8.0422326 | 4.47E-02 | 31995423  | 31995546  | NC_000016.9  |
| cg16753134 | 2.09E-07 | 2.59E-08 | 5.8 | 8.0419753 | 2.52E-02 | 89584924  | 89585047  | NC_000016.9  |
| cg08219459 | 2.09E-07 | 2.59E-08 | 5.8 | 8.0418021 | 2.96E-02 | 68734735  | 68734858  | NC_000016.9  |
| cg08479717 | 2.09E-07 | 2.60E-08 | 5.8 | 8.0411233 | 2.20E-02 | 18251927  | 18252050  | NC_000019.9  |
| cg09442828 | 2.09E-07 | 2.60E-08 | 5.8 | 8.0411034 | 1.20E-01 | 37823979  | 37824102  | NC_000008.10 |
| cg13964439 | 2.09E-07 | 2.60E-08 | 5.8 | 8.0393298 | 9.12E-02 | 90278260  | 90278383  | NC_000009.11 |
| cg14733904 | 2.09E-07 | 2.60E-08 | 5.8 | 8.0392383 | 6.43E-02 | 10493808  | 10493931  | NC_000008.10 |
| cg06419850 | 2.09E-07 | 2.60E-08 | 5.8 | 8.0391391 | 1.32E-01 | 4688683   | 4688806   | NC_000017.10 |
| cg11893127 | 2.10E-07 | 2.60E-08 | 5.8 | 8.0386986 | 9.21E-02 | 131057342 | 131057465 | NC_000012.11 |
| cg13877482 | 2.10E-07 | 2.60E-08 | 5.8 | 8.0379871 | 8.54E-02 | 180202256 | 180202379 | NC_000001.10 |



|            |          |          |     |           |          |           |           |              |
|------------|----------|----------|-----|-----------|----------|-----------|-----------|--------------|
| cg06974755 | 2.10E-07 | 2.60E-08 | 5.8 | 8.0379774 | 2.43E-02 | 135996931 | 135997054 | NC_000009.11 |
| cg12401653 | 2.10E-07 | 2.60E-08 | 5.8 | 8.0379435 | 4.26E-02 | 1754980   | 1755103   | NC_000012.11 |
| cg14661803 | 2.10E-07 | 2.61E-08 | 5.8 | 8.0369009 | 7.14E-02 | 207958145 | 207958268 | NC_000002.11 |
| cg04991214 | 2.10E-07 | 2.61E-08 | 5.8 | 8.0365103 | 1.21E-01 | 161089118 | 161089241 | NC_000001.10 |
| cg04655995 | 2.10E-07 | 2.61E-08 | 5.8 | 8.0360957 | 4.45E-02 | 84424089  | 84424212  | NC_000016.9  |
| cg13185177 | 2.10E-07 | 2.61E-08 | 5.8 | 8.0356778 | 7.17E-02 | 194119885 | 194120008 | NC_000003.11 |
| cg17698295 | 2.10E-07 | 2.61E-08 | 5.8 | 8.0349268 | 1.31E-01 | 145106299 | 145106422 | NC_000008.10 |
| cg10506882 | 2.10E-07 | 2.61E-08 | 5.8 | 8.0346925 | 1.41E-01 | 35681627  | 35681750  | NC_000003.11 |
| cg13891181 | 2.10E-07 | 2.61E-08 | 5.8 | 8.0345385 | 1.25E-01 | 41869086  | 41869209  | NC_000004.11 |
| cg04972745 | 2.10E-07 | 2.62E-08 | 5.8 | 8.0337342 | 1.40E-01 | 101287846 | 101287969 | NC_000010.10 |
| cg26581886 | 2.11E-07 | 2.62E-08 | 5.8 | 8.0335568 | 5.73E-02 | 17090862  | 17090985  | NC_000022.10 |
| cg07263382 | 2.11E-07 | 2.62E-08 | 5.8 | 8.0329869 | 9.05E-02 | 44237087  | 44237210  | NC_000018.9  |
| cg10029186 | 2.11E-07 | 2.62E-08 | 5.8 | 8.0326039 | 1.02E-01 | 174430771 | 174430894 | NC_000004.11 |
| cg14640525 | 2.11E-07 | 2.62E-08 | 5.8 | 8.0320194 | 5.89E-02 | 38876856  | 38876979  | NC_000003.11 |
| cg15006101 | 2.11E-07 | 2.62E-08 | 5.8 | 8.0317184 | 5.98E-02 | 140627399 | 140627522 | NC_000005.9  |
| cg13458005 | 2.11E-07 | 2.62E-08 | 5.8 | 8.031461  | 8.66E-02 | 27702309  | 27702432  | NC_000010.10 |
| cg00569056 | 2.11E-07 | 2.62E-08 | 5.8 | 8.031331  | 9.07E-02 | 121416239 | 121416362 | NC_000005.9  |
| cg16409795 | 2.11E-07 | 2.62E-08 | 5.8 | 8.0305323 | 7.29E-02 | 150497431 | 150497554 | NC_000003.11 |
| cg20852846 | 2.11E-07 | 2.63E-08 | 5.8 | 8.0289589 | 1.21E-01 | 3868872   | 3868995   | NC_000019.9  |
| cg21662156 | 2.12E-07 | 2.63E-08 | 5.8 | 8.0283612 | 5.29E-02 | 196753119 | 196753242 | NC_000003.11 |
| cg20418769 | 2.12E-07 | 2.63E-08 | 5.8 | 8.0282228 | 1.28E-01 | 129511700 | 129511823 | NC_000004.11 |
| cg16156525 | 2.12E-07 | 2.63E-08 | 5.8 | 8.0275671 | 6.87E-02 | 36210688  | 36210811  | NC_000019.9  |
| cg07455318 | 2.12E-07 | 2.63E-08 | 5.8 | 8.0274324 | 5.26E-02 | 91772383  | 91772506  | NC_000014.8  |
| cg23319285 | 2.12E-07 | 2.63E-08 | 5.8 | 8.0269404 | 7.30E-02 | 101287752 | 101287875 | NC_000010.10 |
| cg06389697 | 2.12E-07 | 2.63E-08 | 5.8 | 8.0268776 | 1.49E-01 | 102508529 | 102508652 | NC_000010.10 |

|            |          |          |     |           |          |           |           |              |
|------------|----------|----------|-----|-----------|----------|-----------|-----------|--------------|
| cg21929717 | 2.12E-07 | 2.64E-08 | 5.8 | 8.0246431 | 6.79E-02 | 68089821  | 68089944  | NC_000005.9  |
| cg27616833 | 2.12E-07 | 2.64E-08 | 5.8 | 8.0242632 | 9.44E-02 | 106060221 | 106060344 | NC_000002.11 |
| cg07820996 | 2.12E-07 | 2.64E-08 | 5.8 | 8.0240071 | 6.05E-02 | 1026944   | 1027067   | NC_000016.9  |
| cg22664450 | 2.13E-07 | 2.64E-08 | 5.8 | 8.0234653 | 1.10E-01 | 109247864 | 109247987 | NC_000013.10 |
| cg08732526 | 2.13E-07 | 2.64E-08 | 5.8 | 8.0234504 | 9.13E-02 | 152595982 | 152596105 | NC_000001.10 |
| cg15316716 | 2.13E-07 | 2.64E-08 | 5.8 | 8.0232571 | 7.23E-02 | 21769797  | 21769920  | NC_000008.10 |
| cg27335649 | 2.13E-07 | 2.64E-08 | 5.8 | 8.0230381 | 1.17E-01 | 10953578  | 10953701  | NC_000010.10 |
| cg03963391 | 2.13E-07 | 2.64E-08 | 5.8 | 8.0228669 | 6.98E-02 | 34808479  | 34808602  | NC_000016.9  |
| cg03583111 | 2.13E-07 | 2.65E-08 | 5.8 | 8.0200965 | 1.10E-01 | 220283442 | 220283565 | NC_000002.11 |
| cg09995854 | 2.13E-07 | 2.66E-08 | 5.8 | 8.0189325 | 4.02E-02 | 113810244 | 113810367 | NC_000002.11 |
| cg24964368 | 2.14E-07 | 2.66E-08 | 5.8 | 8.0183441 | 1.10E-01 | 52264413  | 52264536  | NC_000019.9  |
| cg13261713 | 2.14E-07 | 2.66E-08 | 5.8 | 8.0178378 | 1.67E-01 | 77722336  | 77722459  | NC_000017.10 |
| cg00414835 | 2.14E-07 | 2.66E-08 | 5.8 | 8.0156051 | 1.10E-01 | 48439452  | 48439575  | NC_000010.10 |
| cg18175809 | 2.14E-07 | 2.67E-08 | 5.8 | 8.0144821 | 1.49E-01 | 62355525  | 62355648  | NC_000003.11 |
| cg00096104 | 2.15E-07 | 2.67E-08 | 5.8 | 8.0138342 | 1.35E-01 | 100547897 | 100548020 | NC_000013.10 |
| cg10788735 | 2.15E-07 | 2.67E-08 | 5.8 | 8.0127999 | 1.88E-01 | 46974886  | 46975009  | NC_000019.9  |
| cg00918522 | 2.15E-07 | 2.67E-08 | 5.8 | 8.0123205 | 1.34E-01 | 175132871 | 175132994 | NC_000004.11 |
| cg06380820 | 2.15E-07 | 2.68E-08 | 5.8 | 8.0114254 | 9.06E-02 | 134698765 | 134698888 | NC_000010.10 |
| cg03098159 | 2.15E-07 | 2.68E-08 | 5.8 | 8.0112627 | 1.40E-01 | 3873884   | 3874007   | NC_000004.11 |
| cg15078822 | 2.15E-07 | 2.68E-08 | 5.8 | 8.0112229 | 8.23E-02 | 52341469  | 52341592  | NC_000007.13 |
| cg24929264 | 2.15E-07 | 2.68E-08 | 5.8 | 8.0100323 | 9.52E-02 | 34325375  | 34325498  | NC_000017.10 |
| cg02763101 | 2.15E-07 | 2.68E-08 | 5.8 | 8.0094452 | 2.16E-01 | 56904945  | 56905068  | NC_000019.9  |
| cg10536081 | 2.15E-07 | 2.68E-08 | 5.8 | 8.0092666 | 4.73E-02 | 71462149  | 71462272  | NC_000011.9  |
| cg24147498 | 2.16E-07 | 2.69E-08 | 5.8 | 8.0079125 | 1.39E-01 | 95112724  | 95112847  | NC_000010.10 |
| cg23760603 | 2.16E-07 | 2.69E-08 | 5.8 | 8.0075653 | 6.19E-02 | 72135534  | 72135657  | NC_000004.11 |

|            |          |          |      |           |          |           |           |              |
|------------|----------|----------|------|-----------|----------|-----------|-----------|--------------|
| cg18585263 | 2.16E-07 | 2.69E-08 | 5.8  | 8.0073606 | 1.01E-01 | 124770629 | 124770752 | NC_000004.11 |
| cg04825491 | 2.16E-07 | 2.69E-08 | 5.8  | 8.0068995 | 1.18E-01 | 51130058  | 51130181  | NC_000016.9  |
| cg19659218 | 2.16E-07 | 2.69E-08 | 5.8  | 8.006665  | 8.77E-02 | 131706798 | 131706921 | NC_000010.10 |
| cg15160445 | 2.16E-07 | 2.69E-08 | 5.8  | 8.0064912 | 8.00E-02 | 57426749  | 57426872  | NC_000020.10 |
| cg17482089 | 2.16E-07 | 2.69E-08 | 5.8  | 8.0056548 | 9.54E-02 | 140250432 | 140250555 | NC_000005.9  |
| cg00082384 | 2.16E-07 | 2.69E-08 | 5.8  | 8.0047001 | 7.18E-02 | 52516316  | 52516439  | NC_000003.11 |
| cg21480165 | 2.16E-07 | 2.70E-08 | 5.8  | 8.0043085 | 1.12E-01 | 25670170  | 25670293  | NC_000013.10 |
| cg27225068 | 2.16E-07 | 2.70E-08 | 5.8  | 8.0042769 | 5.05E-02 | 188623991 | 188624114 | NC_000003.11 |
| cg20779917 | 2.16E-07 | 2.70E-08 | 5.8  | 8.0042703 | 1.24E-01 | 121946959 | 121947082 | NC_000007.13 |
| cg10439765 | 2.17E-07 | 2.70E-08 | 5.8  | 8.003928  | 1.30E-01 | 44657838  | 44657961  | NC_000020.10 |
| cg18530762 | 2.17E-07 | 2.70E-08 | 5.8  | 8.0039095 | 5.09E-02 | 49138511  | 49138634  | NC_000022.10 |
| cg23054394 | 2.17E-07 | 2.70E-08 | 5.8  | 8.0033979 | 1.17E-01 | 140784675 | 140784798 | NC_000003.11 |
| cg19171383 | 2.17E-07 | 2.70E-08 | 5.8  | 8.003395  | 1.33E-01 | 19555084  | 19555207  | NC_000017.10 |
| cg04326198 | 2.17E-07 | 2.70E-08 | 5.8  | 8.0032559 | 1.17E-01 | 36994456  | 36994579  | NC_000014.8  |
| cg26096100 | 2.17E-07 | 2.70E-08 | 5.8  | 8.0026386 | 6.05E-02 | 180111800 | 180111923 | NC_000005.9  |
| cg08881175 | 2.17E-07 | 2.70E-08 | 5.79 | 8.0010182 | 1.29E-01 | 130832393 | 130832516 | NC_000010.10 |
| cg02856109 | 2.17E-07 | 2.70E-08 | 5.79 | 8.0009941 | 1.52E-01 | 80531656  | 80531779  | NC_000002.11 |
| cg00512171 | 2.17E-07 | 2.70E-08 | 5.79 | 8.0008196 | 1.83E-01 | 105389599 | 105389722 | NC_000006.11 |
| cg00119181 | 2.17E-07 | 2.71E-08 | 5.79 | 8.0005152 | 2.00E-01 | 90758537  | 90758660  | NC_000004.11 |
| cg24247673 | 2.17E-07 | 2.71E-08 | 5.79 | 8.0002489 | 3.67E-02 | 37413610  | 37413733  | NC_000010.10 |
| cg07816637 | 2.17E-07 | 2.71E-08 | 5.79 | 8.0001745 | 8.11E-02 | 140782755 | 140782878 | NC_000005.9  |
| cg12648616 | 2.18E-07 | 2.71E-08 | 5.79 | 7.9985834 | 5.56E-02 | 109944060 | 109944183 | NC_000001.10 |
| cg13708218 | 2.18E-07 | 2.71E-08 | 5.79 | 7.9985608 | 1.31E-01 | 65601267  | 65601390  | NC_000011.9  |
| cg07780895 | 2.18E-07 | 2.71E-08 | 5.79 | 7.9983723 | 8.30E-02 | 134754648 | 134754771 | NC_000010.10 |
| cg08344534 | 2.18E-07 | 2.71E-08 | 5.79 | 7.9976743 | 3.00E-02 | 170453854 | 170453977 | NC_000006.11 |

|            |          |          |      |           |          |           |           |              |
|------------|----------|----------|------|-----------|----------|-----------|-----------|--------------|
| cg17495715 | 2.18E-07 | 2.71E-08 | 5.79 | 7.9976057 | 1.01E-01 | 176950273 | 176950396 | NC_000002.11 |
| cg10300962 | 2.18E-07 | 2.71E-08 | 5.79 | 7.9972656 | 8.47E-02 | 89907817  | 89907940  | NC_000006.11 |
| cg08649439 | 2.18E-07 | 2.72E-08 | 5.79 | 7.9970418 | 3.32E-02 | 4761868   | 4761991   | NC_000007.13 |
| cg16818414 | 2.18E-07 | 2.72E-08 | 5.79 | 7.9967547 | 2.09E-01 | 45898966  | 45899089  | NC_000022.10 |
| cg20794690 | 2.18E-07 | 2.72E-08 | 5.79 | 7.9950445 | 5.25E-02 | 9886405   | 9886528   | NC_000018.9  |
| cg22402816 | 2.19E-07 | 2.72E-08 | 5.79 | 7.9941686 | 4.28E-02 | 30135671  | 30135794  | NC_000006.11 |
| cg12713877 | 2.19E-07 | 2.72E-08 | 5.79 | 7.9941272 | 1.06E-01 | 108525514 | 108525637 | NC_000012.11 |
| cg15589582 | 2.19E-07 | 2.72E-08 | 5.79 | 7.9938481 | 4.15E-02 | 5261136   | 5261259   | NC_000003.11 |
| cg06693667 | 2.19E-07 | 2.73E-08 | 5.79 | 7.9933978 | 7.74E-02 | 57426570  | 57426693  | NC_000020.10 |
| cg17334937 | 2.19E-07 | 2.73E-08 | 5.79 | 7.9933647 | 8.02E-02 | 54538305  | 54538428  | NC_000010.10 |
| cg04363624 | 2.19E-07 | 2.73E-08 | 5.79 | 7.9929364 | 1.51E-01 | 47697965  | 47698088  | NC_000001.10 |
| cg11234328 | 2.19E-07 | 2.73E-08 | 5.79 | 7.9924078 | 9.63E-02 | 135043586 | 135043709 | NC_000010.10 |
| cg24323548 | 2.19E-07 | 2.73E-08 | 5.79 | 7.9906593 | 6.50E-02 | 10467065  | 10467188  | NC_000008.10 |
| cg13214149 | 2.19E-07 | 2.73E-08 | 5.79 | 7.9905347 | 6.90E-02 | 31740978  | 31741101  | NC_000006.11 |
| cg09177518 | 2.19E-07 | 2.74E-08 | 5.79 | 7.9896373 | 1.58E-01 | 196578010 | 196578133 | NC_000001.10 |
| cg25425078 | 2.20E-07 | 2.74E-08 | 5.79 | 7.9881985 | 1.60E-01 | 4381777   | 4381900   | NC_000012.11 |
| cg20486569 | 2.20E-07 | 2.74E-08 | 5.79 | 7.9880382 | 1.64E-01 | 19512228  | 19512351  | NC_000022.10 |
| cg13688573 | 2.20E-07 | 2.74E-08 | 5.79 | 7.9875667 | 6.64E-02 | 38150028  | 38150151  | NC_000002.11 |
| cg17328472 | 2.20E-07 | 2.75E-08 | 5.79 | 7.9857723 | 1.53E-01 | 4712764   | 4712887   | NC_000001.10 |
| cg14331623 | 2.20E-07 | 2.75E-08 | 5.79 | 7.9854445 | 8.49E-02 | 134155084 | 134155207 | NC_000009.11 |
| cg26796621 | 2.21E-07 | 2.75E-08 | 5.79 | 7.9843774 | 4.84E-02 | 44103176  | 44103299  | NC_000019.9  |
| cg22042896 | 2.21E-07 | 2.75E-08 | 5.79 | 7.9834661 | 1.60E-01 | 99057957  | 99058080  | NC_000015.9  |
| cg08445802 | 2.21E-07 | 2.75E-08 | 5.79 | 7.9832223 | 1.57E-01 | 85482612  | 85482735  | NC_000006.11 |
| cg01916088 | 2.21E-07 | 2.76E-08 | 5.79 | 7.9827348 | 1.79E-01 | 41528531  | 41528654  | NC_000006.11 |
| cg21856435 | 2.21E-07 | 2.76E-08 | 5.79 | 7.9820492 | 5.21E-02 | 99917351  | 99917474  | NC_000008.10 |

|            |          |          |      |           |          |           |           |              |
|------------|----------|----------|------|-----------|----------|-----------|-----------|--------------|
| cg09807446 | 2.21E-07 | 2.76E-08 | 5.79 | 7.9818771 | 9.40E-02 | 1171603   | 1171726   | NC_000016.9  |
| cg09496130 | 2.21E-07 | 2.76E-08 | 5.79 | 7.9808954 | 4.56E-02 | 99538493  | 99538616  | NC_000004.11 |
| cg21798608 | 2.21E-07 | 2.76E-08 | 5.79 | 7.9801563 | 2.54E-02 | 195587148 | 195587271 | NC_000003.11 |
| cg24639679 | 2.22E-07 | 2.76E-08 | 5.79 | 7.9798869 | 7.00E-02 | 32847590  | 32847713  | NC_000006.11 |
| cg02876221 | 2.22E-07 | 2.77E-08 | 5.79 | 7.9790727 | 1.22E-01 | 134545513 | 134545636 | NC_000004.11 |
| cg16560313 | 2.22E-07 | 2.77E-08 | 5.79 | 7.9779518 | 1.42E-02 | 103373122 | 103373245 | NC_000014.8  |
| cg14282634 | 2.22E-07 | 2.77E-08 | 5.79 | 7.9773239 | 6.25E-02 | 201680159 | 201680282 | NC_000001.10 |
| cg17255108 | 2.22E-07 | 2.77E-08 | 5.79 | 7.9771531 | 6.19E-02 | 157338433 | 157338556 | NC_000007.13 |
| cg14909464 | 2.22E-07 | 2.77E-08 | 5.79 | 7.976439  | 1.07E-01 | 29107295  | 29107418  | NC_000013.10 |
| cg09635533 | 2.22E-07 | 2.77E-08 | 5.79 | 7.9762032 | 7.87E-02 | 20136822  | 20136945  | NC_000014.8  |
| cg17040471 | 2.23E-07 | 2.78E-08 | 5.79 | 7.9747579 | 1.32E-01 | 19618088  | 19618211  | NC_000021.8  |
| cg24747764 | 2.23E-07 | 2.78E-08 | 5.79 | 7.9730712 | 1.50E-01 | 112761184 | 112761307 | NC_000013.10 |
| cg11920122 | 2.23E-07 | 2.79E-08 | 5.79 | 7.9708746 | 1.29E-01 | 11751556  | 11751679  | NC_000018.9  |
| cg03065139 | 2.23E-07 | 2.79E-08 | 5.79 | 7.9708495 | 6.08E-02 | 209169833 | 209169956 | NC_000002.11 |
| cg22838079 | 2.24E-07 | 2.79E-08 | 5.79 | 7.9699036 | 1.14E-01 | 21759671  | 21759794  | NC_000008.10 |
| cg26836696 | 2.24E-07 | 2.79E-08 | 5.79 | 7.969195  | 1.48E-01 | 145722201 | 145722324 | NC_000005.9  |
| cg22459739 | 2.24E-07 | 2.80E-08 | 5.79 | 7.968642  | 1.14E-01 | 140201153 | 140201276 | NC_000005.9  |
| cg17484771 | 2.24E-07 | 2.80E-08 | 5.79 | 7.968251  | 6.18E-02 | 134890071 | 134890194 | NC_000010.10 |
| cg17339505 | 2.24E-07 | 2.80E-08 | 5.79 | 7.967981  | 1.82E-01 | 43572621  | 43572744  | NC_000010.10 |
| cg21901395 | 2.24E-07 | 2.80E-08 | 5.79 | 7.967937  | 7.94E-02 | 46604235  | 46604358  | NC_000017.10 |
| cg05419671 | 2.24E-07 | 2.80E-08 | 5.79 | 7.967891  | 1.37E-01 | 155248122 | 155248245 | NC_000007.13 |
| cg02658730 | 2.24E-07 | 2.80E-08 | 5.79 | 7.9664739 | 1.01E-01 | 98510182  | 98510305  | NC_000001.10 |
| cg15834355 | 2.24E-07 | 2.80E-08 | 5.79 | 7.9663856 | 4.91E-02 | 54442075  | 54442198  | NC_000012.11 |
| cg19157580 | 2.24E-07 | 2.80E-08 | 5.79 | 7.9660934 | 1.64E-01 | 62733901  | 62734024  | NC_000020.10 |
| cg16206138 | 2.25E-07 | 2.80E-08 | 5.79 | 7.9655549 | 1.65E-01 | 47210270  | 47210393  | NC_000017.10 |

|            |          |          |      |           |          |           |           |              |
|------------|----------|----------|------|-----------|----------|-----------|-----------|--------------|
| cg04247336 | 2.25E-07 | 2.80E-08 | 5.79 | 7.9654353 | 1.07E-01 | 103692104 | 103692227 | NC_000014.8  |
| cg21625881 | 2.25E-07 | 2.81E-08 | 5.79 | 7.9647506 | 6.97E-02 | 57430313  | 57430436  | NC_000020.10 |
| cg27591450 | 2.25E-07 | 2.81E-08 | 5.79 | 7.9647394 | 1.95E-01 | 75525004  | 75525127  | NC_000017.10 |
| cg23178809 | 2.25E-07 | 2.81E-08 | 5.79 | 7.9644508 | 7.89E-02 | 355666    | 355789    | NC_000008.10 |
| cg02170751 | 2.25E-07 | 2.81E-08 | 5.79 | 7.9641102 | 3.66E-02 | 29973158  | 29973281  | NC_000016.9  |
| cg03156547 | 2.25E-07 | 2.81E-08 | 5.79 | 7.9636671 | 7.85E-02 | 23525003  | 23525126  | NC_000014.8  |
| cg08148814 | 2.25E-07 | 2.81E-08 | 5.79 | 7.9635792 | 4.12E-02 | 9831610   | 9831733   | NC_000003.11 |
| cg06007678 | 2.25E-07 | 2.81E-08 | 5.79 | 7.9628462 | 5.18E-02 | 63681486  | 63681609  | NC_000011.9  |
| cg10806146 | 2.25E-07 | 2.81E-08 | 5.79 | 7.9624438 | 1.37E-01 | 42356871  | 42356994  | NC_000008.10 |
| cg04275570 | 2.26E-07 | 2.82E-08 | 5.79 | 7.9598256 | 3.41E-02 | 33573857  | 33573980  | NC_000016.9  |
| cg20370281 | 2.26E-07 | 2.82E-08 | 5.79 | 7.9593129 | 9.89E-02 | 41185803  | 41185926  | NC_000015.9  |
| cg07724670 | 2.26E-07 | 2.82E-08 | 5.79 | 7.9589453 | 1.77E-01 | 45440228  | 45440351  | NC_000020.10 |
| cg00098144 | 2.26E-07 | 2.82E-08 | 5.79 | 7.9586908 | 1.60E-01 | 13525235  | 13525358  | NC_000004.11 |
| cg06499647 | 2.26E-07 | 2.83E-08 | 5.79 | 7.9577763 | 1.19E-01 | 106681983 | 106682106 | NC_000002.11 |
| cg18976437 | 2.26E-07 | 2.83E-08 | 5.79 | 7.9567778 | 1.85E-01 | 9712576   | 9712699   | NC_000001.10 |
| cg26458505 | 2.27E-07 | 2.83E-08 | 5.79 | 7.9566473 | 7.82E-02 | 140794664 | 140794787 | NC_000005.9  |
| cg11806672 | 2.27E-07 | 2.83E-08 | 5.79 | 7.9558845 | 1.25E-01 | 79176608  | 79176731  | NC_000013.10 |
| cg25731359 | 2.27E-07 | 2.83E-08 | 5.79 | 7.9555249 | 1.33E-01 | 3567738   | 3567861   | NC_000001.10 |
| cg15237923 | 2.27E-07 | 2.83E-08 | 5.79 | 7.9555022 | 1.29E-01 | 4852424   | 4852547   | NC_000008.10 |
| cg09768093 | 2.27E-07 | 2.84E-08 | 5.79 | 7.9546473 | 2.18E-01 | 32930511  | 32930634  | NC_000001.10 |
| cg17600918 | 2.27E-07 | 2.84E-08 | 5.79 | 7.9542429 | 1.22E-01 | 154809230 | 154809353 | NC_000006.11 |
| cg05542262 | 2.27E-07 | 2.84E-08 | 5.79 | 7.9539432 | 2.12E-01 | 80256535  | 80256658  | NC_000005.9  |
| cg20092376 | 2.27E-07 | 2.84E-08 | 5.79 | 7.9535811 | 4.62E-02 | 56023423  | 56023546  | NC_000004.11 |
| cg06116248 | 2.27E-07 | 2.84E-08 | 5.79 | 7.953033  | 2.61E-02 | 66515363  | 66515486  | NC_000016.9  |
| cg09829319 | 2.28E-07 | 2.84E-08 | 5.78 | 7.9517801 | 1.67E-01 | 10882238  | 10882361  | NC_000006.11 |

|            |          |          |      |           |          |           |           |              |
|------------|----------|----------|------|-----------|----------|-----------|-----------|--------------|
| cg11314598 | 2.28E-07 | 2.85E-08 | 5.78 | 7.9512869 | 3.68E-02 | 1076874   | 1076997   | NC_000017.10 |
| cg06315149 | 2.28E-07 | 2.85E-08 | 5.78 | 7.9511118 | 9.38E-02 | 2036398   | 2036521   | NC_000001.10 |
| cg01958934 | 2.28E-07 | 2.85E-08 | 5.78 | 7.9501584 | 1.20E-01 | 45449099  | 45449222  | NC_000019.9  |
| cg16230060 | 2.28E-07 | 2.85E-08 | 5.78 | 7.9500699 | 4.45E-02 | 80530213  | 80530336  | NC_000005.9  |
| cg19508437 | 2.28E-07 | 2.85E-08 | 5.78 | 7.9499574 | 1.40E-01 | 35517410  | 35517533  | NC_000013.10 |
| cg24362813 | 2.28E-07 | 2.86E-08 | 5.78 | 7.9474574 | 5.50E-02 | 13523356  | 13523479  | NC_000003.11 |
| cg02293096 | 2.29E-07 | 2.86E-08 | 5.78 | 7.9463649 | 3.60E-02 | 24178632  | 24178755  | NC_000022.10 |
| cg02548777 | 2.29E-07 | 2.86E-08 | 5.78 | 7.9462445 | 8.19E-02 | 170338826 | 170338949 | NC_000006.11 |
| cg03825255 | 2.29E-07 | 2.86E-08 | 5.78 | 7.945058  | 4.49E-02 | 234372469 | 234372592 | NC_000002.11 |
| cg05937046 | 2.29E-07 | 2.87E-08 | 5.78 | 7.9447207 | 2.35E-02 | 77588860  | 77588983  | NC_000014.8  |
| cg12484113 | 2.29E-07 | 2.87E-08 | 5.78 | 7.9442828 | 9.16E-02 | 27898757  | 27898880  | NC_000001.10 |
| cg11150585 | 2.30E-07 | 2.87E-08 | 5.78 | 7.942485  | 1.25E-01 | 45769977  | 45770100  | NC_000021.8  |
| cg27222884 | 2.30E-07 | 2.87E-08 | 5.78 | 7.9421076 | 2.65E-02 | 90001282  | 90001405  | NC_000016.9  |
| cg11827453 | 2.30E-07 | 2.88E-08 | 5.78 | 7.9399367 | 1.24E-01 | 140917413 | 140917536 | NC_000009.11 |
| cg00167710 | 2.30E-07 | 2.88E-08 | 5.78 | 7.9396768 | 1.23E-02 | 178789438 | 178789561 | NC_000003.11 |
| cg12268637 | 2.30E-07 | 2.88E-08 | 5.78 | 7.9395645 | 1.13E-01 | 176964502 | 176964625 | NC_000002.11 |
| cg03113824 | 2.30E-07 | 2.88E-08 | 5.78 | 7.9386248 | 2.66E-02 | 48807322  | 48807445  | NC_000019.9  |
| cg19264651 | 2.31E-07 | 2.88E-08 | 5.78 | 7.9384155 | 8.13E-02 | 126780399 | 126780522 | NC_000009.11 |
| cg02301978 | 2.31E-07 | 2.89E-08 | 5.78 | 7.9377347 | 4.36E-02 | 7069707   | 7069830   | NC_000019.9  |
| cg00400340 | 2.31E-07 | 2.89E-08 | 5.78 | 7.9365594 | 4.89E-02 | 135311642 | 135311765 | NC_000005.9  |
| cg24846199 | 2.31E-07 | 2.89E-08 | 5.78 | 7.9363009 | 1.52E-01 | 1283915   | 1284038   | NC_000007.13 |
| cg00502035 | 2.31E-07 | 2.89E-08 | 5.78 | 7.936177  | 8.66E-02 | 125751386 | 125751509 | NC_000010.10 |
| cg12099658 | 2.31E-07 | 2.89E-08 | 5.78 | 7.9356956 | 8.35E-02 | 89140340  | 89140463  | NC_000008.10 |
| cg01432432 | 2.31E-07 | 2.89E-08 | 5.78 | 7.9349899 | 8.13E-02 | 25199028  | 25199151  | NC_000015.9  |
| cg24307102 | 2.31E-07 | 2.90E-08 | 5.78 | 7.9345263 | 6.08E-02 | 126549492 | 126549615 | NC_000006.11 |

|            |          |          |      |           |          |           |           |              |
|------------|----------|----------|------|-----------|----------|-----------|-----------|--------------|
| cg04102384 | 2.32E-07 | 2.90E-08 | 5.78 | 7.9340113 | 1.17E-01 | 31668622  | 31668745  | NC_000006.11 |
| cg09405790 | 2.32E-07 | 2.90E-08 | 5.78 | 7.9338274 | 1.67E-01 | 41753440  | 41753563  | NC_000008.10 |
| cg18501555 | 2.32E-07 | 2.90E-08 | 5.78 | 7.9335767 | 1.51E-01 | 111554966 | 111555089 | NC_000004.11 |
| cg16546442 | 2.32E-07 | 2.90E-08 | 5.78 | 7.9318205 | 1.01E-01 | 111539907 | 111540030 | NC_000004.11 |
| cg02003272 | 2.32E-07 | 2.91E-08 | 5.78 | 7.9308353 | 7.73E-02 | 50702719  | 50702842  | NC_000013.10 |
| cg23910835 | 2.32E-07 | 2.91E-08 | 5.78 | 7.9307021 | 1.53E-01 | 154710900 | 154711023 | NC_000004.11 |
| cg10862951 | 2.32E-07 | 2.91E-08 | 5.78 | 7.9306557 | 9.30E-02 | 67381192  | 67381315  | NC_000011.9  |
| cg00564737 | 2.32E-07 | 2.91E-08 | 5.78 | 7.9303606 | 1.18E-01 | 196847182 | 196847305 | NC_000001.10 |
| cg13928782 | 2.32E-07 | 2.91E-08 | 5.78 | 7.930067  | 1.25E-01 | 2162445   | 2162568   | NC_000011.9  |
| cg08133228 | 2.32E-07 | 2.91E-08 | 5.78 | 7.9299762 | 8.75E-02 | 33170832  | 33170955  | NC_000006.11 |
| cg13457165 | 2.32E-07 | 2.91E-08 | 5.78 | 7.9297028 | 1.52E-01 | 40105079  | 40105202  | NC_000001.10 |
| cg13880779 | 2.33E-07 | 2.91E-08 | 5.78 | 7.9292578 | 1.22E-01 | 21376337  | 21376460  | NC_000020.10 |
| cg14424538 | 2.33E-07 | 2.92E-08 | 5.78 | 7.9276212 | 1.79E-01 | 1784365   | 1784488   | NC_000020.10 |
| cg16622495 | 2.33E-07 | 2.92E-08 | 5.78 | 7.9275659 | 1.92E-01 | 5544099   | 5544222   | NC_000018.9  |
| cg00963071 | 2.33E-07 | 2.92E-08 | 5.78 | 7.9272521 | 3.64E-02 | 234662401 | 234662524 | NC_000002.11 |
| cg23295647 | 2.33E-07 | 2.92E-08 | 5.78 | 7.9268022 | 7.62E-02 | 34269637  | 34269760  | NC_000014.8  |
| cg13450708 | 2.33E-07 | 2.92E-08 | 5.78 | 7.9260913 | 1.35E-01 | 154862157 | 154862280 | NC_000007.13 |
| cg06557358 | 2.33E-07 | 2.92E-08 | 5.78 | 7.9251875 | 1.24E-01 | 32907002  | 32907125  | NC_000017.10 |
| cg07627119 | 2.33E-07 | 2.92E-08 | 5.78 | 7.9249257 | 1.50E-01 | 89906172  | 89906295  | NC_000015.9  |
| cg10525394 | 2.34E-07 | 2.93E-08 | 5.78 | 7.9244179 | 7.24E-02 | 158097037 | 158097160 | NC_000006.11 |
| cg13933262 | 2.34E-07 | 2.93E-08 | 5.78 | 7.9241294 | 1.91E-01 | 140797172 | 140797295 | NC_000005.9  |
| cg09777237 | 2.34E-07 | 2.93E-08 | 5.78 | 7.9238382 | 1.02E-01 | 73445236  | 73445359  | NC_000007.13 |
| cg12375586 | 2.34E-07 | 2.93E-08 | 5.78 | 7.9225119 | 1.18E-01 | 43698429  | 43698552  | NC_000007.13 |
| cg05618880 | 2.34E-07 | 2.94E-08 | 5.78 | 7.9206531 | 1.34E-01 | 39954239  | 39954362  | NC_000022.10 |
| cg20986370 | 2.35E-07 | 2.94E-08 | 5.78 | 7.9200939 | 1.67E-01 | 57976171  | 57976294  | NC_000004.11 |



|            |          |          |      |           |          |           |           |              |
|------------|----------|----------|------|-----------|----------|-----------|-----------|--------------|
| cg05091238 | 2.35E-07 | 2.94E-08 | 5.78 | 7.9196369 | 1.23E-01 | 157813609 | 157813732 | NC_000003.11 |
| cg21170304 | 2.35E-07 | 2.94E-08 | 5.78 | 7.9193565 | 7.83E-02 | 138879603 | 138879726 | NC_000009.11 |
| cg01881971 | 2.35E-07 | 2.94E-08 | 5.78 | 7.9192633 | 1.36E-01 | 167181457 | 167181580 | NC_000005.9  |
| cg23008606 | 2.35E-07 | 2.94E-08 | 5.78 | 7.9191888 | 1.35E-01 | 26722933  | 26723056  | NC_000008.10 |
| cg10189695 | 2.35E-07 | 2.94E-08 | 5.78 | 7.9187788 | 1.38E-01 | 8582300   | 8582423   | NC_000004.11 |
| cg00348389 | 2.35E-07 | 2.94E-08 | 5.78 | 7.9187616 | 9.18E-02 | 31235706  | 31235829  | NC_000016.9  |
| cg23288807 | 2.35E-07 | 2.95E-08 | 5.78 | 7.9169313 | 9.18E-02 | 128559399 | 128559522 | NC_000011.9  |
| cg13651690 | 2.35E-07 | 2.95E-08 | 5.78 | 7.9168902 | 8.82E-02 | 106320748 | 106320871 | NC_000014.8  |
| cg03954411 | 2.35E-07 | 2.95E-08 | 5.78 | 7.9165896 | 1.15E-01 | 220223623 | 220223746 | NC_000002.11 |
| cg22949575 | 2.35E-07 | 2.95E-08 | 5.78 | 7.9164047 | 1.17E-01 | 79948825  | 79948948  | NC_000017.10 |
| cg17456100 | 2.35E-07 | 2.95E-08 | 5.78 | 7.9160794 | 1.16E-01 | 22140859  | 22140982  | NC_000001.10 |
| cg05335944 | 2.36E-07 | 2.95E-08 | 5.78 | 7.9154867 | 1.40E-01 | 13749010  | 13749133  | NC_000010.10 |
| cg23695687 | 2.36E-07 | 2.95E-08 | 5.78 | 7.9149596 | 1.13E-01 | 54926734  | 54926857  | NC_000019.9  |
| cg19673350 | 2.36E-07 | 2.95E-08 | 5.78 | 7.9148256 | 1.17E-01 | 172755421 | 172755544 | NC_000005.9  |
| cg12304930 | 2.36E-07 | 2.96E-08 | 5.78 | 7.9141488 | 7.38E-02 | 92683554  | 92683677  | NC_000001.10 |
| cg20172500 | 2.36E-07 | 2.96E-08 | 5.78 | 7.9126679 | 1.30E-01 | 6902432   | 6902555   | NC_000003.11 |
| cg01627212 | 2.36E-07 | 2.96E-08 | 5.78 | 7.9126652 | 7.81E-02 | 86715410  | 86715533  | NC_000016.9  |
| cg10614045 | 2.36E-07 | 2.96E-08 | 5.78 | 7.9124674 | 1.18E-01 | 20182122  | 20182245  | NC_000011.9  |
| cg22862961 | 2.36E-07 | 2.96E-08 | 5.78 | 7.9122916 | 3.12E-02 | 99343450  | 99343573  | NC_000010.10 |
| cg26365299 | 2.36E-07 | 2.96E-08 | 5.78 | 7.9120569 | 1.37E-01 | 27205381  | 27205504  | NC_000007.13 |
| cg03427171 | 2.36E-07 | 2.96E-08 | 5.78 | 7.9117776 | 5.39E-02 | 179053297 | 179053420 | NC_000001.10 |
| cg24379742 | 2.36E-07 | 2.96E-08 | 5.78 | 7.9115004 | 1.18E-01 | 194397111 | 194397234 | NC_000003.11 |
| cg17300736 | 2.36E-07 | 2.96E-08 | 5.78 | 7.9114459 | 1.50E-01 | 2162475   | 2162598   | NC_000011.9  |
| cg02414710 | 2.36E-07 | 2.97E-08 | 5.78 | 7.9113312 | 6.78E-02 | 232650142 | 232650265 | NC_000001.10 |
| cg03643904 | 2.36E-07 | 2.97E-08 | 5.78 | 7.911167  | 6.83E-02 | 126063738 | 126063861 | NC_000010.10 |

|            |          |          |      |           |          |           |           |              |
|------------|----------|----------|------|-----------|----------|-----------|-----------|--------------|
| cg17102205 | 2.37E-07 | 2.97E-08 | 5.78 | 7.9086623 | 1.10E-01 | 208091961 | 208092084 | NC_000002.11 |
| cg05153364 | 2.37E-07 | 2.98E-08 | 5.78 | 7.9069946 | 1.66E-01 | 4382086   | 4382209   | NC_000012.11 |
| cg17088073 | 2.38E-07 | 2.98E-08 | 5.78 | 7.9052614 | 1.49E-01 | 50882910  | 50883033  | NC_000001.10 |
| cg18641329 | 2.38E-07 | 2.98E-08 | 5.78 | 7.9048089 | 3.63E-02 | 49070825  | 49070948  | NC_000013.10 |
| cg23998749 | 2.38E-07 | 2.99E-08 | 5.78 | 7.9042346 | 8.50E-02 | 154968781 | 154968904 | NC_000001.10 |
| cg25928881 | 2.38E-07 | 2.99E-08 | 5.78 | 7.9041041 | 6.06E-02 | 32632685  | 32632808  | NC_000010.10 |
| cg10908460 | 2.38E-07 | 2.99E-08 | 5.78 | 7.9040885 | 1.46E-01 | 176950736 | 176950859 | NC_000002.11 |
| cg14896990 | 2.38E-07 | 2.99E-08 | 5.78 | 7.9039076 | 5.16E-02 | 29945954  | 29946077  | NC_000008.10 |
| cg14781189 | 2.38E-07 | 2.99E-08 | 5.78 | 7.9038517 | 1.39E-01 | 163695111 | 163695234 | NC_000002.11 |
| cg07579997 | 2.38E-07 | 2.99E-08 | 5.78 | 7.9036308 | 1.33E-01 | 140187043 | 140187166 | NC_000004.11 |
| cg14458903 | 2.38E-07 | 2.99E-08 | 5.77 | 7.9026377 | 4.59E-02 | 11203475  | 11203598  | NC_000003.11 |
| cg15075897 | 2.38E-07 | 2.99E-08 | 5.77 | 7.9025623 | 9.22E-02 | 7862691   | 7862814   | NC_000012.11 |
| cg04023996 | 2.39E-07 | 2.99E-08 | 5.77 | 7.901702  | 1.26E-01 | 50892794  | 50892917  | NC_000001.10 |
| cg24183439 | 2.39E-07 | 2.99E-08 | 5.77 | 7.901571  | 3.06E-02 | 132508377 | 132508500 | NC_000012.11 |
| cg02149708 | 2.39E-07 | 3.00E-08 | 5.77 | 7.9013233 | 1.54E-01 | 166582159 | 166582282 | NC_000006.11 |
| cg00540769 | 2.39E-07 | 3.00E-08 | 5.77 | 7.9012117 | 1.07E-01 | 80689492  | 80689615  | NC_000005.9  |
| cg15485560 | 2.39E-07 | 3.00E-08 | 5.77 | 7.9001838 | 6.26E-02 | 21000369  | 21000492  | NC_000020.10 |
| cg20004406 | 2.39E-07 | 3.00E-08 | 5.77 | 7.9001028 | 1.36E-01 | 56879994  | 56880117  | NC_000019.9  |
| cg01296889 | 2.39E-07 | 3.00E-08 | 5.77 | 7.8997426 | 1.13E-01 | 54122032  | 54122155  | NC_000003.11 |
| cg05302386 | 2.40E-07 | 3.01E-08 | 5.77 | 7.897819  | 2.26E-01 | 52734525  | 52734648  | NC_000014.8  |
| cg15001372 | 2.40E-07 | 3.01E-08 | 5.77 | 7.8977889 | 8.19E-02 | 44229892  | 44230015  | NC_000007.13 |
| cg01162672 | 2.40E-07 | 3.01E-08 | 5.77 | 7.8972034 | 1.42E-01 | 133562275 | 133562398 | NC_000006.11 |
| cg02492708 | 2.40E-07 | 3.01E-08 | 5.77 | 7.8971097 | 8.61E-02 | 2005062   | 2005185   | NC_000016.9  |
| cg12191970 | 2.40E-07 | 3.01E-08 | 5.77 | 7.8967937 | 7.54E-02 | 39569534  | 39569657  | NC_000014.8  |
| cg13196826 | 2.40E-07 | 3.01E-08 | 5.77 | 7.8962328 | 1.71E-01 | 98945664  | 98945787  | NC_000010.10 |

|            |          |          |      |           |          |           |           |              |
|------------|----------|----------|------|-----------|----------|-----------|-----------|--------------|
| cg15126201 | 2.40E-07 | 3.01E-08 | 5.77 | 7.8958252 | 2.68E-02 | 3325654   | 3325777   | NC_000002.11 |
| cg15688713 | 2.40E-07 | 3.01E-08 | 5.77 | 7.8958085 | 5.79E-02 | 99982392  | 99982515  | NC_000003.11 |
| cg25911123 | 2.40E-07 | 3.01E-08 | 5.77 | 7.8957634 | 8.49E-02 | 55931447  | 55931570  | NC_000017.10 |
| cg06992324 | 2.40E-07 | 3.01E-08 | 5.77 | 7.8951049 | 6.05E-02 | 122322947 | 122323070 | NC_000002.11 |
| cg07545052 | 2.40E-07 | 3.02E-08 | 5.77 | 7.8936267 | 4.43E-02 | 69486584  | 69486707  | NC_000011.9  |
| cg21401879 | 2.41E-07 | 3.02E-08 | 5.77 | 7.8921916 | 1.98E-01 | 45162036  | 45162159  | NC_000002.11 |
| cg08959216 | 2.41E-07 | 3.03E-08 | 5.77 | 7.8918217 | 1.62E-01 | 35293309  | 35293432  | NC_000007.13 |
| cg07089232 | 2.41E-07 | 3.03E-08 | 5.77 | 7.8915841 | 8.69E-02 | 8216813   | 8216936   | NC_000004.11 |
| cg21606490 | 2.41E-07 | 3.03E-08 | 5.77 | 7.8911285 | 1.22E-01 | 108023428 | 108023551 | NC_000001.10 |
| cg18446159 | 2.41E-07 | 3.03E-08 | 5.77 | 7.8904427 | 1.20E-01 | 47574285  | 47574408  | NC_000017.10 |
| cg15611413 | 2.41E-07 | 3.03E-08 | 5.77 | 7.8903677 | 1.85E-01 | 54333587  | 54333710  | NC_000012.11 |
| cg22233579 | 2.41E-07 | 3.03E-08 | 5.77 | 7.8903519 | 4.24E-02 | 206641195 | 206641318 | NC_000002.11 |
| cg02390947 | 2.41E-07 | 3.03E-08 | 5.77 | 7.8894054 | 3.55E-02 | 105273633 | 105273756 | NC_000010.10 |
| cg02081018 | 2.42E-07 | 3.03E-08 | 5.77 | 7.8891855 | 3.14E-02 | 38445169  | 38445292  | NC_000021.8  |
| cg16415340 | 2.42E-07 | 3.03E-08 | 5.77 | 7.8888461 | 1.66E-01 | 2160964   | 2161087   | NC_000011.9  |
| cg27475586 | 2.42E-07 | 3.04E-08 | 5.77 | 7.8877397 | 2.67E-02 | 69931337  | 69931460  | NC_000011.9  |
| cg16791619 | 2.42E-07 | 3.04E-08 | 5.77 | 7.886949  | 1.66E-01 | 29228940  | 29229063  | NC_000014.8  |
| cg24436932 | 2.42E-07 | 3.04E-08 | 5.77 | 7.8863306 | 4.16E-02 | 89879921  | 89880044  | NC_000012.11 |
| cg18031850 | 2.42E-07 | 3.04E-08 | 5.77 | 7.8860799 | 1.22E-01 | 33716452  | 33716575  | NC_000019.9  |
| cg23514936 | 2.42E-07 | 3.04E-08 | 5.77 | 7.8860384 | 1.73E-01 | 20838523  | 20838646  | NC_000007.13 |
| cg05382097 | 2.42E-07 | 3.05E-08 | 5.77 | 7.8851932 | 1.58E-01 | 6201536   | 6201659   | NC_000004.11 |
| cg24930223 | 2.43E-07 | 3.05E-08 | 5.77 | 7.8846886 | 1.27E-01 | 21645163  | 21645286  | NC_000008.10 |
| cg11590337 | 2.43E-07 | 3.05E-08 | 5.77 | 7.8846084 | 7.37E-02 | 130268720 | 130268843 | NC_000006.11 |
| cg01418256 | 2.43E-07 | 3.05E-08 | 5.77 | 7.8842256 | 1.37E-01 | 137523892 | 137524015 | NC_000002.11 |
| cg05631737 | 2.43E-07 | 3.05E-08 | 5.77 | 7.8833027 | 1.20E-01 | 49780701  | 49780824  | NC_000008.10 |

|            |          |          |      |           |          |           |           |              |
|------------|----------|----------|------|-----------|----------|-----------|-----------|--------------|
| cg12468774 | 2.43E-07 | 3.05E-08 | 5.77 | 7.8831544 | 1.69E-01 | 49236860  | 49236983  | NC_000003.11 |
| cg01917669 | 2.43E-07 | 3.06E-08 | 5.77 | 7.8814262 | 4.89E-02 | 47056698  | 47056821  | NC_000021.8  |
| cg25985734 | 2.43E-07 | 3.06E-08 | 5.77 | 7.8806927 | 8.89E-02 | 58908421  | 58908544  | NC_000019.9  |
| cg19246110 | 2.44E-07 | 3.06E-08 | 5.77 | 7.8803468 | 2.19E-01 | 58238928  | 58239051  | NC_000019.9  |
| cg20568659 | 2.44E-07 | 3.06E-08 | 5.77 | 7.8799379 | 3.11E-02 | 229646584 | 229646707 | NC_000001.10 |
| cg22834998 | 2.44E-07 | 3.06E-08 | 5.77 | 7.8793277 | 9.92E-02 | 172755995 | 172756118 | NC_000005.9  |
| cg02318535 | 2.44E-07 | 3.06E-08 | 5.77 | 7.8791215 | 1.20E-01 | 56832804  | 56832927  | NC_000017.10 |
| cg01981601 | 2.44E-07 | 3.06E-08 | 5.77 | 7.879117  | 1.65E-01 | 60032607  | 60032730  | NC_000008.10 |
| cg02798899 | 2.44E-07 | 3.07E-08 | 5.77 | 7.8782019 | 8.87E-02 | 125028166 | 125028289 | NC_000012.11 |
| cg21164697 | 2.44E-07 | 3.07E-08 | 5.77 | 7.8778284 | 1.92E-02 | 6188946   | 6189069   | NC_000001.10 |
| cg18942934 | 2.44E-07 | 3.07E-08 | 5.77 | 7.8766226 | 7.06E-02 | 32847762  | 32847885  | NC_000006.11 |
| cg21481937 | 2.45E-07 | 3.08E-08 | 5.77 | 7.8757251 | 1.09E-01 | 71113149  | 71113272  | NC_000012.11 |
| cg27384088 | 2.45E-07 | 3.08E-08 | 5.77 | 7.8755204 | 9.22E-02 | 72298275  | 72298398  | NC_000006.11 |
| cg10815395 | 2.45E-07 | 3.08E-08 | 5.77 | 7.8749555 | 4.41E-02 | 49237807  | 49237930  | NC_000012.11 |
| cg08857159 | 2.45E-07 | 3.08E-08 | 5.77 | 7.8743521 | 8.83E-02 | 2139690   | 2139813   | NC_000003.11 |
| cg23365739 | 2.45E-07 | 3.08E-08 | 5.77 | 7.8733785 | 1.15E-01 | 57277178  | 57277301  | NC_000014.8  |
| cg04330881 | 2.45E-07 | 3.08E-08 | 5.77 | 7.8730917 | 1.11E-01 | 208613175 | 208613298 | NC_000002.11 |
| cg09362366 | 2.45E-07 | 3.08E-08 | 5.77 | 7.8727784 | 1.20E-01 | 159710706 | 159710829 | NC_000003.11 |
| cg02615376 | 2.45E-07 | 3.08E-08 | 5.77 | 7.8727483 | 5.70E-02 | 141755319 | 141755442 | NC_000005.9  |
| cg23889772 | 2.45E-07 | 3.09E-08 | 5.77 | 7.872314  | 7.34E-02 | 10077324  | 10077447  | NC_000019.9  |
| cg16359799 | 2.46E-07 | 3.09E-08 | 5.77 | 7.8716605 | 8.35E-02 | 138739900 | 138740023 | NC_000003.11 |
| cg01178703 | 2.46E-07 | 3.09E-08 | 5.77 | 7.8714365 | 2.65E-02 | 12066560  | 12066683  | NC_000001.10 |
| cg05654278 | 2.46E-07 | 3.09E-08 | 5.77 | 7.8712649 | 1.02E-01 | 52516335  | 52516458  | NC_000003.11 |
| cg10285526 | 2.46E-07 | 3.09E-08 | 5.77 | 7.8707078 | 1.02E-01 | 34787199  | 34787322  | NC_000016.9  |
| cg23474211 | 2.46E-07 | 3.09E-08 | 5.77 | 7.8701374 | 1.74E-01 | 88388646  | 88388769  | NC_000007.13 |

|            |          |          |      |           |          |           |           |              |
|------------|----------|----------|------|-----------|----------|-----------|-----------|--------------|
| cg05621343 | 2.46E-07 | 3.10E-08 | 5.77 | 7.8691748 | 2.08E-01 | 134146253 | 134146376 | NC_000011.9  |
| cg03810428 | 2.46E-07 | 3.10E-08 | 5.77 | 7.868852  | 1.63E-01 | 103218441 | 103218564 | NC_000012.11 |
| cg10688799 | 2.46E-07 | 3.10E-08 | 5.77 | 7.8684489 | 1.25E-01 | 45481164  | 45481287  | NC_000013.10 |
| cg19314470 | 2.47E-07 | 3.10E-08 | 5.77 | 7.8675209 | 1.43E-01 | 30401028  | 30401151  | NC_000008.10 |
| cg25309759 | 2.47E-07 | 3.10E-08 | 5.77 | 7.8674617 | 1.08E-01 | 34068225  | 34068348  | NC_000017.10 |
| cg05315417 | 2.47E-07 | 3.10E-08 | 5.77 | 7.8670806 | 7.04E-02 | 44237019  | 44237142  | NC_000018.9  |
| cg21854408 | 2.47E-07 | 3.11E-08 | 5.77 | 7.8650102 | 1.40E-01 | 240161445 | 240161568 | NC_000001.10 |
| cg12060877 | 2.47E-07 | 3.11E-08 | 5.77 | 7.8643735 | 7.37E-02 | 55207432  | 55207555  | NC_000001.10 |
| cg10636896 | 2.47E-07 | 3.11E-08 | 5.77 | 7.8642749 | 6.37E-02 | 199947580 | 199947703 | NC_000001.10 |
| cg05983231 | 2.48E-07 | 3.12E-08 | 5.77 | 7.863214  | 1.10E-01 | 4856380   | 4856503   | NC_000004.11 |
| cg21916108 | 2.48E-07 | 3.12E-08 | 5.77 | 7.8630941 | 1.52E-01 | 106330559 | 106330682 | NC_000008.10 |
| cg04553690 | 2.48E-07 | 3.12E-08 | 5.77 | 7.8626476 | 1.12E-01 | 140777501 | 140777624 | NC_000005.9  |
| cg04094811 | 2.48E-07 | 3.12E-08 | 5.77 | 7.8625356 | 1.29E-01 | 1393336   | 1393459   | NC_000006.11 |
| cg20242280 | 2.48E-07 | 3.12E-08 | 5.77 | 7.8622725 | 2.01E-01 | 64826184  | 64826307  | NC_000017.10 |
| cg09362796 | 2.48E-07 | 3.12E-08 | 5.77 | 7.8615325 | 8.69E-02 | 3204792   | 3204915   | NC_000004.11 |
| cg10170495 | 2.48E-07 | 3.12E-08 | 5.77 | 7.8614757 | 9.16E-02 | 33454616  | 33454739  | NC_000022.10 |
| cg07821374 | 2.48E-07 | 3.12E-08 | 5.77 | 7.8614161 | 1.03E-01 | 140536320 | 140536443 | NC_000005.9  |
| cg07954572 | 2.48E-07 | 3.13E-08 | 5.77 | 7.8600927 | 8.51E-02 | 117484521 | 117484644 | NC_000012.11 |
| cg05803237 | 2.48E-07 | 3.13E-08 | 5.77 | 7.8598558 | 1.05E-01 | 92702628  | 92702751  | NC_000011.9  |
| cg20242070 | 2.49E-07 | 3.13E-08 | 5.77 | 7.859088  | 9.84E-02 | 44510570  | 44510693  | NC_000006.11 |
| cg01942492 | 2.49E-07 | 3.13E-08 | 5.77 | 7.8577221 | 4.86E-02 | 237144916 | 237145039 | NC_000001.10 |
| cg11899535 | 2.49E-07 | 3.14E-08 | 5.77 | 7.8563757 | 1.42E-01 | 70598282  | 70598405  | NC_000007.13 |
| cg27663733 | 2.49E-07 | 3.14E-08 | 5.77 | 7.8560642 | 5.28E-02 | 15523510  | 15523633  | NC_000017.10 |
| cg00601432 | 2.50E-07 | 3.14E-08 | 5.77 | 7.8549558 | 5.49E-02 | 151148420 | 151148543 | NC_000005.9  |
| cg14200543 | 2.50E-07 | 3.14E-08 | 5.77 | 7.8547345 | 3.75E-02 | 32023246  | 32023369  | NC_000006.11 |

|            |          |          |      |           |          |           |           |              |
|------------|----------|----------|------|-----------|----------|-----------|-----------|--------------|
| cg13342435 | 2.50E-07 | 3.14E-08 | 5.77 | 7.8546054 | 1.48E-01 | 30605787  | 30605910  | NC_000011.9  |
| cg14957685 | 2.50E-07 | 3.14E-08 | 5.77 | 7.8541604 | 7.59E-02 | 20756214  | 20756337  | NC_000017.10 |
| cg02049629 | 2.50E-07 | 3.14E-08 | 5.77 | 7.8540964 | 1.50E-01 | 28662065  | 28662188  | NC_000006.11 |
| cg10362113 | 2.50E-07 | 3.15E-08 | 5.76 | 7.8518112 | 9.72E-02 | 96978537  | 96978660  | NC_000014.8  |
| cg18409838 | 2.50E-07 | 3.15E-08 | 5.76 | 7.8513723 | 8.45E-02 | 4475157   | 4475280   | NC_000017.10 |
| cg01946451 | 2.50E-07 | 3.15E-08 | 5.76 | 7.8512107 | 1.46E-01 | 147782558 | 147782681 | NC_000001.10 |
| cg04013024 | 2.50E-07 | 3.15E-08 | 5.76 | 7.8511666 | 1.10E-01 | 147075221 | 147075344 | NC_000003.11 |
| cg25422992 | 2.51E-07 | 3.16E-08 | 5.76 | 7.8507567 | 3.44E-02 | 2317059   | 2317182   | NC_000007.13 |
| cg01365486 | 2.51E-07 | 3.16E-08 | 5.76 | 7.8506724 | 7.71E-02 | 150378881 | 150379004 | NC_000006.11 |
| cg06621094 | 2.51E-07 | 3.16E-08 | 5.76 | 7.850423  | 1.53E-01 | 75149963  | 75150086  | NC_000013.10 |
| cg03154931 | 2.51E-07 | 3.16E-08 | 5.76 | 7.8496625 | 1.40E-01 | 21086103  | 21086226  | NC_000020.10 |
| cg01301252 | 2.51E-07 | 3.16E-08 | 5.76 | 7.8489935 | 5.64E-02 | 140724683 | 140724806 | NC_000005.9  |
| cg03184141 | 2.51E-07 | 3.16E-08 | 5.76 | 7.8481157 | 1.03E-01 | 89346989  | 89347112  | NC_000015.9  |
| cg02409351 | 2.51E-07 | 3.17E-08 | 5.76 | 7.8475191 | 1.71E-01 | 85674022  | 85674145  | NC_000012.11 |
| cg03903831 | 2.51E-07 | 3.17E-08 | 5.76 | 7.846861  | 5.01E-02 | 24739249  | 24739372  | NC_000013.10 |
| cg03383295 | 2.52E-07 | 3.17E-08 | 5.76 | 7.8465242 | 1.75E-01 | 1709580   | 1709703   | NC_000007.13 |
| cg09746494 | 2.52E-07 | 3.18E-08 | 5.76 | 7.8441776 | 1.16E-01 | 147568715 | 147568838 | NC_000004.11 |
| cg16092829 | 2.52E-07 | 3.18E-08 | 5.76 | 7.8440779 | 1.16E-01 | 2336971   | 2337094   | NC_000002.11 |
| cg22534759 | 2.52E-07 | 3.18E-08 | 5.76 | 7.8432782 | 5.84E-02 | 32403029  | 32403152  | NC_000010.10 |
| cg00227225 | 2.53E-07 | 3.18E-08 | 5.76 | 7.8416345 | 1.35E-01 | 48011091  | 48011214  | NC_000015.9  |
| cg04169912 | 2.53E-07 | 3.19E-08 | 5.76 | 7.8404363 | 5.36E-02 | 35791192  | 35791315  | NC_000019.9  |
| cg07766572 | 2.53E-07 | 3.19E-08 | 5.76 | 7.8395652 | 7.28E-02 | 84252213  | 84252336  | NC_000016.9  |
| cg06557057 | 2.53E-07 | 3.19E-08 | 5.76 | 7.8394766 | 1.54E-01 | 142494706 | 142494829 | NC_000007.13 |
| cg06012269 | 2.54E-07 | 3.20E-08 | 5.76 | 7.8384074 | 8.12E-02 | 17608374  | 17608497  | NC_000019.9  |
| cg14471124 | 2.54E-07 | 3.20E-08 | 5.76 | 7.8380055 | 3.36E-02 | 360726    | 360849    | NC_000019.9  |

|            |          |          |      |           |          |           |           |              |
|------------|----------|----------|------|-----------|----------|-----------|-----------|--------------|
| cg26195683 | 2.54E-07 | 3.20E-08 | 5.76 | 7.837746  | 1.23E-01 | 1667958   | 1668081   | NC_000005.9  |
| cg24147793 | 2.54E-07 | 3.21E-08 | 5.76 | 7.8353752 | 5.53E-02 | 134471539 | 134471662 | NC_000008.10 |
| cg09862148 | 2.54E-07 | 3.21E-08 | 5.76 | 7.8348259 | 1.31E-01 | 10388322  | 10388445  | NC_000006.11 |
| cg26946821 | 2.54E-07 | 3.21E-08 | 5.76 | 7.8347862 | 1.73E-01 | 35292390  | 35292513  | NC_000017.10 |
| cg18070676 | 2.55E-07 | 3.21E-08 | 5.76 | 7.8342589 | 1.91E-01 | 85997519  | 85997642  | NC_000014.8  |
| cg18639129 | 2.55E-07 | 3.21E-08 | 5.76 | 7.8336953 | 5.15E-02 | 194817200 | 194817323 | NC_000003.11 |
| cg18221021 | 2.55E-07 | 3.21E-08 | 5.76 | 7.8329271 | 1.46E-01 | 84432312  | 84432435  | NC_000011.9  |
| cg00756451 | 2.55E-07 | 3.21E-08 | 5.76 | 7.8325396 | 1.43E-01 | 114842700 | 114842823 | NC_000012.11 |
| cg13031251 | 2.55E-07 | 3.22E-08 | 5.76 | 7.832413  | 1.36E-01 | 77268734  | 77268857  | NC_000005.9  |
| cg23892390 | 2.55E-07 | 3.22E-08 | 5.76 | 7.8322244 | 7.75E-02 | 8603012   | 8603135   | NC_000004.11 |
| cg11120927 | 2.55E-07 | 3.22E-08 | 5.76 | 7.8321894 | 1.80E-01 | 239072674 | 239072797 | NC_000002.11 |
| cg14795752 | 2.55E-07 | 3.22E-08 | 5.76 | 7.832095  | 1.38E-01 | 91185441  | 91185564  | NC_000001.10 |
| cg13874425 | 2.55E-07 | 3.22E-08 | 5.76 | 7.8315685 | 1.25E-01 | 115835616 | 115835739 | NC_000009.11 |
| cg02632952 | 2.56E-07 | 3.22E-08 | 5.76 | 7.8299824 | 1.08E-01 | 190426524 | 190426647 | NC_000003.11 |
| cg04590323 | 2.56E-07 | 3.22E-08 | 5.76 | 7.8299002 | 1.54E-01 | 39953557  | 39953680  | NC_000022.10 |
| cg13391488 | 2.56E-07 | 3.23E-08 | 5.76 | 7.8272614 | 6.13E-02 | 117068532 | 117068655 | NC_000009.11 |
| cg21415035 | 2.56E-07 | 3.23E-08 | 5.76 | 7.8270208 | 4.17E-02 | 52305328  | 52305451  | NC_000012.11 |
| cg14165663 | 2.56E-07 | 3.23E-08 | 5.76 | 7.8265091 | 1.06E-01 | 74070269  | 74070392  | NC_000017.10 |
| cg20642710 | 2.57E-07 | 3.24E-08 | 5.76 | 7.8259308 | 1.71E-01 | 81951951  | 81952074  | NC_000004.11 |
| cg04625975 | 2.57E-07 | 3.24E-08 | 5.76 | 7.8247167 | 1.02E-01 | 44285864  | 44285987  | NC_000010.10 |
| cg26424649 | 2.57E-07 | 3.24E-08 | 5.76 | 7.824142  | 9.12E-02 | 90307521  | 90307644  | NC_000007.13 |
| cg08933615 | 2.57E-07 | 3.25E-08 | 5.76 | 7.8224882 | 1.27E-01 | 149146618 | 149146741 | NC_000001.10 |
| cg26476502 | 2.58E-07 | 3.25E-08 | 5.76 | 7.8218923 | 1.28E-01 | 140480941 | 140481064 | NC_000005.9  |
| cg07806886 | 2.58E-07 | 3.25E-08 | 5.76 | 7.8211625 | 1.72E-01 | 120626899 | 120627022 | NC_000003.11 |
| cg20216928 | 2.58E-07 | 3.26E-08 | 5.76 | 7.8199487 | 7.23E-02 | 134735508 | 134735631 | NC_000010.10 |

|            |          |          |      |           |          |           |           |              |
|------------|----------|----------|------|-----------|----------|-----------|-----------|--------------|
| cg06679334 | 2.58E-07 | 3.26E-08 | 5.76 | 7.8195862 | 1.41E-01 | 35241844  | 35241967  | NC_000017.10 |
| cg13728069 | 2.58E-07 | 3.26E-08 | 5.76 | 7.8193357 | 1.45E-01 | 140352318 | 140352441 | NC_000009.11 |
| cg20657674 | 2.59E-07 | 3.26E-08 | 5.76 | 7.8175307 | 1.15E-01 | 180600912 | 180601035 | NC_000005.9  |
| cg26171815 | 2.59E-07 | 3.27E-08 | 5.76 | 7.8162449 | 1.05E-01 | 36149518  | 36149641  | NC_000005.9  |
| cg13066983 | 2.59E-07 | 3.27E-08 | 5.76 | 7.8159984 | 1.47E-01 | 68057306  | 68057429  | NC_000003.11 |
| cg03099988 | 2.59E-07 | 3.27E-08 | 5.76 | 7.8159082 | 6.08E-02 | 132834467 | 132834590 | NC_000012.11 |
| cg10092709 | 2.59E-07 | 3.27E-08 | 5.76 | 7.8152397 | 4.02E-02 | 3159703   | 3159826   | NC_000016.9  |
| cg03210827 | 2.59E-07 | 3.27E-08 | 5.76 | 7.8145219 | 1.11E-01 | 104574906 | 104575029 | NC_000010.10 |
| cg07544187 | 2.60E-07 | 3.28E-08 | 5.76 | 7.813888  | 1.22E-01 | 19651235  | 19651358  | NC_000019.9  |
| cg16468843 | 2.60E-07 | 3.28E-08 | 5.76 | 7.8136234 | 9.91E-02 | 10370624  | 10370747  | NC_000003.11 |
| cg22462983 | 2.60E-07 | 3.28E-08 | 5.76 | 7.8135594 | 1.23E-01 | 133561756 | 133561879 | NC_000006.11 |
| cg12392473 | 2.60E-07 | 3.28E-08 | 5.76 | 7.8135016 | 2.11E-01 | 48099331  | 48099454  | NC_000020.10 |
| cg03419058 | 2.60E-07 | 3.28E-08 | 5.76 | 7.8133185 | 2.35E-01 | 26108391  | 26108514  | NC_000015.9  |
| cg07631119 | 2.60E-07 | 3.28E-08 | 5.76 | 7.812831  | 4.59E-02 | 127421927 | 127422050 | NC_000007.13 |
| cg04937609 | 2.60E-07 | 3.28E-08 | 5.76 | 7.8128285 | 7.49E-02 | 23852064  | 23852187  | NC_000002.11 |
| cg00378234 | 2.60E-07 | 3.28E-08 | 5.76 | 7.8122986 | 7.68E-02 | 15904416  | 15904539  | NC_000019.9  |
| cg15294263 | 2.60E-07 | 3.28E-08 | 5.76 | 7.8122337 | 9.65E-02 | 46723167  | 46723290  | NC_000021.8  |
| cg05604079 | 2.60E-07 | 3.28E-08 | 5.76 | 7.8117399 | 2.04E-01 | 122302268 | 122302391 | NC_000004.11 |
| cg13768269 | 2.60E-07 | 3.29E-08 | 5.76 | 7.8110585 | 1.77E-01 | 114140    | 114263    | NC_000009.11 |
| cg19564098 | 2.60E-07 | 3.29E-08 | 5.76 | 7.8107505 | 2.07E-01 | 124895697 | 124895820 | NC_000010.10 |
| cg04349219 | 2.60E-07 | 3.29E-08 | 5.76 | 7.8100198 | 3.95E-02 | 105688129 | 105688252 | NC_000014.8  |
| cg24003850 | 2.61E-07 | 3.29E-08 | 5.76 | 7.8091723 | 7.30E-02 | 92246958  | 92247081  | NC_000005.9  |
| cg10417567 | 2.61E-07 | 3.30E-08 | 5.76 | 7.8079842 | 1.06E-01 | 85418371  | 85418494  | NC_000004.11 |
| cg24249411 | 2.61E-07 | 3.30E-08 | 5.76 | 7.8076326 | 1.38E-01 | 27744759  | 27744882  | NC_000011.9  |
| cg09307794 | 2.61E-07 | 3.30E-08 | 5.76 | 7.8075733 | 7.45E-02 | 53851924  | 53852047  | NC_000006.11 |



|            |          |          |      |           |          |           |           |              |
|------------|----------|----------|------|-----------|----------|-----------|-----------|--------------|
| cg20510833 | 2.61E-07 | 3.30E-08 | 5.76 | 7.8075121 | 6.63E-02 | 163483399 | 163483522 | NC_000004.11 |
| cg10023749 | 2.61E-07 | 3.30E-08 | 5.76 | 7.8074284 | 5.45E-02 | 132303409 | 132303532 | NC_000012.11 |
| cg25154482 | 2.61E-07 | 3.30E-08 | 5.76 | 7.8073556 | 1.45E-01 | 179497098 | 179497221 | NC_000005.9  |
| cg15356154 | 2.61E-07 | 3.30E-08 | 5.76 | 7.8066604 | 9.63E-02 | 5928072   | 5928195   | NC_000004.11 |
| cg19343566 | 2.61E-07 | 3.30E-08 | 5.76 | 7.806214  | 1.32E-01 | 149156107 | 149156230 | NC_000001.10 |
| cg22871653 | 2.62E-07 | 3.30E-08 | 5.76 | 7.8056994 | 1.51E-01 | 119535817 | 119535940 | NC_000001.10 |
| cg09500171 | 2.62E-07 | 3.31E-08 | 5.76 | 7.8044324 | 5.77E-02 | 42460818  | 42460941  | NC_000004.11 |
| cg27574815 | 2.62E-07 | 3.31E-08 | 5.75 | 7.8037984 | 3.92E-02 | 69770954  | 69771077  | NC_000016.9  |
| cg05684907 | 2.62E-07 | 3.31E-08 | 5.75 | 7.8037585 | 5.25E-02 | 18694596  | 18694719  | NC_000007.13 |
| cg09758796 | 2.62E-07 | 3.32E-08 | 5.75 | 7.8023475 | 2.70E-02 | 19239848  | 19239971  | NC_000016.9  |
| cg17188147 | 2.63E-07 | 3.32E-08 | 5.75 | 7.8016521 | 1.41E-01 | 48699373  | 48699496  | NC_000003.11 |
| cg22854985 | 2.63E-07 | 3.32E-08 | 5.75 | 7.8010517 | 6.85E-02 | 174082101 | 174082224 | NC_000002.11 |
| cg24035447 | 2.63E-07 | 3.32E-08 | 5.75 | 7.8001884 | 1.73E-01 | 48036613  | 48036736  | NC_000006.11 |
| cg14583124 | 2.63E-07 | 3.32E-08 | 5.75 | 7.7997195 | 6.82E-02 | 186207871 | 186207994 | NC_000004.11 |
| cg07466193 | 2.63E-07 | 3.33E-08 | 5.75 | 7.7992961 | 1.45E-01 | 215410    | 215533    | NC_000016.9  |
| cg12382153 | 2.63E-07 | 3.33E-08 | 5.75 | 7.79906   | 1.60E-01 | 58357204  | 58357327  | NC_000015.9  |
| cg03468463 | 2.63E-07 | 3.33E-08 | 5.75 | 7.798885  | 5.49E-02 | 61223564  | 61223687  | NC_000018.9  |
| cg18586851 | 2.63E-07 | 3.33E-08 | 5.75 | 7.7986364 | 5.66E-02 | 31332353  | 31332476  | NC_000020.10 |
| cg03031609 | 2.64E-07 | 3.33E-08 | 5.75 | 7.7972853 | 1.14E-01 | 7453871   | 7453994   | NC_000010.10 |
| cg21084704 | 2.64E-07 | 3.34E-08 | 5.75 | 7.7956598 | 1.69E-02 | 47022545  | 47022668  | NC_000018.9  |
| cg18905039 | 2.64E-07 | 3.34E-08 | 5.75 | 7.7954945 | 6.78E-02 | 102452473 | 102452596 | NC_000014.8  |
| cg19524681 | 2.64E-07 | 3.34E-08 | 5.75 | 7.7953643 | 5.78E-02 | 240566210 | 240566333 | NC_000002.11 |
| cg11860886 | 2.64E-07 | 3.34E-08 | 5.75 | 7.7941901 | 3.78E-02 | 106857312 | 106857435 | NC_000014.8  |
| cg26480091 | 2.65E-07 | 3.35E-08 | 5.75 | 7.7933535 | 1.28E-01 | 156403454 | 156403577 | NC_000002.11 |
| cg08073882 | 2.65E-07 | 3.35E-08 | 5.75 | 7.7926719 | 2.23E-01 | 6202381   | 6202504   | NC_000004.11 |

|            |          |          |      |           |          |           |           |              |
|------------|----------|----------|------|-----------|----------|-----------|-----------|--------------|
| cg13971603 | 2.65E-07 | 3.35E-08 | 5.75 | 7.792051  | 5.40E-02 | 135061908 | 135062031 | NC_000009.11 |
| cg04028541 | 2.65E-07 | 3.35E-08 | 5.75 | 7.7916897 | 5.39E-02 | 48071778  | 48071901  | NC_000007.13 |
| cg02537309 | 2.65E-07 | 3.36E-08 | 5.75 | 7.790835  | 1.05E-02 | 30680763  | 30680886  | NC_000016.9  |
| cg13794390 | 2.65E-07 | 3.36E-08 | 5.75 | 7.7905824 | 8.74E-02 | 42724714  | 42724837  | NC_000001.10 |
| cg18008247 | 2.65E-07 | 3.36E-08 | 5.75 | 7.7904553 | 1.28E-01 | 124719009 | 124719132 | NC_000003.11 |
| cg01418539 | 2.65E-07 | 3.36E-08 | 5.75 | 7.7902149 | 7.19E-02 | 173098736 | 173098859 | NC_000002.11 |
| cg04685534 | 2.66E-07 | 3.36E-08 | 5.75 | 7.7890415 | 1.59E-01 | 45270788  | 45270911  | NC_000012.11 |
| cg01519714 | 2.66E-07 | 3.36E-08 | 5.75 | 7.788982  | 1.67E-01 | 27070750  | 27070873  | NC_000002.11 |
| cg09087897 | 2.66E-07 | 3.36E-08 | 5.75 | 7.7885037 | 5.71E-02 | 74714618  | 74714741  | NC_000017.10 |
| cg02007844 | 2.66E-07 | 3.37E-08 | 5.75 | 7.7872612 | 1.51E-01 | 21927990  | 21928113  | NC_000012.11 |
| cg07333715 | 2.67E-07 | 3.37E-08 | 5.75 | 7.785978  | 1.40E-01 | 2292691   | 2292814   | NC_000011.9  |
| cg22699052 | 2.67E-07 | 3.37E-08 | 5.75 | 7.7858495 | 4.50E-02 | 708597    | 708720    | NC_000017.10 |
| cg07947531 | 2.67E-07 | 3.38E-08 | 5.75 | 7.785144  | 1.05E-01 | 32252266  | 32252389  | NC_000001.10 |
| cg17702455 | 2.67E-07 | 3.38E-08 | 5.75 | 7.784863  | 3.96E-02 | 28058989  | 28059112  | NC_000007.13 |
| cg05225187 | 2.67E-07 | 3.38E-08 | 5.75 | 7.7846856 | 1.56E-01 | 100809451 | 100809574 | NC_000007.13 |
| cg12178431 | 2.67E-07 | 3.38E-08 | 5.75 | 7.7840992 | 8.02E-02 | 14860764  | 14860887  | NC_000003.11 |
| cg12123671 | 2.67E-07 | 3.38E-08 | 5.75 | 7.7840473 | 1.77E-01 | 170605623 | 170605746 | NC_000006.11 |
| cg03285457 | 2.67E-07 | 3.38E-08 | 5.75 | 7.7840412 | 8.07E-02 | 102988529 | 102988652 | NC_000010.10 |
| cg12061370 | 2.67E-07 | 3.38E-08 | 5.75 | 7.7838946 | 3.70E-02 | 33147514  | 33147637  | NC_000006.11 |
| cg00432659 | 2.67E-07 | 3.38E-08 | 5.75 | 7.783682  | 9.90E-02 | 11151283  | 11151406  | NC_000018.9  |
| cg08055994 | 2.67E-07 | 3.38E-08 | 5.75 | 7.7830823 | 5.59E-02 | 109190922 | 109191045 | NC_000002.11 |
| cg21206233 | 2.67E-07 | 3.38E-08 | 5.75 | 7.7824784 | 4.58E-02 | 53844068  | 53844191  | NC_000003.11 |
| cg16209364 | 2.68E-07 | 3.39E-08 | 5.75 | 7.7808832 | 5.96E-02 | 138632600 | 138632723 | NC_000005.9  |
| cg01114085 | 2.68E-07 | 3.39E-08 | 5.75 | 7.7802352 | 7.88E-02 | 69803503  | 69803626  | NC_000011.9  |
| cg20458433 | 2.68E-07 | 3.40E-08 | 5.75 | 7.7793654 | 1.30E-01 | 71463069  | 71463192  | NC_000017.10 |

|            |          |          |      |           |          |           |           |              |
|------------|----------|----------|------|-----------|----------|-----------|-----------|--------------|
| cg13466546 | 2.68E-07 | 3.40E-08 | 5.75 | 7.7792967 | 6.13E-02 | 77926436  | 77926559  | NC_000017.10 |
| cg13360495 | 2.68E-07 | 3.40E-08 | 5.75 | 7.7783776 | 2.96E-02 | 79893236  | 79893359  | NC_000017.10 |
| cg11877773 | 2.68E-07 | 3.40E-08 | 5.75 | 7.7781575 | 5.65E-02 | 71660200  | 71660323  | NC_000014.8  |
| cg13169667 | 2.69E-07 | 3.40E-08 | 5.75 | 7.7779755 | 7.03E-02 | 144519832 | 144519955 | NC_000008.10 |
| cg11049583 | 2.69E-07 | 3.40E-08 | 5.75 | 7.7771053 | 8.63E-02 | 110158883 | 110159006 | NC_000008.10 |
| cg00439318 | 2.69E-07 | 3.40E-08 | 5.75 | 7.7768941 | 7.28E-02 | 89601909  | 89602032  | NC_000016.9  |
| cg07362328 | 2.69E-07 | 3.41E-08 | 5.75 | 7.776353  | 1.24E-01 | 50886393  | 50886516  | NC_000001.10 |
| cg14850601 | 2.69E-07 | 3.41E-08 | 5.75 | 7.775549  | 1.30E-01 | 44143050  | 44143173  | NC_000018.9  |
| cg19863592 | 2.69E-07 | 3.41E-08 | 5.75 | 7.7751634 | 1.87E-01 | 129338841 | 129338964 | NC_000012.11 |
| cg18887769 | 2.69E-07 | 3.41E-08 | 5.75 | 7.7750473 | 6.51E-02 | 22945181  | 22945304  | NC_000014.8  |
| cg03440540 | 2.69E-07 | 3.41E-08 | 5.75 | 7.7746938 | 8.19E-02 | 48976173  | 48976296  | NC_000022.10 |
| cg18750086 | 2.69E-07 | 3.41E-08 | 5.75 | 7.774294  | 1.80E-01 | 140774161 | 140774284 | NC_000007.13 |
| cg14330641 | 2.70E-07 | 3.42E-08 | 5.75 | 7.7735672 | 1.23E-01 | 154710399 | 154710522 | NC_000004.11 |
| cg23109867 | 2.70E-07 | 3.42E-08 | 5.75 | 7.7731534 | 6.99E-02 | 41304105  | 41304228  | NC_000001.10 |
| cg27580375 | 2.70E-07 | 3.42E-08 | 5.75 | 7.7729591 | 3.02E-02 | 1438391   | 1438514   | NC_000005.9  |
| cg10639888 | 2.70E-07 | 3.42E-08 | 5.75 | 7.7728814 | 1.72E-01 | 154335368 | 154335491 | NC_000002.11 |
| cg11951844 | 2.70E-07 | 3.42E-08 | 5.75 | 7.7727169 | 4.41E-02 | 29378126  | 29378249  | NC_000017.10 |
| cg08472795 | 2.70E-07 | 3.42E-08 | 5.75 | 7.772449  | 1.12E-01 | 129067253 | 129067376 | NC_000002.11 |
| cg17602451 | 2.70E-07 | 3.42E-08 | 5.75 | 7.7719836 | 1.54E-01 | 60985645  | 60985768  | NC_000018.9  |
| cg19195935 | 2.70E-07 | 3.42E-08 | 5.75 | 7.7718913 | 3.11E-02 | 168544539 | 168544662 | NC_000001.10 |
| cg11590213 | 2.70E-07 | 3.42E-08 | 5.75 | 7.7710695 | 5.82E-02 | 66331682  | 66331805  | NC_000005.9  |
| cg14005153 | 2.70E-07 | 3.43E-08 | 5.75 | 7.7704947 | 2.43E-02 | 113350993 | 113351116 | NC_000013.10 |
| cg19673995 | 2.70E-07 | 3.43E-08 | 5.75 | 7.7703486 | 3.83E-02 | 132163518 | 132163641 | NC_000012.11 |
| cg20632416 | 2.71E-07 | 3.43E-08 | 5.75 | 7.7701901 | 7.57E-02 | 48363645  | 48363768  | NC_000019.9  |
| cg16691593 | 2.71E-07 | 3.43E-08 | 5.75 | 7.7697982 | 1.17E-01 | 76934634  | 76934757  | NC_000005.9  |

|            |          |          |      |           |          |           |           |              |
|------------|----------|----------|------|-----------|----------|-----------|-----------|--------------|
| cg02875240 | 2.71E-07 | 3.43E-08 | 5.75 | 7.7692764 | 7.43E-02 | 58893686  | 58893809  | NC_000019.9  |
| cg01680010 | 2.71E-07 | 3.43E-08 | 5.75 | 7.7682856 | 1.89E-01 | 96647117  | 96647240  | NC_000007.13 |
| cg18864124 | 2.71E-07 | 3.44E-08 | 5.75 | 7.7678373 | 9.02E-02 | 227288863 | 227288986 | NC_000002.11 |
| cg05921905 | 2.71E-07 | 3.44E-08 | 5.75 | 7.7673617 | 1.78E-01 | 27142527  | 27142650  | NC_000007.13 |
| cg17204652 | 2.71E-07 | 3.44E-08 | 5.75 | 7.7672041 | 1.20E-01 | 233252706 | 233252829 | NC_000002.11 |
| cg01878960 | 2.71E-07 | 3.44E-08 | 5.75 | 7.7671209 | 1.18E-01 | 158358294 | 158358417 | NC_000007.13 |
| cg02698013 | 2.71E-07 | 3.44E-08 | 5.75 | 7.7663742 | 5.19E-02 | 140777406 | 140777529 | NC_000009.11 |
| cg03439958 | 2.72E-07 | 3.44E-08 | 5.75 | 7.7660479 | 2.65E-02 | 101612331 | 101612454 | NC_000002.11 |
| cg19403534 | 2.72E-07 | 3.45E-08 | 5.75 | 7.7649096 | 1.25E-01 | 120355419 | 120355542 | NC_000010.10 |
| cg13161658 | 2.72E-07 | 3.45E-08 | 5.75 | 7.7648118 | 1.13E-01 | 30038797  | 30038920  | NC_000011.9  |
| cg22700015 | 2.72E-07 | 3.45E-08 | 5.75 | 7.7647734 | 1.32E-01 | 228743131 | 228743254 | NC_000001.10 |
| cg05196366 | 2.72E-07 | 3.45E-08 | 5.75 | 7.7645023 | 9.99E-02 | 3239155   | 3239278   | NC_000016.9  |
| cg13113525 | 2.73E-07 | 3.45E-08 | 5.75 | 7.7624767 | 1.15E-01 | 74427234  | 74427357  | NC_000015.9  |
| cg13527203 | 2.73E-07 | 3.46E-08 | 5.75 | 7.7618705 | 1.20E-01 | 145048278 | 145048401 | NC_000008.10 |
| cg22987116 | 2.73E-07 | 3.46E-08 | 5.75 | 7.7618643 | 9.18E-02 | 37461296  | 37461419  | NC_000006.11 |
| cg23917057 | 2.73E-07 | 3.46E-08 | 5.75 | 7.7617356 | 1.37E-01 | 88752619  | 88752742  | NC_000002.11 |
| cg17451609 | 2.73E-07 | 3.46E-08 | 5.75 | 7.7615552 | 1.44E-01 | 25901869  | 25901992  | NC_000008.10 |
| cg14976646 | 2.73E-07 | 3.46E-08 | 5.75 | 7.7614491 | 1.32E-01 | 12253828  | 12253951  | NC_000018.9  |
| cg03340318 | 2.73E-07 | 3.46E-08 | 5.75 | 7.7614228 | 3.50E-02 | 33389799  | 33389922  | NC_000001.10 |
| cg08892899 | 2.73E-07 | 3.46E-08 | 5.75 | 7.7610661 | 1.09E-01 | 85955302  | 85955425  | NC_000010.10 |
| cg04322718 | 2.73E-07 | 3.46E-08 | 5.75 | 7.7607964 | 8.85E-02 | 32096728  | 32096851  | NC_000006.11 |
| cg19030814 | 2.73E-07 | 3.46E-08 | 5.75 | 7.7607661 | 1.46E-01 | 232600205 | 232600328 | NC_000001.10 |
| cg24790628 | 2.73E-07 | 3.46E-08 | 5.75 | 7.7597169 | 1.09E-01 | 34112376  | 34112499  | NC_000019.9  |
| cg27235662 | 2.73E-07 | 3.46E-08 | 5.75 | 7.7595413 | 8.49E-02 | 190105986 | 190106109 | NC_000003.11 |
| cg22110569 | 2.73E-07 | 3.47E-08 | 5.75 | 7.7590645 | 4.23E-02 | 161009463 | 161009586 | NC_000001.10 |

|            |          |          |      |           |          |           |           |              |
|------------|----------|----------|------|-----------|----------|-----------|-----------|--------------|
| cg22702443 | 2.73E-07 | 3.47E-08 | 5.75 | 7.7586429 | 4.82E-02 | 60831205  | 60831328  | NC_000017.10 |
| cg16691821 | 2.74E-07 | 3.47E-08 | 5.75 | 7.7575696 | 1.48E-01 | 2375627   | 2375750   | NC_000001.10 |
| cg08059859 | 2.74E-07 | 3.47E-08 | 5.75 | 7.7571269 | 4.35E-02 | 50303211  | 50303334  | NC_000019.9  |
| cg06700209 | 2.74E-07 | 3.47E-08 | 5.75 | 7.7570026 | 9.83E-02 | 72758095  | 72758218  | NC_000008.10 |
| cg26509691 | 2.74E-07 | 3.48E-08 | 5.75 | 7.7563788 | 1.25E-01 | 134363516 | 134363639 | NC_000005.9  |
| cg02839622 | 2.74E-07 | 3.48E-08 | 5.75 | 7.7556637 | 4.47E-02 | 55904289  | 55904412  | NC_000020.10 |
| cg18024479 | 2.74E-07 | 3.48E-08 | 5.75 | 7.7554523 | 1.22E-01 | 93519220  | 93519343  | NC_000007.13 |
| cg20292653 | 2.75E-07 | 3.48E-08 | 5.74 | 7.7547238 | 3.92E-02 | 5847374   | 5847497   | NC_000002.11 |
| cg18573383 | 2.75E-07 | 3.48E-08 | 5.74 | 7.7539832 | 1.29E-01 | 75603401  | 75603524  | NC_000012.11 |
| cg00545804 | 2.75E-07 | 3.49E-08 | 5.74 | 7.753067  | 2.06E-01 | 31841391  | 31841514  | NC_000019.9  |
| cg25682903 | 2.75E-07 | 3.49E-08 | 5.74 | 7.7524082 | 6.64E-02 | 149916616 | 149916739 | NC_000007.13 |
| cg19593762 | 2.75E-07 | 3.49E-08 | 5.74 | 7.7521313 | 1.49E-02 | 58240809  | 58240932  | NC_000012.11 |
| cg19733740 | 2.75E-07 | 3.49E-08 | 5.74 | 7.7519697 | 6.18E-02 | 82609924  | 82610047  | NC_000011.9  |
| cg20912923 | 2.76E-07 | 3.50E-08 | 5.74 | 7.7509189 | 1.30E-01 | 2885516   | 2885639   | NC_000008.10 |
| cg13365752 | 2.76E-07 | 3.50E-08 | 5.74 | 7.7507316 | 1.13E-01 | 125485770 | 125485893 | NC_000003.11 |
| cg03575122 | 2.76E-07 | 3.50E-08 | 5.74 | 7.7501483 | 7.27E-02 | 103407566 | 103407689 | NC_000008.10 |
| cg07423205 | 2.76E-07 | 3.50E-08 | 5.74 | 7.7501037 | 1.35E-01 | 37834672  | 37834795  | NC_000005.9  |
| cg07416383 | 2.76E-07 | 3.50E-08 | 5.74 | 7.7499576 | 1.12E-01 | 155302899 | 155303022 | NC_000007.13 |
| cg22734165 | 2.76E-07 | 3.50E-08 | 5.74 | 7.7488837 | 6.73E-02 | 1220336   | 1220459   | NC_000011.9  |
| cg02361493 | 2.76E-07 | 3.50E-08 | 5.74 | 7.748696  | 9.19E-02 | 131164500 | 131164623 | NC_000012.11 |
| cg11835068 | 2.76E-07 | 3.50E-08 | 5.74 | 7.7485981 | 1.40E-01 | 4714974   | 4715097   | NC_000001.10 |
| cg15946571 | 2.76E-07 | 3.51E-08 | 5.74 | 7.7481784 | 7.99E-02 | 167851031 | 167851154 | NC_000005.9  |
| cg21542223 | 2.76E-07 | 3.51E-08 | 5.74 | 7.7477172 | 1.28E-01 | 91190005  | 91190128  | NC_000001.10 |
| cg19227382 | 2.76E-07 | 3.51E-08 | 5.74 | 7.7475411 | 2.97E-02 | 73521606  | 73521729  | NC_000010.10 |
| cg13769046 | 2.77E-07 | 3.51E-08 | 5.74 | 7.746589  | 5.95E-02 | 77389766  | 77389889  | NC_000017.10 |

|            |          |          |      |           |          |           |           |              |
|------------|----------|----------|------|-----------|----------|-----------|-----------|--------------|
| cg22646710 | 2.77E-07 | 3.51E-08 | 5.74 | 7.7463858 | 1.25E-01 | 114696798 | 114696921 | NC_000001.10 |
| cg16779811 | 2.77E-07 | 3.52E-08 | 5.74 | 7.7440868 | 6.04E-02 | 615409    | 615532    | NC_000008.10 |
| cg24941292 | 2.77E-07 | 3.52E-08 | 5.74 | 7.7437457 | 7.24E-02 | 12213045  | 12213168  | NC_000001.10 |
| cg12727256 | 2.77E-07 | 3.52E-08 | 5.74 | 7.743491  | 9.11E-02 | 24838292  | 24838415  | NC_000022.10 |
| cg07341624 | 2.78E-07 | 3.52E-08 | 5.74 | 7.7431275 | 1.32E-01 | 2539167   | 2539290   | NC_000020.10 |
| cg12210890 | 2.78E-07 | 3.53E-08 | 5.74 | 7.742677  | 1.95E-01 | 110988071 | 110988194 | NC_000008.10 |
| cg13748287 | 2.78E-07 | 3.53E-08 | 5.74 | 7.7418    | 8.29E-02 | 184290594 | 184290717 | NC_000003.11 |
| cg15742412 | 2.78E-07 | 3.53E-08 | 5.74 | 7.7407574 | 1.82E-01 | 181452048 | 181452171 | NC_000001.10 |
| cg08218734 | 2.78E-07 | 3.53E-08 | 5.74 | 7.7404536 | 1.88E-01 | 128993810 | 128993933 | NC_000010.10 |
| cg26725891 | 2.78E-07 | 3.53E-08 | 5.74 | 7.7403218 | 8.21E-02 | 23932412  | 23932535  | NC_000015.9  |
| cg02286155 | 2.78E-07 | 3.54E-08 | 5.74 | 7.7400049 | 7.27E-02 | 176826262 | 176826385 | NC_000005.9  |
| cg06727242 | 2.79E-07 | 3.54E-08 | 5.74 | 7.7394218 | 9.90E-02 | 68610489  | 68610612  | NC_000014.8  |
| cg24609094 | 2.79E-07 | 3.54E-08 | 5.74 | 7.7392229 | 7.09E-02 | 25319768  | 25319891  | NC_000013.10 |
| cg13583664 | 2.79E-07 | 3.54E-08 | 5.74 | 7.7377522 | 8.97E-02 | 132016282 | 132016405 | NC_000009.11 |
| cg20453042 | 2.79E-07 | 3.55E-08 | 5.74 | 7.73729   | 1.06E-01 | 132830737 | 132830860 | NC_000010.10 |
| cg23615676 | 2.79E-07 | 3.55E-08 | 5.74 | 7.7370592 | 1.84E-01 | 113697632 | 113697755 | NC_000005.9  |
| cg08971667 | 2.79E-07 | 3.55E-08 | 5.74 | 7.7365977 | 1.37E-01 | 27201728  | 27201851  | NC_000007.13 |
| cg02572606 | 2.80E-07 | 3.55E-08 | 5.74 | 7.7347291 | 1.14E-01 | 20753499  | 20753622  | NC_000016.9  |
| cg03714573 | 2.80E-07 | 3.56E-08 | 5.74 | 7.7340161 | 1.59E-01 | 91172770  | 91172893  | NC_000001.10 |
| cg07594613 | 2.80E-07 | 3.56E-08 | 5.74 | 7.7333928 | 1.01E-01 | 26609417  | 26609540  | NC_000004.11 |
| cg16722118 | 2.80E-07 | 3.56E-08 | 5.74 | 7.7332313 | 4.08E-02 | 143599982 | 143600105 | NC_000007.13 |
| cg06346388 | 2.80E-07 | 3.56E-08 | 5.74 | 7.7322533 | 1.11E-01 | 13539513  | 13539636  | NC_000004.11 |
| cg21649089 | 2.81E-07 | 3.57E-08 | 5.74 | 7.7316283 | 1.28E-01 | 14198392  | 14198515  | NC_000017.10 |
| cg14346873 | 2.81E-07 | 3.57E-08 | 5.74 | 7.7314294 | 1.43E-01 | 25901177  | 25901300  | NC_000008.10 |
| cg01443852 | 2.81E-07 | 3.57E-08 | 5.74 | 7.729458  | 5.58E-02 | 52938023  | 52938146  | NC_000012.11 |

|            |          |          |      |           |          |           |           |              |
|------------|----------|----------|------|-----------|----------|-----------|-----------|--------------|
| cg04880091 | 2.82E-07 | 3.58E-08 | 5.74 | 7.728291  | 1.13E-01 | 43132451  | 43132574  | NC_000008.10 |
| cg21636683 | 2.82E-07 | 3.58E-08 | 5.74 | 7.727433  | 6.89E-02 | 140683699 | 140683822 | NC_000005.9  |
| cg15277658 | 2.82E-07 | 3.58E-08 | 5.74 | 7.7270512 | 4.10E-02 | 73421701  | 73421824  | NC_000010.10 |
| cg16895719 | 2.82E-07 | 3.58E-08 | 5.74 | 7.7269618 | 1.03E-01 | 25899257  | 25899380  | NC_000008.10 |
| cg25622366 | 2.82E-07 | 3.58E-08 | 5.74 | 7.7269518 | 1.62E-01 | 63281139  | 63281262  | NC_000002.11 |
| cg00575665 | 2.82E-07 | 3.58E-08 | 5.74 | 7.7266537 | 9.81E-02 | 39315211  | 39315334  | NC_000020.10 |
| cg00363813 | 2.82E-07 | 3.59E-08 | 5.74 | 7.725694  | 1.13E-01 | 6664872   | 6664995   | NC_000012.11 |
| cg04547809 | 2.82E-07 | 3.59E-08 | 5.74 | 7.7255788 | 3.88E-02 | 51304161  | 51304284  | NC_000019.9  |
| cg02012300 | 2.82E-07 | 3.59E-08 | 5.74 | 7.7253493 | 1.03E-01 | 141263852 | 141263975 | NC_000004.11 |
| cg02900034 | 2.83E-07 | 3.59E-08 | 5.74 | 7.7240579 | 6.42E-02 | 145535640 | 145535763 | NC_000008.10 |
| cg26168643 | 2.83E-07 | 3.59E-08 | 5.74 | 7.7240543 | 1.26E-01 | 88328009  | 88328132  | NC_000013.10 |
| cg09852187 | 2.83E-07 | 3.59E-08 | 5.74 | 7.7238908 | 6.46E-02 | 89155039  | 89155162  | NC_000015.9  |
| cg07627059 | 2.83E-07 | 3.60E-08 | 5.74 | 7.7230333 | 4.95E-02 | 20309824  | 20309947  | NC_000007.13 |
| cg16576935 | 2.83E-07 | 3.60E-08 | 5.74 | 7.7224191 | 5.27E-02 | 89570545  | 89570668  | NC_000001.10 |
| cg26932441 | 2.83E-07 | 3.60E-08 | 5.74 | 7.7219596 | 1.94E-01 | 2754240   | 2754363   | NC_000005.9  |
| cg14599362 | 2.83E-07 | 3.60E-08 | 5.74 | 7.7216663 | 4.06E-02 | 139133513 | 139133636 | NC_000009.11 |
| cg06960881 | 2.83E-07 | 3.60E-08 | 5.74 | 7.721388  | 8.83E-02 | 15168483  | 15168606  | NC_000017.10 |
| cg06626113 | 2.84E-07 | 3.61E-08 | 5.74 | 7.7202571 | 2.80E-02 | 26027696  | 26027819  | NC_000004.11 |
| cg02403395 | 2.84E-07 | 3.61E-08 | 5.74 | 7.7201951 | 1.83E-01 | 192445500 | 192445623 | NC_000003.11 |
| cg10641615 | 2.84E-07 | 3.61E-08 | 5.74 | 7.7199878 | 1.91E-01 | 54359797  | 54359920  | NC_000012.11 |
| cg25535418 | 2.84E-07 | 3.61E-08 | 5.74 | 7.7191353 | 1.17E-01 | 144386474 | 144386597 | NC_000006.11 |
| cg04471325 | 2.84E-07 | 3.61E-08 | 5.74 | 7.7186527 | 1.13E-01 | 141261335 | 141261458 | NC_000005.9  |
| cg09429700 | 2.85E-07 | 3.62E-08 | 5.74 | 7.717167  | 3.09E-02 | 57131870  | 57131993  | NC_000003.11 |
| cg25061304 | 2.85E-07 | 3.62E-08 | 5.74 | 7.7169982 | 6.16E-02 | 99700232  | 99700355  | NC_000014.8  |
| cg05099185 | 2.85E-07 | 3.62E-08 | 5.74 | 7.7167292 | 1.35E-01 | 68723805  | 68723928  | NC_000015.9  |

|            |          |          |      |           |          |           |           |              |
|------------|----------|----------|------|-----------|----------|-----------|-----------|--------------|
| cg02044621 | 2.85E-07 | 3.62E-08 | 5.74 | 7.7165068 | 4.02E-02 | 62452831  | 62452954  | NC_000011.9  |
| cg00810208 | 2.85E-07 | 3.62E-08 | 5.74 | 7.7159085 | 1.75E-01 | 997012    | 997135    | NC_000004.11 |
| cg02389877 | 2.85E-07 | 3.63E-08 | 5.74 | 7.715186  | 9.92E-02 | 68583600  | 68583723  | NC_000015.9  |
| cg06079106 | 2.85E-07 | 3.63E-08 | 5.74 | 7.7151659 | 1.27E-01 | 73519364  | 73519487  | NC_000002.11 |
| cg08647652 | 2.85E-07 | 3.63E-08 | 5.74 | 7.714554  | 8.54E-02 | 18538582  | 18538705  | NC_000017.10 |
| cg06759058 | 2.85E-07 | 3.63E-08 | 5.74 | 7.7140368 | 1.34E-01 | 28602864  | 28602987  | NC_000006.11 |
| cg03790378 | 2.85E-07 | 3.63E-08 | 5.74 | 7.7138283 | 9.93E-02 | 47278831  | 47278954  | NC_000011.9  |
| cg16358738 | 2.86E-07 | 3.64E-08 | 5.74 | 7.7128133 | 5.26E-02 | 241808595 | 241808718 | NC_000002.11 |
| cg08154348 | 2.86E-07 | 3.64E-08 | 5.74 | 7.7120995 | 1.60E-01 | 84562930  | 84563053  | NC_000006.11 |
| cg07958575 | 2.86E-07 | 3.64E-08 | 5.74 | 7.7118228 | 9.89E-02 | 140206867 | 140206990 | NC_000007.13 |
| cg23599771 | 2.86E-07 | 3.64E-08 | 5.74 | 7.7117051 | 1.13E-01 | 190444825 | 190444948 | NC_000001.10 |
| cg08976025 | 2.86E-07 | 3.64E-08 | 5.74 | 7.7115558 | 6.43E-02 | 7463188   | 7463311   | NC_000012.11 |
| cg18851100 | 2.86E-07 | 3.64E-08 | 5.74 | 7.7114776 | 1.30E-01 | 51158550  | 51158673  | NC_000022.10 |
| cg21777188 | 2.86E-07 | 3.64E-08 | 5.74 | 7.7110106 | 1.40E-01 | 140536238 | 140536361 | NC_000005.9  |
| cg07214164 | 2.86E-07 | 3.64E-08 | 5.74 | 7.7105372 | 8.84E-02 | 105480254 | 105480377 | NC_000002.11 |
| cg14689150 | 2.86E-07 | 3.64E-08 | 5.74 | 7.7103788 | 5.48E-02 | 141362619 | 141362742 | NC_000008.10 |
| cg17298666 | 2.87E-07 | 3.65E-08 | 5.74 | 7.709039  | 1.47E-01 | 57364491  | 57364614  | NC_000018.9  |
| cg19355186 | 2.87E-07 | 3.65E-08 | 5.74 | 7.707708  | 1.49E-01 | 12306303  | 12306426  | NC_000019.9  |
| cg17722675 | 2.87E-07 | 3.66E-08 | 5.74 | 7.707506  | 1.35E-01 | 133563382 | 133563505 | NC_000006.11 |
| cg21531040 | 2.87E-07 | 3.66E-08 | 5.74 | 7.7074306 | 5.98E-02 | 106743603 | 106743726 | NC_000014.8  |
| cg05457563 | 2.87E-07 | 3.66E-08 | 5.74 | 7.7069693 | 1.01E-01 | 1467029   | 1467152   | NC_000019.9  |
| cg06785014 | 2.87E-07 | 3.66E-08 | 5.74 | 7.7068424 | 8.19E-02 | 244080869 | 244080992 | NC_000001.10 |
| cg10332367 | 2.87E-07 | 3.66E-08 | 5.74 | 7.7067441 | 2.63E-02 | 2075476   | 2075599   | NC_000016.9  |
| cg15355015 | 2.87E-07 | 3.66E-08 | 5.74 | 7.7066552 | 6.93E-02 | 101943990 | 101944113 | NC_000007.13 |
| cg02841155 | 2.87E-07 | 3.66E-08 | 5.74 | 7.7064446 | 1.19E-01 | 128301328 | 128301451 | NC_000005.9  |



|            |          |          |      |           |          |           |           |              |
|------------|----------|----------|------|-----------|----------|-----------|-----------|--------------|
| cg04284956 | 2.87E-07 | 3.66E-08 | 5.74 | 7.7064087 | 4.67E-02 | 1895190   | 1895313   | NC_000004.11 |
| cg04478179 | 2.87E-07 | 3.66E-08 | 5.74 | 7.7060985 | 2.00E-01 | 154680909 | 154681032 | NC_000004.11 |
| cg23092040 | 2.88E-07 | 3.66E-08 | 5.73 | 7.7056385 | 9.30E-02 | 65068504  | 65068627  | NC_000014.8  |
| cg13443976 | 2.88E-07 | 3.66E-08 | 5.73 | 7.7051217 | 7.80E-02 | 87022201  | 87022324  | NC_000001.10 |
| cg25289028 | 2.88E-07 | 3.66E-08 | 5.73 | 7.7049597 | 1.02E-01 | 36428519  | 36428642  | NC_000019.9  |
| cg17385936 | 2.88E-07 | 3.67E-08 | 5.73 | 7.7037077 | 1.83E-01 | 132756986 | 132757109 | NC_000003.11 |
| cg09564741 | 2.88E-07 | 3.67E-08 | 5.73 | 7.702533  | 4.85E-02 | 49164931  | 49165054  | NC_000019.9  |
| cg16961492 | 2.89E-07 | 3.67E-08 | 5.73 | 7.7023177 | 5.59E-02 | 46101741  | 46101864  | NC_000006.11 |
| cg22510814 | 2.89E-07 | 3.67E-08 | 5.73 | 7.7022873 | 3.55E-02 | 68773285  | 68773408  | NC_000011.9  |
| cg11324832 | 2.89E-07 | 3.68E-08 | 5.73 | 7.7016697 | 1.39E-01 | 181441806 | 181441929 | NC_000003.11 |
| cg09183753 | 2.89E-07 | 3.68E-08 | 5.73 | 7.7014551 | 1.94E-01 | 55204342  | 55204465  | NC_000020.10 |
| cg15299832 | 2.89E-07 | 3.68E-08 | 5.73 | 7.701046  | 1.55E-01 | 34398131  | 34398254  | NC_000021.8  |
| cg21502466 | 2.89E-07 | 3.68E-08 | 5.73 | 7.7009729 | 1.72E-01 | 131438626 | 131438749 | NC_000012.11 |
| cg19712198 | 2.89E-07 | 3.68E-08 | 5.73 | 7.6998691 | 1.91E-01 | 113229374 | 113229497 | NC_000012.11 |
| cg26870744 | 2.89E-07 | 3.69E-08 | 5.73 | 7.6989238 | 1.32E-01 | 59189649  | 59189772  | NC_000005.9  |
| cg23951305 | 2.90E-07 | 3.69E-08 | 5.73 | 7.6976601 | 9.69E-02 | 170581890 | 170582013 | NC_000006.11 |
| cg09786701 | 2.90E-07 | 3.69E-08 | 5.73 | 7.6973374 | 1.68E-01 | 2539517   | 2539640   | NC_000020.10 |
| cg12539711 | 2.90E-07 | 3.69E-08 | 5.73 | 7.6970675 | 8.58E-02 | 84748613  | 84748736  | NC_000015.9  |
| cg14713139 | 2.90E-07 | 3.70E-08 | 5.73 | 7.6963923 | 1.19E-01 | 53811826  | 53811949  | NC_000019.9  |
| cg05384906 | 2.90E-07 | 3.70E-08 | 5.73 | 7.69625   | 6.64E-02 | 77381864  | 77381987  | NC_000018.9  |
| cg02449727 | 2.90E-07 | 3.70E-08 | 5.73 | 7.6961658 | 7.76E-02 | 58286735  | 58286858  | NC_000006.11 |
| cg05025332 | 2.90E-07 | 3.70E-08 | 5.73 | 7.6961163 | 9.22E-02 | 65165160  | 65165283  | NC_000002.11 |
| cg25664338 | 2.90E-07 | 3.70E-08 | 5.73 | 7.6960304 | 1.23E-01 | 128721244 | 128721367 | NC_000003.11 |
| cg05874732 | 2.90E-07 | 3.70E-08 | 5.73 | 7.6953805 | 1.67E-01 | 2539552   | 2539675   | NC_000020.10 |
| cg04694022 | 2.91E-07 | 3.70E-08 | 5.73 | 7.6948917 | 1.21E-01 | 30582352  | 30582475  | NC_000006.11 |

|            |          |          |      |           |          |           |           |              |
|------------|----------|----------|------|-----------|----------|-----------|-----------|--------------|
| cg20212775 | 2.91E-07 | 3.71E-08 | 5.73 | 7.6938798 | 6.23E-02 | 1164681   | 1164804   | NC_000004.11 |
| cg27347104 | 2.91E-07 | 3.71E-08 | 5.73 | 7.6937438 | 4.88E-02 | 6233657   | 6233780   | NC_000012.11 |
| cg13620317 | 2.91E-07 | 3.71E-08 | 5.73 | 7.6921774 | 8.99E-02 | 37894346  | 37894469  | NC_000019.9  |
| cg22353828 | 2.91E-07 | 3.71E-08 | 5.73 | 7.6920481 | 9.29E-02 | 3187704   | 3187827   | NC_000011.9  |
| cg25436886 | 2.91E-07 | 3.71E-08 | 5.73 | 7.6916792 | 7.80E-02 | 127056972 | 127057095 | NC_000003.11 |
| cg07785737 | 2.92E-07 | 3.72E-08 | 5.73 | 7.6913904 | 7.20E-02 | 71176850  | 71176973  | NC_000010.10 |
| cg16693201 | 2.92E-07 | 3.72E-08 | 5.73 | 7.6913883 | 3.86E-02 | 10545696  | 10545819  | NC_000019.9  |
| cg18067236 | 2.92E-07 | 3.72E-08 | 5.73 | 7.6909349 | 6.10E-02 | 538582    | 538705    | NC_000005.9  |
| cg24408776 | 2.92E-07 | 3.72E-08 | 5.73 | 7.6905507 | 1.26E-01 | 203098067 | 203098190 | NC_000001.10 |
| cg11969213 | 2.92E-07 | 3.72E-08 | 5.73 | 7.6905499 | 1.07E-01 | 43324322  | 43324445  | NC_000017.10 |
| cg05321361 | 2.92E-07 | 3.72E-08 | 5.73 | 7.690432  | 1.19E-01 | 2750263   | 2750386   | NC_000005.9  |
| cg26138202 | 2.92E-07 | 3.73E-08 | 5.73 | 7.6890327 | 3.88E-02 | 12628677  | 12628800  | NC_000007.13 |
| cg20503288 | 2.92E-07 | 3.73E-08 | 5.73 | 7.6881094 | 9.24E-02 | 127329180 | 127329303 | NC_000007.13 |
| cg27308218 | 2.92E-07 | 3.73E-08 | 5.73 | 7.6880686 | 5.81E-02 | 173893111 | 173893234 | NC_000002.11 |
| cg18629151 | 2.93E-07 | 3.73E-08 | 5.73 | 7.6875194 | 1.25E-01 | 13539581  | 13539704  | NC_000004.11 |
| cg08378017 | 2.93E-07 | 3.73E-08 | 5.73 | 7.686529  | 1.70E-01 | 105760444 | 105760567 | NC_000002.11 |
| cg12754571 | 2.93E-07 | 3.74E-08 | 5.73 | 7.6859107 | 1.26E-01 | 247694271 | 247694394 | NC_000001.10 |
| cg00145419 | 2.93E-07 | 3.74E-08 | 5.73 | 7.6845774 | 5.42E-02 | 110966036 | 110966159 | NC_000013.10 |
| cg16803837 | 2.94E-07 | 3.74E-08 | 5.73 | 7.6843082 | 8.78E-02 | 18448597  | 18448720  | NC_000007.13 |
| cg09998133 | 2.94E-07 | 3.75E-08 | 5.73 | 7.6837255 | 2.04E-01 | 142494595 | 142494718 | NC_000007.13 |
| cg19670923 | 2.94E-07 | 3.75E-08 | 5.73 | 7.6836378 | 1.62E-01 | 43972806  | 43972929  | NC_000017.10 |
| cg10845391 | 2.94E-07 | 3.75E-08 | 5.73 | 7.6834166 | 8.11E-02 | 175799756 | 175799879 | NC_000005.9  |
| cg08676438 | 2.94E-07 | 3.75E-08 | 5.73 | 7.6833196 | 9.84E-02 | 1763695   | 1763818   | NC_000019.9  |
| cg06362358 | 2.94E-07 | 3.75E-08 | 5.73 | 7.6814365 | 8.67E-02 | 248855545 | 248855668 | NC_000001.10 |
| cg26195829 | 2.94E-07 | 3.75E-08 | 5.73 | 7.6813039 | 1.28E-01 | 61122155  | 61122278  | NC_000014.8  |

|            |          |          |      |           |          |           |           |              |
|------------|----------|----------|------|-----------|----------|-----------|-----------|--------------|
| cg09192377 | 2.95E-07 | 3.76E-08 | 5.73 | 7.6804548 | 1.66E-01 | 94834219  | 94834342  | NC_000010.10 |
| cg06468106 | 2.95E-07 | 3.76E-08 | 5.73 | 7.6804492 | 4.80E-02 | 14419078  | 14419201  | NC_000016.9  |
| cg18913890 | 2.95E-07 | 3.76E-08 | 5.73 | 7.6796589 | 1.61E-01 | 79738619  | 79738742  | NC_000002.11 |
| cg18685594 | 2.95E-07 | 3.76E-08 | 5.73 | 7.6787859 | 1.45E-01 | 134211217 | 134211340 | NC_000006.11 |
| cg21176048 | 2.95E-07 | 3.77E-08 | 5.73 | 7.6783632 | 1.28E-01 | 179755235 | 179755358 | NC_000003.11 |
| cg23923689 | 2.95E-07 | 3.77E-08 | 5.73 | 7.6773681 | 8.58E-02 | 178500634 | 178500757 | NC_000001.10 |
| cg07519471 | 2.96E-07 | 3.77E-08 | 5.73 | 7.6766175 | 8.51E-02 | 46526100  | 46526223  | NC_000019.9  |
| cg14240060 | 2.96E-07 | 3.77E-08 | 5.73 | 7.6760909 | 1.45E-01 | 130830949 | 130831072 | NC_000010.10 |
| cg08607018 | 2.96E-07 | 3.78E-08 | 5.73 | 7.6759663 | 1.24E-01 | 31842873  | 31842996  | NC_000019.9  |
| cg10607454 | 2.96E-07 | 3.78E-08 | 5.73 | 7.6742562 | 6.81E-02 | 1315725   | 1315848   | NC_000007.13 |
| cg05374654 | 2.97E-07 | 3.79E-08 | 5.73 | 7.6734596 | 1.18E-01 | 94134666  | 94134789  | NC_000011.9  |
| cg23900203 | 2.97E-07 | 3.79E-08 | 5.73 | 7.6732693 | 1.34E-01 | 127765331 | 127765454 | NC_000012.11 |
| cg24988625 | 2.97E-07 | 3.79E-08 | 5.73 | 7.6724783 | 1.64E-01 | 83680066  | 83680189  | NC_000005.9  |
| cg26542166 | 2.97E-07 | 3.79E-08 | 5.73 | 7.6723847 | 3.57E-02 | 3618422   | 3618545   | NC_000006.11 |
| cg27455613 | 2.97E-07 | 3.79E-08 | 5.73 | 7.6720131 | 3.47E-02 | 80820699  | 80820822  | NC_000017.10 |
| cg02529919 | 2.97E-07 | 3.79E-08 | 5.73 | 7.6718621 | 5.34E-02 | 2906070   | 2906193   | NC_000016.9  |
| cg19883066 | 2.97E-07 | 3.79E-08 | 5.73 | 7.6713807 | 1.11E-01 | 118896248 | 118896371 | NC_000008.10 |
| cg19597170 | 2.97E-07 | 3.79E-08 | 5.73 | 7.6712355 | 8.67E-02 | 130618547 | 130618670 | NC_000012.11 |
| cg22863523 | 2.97E-07 | 3.80E-08 | 5.73 | 7.6707937 | 1.62E-01 | 14995201  | 14995324  | NC_000011.9  |
| cg06079062 | 2.97E-07 | 3.80E-08 | 5.73 | 7.6707389 | 1.00E-01 | 108672412 | 108672535 | NC_000003.11 |
| cg16052570 | 2.98E-07 | 3.80E-08 | 5.73 | 7.67005   | 5.59E-02 | 184212499 | 184212622 | NC_000003.11 |
| cg02245004 | 2.98E-07 | 3.80E-08 | 5.73 | 7.6699533 | 1.23E-01 | 76634887  | 76635010  | NC_000015.9  |
| cg04237663 | 2.98E-07 | 3.80E-08 | 5.73 | 7.6698351 | 1.86E-01 | 110987019 | 110987142 | NC_000008.10 |
| cg05039548 | 2.98E-07 | 3.80E-08 | 5.73 | 7.6697315 | 1.37E-01 | 91190366  | 91190489  | NC_000001.10 |
| cg16214053 | 2.98E-07 | 3.80E-08 | 5.73 | 7.669321  | 8.23E-02 | 10462849  | 10462972  | NC_000004.11 |

|            |          |          |      |           |          |           |           |              |
|------------|----------|----------|------|-----------|----------|-----------|-----------|--------------|
| cg14226747 | 2.98E-07 | 3.80E-08 | 5.73 | 7.6689296 | 1.01E-01 | 657927    | 658050    | NC_000004.11 |
| cg24371075 | 2.98E-07 | 3.81E-08 | 5.73 | 7.6680526 | 2.25E-01 | 8533391   | 8533514   | NC_000017.10 |
| cg07788469 | 2.98E-07 | 3.81E-08 | 5.73 | 7.6668878 | 3.54E-02 | 134119433 | 134119556 | NC_000010.10 |
| cg02124746 | 2.99E-07 | 3.82E-08 | 5.73 | 7.6645298 | 1.95E-02 | 91615137  | 91615260  | NC_000009.11 |
| cg02964724 | 3.00E-07 | 3.83E-08 | 5.73 | 7.6627698 | 1.15E-01 | 2292361   | 2292484   | NC_000011.9  |
| cg24019564 | 3.00E-07 | 3.83E-08 | 5.73 | 7.6622175 | 9.74E-02 | 25257566  | 25257689  | NC_000001.10 |
| cg05381900 | 3.00E-07 | 3.83E-08 | 5.73 | 7.6618338 | 5.74E-02 | 35863071  | 35863194  | NC_000006.11 |
| cg08690094 | 3.00E-07 | 3.83E-08 | 5.73 | 7.6617244 | 8.80E-02 | 34740934  | 34741057  | NC_000016.9  |
| cg20430047 | 3.00E-07 | 3.83E-08 | 5.73 | 7.6616345 | 1.06E-01 | 20257861  | 20257984  | NC_000020.10 |
| cg05147143 | 3.00E-07 | 3.83E-08 | 5.73 | 7.6610219 | 1.33E-01 | 156217095 | 156217218 | NC_000006.11 |
| cg16966315 | 3.00E-07 | 3.83E-08 | 5.73 | 7.6608663 | 1.49E-01 | 149112318 | 149112441 | NC_000007.13 |
| cg02005847 | 3.00E-07 | 3.84E-08 | 5.73 | 7.6601852 | 4.98E-02 | 1487605   | 1487728   | NC_000019.9  |
| cg25772559 | 3.00E-07 | 3.84E-08 | 5.73 | 7.659944  | 1.45E-01 | 43913719  | 43913842  | NC_000018.9  |
| cg12717594 | 3.00E-07 | 3.84E-08 | 5.73 | 7.6598866 | 1.84E-01 | 36037454  | 36037577  | NC_000009.11 |
| cg26005485 | 3.01E-07 | 3.84E-08 | 5.73 | 7.6592911 | 9.63E-02 | 139508496 | 139508619 | NC_000008.10 |
| cg16263180 | 3.01E-07 | 3.84E-08 | 5.73 | 7.6585611 | 1.11E-01 | 140710509 | 140710632 | NC_000005.9  |
| cg10363885 | 3.01E-07 | 3.85E-08 | 5.73 | 7.6577017 | 8.58E-02 | 61110706  | 61110829  | NC_000014.8  |
| cg09169953 | 3.01E-07 | 3.85E-08 | 5.73 | 7.6574499 | 1.23E-01 | 111555102 | 111555225 | NC_000004.11 |
| cg08071609 | 3.01E-07 | 3.85E-08 | 5.73 | 7.6573863 | 1.43E-01 | 117086040 | 117086163 | NC_000006.11 |
| cg21934015 | 3.02E-07 | 3.86E-08 | 5.72 | 7.6556212 | 5.82E-02 | 4834179   | 4834302   | NC_000017.10 |
| cg08980697 | 3.02E-07 | 3.86E-08 | 5.72 | 7.6552066 | 5.81E-02 | 82362415  | 82362538  | NC_000004.11 |
| cg04091914 | 3.02E-07 | 3.86E-08 | 5.72 | 7.6549326 | 8.94E-02 | 228551538 | 228551661 | NC_000002.11 |
| cg18972885 | 3.02E-07 | 3.86E-08 | 5.72 | 7.6543734 | 1.45E-01 | 119292549 | 119292672 | NC_000010.10 |
| cg05675372 | 3.02E-07 | 3.86E-08 | 5.72 | 7.6539678 | 2.03E-02 | 66639539  | 66639662  | NC_000011.9  |
| cg11211951 | 3.02E-07 | 3.86E-08 | 5.72 | 7.653758  | 1.07E-01 | 145729740 | 145729863 | NC_000008.10 |

|            |          |          |      |           |          |           |           |              |
|------------|----------|----------|------|-----------|----------|-----------|-----------|--------------|
| cg26741373 | 3.02E-07 | 3.86E-08 | 5.72 | 7.653752  | 8.29E-02 | 44585506  | 44585629  | NC_000021.8  |
| cg25050859 | 3.02E-07 | 3.86E-08 | 5.72 | 7.6532345 | 6.75E-02 | 24907497  | 24907620  | NC_000014.8  |
| cg25848827 | 3.02E-07 | 3.86E-08 | 5.72 | 7.6532085 | 3.02E-02 | 7550111   | 7550234   | NC_000001.10 |
| cg21883291 | 3.02E-07 | 3.87E-08 | 5.72 | 7.6530005 | 4.98E-02 | 179132790 | 179132913 | NC_000005.9  |
| cg15672022 | 3.02E-07 | 3.87E-08 | 5.72 | 7.6528306 | 7.08E-02 | 141805772 | 141805895 | NC_000005.9  |
| cg25631352 | 3.03E-07 | 3.87E-08 | 5.72 | 7.6522499 | 1.03E-01 | 70995527  | 70995650  | NC_000002.11 |
| cg19371681 | 3.03E-07 | 3.87E-08 | 5.72 | 7.6521944 | 2.13E-02 | 50266990  | 50267113  | NC_000019.9  |
| cg12164248 | 3.03E-07 | 3.87E-08 | 5.72 | 7.6515335 | 1.30E-01 | 114445955 | 114446078 | NC_000008.10 |
| cg09654247 | 3.03E-07 | 3.87E-08 | 5.72 | 7.6515213 | 1.56E-01 | 200524002 | 200524125 | NC_000002.11 |
| cg06459443 | 3.03E-07 | 3.87E-08 | 5.72 | 7.6507103 | 1.75E-01 | 32907388  | 32907511  | NC_000017.10 |
| cg09173768 | 3.03E-07 | 3.88E-08 | 5.72 | 7.6495385 | 1.41E-01 | 176989349 | 176989472 | NC_000002.11 |
| cg04140862 | 3.04E-07 | 3.88E-08 | 5.72 | 7.6491313 | 1.72E-01 | 70654639  | 70654762  | NC_000014.8  |
| cg00593536 | 3.04E-07 | 3.88E-08 | 5.72 | 7.6490864 | 1.79E-01 | 139538222 | 139538345 | NC_000002.11 |
| cg18543270 | 3.04E-07 | 3.88E-08 | 5.72 | 7.6489352 | 2.45E-01 | 5543271   | 5543394   | NC_000018.9  |
| cg06065657 | 3.04E-07 | 3.88E-08 | 5.72 | 7.6487093 | 1.79E-01 | 4279628   | 4279751   | NC_000019.9  |
| cg05624214 | 3.04E-07 | 3.88E-08 | 5.72 | 7.6485872 | 1.14E-01 | 17783261  | 17783384  | NC_000004.11 |
| cg23742669 | 3.04E-07 | 3.88E-08 | 5.72 | 7.6481307 | 6.72E-02 | 13642414  | 13642537  | NC_000018.9  |
| cg01561869 | 3.04E-07 | 3.89E-08 | 5.72 | 7.6476305 | 1.11E-01 | 140725147 | 140725270 | NC_000005.9  |
| cg15868105 | 3.04E-07 | 3.89E-08 | 5.72 | 7.6471571 | 1.69E-01 | 30116953  | 30117076  | NC_000022.10 |
| cg17604223 | 3.04E-07 | 3.89E-08 | 5.72 | 7.6466321 | 1.33E-01 | 109093158 | 109093281 | NC_000004.11 |
| cg18087477 | 3.04E-07 | 3.89E-08 | 5.72 | 7.6463488 | 1.03E-01 | 115397597 | 115397720 | NC_000001.10 |
| cg24527591 | 3.04E-07 | 3.89E-08 | 5.72 | 7.6456104 | 7.99E-02 | 170547562 | 170547685 | NC_000003.11 |
| cg24296626 | 3.05E-07 | 3.90E-08 | 5.72 | 7.6452787 | 1.40E-01 | 25746012  | 25746135  | NC_000013.10 |
| cg03573068 | 3.05E-07 | 3.90E-08 | 5.72 | 7.6448236 | 1.68E-01 | 20620287  | 20620410  | NC_000011.9  |
| cg17883223 | 3.05E-07 | 3.90E-08 | 5.72 | 7.6447633 | 6.91E-02 | 56854974  | 56855097  | NC_000007.13 |

|            |          |          |      |           |          |           |           |              |
|------------|----------|----------|------|-----------|----------|-----------|-----------|--------------|
| cg05986505 | 3.05E-07 | 3.90E-08 | 5.72 | 7.6447147 | 1.15E-01 | 99955563  | 99955686  | NC_000008.10 |
| cg07313835 | 3.05E-07 | 3.90E-08 | 5.72 | 7.6441654 | 8.37E-02 | 167342724 | 167342847 | NC_000001.10 |
| cg18550846 | 3.05E-07 | 3.90E-08 | 5.72 | 7.6441395 | 1.03E-01 | 48767148  | 48767271  | NC_000020.10 |
| cg22154024 | 3.05E-07 | 3.90E-08 | 5.72 | 7.6437608 | 1.45E-01 | 103351180 | 103351303 | NC_000012.11 |
| cg11761728 | 3.05E-07 | 3.90E-08 | 5.72 | 7.6435053 | 9.28E-02 | 111536679 | 111536802 | NC_000004.11 |
| cg20148334 | 3.05E-07 | 3.91E-08 | 5.72 | 7.643065  | 1.02E-01 | 209815452 | 209815575 | NC_000001.10 |
| cg03357180 | 3.05E-07 | 3.91E-08 | 5.72 | 7.6428231 | 2.19E-01 | 57976573  | 57976696  | NC_000004.11 |
| cg24778383 | 3.05E-07 | 3.91E-08 | 5.72 | 7.6426428 | 1.71E-01 | 6590895   | 6591018   | NC_000019.9  |
| cg13799941 | 3.05E-07 | 3.91E-08 | 5.72 | 7.6426201 | 9.92E-02 | 96632294  | 96632417  | NC_000007.13 |
| cg15621260 | 3.05E-07 | 3.91E-08 | 5.72 | 7.6425982 | 1.52E-01 | 27015813  | 27015936  | NC_000011.9  |
| cg13899678 | 3.05E-07 | 3.91E-08 | 5.72 | 7.6423914 | 1.22E-01 | 105478933 | 105479056 | NC_000002.11 |
| cg27486281 | 3.05E-07 | 3.91E-08 | 5.72 | 7.6419904 | 7.15E-02 | 130013125 | 130013248 | NC_000010.10 |
| cg07810806 | 3.06E-07 | 3.91E-08 | 5.72 | 7.6415356 | 1.13E-01 | 219827866 | 219827989 | NC_000002.11 |
| cg13805052 | 3.06E-07 | 3.91E-08 | 5.72 | 7.640875  | 6.53E-02 | 2283063   | 2283186   | NC_000001.10 |
| cg18195986 | 3.06E-07 | 3.92E-08 | 5.72 | 7.6402035 | 7.66E-02 | 53848593  | 53848716  | NC_000012.11 |
| cg17787990 | 3.06E-07 | 3.92E-08 | 5.72 | 7.6399664 | 6.51E-02 | 65632761  | 65632884  | NC_000017.10 |
| cg17212127 | 3.06E-07 | 3.92E-08 | 5.72 | 7.6393199 | 9.93E-02 | 8383356   | 8383479   | NC_000007.13 |
| cg07646362 | 3.06E-07 | 3.92E-08 | 5.72 | 7.6386901 | 8.67E-02 | 34208469  | 34208592  | NC_000016.9  |
| cg05620865 | 3.07E-07 | 3.92E-08 | 5.72 | 7.6381909 | 6.39E-02 | 77588408  | 77588531  | NC_000005.9  |
| cg23329061 | 3.07E-07 | 3.93E-08 | 5.72 | 7.6379019 | 1.32E-01 | 32914427  | 32914550  | NC_000003.11 |
| cg17841572 | 3.07E-07 | 3.93E-08 | 5.72 | 7.6378133 | 9.46E-02 | 57426368  | 57426491  | NC_000020.10 |
| cg02550257 | 3.07E-07 | 3.93E-08 | 5.72 | 7.6377093 | 1.04E-01 | 222147678 | 222147801 | NC_000002.11 |
| cg08970112 | 3.07E-07 | 3.93E-08 | 5.72 | 7.6363134 | 6.86E-02 | 38907422  | 38907545  | NC_000017.10 |
| cg06906869 | 3.07E-07 | 3.93E-08 | 5.72 | 7.6358125 | 1.25E-01 | 52734154  | 52734277  | NC_000013.10 |
| cg10502571 | 3.07E-07 | 3.94E-08 | 5.72 | 7.6356241 | 5.30E-02 | 6572919   | 6573042   | NC_000005.9  |

|            |          |          |      |           |          |           |           |              |
|------------|----------|----------|------|-----------|----------|-----------|-----------|--------------|
| cg21815667 | 3.07E-07 | 3.94E-08 | 5.72 | 7.6356158 | 1.27E-01 | 176993841 | 176993964 | NC_000002.11 |
| cg11803990 | 3.07E-07 | 3.94E-08 | 5.72 | 7.6355297 | 4.80E-02 | 76503582  | 76503705  | NC_000017.10 |
| cg10567810 | 3.07E-07 | 3.94E-08 | 5.72 | 7.6355061 | 1.61E-01 | 11149068  | 11149191  | NC_000018.9  |
| cg21314480 | 3.08E-07 | 3.94E-08 | 5.72 | 7.6335671 | 1.55E-01 | 75427945  | 75428068  | NC_000002.11 |
| cg18430555 | 3.08E-07 | 3.95E-08 | 5.72 | 7.6327208 | 1.51E-01 | 170740937 | 170741060 | NC_000005.9  |
| cg13342558 | 3.09E-07 | 3.95E-08 | 5.72 | 7.6315612 | 8.74E-02 | 114043548 | 114043671 | NC_000010.10 |
| cg04624885 | 3.09E-07 | 3.96E-08 | 5.72 | 7.6306465 | 8.64E-02 | 1465207   | 1465330   | NC_000019.9  |
| cg18733974 | 3.09E-07 | 3.96E-08 | 5.72 | 7.6304301 | 1.75E-01 | 45404330  | 45404453  | NC_000022.10 |
| cg04691634 | 3.09E-07 | 3.96E-08 | 5.72 | 7.6302351 | 2.70E-02 | 69625284  | 69625407  | NC_000011.9  |
| cg01835368 | 3.09E-07 | 3.96E-08 | 5.72 | 7.629622  | 6.82E-02 | 39612363  | 39612486  | NC_000007.13 |
| cg19227710 | 3.09E-07 | 3.96E-08 | 5.72 | 7.6295569 | 1.01E-01 | 151285666 | 151285789 | NC_000003.11 |
| cg20370678 | 3.09E-07 | 3.96E-08 | 5.72 | 7.6291662 | 1.00E-01 | 58216297  | 58216420  | NC_000017.10 |
| cg22011436 | 3.09E-07 | 3.96E-08 | 5.72 | 7.6289807 | 1.59E-02 | 45310837  | 45310960  | NC_000011.9  |
| cg14542367 | 3.09E-07 | 3.96E-08 | 5.72 | 7.6288193 | 6.28E-02 | 12704964  | 12705087  | NC_000009.11 |
| cg13362605 | 3.10E-07 | 3.97E-08 | 5.72 | 7.6282209 | 5.79E-02 | 121250083 | 121250206 | NC_000010.10 |
| cg01984858 | 3.10E-07 | 3.97E-08 | 5.72 | 7.6281337 | 1.85E-01 | 28555079  | 28555202  | NC_000006.11 |
| cg26735846 | 3.10E-07 | 3.97E-08 | 5.72 | 7.6277408 | 1.44E-01 | 124894943 | 124895066 | NC_000010.10 |
| cg14203738 | 3.10E-07 | 3.97E-08 | 5.72 | 7.6272409 | 4.10E-02 | 29300658  | 29300781  | NC_000018.9  |
| cg12463325 | 3.10E-07 | 3.97E-08 | 5.72 | 7.6271849 | 1.08E-01 | 85371196  | 85371319  | NC_000002.11 |
| cg20761204 | 3.10E-07 | 3.97E-08 | 5.72 | 7.6270681 | 1.18E-01 | 106433397 | 106433520 | NC_000007.13 |
| cg15903032 | 3.11E-07 | 3.98E-08 | 5.72 | 7.6244423 | 8.79E-02 | 101297605 | 101297728 | NC_000010.10 |
| cg25286711 | 3.11E-07 | 3.98E-08 | 5.72 | 7.6242444 | 5.46E-02 | 48866340  | 48866463  | NC_000012.11 |
| cg01785706 | 3.11E-07 | 3.98E-08 | 5.72 | 7.6242341 | 1.05E-01 | 118570077 | 118570200 | NC_000012.11 |
| cg18440523 | 3.11E-07 | 3.98E-08 | 5.72 | 7.6239978 | 7.95E-02 | 42690652  | 42690775  | NC_000021.8  |
| cg11925620 | 3.11E-07 | 3.98E-08 | 5.72 | 7.6239215 | 8.31E-02 | 3211410   | 3211533   | NC_000019.9  |

|            |          |          |      |           |          |           |           |              |
|------------|----------|----------|------|-----------|----------|-----------|-----------|--------------|
| cg18702689 | 3.11E-07 | 3.98E-08 | 5.72 | 7.6236433 | 1.09E-01 | 110223138 | 110223261 | NC_000004.11 |
| cg19523213 | 3.11E-07 | 3.99E-08 | 5.72 | 7.6226227 | 1.72E-01 | 21927973  | 21928096  | NC_000012.11 |
| cg18758572 | 3.12E-07 | 3.99E-08 | 5.72 | 7.620922  | 2.19E-02 | 31325028  | 31325151  | NC_000015.9  |
| cg11842415 | 3.12E-07 | 4.00E-08 | 5.72 | 7.620361  | 1.43E-01 | 75599667  | 75599790  | NC_000001.10 |
| cg00760490 | 3.12E-07 | 4.00E-08 | 5.72 | 7.6190741 | 6.66E-02 | 60214776  | 60214899  | NC_000017.10 |
| cg02695467 | 3.13E-07 | 4.01E-08 | 5.72 | 7.6177573 | 1.81E-01 | 1446581   | 1446704   | NC_000019.9  |
| cg16667279 | 3.13E-07 | 4.01E-08 | 5.72 | 7.6173398 | 1.15E-01 | 11591998  | 11592121  | NC_000019.9  |
| cg17338430 | 3.13E-07 | 4.01E-08 | 5.72 | 7.6169032 | 1.50E-01 | 170739853 | 170739976 | NC_000005.9  |
| cg21845300 | 3.13E-07 | 4.01E-08 | 5.72 | 7.6165944 | 8.12E-02 | 169605650 | 169605773 | NC_000004.11 |
| cg03690956 | 3.13E-07 | 4.01E-08 | 5.72 | 7.616381  | 1.17E-01 | 118900324 | 118900447 | NC_000010.10 |
| cg07268240 | 3.13E-07 | 4.01E-08 | 5.72 | 7.6163667 | 9.38E-02 | 88371417  | 88371540  | NC_000016.9  |
| cg16064261 | 3.13E-07 | 4.02E-08 | 5.72 | 7.6154053 | 3.15E-02 | 1830749   | 1830872   | NC_000008.10 |
| cg16214582 | 3.13E-07 | 4.02E-08 | 5.72 | 7.6150987 | 8.58E-02 | 3685309   | 3685432   | NC_000004.11 |
| cg02120658 | 3.14E-07 | 4.02E-08 | 5.72 | 7.6148641 | 1.13E-01 | 223160297 | 223160420 | NC_000002.11 |
| cg02867763 | 3.14E-07 | 4.02E-08 | 5.72 | 7.6147897 | 1.26E-01 | 140734721 | 140734844 | NC_000005.9  |
| cg10420532 | 3.14E-07 | 4.02E-08 | 5.72 | 7.6140058 | 4.77E-02 | 33297688  | 33297811  | NC_000016.9  |
| cg27567430 | 3.14E-07 | 4.02E-08 | 5.72 | 7.6138497 | 1.22E-01 | 176047151 | 176047274 | NC_000005.9  |
| cg05140069 | 3.14E-07 | 4.02E-08 | 5.72 | 7.6137199 | 1.63E-01 | 13910667  | 13910790  | NC_000001.10 |
| cg24405911 | 3.14E-07 | 4.03E-08 | 5.72 | 7.6126497 | 6.76E-02 | 31146869  | 31146992  | NC_000004.11 |
| cg00336700 | 3.14E-07 | 4.03E-08 | 5.72 | 7.6117151 | 1.17E-01 | 176943704 | 176943827 | NC_000002.11 |
| cg25773262 | 3.15E-07 | 4.03E-08 | 5.72 | 7.611634  | 7.16E-02 | 156616855 | 156616978 | NC_000001.10 |
| cg10186456 | 3.15E-07 | 4.04E-08 | 5.72 | 7.6100634 | 8.17E-02 | 2892912   | 2893035   | NC_000016.9  |
| cg02742969 | 3.15E-07 | 4.04E-08 | 5.72 | 7.6096819 | 6.35E-02 | 172175604 | 172175727 | NC_000005.9  |
| cg05804948 | 3.15E-07 | 4.04E-08 | 5.72 | 7.6095196 | 1.45E-01 | 30717217  | 30717340  | NC_000019.9  |
| cg00405688 | 3.16E-07 | 4.05E-08 | 5.72 | 7.6082977 | 1.64E-01 | 129534182 | 129534305 | NC_000010.10 |



|            |          |          |      |           |          |           |           |              |
|------------|----------|----------|------|-----------|----------|-----------|-----------|--------------|
| cg12165223 | 3.16E-07 | 4.05E-08 | 5.71 | 7.6073543 | 1.26E-01 | 980196    | 980319    | NC_000008.10 |
| cg14598976 | 3.16E-07 | 4.05E-08 | 5.71 | 7.6071227 | 1.95E-01 | 13200685  | 13200808  | NC_000020.10 |
| cg26424888 | 3.16E-07 | 4.05E-08 | 5.71 | 7.6069264 | 1.07E-01 | 74037163  | 74037286  | NC_000011.9  |
| cg13360823 | 3.16E-07 | 4.05E-08 | 5.71 | 7.6064803 | 8.93E-02 | 54496353  | 54496476  | NC_000019.9  |
| cg03601372 | 3.16E-07 | 4.06E-08 | 5.71 | 7.606209  | 1.23E-01 | 37267026  | 37267149  | NC_000019.9  |
| cg08681855 | 3.16E-07 | 4.06E-08 | 5.71 | 7.6059895 | 1.01E-01 | 52957051  | 52957174  | NC_000019.9  |
| cg00447208 | 3.16E-07 | 4.06E-08 | 5.71 | 7.6059635 | 1.05E-01 | 76126301  | 76126424  | NC_000017.10 |
| cg26290926 | 3.16E-07 | 4.06E-08 | 5.71 | 7.6057589 | 1.17E-01 | 89147965  | 89148088  | NC_000015.9  |
| cg09072230 | 3.16E-07 | 4.06E-08 | 5.71 | 7.6056838 | 1.21E-01 | 16918440  | 16918563  | NC_000011.9  |
| cg11038843 | 3.16E-07 | 4.06E-08 | 5.71 | 7.6056222 | 1.17E-01 | 134281391 | 134281514 | NC_000011.9  |
| cg14472390 | 3.17E-07 | 4.06E-08 | 5.71 | 7.6042409 | 8.87E-02 | 140740387 | 140740510 | NC_000005.9  |
| cg25938042 | 3.17E-07 | 4.06E-08 | 5.71 | 7.6040813 | 1.50E-01 | 87637283  | 87637406  | NC_000016.9  |
| cg19324940 | 3.17E-07 | 4.07E-08 | 5.71 | 7.6023756 | 1.44E-01 | 134213992 | 134214115 | NC_000006.11 |
| cg22456251 | 3.17E-07 | 4.07E-08 | 5.71 | 7.6019851 | 8.31E-02 | 89155073  | 89155196  | NC_000015.9  |
| cg11826663 | 3.18E-07 | 4.08E-08 | 5.71 | 7.6015426 | 7.34E-02 | 25068754  | 25068877  | NC_000015.9  |
| cg23598419 | 3.18E-07 | 4.08E-08 | 5.71 | 7.6012181 | 1.44E-01 | 25391042  | 25391165  | NC_000002.11 |
| cg13493620 | 3.18E-07 | 4.08E-08 | 5.71 | 7.6006531 | 6.46E-02 | 129248912 | 129249035 | NC_000009.11 |
| cg26790091 | 3.18E-07 | 4.08E-08 | 5.71 | 7.6001627 | 8.97E-02 | 50702460  | 50702583  | NC_000022.10 |
| cg22333960 | 3.18E-07 | 4.08E-08 | 5.71 | 7.6000908 | 1.55E-01 | 18435619  | 18435742  | NC_000001.10 |
| cg26029736 | 3.18E-07 | 4.08E-08 | 5.71 | 7.5993728 | 1.53E-01 | 105760375 | 105760498 | NC_000002.11 |
| cg10124812 | 3.18E-07 | 4.08E-08 | 5.71 | 7.5993217 | 8.55E-02 | 54087517  | 54087640  | NC_000002.11 |
| cg03631561 | 3.19E-07 | 4.09E-08 | 5.71 | 7.5984142 | 1.55E-01 | 57414626  | 57414749  | NC_000011.9  |
| cg09768178 | 3.19E-07 | 4.09E-08 | 5.71 | 7.5978776 | 8.58E-02 | 22605188  | 22605311  | NC_000019.9  |
| cg14931230 | 3.19E-07 | 4.09E-08 | 5.71 | 7.5978318 | 1.56E-01 | 44324901  | 44325024  | NC_000019.9  |
| cg07665923 | 3.19E-07 | 4.10E-08 | 5.71 | 7.5967683 | 5.71E-02 | 1174784   | 1174907   | NC_000007.13 |

|            |          |          |      |           |          |           |           |              |
|------------|----------|----------|------|-----------|----------|-----------|-----------|--------------|
| cg07953201 | 3.19E-07 | 4.10E-08 | 5.71 | 7.5966626 | 1.24E-01 | 245851802 | 245851925 | NC_000001.10 |
| cg01422881 | 3.19E-07 | 4.10E-08 | 5.71 | 7.5966474 | 1.08E-01 | 44873692  | 44873815  | NC_000001.10 |
| cg05410198 | 3.19E-07 | 4.10E-08 | 5.71 | 7.596544  | 8.43E-02 | 186915302 | 186915425 | NC_000003.11 |
| cg18027654 | 3.19E-07 | 4.10E-08 | 5.71 | 7.5954865 | 9.28E-02 | 23894436  | 23894559  | NC_000001.10 |
| cg18383603 | 3.19E-07 | 4.10E-08 | 5.71 | 7.5953982 | 1.92E-02 | 43200626  | 43200749  | NC_000001.10 |
| cg16318036 | 3.19E-07 | 4.10E-08 | 5.71 | 7.5953791 | 8.82E-02 | 32038045  | 32038168  | NC_000006.11 |
| cg06255741 | 3.19E-07 | 4.10E-08 | 5.71 | 7.5952734 | 4.34E-02 | 2186923   | 2187046   | NC_000016.9  |
| cg09034601 | 3.20E-07 | 4.10E-08 | 5.71 | 7.5947516 | 1.90E-01 | 28175888  | 28176011  | NC_000006.11 |
| cg00780456 | 3.20E-07 | 4.11E-08 | 5.71 | 7.5943214 | 5.12E-02 | 92046216  | 92046339  | NC_000008.10 |
| cg26667946 | 3.20E-07 | 4.11E-08 | 5.71 | 7.5941221 | 1.93E-01 | 46425874  | 46425997  | NC_000013.10 |
| cg12238853 | 3.20E-07 | 4.11E-08 | 5.71 | 7.5932558 | 7.63E-02 | 62575098  | 62575221  | NC_000007.13 |
| cg13511576 | 3.21E-07 | 4.12E-08 | 5.71 | 7.5915756 | 7.03E-02 | 31634890  | 31635013  | NC_000006.11 |
| cg05610198 | 3.21E-07 | 4.12E-08 | 5.71 | 7.5905953 | 2.95E-02 | 55808934  | 55809057  | NC_000007.13 |
| cg27346707 | 3.21E-07 | 4.12E-08 | 5.71 | 7.5904459 | 1.26E-01 | 126626348 | 126626471 | NC_000005.9  |
| cg05501509 | 3.21E-07 | 4.12E-08 | 5.71 | 7.5902437 | 1.14E-01 | 75789529  | 75789652  | NC_000017.10 |
| cg21488876 | 3.21E-07 | 4.12E-08 | 5.71 | 7.5901903 | 1.02E-01 | 5250376   | 5250499   | NC_000019.9  |
| cg13185218 | 3.21E-07 | 4.13E-08 | 5.71 | 7.5893888 | 2.84E-02 | 77382822  | 77382945  | NC_000014.8  |
| cg10841124 | 3.21E-07 | 4.13E-08 | 5.71 | 7.5892856 | 8.90E-02 | 433274    | 433397    | NC_000005.9  |
| cg13686615 | 3.21E-07 | 4.13E-08 | 5.71 | 7.588561  | 3.17E-01 | 71503742  | 71503865  | NC_000002.11 |
| cg14739039 | 3.22E-07 | 4.13E-08 | 5.71 | 7.5883778 | 2.98E-02 | 10761757  | 10761880  | NC_000005.9  |
| cg17381377 | 3.22E-07 | 4.13E-08 | 5.71 | 7.5878044 | 1.39E-01 | 17498601  | 17498724  | NC_000011.9  |
| cg24150623 | 3.22E-07 | 4.13E-08 | 5.71 | 7.587663  | 1.58E-01 | 121971092 | 121971215 | NC_000011.9  |
| cg10073698 | 3.22E-07 | 4.13E-08 | 5.71 | 7.5875487 | 3.25E-02 | 71335214  | 71335337  | NC_000015.9  |
| cg00594560 | 3.22E-07 | 4.13E-08 | 5.71 | 7.5874925 | 1.28E-01 | 77593242  | 77593365  | NC_000008.10 |
| cg04154281 | 3.22E-07 | 4.14E-08 | 5.71 | 7.5871968 | 5.79E-02 | 42289838  | 42289961  | NC_000017.10 |

|            |          |          |      |           |          |           |           |              |
|------------|----------|----------|------|-----------|----------|-----------|-----------|--------------|
| cg17153775 | 3.23E-07 | 4.15E-08 | 5.71 | 7.5849643 | 4.54E-02 | 3512117   | 3512240   | NC_000001.10 |
| cg27363829 | 3.23E-07 | 4.15E-08 | 5.71 | 7.5847862 | 2.04E-01 | 164914614 | 164914737 | NC_000003.11 |
| cg25097497 | 3.23E-07 | 4.15E-08 | 5.71 | 7.5841851 | 1.26E-01 | 8689975   | 8690098   | NC_000004.11 |
| cg01989504 | 3.23E-07 | 4.15E-08 | 5.71 | 7.5839398 | 5.21E-02 | 1256651   | 1256774   | NC_000011.9  |
| cg26646558 | 3.23E-07 | 4.15E-08 | 5.71 | 7.5836098 | 1.13E-01 | 34441787  | 34441910  | NC_000016.9  |
| cg22664157 | 3.23E-07 | 4.15E-08 | 5.71 | 7.5834504 | 1.09E-02 | 134210811 | 134210934 | NC_000010.10 |
| cg00232827 | 3.23E-07 | 4.15E-08 | 5.71 | 7.5833744 | 5.38E-02 | 172096764 | 172096887 | NC_000005.9  |
| cg01477015 | 3.23E-07 | 4.15E-08 | 5.71 | 7.58305   | 2.90E-02 | 28948319  | 28948442  | NC_000016.9  |
| cg11413039 | 3.23E-07 | 4.15E-08 | 5.71 | 7.5830439 | 1.33E-01 | 125774447 | 125774570 | NC_000011.9  |
| cg14016366 | 3.23E-07 | 4.15E-08 | 5.71 | 7.5828879 | 6.75E-02 | 156277454 | 156277577 | NC_000005.9  |
| cg16533359 | 3.23E-07 | 4.16E-08 | 5.71 | 7.582368  | 7.39E-02 | 11710597  | 11710720  | NC_000006.11 |
| cg05021638 | 3.24E-07 | 4.16E-08 | 5.71 | 7.5818459 | 1.88E-01 | 21647026  | 21647149  | NC_000008.10 |
| cg00388673 | 3.24E-07 | 4.16E-08 | 5.71 | 7.5803738 | 1.01E-01 | 99729460  | 99729583  | NC_000001.10 |
| cg16648841 | 3.24E-07 | 4.17E-08 | 5.71 | 7.5795703 | 1.10E-01 | 57320685  | 57320808  | NC_000001.10 |
| cg09988118 | 3.24E-07 | 4.17E-08 | 5.71 | 7.5793046 | 1.42E-01 | 85472307  | 85472430  | NC_000006.11 |
| cg13200838 | 3.25E-07 | 4.18E-08 | 5.71 | 7.5773532 | 1.44E-01 | 91194708  | 91194831  | NC_000001.10 |
| cg04713789 | 3.25E-07 | 4.18E-08 | 5.71 | 7.5762987 | 4.59E-02 | 63684458  | 63684581  | NC_000004.11 |
| cg16761390 | 3.25E-07 | 4.19E-08 | 5.71 | 7.5756117 | 1.66E-01 | 27290724  | 27290847  | NC_000007.13 |
| cg04690917 | 3.25E-07 | 4.19E-08 | 5.71 | 7.5755988 | 4.64E-02 | 19743268  | 19743391  | NC_000002.11 |
| cg06635722 | 3.26E-07 | 4.19E-08 | 5.71 | 7.5754772 | 1.19E-01 | 13532622  | 13532745  | NC_000004.11 |
| cg13777287 | 3.26E-07 | 4.19E-08 | 5.71 | 7.574911  | 1.41E-01 | 154830168 | 154830291 | NC_000006.11 |
| cg03709938 | 3.26E-07 | 4.19E-08 | 5.71 | 7.5741039 | 1.59E-01 | 2560950   | 2561073   | NC_000001.10 |
| cg27623867 | 3.26E-07 | 4.19E-08 | 5.71 | 7.5738868 | 4.05E-02 | 88347592  | 88347715  | NC_000004.11 |
| cg11855615 | 3.26E-07 | 4.19E-08 | 5.71 | 7.5736469 | 1.16E-01 | 33817136  | 33817259  | NC_000017.10 |
| cg26218977 | 3.26E-07 | 4.20E-08 | 5.71 | 7.5730262 | 8.58E-02 | 18336352  | 18336475  | NC_000019.9  |

|            |          |          |      |           |          |           |           |              |
|------------|----------|----------|------|-----------|----------|-----------|-----------|--------------|
| cg11726648 | 3.27E-07 | 4.20E-08 | 5.71 | 7.571692  | 1.26E-01 | 19561035  | 19561158  | NC_000002.11 |
| cg20747000 | 3.27E-07 | 4.20E-08 | 5.71 | 7.5716697 | 2.03E-01 | 500323    | 500446    | NC_000018.9  |
| cg09546907 | 3.27E-07 | 4.20E-08 | 5.71 | 7.5712252 | 1.72E-01 | 136553289 | 136553412 | NC_000007.13 |
| cg01747792 | 3.27E-07 | 4.20E-08 | 5.71 | 7.5712111 | 1.31E-01 | 61806628  | 61806751  | NC_000020.10 |
| cg25304107 | 3.27E-07 | 4.21E-08 | 5.71 | 7.5707059 | 1.28E-01 | 177017331 | 177017454 | NC_000002.11 |
| cg03332109 | 3.27E-07 | 4.21E-08 | 5.71 | 7.5692616 | 9.34E-02 | 126360468 | 126360591 | NC_000011.9  |
| cg01080998 | 3.27E-07 | 4.21E-08 | 5.71 | 7.5692065 | 9.62E-02 | 87981177  | 87981300  | NC_000005.9  |
| cg00647246 | 3.27E-07 | 4.21E-08 | 5.71 | 7.5690917 | 1.01E-01 | 157071437 | 157071560 | NC_000007.13 |
| cg27468506 | 3.28E-07 | 4.22E-08 | 5.71 | 7.568619  | 4.48E-02 | 27048602  | 27048725  | NC_000013.10 |
| cg21354912 | 3.28E-07 | 4.22E-08 | 5.71 | 7.5684817 | 5.87E-02 | 61472145  | 61472268  | NC_000018.9  |
| cg17331566 | 3.28E-07 | 4.22E-08 | 5.71 | 7.5681659 | 6.71E-02 | 44444305  | 44444428  | NC_000001.10 |
| cg19662219 | 3.28E-07 | 4.22E-08 | 5.71 | 7.5681107 | 8.66E-02 | 34260719  | 34260842  | NC_000015.9  |
| cg13702996 | 3.28E-07 | 4.22E-08 | 5.71 | 7.5674021 | 1.20E-01 | 176189    | 176312    | NC_000012.11 |
| cg22862846 | 3.28E-07 | 4.22E-08 | 5.71 | 7.5671141 | 5.73E-02 | 28560543  | 28560666  | NC_000001.10 |
| cg05697976 | 3.28E-07 | 4.23E-08 | 5.71 | 7.5658571 | 1.17E-01 | 29376483  | 29376606  | NC_000012.11 |
| cg27338487 | 3.28E-07 | 4.23E-08 | 5.71 | 7.5658294 | 1.23E-01 | 56887404  | 56887527  | NC_000018.9  |
| cg20801110 | 3.29E-07 | 4.23E-08 | 5.71 | 7.5651235 | 9.56E-02 | 75136007  | 75136130  | NC_000015.9  |
| cg03206741 | 3.29E-07 | 4.23E-08 | 5.71 | 7.5643931 | 1.61E-01 | 105235385 | 105235508 | NC_000008.10 |
| cg07981495 | 3.29E-07 | 4.24E-08 | 5.71 | 7.563158  | 5.25E-02 | 87804765  | 87804888  | NC_000006.11 |
| cg03233940 | 3.29E-07 | 4.24E-08 | 5.71 | 7.5629494 | 7.32E-02 | 37894644  | 37894767  | NC_000019.9  |
| cg08387463 | 3.29E-07 | 4.24E-08 | 5.71 | 7.5628201 | 2.92E-02 | 143694547 | 143694670 | NC_000008.10 |
| cg15747733 | 3.30E-07 | 4.25E-08 | 5.71 | 7.5617302 | 9.52E-02 | 88850398  | 88850521  | NC_000010.10 |
| cg20364512 | 3.30E-07 | 4.25E-08 | 5.71 | 7.5606098 | 5.64E-02 | 28199338  | 28199461  | NC_000022.10 |
| cg12010413 | 3.30E-07 | 4.25E-08 | 5.71 | 7.5605596 | 3.08E-02 | 138851802 | 138851925 | NC_000002.11 |
| cg23634087 | 3.30E-07 | 4.25E-08 | 5.71 | 7.5603187 | 1.44E-01 | 50721797  | 50721920  | NC_000020.10 |

|            |          |          |      |           |          |           |           |              |
|------------|----------|----------|------|-----------|----------|-----------|-----------|--------------|
| cg26297344 | 3.30E-07 | 4.25E-08 | 5.71 | 7.5596368 | 9.17E-02 | 111151163 | 111151286 | NC_000001.10 |
| cg03747002 | 3.31E-07 | 4.26E-08 | 5.71 | 7.5594489 | 6.80E-02 | 7907439   | 7907562   | NC_000017.10 |
| cg25884812 | 3.31E-07 | 4.26E-08 | 5.7  | 7.5578272 | 4.98E-02 | 1233185   | 1233308   | NC_000010.10 |
| cg23091984 | 3.31E-07 | 4.26E-08 | 5.7  | 7.5576959 | 1.32E-01 | 31839664  | 31839787  | NC_000019.9  |
| cg10595547 | 3.31E-07 | 4.27E-08 | 5.7  | 7.556522  | 1.29E-01 | 119310911 | 119311034 | NC_000010.10 |
| cg02557652 | 3.32E-07 | 4.27E-08 | 5.7  | 7.5559302 | 1.43E-01 | 89741016  | 89741139  | NC_000015.9  |
| cg23013977 | 3.32E-07 | 4.27E-08 | 5.7  | 7.555681  | 6.99E-02 | 36523056  | 36523179  | NC_000019.9  |
| cg19212224 | 3.32E-07 | 4.27E-08 | 5.7  | 7.5556158 | 1.68E-01 | 97362705  | 97362828  | NC_000007.13 |
| cg03302088 | 3.32E-07 | 4.27E-08 | 5.7  | 7.555576  | 1.03E-01 | 3163717   | 3163840   | NC_000019.9  |
| cg16746576 | 3.32E-07 | 4.27E-08 | 5.7  | 7.5554775 | 1.55E-01 | 99962118  | 99962241  | NC_000008.10 |
| cg01043019 | 3.32E-07 | 4.27E-08 | 5.7  | 7.5551118 | 1.90E-01 | 127440510 | 127440633 | NC_000006.11 |
| cg13157757 | 3.32E-07 | 4.28E-08 | 5.7  | 7.5547056 | 1.23E-01 | 76250351  | 76250474  | NC_000005.9  |
| cg08542715 | 3.32E-07 | 4.28E-08 | 5.7  | 7.554671  | 8.35E-02 | 34217960  | 34218083  | NC_000017.10 |
| cg00338345 | 3.32E-07 | 4.28E-08 | 5.7  | 7.5544012 | 7.68E-02 | 149224717 | 149224840 | NC_000001.10 |
| cg06888626 | 3.32E-07 | 4.28E-08 | 5.7  | 7.5540092 | 2.23E-02 | 47137631  | 47137754  | NC_000001.10 |
| cg12093775 | 3.32E-07 | 4.28E-08 | 5.7  | 7.5535625 | 1.26E-01 | 112548065 | 112548188 | NC_000013.10 |
| cg18595228 | 3.33E-07 | 4.29E-08 | 5.7  | 7.5523843 | 2.95E-02 | 67193261  | 67193384  | NC_000015.9  |
| cg19117520 | 3.33E-07 | 4.29E-08 | 5.7  | 7.551773  | 7.23E-02 | 184323638 | 184323761 | NC_000004.11 |
| cg26667699 | 3.33E-07 | 4.29E-08 | 5.7  | 7.5505266 | 1.66E-01 | 178017667 | 178017790 | NC_000005.9  |
| cg24930536 | 3.34E-07 | 4.30E-08 | 5.7  | 7.5499014 | 6.88E-02 | 79615807  | 79615930  | NC_000017.10 |
| cg04359129 | 3.34E-07 | 4.30E-08 | 5.7  | 7.5483594 | 1.24E-01 | 104178936 | 104179059 | NC_000010.10 |
| cg10756252 | 3.34E-07 | 4.30E-08 | 5.7  | 7.5483001 | 2.06E-02 | 17855970  | 17856093  | NC_000019.9  |
| cg15398400 | 3.34E-07 | 4.31E-08 | 5.7  | 7.5478468 | 7.79E-02 | 118429481 | 118429604 | NC_000010.10 |
| cg03248970 | 3.35E-07 | 4.31E-08 | 5.7  | 7.546417  | 1.03E-01 | 29198393  | 29198516  | NC_000016.9  |
| cg26581714 | 3.35E-07 | 4.31E-08 | 5.7  | 7.5464163 | 1.34E-01 | 52943247  | 52943370  | NC_000004.11 |

|            |          |          |     |           |          |           |           |              |
|------------|----------|----------|-----|-----------|----------|-----------|-----------|--------------|
| cg26796642 | 3.35E-07 | 4.32E-08 | 5.7 | 7.5455382 | 7.02E-02 | 6204224   | 6204347   | NC_000001.10 |
| cg12093371 | 3.35E-07 | 4.32E-08 | 5.7 | 7.5449377 | 1.71E-01 | 130339316 | 130339439 | NC_000010.10 |
| cg05125843 | 3.35E-07 | 4.32E-08 | 5.7 | 7.5448595 | 2.86E-02 | 133382227 | 133382350 | NC_000012.11 |
| cg15285112 | 3.35E-07 | 4.32E-08 | 5.7 | 7.5447416 | 4.52E-02 | 26215075  | 26215198  | NC_000017.10 |
| cg25102206 | 3.36E-07 | 4.33E-08 | 5.7 | 7.5426221 | 8.36E-02 | 75897342  | 75897465  | NC_000014.8  |
| cg07658357 | 3.36E-07 | 4.33E-08 | 5.7 | 7.5423037 | 1.15E-01 | 114839476 | 114839599 | NC_000012.11 |
| cg02939879 | 3.36E-07 | 4.33E-08 | 5.7 | 7.5422861 | 9.12E-02 | 68762243  | 68762366  | NC_000011.9  |
| cg17507573 | 3.36E-07 | 4.33E-08 | 5.7 | 7.5417128 | 1.45E-01 | 79382998  | 79383121  | NC_000015.9  |
| cg11315153 | 3.36E-07 | 4.33E-08 | 5.7 | 7.5415042 | 1.42E-01 | 62996299  | 62996422  | NC_000006.11 |
| cg03130816 | 3.37E-07 | 4.35E-08 | 5.7 | 7.5382554 | 9.89E-02 | 39456103  | 39456226  | NC_000001.10 |
| cg21852342 | 3.37E-07 | 4.35E-08 | 5.7 | 7.5377179 | 9.19E-02 | 9533948   | 9534071   | NC_000004.11 |
| cg16999584 | 3.38E-07 | 4.35E-08 | 5.7 | 7.5374766 | 4.52E-02 | 169559716 | 169559839 | NC_000006.11 |
| cg10845147 | 3.38E-07 | 4.35E-08 | 5.7 | 7.5373074 | 5.78E-02 | 172149624 | 172149747 | NC_000005.9  |
| cg01749491 | 3.38E-07 | 4.35E-08 | 5.7 | 7.5371266 | 1.58E-01 | 176948693 | 176948816 | NC_000002.11 |
| cg11815570 | 3.38E-07 | 4.36E-08 | 5.7 | 7.5366329 | 2.64E-02 | 178697    | 178820    | NC_000017.10 |
| cg03222323 | 3.38E-07 | 4.36E-08 | 5.7 | 7.5366295 | 1.42E-01 | 59534903  | 59535026  | NC_000017.10 |
| cg03382306 | 3.38E-07 | 4.36E-08 | 5.7 | 7.5360212 | 1.15E-01 | 66097959  | 66098082  | NC_000015.9  |
| cg07640648 | 3.38E-07 | 4.36E-08 | 5.7 | 7.5346939 | 1.56E-01 | 39993697  | 39993820  | NC_000019.9  |
| cg24449777 | 3.39E-07 | 4.37E-08 | 5.7 | 7.5338282 | 1.55E-01 | 99279483  | 99279606  | NC_000006.11 |
| cg20608786 | 3.39E-07 | 4.38E-08 | 5.7 | 7.531978  | 2.66E-02 | 121265838 | 121265961 | NC_000010.10 |
| cg17803868 | 3.39E-07 | 4.38E-08 | 5.7 | 7.5318689 | 1.60E-01 | 155250900 | 155251023 | NC_000007.13 |
| cg25988603 | 3.40E-07 | 4.39E-08 | 5.7 | 7.5300556 | 4.35E-02 | 149784337 | 149784460 | NC_000005.9  |
| cg02388718 | 3.40E-07 | 4.39E-08 | 5.7 | 7.5292842 | 1.10E-01 | 27282580  | 27282703  | NC_000009.11 |
| cg22022442 | 3.40E-07 | 4.39E-08 | 5.7 | 7.5292286 | 1.14E-01 | 31811083  | 31811206  | NC_000012.11 |
| cg20505457 | 3.40E-07 | 4.39E-08 | 5.7 | 7.528494  | 8.63E-02 | 69388953  | 69389076  | NC_000014.8  |

|            |          |          |     |           |          |           |           |              |
|------------|----------|----------|-----|-----------|----------|-----------|-----------|--------------|
| cg12223336 | 3.41E-07 | 4.39E-08 | 5.7 | 7.5280882 | 1.18E-01 | 12717059  | 12717182  | NC_000011.9  |
| cg10878412 | 3.41E-07 | 4.40E-08 | 5.7 | 7.527442  | 1.99E-01 | 179780314 | 179780437 | NC_000005.9  |
| cg10635188 | 3.41E-07 | 4.40E-08 | 5.7 | 7.5267493 | 1.01E-01 | 97706801  | 97706924  | NC_000012.11 |
| cg23179456 | 3.41E-07 | 4.40E-08 | 5.7 | 7.5258326 | 2.41E-01 | 24803873  | 24803996  | NC_000014.8  |
| cg06291867 | 3.42E-07 | 4.41E-08 | 5.7 | 7.5252776 | 1.15E-01 | 92617162  | 92617285  | NC_000010.10 |
| cg09867953 | 3.42E-07 | 4.41E-08 | 5.7 | 7.5247681 | 8.71E-02 | 23706666  | 23706789  | NC_000016.9  |
| cg06711254 | 3.42E-07 | 4.41E-08 | 5.7 | 7.5245164 | 1.29E-01 | 186924071 | 186924194 | NC_000002.11 |
| cg03400785 | 3.42E-07 | 4.41E-08 | 5.7 | 7.5242674 | 1.02E-01 | 140794962 | 140795085 | NC_000005.9  |
| cg26955275 | 3.42E-07 | 4.41E-08 | 5.7 | 7.5236335 | 8.59E-02 | 129931908 | 129932031 | NC_000007.13 |
| cg07664312 | 3.43E-07 | 4.42E-08 | 5.7 | 7.5217174 | 5.03E-02 | 18433550  | 18433673  | NC_000012.11 |
| cg15400238 | 3.43E-07 | 4.42E-08 | 5.7 | 7.5215444 | 1.61E-01 | 154335640 | 154335763 | NC_000002.11 |
| cg08285489 | 3.43E-07 | 4.43E-08 | 5.7 | 7.5211339 | 4.50E-02 | 7115766   | 7115889   | NC_000019.9  |
| cg01295399 | 3.43E-07 | 4.43E-08 | 5.7 | 7.5208425 | 7.53E-02 | 50820278  | 50820401  | NC_000010.10 |
| cg00605063 | 3.44E-07 | 4.44E-08 | 5.7 | 7.5190611 | 1.24E-01 | 27289128  | 27289251  | NC_000007.13 |
| cg23388086 | 3.44E-07 | 4.44E-08 | 5.7 | 7.5190357 | 4.76E-02 | 9340033   | 9340156   | NC_000011.9  |
| cg10601476 | 3.45E-07 | 4.45E-08 | 5.7 | 7.5160688 | 2.38E-02 | 1437284   | 1437407   | NC_000017.10 |
| cg07854182 | 3.45E-07 | 4.45E-08 | 5.7 | 7.5160136 | 5.10E-02 | 47460364  | 47460487  | NC_000021.8  |
| cg00966930 | 3.45E-07 | 4.45E-08 | 5.7 | 7.5159738 | 5.36E-02 | 248300402 | 248300525 | NC_000001.10 |
| cg03389720 | 3.45E-07 | 4.45E-08 | 5.7 | 7.5157485 | 1.00E-01 | 8780048   | 8780171   | NC_000016.9  |
| cg18840273 | 3.45E-07 | 4.45E-08 | 5.7 | 7.515356  | 1.13E-01 | 5890631   | 5890754   | NC_000004.11 |
| cg06664357 | 3.45E-07 | 4.46E-08 | 5.7 | 7.5132707 | 1.02E-01 | 39993390  | 39993513  | NC_000019.9  |
| cg13033814 | 3.46E-07 | 4.46E-08 | 5.7 | 7.51264   | 1.65E-01 | 31830035  | 31830158  | NC_000006.11 |
| cg08252579 | 3.46E-07 | 4.47E-08 | 5.7 | 7.5123656 | 1.51E-01 | 62359773  | 62359896  | NC_000003.11 |
| cg20778688 | 3.46E-07 | 4.47E-08 | 5.7 | 7.5117241 | 5.43E-02 | 35657046  | 35657169  | NC_000017.10 |
| cg26330928 | 3.46E-07 | 4.47E-08 | 5.7 | 7.5113328 | 5.99E-02 | 98743612  | 98743735  | NC_000001.10 |

|            |          |          |      |           |          |           |           |              |
|------------|----------|----------|------|-----------|----------|-----------|-----------|--------------|
| cg21892685 | 3.46E-07 | 4.47E-08 | 5.7  | 7.5107546 | 3.04E-02 | 77168991  | 77169114  | NC_000004.11 |
| cg08874609 | 3.47E-07 | 4.48E-08 | 5.69 | 7.5084002 | 1.06E-01 | 126626360 | 126626483 | NC_000005.9  |
| cg08046044 | 3.47E-07 | 4.49E-08 | 5.69 | 7.5076297 | 1.33E-01 | 54419614  | 54419737  | NC_000014.8  |
| cg15440157 | 3.47E-07 | 4.49E-08 | 5.69 | 7.507433  | 4.48E-02 | 149753446 | 149753569 | NC_000003.11 |
| cg18472549 | 3.47E-07 | 4.49E-08 | 5.69 | 7.5072052 | 7.10E-02 | 107228006 | 107228129 | NC_000008.10 |
| cg10533331 | 3.48E-07 | 4.49E-08 | 5.69 | 7.5067552 | 1.13E-01 | 38857695  | 38857818  | NC_000015.9  |
| cg14421860 | 3.48E-07 | 4.49E-08 | 5.69 | 7.5064632 | 2.37E-01 | 101004934 | 101005057 | NC_000001.10 |
| cg08432971 | 3.48E-07 | 4.49E-08 | 5.69 | 7.5062056 | 8.93E-02 | 178423309 | 178423432 | NC_000005.9  |
| cg16148956 | 3.48E-07 | 4.50E-08 | 5.69 | 7.5060565 | 7.14E-02 | 54140771  | 54140894  | NC_000008.10 |
| cg21187352 | 3.48E-07 | 4.50E-08 | 5.69 | 7.5058615 | 1.31E-01 | 6903327   | 6903450   | NC_000003.11 |
| cg14542583 | 3.48E-07 | 4.50E-08 | 5.69 | 7.5056372 | 1.04E-01 | 38886667  | 38886790  | NC_000019.9  |
| cg17840203 | 3.48E-07 | 4.50E-08 | 5.69 | 7.5053627 | 6.26E-02 | 52623245  | 52623368  | NC_000006.11 |
| cg23654767 | 3.48E-07 | 4.50E-08 | 5.69 | 7.5042767 | 4.93E-02 | 101192981 | 101193104 | NC_000002.11 |
| cg08590257 | 3.48E-07 | 4.50E-08 | 5.69 | 7.5041174 | 7.65E-02 | 159796425 | 159796548 | NC_000006.11 |
| cg24383467 | 3.49E-07 | 4.50E-08 | 5.69 | 7.5039486 | 1.10E-01 | 11893602  | 11893725  | NC_000011.9  |
| cg08882707 | 3.49E-07 | 4.51E-08 | 5.69 | 7.5032459 | 2.70E-02 | 44283283  | 44283406  | NC_000003.11 |
| cg02022380 | 3.49E-07 | 4.51E-08 | 5.69 | 7.5018965 | 8.93E-02 | 101347044 | 101347167 | NC_000014.8  |
| cg03883295 | 3.49E-07 | 4.51E-08 | 5.69 | 7.5018448 | 1.22E-01 | 119603489 | 119603612 | NC_000002.11 |
| cg09105881 | 3.49E-07 | 4.52E-08 | 5.69 | 7.5014022 | 1.21E-01 | 87230060  | 87230183  | NC_000007.13 |
| cg15163862 | 3.49E-07 | 4.52E-08 | 5.69 | 7.5010055 | 9.14E-02 | 76721440  | 76721563  | NC_000010.10 |
| cg11564275 | 3.50E-07 | 4.52E-08 | 5.69 | 7.5005267 | 9.15E-02 | 29158364  | 29158487  | NC_000013.10 |
| cg08868447 | 3.50E-07 | 4.53E-08 | 5.69 | 7.4989596 | 3.26E-02 | 42000667  | 42000790  | NC_000013.10 |
| cg16749235 | 3.50E-07 | 4.53E-08 | 5.69 | 7.4989234 | 1.31E-01 | 25901422  | 25901545  | NC_000008.10 |
| cg17545232 | 3.50E-07 | 4.53E-08 | 5.69 | 7.4988509 | 4.01E-02 | 97584458  | 97584581  | NC_000007.13 |
| cg13297865 | 3.51E-07 | 4.53E-08 | 5.69 | 7.497621  | 1.70E-01 | 80657415  | 80657538  | NC_000006.11 |



|            |          |          |      |           |          |           |           |              |
|------------|----------|----------|------|-----------|----------|-----------|-----------|--------------|
| cg15406683 | 3.51E-07 | 4.54E-08 | 5.69 | 7.4970407 | 2.06E-01 | 23983990  | 23984113  | NC_000010.10 |
| cg23916284 | 3.51E-07 | 4.54E-08 | 5.69 | 7.4964815 | 8.82E-02 | 26358537  | 26358660  | NC_000004.11 |
| cg11721803 | 3.51E-07 | 4.54E-08 | 5.69 | 7.4961436 | 1.75E-01 | 48398380  | 48398503  | NC_000012.11 |
| cg18756179 | 3.51E-07 | 4.54E-08 | 5.69 | 7.495383  | 2.07E-01 | 50554510  | 50554633  | NC_000019.9  |
| cg18158691 | 3.52E-07 | 4.55E-08 | 5.69 | 7.4943488 | 1.95E-02 | 57195432  | 57195555  | NC_000004.11 |
| cg13094313 | 3.52E-07 | 4.55E-08 | 5.69 | 7.4931935 | 4.72E-02 | 62278847  | 62278970  | NC_000014.8  |
| cg05500015 | 3.52E-07 | 4.56E-08 | 5.69 | 7.4926291 | 1.65E-01 | 89867819  | 89867942  | NC_000011.9  |
| cg14355134 | 3.52E-07 | 4.56E-08 | 5.69 | 7.4920434 | 1.25E-01 | 61704021  | 61704144  | NC_000020.10 |
| cg12265623 | 3.53E-07 | 4.57E-08 | 5.69 | 7.4906047 | 1.17E-01 | 8481994   | 8482117   | NC_000007.13 |
| cg07139363 | 3.53E-07 | 4.57E-08 | 5.69 | 7.4901974 | 1.30E-01 | 157381401 | 157381524 | NC_000006.11 |
| cg00151191 | 3.53E-07 | 4.57E-08 | 5.69 | 7.4891325 | 5.24E-02 | 71268532  | 71268655  | NC_000002.11 |
| cg13687996 | 3.54E-07 | 4.58E-08 | 5.69 | 7.4888348 | 1.34E-01 | 5813483   | 5813606   | NC_000002.11 |
| cg21071138 | 3.54E-07 | 4.58E-08 | 5.69 | 7.488708  | 9.37E-02 | 12233184  | 12233307  | NC_000003.11 |
| cg20768515 | 3.54E-07 | 4.58E-08 | 5.69 | 7.488498  | 6.81E-02 | 9471290   | 9471413   | NC_000018.9  |
| cg26649752 | 3.54E-07 | 4.58E-08 | 5.69 | 7.4881958 | 1.62E-01 | 119418110 | 119418233 | NC_000012.11 |
| cg25723217 | 3.54E-07 | 4.58E-08 | 5.69 | 7.4875292 | 7.74E-02 | 69949751  | 69949874  | NC_000011.9  |
| cg09241022 | 3.54E-07 | 4.58E-08 | 5.69 | 7.4872611 | 1.51E-01 | 29254530  | 29254653  | NC_000014.8  |
| cg15598650 | 3.54E-07 | 4.58E-08 | 5.69 | 7.486951  | 1.06E-01 | 123260333 | 123260456 | NC_000010.10 |
| cg17430268 | 3.54E-07 | 4.58E-08 | 5.69 | 7.4868532 | 6.60E-02 | 73501021  | 73501144  | NC_000017.10 |
| cg04820634 | 3.54E-07 | 4.59E-08 | 5.69 | 7.4867531 | 1.47E-01 | 124909415 | 124909538 | NC_000010.10 |
| cg12608723 | 3.54E-07 | 4.59E-08 | 5.69 | 7.4865439 | 4.96E-02 | 176208949 | 176209072 | NC_000005.9  |
| cg24670241 | 3.54E-07 | 4.59E-08 | 5.69 | 7.4863578 | 1.15E-01 | 27282776  | 27282899  | NC_000009.11 |
| cg05190315 | 3.54E-07 | 4.59E-08 | 5.69 | 7.486144  | 1.36E-01 | 170736132 | 170736255 | NC_000005.9  |
| cg08670530 | 3.54E-07 | 4.59E-08 | 5.69 | 7.486138  | 2.73E-02 | 7042894   | 7043017   | NC_000004.11 |
| cg09670535 | 3.55E-07 | 4.59E-08 | 5.69 | 7.4853408 | 1.11E-01 | 18959427  | 18959550  | NC_000001.10 |

|            |          |          |      |           |          |           |           |              |
|------------|----------|----------|------|-----------|----------|-----------|-----------|--------------|
| cg21080452 | 3.55E-07 | 4.59E-08 | 5.69 | 7.4852538 | 5.82E-02 | 29589960  | 29590083  | NC_000006.11 |
| cg19824396 | 3.55E-07 | 4.59E-08 | 5.69 | 7.4852217 | 7.95E-02 | 203018871 | 203018994 | NC_000001.10 |
| cg05717794 | 3.55E-07 | 4.60E-08 | 5.69 | 7.4843316 | 9.69E-02 | 33822621  | 33822744  | NC_000017.10 |
| cg00903242 | 3.55E-07 | 4.60E-08 | 5.69 | 7.4837112 | 1.81E-01 | 238161    | 238284    | NC_000003.11 |
| cg15641162 | 3.56E-07 | 4.61E-08 | 5.69 | 7.4824161 | 1.22E-01 | 185942800 | 185942923 | NC_000004.11 |
| cg19983403 | 3.56E-07 | 4.61E-08 | 5.69 | 7.4806737 | 7.10E-02 | 14683608  | 14683731  | NC_000017.10 |
| cg16117799 | 3.57E-07 | 4.62E-08 | 5.69 | 7.4791985 | 1.23E-01 | 81106857  | 81106980  | NC_000004.11 |
| cg06370357 | 3.57E-07 | 4.62E-08 | 5.69 | 7.4785641 | 1.13E-01 | 60292147  | 60292270  | NC_000015.9  |
| cg09686298 | 3.57E-07 | 4.63E-08 | 5.69 | 7.4774671 | 1.25E-01 | 75255590  | 75255713  | NC_000016.9  |
| cg08949655 | 3.57E-07 | 4.63E-08 | 5.69 | 7.477045  | 1.72E-01 | 176940301 | 176940424 | NC_000002.11 |
| cg14969361 | 3.58E-07 | 4.63E-08 | 5.69 | 7.4765302 | 2.76E-02 | 55464084  | 55464207  | NC_000001.10 |
| cg00862894 | 3.58E-07 | 4.63E-08 | 5.69 | 7.4764255 | 1.39E-01 | 982653    | 982776    | NC_000020.10 |
| cg08988179 | 3.58E-07 | 4.64E-08 | 5.69 | 7.4760865 | 1.11E-01 | 43044765  | 43044888  | NC_000017.10 |
| cg23674788 | 3.58E-07 | 4.64E-08 | 5.69 | 7.4760248 | 4.28E-02 | 39623313  | 39623436  | NC_000017.10 |
| cg23520478 | 3.58E-07 | 4.64E-08 | 5.69 | 7.4755981 | 5.18E-02 | 148721192 | 148721315 | NC_000005.9  |
| cg23661013 | 3.59E-07 | 4.65E-08 | 5.69 | 7.4739623 | 1.14E-01 | 121415506 | 121415629 | NC_000012.11 |
| cg00977377 | 3.59E-07 | 4.65E-08 | 5.69 | 7.4721922 | 3.30E-02 | 108146329 | 108146452 | NC_000006.11 |
| cg04505439 | 3.59E-07 | 4.65E-08 | 5.69 | 7.4721112 | 4.07E-02 | 27498232  | 27498355  | NC_000002.11 |
| cg01730258 | 3.59E-07 | 4.65E-08 | 5.69 | 7.4720564 | 1.01E-01 | 65617742  | 65617865  | NC_000011.9  |
| cg11984566 | 3.59E-07 | 4.66E-08 | 5.69 | 7.4718373 | 3.38E-02 | 74247286  | 74247409  | NC_000002.11 |
| cg00735962 | 3.59E-07 | 4.66E-08 | 5.69 | 7.4717771 | 1.90E-01 | 23847240  | 23847363  | NC_000016.9  |
| cg11913496 | 3.60E-07 | 4.66E-08 | 5.69 | 7.4701636 | 1.39E-01 | 43914226  | 43914349  | NC_000018.9  |
| cg15528028 | 3.60E-07 | 4.67E-08 | 5.69 | 7.4696227 | 1.33E-01 | 33828944  | 33829067  | NC_000001.10 |
| cg26699292 | 3.60E-07 | 4.67E-08 | 5.69 | 7.469557  | 1.42E-01 | 78079801  | 78079924  | NC_000016.9  |
| cg04254347 | 3.60E-07 | 4.67E-08 | 5.69 | 7.4691776 | 1.06E-02 | 2644878   | 2645001   | NC_000020.10 |

|            |          |          |      |           |          |           |           |              |
|------------|----------|----------|------|-----------|----------|-----------|-----------|--------------|
| cg22423750 | 3.60E-07 | 4.67E-08 | 5.69 | 7.469046  | 8.88E-02 | 2334419   | 2334542   | NC_000005.9  |
| cg03738718 | 3.60E-07 | 4.67E-08 | 5.69 | 7.4688177 | 4.12E-02 | 86404572  | 86404695  | NC_000016.9  |
| cg18713166 | 3.60E-07 | 4.67E-08 | 5.69 | 7.4687998 | 4.70E-02 | 17106839  | 17106962  | NC_000017.10 |
| cg08770761 | 3.61E-07 | 4.68E-08 | 5.69 | 7.4678469 | 1.05E-01 | 2563461   | 2563584   | NC_000016.9  |
| cg24663798 | 3.61E-07 | 4.68E-08 | 5.69 | 7.4678012 | 7.11E-02 | 76639743  | 76639866  | NC_000018.9  |
| cg01104277 | 3.61E-07 | 4.68E-08 | 5.69 | 7.4668208 | 4.82E-02 | 207977596 | 207977719 | NC_000001.10 |
| cg03925294 | 3.61E-07 | 4.68E-08 | 5.69 | 7.4668014 | 1.01E-01 | 6247629   | 6247752   | NC_000004.11 |
| cg25190654 | 3.61E-07 | 4.68E-08 | 5.69 | 7.4667151 | 3.89E-02 | 13130178  | 13130301  | NC_000012.11 |
| cg22864077 | 3.61E-07 | 4.68E-08 | 5.69 | 7.4666677 | 1.17E-01 | 131185333 | 131185456 | NC_000002.11 |
| cg10934546 | 3.61E-07 | 4.68E-08 | 5.69 | 7.4665039 | 3.17E-02 | 52885360  | 52885483  | NC_000012.11 |
| cg16377881 | 3.61E-07 | 4.69E-08 | 5.69 | 7.4656429 | 1.97E-01 | 100062488 | 100062611 | NC_000006.11 |
| cg09843874 | 3.61E-07 | 4.69E-08 | 5.69 | 7.4655824 | 1.40E-01 | 51162513  | 51162636  | NC_000019.9  |
| cg05647859 | 3.61E-07 | 4.69E-08 | 5.69 | 7.465404  | 1.62E-01 | 81331718  | 81331841  | NC_000012.11 |
| cg00434395 | 3.61E-07 | 4.69E-08 | 5.69 | 7.4653484 | 5.38E-02 | 59518964  | 59519087  | NC_000011.9  |
| cg23480730 | 3.62E-07 | 4.69E-08 | 5.69 | 7.4650188 | 1.41E-01 | 33402027  | 33402150  | NC_000014.8  |
| cg15288618 | 3.62E-07 | 4.69E-08 | 5.69 | 7.4649599 | 1.22E-01 | 139257775 | 139257898 | NC_000003.11 |
| cg06622953 | 3.62E-07 | 4.69E-08 | 5.69 | 7.4645241 | 9.28E-02 | 54357752  | 54357875  | NC_000012.11 |
| cg21811204 | 3.62E-07 | 4.70E-08 | 5.69 | 7.4635145 | 1.25E-01 | 132158625 | 132158748 | NC_000005.9  |
| cg03672274 | 3.62E-07 | 4.70E-08 | 5.69 | 7.4631183 | 1.28E-01 | 4860468   | 4860591   | NC_000004.11 |
| cg19858718 | 3.62E-07 | 4.70E-08 | 5.69 | 7.4629502 | 1.03E-02 | 123717421 | 123717544 | NC_000012.11 |
| cg23846400 | 3.62E-07 | 4.70E-08 | 5.69 | 7.462423  | 1.19E-01 | 33687040  | 33687163  | NC_000021.8  |
| cg12120741 | 3.63E-07 | 4.70E-08 | 5.69 | 7.4622825 | 8.06E-02 | 78492306  | 78492429  | NC_000013.10 |
| cg11354349 | 3.63E-07 | 4.70E-08 | 5.69 | 7.462061  | 1.46E-01 | 53108165  | 53108288  | NC_000012.11 |
| cg06964190 | 3.63E-07 | 4.70E-08 | 5.69 | 7.4620038 | 1.01E-01 | 61275247  | 61275370  | NC_000011.9  |
| cg14757331 | 3.63E-07 | 4.71E-08 | 5.69 | 7.4615716 | 1.75E-02 | 74211372  | 74211495  | NC_000007.13 |

|            |          |          |      |           |          |           |           |              |
|------------|----------|----------|------|-----------|----------|-----------|-----------|--------------|
| cg06700935 | 3.63E-07 | 4.71E-08 | 5.69 | 7.4613388 | 2.00E-01 | 1704584   | 1704707   | NC_000007.13 |
| cg05967487 | 3.63E-07 | 4.71E-08 | 5.69 | 7.460888  | 1.10E-01 | 65353416  | 65353539  | NC_000011.9  |
| cg00250422 | 3.63E-07 | 4.71E-08 | 5.68 | 7.4603981 | 1.72E-01 | 28352347  | 28352470  | NC_000015.9  |
| cg11168687 | 3.63E-07 | 4.71E-08 | 5.68 | 7.4599073 | 1.15E-01 | 185726782 | 185726905 | NC_000004.11 |
| cg13811423 | 3.63E-07 | 4.71E-08 | 5.68 | 7.4596761 | 7.05E-02 | 61697409  | 61697532  | NC_000020.10 |
| cg07483244 | 3.63E-07 | 4.71E-08 | 5.68 | 7.4596002 | 1.53E-01 | 95358924  | 95359047  | NC_000013.10 |
| cg06674527 | 3.64E-07 | 4.72E-08 | 5.68 | 7.4592894 | 7.14E-02 | 65369928  | 65370051  | NC_000015.9  |
| cg24148304 | 3.64E-07 | 4.72E-08 | 5.68 | 7.4589332 | 8.91E-02 | 7544377   | 7544500   | NC_000006.11 |
| cg23093333 | 3.64E-07 | 4.72E-08 | 5.68 | 7.4589109 | 8.48E-02 | 26474638  | 26474761  | NC_000017.10 |
| cg23696593 | 3.64E-07 | 4.72E-08 | 5.68 | 7.4588404 | 1.00E-01 | 28200623  | 28200746  | NC_000010.10 |
| cg16314851 | 3.64E-07 | 4.72E-08 | 5.68 | 7.4586541 | 1.34E-01 | 104567387 | 104567510 | NC_000007.13 |
| cg09372386 | 3.64E-07 | 4.72E-08 | 5.68 | 7.4584949 | 1.15E-01 | 124397892 | 124398015 | NC_000012.11 |
| cg06601633 | 3.64E-07 | 4.72E-08 | 5.68 | 7.4577809 | 1.28E-01 | 51560874  | 51560997  | NC_000014.8  |
| cg09867598 | 3.64E-07 | 4.72E-08 | 5.68 | 7.4576292 | 1.11E-01 | 122429517 | 122429640 | NC_000005.9  |
| cg11531579 | 3.64E-07 | 4.73E-08 | 5.68 | 7.4573874 | 1.53E-01 | 133484743 | 133484866 | NC_000012.11 |
| cg20747012 | 3.64E-07 | 4.73E-08 | 5.68 | 7.4571718 | 5.64E-02 | 114573744 | 114573867 | NC_000007.13 |
| cg04284321 | 3.64E-07 | 4.73E-08 | 5.68 | 7.4565683 | 8.53E-02 | 68141209  | 68141332  | NC_000001.10 |
| cg02081846 | 3.65E-07 | 4.73E-08 | 5.68 | 7.4558064 | 2.80E-02 | 35186440  | 35186563  | NC_000011.9  |
| cg00423702 | 3.65E-07 | 4.74E-08 | 5.68 | 7.4549157 | 3.89E-02 | 66747538  | 66747661  | NC_000007.13 |
| cg26733846 | 3.65E-07 | 4.74E-08 | 5.68 | 7.4544442 | 8.95E-02 | 112824384 | 112824507 | NC_000006.11 |
| cg20776829 | 3.65E-07 | 4.74E-08 | 5.68 | 7.4542932 | 2.39E-01 | 90758797  | 90758920  | NC_000004.11 |
| cg01349775 | 3.65E-07 | 4.74E-08 | 5.68 | 7.4538754 | 1.78E-01 | 166666838 | 166666961 | NC_000006.11 |
| cg14576347 | 3.65E-07 | 4.74E-08 | 5.68 | 7.4538217 | 8.07E-02 | 117222091 | 117222214 | NC_000009.11 |
| cg27029403 | 3.66E-07 | 4.74E-08 | 5.68 | 7.4534283 | 3.44E-02 | 104029012 | 104029135 | NC_000014.8  |
| cg19378133 | 3.66E-07 | 4.75E-08 | 5.68 | 7.4533056 | 1.54E-01 | 6068835   | 6068958   | NC_000016.9  |

|            |          |          |      |           |          |           |           |              |
|------------|----------|----------|------|-----------|----------|-----------|-----------|--------------|
| cg24226973 | 3.66E-07 | 4.75E-08 | 5.68 | 7.4519163 | 1.31E-01 | 14133336  | 14133459  | NC_000012.11 |
| cg27303211 | 3.66E-07 | 4.75E-08 | 5.68 | 7.4518639 | 8.42E-02 | 109997299 | 109997422 | NC_000013.10 |
| cg20390711 | 3.66E-07 | 4.75E-08 | 5.68 | 7.4517208 | 9.08E-02 | 127796683 | 127796806 | NC_000006.11 |
| cg23502203 | 3.66E-07 | 4.75E-08 | 5.68 | 7.4516497 | 3.18E-02 | 113549970 | 113550093 | NC_000012.11 |
| cg03833880 | 3.66E-07 | 4.76E-08 | 5.68 | 7.4508951 | 1.38E-01 | 113391294 | 113391417 | NC_000005.9  |
| cg24021956 | 3.66E-07 | 4.76E-08 | 5.68 | 7.4507543 | 2.07E-01 | 79083509  | 79083632  | NC_000007.13 |
| cg03032497 | 3.67E-07 | 4.76E-08 | 5.68 | 7.4503638 | 1.32E-01 | 61108227  | 61108350  | NC_000014.8  |
| cg07917609 | 3.67E-07 | 4.76E-08 | 5.68 | 7.4502589 | 9.91E-02 | 33938225  | 33938348  | NC_000005.9  |
| cg21751684 | 3.67E-07 | 4.76E-08 | 5.68 | 7.4502376 | 1.21E-01 | 89920887  | 89921010  | NC_000015.9  |
| cg16104276 | 3.67E-07 | 4.76E-08 | 5.68 | 7.4501507 | 4.86E-02 | 44880317  | 44880440  | NC_000001.10 |
| cg25927708 | 3.67E-07 | 4.77E-08 | 5.68 | 7.449279  | 1.38E-01 | 119603813 | 119603936 | NC_000002.11 |
| cg26110710 | 3.67E-07 | 4.77E-08 | 5.68 | 7.4487776 | 2.18E-01 | 88323607  | 88323730  | NC_000013.10 |
| cg24689699 | 3.67E-07 | 4.77E-08 | 5.68 | 7.4487078 | 8.69E-02 | 105071695 | 105071818 | NC_000014.8  |
| cg23375877 | 3.68E-07 | 4.78E-08 | 5.68 | 7.4463648 | 1.12E-01 | 75992311  | 75992434  | NC_000017.10 |
| cg23099740 | 3.68E-07 | 4.78E-08 | 5.68 | 7.4463425 | 5.95E-02 | 23653553  | 23653676  | NC_000014.8  |
| cg22245961 | 3.68E-07 | 4.78E-08 | 5.68 | 7.4463209 | 1.01E-01 | 242977855 | 242977978 | NC_000002.11 |
| cg01984798 | 3.68E-07 | 4.78E-08 | 5.68 | 7.4462931 | 8.98E-02 | 4463911   | 4464034   | NC_000017.10 |
| cg02135395 | 3.68E-07 | 4.78E-08 | 5.68 | 7.4461605 | 1.08E-01 | 172755183 | 172755306 | NC_000005.9  |
| cg21787965 | 3.68E-07 | 4.78E-08 | 5.68 | 7.4453722 | 1.56E-01 | 41739742  | 41739865  | NC_000007.13 |
| cg11117717 | 3.69E-07 | 4.79E-08 | 5.68 | 7.4439523 | 1.26E-01 | 31560529  | 31560652  | NC_000014.8  |
| cg06798106 | 3.69E-07 | 4.79E-08 | 5.68 | 7.4435875 | 1.65E-01 | 55380185  | 55380308  | NC_000008.10 |
| cg24092939 | 3.69E-07 | 4.80E-08 | 5.68 | 7.4426526 | 1.35E-01 | 49181056  | 49181179  | NC_000012.11 |
| cg21520111 | 3.69E-07 | 4.80E-08 | 5.68 | 7.4423291 | 7.65E-02 | 49713645  | 49713768  | NC_000019.9  |
| cg20989855 | 3.70E-07 | 4.80E-08 | 5.68 | 7.442152  | 1.26E-01 | 20985927  | 20986050  | NC_000004.11 |
| cg11432962 | 3.70E-07 | 4.80E-08 | 5.68 | 7.4415462 | 1.38E-01 | 95354741  | 95354864  | NC_000013.10 |

|            |          |          |      |           |          |           |           |              |
|------------|----------|----------|------|-----------|----------|-----------|-----------|--------------|
| cg25530735 | 3.70E-07 | 4.80E-08 | 5.68 | 7.4415412 | 5.15E-02 | 6572733   | 6572856   | NC_000005.9  |
| cg01767544 | 3.70E-07 | 4.80E-08 | 5.68 | 7.4414452 | 7.86E-02 | 106321115 | 106321238 | NC_000014.8  |
| cg16534163 | 3.70E-07 | 4.81E-08 | 5.68 | 7.4409555 | 4.34E-02 | 146213718 | 146213841 | NC_000003.11 |
| cg24055703 | 3.71E-07 | 4.81E-08 | 5.68 | 7.4392464 | 1.03E-01 | 46417680  | 46417803  | NC_000020.10 |
| cg21535606 | 3.71E-07 | 4.81E-08 | 5.68 | 7.4391934 | 1.34E-01 | 47911940  | 47912063  | NC_000001.10 |
| cg25784372 | 3.71E-07 | 4.82E-08 | 5.68 | 7.4390744 | 3.63E-02 | 171902156 | 171902279 | NC_000003.11 |
| cg06622528 | 3.71E-07 | 4.82E-08 | 5.68 | 7.4389575 | 1.11E-01 | 202996250 | 202996373 | NC_000001.10 |
| cg05344430 | 3.71E-07 | 4.82E-08 | 5.68 | 7.4388673 | 1.58E-01 | 28366600  | 28366723  | NC_000013.10 |
| cg11456145 | 3.71E-07 | 4.82E-08 | 5.68 | 7.4382324 | 2.90E-02 | 54976756  | 54976879  | NC_000019.9  |
| cg04709306 | 3.71E-07 | 4.82E-08 | 5.68 | 7.437292  | 1.20E-01 | 75703329  | 75703452  | NC_000005.9  |
| cg05033333 | 3.71E-07 | 4.82E-08 | 5.68 | 7.4371543 | 1.95E-01 | 3222180   | 3222303   | NC_000016.9  |
| cg06532613 | 3.71E-07 | 4.83E-08 | 5.68 | 7.4368682 | 9.26E-02 | 61713646  | 61713769  | NC_000005.9  |
| cg27528330 | 3.71E-07 | 4.83E-08 | 5.68 | 7.4366494 | 3.16E-02 | 7025947   | 7026070   | NC_000012.11 |
| cg06765217 | 3.71E-07 | 4.83E-08 | 5.68 | 7.4366389 | 1.35E-01 | 38091644  | 38091767  | NC_000014.8  |
| cg15175716 | 3.71E-07 | 4.83E-08 | 5.68 | 7.4366173 | 8.07E-02 | 64120685  | 64120808  | NC_000011.9  |
| cg22640233 | 3.72E-07 | 4.83E-08 | 5.68 | 7.4351887 | 1.54E-01 | 132864113 | 132864236 | NC_000011.9  |
| cg20187173 | 3.72E-07 | 4.83E-08 | 5.68 | 7.4351044 | 7.08E-02 | 177370839 | 177370962 | NC_000003.11 |
| cg24031597 | 3.72E-07 | 4.84E-08 | 5.68 | 7.434524  | 4.64E-02 | 46846381  | 46846504  | NC_000021.8  |
| cg06270776 | 3.72E-07 | 4.84E-08 | 5.68 | 7.4342184 | 1.20E-01 | 160932670 | 160932793 | NC_000006.11 |
| cg24482544 | 3.73E-07 | 4.85E-08 | 5.68 | 7.4329574 | 8.30E-02 | 160371455 | 160371578 | NC_000001.10 |
| cg09891129 | 3.73E-07 | 4.85E-08 | 5.68 | 7.4325081 | 1.50E-01 | 94134732  | 94134855  | NC_000011.9  |
| cg19827511 | 3.73E-07 | 4.85E-08 | 5.68 | 7.431913  | 1.09E-01 | 93580644  | 93580767  | NC_000014.8  |
| cg24345062 | 3.74E-07 | 4.86E-08 | 5.68 | 7.4307763 | 1.36E-01 | 200334439 | 200334562 | NC_000002.11 |
| cg02868790 | 3.74E-07 | 4.86E-08 | 5.68 | 7.4290805 | 1.45E-01 | 53377998  | 53378121  | NC_000006.11 |
| cg25302704 | 3.74E-07 | 4.87E-08 | 5.68 | 7.4287548 | 1.26E-01 | 27470629  | 27470752  | NC_000008.10 |

|            |          |          |      |           |          |           |           |              |
|------------|----------|----------|------|-----------|----------|-----------|-----------|--------------|
| cg21278164 | 3.74E-07 | 4.87E-08 | 5.68 | 7.4282403 | 9.18E-02 | 226127694 | 226127817 | NC_000001.10 |
| cg24690231 | 3.75E-07 | 4.87E-08 | 5.68 | 7.427878  | 1.64E-01 | 18437431  | 18437554  | NC_000001.10 |
| cg17106415 | 3.75E-07 | 4.87E-08 | 5.68 | 7.427204  | 4.35E-02 | 6105003   | 6105126   | NC_000001.10 |
| cg09739413 | 3.75E-07 | 4.88E-08 | 5.68 | 7.426408  | 1.11E-01 | 32729498  | 32729621  | NC_000006.11 |
| cg07721203 | 3.75E-07 | 4.88E-08 | 5.68 | 7.425995  | 1.25E-01 | 58357922  | 58358045  | NC_000015.9  |
| cg08462055 | 3.75E-07 | 4.88E-08 | 5.68 | 7.4258405 | 1.07E-01 | 64944023  | 64944146  | NC_000015.9  |
| cg04976254 | 3.75E-07 | 4.88E-08 | 5.68 | 7.4257026 | 3.05E-02 | 54833222  | 54833345  | NC_000014.8  |
| cg08105352 | 3.75E-07 | 4.88E-08 | 5.68 | 7.4256737 | 1.60E-01 | 114695261 | 114695384 | NC_000001.10 |
| cg13202845 | 3.75E-07 | 4.88E-08 | 5.68 | 7.4252679 | 1.67E-01 | 142410216 | 142410339 | NC_000006.11 |
| cg00757212 | 3.76E-07 | 4.89E-08 | 5.68 | 7.4236829 | 1.34E-01 | 22488176  | 22488299  | NC_000012.11 |
| cg23064481 | 3.77E-07 | 4.90E-08 | 5.68 | 7.4222637 | 7.83E-02 | 30134956  | 30135079  | NC_000006.11 |
| cg16378549 | 3.77E-07 | 4.90E-08 | 5.68 | 7.4221706 | 9.23E-02 | 117260815 | 117260938 | NC_000012.11 |
| cg20933109 | 3.77E-07 | 4.90E-08 | 5.68 | 7.4218428 | 1.60E-01 | 36991034  | 36991157  | NC_000014.8  |
| cg14631165 | 3.77E-07 | 4.90E-08 | 5.68 | 7.421733  | 9.11E-02 | 147560286 | 147560409 | NC_000004.11 |
| cg08195491 | 3.77E-07 | 4.90E-08 | 5.68 | 7.4217118 | 5.74E-02 | 50746063  | 50746186  | NC_000016.9  |
| cg07138305 | 3.77E-07 | 4.90E-08 | 5.68 | 7.4215584 | 8.84E-02 | 72341064  | 72341187  | NC_000017.10 |
| cg01894048 | 3.78E-07 | 4.91E-08 | 5.68 | 7.4193142 | 1.80E-01 | 113697895 | 113698018 | NC_000005.9  |
| cg25827846 | 3.78E-07 | 4.92E-08 | 5.68 | 7.4191196 | 3.20E-02 | 122455120 | 122455243 | NC_000008.10 |
| cg04326808 | 3.78E-07 | 4.92E-08 | 5.68 | 7.4187758 | 1.00E-01 | 39543043  | 39543166  | NC_000015.9  |
| cg13486805 | 3.78E-07 | 4.92E-08 | 5.68 | 7.4181035 | 1.16E-01 | 39738664  | 39738787  | NC_000019.9  |
| cg27076139 | 3.78E-07 | 4.92E-08 | 5.68 | 7.4180514 | 1.26E-01 | 31091718  | 31091841  | NC_000007.13 |
| cg06093525 | 3.78E-07 | 4.92E-08 | 5.68 | 7.4178958 | 8.51E-02 | 136874706 | 136874829 | NC_000006.11 |
| cg02006647 | 3.78E-07 | 4.93E-08 | 5.68 | 7.4170753 | 1.29E-01 | 45738115  | 45738238  | NC_000019.9  |
| cg13572592 | 3.78E-07 | 4.93E-08 | 5.68 | 7.4170642 | 1.30E-01 | 46776425  | 46776548  | NC_000012.11 |
| cg13217260 | 3.78E-07 | 4.93E-08 | 5.68 | 7.4169595 | 1.24E-01 | 176981469 | 176981592 | NC_000002.11 |

|            |          |          |      |           |          |           |           |              |
|------------|----------|----------|------|-----------|----------|-----------|-----------|--------------|
| cg16904330 | 3.79E-07 | 4.93E-08 | 5.68 | 7.41648   | 1.40E-01 | 119299162 | 119299285 | NC_000003.11 |
| cg02716646 | 3.79E-07 | 4.93E-08 | 5.68 | 7.4161906 | 8.06E-02 | 25384293  | 25384416  | NC_000002.11 |
| cg22834653 | 3.79E-07 | 4.93E-08 | 5.68 | 7.4161859 | 1.18E-01 | 192232077 | 192232200 | NC_000003.11 |
| cg04500377 | 3.79E-07 | 4.93E-08 | 5.68 | 7.4158926 | 1.03E-01 | 38090208  | 38090331  | NC_000008.10 |
| cg18369866 | 3.79E-07 | 4.93E-08 | 5.68 | 7.4155887 | 1.46E-01 | 145718392 | 145718515 | NC_000005.9  |
| cg09239524 | 3.79E-07 | 4.93E-08 | 5.68 | 7.4154562 | 1.40E-01 | 124902546 | 124902669 | NC_000010.10 |
| cg24707416 | 3.79E-07 | 4.94E-08 | 5.68 | 7.4150342 | 1.32E-01 | 1277703   | 1277826   | NC_000007.13 |
| cg20111643 | 3.79E-07 | 4.94E-08 | 5.68 | 7.4150147 | 1.81E-02 | 52977892  | 52978015  | NC_000017.10 |
| cg16953006 | 3.79E-07 | 4.94E-08 | 5.68 | 7.4150121 | 1.10E-01 | 201857    | 201980    | NC_000002.11 |
| cg07691152 | 3.79E-07 | 4.94E-08 | 5.68 | 7.4149901 | 1.25E-01 | 103355123 | 103355246 | NC_000012.11 |
| cg02576219 | 3.79E-07 | 4.94E-08 | 5.68 | 7.4146185 | 1.61E-01 | 34894885  | 34895008  | NC_000020.10 |
| cg13405226 | 3.79E-07 | 4.94E-08 | 5.68 | 7.4140689 | 3.97E-02 | 103747281 | 103747404 | NC_000008.10 |
| cg17375267 | 3.80E-07 | 4.95E-08 | 5.68 | 7.4126603 | 6.41E-02 | 46915776  | 46915899  | NC_000019.9  |
| cg09255061 | 3.80E-07 | 4.95E-08 | 5.67 | 7.4113161 | 3.61E-02 | 5554868   | 5554991   | NC_000010.10 |
| cg14053081 | 3.81E-07 | 4.96E-08 | 5.67 | 7.4111124 | 3.78E-02 | 288081    | 288204    | NC_000019.9  |
| cg21520715 | 3.81E-07 | 4.96E-08 | 5.67 | 7.4109677 | 3.62E-02 | 172189776 | 172189899 | NC_000005.9  |
| cg06103657 | 3.81E-07 | 4.96E-08 | 5.67 | 7.4107186 | 6.51E-02 | 33030976  | 33031099  | NC_000012.11 |
| cg05572800 | 3.81E-07 | 4.96E-08 | 5.67 | 7.4097859 | 6.61E-02 | 6449865   | 6449988   | NC_000004.11 |
| cg13702181 | 3.81E-07 | 4.96E-08 | 5.67 | 7.4096546 | 9.83E-02 | 77791657  | 77791780  | NC_000014.8  |
| cg18250028 | 3.82E-07 | 4.97E-08 | 5.67 | 7.407413  | 1.98E-01 | 71015523  | 71015646  | NC_000005.9  |
| cg20002177 | 3.82E-07 | 4.98E-08 | 5.67 | 7.4071328 | 1.56E-01 | 96649956  | 96650079  | NC_000007.13 |
| cg15821095 | 3.82E-07 | 4.98E-08 | 5.67 | 7.4059607 | 9.50E-02 | 51428079  | 51428202  | NC_000003.11 |
| cg08738570 | 3.83E-07 | 4.98E-08 | 5.67 | 7.4056729 | 1.09E-01 | 1475265   | 1475388   | NC_000001.10 |
| cg13790268 | 3.83E-07 | 4.98E-08 | 5.67 | 7.4056463 | 7.79E-02 | 100125548 | 100125671 | NC_000014.8  |
| cg13933729 | 3.83E-07 | 4.99E-08 | 5.67 | 7.4049551 | 2.61E-02 | 35076434  | 35076557  | NC_000009.11 |



|            |          |          |      |           |          |           |           |              |
|------------|----------|----------|------|-----------|----------|-----------|-----------|--------------|
| cg14941291 | 3.83E-07 | 4.99E-08 | 5.67 | 7.4049334 | 1.21E-01 | 176952930 | 176953053 | NC_000002.11 |
| cg23412639 | 3.83E-07 | 4.99E-08 | 5.67 | 7.4048701 | 5.61E-02 | 158929577 | 158929700 | NC_000004.11 |
| cg02806645 | 3.83E-07 | 4.99E-08 | 5.67 | 7.4043362 | 7.45E-02 | 138725153 | 138725276 | NC_000003.11 |
| cg25994725 | 3.83E-07 | 4.99E-08 | 5.67 | 7.4038025 | 1.08E-01 | 35703435  | 35703558  | NC_000006.11 |
| cg17710947 | 3.83E-07 | 4.99E-08 | 5.67 | 7.4035837 | 1.06E-01 | 45580221  | 45580344  | NC_000019.9  |
| cg04365973 | 3.84E-07 | 5.00E-08 | 5.67 | 7.4027498 | 5.37E-02 | 717556    | 717679    | NC_000016.9  |
| cg13981054 | 3.84E-07 | 5.00E-08 | 5.67 | 7.4016553 | 7.35E-02 | 18020115  | 18020238  | NC_000006.11 |
| cg18575221 | 3.84E-07 | 5.01E-08 | 5.67 | 7.400507  | 9.97E-02 | 70037728  | 70037851  | NC_000014.8  |
| cg01569440 | 3.84E-07 | 5.01E-08 | 5.67 | 7.4004153 | 9.18E-02 | 46717147  | 46717270  | NC_000017.10 |
| cg00533585 | 3.85E-07 | 5.02E-08 | 5.67 | 7.399173  | 5.63E-02 | 121214717 | 121214840 | NC_000010.10 |
| cg23620902 | 3.85E-07 | 5.02E-08 | 5.67 | 7.3989592 | 1.38E-01 | 119566332 | 119566455 | NC_000002.11 |
| cg14305278 | 3.85E-07 | 5.02E-08 | 5.67 | 7.3985245 | 1.41E-01 | 971046    | 971169    | NC_000009.11 |
| cg06842946 | 3.85E-07 | 5.02E-08 | 5.67 | 7.3978742 | 7.67E-02 | 49070005  | 49070128  | NC_000011.9  |
| cg17337668 | 3.85E-07 | 5.02E-08 | 5.67 | 7.3978153 | 1.07E-01 | 36863216  | 36863339  | NC_000017.10 |
| cg00514241 | 3.85E-07 | 5.02E-08 | 5.67 | 7.3977065 | 7.01E-02 | 28193910  | 28194033  | NC_000022.10 |
| cg00899090 | 3.86E-07 | 5.03E-08 | 5.67 | 7.3973088 | 8.21E-02 | 119212319 | 119212442 | NC_000012.11 |
| cg04058337 | 3.86E-07 | 5.03E-08 | 5.67 | 7.3972679 | 8.50E-02 | 1113669   | 1113792   | NC_000016.9  |
| cg11666040 | 3.86E-07 | 5.03E-08 | 5.67 | 7.3967688 | 1.41E-01 | 135012454 | 135012577 | NC_000010.10 |
| cg03970032 | 3.86E-07 | 5.03E-08 | 5.67 | 7.3959615 | 1.08E-01 | 16062915  | 16063038  | NC_000001.10 |
| cg00973677 | 3.86E-07 | 5.04E-08 | 5.67 | 7.3952667 | 1.38E-01 | 136553595 | 136553718 | NC_000007.13 |
| cg03476087 | 3.86E-07 | 5.04E-08 | 5.67 | 7.3950166 | 1.65E-01 | 26506353  | 26506476  | NC_000010.10 |
| cg06755555 | 3.87E-07 | 5.04E-08 | 5.67 | 7.394062  | 1.19E-01 | 46704640  | 46704763  | NC_000017.10 |
| cg09926389 | 3.87E-07 | 5.04E-08 | 5.67 | 7.3940091 | 1.41E-01 | 41837123  | 41837246  | NC_000019.9  |
| cg25734864 | 3.88E-07 | 5.06E-08 | 5.67 | 7.3914889 | 7.33E-02 | 113812986 | 113813109 | NC_000013.10 |
| cg24292703 | 3.88E-07 | 5.06E-08 | 5.67 | 7.3913283 | 1.34E-01 | 57264639  | 57264762  | NC_000014.8  |

|            |          |          |      |           |          |           |           |              |
|------------|----------|----------|------|-----------|----------|-----------|-----------|--------------|
| cg09183316 | 3.88E-07 | 5.06E-08 | 5.67 | 7.391206  | 1.38E-01 | 58238232  | 58238355  | NC_000012.11 |
| cg20501518 | 3.88E-07 | 5.06E-08 | 5.67 | 7.3911706 | 1.49E-01 | 157821919 | 157822042 | NC_000003.11 |
| cg13486528 | 3.88E-07 | 5.06E-08 | 5.67 | 7.391126  | 1.62E-01 | 241771368 | 241771491 | NC_000002.11 |
| cg03515098 | 3.88E-07 | 5.06E-08 | 5.67 | 7.3908722 | 7.84E-02 | 38117454  | 38117577  | NC_000021.8  |
| cg01382110 | 3.88E-07 | 5.06E-08 | 5.67 | 7.3906881 | 1.56E-01 | 4454189   | 4454312   | NC_000018.9  |
| cg02175739 | 3.88E-07 | 5.06E-08 | 5.67 | 7.3904557 | 6.91E-02 | 875980    | 876103    | NC_000011.9  |
| cg01156990 | 3.88E-07 | 5.06E-08 | 5.67 | 7.3902268 | 7.78E-02 | 35732801  | 35732924  | NC_000017.10 |
| cg03654735 | 3.88E-07 | 5.07E-08 | 5.67 | 7.3893296 | 1.47E-01 | 38100826  | 38100949  | NC_000001.10 |
| cg10658252 | 3.88E-07 | 5.07E-08 | 5.67 | 7.3892655 | 1.24E-01 | 153853283 | 153853406 | NC_000005.9  |
| cg27036111 | 3.89E-07 | 5.07E-08 | 5.67 | 7.3879694 | 1.17E-01 | 20620680  | 20620803  | NC_000011.9  |
| cg13193239 | 3.89E-07 | 5.08E-08 | 5.67 | 7.3873878 | 9.69E-02 | 111539479 | 111539602 | NC_000004.11 |
| cg22848982 | 3.89E-07 | 5.08E-08 | 5.67 | 7.3872357 | 2.45E-02 | 3697631   | 3697754   | NC_000001.10 |
| cg14443953 | 3.89E-07 | 5.08E-08 | 5.67 | 7.3870118 | 1.54E-01 | 31837124  | 31837247  | NC_000011.9  |
| cg14380586 | 3.89E-07 | 5.08E-08 | 5.67 | 7.3865375 | 1.38E-01 | 103889928 | 103890051 | NC_000012.11 |
| cg01344452 | 3.90E-07 | 5.08E-08 | 5.67 | 7.3863147 | 5.71E-02 | 54912143  | 54912266  | NC_000017.10 |
| cg01815090 | 3.90E-07 | 5.09E-08 | 5.67 | 7.3858371 | 5.60E-02 | 36013708  | 36013831  | NC_000022.10 |
| cg16664193 | 3.90E-07 | 5.09E-08 | 5.67 | 7.385066  | 9.96E-02 | 35227046  | 35227169  | NC_000017.10 |
| cg11280525 | 3.90E-07 | 5.09E-08 | 5.67 | 7.3845524 | 1.06E-01 | 87955695  | 87955818  | NC_000005.9  |
| cg16387401 | 3.90E-07 | 5.09E-08 | 5.67 | 7.3843667 | 5.78E-02 | 24106252  | 24106375  | NC_000014.8  |
| cg11648720 | 3.90E-07 | 5.09E-08 | 5.67 | 7.3843595 | 3.42E-02 | 693895    | 694018    | NC_000004.11 |
| cg19048532 | 3.90E-07 | 5.09E-08 | 5.67 | 7.3841268 | 7.56E-02 | 27148002  | 27148125  | NC_000007.13 |
| cg03807316 | 3.91E-07 | 5.10E-08 | 5.67 | 7.3827502 | 1.39E-01 | 39998290  | 39998413  | NC_000019.9  |
| cg23752563 | 3.91E-07 | 5.10E-08 | 5.67 | 7.3822898 | 1.60E-01 | 54466187  | 54466310  | NC_000019.9  |
| cg01183586 | 3.91E-07 | 5.11E-08 | 5.67 | 7.38219   | 5.09E-02 | 111980326 | 111980449 | NC_000002.11 |
| cg04720797 | 3.91E-07 | 5.11E-08 | 5.67 | 7.3818995 | 8.09E-02 | 140480223 | 140480346 | NC_000005.9  |

|            |          |          |      |           |          |           |           |              |
|------------|----------|----------|------|-----------|----------|-----------|-----------|--------------|
| cg04068005 | 3.91E-07 | 5.11E-08 | 5.67 | 7.3816391 | 1.17E-01 | 137162231 | 137162354 | NC_000006.11 |
| cg22848150 | 3.92E-07 | 5.11E-08 | 5.67 | 7.3806373 | 1.16E-01 | 57358165  | 57358288  | NC_000008.10 |
| cg01983682 | 3.92E-07 | 5.11E-08 | 5.67 | 7.3804057 | 9.86E-02 | 162283979 | 162284102 | NC_000002.11 |
| cg23031141 | 3.92E-07 | 5.12E-08 | 5.67 | 7.3796355 | 7.64E-02 | 203465077 | 203465200 | NC_000001.10 |
| cg01391071 | 3.92E-07 | 5.12E-08 | 5.67 | 7.3795937 | 4.65E-02 | 67379649  | 67379772  | NC_000011.9  |
| cg01870826 | 3.92E-07 | 5.12E-08 | 5.67 | 7.3789052 | 1.36E-01 | 5111875   | 5111998   | NC_000007.13 |
| cg25772185 | 3.92E-07 | 5.12E-08 | 5.67 | 7.3785019 | 5.52E-02 | 25371488  | 25371611  | NC_000010.10 |
| cg15710198 | 3.93E-07 | 5.13E-08 | 5.67 | 7.3770976 | 1.44E-01 | 55370334  | 55370457  | NC_000008.10 |
| cg01578632 | 3.93E-07 | 5.13E-08 | 5.67 | 7.3768829 | 7.16E-02 | 69958298  | 69958421  | NC_000016.9  |
| cg09842125 | 3.93E-07 | 5.13E-08 | 5.67 | 7.3766612 | 5.32E-02 | 157080710 | 157080833 | NC_000005.9  |
| cg04612608 | 3.93E-07 | 5.13E-08 | 5.67 | 7.3766303 | 7.09E-02 | 9248364   | 9248487   | NC_000016.9  |
| cg14666564 | 3.93E-07 | 5.14E-08 | 5.67 | 7.376083  | 1.15E-01 | 177030228 | 177030351 | NC_000002.11 |
| cg20596543 | 3.94E-07 | 5.14E-08 | 5.67 | 7.3754611 | 1.27E-01 | 103794922 | 103795045 | NC_000008.10 |
| cg21970554 | 3.94E-07 | 5.14E-08 | 5.67 | 7.3754131 | 1.35E-01 | 57050370  | 57050493  | NC_000019.9  |
| cg16505550 | 3.94E-07 | 5.14E-08 | 5.67 | 7.3749908 | 1.19E-01 | 57045708  | 57045831  | NC_000001.10 |
| cg00978427 | 3.94E-07 | 5.15E-08 | 5.67 | 7.3739065 | 6.68E-02 | 140736762 | 140736885 | NC_000005.9  |
| cg06298519 | 3.94E-07 | 5.15E-08 | 5.67 | 7.3733942 | 2.12E-01 | 118031864 | 118031987 | NC_000010.10 |
| cg20963227 | 3.95E-07 | 5.15E-08 | 5.67 | 7.3730703 | 1.18E-01 | 41868203  | 41868326  | NC_000004.11 |
| cg06061238 | 3.95E-07 | 5.15E-08 | 5.67 | 7.372953  | 8.76E-02 | 134915859 | 134915982 | NC_000010.10 |
| cg22155218 | 3.95E-07 | 5.16E-08 | 5.67 | 7.3715569 | 6.28E-02 | 92110813  | 92110936  | NC_000001.10 |
| cg14934413 | 3.95E-07 | 5.16E-08 | 5.67 | 7.3715141 | 1.19E-01 | 20184162  | 20184285  | NC_000011.9  |
| cg22856010 | 3.95E-07 | 5.16E-08 | 5.67 | 7.3714711 | 1.01E-01 | 1707413   | 1707536   | NC_000008.10 |
| cg07116997 | 3.95E-07 | 5.16E-08 | 5.67 | 7.3709427 | 1.33E-01 | 27225733  | 27225856  | NC_000007.13 |
| cg22978003 | 3.95E-07 | 5.17E-08 | 5.67 | 7.3705852 | 9.29E-02 | 36066313  | 36066436  | NC_000005.9  |
| cg03373742 | 3.95E-07 | 5.17E-08 | 5.67 | 7.3705754 | 2.08E-02 | 7701581   | 7701704   | NC_000017.10 |

|            |          |          |      |           |          |           |           |              |
|------------|----------|----------|------|-----------|----------|-----------|-----------|--------------|
| cg14884932 | 3.95E-07 | 5.17E-08 | 5.67 | 7.3705488 | 8.58E-02 | 51774451  | 51774574  | NC_000019.9  |
| cg22063692 | 3.96E-07 | 5.17E-08 | 5.67 | 7.3694286 | 1.01E-01 | 73966627  | 73966750  | NC_000018.9  |
| cg20252202 | 3.96E-07 | 5.18E-08 | 5.67 | 7.3682182 | 1.09E-01 | 108239470 | 108239593 | NC_000012.11 |
| cg12030842 | 3.97E-07 | 5.19E-08 | 5.67 | 7.3663579 | 3.38E-02 | 1095607   | 1095730   | NC_000011.9  |
| cg01654566 | 3.97E-07 | 5.19E-08 | 5.67 | 7.3655777 | 8.23E-02 | 28035193  | 28035316  | NC_000022.10 |
| cg08138685 | 3.98E-07 | 5.20E-08 | 5.67 | 7.3650895 | 1.51E-01 | 119610526 | 119610649 | NC_000002.11 |
| cg26365854 | 3.98E-07 | 5.20E-08 | 5.67 | 7.3649566 | 1.77E-01 | 44330903  | 44331026  | NC_000011.9  |
| cg23921249 | 3.98E-07 | 5.20E-08 | 5.67 | 7.3648079 | 6.04E-02 | 16404670  | 16404793  | NC_000022.10 |
| cg00956679 | 3.98E-07 | 5.20E-08 | 5.67 | 7.3645899 | 1.16E-01 | 77462606  | 77462729  | NC_000014.8  |
| cg23484234 | 3.98E-07 | 5.20E-08 | 5.67 | 7.3644327 | 1.39E-01 | 66188433  | 66188556  | NC_000011.9  |
| cg08774452 | 3.98E-07 | 5.20E-08 | 5.67 | 7.364323  | 1.79E-01 | 128850550 | 128850673 | NC_000012.11 |
| cg20684528 | 3.98E-07 | 5.20E-08 | 5.67 | 7.3642699 | 1.47E-01 | 14133667  | 14133790  | NC_000012.11 |
| cg25388715 | 3.98E-07 | 5.20E-08 | 5.67 | 7.3641598 | 2.93E-02 | 115468942 | 115469065 | NC_000010.10 |
| cg24125710 | 3.99E-07 | 5.22E-08 | 5.66 | 7.3613353 | 1.37E-01 | 176414852 | 176414975 | NC_000003.11 |
| cg01267532 | 3.99E-07 | 5.22E-08 | 5.66 | 7.3612427 | 1.06E-01 | 76266372  | 76266495  | NC_000018.9  |
| cg00799748 | 3.99E-07 | 5.22E-08 | 5.66 | 7.3604204 | 2.64E-02 | 1611052   | 1611175   | NC_000016.9  |
| cg27019731 | 4.00E-07 | 5.22E-08 | 5.66 | 7.3597642 | 8.27E-02 | 134800662 | 134800785 | NC_000010.10 |
| cg20403498 | 4.00E-07 | 5.22E-08 | 5.66 | 7.3596796 | 1.93E-01 | 124895693 | 124895816 | NC_000010.10 |
| cg26864834 | 4.00E-07 | 5.22E-08 | 5.66 | 7.3596761 | 7.78E-02 | 4382372   | 4382495   | NC_000012.11 |
| cg00283857 | 4.00E-07 | 5.23E-08 | 5.66 | 7.359533  | 7.37E-02 | 158018184 | 158018307 | NC_000006.11 |
| cg21380341 | 4.00E-07 | 5.23E-08 | 5.66 | 7.3593437 | 1.67E-01 | 94543978  | 94544101  | NC_000012.11 |
| cg06287318 | 4.00E-07 | 5.24E-08 | 5.66 | 7.3576667 | 1.33E-01 | 21496129  | 21496252  | NC_000020.10 |
| cg04933492 | 4.01E-07 | 5.24E-08 | 5.66 | 7.3573775 | 5.34E-02 | 1045310   | 1045433   | NC_000016.9  |
| cg03843951 | 4.01E-07 | 5.24E-08 | 5.66 | 7.3568174 | 4.95E-02 | 50629634  | 50629757  | NC_000007.13 |
| cg02255983 | 4.01E-07 | 5.24E-08 | 5.66 | 7.3564766 | 6.16E-02 | 2798801   | 2798924   | NC_000019.9  |

|            |          |          |      |           |          |           |           |              |
|------------|----------|----------|------|-----------|----------|-----------|-----------|--------------|
| cg16858253 | 4.01E-07 | 5.24E-08 | 5.66 | 7.3563072 | 5.07E-02 | 12202995  | 12203118  | NC_000003.11 |
| cg00934661 | 4.01E-07 | 5.24E-08 | 5.66 | 7.3560777 | 5.86E-02 | 10775706  | 10775829  | NC_000016.9  |
| cg13186884 | 4.01E-07 | 5.24E-08 | 5.66 | 7.3560482 | 1.28E-01 | 65285831  | 65285954  | NC_000008.10 |
| cg24399349 | 4.01E-07 | 5.25E-08 | 5.66 | 7.3555863 | 8.29E-02 | 55517045  | 55517168  | NC_000007.13 |
| cg13207534 | 4.01E-07 | 5.25E-08 | 5.66 | 7.3550394 | 5.21E-02 | 5087447   | 5087570   | NC_000006.11 |
| cg03490073 | 4.01E-07 | 5.25E-08 | 5.66 | 7.3548169 | 4.44E-02 | 176806812 | 176806935 | NC_000003.11 |
| cg22720392 | 4.02E-07 | 5.25E-08 | 5.66 | 7.3546463 | 9.37E-02 | 3133857   | 3133980   | NC_000001.10 |
| cg00466268 | 4.02E-07 | 5.26E-08 | 5.66 | 7.3539965 | 1.73E-01 | 164914621 | 164914744 | NC_000003.11 |
| cg16215422 | 4.03E-07 | 5.27E-08 | 5.66 | 7.3518975 | 1.46E-01 | 147141664 | 147141787 | NC_000003.11 |
| cg13433278 | 4.03E-07 | 5.27E-08 | 5.66 | 7.3512374 | 1.09E-01 | 172958358 | 172958481 | NC_000002.11 |
| cg26630791 | 4.03E-07 | 5.27E-08 | 5.66 | 7.351115  | 1.09E-01 | 83017000  | 83017123  | NC_000005.9  |
| cg04845236 | 4.03E-07 | 5.27E-08 | 5.66 | 7.3510708 | 9.69E-02 | 104294981 | 104295104 | NC_000009.11 |
| cg24932585 | 4.03E-07 | 5.27E-08 | 5.66 | 7.3505519 | 1.17E-01 | 12666317  | 12666440  | NC_000019.9  |
| cg14547509 | 4.03E-07 | 5.28E-08 | 5.66 | 7.3498859 | 1.25E-01 | 14318498  | 14318621  | NC_000009.11 |
| cg04693256 | 4.04E-07 | 5.28E-08 | 5.66 | 7.3492403 | 4.98E-02 | 95524174  | 95524297  | NC_000002.11 |
| cg03181117 | 4.04E-07 | 5.28E-08 | 5.66 | 7.3488562 | 7.53E-02 | 1543188   | 1543311   | NC_000017.10 |
| cg25919948 | 4.04E-07 | 5.28E-08 | 5.66 | 7.3486446 | 4.94E-02 | 63041305  | 63041428  | NC_000007.13 |
| cg09473585 | 4.04E-07 | 5.29E-08 | 5.66 | 7.3483452 | 7.28E-02 | 62305519  | 62305642  | NC_000003.11 |
| cg03364874 | 4.04E-07 | 5.29E-08 | 5.66 | 7.3472927 | 4.55E-02 | 123092870 | 123092993 | NC_000008.10 |
| cg27364741 | 4.04E-07 | 5.29E-08 | 5.66 | 7.3470937 | 1.49E-01 | 63281069  | 63281192  | NC_000002.11 |
| cg21125095 | 4.05E-07 | 5.30E-08 | 5.66 | 7.3454593 | 6.81E-02 | 8680412   | 8680535   | NC_000012.11 |
| cg27235228 | 4.06E-07 | 5.31E-08 | 5.66 | 7.3440431 | 9.23E-02 | 60408266  | 60408389  | NC_000010.10 |
| cg03760951 | 4.06E-07 | 5.31E-08 | 5.66 | 7.3439897 | 1.81E-01 | 2160875   | 2160998   | NC_000011.9  |
| cg01328621 | 4.06E-07 | 5.31E-08 | 5.66 | 7.3438152 | 5.80E-02 | 68567276  | 68567399  | NC_000015.9  |
| cg01366985 | 4.06E-07 | 5.31E-08 | 5.66 | 7.3434183 | 1.05E-01 | 25167695  | 25167818  | NC_000006.11 |

|            |          |          |      |           |          |           |           |              |
|------------|----------|----------|------|-----------|----------|-----------|-----------|--------------|
| cg02712224 | 4.06E-07 | 5.32E-08 | 5.66 | 7.3421203 | 1.43E-01 | 114834201 | 114834324 | NC_000012.11 |
| cg25741215 | 4.06E-07 | 5.32E-08 | 5.66 | 7.3418901 | 1.41E-01 | 63287082  | 63287205  | NC_000002.11 |
| cg10967866 | 4.07E-07 | 5.32E-08 | 5.66 | 7.3412891 | 7.28E-02 | 134362164 | 134362287 | NC_000010.10 |
| cg21423610 | 4.07E-07 | 5.32E-08 | 5.66 | 7.3412029 | 5.31E-02 | 16218007  | 16218130  | NC_000022.10 |
| cg07881817 | 4.07E-07 | 5.33E-08 | 5.66 | 7.3408637 | 1.06E-01 | 170904870 | 170904993 | NC_000003.11 |
| cg02235066 | 4.07E-07 | 5.33E-08 | 5.66 | 7.3397988 | 2.56E-02 | 57457986  | 57458109  | NC_000014.8  |
| cg04630273 | 4.08E-07 | 5.34E-08 | 5.66 | 7.3384139 | 7.01E-02 | 62406879  | 62407002  | NC_000020.10 |
| cg15389068 | 4.08E-07 | 5.34E-08 | 5.66 | 7.3378271 | 9.61E-02 | 140475049 | 140475172 | NC_000005.9  |
| cg08306275 | 4.08E-07 | 5.35E-08 | 5.66 | 7.3372694 | 2.32E-02 | 121502395 | 121502518 | NC_000011.9  |
| cg17197870 | 4.08E-07 | 5.35E-08 | 5.66 | 7.33703   | 9.85E-02 | 30027916  | 30028039  | NC_000006.11 |
| cg06893288 | 4.08E-07 | 5.35E-08 | 5.66 | 7.3366538 | 1.15E-01 | 132859722 | 132859845 | NC_000012.11 |
| cg04168137 | 4.09E-07 | 5.35E-08 | 5.66 | 7.3364039 | 1.41E-01 | 39017630  | 39017753  | NC_000007.13 |
| cg06086177 | 4.09E-07 | 5.35E-08 | 5.66 | 7.3362911 | 1.49E-01 | 73090646  | 73090769  | NC_000016.9  |
| cg18992875 | 4.09E-07 | 5.35E-08 | 5.66 | 7.3359342 | 8.00E-02 | 102745783 | 102745906 | NC_000003.11 |
| cg19469447 | 4.09E-07 | 5.36E-08 | 5.66 | 7.3344158 | 1.45E-01 | 135341870 | 135341993 | NC_000010.10 |
| cg15560061 | 4.09E-07 | 5.36E-08 | 5.66 | 7.334342  | 8.08E-02 | 8576679   | 8576802   | NC_000019.9  |
| cg17982031 | 4.10E-07 | 5.36E-08 | 5.66 | 7.3339453 | 1.26E-01 | 140768213 | 140768336 | NC_000005.9  |
| cg16865446 | 4.10E-07 | 5.37E-08 | 5.66 | 7.3337914 | 1.52E-01 | 31822302  | 31822425  | NC_000011.9  |
| cg25584814 | 4.10E-07 | 5.37E-08 | 5.66 | 7.3334312 | 6.08E-02 | 345306    | 345429    | NC_000019.9  |
| cg25491122 | 4.10E-07 | 5.37E-08 | 5.66 | 7.3333298 | 1.07E-01 | 67801551  | 67801674  | NC_000013.10 |
| cg09288218 | 4.10E-07 | 5.37E-08 | 5.66 | 7.3328236 | 1.01E-01 | 130554977 | 130555100 | NC_000012.11 |
| cg21535366 | 4.10E-07 | 5.37E-08 | 5.66 | 7.3321339 | 1.13E-01 | 107974612 | 107974735 | NC_000012.11 |
| cg15595212 | 4.11E-07 | 5.38E-08 | 5.66 | 7.3312054 | 5.53E-02 | 248100183 | 248100306 | NC_000001.10 |
| cg23928118 | 4.11E-07 | 5.38E-08 | 5.66 | 7.3311526 | 7.70E-02 | 140215201 | 140215324 | NC_000005.9  |
| cg26083180 | 4.11E-07 | 5.38E-08 | 5.66 | 7.3308585 | 1.45E-01 | 99272089  | 99272212  | NC_000006.11 |

|            |          |          |      |           |          |           |           |              |
|------------|----------|----------|------|-----------|----------|-----------|-----------|--------------|
| cg24552773 | 4.11E-07 | 5.38E-08 | 5.66 | 7.3306186 | 6.26E-02 | 9100506   | 9100629   | NC_000001.10 |
| cg05863683 | 4.11E-07 | 5.39E-08 | 5.66 | 7.3300093 | 6.81E-02 | 1912471   | 1912594   | NC_000007.13 |
| cg18125241 | 4.11E-07 | 5.39E-08 | 5.66 | 7.3298013 | 1.27E-01 | 36026419  | 36026542  | NC_000001.10 |
| cg15554338 | 4.12E-07 | 5.39E-08 | 5.66 | 7.3287186 | 1.15E-01 | 167190158 | 167190281 | NC_000003.11 |
| cg22678952 | 4.12E-07 | 5.39E-08 | 5.66 | 7.3286788 | 1.10E-01 | 4382123   | 4382246   | NC_000012.11 |
| cg23532985 | 4.12E-07 | 5.40E-08 | 5.66 | 7.3280082 | 6.42E-02 | 4626526   | 4626649   | NC_000011.9  |
| cg09938511 | 4.12E-07 | 5.40E-08 | 5.66 | 7.3273772 | 2.06E-01 | 77590322  | 77590445  | NC_000008.10 |
| cg12121446 | 4.12E-07 | 5.40E-08 | 5.66 | 7.3270892 | 7.03E-02 | 25115869  | 25115992  | NC_000013.10 |
| cg06128028 | 4.12E-07 | 5.40E-08 | 5.66 | 7.3266617 | 1.18E-01 | 35293892  | 35294015  | NC_000007.13 |
| cg20725716 | 4.13E-07 | 5.41E-08 | 5.66 | 7.3261223 | 4.48E-02 | 176519455 | 176519578 | NC_000005.9  |
| cg08915632 | 4.13E-07 | 5.41E-08 | 5.66 | 7.3258997 | 1.06E-01 | 72466247  | 72466370  | NC_000008.10 |
| cg04502985 | 4.13E-07 | 5.42E-08 | 5.66 | 7.3247592 | 1.63E-01 | 77268452  | 77268575  | NC_000005.9  |
| cg22617898 | 4.13E-07 | 5.42E-08 | 5.66 | 7.3242819 | 9.46E-02 | 18313388  | 18313511  | NC_000019.9  |
| cg17851126 | 4.14E-07 | 5.42E-08 | 5.66 | 7.3231316 | 3.60E-02 | 10503723  | 10503846  | NC_000019.9  |
| cg19296354 | 4.14E-07 | 5.43E-08 | 5.66 | 7.3229441 | 9.13E-02 | 57415697  | 57415820  | NC_000020.10 |
| cg23880736 | 4.14E-07 | 5.43E-08 | 5.66 | 7.3229247 | 9.50E-02 | 582172    | 582295    | NC_000004.11 |
| cg24053721 | 4.14E-07 | 5.43E-08 | 5.66 | 7.3225785 | 1.06E-01 | 142053970 | 142054093 | NC_000004.11 |
| cg01921432 | 4.15E-07 | 5.44E-08 | 5.66 | 7.3204405 | 1.23E-01 | 91182534  | 91182657  | NC_000001.10 |
| cg11859584 | 4.15E-07 | 5.44E-08 | 5.66 | 7.3202458 | 1.12E-01 | 3361374   | 3361497   | NC_000019.9  |
| cg06167730 | 4.15E-07 | 5.45E-08 | 5.66 | 7.3194407 | 8.63E-02 | 991533    | 991656    | NC_000008.10 |
| cg14246568 | 4.16E-07 | 5.46E-08 | 5.66 | 7.3171803 | 1.11E-01 | 105388153 | 105388276 | NC_000006.11 |
| cg27323343 | 4.16E-07 | 5.46E-08 | 5.66 | 7.3167717 | 7.50E-02 | 77916526  | 77916649  | NC_000008.10 |
| cg12389685 | 4.17E-07 | 5.46E-08 | 5.66 | 7.3163334 | 5.46E-02 | 1779542   | 1779665   | NC_000005.9  |
| cg05241406 | 4.17E-07 | 5.46E-08 | 5.66 | 7.3162326 | 1.48E-02 | 38662373  | 38662496  | NC_000004.11 |
| cg08987251 | 4.17E-07 | 5.47E-08 | 5.66 | 7.3151297 | 8.06E-02 | 58769104  | 58769227  | NC_000016.9  |

|            |          |          |      |           |          |           |           |              |
|------------|----------|----------|------|-----------|----------|-----------|-----------|--------------|
| cg11058366 | 4.17E-07 | 5.47E-08 | 5.66 | 7.3144304 | 1.61E-01 | 213401195 | 213401318 | NC_000002.11 |
| cg27172378 | 4.18E-07 | 5.48E-08 | 5.65 | 7.3131212 | 3.74E-02 | 12293395  | 12293518  | NC_000001.10 |
| cg11473240 | 4.18E-07 | 5.48E-08 | 5.65 | 7.313044  | 9.44E-02 | 39553960  | 39554083  | NC_000017.10 |
| cg21203902 | 4.18E-07 | 5.48E-08 | 5.65 | 7.3129231 | 3.90E-02 | 132480847 | 132480970 | NC_000009.11 |
| cg04737283 | 4.18E-07 | 5.48E-08 | 5.65 | 7.3125967 | 9.51E-02 | 36805426  | 36805549  | NC_000003.11 |
| cg23389465 | 4.18E-07 | 5.49E-08 | 5.65 | 7.3118815 | 1.61E-01 | 166406451 | 166406574 | NC_000005.9  |
| cg08935238 | 4.18E-07 | 5.49E-08 | 5.65 | 7.3118546 | 9.92E-02 | 140798161 | 140798284 | NC_000005.9  |
| cg02835822 | 4.19E-07 | 5.49E-08 | 5.65 | 7.3116083 | 1.53E-01 | 2161456   | 2161579   | NC_000011.9  |
| cg19693031 | 4.19E-07 | 5.49E-08 | 5.65 | 7.3113814 | 1.52E-01 | 145441552 | 145441675 | NC_000001.10 |
| cg14963884 | 4.19E-07 | 5.50E-08 | 5.65 | 7.3101683 | 5.33E-02 | 43331952  | 43332075  | NC_000010.10 |
| cg03247926 | 4.20E-07 | 5.51E-08 | 5.65 | 7.3087246 | 1.87E-01 | 29069623  | 29069746  | NC_000013.10 |
| cg16399625 | 4.20E-07 | 5.51E-08 | 5.65 | 7.3086671 | 5.23E-02 | 69322188  | 69322311  | NC_000014.8  |
| cg19016652 | 4.20E-07 | 5.51E-08 | 5.65 | 7.3084831 | 1.03E-01 | 16760040  | 16760163  | NC_000012.11 |
| cg20469764 | 4.20E-07 | 5.51E-08 | 5.65 | 7.3084819 | 7.07E-02 | 57952160  | 57952283  | NC_000014.8  |
| cg03742724 | 4.20E-07 | 5.51E-08 | 5.65 | 7.3078523 | 1.14E-01 | 161838997 | 161839120 | NC_000006.11 |
| cg22192089 | 4.20E-07 | 5.51E-08 | 5.65 | 7.3076544 | 3.11E-02 | 71608715  | 71608838  | NC_000015.9  |
| cg04057288 | 4.20E-07 | 5.51E-08 | 5.65 | 7.3075821 | 1.24E-01 | 130504189 | 130504312 | NC_000009.11 |
| cg00618183 | 4.20E-07 | 5.51E-08 | 5.65 | 7.3071055 | 1.46E-01 | 75143600  | 75143723  | NC_000017.10 |
| cg21088896 | 4.20E-07 | 5.52E-08 | 5.65 | 7.3066153 | 1.39E-01 | 94284917  | 94285040  | NC_000007.13 |
| cg22275864 | 4.21E-07 | 5.53E-08 | 5.65 | 7.3049847 | 1.25E-01 | 37822562  | 37822685  | NC_000008.10 |
| cg09267427 | 4.21E-07 | 5.53E-08 | 5.65 | 7.3047508 | 1.12E-01 | 124953924 | 124954047 | NC_000012.11 |
| cg25566568 | 4.21E-07 | 5.53E-08 | 5.65 | 7.3041613 | 2.05E-01 | 36995009  | 36995132  | NC_000014.8  |
| cg12665414 | 4.22E-07 | 5.53E-08 | 5.65 | 7.3039099 | 1.53E-01 | 173318755 | 173318878 | NC_000005.9  |
| cg25198599 | 4.22E-07 | 5.53E-08 | 5.65 | 7.3038554 | 1.07E-01 | 131142648 | 131142771 | NC_000012.11 |
| cg00985817 | 4.22E-07 | 5.53E-08 | 5.65 | 7.3036429 | 1.04E-01 | 23584720  | 23584843  | NC_000004.11 |



|            |          |          |      |           |          |           |           |              |
|------------|----------|----------|------|-----------|----------|-----------|-----------|--------------|
| cg13248406 | 4.22E-07 | 5.53E-08 | 5.65 | 7.3035313 | 6.15E-02 | 2198631   | 2198754   | NC_000007.13 |
| cg09783270 | 4.22E-07 | 5.54E-08 | 5.65 | 7.3033572 | 5.23E-02 | 46001312  | 46001435  | NC_000007.13 |
| cg13380624 | 4.22E-07 | 5.54E-08 | 5.65 | 7.3030632 | 1.48E-01 | 7735426   | 7735549   | NC_000019.9  |
| cg25745246 | 4.22E-07 | 5.54E-08 | 5.65 | 7.3026349 | 5.16E-02 | 134491331 | 134491454 | NC_000010.10 |
| cg04892919 | 4.22E-07 | 5.54E-08 | 5.65 | 7.3025912 | 2.52E-02 | 191272604 | 191272727 | NC_000002.11 |
| cg03890634 | 4.22E-07 | 5.54E-08 | 5.65 | 7.3024747 | 4.20E-02 | 47584779  | 47584902  | NC_000007.13 |
| cg04965141 | 4.22E-07 | 5.54E-08 | 5.65 | 7.302318  | 1.29E-01 | 154710750 | 154710873 | NC_000004.11 |
| cg24277733 | 4.22E-07 | 5.54E-08 | 5.65 | 7.3022526 | 9.53E-02 | 4763284   | 4763407   | NC_000004.11 |
| cg21910196 | 4.22E-07 | 5.54E-08 | 5.65 | 7.3021358 | 1.09E-01 | 72402619  | 72402742  | NC_000014.8  |
| cg24856171 | 4.22E-07 | 5.54E-08 | 5.65 | 7.3018942 | 2.53E-02 | 1640861   | 1640984   | NC_000005.9  |
| cg27431625 | 4.22E-07 | 5.55E-08 | 5.65 | 7.3017119 | 1.39E-01 | 107679531 | 107679654 | NC_000002.11 |
| cg05475205 | 4.22E-07 | 5.55E-08 | 5.65 | 7.3016851 | 7.41E-02 | 176305017 | 176305140 | NC_000005.9  |
| cg15887459 | 4.22E-07 | 5.55E-08 | 5.65 | 7.3016213 | 1.18E-01 | 18230903  | 18231026  | NC_000011.9  |
| cg16782807 | 4.23E-07 | 5.55E-08 | 5.65 | 7.3013089 | 1.90E-01 | 37354254  | 37354377  | NC_000020.10 |
| cg04676482 | 4.23E-07 | 5.55E-08 | 5.65 | 7.300734  | 8.91E-02 | 111536216 | 111536339 | NC_000004.11 |
| cg13504907 | 4.23E-07 | 5.55E-08 | 5.65 | 7.30046   | 3.60E-02 | 5185586   | 5185709   | NC_000009.11 |
| cg02302082 | 4.23E-07 | 5.55E-08 | 5.65 | 7.3002439 | 2.83E-02 | 125561009 | 125561132 | NC_000012.11 |
| cg27507700 | 4.23E-07 | 5.55E-08 | 5.65 | 7.3000699 | 1.45E-01 | 87230189  | 87230312  | NC_000007.13 |
| cg14552379 | 4.23E-07 | 5.56E-08 | 5.65 | 7.2994295 | 1.50E-01 | 60982036  | 60982159  | NC_000014.8  |
| cg14409919 | 4.23E-07 | 5.56E-08 | 5.65 | 7.2991657 | 4.05E-02 | 130312266 | 130312389 | NC_000009.11 |
| cg23284959 | 4.24E-07 | 5.56E-08 | 5.65 | 7.298831  | 5.39E-02 | 134833312 | 134833435 | NC_000010.10 |
| cg02998129 | 4.24E-07 | 5.57E-08 | 5.65 | 7.2981868 | 1.14E-01 | 42344234  | 42344357  | NC_000017.10 |
| cg14834721 | 4.24E-07 | 5.57E-08 | 5.65 | 7.2981215 | 2.67E-02 | 78492139  | 78492262  | NC_000004.11 |
| cg02855996 | 4.24E-07 | 5.57E-08 | 5.65 | 7.2979135 | 5.44E-02 | 150068757 | 150068880 | NC_000007.13 |
| cg02530172 | 4.24E-07 | 5.57E-08 | 5.65 | 7.2978988 | 1.94E-02 | 515789    | 515912    | NC_000006.11 |

|            |          |          |      |           |          |           |           |              |
|------------|----------|----------|------|-----------|----------|-----------|-----------|--------------|
| cg01553209 | 4.24E-07 | 5.57E-08 | 5.65 | 7.2978913 | 1.64E-01 | 22625874  | 22625997  | NC_000010.10 |
| cg17744293 | 4.24E-07 | 5.57E-08 | 5.65 | 7.2971662 | 1.19E-01 | 50890952  | 50891075  | NC_000001.10 |
| cg00983803 | 4.24E-07 | 5.57E-08 | 5.65 | 7.2969742 | 8.29E-02 | 48575902  | 48576025  | NC_000001.10 |
| cg04218209 | 4.25E-07 | 5.58E-08 | 5.65 | 7.2958359 | 3.69E-02 | 41247988  | 41248111  | NC_000015.9  |
| cg09536336 | 4.25E-07 | 5.58E-08 | 5.65 | 7.2954023 | 1.02E-01 | 168439657 | 168439780 | NC_000005.9  |
| cg03782771 | 4.25E-07 | 5.59E-08 | 5.65 | 7.2945683 | 8.65E-02 | 152801238 | 152801361 | NC_000004.11 |
| cg03177042 | 4.26E-07 | 5.59E-08 | 5.65 | 7.2933604 | 1.16E-01 | 166422671 | 166422794 | NC_000006.11 |
| cg11704490 | 4.26E-07 | 5.59E-08 | 5.65 | 7.2933532 | 6.83E-02 | 162284894 | 162285017 | NC_000002.11 |
| cg17449333 | 4.26E-07 | 5.60E-08 | 5.65 | 7.2928937 | 4.31E-02 | 46669290  | 46669413  | NC_000003.11 |
| cg17314000 | 4.26E-07 | 5.60E-08 | 5.65 | 7.2926355 | 1.55E-01 | 178594447 | 178594570 | NC_000005.9  |
| cg06670599 | 4.26E-07 | 5.60E-08 | 5.65 | 7.2920723 | 9.90E-02 | 31631801  | 31631924  | NC_000006.11 |
| cg24027742 | 4.26E-07 | 5.60E-08 | 5.65 | 7.2918261 | 3.99E-02 | 64895147  | 64895270  | NC_000011.9  |
| cg17683110 | 4.27E-07 | 5.61E-08 | 5.65 | 7.2910314 | 1.11E-01 | 49311934  | 49312057  | NC_000016.9  |
| cg06948763 | 4.27E-07 | 5.61E-08 | 5.65 | 7.2907081 | 1.44E-01 | 110763078 | 110763201 | NC_000001.10 |
| cg05870631 | 4.28E-07 | 5.62E-08 | 5.65 | 7.2878662 | 5.08E-02 | 20450466  | 20450589  | NC_000017.10 |
| cg14490735 | 4.28E-07 | 5.63E-08 | 5.65 | 7.2869022 | 8.26E-02 | 39286162  | 39286285  | NC_000009.11 |
| cg19684990 | 4.29E-07 | 5.64E-08 | 5.65 | 7.2852106 | 6.02E-02 | 106110146 | 106110269 | NC_000014.8  |
| cg19084589 | 4.30E-07 | 5.65E-08 | 5.65 | 7.2836962 | 1.66E-01 | 26737711  | 26737834  | NC_000001.10 |
| cg04369341 | 4.30E-07 | 5.66E-08 | 5.65 | 7.2823647 | 1.24E-01 | 42545022  | 42545145  | NC_000020.10 |
| cg06085038 | 4.31E-07 | 5.66E-08 | 5.65 | 7.2812    | 7.83E-02 | 45946982  | 45947105  | NC_000017.10 |
| cg19456622 | 4.31E-07 | 5.67E-08 | 5.65 | 7.2797255 | 1.16E-01 | 53423132  | 53423255  | NC_000013.10 |
| cg01863682 | 4.32E-07 | 5.68E-08 | 5.65 | 7.2787537 | 1.64E-01 | 182545771 | 182545894 | NC_000002.11 |
| cg04697454 | 4.32E-07 | 5.68E-08 | 5.65 | 7.2786225 | 1.22E-01 | 93633408  | 93633531  | NC_000015.9  |
| cg17948565 | 4.32E-07 | 5.68E-08 | 5.65 | 7.2785453 | 6.38E-02 | 3803114   | 3803237   | NC_000019.9  |
| cg02448922 | 4.32E-07 | 5.69E-08 | 5.65 | 7.2772877 | 1.22E-01 | 21754947  | 21755070  | NC_000001.10 |

|            |          |          |      |           |          |           |           |              |
|------------|----------|----------|------|-----------|----------|-----------|-----------|--------------|
| cg18867912 | 4.32E-07 | 5.69E-08 | 5.65 | 7.2771322 | 4.66E-02 | 33623072  | 33623195  | NC_000019.9  |
| cg06008926 | 4.33E-07 | 5.69E-08 | 5.65 | 7.276863  | 1.27E-01 | 170740673 | 170740796 | NC_000005.9  |
| cg07311566 | 4.33E-07 | 5.69E-08 | 5.65 | 7.276739  | 3.50E-02 | 58632000  | 58632123  | NC_000003.11 |
| cg14530764 | 4.33E-07 | 5.69E-08 | 5.65 | 7.2766488 | 6.92E-02 | 123124018 | 123124141 | NC_000003.11 |
| cg12917718 | 4.33E-07 | 5.69E-08 | 5.65 | 7.2761025 | 1.14E-01 | 70682019  | 70682142  | NC_000013.10 |
| cg10760299 | 4.33E-07 | 5.69E-08 | 5.65 | 7.2760093 | 1.35E-01 | 45669010  | 45669133  | NC_000015.9  |
| cg21177821 | 4.33E-07 | 5.70E-08 | 5.65 | 7.2756874 | 1.15E-01 | 61121712  | 61121835  | NC_000014.8  |
| cg15208375 | 4.33E-07 | 5.70E-08 | 5.65 | 7.2746883 | 2.16E-01 | 31841555  | 31841678  | NC_000019.9  |
| cg06854015 | 4.34E-07 | 5.71E-08 | 5.65 | 7.2732009 | 7.64E-02 | 14852042  | 14852165  | NC_000003.11 |
| cg06781853 | 4.34E-07 | 5.71E-08 | 5.65 | 7.2731721 | 9.79E-02 | 32857551  | 32857674  | NC_000016.9  |
| cg24165443 | 4.34E-07 | 5.71E-08 | 5.65 | 7.2725384 | 2.43E-02 | 97679964  | 97680087  | NC_000002.11 |
| cg03877267 | 4.35E-07 | 5.72E-08 | 5.65 | 7.2709582 | 1.37E-01 | 102430784 | 102430907 | NC_000010.10 |
| cg06350176 | 4.35E-07 | 5.73E-08 | 5.65 | 7.2704295 | 1.69E-02 | 67375936  | 67376059  | NC_000011.9  |
| cg22007237 | 4.35E-07 | 5.73E-08 | 5.65 | 7.2703667 | 7.96E-02 | 68452938  | 68453061  | NC_000011.9  |
| cg00165994 | 4.35E-07 | 5.73E-08 | 5.65 | 7.2701856 | 9.87E-02 | 62054902  | 62055025  | NC_000001.10 |
| cg18194850 | 4.36E-07 | 5.73E-08 | 5.65 | 7.2695971 | 1.12E-01 | 67699305  | 67699428  | NC_000003.11 |
| cg17180678 | 4.36E-07 | 5.74E-08 | 5.65 | 7.2687791 | 1.45E-01 | 89915003  | 89915126  | NC_000015.9  |
| cg12050750 | 4.36E-07 | 5.74E-08 | 5.65 | 7.2687113 | 1.17E-01 | 145938126 | 145938249 | NC_000008.10 |
| cg13969265 | 4.36E-07 | 5.74E-08 | 5.65 | 7.2684331 | 1.47E-01 | 140716673 | 140716796 | NC_000008.10 |
| cg23026675 | 4.36E-07 | 5.74E-08 | 5.65 | 7.2682586 | 1.77E-01 | 77590168  | 77590291  | NC_000008.10 |
| cg01775260 | 4.36E-07 | 5.74E-08 | 5.65 | 7.2679948 | 1.15E-01 | 27018770  | 27018893  | NC_000015.9  |
| cg17880199 | 4.36E-07 | 5.74E-08 | 5.65 | 7.2678761 | 1.30E-01 | 15950840  | 15950963  | NC_000016.9  |
| cg00424169 | 4.37E-07 | 5.75E-08 | 5.65 | 7.2671488 | 9.15E-02 | 31506837  | 31506960  | NC_000013.10 |
| cg01978105 | 4.37E-07 | 5.75E-08 | 5.65 | 7.2670682 | 1.04E-01 | 67678756  | 67678879  | NC_000016.9  |
| cg04753469 | 4.37E-07 | 5.75E-08 | 5.65 | 7.2669947 | 6.50E-02 | 105041708 | 105041831 | NC_000014.8  |

|            |          |          |      |           |          |           |           |              |
|------------|----------|----------|------|-----------|----------|-----------|-----------|--------------|
| cg15986413 | 4.37E-07 | 5.75E-08 | 5.65 | 7.2668602 | 8.66E-02 | 233352776 | 233352899 | NC_000002.11 |
| cg08865829 | 4.37E-07 | 5.75E-08 | 5.65 | 7.2664287 | 3.20E-02 | 51412448  | 51412571  | NC_000015.9  |
| cg07224914 | 4.37E-07 | 5.75E-08 | 5.64 | 7.2655812 | 1.17E-01 | 95691647  | 95691770  | NC_000002.11 |
| cg03546687 | 4.37E-07 | 5.75E-08 | 5.64 | 7.2655775 | 6.97E-02 | 2198080   | 2198203   | NC_000016.9  |
| cg00210016 | 4.37E-07 | 5.76E-08 | 5.64 | 7.2654055 | 2.85E-02 | 18919146  | 18919269  | NC_000017.10 |
| cg17371841 | 4.37E-07 | 5.76E-08 | 5.64 | 7.2653202 | 3.62E-02 | 101183957 | 101184080 | NC_000013.10 |
| cg06066248 | 4.38E-07 | 5.77E-08 | 5.64 | 7.2635131 | 9.20E-02 | 75616272  | 75616395  | NC_000015.9  |
| cg23547017 | 4.38E-07 | 5.77E-08 | 5.64 | 7.2630851 | 7.67E-02 | 177030171 | 177030294 | NC_000002.11 |
| cg06165761 | 4.39E-07 | 5.78E-08 | 5.64 | 7.2613943 | 3.13E-02 | 38118139  | 38118262  | NC_000021.8  |
| cg22533762 | 4.39E-07 | 5.78E-08 | 5.64 | 7.2606749 | 3.44E-02 | 213697049 | 213697172 | NC_000002.11 |
| cg03161037 | 4.39E-07 | 5.79E-08 | 5.64 | 7.2604303 | 9.21E-02 | 46808309  | 46808432  | NC_000017.10 |
| cg13465946 | 4.39E-07 | 5.79E-08 | 5.64 | 7.2603708 | 1.03E-01 | 13208349  | 13208472  | NC_000019.9  |
| cg19689427 | 4.39E-07 | 5.79E-08 | 5.64 | 7.2599979 | 1.06E-01 | 140719008 | 140719131 | NC_000005.9  |
| cg24686236 | 4.40E-07 | 5.80E-08 | 5.64 | 7.2584742 | 3.77E-02 | 14323412  | 14323535  | NC_000005.9  |
| cg24618378 | 4.41E-07 | 5.80E-08 | 5.64 | 7.2573069 | 6.17E-02 | 177614217 | 177614340 | NC_000005.9  |
| cg25703213 | 4.41E-07 | 5.81E-08 | 5.64 | 7.2568083 | 4.89E-02 | 130909656 | 130909779 | NC_000012.11 |
| cg04432319 | 4.41E-07 | 5.81E-08 | 5.64 | 7.2568009 | 1.84E-01 | 13200931  | 13201054  | NC_000020.10 |
| cg26244838 | 4.41E-07 | 5.81E-08 | 5.64 | 7.2561347 | 1.19E-01 | 1110226   | 1110349   | NC_000005.9  |
| cg13775295 | 4.41E-07 | 5.81E-08 | 5.64 | 7.2559673 | 7.84E-02 | 137673894 | 137674017 | NC_000009.11 |
| cg19442201 | 4.41E-07 | 5.81E-08 | 5.64 | 7.2555989 | 1.03E-01 | 40572550  | 40572673  | NC_000015.9  |
| cg07459121 | 4.41E-07 | 5.82E-08 | 5.64 | 7.2553961 | 5.55E-02 | 1092793   | 1092916   | NC_000005.9  |
| cg17332708 | 4.42E-07 | 5.82E-08 | 5.64 | 7.2547007 | 2.52E-02 | 1231840   | 1231963   | NC_000004.11 |
| cg12836313 | 4.42E-07 | 5.82E-08 | 5.64 | 7.2546436 | 8.80E-03 | 156733574 | 156733697 | NC_000007.13 |
| cg04297995 | 4.42E-07 | 5.82E-08 | 5.64 | 7.2544305 | 1.10E-01 | 52023213  | 52023336  | NC_000019.9  |
| cg22889887 | 4.42E-07 | 5.83E-08 | 5.64 | 7.2537226 | 7.68E-02 | 113433931 | 113434054 | NC_000011.9  |

|            |          |          |      |           |          |           |           |              |
|------------|----------|----------|------|-----------|----------|-----------|-----------|--------------|
| cg05455279 | 4.43E-07 | 5.83E-08 | 5.64 | 7.2525191 | 1.04E-01 | 97109009  | 97109132  | NC_000003.11 |
| cg10640845 | 4.43E-07 | 5.84E-08 | 5.64 | 7.2520239 | 9.08E-02 | 1775211   | 1775334   | NC_000019.9  |
| cg26749844 | 4.43E-07 | 5.84E-08 | 5.64 | 7.2517713 | 3.50E-02 | 55197872  | 55197995  | NC_000017.10 |
| cg09360501 | 4.43E-07 | 5.84E-08 | 5.64 | 7.2516088 | 2.09E-01 | 22018958  | 22019081  | NC_000019.9  |
| cg10858215 | 4.43E-07 | 5.84E-08 | 5.64 | 7.2511767 | 1.32E-01 | 177004604 | 177004727 | NC_000002.11 |
| cg07872947 | 4.43E-07 | 5.84E-08 | 5.64 | 7.2506801 | 1.14E-01 | 1732172   | 1732295   | NC_000002.11 |
| cg07531268 | 4.44E-07 | 5.85E-08 | 5.64 | 7.2490101 | 1.40E-01 | 19551750  | 19551873  | NC_000002.11 |
| cg20624886 | 4.44E-07 | 5.86E-08 | 5.64 | 7.2485013 | 1.25E-01 | 46275613  | 46275736  | NC_000019.9  |
| cg04396936 | 4.45E-07 | 5.86E-08 | 5.64 | 7.2479661 | 8.59E-02 | 35732577  | 35732700  | NC_000007.13 |
| cg18273840 | 4.45E-07 | 5.86E-08 | 5.64 | 7.2475776 | 1.84E-01 | 45695643  | 45695766  | NC_000005.9  |
| cg11133963 | 4.45E-07 | 5.87E-08 | 5.64 | 7.2460676 | 7.11E-02 | 47297512  | 47297635  | NC_000017.10 |
| cg04138502 | 4.45E-07 | 5.87E-08 | 5.64 | 7.2459045 | 1.51E-01 | 123167522 | 123167645 | NC_000003.11 |
| cg22798468 | 4.45E-07 | 5.87E-08 | 5.64 | 7.2458688 | 7.32E-02 | 225150341 | 225150464 | NC_000001.10 |
| cg23404248 | 4.46E-07 | 5.88E-08 | 5.64 | 7.2454255 | 1.21E-01 | 111533195 | 111533318 | NC_000004.11 |
| cg20902353 | 4.46E-07 | 5.88E-08 | 5.64 | 7.2453808 | 7.19E-02 | 94425114  | 94425237  | NC_000014.8  |
| cg14170668 | 4.46E-07 | 5.88E-08 | 5.64 | 7.2452291 | 5.32E-02 | 19174022  | 19174145  | NC_000013.10 |
| cg18789624 | 4.46E-07 | 5.88E-08 | 5.64 | 7.2451031 | 6.74E-02 | 30516742  | 30516865  | NC_000007.13 |
| cg06989330 | 4.46E-07 | 5.88E-08 | 5.64 | 7.2445928 | 1.39E-01 | 77822135  | 77822258  | NC_000016.9  |
| cg05687370 | 4.46E-07 | 5.88E-08 | 5.64 | 7.2442289 | 2.52E-02 | 113189960 | 113190083 | NC_000004.11 |
| cg05629669 | 4.46E-07 | 5.89E-08 | 5.64 | 7.2434944 | 3.60E-02 | 40340835  | 40340958  | NC_000019.9  |
| cg04419883 | 4.47E-07 | 5.89E-08 | 5.64 | 7.2429624 | 8.52E-02 | 85607562  | 85607685  | NC_000016.9  |
| cg18533386 | 4.47E-07 | 5.89E-08 | 5.64 | 7.2422383 | 2.04E-01 | 181452039 | 181452162 | NC_000001.10 |
| cg16221240 | 4.47E-07 | 5.90E-08 | 5.64 | 7.2410831 | 7.62E-02 | 130970934 | 130971057 | NC_000002.11 |
| cg23413051 | 4.48E-07 | 5.90E-08 | 5.64 | 7.2409498 | 7.58E-02 | 75557265  | 75557388  | NC_000017.10 |
| cg23302558 | 4.48E-07 | 5.90E-08 | 5.64 | 7.2409411 | 1.09E-01 | 182774636 | 182774759 | NC_000002.11 |

|            |          |          |      |           |          |           |           |              |
|------------|----------|----------|------|-----------|----------|-----------|-----------|--------------|
| cg23999932 | 4.48E-07 | 5.90E-08 | 5.64 | 7.2408246 | 1.16E-01 | 54976184  | 54976307  | NC_000004.11 |
| cg15856829 | 4.48E-07 | 5.90E-08 | 5.64 | 7.2405758 | 1.15E-01 | 161100672 | 161100795 | NC_000006.11 |
| cg15508809 | 4.48E-07 | 5.91E-08 | 5.64 | 7.2400948 | 1.37E-01 | 29231309  | 29231432  | NC_000014.8  |
| cg11308840 | 4.48E-07 | 5.91E-08 | 5.64 | 7.2396424 | 1.14E-01 | 32783516  | 32783639  | NC_000009.11 |
| cg26537209 | 4.48E-07 | 5.91E-08 | 5.64 | 7.2392216 | 1.15E-01 | 54324187  | 54324310  | NC_000016.9  |
| cg26524547 | 4.48E-07 | 5.91E-08 | 5.64 | 7.2391815 | 3.56E-02 | 201820022 | 201820145 | NC_000001.10 |
| cg04506553 | 4.48E-07 | 5.91E-08 | 5.64 | 7.2389633 | 6.00E-02 | 7724769   | 7724892   | NC_000001.10 |
| cg13016408 | 4.48E-07 | 5.91E-08 | 5.64 | 7.2389009 | 1.20E-01 | 133426298 | 133426421 | NC_000002.11 |
| cg06634914 | 4.49E-07 | 5.93E-08 | 5.64 | 7.2369958 | 1.57E-01 | 30354611  | 30354734  | NC_000012.11 |
| cg21907107 | 4.49E-07 | 5.93E-08 | 5.64 | 7.2369792 | 1.18E-01 | 76932062  | 76932185  | NC_000005.9  |
| cg03143395 | 4.49E-07 | 5.93E-08 | 5.64 | 7.2367464 | 1.56E-01 | 186742050 | 186742173 | NC_000004.11 |
| cg12093443 | 4.49E-07 | 5.93E-08 | 5.64 | 7.2366207 | 5.45E-02 | 113351420 | 113351543 | NC_000008.10 |
| cg11067552 | 4.50E-07 | 5.93E-08 | 5.64 | 7.2359698 | 7.90E-02 | 62343481  | 62343604  | NC_000014.8  |
| cg19499361 | 4.50E-07 | 5.93E-08 | 5.64 | 7.2355943 | 1.04E-01 | 21680220  | 21680343  | NC_000012.11 |
| cg00837308 | 4.50E-07 | 5.94E-08 | 5.64 | 7.23558   | 1.17E-01 | 88473488  | 88473611  | NC_000016.9  |
| cg04645039 | 4.50E-07 | 5.94E-08 | 5.64 | 7.234548  | 1.06E-01 | 36667233  | 36667356  | NC_000017.10 |
| cg03070262 | 4.50E-07 | 5.94E-08 | 5.64 | 7.2344821 | 8.94E-02 | 57484819  | 57484942  | NC_000007.13 |
| cg24395452 | 4.51E-07 | 5.95E-08 | 5.64 | 7.2335756 | 7.97E-02 | 52943197  | 52943320  | NC_000004.11 |
| cg06528267 | 4.51E-07 | 5.95E-08 | 5.64 | 7.2335509 | 8.63E-02 | 49815642  | 49815765  | NC_000007.13 |
| cg05406381 | 4.51E-07 | 5.95E-08 | 5.64 | 7.2333892 | 8.36E-02 | 1503917   | 1504040   | NC_000004.11 |
| cg19863955 | 4.51E-07 | 5.95E-08 | 5.64 | 7.2323266 | 3.31E-02 | 178581108 | 178581231 | NC_000005.9  |
| cg07004265 | 4.52E-07 | 5.96E-08 | 5.64 | 7.2313653 | 9.12E-02 | 87101428  | 87101551  | NC_000003.11 |
| cg25920483 | 4.52E-07 | 5.96E-08 | 5.64 | 7.231268  | 1.53E-01 | 140772457 | 140772580 | NC_000007.13 |
| cg23445859 | 4.52E-07 | 5.96E-08 | 5.64 | 7.2308919 | 1.73E-01 | 122688787 | 122688910 | NC_000012.11 |
| cg27195676 | 4.52E-07 | 5.97E-08 | 5.64 | 7.2295512 | 6.84E-02 | 101943788 | 101943911 | NC_000007.13 |

|            |          |          |      |           |          |           |           |              |
|------------|----------|----------|------|-----------|----------|-----------|-----------|--------------|
| cg26606947 | 4.53E-07 | 5.98E-08 | 5.64 | 7.2287128 | 8.12E-02 | 123781602 | 123781725 | NC_000010.10 |
| cg13170600 | 4.53E-07 | 5.98E-08 | 5.64 | 7.2285266 | 8.05E-02 | 21818863  | 21818986  | NC_000001.10 |
| cg20468462 | 4.53E-07 | 5.98E-08 | 5.64 | 7.2283631 | 3.88E-02 | 77645945  | 77646068  | NC_000014.8  |
| cg07527467 | 4.53E-07 | 5.98E-08 | 5.64 | 7.2282474 | 1.76E-02 | 1953811   | 1953934   | NC_000019.9  |
| cg15713729 | 4.53E-07 | 5.99E-08 | 5.64 | 7.2273828 | 3.23E-02 | 32757367  | 32757490  | NC_000001.10 |
| cg08677617 | 4.54E-07 | 5.99E-08 | 5.64 | 7.2269518 | 1.56E-01 | 102484048 | 102484171 | NC_000010.10 |
| cg24391460 | 4.54E-07 | 5.99E-08 | 5.64 | 7.2267839 | 1.01E-01 | 79084166  | 79084289  | NC_000007.13 |
| cg04756853 | 4.54E-07 | 5.99E-08 | 5.64 | 7.2264922 | 2.91E-02 | 38118787  | 38118910  | NC_000017.10 |
| cg18201351 | 4.54E-07 | 6.00E-08 | 5.64 | 7.2254969 | 1.50E-01 | 50575037  | 50575160  | NC_000002.11 |
| cg11973682 | 4.54E-07 | 6.00E-08 | 5.64 | 7.2252881 | 1.08E-01 | 5890633   | 5890756   | NC_000004.11 |
| cg13656404 | 4.54E-07 | 6.00E-08 | 5.64 | 7.2251484 | 1.26E-01 | 106959384 | 106959507 | NC_000002.11 |
| cg09802893 | 4.54E-07 | 6.00E-08 | 5.64 | 7.2251412 | 9.55E-02 | 64350876  | 64350999  | NC_000007.13 |
| cg23949901 | 4.55E-07 | 6.01E-08 | 5.64 | 7.2241037 | 4.96E-02 | 156587958 | 156588081 | NC_000001.10 |
| cg16791424 | 4.55E-07 | 6.01E-08 | 5.64 | 7.2239112 | 1.80E-01 | 27068093  | 27068216  | NC_000014.8  |
| cg16653620 | 4.55E-07 | 6.01E-08 | 5.64 | 7.223124  | 1.63E-01 | 162284135 | 162284258 | NC_000002.11 |
| cg24745738 | 4.55E-07 | 6.01E-08 | 5.64 | 7.2231161 | 1.39E-01 | 78493958  | 78494081  | NC_000013.10 |
| cg14236735 | 4.55E-07 | 6.01E-08 | 5.64 | 7.2229766 | 2.02E-01 | 133536345 | 133536468 | NC_000009.11 |
| cg20116804 | 4.55E-07 | 6.02E-08 | 5.64 | 7.2225519 | 1.37E-01 | 48036212  | 48036335  | NC_000006.11 |
| cg21580421 | 4.56E-07 | 6.02E-08 | 5.64 | 7.2222153 | 8.55E-02 | 112361234 | 112361357 | NC_000003.11 |
| cg16213028 | 4.56E-07 | 6.02E-08 | 5.64 | 7.2216928 | 1.31E-01 | 181861227 | 181861350 | NC_000003.11 |
| cg08578136 | 4.56E-07 | 6.02E-08 | 5.64 | 7.2213489 | 1.73E-01 | 207139443 | 207139566 | NC_000002.11 |
| cg13382516 | 4.56E-07 | 6.03E-08 | 5.64 | 7.2206259 | 7.27E-02 | 52336353  | 52336476  | NC_000010.10 |
| cg22171993 | 4.57E-07 | 6.03E-08 | 5.64 | 7.2199344 | 5.28E-02 | 81818816  | 81818939  | NC_000005.9  |
| cg13418710 | 4.57E-07 | 6.03E-08 | 5.64 | 7.2194295 | 7.64E-02 | 11059050  | 11059173  | NC_000003.11 |
| cg21309351 | 4.57E-07 | 6.04E-08 | 5.64 | 7.2183533 | 1.10E-01 | 138540608 | 138540731 | NC_000006.11 |

|            |          |          |      |           |          |           |           |              |
|------------|----------|----------|------|-----------|----------|-----------|-----------|--------------|
| cg22276251 | 4.58E-07 | 6.04E-08 | 5.64 | 7.2177835 | 4.33E-02 | 14543867  | 14543990  | NC_000018.9  |
| cg16316058 | 4.58E-07 | 6.05E-08 | 5.64 | 7.2174942 | 1.10E-01 | 4545334   | 4545457   | NC_000005.9  |
| cg09946870 | 4.58E-07 | 6.05E-08 | 5.64 | 7.2173774 | 1.56E-01 | 142189600 | 142189723 | NC_000008.10 |
| cg24862668 | 4.58E-07 | 6.06E-08 | 5.63 | 7.2159105 | 1.53E-01 | 25703160  | 25703283  | NC_000016.9  |
| cg01657574 | 4.58E-07 | 6.06E-08 | 5.63 | 7.2157079 | 1.59E-01 | 5995150   | 5995273   | NC_000006.11 |
| cg05719164 | 4.59E-07 | 6.06E-08 | 5.63 | 7.2149337 | 2.20E-01 | 180204221 | 180204344 | NC_000001.10 |
| cg13711394 | 4.59E-07 | 6.07E-08 | 5.63 | 7.2137771 | 1.48E-01 | 37004737  | 37004860  | NC_000013.10 |
| cg07138551 | 4.60E-07 | 6.07E-08 | 5.63 | 7.2133645 | 1.45E-01 | 5196738   | 5196861   | NC_000018.9  |
| cg09001143 | 4.60E-07 | 6.08E-08 | 5.63 | 7.2121234 | 8.55E-02 | 9857475   | 9857598   | NC_000016.9  |
| cg16600020 | 4.60E-07 | 6.08E-08 | 5.63 | 7.2121156 | 4.22E-02 | 30210405  | 30210528  | NC_000008.10 |
| cg10803923 | 4.60E-07 | 6.09E-08 | 5.63 | 7.2112634 | 3.75E-02 | 56637310  | 56637433  | NC_000012.11 |
| cg16083711 | 4.61E-07 | 6.09E-08 | 5.63 | 7.2102256 | 6.82E-02 | 14109211  | 14109334  | NC_000012.11 |
| cg04200224 | 4.61E-07 | 6.10E-08 | 5.63 | 7.2095264 | 1.23E-01 | 25652390  | 25652513  | NC_000006.11 |
| cg17052964 | 4.61E-07 | 6.10E-08 | 5.63 | 7.2093499 | 6.67E-02 | 108602510 | 108602633 | NC_000002.11 |
| cg08312083 | 4.62E-07 | 6.11E-08 | 5.63 | 7.2072605 | 2.33E-02 | 114514236 | 114514359 | NC_000002.11 |
| cg08084154 | 4.62E-07 | 6.11E-08 | 5.63 | 7.2071534 | 1.13E-01 | 2848577   | 2848700   | NC_000016.9  |
| cg02412810 | 4.62E-07 | 6.11E-08 | 5.63 | 7.2068663 | 1.10E-01 | 217788    | 217911    | NC_000012.11 |
| cg13074634 | 4.62E-07 | 6.11E-08 | 5.63 | 7.2068529 | 5.82E-02 | 132835199 | 132835322 | NC_000012.11 |
| cg15588215 | 4.63E-07 | 6.12E-08 | 5.63 | 7.2063337 | 1.16E-01 | 27766045  | 27766168  | NC_000003.11 |
| cg15434398 | 4.63E-07 | 6.12E-08 | 5.63 | 7.2062923 | 1.05E-01 | 52285271  | 52285394  | NC_000012.11 |
| cg19153828 | 4.63E-07 | 6.12E-08 | 5.63 | 7.2061019 | 9.49E-02 | 127782651 | 127782774 | NC_000002.11 |
| cg07151748 | 4.63E-07 | 6.12E-08 | 5.63 | 7.2058524 | 1.02E-01 | 95867431  | 95867554  | NC_000015.9  |
| cg01798595 | 4.63E-07 | 6.12E-08 | 5.63 | 7.2049361 | 1.74E-01 | 21664778  | 21664901  | NC_000006.11 |
| cg14876077 | 4.64E-07 | 6.13E-08 | 5.63 | 7.2042846 | 9.22E-02 | 45737873  | 45737996  | NC_000019.9  |
| cg00097357 | 4.64E-07 | 6.13E-08 | 5.63 | 7.2040031 | 1.03E-01 | 33591336  | 33591459  | NC_000012.11 |



|            |          |          |      |           |          |           |           |              |
|------------|----------|----------|------|-----------|----------|-----------|-----------|--------------|
| cg27577149 | 4.64E-07 | 6.13E-08 | 5.63 | 7.2039973 | 7.57E-02 | 140712441 | 140712564 | NC_000005.9  |
| cg16793370 | 4.64E-07 | 6.13E-08 | 5.63 | 7.2033483 | 4.74E-02 | 105371541 | 105371664 | NC_000014.8  |
| cg25429719 | 4.65E-07 | 6.15E-08 | 5.63 | 7.2017218 | 1.16E-01 | 208989324 | 208989447 | NC_000002.11 |
| cg07915343 | 4.65E-07 | 6.15E-08 | 5.63 | 7.2013517 | 7.02E-02 | 18477680  | 18477803  | NC_000011.9  |
| cg09602542 | 4.65E-07 | 6.15E-08 | 5.63 | 7.2011059 | 4.06E-02 | 4500249   | 4500372   | NC_000017.10 |
| cg11271526 | 4.65E-07 | 6.15E-08 | 5.63 | 7.20037   | 2.99E-02 | 78155327  | 78155450  | NC_000017.10 |
| cg05591716 | 4.65E-07 | 6.15E-08 | 5.63 | 7.2002449 | 1.45E-01 | 117950454 | 117950577 | NC_000008.10 |
| cg21990144 | 4.65E-07 | 6.15E-08 | 5.63 | 7.2002165 | 1.24E-01 | 201726666 | 201726789 | NC_000002.11 |
| cg07283833 | 4.65E-07 | 6.16E-08 | 5.63 | 7.1999257 | 1.55E-01 | 84563444  | 84563567  | NC_000006.11 |
| cg23553442 | 4.65E-07 | 6.16E-08 | 5.63 | 7.1998966 | 1.13E-01 | 74062096  | 74062219  | NC_000009.11 |
| cg16285566 | 4.66E-07 | 6.16E-08 | 5.63 | 7.1996447 | 1.98E-02 | 33682212  | 33682335  | NC_000013.10 |
| cg00605982 | 4.66E-07 | 6.16E-08 | 5.63 | 7.1988858 | 1.38E-01 | 10857688  | 10857811  | NC_000003.11 |
| cg01857151 | 4.66E-07 | 6.17E-08 | 5.63 | 7.1982485 | 1.12E-01 | 145304100 | 145304223 | NC_000005.9  |
| cg08213098 | 4.66E-07 | 6.17E-08 | 5.63 | 7.1980254 | 1.63E-01 | 35395837  | 35395960  | NC_000001.10 |
| cg06340899 | 4.66E-07 | 6.17E-08 | 5.63 | 7.1976788 | 8.07E-02 | 49018971  | 49019094  | NC_000022.10 |
| cg00752195 | 4.67E-07 | 6.18E-08 | 5.63 | 7.1969499 | 1.12E-01 | 1399516   | 1399639   | NC_000004.11 |
| cg18074184 | 4.67E-07 | 6.18E-08 | 5.63 | 7.1965707 | 9.50E-02 | 48485090  | 48485213  | NC_000004.11 |
| cg11891395 | 4.67E-07 | 6.18E-08 | 5.63 | 7.1960979 | 1.59E-01 | 96652153  | 96652276  | NC_000007.13 |
| cg23346801 | 4.68E-07 | 6.19E-08 | 5.63 | 7.1947337 | 6.63E-02 | 31915104  | 31915227  | NC_000006.11 |
| cg13662569 | 4.68E-07 | 6.19E-08 | 5.63 | 7.1944981 | 9.14E-02 | 186577902 | 186578025 | NC_000004.11 |
| cg14912034 | 4.68E-07 | 6.19E-08 | 5.63 | 7.1943314 | 1.01E-01 | 30918851  | 30918974  | NC_000010.10 |
| cg14207210 | 4.68E-07 | 6.19E-08 | 5.63 | 7.1940157 | 8.52E-02 | 56833195  | 56833318  | NC_000017.10 |
| cg13742956 | 4.68E-07 | 6.19E-08 | 5.63 | 7.1939967 | 7.64E-02 | 2612876   | 2612999   | NC_000011.9  |
| cg20692569 | 4.69E-07 | 6.20E-08 | 5.63 | 7.1925383 | 8.17E-02 | 72848481  | 72848604  | NC_000007.13 |
| cg16078060 | 4.69E-07 | 6.21E-08 | 5.63 | 7.1915268 | 4.34E-02 | 74079719  | 74079842  | NC_000006.11 |

|            |          |          |      |           |          |           |           |              |
|------------|----------|----------|------|-----------|----------|-----------|-----------|--------------|
| cg13464401 | 4.69E-07 | 6.21E-08 | 5.63 | 7.1913778 | 5.96E-02 | 44477740  | 44477863  | NC_000021.8  |
| cg10552903 | 4.69E-07 | 6.21E-08 | 5.63 | 7.1909542 | 7.35E-02 | 122458940 | 122459063 | NC_000012.11 |
| cg21663668 | 4.70E-07 | 6.22E-08 | 5.63 | 7.190626  | 2.51E-02 | 69393377  | 69393500  | NC_000002.11 |
| cg24999105 | 4.70E-07 | 6.22E-08 | 5.63 | 7.1905734 | 1.25E-01 | 137106435 | 137106558 | NC_000006.11 |
| cg03633268 | 4.70E-07 | 6.23E-08 | 5.63 | 7.1890889 | 1.20E-01 | 30284255  | 30284378  | NC_000008.10 |
| cg02390561 | 4.70E-07 | 6.23E-08 | 5.63 | 7.189028  | 6.68E-02 | 132846284 | 132846407 | NC_000012.11 |
| cg02461363 | 4.70E-07 | 6.23E-08 | 5.63 | 7.1884514 | 1.33E-01 | 63212496  | 63212619  | NC_000010.10 |
| cg14221936 | 4.71E-07 | 6.23E-08 | 5.63 | 7.1883955 | 5.41E-02 | 14410566  | 14410689  | NC_000021.8  |
| cg16970926 | 4.71E-07 | 6.23E-08 | 5.63 | 7.1883651 | 4.13E-02 | 29381810  | 29381933  | NC_000012.11 |
| cg20543092 | 4.71E-07 | 6.23E-08 | 5.63 | 7.1880557 | 2.86E-02 | 39184217  | 39184340  | NC_000003.11 |
| cg09926747 | 4.71E-07 | 6.23E-08 | 5.63 | 7.1880508 | 1.50E-01 | 110224247 | 110224370 | NC_000004.11 |
| cg14979301 | 4.71E-07 | 6.23E-08 | 5.63 | 7.1880377 | 1.80E-01 | 42994123  | 42994246  | NC_000005.9  |
| cg01568998 | 4.71E-07 | 6.23E-08 | 5.63 | 7.188001  | 1.46E-01 | 68864782  | 68864905  | NC_000008.10 |
| cg17295878 | 4.71E-07 | 6.24E-08 | 5.63 | 7.1872697 | 1.69E-01 | 77924665  | 77924788  | NC_000017.10 |
| cg07185468 | 4.71E-07 | 6.24E-08 | 5.63 | 7.1871143 | 6.44E-02 | 28447896  | 28448019  | NC_000001.10 |
| cg02103875 | 4.71E-07 | 6.24E-08 | 5.63 | 7.1865374 | 7.78E-02 | 17877203  | 17877326  | NC_000017.10 |
| cg03802201 | 4.71E-07 | 6.24E-08 | 5.63 | 7.1864813 | 4.91E-02 | 13069409  | 13069532  | NC_000012.11 |
| cg14873600 | 4.71E-07 | 6.24E-08 | 5.63 | 7.1864137 | 1.59E-01 | 147072736 | 147072859 | NC_000003.11 |
| cg23409074 | 4.71E-07 | 6.24E-08 | 5.63 | 7.186337  | 7.92E-02 | 67090798  | 67090921  | NC_000008.10 |
| cg03287940 | 4.71E-07 | 6.24E-08 | 5.63 | 7.1860892 | 4.77E-02 | 24537338  | 24537461  | NC_000003.11 |
| cg04926461 | 4.72E-07 | 6.25E-08 | 5.63 | 7.1858772 | 7.75E-02 | 125985088 | 125985211 | NC_000003.11 |
| cg09161519 | 4.72E-07 | 6.25E-08 | 5.63 | 7.1856252 | 3.19E-02 | 2008505   | 2008628   | NC_000016.9  |
| cg02583938 | 4.72E-07 | 6.25E-08 | 5.63 | 7.1854031 | 1.19E-01 | 19748777  | 19748900  | NC_000022.10 |
| cg17462074 | 4.72E-07 | 6.25E-08 | 5.63 | 7.1852517 | 7.85E-02 | 14133168  | 14133291  | NC_000012.11 |
| cg00661947 | 4.72E-07 | 6.25E-08 | 5.63 | 7.1852061 | 3.69E-02 | 65939993  | 65940116  | NC_000012.11 |

|            |          |          |      |           |          |           |           |              |
|------------|----------|----------|------|-----------|----------|-----------|-----------|--------------|
| cg07989490 | 4.72E-07 | 6.25E-08 | 5.63 | 7.1847842 | 3.25E-02 | 8117026   | 8117149   | NC_000010.10 |
| cg08044694 | 4.73E-07 | 6.26E-08 | 5.63 | 7.1835784 | 1.39E-01 | 15391927  | 15392050  | NC_000019.9  |
| cg17809945 | 4.73E-07 | 6.26E-08 | 5.63 | 7.1835402 | 1.08E-01 | 192712975 | 192713098 | NC_000002.11 |
| cg21483110 | 4.73E-07 | 6.27E-08 | 5.63 | 7.1828643 | 1.10E-01 | 34112288  | 34112411  | NC_000019.9  |
| cg24209874 | 4.73E-07 | 6.27E-08 | 5.63 | 7.1827488 | 7.77E-02 | 132282367 | 132282490 | NC_000012.11 |
| cg08484337 | 4.73E-07 | 6.27E-08 | 5.63 | 7.1821838 | 9.69E-02 | 31590563  | 31590686  | NC_000006.11 |
| cg18207741 | 4.74E-07 | 6.28E-08 | 5.63 | 7.1812909 | 1.52E-01 | 60294120  | 60294243  | NC_000015.9  |
| cg15890143 | 4.74E-07 | 6.28E-08 | 5.63 | 7.1799584 | 1.81E-01 | 77736904  | 77737027  | NC_000014.8  |
| cg04240971 | 4.74E-07 | 6.29E-08 | 5.63 | 7.1797829 | 5.45E-02 | 202031356 | 202031479 | NC_000002.11 |
| cg18405539 | 4.75E-07 | 6.29E-08 | 5.63 | 7.1790541 | 1.66E-01 | 30555908  | 30556031  | NC_000020.10 |
| cg06668300 | 4.75E-07 | 6.30E-08 | 5.63 | 7.177804  | 1.41E-01 | 95691755  | 95691878  | NC_000002.11 |
| cg26467725 | 4.76E-07 | 6.30E-08 | 5.63 | 7.1768405 | 2.09E-02 | 92647041  | 92647164  | NC_000015.9  |
| cg08120023 | 4.76E-07 | 6.30E-08 | 5.63 | 7.1768312 | 6.76E-02 | 116947203 | 116947326 | NC_000001.10 |
| cg17632372 | 4.76E-07 | 6.31E-08 | 5.63 | 7.1766632 | 1.30E-01 | 1280236   | 1280359   | NC_000007.13 |
| cg06473941 | 4.76E-07 | 6.31E-08 | 5.63 | 7.1766581 | 9.77E-02 | 81678907  | 81679030  | NC_000016.9  |
| cg05233289 | 4.76E-07 | 6.31E-08 | 5.63 | 7.1758254 | 1.13E-01 | 64120728  | 64120851  | NC_000011.9  |
| cg05170867 | 4.76E-07 | 6.31E-08 | 5.63 | 7.1757003 | 7.47E-02 | 84375634  | 84375757  | NC_000016.9  |
| cg14169163 | 4.76E-07 | 6.32E-08 | 5.63 | 7.1750755 | 7.92E-02 | 20500279  | 20500402  | NC_000015.9  |
| cg21692846 | 4.77E-07 | 6.32E-08 | 5.63 | 7.1750372 | 1.87E-01 | 134146075 | 134146198 | NC_000011.9  |
| cg26571127 | 4.77E-07 | 6.32E-08 | 5.63 | 7.1742154 | 1.45E-01 | 12952280  | 12952403  | NC_000019.9  |
| cg08327532 | 4.77E-07 | 6.33E-08 | 5.63 | 7.1736509 | 1.30E-01 | 50822606  | 50822729  | NC_000010.10 |
| cg04195133 | 4.77E-07 | 6.33E-08 | 5.63 | 7.1734524 | 1.01E-01 | 118384411 | 118384534 | NC_000010.10 |
| cg07452442 | 4.77E-07 | 6.33E-08 | 5.63 | 7.1732804 | 2.64E-02 | 17182186  | 17182309  | NC_000019.9  |
| cg08802652 | 4.77E-07 | 6.33E-08 | 5.63 | 7.1732694 | 9.23E-02 | 39076528  | 39076651  | NC_000006.11 |
| cg16494567 | 4.77E-07 | 6.33E-08 | 5.63 | 7.1731617 | 6.92E-02 | 142200140 | 142200263 | NC_000008.10 |

|            |          |          |      |           |          |           |           |              |
|------------|----------|----------|------|-----------|----------|-----------|-----------|--------------|
| cg05593669 | 4.77E-07 | 6.33E-08 | 5.63 | 7.1730226 | 8.10E-02 | 3900743   | 3900866   | NC_000012.11 |
| cg14422315 | 4.77E-07 | 6.33E-08 | 5.63 | 7.1729901 | 8.40E-02 | 99664004  | 99664127  | NC_000010.10 |
| cg19343518 | 4.77E-07 | 6.33E-08 | 5.63 | 7.1728681 | 1.46E-01 | 157508679 | 157508802 | NC_000006.11 |
| cg13750474 | 4.78E-07 | 6.34E-08 | 5.63 | 7.1714336 | 1.53E-01 | 28364188  | 28364311  | NC_000013.10 |
| cg03161803 | 4.78E-07 | 6.34E-08 | 5.63 | 7.1713992 | 1.66E-01 | 27649120  | 27649243  | NC_000006.11 |
| cg08024029 | 4.78E-07 | 6.34E-08 | 5.63 | 7.1713217 | 1.10E-01 | 20669724  | 20669847  | NC_000001.10 |
| cg13034825 | 4.78E-07 | 6.34E-08 | 5.63 | 7.1713077 | 4.46E-02 | 150497588 | 150497711 | NC_000003.11 |
| cg08727218 | 4.78E-07 | 6.34E-08 | 5.63 | 7.1708733 | 7.20E-02 | 87832318  | 87832441  | NC_000006.11 |
| cg01233392 | 4.78E-07 | 6.34E-08 | 5.63 | 7.1707506 | 9.61E-02 | 85665444  | 85665567  | NC_000001.10 |
| cg13621679 | 4.79E-07 | 6.35E-08 | 5.63 | 7.1698615 | 1.46E-01 | 37761692  | 37761815  | NC_000017.10 |
| cg20615117 | 4.79E-07 | 6.35E-08 | 5.63 | 7.1697967 | 6.96E-02 | 121370102 | 121370225 | NC_000011.9  |
| cg08121652 | 4.80E-07 | 6.36E-08 | 5.62 | 7.1682724 | 6.17E-02 | 48381824  | 48381947  | NC_000001.10 |
| cg24630201 | 4.80E-07 | 6.36E-08 | 5.62 | 7.1682101 | 1.08E-01 | 98836104  | 98836227  | NC_000015.9  |
| cg14772599 | 4.80E-07 | 6.36E-08 | 5.62 | 7.1680896 | 3.48E-02 | 14455876  | 14455999  | NC_000003.11 |
| cg02658214 | 4.80E-07 | 6.36E-08 | 5.62 | 7.1679517 | 3.36E-02 | 57327964  | 57328087  | NC_000012.11 |
| cg02960500 | 4.80E-07 | 6.37E-08 | 5.62 | 7.1669077 | 1.16E-01 | 131469924 | 131470047 | NC_000011.9  |
| cg07717429 | 4.80E-07 | 6.37E-08 | 5.62 | 7.1668047 | 1.69E-01 | 18813466  | 18813589  | NC_000011.9  |
| cg23225748 | 4.80E-07 | 6.37E-08 | 5.62 | 7.1666224 | 5.74E-02 | 80062665  | 80062788  | NC_000010.10 |
| cg03354777 | 4.80E-07 | 6.37E-08 | 5.62 | 7.1665003 | 8.06E-02 | 61471904  | 61472027  | NC_000020.10 |
| cg23103993 | 4.80E-07 | 6.37E-08 | 5.62 | 7.1663887 | 1.94E-01 | 10531434  | 10531557  | NC_000019.9  |
| cg26194447 | 4.80E-07 | 6.37E-08 | 5.62 | 7.1662489 | 6.06E-02 | 54900991  | 54901114  | NC_000014.8  |
| cg01798261 | 4.80E-07 | 6.37E-08 | 5.62 | 7.1662454 | 1.03E-01 | 21378495  | 21378618  | NC_000020.10 |
| cg10162971 | 4.81E-07 | 6.38E-08 | 5.62 | 7.1654616 | 9.38E-02 | 10093493  | 10093616  | NC_000002.11 |
| cg01779771 | 4.81E-07 | 6.38E-08 | 5.62 | 7.1654073 | 1.68E-01 | 105235715 | 105235838 | NC_000008.10 |
| cg01195276 | 4.81E-07 | 6.38E-08 | 5.62 | 7.1650591 | 1.12E-01 | 121567477 | 121567600 | NC_000011.9  |

|            |          |          |      |           |          |           |           |              |
|------------|----------|----------|------|-----------|----------|-----------|-----------|--------------|
| cg22277994 | 4.81E-07 | 6.38E-08 | 5.62 | 7.1649395 | 1.41E-01 | 71161157  | 71161280  | NC_000017.10 |
| cg13417485 | 4.81E-07 | 6.38E-08 | 5.62 | 7.1645673 | 5.01E-02 | 91494820  | 91494943  | NC_000015.9  |
| cg11949420 | 4.81E-07 | 6.38E-08 | 5.62 | 7.164521  | 5.13E-02 | 32168681  | 32168804  | NC_000006.11 |
| cg19503826 | 4.81E-07 | 6.39E-08 | 5.62 | 7.163973  | 1.23E-01 | 56187810  | 56187933  | NC_000019.9  |
| cg22016731 | 4.83E-07 | 6.41E-08 | 5.62 | 7.1610959 | 1.20E-01 | 40311142  | 40311265  | NC_000001.10 |
| cg08815403 | 4.83E-07 | 6.41E-08 | 5.62 | 7.1600686 | 9.52E-02 | 88244142  | 88244265  | NC_000004.11 |
| cg01618130 | 4.83E-07 | 6.42E-08 | 5.62 | 7.1597033 | 1.64E-01 | 1968576   | 1968699   | NC_000016.9  |
| cg18053030 | 4.84E-07 | 6.42E-08 | 5.62 | 7.1593805 | 2.46E-02 | 47097679  | 47097802  | NC_000006.11 |
| cg05071493 | 4.84E-07 | 6.43E-08 | 5.62 | 7.1583356 | 1.54E-02 | 2844659   | 2844782   | NC_000020.10 |
| cg04883911 | 4.84E-07 | 6.43E-08 | 5.62 | 7.1578857 | 1.16E-01 | 208977452 | 208977575 | NC_000002.11 |
| cg12664209 | 4.84E-07 | 6.43E-08 | 5.62 | 7.1576967 | 2.31E-01 | 13200954  | 13201077  | NC_000020.10 |
| cg14490686 | 4.85E-07 | 6.43E-08 | 5.62 | 7.1570415 | 7.52E-02 | 32975145  | 32975268  | NC_000006.11 |
| cg02899346 | 4.85E-07 | 6.44E-08 | 5.62 | 7.1563067 | 2.17E-01 | 45996372  | 45996495  | NC_000019.9  |
| cg03742003 | 4.85E-07 | 6.44E-08 | 5.62 | 7.1561624 | 1.25E-01 | 20255264  | 20255387  | NC_000004.11 |
| cg26523866 | 4.85E-07 | 6.44E-08 | 5.62 | 7.1558257 | 1.16E-01 | 189722103 | 189722226 | NC_000001.10 |
| cg07164631 | 4.86E-07 | 6.45E-08 | 5.62 | 7.1546184 | 7.85E-02 | 47436584  | 47436707  | NC_000017.10 |
| cg13845147 | 4.86E-07 | 6.45E-08 | 5.62 | 7.1539957 | 1.55E-01 | 8115362   | 8115485   | NC_000019.9  |
| cg04413320 | 4.87E-07 | 6.46E-08 | 5.62 | 7.1530326 | 1.48E-01 | 58208929  | 58209052  | NC_000013.10 |
| cg17457986 | 4.87E-07 | 6.46E-08 | 5.62 | 7.1525385 | 1.86E-01 | 46806056  | 46806179  | NC_000017.10 |
| cg08700032 | 4.87E-07 | 6.47E-08 | 5.62 | 7.1521457 | 1.59E-01 | 28616682  | 28616805  | NC_000003.11 |
| cg07660283 | 4.87E-07 | 6.47E-08 | 5.62 | 7.1521409 | 9.19E-02 | 51223343  | 51223466  | NC_000022.10 |
| cg04757093 | 4.87E-07 | 6.47E-08 | 5.62 | 7.1516494 | 8.09E-02 | 25229192  | 25229315  | NC_000001.10 |
| cg10179911 | 4.87E-07 | 6.47E-08 | 5.62 | 7.1511831 | 1.56E-01 | 154333568 | 154333691 | NC_000002.11 |
| cg13820434 | 4.87E-07 | 6.47E-08 | 5.62 | 7.1511388 | 4.97E-02 | 47828743  | 47828866  | NC_000002.11 |
| cg26354398 | 4.89E-07 | 6.49E-08 | 5.62 | 7.1485879 | 3.16E-02 | 116224036 | 116224159 | NC_000009.11 |

|            |          |          |      |           |          |           |           |              |
|------------|----------|----------|------|-----------|----------|-----------|-----------|--------------|
| cg03309232 | 4.89E-07 | 6.49E-08 | 5.62 | 7.1484749 | 1.44E-01 | 216626    | 216749    | NC_000016.9  |
| cg14004271 | 4.89E-07 | 6.50E-08 | 5.62 | 7.1472518 | 7.35E-02 | 115650248 | 115650371 | NC_000009.11 |
| cg17777683 | 4.90E-07 | 6.51E-08 | 5.62 | 7.1461804 | 1.12E-01 | 201986522 | 201986645 | NC_000002.11 |
| cg20169197 | 4.90E-07 | 6.51E-08 | 5.62 | 7.1454485 | 9.38E-02 | 376100    | 376223    | NC_000011.9  |
| cg09291026 | 4.90E-07 | 6.51E-08 | 5.62 | 7.1454471 | 4.37E-02 | 81184965  | 81185088  | NC_000014.8  |
| cg07239897 | 4.91E-07 | 6.52E-08 | 5.62 | 7.1445499 | 5.33E-02 | 134373592 | 134373715 | NC_000011.9  |
| cg05887270 | 4.91E-07 | 6.52E-08 | 5.62 | 7.1445153 | 1.07E-01 | 26129627  | 26129750  | NC_000001.10 |
| cg18244817 | 4.91E-07 | 6.52E-08 | 5.62 | 7.1439764 | 1.67E-01 | 42949610  | 42949733  | NC_000005.9  |
| cg10511618 | 4.91E-07 | 6.53E-08 | 5.62 | 7.143089  | 1.50E-01 | 113436232 | 113436355 | NC_000004.11 |
| cg15055149 | 4.91E-07 | 6.53E-08 | 5.62 | 7.1428727 | 6.56E-02 | 34208209  | 34208332  | NC_000016.9  |
| cg01222732 | 4.91E-07 | 6.53E-08 | 5.62 | 7.1425874 | 5.72E-02 | 582704    | 582827    | NC_000002.11 |
| cg11703759 | 4.91E-07 | 6.53E-08 | 5.62 | 7.1424964 | 8.07E-02 | 31403193  | 31403316  | NC_000001.10 |
| cg17208060 | 4.92E-07 | 6.54E-08 | 5.62 | 7.1405325 | 1.17E-01 | 11680086  | 11680209  | NC_000002.11 |
| cg14273545 | 4.93E-07 | 6.55E-08 | 5.62 | 7.1394462 | 7.95E-02 | 87449508  | 87449631  | NC_000009.11 |
| cg03326762 | 4.93E-07 | 6.55E-08 | 5.62 | 7.1392378 | 1.30E-01 | 75597304  | 75597427  | NC_000001.10 |
| cg09147938 | 4.93E-07 | 6.56E-08 | 5.62 | 7.1386782 | 6.06E-02 | 43418406  | 43418529  | NC_000008.10 |
| cg05530592 | 4.93E-07 | 6.56E-08 | 5.62 | 7.1382208 | 7.94E-02 | 195355260 | 195355383 | NC_000003.11 |
| cg01821923 | 4.95E-07 | 6.57E-08 | 5.62 | 7.136111  | 1.41E-01 | 134914371 | 134914494 | NC_000005.9  |
| cg27279991 | 4.95E-07 | 6.58E-08 | 5.62 | 7.1355599 | 1.88E-01 | 83349722  | 83349845  | NC_000015.9  |
| cg11753356 | 4.95E-07 | 6.59E-08 | 5.62 | 7.1342747 | 1.09E-01 | 230356642 | 230356765 | NC_000001.10 |
| cg08489674 | 4.96E-07 | 6.59E-08 | 5.62 | 7.1336498 | 1.35E-01 | 119609557 | 119609680 | NC_000002.11 |
| cg11222836 | 4.96E-07 | 6.59E-08 | 5.62 | 7.133194  | 4.38E-02 | 142203937 | 142204060 | NC_000008.10 |
| cg24148699 | 4.96E-07 | 6.60E-08 | 5.62 | 7.1321578 | 4.27E-02 | 853202    | 853325    | NC_000005.9  |
| cg14707948 | 4.96E-07 | 6.60E-08 | 5.62 | 7.132078  | 6.95E-02 | 141468900 | 141469023 | NC_000008.10 |
| cg07671949 | 4.97E-07 | 6.60E-08 | 5.62 | 7.1316798 | 1.42E-01 | 152128338 | 152128461 | NC_000006.11 |

|            |          |          |      |           |          |           |           |              |
|------------|----------|----------|------|-----------|----------|-----------|-----------|--------------|
| cg15933840 | 4.97E-07 | 6.61E-08 | 5.62 | 7.131249  | 4.13E-02 | 240123850 | 240123973 | NC_000002.11 |
| cg17471467 | 4.97E-07 | 6.61E-08 | 5.62 | 7.1302657 | 1.19E-01 | 44332838  | 44332961  | NC_000011.9  |
| cg11404502 | 4.98E-07 | 6.63E-08 | 5.62 | 7.1280923 | 9.17E-02 | 133376790 | 133376913 | NC_000010.10 |
| cg20699151 | 4.98E-07 | 6.63E-08 | 5.62 | 7.12784   | 4.02E-02 | 8840460   | 8840583   | NC_000005.9  |
| cg11872086 | 4.99E-07 | 6.63E-08 | 5.62 | 7.1272015 | 4.59E-02 | 1709516   | 1709639   | NC_000011.9  |
| cg14514813 | 4.99E-07 | 6.64E-08 | 5.62 | 7.1266866 | 8.06E-02 | 140248772 | 140248895 | NC_000005.9  |
| cg00395951 | 4.99E-07 | 6.64E-08 | 5.62 | 7.126104  | 3.98E-02 | 113413263 | 113413386 | NC_000003.11 |
| cg27136755 | 4.99E-07 | 6.64E-08 | 5.62 | 7.1260401 | 7.73E-02 | 89603153  | 89603276  | NC_000016.9  |
| cg23575732 | 4.99E-07 | 6.64E-08 | 5.62 | 7.1258049 | 8.98E-02 | 43701083  | 43701206  | NC_000011.9  |
| cg04365452 | 4.99E-07 | 6.65E-08 | 5.62 | 7.125611  | 1.24E-01 | 26690079  | 26690202  | NC_000006.11 |
| cg11648404 | 5.00E-07 | 6.66E-08 | 5.62 | 7.124108  | 2.65E-02 | 68830440  | 68830563  | NC_000011.9  |
| cg13135609 | 5.00E-07 | 6.66E-08 | 5.62 | 7.1240231 | 8.45E-02 | 125123369 | 125123492 | NC_000008.10 |
| cg00281837 | 5.00E-07 | 6.66E-08 | 5.62 | 7.1235159 | 8.34E-02 | 231855218 | 231855341 | NC_000002.11 |
| cg16998906 | 5.01E-07 | 6.66E-08 | 5.62 | 7.1230893 | 4.34E-02 | 68853398  | 68853521  | NC_000011.9  |
| cg13902786 | 5.01E-07 | 6.66E-08 | 5.62 | 7.1228499 | 5.78E-02 | 138447960 | 138448083 | NC_000009.11 |
| cg00347882 | 5.01E-07 | 6.66E-08 | 5.62 | 7.1227232 | 3.22E-02 | 88483312  | 88483435  | NC_000016.9  |
| cg06707978 | 5.01E-07 | 6.67E-08 | 5.62 | 7.1226618 | 1.12E-01 | 58095155  | 58095278  | NC_000019.9  |
| cg02731824 | 5.01E-07 | 6.67E-08 | 5.62 | 7.1223244 | 3.91E-02 | 44695195  | 44695318  | NC_000006.11 |
| cg20909645 | 5.02E-07 | 6.68E-08 | 5.62 | 7.1211137 | 1.40E-01 | 99985049  | 99985172  | NC_000008.10 |
| cg08667600 | 5.02E-07 | 6.68E-08 | 5.62 | 7.1208956 | 9.84E-02 | 29623882  | 29624005  | NC_000003.11 |
| cg25660265 | 5.02E-07 | 6.68E-08 | 5.62 | 7.1208282 | 1.03E-01 | 4785832   | 4785955   | NC_000004.11 |
| cg18068664 | 5.02E-07 | 6.68E-08 | 5.62 | 7.1201757 | 1.62E-01 | 177713244 | 177713367 | NC_000004.11 |
| cg24746100 | 5.02E-07 | 6.69E-08 | 5.61 | 7.1192434 | 2.18E-01 | 88751786  | 88751909  | NC_000002.11 |
| cg07231911 | 5.03E-07 | 6.70E-08 | 5.61 | 7.1176351 | 9.41E-02 | 94141047  | 94141170  | NC_000001.10 |
| cg25536014 | 5.03E-07 | 6.70E-08 | 5.61 | 7.1172041 | 1.08E-01 | 5139458   | 5139581   | NC_000005.9  |

|            |          |          |      |           |          |           |           |              |
|------------|----------|----------|------|-----------|----------|-----------|-----------|--------------|
| cg22680073 | 5.04E-07 | 6.71E-08 | 5.61 | 7.1165809 | 8.44E-02 | 128162581 | 128162704 | NC_000002.11 |
| cg10899681 | 5.05E-07 | 6.72E-08 | 5.61 | 7.1149046 | 1.11E-01 | 158531647 | 158531770 | NC_000005.9  |
| cg26374305 | 5.05E-07 | 6.72E-08 | 5.61 | 7.1143857 | 9.87E-02 | 101293856 | 101293979 | NC_000014.8  |
| cg05700339 | 5.05E-07 | 6.73E-08 | 5.61 | 7.1133377 | 1.49E-01 | 12254566  | 12254689  | NC_000018.9  |
| cg01661350 | 5.06E-07 | 6.74E-08 | 5.61 | 7.1119195 | 1.49E-01 | 70682098  | 70682221  | NC_000013.10 |
| cg21070222 | 5.06E-07 | 6.74E-08 | 5.61 | 7.1118995 | 4.65E-02 | 118963056 | 118963179 | NC_000003.11 |
| cg03163783 | 5.07E-07 | 6.75E-08 | 5.61 | 7.1108778 | 1.40E-01 | 200326591 | 200326714 | NC_000002.11 |
| cg17304712 | 5.07E-07 | 6.75E-08 | 5.61 | 7.1105389 | 3.99E-02 | 1318519   | 1318642   | NC_000005.9  |
| cg21091227 | 5.07E-07 | 6.75E-08 | 5.61 | 7.1105218 | 1.43E-01 | 4454304   | 4454427   | NC_000018.9  |
| cg08215831 | 5.07E-07 | 6.75E-08 | 5.61 | 7.1103649 | 7.73E-02 | 67090776  | 67090899  | NC_000008.10 |
| cg01533965 | 5.07E-07 | 6.76E-08 | 5.61 | 7.1095149 | 1.49E-01 | 1281585   | 1281708   | NC_000007.13 |
| cg02484343 | 5.07E-07 | 6.76E-08 | 5.61 | 7.109408  | 8.63E-02 | 2284734   | 2284857   | NC_000016.9  |
| cg16387593 | 5.08E-07 | 6.77E-08 | 5.61 | 7.1080036 | 1.07E-01 | 54973579  | 54973702  | NC_000016.9  |
| cg06806214 | 5.08E-07 | 6.77E-08 | 5.61 | 7.1073569 | 3.36E-02 | 87392029  | 87392152  | NC_000016.9  |
| cg16025847 | 5.09E-07 | 6.78E-08 | 5.61 | 7.1058227 | 1.52E-01 | 129338484 | 129338607 | NC_000012.11 |
| cg15977267 | 5.09E-07 | 6.79E-08 | 5.61 | 7.1051407 | 1.54E-02 | 90359883  | 90360006  | NC_000012.11 |
| cg16321608 | 5.09E-07 | 6.79E-08 | 5.61 | 7.105092  | 6.28E-02 | 106186239 | 106186362 | NC_000014.8  |
| cg25649641 | 5.10E-07 | 6.79E-08 | 5.61 | 7.104056  | 9.99E-02 | 76635357  | 76635480  | NC_000015.9  |
| cg15541008 | 5.10E-07 | 6.80E-08 | 5.61 | 7.1034718 | 8.34E-02 | 95297508  | 95297631  | NC_000005.9  |
| cg20367712 | 5.10E-07 | 6.80E-08 | 5.61 | 7.1033671 | 1.07E-01 | 54967809  | 54967932  | NC_000004.11 |
| cg07376805 | 5.10E-07 | 6.80E-08 | 5.61 | 7.1029879 | 1.36E-02 | 161833149 | 161833272 | NC_000001.10 |
| cg24928433 | 5.11E-07 | 6.81E-08 | 5.61 | 7.1014497 | 1.64E-02 | 1091849   | 1091972   | NC_000005.9  |
| cg14252602 | 5.11E-07 | 6.82E-08 | 5.61 | 7.1009234 | 2.00E-01 | 22018746  | 22018869  | NC_000019.9  |
| cg16799087 | 5.12E-07 | 6.82E-08 | 5.61 | 7.0997957 | 7.67E-02 | 90128361  | 90128484  | NC_000016.9  |
| cg20685897 | 5.12E-07 | 6.82E-08 | 5.61 | 7.0997753 | 1.48E-01 | 207818696 | 207818819 | NC_000001.10 |



|            |          |          |      |           |          |           |           |              |
|------------|----------|----------|------|-----------|----------|-----------|-----------|--------------|
| cg26075184 | 5.12E-07 | 6.82E-08 | 5.61 | 7.0997421 | 1.39E-01 | 101281703 | 101281826 | NC_000010.10 |
| cg16295133 | 5.12E-07 | 6.82E-08 | 5.61 | 7.099712  | 9.94E-02 | 124598650 | 124598773 | NC_000010.10 |
| cg11803251 | 5.12E-07 | 6.83E-08 | 5.61 | 7.0993317 | 8.17E-02 | 41659108  | 41659231  | NC_000004.11 |
| cg24750614 | 5.13E-07 | 6.84E-08 | 5.61 | 7.0977598 | 1.71E-01 | 131513608 | 131513731 | NC_000002.11 |
| cg13749070 | 5.13E-07 | 6.85E-08 | 5.61 | 7.0966742 | 1.86E-02 | 99451935  | 99452058  | NC_000015.9  |
| cg03966685 | 5.14E-07 | 6.85E-08 | 5.61 | 7.0962596 | 4.38E-02 | 1024022   | 1024145   | NC_000007.13 |
| cg13376720 | 5.15E-07 | 6.86E-08 | 5.61 | 7.0943181 | 3.31E-02 | 8433230   | 8433353   | NC_000012.11 |
| cg02034887 | 5.15E-07 | 6.86E-08 | 5.61 | 7.0939899 | 1.26E-01 | 121612991 | 121613114 | NC_000003.11 |
| cg05069426 | 5.15E-07 | 6.87E-08 | 5.61 | 7.0933119 | 1.76E-01 | 54393966  | 54394089  | NC_000012.11 |
| cg05927274 | 5.15E-07 | 6.87E-08 | 5.61 | 7.0931878 | 9.63E-02 | 153457181 | 153457304 | NC_000001.10 |
| cg01807026 | 5.15E-07 | 6.87E-08 | 5.61 | 7.09317   | 1.09E-01 | 123475367 | 123475490 | NC_000009.11 |
| cg07027251 | 5.15E-07 | 6.87E-08 | 5.61 | 7.092936  | 1.54E-01 | 111216426 | 111216549 | NC_000010.10 |
| cg23623625 | 5.15E-07 | 6.87E-08 | 5.61 | 7.0928576 | 1.26E-01 | 149968511 | 149968634 | NC_000001.10 |
| cg13778274 | 5.16E-07 | 6.88E-08 | 5.61 | 7.0917685 | 1.10E-01 | 132478358 | 132478481 | NC_000009.11 |
| cg27435498 | 5.16E-07 | 6.88E-08 | 5.61 | 7.0916084 | 9.57E-02 | 150655387 | 150655510 | NC_000007.13 |
| cg12286573 | 5.16E-07 | 6.88E-08 | 5.61 | 7.0911943 | 1.19E-01 | 42734503  | 42734626  | NC_000017.10 |
| cg05557262 | 5.16E-07 | 6.89E-08 | 5.61 | 7.0908793 | 6.26E-02 | 135434988 | 135435111 | NC_000007.13 |
| cg20523466 | 5.16E-07 | 6.89E-08 | 5.61 | 7.0906255 | 9.21E-02 | 98900895  | 98901018  | NC_000008.10 |
| cg16624692 | 5.17E-07 | 6.90E-08 | 5.61 | 7.0896299 | 1.64E-01 | 65601301  | 65601424  | NC_000011.9  |
| cg23188704 | 5.17E-07 | 6.90E-08 | 5.61 | 7.0895525 | 1.17E-01 | 170740905 | 170741028 | NC_000005.9  |
| cg07210123 | 5.17E-07 | 6.90E-08 | 5.61 | 7.0891044 | 7.41E-02 | 44596411  | 44596534  | NC_000013.10 |
| cg10024478 | 5.17E-07 | 6.90E-08 | 5.61 | 7.0885851 | 1.06E-01 | 16243918  | 16244041  | NC_000016.9  |
| cg05365901 | 5.18E-07 | 6.91E-08 | 5.61 | 7.08794   | 2.03E-02 | 114010340 | 114010463 | NC_000002.11 |
| cg23954416 | 5.18E-07 | 6.91E-08 | 5.61 | 7.0879177 | 7.37E-02 | 13909161  | 13909284  | NC_000001.10 |
| cg05353133 | 5.18E-07 | 6.92E-08 | 5.61 | 7.0868315 | 7.42E-02 | 229567914 | 229568037 | NC_000001.10 |

|            |          |          |      |           |          |           |           |              |
|------------|----------|----------|------|-----------|----------|-----------|-----------|--------------|
| cg06748978 | 5.18E-07 | 6.92E-08 | 5.61 | 7.0864236 | 6.48E-02 | 25562512  | 25562635  | NC_000002.11 |
| cg21515003 | 5.19E-07 | 6.92E-08 | 5.61 | 7.0862135 | 1.07E-01 | 1049335   | 1049458   | NC_000008.10 |
| cg23191950 | 5.19E-07 | 6.92E-08 | 5.61 | 7.0861371 | 1.16E-01 | 101419074 | 101419197 | NC_000015.9  |
| cg14664759 | 5.19E-07 | 6.92E-08 | 5.61 | 7.0856067 | 1.93E-01 | 196577723 | 196577846 | NC_000001.10 |
| cg09412975 | 5.19E-07 | 6.93E-08 | 5.61 | 7.0853722 | 6.73E-02 | 218892376 | 218892499 | NC_000001.10 |
| cg21037784 | 5.19E-07 | 6.93E-08 | 5.61 | 7.0844161 | 7.93E-02 | 101351511 | 101351634 | NC_000014.8  |
| cg11677744 | 5.20E-07 | 6.94E-08 | 5.61 | 7.0835392 | 1.12E-01 | 235863589 | 235863712 | NC_000002.11 |
| cg05828690 | 5.20E-07 | 6.94E-08 | 5.61 | 7.0831321 | 1.89E-01 | 145752587 | 145752710 | NC_000008.10 |
| cg23831897 | 5.21E-07 | 6.95E-08 | 5.61 | 7.0819863 | 3.32E-02 | 60827363  | 60827486  | NC_000017.10 |
| cg03689324 | 5.21E-07 | 6.96E-08 | 5.61 | 7.0811133 | 9.25E-02 | 74426925  | 74427048  | NC_000015.9  |
| cg02703908 | 5.21E-07 | 6.96E-08 | 5.61 | 7.08111   | 7.48E-02 | 9593701   | 9593824   | NC_000003.11 |
| cg19464917 | 5.21E-07 | 6.96E-08 | 5.61 | 7.0810933 | 1.38E-01 | 76627666  | 76627789  | NC_000015.9  |
| cg09400607 | 5.21E-07 | 6.96E-08 | 5.61 | 7.0810064 | 8.64E-02 | 76641712  | 76641835  | NC_000017.10 |
| cg27316393 | 5.21E-07 | 6.96E-08 | 5.61 | 7.0809819 | 1.35E-01 | 152128675 | 152128798 | NC_000006.11 |
| cg10840361 | 5.21E-07 | 6.96E-08 | 5.61 | 7.0809278 | 1.02E-01 | 106842512 | 106842635 | NC_000007.13 |
| cg19542849 | 5.21E-07 | 6.96E-08 | 5.61 | 7.0807789 | 1.03E-01 | 100217960 | 100218083 | NC_000002.11 |
| cg25641025 | 5.21E-07 | 6.96E-08 | 5.61 | 7.0799331 | 4.73E-02 | 1283106   | 1283229   | NC_000005.9  |
| cg05503307 | 5.21E-07 | 6.96E-08 | 5.61 | 7.079921  | 1.79E-02 | 38146289  | 38146412  | NC_000008.10 |
| cg09222115 | 5.22E-07 | 6.97E-08 | 5.61 | 7.079713  | 6.71E-02 | 241079766 | 241079889 | NC_000002.11 |
| cg09906995 | 5.22E-07 | 6.97E-08 | 5.61 | 7.0792479 | 4.21E-02 | 106215669 | 106215792 | NC_000002.11 |
| cg08825645 | 5.22E-07 | 6.97E-08 | 5.61 | 7.0791988 | 1.19E-01 | 54325319  | 54325442  | NC_000016.9  |
| cg11156672 | 5.22E-07 | 6.97E-08 | 5.61 | 7.0788809 | 1.92E-01 | 8533218   | 8533341   | NC_000017.10 |
| cg14205576 | 5.22E-07 | 6.97E-08 | 5.61 | 7.0788172 | 1.22E-02 | 178482026 | 178482149 | NC_000001.10 |
| cg24321297 | 5.22E-07 | 6.97E-08 | 5.61 | 7.0786182 | 8.08E-02 | 74577390  | 74577513  | NC_000017.10 |
| cg13724820 | 5.22E-07 | 6.97E-08 | 5.61 | 7.0785563 | 1.07E-01 | 44104732  | 44104855  | NC_000002.11 |

|            |          |          |      |           |          |           |           |              |
|------------|----------|----------|------|-----------|----------|-----------|-----------|--------------|
| cg11755548 | 5.22E-07 | 6.97E-08 | 5.61 | 7.0785501 | 1.10E-01 | 75144040  | 75144163  | NC_000011.9  |
| cg03293206 | 5.22E-07 | 6.98E-08 | 5.61 | 7.0781467 | 7.17E-02 | 46603015  | 46603138  | NC_000016.9  |
| cg04640972 | 5.22E-07 | 6.98E-08 | 5.61 | 7.0779882 | 8.15E-02 | 8373522   | 8373645   | NC_000010.10 |
| cg10972973 | 5.23E-07 | 6.98E-08 | 5.61 | 7.0772711 | 1.48E-01 | 28602745  | 28602868  | NC_000006.11 |
| cg03467555 | 5.23E-07 | 6.99E-08 | 5.61 | 7.0766326 | 9.05E-02 | 54404408  | 54404531  | NC_000016.9  |
| cg24287438 | 5.23E-07 | 6.99E-08 | 5.61 | 7.0763416 | 1.52E-01 | 904878    | 905001    | NC_000018.9  |
| cg24008238 | 5.23E-07 | 6.99E-08 | 5.61 | 7.0760053 | 6.36E-02 | 168366528 | 168366651 | NC_000006.11 |
| cg02338757 | 5.24E-07 | 7.00E-08 | 5.61 | 7.0752766 | 9.46E-02 | 132814117 | 132814240 | NC_000011.9  |
| cg06471296 | 5.24E-07 | 7.00E-08 | 5.61 | 7.0750183 | 7.86E-02 | 150259601 | 150259724 | NC_000006.11 |
| cg16988611 | 5.24E-07 | 7.00E-08 | 5.61 | 7.0748958 | 9.23E-02 | 82224946  | 82225069  | NC_000010.10 |
| cg23494140 | 5.24E-07 | 7.00E-08 | 5.61 | 7.0744526 | 1.55E-01 | 78493671  | 78493794  | NC_000013.10 |
| cg06048556 | 5.24E-07 | 7.01E-08 | 5.61 | 7.0740721 | 6.30E-02 | 29151034  | 29151157  | NC_000016.9  |
| cg10271763 | 5.24E-07 | 7.01E-08 | 5.61 | 7.0737263 | 7.08E-02 | 25068763  | 25068886  | NC_000015.9  |
| cg00982400 | 5.24E-07 | 7.01E-08 | 5.61 | 7.0736418 | 6.98E-02 | 149438095 | 149438218 | NC_000005.9  |
| cg00481951 | 5.24E-07 | 7.01E-08 | 5.61 | 7.0735654 | 1.20E-01 | 187387650 | 187387773 | NC_000003.11 |
| cg02242975 | 5.25E-07 | 7.02E-08 | 5.61 | 7.0724202 | 2.32E-02 | 68624768  | 68624891  | NC_000015.9  |
| cg25705558 | 5.25E-07 | 7.02E-08 | 5.61 | 7.072403  | 1.34E-01 | 74421918  | 74422041  | NC_000015.9  |
| cg16248400 | 5.25E-07 | 7.02E-08 | 5.61 | 7.0722777 | 9.04E-02 | 130904084 | 130904207 | NC_000002.11 |
| cg23770904 | 5.25E-07 | 7.02E-08 | 5.61 | 7.0722268 | 1.98E-01 | 61051561  | 61051684  | NC_000020.10 |
| cg01085224 | 5.25E-07 | 7.02E-08 | 5.61 | 7.0716918 | 1.24E-01 | 5139626   | 5139749   | NC_000005.9  |
| cg21230021 | 5.25E-07 | 7.03E-08 | 5.6  | 7.0714793 | 8.81E-02 | 101530770 | 101530893 | NC_000014.8  |
| cg16535717 | 5.25E-07 | 7.03E-08 | 5.6  | 7.071429  | 1.81E-01 | 97685158  | 97685281  | NC_000014.8  |
| cg11953513 | 5.26E-07 | 7.04E-08 | 5.6  | 7.0700161 | 1.90E-02 | 42618810  | 42618933  | NC_000013.10 |
| cg07238439 | 5.26E-07 | 7.04E-08 | 5.6  | 7.0697138 | 1.01E-01 | 113710369 | 113710492 | NC_000012.11 |
| cg07204163 | 5.27E-07 | 7.05E-08 | 5.6  | 7.0678847 | 2.12E-02 | 53904319  | 53904442  | NC_000001.10 |

|            |          |          |     |           |          |           |           |              |
|------------|----------|----------|-----|-----------|----------|-----------|-----------|--------------|
| cg23472714 | 5.28E-07 | 7.06E-08 | 5.6 | 7.0669286 | 3.57E-02 | 99912131  | 99912254  | NC_000007.13 |
| cg06127541 | 5.28E-07 | 7.06E-08 | 5.6 | 7.0668235 | 1.06E-01 | 14331601  | 14331724  | NC_000011.9  |
| cg19790509 | 5.28E-07 | 7.06E-08 | 5.6 | 7.0664192 | 1.06E-01 | 130040893 | 130041016 | NC_000012.11 |
| cg22396057 | 5.28E-07 | 7.06E-08 | 5.6 | 7.0663731 | 8.88E-02 | 14925078  | 14925201  | NC_000001.10 |
| cg05069228 | 5.29E-07 | 7.07E-08 | 5.6 | 7.0648065 | 1.18E-01 | 61793623  | 61793746  | NC_000003.11 |
| cg14060111 | 5.29E-07 | 7.07E-08 | 5.6 | 7.0647005 | 2.30E-01 | 13200944  | 13201067  | NC_000020.10 |
| cg08307369 | 5.29E-07 | 7.08E-08 | 5.6 | 7.0636    | 1.91E-02 | 128379382 | 128379505 | NC_000007.13 |
| cg13029423 | 5.30E-07 | 7.09E-08 | 5.6 | 7.063105  | 1.19E-01 | 86549276  | 86549399  | NC_000016.9  |
| cg10143067 | 5.30E-07 | 7.09E-08 | 5.6 | 7.0630914 | 1.86E-01 | 118892423 | 118892546 | NC_000010.10 |
| cg12743398 | 5.30E-07 | 7.09E-08 | 5.6 | 7.0625467 | 8.19E-02 | 28609531  | 28609654  | NC_000016.9  |
| cg12074585 | 5.30E-07 | 7.09E-08 | 5.6 | 7.0625263 | 4.87E-02 | 7280958   | 7281081   | NC_000012.11 |
| cg02739437 | 5.30E-07 | 7.10E-08 | 5.6 | 7.0617601 | 7.74E-02 | 168156813 | 168156936 | NC_000004.11 |
| cg24955824 | 5.30E-07 | 7.10E-08 | 5.6 | 7.0617098 | 9.59E-02 | 3394109   | 3394232   | NC_000005.9  |
| cg27605701 | 5.31E-07 | 7.10E-08 | 5.6 | 7.0610541 | 1.14E-01 | 87030604  | 87030727  | NC_000016.9  |
| cg02494150 | 5.31E-07 | 7.10E-08 | 5.6 | 7.0609188 | 3.72E-02 | 1536455   | 1536578   | NC_000016.9  |
| cg17799601 | 5.31E-07 | 7.11E-08 | 5.6 | 7.0604033 | 7.21E-02 | 27285663  | 27285786  | NC_000001.10 |
| cg17989313 | 5.32E-07 | 7.11E-08 | 5.6 | 7.0592271 | 1.04E-01 | 11866971  | 11867094  | NC_000010.10 |
| cg13470341 | 5.32E-07 | 7.12E-08 | 5.6 | 7.0580939 | 1.24E-01 | 977490    | 977613    | NC_000009.11 |
| cg22476848 | 5.32E-07 | 7.12E-08 | 5.6 | 7.0579745 | 1.20E-01 | 42095441  | 42095564  | NC_000022.10 |
| cg11964314 | 5.33E-07 | 7.13E-08 | 5.6 | 7.0573688 | 1.23E-01 | 44858069  | 44858192  | NC_000012.11 |
| cg20578850 | 5.33E-07 | 7.13E-08 | 5.6 | 7.0572325 | 5.65E-02 | 71721323  | 71721446  | NC_000014.8  |
| cg18771195 | 5.33E-07 | 7.13E-08 | 5.6 | 7.0569657 | 7.68E-02 | 182656    | 182779    | NC_000017.10 |
| cg05358544 | 5.33E-07 | 7.13E-08 | 5.6 | 7.0569196 | 8.38E-02 | 91205136  | 91205259  | NC_000006.11 |
| cg13908833 | 5.33E-07 | 7.13E-08 | 5.6 | 7.0567098 | 8.75E-02 | 168271731 | 168271854 | NC_000005.9  |
| cg15756319 | 5.33E-07 | 7.14E-08 | 5.6 | 7.0556324 | 7.46E-02 | 113296447 | 113296570 | NC_000013.10 |

|            |          |          |     |           |          |           |           |              |
|------------|----------|----------|-----|-----------|----------|-----------|-----------|--------------|
| cg26034769 | 5.34E-07 | 7.15E-08 | 5.6 | 7.0549443 | 9.28E-02 | 55714670  | 55714793  | NC_000018.9  |
| cg23043937 | 5.35E-07 | 7.16E-08 | 5.6 | 7.0534006 | 1.08E-01 | 59893019  | 59893142  | NC_000013.10 |
| cg06350544 | 5.36E-07 | 7.17E-08 | 5.6 | 7.0512584 | 9.62E-02 | 48833535  | 48833658  | NC_000019.9  |
| cg17656890 | 5.37E-07 | 7.19E-08 | 5.6 | 7.0493833 | 9.82E-02 | 155855572 | 155855695 | NC_000007.13 |
| cg01033654 | 5.37E-07 | 7.19E-08 | 5.6 | 7.0491411 | 9.80E-02 | 2132757   | 2132880   | NC_000005.9  |
| cg04390488 | 5.37E-07 | 7.19E-08 | 5.6 | 7.0489523 | 7.09E-02 | 820321    | 820444    | NC_000010.10 |
| cg27110007 | 5.37E-07 | 7.19E-08 | 5.6 | 7.0487501 | 4.04E-02 | 39668590  | 39668713  | NC_000002.11 |
| cg22737624 | 5.37E-07 | 7.19E-08 | 5.6 | 7.0486599 | 1.23E-01 | 140750111 | 140750234 | NC_000005.9  |
| cg04400145 | 5.37E-07 | 7.20E-08 | 5.6 | 7.0481999 | 6.48E-02 | 1873682   | 1873805   | NC_000020.10 |
| cg17204510 | 5.37E-07 | 7.20E-08 | 5.6 | 7.0478773 | 5.90E-02 | 138955475 | 138955598 | NC_000005.9  |
| cg02008154 | 5.38E-07 | 7.20E-08 | 5.6 | 7.0474234 | 1.26E-01 | 35293537  | 35293660  | NC_000007.13 |
| cg14468658 | 5.38E-07 | 7.20E-08 | 5.6 | 7.0470258 | 1.06E-01 | 140723509 | 140723632 | NC_000005.9  |
| cg01364862 | 5.38E-07 | 7.20E-08 | 5.6 | 7.0469614 | 7.92E-02 | 159364474 | 159364597 | NC_000003.11 |
| cg12665460 | 5.38E-07 | 7.21E-08 | 5.6 | 7.0463131 | 1.37E-01 | 52956657  | 52956780  | NC_000019.9  |
| cg13706315 | 5.38E-07 | 7.21E-08 | 5.6 | 7.0460405 | 8.35E-02 | 134724316 | 134724439 | NC_000009.11 |
| cg20098478 | 5.38E-07 | 7.21E-08 | 5.6 | 7.0459723 | 6.90E-02 | 65515862  | 65515985  | NC_000012.11 |
| cg21513316 | 5.39E-07 | 7.22E-08 | 5.6 | 7.0452444 | 7.83E-02 | 101532296 | 101532419 | NC_000014.8  |
| cg15725584 | 5.39E-07 | 7.22E-08 | 5.6 | 7.0450392 | 1.07E-01 | 43603572  | 43603695  | NC_000011.9  |
| cg11957848 | 5.40E-07 | 7.23E-08 | 5.6 | 7.0438981 | 1.01E-01 | 169575326 | 169575449 | NC_000006.11 |
| cg12962078 | 5.40E-07 | 7.23E-08 | 5.6 | 7.043831  | 1.56E-01 | 119610113 | 119610236 | NC_000002.11 |
| cg02410480 | 5.40E-07 | 7.23E-08 | 5.6 | 7.0433019 | 9.46E-02 | 132819930 | 132820053 | NC_000012.11 |
| cg17530965 | 5.40E-07 | 7.24E-08 | 5.6 | 7.0425641 | 1.02E-01 | 1034427   | 1034550   | NC_000005.9  |
| cg08679971 | 5.41E-07 | 7.24E-08 | 5.6 | 7.0417931 | 9.47E-02 | 38281047  | 38281170  | NC_000019.9  |
| cg03523104 | 5.41E-07 | 7.25E-08 | 5.6 | 7.0414751 | 9.37E-02 | 57399475  | 57399598  | NC_000012.11 |
| cg23709430 | 5.41E-07 | 7.25E-08 | 5.6 | 7.0408933 | 5.99E-02 | 3977501   | 3977624   | NC_000017.10 |

|            |          |          |     |           |          |           |           |              |
|------------|----------|----------|-----|-----------|----------|-----------|-----------|--------------|
| cg06776823 | 5.42E-07 | 7.26E-08 | 5.6 | 7.0397261 | 4.50E-02 | 107170751 | 107170874 | NC_000012.11 |
| cg10997479 | 5.42E-07 | 7.27E-08 | 5.6 | 7.0384342 | 8.93E-02 | 62362924  | 62363047  | NC_000003.11 |
| cg26986573 | 5.43E-07 | 7.27E-08 | 5.6 | 7.0378201 | 4.30E-02 | 63254499  | 63254622  | NC_000011.9  |
| cg03290752 | 5.44E-07 | 7.29E-08 | 5.6 | 7.0360992 | 9.03E-02 | 176915082 | 176915205 | NC_000003.11 |
| cg20523861 | 5.44E-07 | 7.29E-08 | 5.6 | 7.0355688 | 1.31E-01 | 70682324  | 70682447  | NC_000013.10 |
| cg08182597 | 5.44E-07 | 7.29E-08 | 5.6 | 7.0349971 | 1.15E-01 | 85274772  | 85274895  | NC_000016.9  |
| cg06624036 | 5.45E-07 | 7.30E-08 | 5.6 | 7.033613  | 1.37E-01 | 117257137 | 117257260 | NC_000002.11 |
| cg19119609 | 5.46E-07 | 7.32E-08 | 5.6 | 7.0319083 | 1.24E-01 | 57331394  | 57331517  | NC_000020.10 |
| cg22719623 | 5.46E-07 | 7.32E-08 | 5.6 | 7.0311522 | 1.05E-01 | 154360732 | 154360855 | NC_000006.11 |
| cg19678564 | 5.47E-07 | 7.33E-08 | 5.6 | 7.0297161 | 5.38E-02 | 203115918 | 203116041 | NC_000001.10 |
| cg04194073 | 5.47E-07 | 7.34E-08 | 5.6 | 7.029476  | 1.33E-01 | 50064930  | 50065053  | NC_000022.10 |
| cg26150922 | 5.47E-07 | 7.34E-08 | 5.6 | 7.0294    | 1.36E-01 | 100937072 | 100937195 | NC_000002.11 |
| cg24128853 | 5.47E-07 | 7.34E-08 | 5.6 | 7.0290504 | 2.79E-02 | 142278132 | 142278255 | NC_000008.10 |
| cg13338798 | 5.47E-07 | 7.34E-08 | 5.6 | 7.0289541 | 1.34E-01 | 28557846  | 28557969  | NC_000006.11 |
| cg18181201 | 5.48E-07 | 7.35E-08 | 5.6 | 7.0281779 | 1.59E-01 | 242686709 | 242686832 | NC_000001.10 |
| cg18090004 | 5.48E-07 | 7.35E-08 | 5.6 | 7.0279558 | 1.50E-01 | 1283896   | 1284019   | NC_000007.13 |
| cg20377447 | 5.48E-07 | 7.35E-08 | 5.6 | 7.0277773 | 8.87E-02 | 41010217  | 41010340  | NC_000006.11 |
| cg13882824 | 5.48E-07 | 7.36E-08 | 5.6 | 7.0267573 | 6.08E-02 | 32187651  | 32187774  | NC_000006.11 |
| cg26839871 | 5.49E-07 | 7.36E-08 | 5.6 | 7.0259158 | 1.62E-01 | 171811299 | 171811422 | NC_000001.10 |
| cg15475576 | 5.49E-07 | 7.37E-08 | 5.6 | 7.0254833 | 1.00E-01 | 99289295  | 99289418  | NC_000012.11 |
| cg19582946 | 5.49E-07 | 7.37E-08 | 5.6 | 7.024902  | 3.84E-02 | 74518078  | 74518201  | NC_000018.9  |
| cg02554345 | 5.50E-07 | 7.37E-08 | 5.6 | 7.0248148 | 1.43E-01 | 50604569  | 50604692  | NC_000010.10 |
| cg23657809 | 5.50E-07 | 7.38E-08 | 5.6 | 7.0239344 | 6.62E-02 | 43847821  | 43847944  | NC_000001.10 |
| cg22616126 | 5.50E-07 | 7.38E-08 | 5.6 | 7.0239145 | 5.96E-02 | 33580416  | 33580539  | NC_000008.10 |
| cg26299084 | 5.50E-07 | 7.38E-08 | 5.6 | 7.0237538 | 1.25E-01 | 81118588  | 81118711  | NC_000004.11 |

|            |          |          |      |           |          |           |           |              |
|------------|----------|----------|------|-----------|----------|-----------|-----------|--------------|
| cg13337064 | 5.50E-07 | 7.38E-08 | 5.6  | 7.0234577 | 1.20E-01 | 140625389 | 140625512 | NC_000005.9  |
| cg04473302 | 5.51E-07 | 7.39E-08 | 5.59 | 7.0221395 | 1.28E-01 | 107301217 | 107301340 | NC_000007.13 |
| cg07262457 | 5.51E-07 | 7.40E-08 | 5.59 | 7.0212158 | 8.93E-02 | 128777371 | 128777494 | NC_000003.11 |
| cg10423771 | 5.52E-07 | 7.40E-08 | 5.59 | 7.0207496 | 1.24E-01 | 50604499  | 50604622  | NC_000010.10 |
| cg09417503 | 5.52E-07 | 7.40E-08 | 5.59 | 7.0203314 | 5.14E-02 | 36180082  | 36180205  | NC_000001.10 |
| cg15051226 | 5.52E-07 | 7.41E-08 | 5.59 | 7.0202916 | 1.69E-01 | 28555118  | 28555241  | NC_000006.11 |
| cg08391415 | 5.52E-07 | 7.41E-08 | 5.59 | 7.0197675 | 1.52E-01 | 31835577  | 31835700  | NC_000011.9  |
| cg11345143 | 5.52E-07 | 7.41E-08 | 5.59 | 7.0196768 | 4.90E-02 | 20989349  | 20989472  | NC_000013.10 |
| cg16227623 | 5.52E-07 | 7.41E-08 | 5.59 | 7.0192991 | 8.68E-02 | 3605783   | 3605906   | NC_000005.9  |
| cg07645844 | 5.53E-07 | 7.42E-08 | 5.59 | 7.018126  | 1.07E-01 | 26722635  | 26722758  | NC_000008.10 |
| cg01130056 | 5.53E-07 | 7.42E-08 | 5.59 | 7.017921  | 1.26E-01 | 65528415  | 65528538  | NC_000016.9  |
| cg02983424 | 5.54E-07 | 7.43E-08 | 5.59 | 7.0169792 | 1.50E-01 | 97491433  | 97491556  | NC_000015.9  |
| cg16626314 | 5.54E-07 | 7.43E-08 | 5.59 | 7.0166516 | 3.09E-02 | 30780252  | 30780375  | NC_000016.9  |
| cg20124450 | 5.54E-07 | 7.44E-08 | 5.59 | 7.0158235 | 1.93E-01 | 26108401  | 26108524  | NC_000015.9  |
| cg26950557 | 5.55E-07 | 7.45E-08 | 5.59 | 7.0141585 | 1.32E-01 | 38258441  | 38258564  | NC_000005.9  |
| cg17024542 | 5.56E-07 | 7.46E-08 | 5.59 | 7.0136241 | 8.65E-02 | 142837472 | 142837595 | NC_000003.11 |
| cg01953429 | 5.56E-07 | 7.46E-08 | 5.59 | 7.0128374 | 1.65E-02 | 1367848   | 1367971   | NC_000004.11 |
| cg20268279 | 5.56E-07 | 7.47E-08 | 5.59 | 7.0119278 | 2.25E-02 | 52219923  | 52220046  | NC_000014.8  |
| cg01188592 | 5.57E-07 | 7.47E-08 | 5.59 | 7.0116208 | 1.76E-01 | 982831    | 982954    | NC_000020.10 |
| cg18652721 | 5.57E-07 | 7.47E-08 | 5.59 | 7.0114108 | 1.61E-01 | 2754074   | 2754197   | NC_000005.9  |
| cg03300898 | 5.57E-07 | 7.48E-08 | 5.59 | 7.0109318 | 3.99E-02 | 18538782  | 18538905  | NC_000017.10 |
| cg19893751 | 5.57E-07 | 7.48E-08 | 5.59 | 7.0103327 | 1.37E-01 | 45029285  | 45029408  | NC_000002.11 |
| cg02930239 | 5.57E-07 | 7.48E-08 | 5.59 | 7.0099926 | 8.08E-02 | 138763670 | 138763793 | NC_000003.11 |
| cg02886033 | 5.58E-07 | 7.49E-08 | 5.59 | 7.0095887 | 1.16E-01 | 27208114  | 27208237  | NC_000007.13 |
| cg00860808 | 5.58E-07 | 7.49E-08 | 5.59 | 7.0087968 | 1.27E-01 | 171670500 | 171670623 | NC_000002.11 |

|            |          |          |      |           |          |           |           |              |
|------------|----------|----------|------|-----------|----------|-----------|-----------|--------------|
| cg07000290 | 5.58E-07 | 7.49E-08 | 5.59 | 7.008754  | 8.90E-02 | 29796429  | 29796552  | NC_000006.11 |
| cg20792735 | 5.58E-07 | 7.50E-08 | 5.59 | 7.0080606 | 1.75E-01 | 80531483  | 80531606  | NC_000002.11 |
| cg23522601 | 5.60E-07 | 7.51E-08 | 5.59 | 7.0060086 | 1.23E-01 | 132934377 | 132934500 | NC_000011.9  |
| cg20780546 | 5.60E-07 | 7.52E-08 | 5.59 | 7.0059199 | 7.56E-02 | 39507134  | 39507257  | NC_000017.10 |
| cg04748546 | 5.60E-07 | 7.52E-08 | 5.59 | 7.0058243 | 7.13E-02 | 49696260  | 49696383  | NC_000019.9  |
| cg02347859 | 5.60E-07 | 7.52E-08 | 5.59 | 7.0050052 | 5.02E-02 | 3762520   | 3762643   | NC_000020.10 |
| cg03656899 | 5.60E-07 | 7.52E-08 | 5.59 | 7.0049772 | 1.12E-01 | 62996132  | 62996255  | NC_000006.11 |
| cg24066601 | 5.60E-07 | 7.53E-08 | 5.59 | 7.0045318 | 7.99E-02 | 26271455  | 26271578  | NC_000006.11 |
| cg25500028 | 5.61E-07 | 7.54E-08 | 5.59 | 7.0032287 | 1.14E-01 | 187336889 | 187337012 | NC_000003.11 |
| cg25095697 | 5.61E-07 | 7.54E-08 | 5.59 | 7.0031753 | 5.61E-02 | 148930070 | 148930193 | NC_000001.10 |
| cg24886867 | 5.61E-07 | 7.54E-08 | 5.59 | 7.0031379 | 1.09E-01 | 3076190   | 3076313   | NC_000006.11 |
| cg03157795 | 5.62E-07 | 7.55E-08 | 5.59 | 7.0018563 | 8.68E-02 | 134871519 | 134871642 | NC_000010.10 |
| cg23754772 | 5.62E-07 | 7.55E-08 | 5.59 | 7.0010896 | 1.55E-01 | 12253859  | 12253982  | NC_000018.9  |
| cg21760402 | 5.62E-07 | 7.56E-08 | 5.59 | 7.0007488 | 1.26E-01 | 50690590  | 50690713  | NC_000006.11 |
| cg03077077 | 5.63E-07 | 7.56E-08 | 5.59 | 7.0001069 | 9.36E-02 | 122685352 | 122685475 | NC_000004.11 |
| cg00043788 | 5.63E-07 | 7.56E-08 | 5.59 | 6.9995089 | 1.41E-01 | 25062754  | 25062877  | NC_000020.10 |
| cg24764168 | 5.63E-07 | 7.57E-08 | 5.59 | 6.9992708 | 1.01E-01 | 1386142   | 1386265   | NC_000006.11 |
| cg23979631 | 5.64E-07 | 7.57E-08 | 5.59 | 6.9986732 | 1.63E-01 | 27142427  | 27142550  | NC_000007.13 |
| cg25830182 | 5.64E-07 | 7.57E-08 | 5.59 | 6.9985379 | 1.69E-01 | 85417077  | 85417200  | NC_000004.11 |
| cg27250634 | 5.64E-07 | 7.58E-08 | 5.59 | 6.9971603 | 1.21E-01 | 168597617 | 168597740 | NC_000006.11 |
| cg18470839 | 5.65E-07 | 7.59E-08 | 5.59 | 6.9965429 | 1.39E-01 | 114878173 | 114878296 | NC_000012.11 |
| cg17938383 | 5.65E-07 | 7.59E-08 | 5.59 | 6.9961124 | 1.02E-01 | 11146040  | 11146163  | NC_000017.10 |
| cg08341316 | 5.65E-07 | 7.59E-08 | 5.59 | 6.9960964 | 1.71E-01 | 107956955 | 107957078 | NC_000004.11 |
| cg10223531 | 5.65E-07 | 7.60E-08 | 5.59 | 6.995579  | 2.93E-02 | 35317655  | 35317778  | NC_000001.10 |
| cg14451926 | 5.65E-07 | 7.60E-08 | 5.59 | 6.9951452 | 1.16E-01 | 23562918  | 23563041  | NC_000008.10 |



|            |          |          |      |           |          |           |           |              |
|------------|----------|----------|------|-----------|----------|-----------|-----------|--------------|
| cg13545212 | 5.66E-07 | 7.60E-08 | 5.59 | 6.994625  | 1.62E-01 | 6617192   | 6617315   | NC_000017.10 |
| cg00652908 | 5.66E-07 | 7.60E-08 | 5.59 | 6.9944079 | 9.96E-02 | 46878164  | 46878287  | NC_000016.9  |
| cg01976303 | 5.66E-07 | 7.61E-08 | 5.59 | 6.993907  | 3.26E-02 | 89393185  | 89393308  | NC_000016.9  |
| cg16101739 | 5.66E-07 | 7.61E-08 | 5.59 | 6.9935025 | 1.16E-01 | 170634330 | 170634453 | NC_000001.10 |
| cg19870370 | 5.66E-07 | 7.61E-08 | 5.59 | 6.9933073 | 6.45E-02 | 21010223  | 21010346  | NC_000013.10 |
| cg03160217 | 5.67E-07 | 7.62E-08 | 5.59 | 6.9929671 | 6.00E-02 | 117814299 | 117814422 | NC_000002.11 |
| cg24980657 | 5.67E-07 | 7.62E-08 | 5.59 | 6.9922647 | 9.90E-02 | 150177277 | 150177400 | NC_000002.11 |
| cg26266786 | 5.67E-07 | 7.62E-08 | 5.59 | 6.9918595 | 2.84E-02 | 101842686 | 101842809 | NC_000003.11 |
| cg26662049 | 5.67E-07 | 7.63E-08 | 5.59 | 6.9917475 | 1.05E-01 | 89903672  | 89903795  | NC_000015.9  |
| cg19526659 | 5.67E-07 | 7.63E-08 | 5.59 | 6.9915579 | 1.18E-01 | 57154862  | 57154985  | NC_000019.9  |
| cg00677407 | 5.68E-07 | 7.63E-08 | 5.59 | 6.9907924 | 5.91E-02 | 33964200  | 33964323  | NC_000016.9  |
| cg09191327 | 5.68E-07 | 7.63E-08 | 5.59 | 6.9905676 | 1.77E-01 | 133540108 | 133540231 | NC_000009.11 |
| cg16391792 | 5.68E-07 | 7.64E-08 | 5.59 | 6.9900035 | 9.11E-02 | 58723657  | 58723780  | NC_000015.9  |
| cg06460013 | 5.70E-07 | 7.66E-08 | 5.59 | 6.9870713 | 8.74E-02 | 775648    | 775771    | NC_000016.9  |
| cg10664784 | 5.70E-07 | 7.67E-08 | 5.59 | 6.9859767 | 4.95E-02 | 4075258   | 4075381   | NC_000017.10 |
| cg05505745 | 5.71E-07 | 7.68E-08 | 5.59 | 6.9849874 | 1.27E-01 | 74422330  | 74422453  | NC_000015.9  |
| cg22488719 | 5.71E-07 | 7.68E-08 | 5.59 | 6.9845196 | 1.08E-01 | 107601033 | 107601156 | NC_000003.11 |
| cg14095959 | 5.71E-07 | 7.68E-08 | 5.59 | 6.9844362 | 1.21E-01 | 77723415  | 77723538  | NC_000004.11 |
| cg20011562 | 5.72E-07 | 7.69E-08 | 5.59 | 6.9837224 | 1.21E-01 | 12749352  | 12749475  | NC_000006.11 |
| cg24970558 | 5.72E-07 | 7.69E-08 | 5.59 | 6.9831035 | 1.04E-01 | 67925129  | 67925252  | NC_000014.8  |
| cg08642198 | 5.72E-07 | 7.69E-08 | 5.59 | 6.983097  | 8.93E-02 | 2419444   | 2419567   | NC_000008.10 |
| cg00820637 | 5.72E-07 | 7.70E-08 | 5.59 | 6.9825279 | 9.50E-02 | 51955005  | 51955128  | NC_000014.8  |
| cg03218797 | 5.72E-07 | 7.70E-08 | 5.59 | 6.9825108 | 1.62E-01 | 54399468  | 54399591  | NC_000012.11 |
| cg08567644 | 5.72E-07 | 7.70E-08 | 5.59 | 6.9823847 | 1.32E-01 | 49925720  | 49925843  | NC_000019.9  |
| cg18420599 | 5.73E-07 | 7.71E-08 | 5.59 | 6.9811867 | 1.40E-01 | 32173206  | 32173329  | NC_000018.9  |

|            |          |          |      |           |          |           |           |              |
|------------|----------|----------|------|-----------|----------|-----------|-----------|--------------|
| cg07816687 | 5.73E-07 | 7.71E-08 | 5.59 | 6.9808854 | 1.18E-01 | 67197186  | 67197309  | NC_000016.9  |
| cg04491871 | 5.73E-07 | 7.71E-08 | 5.59 | 6.9804574 | 2.95E-02 | 27843571  | 27843694  | NC_000006.11 |
| cg09135656 | 5.74E-07 | 7.72E-08 | 5.59 | 6.9797209 | 9.94E-02 | 140625848 | 140625971 | NC_000005.9  |
| cg23374892 | 5.74E-07 | 7.72E-08 | 5.59 | 6.9795727 | 8.09E-02 | 51165845  | 51165968  | NC_000019.9  |
| cg18469436 | 5.75E-07 | 7.73E-08 | 5.59 | 6.9784155 | 1.24E-01 | 87652828  | 87652951  | NC_000014.8  |
| cg13488395 | 5.75E-07 | 7.74E-08 | 5.59 | 6.9776617 | 1.74E-01 | 132312702 | 132312825 | NC_000012.11 |
| cg01850798 | 5.75E-07 | 7.74E-08 | 5.59 | 6.9776548 | 4.12E-02 | 77341251  | 77341374  | NC_000004.11 |
| cg02892388 | 5.75E-07 | 7.74E-08 | 5.59 | 6.9772617 | 1.16E-01 | 155260310 | 155260433 | NC_000007.13 |
| cg15928538 | 5.75E-07 | 7.74E-08 | 5.59 | 6.9772222 | 1.55E-01 | 140773578 | 140773701 | NC_000007.13 |
| cg26091965 | 5.75E-07 | 7.74E-08 | 5.59 | 6.9771258 | 3.49E-02 | 66022069  | 66022192  | NC_000007.13 |
| cg25683336 | 5.75E-07 | 7.74E-08 | 5.59 | 6.976772  | 4.68E-02 | 30950305  | 30950428  | NC_000010.10 |
| cg04141610 | 5.77E-07 | 7.76E-08 | 5.58 | 6.9748152 | 1.21E-02 | 558976    | 559099    | NC_000007.13 |
| cg18559568 | 5.77E-07 | 7.76E-08 | 5.58 | 6.9747279 | 7.39E-02 | 43441670  | 43441793  | NC_000021.8  |
| cg26533311 | 5.77E-07 | 7.76E-08 | 5.58 | 6.9742343 | 1.25E-01 | 27206911  | 27207034  | NC_000006.11 |
| cg10799668 | 5.77E-07 | 7.77E-08 | 5.58 | 6.9740481 | 1.30E-01 | 131631816 | 131631939 | NC_000010.10 |
| cg01855313 | 5.77E-07 | 7.77E-08 | 5.58 | 6.9734351 | 1.49E-01 | 120628291 | 120628414 | NC_000003.11 |
| cg02001956 | 5.77E-07 | 7.77E-08 | 5.58 | 6.9733673 | 5.04E-02 | 32017261  | 32017384  | NC_000006.11 |
| cg18846889 | 5.77E-07 | 7.77E-08 | 5.58 | 6.9733581 | 1.09E-01 | 100032685 | 100032808 | NC_000014.8  |
| cg17204562 | 5.77E-07 | 7.77E-08 | 5.58 | 6.9730982 | 5.90E-02 | 48568916  | 48569039  | NC_000020.10 |
| cg15271026 | 5.78E-07 | 7.78E-08 | 5.58 | 6.9726496 | 9.13E-02 | 37494173  | 37494296  | NC_000022.10 |
| cg16911872 | 5.78E-07 | 7.78E-08 | 5.58 | 6.9721976 | 8.72E-02 | 152591175 | 152591298 | NC_000007.13 |
| cg11005826 | 5.79E-07 | 7.79E-08 | 5.58 | 6.970508  | 1.16E-01 | 2165961   | 2166084   | NC_000011.9  |
| cg24045590 | 5.79E-07 | 7.79E-08 | 5.58 | 6.9704678 | 6.07E-02 | 2716877   | 2717000   | NC_000001.10 |
| cg12176249 | 5.79E-07 | 7.79E-08 | 5.58 | 6.970407  | 1.04E-01 | 102441217 | 102441340 | NC_000010.10 |
| cg22299741 | 5.79E-07 | 7.80E-08 | 5.58 | 6.9703254 | 1.49E-01 | 101000164 | 101000287 | NC_000011.9  |

|            |          |          |      |           |          |           |           |              |
|------------|----------|----------|------|-----------|----------|-----------|-----------|--------------|
| cg09861240 | 5.79E-07 | 7.80E-08 | 5.58 | 6.9700682 | 5.52E-02 | 38038956  | 38039079  | NC_000022.10 |
| cg25819103 | 5.80E-07 | 7.80E-08 | 5.58 | 6.9692979 | 2.37E-02 | 63906050  | 63906173  | NC_000011.9  |
| cg18462381 | 5.80E-07 | 7.80E-08 | 5.58 | 6.9691642 | 1.05E-01 | 129536718 | 129536841 | NC_000010.10 |
| cg00547425 | 5.80E-07 | 7.81E-08 | 5.58 | 6.9690377 | 1.10E-01 | 31829960  | 31830083  | NC_000006.11 |
| cg05007495 | 5.80E-07 | 7.81E-08 | 5.58 | 6.9680847 | 6.94E-02 | 227949789 | 227949912 | NC_000001.10 |
| cg21704448 | 5.80E-07 | 7.81E-08 | 5.58 | 6.9680536 | 4.58E-02 | 132410188 | 132410311 | NC_000006.11 |
| cg20090970 | 5.81E-07 | 7.82E-08 | 5.58 | 6.9666764 | 3.54E-02 | 119044523 | 119044646 | NC_000003.11 |
| cg05020257 | 5.81E-07 | 7.83E-08 | 5.58 | 6.9664814 | 4.29E-02 | 151124112 | 151124235 | NC_000005.9  |
| cg23151706 | 5.81E-07 | 7.83E-08 | 5.58 | 6.9659941 | 2.62E-02 | 69931353  | 69931476  | NC_000011.9  |
| cg23377607 | 5.82E-07 | 7.83E-08 | 5.58 | 6.965577  | 8.27E-02 | 39728362  | 39728485  | NC_000017.10 |
| cg07354556 | 5.82E-07 | 7.84E-08 | 5.58 | 6.9649055 | 3.93E-02 | 56502529  | 56502652  | NC_000004.11 |
| cg06466900 | 5.82E-07 | 7.84E-08 | 5.58 | 6.9648329 | 3.54E-02 | 114763268 | 114763391 | NC_000013.10 |
| cg14475913 | 5.82E-07 | 7.84E-08 | 5.58 | 6.9646211 | 3.71E-02 | 144946557 | 144946680 | NC_000008.10 |
| cg01247987 | 5.82E-07 | 7.84E-08 | 5.58 | 6.9641789 | 8.61E-02 | 130230059 | 130230182 | NC_000010.10 |
| cg05310764 | 5.82E-07 | 7.85E-08 | 5.58 | 6.9640902 | 1.73E-01 | 27513479  | 27513602  | NC_000006.11 |
| cg15011409 | 5.84E-07 | 7.87E-08 | 5.58 | 6.9614441 | 1.01E-01 | 10405226  | 10405349  | NC_000019.9  |
| cg15000379 | 5.85E-07 | 7.88E-08 | 5.58 | 6.9597083 | 1.46E-01 | 42733662  | 42733785  | NC_000017.10 |
| cg15011775 | 5.86E-07 | 7.89E-08 | 5.58 | 6.9582131 | 6.68E-02 | 25482937  | 25483060  | NC_000003.11 |
| cg09348732 | 5.86E-07 | 7.90E-08 | 5.58 | 6.957308  | 6.03E-02 | 12354838  | 12354961  | NC_000016.9  |
| cg25942990 | 5.87E-07 | 7.90E-08 | 5.58 | 6.9569012 | 1.47E-01 | 177014996 | 177015119 | NC_000002.11 |
| cg16006626 | 5.87E-07 | 7.91E-08 | 5.58 | 6.9566746 | 2.48E-02 | 68849960  | 68850083  | NC_000011.9  |
| cg13962664 | 5.87E-07 | 7.91E-08 | 5.58 | 6.9566485 | 9.49E-02 | 110225900 | 110226023 | NC_000010.10 |
| cg16021217 | 5.87E-07 | 7.92E-08 | 5.58 | 6.9552965 | 1.16E-01 | 25197710  | 25197833  | NC_000003.11 |
| cg24535439 | 5.88E-07 | 7.92E-08 | 5.58 | 6.95431   | 1.32E-01 | 1566351   | 1566474   | NC_000001.10 |
| cg03840647 | 5.88E-07 | 7.93E-08 | 5.58 | 6.9540417 | 1.34E-01 | 36974968  | 36975091  | NC_000014.8  |

|            |          |          |      |           |          |           |           |              |
|------------|----------|----------|------|-----------|----------|-----------|-----------|--------------|
| cg15450981 | 5.89E-07 | 7.94E-08 | 5.58 | 6.9523905 | 5.39E-02 | 57594308  | 57594431  | NC_000004.11 |
| cg19143209 | 5.90E-07 | 7.96E-08 | 5.58 | 6.9503451 | 1.14E-01 | 19789287  | 19789410  | NC_000009.11 |
| cg15065049 | 5.91E-07 | 7.96E-08 | 5.58 | 6.949703  | 1.05E-01 | 46629018  | 46629141  | NC_000017.10 |
| cg10483525 | 5.91E-07 | 7.96E-08 | 5.58 | 6.9495995 | 1.09E-01 | 73080909  | 73081032  | NC_000016.9  |
| cg17820229 | 5.91E-07 | 7.97E-08 | 5.58 | 6.9491221 | 1.15E-01 | 45220102  | 45220225  | NC_000003.11 |
| cg23227697 | 5.91E-07 | 7.97E-08 | 5.58 | 6.9482121 | 6.00E-02 | 27531633  | 27531756  | NC_000001.10 |
| cg26690648 | 5.92E-07 | 7.98E-08 | 5.58 | 6.9478791 | 1.21E-01 | 38549214  | 38549337  | NC_000005.9  |
| cg27287593 | 5.92E-07 | 7.98E-08 | 5.58 | 6.9477953 | 8.05E-02 | 139894898 | 139895021 | NC_000004.11 |
| cg09344986 | 5.92E-07 | 7.98E-08 | 5.58 | 6.9474884 | 1.65E-01 | 140774104 | 140774227 | NC_000007.13 |
| cg07208161 | 5.92E-07 | 7.99E-08 | 5.58 | 6.946778  | 9.79E-02 | 26698209  | 26698332  | NC_000006.11 |
| cg05705496 | 5.93E-07 | 8.00E-08 | 5.58 | 6.9455389 | 6.80E-02 | 45666671  | 45666794  | NC_000021.8  |
| cg14953590 | 5.93E-07 | 8.00E-08 | 5.58 | 6.9452676 | 1.24E-01 | 117586666 | 117586789 | NC_000006.11 |
| cg22353369 | 5.94E-07 | 8.00E-08 | 5.58 | 6.944537  | 2.42E-02 | 128972450 | 128972573 | NC_000008.10 |
| cg21336594 | 5.94E-07 | 8.01E-08 | 5.58 | 6.9444818 | 1.43E-01 | 79057742  | 79057865  | NC_000004.11 |
| cg22268510 | 5.94E-07 | 8.01E-08 | 5.58 | 6.9437519 | 1.25E-01 | 32118420  | 32118543  | NC_000006.11 |
| cg21771915 | 5.94E-07 | 8.01E-08 | 5.58 | 6.9436133 | 3.45E-02 | 28101336  | 28101459  | NC_000007.13 |
| cg20361427 | 5.95E-07 | 8.02E-08 | 5.58 | 6.9427188 | 9.51E-02 | 7610535   | 7610658   | NC_000007.13 |
| cg19638435 | 5.95E-07 | 8.02E-08 | 5.58 | 6.9423244 | 1.01E-01 | 28452093  | 28452216  | NC_000007.13 |
| cg20161965 | 5.95E-07 | 8.02E-08 | 5.58 | 6.9421825 | 1.52E-01 | 27171401  | 27171524  | NC_000007.13 |
| cg20317123 | 5.95E-07 | 8.03E-08 | 5.58 | 6.9419859 | 1.22E-01 | 134214026 | 134214149 | NC_000006.11 |
| cg22113930 | 5.95E-07 | 8.03E-08 | 5.58 | 6.9416057 | 2.12E-01 | 26108410  | 26108533  | NC_000015.9  |
| cg10599900 | 5.95E-07 | 8.03E-08 | 5.58 | 6.9413268 | 2.13E-01 | 30063036  | 30063159  | NC_000020.10 |
| cg12467933 | 5.96E-07 | 8.04E-08 | 5.58 | 6.9402816 | 9.96E-02 | 72353536  | 72353659  | NC_000017.10 |
| cg00992298 | 5.97E-07 | 8.05E-08 | 5.58 | 6.9389959 | 4.93E-02 | 49615438  | 49615561  | NC_000019.9  |
| cg19088984 | 5.97E-07 | 8.05E-08 | 5.58 | 6.9385321 | 1.40E-01 | 100239319 | 100239442 | NC_000005.9  |

|            |          |          |      |           |          |           |           |              |
|------------|----------|----------|------|-----------|----------|-----------|-----------|--------------|
| cg07143479 | 5.98E-07 | 8.06E-08 | 5.58 | 6.9373028 | 4.96E-02 | 12402127  | 12402250  | NC_000011.9  |
| cg24293898 | 5.98E-07 | 8.06E-08 | 5.58 | 6.9372658 | 4.35E-02 | 145520163 | 145520286 | NC_000001.10 |
| cg04457481 | 5.98E-07 | 8.07E-08 | 5.58 | 6.936464  | 8.71E-02 | 57426835  | 57426958  | NC_000020.10 |
| cg10880973 | 5.99E-07 | 8.08E-08 | 5.58 | 6.93545   | 8.53E-02 | 157982213 | 157982336 | NC_000006.11 |
| cg22758104 | 5.99E-07 | 8.08E-08 | 5.58 | 6.9349859 | 1.20E-01 | 50465     | 50588     | NC_000017.10 |
| cg15126050 | 6.00E-07 | 8.09E-08 | 5.58 | 6.933813  | 4.19E-02 | 71441596  | 71441719  | NC_000005.9  |
| cg00838898 | 6.00E-07 | 8.10E-08 | 5.58 | 6.9334319 | 1.19E-01 | 49309445  | 49309568  | NC_000016.9  |
| cg11936639 | 6.00E-07 | 8.10E-08 | 5.58 | 6.9333024 | 6.18E-02 | 32944495  | 32944618  | NC_000006.11 |
| cg03628820 | 6.00E-07 | 8.10E-08 | 5.58 | 6.9332397 | 4.52E-02 | 11607557  | 11607680  | NC_000008.10 |
| cg08221350 | 6.00E-07 | 8.10E-08 | 5.58 | 6.9332305 | 9.10E-02 | 134983838 | 134983961 | NC_000010.10 |
| cg25610294 | 6.00E-07 | 8.10E-08 | 5.58 | 6.9326669 | 6.48E-02 | 24777910  | 24778033  | NC_000014.8  |
| cg22584645 | 6.00E-07 | 8.10E-08 | 5.58 | 6.9324983 | 5.30E-02 | 109783620 | 109783743 | NC_000013.10 |
| cg05163496 | 6.01E-07 | 8.11E-08 | 5.58 | 6.9315844 | 1.79E-01 | 87018104  | 87018227  | NC_000002.11 |
| cg13878010 | 6.01E-07 | 8.11E-08 | 5.58 | 6.9313891 | 1.88E-01 | 123167276 | 123167399 | NC_000003.11 |
| cg03168108 | 6.01E-07 | 8.11E-08 | 5.58 | 6.9312719 | 1.88E-01 | 51259697  | 51259820  | NC_000002.11 |
| cg14776962 | 6.01E-07 | 8.12E-08 | 5.58 | 6.9306615 | 2.25E-01 | 26251899  | 26252022  | NC_000006.11 |
| cg16589135 | 6.01E-07 | 8.12E-08 | 5.58 | 6.9306303 | 1.18E-01 | 44063404  | 44063527  | NC_000003.11 |
| cg04321224 | 6.02E-07 | 8.12E-08 | 5.58 | 6.9304255 | 8.42E-02 | 46341380  | 46341503  | NC_000021.8  |
| cg16178491 | 6.02E-07 | 8.12E-08 | 5.58 | 6.9301832 | 1.03E-01 | 101603996 | 101604119 | NC_000012.11 |
| cg15358723 | 6.02E-07 | 8.13E-08 | 5.58 | 6.9295844 | 1.21E-01 | 245750662 | 245750785 | NC_000001.10 |
| cg00058879 | 6.02E-07 | 8.13E-08 | 5.58 | 6.9295503 | 1.20E-01 | 40082173  | 40082296  | NC_000022.10 |
| cg20676317 | 6.02E-07 | 8.13E-08 | 5.58 | 6.9294998 | 3.93E-02 | 135080434 | 135080557 | NC_000010.10 |
| cg04871538 | 6.02E-07 | 8.14E-08 | 5.58 | 6.9287408 | 8.42E-02 | 73348009  | 73348132  | NC_000015.9  |
| cg02562419 | 6.03E-07 | 8.14E-08 | 5.58 | 6.9280701 | 4.96E-02 | 159049626 | 159049749 | NC_000006.11 |
| cg21648941 | 6.03E-07 | 8.15E-08 | 5.58 | 6.9270941 | 8.76E-02 | 34261436  | 34261559  | NC_000012.11 |

|            |          |          |      |           |          |           |           |              |
|------------|----------|----------|------|-----------|----------|-----------|-----------|--------------|
| cg10557253 | 6.04E-07 | 8.15E-08 | 5.58 | 6.9268965 | 1.29E-01 | 94543947  | 94544070  | NC_000012.11 |
| cg04685570 | 6.04E-07 | 8.15E-08 | 5.58 | 6.9268508 | 1.07E-01 | 114841202 | 114841325 | NC_000012.11 |
| cg03600823 | 6.04E-07 | 8.15E-08 | 5.57 | 6.9265193 | 8.99E-02 | 33170177  | 33170300  | NC_000006.11 |
| cg05957169 | 6.04E-07 | 8.16E-08 | 5.57 | 6.9261465 | 1.36E-01 | 72388187  | 72388310  | NC_000011.9  |
| cg17475304 | 6.04E-07 | 8.16E-08 | 5.57 | 6.9260902 | 8.14E-02 | 176512896 | 176513019 | NC_000005.9  |
| cg21104351 | 6.04E-07 | 8.16E-08 | 5.57 | 6.9260507 | 6.28E-02 | 134152202 | 134152325 | NC_000011.9  |
| cg04548926 | 6.04E-07 | 8.16E-08 | 5.57 | 6.9259777 | 7.25E-02 | 2219053   | 2219176   | NC_000011.9  |
| cg27537321 | 6.04E-07 | 8.16E-08 | 5.57 | 6.9253034 | 6.25E-02 | 134066989 | 134067112 | NC_000003.11 |
| cg01132150 | 6.05E-07 | 8.17E-08 | 5.57 | 6.9248851 | 1.39E-01 | 131782489 | 131782612 | NC_000005.9  |
| cg06948885 | 6.06E-07 | 8.18E-08 | 5.57 | 6.9231344 | 5.49E-02 | 81980218  | 81980341  | NC_000014.8  |
| cg05846633 | 6.06E-07 | 8.20E-08 | 5.57 | 6.9216562 | 1.03E-01 | 69934109  | 69934232  | NC_000011.9  |
| cg02591199 | 6.07E-07 | 8.20E-08 | 5.57 | 6.921461  | 8.99E-03 | 113066609 | 113066732 | NC_000004.11 |
| cg19949853 | 6.07E-07 | 8.21E-08 | 5.57 | 6.9204124 | 8.26E-02 | 49150845  | 49150968  | NC_000022.10 |
| cg03313088 | 6.07E-07 | 8.21E-08 | 5.57 | 6.9202318 | 7.51E-02 | 57472367  | 57472490  | NC_000007.13 |
| cg27403406 | 6.07E-07 | 8.21E-08 | 5.57 | 6.9201747 | 1.26E-01 | 48325721  | 48325844  | NC_000020.10 |
| cg24452260 | 6.07E-07 | 8.21E-08 | 5.57 | 6.9199545 | 1.45E-01 | 158143538 | 158143661 | NC_000004.11 |
| cg15965006 | 6.08E-07 | 8.21E-08 | 5.57 | 6.9198263 | 1.09E-01 | 31938777  | 31938900  | NC_000006.11 |
| cg09909740 | 6.08E-07 | 8.22E-08 | 5.57 | 6.9192692 | 9.85E-02 | 56225464  | 56225587  | NC_000014.8  |
| cg18557185 | 6.08E-07 | 8.22E-08 | 5.57 | 6.919238  | 1.04E-01 | 27128169  | 27128292  | NC_000007.13 |
| cg20251943 | 6.09E-07 | 8.23E-08 | 5.57 | 6.9176792 | 7.80E-02 | 407721    | 407844    | NC_000010.10 |
| cg06801994 | 6.09E-07 | 8.23E-08 | 5.57 | 6.917454  | 2.34E-02 | 113834082 | 113834205 | NC_000013.10 |
| cg02150135 | 6.09E-07 | 8.23E-08 | 5.57 | 6.9169973 | 1.15E-01 | 27279917  | 27280040  | NC_000006.11 |
| cg14321245 | 6.10E-07 | 8.24E-08 | 5.57 | 6.9164548 | 8.08E-02 | 34314768  | 34314891  | NC_000017.10 |
| cg22500555 | 6.10E-07 | 8.24E-08 | 5.57 | 6.9164532 | 1.22E-01 | 159756996 | 159757119 | NC_000003.11 |
| cg25315235 | 6.10E-07 | 8.24E-08 | 5.57 | 6.9160103 | 2.24E-02 | 47070765  | 47070888  | NC_000001.10 |

|            |          |          |      |           |          |           |           |              |
|------------|----------|----------|------|-----------|----------|-----------|-----------|--------------|
| cg21621248 | 6.10E-07 | 8.25E-08 | 5.57 | 6.9155342 | 1.49E-01 | 80531842  | 80531965  | NC_000002.11 |
| cg07340580 | 6.11E-07 | 8.26E-08 | 5.57 | 6.9134959 | 1.30E-01 | 107301288 | 107301411 | NC_000007.13 |
| cg06590074 | 6.11E-07 | 8.27E-08 | 5.57 | 6.9133839 | 7.35E-02 | 691211    | 691334    | NC_000020.10 |
| cg08350126 | 6.11E-07 | 8.27E-08 | 5.57 | 6.9133373 | 5.00E-02 | 6463476   | 6463599   | NC_000011.9  |
| cg19512268 | 6.11E-07 | 8.27E-08 | 5.57 | 6.9133202 | 1.69E-01 | 146348901 | 146349024 | NC_000006.11 |
| cg12497914 | 6.12E-07 | 8.27E-08 | 5.57 | 6.9126933 | 1.43E-01 | 2674285   | 2674408   | NC_000020.10 |
| cg11359133 | 6.12E-07 | 8.27E-08 | 5.57 | 6.9124576 | 1.53E-01 | 176948699 | 176948822 | NC_000002.11 |
| cg27585287 | 6.12E-07 | 8.28E-08 | 5.57 | 6.9119592 | 5.56E-02 | 37963407  | 37963530  | NC_000022.10 |
| cg01834210 | 6.12E-07 | 8.28E-08 | 5.57 | 6.9116635 | 1.46E-01 | 153858967 | 153859090 | NC_000005.9  |
| cg27625748 | 6.13E-07 | 8.28E-08 | 5.57 | 6.9111396 | 5.06E-02 | 216783471 | 216783594 | NC_000002.11 |
| cg18753296 | 6.13E-07 | 8.29E-08 | 5.57 | 6.9103502 | 3.86E-02 | 31630923  | 31631046  | NC_000006.11 |
| cg15274983 | 6.13E-07 | 8.29E-08 | 5.57 | 6.9099298 | 2.19E-02 | 35492108  | 35492231  | NC_000020.10 |
| cg26111518 | 6.14E-07 | 8.30E-08 | 5.57 | 6.909322  | 4.75E-02 | 40345445  | 40345568  | NC_000017.10 |
| cg00444884 | 6.14E-07 | 8.30E-08 | 5.57 | 6.9092576 | 1.33E-01 | 48886784  | 48886907  | NC_000022.10 |
| cg19034028 | 6.14E-07 | 8.31E-08 | 5.57 | 6.9085553 | 3.37E-02 | 68677364  | 68677487  | NC_000016.9  |
| cg27453745 | 6.14E-07 | 8.31E-08 | 5.57 | 6.9083253 | 1.39E-01 | 86546938  | 86547061  | NC_000016.9  |
| cg21281009 | 6.14E-07 | 8.31E-08 | 5.57 | 6.9083048 | 1.56E-01 | 14748298  | 14748421  | NC_000018.9  |
| cg03226752 | 6.14E-07 | 8.31E-08 | 5.57 | 6.9083    | 7.16E-02 | 1835533   | 1835656   | NC_000016.9  |
| cg14826456 | 6.14E-07 | 8.31E-08 | 5.57 | 6.907937  | 1.02E-01 | 115804095 | 115804218 | NC_000010.10 |
| cg19934709 | 6.15E-07 | 8.31E-08 | 5.57 | 6.9076331 | 2.38E-02 | 24115027  | 24115150  | NC_000022.10 |
| cg02770887 | 6.15E-07 | 8.32E-08 | 5.57 | 6.9068486 | 4.63E-02 | 122924025 | 122924148 | NC_000003.11 |
| cg23068499 | 6.15E-07 | 8.32E-08 | 5.57 | 6.9064548 | 1.22E-01 | 176986026 | 176986149 | NC_000002.11 |
| cg19642421 | 6.16E-07 | 8.33E-08 | 5.57 | 6.9059505 | 1.12E-01 | 131438737 | 131438860 | NC_000012.11 |
| cg13549845 | 6.16E-07 | 8.33E-08 | 5.57 | 6.9059196 | 1.51E-01 | 93225960  | 93226083  | NC_000004.11 |
| cg08917174 | 6.16E-07 | 8.34E-08 | 5.57 | 6.9051091 | 1.28E-01 | 217236650 | 217236773 | NC_000002.11 |

|            |          |          |      |           |          |           |           |              |
|------------|----------|----------|------|-----------|----------|-----------|-----------|--------------|
| cg15439369 | 6.17E-07 | 8.35E-08 | 5.57 | 6.9032943 | 6.19E-02 | 130604743 | 130604866 | NC_000012.11 |
| cg10479672 | 6.17E-07 | 8.35E-08 | 5.57 | 6.9032893 | 7.59E-02 | 113810641 | 113810764 | NC_000002.11 |
| cg23463144 | 6.17E-07 | 8.35E-08 | 5.57 | 6.9031778 | 1.45E-01 | 44650153  | 44650276  | NC_000020.10 |
| cg09408098 | 6.18E-07 | 8.36E-08 | 5.57 | 6.9021527 | 1.28E-01 | 170631331 | 170631454 | NC_000001.10 |
| cg25608871 | 6.18E-07 | 8.37E-08 | 5.57 | 6.9013439 | 1.36E-02 | 79298384  | 79298507  | NC_000015.9  |
| cg11680908 | 6.18E-07 | 8.37E-08 | 5.57 | 6.9012098 | 1.23E-01 | 68042226  | 68042349  | NC_000005.9  |
| cg02531794 | 6.19E-07 | 8.38E-08 | 5.57 | 6.9005527 | 6.04E-02 | 76039208  | 76039331  | NC_000007.13 |
| cg13398346 | 6.19E-07 | 8.38E-08 | 5.57 | 6.9005314 | 4.96E-02 | 68973272  | 68973395  | NC_000011.9  |
| cg27128941 | 6.19E-07 | 8.38E-08 | 5.57 | 6.9005285 | 7.23E-02 | 177592922 | 177593045 | NC_000005.9  |
| cg12929487 | 6.19E-07 | 8.38E-08 | 5.57 | 6.8994255 | 1.53E-01 | 41869175  | 41869298  | NC_000004.11 |
| cg14687118 | 6.20E-07 | 8.39E-08 | 5.57 | 6.8991672 | 1.18E-01 | 126205766 | 126205889 | NC_000010.10 |
| cg11490805 | 6.20E-07 | 8.39E-08 | 5.57 | 6.8989703 | 1.20E-01 | 3226466   | 3226589   | NC_000005.9  |
| cg08808258 | 6.20E-07 | 8.39E-08 | 5.57 | 6.8989595 | 6.76E-02 | 24671137  | 24671260  | NC_000022.10 |
| cg04328219 | 6.20E-07 | 8.40E-08 | 5.57 | 6.8977611 | 2.73E-02 | 6263432   | 6263555   | NC_000010.10 |
| cg15592324 | 6.20E-07 | 8.40E-08 | 5.57 | 6.8975993 | 1.08E-01 | 23810740  | 23810863  | NC_000018.9  |
| cg07635747 | 6.21E-07 | 8.41E-08 | 5.57 | 6.8968081 | 1.62E-01 | 25755942  | 25756065  | NC_000018.9  |
| cg21140633 | 6.21E-07 | 8.41E-08 | 5.57 | 6.8963413 | 5.67E-02 | 15600659  | 15600782  | NC_000017.10 |
| cg16986315 | 6.21E-07 | 8.41E-08 | 5.57 | 6.8962733 | 7.95E-02 | 19181291  | 19181414  | NC_000001.10 |
| cg03411507 | 6.22E-07 | 8.42E-08 | 5.57 | 6.8956364 | 9.08E-02 | 101454317 | 101454440 | NC_000011.9  |
| cg24969187 | 6.22E-07 | 8.42E-08 | 5.57 | 6.8956135 | 7.47E-02 | 132870448 | 132870571 | NC_000012.11 |
| cg15983005 | 6.22E-07 | 8.42E-08 | 5.57 | 6.8952196 | 6.93E-02 | 39506938  | 39507061  | NC_000017.10 |
| cg07259974 | 6.22E-07 | 8.42E-08 | 5.57 | 6.895208  | 5.28E-02 | 88854249  | 88854372  | NC_000006.11 |
| cg09677268 | 6.22E-07 | 8.42E-08 | 5.57 | 6.894918  | 5.49E-02 | 58556044  | 58556167  | NC_000019.9  |
| cg01448711 | 6.23E-07 | 8.43E-08 | 5.57 | 6.8937877 | 3.61E-02 | 120741565 | 120741688 | NC_000012.11 |
| cg25590492 | 6.23E-07 | 8.44E-08 | 5.57 | 6.8933414 | 1.31E-01 | 147129952 | 147130075 | NC_000003.11 |



|            |          |          |      |           |          |           |           |              |
|------------|----------|----------|------|-----------|----------|-----------|-----------|--------------|
| cg03729566 | 6.23E-07 | 8.44E-08 | 5.57 | 6.8933008 | 2.32E-02 | 1059678   | 1059801   | NC_000007.13 |
| cg02285922 | 6.23E-07 | 8.44E-08 | 5.57 | 6.8930853 | 1.41E-01 | 119799862 | 119799985 | NC_000005.9  |
| cg07775371 | 6.23E-07 | 8.44E-08 | 5.57 | 6.8926996 | 7.66E-02 | 1922155   | 1922278   | NC_000016.9  |
| cg08729686 | 6.23E-07 | 8.45E-08 | 5.57 | 6.8924397 | 1.62E-01 | 99194624  | 99194747  | NC_000015.9  |
| cg09327378 | 6.24E-07 | 8.45E-08 | 5.57 | 6.8923722 | 6.64E-02 | 32437574  | 32437697  | NC_000022.10 |
| cg03489382 | 6.24E-07 | 8.45E-08 | 5.57 | 6.8922692 | 9.08E-02 | 128432457 | 128432580 | NC_000007.13 |
| cg23049291 | 6.24E-07 | 8.46E-08 | 5.57 | 6.8910948 | 1.23E-01 | 165204745 | 165204868 | NC_000001.10 |
| cg21194807 | 6.24E-07 | 8.46E-08 | 5.57 | 6.8909885 | 5.57E-02 | 116856710 | 116856833 | NC_000009.11 |
| cg24945657 | 6.25E-07 | 8.47E-08 | 5.57 | 6.8899785 | 1.11E-01 | 43044484  | 43044607  | NC_000017.10 |
| cg05351827 | 6.25E-07 | 8.47E-08 | 5.57 | 6.8894556 | 8.96E-02 | 220313600 | 220313723 | NC_000002.11 |
| cg06938356 | 6.25E-07 | 8.48E-08 | 5.57 | 6.8889724 | 4.92E-02 | 177987724 | 177987847 | NC_000005.9  |
| cg15584445 | 6.26E-07 | 8.48E-08 | 5.57 | 6.8886919 | 1.14E-01 | 130527046 | 130527169 | NC_000012.11 |
| cg19874421 | 6.26E-07 | 8.48E-08 | 5.57 | 6.888394  | 8.01E-02 | 72203901  | 72204024  | NC_000004.11 |
| cg08105378 | 6.26E-07 | 8.49E-08 | 5.57 | 6.887619  | 4.15E-02 | 19040175  | 19040298  | NC_000019.9  |
| cg17054386 | 6.27E-07 | 8.49E-08 | 5.57 | 6.8872089 | 8.44E-02 | 219855054 | 219855177 | NC_000002.11 |
| cg25662926 | 6.27E-07 | 8.50E-08 | 5.57 | 6.8866991 | 1.22E-01 | 77595359  | 77595482  | NC_000008.10 |
| cg17930194 | 6.28E-07 | 8.52E-08 | 5.57 | 6.8842891 | 1.13E-01 | 124982834 | 124982957 | NC_000009.11 |
| cg25515941 | 6.28E-07 | 8.52E-08 | 5.57 | 6.8840954 | 4.35E-02 | 46871708  | 46871831  | NC_000017.10 |
| cg13651483 | 6.29E-07 | 8.52E-08 | 5.57 | 6.8837051 | 9.64E-02 | 48566587  | 48566710  | NC_000019.9  |
| cg12718339 | 6.29E-07 | 8.53E-08 | 5.57 | 6.8829207 | 1.21E-01 | 29936407  | 29936530  | NC_000012.11 |
| cg00911351 | 6.29E-07 | 8.53E-08 | 5.57 | 6.8822411 | 1.06E-01 | 140767255 | 140767378 | NC_000005.9  |
| cg04617936 | 6.30E-07 | 8.54E-08 | 5.57 | 6.8819413 | 6.50E-02 | 214353    | 214476    | NC_000002.11 |
| cg25823085 | 6.30E-07 | 8.54E-08 | 5.57 | 6.8818705 | 7.55E-02 | 87105416  | 87105539  | NC_000007.13 |
| cg08018585 | 6.31E-07 | 8.55E-08 | 5.57 | 6.8804827 | 1.68E-01 | 46425866  | 46425989  | NC_000013.10 |
| cg20628734 | 6.31E-07 | 8.56E-08 | 5.57 | 6.8796653 | 9.11E-02 | 102289844 | 102289967 | NC_000008.10 |

|            |          |          |      |           |          |           |           |              |
|------------|----------|----------|------|-----------|----------|-----------|-----------|--------------|
| cg21338532 | 6.31E-07 | 8.56E-08 | 5.57 | 6.8792869 | 1.92E-01 | 154335348 | 154335471 | NC_000002.11 |
| cg20893919 | 6.32E-07 | 8.57E-08 | 5.56 | 6.8784125 | 7.85E-02 | 122854168 | 122854291 | NC_000004.11 |
| cg07435350 | 6.32E-07 | 8.57E-08 | 5.56 | 6.8782646 | 3.90E-02 | 14539217  | 14539340  | NC_000011.9  |
| cg10601171 | 6.33E-07 | 8.58E-08 | 5.56 | 6.8771896 | 5.09E-02 | 61290162  | 61290285  | NC_000020.10 |
| cg15346842 | 6.33E-07 | 8.58E-08 | 5.56 | 6.8766393 | 1.34E-01 | 59477066  | 59477189  | NC_000002.11 |
| cg04617755 | 6.33E-07 | 8.59E-08 | 5.56 | 6.8764573 | 1.62E-01 | 115919366 | 115919489 | NC_000002.11 |
| cg23166781 | 6.33E-07 | 8.59E-08 | 5.56 | 6.8761825 | 7.48E-02 | 6107280   | 6107403   | NC_000004.11 |
| cg12288076 | 6.33E-07 | 8.59E-08 | 5.56 | 6.8761627 | 8.81E-02 | 45170254  | 45170377  | NC_000020.10 |
| cg16891075 | 6.34E-07 | 8.59E-08 | 5.56 | 6.8754466 | 9.22E-02 | 15170709  | 15170832  | NC_000006.11 |
| cg23452259 | 6.34E-07 | 8.60E-08 | 5.56 | 6.8748996 | 8.51E-02 | 219823559 | 219823682 | NC_000002.11 |
| cg17071045 | 6.34E-07 | 8.60E-08 | 5.56 | 6.8744809 | 1.29E-01 | 54969609  | 54969732  | NC_000004.11 |
| cg01862688 | 6.35E-07 | 8.61E-08 | 5.56 | 6.8734466 | 8.32E-02 | 140480872 | 140480995 | NC_000005.9  |
| cg25316339 | 6.35E-07 | 8.61E-08 | 5.56 | 6.8731707 | 1.33E-01 | 79866379  | 79866502  | NC_000005.9  |
| cg26926138 | 6.35E-07 | 8.62E-08 | 5.56 | 6.8730897 | 1.17E-01 | 54960034  | 54960157  | NC_000004.11 |
| cg18538340 | 6.35E-07 | 8.62E-08 | 5.56 | 6.8726724 | 1.26E-01 | 132756780 | 132756903 | NC_000003.11 |
| cg12745203 | 6.36E-07 | 8.63E-08 | 5.56 | 6.8718583 | 9.20E-02 | 40722429  | 40722552  | NC_000006.11 |
| cg26570867 | 6.37E-07 | 8.64E-08 | 5.56 | 6.8697182 | 2.60E-02 | 12308181  | 12308304  | NC_000016.9  |
| cg17822947 | 6.38E-07 | 8.66E-08 | 5.56 | 6.8677606 | 1.42E-01 | 207842917 | 207843040 | NC_000001.10 |
| cg20028470 | 6.38E-07 | 8.66E-08 | 5.56 | 6.8676481 | 8.19E-02 | 27530829  | 27530952  | NC_000002.11 |
| cg16735875 | 6.39E-07 | 8.67E-08 | 5.56 | 6.8669836 | 5.86E-02 | 99367484  | 99367607  | NC_000015.9  |
| cg27393126 | 6.39E-07 | 8.67E-08 | 5.56 | 6.866754  | 1.78E-01 | 75139364  | 75139487  | NC_000001.10 |
| cg11179518 | 6.39E-07 | 8.68E-08 | 5.56 | 6.8663139 | 5.24E-02 | 58980157  | 58980280  | NC_000011.9  |
| cg16014987 | 6.39E-07 | 8.68E-08 | 5.56 | 6.8661132 | 7.08E-02 | 119345741 | 119345864 | NC_000003.11 |
| cg01748699 | 6.39E-07 | 8.68E-08 | 5.56 | 6.8659972 | 4.36E-02 | 71281866  | 71281989  | NC_000017.10 |
| cg20672187 | 6.39E-07 | 8.68E-08 | 5.56 | 6.8659295 | 9.13E-02 | 130686082 | 130686205 | NC_000006.11 |

|            |          |          |      |           |          |           |           |              |
|------------|----------|----------|------|-----------|----------|-----------|-----------|--------------|
| cg05928369 | 6.40E-07 | 8.68E-08 | 5.56 | 6.8652301 | 2.57E-02 | 2185971   | 2186094   | NC_000007.13 |
| cg21642103 | 6.40E-07 | 8.69E-08 | 5.56 | 6.8648439 | 1.14E-01 | 32064656  | 32064779  | NC_000006.11 |
| cg26377880 | 6.40E-07 | 8.69E-08 | 5.56 | 6.8642896 | 1.48E-01 | 7851487   | 7851610   | NC_000005.9  |
| cg20747630 | 6.40E-07 | 8.69E-08 | 5.56 | 6.8641949 | 7.55E-02 | 23892574  | 23892697  | NC_000015.9  |
| cg04049203 | 6.41E-07 | 8.70E-08 | 5.56 | 6.863695  | 5.98E-02 | 44291664  | 44291787  | NC_000022.10 |
| cg18028999 | 6.41E-07 | 8.70E-08 | 5.56 | 6.8632715 | 1.66E-01 | 81426610  | 81426733  | NC_000015.9  |
| cg09576415 | 6.41E-07 | 8.70E-08 | 5.56 | 6.8631586 | 5.76E-02 | 62059559  | 62059682  | NC_000020.10 |
| cg03631864 | 6.41E-07 | 8.71E-08 | 5.56 | 6.8628808 | 1.35E-01 | 155260630 | 155260753 | NC_000007.13 |
| cg03992191 | 6.42E-07 | 8.71E-08 | 5.56 | 6.8624714 | 3.05E-02 | 22312957  | 22313080  | NC_000022.10 |
| cg26207503 | 6.42E-07 | 8.71E-08 | 5.56 | 6.8621988 | 8.68E-02 | 81110749  | 81110872  | NC_000012.11 |
| cg04381043 | 6.42E-07 | 8.72E-08 | 5.56 | 6.8618155 | 3.13E-02 | 89341467  | 89341590  | NC_000016.9  |
| cg16225703 | 6.42E-07 | 8.72E-08 | 5.56 | 6.8612299 | 1.18E-01 | 62383028  | 62383151  | NC_000004.11 |
| cg08525989 | 6.42E-07 | 8.72E-08 | 5.56 | 6.8609452 | 1.78E-02 | 32262282  | 32262405  | NC_000020.10 |
| cg23677657 | 6.43E-07 | 8.73E-08 | 5.56 | 6.8602478 | 9.90E-02 | 96619076  | 96619199  | NC_000007.13 |
| cg23558227 | 6.43E-07 | 8.73E-08 | 5.56 | 6.859771  | 4.50E-02 | 97586426  | 97586549  | NC_000007.13 |
| cg06624154 | 6.43E-07 | 8.74E-08 | 5.56 | 6.8594918 | 1.26E-01 | 101544117 | 101544240 | NC_000014.8  |
| cg20341758 | 6.44E-07 | 8.74E-08 | 5.56 | 6.8588464 | 8.53E-02 | 90966221  | 90966344  | NC_000010.10 |
| cg20229534 | 6.44E-07 | 8.75E-08 | 5.56 | 6.8578418 | 1.15E-01 | 10882250  | 10882373  | NC_000006.11 |
| cg06973667 | 6.44E-07 | 8.75E-08 | 5.56 | 6.8576952 | 1.20E-01 | 71332139  | 71332262  | NC_000010.10 |
| cg08500908 | 6.45E-07 | 8.75E-08 | 5.56 | 6.8575276 | 6.24E-02 | 2036530   | 2036653   | NC_000016.9  |
| cg17919502 | 6.45E-07 | 8.76E-08 | 5.56 | 6.8565031 | 5.83E-02 | 47144363  | 47144486  | NC_000008.10 |
| cg05812269 | 6.46E-07 | 8.77E-08 | 5.56 | 6.8559379 | 5.64E-02 | 21033260  | 21033383  | NC_000018.9  |
| cg19083909 | 6.46E-07 | 8.77E-08 | 5.56 | 6.8555364 | 8.14E-02 | 120030707 | 120030830 | NC_000012.11 |
| cg25382032 | 6.46E-07 | 8.77E-08 | 5.56 | 6.8552813 | 6.82E-02 | 184035178 | 184035301 | NC_000003.11 |
| cg04907173 | 6.46E-07 | 8.77E-08 | 5.56 | 6.8552555 | 1.11E-01 | 65060386  | 65060509  | NC_000011.9  |

|            |          |          |      |           |          |           |           |              |
|------------|----------|----------|------|-----------|----------|-----------|-----------|--------------|
| cg14035231 | 6.46E-07 | 8.78E-08 | 5.56 | 6.8549327 | 1.18E-01 | 75602925  | 75603048  | NC_000001.10 |
| cg08216304 | 6.46E-07 | 8.78E-08 | 5.56 | 6.8546095 | 1.23E-01 | 26483122  | 26483245  | NC_000008.10 |
| cg11312674 | 6.46E-07 | 8.78E-08 | 5.56 | 6.8544857 | 5.37E-02 | 121169616 | 121169739 | NC_000010.10 |
| cg16361757 | 6.48E-07 | 8.80E-08 | 5.56 | 6.8523001 | 1.03E-01 | 87010217  | 87010340  | NC_000016.9  |
| cg03340228 | 6.48E-07 | 8.80E-08 | 5.56 | 6.8519586 | 8.41E-02 | 56327663  | 56327786  | NC_000020.10 |
| cg23465910 | 6.48E-07 | 8.81E-08 | 5.56 | 6.8516128 | 2.91E-02 | 43454929  | 43455052  | NC_000002.11 |
| cg07382943 | 6.48E-07 | 8.81E-08 | 5.56 | 6.8515907 | 1.71E-01 | 51830477  | 51830600  | NC_000019.9  |
| cg13270163 | 6.48E-07 | 8.81E-08 | 5.56 | 6.8513087 | 7.35E-02 | 3708502   | 3708625   | NC_000010.10 |
| cg23933289 | 6.49E-07 | 8.81E-08 | 5.56 | 6.8510997 | 1.45E-01 | 178998656 | 178998779 | NC_000001.10 |
| cg11146173 | 6.49E-07 | 8.82E-08 | 5.56 | 6.8506873 | 2.04E-02 | 105886254 | 105886377 | NC_000014.8  |
| cg03385864 | 6.49E-07 | 8.82E-08 | 5.56 | 6.8504608 | 1.58E-01 | 43045368  | 43045491  | NC_000017.10 |
| cg09018944 | 6.49E-07 | 8.82E-08 | 5.56 | 6.8502346 | 3.84E-02 | 9453650   | 9453773   | NC_000004.11 |
| cg03561416 | 6.49E-07 | 8.82E-08 | 5.56 | 6.8502107 | 1.30E-01 | 157254584 | 157254707 | NC_000006.11 |
| cg13326227 | 6.49E-07 | 8.82E-08 | 5.56 | 6.8501278 | 2.09E-01 | 20349168  | 20349291  | NC_000020.10 |
| cg05476956 | 6.50E-07 | 8.83E-08 | 5.56 | 6.8494006 | 6.87E-02 | 140595291 | 140595414 | NC_000005.9  |
| cg24627517 | 6.50E-07 | 8.83E-08 | 5.56 | 6.8491115 | 1.72E-02 | 102782033 | 102782156 | NC_000010.10 |
| cg01545587 | 6.50E-07 | 8.83E-08 | 5.56 | 6.8488877 | 1.93E-01 | 105993579 | 105993702 | NC_000014.8  |
| cg21476673 | 6.50E-07 | 8.84E-08 | 5.56 | 6.8480072 | 1.10E-01 | 46691543  | 46691666  | NC_000017.10 |
| cg18961944 | 6.50E-07 | 8.84E-08 | 5.56 | 6.8478632 | 1.60E-01 | 74961360  | 74961483  | NC_000018.9  |
| cg13022129 | 6.51E-07 | 8.85E-08 | 5.56 | 6.8473474 | 4.24E-02 | 131683862 | 131683985 | NC_000009.11 |
| cg24076502 | 6.52E-07 | 8.86E-08 | 5.56 | 6.8458678 | 1.03E-01 | 59823744  | 59823867  | NC_000020.10 |
| cg23114616 | 6.52E-07 | 8.87E-08 | 5.56 | 6.8450652 | 9.38E-02 | 6526398   | 6526521   | NC_000001.10 |
| cg14687949 | 6.53E-07 | 8.88E-08 | 5.56 | 6.843908  | 8.00E-02 | 121537346 | 121537469 | NC_000002.11 |
| cg06615464 | 6.53E-07 | 8.88E-08 | 5.56 | 6.8438484 | 2.02E-02 | 32080287  | 32080410  | NC_000001.10 |
| cg07538216 | 6.53E-07 | 8.88E-08 | 5.56 | 6.8438258 | 4.62E-02 | 132152473 | 132152596 | NC_000012.11 |

|            |          |          |      |           |          |           |           |              |
|------------|----------|----------|------|-----------|----------|-----------|-----------|--------------|
| cg25313772 | 6.53E-07 | 8.88E-08 | 5.56 | 6.8437647 | 6.12E-02 | 160331687 | 160331810 | NC_000001.10 |
| cg27476279 | 6.53E-07 | 8.88E-08 | 5.56 | 6.8432142 | 9.74E-02 | 106943488 | 106943611 | NC_000006.11 |
| cg16056044 | 6.54E-07 | 8.89E-08 | 5.56 | 6.8430138 | 1.05E-01 | 36705593  | 36705716  | NC_000001.10 |
| cg12338273 | 6.54E-07 | 8.89E-08 | 5.56 | 6.8427559 | 4.92E-02 | 143753686 | 143753809 | NC_000002.11 |
| cg27205159 | 6.54E-07 | 8.89E-08 | 5.56 | 6.8426077 | 4.86E-02 | 4134990   | 4135113   | NC_000004.11 |
| cg21977377 | 6.54E-07 | 8.90E-08 | 5.56 | 6.8418657 | 1.25E-01 | 21492823  | 21492946  | NC_000020.10 |
| cg12151542 | 6.54E-07 | 8.90E-08 | 5.56 | 6.841853  | 5.86E-02 | 31069906  | 31070029  | NC_000010.10 |
| cg10864979 | 6.54E-07 | 8.90E-08 | 5.56 | 6.8417135 | 9.12E-02 | 128879141 | 128879264 | NC_000008.10 |
| cg14742809 | 6.55E-07 | 8.91E-08 | 5.56 | 6.84078   | 1.12E-01 | 60631028  | 60631151  | NC_000005.9  |
| cg08206318 | 6.55E-07 | 8.91E-08 | 5.56 | 6.8407481 | 1.13E-01 | 134363637 | 134363760 | NC_000005.9  |
| cg10669834 | 6.56E-07 | 8.92E-08 | 5.56 | 6.8390696 | 2.58E-02 | 33390828  | 33390951  | NC_000015.9  |
| cg10979436 | 6.56E-07 | 8.93E-08 | 5.56 | 6.8382956 | 1.38E-01 | 27242005  | 27242128  | NC_000007.13 |
| cg14000361 | 6.57E-07 | 8.94E-08 | 5.56 | 6.8374417 | 1.71E-01 | 10882336  | 10882459  | NC_000006.11 |
| cg07102320 | 6.57E-07 | 8.94E-08 | 5.56 | 6.837074  | 9.23E-02 | 46171075  | 46171198  | NC_000011.9  |
| cg01957599 | 6.57E-07 | 8.94E-08 | 5.56 | 6.8368387 | 6.94E-02 | 89631033  | 89631156  | NC_000004.11 |
| cg09123155 | 6.57E-07 | 8.94E-08 | 5.56 | 6.8368136 | 9.70E-02 | 1127792   | 1127915   | NC_000016.9  |
| cg01972496 | 6.57E-07 | 8.94E-08 | 5.56 | 6.8367709 | 3.70E-02 | 190229302 | 190229425 | NC_000003.11 |
| cg03127034 | 6.58E-07 | 8.95E-08 | 5.56 | 6.8364396 | 3.04E-02 | 41561307  | 41561430  | NC_000006.11 |
| cg02324291 | 6.58E-07 | 8.95E-08 | 5.56 | 6.8363123 | 5.88E-02 | 112234911 | 112235034 | NC_000010.10 |
| cg09558547 | 6.58E-07 | 8.95E-08 | 5.56 | 6.8361229 | 1.81E-01 | 27526256  | 27526379  | NC_000006.11 |
| cg25259711 | 6.58E-07 | 8.95E-08 | 5.56 | 6.835628  | 1.23E-01 | 105235978 | 105236101 | NC_000008.10 |
| cg02976355 | 6.59E-07 | 8.96E-08 | 5.56 | 6.8348902 | 1.38E-01 | 14312435  | 14312558  | NC_000009.11 |
| cg08803500 | 6.59E-07 | 8.96E-08 | 5.56 | 6.8346571 | 9.55E-02 | 54338824  | 54338947  | NC_000012.11 |
| cg14425564 | 6.59E-07 | 8.97E-08 | 5.56 | 6.8343528 | 1.37E-01 | 126794772 | 126794895 | NC_000009.11 |
| cg01382181 | 6.59E-07 | 8.97E-08 | 5.56 | 6.8341347 | 2.28E-02 | 32917655  | 32917778  | NC_000006.11 |

|            |          |          |      |           |          |           |           |              |
|------------|----------|----------|------|-----------|----------|-----------|-----------|--------------|
| cg11025763 | 6.59E-07 | 8.97E-08 | 5.56 | 6.834108  | 1.64E-01 | 76819246  | 76819369  | NC_000014.8  |
| cg15544235 | 6.59E-07 | 8.97E-08 | 5.56 | 6.8335023 | 3.78E-02 | 3080113   | 3080236   | NC_000004.11 |
| cg00164500 | 6.59E-07 | 8.97E-08 | 5.56 | 6.8334588 | 2.99E-02 | 132416160 | 132416283 | NC_000002.11 |
| cg26805263 | 6.59E-07 | 8.97E-08 | 5.56 | 6.8333379 | 6.32E-02 | 24212312  | 24212435  | NC_000013.10 |
| cg09794131 | 6.60E-07 | 8.98E-08 | 5.56 | 6.8322115 | 1.97E-01 | 71264658  | 71264781  | NC_000016.9  |
| cg21825757 | 6.61E-07 | 8.99E-08 | 5.56 | 6.8316833 | 5.12E-02 | 128602077 | 128602200 | NC_000003.11 |
| cg22387174 | 6.61E-07 | 9.00E-08 | 5.56 | 6.8306126 | 1.13E-01 | 155302770 | 155302893 | NC_000007.13 |
| cg19236679 | 6.62E-07 | 9.01E-08 | 5.55 | 6.8298289 | 1.53E-01 | 118032330 | 118032453 | NC_000010.10 |
| cg14472888 | 6.62E-07 | 9.01E-08 | 5.55 | 6.829295  | 9.52E-02 | 151477988 | 151478111 | NC_000002.11 |
| cg20977024 | 6.62E-07 | 9.02E-08 | 5.55 | 6.8288919 | 5.05E-02 | 114336683 | 114336806 | NC_000001.10 |
| cg03098375 | 6.63E-07 | 9.02E-08 | 5.55 | 6.8286411 | 8.37E-02 | 32572348  | 32572471  | NC_000022.10 |
| cg08065122 | 6.63E-07 | 9.02E-08 | 5.55 | 6.8284073 | 9.21E-02 | 794433    | 794556    | NC_000011.9  |
| cg23367478 | 6.64E-07 | 9.04E-08 | 5.55 | 6.8265752 | 1.55E-01 | 20521299  | 20521422  | NC_000012.11 |
| cg07306259 | 6.64E-07 | 9.04E-08 | 5.55 | 6.8262779 | 8.28E-02 | 36007718  | 36007841  | NC_000007.13 |
| cg01141940 | 6.65E-07 | 9.05E-08 | 5.55 | 6.8254077 | 1.65E-01 | 60097247  | 60097370  | NC_000014.8  |
| cg03605226 | 6.65E-07 | 9.05E-08 | 5.55 | 6.8248993 | 1.29E-01 | 87637261  | 87637384  | NC_000016.9  |
| cg27312388 | 6.66E-07 | 9.06E-08 | 5.55 | 6.8239776 | 1.54E-01 | 132864165 | 132864288 | NC_000011.9  |
| cg00597602 | 6.66E-07 | 9.06E-08 | 5.55 | 6.8239759 | 7.41E-02 | 29229107  | 29229230  | NC_000016.9  |
| cg25587233 | 6.66E-07 | 9.07E-08 | 5.55 | 6.8225297 | 7.74E-02 | 131872005 | 131872128 | NC_000009.11 |
| cg27011060 | 6.67E-07 | 9.08E-08 | 5.55 | 6.8222534 | 1.61E-01 | 31825226  | 31825349  | NC_000011.9  |
| cg26088614 | 6.67E-07 | 9.08E-08 | 5.55 | 6.8215839 | 7.79E-02 | 26039146  | 26039269  | NC_000002.11 |
| cg05040893 | 6.67E-07 | 9.09E-08 | 5.55 | 6.8212302 | 1.04E-01 | 43034755  | 43034878  | NC_000017.10 |
| cg14170313 | 6.68E-07 | 9.09E-08 | 5.55 | 6.8206387 | 2.06E-01 | 77112896  | 77113019  | NC_000009.11 |
| cg13180844 | 6.68E-07 | 9.10E-08 | 5.55 | 6.8199308 | 1.18E-01 | 2711168   | 2711291   | NC_000002.11 |
| cg07338917 | 6.68E-07 | 9.10E-08 | 5.55 | 6.8198472 | 1.13E-01 | 112728964 | 112729087 | NC_000013.10 |

|            |          |          |      |           |          |           |           |              |
|------------|----------|----------|------|-----------|----------|-----------|-----------|--------------|
| cg11887973 | 6.68E-07 | 9.10E-08 | 5.55 | 6.81931   | 1.79E-02 | 104032735 | 104032858 | NC_000014.8  |
| cg11153872 | 6.68E-07 | 9.11E-08 | 5.55 | 6.8192256 | 1.10E-01 | 14995142  | 14995265  | NC_000011.9  |
| cg11018723 | 6.69E-07 | 9.11E-08 | 5.55 | 6.8191926 | 1.83E-01 | 25256939  | 25257062  | NC_000001.10 |
| cg06838302 | 6.69E-07 | 9.12E-08 | 5.55 | 6.8180587 | 5.20E-02 | 151066596 | 151066719 | NC_000003.11 |
| cg09172362 | 6.69E-07 | 9.12E-08 | 5.55 | 6.8179016 | 1.09E-01 | 299482    | 299605    | NC_000011.9  |
| cg13476635 | 6.69E-07 | 9.12E-08 | 5.55 | 6.8178271 | 7.85E-02 | 128654419 | 128654542 | NC_000011.9  |
| cg26496204 | 6.70E-07 | 9.12E-08 | 5.55 | 6.8176008 | 7.82E-02 | 57427210  | 57427333  | NC_000020.10 |
| cg26834169 | 6.70E-07 | 9.13E-08 | 5.55 | 6.8170599 | 1.64E-01 | 31540879  | 31541002  | NC_000016.9  |
| cg13946538 | 6.70E-07 | 9.13E-08 | 5.55 | 6.8165391 | 1.09E-01 | 96911696  | 96911819  | NC_000015.9  |
| cg06884495 | 6.70E-07 | 9.13E-08 | 5.55 | 6.8164488 | 7.12E-02 | 104394621 | 104394744 | NC_000014.8  |
| cg08988949 | 6.71E-07 | 9.14E-08 | 5.55 | 6.8158771 | 3.08E-02 | 67498961  | 67499084  | NC_000016.9  |
| cg01975502 | 6.71E-07 | 9.14E-08 | 5.55 | 6.8156993 | 3.41E-02 | 54291017  | 54291140  | NC_000019.9  |
| cg21597802 | 6.71E-07 | 9.14E-08 | 5.55 | 6.8152726 | 7.14E-02 | 32190281  | 32190404  | NC_000006.11 |
| cg16635196 | 6.71E-07 | 9.15E-08 | 5.55 | 6.8147835 | 1.28E-01 | 169758644 | 169758767 | NC_000003.11 |
| cg13292042 | 6.72E-07 | 9.15E-08 | 5.55 | 6.8140381 | 1.67E-01 | 111535334 | 111535457 | NC_000004.11 |
| cg08214142 | 6.72E-07 | 9.16E-08 | 5.55 | 6.8138873 | 9.07E-02 | 56623826  | 56623949  | NC_000012.11 |
| cg19856771 | 6.72E-07 | 9.16E-08 | 5.55 | 6.8138601 | 2.10E-02 | 42780042  | 42780165  | NC_000013.10 |
| cg17588350 | 6.72E-07 | 9.16E-08 | 5.55 | 6.8138399 | 6.70E-02 | 60414689  | 60414812  | NC_000011.9  |
| cg05105529 | 6.72E-07 | 9.16E-08 | 5.55 | 6.8133305 | 9.01E-02 | 51132316  | 51132439  | NC_000014.8  |
| cg05263666 | 6.72E-07 | 9.16E-08 | 5.55 | 6.8130244 | 4.00E-02 | 145555707 | 145555830 | NC_000001.10 |
| cg12517027 | 6.72E-07 | 9.16E-08 | 5.55 | 6.8129368 | 9.57E-02 | 55469021  | 55469144  | NC_000018.9  |
| cg18857767 | 6.73E-07 | 9.17E-08 | 5.55 | 6.8124795 | 3.38E-02 | 178043005 | 178043128 | NC_000002.11 |
| cg26514430 | 6.73E-07 | 9.18E-08 | 5.55 | 6.8118231 | 1.15E-01 | 140249080 | 140249203 | NC_000005.9  |
| cg07875335 | 6.73E-07 | 9.18E-08 | 5.55 | 6.8116665 | 6.58E-02 | 48844728  | 48844851  | NC_000002.11 |
| cg22816857 | 6.74E-07 | 9.18E-08 | 5.55 | 6.8111573 | 1.17E-01 | 11565391  | 11565514  | NC_000019.9  |

|            |          |          |      |           |          |           |           |              |
|------------|----------|----------|------|-----------|----------|-----------|-----------|--------------|
| cg00329039 | 6.74E-07 | 9.18E-08 | 5.55 | 6.8109718 | 1.25E-01 | 96470053  | 96470176  | NC_000004.11 |
| cg20160127 | 6.74E-07 | 9.19E-08 | 5.55 | 6.8101346 | 5.30E-02 | 64363624  | 64363747  | NC_000007.13 |
| cg02773086 | 6.74E-07 | 9.19E-08 | 5.55 | 6.8098049 | 1.42E-01 | 177027440 | 177027563 | NC_000002.11 |
| cg23312086 | 6.75E-07 | 9.20E-08 | 5.55 | 6.809743  | 9.07E-02 | 103780068 | 103780191 | NC_000008.10 |
| cg02713153 | 6.75E-07 | 9.20E-08 | 5.55 | 6.8094979 | 3.79E-02 | 145063215 | 145063338 | NC_000008.10 |
| cg21052660 | 6.75E-07 | 9.20E-08 | 5.55 | 6.8092072 | 1.18E-01 | 41342202  | 41342325  | NC_000006.11 |
| cg13333954 | 6.76E-07 | 9.21E-08 | 5.55 | 6.8076575 | 1.14E-01 | 1098663   | 1098786   | NC_000012.11 |
| cg02319187 | 6.76E-07 | 9.22E-08 | 5.55 | 6.8075309 | 2.23E-02 | 137229907 | 137230030 | NC_000009.11 |
| cg11996428 | 6.76E-07 | 9.22E-08 | 5.55 | 6.8075254 | 1.04E-01 | 135466211 | 135466334 | NC_000009.11 |
| cg01184539 | 6.76E-07 | 9.22E-08 | 5.55 | 6.807412  | 5.98E-02 | 116848950 | 116849073 | NC_000006.11 |
| cg22900415 | 6.76E-07 | 9.22E-08 | 5.55 | 6.8066871 | 1.45E-01 | 20736075  | 20736198  | NC_000013.10 |
| cg01147550 | 6.77E-07 | 9.23E-08 | 5.55 | 6.8062998 | 2.13E-01 | 47210027  | 47210150  | NC_000017.10 |
| cg17121178 | 6.77E-07 | 9.23E-08 | 5.55 | 6.8058305 | 1.38E-01 | 122850741 | 122850864 | NC_000011.9  |
| cg12618988 | 6.77E-07 | 9.23E-08 | 5.55 | 6.8057197 | 7.42E-02 | 54871856  | 54871979  | NC_000001.10 |
| cg19193135 | 6.77E-07 | 9.23E-08 | 5.55 | 6.8055324 | 7.61E-02 | 118219874 | 118219997 | NC_000011.9  |
| cg13168683 | 6.77E-07 | 9.24E-08 | 5.55 | 6.8054493 | 1.74E-01 | 6202379   | 6202502   | NC_000004.11 |
| cg04260867 | 6.78E-07 | 9.25E-08 | 5.55 | 6.8042788 | 9.77E-02 | 33004424  | 33004547  | NC_000001.10 |
| cg03970319 | 6.78E-07 | 9.25E-08 | 5.55 | 6.8039099 | 1.22E-01 | 1274752   | 1274875   | NC_000007.13 |
| cg23606718 | 6.78E-07 | 9.25E-08 | 5.55 | 6.8036811 | 1.32E-01 | 131513927 | 131514050 | NC_000002.11 |
| cg26852331 | 6.79E-07 | 9.26E-08 | 5.55 | 6.8030718 | 2.51E-02 | 3594801   | 3594924   | NC_000010.10 |
| cg14816825 | 6.79E-07 | 9.26E-08 | 5.55 | 6.8029524 | 5.70E-02 | 12128203  | 12128326  | NC_000011.9  |
| cg11596863 | 6.79E-07 | 9.26E-08 | 5.55 | 6.8025482 | 9.84E-02 | 113013215 | 113013338 | NC_000012.11 |
| cg24301288 | 6.80E-07 | 9.28E-08 | 5.55 | 6.8006517 | 4.94E-02 | 8263007   | 8263130   | NC_000004.11 |
| cg07404961 | 6.81E-07 | 9.29E-08 | 5.55 | 6.8000573 | 5.60E-02 | 31049270  | 31049393  | NC_000016.9  |
| cg18201679 | 6.81E-07 | 9.29E-08 | 5.55 | 6.7992773 | 1.11E-01 | 149672149 | 149672272 | NC_000001.10 |



|            |          |          |      |           |          |           |           |              |
|------------|----------|----------|------|-----------|----------|-----------|-----------|--------------|
| cg08698721 | 6.81E-07 | 9.30E-08 | 5.55 | 6.7989446 | 6.62E-02 | 101294147 | 101294270 | NC_000014.8  |
| cg23222160 | 6.82E-07 | 9.30E-08 | 5.55 | 6.7987869 | 6.04E-02 | 94605081  | 94605204  | NC_000014.8  |
| cg14655855 | 6.82E-07 | 9.30E-08 | 5.55 | 6.798699  | 1.60E-01 | 13278626  | 13278749  | NC_000009.11 |
| cg04275404 | 6.82E-07 | 9.30E-08 | 5.55 | 6.7985977 | 1.87E-01 | 23984534  | 23984657  | NC_000010.10 |
| cg17011981 | 6.82E-07 | 9.31E-08 | 5.55 | 6.797553  | 1.58E-01 | 60287397  | 60287520  | NC_000015.9  |
| cg12464561 | 6.82E-07 | 9.31E-08 | 5.55 | 6.7974711 | 1.15E-01 | 1401729   | 1401852   | NC_000004.11 |
| cg17332326 | 6.83E-07 | 9.32E-08 | 5.55 | 6.7961636 | 2.04E-01 | 37997471  | 37997594  | NC_000019.9  |
| cg08635685 | 6.84E-07 | 9.33E-08 | 5.55 | 6.7956618 | 1.55E-01 | 131400931 | 131401054 | NC_000012.11 |
| cg23671901 | 6.84E-07 | 9.33E-08 | 5.55 | 6.7953307 | 7.74E-02 | 41621118  | 41621241  | NC_000006.11 |
| cg25093954 | 6.84E-07 | 9.33E-08 | 5.55 | 6.7951928 | 3.14E-02 | 2932076   | 2932199   | NC_000010.10 |
| cg18658397 | 6.85E-07 | 9.34E-08 | 5.55 | 6.7943353 | 1.28E-01 | 102031426 | 102031549 | NC_000014.8  |
| cg18005337 | 6.85E-07 | 9.34E-08 | 5.55 | 6.7941474 | 8.92E-02 | 98340655  | 98340778  | NC_000002.11 |
| cg09908001 | 6.85E-07 | 9.34E-08 | 5.55 | 6.7940443 | 2.29E-02 | 42780440  | 42780563  | NC_000021.8  |
| cg09584358 | 6.85E-07 | 9.35E-08 | 5.55 | 6.7937806 | 1.07E-01 | 14201680  | 14201803  | NC_000017.10 |
| cg04080041 | 6.85E-07 | 9.35E-08 | 5.55 | 6.7934738 | 1.08E-01 | 140811253 | 140811376 | NC_000005.9  |
| cg15579587 | 6.85E-07 | 9.35E-08 | 5.55 | 6.7933346 | 1.19E-01 | 238600061 | 238600184 | NC_000002.11 |
| cg09592867 | 6.85E-07 | 9.35E-08 | 5.55 | 6.7933012 | 1.18E-01 | 48472588  | 48472711  | NC_000017.10 |
| cg20161179 | 6.85E-07 | 9.36E-08 | 5.55 | 6.7927989 | 1.18E-01 | 4863282   | 4863405   | NC_000004.11 |
| cg22539420 | 6.86E-07 | 9.37E-08 | 5.55 | 6.7913915 | 1.20E-01 | 200329680 | 200329803 | NC_000002.11 |
| cg24248713 | 6.87E-07 | 9.38E-08 | 5.55 | 6.7902523 | 1.44E-01 | 31803615  | 31803738  | NC_000018.9  |
| cg19437325 | 6.87E-07 | 9.38E-08 | 5.55 | 6.790099  | 2.43E-02 | 46802432  | 46802555  | NC_000022.10 |
| cg14108567 | 6.87E-07 | 9.38E-08 | 5.55 | 6.7898983 | 1.27E-01 | 8717487   | 8717610   | NC_000012.11 |
| cg08287265 | 6.88E-07 | 9.39E-08 | 5.55 | 6.7892588 | 1.86E-01 | 101292766 | 101292889 | NC_000010.10 |
| cg23941527 | 6.88E-07 | 9.39E-08 | 5.55 | 6.7891683 | 1.24E-01 | 92868380  | 92868503  | NC_000005.9  |
| cg05691934 | 6.88E-07 | 9.40E-08 | 5.55 | 6.7886158 | 4.98E-02 | 1755162   | 1755285   | NC_000012.11 |

|            |          |          |      |           |          |           |           |              |
|------------|----------|----------|------|-----------|----------|-----------|-----------|--------------|
| cg07862768 | 6.89E-07 | 9.40E-08 | 5.55 | 6.7880962 | 9.25E-02 | 105379411 | 105379534 | NC_000008.10 |
| cg00323695 | 6.89E-07 | 9.40E-08 | 5.55 | 6.7880784 | 1.30E-01 | 39989978  | 39990101  | NC_000019.9  |
| cg12429455 | 6.89E-07 | 9.41E-08 | 5.55 | 6.787367  | 3.64E-02 | 61715096  | 61715219  | NC_000002.11 |
| cg02723913 | 6.90E-07 | 9.42E-08 | 5.55 | 6.7860746 | 5.09E-02 | 22992214  | 22992337  | NC_000015.9  |
| cg17994569 | 6.90E-07 | 9.42E-08 | 5.55 | 6.7860728 | 1.63E-01 | 50821652  | 50821775  | NC_000010.10 |
| cg16197684 | 6.90E-07 | 9.42E-08 | 5.55 | 6.7859049 | 4.21E-02 | 31630819  | 31630942  | NC_000006.11 |
| cg08288811 | 6.90E-07 | 9.42E-08 | 5.55 | 6.7857422 | 8.18E-02 | 140180926 | 140181049 | NC_000005.9  |
| cg18572653 | 6.91E-07 | 9.43E-08 | 5.55 | 6.784914  | 1.21E-01 | 72200922  | 72201045  | NC_000010.10 |
| cg09157431 | 6.91E-07 | 9.44E-08 | 5.55 | 6.7842984 | 5.55E-02 | 2496973   | 2497096   | NC_000017.10 |
| cg05827546 | 6.91E-07 | 9.45E-08 | 5.55 | 6.7836354 | 6.78E-02 | 81028116  | 81028239  | NC_000017.10 |
| cg01614898 | 6.93E-07 | 9.47E-08 | 5.54 | 6.7813987 | 6.52E-02 | 3736816   | 3736939   | NC_000005.9  |
| cg16090347 | 6.93E-07 | 9.47E-08 | 5.54 | 6.7813648 | 8.46E-02 | 124906421 | 124906544 | NC_000010.10 |
| cg09592456 | 6.93E-07 | 9.47E-08 | 5.54 | 6.7809482 | 3.20E-02 | 19780308  | 19780431  | NC_000022.10 |
| cg19509715 | 6.94E-07 | 9.48E-08 | 5.54 | 6.7804882 | 1.94E-01 | 44037128  | 44037251  | NC_000003.11 |
| cg09607482 | 6.94E-07 | 9.48E-08 | 5.54 | 6.7804459 | 6.97E-02 | 131567073 | 131567196 | NC_000010.10 |
| cg14267263 | 6.94E-07 | 9.48E-08 | 5.54 | 6.7802172 | 1.44E-01 | 841436    | 841559    | NC_000009.11 |
| cg16420354 | 6.94E-07 | 9.49E-08 | 5.54 | 6.7795049 | 3.31E-02 | 150690881 | 150691004 | NC_000007.13 |
| cg12570975 | 6.95E-07 | 9.49E-08 | 5.54 | 6.7789775 | 6.59E-02 | 69206335  | 69206458  | NC_000011.9  |
| cg15218983 | 6.95E-07 | 9.49E-08 | 5.54 | 6.7785715 | 5.83E-02 | 44708669  | 44708792  | NC_000022.10 |
| cg10457056 | 6.95E-07 | 9.50E-08 | 5.54 | 6.777972  | 1.69E-01 | 44494997  | 44495120  | NC_000021.8  |
| cg15704304 | 6.96E-07 | 9.51E-08 | 5.54 | 6.7772843 | 4.57E-02 | 68881427  | 68881550  | NC_000012.11 |
| cg15001567 | 6.96E-07 | 9.51E-08 | 5.54 | 6.7771715 | 3.60E-02 | 27327653  | 27327776  | NC_000002.11 |
| cg22149588 | 6.96E-07 | 9.51E-08 | 5.54 | 6.7770513 | 4.40E-02 | 30736610  | 30736733  | NC_000022.10 |
| cg09828381 | 6.96E-07 | 9.51E-08 | 5.54 | 6.7770276 | 6.47E-02 | 63177404  | 63177527  | NC_000012.11 |
| cg09635541 | 6.96E-07 | 9.51E-08 | 5.54 | 6.7768707 | 6.67E-02 | 812499    | 812622    | NC_000004.11 |

|            |          |          |      |           |          |           |           |              |
|------------|----------|----------|------|-----------|----------|-----------|-----------|--------------|
| cg17271180 | 6.96E-07 | 9.52E-08 | 5.54 | 6.7763099 | 1.22E-01 | 76629110  | 76629233  | NC_000015.9  |
| cg26694831 | 6.96E-07 | 9.52E-08 | 5.54 | 6.7761772 | 1.15E-01 | 178763419 | 178763542 | NC_000005.9  |
| cg11945824 | 6.97E-07 | 9.53E-08 | 5.54 | 6.7748669 | 1.44E-01 | 32116963  | 32117086  | NC_000006.11 |
| cg16733419 | 6.98E-07 | 9.54E-08 | 5.54 | 6.7738791 | 7.65E-02 | 8983288   | 8983411   | NC_000011.9  |
| cg22600043 | 6.99E-07 | 9.56E-08 | 5.54 | 6.7718103 | 1.12E-01 | 109095991 | 109096114 | NC_000008.10 |
| cg06893389 | 7.00E-07 | 9.57E-08 | 5.54 | 6.7710443 | 1.73E-01 | 37117018  | 37117141  | NC_000014.8  |
| cg03386347 | 7.00E-07 | 9.57E-08 | 5.54 | 6.7705762 | 5.71E-02 | 88261775  | 88261898  | NC_000016.9  |
| cg00936626 | 7.01E-07 | 9.58E-08 | 5.54 | 6.769376  | 7.61E-02 | 196694856 | 196694979 | NC_000003.11 |
| cg12213811 | 7.02E-07 | 9.60E-08 | 5.54 | 6.7677841 | 1.30E-01 | 122251152 | 122251275 | NC_000012.11 |
| cg00384210 | 7.02E-07 | 9.60E-08 | 5.54 | 6.7674489 | 8.24E-02 | 126168486 | 126168609 | NC_000012.11 |
| cg08354104 | 7.03E-07 | 9.61E-08 | 5.54 | 6.7668591 | 9.98E-02 | 110409196 | 110409319 | NC_000005.9  |
| cg16277071 | 7.03E-07 | 9.61E-08 | 5.54 | 6.7666774 | 9.96E-02 | 75537317  | 75537440  | NC_000017.10 |
| cg26458288 | 7.04E-07 | 9.62E-08 | 5.54 | 6.765713  | 1.59E-01 | 119799822 | 119799945 | NC_000005.9  |
| cg08708943 | 7.04E-07 | 9.63E-08 | 5.54 | 6.7646974 | 3.30E-02 | 15818255  | 15818378  | NC_000016.9  |
| cg18347426 | 7.05E-07 | 9.65E-08 | 5.54 | 6.7629942 | 7.55E-02 | 126267104 | 126267227 | NC_000005.9  |
| cg07084941 | 7.05E-07 | 9.65E-08 | 5.54 | 6.7629855 | 8.26E-02 | 129061382 | 129061505 | NC_000008.10 |
| cg01048972 | 7.05E-07 | 9.65E-08 | 5.54 | 6.7628678 | 4.40E-02 | 4446152   | 4446275   | NC_000010.10 |
| cg16024950 | 7.06E-07 | 9.65E-08 | 5.54 | 6.7625919 | 1.84E-01 | 100254149 | 100254272 | NC_000007.13 |
| cg09423703 | 7.06E-07 | 9.66E-08 | 5.54 | 6.7622659 | 1.60E-01 | 71115230  | 71115353  | NC_000002.11 |
| cg18124852 | 7.06E-07 | 9.66E-08 | 5.54 | 6.7619995 | 8.78E-02 | 43506540  | 43506663  | NC_000017.10 |
| cg17301987 | 7.06E-07 | 9.66E-08 | 5.54 | 6.7617967 | 7.37E-02 | 5752667   | 5752790   | NC_000006.11 |
| cg13396821 | 7.06E-07 | 9.66E-08 | 5.54 | 6.7616301 | 3.72E-02 | 154812952 | 154813075 | NC_000001.10 |
| cg09839318 | 7.07E-07 | 9.67E-08 | 5.54 | 6.7610393 | 9.84E-02 | 921295    | 921418    | NC_000004.11 |
| cg09498572 | 7.07E-07 | 9.68E-08 | 5.54 | 6.7599803 | 1.24E-01 | 112707805 | 112707928 | NC_000013.10 |
| cg17861481 | 7.07E-07 | 9.68E-08 | 5.54 | 6.7599249 | 3.91E-02 | 110134776 | 110134899 | NC_000001.10 |

|            |          |          |      |           |          |           |           |              |
|------------|----------|----------|------|-----------|----------|-----------|-----------|--------------|
| cg00123090 | 7.08E-07 | 9.68E-08 | 5.54 | 6.7593024 | 8.68E-02 | 234667087 | 234667210 | NC_000001.10 |
| cg20332660 | 7.08E-07 | 9.69E-08 | 5.54 | 6.7591057 | 7.60E-02 | 47878427  | 47878550  | NC_000001.10 |
| cg06650260 | 7.08E-07 | 9.69E-08 | 5.54 | 6.7585805 | 1.42E-01 | 27240478  | 27240601  | NC_000001.10 |
| cg11111740 | 7.09E-07 | 9.71E-08 | 5.54 | 6.7569485 | 1.34E-01 | 28584288  | 28584411  | NC_000006.11 |
| cg12128017 | 7.10E-07 | 9.71E-08 | 5.54 | 6.7564083 | 1.59E-01 | 38230769  | 38230892  | NC_000001.10 |
| cg01416712 | 7.11E-07 | 9.73E-08 | 5.54 | 6.7545708 | 1.26E-01 | 41750864  | 41750987  | NC_000004.11 |
| cg10164592 | 7.11E-07 | 9.74E-08 | 5.54 | 6.7542295 | 1.71E-01 | 107715146 | 107715269 | NC_000012.11 |
| cg18594669 | 7.12E-07 | 9.74E-08 | 5.54 | 6.7536759 | 8.43E-02 | 124364423 | 124364546 | NC_000012.11 |
| cg22299454 | 7.12E-07 | 9.74E-08 | 5.54 | 6.7536519 | 1.08E-01 | 165304443 | 165304566 | NC_000004.11 |
| cg24070990 | 7.12E-07 | 9.75E-08 | 5.54 | 6.7526084 | 8.59E-02 | 228634724 | 228634847 | NC_000001.10 |
| cg25103160 | 7.13E-07 | 9.76E-08 | 5.54 | 6.7520432 | 6.22E-02 | 76206788  | 76206911  | NC_000012.11 |
| cg10111214 | 7.13E-07 | 9.76E-08 | 5.54 | 6.7516574 | 7.79E-02 | 14815676  | 14815799  | NC_000006.11 |
| cg02796390 | 7.13E-07 | 9.76E-08 | 5.54 | 6.7514638 | 1.20E-01 | 3726190   | 3726313   | NC_000020.10 |
| cg21689075 | 7.14E-07 | 9.77E-08 | 5.54 | 6.7503518 | 1.76E-02 | 109192664 | 109192787 | NC_000001.10 |
| cg19942830 | 7.14E-07 | 9.78E-08 | 5.54 | 6.7500764 | 4.71E-02 | 99054915  | 99055038  | NC_000008.10 |
| cg25584474 | 7.14E-07 | 9.78E-08 | 5.54 | 6.7499388 | 7.26E-02 | 52160138  | 52160261  | NC_000014.8  |
| cg18573327 | 7.15E-07 | 9.78E-08 | 5.54 | 6.7493242 | 1.22E-01 | 115123875 | 115123998 | NC_000012.11 |
| cg08631504 | 7.15E-07 | 9.79E-08 | 5.54 | 6.7490594 | 1.60E-01 | 89943431  | 89943554  | NC_000015.9  |
| cg11510523 | 7.15E-07 | 9.79E-08 | 5.54 | 6.7489956 | 1.69E-01 | 12306136  | 12306259  | NC_000019.9  |
| cg18457818 | 7.15E-07 | 9.79E-08 | 5.54 | 6.7488394 | 6.22E-02 | 131360788 | 131360911 | NC_000012.11 |
| cg02422011 | 7.15E-07 | 9.79E-08 | 5.54 | 6.7485151 | 5.37E-02 | 38745928  | 38746051  | NC_000019.9  |
| cg03975797 | 7.15E-07 | 9.80E-08 | 5.54 | 6.7481963 | 1.36E-01 | 100238977 | 100239100 | NC_000005.9  |
| cg07572815 | 7.16E-07 | 9.80E-08 | 5.54 | 6.7475001 | 2.17E-02 | 228582869 | 228582992 | NC_000001.10 |
| cg06613095 | 7.16E-07 | 9.81E-08 | 5.54 | 6.7472475 | 1.75E-01 | 137483617 | 137483740 | NC_000003.11 |
| cg00173504 | 7.17E-07 | 9.82E-08 | 5.54 | 6.7453985 | 1.47E-01 | 119530144 | 119530267 | NC_000001.10 |

|            |          |          |      |           |          |           |           |              |
|------------|----------|----------|------|-----------|----------|-----------|-----------|--------------|
| cg13130031 | 7.19E-07 | 9.84E-08 | 5.54 | 6.7435293 | 9.99E-02 | 99584939  | 99585062  | NC_000014.8  |
| cg00900933 | 7.19E-07 | 9.84E-08 | 5.54 | 6.7434861 | 8.28E-02 | 37322028  | 37322151  | NC_000017.10 |
| cg15806304 | 7.19E-07 | 9.85E-08 | 5.54 | 6.7426229 | 6.90E-02 | 119000083 | 119000206 | NC_000010.10 |
| cg26539522 | 7.21E-07 | 9.87E-08 | 5.54 | 6.7404766 | 2.68E-02 | 88807658  | 88807781  | NC_000016.9  |
| cg19277182 | 7.22E-07 | 9.90E-08 | 5.54 | 6.7383851 | 3.31E-02 | 80560098  | 80560221  | NC_000017.10 |
| cg14176797 | 7.22E-07 | 9.90E-08 | 5.54 | 6.7380147 | 8.44E-02 | 57426801  | 57426924  | NC_000020.10 |
| cg05729827 | 7.23E-07 | 9.90E-08 | 5.54 | 6.7376397 | 4.68E-02 | 75968409  | 75968532  | NC_000015.9  |
| cg12298745 | 7.23E-07 | 9.91E-08 | 5.54 | 6.7370069 | 1.34E-01 | 76737545  | 76737668  | NC_000018.9  |
| cg14345497 | 7.24E-07 | 9.91E-08 | 5.54 | 6.7365217 | 1.54E-01 | 46655603  | 46655726  | NC_000017.10 |
| cg15634398 | 7.24E-07 | 9.92E-08 | 5.54 | 6.736272  | 1.48E-01 | 44324903  | 44325026  | NC_000019.9  |
| cg25966893 | 7.24E-07 | 9.92E-08 | 5.54 | 6.7356973 | 1.13E-01 | 100050770 | 100050893 | NC_000006.11 |
| cg16805150 | 7.24E-07 | 9.93E-08 | 5.54 | 6.735149  | 1.20E-01 | 6570684   | 6570807   | NC_000007.13 |
| cg07363307 | 7.25E-07 | 9.93E-08 | 5.54 | 6.7350913 | 6.86E-02 | 233794334 | 233794457 | NC_000002.11 |
| cg01158680 | 7.25E-07 | 9.93E-08 | 5.54 | 6.7348268 | 1.39E-01 | 79083997  | 79084120  | NC_000007.13 |
| cg03538020 | 7.25E-07 | 9.93E-08 | 5.54 | 6.734601  | 7.36E-02 | 156363442 | 156363565 | NC_000005.9  |
| cg06315607 | 7.25E-07 | 9.93E-08 | 5.54 | 6.7345998 | 9.76E-02 | 19512084  | 19512207  | NC_000022.10 |
| cg16833551 | 7.25E-07 | 9.93E-08 | 5.54 | 6.7345993 | 8.21E-02 | 57427237  | 57427360  | NC_000020.10 |
| cg06456154 | 7.25E-07 | 9.94E-08 | 5.53 | 6.7337355 | 1.32E-01 | 119310356 | 119310479 | NC_000010.10 |
| cg26391902 | 7.26E-07 | 9.95E-08 | 5.53 | 6.7332627 | 8.50E-02 | 93191430  | 93191553  | NC_000015.9  |
| cg06748440 | 7.26E-07 | 9.95E-08 | 5.53 | 6.7328545 | 8.58E-02 | 6609746   | 6609869   | NC_000017.10 |
| cg01178854 | 7.26E-07 | 9.96E-08 | 5.53 | 6.7323579 | 6.29E-02 | 154913744 | 154913867 | NC_000001.10 |
| cg05425326 | 7.27E-07 | 9.96E-08 | 5.53 | 6.7318472 | 4.05E-02 | 58439361  | 58439484  | NC_000016.9  |
| cg26121591 | 7.27E-07 | 9.96E-08 | 5.53 | 6.7315807 | 1.93E-01 | 175298564 | 175298687 | NC_000005.9  |
| cg06911753 | 7.27E-07 | 9.97E-08 | 5.53 | 6.7307481 | 8.17E-02 | 47611236  | 47611359  | NC_000011.9  |
| cg17397493 | 7.28E-07 | 9.98E-08 | 5.53 | 6.7299366 | 4.91E-02 | 35231272  | 35231395  | NC_000005.9  |

|            |          |          |      |           |          |           |           |              |
|------------|----------|----------|------|-----------|----------|-----------|-----------|--------------|
| cg05825950 | 7.28E-07 | 9.98E-08 | 5.53 | 6.7296142 | 1.12E-01 | 207669576 | 207669699 | NC_000001.10 |
| cg12698813 | 7.28E-07 | 9.99E-08 | 5.53 | 6.7293957 | 1.17E-01 | 115136060 | 115136183 | NC_000012.11 |
| cg16406385 | 7.29E-07 | 1.00E-07 | 5.53 | 6.7282794 | 7.87E-02 | 62694514  | 62694637  | NC_000004.11 |
| cg08453096 | 7.29E-07 | 1.00E-07 | 5.53 | 6.728098  | 5.72E-02 | 44065893  | 44066016  | NC_000002.11 |
| cg19237923 | 7.30E-07 | 1.00E-07 | 5.53 | 6.7276796 | 1.10E-01 | 156831236 | 156831359 | NC_000001.10 |
| cg01901089 | 7.30E-07 | 1.00E-07 | 5.53 | 6.7268337 | 4.23E-02 | 75862195  | 75862318  | NC_000004.11 |
| cg26601317 | 7.30E-07 | 1.00E-07 | 5.53 | 6.7266454 | 1.12E-01 | 2890575   | 2890698   | NC_000011.9  |
| cg08997224 | 7.31E-07 | 1.00E-07 | 5.53 | 6.7259912 | 3.10E-02 | 69951486  | 69951609  | NC_000011.9  |
| cg06511917 | 7.31E-07 | 1.00E-07 | 5.53 | 6.7257643 | 9.52E-02 | 23482255  | 23482378  | NC_000010.10 |
| cg25206073 | 7.31E-07 | 1.00E-07 | 5.53 | 6.7256006 | 1.05E-01 | 19812858  | 19812981  | NC_000011.9  |
| cg05637351 | 7.31E-07 | 1.00E-07 | 5.53 | 6.7253251 | 1.17E-01 | 63417669  | 63417792  | NC_000018.9  |
| cg13553400 | 7.32E-07 | 1.00E-07 | 5.53 | 6.7244968 | 5.12E-02 | 14248369  | 14248492  | NC_000017.10 |
| cg03102494 | 7.32E-07 | 1.00E-07 | 5.53 | 6.7237566 | 1.07E-01 | 147801721 | 147801844 | NC_000001.10 |
| cg23361828 | 7.32E-07 | 1.00E-07 | 5.53 | 6.7236908 | 6.96E-02 | 239463246 | 239463369 | NC_000002.11 |
| cg15184687 | 7.32E-07 | 1.00E-07 | 5.53 | 6.7236049 | 1.47E-01 | 112728885 | 112729008 | NC_000013.10 |
| cg21938521 | 7.32E-07 | 1.00E-07 | 5.53 | 6.7234786 | 5.04E-02 | 52006267  | 52006390  | NC_000013.10 |
| cg11694262 | 7.33E-07 | 1.01E-07 | 5.53 | 6.7221338 | 1.34E-01 | 100644657 | 100644780 | NC_000013.10 |
| cg09760644 | 7.34E-07 | 1.01E-07 | 5.53 | 6.7211961 | 6.04E-02 | 166822241 | 166822364 | NC_000006.11 |
| cg07143898 | 7.34E-07 | 1.01E-07 | 5.53 | 6.720699  | 1.80E-01 | 98945300  | 98945423  | NC_000010.10 |
| cg04694035 | 7.35E-07 | 1.01E-07 | 5.53 | 6.7205352 | 1.17E-01 | 96647440  | 96647563  | NC_000007.13 |
| cg19487717 | 7.35E-07 | 1.01E-07 | 5.53 | 6.7204515 | 4.48E-02 | 70263216  | 70263339  | NC_000011.9  |
| cg04011135 | 7.35E-07 | 1.01E-07 | 5.53 | 6.7200752 | 9.87E-02 | 236582960 | 236583083 | NC_000002.11 |
| cg19979590 | 7.36E-07 | 1.01E-07 | 5.53 | 6.7191324 | 3.98E-02 | 63011250  | 63011373  | NC_000015.9  |
| cg23213951 | 7.36E-07 | 1.01E-07 | 5.53 | 6.7190493 | 4.70E-02 | 17551678  | 17551801  | NC_000001.10 |
| cg24813613 | 7.36E-07 | 1.01E-07 | 5.53 | 6.7184649 | 7.02E-02 | 1882135   | 1882258   | NC_000007.13 |

|            |          |          |      |           |          |           |           |              |
|------------|----------|----------|------|-----------|----------|-----------|-----------|--------------|
| cg01175020 | 7.36E-07 | 1.01E-07 | 5.53 | 6.7183222 | 1.40E-01 | 102896475 | 102896598 | NC_000010.10 |
| cg16590189 | 7.37E-07 | 1.01E-07 | 5.53 | 6.7172303 | 1.32E-01 | 175299798 | 175299921 | NC_000005.9  |
| cg21293934 | 7.38E-07 | 1.01E-07 | 5.53 | 6.7162498 | 1.21E-01 | 14748230  | 14748353  | NC_000018.9  |
| cg20159871 | 7.38E-07 | 1.01E-07 | 5.53 | 6.7154171 | 5.18E-02 | 77864271  | 77864394  | NC_000001.10 |
| cg18120376 | 7.38E-07 | 1.01E-07 | 5.53 | 6.7151543 | 1.92E-01 | 142054254 | 142054377 | NC_000004.11 |
| cg06622151 | 7.38E-07 | 1.01E-07 | 5.53 | 6.7150554 | 1.36E-01 | 45168246  | 45168369  | NC_000002.11 |
| cg12437277 | 7.39E-07 | 1.01E-07 | 5.53 | 6.7148363 | 8.45E-02 | 228743235 | 228743358 | NC_000001.10 |
| cg07210454 | 7.39E-07 | 1.01E-07 | 5.53 | 6.7147459 | 9.43E-02 | 2482303   | 2482426   | NC_000011.9  |
| cg21518947 | 7.39E-07 | 1.01E-07 | 5.53 | 6.7142519 | 6.05E-02 | 67222648  | 67222771  | NC_000011.9  |
| cg10949430 | 7.39E-07 | 1.01E-07 | 5.53 | 6.714224  | 4.86E-02 | 6496243   | 6496366   | NC_000001.10 |
| cg23411440 | 7.40E-07 | 1.02E-07 | 5.53 | 6.7133776 | 1.14E-01 | 23821570  | 23821693  | NC_000014.8  |
| cg10456990 | 7.40E-07 | 1.02E-07 | 5.53 | 6.7132986 | 1.28E-01 | 38077597  | 38077720  | NC_000021.8  |
| cg00155526 | 7.40E-07 | 1.02E-07 | 5.53 | 6.7132116 | 1.42E-01 | 32713290  | 32713413  | NC_000005.9  |
| cg27307693 | 7.40E-07 | 1.02E-07 | 5.53 | 6.7128547 | 9.50E-02 | 50714304  | 50714427  | NC_000015.9  |
| cg26105725 | 7.40E-07 | 1.02E-07 | 5.53 | 6.7126517 | 9.82E-02 | 27511112  | 27511235  | NC_000006.11 |
| cg10709785 | 7.41E-07 | 1.02E-07 | 5.53 | 6.7118628 | 6.64E-02 | 32359756  | 32359879  | NC_000016.9  |
| cg16943083 | 7.41E-07 | 1.02E-07 | 5.53 | 6.7115247 | 1.65E-01 | 500817    | 500940    | NC_000018.9  |
| cg03312958 | 7.43E-07 | 1.02E-07 | 5.53 | 6.7091698 | 7.04E-02 | 2749302   | 2749425   | NC_000005.9  |
| cg08848140 | 7.43E-07 | 1.02E-07 | 5.53 | 6.7091089 | 1.27E-01 | 124982018 | 124982141 | NC_000009.11 |
| cg05890062 | 7.43E-07 | 1.02E-07 | 5.53 | 6.7090176 | 1.35E-01 | 51288552  | 51288675  | NC_000008.10 |
| cg04410989 | 7.43E-07 | 1.02E-07 | 5.53 | 6.7089062 | 9.45E-02 | 35578437  | 35578560  | NC_000020.10 |
| cg15996947 | 7.43E-07 | 1.02E-07 | 5.53 | 6.7086582 | 1.28E-01 | 50780115  | 50780238  | NC_000014.8  |
| cg06138239 | 7.43E-07 | 1.02E-07 | 5.53 | 6.7082885 | 8.13E-02 | 19567590  | 19567713  | NC_000016.9  |
| cg03399963 | 7.43E-07 | 1.02E-07 | 5.53 | 6.7077909 | 8.75E-02 | 150359383 | 150359506 | NC_000006.11 |
| cg16652741 | 7.45E-07 | 1.02E-07 | 5.53 | 6.7060885 | 1.92E-01 | 219825300 | 219825423 | NC_000002.11 |

|            |          |          |      |           |          |           |           |              |
|------------|----------|----------|------|-----------|----------|-----------|-----------|--------------|
| cg02161900 | 7.45E-07 | 1.02E-07 | 5.53 | 6.7056986 | 1.30E-01 | 28035631  | 28035754  | NC_000010.10 |
| cg13200125 | 7.45E-07 | 1.02E-07 | 5.53 | 6.7055524 | 2.58E-02 | 47360181  | 47360304  | NC_000011.9  |
| cg27658416 | 7.45E-07 | 1.02E-07 | 5.53 | 6.7050753 | 1.71E-01 | 28603033  | 28603156  | NC_000006.11 |
| cg17069437 | 7.46E-07 | 1.02E-07 | 5.53 | 6.704983  | 7.06E-02 | 100064485 | 100064608 | NC_000007.13 |
| cg07816809 | 7.46E-07 | 1.02E-07 | 5.53 | 6.7045516 | 5.34E-02 | 131810674 | 131810797 | NC_000010.10 |
| cg02986266 | 7.46E-07 | 1.02E-07 | 5.53 | 6.7042028 | 1.23E-01 | 20833552  | 20833675  | NC_000007.13 |
| cg02242289 | 7.46E-07 | 1.03E-07 | 5.53 | 6.703925  | 1.91E-01 | 224804149 | 224804272 | NC_000001.10 |
| cg02445958 | 7.46E-07 | 1.03E-07 | 5.53 | 6.7038304 | 9.15E-02 | 66911914  | 66912037  | NC_000016.9  |
| cg24939819 | 7.47E-07 | 1.03E-07 | 5.53 | 6.7027956 | 7.05E-02 | 27217358  | 27217481  | NC_000001.10 |
| cg01222324 | 7.47E-07 | 1.03E-07 | 5.53 | 6.7024089 | 1.38E-01 | 135050630 | 135050753 | NC_000010.10 |
| cg25535044 | 7.47E-07 | 1.03E-07 | 5.53 | 6.7021682 | 4.79E-02 | 54200863  | 54200986  | NC_000019.9  |
| cg05124756 | 7.48E-07 | 1.03E-07 | 5.53 | 6.7009268 | 1.61E-02 | 2263820   | 2263943   | NC_000004.11 |
| cg09290600 | 7.49E-07 | 1.03E-07 | 5.53 | 6.7004503 | 1.51E-01 | 41753032  | 41753155  | NC_000004.11 |
| cg03754361 | 7.49E-07 | 1.03E-07 | 5.53 | 6.7003935 | 3.26E-02 | 12414821  | 12414944  | NC_000016.9  |
| cg22233547 | 7.49E-07 | 1.03E-07 | 5.53 | 6.699852  | 5.58E-02 | 68488938  | 68489061  | NC_000013.10 |
| cg22778178 | 7.50E-07 | 1.03E-07 | 5.53 | 6.6985638 | 1.08E-01 | 48041956  | 48042079  | NC_000017.10 |
| cg22897615 | 7.51E-07 | 1.03E-07 | 5.53 | 6.6976222 | 1.76E-01 | 32117079  | 32117202  | NC_000006.11 |
| cg09826050 | 7.52E-07 | 1.03E-07 | 5.53 | 6.6962937 | 1.13E-01 | 217310174 | 217310297 | NC_000001.10 |
| cg21023520 | 7.52E-07 | 1.03E-07 | 5.53 | 6.6959815 | 5.23E-02 | 43817384  | 43817507  | NC_000022.10 |
| cg13436155 | 7.52E-07 | 1.03E-07 | 5.53 | 6.6959767 | 9.71E-02 | 100644217 | 100644340 | NC_000013.10 |
| cg19260430 | 7.53E-07 | 1.04E-07 | 5.53 | 6.6944317 | 6.79E-02 | 195735283 | 195735406 | NC_000003.11 |
| cg13782090 | 7.54E-07 | 1.04E-07 | 5.53 | 6.6939004 | 1.46E-01 | 220417853 | 220417976 | NC_000002.11 |
| cg26685590 | 7.54E-07 | 1.04E-07 | 5.53 | 6.6936999 | 1.22E-01 | 133795623 | 133795746 | NC_000010.10 |
| cg25528298 | 7.54E-07 | 1.04E-07 | 5.53 | 6.6936209 | 1.29E-01 | 161352297 | 161352420 | NC_000006.11 |
| cg07536847 | 7.54E-07 | 1.04E-07 | 5.53 | 6.69348   | 1.35E-01 | 18957232  | 18957355  | NC_000001.10 |



|            |          |          |      |           |          |           |           |              |
|------------|----------|----------|------|-----------|----------|-----------|-----------|--------------|
| cg10213633 | 7.55E-07 | 1.04E-07 | 5.53 | 6.6921397 | 5.19E-02 | 30683782  | 30683905  | NC_000016.9  |
| cg04690927 | 7.55E-07 | 1.04E-07 | 5.53 | 6.6920871 | 1.35E-01 | 45961524  | 45961647  | NC_000007.13 |
| cg07202461 | 7.55E-07 | 1.04E-07 | 5.53 | 6.6912047 | 6.28E-02 | 19406765  | 19406888  | NC_000018.9  |
| cg06544061 | 7.56E-07 | 1.04E-07 | 5.53 | 6.6911037 | 6.56E-02 | 2476423   | 2476546   | NC_000007.13 |
| cg06724078 | 7.56E-07 | 1.04E-07 | 5.53 | 6.6910742 | 1.06E-01 | 48429551  | 48429674  | NC_000001.10 |
| cg24686074 | 7.56E-07 | 1.04E-07 | 5.53 | 6.690705  | 1.57E-01 | 102497666 | 102497789 | NC_000010.10 |
| cg18447790 | 7.56E-07 | 1.04E-07 | 5.53 | 6.6906711 | 1.45E-01 | 44789949  | 44790072  | NC_000018.9  |
| cg11697123 | 7.57E-07 | 1.04E-07 | 5.53 | 6.6895941 | 7.57E-02 | 83332828  | 83332951  | NC_000005.9  |
| cg10010898 | 7.57E-07 | 1.04E-07 | 5.53 | 6.6895594 | 4.64E-02 | 339598    | 339721    | NC_000016.9  |
| cg18956481 | 7.57E-07 | 1.04E-07 | 5.53 | 6.6889927 | 1.94E-01 | 52790139  | 52790262  | NC_000020.10 |
| cg00303335 | 7.58E-07 | 1.04E-07 | 5.53 | 6.6874849 | 5.93E-02 | 101385620 | 101385743 | NC_000007.13 |
| cg18205636 | 7.58E-07 | 1.04E-07 | 5.53 | 6.6872718 | 2.91E-02 | 143530782 | 143530905 | NC_000007.13 |
| cg25149122 | 7.58E-07 | 1.04E-07 | 5.53 | 6.6871553 | 7.72E-02 | 74201231  | 74201354  | NC_000018.9  |
| cg05985988 | 7.59E-07 | 1.04E-07 | 5.53 | 6.6868679 | 1.07E-01 | 15304885  | 15305008  | NC_000006.11 |
| cg05020203 | 7.59E-07 | 1.04E-07 | 5.52 | 6.6864248 | 4.22E-02 | 242968829 | 242968952 | NC_000002.11 |
| cg18747039 | 7.59E-07 | 1.04E-07 | 5.52 | 6.6863357 | 9.55E-02 | 100650031 | 100650154 | NC_000013.10 |
| cg06352406 | 7.59E-07 | 1.04E-07 | 5.52 | 6.6862441 | 1.23E-01 | 7454063   | 7454186   | NC_000010.10 |
| cg06009620 | 7.59E-07 | 1.04E-07 | 5.52 | 6.686087  | 4.13E-02 | 30904694  | 30904817  | NC_000006.11 |
| cg01704609 | 7.60E-07 | 1.04E-07 | 5.52 | 6.6854171 | 8.90E-02 | 24202847  | 24202970  | NC_000013.10 |
| cg08932343 | 7.60E-07 | 1.05E-07 | 5.52 | 6.6850717 | 2.38E-02 | 67815010  | 67815133  | NC_000011.9  |
| cg00333800 | 7.60E-07 | 1.05E-07 | 5.52 | 6.6848485 | 6.98E-02 | 76687878  | 76688001  | NC_000018.9  |
| cg26022015 | 7.60E-07 | 1.05E-07 | 5.52 | 6.6847852 | 1.51E-01 | 78493583  | 78493706  | NC_000013.10 |
| cg19021428 | 7.60E-07 | 1.05E-07 | 5.52 | 6.6844354 | 8.66E-02 | 84983301  | 84983424  | NC_000010.10 |
| cg14317639 | 7.60E-07 | 1.05E-07 | 5.52 | 6.6843361 | 1.23E-01 | 92721505  | 92721628  | NC_000014.8  |
| cg18178432 | 7.60E-07 | 1.05E-07 | 5.52 | 6.684309  | 2.14E-02 | 44517288  | 44517411  | NC_000020.10 |

|            |          |          |      |           |          |           |           |              |
|------------|----------|----------|------|-----------|----------|-----------|-----------|--------------|
| cg04129308 | 7.61E-07 | 1.05E-07 | 5.52 | 6.6837092 | 1.32E-01 | 134214995 | 134215118 | NC_000006.11 |
| cg11670211 | 7.61E-07 | 1.05E-07 | 5.52 | 6.6836749 | 1.26E-01 | 89224288  | 89224411  | NC_000011.9  |
| cg16675758 | 7.61E-07 | 1.05E-07 | 5.52 | 6.6833382 | 1.09E-01 | 115531171 | 115531294 | NC_000011.9  |
| cg00081087 | 7.61E-07 | 1.05E-07 | 5.52 | 6.6832749 | 8.13E-02 | 34873912  | 34874035  | NC_000007.13 |
| cg15711268 | 7.61E-07 | 1.05E-07 | 5.52 | 6.6826306 | 2.32E-01 | 31841952  | 31842075  | NC_000019.9  |
| cg26572392 | 7.62E-07 | 1.05E-07 | 5.52 | 6.6817086 | 1.07E-01 | 24496943  | 24497066  | NC_000010.10 |
| cg18703515 | 7.62E-07 | 1.05E-07 | 5.52 | 6.6814077 | 1.05E-01 | 44830587  | 44830710  | NC_000010.10 |
| cg13774342 | 7.63E-07 | 1.05E-07 | 5.52 | 6.6809292 | 6.59E-02 | 50702795  | 50702918  | NC_000013.10 |
| cg09258877 | 7.64E-07 | 1.05E-07 | 5.52 | 6.6793376 | 5.20E-02 | 230664097 | 230664220 | NC_000002.11 |
| cg20403644 | 7.64E-07 | 1.05E-07 | 5.52 | 6.6791155 | 1.13E-01 | 707141    | 707264    | NC_000017.10 |
| cg21690892 | 7.64E-07 | 1.05E-07 | 5.52 | 6.6791046 | 1.44E-02 | 42162428  | 42162551  | NC_000006.11 |
| cg19246018 | 7.65E-07 | 1.05E-07 | 5.52 | 6.6780039 | 1.56E-01 | 240031588 | 240031711 | NC_000002.11 |
| cg07573727 | 7.65E-07 | 1.05E-07 | 5.52 | 6.6778237 | 1.68E-01 | 74706196  | 74706319  | NC_000014.8  |
| cg25848557 | 7.65E-07 | 1.05E-07 | 5.52 | 6.6778234 | 1.81E-01 | 108507766 | 108507889 | NC_000001.10 |
| cg23676439 | 7.66E-07 | 1.06E-07 | 5.52 | 6.6759893 | 1.50E-01 | 155663836 | 155663959 | NC_000004.11 |
| cg20956407 | 7.67E-07 | 1.06E-07 | 5.52 | 6.6750557 | 1.10E-01 | 149889677 | 149889800 | NC_000005.9  |
| cg18669373 | 7.67E-07 | 1.06E-07 | 5.52 | 6.6748052 | 4.18E-02 | 51033148  | 51033271  | NC_000013.10 |
| cg13095560 | 7.68E-07 | 1.06E-07 | 5.52 | 6.6736155 | 4.39E-02 | 27436915  | 27437038  | NC_000017.10 |
| cg02184772 | 7.68E-07 | 1.06E-07 | 5.52 | 6.6731948 | 1.73E-01 | 47063028  | 47063151  | NC_000021.8  |
| cg14138611 | 7.70E-07 | 1.06E-07 | 5.52 | 6.6716322 | 6.89E-02 | 71007843  | 71007966  | NC_000012.11 |
| cg01194371 | 7.70E-07 | 1.06E-07 | 5.52 | 6.6714572 | 1.42E-01 | 79331477  | 79331600  | NC_000005.9  |
| cg01903503 | 7.70E-07 | 1.06E-07 | 5.52 | 6.6706946 | 4.32E-02 | 40269447  | 40269570  | NC_000017.10 |
| cg13412754 | 7.70E-07 | 1.06E-07 | 5.52 | 6.6704423 | 1.43E-01 | 128307578 | 128307701 | NC_000009.11 |
| cg22981628 | 7.70E-07 | 1.06E-07 | 5.52 | 6.6703721 | 7.49E-02 | 27332559  | 27332682  | NC_000017.10 |
| cg23943829 | 7.71E-07 | 1.06E-07 | 5.52 | 6.6699408 | 6.03E-02 | 132009111 | 132009234 | NC_000005.9  |

|            |          |          |      |           |          |           |           |              |
|------------|----------|----------|------|-----------|----------|-----------|-----------|--------------|
| cg07746514 | 7.71E-07 | 1.06E-07 | 5.52 | 6.669482  | 1.75E-02 | 121139042 | 121139165 | NC_000012.11 |
| cg27142924 | 7.71E-07 | 1.06E-07 | 5.52 | 6.6694126 | 1.29E-01 | 37005452  | 37005575  | NC_000013.10 |
| cg26875384 | 7.71E-07 | 1.06E-07 | 5.52 | 6.6693436 | 7.49E-02 | 14817904  | 14818027  | NC_000010.10 |
| cg00671534 | 7.72E-07 | 1.06E-07 | 5.52 | 6.6682872 | 5.47E-02 | 27316496  | 27316619  | NC_000013.10 |
| cg12268562 | 7.72E-07 | 1.06E-07 | 5.52 | 6.6677431 | 8.91E-02 | 3625409   | 3625532   | NC_000001.10 |
| cg07484450 | 7.72E-07 | 1.06E-07 | 5.52 | 6.6675459 | 7.01E-02 | 60383361  | 60383484  | NC_000011.9  |
| cg15471661 | 7.73E-07 | 1.06E-07 | 5.52 | 6.6672538 | 4.43E-02 | 105372846 | 105372969 | NC_000014.8  |
| cg16124188 | 7.73E-07 | 1.06E-07 | 5.52 | 6.6671652 | 1.16E-01 | 74647315  | 74647438  | NC_000006.11 |
| cg15625693 | 7.73E-07 | 1.07E-07 | 5.52 | 6.666577  | 1.09E-01 | 187187177 | 187187300 | NC_000004.11 |
| cg08403345 | 7.74E-07 | 1.07E-07 | 5.52 | 6.6656415 | 1.75E-01 | 496425    | 496548    | NC_000019.9  |
| cg04710402 | 7.76E-07 | 1.07E-07 | 5.52 | 6.6632116 | 2.17E-01 | 87257074  | 87257197  | NC_000007.13 |
| cg03447557 | 7.76E-07 | 1.07E-07 | 5.52 | 6.6623414 | 6.27E-02 | 2273735   | 2273858   | NC_000001.10 |
| cg13493005 | 7.77E-07 | 1.07E-07 | 5.52 | 6.662167  | 1.35E-01 | 78371046  | 78371169  | NC_000011.9  |
| cg23241637 | 7.77E-07 | 1.07E-07 | 5.52 | 6.6619562 | 1.69E-01 | 185463803 | 185463926 | NC_000002.11 |
| cg17161520 | 7.77E-07 | 1.07E-07 | 5.52 | 6.6614286 | 1.01E-01 | 67174843  | 67174966  | NC_000011.9  |
| cg14679463 | 7.78E-07 | 1.07E-07 | 5.52 | 6.6605465 | 5.15E-02 | 27580157  | 27580280  | NC_000013.10 |
| cg06629130 | 7.78E-07 | 1.07E-07 | 5.52 | 6.6601725 | 1.44E-01 | 44787585  | 44787708  | NC_000018.9  |
| cg13560794 | 7.78E-07 | 1.07E-07 | 5.52 | 6.6601117 | 3.14E-02 | 39155777  | 39155900  | NC_000017.10 |
| cg25310241 | 7.78E-07 | 1.07E-07 | 5.52 | 6.6598146 | 7.05E-02 | 41513768  | 41513891  | NC_000021.8  |
| cg14391016 | 7.78E-07 | 1.07E-07 | 5.52 | 6.659585  | 6.14E-02 | 167523797 | 167523920 | NC_000006.11 |
| cg20589633 | 7.78E-07 | 1.07E-07 | 5.52 | 6.659583  | 3.03E-02 | 31778007  | 31778130  | NC_000006.11 |
| cg16612423 | 7.80E-07 | 1.07E-07 | 5.52 | 6.6579937 | 5.06E-02 | 6491884   | 6492007   | NC_000005.9  |
| cg14127659 | 7.80E-07 | 1.08E-07 | 5.52 | 6.6578477 | 8.02E-02 | 38350784  | 38350907  | NC_000022.10 |
| cg21268984 | 7.80E-07 | 1.08E-07 | 5.52 | 6.6573529 | 1.12E-01 | 8720599   | 8720722   | NC_000001.10 |
| cg11780096 | 7.80E-07 | 1.08E-07 | 5.52 | 6.6570921 | 4.97E-02 | 178976254 | 178976377 | NC_000002.11 |

|            |          |          |      |           |          |           |           |              |
|------------|----------|----------|------|-----------|----------|-----------|-----------|--------------|
| cg04453648 | 7.80E-07 | 1.08E-07 | 5.52 | 6.6568561 | 4.01E-02 | 78176139  | 78176262  | NC_000017.10 |
| cg14764357 | 7.81E-07 | 1.08E-07 | 5.52 | 6.6566699 | 3.93E-02 | 1093718   | 1093841   | NC_000007.13 |
| cg00922522 | 7.81E-07 | 1.08E-07 | 5.52 | 6.6565891 | 8.29E-02 | 130918862 | 130918985 | NC_000012.11 |
| cg05694245 | 7.81E-07 | 1.08E-07 | 5.52 | 6.6559123 | 1.80E-01 | 28034816  | 28034939  | NC_000010.10 |
| cg05457273 | 7.81E-07 | 1.08E-07 | 5.52 | 6.6557003 | 1.56E-01 | 113697649 | 113697772 | NC_000005.9  |
| cg02173749 | 7.82E-07 | 1.08E-07 | 5.52 | 6.6552917 | 1.92E-01 | 121104029 | 121104152 | NC_000002.11 |
| cg22098660 | 7.82E-07 | 1.08E-07 | 5.52 | 6.654453  | 7.09E-02 | 6107339   | 6107462   | NC_000004.11 |
| cg15877129 | 7.82E-07 | 1.08E-07 | 5.52 | 6.6542456 | 1.43E-01 | 103218238 | 103218361 | NC_000012.11 |
| cg10308611 | 7.83E-07 | 1.08E-07 | 5.52 | 6.6538521 | 5.39E-02 | 169567348 | 169567471 | NC_000006.11 |
| cg17497176 | 7.83E-07 | 1.08E-07 | 5.52 | 6.6533367 | 4.74E-02 | 150763829 | 150763952 | NC_000007.13 |
| cg04637372 | 7.85E-07 | 1.08E-07 | 5.52 | 6.6506219 | 1.07E-01 | 20617456  | 20617579  | NC_000001.10 |
| cg10318647 | 7.86E-07 | 1.08E-07 | 5.52 | 6.649346  | 4.20E-02 | 64671221  | 64671344  | NC_000010.10 |
| cg13443843 | 7.87E-07 | 1.08E-07 | 5.52 | 6.6488586 | 2.47E-02 | 42797239  | 42797362  | NC_000001.10 |
| cg09824563 | 7.88E-07 | 1.09E-07 | 5.52 | 6.6476509 | 5.18E-02 | 45586779  | 45586902  | NC_000003.11 |
| cg03666796 | 7.88E-07 | 1.09E-07 | 5.52 | 6.6473371 | 6.96E-02 | 134746860 | 134746983 | NC_000010.10 |
| cg21854621 | 7.88E-07 | 1.09E-07 | 5.52 | 6.6468597 | 1.22E-01 | 19136844  | 19136967  | NC_000022.10 |
| cg02573472 | 7.89E-07 | 1.09E-07 | 5.52 | 6.646123  | 8.66E-02 | 76940356  | 76940479  | NC_000005.9  |
| cg24676071 | 7.89E-07 | 1.09E-07 | 5.52 | 6.6459444 | 1.30E-01 | 45613410  | 45613533  | NC_000007.13 |
| cg15381251 | 7.89E-07 | 1.09E-07 | 5.52 | 6.6454434 | 1.00E-01 | 32555275  | 32555398  | NC_000022.10 |
| cg24886391 | 7.93E-07 | 1.09E-07 | 5.52 | 6.6403724 | 6.48E-02 | 132666527 | 132666650 | NC_000012.11 |
| cg22653976 | 7.93E-07 | 1.09E-07 | 5.52 | 6.6402068 | 1.48E-01 | 17741070  | 17741193  | NC_000011.9  |
| cg11573566 | 7.93E-07 | 1.09E-07 | 5.52 | 6.6400016 | 1.36E-01 | 1386087   | 1386210   | NC_000006.11 |
| cg11796455 | 7.94E-07 | 1.10E-07 | 5.52 | 6.6390746 | 1.11E-01 | 10883895  | 10884018  | NC_000006.11 |
| cg19795151 | 7.95E-07 | 1.10E-07 | 5.51 | 6.6374293 | 8.23E-02 | 134804172 | 134804295 | NC_000010.10 |
| cg09526693 | 7.96E-07 | 1.10E-07 | 5.51 | 6.6368713 | 5.78E-02 | 123378308 | 123378431 | NC_000004.11 |

|            |          |          |      |           |          |           |           |              |
|------------|----------|----------|------|-----------|----------|-----------|-----------|--------------|
| cg04142323 | 7.96E-07 | 1.10E-07 | 5.51 | 6.6362357 | 1.22E-01 | 87981449  | 87981572  | NC_000005.9  |
| cg09978023 | 7.97E-07 | 1.10E-07 | 5.51 | 6.6359546 | 7.78E-02 | 192608588 | 192608711 | NC_000001.10 |
| cg16705287 | 7.97E-07 | 1.10E-07 | 5.51 | 6.6358792 | 3.16E-02 | 1091566   | 1091689   | NC_000019.9  |
| cg08157194 | 7.97E-07 | 1.10E-07 | 5.51 | 6.6351076 | 2.43E-02 | 41185264  | 41185387  | NC_000022.10 |
| cg26953727 | 7.97E-07 | 1.10E-07 | 5.51 | 6.6348514 | 1.24E-01 | 134176231 | 134176354 | NC_000006.11 |
| cg12832649 | 7.97E-07 | 1.10E-07 | 5.51 | 6.6346875 | 1.12E-01 | 136834863 | 136834986 | NC_000005.9  |
| cg15190834 | 7.98E-07 | 1.10E-07 | 5.51 | 6.6345017 | 6.53E-02 | 34066196  | 34066319  | NC_000007.13 |
| cg11696388 | 7.98E-07 | 1.10E-07 | 5.51 | 6.6339164 | 1.04E-01 | 41557540  | 41557663  | NC_000008.10 |
| cg01134637 | 7.99E-07 | 1.10E-07 | 5.51 | 6.6327911 | 3.46E-02 | 55962522  | 55962645  | NC_000017.10 |
| cg09422701 | 7.99E-07 | 1.10E-07 | 5.51 | 6.6325719 | 1.78E-02 | 71961266  | 71961389  | NC_000004.11 |
| cg20576322 | 7.99E-07 | 1.10E-07 | 5.51 | 6.6320279 | 1.25E-01 | 85886384  | 85886507  | NC_000004.11 |
| cg10806820 | 8.01E-07 | 1.11E-07 | 5.51 | 6.6296559 | 1.06E-01 | 48699090  | 48699213  | NC_000003.11 |
| cg15767908 | 8.02E-07 | 1.11E-07 | 5.51 | 6.6293971 | 3.60E-02 | 28611503  | 28611626  | NC_000002.11 |
| cg12099459 | 8.02E-07 | 1.11E-07 | 5.51 | 6.6293499 | 7.60E-02 | 147826902 | 147827025 | NC_000001.10 |
| cg24507762 | 8.02E-07 | 1.11E-07 | 5.51 | 6.6290584 | 1.27E-01 | 48099890  | 48100013  | NC_000020.10 |
| cg24054180 | 8.03E-07 | 1.11E-07 | 5.51 | 6.628018  | 6.78E-02 | 112157241 | 112157364 | NC_000011.9  |
| cg16730824 | 8.03E-07 | 1.11E-07 | 5.51 | 6.6279394 | 8.15E-02 | 20809793  | 20809916  | NC_000001.10 |
| cg01609275 | 8.03E-07 | 1.11E-07 | 5.51 | 6.6275501 | 1.46E-01 | 37049091  | 37049214  | NC_000014.8  |
| cg00312921 | 8.03E-07 | 1.11E-07 | 5.51 | 6.6271879 | 1.49E-01 | 113441703 | 113441826 | NC_000004.11 |
| cg01725130 | 8.04E-07 | 1.11E-07 | 5.51 | 6.6261714 | 6.12E-02 | 92994158  | 92994281  | NC_000014.8  |
| cg24500799 | 8.04E-07 | 1.11E-07 | 5.51 | 6.6260384 | 8.12E-02 | 228676532 | 228676655 | NC_000001.10 |
| cg04995311 | 8.04E-07 | 1.11E-07 | 5.51 | 6.6255589 | 7.34E-02 | 57630446  | 57630569  | NC_000019.9  |
| cg01274907 | 8.05E-07 | 1.11E-07 | 5.51 | 6.6250931 | 1.07E-01 | 140568075 | 140568198 | NC_000005.9  |
| cg01337391 | 8.05E-07 | 1.11E-07 | 5.51 | 6.6248624 | 9.22E-02 | 54324358  | 54324481  | NC_000016.9  |
| cg09579094 | 8.05E-07 | 1.11E-07 | 5.51 | 6.624675  | 4.90E-02 | 174949048 | 174949171 | NC_000002.11 |

|            |          |          |      |           |          |           |           |              |
|------------|----------|----------|------|-----------|----------|-----------|-----------|--------------|
| cg06224178 | 8.05E-07 | 1.11E-07 | 5.51 | 6.6242145 | 5.86E-02 | 131360571 | 131360694 | NC_000008.10 |
| cg20755170 | 8.06E-07 | 1.11E-07 | 5.51 | 6.6240744 | 1.35E-01 | 145720024 | 145720147 | NC_000005.9  |
| cg06898306 | 8.06E-07 | 1.11E-07 | 5.51 | 6.623316  | 6.78E-02 | 33996673  | 33996796  | NC_000006.11 |
| cg25691959 | 8.07E-07 | 1.11E-07 | 5.51 | 6.6224835 | 4.66E-02 | 36802391  | 36802514  | NC_000019.9  |
| cg04851268 | 8.07E-07 | 1.11E-07 | 5.51 | 6.6223541 | 1.38E-01 | 172167445 | 172167568 | NC_000003.11 |
| cg11155432 | 8.07E-07 | 1.12E-07 | 5.51 | 6.6223231 | 1.59E-01 | 27038802  | 27038925  | NC_000005.9  |
| cg21566689 | 8.08E-07 | 1.12E-07 | 5.51 | 6.6211365 | 1.08E-01 | 27534346  | 27534469  | NC_000006.11 |
| cg09786978 | 8.09E-07 | 1.12E-07 | 5.51 | 6.6200814 | 5.16E-02 | 734704    | 734827    | NC_000011.9  |
| cg07222861 | 8.09E-07 | 1.12E-07 | 5.51 | 6.6200433 | 1.24E-01 | 32355084  | 32355207  | NC_000001.10 |
| cg26560110 | 8.09E-07 | 1.12E-07 | 5.51 | 6.61983   | 1.24E-01 | 28603161  | 28603284  | NC_000006.11 |
| cg01620208 | 8.10E-07 | 1.12E-07 | 5.51 | 6.6180948 | 5.06E-02 | 142311010 | 142311133 | NC_000008.10 |
| cg02655630 | 8.10E-07 | 1.12E-07 | 5.51 | 6.6178722 | 9.97E-02 | 44658941  | 44659064  | NC_000020.10 |
| cg06936631 | 8.11E-07 | 1.12E-07 | 5.51 | 6.6174378 | 1.11E-01 | 51171997  | 51172120  | NC_000019.9  |
| cg27351358 | 8.11E-07 | 1.12E-07 | 5.51 | 6.6167628 | 1.37E-01 | 27743258  | 27743381  | NC_000011.9  |
| cg16839815 | 8.12E-07 | 1.12E-07 | 5.51 | 6.6160091 | 7.17E-02 | 39230320  | 39230443  | NC_000003.11 |
| cg00468400 | 8.12E-07 | 1.12E-07 | 5.51 | 6.6157833 | 5.06E-02 | 57357785  | 57357908  | NC_000008.10 |
| cg05163177 | 8.12E-07 | 1.12E-07 | 5.51 | 6.6156872 | 1.75E-02 | 1783521   | 1783644   | NC_000016.9  |
| cg10463207 | 8.12E-07 | 1.12E-07 | 5.51 | 6.6156017 | 9.64E-02 | 3182108   | 3182231   | NC_000005.9  |
| cg19734830 | 8.13E-07 | 1.12E-07 | 5.51 | 6.6151474 | 9.22E-02 | 49139600  | 49139723  | NC_000022.10 |
| cg09741713 | 8.13E-07 | 1.12E-07 | 5.51 | 6.614799  | 8.39E-02 | 62471915  | 62472038  | NC_000012.11 |
| cg22633722 | 8.13E-07 | 1.12E-07 | 5.51 | 6.6140315 | 1.39E-01 | 44496743  | 44496866  | NC_000021.8  |
| cg04209885 | 8.14E-07 | 1.12E-07 | 5.51 | 6.6138973 | 6.31E-02 | 134109755 | 134109878 | NC_000010.10 |
| cg00285620 | 8.14E-07 | 1.13E-07 | 5.51 | 6.6135505 | 7.07E-02 | 102147694 | 102147817 | NC_000011.9  |
| cg22798201 | 8.14E-07 | 1.13E-07 | 5.51 | 6.6134341 | 1.22E-01 | 46995637  | 46995760  | NC_000004.11 |
| cg06287783 | 8.14E-07 | 1.13E-07 | 5.51 | 6.6132679 | 5.98E-02 | 33137622  | 33137745  | NC_000006.11 |

|            |          |          |      |           |          |           |           |              |
|------------|----------|----------|------|-----------|----------|-----------|-----------|--------------|
| cg09516959 | 8.14E-07 | 1.13E-07 | 5.51 | 6.6132506 | 8.57E-02 | 30721478  | 30721601  | NC_000007.13 |
| cg01047904 | 8.14E-07 | 1.13E-07 | 5.51 | 6.6130611 | 1.57E-01 | 20521183  | 20521306  | NC_000012.11 |
| cg12241333 | 8.15E-07 | 1.13E-07 | 5.51 | 6.6119802 | 7.98E-02 | 31355430  | 31355553  | NC_000015.9  |
| cg15751948 | 8.16E-07 | 1.13E-07 | 5.51 | 6.6108416 | 1.23E-01 | 74870268  | 74870391  | NC_000011.9  |
| cg24947324 | 8.16E-07 | 1.13E-07 | 5.51 | 6.6106419 | 5.66E-02 | 4566677   | 4566800   | NC_000019.9  |
| cg01637404 | 8.17E-07 | 1.13E-07 | 5.51 | 6.6100527 | 1.32E-01 | 86322358  | 86322481  | NC_000016.9  |
| cg25147376 | 8.17E-07 | 1.13E-07 | 5.51 | 6.6100071 | 1.18E-01 | 166890293 | 166890416 | NC_000001.10 |
| cg03881544 | 8.17E-07 | 1.13E-07 | 5.51 | 6.6097285 | 1.45E-01 | 5712581   | 5712704   | NC_000004.11 |
| cg10805220 | 8.17E-07 | 1.13E-07 | 5.51 | 6.6095096 | 6.91E-02 | 140812464 | 140812587 | NC_000005.9  |
| cg23129478 | 8.17E-07 | 1.13E-07 | 5.51 | 6.6090813 | 1.56E-01 | 44337922  | 44338045  | NC_000018.9  |
| cg11909064 | 8.17E-07 | 1.13E-07 | 5.51 | 6.608818  | 2.76E-02 | 155578034 | 155578157 | NC_000006.11 |
| cg21088108 | 8.18E-07 | 1.13E-07 | 5.51 | 6.6084751 | 5.66E-02 | 77075025  | 77075148  | NC_000017.10 |
| cg10649903 | 8.18E-07 | 1.13E-07 | 5.51 | 6.6082353 | 1.09E-01 | 140181058 | 140181181 | NC_000005.9  |
| cg18496440 | 8.18E-07 | 1.13E-07 | 5.51 | 6.6082265 | 9.51E-02 | 158532302 | 158532425 | NC_000005.9  |
| cg22614239 | 8.18E-07 | 1.13E-07 | 5.51 | 6.6077964 | 1.32E-01 | 147106208 | 147106331 | NC_000003.11 |
| cg21543987 | 8.18E-07 | 1.13E-07 | 5.51 | 6.6075015 | 1.12E-01 | 1272486   | 1272609   | NC_000007.13 |
| cg00978901 | 8.19E-07 | 1.13E-07 | 5.51 | 6.607252  | 9.33E-02 | 22956280  | 22956403  | NC_000001.10 |
| cg17156743 | 8.19E-07 | 1.13E-07 | 5.51 | 6.6069176 | 1.34E-01 | 28603171  | 28603294  | NC_000006.11 |
| cg15576900 | 8.19E-07 | 1.13E-07 | 5.51 | 6.6068152 | 1.77E-01 | 44883697  | 44883820  | NC_000001.10 |
| cg03155271 | 8.19E-07 | 1.13E-07 | 5.51 | 6.606537  | 4.00E-02 | 49646909  | 49647032  | NC_000019.9  |
| cg14688451 | 8.19E-07 | 1.13E-07 | 5.51 | 6.6065249 | 1.21E-01 | 124303035 | 124303158 | NC_000003.11 |
| cg11807539 | 8.20E-07 | 1.13E-07 | 5.51 | 6.6057907 | 6.14E-02 | 132822403 | 132822526 | NC_000012.11 |
| cg02213260 | 8.20E-07 | 1.13E-07 | 5.51 | 6.6053982 | 9.83E-02 | 23834995  | 23835118  | NC_000014.8  |
| cg13600755 | 8.20E-07 | 1.14E-07 | 5.51 | 6.6049955 | 2.41E-02 | 59499084  | 59499207  | NC_000015.9  |
| cg13721429 | 8.21E-07 | 1.14E-07 | 5.51 | 6.6045566 | 1.87E-01 | 106975246 | 106975369 | NC_000012.11 |

|            |          |          |      |           |          |           |           |              |
|------------|----------|----------|------|-----------|----------|-----------|-----------|--------------|
| cg27529668 | 8.21E-07 | 1.14E-07 | 5.51 | 6.6035915 | 6.55E-02 | 79224770  | 79224893  | NC_000017.10 |
| cg00290033 | 8.22E-07 | 1.14E-07 | 5.51 | 6.6031299 | 3.15E-02 | 14640562  | 14640685  | NC_000006.11 |
| cg26244109 | 8.22E-07 | 1.14E-07 | 5.51 | 6.6027285 | 3.15E-02 | 57640690  | 57640813  | NC_000012.11 |
| cg02637414 | 8.22E-07 | 1.14E-07 | 5.51 | 6.6027141 | 9.52E-02 | 13613091  | 13613214  | NC_000019.9  |
| cg15073914 | 8.22E-07 | 1.14E-07 | 5.51 | 6.6024187 | 2.82E-02 | 3733090   | 3733213   | NC_000001.10 |
| cg11653858 | 8.23E-07 | 1.14E-07 | 5.51 | 6.6021692 | 6.19E-02 | 26799289  | 26799412  | NC_000017.10 |
| cg03869608 | 8.23E-07 | 1.14E-07 | 5.51 | 6.6011846 | 1.42E-01 | 73674656  | 73674779  | NC_000003.11 |
| cg10323433 | 8.24E-07 | 1.14E-07 | 5.51 | 6.6005785 | 1.20E-01 | 47471562  | 47471685  | NC_000013.10 |
| cg17500587 | 8.25E-07 | 1.14E-07 | 5.51 | 6.5994449 | 1.62E-01 | 118922194 | 118922317 | NC_000010.10 |
| cg12789472 | 8.25E-07 | 1.14E-07 | 5.51 | 6.5992494 | 4.39E-02 | 161063939 | 161064062 | NC_000003.11 |
| cg03340649 | 8.25E-07 | 1.14E-07 | 5.51 | 6.5989076 | 1.55E-01 | 44626453  | 44626576  | NC_000003.11 |
| cg14256008 | 8.25E-07 | 1.14E-07 | 5.51 | 6.5985608 | 1.62E-01 | 131200631 | 131200754 | NC_000012.11 |
| cg23689579 | 8.26E-07 | 1.14E-07 | 5.51 | 6.5980778 | 1.22E-01 | 221795858 | 221795981 | NC_000002.11 |
| cg00158789 | 8.27E-07 | 1.15E-07 | 5.51 | 6.5961825 | 1.26E-01 | 59534683  | 59534806  | NC_000017.10 |
| cg25607948 | 8.28E-07 | 1.15E-07 | 5.51 | 6.594689  | 7.82E-02 | 92007887  | 92008010  | NC_000001.10 |
| cg12871937 | 8.29E-07 | 1.15E-07 | 5.51 | 6.5943875 | 4.33E-02 | 14394404  | 14394527  | NC_000003.11 |
| cg14716734 | 8.29E-07 | 1.15E-07 | 5.51 | 6.5934604 | 5.43E-02 | 18549397  | 18549520  | NC_000010.10 |
| cg12045511 | 8.31E-07 | 1.15E-07 | 5.51 | 6.5919755 | 3.19E-02 | 42193157  | 42193280  | NC_000015.9  |
| cg27419075 | 8.31E-07 | 1.15E-07 | 5.51 | 6.591318  | 8.11E-02 | 72295168  | 72295291  | NC_000011.9  |
| cg17212685 | 8.31E-07 | 1.15E-07 | 5.5  | 6.5908865 | 3.25E-02 | 55412004  | 55412127  | NC_000007.13 |
| cg11313411 | 8.32E-07 | 1.15E-07 | 5.5  | 6.5907324 | 2.06E-02 | 33391277  | 33391400  | NC_000006.11 |
| cg20421446 | 8.32E-07 | 1.15E-07 | 5.5  | 6.5903785 | 1.03E-01 | 5994588   | 5994711   | NC_000006.11 |
| cg20850275 | 8.33E-07 | 1.15E-07 | 5.5  | 6.589517  | 1.94E-02 | 32917641  | 32917764  | NC_000006.11 |
| cg15168906 | 8.33E-07 | 1.15E-07 | 5.5  | 6.5887947 | 8.05E-02 | 2162783   | 2162906   | NC_000011.9  |
| cg16619378 | 8.33E-07 | 1.15E-07 | 5.5  | 6.5884294 | 1.18E-01 | 14207530  | 14207653  | NC_000017.10 |



|            |          |          |     |           |          |           |           |              |
|------------|----------|----------|-----|-----------|----------|-----------|-----------|--------------|
| cg14220181 | 8.34E-07 | 1.15E-07 | 5.5 | 6.5882078 | 6.67E-02 | 234891861 | 234891984 | NC_000002.11 |
| cg13212362 | 8.34E-07 | 1.16E-07 | 5.5 | 6.5879402 | 1.09E-01 | 21648026  | 21648149  | NC_000001.10 |
| cg00665492 | 8.34E-07 | 1.16E-07 | 5.5 | 6.5878439 | 1.92E-01 | 164914575 | 164914698 | NC_000003.11 |
| cg13756879 | 8.34E-07 | 1.16E-07 | 5.5 | 6.5874831 | 1.76E-01 | 2161473   | 2161596   | NC_000011.9  |
| cg23967742 | 8.34E-07 | 1.16E-07 | 5.5 | 6.5873714 | 1.66E-01 | 90966701  | 90966824  | NC_000010.10 |
| cg03333330 | 8.34E-07 | 1.16E-07 | 5.5 | 6.5873509 | 1.60E-01 | 93520346  | 93520469  | NC_000007.13 |
| cg08628428 | 8.35E-07 | 1.16E-07 | 5.5 | 6.5864803 | 7.87E-02 | 14352476  | 14352599  | NC_000017.10 |
| cg04745673 | 8.35E-07 | 1.16E-07 | 5.5 | 6.5861193 | 1.47E-01 | 103359368 | 103359491 | NC_000012.11 |
| cg22596049 | 8.35E-07 | 1.16E-07 | 5.5 | 6.5860915 | 8.18E-02 | 9929867   | 9929990   | NC_000017.10 |
| cg09538995 | 8.35E-07 | 1.16E-07 | 5.5 | 6.586018  | 1.34E-01 | 128301156 | 128301279 | NC_000005.9  |
| cg18443437 | 8.35E-07 | 1.16E-07 | 5.5 | 6.5860109 | 1.05E-01 | 3326731   | 3326854   | NC_000005.9  |
| cg12837173 | 8.36E-07 | 1.16E-07 | 5.5 | 6.5852611 | 5.18E-02 | 101595316 | 101595439 | NC_000014.8  |
| cg14012564 | 8.37E-07 | 1.16E-07 | 5.5 | 6.5843799 | 4.17E-02 | 47133876  | 47133999  | NC_000010.10 |
| cg20891501 | 8.37E-07 | 1.16E-07 | 5.5 | 6.5835698 | 1.63E-01 | 36979758  | 36979881  | NC_000014.8  |
| cg08411886 | 8.40E-07 | 1.16E-07 | 5.5 | 6.5803482 | 6.05E-02 | 70513830  | 70513953  | NC_000016.9  |
| cg10748160 | 8.40E-07 | 1.16E-07 | 5.5 | 6.5802224 | 1.88E-01 | 6202384   | 6202507   | NC_000004.11 |
| cg04380229 | 8.40E-07 | 1.16E-07 | 5.5 | 6.5801862 | 3.28E-02 | 1084931   | 1085054   | NC_000005.9  |
| cg25974442 | 8.40E-07 | 1.16E-07 | 5.5 | 6.5799345 | 2.92E-02 | 18225728  | 18225851  | NC_000019.9  |
| cg16993582 | 8.40E-07 | 1.17E-07 | 5.5 | 6.5796052 | 9.16E-02 | 92795230  | 92795353  | NC_000014.8  |
| cg04081201 | 8.41E-07 | 1.17E-07 | 5.5 | 6.5791794 | 1.18E-01 | 86601024  | 86601147  | NC_000016.9  |
| cg25775322 | 8.41E-07 | 1.17E-07 | 5.5 | 6.5791498 | 1.61E-01 | 154710373 | 154710496 | NC_000004.11 |
| cg08983097 | 8.41E-07 | 1.17E-07 | 5.5 | 6.5788927 | 1.14E-01 | 117586538 | 117586661 | NC_000006.11 |
| cg10977734 | 8.41E-07 | 1.17E-07 | 5.5 | 6.5788894 | 4.89E-02 | 30582416  | 30582539  | NC_000006.11 |
| cg13945224 | 8.41E-07 | 1.17E-07 | 5.5 | 6.5788889 | 1.42E-01 | 98111970  | 98112093  | NC_000009.11 |
| cg08367573 | 8.41E-07 | 1.17E-07 | 5.5 | 6.5787383 | 9.70E-02 | 194538878 | 194539001 | NC_000003.11 |

|            |          |          |     |           |          |           |           |              |
|------------|----------|----------|-----|-----------|----------|-----------|-----------|--------------|
| cg13266435 | 8.41E-07 | 1.17E-07 | 5.5 | 6.5784743 | 1.14E-01 | 14748220  | 14748343  | NC_000018.9  |
| cg06533798 | 8.43E-07 | 1.17E-07 | 5.5 | 6.5766945 | 8.80E-02 | 59323070  | 59323193  | NC_000011.9  |
| cg13279713 | 8.43E-07 | 1.17E-07 | 5.5 | 6.576162  | 3.79E-02 | 117011938 | 117012061 | NC_000011.9  |
| cg25744277 | 8.44E-07 | 1.17E-07 | 5.5 | 6.5752498 | 5.04E-02 | 28148431  | 28148554  | NC_000015.9  |
| cg21090429 | 8.44E-07 | 1.17E-07 | 5.5 | 6.5748432 | 2.99E-02 | 141825462 | 141825585 | NC_000005.9  |
| cg25288034 | 8.45E-07 | 1.17E-07 | 5.5 | 6.5744908 | 9.11E-02 | 125117367 | 125117490 | NC_000010.10 |
| cg18160614 | 8.45E-07 | 1.17E-07 | 5.5 | 6.5743979 | 7.05E-02 | 25567240  | 25567363  | NC_000001.10 |
| cg23437843 | 8.45E-07 | 1.17E-07 | 5.5 | 6.5742457 | 1.03E-01 | 44596360  | 44596483  | NC_000003.11 |
| cg01148731 | 8.45E-07 | 1.17E-07 | 5.5 | 6.5740436 | 7.59E-02 | 174156296 | 174156419 | NC_000005.9  |
| cg23225469 | 8.45E-07 | 1.17E-07 | 5.5 | 6.5737063 | 4.95E-02 | 72038427  | 72038550  | NC_000011.9  |
| cg01884014 | 8.46E-07 | 1.17E-07 | 5.5 | 6.5732006 | 5.23E-02 | 132202520 | 132202643 | NC_000002.11 |
| cg12412154 | 8.46E-07 | 1.17E-07 | 5.5 | 6.5728681 | 6.47E-02 | 61222064  | 61222187  | NC_000018.9  |
| cg17199325 | 8.47E-07 | 1.17E-07 | 5.5 | 6.5720236 | 1.20E-01 | 23821229  | 23821352  | NC_000014.8  |
| cg14716780 | 8.48E-07 | 1.18E-07 | 5.5 | 6.5706367 | 2.49E-02 | 42075871  | 42075994  | NC_000006.11 |
| cg00539925 | 8.48E-07 | 1.18E-07 | 5.5 | 6.5706156 | 7.77E-02 | 160366521 | 160366644 | NC_000001.10 |
| cg07008544 | 8.48E-07 | 1.18E-07 | 5.5 | 6.5705039 | 7.60E-02 | 1203382   | 1203505   | NC_000016.9  |
| cg27138951 | 8.48E-07 | 1.18E-07 | 5.5 | 6.5703264 | 6.44E-02 | 26188943  | 26189066  | NC_000020.10 |
| cg09286626 | 8.48E-07 | 1.18E-07 | 5.5 | 6.5696632 | 4.22E-02 | 113660999 | 113661122 | NC_000011.9  |
| cg11684826 | 8.49E-07 | 1.18E-07 | 5.5 | 6.5691473 | 8.62E-02 | 6055582   | 6055705   | NC_000007.13 |
| cg25580076 | 8.49E-07 | 1.18E-07 | 5.5 | 6.5689997 | 1.25E-01 | 102748541 | 102748664 | NC_000010.10 |
| cg23040064 | 8.49E-07 | 1.18E-07 | 5.5 | 6.5689504 | 1.30E-01 | 87635784  | 87635907  | NC_000016.9  |
| cg03985874 | 8.49E-07 | 1.18E-07 | 5.5 | 6.5684955 | 5.28E-02 | 242438731 | 242438854 | NC_000002.11 |
| cg10516080 | 8.50E-07 | 1.18E-07 | 5.5 | 6.567745  | 8.68E-02 | 88784937  | 88785060  | NC_000012.11 |
| cg08064068 | 8.50E-07 | 1.18E-07 | 5.5 | 6.5674793 | 1.21E-01 | 60671024  | 60671147  | NC_000014.8  |
| cg26668276 | 8.51E-07 | 1.18E-07 | 5.5 | 6.5662892 | 1.33E-01 | 96633311  | 96633434  | NC_000007.13 |

|            |          |          |     |           |          |           |           |              |
|------------|----------|----------|-----|-----------|----------|-----------|-----------|--------------|
| cg07040834 | 8.51E-07 | 1.18E-07 | 5.5 | 6.5660815 | 1.87E-01 | 44063541  | 44063664  | NC_000003.11 |
| cg24834751 | 8.51E-07 | 1.18E-07 | 5.5 | 6.5660219 | 1.43E-01 | 131194447 | 131194570 | NC_000010.10 |
| cg00123762 | 8.51E-07 | 1.18E-07 | 5.5 | 6.5657345 | 1.53E-01 | 41343697  | 41343820  | NC_000006.11 |
| cg21212139 | 8.52E-07 | 1.18E-07 | 5.5 | 6.5649311 | 1.61E-01 | 86886588  | 86886711  | NC_000009.11 |
| cg06698575 | 8.52E-07 | 1.18E-07 | 5.5 | 6.5648997 | 8.15E-02 | 117470875 | 117470998 | NC_000012.11 |
| cg07850967 | 8.52E-07 | 1.18E-07 | 5.5 | 6.5648911 | 3.87E-02 | 54785550  | 54785673  | NC_000002.11 |
| cg21647460 | 8.52E-07 | 1.18E-07 | 5.5 | 6.5645872 | 3.58E-02 | 1265243   | 1265366   | NC_000001.10 |
| cg23618440 | 8.53E-07 | 1.18E-07 | 5.5 | 6.5641449 | 1.42E-01 | 48036605  | 48036728  | NC_000006.11 |
| cg14326671 | 8.53E-07 | 1.18E-07 | 5.5 | 6.5641333 | 1.40E-01 | 77585318  | 77585441  | NC_000008.10 |
| cg15503722 | 8.53E-07 | 1.18E-07 | 5.5 | 6.5638525 | 1.35E-01 | 122850522 | 122850645 | NC_000011.9  |
| cg24798853 | 8.53E-07 | 1.18E-07 | 5.5 | 6.5636079 | 6.81E-02 | 58866721  | 58866844  | NC_000011.9  |
| cg19371526 | 8.53E-07 | 1.18E-07 | 5.5 | 6.5631964 | 1.14E-01 | 2161341   | 2161464   | NC_000011.9  |
| cg17645823 | 8.54E-07 | 1.19E-07 | 5.5 | 6.5626044 | 1.12E-01 | 114846321 | 114846444 | NC_000012.11 |
| cg19735097 | 8.54E-07 | 1.19E-07 | 5.5 | 6.5625871 | 5.16E-02 | 36646372  | 36646495  | NC_000017.10 |
| cg11077561 | 8.54E-07 | 1.19E-07 | 5.5 | 6.5623237 | 2.56E-02 | 197026019 | 197026142 | NC_000003.11 |
| cg23585686 | 8.54E-07 | 1.19E-07 | 5.5 | 6.5620936 | 4.41E-02 | 242787243 | 242787366 | NC_000002.11 |
| cg26980034 | 8.55E-07 | 1.19E-07 | 5.5 | 6.5618669 | 8.60E-02 | 53530624  | 53530747  | NC_000006.11 |
| cg24617171 | 8.55E-07 | 1.19E-07 | 5.5 | 6.5609137 | 1.21E-01 | 121567396 | 121567519 | NC_000011.9  |
| cg12950492 | 8.55E-07 | 1.19E-07 | 5.5 | 6.5608891 | 6.76E-02 | 187000846 | 187000969 | NC_000004.11 |
| cg05052324 | 8.56E-07 | 1.19E-07 | 5.5 | 6.5603604 | 1.57E-01 | 18957020  | 18957143  | NC_000001.10 |
| cg00462168 | 8.56E-07 | 1.19E-07 | 5.5 | 6.5597812 | 1.53E-01 | 79724794  | 79724917  | NC_000015.9  |
| cg15164958 | 8.57E-07 | 1.19E-07 | 5.5 | 6.5587878 | 1.64E-01 | 54609587  | 54609710  | NC_000007.13 |
| cg01037703 | 8.60E-07 | 1.19E-07 | 5.5 | 6.5557737 | 9.31E-02 | 45014547  | 45014670  | NC_000022.10 |
| cg02565132 | 8.60E-07 | 1.19E-07 | 5.5 | 6.5556857 | 7.91E-02 | 109559473 | 109559596 | NC_000002.11 |
| cg20103919 | 8.60E-07 | 1.19E-07 | 5.5 | 6.5556362 | 2.69E-02 | 22211317  | 22211440  | NC_000001.10 |

|            |          |          |     |           |          |           |           |              |
|------------|----------|----------|-----|-----------|----------|-----------|-----------|--------------|
| cg20606555 | 8.60E-07 | 1.19E-07 | 5.5 | 6.5554927 | 6.74E-02 | 52452094  | 52452217  | NC_000019.9  |
| cg15715507 | 8.60E-07 | 1.19E-07 | 5.5 | 6.5554154 | 8.79E-02 | 140053663 | 140053786 | NC_000005.9  |
| cg23034373 | 8.60E-07 | 1.20E-07 | 5.5 | 6.5548662 | 9.42E-02 | 37915354  | 37915477  | NC_000021.8  |
| cg07035515 | 8.61E-07 | 1.20E-07 | 5.5 | 6.5544015 | 1.01E-01 | 78493704  | 78493827  | NC_000013.10 |
| cg18797282 | 8.61E-07 | 1.20E-07 | 5.5 | 6.5535425 | 2.04E-02 | 50387146  | 50387269  | NC_000003.11 |
| cg15267250 | 8.62E-07 | 1.20E-07 | 5.5 | 6.5533201 | 5.75E-02 | 128146064 | 128146187 | NC_000003.11 |
| cg02422694 | 8.62E-07 | 1.20E-07 | 5.5 | 6.5531632 | 1.62E-01 | 46655790  | 46655913  | NC_000017.10 |
| cg13703049 | 8.62E-07 | 1.20E-07 | 5.5 | 6.552918  | 2.10E-01 | 27213610  | 27213733  | NC_000007.13 |
| cg25306480 | 8.62E-07 | 1.20E-07 | 5.5 | 6.5527725 | 9.83E-02 | 134226517 | 134226640 | NC_000010.10 |
| cg17289378 | 8.62E-07 | 1.20E-07 | 5.5 | 6.5527629 | 1.37E-01 | 168773658 | 168773781 | NC_000006.11 |
| cg24621972 | 8.62E-07 | 1.20E-07 | 5.5 | 6.5522728 | 1.31E-01 | 223160175 | 223160298 | NC_000002.11 |
| cg04066190 | 8.63E-07 | 1.20E-07 | 5.5 | 6.5516352 | 1.24E-01 | 10407470  | 10407593  | NC_000006.11 |
| cg11895835 | 8.63E-07 | 1.20E-07 | 5.5 | 6.5515177 | 1.34E-01 | 111078476 | 111078599 | NC_000005.9  |
| cg12767109 | 8.64E-07 | 1.20E-07 | 5.5 | 6.5507717 | 6.74E-02 | 73017736  | 73017859  | NC_000007.13 |
| cg07175288 | 8.64E-07 | 1.20E-07 | 5.5 | 6.5505086 | 9.18E-02 | 76266437  | 76266560  | NC_000018.9  |
| cg08852245 | 8.64E-07 | 1.20E-07 | 5.5 | 6.5501628 | 1.22E-01 | 175138785 | 175138908 | NC_000004.11 |
| cg22324022 | 8.64E-07 | 1.20E-07 | 5.5 | 6.5498585 | 1.62E-01 | 51259703  | 51259826  | NC_000002.11 |
| cg10814202 | 8.65E-07 | 1.20E-07 | 5.5 | 6.5490211 | 3.05E-02 | 75461141  | 75461264  | NC_000014.8  |
| cg21343223 | 8.65E-07 | 1.20E-07 | 5.5 | 6.5485233 | 5.65E-02 | 28700127  | 28700250  | NC_000015.9  |
| cg13022459 | 8.67E-07 | 1.21E-07 | 5.5 | 6.5468543 | 4.62E-02 | 112374876 | 112374999 | NC_000006.11 |
| cg08279075 | 8.67E-07 | 1.21E-07 | 5.5 | 6.5466584 | 1.85E-01 | 54318772  | 54318895  | NC_000016.9  |
| cg09918510 | 8.67E-07 | 1.21E-07 | 5.5 | 6.546335  | 2.07E-01 | 71264579  | 71264702  | NC_000016.9  |
| cg06485521 | 8.68E-07 | 1.21E-07 | 5.5 | 6.5449347 | 7.58E-02 | 53530600  | 53530723  | NC_000006.11 |
| cg10126931 | 8.69E-07 | 1.21E-07 | 5.5 | 6.5447089 | 9.68E-02 | 197300499 | 197300622 | NC_000003.11 |
| cg04406454 | 8.69E-07 | 1.21E-07 | 5.5 | 6.5435909 | 1.18E-01 | 10398494  | 10398617  | NC_000006.11 |

|            |          |          |      |           |          |           |           |              |
|------------|----------|----------|------|-----------|----------|-----------|-----------|--------------|
| cg19026547 | 8.70E-07 | 1.21E-07 | 5.49 | 6.5432919 | 7.00E-02 | 42688838  | 42688961  | NC_000022.10 |
| cg13405783 | 8.71E-07 | 1.21E-07 | 5.49 | 6.5420867 | 1.76E-01 | 54164296  | 54164419  | NC_000008.10 |
| cg17547742 | 8.71E-07 | 1.21E-07 | 5.49 | 6.5414704 | 1.65E-01 | 985589    | 985712    | NC_000011.9  |
| cg24028202 | 8.72E-07 | 1.21E-07 | 5.49 | 6.5400704 | 1.21E-01 | 74424640  | 74424763  | NC_000015.9  |
| cg08234354 | 8.73E-07 | 1.21E-07 | 5.49 | 6.5399358 | 1.26E-01 | 72269398  | 72269521  | NC_000008.10 |
| cg15237820 | 8.73E-07 | 1.21E-07 | 5.49 | 6.5396752 | 2.96E-02 | 78984332  | 78984455  | NC_000004.11 |
| cg23209926 | 8.73E-07 | 1.21E-07 | 5.49 | 6.5389781 | 3.87E-02 | 107865419 | 107865542 | NC_000013.10 |
| cg06201512 | 8.74E-07 | 1.22E-07 | 5.49 | 6.5386479 | 2.44E-02 | 143121549 | 143121672 | NC_000007.13 |
| cg12797828 | 8.74E-07 | 1.22E-07 | 5.49 | 6.5379915 | 1.15E-01 | 106520928 | 106521051 | NC_000008.10 |
| cg14207728 | 8.74E-07 | 1.22E-07 | 5.49 | 6.5378842 | 1.45E-01 | 67217886  | 67218009  | NC_000001.10 |
| cg17700915 | 8.74E-07 | 1.22E-07 | 5.49 | 6.5378333 | 1.80E-01 | 52840042  | 52840165  | NC_000019.9  |
| cg00902374 | 8.75E-07 | 1.22E-07 | 5.49 | 6.5374073 | 1.10E-01 | 25461111  | 25461234  | NC_000003.11 |
| cg19935040 | 8.75E-07 | 1.22E-07 | 5.49 | 6.5367756 | 8.20E-02 | 42432165  | 42432288  | NC_000017.10 |
| cg06921573 | 8.76E-07 | 1.22E-07 | 5.49 | 6.5363886 | 1.19E-01 | 50889128  | 50889251  | NC_000001.10 |
| cg11058916 | 8.76E-07 | 1.22E-07 | 5.49 | 6.5360653 | 7.82E-02 | 34257749  | 34257872  | NC_000016.9  |
| cg21699342 | 8.76E-07 | 1.22E-07 | 5.49 | 6.5357074 | 7.91E-02 | 239360505 | 239360628 | NC_000002.11 |
| cg23249369 | 8.78E-07 | 1.22E-07 | 5.49 | 6.5339854 | 7.59E-02 | 57426759  | 57426882  | NC_000020.10 |
| cg00775172 | 8.78E-07 | 1.22E-07 | 5.49 | 6.5336276 | 5.39E-02 | 37601268  | 37601391  | NC_000022.10 |
| cg05386493 | 8.78E-07 | 1.22E-07 | 5.49 | 6.5334557 | 1.78E-01 | 138665654 | 138665777 | NC_000003.11 |
| cg26992949 | 8.78E-07 | 1.22E-07 | 5.49 | 6.5332788 | 6.29E-02 | 13919339  | 13919462  | NC_000005.9  |
| cg15992284 | 8.79E-07 | 1.22E-07 | 5.49 | 6.5324419 | 1.19E-01 | 91191254  | 91191377  | NC_000001.10 |
| cg01651570 | 8.79E-07 | 1.22E-07 | 5.49 | 6.5319419 | 1.00E-01 | 104194141 | 104194264 | NC_000014.8  |
| cg16201899 | 8.80E-07 | 1.22E-07 | 5.49 | 6.531216  | 5.48E-02 | 52766123  | 52766246  | NC_000013.10 |
| cg06108782 | 8.80E-07 | 1.23E-07 | 5.49 | 6.530588  | 1.04E-01 | 50817213  | 50817336  | NC_000010.10 |
| cg14888445 | 8.81E-07 | 1.23E-07 | 5.49 | 6.5301052 | 2.08E-02 | 101184494 | 101184617 | NC_000013.10 |

|            |          |          |      |           |          |           |           |              |
|------------|----------|----------|------|-----------|----------|-----------|-----------|--------------|
| cg23158731 | 8.81E-07 | 1.23E-07 | 5.49 | 6.5293902 | 9.91E-02 | 121137734 | 121137857 | NC_000008.10 |
| cg21715903 | 8.82E-07 | 1.23E-07 | 5.49 | 6.5289343 | 5.00E-02 | 51275527  | 51275650  | NC_000006.11 |
| cg12184012 | 8.82E-07 | 1.23E-07 | 5.49 | 6.5284027 | 9.47E-02 | 801195    | 801318    | NC_000005.9  |
| cg04534008 | 8.82E-07 | 1.23E-07 | 5.49 | 6.5283194 | 5.06E-02 | 39594441  | 39594564  | NC_000017.10 |
| cg09470963 | 8.83E-07 | 1.23E-07 | 5.49 | 6.5278929 | 2.97E-02 | 169556657 | 169556780 | NC_000001.10 |
| cg22850451 | 8.83E-07 | 1.23E-07 | 5.49 | 6.527285  | 7.87E-02 | 17829496  | 17829619  | NC_000019.9  |
| cg21872336 | 8.83E-07 | 1.23E-07 | 5.49 | 6.5272725 | 1.77E-01 | 1710378   | 1710501   | NC_000007.13 |
| cg10514113 | 8.83E-07 | 1.23E-07 | 5.49 | 6.5270418 | 2.45E-02 | 80765517  | 80765640  | NC_000017.10 |
| cg10200169 | 8.84E-07 | 1.23E-07 | 5.49 | 6.5266399 | 4.37E-02 | 54291194  | 54291317  | NC_000019.9  |
| cg11743448 | 8.84E-07 | 1.23E-07 | 5.49 | 6.5257454 | 1.53E-01 | 103889960 | 103890083 | NC_000012.11 |
| cg01440841 | 8.85E-07 | 1.23E-07 | 5.49 | 6.5254271 | 1.74E-01 | 154681066 | 154681189 | NC_000004.11 |
| cg01033463 | 8.85E-07 | 1.23E-07 | 5.49 | 6.525316  | 1.37E-01 | 45404843  | 45404966  | NC_000022.10 |
| cg20852250 | 8.85E-07 | 1.23E-07 | 5.49 | 6.5246572 | 9.56E-02 | 72149422  | 72149545  | NC_000003.11 |
| cg04165000 | 8.86E-07 | 1.23E-07 | 5.49 | 6.524202  | 1.11E-01 | 53375279  | 53375402  | NC_000006.11 |
| cg15161394 | 8.86E-07 | 1.23E-07 | 5.49 | 6.5238836 | 1.30E-01 | 145722909 | 145723032 | NC_000005.9  |
| cg09120725 | 8.87E-07 | 1.24E-07 | 5.49 | 6.5227145 | 7.01E-02 | 168971785 | 168971908 | NC_000006.11 |
| cg06941037 | 8.87E-07 | 1.24E-07 | 5.49 | 6.5224092 | 9.11E-02 | 88534973  | 88535096  | NC_000010.10 |
| cg00034433 | 8.87E-07 | 1.24E-07 | 5.49 | 6.5222831 | 1.57E-01 | 224803837 | 224803960 | NC_000001.10 |
| cg14136086 | 8.87E-07 | 1.24E-07 | 5.49 | 6.522053  | 9.31E-02 | 46863924  | 46864047  | NC_000021.8  |
| cg09411999 | 8.88E-07 | 1.24E-07 | 5.49 | 6.5218732 | 1.08E-01 | 27214383  | 27214506  | NC_000007.13 |
| cg06562865 | 8.89E-07 | 1.24E-07 | 5.49 | 6.5203226 | 1.33E-01 | 74961451  | 74961574  | NC_000018.9  |
| cg04487857 | 8.89E-07 | 1.24E-07 | 5.49 | 6.5200065 | 1.39E-01 | 139096540 | 139096663 | NC_000004.11 |
| cg19671026 | 8.90E-07 | 1.24E-07 | 5.49 | 6.5191948 | 9.31E-02 | 40005652  | 40005775  | NC_000019.9  |
| cg07726288 | 8.90E-07 | 1.24E-07 | 5.49 | 6.5191621 | 8.12E-02 | 248855278 | 248855401 | NC_000001.10 |
| cg07546255 | 8.90E-07 | 1.24E-07 | 5.49 | 6.5189656 | 1.66E-01 | 131200134 | 131200257 | NC_000012.11 |

|            |          |          |      |           |          |           |           |              |
|------------|----------|----------|------|-----------|----------|-----------|-----------|--------------|
| cg18254356 | 8.91E-07 | 1.24E-07 | 5.49 | 6.5180239 | 8.95E-02 | 43044573  | 43044696  | NC_000005.9  |
| cg19020758 | 8.91E-07 | 1.24E-07 | 5.49 | 6.5176862 | 4.77E-02 | 77316152  | 77316275  | NC_000018.9  |
| cg05239311 | 8.91E-07 | 1.24E-07 | 5.49 | 6.5176652 | 2.12E-01 | 78913147  | 78913270  | NC_000015.9  |
| cg17102963 | 8.91E-07 | 1.24E-07 | 5.49 | 6.517635  | 1.31E-01 | 231298758 | 231298881 | NC_000001.10 |
| cg03742250 | 8.91E-07 | 1.24E-07 | 5.49 | 6.5173294 | 9.10E-02 | 74550235  | 74550358  | NC_000017.10 |
| cg01199495 | 8.92E-07 | 1.24E-07 | 5.49 | 6.5168134 | 9.54E-02 | 31019946  | 31020069  | NC_000018.9  |
| cg02340853 | 8.92E-07 | 1.24E-07 | 5.49 | 6.5167452 | 3.58E-02 | 39502887  | 39503010  | NC_000017.10 |
| cg24413662 | 8.92E-07 | 1.24E-07 | 5.49 | 6.5164714 | 1.67E-01 | 122311293 | 122311416 | NC_000011.9  |
| cg16282552 | 8.92E-07 | 1.24E-07 | 5.49 | 6.5163782 | 5.27E-02 | 56607144  | 56607267  | NC_000005.9  |
| cg00693419 | 8.93E-07 | 1.24E-07 | 5.49 | 6.5155283 | 9.58E-02 | 79325320  | 79325443  | NC_000010.10 |
| cg11060379 | 8.93E-07 | 1.25E-07 | 5.49 | 6.515004  | 5.09E-02 | 32847675  | 32847798  | NC_000006.11 |
| cg03748158 | 8.94E-07 | 1.25E-07 | 5.49 | 6.5139891 | 6.82E-02 | 85670174  | 85670297  | NC_000016.9  |
| cg14910175 | 8.95E-07 | 1.25E-07 | 5.49 | 6.513483  | 8.79E-02 | 131840954 | 131841077 | NC_000010.10 |
| cg00683984 | 8.95E-07 | 1.25E-07 | 5.49 | 6.5132465 | 9.32E-02 | 45615337  | 45615460  | NC_000007.13 |
| cg08659539 | 8.95E-07 | 1.25E-07 | 5.49 | 6.5131421 | 2.99E-02 | 41098188  | 41098311  | NC_000015.9  |
| cg06873374 | 8.96E-07 | 1.25E-07 | 5.49 | 6.5124812 | 4.16E-02 | 11504794  | 11504917  | NC_000010.10 |
| cg26322711 | 8.96E-07 | 1.25E-07 | 5.49 | 6.5123015 | 2.96E-02 | 105846908 | 105847031 | NC_000010.10 |
| cg09481347 | 8.96E-07 | 1.25E-07 | 5.49 | 6.5118484 | 3.17E-02 | 51968758  | 51968881  | NC_000007.13 |
| cg09553651 | 8.96E-07 | 1.25E-07 | 5.49 | 6.5116423 | 9.15E-02 | 60411555  | 60411678  | NC_000015.9  |
| cg13493426 | 8.96E-07 | 1.25E-07 | 5.49 | 6.5115265 | 1.15E-01 | 34111564  | 34111687  | NC_000014.8  |
| cg15327559 | 8.96E-07 | 1.25E-07 | 5.49 | 6.5114921 | 2.49E-02 | 180925922 | 180926045 | NC_000001.10 |
| cg13564742 | 8.97E-07 | 1.25E-07 | 5.49 | 6.5110249 | 1.36E-01 | 100614879 | 100615002 | NC_000009.11 |
| cg00979369 | 8.97E-07 | 1.25E-07 | 5.49 | 6.5107085 | 5.69E-02 | 69403340  | 69403463  | NC_000014.8  |
| cg01511828 | 8.98E-07 | 1.25E-07 | 5.49 | 6.5099073 | 1.62E-01 | 57365520  | 57365643  | NC_000018.9  |
| cg09939303 | 8.98E-07 | 1.25E-07 | 5.49 | 6.509863  | 4.11E-02 | 304080    | 304203    | NC_000011.9  |

|            |          |          |      |           |          |           |           |              |
|------------|----------|----------|------|-----------|----------|-----------|-----------|--------------|
| cg07002403 | 8.98E-07 | 1.25E-07 | 5.49 | 6.5098323 | 1.59E-01 | 68687951  | 68688074  | NC_000010.10 |
| cg03617826 | 8.99E-07 | 1.25E-07 | 5.49 | 6.5077224 | 1.34E-01 | 140718405 | 140718528 | NC_000005.9  |
| cg25663892 | 9.00E-07 | 1.25E-07 | 5.49 | 6.507687  | 7.24E-02 | 10553728  | 10553851  | NC_000008.10 |
| cg08607625 | 9.00E-07 | 1.26E-07 | 5.49 | 6.5072909 | 3.95E-02 | 150690699 | 150690822 | NC_000007.13 |
| cg12154261 | 9.00E-07 | 1.26E-07 | 5.49 | 6.5071656 | 7.58E-02 | 104394530 | 104394653 | NC_000014.8  |
| cg11441617 | 9.00E-07 | 1.26E-07 | 5.49 | 6.5065645 | 3.47E-02 | 54646104  | 54646227  | NC_000019.9  |
| cg19675142 | 9.00E-07 | 1.26E-07 | 5.49 | 6.5065188 | 9.33E-02 | 116107015 | 116107138 | NC_000001.10 |
| cg16482324 | 9.01E-07 | 1.26E-07 | 5.49 | 6.5062776 | 1.36E-01 | 69065031  | 69065154  | NC_000007.13 |
| cg10963061 | 9.01E-07 | 1.26E-07 | 5.49 | 6.5061068 | 1.64E-01 | 158147729 | 158147852 | NC_000001.10 |
| cg05185040 | 9.01E-07 | 1.26E-07 | 5.49 | 6.506008  | 8.21E-02 | 41425077  | 41425200  | NC_000008.10 |
| cg19109570 | 9.02E-07 | 1.26E-07 | 5.49 | 6.5052649 | 5.47E-02 | 77376639  | 77376762  | NC_000018.9  |
| cg23285599 | 9.03E-07 | 1.26E-07 | 5.49 | 6.5039363 | 3.10E-02 | 32020572  | 32020695  | NC_000006.11 |
| cg06717565 | 9.03E-07 | 1.26E-07 | 5.49 | 6.5034545 | 1.07E-01 | 114836487 | 114836610 | NC_000012.11 |
| cg19568544 | 9.04E-07 | 1.26E-07 | 5.49 | 6.5029897 | 1.28E-01 | 140514811 | 140514934 | NC_000005.9  |
| cg13453520 | 9.04E-07 | 1.26E-07 | 5.49 | 6.5024691 | 1.34E-01 | 48485306  | 48485429  | NC_000004.11 |
| cg09974298 | 9.05E-07 | 1.26E-07 | 5.49 | 6.5010465 | 4.48E-02 | 202503750 | 202503873 | NC_000002.11 |
| cg09086201 | 9.05E-07 | 1.26E-07 | 5.49 | 6.5009302 | 1.50E-01 | 50692495  | 50692618  | NC_000006.11 |
| cg13238680 | 9.05E-07 | 1.26E-07 | 5.49 | 6.5008937 | 5.90E-02 | 65733273  | 65733396  | NC_000010.10 |
| cg09435668 | 9.07E-07 | 1.27E-07 | 5.49 | 6.4987868 | 8.17E-02 | 22194163  | 22194286  | NC_000017.10 |
| cg04060571 | 9.08E-07 | 1.27E-07 | 5.49 | 6.4982366 | 9.04E-02 | 75267857  | 75267980  | NC_000016.9  |
| cg05132306 | 9.08E-07 | 1.27E-07 | 5.49 | 6.4981552 | 7.32E-02 | 1846340   | 1846463   | NC_000001.10 |
| cg17255005 | 9.08E-07 | 1.27E-07 | 5.49 | 6.4978394 | 8.36E-02 | 129418540 | 129418663 | NC_000006.11 |
| cg03610826 | 9.09E-07 | 1.27E-07 | 5.49 | 6.4967473 | 4.80E-02 | 19098212  | 19098335  | NC_000008.10 |
| cg08216584 | 9.09E-07 | 1.27E-07 | 5.49 | 6.4967407 | 4.72E-02 | 72056209  | 72056332  | NC_000004.11 |
| cg02706653 | 9.10E-07 | 1.27E-07 | 5.49 | 6.4961163 | 1.31E-01 | 17208584  | 17208707  | NC_000020.10 |



|            |          |          |      |           |          |           |           |              |
|------------|----------|----------|------|-----------|----------|-----------|-----------|--------------|
| cg07687043 | 9.10E-07 | 1.27E-07 | 5.49 | 6.4958746 | 2.19E-02 | 140484977 | 140485100 | NC_000009.11 |
| cg06223466 | 9.10E-07 | 1.27E-07 | 5.49 | 6.4958592 | 1.88E-01 | 4922708   | 4922831   | NC_000007.13 |
| cg25279586 | 9.11E-07 | 1.27E-07 | 5.48 | 6.4950714 | 1.09E-01 | 7566258   | 7566381   | NC_000018.9  |
| cg16248311 | 9.11E-07 | 1.27E-07 | 5.48 | 6.4947617 | 2.30E-02 | 79844423  | 79844546  | NC_000012.11 |
| cg05401965 | 9.11E-07 | 1.27E-07 | 5.48 | 6.494741  | 1.32E-01 | 134070039 | 134070162 | NC_000004.11 |
| cg26920627 | 9.11E-07 | 1.27E-07 | 5.48 | 6.4942575 | 4.56E-02 | 7319248   | 7319371   | NC_000001.10 |
| cg08722774 | 9.12E-07 | 1.27E-07 | 5.48 | 6.4935766 | 1.55E-01 | 71338423  | 71338546  | NC_000010.10 |
| cg08275306 | 9.12E-07 | 1.27E-07 | 5.48 | 6.4934625 | 1.54E-01 | 43572359  | 43572482  | NC_000010.10 |
| cg21531654 | 9.13E-07 | 1.27E-07 | 5.48 | 6.4926835 | 4.26E-02 | 155834151 | 155834274 | NC_000007.13 |
| cg23511613 | 9.13E-07 | 1.27E-07 | 5.48 | 6.4925898 | 2.02E-01 | 88752322  | 88752445  | NC_000002.11 |
| cg01767631 | 9.13E-07 | 1.27E-07 | 5.48 | 6.4923941 | 1.03E-01 | 20716728  | 20716851  | NC_000013.10 |
| cg23292160 | 9.13E-07 | 1.28E-07 | 5.48 | 6.4920116 | 1.18E-01 | 154710425 | 154710548 | NC_000004.11 |
| cg00245613 | 9.13E-07 | 1.28E-07 | 5.48 | 6.4919672 | 5.15E-02 | 143326069 | 143326192 | NC_000008.10 |
| cg21032661 | 9.14E-07 | 1.28E-07 | 5.48 | 6.4914433 | 5.85E-02 | 74372798  | 74372921  | NC_000002.11 |
| cg16505528 | 9.14E-07 | 1.28E-07 | 5.48 | 6.4909382 | 7.06E-02 | 76318945  | 76319068  | NC_000018.9  |
| cg03722802 | 9.14E-07 | 1.28E-07 | 5.48 | 6.490523  | 8.78E-02 | 26495178  | 26495301  | NC_000001.10 |
| cg07628771 | 9.15E-07 | 1.28E-07 | 5.48 | 6.4900235 | 9.32E-02 | 4383660   | 4383783   | NC_000007.13 |
| cg07234439 | 9.15E-07 | 1.28E-07 | 5.48 | 6.4898929 | 3.96E-02 | 110479374 | 110479497 | NC_000009.11 |
| cg09200738 | 9.15E-07 | 1.28E-07 | 5.48 | 6.4897204 | 1.32E-01 | 30865200  | 30865323  | NC_000015.9  |
| cg10456591 | 9.15E-07 | 1.28E-07 | 5.48 | 6.4896851 | 6.62E-02 | 71279864  | 71279987  | NC_000008.10 |
| cg13475877 | 9.15E-07 | 1.28E-07 | 5.48 | 6.4894357 | 8.88E-02 | 56882373  | 56882496  | NC_000008.10 |
| cg07196462 | 9.15E-07 | 1.28E-07 | 5.48 | 6.4894078 | 6.31E-02 | 391060    | 391183    | NC_000002.11 |
| cg06488775 | 9.16E-07 | 1.28E-07 | 5.48 | 6.4886835 | 1.76E-01 | 8115360   | 8115483   | NC_000019.9  |
| cg11380908 | 9.16E-07 | 1.28E-07 | 5.48 | 6.488592  | 3.41E-02 | 48991619  | 48991742  | NC_000011.9  |
| cg11036831 | 9.17E-07 | 1.28E-07 | 5.48 | 6.487768  | 1.38E-01 | 82116382  | 82116505  | NC_000010.10 |

|            |          |          |      |           |          |           |           |              |
|------------|----------|----------|------|-----------|----------|-----------|-----------|--------------|
| cg25423004 | 9.17E-07 | 1.28E-07 | 5.48 | 6.4870829 | 1.25E-01 | 176993211 | 176993334 | NC_000002.11 |
| cg06664205 | 9.18E-07 | 1.28E-07 | 5.48 | 6.4860938 | 7.71E-02 | 50453093  | 50453216  | NC_000005.9  |
| cg24871584 | 9.20E-07 | 1.28E-07 | 5.48 | 6.4847034 | 1.20E-02 | 115178131 | 115178254 | NC_000005.9  |
| cg08944893 | 9.20E-07 | 1.28E-07 | 5.48 | 6.4845993 | 1.07E-01 | 105461870 | 105461993 | NC_000002.11 |
| cg23074932 | 9.20E-07 | 1.29E-07 | 5.48 | 6.4840552 | 1.07E-01 | 140718731 | 140718854 | NC_000005.9  |
| cg08009697 | 9.20E-07 | 1.29E-07 | 5.48 | 6.4839371 | 8.27E-02 | 104883450 | 104883573 | NC_000007.13 |
| cg19369438 | 9.21E-07 | 1.29E-07 | 5.48 | 6.4828225 | 2.50E-02 | 33623230  | 33623353  | NC_000019.9  |
| cg11070069 | 9.22E-07 | 1.29E-07 | 5.48 | 6.4824455 | 1.04E-01 | 105389370 | 105389493 | NC_000006.11 |
| cg08491487 | 9.22E-07 | 1.29E-07 | 5.48 | 6.482057  | 9.20E-02 | 30039130  | 30039253  | NC_000006.11 |
| cg04523268 | 9.22E-07 | 1.29E-07 | 5.48 | 6.4819281 | 1.31E-01 | 139606583 | 139606706 | NC_000009.11 |
| cg23906459 | 9.23E-07 | 1.29E-07 | 5.48 | 6.4813257 | 1.22E-01 | 143530680 | 143530803 | NC_000008.10 |
| cg25680629 | 9.23E-07 | 1.29E-07 | 5.48 | 6.4809069 | 1.10E-01 | 33188872  | 33188995  | NC_000003.11 |
| cg18322546 | 9.23E-07 | 1.29E-07 | 5.48 | 6.4804074 | 1.04E-01 | 77422738  | 77422861  | NC_000014.8  |
| cg18495118 | 9.23E-07 | 1.29E-07 | 5.48 | 6.4803206 | 4.35E-02 | 176836535 | 176836658 | NC_000005.9  |
| cg16400017 | 9.24E-07 | 1.29E-07 | 5.48 | 6.4795813 | 1.11E-01 | 37125155  | 37125278  | NC_000014.8  |
| cg17609158 | 9.24E-07 | 1.29E-07 | 5.48 | 6.4794312 | 1.36E-01 | 41342382  | 41342505  | NC_000006.11 |
| cg06072021 | 9.25E-07 | 1.29E-07 | 5.48 | 6.4790053 | 1.95E-01 | 128564106 | 128564229 | NC_000011.9  |
| cg22083053 | 9.25E-07 | 1.29E-07 | 5.48 | 6.4789782 | 1.09E-01 | 13541444  | 13541567  | NC_000004.11 |
| cg14133541 | 9.25E-07 | 1.29E-07 | 5.48 | 6.478587  | 4.55E-02 | 75881901  | 75882024  | NC_000012.11 |
| cg26734696 | 9.25E-07 | 1.29E-07 | 5.48 | 6.4780941 | 1.83E-01 | 25703830  | 25703953  | NC_000016.9  |
| cg06489008 | 9.25E-07 | 1.29E-07 | 5.48 | 6.4780819 | 7.95E-02 | 23433349  | 23433472  | NC_000020.10 |
| cg24725576 | 9.25E-07 | 1.29E-07 | 5.48 | 6.4780466 | 1.22E-01 | 29234671  | 29234794  | NC_000014.8  |
| cg13580336 | 9.25E-07 | 1.29E-07 | 5.48 | 6.4779416 | 7.08E-02 | 177065929 | 177066052 | NC_000002.11 |
| cg18749015 | 9.25E-07 | 1.29E-07 | 5.48 | 6.4779064 | 1.72E-01 | 45631363  | 45631486  | NC_000006.11 |
| cg01612449 | 9.26E-07 | 1.29E-07 | 5.48 | 6.4772228 | 1.03E-01 | 66410467  | 66410590  | NC_000011.9  |

|               |          |          |      |           |          |           |           |              |
|---------------|----------|----------|------|-----------|----------|-----------|-----------|--------------|
| cg27237420    | 9.26E-07 | 1.30E-07 | 5.48 | 6.4766307 | 3.09E-02 | 105817534 | 105817657 | NC_000014.8  |
| cg12435629    | 9.27E-07 | 1.30E-07 | 5.48 | 6.4755128 | 8.66E-02 | 75598039  | 75598162  | NC_000001.10 |
| cg13003786    | 9.28E-07 | 1.30E-07 | 5.48 | 6.4752801 | 1.11E-01 | 80232334  | 80232457  | NC_000017.10 |
| cg13886334    | 9.28E-07 | 1.30E-07 | 5.48 | 6.4750132 | 1.68E-01 | 175193377 | 175193500 | NC_000002.11 |
| cg16348385    | 9.29E-07 | 1.30E-07 | 5.48 | 6.4743192 | 8.23E-02 | 30106822  | 30106945  | NC_000016.9  |
| cg01296927    | 9.29E-07 | 1.30E-07 | 5.48 | 6.4739394 | 8.12E-02 | 82120996  | 82121119  | NC_000002.11 |
| cg08195758    | 9.29E-07 | 1.30E-07 | 5.48 | 6.4738438 | 6.16E-02 | 88680780  | 88680903  | NC_000016.9  |
| cg19037007    | 9.29E-07 | 1.30E-07 | 5.48 | 6.4733923 | 1.01E-01 | 741798    | 741921    | NC_000020.10 |
| cg14153919    | 9.29E-07 | 1.30E-07 | 5.48 | 6.4733224 | 1.05E-01 | 78631963  | 78632086  | NC_000015.9  |
| ch.17.458890R | 9.30E-07 | 1.30E-07 | 5.48 | 6.4731734 | 3.76E-02 | 13550191  | 13550314  | NC_000017.10 |
| cg20894686    | 9.30E-07 | 1.30E-07 | 5.48 | 6.4727314 | 1.30E-01 | 50803903  | 50804026  | NC_000006.11 |
| cg03198269    | 9.30E-07 | 1.30E-07 | 5.48 | 6.4726287 | 1.05E-01 | 108028454 | 108028577 | NC_000012.11 |
| cg23897749    | 9.30E-07 | 1.30E-07 | 5.48 | 6.4725151 | 1.35E-01 | 65491200  | 65491323  | NC_000008.10 |
| cg13590414    | 9.31E-07 | 1.30E-07 | 5.48 | 6.4719345 | 7.61E-02 | 128173245 | 128173368 | NC_000009.11 |
| cg06335143    | 9.31E-07 | 1.30E-07 | 5.48 | 6.4714011 | 1.03E-01 | 53308654  | 53308777  | NC_000001.10 |
| cg15104158    | 9.33E-07 | 1.30E-07 | 5.48 | 6.4696268 | 1.28E-01 | 192445388 | 192445511 | NC_000003.11 |
| cg11687036    | 9.34E-07 | 1.31E-07 | 5.48 | 6.4680833 | 1.07E-01 | 147139563 | 147139686 | NC_000003.11 |
| cg26107642    | 9.34E-07 | 1.31E-07 | 5.48 | 6.4676501 | 1.08E-01 | 35890578  | 35890701  | NC_000005.9  |
| cg27264249    | 9.35E-07 | 1.31E-07 | 5.48 | 6.4674387 | 1.38E-01 | 2141686   | 2141809   | NC_000003.11 |
| cg03660500    | 9.35E-07 | 1.31E-07 | 5.48 | 6.4673968 | 1.57E-01 | 197887649 | 197887772 | NC_000001.10 |
| cg02401556    | 9.35E-07 | 1.31E-07 | 5.48 | 6.467288  | 1.24E-01 | 137479590 | 137479713 | NC_000003.11 |
| cg25599521    | 9.35E-07 | 1.31E-07 | 5.48 | 6.4671181 | 8.09E-02 | 94981685  | 94981808  | NC_000014.8  |
| cg15831998    | 9.36E-07 | 1.31E-07 | 5.48 | 6.4663571 | 1.11E-01 | 119470324 | 119470447 | NC_000006.11 |
| cg01108118    | 9.36E-07 | 1.31E-07 | 5.48 | 6.4658924 | 1.67E-01 | 391189    | 391312    | NC_000006.11 |
| cg09977288    | 9.36E-07 | 1.31E-07 | 5.48 | 6.4656717 | 7.66E-02 | 14113460  | 14113583  | NC_000012.11 |

|            |          |          |      |           |          |           |           |              |
|------------|----------|----------|------|-----------|----------|-----------|-----------|--------------|
| cg19560014 | 9.36E-07 | 1.31E-07 | 5.48 | 6.4656438 | 7.73E-02 | 31799118  | 31799241  | NC_000012.11 |
| cg00774375 | 9.37E-07 | 1.31E-07 | 5.48 | 6.4651674 | 7.05E-02 | 7989720   | 7989843   | NC_000019.9  |
| cg22694067 | 9.37E-07 | 1.31E-07 | 5.48 | 6.4644482 | 7.90E-02 | 23932397  | 23932520  | NC_000015.9  |
| cg22294523 | 9.37E-07 | 1.31E-07 | 5.48 | 6.4642725 | 4.88E-02 | 1121113   | 1121236   | NC_000011.9  |
| cg04850059 | 9.38E-07 | 1.31E-07 | 5.48 | 6.463881  | 3.16E-02 | 225883161 | 225883284 | NC_000001.10 |
| cg12678686 | 9.38E-07 | 1.31E-07 | 5.48 | 6.4638514 | 7.67E-02 | 127327369 | 127327492 | NC_000003.11 |
| cg16478719 | 9.39E-07 | 1.31E-07 | 5.48 | 6.4630003 | 1.41E-01 | 36983171  | 36983294  | NC_000014.8  |
| cg27046460 | 9.39E-07 | 1.31E-07 | 5.48 | 6.4627365 | 6.91E-02 | 230837380 | 230837503 | NC_000001.10 |
| cg24460544 | 9.39E-07 | 1.31E-07 | 5.48 | 6.4623425 | 7.94E-02 | 3085446   | 3085569   | NC_000001.10 |
| cg08653692 | 9.39E-07 | 1.31E-07 | 5.48 | 6.4622423 | 1.76E-01 | 54466297  | 54466420  | NC_000019.9  |
| cg01991875 | 9.39E-07 | 1.31E-07 | 5.48 | 6.4621547 | 9.17E-02 | 106045899 | 106046022 | NC_000003.11 |
| cg01430218 | 9.40E-07 | 1.32E-07 | 5.48 | 6.4612975 | 1.43E-01 | 1269181   | 1269304   | NC_000007.13 |
| cg13347071 | 9.40E-07 | 1.32E-07 | 5.48 | 6.4612826 | 1.01E-01 | 210636748 | 210636871 | NC_000002.11 |
| cg13408752 | 9.40E-07 | 1.32E-07 | 5.48 | 6.4611621 | 1.20E-01 | 1575750   | 1575873   | NC_000008.10 |
| cg11152167 | 9.40E-07 | 1.32E-07 | 5.48 | 6.4607421 | 5.64E-02 | 64567482  | 64567605  | NC_000001.10 |
| cg27324823 | 9.41E-07 | 1.32E-07 | 5.48 | 6.4601581 | 9.92E-02 | 132116103 | 132116226 | NC_000011.9  |
| cg12422704 | 9.41E-07 | 1.32E-07 | 5.48 | 6.4599915 | 7.85E-02 | 1080694   | 1080817   | NC_000017.10 |
| cg15733245 | 9.42E-07 | 1.32E-07 | 5.48 | 6.4591377 | 4.61E-02 | 132910685 | 132910808 | NC_000012.11 |
| cg12306414 | 9.42E-07 | 1.32E-07 | 5.48 | 6.4587003 | 1.19E-01 | 13549355  | 13549478  | NC_000004.11 |
| cg20387387 | 9.43E-07 | 1.32E-07 | 5.48 | 6.4577859 | 1.23E-01 | 144511212 | 144511335 | NC_000008.10 |
| cg01824969 | 9.43E-07 | 1.32E-07 | 5.48 | 6.4577708 | 1.73E-01 | 67875261  | 67875384  | NC_000008.10 |
| cg21935519 | 9.46E-07 | 1.33E-07 | 5.48 | 6.454548  | 1.23E-01 | 66472955  | 66473078  | NC_000008.10 |
| cg07984133 | 9.47E-07 | 1.33E-07 | 5.48 | 6.4538525 | 1.13E-01 | 28544592  | 28544715  | NC_000013.10 |
| cg05837235 | 9.47E-07 | 1.33E-07 | 5.48 | 6.4532839 | 2.16E-02 | 77043815  | 77043938  | NC_000017.10 |
| cg22697574 | 9.47E-07 | 1.33E-07 | 5.48 | 6.4532534 | 9.89E-02 | 34642605  | 34642728  | NC_000001.10 |

|            |          |          |      |           |          |           |           |              |
|------------|----------|----------|------|-----------|----------|-----------|-----------|--------------|
| cg18899220 | 9.48E-07 | 1.33E-07 | 5.48 | 6.4529189 | 7.12E-02 | 20392529  | 20392652  | NC_000013.10 |
| cg05086443 | 9.48E-07 | 1.33E-07 | 5.48 | 6.4526737 | 3.36E-02 | 66437349  | 66437472  | NC_000016.9  |
| cg11740138 | 9.48E-07 | 1.33E-07 | 5.48 | 6.4526015 | 7.79E-02 | 181669177 | 181669300 | NC_000003.11 |
| cg16632715 | 9.49E-07 | 1.33E-07 | 5.48 | 6.4518965 | 8.60E-02 | 176972113 | 176972236 | NC_000002.11 |
| cg05235248 | 9.49E-07 | 1.33E-07 | 5.48 | 6.4516882 | 3.41E-02 | 35503876  | 35503999  | NC_000010.10 |
| cg09327821 | 9.50E-07 | 1.33E-07 | 5.48 | 6.4508423 | 5.45E-02 | 6380399   | 6380522   | NC_000004.11 |
| cg20312228 | 9.50E-07 | 1.33E-07 | 5.48 | 6.4498965 | 1.05E-01 | 126113707 | 126113830 | NC_000003.11 |
| cg08929188 | 9.51E-07 | 1.33E-07 | 5.48 | 6.4495944 | 1.30E-01 | 14995322  | 14995445  | NC_000011.9  |
| cg17571919 | 9.51E-07 | 1.33E-07 | 5.48 | 6.449041  | 4.31E-02 | 28829328  | 28829451  | NC_000006.11 |
| cg02967059 | 9.52E-07 | 1.33E-07 | 5.47 | 6.447936  | 3.68E-02 | 126306851 | 126306974 | NC_000011.9  |
| cg21782376 | 9.52E-07 | 1.33E-07 | 5.47 | 6.4479168 | 1.39E-01 | 127534799 | 127534922 | NC_000002.11 |
| cg21918313 | 9.52E-07 | 1.33E-07 | 5.47 | 6.4476876 | 1.00E-01 | 73496203  | 73496326  | NC_000002.11 |
| cg07006889 | 9.54E-07 | 1.34E-07 | 5.47 | 6.4464475 | 1.21E-01 | 106980192 | 106980315 | NC_000012.11 |
| cg11210881 | 9.54E-07 | 1.34E-07 | 5.47 | 6.4460772 | 1.59E-01 | 113930500 | 113930623 | NC_000011.9  |
| cg12652502 | 9.54E-07 | 1.34E-07 | 5.47 | 6.4459086 | 9.14E-02 | 490417    | 490540    | NC_000002.11 |
| cg06684850 | 9.54E-07 | 1.34E-07 | 5.47 | 6.4458849 | 1.77E-01 | 27742369  | 27742492  | NC_000011.9  |
| cg23383149 | 9.54E-07 | 1.34E-07 | 5.47 | 6.4458289 | 8.41E-02 | 24909125  | 24909248  | NC_000014.8  |
| cg19206146 | 9.54E-07 | 1.34E-07 | 5.47 | 6.445376  | 1.44E-01 | 28661759  | 28661882  | NC_000006.11 |
| cg24448171 | 9.55E-07 | 1.34E-07 | 5.47 | 6.4444581 | 5.63E-02 | 31597352  | 31597475  | NC_000015.9  |
| cg02409815 | 9.56E-07 | 1.34E-07 | 5.47 | 6.4442329 | 1.42E-01 | 69589122  | 69589245  | NC_000011.9  |
| cg22213042 | 9.56E-07 | 1.34E-07 | 5.47 | 6.4432417 | 1.35E-01 | 129906627 | 129906750 | NC_000007.13 |
| cg02347773 | 9.57E-07 | 1.34E-07 | 5.47 | 6.4427296 | 1.16E-01 | 176994142 | 176994265 | NC_000002.11 |
| cg27216969 | 9.57E-07 | 1.34E-07 | 5.47 | 6.4424444 | 2.02E-02 | 135193704 | 135193827 | NC_000010.10 |
| cg21621538 | 9.57E-07 | 1.34E-07 | 5.47 | 6.4423544 | 1.17E-01 | 24614206  | 24614329  | NC_000007.13 |
| cg08902205 | 9.58E-07 | 1.34E-07 | 5.47 | 6.4410303 | 7.61E-02 | 85658997  | 85659120  | NC_000016.9  |

|            |          |          |      |           |          |           |           |              |
|------------|----------|----------|------|-----------|----------|-----------|-----------|--------------|
| cg17477162 | 9.59E-07 | 1.34E-07 | 5.47 | 6.4401793 | 1.29E-01 | 91176464  | 91176587  | NC_000001.10 |
| cg20491446 | 9.60E-07 | 1.35E-07 | 5.47 | 6.4398461 | 2.28E-02 | 80656612  | 80656735  | NC_000017.10 |
| cg06014401 | 9.61E-07 | 1.35E-07 | 5.47 | 6.4387832 | 1.64E-01 | 27765232  | 27765355  | NC_000003.11 |
| cg20684549 | 9.61E-07 | 1.35E-07 | 5.47 | 6.4381163 | 8.42E-02 | 822842    | 822965    | NC_000019.9  |
| cg03959661 | 9.62E-07 | 1.35E-07 | 5.47 | 6.4375844 | 1.32E-01 | 207139348 | 207139471 | NC_000002.11 |
| cg00130223 | 9.62E-07 | 1.35E-07 | 5.47 | 6.4372261 | 9.00E-02 | 33070551  | 33070674  | NC_000016.9  |
| cg02191312 | 9.62E-07 | 1.35E-07 | 5.47 | 6.4369679 | 1.21E-01 | 52734397  | 52734520  | NC_000014.8  |
| cg08355538 | 9.63E-07 | 1.35E-07 | 5.47 | 6.436473  | 6.33E-02 | 113013707 | 113013830 | NC_000012.11 |
| cg18319029 | 9.65E-07 | 1.35E-07 | 5.47 | 6.434438  | 1.81E-01 | 904920    | 905043    | NC_000018.9  |
| cg25954914 | 9.65E-07 | 1.35E-07 | 5.47 | 6.4342086 | 6.31E-02 | 54785183  | 54785306  | NC_000002.11 |
| cg00181834 | 9.66E-07 | 1.35E-07 | 5.47 | 6.4333282 | 1.13E-01 | 23463015  | 23463138  | NC_000010.10 |
| cg12608433 | 9.66E-07 | 1.36E-07 | 5.47 | 6.4327693 | 8.63E-02 | 172945144 | 172945267 | NC_000002.11 |
| cg05658956 | 9.67E-07 | 1.36E-07 | 5.47 | 6.4318199 | 4.60E-02 | 42584517  | 42584640  | NC_000019.9  |
| cg05142942 | 9.68E-07 | 1.36E-07 | 5.47 | 6.4308298 | 7.46E-02 | 77320211  | 77320334  | NC_000015.9  |
| cg13690003 | 9.68E-07 | 1.36E-07 | 5.47 | 6.4306801 | 6.11E-02 | 45767909  | 45768032  | NC_000013.10 |
| cg18554639 | 9.68E-07 | 1.36E-07 | 5.47 | 6.4306021 | 7.50E-02 | 45905524  | 45905647  | NC_000006.11 |
| cg22913933 | 9.69E-07 | 1.36E-07 | 5.47 | 6.430154  | 1.01E-01 | 46692168  | 46692291  | NC_000017.10 |
| cg20248093 | 9.69E-07 | 1.36E-07 | 5.47 | 6.4299296 | 9.86E-02 | 77722496  | 77722619  | NC_000017.10 |
| cg27557790 | 9.69E-07 | 1.36E-07 | 5.47 | 6.4294144 | 2.60E-02 | 220028196 | 220028319 | NC_000002.11 |
| cg21523601 | 9.69E-07 | 1.36E-07 | 5.47 | 6.4293924 | 7.64E-02 | 3269793   | 3269916   | NC_000005.9  |
| cg20797858 | 9.70E-07 | 1.36E-07 | 5.47 | 6.4284965 | 1.38E-01 | 99283304  | 99283427  | NC_000006.11 |
| cg16449489 | 9.70E-07 | 1.36E-07 | 5.47 | 6.4283256 | 6.42E-02 | 125807047 | 125807170 | NC_000010.10 |
| cg09052548 | 9.71E-07 | 1.36E-07 | 5.47 | 6.4273931 | 8.82E-02 | 11047368  | 11047491  | NC_000010.10 |
| cg15756248 | 9.72E-07 | 1.36E-07 | 5.47 | 6.4268151 | 2.89E-02 | 59665648  | 59665771  | NC_000011.9  |
| cg19065106 | 9.72E-07 | 1.36E-07 | 5.47 | 6.426715  | 9.25E-02 | 53722177  | 53722300  | NC_000012.11 |

|            |          |          |      |           |          |           |           |              |
|------------|----------|----------|------|-----------|----------|-----------|-----------|--------------|
| cg04617251 | 9.73E-07 | 1.36E-07 | 5.47 | 6.4259017 | 1.52E-01 | 98891756  | 98891879  | NC_000011.9  |
| cg06730723 | 9.74E-07 | 1.37E-07 | 5.47 | 6.4248448 | 1.19E-01 | 1779819   | 1779942   | NC_000010.10 |
| cg10596451 | 9.74E-07 | 1.37E-07 | 5.47 | 6.4245716 | 1.25E-01 | 182549368 | 182549491 | NC_000002.11 |
| cg15175143 | 9.74E-07 | 1.37E-07 | 5.47 | 6.4245176 | 1.64E-01 | 139538356 | 139538479 | NC_000002.11 |
| cg03966099 | 9.74E-07 | 1.37E-07 | 5.47 | 6.4243677 | 4.76E-02 | 16157595  | 16157718  | NC_000022.10 |
| cg17293426 | 9.75E-07 | 1.37E-07 | 5.47 | 6.4238306 | 3.29E-02 | 24284359  | 24284482  | NC_000022.10 |
| cg15997770 | 9.75E-07 | 1.37E-07 | 5.47 | 6.4236873 | 6.09E-02 | 8716182   | 8716305   | NC_000001.10 |
| cg27023524 | 9.76E-07 | 1.37E-07 | 5.47 | 6.4223161 | 5.07E-02 | 54010481  | 54010604  | NC_000005.9  |
| cg23292259 | 9.76E-07 | 1.37E-07 | 5.47 | 6.4220118 | 9.95E-02 | 39702965  | 39703088  | NC_000014.8  |
| cg03148184 | 9.76E-07 | 1.37E-07 | 5.47 | 6.421875  | 1.28E-01 | 111562513 | 111562636 | NC_000004.11 |
| cg09240267 | 9.77E-07 | 1.37E-07 | 5.47 | 6.4215439 | 5.26E-02 | 31437287  | 31437410  | NC_000020.10 |
| cg24949661 | 9.77E-07 | 1.37E-07 | 5.47 | 6.4208505 | 1.64E-02 | 60899592  | 60899715  | NC_000011.9  |
| cg07329180 | 9.78E-07 | 1.37E-07 | 5.47 | 6.4203229 | 3.46E-02 | 3374141   | 3374264   | NC_000010.10 |
| cg09287190 | 9.78E-07 | 1.37E-07 | 5.47 | 6.4201198 | 9.34E-02 | 100640914 | 100641037 | NC_000013.10 |
| cg03254146 | 9.78E-07 | 1.37E-07 | 5.47 | 6.4200137 | 6.82E-02 | 30240119  | 30240242  | NC_000001.10 |
| cg17677988 | 9.79E-07 | 1.37E-07 | 5.47 | 6.4188879 | 6.39E-02 | 10687769  | 10687892  | NC_000004.11 |
| cg08831744 | 9.79E-07 | 1.37E-07 | 5.47 | 6.4188078 | 1.43E-01 | 45961346  | 45961469  | NC_000007.13 |
| cg14463461 | 9.80E-07 | 1.38E-07 | 5.47 | 6.4181287 | 7.41E-02 | 92161607  | 92161730  | NC_000007.13 |
| cg12559925 | 9.80E-07 | 1.38E-07 | 5.47 | 6.4178835 | 1.29E-01 | 235863365 | 235863488 | NC_000002.11 |
| cg14886059 | 9.80E-07 | 1.38E-07 | 5.47 | 6.4176529 | 1.52E-01 | 58545001  | 58545124  | NC_000019.9  |
| cg26548542 | 9.81E-07 | 1.38E-07 | 5.47 | 6.4170029 | 2.43E-02 | 89177266  | 89177389  | NC_000016.9  |
| cg07425171 | 9.81E-07 | 1.38E-07 | 5.47 | 6.4166058 | 8.85E-02 | 34442090  | 34442213  | NC_000016.9  |
| cg23949936 | 9.82E-07 | 1.38E-07 | 5.47 | 6.4161375 | 1.12E-01 | 100212502 | 100212625 | NC_000004.11 |
| cg15035528 | 9.82E-07 | 1.38E-07 | 5.47 | 6.4157062 | 8.38E-02 | 44068491  | 44068614  | NC_000011.9  |
| cg01443020 | 9.82E-07 | 1.38E-07 | 5.47 | 6.4153875 | 9.95E-02 | 15653096  | 15653219  | NC_000017.10 |

|            |          |          |      |           |          |           |           |              |
|------------|----------|----------|------|-----------|----------|-----------|-----------|--------------|
| cg04494750 | 9.83E-07 | 1.38E-07 | 5.47 | 6.4152666 | 8.60E-02 | 100304693 | 100304816 | NC_000007.13 |
| cg06201604 | 9.83E-07 | 1.38E-07 | 5.47 | 6.4149903 | 3.91E-02 | 81278776  | 81278899  | NC_000016.9  |
| cg04570265 | 9.84E-07 | 1.38E-07 | 5.47 | 6.414295  | 6.64E-02 | 228679629 | 228679752 | NC_000001.10 |
| cg13511000 | 9.84E-07 | 1.38E-07 | 5.47 | 6.4142233 | 1.47E-01 | 94750997  | 94751120  | NC_000004.11 |
| cg09117673 | 9.84E-07 | 1.38E-07 | 5.47 | 6.4137373 | 4.81E-02 | 73275311  | 73275434  | NC_000007.13 |
| cg10397440 | 9.84E-07 | 1.38E-07 | 5.47 | 6.4133806 | 1.20E-01 | 57359258  | 57359381  | NC_000008.10 |
| cg15867711 | 9.84E-07 | 1.38E-07 | 5.47 | 6.4132615 | 3.42E-02 | 218014162 | 218014285 | NC_000002.11 |
| cg01460202 | 9.85E-07 | 1.38E-07 | 5.47 | 6.4129941 | 1.08E-01 | 23706506  | 23706629  | NC_000016.9  |
| cg12440105 | 9.85E-07 | 1.38E-07 | 5.47 | 6.4125621 | 1.16E-01 | 239756128 | 239756251 | NC_000002.11 |
| cg04871807 | 9.85E-07 | 1.38E-07 | 5.47 | 6.4124522 | 9.06E-02 | 95186505  | 95186628  | NC_000005.9  |
| cg21251785 | 9.86E-07 | 1.38E-07 | 5.47 | 6.4118507 | 1.19E-01 | 73484407  | 73484530  | NC_000009.11 |
| cg05495351 | 9.86E-07 | 1.39E-07 | 5.47 | 6.411626  | 1.92E-01 | 51259693  | 51259816  | NC_000002.11 |
| cg15890274 | 9.86E-07 | 1.39E-07 | 5.47 | 6.4112628 | 1.68E-01 | 65601265  | 65601388  | NC_000011.9  |
| cg04380118 | 9.86E-07 | 1.39E-07 | 5.47 | 6.411066  | 1.04E-01 | 45670624  | 45670747  | NC_000001.10 |
| cg17151560 | 9.87E-07 | 1.39E-07 | 5.47 | 6.4109693 | 5.10E-02 | 6544511   | 6544634   | NC_000001.10 |
| cg27198843 | 9.87E-07 | 1.39E-07 | 5.47 | 6.4108085 | 1.84E-02 | 78165188  | 78165311  | NC_000017.10 |
| cg15160709 | 9.87E-07 | 1.39E-07 | 5.47 | 6.4104145 | 1.18E-01 | 72357937  | 72358060  | NC_000002.11 |
| cg01032359 | 9.87E-07 | 1.39E-07 | 5.47 | 6.4100526 | 1.19E-01 | 111473208 | 111473331 | NC_000012.11 |
| cg06802488 | 9.88E-07 | 1.39E-07 | 5.47 | 6.4098076 | 9.92E-02 | 54515341  | 54515464  | NC_000019.9  |
| cg05819296 | 9.88E-07 | 1.39E-07 | 5.47 | 6.4097717 | 9.38E-02 | 871980    | 872103    | NC_000001.10 |
| cg06451228 | 9.88E-07 | 1.39E-07 | 5.47 | 6.4096819 | 8.13E-02 | 64397333  | 64397456  | NC_000011.9  |
| cg15709766 | 9.88E-07 | 1.39E-07 | 5.47 | 6.4094744 | 7.60E-02 | 1466497   | 1466620   | NC_000019.9  |
| cg15209808 | 9.88E-07 | 1.39E-07 | 5.47 | 6.4092699 | 7.83E-02 | 30476254  | 30476377  | NC_000022.10 |
| cg19878711 | 9.89E-07 | 1.39E-07 | 5.47 | 6.4086789 | 3.92E-02 | 7099843   | 7099966   | NC_000007.13 |
| cg27175788 | 9.89E-07 | 1.39E-07 | 5.47 | 6.4082902 | 2.17E-02 | 24810213  | 24810336  | NC_000014.8  |



|            |          |          |      |           |          |           |           |              |
|------------|----------|----------|------|-----------|----------|-----------|-----------|--------------|
| cg11390905 | 9.90E-07 | 1.39E-07 | 5.47 | 6.40716   | 1.39E-01 | 139085102 | 139085225 | NC_000009.11 |
| cg10283844 | 9.90E-07 | 1.39E-07 | 5.47 | 6.4068995 | 1.07E-01 | 10487314  | 10487437  | NC_000002.11 |
| cg16353800 | 9.91E-07 | 1.39E-07 | 5.47 | 6.4065283 | 6.93E-02 | 72917943  | 72918066  | NC_000018.9  |
| cg20885910 | 9.91E-07 | 1.39E-07 | 5.47 | 6.4059179 | 6.65E-02 | 48922741  | 48922864  | NC_000011.9  |
| cg23658477 | 9.91E-07 | 1.39E-07 | 5.47 | 6.405915  | 1.76E-01 | 22094371  | 22094494  | NC_000012.11 |
| cg23337361 | 9.91E-07 | 1.39E-07 | 5.47 | 6.4058768 | 1.48E-01 | 13013668  | 13013791  | NC_000006.11 |
| cg27552493 | 9.92E-07 | 1.39E-07 | 5.47 | 6.4056688 | 1.39E-01 | 62652662  | 62652785  | NC_000012.11 |
| cg08235161 | 9.92E-07 | 1.39E-07 | 5.47 | 6.4053536 | 1.15E-01 | 57262049  | 57262172  | NC_000014.8  |
| cg05170445 | 9.93E-07 | 1.40E-07 | 5.47 | 6.4045583 | 7.05E-02 | 1641924   | 1642047   | NC_000012.11 |
| cg24374861 | 9.93E-07 | 1.40E-07 | 5.47 | 6.4038469 | 1.07E-01 | 74422933  | 74423056  | NC_000015.9  |
| cg05229723 | 9.94E-07 | 1.40E-07 | 5.47 | 6.4033935 | 3.05E-02 | 104526470 | 104526593 | NC_000012.11 |
| cg06760830 | 9.94E-07 | 1.40E-07 | 5.47 | 6.4033198 | 1.19E-01 | 47079672  | 47079795  | NC_000001.10 |
| cg13133000 | 9.94E-07 | 1.40E-07 | 5.47 | 6.4030242 | 4.74E-02 | 78463620  | 78463743  | NC_000001.10 |
| cg18824990 | 9.94E-07 | 1.40E-07 | 5.47 | 6.4029872 | 1.26E-01 | 54360262  | 54360385  | NC_000012.11 |
| cg17266805 | 9.94E-07 | 1.40E-07 | 5.47 | 6.4029091 | 9.41E-02 | 174776890 | 174777013 | NC_000005.9  |
| cg03338510 | 9.96E-07 | 1.40E-07 | 5.47 | 6.4013382 | 7.28E-02 | 180541684 | 180541807 | NC_000005.9  |
| cg07726085 | 9.96E-07 | 1.40E-07 | 5.47 | 6.4011349 | 5.09E-02 | 59022705  | 59022828  | NC_000019.9  |
| cg17385749 | 9.96E-07 | 1.40E-07 | 5.47 | 6.4009941 | 7.20E-02 | 96675342  | 96675465  | NC_000002.11 |
| cg03083562 | 9.97E-07 | 1.40E-07 | 5.46 | 6.4002958 | 5.81E-02 | 126007153 | 126007276 | NC_000008.10 |
| cg00765312 | 9.97E-07 | 1.40E-07 | 5.46 | 6.3998314 | 1.63E-01 | 85674694  | 85674817  | NC_000012.11 |
| cg16357224 | 9.98E-07 | 1.40E-07 | 5.46 | 6.3985064 | 8.44E-02 | 86530053  | 86530176  | NC_000016.9  |
| cg25472353 | 9.98E-07 | 1.40E-07 | 5.46 | 6.398386  | 1.46E-01 | 37489005  | 37489128  | NC_000007.13 |
| cg03158581 | 9.99E-07 | 1.40E-07 | 5.46 | 6.3981198 | 1.04E-01 | 153858816 | 153858939 | NC_000005.9  |
| cg20595784 | 9.99E-07 | 1.40E-07 | 5.46 | 6.3979844 | 5.06E-02 | 169560122 | 169560245 | NC_000006.11 |
| cg18235465 | 1.00E-06 | 1.41E-07 | 5.46 | 6.3967344 | 2.75E-02 | 73471634  | 73471757  | NC_000010.10 |

|            |          |          |      |           |          |           |           |              |
|------------|----------|----------|------|-----------|----------|-----------|-----------|--------------|
| cg06636372 | 1.00E-06 | 1.41E-07 | 5.46 | 6.3966534 | 2.06E-02 | 89349979  | 89350102  | NC_000016.9  |
| cg03701425 | 1.00E-06 | 1.41E-07 | 5.46 | 6.396116  | 3.95E-02 | 1719380   | 1719503   | NC_000008.10 |
| cg11635197 | 1.00E-06 | 1.41E-07 | 5.46 | 6.3957837 | 7.53E-02 | 66193993  | 66194116  | NC_000011.9  |
| cg13845094 | 1.00E-06 | 1.41E-07 | 5.46 | 6.3940663 | 1.75E-01 | 81108034  | 81108157  | NC_000012.11 |
| cg16635480 | 1.00E-06 | 1.41E-07 | 5.46 | 6.3939207 | 7.09E-02 | 150285815 | 150285938 | NC_000006.11 |
| cg16601494 | 1.00E-06 | 1.41E-07 | 5.46 | 6.3930041 | 1.77E-01 | 1475737   | 1475860   | NC_000001.10 |
| cg23409168 | 1.00E-06 | 1.41E-07 | 5.46 | 6.3926455 | 1.21E-01 | 117101690 | 117101813 | NC_000008.10 |
| cg14291663 | 1.00E-06 | 1.41E-07 | 5.46 | 6.391692  | 1.20E-01 | 135454951 | 135455074 | NC_000009.11 |
| cg12967001 | 1.01E-06 | 1.41E-07 | 5.46 | 6.3913043 | 1.36E-01 | 5544089   | 5544212   | NC_000018.9  |
| cg10418237 | 1.01E-06 | 1.42E-07 | 5.46 | 6.3898319 | 7.49E-02 | 140237879 | 140238002 | NC_000005.9  |
| cg18313790 | 1.01E-06 | 1.42E-07 | 5.46 | 6.3892753 | 6.26E-02 | 140595722 | 140595845 | NC_000005.9  |
| cg13183298 | 1.01E-06 | 1.42E-07 | 5.46 | 6.3888267 | 8.46E-02 | 2376119   | 2376242   | NC_000001.10 |
| cg04275566 | 1.01E-06 | 1.42E-07 | 5.46 | 6.3887946 | 1.50E-02 | 113512395 | 113512518 | NC_000013.10 |
| cg01832036 | 1.01E-06 | 1.42E-07 | 5.46 | 6.3887319 | 1.40E-01 | 48050274  | 48050397  | NC_000017.10 |
| cg17833303 | 1.01E-06 | 1.42E-07 | 5.46 | 6.3886789 | 1.78E-02 | 245026373 | 245026496 | NC_000001.10 |
| cg27007197 | 1.01E-06 | 1.42E-07 | 5.46 | 6.3881336 | 3.69E-02 | 44120547  | 44120670  | NC_000006.11 |
| cg25276848 | 1.01E-06 | 1.42E-07 | 5.46 | 6.3878874 | 9.62E-02 | 92063013  | 92063136  | NC_000010.10 |
| cg00858855 | 1.01E-06 | 1.42E-07 | 5.46 | 6.3875042 | 1.42E-01 | 28554964  | 28555087  | NC_000006.11 |
| cg22027766 | 1.01E-06 | 1.42E-07 | 5.46 | 6.387312  | 8.52E-02 | 23713928  | 23714051  | NC_000018.9  |
| cg04307587 | 1.01E-06 | 1.42E-07 | 5.46 | 6.3872398 | 9.93E-02 | 44104283  | 44104406  | NC_000019.9  |
| cg20312971 | 1.01E-06 | 1.42E-07 | 5.46 | 6.3869837 | 1.41E-01 | 79746780  | 79746903  | NC_000014.8  |
| cg17591574 | 1.01E-06 | 1.42E-07 | 5.46 | 6.3859593 | 3.20E-02 | 179059407 | 179059530 | NC_000001.10 |
| cg09516965 | 1.01E-06 | 1.42E-07 | 5.46 | 6.3857593 | 1.82E-01 | 52734529  | 52734652  | NC_000014.8  |
| cg02783179 | 1.01E-06 | 1.42E-07 | 5.46 | 6.3856831 | 5.01E-02 | 32035444  | 32035567  | NC_000006.11 |
| cg18881684 | 1.01E-06 | 1.42E-07 | 5.46 | 6.3855851 | 1.42E-01 | 70033592  | 70033715  | NC_000001.10 |

|            |          |          |      |           |          |           |           |              |
|------------|----------|----------|------|-----------|----------|-----------|-----------|--------------|
| cg03477240 | 1.01E-06 | 1.42E-07 | 5.46 | 6.3851305 | 1.04E-01 | 20583779  | 20583902  | NC_000006.11 |
| cg07295964 | 1.01E-06 | 1.42E-07 | 5.46 | 6.3845696 | 2.37E-01 | 175223982 | 175224105 | NC_000005.9  |
| cg23178714 | 1.01E-06 | 1.42E-07 | 5.46 | 6.3840976 | 1.05E-01 | 153855031 | 153855154 | NC_000005.9  |
| cg20243351 | 1.01E-06 | 1.43E-07 | 5.46 | 6.3839171 | 1.25E-01 | 47271156  | 47271279  | NC_000017.10 |
| cg14409414 | 1.01E-06 | 1.43E-07 | 5.46 | 6.3832752 | 1.34E-01 | 77777649  | 77777772  | NC_000017.10 |
| cg12210736 | 1.01E-06 | 1.43E-07 | 5.46 | 6.3831713 | 1.22E-01 | 110224288 | 110224411 | NC_000004.11 |
| cg18439339 | 1.01E-06 | 1.43E-07 | 5.46 | 6.3829774 | 7.01E-02 | 151441268 | 151441391 | NC_000007.13 |
| cg07563101 | 1.01E-06 | 1.43E-07 | 5.46 | 6.3826501 | 1.18E-01 | 23158658  | 23158781  | NC_000015.9  |
| cg21650975 | 1.01E-06 | 1.43E-07 | 5.46 | 6.3813982 | 3.44E-02 | 151788471 | 151788594 | NC_000002.11 |
| cg01587682 | 1.01E-06 | 1.43E-07 | 5.46 | 6.38123   | 1.47E-01 | 31820572  | 31820695  | NC_000011.9  |
| cg13903421 | 1.02E-06 | 1.43E-07 | 5.46 | 6.3804038 | 1.12E-01 | 219738714 | 219738837 | NC_000002.11 |
| cg06812019 | 1.02E-06 | 1.43E-07 | 5.46 | 6.3802548 | 3.04E-02 | 1143331   | 1143454   | NC_000005.9  |
| cg26701408 | 1.02E-06 | 1.43E-07 | 5.46 | 6.3799356 | 1.30E-01 | 102906057 | 102906180 | NC_000010.10 |
| cg14091920 | 1.02E-06 | 1.43E-07 | 5.46 | 6.3791344 | 4.88E-02 | 133903136 | 133903259 | NC_000009.11 |
| cg08745461 | 1.02E-06 | 1.43E-07 | 5.46 | 6.3787412 | 7.83E-02 | 232319740 | 232319863 | NC_000002.11 |
| cg27328673 | 1.02E-06 | 1.43E-07 | 5.46 | 6.3784669 | 8.05E-02 | 140625750 | 140625873 | NC_000005.9  |
| cg17960823 | 1.02E-06 | 1.43E-07 | 5.46 | 6.377941  | 5.58E-02 | 50306886  | 50307009  | NC_000012.11 |
| cg03909983 | 1.02E-06 | 1.43E-07 | 5.46 | 6.3778996 | 8.13E-02 | 72758461  | 72758584  | NC_000008.10 |
| cg14511698 | 1.02E-06 | 1.43E-07 | 5.46 | 6.3776272 | 1.28E-01 | 60976898  | 60977021  | NC_000014.8  |
| cg06786064 | 1.02E-06 | 1.44E-07 | 5.46 | 6.3765232 | 1.11E-01 | 6894869   | 6894992   | NC_000007.13 |
| cg19920134 | 1.02E-06 | 1.44E-07 | 5.46 | 6.3763374 | 6.93E-02 | 38227870  | 38227993  | NC_000007.13 |
| cg10253847 | 1.02E-06 | 1.44E-07 | 5.46 | 6.3762827 | 1.27E-01 | 28227085  | 28227208  | NC_000006.11 |
| cg04984039 | 1.02E-06 | 1.44E-07 | 5.46 | 6.3759778 | 4.22E-02 | 54901239  | 54901362  | NC_000007.13 |
| cg26064794 | 1.02E-06 | 1.44E-07 | 5.46 | 6.3758988 | 7.57E-02 | 204435434 | 204435557 | NC_000001.10 |
| cg24083324 | 1.02E-06 | 1.44E-07 | 5.46 | 6.3752919 | 1.26E-01 | 214162604 | 214162727 | NC_000001.10 |

|            |          |          |      |           |          |           |           |              |
|------------|----------|----------|------|-----------|----------|-----------|-----------|--------------|
| cg09549304 | 1.02E-06 | 1.44E-07 | 5.46 | 6.3748837 | 4.15E-02 | 101921849 | 101921972 | NC_000011.9  |
| cg00260937 | 1.02E-06 | 1.44E-07 | 5.46 | 6.3748525 | 1.31E-01 | 128520193 | 128520316 | NC_000007.13 |
| cg26670249 | 1.02E-06 | 1.44E-07 | 5.46 | 6.3745388 | 1.01E-01 | 14223997  | 14224120  | NC_000019.9  |
| cg18873957 | 1.02E-06 | 1.44E-07 | 5.46 | 6.3738075 | 1.30E-01 | 158119673 | 158119796 | NC_000001.10 |
| cg26245256 | 1.02E-06 | 1.44E-07 | 5.46 | 6.3734705 | 8.07E-02 | 79139112  | 79139235  | NC_000017.10 |
| cg05508296 | 1.02E-06 | 1.44E-07 | 5.46 | 6.3730305 | 9.45E-02 | 1016460   | 1016583   | NC_000005.9  |
| cg07326016 | 1.02E-06 | 1.44E-07 | 5.46 | 6.3730239 | 5.78E-02 | 88846234  | 88846357  | NC_000016.9  |
| cg02192967 | 1.02E-06 | 1.44E-07 | 5.46 | 6.3729803 | 1.98E-01 | 90758406  | 90758529  | NC_000004.11 |
| cg11630996 | 1.02E-06 | 1.44E-07 | 5.46 | 6.3728503 | 9.95E-02 | 47113599  | 47113722  | NC_000006.11 |
| cg01293723 | 1.02E-06 | 1.44E-07 | 5.46 | 6.3726869 | 7.96E-02 | 39183037  | 39183160  | NC_000017.10 |
| cg04989185 | 1.02E-06 | 1.44E-07 | 5.46 | 6.3726123 | 1.08E-01 | 9790928   | 9791051   | NC_000008.10 |
| cg14659193 | 1.02E-06 | 1.44E-07 | 5.46 | 6.3723311 | 1.37E-01 | 87990122  | 87990245  | NC_000005.9  |
| cg01497921 | 1.02E-06 | 1.44E-07 | 5.46 | 6.3722123 | 5.27E-02 | 89718583  | 89718706  | NC_000016.9  |
| cg14278808 | 1.02E-06 | 1.44E-07 | 5.46 | 6.3720298 | 1.51E-01 | 9761141   | 9761264   | NC_000008.10 |
| cg27019126 | 1.02E-06 | 1.44E-07 | 5.46 | 6.3708736 | 1.46E-01 | 56940693  | 56940816  | NC_000018.9  |
| cg06384763 | 1.02E-06 | 1.45E-07 | 5.46 | 6.3704369 | 1.79E-01 | 12203198  | 12203321  | NC_000019.9  |
| cg11734112 | 1.03E-06 | 1.45E-07 | 5.46 | 6.3702232 | 9.10E-02 | 145809092 | 145809215 | NC_000003.11 |
| cg09035529 | 1.03E-06 | 1.45E-07 | 5.46 | 6.3690748 | 3.26E-02 | 64335804  | 64335927  | NC_000011.9  |
| cg08008286 | 1.03E-06 | 1.45E-07 | 5.46 | 6.3677827 | 6.59E-02 | 28622037  | 28622160  | NC_000016.9  |
| cg26338453 | 1.03E-06 | 1.45E-07 | 5.46 | 6.3670138 | 1.86E-01 | 82340023  | 82340146  | NC_000015.9  |
| cg13322954 | 1.03E-06 | 1.45E-07 | 5.46 | 6.3661933 | 7.37E-02 | 69198953  | 69199076  | NC_000012.11 |
| cg23714408 | 1.03E-06 | 1.45E-07 | 5.46 | 6.3661267 | 1.25E-01 | 154710873 | 154710996 | NC_000004.11 |
| cg04748321 | 1.03E-06 | 1.45E-07 | 5.46 | 6.3658193 | 1.27E-02 | 14140734  | 14140857  | NC_000017.10 |
| cg17380238 | 1.03E-06 | 1.45E-07 | 5.46 | 6.3650404 | 1.22E-01 | 45889464  | 45889587  | NC_000019.9  |
| cg00733728 | 1.03E-06 | 1.45E-07 | 5.46 | 6.3644754 | 1.30E-01 | 79171230  | 79171353  | NC_000013.10 |

|            |          |          |      |           |          |           |           |              |
|------------|----------|----------|------|-----------|----------|-----------|-----------|--------------|
| cg25094972 | 1.03E-06 | 1.45E-07 | 5.46 | 6.3644442 | 9.01E-02 | 61920606  | 61920729  | NC_000020.10 |
| cg20030817 | 1.03E-06 | 1.45E-07 | 5.46 | 6.3640819 | 1.49E-02 | 30699481  | 30699604  | NC_000006.11 |
| cg12608132 | 1.03E-06 | 1.45E-07 | 5.46 | 6.3640055 | 7.39E-02 | 46564242  | 46564365  | NC_000002.11 |
| cg19300924 | 1.03E-06 | 1.46E-07 | 5.46 | 6.3631995 | 1.16E-01 | 119536064 | 119536187 | NC_000001.10 |
| cg12840933 | 1.03E-06 | 1.46E-07 | 5.46 | 6.3629132 | 9.58E-02 | 79862991  | 79863114  | NC_000005.9  |
| cg05938001 | 1.03E-06 | 1.46E-07 | 5.46 | 6.362605  | 1.27E-01 | 172952948 | 172953071 | NC_000002.11 |
| cg24954977 | 1.03E-06 | 1.46E-07 | 5.46 | 6.3623038 | 1.33E-01 | 85544382  | 85544505  | NC_000015.9  |
| cg06157645 | 1.03E-06 | 1.46E-07 | 5.46 | 6.3618418 | 1.13E-01 | 85230590  | 85230713  | NC_000016.9  |
| cg21652122 | 1.03E-06 | 1.46E-07 | 5.46 | 6.3611889 | 8.46E-02 | 28837586  | 28837709  | NC_000022.10 |
| cg23123267 | 1.03E-06 | 1.46E-07 | 5.46 | 6.3610278 | 5.46E-02 | 21254223  | 21254346  | NC_000017.10 |
| cg00901320 | 1.03E-06 | 1.46E-07 | 5.46 | 6.3607337 | 1.39E-01 | 129338534 | 129338657 | NC_000012.11 |
| cg11538848 | 1.03E-06 | 1.46E-07 | 5.46 | 6.3604175 | 8.91E-02 | 180604978 | 180605101 | NC_000001.10 |
| cg07108206 | 1.03E-06 | 1.46E-07 | 5.46 | 6.3602678 | 1.57E-01 | 232791814 | 232791937 | NC_000002.11 |
| cg14214914 | 1.04E-06 | 1.46E-07 | 5.46 | 6.3598576 | 2.94E-02 | 131870304 | 131870427 | NC_000009.11 |
| cg11791481 | 1.04E-06 | 1.47E-07 | 5.46 | 6.357001  | 3.48E-02 | 75211689  | 75211812  | NC_000017.10 |
| cg18299157 | 1.04E-06 | 1.47E-07 | 5.46 | 6.3569496 | 4.95E-02 | 131904410 | 131904533 | NC_000010.10 |
| cg19112895 | 1.04E-06 | 1.47E-07 | 5.46 | 6.3563681 | 1.53E-01 | 147075099 | 147075222 | NC_000003.11 |
| cg13504318 | 1.04E-06 | 1.47E-07 | 5.46 | 6.356217  | 8.93E-02 | 17932100  | 17932223  | NC_000019.9  |
| cg07148025 | 1.04E-06 | 1.47E-07 | 5.46 | 6.3559278 | 6.75E-02 | 116108611 | 116108734 | NC_000005.9  |
| cg20698924 | 1.04E-06 | 1.47E-07 | 5.46 | 6.3558446 | 1.15E-01 | 28344730  | 28344853  | NC_000015.9  |
| cg03239552 | 1.04E-06 | 1.47E-07 | 5.46 | 6.3551014 | 1.45E-01 | 54339653  | 54339776  | NC_000012.11 |
| cg09338251 | 1.04E-06 | 1.47E-07 | 5.46 | 6.3545434 | 1.14E-01 | 86546979  | 86547102  | NC_000016.9  |
| cg24924358 | 1.04E-06 | 1.47E-07 | 5.46 | 6.3542782 | 2.97E-02 | 32745496  | 32745619  | NC_000001.10 |
| cg09855384 | 1.04E-06 | 1.47E-07 | 5.46 | 6.3541427 | 3.78E-02 | 35684812  | 35684935  | NC_000017.10 |
| cg03003467 | 1.04E-06 | 1.47E-07 | 5.46 | 6.3538753 | 5.42E-02 | 106938289 | 106938412 | NC_000014.8  |

|            |          |          |      |           |          |           |           |              |
|------------|----------|----------|------|-----------|----------|-----------|-----------|--------------|
| cg03630800 | 1.04E-06 | 1.47E-07 | 5.46 | 6.3532    | 3.00E-02 | 678562    | 678685    | NC_000016.9  |
| cg14976969 | 1.04E-06 | 1.47E-07 | 5.45 | 6.3526793 | 4.59E-02 | 68857935  | 68858058  | NC_000001.10 |
| cg14565120 | 1.04E-06 | 1.47E-07 | 5.45 | 6.3526687 | 4.18E-02 | 77710848  | 77710971  | NC_000017.10 |
| cg16253834 | 1.04E-06 | 1.47E-07 | 5.45 | 6.3526666 | 4.90E-02 | 75522097  | 75522220  | NC_000011.9  |
| cg06730132 | 1.04E-06 | 1.47E-07 | 5.45 | 6.3522303 | 4.95E-02 | 20975125  | 20975248  | NC_000016.9  |
| cg23937382 | 1.04E-06 | 1.47E-07 | 5.45 | 6.3519124 | 7.46E-02 | 58549531  | 58549654  | NC_000019.9  |
| cg01497613 | 1.04E-06 | 1.47E-07 | 5.45 | 6.3514308 | 1.28E-01 | 48041301  | 48041424  | NC_000017.10 |
| cg24131595 | 1.04E-06 | 1.47E-07 | 5.45 | 6.3511037 | 1.37E-01 | 56887310  | 56887433  | NC_000018.9  |
| cg02991338 | 1.05E-06 | 1.48E-07 | 5.45 | 6.3496114 | 1.24E-01 | 29236017  | 29236140  | NC_000014.8  |
| cg03108347 | 1.05E-06 | 1.48E-07 | 5.45 | 6.348896  | 8.19E-02 | 70961784  | 70961907  | NC_000011.9  |
| cg04664126 | 1.05E-06 | 1.48E-07 | 5.45 | 6.3482243 | 1.22E-01 | 28554262  | 28554385  | NC_000006.11 |
| cg20430077 | 1.05E-06 | 1.48E-07 | 5.45 | 6.3453391 | 1.05E-01 | 102983513 | 102983636 | NC_000010.10 |
| cg17389077 | 1.05E-06 | 1.48E-07 | 5.45 | 6.3453239 | 9.21E-02 | 128810904 | 128811027 | NC_000010.10 |
| cg11119655 | 1.05E-06 | 1.48E-07 | 5.45 | 6.3452553 | 3.02E-02 | 46032202  | 46032325  | NC_000010.10 |
| cg02329029 | 1.05E-06 | 1.48E-07 | 5.45 | 6.3443021 | 8.68E-02 | 18559261  | 18559384  | NC_000022.10 |
| cg16800708 | 1.05E-06 | 1.48E-07 | 5.45 | 6.3441897 | 9.22E-02 | 101192973 | 101193096 | NC_000014.8  |
| cg15984718 | 1.05E-06 | 1.49E-07 | 5.45 | 6.3438909 | 1.38E-01 | 96470349  | 96470472  | NC_000004.11 |
| cg06886867 | 1.05E-06 | 1.49E-07 | 5.45 | 6.3426452 | 1.07E-02 | 23671218  | 23671341  | NC_000001.10 |
| cg07684169 | 1.05E-06 | 1.49E-07 | 5.45 | 6.3425935 | 1.13E-01 | 21686376  | 21686499  | NC_000020.10 |
| cg25905812 | 1.05E-06 | 1.49E-07 | 5.45 | 6.3415164 | 1.52E-01 | 841632    | 841755    | NC_000009.11 |
| cg11339341 | 1.06E-06 | 1.49E-07 | 5.45 | 6.3395036 | 1.04E-01 | 87969330  | 87969453  | NC_000005.9  |
| cg07081770 | 1.06E-06 | 1.50E-07 | 5.45 | 6.33733   | 1.43E-01 | 155241685 | 155241808 | NC_000007.13 |
| cg24359323 | 1.06E-06 | 1.50E-07 | 5.45 | 6.3370927 | 1.78E-01 | 69634372  | 69634495  | NC_000011.9  |
| cg02816429 | 1.06E-06 | 1.50E-07 | 5.45 | 6.3368167 | 8.05E-02 | 44229209  | 44229332  | NC_000007.13 |
| cg02102114 | 1.06E-06 | 1.50E-07 | 5.45 | 6.3365089 | 4.61E-02 | 74813369  | 74813492  | NC_000002.11 |

|            |          |          |      |           |          |           |           |              |
|------------|----------|----------|------|-----------|----------|-----------|-----------|--------------|
| cg02788266 | 1.06E-06 | 1.50E-07 | 5.45 | 6.3360641 | 1.14E-01 | 50694104  | 50694227  | NC_000005.9  |
| cg06358636 | 1.06E-06 | 1.50E-07 | 5.45 | 6.3357096 | 1.14E-01 | 133480830 | 133480953 | NC_000006.11 |
| cg17563229 | 1.06E-06 | 1.50E-07 | 5.45 | 6.3353997 | 6.81E-02 | 552323    | 552446    | NC_000007.13 |
| cg06447341 | 1.06E-06 | 1.50E-07 | 5.45 | 6.3348114 | 7.52E-02 | 32452930  | 32453053  | NC_000001.10 |
| cg23861803 | 1.06E-06 | 1.50E-07 | 5.45 | 6.3341792 | 1.62E-01 | 31830030  | 31830153  | NC_000006.11 |
| cg14961391 | 1.06E-06 | 1.50E-07 | 5.45 | 6.3333562 | 7.56E-02 | 148758708 | 148758831 | NC_000002.11 |
| cg15608397 | 1.06E-06 | 1.50E-07 | 5.45 | 6.3327516 | 9.08E-02 | 223163573 | 223163696 | NC_000002.11 |
| cg16455748 | 1.06E-06 | 1.50E-07 | 5.45 | 6.3315438 | 1.06E-01 | 107211518 | 107211641 | NC_000005.9  |
| cg20315995 | 1.06E-06 | 1.50E-07 | 5.45 | 6.3313646 | 4.24E-02 | 7280971   | 7281094   | NC_000012.11 |
| cg14773523 | 1.06E-06 | 1.50E-07 | 5.45 | 6.3313306 | 8.57E-02 | 97692429  | 97692552  | NC_000003.11 |
| cg04971362 | 1.06E-06 | 1.51E-07 | 5.45 | 6.3308469 | 1.73E-01 | 170738987 | 170739110 | NC_000005.9  |
| cg14609668 | 1.07E-06 | 1.51E-07 | 5.45 | 6.329534  | 6.86E-02 | 34651062  | 34651185  | NC_000009.11 |
| cg25188032 | 1.07E-06 | 1.51E-07 | 5.45 | 6.3291644 | 1.07E-01 | 84455028  | 84455151  | NC_000013.10 |
| cg09576649 | 1.07E-06 | 1.51E-07 | 5.45 | 6.3279486 | 4.34E-02 | 31044055  | 31044178  | NC_000020.10 |
| cg23297972 | 1.07E-06 | 1.51E-07 | 5.45 | 6.3275255 | 7.40E-02 | 32624145  | 32624268  | NC_000021.8  |
| cg10639585 | 1.07E-06 | 1.51E-07 | 5.45 | 6.3274984 | 1.20E-01 | 130387131 | 130387254 | NC_000012.11 |
| cg00140112 | 1.07E-06 | 1.51E-07 | 5.45 | 6.3274816 | 4.35E-02 | 3879595   | 3879718   | NC_000018.9  |
| cg16274476 | 1.07E-06 | 1.51E-07 | 5.45 | 6.3269307 | 1.60E-01 | 55588962  | 55589085  | NC_000020.10 |
| cg13510651 | 1.07E-06 | 1.51E-07 | 5.45 | 6.3267255 | 9.03E-02 | 137227772 | 137227895 | NC_000009.11 |
| cg02031187 | 1.07E-06 | 1.51E-07 | 5.45 | 6.326554  | 5.80E-02 | 15383222  | 15383345  | NC_000021.8  |
| cg20529655 | 1.07E-06 | 1.51E-07 | 5.45 | 6.3263919 | 6.47E-02 | 133289633 | 133289756 | NC_000006.11 |
| cg25212131 | 1.07E-06 | 1.51E-07 | 5.45 | 6.3263525 | 7.12E-02 | 140683670 | 140683793 | NC_000005.9  |
| cg13330559 | 1.07E-06 | 1.51E-07 | 5.45 | 6.3256415 | 2.05E-01 | 11144043  | 11144166  | NC_000017.10 |
| cg01722932 | 1.07E-06 | 1.51E-07 | 5.45 | 6.3255755 | 6.29E-02 | 92702653  | 92702776  | NC_000011.9  |
| cg23739994 | 1.07E-06 | 1.51E-07 | 5.45 | 6.3250577 | 1.53E-01 | 94134756  | 94134879  | NC_000011.9  |

|            |          |          |      |           |          |           |           |              |
|------------|----------|----------|------|-----------|----------|-----------|-----------|--------------|
| cg01138448 | 1.07E-06 | 1.51E-07 | 5.45 | 6.3250363 | 1.03E-01 | 45028595  | 45028718  | NC_000015.9  |
| cg24431229 | 1.07E-06 | 1.51E-07 | 5.45 | 6.3245803 | 6.93E-02 | 17463136  | 17463259  | NC_000019.9  |
| cg08987560 | 1.07E-06 | 1.52E-07 | 5.45 | 6.3243841 | 5.44E-02 | 47015665  | 47015788  | NC_000008.10 |
| cg01370541 | 1.07E-06 | 1.52E-07 | 5.45 | 6.3241825 | 1.26E-01 | 41882812  | 41882935  | NC_000004.11 |
| cg15654121 | 1.07E-06 | 1.52E-07 | 5.45 | 6.3232337 | 1.90E-01 | 34630944  | 34631067  | NC_000001.10 |
| cg03333101 | 1.07E-06 | 1.52E-07 | 5.45 | 6.3229688 | 7.00E-02 | 12954349  | 12954472  | NC_000019.9  |
| cg02784874 | 1.07E-06 | 1.52E-07 | 5.45 | 6.3224717 | 7.95E-02 | 39728962  | 39729085  | NC_000017.10 |
| cg27213509 | 1.07E-06 | 1.52E-07 | 5.45 | 6.3221608 | 9.55E-02 | 176947228 | 176947351 | NC_000002.11 |
| cg24373253 | 1.07E-06 | 1.52E-07 | 5.45 | 6.3219889 | 1.01E-01 | 99469634  | 99469757  | NC_000001.10 |
| cg25837340 | 1.07E-06 | 1.52E-07 | 5.45 | 6.3218546 | 1.48E-01 | 128712932 | 128713055 | NC_000011.9  |
| cg12412390 | 1.07E-06 | 1.52E-07 | 5.45 | 6.3217745 | 1.53E-01 | 96469286  | 96469409  | NC_000004.11 |
| cg14212891 | 1.07E-06 | 1.52E-07 | 5.45 | 6.3211691 | 4.55E-02 | 212733199 | 212733322 | NC_000001.10 |
| cg16739441 | 1.07E-06 | 1.52E-07 | 5.45 | 6.3210086 | 1.43E-01 | 21926524  | 21926647  | NC_000012.11 |
| cg17705066 | 1.07E-06 | 1.52E-07 | 5.45 | 6.3209468 | 1.20E-01 | 3587038   | 3587161   | NC_000019.9  |
| cg18391058 | 1.07E-06 | 1.52E-07 | 5.45 | 6.3208127 | 5.36E-02 | 6207067   | 6207190   | NC_000001.10 |
| cg14641472 | 1.08E-06 | 1.52E-07 | 5.45 | 6.3192019 | 1.20E-01 | 132387471 | 132387594 | NC_000009.11 |
| cg25200151 | 1.08E-06 | 1.53E-07 | 5.45 | 6.3177657 | 8.15E-02 | 112125000 | 112125123 | NC_000012.11 |
| cg16084190 | 1.08E-06 | 1.53E-07 | 5.45 | 6.3161673 | 1.15E-01 | 61716821  | 61716944  | NC_000011.9  |
| cg17826043 | 1.08E-06 | 1.53E-07 | 5.45 | 6.3160971 | 6.83E-02 | 42299635  | 42299758  | NC_000019.9  |
| cg17468459 | 1.08E-06 | 1.53E-07 | 5.45 | 6.3144591 | 1.40E-01 | 92208474  | 92208597  | NC_000001.10 |
| cg20000562 | 1.08E-06 | 1.53E-07 | 5.45 | 6.3142845 | 1.52E-01 | 36978633  | 36978756  | NC_000014.8  |
| cg22829375 | 1.08E-06 | 1.53E-07 | 5.45 | 6.3140978 | 4.55E-02 | 233764831 | 233764954 | NC_000002.11 |
| cg01098955 | 1.08E-06 | 1.53E-07 | 5.45 | 6.3139958 | 1.15E-01 | 106322163 | 106322286 | NC_000014.8  |
| cg00552490 | 1.08E-06 | 1.53E-07 | 5.45 | 6.3129976 | 5.28E-02 | 106746466 | 106746589 | NC_000002.11 |
| cg21901488 | 1.08E-06 | 1.53E-07 | 5.45 | 6.3127716 | 4.68E-02 | 128412420 | 128412543 | NC_000002.11 |



|            |          |          |      |           |          |           |           |              |
|------------|----------|----------|------|-----------|----------|-----------|-----------|--------------|
| cg25601040 | 1.08E-06 | 1.53E-07 | 5.45 | 6.3126734 | 6.52E-02 | 13540236  | 13540359  | NC_000004.11 |
| cg24058145 | 1.08E-06 | 1.53E-07 | 5.45 | 6.3119224 | 8.45E-02 | 29523592  | 29523715  | NC_000006.11 |
| cg16570917 | 1.08E-06 | 1.53E-07 | 5.45 | 6.3118811 | 6.97E-02 | 43996062  | 43996185  | NC_000001.10 |
| cg02836529 | 1.08E-06 | 1.53E-07 | 5.45 | 6.3117961 | 1.44E-01 | 182544413 | 182544536 | NC_000002.11 |
| cg04999479 | 1.08E-06 | 1.54E-07 | 5.45 | 6.3117477 | 1.50E-01 | 19839039  | 19839162  | NC_000006.11 |
| cg26106948 | 1.08E-06 | 1.54E-07 | 5.45 | 6.3115536 | 1.29E-01 | 27766284  | 27766407  | NC_000003.11 |
| cg10488267 | 1.08E-06 | 1.54E-07 | 5.45 | 6.3110833 | 8.22E-02 | 58147625  | 58147748  | NC_000006.11 |
| cg00095976 | 1.09E-06 | 1.54E-07 | 5.45 | 6.3104233 | 1.77E-01 | 118228060 | 118228183 | NC_000006.11 |
| cg07167168 | 1.09E-06 | 1.54E-07 | 5.45 | 6.3098928 | 1.65E-01 | 41818788  | 41818911  | NC_000020.10 |
| cg08173261 | 1.09E-06 | 1.54E-07 | 5.45 | 6.3098908 | 4.32E-02 | 3845637   | 3845760   | NC_000006.11 |
| cg06775869 | 1.09E-06 | 1.54E-07 | 5.45 | 6.3095043 | 1.35E-01 | 76843657  | 76843780  | NC_000014.8  |
| cg02271926 | 1.09E-06 | 1.54E-07 | 5.45 | 6.3091941 | 2.72E-02 | 55643121  | 55643244  | NC_000007.13 |
| cg18584067 | 1.09E-06 | 1.54E-07 | 5.45 | 6.3087067 | 1.08E-01 | 64975916  | 64976039  | NC_000002.11 |
| cg06384413 | 1.09E-06 | 1.54E-07 | 5.45 | 6.3084789 | 7.19E-02 | 46671215  | 46671338  | NC_000017.10 |
| cg25934198 | 1.09E-06 | 1.54E-07 | 5.45 | 6.307961  | 4.42E-02 | 139920781 | 139920904 | NC_000009.11 |
| cg02390209 | 1.09E-06 | 1.54E-07 | 5.45 | 6.3059437 | 1.47E-01 | 25703018  | 25703141  | NC_000016.9  |
| cg00149492 | 1.09E-06 | 1.55E-07 | 5.44 | 6.3046655 | 6.35E-02 | 36038468  | 36038591  | NC_000001.10 |
| cg03651292 | 1.09E-06 | 1.55E-07 | 5.44 | 6.3034975 | 8.99E-02 | 14999803  | 14999926  | NC_000018.9  |
| cg03476864 | 1.09E-06 | 1.55E-07 | 5.44 | 6.3032128 | 6.91E-02 | 157612081 | 157612204 | NC_000007.13 |
| cg17811857 | 1.09E-06 | 1.55E-07 | 5.44 | 6.3031439 | 4.15E-02 | 158529155 | 158529278 | NC_000005.9  |
| cg22764421 | 1.09E-06 | 1.55E-07 | 5.44 | 6.3027721 | 5.88E-02 | 74913316  | 74913439  | NC_000017.10 |
| cg09622447 | 1.09E-06 | 1.55E-07 | 5.44 | 6.3025809 | 1.29E-01 | 44496378  | 44496501  | NC_000021.8  |
| cg06667574 | 1.09E-06 | 1.55E-07 | 5.44 | 6.3022217 | 1.53E-01 | 51830634  | 51830757  | NC_000019.9  |
| cg15377585 | 1.09E-06 | 1.55E-07 | 5.44 | 6.3020127 | 1.25E-01 | 19813079  | 19813202  | NC_000007.13 |
| cg04299200 | 1.09E-06 | 1.55E-07 | 5.44 | 6.301941  | 1.14E-01 | 534332    | 534455    | NC_000005.9  |

|            |          |          |      |           |          |           |           |              |
|------------|----------|----------|------|-----------|----------|-----------|-----------|--------------|
| cg21754388 | 1.10E-06 | 1.55E-07 | 5.44 | 6.3006888 | 1.38E-01 | 37004747  | 37004870  | NC_000013.10 |
| cg10709593 | 1.10E-06 | 1.55E-07 | 5.44 | 6.3005804 | 1.17E-01 | 172952883 | 172953006 | NC_000002.11 |
| cg04561637 | 1.10E-06 | 1.55E-07 | 5.44 | 6.2999024 | 5.73E-02 | 172480106 | 172480229 | NC_000005.9  |
| cg26014266 | 1.10E-06 | 1.56E-07 | 5.44 | 6.2986047 | 1.54E-01 | 109294069 | 109294192 | NC_000011.9  |
| cg07825414 | 1.10E-06 | 1.56E-07 | 5.44 | 6.2983025 | 4.54E-02 | 19712640  | 19712763  | NC_000022.10 |
| cg02420027 | 1.10E-06 | 1.56E-07 | 5.44 | 6.2965903 | 1.33E-01 | 41632640  | 41632763  | NC_000013.10 |
| cg18602314 | 1.10E-06 | 1.56E-07 | 5.44 | 6.2959911 | 1.25E-01 | 179780802 | 179780925 | NC_000005.9  |
| cg26972969 | 1.10E-06 | 1.56E-07 | 5.44 | 6.2958442 | 9.04E-02 | 87973899  | 87974022  | NC_000005.9  |
| cg27177058 | 1.10E-06 | 1.56E-07 | 5.44 | 6.2955645 | 7.04E-02 | 63251072  | 63251195  | NC_000007.13 |
| cg12462771 | 1.10E-06 | 1.56E-07 | 5.44 | 6.2954648 | 4.37E-02 | 122443998 | 122444121 | NC_000002.11 |
| cg26478582 | 1.10E-06 | 1.56E-07 | 5.44 | 6.2952046 | 8.78E-02 | 42573533  | 42573656  | NC_000020.10 |
| cg09875385 | 1.10E-06 | 1.56E-07 | 5.44 | 6.2951223 | 4.40E-02 | 85937861  | 85937984  | NC_000013.10 |
| cg27387573 | 1.10E-06 | 1.56E-07 | 5.44 | 6.2950675 | 7.73E-02 | 29160196  | 29160319  | NC_000016.9  |
| cg05151621 | 1.10E-06 | 1.56E-07 | 5.44 | 6.2948977 | 1.77E-01 | 89008406  | 89008529  | NC_000016.9  |
| cg26607031 | 1.10E-06 | 1.56E-07 | 5.44 | 6.2936005 | 1.19E-01 | 9602701   | 9602824   | NC_000001.10 |
| cg00660701 | 1.10E-06 | 1.56E-07 | 5.44 | 6.2935211 | 5.10E-02 | 17249201  | 17249324  | NC_000001.10 |
| cg22280820 | 1.10E-06 | 1.56E-07 | 5.44 | 6.2935068 | 8.10E-02 | 70958936  | 70959059  | NC_000011.9  |
| cg01089319 | 1.10E-06 | 1.56E-07 | 5.44 | 6.293463  | 1.03E-01 | 171676809 | 171676932 | NC_000002.11 |
| cg19544372 | 1.10E-06 | 1.56E-07 | 5.44 | 6.2931087 | 1.24E-01 | 9609405   | 9609528   | NC_000019.9  |
| cg05516617 | 1.10E-06 | 1.57E-07 | 5.44 | 6.2928506 | 9.34E-02 | 27221689  | 27221812  | NC_000007.13 |
| cg27259633 | 1.10E-06 | 1.57E-07 | 5.44 | 6.2927786 | 1.00E-01 | 19534852  | 19534975  | NC_000016.9  |
| cg07062043 | 1.10E-06 | 1.57E-07 | 5.44 | 6.2924607 | 1.67E-01 | 60935910  | 60936033  | NC_000010.10 |
| cg04282082 | 1.10E-06 | 1.57E-07 | 5.44 | 6.2920384 | 1.08E-01 | 124988720 | 124988843 | NC_000009.11 |
| cg19763428 | 1.11E-06 | 1.57E-07 | 5.44 | 6.2912729 | 1.44E-01 | 32109831  | 32109954  | NC_000007.13 |
| cg04304434 | 1.11E-06 | 1.57E-07 | 5.44 | 6.2909674 | 1.88E-02 | 16305455  | 16305578  | NC_000019.9  |

|            |          |          |      |           |          |           |           |              |
|------------|----------|----------|------|-----------|----------|-----------|-----------|--------------|
| cg09820378 | 1.11E-06 | 1.57E-07 | 5.44 | 6.2905639 | 1.18E-01 | 140207488 | 140207611 | NC_000005.9  |
| cg01310397 | 1.11E-06 | 1.57E-07 | 5.44 | 6.2904218 | 1.04E-01 | 195490033 | 195490156 | NC_000003.11 |
| cg05999189 | 1.11E-06 | 1.57E-07 | 5.44 | 6.2902844 | 8.55E-02 | 18545071  | 18545194  | NC_000020.10 |
| cg06929724 | 1.11E-06 | 1.57E-07 | 5.44 | 6.2894833 | 5.05E-02 | 97991122  | 97991245  | NC_000013.10 |
| cg10367023 | 1.11E-06 | 1.57E-07 | 5.44 | 6.2894453 | 1.07E-01 | 223177287 | 223177410 | NC_000002.11 |
| cg12231340 | 1.11E-06 | 1.57E-07 | 5.44 | 6.2888463 | 5.89E-02 | 52685221  | 52685344  | NC_000012.11 |
| cg19500979 | 1.11E-06 | 1.57E-07 | 5.44 | 6.2881348 | 7.79E-02 | 67287273  | 67287396  | NC_000011.9  |
| cg06824199 | 1.11E-06 | 1.57E-07 | 5.44 | 6.2877236 | 6.28E-02 | 47157809  | 47157932  | NC_000001.10 |
| cg26573704 | 1.11E-06 | 1.57E-07 | 5.44 | 6.2877181 | 1.59E-01 | 33892223  | 33892346  | NC_000005.9  |
| cg11897314 | 1.11E-06 | 1.57E-07 | 5.44 | 6.2872817 | 1.78E-01 | 119799832 | 119799955 | NC_000005.9  |
| cg23344706 | 1.11E-06 | 1.58E-07 | 5.44 | 6.2867236 | 5.80E-02 | 172593877 | 172594000 | NC_000003.11 |
| cg08448812 | 1.11E-06 | 1.58E-07 | 5.44 | 6.2861672 | 8.31E-02 | 140207760 | 140207883 | NC_000005.9  |
| cg14169008 | 1.11E-06 | 1.58E-07 | 5.44 | 6.2857485 | 2.75E-02 | 139444604 | 139444727 | NC_000009.11 |
| cg12258824 | 1.11E-06 | 1.58E-07 | 5.44 | 6.285526  | 6.34E-02 | 47354548  | 47354671  | NC_000019.9  |
| cg02235562 | 1.11E-06 | 1.58E-07 | 5.44 | 6.2854344 | 9.02E-02 | 36729137  | 36729260  | NC_000013.10 |
| cg02585729 | 1.11E-06 | 1.58E-07 | 5.44 | 6.2852195 | 3.36E-02 | 71619555  | 71619678  | NC_000011.9  |
| cg24395801 | 1.11E-06 | 1.58E-07 | 5.44 | 6.2843038 | 1.42E-01 | 86622624  | 86622747  | NC_000001.10 |
| cg21167612 | 1.11E-06 | 1.58E-07 | 5.44 | 6.2839547 | 1.15E-01 | 2196584   | 2196707   | NC_000008.10 |
| cg16864999 | 1.11E-06 | 1.58E-07 | 5.44 | 6.2837407 | 1.40E-01 | 117190160 | 117190283 | NC_000011.9  |
| cg27316754 | 1.11E-06 | 1.58E-07 | 5.44 | 6.2836901 | 8.94E-02 | 69441348  | 69441471  | NC_000003.11 |
| cg22290782 | 1.11E-06 | 1.58E-07 | 5.44 | 6.2834682 | 1.04E-01 | 48608794  | 48608917  | NC_000017.10 |
| cg05728282 | 1.11E-06 | 1.58E-07 | 5.44 | 6.2834136 | 5.98E-02 | 54473448  | 54473571  | NC_000012.11 |
| cg07252200 | 1.11E-06 | 1.58E-07 | 5.44 | 6.2826538 | 9.45E-02 | 125751941 | 125752064 | NC_000010.10 |
| cg08448341 | 1.11E-06 | 1.58E-07 | 5.44 | 6.2825417 | 5.97E-02 | 134324873 | 134324996 | NC_000006.11 |
| cg23966123 | 1.12E-06 | 1.58E-07 | 5.44 | 6.2819    | 3.07E-02 | 105886028 | 105886151 | NC_000014.8  |

|            |          |          |      |           |          |           |           |              |
|------------|----------|----------|------|-----------|----------|-----------|-----------|--------------|
| cg06414095 | 1.12E-06 | 1.58E-07 | 5.44 | 6.2818117 | 1.18E-01 | 1379969   | 1380092   | NC_000019.9  |
| cg01250563 | 1.12E-06 | 1.58E-07 | 5.44 | 6.2816951 | 7.67E-02 | 24142935  | 24143058  | NC_000015.9  |
| cg01962496 | 1.12E-06 | 1.59E-07 | 5.44 | 6.2805548 | 3.12E-02 | 78809740  | 78809863  | NC_000005.9  |
| cg14024788 | 1.12E-06 | 1.59E-07 | 5.44 | 6.2803662 | 1.32E-01 | 1875611   | 1875734   | NC_000005.9  |
| cg11228165 | 1.12E-06 | 1.59E-07 | 5.44 | 6.2798553 | 3.52E-02 | 132474636 | 132474759 | NC_000012.11 |
| cg26542796 | 1.12E-06 | 1.59E-07 | 5.44 | 6.2794627 | 3.15E-02 | 72148356  | 72148479  | NC_000005.9  |
| cg11096905 | 1.12E-06 | 1.59E-07 | 5.44 | 6.2792794 | 6.61E-02 | 63535567  | 63535690  | NC_000017.10 |
| cg10408178 | 1.12E-06 | 1.59E-07 | 5.44 | 6.2789971 | 1.17E-01 | 72219272  | 72219395  | NC_000014.8  |
| cg12400610 | 1.12E-06 | 1.59E-07 | 5.44 | 6.2786855 | 8.25E-02 | 126066699 | 126066822 | NC_000006.11 |
| cg18739932 | 1.12E-06 | 1.59E-07 | 5.44 | 6.2776329 | 7.76E-02 | 1112153   | 1112276   | NC_000008.10 |
| cg25990647 | 1.12E-06 | 1.59E-07 | 5.44 | 6.2773027 | 1.49E-01 | 54164081  | 54164204  | NC_000008.10 |
| cg13494826 | 1.12E-06 | 1.59E-07 | 5.44 | 6.2772648 | 7.36E-02 | 132472473 | 132472596 | NC_000009.11 |
| cg13969146 | 1.12E-06 | 1.59E-07 | 5.44 | 6.2772375 | 5.99E-02 | 30892490  | 30892613  | NC_000008.10 |
| cg09793584 | 1.12E-06 | 1.59E-07 | 5.44 | 6.2756892 | 1.89E-01 | 156391310 | 156391433 | NC_000001.10 |
| cg16234335 | 1.12E-06 | 1.59E-07 | 5.44 | 6.2756355 | 5.31E-02 | 140188119 | 140188242 | NC_000005.9  |
| cg13263323 | 1.12E-06 | 1.59E-07 | 5.44 | 6.2749529 | 6.79E-02 | 86062960  | 86063083  | NC_000015.9  |
| cg05520811 | 1.12E-06 | 1.59E-07 | 5.44 | 6.2747492 | 7.84E-02 | 68773448  | 68773571  | NC_000011.9  |
| cg19236995 | 1.12E-06 | 1.60E-07 | 5.44 | 6.2736569 | 1.50E-01 | 98515177  | 98515300  | NC_000001.10 |
| cg21363811 | 1.13E-06 | 1.60E-07 | 5.44 | 6.2726989 | 7.46E-02 | 179713950 | 179714073 | NC_000001.10 |
| cg02637537 | 1.13E-06 | 1.60E-07 | 5.44 | 6.2724653 | 9.23E-02 | 22447181  | 22447304  | NC_000008.10 |
| cg27523417 | 1.13E-06 | 1.60E-07 | 5.44 | 6.2723481 | 6.94E-02 | 3018024   | 3018147   | NC_000001.10 |
| cg25560775 | 1.13E-06 | 1.60E-07 | 5.44 | 6.271772  | 1.11E-01 | 65707468  | 65707591  | NC_000015.9  |
| cg10979880 | 1.13E-06 | 1.60E-07 | 5.44 | 6.27159   | 1.85E-01 | 105584689 | 105584812 | NC_000006.11 |
| cg27391627 | 1.13E-06 | 1.60E-07 | 5.44 | 6.2711393 | 5.75E-02 | 86704130  | 86704253  | NC_000016.9  |
| cg12926529 | 1.13E-06 | 1.60E-07 | 5.44 | 6.2711265 | 6.88E-02 | 118897188 | 118897311 | NC_000011.9  |

|            |          |          |      |           |          |           |           |              |
|------------|----------|----------|------|-----------|----------|-----------|-----------|--------------|
| cg10894483 | 1.13E-06 | 1.60E-07 | 5.44 | 6.2703022 | 1.52E-01 | 44257997  | 44258120  | NC_000022.10 |
| cg19713851 | 1.13E-06 | 1.60E-07 | 5.44 | 6.2701022 | 1.30E-01 | 233246594 | 233246717 | NC_000002.11 |
| cg18847904 | 1.13E-06 | 1.60E-07 | 5.44 | 6.2698351 | 1.19E-01 | 1779178   | 1779301   | NC_000005.9  |
| cg15585318 | 1.13E-06 | 1.60E-07 | 5.44 | 6.269498  | 9.50E-02 | 55515168  | 55515291  | NC_000003.11 |
| cg19898128 | 1.13E-06 | 1.60E-07 | 5.44 | 6.2690526 | 1.69E-01 | 166794971 | 166795094 | NC_000004.11 |
| cg07991675 | 1.13E-06 | 1.60E-07 | 5.44 | 6.2685954 | 4.02E-02 | 36697055  | 36697178  | NC_000022.10 |
| cg10864951 | 1.13E-06 | 1.61E-07 | 5.44 | 6.268127  | 5.28E-02 | 1159070   | 1159193   | NC_000007.13 |
| cg04981611 | 1.13E-06 | 1.61E-07 | 5.44 | 6.2670856 | 1.46E-01 | 47798477  | 47798600  | NC_000002.11 |
| cg23312425 | 1.13E-06 | 1.61E-07 | 5.44 | 6.2667295 | 6.73E-02 | 64120623  | 64120746  | NC_000011.9  |
| cg18406285 | 1.13E-06 | 1.61E-07 | 5.44 | 6.2665107 | 1.13E-01 | 11164228  | 11164351  | NC_000002.11 |
| cg07590529 | 1.13E-06 | 1.61E-07 | 5.44 | 6.2662805 | 1.20E-01 | 85471973  | 85472096  | NC_000006.11 |
| cg04221624 | 1.13E-06 | 1.61E-07 | 5.44 | 6.2660754 | 5.01E-02 | 72274527  | 72274650  | NC_000010.10 |
| cg18346784 | 1.13E-06 | 1.61E-07 | 5.44 | 6.2657456 | 1.24E-02 | 10754162  | 10754285  | NC_000001.10 |
| cg19247350 | 1.13E-06 | 1.61E-07 | 5.44 | 6.2656641 | 1.94E-01 | 26250919  | 26251042  | NC_000006.11 |
| cg20561300 | 1.13E-06 | 1.61E-07 | 5.44 | 6.2653714 | 4.90E-02 | 93189780  | 93189903  | NC_000015.9  |
| cg11292836 | 1.13E-06 | 1.61E-07 | 5.44 | 6.2647982 | 1.08E-01 | 78361907  | 78362030  | NC_000012.11 |
| cg13864473 | 1.13E-06 | 1.61E-07 | 5.44 | 6.2642594 | 1.14E-01 | 228194036 | 228194159 | NC_000001.10 |
| cg17918544 | 1.13E-06 | 1.61E-07 | 5.44 | 6.2637235 | 1.02E-01 | 24123363  | 24123486  | NC_000015.9  |
| cg04355159 | 1.14E-06 | 1.61E-07 | 5.44 | 6.2628654 | 1.06E-01 | 111533951 | 111534074 | NC_000004.11 |
| cg26022073 | 1.14E-06 | 1.62E-07 | 5.44 | 6.2622811 | 1.43E-01 | 42836025  | 42836148  | NC_000017.10 |
| cg23514135 | 1.14E-06 | 1.62E-07 | 5.44 | 6.2617767 | 1.33E-01 | 1110315   | 1110438   | NC_000005.9  |
| cg00575005 | 1.14E-06 | 1.62E-07 | 5.44 | 6.2617207 | 1.56E-01 | 84562888  | 84563011  | NC_000006.11 |
| cg11231249 | 1.14E-06 | 1.62E-07 | 5.44 | 6.2612179 | 1.45E-01 | 80531599  | 80531722  | NC_000002.11 |
| cg19793640 | 1.14E-06 | 1.62E-07 | 5.44 | 6.2606106 | 7.75E-02 | 40822862  | 40822985  | NC_000021.8  |
| cg03295083 | 1.14E-06 | 1.62E-07 | 5.44 | 6.259885  | 1.47E-01 | 50574912  | 50575035  | NC_000002.11 |

|            |          |          |      |           |          |           |           |              |
|------------|----------|----------|------|-----------|----------|-----------|-----------|--------------|
| cg16591048 | 1.14E-06 | 1.62E-07 | 5.44 | 6.2594855 | 5.40E-02 | 2836816   | 2836939   | NC_000016.9  |
| cg23734234 | 1.14E-06 | 1.62E-07 | 5.44 | 6.2589084 | 4.31E-02 | 138602549 | 138602672 | NC_000007.13 |
| cg21129181 | 1.14E-06 | 1.62E-07 | 5.43 | 6.2577247 | 6.72E-02 | 1553224   | 1553347   | NC_000005.9  |
| cg24953321 | 1.14E-06 | 1.62E-07 | 5.43 | 6.2573968 | 9.11E-02 | 32860553  | 32860676  | NC_000003.11 |
| cg14304817 | 1.14E-06 | 1.62E-07 | 5.43 | 6.2572227 | 1.56E-01 | 89867911  | 89868034  | NC_000011.9  |
| cg21964800 | 1.14E-06 | 1.62E-07 | 5.43 | 6.2567652 | 8.75E-02 | 63272764  | 63272887  | NC_000011.9  |
| cg07716696 | 1.14E-06 | 1.63E-07 | 5.43 | 6.2558396 | 1.36E-01 | 24123232  | 24123355  | NC_000015.9  |
| cg06398482 | 1.14E-06 | 1.63E-07 | 5.43 | 6.2555929 | 1.09E-01 | 77411461  | 77411584  | NC_000013.10 |
| cg14497491 | 1.14E-06 | 1.63E-07 | 5.43 | 6.2547677 | 3.49E-02 | 77982477  | 77982600  | NC_000017.10 |
| cg13948987 | 1.14E-06 | 1.63E-07 | 5.43 | 6.2545518 | 1.04E-01 | 55039259  | 55039382  | NC_000006.11 |
| cg09051513 | 1.14E-06 | 1.63E-07 | 5.43 | 6.2544693 | 1.22E-01 | 824257    | 824380    | NC_000011.9  |
| cg07746241 | 1.15E-06 | 1.63E-07 | 5.43 | 6.2541473 | 8.07E-02 | 43920635  | 43920758  | NC_000003.11 |
| cg10236414 | 1.15E-06 | 1.63E-07 | 5.43 | 6.253874  | 9.13E-02 | 84455742  | 84455865  | NC_000013.10 |
| cg25760229 | 1.15E-06 | 1.63E-07 | 5.43 | 6.2538131 | 9.93E-02 | 1203595   | 1203718   | NC_000016.9  |
| cg16396441 | 1.15E-06 | 1.63E-07 | 5.43 | 6.25242   | 5.05E-02 | 84590014  | 84590137  | NC_000016.9  |
| cg10993442 | 1.15E-06 | 1.63E-07 | 5.43 | 6.2522935 | 8.69E-02 | 25257587  | 25257710  | NC_000001.10 |
| cg24421865 | 1.15E-06 | 1.63E-07 | 5.43 | 6.2520466 | 4.00E-02 | 45919623  | 45919746  | NC_000021.8  |
| cg15057061 | 1.15E-06 | 1.63E-07 | 5.43 | 6.2520025 | 1.79E-01 | 181437299 | 181437422 | NC_000003.11 |
| cg05280478 | 1.15E-06 | 1.63E-07 | 5.43 | 6.2519255 | 8.50E-02 | 73662588  | 73662711  | NC_000017.10 |
| cg25584626 | 1.15E-06 | 1.63E-07 | 5.43 | 6.2518798 | 1.40E-01 | 119800234 | 119800357 | NC_000005.9  |
| cg08757742 | 1.15E-06 | 1.63E-07 | 5.43 | 6.2517559 | 1.07E-01 | 80256371  | 80256494  | NC_000005.9  |
| cg23243038 | 1.15E-06 | 1.63E-07 | 5.43 | 6.2515222 | 1.19E-01 | 32859558  | 32859681  | NC_000003.11 |
| cg24094550 | 1.15E-06 | 1.63E-07 | 5.43 | 6.2514567 | 1.49E-01 | 54333565  | 54333688  | NC_000012.11 |
| cg00731958 | 1.15E-06 | 1.63E-07 | 5.43 | 6.2512554 | 2.88E-02 | 48081031  | 48081154  | NC_000007.13 |
| cg14430974 | 1.15E-06 | 1.63E-07 | 5.43 | 6.2505704 | 2.51E-02 | 21995735  | 21995858  | NC_000009.11 |

|            |          |          |      |           |          |           |           |              |
|------------|----------|----------|------|-----------|----------|-----------|-----------|--------------|
| cg09130077 | 1.15E-06 | 1.63E-07 | 5.43 | 6.2504898 | 1.65E-01 | 46810702  | 46810825  | NC_000017.10 |
| cg16146806 | 1.15E-06 | 1.64E-07 | 5.43 | 6.2493697 | 5.46E-02 | 6530205   | 6530328   | NC_000001.10 |
| cg21043746 | 1.15E-06 | 1.64E-07 | 5.43 | 6.2488063 | 6.85E-02 | 178565721 | 178565844 | NC_000005.9  |
| cg24558425 | 1.15E-06 | 1.64E-07 | 5.43 | 6.2479903 | 1.48E-01 | 34631613  | 34631736  | NC_000001.10 |
| cg14974938 | 1.15E-06 | 1.64E-07 | 5.43 | 6.2478384 | 1.04E-01 | 62606570  | 62606693  | NC_000004.11 |
| cg25764935 | 1.15E-06 | 1.64E-07 | 5.43 | 6.2475479 | 1.16E-01 | 168551427 | 168551550 | NC_000006.11 |
| cg11058942 | 1.15E-06 | 1.64E-07 | 5.43 | 6.2463289 | 1.33E-01 | 1287561   | 1287684   | NC_000007.13 |
| cg03540622 | 1.15E-06 | 1.64E-07 | 5.43 | 6.246006  | 6.53E-02 | 42706066  | 42706189  | NC_000003.11 |
| cg09103073 | 1.16E-06 | 1.64E-07 | 5.43 | 6.2448377 | 2.37E-02 | 39019724  | 39019847  | NC_000017.10 |
| cg14780132 | 1.16E-06 | 1.65E-07 | 5.43 | 6.2444565 | 1.45E-01 | 155254602 | 155254725 | NC_000004.11 |
| cg09628601 | 1.16E-06 | 1.65E-07 | 5.43 | 6.2443838 | 1.25E-01 | 47523630  | 47523753  | NC_000019.9  |
| cg26677406 | 1.16E-06 | 1.65E-07 | 5.43 | 6.2442959 | 5.96E-02 | 92580100  | 92580223  | NC_000015.9  |
| cg14118850 | 1.16E-06 | 1.65E-07 | 5.43 | 6.2431519 | 1.31E-01 | 10447890  | 10448013  | NC_000002.11 |
| cg03950614 | 1.16E-06 | 1.65E-07 | 5.43 | 6.2413862 | 1.12E-01 | 108486517 | 108486640 | NC_000006.11 |
| cg13840445 | 1.16E-06 | 1.65E-07 | 5.43 | 6.240486  | 9.13E-02 | 53530628  | 53530751  | NC_000006.11 |
| cg22616881 | 1.16E-06 | 1.65E-07 | 5.43 | 6.23979   | 1.16E-01 | 96642096  | 96642219  | NC_000007.13 |
| cg14601444 | 1.16E-06 | 1.65E-07 | 5.43 | 6.2391606 | 9.95E-02 | 74607536  | 74607659  | NC_000002.11 |
| cg12215340 | 1.16E-06 | 1.66E-07 | 5.43 | 6.238204  | 1.20E-01 | 4229610   | 4229733   | NC_000020.10 |
| cg23357913 | 1.16E-06 | 1.66E-07 | 5.43 | 6.2377001 | 5.13E-02 | 3806061   | 3806184   | NC_000019.9  |
| cg03839949 | 1.16E-06 | 1.66E-07 | 5.43 | 6.2376579 | 1.00E-01 | 128210541 | 128210664 | NC_000003.11 |
| cg24322623 | 1.16E-06 | 1.66E-07 | 5.43 | 6.2376401 | 1.11E-01 | 17740430  | 17740553  | NC_000011.9  |
| cg13641082 | 1.16E-06 | 1.66E-07 | 5.43 | 6.2371452 | 7.51E-02 | 2319604   | 2319727   | NC_000007.13 |
| cg18246262 | 1.16E-06 | 1.66E-07 | 5.43 | 6.2368723 | 1.30E-01 | 9762100   | 9762223   | NC_000008.10 |
| cg20954179 | 1.16E-06 | 1.66E-07 | 5.43 | 6.2368394 | 1.13E-01 | 175138488 | 175138611 | NC_000004.11 |
| cg02030034 | 1.16E-06 | 1.66E-07 | 5.43 | 6.2362771 | 1.08E-01 | 101292403 | 101292526 | NC_000010.10 |

|            |          |          |      |           |          |           |           |              |
|------------|----------|----------|------|-----------|----------|-----------|-----------|--------------|
| cg07773597 | 1.16E-06 | 1.66E-07 | 5.43 | 6.235972  | 1.23E-01 | 131793369 | 131793492 | NC_000011.9  |
| cg12511310 | 1.17E-06 | 1.66E-07 | 5.43 | 6.2357128 | 3.95E-02 | 11629778  | 11629901  | NC_000011.9  |
| cg11038322 | 1.17E-06 | 1.66E-07 | 5.43 | 6.2345814 | 1.58E-01 | 50682340  | 50682463  | NC_000006.11 |
| cg02193611 | 1.17E-06 | 1.66E-07 | 5.43 | 6.2337558 | 1.27E-01 | 23982779  | 23982902  | NC_000010.10 |
| cg11085304 | 1.17E-06 | 1.66E-07 | 5.43 | 6.2336196 | 1.20E-01 | 11047586  | 11047709  | NC_000010.10 |
| cg24805681 | 1.17E-06 | 1.66E-07 | 5.43 | 6.2332872 | 2.68E-02 | 82335638  | 82335761  | NC_000015.9  |
| cg08198486 | 1.17E-06 | 1.67E-07 | 5.43 | 6.2324247 | 4.58E-02 | 13612434  | 13612557  | NC_000003.11 |
| cg18762505 | 1.17E-06 | 1.67E-07 | 5.43 | 6.2323944 | 4.34E-02 | 59646049  | 59646172  | NC_000001.10 |
| cg10358745 | 1.17E-06 | 1.67E-07 | 5.43 | 6.2323439 | 5.39E-02 | 111473128 | 111473251 | NC_000013.10 |
| cg27349540 | 1.17E-06 | 1.67E-07 | 5.43 | 6.232316  | 4.34E-02 | 46580381  | 46580504  | NC_000017.10 |
| cg05729015 | 1.17E-06 | 1.67E-07 | 5.43 | 6.2319856 | 1.28E-01 | 10135225  | 10135348  | NC_000010.10 |
| cg25365260 | 1.17E-06 | 1.67E-07 | 5.43 | 6.231273  | 1.33E-01 | 46669781  | 46669904  | NC_000017.10 |
| cg02404974 | 1.17E-06 | 1.67E-07 | 5.43 | 6.2312653 | 8.16E-02 | 41376295  | 41376418  | NC_000006.11 |
| cg03686593 | 1.17E-06 | 1.67E-07 | 5.43 | 6.231116  | 2.40E-01 | 11149470  | 11149593  | NC_000018.9  |
| cg05677724 | 1.17E-06 | 1.67E-07 | 5.43 | 6.230594  | 7.11E-02 | 131125565 | 131125688 | NC_000012.11 |
| cg22402261 | 1.17E-06 | 1.67E-07 | 5.43 | 6.2290223 | 1.24E-01 | 36026611  | 36026734  | NC_000001.10 |
| cg03126616 | 1.17E-06 | 1.67E-07 | 5.43 | 6.2285843 | 9.25E-02 | 179003843 | 179003966 | NC_000005.9  |
| cg14661959 | 1.17E-06 | 1.67E-07 | 5.43 | 6.2284441 | 1.23E-01 | 152080471 | 152080594 | NC_000001.10 |
| cg16146177 | 1.17E-06 | 1.67E-07 | 5.43 | 6.2278176 | 1.09E-01 | 41883608  | 41883731  | NC_000004.11 |
| cg05264101 | 1.17E-06 | 1.67E-07 | 5.43 | 6.2274254 | 9.95E-02 | 75880308  | 75880431  | NC_000017.10 |
| cg13804058 | 1.17E-06 | 1.67E-07 | 5.43 | 6.2273145 | 1.32E-01 | 115880935 | 115881058 | NC_000001.10 |
| cg08561856 | 1.17E-06 | 1.68E-07 | 5.43 | 6.2269809 | 1.49E-01 | 44324945  | 44325068  | NC_000019.9  |
| cg22352800 | 1.18E-06 | 1.68E-07 | 5.43 | 6.2262716 | 1.01E-01 | 177014467 | 177014590 | NC_000002.11 |
| cg02719154 | 1.18E-06 | 1.68E-07 | 5.43 | 6.2262633 | 1.18E-01 | 111533823 | 111533946 | NC_000004.11 |
| cg21885864 | 1.18E-06 | 1.68E-07 | 5.43 | 6.2252189 | 1.47E-01 | 100644507 | 100644630 | NC_000013.10 |



|            |          |          |      |           |          |           |           |              |
|------------|----------|----------|------|-----------|----------|-----------|-----------|--------------|
| cg18351939 | 1.18E-06 | 1.68E-07 | 5.43 | 6.2243733 | 1.44E-01 | 41883164  | 41883287  | NC_000004.11 |
| cg10614025 | 1.18E-06 | 1.68E-07 | 5.43 | 6.2241134 | 9.95E-02 | 83348985  | 83349108  | NC_000015.9  |
| cg01254948 | 1.18E-06 | 1.68E-07 | 5.43 | 6.2238269 | 1.53E-01 | 89854539  | 89854662  | NC_000005.9  |
| cg00384701 | 1.18E-06 | 1.68E-07 | 5.43 | 6.2237601 | 1.06E-01 | 13974800  | 13974923  | NC_000003.11 |
| cg21762820 | 1.18E-06 | 1.68E-07 | 5.43 | 6.2235927 | 1.15E-01 | 166135233 | 166135356 | NC_000001.10 |
| cg02839029 | 1.18E-06 | 1.68E-07 | 5.43 | 6.2217793 | 3.92E-02 | 79026206  | 79026329  | NC_000017.10 |
| cg01350680 | 1.18E-06 | 1.68E-07 | 5.43 | 6.2213828 | 1.12E-01 | 124903314 | 124903437 | NC_000010.10 |
| cg01191048 | 1.18E-06 | 1.69E-07 | 5.43 | 6.2211257 | 3.08E-02 | 59295079  | 59295202  | NC_000014.8  |
| cg00732656 | 1.18E-06 | 1.69E-07 | 5.43 | 6.2210063 | 1.02E-01 | 150459814 | 150459937 | NC_000003.11 |
| cg03234839 | 1.18E-06 | 1.69E-07 | 5.43 | 6.2207178 | 7.22E-02 | 46408037  | 46408160  | NC_000021.8  |
| cg11685898 | 1.18E-06 | 1.69E-07 | 5.43 | 6.2204351 | 6.07E-02 | 64160521  | 64160644  | NC_000010.10 |
| cg11339837 | 1.18E-06 | 1.69E-07 | 5.43 | 6.2188582 | 1.29E-01 | 90967211  | 90967334  | NC_000001.10 |
| cg23474312 | 1.18E-06 | 1.69E-07 | 5.43 | 6.2186695 | 4.82E-02 | 158142707 | 158142830 | NC_000006.11 |
| cg02227331 | 1.18E-06 | 1.69E-07 | 5.43 | 6.2181693 | 4.16E-02 | 234663937 | 234664060 | NC_000002.11 |
| cg27343992 | 1.19E-06 | 1.69E-07 | 5.43 | 6.2179792 | 3.49E-02 | 35118177  | 35118300  | NC_000006.11 |
| cg15454552 | 1.19E-06 | 1.69E-07 | 5.43 | 6.2178515 | 5.33E-02 | 10026503  | 10026626  | NC_000019.9  |
| cg10435282 | 1.19E-06 | 1.69E-07 | 5.43 | 6.2174058 | 1.58E-02 | 13303971  | 13304094  | NC_000011.9  |
| cg04752299 | 1.19E-06 | 1.69E-07 | 5.43 | 6.2165365 | 9.48E-02 | 8085558   | 8085681   | NC_000010.10 |
| cg25152136 | 1.19E-06 | 1.70E-07 | 5.43 | 6.2154581 | 1.62E-01 | 139655077 | 139655200 | NC_000003.11 |
| cg20187572 | 1.19E-06 | 1.70E-07 | 5.43 | 6.2153863 | 4.84E-02 | 7802192   | 7802315   | NC_000004.11 |
| cg17964955 | 1.19E-06 | 1.70E-07 | 5.43 | 6.2149066 | 6.75E-02 | 48390936  | 48391059  | NC_000010.10 |
| cg14440640 | 1.19E-06 | 1.70E-07 | 5.43 | 6.2146982 | 9.10E-02 | 61578115  | 61578238  | NC_000014.8  |
| cg20630151 | 1.19E-06 | 1.70E-07 | 5.43 | 6.2144737 | 3.06E-02 | 138823086 | 138823209 | NC_000003.11 |
| cg06424550 | 1.19E-06 | 1.70E-07 | 5.43 | 6.2138716 | 5.68E-02 | 12808422  | 12808545  | NC_000010.10 |
| cg05719140 | 1.19E-06 | 1.70E-07 | 5.43 | 6.2136883 | 8.93E-02 | 63782426  | 63782549  | NC_000001.10 |

|            |          |          |      |           |          |           |           |              |
|------------|----------|----------|------|-----------|----------|-----------|-----------|--------------|
| cg00328284 | 1.19E-06 | 1.70E-07 | 5.43 | 6.213116  | 4.14E-02 | 41519119  | 41519242  | NC_000008.10 |
| cg06222162 | 1.19E-06 | 1.70E-07 | 5.43 | 6.2127875 | 8.85E-02 | 48131444  | 48131567  | NC_000012.11 |
| cg03122669 | 1.19E-06 | 1.70E-07 | 5.43 | 6.2126462 | 9.96E-02 | 54393442  | 54393565  | NC_000012.11 |
| cg25262044 | 1.19E-06 | 1.70E-07 | 5.43 | 6.2125325 | 9.79E-02 | 107958491 | 107958614 | NC_000004.11 |
| cg13553897 | 1.19E-06 | 1.70E-07 | 5.43 | 6.2125119 | 3.54E-02 | 4244667   | 4244790   | NC_000019.9  |
| cg27576271 | 1.19E-06 | 1.70E-07 | 5.43 | 6.2118711 | 1.11E-01 | 93096811  | 93096934  | NC_000012.11 |
| cg00107187 | 1.19E-06 | 1.70E-07 | 5.43 | 6.2115885 | 1.12E-01 | 105070998 | 105071121 | NC_000014.8  |
| cg27576259 | 1.19E-06 | 1.70E-07 | 5.43 | 6.2113276 | 1.08E-01 | 2567316   | 2567439   | NC_000016.9  |
| cg22268718 | 1.19E-06 | 1.70E-07 | 5.42 | 6.2105907 | 7.74E-02 | 131441413 | 131441536 | NC_000008.10 |
| cg18575770 | 1.19E-06 | 1.70E-07 | 5.42 | 6.2098622 | 1.33E-01 | 115121307 | 115121430 | NC_000012.11 |
| cg26672794 | 1.19E-06 | 1.71E-07 | 5.42 | 6.2095352 | 1.54E-01 | 25257131  | 25257254  | NC_000001.10 |
| cg22130145 | 1.19E-06 | 1.71E-07 | 5.42 | 6.2093065 | 1.22E-01 | 113391280 | 113391403 | NC_000005.9  |
| cg17128947 | 1.20E-06 | 1.71E-07 | 5.42 | 6.2087604 | 1.30E-01 | 779480    | 779603    | NC_000004.11 |
| cg02893231 | 1.20E-06 | 1.71E-07 | 5.42 | 6.2082298 | 1.19E-01 | 190444761 | 190444884 | NC_000001.10 |
| cg06937549 | 1.20E-06 | 1.71E-07 | 5.42 | 6.2075321 | 1.32E-01 | 179046350 | 179046473 | NC_000005.9  |
| cg06391377 | 1.20E-06 | 1.71E-07 | 5.42 | 6.2073641 | 2.57E-02 | 10273494  | 10273617  | NC_000003.11 |
| cg00230715 | 1.20E-06 | 1.71E-07 | 5.42 | 6.2071432 | 4.61E-02 | 106854267 | 106854390 | NC_000005.9  |
| cg13917560 | 1.20E-06 | 1.71E-07 | 5.42 | 6.2070182 | 5.69E-02 | 157372255 | 157372378 | NC_000007.13 |
| cg03481509 | 1.20E-06 | 1.71E-07 | 5.42 | 6.2064795 | 9.98E-02 | 172066964 | 172067087 | NC_000005.9  |
| cg27560452 | 1.20E-06 | 1.71E-07 | 5.42 | 6.2063172 | 8.41E-02 | 49499385  | 49499508  | NC_000016.9  |
| cg13574883 | 1.20E-06 | 1.71E-07 | 5.42 | 6.2055158 | 1.78E-01 | 1705861   | 1705984   | NC_000007.13 |
| cg21845273 | 1.20E-06 | 1.71E-07 | 5.42 | 6.2054955 | 1.34E-01 | 44037001  | 44037124  | NC_000003.11 |
| cg21609640 | 1.20E-06 | 1.71E-07 | 5.42 | 6.2041433 | 1.19E-01 | 166890380 | 166890503 | NC_000001.10 |
| cg11291773 | 1.20E-06 | 1.72E-07 | 5.42 | 6.2039862 | 5.34E-02 | 170487718 | 170487841 | NC_000003.11 |
| cg25240254 | 1.20E-06 | 1.72E-07 | 5.42 | 6.2038278 | 8.37E-02 | 56000944  | 56001067  | NC_000019.9  |

|            |          |          |      |           |          |           |           |              |
|------------|----------|----------|------|-----------|----------|-----------|-----------|--------------|
| cg09230996 | 1.20E-06 | 1.72E-07 | 5.42 | 6.2025864 | 1.09E-01 | 102498419 | 102498542 | NC_000010.10 |
| cg21904654 | 1.20E-06 | 1.72E-07 | 5.42 | 6.2013004 | 5.53E-02 | 31831890  | 31832013  | NC_000006.11 |
| cg24505778 | 1.20E-06 | 1.72E-07 | 5.42 | 6.2007144 | 3.81E-02 | 28852887  | 28853010  | NC_000006.11 |
| cg20072359 | 1.21E-06 | 1.72E-07 | 5.42 | 6.2000951 | 8.38E-02 | 77147272  | 77147395  | NC_000017.10 |
| cg24636327 | 1.21E-06 | 1.72E-07 | 5.42 | 6.1999358 | 7.46E-02 | 129614085 | 129614208 | NC_000006.11 |
| cg09077752 | 1.21E-06 | 1.72E-07 | 5.42 | 6.1998535 | 1.06E-01 | 115631389 | 115631512 | NC_000011.9  |
| cg21010475 | 1.21E-06 | 1.72E-07 | 5.42 | 6.1995764 | 8.71E-02 | 42401610  | 42401733  | NC_000004.11 |
| cg14479798 | 1.21E-06 | 1.72E-07 | 5.42 | 6.1985173 | 1.17E-01 | 129533998 | 129534121 | NC_000010.10 |
| cg09139491 | 1.21E-06 | 1.72E-07 | 5.42 | 6.1984791 | 3.09E-02 | 20392431  | 20392554  | NC_000013.10 |
| cg10303978 | 1.21E-06 | 1.73E-07 | 5.42 | 6.1980888 | 1.30E-01 | 50982437  | 50982560  | NC_000016.9  |
| cg15945262 | 1.21E-06 | 1.73E-07 | 5.42 | 6.1977671 | 5.48E-02 | 1881887   | 1882010   | NC_000007.13 |
| cg22415472 | 1.21E-06 | 1.73E-07 | 5.42 | 6.1973666 | 1.08E-01 | 108602361 | 108602484 | NC_000002.11 |
| cg06825415 | 1.21E-06 | 1.73E-07 | 5.42 | 6.196552  | 8.88E-02 | 13960359  | 13960482  | NC_000005.9  |
| cg13863153 | 1.21E-06 | 1.73E-07 | 5.42 | 6.1964077 | 1.02E-01 | 39628679  | 39628802  | NC_000021.8  |
| cg13649056 | 1.21E-06 | 1.73E-07 | 5.42 | 6.1959369 | 7.80E-02 | 136474626 | 136474749 | NC_000009.11 |
| cg08169778 | 1.21E-06 | 1.73E-07 | 5.42 | 6.1951487 | 1.20E-01 | 115846336 | 115846459 | NC_000011.9  |
| cg26283963 | 1.21E-06 | 1.73E-07 | 5.42 | 6.1937965 | 4.37E-02 | 29330752  | 29330875  | NC_000007.13 |
| cg22371227 | 1.21E-06 | 1.73E-07 | 5.42 | 6.1935393 | 8.09E-02 | 177139876 | 177139999 | NC_000001.10 |
| cg24239882 | 1.21E-06 | 1.73E-07 | 5.42 | 6.1933667 | 1.95E-01 | 22488229  | 22488352  | NC_000012.11 |
| cg19274270 | 1.21E-06 | 1.73E-07 | 5.42 | 6.1932744 | 5.75E-02 | 78178856  | 78178979  | NC_000017.10 |
| cg17297238 | 1.21E-06 | 1.73E-07 | 5.42 | 6.1932569 | 1.00E-01 | 140871590 | 140871713 | NC_000005.9  |
| cg21892111 | 1.21E-06 | 1.73E-07 | 5.42 | 6.1931979 | 8.44E-02 | 90171423  | 90171546  | NC_000004.11 |
| cg05718652 | 1.21E-06 | 1.74E-07 | 5.42 | 6.1926786 | 2.68E-02 | 19350153  | 19350276  | NC_000017.10 |
| cg24068299 | 1.21E-06 | 1.74E-07 | 5.42 | 6.1924211 | 1.89E-01 | 27071255  | 27071378  | NC_000002.11 |
| cg05082965 | 1.21E-06 | 1.74E-07 | 5.42 | 6.192319  | 1.16E-01 | 33404180  | 33404303  | NC_000014.8  |

|            |          |          |      |           |          |           |           |              |
|------------|----------|----------|------|-----------|----------|-----------|-----------|--------------|
| cg03185622 | 1.21E-06 | 1.74E-07 | 5.42 | 6.1922148 | 8.86E-02 | 1501226   | 1501349   | NC_000008.10 |
| cg21882300 | 1.22E-06 | 1.74E-07 | 5.42 | 6.1917097 | 1.26E-01 | 64831087  | 64831210  | NC_000017.10 |
| cg14472384 | 1.22E-06 | 1.74E-07 | 5.42 | 6.1915063 | 1.51E-01 | 27256375  | 27256498  | NC_000006.11 |
| cg17374727 | 1.22E-06 | 1.74E-07 | 5.42 | 6.1910959 | 4.09E-02 | 135615376 | 135615499 | NC_000007.13 |
| cg01576677 | 1.22E-06 | 1.74E-07 | 5.42 | 6.1907483 | 1.50E-01 | 45029908  | 45030031  | NC_000002.11 |
| cg03586412 | 1.22E-06 | 1.74E-07 | 5.42 | 6.1905689 | 7.88E-02 | 45811830  | 45811953  | NC_000020.10 |
| cg03560957 | 1.22E-06 | 1.74E-07 | 5.42 | 6.1900071 | 8.58E-02 | 55375066  | 55375189  | NC_000008.10 |
| cg26281453 | 1.22E-06 | 1.74E-07 | 5.42 | 6.1894214 | 2.05E-01 | 45810610  | 45810733  | NC_000017.10 |
| cg10553088 | 1.22E-06 | 1.74E-07 | 5.42 | 6.189252  | 1.48E-01 | 115372912 | 115373035 | NC_000011.9  |
| cg04284463 | 1.22E-06 | 1.74E-07 | 5.42 | 6.1885535 | 1.41E-01 | 154335766 | 154335889 | NC_000002.11 |
| cg01089249 | 1.22E-06 | 1.74E-07 | 5.42 | 6.1877741 | 1.20E-01 | 171676553 | 171676676 | NC_000002.11 |
| cg13726345 | 1.22E-06 | 1.74E-07 | 5.42 | 6.1875055 | 1.67E-01 | 129948126 | 129948249 | NC_000010.10 |
| cg15380603 | 1.22E-06 | 1.74E-07 | 5.42 | 6.187344  | 8.49E-02 | 91007563  | 91007686  | NC_000006.11 |
| cg00588262 | 1.22E-06 | 1.75E-07 | 5.42 | 6.1867986 | 5.44E-02 | 42348588  | 42348711  | NC_000019.9  |
| cg25254986 | 1.22E-06 | 1.75E-07 | 5.42 | 6.1860321 | 5.40E-02 | 46438747  | 46438870  | NC_000019.9  |
| cg02322252 | 1.22E-06 | 1.75E-07 | 5.42 | 6.1856567 | 1.46E-01 | 161274488 | 161274611 | NC_000005.9  |
| cg00300627 | 1.22E-06 | 1.75E-07 | 5.42 | 6.1849444 | 1.04E-01 | 132646360 | 132646483 | NC_000009.11 |
| cg13053372 | 1.22E-06 | 1.75E-07 | 5.42 | 6.1843561 | 3.69E-02 | 63032888  | 63033011  | NC_000007.13 |
| cg12008350 | 1.22E-06 | 1.75E-07 | 5.42 | 6.1842418 | 7.29E-02 | 79793208  | 79793331  | NC_000017.10 |
| cg17972013 | 1.22E-06 | 1.75E-07 | 5.42 | 6.1832469 | 1.13E-01 | 9547468   | 9547591   | NC_000005.9  |
| cg10372770 | 1.23E-06 | 1.75E-07 | 5.42 | 6.1829065 | 7.64E-02 | 12377156  | 12377279  | NC_000019.9  |
| cg18065811 | 1.23E-06 | 1.75E-07 | 5.42 | 6.1822426 | 1.28E-01 | 185940638 | 185940761 | NC_000004.11 |
| cg11830061 | 1.23E-06 | 1.75E-07 | 5.42 | 6.181929  | 6.57E-02 | 5185415   | 5185538   | NC_000009.11 |
| cg16857801 | 1.23E-06 | 1.76E-07 | 5.42 | 6.1815887 | 1.03E-01 | 49580017  | 49580140  | NC_000011.9  |
| cg03087607 | 1.23E-06 | 1.76E-07 | 5.42 | 6.1811774 | 1.24E-01 | 134210667 | 134210790 | NC_000006.11 |

|            |          |          |      |           |          |           |           |              |
|------------|----------|----------|------|-----------|----------|-----------|-----------|--------------|
| cg14324358 | 1.23E-06 | 1.76E-07 | 5.42 | 6.1810845 | 6.45E-02 | 140759213 | 140759336 | NC_000006.11 |
| cg06977257 | 1.23E-06 | 1.76E-07 | 5.42 | 6.1806397 | 3.41E-02 | 88789619  | 88789742  | NC_000016.9  |
| cg01880913 | 1.23E-06 | 1.76E-07 | 5.42 | 6.1805295 | 5.25E-02 | 23693527  | 23693650  | NC_000007.13 |
| cg13787987 | 1.23E-06 | 1.76E-07 | 5.42 | 6.1803739 | 1.12E-01 | 50970591  | 50970714  | NC_000010.10 |
| cg02340556 | 1.23E-06 | 1.76E-07 | 5.42 | 6.1802602 | 1.17E-01 | 46797764  | 46797887  | NC_000017.10 |
| cg20389750 | 1.23E-06 | 1.76E-07 | 5.42 | 6.1795648 | 3.71E-02 | 99929438  | 99929561  | NC_000007.13 |
| cg00750428 | 1.23E-06 | 1.76E-07 | 5.42 | 6.1789861 | 1.24E-01 | 106975489 | 106975612 | NC_000012.11 |
| cg06205172 | 1.23E-06 | 1.76E-07 | 5.42 | 6.1786401 | 1.04E-01 | 29032975  | 29033098  | NC_000017.10 |
| cg16278512 | 1.23E-06 | 1.76E-07 | 5.42 | 6.1783002 | 1.77E-01 | 12443529  | 12443652  | NC_000007.13 |
| cg19688222 | 1.23E-06 | 1.76E-07 | 5.42 | 6.177911  | 5.08E-02 | 4199452   | 4199575   | NC_000004.11 |
| cg11527220 | 1.23E-06 | 1.76E-07 | 5.42 | 6.1767206 | 3.22E-02 | 49041451  | 49041574  | NC_000017.10 |
| cg17876332 | 1.23E-06 | 1.76E-07 | 5.42 | 6.1763092 | 4.30E-02 | 945994    | 946117    | NC_000017.10 |
| cg03669358 | 1.23E-06 | 1.77E-07 | 5.42 | 6.1761107 | 7.38E-02 | 134981930 | 134982053 | NC_000010.10 |
| cg01327602 | 1.23E-06 | 1.77E-07 | 5.42 | 6.1760815 | 9.69E-02 | 55952038  | 55952161  | NC_000019.9  |
| cg16099707 | 1.23E-06 | 1.77E-07 | 5.42 | 6.1755086 | 1.62E-01 | 47518068  | 47518191  | NC_000021.8  |
| cg07135042 | 1.23E-06 | 1.77E-07 | 5.42 | 6.1746261 | 1.82E-01 | 56905152  | 56905275  | NC_000019.9  |
| cg24430642 | 1.23E-06 | 1.77E-07 | 5.42 | 6.1745865 | 2.38E-02 | 50528746  | 50528869  | NC_000022.10 |
| cg09035284 | 1.24E-06 | 1.77E-07 | 5.42 | 6.1722742 | 1.66E-01 | 219850123 | 219850246 | NC_000002.11 |
| cg11083967 | 1.24E-06 | 1.77E-07 | 5.42 | 6.1721275 | 6.81E-02 | 97500345  | 97500468  | NC_000014.8  |
| cg16837206 | 1.24E-06 | 1.77E-07 | 5.42 | 6.1716464 | 7.64E-02 | 104972474 | 104972597 | NC_000011.9  |
| cg24201033 | 1.24E-06 | 1.77E-07 | 5.42 | 6.1707374 | 8.91E-02 | 50204707  | 50204830  | NC_000019.9  |
| cg08957069 | 1.24E-06 | 1.78E-07 | 5.42 | 6.1699585 | 1.75E-01 | 28743700  | 28743823  | NC_000006.11 |
| cg26757097 | 1.24E-06 | 1.78E-07 | 5.42 | 6.1699399 | 6.10E-02 | 33260263  | 33260386  | NC_000006.11 |
| cg13466917 | 1.24E-06 | 1.78E-07 | 5.42 | 6.1694611 | 9.94E-02 | 57116416  | 57116539  | NC_000017.10 |
| cg27343801 | 1.24E-06 | 1.78E-07 | 5.42 | 6.1691641 | 4.89E-02 | 46444017  | 46444140  | NC_000019.9  |

|            |          |          |      |           |          |           |           |              |
|------------|----------|----------|------|-----------|----------|-----------|-----------|--------------|
| cg08719486 | 1.24E-06 | 1.78E-07 | 5.42 | 6.1690058 | 1.12E-01 | 90112101  | 90112224  | NC_000009.11 |
| cg08762484 | 1.24E-06 | 1.78E-07 | 5.42 | 6.1687617 | 6.12E-02 | 125058884 | 125059007 | NC_000012.11 |
| cg14432018 | 1.24E-06 | 1.78E-07 | 5.42 | 6.1684597 | 7.83E-02 | 23892770  | 23892893  | NC_000015.9  |
| cg15692992 | 1.24E-06 | 1.78E-07 | 5.42 | 6.1675493 | 1.24E-01 | 112710428 | 112710551 | NC_000013.10 |
| cg03330377 | 1.24E-06 | 1.78E-07 | 5.42 | 6.1673324 | 3.49E-02 | 92242243  | 92242366  | NC_000007.13 |
| cg17472796 | 1.24E-06 | 1.78E-07 | 5.42 | 6.1672917 | 3.05E-02 | 72406685  | 72406808  | NC_000011.9  |
| cg27233338 | 1.24E-06 | 1.78E-07 | 5.42 | 6.1671513 | 5.32E-02 | 25101646  | 25101769  | NC_000015.9  |
| cg03696393 | 1.24E-06 | 1.78E-07 | 5.42 | 6.1668799 | 1.20E-02 | 107027491 | 107027614 | NC_000013.10 |
| cg27466999 | 1.24E-06 | 1.78E-07 | 5.42 | 6.1664749 | 5.18E-02 | 948246    | 948369    | NC_000016.9  |
| cg21770060 | 1.25E-06 | 1.78E-07 | 5.42 | 6.1658864 | 6.65E-02 | 159583545 | 159583668 | NC_000003.11 |
| cg02835467 | 1.25E-06 | 1.78E-07 | 5.42 | 6.1656595 | 1.72E-01 | 63417385  | 63417508  | NC_000018.9  |
| cg00461506 | 1.25E-06 | 1.79E-07 | 5.41 | 6.163944  | 4.35E-02 | 7106214   | 7106337   | NC_000007.13 |
| cg12852499 | 1.25E-06 | 1.79E-07 | 5.41 | 6.163799  | 9.70E-02 | 79170959  | 79171082  | NC_000013.10 |
| cg10245915 | 1.25E-06 | 1.79E-07 | 5.41 | 6.1632557 | 1.63E-01 | 119001478 | 119001601 | NC_000010.10 |
| cg08257133 | 1.25E-06 | 1.79E-07 | 5.41 | 6.1630562 | 6.10E-02 | 52711352  | 52711475  | NC_000012.11 |
| cg21249563 | 1.25E-06 | 1.79E-07 | 5.41 | 6.1630134 | 8.28E-02 | 29297717  | 29297840  | NC_000002.11 |
| cg09088190 | 1.25E-06 | 1.79E-07 | 5.41 | 6.1629348 | 4.42E-02 | 46656967  | 46657090  | NC_000006.11 |
| cg14239588 | 1.25E-06 | 1.79E-07 | 5.41 | 6.1618349 | 9.78E-02 | 23258573  | 23258696  | NC_000019.9  |
| cg13849066 | 1.25E-06 | 1.79E-07 | 5.41 | 6.1616798 | 6.87E-02 | 37331768  | 37331891  | NC_000017.10 |
| cg01840244 | 1.25E-06 | 1.79E-07 | 5.41 | 6.1610185 | 1.26E-02 | 45915264  | 45915387  | NC_000013.10 |
| cg11600186 | 1.25E-06 | 1.80E-07 | 5.41 | 6.1597067 | 9.79E-02 | 32945273  | 32945396  | NC_000006.11 |
| cg09494378 | 1.25E-06 | 1.80E-07 | 5.41 | 6.1591898 | 8.59E-02 | 18127503  | 18127626  | NC_000007.13 |
| cg03145999 | 1.25E-06 | 1.80E-07 | 5.41 | 6.1587627 | 1.69E-01 | 58629828  | 58629951  | NC_000019.9  |
| cg15480475 | 1.25E-06 | 1.80E-07 | 5.41 | 6.1580792 | 8.10E-02 | 8060060   | 8060183   | NC_000011.9  |
| cg00503302 | 1.26E-06 | 1.80E-07 | 5.41 | 6.1572588 | 1.17E-01 | 62355319  | 62355442  | NC_000003.11 |

|            |          |          |      |           |          |           |           |              |
|------------|----------|----------|------|-----------|----------|-----------|-----------|--------------|
| cg14239515 | 1.26E-06 | 1.80E-07 | 5.41 | 6.1557556 | 1.54E-01 | 38885242  | 38885365  | NC_000019.9  |
| cg06987468 | 1.26E-06 | 1.80E-07 | 5.41 | 6.1555722 | 1.37E-01 | 116963502 | 116963625 | NC_000007.13 |
| cg05569742 | 1.26E-06 | 1.80E-07 | 5.41 | 6.1555443 | 1.23E-01 | 122429414 | 122429537 | NC_000005.9  |
| cg05618683 | 1.26E-06 | 1.80E-07 | 5.41 | 6.1552102 | 5.97E-02 | 95040444  | 95040567  | NC_000010.10 |
| cg00779924 | 1.26E-06 | 1.80E-07 | 5.41 | 6.1547456 | 1.45E-01 | 8094641   | 8094764   | NC_000010.10 |
| cg00885918 | 1.26E-06 | 1.80E-07 | 5.41 | 6.154576  | 9.87E-02 | 30406997  | 30407120  | NC_000020.10 |
| cg05511872 | 1.26E-06 | 1.81E-07 | 5.41 | 6.1539428 | 1.12E-01 | 70824260  | 70824383  | NC_000011.9  |
| cg12044654 | 1.26E-06 | 1.81E-07 | 5.41 | 6.1537945 | 2.21E-02 | 139890342 | 139890465 | NC_000008.10 |
| cg13592022 | 1.26E-06 | 1.81E-07 | 5.41 | 6.1536855 | 5.95E-02 | 137111068 | 137111191 | NC_000009.11 |
| cg22503489 | 1.26E-06 | 1.81E-07 | 5.41 | 6.1533055 | 3.43E-02 | 122296027 | 122296150 | NC_000003.11 |
| cg23643100 | 1.26E-06 | 1.81E-07 | 5.41 | 6.1531473 | 5.73E-02 | 5012842   | 5012965   | NC_000007.13 |
| cg00188704 | 1.26E-06 | 1.81E-07 | 5.41 | 6.1528667 | 9.73E-02 | 27140797  | 27140920  | NC_000007.13 |
| cg04910970 | 1.26E-06 | 1.81E-07 | 5.41 | 6.1523183 | 9.89E-02 | 100053930 | 100054053 | NC_000006.11 |
| cg04927502 | 1.26E-06 | 1.81E-07 | 5.41 | 6.152089  | 1.40E-01 | 149889361 | 149889484 | NC_000001.10 |
| cg03791074 | 1.26E-06 | 1.81E-07 | 5.41 | 6.1518848 | 8.96E-02 | 1117852   | 1117975   | NC_000007.13 |
| cg03676298 | 1.26E-06 | 1.81E-07 | 5.41 | 6.1516818 | 4.93E-02 | 48078103  | 48078226  | NC_000003.11 |
| cg06830450 | 1.26E-06 | 1.81E-07 | 5.41 | 6.15132   | 1.15E-01 | 58121004  | 58121127  | NC_000012.11 |
| cg00016439 | 1.26E-06 | 1.81E-07 | 5.41 | 6.1510576 | 3.88E-02 | 55018650  | 55018773  | NC_000018.9  |
| cg02577108 | 1.26E-06 | 1.81E-07 | 5.41 | 6.1510279 | 1.49E-01 | 59478194  | 59478317  | NC_000017.10 |
| cg05819745 | 1.27E-06 | 1.81E-07 | 5.41 | 6.1491843 | 9.96E-02 | 71350743  | 71350866  | NC_000011.9  |
| cg07770129 | 1.27E-06 | 1.82E-07 | 5.41 | 6.1484914 | 7.33E-02 | 1345418   | 1345541   | NC_000008.10 |
| cg06606773 | 1.27E-06 | 1.82E-07 | 5.41 | 6.1483775 | 8.26E-02 | 63387053  | 63387176  | NC_000007.13 |
| cg16461251 | 1.27E-06 | 1.82E-07 | 5.41 | 6.1479355 | 1.21E-01 | 104640833 | 104640956 | NC_000004.11 |
| cg20648899 | 1.27E-06 | 1.82E-07 | 5.41 | 6.1479083 | 1.28E-01 | 94126141  | 94126264  | NC_000006.11 |
| cg21089584 | 1.27E-06 | 1.82E-07 | 5.41 | 6.1472471 | 6.36E-02 | 15385378  | 15385501  | NC_000006.11 |

|            |          |          |      |           |          |           |           |              |
|------------|----------|----------|------|-----------|----------|-----------|-----------|--------------|
| cg25936177 | 1.27E-06 | 1.82E-07 | 5.41 | 6.1464261 | 7.03E-02 | 89313056  | 89313179  | NC_000015.9  |
| cg23812680 | 1.27E-06 | 1.82E-07 | 5.41 | 6.1458944 | 1.17E-01 | 27561058  | 27561181  | NC_000006.11 |
| cg14716095 | 1.27E-06 | 1.82E-07 | 5.41 | 6.1443047 | 8.19E-02 | 20968690  | 20968813  | NC_000013.10 |
| cg04889069 | 1.27E-06 | 1.82E-07 | 5.41 | 6.1439993 | 9.13E-02 | 57030408  | 57030531  | NC_000008.10 |
| cg17023770 | 1.27E-06 | 1.83E-07 | 5.41 | 6.1429182 | 1.30E-01 | 140624874 | 140624997 | NC_000005.9  |
| cg05583171 | 1.28E-06 | 1.83E-07 | 5.41 | 6.1412042 | 8.81E-02 | 159382190 | 159382313 | NC_000005.9  |
| cg07018857 | 1.28E-06 | 1.83E-07 | 5.41 | 6.1409662 | 4.81E-02 | 239834442 | 239834565 | NC_000002.11 |
| cg18193764 | 1.28E-06 | 1.83E-07 | 5.41 | 6.1405272 | 1.38E-01 | 134879961 | 134880084 | NC_000005.9  |
| cg23348297 | 1.28E-06 | 1.83E-07 | 5.41 | 6.1398908 | 3.28E-02 | 134018798 | 134018921 | NC_000010.10 |
| cg18666249 | 1.28E-06 | 1.83E-07 | 5.41 | 6.1398833 | 5.61E-02 | 89670502  | 89670625  | NC_000014.8  |
| cg18382926 | 1.28E-06 | 1.83E-07 | 5.41 | 6.1390987 | 4.75E-02 | 1113624   | 1113747   | NC_000001.10 |
| cg09743615 | 1.28E-06 | 1.83E-07 | 5.41 | 6.138552  | 5.70E-02 | 69054431  | 69054554  | NC_000011.9  |
| cg14554491 | 1.28E-06 | 1.83E-07 | 5.41 | 6.138442  | 1.52E-01 | 4769093   | 4769216   | NC_000019.9  |
| cg21548220 | 1.28E-06 | 1.84E-07 | 5.41 | 6.1376392 | 7.70E-02 | 46284048  | 46284171  | NC_000019.9  |
| cg10860308 | 1.28E-06 | 1.84E-07 | 5.41 | 6.1356596 | 9.19E-02 | 124714384 | 124714507 | NC_000010.10 |
| cg27577928 | 1.28E-06 | 1.84E-07 | 5.41 | 6.1347708 | 9.80E-02 | 54975388  | 54975511  | NC_000004.11 |
| cg02604503 | 1.28E-06 | 1.84E-07 | 5.41 | 6.1345203 | 1.18E-01 | 134872315 | 134872438 | NC_000005.9  |
| cg17107893 | 1.28E-06 | 1.84E-07 | 5.41 | 6.1341674 | 1.09E-01 | 36912880  | 36913003  | NC_000019.9  |
| cg20971488 | 1.28E-06 | 1.84E-07 | 5.41 | 6.1335459 | 5.78E-02 | 228786295 | 228786418 | NC_000001.10 |
| cg27309276 | 1.28E-06 | 1.84E-07 | 5.41 | 6.1334613 | 1.64E-01 | 145718098 | 145718221 | NC_000005.9  |
| cg03075709 | 1.29E-06 | 1.84E-07 | 5.41 | 6.133205  | 1.61E-01 | 2755820   | 2755943   | NC_000005.9  |
| cg20037507 | 1.29E-06 | 1.85E-07 | 5.41 | 6.1331286 | 8.75E-02 | 62363248  | 62363371  | NC_000003.11 |
| cg14251267 | 1.29E-06 | 1.85E-07 | 5.41 | 6.1328515 | 7.79E-02 | 62406428  | 62406551  | NC_000020.10 |
| cg08817483 | 1.29E-06 | 1.85E-07 | 5.41 | 6.1328059 | 1.54E-01 | 20744547  | 20744670  | NC_000017.10 |
| cg07765161 | 1.29E-06 | 1.85E-07 | 5.41 | 6.1324714 | 1.00E-01 | 1272325   | 1272448   | NC_000007.13 |



|            |          |          |      |           |          |           |           |              |
|------------|----------|----------|------|-----------|----------|-----------|-----------|--------------|
| cg11613427 | 1.29E-06 | 1.85E-07 | 5.41 | 6.1312173 | 1.10E-01 | 52932208  | 52932331  | NC_000003.11 |
| cg26305817 | 1.29E-06 | 1.85E-07 | 5.41 | 6.1310288 | 1.31E-01 | 172656055 | 172656178 | NC_000005.9  |
| cg14415885 | 1.29E-06 | 1.85E-07 | 5.41 | 6.1309458 | 1.07E-01 | 119531122 | 119531245 | NC_000001.10 |
| cg21907579 | 1.29E-06 | 1.85E-07 | 5.41 | 6.1302568 | 1.43E-01 | 114845868 | 114845991 | NC_000012.11 |
| cg11391201 | 1.29E-06 | 1.85E-07 | 5.41 | 6.1291264 | 1.09E-01 | 44333070  | 44333193  | NC_000011.9  |
| cg23603852 | 1.29E-06 | 1.85E-07 | 5.41 | 6.1287248 | 5.47E-02 | 105233423 | 105233546 | NC_000010.10 |
| cg18599750 | 1.29E-06 | 1.85E-07 | 5.41 | 6.1281177 | 4.48E-02 | 99664910  | 99665033  | NC_000014.8  |
| cg08652369 | 1.29E-06 | 1.85E-07 | 5.41 | 6.1279999 | 3.02E-02 | 66429805  | 66429928  | NC_000003.11 |
| cg22931604 | 1.29E-06 | 1.86E-07 | 5.41 | 6.1277938 | 9.64E-02 | 129694392 | 129694515 | NC_000003.11 |
| cg11804692 | 1.29E-06 | 1.86E-07 | 5.41 | 6.1269498 | 5.86E-02 | 2777158   | 2777281   | NC_000001.10 |
| cg25015271 | 1.29E-06 | 1.86E-07 | 5.41 | 6.1266623 | 4.96E-02 | 76818797  | 76818920  | NC_000010.10 |
| cg16435782 | 1.29E-06 | 1.86E-07 | 5.41 | 6.126218  | 5.67E-02 | 39087399  | 39087522  | NC_000021.8  |
| cg05051550 | 1.29E-06 | 1.86E-07 | 5.41 | 6.1261345 | 6.81E-02 | 106766775 | 106766898 | NC_000004.11 |
| cg04597985 | 1.29E-06 | 1.86E-07 | 5.41 | 6.1260198 | 9.36E-02 | 138114706 | 138114829 | NC_000004.11 |
| cg03883331 | 1.29E-06 | 1.86E-07 | 5.41 | 6.1259308 | 4.81E-02 | 244217328 | 244217451 | NC_000001.10 |
| cg14346208 | 1.29E-06 | 1.86E-07 | 5.41 | 6.1258986 | 1.34E-01 | 35547548  | 35547671  | NC_000011.9  |
| cg23041896 | 1.29E-06 | 1.86E-07 | 5.41 | 6.1256387 | 3.70E-02 | 144462235 | 144462358 | NC_000008.10 |
| cg23102129 | 1.30E-06 | 1.86E-07 | 5.41 | 6.1250576 | 3.56E-02 | 42926481  | 42926604  | NC_000005.9  |
| cg27295963 | 1.30E-06 | 1.86E-07 | 5.41 | 6.1248479 | 1.12E-01 | 56622951  | 56623074  | NC_000016.9  |
| cg08410039 | 1.30E-06 | 1.86E-07 | 5.41 | 6.124012  | 6.26E-02 | 41043711  | 41043834  | NC_000015.9  |
| cg17412464 | 1.30E-06 | 1.86E-07 | 5.41 | 6.123771  | 4.29E-02 | 141993376 | 141993499 | NC_000005.9  |
| cg13535593 | 1.30E-06 | 1.86E-07 | 5.41 | 6.1236841 | 1.53E-01 | 3786125   | 3786248   | NC_000019.9  |
| cg23984446 | 1.30E-06 | 1.86E-07 | 5.41 | 6.1232946 | 8.22E-02 | 56756800  | 56756923  | NC_000011.9  |
| cg01175550 | 1.30E-06 | 1.86E-07 | 5.41 | 6.1231908 | 1.23E-01 | 27147206  | 27147329  | NC_000007.13 |
| cg15723709 | 1.30E-06 | 1.86E-07 | 5.41 | 6.1227589 | 1.35E-01 | 44337982  | 44338105  | NC_000011.9  |

|            |          |          |      |           |          |           |           |              |
|------------|----------|----------|------|-----------|----------|-----------|-----------|--------------|
| cg27091617 | 1.30E-06 | 1.87E-07 | 5.41 | 6.1225675 | 6.40E-02 | 6114699   | 6114822   | NC_000004.11 |
| cg23982315 | 1.30E-06 | 1.87E-07 | 5.41 | 6.1225598 | 8.88E-03 | 15005487  | 15005610  | NC_000004.11 |
| cg05301866 | 1.30E-06 | 1.87E-07 | 5.41 | 6.1224246 | 9.03E-02 | 162279964 | 162280087 | NC_000002.11 |
| cg22797735 | 1.30E-06 | 1.87E-07 | 5.41 | 6.122397  | 1.73E-01 | 115122157 | 115122280 | NC_000012.11 |
| cg06482783 | 1.30E-06 | 1.87E-07 | 5.41 | 6.1220198 | 4.21E-02 | 115289176 | 115289299 | NC_000005.9  |
| cg02450725 | 1.30E-06 | 1.87E-07 | 5.41 | 6.1213293 | 3.31E-02 | 75502873  | 75502996  | NC_000017.10 |
| cg03302386 | 1.30E-06 | 1.87E-07 | 5.41 | 6.121027  | 4.84E-02 | 38069204  | 38069327  | NC_000003.11 |
| cg21291771 | 1.30E-06 | 1.87E-07 | 5.41 | 6.1208733 | 6.30E-02 | 38954603  | 38954726  | NC_000017.10 |
| cg27573888 | 1.30E-06 | 1.87E-07 | 5.41 | 6.1208539 | 1.59E-02 | 28206343  | 28206466  | NC_000001.10 |
| cg15760840 | 1.30E-06 | 1.87E-07 | 5.41 | 6.1204456 | 1.31E-01 | 27225222  | 27225345  | NC_000007.13 |
| cg14698025 | 1.30E-06 | 1.87E-07 | 5.41 | 6.1198177 | 5.27E-02 | 1245418   | 1245541   | NC_000010.10 |
| cg21662506 | 1.30E-06 | 1.87E-07 | 5.41 | 6.1195678 | 9.93E-02 | 167956425 | 167956548 | NC_000005.9  |
| cg19787532 | 1.30E-06 | 1.87E-07 | 5.41 | 6.1193024 | 1.27E-01 | 114841880 | 114842003 | NC_000012.11 |
| cg05404698 | 1.30E-06 | 1.87E-07 | 5.41 | 6.1188518 | 2.03E-01 | 28956247  | 28956370  | NC_000006.11 |
| cg11864201 | 1.30E-06 | 1.87E-07 | 5.41 | 6.1187897 | 6.95E-02 | 77997198  | 77997321  | NC_000017.10 |
| cg21579274 | 1.30E-06 | 1.87E-07 | 5.41 | 6.118362  | 1.22E-01 | 115138445 | 115138568 | NC_000012.11 |
| cg21978924 | 1.30E-06 | 1.87E-07 | 5.41 | 6.1177667 | 1.07E-01 | 44332756  | 44332879  | NC_000011.9  |
| cg20227806 | 1.30E-06 | 1.87E-07 | 5.41 | 6.1176291 | 1.29E-01 | 40678760  | 40678883  | NC_000002.11 |
| cg09176539 | 1.30E-06 | 1.88E-07 | 5.41 | 6.1173503 | 7.43E-02 | 49580074  | 49580197  | NC_000011.9  |
| cg20755748 | 1.30E-06 | 1.88E-07 | 5.41 | 6.1169313 | 7.85E-02 | 31799116  | 31799239  | NC_000012.11 |
| cg11198128 | 1.31E-06 | 1.88E-07 | 5.4  | 6.1166595 | 1.90E-01 | 65601332  | 65601455  | NC_000011.9  |
| cg09416313 | 1.31E-06 | 1.88E-07 | 5.4  | 6.1163383 | 1.66E-01 | 3801727   | 3801850   | NC_000019.9  |
| cg13345375 | 1.31E-06 | 1.88E-07 | 5.4  | 6.1160672 | 6.17E-02 | 10382269  | 10382392  | NC_000003.11 |
| cg04943225 | 1.31E-06 | 1.88E-07 | 5.4  | 6.11582   | 1.05E-01 | 47799165  | 47799288  | NC_000002.11 |
| cg27400216 | 1.31E-06 | 1.88E-07 | 5.4  | 6.1147474 | 7.61E-02 | 56702913  | 56703036  | NC_000018.9  |

|            |          |          |     |           |          |           |           |              |
|------------|----------|----------|-----|-----------|----------|-----------|-----------|--------------|
| cg27195326 | 1.31E-06 | 1.88E-07 | 5.4 | 6.1144572 | 1.01E-01 | 41087459  | 41087582  | NC_000012.11 |
| cg09482777 | 1.31E-06 | 1.88E-07 | 5.4 | 6.1143363 | 1.40E-01 | 80531645  | 80531768  | NC_000002.11 |
| cg27464144 | 1.31E-06 | 1.88E-07 | 5.4 | 6.1139525 | 1.01E-01 | 66951572  | 66951695  | NC_000017.10 |
| cg26527487 | 1.31E-06 | 1.88E-07 | 5.4 | 6.113949  | 1.54E-01 | 99469819  | 99469942  | NC_000001.10 |
| cg07005513 | 1.31E-06 | 1.88E-07 | 5.4 | 6.1139003 | 1.15E-01 | 61595956  | 61596079  | NC_000011.9  |
| cg12012886 | 1.31E-06 | 1.88E-07 | 5.4 | 6.1132067 | 4.33E-02 | 92168191  | 92168314  | NC_000007.13 |
| cg20806345 | 1.31E-06 | 1.89E-07 | 5.4 | 6.1122495 | 1.14E-01 | 182543706 | 182543829 | NC_000002.11 |
| cg19592720 | 1.31E-06 | 1.89E-07 | 5.4 | 6.111447  | 1.14E-01 | 95971840  | 95971963  | NC_000002.11 |
| cg02092785 | 1.31E-06 | 1.89E-07 | 5.4 | 6.1114436 | 1.44E-01 | 13012998  | 13013121  | NC_000006.11 |
| cg12529457 | 1.31E-06 | 1.89E-07 | 5.4 | 6.1110192 | 6.13E-02 | 240428927 | 240429050 | NC_000002.11 |
| cg03454017 | 1.31E-06 | 1.89E-07 | 5.4 | 6.1108098 | 1.10E-01 | 71479333  | 71479456  | NC_000015.9  |
| cg21544805 | 1.31E-06 | 1.89E-07 | 5.4 | 6.110191  | 8.98E-02 | 8334656   | 8334779   | NC_000001.10 |
| cg12878216 | 1.31E-06 | 1.89E-07 | 5.4 | 6.1101347 | 4.93E-02 | 74909201  | 74909324  | NC_000006.11 |
| cg11208165 | 1.31E-06 | 1.89E-07 | 5.4 | 6.1094168 | 1.10E-01 | 16308357  | 16308480  | NC_000003.11 |
| cg23623681 | 1.31E-06 | 1.89E-07 | 5.4 | 6.1093418 | 5.78E-02 | 32042797  | 32042920  | NC_000006.11 |
| cg20433989 | 1.31E-06 | 1.89E-07 | 5.4 | 6.1092287 | 1.03E-01 | 49683801  | 49683924  | NC_000013.10 |
| cg13486532 | 1.31E-06 | 1.89E-07 | 5.4 | 6.1089    | 1.55E-01 | 10421460  | 10421583  | NC_000006.11 |
| cg15245556 | 1.31E-06 | 1.89E-07 | 5.4 | 6.1087893 | 9.31E-02 | 49843259  | 49843382  | NC_000022.10 |
| cg03371043 | 1.32E-06 | 1.90E-07 | 5.4 | 6.1070986 | 3.46E-02 | 31930833  | 31930956  | NC_000006.11 |
| cg04546917 | 1.32E-06 | 1.90E-07 | 5.4 | 6.1069566 | 4.98E-02 | 73667384  | 73667507  | NC_000017.10 |
| cg19734465 | 1.32E-06 | 1.90E-07 | 5.4 | 6.1068825 | 1.20E-01 | 140767412 | 140767535 | NC_000005.9  |
| cg01605516 | 1.32E-06 | 1.90E-07 | 5.4 | 6.1065347 | 2.89E-02 | 152369723 | 152369846 | NC_000007.13 |
| cg24802014 | 1.32E-06 | 1.90E-07 | 5.4 | 6.1061996 | 1.31E-01 | 30717755  | 30717878  | NC_000019.9  |
| cg01832737 | 1.32E-06 | 1.90E-07 | 5.4 | 6.1059817 | 1.31E-01 | 166075022 | 166075145 | NC_000006.11 |
| cg19921286 | 1.32E-06 | 1.90E-07 | 5.4 | 6.1055803 | 7.96E-02 | 201118305 | 201118428 | NC_000002.11 |

|            |          |          |     |           |          |           |           |              |
|------------|----------|----------|-----|-----------|----------|-----------|-----------|--------------|
| cg05123263 | 1.32E-06 | 1.90E-07 | 5.4 | 6.1049899 | 1.00E-01 | 131223404 | 131223527 | NC_000010.10 |
| cg00469856 | 1.32E-06 | 1.90E-07 | 5.4 | 6.1037668 | 7.92E-02 | 71017557  | 71017680  | NC_000002.11 |
| cg26150071 | 1.32E-06 | 1.90E-07 | 5.4 | 6.1037124 | 1.79E-01 | 34629559  | 34629682  | NC_000001.10 |
| cg07650681 | 1.32E-06 | 1.90E-07 | 5.4 | 6.1030291 | 1.36E-01 | 43885007  | 43885130  | NC_000006.11 |
| cg04518195 | 1.32E-06 | 1.90E-07 | 5.4 | 6.1028866 | 8.46E-02 | 51020534  | 51020657  | NC_000019.9  |
| cg10608596 | 1.32E-06 | 1.90E-07 | 5.4 | 6.1026258 | 1.35E-01 | 11785125  | 11785248  | NC_000019.9  |
| cg02817030 | 1.32E-06 | 1.91E-07 | 5.4 | 6.1019709 | 1.50E-01 | 20833508  | 20833631  | NC_000007.13 |
| cg00165078 | 1.32E-06 | 1.91E-07 | 5.4 | 6.101207  | 6.75E-02 | 94799132  | 94799255  | NC_000001.10 |
| cg00002769 | 1.33E-06 | 1.91E-07 | 5.4 | 6.1007432 | 3.87E-02 | 90002618  | 90002741  | NC_000016.9  |
| cg15030397 | 1.33E-06 | 1.91E-07 | 5.4 | 6.1006487 | 8.87E-02 | 140764679 | 140764802 | NC_000005.9  |
| cg03127886 | 1.33E-06 | 1.91E-07 | 5.4 | 6.1002756 | 7.70E-02 | 85966237  | 85966360  | NC_000016.9  |
| cg23874561 | 1.33E-06 | 1.91E-07 | 5.4 | 6.0996735 | 1.52E-01 | 81124484  | 81124607  | NC_000004.11 |
| cg02936931 | 1.33E-06 | 1.91E-07 | 5.4 | 6.0995438 | 7.42E-02 | 134856977 | 134857100 | NC_000006.11 |
| cg15035382 | 1.33E-06 | 1.91E-07 | 5.4 | 6.099004  | 4.94E-02 | 40728255  | 40728378  | NC_000019.9  |
| cg25008263 | 1.33E-06 | 1.91E-07 | 5.4 | 6.0983571 | 9.65E-02 | 89884608  | 89884731  | NC_000014.8  |
| cg02330121 | 1.33E-06 | 1.91E-07 | 5.4 | 6.0972058 | 1.25E-01 | 118228514 | 118228637 | NC_000006.11 |
| cg22354782 | 1.33E-06 | 1.92E-07 | 5.4 | 6.096318  | 1.14E-01 | 115881132 | 115881255 | NC_000001.10 |
| cg24069286 | 1.33E-06 | 1.92E-07 | 5.4 | 6.0963121 | 1.05E-01 | 186300477 | 186300600 | NC_000004.11 |
| cg26103526 | 1.33E-06 | 1.92E-07 | 5.4 | 6.0961397 | 2.29E-02 | 55212952  | 55213075  | NC_000005.9  |
| cg02620015 | 1.33E-06 | 1.92E-07 | 5.4 | 6.0958121 | 2.88E-02 | 127341229 | 127341352 | NC_000003.11 |
| cg18822036 | 1.33E-06 | 1.92E-07 | 5.4 | 6.0955105 | 7.07E-02 | 131371659 | 131371782 | NC_000008.10 |
| cg09833158 | 1.33E-06 | 1.92E-07 | 5.4 | 6.0953494 | 9.81E-02 | 51823006  | 51823129  | NC_000014.8  |
| cg27565473 | 1.33E-06 | 1.92E-07 | 5.4 | 6.095194  | 6.56E-02 | 47398007  | 47398130  | NC_000003.11 |
| cg04603391 | 1.33E-06 | 1.92E-07 | 5.4 | 6.0943493 | 8.74E-02 | 31844056  | 31844179  | NC_000019.9  |
| cg23038824 | 1.33E-06 | 1.92E-07 | 5.4 | 6.0938954 | 5.02E-02 | 66676634  | 66676757  | NC_000011.9  |

|            |          |          |     |           |          |           |           |              |
|------------|----------|----------|-----|-----------|----------|-----------|-----------|--------------|
| cg13906082 | 1.33E-06 | 1.92E-07 | 5.4 | 6.0937916 | 2.19E-02 | 110482541 | 110482664 | NC_000009.11 |
| cg18050139 | 1.33E-06 | 1.92E-07 | 5.4 | 6.0935089 | 5.77E-02 | 117099208 | 117099331 | NC_000012.11 |
| cg22251117 | 1.34E-06 | 1.92E-07 | 5.4 | 6.0927873 | 5.72E-02 | 182954    | 183077    | NC_000017.10 |
| cg19949550 | 1.34E-06 | 1.92E-07 | 5.4 | 6.0927744 | 6.26E-02 | 94423704  | 94423827  | NC_000014.8  |
| cg21410276 | 1.34E-06 | 1.92E-07 | 5.4 | 6.092603  | 6.11E-02 | 71507686  | 71507809  | NC_000015.9  |
| cg11777870 | 1.34E-06 | 1.93E-07 | 5.4 | 6.0918913 | 5.03E-02 | 52191937  | 52192060  | NC_000014.8  |
| cg19886978 | 1.34E-06 | 1.93E-07 | 5.4 | 6.0918202 | 2.37E-02 | 63967183  | 63967306  | NC_000015.9  |
| cg14106584 | 1.34E-06 | 1.93E-07 | 5.4 | 6.0917164 | 6.30E-02 | 45737537  | 45737660  | NC_000009.11 |
| cg06095270 | 1.34E-06 | 1.93E-07 | 5.4 | 6.0902684 | 1.01E-01 | 100060980 | 100061103 | NC_000006.11 |
| cg01076272 | 1.34E-06 | 1.93E-07 | 5.4 | 6.0899325 | 1.07E-01 | 86320281  | 86320404  | NC_000016.9  |
| cg01429662 | 1.34E-06 | 1.93E-07 | 5.4 | 6.0891137 | 2.04E-01 | 47210162  | 47210285  | NC_000017.10 |
| cg16573782 | 1.34E-06 | 1.93E-07 | 5.4 | 6.0890562 | 1.49E-01 | 49315536  | 49315659  | NC_000016.9  |
| cg02758236 | 1.34E-06 | 1.93E-07 | 5.4 | 6.0889365 | 1.44E-01 | 128562003 | 128562126 | NC_000011.9  |
| cg25486432 | 1.34E-06 | 1.93E-07 | 5.4 | 6.0886035 | 4.67E-02 | 24737336  | 24737459  | NC_000012.11 |
| cg26491484 | 1.34E-06 | 1.93E-07 | 5.4 | 6.0873901 | 5.00E-02 | 133885058 | 133885181 | NC_000009.11 |
| cg07724304 | 1.34E-06 | 1.94E-07 | 5.4 | 6.0868488 | 3.28E-02 | 73509955  | 73510078  | NC_000017.10 |
| cg17852564 | 1.34E-06 | 1.94E-07 | 5.4 | 6.0868276 | 8.46E-02 | 51806490  | 51806613  | NC_000001.10 |
| cg10086659 | 1.34E-06 | 1.94E-07 | 5.4 | 6.0861917 | 1.00E-01 | 177040226 | 177040349 | NC_000002.11 |
| cg10683929 | 1.34E-06 | 1.94E-07 | 5.4 | 6.085675  | 1.01E-01 | 147077354 | 147077477 | NC_000003.11 |
| cg01841306 | 1.35E-06 | 1.94E-07 | 5.4 | 6.0842043 | 1.12E-01 | 908923    | 909046    | NC_000017.10 |
| cg00997310 | 1.35E-06 | 1.94E-07 | 5.4 | 6.0837332 | 5.04E-02 | 3789280   | 3789403   | NC_000001.10 |
| cg11421160 | 1.35E-06 | 1.94E-07 | 5.4 | 6.0826493 | 3.94E-02 | 17949565  | 17949688  | NC_000001.10 |
| cg12565679 | 1.35E-06 | 1.94E-07 | 5.4 | 6.0825158 | 6.21E-02 | 135283016 | 135283139 | NC_000005.9  |
| cg27634151 | 1.35E-06 | 1.95E-07 | 5.4 | 6.0805572 | 1.12E-01 | 94134646  | 94134769  | NC_000011.9  |
| cg15531369 | 1.35E-06 | 1.95E-07 | 5.4 | 6.0792217 | 7.24E-02 | 49993157  | 49993280  | NC_000019.9  |

|            |          |          |      |           |          |           |           |              |
|------------|----------|----------|------|-----------|----------|-----------|-----------|--------------|
| cg24548682 | 1.35E-06 | 1.95E-07 | 5.4  | 6.0788745 | 1.58E-01 | 57687768  | 57687891  | NC_000004.11 |
| cg04384033 | 1.35E-06 | 1.95E-07 | 5.4  | 6.0787272 | 6.87E-02 | 173111646 | 173111769 | NC_000003.11 |
| cg10473266 | 1.35E-06 | 1.95E-07 | 5.4  | 6.0785736 | 6.91E-02 | 112548728 | 112548851 | NC_000005.9  |
| cg08129129 | 1.35E-06 | 1.95E-07 | 5.4  | 6.0782892 | 4.37E-02 | 99714031  | 99714154  | NC_000014.8  |
| cg16562959 | 1.36E-06 | 1.95E-07 | 5.4  | 6.077294  | 1.43E-01 | 166419479 | 166419602 | NC_000006.11 |
| cg20253855 | 1.36E-06 | 1.95E-07 | 5.4  | 6.0770283 | 8.95E-02 | 101762511 | 101762634 | NC_000007.13 |
| cg12865552 | 1.36E-06 | 1.96E-07 | 5.4  | 6.0765026 | 1.59E-01 | 77721631  | 77721754  | NC_000017.10 |
| cg27309702 | 1.36E-06 | 1.96E-07 | 5.4  | 6.0762985 | 3.97E-02 | 57792310  | 57792433  | NC_000016.9  |
| cg05053688 | 1.36E-06 | 1.96E-07 | 5.4  | 6.0758257 | 1.10E-01 | 101702744 | 101702867 | NC_000001.10 |
| cg05753046 | 1.36E-06 | 1.96E-07 | 5.4  | 6.074812  | 7.77E-02 | 67801224  | 67801347  | NC_000011.9  |
| cg14458068 | 1.36E-06 | 1.96E-07 | 5.4  | 6.0743328 | 1.18E-01 | 140772256 | 140772379 | NC_000005.9  |
| cg09682330 | 1.36E-06 | 1.96E-07 | 5.4  | 6.0727996 | 1.65E-01 | 28411287  | 28411410  | NC_000006.11 |
| cg00913283 | 1.36E-06 | 1.96E-07 | 5.4  | 6.0723246 | 6.40E-02 | 4832340   | 4832463   | NC_000007.13 |
| cg26780333 | 1.36E-06 | 1.97E-07 | 5.4  | 6.0718763 | 8.20E-02 | 74058972  | 74059095  | NC_000014.8  |
| cg25344367 | 1.36E-06 | 1.97E-07 | 5.4  | 6.0718745 | 2.88E-02 | 44220337  | 44220460  | NC_000019.9  |
| cg20414186 | 1.36E-06 | 1.97E-07 | 5.4  | 6.0711487 | 1.00E-01 | 32064491  | 32064614  | NC_000006.11 |
| cg03388193 | 1.37E-06 | 1.97E-07 | 5.4  | 6.0699002 | 1.43E-01 | 100996070 | 100996193 | NC_000010.10 |
| cg00251610 | 1.37E-06 | 1.97E-07 | 5.39 | 6.0691825 | 1.55E-01 | 158527817 | 158527940 | NC_000005.9  |
| cg18611828 | 1.37E-06 | 1.97E-07 | 5.39 | 6.0689301 | 4.82E-02 | 3284127   | 3284250   | NC_000010.10 |
| cg13570487 | 1.37E-06 | 1.97E-07 | 5.39 | 6.0686005 | 6.71E-02 | 142574509 | 142574632 | NC_000007.13 |
| cg25038311 | 1.37E-06 | 1.97E-07 | 5.39 | 6.0685467 | 1.31E-01 | 104964751 | 104964874 | NC_000010.10 |
| cg05467716 | 1.37E-06 | 1.97E-07 | 5.39 | 6.0671748 | 9.48E-02 | 62774079  | 62774202  | NC_000017.10 |
| cg04637809 | 1.37E-06 | 1.97E-07 | 5.39 | 6.0671239 | 4.48E-02 | 32822480  | 32822603  | NC_000016.9  |
| cg06667761 | 1.37E-06 | 1.97E-07 | 5.39 | 6.067086  | 1.09E-01 | 134073627 | 134073750 | NC_000004.11 |
| cg15320272 | 1.37E-06 | 1.98E-07 | 5.39 | 6.0658822 | 3.42E-02 | 48677773  | 48677896  | NC_000003.11 |

|            |          |          |      |           |          |           |           |              |
|------------|----------|----------|------|-----------|----------|-----------|-----------|--------------|
| cg15736336 | 1.37E-06 | 1.98E-07 | 5.39 | 6.065511  | 3.09E-02 | 18891214  | 18891337  | NC_000012.11 |
| cg09512236 | 1.37E-06 | 1.98E-07 | 5.39 | 6.0645656 | 1.40E-01 | 79398415  | 79398538  | NC_000010.10 |
| cg06050065 | 1.37E-06 | 1.98E-07 | 5.39 | 6.0644841 | 3.60E-02 | 41113316  | 41113439  | NC_000017.10 |
| cg04274199 | 1.37E-06 | 1.98E-07 | 5.39 | 6.0643397 | 6.67E-02 | 47334057  | 47334180  | NC_000021.8  |
| cg11073773 | 1.37E-06 | 1.98E-07 | 5.39 | 6.0639995 | 1.05E-01 | 25897512  | 25897635  | NC_000007.13 |
| cg21392341 | 1.37E-06 | 1.98E-07 | 5.39 | 6.0638809 | 1.68E-01 | 119530677 | 119530800 | NC_000001.10 |
| cg05379541 | 1.38E-06 | 1.99E-07 | 5.39 | 6.0617089 | 1.47E-01 | 27252541  | 27252664  | NC_000007.13 |
| cg14269813 | 1.38E-06 | 1.99E-07 | 5.39 | 6.0608174 | 1.30E-01 | 3899055   | 3899178   | NC_000009.11 |
| cg06666008 | 1.38E-06 | 1.99E-07 | 5.39 | 6.0595122 | 1.03E-01 | 31819464  | 31819587  | NC_000011.9  |
| cg10257905 | 1.38E-06 | 1.99E-07 | 5.39 | 6.0582673 | 9.76E-02 | 12568092  | 12568215  | NC_000017.10 |
| cg00476430 | 1.38E-06 | 1.99E-07 | 5.39 | 6.0576843 | 5.36E-02 | 81947741  | 81947864  | NC_000008.10 |
| cg20090283 | 1.38E-06 | 1.99E-07 | 5.39 | 6.0572762 | 8.27E-02 | 36718549  | 36718672  | NC_000017.10 |
| cg09920172 | 1.38E-06 | 2.00E-07 | 5.39 | 6.0570817 | 9.85E-02 | 3870806   | 3870929   | NC_000019.9  |
| cg27404023 | 1.38E-06 | 2.00E-07 | 5.39 | 6.0553869 | 1.30E-01 | 162283994 | 162284117 | NC_000002.11 |
| cg18156592 | 1.38E-06 | 2.00E-07 | 5.39 | 6.0553229 | 1.57E-01 | 69143889  | 69144012  | NC_000003.11 |
| cg27363327 | 1.38E-06 | 2.00E-07 | 5.39 | 6.0552852 | 1.95E-01 | 43211208  | 43211331  | NC_000006.11 |
| cg27022678 | 1.38E-06 | 2.00E-07 | 5.39 | 6.0549526 | 5.55E-02 | 140563942 | 140564065 | NC_000005.9  |
| cg22639011 | 1.39E-06 | 2.00E-07 | 5.39 | 6.0538722 | 1.20E-01 | 30037875  | 30037998  | NC_000011.9  |
| cg27043531 | 1.39E-06 | 2.00E-07 | 5.39 | 6.0535497 | 4.81E-02 | 21965934  | 21966057  | NC_000006.11 |
| cg22603562 | 1.39E-06 | 2.00E-07 | 5.39 | 6.0531386 | 8.05E-02 | 50939919  | 50940042  | NC_000019.9  |
| cg18892624 | 1.39E-06 | 2.00E-07 | 5.39 | 6.0526014 | 7.35E-02 | 149973088 | 149973211 | NC_000007.13 |
| cg08577231 | 1.39E-06 | 2.01E-07 | 5.39 | 6.0521049 | 1.70E-02 | 403800    | 403923    | NC_000016.9  |
| cg02772711 | 1.39E-06 | 2.01E-07 | 5.39 | 6.0518801 | 3.24E-02 | 68770156  | 68770279  | NC_000012.11 |
| cg04373435 | 1.39E-06 | 2.01E-07 | 5.39 | 6.0514833 | 1.59E-01 | 79738582  | 79738705  | NC_000002.11 |
| cg22325703 | 1.39E-06 | 2.01E-07 | 5.39 | 6.0512416 | 1.28E-01 | 94134235  | 94134358  | NC_000011.9  |

|            |          |          |      |           |          |           |           |              |
|------------|----------|----------|------|-----------|----------|-----------|-----------|--------------|
| cg23235334 | 1.39E-06 | 2.01E-07 | 5.39 | 6.0509229 | 1.38E-01 | 4382099   | 4382222   | NC_000012.11 |
| cg09814128 | 1.39E-06 | 2.01E-07 | 5.39 | 6.0502806 | 1.23E-01 | 178243783 | 178243906 | NC_000004.11 |
| cg08908306 | 1.39E-06 | 2.01E-07 | 5.39 | 6.0502533 | 6.58E-02 | 130268585 | 130268708 | NC_000010.10 |
| cg19725474 | 1.39E-06 | 2.01E-07 | 5.39 | 6.0499849 | 3.53E-02 | 51172257  | 51172380  | NC_000014.8  |
| cg00445475 | 1.39E-06 | 2.01E-07 | 5.39 | 6.0498481 | 1.20E-01 | 138628673 | 138628796 | NC_000009.11 |
| cg06722216 | 1.39E-06 | 2.01E-07 | 5.39 | 6.049549  | 1.45E-01 | 31803067  | 31803190  | NC_000018.9  |
| cg11073381 | 1.39E-06 | 2.01E-07 | 5.39 | 6.0490161 | 1.04E-01 | 54305205  | 54305328  | NC_000017.10 |
| cg13997788 | 1.39E-06 | 2.01E-07 | 5.39 | 6.0486133 | 5.22E-02 | 46593223  | 46593346  | NC_000002.11 |
| cg07717903 | 1.39E-06 | 2.01E-07 | 5.39 | 6.0486087 | 8.56E-02 | 140753536 | 140753659 | NC_000005.9  |
| cg05344295 | 1.39E-06 | 2.01E-07 | 5.39 | 6.047624  | 1.55E-01 | 54411509  | 54411632  | NC_000019.9  |
| cg11613902 | 1.39E-06 | 2.02E-07 | 5.39 | 6.0475219 | 1.10E-01 | 98156120  | 98156243  | NC_000010.10 |
| cg13629563 | 1.39E-06 | 2.02E-07 | 5.39 | 6.0474958 | 1.49E-01 | 25256949  | 25257072  | NC_000001.10 |
| cg02925601 | 1.39E-06 | 2.02E-07 | 5.39 | 6.0471778 | 1.40E-01 | 27648605  | 27648728  | NC_000006.11 |
| cg07525267 | 1.40E-06 | 2.02E-07 | 5.39 | 6.0468469 | 5.81E-02 | 1016356   | 1016479   | NC_000005.9  |
| cg05053818 | 1.40E-06 | 2.02E-07 | 5.39 | 6.0453642 | 9.77E-02 | 31618987  | 31619110  | NC_000006.11 |
| cg16615388 | 1.40E-06 | 2.02E-07 | 5.39 | 6.0449458 | 4.73E-02 | 19401411  | 19401534  | NC_000008.10 |
| cg04996195 | 1.40E-06 | 2.02E-07 | 5.39 | 6.0447085 | 1.04E-01 | 87105398  | 87105521  | NC_000007.13 |
| cg01798806 | 1.40E-06 | 2.02E-07 | 5.39 | 6.0446998 | 6.50E-02 | 143318983 | 143319106 | NC_000008.10 |
| cg23651872 | 1.40E-06 | 2.02E-07 | 5.39 | 6.0444808 | 1.67E-01 | 77924733  | 77924856  | NC_000017.10 |
| cg10087771 | 1.40E-06 | 2.02E-07 | 5.39 | 6.0440016 | 4.89E-02 | 103399429 | 103399552 | NC_000014.8  |
| cg18482593 | 1.40E-06 | 2.02E-07 | 5.39 | 6.0438247 | 4.89E-02 | 126147781 | 126147904 | NC_000011.9  |
| cg01776298 | 1.40E-06 | 2.02E-07 | 5.39 | 6.0437997 | 7.63E-02 | 23767194  | 23767317  | NC_000016.9  |
| cg24944017 | 1.40E-06 | 2.03E-07 | 5.39 | 6.0422632 | 2.71E-02 | 45128886  | 45129009  | NC_000003.11 |
| cg10140794 | 1.40E-06 | 2.03E-07 | 5.39 | 6.0417766 | 1.23E-01 | 36066972  | 36067095  | NC_000005.9  |
| cg23863000 | 1.40E-06 | 2.03E-07 | 5.39 | 6.0415846 | 1.03E-01 | 1577945   | 1578068   | NC_000004.11 |



|            |          |          |      |           |          |           |           |              |
|------------|----------|----------|------|-----------|----------|-----------|-----------|--------------|
| cg24027679 | 1.40E-06 | 2.03E-07 | 5.39 | 6.0414583 | 9.13E-02 | 9086621   | 9086744   | NC_000001.10 |
| cg13042543 | 1.40E-06 | 2.03E-07 | 5.39 | 6.04061   | 1.87E-01 | 30640256  | 30640379  | NC_000020.10 |
| cg03775632 | 1.40E-06 | 2.03E-07 | 5.39 | 6.0397463 | 3.38E-02 | 134632344 | 134632467 | NC_000007.13 |
| cg17755508 | 1.41E-06 | 2.03E-07 | 5.39 | 6.0394741 | 4.35E-02 | 58290733  | 58290856  | NC_000003.11 |
| cg22718169 | 1.41E-06 | 2.04E-07 | 5.39 | 6.0377457 | 7.98E-02 | 2264352   | 2264475   | NC_000001.10 |
| cg09820373 | 1.41E-06 | 2.04E-07 | 5.39 | 6.0364645 | 6.85E-02 | 46126202  | 46126325  | NC_000012.11 |
| cg06068373 | 1.41E-06 | 2.04E-07 | 5.39 | 6.0356007 | 8.29E-02 | 42594510  | 42594633  | NC_000003.11 |
| cg01530962 | 1.41E-06 | 2.04E-07 | 5.39 | 6.0354594 | 4.07E-02 | 9027157   | 9027280   | NC_000003.11 |
| cg08342966 | 1.41E-06 | 2.04E-07 | 5.39 | 6.0348586 | 1.75E-02 | 14237692  | 14237815  | NC_000005.9  |
| cg12017911 | 1.41E-06 | 2.04E-07 | 5.39 | 6.0348359 | 1.16E-01 | 74421887  | 74422010  | NC_000015.9  |
| cg24438644 | 1.41E-06 | 2.04E-07 | 5.39 | 6.0344947 | 1.33E-01 | 37823996  | 37824119  | NC_000008.10 |
| cg17458053 | 1.41E-06 | 2.04E-07 | 5.39 | 6.0337888 | 6.04E-02 | 1789267   | 1789390   | NC_000008.10 |
| cg10730174 | 1.41E-06 | 2.05E-07 | 5.39 | 6.0329786 | 1.49E-01 | 170633559 | 170633682 | NC_000001.10 |
| cg11837749 | 1.41E-06 | 2.05E-07 | 5.39 | 6.0327949 | 9.50E-02 | 55047332  | 55047455  | NC_000001.10 |
| cg20186995 | 1.42E-06 | 2.05E-07 | 5.39 | 6.032255  | 3.34E-02 | 146129264 | 146129387 | NC_000003.11 |
| cg01075852 | 1.42E-06 | 2.05E-07 | 5.39 | 6.031579  | 1.09E-01 | 1702381   | 1702504   | NC_000005.9  |
| cg06968241 | 1.42E-06 | 2.05E-07 | 5.39 | 6.0314103 | 9.90E-02 | 32411144  | 32411267  | NC_000006.11 |
| cg17204569 | 1.42E-06 | 2.05E-07 | 5.39 | 6.0309587 | 3.94E-02 | 16466518  | 16466641  | NC_000022.10 |
| cg18912768 | 1.42E-06 | 2.05E-07 | 5.39 | 6.0308423 | 8.57E-02 | 169887819 | 169887942 | NC_000002.11 |
| cg03408271 | 1.42E-06 | 2.05E-07 | 5.39 | 6.0305274 | 1.12E-01 | 13537647  | 13537770  | NC_000004.11 |
| cg26678217 | 1.42E-06 | 2.05E-07 | 5.39 | 6.0304285 | 1.20E-01 | 438913    | 439036    | NC_000008.10 |
| cg01035160 | 1.42E-06 | 2.05E-07 | 5.39 | 6.0303829 | 1.91E-01 | 90758529  | 90758652  | NC_000004.11 |
| cg12630479 | 1.42E-06 | 2.05E-07 | 5.39 | 6.0302965 | 9.89E-02 | 1130376   | 1130499   | NC_000017.10 |
| cg09503045 | 1.42E-06 | 2.05E-07 | 5.39 | 6.0302122 | 1.24E-01 | 55592453  | 55592576  | NC_000019.9  |
| cg03738365 | 1.42E-06 | 2.05E-07 | 5.39 | 6.0300413 | 5.16E-02 | 20233534  | 20233657  | NC_000006.11 |

|            |          |          |      |           |          |           |           |              |
|------------|----------|----------|------|-----------|----------|-----------|-----------|--------------|
| cg06964030 | 1.42E-06 | 2.05E-07 | 5.39 | 6.0299434 | 5.70E-02 | 20073636  | 20073759  | NC_000022.10 |
| cg26423145 | 1.42E-06 | 2.06E-07 | 5.39 | 6.0284153 | 6.61E-02 | 117067804 | 117067927 | NC_000007.13 |
| cg00654637 | 1.42E-06 | 2.06E-07 | 5.39 | 6.0283107 | 3.90E-02 | 131156065 | 131156188 | NC_000009.11 |
| cg05478631 | 1.42E-06 | 2.06E-07 | 5.39 | 6.0274961 | 1.74E-01 | 166581538 | 166581661 | NC_000006.11 |
| cg10548355 | 1.42E-06 | 2.06E-07 | 5.39 | 6.0273346 | 3.68E-02 | 70129868  | 70129991  | NC_000011.9  |
| cg09694921 | 1.42E-06 | 2.06E-07 | 5.39 | 6.0271486 | 9.53E-02 | 126215608 | 126215731 | NC_000011.9  |
| cg24483554 | 1.42E-06 | 2.06E-07 | 5.39 | 6.0269458 | 6.34E-02 | 179544584 | 179544707 | NC_000001.10 |
| cg00822495 | 1.42E-06 | 2.06E-07 | 5.39 | 6.0268592 | 1.38E-01 | 57276490  | 57276613  | NC_000014.8  |
| cg24530246 | 1.42E-06 | 2.06E-07 | 5.39 | 6.0261278 | 9.20E-02 | 53118167  | 53118290  | NC_000003.11 |
| cg12882804 | 1.42E-06 | 2.06E-07 | 5.39 | 6.0254681 | 2.04E-02 | 105747050 | 105747173 | NC_000014.8  |
| cg06410694 | 1.42E-06 | 2.06E-07 | 5.39 | 6.0253624 | 2.19E-02 | 25175138  | 25175261  | NC_000020.10 |
| cg25501191 | 1.42E-06 | 2.06E-07 | 5.39 | 6.0250599 | 6.26E-02 | 133090347 | 133090470 | NC_000002.11 |
| cg05527785 | 1.42E-06 | 2.06E-07 | 5.39 | 6.0249018 | 1.91E-01 | 46656543  | 46656666  | NC_000017.10 |
| cg24475782 | 1.43E-06 | 2.06E-07 | 5.39 | 6.0239347 | 1.60E-01 | 119530932 | 119531055 | NC_000001.10 |
| cg26728517 | 1.43E-06 | 2.06E-07 | 5.39 | 6.0239012 | 1.36E-01 | 39319540  | 39319663  | NC_000020.10 |
| cg25596754 | 1.43E-06 | 2.07E-07 | 5.39 | 6.0234398 | 9.38E-02 | 32026610  | 32026733  | NC_000006.11 |
| cg14496048 | 1.43E-06 | 2.07E-07 | 5.39 | 6.0231689 | 8.28E-02 | 135946169 | 135946292 | NC_000009.11 |
| cg21221690 | 1.43E-06 | 2.07E-07 | 5.38 | 6.0225606 | 1.27E-01 | 68684332  | 68684455  | NC_000001.10 |
| cg17103634 | 1.43E-06 | 2.07E-07 | 5.38 | 6.0221224 | 7.75E-02 | 614752    | 614875    | NC_000004.11 |
| cg23801748 | 1.43E-06 | 2.07E-07 | 5.38 | 6.0217043 | 5.30E-02 | 2482735   | 2482858   | NC_000011.9  |
| cg02728721 | 1.43E-06 | 2.07E-07 | 5.38 | 6.0209089 | 1.00E-01 | 9487112   | 9487235   | NC_000020.10 |
| cg00870269 | 1.43E-06 | 2.07E-07 | 5.38 | 6.0209029 | 7.63E-02 | 58782688  | 58782811  | NC_000015.9  |
| cg21229570 | 1.43E-06 | 2.07E-07 | 5.38 | 6.0202149 | 1.70E-01 | 115124768 | 115124891 | NC_000012.11 |
| cg00146805 | 1.43E-06 | 2.07E-07 | 5.38 | 6.020163  | 6.76E-02 | 52339555  | 52339678  | NC_000007.13 |
| cg09905199 | 1.43E-06 | 2.07E-07 | 5.38 | 6.0193819 | 1.17E-01 | 159158497 | 159158620 | NC_000001.10 |

|            |          |          |      |           |          |           |           |              |
|------------|----------|----------|------|-----------|----------|-----------|-----------|--------------|
| cg10776919 | 1.43E-06 | 2.08E-07 | 5.38 | 6.0188628 | 1.22E-01 | 50889442  | 50889565  | NC_000001.10 |
| cg01649597 | 1.43E-06 | 2.08E-07 | 5.38 | 6.0180178 | 1.53E-01 | 232395061 | 232395184 | NC_000002.11 |
| cg08262269 | 1.43E-06 | 2.08E-07 | 5.38 | 6.0179821 | 4.93E-02 | 168877862 | 168877985 | NC_000002.11 |
| cg00277936 | 1.43E-06 | 2.08E-07 | 5.38 | 6.0177553 | 4.88E-02 | 66323234  | 66323357  | NC_000005.9  |
| cg25298039 | 1.44E-06 | 2.08E-07 | 5.38 | 6.0175655 | 9.13E-02 | 5402539   | 5402662   | NC_000017.10 |
| cg22007227 | 1.44E-06 | 2.08E-07 | 5.38 | 6.0170888 | 1.89E-01 | 32930544  | 32930667  | NC_000001.10 |
| cg19972696 | 1.44E-06 | 2.08E-07 | 5.38 | 6.015471  | 1.80E-01 | 45898553  | 45898676  | NC_000022.10 |
| cg07355346 | 1.44E-06 | 2.08E-07 | 5.38 | 6.0149273 | 4.02E-02 | 56438419  | 56438542  | NC_000012.11 |
| cg16180796 | 1.44E-06 | 2.08E-07 | 5.38 | 6.0145238 | 8.54E-02 | 23245900  | 23246023  | NC_000007.13 |
| cg17584490 | 1.44E-06 | 2.09E-07 | 5.38 | 6.0136931 | 7.48E-02 | 41144822  | 41144945  | NC_000017.10 |
| cg10429608 | 1.44E-06 | 2.09E-07 | 5.38 | 6.0128078 | 1.39E-01 | 238864632 | 238864755 | NC_000002.11 |
| cg19300568 | 1.44E-06 | 2.09E-07 | 5.38 | 6.0123793 | 1.18E-01 | 2060112   | 2060235   | NC_000004.11 |
| cg13726887 | 1.44E-06 | 2.09E-07 | 5.38 | 6.0115809 | 1.34E-01 | 133541653 | 133541776 | NC_000009.11 |
| cg09486407 | 1.45E-06 | 2.09E-07 | 5.38 | 6.0100066 | 3.75E-02 | 89478268  | 89478391  | NC_000016.9  |
| cg00521703 | 1.45E-06 | 2.10E-07 | 5.38 | 6.0096135 | 8.57E-02 | 34112157  | 34112280  | NC_000019.9  |
| cg14703829 | 1.45E-06 | 2.10E-07 | 5.38 | 6.0093865 | 1.03E-01 | 20780298  | 20780421  | NC_000022.10 |
| cg18054674 | 1.45E-06 | 2.10E-07 | 5.38 | 6.0091909 | 8.46E-02 | 140753542 | 140753665 | NC_000005.9  |
| cg26585452 | 1.45E-06 | 2.10E-07 | 5.38 | 6.0082574 | 9.02E-02 | 50702914  | 50703037  | NC_000013.10 |
| cg24029551 | 1.45E-06 | 2.10E-07 | 5.38 | 6.0081626 | 2.15E-02 | 35817614  | 35817737  | NC_000015.9  |
| cg08478074 | 1.45E-06 | 2.10E-07 | 5.38 | 6.0077063 | 1.03E-01 | 110613397 | 110613520 | NC_000001.10 |
| cg13549719 | 1.45E-06 | 2.10E-07 | 5.38 | 6.0076254 | 1.22E-01 | 38444052  | 38444175  | NC_000013.10 |
| cg24765360 | 1.45E-06 | 2.10E-07 | 5.38 | 6.0071684 | 1.13E-01 | 119611101 | 119611224 | NC_000002.11 |
| cg18961501 | 1.45E-06 | 2.10E-07 | 5.38 | 6.0071461 | 7.81E-02 | 147612852 | 147612975 | NC_000002.11 |
| cg11144775 | 1.45E-06 | 2.10E-07 | 5.38 | 6.0069653 | 5.26E-02 | 70684371  | 70684494  | NC_000001.10 |
| cg20058389 | 1.45E-06 | 2.10E-07 | 5.38 | 6.0056559 | 1.96E-02 | 196412552 | 196412675 | NC_000002.11 |

|            |          |          |      |           |          |           |           |              |
|------------|----------|----------|------|-----------|----------|-----------|-----------|--------------|
| cg21114049 | 1.45E-06 | 2.10E-07 | 5.38 | 6.0051847 | 6.72E-02 | 37007351  | 37007474  | NC_000008.10 |
| cg22883304 | 1.45E-06 | 2.11E-07 | 5.38 | 6.0035528 | 3.82E-02 | 238707250 | 238707373 | NC_000002.11 |
| cg19522050 | 1.45E-06 | 2.11E-07 | 5.38 | 6.0034106 | 1.00E-01 | 101281275 | 101281398 | NC_000010.10 |
| cg13576904 | 1.45E-06 | 2.11E-07 | 5.38 | 6.0033601 | 5.59E-02 | 109768994 | 109769117 | NC_000009.11 |
| cg26092675 | 1.46E-06 | 2.11E-07 | 5.38 | 6.0025019 | 1.25E-01 | 26225258  | 26225381  | NC_000006.11 |
| cg05350224 | 1.46E-06 | 2.11E-07 | 5.38 | 6.0020815 | 6.06E-02 | 3053510   | 3053633   | NC_000019.9  |
| cg02736288 | 1.46E-06 | 2.11E-07 | 5.38 | 6.0014591 | 4.46E-02 | 86012573  | 86012696  | NC_000016.9  |
| cg08085639 | 1.46E-06 | 2.11E-07 | 5.38 | 6.0012456 | 6.42E-02 | 1506135   | 1506258   | NC_000019.9  |
| cg21269843 | 1.46E-06 | 2.11E-07 | 5.38 | 6.0008535 | 1.10E-01 | 76934696  | 76934819  | NC_000005.9  |
| cg00236005 | 1.46E-06 | 2.11E-07 | 5.38 | 6.0007276 | 9.51E-02 | 64279749  | 64279872  | NC_000010.10 |
| cg13935928 | 1.46E-06 | 2.11E-07 | 5.38 | 6.0006621 | 5.00E-02 | 19995469  | 19995592  | NC_000018.9  |
| cg13336665 | 1.46E-06 | 2.11E-07 | 5.38 | 6.0005804 | 9.19E-02 | 134872610 | 134872733 | NC_000005.9  |
| cg23854488 | 1.46E-06 | 2.12E-07 | 5.38 | 5.9992766 | 1.35E-01 | 69588848  | 69588971  | NC_000011.9  |
| cg10523860 | 1.46E-06 | 2.12E-07 | 5.38 | 5.9984353 | 8.87E-02 | 103875565 | 103875688 | NC_000014.8  |
| cg21829921 | 1.46E-06 | 2.12E-07 | 5.38 | 5.9982401 | 2.24E-02 | 93159025  | 93159148  | NC_000014.8  |
| cg14602438 | 1.46E-06 | 2.12E-07 | 5.38 | 5.9976878 | 1.91E-01 | 37464066  | 37464189  | NC_000019.9  |
| cg04474988 | 1.46E-06 | 2.12E-07 | 5.38 | 5.9962877 | 8.92E-02 | 131770171 | 131770294 | NC_000010.10 |
| cg23225572 | 1.47E-06 | 2.13E-07 | 5.38 | 5.9958398 | 2.25E-02 | 162335982 | 162336105 | NC_000001.10 |
| cg20995030 | 1.47E-06 | 2.13E-07 | 5.38 | 5.995388  | 4.74E-02 | 143214333 | 143214456 | NC_000008.10 |
| cg15796980 | 1.47E-06 | 2.13E-07 | 5.38 | 5.9953413 | 7.57E-02 | 13860443  | 13860566  | NC_000006.11 |
| cg25443851 | 1.47E-06 | 2.13E-07 | 5.38 | 5.9947302 | 1.01E-01 | 87991388  | 87991511  | NC_000005.9  |
| cg14795750 | 1.47E-06 | 2.13E-07 | 5.38 | 5.9927902 | 1.65E-01 | 134070819 | 134070942 | NC_000004.11 |
| cg23170091 | 1.47E-06 | 2.13E-07 | 5.38 | 5.9927081 | 7.60E-02 | 195490094 | 195490217 | NC_000003.11 |
| cg10368284 | 1.47E-06 | 2.13E-07 | 5.38 | 5.9918385 | 7.68E-02 | 2762214   | 2762337   | NC_000012.11 |
| cg14284050 | 1.47E-06 | 2.13E-07 | 5.38 | 5.9917182 | 6.28E-02 | 23885254  | 23885377  | NC_000014.8  |

|            |          |          |      |           |          |           |           |              |
|------------|----------|----------|------|-----------|----------|-----------|-----------|--------------|
| cg03174523 | 1.47E-06 | 2.14E-07 | 5.38 | 5.9895459 | 1.05E-01 | 109147160 | 109147283 | NC_000013.10 |
| cg24421839 | 1.47E-06 | 2.14E-07 | 5.38 | 5.9894284 | 7.72E-02 | 85111313  | 85111436  | NC_000015.9  |
| cg02503117 | 1.48E-06 | 2.14E-07 | 5.38 | 5.9890716 | 8.97E-02 | 86538424  | 86538547  | NC_000016.9  |
| cg20446948 | 1.48E-06 | 2.14E-07 | 5.38 | 5.9887626 | 8.24E-02 | 15963167  | 15963290  | NC_000011.9  |
| cg20352178 | 1.48E-06 | 2.14E-07 | 5.38 | 5.9877355 | 5.01E-02 | 69099262  | 69099385  | NC_000015.9  |
| cg02598872 | 1.48E-06 | 2.14E-07 | 5.38 | 5.9873325 | 1.22E-01 | 96952150  | 96952273  | NC_000015.9  |
| cg15847996 | 1.48E-06 | 2.15E-07 | 5.38 | 5.9867428 | 7.67E-02 | 134528050 | 134528173 | NC_000010.10 |
| cg12459059 | 1.48E-06 | 2.15E-07 | 5.38 | 5.9859358 | 3.94E-02 | 10884748  | 10884871  | NC_000021.8  |
| cg07293320 | 1.48E-06 | 2.15E-07 | 5.38 | 5.9857252 | 1.07E-01 | 1277291   | 1277414   | NC_000007.13 |
| cg07683388 | 1.48E-06 | 2.15E-07 | 5.38 | 5.9854165 | 8.22E-02 | 198029332 | 198029455 | NC_000002.11 |
| cg13492159 | 1.48E-06 | 2.15E-07 | 5.38 | 5.9852038 | 1.70E-01 | 107714826 | 107714949 | NC_000012.11 |
| cg06652315 | 1.48E-06 | 2.15E-07 | 5.38 | 5.9850394 | 1.10E-01 | 69591012  | 69591135  | NC_000003.11 |
| cg24860589 | 1.48E-06 | 2.15E-07 | 5.38 | 5.9847572 | 1.52E-01 | 129941906 | 129942029 | NC_000011.9  |
| cg11528392 | 1.48E-06 | 2.15E-07 | 5.38 | 5.9837463 | 5.14E-02 | 164412233 | 164412356 | NC_000004.11 |
| cg01745044 | 1.48E-06 | 2.15E-07 | 5.38 | 5.9835157 | 2.98E-02 | 1686159   | 1686282   | NC_000011.9  |
| cg19362426 | 1.48E-06 | 2.15E-07 | 5.38 | 5.9832875 | 6.90E-02 | 44926197  | 44926320  | NC_000013.10 |
| cg11153529 | 1.48E-06 | 2.15E-07 | 5.38 | 5.983236  | 1.35E-01 | 50970539  | 50970662  | NC_000010.10 |
| cg22787141 | 1.48E-06 | 2.15E-07 | 5.38 | 5.983174  | 1.94E-02 | 50105274  | 50105397  | NC_000014.8  |
| cg15632826 | 1.49E-06 | 2.16E-07 | 5.38 | 5.9820144 | 1.50E-01 | 31831740  | 31831863  | NC_000006.11 |
| cg17530231 | 1.49E-06 | 2.16E-07 | 5.38 | 5.9811283 | 9.15E-02 | 237082534 | 237082657 | NC_000002.11 |
| cg26429042 | 1.49E-06 | 2.16E-07 | 5.38 | 5.9809569 | 7.57E-02 | 141342131 | 141342254 | NC_000008.10 |
| cg03456560 | 1.49E-06 | 2.16E-07 | 5.38 | 5.9797211 | 1.02E-01 | 4866192   | 4866315   | NC_000004.11 |
| cg08801795 | 1.49E-06 | 2.16E-07 | 5.38 | 5.9787022 | 9.15E-02 | 220361916 | 220362039 | NC_000002.11 |
| cg00228738 | 1.49E-06 | 2.16E-07 | 5.38 | 5.9783988 | 4.25E-02 | 95944545  | 95944668  | NC_000009.11 |
| cg13606255 | 1.49E-06 | 2.16E-07 | 5.38 | 5.9780054 | 9.04E-02 | 32053100  | 32053223  | NC_000006.11 |

|            |          |          |      |           |          |           |           |              |
|------------|----------|----------|------|-----------|----------|-----------|-----------|--------------|
| cg17097782 | 1.49E-06 | 2.17E-07 | 5.38 | 5.9776937 | 1.39E-01 | 19551860  | 19551983  | NC_000002.11 |
| cg09434500 | 1.49E-06 | 2.17E-07 | 5.38 | 5.9775343 | 1.33E-01 | 42502897  | 42503020  | NC_000019.9  |
| cg16904960 | 1.49E-06 | 2.17E-07 | 5.38 | 5.9770281 | 1.34E-01 | 182549928 | 182550051 | NC_000002.11 |
| cg19935171 | 1.49E-06 | 2.17E-07 | 5.38 | 5.9769895 | 1.84E-01 | 39893078  | 39893201  | NC_000002.11 |
| cg20849957 | 1.49E-06 | 2.17E-07 | 5.38 | 5.9768058 | 8.89E-02 | 2820995   | 2821118   | NC_000001.10 |
| cg18184411 | 1.49E-06 | 2.17E-07 | 5.38 | 5.9758864 | 1.34E-01 | 53309261  | 53309384  | NC_000001.10 |
| cg11336178 | 1.49E-06 | 2.17E-07 | 5.37 | 5.9753975 | 6.63E-02 | 42931581  | 42931704  | NC_000006.11 |
| cg08662168 | 1.49E-06 | 2.17E-07 | 5.37 | 5.9751232 | 1.16E-01 | 9976437   | 9976560   | NC_000017.10 |
| cg14355654 | 1.50E-06 | 2.17E-07 | 5.37 | 5.9750078 | 6.46E-02 | 117781276 | 117781399 | NC_000008.10 |
| cg12742937 | 1.50E-06 | 2.17E-07 | 5.37 | 5.9748398 | 1.72E-01 | 40678618  | 40678741  | NC_000002.11 |
| cg25137403 | 1.50E-06 | 2.17E-07 | 5.37 | 5.9742407 | 8.70E-02 | 177022172 | 177022295 | NC_000002.11 |
| cg11581865 | 1.50E-06 | 2.17E-07 | 5.37 | 5.9738355 | 1.25E-01 | 120078840 | 120078963 | NC_000011.9  |
| cg10786870 | 1.50E-06 | 2.17E-07 | 5.37 | 5.973531  | 6.84E-02 | 44616116  | 44616239  | NC_000019.9  |
| cg25816031 | 1.50E-06 | 2.18E-07 | 5.37 | 5.9731641 | 4.26E-02 | 158087662 | 158087785 | NC_000002.11 |
| cg02134705 | 1.50E-06 | 2.18E-07 | 5.37 | 5.9730787 | 4.70E-02 | 149388151 | 149388274 | NC_000003.11 |
| cg11983405 | 1.50E-06 | 2.18E-07 | 5.37 | 5.9708329 | 1.97E-02 | 128331518 | 128331641 | NC_000002.11 |
| cg06846752 | 1.50E-06 | 2.18E-07 | 5.37 | 5.9698135 | 9.93E-02 | 32929715  | 32929838  | NC_000001.10 |
| cg05203985 | 1.50E-06 | 2.18E-07 | 5.37 | 5.9696059 | 3.45E-02 | 81703815  | 81703938  | NC_000016.9  |
| cg12935136 | 1.50E-06 | 2.18E-07 | 5.37 | 5.9689761 | 1.50E-01 | 78493590  | 78493713  | NC_000013.10 |
| cg21127580 | 1.51E-06 | 2.19E-07 | 5.37 | 5.9677651 | 1.39E-01 | 901081    | 901204    | NC_000006.11 |
| cg07268431 | 1.51E-06 | 2.19E-07 | 5.37 | 5.9676803 | 1.01E-01 | 47436106  | 47436229  | NC_000003.11 |
| cg11636151 | 1.51E-06 | 2.19E-07 | 5.37 | 5.967415  | 5.19E-02 | 100141862 | 100141985 | NC_000014.8  |
| cg25051331 | 1.51E-06 | 2.19E-07 | 5.37 | 5.9673117 | 9.72E-02 | 77253833  | 77253956  | NC_000005.9  |
| cg09511914 | 1.51E-06 | 2.19E-07 | 5.37 | 5.9672159 | 1.43E-01 | 20878928  | 20879051  | NC_000001.10 |
| cg07067667 | 1.51E-06 | 2.19E-07 | 5.37 | 5.9671031 | 5.65E-02 | 68592625  | 68592748  | NC_000014.8  |

|            |          |          |      |           |          |           |           |              |
|------------|----------|----------|------|-----------|----------|-----------|-----------|--------------|
| cg07508446 | 1.51E-06 | 2.19E-07 | 5.37 | 5.9668525 | 5.17E-02 | 85966197  | 85966320  | NC_000016.9  |
| cg17980283 | 1.51E-06 | 2.19E-07 | 5.37 | 5.9668024 | 5.98E-02 | 45156642  | 45156765  | NC_000002.11 |
| cg13630043 | 1.51E-06 | 2.19E-07 | 5.37 | 5.9655712 | 1.03E-01 | 119307769 | 119307892 | NC_000010.10 |
| cg21888330 | 1.51E-06 | 2.19E-07 | 5.37 | 5.9653584 | 9.18E-02 | 42546577  | 42546700  | NC_000013.10 |
| cg07529575 | 1.51E-06 | 2.19E-07 | 5.37 | 5.9653416 | 1.71E-01 | 119604270 | 119604393 | NC_000002.11 |
| cg02712922 | 1.51E-06 | 2.19E-07 | 5.37 | 5.965284  | 9.99E-02 | 3032302   | 3032425   | NC_000001.10 |
| cg09476997 | 1.51E-06 | 2.19E-07 | 5.37 | 5.9649632 | 4.85E-02 | 2087932   | 2088055   | NC_000016.9  |
| cg20362266 | 1.51E-06 | 2.19E-07 | 5.37 | 5.9649603 | 3.74E-02 | 10161687  | 10161810  | NC_000012.11 |
| cg27583922 | 1.51E-06 | 2.19E-07 | 5.37 | 5.9647244 | 6.23E-02 | 54977744  | 54977867  | NC_000019.9  |
| cg18144593 | 1.51E-06 | 2.20E-07 | 5.37 | 5.9644455 | 1.37E-01 | 71116411  | 71116534  | NC_000002.11 |
| cg09935440 | 1.51E-06 | 2.20E-07 | 5.37 | 5.9640617 | 7.57E-02 | 135429446 | 135429569 | NC_000007.13 |
| cg01808545 | 1.51E-06 | 2.20E-07 | 5.37 | 5.9638199 | 2.00E-01 | 193059717 | 193059840 | NC_000002.11 |
| cg20545907 | 1.51E-06 | 2.20E-07 | 5.37 | 5.9637356 | 1.33E-01 | 17401890  | 17402013  | NC_000005.9  |
| cg06850283 | 1.51E-06 | 2.20E-07 | 5.37 | 5.9632124 | 1.58E-01 | 44389769  | 44389892  | NC_000005.9  |
| cg27250236 | 1.51E-06 | 2.20E-07 | 5.37 | 5.9625283 | 1.57E-01 | 48036617  | 48036740  | NC_000006.11 |
| cg15161667 | 1.52E-06 | 2.21E-07 | 5.37 | 5.9598961 | 6.62E-02 | 46940613  | 46940736  | NC_000011.9  |
| cg24617612 | 1.52E-06 | 2.21E-07 | 5.37 | 5.9593362 | 5.77E-02 | 49043544  | 49043667  | NC_000008.10 |
| cg04075738 | 1.52E-06 | 2.21E-07 | 5.37 | 5.9591104 | 1.04E-01 | 130571303 | 130571426 | NC_000012.11 |
| cg18453481 | 1.52E-06 | 2.21E-07 | 5.37 | 5.9590688 | 2.89E-02 | 102250174 | 102250297 | NC_000014.8  |
| cg21932360 | 1.52E-06 | 2.21E-07 | 5.37 | 5.958813  | 1.01E-01 | 22724896  | 22725019  | NC_000008.10 |
| cg15844611 | 1.52E-06 | 2.21E-07 | 5.37 | 5.9586878 | 1.31E-01 | 68113580  | 68113703  | NC_000015.9  |
| cg04118306 | 1.52E-06 | 2.21E-07 | 5.37 | 5.9579867 | 1.32E-01 | 24772350  | 24772473  | NC_000008.10 |
| cg08601628 | 1.52E-06 | 2.21E-07 | 5.37 | 5.9579151 | 6.42E-02 | 10555466  | 10555589  | NC_000008.10 |
| cg08848643 | 1.52E-06 | 2.21E-07 | 5.37 | 5.9571205 | 2.13E-02 | 50745102  | 50745225  | NC_000016.9  |
| cg27470066 | 1.52E-06 | 2.21E-07 | 5.37 | 5.9567073 | 9.21E-02 | 59485779  | 59485902  | NC_000017.10 |

|            |          |          |      |           |          |           |           |              |
|------------|----------|----------|------|-----------|----------|-----------|-----------|--------------|
| cg13523312 | 1.52E-06 | 2.21E-07 | 5.37 | 5.9562584 | 3.18E-02 | 39711467  | 39711590  | NC_000022.10 |
| cg10676327 | 1.52E-06 | 2.21E-07 | 5.37 | 5.956098  | 6.77E-02 | 6659735   | 6659858   | NC_000004.11 |
| cg17661601 | 1.52E-06 | 2.22E-07 | 5.37 | 5.9554297 | 1.07E-01 | 11656692  | 11656815  | NC_000008.10 |
| cg01041222 | 1.52E-06 | 2.22E-07 | 5.37 | 5.9552313 | 1.04E-01 | 158142863 | 158142986 | NC_000004.11 |
| cg22347212 | 1.52E-06 | 2.22E-07 | 5.37 | 5.9552147 | 8.94E-02 | 130648519 | 130648642 | NC_000012.11 |
| cg26518580 | 1.52E-06 | 2.22E-07 | 5.37 | 5.9549891 | 1.16E-01 | 111742515 | 111742638 | NC_000001.10 |
| cg02804091 | 1.53E-06 | 2.22E-07 | 5.37 | 5.9540974 | 5.99E-02 | 140536496 | 140536619 | NC_000005.9  |
| cg23013489 | 1.53E-06 | 2.22E-07 | 5.37 | 5.953619  | 9.64E-02 | 105901566 | 105901689 | NC_000010.10 |
| cg02873321 | 1.53E-06 | 2.22E-07 | 5.37 | 5.9534419 | 1.45E-01 | 123301090 | 123301213 | NC_000011.9  |
| cg25007722 | 1.53E-06 | 2.22E-07 | 5.37 | 5.9525679 | 7.58E-02 | 247803033 | 247803156 | NC_000001.10 |
| cg12314121 | 1.53E-06 | 2.22E-07 | 5.37 | 5.95144   | 6.14E-02 | 140167213 | 140167336 | NC_000005.9  |
| cg16783349 | 1.53E-06 | 2.22E-07 | 5.37 | 5.9513607 | 9.90E-02 | 130854343 | 130854466 | NC_000010.10 |
| cg14664621 | 1.53E-06 | 2.23E-07 | 5.37 | 5.9508938 | 9.46E-02 | 104640772 | 104640895 | NC_000004.11 |
| cg02860282 | 1.53E-06 | 2.23E-07 | 5.37 | 5.9491161 | 1.58E-01 | 70033624  | 70033747  | NC_000001.10 |
| cg04164351 | 1.53E-06 | 2.23E-07 | 5.37 | 5.9490286 | 2.32E-02 | 169571297 | 169571420 | NC_000006.11 |
| cg08415141 | 1.53E-06 | 2.23E-07 | 5.37 | 5.948907  | 6.07E-02 | 29598310  | 29598433  | NC_000006.11 |
| cg00988260 | 1.53E-06 | 2.23E-07 | 5.37 | 5.94851   | 4.23E-02 | 583271    | 583394    | NC_000002.11 |
| cg16857771 | 1.53E-06 | 2.23E-07 | 5.37 | 5.9481565 | 1.18E-01 | 56160409  | 56160532  | NC_000007.13 |
| cg09929187 | 1.54E-06 | 2.24E-07 | 5.37 | 5.9467866 | 1.18E-01 | 92501570  | 92501693  | NC_000012.11 |
| cg17928876 | 1.54E-06 | 2.24E-07 | 5.37 | 5.9467782 | 1.11E-01 | 76447431  | 76447554  | NC_000014.8  |
| cg13612083 | 1.54E-06 | 2.24E-07 | 5.37 | 5.9459348 | 1.03E-01 | 127836053 | 127836176 | NC_000006.11 |
| cg27007060 | 1.54E-06 | 2.24E-07 | 5.37 | 5.9457073 | 7.67E-02 | 107057773 | 107057896 | NC_000006.11 |
| cg25453841 | 1.54E-06 | 2.24E-07 | 5.37 | 5.9455506 | 7.55E-02 | 23031475  | 23031598  | NC_000003.11 |
| cg18947261 | 1.54E-06 | 2.24E-07 | 5.37 | 5.9450472 | 7.43E-02 | 73321439  | 73321562  | NC_000010.10 |
| cg16006701 | 1.54E-06 | 2.24E-07 | 5.37 | 5.9442962 | 1.03E-01 | 2751402   | 2751525   | NC_000006.11 |



|            |          |          |      |           |          |           |           |              |
|------------|----------|----------|------|-----------|----------|-----------|-----------|--------------|
| cg05713954 | 1.54E-06 | 2.24E-07 | 5.37 | 5.9441762 | 1.34E-01 | 49518536  | 49518659  | NC_000016.9  |
| cg09395239 | 1.54E-06 | 2.24E-07 | 5.37 | 5.9436173 | 3.51E-02 | 57511522  | 57511645  | NC_000011.9  |
| cg10122865 | 1.54E-06 | 2.25E-07 | 5.37 | 5.9426253 | 1.53E-01 | 63284132  | 63284255  | NC_000002.11 |
| cg25661142 | 1.54E-06 | 2.25E-07 | 5.37 | 5.941981  | 3.55E-02 | 15541374  | 15541497  | NC_000019.9  |
| cg18676790 | 1.54E-06 | 2.25E-07 | 5.37 | 5.9416849 | 1.72E-01 | 97680731  | 97680854  | NC_000007.13 |
| cg05310249 | 1.54E-06 | 2.25E-07 | 5.37 | 5.941056  | 1.24E-01 | 23560590  | 23560713  | NC_000008.10 |
| cg10043037 | 1.54E-06 | 2.25E-07 | 5.37 | 5.9410413 | 1.10E-01 | 19185407  | 19185530  | NC_000007.13 |
| cg19300741 | 1.55E-06 | 2.25E-07 | 5.37 | 5.9395486 | 1.07E-01 | 11034890  | 11035013  | NC_000003.11 |
| cg01499988 | 1.55E-06 | 2.25E-07 | 5.37 | 5.9394593 | 4.39E-02 | 35755346  | 35755469  | NC_000009.11 |
| cg23330451 | 1.55E-06 | 2.25E-07 | 5.37 | 5.9386207 | 1.16E-01 | 138739922 | 138740045 | NC_000003.11 |
| cg22540552 | 1.55E-06 | 2.25E-07 | 5.37 | 5.9385101 | 1.20E-01 | 166579199 | 166579322 | NC_000006.11 |
| cg11716665 | 1.55E-06 | 2.26E-07 | 5.37 | 5.938346  | 9.47E-02 | 149569601 | 149569724 | NC_000005.9  |
| cg04869838 | 1.55E-06 | 2.26E-07 | 5.37 | 5.9382848 | 5.95E-02 | 147801437 | 147801560 | NC_000001.10 |
| cg15612053 | 1.55E-06 | 2.26E-07 | 5.37 | 5.9382049 | 3.07E-02 | 233899246 | 233899369 | NC_000002.11 |
| cg01578293 | 1.55E-06 | 2.26E-07 | 5.37 | 5.9380569 | 4.85E-02 | 41400597  | 41400720  | NC_000004.11 |
| cg27620317 | 1.55E-06 | 2.26E-07 | 5.37 | 5.938022  | 1.08E-01 | 25900768  | 25900891  | NC_000007.13 |
| cg04406436 | 1.55E-06 | 2.26E-07 | 5.37 | 5.9377634 | 1.11E-01 | 38942313  | 38942436  | NC_000001.10 |
| cg01196322 | 1.55E-06 | 2.26E-07 | 5.37 | 5.9372821 | 9.31E-02 | 122435202 | 122435325 | NC_000005.9  |
| cg13312195 | 1.55E-06 | 2.26E-07 | 5.37 | 5.9369848 | 7.61E-02 | 2432957   | 2433080   | NC_000011.9  |
| cg14161359 | 1.55E-06 | 2.26E-07 | 5.37 | 5.936549  | 1.35E-01 | 30039031  | 30039154  | NC_000011.9  |
| cg01450390 | 1.55E-06 | 2.26E-07 | 5.37 | 5.9361399 | 1.33E-01 | 54483251  | 54483374  | NC_000019.9  |
| cg11404129 | 1.55E-06 | 2.26E-07 | 5.37 | 5.935617  | 4.39E-02 | 150484766 | 150484889 | NC_000001.10 |
| cg24483493 | 1.55E-06 | 2.26E-07 | 5.37 | 5.9355358 | 1.38E-01 | 63333476  | 63333599  | NC_000015.9  |
| cg01521274 | 1.55E-06 | 2.26E-07 | 5.37 | 5.9348613 | 1.21E-01 | 71822452  | 71822575  | NC_000014.8  |
| cg05041351 | 1.55E-06 | 2.26E-07 | 5.37 | 5.9346517 | 1.21E-01 | 1922149   | 1922272   | NC_000016.9  |

|            |          |          |      |           |          |           |           |              |
|------------|----------|----------|------|-----------|----------|-----------|-----------|--------------|
| cg25265360 | 1.55E-06 | 2.26E-07 | 5.37 | 5.9344839 | 8.33E-02 | 32081789  | 32081912  | NC_000006.11 |
| cg05598562 | 1.55E-06 | 2.26E-07 | 5.37 | 5.9344079 | 2.01E-01 | 28674876  | 28674999  | NC_000013.10 |
| cg03135713 | 1.55E-06 | 2.26E-07 | 5.37 | 5.9342596 | 9.31E-02 | 46961897  | 46962020  | NC_000013.10 |
| cg11064255 | 1.55E-06 | 2.27E-07 | 5.37 | 5.9339184 | 1.92E-01 | 5629890   | 5630013   | NC_000018.9  |
| cg08003887 | 1.55E-06 | 2.27E-07 | 5.37 | 5.933872  | 1.09E-01 | 8371812   | 8371935   | NC_000012.11 |
| cg24996161 | 1.56E-06 | 2.27E-07 | 5.37 | 5.9331289 | 1.07E-01 | 140735397 | 140735520 | NC_000005.9  |
| cg21649013 | 1.56E-06 | 2.27E-07 | 5.37 | 5.9323345 | 8.61E-02 | 132381683 | 132381806 | NC_000012.11 |
| cg19047158 | 1.56E-06 | 2.27E-07 | 5.37 | 5.9316941 | 1.02E-01 | 208080231 | 208080354 | NC_000002.11 |
| cg13682096 | 1.56E-06 | 2.27E-07 | 5.37 | 5.931627  | 5.28E-02 | 43513306  | 43513429  | NC_000015.9  |
| cg22579691 | 1.56E-06 | 2.27E-07 | 5.37 | 5.9308411 | 8.79E-02 | 36049734  | 36049857  | NC_000019.9  |
| cg13933734 | 1.56E-06 | 2.27E-07 | 5.37 | 5.9299736 | 1.10E-01 | 119550484 | 119550607 | NC_000001.10 |
| cg09739212 | 1.56E-06 | 2.27E-07 | 5.37 | 5.9299027 | 6.30E-02 | 56891858  | 56891981  | NC_000011.9  |
| cg23683146 | 1.56E-06 | 2.27E-07 | 5.37 | 5.9298517 | 8.00E-02 | 47057850  | 47057973  | NC_000012.11 |
| cg07780979 | 1.56E-06 | 2.28E-07 | 5.37 | 5.9293205 | 4.23E-02 | 303287    | 303410    | NC_000005.9  |
| cg01446287 | 1.56E-06 | 2.28E-07 | 5.37 | 5.929316  | 5.63E-02 | 10649381  | 10649504  | NC_000005.9  |
| cg13570585 | 1.56E-06 | 2.28E-07 | 5.37 | 5.9291358 | 1.68E-01 | 8113573   | 8113696   | NC_000020.10 |
| cg13323701 | 1.56E-06 | 2.28E-07 | 5.36 | 5.928696  | 1.34E-01 | 118228508 | 118228631 | NC_000006.11 |
| cg01574673 | 1.56E-06 | 2.28E-07 | 5.36 | 5.9278494 | 1.27E-01 | 156595164 | 156595287 | NC_000001.10 |
| cg23574897 | 1.56E-06 | 2.28E-07 | 5.36 | 5.9268968 | 1.38E-01 | 102988836 | 102988959 | NC_000010.10 |
| cg11464806 | 1.56E-06 | 2.28E-07 | 5.36 | 5.926811  | 9.17E-02 | 156837580 | 156837703 | NC_000007.13 |
| cg11515702 | 1.57E-06 | 2.28E-07 | 5.36 | 5.926647  | 6.00E-02 | 67789123  | 67789246  | NC_000011.9  |
| cg09449030 | 1.57E-06 | 2.28E-07 | 5.36 | 5.9266253 | 1.36E-01 | 38182950  | 38183073  | NC_000019.9  |
| cg02949067 | 1.57E-06 | 2.28E-07 | 5.36 | 5.9264949 | 6.75E-02 | 17463831  | 17463954  | NC_000020.10 |
| cg09140778 | 1.57E-06 | 2.28E-07 | 5.36 | 5.9262086 | 1.15E-01 | 237086398 | 237086521 | NC_000002.11 |
| cg07514505 | 1.57E-06 | 2.28E-07 | 5.36 | 5.9258351 | 1.39E-01 | 96743754  | 96743877  | NC_000013.10 |

|            |          |          |      |           |          |           |           |              |
|------------|----------|----------|------|-----------|----------|-----------|-----------|--------------|
| cg07920236 | 1.57E-06 | 2.29E-07 | 5.36 | 5.9248117 | 5.79E-02 | 166793890 | 166794013 | NC_000006.11 |
| cg25878131 | 1.57E-06 | 2.29E-07 | 5.36 | 5.9246291 | 1.31E-01 | 41594509  | 41594632  | NC_000013.10 |
| cg06816651 | 1.57E-06 | 2.29E-07 | 5.36 | 5.9245705 | 8.91E-02 | 95664359  | 95664482  | NC_000002.11 |
| cg12631351 | 1.57E-06 | 2.29E-07 | 5.36 | 5.9219961 | 1.88E-01 | 80256738  | 80256861  | NC_000005.9  |
| cg10490206 | 1.57E-06 | 2.29E-07 | 5.36 | 5.9216756 | 1.67E-01 | 17798846  | 17798969  | NC_000019.9  |
| cg16700364 | 1.57E-06 | 2.29E-07 | 5.36 | 5.9213586 | 1.24E-01 | 157178889 | 157179012 | NC_000002.11 |
| cg00015261 | 1.57E-06 | 2.30E-07 | 5.36 | 5.9212056 | 6.12E-02 | 35029997  | 35030120  | NC_000016.9  |
| cg01287788 | 1.57E-06 | 2.30E-07 | 5.36 | 5.9210866 | 1.41E-01 | 86362935  | 86363058  | NC_000002.11 |
| cg15422005 | 1.57E-06 | 2.30E-07 | 5.36 | 5.9208784 | 1.05E-01 | 87991197  | 87991320  | NC_000005.9  |
| cg27521476 | 1.57E-06 | 2.30E-07 | 5.36 | 5.9206496 | 1.06E-01 | 102896376 | 102896499 | NC_000010.10 |
| cg27322846 | 1.57E-06 | 2.30E-07 | 5.36 | 5.9203512 | 1.06E-01 | 162284638 | 162284761 | NC_000002.11 |
| cg22715479 | 1.58E-06 | 2.30E-07 | 5.36 | 5.9193186 | 4.87E-02 | 131671830 | 131671953 | NC_000010.10 |
| cg13709720 | 1.58E-06 | 2.30E-07 | 5.36 | 5.9191047 | 5.60E-02 | 19028020  | 19028143  | NC_000009.11 |
| cg05615443 | 1.58E-06 | 2.30E-07 | 5.36 | 5.9180547 | 4.49E-02 | 47012103  | 47012226  | NC_000013.10 |
| cg03878133 | 1.58E-06 | 2.30E-07 | 5.36 | 5.9180043 | 1.69E-01 | 164593411 | 164593534 | NC_000002.11 |
| cg10276066 | 1.58E-06 | 2.30E-07 | 5.36 | 5.9173195 | 3.76E-02 | 41891641  | 41891764  | NC_000017.10 |
| cg16365445 | 1.58E-06 | 2.31E-07 | 5.36 | 5.9168407 | 1.11E-01 | 33230686  | 33230809  | NC_000010.10 |
| cg11312462 | 1.58E-06 | 2.31E-07 | 5.36 | 5.9167952 | 7.60E-02 | 10213042  | 10213165  | NC_000017.10 |
| cg12912920 | 1.58E-06 | 2.31E-07 | 5.36 | 5.9167223 | 1.10E-01 | 140762680 | 140762803 | NC_000004.11 |
| cg20479774 | 1.58E-06 | 2.31E-07 | 5.36 | 5.916678  | 1.98E-01 | 96635748  | 96635871  | NC_000007.13 |
| cg04811098 | 1.58E-06 | 2.31E-07 | 5.36 | 5.9163719 | 7.13E-02 | 155088454 | 155088577 | NC_000007.13 |
| cg05785989 | 1.58E-06 | 2.31E-07 | 5.36 | 5.9154483 | 9.32E-02 | 3306812   | 3306935   | NC_000010.10 |
| cg27210464 | 1.58E-06 | 2.31E-07 | 5.36 | 5.9150782 | 1.33E-01 | 101283479 | 101283602 | NC_000010.10 |
| cg14211385 | 1.58E-06 | 2.31E-07 | 5.36 | 5.9150478 | 3.11E-02 | 72995555  | 72995678  | NC_000017.10 |
| cg10129025 | 1.58E-06 | 2.31E-07 | 5.36 | 5.9149243 | 7.90E-02 | 139880518 | 139880641 | NC_000009.11 |

|            |          |          |      |           |          |           |           |              |
|------------|----------|----------|------|-----------|----------|-----------|-----------|--------------|
| cg17173663 | 1.58E-06 | 2.31E-07 | 5.36 | 5.9142502 | 1.32E-01 | 115135859 | 115135982 | NC_000012.11 |
| cg00122854 | 1.59E-06 | 2.32E-07 | 5.36 | 5.9127052 | 5.16E-02 | 218898491 | 218898614 | NC_000002.11 |
| cg03595881 | 1.59E-06 | 2.32E-07 | 5.36 | 5.9123987 | 1.08E-01 | 25895105  | 25895228  | NC_000008.10 |
| cg16288248 | 1.59E-06 | 2.32E-07 | 5.36 | 5.9123813 | 1.19E-01 | 87230087  | 87230210  | NC_000007.13 |
| cg16405768 | 1.59E-06 | 2.32E-07 | 5.36 | 5.9121545 | 3.63E-02 | 61290066  | 61290189  | NC_000020.10 |
| cg03092680 | 1.59E-06 | 2.32E-07 | 5.36 | 5.9115714 | 1.13E-01 | 168597666 | 168597789 | NC_000006.11 |
| cg18535283 | 1.59E-06 | 2.32E-07 | 5.36 | 5.9114051 | 6.68E-02 | 43044071  | 43044194  | NC_000022.10 |
| cg13880111 | 1.59E-06 | 2.32E-07 | 5.36 | 5.9112182 | 5.13E-02 | 91835816  | 91835939  | NC_000012.11 |
| cg15270150 | 1.59E-06 | 2.32E-07 | 5.36 | 5.9108431 | 1.14E-01 | 73151966  | 73152089  | NC_000002.11 |
| cg20426571 | 1.59E-06 | 2.32E-07 | 5.36 | 5.9095313 | 9.28E-02 | 114843919 | 114844042 | NC_000012.11 |
| cg09263516 | 1.59E-06 | 2.32E-07 | 5.36 | 5.9091912 | 8.01E-02 | 115107338 | 115107461 | NC_000012.11 |
| cg15688551 | 1.59E-06 | 2.33E-07 | 5.36 | 5.9086857 | 1.20E-01 | 34175132  | 34175255  | NC_000019.9  |
| cg23078522 | 1.59E-06 | 2.33E-07 | 5.36 | 5.9078179 | 5.05E-02 | 180694646 | 180694769 | NC_000003.11 |
| cg22931182 | 1.59E-06 | 2.33E-07 | 5.36 | 5.9074143 | 1.49E-01 | 44331623  | 44331746  | NC_000011.9  |
| cg13401829 | 1.60E-06 | 2.33E-07 | 5.36 | 5.9067992 | 3.11E-02 | 71955259  | 71955382  | NC_000006.11 |
| cg12419052 | 1.60E-06 | 2.33E-07 | 5.36 | 5.9066751 | 1.11E-01 | 147126121 | 147126244 | NC_000003.11 |
| cg00245746 | 1.60E-06 | 2.33E-07 | 5.36 | 5.9060454 | 4.62E-02 | 674940    | 675063    | NC_000002.11 |
| cg19373874 | 1.60E-06 | 2.33E-07 | 5.36 | 5.9056479 | 9.76E-02 | 115946022 | 115946145 | NC_000012.11 |
| cg05317038 | 1.60E-06 | 2.33E-07 | 5.36 | 5.9052424 | 1.30E-01 | 28793454  | 28793577  | NC_000006.11 |
| cg18461458 | 1.60E-06 | 2.34E-07 | 5.36 | 5.9044733 | 7.63E-02 | 21324796  | 21324919  | NC_000019.9  |
| cg19395056 | 1.60E-06 | 2.34E-07 | 5.36 | 5.9043327 | 1.18E-01 | 57829175  | 57829298  | NC_000019.9  |
| cg15378913 | 1.60E-06 | 2.34E-07 | 5.36 | 5.9041024 | 5.51E-02 | 72419592  | 72419715  | NC_000007.13 |
| cg05676400 | 1.60E-06 | 2.34E-07 | 5.36 | 5.904095  | 1.25E-01 | 174443865 | 174443988 | NC_000004.11 |
| cg19788831 | 1.60E-06 | 2.34E-07 | 5.36 | 5.9039445 | 1.77E-01 | 45444623  | 45444746  | NC_000012.11 |
| cg12009516 | 1.60E-06 | 2.34E-07 | 5.36 | 5.9038917 | 7.33E-02 | 45737880  | 45738003  | NC_000019.9  |

|            |          |          |      |           |          |           |           |              |
|------------|----------|----------|------|-----------|----------|-----------|-----------|--------------|
| cg02104644 | 1.60E-06 | 2.34E-07 | 5.36 | 5.9018172 | 1.25E-01 | 61347820  | 61347943  | NC_000011.9  |
| cg18428134 | 1.60E-06 | 2.34E-07 | 5.36 | 5.9017567 | 7.54E-02 | 111929752 | 111929875 | NC_000009.11 |
| cg00306003 | 1.60E-06 | 2.34E-07 | 5.36 | 5.9016163 | 4.05E-02 | 171640102 | 171640225 | NC_000001.10 |
| cg00087906 | 1.60E-06 | 2.34E-07 | 5.36 | 5.9011286 | 1.66E-01 | 55513415  | 55513538  | NC_000016.9  |
| cg02325128 | 1.60E-06 | 2.34E-07 | 5.36 | 5.9007484 | 3.22E-02 | 96530415  | 96530538  | NC_000012.11 |
| cg04527220 | 1.60E-06 | 2.34E-07 | 5.36 | 5.9004905 | 9.98E-02 | 105521961 | 105522084 | NC_000014.8  |
| cg06692050 | 1.61E-06 | 2.35E-07 | 5.36 | 5.9000607 | 1.14E-01 | 99532398  | 99532521  | NC_000010.10 |
| cg02647878 | 1.61E-06 | 2.35E-07 | 5.36 | 5.8998911 | 1.96E-01 | 154681197 | 154681320 | NC_000004.11 |
| cg07231479 | 1.61E-06 | 2.35E-07 | 5.36 | 5.8986326 | 9.05E-02 | 140794359 | 140794482 | NC_000005.9  |
| cg04275490 | 1.61E-06 | 2.35E-07 | 5.36 | 5.8983114 | 1.46E-01 | 54967423  | 54967546  | NC_000004.11 |
| cg13882278 | 1.61E-06 | 2.35E-07 | 5.36 | 5.8982557 | 1.21E-01 | 23983498  | 23983621  | NC_000010.10 |
| cg24756105 | 1.61E-06 | 2.35E-07 | 5.36 | 5.8980833 | 1.03E-01 | 76271399  | 76271522  | NC_000018.9  |
| cg16976370 | 1.61E-06 | 2.35E-07 | 5.36 | 5.8979509 | 1.63E-01 | 46995821  | 46995944  | NC_000004.11 |
| cg24402070 | 1.61E-06 | 2.35E-07 | 5.36 | 5.8967642 | 6.55E-02 | 17046932  | 17047055  | NC_000001.10 |
| cg14958018 | 1.61E-06 | 2.35E-07 | 5.36 | 5.8962608 | 5.26E-02 | 41505042  | 41505165  | NC_000008.10 |
| cg16099023 | 1.61E-06 | 2.36E-07 | 5.36 | 5.8959218 | 1.42E-01 | 58148810  | 58148933  | NC_000006.11 |
| cg09365542 | 1.61E-06 | 2.36E-07 | 5.36 | 5.8958522 | 3.60E-02 | 31597100  | 31597223  | NC_000006.11 |
| cg19547629 | 1.61E-06 | 2.36E-07 | 5.36 | 5.8953587 | 1.23E-01 | 39851641  | 39851764  | NC_000003.11 |
| cg25657187 | 1.61E-06 | 2.36E-07 | 5.36 | 5.8953115 | 1.22E-01 | 87969213  | 87969336  | NC_000005.9  |
| cg02300818 | 1.61E-06 | 2.36E-07 | 5.36 | 5.8952181 | 8.72E-02 | 49295501  | 49295624  | NC_000022.10 |
| cg11846618 | 1.61E-06 | 2.36E-07 | 5.36 | 5.8940612 | 2.18E-02 | 105750676 | 105750799 | NC_000014.8  |
| cg21885795 | 1.61E-06 | 2.36E-07 | 5.36 | 5.8937362 | 5.51E-02 | 1809756   | 1809879   | NC_000019.9  |
| cg25115993 | 1.62E-06 | 2.36E-07 | 5.36 | 5.8935322 | 9.37E-02 | 150285475 | 150285598 | NC_000006.11 |
| cg11414505 | 1.62E-06 | 2.36E-07 | 5.36 | 5.8924585 | 4.22E-02 | 58877856  | 58877979  | NC_000019.9  |
| cg22354595 | 1.62E-06 | 2.37E-07 | 5.36 | 5.8916946 | 7.33E-02 | 57351440  | 57351563  | NC_000019.9  |

|            |          |          |      |           |          |           |           |              |
|------------|----------|----------|------|-----------|----------|-----------|-----------|--------------|
| cg01534273 | 1.62E-06 | 2.37E-07 | 5.36 | 5.8915114 | 5.44E-02 | 1877553   | 1877676   | NC_000019.9  |
| cg02354293 | 1.62E-06 | 2.37E-07 | 5.36 | 5.8913115 | 5.77E-02 | 148538682 | 148538805 | NC_000003.11 |
| cg08956157 | 1.62E-06 | 2.37E-07 | 5.36 | 5.8906806 | 1.05E-01 | 235796044 | 235796167 | NC_000002.11 |
| cg13911501 | 1.62E-06 | 2.37E-07 | 5.36 | 5.8905739 | 1.20E-01 | 141220320 | 141220443 | NC_000008.10 |
| cg11871421 | 1.62E-06 | 2.37E-07 | 5.36 | 5.8904801 | 1.70E-01 | 6679476   | 6679599   | NC_000017.10 |
| cg02969214 | 1.62E-06 | 2.37E-07 | 5.36 | 5.8904511 | 7.95E-02 | 32037602  | 32037725  | NC_000006.11 |
| cg13480046 | 1.62E-06 | 2.37E-07 | 5.36 | 5.8902191 | 2.26E-02 | 77497179  | 77497302  | NC_000018.9  |
| cg11414709 | 1.62E-06 | 2.37E-07 | 5.36 | 5.8900599 | 1.87E-01 | 28555055  | 28555178  | NC_000006.11 |
| cg24864402 | 1.62E-06 | 2.37E-07 | 5.36 | 5.8898887 | 1.05E-01 | 55204278  | 55204401  | NC_000020.10 |
| cg16201822 | 1.62E-06 | 2.37E-07 | 5.36 | 5.8894444 | 2.68E-02 | 43970683  | 43970806  | NC_000019.9  |
| cg17325912 | 1.62E-06 | 2.37E-07 | 5.36 | 5.8894078 | 3.33E-02 | 97520089  | 97520212  | NC_000002.11 |
| cg07636037 | 1.62E-06 | 2.38E-07 | 5.36 | 5.8880148 | 1.24E-02 | 49044803  | 49044926  | NC_000003.11 |
| cg00561194 | 1.62E-06 | 2.38E-07 | 5.36 | 5.8876516 | 1.21E-01 | 38069720  | 38069843  | NC_000010.10 |
| cg01048962 | 1.62E-06 | 2.38E-07 | 5.36 | 5.887616  | 1.58E-01 | 21646470  | 21646593  | NC_000019.9  |
| cg09485472 | 1.63E-06 | 2.38E-07 | 5.36 | 5.8868917 | 1.46E-02 | 169849786 | 169849909 | NC_000006.11 |
| cg21319411 | 1.63E-06 | 2.38E-07 | 5.36 | 5.8868272 | 5.32E-02 | 39340925  | 39341048  | NC_000017.10 |
| cg17781313 | 1.63E-06 | 2.38E-07 | 5.36 | 5.8861749 | 1.51E-01 | 50817374  | 50817497  | NC_000006.11 |
| cg20677570 | 1.63E-06 | 2.38E-07 | 5.36 | 5.8861126 | 8.19E-02 | 15962841  | 15962964  | NC_000011.9  |
| cg00019511 | 1.63E-06 | 2.38E-07 | 5.36 | 5.8855223 | 5.20E-02 | 101201288 | 101201411 | NC_000014.8  |
| cg14855607 | 1.63E-06 | 2.38E-07 | 5.36 | 5.8852093 | 1.36E-01 | 74706891  | 74707014  | NC_000014.8  |
| cg01019355 | 1.63E-06 | 2.38E-07 | 5.36 | 5.8851942 | 3.46E-02 | 27712255  | 27712378  | NC_000013.10 |
| cg21917351 | 1.63E-06 | 2.38E-07 | 5.36 | 5.8849838 | 2.30E-02 | 43859682  | 43859805  | NC_000001.10 |
| cg09212113 | 1.63E-06 | 2.38E-07 | 5.36 | 5.8848236 | 2.28E-02 | 31958950  | 31959073  | NC_000012.11 |
| cg07340574 | 1.63E-06 | 2.38E-07 | 5.36 | 5.8847935 | 1.09E-01 | 1203586   | 1203709   | NC_000016.9  |
| cg17965926 | 1.63E-06 | 2.38E-07 | 5.36 | 5.8846447 | 1.41E-01 | 140716970 | 140717093 | NC_000008.10 |

|            |          |          |      |           |          |           |           |              |
|------------|----------|----------|------|-----------|----------|-----------|-----------|--------------|
| cg13391313 | 1.63E-06 | 2.38E-07 | 5.36 | 5.8841219 | 1.05E-01 | 80330415  | 80330538  | NC_000017.10 |
| cg08624705 | 1.63E-06 | 2.38E-07 | 5.36 | 5.8840548 | 6.10E-02 | 8332156   | 8332279   | NC_000012.11 |
| cg20097984 | 1.63E-06 | 2.39E-07 | 5.36 | 5.8838777 | 3.66E-02 | 43388707  | 43388830  | NC_000013.10 |
| cg03256938 | 1.63E-06 | 2.39E-07 | 5.36 | 5.8832175 | 9.68E-02 | 2983926   | 2984049   | NC_000001.10 |
| cg17368737 | 1.63E-06 | 2.39E-07 | 5.36 | 5.8828504 | 1.37E-02 | 144897570 | 144897693 | NC_000008.10 |
| cg09484032 | 1.63E-06 | 2.39E-07 | 5.36 | 5.8828124 | 1.16E-01 | 54329854  | 54329977  | NC_000012.11 |
| cg20229014 | 1.63E-06 | 2.39E-07 | 5.36 | 5.8827642 | 6.98E-02 | 134529378 | 134529501 | NC_000008.10 |
| cg03075244 | 1.63E-06 | 2.39E-07 | 5.35 | 5.8814019 | 5.46E-02 | 26869910  | 26870033  | NC_000008.10 |
| cg13330341 | 1.63E-06 | 2.39E-07 | 5.35 | 5.8811074 | 1.09E-01 | 2292625   | 2292748   | NC_000011.9  |
| cg26043529 | 1.64E-06 | 2.39E-07 | 5.35 | 5.8806719 | 2.87E-02 | 17106266  | 17106389  | NC_000017.10 |
| cg12356266 | 1.64E-06 | 2.39E-07 | 5.35 | 5.8800066 | 6.83E-02 | 99984350  | 99984473  | NC_000008.10 |
| cg27487551 | 1.64E-06 | 2.40E-07 | 5.35 | 5.8778496 | 4.78E-02 | 143636680 | 143636803 | NC_000008.10 |
| cg26510404 | 1.64E-06 | 2.40E-07 | 5.35 | 5.877046  | 6.02E-02 | 74657448  | 74657571  | NC_000005.9  |
| cg22084806 | 1.64E-06 | 2.40E-07 | 5.35 | 5.8768045 | 1.60E-01 | 114261270 | 114261393 | NC_000002.11 |
| cg23009355 | 1.64E-06 | 2.40E-07 | 5.35 | 5.8766304 | 7.69E-02 | 68451396  | 68451519  | NC_000011.9  |
| cg15188010 | 1.64E-06 | 2.40E-07 | 5.35 | 5.8766083 | 1.08E-01 | 100636801 | 100636924 | NC_000013.10 |
| cg15988345 | 1.64E-06 | 2.40E-07 | 5.35 | 5.8763032 | 5.68E-02 | 24122261  | 24122384  | NC_000001.10 |
| cg22231329 | 1.64E-06 | 2.40E-07 | 5.35 | 5.8761228 | 1.92E-01 | 51071309  | 51071432  | NC_000019.9  |
| cg02922566 | 1.64E-06 | 2.41E-07 | 5.35 | 5.8755143 | 9.15E-02 | 106143737 | 106143860 | NC_000013.10 |
| cg15442907 | 1.64E-06 | 2.41E-07 | 5.35 | 5.8751577 | 1.46E-01 | 2800463   | 2800586   | NC_000012.11 |
| cg07897690 | 1.65E-06 | 2.41E-07 | 5.35 | 5.8743793 | 1.31E-01 | 200328645 | 200328768 | NC_000002.11 |
| cg12873903 | 1.65E-06 | 2.41E-07 | 5.35 | 5.8743449 | 5.51E-02 | 40514805  | 40514928  | NC_000017.10 |
| cg08992305 | 1.65E-06 | 2.41E-07 | 5.35 | 5.8739682 | 1.74E-01 | 165878219 | 165878342 | NC_000004.11 |
| cg01585567 | 1.65E-06 | 2.41E-07 | 5.35 | 5.8734895 | 4.68E-02 | 138975385 | 138975508 | NC_000002.11 |
| cg17018527 | 1.65E-06 | 2.41E-07 | 5.35 | 5.8725267 | 1.01E-01 | 83775931  | 83776054  | NC_000015.9  |

|            |          |          |      |           |          |           |           |              |
|------------|----------|----------|------|-----------|----------|-----------|-----------|--------------|
| cg01522412 | 1.65E-06 | 2.42E-07 | 5.35 | 5.871199  | 7.00E-02 | 60744202  | 60744325  | NC_000017.10 |
| cg05461666 | 1.65E-06 | 2.42E-07 | 5.35 | 5.8711678 | 1.96E-02 | 20573259  | 20573382  | NC_000001.10 |
| cg00993308 | 1.65E-06 | 2.42E-07 | 5.35 | 5.8711555 | 8.73E-02 | 3325561   | 3325684   | NC_000005.9  |
| cg26898336 | 1.65E-06 | 2.42E-07 | 5.35 | 5.8709942 | 1.33E-01 | 15244519  | 15244642  | NC_000017.10 |
| cg19799413 | 1.65E-06 | 2.42E-07 | 5.35 | 5.8702051 | 6.46E-02 | 134746824 | 134746947 | NC_000010.10 |
| cg26794835 | 1.65E-06 | 2.42E-07 | 5.35 | 5.8694463 | 1.25E-01 | 18700365  | 18700488  | NC_000004.11 |
| cg15828364 | 1.65E-06 | 2.42E-07 | 5.35 | 5.8691129 | 1.10E-01 | 20626786  | 20626909  | NC_000011.9  |
| cg18583378 | 1.65E-06 | 2.42E-07 | 5.35 | 5.8688976 | 1.53E-01 | 150715831 | 150715954 | NC_000007.13 |
| cg25126456 | 1.65E-06 | 2.42E-07 | 5.35 | 5.8688534 | 1.06E-01 | 4382105   | 4382228   | NC_000012.11 |
| cg19254119 | 1.65E-06 | 2.42E-07 | 5.35 | 5.8687485 | 1.47E-01 | 9609422   | 9609545   | NC_000019.9  |
| cg26171898 | 1.65E-06 | 2.42E-07 | 5.35 | 5.8681938 | 3.41E-02 | 92544660  | 92544783  | NC_000005.9  |
| cg02992632 | 1.65E-06 | 2.42E-07 | 5.35 | 5.8681855 | 1.29E-01 | 192445380 | 192445503 | NC_000003.11 |
| cg08029969 | 1.66E-06 | 2.43E-07 | 5.35 | 5.8667615 | 6.86E-02 | 28270611  | 28270734  | NC_000016.9  |
| cg04136149 | 1.66E-06 | 2.43E-07 | 5.35 | 5.8662065 | 1.53E-01 | 37488936  | 37489059  | NC_000007.13 |
| cg21621906 | 1.66E-06 | 2.43E-07 | 5.35 | 5.8657418 | 1.71E-01 | 142494914 | 142495037 | NC_000007.13 |
| cg09229683 | 1.66E-06 | 2.43E-07 | 5.35 | 5.8649901 | 1.38E-01 | 12995011  | 12995134  | NC_000016.9  |
| cg26139303 | 1.66E-06 | 2.43E-07 | 5.35 | 5.8646339 | 1.41E-01 | 76940880  | 76941003  | NC_000005.9  |
| cg14654643 | 1.66E-06 | 2.44E-07 | 5.35 | 5.8637099 | 5.27E-02 | 223187519 | 223187642 | NC_000002.11 |
| cg04244170 | 1.66E-06 | 2.44E-07 | 5.35 | 5.8633841 | 1.13E-01 | 100116021 | 100116144 | NC_000003.11 |
| cg12665504 | 1.66E-06 | 2.44E-07 | 5.35 | 5.8628232 | 1.24E-01 | 100239050 | 100239173 | NC_000005.9  |
| cg08101329 | 1.66E-06 | 2.44E-07 | 5.35 | 5.8627348 | 2.48E-02 | 4884631   | 4884754   | NC_000017.10 |
| cg25664275 | 1.66E-06 | 2.44E-07 | 5.35 | 5.8626281 | 1.39E-02 | 67511521  | 67511644  | NC_000005.9  |
| cg09947611 | 1.66E-06 | 2.44E-07 | 5.35 | 5.8625458 | 6.63E-02 | 1542360   | 1542483   | NC_000011.9  |
| cg09491991 | 1.66E-06 | 2.44E-07 | 5.35 | 5.8619613 | 2.27E-01 | 13200980  | 13201103  | NC_000020.10 |
| cg18636698 | 1.66E-06 | 2.44E-07 | 5.35 | 5.86183   | 5.02E-02 | 154163535 | 154163658 | NC_000005.9  |



|            |          |          |      |           |          |           |           |              |
|------------|----------|----------|------|-----------|----------|-----------|-----------|--------------|
| cg20262722 | 1.67E-06 | 2.44E-07 | 5.35 | 5.8614721 | 3.82E-02 | 742727    | 742850    | NC_000010.10 |
| cg00531137 | 1.67E-06 | 2.44E-07 | 5.35 | 5.861084  | 1.26E-01 | 57643932  | 57644055  | NC_000016.9  |
| cg15133351 | 1.67E-06 | 2.44E-07 | 5.35 | 5.8608212 | 1.46E-01 | 176948732 | 176948855 | NC_000002.11 |
| cg24155429 | 1.67E-06 | 2.44E-07 | 5.35 | 5.8600861 | 1.42E-01 | 185911885 | 185912008 | NC_000003.11 |
| cg05722504 | 1.67E-06 | 2.44E-07 | 5.35 | 5.8599629 | 9.06E-02 | 41749361  | 41749484  | NC_000004.11 |
| cg08302913 | 1.67E-06 | 2.45E-07 | 5.35 | 5.8595831 | 1.82E-01 | 182548786 | 182548909 | NC_000002.11 |
| cg24488772 | 1.67E-06 | 2.45E-07 | 5.35 | 5.8576349 | 2.65E-02 | 1017318   | 1017441   | NC_000001.10 |
| cg04135960 | 1.67E-06 | 2.45E-07 | 5.35 | 5.856837  | 7.06E-02 | 134982446 | 134982569 | NC_000010.10 |
| cg04389822 | 1.67E-06 | 2.45E-07 | 5.35 | 5.856779  | 3.21E-02 | 76755488  | 76755611  | NC_000018.9  |
| cg19975560 | 1.68E-06 | 2.46E-07 | 5.35 | 5.8548408 | 5.74E-02 | 197402207 | 197402330 | NC_000003.11 |
| cg10841775 | 1.68E-06 | 2.46E-07 | 5.35 | 5.8546492 | 1.40E-01 | 79258313  | 79258436  | NC_000012.11 |
| cg13849759 | 1.68E-06 | 2.46E-07 | 5.35 | 5.8543144 | 6.41E-02 | 13860785  | 13860908  | NC_000009.11 |
| cg10923219 | 1.68E-06 | 2.46E-07 | 5.35 | 5.8535355 | 4.30E-02 | 8555895   | 8556018   | NC_000010.10 |
| cg04976753 | 1.68E-06 | 2.46E-07 | 5.35 | 5.8534875 | 3.56E-02 | 3187921   | 3188044   | NC_000011.9  |
| cg27396403 | 1.68E-06 | 2.46E-07 | 5.35 | 5.8523843 | 5.65E-02 | 107387175 | 107387298 | NC_000007.13 |
| cg16761581 | 1.68E-06 | 2.46E-07 | 5.35 | 5.8523535 | 1.80E-01 | 24803807  | 24803930  | NC_000014.8  |
| cg08681856 | 1.68E-06 | 2.47E-07 | 5.35 | 5.8516906 | 7.32E-02 | 51411737  | 51411860  | NC_000019.9  |
| cg15517113 | 1.68E-06 | 2.47E-07 | 5.35 | 5.8514227 | 9.44E-02 | 620265    | 620388    | NC_000002.11 |
| cg16389285 | 1.68E-06 | 2.47E-07 | 5.35 | 5.8511264 | 1.66E-01 | 26108399  | 26108522  | NC_000015.9  |
| cg10635122 | 1.68E-06 | 2.47E-07 | 5.35 | 5.8505332 | 1.94E-01 | 52391090  | 52391213  | NC_000019.9  |
| cg07825955 | 1.68E-06 | 2.47E-07 | 5.35 | 5.8498884 | 7.17E-02 | 63014468  | 63014591  | NC_000007.13 |
| cg13674662 | 1.68E-06 | 2.47E-07 | 5.35 | 5.8496163 | 4.21E-02 | 51132637  | 51132760  | NC_000019.9  |
| cg10475172 | 1.69E-06 | 2.47E-07 | 5.35 | 5.8490953 | 4.04E-02 | 45927914  | 45928037  | NC_000003.11 |
| cg07112473 | 1.69E-06 | 2.47E-07 | 5.35 | 5.8483103 | 1.24E-01 | 105480748 | 105480871 | NC_000002.11 |
| cg16414403 | 1.69E-06 | 2.48E-07 | 5.35 | 5.8474293 | 8.49E-02 | 35399314  | 35399437  | NC_000020.10 |

|            |          |          |      |           |          |           |           |              |
|------------|----------|----------|------|-----------|----------|-----------|-----------|--------------|
| cg16266809 | 1.69E-06 | 2.48E-07 | 5.35 | 5.8466843 | 9.68E-02 | 30943371  | 30943494  | NC_000020.10 |
| cg03181966 | 1.69E-06 | 2.48E-07 | 5.35 | 5.8466494 | 6.44E-02 | 106493892 | 106494015 | NC_000002.11 |
| cg20798152 | 1.69E-06 | 2.48E-07 | 5.35 | 5.8463555 | 8.34E-02 | 71014900  | 71015023  | NC_000005.9  |
| cg16366809 | 1.69E-06 | 2.48E-07 | 5.35 | 5.8460849 | 1.28E-01 | 134844306 | 134844429 | NC_000005.9  |
| cg17755483 | 1.69E-06 | 2.48E-07 | 5.35 | 5.8458564 | 4.80E-02 | 71541917  | 71542040  | NC_000005.9  |
| cg24546683 | 1.69E-06 | 2.48E-07 | 5.35 | 5.8455424 | 1.19E-01 | 242097870 | 242097993 | NC_000001.10 |
| cg06766626 | 1.69E-06 | 2.48E-07 | 5.35 | 5.8448815 | 8.46E-02 | 35017872  | 35017995  | NC_000017.10 |
| cg05834477 | 1.69E-06 | 2.48E-07 | 5.35 | 5.8443641 | 9.34E-02 | 50887049  | 50887172  | NC_000010.10 |
| cg17971113 | 1.69E-06 | 2.49E-07 | 5.35 | 5.8434146 | 8.16E-02 | 47706142  | 47706265  | NC_000004.11 |
| cg21622464 | 1.69E-06 | 2.49E-07 | 5.35 | 5.8433116 | 5.36E-02 | 56164461  | 56164584  | NC_000017.10 |
| cg10460813 | 1.70E-06 | 2.49E-07 | 5.35 | 5.8429156 | 4.49E-02 | 87749116  | 87749239  | NC_000016.9  |
| cg19837124 | 1.70E-06 | 2.49E-07 | 5.35 | 5.8416873 | 6.95E-02 | 1974167   | 1974290   | NC_000011.9  |
| cg02072975 | 1.70E-06 | 2.49E-07 | 5.35 | 5.8411775 | 1.11E-01 | 45249541  | 45249664  | NC_000001.10 |
| cg11921539 | 1.70E-06 | 2.50E-07 | 5.35 | 5.8397406 | 7.41E-02 | 116328665 | 116328788 | NC_000011.9  |
| cg18676082 | 1.70E-06 | 2.50E-07 | 5.35 | 5.8391814 | 1.18E-01 | 75629433  | 75629556  | NC_000003.11 |
| cg13571707 | 1.70E-06 | 2.50E-07 | 5.35 | 5.8388404 | 2.04E-01 | 79383980  | 79384103  | NC_000015.9  |
| cg06635328 | 1.70E-06 | 2.50E-07 | 5.35 | 5.8388023 | 9.31E-02 | 1408635   | 1408758   | NC_000007.13 |
| cg05888917 | 1.70E-06 | 2.50E-07 | 5.35 | 5.8378616 | 1.61E-01 | 156626749 | 156626872 | NC_000001.10 |
| cg12099423 | 1.70E-06 | 2.50E-07 | 5.35 | 5.837746  | 8.57E-02 | 61590751  | 61590874  | NC_000020.10 |
| cg25226247 | 1.70E-06 | 2.50E-07 | 5.35 | 5.8376774 | 1.39E-01 | 50785152  | 50785275  | NC_000006.11 |
| cg07490085 | 1.70E-06 | 2.50E-07 | 5.35 | 5.8374245 | 5.19E-02 | 3876413   | 3876536   | NC_000004.11 |
| cg02974931 | 1.71E-06 | 2.50E-07 | 5.35 | 5.8366837 | 1.16E-01 | 48439216  | 48439339  | NC_000010.10 |
| cg03528946 | 1.71E-06 | 2.50E-07 | 5.35 | 5.8366249 | 3.05E-02 | 38069800  | 38069923  | NC_000009.11 |
| cg03966486 | 1.71E-06 | 2.50E-07 | 5.35 | 5.8365206 | 2.86E-02 | 40191051  | 40191174  | NC_000021.8  |
| cg03606725 | 1.71E-06 | 2.51E-07 | 5.35 | 5.8362337 | 1.13E-01 | 79758582  | 79758705  | NC_000016.9  |

|            |          |          |      |           |          |           |           |              |
|------------|----------|----------|------|-----------|----------|-----------|-----------|--------------|
| cg20673321 | 1.71E-06 | 2.51E-07 | 5.35 | 5.8361156 | 6.12E-02 | 48049233  | 48049356  | NC_000019.9  |
| cg19699090 | 1.71E-06 | 2.51E-07 | 5.34 | 5.8353381 | 8.77E-02 | 36808894  | 36809017  | NC_000006.11 |
| cg24530432 | 1.71E-06 | 2.51E-07 | 5.34 | 5.8349182 | 7.92E-02 | 174428060 | 174428183 | NC_000004.11 |
| cg03557698 | 1.71E-06 | 2.51E-07 | 5.34 | 5.8338626 | 3.04E-02 | 55271921  | 55272044  | NC_000001.10 |
| cg23323879 | 1.71E-06 | 2.51E-07 | 5.34 | 5.8334539 | 7.23E-02 | 65504534  | 65504657  | NC_000015.9  |
| cg19447629 | 1.71E-06 | 2.51E-07 | 5.34 | 5.8334157 | 3.68E-02 | 82766859  | 82766982  | NC_000012.11 |
| cg14427437 | 1.71E-06 | 2.51E-07 | 5.34 | 5.8333545 | 1.09E-01 | 20229471  | 20229594  | NC_000011.9  |
| cg05553511 | 1.71E-06 | 2.51E-07 | 5.34 | 5.8327011 | 5.66E-02 | 132655396 | 132655519 | NC_000012.11 |
| cg04047472 | 1.71E-06 | 2.51E-07 | 5.34 | 5.8326105 | 6.49E-02 | 1679796   | 1679919   | NC_000016.9  |
| cg07135032 | 1.71E-06 | 2.52E-07 | 5.34 | 5.8323365 | 1.33E-01 | 165322099 | 165322222 | NC_000001.10 |
| cg05825420 | 1.71E-06 | 2.52E-07 | 5.34 | 5.832231  | 1.13E-01 | 119303479 | 119303602 | NC_000010.10 |
| cg23705224 | 1.71E-06 | 2.52E-07 | 5.34 | 5.8315129 | 8.35E-02 | 48483948  | 48484071  | NC_000015.9  |
| cg23347429 | 1.72E-06 | 2.52E-07 | 5.34 | 5.8303404 | 1.52E-01 | 128850557 | 128850680 | NC_000012.11 |
| cg00806704 | 1.72E-06 | 2.52E-07 | 5.34 | 5.8294563 | 1.06E-01 | 28539042  | 28539165  | NC_000013.10 |
| cg00292312 | 1.72E-06 | 2.52E-07 | 5.34 | 5.8294045 | 9.62E-02 | 7318138   | 7318261   | NC_000001.10 |
| cg07502358 | 1.72E-06 | 2.53E-07 | 5.34 | 5.8283278 | 7.46E-02 | 78168218  | 78168341  | NC_000013.10 |
| cg07387286 | 1.72E-06 | 2.53E-07 | 5.34 | 5.827236  | 1.16E-01 | 39172120  | 39172243  | NC_000008.10 |
| cg09524396 | 1.72E-06 | 2.53E-07 | 5.34 | 5.8269267 | 1.22E-01 | 137817634 | 137817757 | NC_000006.11 |
| cg09931793 | 1.72E-06 | 2.53E-07 | 5.34 | 5.826715  | 4.86E-02 | 114090261 | 114090384 | NC_000009.11 |
| cg08181476 | 1.72E-06 | 2.53E-07 | 5.34 | 5.8264159 | 1.95E-01 | 19322676  | 19322799  | NC_000019.9  |
| cg23340034 | 1.72E-06 | 2.53E-07 | 5.34 | 5.8262997 | 1.21E-01 | 186782465 | 186782588 | NC_000003.11 |
| cg00811132 | 1.72E-06 | 2.53E-07 | 5.34 | 5.8257226 | 1.36E-01 | 19511707  | 19511830  | NC_000022.10 |
| cg24698727 | 1.72E-06 | 2.53E-07 | 5.34 | 5.8253462 | 1.13E-01 | 158150581 | 158150704 | NC_000001.10 |
| cg20026205 | 1.72E-06 | 2.53E-07 | 5.34 | 5.8253383 | 3.81E-02 | 108908672 | 108908795 | NC_000003.11 |
| cg08531260 | 1.72E-06 | 2.53E-07 | 5.34 | 5.8252912 | 5.96E-02 | 4230413   | 4230536   | NC_000010.10 |

|            |          |          |      |           |          |           |           |              |
|------------|----------|----------|------|-----------|----------|-----------|-----------|--------------|
| cg11842367 | 1.72E-06 | 2.53E-07 | 5.34 | 5.8252798 | 1.01E-01 | 78703580  | 78703703  | NC_000001.10 |
| cg16480692 | 1.72E-06 | 2.53E-07 | 5.34 | 5.8250767 | 1.66E-01 | 3355295   | 3355418   | NC_000016.9  |
| cg12259537 | 1.72E-06 | 2.53E-07 | 5.34 | 5.8247966 | 1.28E-01 | 58514694  | 58514817  | NC_000019.9  |
| cg26166818 | 1.73E-06 | 2.54E-07 | 5.34 | 5.8245351 | 2.79E-02 | 17062215  | 17062338  | NC_000017.10 |
| cg12279877 | 1.73E-06 | 2.54E-07 | 5.34 | 5.8245134 | 1.63E-01 | 35294230  | 35294353  | NC_000017.10 |
| cg03874601 | 1.73E-06 | 2.54E-07 | 5.34 | 5.8241806 | 7.48E-02 | 174505619 | 174505742 | NC_000002.11 |
| cg08487063 | 1.73E-06 | 2.54E-07 | 5.34 | 5.8230081 | 1.23E-01 | 102894639 | 102894762 | NC_000010.10 |
| cg18026244 | 1.73E-06 | 2.54E-07 | 5.34 | 5.822682  | 3.35E-02 | 38109876  | 38109999  | NC_000010.10 |
| cg11588317 | 1.73E-06 | 2.54E-07 | 5.34 | 5.8221634 | 3.47E-02 | 95837120  | 95837243  | NC_000011.9  |
| cg08538752 | 1.73E-06 | 2.54E-07 | 5.34 | 5.822118  | 7.55E-02 | 10990890  | 10991013  | NC_000021.8  |
| cg23204096 | 1.73E-06 | 2.54E-07 | 5.34 | 5.8219859 | 1.03E-01 | 169768053 | 169768176 | NC_000006.11 |
| cg19702785 | 1.73E-06 | 2.54E-07 | 5.34 | 5.82192   | 9.26E-02 | 43727089  | 43727212  | NC_000020.10 |
| cg04571163 | 1.73E-06 | 2.54E-07 | 5.34 | 5.8213352 | 1.06E-01 | 107502354 | 107502477 | NC_000002.11 |
| cg04285666 | 1.73E-06 | 2.55E-07 | 5.34 | 5.8200081 | 9.76E-02 | 122422863 | 122422986 | NC_000005.9  |
| cg02376703 | 1.73E-06 | 2.55E-07 | 5.34 | 5.8192118 | 2.91E-02 | 143106130 | 143106253 | NC_000007.13 |
| cg15891422 | 1.73E-06 | 2.55E-07 | 5.34 | 5.8188038 | 1.54E-01 | 43045386  | 43045509  | NC_000017.10 |
| cg01566312 | 1.74E-06 | 2.55E-07 | 5.34 | 5.8183978 | 5.94E-02 | 97418099  | 97418222  | NC_000001.10 |
| cg18016994 | 1.74E-06 | 2.55E-07 | 5.34 | 5.8183162 | 4.55E-02 | 28889421  | 28889544  | NC_000006.11 |
| cg25126698 | 1.74E-06 | 2.55E-07 | 5.34 | 5.8179248 | 6.72E-02 | 140751840 | 140751963 | NC_000005.9  |
| cg06129712 | 1.74E-06 | 2.55E-07 | 5.34 | 5.8178323 | 3.15E-02 | 83715302  | 83715425  | NC_000007.13 |
| cg04887124 | 1.74E-06 | 2.55E-07 | 5.34 | 5.8177431 | 2.60E-02 | 16557469  | 16557592  | NC_000001.10 |
| cg15586779 | 1.74E-06 | 2.55E-07 | 5.34 | 5.8176082 | 7.20E-02 | 202612132 | 202612255 | NC_000001.10 |
| cg27315497 | 1.74E-06 | 2.55E-07 | 5.34 | 5.8175258 | 8.97E-02 | 57281561  | 57281684  | NC_000011.9  |
| cg11052780 | 1.74E-06 | 2.56E-07 | 5.34 | 5.8168513 | 1.30E-01 | 72987499  | 72987622  | NC_000008.10 |
| cg17030488 | 1.74E-06 | 2.56E-07 | 5.34 | 5.8162619 | 6.93E-02 | 115172748 | 115172871 | NC_000012.11 |

|            |          |          |      |           |          |           |           |              |
|------------|----------|----------|------|-----------|----------|-----------|-----------|--------------|
| cg24071532 | 1.74E-06 | 2.56E-07 | 5.34 | 5.8158185 | 1.22E-01 | 32909042  | 32909165  | NC_000017.10 |
| cg07444005 | 1.74E-06 | 2.56E-07 | 5.34 | 5.8151669 | 2.68E-02 | 21678461  | 21678584  | NC_000013.10 |
| cg02921617 | 1.74E-06 | 2.56E-07 | 5.34 | 5.8148164 | 9.55E-02 | 326673    | 326796    | NC_000016.9  |
| cg14250833 | 1.74E-06 | 2.56E-07 | 5.34 | 5.8146343 | 1.52E-01 | 10882240  | 10882363  | NC_000006.11 |
| cg21074347 | 1.74E-06 | 2.56E-07 | 5.34 | 5.8145175 | 1.24E-01 | 9115009   | 9115132   | NC_000011.9  |
| cg12664119 | 1.74E-06 | 2.56E-07 | 5.34 | 5.813786  | 8.63E-02 | 119532352 | 119532475 | NC_000001.10 |
| cg01993124 | 1.74E-06 | 2.56E-07 | 5.34 | 5.8137632 | 7.92E-02 | 81190494  | 81190617  | NC_000016.9  |
| cg05299836 | 1.74E-06 | 2.57E-07 | 5.34 | 5.8131298 | 7.69E-02 | 31119067  | 31119190  | NC_000016.9  |
| cg00022558 | 1.74E-06 | 2.57E-07 | 5.34 | 5.8127536 | 1.33E-01 | 69590287  | 69590410  | NC_000011.9  |
| cg04673446 | 1.74E-06 | 2.57E-07 | 5.34 | 5.8126558 | 6.62E-02 | 39879951  | 39880074  | NC_000022.10 |
| cg06026545 | 1.75E-06 | 2.57E-07 | 5.34 | 5.812507  | 1.04E-01 | 35656860  | 35656983  | NC_000017.10 |
| cg19236454 | 1.75E-06 | 2.57E-07 | 5.34 | 5.8124712 | 7.31E-02 | 42799926  | 42800049  | NC_000019.9  |
| cg00059225 | 1.75E-06 | 2.57E-07 | 5.34 | 5.8124172 | 9.66E-02 | 151304357 | 151304480 | NC_000005.9  |
| cg08379987 | 1.75E-06 | 2.57E-07 | 5.34 | 5.8122612 | 1.28E-01 | 31507139  | 31507262  | NC_000013.10 |
| cg23982858 | 1.75E-06 | 2.57E-07 | 5.34 | 5.8118632 | 1.47E-01 | 95941869  | 95941992  | NC_000012.11 |
| cg01765545 | 1.75E-06 | 2.57E-07 | 5.34 | 5.8106935 | 1.60E-01 | 81045418  | 81045541  | NC_000005.9  |
| cg08614290 | 1.75E-06 | 2.57E-07 | 5.34 | 5.8100282 | 1.20E-01 | 158938491 | 158938614 | NC_000007.13 |
| cg27213352 | 1.75E-06 | 2.57E-07 | 5.34 | 5.8099938 | 1.09E-01 | 32907731  | 32907854  | NC_000017.10 |
| cg18323768 | 1.75E-06 | 2.58E-07 | 5.34 | 5.8090801 | 1.49E-01 | 24858943  | 24859066  | NC_000008.10 |
| cg10257302 | 1.75E-06 | 2.58E-07 | 5.34 | 5.8082326 | 1.17E-01 | 55907427  | 55907550  | NC_000014.8  |
| cg09440788 | 1.75E-06 | 2.58E-07 | 5.34 | 5.8072221 | 1.02E-01 | 37757401  | 37757524  | NC_000008.10 |
| cg06758644 | 1.75E-06 | 2.58E-07 | 5.34 | 5.806789  | 1.03E-01 | 12533120  | 12533243  | NC_000001.10 |
| cg14783814 | 1.75E-06 | 2.58E-07 | 5.34 | 5.8066616 | 1.47E-01 | 98511792  | 98511915  | NC_000001.10 |
| cg09265529 | 1.76E-06 | 2.58E-07 | 5.34 | 5.8064431 | 2.04E-01 | 57078765  | 57078888  | NC_000019.9  |
| cg00838874 | 1.76E-06 | 2.58E-07 | 5.34 | 5.8060047 | 1.41E-01 | 5018338   | 5018461   | NC_000012.11 |

|            |          |          |      |           |          |           |           |              |
|------------|----------|----------|------|-----------|----------|-----------|-----------|--------------|
| cg13169011 | 1.76E-06 | 2.59E-07 | 5.34 | 5.8053726 | 1.36E-01 | 60973462  | 60973585  | NC_000014.8  |
| cg07816247 | 1.76E-06 | 2.59E-07 | 5.34 | 5.8047679 | 8.70E-02 | 15540152  | 15540275  | NC_000001.10 |
| cg12499316 | 1.76E-06 | 2.59E-07 | 5.34 | 5.8047525 | 6.93E-02 | 106242236 | 106242359 | NC_000002.11 |
| cg24024505 | 1.76E-06 | 2.59E-07 | 5.34 | 5.8047256 | 4.86E-02 | 28829401  | 28829524  | NC_000006.11 |
| cg20016631 | 1.76E-06 | 2.59E-07 | 5.34 | 5.8044589 | 7.42E-02 | 38871320  | 38871443  | NC_000004.11 |
| cg27188358 | 1.76E-06 | 2.59E-07 | 5.34 | 5.804249  | 4.07E-02 | 281376    | 281499    | NC_000019.9  |
| cg10541767 | 1.76E-06 | 2.59E-07 | 5.34 | 5.8036295 | 7.67E-02 | 142537016 | 142537139 | NC_000003.11 |
| cg10871779 | 1.76E-06 | 2.59E-07 | 5.34 | 5.8034301 | 1.35E-01 | 113437909 | 113438032 | NC_000004.11 |
| cg05966641 | 1.76E-06 | 2.59E-07 | 5.34 | 5.8031484 | 3.17E-02 | 134637428 | 134637551 | NC_000006.11 |
| cg11410473 | 1.76E-06 | 2.59E-07 | 5.34 | 5.8029496 | 2.62E-02 | 167649749 | 167649872 | NC_000006.11 |
| cg14873240 | 1.76E-06 | 2.59E-07 | 5.34 | 5.8026005 | 9.35E-02 | 170303147 | 170303270 | NC_000003.11 |
| cg01762785 | 1.76E-06 | 2.59E-07 | 5.34 | 5.8024329 | 4.73E-02 | 42226837  | 42226960  | NC_000022.10 |
| cg11874762 | 1.76E-06 | 2.59E-07 | 5.34 | 5.8023222 | 1.44E-01 | 71318870  | 71318993  | NC_000011.9  |
| cg25903158 | 1.76E-06 | 2.60E-07 | 5.34 | 5.8011988 | 1.24E-01 | 1288721   | 1288844   | NC_000007.13 |
| cg11472725 | 1.76E-06 | 2.60E-07 | 5.34 | 5.8005732 | 5.64E-02 | 138938931 | 138939054 | NC_000006.11 |
| cg02046247 | 1.76E-06 | 2.60E-07 | 5.34 | 5.8004672 | 1.11E-01 | 1662459   | 1662582   | NC_000012.11 |
| cg26103369 | 1.77E-06 | 2.60E-07 | 5.34 | 5.8001262 | 1.42E-01 | 75153307  | 75153430  | NC_000014.8  |
| cg06362543 | 1.77E-06 | 2.60E-07 | 5.34 | 5.8000413 | 9.65E-02 | 42135794  | 42135917  | NC_000020.10 |
| cg06776644 | 1.77E-06 | 2.60E-07 | 5.34 | 5.7992469 | 9.29E-02 | 93218074  | 93218197  | NC_000011.9  |
| cg07385490 | 1.77E-06 | 2.60E-07 | 5.34 | 5.7989201 | 2.85E-02 | 1318548   | 1318671   | NC_000005.9  |
| cg11967835 | 1.77E-06 | 2.61E-07 | 5.34 | 5.7981401 | 5.88E-02 | 145624713 | 145624836 | NC_000008.10 |
| cg26023087 | 1.77E-06 | 2.61E-07 | 5.34 | 5.797416  | 1.41E-01 | 972520    | 972643    | NC_000009.11 |
| cg26380443 | 1.77E-06 | 2.61E-07 | 5.34 | 5.7960222 | 1.53E-01 | 140625240 | 140625363 | NC_000005.9  |
| cg12277278 | 1.77E-06 | 2.61E-07 | 5.34 | 5.7952809 | 1.23E-01 | 61636767  | 61636890  | NC_000020.10 |
| cg03575602 | 1.77E-06 | 2.61E-07 | 5.34 | 5.7946865 | 8.70E-02 | 12390599  | 12390722  | NC_000010.10 |

|            |          |          |      |           |          |           |           |              |
|------------|----------|----------|------|-----------|----------|-----------|-----------|--------------|
| cg26028149 | 1.78E-06 | 2.62E-07 | 5.34 | 5.7945257 | 6.95E-02 | 37974016  | 37974139  | NC_000010.10 |
| cg02715304 | 1.78E-06 | 2.62E-07 | 5.34 | 5.7944122 | 7.31E-02 | 67381183  | 67381306  | NC_000011.9  |
| cg05798059 | 1.78E-06 | 2.62E-07 | 5.34 | 5.7942345 | 1.17E-01 | 30444984  | 30445107  | NC_000011.9  |
| cg00414898 | 1.78E-06 | 2.62E-07 | 5.34 | 5.7935432 | 9.65E-02 | 89950542  | 89950665  | NC_000015.9  |
| cg12623183 | 1.78E-06 | 2.62E-07 | 5.34 | 5.7930567 | 9.93E-02 | 138831252 | 138831375 | NC_000004.11 |
| cg01783492 | 1.78E-06 | 2.62E-07 | 5.34 | 5.7928928 | 5.38E-02 | 10721112  | 10721235  | NC_000016.9  |
| cg18080733 | 1.78E-06 | 2.62E-07 | 5.34 | 5.7927516 | 1.17E-01 | 113611873 | 113611996 | NC_000013.10 |
| cg05116255 | 1.78E-06 | 2.62E-07 | 5.34 | 5.7927284 | 3.39E-02 | 37413782  | 37413905  | NC_000010.10 |
| cg16425161 | 1.78E-06 | 2.62E-07 | 5.34 | 5.7922115 | 1.30E-01 | 47624584  | 47624707  | NC_000015.9  |
| cg02988422 | 1.78E-06 | 2.62E-07 | 5.34 | 5.792024  | 5.45E-02 | 14450799  | 14450922  | NC_000018.9  |
| cg24620761 | 1.78E-06 | 2.62E-07 | 5.34 | 5.7916912 | 1.35E-01 | 147123199 | 147123322 | NC_000003.11 |
| cg16205958 | 1.78E-06 | 2.62E-07 | 5.34 | 5.7913305 | 1.09E-01 | 124653247 | 124653370 | NC_000005.9  |
| cg13385203 | 1.78E-06 | 2.62E-07 | 5.34 | 5.7912682 | 4.67E-02 | 79216946  | 79217069  | NC_000017.10 |
| cg25022687 | 1.78E-06 | 2.62E-07 | 5.34 | 5.7912042 | 1.22E-01 | 118032987 | 118033110 | NC_000010.10 |
| cg23318020 | 1.78E-06 | 2.63E-07 | 5.34 | 5.7904284 | 1.17E-01 | 74805375  | 74805498  | NC_000013.10 |
| cg03910557 | 1.78E-06 | 2.63E-07 | 5.34 | 5.7899225 | 9.76E-02 | 126074639 | 126074762 | NC_000006.11 |
| cg03886520 | 1.78E-06 | 2.63E-07 | 5.34 | 5.7898679 | 2.74E-02 | 8395396   | 8395519   | NC_000001.10 |
| cg02569613 | 1.78E-06 | 2.63E-07 | 5.34 | 5.789712  | 1.25E-01 | 50323127  | 50323250  | NC_000010.10 |
| cg27407147 | 1.78E-06 | 2.63E-07 | 5.34 | 5.7894972 | 9.87E-02 | 89920824  | 89920947  | NC_000015.9  |
| cg00498804 | 1.78E-06 | 2.63E-07 | 5.34 | 5.789025  | 6.46E-02 | 8827626   | 8827749   | NC_000011.9  |
| cg24833819 | 1.79E-06 | 2.63E-07 | 5.33 | 5.7883972 | 7.84E-02 | 42924552  | 42924675  | NC_000005.9  |
| cg18194734 | 1.79E-06 | 2.63E-07 | 5.33 | 5.7882296 | 1.87E-01 | 131513724 | 131513847 | NC_000002.11 |
| cg03707183 | 1.79E-06 | 2.63E-07 | 5.33 | 5.7880992 | 8.62E-02 | 4901449   | 4901572   | NC_000007.13 |
| cg00079219 | 1.79E-06 | 2.63E-07 | 5.33 | 5.7880513 | 1.34E-01 | 54360131  | 54360254  | NC_000012.11 |
| cg20250981 | 1.79E-06 | 2.63E-07 | 5.33 | 5.7876653 | 1.01E-01 | 2890644   | 2890767   | NC_000011.9  |

|            |          |          |      |           |          |           |           |              |
|------------|----------|----------|------|-----------|----------|-----------|-----------|--------------|
| cg07652774 | 1.79E-06 | 2.63E-07 | 5.33 | 5.7876242 | 3.32E-02 | 29003922  | 29004045  | NC_000006.11 |
| cg17592231 | 1.79E-06 | 2.63E-07 | 5.33 | 5.7874187 | 8.39E-02 | 43604758  | 43604881  | NC_000011.9  |
| cg25050332 | 1.79E-06 | 2.63E-07 | 5.33 | 5.7873452 | 8.35E-02 | 316088    | 316211    | NC_000011.9  |
| cg14793931 | 1.79E-06 | 2.63E-07 | 5.33 | 5.787285  | 5.76E-02 | 3834745   | 3834868   | NC_000019.9  |
| cg07743919 | 1.79E-06 | 2.64E-07 | 5.33 | 5.7869317 | 3.41E-02 | 3499277   | 3499400   | NC_000010.10 |
| cg03041629 | 1.79E-06 | 2.64E-07 | 5.33 | 5.7867016 | 1.01E-01 | 100463590 | 100463713 | NC_000011.9  |
| cg00223715 | 1.79E-06 | 2.64E-07 | 5.33 | 5.7855785 | 8.23E-02 | 49063003  | 49063126  | NC_000022.10 |
| cg09269935 | 1.79E-06 | 2.64E-07 | 5.33 | 5.7853387 | 6.36E-02 | 4541555   | 4541678   | NC_000001.10 |
| cg25345561 | 1.79E-06 | 2.64E-07 | 5.33 | 5.7845687 | 2.58E-02 | 69323046  | 69323169  | NC_000015.9  |
| cg16677955 | 1.79E-06 | 2.64E-07 | 5.33 | 5.7845121 | 1.46E-01 | 32930380  | 32930503  | NC_000001.10 |
| cg13673536 | 1.79E-06 | 2.64E-07 | 5.33 | 5.7843752 | 8.44E-02 | 71397641  | 71397764  | NC_000009.11 |
| cg07314988 | 1.79E-06 | 2.64E-07 | 5.33 | 5.7840583 | 1.22E-01 | 289774    | 289897    | NC_000011.9  |
| cg12874092 | 1.79E-06 | 2.64E-07 | 5.33 | 5.7837804 | 1.66E-01 | 17271519  | 17271642  | NC_000010.10 |
| cg02138124 | 1.79E-06 | 2.65E-07 | 5.33 | 5.7828653 | 9.18E-02 | 37901697  | 37901820  | NC_000008.10 |
| cg19403023 | 1.80E-06 | 2.65E-07 | 5.33 | 5.7815323 | 8.26E-02 | 2848797   | 2848920   | NC_000016.9  |
| cg01948367 | 1.80E-06 | 2.65E-07 | 5.33 | 5.781041  | 4.86E-02 | 93327134  | 93327257  | NC_000005.9  |
| cg11428482 | 1.80E-06 | 2.65E-07 | 5.33 | 5.7806932 | 1.63E-01 | 45405333  | 45405456  | NC_000022.10 |
| cg03573945 | 1.80E-06 | 2.65E-07 | 5.33 | 5.7806918 | 1.03E-01 | 25897342  | 25897465  | NC_000008.10 |
| cg09681877 | 1.80E-06 | 2.65E-07 | 5.33 | 5.7806336 | 1.13E-01 | 113391671 | 113391794 | NC_000005.9  |
| cg12954234 | 1.80E-06 | 2.65E-07 | 5.33 | 5.7803813 | 1.05E-01 | 89628141  | 89628264  | NC_000004.11 |
| cg23926793 | 1.80E-06 | 2.66E-07 | 5.33 | 5.7798029 | 1.51E-01 | 62996664  | 62996787  | NC_000006.11 |
| cg11504355 | 1.80E-06 | 2.66E-07 | 5.33 | 5.7795654 | 7.81E-02 | 158065595 | 158065718 | NC_000001.10 |
| cg11854217 | 1.80E-06 | 2.66E-07 | 5.33 | 5.779511  | 6.04E-02 | 106235684 | 106235807 | NC_000014.8  |
| cg07921625 | 1.80E-06 | 2.66E-07 | 5.33 | 5.7785902 | 1.09E-01 | 58208350  | 58208473  | NC_000013.10 |
| cg00249383 | 1.80E-06 | 2.66E-07 | 5.33 | 5.7784833 | 7.81E-02 | 2287763   | 2287886   | NC_000016.9  |



|            |          |          |      |           |          |           |           |              |
|------------|----------|----------|------|-----------|----------|-----------|-----------|--------------|
| cg22486630 | 1.80E-06 | 2.66E-07 | 5.33 | 5.7774722 | 1.17E-01 | 11471954  | 11472077  | NC_000019.9  |
| cg12436377 | 1.81E-06 | 2.66E-07 | 5.33 | 5.7768504 | 1.52E-01 | 87440296  | 87440419  | NC_000005.9  |
| cg03589230 | 1.81E-06 | 2.67E-07 | 5.33 | 5.7757175 | 6.01E-02 | 1992099   | 1992222   | NC_000008.10 |
| cg04956944 | 1.81E-06 | 2.67E-07 | 5.33 | 5.7756941 | 6.79E-02 | 112899297 | 112899420 | NC_000002.11 |
| cg24278817 | 1.81E-06 | 2.67E-07 | 5.33 | 5.775669  | 2.70E-02 | 129116327 | 129116450 | NC_000003.11 |
| cg10020325 | 1.81E-06 | 2.67E-07 | 5.33 | 5.7746371 | 5.65E-02 | 220362163 | 220362286 | NC_000002.11 |
| cg09415272 | 1.81E-06 | 2.67E-07 | 5.33 | 5.7738257 | 9.97E-02 | 88751158  | 88751281  | NC_000002.11 |
| cg18906520 | 1.81E-06 | 2.67E-07 | 5.33 | 5.7738134 | 7.92E-02 | 123461288 | 123461411 | NC_000012.11 |
| cg19716414 | 1.81E-06 | 2.67E-07 | 5.33 | 5.7737595 | 4.98E-02 | 131976236 | 131976359 | NC_000002.11 |
| cg01807770 | 1.81E-06 | 2.67E-07 | 5.33 | 5.7736972 | 3.27E-02 | 79471305  | 79471428  | NC_000004.11 |
| cg24719321 | 1.81E-06 | 2.67E-07 | 5.33 | 5.7729084 | 1.18E-01 | 122850490 | 122850613 | NC_000011.9  |
| cg19943325 | 1.81E-06 | 2.68E-07 | 5.33 | 5.7714317 | 3.87E-02 | 77018107  | 77018230  | NC_000012.11 |
| cg13853761 | 1.82E-06 | 2.68E-07 | 5.33 | 5.7704261 | 8.86E-02 | 64863232  | 64863355  | NC_000011.9  |
| cg02208891 | 1.82E-06 | 2.68E-07 | 5.33 | 5.7700336 | 7.33E-02 | 126205741 | 126205864 | NC_000010.10 |
| cg23785043 | 1.82E-06 | 2.68E-07 | 5.33 | 5.7699226 | 1.41E-01 | 19147307  | 19147430  | NC_000007.13 |
| cg13073773 | 1.82E-06 | 2.68E-07 | 5.33 | 5.7690249 | 1.09E-01 | 95234658  | 95234781  | NC_000014.8  |
| cg18537454 | 1.82E-06 | 2.69E-07 | 5.33 | 5.7683384 | 7.46E-02 | 22623213  | 22623336  | NC_000010.10 |
| cg02630629 | 1.82E-06 | 2.69E-07 | 5.33 | 5.7679845 | 6.18E-02 | 6111671   | 6111794   | NC_000001.10 |
| cg16310491 | 1.82E-06 | 2.69E-07 | 5.33 | 5.7679734 | 1.12E-01 | 87973597  | 87973720  | NC_000005.9  |
| cg10019132 | 1.82E-06 | 2.69E-07 | 5.33 | 5.7675821 | 1.47E-01 | 28602626  | 28602749  | NC_000006.11 |
| cg14510404 | 1.82E-06 | 2.69E-07 | 5.33 | 5.7674452 | 1.29E-01 | 79382995  | 79383118  | NC_000015.9  |
| cg07464571 | 1.82E-06 | 2.69E-07 | 5.33 | 5.7672696 | 8.33E-02 | 127881001 | 127881124 | NC_000007.13 |
| cg26991571 | 1.82E-06 | 2.69E-07 | 5.33 | 5.766735  | 5.94E-02 | 140568535 | 140568658 | NC_000005.9  |
| cg15710554 | 1.82E-06 | 2.69E-07 | 5.33 | 5.7661129 | 6.54E-02 | 138497336 | 138497459 | NC_000005.9  |
| cg24973298 | 1.82E-06 | 2.69E-07 | 5.33 | 5.7657965 | 1.50E-01 | 7568539   | 7568662   | NC_000018.9  |

|            |          |          |      |           |          |           |           |              |
|------------|----------|----------|------|-----------|----------|-----------|-----------|--------------|
| cg09785338 | 1.83E-06 | 2.70E-07 | 5.33 | 5.7646358 | 1.15E-01 | 79027673  | 79027796  | NC_000016.9  |
| cg25165908 | 1.83E-06 | 2.70E-07 | 5.33 | 5.7625869 | 7.34E-02 | 111476211 | 111476334 | NC_000012.11 |
| cg00804628 | 1.83E-06 | 2.71E-07 | 5.33 | 5.7614539 | 1.65E-01 | 139537845 | 139537968 | NC_000002.11 |
| cg03833429 | 1.83E-06 | 2.71E-07 | 5.33 | 5.7603134 | 9.93E-02 | 4258342   | 4258465   | NC_000016.9  |
| cg05532239 | 1.83E-06 | 2.71E-07 | 5.33 | 5.7599412 | 7.78E-02 | 156309258 | 156309381 | NC_000001.10 |
| cg19181310 | 1.83E-06 | 2.71E-07 | 5.33 | 5.7598563 | 3.50E-02 | 40735036  | 40735159  | NC_000015.9  |
| cg17964921 | 1.83E-06 | 2.71E-07 | 5.33 | 5.7597479 | 2.84E-02 | 872045    | 872168    | NC_000005.9  |
| cg23281803 | 1.83E-06 | 2.71E-07 | 5.33 | 5.7596834 | 1.12E-01 | 121138317 | 121138440 | NC_000008.10 |
| cg20136061 | 1.84E-06 | 2.71E-07 | 5.33 | 5.7591412 | 1.37E-01 | 147136586 | 147136709 | NC_000003.11 |
| cg26884787 | 1.84E-06 | 2.71E-07 | 5.33 | 5.7589724 | 7.86E-02 | 88543447  | 88543570  | NC_000016.9  |
| cg06522179 | 1.84E-06 | 2.71E-07 | 5.33 | 5.7585458 | 2.65E-02 | 2647662   | 2647785   | NC_000016.9  |
| cg20055426 | 1.84E-06 | 2.71E-07 | 5.33 | 5.7584496 | 1.09E-01 | 127211421 | 127211544 | NC_000012.11 |
| cg04640684 | 1.84E-06 | 2.72E-07 | 5.33 | 5.7581139 | 5.82E-02 | 107763534 | 107763657 | NC_000008.10 |
| cg18429584 | 1.84E-06 | 2.72E-07 | 5.33 | 5.7558657 | 3.93E-02 | 10264210  | 10264333  | NC_000012.11 |
| cg26583598 | 1.84E-06 | 2.72E-07 | 5.33 | 5.7554731 | 8.18E-02 | 60776693  | 60776816  | NC_000005.9  |
| cg06266993 | 1.84E-06 | 2.72E-07 | 5.33 | 5.7554726 | 1.73E-01 | 46671131  | 46671254  | NC_000017.10 |
| cg06027587 | 1.84E-06 | 2.72E-07 | 5.33 | 5.7554399 | 6.47E-02 | 27128708  | 27128831  | NC_000006.11 |
| cg03940047 | 1.84E-06 | 2.72E-07 | 5.33 | 5.7553743 | 1.03E-01 | 62120117  | 62120240  | NC_000020.10 |
| cg08704196 | 1.84E-06 | 2.73E-07 | 5.33 | 5.7546123 | 8.25E-02 | 34787392  | 34787515  | NC_000016.9  |
| cg06159353 | 1.85E-06 | 2.73E-07 | 5.33 | 5.7537798 | 1.24E-01 | 72595807  | 72595930  | NC_000005.9  |
| cg00537351 | 1.85E-06 | 2.73E-07 | 5.33 | 5.7535267 | 4.11E-02 | 14339109  | 14339232  | NC_000005.9  |
| cg10763953 | 1.85E-06 | 2.73E-07 | 5.33 | 5.7532126 | 5.80E-02 | 114741115 | 114741238 | NC_000007.13 |
| cg23228019 | 1.85E-06 | 2.73E-07 | 5.33 | 5.753198  | 5.10E-02 | 46579870  | 46579993  | NC_000020.10 |
| cg10479181 | 1.85E-06 | 2.73E-07 | 5.33 | 5.7528463 | 4.32E-02 | 1026877   | 1027000   | NC_000016.9  |
| cg24444839 | 1.85E-06 | 2.73E-07 | 5.33 | 5.7521887 | 5.54E-02 | 34350730  | 34350853  | NC_000021.8  |

|            |          |          |      |           |          |           |           |              |
|------------|----------|----------|------|-----------|----------|-----------|-----------|--------------|
| cg04954680 | 1.85E-06 | 2.73E-07 | 5.33 | 5.7514819 | 1.50E-01 | 26663593  | 26663716  | NC_000003.11 |
| cg16146060 | 1.85E-06 | 2.74E-07 | 5.33 | 5.7504927 | 7.11E-02 | 11487165  | 11487288  | NC_000010.10 |
| cg26287309 | 1.85E-06 | 2.74E-07 | 5.33 | 5.7503424 | 6.27E-02 | 37774499  | 37774622  | NC_000022.10 |
| cg11273834 | 1.85E-06 | 2.74E-07 | 5.33 | 5.7497181 | 8.24E-02 | 149863603 | 149863726 | NC_000006.11 |
| cg03660034 | 1.85E-06 | 2.74E-07 | 5.33 | 5.7491902 | 9.14E-02 | 76040976  | 76041099  | NC_000017.10 |
| cg08403195 | 1.85E-06 | 2.74E-07 | 5.33 | 5.7488986 | 1.15E-01 | 79181440  | 79181563  | NC_000013.10 |
| cg06493386 | 1.85E-06 | 2.74E-07 | 5.33 | 5.7488063 | 1.15E-01 | 72987797  | 72987920  | NC_000008.10 |
| cg26876077 | 1.86E-06 | 2.74E-07 | 5.33 | 5.7481541 | 8.06E-02 | 159347295 | 159347418 | NC_000005.9  |
| cg00086426 | 1.86E-06 | 2.75E-07 | 5.33 | 5.7461182 | 9.21E-02 | 10934373  | 10934496  | NC_000016.9  |
| cg00614249 | 1.86E-06 | 2.75E-07 | 5.33 | 5.7450399 | 8.26E-02 | 139784036 | 139784159 | NC_000008.10 |
| cg23933606 | 1.86E-06 | 2.75E-07 | 5.33 | 5.744959  | 3.44E-02 | 4944005   | 4944128   | NC_000019.9  |
| cg24789424 | 1.86E-06 | 2.75E-07 | 5.33 | 5.7446544 | 4.50E-02 | 197300143 | 197300266 | NC_000003.11 |
| cg03415916 | 1.86E-06 | 2.76E-07 | 5.33 | 5.7430292 | 6.34E-02 | 140788613 | 140788736 | NC_000005.9  |
| cg02286665 | 1.87E-06 | 2.76E-07 | 5.33 | 5.7426983 | 4.17E-02 | 45552320  | 45552443  | NC_000021.8  |
| cg17579515 | 1.87E-06 | 2.76E-07 | 5.33 | 5.7422179 | 4.02E-02 | 117186815 | 117186938 | NC_000012.11 |
| cg13049471 | 1.87E-06 | 2.76E-07 | 5.32 | 5.7419201 | 1.34E-01 | 74641167  | 74641290  | NC_000017.10 |
| cg02212846 | 1.87E-06 | 2.76E-07 | 5.32 | 5.7414305 | 6.92E-02 | 159639257 | 159639380 | NC_000006.11 |
| cg10873330 | 1.87E-06 | 2.76E-07 | 5.32 | 5.7414091 | 4.59E-02 | 7677873   | 7677996   | NC_000004.11 |
| cg05890279 | 1.87E-06 | 2.76E-07 | 5.32 | 5.7411673 | 8.00E-02 | 6337357   | 6337480   | NC_000017.10 |
| cg16626884 | 1.87E-06 | 2.77E-07 | 5.32 | 5.7400587 | 1.37E-01 | 71693389  | 71693512  | NC_000002.11 |
| cg22815110 | 1.87E-06 | 2.77E-07 | 5.32 | 5.7392007 | 1.08E-01 | 63788933  | 63789056  | NC_000001.10 |
| cg18918831 | 1.87E-06 | 2.77E-07 | 5.32 | 5.7390684 | 1.22E-01 | 195489782 | 195489905 | NC_000003.11 |
| cg09662823 | 1.87E-06 | 2.77E-07 | 5.32 | 5.7387913 | 4.43E-02 | 3825441   | 3825564   | NC_000019.9  |
| cg17857974 | 1.87E-06 | 2.77E-07 | 5.32 | 5.7384677 | 1.42E-01 | 140800474 | 140800597 | NC_000005.9  |
| cg25274185 | 1.87E-06 | 2.77E-07 | 5.32 | 5.738458  | 1.27E-01 | 32611483  | 32611606  | NC_000013.10 |

|            |          |          |      |           |          |           |           |              |
|------------|----------|----------|------|-----------|----------|-----------|-----------|--------------|
| cg01403885 | 1.87E-06 | 2.77E-07 | 5.32 | 5.7382124 | 7.86E-02 | 45742140  | 45742263  | NC_000019.9  |
| cg05589845 | 1.87E-06 | 2.77E-07 | 5.32 | 5.7381584 | 1.19E-01 | 27282444  | 27282567  | NC_000007.13 |
| cg03803008 | 1.87E-06 | 2.77E-07 | 5.32 | 5.7374805 | 8.33E-02 | 70055327  | 70055450  | NC_000007.13 |
| cg20985560 | 1.88E-06 | 2.78E-07 | 5.32 | 5.7364399 | 5.92E-02 | 1409174   | 1409297   | NC_000004.11 |
| cg16576620 | 1.88E-06 | 2.78E-07 | 5.32 | 5.7358861 | 1.50E-01 | 61596068  | 61596191  | NC_000011.9  |
| cg26409237 | 1.88E-06 | 2.78E-07 | 5.32 | 5.7354408 | 6.67E-02 | 10041000  | 10041123  | NC_000004.11 |
| cg18447772 | 1.88E-06 | 2.78E-07 | 5.32 | 5.7354174 | 1.57E-01 | 27205224  | 27205347  | NC_000007.13 |
| cg23195028 | 1.88E-06 | 2.78E-07 | 5.32 | 5.7353745 | 8.27E-02 | 6380234   | 6380357   | NC_000004.11 |
| cg18015746 | 1.88E-06 | 2.78E-07 | 5.32 | 5.7353728 | 1.57E-01 | 19797134  | 19797257  | NC_000008.10 |
| cg05198963 | 1.88E-06 | 2.78E-07 | 5.32 | 5.7346411 | 7.63E-02 | 30336870  | 30336993  | NC_000010.10 |
| cg03935055 | 1.88E-06 | 2.78E-07 | 5.32 | 5.7344258 | 1.23E-01 | 27771905  | 27772028  | NC_000003.11 |
| cg09997356 | 1.88E-06 | 2.78E-07 | 5.32 | 5.734113  | 5.34E-02 | 41651695  | 41651818  | NC_000008.10 |
| cg08654288 | 1.88E-06 | 2.79E-07 | 5.32 | 5.7333819 | 2.49E-02 | 13861340  | 13861463  | NC_000019.9  |
| cg11792184 | 1.88E-06 | 2.79E-07 | 5.32 | 5.7332916 | 3.73E-02 | 33193550  | 33193673  | NC_000022.10 |
| cg20160351 | 1.88E-06 | 2.79E-07 | 5.32 | 5.7327752 | 7.37E-02 | 58555364  | 58555487  | NC_000001.10 |
| cg18326783 | 1.88E-06 | 2.79E-07 | 5.32 | 5.7326494 | 3.23E-02 | 102765364 | 102765487 | NC_000010.10 |
| cg25616160 | 1.88E-06 | 2.79E-07 | 5.32 | 5.732597  | 4.87E-02 | 39655863  | 39655986  | NC_000017.10 |
| cg00076497 | 1.88E-06 | 2.79E-07 | 5.32 | 5.7325544 | 9.21E-02 | 126891621 | 126891744 | NC_000007.13 |
| cg04556542 | 1.88E-06 | 2.79E-07 | 5.32 | 5.7323168 | 1.00E-01 | 92790580  | 92790703  | NC_000014.8  |
| cg14598327 | 1.89E-06 | 2.79E-07 | 5.32 | 5.7313242 | 2.00E-01 | 54675137  | 54675260  | NC_000017.10 |
| cg24692872 | 1.89E-06 | 2.79E-07 | 5.32 | 5.7311195 | 5.38E-02 | 19181150  | 19181273  | NC_000001.10 |
| cg08170583 | 1.89E-06 | 2.79E-07 | 5.32 | 5.7306944 | 7.06E-02 | 25269908  | 25270031  | NC_000008.10 |
| cg20847580 | 1.89E-06 | 2.79E-07 | 5.32 | 5.7306481 | 1.07E-01 | 41528750  | 41528873  | NC_000006.11 |
| cg26809497 | 1.89E-06 | 2.79E-07 | 5.32 | 5.7305868 | 1.17E-01 | 69244152  | 69244275  | NC_000008.10 |
| cg09118552 | 1.89E-06 | 2.80E-07 | 5.32 | 5.728494  | 4.33E-02 | 117067745 | 117067868 | NC_000007.13 |

|            |          |          |      |           |          |           |           |              |
|------------|----------|----------|------|-----------|----------|-----------|-----------|--------------|
| cg00505318 | 1.89E-06 | 2.80E-07 | 5.32 | 5.7276932 | 1.11E-01 | 69130918  | 69131041  | NC_000003.11 |
| cg18269143 | 1.89E-06 | 2.80E-07 | 5.32 | 5.7269871 | 1.05E-01 | 32555255  | 32555378  | NC_000022.10 |
| cg21433912 | 1.89E-06 | 2.80E-07 | 5.32 | 5.7267851 | 1.01E-01 | 84815088  | 84815211  | NC_000007.13 |
| cg24071582 | 1.89E-06 | 2.80E-07 | 5.32 | 5.7267524 | 1.59E-01 | 113430656 | 113430779 | NC_000004.11 |
| cg05589784 | 1.89E-06 | 2.81E-07 | 5.32 | 5.7265454 | 1.39E-01 | 2915123   | 2915246   | NC_000005.9  |
| cg11829486 | 1.90E-06 | 2.81E-07 | 5.32 | 5.7253795 | 7.52E-02 | 11772568  | 11772691  | NC_000008.10 |
| cg27652350 | 1.90E-06 | 2.81E-07 | 5.32 | 5.7247783 | 1.16E-01 | 101420989 | 101421112 | NC_000015.9  |
| cg03540606 | 1.90E-06 | 2.81E-07 | 5.32 | 5.7242321 | 1.36E-01 | 60982016  | 60982139  | NC_000014.8  |
| cg00514723 | 1.90E-06 | 2.81E-07 | 5.32 | 5.7239478 | 7.53E-02 | 40244770  | 40244893  | NC_000020.10 |
| cg12308746 | 1.90E-06 | 2.81E-07 | 5.32 | 5.7237068 | 1.36E-01 | 172952415 | 172952538 | NC_000002.11 |
| cg13537915 | 1.90E-06 | 2.82E-07 | 5.32 | 5.7231253 | 1.82E-01 | 43603214  | 43603337  | NC_000011.9  |
| cg03971338 | 1.90E-06 | 2.82E-07 | 5.32 | 5.7228032 | 6.54E-02 | 79224178  | 79224301  | NC_000017.10 |
| cg11503287 | 1.90E-06 | 2.82E-07 | 5.32 | 5.7227275 | 3.60E-02 | 3498567   | 3498690   | NC_000010.10 |
| cg08887742 | 1.90E-06 | 2.82E-07 | 5.32 | 5.7224973 | 1.10E-01 | 147132321 | 147132444 | NC_000003.11 |
| cg13054224 | 1.90E-06 | 2.82E-07 | 5.32 | 5.7223109 | 1.14E-01 | 65648254  | 65648377  | NC_000015.9  |
| cg01814027 | 1.90E-06 | 2.82E-07 | 5.32 | 5.7221381 | 1.04E-01 | 71923401  | 71923524  | NC_000008.10 |
| cg02238634 | 1.90E-06 | 2.82E-07 | 5.32 | 5.7215863 | 7.05E-02 | 38487864  | 38487987  | NC_000009.11 |
| cg05459517 | 1.90E-06 | 2.82E-07 | 5.32 | 5.7210463 | 1.11E-01 | 123795904 | 123796027 | NC_000008.10 |
| cg02993699 | 1.90E-06 | 2.82E-07 | 5.32 | 5.7209646 | 4.33E-02 | 3415135   | 3415258   | NC_000004.11 |
| cg16443970 | 1.90E-06 | 2.82E-07 | 5.32 | 5.7208903 | 9.45E-02 | 102504022 | 102504145 | NC_000010.10 |
| cg17074575 | 1.90E-06 | 2.82E-07 | 5.32 | 5.7207896 | 3.63E-02 | 9931157   | 9931280   | NC_000003.11 |
| cg07779444 | 1.90E-06 | 2.82E-07 | 5.32 | 5.7204429 | 1.42E-01 | 134902278 | 134902401 | NC_000010.10 |
| cg01978246 | 1.91E-06 | 2.82E-07 | 5.32 | 5.7200032 | 1.18E-01 | 145749776 | 145749899 | NC_000008.10 |
| cg14511946 | 1.91E-06 | 2.83E-07 | 5.32 | 5.7191178 | 1.82E-01 | 23850969  | 23851092  | NC_000009.11 |
| cg26663686 | 1.91E-06 | 2.83E-07 | 5.32 | 5.7188592 | 8.81E-02 | 144241809 | 144241932 | NC_000008.10 |

|            |          |          |      |           |          |           |           |              |
|------------|----------|----------|------|-----------|----------|-----------|-----------|--------------|
| cg14599091 | 1.91E-06 | 2.83E-07 | 5.32 | 5.7186426 | 9.87E-02 | 79171679  | 79171802  | NC_000013.10 |
| cg00447646 | 1.91E-06 | 2.83E-07 | 5.32 | 5.717252  | 8.78E-02 | 54496299  | 54496422  | NC_000019.9  |
| cg02218306 | 1.91E-06 | 2.83E-07 | 5.32 | 5.7171632 | 1.04E-01 | 51561618  | 51561741  | NC_000014.8  |
| cg13107144 | 1.91E-06 | 2.83E-07 | 5.32 | 5.7165416 | 7.84E-02 | 63353166  | 63353289  | NC_000015.9  |
| cg17713780 | 1.91E-06 | 2.83E-07 | 5.32 | 5.7163751 | 1.01E-01 | 25945656  | 25945779  | NC_000013.10 |
| cg15118519 | 1.91E-06 | 2.84E-07 | 5.32 | 5.7151524 | 4.48E-02 | 26699617  | 26699740  | NC_000001.10 |
| cg12067287 | 1.92E-06 | 2.84E-07 | 5.32 | 5.7134147 | 4.98E-02 | 3221598   | 3221721   | NC_000018.9  |
| cg24990327 | 1.92E-06 | 2.85E-07 | 5.32 | 5.7118656 | 1.27E-01 | 147591897 | 147592020 | NC_000007.13 |
| cg15571705 | 1.92E-06 | 2.85E-07 | 5.32 | 5.7113137 | 5.56E-02 | 129308733 | 129308856 | NC_000011.9  |
| cg15568376 | 1.92E-06 | 2.85E-07 | 5.32 | 5.7099062 | 6.95E-02 | 8808271   | 8808394   | NC_000019.9  |
| cg01565314 | 1.92E-06 | 2.85E-07 | 5.32 | 5.7097234 | 9.34E-02 | 45737610  | 45737733  | NC_000019.9  |
| cg02878183 | 1.92E-06 | 2.85E-07 | 5.32 | 5.709553  | 1.79E-02 | 66288146  | 66288269  | NC_000014.8  |
| cg19970121 | 1.93E-06 | 2.86E-07 | 5.32 | 5.709393  | 5.10E-02 | 93822184  | 93822307  | NC_000011.9  |
| cg11159666 | 1.93E-06 | 2.86E-07 | 5.32 | 5.7092108 | 8.28E-02 | 71432902  | 71433025  | NC_000017.10 |
| cg18232816 | 1.93E-06 | 2.86E-07 | 5.32 | 5.7090933 | 1.19E-01 | 33591505  | 33591628  | NC_000012.11 |
| cg19993133 | 1.93E-06 | 2.86E-07 | 5.32 | 5.7083838 | 7.29E-02 | 20484804  | 20484927  | NC_000022.10 |
| cg12558966 | 1.93E-06 | 2.86E-07 | 5.32 | 5.7081736 | 9.60E-02 | 4866946   | 4867069   | NC_000004.11 |
| cg07773060 | 1.93E-06 | 2.86E-07 | 5.32 | 5.7077579 | 1.39E-01 | 24813046  | 24813169  | NC_000008.10 |
| cg17886028 | 1.93E-06 | 2.86E-07 | 5.32 | 5.7065378 | 1.34E-01 | 4383507   | 4383630   | NC_000012.11 |
| cg04380513 | 1.93E-06 | 2.87E-07 | 5.32 | 5.7057577 | 1.32E-01 | 100238983 | 100239106 | NC_000005.9  |
| cg06611358 | 1.93E-06 | 2.87E-07 | 5.32 | 5.7042979 | 1.85E-01 | 37464417  | 37464540  | NC_000019.9  |
| cg09576209 | 1.94E-06 | 2.87E-07 | 5.32 | 5.7034171 | 1.14E-01 | 2339614   | 2339737   | NC_000012.11 |
| cg11715966 | 1.94E-06 | 2.87E-07 | 5.32 | 5.703002  | 7.64E-02 | 46917255  | 46917378  | NC_000019.9  |
| cg09103423 | 1.94E-06 | 2.87E-07 | 5.32 | 5.7027054 | 7.68E-02 | 4665238   | 4665361   | NC_000006.11 |
| cg23667734 | 1.94E-06 | 2.88E-07 | 5.32 | 5.7023569 | 1.51E-01 | 34998374  | 34998497  | NC_000017.10 |

|            |          |          |      |           |          |           |           |              |
|------------|----------|----------|------|-----------|----------|-----------|-----------|--------------|
| cg09611226 | 1.94E-06 | 2.88E-07 | 5.32 | 5.7016617 | 4.16E-02 | 85672056  | 85672179  | NC_000016.9  |
| cg25974484 | 1.94E-06 | 2.88E-07 | 5.32 | 5.7008286 | 3.67E-02 | 227163700 | 227163823 | NC_000001.10 |
| cg08292058 | 1.94E-06 | 2.88E-07 | 5.32 | 5.700674  | 1.92E-02 | 2807172   | 2807295   | NC_000019.9  |
| cg12354122 | 1.94E-06 | 2.88E-07 | 5.32 | 5.7006379 | 1.10E-01 | 101419148 | 101419271 | NC_000015.9  |
| cg02519208 | 1.94E-06 | 2.88E-07 | 5.32 | 5.7003884 | 8.77E-02 | 190105821 | 190105944 | NC_000003.11 |
| cg02869163 | 1.94E-06 | 2.88E-07 | 5.32 | 5.6997704 | 5.00E-02 | 45364410  | 45364533  | NC_000021.8  |
| cg27331524 | 1.94E-06 | 2.88E-07 | 5.32 | 5.6993507 | 1.66E-01 | 116963193 | 116963316 | NC_000007.13 |
| cg25673084 | 1.94E-06 | 2.89E-07 | 5.32 | 5.699326  | 1.90E-01 | 79383852  | 79383975  | NC_000015.9  |
| cg03753642 | 1.94E-06 | 2.89E-07 | 5.32 | 5.6992732 | 6.11E-02 | 75261222  | 75261345  | NC_000008.10 |
| cg23369114 | 1.94E-06 | 2.89E-07 | 5.32 | 5.6991241 | 4.41E-02 | 14198698  | 14198821  | NC_000019.9  |
| cg06980853 | 1.94E-06 | 2.89E-07 | 5.32 | 5.6988638 | 1.48E-01 | 13843859  | 13843982  | NC_000001.10 |
| cg05501320 | 1.95E-06 | 2.89E-07 | 5.32 | 5.6985467 | 1.40E-01 | 75263248  | 75263371  | NC_000008.10 |
| cg10553103 | 1.95E-06 | 2.89E-07 | 5.32 | 5.6985362 | 1.13E-01 | 140619567 | 140619690 | NC_000005.9  |
| cg07414571 | 1.95E-06 | 2.89E-07 | 5.32 | 5.6969218 | 1.19E-01 | 26690091  | 26690214  | NC_000006.11 |
| cg03044186 | 1.95E-06 | 2.89E-07 | 5.32 | 5.696081  | 5.24E-02 | 3685357   | 3685480   | NC_000004.11 |
| cg02459827 | 1.95E-06 | 2.89E-07 | 5.32 | 5.6960544 | 5.67E-02 | 108082637 | 108082760 | NC_000005.9  |
| cg19315479 | 1.95E-06 | 2.90E-07 | 5.32 | 5.6958069 | 3.58E-02 | 47426939  | 47427062  | NC_000021.8  |
| cg15685943 | 1.95E-06 | 2.90E-07 | 5.32 | 5.6957673 | 1.93E-01 | 115632272 | 115632395 | NC_000001.10 |
| cg17606548 | 1.95E-06 | 2.90E-07 | 5.31 | 5.6949994 | 3.69E-02 | 66123702  | 66123825  | NC_000005.9  |
| cg01820584 | 1.95E-06 | 2.90E-07 | 5.31 | 5.6940981 | 3.75E-02 | 52735830  | 52735953  | NC_000004.11 |
| cg10173172 | 1.95E-06 | 2.90E-07 | 5.31 | 5.694091  | 3.08E-02 | 125380812 | 125380935 | NC_000008.10 |
| cg08633479 | 1.95E-06 | 2.90E-07 | 5.31 | 5.6937459 | 8.48E-02 | 57630524  | 57630647  | NC_000019.9  |
| cg07907506 | 1.96E-06 | 2.90E-07 | 5.31 | 5.6930172 | 9.38E-02 | 100210582 | 100210705 | NC_000003.11 |
| cg22012477 | 1.96E-06 | 2.90E-07 | 5.31 | 5.692905  | 3.87E-02 | 168132177 | 168132300 | NC_000006.11 |
| cg24608717 | 1.96E-06 | 2.90E-07 | 5.31 | 5.6928054 | 8.74E-02 | 48678331  | 48678454  | NC_000003.11 |

|            |          |          |      |           |          |           |           |              |
|------------|----------|----------|------|-----------|----------|-----------|-----------|--------------|
| cg05639205 | 1.96E-06 | 2.90E-07 | 5.31 | 5.6927102 | 1.05E-01 | 155595693 | 155595816 | NC_000007.13 |
| cg24837653 | 1.96E-06 | 2.91E-07 | 5.31 | 5.6919179 | 3.34E-02 | 4849101   | 4849224   | NC_000019.9  |
| cg14215586 | 1.96E-06 | 2.91E-07 | 5.31 | 5.6916193 | 2.00E-01 | 54394545  | 54394668  | NC_000012.11 |
| cg03743262 | 1.96E-06 | 2.91E-07 | 5.31 | 5.691486  | 1.19E-01 | 113728506 | 113728629 | NC_000007.13 |
| cg00551378 | 1.96E-06 | 2.91E-07 | 5.31 | 5.6913828 | 3.16E-02 | 31711701  | 31711824  | NC_000006.11 |
| cg09937382 | 1.96E-06 | 2.91E-07 | 5.31 | 5.691346  | 3.98E-02 | 54437821  | 54437944  | NC_000008.10 |
| cg08242633 | 1.96E-06 | 2.91E-07 | 5.31 | 5.6910176 | 1.08E-01 | 2591411   | 2591534   | NC_000008.10 |
| cg17997332 | 1.96E-06 | 2.91E-07 | 5.31 | 5.6910099 | 5.69E-02 | 134022578 | 134022701 | NC_000010.10 |
| cg00794881 | 1.96E-06 | 2.91E-07 | 5.31 | 5.6903995 | 1.18E-01 | 19043573  | 19043696  | NC_000001.10 |
| cg13905053 | 1.96E-06 | 2.92E-07 | 5.31 | 5.688583  | 6.07E-02 | 139235493 | 139235616 | NC_000009.11 |
| cg21342636 | 1.97E-06 | 2.92E-07 | 5.31 | 5.6875959 | 1.01E-01 | 32064671  | 32064794  | NC_000006.11 |
| cg17701373 | 1.97E-06 | 2.92E-07 | 5.31 | 5.6870717 | 1.37E-01 | 94285343  | 94285466  | NC_000007.13 |
| cg27158472 | 1.97E-06 | 2.92E-07 | 5.31 | 5.6868152 | 9.85E-02 | 45926170  | 45926293  | NC_000011.9  |
| cg10192198 | 1.97E-06 | 2.92E-07 | 5.31 | 5.6867999 | 1.16E-01 | 973184    | 973307    | NC_000009.11 |
| cg21635185 | 1.97E-06 | 2.92E-07 | 5.31 | 5.6866087 | 4.55E-02 | 27360428  | 27360551  | NC_000002.11 |
| cg10469329 | 1.97E-06 | 2.92E-07 | 5.31 | 5.6863268 | 1.84E-01 | 170947241 | 170947364 | NC_000004.11 |
| cg02331883 | 1.97E-06 | 2.92E-07 | 5.31 | 5.6862332 | 1.18E-01 | 140798095 | 140798218 | NC_000005.9  |
| cg22827864 | 1.97E-06 | 2.93E-07 | 5.31 | 5.6853913 | 1.29E-01 | 72298424  | 72298547  | NC_000006.11 |
| cg08422668 | 1.97E-06 | 2.93E-07 | 5.31 | 5.6848693 | 4.72E-02 | 32857347  | 32857470  | NC_000016.9  |
| cg22141111 | 1.97E-06 | 2.93E-07 | 5.31 | 5.6832471 | 1.22E-01 | 25746007  | 25746130  | NC_000013.10 |
| cg22111118 | 1.97E-06 | 2.93E-07 | 5.31 | 5.6830343 | 1.11E-01 | 77438300  | 77438423  | NC_000018.9  |
| cg04820911 | 1.97E-06 | 2.93E-07 | 5.31 | 5.6828618 | 3.60E-02 | 677332    | 677455    | NC_000004.11 |
| cg00351011 | 1.97E-06 | 2.94E-07 | 5.31 | 5.6825529 | 1.77E-01 | 8274460   | 8274583   | NC_000019.9  |
| cg24070963 | 1.98E-06 | 2.94E-07 | 5.31 | 5.6823721 | 7.02E-02 | 64734843  | 64734966  | NC_000006.11 |
| cg18300008 | 1.98E-06 | 2.94E-07 | 5.31 | 5.6808337 | 8.01E-02 | 156342156 | 156342279 | NC_000006.11 |



|            |          |          |      |           |          |           |           |              |
|------------|----------|----------|------|-----------|----------|-----------|-----------|--------------|
| cg11754420 | 1.98E-06 | 2.94E-07 | 5.31 | 5.6803714 | 8.80E-02 | 112979874 | 112979997 | NC_000013.10 |
| cg01920578 | 1.98E-06 | 2.94E-07 | 5.31 | 5.679848  | 1.19E-01 | 45270573  | 45270696  | NC_000012.11 |
| cg04636269 | 1.98E-06 | 2.94E-07 | 5.31 | 5.6797495 | 1.35E-01 | 35300868  | 35300991  | NC_000017.10 |
| cg04488487 | 1.98E-06 | 2.95E-07 | 5.31 | 5.6788061 | 7.72E-02 | 242709673 | 242709796 | NC_000002.11 |
| cg12083965 | 1.98E-06 | 2.95E-07 | 5.31 | 5.6785975 | 1.21E-01 | 14995138  | 14995261  | NC_000011.9  |
| cg04063945 | 1.98E-06 | 2.95E-07 | 5.31 | 5.6778917 | 1.78E-01 | 23982480  | 23982603  | NC_000010.10 |
| cg18483289 | 1.98E-06 | 2.95E-07 | 5.31 | 5.6772779 | 8.39E-02 | 644897    | 645020    | NC_000020.10 |
| cg18416576 | 1.99E-06 | 2.95E-07 | 5.31 | 5.6766166 | 1.36E-01 | 27214043  | 27214166  | NC_000007.13 |
| cg26788570 | 1.99E-06 | 2.96E-07 | 5.31 | 5.675931  | 3.92E-02 | 17734447  | 17734570  | NC_000001.10 |
| cg20017253 | 1.99E-06 | 2.96E-07 | 5.31 | 5.675695  | 7.85E-02 | 46444011  | 46444134  | NC_000019.9  |
| cg24155871 | 1.99E-06 | 2.96E-07 | 5.31 | 5.6756249 | 1.44E-01 | 75139347  | 75139470  | NC_000001.10 |
| cg00258597 | 1.99E-06 | 2.96E-07 | 5.31 | 5.675269  | 1.23E-01 | 23567607  | 23567730  | NC_000008.10 |
| cg10005475 | 1.99E-06 | 2.96E-07 | 5.31 | 5.6748967 | 4.49E-02 | 74011063  | 74011186  | NC_000017.10 |
| cg03865925 | 1.99E-06 | 2.96E-07 | 5.31 | 5.6746166 | 1.07E-01 | 77843317  | 77843440  | NC_000003.11 |
| cg11481133 | 1.99E-06 | 2.96E-07 | 5.31 | 5.6745788 | 1.30E-01 | 69611360  | 69611483  | NC_000002.11 |
| cg18051798 | 1.99E-06 | 2.96E-07 | 5.31 | 5.6738877 | 5.59E-02 | 51453432  | 51453555  | NC_000012.11 |
| cg16136098 | 1.99E-06 | 2.96E-07 | 5.31 | 5.6737403 | 1.34E-01 | 107683532 | 107683655 | NC_000001.10 |
| cg19696083 | 1.99E-06 | 2.96E-07 | 5.31 | 5.673094  | 1.06E-01 | 54438419  | 54438542  | NC_000012.11 |
| cg20180370 | 1.99E-06 | 2.96E-07 | 5.31 | 5.6728582 | 1.25E-01 | 50691003  | 50691126  | NC_000006.11 |
| cg04840356 | 1.99E-06 | 2.97E-07 | 5.31 | 5.6726516 | 1.23E-01 | 239755585 | 239755708 | NC_000002.11 |
| cg08134286 | 2.00E-06 | 2.97E-07 | 5.31 | 5.6718576 | 5.71E-02 | 7845798   | 7845921   | NC_000001.10 |
| cg27258551 | 2.00E-06 | 2.97E-07 | 5.31 | 5.6711409 | 4.94E-02 | 23197740  | 23197863  | NC_000016.9  |
| cg08349826 | 2.00E-06 | 2.97E-07 | 5.31 | 5.6698422 | 4.78E-02 | 10346403  | 10346526  | NC_000016.9  |
| cg06824523 | 2.00E-06 | 2.97E-07 | 5.31 | 5.6696276 | 7.69E-02 | 2411612   | 2411735   | NC_000001.10 |
| cg22430565 | 2.00E-06 | 2.98E-07 | 5.31 | 5.6692298 | 4.80E-02 | 178482328 | 178482451 | NC_000001.10 |

|            |          |          |      |           |          |           |           |              |
|------------|----------|----------|------|-----------|----------|-----------|-----------|--------------|
| cg01193822 | 2.00E-06 | 2.98E-07 | 5.31 | 5.6682068 | 2.98E-02 | 52239037  | 52239160  | NC_000014.8  |
| cg16192821 | 2.00E-06 | 2.98E-07 | 5.31 | 5.6674447 | 8.74E-02 | 13028642  | 13028765  | NC_000003.11 |
| cg09214099 | 2.00E-06 | 2.98E-07 | 5.31 | 5.6674243 | 8.78E-02 | 72791740  | 72791863  | NC_000007.13 |
| cg17978037 | 2.01E-06 | 2.99E-07 | 5.31 | 5.6659954 | 2.96E-02 | 33391307  | 33391430  | NC_000006.11 |
| cg01410359 | 2.01E-06 | 2.99E-07 | 5.31 | 5.6657759 | 8.50E-02 | 38302230  | 38302353  | NC_000002.11 |
| cg03345037 | 2.01E-06 | 2.99E-07 | 5.31 | 5.6656863 | 1.62E-01 | 94134446  | 94134569  | NC_000011.9  |
| cg06944096 | 2.01E-06 | 2.99E-07 | 5.31 | 5.6654027 | 5.84E-02 | 124787364 | 124787487 | NC_000012.11 |
| cg14777772 | 2.01E-06 | 2.99E-07 | 5.31 | 5.6650444 | 1.51E-01 | 55098130  | 55098253  | NC_000004.11 |
| cg08617160 | 2.01E-06 | 2.99E-07 | 5.31 | 5.6647387 | 9.51E-02 | 345312    | 345435    | NC_000019.9  |
| cg23374834 | 2.01E-06 | 2.99E-07 | 5.31 | 5.6638848 | 9.60E-02 | 131631671 | 131631794 | NC_000010.10 |
| cg23243884 | 2.01E-06 | 2.99E-07 | 5.31 | 5.663342  | 5.00E-02 | 15375386  | 15375509  | NC_000001.10 |
| cg19959677 | 2.01E-06 | 3.00E-07 | 5.31 | 5.6623454 | 1.09E-01 | 61120783  | 61120906  | NC_000014.8  |
| cg04222917 | 2.01E-06 | 3.00E-07 | 5.31 | 5.6619016 | 3.92E-02 | 112021676 | 112021799 | NC_000006.11 |
| cg16319517 | 2.01E-06 | 3.00E-07 | 5.31 | 5.661707  | 3.74E-02 | 190287031 | 190287154 | NC_000003.11 |
| cg10008757 | 2.02E-06 | 3.00E-07 | 5.31 | 5.661362  | 1.78E-01 | 8097183   | 8097306   | NC_000010.10 |
| cg26201535 | 2.02E-06 | 3.00E-07 | 5.31 | 5.6613476 | 9.09E-02 | 409934    | 410057    | NC_000011.9  |
| cg12030923 | 2.02E-06 | 3.00E-07 | 5.31 | 5.6604007 | 6.96E-02 | 95800094  | 95800217  | NC_000007.13 |
| cg20512247 | 2.02E-06 | 3.01E-07 | 5.31 | 5.6594878 | 6.70E-02 | 21030335  | 21030458  | NC_000014.8  |
| cg01167755 | 2.02E-06 | 3.01E-07 | 5.31 | 5.6587442 | 1.40E-01 | 139284498 | 139284621 | NC_000005.9  |
| cg02639931 | 2.02E-06 | 3.01E-07 | 5.31 | 5.6576994 | 9.19E-02 | 1387894   | 1388017   | NC_000019.9  |
| cg13419713 | 2.02E-06 | 3.01E-07 | 5.31 | 5.6574338 | 8.06E-02 | 18059878  | 18060001  | NC_000019.9  |
| cg06873880 | 2.02E-06 | 3.01E-07 | 5.31 | 5.6573891 | 1.19E-01 | 37123678  | 37123801  | NC_000014.8  |
| cg06164804 | 2.02E-06 | 3.01E-07 | 5.31 | 5.6572326 | 6.89E-02 | 240044389 | 240044512 | NC_000002.11 |
| cg17302548 | 2.02E-06 | 3.01E-07 | 5.31 | 5.6569968 | 3.60E-02 | 2215918   | 2216041   | NC_000016.9  |
| cg14143441 | 2.02E-06 | 3.02E-07 | 5.31 | 5.6563022 | 8.39E-02 | 134387493 | 134387616 | NC_000008.10 |

|            |          |          |      |           |          |           |           |              |
|------------|----------|----------|------|-----------|----------|-----------|-----------|--------------|
| cg09514875 | 2.03E-06 | 3.02E-07 | 5.31 | 5.6558517 | 4.93E-02 | 58389438  | 58389561  | NC_000011.9  |
| cg14731458 | 2.03E-06 | 3.02E-07 | 5.31 | 5.6542853 | 1.03E-01 | 139196491 | 139196614 | NC_000003.11 |
| cg06400704 | 2.03E-06 | 3.02E-07 | 5.31 | 5.6541024 | 1.53E-01 | 240256644 | 240256767 | NC_000001.10 |
| cg15491461 | 2.03E-06 | 3.02E-07 | 5.31 | 5.653491  | 1.21E-01 | 89959984  | 89960107  | NC_000015.9  |
| cg19619206 | 2.03E-06 | 3.03E-07 | 5.31 | 5.6533636 | 8.46E-02 | 7017569   | 7017692   | NC_000017.10 |
| cg19769520 | 2.03E-06 | 3.03E-07 | 5.31 | 5.653202  | 2.79E-02 | 1659591   | 1659714   | NC_000002.11 |
| cg27318507 | 2.03E-06 | 3.03E-07 | 5.31 | 5.6531025 | 3.36E-02 | 160513854 | 160513977 | NC_000006.11 |
| cg21337120 | 2.03E-06 | 3.03E-07 | 5.31 | 5.6513302 | 5.94E-02 | 143254726 | 143254849 | NC_000008.10 |
| cg23822879 | 2.04E-06 | 3.03E-07 | 5.31 | 5.6506463 | 1.27E-01 | 73674591  | 73674714  | NC_000003.11 |
| cg11233468 | 2.04E-06 | 3.03E-07 | 5.31 | 5.6505506 | 5.87E-02 | 5831171   | 5831294   | NC_000019.9  |
| cg01900030 | 2.04E-06 | 3.03E-07 | 5.31 | 5.6501968 | 3.36E-02 | 92412319  | 92412442  | NC_000007.13 |
| cg20104341 | 2.04E-06 | 3.04E-07 | 5.31 | 5.649744  | 1.16E-01 | 54338937  | 54339060  | NC_000012.11 |
| cg08111158 | 2.04E-06 | 3.04E-07 | 5.3  | 5.648264  | 1.02E-01 | 227746191 | 227746314 | NC_000001.10 |
| cg00994649 | 2.04E-06 | 3.04E-07 | 5.3  | 5.6480865 | 2.85E-02 | 86131385  | 86131508  | NC_000008.10 |
| cg13864319 | 2.04E-06 | 3.04E-07 | 5.3  | 5.6476866 | 1.03E-01 | 42951935  | 42952058  | NC_000005.9  |
| cg18164305 | 2.04E-06 | 3.04E-07 | 5.3  | 5.6476688 | 8.74E-02 | 4212446   | 4212569   | NC_000011.9  |
| cg06440361 | 2.04E-06 | 3.04E-07 | 5.3  | 5.6476388 | 5.75E-02 | 50590075  | 50590198  | NC_000013.10 |
| cg08721320 | 2.04E-06 | 3.04E-07 | 5.3  | 5.6474916 | 6.73E-02 | 134929913 | 134930036 | NC_000010.10 |
| cg08109815 | 2.04E-06 | 3.04E-07 | 5.3  | 5.6469955 | 1.11E-01 | 142409831 | 142409954 | NC_000006.11 |
| cg18972349 | 2.04E-06 | 3.05E-07 | 5.3  | 5.6469515 | 3.81E-02 | 28195327  | 28195450  | NC_000001.10 |
| cg16158681 | 2.05E-06 | 3.05E-07 | 5.3  | 5.6458359 | 1.10E-01 | 56623109  | 56623232  | NC_000016.9  |
| cg03711182 | 2.05E-06 | 3.05E-07 | 5.3  | 5.6456631 | 1.88E-01 | 79383924  | 79384047  | NC_000015.9  |
| cg07788369 | 2.05E-06 | 3.05E-07 | 5.3  | 5.6452546 | 1.11E-01 | 96619068  | 96619191  | NC_000007.13 |
| cg04051962 | 2.05E-06 | 3.05E-07 | 5.3  | 5.6452345 | 3.99E-02 | 1570409   | 1570532   | NC_000016.9  |
| cg26229018 | 2.05E-06 | 3.05E-07 | 5.3  | 5.6449537 | 3.84E-02 | 7574875   | 7574998   | NC_000001.10 |

|            |          |          |     |           |          |           |           |              |
|------------|----------|----------|-----|-----------|----------|-----------|-----------|--------------|
| cg14330737 | 2.05E-06 | 3.05E-07 | 5.3 | 5.6445537 | 1.49E-02 | 3123480   | 3123603   | NC_000010.10 |
| cg15160263 | 2.05E-06 | 3.05E-07 | 5.3 | 5.6443891 | 1.37E-01 | 76923943  | 76924066  | NC_000005.9  |
| cg04171065 | 2.05E-06 | 3.05E-07 | 5.3 | 5.6438553 | 1.49E-01 | 42075760  | 42075883  | NC_000014.8  |
| cg12432709 | 2.05E-06 | 3.06E-07 | 5.3 | 5.6436838 | 4.80E-02 | 52627333  | 52627456  | NC_000018.9  |
| cg06582426 | 2.05E-06 | 3.06E-07 | 5.3 | 5.6431211 | 1.13E-01 | 5603168   | 5603291   | NC_000012.11 |
| cg14843922 | 2.05E-06 | 3.06E-07 | 5.3 | 5.6422841 | 1.20E-01 | 34398849  | 34398972  | NC_000021.8  |
| cg14023556 | 2.05E-06 | 3.06E-07 | 5.3 | 5.641578  | 3.54E-02 | 110007591 | 110007714 | NC_000012.11 |
| cg06210989 | 2.06E-06 | 3.06E-07 | 5.3 | 5.6407395 | 5.58E-02 | 57440587  | 57440710  | NC_000003.11 |
| cg20239333 | 2.06E-06 | 3.07E-07 | 5.3 | 5.6404449 | 9.62E-02 | 133111331 | 133111454 | NC_000010.10 |
| cg18251449 | 2.06E-06 | 3.07E-07 | 5.3 | 5.640431  | 8.21E-02 | 58728390  | 58728513  | NC_000019.9  |
| cg25653223 | 2.06E-06 | 3.07E-07 | 5.3 | 5.6397814 | 1.19E-01 | 20833088  | 20833211  | NC_000007.13 |
| cg25988034 | 2.06E-06 | 3.07E-07 | 5.3 | 5.6391067 | 1.45E-01 | 8093239   | 8093362   | NC_000010.10 |
| cg04514024 | 2.06E-06 | 3.07E-07 | 5.3 | 5.6388597 | 5.20E-02 | 7222668   | 7222791   | NC_000017.10 |
| cg11199639 | 2.06E-06 | 3.07E-07 | 5.3 | 5.6388447 | 1.15E-01 | 39172111  | 39172234  | NC_000008.10 |
| cg18107355 | 2.06E-06 | 3.07E-07 | 5.3 | 5.6385355 | 6.71E-02 | 37940899  | 37941022  | NC_000010.10 |
| cg12816057 | 2.06E-06 | 3.07E-07 | 5.3 | 5.638425  | 3.90E-02 | 148034206 | 148034329 | NC_000005.9  |
| cg01919204 | 2.06E-06 | 3.07E-07 | 5.3 | 5.6380948 | 1.01E-01 | 145729149 | 145729272 | NC_000008.10 |
| cg26913248 | 2.06E-06 | 3.07E-07 | 5.3 | 5.6380178 | 1.31E-01 | 239755455 | 239755578 | NC_000002.11 |
| cg01624414 | 2.06E-06 | 3.08E-07 | 5.3 | 5.6372494 | 1.29E-01 | 77119206  | 77119329  | NC_000004.11 |
| cg22617773 | 2.06E-06 | 3.08E-07 | 5.3 | 5.6366862 | 1.78E-01 | 29521751  | 29521874  | NC_000006.11 |
| cg21207205 | 2.06E-06 | 3.08E-07 | 5.3 | 5.6359999 | 1.23E-01 | 142249864 | 142249987 | NC_000004.11 |
| cg10575219 | 2.07E-06 | 3.08E-07 | 5.3 | 5.6357752 | 1.17E-01 | 105313992 | 105314115 | NC_000007.13 |
| cg22799420 | 2.07E-06 | 3.08E-07 | 5.3 | 5.6354654 | 9.75E-02 | 102028994 | 102029117 | NC_000014.8  |
| cg18698788 | 2.07E-06 | 3.08E-07 | 5.3 | 5.6350941 | 1.74E-01 | 89952499  | 89952622  | NC_000015.9  |
| cg17945419 | 2.07E-06 | 3.08E-07 | 5.3 | 5.6349745 | 1.34E-01 | 102504297 | 102504420 | NC_000010.10 |

|            |          |          |     |           |          |           |           |              |
|------------|----------|----------|-----|-----------|----------|-----------|-----------|--------------|
| cg09537621 | 2.07E-06 | 3.08E-07 | 5.3 | 5.6345682 | 5.34E-02 | 114189998 | 114190121 | NC_000013.10 |
| cg21895380 | 2.07E-06 | 3.08E-07 | 5.3 | 5.6344881 | 5.64E-02 | 41700693  | 41700816  | NC_000004.11 |
| cg17869988 | 2.07E-06 | 3.09E-07 | 5.3 | 5.6343034 | 3.66E-02 | 1601380   | 1601503   | NC_000001.10 |
| cg11995137 | 2.07E-06 | 3.09E-07 | 5.3 | 5.6340053 | 5.32E-02 | 72084660  | 72084783  | NC_000015.9  |
| cg18134262 | 2.07E-06 | 3.09E-07 | 5.3 | 5.6337144 | 7.71E-02 | 140263086 | 140263209 | NC_000005.9  |
| cg03604073 | 2.07E-06 | 3.09E-07 | 5.3 | 5.6333743 | 1.09E-01 | 47507409  | 47507532  | NC_000019.9  |
| cg03127334 | 2.07E-06 | 3.09E-07 | 5.3 | 5.6333348 | 1.46E-01 | 40033634  | 40033757  | NC_000021.8  |
| cg06705930 | 2.07E-06 | 3.09E-07 | 5.3 | 5.6332492 | 9.45E-02 | 31823191  | 31823314  | NC_000011.9  |
| cg02805859 | 2.07E-06 | 3.09E-07 | 5.3 | 5.6330532 | 2.49E-02 | 89922611  | 89922734  | NC_000016.9  |
| cg13721688 | 2.07E-06 | 3.09E-07 | 5.3 | 5.6328299 | 3.16E-02 | 9091180   | 9091303   | NC_000009.11 |
| cg13247990 | 2.07E-06 | 3.09E-07 | 5.3 | 5.6323087 | 4.65E-02 | 46782176  | 46782299  | NC_000016.9  |
| cg16349876 | 2.07E-06 | 3.09E-07 | 5.3 | 5.6318381 | 1.48E-01 | 50554013  | 50554136  | NC_000019.9  |
| cg26872049 | 2.07E-06 | 3.09E-07 | 5.3 | 5.6312058 | 5.05E-02 | 145624184 | 145624307 | NC_000008.10 |
| cg22921703 | 2.07E-06 | 3.10E-07 | 5.3 | 5.6310751 | 5.68E-02 | 23511636  | 23511759  | NC_000014.8  |
| cg26344794 | 2.07E-06 | 3.10E-07 | 5.3 | 5.6309446 | 7.66E-02 | 36451504  | 36451627  | NC_000017.10 |
| cg25451958 | 2.08E-06 | 3.10E-07 | 5.3 | 5.6307878 | 1.31E-01 | 24859074  | 24859197  | NC_000008.10 |
| cg23614791 | 2.08E-06 | 3.10E-07 | 5.3 | 5.6306606 | 1.61E-01 | 81471754  | 81471877  | NC_000012.11 |
| cg09725195 | 2.08E-06 | 3.10E-07 | 5.3 | 5.6304941 | 1.31E-01 | 20348331  | 20348454  | NC_000020.10 |
| cg08251399 | 2.08E-06 | 3.10E-07 | 5.3 | 5.6304397 | 6.90E-02 | 31457608  | 31457731  | NC_000002.11 |
| cg08858295 | 2.08E-06 | 3.10E-07 | 5.3 | 5.6296698 | 9.36E-02 | 149979253 | 149979376 | NC_000001.10 |
| cg02061804 | 2.08E-06 | 3.10E-07 | 5.3 | 5.6291278 | 9.75E-02 | 32453     | 32576     | NC_000017.10 |
| cg01864825 | 2.08E-06 | 3.10E-07 | 5.3 | 5.6291102 | 1.02E-01 | 14585625  | 14585748  | NC_000005.9  |
| cg13053082 | 2.08E-06 | 3.10E-07 | 5.3 | 5.6287594 | 6.10E-02 | 182813224 | 182813347 | NC_000003.11 |
| cg17862152 | 2.08E-06 | 3.10E-07 | 5.3 | 5.6286472 | 1.17E-01 | 203044930 | 203045053 | NC_000001.10 |
| cg00808170 | 2.08E-06 | 3.11E-07 | 5.3 | 5.6275333 | 8.54E-02 | 140807787 | 140807910 | NC_000005.9  |

|            |          |          |     |           |          |           |           |              |
|------------|----------|----------|-----|-----------|----------|-----------|-----------|--------------|
| cg01568816 | 2.08E-06 | 3.11E-07 | 5.3 | 5.627     | 5.40E-02 | 50876186  | 50876309  | NC_000022.10 |
| cg07731304 | 2.08E-06 | 3.11E-07 | 5.3 | 5.6268751 | 1.42E-01 | 12124114  | 12124237  | NC_000001.10 |
| cg20680669 | 2.08E-06 | 3.11E-07 | 5.3 | 5.626456  | 4.05E-02 | 28189870  | 28189993  | NC_000022.10 |
| cg16578578 | 2.08E-06 | 3.11E-07 | 5.3 | 5.626323  | 3.86E-02 | 80763427  | 80763550  | NC_000017.10 |
| cg12435074 | 2.08E-06 | 3.11E-07 | 5.3 | 5.6260307 | 8.65E-02 | 75672801  | 75672924  | NC_000017.10 |
| cg08278108 | 2.09E-06 | 3.11E-07 | 5.3 | 5.6253374 | 1.12E-01 | 48042917  | 48043040  | NC_000017.10 |
| cg05256269 | 2.09E-06 | 3.11E-07 | 5.3 | 5.6252617 | 1.03E-01 | 176956841 | 176956964 | NC_000002.11 |
| cg13215078 | 2.09E-06 | 3.12E-07 | 5.3 | 5.6239833 | 9.84E-02 | 66188441  | 66188564  | NC_000011.9  |
| cg10573505 | 2.09E-06 | 3.12E-07 | 5.3 | 5.6239034 | 9.94E-02 | 181454164 | 181454287 | NC_000001.10 |
| cg15932464 | 2.09E-06 | 3.12E-07 | 5.3 | 5.6237522 | 3.47E-02 | 151046740 | 151046863 | NC_000001.10 |
| cg19224278 | 2.09E-06 | 3.12E-07 | 5.3 | 5.6232308 | 1.04E-01 | 101419017 | 101419140 | NC_000015.9  |
| cg00554871 | 2.09E-06 | 3.12E-07 | 5.3 | 5.623095  | 7.07E-02 | 107836762 | 107836885 | NC_000003.11 |
| cg16303846 | 2.09E-06 | 3.12E-07 | 5.3 | 5.6225216 | 1.73E-01 | 225907539 | 225907662 | NC_000002.11 |
| cg18479972 | 2.09E-06 | 3.12E-07 | 5.3 | 5.6224086 | 1.16E-01 | 46810705  | 46810828  | NC_000017.10 |
| cg09987596 | 2.09E-06 | 3.12E-07 | 5.3 | 5.6220528 | 1.37E-01 | 131513705 | 131513828 | NC_000002.11 |
| cg22481882 | 2.09E-06 | 3.12E-07 | 5.3 | 5.6218577 | 2.55E-02 | 145161551 | 145161674 | NC_000008.10 |
| cg21900073 | 2.09E-06 | 3.12E-07 | 5.3 | 5.6218454 | 8.28E-02 | 82005992  | 82006115  | NC_000004.11 |
| cg16074109 | 2.09E-06 | 3.13E-07 | 5.3 | 5.6212288 | 3.10E-02 | 124799011 | 124799134 | NC_000012.11 |
| cg17693013 | 2.09E-06 | 3.13E-07 | 5.3 | 5.6208096 | 3.10E-02 | 30001557  | 30001680  | NC_000006.11 |
| cg08991910 | 2.10E-06 | 3.13E-07 | 5.3 | 5.6198557 | 3.26E-02 | 34858035  | 34858158  | NC_000011.9  |
| cg02285386 | 2.10E-06 | 3.13E-07 | 5.3 | 5.6196018 | 9.29E-02 | 35695157  | 35695280  | NC_000022.10 |
| cg06954481 | 2.10E-06 | 3.13E-07 | 5.3 | 5.6190939 | 1.84E-01 | 237076497 | 237076620 | NC_000002.11 |
| cg03361585 | 2.10E-06 | 3.14E-07 | 5.3 | 5.6187397 | 1.96E-01 | 47444241  | 47444364  | NC_000020.10 |
| cg08650910 | 2.10E-06 | 3.14E-07 | 5.3 | 5.6186842 | 1.96E-01 | 20817530  | 20817653  | NC_000007.13 |
| cg18166150 | 2.10E-06 | 3.14E-07 | 5.3 | 5.6182694 | 1.37E-01 | 3169037   | 3169160   | NC_000010.10 |

|            |          |          |     |           |          |           |           |              |
|------------|----------|----------|-----|-----------|----------|-----------|-----------|--------------|
| cg26257822 | 2.10E-06 | 3.14E-07 | 5.3 | 5.6181958 | 1.13E-01 | 119292547 | 119292670 | NC_000010.10 |
| cg07178825 | 2.10E-06 | 3.14E-07 | 5.3 | 5.6177811 | 9.53E-02 | 3649574   | 3649697   | NC_000001.10 |
| cg13847701 | 2.10E-06 | 3.14E-07 | 5.3 | 5.6173957 | 5.08E-02 | 31570468  | 31570591  | NC_000002.11 |
| cg10665199 | 2.10E-06 | 3.14E-07 | 5.3 | 5.6171493 | 2.46E-02 | 133106180 | 133106303 | NC_000007.13 |
| cg10419709 | 2.10E-06 | 3.14E-07 | 5.3 | 5.6166969 | 8.10E-02 | 58216651  | 58216774  | NC_000017.10 |
| cg21127508 | 2.10E-06 | 3.14E-07 | 5.3 | 5.6159007 | 3.30E-02 | 40749867  | 40749990  | NC_000015.9  |
| cg11206067 | 2.11E-06 | 3.15E-07 | 5.3 | 5.61545   | 9.57E-02 | 60936232  | 60936355  | NC_000010.10 |
| cg21233688 | 2.11E-06 | 3.15E-07 | 5.3 | 5.6141652 | 1.28E-01 | 134880353 | 134880476 | NC_000005.9  |
| cg03321133 | 2.11E-06 | 3.15E-07 | 5.3 | 5.6135761 | 1.08E-01 | 176993115 | 176993238 | NC_000002.11 |
| cg01073821 | 2.11E-06 | 3.15E-07 | 5.3 | 5.6135715 | 4.47E-02 | 202046548 | 202046671 | NC_000002.11 |
| cg19987349 | 2.11E-06 | 3.15E-07 | 5.3 | 5.6130662 | 4.90E-02 | 98993142  | 98993265  | NC_000008.10 |
| cg12699648 | 2.11E-06 | 3.15E-07 | 5.3 | 5.6130347 | 1.39E-01 | 24758155  | 24758278  | NC_000013.10 |
| cg01042465 | 2.11E-06 | 3.16E-07 | 5.3 | 5.6116563 | 9.23E-02 | 54765601  | 54765724  | NC_000007.13 |
| cg16811443 | 2.11E-06 | 3.16E-07 | 5.3 | 5.611601  | 4.62E-02 | 20517129  | 20517252  | NC_000017.10 |
| cg08871855 | 2.12E-06 | 3.16E-07 | 5.3 | 5.6101367 | 1.86E-01 | 88752285  | 88752408  | NC_000002.11 |
| cg00811961 | 2.12E-06 | 3.16E-07 | 5.3 | 5.6097632 | 8.23E-02 | 51685227  | 51685350  | NC_000019.9  |
| cg23866596 | 2.12E-06 | 3.16E-07 | 5.3 | 5.6097056 | 7.39E-03 | 96969812  | 96969935  | NC_000006.11 |
| cg05075454 | 2.12E-06 | 3.17E-07 | 5.3 | 5.6093712 | 4.59E-02 | 5283022   | 5283145   | NC_000020.10 |
| cg02931604 | 2.12E-06 | 3.17E-07 | 5.3 | 5.609264  | 8.71E-02 | 74064298  | 74064421  | NC_000006.11 |
| cg00076880 | 2.12E-06 | 3.17E-07 | 5.3 | 5.6087663 | 6.24E-02 | 167717196 | 167717319 | NC_000006.11 |
| cg01162610 | 2.12E-06 | 3.17E-07 | 5.3 | 5.6085963 | 6.56E-02 | 683450    | 683573    | NC_000010.10 |
| cg08630869 | 2.12E-06 | 3.17E-07 | 5.3 | 5.6081343 | 4.80E-02 | 100842115 | 100842238 | NC_000007.13 |
| cg10917941 | 2.12E-06 | 3.17E-07 | 5.3 | 5.6080491 | 7.71E-02 | 30296049  | 30296172  | NC_000006.11 |
| cg25703346 | 2.12E-06 | 3.17E-07 | 5.3 | 5.6076161 | 1.83E-01 | 154729189 | 154729312 | NC_000002.11 |
| cg24890716 | 2.12E-06 | 3.17E-07 | 5.3 | 5.6072029 | 8.67E-02 | 1458554   | 1458677   | NC_000008.10 |

|            |          |          |      |           |          |           |           |              |
|------------|----------|----------|------|-----------|----------|-----------|-----------|--------------|
| cg09984339 | 2.12E-06 | 3.17E-07 | 5.3  | 5.6071877 | 1.55E-01 | 26108674  | 26108797  | NC_000015.9  |
| cg05371015 | 2.12E-06 | 3.17E-07 | 5.3  | 5.6064827 | 2.34E-02 | 14473118  | 14473241  | NC_000012.11 |
| cg18375494 | 2.12E-06 | 3.18E-07 | 5.3  | 5.6064269 | 1.69E-01 | 134146324 | 134146447 | NC_000011.9  |
| cg00929798 | 2.12E-06 | 3.18E-07 | 5.3  | 5.6064134 | 9.02E-02 | 135150139 | 135150262 | NC_000010.10 |
| cg21818216 | 2.12E-06 | 3.18E-07 | 5.3  | 5.606386  | 6.78E-02 | 178457875 | 178457998 | NC_000001.10 |
| cg10803098 | 2.12E-06 | 3.18E-07 | 5.3  | 5.6062827 | 1.04E-01 | 130064137 | 130064260 | NC_000010.10 |
| cg19137417 | 2.12E-06 | 3.18E-07 | 5.3  | 5.6058278 | 6.84E-02 | 79362935  | 79363058  | NC_000017.10 |
| cg11510060 | 2.12E-06 | 3.18E-07 | 5.3  | 5.6056931 | 1.65E-01 | 330694    | 330817    | NC_000004.11 |
| cg11352866 | 2.13E-06 | 3.18E-07 | 5.3  | 5.6052512 | 1.10E-01 | 176057089 | 176057212 | NC_000005.9  |
| cg05992357 | 2.13E-06 | 3.18E-07 | 5.3  | 5.605243  | 1.34E-01 | 46670933  | 46671056  | NC_000017.10 |
| cg20223728 | 2.13E-06 | 3.18E-07 | 5.3  | 5.6047523 | 1.17E-01 | 6006398   | 6006521   | NC_000006.11 |
| cg23915282 | 2.13E-06 | 3.18E-07 | 5.3  | 5.6043222 | 9.06E-02 | 135547572 | 135547695 | NC_000005.9  |
| cg09355247 | 2.13E-06 | 3.19E-07 | 5.3  | 5.6032031 | 3.56E-02 | 226499634 | 226499757 | NC_000001.10 |
| cg13836687 | 2.13E-06 | 3.19E-07 | 5.3  | 5.6028588 | 7.17E-02 | 106662577 | 106662700 | NC_000014.8  |
| cg16300021 | 2.13E-06 | 3.19E-07 | 5.3  | 5.6026552 | 5.84E-02 | 169900573 | 169900696 | NC_000005.9  |
| cg03586879 | 2.13E-06 | 3.19E-07 | 5.29 | 5.6022509 | 1.09E-01 | 6068831   | 6068954   | NC_000016.9  |
| cg06832446 | 2.13E-06 | 3.19E-07 | 5.29 | 5.6018078 | 1.20E-01 | 185942701 | 185942824 | NC_000004.11 |
| cg14917395 | 2.13E-06 | 3.19E-07 | 5.29 | 5.6007792 | 1.70E-01 | 123300849 | 123300972 | NC_000011.9  |
| cg07968685 | 2.13E-06 | 3.19E-07 | 5.29 | 5.6007196 | 4.27E-02 | 170076758 | 170076881 | NC_000006.11 |
| cg11998703 | 2.14E-06 | 3.20E-07 | 5.29 | 5.6003468 | 1.40E-01 | 58446669  | 58446792  | NC_000019.9  |
| cg22444507 | 2.14E-06 | 3.20E-07 | 5.29 | 5.6000124 | 1.35E-01 | 7708805   | 7708928   | NC_000010.10 |
| cg19431448 | 2.14E-06 | 3.20E-07 | 5.29 | 5.5996125 | 1.70E-01 | 79383385  | 79383508  | NC_000015.9  |
| cg24686610 | 2.14E-06 | 3.20E-07 | 5.29 | 5.5995785 | 1.27E-01 | 147125782 | 147125905 | NC_000003.11 |
| cg13465393 | 2.14E-06 | 3.20E-07 | 5.29 | 5.599387  | 6.69E-02 | 91450356  | 91450479  | NC_000011.9  |
| cg00662556 | 2.14E-06 | 3.20E-07 | 5.29 | 5.5988821 | 9.95E-02 | 74963364  | 74963487  | NC_000018.9  |



|            |          |          |      |           |          |           |           |              |
|------------|----------|----------|------|-----------|----------|-----------|-----------|--------------|
| cg13347257 | 2.14E-06 | 3.20E-07 | 5.29 | 5.5987115 | 1.61E-01 | 9594151   | 9594274   | NC_000003.11 |
| cg11113753 | 2.14E-06 | 3.20E-07 | 5.29 | 5.598639  | 4.73E-02 | 44065383  | 44065506  | NC_000002.11 |
| cg08441314 | 2.14E-06 | 3.20E-07 | 5.29 | 5.5985287 | 7.55E-02 | 121446689 | 121446812 | NC_000011.9  |
| cg15817464 | 2.14E-06 | 3.20E-07 | 5.29 | 5.598257  | 5.99E-02 | 150227654 | 150227777 | NC_000005.9  |
| cg24633771 | 2.14E-06 | 3.20E-07 | 5.29 | 5.5981727 | 1.33E-01 | 104149619 | 104149742 | NC_000008.10 |
| cg03087937 | 2.14E-06 | 3.20E-07 | 5.29 | 5.598115  | 8.95E-02 | 26593556  | 26593679  | NC_000011.9  |
| cg23883409 | 2.14E-06 | 3.20E-07 | 5.29 | 5.5978545 | 1.79E-01 | 142425636 | 142425759 | NC_000008.10 |
| cg02413999 | 2.14E-06 | 3.21E-07 | 5.29 | 5.596813  | 9.01E-02 | 64280163  | 64280286  | NC_000010.10 |
| cg01310750 | 2.14E-06 | 3.21E-07 | 5.29 | 5.5962718 | 1.02E-01 | 52996548  | 52996671  | NC_000019.9  |
| cg00483304 | 2.15E-06 | 3.22E-07 | 5.29 | 5.5941578 | 1.29E-01 | 64976962  | 64977085  | NC_000002.11 |
| cg21299458 | 2.15E-06 | 3.22E-07 | 5.29 | 5.593076  | 7.66E-02 | 20779896  | 20780019  | NC_000022.10 |
| cg04846036 | 2.15E-06 | 3.22E-07 | 5.29 | 5.5930312 | 1.27E-01 | 8079205   | 8079328   | NC_000010.10 |
| cg12298955 | 2.15E-06 | 3.22E-07 | 5.29 | 5.5929985 | 5.04E-02 | 51220192  | 51220315  | NC_000019.9  |
| cg11875268 | 2.15E-06 | 3.22E-07 | 5.29 | 5.5922693 | 1.64E-02 | 54576025  | 54576148  | NC_000012.11 |
| cg00478326 | 2.15E-06 | 3.22E-07 | 5.29 | 5.5918064 | 8.17E-02 | 78978136  | 78978259  | NC_000015.9  |
| cg09866275 | 2.15E-06 | 3.22E-07 | 5.29 | 5.5917409 | 1.00E-01 | 77930333  | 77930456  | NC_000016.9  |
| cg24496978 | 2.15E-06 | 3.22E-07 | 5.29 | 5.5913499 | 1.29E-01 | 44495223  | 44495346  | NC_000021.8  |
| cg21431690 | 2.15E-06 | 3.23E-07 | 5.29 | 5.5912558 | 9.48E-02 | 101603932 | 101604055 | NC_000012.11 |
| cg08244959 | 2.16E-06 | 3.23E-07 | 5.29 | 5.5903612 | 8.53E-02 | 18434774  | 18434897  | NC_000001.10 |
| cg00321480 | 2.16E-06 | 3.23E-07 | 5.29 | 5.5889029 | 1.22E-01 | 143533853 | 143533976 | NC_000008.10 |
| cg12167335 | 2.16E-06 | 3.24E-07 | 5.29 | 5.5878233 | 3.85E-02 | 115304337 | 115304460 | NC_000004.11 |
| cg19229344 | 2.16E-06 | 3.24E-07 | 5.29 | 5.5877359 | 1.25E-01 | 101294643 | 101294766 | NC_000010.10 |
| cg01725586 | 2.16E-06 | 3.24E-07 | 5.29 | 5.5873712 | 1.74E-01 | 131513735 | 131513858 | NC_000002.11 |
| cg23948204 | 2.16E-06 | 3.24E-07 | 5.29 | 5.5871802 | 8.61E-02 | 145758586 | 145758709 | NC_000005.9  |
| cg25755283 | 2.16E-06 | 3.24E-07 | 5.29 | 5.5871798 | 1.48E-01 | 119531093 | 119531216 | NC_000001.10 |

|            |          |          |      |           |          |           |           |              |
|------------|----------|----------|------|-----------|----------|-----------|-----------|--------------|
| cg00962466 | 2.16E-06 | 3.24E-07 | 5.29 | 5.5869989 | 4.64E-02 | 19829406  | 19829529  | NC_000014.8  |
| cg00761126 | 2.16E-06 | 3.24E-07 | 5.29 | 5.5862026 | 6.75E-02 | 3195994   | 3196117   | NC_000016.9  |
| cg06835156 | 2.16E-06 | 3.24E-07 | 5.29 | 5.586118  | 7.40E-02 | 101131459 | 101131582 | NC_000014.8  |
| cg00061629 | 2.17E-06 | 3.24E-07 | 5.29 | 5.5858743 | 1.18E-01 | 44325258  | 44325381  | NC_000011.9  |
| cg01797434 | 2.17E-06 | 3.24E-07 | 5.29 | 5.5853058 | 3.01E-02 | 16968465  | 16968588  | NC_000001.10 |
| cg15558982 | 2.17E-06 | 3.24E-07 | 5.29 | 5.5853054 | 2.01E-01 | 115632262 | 115632385 | NC_000001.10 |
| cg14140647 | 2.17E-06 | 3.25E-07 | 5.29 | 5.5844432 | 1.42E-01 | 2848065   | 2848188   | NC_000018.9  |
| cg23716800 | 2.17E-06 | 3.25E-07 | 5.29 | 5.5843999 | 1.76E-01 | 183385961 | 183386084 | NC_000001.10 |
| cg26832879 | 2.17E-06 | 3.25E-07 | 5.29 | 5.5842678 | 8.81E-02 | 54620073  | 54620196  | NC_000019.9  |
| cg25593476 | 2.17E-06 | 3.25E-07 | 5.29 | 5.5841118 | 5.06E-02 | 4233264   | 4233387   | NC_000020.10 |
| cg15515258 | 2.17E-06 | 3.26E-07 | 5.29 | 5.5821835 | 1.27E-01 | 112728932 | 112729055 | NC_000013.10 |
| cg01869243 | 2.17E-06 | 3.26E-07 | 5.29 | 5.5821054 | 1.38E-01 | 233350363 | 233350486 | NC_000002.11 |
| cg06043114 | 2.17E-06 | 3.26E-07 | 5.29 | 5.5818596 | 1.89E-01 | 115632455 | 115632578 | NC_000001.10 |
| cg15509687 | 2.17E-06 | 3.26E-07 | 5.29 | 5.5817929 | 1.31E-01 | 56887651  | 56887774  | NC_000018.9  |
| cg12281328 | 2.18E-06 | 3.26E-07 | 5.29 | 5.5807114 | 9.64E-02 | 149681703 | 149681826 | NC_000005.9  |
| cg23572163 | 2.18E-06 | 3.26E-07 | 5.29 | 5.5799506 | 8.19E-02 | 17083727  | 17083850  | NC_000022.10 |
| cg03196269 | 2.18E-06 | 3.26E-07 | 5.29 | 5.5797082 | 1.70E-01 | 1265635   | 1265758   | NC_000007.13 |
| cg27471989 | 2.18E-06 | 3.27E-07 | 5.29 | 5.5792614 | 9.13E-02 | 84326435  | 84326558  | NC_000016.9  |
| cg00418027 | 2.18E-06 | 3.27E-07 | 5.29 | 5.5792315 | 1.42E-01 | 96716998  | 96717121  | NC_000009.11 |
| cg10366178 | 2.18E-06 | 3.27E-07 | 5.29 | 5.5789937 | 1.25E-01 | 13323866  | 13323989  | NC_000003.11 |
| cg06843889 | 2.18E-06 | 3.27E-07 | 5.29 | 5.5778413 | 1.59E-01 | 42949542  | 42949665  | NC_000005.9  |
| cg03863817 | 2.18E-06 | 3.27E-07 | 5.29 | 5.5770838 | 5.24E-02 | 96495925  | 96496048  | NC_000003.11 |
| cg13804571 | 2.18E-06 | 3.27E-07 | 5.29 | 5.5769232 | 4.79E-02 | 99525565  | 99525688  | NC_000010.10 |
| cg10511904 | 2.18E-06 | 3.27E-07 | 5.29 | 5.5765652 | 1.57E-01 | 192127327 | 192127450 | NC_000003.11 |
| cg15204912 | 2.19E-06 | 3.28E-07 | 5.29 | 5.5760492 | 2.64E-02 | 60784362  | 60784485  | NC_000017.10 |

|            |          |          |      |           |          |           |           |              |
|------------|----------|----------|------|-----------|----------|-----------|-----------|--------------|
| cg22781950 | 2.19E-06 | 3.28E-07 | 5.29 | 5.5756653 | 1.17E-01 | 131200532 | 131200655 | NC_000012.11 |
| cg13945265 | 2.19E-06 | 3.28E-07 | 5.29 | 5.5755727 | 8.94E-02 | 17802512  | 17802635  | NC_000005.9  |
| cg14952237 | 2.19E-06 | 3.28E-07 | 5.29 | 5.5749131 | 5.86E-02 | 130132790 | 130132913 | NC_000007.13 |
| cg26460471 | 2.19E-06 | 3.28E-07 | 5.29 | 5.5747303 | 1.54E-01 | 56887271  | 56887394  | NC_000018.9  |
| cg27103130 | 2.19E-06 | 3.28E-07 | 5.29 | 5.5745154 | 1.25E-01 | 49926748  | 49926871  | NC_000019.9  |
| cg23271057 | 2.20E-06 | 3.29E-07 | 5.29 | 5.5713719 | 4.20E-02 | 32944354  | 32944477  | NC_000006.11 |
| cg10792302 | 2.20E-06 | 3.29E-07 | 5.29 | 5.5707589 | 1.24E-01 | 54376019  | 54376142  | NC_000012.11 |
| cg05638929 | 2.20E-06 | 3.30E-07 | 5.29 | 5.5701487 | 1.37E-01 | 102508633 | 102508756 | NC_000010.10 |
| cg07808231 | 2.20E-06 | 3.30E-07 | 5.29 | 5.5695494 | 7.08E-02 | 41111347  | 41111470  | NC_000019.9  |
| cg23164938 | 2.20E-06 | 3.30E-07 | 5.29 | 5.5694966 | 1.35E-01 | 152128366 | 152128489 | NC_000006.11 |
| cg25887619 | 2.20E-06 | 3.30E-07 | 5.29 | 5.569439  | 4.67E-02 | 101558435 | 101558558 | NC_000007.13 |
| cg17011300 | 2.20E-06 | 3.30E-07 | 5.29 | 5.5694056 | 9.00E-02 | 217260830 | 217260953 | NC_000001.10 |
| cg15453392 | 2.20E-06 | 3.30E-07 | 5.29 | 5.5691214 | 1.30E-01 | 117715495 | 117715618 | NC_000003.11 |
| cg05269845 | 2.20E-06 | 3.30E-07 | 5.29 | 5.5689259 | 1.05E-01 | 690059    | 690182    | NC_000008.10 |
| cg16999370 | 2.20E-06 | 3.30E-07 | 5.29 | 5.5688724 | 1.33E-01 | 122302232 | 122302355 | NC_000004.11 |
| cg02047221 | 2.20E-06 | 3.30E-07 | 5.29 | 5.5675686 | 3.73E-02 | 49686805  | 49686928  | NC_000003.11 |
| cg23980859 | 2.21E-06 | 3.31E-07 | 5.29 | 5.5666076 | 8.24E-02 | 55844285  | 55844408  | NC_000001.10 |
| cg20724189 | 2.21E-06 | 3.31E-07 | 5.29 | 5.5661995 | 1.08E-02 | 85568918  | 85569041  | NC_000002.11 |
| cg18363192 | 2.21E-06 | 3.31E-07 | 5.29 | 5.5658275 | 1.66E-01 | 31831434  | 31831557  | NC_000006.11 |
| cg20064455 | 2.21E-06 | 3.31E-07 | 5.29 | 5.5654899 | 1.19E-01 | 116962950 | 116963073 | NC_000007.13 |
| cg04493430 | 2.21E-06 | 3.31E-07 | 5.29 | 5.5650679 | 8.23E-02 | 1030388   | 1030511   | NC_000016.9  |
| cg26921482 | 2.21E-06 | 3.31E-07 | 5.29 | 5.5649623 | 9.81E-02 | 2570283   | 2570406   | NC_000016.9  |
| cg19889376 | 2.21E-06 | 3.32E-07 | 5.29 | 5.5644695 | 1.03E-01 | 20681529  | 20681652  | NC_000013.10 |
| cg13788819 | 2.21E-06 | 3.32E-07 | 5.29 | 5.5641759 | 9.61E-02 | 31352228  | 31352351  | NC_000020.10 |
| cg24344143 | 2.21E-06 | 3.32E-07 | 5.29 | 5.5641639 | 4.77E-02 | 26050161  | 26050284  | NC_000008.10 |

|            |          |          |      |           |          |           |           |              |
|------------|----------|----------|------|-----------|----------|-----------|-----------|--------------|
| cg10471944 | 2.21E-06 | 3.32E-07 | 5.29 | 5.5639864 | 6.86E-02 | 157345246 | 157345369 | NC_000007.13 |
| cg07908654 | 2.21E-06 | 3.32E-07 | 5.29 | 5.5638315 | 1.46E-01 | 41631052  | 41631175  | NC_000013.10 |
| cg00378999 | 2.21E-06 | 3.32E-07 | 5.29 | 5.5636168 | 8.47E-02 | 3246380   | 3246503   | NC_000011.9  |
| cg00982952 | 2.21E-06 | 3.32E-07 | 5.29 | 5.5619868 | 8.27E-02 | 74638278  | 74638401  | NC_000016.9  |
| cg12467264 | 2.22E-06 | 3.33E-07 | 5.29 | 5.5613868 | 1.27E-01 | 175200071 | 175200194 | NC_000005.9  |
| cg15245631 | 2.22E-06 | 3.33E-07 | 5.29 | 5.5611369 | 3.70E-02 | 23990319  | 23990442  | NC_000003.11 |
| cg11259591 | 2.22E-06 | 3.33E-07 | 5.29 | 5.561099  | 6.39E-02 | 111653746 | 111653869 | NC_000011.9  |
| cg25030388 | 2.22E-06 | 3.33E-07 | 5.29 | 5.5610448 | 1.34E-01 | 32906205  | 32906328  | NC_000017.10 |
| cg25621466 | 2.22E-06 | 3.33E-07 | 5.29 | 5.5606769 | 2.47E-02 | 202992890 | 202993013 | NC_000001.10 |
| cg00377695 | 2.22E-06 | 3.33E-07 | 5.29 | 5.5605771 | 9.37E-02 | 117667189 | 117667312 | NC_000011.9  |
| cg22152492 | 2.22E-06 | 3.33E-07 | 5.29 | 5.5588939 | 9.09E-02 | 28554334  | 28554457  | NC_000006.11 |
| cg00220335 | 2.22E-06 | 3.34E-07 | 5.29 | 5.5581869 | 7.90E-02 | 1343783   | 1343906   | NC_000005.9  |
| cg03209530 | 2.22E-06 | 3.34E-07 | 5.29 | 5.5575958 | 4.85E-02 | 18646874  | 18646997  | NC_000017.10 |
| cg26364809 | 2.22E-06 | 3.34E-07 | 5.29 | 5.5571969 | 7.36E-02 | 27145159  | 27145282  | NC_000007.13 |
| cg20184247 | 2.23E-06 | 3.34E-07 | 5.29 | 5.5571042 | 1.14E-01 | 46672052  | 46672175  | NC_000017.10 |
| cg02610064 | 2.23E-06 | 3.34E-07 | 5.29 | 5.5570648 | 9.49E-02 | 67179310  | 67179433  | NC_000011.9  |
| cg05758434 | 2.23E-06 | 3.34E-07 | 5.29 | 5.5568345 | 9.18E-02 | 207139471 | 207139594 | NC_000002.11 |
| cg02523844 | 2.23E-06 | 3.34E-07 | 5.29 | 5.5565562 | 1.92E-01 | 79083507  | 79083630  | NC_000007.13 |
| cg08992872 | 2.23E-06 | 3.35E-07 | 5.28 | 5.5554232 | 1.42E-01 | 91095058  | 91095181  | NC_000008.10 |
| cg13980570 | 2.23E-06 | 3.35E-07 | 5.28 | 5.5553022 | 1.47E-01 | 1705405   | 1705528   | NC_000007.13 |
| cg11999002 | 2.23E-06 | 3.35E-07 | 5.28 | 5.5550925 | 7.81E-02 | 134728762 | 134728885 | NC_000002.11 |
| cg14659404 | 2.23E-06 | 3.35E-07 | 5.28 | 5.5547982 | 1.60E-01 | 177134019 | 177134142 | NC_000001.10 |
| cg07285213 | 2.23E-06 | 3.35E-07 | 5.28 | 5.5542318 | 8.86E-02 | 1292339   | 1292462   | NC_000005.9  |
| cg11073104 | 2.23E-06 | 3.35E-07 | 5.28 | 5.5537966 | 2.73E-02 | 39643353  | 39643476  | NC_000021.8  |
| cg06593237 | 2.23E-06 | 3.35E-07 | 5.28 | 5.5536567 | 2.57E-02 | 134642951 | 134643074 | NC_000005.9  |

|            |          |          |      |           |          |           |           |              |
|------------|----------|----------|------|-----------|----------|-----------|-----------|--------------|
| cg08647685 | 2.23E-06 | 3.35E-07 | 5.28 | 5.5535011 | 3.61E-02 | 43469434  | 43469557  | NC_000001.10 |
| cg18646365 | 2.23E-06 | 3.35E-07 | 5.28 | 5.5533997 | 1.16E-01 | 78632081  | 78632204  | NC_000015.9  |
| cg24919790 | 2.24E-06 | 3.36E-07 | 5.28 | 5.5524575 | 1.30E-01 | 90967918  | 90968041  | NC_000010.10 |
| cg18702998 | 2.24E-06 | 3.36E-07 | 5.28 | 5.5519264 | 7.80E-02 | 10623852  | 10623975  | NC_000005.9  |
| cg03459791 | 2.24E-06 | 3.36E-07 | 5.28 | 5.5514419 | 1.16E-01 | 15244441  | 15244564  | NC_000017.10 |
| cg22852065 | 2.24E-06 | 3.36E-07 | 5.28 | 5.5510567 | 1.11E-01 | 52942997  | 52943120  | NC_000004.11 |
| cg17185921 | 2.24E-06 | 3.36E-07 | 5.28 | 5.5510512 | 7.70E-02 | 28946749  | 28946872  | NC_000006.11 |
| cg14578262 | 2.24E-06 | 3.36E-07 | 5.28 | 5.5506207 | 9.74E-02 | 71155577  | 71155700  | NC_000005.9  |
| cg19448644 | 2.24E-06 | 3.36E-07 | 5.28 | 5.5504274 | 9.81E-02 | 50844676  | 50844799  | NC_000003.11 |
| cg03050096 | 2.24E-06 | 3.36E-07 | 5.28 | 5.5503339 | 6.17E-02 | 101530580 | 101530703 | NC_000014.8  |
| cg22682739 | 2.24E-06 | 3.37E-07 | 5.28 | 5.5499438 | 5.21E-02 | 127292275 | 127292398 | NC_000003.11 |
| cg05483509 | 2.24E-06 | 3.37E-07 | 5.28 | 5.5497177 | 1.22E-01 | 2563435   | 2563558   | NC_000016.9  |
| cg22998959 | 2.24E-06 | 3.37E-07 | 5.28 | 5.5494224 | 9.34E-02 | 74877005  | 74877128  | NC_000006.11 |
| cg15324865 | 2.24E-06 | 3.37E-07 | 5.28 | 5.5489556 | 1.00E-01 | 246414665 | 246414788 | NC_000001.10 |
| cg06448090 | 2.24E-06 | 3.37E-07 | 5.28 | 5.548493  | 7.79E-02 | 13424135  | 13424258  | NC_000008.10 |
| cg15604182 | 2.25E-06 | 3.37E-07 | 5.28 | 5.5477075 | 5.77E-02 | 62687964  | 62688087  | NC_000002.11 |
| cg14348741 | 2.25E-06 | 3.37E-07 | 5.28 | 5.5475461 | 1.39E-01 | 139880223 | 139880346 | NC_000009.11 |
| cg06706670 | 2.25E-06 | 3.37E-07 | 5.28 | 5.5475426 | 2.89E-02 | 19516358  | 19516481  | NC_000001.10 |
| cg11930400 | 2.25E-06 | 3.37E-07 | 5.28 | 5.5472344 | 1.21E-01 | 111533883 | 111534006 | NC_000004.11 |
| cg05281221 | 2.25E-06 | 3.38E-07 | 5.28 | 5.546973  | 1.36E-01 | 43600303  | 43600426  | NC_000011.9  |
| cg20609302 | 2.25E-06 | 3.38E-07 | 5.28 | 5.54603   | 8.28E-02 | 96905576  | 96905699  | NC_000015.9  |
| cg18435000 | 2.25E-06 | 3.38E-07 | 5.28 | 5.545966  | 9.07E-02 | 249109    | 249232    | NC_000012.11 |
| cg21889472 | 2.25E-06 | 3.38E-07 | 5.28 | 5.5451731 | 1.39E-01 | 42992555  | 42992678  | NC_000005.9  |
| cg00098286 | 2.25E-06 | 3.38E-07 | 5.28 | 5.5449351 | 9.89E-02 | 118404628 | 118404751 | NC_000010.10 |
| cg21022949 | 2.25E-06 | 3.38E-07 | 5.28 | 5.5444267 | 2.61E-02 | 231809697 | 231809820 | NC_000002.11 |

|            |          |          |      |           |          |           |           |              |
|------------|----------|----------|------|-----------|----------|-----------|-----------|--------------|
| cg04829364 | 2.25E-06 | 3.39E-07 | 5.28 | 5.5441839 | 6.28E-02 | 131615325 | 131615448 | NC_000012.11 |
| cg00336150 | 2.25E-06 | 3.39E-07 | 5.28 | 5.5439345 | 1.65E-01 | 118981150 | 118981273 | NC_000002.11 |
| cg25054390 | 2.25E-06 | 3.39E-07 | 5.28 | 5.543859  | 8.45E-02 | 91720372  | 91720495  | NC_000014.8  |
| cg11200917 | 2.25E-06 | 3.39E-07 | 5.28 | 5.5435554 | 1.16E-01 | 151305111 | 151305234 | NC_000005.9  |
| cg06713632 | 2.25E-06 | 3.39E-07 | 5.28 | 5.5430392 | 1.20E-01 | 49576056  | 49576179  | NC_000019.9  |
| cg06285340 | 2.26E-06 | 3.39E-07 | 5.28 | 5.5427428 | 1.07E-01 | 74659901  | 74660024  | NC_000015.9  |
| cg04027781 | 2.26E-06 | 3.39E-07 | 5.28 | 5.5424281 | 4.32E-02 | 133219074 | 133219197 | NC_000012.11 |
| cg24273728 | 2.26E-06 | 3.40E-07 | 5.28 | 5.5413785 | 6.98E-02 | 105221308 | 105221431 | NC_000003.11 |
| cg23765153 | 2.26E-06 | 3.40E-07 | 5.28 | 5.5413705 | 2.35E-02 | 23357876  | 23357999  | NC_000020.10 |
| cg18691434 | 2.26E-06 | 3.40E-07 | 5.28 | 5.5412982 | 1.07E-01 | 99775425  | 99775548  | NC_000007.13 |
| cg19282928 | 2.26E-06 | 3.40E-07 | 5.28 | 5.5402553 | 3.18E-02 | 241570341 | 241570464 | NC_000002.11 |
| cg10277548 | 2.26E-06 | 3.40E-07 | 5.28 | 5.53995   | 5.48E-02 | 17517062  | 17517185  | NC_000022.10 |
| cg20693209 | 2.26E-06 | 3.40E-07 | 5.28 | 5.5399472 | 1.29E-01 | 13984067  | 13984190  | NC_000011.9  |
| cg14201617 | 2.26E-06 | 3.40E-07 | 5.28 | 5.5395872 | 5.92E-02 | 47382452  | 47382575  | NC_000002.11 |
| cg04583874 | 2.26E-06 | 3.40E-07 | 5.28 | 5.5394587 | 1.52E-01 | 144242268 | 144242391 | NC_000008.10 |
| cg27275352 | 2.26E-06 | 3.40E-07 | 5.28 | 5.5388403 | 1.49E-01 | 19652066  | 19652189  | NC_000019.9  |
| cg00973115 | 2.26E-06 | 3.41E-07 | 5.28 | 5.538436  | 4.86E-02 | 105965156 | 105965279 | NC_000014.8  |
| cg13816414 | 2.27E-06 | 3.41E-07 | 5.28 | 5.5381584 | 5.39E-02 | 130935796 | 130935919 | NC_000012.11 |
| cg12503267 | 2.27E-06 | 3.41E-07 | 5.28 | 5.5380018 | 1.11E-01 | 176963315 | 176963438 | NC_000002.11 |
| cg00584026 | 2.27E-06 | 3.41E-07 | 5.28 | 5.536108  | 1.96E-01 | 942342    | 942465    | NC_000004.11 |
| cg25530246 | 2.27E-06 | 3.41E-07 | 5.28 | 5.5360377 | 8.33E-02 | 110960563 | 110960686 | NC_000013.10 |
| cg08256691 | 2.27E-06 | 3.42E-07 | 5.28 | 5.5357347 | 1.02E-01 | 155881846 | 155881969 | NC_000001.10 |
| cg07179075 | 2.27E-06 | 3.42E-07 | 5.28 | 5.5353202 | 6.85E-02 | 97706031  | 97706154  | NC_000001.10 |
| cg02393845 | 2.27E-06 | 3.42E-07 | 5.28 | 5.5353158 | 1.30E-01 | 197887438 | 197887561 | NC_000001.10 |
| cg16092370 | 2.27E-06 | 3.42E-07 | 5.28 | 5.5349037 | 6.16E-02 | 135285974 | 135286097 | NC_000005.9  |

|            |          |          |      |           |          |           |           |              |
|------------|----------|----------|------|-----------|----------|-----------|-----------|--------------|
| cg02367930 | 2.27E-06 | 3.42E-07 | 5.28 | 5.5342858 | 1.65E-01 | 32930938  | 32931061  | NC_000021.8  |
| cg20097440 | 2.28E-06 | 3.42E-07 | 5.28 | 5.5333389 | 1.61E-01 | 72374969  | 72375092  | NC_000002.11 |
| cg16797300 | 2.28E-06 | 3.43E-07 | 5.28 | 5.5326559 | 1.21E-01 | 89942816  | 89942939  | NC_000015.9  |
| cg00394180 | 2.28E-06 | 3.43E-07 | 5.28 | 5.5324758 | 1.07E-01 | 97167170  | 97167293  | NC_000008.10 |
| cg05460980 | 2.28E-06 | 3.43E-07 | 5.28 | 5.5324065 | 1.22E-01 | 25946657  | 25946780  | NC_000013.10 |
| cg11297107 | 2.28E-06 | 3.43E-07 | 5.28 | 5.5317155 | 1.54E-01 | 38924319  | 38924442  | NC_000019.9  |
| cg06597462 | 2.28E-06 | 3.43E-07 | 5.28 | 5.5314488 | 1.18E-01 | 155243251 | 155243374 | NC_000007.13 |
| cg13347970 | 2.28E-06 | 3.43E-07 | 5.28 | 5.5304703 | 1.21E-01 | 137809630 | 137809753 | NC_000006.11 |
| cg20240736 | 2.28E-06 | 3.44E-07 | 5.28 | 5.529425  | 7.55E-02 | 5597285   | 5597408   | NC_000019.9  |
| cg18891915 | 2.29E-06 | 3.44E-07 | 5.28 | 5.5292091 | 2.76E-02 | 1962145   | 1962268   | NC_000016.9  |
| cg16615954 | 2.29E-06 | 3.44E-07 | 5.28 | 5.5289038 | 9.82E-02 | 31820441  | 31820564  | NC_000011.9  |
| cg13524919 | 2.29E-06 | 3.44E-07 | 5.28 | 5.5288534 | 1.01E-01 | 34396506  | 34396629  | NC_000021.8  |
| cg10077410 | 2.29E-06 | 3.44E-07 | 5.28 | 5.5286643 | 7.71E-02 | 79096751  | 79096874  | NC_000015.9  |
| cg08853659 | 2.29E-06 | 3.45E-07 | 5.28 | 5.5267365 | 1.66E-01 | 139654245 | 139654368 | NC_000003.11 |
| cg03323292 | 2.29E-06 | 3.45E-07 | 5.28 | 5.5266559 | 2.02E-01 | 134146132 | 134146255 | NC_000011.9  |
| cg11654662 | 2.29E-06 | 3.45E-07 | 5.28 | 5.5261967 | 6.88E-02 | 18264018  | 18264141  | NC_000017.10 |
| cg08712336 | 2.30E-06 | 3.45E-07 | 5.28 | 5.5246924 | 8.22E-02 | 168464351 | 168464474 | NC_000005.9  |
| cg08608727 | 2.30E-06 | 3.46E-07 | 5.28 | 5.5242724 | 1.03E-01 | 111799994 | 111800117 | NC_000012.11 |
| cg13847137 | 2.30E-06 | 3.46E-07 | 5.28 | 5.5237863 | 5.33E-02 | 6380703   | 6380826   | NC_000004.11 |
| cg15469655 | 2.30E-06 | 3.46E-07 | 5.28 | 5.523715  | 8.03E-02 | 33245094  | 33245217  | NC_000003.11 |
| cg01017926 | 2.30E-06 | 3.46E-07 | 5.28 | 5.5235885 | 3.26E-02 | 30581228  | 30581351  | NC_000016.9  |
| cg21215325 | 2.30E-06 | 3.46E-07 | 5.28 | 5.5235008 | 9.15E-02 | 35178803  | 35178926  | NC_000015.9  |
| cg22187354 | 2.30E-06 | 3.46E-07 | 5.28 | 5.5225832 | 1.27E-01 | 64480312  | 64480435  | NC_000011.9  |
| cg05134775 | 2.30E-06 | 3.46E-07 | 5.28 | 5.5223269 | 1.52E-02 | 98273510  | 98273633  | NC_000010.10 |
| cg06820621 | 2.30E-06 | 3.46E-07 | 5.28 | 5.5217686 | 1.31E-01 | 92938232  | 92938355  | NC_000005.9  |

|            |          |          |      |           |          |           |           |              |
|------------|----------|----------|------|-----------|----------|-----------|-----------|--------------|
| cg16363874 | 2.30E-06 | 3.47E-07 | 5.28 | 5.5211063 | 2.01E-02 | 26564986  | 26565109  | NC_000001.10 |
| cg12486913 | 2.30E-06 | 3.47E-07 | 5.28 | 5.5207362 | 1.16E-01 | 159870915 | 159871038 | NC_000001.10 |
| cg20809378 | 2.30E-06 | 3.47E-07 | 5.28 | 5.5207297 | 1.76E-01 | 43569555  | 43569678  | NC_000011.9  |
| cg08642081 | 2.30E-06 | 3.47E-07 | 5.28 | 5.5206279 | 4.15E-02 | 75293457  | 75293580  | NC_000011.9  |
| cg02285791 | 2.31E-06 | 3.47E-07 | 5.28 | 5.5199054 | 1.28E-01 | 27550747  | 27550870  | NC_000006.11 |
| cg01482958 | 2.31E-06 | 3.47E-07 | 5.28 | 5.5193573 | 9.06E-02 | 85357136  | 85357259  | NC_000001.10 |
| cg16519487 | 2.31E-06 | 3.47E-07 | 5.28 | 5.5192317 | 6.41E-02 | 20876063  | 20876186  | NC_000013.10 |
| cg02294870 | 2.31E-06 | 3.48E-07 | 5.28 | 5.518493  | 6.25E-02 | 41479663  | 41479786  | NC_000017.10 |
| cg17525428 | 2.31E-06 | 3.48E-07 | 5.28 | 5.5177185 | 1.17E-01 | 51197463  | 51197586  | NC_000019.9  |
| cg14702132 | 2.31E-06 | 3.48E-07 | 5.28 | 5.5174908 | 1.91E-02 | 31924498  | 31924621  | NC_000006.11 |
| cg02967616 | 2.31E-06 | 3.48E-07 | 5.28 | 5.5167627 | 5.76E-02 | 212871130 | 212871253 | NC_000001.10 |
| cg24058407 | 2.31E-06 | 3.48E-07 | 5.28 | 5.5167286 | 5.18E-02 | 57428282  | 57428405  | NC_000020.10 |
| cg04445871 | 2.31E-06 | 3.48E-07 | 5.28 | 5.5163769 | 1.14E-01 | 137480750 | 137480873 | NC_000003.11 |
| cg00000165 | 2.32E-06 | 3.49E-07 | 5.28 | 5.5155889 | 1.39E-01 | 91194674  | 91194797  | NC_000001.10 |
| cg26821634 | 2.32E-06 | 3.49E-07 | 5.28 | 5.5155131 | 6.35E-02 | 33558536  | 33558659  | NC_000019.9  |
| cg16925003 | 2.32E-06 | 3.49E-07 | 5.28 | 5.5154501 | 2.37E-02 | 1684003   | 1684126   | NC_000002.11 |
| cg23460851 | 2.32E-06 | 3.49E-07 | 5.28 | 5.5154376 | 5.45E-02 | 1604456   | 1604579   | NC_000004.11 |
| cg12598338 | 2.32E-06 | 3.49E-07 | 5.28 | 5.5154091 | 1.12E-01 | 28368172  | 28368295  | NC_000013.10 |
| cg16391678 | 2.32E-06 | 3.49E-07 | 5.28 | 5.5154072 | 8.27E-02 | 30485597  | 30485720  | NC_000016.9  |
| cg02577267 | 2.32E-06 | 3.49E-07 | 5.28 | 5.5151017 | 8.84E-02 | 240656513 | 240656636 | NC_000001.10 |
| cg16819028 | 2.32E-06 | 3.49E-07 | 5.28 | 5.5147285 | 2.85E-02 | 201251982 | 201252105 | NC_000001.10 |
| cg03162994 | 2.32E-06 | 3.49E-07 | 5.28 | 5.5140022 | 9.55E-02 | 23713729  | 23713852  | NC_000018.9  |
| cg21009747 | 2.32E-06 | 3.49E-07 | 5.28 | 5.5139323 | 4.49E-02 | 36681341  | 36681464  | NC_000022.10 |
| cg09842237 | 2.32E-06 | 3.49E-07 | 5.28 | 5.5138324 | 1.21E-01 | 51189844  | 51189967  | NC_000016.9  |
| cg19102771 | 2.32E-06 | 3.49E-07 | 5.28 | 5.513392  | 1.31E-01 | 223166909 | 223167032 | NC_000002.11 |



|            |          |          |      |           |          |           |           |              |
|------------|----------|----------|------|-----------|----------|-----------|-----------|--------------|
| cg14598338 | 2.32E-06 | 3.50E-07 | 5.28 | 5.5131267 | 7.99E-02 | 96623480  | 96623603  | NC_000009.11 |
| cg09482386 | 2.32E-06 | 3.50E-07 | 5.28 | 5.512759  | 4.53E-02 | 61521552  | 61521675  | NC_000017.10 |
| cg07279802 | 2.32E-06 | 3.50E-07 | 5.28 | 5.5117585 | 3.58E-02 | 42701042  | 42701165  | NC_000003.11 |
| cg24718722 | 2.33E-06 | 3.50E-07 | 5.28 | 5.5111615 | 1.14E-01 | 129536818 | 129536941 | NC_000010.10 |
| cg21546522 | 2.33E-06 | 3.50E-07 | 5.28 | 5.5109639 | 1.23E-01 | 234667549 | 234667672 | NC_000001.10 |
| cg09429847 | 2.33E-06 | 3.50E-07 | 5.28 | 5.5109294 | 7.57E-02 | 241629829 | 241629952 | NC_000002.11 |
| cg23296010 | 2.33E-06 | 3.51E-07 | 5.28 | 5.5104401 | 1.92E-01 | 37997817  | 37997940  | NC_000019.9  |
| cg17520712 | 2.33E-06 | 3.51E-07 | 5.28 | 5.5102882 | 6.67E-02 | 75491477  | 75491600  | NC_000010.10 |
| cg02549834 | 2.33E-06 | 3.51E-07 | 5.28 | 5.5100912 | 3.27E-02 | 49164913  | 49165036  | NC_000019.9  |
| cg03634777 | 2.33E-06 | 3.51E-07 | 5.27 | 5.5097048 | 5.61E-02 | 160512657 | 160512780 | NC_000006.11 |
| cg11747462 | 2.33E-06 | 3.51E-07 | 5.27 | 5.509282  | 1.06E-01 | 132869600 | 132869723 | NC_000011.9  |
| cg21613754 | 2.33E-06 | 3.51E-07 | 5.27 | 5.5090004 | 8.80E-02 | 219133847 | 219133970 | NC_000002.11 |
| cg03127558 | 2.33E-06 | 3.51E-07 | 5.27 | 5.5083238 | 1.14E-01 | 49223278  | 49223401  | NC_000019.9  |
| cg15829088 | 2.33E-06 | 3.51E-07 | 5.27 | 5.5079185 | 1.16E-01 | 247802935 | 247803058 | NC_000001.10 |
| cg08082862 | 2.33E-06 | 3.52E-07 | 5.27 | 5.5077391 | 8.55E-02 | 67807580  | 67807703  | NC_000016.9  |
| cg03244560 | 2.33E-06 | 3.52E-07 | 5.27 | 5.5073226 | 8.83E-02 | 25909171  | 25909294  | NC_000008.10 |
| cg25784308 | 2.33E-06 | 3.52E-07 | 5.27 | 5.50695   | 1.40E-01 | 131513216 | 131513339 | NC_000002.11 |
| cg25750714 | 2.33E-06 | 3.52E-07 | 5.27 | 5.5067274 | 8.97E-02 | 131631686 | 131631809 | NC_000010.10 |
| cg23023937 | 2.34E-06 | 3.52E-07 | 5.27 | 5.5064289 | 1.13E-01 | 133999758 | 133999881 | NC_000010.10 |
| cg21785010 | 2.34E-06 | 3.52E-07 | 5.27 | 5.5053253 | 1.49E-01 | 901035    | 901158    | NC_000006.11 |
| cg06365607 | 2.34E-06 | 3.53E-07 | 5.27 | 5.5047151 | 5.34E-02 | 43126988  | 43127111  | NC_000008.10 |
| cg07750118 | 2.34E-06 | 3.53E-07 | 5.27 | 5.5036884 | 1.94E-02 | 41630815  | 41630938  | NC_000019.9  |
| cg12475142 | 2.34E-06 | 3.53E-07 | 5.27 | 5.503443  | 1.28E-01 | 79012396  | 79012519  | NC_000017.10 |
| cg23464698 | 2.34E-06 | 3.53E-07 | 5.27 | 5.5030872 | 1.56E-01 | 23822265  | 23822388  | NC_000014.8  |
| cg01304894 | 2.34E-06 | 3.53E-07 | 5.27 | 5.5029835 | 3.65E-02 | 70715140  | 70715263  | NC_000016.9  |

|            |          |          |      |           |          |           |           |              |
|------------|----------|----------|------|-----------|----------|-----------|-----------|--------------|
| cg24286220 | 2.34E-06 | 3.53E-07 | 5.27 | 5.502727  | 2.77E-02 | 94290258  | 94290381  | NC_000011.9  |
| cg13384816 | 2.34E-06 | 3.53E-07 | 5.27 | 5.5025313 | 6.14E-02 | 11728558  | 11728681  | NC_000008.10 |
| cg26294431 | 2.34E-06 | 3.54E-07 | 5.27 | 5.5022816 | 1.24E-01 | 213400869 | 213400992 | NC_000002.11 |
| cg14798032 | 2.35E-06 | 3.54E-07 | 5.27 | 5.5018076 | 6.08E-02 | 132936591 | 132936714 | NC_000012.11 |
| cg00902847 | 2.35E-06 | 3.54E-07 | 5.27 | 5.5017843 | 1.43E-01 | 192445514 | 192445637 | NC_000003.11 |
| cg02265922 | 2.35E-06 | 3.54E-07 | 5.27 | 5.5010877 | 7.22E-02 | 3477168   | 3477291   | NC_000001.10 |
| cg12270813 | 2.35E-06 | 3.54E-07 | 5.27 | 5.5000883 | 3.01E-02 | 1473370   | 1473493   | NC_000001.10 |
| cg00039147 | 2.35E-06 | 3.54E-07 | 5.27 | 5.4996252 | 5.19E-02 | 35194628  | 35194751  | NC_000017.10 |
| cg24377729 | 2.35E-06 | 3.55E-07 | 5.27 | 5.4995506 | 5.49E-02 | 7806066   | 7806189   | NC_000019.9  |
| cg08324612 | 2.35E-06 | 3.55E-07 | 5.27 | 5.4994026 | 8.45E-02 | 1030521   | 1030644   | NC_000008.10 |
| cg07003632 | 2.35E-06 | 3.55E-07 | 5.27 | 5.4991808 | 1.47E-01 | 100259329 | 100259452 | NC_000014.8  |
| cg14021961 | 2.35E-06 | 3.55E-07 | 5.27 | 5.4988725 | 8.06E-02 | 16348752  | 16348875  | NC_000001.10 |
| cg22605822 | 2.35E-06 | 3.55E-07 | 5.27 | 5.4980163 | 2.75E-02 | 31367822  | 31367945  | NC_000020.10 |
| cg10020546 | 2.35E-06 | 3.55E-07 | 5.27 | 5.4976833 | 4.44E-02 | 111295081 | 111295204 | NC_000013.10 |
| cg20142672 | 2.36E-06 | 3.56E-07 | 5.27 | 5.4967315 | 7.39E-02 | 21324833  | 21324956  | NC_000019.9  |
| cg06026129 | 2.36E-06 | 3.56E-07 | 5.27 | 5.4962428 | 8.43E-02 | 822355    | 822478    | NC_000019.9  |
| cg02021288 | 2.36E-06 | 3.56E-07 | 5.27 | 5.4956585 | 6.47E-02 | 11435867  | 11435990  | NC_000016.9  |
| cg21052682 | 2.36E-06 | 3.56E-07 | 5.27 | 5.4955941 | 1.28E-01 | 69518197  | 69518320  | NC_000011.9  |
| cg21277452 | 2.36E-06 | 3.56E-07 | 5.27 | 5.4955463 | 4.33E-02 | 28829340  | 28829463  | NC_000006.11 |
| cg07459252 | 2.36E-06 | 3.56E-07 | 5.27 | 5.4953207 | 1.58E-01 | 37130212  | 37130335  | NC_000014.8  |
| cg15825731 | 2.36E-06 | 3.56E-07 | 5.27 | 5.494564  | 1.30E-01 | 224805753 | 224805876 | NC_000001.10 |
| cg09510339 | 2.36E-06 | 3.56E-07 | 5.27 | 5.4944353 | 8.09E-02 | 105858013 | 105858136 | NC_000002.11 |
| cg08323832 | 2.36E-06 | 3.57E-07 | 5.27 | 5.4941037 | 1.80E-02 | 9057783   | 9057906   | NC_000016.9  |
| cg25819424 | 2.37E-06 | 3.57E-07 | 5.27 | 5.4922429 | 7.39E-02 | 2797964   | 2798087   | NC_000017.10 |
| cg14156905 | 2.37E-06 | 3.57E-07 | 5.27 | 5.4918942 | 1.04E-01 | 17193979  | 17194102  | NC_000001.10 |

|            |          |          |      |           |          |           |           |              |
|------------|----------|----------|------|-----------|----------|-----------|-----------|--------------|
| cg13228701 | 2.37E-06 | 3.57E-07 | 5.27 | 5.4916037 | 7.14E-02 | 78614522  | 78614645  | NC_000011.9  |
| cg01382414 | 2.37E-06 | 3.58E-07 | 5.27 | 5.4908514 | 1.05E-01 | 176056675 | 176056798 | NC_000005.9  |
| cg02386403 | 2.37E-06 | 3.58E-07 | 5.27 | 5.4906968 | 1.44E-01 | 1390998   | 1391121   | NC_000006.11 |
| cg07211212 | 2.37E-06 | 3.58E-07 | 5.27 | 5.489527  | 1.56E-01 | 55200146  | 55200269  | NC_000020.10 |
| cg24607859 | 2.37E-06 | 3.58E-07 | 5.27 | 5.4891409 | 1.03E-01 | 91937265  | 91937388  | NC_000002.11 |
| cg03511041 | 2.37E-06 | 3.58E-07 | 5.27 | 5.488846  | 1.27E-01 | 61808126  | 61808249  | NC_000020.10 |
| cg01641835 | 2.38E-06 | 3.59E-07 | 5.27 | 5.4878634 | 2.45E-02 | 53095567  | 53095690  | NC_000017.10 |
| cg26525592 | 2.38E-06 | 3.59E-07 | 5.27 | 5.4869682 | 1.15E-01 | 134916398 | 134916521 | NC_000005.9  |
| cg23233404 | 2.38E-06 | 3.59E-07 | 5.27 | 5.4869006 | 1.40E-01 | 10887587  | 10887710  | NC_000006.11 |
| cg11131532 | 2.38E-06 | 3.59E-07 | 5.27 | 5.4865314 | 1.60E-01 | 48099323  | 48099446  | NC_000020.10 |
| cg11610626 | 2.38E-06 | 3.60E-07 | 5.27 | 5.4859248 | 9.80E-02 | 128222053 | 128222176 | NC_000006.11 |
| cg22855020 | 2.38E-06 | 3.60E-07 | 5.27 | 5.4852348 | 1.68E-01 | 42356731  | 42356854  | NC_000008.10 |
| cg00594408 | 2.38E-06 | 3.60E-07 | 5.27 | 5.485014  | 9.36E-02 | 29595349  | 29595472  | NC_000006.11 |
| cg11071242 | 2.38E-06 | 3.60E-07 | 5.27 | 5.4844681 | 2.37E-02 | 33654980  | 33655103  | NC_000021.8  |
| cg27543103 | 2.38E-06 | 3.60E-07 | 5.27 | 5.4843605 | 8.71E-02 | 54975677  | 54975800  | NC_000004.11 |
| cg10541864 | 2.39E-06 | 3.61E-07 | 5.27 | 5.4830461 | 1.61E-01 | 174450722 | 174450845 | NC_000004.11 |
| cg24456654 | 2.39E-06 | 3.61E-07 | 5.27 | 5.4829807 | 1.08E-01 | 41754125  | 41754248  | NC_000004.11 |
| cg00375819 | 2.39E-06 | 3.61E-07 | 5.27 | 5.482799  | 1.09E-01 | 11033866  | 11033989  | NC_000003.11 |
| cg16709734 | 2.39E-06 | 3.61E-07 | 5.27 | 5.4827721 | 1.15E-01 | 27229062  | 27229185  | NC_000007.13 |
| cg17485988 | 2.39E-06 | 3.61E-07 | 5.27 | 5.4824805 | 8.02E-02 | 52738966  | 52739089  | NC_000007.13 |
| cg15679052 | 2.39E-06 | 3.61E-07 | 5.27 | 5.4821156 | 1.24E-01 | 77749199  | 77749322  | NC_000017.10 |
| cg25773199 | 2.39E-06 | 3.61E-07 | 5.27 | 5.4818115 | 6.74E-02 | 6131834   | 6131957   | NC_000001.10 |
| cg24431372 | 2.39E-06 | 3.61E-07 | 5.27 | 5.4817146 | 8.09E-02 | 112494836 | 112494959 | NC_000003.11 |
| cg14977938 | 2.39E-06 | 3.61E-07 | 5.27 | 5.481376  | 1.03E-01 | 104190829 | 104190952 | NC_000014.8  |
| cg14214797 | 2.39E-06 | 3.61E-07 | 5.27 | 5.4812343 | 1.06E-01 | 91860613  | 91860736  | NC_000014.8  |

|            |          |          |      |           |          |           |           |              |
|------------|----------|----------|------|-----------|----------|-----------|-----------|--------------|
| cg00698908 | 2.39E-06 | 3.61E-07 | 5.27 | 5.4811617 | 1.08E-01 | 128750971 | 128751094 | NC_000012.11 |
| cg10377690 | 2.39E-06 | 3.61E-07 | 5.27 | 5.4809473 | 4.38E-02 | 80898550  | 80898673  | NC_000015.9  |
| cg11549265 | 2.39E-06 | 3.61E-07 | 5.27 | 5.4807828 | 9.17E-02 | 26988177  | 26988300  | NC_000006.11 |
| cg24942465 | 2.39E-06 | 3.62E-07 | 5.27 | 5.4802414 | 3.59E-02 | 104580693 | 104580816 | NC_000007.13 |
| cg07778983 | 2.39E-06 | 3.62E-07 | 5.27 | 5.4801465 | 8.64E-02 | 56905383  | 56905506  | NC_000019.9  |
| cg19384531 | 2.39E-06 | 3.62E-07 | 5.27 | 5.4801315 | 1.18E-01 | 50692252  | 50692375  | NC_000006.11 |
| cg22527793 | 2.40E-06 | 3.62E-07 | 5.27 | 5.4790777 | 1.10E-01 | 55367466  | 55367589  | NC_000008.10 |
| cg26224223 | 2.40E-06 | 3.62E-07 | 5.27 | 5.4782938 | 1.21E-01 | 31840737  | 31840860  | NC_000019.9  |
| cg09422574 | 2.40E-06 | 3.63E-07 | 5.27 | 5.477563  | 2.82E-02 | 127006605 | 127006728 | NC_000003.11 |
| cg03320827 | 2.40E-06 | 3.63E-07 | 5.27 | 5.4766437 | 1.16E-01 | 10887367  | 10887490  | NC_000006.11 |
| cg12623422 | 2.40E-06 | 3.63E-07 | 5.27 | 5.4763226 | 8.81E-02 | 77737749  | 77737872  | NC_000014.8  |
| cg22870667 | 2.41E-06 | 3.64E-07 | 5.27 | 5.4752179 | 3.33E-02 | 521182    | 521305    | NC_000008.10 |
| cg08775137 | 2.41E-06 | 3.64E-07 | 5.27 | 5.4749246 | 9.78E-02 | 41880319  | 41880442  | NC_000004.11 |
| cg09123473 | 2.41E-06 | 3.64E-07 | 5.27 | 5.4747159 | 1.35E-01 | 56234826  | 56234949  | NC_000017.10 |
| cg10265016 | 2.41E-06 | 3.64E-07 | 5.27 | 5.474431  | 1.11E-01 | 18061319  | 18061442  | NC_000002.11 |
| cg16764564 | 2.41E-06 | 3.64E-07 | 5.27 | 5.4741396 | 6.09E-02 | 70133390  | 70133513  | NC_000015.9  |
| cg17582411 | 2.41E-06 | 3.64E-07 | 5.27 | 5.4739872 | 5.01E-02 | 77458542  | 77458665  | NC_000017.10 |
| cg19092981 | 2.41E-06 | 3.64E-07 | 5.27 | 5.4739145 | 1.33E-01 | 19751654  | 19751777  | NC_000022.10 |
| cg18328933 | 2.41E-06 | 3.64E-07 | 5.27 | 5.4732793 | 6.86E-02 | 52008538  | 52008661  | NC_000003.11 |
| cg22000727 | 2.41E-06 | 3.65E-07 | 5.27 | 5.4717247 | 8.94E-02 | 3459199   | 3459322   | NC_000006.11 |
| cg05575273 | 2.41E-06 | 3.65E-07 | 5.27 | 5.4715824 | 6.21E-02 | 166128575 | 166128698 | NC_000006.11 |
| cg03644034 | 2.41E-06 | 3.65E-07 | 5.27 | 5.4714343 | 7.55E-02 | 16229964  | 16230087  | NC_000006.11 |
| cg01018477 | 2.41E-06 | 3.65E-07 | 5.27 | 5.4712903 | 9.04E-02 | 172658226 | 172658349 | NC_000005.9  |
| cg27112666 | 2.42E-06 | 3.65E-07 | 5.27 | 5.4702283 | 1.17E-01 | 100050791 | 100050914 | NC_000006.11 |
| cg14663451 | 2.42E-06 | 3.65E-07 | 5.27 | 5.4700267 | 1.02E-01 | 32504919  | 32505042  | NC_000008.10 |

|            |          |          |      |           |          |           |           |              |
|------------|----------|----------|------|-----------|----------|-----------|-----------|--------------|
| cg06418959 | 2.42E-06 | 3.66E-07 | 5.27 | 5.4685043 | 1.30E-01 | 161275436 | 161275559 | NC_000005.9  |
| cg18313340 | 2.42E-06 | 3.66E-07 | 5.27 | 5.4680555 | 1.29E-01 | 112760898 | 112761021 | NC_000013.10 |
| cg26389727 | 2.42E-06 | 3.66E-07 | 5.27 | 5.4677995 | 1.48E-01 | 28510283  | 28510406  | NC_000006.11 |
| cg27185976 | 2.42E-06 | 3.66E-07 | 5.27 | 5.4677524 | 5.98E-02 | 1472161   | 1472284   | NC_000008.10 |
| cg16112904 | 2.43E-06 | 3.67E-07 | 5.27 | 5.4666254 | 4.40E-02 | 106015656 | 106015779 | NC_000014.8  |
| cg05010929 | 2.43E-06 | 3.67E-07 | 5.27 | 5.4658156 | 9.22E-02 | 73967004  | 73967127  | NC_000002.11 |
| cg09221960 | 2.43E-06 | 3.67E-07 | 5.27 | 5.4657879 | 5.13E-02 | 120434710 | 120434833 | NC_000011.9  |
| cg16336127 | 2.43E-06 | 3.67E-07 | 5.27 | 5.4657714 | 1.18E-01 | 76941173  | 76941296  | NC_000005.9  |
| cg21028402 | 2.43E-06 | 3.67E-07 | 5.27 | 5.4655932 | 1.27E-01 | 113932902 | 113933025 | NC_000006.11 |
| cg02768048 | 2.43E-06 | 3.67E-07 | 5.27 | 5.4652352 | 3.08E-02 | 95166697  | 95166820  | NC_000005.9  |
| cg20439889 | 2.43E-06 | 3.68E-07 | 5.27 | 5.4644829 | 1.02E-01 | 34175554  | 34175677  | NC_000019.9  |
| cg11467291 | 2.43E-06 | 3.68E-07 | 5.27 | 5.4643454 | 4.84E-02 | 1143520   | 1143643   | NC_000005.9  |
| cg03352776 | 2.43E-06 | 3.68E-07 | 5.27 | 5.4640831 | 1.36E-01 | 111471309 | 111471432 | NC_000012.11 |
| cg05085809 | 2.43E-06 | 3.68E-07 | 5.27 | 5.464014  | 1.64E-01 | 46671083  | 46671206  | NC_000017.10 |
| cg21545902 | 2.43E-06 | 3.68E-07 | 5.26 | 5.4636833 | 1.11E-01 | 33590083  | 33590206  | NC_000013.10 |
| cg02527669 | 2.43E-06 | 3.68E-07 | 5.26 | 5.4634471 | 1.99E-01 | 220417030 | 220417153 | NC_000002.11 |
| cg03041617 | 2.43E-06 | 3.68E-07 | 5.26 | 5.4630987 | 4.00E-02 | 2695410   | 2695533   | NC_000007.13 |
| cg21412973 | 2.43E-06 | 3.68E-07 | 5.26 | 5.4630737 | 1.04E-01 | 1408557   | 1408680   | NC_000004.11 |
| cg20680265 | 2.44E-06 | 3.69E-07 | 5.26 | 5.4619397 | 8.99E-02 | 70194602  | 70194725  | NC_000007.13 |
| cg00638574 | 2.44E-06 | 3.69E-07 | 5.26 | 5.4618095 | 8.57E-02 | 209956565 | 209956688 | NC_000001.10 |
| cg11335203 | 2.44E-06 | 3.69E-07 | 5.26 | 5.4616867 | 2.30E-02 | 6398594   | 6398717   | NC_000001.10 |
| cg11201710 | 2.44E-06 | 3.69E-07 | 5.26 | 5.4609779 | 1.33E-01 | 192232468 | 192232591 | NC_000003.11 |
| cg10412384 | 2.44E-06 | 3.69E-07 | 5.26 | 5.4609775 | 1.84E-02 | 21358666  | 21358789  | NC_000016.9  |
| cg21380625 | 2.44E-06 | 3.69E-07 | 5.26 | 5.4609696 | 6.61E-02 | 140176585 | 140176708 | NC_000005.9  |
| cg26732808 | 2.44E-06 | 3.69E-07 | 5.26 | 5.4605782 | 1.02E-01 | 167704769 | 167704892 | NC_000006.11 |

|            |          |          |      |           |          |           |           |              |
|------------|----------|----------|------|-----------|----------|-----------|-----------|--------------|
| cg06520675 | 2.44E-06 | 3.69E-07 | 5.26 | 5.4598518 | 1.22E-01 | 102996310 | 102996433 | NC_000010.10 |
| cg08197287 | 2.44E-06 | 3.69E-07 | 5.26 | 5.4597475 | 1.01E-01 | 87952173  | 87952296  | NC_000004.11 |
| cg00938816 | 2.44E-06 | 3.70E-07 | 5.26 | 5.4592046 | 7.34E-02 | 8058149   | 8058272   | NC_000017.10 |
| cg12191107 | 2.44E-06 | 3.70E-07 | 5.26 | 5.4591637 | 5.27E-02 | 88297591  | 88297714  | NC_000006.11 |
| cg08121117 | 2.44E-06 | 3.70E-07 | 5.26 | 5.4587009 | 6.84E-02 | 112575735 | 112575858 | NC_000013.10 |
| cg21205222 | 2.44E-06 | 3.70E-07 | 5.26 | 5.458491  | 7.19E-02 | 143876783 | 143876906 | NC_000008.10 |
| cg06495401 | 2.45E-06 | 3.70E-07 | 5.26 | 5.4579344 | 5.04E-02 | 109559412 | 109559535 | NC_000002.11 |
| cg24058604 | 2.45E-06 | 3.70E-07 | 5.26 | 5.4579286 | 1.39E-01 | 27142437  | 27142560  | NC_000007.13 |
| cg00883210 | 2.45E-06 | 3.70E-07 | 5.26 | 5.4575331 | 3.43E-02 | 3565646   | 3565769   | NC_000004.11 |
| cg14395298 | 2.45E-06 | 3.70E-07 | 5.26 | 5.456902  | 1.27E-01 | 23412250  | 23412373  | NC_000013.10 |
| cg11191210 | 2.45E-06 | 3.71E-07 | 5.26 | 5.4564107 | 1.34E-01 | 117585815 | 117585938 | NC_000006.11 |
| cg05781609 | 2.45E-06 | 3.71E-07 | 5.26 | 5.4558249 | 7.64E-02 | 86429211  | 86429334  | NC_000001.10 |
| cg01056478 | 2.45E-06 | 3.71E-07 | 5.26 | 5.454734  | 5.06E-02 | 100713238 | 100713361 | NC_000014.8  |
| cg09176545 | 2.45E-06 | 3.71E-07 | 5.26 | 5.4547329 | 5.27E-02 | 55641959  | 55642082  | NC_000011.9  |
| cg07404921 | 2.45E-06 | 3.71E-07 | 5.26 | 5.4546278 | 1.14E-01 | 75600250  | 75600373  | NC_000001.10 |
| cg13561372 | 2.45E-06 | 3.72E-07 | 5.26 | 5.4540855 | 1.03E-01 | 121781778 | 121781901 | NC_000007.13 |
| cg09371042 | 2.45E-06 | 3.72E-07 | 5.26 | 5.4538229 | 4.85E-02 | 53741690  | 53741813  | NC_000012.11 |
| cg02126051 | 2.46E-06 | 3.72E-07 | 5.26 | 5.4536852 | 1.15E-01 | 147112438 | 147112561 | NC_000003.11 |
| cg02091109 | 2.46E-06 | 3.72E-07 | 5.26 | 5.4531598 | 1.35E-01 | 76940449  | 76940572  | NC_000005.9  |
| cg21754051 | 2.46E-06 | 3.73E-07 | 5.26 | 5.4514961 | 8.96E-02 | 195004826 | 195004949 | NC_000003.11 |
| cg00989365 | 2.46E-06 | 3.73E-07 | 5.26 | 5.4511906 | 1.01E-01 | 70014548  | 70014671  | NC_000014.8  |
| cg08475096 | 2.46E-06 | 3.73E-07 | 5.26 | 5.4510436 | 1.18E-01 | 158143750 | 158143873 | NC_000004.11 |
| cg09535072 | 2.46E-06 | 3.73E-07 | 5.26 | 5.4509728 | 3.52E-02 | 74083773  | 74083896  | NC_000014.8  |
| cg25885358 | 2.46E-06 | 3.73E-07 | 5.26 | 5.4508747 | 2.18E-02 | 43263929  | 43264052  | NC_000022.10 |
| cg06603074 | 2.46E-06 | 3.73E-07 | 5.26 | 5.450698  | 9.27E-02 | 60192893  | 60193016  | NC_000018.9  |

|            |          |          |      |           |          |           |           |              |
|------------|----------|----------|------|-----------|----------|-----------|-----------|--------------|
| cg11971852 | 2.46E-06 | 3.73E-07 | 5.26 | 5.450662  | 4.27E-02 | 32678846  | 32678969  | NC_000002.11 |
| cg15449323 | 2.46E-06 | 3.73E-07 | 5.26 | 5.4506455 | 1.55E-01 | 52956729  | 52956852  | NC_000019.9  |
| cg19912197 | 2.46E-06 | 3.73E-07 | 5.26 | 5.450595  | 3.27E-02 | 26523257  | 26523380  | NC_000017.10 |
| cg17187673 | 2.46E-06 | 3.73E-07 | 5.26 | 5.4505831 | 8.40E-02 | 5458721   | 5458844   | NC_000004.11 |
| cg19520452 | 2.47E-06 | 3.73E-07 | 5.26 | 5.4492999 | 3.86E-02 | 59369156  | 59369279  | NC_000001.10 |
| cg00604202 | 2.47E-06 | 3.74E-07 | 5.26 | 5.4470206 | 1.13E-01 | 99272987  | 99273110  | NC_000006.11 |
| cg24545908 | 2.47E-06 | 3.75E-07 | 5.26 | 5.44585   | 1.93E-02 | 68097886  | 68098009  | NC_000018.9  |
| cg24987590 | 2.47E-06 | 3.75E-07 | 5.26 | 5.4452575 | 1.03E-01 | 8191300   | 8191423   | NC_000017.10 |
| cg25936223 | 2.48E-06 | 3.75E-07 | 5.26 | 5.4447673 | 5.94E-02 | 76807577  | 76807700  | NC_000004.11 |
| cg04099420 | 2.48E-06 | 3.75E-07 | 5.26 | 5.4447025 | 8.85E-02 | 3076354   | 3076477   | NC_000006.11 |
| cg01986648 | 2.48E-06 | 3.75E-07 | 5.26 | 5.444502  | 1.16E-01 | 64226341  | 64226464  | NC_000006.11 |
| cg01011533 | 2.48E-06 | 3.75E-07 | 5.26 | 5.4444268 | 4.58E-02 | 102805240 | 102805363 | NC_000010.10 |
| cg25143706 | 2.48E-06 | 3.75E-07 | 5.26 | 5.444129  | 4.55E-02 | 148930093 | 148930216 | NC_000001.10 |
| cg00648301 | 2.48E-06 | 3.76E-07 | 5.26 | 5.4433025 | 1.78E-01 | 20349241  | 20349364  | NC_000020.10 |
| cg20916535 | 2.48E-06 | 3.76E-07 | 5.26 | 5.4432309 | 1.26E-01 | 117592262 | 117592385 | NC_000006.11 |
| cg22840780 | 2.48E-06 | 3.76E-07 | 5.26 | 5.4429089 | 1.03E-01 | 58207650  | 58207773  | NC_000013.10 |
| cg00387551 | 2.48E-06 | 3.76E-07 | 5.26 | 5.4425615 | 3.89E-02 | 3011304   | 3011427   | NC_000001.10 |
| cg00939727 | 2.48E-06 | 3.76E-07 | 5.26 | 5.4414027 | 4.69E-02 | 134935506 | 134935629 | NC_000002.11 |
| cg06688989 | 2.49E-06 | 3.77E-07 | 5.26 | 5.4407607 | 1.21E-01 | 41606869  | 41606992  | NC_000006.11 |
| cg07455757 | 2.49E-06 | 3.77E-07 | 5.26 | 5.4407568 | 1.44E-01 | 54968985  | 54969108  | NC_000016.9  |
| cg16759932 | 2.49E-06 | 3.77E-07 | 5.26 | 5.4400074 | 1.19E-01 | 134859885 | 134860008 | NC_000010.10 |
| cg04027757 | 2.49E-06 | 3.78E-07 | 5.26 | 5.4386379 | 6.62E-02 | 22987124  | 22987247  | NC_000022.10 |
| cg07617129 | 2.49E-06 | 3.78E-07 | 5.26 | 5.4374174 | 4.23E-02 | 8390291   | 8390414   | NC_000001.10 |
| cg21346925 | 2.49E-06 | 3.78E-07 | 5.26 | 5.4373646 | 1.20E-01 | 64062384  | 64062507  | NC_000012.11 |
| cg18397523 | 2.50E-06 | 3.78E-07 | 5.26 | 5.4368372 | 1.21E-01 | 27282351  | 27282474  | NC_000007.13 |

|            |          |          |      |           |          |           |           |              |
|------------|----------|----------|------|-----------|----------|-----------|-----------|--------------|
| cg10962930 | 2.50E-06 | 3.79E-07 | 5.26 | 5.4359501 | 1.10E-01 | 179763857 | 179763980 | NC_000005.9  |
| cg13992728 | 2.50E-06 | 3.79E-07 | 5.26 | 5.4354246 | 7.06E-02 | 134817184 | 134817307 | NC_000010.10 |
| cg08201736 | 2.50E-06 | 3.79E-07 | 5.26 | 5.4347407 | 2.36E-02 | 79298769  | 79298892  | NC_000015.9  |
| cg16881209 | 2.50E-06 | 3.79E-07 | 5.26 | 5.4346555 | 7.76E-02 | 57472959  | 57473082  | NC_000007.13 |
| cg11668529 | 2.50E-06 | 3.79E-07 | 5.26 | 5.434252  | 6.80E-02 | 242764496 | 242764619 | NC_000002.11 |
| cg02676375 | 2.50E-06 | 3.80E-07 | 5.26 | 5.4333147 | 8.12E-02 | 170736180 | 170736303 | NC_000005.9  |
| cg03572772 | 2.50E-06 | 3.80E-07 | 5.26 | 5.4327727 | 1.37E-01 | 140624869 | 140624992 | NC_000005.9  |
| cg22688656 | 2.51E-06 | 3.80E-07 | 5.26 | 5.4323483 | 5.01E-02 | 109812464 | 109812587 | NC_000013.10 |
| cg11260848 | 2.51E-06 | 3.80E-07 | 5.26 | 5.4321289 | 1.07E-01 | 44326260  | 44326383  | NC_000011.9  |
| cg20438306 | 2.51E-06 | 3.80E-07 | 5.26 | 5.4321215 | 1.27E-01 | 41747092  | 41747215  | NC_000004.11 |
| cg20343195 | 2.51E-06 | 3.80E-07 | 5.26 | 5.4313135 | 3.06E-02 | 98828199  | 98828322  | NC_000002.11 |
| cg18640327 | 2.51E-06 | 3.80E-07 | 5.26 | 5.4311496 | 3.44E-02 | 99674170  | 99674293  | NC_000015.9  |
| cg04455265 | 2.51E-06 | 3.80E-07 | 5.26 | 5.4311127 | 3.35E-02 | 49837689  | 49837812  | NC_000003.11 |
| cg23778596 | 2.51E-06 | 3.80E-07 | 5.26 | 5.4309944 | 1.35E-01 | 149411498 | 149411621 | NC_000007.13 |
| cg25724712 | 2.51E-06 | 3.81E-07 | 5.26 | 5.4300942 | 4.09E-02 | 45117457  | 45117580  | NC_000019.9  |
| cg04021706 | 2.52E-06 | 3.82E-07 | 5.26 | 5.4280803 | 5.72E-02 | 389763    | 389886    | NC_000005.9  |
| cg19530886 | 2.52E-06 | 3.82E-07 | 5.26 | 5.4278521 | 3.93E-02 | 54785473  | 54785596  | NC_000002.11 |
| cg20290001 | 2.52E-06 | 3.82E-07 | 5.26 | 5.4272473 | 2.85E-02 | 52219720  | 52219843  | NC_000014.8  |
| cg26194477 | 2.52E-06 | 3.82E-07 | 5.26 | 5.4267526 | 1.15E-01 | 29234890  | 29235013  | NC_000014.8  |
| cg09504320 | 2.52E-06 | 3.82E-07 | 5.26 | 5.4266968 | 8.14E-02 | 157164796 | 157164919 | NC_000001.10 |
| cg00773460 | 2.52E-06 | 3.82E-07 | 5.26 | 5.4262595 | 8.24E-02 | 6133428   | 6133551   | NC_000001.10 |
| cg22217463 | 2.52E-06 | 3.82E-07 | 5.26 | 5.426043  | 3.88E-02 | 4834841   | 4834964   | NC_000017.10 |
| cg26384430 | 2.52E-06 | 3.83E-07 | 5.26 | 5.4254313 | 1.49E-01 | 156129655 | 156129778 | NC_000004.11 |
| cg02328239 | 2.52E-06 | 3.83E-07 | 5.26 | 5.4253254 | 1.02E-01 | 37837463  | 37837586  | NC_000005.9  |
| cg17974054 | 2.53E-06 | 3.83E-07 | 5.26 | 5.4245024 | 3.43E-02 | 135413810 | 135413933 | NC_000005.9  |



|            |          |          |      |           |          |           |           |              |
|------------|----------|----------|------|-----------|----------|-----------|-----------|--------------|
| cg18219522 | 2.53E-06 | 3.83E-07 | 5.26 | 5.4244905 | 6.21E-02 | 95870414  | 95870537  | NC_000011.9  |
| cg03299487 | 2.53E-06 | 3.84E-07 | 5.26 | 5.4232537 | 1.04E-01 | 20182644  | 20182767  | NC_000011.9  |
| cg07215236 | 2.53E-06 | 3.84E-07 | 5.26 | 5.4228279 | 8.54E-02 | 239865226 | 239865349 | NC_000002.11 |
| cg11650460 | 2.53E-06 | 3.84E-07 | 5.26 | 5.4223786 | 8.07E-02 | 120538792 | 120538915 | NC_000012.11 |
| cg05181941 | 2.53E-06 | 3.84E-07 | 5.26 | 5.4222376 | 7.67E-02 | 131171031 | 131171154 | NC_000012.11 |
| cg13761419 | 2.53E-06 | 3.84E-07 | 5.26 | 5.421715  | 9.05E-02 | 116914074 | 116914197 | NC_000009.11 |
| cg10747023 | 2.53E-06 | 3.84E-07 | 5.26 | 5.4214859 | 1.24E-01 | 140774559 | 140774682 | NC_000007.13 |
| cg03579392 | 2.53E-06 | 3.85E-07 | 5.26 | 5.4206389 | 6.34E-02 | 101002170 | 101002293 | NC_000014.8  |
| cg15123187 | 2.54E-06 | 3.85E-07 | 5.26 | 5.4202783 | 4.93E-02 | 20569715  | 20569838  | NC_000001.10 |
| cg15607292 | 2.54E-06 | 3.85E-07 | 5.26 | 5.4199314 | 8.42E-02 | 25426810  | 25426933  | NC_000003.11 |
| cg06354527 | 2.54E-06 | 3.85E-07 | 5.26 | 5.419707  | 7.17E-02 | 168122755 | 168122878 | NC_000006.11 |
| cg00606739 | 2.54E-06 | 3.85E-07 | 5.26 | 5.4193077 | 9.03E-02 | 49580019  | 49580142  | NC_000011.9  |
| cg03695260 | 2.54E-06 | 3.85E-07 | 5.26 | 5.4188333 | 7.97E-02 | 134945452 | 134945575 | NC_000010.10 |
| cg07416315 | 2.54E-06 | 3.85E-07 | 5.26 | 5.4187502 | 8.39E-02 | 48897200  | 48897323  | NC_000022.10 |
| cg10530281 | 2.54E-06 | 3.85E-07 | 5.26 | 5.4185471 | 1.81E-01 | 115122054 | 115122177 | NC_000012.11 |
| cg24755537 | 2.54E-06 | 3.85E-07 | 5.26 | 5.4183803 | 9.97E-02 | 14014662  | 14014785  | NC_000017.10 |
| cg21139227 | 2.54E-06 | 3.86E-07 | 5.26 | 5.4181583 | 5.25E-02 | 49887720  | 49887843  | NC_000008.10 |
| cg14469019 | 2.54E-06 | 3.86E-07 | 5.26 | 5.4178916 | 1.16E-01 | 35925230  | 35925353  | NC_000005.9  |
| cg14930884 | 2.54E-06 | 3.86E-07 | 5.25 | 5.417068  | 1.30E-01 | 65488640  | 65488763  | NC_000008.10 |
| cg18290075 | 2.54E-06 | 3.86E-07 | 5.25 | 5.4162664 | 1.65E-01 | 153840477 | 153840600 | NC_000003.11 |
| cg05964487 | 2.55E-06 | 3.86E-07 | 5.25 | 5.4161598 | 8.05E-02 | 40747228  | 40747351  | NC_000013.10 |
| cg26283098 | 2.55E-06 | 3.87E-07 | 5.25 | 5.415412  | 9.16E-02 | 10021690  | 10021813  | NC_000017.10 |
| cg04780984 | 2.55E-06 | 3.87E-07 | 5.25 | 5.4153494 | 1.22E-01 | 56454528  | 56454651  | NC_000017.10 |
| cg01152616 | 2.55E-06 | 3.87E-07 | 5.25 | 5.4143777 | 2.94E-02 | 30619173  | 30619296  | NC_000006.11 |
| cg26470309 | 2.55E-06 | 3.87E-07 | 5.25 | 5.4138077 | 9.99E-02 | 117626777 | 117626900 | NC_000012.11 |

|            |          |          |      |           |          |           |           |              |
|------------|----------|----------|------|-----------|----------|-----------|-----------|--------------|
| cg02709205 | 2.55E-06 | 3.87E-07 | 5.25 | 5.4137189 | 1.34E-01 | 74421935  | 74422058  | NC_000015.9  |
| cg25619157 | 2.55E-06 | 3.87E-07 | 5.25 | 5.4134525 | 7.51E-02 | 88520943  | 88521066  | NC_000010.10 |
| cg02447287 | 2.55E-06 | 3.88E-07 | 5.25 | 5.4121914 | 4.22E-02 | 238707023 | 238707146 | NC_000002.11 |
| cg15832180 | 2.56E-06 | 3.88E-07 | 5.25 | 5.411434  | 4.96E-02 | 7032924   | 7033047   | NC_000019.9  |
| cg01130991 | 2.56E-06 | 3.88E-07 | 5.25 | 5.4113389 | 7.39E-02 | 46510392  | 46510515  | NC_000017.10 |
| cg12903638 | 2.56E-06 | 3.88E-07 | 5.25 | 5.4113348 | 2.03E-01 | 210636350 | 210636473 | NC_000002.11 |
| cg16447950 | 2.56E-06 | 3.88E-07 | 5.25 | 5.4112069 | 8.20E-02 | 562315    | 562438    | NC_000005.9  |
| cg17200850 | 2.56E-06 | 3.89E-07 | 5.25 | 5.4101704 | 1.05E-01 | 175107097 | 175107220 | NC_000005.9  |
| cg14430141 | 2.56E-06 | 3.89E-07 | 5.25 | 5.4097732 | 1.14E-01 | 175568377 | 175568500 | NC_000001.10 |
| cg06867377 | 2.56E-06 | 3.89E-07 | 5.25 | 5.4084533 | 1.73E-01 | 113917395 | 113917518 | NC_000012.11 |
| cg00393992 | 2.56E-06 | 3.89E-07 | 5.25 | 5.4084231 | 9.73E-02 | 121081935 | 121082058 | NC_000012.11 |
| cg06135282 | 2.56E-06 | 3.90E-07 | 5.25 | 5.4081856 | 4.49E-02 | 86370102  | 86370225  | NC_000013.10 |
| cg01051310 | 2.57E-06 | 3.90E-07 | 5.25 | 5.4069917 | 1.97E-01 | 228194443 | 228194566 | NC_000001.10 |
| cg10102762 | 2.57E-06 | 3.90E-07 | 5.25 | 5.4067237 | 1.00E-01 | 57025881  | 57026004  | NC_000008.10 |
| cg24524702 | 2.57E-06 | 3.90E-07 | 5.25 | 5.4065781 | 6.15E-02 | 100109440 | 100109563 | NC_000015.9  |
| cg13561592 | 2.57E-06 | 3.90E-07 | 5.25 | 5.406001  | 1.64E-01 | 118916976 | 118917099 | NC_000009.11 |
| cg00319157 | 2.57E-06 | 3.90E-07 | 5.25 | 5.4058811 | 2.45E-02 | 47052970  | 47053093  | NC_000022.10 |
| cg04804539 | 2.57E-06 | 3.91E-07 | 5.25 | 5.4046031 | 1.55E-01 | 95691255  | 95691378  | NC_000002.11 |
| cg11153057 | 2.57E-06 | 3.91E-07 | 5.25 | 5.4044446 | 3.65E-02 | 147380334 | 147380457 | NC_000001.10 |
| cg17952075 | 2.57E-06 | 3.91E-07 | 5.25 | 5.4041364 | 4.25E-02 | 23854382  | 23854505  | NC_000002.11 |
| cg20791007 | 2.58E-06 | 3.91E-07 | 5.25 | 5.4038766 | 8.59E-02 | 150229443 | 150229566 | NC_000001.10 |
| cg20808234 | 2.58E-06 | 3.91E-07 | 5.25 | 5.4037281 | 1.08E-01 | 19692082  | 19692205  | NC_000006.11 |
| cg11119412 | 2.58E-06 | 3.91E-07 | 5.25 | 5.4036573 | 3.21E-02 | 81144818  | 81144941  | NC_000005.9  |
| cg16128363 | 2.58E-06 | 3.92E-07 | 5.25 | 5.4019104 | 1.82E-02 | 3880558   | 3880681   | NC_000018.9  |
| cg27383174 | 2.58E-06 | 3.92E-07 | 5.25 | 5.4017405 | 1.07E-01 | 148450860 | 148450983 | NC_000003.11 |

|            |          |          |      |           |          |           |           |              |
|------------|----------|----------|------|-----------|----------|-----------|-----------|--------------|
| cg12806613 | 2.58E-06 | 3.93E-07 | 5.25 | 5.4006726 | 1.04E-01 | 63540205  | 63540328  | NC_000001.10 |
| cg25778446 | 2.58E-06 | 3.93E-07 | 5.25 | 5.4003766 | 8.30E-02 | 94652282  | 94652405  | NC_000004.11 |
| cg25124433 | 2.58E-06 | 3.93E-07 | 5.25 | 5.4002101 | 4.39E-02 | 39041110  | 39041233  | NC_000017.10 |
| cg01301382 | 2.58E-06 | 3.93E-07 | 5.25 | 5.400103  | 1.27E-01 | 15198067  | 15198190  | NC_000018.9  |
| cg06635392 | 2.59E-06 | 3.93E-07 | 5.25 | 5.3989601 | 1.04E-01 | 85473238  | 85473361  | NC_000006.11 |
| cg05476287 | 2.59E-06 | 3.93E-07 | 5.25 | 5.3989597 | 4.01E-02 | 176522511 | 176522634 | NC_000005.9  |
| cg13575612 | 2.59E-06 | 3.93E-07 | 5.25 | 5.3987539 | 6.06E-02 | 156552224 | 156552347 | NC_000003.11 |
| cg09772954 | 2.59E-06 | 3.94E-07 | 5.25 | 5.3982844 | 9.01E-02 | 172734514 | 172734637 | NC_000004.11 |
| cg02620361 | 2.59E-06 | 3.94E-07 | 5.25 | 5.3974345 | 1.36E-01 | 115117424 | 115117547 | NC_000007.13 |
| cg19856705 | 2.59E-06 | 3.94E-07 | 5.25 | 5.3969253 | 1.08E-01 | 234667500 | 234667623 | NC_000001.10 |
| cg07734961 | 2.59E-06 | 3.94E-07 | 5.25 | 5.3966234 | 3.73E-02 | 198650603 | 198650726 | NC_000002.11 |
| cg16520795 | 2.59E-06 | 3.94E-07 | 5.25 | 5.3965147 | 1.78E-02 | 36562653  | 36562776  | NC_000001.10 |
| cg18292434 | 2.60E-06 | 3.95E-07 | 5.25 | 5.395844  | 1.04E-01 | 147112541 | 147112664 | NC_000003.11 |
| cg01162494 | 2.60E-06 | 3.95E-07 | 5.25 | 5.395827  | 7.23E-02 | 44589011  | 44589134  | NC_000021.8  |
| cg15159605 | 2.60E-06 | 3.95E-07 | 5.25 | 5.3957848 | 1.40E-01 | 113904506 | 113904629 | NC_000012.11 |
| cg05625839 | 2.60E-06 | 3.95E-07 | 5.25 | 5.3954033 | 4.57E-02 | 48127569  | 48127692  | NC_000017.10 |
| cg10758369 | 2.60E-06 | 3.95E-07 | 5.25 | 5.3939196 | 7.42E-02 | 48459236  | 48459359  | NC_000001.10 |
| cg01990328 | 2.60E-06 | 3.95E-07 | 5.25 | 5.3937404 | 5.68E-02 | 74675799  | 74675922  | NC_000017.10 |
| cg18710929 | 2.60E-06 | 3.96E-07 | 5.25 | 5.3934669 | 1.61E-01 | 118228078 | 118228201 | NC_000006.11 |
| cg16204357 | 2.60E-06 | 3.96E-07 | 5.25 | 5.3934076 | 1.16E-01 | 101923155 | 101923278 | NC_000014.8  |
| cg16350608 | 2.60E-06 | 3.96E-07 | 5.25 | 5.3933558 | 7.41E-02 | 97063920  | 97064043  | NC_000001.10 |
| cg14614094 | 2.60E-06 | 3.96E-07 | 5.25 | 5.3927765 | 6.89E-02 | 133567903 | 133568026 | NC_000009.11 |
| cg05256483 | 2.60E-06 | 3.96E-07 | 5.25 | 5.3925497 | 1.08E-01 | 119616242 | 119616365 | NC_000002.11 |
| cg08415838 | 2.60E-06 | 3.96E-07 | 5.25 | 5.3921399 | 1.27E-01 | 92936856  | 92936979  | NC_000015.9  |
| cg06920037 | 2.60E-06 | 3.96E-07 | 5.25 | 5.392132  | 1.29E-01 | 115130868 | 115130991 | NC_000012.11 |

|            |          |          |      |           |          |           |           |              |
|------------|----------|----------|------|-----------|----------|-----------|-----------|--------------|
| cg10062945 | 2.61E-06 | 3.97E-07 | 5.25 | 5.390915  | 1.03E-01 | 64989895  | 64990018  | NC_000006.11 |
| cg20212940 | 2.61E-06 | 3.97E-07 | 5.25 | 5.3907977 | 1.06E-01 | 31121906  | 31122029  | NC_000010.10 |
| cg07881365 | 2.61E-06 | 3.97E-07 | 5.25 | 5.3907319 | 1.04E-01 | 15833929  | 15834052  | NC_000019.9  |
| cg14168923 | 2.61E-06 | 3.97E-07 | 5.25 | 5.3902558 | 1.65E-01 | 28366606  | 28366729  | NC_000013.10 |
| cg24086690 | 2.61E-06 | 3.97E-07 | 5.25 | 5.3896567 | 5.34E-02 | 30951189  | 30951312  | NC_000010.10 |
| cg01926906 | 2.61E-06 | 3.97E-07 | 5.25 | 5.3896267 | 1.18E-01 | 65499701  | 65499824  | NC_000008.10 |
| cg27282530 | 2.61E-06 | 3.97E-07 | 5.25 | 5.3892489 | 1.44E-01 | 125898680 | 125898803 | NC_000003.11 |
| cg24690722 | 2.61E-06 | 3.97E-07 | 5.25 | 5.3891936 | 1.43E-02 | 166809144 | 166809267 | NC_000001.10 |
| cg08471896 | 2.61E-06 | 3.97E-07 | 5.25 | 5.3889842 | 1.04E-01 | 135808560 | 135808683 | NC_000002.11 |
| cg05819154 | 2.61E-06 | 3.98E-07 | 5.25 | 5.3882346 | 4.49E-02 | 49902436  | 49902559  | NC_000016.9  |
| cg12283119 | 2.61E-06 | 3.98E-07 | 5.25 | 5.3879931 | 7.82E-02 | 15805012  | 15805135  | NC_000002.11 |
| cg24536163 | 2.62E-06 | 3.98E-07 | 5.25 | 5.3870031 | 4.89E-02 | 61264371  | 61264494  | NC_000018.9  |
| cg27549720 | 2.62E-06 | 3.98E-07 | 5.25 | 5.3862547 | 1.33E-01 | 19992167  | 19992290  | NC_000001.10 |
| cg04366249 | 2.62E-06 | 3.99E-07 | 5.25 | 5.3861397 | 1.17E-01 | 94285501  | 94285624  | NC_000007.13 |
| cg23413104 | 2.62E-06 | 3.99E-07 | 5.25 | 5.3861371 | 9.96E-02 | 118982263 | 118982386 | NC_000002.11 |
| cg19749975 | 2.62E-06 | 3.99E-07 | 5.25 | 5.3859293 | 8.82E-02 | 71547563  | 71547686  | NC_000001.10 |
| cg19795594 | 2.62E-06 | 3.99E-07 | 5.25 | 5.3843443 | 7.90E-02 | 132790734 | 132790857 | NC_000011.9  |
| cg24054190 | 2.62E-06 | 3.99E-07 | 5.25 | 5.3840039 | 1.38E-01 | 192232863 | 192232986 | NC_000003.11 |
| cg17565078 | 2.63E-06 | 4.00E-07 | 5.25 | 5.3833512 | 1.84E-01 | 27334723  | 27334846  | NC_000013.10 |
| cg07557707 | 2.63E-06 | 4.00E-07 | 5.25 | 5.3823694 | 1.50E-01 | 58549711  | 58549834  | NC_000019.9  |
| cg07804773 | 2.63E-06 | 4.00E-07 | 5.25 | 5.3821114 | 4.38E-02 | 151662651 | 151662774 | NC_000006.11 |
| cg13894444 | 2.63E-06 | 4.00E-07 | 5.25 | 5.3820257 | 6.26E-02 | 189821064 | 189821187 | NC_000003.11 |
| cg23151862 | 2.63E-06 | 4.00E-07 | 5.25 | 5.3819328 | 1.15E-01 | 132813362 | 132813485 | NC_000011.9  |
| cg01146063 | 2.63E-06 | 4.01E-07 | 5.25 | 5.3809028 | 9.83E-02 | 80549973  | 80550096  | NC_000002.11 |
| cg23448729 | 2.63E-06 | 4.01E-07 | 5.25 | 5.3803263 | 1.16E-01 | 63256285  | 63256408  | NC_000005.9  |

|            |          |          |      |           |          |           |           |              |
|------------|----------|----------|------|-----------|----------|-----------|-----------|--------------|
| cg21661027 | 2.63E-06 | 4.01E-07 | 5.25 | 5.3799767 | 1.27E-01 | 74961342  | 74961465  | NC_000018.9  |
| cg04730882 | 2.63E-06 | 4.01E-07 | 5.25 | 5.3798869 | 8.65E-02 | 176986535 | 176986658 | NC_000002.11 |
| cg11318087 | 2.63E-06 | 4.01E-07 | 5.25 | 5.3797825 | 4.13E-02 | 80336356  | 80336479  | NC_000017.10 |
| cg24790764 | 2.64E-06 | 4.02E-07 | 5.25 | 5.378052  | 4.84E-02 | 104344310 | 104344433 | NC_000012.11 |
| cg23272399 | 2.64E-06 | 4.02E-07 | 5.25 | 5.3779252 | 1.22E-01 | 53068579  | 53068702  | NC_000001.10 |
| cg18664869 | 2.64E-06 | 4.02E-07 | 5.25 | 5.377829  | 1.11E-01 | 140625004 | 140625127 | NC_000005.9  |
| cg25196575 | 2.64E-06 | 4.02E-07 | 5.25 | 5.377657  | 8.21E-02 | 3649250   | 3649373   | NC_000001.10 |
| cg27363741 | 2.64E-06 | 4.02E-07 | 5.25 | 5.3776566 | 1.15E-01 | 6005349   | 6005472   | NC_000006.11 |
| cg10001275 | 2.64E-06 | 4.02E-07 | 5.25 | 5.3775124 | 2.89E-02 | 41443956  | 41444079  | NC_000015.9  |
| cg23185921 | 2.64E-06 | 4.02E-07 | 5.25 | 5.3767241 | 1.15E-01 | 45270799  | 45270922  | NC_000012.11 |
| cg22340762 | 2.64E-06 | 4.02E-07 | 5.25 | 5.3766812 | 4.86E-02 | 183823538 | 183823661 | NC_000001.10 |
| cg24927800 | 2.64E-06 | 4.02E-07 | 5.25 | 5.3766121 | 1.51E-01 | 220283214 | 220283337 | NC_000002.11 |
| cg12608727 | 2.64E-06 | 4.02E-07 | 5.25 | 5.3765748 | 1.25E-01 | 64711033  | 64711156  | NC_000001.10 |
| cg22994720 | 2.64E-06 | 4.03E-07 | 5.25 | 5.3761911 | 1.22E-01 | 74441988  | 74442111  | NC_000011.9  |
| cg15925090 | 2.65E-06 | 4.03E-07 | 5.25 | 5.3754284 | 9.34E-02 | 4874042   | 4874165   | NC_000004.11 |
| cg03542222 | 2.65E-06 | 4.03E-07 | 5.25 | 5.3749688 | 2.57E-02 | 110260848 | 110260971 | NC_000001.10 |
| cg17971936 | 2.65E-06 | 4.03E-07 | 5.25 | 5.3744564 | 1.37E-01 | 83378895  | 83379018  | NC_000015.9  |
| cg13043117 | 2.65E-06 | 4.03E-07 | 5.25 | 5.3744186 | 1.15E-01 | 61992820  | 61992943  | NC_000014.8  |
| cg19908556 | 2.65E-06 | 4.03E-07 | 5.25 | 5.3743096 | 1.43E-01 | 32355022  | 32355145  | NC_000011.9  |
| cg05727776 | 2.65E-06 | 4.03E-07 | 5.25 | 5.3741219 | 5.96E-02 | 65127677  | 65127800  | NC_000011.9  |
| cg22803222 | 2.65E-06 | 4.04E-07 | 5.25 | 5.3739537 | 5.30E-02 | 76636725  | 76636848  | NC_000006.11 |
| cg04175877 | 2.65E-06 | 4.04E-07 | 5.25 | 5.3734756 | 8.81E-02 | 65295989  | 65296112  | NC_000005.9  |
| cg02516134 | 2.65E-06 | 4.04E-07 | 5.25 | 5.3734362 | 5.45E-02 | 134575187 | 134575310 | NC_000007.13 |
| cg06632310 | 2.65E-06 | 4.04E-07 | 5.25 | 5.3729534 | 9.50E-02 | 8275229   | 8275352   | NC_000019.9  |
| cg20683765 | 2.65E-06 | 4.04E-07 | 5.25 | 5.3724497 | 1.11E-01 | 37835168  | 37835291  | NC_000005.9  |

|            |          |          |      |           |          |           |           |              |
|------------|----------|----------|------|-----------|----------|-----------|-----------|--------------|
| cg06627087 | 2.65E-06 | 4.04E-07 | 5.25 | 5.3717984 | 7.92E-02 | 57376177  | 57376300  | NC_000019.9  |
| cg26301788 | 2.65E-06 | 4.05E-07 | 5.25 | 5.3715783 | 1.27E-01 | 177713423 | 177713546 | NC_000004.11 |
| cg14352267 | 2.66E-06 | 4.05E-07 | 5.24 | 5.3706641 | 9.01E-02 | 52627127  | 52627250  | NC_000018.9  |
| cg27211284 | 2.66E-06 | 4.05E-07 | 5.24 | 5.3697966 | 1.15E-01 | 200524012 | 200524135 | NC_000002.11 |
| cg02794451 | 2.66E-06 | 4.06E-07 | 5.24 | 5.3692207 | 1.45E-01 | 2800446   | 2800569   | NC_000012.11 |
| cg18562759 | 2.66E-06 | 4.06E-07 | 5.24 | 5.368401  | 5.13E-02 | 56809497  | 56809620  | NC_000003.11 |
| cg26230674 | 2.67E-06 | 4.06E-07 | 5.24 | 5.3676001 | 1.02E-01 | 17982925  | 17983048  | NC_000019.9  |
| cg03914735 | 2.67E-06 | 4.06E-07 | 5.24 | 5.3674696 | 5.79E-02 | 140953689 | 140953812 | NC_000003.11 |
| cg24058732 | 2.67E-06 | 4.06E-07 | 5.24 | 5.3673089 | 1.11E-01 | 177004998 | 177005121 | NC_000002.11 |
| cg18489945 | 2.67E-06 | 4.06E-07 | 5.24 | 5.3669638 | 1.17E-01 | 60294398  | 60294521  | NC_000015.9  |
| cg12751565 | 2.67E-06 | 4.07E-07 | 5.24 | 5.3666866 | 1.26E-01 | 207119987 | 207120110 | NC_000001.10 |
| cg01830883 | 2.67E-06 | 4.07E-07 | 5.24 | 5.366659  | 6.21E-02 | 3557942   | 3558065   | NC_000001.10 |
| cg06915524 | 2.67E-06 | 4.07E-07 | 5.24 | 5.3662097 | 5.07E-02 | 159049869 | 159049992 | NC_000006.11 |
| cg08530537 | 2.67E-06 | 4.07E-07 | 5.24 | 5.3651408 | 7.55E-02 | 68014374  | 68014497  | NC_000016.9  |
| cg00357546 | 2.67E-06 | 4.07E-07 | 5.24 | 5.3649038 | 7.53E-02 | 135032154 | 135032277 | NC_000010.10 |
| cg03259494 | 2.67E-06 | 4.07E-07 | 5.24 | 5.3647804 | 1.61E-01 | 47307743  | 47307866  | NC_000017.10 |
| cg06866712 | 2.67E-06 | 4.07E-07 | 5.24 | 5.3646792 | 4.13E-02 | 18743898  | 18744021  | NC_000008.10 |
| cg25749267 | 2.67E-06 | 4.08E-07 | 5.24 | 5.3644144 | 1.40E-01 | 1705029   | 1705152   | NC_000007.13 |
| cg01166071 | 2.67E-06 | 4.08E-07 | 5.24 | 5.3644069 | 1.71E-01 | 8095687   | 8095810   | NC_000010.10 |
| cg22649289 | 2.67E-06 | 4.08E-07 | 5.24 | 5.3642865 | 6.66E-02 | 582568    | 582691    | NC_000002.11 |
| cg08646202 | 2.67E-06 | 4.08E-07 | 5.24 | 5.3640278 | 4.51E-02 | 111692209 | 111692332 | NC_000011.9  |
| cg02392179 | 2.68E-06 | 4.09E-07 | 5.24 | 5.3620341 | 1.35E-01 | 106400114 | 106400237 | NC_000010.10 |
| cg19373290 | 2.68E-06 | 4.09E-07 | 5.24 | 5.3620329 | 6.34E-02 | 134738298 | 134738421 | NC_000010.10 |
| cg14169333 | 2.68E-06 | 4.09E-07 | 5.24 | 5.3619694 | 1.67E-01 | 96721468  | 96721591  | NC_000009.11 |
| cg17711527 | 2.68E-06 | 4.09E-07 | 5.24 | 5.3619426 | 8.86E-02 | 203734396 | 203734519 | NC_000001.10 |

|            |          |          |      |           |          |           |           |              |
|------------|----------|----------|------|-----------|----------|-----------|-----------|--------------|
| cg08690159 | 2.68E-06 | 4.09E-07 | 5.24 | 5.3619326 | 6.51E-02 | 3689565   | 3689688   | NC_000002.11 |
| cg23362032 | 2.68E-06 | 4.09E-07 | 5.24 | 5.3616177 | 8.73E-02 | 126990845 | 126990968 | NC_000007.13 |
| cg02971654 | 2.68E-06 | 4.09E-07 | 5.24 | 5.3603003 | 1.17E-01 | 79745343  | 79745466  | NC_000014.8  |
| cg16955704 | 2.69E-06 | 4.10E-07 | 5.24 | 5.3597161 | 9.77E-02 | 656994    | 657117    | NC_000004.11 |
| cg18861112 | 2.69E-06 | 4.10E-07 | 5.24 | 5.3595138 | 1.29E-01 | 52239835  | 52239958  | NC_000013.10 |
| cg11206167 | 2.69E-06 | 4.10E-07 | 5.24 | 5.3594787 | 8.28E-02 | 42924367  | 42924490  | NC_000005.9  |
| cg09063765 | 2.69E-06 | 4.10E-07 | 5.24 | 5.3592801 | 2.11E-02 | 113763326 | 113763449 | NC_000002.11 |
| cg16134191 | 2.69E-06 | 4.10E-07 | 5.24 | 5.3590162 | 9.71E-02 | 31847509  | 31847632  | NC_000011.9  |
| cg03468072 | 2.69E-06 | 4.10E-07 | 5.24 | 5.3584325 | 1.04E-01 | 39539422  | 39539545  | NC_000012.11 |
| cg18965620 | 2.69E-06 | 4.10E-07 | 5.24 | 5.3583037 | 2.35E-02 | 180144025 | 180144148 | NC_000001.10 |
| cg15002294 | 2.69E-06 | 4.10E-07 | 5.24 | 5.3582057 | 1.61E-01 | 147126444 | 147126567 | NC_000003.11 |
| cg25274275 | 2.69E-06 | 4.10E-07 | 5.24 | 5.3579003 | 7.13E-02 | 233217617 | 233217740 | NC_000002.11 |
| cg07750560 | 2.69E-06 | 4.11E-07 | 5.24 | 5.3572581 | 1.03E-01 | 53561973  | 53562096  | NC_000019.9  |
| cg00831126 | 2.69E-06 | 4.11E-07 | 5.24 | 5.3569203 | 1.13E-01 | 56605325  | 56605448  | NC_000007.13 |
| cg02251663 | 2.69E-06 | 4.11E-07 | 5.24 | 5.3562156 | 9.35E-02 | 14281053  | 14281176  | NC_000011.9  |
| cg12359895 | 2.69E-06 | 4.11E-07 | 5.24 | 5.3558919 | 3.50E-02 | 4697267   | 4697390   | NC_000010.10 |
| cg22079149 | 2.70E-06 | 4.12E-07 | 5.24 | 5.3547109 | 5.33E-02 | 241568656 | 241568779 | NC_000002.11 |
| cg06749053 | 2.70E-06 | 4.12E-07 | 5.24 | 5.3543294 | 1.47E-01 | 121971219 | 121971342 | NC_000011.9  |
| cg03854025 | 2.70E-06 | 4.12E-07 | 5.24 | 5.3542574 | 1.25E-01 | 73753087  | 73753210  | NC_000004.11 |
| cg06555093 | 2.70E-06 | 4.12E-07 | 5.24 | 5.3536914 | 5.38E-02 | 43221380  | 43221503  | NC_000021.8  |
| cg14852134 | 2.70E-06 | 4.12E-07 | 5.24 | 5.353666  | 1.57E-01 | 13200748  | 13200871  | NC_000020.10 |
| cg20162381 | 2.70E-06 | 4.12E-07 | 5.24 | 5.3528813 | 1.45E-01 | 3310097   | 3310220   | NC_000012.11 |
| cg17214023 | 2.70E-06 | 4.12E-07 | 5.24 | 5.3527461 | 1.10E-01 | 10176748  | 10176871  | NC_000002.11 |
| cg07537739 | 2.70E-06 | 4.13E-07 | 5.24 | 5.352296  | 1.24E-01 | 53446528  | 53446651  | NC_000018.9  |
| cg10582827 | 2.70E-06 | 4.13E-07 | 5.24 | 5.3520976 | 1.16E-01 | 28584464  | 28584587  | NC_000006.11 |

|            |          |          |      |           |          |           |           |              |
|------------|----------|----------|------|-----------|----------|-----------|-----------|--------------|
| cg15613014 | 2.70E-06 | 4.13E-07 | 5.24 | 5.3520921 | 7.27E-02 | 158151204 | 158151327 | NC_000001.10 |
| cg23597264 | 2.71E-06 | 4.13E-07 | 5.24 | 5.3518854 | 6.46E-02 | 579667    | 579790    | NC_000002.11 |
| cg12101354 | 2.71E-06 | 4.13E-07 | 5.24 | 5.3518603 | 8.47E-02 | 20622652  | 20622775  | NC_000011.9  |
| cg16263005 | 2.71E-06 | 4.13E-07 | 5.24 | 5.3515085 | 5.06E-02 | 139766406 | 139766529 | NC_000004.11 |
| cg20417128 | 2.71E-06 | 4.13E-07 | 5.24 | 5.3511711 | 9.18E-02 | 1690625   | 1690748   | NC_000002.11 |
| cg21210220 | 2.71E-06 | 4.13E-07 | 5.24 | 5.3503776 | 7.84E-02 | 202948038 | 202948161 | NC_000002.11 |
| cg27114026 | 2.71E-06 | 4.14E-07 | 5.24 | 5.3502594 | 1.68E-02 | 51740258  | 51740381  | NC_000012.11 |
| cg23272632 | 2.71E-06 | 4.14E-07 | 5.24 | 5.3494364 | 1.76E-01 | 77737146  | 77737269  | NC_000014.8  |
| cg07387591 | 2.71E-06 | 4.14E-07 | 5.24 | 5.3493555 | 1.34E-01 | 17208649  | 17208772  | NC_000020.10 |
| cg18671949 | 2.71E-06 | 4.14E-07 | 5.24 | 5.349148  | 1.74E-01 | 5404581   | 5404704   | NC_000017.10 |
| cg24226115 | 2.71E-06 | 4.14E-07 | 5.24 | 5.349142  | 1.49E-01 | 134000410 | 134000533 | NC_000010.10 |
| cg20863949 | 2.71E-06 | 4.14E-07 | 5.24 | 5.3488355 | 4.20E-02 | 71213618  | 71213741  | NC_000002.11 |
| cg02902261 | 2.71E-06 | 4.14E-07 | 5.24 | 5.3485076 | 7.40E-02 | 72991150  | 72991273  | NC_000007.13 |
| cg23496260 | 2.72E-06 | 4.15E-07 | 5.24 | 5.3475408 | 1.55E-01 | 17218089  | 17218212  | NC_000005.9  |
| cg15209908 | 2.72E-06 | 4.15E-07 | 5.24 | 5.3474865 | 3.06E-02 | 17247699  | 17247822  | NC_000001.10 |
| cg13895323 | 2.72E-06 | 4.15E-07 | 5.24 | 5.3474391 | 6.46E-02 | 50528641  | 50528764  | NC_000022.10 |
| cg27313201 | 2.72E-06 | 4.15E-07 | 5.24 | 5.3473626 | 9.96E-02 | 154165904 | 154166027 | NC_000001.10 |
| cg19732052 | 2.72E-06 | 4.15E-07 | 5.24 | 5.3471924 | 5.14E-02 | 111662594 | 111662717 | NC_000007.13 |
| cg00714115 | 2.72E-06 | 4.15E-07 | 5.24 | 5.3462215 | 6.12E-02 | 52954462  | 52954585  | NC_000019.9  |
| cg07283114 | 2.72E-06 | 4.16E-07 | 5.24 | 5.3451853 | 1.41E-01 | 65489065  | 65489188  | NC_000008.10 |
| cg01270424 | 2.72E-06 | 4.16E-07 | 5.24 | 5.3447736 | 1.26E-01 | 237078509 | 237078632 | NC_000002.11 |
| cg08286854 | 2.72E-06 | 4.16E-07 | 5.24 | 5.3444112 | 7.12E-02 | 39211041  | 39211164  | NC_000017.10 |
| cg08602008 | 2.72E-06 | 4.16E-07 | 5.24 | 5.3443491 | 9.57E-02 | 48076841  | 48076964  | NC_000019.9  |
| cg01417037 | 2.72E-06 | 4.16E-07 | 5.24 | 5.3443239 | 1.25E-01 | 4244675   | 4244798   | NC_000005.9  |
| cg19614698 | 2.73E-06 | 4.16E-07 | 5.24 | 5.3441145 | 1.25E-01 | 104604893 | 104605016 | NC_000014.8  |



|            |          |          |      |           |          |           |           |              |
|------------|----------|----------|------|-----------|----------|-----------|-----------|--------------|
| cg21487830 | 2.73E-06 | 4.17E-07 | 5.24 | 5.3426634 | 1.65E-02 | 48943706  | 48943829  | NC_000017.10 |
| cg10790429 | 2.73E-06 | 4.17E-07 | 5.24 | 5.3423953 | 1.05E-01 | 106974623 | 106974746 | NC_000012.11 |
| cg03457195 | 2.73E-06 | 4.17E-07 | 5.24 | 5.3416362 | 1.00E-01 | 162284206 | 162284329 | NC_000002.11 |
| cg11157253 | 2.73E-06 | 4.17E-07 | 5.24 | 5.3413478 | 8.72E-02 | 96905729  | 96905852  | NC_000015.9  |
| cg07211768 | 2.73E-06 | 4.18E-07 | 5.24 | 5.3408414 | 1.36E-01 | 115102290 | 115102413 | NC_000012.11 |
| cg07715201 | 2.74E-06 | 4.18E-07 | 5.24 | 5.3404018 | 1.22E-01 | 37840839  | 37840962  | NC_000005.9  |
| cg16104915 | 2.74E-06 | 4.18E-07 | 5.24 | 5.3400027 | 1.28E-01 | 27205217  | 27205340  | NC_000007.13 |
| cg17347178 | 2.74E-06 | 4.18E-07 | 5.24 | 5.3399848 | 6.64E-02 | 140052701 | 140052824 | NC_000005.9  |
| cg02922094 | 2.74E-06 | 4.18E-07 | 5.24 | 5.3395595 | 3.86E-02 | 113262512 | 113262635 | NC_000001.10 |
| cg06417885 | 2.74E-06 | 4.18E-07 | 5.24 | 5.3394499 | 5.23E-02 | 47108318  | 47108441  | NC_000008.10 |
| cg06111374 | 2.74E-06 | 4.18E-07 | 5.24 | 5.3390032 | 6.09E-02 | 14109584  | 14109707  | NC_000012.11 |
| cg02488338 | 2.74E-06 | 4.18E-07 | 5.24 | 5.3389899 | 1.40E-01 | 63798214  | 63798337  | NC_000005.9  |
| cg14041812 | 2.74E-06 | 4.19E-07 | 5.24 | 5.3380591 | 9.71E-02 | 169645874 | 169645997 | NC_000004.11 |
| cg07845390 | 2.74E-06 | 4.19E-07 | 5.24 | 5.3378422 | 1.66E-01 | 196577709 | 196577832 | NC_000001.10 |
| cg25598530 | 2.74E-06 | 4.19E-07 | 5.24 | 5.3372855 | 1.20E-01 | 148193376 | 148193499 | NC_000001.10 |
| cg15015143 | 2.74E-06 | 4.19E-07 | 5.24 | 5.3366169 | 4.84E-02 | 142245773 | 142245896 | NC_000005.9  |
| cg07751641 | 2.75E-06 | 4.20E-07 | 5.24 | 5.3360622 | 9.01E-02 | 134826244 | 134826367 | NC_000005.9  |
| cg16663022 | 2.75E-06 | 4.20E-07 | 5.24 | 5.3355913 | 8.97E-02 | 56429381  | 56429504  | NC_000004.11 |
| cg18418928 | 2.75E-06 | 4.20E-07 | 5.24 | 5.3355491 | 1.04E-01 | 23953778  | 23953901  | NC_000001.10 |
| cg04330874 | 2.75E-06 | 4.20E-07 | 5.24 | 5.3355201 | 7.87E-02 | 113822176 | 113822299 | NC_000011.9  |
| cg00694324 | 2.75E-06 | 4.20E-07 | 5.24 | 5.3354768 | 2.12E-02 | 16764960  | 16765083  | NC_000001.10 |
| cg10828456 | 2.75E-06 | 4.20E-07 | 5.24 | 5.3351908 | 7.94E-02 | 368847    | 368970    | NC_000011.9  |
| cg05940231 | 2.75E-06 | 4.20E-07 | 5.24 | 5.3349256 | 1.03E-01 | 119532189 | 119532312 | NC_000001.10 |
| cg21198219 | 2.75E-06 | 4.20E-07 | 5.24 | 5.3345815 | 8.15E-02 | 128558454 | 128558577 | NC_000011.9  |
| cg06395298 | 2.75E-06 | 4.20E-07 | 5.24 | 5.3341023 | 1.50E-01 | 46651225  | 46651348  | NC_000017.10 |

|            |          |          |      |           |          |           |           |              |
|------------|----------|----------|------|-----------|----------|-----------|-----------|--------------|
| cg15595573 | 2.75E-06 | 4.21E-07 | 5.24 | 5.3340959 | 1.09E-01 | 145925419 | 145925542 | NC_000008.10 |
| cg00745555 | 2.75E-06 | 4.21E-07 | 5.24 | 5.3334433 | 1.63E-01 | 135050896 | 135051019 | NC_000010.10 |
| cg06875598 | 2.75E-06 | 4.21E-07 | 5.24 | 5.3332109 | 1.00E-01 | 49297922  | 49298045  | NC_000022.10 |
| cg09300185 | 2.75E-06 | 4.21E-07 | 5.24 | 5.3327397 | 8.88E-02 | 42000079  | 42000202  | NC_000012.11 |
| cg12468377 | 2.76E-06 | 4.21E-07 | 5.24 | 5.3325724 | 6.43E-02 | 8791763   | 8791886   | NC_000017.10 |
| cg17516271 | 2.76E-06 | 4.21E-07 | 5.24 | 5.3324166 | 1.23E-01 | 66187007  | 66187130  | NC_000008.10 |
| cg04486885 | 2.76E-06 | 4.22E-07 | 5.24 | 5.3301944 | 6.05E-02 | 176823424 | 176823547 | NC_000005.9  |
| cg26869615 | 2.76E-06 | 4.23E-07 | 5.24 | 5.3294218 | 1.08E-01 | 20044639  | 20044762  | NC_000011.9  |
| cg14909842 | 2.77E-06 | 4.23E-07 | 5.24 | 5.3282929 | 5.06E-02 | 44869885  | 44870008  | NC_000021.8  |
| cg11973974 | 2.77E-06 | 4.24E-07 | 5.24 | 5.3271018 | 9.68E-02 | 37917061  | 37917184  | NC_000002.11 |
| cg08739576 | 2.77E-06 | 4.24E-07 | 5.24 | 5.3269982 | 1.01E-01 | 44144360  | 44144483  | NC_000007.13 |
| cg16658931 | 2.77E-06 | 4.24E-07 | 5.24 | 5.326363  | 1.59E-01 | 51171061  | 51171184  | NC_000019.9  |
| cg22249789 | 2.77E-06 | 4.24E-07 | 5.24 | 5.3262467 | 1.22E-01 | 63284574  | 63284697  | NC_000002.11 |
| cg17101703 | 2.77E-06 | 4.24E-07 | 5.24 | 5.3261273 | 8.88E-02 | 69793701  | 69793824  | NC_000002.11 |
| cg01496199 | 2.77E-06 | 4.24E-07 | 5.24 | 5.3261066 | 1.13E-01 | 39755181  | 39755304  | NC_000019.9  |
| cg07287401 | 2.78E-06 | 4.24E-07 | 5.23 | 5.3250927 | 4.87E-02 | 134054776 | 134054899 | NC_000010.10 |
| cg22870373 | 2.78E-06 | 4.25E-07 | 5.23 | 5.3247148 | 6.06E-02 | 1967665   | 1967788   | NC_000007.13 |
| cg03575380 | 2.78E-06 | 4.25E-07 | 5.23 | 5.3246282 | 5.06E-02 | 88262974  | 88263097  | NC_000016.9  |
| cg13918611 | 2.78E-06 | 4.25E-07 | 5.23 | 5.3240675 | 1.04E-01 | 97841998  | 97842121  | NC_000007.13 |
| cg01541443 | 2.78E-06 | 4.25E-07 | 5.23 | 5.3238613 | 2.44E-02 | 30185315  | 30185438  | NC_000007.13 |
| cg03281705 | 2.78E-06 | 4.25E-07 | 5.23 | 5.3232055 | 4.81E-02 | 41900206  | 41900329  | NC_000019.9  |
| cg12802537 | 2.78E-06 | 4.25E-07 | 5.23 | 5.3231026 | 3.17E-02 | 221870819 | 221870942 | NC_000001.10 |
| cg12765028 | 2.78E-06 | 4.25E-07 | 5.23 | 5.3230187 | 8.12E-02 | 13526659  | 13526782  | NC_000004.11 |
| cg14849423 | 2.78E-06 | 4.26E-07 | 5.23 | 5.3220393 | 6.13E-02 | 57351791  | 57351914  | NC_000019.9  |
| cg14583365 | 2.78E-06 | 4.26E-07 | 5.23 | 5.3216371 | 6.15E-02 | 132679218 | 132679341 | NC_000007.13 |

|            |          |          |      |           |          |           |           |              |
|------------|----------|----------|------|-----------|----------|-----------|-----------|--------------|
| cg19369556 | 2.78E-06 | 4.26E-07 | 5.23 | 5.3213277 | 1.26E-01 | 82661725  | 82661848  | NC_000016.9  |
| cg10814646 | 2.79E-06 | 4.26E-07 | 5.23 | 5.3210245 | 7.36E-02 | 38117644  | 38117767  | NC_000021.8  |
| cg19539568 | 2.79E-06 | 4.27E-07 | 5.23 | 5.3190609 | 4.84E-02 | 21446087  | 21446210  | NC_000014.8  |
| cg00888463 | 2.79E-06 | 4.27E-07 | 5.23 | 5.3182561 | 1.42E-01 | 106686041 | 106686164 | NC_000007.13 |
| cg11930274 | 2.79E-06 | 4.27E-07 | 5.23 | 5.3182505 | 3.51E-02 | 74879093  | 74879216  | NC_000010.10 |
| cg00031491 | 2.79E-06 | 4.27E-07 | 5.23 | 5.3181058 | 4.58E-02 | 31837439  | 31837562  | NC_000006.11 |
| cg19063564 | 2.79E-06 | 4.28E-07 | 5.23 | 5.317828  | 1.48E-01 | 22019059  | 22019182  | NC_000019.9  |
| cg15888569 | 2.80E-06 | 4.28E-07 | 5.23 | 5.3173865 | 6.05E-02 | 15033042  | 15033165  | NC_000004.11 |
| cg07555437 | 2.80E-06 | 4.28E-07 | 5.23 | 5.317351  | 7.51E-02 | 45279830  | 45279953  | NC_000020.10 |
| cg08693082 | 2.80E-06 | 4.28E-07 | 5.23 | 5.3170639 | 5.93E-02 | 128851969 | 128852092 | NC_000002.11 |
| cg02799448 | 2.80E-06 | 4.28E-07 | 5.23 | 5.3170279 | 1.03E-01 | 137817008 | 137817131 | NC_000006.11 |
| cg02381898 | 2.80E-06 | 4.28E-07 | 5.23 | 5.3167922 | 1.41E-01 | 54970175  | 54970298  | NC_000004.11 |
| cg00730561 | 2.80E-06 | 4.28E-07 | 5.23 | 5.3162575 | 9.66E-02 | 102279703 | 102279826 | NC_000010.10 |
| cg08115618 | 2.80E-06 | 4.28E-07 | 5.23 | 5.3160122 | 9.47E-02 | 134667555 | 134667678 | NC_000008.10 |
| cg23052669 | 2.80E-06 | 4.29E-07 | 5.23 | 5.3157966 | 4.81E-02 | 65765487  | 65765610  | NC_000011.9  |
| cg03495768 | 2.80E-06 | 4.29E-07 | 5.23 | 5.3153435 | 1.68E-01 | 100637113 | 100637236 | NC_000013.10 |
| cg21570988 | 2.80E-06 | 4.29E-07 | 5.23 | 5.315164  | 1.09E-01 | 32116841  | 32116964  | NC_000006.11 |
| cg14544831 | 2.80E-06 | 4.29E-07 | 5.23 | 5.3144322 | 1.11E-01 | 60985269  | 60985392  | NC_000018.9  |
| cg01127020 | 2.80E-06 | 4.29E-07 | 5.23 | 5.3143896 | 4.78E-02 | 185457334 | 185457457 | NC_000003.11 |
| cg07431122 | 2.80E-06 | 4.29E-07 | 5.23 | 5.3140888 | 3.56E-02 | 141733120 | 141733243 | NC_000005.9  |
| cg15652873 | 2.80E-06 | 4.29E-07 | 5.23 | 5.3138565 | 9.64E-02 | 129427178 | 129427301 | NC_000012.11 |
| cg00480381 | 2.81E-06 | 4.30E-07 | 5.23 | 5.3134769 | 8.79E-02 | 7382796   | 7382919   | NC_000016.9  |
| cg01196517 | 2.81E-06 | 4.30E-07 | 5.23 | 5.3121609 | 1.12E-01 | 28642394  | 28642517  | NC_000006.11 |
| cg04521867 | 2.81E-06 | 4.30E-07 | 5.23 | 5.3120925 | 7.66E-02 | 41054942  | 41055065  | NC_000019.9  |
| cg06118116 | 2.81E-06 | 4.30E-07 | 5.23 | 5.311799  | 9.63E-02 | 228336171 | 228336294 | NC_000002.11 |

|            |          |          |      |           |          |           |           |              |
|------------|----------|----------|------|-----------|----------|-----------|-----------|--------------|
| cg14762289 | 2.81E-06 | 4.30E-07 | 5.23 | 5.3115514 | 1.07E-01 | 55305648  | 55305771  | NC_000003.11 |
| cg20186445 | 2.81E-06 | 4.31E-07 | 5.23 | 5.3112167 | 1.38E-01 | 48439220  | 48439343  | NC_000010.10 |
| cg27160348 | 2.81E-06 | 4.31E-07 | 5.23 | 5.3108347 | 8.66E-02 | 32729590  | 32729713  | NC_000006.11 |
| cg19743686 | 2.81E-06 | 4.31E-07 | 5.23 | 5.3105557 | 6.49E-02 | 2637301   | 2637424   | NC_000006.11 |
| cg01572513 | 2.81E-06 | 4.31E-07 | 5.23 | 5.3104317 | 1.43E-01 | 147557859 | 147557982 | NC_000004.11 |
| cg14279856 | 2.82E-06 | 4.31E-07 | 5.23 | 5.3091508 | 1.16E-01 | 30851086  | 30851209  | NC_000006.11 |
| cg13434352 | 2.82E-06 | 4.32E-07 | 5.23 | 5.308836  | 8.39E-02 | 101471921 | 101472044 | NC_000009.11 |
| cg18984452 | 2.82E-06 | 4.32E-07 | 5.23 | 5.3086457 | 9.94E-02 | 1046103   | 1046226   | NC_000009.11 |
| cg19418958 | 2.82E-06 | 4.32E-07 | 5.23 | 5.3085245 | 1.09E-01 | 30705886  | 30706009  | NC_000008.10 |
| cg12187624 | 2.82E-06 | 4.32E-07 | 5.23 | 5.3084466 | 4.09E-02 | 13226110  | 13226233  | NC_000019.9  |
| cg03894891 | 2.82E-06 | 4.32E-07 | 5.23 | 5.3069165 | 1.21E-01 | 1308483   | 1308606   | NC_000007.13 |
| cg18210732 | 2.82E-06 | 4.32E-07 | 5.23 | 5.3068429 | 1.61E-01 | 69518545  | 69518668  | NC_000011.9  |
| cg25588826 | 2.82E-06 | 4.33E-07 | 5.23 | 5.3066663 | 6.08E-02 | 7755583   | 7755706   | NC_000017.10 |
| cg19385628 | 2.82E-06 | 4.33E-07 | 5.23 | 5.3064369 | 1.14E-01 | 6904640   | 6904763   | NC_000003.11 |
| cg20307302 | 2.83E-06 | 4.33E-07 | 5.23 | 5.3061619 | 1.53E-01 | 133484621 | 133484744 | NC_000012.11 |
| cg27432847 | 2.83E-06 | 4.33E-07 | 5.23 | 5.3060647 | 1.35E-01 | 113444372 | 113444495 | NC_000004.11 |
| cg08409953 | 2.83E-06 | 4.33E-07 | 5.23 | 5.3055911 | 3.47E-02 | 130463629 | 130463752 | NC_000003.11 |
| cg09663494 | 2.83E-06 | 4.33E-07 | 5.23 | 5.3048749 | 3.79E-02 | 67223733  | 67223856  | NC_000016.9  |
| cg14923157 | 2.83E-06 | 4.34E-07 | 5.23 | 5.3039972 | 1.41E-01 | 17138063  | 17138186  | NC_000019.9  |
| cg17466636 | 2.83E-06 | 4.34E-07 | 5.23 | 5.3035626 | 8.79E-02 | 10456284  | 10456407  | NC_000002.11 |
| cg05215806 | 2.83E-06 | 4.34E-07 | 5.23 | 5.3032318 | 1.69E-01 | 31842272  | 31842395  | NC_000019.9  |
| cg05376405 | 2.83E-06 | 4.34E-07 | 5.23 | 5.3027204 | 5.40E-02 | 67225165  | 67225288  | NC_000016.9  |
| cg00208153 | 2.84E-06 | 4.35E-07 | 5.23 | 5.3022919 | 1.57E-01 | 58206058  | 58206181  | NC_000013.10 |
| cg07279752 | 2.84E-06 | 4.35E-07 | 5.23 | 5.3020996 | 5.37E-02 | 95031075  | 95031198  | NC_000008.10 |
| cg11934394 | 2.84E-06 | 4.35E-07 | 5.23 | 5.3020553 | 7.72E-02 | 53215390  | 53215513  | NC_000012.11 |

|            |          |          |      |           |          |           |           |              |
|------------|----------|----------|------|-----------|----------|-----------|-----------|--------------|
| cg07279933 | 2.84E-06 | 4.35E-07 | 5.23 | 5.3006911 | 1.84E-01 | 127440413 | 127440536 | NC_000006.11 |
| cg18502829 | 2.84E-06 | 4.35E-07 | 5.23 | 5.3005889 | 8.77E-02 | 31967526  | 31967649  | NC_000017.10 |
| cg04368939 | 2.84E-06 | 4.35E-07 | 5.23 | 5.3003127 | 6.36E-02 | 103588914 | 103589037 | NC_000010.10 |
| cg26279336 | 2.84E-06 | 4.35E-07 | 5.23 | 5.3003108 | 1.74E-01 | 46674438  | 46674561  | NC_000017.10 |
| cg13548587 | 2.84E-06 | 4.36E-07 | 5.23 | 5.2999501 | 4.10E-02 | 72798948  | 72799071  | NC_000003.11 |
| cg10572951 | 2.84E-06 | 4.36E-07 | 5.23 | 5.2997291 | 3.87E-02 | 154744863 | 154744986 | NC_000001.10 |
| cg10761085 | 2.84E-06 | 4.36E-07 | 5.23 | 5.2992121 | 3.35E-02 | 3313527   | 3313650   | NC_000002.11 |
| cg26196087 | 2.85E-06 | 4.36E-07 | 5.23 | 5.2984477 | 6.93E-02 | 120530251 | 120530374 | NC_000001.10 |
| cg08696727 | 2.85E-06 | 4.36E-07 | 5.23 | 5.298108  | 1.95E-01 | 28034797  | 28034920  | NC_000010.10 |
| cg08003732 | 2.85E-06 | 4.37E-07 | 5.23 | 5.2976911 | 7.13E-02 | 7023752   | 7023875   | NC_000012.11 |
| cg26969652 | 2.85E-06 | 4.37E-07 | 5.23 | 5.2963613 | 5.90E-02 | 52783890  | 52784013  | NC_000008.10 |
| cg17588578 | 2.85E-06 | 4.37E-07 | 5.23 | 5.2963583 | 9.36E-02 | 140723583 | 140723706 | NC_000005.9  |
| cg08502239 | 2.85E-06 | 4.37E-07 | 5.23 | 5.2963268 | 8.96E-02 | 9808122   | 9808245   | NC_000017.10 |
| cg01615018 | 2.85E-06 | 4.37E-07 | 5.23 | 5.2961248 | 1.37E-01 | 54393550  | 54393673  | NC_000012.11 |
| cg21131022 | 2.85E-06 | 4.38E-07 | 5.23 | 5.2955021 | 1.06E-01 | 19371974  | 19372097  | NC_000019.9  |
| cg01729125 | 2.85E-06 | 4.38E-07 | 5.23 | 5.2954347 | 4.33E-02 | 78996164  | 78996287  | NC_000004.11 |
| cg09563325 | 2.85E-06 | 4.38E-07 | 5.23 | 5.294982  | 4.88E-02 | 34809256  | 34809379  | NC_000016.9  |
| cg18714498 | 2.86E-06 | 4.38E-07 | 5.23 | 5.294358  | 1.05E-01 | 230578312 | 230578435 | NC_000002.11 |
| cg17404981 | 2.86E-06 | 4.38E-07 | 5.23 | 5.294032  | 9.17E-02 | 1240264   | 1240387   | NC_000004.11 |
| cg14037728 | 2.86E-06 | 4.39E-07 | 5.23 | 5.2930938 | 8.84E-02 | 116645936 | 116646059 | NC_000009.11 |
| cg11906444 | 2.86E-06 | 4.39E-07 | 5.23 | 5.29309   | 1.00E-01 | 43858174  | 43858297  | NC_000019.9  |
| cg02712553 | 2.86E-06 | 4.39E-07 | 5.23 | 5.2922455 | 3.96E-02 | 64136038  | 64136161  | NC_000010.10 |
| cg08421080 | 2.86E-06 | 4.39E-07 | 5.23 | 5.2918273 | 7.40E-02 | 130963378 | 130963501 | NC_000012.11 |
| cg08402365 | 2.86E-06 | 4.39E-07 | 5.23 | 5.2913992 | 1.44E-01 | 172945274 | 172945397 | NC_000002.11 |
| cg02309841 | 2.87E-06 | 4.40E-07 | 5.23 | 5.2910688 | 1.05E-01 | 11758425  | 11758548  | NC_000003.11 |

|            |          |          |      |           |          |           |           |              |
|------------|----------|----------|------|-----------|----------|-----------|-----------|--------------|
| cg22110273 | 2.87E-06 | 4.40E-07 | 5.23 | 5.2904794 | 1.35E-01 | 138606909 | 138607032 | NC_000009.11 |
| cg01558212 | 2.87E-06 | 4.40E-07 | 5.23 | 5.2896375 | 1.23E-01 | 200327336 | 200327459 | NC_000002.11 |
| cg23546474 | 2.87E-06 | 4.40E-07 | 5.23 | 5.2892735 | 1.32E-01 | 223163033 | 223163156 | NC_000002.11 |
| cg15424739 | 2.87E-06 | 4.41E-07 | 5.23 | 5.2886921 | 1.84E-01 | 18901666  | 18901789  | NC_000019.9  |
| cg19859270 | 2.87E-06 | 4.41E-07 | 5.23 | 5.2878907 | 4.45E-02 | 98251294  | 98251417  | NC_000003.11 |
| cg04694812 | 2.87E-06 | 4.41E-07 | 5.23 | 5.2875853 | 1.19E-01 | 63257554  | 63257677  | NC_000005.9  |
| cg15270892 | 2.87E-06 | 4.41E-07 | 5.23 | 5.2875552 | 1.24E-01 | 27762352  | 27762475  | NC_000003.11 |
| cg16694007 | 2.88E-06 | 4.42E-07 | 5.23 | 5.28684   | 4.62E-02 | 53638692  | 53638815  | NC_000017.10 |
| cg16318112 | 2.88E-06 | 4.42E-07 | 5.23 | 5.2848352 | 1.21E-01 | 969254    | 969377    | NC_000001.10 |
| cg23920953 | 2.88E-06 | 4.42E-07 | 5.23 | 5.2848301 | 1.52E-01 | 70038505  | 70038628  | NC_000014.8  |
| cg26318502 | 2.88E-06 | 4.42E-07 | 5.23 | 5.2848291 | 5.68E-02 | 172152291 | 172152414 | NC_000005.9  |
| cg20367479 | 2.88E-06 | 4.42E-07 | 5.23 | 5.2847478 | 5.03E-02 | 171873675 | 171873798 | NC_000003.11 |
| cg23643568 | 2.88E-06 | 4.42E-07 | 5.23 | 5.2847219 | 4.82E-02 | 33170779  | 33170902  | NC_000006.11 |
| cg23203969 | 2.88E-06 | 4.43E-07 | 5.23 | 5.2841022 | 9.17E-02 | 3726328   | 3726451   | NC_000020.10 |
| cg23534802 | 2.89E-06 | 4.44E-07 | 5.23 | 5.2813782 | 7.80E-02 | 28555742  | 28555865  | NC_000006.11 |
| cg01414464 | 2.89E-06 | 4.44E-07 | 5.23 | 5.2812677 | 1.05E-01 | 113695858 | 113695981 | NC_000005.9  |
| cg01136848 | 2.89E-06 | 4.44E-07 | 5.23 | 5.2812431 | 4.77E-02 | 51535487  | 51535610  | NC_000003.11 |
| cg23429510 | 2.89E-06 | 4.44E-07 | 5.23 | 5.2811475 | 1.20E-01 | 176936942 | 176937065 | NC_000002.11 |
| cg06868946 | 2.89E-06 | 4.44E-07 | 5.23 | 5.2809767 | 8.66E-02 | 56015785  | 56015908  | NC_000008.10 |
| cg16624994 | 2.90E-06 | 4.45E-07 | 5.23 | 5.2800425 | 7.30E-02 | 14816426  | 14816549  | NC_000010.10 |
| cg09866712 | 2.90E-06 | 4.45E-07 | 5.23 | 5.2800159 | 2.49E-02 | 24673830  | 24673953  | NC_000014.8  |
| cg21820890 | 2.90E-06 | 4.45E-07 | 5.23 | 5.2795661 | 7.20E-02 | 74714375  | 74714498  | NC_000010.10 |
| cg24912023 | 2.90E-06 | 4.45E-07 | 5.22 | 5.2790157 | 9.29E-02 | 110979750 | 110979873 | NC_000002.11 |
| cg01962727 | 2.90E-06 | 4.45E-07 | 5.22 | 5.2789942 | 6.41E-02 | 46603059  | 46603182  | NC_000016.9  |
| cg00006787 | 2.90E-06 | 4.45E-07 | 5.22 | 5.2789353 | 5.19E-02 | 110533441 | 110533564 | NC_000013.10 |

|            |          |          |      |           |          |           |           |              |
|------------|----------|----------|------|-----------|----------|-----------|-----------|--------------|
| cg14792959 | 2.90E-06 | 4.45E-07 | 5.22 | 5.2788945 | 7.37E-02 | 34263159  | 34263282  | NC_000019.9  |
| cg25032336 | 2.90E-06 | 4.45E-07 | 5.22 | 5.2787428 | 1.37E-01 | 134068592 | 134068715 | NC_000004.11 |
| cg04220230 | 2.90E-06 | 4.45E-07 | 5.22 | 5.2781583 | 3.78E-02 | 52215551  | 52215674  | NC_000014.8  |
| cg27357918 | 2.90E-06 | 4.46E-07 | 5.22 | 5.2775398 | 1.19E-01 | 645256    | 645379    | NC_000004.11 |
| cg26857521 | 2.90E-06 | 4.46E-07 | 5.22 | 5.2772224 | 7.16E-02 | 2350123   | 2350246   | NC_000001.10 |
| cg02328010 | 2.90E-06 | 4.46E-07 | 5.22 | 5.2770836 | 1.12E-01 | 237206482 | 237206605 | NC_000001.10 |
| cg03694415 | 2.90E-06 | 4.46E-07 | 5.22 | 5.2768857 | 3.80E-02 | 47549635  | 47549758  | NC_000021.8  |
| cg09054649 | 2.91E-06 | 4.46E-07 | 5.22 | 5.2762132 | 5.52E-02 | 162758241 | 162758364 | NC_000005.9  |
| cg05854644 | 2.91E-06 | 4.46E-07 | 5.22 | 5.2761446 | 1.63E-01 | 26699187  | 26699310  | NC_000017.10 |
| cg10226527 | 2.91E-06 | 4.47E-07 | 5.22 | 5.2757314 | 3.75E-02 | 779605    | 779728    | NC_000016.9  |
| cg09168805 | 2.91E-06 | 4.47E-07 | 5.22 | 5.2752136 | 7.42E-02 | 94514548  | 94514671  | NC_000001.10 |
| cg03555914 | 2.91E-06 | 4.47E-07 | 5.22 | 5.2751793 | 3.50E-02 | 121554810 | 121554933 | NC_000002.11 |
| cg21002146 | 2.91E-06 | 4.47E-07 | 5.22 | 5.2751637 | 1.23E-01 | 92303622  | 92303745  | NC_000014.8  |
| cg00700008 | 2.91E-06 | 4.47E-07 | 5.22 | 5.2746068 | 5.61E-02 | 120138107 | 120138230 | NC_000004.11 |
| cg23943476 | 2.91E-06 | 4.48E-07 | 5.22 | 5.2736804 | 9.67E-02 | 26825295  | 26825418  | NC_000017.10 |
| cg04920385 | 2.91E-06 | 4.48E-07 | 5.22 | 5.2734466 | 8.50E-02 | 81171149  | 81171272  | NC_000010.10 |
| cg02793099 | 2.91E-06 | 4.48E-07 | 5.22 | 5.2733873 | 8.05E-02 | 57350004  | 57350127  | NC_000019.9  |
| cg09032487 | 2.92E-06 | 4.48E-07 | 5.22 | 5.2726051 | 2.17E-02 | 40716584  | 40716707  | NC_000017.10 |
| cg06797385 | 2.92E-06 | 4.48E-07 | 5.22 | 5.2721963 | 9.51E-02 | 30018105  | 30018228  | NC_000016.9  |
| cg12593515 | 2.92E-06 | 4.48E-07 | 5.22 | 5.2716615 | 8.86E-02 | 22233159  | 22233282  | NC_000007.13 |
| cg09632907 | 2.92E-06 | 4.49E-07 | 5.22 | 5.2710951 | 1.23E-01 | 54969963  | 54970086  | NC_000004.11 |
| cg02436605 | 2.92E-06 | 4.49E-07 | 5.22 | 5.2705787 | 9.00E-02 | 146125223 | 146125346 | NC_000008.10 |
| cg00754617 | 2.92E-06 | 4.49E-07 | 5.22 | 5.2702865 | 4.39E-02 | 49109288  | 49109411  | NC_000019.9  |
| cg05052450 | 2.92E-06 | 4.49E-07 | 5.22 | 5.2702412 | 1.26E-01 | 147140118 | 147140241 | NC_000003.11 |
| cg11792285 | 2.93E-06 | 4.50E-07 | 5.22 | 5.2684039 | 9.58E-02 | 240968949 | 240969072 | NC_000002.11 |

|            |          |          |      |           |          |           |           |              |
|------------|----------|----------|------|-----------|----------|-----------|-----------|--------------|
| cg21684654 | 2.93E-06 | 4.50E-07 | 5.22 | 5.2676832 | 7.89E-02 | 100203651 | 100203774 | NC_000007.13 |
| cg14455170 | 2.93E-06 | 4.50E-07 | 5.22 | 5.2675644 | 1.55E-01 | 42002398  | 42002521  | NC_000013.10 |
| cg19417549 | 2.93E-06 | 4.50E-07 | 5.22 | 5.2674937 | 2.67E-02 | 59067502  | 59067625  | NC_000019.9  |
| cg17420983 | 2.93E-06 | 4.51E-07 | 5.22 | 5.2670207 | 1.53E-01 | 111471202 | 111471325 | NC_000012.11 |
| cg11284316 | 2.93E-06 | 4.51E-07 | 5.22 | 5.2669835 | 1.74E-01 | 210636398 | 210636521 | NC_000002.11 |
| cg17105609 | 2.93E-06 | 4.51E-07 | 5.22 | 5.2669747 | 2.07E-02 | 1006237   | 1006360   | NC_000004.11 |
| cg12146232 | 2.93E-06 | 4.51E-07 | 5.22 | 5.266712  | 3.58E-02 | 231854635 | 231854758 | NC_000002.11 |
| cg21483929 | 2.93E-06 | 4.51E-07 | 5.22 | 5.2660324 | 3.81E-02 | 20392406  | 20392529  | NC_000013.10 |
| cg01157146 | 2.94E-06 | 4.52E-07 | 5.22 | 5.2645004 | 1.11E-01 | 42877638  | 42877761  | NC_000021.8  |
| cg19111906 | 2.94E-06 | 4.52E-07 | 5.22 | 5.2639596 | 3.16E-02 | 67816846  | 67816969  | NC_000011.9  |
| cg23693548 | 2.94E-06 | 4.52E-07 | 5.22 | 5.2638108 | 3.39E-02 | 202804464 | 202804587 | NC_000001.10 |
| cg09722826 | 2.94E-06 | 4.52E-07 | 5.22 | 5.2633396 | 6.60E-02 | 50780248  | 50780371  | NC_000016.9  |
| cg12078229 | 2.94E-06 | 4.53E-07 | 5.22 | 5.2624218 | 1.06E-01 | 19245687  | 19245810  | NC_000019.9  |
| cg02172533 | 2.95E-06 | 4.53E-07 | 5.22 | 5.2616469 | 3.49E-02 | 32978593  | 32978716  | NC_000006.11 |
| cg26582733 | 2.95E-06 | 4.53E-07 | 5.22 | 5.26134   | 1.43E-01 | 47547707  | 47547830  | NC_000017.10 |
| cg20247911 | 2.95E-06 | 4.53E-07 | 5.22 | 5.2610967 | 1.26E-01 | 2124618   | 2124741   | NC_000002.11 |
| cg18461362 | 2.95E-06 | 4.54E-07 | 5.22 | 5.2600615 | 4.59E-02 | 47866784  | 47866907  | NC_000008.10 |
| cg18117403 | 2.95E-06 | 4.54E-07 | 5.22 | 5.2597169 | 7.24E-02 | 229114792 | 229114915 | NC_000001.10 |
| cg06740354 | 2.95E-06 | 4.54E-07 | 5.22 | 5.2594913 | 1.21E-02 | 40265795  | 40265918  | NC_000017.10 |
| cg24590723 | 2.95E-06 | 4.54E-07 | 5.22 | 5.2592554 | 1.00E-01 | 54355910  | 54356033  | NC_000003.11 |
| cg25536137 | 2.96E-06 | 4.55E-07 | 5.22 | 5.2579678 | 1.30E-01 | 8094142   | 8094265   | NC_000010.10 |
| cg13434638 | 2.96E-06 | 4.55E-07 | 5.22 | 5.2576849 | 1.75E-01 | 68723690  | 68723813  | NC_000015.9  |
| cg21077049 | 2.96E-06 | 4.55E-07 | 5.22 | 5.2573484 | 7.04E-02 | 96132850  | 96132973  | NC_000007.13 |
| cg10019507 | 2.96E-06 | 4.55E-07 | 5.22 | 5.2573266 | 6.58E-02 | 23016315  | 23016438  | NC_000020.10 |
| cg26540367 | 2.96E-06 | 4.55E-07 | 5.22 | 5.2569896 | 1.35E-01 | 215864    | 215987    | NC_000016.9  |



|            |          |          |      |           |          |           |           |              |
|------------|----------|----------|------|-----------|----------|-----------|-----------|--------------|
| cg20700460 | 2.96E-06 | 4.56E-07 | 5.22 | 5.2563216 | 1.19E-01 | 7130299   | 7130422   | NC_000001.10 |
| cg18388552 | 2.96E-06 | 4.56E-07 | 5.22 | 5.2560494 | 1.23E-01 | 28677272  | 28677395  | NC_000006.11 |
| cg17276590 | 2.96E-06 | 4.56E-07 | 5.22 | 5.2559043 | 1.84E-01 | 119304487 | 119304610 | NC_000010.10 |
| cg15135047 | 2.97E-06 | 4.56E-07 | 5.22 | 5.2550524 | 1.45E-01 | 72149514  | 72149637  | NC_000003.11 |
| cg16783571 | 2.97E-06 | 4.57E-07 | 5.22 | 5.2543844 | 7.50E-02 | 74064594  | 74064717  | NC_000006.11 |
| cg20432507 | 2.97E-06 | 4.57E-07 | 5.22 | 5.2541476 | 1.23E-01 | 21689861  | 21689984  | NC_000020.10 |
| cg25107522 | 2.97E-06 | 4.57E-07 | 5.22 | 5.2537601 | 6.10E-02 | 234297039 | 234297162 | NC_000002.11 |
| cg02177231 | 2.97E-06 | 4.57E-07 | 5.22 | 5.2536782 | 1.81E-01 | 119529930 | 119530053 | NC_000001.10 |
| cg07919108 | 2.97E-06 | 4.57E-07 | 5.22 | 5.2531055 | 1.30E-01 | 102984661 | 102984784 | NC_000010.10 |
| cg15945754 | 2.97E-06 | 4.57E-07 | 5.22 | 5.2528838 | 4.24E-02 | 118973695 | 118973818 | NC_000006.11 |
| cg27390220 | 2.97E-06 | 4.57E-07 | 5.22 | 5.2528837 | 8.04E-02 | 45268523  | 45268646  | NC_000003.11 |
| cg04148002 | 2.97E-06 | 4.57E-07 | 5.22 | 5.2524618 | 1.03E-01 | 102484475 | 102484598 | NC_000010.10 |
| cg08833952 | 2.97E-06 | 4.57E-07 | 5.22 | 5.2524316 | 4.90E-02 | 22469457  | 22469580  | NC_000022.10 |
| cg22928405 | 2.97E-06 | 4.58E-07 | 5.22 | 5.2518925 | 2.07E-02 | 127523174 | 127523297 | NC_000003.11 |
| cg05870739 | 2.97E-06 | 4.58E-07 | 5.22 | 5.2518022 | 1.37E-01 | 140800586 | 140800709 | NC_000005.9  |
| cg04487904 | 2.98E-06 | 4.58E-07 | 5.22 | 5.2515236 | 3.83E-02 | 176693341 | 176693464 | NC_000005.9  |
| cg08155249 | 2.98E-06 | 4.58E-07 | 5.22 | 5.2514206 | 9.92E-02 | 72919936  | 72920059  | NC_000005.9  |
| cg03615683 | 2.98E-06 | 4.58E-07 | 5.22 | 5.250847  | 3.35E-02 | 48156576  | 48156699  | NC_000012.11 |
| cg26473301 | 2.98E-06 | 4.59E-07 | 5.22 | 5.2502576 | 5.16E-02 | 37695738  | 37695861  | NC_000021.8  |
| cg17033810 | 2.98E-06 | 4.59E-07 | 5.22 | 5.2496731 | 6.05E-02 | 71805533  | 71805656  | NC_000005.9  |
| cg05313794 | 2.98E-06 | 4.59E-07 | 5.22 | 5.2489615 | 7.79E-02 | 1845466   | 1845589   | NC_000002.11 |
| cg15282731 | 2.98E-06 | 4.59E-07 | 5.22 | 5.2488333 | 3.96E-02 | 90177012  | 90177135  | NC_000012.11 |
| cg21567371 | 2.98E-06 | 4.59E-07 | 5.22 | 5.2483669 | 4.00E-02 | 48630540  | 48630663  | NC_000003.11 |
| cg23206461 | 2.99E-06 | 4.60E-07 | 5.22 | 5.2481258 | 1.29E-01 | 147782116 | 147782239 | NC_000001.10 |
| cg12670310 | 2.99E-06 | 4.60E-07 | 5.22 | 5.2479522 | 5.80E-02 | 20071307  | 20071430  | NC_000022.10 |

|            |          |          |      |           |          |           |           |              |
|------------|----------|----------|------|-----------|----------|-----------|-----------|--------------|
| cg05046525 | 2.99E-06 | 4.60E-07 | 5.22 | 5.2478441 | 1.71E-01 | 35395821  | 35395944  | NC_000001.10 |
| cg12840850 | 2.99E-06 | 4.60E-07 | 5.22 | 5.2475957 | 5.22E-02 | 62407352  | 62407475  | NC_000020.10 |
| cg26232655 | 2.99E-06 | 4.60E-07 | 5.22 | 5.2474703 | 2.36E-02 | 55004583  | 55004706  | NC_000001.10 |
| cg02055264 | 2.99E-06 | 4.60E-07 | 5.22 | 5.2472715 | 7.14E-02 | 27210913  | 27211036  | NC_000006.11 |
| cg11035730 | 2.99E-06 | 4.60E-07 | 5.22 | 5.2472017 | 9.91E-02 | 104662709 | 104662832 | NC_000014.8  |
| cg08561825 | 2.99E-06 | 4.60E-07 | 5.22 | 5.24719   | 1.20E-01 | 64333366  | 64333489  | NC_000011.9  |
| cg03739378 | 2.99E-06 | 4.60E-07 | 5.22 | 5.2470315 | 4.67E-02 | 105295865 | 105295988 | NC_000007.13 |
| cg21516341 | 2.99E-06 | 4.60E-07 | 5.22 | 5.2467974 | 1.32E-01 | 45270818  | 45270941  | NC_000012.11 |
| cg01468621 | 2.99E-06 | 4.60E-07 | 5.22 | 5.2467211 | 1.41E-01 | 1411609   | 1411732   | NC_000011.9  |
| cg20540748 | 2.99E-06 | 4.60E-07 | 5.22 | 5.2466895 | 4.91E-02 | 170407101 | 170407224 | NC_000006.11 |
| cg02340615 | 2.99E-06 | 4.60E-07 | 5.22 | 5.2466774 | 4.11E-02 | 104617058 | 104617181 | NC_000012.11 |
| cg09415518 | 2.99E-06 | 4.60E-07 | 5.22 | 5.2462237 | 1.05E-01 | 69093675  | 69093798  | NC_000004.11 |
| cg20576264 | 2.99E-06 | 4.60E-07 | 5.22 | 5.2462041 | 4.44E-02 | 23512002  | 23512125  | NC_000014.8  |
| cg02198051 | 2.99E-06 | 4.61E-07 | 5.22 | 5.2449878 | 8.48E-02 | 30674811  | 30674934  | NC_000016.9  |
| cg00003529 | 2.99E-06 | 4.61E-07 | 5.22 | 5.2446116 | 7.67E-02 | 149510115 | 149510238 | NC_000003.11 |
| cg02269497 | 3.00E-06 | 4.61E-07 | 5.22 | 5.2443449 | 7.10E-02 | 51469393  | 51469516  | NC_000019.9  |
| cg11990296 | 3.00E-06 | 4.61E-07 | 5.22 | 5.2441564 | 8.80E-02 | 8651775   | 8651898   | NC_000019.9  |
| cg13147856 | 3.00E-06 | 4.62E-07 | 5.22 | 5.2437195 | 4.90E-02 | 63896114  | 63896237  | NC_000015.9  |
| cg04865692 | 3.00E-06 | 4.62E-07 | 5.22 | 5.2436556 | 1.36E-01 | 50831762  | 50831885  | NC_000019.9  |
| cg12457773 | 3.00E-06 | 4.62E-07 | 5.22 | 5.2435066 | 1.15E-01 | 24126497  | 24126620  | NC_000006.11 |
| cg06323290 | 3.00E-06 | 4.62E-07 | 5.22 | 5.24317   | 6.13E-02 | 71029879  | 71030002  | NC_000010.10 |
| cg03510041 | 3.00E-06 | 4.62E-07 | 5.22 | 5.2430258 | 7.72E-02 | 41559210  | 41559333  | NC_000006.11 |
| cg18426506 | 3.00E-06 | 4.62E-07 | 5.22 | 5.2425807 | 3.73E-02 | 42935700  | 42935823  | NC_000020.10 |
| cg07615127 | 3.00E-06 | 4.62E-07 | 5.22 | 5.2420497 | 6.63E-02 | 195345288 | 195345411 | NC_000003.11 |
| cg14785381 | 3.00E-06 | 4.62E-07 | 5.22 | 5.2419595 | 4.36E-02 | 22969267  | 22969390  | NC_000015.9  |

|            |          |          |      |           |          |           |           |              |
|------------|----------|----------|------|-----------|----------|-----------|-----------|--------------|
| cg06159269 | 3.00E-06 | 4.63E-07 | 5.22 | 5.2417149 | 1.30E-01 | 8767347   | 8767470   | NC_000001.10 |
| cg23205521 | 3.00E-06 | 4.63E-07 | 5.22 | 5.2414543 | 1.93E-02 | 53742818  | 53742941  | NC_000001.10 |
| cg02117924 | 3.00E-06 | 4.63E-07 | 5.22 | 5.2414346 | 4.38E-02 | 46321585  | 46321708  | NC_000021.8  |
| cg02257883 | 3.00E-06 | 4.63E-07 | 5.22 | 5.2409441 | 3.66E-02 | 92492784  | 92492907  | NC_000015.9  |
| cg23191576 | 3.01E-06 | 4.63E-07 | 5.22 | 5.2401446 | 6.35E-02 | 170597326 | 170597449 | NC_000006.11 |
| cg13572071 | 3.01E-06 | 4.63E-07 | 5.22 | 5.2398341 | 5.96E-02 | 23707912  | 23708035  | NC_000001.10 |
| cg27580229 | 3.01E-06 | 4.64E-07 | 5.22 | 5.2396589 | 8.07E-02 | 8714248   | 8714371   | NC_000002.11 |
| cg10297193 | 3.01E-06 | 4.64E-07 | 5.22 | 5.2391694 | 6.81E-02 | 102111502 | 102111625 | NC_000015.9  |
| cg13948934 | 3.01E-06 | 4.64E-07 | 5.22 | 5.239162  | 3.36E-02 | 241072063 | 241072186 | NC_000002.11 |
| cg17435479 | 3.01E-06 | 4.64E-07 | 5.22 | 5.2382665 | 1.15E-01 | 182248713 | 182248836 | NC_000001.10 |
| cg11146971 | 3.01E-06 | 4.64E-07 | 5.22 | 5.2380812 | 1.52E-01 | 27068354  | 27068477  | NC_000014.8  |
| cg04823738 | 3.01E-06 | 4.64E-07 | 5.22 | 5.2380034 | 2.20E-02 | 23631875  | 23631998  | NC_000015.9  |
| cg02792655 | 3.01E-06 | 4.64E-07 | 5.22 | 5.2378549 | 1.33E-01 | 89854364  | 89854487  | NC_000005.9  |
| cg10632395 | 3.01E-06 | 4.65E-07 | 5.22 | 5.2374079 | 1.09E-01 | 137815648 | 137815771 | NC_000006.11 |
| cg17282027 | 3.02E-06 | 4.65E-07 | 5.22 | 5.2371245 | 6.35E-02 | 7762596   | 7762719   | NC_000004.11 |
| cg06992285 | 3.02E-06 | 4.66E-07 | 5.22 | 5.2352818 | 1.21E-01 | 99952047  | 99952170  | NC_000008.10 |
| cg04865716 | 3.02E-06 | 4.66E-07 | 5.22 | 5.2349716 | 1.05E-01 | 2290843   | 2290966   | NC_000019.9  |
| cg02700606 | 3.02E-06 | 4.66E-07 | 5.22 | 5.2347126 | 1.10E-01 | 131763134 | 131763257 | NC_000010.10 |
| cg07697433 | 3.02E-06 | 4.66E-07 | 5.22 | 5.2346054 | 1.90E-02 | 180647736 | 180647859 | NC_000005.9  |
| cg08560465 | 3.02E-06 | 4.66E-07 | 5.22 | 5.2342271 | 5.26E-02 | 151055012 | 151055135 | NC_000006.11 |
| cg23229610 | 3.02E-06 | 4.66E-07 | 5.22 | 5.234106  | 3.44E-02 | 6841125   | 6841248   | NC_000001.10 |
| cg11432275 | 3.02E-06 | 4.66E-07 | 5.22 | 5.2339233 | 2.51E-02 | 3239323   | 3239446   | NC_000004.11 |
| cg25484139 | 3.03E-06 | 4.66E-07 | 5.22 | 5.2337977 | 8.66E-02 | 13008273  | 13008396  | NC_000003.11 |
| cg05517900 | 3.03E-06 | 4.67E-07 | 5.21 | 5.2330285 | 2.96E-02 | 139127931 | 139128054 | NC_000009.11 |
| cg03022552 | 3.03E-06 | 4.67E-07 | 5.21 | 5.2325753 | 4.47E-02 | 21324130  | 21324253  | NC_000019.9  |

|            |          |          |      |           |          |           |           |              |
|------------|----------|----------|------|-----------|----------|-----------|-----------|--------------|
| cg02139871 | 3.03E-06 | 4.67E-07 | 5.21 | 5.2322308 | 1.76E-01 | 127783370 | 127783493 | NC_000002.11 |
| cg08911638 | 3.03E-06 | 4.67E-07 | 5.21 | 5.2318274 | 3.49E-02 | 167708827 | 167708950 | NC_000006.11 |
| cg08319778 | 3.03E-06 | 4.67E-07 | 5.21 | 5.2315292 | 4.67E-02 | 7435463   | 7435586   | NC_000004.11 |
| cg02482717 | 3.03E-06 | 4.68E-07 | 5.21 | 5.2313913 | 6.78E-02 | 182368734 | 182368857 | NC_000001.10 |
| cg13604887 | 3.03E-06 | 4.68E-07 | 5.21 | 5.2309973 | 1.36E-01 | 22018953  | 22019076  | NC_000019.9  |
| cg22658758 | 3.03E-06 | 4.68E-07 | 5.21 | 5.230521  | 1.09E-01 | 92935309  | 92935432  | NC_000005.9  |
| cg13099542 | 3.04E-06 | 4.68E-07 | 5.21 | 5.2303579 | 5.01E-02 | 114056351 | 114056474 | NC_000013.10 |
| cg22150051 | 3.04E-06 | 4.68E-07 | 5.21 | 5.2301612 | 6.77E-02 | 23499697  | 23499820  | NC_000020.10 |
| cg02787120 | 3.04E-06 | 4.68E-07 | 5.21 | 5.2299574 | 1.05E-01 | 111200944 | 111201067 | NC_000007.13 |
| cg10312190 | 3.04E-06 | 4.68E-07 | 5.21 | 5.2297049 | 3.06E-02 | 67749846  | 67749969  | NC_000011.9  |
| cg22434835 | 3.04E-06 | 4.69E-07 | 5.21 | 5.2293301 | 7.73E-02 | 108603985 | 108604108 | NC_000012.11 |
| cg13375690 | 3.04E-06 | 4.69E-07 | 5.21 | 5.2284303 | 8.17E-02 | 66706202  | 66706325  | NC_000008.10 |
| cg17432620 | 3.04E-06 | 4.69E-07 | 5.21 | 5.2284105 | 8.77E-02 | 50817711  | 50817834  | NC_000006.11 |
| cg24605404 | 3.04E-06 | 4.69E-07 | 5.21 | 5.2275436 | 2.77E-02 | 54450822  | 54450945  | NC_000012.11 |
| cg06008724 | 3.04E-06 | 4.69E-07 | 5.21 | 5.227543  | 1.77E-01 | 45403507  | 45403630  | NC_000022.10 |
| cg00661438 | 3.05E-06 | 4.70E-07 | 5.21 | 5.2267838 | 2.67E-02 | 75661320  | 75661443  | NC_000003.11 |
| cg01177168 | 3.05E-06 | 4.70E-07 | 5.21 | 5.226069  | 8.09E-02 | 17680457  | 17680580  | NC_000007.13 |
| cg27642062 | 3.05E-06 | 4.70E-07 | 5.21 | 5.225335  | 1.42E-01 | 55513148  | 55513271  | NC_000016.9  |
| cg14826797 | 3.05E-06 | 4.71E-07 | 5.21 | 5.2252307 | 9.32E-02 | 33444867  | 33444990  | NC_000005.9  |
| cg18799241 | 3.05E-06 | 4.71E-07 | 5.21 | 5.2250847 | 3.55E-02 | 45412599  | 45412722  | NC_000019.9  |
| cg08769451 | 3.05E-06 | 4.71E-07 | 5.21 | 5.2245486 | 1.45E-01 | 132813235 | 132813358 | NC_000011.9  |
| cg05735639 | 3.05E-06 | 4.71E-07 | 5.21 | 5.2240685 | 4.31E-02 | 49021875  | 49021998  | NC_000017.10 |
| cg14927663 | 3.05E-06 | 4.71E-07 | 5.21 | 5.2235964 | 2.62E-02 | 76565480  | 76565603  | NC_000017.10 |
| cg15711744 | 3.06E-06 | 4.72E-07 | 5.21 | 5.2231127 | 8.05E-02 | 48866138  | 48866261  | NC_000012.11 |
| cg00692173 | 3.06E-06 | 4.72E-07 | 5.21 | 5.222861  | 1.26E-01 | 53217358  | 53217481  | NC_000001.10 |

|            |          |          |      |           |          |           |           |              |
|------------|----------|----------|------|-----------|----------|-----------|-----------|--------------|
| cg11779239 | 3.06E-06 | 4.72E-07 | 5.21 | 5.2225775 | 5.53E-02 | 73762276  | 73762399  | NC_000017.10 |
| cg05965863 | 3.06E-06 | 4.72E-07 | 5.21 | 5.2220214 | 1.13E-01 | 137480182 | 137480305 | NC_000003.11 |
| cg11747695 | 3.06E-06 | 4.72E-07 | 5.21 | 5.2216172 | 5.39E-02 | 111164966 | 111165089 | NC_000013.10 |
| cg10420542 | 3.06E-06 | 4.72E-07 | 5.21 | 5.2213744 | 7.29E-02 | 242853946 | 242854069 | NC_000002.11 |
| cg03125498 | 3.06E-06 | 4.72E-07 | 5.21 | 5.2212357 | 7.32E-02 | 34112111  | 34112234  | NC_000019.9  |
| cg22257101 | 3.06E-06 | 4.73E-07 | 5.21 | 5.2208447 | 4.67E-02 | 245741203 | 245741326 | NC_000001.10 |
| cg21898944 | 3.06E-06 | 4.73E-07 | 5.21 | 5.2207007 | 1.56E-01 | 130589151 | 130589274 | NC_000012.11 |
| cg13145670 | 3.06E-06 | 4.73E-07 | 5.21 | 5.2200791 | 7.56E-02 | 21934776  | 21934899  | NC_000017.10 |
| cg20896233 | 3.07E-06 | 4.73E-07 | 5.21 | 5.2196332 | 1.49E-01 | 186603561 | 186603684 | NC_000002.11 |
| cg02293437 | 3.07E-06 | 4.74E-07 | 5.21 | 5.2183077 | 1.94E-01 | 71264678  | 71264801  | NC_000016.9  |
| cg25056460 | 3.07E-06 | 4.74E-07 | 5.21 | 5.2177724 | 1.33E-01 | 122215896 | 122216019 | NC_000010.10 |
| cg03709271 | 3.07E-06 | 4.74E-07 | 5.21 | 5.2175294 | 8.06E-02 | 134819662 | 134819785 | NC_000010.10 |
| cg14382835 | 3.07E-06 | 4.74E-07 | 5.21 | 5.2172863 | 3.60E-02 | 62731949  | 62732072  | NC_000004.11 |
| cg11258484 | 3.07E-06 | 4.75E-07 | 5.21 | 5.2169262 | 9.24E-02 | 92168021  | 92168144  | NC_000012.11 |
| cg16606324 | 3.07E-06 | 4.75E-07 | 5.21 | 5.2168425 | 7.43E-02 | 10149918  | 10150041  | NC_000003.11 |
| cg27316026 | 3.07E-06 | 4.75E-07 | 5.21 | 5.2166865 | 5.92E-02 | 38859976  | 38860099  | NC_000017.10 |
| cg16914123 | 3.08E-06 | 4.75E-07 | 5.21 | 5.2164955 | 7.99E-02 | 35226751  | 35226874  | NC_000007.13 |
| cg03740167 | 3.08E-06 | 4.75E-07 | 5.21 | 5.2161157 | 1.26E-01 | 23463746  | 23463869  | NC_000010.10 |
| cg24089400 | 3.08E-06 | 4.75E-07 | 5.21 | 5.215858  | 7.35E-02 | 98507930  | 98508053  | NC_000001.10 |
| cg20568140 | 3.08E-06 | 4.76E-07 | 5.21 | 5.2131939 | 3.70E-02 | 46739004  | 46739127  | NC_000003.11 |
| cg24972087 | 3.09E-06 | 4.77E-07 | 5.21 | 5.2124017 | 8.16E-02 | 77387841  | 77387964  | NC_000018.9  |
| cg21857668 | 3.09E-06 | 4.77E-07 | 5.21 | 5.2123232 | 1.43E-01 | 111451273 | 111451396 | NC_000003.11 |
| cg03887520 | 3.09E-06 | 4.77E-07 | 5.21 | 5.2121718 | 1.15E-01 | 45161283  | 45161406  | NC_000002.11 |
| cg23151000 | 3.09E-06 | 4.77E-07 | 5.21 | 5.211408  | 1.04E-01 | 38302892  | 38303015  | NC_000002.11 |
| cg22891099 | 3.09E-06 | 4.77E-07 | 5.21 | 5.2110463 | 6.73E-02 | 234579550 | 234579673 | NC_000002.11 |

|            |          |          |      |           |          |           |           |              |
|------------|----------|----------|------|-----------|----------|-----------|-----------|--------------|
| cg23831328 | 3.09E-06 | 4.78E-07 | 5.21 | 5.2108123 | 1.39E-01 | 3873555   | 3873678   | NC_000004.11 |
| cg19642877 | 3.09E-06 | 4.78E-07 | 5.21 | 5.2106668 | 9.22E-02 | 2168625   | 2168748   | NC_000011.9  |
| cg27446137 | 3.09E-06 | 4.78E-07 | 5.21 | 5.2100545 | 7.82E-02 | 77723198  | 77723321  | NC_000004.11 |
| cg26162554 | 3.09E-06 | 4.78E-07 | 5.21 | 5.2099245 | 1.41E-01 | 42425093  | 42425216  | NC_000005.9  |
| cg02381009 | 3.10E-06 | 4.78E-07 | 5.21 | 5.2095253 | 5.00E-02 | 1241958   | 1242081   | NC_000005.9  |
| cg14771240 | 3.10E-06 | 4.78E-07 | 5.21 | 5.2091904 | 6.22E-02 | 33284168  | 33284291  | NC_000006.11 |
| cg01708344 | 3.10E-06 | 4.78E-07 | 5.21 | 5.2089801 | 6.05E-02 | 60827202  | 60827325  | NC_000017.10 |
| cg21994045 | 3.10E-06 | 4.78E-07 | 5.21 | 5.2089263 | 8.75E-02 | 10403936  | 10404059  | NC_000019.9  |
| cg20143415 | 3.10E-06 | 4.79E-07 | 5.21 | 5.2083258 | 4.40E-02 | 117473375 | 117473498 | NC_000012.11 |
| cg03585447 | 3.10E-06 | 4.79E-07 | 5.21 | 5.2082883 | 1.15E-01 | 29077683  | 29077806  | NC_000015.9  |
| cg00282510 | 3.10E-06 | 4.79E-07 | 5.21 | 5.2078321 | 1.42E-01 | 100611516 | 100611639 | NC_000009.11 |
| cg15090727 | 3.10E-06 | 4.79E-07 | 5.21 | 5.2074952 | 1.49E-01 | 113341951 | 113342074 | NC_000009.11 |
| cg13883603 | 3.10E-06 | 4.79E-07 | 5.21 | 5.2072081 | 8.48E-02 | 130516816 | 130516939 | NC_000009.11 |
| cg12502098 | 3.10E-06 | 4.79E-07 | 5.21 | 5.2071527 | 8.48E-02 | 48955947  | 48956070  | NC_000022.10 |
| cg21009965 | 3.10E-06 | 4.79E-07 | 5.21 | 5.2069784 | 1.30E-01 | 75593596  | 75593719  | NC_000001.10 |
| cg05600126 | 3.10E-06 | 4.80E-07 | 5.21 | 5.206736  | 4.77E-02 | 950540    | 950663    | NC_000017.10 |
| cg07211465 | 3.10E-06 | 4.80E-07 | 5.21 | 5.2065811 | 7.42E-02 | 148476471 | 148476594 | NC_000006.11 |
| cg25879102 | 3.11E-06 | 4.80E-07 | 5.21 | 5.2060873 | 1.25E-01 | 38600119  | 38600242  | NC_000001.10 |
| cg18292202 | 3.11E-06 | 4.80E-07 | 5.21 | 5.2059566 | 7.92E-02 | 26746947  | 26747070  | NC_000006.11 |
| cg01740202 | 3.11E-06 | 4.80E-07 | 5.21 | 5.2051433 | 6.69E-02 | 550568    | 550691    | NC_000007.13 |
| cg11125249 | 3.11E-06 | 4.81E-07 | 5.21 | 5.2046849 | 1.08E-01 | 148737622 | 148737745 | NC_000003.11 |
| cg19120717 | 3.11E-06 | 4.81E-07 | 5.21 | 5.2045967 | 1.08E-01 | 41343647  | 41343770  | NC_000006.11 |
| cg10539173 | 3.11E-06 | 4.81E-07 | 5.21 | 5.2038792 | 4.12E-02 | 12653502  | 12653625  | NC_000012.11 |
| cg24222440 | 3.11E-06 | 4.81E-07 | 5.21 | 5.2037248 | 6.08E-02 | 118397413 | 118397536 | NC_000011.9  |
| cg26954751 | 3.11E-06 | 4.81E-07 | 5.21 | 5.2037053 | 7.58E-02 | 107506867 | 107506990 | NC_000006.11 |

|            |          |          |      |           |          |           |           |              |
|------------|----------|----------|------|-----------|----------|-----------|-----------|--------------|
| cg07940593 | 3.11E-06 | 4.81E-07 | 5.21 | 5.2034164 | 6.71E-02 | 39710068  | 39710191  | NC_000022.10 |
| cg07973479 | 3.12E-06 | 4.82E-07 | 5.21 | 5.2011437 | 9.99E-02 | 25945255  | 25945378  | NC_000013.10 |
| cg14894848 | 3.12E-06 | 4.83E-07 | 5.21 | 5.2002544 | 1.00E-01 | 48884945  | 48885068  | NC_000022.10 |
| cg09175620 | 3.12E-06 | 4.83E-07 | 5.21 | 5.1997374 | 5.99E-02 | 54484536  | 54484659  | NC_000001.10 |
| cg05779364 | 3.12E-06 | 4.83E-07 | 5.21 | 5.1996509 | 6.52E-02 | 220132137 | 220132260 | NC_000001.10 |
| cg00842549 | 3.13E-06 | 4.84E-07 | 5.21 | 5.1982642 | 1.13E-01 | 46651920  | 46652043  | NC_000017.10 |
| cg25661931 | 3.13E-06 | 4.84E-07 | 5.21 | 5.1981419 | 9.59E-02 | 123166561 | 123166684 | NC_000003.11 |
| cg09684233 | 3.13E-06 | 4.84E-07 | 5.21 | 5.1979017 | 1.34E-01 | 175206966 | 175207089 | NC_000002.11 |
| cg09618830 | 3.13E-06 | 4.84E-07 | 5.21 | 5.1978638 | 2.82E-02 | 24580244  | 24580367  | NC_000016.9  |
| cg06732870 | 3.13E-06 | 4.84E-07 | 5.21 | 5.1975923 | 6.38E-02 | 51143348  | 51143471  | NC_000019.9  |
| cg25870010 | 3.13E-06 | 4.85E-07 | 5.21 | 5.1966077 | 4.73E-02 | 96191158  | 96191281  | NC_000002.11 |
| cg02347212 | 3.14E-06 | 4.85E-07 | 5.21 | 5.1956134 | 6.07E-02 | 6141790   | 6141913   | NC_000017.10 |
| cg13021890 | 3.14E-06 | 4.86E-07 | 5.21 | 5.1934642 | 2.81E-02 | 242689305 | 242689428 | NC_000002.11 |
| cg02028402 | 3.14E-06 | 4.86E-07 | 5.21 | 5.1931293 | 4.39E-02 | 32410339  | 32410462  | NC_000006.11 |
| cg19659741 | 3.15E-06 | 4.87E-07 | 5.21 | 5.192785  | 1.16E-01 | 39172099  | 39172222  | NC_000008.10 |
| cg13705169 | 3.15E-06 | 4.87E-07 | 5.21 | 5.192228  | 6.75E-02 | 102775472 | 102775595 | NC_000010.10 |
| cg01474257 | 3.15E-06 | 4.87E-07 | 5.21 | 5.1922358 | 8.48E-02 | 42030842  | 42030965  | NC_000017.10 |
| cg16277944 | 3.15E-06 | 4.87E-07 | 5.21 | 5.1921526 | 9.87E-02 | 169068404 | 169068527 | NC_000005.9  |
| cg23246360 | 3.15E-06 | 4.87E-07 | 5.21 | 5.1919926 | 4.89E-02 | 17000596  | 17000719  | NC_000022.10 |
| cg06525987 | 3.15E-06 | 4.87E-07 | 5.21 | 5.1918158 | 8.87E-02 | 161494645 | 161494768 | NC_000005.9  |
| cg11126767 | 3.15E-06 | 4.87E-07 | 5.21 | 5.1917808 | 1.08E-01 | 60978275  | 60978398  | NC_000014.8  |
| cg12575928 | 3.15E-06 | 4.87E-07 | 5.21 | 5.1915815 | 1.20E-01 | 22687660  | 22687783  | NC_000011.9  |
| cg10376904 | 3.15E-06 | 4.88E-07 | 5.21 | 5.1906511 | 5.64E-02 | 131687337 | 131687460 | NC_000012.11 |
| cg03790988 | 3.15E-06 | 4.88E-07 | 5.21 | 5.1904708 | 8.79E-02 | 67069959  | 67070082  | NC_000018.9  |
| cg13930105 | 3.15E-06 | 4.88E-07 | 5.21 | 5.19007   | 1.70E-01 | 158083475 | 158083598 | NC_000001.10 |

|            |          |          |      |           |          |           |           |              |
|------------|----------|----------|------|-----------|----------|-----------|-----------|--------------|
| cg20012008 | 3.15E-06 | 4.88E-07 | 5.21 | 5.1899393 | 1.40E-01 | 69062534  | 69062657  | NC_000007.13 |
| cg17883458 | 3.15E-06 | 4.88E-07 | 5.21 | 5.1898228 | 1.19E-01 | 137489767 | 137489890 | NC_000003.11 |
| cg16201038 | 3.15E-06 | 4.88E-07 | 5.21 | 5.1897144 | 1.09E-01 | 28544760  | 28544883  | NC_000013.10 |
| cg14870229 | 3.15E-06 | 4.88E-07 | 5.21 | 5.1896501 | 1.13E-01 | 6590801   | 6590924   | NC_000019.9  |
| cg24007247 | 3.16E-06 | 4.88E-07 | 5.21 | 5.1895013 | 3.21E-02 | 6410669   | 6410792   | NC_000007.13 |
| cg12320039 | 3.16E-06 | 4.88E-07 | 5.21 | 5.1892032 | 9.75E-02 | 32118204  | 32118327  | NC_000006.11 |
| cg25500948 | 3.16E-06 | 4.89E-07 | 5.2  | 5.1877288 | 6.94E-02 | 167761378 | 167761501 | NC_000005.9  |
| cg17851392 | 3.16E-06 | 4.89E-07 | 5.2  | 5.1872046 | 3.43E-02 | 135120603 | 135120726 | NC_000010.10 |
| cg00174279 | 3.16E-06 | 4.90E-07 | 5.2  | 5.1867994 | 7.39E-02 | 75525361  | 75525484  | NC_000017.10 |
| cg13015284 | 3.17E-06 | 4.90E-07 | 5.2  | 5.186213  | 8.98E-02 | 64410392  | 64410515  | NC_000011.9  |
| cg12604435 | 3.17E-06 | 4.90E-07 | 5.2  | 5.1861943 | 1.04E-01 | 153653559 | 153653682 | NC_000001.10 |
| cg00127505 | 3.17E-06 | 4.90E-07 | 5.2  | 5.1858178 | 8.95E-02 | 131763820 | 131763943 | NC_000010.10 |
| cg25774643 | 3.17E-06 | 4.90E-07 | 5.2  | 5.1856528 | 1.53E-01 | 627175    | 627298    | NC_000011.9  |
| cg18067520 | 3.17E-06 | 4.90E-07 | 5.2  | 5.1853987 | 5.83E-02 | 107114594 | 107114717 | NC_000006.11 |
| cg04495336 | 3.17E-06 | 4.90E-07 | 5.2  | 5.185362  | 1.07E-01 | 2419119   | 2419242   | NC_000008.10 |
| cg14530963 | 3.17E-06 | 4.90E-07 | 5.2  | 5.1851211 | 7.22E-02 | 3489551   | 3489674   | NC_000005.9  |
| cg02911432 | 3.17E-06 | 4.91E-07 | 5.2  | 5.1847533 | 1.01E-01 | 128754513 | 128754636 | NC_000012.11 |
| cg15388210 | 3.17E-06 | 4.91E-07 | 5.2  | 5.184659  | 9.35E-02 | 36005826  | 36005949  | NC_000001.10 |
| cg25195374 | 3.17E-06 | 4.91E-07 | 5.2  | 5.1846148 | 4.55E-02 | 18257610  | 18257733  | NC_000008.10 |
| cg06193578 | 3.18E-06 | 4.92E-07 | 5.2  | 5.1816441 | 1.39E-01 | 35396475  | 35396598  | NC_000019.9  |
| cg13453589 | 3.18E-06 | 4.92E-07 | 5.2  | 5.1815243 | 1.30E-01 | 33850099  | 33850222  | NC_000009.11 |
| cg03546668 | 3.18E-06 | 4.92E-07 | 5.2  | 5.1813253 | 4.00E-02 | 55533785  | 55533908  | NC_000008.10 |
| cg03937515 | 3.18E-06 | 4.92E-07 | 5.2  | 5.1811605 | 3.87E-02 | 76277580  | 76277703  | NC_000018.9  |
| cg22898082 | 3.18E-06 | 4.92E-07 | 5.2  | 5.1809906 | 9.28E-02 | 11074428  | 11074551  | NC_000019.9  |
| cg18752854 | 3.18E-06 | 4.93E-07 | 5.2  | 5.1807626 | 3.77E-02 | 218809254 | 218809377 | NC_000002.11 |



|            |          |          |     |           |          |           |           |              |
|------------|----------|----------|-----|-----------|----------|-----------|-----------|--------------|
| cg01308419 | 3.18E-06 | 4.93E-07 | 5.2 | 5.1807123 | 4.92E-02 | 6565891   | 6566014   | NC_000007.13 |
| cg08791813 | 3.18E-06 | 4.93E-07 | 5.2 | 5.1806273 | 5.91E-02 | 80316822  | 80316945  | NC_000005.9  |
| cg14531663 | 3.18E-06 | 4.93E-07 | 5.2 | 5.1801922 | 1.53E-01 | 32116933  | 32117056  | NC_000006.11 |
| cg26278228 | 3.18E-06 | 4.93E-07 | 5.2 | 5.1800148 | 1.67E-02 | 191367505 | 191367628 | NC_000002.11 |
| cg21875423 | 3.18E-06 | 4.93E-07 | 5.2 | 5.1800092 | 1.57E-01 | 217559867 | 217559990 | NC_000002.11 |
| cg17124224 | 3.18E-06 | 4.93E-07 | 5.2 | 5.1799685 | 1.21E-01 | 83953880  | 83954003  | NC_000015.9  |
| cg08430489 | 3.19E-06 | 4.93E-07 | 5.2 | 5.1795907 | 1.74E-01 | 142494953 | 142495076 | NC_000007.13 |
| cg27598107 | 3.19E-06 | 4.93E-07 | 5.2 | 5.1795099 | 1.47E-01 | 102759782 | 102759905 | NC_000002.11 |
| cg05359130 | 3.19E-06 | 4.93E-07 | 5.2 | 5.1793982 | 1.62E-01 | 29228970  | 29229093  | NC_000014.8  |
| cg24831888 | 3.19E-06 | 4.93E-07 | 5.2 | 5.1791021 | 2.00E-02 | 124612215 | 124612338 | NC_000011.9  |
| cg17104706 | 3.19E-06 | 4.94E-07 | 5.2 | 5.1786813 | 1.79E-02 | 121461110 | 121461233 | NC_000008.10 |
| cg11986813 | 3.19E-06 | 4.94E-07 | 5.2 | 5.1786668 | 1.83E-01 | 43429144  | 43429267  | NC_000010.10 |
| cg26646370 | 3.19E-06 | 4.94E-07 | 5.2 | 5.1776833 | 1.67E-01 | 4279441   | 4279564   | NC_000019.9  |
| cg12243375 | 3.19E-06 | 4.94E-07 | 5.2 | 5.1774063 | 1.47E-01 | 106889329 | 106889452 | NC_000011.9  |
| cg00992521 | 3.19E-06 | 4.95E-07 | 5.2 | 5.176556  | 7.09E-02 | 36889859  | 36889982  | NC_000020.10 |
| cg22009464 | 3.20E-06 | 4.95E-07 | 5.2 | 5.1760614 | 1.45E-01 | 32173084  | 32173207  | NC_000018.9  |
| cg01715538 | 3.20E-06 | 4.95E-07 | 5.2 | 5.1758276 | 7.69E-02 | 170468154 | 170468277 | NC_000006.11 |
| cg04611437 | 3.20E-06 | 4.95E-07 | 5.2 | 5.1753303 | 1.02E-01 | 102279697 | 102279820 | NC_000010.10 |
| cg00888108 | 3.20E-06 | 4.96E-07 | 5.2 | 5.1745732 | 7.22E-02 | 77149314  | 77149437  | NC_000018.9  |
| cg14404807 | 3.20E-06 | 4.96E-07 | 5.2 | 5.1744122 | 4.14E-02 | 106938294 | 106938417 | NC_000014.8  |
| cg03369999 | 3.20E-06 | 4.96E-07 | 5.2 | 5.1741908 | 3.91E-02 | 194342992 | 194343115 | NC_000003.11 |
| cg02740308 | 3.20E-06 | 4.96E-07 | 5.2 | 5.1732247 | 5.51E-02 | 132414348 | 132414471 | NC_000002.11 |
| cg25481384 | 3.21E-06 | 4.96E-07 | 5.2 | 5.1731975 | 6.39E-02 | 694470    | 694593    | NC_000008.10 |
| cg04013159 | 3.21E-06 | 4.97E-07 | 5.2 | 5.1729554 | 5.90E-02 | 62285926  | 62286049  | NC_000020.10 |
| cg12499062 | 3.21E-06 | 4.97E-07 | 5.2 | 5.1729231 | 6.72E-02 | 11519034  | 11519157  | NC_000018.9  |

|            |          |          |     |           |          |           |           |              |
|------------|----------|----------|-----|-----------|----------|-----------|-----------|--------------|
| cg13936125 | 3.21E-06 | 4.97E-07 | 5.2 | 5.1727297 | 1.30E-01 | 56225599  | 56225722  | NC_000016.9  |
| cg24286200 | 3.21E-06 | 4.97E-07 | 5.2 | 5.1715787 | 3.12E-02 | 139481268 | 139481391 | NC_000007.13 |
| cg10152627 | 3.21E-06 | 4.97E-07 | 5.2 | 5.1715782 | 3.42E-02 | 182218332 | 182218455 | NC_000003.11 |
| cg06893371 | 3.21E-06 | 4.98E-07 | 5.2 | 5.1711718 | 1.44E-01 | 41582961  | 41583084  | NC_000012.11 |
| cg09079909 | 3.21E-06 | 4.98E-07 | 5.2 | 5.1709898 | 1.03E-01 | 127808092 | 127808215 | NC_000007.13 |
| cg04230050 | 3.21E-06 | 4.98E-07 | 5.2 | 5.1709794 | 8.42E-02 | 166144874 | 166144997 | NC_000006.11 |
| cg24414788 | 3.21E-06 | 4.98E-07 | 5.2 | 5.1708473 | 1.11E-01 | 8093298   | 8093421   | NC_000010.10 |
| cg12772086 | 3.21E-06 | 4.98E-07 | 5.2 | 5.1704099 | 7.87E-02 | 107783986 | 107784109 | NC_000006.11 |
| cg09031522 | 3.21E-06 | 4.98E-07 | 5.2 | 5.1700965 | 4.57E-02 | 112610918 | 112611041 | NC_000013.10 |
| cg22330763 | 3.22E-06 | 4.98E-07 | 5.2 | 5.1698026 | 8.79E-02 | 44194767  | 44194890  | NC_000006.11 |
| cg12534008 | 3.22E-06 | 4.99E-07 | 5.2 | 5.1688471 | 1.20E-01 | 2252029   | 2252152   | NC_000019.9  |
| cg13485718 | 3.22E-06 | 4.99E-07 | 5.2 | 5.168711  | 1.21E-01 | 93315488  | 93315611  | NC_000014.8  |
| cg07906262 | 3.23E-06 | 5.00E-07 | 5.2 | 5.166537  | 7.73E-02 | 41303570  | 41303693  | NC_000001.10 |
| cg07662771 | 3.23E-06 | 5.01E-07 | 5.2 | 5.1650404 | 1.25E-01 | 64008007  | 64008130  | NC_000003.11 |
| cg22860534 | 3.23E-06 | 5.01E-07 | 5.2 | 5.1645263 | 4.06E-02 | 68813585  | 68813708  | NC_000011.9  |
| cg21433239 | 3.23E-06 | 5.01E-07 | 5.2 | 5.1640485 | 5.00E-02 | 172578576 | 172578699 | NC_000003.11 |
| cg10565216 | 3.23E-06 | 5.01E-07 | 5.2 | 5.1638398 | 2.81E-02 | 22785257  | 22785380  | NC_000008.10 |
| cg02935024 | 3.24E-06 | 5.01E-07 | 5.2 | 5.163491  | 9.01E-02 | 133573285 | 133573408 | NC_000003.11 |
| cg09981533 | 3.24E-06 | 5.02E-07 | 5.2 | 5.1630546 | 8.62E-02 | 31507701  | 31507824  | NC_000006.11 |
| cg22306173 | 3.24E-06 | 5.02E-07 | 5.2 | 5.1622589 | 8.94E-02 | 46368025  | 46368148  | NC_000022.10 |
| cg14337027 | 3.24E-06 | 5.02E-07 | 5.2 | 5.1620536 | 1.11E-01 | 46803802  | 46803925  | NC_000017.10 |
| cg10305337 | 3.24E-06 | 5.02E-07 | 5.2 | 5.1617919 | 5.10E-02 | 71420076  | 71420199  | NC_000017.10 |
| cg03021496 | 3.24E-06 | 5.03E-07 | 5.2 | 5.1611463 | 7.39E-02 | 71997462  | 71997585  | NC_000006.11 |
| cg06971092 | 3.24E-06 | 5.03E-07 | 5.2 | 5.160742  | 1.13E-01 | 35291286  | 35291409  | NC_000017.10 |
| cg10601287 | 3.25E-06 | 5.03E-07 | 5.2 | 5.1598535 | 1.21E-01 | 119293861 | 119293984 | NC_000011.9  |

|            |          |          |     |           |          |           |           |              |
|------------|----------|----------|-----|-----------|----------|-----------|-----------|--------------|
| cg08222399 | 3.25E-06 | 5.03E-07 | 5.2 | 5.1596018 | 3.74E-02 | 16936466  | 16936589  | NC_000005.9  |
| cg22795610 | 3.25E-06 | 5.04E-07 | 5.2 | 5.1592267 | 8.12E-02 | 4803422   | 4803545   | NC_000017.10 |
| cg05449257 | 3.25E-06 | 5.04E-07 | 5.2 | 5.158739  | 1.10E-01 | 75595408  | 75595531  | NC_000001.10 |
| cg24427724 | 3.25E-06 | 5.04E-07 | 5.2 | 5.1585894 | 8.69E-02 | 6234257   | 6234380   | NC_000012.11 |
| cg26870126 | 3.25E-06 | 5.04E-07 | 5.2 | 5.1584111 | 9.37E-02 | 124901477 | 124901600 | NC_000010.10 |
| cg01945840 | 3.25E-06 | 5.04E-07 | 5.2 | 5.1580025 | 6.96E-02 | 36013675  | 36013798  | NC_000022.10 |
| cg18422875 | 3.25E-06 | 5.04E-07 | 5.2 | 5.1578341 | 1.58E-01 | 113697897 | 113698020 | NC_000005.9  |
| cg05226125 | 3.25E-06 | 5.05E-07 | 5.2 | 5.1575817 | 5.00E-02 | 87594107  | 87594230  | NC_000001.10 |
| cg08384657 | 3.25E-06 | 5.05E-07 | 5.2 | 5.1573952 | 6.38E-02 | 143208406 | 143208529 | NC_000007.13 |
| cg18465245 | 3.25E-06 | 5.05E-07 | 5.2 | 5.1573902 | 5.39E-02 | 30737566  | 30737689  | NC_000003.11 |
| cg21055462 | 3.26E-06 | 5.05E-07 | 5.2 | 5.1564869 | 3.68E-02 | 100276975 | 100277098 | NC_000007.13 |
| cg13619915 | 3.26E-06 | 5.05E-07 | 5.2 | 5.1563153 | 1.52E-01 | 164914437 | 164914560 | NC_000003.11 |
| cg26896979 | 3.26E-06 | 5.05E-07 | 5.2 | 5.1560442 | 9.43E-02 | 10494322  | 10494445  | NC_000001.10 |
| cg01218206 | 3.26E-06 | 5.05E-07 | 5.2 | 5.1560383 | 9.32E-02 | 116933977 | 116934100 | NC_000011.9  |
| cg07447922 | 3.26E-06 | 5.05E-07 | 5.2 | 5.1559569 | 1.81E-01 | 38230827  | 38230950  | NC_000001.10 |
| cg15703377 | 3.26E-06 | 5.05E-07 | 5.2 | 5.1559501 | 4.47E-02 | 71282593  | 71282716  | NC_000017.10 |
| cg13544333 | 3.26E-06 | 5.06E-07 | 5.2 | 5.1556173 | 7.11E-02 | 101287381 | 101287504 | NC_000010.10 |
| cg04678231 | 3.26E-06 | 5.06E-07 | 5.2 | 5.1542043 | 6.49E-02 | 52451268  | 52451391  | NC_000012.11 |
| cg26374206 | 3.26E-06 | 5.06E-07 | 5.2 | 5.1539552 | 1.06E-01 | 12595245  | 12595368  | NC_000019.9  |
| cg24905196 | 3.27E-06 | 5.07E-07 | 5.2 | 5.1537292 | 9.97E-02 | 121555186 | 121555309 | NC_000003.11 |
| cg27434863 | 3.27E-06 | 5.07E-07 | 5.2 | 5.1531197 | 2.14E-02 | 12142497  | 12142620  | NC_000016.9  |
| cg24709285 | 3.27E-06 | 5.07E-07 | 5.2 | 5.1529374 | 9.69E-02 | 7052788   | 7052911   | NC_000004.11 |
| cg18678316 | 3.27E-06 | 5.07E-07 | 5.2 | 5.1525472 | 6.50E-02 | 42260985  | 42261108  | NC_000017.10 |
| cg11015038 | 3.27E-06 | 5.07E-07 | 5.2 | 5.1519566 | 1.56E-01 | 20349568  | 20349691  | NC_000020.10 |
| cg15772133 | 3.27E-06 | 5.08E-07 | 5.2 | 5.1518892 | 6.38E-02 | 33585815  | 33585938  | NC_000002.11 |

|            |          |          |      |           |          |           |           |              |
|------------|----------|----------|------|-----------|----------|-----------|-----------|--------------|
| cg16993957 | 3.27E-06 | 5.08E-07 | 5.2  | 5.1515588 | 5.23E-02 | 30867748  | 30867871  | NC_000006.11 |
| cg26981309 | 3.27E-06 | 5.08E-07 | 5.2  | 5.1507138 | 1.13E-01 | 100442002 | 100442125 | NC_000006.11 |
| cg14632140 | 3.28E-06 | 5.08E-07 | 5.2  | 5.1503832 | 9.30E-02 | 16758112  | 16758235  | NC_000012.11 |
| cg24535154 | 3.28E-06 | 5.09E-07 | 5.2  | 5.1496381 | 4.41E-02 | 29946559  | 29946682  | NC_000022.10 |
| cg04630490 | 3.28E-06 | 5.09E-07 | 5.2  | 5.1493339 | 7.17E-02 | 70272395  | 70272518  | NC_000015.9  |
| cg00508975 | 3.28E-06 | 5.09E-07 | 5.2  | 5.1490743 | 9.41E-02 | 26666151  | 26666274  | NC_000003.11 |
| cg03206681 | 3.28E-06 | 5.09E-07 | 5.2  | 5.1484413 | 8.42E-02 | 193512175 | 193512298 | NC_000003.11 |
| cg02844545 | 3.28E-06 | 5.09E-07 | 5.2  | 5.1483919 | 1.16E-01 | 10882043  | 10882166  | NC_000006.11 |
| cg02774186 | 3.28E-06 | 5.10E-07 | 5.2  | 5.1474044 | 2.03E-01 | 57364587  | 57364710  | NC_000018.9  |
| cg19246065 | 3.29E-06 | 5.10E-07 | 5.2  | 5.1463918 | 9.74E-02 | 11245457  | 11245580  | NC_000002.11 |
| cg02182587 | 3.29E-06 | 5.11E-07 | 5.2  | 5.1451524 | 9.86E-02 | 2110497   | 2110620   | NC_000005.9  |
| cg02370767 | 3.29E-06 | 5.11E-07 | 5.2  | 5.1448734 | 2.36E-02 | 3207097   | 3207220   | NC_000020.10 |
| cg02145932 | 3.29E-06 | 5.11E-07 | 5.2  | 5.1444173 | 1.78E-01 | 13200969  | 13201092  | NC_000020.10 |
| cg07494300 | 3.29E-06 | 5.11E-07 | 5.2  | 5.1443132 | 1.07E-01 | 102051019 | 102051142 | NC_000013.10 |
| cg12468496 | 3.30E-06 | 5.12E-07 | 5.2  | 5.1437025 | 4.95E-02 | 93156539  | 93156662  | NC_000008.10 |
| cg22082015 | 3.30E-06 | 5.12E-07 | 5.2  | 5.1428414 | 6.65E-02 | 38252123  | 38252246  | NC_000017.10 |
| cg26574334 | 3.30E-06 | 5.12E-07 | 5.2  | 5.142726  | 1.30E-01 | 134176500 | 134176623 | NC_000006.11 |
| cg07821297 | 3.30E-06 | 5.13E-07 | 5.2  | 5.1423129 | 9.73E-02 | 152596177 | 152596300 | NC_000001.10 |
| cg25302284 | 3.30E-06 | 5.13E-07 | 5.19 | 5.1410697 | 6.39E-02 | 158120045 | 158120168 | NC_000001.10 |
| cg13795948 | 3.31E-06 | 5.13E-07 | 5.19 | 5.1409823 | 1.28E-01 | 133538743 | 133538866 | NC_000009.11 |
| cg13566610 | 3.31E-06 | 5.13E-07 | 5.19 | 5.140824  | 1.45E-01 | 103630083 | 103630206 | NC_000007.13 |
| cg19385331 | 3.31E-06 | 5.14E-07 | 5.19 | 5.1400669 | 1.43E-01 | 100641867 | 100641990 | NC_000013.10 |
| cg01060861 | 3.31E-06 | 5.14E-07 | 5.19 | 5.1399809 | 1.37E-01 | 28033840  | 28033963  | NC_000010.10 |
| cg00872984 | 3.31E-06 | 5.14E-07 | 5.19 | 5.1393143 | 1.20E-01 | 32063991  | 32064114  | NC_000006.11 |
| cg00697992 | 3.31E-06 | 5.14E-07 | 5.19 | 5.1391851 | 1.57E-01 | 139537131 | 139537254 | NC_000002.11 |

|            |          |          |      |           |          |           |           |              |
|------------|----------|----------|------|-----------|----------|-----------|-----------|--------------|
| cg16288562 | 3.32E-06 | 5.15E-07 | 5.19 | 5.1375292 | 3.32E-02 | 2111458   | 2111581   | NC_000005.9  |
| cg04588840 | 3.32E-06 | 5.15E-07 | 5.19 | 5.1369476 | 1.57E-01 | 2781685   | 2781808   | NC_000020.10 |
| cg02347527 | 3.32E-06 | 5.15E-07 | 5.19 | 5.1367858 | 1.45E-01 | 113916891 | 113917014 | NC_000012.11 |
| cg03513309 | 3.32E-06 | 5.16E-07 | 5.19 | 5.1363432 | 9.58E-02 | 96930761  | 96930884  | NC_000001.10 |
| cg20115597 | 3.32E-06 | 5.16E-07 | 5.19 | 5.1363101 | 7.97E-02 | 56516248  | 56516371  | NC_000007.13 |
| cg06275853 | 3.32E-06 | 5.16E-07 | 5.19 | 5.1355259 | 1.01E-01 | 20617937  | 20618060  | NC_000011.9  |
| cg00482488 | 3.32E-06 | 5.16E-07 | 5.19 | 5.1354747 | 1.63E-01 | 70216332  | 70216455  | NC_000017.10 |
| cg18710278 | 3.32E-06 | 5.16E-07 | 5.19 | 5.1349207 | 1.33E-01 | 19988366  | 19988489  | NC_000005.9  |
| cg14442992 | 3.33E-06 | 5.17E-07 | 5.19 | 5.1342017 | 4.11E-02 | 150039342 | 150039465 | NC_000007.13 |
| cg14585513 | 3.33E-06 | 5.17E-07 | 5.19 | 5.133826  | 1.15E-01 | 26254060  | 26254183  | NC_000006.11 |
| cg11754318 | 3.33E-06 | 5.17E-07 | 5.19 | 5.1336455 | 8.80E-02 | 176964506 | 176964629 | NC_000002.11 |
| cg20281962 | 3.33E-06 | 5.17E-07 | 5.19 | 5.1331732 | 1.39E-01 | 8089733   | 8089856   | NC_000010.10 |
| cg00318573 | 3.33E-06 | 5.17E-07 | 5.19 | 5.1331507 | 1.16E-01 | 61993118  | 61993241  | NC_000020.10 |
| cg10171332 | 3.33E-06 | 5.18E-07 | 5.19 | 5.1324801 | 6.29E-02 | 57842079  | 57842202  | NC_000012.11 |
| cg06140051 | 3.33E-06 | 5.18E-07 | 5.19 | 5.1324619 | 6.47E-02 | 6479361   | 6479484   | NC_000011.9  |
| cg07192718 | 3.33E-06 | 5.18E-07 | 5.19 | 5.132332  | 1.06E-01 | 55445837  | 55445960  | NC_000001.10 |
| cg20763234 | 3.33E-06 | 5.18E-07 | 5.19 | 5.1319648 | 6.73E-02 | 1854608   | 1854731   | NC_000008.10 |
| cg17462140 | 3.33E-06 | 5.18E-07 | 5.19 | 5.1315965 | 9.22E-02 | 2162363   | 2162486   | NC_000011.9  |
| cg06678468 | 3.33E-06 | 5.18E-07 | 5.19 | 5.1315682 | 7.62E-02 | 114551190 | 114551313 | NC_000006.11 |
| cg27234490 | 3.34E-06 | 5.19E-07 | 5.19 | 5.1306372 | 3.23E-02 | 58174435  | 58174558  | NC_000003.11 |
| cg10791580 | 3.34E-06 | 5.19E-07 | 5.19 | 5.1306159 | 6.58E-02 | 131147870 | 131147993 | NC_000006.11 |
| cg00499475 | 3.34E-06 | 5.19E-07 | 5.19 | 5.1303649 | 1.63E-01 | 115122304 | 115122427 | NC_000012.11 |
| cg25792581 | 3.34E-06 | 5.19E-07 | 5.19 | 5.1298438 | 7.69E-02 | 7597305   | 7597428   | NC_000002.11 |
| cg24781804 | 3.34E-06 | 5.19E-07 | 5.19 | 5.1296445 | 4.49E-02 | 72118736  | 72118859  | NC_000004.11 |
| cg17810966 | 3.34E-06 | 5.19E-07 | 5.19 | 5.1296058 | 3.29E-02 | 95460771  | 95460894  | NC_000004.11 |

|            |          |          |      |           |          |           |           |              |
|------------|----------|----------|------|-----------|----------|-----------|-----------|--------------|
| cg03427298 | 3.34E-06 | 5.20E-07 | 5.19 | 5.1286898 | 9.17E-02 | 68982098  | 68982221  | NC_000003.11 |
| cg26349869 | 3.34E-06 | 5.20E-07 | 5.19 | 5.1286728 | 5.77E-02 | 7528468   | 7528591   | NC_000004.11 |
| cg04819760 | 3.35E-06 | 5.20E-07 | 5.19 | 5.1278203 | 1.43E-01 | 22765645  | 22765768  | NC_000010.10 |
| cg24496154 | 3.35E-06 | 5.20E-07 | 5.19 | 5.1277783 | 8.98E-02 | 30483519  | 30483642  | NC_000015.9  |
| cg18267374 | 3.35E-06 | 5.20E-07 | 5.19 | 5.1277161 | 1.02E-01 | 24771273  | 24771396  | NC_000008.10 |
| cg26892444 | 3.35E-06 | 5.21E-07 | 5.19 | 5.1273601 | 1.11E-01 | 63987010  | 63987133  | NC_000005.9  |
| cg13170076 | 3.35E-06 | 5.21E-07 | 5.19 | 5.1273426 | 6.52E-02 | 382356    | 382479    | NC_000002.11 |
| cg12975230 | 3.35E-06 | 5.21E-07 | 5.19 | 5.1266884 | 1.96E-01 | 73167671  | 73167794  | NC_000018.9  |
| cg16762735 | 3.35E-06 | 5.22E-07 | 5.19 | 5.1253306 | 9.29E-02 | 188916814 | 188916937 | NC_000004.11 |
| cg04060909 | 3.36E-06 | 5.22E-07 | 5.19 | 5.1237465 | 7.16E-02 | 38069519  | 38069642  | NC_000010.10 |
| cg24307799 | 3.36E-06 | 5.23E-07 | 5.19 | 5.1229513 | 1.06E-01 | 238931    | 239054    | NC_000003.11 |
| cg12259469 | 3.37E-06 | 5.23E-07 | 5.19 | 5.1220409 | 1.31E-01 | 39017305  | 39017428  | NC_000007.13 |
| cg00355389 | 3.37E-06 | 5.24E-07 | 5.19 | 5.121461  | 1.00E-01 | 139653431 | 139653554 | NC_000003.11 |
| cg27630202 | 3.37E-06 | 5.24E-07 | 5.19 | 5.120827  | 6.12E-02 | 140799305 | 140799428 | NC_000005.9  |
| cg17129262 | 3.37E-06 | 5.25E-07 | 5.19 | 5.1196811 | 6.61E-02 | 41617803  | 41617926  | NC_000006.11 |
| cg12376916 | 3.37E-06 | 5.25E-07 | 5.19 | 5.1196746 | 6.47E-02 | 159699732 | 159699855 | NC_000005.9  |
| cg12664464 | 3.37E-06 | 5.25E-07 | 5.19 | 5.1196609 | 2.04E-01 | 61051021  | 61051144  | NC_000020.10 |
| cg16458596 | 3.37E-06 | 5.25E-07 | 5.19 | 5.1193484 | 9.48E-02 | 99584812  | 99584935  | NC_000014.8  |
| cg19665765 | 3.38E-06 | 5.26E-07 | 5.19 | 5.117357  | 3.70E-02 | 155575489 | 155575612 | NC_000006.11 |
| cg10533103 | 3.38E-06 | 5.26E-07 | 5.19 | 5.1170661 | 4.75E-02 | 212688961 | 212689084 | NC_000001.10 |
| cg03338633 | 3.38E-06 | 5.26E-07 | 5.19 | 5.1170295 | 5.15E-02 | 105935004 | 105935127 | NC_000013.10 |
| cg06799305 | 3.38E-06 | 5.27E-07 | 5.19 | 5.1161566 | 2.19E-02 | 78551370  | 78551493  | NC_000017.10 |
| cg03663788 | 3.38E-06 | 5.27E-07 | 5.19 | 5.116098  | 5.52E-02 | 64514658  | 64514781  | NC_000011.9  |
| cg10423052 | 3.39E-06 | 5.27E-07 | 5.19 | 5.1155189 | 1.49E-01 | 22562469  | 22562592  | NC_000008.10 |
| cg17804611 | 3.39E-06 | 5.27E-07 | 5.19 | 5.1147409 | 1.06E-01 | 15804917  | 15805040  | NC_000002.11 |

|            |          |          |      |           |          |           |           |              |
|------------|----------|----------|------|-----------|----------|-----------|-----------|--------------|
| cg20712925 | 3.39E-06 | 5.27E-07 | 5.19 | 5.1146293 | 3.76E-02 | 18657397  | 18657520  | NC_000019.9  |
| cg10606490 | 3.39E-06 | 5.28E-07 | 5.19 | 5.1143248 | 1.53E-01 | 111385450 | 111385573 | NC_000011.9  |
| cg14069465 | 3.39E-06 | 5.28E-07 | 5.19 | 5.1142916 | 1.48E-02 | 33248707  | 33248830  | NC_000006.11 |
| cg27561907 | 3.39E-06 | 5.28E-07 | 5.19 | 5.1141933 | 7.49E-02 | 2848830   | 2848953   | NC_000016.9  |
| cg03959232 | 3.39E-06 | 5.28E-07 | 5.19 | 5.1140232 | 7.62E-02 | 140621344 | 140621467 | NC_000005.9  |
| cg08928189 | 3.39E-06 | 5.28E-07 | 5.19 | 5.1132323 | 7.87E-02 | 15757906  | 15758029  | NC_000001.10 |
| cg05871694 | 3.40E-06 | 5.29E-07 | 5.19 | 5.1121513 | 1.12E-01 | 177053503 | 177053626 | NC_000002.11 |
| cg23115387 | 3.40E-06 | 5.29E-07 | 5.19 | 5.1118019 | 7.02E-02 | 47882936  | 47883059  | NC_000001.10 |
| cg20991819 | 3.40E-06 | 5.29E-07 | 5.19 | 5.1114297 | 9.78E-02 | 218617769 | 218617892 | NC_000001.10 |
| cg25962358 | 3.40E-06 | 5.29E-07 | 5.19 | 5.1113024 | 8.77E-02 | 140347293 | 140347416 | NC_000005.9  |
| cg01959429 | 3.40E-06 | 5.29E-07 | 5.19 | 5.1108938 | 4.97E-02 | 176764224 | 176764347 | NC_000005.9  |
| cg10961733 | 3.40E-06 | 5.30E-07 | 5.19 | 5.1105175 | 9.63E-02 | 6807134   | 6807257   | NC_000010.10 |
| cg16690876 | 3.40E-06 | 5.30E-07 | 5.19 | 5.1103107 | 8.21E-02 | 19845638  | 19845761  | NC_000017.10 |
| cg02780919 | 3.40E-06 | 5.30E-07 | 5.19 | 5.1102605 | 1.01E-01 | 9026308   | 9026431   | NC_000011.9  |
| cg07730007 | 3.41E-06 | 5.30E-07 | 5.19 | 5.1091146 | 7.85E-02 | 107377277 | 107377400 | NC_000012.11 |
| cg03094083 | 3.41E-06 | 5.31E-07 | 5.19 | 5.1081174 | 8.88E-02 | 26864469  | 26864592  | NC_000017.10 |
| cg14785479 | 3.41E-06 | 5.31E-07 | 5.19 | 5.1079979 | 1.08E-01 | 20792535  | 20792658  | NC_000022.10 |
| cg16781647 | 3.41E-06 | 5.31E-07 | 5.19 | 5.1079265 | 2.03E-01 | 73151595  | 73151718  | NC_000002.11 |
| cg09382002 | 3.41E-06 | 5.31E-07 | 5.19 | 5.1079064 | 5.04E-02 | 6590564   | 6590687   | NC_000007.13 |
| cg05839818 | 3.41E-06 | 5.31E-07 | 5.19 | 5.1075564 | 9.28E-02 | 85634031  | 85634154  | NC_000016.9  |
| cg15812753 | 3.42E-06 | 5.32E-07 | 5.19 | 5.106509  | 8.52E-02 | 177029813 | 177029936 | NC_000002.11 |
| cg21435336 | 3.42E-06 | 5.33E-07 | 5.19 | 5.1052814 | 1.43E-01 | 17392852  | 17392975  | NC_000019.9  |
| cg15079326 | 3.42E-06 | 5.33E-07 | 5.19 | 5.1051619 | 1.42E-02 | 110882112 | 110882235 | NC_000001.10 |
| cg04706867 | 3.42E-06 | 5.33E-07 | 5.19 | 5.1049547 | 1.35E-01 | 145813031 | 145813154 | NC_000007.13 |
| cg05738470 | 3.42E-06 | 5.33E-07 | 5.19 | 5.1049399 | 5.21E-02 | 603743    | 603866    | NC_000016.9  |

|            |          |          |      |           |          |           |           |              |
|------------|----------|----------|------|-----------|----------|-----------|-----------|--------------|
| cg07669182 | 3.42E-06 | 5.33E-07 | 5.19 | 5.1040626 | 6.01E-02 | 39203755  | 39203878  | NC_000005.9  |
| cg12600174 | 3.42E-06 | 5.33E-07 | 5.19 | 5.1039626 | 1.55E-01 | 27205230  | 27205353  | NC_000007.13 |
| cg00913953 | 3.42E-06 | 5.33E-07 | 5.19 | 5.1038921 | 1.53E-02 | 6189040   | 6189163   | NC_000001.10 |
| cg21088983 | 3.43E-06 | 5.34E-07 | 5.19 | 5.1034598 | 1.35E-01 | 62200463  | 62200586  | NC_000008.10 |
| cg16532497 | 3.43E-06 | 5.34E-07 | 5.19 | 5.103151  | 1.14E-01 | 44448931  | 44449054  | NC_000004.11 |
| cg20948778 | 3.43E-06 | 5.34E-07 | 5.19 | 5.1028898 | 1.72E-02 | 30643516  | 30643639  | NC_000007.13 |
| cg24703168 | 3.43E-06 | 5.34E-07 | 5.19 | 5.1022872 | 1.12E-01 | 28411309  | 28411432  | NC_000006.11 |
| cg20510207 | 3.44E-06 | 5.35E-07 | 5.19 | 5.1005214 | 1.82E-01 | 38230779  | 38230902  | NC_000001.10 |
| cg22517705 | 3.44E-06 | 5.35E-07 | 5.19 | 5.1004807 | 9.87E-02 | 26645313  | 26645436  | NC_000001.10 |
| cg13491462 | 3.44E-06 | 5.36E-07 | 5.19 | 5.0997533 | 1.06E-01 | 1384491   | 1384614   | NC_000006.11 |
| cg03543861 | 3.44E-06 | 5.36E-07 | 5.19 | 5.0993338 | 7.81E-02 | 44258195  | 44258318  | NC_000021.8  |
| cg10094693 | 3.44E-06 | 5.36E-07 | 5.19 | 5.0992867 | 1.99E-02 | 43383033  | 43383156  | NC_000001.10 |
| cg27578977 | 3.44E-06 | 5.36E-07 | 5.19 | 5.099087  | 8.11E-02 | 23018266  | 23018389  | NC_000020.10 |
| cg03780701 | 3.44E-06 | 5.36E-07 | 5.19 | 5.099053  | 9.15E-02 | 38965386  | 38965509  | NC_000008.10 |
| cg01227445 | 3.44E-06 | 5.36E-07 | 5.19 | 5.0989338 | 4.27E-02 | 6992632   | 6992755   | NC_000012.11 |
| cg07706810 | 3.44E-06 | 5.36E-07 | 5.19 | 5.0983633 | 3.49E-02 | 202208065 | 202208188 | NC_000001.10 |
| cg13688098 | 3.44E-06 | 5.36E-07 | 5.19 | 5.0983244 | 4.33E-02 | 57181855  | 57181978  | NC_000004.11 |
| cg23094666 | 3.44E-06 | 5.36E-07 | 5.19 | 5.0981921 | 2.58E-02 | 100857676 | 100857799 | NC_000014.8  |
| cg21473741 | 3.44E-06 | 5.37E-07 | 5.19 | 5.0977468 | 1.06E-01 | 138436009 | 138436132 | NC_000007.13 |
| cg06830148 | 3.45E-06 | 5.37E-07 | 5.19 | 5.0975197 | 8.37E-02 | 2004777   | 2004900   | NC_000016.9  |
| cg19620668 | 3.45E-06 | 5.37E-07 | 5.19 | 5.0973018 | 5.11E-02 | 129214879 | 129215002 | NC_000007.13 |
| cg16509592 | 3.45E-06 | 5.37E-07 | 5.19 | 5.0970209 | 6.63E-02 | 106120415 | 106120538 | NC_000002.11 |
| cg13954127 | 3.45E-06 | 5.37E-07 | 5.19 | 5.0964602 | 8.59E-02 | 138675481 | 138675604 | NC_000009.11 |
| cg23888238 | 3.45E-06 | 5.37E-07 | 5.19 | 5.096359  | 8.41E-02 | 109192755 | 109192878 | NC_000004.11 |
| cg09769218 | 3.45E-06 | 5.38E-07 | 5.18 | 5.0962897 | 7.02E-02 | 1961075   | 1961198   | NC_000001.10 |



|            |          |          |      |           |          |           |           |              |
|------------|----------|----------|------|-----------|----------|-----------|-----------|--------------|
| cg26836204 | 3.45E-06 | 5.38E-07 | 5.18 | 5.0961072 | 9.70E-02 | 74506668  | 74506791  | NC_000015.9  |
| cg14233354 | 3.45E-06 | 5.38E-07 | 5.18 | 5.0958442 | 1.41E-01 | 99790761  | 99790884  | NC_000010.10 |
| cg20340866 | 3.45E-06 | 5.38E-07 | 5.18 | 5.0957749 | 1.40E-01 | 54391631  | 54391754  | NC_000012.11 |
| cg23093058 | 3.46E-06 | 5.38E-07 | 5.18 | 5.0945213 | 5.66E-02 | 1662987   | 1663110   | NC_000005.9  |
| cg04017533 | 3.46E-06 | 5.39E-07 | 5.18 | 5.0944682 | 1.49E-01 | 55020099  | 55020222  | NC_000018.9  |
| cg01522456 | 3.46E-06 | 5.39E-07 | 5.18 | 5.0938505 | 1.73E-01 | 115632236 | 115632359 | NC_000001.10 |
| cg17360338 | 3.46E-06 | 5.39E-07 | 5.18 | 5.0935425 | 9.23E-02 | 19500060  | 19500183  | NC_000019.9  |
| cg06734820 | 3.46E-06 | 5.39E-07 | 5.18 | 5.0933872 | 3.64E-02 | 39024195  | 39024318  | NC_000010.10 |
| cg24935135 | 3.46E-06 | 5.39E-07 | 5.18 | 5.0932546 | 7.82E-02 | 62900312  | 62900435  | NC_000002.11 |
| cg08370173 | 3.46E-06 | 5.39E-07 | 5.18 | 5.0932543 | 1.00E-01 | 75537444  | 75537567  | NC_000017.10 |
| cg25084332 | 3.47E-06 | 5.40E-07 | 5.18 | 5.0914323 | 1.51E-02 | 62997409  | 62997532  | NC_000012.11 |
| cg17283111 | 3.47E-06 | 5.41E-07 | 5.18 | 5.0906534 | 8.33E-02 | 77744527  | 77744650  | NC_000001.10 |
| cg03605117 | 3.47E-06 | 5.41E-07 | 5.18 | 5.0905959 | 3.33E-02 | 176922199 | 176922322 | NC_000003.11 |
| cg07075085 | 3.47E-06 | 5.41E-07 | 5.18 | 5.0904071 | 9.82E-02 | 64572729  | 64572852  | NC_000003.11 |
| cg02355411 | 3.47E-06 | 5.41E-07 | 5.18 | 5.0898116 | 4.01E-02 | 49700427  | 49700550  | NC_000019.9  |
| cg15509177 | 3.47E-06 | 5.41E-07 | 5.18 | 5.0897691 | 9.83E-02 | 19919208  | 19919331  | NC_000013.10 |
| cg10597337 | 3.47E-06 | 5.41E-07 | 5.18 | 5.0897526 | 5.02E-02 | 65359466  | 65359589  | NC_000017.10 |
| cg11650858 | 3.47E-06 | 5.41E-07 | 5.18 | 5.0896282 | 2.73E-02 | 16943879  | 16944002  | NC_000001.10 |
| cg13874040 | 3.47E-06 | 5.42E-07 | 5.18 | 5.0885266 | 8.48E-02 | 231751449 | 231751572 | NC_000002.11 |
| cg26926765 | 3.48E-06 | 5.42E-07 | 5.18 | 5.0880277 | 9.71E-02 | 54127349  | 54127472  | NC_000006.11 |
| cg13588800 | 3.48E-06 | 5.42E-07 | 5.18 | 5.0879314 | 1.35E-01 | 19155785  | 19155908  | NC_000007.13 |
| cg23152885 | 3.48E-06 | 5.42E-07 | 5.18 | 5.0877234 | 9.32E-02 | 74422282  | 74422405  | NC_000015.9  |
| cg13646785 | 3.48E-06 | 5.42E-07 | 5.18 | 5.0873792 | 1.26E-01 | 135461935 | 135462058 | NC_000009.11 |
| cg00040312 | 3.48E-06 | 5.42E-07 | 5.18 | 5.0873392 | 1.61E-01 | 54424679  | 54424802  | NC_000012.11 |
| cg22680536 | 3.48E-06 | 5.43E-07 | 5.18 | 5.0870625 | 9.34E-02 | 55636163  | 55636286  | NC_000004.11 |

|            |          |          |      |           |          |           |           |              |
|------------|----------|----------|------|-----------|----------|-----------|-----------|--------------|
| cg04908625 | 3.48E-06 | 5.43E-07 | 5.18 | 5.0868386 | 7.65E-02 | 123166882 | 123167005 | NC_000003.11 |
| cg09216081 | 3.48E-06 | 5.43E-07 | 5.18 | 5.0865533 | 4.10E-02 | 134940484 | 134940607 | NC_000010.10 |
| cg19603744 | 3.48E-06 | 5.43E-07 | 5.18 | 5.0865025 | 6.88E-02 | 58554401  | 58554524  | NC_000019.9  |
| cg08063452 | 3.48E-06 | 5.43E-07 | 5.18 | 5.0864596 | 3.28E-02 | 48677668  | 48677791  | NC_000003.11 |
| cg07191594 | 3.48E-06 | 5.43E-07 | 5.18 | 5.0859346 | 8.72E-02 | 44650220  | 44650343  | NC_000020.10 |
| cg07524214 | 3.48E-06 | 5.43E-07 | 5.18 | 5.0856797 | 8.53E-02 | 86825363  | 86825486  | NC_000016.9  |
| cg02423496 | 3.49E-06 | 5.44E-07 | 5.18 | 5.0848746 | 3.49E-02 | 210084    | 210207    | NC_000005.9  |
| cg25603277 | 3.49E-06 | 5.44E-07 | 5.18 | 5.0847499 | 1.47E-01 | 31837607  | 31837730  | NC_000011.9  |
| cg16852892 | 3.49E-06 | 5.44E-07 | 5.18 | 5.0846024 | 1.35E-01 | 89339473  | 89339596  | NC_000008.10 |
| cg26702958 | 3.49E-06 | 5.44E-07 | 5.18 | 5.0844432 | 1.12E-01 | 102996254 | 102996377 | NC_000010.10 |
| cg02045971 | 3.49E-06 | 5.45E-07 | 5.18 | 5.0834658 | 8.43E-02 | 138739874 | 138739997 | NC_000003.11 |
| cg22132982 | 3.49E-06 | 5.45E-07 | 5.18 | 5.0834656 | 9.59E-02 | 13916247  | 13916370  | NC_000003.11 |
| cg12015851 | 3.50E-06 | 5.45E-07 | 5.18 | 5.0821534 | 3.56E-02 | 91425292  | 91425415  | NC_000015.9  |
| cg13658899 | 3.50E-06 | 5.46E-07 | 5.18 | 5.081848  | 9.57E-02 | 139094665 | 139094788 | NC_000009.11 |
| cg20961943 | 3.50E-06 | 5.46E-07 | 5.18 | 5.0811656 | 9.20E-02 | 27066577  | 27066700  | NC_000014.8  |
| cg14563449 | 3.50E-06 | 5.46E-07 | 5.18 | 5.0807717 | 3.29E-02 | 137021138 | 137021261 | NC_000009.11 |
| cg11743675 | 3.50E-06 | 5.46E-07 | 5.18 | 5.0802293 | 1.27E-01 | 41221855  | 41221978  | NC_000012.11 |
| cg06633429 | 3.50E-06 | 5.47E-07 | 5.18 | 5.0794973 | 1.49E-01 | 76941396  | 76941519  | NC_000005.9  |
| cg16902385 | 3.51E-06 | 5.47E-07 | 5.18 | 5.0787043 | 1.45E-01 | 55019669  | 55019792  | NC_000018.9  |
| cg16049364 | 3.51E-06 | 5.48E-07 | 5.18 | 5.0772477 | 1.06E-01 | 244080978 | 244081101 | NC_000001.10 |
| cg09788390 | 3.51E-06 | 5.48E-07 | 5.18 | 5.0771496 | 7.23E-02 | 86921471  | 86921594  | NC_000001.10 |
| cg26140007 | 3.52E-06 | 5.49E-07 | 5.18 | 5.0750443 | 3.19E-02 | 64395544  | 64395667  | NC_000005.9  |
| cg19133443 | 3.52E-06 | 5.50E-07 | 5.18 | 5.0747801 | 7.65E-02 | 63174851  | 63174974  | NC_000010.10 |
| cg25662963 | 3.52E-06 | 5.50E-07 | 5.18 | 5.0743707 | 1.39E-01 | 69062887  | 69063010  | NC_000007.13 |
| cg16692735 | 3.53E-06 | 5.51E-07 | 5.18 | 5.0717996 | 8.09E-02 | 135259860 | 135259983 | NC_000010.10 |

|            |          |          |      |           |          |           |           |              |
|------------|----------|----------|------|-----------|----------|-----------|-----------|--------------|
| cg26495953 | 3.53E-06 | 5.51E-07 | 5.18 | 5.0717058 | 8.49E-02 | 43937289  | 43937412  | NC_000020.10 |
| cg15964212 | 3.53E-06 | 5.52E-07 | 5.18 | 5.0712401 | 9.45E-02 | 67999390  | 67999513  | NC_000014.8  |
| cg13827597 | 3.53E-06 | 5.52E-07 | 5.18 | 5.0710139 | 5.50E-02 | 129282394 | 129282517 | NC_000009.11 |
| cg06464468 | 3.53E-06 | 5.52E-07 | 5.18 | 5.0707389 | 1.10E-01 | 65414413  | 65414536  | NC_000011.9  |
| cg03390245 | 3.54E-06 | 5.52E-07 | 5.18 | 5.0706322 | 7.87E-02 | 156819061 | 156819184 | NC_000001.10 |
| cg01959238 | 3.54E-06 | 5.52E-07 | 5.18 | 5.0697654 | 1.46E-01 | 85200915  | 85201038  | NC_000016.9  |
| cg21441657 | 3.54E-06 | 5.53E-07 | 5.18 | 5.0695129 | 5.64E-02 | 3643404   | 3643527   | NC_000004.11 |
| cg13659970 | 3.54E-06 | 5.53E-07 | 5.18 | 5.068851  | 7.81E-02 | 106054129 | 106054252 | NC_000014.8  |
| cg21102121 | 3.54E-06 | 5.53E-07 | 5.18 | 5.0688425 | 9.32E-02 | 54401295  | 54401418  | NC_000019.9  |
| cg07061368 | 3.54E-06 | 5.53E-07 | 5.18 | 5.0688407 | 9.17E-02 | 35631736  | 35631859  | NC_000006.11 |
| cg26829131 | 3.54E-06 | 5.53E-07 | 5.18 | 5.0688331 | 1.38E-01 | 54393375  | 54393498  | NC_000012.11 |
| cg19453181 | 3.54E-06 | 5.53E-07 | 5.18 | 5.0686725 | 1.40E-01 | 48011002  | 48011125  | NC_000015.9  |
| cg21206652 | 3.54E-06 | 5.53E-07 | 5.18 | 5.0685723 | 6.94E-02 | 144790187 | 144790310 | NC_000008.10 |
| cg07502936 | 3.54E-06 | 5.53E-07 | 5.18 | 5.0681699 | 4.90E-02 | 58571638  | 58571761  | NC_000019.9  |
| cg17301223 | 3.54E-06 | 5.53E-07 | 5.18 | 5.0680948 | 1.22E-01 | 145106438 | 145106561 | NC_000008.10 |
| cg23962872 | 3.54E-06 | 5.53E-07 | 5.18 | 5.0680791 | 6.75E-02 | 1345372   | 1345495   | NC_000008.10 |
| cg18424431 | 3.54E-06 | 5.53E-07 | 5.18 | 5.0680313 | 3.55E-02 | 32052264  | 32052387  | NC_000006.11 |
| cg21571339 | 3.54E-06 | 5.53E-07 | 5.18 | 5.0679266 | 1.56E-01 | 86001111  | 86001234  | NC_000014.8  |
| cg05410102 | 3.54E-06 | 5.54E-07 | 5.18 | 5.0676909 | 1.41E-02 | 57416074  | 57416197  | NC_000016.9  |
| cg08648727 | 3.55E-06 | 5.54E-07 | 5.18 | 5.0670376 | 1.15E-01 | 58446436  | 58446559  | NC_000019.9  |
| cg07214715 | 3.55E-06 | 5.54E-07 | 5.18 | 5.0668497 | 4.51E-02 | 86114883  | 86115006  | NC_000002.11 |
| cg16289029 | 3.55E-06 | 5.54E-07 | 5.18 | 5.0667384 | 1.11E-01 | 31473577  | 31473700  | NC_000012.11 |
| cg19463228 | 3.55E-06 | 5.54E-07 | 5.18 | 5.0666576 | 6.33E-02 | 24028302  | 24028425  | NC_000014.8  |
| cg10321339 | 3.55E-06 | 5.55E-07 | 5.18 | 5.0656208 | 9.21E-02 | 369810    | 369933    | NC_000011.9  |
| cg01506298 | 3.55E-06 | 5.55E-07 | 5.18 | 5.0653386 | 9.73E-02 | 89065442  | 89065565  | NC_000002.11 |

|            |          |          |      |           |          |           |           |              |
|------------|----------|----------|------|-----------|----------|-----------|-----------|--------------|
| cg08769966 | 3.55E-06 | 5.55E-07 | 5.18 | 5.0650653 | 2.00E-01 | 92937735  | 92937858  | NC_000015.9  |
| cg09411719 | 3.55E-06 | 5.55E-07 | 5.18 | 5.0648461 | 1.32E-01 | 27513009  | 27513132  | NC_000006.11 |
| cg03327643 | 3.56E-06 | 5.55E-07 | 5.18 | 5.0645121 | 5.81E-02 | 245836835 | 245836958 | NC_000001.10 |
| cg21168444 | 3.56E-06 | 5.56E-07 | 5.18 | 5.0633432 | 9.57E-02 | 11896095  | 11896218  | NC_000012.11 |
| cg03914922 | 3.56E-06 | 5.56E-07 | 5.18 | 5.0629568 | 1.04E-01 | 87985200  | 87985323  | NC_000005.9  |
| cg17890850 | 3.56E-06 | 5.56E-07 | 5.18 | 5.0628919 | 3.33E-02 | 79954500  | 79954623  | NC_000017.10 |
| cg24908882 | 3.56E-06 | 5.56E-07 | 5.18 | 5.062839  | 1.57E-01 | 179780563 | 179780686 | NC_000005.9  |
| cg15295775 | 3.56E-06 | 5.57E-07 | 5.18 | 5.0617059 | 3.34E-02 | 44413609  | 44413732  | NC_000006.11 |
| cg16257013 | 3.57E-06 | 5.58E-07 | 5.18 | 5.0604857 | 6.67E-02 | 30167403  | 30167526  | NC_000006.11 |
| cg00992145 | 3.57E-06 | 5.58E-07 | 5.18 | 5.0602771 | 6.45E-02 | 36891623  | 36891746  | NC_000020.10 |
| cg06480482 | 3.57E-06 | 5.58E-07 | 5.18 | 5.0601441 | 4.72E-02 | 29265720  | 29265843  | NC_000016.9  |
| cg13707623 | 3.57E-06 | 5.58E-07 | 5.18 | 5.059456  | 8.40E-02 | 57766574  | 57766697  | NC_000020.10 |
| cg26826117 | 3.57E-06 | 5.59E-07 | 5.18 | 5.0588709 | 4.56E-02 | 85116902  | 85117025  | NC_000015.9  |
| cg26745222 | 3.58E-06 | 5.59E-07 | 5.18 | 5.0582796 | 1.66E-01 | 42543878  | 42544001  | NC_000020.10 |
| cg01593834 | 3.58E-06 | 5.59E-07 | 5.18 | 5.0579441 | 1.12E-01 | 145718401 | 145718524 | NC_000005.9  |
| cg11914962 | 3.58E-06 | 5.59E-07 | 5.18 | 5.0577245 | 7.90E-02 | 97842268  | 97842391  | NC_000007.13 |
| cg11124080 | 3.58E-06 | 5.60E-07 | 5.18 | 5.0567906 | 1.02E-01 | 119295875 | 119295998 | NC_000010.10 |
| cg22895198 | 3.58E-06 | 5.60E-07 | 5.18 | 5.0566638 | 7.19E-02 | 74978020  | 74978143  | NC_000005.9  |
| cg03876618 | 3.58E-06 | 5.60E-07 | 5.18 | 5.0566471 | 1.40E-01 | 57976034  | 57976157  | NC_000004.11 |
| cg17390646 | 3.58E-06 | 5.60E-07 | 5.18 | 5.0566316 | 2.13E-02 | 132872395 | 132872518 | NC_000012.11 |
| cg14156498 | 3.58E-06 | 5.60E-07 | 5.18 | 5.0564395 | 9.47E-02 | 1047246   | 1047369   | NC_000009.11 |
| cg00888007 | 3.58E-06 | 5.60E-07 | 5.18 | 5.0564305 | 1.54E-01 | 4382184   | 4382307   | NC_000012.11 |
| cg00979076 | 3.58E-06 | 5.60E-07 | 5.18 | 5.0563185 | 1.28E-01 | 24123271  | 24123394  | NC_000015.9  |
| cg08789696 | 3.58E-06 | 5.60E-07 | 5.18 | 5.0560626 | 2.27E-02 | 2575895   | 2576018   | NC_000002.11 |
| cg21342567 | 3.59E-06 | 5.61E-07 | 5.18 | 5.0555681 | 9.72E-02 | 36484087  | 36484210  | NC_000013.10 |

|            |          |          |      |           |          |           |           |              |
|------------|----------|----------|------|-----------|----------|-----------|-----------|--------------|
| cg03529367 | 3.59E-06 | 5.61E-07 | 5.18 | 5.0552951 | 3.30E-02 | 102087309 | 102087432 | NC_000007.13 |
| cg08224682 | 3.59E-06 | 5.61E-07 | 5.18 | 5.0552876 | 8.95E-02 | 92684164  | 92684287  | NC_000005.9  |
| cg23108037 | 3.59E-06 | 5.61E-07 | 5.18 | 5.0548038 | 9.53E-02 | 3507069   | 3507192   | NC_000001.10 |
| cg10858623 | 3.59E-06 | 5.61E-07 | 5.18 | 5.0541778 | 2.41E-02 | 1538120   | 1538243   | NC_000005.9  |
| cg09854709 | 3.59E-06 | 5.61E-07 | 5.18 | 5.0541124 | 8.26E-02 | 156903097 | 156903220 | NC_000001.10 |
| cg25049698 | 3.59E-06 | 5.62E-07 | 5.18 | 5.0537018 | 1.47E-01 | 50692605  | 50692728  | NC_000006.11 |
| cg25147632 | 3.59E-06 | 5.62E-07 | 5.18 | 5.0535284 | 1.01E-01 | 84027418  | 84027541  | NC_000010.10 |
| cg10877084 | 3.59E-06 | 5.62E-07 | 5.18 | 5.0533245 | 1.68E-01 | 87967728  | 87967851  | NC_000005.9  |
| cg08774009 | 3.60E-06 | 5.63E-07 | 5.18 | 5.0522032 | 7.84E-02 | 49309094  | 49309217  | NC_000008.10 |
| cg22747076 | 3.60E-06 | 5.63E-07 | 5.18 | 5.0514858 | 1.77E-01 | 54447873  | 54447996  | NC_000012.11 |
| cg01932182 | 3.60E-06 | 5.63E-07 | 5.18 | 5.0513554 | 5.07E-02 | 3689368   | 3689491   | NC_000002.11 |
| cg05330297 | 3.60E-06 | 5.63E-07 | 5.18 | 5.0512513 | 1.25E-01 | 90527606  | 90527729  | NC_000014.8  |
| cg00241664 | 3.60E-06 | 5.63E-07 | 5.18 | 5.0507649 | 2.22E-02 | 1611966   | 1612089   | NC_000016.9  |
| cg22110267 | 3.60E-06 | 5.63E-07 | 5.18 | 5.0507432 | 8.41E-02 | 75052065  | 75052188  | NC_000011.9  |
| cg27221554 | 3.60E-06 | 5.63E-07 | 5.18 | 5.0507215 | 3.03E-02 | 29924188  | 29924311  | NC_000008.10 |
| cg27382910 | 3.60E-06 | 5.63E-07 | 5.17 | 5.0506915 | 9.01E-02 | 129807539 | 129807662 | NC_000010.10 |
| cg03086857 | 3.60E-06 | 5.63E-07 | 5.17 | 5.0505912 | 1.10E-01 | 78492568  | 78492691  | NC_000013.10 |
| cg05337137 | 3.60E-06 | 5.64E-07 | 5.17 | 5.0501433 | 8.54E-02 | 6223463   | 6223586   | NC_000004.11 |
| cg12134230 | 3.61E-06 | 5.64E-07 | 5.17 | 5.0492404 | 3.06E-02 | 10703262  | 10703385  | NC_000011.9  |
| cg25739366 | 3.61E-06 | 5.64E-07 | 5.17 | 5.0489412 | 6.33E-02 | 57004007  | 57004130  | NC_000011.9  |
| cg14410319 | 3.61E-06 | 5.65E-07 | 5.17 | 5.048186  | 1.22E-01 | 134070598 | 134070721 | NC_000004.11 |
| cg05611218 | 3.62E-06 | 5.66E-07 | 5.17 | 5.0467743 | 1.31E-02 | 43121586  | 43121709  | NC_000005.9  |
| cg02324529 | 3.62E-06 | 5.66E-07 | 5.17 | 5.0460334 | 2.90E-02 | 57179371  | 57179494  | NC_000004.11 |
| cg14093570 | 3.62E-06 | 5.66E-07 | 5.17 | 5.0454699 | 1.48E-02 | 16679143  | 16679266  | NC_000001.10 |
| cg07990736 | 3.62E-06 | 5.67E-07 | 5.17 | 5.0453177 | 1.31E-01 | 37026418  | 37026541  | NC_000009.11 |

|            |          |          |      |           |          |           |           |              |
|------------|----------|----------|------|-----------|----------|-----------|-----------|--------------|
| cg00942551 | 3.62E-06 | 5.67E-07 | 5.17 | 5.0447758 | 1.53E-01 | 3585406   | 3585529   | NC_000019.9  |
| cg15818632 | 3.63E-06 | 5.68E-07 | 5.17 | 5.0432701 | 7.81E-02 | 3017794   | 3017917   | NC_000001.10 |
| cg08353479 | 3.63E-06 | 5.68E-07 | 5.17 | 5.043104  | 6.79E-02 | 1267618   | 1267741   | NC_000016.9  |
| cg27493928 | 3.63E-06 | 5.68E-07 | 5.17 | 5.0430385 | 1.30E-01 | 44144279  | 44144402  | NC_000007.13 |
| cg21361094 | 3.63E-06 | 5.68E-07 | 5.17 | 5.0427687 | 1.26E-01 | 58021917  | 58022040  | NC_000012.11 |
| cg19322509 | 3.63E-06 | 5.68E-07 | 5.17 | 5.0425505 | 3.50E-02 | 43851891  | 43852014  | NC_000001.10 |
| cg09202971 | 3.63E-06 | 5.69E-07 | 5.17 | 5.0417755 | 3.32E-02 | 100731207 | 100731330 | NC_000013.10 |
| cg26874634 | 3.64E-06 | 5.69E-07 | 5.17 | 5.0407926 | 2.18E-02 | 49022278  | 49022401  | NC_000017.10 |
| cg21877680 | 3.64E-06 | 5.69E-07 | 5.17 | 5.0405314 | 9.22E-02 | 43132507  | 43132630  | NC_000008.10 |
| cg09845883 | 3.64E-06 | 5.69E-07 | 5.17 | 5.0403537 | 5.82E-02 | 154197610 | 154197733 | NC_000001.10 |
| cg23986335 | 3.64E-06 | 5.70E-07 | 5.17 | 5.0400277 | 1.38E-01 | 18059456  | 18059579  | NC_000002.11 |
| cg02767356 | 3.64E-06 | 5.70E-07 | 5.17 | 5.0389496 | 7.75E-02 | 43456065  | 43456188  | NC_000006.11 |
| cg12224388 | 3.65E-06 | 5.71E-07 | 5.17 | 5.0384504 | 1.03E-01 | 545599    | 545722    | NC_000002.11 |
| cg14644865 | 3.65E-06 | 5.71E-07 | 5.17 | 5.0375348 | 3.21E-02 | 994943    | 995066    | NC_000010.10 |
| cg12354729 | 3.65E-06 | 5.71E-07 | 5.17 | 5.0371304 | 1.79E-02 | 50769083  | 50769206  | NC_000020.10 |
| cg00330492 | 3.66E-06 | 5.72E-07 | 5.17 | 5.0354306 | 1.58E-01 | 28352558  | 28352681  | NC_000015.9  |
| cg07726139 | 3.66E-06 | 5.73E-07 | 5.17 | 5.0349234 | 1.42E-01 | 228652528 | 228652651 | NC_000001.10 |
| cg20919143 | 3.66E-06 | 5.73E-07 | 5.17 | 5.0348933 | 4.21E-02 | 105739057 | 105739180 | NC_000014.8  |
| cg13823327 | 3.66E-06 | 5.73E-07 | 5.17 | 5.034228  | 4.28E-02 | 137926784 | 137926907 | NC_000009.11 |
| cg05306070 | 3.66E-06 | 5.73E-07 | 5.17 | 5.0335875 | 2.00E-01 | 45770298  | 45770421  | NC_000021.8  |
| cg22097768 | 3.66E-06 | 5.73E-07 | 5.17 | 5.0335469 | 1.42E-01 | 61615913  | 61616036  | NC_000017.10 |
| cg21276456 | 3.66E-06 | 5.73E-07 | 5.17 | 5.0335369 | 2.95E-02 | 135467680 | 135467803 | NC_000006.11 |
| cg20996561 | 3.66E-06 | 5.74E-07 | 5.17 | 5.0331491 | 9.04E-02 | 40082316  | 40082439  | NC_000022.10 |
| cg18674899 | 3.67E-06 | 5.75E-07 | 5.17 | 5.03125   | 1.02E-01 | 83904319  | 83904442  | NC_000006.11 |
| cg06721796 | 3.67E-06 | 5.75E-07 | 5.17 | 5.0307442 | 7.01E-02 | 44037519  | 44037642  | NC_000020.10 |

|            |          |          |      |           |          |           |           |              |
|------------|----------|----------|------|-----------|----------|-----------|-----------|--------------|
| cg16212053 | 3.67E-06 | 5.75E-07 | 5.17 | 5.0304922 | 1.22E-01 | 176333705 | 176333828 | NC_000002.11 |
| cg00960186 | 3.67E-06 | 5.75E-07 | 5.17 | 5.0302785 | 1.97E-01 | 5890358   | 5890481   | NC_000004.11 |
| cg16079774 | 3.68E-06 | 5.76E-07 | 5.17 | 5.0297182 | 1.28E-01 | 22364498  | 22364621  | NC_000011.9  |
| cg18683604 | 3.68E-06 | 5.76E-07 | 5.17 | 5.0290951 | 1.65E-01 | 51561293  | 51561416  | NC_000014.8  |
| cg13777783 | 3.68E-06 | 5.76E-07 | 5.17 | 5.0290204 | 5.81E-02 | 79615861  | 79615984  | NC_000017.10 |
| cg01519897 | 3.68E-06 | 5.76E-07 | 5.17 | 5.028879  | 1.10E-01 | 153859049 | 153859172 | NC_000005.9  |
| cg14172108 | 3.68E-06 | 5.76E-07 | 5.17 | 5.0287858 | 8.50E-02 | 34405553  | 34405676  | NC_000021.8  |
| cg07562773 | 3.68E-06 | 5.76E-07 | 5.17 | 5.0286483 | 4.28E-02 | 29075159  | 29075282  | NC_000022.10 |
| cg17474338 | 3.68E-06 | 5.76E-07 | 5.17 | 5.0285026 | 1.54E-01 | 28733950  | 28734073  | NC_000006.11 |
| cg15841511 | 3.68E-06 | 5.77E-07 | 5.17 | 5.028219  | 6.11E-02 | 66829701  | 66829824  | NC_000007.13 |
| cg18560936 | 3.68E-06 | 5.77E-07 | 5.17 | 5.0281166 | 8.92E-02 | 1632620   | 1632743   | NC_000007.13 |
| cg01705934 | 3.68E-06 | 5.77E-07 | 5.17 | 5.0279335 | 6.27E-02 | 155258915 | 155259038 | NC_000007.13 |
| cg17003607 | 3.68E-06 | 5.77E-07 | 5.17 | 5.0275432 | 5.11E-02 | 61871452  | 61871575  | NC_000020.10 |
| cg16106368 | 3.68E-06 | 5.77E-07 | 5.17 | 5.0274175 | 1.83E-01 | 5890369   | 5890492   | NC_000004.11 |
| cg03936251 | 3.69E-06 | 5.77E-07 | 5.17 | 5.0270482 | 4.39E-02 | 55530254  | 55530377  | NC_000005.9  |
| cg24678581 | 3.69E-06 | 5.77E-07 | 5.17 | 5.0268192 | 5.88E-02 | 170882542 | 170882665 | NC_000005.9  |
| cg18365536 | 3.69E-06 | 5.78E-07 | 5.17 | 5.0265697 | 7.24E-02 | 32027603  | 32027726  | NC_000006.11 |
| cg11069317 | 3.69E-06 | 5.78E-07 | 5.17 | 5.0263539 | 6.23E-02 | 37603654  | 37603777  | NC_000022.10 |
| cg08271259 | 3.69E-06 | 5.78E-07 | 5.17 | 5.0262026 | 1.18E-01 | 219504623 | 219504746 | NC_000001.10 |
| cg26000460 | 3.69E-06 | 5.78E-07 | 5.17 | 5.0259388 | 4.59E-02 | 39328038  | 39328161  | NC_000001.10 |
| cg08840847 | 3.69E-06 | 5.78E-07 | 5.17 | 5.0252929 | 1.09E-01 | 26758238  | 26758361  | NC_000006.11 |
| cg10528482 | 3.69E-06 | 5.79E-07 | 5.17 | 5.0247202 | 8.43E-02 | 525771    | 525894    | NC_000005.9  |
| cg27180298 | 3.69E-06 | 5.79E-07 | 5.17 | 5.0242833 | 5.82E-02 | 88261431  | 88261554  | NC_000016.9  |
| cg23174616 | 3.69E-06 | 5.79E-07 | 5.17 | 5.0242789 | 1.08E-01 | 145713698 | 145713821 | NC_000005.9  |
| cg03347559 | 3.70E-06 | 5.79E-07 | 5.17 | 5.0241551 | 8.73E-02 | 3225059   | 3225182   | NC_000011.9  |

|            |          |          |      |           |          |           |           |              |
|------------|----------|----------|------|-----------|----------|-----------|-----------|--------------|
| cg24461171 | 3.70E-06 | 5.79E-07 | 5.17 | 5.0238848 | 8.58E-02 | 197745025 | 197745148 | NC_000001.10 |
| cg14185025 | 3.70E-06 | 5.79E-07 | 5.17 | 5.0237955 | 1.58E-01 | 100259341 | 100259464 | NC_000014.8  |
| cg01671895 | 3.70E-06 | 5.79E-07 | 5.17 | 5.0235961 | 1.09E-01 | 100997799 | 100997922 | NC_000011.9  |
| cg22472267 | 3.70E-06 | 5.80E-07 | 5.17 | 5.0233577 | 6.30E-02 | 31851871  | 31851994  | NC_000005.9  |
| cg03107393 | 3.70E-06 | 5.80E-07 | 5.17 | 5.023262  | 1.41E-01 | 46692553  | 46692676  | NC_000017.10 |
| cg24931520 | 3.70E-06 | 5.80E-07 | 5.17 | 5.0227712 | 1.12E-01 | 99291587  | 99291710  | NC_000006.11 |
| cg17557002 | 3.70E-06 | 5.80E-07 | 5.17 | 5.0226522 | 6.35E-02 | 169244651 | 169244774 | NC_000006.11 |
| cg14463412 | 3.70E-06 | 5.80E-07 | 5.17 | 5.0225057 | 1.11E-01 | 96588830  | 96588953  | NC_000009.11 |
| cg01482790 | 3.70E-06 | 5.80E-07 | 5.17 | 5.0221457 | 1.15E-01 | 8513923   | 8514046   | NC_000019.9  |
| cg25513535 | 3.70E-06 | 5.80E-07 | 5.17 | 5.0220324 | 8.46E-02 | 15589441  | 15589564  | NC_000021.8  |
| cg13359948 | 3.70E-06 | 5.81E-07 | 5.17 | 5.0217253 | 1.90E-01 | 58458769  | 58458892  | NC_000019.9  |
| cg25404458 | 3.71E-06 | 5.81E-07 | 5.17 | 5.0208404 | 3.66E-02 | 60966991  | 60967114  | NC_000020.10 |
| cg20001829 | 3.71E-06 | 5.81E-07 | 5.17 | 5.0208306 | 1.57E-01 | 118402342 | 118402465 | NC_000011.9  |
| cg13593448 | 3.71E-06 | 5.81E-07 | 5.17 | 5.0206033 | 4.28E-02 | 41111757  | 41111880  | NC_000019.9  |
| cg26293546 | 3.71E-06 | 5.82E-07 | 5.17 | 5.019898  | 1.50E-01 | 214162659 | 214162782 | NC_000001.10 |
| cg09734541 | 3.71E-06 | 5.82E-07 | 5.17 | 5.0198344 | 6.19E-02 | 64475892  | 64476015  | NC_000012.11 |
| cg01577751 | 3.71E-06 | 5.82E-07 | 5.17 | 5.0194396 | 1.09E-01 | 54332222  | 54332345  | NC_000012.11 |
| cg25819441 | 3.71E-06 | 5.82E-07 | 5.17 | 5.0193595 | 9.77E-02 | 38307803  | 38307926  | NC_000019.9  |
| cg04011995 | 3.71E-06 | 5.82E-07 | 5.17 | 5.0191394 | 9.77E-02 | 41326317  | 41326440  | NC_000001.10 |
| cg04148489 | 3.71E-06 | 5.82E-07 | 5.17 | 5.0190512 | 4.54E-02 | 135096710 | 135096833 | NC_000010.10 |
| cg04781626 | 3.72E-06 | 5.83E-07 | 5.17 | 5.0181666 | 9.84E-02 | 135172091 | 135172214 | NC_000003.11 |
| cg21754201 | 3.72E-06 | 5.83E-07 | 5.17 | 5.0181103 | 6.65E-02 | 32032817  | 32032940  | NC_000006.11 |
| cg06679270 | 3.72E-06 | 5.83E-07 | 5.17 | 5.0168603 | 8.89E-02 | 101084980 | 101085103 | NC_000015.9  |
| cg03111498 | 3.72E-06 | 5.84E-07 | 5.17 | 5.0164274 | 8.98E-02 | 25062860  | 25062983  | NC_000020.10 |
| cg05764839 | 3.72E-06 | 5.84E-07 | 5.17 | 5.0164211 | 8.50E-02 | 32118298  | 32118421  | NC_000006.11 |



|            |          |          |      |           |          |           |           |              |
|------------|----------|----------|------|-----------|----------|-----------|-----------|--------------|
| cg13754661 | 3.72E-06 | 5.84E-07 | 5.17 | 5.0158182 | 1.69E-01 | 137533360 | 137533483 | NC_000009.11 |
| cg14073497 | 3.72E-06 | 5.84E-07 | 5.17 | 5.0156397 | 8.28E-02 | 68611479  | 68611602  | NC_000011.9  |
| cg05291965 | 3.72E-06 | 5.84E-07 | 5.17 | 5.0156385 | 6.16E-02 | 47382583  | 47382706  | NC_000002.11 |
| cg12628659 | 3.73E-06 | 5.84E-07 | 5.17 | 5.0153486 | 1.48E-01 | 79576216  | 79576339  | NC_000015.9  |
| cg08448407 | 3.73E-06 | 5.85E-07 | 5.17 | 5.0148448 | 9.13E-02 | 54633831  | 54633954  | NC_000010.10 |
| cg13189149 | 3.73E-06 | 5.85E-07 | 5.17 | 5.0142117 | 1.20E-01 | 102985868 | 102985991 | NC_000010.10 |
| cg05481257 | 3.73E-06 | 5.85E-07 | 5.17 | 5.0142088 | 1.07E-01 | 20870211  | 20870334  | NC_000002.11 |
| cg15575875 | 3.73E-06 | 5.85E-07 | 5.17 | 5.0137145 | 8.96E-02 | 85220088  | 85220211  | NC_000001.10 |
| cg03365437 | 3.73E-06 | 5.86E-07 | 5.17 | 5.013264  | 1.17E-01 | 58357874  | 58357997  | NC_000015.9  |
| cg27498114 | 3.73E-06 | 5.86E-07 | 5.17 | 5.0130317 | 1.09E-01 | 37823292  | 37823415  | NC_000008.10 |
| cg10111604 | 3.74E-06 | 5.86E-07 | 5.17 | 5.0126544 | 5.27E-02 | 29530950  | 29531073  | NC_000012.11 |
| cg00693060 | 3.74E-06 | 5.86E-07 | 5.17 | 5.0126108 | 4.91E-02 | 360072    | 360195    | NC_000019.9  |
| cg15792338 | 3.74E-06 | 5.86E-07 | 5.17 | 5.0118515 | 1.56E-01 | 31840743  | 31840866  | NC_000019.9  |
| cg10829693 | 3.74E-06 | 5.86E-07 | 5.17 | 5.0118215 | 1.18E-01 | 34396221  | 34396344  | NC_000021.8  |
| cg12300084 | 3.74E-06 | 5.87E-07 | 5.17 | 5.0117764 | 3.01E-02 | 2695197   | 2695320   | NC_000007.13 |
| cg17075808 | 3.74E-06 | 5.87E-07 | 5.17 | 5.0114941 | 1.06E-01 | 225774214 | 225774337 | NC_000002.11 |
| cg20525088 | 3.74E-06 | 5.87E-07 | 5.17 | 5.0114867 | 9.35E-02 | 112859484 | 112859607 | NC_000013.10 |
| cg05002305 | 3.74E-06 | 5.87E-07 | 5.17 | 5.0111564 | 5.56E-02 | 1273661   | 1273784   | NC_000011.9  |
| cg05972386 | 3.74E-06 | 5.87E-07 | 5.17 | 5.0110647 | 5.01E-02 | 48844763  | 48844886  | NC_000002.11 |
| cg06530490 | 3.74E-06 | 5.87E-07 | 5.17 | 5.0105348 | 1.68E-01 | 118981783 | 118981906 | NC_000002.11 |
| cg27167601 | 3.74E-06 | 5.87E-07 | 5.17 | 5.0104019 | 1.12E-01 | 61521923  | 61522046  | NC_000015.9  |
| cg12973753 | 3.75E-06 | 5.88E-07 | 5.17 | 5.0094015 | 9.47E-02 | 26208128  | 26208251  | NC_000006.11 |
| cg12543219 | 3.75E-06 | 5.88E-07 | 5.17 | 5.0090656 | 1.24E-01 | 135016451 | 135016574 | NC_000010.10 |
| cg27635069 | 3.75E-06 | 5.88E-07 | 5.17 | 5.0086506 | 1.11E-01 | 115880381 | 115880504 | NC_000001.10 |
| cg06609094 | 3.75E-06 | 5.88E-07 | 5.17 | 5.0086013 | 1.13E-01 | 175132842 | 175132965 | NC_000004.11 |

|            |          |          |      |           |          |           |           |              |
|------------|----------|----------|------|-----------|----------|-----------|-----------|--------------|
| cg21963643 | 3.75E-06 | 5.89E-07 | 5.17 | 5.0084318 | 1.56E-01 | 181451911 | 181452034 | NC_000001.10 |
| cg20687190 | 3.75E-06 | 5.89E-07 | 5.17 | 5.008238  | 3.85E-02 | 43361605  | 43361728  | NC_000010.10 |
| cg06830348 | 3.75E-06 | 5.89E-07 | 5.17 | 5.0081324 | 5.70E-02 | 55035997  | 55036120  | NC_000018.9  |
| cg14035969 | 3.75E-06 | 5.89E-07 | 5.17 | 5.0071665 | 8.04E-02 | 221068423 | 221068546 | NC_000001.10 |
| cg12437821 | 3.76E-06 | 5.90E-07 | 5.17 | 5.0064744 | 1.46E-01 | 114852027 | 114852150 | NC_000012.11 |
| cg15171155 | 3.76E-06 | 5.90E-07 | 5.17 | 5.006181  | 1.15E-01 | 142844036 | 142844159 | NC_000003.11 |
| cg08258650 | 3.76E-06 | 5.91E-07 | 5.16 | 5.0051301 | 6.01E-02 | 35441900  | 35442023  | NC_000011.9  |
| cg07488506 | 3.76E-06 | 5.91E-07 | 5.16 | 5.0045761 | 8.96E-02 | 78631626  | 78631749  | NC_000015.9  |
| cg19447923 | 3.77E-06 | 5.91E-07 | 5.16 | 5.0038483 | 8.44E-02 | 77141126  | 77141249  | NC_000017.10 |
| cg08944430 | 3.77E-06 | 5.91E-07 | 5.16 | 5.003716  | 1.73E-01 | 23848439  | 23848562  | NC_000016.9  |
| cg27151135 | 3.77E-06 | 5.92E-07 | 5.16 | 5.0031785 | 7.38E-02 | 66412241  | 66412364  | NC_000012.11 |
| cg11757357 | 3.77E-06 | 5.92E-07 | 5.16 | 5.0026746 | 1.89E-01 | 131762052 | 131762175 | NC_000010.10 |
| cg04206926 | 3.77E-06 | 5.93E-07 | 5.16 | 5.0018616 | 7.68E-02 | 47453297  | 47453420  | NC_000021.8  |
| cg17104959 | 3.77E-06 | 5.93E-07 | 5.16 | 5.0016131 | 1.21E-01 | 95696376  | 95696499  | NC_000001.10 |
| cg02330371 | 3.78E-06 | 5.93E-07 | 5.16 | 5.0010505 | 5.68E-02 | 21380498  | 21380621  | NC_000015.9  |
| cg04341454 | 3.78E-06 | 5.94E-07 | 5.16 | 5.0000309 | 2.61E-02 | 234255578 | 234255701 | NC_000002.11 |
| cg00991744 | 3.78E-06 | 5.94E-07 | 5.16 | 4.9997411 | 1.18E-01 | 41581484  | 41581607  | NC_000012.11 |
| cg02320784 | 3.78E-06 | 5.94E-07 | 5.16 | 4.9992152 | 7.69E-02 | 26195988  | 26196111  | NC_000012.11 |
| cg27442613 | 3.78E-06 | 5.94E-07 | 5.16 | 4.9989882 | 4.90E-02 | 2801085   | 2801208   | NC_000001.10 |
| cg16340023 | 3.78E-06 | 5.94E-07 | 5.16 | 4.9987397 | 4.36E-02 | 60544932  | 60545055  | NC_000020.10 |
| cg08605326 | 3.79E-06 | 5.95E-07 | 5.16 | 4.9984563 | 1.26E-01 | 50237401  | 50237524  | NC_000017.10 |
| cg04380653 | 3.79E-06 | 5.95E-07 | 5.16 | 4.9984539 | 7.16E-02 | 2293164   | 2293287   | NC_000011.9  |
| cg01139651 | 3.79E-06 | 5.95E-07 | 5.16 | 4.9975703 | 5.23E-02 | 33255541  | 33255664  | NC_000006.11 |
| cg26924294 | 3.79E-06 | 5.96E-07 | 5.16 | 4.9964542 | 1.07E-01 | 98510865  | 98510988  | NC_000001.10 |
| cg03596280 | 3.80E-06 | 5.96E-07 | 5.16 | 4.995542  | 1.24E-01 | 26507323  | 26507446  | NC_000010.10 |

|            |          |          |      |           |          |           |           |              |
|------------|----------|----------|------|-----------|----------|-----------|-----------|--------------|
| cg27606567 | 3.80E-06 | 5.97E-07 | 5.16 | 4.9954172 | 1.89E-01 | 44040811  | 44040934  | NC_000003.11 |
| cg20063965 | 3.80E-06 | 5.97E-07 | 5.16 | 4.9953122 | 6.89E-02 | 143546524 | 143546647 | NC_000008.10 |
| cg10190698 | 3.80E-06 | 5.97E-07 | 5.16 | 4.9952992 | 2.04E-02 | 50154770  | 50154893  | NC_000014.8  |
| cg01723995 | 3.80E-06 | 5.97E-07 | 5.16 | 4.9950265 | 8.62E-02 | 64415629  | 64415752  | NC_000001.10 |
| cg16656493 | 3.80E-06 | 5.97E-07 | 5.16 | 4.9950125 | 6.86E-02 | 42893167  | 42893290  | NC_000006.11 |
| cg06554228 | 3.80E-06 | 5.97E-07 | 5.16 | 4.9944362 | 3.09E-02 | 144593057 | 144593180 | NC_000008.10 |
| cg19806327 | 3.80E-06 | 5.97E-07 | 5.16 | 4.9941784 | 3.87E-02 | 53293012  | 53293135  | NC_000019.9  |
| cg10356260 | 3.80E-06 | 5.98E-07 | 5.16 | 4.9936322 | 4.93E-02 | 7593437   | 7593560   | NC_000004.11 |
| cg06716684 | 3.80E-06 | 5.98E-07 | 5.16 | 4.9932224 | 1.54E-01 | 27011480  | 27011603  | NC_000021.8  |
| cg20177315 | 3.81E-06 | 5.98E-07 | 5.16 | 4.9931294 | 1.45E-01 | 69634648  | 69634771  | NC_000011.9  |
| cg07440775 | 3.81E-06 | 5.99E-07 | 5.16 | 4.9921895 | 1.02E-01 | 26507383  | 26507506  | NC_000010.10 |
| cg21821214 | 3.81E-06 | 5.99E-07 | 5.16 | 4.9919764 | 1.40E-01 | 176969223 | 176969346 | NC_000002.11 |
| cg03142586 | 3.81E-06 | 5.99E-07 | 5.16 | 4.9914065 | 1.50E-01 | 58220080  | 58220203  | NC_000019.9  |
| cg10440578 | 3.81E-06 | 5.99E-07 | 5.16 | 4.9906514 | 1.40E-01 | 115397857 | 115397980 | NC_000001.10 |
| cg21868699 | 3.81E-06 | 5.99E-07 | 5.16 | 4.9906224 | 9.66E-02 | 9534366   | 9534489   | NC_000004.11 |
| cg11825524 | 3.82E-06 | 6.00E-07 | 5.16 | 4.9902197 | 6.39E-02 | 38574614  | 38574737  | NC_000021.8  |
| cg10587913 | 3.82E-06 | 6.00E-07 | 5.16 | 4.9892281 | 1.29E-01 | 54392867  | 54392990  | NC_000012.11 |
| cg15038286 | 3.82E-06 | 6.01E-07 | 5.16 | 4.9886284 | 8.29E-02 | 128200723 | 128200846 | NC_000003.11 |
| cg24302133 | 3.82E-06 | 6.01E-07 | 5.16 | 4.9886097 | 8.39E-02 | 181770173 | 181770296 | NC_000001.10 |
| cg10190253 | 3.82E-06 | 6.01E-07 | 5.16 | 4.9885294 | 5.37E-02 | 21730938  | 21731061  | NC_000017.10 |
| cg26379859 | 3.82E-06 | 6.01E-07 | 5.16 | 4.9880212 | 1.64E-01 | 58672888  | 58673011  | NC_000011.9  |
| cg10496762 | 3.82E-06 | 6.01E-07 | 5.16 | 4.9878652 | 4.55E-02 | 8941568   | 8941691   | NC_000016.9  |
| cg13249256 | 3.82E-06 | 6.01E-07 | 5.16 | 4.9877747 | 3.98E-02 | 166958581 | 166958704 | NC_000001.10 |
| cg14933485 | 3.82E-06 | 6.01E-07 | 5.16 | 4.9877163 | 1.48E-01 | 101000436 | 101000559 | NC_000011.9  |
| cg05705964 | 3.83E-06 | 6.02E-07 | 5.16 | 4.9867039 | 4.69E-02 | 41453012  | 41453135  | NC_000001.10 |

|            |          |          |      |           |          |           |           |              |
|------------|----------|----------|------|-----------|----------|-----------|-----------|--------------|
| cg00133624 | 3.83E-06 | 6.02E-07 | 5.16 | 4.9857908 | 1.10E-01 | 3756130   | 3756253   | NC_000012.11 |
| cg22542731 | 3.83E-06 | 6.03E-07 | 5.16 | 4.9856601 | 9.12E-02 | 128440274 | 128440397 | NC_000002.11 |
| cg11667823 | 3.83E-06 | 6.03E-07 | 5.16 | 4.9850993 | 2.19E-02 | 219521697 | 219521820 | NC_000002.11 |
| cg12965202 | 3.84E-06 | 6.03E-07 | 5.16 | 4.9847972 | 6.75E-02 | 81688436  | 81688559  | NC_000014.8  |
| cg25574691 | 3.84E-06 | 6.03E-07 | 5.16 | 4.9846843 | 6.95E-02 | 39230030  | 39230153  | NC_000003.11 |
| cg10149337 | 3.84E-06 | 6.03E-07 | 5.16 | 4.9845911 | 1.07E-01 | 76734278  | 76734401  | NC_000018.9  |
| cg07269374 | 3.84E-06 | 6.04E-07 | 5.16 | 4.9841327 | 1.02E-01 | 66176707  | 66176830  | NC_000012.11 |
| cg07944278 | 3.84E-06 | 6.04E-07 | 5.16 | 4.9839313 | 1.72E-02 | 35699425  | 35699548  | NC_000006.11 |
| cg20057103 | 3.84E-06 | 6.04E-07 | 5.16 | 4.9838373 | 1.11E-01 | 121740719 | 121740842 | NC_000011.9  |
| cg03945800 | 3.84E-06 | 6.04E-07 | 5.16 | 4.9831045 | 1.10E-01 | 4165515   | 4165638   | NC_000016.9  |
| cg11523191 | 3.84E-06 | 6.05E-07 | 5.16 | 4.982488  | 9.01E-02 | 62187126  | 62187249  | NC_000020.10 |
| cg18327061 | 3.85E-06 | 6.05E-07 | 5.16 | 4.9817966 | 1.61E-01 | 62200380  | 62200503  | NC_000008.10 |
| cg26237512 | 3.85E-06 | 6.05E-07 | 5.16 | 4.981576  | 1.59E-01 | 95388002  | 95388125  | NC_000015.9  |
| cg14857024 | 3.85E-06 | 6.05E-07 | 5.16 | 4.9815672 | 2.38E-02 | 66234241  | 66234364  | NC_000012.11 |
| cg14717170 | 3.85E-06 | 6.05E-07 | 5.16 | 4.9814089 | 1.62E-01 | 164914471 | 164914594 | NC_000003.11 |
| cg20128772 | 3.85E-06 | 6.05E-07 | 5.16 | 4.9809793 | 5.57E-02 | 27498295  | 27498418  | NC_000002.11 |
| cg23123165 | 3.85E-06 | 6.05E-07 | 5.16 | 4.9809575 | 2.91E-02 | 54901015  | 54901138  | NC_000007.13 |
| cg10509323 | 3.85E-06 | 6.06E-07 | 5.16 | 4.9805241 | 1.58E-01 | 170631431 | 170631554 | NC_000001.10 |
| cg24439256 | 3.85E-06 | 6.06E-07 | 5.16 | 4.9804917 | 1.39E-01 | 25464513  | 25464636  | NC_000010.10 |
| cg09171368 | 3.85E-06 | 6.06E-07 | 5.16 | 4.9804339 | 8.80E-02 | 38544936  | 38545059  | NC_000012.11 |
| cg16084133 | 3.85E-06 | 6.06E-07 | 5.16 | 4.9799858 | 6.00E-02 | 28074146  | 28074269  | NC_000022.10 |
| cg21296675 | 3.86E-06 | 6.07E-07 | 5.16 | 4.9786636 | 5.35E-02 | 89064965  | 89065088  | NC_000002.11 |
| cg12598635 | 3.86E-06 | 6.07E-07 | 5.16 | 4.9784541 | 1.49E-01 | 819227    | 819350    | NC_000004.11 |
| cg10566297 | 3.86E-06 | 6.07E-07 | 5.16 | 4.9783047 | 4.70E-02 | 2049235   | 2049358   | NC_000004.11 |
| cg21484910 | 3.86E-06 | 6.07E-07 | 5.16 | 4.9781769 | 9.89E-02 | 40097661  | 40097784  | NC_000002.11 |

|            |          |          |      |           |          |           |           |              |
|------------|----------|----------|------|-----------|----------|-----------|-----------|--------------|
| cg05329692 | 3.86E-06 | 6.07E-07 | 5.16 | 4.9779452 | 1.58E-01 | 102891280 | 102891403 | NC_000010.10 |
| cg10820045 | 3.86E-06 | 6.07E-07 | 5.16 | 4.9777878 | 1.10E-01 | 198174542 | 198174665 | NC_000002.11 |
| cg07629017 | 3.86E-06 | 6.08E-07 | 5.16 | 4.9769848 | 1.09E-01 | 53851613  | 53851736  | NC_000008.10 |
| cg25928579 | 3.86E-06 | 6.08E-07 | 5.16 | 4.9768563 | 1.70E-01 | 46692534  | 46692657  | NC_000017.10 |
| cg09368832 | 3.86E-06 | 6.08E-07 | 5.16 | 4.9766357 | 2.10E-02 | 9146934   | 9147057   | NC_000017.10 |
| cg01381617 | 3.86E-06 | 6.08E-07 | 5.16 | 4.9765429 | 8.08E-02 | 8651855   | 8651978   | NC_000004.11 |
| cg05083273 | 3.86E-06 | 6.08E-07 | 5.16 | 4.9765308 | 8.94E-02 | 13688564  | 13688687  | NC_000017.10 |
| cg21514612 | 3.87E-06 | 6.08E-07 | 5.16 | 4.9763996 | 1.06E-01 | 13537318  | 13537441  | NC_000004.11 |
| cg01782024 | 3.87E-06 | 6.08E-07 | 5.16 | 4.9761692 | 1.07E-01 | 91989267  | 91989390  | NC_000001.10 |
| cg17965737 | 3.87E-06 | 6.10E-07 | 5.16 | 4.9743647 | 5.46E-02 | 244208721 | 244208844 | NC_000001.10 |
| cg04484520 | 3.87E-06 | 6.10E-07 | 5.16 | 4.9741448 | 4.87E-02 | 48697594  | 48697717  | NC_000003.11 |
| cg25109019 | 3.87E-06 | 6.10E-07 | 5.16 | 4.9741213 | 9.87E-02 | 181441345 | 181441468 | NC_000003.11 |
| cg18500360 | 3.87E-06 | 6.10E-07 | 5.16 | 4.9739731 | 6.54E-02 | 22193293  | 22193416  | NC_000019.9  |
| cg15633699 | 3.87E-06 | 6.10E-07 | 5.16 | 4.973912  | 8.51E-02 | 1356728   | 1356851   | NC_000001.10 |
| cg06867478 | 3.87E-06 | 6.10E-07 | 5.16 | 4.9738874 | 3.94E-02 | 156783274 | 156783397 | NC_000007.13 |
| cg03149157 | 3.88E-06 | 6.10E-07 | 5.16 | 4.9736942 | 3.67E-02 | 33585904  | 33586027  | NC_000001.10 |
| cg00559560 | 3.88E-06 | 6.10E-07 | 5.16 | 4.9731102 | 1.03E-01 | 47317093  | 47317216  | NC_000021.8  |
| cg02526277 | 3.88E-06 | 6.11E-07 | 5.16 | 4.9724822 | 8.47E-02 | 18230620  | 18230743  | NC_000011.9  |
| cg18403548 | 3.88E-06 | 6.11E-07 | 5.16 | 4.9724477 | 9.78E-02 | 2820786   | 2820909   | NC_000004.11 |
| cg18735810 | 3.88E-06 | 6.11E-07 | 5.16 | 4.9723931 | 1.07E-01 | 50260204  | 50260327  | NC_000005.9  |
| cg21053831 | 3.88E-06 | 6.11E-07 | 5.16 | 4.9723369 | 1.59E-01 | 4455512   | 4455635   | NC_000018.9  |
| cg05522848 | 3.88E-06 | 6.11E-07 | 5.16 | 4.9719263 | 6.98E-02 | 68710359  | 68710482  | NC_000005.9  |
| cg27167224 | 3.88E-06 | 6.11E-07 | 5.16 | 4.9719206 | 1.08E-01 | 50675475  | 50675598  | NC_000006.11 |
| cg08084860 | 3.88E-06 | 6.12E-07 | 5.16 | 4.9711062 | 1.19E-01 | 237080340 | 237080463 | NC_000002.11 |
| cg13174253 | 3.89E-06 | 6.12E-07 | 5.16 | 4.9709194 | 7.68E-02 | 146278678 | 146278801 | NC_000008.10 |

|            |          |          |      |           |          |           |           |              |
|------------|----------|----------|------|-----------|----------|-----------|-----------|--------------|
| cg26809965 | 3.89E-06 | 6.12E-07 | 5.16 | 4.969929  | 3.47E-02 | 214779430 | 214779553 | NC_000001.10 |
| cg07107171 | 3.89E-06 | 6.13E-07 | 5.16 | 4.9692397 | 1.33E-01 | 175712382 | 175712505 | NC_000001.10 |
| cg00719651 | 3.89E-06 | 6.13E-07 | 5.16 | 4.9686904 | 1.32E-01 | 47225449  | 47225572  | NC_000012.11 |
| cg09832244 | 3.90E-06 | 6.14E-07 | 5.16 | 4.9681367 | 6.27E-02 | 6729600   | 6729723   | NC_000012.11 |
| cg07703081 | 3.90E-06 | 6.14E-07 | 5.16 | 4.9679922 | 6.79E-02 | 33131426  | 33131549  | NC_000006.11 |
| cg27007937 | 3.90E-06 | 6.14E-07 | 5.16 | 4.9678519 | 9.18E-02 | 140480597 | 140480720 | NC_000005.9  |
| cg22051964 | 3.90E-06 | 6.14E-07 | 5.16 | 4.9678131 | 1.01E-01 | 35297138  | 35297261  | NC_000007.13 |
| cg20328160 | 3.90E-06 | 6.15E-07 | 5.16 | 4.9663775 | 4.70E-02 | 161209081 | 161209204 | NC_000001.10 |
| cg03494022 | 3.90E-06 | 6.15E-07 | 5.16 | 4.9663345 | 8.50E-02 | 43992823  | 43992946  | NC_000018.9  |
| cg19083265 | 3.90E-06 | 6.15E-07 | 5.16 | 4.9663143 | 4.89E-02 | 75300284  | 75300407  | NC_000017.10 |
| cg02994956 | 3.90E-06 | 6.15E-07 | 5.16 | 4.9660911 | 6.96E-02 | 29876534  | 29876657  | NC_000022.10 |
| cg01225698 | 3.91E-06 | 6.15E-07 | 5.16 | 4.9657856 | 1.56E-01 | 27742355  | 27742478  | NC_000011.9  |
| cg20376009 | 3.91E-06 | 6.15E-07 | 5.16 | 4.9655942 | 8.05E-02 | 34296108  | 34296231  | NC_000016.9  |
| cg16697977 | 3.91E-06 | 6.15E-07 | 5.16 | 4.9655701 | 2.68E-02 | 64972115  | 64972238  | NC_000011.9  |
| cg22517995 | 3.91E-06 | 6.15E-07 | 5.16 | 4.9655044 | 1.05E-01 | 37096588  | 37096711  | NC_000019.9  |
| cg26269510 | 3.91E-06 | 6.15E-07 | 5.16 | 4.9654917 | 1.65E-01 | 57615256  | 57615379  | NC_000019.9  |
| cg15850954 | 3.91E-06 | 6.15E-07 | 5.16 | 4.9651541 | 1.23E-01 | 26505245  | 26505368  | NC_000010.10 |
| cg07456629 | 3.91E-06 | 6.16E-07 | 5.16 | 4.9643822 | 6.67E-02 | 77616944  | 77617067  | NC_000008.10 |
| cg02970551 | 3.91E-06 | 6.16E-07 | 5.16 | 4.9635257 | 1.21E-01 | 25257191  | 25257314  | NC_000001.10 |
| cg00273449 | 3.91E-06 | 6.17E-07 | 5.16 | 4.9633058 | 9.25E-02 | 74875268  | 74875391  | NC_000002.11 |
| cg27147858 | 3.91E-06 | 6.17E-07 | 5.16 | 4.9632026 | 3.94E-02 | 64662747  | 64662870  | NC_000011.9  |
| cg22055513 | 3.92E-06 | 6.17E-07 | 5.16 | 4.9630484 | 7.87E-02 | 54106593  | 54106716  | NC_000019.9  |
| cg07084019 | 3.92E-06 | 6.18E-07 | 5.16 | 4.9615258 | 8.67E-02 | 171094206 | 171094329 | NC_000002.11 |
| cg27230697 | 3.92E-06 | 6.18E-07 | 5.16 | 4.9610268 | 1.50E-01 | 58673577  | 58673700  | NC_000011.9  |
| cg10626515 | 3.92E-06 | 6.18E-07 | 5.16 | 4.9609788 | 8.45E-02 | 25100428  | 25100551  | NC_000007.13 |

|            |          |          |      |           |          |           |           |              |
|------------|----------|----------|------|-----------|----------|-----------|-----------|--------------|
| cg20754476 | 3.92E-06 | 6.18E-07 | 5.16 | 4.9606386 | 5.13E-02 | 71117679  | 71117802  | NC_000011.9  |
| cg19815271 | 3.93E-06 | 6.19E-07 | 5.16 | 4.9596883 | 9.67E-02 | 15880379  | 15880502  | NC_000017.10 |
| cg04654288 | 3.93E-06 | 6.19E-07 | 5.15 | 4.9591859 | 1.05E-01 | 10390247  | 10390370  | NC_000006.11 |
| cg25155068 | 3.93E-06 | 6.20E-07 | 5.15 | 4.95858   | 9.27E-02 | 12587709  | 12587832  | NC_000001.10 |
| cg23041410 | 3.93E-06 | 6.20E-07 | 5.15 | 4.9583407 | 2.66E-02 | 113884447 | 113884570 | NC_000002.11 |
| cg03032607 | 3.93E-06 | 6.20E-07 | 5.15 | 4.957974  | 9.98E-02 | 45882686  | 45882809  | NC_000003.11 |
| cg25348841 | 3.94E-06 | 6.21E-07 | 5.15 | 4.957002  | 6.31E-02 | 159888633 | 159888756 | NC_000002.11 |
| cg21213426 | 3.94E-06 | 6.22E-07 | 5.15 | 4.9554916 | 2.86E-02 | 152134133 | 152134256 | NC_000002.11 |
| cg22680204 | 3.94E-06 | 6.22E-07 | 5.15 | 4.9552339 | 1.28E-01 | 5895098   | 5895221   | NC_000004.11 |
| cg17042009 | 3.94E-06 | 6.22E-07 | 5.15 | 4.9552254 | 1.15E-01 | 101293083 | 101293206 | NC_000010.10 |
| cg04593426 | 3.94E-06 | 6.22E-07 | 5.15 | 4.9552123 | 9.64E-02 | 233352148 | 233352271 | NC_000002.11 |
| cg26841894 | 3.95E-06 | 6.22E-07 | 5.15 | 4.9551339 | 5.90E-02 | 127479891 | 127480014 | NC_000008.10 |
| cg16074383 | 3.95E-06 | 6.22E-07 | 5.15 | 4.9550163 | 7.09E-02 | 21561058  | 21561181  | NC_000014.8  |
| cg09415601 | 3.95E-06 | 6.22E-07 | 5.15 | 4.9549171 | 3.86E-02 | 81927399  | 81927522  | NC_000016.9  |
| cg10722444 | 3.95E-06 | 6.22E-07 | 5.15 | 4.9547203 | 8.11E-02 | 112630569 | 112630692 | NC_000013.10 |
| cg27269936 | 3.95E-06 | 6.23E-07 | 5.15 | 4.9538856 | 5.25E-02 | 121717737 | 121717860 | NC_000012.11 |
| cg17054691 | 3.95E-06 | 6.23E-07 | 5.15 | 4.9531654 | 1.03E-01 | 79813439  | 79813562  | NC_000017.10 |
| cg17842066 | 3.95E-06 | 6.23E-07 | 5.15 | 4.9527203 | 1.97E-02 | 7125201   | 7125324   | NC_000012.11 |
| cg01086672 | 3.96E-06 | 6.24E-07 | 5.15 | 4.9520662 | 5.57E-02 | 31123044  | 31123167  | NC_000006.11 |
| cg01544877 | 3.96E-06 | 6.24E-07 | 5.15 | 4.9517853 | 8.95E-02 | 136609152 | 136609275 | NC_000006.11 |
| cg06646218 | 3.96E-06 | 6.25E-07 | 5.15 | 4.950102  | 7.75E-02 | 59165920  | 59166043  | NC_000003.11 |
| cg03986829 | 3.97E-06 | 6.25E-07 | 5.15 | 4.9498986 | 1.36E-01 | 62358234  | 62358357  | NC_000003.11 |
| cg21925025 | 3.97E-06 | 6.26E-07 | 5.15 | 4.9493792 | 9.66E-02 | 144508684 | 144508807 | NC_000008.10 |
| cg18924298 | 3.97E-06 | 6.26E-07 | 5.15 | 4.9492413 | 1.16E-01 | 6006917   | 6007040   | NC_000006.11 |
| cg05461153 | 3.97E-06 | 6.26E-07 | 5.15 | 4.9489122 | 6.01E-02 | 148961424 | 148961547 | NC_000007.13 |

|            |          |          |      |           |          |           |           |              |
|------------|----------|----------|------|-----------|----------|-----------|-----------|--------------|
| cg26341848 | 3.97E-06 | 6.26E-07 | 5.15 | 4.9487257 | 7.79E-02 | 52657514  | 52657637  | NC_000005.9  |
| cg03093838 | 3.97E-06 | 6.26E-07 | 5.15 | 4.9483721 | 9.35E-02 | 137815725 | 137815848 | NC_000006.11 |
| cg25247231 | 3.97E-06 | 6.27E-07 | 5.15 | 4.9478296 | 1.33E-01 | 60287537  | 60287660  | NC_000015.9  |
| cg03502791 | 3.97E-06 | 6.27E-07 | 5.15 | 4.9476466 | 1.47E-01 | 54413931  | 54414054  | NC_000014.8  |
| cg14577415 | 3.97E-06 | 6.27E-07 | 5.15 | 4.9474188 | 2.20E-02 | 123592420 | 123592543 | NC_000009.11 |
| cg00538888 | 3.97E-06 | 6.27E-07 | 5.15 | 4.9473571 | 5.68E-02 | 129703001 | 129703124 | NC_000010.10 |
| cg09047691 | 3.98E-06 | 6.27E-07 | 5.15 | 4.9469668 | 1.16E-01 | 101470004 | 101470127 | NC_000009.11 |
| cg03915932 | 3.98E-06 | 6.27E-07 | 5.15 | 4.9464802 | 1.37E-01 | 46591291  | 46591414  | NC_000017.10 |
| cg13276755 | 3.98E-06 | 6.28E-07 | 5.15 | 4.9462891 | 2.00E-02 | 234260986 | 234261109 | NC_000002.11 |
| cg11855587 | 3.98E-06 | 6.28E-07 | 5.15 | 4.9450215 | 7.50E-02 | 111746866 | 111746989 | NC_000013.10 |
| cg24429622 | 3.99E-06 | 6.29E-07 | 5.15 | 4.9444107 | 3.22E-02 | 30981712  | 30981835  | NC_000010.10 |
| cg02795515 | 3.99E-06 | 6.29E-07 | 5.15 | 4.9440164 | 1.02E-01 | 37381273  | 37381396  | NC_000017.10 |
| cg08295072 | 3.99E-06 | 6.29E-07 | 5.15 | 4.9434573 | 3.61E-02 | 1260335   | 1260458   | NC_000005.9  |
| cg26170569 | 3.99E-06 | 6.30E-07 | 5.15 | 4.9430349 | 1.09E-01 | 130986931 | 130987054 | NC_000002.11 |
| cg06723057 | 3.99E-06 | 6.30E-07 | 5.15 | 4.9420477 | 6.89E-02 | 28549923  | 28550046  | NC_000016.9  |
| cg27003520 | 3.99E-06 | 6.30E-07 | 5.15 | 4.9419456 | 8.36E-02 | 165086976 | 165087099 | NC_000001.10 |
| cg22238600 | 4.00E-06 | 6.30E-07 | 5.15 | 4.9418164 | 8.45E-02 | 77894058  | 77894181  | NC_000007.13 |
| cg15924332 | 4.00E-06 | 6.31E-07 | 5.15 | 4.9413739 | 1.13E-01 | 7710179   | 7710302   | NC_000010.10 |
| cg14567374 | 4.00E-06 | 6.31E-07 | 5.15 | 4.9409158 | 8.25E-02 | 140084348 | 140084471 | NC_000009.11 |
| cg11375112 | 4.00E-06 | 6.32E-07 | 5.15 | 4.9396661 | 8.54E-02 | 11883006  | 11883129  | NC_000012.11 |
| cg05688618 | 4.00E-06 | 6.32E-07 | 5.15 | 4.9396392 | 1.06E-01 | 86699962  | 86700085  | NC_000004.11 |
| cg00468670 | 4.00E-06 | 6.32E-07 | 5.15 | 4.9395213 | 3.23E-02 | 69371195  | 69371318  | NC_000003.11 |
| cg19345219 | 4.00E-06 | 6.32E-07 | 5.15 | 4.9395107 | 6.34E-02 | 6747405   | 6747528   | NC_000012.11 |
| cg05284751 | 4.01E-06 | 6.32E-07 | 5.15 | 4.9388883 | 6.67E-02 | 34407760  | 34407883  | NC_000016.9  |
| cg00988577 | 4.01E-06 | 6.32E-07 | 5.15 | 4.9388463 | 9.76E-02 | 32978548  | 32978671  | NC_000006.11 |



|            |          |          |      |           |          |           |           |              |
|------------|----------|----------|------|-----------|----------|-----------|-----------|--------------|
| cg04099186 | 4.01E-06 | 6.33E-07 | 5.15 | 4.9381733 | 5.11E-02 | 211860612 | 211860735 | NC_000001.10 |
| cg19774365 | 4.01E-06 | 6.33E-07 | 5.15 | 4.9381368 | 1.27E-01 | 64342997  | 64343120  | NC_000007.13 |
| cg03749016 | 4.01E-06 | 6.33E-07 | 5.15 | 4.937815  | 1.36E-01 | 23564591  | 23564714  | NC_000008.10 |
| cg07808859 | 4.01E-06 | 6.33E-07 | 5.15 | 4.9374345 | 8.46E-02 | 134550116 | 134550239 | NC_000005.9  |
| cg11267390 | 4.01E-06 | 6.34E-07 | 5.15 | 4.9366847 | 7.87E-02 | 45815264  | 45815387  | NC_000021.8  |
| cg09732486 | 4.02E-06 | 6.35E-07 | 5.15 | 4.9352993 | 1.17E-01 | 41086050  | 41086173  | NC_000012.11 |
| cg25652516 | 4.02E-06 | 6.35E-07 | 5.15 | 4.9343098 | 4.21E-02 | 46914628  | 46914751  | NC_000021.8  |
| cg26687173 | 4.03E-06 | 6.36E-07 | 5.15 | 4.9335113 | 8.52E-02 | 33623091  | 33623214  | NC_000019.9  |
| cg24792245 | 4.03E-06 | 6.36E-07 | 5.15 | 4.9332714 | 5.29E-02 | 28820367  | 28820490  | NC_000010.10 |
| cg16596604 | 4.03E-06 | 6.37E-07 | 5.15 | 4.9320061 | 1.44E-01 | 21294947  | 21295070  | NC_000016.9  |
| cg00793591 | 4.04E-06 | 6.38E-07 | 5.15 | 4.9307692 | 1.00E-01 | 70014715  | 70014838  | NC_000014.8  |
| cg06393286 | 4.04E-06 | 6.38E-07 | 5.15 | 4.9304481 | 9.96E-02 | 20879644  | 20879767  | NC_000001.10 |
| cg19595234 | 4.04E-06 | 6.38E-07 | 5.15 | 4.9303797 | 1.73E-01 | 42543778  | 42543901  | NC_000020.10 |
| cg24335138 | 4.04E-06 | 6.38E-07 | 5.15 | 4.9303025 | 1.48E-01 | 44331108  | 44331231  | NC_000011.9  |
| cg27387193 | 4.04E-06 | 6.38E-07 | 5.15 | 4.929982  | 1.13E-01 | 32064032  | 32064155  | NC_000006.11 |
| cg00043800 | 4.04E-06 | 6.38E-07 | 5.15 | 4.9298195 | 5.30E-02 | 74612144  | 74612267  | NC_000002.11 |
| cg26797585 | 4.04E-06 | 6.38E-07 | 5.15 | 4.9296995 | 1.59E-01 | 3585609   | 3585732   | NC_000019.9  |
| cg25271804 | 4.05E-06 | 6.39E-07 | 5.15 | 4.9285066 | 3.29E-02 | 3566660   | 3566783   | NC_000004.11 |
| cg18931036 | 4.05E-06 | 6.40E-07 | 5.15 | 4.9279956 | 7.53E-02 | 27185393  | 27185516  | NC_000007.13 |
| cg10972897 | 4.05E-06 | 6.40E-07 | 5.15 | 4.9278686 | 8.21E-02 | 165859714 | 165859837 | NC_000001.10 |
| cg00257047 | 4.05E-06 | 6.40E-07 | 5.15 | 4.9277878 | 1.11E-01 | 88849457  | 88849580  | NC_000002.11 |
| cg26272477 | 4.05E-06 | 6.40E-07 | 5.15 | 4.9274762 | 1.36E-01 | 100437554 | 100437677 | NC_000014.8  |
| cg03830929 | 4.05E-06 | 6.40E-07 | 5.15 | 4.9270672 | 1.05E-01 | 154165776 | 154165899 | NC_000001.10 |
| cg10103623 | 4.05E-06 | 6.40E-07 | 5.15 | 4.9267674 | 7.32E-02 | 3486303   | 3486426   | NC_000002.11 |
| cg19273715 | 4.05E-06 | 6.41E-07 | 5.15 | 4.9264312 | 3.84E-02 | 22198364  | 22198487  | NC_000012.11 |

|            |          |          |      |           |          |           |           |              |
|------------|----------|----------|------|-----------|----------|-----------|-----------|--------------|
| cg13050318 | 4.06E-06 | 6.41E-07 | 5.15 | 4.925341  | 8.92E-02 | 58896613  | 58896736  | NC_000014.8  |
| cg24826636 | 4.06E-06 | 6.41E-07 | 5.15 | 4.9251335 | 8.18E-02 | 31868782  | 31868905  | NC_000006.11 |
| cg27466042 | 4.06E-06 | 6.42E-07 | 5.15 | 4.9250085 | 2.86E-02 | 36896370  | 36896493  | NC_000017.10 |
| cg21745091 | 4.07E-06 | 6.42E-07 | 5.15 | 4.9236995 | 1.47E-02 | 118992183 | 118992306 | NC_000011.9  |
| cg19077854 | 4.07E-06 | 6.43E-07 | 5.15 | 4.923021  | 3.44E-02 | 122220652 | 122220775 | NC_000005.9  |
| cg23796243 | 4.07E-06 | 6.43E-07 | 5.15 | 4.9225418 | 9.62E-02 | 67978654  | 67978777  | NC_000011.9  |
| cg04098339 | 4.07E-06 | 6.43E-07 | 5.15 | 4.9220292 | 9.56E-02 | 48486087  | 48486210  | NC_000004.11 |
| cg14684960 | 4.08E-06 | 6.44E-07 | 5.15 | 4.9205571 | 3.54E-02 | 422213    | 422336    | NC_000005.9  |
| cg10823785 | 4.08E-06 | 6.45E-07 | 5.15 | 4.9202363 | 2.84E-02 | 28787446  | 28787569  | NC_000002.11 |
| cg05506270 | 4.08E-06 | 6.45E-07 | 5.15 | 4.9200867 | 9.35E-02 | 1654421   | 1654544   | NC_000010.10 |
| cg12019265 | 4.08E-06 | 6.46E-07 | 5.15 | 4.9187827 | 6.10E-02 | 36523650  | 36523773  | NC_000015.9  |
| cg06624146 | 4.09E-06 | 6.47E-07 | 5.15 | 4.9163997 | 9.50E-02 | 128360149 | 128360272 | NC_000010.10 |
| cg07928083 | 4.10E-06 | 6.48E-07 | 5.15 | 4.9158526 | 1.07E-01 | 60295312  | 60295435  | NC_000015.9  |
| cg02874016 | 4.10E-06 | 6.48E-07 | 5.15 | 4.9158287 | 6.77E-02 | 2017649   | 2017772   | NC_000012.11 |
| cg12388541 | 4.10E-06 | 6.48E-07 | 5.15 | 4.9155923 | 1.21E-01 | 168773775 | 168773898 | NC_000006.11 |
| cg05059291 | 4.10E-06 | 6.48E-07 | 5.15 | 4.9154826 | 1.56E-01 | 61703362  | 61703485  | NC_000020.10 |
| cg00960263 | 4.10E-06 | 6.48E-07 | 5.15 | 4.9153588 | 1.23E-01 | 15501678  | 15501801  | NC_000005.9  |
| cg02988171 | 4.10E-06 | 6.48E-07 | 5.15 | 4.9148443 | 5.58E-02 | 145621852 | 145621975 | NC_000008.10 |
| cg21192370 | 4.10E-06 | 6.48E-07 | 5.15 | 4.9148312 | 1.11E-01 | 81220079  | 81220202  | NC_000009.11 |
| cg00784263 | 4.10E-06 | 6.49E-07 | 5.15 | 4.9144698 | 1.42E-01 | 52801097  | 52801220  | NC_000019.9  |
| cg10136263 | 4.10E-06 | 6.49E-07 | 5.14 | 4.9138126 | 3.65E-02 | 89921102  | 89921225  | NC_000016.9  |
| cg08805241 | 4.11E-06 | 6.49E-07 | 5.14 | 4.9134239 | 1.13E-01 | 55110904  | 55111027  | NC_000017.10 |
| cg07462292 | 4.11E-06 | 6.50E-07 | 5.14 | 4.9128906 | 9.07E-02 | 44332340  | 44332463  | NC_000011.9  |
| cg19111265 | 4.11E-06 | 6.50E-07 | 5.14 | 4.9128539 | 1.02E-01 | 143106537 | 143106660 | NC_000007.13 |
| cg18200783 | 4.12E-06 | 6.51E-07 | 5.14 | 4.9109377 | 1.05E-01 | 29535924  | 29536047  | NC_000007.13 |

|            |          |          |      |           |          |           |           |              |
|------------|----------|----------|------|-----------|----------|-----------|-----------|--------------|
| cg18235799 | 4.12E-06 | 6.51E-07 | 5.14 | 4.9105556 | 6.20E-02 | 159680170 | 159680293 | NC_000005.9  |
| cg10467926 | 4.12E-06 | 6.51E-07 | 5.14 | 4.9104295 | 6.51E-02 | 57090465  | 57090588  | NC_000007.13 |
| cg07639720 | 4.12E-06 | 6.52E-07 | 5.14 | 4.9100151 | 9.79E-02 | 83952875  | 83952998  | NC_000015.9  |
| cg12989934 | 4.12E-06 | 6.52E-07 | 5.14 | 4.9096477 | 1.70E-01 | 170108187 | 170108310 | NC_000005.9  |
| cg17094171 | 4.12E-06 | 6.52E-07 | 5.14 | 4.9087828 | 1.06E-01 | 14133281  | 14133404  | NC_000012.11 |
| cg14431006 | 4.13E-06 | 6.53E-07 | 5.14 | 4.9082536 | 1.05E-01 | 83952722  | 83952845  | NC_000015.9  |
| cg12715421 | 4.13E-06 | 6.53E-07 | 5.14 | 4.9081607 | 7.53E-02 | 50629987  | 50630110  | NC_000007.13 |
| cg26118202 | 4.13E-06 | 6.53E-07 | 5.14 | 4.9076309 | 3.61E-02 | 1806471   | 1806594   | NC_000005.9  |
| cg04317765 | 4.13E-06 | 6.53E-07 | 5.14 | 4.9074358 | 1.01E-01 | 72219158  | 72219281  | NC_000014.8  |
| cg16937769 | 4.13E-06 | 6.54E-07 | 5.14 | 4.9065864 | 1.48E-01 | 54409485  | 54409608  | NC_000012.11 |
| cg17462417 | 4.13E-06 | 6.54E-07 | 5.14 | 4.9065297 | 2.14E-02 | 31528165  | 31528288  | NC_000001.10 |
| cg06865612 | 4.14E-06 | 6.54E-07 | 5.14 | 4.9059488 | 9.53E-02 | 946999    | 947122    | NC_000002.11 |
| cg06754987 | 4.14E-06 | 6.54E-07 | 5.14 | 4.9058306 | 6.77E-02 | 44444250  | 44444373  | NC_000001.10 |
| cg06366833 | 4.14E-06 | 6.54E-07 | 5.14 | 4.9058117 | 8.36E-02 | 183710473 | 183710596 | NC_000004.11 |
| cg27373371 | 4.14E-06 | 6.54E-07 | 5.14 | 4.9058106 | 2.86E-02 | 146728376 | 146728499 | NC_000005.9  |
| cg23044079 | 4.14E-06 | 6.54E-07 | 5.14 | 4.9056908 | 1.16E-01 | 88751621  | 88751744  | NC_000002.11 |
| cg10730421 | 4.14E-06 | 6.54E-07 | 5.14 | 4.9056346 | 1.07E-01 | 186078847 | 186078970 | NC_000003.11 |
| cg03396664 | 4.14E-06 | 6.55E-07 | 5.14 | 4.9055531 | 8.53E-02 | 88479546  | 88479669  | NC_000016.9  |
| cg21094739 | 4.14E-06 | 6.55E-07 | 5.14 | 4.9054706 | 3.54E-02 | 61572645  | 61572768  | NC_000017.10 |
| cg05768702 | 4.14E-06 | 6.55E-07 | 5.14 | 4.9054372 | 1.35E-01 | 47271133  | 47271256  | NC_000017.10 |
| cg18045155 | 4.14E-06 | 6.55E-07 | 5.14 | 4.9048474 | 9.53E-02 | 178767472 | 178767595 | NC_000005.9  |
| cg19885651 | 4.15E-06 | 6.56E-07 | 5.14 | 4.9027052 | 3.75E-02 | 159457714 | 159457837 | NC_000006.11 |
| cg03012170 | 4.15E-06 | 6.57E-07 | 5.14 | 4.9024673 | 1.08E-01 | 73628366  | 73628489  | NC_000018.9  |
| cg02245612 | 4.15E-06 | 6.57E-07 | 5.14 | 4.9021875 | 1.76E-01 | 5293611   | 5293734   | NC_000019.9  |
| cg10803024 | 4.15E-06 | 6.57E-07 | 5.14 | 4.9015714 | 6.72E-02 | 18709429  | 18709552  | NC_000019.9  |

|            |          |          |      |           |          |           |           |              |
|------------|----------|----------|------|-----------|----------|-----------|-----------|--------------|
| cg03171924 | 4.15E-06 | 6.58E-07 | 5.14 | 4.9011332 | 9.07E-02 | 25258332  | 25258455  | NC_000001.10 |
| cg19498960 | 4.16E-06 | 6.58E-07 | 5.14 | 4.9009259 | 1.17E-01 | 38077270  | 38077393  | NC_000021.8  |
| cg03019986 | 4.16E-06 | 6.58E-07 | 5.14 | 4.8999915 | 9.26E-02 | 46628850  | 46628973  | NC_000017.10 |
| cg10868817 | 4.16E-06 | 6.59E-07 | 5.14 | 4.8993047 | 1.96E-01 | 106332119 | 106332242 | NC_000008.10 |
| cg07012823 | 4.16E-06 | 6.59E-07 | 5.14 | 4.8988048 | 8.23E-02 | 155777070 | 155777193 | NC_000006.11 |
| cg15842276 | 4.17E-06 | 6.59E-07 | 5.14 | 4.898275  | 8.03E-02 | 92702648  | 92702771  | NC_000011.9  |
| cg27584546 | 4.17E-06 | 6.59E-07 | 5.14 | 4.8982602 | 9.26E-02 | 98657118  | 98657241  | NC_000010.10 |
| cg11520866 | 4.17E-06 | 6.60E-07 | 5.14 | 4.897801  | 3.27E-02 | 64856789  | 64856912  | NC_000011.9  |
| cg01505987 | 4.17E-06 | 6.60E-07 | 5.14 | 4.8975349 | 1.24E-01 | 131485095 | 131485218 | NC_000002.11 |
| cg04002203 | 4.17E-06 | 6.60E-07 | 5.14 | 4.8972692 | 5.44E-02 | 73072692  | 73072815  | NC_000015.9  |
| cg09557387 | 4.17E-06 | 6.61E-07 | 5.14 | 4.8966059 | 2.25E-01 | 207818395 | 207818518 | NC_000001.10 |
| cg26159184 | 4.17E-06 | 6.61E-07 | 5.14 | 4.8964475 | 6.34E-02 | 62528610  | 62528733  | NC_000007.13 |
| cg00835193 | 4.18E-06 | 6.61E-07 | 5.14 | 4.8959284 | 9.53E-02 | 2291780   | 2291903   | NC_000019.9  |
| cg18240528 | 4.18E-06 | 6.61E-07 | 5.14 | 4.8958713 | 9.34E-02 | 205341305 | 205341428 | NC_000001.10 |
| cg10932068 | 4.18E-06 | 6.62E-07 | 5.14 | 4.8950331 | 1.61E-01 | 19748398  | 19748521  | NC_000022.10 |
| cg25428970 | 4.18E-06 | 6.62E-07 | 5.14 | 4.8947488 | 1.40E-02 | 1863731   | 1863854   | NC_000019.9  |
| cg01229860 | 4.18E-06 | 6.62E-07 | 5.14 | 4.8946363 | 1.38E-01 | 96634623  | 96634746  | NC_000007.13 |
| cg09267483 | 4.18E-06 | 6.63E-07 | 5.14 | 4.8937111 | 1.18E-01 | 72353512  | 72353635  | NC_000017.10 |
| cg08329004 | 4.19E-06 | 6.63E-07 | 5.14 | 4.893378  | 5.53E-02 | 10364849  | 10364972  | NC_000019.9  |
| cg18653451 | 4.19E-06 | 6.63E-07 | 5.14 | 4.8933186 | 1.09E-01 | 46917018  | 46917141  | NC_000019.9  |
| cg01840724 | 4.19E-06 | 6.63E-07 | 5.14 | 4.8929389 | 6.97E-02 | 15420564  | 15420687  | NC_000009.11 |
| cg01717446 | 4.19E-06 | 6.64E-07 | 5.14 | 4.8921979 | 1.83E-01 | 71503566  | 71503689  | NC_000002.11 |
| cg21069176 | 4.19E-06 | 6.64E-07 | 5.14 | 4.8921532 | 1.06E-01 | 24347656  | 24347779  | NC_000003.11 |
| cg07334509 | 4.19E-06 | 6.64E-07 | 5.14 | 4.8919333 | 2.05E-02 | 74361129  | 74361252  | NC_000008.10 |
| cg02983950 | 4.19E-06 | 6.64E-07 | 5.14 | 4.8915785 | 1.31E-01 | 38942220  | 38942343  | NC_000001.10 |

|            |          |          |      |           |          |           |           |              |
|------------|----------|----------|------|-----------|----------|-----------|-----------|--------------|
| cg13126517 | 4.19E-06 | 6.64E-07 | 5.14 | 4.891564  | 1.41E-01 | 106974429 | 106974552 | NC_000012.11 |
| cg26268968 | 4.19E-06 | 6.64E-07 | 5.14 | 4.8912165 | 6.46E-02 | 53517561  | 53517684  | NC_000012.11 |
| cg19568003 | 4.20E-06 | 6.65E-07 | 5.14 | 4.890307  | 5.28E-02 | 57742217  | 57742340  | NC_000019.9  |
| cg27003849 | 4.20E-06 | 6.65E-07 | 5.14 | 4.8902032 | 1.32E-01 | 3601880   | 3602003   | NC_000012.11 |
| cg11176737 | 4.20E-06 | 6.65E-07 | 5.14 | 4.8900777 | 6.42E-02 | 5154148   | 5154271   | NC_000012.11 |
| cg01377358 | 4.20E-06 | 6.65E-07 | 5.14 | 4.8899031 | 1.07E-01 | 30948211  | 30948334  | NC_000020.10 |
| cg25970575 | 4.20E-06 | 6.65E-07 | 5.14 | 4.8897985 | 9.34E-02 | 6010164   | 6010287   | NC_000004.11 |
| cg01167615 | 4.20E-06 | 6.65E-07 | 5.14 | 4.8896642 | 9.71E-02 | 174496001 | 174496124 | NC_000002.11 |
| cg10650018 | 4.20E-06 | 6.66E-07 | 5.14 | 4.8889594 | 1.00E-01 | 92616759  | 92616882  | NC_000010.10 |
| cg04652645 | 4.21E-06 | 6.66E-07 | 5.14 | 4.8883025 | 1.51E-01 | 135049999 | 135050122 | NC_000010.10 |
| cg05628049 | 4.21E-06 | 6.66E-07 | 5.14 | 4.88826   | 9.67E-02 | 42113624  | 42113747  | NC_000003.11 |
| cg07219542 | 4.21E-06 | 6.68E-07 | 5.14 | 4.8865525 | 1.42E-01 | 110210770 | 110210893 | NC_000001.10 |
| cg02546828 | 4.21E-06 | 6.68E-07 | 5.14 | 4.8862967 | 1.08E-01 | 130838883 | 130839006 | NC_000008.10 |
| cg22491141 | 4.21E-06 | 6.68E-07 | 5.14 | 4.8861628 | 1.07E-01 | 56932314  | 56932437  | NC_000018.9  |
| cg05945401 | 4.22E-06 | 6.68E-07 | 5.14 | 4.8858134 | 1.05E-01 | 31506990  | 31507113  | NC_000006.11 |
| cg04630271 | 4.22E-06 | 6.69E-07 | 5.14 | 4.8850731 | 8.24E-02 | 58148485  | 58148608  | NC_000006.11 |
| cg14672496 | 4.22E-06 | 6.69E-07 | 5.14 | 4.8847995 | 7.12E-02 | 21087552  | 21087675  | NC_000018.9  |
| cg07687119 | 4.22E-06 | 6.69E-07 | 5.14 | 4.8843055 | 1.14E-01 | 54423549  | 54423672  | NC_000012.11 |
| cg00377924 | 4.22E-06 | 6.69E-07 | 5.14 | 4.8841143 | 8.13E-02 | 107535430 | 107535553 | NC_000003.11 |
| cg03628800 | 4.22E-06 | 6.69E-07 | 5.14 | 4.8839774 | 6.76E-02 | 129702726 | 129702849 | NC_000010.10 |
| cg25995825 | 4.22E-06 | 6.69E-07 | 5.14 | 4.8837103 | 1.32E-01 | 11148832  | 11148955  | NC_000018.9  |
| cg06285241 | 4.23E-06 | 6.70E-07 | 5.14 | 4.8828608 | 8.63E-02 | 105944655 | 105944778 | NC_000014.8  |
| cg16855817 | 4.23E-06 | 6.70E-07 | 5.14 | 4.8825146 | 3.71E-02 | 143774683 | 143774806 | NC_000006.11 |
| cg03024742 | 4.23E-06 | 6.70E-07 | 5.14 | 4.882469  | 6.24E-02 | 154863244 | 154863367 | NC_000007.13 |
| cg24629111 | 4.23E-06 | 6.70E-07 | 5.14 | 4.8824282 | 5.01E-02 | 131092116 | 131092239 | NC_000005.9  |

|            |          |          |      |           |          |           |           |              |
|------------|----------|----------|------|-----------|----------|-----------|-----------|--------------|
| cg17339147 | 4.23E-06 | 6.71E-07 | 5.14 | 4.8821403 | 1.26E-01 | 116963500 | 116963623 | NC_000007.13 |
| cg03367757 | 4.23E-06 | 6.71E-07 | 5.14 | 4.8819716 | 1.14E-01 | 19147041  | 19147164  | NC_000007.13 |
| cg20320158 | 4.23E-06 | 6.71E-07 | 5.14 | 4.8813423 | 1.08E-01 | 97847054  | 97847177  | NC_000007.13 |
| cg19922758 | 4.23E-06 | 6.71E-07 | 5.14 | 4.8812249 | 4.06E-02 | 170778275 | 170778398 | NC_000006.11 |
| cg04336894 | 4.24E-06 | 6.72E-07 | 5.14 | 4.8805377 | 4.92E-02 | 111381500 | 111381623 | NC_000007.13 |
| cg23490887 | 4.24E-06 | 6.72E-07 | 5.14 | 4.880325  | 1.37E-01 | 117584596 | 117584719 | NC_000006.11 |
| cg17358883 | 4.24E-06 | 6.72E-07 | 5.14 | 4.8801954 | 1.14E-01 | 111559134 | 111559257 | NC_000004.11 |
| cg16621833 | 4.24E-06 | 6.72E-07 | 5.14 | 4.8801423 | 1.43E-01 | 117587588 | 117587711 | NC_000006.11 |
| cg03965795 | 4.24E-06 | 6.72E-07 | 5.14 | 4.8796006 | 1.28E-01 | 102431021 | 102431144 | NC_000010.10 |
| cg23051578 | 4.24E-06 | 6.72E-07 | 5.14 | 4.8795858 | 1.43E-01 | 109799909 | 109800032 | NC_000008.10 |
| cg14750757 | 4.24E-06 | 6.72E-07 | 5.14 | 4.8795488 | 9.23E-02 | 127506604 | 127506727 | NC_000003.11 |
| cg12004183 | 4.24E-06 | 6.72E-07 | 5.14 | 4.8794623 | 1.67E-01 | 71217124  | 71217247  | NC_000007.13 |
| cg16338178 | 4.24E-06 | 6.73E-07 | 5.14 | 4.8791781 | 4.12E-02 | 158894440 | 158894563 | NC_000005.9  |
| cg13051249 | 4.24E-06 | 6.73E-07 | 5.14 | 4.8791364 | 4.35E-02 | 6594886   | 6595009   | NC_000007.13 |
| cg03650342 | 4.24E-06 | 6.73E-07 | 5.14 | 4.8791237 | 9.61E-02 | 25465350  | 25465473  | NC_000010.10 |
| cg17471928 | 4.24E-06 | 6.73E-07 | 5.14 | 4.8787395 | 1.51E-01 | 37381830  | 37381953  | NC_000017.10 |
| cg21436572 | 4.25E-06 | 6.73E-07 | 5.14 | 4.878092  | 1.06E-01 | 70623422  | 70623545  | NC_000008.10 |
| cg20799503 | 4.25E-06 | 6.73E-07 | 5.14 | 4.8779397 | 4.09E-02 | 6922925   | 6923048   | NC_000008.10 |
| cg00419012 | 4.25E-06 | 6.74E-07 | 5.14 | 4.8776946 | 7.23E-02 | 132899234 | 132899357 | NC_000012.11 |
| cg01569339 | 4.25E-06 | 6.74E-07 | 5.14 | 4.8766511 | 2.06E-02 | 16645732  | 16645855  | NC_000003.11 |
| cg00657674 | 4.25E-06 | 6.75E-07 | 5.14 | 4.8764743 | 6.66E-02 | 102198240 | 102198363 | NC_000003.11 |
| cg02423030 | 4.26E-06 | 6.75E-07 | 5.14 | 4.8757284 | 4.05E-02 | 12968505  | 12968628  | NC_000019.9  |
| cg15141371 | 4.26E-06 | 6.76E-07 | 5.14 | 4.8749689 | 2.85E-02 | 39195098  | 39195221  | NC_000003.11 |
| cg19026320 | 4.26E-06 | 6.76E-07 | 5.14 | 4.8738417 | 1.21E-01 | 31588354  | 31588477  | NC_000021.8  |
| cg26385286 | 4.27E-06 | 6.77E-07 | 5.14 | 4.8730832 | 1.01E-01 | 10527815  | 10527938  | NC_000006.11 |

|            |          |          |      |           |          |           |           |              |
|------------|----------|----------|------|-----------|----------|-----------|-----------|--------------|
| cg11854806 | 4.27E-06 | 6.77E-07 | 5.14 | 4.872809  | 1.49E-01 | 82116365  | 82116488  | NC_000010.10 |
| cg15493618 | 4.27E-06 | 6.78E-07 | 5.14 | 4.8714372 | 9.64E-02 | 154714069 | 154714192 | NC_000004.11 |
| cg10401733 | 4.27E-06 | 6.78E-07 | 5.14 | 4.8711687 | 6.15E-02 | 72491892  | 72492015  | NC_000015.9  |
| cg16665231 | 4.28E-06 | 6.78E-07 | 5.14 | 4.870802  | 3.24E-02 | 245741199 | 245741322 | NC_000001.10 |
| cg16335858 | 4.28E-06 | 6.78E-07 | 5.14 | 4.8707909 | 4.16E-02 | 45942027  | 45942150  | NC_000011.9  |
| cg16920407 | 4.28E-06 | 6.79E-07 | 5.14 | 4.8703797 | 2.52E-02 | 7605206   | 7605329   | NC_000017.10 |
| cg26695780 | 4.28E-06 | 6.79E-07 | 5.14 | 4.8702464 | 1.36E-02 | 66021476  | 66021599  | NC_000007.13 |
| cg07211684 | 4.29E-06 | 6.81E-07 | 5.13 | 4.8678029 | 3.38E-02 | 160211221 | 160211344 | NC_000004.11 |
| cg18711246 | 4.29E-06 | 6.81E-07 | 5.13 | 4.8677621 | 2.62E-02 | 72249338  | 72249461  | NC_000013.10 |
| cg09644952 | 4.29E-06 | 6.81E-07 | 5.13 | 4.8675728 | 6.75E-02 | 121796071 | 121796194 | NC_000003.11 |
| cg20933586 | 4.29E-06 | 6.81E-07 | 5.13 | 4.8670355 | 8.12E-02 | 24608199  | 24608322  | NC_000014.8  |
| cg06023161 | 4.29E-06 | 6.81E-07 | 5.13 | 4.8668856 | 8.30E-02 | 31590572  | 31590695  | NC_000006.11 |
| cg14543770 | 4.30E-06 | 6.82E-07 | 5.13 | 4.8661714 | 3.08E-02 | 75921889  | 75922012  | NC_000015.9  |
| cg22133552 | 4.30E-06 | 6.83E-07 | 5.13 | 4.8649563 | 1.69E-02 | 6474306   | 6474429   | NC_000007.13 |
| cg01530605 | 4.30E-06 | 6.83E-07 | 5.13 | 4.8645945 | 1.46E-01 | 181414848 | 181414971 | NC_000003.11 |
| cg01866606 | 4.30E-06 | 6.83E-07 | 5.13 | 4.8644584 | 1.11E-01 | 176950843 | 176950966 | NC_000002.11 |
| cg12858370 | 4.30E-06 | 6.83E-07 | 5.13 | 4.8643548 | 1.05E-01 | 5313892   | 5314015   | NC_000005.9  |
| cg01437781 | 4.30E-06 | 6.83E-07 | 5.13 | 4.8641773 | 7.09E-02 | 118563568 | 118563691 | NC_000010.10 |
| cg24794052 | 4.30E-06 | 6.83E-07 | 5.13 | 4.8638301 | 1.18E-01 | 123127861 | 123127984 | NC_000010.10 |
| cg12302070 | 4.31E-06 | 6.83E-07 | 5.13 | 4.8636698 | 1.51E-01 | 163695776 | 163695899 | NC_000002.11 |
| cg12686317 | 4.31E-06 | 6.84E-07 | 5.13 | 4.8630216 | 1.45E-01 | 55880894  | 55881017  | NC_000015.9  |
| cg09430946 | 4.31E-06 | 6.84E-07 | 5.13 | 4.8628868 | 4.07E-02 | 29795361  | 29795484  | NC_000006.11 |
| cg23032393 | 4.31E-06 | 6.84E-07 | 5.13 | 4.8628343 | 5.89E-02 | 114845403 | 114845526 | NC_000013.10 |
| cg03873694 | 4.31E-06 | 6.85E-07 | 5.13 | 4.8617314 | 9.21E-02 | 43118627  | 43118750  | NC_000007.13 |
| cg02827340 | 4.31E-06 | 6.85E-07 | 5.13 | 4.8615477 | 8.20E-02 | 222021114 | 222021237 | NC_000002.11 |

|            |          |          |      |           |          |           |           |              |
|------------|----------|----------|------|-----------|----------|-----------|-----------|--------------|
| cg04827223 | 4.32E-06 | 6.86E-07 | 5.13 | 4.8607948 | 5.72E-02 | 72435913  | 72436036  | NC_000011.9  |
| cg09691134 | 4.32E-06 | 6.86E-07 | 5.13 | 4.8606758 | 4.66E-02 | 234734475 | 234734598 | NC_000001.10 |
| cg01705587 | 4.32E-06 | 6.86E-07 | 5.13 | 4.8606671 | 1.30E-01 | 149889364 | 149889487 | NC_000001.10 |
| cg02400433 | 4.32E-06 | 6.86E-07 | 5.13 | 4.8606613 | 9.11E-02 | 100054987 | 100055110 | NC_000006.11 |
| cg02539083 | 4.32E-06 | 6.86E-07 | 5.13 | 4.8601804 | 8.10E-02 | 97361148  | 97361271  | NC_000007.13 |
| cg24503261 | 4.32E-06 | 6.86E-07 | 5.13 | 4.8599293 | 8.27E-02 | 299629    | 299752    | NC_000011.9  |
| cg11413133 | 4.32E-06 | 6.87E-07 | 5.13 | 4.8591188 | 1.07E-01 | 21281318  | 21281441  | NC_000017.10 |
| cg01152019 | 4.33E-06 | 6.88E-07 | 5.13 | 4.8579723 | 1.10E-01 | 177015044 | 177015167 | NC_000002.11 |
| cg04457196 | 4.33E-06 | 6.88E-07 | 5.13 | 4.857398  | 1.79E-01 | 164593264 | 164593387 | NC_000002.11 |
| cg24458609 | 4.33E-06 | 6.88E-07 | 5.13 | 4.8572994 | 1.25E-01 | 56948015  | 56948138  | NC_000011.9  |
| cg13380103 | 4.33E-06 | 6.88E-07 | 5.13 | 4.8572419 | 8.73E-02 | 178770629 | 178770752 | NC_000005.9  |
| cg09850980 | 4.33E-06 | 6.88E-07 | 5.13 | 4.8569931 | 1.04E-01 | 36067127  | 36067250  | NC_000005.9  |
| cg04043150 | 4.33E-06 | 6.88E-07 | 5.13 | 4.8566737 | 9.21E-02 | 110673319 | 110673442 | NC_000001.10 |
| cg14179389 | 4.34E-06 | 6.89E-07 | 5.13 | 4.8560803 | 1.37E-01 | 92947961  | 92948084  | NC_000001.10 |
| cg23703062 | 4.34E-06 | 6.89E-07 | 5.13 | 4.8559684 | 9.82E-02 | 14748198  | 14748321  | NC_000018.9  |
| cg01594675 | 4.34E-06 | 6.89E-07 | 5.13 | 4.8555519 | 3.88E-02 | 55289112  | 55289235  | NC_000002.11 |
| cg20265528 | 4.34E-06 | 6.90E-07 | 5.13 | 4.8547847 | 5.50E-02 | 105853269 | 105853392 | NC_000002.11 |
| cg03841832 | 4.34E-06 | 6.90E-07 | 5.13 | 4.8545969 | 7.46E-02 | 9981202   | 9981325   | NC_000004.11 |
| cg27316766 | 4.34E-06 | 6.90E-07 | 5.13 | 4.8541851 | 8.26E-02 | 106066793 | 106066916 | NC_000014.8  |
| cg06666025 | 4.35E-06 | 6.90E-07 | 5.13 | 4.853864  | 1.38E-01 | 66613278  | 66613401  | NC_000016.9  |
| cg11527930 | 4.35E-06 | 6.91E-07 | 5.13 | 4.8537215 | 7.61E-02 | 107162110 | 107162233 | NC_000005.9  |
| cg18358643 | 4.35E-06 | 6.91E-07 | 5.13 | 4.8527689 | 2.00E-02 | 61108264  | 61108387  | NC_000002.11 |
| cg27592453 | 4.35E-06 | 6.92E-07 | 5.13 | 4.8519621 | 4.39E-02 | 44565030  | 44565153  | NC_000022.10 |
| cg02657800 | 4.35E-06 | 6.92E-07 | 5.13 | 4.8517148 | 1.12E-01 | 32953351  | 32953474  | NC_000017.10 |
| cg20043105 | 4.36E-06 | 6.92E-07 | 5.13 | 4.8515117 | 1.21E-01 | 29247458  | 29247581  | NC_000014.8  |



|            |          |          |      |           |          |           |           |              |
|------------|----------|----------|------|-----------|----------|-----------|-----------|--------------|
| cg14911132 | 4.36E-06 | 6.93E-07 | 5.13 | 4.8507918 | 7.97E-02 | 61596755  | 61596878  | NC_000011.9  |
| cg03879594 | 4.36E-06 | 6.93E-07 | 5.13 | 4.8505473 | 7.78E-02 | 85207569  | 85207692  | NC_000016.9  |
| cg26974111 | 4.36E-06 | 6.94E-07 | 5.13 | 4.849578  | 1.20E-01 | 12254120  | 12254243  | NC_000018.9  |
| cg24225517 | 4.36E-06 | 6.94E-07 | 5.13 | 4.8495744 | 1.48E-01 | 108487063 | 108487186 | NC_000006.11 |
| cg00907198 | 4.37E-06 | 6.94E-07 | 5.13 | 4.8489192 | 6.81E-02 | 153811985 | 153812108 | NC_000003.11 |
| cg08064488 | 4.37E-06 | 6.94E-07 | 5.13 | 4.8489061 | 9.81E-02 | 38068043  | 38068166  | NC_000021.8  |
| cg00967123 | 4.37E-06 | 6.94E-07 | 5.13 | 4.8488973 | 9.02E-02 | 78427788  | 78427911  | NC_000017.10 |
| cg10365886 | 4.37E-06 | 6.94E-07 | 5.13 | 4.8488797 | 1.36E-01 | 32063874  | 32063997  | NC_000006.11 |
| cg04007271 | 4.37E-06 | 6.94E-07 | 5.13 | 4.8487936 | 4.61E-02 | 88451576  | 88451699  | NC_000016.9  |
| cg00055679 | 4.37E-06 | 6.94E-07 | 5.13 | 4.8486963 | 8.49E-02 | 79170430  | 79170553  | NC_000013.10 |
| cg02029665 | 4.37E-06 | 6.94E-07 | 5.13 | 4.8486793 | 1.25E-01 | 46441799  | 46441922  | NC_000022.10 |
| cg08204783 | 4.37E-06 | 6.95E-07 | 5.13 | 4.8472115 | 1.02E-01 | 12624679  | 12624802  | NC_000019.9  |
| cg12307787 | 4.37E-06 | 6.95E-07 | 5.13 | 4.847193  | 1.56E-01 | 48099359  | 48099482  | NC_000020.10 |
| cg19610519 | 4.37E-06 | 6.95E-07 | 5.13 | 4.8469669 | 3.41E-02 | 70073031  | 70073154  | NC_000011.9  |
| cg13788258 | 4.38E-06 | 6.96E-07 | 5.13 | 4.8467759 | 1.34E-01 | 13840381  | 13840504  | NC_000001.10 |
| cg06512774 | 4.38E-06 | 6.96E-07 | 5.13 | 4.8463281 | 7.50E-02 | 38456379  | 38456502  | NC_000021.8  |
| cg27318546 | 4.38E-06 | 6.96E-07 | 5.13 | 4.8454535 | 6.31E-02 | 48345906  | 48346029  | NC_000018.9  |
| cg19211077 | 4.38E-06 | 6.97E-07 | 5.13 | 4.8454099 | 1.47E-01 | 21658001  | 21658124  | NC_000019.9  |
| cg00306909 | 4.38E-06 | 6.97E-07 | 5.13 | 4.8452717 | 1.09E-01 | 175194079 | 175194202 | NC_000002.11 |
| cg18668540 | 4.38E-06 | 6.97E-07 | 5.13 | 4.845214  | 6.29E-02 | 73479848  | 73479971  | NC_000010.10 |
| cg27069422 | 4.38E-06 | 6.97E-07 | 5.13 | 4.8451145 | 7.41E-02 | 140531474 | 140531597 | NC_000005.9  |
| cg17851113 | 4.38E-06 | 6.97E-07 | 5.13 | 4.844948  | 7.71E-02 | 233746170 | 233746293 | NC_000001.10 |
| cg01786704 | 4.38E-06 | 6.97E-07 | 5.13 | 4.8445361 | 1.13E-01 | 25123688  | 25123811  | NC_000015.9  |
| cg17504341 | 4.39E-06 | 6.98E-07 | 5.13 | 4.844029  | 1.75E-01 | 26724836  | 26724959  | NC_000008.10 |
| cg12619347 | 4.39E-06 | 6.98E-07 | 5.13 | 4.8437543 | 9.68E-02 | 57280909  | 57281032  | NC_000011.9  |

|            |          |          |      |           |          |           |           |              |
|------------|----------|----------|------|-----------|----------|-----------|-----------|--------------|
| cg17823346 | 4.39E-06 | 6.98E-07 | 5.13 | 4.8436313 | 1.25E-01 | 80848143  | 80848266  | NC_000010.10 |
| cg27629948 | 4.39E-06 | 6.98E-07 | 5.13 | 4.8435018 | 5.98E-02 | 89285170  | 89285293  | NC_000015.9  |
| cg01414728 | 4.39E-06 | 6.98E-07 | 5.13 | 4.8433781 | 7.40E-02 | 131872222 | 131872345 | NC_000012.11 |
| cg20025977 | 4.39E-06 | 6.98E-07 | 5.13 | 4.8431157 | 8.00E-02 | 1579814   | 1579937   | NC_000004.11 |
| cg25751961 | 4.39E-06 | 6.98E-07 | 5.13 | 4.8430896 | 1.03E-01 | 128711233 | 128711356 | NC_000011.9  |
| cg14871534 | 4.39E-06 | 6.98E-07 | 5.13 | 4.8430142 | 4.35E-02 | 47121158  | 47121281  | NC_000014.8  |
| cg04105282 | 4.39E-06 | 6.98E-07 | 5.13 | 4.8427214 | 1.57E-01 | 99790170  | 99790293  | NC_000010.10 |
| cg23600438 | 4.39E-06 | 6.99E-07 | 5.13 | 4.8420488 | 1.11E-01 | 76153779  | 76153902  | NC_000018.9  |
| cg26322248 | 4.40E-06 | 6.99E-07 | 5.13 | 4.841805  | 1.46E-01 | 13200982  | 13201105  | NC_000020.10 |
| cg08985979 | 4.40E-06 | 6.99E-07 | 5.13 | 4.8415127 | 1.08E-01 | 183062576 | 183062699 | NC_000004.11 |
| cg05490591 | 4.40E-06 | 6.99E-07 | 5.13 | 4.8412824 | 8.05E-02 | 55648137  | 55648260  | NC_000017.10 |
| cg08464824 | 4.40E-06 | 7.00E-07 | 5.13 | 4.8401926 | 1.47E-01 | 56904977  | 56905100  | NC_000019.9  |
| cg13963658 | 4.40E-06 | 7.01E-07 | 5.13 | 4.8395947 | 9.05E-02 | 50697503  | 50697626  | NC_000022.10 |
| cg03939709 | 4.41E-06 | 7.01E-07 | 5.13 | 4.8393592 | 8.48E-02 | 1064210   | 1064333   | NC_000017.10 |
| cg19681718 | 4.41E-06 | 7.01E-07 | 5.13 | 4.8393206 | 7.67E-02 | 33454623  | 33454746  | NC_000022.10 |
| cg00122765 | 4.41E-06 | 7.01E-07 | 5.13 | 4.8386327 | 5.88E-02 | 29457918  | 29458041  | NC_000017.10 |
| cg08149859 | 4.41E-06 | 7.02E-07 | 5.13 | 4.8379194 | 2.35E-02 | 66919604  | 66919727  | NC_000016.9  |
| cg13239348 | 4.41E-06 | 7.02E-07 | 5.13 | 4.8378398 | 1.10E-01 | 131768533 | 131768656 | NC_000010.10 |
| cg25288068 | 4.41E-06 | 7.02E-07 | 5.13 | 4.8377696 | 1.12E-01 | 28793681  | 28793804  | NC_000006.11 |
| cg24014143 | 4.41E-06 | 7.02E-07 | 5.13 | 4.8377308 | 1.11E-01 | 70682127  | 70682250  | NC_000013.10 |
| cg03503871 | 4.41E-06 | 7.02E-07 | 5.13 | 4.8376295 | 6.66E-02 | 30616011  | 30616134  | NC_000016.9  |
| cg24158482 | 4.42E-06 | 7.03E-07 | 5.13 | 4.8370331 | 3.53E-02 | 55715082  | 55715205  | NC_000017.10 |
| cg16661464 | 4.42E-06 | 7.03E-07 | 5.13 | 4.8370096 | 4.67E-02 | 61037759  | 61037882  | NC_000018.9  |
| cg21329649 | 4.42E-06 | 7.03E-07 | 5.13 | 4.8368137 | 4.51E-02 | 1901840   | 1901963   | NC_000007.13 |
| cg15513743 | 4.42E-06 | 7.04E-07 | 5.13 | 4.8356566 | 9.78E-02 | 119528688 | 119528811 | NC_000001.10 |

|            |          |          |      |           |          |           |           |              |
|------------|----------|----------|------|-----------|----------|-----------|-----------|--------------|
| cg03805019 | 4.42E-06 | 7.04E-07 | 5.13 | 4.8351917 | 8.34E-02 | 62464090  | 62464213  | NC_000020.10 |
| cg02054776 | 4.42E-06 | 7.04E-07 | 5.13 | 4.8348262 | 7.56E-02 | 165326345 | 165326468 | NC_000001.10 |
| cg11251177 | 4.42E-06 | 7.04E-07 | 5.13 | 4.8347981 | 2.97E-02 | 169569137 | 169569260 | NC_000006.11 |
| cg00045753 | 4.43E-06 | 7.05E-07 | 5.13 | 4.8338779 | 1.01E-01 | 123630545 | 123630668 | NC_000009.11 |
| cg01796478 | 4.43E-06 | 7.05E-07 | 5.13 | 4.8335141 | 5.02E-02 | 56738942  | 56739065  | NC_000017.10 |
| cg20893031 | 4.43E-06 | 7.06E-07 | 5.13 | 4.8324703 | 1.67E-01 | 108306467 | 108306590 | NC_000012.11 |
| cg15573040 | 4.44E-06 | 7.06E-07 | 5.13 | 4.8316499 | 1.43E-01 | 92938295  | 92938418  | NC_000015.9  |
| cg04259752 | 4.44E-06 | 7.07E-07 | 5.13 | 4.8311468 | 6.37E-02 | 23262159  | 23262282  | NC_000008.10 |
| cg02634628 | 4.44E-06 | 7.08E-07 | 5.13 | 4.8301686 | 1.19E-01 | 1308420   | 1308543   | NC_000007.13 |
| cg12555369 | 4.45E-06 | 7.08E-07 | 5.13 | 4.8296311 | 9.46E-02 | 105153066 | 105153189 | NC_000010.10 |
| cg00410370 | 4.45E-06 | 7.08E-07 | 5.13 | 4.8294861 | 1.46E-01 | 175200477 | 175200600 | NC_000002.11 |
| cg24709681 | 4.45E-06 | 7.08E-07 | 5.13 | 4.8293653 | 1.32E-01 | 140771372 | 140771495 | NC_000003.11 |
| cg22737001 | 4.45E-06 | 7.09E-07 | 5.13 | 4.828803  | 1.54E-01 | 25257029  | 25257152  | NC_000001.10 |
| cg05792273 | 4.45E-06 | 7.09E-07 | 5.13 | 4.8282303 | 2.71E-02 | 30310118  | 30310241  | NC_000006.11 |
| cg19007908 | 4.45E-06 | 7.09E-07 | 5.13 | 4.8282219 | 5.94E-02 | 49686020  | 49686143  | NC_000019.9  |
| cg21392868 | 4.45E-06 | 7.09E-07 | 5.13 | 4.8281301 | 2.80E-02 | 11983333  | 11983456  | NC_000001.10 |
| cg18654956 | 4.45E-06 | 7.09E-07 | 5.13 | 4.827926  | 6.92E-02 | 68377657  | 68377780  | NC_000009.11 |
| cg06457811 | 4.46E-06 | 7.10E-07 | 5.13 | 4.8267921 | 1.09E-01 | 155175061 | 155175184 | NC_000007.13 |
| cg03693706 | 4.46E-06 | 7.11E-07 | 5.13 | 4.8258038 | 4.05E-02 | 6928705   | 6928828   | NC_000017.10 |
| cg18861231 | 4.47E-06 | 7.11E-07 | 5.13 | 4.8254408 | 4.53E-02 | 152057943 | 152058066 | NC_000003.11 |
| cg00801571 | 4.47E-06 | 7.11E-07 | 5.13 | 4.8253669 | 7.43E-02 | 112033832 | 112033955 | NC_000006.11 |
| cg16797575 | 4.47E-06 | 7.11E-07 | 5.13 | 4.8251643 | 3.96E-02 | 100340195 | 100340318 | NC_000015.9  |
| cg20055230 | 4.47E-06 | 7.11E-07 | 5.13 | 4.8248513 | 4.04E-02 | 41102374  | 41102497  | NC_000015.9  |
| cg00171578 | 4.47E-06 | 7.12E-07 | 5.13 | 4.8241012 | 4.42E-02 | 147789747 | 147789870 | NC_000001.10 |
| cg20285546 | 4.47E-06 | 7.12E-07 | 5.13 | 4.8240989 | 9.54E-02 | 58728728  | 58728851  | NC_000019.9  |

|            |          |          |      |           |          |           |           |              |
|------------|----------|----------|------|-----------|----------|-----------|-----------|--------------|
| cg20295537 | 4.47E-06 | 7.12E-07 | 5.13 | 4.8240162 | 1.49E-01 | 57389906  | 57390029  | NC_000010.10 |
| cg00250409 | 4.47E-06 | 7.12E-07 | 5.13 | 4.8238522 | 1.09E-01 | 73206310  | 73206433  | NC_000016.9  |
| cg06275642 | 4.47E-06 | 7.12E-07 | 5.13 | 4.82382   | 9.51E-02 | 68546038  | 68546161  | NC_000002.11 |
| cg00525823 | 4.48E-06 | 7.13E-07 | 5.12 | 4.8224312 | 1.19E-01 | 11148510  | 11148633  | NC_000018.9  |
| cg09445472 | 4.48E-06 | 7.14E-07 | 5.12 | 4.8214565 | 1.19E-01 | 7709962   | 7710085   | NC_000010.10 |
| cg09038914 | 4.48E-06 | 7.14E-07 | 5.12 | 4.8212283 | 6.34E-02 | 42992567  | 42992690  | NC_000017.10 |
| cg03398843 | 4.49E-06 | 7.15E-07 | 5.12 | 4.8194311 | 4.83E-02 | 154679990 | 154680113 | NC_000001.10 |
| cg05352087 | 4.49E-06 | 7.16E-07 | 5.12 | 4.8191103 | 1.24E-01 | 75600124  | 75600247  | NC_000001.10 |
| cg17073273 | 4.49E-06 | 7.16E-07 | 5.12 | 4.8189105 | 1.23E-01 | 99279795  | 99279918  | NC_000006.11 |
| cg02865242 | 4.50E-06 | 7.17E-07 | 5.12 | 4.817311  | 3.43E-02 | 72702859  | 72702982  | NC_000017.10 |
| cg08424166 | 4.50E-06 | 7.17E-07 | 5.12 | 4.8171154 | 4.98E-02 | 161592221 | 161592344 | NC_000006.11 |
| cg22223232 | 4.50E-06 | 7.17E-07 | 5.12 | 4.816956  | 1.10E-01 | 117913096 | 117913219 | NC_000001.10 |
| cg17239923 | 4.50E-06 | 7.18E-07 | 5.12 | 4.8163546 | 1.05E-01 | 128556611 | 128556734 | NC_000011.9  |
| cg16032050 | 4.50E-06 | 7.18E-07 | 5.12 | 4.816299  | 1.41E-01 | 50605158  | 50605281  | NC_000010.10 |
| cg21229170 | 4.51E-06 | 7.18E-07 | 5.12 | 4.8153458 | 3.04E-02 | 129331407 | 129331530 | NC_000008.10 |
| cg23791505 | 4.51E-06 | 7.19E-07 | 5.12 | 4.8151116 | 1.12E-01 | 32906991  | 32907114  | NC_000017.10 |
| cg25061451 | 4.51E-06 | 7.19E-07 | 5.12 | 4.8147597 | 7.36E-02 | 173826988 | 173827111 | NC_000001.10 |
| cg06574716 | 4.51E-06 | 7.19E-07 | 5.12 | 4.8146686 | 1.16E-01 | 44331239  | 44331362  | NC_000019.9  |
| cg08266945 | 4.51E-06 | 7.20E-07 | 5.12 | 4.8139257 | 1.16E-02 | 170550881 | 170551004 | NC_000002.11 |
| cg05251676 | 4.52E-06 | 7.20E-07 | 5.12 | 4.8131146 | 2.16E-01 | 38258884  | 38259007  | NC_000005.9  |
| cg00330490 | 4.53E-06 | 7.22E-07 | 5.12 | 4.8105439 | 5.58E-02 | 11073908  | 11074031  | NC_000001.10 |
| cg13313813 | 4.53E-06 | 7.23E-07 | 5.12 | 4.809733  | 9.41E-02 | 34820562  | 34820685  | NC_000017.10 |
| cg08009711 | 4.53E-06 | 7.23E-07 | 5.12 | 4.809393  | 7.94E-02 | 43346184  | 43346307  | NC_000021.8  |
| cg26214026 | 4.53E-06 | 7.23E-07 | 5.12 | 4.8092136 | 1.02E-01 | 111926384 | 111926507 | NC_000012.11 |
| cg19511235 | 4.53E-06 | 7.23E-07 | 5.12 | 4.8091575 | 7.03E-02 | 18709437  | 18709560  | NC_000019.9  |

|            |          |          |      |           |          |           |           |              |
|------------|----------|----------|------|-----------|----------|-----------|-----------|--------------|
| cg24617696 | 4.53E-06 | 7.23E-07 | 5.12 | 4.8091172 | 1.28E-01 | 121104312 | 121104435 | NC_000002.11 |
| cg19102272 | 4.54E-06 | 7.24E-07 | 5.12 | 4.8081532 | 5.95E-02 | 71662023  | 71662146  | NC_000002.11 |
| cg00822361 | 4.54E-06 | 7.25E-07 | 5.12 | 4.8068514 | 1.11E-01 | 156271246 | 156271369 | NC_000003.11 |
| cg19488874 | 4.55E-06 | 7.25E-07 | 5.12 | 4.8062569 | 1.23E-01 | 175193551 | 175193674 | NC_000002.11 |
| cg03242265 | 4.55E-06 | 7.25E-07 | 5.12 | 4.8061123 | 1.30E-01 | 147782472 | 147782595 | NC_000001.10 |
| cg26261502 | 4.55E-06 | 7.26E-07 | 5.12 | 4.804949  | 1.14E-01 | 31846533  | 31846656  | NC_000011.9  |
| cg01924868 | 4.56E-06 | 7.27E-07 | 5.12 | 4.8045091 | 7.15E-02 | 26305569  | 26305692  | NC_000008.10 |
| cg14137162 | 4.56E-06 | 7.27E-07 | 5.12 | 4.8041545 | 3.91E-02 | 66493682  | 66493805  | NC_000005.9  |
| cg06704897 | 4.56E-06 | 7.27E-07 | 5.12 | 4.8040675 | 1.03E-01 | 95870906  | 95871029  | NC_000015.9  |
| cg26607248 | 4.56E-06 | 7.27E-07 | 5.12 | 4.8034089 | 3.61E-02 | 202979751 | 202979874 | NC_000001.10 |
| cg11717738 | 4.56E-06 | 7.28E-07 | 5.12 | 4.8027291 | 4.71E-02 | 104193799 | 104193922 | NC_000014.8  |
| cg20000718 | 4.56E-06 | 7.28E-07 | 5.12 | 4.8023722 | 1.30E-01 | 41869433  | 41869556  | NC_000004.11 |
| cg23044270 | 4.57E-06 | 7.29E-07 | 5.12 | 4.8016245 | 6.71E-02 | 43659607  | 43659730  | NC_000003.11 |
| cg01898964 | 4.57E-06 | 7.29E-07 | 5.12 | 4.8013276 | 1.29E-01 | 175203497 | 175203620 | NC_000002.11 |
| cg03730709 | 4.57E-06 | 7.29E-07 | 5.12 | 4.8011999 | 1.12E-01 | 81954663  | 81954786  | NC_000010.10 |
| cg06135032 | 4.57E-06 | 7.29E-07 | 5.12 | 4.8009948 | 1.53E-02 | 1461221   | 1461344   | NC_000016.9  |
| cg07594209 | 4.57E-06 | 7.29E-07 | 5.12 | 4.8009707 | 1.59E-01 | 17218278  | 17218401  | NC_000005.9  |
| cg16046028 | 4.57E-06 | 7.29E-07 | 5.12 | 4.8007742 | 1.18E-01 | 391683    | 391806    | NC_000006.11 |
| cg01407406 | 4.57E-06 | 7.29E-07 | 5.12 | 4.8006741 | 1.31E-01 | 77468277  | 77468400  | NC_000016.9  |
| cg03134661 | 4.58E-06 | 7.31E-07 | 5.12 | 4.7991891 | 8.74E-02 | 4919655   | 4919778   | NC_000019.9  |
| cg23817343 | 4.58E-06 | 7.31E-07 | 5.12 | 4.7987819 | 4.32E-02 | 31636140  | 31636263  | NC_000006.11 |
| cg25307318 | 4.58E-06 | 7.31E-07 | 5.12 | 4.798774  | 1.02E-01 | 123923081 | 123923204 | NC_000010.10 |
| cg19814934 | 4.59E-06 | 7.32E-07 | 5.12 | 4.7970857 | 1.68E-01 | 42950152  | 42950275  | NC_000005.9  |
| cg09628838 | 4.59E-06 | 7.32E-07 | 5.12 | 4.7966626 | 1.29E-01 | 32906394  | 32906517  | NC_000017.10 |
| cg07119829 | 4.59E-06 | 7.33E-07 | 5.12 | 4.7962434 | 1.18E-01 | 223168487 | 223168610 | NC_000002.11 |

|            |          |          |      |           |          |           |           |              |
|------------|----------|----------|------|-----------|----------|-----------|-----------|--------------|
| cg01900788 | 4.59E-06 | 7.33E-07 | 5.12 | 4.7961784 | 1.84E-02 | 105835796 | 105835919 | NC_000014.8  |
| cg06747432 | 4.59E-06 | 7.33E-07 | 5.12 | 4.7959011 | 1.21E-01 | 46916741  | 46916864  | NC_000019.9  |
| cg09464194 | 4.60E-06 | 7.34E-07 | 5.12 | 4.795315  | 1.17E-01 | 39522944  | 39523067  | NC_000019.9  |
| cg00075634 | 4.60E-06 | 7.34E-07 | 5.12 | 4.7947001 | 1.17E-01 | 185940595 | 185940718 | NC_000004.11 |
| cg17070988 | 4.60E-06 | 7.34E-07 | 5.12 | 4.7941683 | 1.12E-01 | 115103351 | 115103474 | NC_000012.11 |
| cg13543572 | 4.60E-06 | 7.35E-07 | 5.12 | 4.7939775 | 3.09E-02 | 2335085   | 2335208   | NC_000019.9  |
| cg14633398 | 4.61E-06 | 7.35E-07 | 5.12 | 4.7932327 | 1.26E-01 | 19789383  | 19789506  | NC_000009.11 |
| cg15957959 | 4.61E-06 | 7.36E-07 | 5.12 | 4.7925138 | 3.25E-02 | 105239457 | 105239580 | NC_000014.8  |
| cg27435660 | 4.61E-06 | 7.36E-07 | 5.12 | 4.7922834 | 3.98E-02 | 5935953   | 5936076   | NC_000010.10 |
| cg17142870 | 4.61E-06 | 7.36E-07 | 5.12 | 4.792215  | 1.03E-01 | 37275372  | 37275495  | NC_000020.10 |
| cg17969579 | 4.62E-06 | 7.37E-07 | 5.12 | 4.7909684 | 9.86E-02 | 9416736   | 9416859   | NC_000008.10 |
| cg00427939 | 4.62E-06 | 7.37E-07 | 5.12 | 4.7906375 | 7.84E-02 | 3217249   | 3217372   | NC_000016.9  |
| cg19414967 | 4.62E-06 | 7.37E-07 | 5.12 | 4.7904077 | 9.62E-02 | 49468296  | 49468419  | NC_000008.10 |
| cg05758139 | 4.62E-06 | 7.38E-07 | 5.12 | 4.789994  | 4.78E-02 | 215169182 | 215169305 | NC_000001.10 |
| cg12037450 | 4.62E-06 | 7.38E-07 | 5.12 | 4.7889488 | 9.12E-02 | 85513124  | 85513247  | NC_000001.10 |
| cg04599342 | 4.62E-06 | 7.38E-07 | 5.12 | 4.7887802 | 2.60E-02 | 48058991  | 48059114  | NC_000019.9  |
| cg27427581 | 4.62E-06 | 7.39E-07 | 5.12 | 4.7887606 | 7.97E-02 | 8075716   | 8075839   | NC_000010.10 |
| cg14927855 | 4.63E-06 | 7.39E-07 | 5.12 | 4.7884814 | 7.65E-02 | 155151427 | 155151550 | NC_000007.13 |
| cg04511411 | 4.63E-06 | 7.39E-07 | 5.12 | 4.7880667 | 7.33E-02 | 16408214  | 16408337  | NC_000002.11 |
| cg17827470 | 4.63E-06 | 7.39E-07 | 5.12 | 4.787844  | 3.81E-02 | 22730195  | 22730318  | NC_000010.10 |
| cg13197216 | 4.63E-06 | 7.39E-07 | 5.12 | 4.7875135 | 1.22E-01 | 23567658  | 23567781  | NC_000008.10 |
| cg22638597 | 4.63E-06 | 7.40E-07 | 5.12 | 4.7870224 | 1.49E-01 | 94134739  | 94134862  | NC_000011.9  |
| cg06095802 | 4.63E-06 | 7.40E-07 | 5.12 | 4.7868659 | 7.17E-02 | 102843294 | 102843417 | NC_000011.9  |
| cg12537382 | 4.64E-06 | 7.41E-07 | 5.12 | 4.7859846 | 1.29E-01 | 1404446   | 1404569   | NC_000004.11 |
| cg02821998 | 4.64E-06 | 7.42E-07 | 5.12 | 4.7847986 | 5.69E-02 | 1827256   | 1827379   | NC_000004.11 |

|            |          |          |      |           |          |           |           |              |
|------------|----------|----------|------|-----------|----------|-----------|-----------|--------------|
| cg05137466 | 4.64E-06 | 7.42E-07 | 5.12 | 4.7844939 | 1.16E-01 | 34809811  | 34809934  | NC_000009.11 |
| cg02064368 | 4.65E-06 | 7.43E-07 | 5.12 | 4.7830339 | 7.02E-02 | 119786577 | 119786700 | NC_000004.11 |
| cg10449675 | 4.65E-06 | 7.43E-07 | 5.12 | 4.7829944 | 1.67E-02 | 44637500  | 44637623  | NC_000011.9  |
| cg15278682 | 4.65E-06 | 7.43E-07 | 5.12 | 4.7825635 | 2.90E-02 | 71175852  | 71175975  | NC_000010.10 |
| cg20112159 | 4.65E-06 | 7.43E-07 | 5.12 | 4.7823767 | 7.78E-02 | 80907159  | 80907282  | NC_000012.11 |
| cg07340499 | 4.65E-06 | 7.43E-07 | 5.12 | 4.7823164 | 5.06E-02 | 2208345   | 2208468   | NC_000007.13 |
| cg04591034 | 4.65E-06 | 7.44E-07 | 5.12 | 4.782151  | 1.13E-01 | 178017937 | 178018060 | NC_000005.9  |
| cg08730623 | 4.65E-06 | 7.44E-07 | 5.12 | 4.7820269 | 1.33E-01 | 98515041  | 98515164  | NC_000001.10 |
| cg23827991 | 4.66E-06 | 7.44E-07 | 5.12 | 4.7818731 | 4.52E-02 | 1283243   | 1283366   | NC_000005.9  |
| cg07708613 | 4.66E-06 | 7.44E-07 | 5.12 | 4.7812723 | 4.29E-02 | 42737139  | 42737262  | NC_000010.10 |
| cg22630939 | 4.66E-06 | 7.45E-07 | 5.12 | 4.7802388 | 8.58E-02 | 1135958   | 1136081   | NC_000007.13 |
| cg22924713 | 4.66E-06 | 7.45E-07 | 5.12 | 4.7800188 | 4.85E-02 | 111682141 | 111682264 | NC_000013.10 |
| cg02518899 | 4.67E-06 | 7.45E-07 | 5.12 | 4.779659  | 5.92E-02 | 39742965  | 39743088  | NC_000017.10 |
| cg08726417 | 4.67E-06 | 7.46E-07 | 5.12 | 4.7795559 | 8.00E-02 | 30407016  | 30407139  | NC_000020.10 |
| cg12990575 | 4.67E-06 | 7.46E-07 | 5.12 | 4.7794869 | 5.99E-02 | 43042420  | 43042543  | NC_000006.11 |
| cg18866015 | 4.67E-06 | 7.46E-07 | 5.12 | 4.7792946 | 1.68E-01 | 49868552  | 49868675  | NC_000018.9  |
| cg14531026 | 4.67E-06 | 7.46E-07 | 5.12 | 4.7789061 | 4.30E-02 | 184043286 | 184043409 | NC_000003.11 |
| cg22264393 | 4.68E-06 | 7.47E-07 | 5.11 | 4.7772586 | 6.55E-02 | 136861413 | 136861536 | NC_000004.11 |
| cg21059878 | 4.68E-06 | 7.47E-07 | 5.11 | 4.7771044 | 3.18E-02 | 74907683  | 74907806  | NC_000004.11 |
| cg12405983 | 4.68E-06 | 7.48E-07 | 5.11 | 4.7763738 | 5.66E-02 | 58630240  | 58630363  | NC_000019.9  |
| cg17080423 | 4.69E-06 | 7.49E-07 | 5.11 | 4.7747977 | 9.44E-02 | 81189774  | 81189897  | NC_000004.11 |
| cg03329019 | 4.69E-06 | 7.50E-07 | 5.11 | 4.7736259 | 8.53E-02 | 221051117 | 221051240 | NC_000001.10 |
| cg07285995 | 4.69E-06 | 7.50E-07 | 5.11 | 4.7731802 | 1.26E-01 | 92790364  | 92790487  | NC_000014.8  |
| cg23676302 | 4.70E-06 | 7.51E-07 | 5.11 | 4.7725332 | 1.23E-01 | 177025859 | 177025982 | NC_000002.11 |
| cg18061255 | 4.70E-06 | 7.51E-07 | 5.11 | 4.7723986 | 9.33E-02 | 7744722   | 7744845   | NC_000010.10 |

|            |          |          |      |           |          |           |           |              |
|------------|----------|----------|------|-----------|----------|-----------|-----------|--------------|
| cg06757180 | 4.70E-06 | 7.51E-07 | 5.11 | 4.7721728 | 2.79E-02 | 88914674  | 88914797  | NC_000016.9  |
| cg13936452 | 4.70E-06 | 7.51E-07 | 5.11 | 4.7720621 | 1.25E-01 | 47911336  | 47911459  | NC_000001.10 |
| cg18925094 | 4.71E-06 | 7.53E-07 | 5.11 | 4.7703694 | 5.45E-02 | 35551622  | 35551745  | NC_000021.8  |
| cg05941129 | 4.71E-06 | 7.53E-07 | 5.11 | 4.7701315 | 6.97E-02 | 140188813 | 140188936 | NC_000005.9  |
| cg24890884 | 4.71E-06 | 7.53E-07 | 5.11 | 4.7698222 | 5.25E-02 | 7002827   | 7002950   | NC_000012.11 |
| cg25460166 | 4.71E-06 | 7.53E-07 | 5.11 | 4.7696995 | 9.41E-02 | 87088817  | 87088940  | NC_000002.11 |
| cg10677590 | 4.71E-06 | 7.53E-07 | 5.11 | 4.7695065 | 2.55E-02 | 7657449   | 7657572   | NC_000017.10 |
| cg11294692 | 4.72E-06 | 7.55E-07 | 5.11 | 4.767696  | 1.01E-01 | 92790711  | 92790834  | NC_000014.8  |
| cg27425784 | 4.72E-06 | 7.55E-07 | 5.11 | 4.7673969 | 7.43E-02 | 98340511  | 98340634  | NC_000002.11 |
| cg24726370 | 4.72E-06 | 7.55E-07 | 5.11 | 4.7670392 | 6.94E-02 | 56855495  | 56855618  | NC_000007.13 |
| cg06074920 | 4.72E-06 | 7.55E-07 | 5.11 | 4.7670176 | 5.64E-02 | 39539075  | 39539198  | NC_000017.10 |
| cg10669265 | 4.73E-06 | 7.56E-07 | 5.11 | 4.766177  | 1.93E-01 | 1709950   | 1710073   | NC_000007.13 |
| cg01172903 | 4.73E-06 | 7.56E-07 | 5.11 | 4.7661006 | 1.57E-01 | 12203315  | 12203438  | NC_000019.9  |
| cg01364478 | 4.73E-06 | 7.56E-07 | 5.11 | 4.7658311 | 1.02E-01 | 170640331 | 170640454 | NC_000001.10 |
| cg01711077 | 4.73E-06 | 7.56E-07 | 5.11 | 4.7657386 | 5.33E-02 | 981222    | 981345    | NC_000001.10 |
| cg06492144 | 4.73E-06 | 7.56E-07 | 5.11 | 4.7655589 | 5.55E-02 | 31806352  | 31806475  | NC_000002.11 |
| cg27286999 | 4.73E-06 | 7.57E-07 | 5.11 | 4.7654505 | 1.04E-01 | 137967306 | 137967429 | NC_000009.11 |
| cg09682272 | 4.73E-06 | 7.57E-07 | 5.11 | 4.7654016 | 9.95E-02 | 108274587 | 108274710 | NC_000006.11 |
| cg27408540 | 4.73E-06 | 7.57E-07 | 5.11 | 4.7653626 | 9.81E-02 | 25465171  | 25465294  | NC_000010.10 |
| cg07563363 | 4.73E-06 | 7.57E-07 | 5.11 | 4.7647426 | 1.18E-01 | 154143677 | 154143800 | NC_000002.11 |
| cg14037837 | 4.73E-06 | 7.57E-07 | 5.11 | 4.7645376 | 1.67E-01 | 31839314  | 31839437  | NC_000011.9  |
| cg02851047 | 4.74E-06 | 7.58E-07 | 5.11 | 4.7637174 | 6.03E-02 | 2132723   | 2132846   | NC_000016.9  |
| cg15268244 | 4.74E-06 | 7.58E-07 | 5.11 | 4.7635488 | 9.23E-02 | 77196840  | 77196963  | NC_000015.9  |
| cg15066967 | 4.74E-06 | 7.58E-07 | 5.11 | 4.7634039 | 1.10E-01 | 237487774 | 237487897 | NC_000002.11 |
| cg17724412 | 4.74E-06 | 7.59E-07 | 5.11 | 4.762903  | 4.05E-02 | 28829283  | 28829406  | NC_000006.11 |



|            |          |          |      |           |          |           |           |              |
|------------|----------|----------|------|-----------|----------|-----------|-----------|--------------|
| cg00998744 | 4.74E-06 | 7.59E-07 | 5.11 | 4.762844  | 1.03E-01 | 147142198 | 147142321 | NC_000003.11 |
| cg05722371 | 4.74E-06 | 7.59E-07 | 5.11 | 4.7622192 | 3.94E-02 | 160247151 | 160247274 | NC_000001.10 |
| cg13960339 | 4.74E-06 | 7.59E-07 | 5.11 | 4.7620164 | 7.00E-02 | 57352142  | 57352265  | NC_000019.9  |
| cg12385599 | 4.74E-06 | 7.59E-07 | 5.11 | 4.7619602 | 1.01E-01 | 56184153  | 56184276  | NC_000007.13 |
| cg16758809 | 4.74E-06 | 7.59E-07 | 5.11 | 4.7619495 | 2.49E-02 | 43151825  | 43151948  | NC_000012.11 |
| cg01035170 | 4.74E-06 | 7.59E-07 | 5.11 | 4.7618053 | 1.35E-01 | 7851681   | 7851804   | NC_000005.9  |
| cg23963802 | 4.75E-06 | 7.60E-07 | 5.11 | 4.760907  | 7.44E-02 | 101874887 | 101875010 | NC_000010.10 |
| cg14036830 | 4.75E-06 | 7.60E-07 | 5.11 | 4.7607506 | 1.80E-01 | 42503207  | 42503330  | NC_000019.9  |
| cg02980499 | 4.75E-06 | 7.60E-07 | 5.11 | 4.7606925 | 9.48E-02 | 98031964  | 98032087  | NC_000010.10 |
| cg02439266 | 4.76E-06 | 7.61E-07 | 5.11 | 4.7593712 | 1.02E-01 | 27150042  | 27150165  | NC_000007.13 |
| cg17797121 | 4.76E-06 | 7.62E-07 | 5.11 | 4.7578918 | 3.29E-02 | 99330133  | 99330256  | NC_000010.10 |
| cg05495391 | 4.76E-06 | 7.63E-07 | 5.11 | 4.7575554 | 8.76E-02 | 7866767   | 7866890   | NC_000005.9  |
| cg22765233 | 4.77E-06 | 7.63E-07 | 5.11 | 4.7568658 | 3.81E-02 | 58257814  | 58257937  | NC_000019.9  |
| cg22333259 | 4.77E-06 | 7.64E-07 | 5.11 | 4.7564034 | 7.85E-02 | 19394757  | 19394880  | NC_000001.10 |
| cg09894929 | 4.77E-06 | 7.64E-07 | 5.11 | 4.7557584 | 8.98E-02 | 8473578   | 8473701   | NC_000007.13 |
| cg21341928 | 4.77E-06 | 7.64E-07 | 5.11 | 4.755635  | 8.40E-02 | 25670327  | 25670450  | NC_000013.10 |
| cg19516404 | 4.77E-06 | 7.64E-07 | 5.11 | 4.7554755 | 9.01E-02 | 147123475 | 147123598 | NC_000003.11 |
| cg13726878 | 4.78E-06 | 7.65E-07 | 5.11 | 4.7551033 | 5.49E-02 | 1908303   | 1908426   | NC_000012.11 |
| cg19614312 | 4.78E-06 | 7.65E-07 | 5.11 | 4.7549126 | 6.29E-02 | 123477787 | 123477910 | NC_000011.9  |
| cg08089567 | 4.78E-06 | 7.65E-07 | 5.11 | 4.7544544 | 9.33E-02 | 45705994  | 45706117  | NC_000021.8  |
| cg05710071 | 4.78E-06 | 7.66E-07 | 5.11 | 4.7539978 | 6.61E-02 | 40786198  | 40786321  | NC_000001.10 |
| cg19333114 | 4.78E-06 | 7.66E-07 | 5.11 | 4.7537064 | 8.06E-02 | 60777419  | 60777542  | NC_000002.11 |
| cg01799653 | 4.79E-06 | 7.67E-07 | 5.11 | 4.7516144 | 1.35E-01 | 10563501  | 10563624  | NC_000005.9  |
| cg18196334 | 4.79E-06 | 7.68E-07 | 5.11 | 4.7514429 | 7.41E-02 | 132169032 | 132169155 | NC_000012.11 |
| cg01790002 | 4.79E-06 | 7.68E-07 | 5.11 | 4.7513249 | 1.56E-01 | 27283545  | 27283668  | NC_000007.13 |

|            |          |          |      |           |          |           |           |              |
|------------|----------|----------|------|-----------|----------|-----------|-----------|--------------|
| cg11269599 | 4.80E-06 | 7.68E-07 | 5.11 | 4.7507288 | 1.75E-01 | 52391304  | 52391427  | NC_000019.9  |
| cg05380503 | 4.80E-06 | 7.68E-07 | 5.11 | 4.7503855 | 1.00E-01 | 43151986  | 43152109  | NC_000007.13 |
| cg07303244 | 4.80E-06 | 7.68E-07 | 5.11 | 4.7503681 | 1.87E-01 | 54164161  | 54164284  | NC_000008.10 |
| cg13485564 | 4.80E-06 | 7.69E-07 | 5.11 | 4.7497692 | 1.35E-01 | 223167617 | 223167740 | NC_000002.11 |
| cg19585597 | 4.80E-06 | 7.69E-07 | 5.11 | 4.7494757 | 1.28E-01 | 150326193 | 150326316 | NC_000005.9  |
| cg27650870 | 4.80E-06 | 7.69E-07 | 5.11 | 4.7494308 | 7.51E-02 | 41583136  | 41583259  | NC_000008.10 |
| cg13895235 | 4.80E-06 | 7.69E-07 | 5.11 | 4.7492885 | 1.93E-01 | 752292    | 752415    | NC_000007.13 |
| cg00875989 | 4.80E-06 | 7.69E-07 | 5.11 | 4.7490999 | 9.52E-02 | 44774054  | 44774177  | NC_000018.9  |
| cg15487867 | 4.80E-06 | 7.70E-07 | 5.11 | 4.7486415 | 1.87E-01 | 1475742   | 1475865   | NC_000001.10 |
| cg00570580 | 4.81E-06 | 7.70E-07 | 5.11 | 4.7480525 | 8.72E-02 | 111447255 | 111447378 | NC_000002.11 |
| cg04813711 | 4.81E-06 | 7.70E-07 | 5.11 | 4.747988  | 1.08E-01 | 57597905  | 57598028  | NC_000016.9  |
| cg22497741 | 4.81E-06 | 7.71E-07 | 5.11 | 4.7474965 | 1.25E-01 | 1475644   | 1475767   | NC_000001.10 |
| cg00700041 | 4.81E-06 | 7.71E-07 | 5.11 | 4.7467813 | 1.32E-01 | 13843911  | 13844034  | NC_000001.10 |
| cg14814323 | 4.81E-06 | 7.71E-07 | 5.11 | 4.7467677 | 3.91E-02 | 6412852   | 6412975   | NC_000011.9  |
| cg26147947 | 4.81E-06 | 7.71E-07 | 5.11 | 4.746578  | 1.17E-01 | 130590231 | 130590354 | NC_000012.11 |
| cg25048816 | 4.81E-06 | 7.71E-07 | 5.11 | 4.7465353 | 5.13E-02 | 778219    | 778342    | NC_000010.10 |
| cg01965425 | 4.81E-06 | 7.72E-07 | 5.11 | 4.7464431 | 1.08E-02 | 89629891  | 89630014  | NC_000004.11 |
| cg06410163 | 4.81E-06 | 7.72E-07 | 5.11 | 4.7463825 | 7.33E-02 | 57484637  | 57484760  | NC_000007.13 |
| cg21080655 | 4.82E-06 | 7.72E-07 | 5.11 | 4.7455503 | 3.50E-02 | 3633956   | 3634079   | NC_000002.11 |
| cg12629250 | 4.82E-06 | 7.72E-07 | 5.11 | 4.7454415 | 4.46E-02 | 20149347  | 20149470  | NC_000015.9  |
| cg25106304 | 4.82E-06 | 7.72E-07 | 5.11 | 4.7453157 | 9.50E-02 | 85906433  | 85906556  | NC_000011.9  |
| cg14278853 | 4.82E-06 | 7.72E-07 | 5.11 | 4.7452605 | 1.71E-01 | 29521756  | 29521879  | NC_000006.11 |
| cg08316009 | 4.82E-06 | 7.73E-07 | 5.11 | 4.7449502 | 7.65E-02 | 89165765  | 89165888  | NC_000016.9  |
| cg10188732 | 4.82E-06 | 7.73E-07 | 5.11 | 4.7445771 | 1.50E-01 | 98945949  | 98946072  | NC_000010.10 |
| cg09152886 | 4.82E-06 | 7.73E-07 | 5.11 | 4.7445106 | 1.00E-01 | 78493651  | 78493774  | NC_000013.10 |

|            |          |          |      |           |          |           |           |              |
|------------|----------|----------|------|-----------|----------|-----------|-----------|--------------|
| cg14507445 | 4.82E-06 | 7.73E-07 | 5.11 | 4.744199  | 1.08E-01 | 49886340  | 49886463  | NC_000022.10 |
| cg08520746 | 4.83E-06 | 7.73E-07 | 5.11 | 4.7439935 | 1.01E-01 | 172945932 | 172946055 | NC_000002.11 |
| cg13237021 | 4.83E-06 | 7.74E-07 | 5.11 | 4.7437478 | 5.50E-02 | 69949774  | 69949897  | NC_000011.9  |
| cg22158769 | 4.83E-06 | 7.74E-07 | 5.11 | 4.7437379 | 1.44E-01 | 39187539  | 39187662  | NC_000002.11 |
| cg20026664 | 4.83E-06 | 7.74E-07 | 5.11 | 4.7434436 | 1.01E-01 | 87999314  | 87999437  | NC_000004.11 |
| cg23547243 | 4.83E-06 | 7.74E-07 | 5.11 | 4.7434368 | 3.04E-02 | 43439288  | 43439411  | NC_000013.10 |
| cg13772595 | 4.83E-06 | 7.74E-07 | 5.11 | 4.7430236 | 6.93E-02 | 138623422 | 138623545 | NC_000009.11 |
| cg02335657 | 4.83E-06 | 7.74E-07 | 5.11 | 4.7430077 | 5.74E-02 | 129116059 | 129116182 | NC_000003.11 |
| cg01888566 | 4.83E-06 | 7.75E-07 | 5.11 | 4.7423512 | 8.36E-02 | 130126513 | 130126636 | NC_000007.13 |
| cg11218385 | 4.84E-06 | 7.75E-07 | 5.11 | 4.7416608 | 1.32E-01 | 31092854  | 31092977  | NC_000007.13 |
| cg23933618 | 4.84E-06 | 7.75E-07 | 5.11 | 4.7416332 | 1.47E-01 | 31837250  | 31837373  | NC_000011.9  |
| cg06267728 | 4.84E-06 | 7.76E-07 | 5.11 | 4.7403566 | 6.62E-02 | 32097116  | 32097239  | NC_000006.11 |
| cg24328125 | 4.85E-06 | 7.77E-07 | 5.11 | 4.7396928 | 1.19E-01 | 126168546 | 126168669 | NC_000012.11 |
| cg00934355 | 4.85E-06 | 7.77E-07 | 5.11 | 4.7394327 | 1.23E-01 | 1049244   | 1049367   | NC_000009.11 |
| cg26351951 | 4.85E-06 | 7.77E-07 | 5.11 | 4.7390298 | 4.57E-02 | 32056756  | 32056879  | NC_000006.11 |
| cg20375093 | 4.85E-06 | 7.78E-07 | 5.11 | 4.7387412 | 6.61E-02 | 178775192 | 178775315 | NC_000005.9  |
| cg07720540 | 4.85E-06 | 7.78E-07 | 5.11 | 4.738631  | 5.88E-02 | 3477442   | 3477565   | NC_000001.10 |
| cg24010531 | 4.85E-06 | 7.78E-07 | 5.11 | 4.7382464 | 5.81E-02 | 28400281  | 28400404  | NC_000019.9  |
| cg15003570 | 4.85E-06 | 7.78E-07 | 5.11 | 4.7380068 | 9.73E-02 | 133529939 | 133530062 | NC_000010.10 |
| cg03467725 | 4.85E-06 | 7.78E-07 | 5.11 | 4.7379634 | 9.96E-02 | 1922370   | 1922493   | NC_000016.9  |
| cg22031848 | 4.85E-06 | 7.78E-07 | 5.11 | 4.7378425 | 5.76E-02 | 68594526  | 68594649  | NC_000015.9  |
| cg10821610 | 4.85E-06 | 7.79E-07 | 5.11 | 4.7376746 | 1.13E-01 | 19052235  | 19052358  | NC_000001.10 |
| cg20447508 | 4.86E-06 | 7.79E-07 | 5.11 | 4.7372402 | 9.34E-02 | 38691801  | 38691924  | NC_000010.10 |
| cg19848629 | 4.86E-06 | 7.79E-07 | 5.11 | 4.7370823 | 1.42E-01 | 65286244  | 65286367  | NC_000008.10 |
| cg00558031 | 4.86E-06 | 7.80E-07 | 5.11 | 4.7363375 | 9.19E-02 | 8466291   | 8466414   | NC_000004.11 |

|            |          |          |      |           |          |           |           |              |
|------------|----------|----------|------|-----------|----------|-----------|-----------|--------------|
| cg05988356 | 4.86E-06 | 7.80E-07 | 5.11 | 4.7355434 | 9.05E-02 | 34295916  | 34296039  | NC_000016.9  |
| cg26756083 | 4.87E-06 | 7.81E-07 | 5.11 | 4.7351787 | 1.42E-01 | 89339622  | 89339745  | NC_000008.10 |
| cg11071155 | 4.87E-06 | 7.81E-07 | 5.11 | 4.7344732 | 4.09E-02 | 157012049 | 157012172 | NC_000006.11 |
| cg09121478 | 4.87E-06 | 7.82E-07 | 5.11 | 4.7337048 | 6.27E-02 | 9086460   | 9086583   | NC_000001.10 |
| cg17657394 | 4.87E-06 | 7.82E-07 | 5.11 | 4.733391  | 9.37E-02 | 137819188 | 137819311 | NC_000006.11 |
| cg01082512 | 4.88E-06 | 7.83E-07 | 5.1  | 4.7326623 | 1.38E-01 | 23462117  | 23462240  | NC_000010.10 |
| cg23920642 | 4.88E-06 | 7.83E-07 | 5.1  | 4.7325442 | 1.01E-01 | 121947425 | 121947548 | NC_000007.13 |
| cg06314969 | 4.88E-06 | 7.83E-07 | 5.1  | 4.7325259 | 5.71E-02 | 31357535  | 31357658  | NC_000015.9  |
| cg06973225 | 4.88E-06 | 7.83E-07 | 5.1  | 4.7321893 | 2.65E-02 | 31343737  | 31343860  | NC_000001.10 |
| cg04493818 | 4.88E-06 | 7.83E-07 | 5.1  | 4.7316571 | 9.91E-02 | 3644437   | 3644560   | NC_000004.11 |
| cg24867279 | 4.88E-06 | 7.83E-07 | 5.1  | 4.7315867 | 1.17E-01 | 28853021  | 28853144  | NC_000006.11 |
| cg05749067 | 4.88E-06 | 7.84E-07 | 5.1  | 4.7314922 | 4.58E-02 | 26517321  | 26517444  | NC_000001.10 |
| cg13060531 | 4.88E-06 | 7.84E-07 | 5.1  | 4.731437  | 6.73E-02 | 84466098  | 84466221  | NC_000001.10 |
| cg04201285 | 4.88E-06 | 7.84E-07 | 5.1  | 4.731063  | 6.55E-02 | 5687733   | 5687856   | NC_000019.9  |
| cg02147695 | 4.89E-06 | 7.84E-07 | 5.1  | 4.730987  | 1.35E-01 | 78493657  | 78493780  | NC_000013.10 |
| cg15613067 | 4.89E-06 | 7.85E-07 | 5.1  | 4.7302329 | 2.34E-02 | 242053881 | 242054004 | NC_000002.11 |
| cg17916835 | 4.89E-06 | 7.85E-07 | 5.1  | 4.7301048 | 1.15E-01 | 96655044  | 96655167  | NC_000007.13 |
| cg21467206 | 4.89E-06 | 7.85E-07 | 5.1  | 4.7298793 | 9.23E-02 | 53455960  | 53456083  | NC_000012.11 |
| cg20029745 | 4.89E-06 | 7.85E-07 | 5.1  | 4.7295193 | 1.29E-01 | 28621985  | 28622108  | NC_000018.9  |
| cg17386057 | 4.89E-06 | 7.85E-07 | 5.1  | 4.7294717 | 1.69E-01 | 113917621 | 113917744 | NC_000012.11 |
| cg04607865 | 4.89E-06 | 7.85E-07 | 5.1  | 4.7292295 | 1.12E-01 | 20834362  | 20834485  | NC_000007.13 |
| cg10362842 | 4.89E-06 | 7.86E-07 | 5.1  | 4.7290614 | 4.23E-02 | 123353578 | 123353701 | NC_000010.10 |
| cg11877297 | 4.89E-06 | 7.86E-07 | 5.1  | 4.7288685 | 1.48E-02 | 81965725  | 81965848  | NC_000010.10 |
| cg05110901 | 4.90E-06 | 7.86E-07 | 5.1  | 4.7286588 | 4.30E-02 | 76931566  | 76931689  | NC_000004.11 |
| cg04514469 | 4.90E-06 | 7.86E-07 | 5.1  | 4.7286077 | 8.37E-02 | 95942666  | 95942789  | NC_000014.8  |

|            |          |          |     |           |          |           |           |              |
|------------|----------|----------|-----|-----------|----------|-----------|-----------|--------------|
| cg18988938 | 4.90E-06 | 7.86E-07 | 5.1 | 4.7282032 | 5.61E-02 | 23849671  | 23849794  | NC_000002.11 |
| cg17174023 | 4.90E-06 | 7.86E-07 | 5.1 | 4.728186  | 1.45E-01 | 50987453  | 50987576  | NC_000022.10 |
| cg09646754 | 4.90E-06 | 7.86E-07 | 5.1 | 4.7279301 | 6.36E-02 | 44207543  | 44207666  | NC_000020.10 |
| cg24122826 | 4.90E-06 | 7.87E-07 | 5.1 | 4.727357  | 9.82E-02 | 107578640 | 107578763 | NC_000011.9  |
| cg17251384 | 4.90E-06 | 7.87E-07 | 5.1 | 4.7270631 | 3.05E-02 | 36333629  | 36333752  | NC_000004.11 |
| cg22498251 | 4.90E-06 | 7.87E-07 | 5.1 | 4.7269227 | 1.04E-01 | 19157710  | 19157833  | NC_000007.13 |
| cg26693927 | 4.90E-06 | 7.88E-07 | 5.1 | 4.7265388 | 3.42E-02 | 75538132  | 75538255  | NC_000005.9  |
| cg09503194 | 4.91E-06 | 7.88E-07 | 5.1 | 4.7263443 | 4.03E-02 | 41833279  | 41833402  | NC_000022.10 |
| cg24776465 | 4.91E-06 | 7.88E-07 | 5.1 | 4.7259769 | 3.00E-02 | 25572657  | 25572780  | NC_000018.9  |
| cg25252585 | 4.91E-06 | 7.89E-07 | 5.1 | 4.7247541 | 8.02E-02 | 35633972  | 35634095  | NC_000019.9  |
| cg07169798 | 4.92E-06 | 7.89E-07 | 5.1 | 4.7243622 | 5.81E-02 | 43417050  | 43417173  | NC_000008.10 |
| cg19878659 | 4.92E-06 | 7.89E-07 | 5.1 | 4.7243576 | 1.15E-01 | 143532735 | 143532858 | NC_000008.10 |
| cg24422029 | 4.92E-06 | 7.90E-07 | 5.1 | 4.7239374 | 8.37E-02 | 18549378  | 18549501  | NC_000010.10 |
| cg12097883 | 4.92E-06 | 7.90E-07 | 5.1 | 4.7238507 | 1.11E-01 | 62774939  | 62775062  | NC_000017.10 |
| cg24794228 | 4.92E-06 | 7.90E-07 | 5.1 | 4.7232915 | 1.55E-01 | 52391166  | 52391289  | NC_000019.9  |
| cg26155867 | 4.92E-06 | 7.91E-07 | 5.1 | 4.7227396 | 9.27E-02 | 100644276 | 100644399 | NC_000013.10 |
| cg05868512 | 4.92E-06 | 7.91E-07 | 5.1 | 4.7223637 | 1.00E-01 | 54794875  | 54794998  | NC_000008.10 |
| cg04737131 | 4.92E-06 | 7.91E-07 | 5.1 | 4.7223124 | 1.78E-01 | 27142708  | 27142831  | NC_000007.13 |
| cg17724789 | 4.93E-06 | 7.91E-07 | 5.1 | 4.7220559 | 4.17E-02 | 164711880 | 164712003 | NC_000001.10 |
| cg00773902 | 4.93E-06 | 7.91E-07 | 5.1 | 4.7218337 | 1.73E-01 | 19007324  | 19007447  | NC_000019.9  |
| cg05969018 | 4.93E-06 | 7.91E-07 | 5.1 | 4.721817  | 6.91E-02 | 47056933  | 47057056  | NC_000021.8  |
| cg02765363 | 4.93E-06 | 7.92E-07 | 5.1 | 4.7215965 | 1.07E-01 | 80200741  | 80200864  | NC_000017.10 |
| cg07615781 | 4.93E-06 | 7.92E-07 | 5.1 | 4.7215258 | 8.41E-02 | 71350888  | 71351011  | NC_000011.9  |
| cg07471256 | 4.93E-06 | 7.92E-07 | 5.1 | 4.7211129 | 5.94E-02 | 96057505  | 96057628  | NC_000011.9  |
| cg12707693 | 4.93E-06 | 7.92E-07 | 5.1 | 4.720718  | 1.10E-01 | 6652106   | 6652229   | NC_000011.9  |

|            |          |          |     |           |          |           |           |              |
|------------|----------|----------|-----|-----------|----------|-----------|-----------|--------------|
| cg00009292 | 4.93E-06 | 7.93E-07 | 5.1 | 4.7204442 | 1.31E-01 | 50882082  | 50882205  | NC_000001.10 |
| cg21178979 | 4.94E-06 | 7.93E-07 | 5.1 | 4.7193696 | 5.33E-02 | 1889533   | 1889656   | NC_000007.13 |
| cg17934948 | 4.94E-06 | 7.94E-07 | 5.1 | 4.719134  | 1.35E-01 | 215255716 | 215255839 | NC_000001.10 |
| cg12690148 | 4.94E-06 | 7.94E-07 | 5.1 | 4.7187213 | 1.79E-01 | 63788429  | 63788552  | NC_000001.10 |
| cg07349767 | 4.94E-06 | 7.94E-07 | 5.1 | 4.7181274 | 3.61E-02 | 230827339 | 230827462 | NC_000001.10 |
| cg03748210 | 4.95E-06 | 7.95E-07 | 5.1 | 4.7177045 | 2.63E-02 | 1854795   | 1854918   | NC_000008.10 |
| cg03742932 | 4.95E-06 | 7.95E-07 | 5.1 | 4.717611  | 5.06E-02 | 90338067  | 90338190  | NC_000007.13 |
| cg07973507 | 4.95E-06 | 7.95E-07 | 5.1 | 4.7168721 | 7.00E-02 | 106095523 | 106095646 | NC_000014.8  |
| cg12927990 | 4.95E-06 | 7.95E-07 | 5.1 | 4.7168472 | 1.54E-01 | 56887320  | 56887443  | NC_000018.9  |
| cg04938966 | 4.95E-06 | 7.96E-07 | 5.1 | 4.7168036 | 8.79E-02 | 86530790  | 86530913  | NC_000016.9  |
| cg03367275 | 4.95E-06 | 7.96E-07 | 5.1 | 4.7167544 | 3.70E-02 | 93649798  | 93649921  | NC_000010.10 |
| cg07092111 | 4.95E-06 | 7.96E-07 | 5.1 | 4.7167425 | 1.17E-01 | 32621403  | 32621526  | NC_000010.10 |
| cg09775238 | 4.95E-06 | 7.96E-07 | 5.1 | 4.716476  | 5.33E-02 | 86580410  | 86580533  | NC_000016.9  |
| cg26964907 | 4.95E-06 | 7.96E-07 | 5.1 | 4.7164028 | 8.59E-02 | 117592358 | 117592481 | NC_000006.11 |
| cg13889508 | 4.96E-06 | 7.97E-07 | 5.1 | 4.7154395 | 7.86E-02 | 11059010  | 11059133  | NC_000003.11 |
| cg23633028 | 4.96E-06 | 7.97E-07 | 5.1 | 4.7152953 | 7.71E-02 | 31039180  | 31039303  | NC_000006.11 |
| cg16911349 | 4.96E-06 | 7.97E-07 | 5.1 | 4.715015  | 1.11E-01 | 10406935  | 10407058  | NC_000019.9  |
| cg16720379 | 4.96E-06 | 7.97E-07 | 5.1 | 4.7150146 | 7.09E-02 | 33506184  | 33506307  | NC_000011.9  |
| cg17304531 | 4.96E-06 | 7.97E-07 | 5.1 | 4.7146545 | 8.88E-02 | 197401639 | 197401762 | NC_000003.11 |
| cg15163719 | 4.96E-06 | 7.97E-07 | 5.1 | 4.7144531 | 7.39E-02 | 32052212  | 32052335  | NC_000006.11 |
| cg17323956 | 4.96E-06 | 7.98E-07 | 5.1 | 4.7141975 | 6.35E-02 | 134807335 | 134807458 | NC_000010.10 |
| cg07044282 | 4.97E-06 | 7.98E-07 | 5.1 | 4.7135469 | 9.39E-02 | 178840137 | 178840260 | NC_000001.10 |
| cg22659049 | 4.97E-06 | 7.99E-07 | 5.1 | 4.712673  | 8.71E-02 | 41646672  | 41646795  | NC_000004.11 |
| cg15793329 | 4.97E-06 | 7.99E-07 | 5.1 | 4.7125909 | 9.04E-02 | 32064749  | 32064872  | NC_000006.11 |
| cg00178897 | 4.98E-06 | 8.00E-07 | 5.1 | 4.7110613 | 1.65E-01 | 175208588 | 175208711 | NC_000002.11 |

|            |          |          |     |           |          |           |           |              |
|------------|----------|----------|-----|-----------|----------|-----------|-----------|--------------|
| cg07343429 | 4.98E-06 | 8.00E-07 | 5.1 | 4.7109209 | 8.23E-03 | 1785120   | 1785243   | NC_000011.9  |
| cg21627181 | 4.98E-06 | 8.01E-07 | 5.1 | 4.7104636 | 1.02E-01 | 25754190  | 25754313  | NC_000006.11 |
| cg21164440 | 4.98E-06 | 8.01E-07 | 5.1 | 4.7103049 | 1.51E-01 | 100438737 | 100438860 | NC_000014.8  |
| cg00475112 | 4.98E-06 | 8.01E-07 | 5.1 | 4.7102595 | 2.78E-02 | 9444815   | 9444938   | NC_000012.11 |
| cg17042439 | 4.98E-06 | 8.01E-07 | 5.1 | 4.7100268 | 9.64E-02 | 117529772 | 117529895 | NC_000001.10 |
| cg05214708 | 4.99E-06 | 8.02E-07 | 5.1 | 4.7095239 | 6.65E-02 | 207961006 | 207961129 | NC_000002.11 |
| cg26622699 | 4.99E-06 | 8.02E-07 | 5.1 | 4.7094287 | 8.88E-02 | 46628303  | 46628426  | NC_000017.10 |
| cg03472672 | 4.99E-06 | 8.02E-07 | 5.1 | 4.7091294 | 1.20E-01 | 28762471  | 28762594  | NC_000006.11 |
| cg13590475 | 4.99E-06 | 8.03E-07 | 5.1 | 4.7081787 | 8.90E-02 | 133137827 | 133137950 | NC_000006.11 |
| cg19269511 | 4.99E-06 | 8.03E-07 | 5.1 | 4.7079599 | 7.73E-02 | 132890839 | 132890962 | NC_000010.10 |
| cg25326570 | 4.99E-06 | 8.03E-07 | 5.1 | 4.7077113 | 7.10E-02 | 57426757  | 57426880  | NC_000020.10 |
| cg09889228 | 5.00E-06 | 8.04E-07 | 5.1 | 4.7071257 | 5.09E-02 | 48530097  | 48530220  | NC_000016.9  |
| cg23051411 | 5.00E-06 | 8.04E-07 | 5.1 | 4.7062956 | 5.80E-02 | 237123571 | 237123694 | NC_000002.11 |
| cg14610066 | 5.00E-06 | 8.05E-07 | 5.1 | 4.7058098 | 1.11E-01 | 71936691  | 71936814  | NC_000009.11 |
| cg05121790 | 5.00E-06 | 8.05E-07 | 5.1 | 4.7054397 | 1.29E-01 | 12123554  | 12123677  | NC_000001.10 |
| cg07285641 | 5.00E-06 | 8.05E-07 | 5.1 | 4.7053694 | 1.21E-01 | 52345302  | 52345425  | NC_000013.10 |
| cg26862314 | 5.01E-06 | 8.05E-07 | 5.1 | 4.7048951 | 3.21E-02 | 12871165  | 12871288  | NC_000019.9  |
| cg07266404 | 5.01E-06 | 8.06E-07 | 5.1 | 4.7045607 | 1.69E-01 | 54447584  | 54447707  | NC_000012.11 |
| cg27537611 | 5.01E-06 | 8.06E-07 | 5.1 | 4.7044674 | 7.55E-02 | 133795558 | 133795681 | NC_000010.10 |
| cg17161250 | 5.01E-06 | 8.06E-07 | 5.1 | 4.7043146 | 1.91E-01 | 106682209 | 106682332 | NC_000002.11 |
| cg06500714 | 5.01E-06 | 8.06E-07 | 5.1 | 4.7041129 | 1.36E-01 | 135050622 | 135050745 | NC_000010.10 |
| cg07938847 | 5.01E-06 | 8.06E-07 | 5.1 | 4.7036293 | 9.87E-02 | 82126349  | 82126472  | NC_000004.11 |
| cg13378628 | 5.02E-06 | 8.07E-07 | 5.1 | 4.7024108 | 1.05E-01 | 76934693  | 76934816  | NC_000005.9  |
| cg13726459 | 5.02E-06 | 8.08E-07 | 5.1 | 4.7023226 | 1.20E-01 | 54409657  | 54409780  | NC_000012.11 |
| cg06534427 | 5.02E-06 | 8.08E-07 | 5.1 | 4.7019104 | 8.78E-02 | 39713022  | 39713145  | NC_000022.10 |

|            |          |          |     |           |          |           |           |              |
|------------|----------|----------|-----|-----------|----------|-----------|-----------|--------------|
| cg12363671 | 5.02E-06 | 8.08E-07 | 5.1 | 4.7016831 | 7.61E-02 | 43491213  | 43491336  | NC_000021.8  |
| cg01617859 | 5.02E-06 | 8.08E-07 | 5.1 | 4.7014369 | 2.40E-02 | 41527294  | 41527417  | NC_000006.11 |
| cg06005891 | 5.02E-06 | 8.08E-07 | 5.1 | 4.7012473 | 1.30E-01 | 1389167   | 1389290   | NC_000006.11 |
| cg00020191 | 5.03E-06 | 8.09E-07 | 5.1 | 4.7007035 | 1.70E-01 | 79258083  | 79258206  | NC_000012.11 |
| cg13681468 | 5.03E-06 | 8.09E-07 | 5.1 | 4.700289  | 1.29E-01 | 90227879  | 90228002  | NC_000004.11 |
| cg25323444 | 5.03E-06 | 8.10E-07 | 5.1 | 4.6998608 | 3.42E-02 | 2111060   | 2111183   | NC_000007.13 |
| cg11349594 | 5.03E-06 | 8.10E-07 | 5.1 | 4.6993228 | 1.04E-01 | 31868797  | 31868920  | NC_000006.11 |
| cg02072366 | 5.04E-06 | 8.10E-07 | 5.1 | 4.6989904 | 9.03E-02 | 54345056  | 54345179  | NC_000012.11 |
| cg02282774 | 5.04E-06 | 8.10E-07 | 5.1 | 4.6988789 | 1.14E-01 | 50264516  | 50264639  | NC_000005.9  |
| cg08584665 | 5.04E-06 | 8.11E-07 | 5.1 | 4.698226  | 6.80E-02 | 23471813  | 23471936  | NC_000007.13 |
| cg11886002 | 5.04E-06 | 8.11E-07 | 5.1 | 4.6980975 | 6.38E-02 | 180487371 | 180487494 | NC_000005.9  |
| cg20582976 | 5.04E-06 | 8.11E-07 | 5.1 | 4.6979137 | 1.03E-01 | 90301560  | 90301683  | NC_000014.8  |
| cg00807197 | 5.04E-06 | 8.11E-07 | 5.1 | 4.6977614 | 1.21E-01 | 128822865 | 128822988 | NC_000012.11 |
| cg07628705 | 5.04E-06 | 8.11E-07 | 5.1 | 4.697712  | 9.43E-02 | 51339074  | 51339197  | NC_000014.8  |
| cg09285795 | 5.04E-06 | 8.11E-07 | 5.1 | 4.6976739 | 8.63E-02 | 112761581 | 112761704 | NC_000013.10 |
| cg24589834 | 5.04E-06 | 8.11E-07 | 5.1 | 4.6976259 | 8.96E-02 | 15083092  | 15083215  | NC_000001.10 |
| cg06480695 | 5.04E-06 | 8.12E-07 | 5.1 | 4.6975382 | 1.14E-01 | 20747314  | 20747437  | NC_000017.10 |
| cg18434560 | 5.05E-06 | 8.12E-07 | 5.1 | 4.6964228 | 8.85E-02 | 317767    | 317890    | NC_000011.9  |
| cg19133221 | 5.05E-06 | 8.13E-07 | 5.1 | 4.6959983 | 1.49E-01 | 47210279  | 47210402  | NC_000017.10 |
| cg24398258 | 5.05E-06 | 8.13E-07 | 5.1 | 4.6957493 | 4.73E-02 | 61401678  | 61401801  | NC_000020.10 |
| cg08097755 | 5.05E-06 | 8.13E-07 | 5.1 | 4.6956847 | 1.46E-01 | 100808488 | 100808611 | NC_000007.13 |
| cg19039028 | 5.05E-06 | 8.13E-07 | 5.1 | 4.6956682 | 1.28E-01 | 110223429 | 110223552 | NC_000004.11 |
| cg26380692 | 5.05E-06 | 8.13E-07 | 5.1 | 4.6952979 | 7.70E-02 | 28967425  | 28967548  | NC_000006.11 |
| cg06610484 | 5.05E-06 | 8.14E-07 | 5.1 | 4.6950318 | 1.27E-01 | 100442105 | 100442228 | NC_000006.11 |
| cg18794577 | 5.06E-06 | 8.14E-07 | 5.1 | 4.6944379 | 1.59E-01 | 104501030 | 104501153 | NC_000009.11 |



|            |          |          |      |           |          |           |           |              |
|------------|----------|----------|------|-----------|----------|-----------|-----------|--------------|
| cg27618483 | 5.06E-06 | 8.14E-07 | 5.1  | 4.6944054 | 4.07E-02 | 155433424 | 155433547 | NC_000002.11 |
| cg19709054 | 5.06E-06 | 8.14E-07 | 5.1  | 4.694336  | 6.83E-02 | 25654697  | 25654820  | NC_000015.9  |
| cg00120825 | 5.06E-06 | 8.14E-07 | 5.1  | 4.6940719 | 5.13E-02 | 2338738   | 2338861   | NC_000001.10 |
| cg13426224 | 5.06E-06 | 8.15E-07 | 5.1  | 4.6929943 | 9.75E-02 | 133196447 | 133196570 | NC_000012.11 |
| cg01396112 | 5.06E-06 | 8.16E-07 | 5.1  | 4.692803  | 1.61E-01 | 26120702  | 26120825  | NC_000017.10 |
| cg12065840 | 5.07E-06 | 8.16E-07 | 5.1  | 4.6922052 | 1.55E-01 | 121138133 | 121138256 | NC_000008.10 |
| cg07080864 | 5.07E-06 | 8.16E-07 | 5.1  | 4.691752  | 8.86E-02 | 57359956  | 57360079  | NC_000008.10 |
| cg12581592 | 5.07E-06 | 8.16E-07 | 5.1  | 4.6916755 | 1.31E-01 | 13984043  | 13984166  | NC_000011.9  |
| cg06374165 | 5.07E-06 | 8.17E-07 | 5.1  | 4.6909566 | 1.53E-01 | 192445533 | 192445656 | NC_000003.11 |
| cg11457817 | 5.08E-06 | 8.19E-07 | 5.1  | 4.6891714 | 6.66E-02 | 172755103 | 172755226 | NC_000005.9  |
| cg10453123 | 5.08E-06 | 8.19E-07 | 5.1  | 4.6887701 | 2.16E-02 | 57388979  | 57389102  | NC_000012.11 |
| cg10098888 | 5.09E-06 | 8.19E-07 | 5.1  | 4.6884361 | 5.74E-02 | 227665799 | 227665922 | NC_000002.11 |
| cg00840516 | 5.09E-06 | 8.19E-07 | 5.1  | 4.6884022 | 7.55E-02 | 50360097  | 50360220  | NC_000003.11 |
| cg05478392 | 5.09E-06 | 8.19E-07 | 5.09 | 4.6880878 | 9.95E-02 | 34510767  | 34510890  | NC_000005.9  |
| cg17518215 | 5.09E-06 | 8.20E-07 | 5.09 | 4.6880553 | 1.13E-01 | 172973241 | 172973364 | NC_000002.11 |
| cg14605150 | 5.09E-06 | 8.20E-07 | 5.09 | 4.6879354 | 6.77E-02 | 33012608  | 33012731  | NC_000015.9  |
| cg26003222 | 5.09E-06 | 8.20E-07 | 5.09 | 4.687721  | 3.56E-02 | 75347770  | 75347893  | NC_000017.10 |
| cg21525314 | 5.09E-06 | 8.21E-07 | 5.09 | 4.6867072 | 9.26E-02 | 102920771 | 102920894 | NC_000007.13 |
| cg24139732 | 5.10E-06 | 8.21E-07 | 5.09 | 4.6860015 | 1.07E-01 | 4857506   | 4857629   | NC_000004.11 |
| cg06430772 | 5.10E-06 | 8.21E-07 | 5.09 | 4.6858766 | 1.12E-01 | 236443508 | 236443631 | NC_000002.11 |
| cg12330703 | 5.10E-06 | 8.22E-07 | 5.09 | 4.6855873 | 5.55E-02 | 153424395 | 153424518 | NC_000003.11 |
| cg11746396 | 5.10E-06 | 8.22E-07 | 5.09 | 4.6847361 | 6.75E-02 | 65157749  | 65157872  | NC_000001.10 |
| cg00047683 | 5.10E-06 | 8.22E-07 | 5.09 | 4.6846024 | 1.03E-01 | 72034122  | 72034245  | NC_000016.9  |
| cg03298319 | 5.10E-06 | 8.22E-07 | 5.09 | 4.6845817 | 1.73E-01 | 33403060  | 33403183  | NC_000014.8  |
| cg08587797 | 5.11E-06 | 8.24E-07 | 5.09 | 4.682918  | 1.38E-01 | 102988852 | 102988975 | NC_000010.10 |

|            |          |          |      |           |          |           |           |              |
|------------|----------|----------|------|-----------|----------|-----------|-----------|--------------|
| cg15474435 | 5.11E-06 | 8.24E-07 | 5.09 | 4.6828374 | 3.01E-02 | 130368058 | 130368181 | NC_000003.11 |
| cg05082738 | 5.11E-06 | 8.24E-07 | 5.09 | 4.6828135 | 5.39E-02 | 60414918  | 60415041  | NC_000011.9  |
| cg01503348 | 5.11E-06 | 8.24E-07 | 5.09 | 4.6824281 | 1.66E-01 | 113342326 | 113342449 | NC_000009.11 |
| cg00376544 | 5.12E-06 | 8.25E-07 | 5.09 | 4.6820681 | 1.85E-01 | 6679348   | 6679471   | NC_000017.10 |
| cg01764020 | 5.12E-06 | 8.25E-07 | 5.09 | 4.682019  | 1.36E-01 | 38444087  | 38444210  | NC_000013.10 |
| cg00614641 | 5.12E-06 | 8.25E-07 | 5.09 | 4.6817852 | 1.28E-01 | 61596405  | 61596528  | NC_000011.9  |
| cg10620767 | 5.12E-06 | 8.25E-07 | 5.09 | 4.6816864 | 3.14E-02 | 300254    | 300377    | NC_000010.10 |
| cg03142956 | 5.12E-06 | 8.25E-07 | 5.09 | 4.6815397 | 8.00E-02 | 205012349 | 205012472 | NC_000001.10 |
| cg17075913 | 5.12E-06 | 8.25E-07 | 5.09 | 4.6814981 | 5.56E-02 | 78444608  | 78444731  | NC_000017.10 |
| cg22741272 | 5.12E-06 | 8.25E-07 | 5.09 | 4.6811887 | 4.25E-02 | 6460966   | 6461089   | NC_000007.13 |
| cg15356923 | 5.12E-06 | 8.25E-07 | 5.09 | 4.6811532 | 1.12E-01 | 68981011  | 68981134  | NC_000003.11 |
| cg24334111 | 5.12E-06 | 8.25E-07 | 5.09 | 4.6811454 | 1.82E-01 | 57078780  | 57078903  | NC_000019.9  |
| cg04440811 | 5.12E-06 | 8.26E-07 | 5.09 | 4.6803255 | 4.78E-02 | 129817712 | 129817835 | NC_000011.9  |
| cg06878361 | 5.13E-06 | 8.26E-07 | 5.09 | 4.6802073 | 1.38E-01 | 52390810  | 52390933  | NC_000019.9  |
| cg18976177 | 5.13E-06 | 8.27E-07 | 5.09 | 4.6797133 | 5.60E-02 | 75160019  | 75160142  | NC_000007.13 |
| cg07218663 | 5.13E-06 | 8.27E-07 | 5.09 | 4.6795354 | 1.25E-01 | 146350618 | 146350741 | NC_000006.11 |
| cg21643178 | 5.13E-06 | 8.27E-07 | 5.09 | 4.6789821 | 9.52E-02 | 30139573  | 30139696  | NC_000006.11 |
| cg06722923 | 5.13E-06 | 8.27E-07 | 5.09 | 4.6786855 | 2.30E-02 | 130952266 | 130952389 | NC_000009.11 |
| cg00292971 | 5.14E-06 | 8.28E-07 | 5.09 | 4.678248  | 7.10E-02 | 143060536 | 143060659 | NC_000007.13 |
| cg24518873 | 5.14E-06 | 8.28E-07 | 5.09 | 4.6778493 | 5.64E-02 | 40566060  | 40566183  | NC_000001.10 |
| cg26094554 | 5.14E-06 | 8.29E-07 | 5.09 | 4.6774868 | 8.85E-02 | 36719654  | 36719777  | NC_000017.10 |
| cg00758296 | 5.14E-06 | 8.29E-07 | 5.09 | 4.6773366 | 1.52E-01 | 45402995  | 45403118  | NC_000022.10 |
| cg13525812 | 5.14E-06 | 8.29E-07 | 5.09 | 4.6771392 | 3.81E-02 | 68220007  | 68220130  | NC_000008.10 |
| cg22478121 | 5.14E-06 | 8.29E-07 | 5.09 | 4.6766796 | 1.06E-01 | 19556066  | 19556189  | NC_000002.11 |
| cg10638599 | 5.14E-06 | 8.29E-07 | 5.09 | 4.6764186 | 1.58E-01 | 55954621  | 55954744  | NC_000019.9  |

|            |          |          |      |           |          |           |           |              |
|------------|----------|----------|------|-----------|----------|-----------|-----------|--------------|
| cg12131419 | 5.14E-06 | 8.30E-07 | 5.09 | 4.6762607 | 7.60E-02 | 49353073  | 49353196  | NC_000015.9  |
| cg10387956 | 5.15E-06 | 8.31E-07 | 5.09 | 4.6747933 | 6.47E-02 | 72646210  | 72646333  | NC_000015.9  |
| cg10982443 | 5.16E-06 | 8.32E-07 | 5.09 | 4.6738112 | 8.92E-02 | 20903611  | 20903734  | NC_000014.8  |
| cg16727201 | 5.16E-06 | 8.32E-07 | 5.09 | 4.673641  | 1.62E-01 | 12254556  | 12254679  | NC_000018.9  |
| cg05947505 | 5.16E-06 | 8.32E-07 | 5.09 | 4.673477  | 6.36E-02 | 102800464 | 102800587 | NC_000010.10 |
| cg03476673 | 5.17E-06 | 8.34E-07 | 5.09 | 4.6715793 | 1.15E-01 | 84870203  | 84870326  | NC_000016.9  |
| cg05277466 | 5.17E-06 | 8.34E-07 | 5.09 | 4.6713022 | 2.82E-02 | 88082055  | 88082178  | NC_000016.9  |
| cg26841967 | 5.17E-06 | 8.34E-07 | 5.09 | 4.6708753 | 1.04E-01 | 53812098  | 53812221  | NC_000019.9  |
| cg13036702 | 5.17E-06 | 8.35E-07 | 5.09 | 4.6703407 | 1.06E-01 | 94799727  | 94799850  | NC_000011.9  |
| cg24642065 | 5.18E-06 | 8.35E-07 | 5.09 | 4.669892  | 1.13E-01 | 130527030 | 130527153 | NC_000012.11 |
| cg08684733 | 5.18E-06 | 8.35E-07 | 5.09 | 4.6697632 | 3.54E-02 | 197663828 | 197663951 | NC_000003.11 |
| cg00382185 | 5.18E-06 | 8.35E-07 | 5.09 | 4.6697157 | 9.71E-02 | 4464011   | 4464134   | NC_000017.10 |
| cg25694480 | 5.18E-06 | 8.35E-07 | 5.09 | 4.669698  | 6.53E-02 | 62032881  | 62033004  | NC_000020.10 |
| cg05472874 | 5.18E-06 | 8.36E-07 | 5.09 | 4.6691802 | 9.73E-02 | 44258179  | 44258302  | NC_000022.10 |
| cg15410169 | 5.18E-06 | 8.36E-07 | 5.09 | 4.6687431 | 5.17E-02 | 29518429  | 29518552  | NC_000007.13 |
| cg18023943 | 5.18E-06 | 8.36E-07 | 5.09 | 4.6685604 | 1.09E-01 | 221066688 | 221066811 | NC_000001.10 |
| cg27576971 | 5.18E-06 | 8.37E-07 | 5.09 | 4.6681861 | 6.24E-02 | 143093639 | 143093762 | NC_000005.9  |
| cg17238766 | 5.19E-06 | 8.37E-07 | 5.09 | 4.6675718 | 9.56E-02 | 60539675  | 60539798  | NC_000001.10 |
| cg10885139 | 5.19E-06 | 8.37E-07 | 5.09 | 4.6674508 | 1.78E-02 | 76111995  | 76112118  | NC_000005.9  |
| cg22091609 | 5.19E-06 | 8.37E-07 | 5.09 | 4.6673554 | 9.24E-02 | 20780508  | 20780631  | NC_000022.10 |
| cg14547644 | 5.19E-06 | 8.37E-07 | 5.09 | 4.6673336 | 1.31E-01 | 28411285  | 28411408  | NC_000006.11 |
| cg15909933 | 5.19E-06 | 8.38E-07 | 5.09 | 4.6666222 | 1.29E-01 | 72201008  | 72201131  | NC_000010.10 |
| cg26771559 | 5.19E-06 | 8.38E-07 | 5.09 | 4.6665557 | 2.13E-02 | 4102512   | 4102635   | NC_000019.9  |
| cg22940953 | 5.20E-06 | 8.39E-07 | 5.09 | 4.665893  | 6.61E-02 | 15096426  | 15096549  | NC_000021.8  |
| cg07788286 | 5.20E-06 | 8.39E-07 | 5.09 | 4.6656511 | 1.44E-01 | 906224    | 906347    | NC_000018.9  |

|            |          |          |      |           |          |           |           |              |
|------------|----------|----------|------|-----------|----------|-----------|-----------|--------------|
| cg02833386 | 5.20E-06 | 8.39E-07 | 5.09 | 4.6651616 | 2.16E-02 | 107223427 | 107223550 | NC_000006.11 |
| cg21530267 | 5.20E-06 | 8.40E-07 | 5.09 | 4.664747  | 7.67E-02 | 140481267 | 140481390 | NC_000005.9  |
| cg26913306 | 5.20E-06 | 8.40E-07 | 5.09 | 4.6646686 | 2.57E-02 | 159912862 | 159912985 | NC_000001.10 |
| cg23734973 | 5.21E-06 | 8.40E-07 | 5.09 | 4.6636562 | 9.41E-02 | 158141449 | 158141572 | NC_000004.11 |
| cg04802694 | 5.21E-06 | 8.41E-07 | 5.09 | 4.6633168 | 1.49E-01 | 60797213  | 60797336  | NC_000002.11 |
| cg21023770 | 5.21E-06 | 8.41E-07 | 5.09 | 4.6624977 | 5.10E-02 | 44517227  | 44517350  | NC_000020.10 |
| cg01728712 | 5.21E-06 | 8.42E-07 | 5.09 | 4.6624458 | 3.89E-02 | 17304434  | 17304557  | NC_000001.10 |
| cg14996143 | 5.21E-06 | 8.42E-07 | 5.09 | 4.6624385 | 1.00E-01 | 172945328 | 172945451 | NC_000002.11 |
| cg00244391 | 5.21E-06 | 8.42E-07 | 5.09 | 4.6623281 | 1.52E-02 | 109420291 | 109420414 | NC_000006.11 |
| cg13294753 | 5.22E-06 | 8.42E-07 | 5.09 | 4.6619141 | 3.21E-02 | 141001788 | 141001911 | NC_000005.9  |
| cg09495769 | 5.22E-06 | 8.42E-07 | 5.09 | 4.6617543 | 1.22E-01 | 27225342  | 27225465  | NC_000007.13 |
| cg22414192 | 5.22E-06 | 8.42E-07 | 5.09 | 4.6613626 | 6.16E-02 | 49621088  | 49621211  | NC_000020.10 |
| cg10612282 | 5.22E-06 | 8.43E-07 | 5.09 | 4.6609506 | 3.84E-02 | 123479583 | 123479706 | NC_000012.11 |
| cg00756448 | 5.22E-06 | 8.43E-07 | 5.09 | 4.6604514 | 4.19E-02 | 18997967  | 18998090  | NC_000016.9  |
| cg16488737 | 5.22E-06 | 8.43E-07 | 5.09 | 4.6602276 | 1.71E-01 | 132934224 | 132934347 | NC_000011.9  |
| cg03903991 | 5.22E-06 | 8.44E-07 | 5.09 | 4.6601287 | 1.15E-01 | 107955541 | 107955664 | NC_000004.11 |
| cg07783889 | 5.23E-06 | 8.44E-07 | 5.09 | 4.6599332 | 3.39E-02 | 134593607 | 134593730 | NC_000010.10 |
| cg26546373 | 5.23E-06 | 8.44E-07 | 5.09 | 4.6599013 | 8.99E-02 | 154095163 | 154095286 | NC_000005.9  |
| cg12412255 | 5.23E-06 | 8.45E-07 | 5.09 | 4.6586033 | 3.70E-02 | 1487975   | 1488098   | NC_000005.9  |
| cg23511079 | 5.24E-06 | 8.46E-07 | 5.09 | 4.6577022 | 2.85E-02 | 71509120  | 71509243  | NC_000015.9  |
| cg08852035 | 5.24E-06 | 8.46E-07 | 5.09 | 4.6572408 | 3.83E-02 | 7985346   | 7985469   | NC_000006.11 |
| cg26773342 | 5.24E-06 | 8.47E-07 | 5.09 | 4.6564653 | 4.07E-02 | 135406185 | 135406308 | NC_000007.13 |
| cg17409288 | 5.24E-06 | 8.47E-07 | 5.09 | 4.6563706 | 2.10E-02 | 17600149  | 17600272  | NC_000004.11 |
| cg12364115 | 5.24E-06 | 8.47E-07 | 5.09 | 4.6562494 | 6.15E-02 | 2780544   | 2780667   | NC_000005.9  |
| cg06514855 | 5.25E-06 | 8.48E-07 | 5.09 | 4.6553435 | 8.29E-02 | 21220141  | 21220264  | NC_000017.10 |

|            |          |          |      |           |          |           |           |              |
|------------|----------|----------|------|-----------|----------|-----------|-----------|--------------|
| cg27581091 | 5.25E-06 | 8.48E-07 | 5.09 | 4.6546379 | 6.78E-02 | 134884455 | 134884578 | NC_000010.10 |
| cg11806630 | 5.25E-06 | 8.48E-07 | 5.09 | 4.6546195 | 1.74E-01 | 79383858  | 79383981  | NC_000015.9  |
| cg23291039 | 5.25E-06 | 8.49E-07 | 5.09 | 4.6541698 | 6.60E-02 | 25808901  | 25809024  | NC_000004.11 |
| cg20674577 | 5.25E-06 | 8.49E-07 | 5.09 | 4.6541208 | 1.29E-01 | 58179540  | 58179663  | NC_000020.10 |
| cg07206630 | 5.26E-06 | 8.49E-07 | 5.09 | 4.653882  | 8.62E-02 | 142066768 | 142066891 | NC_000005.9  |
| cg04598774 | 5.26E-06 | 8.50E-07 | 5.09 | 4.6532415 | 1.00E-01 | 31821590  | 31821713  | NC_000011.9  |
| cg26558435 | 5.26E-06 | 8.50E-07 | 5.09 | 4.6529273 | 4.81E-02 | 431422    | 431545    | NC_000011.9  |
| cg19962990 | 5.26E-06 | 8.50E-07 | 5.09 | 4.6528877 | 1.41E-01 | 904523    | 904646    | NC_000018.9  |
| cg17292384 | 5.26E-06 | 8.50E-07 | 5.09 | 4.6528052 | 8.31E-02 | 63743837  | 63743960  | NC_000011.9  |
| cg07878486 | 5.26E-06 | 8.50E-07 | 5.09 | 4.6526488 | 1.59E-01 | 58951885  | 58952008  | NC_000019.9  |
| cg16429214 | 5.26E-06 | 8.50E-07 | 5.09 | 4.6525741 | 5.35E-02 | 74266574  | 74266697  | NC_000017.10 |
| cg22525715 | 5.26E-06 | 8.50E-07 | 5.09 | 4.6524809 | 1.07E-01 | 58190139  | 58190262  | NC_000001.10 |
| cg16513149 | 5.26E-06 | 8.50E-07 | 5.09 | 4.6523    | 5.46E-02 | 144069512 | 144069635 | NC_000008.10 |
| cg03130180 | 5.26E-06 | 8.50E-07 | 5.09 | 4.6522312 | 7.55E-02 | 30312857  | 30312980  | NC_000006.11 |
| cg26683794 | 5.26E-06 | 8.51E-07 | 5.09 | 4.6520839 | 4.55E-02 | 96583751  | 96583874  | NC_000013.10 |
| cg05429698 | 5.27E-06 | 8.52E-07 | 5.09 | 4.6507235 | 4.61E-02 | 94783566  | 94783689  | NC_000011.9  |
| cg23675536 | 5.27E-06 | 8.52E-07 | 5.09 | 4.6504345 | 4.60E-02 | 134373627 | 134373750 | NC_000011.9  |
| cg05343689 | 5.28E-06 | 8.52E-07 | 5.09 | 4.6499233 | 4.75E-02 | 75852437  | 75852560  | NC_000011.9  |
| cg25171014 | 5.28E-06 | 8.53E-07 | 5.09 | 4.6496058 | 5.14E-02 | 39766256  | 39766379  | NC_000017.10 |
| cg16633951 | 5.28E-06 | 8.53E-07 | 5.09 | 4.6493287 | 1.29E-01 | 42971575  | 42971698  | NC_000010.10 |
| cg10433052 | 5.29E-06 | 8.54E-07 | 5.09 | 4.6476757 | 6.54E-02 | 26795536  | 26795659  | NC_000001.10 |
| cg00203347 | 5.29E-06 | 8.55E-07 | 5.09 | 4.6470409 | 8.10E-02 | 108603943 | 108604066 | NC_000012.11 |
| cg21399057 | 5.29E-06 | 8.55E-07 | 5.09 | 4.6470229 | 1.09E-01 | 46631910  | 46632033  | NC_000017.10 |
| cg24227371 | 5.29E-06 | 8.55E-07 | 5.09 | 4.6467857 | 7.31E-02 | 82718527  | 82718650  | NC_000011.9  |
| cg15941945 | 5.29E-06 | 8.56E-07 | 5.09 | 4.646446  | 3.70E-02 | 21319222  | 21319345  | NC_000017.10 |

|            |          |          |      |           |          |           |           |              |
|------------|----------|----------|------|-----------|----------|-----------|-----------|--------------|
| cg15722265 | 5.29E-06 | 8.56E-07 | 5.09 | 4.6463478 | 5.47E-02 | 224224049 | 224224172 | NC_000001.10 |
| cg12052765 | 5.30E-06 | 8.57E-07 | 5.09 | 4.6451697 | 1.28E-01 | 50816963  | 50817086  | NC_000010.10 |
| cg16581884 | 5.31E-06 | 8.58E-07 | 5.09 | 4.6431337 | 1.60E-01 | 100999953 | 101000076 | NC_000011.9  |
| cg09993715 | 5.31E-06 | 8.59E-07 | 5.08 | 4.6427735 | 1.57E-02 | 113891597 | 113891720 | NC_000013.10 |
| cg02702041 | 5.31E-06 | 8.59E-07 | 5.08 | 4.6424663 | 4.83E-02 | 91996229  | 91996352  | NC_000009.11 |
| cg21170836 | 5.32E-06 | 8.60E-07 | 5.08 | 4.6415062 | 9.86E-02 | 105812713 | 105812836 | NC_000014.8  |
| cg08741952 | 5.32E-06 | 8.60E-07 | 5.08 | 4.6413934 | 7.81E-02 | 35462987  | 35463110  | NC_000022.10 |
| cg16864819 | 5.32E-06 | 8.61E-07 | 5.08 | 4.6404852 | 7.60E-02 | 130641101 | 130641224 | NC_000011.9  |
| cg09599130 | 5.33E-06 | 8.61E-07 | 5.08 | 4.6399557 | 1.22E-01 | 104170691 | 104170814 | NC_000010.10 |
| cg05970311 | 5.33E-06 | 8.61E-07 | 5.08 | 4.6397529 | 1.20E-01 | 10749977  | 10750100  | NC_000003.11 |
| cg07894004 | 5.33E-06 | 8.62E-07 | 5.08 | 4.6395843 | 5.75E-02 | 11810683  | 11810806  | NC_000002.11 |
| cg01500844 | 5.33E-06 | 8.62E-07 | 5.08 | 4.6389778 | 1.10E-01 | 11530060  | 11530183  | NC_000019.9  |
| cg20716812 | 5.33E-06 | 8.62E-07 | 5.08 | 4.6388925 | 4.70E-02 | 39267536  | 39267659  | NC_000006.11 |
| cg09024228 | 5.33E-06 | 8.63E-07 | 5.08 | 4.638457  | 6.91E-02 | 116707400 | 116707523 | NC_000001.10 |
| cg24333192 | 5.33E-06 | 8.63E-07 | 5.08 | 4.6383121 | 1.51E-01 | 28603367  | 28603490  | NC_000006.11 |
| cg13605536 | 5.34E-06 | 8.63E-07 | 5.08 | 4.6378665 | 7.60E-02 | 137718987 | 137719110 | NC_000009.11 |
| cg22474464 | 5.34E-06 | 8.63E-07 | 5.08 | 4.6376617 | 1.44E-01 | 21492914  | 21493037  | NC_000020.10 |
| cg22168676 | 5.34E-06 | 8.64E-07 | 5.08 | 4.6373086 | 8.69E-02 | 10060780  | 10060903  | NC_000006.11 |
| cg05210412 | 5.35E-06 | 8.65E-07 | 5.08 | 4.6362015 | 1.32E-01 | 58227342  | 58227465  | NC_000017.10 |
| cg23733608 | 5.35E-06 | 8.65E-07 | 5.08 | 4.6358024 | 2.09E-02 | 35261572  | 35261695  | NC_000021.8  |
| cg12811157 | 5.35E-06 | 8.65E-07 | 5.08 | 4.635671  | 1.23E-01 | 368902    | 369025    | NC_000011.9  |
| cg18635631 | 5.35E-06 | 8.66E-07 | 5.08 | 4.6352159 | 2.90E-02 | 718175    | 718298    | NC_000012.11 |
| cg02091526 | 5.35E-06 | 8.66E-07 | 5.08 | 4.6351328 | 1.35E-01 | 175190867 | 175190990 | NC_000002.11 |
| cg13256912 | 5.35E-06 | 8.66E-07 | 5.08 | 4.6347527 | 7.22E-02 | 11211081  | 11211204  | NC_000003.11 |
| cg14343210 | 5.36E-06 | 8.66E-07 | 5.08 | 4.6341628 | 7.60E-02 | 114328366 | 114328489 | NC_000004.11 |

|            |          |          |      |           |          |           |           |              |
|------------|----------|----------|------|-----------|----------|-----------|-----------|--------------|
| cg06301399 | 5.36E-06 | 8.67E-07 | 5.08 | 4.6339578 | 9.73E-02 | 29634495  | 29634618  | NC_000006.11 |
| cg11875044 | 5.36E-06 | 8.67E-07 | 5.08 | 4.6338573 | 1.15E-01 | 8546509   | 8546632   | NC_000010.10 |
| cg13306087 | 5.36E-06 | 8.67E-07 | 5.08 | 4.6337734 | 7.75E-02 | 71713491  | 71713614  | NC_000005.9  |
| cg18515046 | 5.36E-06 | 8.67E-07 | 5.08 | 4.6331742 | 7.49E-02 | 1223167   | 1223290   | NC_000005.9  |
| cg02521641 | 5.36E-06 | 8.68E-07 | 5.08 | 4.6329308 | 1.39E-01 | 6202609   | 6202732   | NC_000004.11 |
| cg15895690 | 5.37E-06 | 8.68E-07 | 5.08 | 4.6320822 | 9.69E-02 | 60982635  | 60982758  | NC_000014.8  |
| cg03060468 | 5.37E-06 | 8.69E-07 | 5.08 | 4.631883  | 6.91E-02 | 140683196 | 140683319 | NC_000005.9  |
| cg07095330 | 5.37E-06 | 8.69E-07 | 5.08 | 4.6312397 | 1.27E-01 | 36889069  | 36889192  | NC_000017.10 |
| cg00370229 | 5.38E-06 | 8.70E-07 | 5.08 | 4.6301824 | 1.97E-01 | 29521602  | 29521725  | NC_000006.11 |
| cg15488143 | 5.38E-06 | 8.70E-07 | 5.08 | 4.6300811 | 5.98E-02 | 128924101 | 128924224 | NC_000007.13 |
| cg01871695 | 5.38E-06 | 8.71E-07 | 5.08 | 4.6294212 | 9.57E-02 | 127841729 | 127841852 | NC_000007.13 |
| cg24665265 | 5.38E-06 | 8.71E-07 | 5.08 | 4.6294208 | 7.82E-02 | 70852115  | 70852238  | NC_000015.9  |
| cg11015960 | 5.38E-06 | 8.71E-07 | 5.08 | 4.6290805 | 3.43E-02 | 189841685 | 189841808 | NC_000003.11 |
| cg05987650 | 5.38E-06 | 8.71E-07 | 5.08 | 4.628817  | 1.29E-01 | 4382114   | 4382237   | NC_000012.11 |
| cg25717994 | 5.38E-06 | 8.71E-07 | 5.08 | 4.6285752 | 1.01E-01 | 78493631  | 78493754  | NC_000013.10 |
| cg24050112 | 5.39E-06 | 8.72E-07 | 5.08 | 4.628372  | 7.81E-02 | 19726386  | 19726509  | NC_000019.9  |
| cg25627226 | 5.39E-06 | 8.73E-07 | 5.08 | 4.6273455 | 1.86E-01 | 4455337   | 4455460   | NC_000018.9  |
| cg05642993 | 5.39E-06 | 8.73E-07 | 5.08 | 4.6267562 | 7.44E-02 | 118822824 | 118822947 | NC_000004.11 |
| cg21144063 | 5.40E-06 | 8.73E-07 | 5.08 | 4.6264647 | 1.13E-01 | 64035529  | 64035652  | NC_000007.13 |
| cg07605410 | 5.40E-06 | 8.74E-07 | 5.08 | 4.6263079 | 5.25E-02 | 16828163  | 16828286  | NC_000001.10 |
| cg27079680 | 5.40E-06 | 8.74E-07 | 5.08 | 4.6262623 | 1.09E-01 | 150326190 | 150326313 | NC_000005.9  |
| cg23657299 | 5.40E-06 | 8.74E-07 | 5.08 | 4.6254607 | 8.22E-02 | 166422626 | 166422749 | NC_000006.11 |
| cg24608144 | 5.40E-06 | 8.75E-07 | 5.08 | 4.6252428 | 5.47E-02 | 62398219  | 62398342  | NC_000020.10 |
| cg01479768 | 5.41E-06 | 8.75E-07 | 5.08 | 4.6242209 | 8.69E-02 | 731298    | 731421    | NC_000002.11 |
| cg05293738 | 5.41E-06 | 8.76E-07 | 5.08 | 4.6239209 | 1.53E-01 | 68864318  | 68864441  | NC_000008.10 |

|            |          |          |      |           |          |           |           |              |
|------------|----------|----------|------|-----------|----------|-----------|-----------|--------------|
| cg00455467 | 5.41E-06 | 8.76E-07 | 5.08 | 4.6233396 | 7.73E-02 | 131593162 | 131593285 | NC_000002.11 |
| cg09462089 | 5.41E-06 | 8.77E-07 | 5.08 | 4.6230297 | 4.52E-02 | 58329456  | 58329579  | NC_000016.9  |
| cg11528835 | 5.42E-06 | 8.77E-07 | 5.08 | 4.6225521 | 9.63E-02 | 39132860  | 39132983  | NC_000009.11 |
| cg04576764 | 5.42E-06 | 8.78E-07 | 5.08 | 4.6219055 | 6.30E-02 | 101292149 | 101292272 | NC_000014.8  |
| cg03972398 | 5.42E-06 | 8.78E-07 | 5.08 | 4.621189  | 1.12E-01 | 54333179  | 54333302  | NC_000012.11 |
| cg22910295 | 5.42E-06 | 8.78E-07 | 5.08 | 4.6209464 | 8.51E-02 | 10403862  | 10403985  | NC_000019.9  |
| cg23477406 | 5.43E-06 | 8.80E-07 | 5.08 | 4.6188758 | 2.09E-01 | 132312741 | 132312864 | NC_000012.11 |
| cg19597230 | 5.44E-06 | 8.81E-07 | 5.08 | 4.6181687 | 1.07E-01 | 223517425 | 223517548 | NC_000002.11 |
| cg14356396 | 5.44E-06 | 8.81E-07 | 5.08 | 4.6179176 | 1.09E-01 | 38081695  | 38081818  | NC_000021.8  |
| cg05547260 | 5.44E-06 | 8.82E-07 | 5.08 | 4.6172756 | 8.70E-02 | 43611905  | 43612028  | NC_000006.11 |
| cg18488855 | 5.45E-06 | 8.82E-07 | 5.08 | 4.6167474 | 1.41E-01 | 27066634  | 27066757  | NC_000014.8  |
| cg11378052 | 5.45E-06 | 8.82E-07 | 5.08 | 4.6166477 | 6.48E-02 | 74027058  | 74027181  | NC_000014.8  |
| cg00475820 | 5.45E-06 | 8.83E-07 | 5.08 | 4.6163957 | 1.15E-01 | 58180155  | 58180278  | NC_000006.11 |
| cg23853484 | 5.45E-06 | 8.83E-07 | 5.08 | 4.6163332 | 1.63E-01 | 7795988   | 7796111   | NC_000019.9  |
| cg06034792 | 5.45E-06 | 8.83E-07 | 5.08 | 4.6158767 | 8.28E-02 | 65068554  | 65068677  | NC_000015.9  |
| cg23720384 | 5.45E-06 | 8.84E-07 | 5.08 | 4.6150249 | 1.45E-01 | 23747055  | 23747178  | NC_000021.8  |
| cg03562044 | 5.46E-06 | 8.84E-07 | 5.08 | 4.6147871 | 1.46E-01 | 15342749  | 15342872  | NC_000019.9  |
| cg12806763 | 5.46E-06 | 8.84E-07 | 5.08 | 4.6147599 | 1.92E-01 | 46655836  | 46655959  | NC_000017.10 |
| cg24060890 | 5.46E-06 | 8.85E-07 | 5.08 | 4.6141818 | 8.28E-02 | 93229269  | 93229392  | NC_000004.11 |
| cg19146767 | 5.46E-06 | 8.85E-07 | 5.08 | 4.6139197 | 1.11E-01 | 142352423 | 142352546 | NC_000006.11 |
| cg20090561 | 5.46E-06 | 8.85E-07 | 5.08 | 4.6139188 | 6.85E-02 | 185704268 | 185704391 | NC_000003.11 |
| cg20962137 | 5.46E-06 | 8.85E-07 | 5.08 | 4.6134197 | 1.51E-01 | 130064583 | 130064706 | NC_000003.11 |
| cg09838568 | 5.47E-06 | 8.86E-07 | 5.08 | 4.6129351 | 9.88E-02 | 45769981  | 45770104  | NC_000021.8  |
| cg00582583 | 5.47E-06 | 8.86E-07 | 5.08 | 4.6124433 | 9.65E-02 | 88992178  | 88992301  | NC_000016.9  |
| cg05015185 | 5.47E-06 | 8.86E-07 | 5.08 | 4.6123065 | 1.35E-01 | 50574624  | 50574747  | NC_000002.11 |



|            |          |          |      |           |          |           |           |              |
|------------|----------|----------|------|-----------|----------|-----------|-----------|--------------|
| cg01469818 | 5.47E-06 | 8.86E-07 | 5.08 | 4.6122042 | 1.12E-01 | 14860926  | 14861049  | NC_000006.11 |
| cg19668034 | 5.47E-06 | 8.87E-07 | 5.08 | 4.6119578 | 7.06E-02 | 75878019  | 75878142  | NC_000012.11 |
| cg00785941 | 5.48E-06 | 8.88E-07 | 5.08 | 4.6109223 | 9.83E-02 | 248100591 | 248100714 | NC_000001.10 |
| cg06132283 | 5.48E-06 | 8.88E-07 | 5.08 | 4.6106461 | 1.24E-01 | 37116367  | 37116490  | NC_000014.8  |
| cg05994244 | 5.48E-06 | 8.88E-07 | 5.08 | 4.6106089 | 9.26E-02 | 96904960  | 96905083  | NC_000015.9  |
| cg10873781 | 5.48E-06 | 8.88E-07 | 5.08 | 4.610541  | 9.41E-02 | 47560729  | 47560852  | NC_000021.8  |
| cg23469230 | 5.48E-06 | 8.88E-07 | 5.08 | 4.6102074 | 5.04E-02 | 195939310 | 195939433 | NC_000003.11 |
| cg04524933 | 5.48E-06 | 8.88E-07 | 5.08 | 4.6099731 | 4.83E-02 | 49621299  | 49621422  | NC_000020.10 |
| cg20619067 | 5.49E-06 | 8.89E-07 | 5.08 | 4.6089944 | 4.24E-02 | 169284843 | 169284966 | NC_000006.11 |
| cg20195046 | 5.49E-06 | 8.90E-07 | 5.08 | 4.6086969 | 3.07E-02 | 69466815  | 69466938  | NC_000011.9  |
| cg15358431 | 5.49E-06 | 8.90E-07 | 5.08 | 4.6085758 | 7.54E-02 | 6522605   | 6522728   | NC_000001.10 |
| cg18004856 | 5.49E-06 | 8.91E-07 | 5.08 | 4.607656  | 8.47E-02 | 46029278  | 46029401  | NC_000003.11 |
| cg18466859 | 5.50E-06 | 8.91E-07 | 5.08 | 4.6072717 | 1.30E-01 | 91282281  | 91282404  | NC_000014.8  |
| cg01486910 | 5.50E-06 | 8.91E-07 | 5.08 | 4.6072033 | 9.00E-02 | 85242230  | 85242353  | NC_000016.9  |
| cg08954352 | 5.50E-06 | 8.91E-07 | 5.08 | 4.6071555 | 7.96E-02 | 44360899  | 44361022  | NC_000010.10 |
| cg17369527 | 5.50E-06 | 8.91E-07 | 5.08 | 4.6071116 | 1.60E-01 | 28366702  | 28366825  | NC_000013.10 |
| cg01269670 | 5.50E-06 | 8.91E-07 | 5.08 | 4.606859  | 1.11E-01 | 149411377 | 149411500 | NC_000007.13 |
| cg27639142 | 5.50E-06 | 8.91E-07 | 5.08 | 4.6067859 | 8.17E-02 | 126072941 | 126073064 | NC_000003.11 |
| cg15684962 | 5.50E-06 | 8.91E-07 | 5.08 | 4.6066478 | 1.19E-01 | 99273315  | 99273438  | NC_000006.11 |
| cg12437115 | 5.50E-06 | 8.92E-07 | 5.08 | 4.6059612 | 6.30E-02 | 39024690  | 39024813  | NC_000017.10 |
| cg13457427 | 5.50E-06 | 8.92E-07 | 5.08 | 4.605862  | 7.29E-02 | 134955698 | 134955821 | NC_000010.10 |
| cg15336091 | 5.50E-06 | 8.92E-07 | 5.08 | 4.6058025 | 6.61E-02 | 26028624  | 26028747  | NC_000006.11 |
| cg01939336 | 5.50E-06 | 8.93E-07 | 5.08 | 4.6053853 | 1.39E-01 | 113697487 | 113697610 | NC_000005.9  |
| cg10648670 | 5.51E-06 | 8.93E-07 | 5.08 | 4.6050945 | 1.30E-01 | 25439375  | 25439498  | NC_000002.11 |
| cg00461991 | 5.51E-06 | 8.93E-07 | 5.08 | 4.6050559 | 3.19E-02 | 239963209 | 239963332 | NC_000002.11 |

|            |          |          |      |           |          |           |           |              |
|------------|----------|----------|------|-----------|----------|-----------|-----------|--------------|
| cg04078118 | 5.51E-06 | 8.93E-07 | 5.08 | 4.6045102 | 9.88E-02 | 40439969  | 40440092  | NC_000022.10 |
| cg03099790 | 5.51E-06 | 8.94E-07 | 5.08 | 4.604211  | 3.47E-02 | 56456455  | 56456578  | NC_000016.9  |
| cg17229173 | 5.52E-06 | 8.95E-07 | 5.08 | 4.6033759 | 6.73E-02 | 67483875  | 67483998  | NC_000005.9  |
| cg14286292 | 5.52E-06 | 8.95E-07 | 5.08 | 4.6031151 | 7.55E-02 | 130546644 | 130546767 | NC_000009.11 |
| cg05676251 | 5.52E-06 | 8.95E-07 | 5.08 | 4.6027015 | 5.97E-02 | 89225592  | 89225715  | NC_000016.9  |
| cg21611810 | 5.52E-06 | 8.96E-07 | 5.08 | 4.6016961 | 1.33E-01 | 114841870 | 114841993 | NC_000012.11 |
| cg13941474 | 5.53E-06 | 8.97E-07 | 5.08 | 4.6010654 | 9.54E-02 | 112788517 | 112788640 | NC_000013.10 |
| cg17007339 | 5.53E-06 | 8.97E-07 | 5.08 | 4.6009456 | 9.78E-02 | 85430629  | 85430752  | NC_000011.9  |
| cg05942970 | 5.53E-06 | 8.97E-07 | 5.08 | 4.6008739 | 5.15E-02 | 133955527 | 133955650 | NC_000010.10 |
| cg05915593 | 5.53E-06 | 8.98E-07 | 5.08 | 4.5997991 | 1.26E-01 | 64361272  | 64361395  | NC_000014.8  |
| cg11785623 | 5.53E-06 | 8.98E-07 | 5.08 | 4.5997684 | 3.00E-02 | 117038630 | 117038753 | NC_000012.11 |
| cg10583311 | 5.54E-06 | 8.98E-07 | 5.08 | 4.5993152 | 7.54E-02 | 133082545 | 133082668 | NC_000012.11 |
| cg09646197 | 5.54E-06 | 8.99E-07 | 5.08 | 4.598709  | 5.55E-02 | 149462836 | 149462959 | NC_000007.13 |
| cg11844198 | 5.54E-06 | 8.99E-07 | 5.08 | 4.5985287 | 1.22E-02 | 154387428 | 154387551 | NC_000004.11 |
| cg25086828 | 5.54E-06 | 8.99E-07 | 5.08 | 4.5982133 | 1.02E-01 | 62744796  | 62744919  | NC_000020.10 |
| cg10095968 | 5.54E-06 | 9.00E-07 | 5.07 | 4.5978082 | 1.08E-01 | 45847903  | 45848026  | NC_000021.8  |
| cg06813515 | 5.54E-06 | 9.00E-07 | 5.07 | 4.5977545 | 1.24E-01 | 165722651 | 165722774 | NC_000006.11 |
| cg08161931 | 5.55E-06 | 9.00E-07 | 5.07 | 4.5975574 | 9.40E-02 | 145028402 | 145028525 | NC_000008.10 |
| cg22022580 | 5.55E-06 | 9.00E-07 | 5.07 | 4.5973813 | 1.20E-01 | 37266605  | 37266728  | NC_000019.9  |
| cg01469887 | 5.55E-06 | 9.00E-07 | 5.07 | 4.5969403 | 1.53E-01 | 175205716 | 175205839 | NC_000002.11 |
| cg12991050 | 5.55E-06 | 9.01E-07 | 5.07 | 4.5962617 | 1.25E-01 | 87979504  | 87979627  | NC_000005.9  |
| cg08642731 | 5.55E-06 | 9.01E-07 | 5.07 | 4.5958535 | 1.20E-01 | 50507092  | 50507215  | NC_000010.10 |
| cg03358636 | 5.56E-06 | 9.02E-07 | 5.07 | 4.5956906 | 7.73E-02 | 197474006 | 197474129 | NC_000003.11 |
| cg27658967 | 5.56E-06 | 9.02E-07 | 5.07 | 4.5955534 | 1.40E-01 | 37095757  | 37095880  | NC_000019.9  |
| cg15988350 | 5.56E-06 | 9.02E-07 | 5.07 | 4.5954907 | 1.61E-01 | 32110650  | 32110773  | NC_000007.13 |

|            |          |          |      |           |          |           |           |              |
|------------|----------|----------|------|-----------|----------|-----------|-----------|--------------|
| cg23247185 | 5.56E-06 | 9.02E-07 | 5.07 | 4.5950572 | 5.97E-02 | 14530356  | 14530479  | NC_000003.11 |
| cg04128045 | 5.56E-06 | 9.02E-07 | 5.07 | 4.5948444 | 1.10E-01 | 18435700  | 18435823  | NC_000001.10 |
| cg16219125 | 5.56E-06 | 9.03E-07 | 5.07 | 4.5947537 | 1.10E-01 | 174043293 | 174043416 | NC_000003.11 |
| cg06586496 | 5.56E-06 | 9.03E-07 | 5.07 | 4.5946007 | 1.84E-02 | 21715307  | 21715430  | NC_000018.9  |
| cg05750884 | 5.56E-06 | 9.03E-07 | 5.07 | 4.5941851 | 9.08E-02 | 11162183  | 11162306  | NC_000001.10 |
| cg00497232 | 5.57E-06 | 9.03E-07 | 5.07 | 4.5938653 | 1.11E-01 | 6665905   | 6666028   | NC_000004.11 |
| cg12359809 | 5.57E-06 | 9.04E-07 | 5.07 | 4.5931652 | 9.58E-02 | 228246632 | 228246755 | NC_000001.10 |
| cg20649716 | 5.57E-06 | 9.04E-07 | 5.07 | 4.5930968 | 5.51E-02 | 140573721 | 140573844 | NC_000005.9  |
| cg01879048 | 5.57E-06 | 9.04E-07 | 5.07 | 4.5928323 | 7.87E-02 | 61675079  | 61675202  | NC_000020.10 |
| cg14657915 | 5.57E-06 | 9.05E-07 | 5.07 | 4.5926    | 6.84E-02 | 11672469  | 11672592  | NC_000017.10 |
| cg03772909 | 5.57E-06 | 9.05E-07 | 5.07 | 4.5925742 | 6.14E-02 | 138725311 | 138725434 | NC_000003.11 |
| cg05169099 | 5.57E-06 | 9.05E-07 | 5.07 | 4.5924498 | 7.68E-02 | 481640    | 481763    | NC_000005.9  |
| cg17463287 | 5.58E-06 | 9.05E-07 | 5.07 | 4.5919976 | 8.25E-02 | 71475335  | 71475458  | NC_000016.9  |
| cg14776091 | 5.58E-06 | 9.05E-07 | 5.07 | 4.5918771 | 2.84E-02 | 121581281 | 121581404 | NC_000010.10 |
| cg00005847 | 5.58E-06 | 9.06E-07 | 5.07 | 4.5914428 | 1.30E-01 | 177029073 | 177029196 | NC_000002.11 |
| cg19292062 | 5.58E-06 | 9.06E-07 | 5.07 | 4.5913393 | 4.24E-02 | 524344    | 524467    | NC_000020.10 |
| cg04648334 | 5.58E-06 | 9.07E-07 | 5.07 | 4.5902198 | 6.40E-02 | 27236866  | 27236989  | NC_000006.11 |
| cg12302527 | 5.59E-06 | 9.07E-07 | 5.07 | 4.589673  | 3.65E-02 | 3461381   | 3461504   | NC_000001.10 |
| cg17793776 | 5.59E-06 | 9.08E-07 | 5.07 | 4.5892242 | 6.78E-02 | 77140381  | 77140504  | NC_000005.9  |
| cg00584174 | 5.59E-06 | 9.08E-07 | 5.07 | 4.5886304 | 1.18E-01 | 63257403  | 63257526  | NC_000011.9  |
| cg21737226 | 5.60E-06 | 9.09E-07 | 5.07 | 4.5879485 | 1.15E-01 | 53326668  | 53326791  | NC_000008.10 |
| cg07750784 | 5.61E-06 | 9.12E-07 | 5.07 | 4.584716  | 1.64E-02 | 239988676 | 239988799 | NC_000002.11 |
| cg10206873 | 5.61E-06 | 9.12E-07 | 5.07 | 4.5846659 | 4.50E-02 | 1784087   | 1784210   | NC_000007.13 |
| cg01890858 | 5.62E-06 | 9.14E-07 | 5.07 | 4.5827567 | 9.17E-02 | 3854704   | 3854827   | NC_000005.9  |
| cg03007511 | 5.63E-06 | 9.14E-07 | 5.07 | 4.5825937 | 7.17E-02 | 27205383  | 27205506  | NC_000006.11 |

|            |          |          |      |           |          |           |           |              |
|------------|----------|----------|------|-----------|----------|-----------|-----------|--------------|
| cg00087244 | 5.63E-06 | 9.14E-07 | 5.07 | 4.5824668 | 1.06E-01 | 74042487  | 74042610  | NC_000007.13 |
| cg17303540 | 5.63E-06 | 9.15E-07 | 5.07 | 4.5819764 | 1.03E-01 | 140808068 | 140808191 | NC_000005.9  |
| cg25242498 | 5.63E-06 | 9.15E-07 | 5.07 | 4.5816487 | 4.05E-02 | 6008046   | 6008169   | NC_000019.9  |
| cg14191369 | 5.63E-06 | 9.15E-07 | 5.07 | 4.5815167 | 4.77E-02 | 130996177 | 130996300 | NC_000009.11 |
| cg07136023 | 5.63E-06 | 9.15E-07 | 5.07 | 4.5814753 | 1.23E-01 | 86537316  | 86537439  | NC_000016.9  |
| cg16097357 | 5.63E-06 | 9.15E-07 | 5.07 | 4.5813854 | 1.41E-01 | 73584360  | 73584483  | NC_000017.10 |
| cg26820037 | 5.63E-06 | 9.15E-07 | 5.07 | 4.5810075 | 1.09E-01 | 103534501 | 103534624 | NC_000010.10 |
| cg12510221 | 5.63E-06 | 9.16E-07 | 5.07 | 4.580884  | 9.27E-02 | 45678137  | 45678260  | NC_000021.8  |
| cg26800771 | 5.63E-06 | 9.16E-07 | 5.07 | 4.580836  | 8.06E-02 | 241855454 | 241855577 | NC_000002.11 |
| cg06448573 | 5.64E-06 | 9.16E-07 | 5.07 | 4.5803635 | 4.58E-02 | 144107231 | 144107354 | NC_000008.10 |
| cg01553935 | 5.64E-06 | 9.16E-07 | 5.07 | 4.5801261 | 6.83E-02 | 46641061  | 46641184  | NC_000001.10 |
| cg00703061 | 5.64E-06 | 9.17E-07 | 5.07 | 4.5797247 | 6.07E-02 | 75889492  | 75889615  | NC_000018.9  |
| cg20667575 | 5.64E-06 | 9.17E-07 | 5.07 | 4.5792309 | 8.96E-02 | 113258210 | 113258333 | NC_000011.9  |
| cg03663462 | 5.64E-06 | 9.17E-07 | 5.07 | 4.5792198 | 1.49E-01 | 76734764  | 76734887  | NC_000018.9  |
| cg16268769 | 5.64E-06 | 9.17E-07 | 5.07 | 4.5791591 | 8.07E-02 | 156890782 | 156890905 | NC_000001.10 |
| cg08932277 | 5.64E-06 | 9.17E-07 | 5.07 | 4.5790046 | 7.27E-02 | 74627589  | 74627712  | NC_000015.9  |
| cg15480367 | 5.65E-06 | 9.18E-07 | 5.07 | 4.5785444 | 8.28E-02 | 93389485  | 93389608  | NC_000014.8  |
| cg17867333 | 5.65E-06 | 9.18E-07 | 5.07 | 4.5783093 | 6.68E-02 | 178423163 | 178423286 | NC_000005.9  |
| cg07589254 | 5.65E-06 | 9.19E-07 | 5.07 | 4.5772201 | 1.69E-01 | 1705402   | 1705525   | NC_000007.13 |
| cg22665096 | 5.66E-06 | 9.19E-07 | 5.07 | 4.5768775 | 1.12E-01 | 42102842  | 42102965  | NC_000012.11 |
| cg02224980 | 5.66E-06 | 9.21E-07 | 5.07 | 4.5752506 | 1.12E-01 | 223169501 | 223169624 | NC_000002.11 |
| cg23312151 | 5.66E-06 | 9.21E-07 | 5.07 | 4.5751625 | 2.43E-02 | 1466132   | 1466255   | NC_000005.9  |
| cg12881854 | 5.67E-06 | 9.21E-07 | 5.07 | 4.5747679 | 1.05E-01 | 54961668  | 54961791  | NC_000004.11 |
| cg26005761 | 5.67E-06 | 9.22E-07 | 5.07 | 4.5745326 | 1.06E-01 | 110223252 | 110223375 | NC_000004.11 |
| cg21585733 | 5.67E-06 | 9.22E-07 | 5.07 | 4.5744066 | 1.07E-01 | 107799660 | 107799783 | NC_000011.9  |

|            |          |          |      |           |          |           |           |              |
|------------|----------|----------|------|-----------|----------|-----------|-----------|--------------|
| cg26944301 | 5.67E-06 | 9.22E-07 | 5.07 | 4.5736789 | 1.31E-01 | 170738524 | 170738647 | NC_000005.9  |
| cg22373181 | 5.68E-06 | 9.23E-07 | 5.07 | 4.5731461 | 1.52E-01 | 39893080  | 39893203  | NC_000002.11 |
| cg21838933 | 5.68E-06 | 9.23E-07 | 5.07 | 4.5725936 | 5.25E-02 | 148481907 | 148482030 | NC_000007.13 |
| cg14502659 | 5.68E-06 | 9.24E-07 | 5.07 | 4.5723512 | 1.05E-01 | 239948617 | 239948740 | NC_000002.11 |
| cg27014135 | 5.68E-06 | 9.24E-07 | 5.07 | 4.5722003 | 2.29E-01 | 25703528  | 25703651  | NC_000016.9  |
| cg16607685 | 5.68E-06 | 9.24E-07 | 5.07 | 4.5721807 | 9.79E-02 | 140181889 | 140182012 | NC_000005.9  |
| cg20129313 | 5.68E-06 | 9.24E-07 | 5.07 | 4.5717873 | 1.12E-01 | 45055836  | 45055959  | NC_000017.10 |
| cg20294080 | 5.68E-06 | 9.24E-07 | 5.07 | 4.571653  | 1.10E-01 | 17932629  | 17932752  | NC_000001.10 |
| cg18177920 | 5.68E-06 | 9.25E-07 | 5.07 | 4.57136   | 7.55E-02 | 5956787   | 5956910   | NC_000011.9  |
| cg25097398 | 5.69E-06 | 9.25E-07 | 5.07 | 4.5712443 | 4.83E-02 | 127650901 | 127651024 | NC_000012.11 |
| cg01435039 | 5.69E-06 | 9.25E-07 | 5.07 | 4.5708599 | 4.36E-02 | 29700804  | 29700927  | NC_000010.10 |
| cg21469854 | 5.69E-06 | 9.25E-07 | 5.07 | 4.5708085 | 9.01E-02 | 55201971  | 55202094  | NC_000020.10 |
| cg16025094 | 5.69E-06 | 9.26E-07 | 5.07 | 4.5698746 | 1.36E-01 | 175298655 | 175298778 | NC_000005.9  |
| cg14753334 | 5.69E-06 | 9.26E-07 | 5.07 | 4.5696247 | 1.01E-01 | 73674702  | 73674825  | NC_000003.11 |
| cg06138195 | 5.70E-06 | 9.27E-07 | 5.07 | 4.5693352 | 4.63E-02 | 45143871  | 45143994  | NC_000017.10 |
| cg09931134 | 5.70E-06 | 9.27E-07 | 5.07 | 4.5688084 | 4.19E-02 | 46982592  | 46982715  | NC_000017.10 |
| cg11882488 | 5.70E-06 | 9.27E-07 | 5.07 | 4.5687191 | 8.63E-02 | 112983145 | 112983268 | NC_000003.11 |
| cg07151565 | 5.70E-06 | 9.27E-07 | 5.07 | 4.5685497 | 4.77E-02 | 53869995  | 53870118  | NC_000012.11 |
| cg16803613 | 5.70E-06 | 9.28E-07 | 5.07 | 4.5682288 | 8.46E-02 | 7583651   | 7583774   | NC_000012.11 |
| cg23223091 | 5.70E-06 | 9.28E-07 | 5.07 | 4.567943  | 2.19E-02 | 32046306  | 32046429  | NC_000006.11 |
| cg21385821 | 5.70E-06 | 9.28E-07 | 5.07 | 4.5677803 | 1.33E-01 | 50237844  | 50237967  | NC_000017.10 |
| cg27203924 | 5.70E-06 | 9.28E-07 | 5.07 | 4.5676858 | 5.66E-02 | 64627542  | 64627665  | NC_000003.11 |
| cg16330066 | 5.71E-06 | 9.29E-07 | 5.07 | 4.5670174 | 1.99E-02 | 8399372   | 8399495   | NC_000004.11 |
| cg18781988 | 5.71E-06 | 9.29E-07 | 5.07 | 4.5665973 | 1.28E-01 | 140723549 | 140723672 | NC_000005.9  |
| cg03175206 | 5.71E-06 | 9.30E-07 | 5.07 | 4.5662404 | 2.56E-02 | 194978283 | 194978406 | NC_000003.11 |

|            |          |          |           |             |           |           |           |              |
|------------|----------|----------|-----------|-------------|-----------|-----------|-----------|--------------|
| cg13350173 | 5.71E-06 | 9.30E-07 | 5.07      | 4.565895    | 8.23E-02  | 38281183  | 38281306  | NC_000019.9  |
| cg16611581 | 5.72E-06 | 9.30E-07 | 5.07      | 4.5654291   | 1.64E-01  | 4379062   | 4379185   | NC_000012.11 |
| cg00872900 | 5.72E-06 | 9.32E-07 | 5.07      | 4.5641389   | 4.59E-02  | 32662543  | 32662666  | NC_000016.9  |
| cg17412248 | 5.72E-06 | 9.32E-07 | 5.07      | 4.5640485   | 9.51E-02  | 44803411  | 44803534  | NC_000020.10 |
| cg12062819 | 5.73E-06 | 9.32E-07 | 5.07      | 4.5634993   | 1.96E-01  | 156358231 | 156358354 | NC_000001.10 |
| cg07784442 | 5.73E-06 | 9.33E-07 | 5.07      | 4.5629606   | 2.62E-02  | 153690819 | 153690942 | NC_000004.11 |
| cg01176947 | 5.73E-06 | 9.33E-07 | 5.07      | 4.5623746   | 1.04E-01  | 10385279  | 10385402  | NC_000006.11 |
| cg23095743 | 5.74E-06 | 9.34E-07 | 5.07      | 4.5616716   | 1.19E-01  | 104000831 | 104000954 | NC_000010.10 |
| cg26216629 | 5.74E-06 | 9.34E-07 | 5.07      | 4.561475    | 7.94E-02  | 153863712 | 153863835 | NC_000005.9  |
| cg05392263 | 5.74E-06 | 9.34E-07 | 5.07      | 4.5614017   | 1.17E-01  | 168418527 | 168418650 | NC_000006.11 |
| cg16887420 | 5.74E-06 | 9.35E-07 | 5.07      | 4.5606186   | 5.65E-02  | 131548063 | 131548186 | NC_000006.11 |
| cg15555709 | 5.75E-06 | 9.36E-07 | 5.07      | 4.5599196   | 6.25E-02  | 44786241  | 44786364  | NC_000021.8  |
| cg09310185 | 5.75E-06 | 9.36E-07 | 5.07      | 4.5596031   | 8.93E-02  | 61866960  | 61867083  | NC_000020.10 |
| cg12915878 | 5.75E-06 | 9.37E-07 | 5.07      | 4.5585912   | 2.95E-02  | 109557137 | 109557260 | NC_000002.11 |
| cg14501638 | 5.76E-06 | 9.37E-07 | 5.07      | 4.5582351   | 8.90E-02  | 143609540 | 143609663 | NC_000008.10 |
| cg00539347 | 2.60E-50 | 1.29E-55 | -2.23E+01 | 116.0836635 | -3.52E-01 | 30592296  | 30592419  | NC_000022.10 |
| cg03130910 | 5.45E-49 | 5.42E-54 | -2.17E+01 | 112.3715553 | -3.67E-01 | 234908226 | 234908349 | NC_000001.10 |
| cg21777553 | 2.24E-46 | 5.00E-51 | -2.07E+01 | 105.5886088 | -2.77E-01 | 208028218 | 208028341 | NC_000002.11 |
| cg15311822 | 8.48E-46 | 2.11E-50 | -2.04E+01 | 104.1585153 | -2.50E-01 | 9144618   | 9144741   | NC_000002.11 |
| cg20663852 | 1.27E-45 | 3.47E-50 | -2.04E+01 | 103.6622288 | -3.76E-01 | 50312386  | 50312509  | NC_000020.10 |
| cg20826151 | 5.73E-45 | 1.71E-49 | -2.01E+01 | 102.0791272 | -1.83E-01 | 100743732 | 100743855 | NC_000007.13 |
| cg02930667 | 1.08E-44 | 3.76E-49 | -2.00E+01 | 101.2958599 | -3.92E-01 | 219671206 | 219671329 | NC_000002.11 |
| cg21956614 | 1.81E-44 | 6.76E-49 | -1.99E+01 | 100.7111012 | -2.98E-01 | 129439073 | 129439196 | NC_000004.11 |
| cg24039394 | 2.89E-44 | 1.15E-48 | -1.98E+01 | 100.1856172 | -1.56E-01 | 55294823  | 55294946  | NC_000008.10 |
| cg08357990 | 2.89E-44 | 1.22E-48 | -1.98E+01 | 100.1229544 | -2.61E-01 | 33359550  | 33359673  | NC_000002.11 |

|            |          |          |           |            |           |           |           |              |
|------------|----------|----------|-----------|------------|-----------|-----------|-----------|--------------|
| cg13699887 | 3.89E-44 | 1.74E-48 | -1.98E+01 | 99.7726896 | -3.34E-01 | 16320488  | 16320611  | NC_000006.11 |
| cg14701867 | 5.22E-44 | 2.46E-48 | -1.97E+01 | 99.4258589 | -2.77E-01 | 64193068  | 64193191  | NC_000010.10 |
| cg01649611 | 1.23E-43 | 6.13E-48 | -1.96E+01 | 98.5200711 | -4.10E-01 | 43521066  | 43521189  | NC_000002.11 |
| cg17130457 | 1.66E-43 | 8.66E-48 | -1.95E+01 | 98.1764042 | -4.08E-01 | 76414729  | 76414852  | NC_000012.11 |
| cg06197966 | 3.24E-43 | 1.77E-47 | -1.94E+01 | 97.465387  | -4.08E-01 | 29948324  | 29948447  | NC_000010.10 |
| cg01973676 | 4.69E-43 | 2.68E-47 | -1.94E+01 | 97.0535999 | -4.23E-01 | 101596404 | 101596527 | NC_000007.13 |
| cg04786142 | 7.59E-43 | 4.53E-47 | -1.93E+01 | 96.532288  | -4.28E-01 | 234908381 | 234908504 | NC_000001.10 |
| cg02570061 | 1.32E-42 | 8.21E-47 | -1.92E+01 | 95.9401744 | -2.16E-01 | 179051583 | 179051706 | NC_000005.9  |
| cg02727227 | 2.26E-42 | 1.48E-46 | -1.91E+01 | 95.3521315 | -1.31E-01 | 9144505   | 9144628   | NC_000002.11 |
| cg26140475 | 2.26E-42 | 1.52E-46 | -1.91E+01 | 95.3303152 | -2.43E-01 | 126525558 | 126525681 | NC_000008.10 |
| cg07537821 | 2.88E-42 | 2.00E-46 | -1.91E+01 | 95.0544234 | -3.05E-01 | 122727440 | 122727563 | NC_000011.9  |
| cg11517094 | 4.15E-42 | 2.99E-46 | -1.90E+01 | 94.656203  | -2.06E-01 | 179051568 | 179051691 | NC_000005.9  |
| cg08824350 | 5.19E-42 | 3.87E-46 | -1.90E+01 | 94.3999999 | -2.68E-01 | 133780924 | 133781047 | NC_000008.10 |
| cg13157980 | 5.92E-42 | 4.56E-46 | -1.89E+01 | 94.2353839 | -3.43E-01 | 141599141 | 141599264 | NC_000008.10 |
| cg20645040 | 1.08E-41 | 8.68E-46 | -1.88E+01 | 93.5953298 | -3.23E-01 | 45946271  | 45946394  | NC_000020.10 |
| cg23811057 | 1.08E-41 | 8.89E-46 | -1.88E+01 | 93.5712994 | -3.32E-01 | 234908514 | 234908637 | NC_000001.10 |
| cg05471495 | 1.18E-41 | 9.94E-46 | -1.88E+01 | 93.4604961 | -3.63E-01 | 101369330 | 101369453 | NC_000002.11 |
| cg16210355 | 1.19E-41 | 1.04E-45 | -1.88E+01 | 93.4186673 | -3.69E-01 | 107028903 | 107029026 | NC_000013.10 |
| cg24033661 | 1.35E-41 | 1.21E-45 | -1.88E+01 | 93.2645686 | -4.17E-01 | 2920055   | 2920178   | NC_000011.9  |
| cg06858555 | 1.68E-41 | 1.54E-45 | -1.87E+01 | 93.0244216 | -3.90E-01 | 105144735 | 105144858 | NC_000014.8  |
| cg15840891 | 1.99E-41 | 2.02E-45 | -1.87E+01 | 92.7542335 | -2.81E-01 | 102133972 | 102134095 | NC_000002.11 |
| cg24438354 | 2.50E-41 | 2.67E-45 | -1.87E+01 | 92.4767848 | -3.92E-01 | 12111838  | 12111961  | NC_000012.11 |
| cg09417692 | 2.93E-41 | 3.23E-45 | -1.86E+01 | 92.289992  | -4.10E-01 | 30700056  | 30700179  | NC_000003.11 |
| cg23683800 | 2.93E-41 | 3.27E-45 | -1.86E+01 | 92.2753644 | -3.27E-01 | 115086103 | 115086226 | NC_000010.10 |
| cg11059357 | 3.30E-41 | 3.85E-45 | -1.86E+01 | 92.1141142 | -1.39E-01 | 41649676  | 41649799  | NC_000008.10 |

|            |          |          |           |            |           |           |           |              |
|------------|----------|----------|-----------|------------|-----------|-----------|-----------|--------------|
| cg05926314 | 3.63E-41 | 4.41E-45 | -1.86E+01 | 91.9783172 | -4.24E-01 | 157347105 | 157347228 | NC_000007.13 |
| cg14972576 | 6.11E-41 | 7.74E-45 | -1.85E+01 | 91.419494  | -3.85E-01 | 97645526  | 97645649  | NC_000005.9  |
| cg06485603 | 1.21E-40 | 1.61E-44 | -1.84E+01 | 90.6923707 | -2.76E-01 | 2847258   | 2847381   | NC_000011.9  |
| cg06825878 | 1.24E-40 | 1.70E-44 | -1.84E+01 | 90.639909  | -3.51E-01 | 75472540  | 75472663  | NC_000007.13 |
| cg27181375 | 1.26E-40 | 1.75E-44 | -1.84E+01 | 90.6072059 | -3.10E-01 | 74249189  | 74249312  | NC_000015.9  |
| cg16371229 | 1.61E-40 | 2.28E-44 | -1.83E+01 | 90.3467654 | -3.68E-01 | 233248845 | 233248968 | NC_000001.10 |
| cg08305942 | 1.94E-40 | 2.80E-44 | -1.83E+01 | 90.1429788 | -3.81E-01 | 79692354  | 79692477  | NC_000016.9  |
| cg13324103 | 2.25E-40 | 3.29E-44 | -1.83E+01 | 89.9803838 | -3.98E-01 | 29948428  | 29948551  | NC_000010.10 |
| cg07960067 | 8.59E-40 | 1.32E-43 | -1.81E+01 | 88.5973777 | -1.69E-01 | 9144629   | 9144752   | NC_000002.11 |
| cg19918734 | 8.79E-40 | 1.38E-43 | -1.81E+01 | 88.5576941 | -3.42E-01 | 86343931  | 86344054  | NC_000011.9  |
| cg04456219 | 1.45E-39 | 2.31E-43 | -1.80E+01 | 88.0443116 | -3.97E-01 | 17274337  | 17274460  | NC_000007.13 |
| cg21380183 | 2.04E-39 | 3.34E-43 | -1.80E+01 | 87.6754303 | -3.31E-01 | 50312632  | 50312755  | NC_000020.10 |
| cg15247093 | 2.22E-39 | 3.73E-43 | -1.79E+01 | 87.5656633 | -3.09E-01 | 47768476  | 47768599  | NC_000010.10 |
| cg05876246 | 2.22E-39 | 3.74E-43 | -1.79E+01 | 87.5629875 | -3.57E-01 | 81831079  | 81831202  | NC_000008.10 |
| cg01802545 | 4.42E-39 | 7.58E-43 | -1.78E+01 | 86.8609993 | -2.22E-01 | 93196432  | 93196555  | NC_000014.8  |
| cg19858214 | 7.72E-39 | 1.36E-42 | -1.77E+01 | 86.2780387 | -4.28E-01 | 134298937 | 134299060 | NC_000007.13 |
| cg17004104 | 9.70E-39 | 1.76E-42 | -1.77E+01 | 86.0234893 | -1.66E-01 | 114165730 | 114165853 | NC_000011.9  |
| cg19237113 | 1.29E-38 | 2.37E-42 | -1.77E+01 | 85.7261125 | -2.58E-01 | 6803800   | 6803923   | NC_000001.10 |
| cg21778987 | 1.62E-38 | 3.05E-42 | -1.76E+01 | 85.4756864 | -3.81E-01 | 136915367 | 136915490 | NC_000006.11 |
| cg07962303 | 1.75E-38 | 3.35E-42 | -1.76E+01 | 85.3837824 | -2.74E-01 | 11253944  | 11254067  | NC_000019.9  |
| cg07643930 | 1.81E-38 | 3.55E-42 | -1.76E+01 | 85.3259259 | -1.67E-01 | 2060265   | 2060388   | NC_000016.9  |
| cg14292522 | 1.91E-38 | 3.79E-42 | -1.76E+01 | 85.2606035 | -2.96E-01 | 100535489 | 100535612 | NC_000012.11 |
| cg13327911 | 2.44E-38 | 4.90E-42 | -1.76E+01 | 85.0044702 | -3.49E-01 | 55965977  | 55966100  | NC_000006.11 |
| cg15832662 | 2.53E-38 | 5.15E-42 | -1.76E+01 | 84.9547951 | -2.52E-01 | 63448437  | 63448560  | NC_000011.9  |
| cg23341182 | 2.64E-38 | 5.52E-42 | -1.75E+01 | 84.8872061 | -1.81E-01 | 102046768 | 102046891 | NC_000010.10 |



|            |          |          |           |            |           |           |           |              |
|------------|----------|----------|-----------|------------|-----------|-----------|-----------|--------------|
| cg13859639 | 2.86E-38 | 6.03E-42 | -1.75E+01 | 84.7979046 | -2.70E-01 | 2846716   | 2846839   | NC_000011.9  |
| cg03851835 | 4.38E-38 | 9.48E-42 | -1.75E+01 | 84.3488828 | -3.91E-01 | 107711742 | 107711865 | NC_000011.9  |
| cg07339236 | 4.43E-38 | 9.68E-42 | -1.75E+01 | 84.3282083 | -3.53E-01 | 50312490  | 50312613  | NC_000020.10 |
| cg02861178 | 4.43E-38 | 9.79E-42 | -1.75E+01 | 84.3170719 | -2.78E-01 | 10492319  | 10492442  | NC_000020.10 |
| cg27471192 | 4.88E-38 | 1.09E-41 | -1.74E+01 | 84.20859   | -3.00E-01 | 59015338  | 59015461  | NC_000011.9  |
| cg16649560 | 5.40E-38 | 1.22E-41 | -1.74E+01 | 84.096027  | -3.03E-01 | 27338391  | 27338514  | NC_000016.9  |
| cg04923845 | 5.81E-38 | 1.34E-41 | -1.74E+01 | 84.0024091 | -2.46E-01 | 114575681 | 114575804 | NC_000010.10 |
| cg26361533 | 6.66E-38 | 1.56E-41 | -1.74E+01 | 83.8559593 | -3.52E-01 | 2445561   | 2445684   | NC_000012.11 |
| cg15978561 | 6.82E-38 | 1.63E-41 | -1.74E+01 | 83.8126414 | -4.03E-01 | 240196996 | 240197119 | NC_000002.11 |
| cg08698943 | 6.82E-38 | 1.63E-41 | -1.74E+01 | 83.8121314 | -3.34E-01 | 3509758   | 3509881   | NC_000010.10 |
| cg01876978 | 8.52E-38 | 2.05E-41 | -1.73E+01 | 83.5795846 | -1.76E-01 | 11970145  | 11970268  | NC_000002.11 |
| cg10087036 | 9.74E-38 | 2.37E-41 | -1.73E+01 | 83.4370052 | -4.38E-01 | 19130461  | 19130584  | NC_000016.9  |
| cg13972124 | 9.87E-38 | 2.45E-41 | -1.73E+01 | 83.4034793 | -3.58E-01 | 132539744 | 132539867 | NC_000009.11 |
| cg07734161 | 1.05E-37 | 2.64E-41 | -1.73E+01 | 83.3298273 | -3.17E-01 | 1593557   | 1593680   | NC_000016.9  |
| cg21324456 | 1.14E-37 | 2.92E-41 | -1.73E+01 | 83.2310232 | -3.57E-01 | 50248076  | 50248199  | NC_000020.10 |
| cg11580676 | 1.16E-37 | 3.01E-41 | -1.73E+01 | 83.2010434 | -2.49E-01 | 156211415 | 156211538 | NC_000001.10 |
| cg14901243 | 1.19E-37 | 3.11E-41 | -1.73E+01 | 83.1669571 | -3.78E-01 | 13951845  | 13951968  | NC_000019.9  |
| cg11564601 | 1.27E-37 | 3.37E-41 | -1.73E+01 | 83.0883194 | -3.64E-01 | 30592435  | 30592558  | NC_000022.10 |
| cg05673882 | 1.58E-37 | 4.27E-41 | -1.72E+01 | 82.851332  | -3.58E-01 | 74862702  | 74862825  | NC_000005.9  |
| cg01826354 | 1.68E-37 | 4.58E-41 | -1.72E+01 | 82.7821389 | -3.59E-01 | 81006497  | 81006620  | NC_000017.10 |
| cg16973527 | 2.21E-37 | 6.21E-41 | -1.72E+01 | 82.4799499 | -3.26E-01 | 70767570  | 70767693  | NC_000015.9  |
| cg01616225 | 4.28E-37 | 1.22E-40 | -1.71E+01 | 81.8046161 | -3.25E-01 | 57662347  | 57662470  | NC_000016.9  |
| cg05036846 | 4.53E-37 | 1.31E-40 | -1.71E+01 | 81.7405426 | -2.27E-01 | 24648984  | 24649107  | NC_000001.10 |
| cg03434029 | 5.73E-37 | 1.66E-40 | -1.70E+01 | 81.4984182 | -1.91E-01 | 45274048  | 45274171  | NC_000001.10 |
| cg24661168 | 6.05E-37 | 1.79E-40 | -1.70E+01 | 81.4278121 | -3.53E-01 | 210013268 | 210013391 | NC_000001.10 |

|            |          |          |           |            |           |           |           |              |
|------------|----------|----------|-----------|------------|-----------|-----------|-----------|--------------|
| cg06936290 | 6.31E-37 | 1.88E-40 | -1.70E+01 | 81.3772037 | -4.27E-01 | 13889871  | 13889994  | NC_000007.13 |
| cg03906115 | 6.80E-37 | 2.08E-40 | -1.70E+01 | 81.2780449 | -2.77E-01 | 33359529  | 33359652  | NC_000002.11 |
| cg10378325 | 6.89E-37 | 2.12E-40 | -1.70E+01 | 81.2566389 | -2.01E-01 | 86895705  | 86895828  | NC_000001.10 |
| cg13531667 | 7.98E-37 | 2.48E-40 | -1.70E+01 | 81.1030193 | -3.23E-01 | 112825132 | 112825255 | NC_000005.9  |
| cg06474225 | 8.14E-37 | 2.57E-40 | -1.70E+01 | 81.0670124 | -3.61E-01 | 124228770 | 124228893 | NC_000010.10 |
| cg09126279 | 1.05E-36 | 3.35E-40 | -1.69E+01 | 80.8017007 | -4.05E-01 | 40675171  | 40675294  | NC_000004.11 |
| cg03518729 | 1.19E-36 | 3.81E-40 | -1.69E+01 | 80.6760621 | -4.18E-01 | 235147744 | 235147867 | NC_000001.10 |
| cg26389380 | 1.50E-36 | 4.96E-40 | -1.69E+01 | 80.4122449 | -3.79E-01 | 11330567  | 11330690  | NC_000003.11 |
| cg18101152 | 1.55E-36 | 5.16E-40 | -1.69E+01 | 80.3724221 | -2.09E-01 | 31096463  | 31096586  | NC_000008.10 |
| cg25461300 | 1.69E-36 | 5.68E-40 | -1.69E+01 | 80.2785883 | -1.68E-01 | 3015372   | 3015495   | NC_000018.9  |
| cg17471425 | 1.84E-36 | 6.31E-40 | -1.68E+01 | 80.1732704 | -3.65E-01 | 10614014  | 10614137  | NC_000011.9  |
| cg15058210 | 1.91E-36 | 6.61E-40 | -1.68E+01 | 80.1268248 | -3.50E-01 | 240196877 | 240197000 | NC_000002.11 |
| cg23190089 | 1.91E-36 | 6.64E-40 | -1.68E+01 | 80.1225462 | -3.73E-01 | 2920209   | 2920332   | NC_000011.9  |
| cg19770281 | 1.94E-36 | 6.81E-40 | -1.68E+01 | 80.0976093 | -3.13E-01 | 132261993 | 132262116 | NC_000003.11 |
| cg05614013 | 1.99E-36 | 7.02E-40 | -1.68E+01 | 80.0677012 | -2.35E-01 | 11253754  | 11253877  | NC_000019.9  |
| cg05228359 | 2.78E-36 | 1.01E-39 | -1.68E+01 | 79.7080454 | -2.71E-01 | 47995865  | 47995988  | NC_000011.9  |
| cg18419977 | 2.78E-36 | 1.01E-39 | -1.68E+01 | 79.7070436 | -4.34E-01 | 2920052   | 2920175   | NC_000011.9  |
| cg03796321 | 2.83E-36 | 1.04E-39 | -1.68E+01 | 79.6805226 | -2.79E-01 | 86162442  | 86162565  | NC_000015.9  |
| cg21211271 | 3.04E-36 | 1.12E-39 | -1.68E+01 | 79.6001447 | -2.22E-01 | 6265071   | 6265194   | NC_000001.10 |
| cg27107970 | 3.04E-36 | 1.13E-39 | -1.68E+01 | 79.5975978 | -2.21E-01 | 79520734  | 79520857  | NC_000017.10 |
| cg21196487 | 3.40E-36 | 1.27E-39 | -1.67E+01 | 79.4797553 | -2.27E-01 | 153538964 | 153539087 | NC_000001.10 |
| cg10069121 | 3.75E-36 | 1.41E-39 | -1.67E+01 | 79.3701    | -2.25E-01 | 152009711 | 152009834 | NC_000001.10 |
| cg03850117 | 4.11E-36 | 1.56E-39 | -1.67E+01 | 79.2722689 | -2.47E-01 | 87894334  | 87894457  | NC_000016.9  |
| cg17327067 | 4.43E-36 | 1.70E-39 | -1.67E+01 | 79.1847492 | -2.21E-01 | 145025760 | 145025883 | NC_000008.10 |
| cg03761750 | 4.99E-36 | 1.93E-39 | -1.67E+01 | 79.0597049 | -2.23E-01 | 6184355   | 6184478   | NC_000012.11 |

|            |          |          |           |            |           |           |           |              |
|------------|----------|----------|-----------|------------|-----------|-----------|-----------|--------------|
| cg04111435 | 5.38E-36 | 2.11E-39 | -1.67E+01 | 78.9716834 | -2.11E-01 | 63448455  | 63448578  | NC_000011.9  |
| cg08033031 | 6.09E-36 | 2.41E-39 | -1.67E+01 | 78.8413373 | -2.04E-01 | 16528764  | 16528887  | NC_000019.9  |
| cg09701880 | 6.65E-36 | 2.65E-39 | -1.66E+01 | 78.7475391 | -3.14E-01 | 112252254 | 112252377 | NC_000002.11 |
| cg05309989 | 7.25E-36 | 2.92E-39 | -1.66E+01 | 78.6498277 | -3.07E-01 | 50527872  | 50527995  | NC_000014.8  |
| cg08737189 | 7.40E-36 | 3.00E-39 | -1.66E+01 | 78.6233139 | -2.27E-01 | 131223417 | 131223540 | NC_000007.13 |
| cg12691534 | 8.58E-36 | 3.56E-39 | -1.66E+01 | 78.4524759 | -2.18E-01 | 50275394  | 50275517  | NC_000003.11 |
| cg15298486 | 8.67E-36 | 3.62E-39 | -1.66E+01 | 78.4356167 | -1.61E-01 | 102046690 | 102046813 | NC_000010.10 |
| cg15339605 | 9.46E-36 | 3.97E-39 | -1.66E+01 | 78.3436463 | -2.70E-01 | 115670795 | 115670918 | NC_000007.13 |
| cg04470054 | 9.68E-36 | 4.09E-39 | -1.66E+01 | 78.3143061 | -3.94E-01 | 78830472  | 78830595  | NC_000017.10 |
| cg14106046 | 1.01E-35 | 4.30E-39 | -1.66E+01 | 78.2634659 | -3.85E-01 | 81006485  | 81006608  | NC_000017.10 |
| cg11228682 | 1.01E-35 | 4.33E-39 | -1.66E+01 | 78.2584274 | -4.05E-01 | 16320530  | 16320653  | NC_000006.11 |
| cg11558212 | 1.07E-35 | 4.61E-39 | -1.66E+01 | 78.1961142 | -2.15E-01 | 22810001  | 22810124  | NC_000013.10 |
| cg21193484 | 1.11E-35 | 4.81E-39 | -1.66E+01 | 78.1535694 | -2.68E-01 | 61938892  | 61939015  | NC_000014.8  |
| cg21055554 | 1.16E-35 | 5.04E-39 | -1.65E+01 | 78.1069211 | -2.42E-01 | 113652889 | 113653012 | NC_000012.11 |
| cg04504205 | 1.30E-35 | 5.67E-39 | -1.65E+01 | 77.9888974 | -2.77E-01 | 45946429  | 45946552  | NC_000020.10 |
| cg00813746 | 1.48E-35 | 6.52E-39 | -1.65E+01 | 77.8503323 | -2.79E-01 | 50275558  | 50275681  | NC_000003.11 |
| cg22274117 | 1.48E-35 | 6.55E-39 | -1.65E+01 | 77.8458806 | -4.26E-01 | 16713613  | 16713736  | NC_000006.11 |
| cg15584788 | 1.66E-35 | 7.37E-39 | -1.65E+01 | 77.7285808 | -1.85E-01 | 6265300   | 6265423   | NC_000001.10 |
| cg26610808 | 1.71E-35 | 7.64E-39 | -1.65E+01 | 77.6921167 | -1.34E-01 | 102046685 | 102046808 | NC_000010.10 |
| cg08452327 | 1.79E-35 | 8.06E-39 | -1.65E+01 | 77.6389162 | -1.41E-01 | 128379171 | 128379294 | NC_000011.9  |
| cg12435551 | 1.82E-35 | 8.22E-39 | -1.65E+01 | 77.6194218 | -3.77E-01 | 118679290 | 118679413 | NC_000001.10 |
| cg11311352 | 1.87E-35 | 8.49E-39 | -1.65E+01 | 77.587425  | -3.09E-01 | 56058710  | 56058833  | NC_000019.9  |
| cg15244327 | 1.91E-35 | 8.75E-39 | -1.65E+01 | 77.5572306 | -2.97E-01 | 23021690  | 23021813  | NC_000008.10 |
| cg03311274 | 2.11E-35 | 9.75E-39 | -1.65E+01 | 77.4498924 | -2.27E-01 | 58624344  | 58624467  | NC_000015.9  |
| cg07474842 | 2.26E-35 | 1.05E-38 | -1.64E+01 | 77.3762758 | -4.06E-01 | 136915088 | 136915211 | NC_000006.11 |

|            |          |          |           |            |           |           |           |              |
|------------|----------|----------|-----------|------------|-----------|-----------|-----------|--------------|
| cg06788267 | 2.48E-35 | 1.17E-38 | -1.64E+01 | 77.2677762 | -3.53E-01 | 95258162  | 95258285  | NC_000001.10 |
| cg26994377 | 2.66E-35 | 1.27E-38 | -1.64E+01 | 77.1868706 | -3.94E-01 | 140579069 | 140579192 | NC_000004.11 |
| cg14753356 | 2.72E-35 | 1.30E-38 | -1.64E+01 | 77.1619923 | -3.40E-01 | 30720108  | 30720231  | NC_000006.11 |
| cg14722693 | 2.97E-35 | 1.44E-38 | -1.64E+01 | 77.0636615 | -3.23E-01 | 19436451  | 19436574  | NC_000008.10 |
| cg01612140 | 3.45E-35 | 1.69E-38 | -1.64E+01 | 76.9036366 | -3.57E-01 | 78166436  | 78166559  | NC_000006.11 |
| cg20867963 | 3.71E-35 | 1.84E-38 | -1.64E+01 | 76.8169988 | -3.29E-01 | 3743529   | 3743652   | NC_000006.11 |
| cg01120308 | 4.06E-35 | 2.04E-38 | -1.63E+01 | 76.715993  | -2.48E-01 | 85780971  | 85781094  | NC_000011.9  |
| cg05929574 | 4.18E-35 | 2.11E-38 | -1.63E+01 | 76.6838251 | -1.01E-01 | 62611299  | 62611422  | NC_000020.10 |
| cg04794141 | 4.19E-35 | 2.12E-38 | -1.63E+01 | 76.6766417 | -3.10E-01 | 92325159  | 92325282  | NC_000014.8  |
| cg19924948 | 5.02E-35 | 2.56E-38 | -1.63E+01 | 76.4914968 | -2.50E-01 | 11970722  | 11970845  | NC_000002.11 |
| cg16353624 | 5.14E-35 | 2.63E-38 | -1.63E+01 | 76.4633832 | -2.27E-01 | 74160974  | 74161097  | NC_000006.11 |
| cg03821121 | 5.43E-35 | 2.81E-38 | -1.63E+01 | 76.3979993 | -3.58E-01 | 12148288  | 12148411  | NC_000011.9  |
| cg20968743 | 5.59E-35 | 2.91E-38 | -1.63E+01 | 76.3639829 | -3.76E-01 | 44883965  | 44884088  | NC_000011.9  |
| cg08035323 | 5.65E-35 | 2.95E-38 | -1.63E+01 | 76.3494459 | -1.79E-01 | 9843525   | 9843648   | NC_000002.11 |
| cg11303839 | 6.15E-35 | 3.25E-38 | -1.63E+01 | 76.2521508 | -4.44E-01 | 75405967  | 75406090  | NC_000007.13 |
| cg13052638 | 6.15E-35 | 3.26E-38 | -1.63E+01 | 76.2506483 | -3.89E-01 | 206677719 | 206677842 | NC_000001.10 |
| cg03254336 | 6.38E-35 | 3.39E-38 | -1.63E+01 | 76.2091941 | -3.03E-01 | 114635839 | 114635962 | NC_000010.10 |
| cg11122255 | 6.83E-35 | 3.67E-38 | -1.63E+01 | 76.1323726 | -3.08E-01 | 24995583  | 24995706  | NC_000010.10 |
| cg02693002 | 6.96E-35 | 3.75E-38 | -1.63E+01 | 76.109948  | -1.70E-01 | 126106594 | 126106717 | NC_000010.10 |
| cg11448683 | 7.03E-35 | 3.81E-38 | -1.63E+01 | 76.0947472 | -2.23E-01 | 45274099  | 45274222  | NC_000001.10 |
| cg10308629 | 7.98E-35 | 4.34E-38 | -1.62E+01 | 75.9640511 | -2.19E-01 | 134354803 | 134354926 | NC_000007.13 |
| cg07541559 | 8.69E-35 | 4.75E-38 | -1.62E+01 | 75.8754484 | -3.63E-01 | 34288225  | 34288348  | NC_000011.9  |
| cg06508783 | 8.77E-35 | 4.82E-38 | -1.62E+01 | 75.8611274 | -2.10E-01 | 50275446  | 50275569  | NC_000003.11 |
| cg17491456 | 1.06E-34 | 5.91E-38 | -1.62E+01 | 75.6578418 | -2.28E-01 | 39424524  | 39424647  | NC_000005.9  |
| cg00516092 | 1.07E-34 | 5.99E-38 | -1.62E+01 | 75.6447363 | -2.79E-01 | 31177275  | 31177398  | NC_000020.10 |

|            |          |          |           |            |           |           |           |              |
|------------|----------|----------|-----------|------------|-----------|-----------|-----------|--------------|
| cg20873416 | 1.07E-34 | 6.03E-38 | -1.62E+01 | 75.6374395 | -2.83E-01 | 30737068  | 30737191  | NC_000006.11 |
| cg13106758 | 1.23E-34 | 6.97E-38 | -1.62E+01 | 75.493192  | -3.14E-01 | 101708575 | 101708698 | NC_000015.9  |
| cg01093786 | 1.32E-34 | 7.63E-38 | -1.62E+01 | 75.4033832 | -2.89E-01 | 96047698  | 96047821  | NC_000011.9  |
| cg25277632 | 1.32E-34 | 7.63E-38 | -1.62E+01 | 75.4032569 | -2.31E-01 | 14995476  | 14995599  | NC_000010.10 |
| cg23804620 | 1.40E-34 | 8.08E-38 | -1.61E+01 | 75.3466395 | -2.59E-01 | 6690894   | 6691017   | NC_000004.11 |
| cg06021088 | 1.44E-34 | 8.43E-38 | -1.61E+01 | 75.3045431 | -3.45E-01 | 127822551 | 127822674 | NC_000002.11 |
| cg23521140 | 1.46E-34 | 8.54E-38 | -1.61E+01 | 75.2919899 | -3.59E-01 | 37617601  | 37617724  | NC_000002.11 |
| cg07068735 | 1.46E-34 | 8.57E-38 | -1.61E+01 | 75.2877016 | -3.13E-01 | 63504871  | 63504994  | NC_000015.9  |
| cg00863099 | 1.49E-34 | 8.82E-38 | -1.61E+01 | 75.2593521 | -3.12E-01 | 87755371  | 87755494  | NC_000002.11 |
| cg17333973 | 1.71E-34 | 1.02E-37 | -1.61E+01 | 75.115545  | -2.51E-01 | 2847019   | 2847142   | NC_000011.9  |
| cg16865138 | 1.80E-34 | 1.08E-37 | -1.61E+01 | 75.0624301 | -2.43E-01 | 56732447  | 56732570  | NC_000012.11 |
| cg04821520 | 1.98E-34 | 1.19E-37 | -1.61E+01 | 74.9626348 | -3.12E-01 | 37525709  | 37525832  | NC_000011.9  |
| cg08823209 | 1.98E-34 | 1.20E-37 | -1.61E+01 | 74.9547475 | -2.86E-01 | 35611675  | 35611798  | NC_000019.9  |
| cg25766247 | 1.99E-34 | 1.21E-37 | -1.61E+01 | 74.9464888 | -2.00E-01 | 59714165  | 59714288  | NC_000008.10 |
| cg09803959 | 1.99E-34 | 1.21E-37 | -1.61E+01 | 74.9409446 | -3.43E-01 | 78865514  | 78865637  | NC_000017.10 |
| cg05903736 | 1.99E-34 | 1.22E-37 | -1.61E+01 | 74.9384502 | -3.47E-01 | 240197131 | 240197254 | NC_000002.11 |
| cg12810800 | 2.38E-34 | 1.48E-37 | -1.61E+01 | 74.7465698 | -2.94E-01 | 159788345 | 159788468 | NC_000002.11 |
| cg18886444 | 2.39E-34 | 1.49E-37 | -1.61E+01 | 74.7358697 | -2.45E-01 | 49378032  | 49378155  | NC_000003.11 |
| cg25856090 | 2.62E-34 | 1.66E-37 | -1.60E+01 | 74.6285445 | -3.68E-01 | 143028708 | 143028831 | NC_000007.13 |
| cg00830767 | 2.62E-34 | 1.67E-37 | -1.60E+01 | 74.6265623 | -2.11E-01 | 19098198  | 19098321  | NC_000016.9  |
| cg03813377 | 2.69E-34 | 1.73E-37 | -1.60E+01 | 74.5918582 | -2.21E-01 | 30737455  | 30737578  | NC_000006.11 |
| cg02064267 | 2.79E-34 | 1.79E-37 | -1.60E+01 | 74.5527321 | -2.43E-01 | 112220471 | 112220594 | NC_000010.10 |
| cg06586046 | 2.81E-34 | 1.81E-37 | -1.60E+01 | 74.5420559 | -2.63E-01 | 78038103  | 78038226  | NC_000017.10 |
| cg15391590 | 3.05E-34 | 1.99E-37 | -1.60E+01 | 74.4491126 | -4.33E-01 | 52913427  | 52913550  | NC_000006.11 |
| cg16215913 | 3.12E-34 | 2.04E-37 | -1.60E+01 | 74.4234852 | -3.58E-01 | 101942275 | 101942398 | NC_000004.11 |

|            |          |          |           |            |           |           |           |              |
|------------|----------|----------|-----------|------------|-----------|-----------|-----------|--------------|
| cg25874782 | 3.16E-34 | 2.08E-37 | -1.60E+01 | 74.4042033 | -3.68E-01 | 59508474  | 59508597  | NC_000008.10 |
| cg27132471 | 3.16E-34 | 2.09E-37 | -1.60E+01 | 74.4025196 | -3.74E-01 | 92613280  | 92613403  | NC_000015.9  |
| cg14606858 | 3.18E-34 | 2.11E-37 | -1.60E+01 | 74.3934556 | -3.36E-01 | 98871769  | 98871892  | NC_000007.13 |
| cg11935248 | 3.33E-34 | 2.22E-37 | -1.60E+01 | 74.340125  | -2.77E-01 | 4942483   | 4942606   | NC_000006.11 |
| cg14129735 | 3.33E-34 | 2.22E-37 | -1.60E+01 | 74.3391608 | -2.95E-01 | 30737007  | 30737130  | NC_000006.11 |
| cg04214938 | 3.39E-34 | 2.28E-37 | -1.60E+01 | 74.3138847 | -3.46E-01 | 119496171 | 119496294 | NC_000002.11 |
| cg06061086 | 3.39E-34 | 2.28E-37 | -1.60E+01 | 74.3134164 | -3.98E-01 | 41499640  | 41499763  | NC_000006.11 |
| cg13427748 | 3.65E-34 | 2.46E-37 | -1.60E+01 | 74.2373421 | -3.33E-01 | 70767649  | 70767772  | NC_000015.9  |
| cg03946324 | 3.65E-34 | 2.48E-37 | -1.60E+01 | 74.2317383 | -1.64E-01 | 14995581  | 14995704  | NC_000010.10 |
| cg26084949 | 3.79E-34 | 2.59E-37 | -1.60E+01 | 74.1873277 | -3.09E-01 | 75039090  | 75039213  | NC_000014.8  |
| cg14055655 | 4.50E-34 | 3.10E-37 | -1.60E+01 | 74.0074929 | -2.28E-01 | 50117794  | 50117917  | NC_000019.9  |
| cg21477985 | 4.65E-34 | 3.22E-37 | -1.59E+01 | 73.9709146 | -2.80E-01 | 56732427  | 56732550  | NC_000012.11 |
| cg21422164 | 4.80E-34 | 3.34E-37 | -1.59E+01 | 73.9347158 | -4.16E-01 | 114770148 | 114770271 | NC_000013.10 |
| cg20952257 | 4.96E-34 | 3.46E-37 | -1.59E+01 | 73.8990958 | -2.45E-01 | 171074407 | 171074530 | NC_000005.9  |
| cg00374672 | 5.08E-34 | 3.57E-37 | -1.59E+01 | 73.8679909 | -2.57E-01 | 100463416 | 100463539 | NC_000007.13 |
| cg08003402 | 5.78E-34 | 4.11E-37 | -1.59E+01 | 73.7295043 | -3.83E-01 | 15311021  | 15311144  | NC_000003.11 |
| cg01261503 | 5.85E-34 | 4.17E-37 | -1.59E+01 | 73.7139682 | -1.61E-01 | 62493599  | 62493722  | NC_000017.10 |
| cg23841186 | 5.92E-34 | 4.24E-37 | -1.59E+01 | 73.698751  | -3.38E-01 | 53492662  | 53492785  | NC_000012.11 |
| cg03800922 | 6.36E-34 | 4.57E-37 | -1.59E+01 | 73.6230074 | -2.58E-01 | 74290220  | 74290343  | NC_000006.11 |
| cg04465078 | 6.36E-34 | 4.59E-37 | -1.59E+01 | 73.6196597 | -3.08E-01 | 15766942  | 15767065  | NC_000016.9  |
| cg09889848 | 6.76E-34 | 4.89E-37 | -1.59E+01 | 73.5558862 | -2.50E-01 | 370009    | 370132    | NC_000010.10 |
| cg19730972 | 6.76E-34 | 4.90E-37 | -1.59E+01 | 73.5528106 | -2.31E-01 | 102176671 | 102176794 | NC_000014.8  |
| cg07493562 | 6.80E-34 | 4.95E-37 | -1.59E+01 | 73.5433111 | -2.99E-01 | 78244468  | 78244591  | NC_000016.9  |
| cg10880902 | 6.88E-34 | 5.03E-37 | -1.59E+01 | 73.5273216 | -2.54E-01 | 59278781  | 59278904  | NC_000001.10 |
| cg08549335 | 6.88E-34 | 5.04E-37 | -1.59E+01 | 73.524735  | -4.23E-01 | 30387954  | 30388077  | NC_000007.13 |

|            |          |          |           |            |           |           |           |              |
|------------|----------|----------|-----------|------------|-----------|-----------|-----------|--------------|
| cg07094298 | 7.05E-34 | 5.18E-37 | -1.59E+01 | 73.4974549 | -2.72E-01 | 2748026   | 2748149   | NC_000004.11 |
| cg18388547 | 7.64E-34 | 5.66E-37 | -1.59E+01 | 73.4110195 | -3.25E-01 | 35513161  | 35513284  | NC_000001.10 |
| cg10907912 | 8.30E-34 | 6.17E-37 | -1.59E+01 | 73.3248118 | -4.11E-01 | 197024904 | 197025027 | NC_000002.11 |
| cg14102437 | 8.45E-34 | 6.31E-37 | -1.59E+01 | 73.3024317 | -3.18E-01 | 33359688  | 33359811  | NC_000002.11 |
| cg10466548 | 8.45E-34 | 6.32E-37 | -1.59E+01 | 73.3003528 | -2.77E-01 | 10965217  | 10965340  | NC_000016.9  |
| cg09502149 | 8.57E-34 | 6.43E-37 | -1.58E+01 | 73.2834186 | -2.78E-01 | 43406792  | 43406915  | NC_000001.10 |
| cg07382998 | 9.14E-34 | 6.88E-37 | -1.58E+01 | 73.2162706 | -2.59E-01 | 76880071  | 76880194  | NC_000017.10 |
| cg06422467 | 9.16E-34 | 6.92E-37 | -1.58E+01 | 73.2102281 | -3.11E-01 | 30720484  | 30720607  | NC_000006.11 |
| cg26788216 | 9.44E-34 | 7.15E-37 | -1.58E+01 | 73.1773723 | -2.94E-01 | 102844110 | 102844233 | NC_000002.11 |
| cg16102739 | 9.45E-34 | 7.18E-37 | -1.58E+01 | 73.1733025 | -2.86E-01 | 9224376   | 9224499   | NC_000001.10 |
| cg04279411 | 9.48E-34 | 7.23E-37 | -1.58E+01 | 73.1664382 | -3.44E-01 | 230645569 | 230645692 | NC_000001.10 |
| cg09015280 | 9.81E-34 | 7.51E-37 | -1.58E+01 | 73.1291136 | -3.56E-01 | 80623161  | 80623284  | NC_000013.10 |
| cg18424091 | 1.01E-33 | 7.73E-37 | -1.58E+01 | 73.0999586 | -1.94E-01 | 31781814  | 31781937  | NC_000006.11 |
| cg15453708 | 1.04E-33 | 8.07E-37 | -1.58E+01 | 73.0572166 | -2.71E-01 | 151493647 | 151493770 | NC_000007.13 |
| cg14665413 | 1.07E-33 | 8.28E-37 | -1.58E+01 | 73.0316378 | -2.77E-01 | 38859728  | 38859851  | NC_000004.11 |
| cg23731089 | 1.10E-33 | 8.60E-37 | -1.58E+01 | 72.9943885 | -3.30E-01 | 141599208 | 141599331 | NC_000008.10 |
| cg20297199 | 1.16E-33 | 9.10E-37 | -1.58E+01 | 72.9380727 | -1.15E-01 | 54422775  | 54422898  | NC_000014.8  |
| cg03577157 | 1.24E-33 | 9.82E-37 | -1.58E+01 | 72.8621651 | -3.81E-01 | 80716263  | 80716386  | NC_000005.9  |
| cg24921221 | 1.33E-33 | 1.06E-36 | -1.58E+01 | 72.785405  | -2.78E-01 | 12584192  | 12584315  | NC_000008.10 |
| cg05870586 | 1.34E-33 | 1.07E-36 | -1.58E+01 | 72.7749657 | -3.42E-01 | 240196769 | 240196892 | NC_000002.11 |
| cg04894537 | 1.53E-33 | 1.23E-36 | -1.58E+01 | 72.6358432 | -3.41E-01 | 2763171   | 2763294   | NC_000011.9  |
| cg11542784 | 1.62E-33 | 1.32E-36 | -1.57E+01 | 72.5700135 | -2.20E-01 | 29316633  | 29316756  | NC_000008.10 |
| cg11006453 | 1.86E-33 | 1.52E-36 | -1.57E+01 | 72.4257115 | -3.50E-01 | 141599185 | 141599308 | NC_000008.10 |
| cg27033479 | 2.21E-33 | 1.83E-36 | -1.57E+01 | 72.2448409 | -1.75E-01 | 194353554 | 194353677 | NC_000003.11 |
| cg02836864 | 2.31E-33 | 1.91E-36 | -1.57E+01 | 72.198986  | -2.44E-01 | 113388910 | 113389033 | NC_000002.11 |

|            |          |          |           |            |           |           |           |              |
|------------|----------|----------|-----------|------------|-----------|-----------|-----------|--------------|
| cg11554335 | 2.40E-33 | 2.00E-36 | -1.57E+01 | 72.156976  | -2.79E-01 | 57336941  | 57337064  | NC_000011.9  |
| cg09782560 | 2.50E-33 | 2.08E-36 | -1.57E+01 | 72.1135694 | -3.30E-01 | 92058845  | 92058968  | NC_000015.9  |
| cg24327132 | 2.76E-33 | 2.32E-36 | -1.57E+01 | 72.0075853 | -3.12E-01 | 72520632  | 72520755  | NC_000015.9  |
| cg20450123 | 2.79E-33 | 2.35E-36 | -1.57E+01 | 71.9925627 | -3.07E-01 | 19540210  | 19540333  | NC_000008.10 |
| cg20045394 | 2.85E-33 | 2.40E-36 | -1.57E+01 | 71.9718599 | -2.87E-01 | 36184576  | 36184699  | NC_000017.10 |
| cg06713116 | 3.10E-33 | 2.65E-36 | -1.56E+01 | 71.873539  | -1.29E-01 | 154720452 | 154720575 | NC_000007.13 |
| cg07007400 | 3.11E-33 | 2.67E-36 | -1.56E+01 | 71.8677154 | -2.11E-01 | 52626831  | 52626954  | NC_000012.11 |
| cg05101437 | 3.46E-33 | 2.97E-36 | -1.56E+01 | 71.7602    | -3.28E-01 | 92262970  | 92263093  | NC_000007.13 |
| cg13485320 | 3.87E-33 | 3.35E-36 | -1.56E+01 | 71.6428364 | -2.55E-01 | 2920128   | 2920251   | NC_000011.9  |
| cg23019886 | 4.03E-33 | 3.49E-36 | -1.56E+01 | 71.5995361 | -3.82E-01 | 6277045   | 6277168   | NC_000012.11 |
| cg00068038 | 4.20E-33 | 3.65E-36 | -1.56E+01 | 71.556091  | -3.00E-01 | 36688564  | 36688687  | NC_000002.11 |
| cg09522147 | 4.23E-33 | 3.69E-36 | -1.56E+01 | 71.5460644 | -2.69E-01 | 52627342  | 52627465  | NC_000012.11 |
| cg17922998 | 4.39E-33 | 3.86E-36 | -1.56E+01 | 71.5008498 | -3.88E-01 | 61863697  | 61863820  | NC_000008.10 |
| cg25349820 | 4.84E-33 | 4.28E-36 | -1.56E+01 | 71.3975318 | -2.70E-01 | 25346354  | 25346477  | NC_000022.10 |
| cg23575688 | 5.04E-33 | 4.47E-36 | -1.56E+01 | 71.353931  | -3.14E-01 | 119486443 | 119486566 | NC_000011.9  |
| cg12711814 | 5.06E-33 | 4.51E-36 | -1.56E+01 | 71.346955  | -1.37E-01 | 8939529   | 8939652   | NC_000001.10 |
| cg13563026 | 5.09E-33 | 4.54E-36 | -1.56E+01 | 71.339224  | -2.33E-01 | 47512538  | 47512661  | NC_000004.11 |
| cg00950718 | 5.36E-33 | 4.79E-36 | -1.56E+01 | 71.2855491 | -2.72E-01 | 159859904 | 159860027 | NC_000001.10 |
| cg03429644 | 5.53E-33 | 4.98E-36 | -1.56E+01 | 71.2480934 | -2.25E-01 | 9252446   | 9252569   | NC_000002.11 |
| cg07551060 | 5.66E-33 | 5.10E-36 | -1.56E+01 | 71.2234505 | -4.10E-01 | 121075316 | 121075439 | NC_000010.10 |
| cg12864389 | 5.81E-33 | 5.27E-36 | -1.55E+01 | 71.1909376 | -3.49E-01 | 145025178 | 145025301 | NC_000008.10 |
| cg13921921 | 6.06E-33 | 5.51E-36 | -1.55E+01 | 71.1469863 | -2.95E-01 | 155931763 | 155931886 | NC_000001.10 |
| cg22047295 | 6.21E-33 | 5.66E-36 | -1.55E+01 | 71.1194575 | -4.13E-01 | 175462522 | 175462645 | NC_000002.11 |
| cg10018519 | 6.28E-33 | 5.74E-36 | -1.55E+01 | 71.1054578 | -1.60E-01 | 11970078  | 11970201  | NC_000002.11 |
| cg01464985 | 6.50E-33 | 5.96E-36 | -1.55E+01 | 71.0693542 | -2.06E-01 | 27805622  | 27805745  | NC_000002.11 |



|            |          |          |           |            |           |           |           |              |
|------------|----------|----------|-----------|------------|-----------|-----------|-----------|--------------|
| cg20445035 | 6.61E-33 | 6.08E-36 | -1.55E+01 | 71.0484891 | -1.15E-01 | 44174593  | 44174716  | NC_000019.9  |
| cg24966363 | 6.61E-33 | 6.09E-36 | -1.55E+01 | 71.0465894 | -2.57E-01 | 8932588   | 8932711   | NC_000008.10 |
| cg19084031 | 6.98E-33 | 6.46E-36 | -1.55E+01 | 70.9877098 | -2.92E-01 | 38361362  | 38361485  | NC_000015.9  |
| cg20003368 | 7.18E-33 | 6.67E-36 | -1.55E+01 | 70.9563056 | -3.35E-01 | 44026475  | 44026598  | NC_000006.11 |
| cg03989617 | 7.23E-33 | 6.74E-36 | -1.55E+01 | 70.9468029 | -2.98E-01 | 57662541  | 57662664  | NC_000016.9  |
| cg03081478 | 7.26E-33 | 6.78E-36 | -1.55E+01 | 70.9398123 | -2.96E-01 | 2773127   | 2773250   | NC_000007.13 |
| cg04663487 | 7.58E-33 | 7.10E-36 | -1.55E+01 | 70.8943566 | -2.24E-01 | 115670804 | 115670927 | NC_000007.13 |
| cg11461670 | 7.91E-33 | 7.44E-36 | -1.55E+01 | 70.8481199 | -2.46E-01 | 22454935  | 22455058  | NC_000008.10 |
| cg17943323 | 8.09E-33 | 7.66E-36 | -1.55E+01 | 70.8189495 | -3.06E-01 | 203876248 | 203876371 | NC_000001.10 |
| cg19257864 | 8.09E-33 | 7.66E-36 | -1.55E+01 | 70.8187088 | -1.90E-01 | 155211736 | 155211859 | NC_000001.10 |
| cg20326647 | 8.38E-33 | 7.98E-36 | -1.55E+01 | 70.7788275 | -3.47E-01 | 144820709 | 144820832 | NC_000008.10 |
| cg14931884 | 9.48E-33 | 9.10E-36 | -1.55E+01 | 70.6480768 | -3.38E-01 | 369977    | 370100    | NC_000010.10 |
| cg25388800 | 9.52E-33 | 9.15E-36 | -1.55E+01 | 70.6416507 | -4.27E-01 | 137990243 | 137990366 | NC_000005.9  |
| cg14205864 | 9.81E-33 | 9.45E-36 | -1.55E+01 | 70.6096719 | -3.53E-01 | 113841719 | 113841842 | NC_000013.10 |
| cg11118962 | 1.06E-32 | 1.02E-35 | -1.55E+01 | 70.5305091 | -2.52E-01 | 171685460 | 171685583 | NC_000003.11 |
| cg12053155 | 1.08E-32 | 1.04E-35 | -1.54E+01 | 70.5101683 | -1.59E-01 | 107186476 | 107186599 | NC_000013.10 |
| cg15156975 | 1.12E-32 | 1.09E-35 | -1.54E+01 | 70.4688859 | -1.48E-01 | 43449055  | 43449178  | NC_000017.10 |
| cg16277214 | 1.16E-32 | 1.13E-35 | -1.54E+01 | 70.4326158 | -2.85E-01 | 32434339  | 32434462  | NC_000003.11 |
| cg19262282 | 1.30E-32 | 1.27E-35 | -1.54E+01 | 70.3159198 | -3.19E-01 | 40923249  | 40923372  | NC_000019.9  |
| cg06747543 | 1.42E-32 | 1.40E-35 | -1.54E+01 | 70.2217559 | -2.81E-01 | 18589894  | 18590017  | NC_000019.9  |
| cg00446414 | 1.43E-32 | 1.41E-35 | -1.54E+01 | 70.2143323 | -3.53E-01 | 29387350  | 29387473  | NC_000008.10 |
| cg26673980 | 1.49E-32 | 1.47E-35 | -1.54E+01 | 70.1710273 | -2.82E-01 | 151493820 | 151493943 | NC_000007.13 |
| cg16210842 | 1.52E-32 | 1.51E-35 | -1.54E+01 | 70.1428414 | -3.39E-01 | 139511585 | 139511708 | NC_000005.9  |
| cg04943879 | 1.53E-32 | 1.52E-35 | -1.54E+01 | 70.1402414 | -2.76E-01 | 12609705  | 12609828  | NC_000001.10 |
| cg20740711 | 1.62E-32 | 1.62E-35 | -1.54E+01 | 70.0748369 | -2.75E-01 | 113450279 | 113450402 | NC_000002.11 |

|            |          |          |           |            |           |           |           |              |
|------------|----------|----------|-----------|------------|-----------|-----------|-----------|--------------|
| cg00980058 | 1.64E-32 | 1.65E-35 | -1.54E+01 | 70.0574197 | -3.38E-01 | 233248709 | 233248832 | NC_000001.10 |
| cg06769820 | 1.65E-32 | 1.66E-35 | -1.54E+01 | 70.0506226 | -2.61E-01 | 54554571  | 54554694  | NC_000004.11 |
| cg19852660 | 1.67E-32 | 1.68E-35 | -1.54E+01 | 70.0367757 | -2.39E-01 | 2846681   | 2846804   | NC_000011.9  |
| cg26800803 | 1.81E-32 | 1.83E-35 | -1.54E+01 | 69.9515855 | -1.91E-01 | 4765095   | 4765218   | NC_000007.13 |
| cg10460033 | 1.89E-32 | 1.92E-35 | -1.54E+01 | 69.9035249 | -2.41E-01 | 13894328  | 13894451  | NC_000003.11 |
| cg08005122 | 1.90E-32 | 1.94E-35 | -1.54E+01 | 69.8945192 | -1.59E-01 | 110779637 | 110779760 | NC_000011.9  |
| cg05259836 | 1.92E-32 | 1.96E-35 | -1.54E+01 | 69.8823913 | -2.93E-01 | 74290516  | 74290639  | NC_000006.11 |
| cg07960624 | 1.94E-32 | 1.99E-35 | -1.54E+01 | 69.8710452 | -3.73E-01 | 119208486 | 119208609 | NC_000008.10 |
| cg01265860 | 1.96E-32 | 2.01E-35 | -1.54E+01 | 69.8606033 | -3.28E-01 | 36256316  | 36256439  | NC_000021.8  |
| cg00294382 | 1.97E-32 | 2.03E-35 | -1.54E+01 | 69.848857  | -2.68E-01 | 56732721  | 56732844  | NC_000012.11 |
| cg15809077 | 2.18E-32 | 2.25E-35 | -1.53E+01 | 69.7467394 | -2.59E-01 | 112462079 | 112462202 | NC_000002.11 |
| cg19630689 | 2.21E-32 | 2.29E-35 | -1.53E+01 | 69.7282205 | -2.33E-01 | 94984381  | 94984504  | NC_000014.8  |
| cg15787146 | 2.31E-32 | 2.40E-35 | -1.53E+01 | 69.6813266 | -3.02E-01 | 70107185  | 70107308  | NC_000017.10 |
| cg19913563 | 2.31E-32 | 2.41E-35 | -1.53E+01 | 69.6782016 | -2.92E-01 | 30720261  | 30720384  | NC_000006.11 |
| cg10893986 | 2.31E-32 | 2.42E-35 | -1.53E+01 | 69.6759081 | -3.40E-01 | 3229739   | 3229862   | NC_000001.10 |
| cg22610620 | 2.34E-32 | 2.46E-35 | -1.53E+01 | 69.6589301 | -2.78E-01 | 77524487  | 77524610  | NC_000010.10 |
| cg07925587 | 2.38E-32 | 2.51E-35 | -1.53E+01 | 69.6400856 | -2.98E-01 | 52583324  | 52583447  | NC_000012.11 |
| cg08998657 | 2.43E-32 | 2.58E-35 | -1.53E+01 | 69.6127343 | -3.28E-01 | 46893929  | 46894052  | NC_000016.9  |
| cg25063165 | 2.43E-32 | 2.58E-35 | -1.53E+01 | 69.6099724 | -2.19E-01 | 30737436  | 30737559  | NC_000006.11 |
| cg09730500 | 2.59E-32 | 2.76E-35 | -1.53E+01 | 69.5426552 | -2.90E-01 | 57662690  | 57662813  | NC_000016.9  |
| cg03495084 | 2.71E-32 | 2.90E-35 | -1.53E+01 | 69.495881  | -3.16E-01 | 15311154  | 15311277  | NC_000003.11 |
| cg02898159 | 2.79E-32 | 2.99E-35 | -1.53E+01 | 69.4628258 | -2.66E-01 | 5346237   | 5346360   | NC_000019.9  |
| cg14434062 | 2.79E-32 | 3.01E-35 | -1.53E+01 | 69.4592003 | -3.17E-01 | 70767419  | 70767542  | NC_000015.9  |
| cg14255824 | 2.82E-32 | 3.04E-35 | -1.53E+01 | 69.4485514 | -3.13E-01 | 71795999  | 71796122  | NC_000009.11 |
| cg16476991 | 2.88E-32 | 3.11E-35 | -1.53E+01 | 69.4241287 | -3.45E-01 | 114831404 | 114831527 | NC_000013.10 |

|            |          |          |           |            |           |           |           |              |
|------------|----------|----------|-----------|------------|-----------|-----------|-----------|--------------|
| cg04177251 | 3.55E-32 | 3.85E-35 | -1.53E+01 | 69.2130558 | -3.19E-01 | 8193123   | 8193246   | NC_000004.11 |
| cg16137928 | 3.59E-32 | 3.90E-35 | -1.53E+01 | 69.1993298 | -3.17E-01 | 30720491  | 30720614  | NC_000006.11 |
| cg11229273 | 3.61E-32 | 3.94E-35 | -1.53E+01 | 69.1905261 | -3.85E-01 | 57015101  | 57015224  | NC_000003.11 |
| cg16929739 | 3.61E-32 | 3.95E-35 | -1.53E+01 | 69.1879678 | -3.54E-01 | 11178593  | 11178716  | NC_000003.11 |
| cg22813430 | 3.80E-32 | 4.17E-35 | -1.53E+01 | 69.1333032 | -2.28E-01 | 52626427  | 52626550  | NC_000012.11 |
| cg24970181 | 3.83E-32 | 4.21E-35 | -1.53E+01 | 69.1239303 | -1.72E-01 | 56716884  | 56717007  | NC_000006.11 |
| cg15867307 | 4.05E-32 | 4.47E-35 | -1.52E+01 | 69.0638776 | -3.41E-01 | 238110829 | 238110952 | NC_000002.11 |
| cg17654419 | 4.11E-32 | 4.56E-35 | -1.52E+01 | 69.0455057 | -3.25E-01 | 102012904 | 102013027 | NC_000002.11 |
| cg03731202 | 4.11E-32 | 4.56E-35 | -1.52E+01 | 69.0444529 | -3.06E-01 | 36574795  | 36574918  | NC_000001.10 |
| cg08446038 | 4.11E-32 | 4.57E-35 | -1.52E+01 | 69.0431977 | -3.29E-01 | 52327649  | 52327772  | NC_000005.9  |
| cg02413040 | 4.17E-32 | 4.64E-35 | -1.52E+01 | 69.0272865 | -2.72E-01 | 36419648  | 36419771  | NC_000021.8  |
| cg16245261 | 4.41E-32 | 4.92E-35 | -1.52E+01 | 68.9687993 | -2.84E-01 | 6342357   | 6342480   | NC_000011.9  |
| cg19764555 | 4.64E-32 | 5.20E-35 | -1.52E+01 | 68.9146438 | -1.78E-01 | 62315119  | 62315242  | NC_000011.9  |
| cg06780032 | 4.66E-32 | 5.25E-35 | -1.52E+01 | 68.9036882 | -2.95E-01 | 8272277   | 8272400   | NC_000001.10 |
| cg02104162 | 5.18E-32 | 5.87E-35 | -1.52E+01 | 68.793967  | -2.81E-01 | 4610716   | 4610839   | NC_000006.11 |
| cg17318719 | 5.18E-32 | 5.87E-35 | -1.52E+01 | 68.793451  | -2.99E-01 | 117959349 | 117959472 | NC_000011.9  |
| cg21499869 | 5.48E-32 | 6.25E-35 | -1.52E+01 | 68.7307982 | -2.85E-01 | 18589848  | 18589971  | NC_000019.9  |
| cg20369204 | 5.52E-32 | 6.31E-35 | -1.52E+01 | 68.7210008 | -1.10E-01 | 92053404  | 92053527  | NC_000008.10 |
| cg11993173 | 5.58E-32 | 6.39E-35 | -1.52E+01 | 68.7091103 | -3.41E-01 | 54857695  | 54857818  | NC_000008.10 |
| cg05646575 | 5.65E-32 | 6.50E-35 | -1.52E+01 | 68.6913622 | -3.29E-01 | 132221835 | 132221958 | NC_000012.11 |
| cg24540678 | 5.65E-32 | 6.50E-35 | -1.52E+01 | 68.6913065 | -2.33E-01 | 28258603  | 28258726  | NC_000008.10 |
| cg04605590 | 5.74E-32 | 6.61E-35 | -1.52E+01 | 68.6749851 | -3.34E-01 | 148185121 | 148185244 | NC_000005.9  |
| cg10576245 | 5.78E-32 | 6.68E-35 | -1.52E+01 | 68.664885  | -3.88E-01 | 233249267 | 233249390 | NC_000001.10 |
| cg23138413 | 5.80E-32 | 6.72E-35 | -1.52E+01 | 68.6589172 | -2.78E-01 | 49320596  | 49320719  | NC_000008.10 |
| cg02396676 | 5.86E-32 | 6.80E-35 | -1.52E+01 | 68.6473816 | -1.63E-01 | 45067564  | 45067687  | NC_000003.11 |

|            |          |          |           |            |           |           |           |              |
|------------|----------|----------|-----------|------------|-----------|-----------|-----------|--------------|
| cg08487215 | 5.87E-32 | 6.82E-35 | -1.52E+01 | 68.6437931 | -1.43E-01 | 83018422  | 83018545  | NC_000005.9  |
| cg07078958 | 6.03E-32 | 7.03E-35 | -1.52E+01 | 68.6141774 | -3.95E-01 | 15311183  | 15311306  | NC_000003.11 |
| cg21145938 | 6.88E-32 | 8.05E-35 | -1.52E+01 | 68.4796905 | -1.57E-01 | 38795218  | 38795341  | NC_000008.10 |
| cg14088282 | 6.92E-32 | 8.11E-35 | -1.52E+01 | 68.4718409 | -3.96E-01 | 222003220 | 222003343 | NC_000001.10 |
| cg01553231 | 6.92E-32 | 8.13E-35 | -1.52E+01 | 68.4690808 | -3.30E-01 | 141072866 | 141072989 | NC_000005.9  |
| cg24727480 | 7.08E-32 | 8.34E-35 | -1.52E+01 | 68.4440276 | -2.62E-01 | 109901083 | 109901206 | NC_000012.11 |
| cg18458509 | 7.40E-32 | 8.73E-35 | -1.51E+01 | 68.3984066 | -3.52E-01 | 2920189   | 2920312   | NC_000011.9  |
| cg27109748 | 7.57E-32 | 8.95E-35 | -1.51E+01 | 68.3737517 | -3.23E-01 | 2150016   | 2150139   | NC_000007.13 |
| cg04863713 | 8.12E-32 | 9.62E-35 | -1.51E+01 | 68.3017398 | -9.71E-02 | 150521201 | 150521324 | NC_000001.10 |
| cg14475840 | 8.14E-32 | 9.66E-35 | -1.51E+01 | 68.2977946 | -2.48E-01 | 103191817 | 103191940 | NC_000009.11 |
| cg20618695 | 8.24E-32 | 9.80E-35 | -1.51E+01 | 68.2835479 | -2.91E-01 | 13251495  | 13251618  | NC_000012.11 |
| cg03335216 | 8.26E-32 | 9.85E-35 | -1.51E+01 | 68.2786659 | -8.26E-02 | 8086776   | 8086899   | NC_000001.10 |
| cg13794404 | 8.88E-32 | 1.06E-34 | -1.51E+01 | 68.201889  | -2.53E-01 | 126816959 | 126817082 | NC_000009.11 |
| cg25518868 | 9.03E-32 | 1.08E-34 | -1.51E+01 | 68.1840736 | -3.17E-01 | 140984057 | 140984180 | NC_000005.9  |
| cg21936552 | 9.12E-32 | 1.10E-34 | -1.51E+01 | 68.1716178 | -2.92E-01 | 79386428  | 79386551  | NC_000017.10 |
| cg24178897 | 9.14E-32 | 1.10E-34 | -1.51E+01 | 68.1654314 | -3.38E-01 | 69170010  | 69170133  | NC_000014.8  |
| cg06114334 | 9.18E-32 | 1.11E-34 | -1.51E+01 | 68.1592109 | -4.16E-01 | 154997361 | 154997484 | NC_000007.13 |
| cg27628707 | 9.35E-32 | 1.13E-34 | -1.51E+01 | 68.1383041 | -2.95E-01 | 31727289  | 31727412  | NC_000015.9  |
| cg07634959 | 9.46E-32 | 1.15E-34 | -1.51E+01 | 68.1227167 | -1.25E-01 | 114901187 | 114901310 | NC_000004.11 |
| cg10523105 | 9.48E-32 | 1.16E-34 | -1.51E+01 | 68.1192728 | -3.98E-01 | 74178976  | 74179099  | NC_000014.8  |
| cg21197336 | 9.62E-32 | 1.18E-34 | -1.51E+01 | 68.1023295 | -3.61E-01 | 193587490 | 193587613 | NC_000003.11 |
| cg27461254 | 9.79E-32 | 1.20E-34 | -1.51E+01 | 68.0828486 | -3.29E-01 | 39135472  | 39135595  | NC_000020.10 |
| cg07220152 | 9.84E-32 | 1.21E-34 | -1.51E+01 | 68.0761431 | -2.47E-01 | 30737270  | 30737393  | NC_000006.11 |
| cg01378159 | 9.86E-32 | 1.21E-34 | -1.51E+01 | 68.0718973 | -1.84E-01 | 37703496  | 37703619  | NC_000022.10 |
| cg27092248 | 9.90E-32 | 1.22E-34 | -1.51E+01 | 68.0660094 | -3.29E-01 | 11178798  | 11178921  | NC_000003.11 |

|            |          |          |           |            |           |           |           |              |
|------------|----------|----------|-----------|------------|-----------|-----------|-----------|--------------|
| cg14271665 | 9.92E-32 | 1.22E-34 | -1.51E+01 | 68.0618353 | -1.83E-01 | 1370768   | 1370891   | NC_000001.10 |
| cg26082814 | 1.00E-31 | 1.24E-34 | -1.51E+01 | 68.0479043 | -3.26E-01 | 114065777 | 114065900 | NC_000013.10 |
| cg07727594 | 1.01E-31 | 1.25E-34 | -1.51E+01 | 68.0405302 | -2.89E-01 | 45187423  | 45187546  | NC_000020.10 |
| cg19724667 | 1.04E-31 | 1.29E-34 | -1.51E+01 | 68.006703  | -1.59E-01 | 190204073 | 190204196 | NC_000003.11 |
| cg23255964 | 1.04E-31 | 1.30E-34 | -1.51E+01 | 68.0060869 | -2.83E-01 | 138862353 | 138862476 | NC_000005.9  |
| cg05178291 | 1.08E-31 | 1.34E-34 | -1.51E+01 | 67.9705024 | -1.51E-01 | 18287689  | 18287812  | NC_000011.9  |
| cg27469037 | 1.11E-31 | 1.39E-34 | -1.51E+01 | 67.9366658 | -1.34E-01 | 29172906  | 29173029  | NC_000008.10 |
| cg20327845 | 1.15E-31 | 1.44E-34 | -1.51E+01 | 67.9030563 | -2.85E-01 | 3138418   | 3138541   | NC_000010.10 |
| cg04495354 | 1.16E-31 | 1.46E-34 | -1.51E+01 | 67.8843533 | -3.20E-01 | 57294356  | 57294479  | NC_000016.9  |
| cg00883329 | 1.18E-31 | 1.49E-34 | -1.51E+01 | 67.8674301 | -1.17E-01 | 54422411  | 54422534  | NC_000014.8  |
| cg12534147 | 1.20E-31 | 1.52E-34 | -1.51E+01 | 67.8466125 | -4.14E-01 | 54040362  | 54040485  | NC_000005.9  |
| cg02577773 | 1.23E-31 | 1.56E-34 | -1.51E+01 | 67.8223422 | -3.03E-01 | 208027870 | 208027993 | NC_000002.11 |
| cg23939096 | 1.24E-31 | 1.58E-34 | -1.51E+01 | 67.8077543 | -3.06E-01 | 1555791   | 1555914   | NC_000005.9  |
| cg15992347 | 1.29E-31 | 1.65E-34 | -1.51E+01 | 67.7641388 | -2.20E-01 | 85565475  | 85565598  | NC_000011.9  |
| cg17279359 | 1.32E-31 | 1.70E-34 | -1.51E+01 | 67.7366643 | -1.50E-01 | 17565744  | 17565867  | NC_000011.9  |
| cg10624860 | 1.45E-31 | 1.88E-34 | -1.50E+01 | 67.6370786 | -1.98E-01 | 75945841  | 75945964  | NC_000011.9  |
| cg21156590 | 1.51E-31 | 1.96E-34 | -1.50E+01 | 67.5950411 | -2.47E-01 | 3420848   | 3420971   | NC_000001.10 |
| cg06728055 | 1.53E-31 | 1.98E-34 | -1.50E+01 | 67.5826548 | -3.32E-01 | 149294286 | 149294409 | NC_000003.11 |
| cg06802985 | 1.53E-31 | 2.00E-34 | -1.50E+01 | 67.5764614 | -1.89E-01 | 179341359 | 179341482 | NC_000005.9  |
| cg22027204 | 1.54E-31 | 2.01E-34 | -1.50E+01 | 67.5673202 | -3.55E-01 | 36216248  | 36216371  | NC_000006.11 |
| cg19239199 | 1.55E-31 | 2.02E-34 | -1.50E+01 | 67.5627363 | -3.94E-01 | 852714    | 852837    | NC_000007.13 |
| cg13239301 | 1.57E-31 | 2.06E-34 | -1.50E+01 | 67.5451441 | -1.43E-01 | 19739772  | 19739895  | NC_000020.10 |
| cg16946439 | 1.63E-31 | 2.15E-34 | -1.50E+01 | 67.5021198 | -1.05E-01 | 12131814  | 12131937  | NC_000011.9  |
| cg22895231 | 1.63E-31 | 2.15E-34 | -1.50E+01 | 67.5010742 | -1.38E-01 | 45311868  | 45311991  | NC_000019.9  |
| cg01710189 | 1.64E-31 | 2.17E-34 | -1.50E+01 | 67.4914335 | -2.92E-01 | 22454888  | 22455011  | NC_000008.10 |

|            |          |          |           |            |           |           |           |              |
|------------|----------|----------|-----------|------------|-----------|-----------|-----------|--------------|
| cg16647844 | 1.69E-31 | 2.24E-34 | -1.50E+01 | 67.4603397 | -2.67E-01 | 232903627 | 232903750 | NC_000001.10 |
| cg09862950 | 1.72E-31 | 2.28E-34 | -1.50E+01 | 67.4444053 | -1.29E-01 | 132275639 | 132275762 | NC_000006.11 |
| cg01637090 | 2.03E-31 | 2.73E-34 | -1.50E+01 | 67.2629891 | -2.50E-01 | 1213672   | 1213795   | NC_000016.9  |
| cg15035705 | 2.03E-31 | 2.74E-34 | -1.50E+01 | 67.2619323 | -1.81E-01 | 179159291 | 179159414 | NC_000005.9  |
| cg00766914 | 2.09E-31 | 2.82E-34 | -1.50E+01 | 67.2317733 | -8.82E-02 | 107781299 | 107781422 | NC_000006.11 |
| cg06401414 | 2.13E-31 | 2.88E-34 | -1.50E+01 | 67.2099747 | -2.38E-01 | 141599436 | 141599559 | NC_000008.10 |
| cg20518446 | 2.13E-31 | 2.89E-34 | -1.50E+01 | 67.2095492 | -3.85E-01 | 62315034  | 62315157  | NC_000011.9  |
| cg01652514 | 2.18E-31 | 2.96E-34 | -1.50E+01 | 67.182674  | -3.00E-01 | 114831142 | 114831265 | NC_000013.10 |
| cg03663556 | 2.20E-31 | 2.99E-34 | -1.50E+01 | 67.1731531 | -3.40E-01 | 50900556  | 50900679  | NC_000007.13 |
| cg04387396 | 2.22E-31 | 3.03E-34 | -1.50E+01 | 67.1617555 | -2.74E-01 | 72593165  | 72593288  | NC_000010.10 |
| cg10087172 | 2.26E-31 | 3.09E-34 | -1.50E+01 | 67.1405578 | -1.81E-01 | 15114494  | 15114617  | NC_000012.11 |
| cg16291048 | 2.30E-31 | 3.15E-34 | -1.50E+01 | 67.1210475 | -3.27E-01 | 153507498 | 153507621 | NC_000001.10 |
| cg18686155 | 2.34E-31 | 3.20E-34 | -1.50E+01 | 67.1051385 | -7.59E-02 | 54421381  | 54421504  | NC_000014.8  |
| cg02849507 | 2.39E-31 | 3.30E-34 | -1.50E+01 | 67.0774694 | -2.03E-01 | 14051717  | 14051840  | NC_000016.9  |
| cg01781725 | 2.45E-31 | 3.38E-34 | -1.50E+01 | 67.0524318 | -1.94E-01 | 1047460   | 1047583   | NC_000016.9  |
| cg06795649 | 2.49E-31 | 3.46E-34 | -1.49E+01 | 67.0303322 | -2.87E-01 | 30135976  | 30136099  | NC_000015.9  |
| cg14770102 | 2.55E-31 | 3.54E-34 | -1.49E+01 | 67.0060543 | -2.71E-01 | 58984446  | 58984569  | NC_000011.9  |
| cg02983090 | 2.63E-31 | 3.65E-34 | -1.49E+01 | 66.9748649 | -3.02E-01 | 27437892  | 27438015  | NC_000016.9  |
| cg13475583 | 2.84E-31 | 3.97E-34 | -1.49E+01 | 66.8928214 | -2.54E-01 | 235116731 | 235116854 | NC_000001.10 |
| cg19160629 | 2.86E-31 | 4.00E-34 | -1.49E+01 | 66.8846575 | -3.48E-01 | 116742145 | 116742268 | NC_000011.9  |
| cg08282819 | 2.88E-31 | 4.04E-34 | -1.49E+01 | 66.8744137 | -2.68E-01 | 27437900  | 27438023  | NC_000016.9  |
| cg04633683 | 2.98E-31 | 4.21E-34 | -1.49E+01 | 66.8330215 | -3.24E-01 | 29837056  | 29837179  | NC_000016.9  |
| cg09552548 | 3.06E-31 | 4.34E-34 | -1.49E+01 | 66.8043439 | -3.17E-01 | 232538286 | 232538409 | NC_000002.11 |
| cg23451678 | 3.12E-31 | 4.43E-34 | -1.49E+01 | 66.78321   | -2.67E-01 | 112323619 | 112323742 | NC_000003.11 |
| cg16271437 | 3.16E-31 | 4.49E-34 | -1.49E+01 | 66.7697447 | -1.85E-01 | 23123952  | 23124075  | NC_000020.10 |

|            |          |          |           |            |           |           |           |              |
|------------|----------|----------|-----------|------------|-----------|-----------|-----------|--------------|
| cg13275603 | 3.34E-31 | 4.76E-34 | -1.49E+01 | 66.7123203 | -2.71E-01 | 73927487  | 73927610  | NC_000005.9  |
| cg26051755 | 3.50E-31 | 5.01E-34 | -1.49E+01 | 66.6608938 | -2.44E-01 | 97198107  | 97198230  | NC_000002.11 |
| cg09621958 | 3.68E-31 | 5.28E-34 | -1.49E+01 | 66.6087509 | -2.50E-01 | 112395854 | 112395977 | NC_000003.11 |
| cg10185478 | 3.69E-31 | 5.32E-34 | -1.49E+01 | 66.6007198 | -3.10E-01 | 15767006  | 15767129  | NC_000016.9  |
| cg24495643 | 3.72E-31 | 5.37E-34 | -1.49E+01 | 66.5919632 | -3.25E-01 | 29230953  | 29231076  | NC_000008.10 |
| cg05312104 | 3.79E-31 | 5.48E-34 | -1.49E+01 | 66.5720091 | -2.53E-01 | 19402066  | 19402189  | NC_000011.9  |
| cg06075311 | 3.79E-31 | 5.49E-34 | -1.49E+01 | 66.5691571 | -3.45E-01 | 105210937 | 105211060 | NC_000010.10 |
| cg02640104 | 3.95E-31 | 5.76E-34 | -1.49E+01 | 66.5227517 | -2.42E-01 | 30476615  | 30476738  | NC_000013.10 |
| cg19412669 | 3.98E-31 | 5.82E-34 | -1.49E+01 | 66.5109357 | -2.07E-01 | 36839270  | 36839393  | NC_000001.10 |
| cg16636721 | 3.98E-31 | 5.83E-34 | -1.49E+01 | 66.5100329 | -1.37E-01 | 47920571  | 47920694  | NC_000021.8  |
| cg10784519 | 4.05E-31 | 5.93E-34 | -1.49E+01 | 66.4927755 | -2.14E-01 | 30737231  | 30737354  | NC_000006.11 |
| cg09845604 | 4.11E-31 | 6.03E-34 | -1.49E+01 | 66.4764922 | -2.91E-01 | 3229921   | 3230044   | NC_000001.10 |
| cg19061690 | 4.31E-31 | 6.33E-34 | -1.49E+01 | 66.4274434 | -2.45E-01 | 46080304  | 46080427  | NC_000017.10 |
| cg16465430 | 4.51E-31 | 6.66E-34 | -1.49E+01 | 66.3773373 | -1.71E-01 | 23289114  | 23289237  | NC_000014.8  |
| cg22117918 | 4.98E-31 | 7.37E-34 | -1.48E+01 | 66.2770108 | -1.40E-01 | 160769114 | 160769237 | NC_000006.11 |
| cg09889479 | 5.09E-31 | 7.56E-34 | -1.48E+01 | 66.2515114 | -2.29E-01 | 2082689   | 2082812   | NC_000016.9  |
| cg23145794 | 5.11E-31 | 7.60E-34 | -1.48E+01 | 66.2463083 | -3.08E-01 | 20433062  | 20433185  | NC_000020.10 |
| cg01513078 | 5.12E-31 | 7.64E-34 | -1.48E+01 | 66.2412397 | -3.43E-01 | 105437094 | 105437217 | NC_000014.8  |
| cg26704293 | 5.17E-31 | 7.73E-34 | -1.48E+01 | 66.2300726 | -3.74E-01 | 125073750 | 125073873 | NC_000012.11 |
| cg12520319 | 5.22E-31 | 7.81E-34 | -1.48E+01 | 66.2198508 | -2.54E-01 | 101740264 | 101740387 | NC_000015.9  |
| cg25313172 | 5.42E-31 | 8.14E-34 | -1.48E+01 | 66.1783256 | -1.86E-01 | 52627272  | 52627395  | NC_000012.11 |
| cg04603419 | 5.59E-31 | 8.41E-34 | -1.48E+01 | 66.1461256 | -1.36E-01 | 42061560  | 42061683  | NC_000017.10 |
| cg17951878 | 5.61E-31 | 8.46E-34 | -1.48E+01 | 66.1393184 | -3.81E-01 | 7698374   | 7698497   | NC_000006.11 |
| cg27170015 | 5.66E-31 | 8.55E-34 | -1.48E+01 | 66.1296126 | -2.30E-01 | 23689753  | 23689876  | NC_000016.9  |
| cg13610455 | 5.84E-31 | 8.85E-34 | -1.48E+01 | 66.0948279 | -2.97E-01 | 37054900  | 37055023  | NC_000020.10 |

|            |          |          |           |            |           |           |           |              |
|------------|----------|----------|-----------|------------|-----------|-----------|-----------|--------------|
| cg07573872 | 5.85E-31 | 8.88E-34 | -1.48E+01 | 66.0911819 | -2.40E-01 | 1126342   | 1126465   | NC_000019.9  |
| cg05789595 | 5.86E-31 | 8.90E-34 | -1.48E+01 | 66.0888473 | -2.45E-01 | 56555274  | 56555397  | NC_000006.11 |
| cg03852570 | 5.90E-31 | 8.98E-34 | -1.48E+01 | 66.079858  | -1.99E-01 | 100175106 | 100175229 | NC_000010.10 |
| cg03720100 | 6.16E-31 | 9.40E-34 | -1.48E+01 | 66.0345763 | -2.59E-01 | 30720263  | 30720386  | NC_000006.11 |
| cg08476984 | 6.17E-31 | 9.43E-34 | -1.48E+01 | 66.0312308 | -2.50E-01 | 5588169   | 5588292   | NC_000010.10 |
| cg07388969 | 6.62E-31 | 1.01E-33 | -1.48E+01 | 65.9606575 | -3.99E-01 | 38509709  | 38509832  | NC_000015.9  |
| cg03367387 | 6.81E-31 | 1.05E-33 | -1.48E+01 | 65.9295837 | -3.93E-01 | 197439334 | 197439457 | NC_000003.11 |
| cg26177041 | 6.99E-31 | 1.08E-33 | -1.48E+01 | 65.9009928 | -3.36E-01 | 114389632 | 114389755 | NC_000004.11 |
| cg05973398 | 7.16E-31 | 1.10E-33 | -1.48E+01 | 65.8759979 | -2.47E-01 | 36420164  | 36420287  | NC_000021.8  |
| cg09129067 | 7.32E-31 | 1.13E-33 | -1.48E+01 | 65.851726  | -3.05E-01 | 103750904 | 103751027 | NC_000008.10 |
| cg27064337 | 8.12E-31 | 1.26E-33 | -1.48E+01 | 65.7460175 | -2.25E-01 | 18925266  | 18925389  | NC_000008.10 |
| cg04188351 | 8.34E-31 | 1.29E-33 | -1.48E+01 | 65.7173929 | -2.57E-01 | 33744823  | 33744946  | NC_000011.9  |
| cg01077100 | 8.37E-31 | 1.30E-33 | -1.48E+01 | 65.712303  | -3.48E-01 | 124067280 | 124067403 | NC_000010.10 |
| cg01626885 | 8.80E-31 | 1.37E-33 | -1.48E+01 | 65.6600956 | -2.66E-01 | 45937757  | 45937880  | NC_000015.9  |
| cg20488673 | 8.92E-31 | 1.39E-33 | -1.48E+01 | 65.6446369 | -2.95E-01 | 100497940 | 100498063 | NC_000014.8  |
| cg27149179 | 9.12E-31 | 1.43E-33 | -1.47E+01 | 65.6207916 | -2.92E-01 | 86451848  | 86451971  | NC_000011.9  |
| cg06635797 | 9.66E-31 | 1.51E-33 | -1.47E+01 | 65.560771  | -2.00E-01 | 4915394   | 4915517   | NC_000019.9  |
| cg11383291 | 9.78E-31 | 1.54E-33 | -1.47E+01 | 65.5453434 | -2.51E-01 | 124597938 | 124598061 | NC_000003.11 |
| cg00667789 | 9.84E-31 | 1.55E-33 | -1.47E+01 | 65.5376883 | -2.17E-01 | 59042065  | 59042188  | NC_000001.10 |
| cg10239077 | 1.02E-30 | 1.61E-33 | -1.47E+01 | 65.5001493 | -1.13E-01 | 55294882  | 55295005  | NC_000008.10 |
| cg19377250 | 1.03E-30 | 1.63E-33 | -1.47E+01 | 65.4902548 | -3.02E-01 | 100463206 | 100463329 | NC_000007.13 |
| cg05060704 | 1.03E-30 | 1.64E-33 | -1.47E+01 | 65.4799375 | -2.42E-01 | 50275694  | 50275817  | NC_000003.11 |
| cg06914505 | 1.08E-30 | 1.71E-33 | -1.47E+01 | 65.437285  | -2.46E-01 | 39464601  | 39464724  | NC_000015.9  |
| cg06126421 | 1.12E-30 | 1.79E-33 | -1.47E+01 | 65.3968558 | -3.29E-01 | 30720080  | 30720203  | NC_000006.11 |
| cg04956471 | 1.21E-30 | 1.95E-33 | -1.47E+01 | 65.3101365 | -2.72E-01 | 234328457 | 234328580 | NC_000002.11 |



|            |          |          |           |            |           |           |           |              |
|------------|----------|----------|-----------|------------|-----------|-----------|-----------|--------------|
| cg24890964 | 1.21E-30 | 1.95E-33 | -1.47E+01 | 65.3098318 | -2.83E-01 | 36153642  | 36153765  | NC_000020.10 |
| cg18282388 | 1.23E-30 | 1.98E-33 | -1.47E+01 | 65.2942289 | -3.16E-01 | 129716470 | 129716593 | NC_000011.9  |
| cg15275625 | 1.27E-30 | 2.05E-33 | -1.47E+01 | 65.2579254 | -2.88E-01 | 13343118  | 13343241  | NC_000003.11 |
| cg14442408 | 1.30E-30 | 2.09E-33 | -1.47E+01 | 65.2387912 | -1.71E-01 | 33785412  | 33785535  | NC_000021.8  |
| cg01264639 | 1.31E-30 | 2.12E-33 | -1.47E+01 | 65.2253083 | -2.10E-01 | 73839484  | 73839607  | NC_000005.9  |
| cg22066894 | 1.31E-30 | 2.13E-33 | -1.47E+01 | 65.2220814 | -2.24E-01 | 126581972 | 126582095 | NC_000011.9  |
| cg05760402 | 1.33E-30 | 2.17E-33 | -1.47E+01 | 65.2037806 | -1.31E-01 | 20139913  | 20140036  | NC_000018.9  |
| cg00073090 | 1.39E-30 | 2.26E-33 | -1.47E+01 | 65.1632284 | -2.40E-01 | 1265879   | 1266002   | NC_000019.9  |
| cg14369318 | 1.43E-30 | 2.34E-33 | -1.47E+01 | 65.1281029 | -2.29E-01 | 30759285  | 30759408  | NC_000004.11 |
| cg04417773 | 1.48E-30 | 2.43E-33 | -1.47E+01 | 65.09056   | -2.47E-01 | 80909901  | 80910024  | NC_000010.10 |
| cg27282397 | 1.49E-30 | 2.44E-33 | -1.47E+01 | 65.0859059 | -3.21E-01 | 20793466  | 20793589  | NC_000002.11 |
| cg14373727 | 1.50E-30 | 2.46E-33 | -1.47E+01 | 65.0779711 | -1.92E-01 | 72091514  | 72091637  | NC_000010.10 |
| cg27306119 | 1.56E-30 | 2.58E-33 | -1.47E+01 | 65.0316636 | -7.33E-02 | 9144605   | 9144728   | NC_000002.11 |
| cg27307298 | 1.56E-30 | 2.58E-33 | -1.47E+01 | 65.0312923 | -2.44E-01 | 6266753   | 6266876   | NC_000001.10 |
| cg16717008 | 1.63E-30 | 2.69E-33 | -1.47E+01 | 64.9883073 | -3.33E-01 | 148037650 | 148037773 | NC_000003.11 |
| cg23558337 | 1.63E-30 | 2.70E-33 | -1.47E+01 | 64.984917  | -2.30E-01 | 10492394  | 10492517  | NC_000020.10 |
| cg18296036 | 1.63E-30 | 2.70E-33 | -1.47E+01 | 64.9845377 | -1.71E-01 | 150653115 | 150653238 | NC_000007.13 |
| cg07372824 | 1.76E-30 | 2.92E-33 | -1.46E+01 | 64.9060725 | -1.93E-01 | 9017748   | 9017871   | NC_000018.9  |
| cg18020065 | 1.77E-30 | 2.95E-33 | -1.46E+01 | 64.8986911 | -3.22E-01 | 114829733 | 114829856 | NC_000013.10 |
| cg12273284 | 1.86E-30 | 3.10E-33 | -1.46E+01 | 64.8481166 | -3.80E-01 | 12490844  | 12490967  | NC_000010.10 |
| cg14302224 | 1.88E-30 | 3.14E-33 | -1.46E+01 | 64.834424  | -2.57E-01 | 105210980 | 105211103 | NC_000010.10 |
| cg21243631 | 2.07E-30 | 3.47E-33 | -1.46E+01 | 64.7370102 | -2.81E-01 | 21154260  | 21154383  | NC_000018.9  |
| cg19578660 | 2.16E-30 | 3.64E-33 | -1.46E+01 | 64.6891046 | -2.63E-01 | 3511600   | 3511723   | NC_000010.10 |
| cg08490529 | 2.24E-30 | 3.79E-33 | -1.46E+01 | 64.6473844 | -3.25E-01 | 157347704 | 157347827 | NC_000007.13 |
| cg01301803 | 2.24E-30 | 3.79E-33 | -1.46E+01 | 64.6470192 | -2.43E-01 | 134143535 | 134143658 | NC_000010.10 |

|            |          |          |           |            |           |           |           |              |
|------------|----------|----------|-----------|------------|-----------|-----------|-----------|--------------|
| cg14276379 | 2.26E-30 | 3.83E-33 | -1.46E+01 | 64.6385514 | -3.37E-01 | 97663142  | 97663265  | NC_000009.11 |
| cg21513437 | 2.26E-30 | 3.83E-33 | -1.46E+01 | 64.6373991 | -1.82E-01 | 39678107  | 39678230  | NC_000017.10 |
| cg14761989 | 2.30E-30 | 3.92E-33 | -1.46E+01 | 64.6158139 | -2.43E-01 | 79544417  | 79544540  | NC_000017.10 |
| cg23261919 | 2.46E-30 | 4.20E-33 | -1.46E+01 | 64.5458432 | -3.61E-01 | 135072960 | 135073083 | NC_000010.10 |
| cg25204094 | 2.53E-30 | 4.33E-33 | -1.46E+01 | 64.5148185 | -1.25E-01 | 100747473 | 100747596 | NC_000009.11 |
| cg00910893 | 2.55E-30 | 4.38E-33 | -1.46E+01 | 64.5038571 | -1.85E-01 | 78286548  | 78286671  | NC_000015.9  |
| cg26203879 | 2.58E-30 | 4.44E-33 | -1.46E+01 | 64.4912676 | -2.55E-01 | 120968844 | 120968967 | NC_000010.10 |
| cg03896685 | 2.60E-30 | 4.49E-33 | -1.46E+01 | 64.4807595 | -2.90E-01 | 65512561  | 65512684  | NC_000007.13 |
| cg05810177 | 2.66E-30 | 4.60E-33 | -1.46E+01 | 64.4553001 | -3.47E-01 | 134050402 | 134050525 | NC_000007.13 |
| cg27195914 | 2.89E-30 | 5.01E-33 | -1.46E+01 | 64.3698612 | -2.68E-01 | 66907460  | 66907583  | NC_000016.9  |
| cg23995143 | 2.93E-30 | 5.10E-33 | -1.46E+01 | 64.3525091 | -1.85E-01 | 30791343  | 30791466  | NC_000010.10 |
| cg14908245 | 2.95E-30 | 5.15E-33 | -1.46E+01 | 64.343805  | -1.00E-01 | 23619180  | 23619303  | NC_000008.10 |
| cg27537125 | 2.96E-30 | 5.18E-33 | -1.46E+01 | 64.3369101 | -2.27E-01 | 25349681  | 25349804  | NC_000001.10 |
| cg16661744 | 3.00E-30 | 5.26E-33 | -1.46E+01 | 64.3227013 | -1.99E-01 | 60868835  | 60868958  | NC_000017.10 |
| cg07168232 | 3.05E-30 | 5.35E-33 | -1.46E+01 | 64.3055275 | -2.57E-01 | 209822928 | 209823051 | NC_000001.10 |
| cg13632630 | 3.06E-30 | 5.38E-33 | -1.46E+01 | 64.2993018 | -3.28E-01 | 90206329  | 90206452  | NC_000015.9  |
| cg20731529 | 3.38E-30 | 5.99E-33 | -1.45E+01 | 64.1922102 | -1.62E-01 | 200296767 | 200296890 | NC_000002.11 |
| cg09956615 | 3.39E-30 | 6.01E-33 | -1.45E+01 | 64.1899243 | -2.48E-01 | 2672989   | 2673112   | NC_000007.13 |
| cg19348484 | 3.47E-30 | 6.17E-33 | -1.45E+01 | 64.162914  | -2.93E-01 | 91413236  | 91413359  | NC_000015.9  |
| cg22176324 | 3.51E-30 | 6.25E-33 | -1.45E+01 | 64.1504538 | -1.41E-01 | 24648851  | 24648974  | NC_000001.10 |
| cg22995449 | 3.56E-30 | 6.36E-33 | -1.45E+01 | 64.1335894 | -1.88E-01 | 75988765  | 75988888  | NC_000014.8  |
| cg08135379 | 3.66E-30 | 6.55E-33 | -1.45E+01 | 64.1042296 | -2.18E-01 | 47474763  | 47474886  | NC_000012.11 |
| cg13997435 | 3.66E-30 | 6.56E-33 | -1.45E+01 | 64.1020886 | -2.35E-01 | 153538406 | 153538529 | NC_000001.10 |
| cg19519964 | 3.72E-30 | 6.68E-33 | -1.45E+01 | 64.0847917 | -1.31E-01 | 223290012 | 223290135 | NC_000002.11 |
| cg26442874 | 3.90E-30 | 7.03E-33 | -1.45E+01 | 64.0339803 | -1.02E-01 | 74381784  | 74381907  | NC_000017.10 |

|            |          |          |           |            |           |           |           |              |
|------------|----------|----------|-----------|------------|-----------|-----------|-----------|--------------|
| cg04635642 | 4.15E-30 | 7.50E-33 | -1.45E+01 | 63.9698675 | -3.23E-01 | 12183938  | 12184061  | NC_000016.9  |
| cg25377796 | 4.43E-30 | 8.02E-33 | -1.45E+01 | 63.9024872 | -2.22E-01 | 8643957   | 8644080   | NC_000004.11 |
| cg10853566 | 4.48E-30 | 8.13E-33 | -1.45E+01 | 63.8887287 | -1.56E-01 | 23288993  | 23289116  | NC_000014.8  |
| cg01415937 | 4.59E-30 | 8.35E-33 | -1.45E+01 | 63.8626942 | -3.19E-01 | 10134620  | 10134743  | NC_000001.10 |
| cg16755500 | 4.63E-30 | 8.44E-33 | -1.45E+01 | 63.852195  | -3.13E-01 | 27918338  | 27918461  | NC_000017.10 |
| cg01797450 | 4.79E-30 | 8.78E-33 | -1.45E+01 | 63.8130245 | -2.23E-01 | 168134760 | 168134883 | NC_000006.11 |
| cg08614871 | 4.82E-30 | 8.84E-33 | -1.45E+01 | 63.8054529 | -3.00E-01 | 3824555   | 3824678   | NC_000010.10 |
| cg01556706 | 4.91E-30 | 9.03E-33 | -1.45E+01 | 63.7847305 | -3.21E-01 | 59804435  | 59804558  | NC_000003.11 |
| cg13602461 | 4.91E-30 | 9.03E-33 | -1.45E+01 | 63.7846082 | -3.21E-01 | 55066317  | 55066440  | NC_000008.10 |
| cg02832512 | 4.96E-30 | 9.14E-33 | -1.45E+01 | 63.7727492 | -3.37E-01 | 22113516  | 22113639  | NC_000006.11 |
| cg07980854 | 4.97E-30 | 9.18E-33 | -1.45E+01 | 63.7685717 | -2.52E-01 | 57586338  | 57586461  | NC_000020.10 |
| cg24796998 | 5.16E-30 | 9.55E-33 | -1.45E+01 | 63.7286444 | -3.46E-01 | 70383845  | 70383968  | NC_000017.10 |
| cg13477614 | 5.36E-30 | 9.97E-33 | -1.45E+01 | 63.6867334 | -2.47E-01 | 79396462  | 79396585  | NC_000017.10 |
| cg24522654 | 5.50E-30 | 1.03E-32 | -1.45E+01 | 63.6584015 | -2.59E-01 | 19535154  | 19535277  | NC_000012.11 |
| cg02054792 | 5.52E-30 | 1.03E-32 | -1.45E+01 | 63.6533974 | -2.23E-01 | 106014950 | 106015073 | NC_000002.11 |
| cg26191447 | 5.54E-30 | 1.03E-32 | -1.45E+01 | 63.649929  | -3.08E-01 | 191656418 | 191656541 | NC_000002.11 |
| cg03280622 | 5.96E-30 | 1.12E-32 | -1.45E+01 | 63.5744407 | -2.89E-01 | 145023013 | 145023136 | NC_000008.10 |
| cg16734433 | 6.03E-30 | 1.13E-32 | -1.45E+01 | 63.5596822 | -3.38E-01 | 115860297 | 115860420 | NC_000010.10 |
| cg04150762 | 6.06E-30 | 1.14E-32 | -1.45E+01 | 63.5535542 | -2.81E-01 | 628677    | 628800    | NC_000011.9  |
| cg24227481 | 6.13E-30 | 1.16E-32 | -1.44E+01 | 63.5387741 | -2.95E-01 | 73417185  | 73417308  | NC_000007.13 |
| cg19821297 | 6.15E-30 | 1.16E-32 | -1.44E+01 | 63.5328651 | -3.08E-01 | 12890029  | 12890152  | NC_000019.9  |
| cg10416784 | 6.23E-30 | 1.18E-32 | -1.44E+01 | 63.5187727 | -3.09E-01 | 58797233  | 58797356  | NC_000002.11 |
| cg06545761 | 6.24E-30 | 1.18E-32 | -1.44E+01 | 63.5160941 | -3.05E-01 | 87441441  | 87441564  | NC_000016.9  |
| cg26232553 | 6.49E-30 | 1.23E-32 | -1.44E+01 | 63.4737972 | -3.19E-01 | 101471097 | 101471220 | NC_000008.10 |
| cg25277868 | 6.58E-30 | 1.26E-32 | -1.44E+01 | 63.4566882 | -6.14E-02 | 21059257  | 21059380  | NC_000001.10 |

|            |          |          |           |            |           |           |           |              |
|------------|----------|----------|-----------|------------|-----------|-----------|-----------|--------------|
| cg06624156 | 6.59E-30 | 1.26E-32 | -1.44E+01 | 63.4543465 | -8.12E-02 | 49377976  | 49378099  | NC_000003.11 |
| cg25124300 | 6.59E-30 | 1.26E-32 | -1.44E+01 | 63.4527374 | -3.82E-01 | 31607761  | 31607884  | NC_000002.11 |
| cg27631427 | 6.60E-30 | 1.26E-32 | -1.44E+01 | 63.4501702 | -8.68E-02 | 47088306  | 47088429  | NC_000018.9  |
| cg00542992 | 6.63E-30 | 1.27E-32 | -1.44E+01 | 63.4437827 | -2.98E-01 | 141595654 | 141595777 | NC_000005.9  |
| cg10184289 | 6.73E-30 | 1.30E-32 | -1.44E+01 | 63.4232885 | -2.36E-01 | 64870490  | 64870613  | NC_000002.11 |
| cg05343811 | 6.97E-30 | 1.35E-32 | -1.44E+01 | 63.384523  | -2.40E-01 | 75590896  | 75591019  | NC_000014.8  |
| cg24775814 | 6.98E-30 | 1.36E-32 | -1.44E+01 | 63.380128  | -1.05E-01 | 76982780  | 76982903  | NC_000017.10 |
| cg04659689 | 7.10E-30 | 1.38E-32 | -1.44E+01 | 63.3614413 | -3.42E-01 | 2903377   | 2903500   | NC_000007.13 |
| cg09535960 | 7.38E-30 | 1.44E-32 | -1.44E+01 | 63.3207943 | -3.08E-01 | 23193704  | 23193827  | NC_000008.10 |
| cg17844606 | 8.06E-30 | 1.58E-32 | -1.44E+01 | 63.2260088 | -1.02E-01 | 31174318  | 31174441  | NC_000007.13 |
| cg13585930 | 8.12E-30 | 1.60E-32 | -1.44E+01 | 63.2168419 | -3.26E-01 | 72027357  | 72027480  | NC_000010.10 |
| cg16983159 | 8.19E-30 | 1.61E-32 | -1.44E+01 | 63.2079858 | -3.72E-01 | 138862441 | 138862564 | NC_000005.9  |
| cg03226203 | 8.21E-30 | 1.62E-32 | -1.44E+01 | 63.2038216 | -2.47E-01 | 145024637 | 145024760 | NC_000008.10 |
| cg24671734 | 8.24E-30 | 1.63E-32 | -1.44E+01 | 63.1985565 | -3.81E-01 | 107909364 | 107909487 | NC_000012.11 |
| cg11134430 | 8.32E-30 | 1.64E-32 | -1.44E+01 | 63.1884738 | -2.54E-01 | 193987426 | 193987549 | NC_000003.11 |
| cg19135406 | 8.33E-30 | 1.65E-32 | -1.44E+01 | 63.1855917 | -2.15E-01 | 160219852 | 160219975 | NC_000004.11 |
| cg06853894 | 8.46E-30 | 1.68E-32 | -1.44E+01 | 63.1674736 | -3.32E-01 | 12204096  | 12204219  | NC_000001.10 |
| cg24310959 | 8.61E-30 | 1.71E-32 | -1.44E+01 | 63.1487612 | -2.75E-01 | 37054880  | 37055003  | NC_000020.10 |
| cg06604467 | 8.67E-30 | 1.73E-32 | -1.44E+01 | 63.1394816 | -1.68E-01 | 1232088   | 1232211   | NC_000007.13 |
| cg06530983 | 8.71E-30 | 1.74E-32 | -1.44E+01 | 63.1336023 | -2.05E-01 | 9141884   | 9142007   | NC_000016.9  |
| cg06520812 | 9.84E-30 | 1.97E-32 | -1.44E+01 | 63.010178  | -1.63E-01 | 46000742  | 46000865  | NC_000019.9  |
| cg26175448 | 9.84E-30 | 1.97E-32 | -1.44E+01 | 63.0085773 | -2.00E-01 | 39072167  | 39072290  | NC_000017.10 |
| cg05699373 | 1.01E-29 | 2.02E-32 | -1.44E+01 | 62.9860647 | -1.20E-01 | 60609308  | 60609431  | NC_000011.9  |
| cg09010707 | 1.01E-29 | 2.03E-32 | -1.44E+01 | 62.9805393 | -2.33E-01 | 26392567  | 26392690  | NC_000012.11 |
| cg13410764 | 1.03E-29 | 2.08E-32 | -1.44E+01 | 62.9572466 | -3.32E-01 | 90407888  | 90408011  | NC_000009.11 |

|            |          |          |           |            |           |           |           |              |
|------------|----------|----------|-----------|------------|-----------|-----------|-----------|--------------|
| cg00590817 | 1.03E-29 | 2.08E-32 | -1.44E+01 | 62.9566231 | -3.04E-01 | 8272081   | 8272204   | NC_000001.10 |
| cg21571658 | 1.03E-29 | 2.08E-32 | -1.44E+01 | 62.9527663 | -3.61E-01 | 70785399  | 70785522  | NC_000015.9  |
| cg26666580 | 1.03E-29 | 2.09E-32 | -1.44E+01 | 62.9511519 | -2.09E-01 | 12183835  | 12183958  | NC_000016.9  |
| cg06475541 | 1.08E-29 | 2.20E-32 | -1.44E+01 | 62.9009032 | -1.67E-01 | 34731213  | 34731336  | NC_000013.10 |
| cg24799187 | 1.15E-29 | 2.34E-32 | -1.43E+01 | 62.8393111 | -7.87E-02 | 27759410  | 27759533  | NC_000006.11 |
| cg16596317 | 1.16E-29 | 2.36E-32 | -1.43E+01 | 62.8279449 | -3.57E-01 | 85755348  | 85755471  | NC_000001.10 |
| cg19769182 | 1.17E-29 | 2.39E-32 | -1.43E+01 | 62.8182252 | -1.53E-01 | 29823868  | 29823991  | NC_000016.9  |
| cg25783579 | 1.19E-29 | 2.43E-32 | -1.43E+01 | 62.8011102 | -1.56E-01 | 87936385  | 87936508  | NC_000007.13 |
| cg17416793 | 1.21E-29 | 2.46E-32 | -1.43E+01 | 62.789107  | -2.55E-01 | 2846932   | 2847055   | NC_000011.9  |
| cg15876968 | 1.22E-29 | 2.48E-32 | -1.43E+01 | 62.7798857 | -2.11E-01 | 85086322  | 85086445  | NC_000001.10 |
| cg19657351 | 1.24E-29 | 2.52E-32 | -1.43E+01 | 62.7628051 | -1.57E-01 | 10521558  | 10521681  | NC_000006.11 |
| cg01425762 | 1.24E-29 | 2.53E-32 | -1.43E+01 | 62.7604987 | -3.19E-01 | 81666633  | 81666756  | NC_000016.9  |
| cg03598112 | 1.25E-29 | 2.56E-32 | -1.43E+01 | 62.7477965 | -2.81E-01 | 28691021  | 28691144  | NC_000017.10 |
| cg17472111 | 1.26E-29 | 2.59E-32 | -1.43E+01 | 62.7365459 | -2.74E-01 | 75287721  | 75287844  | NC_000011.9  |
| cg13876325 | 1.39E-29 | 2.85E-32 | -1.43E+01 | 62.6423387 | -3.16E-01 | 16190098  | 16190221  | NC_000017.10 |
| cg05339037 | 1.40E-29 | 2.88E-32 | -1.43E+01 | 62.6305222 | -2.77E-01 | 13951168  | 13951291  | NC_000019.9  |
| cg27428856 | 1.42E-29 | 2.93E-32 | -1.43E+01 | 62.6133767 | -1.16E-01 | 111927480 | 111927603 | NC_000006.11 |
| cg06827256 | 1.42E-29 | 2.93E-32 | -1.43E+01 | 62.6131706 | -3.31E-01 | 226311603 | 226311726 | NC_000001.10 |
| cg06112171 | 1.46E-29 | 3.01E-32 | -1.43E+01 | 62.5881253 | -3.02E-01 | 40324498  | 40324621  | NC_000006.11 |
| cg22658229 | 1.48E-29 | 3.07E-32 | -1.43E+01 | 62.5689345 | -1.07E-01 | 41496184  | 41496307  | NC_000013.10 |
| cg17837069 | 1.52E-29 | 3.16E-32 | -1.43E+01 | 62.5380269 | -2.36E-01 | 30138588  | 30138711  | NC_000010.10 |
| cg07607355 | 1.57E-29 | 3.27E-32 | -1.43E+01 | 62.5046273 | -1.61E-01 | 30196400  | 30196523  | NC_000020.10 |
| cg03163545 | 1.57E-29 | 3.27E-32 | -1.43E+01 | 62.5043718 | -3.01E-01 | 1593415   | 1593538   | NC_000016.9  |
| cg21672292 | 1.72E-29 | 3.60E-32 | -1.43E+01 | 62.4096151 | -2.81E-01 | 145025128 | 145025251 | NC_000008.10 |
| cg27093918 | 1.75E-29 | 3.67E-32 | -1.43E+01 | 62.3892696 | -2.70E-01 | 69564625  | 69564748  | NC_000016.9  |

|            |          |          |           |            |           |           |           |              |
|------------|----------|----------|-----------|------------|-----------|-----------|-----------|--------------|
| cg04749549 | 1.76E-29 | 3.69E-32 | -1.43E+01 | 62.3841871 | -1.74E-01 | 17459798  | 17459921  | NC_000019.9  |
| cg21764708 | 1.76E-29 | 3.71E-32 | -1.43E+01 | 62.3807612 | -3.06E-01 | 151493629 | 151493752 | NC_000007.13 |
| cg17233819 | 1.77E-29 | 3.72E-32 | -1.43E+01 | 62.3775494 | -2.62E-01 | 45266782  | 45266905  | NC_000001.10 |
| cg03317505 | 1.78E-29 | 3.75E-32 | -1.43E+01 | 62.3684609 | -2.64E-01 | 138861832 | 138861955 | NC_000005.9  |
| cg05675514 | 1.80E-29 | 3.81E-32 | -1.43E+01 | 62.3524396 | -2.97E-01 | 22026015  | 22026138  | NC_000006.11 |
| cg14509535 | 1.82E-29 | 3.85E-32 | -1.43E+01 | 62.3427371 | -1.06E-01 | 65670832  | 65670955  | NC_000011.9  |
| cg15187223 | 1.93E-29 | 4.09E-32 | -1.43E+01 | 62.2817571 | -4.11E-01 | 114770074 | 114770197 | NC_000013.10 |
| cg06358442 | 1.97E-29 | 4.19E-32 | -1.43E+01 | 62.2578646 | -7.92E-02 | 33239202  | 33239325  | NC_000006.11 |
| cg06946797 | 1.98E-29 | 4.22E-32 | -1.43E+01 | 62.2509782 | -3.41E-01 | 11422409  | 11422532  | NC_000016.9  |
| cg22752023 | 2.01E-29 | 4.29E-32 | -1.43E+01 | 62.2355038 | -1.91E-01 | 100174935 | 100175058 | NC_000010.10 |
| cg21314318 | 2.05E-29 | 4.39E-32 | -1.43E+01 | 62.2126778 | -3.02E-01 | 100651510 | 100651633 | NC_000015.9  |
| cg09288894 | 2.05E-29 | 4.39E-32 | -1.43E+01 | 62.2119949 | -2.17E-01 | 12894309  | 12894432  | NC_000019.9  |
| cg11146034 | 2.06E-29 | 4.41E-32 | -1.43E+01 | 62.2084569 | -3.01E-01 | 96590670  | 96590793  | NC_000012.11 |
| cg19352830 | 2.07E-29 | 4.44E-32 | -1.43E+01 | 62.2016703 | -2.46E-01 | 141599356 | 141599479 | NC_000008.10 |
| cg11116086 | 2.08E-29 | 4.47E-32 | -1.43E+01 | 62.1933617 | -3.58E-01 | 32943612  | 32943735  | NC_000015.9  |
| cg19672546 | 2.09E-29 | 4.50E-32 | -1.43E+01 | 62.1870381 | -2.55E-01 | 145025123 | 145025246 | NC_000008.10 |
| cg04810745 | 2.14E-29 | 4.60E-32 | -1.43E+01 | 62.1655359 | -3.36E-01 | 189064557 | 189064680 | NC_000002.11 |
| cg25872744 | 2.14E-29 | 4.62E-32 | -1.43E+01 | 62.1613891 | -9.85E-02 | 85566296  | 85566419  | NC_000011.9  |
| cg01676182 | 2.35E-29 | 5.08E-32 | -1.42E+01 | 62.0662703 | -1.31E-01 | 20139875  | 20139998  | NC_000018.9  |
| cg05088820 | 2.38E-29 | 5.15E-32 | -1.42E+01 | 62.0538632 | -3.57E-01 | 9375605   | 9375728   | NC_000002.11 |
| cg03076094 | 2.51E-29 | 5.43E-32 | -1.42E+01 | 62.0004669 | -2.27E-01 | 4357346   | 4357469   | NC_000016.9  |
| cg23963984 | 2.70E-29 | 5.91E-32 | -1.42E+01 | 61.9170264 | -2.07E-01 | 79659038  | 79659161  | NC_000010.10 |
| cg05514299 | 2.74E-29 | 6.01E-32 | -1.42E+01 | 61.9001282 | -3.35E-01 | 74868670  | 74868793  | NC_000017.10 |
| cg10503655 | 2.76E-29 | 6.07E-32 | -1.42E+01 | 61.8906532 | -1.91E-01 | 45443689  | 45443812  | NC_000020.10 |
| cg03869928 | 2.77E-29 | 6.09E-32 | -1.42E+01 | 61.8859321 | -1.55E-01 | 8818142   | 8818265   | NC_000002.11 |

|            |          |          |           |            |           |           |           |              |
|------------|----------|----------|-----------|------------|-----------|-----------|-----------|--------------|
| cg07771539 | 2.81E-29 | 6.20E-32 | -1.42E+01 | 61.8686411 | -1.30E-01 | 99957225  | 99957348  | NC_000008.10 |
| cg26503877 | 2.81E-29 | 6.20E-32 | -1.42E+01 | 61.8681067 | -2.33E-01 | 128391429 | 128391552 | NC_000011.9  |
| cg23408558 | 2.86E-29 | 6.32E-32 | -1.42E+01 | 61.8495258 | -3.19E-01 | 56679194  | 56679317  | NC_000005.9  |
| cg27312979 | 2.87E-29 | 6.35E-32 | -1.42E+01 | 61.845252  | -2.51E-01 | 97094453  | 97094576  | NC_000010.10 |
| cg12624792 | 2.88E-29 | 6.39E-32 | -1.42E+01 | 61.8380903 | -1.24E-01 | 38714001  | 38714124  | NC_000022.10 |
| cg10328047 | 2.88E-29 | 6.40E-32 | -1.42E+01 | 61.8376368 | -2.31E-01 | 145024774 | 145024897 | NC_000008.10 |
| cg18633230 | 2.88E-29 | 6.40E-32 | -1.42E+01 | 61.836872  | -2.80E-01 | 151425104 | 151425227 | NC_000007.13 |
| cg16477879 | 2.98E-29 | 6.62E-32 | -1.42E+01 | 61.8030734 | -3.33E-01 | 239348171 | 239348294 | NC_000002.11 |
| cg26650359 | 2.99E-29 | 6.66E-32 | -1.42E+01 | 61.7970677 | -2.93E-01 | 57674183  | 57674306  | NC_000012.11 |
| cg12094892 | 3.11E-29 | 6.94E-32 | -1.42E+01 | 61.7561204 | -2.10E-01 | 77591038  | 77591161  | NC_000014.8  |
| cg07248223 | 3.25E-29 | 7.27E-32 | -1.42E+01 | 61.710987  | -3.58E-01 | 38717275  | 38717398  | NC_000017.10 |
| cg20061378 | 3.30E-29 | 7.37E-32 | -1.42E+01 | 61.6963059 | -2.41E-01 | 1791585   | 1791708   | NC_000004.11 |
| cg14995562 | 3.33E-29 | 7.46E-32 | -1.42E+01 | 61.6847782 | -1.46E-01 | 38714166  | 38714289  | NC_000022.10 |
| cg06688396 | 3.36E-29 | 7.52E-32 | -1.42E+01 | 61.676481  | -1.27E-01 | 92053433  | 92053556  | NC_000008.10 |
| cg27539986 | 3.39E-29 | 7.60E-32 | -1.42E+01 | 61.6660291 | -2.00E-01 | 6664103   | 6664226   | NC_000001.10 |
| cg15763670 | 3.41E-29 | 7.65E-32 | -1.42E+01 | 61.6600134 | -2.33E-01 | 73473235  | 73473358  | NC_000010.10 |
| cg20636248 | 3.47E-29 | 7.81E-32 | -1.42E+01 | 61.6396339 | -3.29E-01 | 121439845 | 121439968 | NC_000010.10 |
| cg01784327 | 3.61E-29 | 8.16E-32 | -1.42E+01 | 61.5959977 | -2.11E-01 | 1166755   | 1166878   | NC_000004.11 |
| cg20300175 | 3.62E-29 | 8.18E-32 | -1.42E+01 | 61.5934156 | -2.29E-01 | 27918316  | 27918439  | NC_000017.10 |
| cg18860310 | 3.64E-29 | 8.25E-32 | -1.42E+01 | 61.5848353 | -2.61E-01 | 87752504  | 87752627  | NC_000004.11 |
| cg13454226 | 3.67E-29 | 8.33E-32 | -1.42E+01 | 61.5747226 | -3.87E-01 | 3823758   | 3823881   | NC_000010.10 |
| cg08397758 | 3.82E-29 | 8.70E-32 | -1.42E+01 | 61.5314009 | -2.18E-01 | 100174853 | 100174976 | NC_000010.10 |
| cg23633330 | 3.83E-29 | 8.74E-32 | -1.42E+01 | 61.5278455 | -2.08E-01 | 207510679 | 207510802 | NC_000001.10 |
| cg15420926 | 3.97E-29 | 9.07E-32 | -1.42E+01 | 61.4902521 | -2.17E-01 | 132929147 | 132929270 | NC_000008.10 |
| cg03624316 | 3.97E-29 | 9.08E-32 | -1.42E+01 | 61.4895271 | -3.01E-01 | 53693054  | 53693177  | NC_000012.11 |

|            |          |          |           |            |           |           |           |              |
|------------|----------|----------|-----------|------------|-----------|-----------|-----------|--------------|
| cg03884082 | 3.97E-29 | 9.08E-32 | -1.42E+01 | 61.4889865 | -1.39E-01 | 19971709  | 19971832  | NC_000001.10 |
| cg25423416 | 3.97E-29 | 9.09E-32 | -1.42E+01 | 61.4879648 | -1.62E-01 | 46934860  | 46934983  | NC_000022.10 |
| cg14731462 | 4.02E-29 | 9.22E-32 | -1.42E+01 | 61.4745913 | -3.96E-01 | 129789429 | 129789552 | NC_000010.10 |
| cg08975803 | 4.31E-29 | 9.93E-32 | -1.41E+01 | 61.4004594 | -1.59E-01 | 52626818  | 52626941  | NC_000012.11 |
| cg26775866 | 4.41E-29 | 1.02E-31 | -1.41E+01 | 61.3743497 | -2.32E-01 | 159849193 | 159849316 | NC_000005.9  |
| cg01238435 | 4.46E-29 | 1.03E-31 | -1.41E+01 | 61.3630113 | -3.59E-01 | 141595696 | 141595819 | NC_000005.9  |
| cg26940518 | 4.61E-29 | 1.07E-31 | -1.41E+01 | 61.3241185 | -2.00E-01 | 1593766   | 1593889   | NC_000016.9  |
| cg01928076 | 4.67E-29 | 1.09E-31 | -1.41E+01 | 61.3094669 | -1.99E-01 | 77818356  | 77818479  | NC_000017.10 |
| cg24166450 | 4.74E-29 | 1.10E-31 | -1.41E+01 | 61.2941985 | -1.71E-01 | 74248466  | 74248589  | NC_000017.10 |
| cg04147642 | 4.78E-29 | 1.12E-31 | -1.41E+01 | 61.2834081 | -2.09E-01 | 32054659  | 32054782  | NC_000006.11 |
| cg14462645 | 4.81E-29 | 1.13E-31 | -1.41E+01 | 61.2746736 | -1.85E-01 | 52226698  | 52226821  | NC_000006.11 |
| cg06457736 | 4.86E-29 | 1.14E-31 | -1.41E+01 | 61.2631525 | -3.81E-01 | 11178683  | 11178806  | NC_000003.11 |
| cg26392367 | 4.86E-29 | 1.14E-31 | -1.41E+01 | 61.2630613 | -2.87E-01 | 17566891  | 17567014  | NC_000017.10 |
| cg00927231 | 4.94E-29 | 1.16E-31 | -1.41E+01 | 61.2468784 | -1.13E-01 | 4357579   | 4357702   | NC_000016.9  |
| cg17441401 | 5.03E-29 | 1.18E-31 | -1.41E+01 | 61.2258594 | -3.56E-01 | 53794150  | 53794273  | NC_000001.10 |
| cg26781466 | 5.04E-29 | 1.19E-31 | -1.41E+01 | 61.2229823 | -2.28E-01 | 10521612  | 10521735  | NC_000006.11 |
| cg17272838 | 5.13E-29 | 1.21E-31 | -1.41E+01 | 61.2025198 | -3.06E-01 | 152597659 | 152597782 | NC_000004.11 |
| cg08622198 | 5.45E-29 | 1.29E-31 | -1.41E+01 | 61.1404539 | -3.38E-01 | 239979505 | 239979628 | NC_000001.10 |
| cg19714737 | 5.46E-29 | 1.29E-31 | -1.41E+01 | 61.138943  | -3.23E-01 | 94880976  | 94881099  | NC_000011.9  |
| cg07902749 | 5.49E-29 | 1.30E-31 | -1.41E+01 | 61.1323783 | -2.17E-01 | 37813553  | 37813676  | NC_000002.11 |
| cg26165146 | 5.50E-29 | 1.30E-31 | -1.41E+01 | 61.1290306 | -3.37E-01 | 27484656  | 27484779  | NC_000012.11 |
| cg07243202 | 5.60E-29 | 1.33E-31 | -1.41E+01 | 61.1089328 | -2.87E-01 | 134315520 | 134315643 | NC_000008.10 |
| cg21452188 | 6.02E-29 | 1.44E-31 | -1.41E+01 | 61.0339232 | -3.02E-01 | 156095914 | 156096037 | NC_000001.10 |
| cg09939948 | 6.32E-29 | 1.51E-31 | -1.41E+01 | 60.9848486 | -1.73E-01 | 90548043  | 90548166  | NC_000015.9  |
| cg16271600 | 6.55E-29 | 1.57E-31 | -1.41E+01 | 60.9470661 | -1.76E-01 | 23450522  | 23450645  | NC_000014.8  |



|            |          |          |           |            |           |           |           |              |
|------------|----------|----------|-----------|------------|-----------|-----------|-----------|--------------|
| cg05711474 | 6.58E-29 | 1.58E-31 | -1.41E+01 | 60.9404555 | -1.67E-01 | 57937462  | 57937585  | NC_000003.11 |
| cg22786667 | 6.66E-29 | 1.60E-31 | -1.41E+01 | 60.9288053 | -2.94E-01 | 47641179  | 47641302  | NC_000007.13 |
| cg06470626 | 6.70E-29 | 1.61E-31 | -1.41E+01 | 60.9211385 | -2.26E-01 | 22364961  | 22365084  | NC_000016.9  |
| cg15601264 | 6.81E-29 | 1.64E-31 | -1.41E+01 | 60.9039545 | -2.99E-01 | 54864697  | 54864820  | NC_000017.10 |
| cg19358397 | 6.87E-29 | 1.65E-31 | -1.41E+01 | 60.8931071 | -2.13E-01 | 1794018   | 1794141   | NC_000011.9  |
| cg11484353 | 7.11E-29 | 1.72E-31 | -1.41E+01 | 60.8558471 | -1.54E-01 | 39958249  | 39958372  | NC_000020.10 |
| cg25250968 | 7.27E-29 | 1.76E-31 | -1.41E+01 | 60.8320278 | -3.14E-01 | 11318770  | 11318893  | NC_000006.11 |
| cg16608018 | 7.45E-29 | 1.80E-31 | -1.41E+01 | 60.8063652 | -1.26E-01 | 122739544 | 122739667 | NC_000010.10 |
| cg17260706 | 7.46E-29 | 1.81E-31 | -1.41E+01 | 60.8042866 | -2.24E-01 | 118782879 | 118783002 | NC_000011.9  |
| cg06361405 | 7.65E-29 | 1.86E-31 | -1.41E+01 | 60.7777607 | -2.34E-01 | 104434010 | 104434133 | NC_000010.10 |
| cg14204586 | 7.74E-29 | 1.88E-31 | -1.41E+01 | 60.765133  | -2.66E-01 | 155931858 | 155931981 | NC_000001.10 |
| cg12711760 | 7.85E-29 | 1.91E-31 | -1.40E+01 | 60.749341  | -1.79E-01 | 20132923  | 20133046  | NC_000011.9  |
| cg14140379 | 7.94E-29 | 1.94E-31 | -1.40E+01 | 60.7365558 | -3.14E-01 | 6695380   | 6695503   | NC_000004.11 |
| cg07134230 | 8.03E-29 | 1.96E-31 | -1.40E+01 | 60.7247997 | -1.66E-01 | 156631248 | 156631371 | NC_000001.10 |
| cg04916810 | 8.69E-29 | 2.12E-31 | -1.40E+01 | 60.6454672 | -1.27E-01 | 19733614  | 19733737  | NC_000011.9  |
| cg15626828 | 8.74E-29 | 2.14E-31 | -1.40E+01 | 60.6386664 | -1.70E-01 | 198651141 | 198651264 | NC_000001.10 |
| cg13414270 | 8.74E-29 | 2.14E-31 | -1.40E+01 | 60.6376261 | -3.09E-01 | 45465395  | 45465518  | NC_000002.11 |
| cg25969122 | 8.75E-29 | 2.14E-31 | -1.40E+01 | 60.6347718 | -3.18E-01 | 119630362 | 119630485 | NC_000011.9  |
| cg18041642 | 8.81E-29 | 2.16E-31 | -1.40E+01 | 60.6258968 | -2.90E-01 | 62062565  | 62062688  | NC_000017.10 |
| cg13985234 | 9.00E-29 | 2.21E-31 | -1.40E+01 | 60.6041007 | -2.97E-01 | 138582143 | 138582266 | NC_000005.9  |
| cg16978398 | 9.09E-29 | 2.24E-31 | -1.40E+01 | 60.5934658 | -2.84E-01 | 98047885  | 98048008  | NC_000007.13 |
| cg02816525 | 9.19E-29 | 2.26E-31 | -1.40E+01 | 60.5814863 | -3.80E-01 | 59024033  | 59024156  | NC_000015.9  |
| cg13314965 | 9.42E-29 | 2.32E-31 | -1.40E+01 | 60.5551394 | -2.54E-01 | 196065506 | 196065629 | NC_000003.11 |
| cg02538248 | 9.83E-29 | 2.43E-31 | -1.40E+01 | 60.5107283 | -2.37E-01 | 75045643  | 75045766  | NC_000016.9  |
| cg12284769 | 9.96E-29 | 2.46E-31 | -1.40E+01 | 60.4968149 | -2.58E-01 | 125259369 | 125259492 | NC_000012.11 |

|            |          |          |           |            |           |           |           |              |
|------------|----------|----------|-----------|------------|-----------|-----------|-----------|--------------|
| cg07277549 | 1.02E-28 | 2.53E-31 | -1.40E+01 | 60.4706731 | -2.81E-01 | 30509141  | 30509264  | NC_000007.13 |
| cg18289141 | 1.06E-28 | 2.62E-31 | -1.40E+01 | 60.4364167 | -2.52E-01 | 30182218  | 30182341  | NC_000001.10 |
| cg12614090 | 1.11E-28 | 2.75E-31 | -1.40E+01 | 60.3878611 | -1.29E-01 | 116444240 | 116444363 | NC_000010.10 |
| cg10009157 | 1.12E-28 | 2.80E-31 | -1.40E+01 | 60.3704972 | -1.28E-01 | 66025586  | 66025709  | NC_000003.11 |
| cg23201812 | 1.13E-28 | 2.83E-31 | -1.40E+01 | 60.3597792 | -3.00E-01 | 34771918  | 34772041  | NC_000011.9  |
| cg13447080 | 1.17E-28 | 2.92E-31 | -1.40E+01 | 60.3278043 | -3.21E-01 | 131054408 | 131054531 | NC_000008.10 |
| cg18700940 | 1.17E-28 | 2.92E-31 | -1.40E+01 | 60.3263672 | -2.33E-01 | 43371099  | 43371222  | NC_000017.10 |
| cg21430685 | 1.17E-28 | 2.93E-31 | -1.40E+01 | 60.3231082 | -3.58E-01 | 29387008  | 29387131  | NC_000008.10 |
| cg13389508 | 1.18E-28 | 2.95E-31 | -1.40E+01 | 60.3182321 | -2.35E-01 | 145012644 | 145012767 | NC_000008.10 |
| cg04403415 | 1.20E-28 | 3.00E-31 | -1.40E+01 | 60.3023128 | -2.81E-01 | 124991087 | 124991210 | NC_000012.11 |
| cg19930352 | 1.20E-28 | 3.01E-31 | -1.40E+01 | 60.2984715 | -2.73E-01 | 152009772 | 152009895 | NC_000001.10 |
| cg17411016 | 1.20E-28 | 3.02E-31 | -1.40E+01 | 60.2941597 | -2.57E-01 | 47100912  | 47101035  | NC_000002.11 |
| cg24354933 | 1.25E-28 | 3.15E-31 | -1.40E+01 | 60.2530248 | -1.70E-01 | 14049294  | 14049417  | NC_000019.9  |
| cg02641539 | 1.25E-28 | 3.16E-31 | -1.40E+01 | 60.2493811 | -2.62E-01 | 105351190 | 105351313 | NC_000008.10 |
| cg20917083 | 1.26E-28 | 3.17E-31 | -1.40E+01 | 60.2452748 | -2.21E-01 | 15114233  | 15114356  | NC_000012.11 |
| cg21837069 | 1.26E-28 | 3.18E-31 | -1.40E+01 | 60.24336   | -2.76E-01 | 1369466   | 1369589   | NC_000001.10 |
| cg07904452 | 1.26E-28 | 3.18E-31 | -1.40E+01 | 60.2422485 | -2.68E-01 | 22892738  | 22892861  | NC_000006.11 |
| cg02244288 | 1.30E-28 | 3.29E-31 | -1.40E+01 | 60.2102684 | -2.15E-01 | 89573955  | 89574078  | NC_000016.9  |
| cg17826428 | 1.31E-28 | 3.32E-31 | -1.40E+01 | 60.1999226 | -2.25E-01 | 180336487 | 180336610 | NC_000005.9  |
| cg13784855 | 1.31E-28 | 3.33E-31 | -1.40E+01 | 60.1969453 | -1.81E-01 | 128806938 | 128807061 | NC_000008.10 |
| cg22362636 | 1.32E-28 | 3.37E-31 | -1.40E+01 | 60.1853579 | -1.86E-01 | 2758447   | 2758570   | NC_000004.11 |
| cg11152384 | 1.35E-28 | 3.43E-31 | -1.40E+01 | 60.1681779 | -3.32E-01 | 68934300  | 68934423  | NC_000011.9  |
| cg09624855 | 1.36E-28 | 3.46E-31 | -1.40E+01 | 60.1585144 | -2.64E-01 | 85038123  | 85038246  | NC_000016.9  |
| cg04108570 | 1.36E-28 | 3.47E-31 | -1.40E+01 | 60.1550557 | -1.21E-01 | 9143163   | 9143286   | NC_000002.11 |
| cg07373723 | 1.39E-28 | 3.55E-31 | -1.40E+01 | 60.1344015 | -3.61E-01 | 110838461 | 110838584 | NC_000007.13 |

|            |          |          |           |            |           |           |           |              |
|------------|----------|----------|-----------|------------|-----------|-----------|-----------|--------------|
| cg02059176 | 1.45E-28 | 3.71E-31 | -1.40E+01 | 60.0884498 | -3.43E-01 | 44327637  | 44327760  | NC_000002.11 |
| cg25711003 | 1.46E-28 | 3.75E-31 | -1.40E+01 | 60.079924  | -2.34E-01 | 111522050 | 111522173 | NC_000003.11 |
| cg12996903 | 1.48E-28 | 3.82E-31 | -1.40E+01 | 60.0604185 | -2.06E-01 | 50275575  | 50275698  | NC_000003.11 |
| cg27027375 | 1.49E-28 | 3.83E-31 | -1.39E+01 | 60.0569218 | -2.99E-01 | 6695319   | 6695442   | NC_000004.11 |
| cg14541915 | 1.51E-28 | 3.91E-31 | -1.39E+01 | 60.038341  | -1.92E-01 | 65894463  | 65894586  | NC_000011.9  |
| cg24713529 | 1.54E-28 | 3.98E-31 | -1.39E+01 | 60.020103  | -1.96E-01 | 50965126  | 50965249  | NC_000022.10 |
| cg26388816 | 1.55E-28 | 4.02E-31 | -1.39E+01 | 60.0092054 | -1.90E-01 | 570155    | 570278    | NC_000012.11 |
| cg05147714 | 1.57E-28 | 4.07E-31 | -1.39E+01 | 59.9973057 | -1.77E-01 | 73239682  | 73239805  | NC_000011.9  |
| cg16409012 | 1.57E-28 | 4.08E-31 | -1.39E+01 | 59.9945675 | -3.10E-01 | 13024987  | 13025110  | NC_000002.11 |
| cg19263548 | 1.70E-28 | 4.42E-31 | -1.39E+01 | 59.9163838 | -2.62E-01 | 12609616  | 12609739  | NC_000001.10 |
| cg14943135 | 1.73E-28 | 4.52E-31 | -1.39E+01 | 59.8932092 | -3.25E-01 | 168558115 | 168558238 | NC_000006.11 |
| cg13790353 | 1.76E-28 | 4.59E-31 | -1.39E+01 | 59.8783393 | -2.58E-01 | 85565559  | 85565682  | NC_000011.9  |
| cg01324115 | 1.80E-28 | 4.70E-31 | -1.39E+01 | 59.8549647 | -1.12E-01 | 42722189  | 42722312  | NC_000019.9  |
| cg01511901 | 1.82E-28 | 4.76E-31 | -1.39E+01 | 59.8415864 | -2.96E-01 | 31004719  | 31004842  | NC_000013.10 |
| cg07967679 | 1.87E-28 | 4.90E-31 | -1.39E+01 | 59.8132711 | -2.04E-01 | 52626814  | 52626937  | NC_000012.11 |
| cg25296374 | 1.87E-28 | 4.92E-31 | -1.39E+01 | 59.8097991 | -2.13E-01 | 154691940 | 154692063 | NC_000006.11 |
| cg25015038 | 1.88E-28 | 4.95E-31 | -1.39E+01 | 59.8036127 | -2.63E-01 | 89604062  | 89604185  | NC_000014.8  |
| cg16799831 | 1.97E-28 | 5.20E-31 | -1.39E+01 | 59.7548711 | -2.40E-01 | 7468973   | 7469096   | NC_000006.11 |
| cg17994788 | 1.98E-28 | 5.22E-31 | -1.39E+01 | 59.7498773 | -2.78E-01 | 7261594   | 7261717   | NC_000007.13 |
| cg24218925 | 1.99E-28 | 5.26E-31 | -1.39E+01 | 59.7427312 | -1.07E-01 | 2578938   | 2579061   | NC_000019.9  |
| cg05307752 | 2.02E-28 | 5.34E-31 | -1.39E+01 | 59.7274534 | -2.89E-01 | 144462886 | 144463009 | NC_000002.11 |
| cg15063366 | 2.04E-28 | 5.39E-31 | -1.39E+01 | 59.7178639 | -1.98E-01 | 228683032 | 228683155 | NC_000002.11 |
| cg12280317 | 2.04E-28 | 5.41E-31 | -1.39E+01 | 59.7152646 | -2.69E-01 | 152008083 | 152008206 | NC_000001.10 |
| cg13471114 | 2.05E-28 | 5.43E-31 | -1.39E+01 | 59.711102  | -9.42E-02 | 63276984  | 63277107  | NC_000002.11 |
| cg00375457 | 2.10E-28 | 5.56E-31 | -1.39E+01 | 59.6875555 | -2.30E-01 | 5617273   | 5617396   | NC_000011.9  |

|            |          |          |           |            |           |           |           |              |
|------------|----------|----------|-----------|------------|-----------|-----------|-----------|--------------|
| cg24152264 | 2.14E-28 | 5.68E-31 | -1.39E+01 | 59.6665807 | -2.91E-01 | 232820610 | 232820733 | NC_000001.10 |
| cg02524099 | 2.20E-28 | 5.86E-31 | -1.39E+01 | 59.6351082 | -1.86E-01 | 1037816   | 1037939   | NC_000004.11 |
| cg20048529 | 2.22E-28 | 5.92E-31 | -1.39E+01 | 59.6252532 | -1.68E-01 | 98740022  | 98740145  | NC_000007.13 |
| cg22926842 | 2.29E-28 | 6.12E-31 | -1.39E+01 | 59.5912522 | -2.96E-01 | 42336869  | 42336992  | NC_000022.10 |
| cg07129104 | 2.29E-28 | 6.13E-31 | -1.39E+01 | 59.5902024 | -1.71E-01 | 2907517   | 2907640   | NC_000016.9  |
| cg01827726 | 2.31E-28 | 6.19E-31 | -1.39E+01 | 59.5812744 | -2.51E-01 | 2673408   | 2673531   | NC_000007.13 |
| cg09888026 | 2.37E-28 | 6.37E-31 | -1.39E+01 | 59.5528577 | -1.85E-01 | 79303434  | 79303557  | NC_000017.10 |
| cg27594683 | 2.45E-28 | 6.58E-31 | -1.39E+01 | 59.5197939 | -2.53E-01 | 7468945   | 7469068   | NC_000006.11 |
| cg17419597 | 2.45E-28 | 6.60E-31 | -1.39E+01 | 59.5173301 | -1.79E-01 | 156211529 | 156211652 | NC_000001.10 |
| cg25981998 | 2.48E-28 | 6.67E-31 | -1.39E+01 | 59.5060192 | -2.11E-01 | 30124248  | 30124371  | NC_000006.11 |
| cg01965939 | 2.55E-28 | 6.88E-31 | -1.39E+01 | 59.4757392 | -1.72E-01 | 148442694 | 148442817 | NC_000005.9  |
| cg03919488 | 2.55E-28 | 6.88E-31 | -1.39E+01 | 59.4756761 | -3.17E-01 | 63179691  | 63179814  | NC_000012.11 |
| cg00755546 | 2.57E-28 | 6.95E-31 | -1.39E+01 | 59.4653569 | -1.46E-01 | 19971792  | 19971915  | NC_000001.10 |
| cg08521995 | 2.60E-28 | 7.04E-31 | -1.39E+01 | 59.4527028 | -2.72E-01 | 41628237  | 41628360  | NC_000008.10 |
| cg27544190 | 2.68E-28 | 7.27E-31 | -1.39E+01 | 59.4208039 | -1.61E-01 | 33785434  | 33785557  | NC_000021.8  |
| cg22795331 | 2.68E-28 | 7.28E-31 | -1.39E+01 | 59.4200667 | -3.24E-01 | 117785611 | 117785734 | NC_000006.11 |
| cg04447128 | 2.68E-28 | 7.29E-31 | -1.39E+01 | 59.4180325 | -2.09E-01 | 74771998  | 74772121  | NC_000016.9  |
| cg21708130 | 2.80E-28 | 7.61E-31 | -1.39E+01 | 59.3747759 | -3.35E-01 | 238596537 | 238596660 | NC_000002.11 |
| cg14363981 | 3.11E-28 | 8.51E-31 | -1.38E+01 | 59.2643434 | -1.41E-01 | 107186561 | 107186684 | NC_000013.10 |
| cg23052220 | 3.12E-28 | 8.54E-31 | -1.38E+01 | 59.2608612 | -1.20E-01 | 32912081  | 32912204  | NC_000017.10 |
| cg12279294 | 3.12E-28 | 8.54E-31 | -1.38E+01 | 59.2608612 | -2.41E-01 | 96877300  | 96877423  | NC_000015.9  |
| cg17579770 | 3.14E-28 | 8.60E-31 | -1.38E+01 | 59.2531663 | -1.64E-01 | 60105965  | 60106088  | NC_000013.10 |
| cg09159285 | 3.21E-28 | 8.82E-31 | -1.38E+01 | 59.2282947 | -2.26E-01 | 6664134   | 6664257   | NC_000001.10 |
| cg02896318 | 3.26E-28 | 8.97E-31 | -1.38E+01 | 59.2115608 | -1.77E-01 | 1370775   | 1370898   | NC_000001.10 |
| cg04742550 | 3.28E-28 | 9.04E-31 | -1.38E+01 | 59.2042251 | -1.32E-01 | 31366429  | 31366552  | NC_000016.9  |

|            |          |          |           |            |           |           |           |              |
|------------|----------|----------|-----------|------------|-----------|-----------|-----------|--------------|
| cg06121808 | 3.30E-28 | 9.10E-31 | -1.38E+01 | 59.1980223 | -2.51E-01 | 113404678 | 113404801 | NC_000002.11 |
| cg23680451 | 3.46E-28 | 9.59E-31 | -1.38E+01 | 59.1456971 | -3.70E-01 | 3823790   | 3823913   | NC_000010.10 |
| cg15674825 | 3.49E-28 | 9.66E-31 | -1.38E+01 | 59.1379929 | -2.03E-01 | 150052349 | 150052472 | NC_000005.9  |
| cg18717167 | 3.63E-28 | 1.01E-30 | -1.38E+01 | 59.0977797 | -2.48E-01 | 80266962  | 80267085  | NC_000017.10 |
| cg22140866 | 3.70E-28 | 1.03E-30 | -1.38E+01 | 59.0749017 | -3.06E-01 | 59686676  | 59686799  | NC_000013.10 |
| cg04385934 | 3.74E-28 | 1.04E-30 | -1.38E+01 | 59.0635669 | -1.68E-01 | 99396621  | 99396744  | NC_000015.9  |
| cg11124260 | 3.74E-28 | 1.04E-30 | -1.38E+01 | 59.0610189 | -2.34E-01 | 79709078  | 79709201  | NC_000010.10 |
| cg11277126 | 3.90E-28 | 1.09E-30 | -1.38E+01 | 59.0164593 | -1.79E-01 | 33680945  | 33681068  | NC_000020.10 |
| cg08382534 | 4.09E-28 | 1.15E-30 | -1.38E+01 | 58.9676403 | -3.71E-01 | 84058601  | 84058724  | NC_000016.9  |
| cg18923740 | 4.13E-28 | 1.16E-30 | -1.38E+01 | 58.9570783 | -1.80E-01 | 19971790  | 19971913  | NC_000001.10 |
| cg16783186 | 4.13E-28 | 1.16E-30 | -1.38E+01 | 58.9567158 | -3.00E-01 | 30516374  | 30516497  | NC_000002.11 |
| cg17349632 | 4.14E-28 | 1.17E-30 | -1.38E+01 | 58.9515333 | -3.15E-01 | 131830544 | 131830667 | NC_000007.13 |
| cg11225090 | 4.15E-28 | 1.17E-30 | -1.38E+01 | 58.9497966 | -2.10E-01 | 185276573 | 185276696 | NC_000004.11 |
| cg02047051 | 4.26E-28 | 1.20E-30 | -1.38E+01 | 58.9215794 | -3.16E-01 | 12792283  | 12792406  | NC_000003.11 |
| cg11706635 | 4.30E-28 | 1.22E-30 | -1.38E+01 | 58.9096313 | -1.35E-01 | 103087723 | 103087846 | NC_000007.13 |
| cg19859193 | 4.33E-28 | 1.22E-30 | -1.38E+01 | 58.9036405 | -2.57E-01 | 79391616  | 79391739  | NC_000017.10 |
| cg14289469 | 4.36E-28 | 1.24E-30 | -1.38E+01 | 58.8938761 | -2.08E-01 | 103010887 | 103011010 | NC_000014.8  |
| cg24894531 | 4.38E-28 | 1.24E-30 | -1.38E+01 | 58.8897402 | -3.25E-01 | 137717665 | 137717788 | NC_000003.11 |
| cg26856257 | 4.41E-28 | 1.25E-30 | -1.38E+01 | 58.8813229 | -2.85E-01 | 32805350  | 32805473  | NC_000001.10 |
| cg23773252 | 4.53E-28 | 1.29E-30 | -1.38E+01 | 58.8533184 | -1.66E-01 | 99527224  | 99527347  | NC_000007.13 |
| cg09510077 | 4.58E-28 | 1.30E-30 | -1.38E+01 | 58.8422113 | -1.66E-01 | 68722976  | 68723099  | NC_000011.9  |
| cg01484686 | 4.64E-28 | 1.32E-30 | -1.38E+01 | 58.8266857 | -2.34E-01 | 106258629 | 106258752 | NC_000006.11 |
| cg05155319 | 4.66E-28 | 1.33E-30 | -1.38E+01 | 58.8211797 | -2.07E-01 | 109355164 | 109355287 | NC_000004.11 |
| cg01904393 | 4.71E-28 | 1.34E-30 | -1.38E+01 | 58.809774  | -1.94E-01 | 51815083  | 51815206  | NC_000012.11 |
| cg16755214 | 4.78E-28 | 1.36E-30 | -1.38E+01 | 58.7946473 | -2.94E-01 | 54720346  | 54720469  | NC_000014.8  |

|            |          |          |           |            |           |           |           |              |
|------------|----------|----------|-----------|------------|-----------|-----------|-----------|--------------|
| cg26680608 | 5.00E-28 | 1.43E-30 | -1.38E+01 | 58.7485196 | -3.81E-01 | 136915556 | 136915679 | NC_000006.11 |
| cg00778190 | 5.10E-28 | 1.46E-30 | -1.38E+01 | 58.7274914 | -3.08E-01 | 95068029  | 95068152  | NC_000001.10 |
| cg04335293 | 5.15E-28 | 1.48E-30 | -1.38E+01 | 58.7161302 | -1.90E-01 | 24713157  | 24713280  | NC_000002.11 |
| cg07805542 | 5.29E-28 | 1.52E-30 | -1.38E+01 | 58.6893924 | -3.33E-01 | 9779309   | 9779432   | NC_000001.10 |
| cg17457701 | 5.29E-28 | 1.52E-30 | -1.38E+01 | 58.6873343 | -2.17E-01 | 86313860  | 86313983  | NC_000015.9  |
| cg02052726 | 5.37E-28 | 1.54E-30 | -1.38E+01 | 58.6717169 | -1.87E-01 | 126180465 | 126180588 | NC_000011.9  |
| cg07756483 | 5.38E-28 | 1.55E-30 | -1.38E+01 | 58.6680217 | -2.38E-01 | 44281665  | 44281788  | NC_000019.9  |
| cg09680447 | 5.45E-28 | 1.57E-30 | -1.37E+01 | 58.6556774 | -1.79E-01 | 1037615   | 1037738   | NC_000004.11 |
| cg21026469 | 5.52E-28 | 1.59E-30 | -1.37E+01 | 58.6416339 | -2.33E-01 | 144820683 | 144820806 | NC_000008.10 |
| cg24607755 | 5.62E-28 | 1.62E-30 | -1.37E+01 | 58.6225486 | -1.44E-01 | 36171375  | 36171498  | NC_000011.9  |
| cg10487970 | 5.62E-28 | 1.62E-30 | -1.37E+01 | 58.6221695 | -1.10E-01 | 63277030  | 63277153  | NC_000002.11 |
| cg04468741 | 5.62E-28 | 1.63E-30 | -1.37E+01 | 58.620995  | -3.48E-01 | 12181467  | 12181590  | NC_000011.9  |
| cg23222604 | 5.68E-28 | 1.64E-30 | -1.37E+01 | 58.6090656 | -1.91E-01 | 125110933 | 125111056 | NC_000012.11 |
| cg16409409 | 5.77E-28 | 1.68E-30 | -1.37E+01 | 58.5898743 | -2.58E-01 | 200861597 | 200861720 | NC_000001.10 |
| cg00541683 | 5.77E-28 | 1.68E-30 | -1.37E+01 | 58.5894277 | -1.57E-01 | 32041933  | 32042056  | NC_000001.10 |
| cg07495389 | 5.89E-28 | 1.72E-30 | -1.37E+01 | 58.5671347 | -2.82E-01 | 27233872  | 27233995  | NC_000002.11 |
| cg06821992 | 5.92E-28 | 1.73E-30 | -1.37E+01 | 58.56085   | -2.52E-01 | 56790874  | 56790997  | NC_000005.9  |
| cg12885751 | 6.18E-28 | 1.80E-30 | -1.37E+01 | 58.5168833 | -2.29E-01 | 100085073 | 100085196 | NC_000013.10 |
| cg00301239 | 6.31E-28 | 1.84E-30 | -1.37E+01 | 58.4960753 | -1.83E-01 | 103801487 | 103801610 | NC_000008.10 |
| cg25233271 | 6.44E-28 | 1.88E-30 | -1.37E+01 | 58.4740253 | -2.89E-01 | 69068109  | 69068232  | NC_000017.10 |
| cg23866916 | 6.45E-28 | 1.89E-30 | -1.37E+01 | 58.472095  | -2.68E-01 | 1155738   | 1155861   | NC_000019.9  |
| cg18975416 | 6.64E-28 | 1.94E-30 | -1.37E+01 | 58.4427276 | -3.10E-01 | 25349562  | 25349685  | NC_000001.10 |
| cg23344780 | 6.78E-28 | 1.99E-30 | -1.37E+01 | 58.4187524 | -2.51E-01 | 48829487  | 48829610  | NC_000019.9  |
| cg08185345 | 7.00E-28 | 2.06E-30 | -1.37E+01 | 58.3857109 | -1.93E-01 | 155055102 | 155055225 | NC_000001.10 |
| cg07356549 | 7.08E-28 | 2.08E-30 | -1.37E+01 | 58.3748174 | -2.72E-01 | 212091686 | 212091809 | NC_000001.10 |

|            |          |          |           |            |           |           |           |              |
|------------|----------|----------|-----------|------------|-----------|-----------|-----------|--------------|
| cg23654821 | 7.16E-28 | 2.11E-30 | -1.37E+01 | 58.3615267 | -2.09E-01 | 39188656  | 39188779  | NC_000003.11 |
| cg05827190 | 7.21E-28 | 2.13E-30 | -1.37E+01 | 58.3539259 | -2.78E-01 | 681440    | 681563    | NC_000004.11 |
| cg09055236 | 7.28E-28 | 2.15E-30 | -1.37E+01 | 58.3429251 | -3.17E-01 | 2673197   | 2673320   | NC_000007.13 |
| cg24067911 | 7.46E-28 | 2.21E-30 | -1.37E+01 | 58.3170833 | -3.24E-01 | 16729610  | 16729733  | NC_000006.11 |
| cg07030727 | 7.46E-28 | 2.21E-30 | -1.37E+01 | 58.3161396 | -3.01E-01 | 85536594  | 85536717  | NC_000002.11 |
| cg11717881 | 7.56E-28 | 2.24E-30 | -1.37E+01 | 58.3018058 | -1.89E-01 | 44513921  | 44514044  | NC_000001.10 |
| cg02341503 | 7.56E-28 | 2.24E-30 | -1.37E+01 | 58.3011247 | -2.13E-01 | 45947123  | 45947246  | NC_000020.10 |
| cg19180828 | 7.65E-28 | 2.27E-30 | -1.37E+01 | 58.2872983 | -2.33E-01 | 6265220   | 6265343   | NC_000001.10 |
| cg15373928 | 7.91E-28 | 2.35E-30 | -1.37E+01 | 58.2537289 | -1.14E-01 | 184893413 | 184893536 | NC_000003.11 |
| cg11993160 | 8.07E-28 | 2.40E-30 | -1.37E+01 | 58.2319899 | -2.09E-01 | 12404041  | 12404164  | NC_000018.9  |
| cg16933922 | 8.12E-28 | 2.42E-30 | -1.37E+01 | 58.2258801 | -1.87E-01 | 126106614 | 126106737 | NC_000010.10 |
| cg14672154 | 8.12E-28 | 2.42E-30 | -1.37E+01 | 58.2252582 | -1.03E-01 | 107647121 | 107647244 | NC_000003.11 |
| cg24492058 | 8.25E-28 | 2.46E-30 | -1.37E+01 | 58.2077441 | -2.14E-01 | 12203751  | 12203874  | NC_000001.10 |
| cg18442362 | 8.25E-28 | 2.46E-30 | -1.37E+01 | 58.2069917 | -3.69E-01 | 44677772  | 44677895  | NC_000007.13 |
| cg02607544 | 8.46E-28 | 2.53E-30 | -1.37E+01 | 58.180652  | -2.89E-01 | 6649994   | 6650117   | NC_000012.11 |
| cg05695699 | 8.71E-28 | 2.61E-30 | -1.37E+01 | 58.1503508 | -2.70E-01 | 33235324  | 33235447  | NC_000001.10 |
| cg20918957 | 8.78E-28 | 2.63E-30 | -1.37E+01 | 58.141337  | -2.63E-01 | 50275112  | 50275235  | NC_000003.11 |
| cg07709148 | 8.78E-28 | 2.64E-30 | -1.37E+01 | 58.1402438 | -2.54E-01 | 29387238  | 29387361  | NC_000008.10 |
| cg16750801 | 9.06E-28 | 2.72E-30 | -1.37E+01 | 58.107304  | -1.15E-01 | 129706313 | 129706436 | NC_000010.10 |
| cg06354695 | 9.06E-28 | 2.72E-30 | -1.37E+01 | 58.1072332 | -2.99E-01 | 212643521 | 212643644 | NC_000001.10 |
| cg12700319 | 9.28E-28 | 2.80E-30 | -1.37E+01 | 58.0816393 | -2.06E-01 | 8272199   | 8272322   | NC_000001.10 |
| cg12109838 | 9.44E-28 | 2.85E-30 | -1.37E+01 | 58.0636638 | -3.24E-01 | 103996978 | 103997101 | NC_000004.11 |
| cg15523958 | 9.44E-28 | 2.85E-30 | -1.37E+01 | 58.0630396 | -1.20E-01 | 43864929  | 43865052  | NC_000002.11 |
| cg22270364 | 9.49E-28 | 2.87E-30 | -1.37E+01 | 58.0560326 | -2.86E-01 | 16178426  | 16178549  | NC_000019.9  |
| cg19391247 | 9.49E-28 | 2.87E-30 | -1.37E+01 | 58.055985  | -3.07E-01 | 2360385   | 2360508   | NC_000020.10 |

|            |          |          |           |            |           |           |           |              |
|------------|----------|----------|-----------|------------|-----------|-----------|-----------|--------------|
| cg19090437 | 9.50E-28 | 2.87E-30 | -1.37E+01 | 58.054222  | -3.00E-01 | 38080799  | 38080922  | NC_000004.11 |
| cg26314722 | 9.53E-28 | 2.89E-30 | -1.37E+01 | 58.0497255 | -2.55E-01 | 234867300 | 234867423 | NC_000001.10 |
| cg09287864 | 9.73E-28 | 2.95E-30 | -1.37E+01 | 58.0284598 | -3.54E-01 | 17274056  | 17274179  | NC_000007.13 |
| cg18166947 | 9.75E-28 | 2.96E-30 | -1.37E+01 | 58.0259051 | -2.02E-01 | 18189443  | 18189566  | NC_000022.10 |
| cg09291474 | 1.02E-27 | 3.09E-30 | -1.37E+01 | 57.9822266 | -2.22E-01 | 65223141  | 65223264  | NC_000015.9  |
| cg07267600 | 1.03E-27 | 3.15E-30 | -1.37E+01 | 57.9630385 | -2.62E-01 | 2750053   | 2750176   | NC_000012.11 |
| cg21860675 | 1.09E-27 | 3.33E-30 | -1.36E+01 | 57.9062591 | -3.35E-01 | 71586357  | 71586480  | NC_000003.11 |
| cg08589721 | 1.11E-27 | 3.37E-30 | -1.36E+01 | 57.895049  | -1.88E-01 | 1370722   | 1370845   | NC_000001.10 |
| cg06547285 | 1.16E-27 | 3.53E-30 | -1.36E+01 | 57.8497192 | -3.17E-01 | 47630263  | 47630386  | NC_000012.11 |
| cg24408469 | 1.19E-27 | 3.66E-30 | -1.36E+01 | 57.8138801 | -2.40E-01 | 46770440  | 46770563  | NC_000022.10 |
| cg03890877 | 1.20E-27 | 3.67E-30 | -1.36E+01 | 57.812299  | -1.81E-01 | 52272690  | 52272813  | NC_000003.11 |
| cg00044372 | 1.23E-27 | 3.77E-30 | -1.36E+01 | 57.7831814 | -3.33E-01 | 85070825  | 85070948  | NC_000016.9  |
| cg10708675 | 1.23E-27 | 3.80E-30 | -1.36E+01 | 57.7770286 | -1.31E-01 | 69760758  | 69760881  | NC_000016.9  |
| cg01350686 | 1.32E-27 | 4.08E-30 | -1.36E+01 | 57.7055466 | -1.52E-01 | 24439075  | 24439198  | NC_000001.10 |
| cg06866938 | 1.33E-27 | 4.11E-30 | -1.36E+01 | 57.6975418 | -1.42E-01 | 46934811  | 46934934  | NC_000022.10 |
| cg10142237 | 1.33E-27 | 4.12E-30 | -1.36E+01 | 57.6956857 | -2.23E-01 | 38714395  | 38714518  | NC_000022.10 |
| cg02917867 | 1.34E-27 | 4.15E-30 | -1.36E+01 | 57.6882877 | -2.02E-01 | 1265999   | 1266122   | NC_000019.9  |
| cg19017553 | 1.34E-27 | 4.15E-30 | -1.36E+01 | 57.6875801 | -2.69E-01 | 34817409  | 34817532  | NC_000010.10 |
| cg20117369 | 1.35E-27 | 4.20E-30 | -1.36E+01 | 57.6778771 | -1.51E-01 | 49061546  | 49061669  | NC_000019.9  |
| cg16046375 | 1.37E-27 | 4.25E-30 | -1.36E+01 | 57.6660841 | -1.91E-01 | 114881019 | 114881142 | NC_000013.10 |
| cg16704703 | 1.37E-27 | 4.26E-30 | -1.36E+01 | 57.662261  | -2.87E-01 | 3509710   | 3509833   | NC_000010.10 |
| cg24275730 | 1.38E-27 | 4.29E-30 | -1.36E+01 | 57.6553681 | -1.18E-01 | 98703108  | 98703231  | NC_000002.11 |
| cg06834637 | 1.39E-27 | 4.32E-30 | -1.36E+01 | 57.649147  | -2.38E-01 | 9017502   | 9017625   | NC_000018.9  |
| cg13712023 | 1.39E-27 | 4.33E-30 | -1.36E+01 | 57.6462084 | -2.31E-01 | 141060575 | 141060698 | NC_000005.9  |
| cg26829395 | 1.39E-27 | 4.35E-30 | -1.36E+01 | 57.6412727 | -2.63E-01 | 40217855  | 40217978  | NC_000015.9  |



|            |          |          |           |            |           |           |           |              |
|------------|----------|----------|-----------|------------|-----------|-----------|-----------|--------------|
| cg11033617 | 1.40E-27 | 4.38E-30 | -1.36E+01 | 57.6343349 | -2.14E-01 | 179562118 | 179562241 | NC_000005.9  |
| cg06278108 | 1.44E-27 | 4.52E-30 | -1.36E+01 | 57.6043162 | -2.10E-01 | 66274343  | 66274466  | NC_000015.9  |
| cg11597902 | 1.45E-27 | 4.55E-30 | -1.36E+01 | 57.5968866 | -3.38E-01 | 75096239  | 75096362  | NC_000017.10 |
| cg21965980 | 1.46E-27 | 4.59E-30 | -1.36E+01 | 57.5890856 | -2.58E-01 | 35614992  | 35615115  | NC_000019.9  |
| cg14854503 | 1.48E-27 | 4.66E-30 | -1.36E+01 | 57.5738751 | -3.32E-01 | 19540272  | 19540395  | NC_000008.10 |
| cg03742286 | 1.48E-27 | 4.67E-30 | -1.36E+01 | 57.5718956 | -1.21E-01 | 74725571  | 74725694  | NC_000002.11 |
| cg27116365 | 1.51E-27 | 4.75E-30 | -1.36E+01 | 57.5538004 | -1.80E-01 | 137827315 | 137827438 | NC_000005.9  |
| cg05168229 | 1.55E-27 | 4.89E-30 | -1.36E+01 | 57.5256217 | -2.11E-01 | 45390049  | 45390172  | NC_000013.10 |
| cg12060422 | 1.56E-27 | 4.93E-30 | -1.36E+01 | 57.5180256 | -3.31E-01 | 102821684 | 102821807 | NC_000010.10 |
| cg25097904 | 1.58E-27 | 4.99E-30 | -1.36E+01 | 57.5057255 | -7.39E-02 | 141736095 | 141736218 | NC_000005.9  |
| cg18325192 | 1.63E-27 | 5.15E-30 | -1.36E+01 | 57.4737661 | -2.95E-01 | 19540396  | 19540519  | NC_000008.10 |
| cg10349436 | 1.65E-27 | 5.22E-30 | -1.36E+01 | 57.45996   | -7.37E-02 | 106015079 | 106015202 | NC_000002.11 |
| cg06061240 | 1.65E-27 | 5.23E-30 | -1.36E+01 | 57.4591606 | -2.48E-01 | 51800535  | 51800658  | NC_000001.10 |
| cg12755421 | 1.66E-27 | 5.25E-30 | -1.36E+01 | 57.4541119 | -2.53E-01 | 6342214   | 6342337   | NC_000011.9  |
| cg01023203 | 1.67E-27 | 5.31E-30 | -1.36E+01 | 57.4440064 | -8.79E-02 | 181429233 | 181429356 | NC_000003.11 |
| cg26353296 | 1.74E-27 | 5.51E-30 | -1.36E+01 | 57.4070487 | -2.52E-01 | 49378124  | 49378247  | NC_000003.11 |
| cg21038682 | 1.80E-27 | 5.72E-30 | -1.36E+01 | 57.3697431 | -1.41E-01 | 62314820  | 62314943  | NC_000011.9  |
| cg10755077 | 1.80E-27 | 5.73E-30 | -1.36E+01 | 57.3675694 | -1.95E-01 | 75318882  | 75319005  | NC_000017.10 |
| cg24773560 | 1.82E-27 | 5.81E-30 | -1.36E+01 | 57.3545852 | -2.64E-01 | 56732723  | 56732846  | NC_000012.11 |
| cg15101245 | 1.82E-27 | 5.82E-30 | -1.36E+01 | 57.3532866 | -2.24E-01 | 156631242 | 156631365 | NC_000001.10 |
| cg16442312 | 1.85E-27 | 5.91E-30 | -1.36E+01 | 57.3379657 | -2.50E-01 | 174279907 | 174280030 | NC_000002.11 |
| cg17988310 | 1.92E-27 | 6.14E-30 | -1.36E+01 | 57.2997702 | -3.31E-01 | 40355732  | 40355855  | NC_000022.10 |
| cg03454663 | 1.99E-27 | 6.37E-30 | -1.35E+01 | 57.2624685 | -2.42E-01 | 156848265 | 156848388 | NC_000003.11 |
| cg05033369 | 1.99E-27 | 6.40E-30 | -1.35E+01 | 57.2586802 | -2.79E-01 | 161676469 | 161676592 | NC_000001.10 |
| cg21406967 | 2.01E-27 | 6.47E-30 | -1.35E+01 | 57.2465458 | -1.93E-01 | 100464553 | 100464676 | NC_000007.13 |

|            |          |          |           |            |           |           |           |              |
|------------|----------|----------|-----------|------------|-----------|-----------|-----------|--------------|
| cg08412188 | 2.05E-27 | 6.61E-30 | -1.35E+01 | 57.2266996 | -1.88E-01 | 74074356  | 74074479  | NC_000007.13 |
| cg18672030 | 2.08E-27 | 6.71E-30 | -1.35E+01 | 57.2106784 | -2.84E-01 | 37668528  | 37668651  | NC_000004.11 |
| cg07786675 | 2.10E-27 | 6.77E-30 | -1.35E+01 | 57.2016294 | -2.29E-01 | 27189985  | 27190108  | NC_000001.10 |
| cg03966751 | 2.13E-27 | 6.87E-30 | -1.35E+01 | 57.1877653 | -2.90E-01 | 48367746  | 48367869  | NC_000017.10 |
| cg20492922 | 2.18E-27 | 7.05E-30 | -1.35E+01 | 57.1625651 | -1.27E-01 | 39194066  | 39194189  | NC_000001.10 |
| cg07065220 | 2.20E-27 | 7.10E-30 | -1.35E+01 | 57.1542132 | -2.60E-01 | 193987540 | 193987663 | NC_000003.11 |
| cg26962618 | 2.20E-27 | 7.13E-30 | -1.35E+01 | 57.150585  | -3.16E-01 | 70767183  | 70767306  | NC_000015.9  |
| cg08550523 | 2.25E-27 | 7.29E-30 | -1.35E+01 | 57.1281218 | -3.57E-01 | 219047954 | 219048077 | NC_000001.10 |
| cg04560810 | 2.25E-27 | 7.31E-30 | -1.35E+01 | 57.126252  | -2.88E-01 | 138861847 | 138861970 | NC_000005.9  |
| cg05191397 | 2.27E-27 | 7.37E-30 | -1.35E+01 | 57.1172697 | -2.49E-01 | 5437001   | 5437124   | NC_000007.13 |
| cg13541713 | 2.27E-27 | 7.39E-30 | -1.35E+01 | 57.1150253 | -3.48E-01 | 119947251 | 119947374 | NC_000004.11 |
| cg08558323 | 2.27E-27 | 7.40E-30 | -1.35E+01 | 57.1139051 | -1.34E-01 | 43097370  | 43097493  | NC_000006.11 |
| cg24235518 | 2.28E-27 | 7.43E-30 | -1.35E+01 | 57.1098144 | -2.45E-01 | 61371425  | 61371548  | NC_000020.10 |
| cg23022574 | 2.28E-27 | 7.45E-30 | -1.35E+01 | 57.107482  | -1.36E-01 | 219866218 | 219866341 | NC_000002.11 |
| cg00792251 | 2.32E-27 | 7.56E-30 | -1.35E+01 | 57.0924167 | -3.05E-01 | 223888905 | 223889028 | NC_000001.10 |
| cg08035555 | 2.32E-27 | 7.57E-30 | -1.35E+01 | 57.091144  | -2.91E-01 | 3558417   | 3558540   | NC_000019.9  |
| cg10255237 | 2.34E-27 | 7.66E-30 | -1.35E+01 | 57.0799418 | -3.42E-01 | 90150622  | 90150745  | NC_000012.11 |
| cg20446824 | 2.34E-27 | 7.67E-30 | -1.35E+01 | 57.0779966 | -2.69E-01 | 125076771 | 125076894 | NC_000012.11 |
| cg21275690 | 2.37E-27 | 7.76E-30 | -1.35E+01 | 57.0659686 | -2.12E-01 | 3072970   | 3073093   | NC_000016.9  |
| cg19229692 | 2.39E-27 | 7.84E-30 | -1.35E+01 | 57.0568709 | -3.09E-01 | 131830279 | 131830402 | NC_000007.13 |
| cg12611448 | 2.44E-27 | 8.03E-30 | -1.35E+01 | 57.0324133 | -1.92E-01 | 185255217 | 185255340 | NC_000003.11 |
| cg17952468 | 2.45E-27 | 8.07E-30 | -1.35E+01 | 57.0280365 | -1.22E-01 | 57874942  | 57875065  | NC_000020.10 |
| cg07932199 | 2.49E-27 | 8.23E-30 | -1.35E+01 | 57.0084458 | -1.49E-01 | 112008034 | 112008157 | NC_000012.11 |
| cg19805223 | 2.55E-27 | 8.42E-30 | -1.35E+01 | 56.9854758 | -1.43E-01 | 25346191  | 25346314  | NC_000022.10 |
| cg14692854 | 2.60E-27 | 8.62E-30 | -1.35E+01 | 56.961794  | -1.96E-01 | 97198126  | 97198249  | NC_000002.11 |

|            |          |          |           |            |           |           |           |              |
|------------|----------|----------|-----------|------------|-----------|-----------|-----------|--------------|
| cg27454102 | 2.60E-27 | 8.64E-30 | -1.35E+01 | 56.9599413 | -2.63E-01 | 32428473  | 32428596  | NC_000010.10 |
| cg05190002 | 2.72E-27 | 9.03E-30 | -1.35E+01 | 56.916167  | -1.54E-01 | 219262192 | 219262315 | NC_000002.11 |
| cg02277965 | 2.75E-27 | 9.16E-30 | -1.35E+01 | 56.9015245 | -8.24E-02 | 39298824  | 39298947  | NC_000012.11 |
| cg19418318 | 2.77E-27 | 9.24E-30 | -1.35E+01 | 56.8924039 | -2.94E-01 | 17219073  | 17219196  | NC_000019.9  |
| cg23652182 | 2.78E-27 | 9.27E-30 | -1.35E+01 | 56.8901423 | -1.01E-01 | 180631604 | 180631727 | NC_000005.9  |
| cg12138695 | 2.78E-27 | 9.28E-30 | -1.35E+01 | 56.8888938 | -1.77E-01 | 149160934 | 149161057 | NC_000003.11 |
| cg12897164 | 2.78E-27 | 9.29E-30 | -1.35E+01 | 56.8880407 | -2.98E-01 | 124529273 | 124529396 | NC_000008.10 |
| cg24239690 | 2.81E-27 | 9.41E-30 | -1.35E+01 | 56.874987  | -1.32E-01 | 5635953   | 5636076   | NC_000007.13 |
| cg23687149 | 2.82E-27 | 9.44E-30 | -1.35E+01 | 56.8715879 | -1.26E-01 | 19739422  | 19739545  | NC_000020.10 |
| cg10064525 | 2.86E-27 | 9.58E-30 | -1.35E+01 | 56.8573882 | -2.52E-01 | 109262682 | 109262805 | NC_000001.10 |
| cg21282907 | 2.87E-27 | 9.63E-30 | -1.35E+01 | 56.8513511 | -2.51E-01 | 74289980  | 74290103  | NC_000006.11 |
| cg11606261 | 2.91E-27 | 9.78E-30 | -1.35E+01 | 56.8369408 | -3.35E-01 | 53775336  | 53775459  | NC_000012.11 |
| cg15202006 | 2.94E-27 | 9.91E-30 | -1.35E+01 | 56.8235499 | -1.82E-01 | 68658566  | 68658689  | NC_000008.10 |
| cg20945055 | 2.98E-27 | 1.00E-29 | -1.35E+01 | 56.8094421 | -2.91E-01 | 836474    | 836597    | NC_000017.10 |
| cg27185793 | 2.99E-27 | 1.01E-29 | -1.35E+01 | 56.805787  | -2.18E-01 | 1238797   | 1238920   | NC_000001.10 |
| cg09293816 | 3.01E-27 | 1.01E-29 | -1.35E+01 | 56.79965   | -2.95E-01 | 50015532  | 50015655  | NC_000019.9  |
| cg03944843 | 3.03E-27 | 1.02E-29 | -1.35E+01 | 56.7914646 | -2.10E-01 | 24307429  | 24307552  | NC_000001.10 |
| cg14187724 | 3.06E-27 | 1.04E-29 | -1.35E+01 | 56.7793757 | -1.71E-01 | 93799798  | 93799921  | NC_000009.11 |
| cg03003434 | 3.14E-27 | 1.06E-29 | -1.35E+01 | 56.7546035 | -3.74E-01 | 159141722 | 159141845 | NC_000006.11 |
| cg02922879 | 3.14E-27 | 1.06E-29 | -1.35E+01 | 56.7522363 | -2.40E-01 | 94270127  | 94270250  | NC_000001.10 |
| cg26894575 | 3.19E-27 | 1.08E-29 | -1.35E+01 | 56.7349431 | -1.41E-01 | 153518054 | 153518177 | NC_000001.10 |
| cg08105396 | 3.25E-27 | 1.10E-29 | -1.35E+01 | 56.7156722 | -2.55E-01 | 153539058 | 153539181 | NC_000001.10 |
| cg13936668 | 3.27E-27 | 1.11E-29 | -1.35E+01 | 56.7091745 | -2.05E-01 | 94954264  | 94954387  | NC_000009.11 |
| cg07589202 | 3.35E-27 | 1.14E-29 | -1.35E+01 | 56.6859126 | -2.79E-01 | 10081532  | 10081655  | NC_000002.11 |
| cg02468320 | 3.35E-27 | 1.14E-29 | -1.35E+01 | 56.6834428 | -2.97E-01 | 2404134   | 2404257   | NC_000012.11 |

|            |          |          |           |            |           |           |           |              |
|------------|----------|----------|-----------|------------|-----------|-----------|-----------|--------------|
| cg09166410 | 3.74E-27 | 1.28E-29 | -1.35E+01 | 56.5702301 | -2.79E-01 | 111989685 | 111989808 | NC_000013.10 |
| cg25738326 | 3.79E-27 | 1.29E-29 | -1.34E+01 | 56.558486  | -3.08E-01 | 75463903  | 75464026  | NC_000015.9  |
| cg21422700 | 3.83E-27 | 1.31E-29 | -1.34E+01 | 56.5472475 | -1.05E-01 | 201229247 | 201229370 | NC_000001.10 |
| cg24251035 | 3.85E-27 | 1.32E-29 | -1.34E+01 | 56.5410122 | -2.10E-01 | 138721065 | 138721188 | NC_000007.13 |
| cg11825899 | 3.89E-27 | 1.34E-29 | -1.34E+01 | 56.5266484 | -2.79E-01 | 35844849  | 35844972  | NC_000009.11 |
| cg26109145 | 3.89E-27 | 1.34E-29 | -1.34E+01 | 56.5257127 | -2.10E-01 | 79045877  | 79046000  | NC_000017.10 |
| cg00369658 | 4.21E-27 | 1.45E-29 | -1.34E+01 | 56.4450143 | -1.48E-01 | 57365088  | 57365211  | NC_000011.9  |
| cg22525688 | 4.27E-27 | 1.47E-29 | -1.34E+01 | 56.4310993 | -2.66E-01 | 74001908  | 74002031  | NC_000007.13 |
| cg03818307 | 4.36E-27 | 1.50E-29 | -1.34E+01 | 56.4086686 | -3.00E-01 | 150480534 | 150480657 | NC_000001.10 |
| cg12719844 | 4.38E-27 | 1.51E-29 | -1.34E+01 | 56.4027849 | -2.40E-01 | 131685278 | 131685401 | NC_000008.10 |
| cg04964062 | 4.42E-27 | 1.53E-29 | -1.34E+01 | 56.3936189 | -1.81E-01 | 23294242  | 23294365  | NC_000014.8  |
| cg23557926 | 4.42E-27 | 1.53E-29 | -1.34E+01 | 56.3931985 | -2.79E-01 | 196620963 | 196621086 | NC_000001.10 |
| cg11798406 | 4.50E-27 | 1.56E-29 | -1.34E+01 | 56.3722793 | -3.25E-01 | 40145361  | 40145484  | NC_000021.8  |
| cg02772509 | 4.54E-27 | 1.57E-29 | -1.34E+01 | 56.3635382 | -1.74E-01 | 212102812 | 212102935 | NC_000001.10 |
| cg02319868 | 4.58E-27 | 1.59E-29 | -1.34E+01 | 56.3545498 | -2.27E-01 | 94885861  | 94885984  | NC_000013.10 |
| cg03276422 | 4.58E-27 | 1.59E-29 | -1.34E+01 | 56.3542585 | -1.25E-01 | 80655668  | 80655791  | NC_000017.10 |
| cg23679769 | 4.80E-27 | 1.67E-29 | -1.34E+01 | 56.3028544 | -8.75E-02 | 156542017 | 156542140 | NC_000001.10 |
| cg16324121 | 4.80E-27 | 1.67E-29 | -1.34E+01 | 56.3025253 | -2.99E-01 | 9954273   | 9954396   | NC_000003.11 |
| cg10819238 | 4.90E-27 | 1.71E-29 | -1.34E+01 | 56.2811507 | -2.00E-01 | 1155184   | 1155307   | NC_000019.9  |
| cg06398236 | 4.95E-27 | 1.73E-29 | -1.34E+01 | 56.2713367 | -2.34E-01 | 100738139 | 100738262 | NC_000004.11 |
| cg07582825 | 4.99E-27 | 1.74E-29 | -1.34E+01 | 56.2628175 | -3.08E-01 | 152769889 | 152770012 | NC_000003.11 |
| cg14351425 | 4.99E-27 | 1.74E-29 | -1.34E+01 | 56.2615217 | -2.33E-01 | 120968739 | 120968862 | NC_000010.10 |
| cg23391288 | 5.09E-27 | 1.78E-29 | -1.34E+01 | 56.2406958 | -3.44E-01 | 49366203  | 49366326  | NC_000013.10 |
| cg02847588 | 5.13E-27 | 1.80E-29 | -1.34E+01 | 56.2307854 | -2.77E-01 | 8271997   | 8272120   | NC_000001.10 |
| cg15285733 | 5.24E-27 | 1.84E-29 | -1.34E+01 | 56.2089245 | -2.08E-01 | 10039537  | 10039660  | NC_000017.10 |

|            |          |          |           |            |           |           |           |              |
|------------|----------|----------|-----------|------------|-----------|-----------|-----------|--------------|
| cg12840818 | 5.24E-27 | 1.84E-29 | -1.34E+01 | 56.2072262 | -2.19E-01 | 64442979  | 64443102  | NC_000011.9  |
| cg08922729 | 5.29E-27 | 1.86E-29 | -1.34E+01 | 56.1975786 | -2.09E-01 | 21913557  | 21913680  | NC_000001.10 |
| cg19676285 | 5.45E-27 | 1.92E-29 | -1.34E+01 | 56.1636198 | -2.26E-01 | 7967275   | 7967398   | NC_000004.11 |
| cg17967818 | 5.59E-27 | 1.98E-29 | -1.34E+01 | 56.1372365 | -2.10E-01 | 7992543   | 7992666   | NC_000006.11 |
| cg04663932 | 5.67E-27 | 2.01E-29 | -1.34E+01 | 56.1216075 | -2.94E-01 | 73508618  | 73508741  | NC_000007.13 |
| cg10297561 | 5.85E-27 | 2.07E-29 | -1.34E+01 | 56.0895212 | -1.29E-01 | 49231655  | 49231778  | NC_000008.10 |
| cg05374451 | 5.86E-27 | 2.08E-29 | -1.34E+01 | 56.0859264 | -1.57E-01 | 79009761  | 79009884  | NC_000017.10 |
| cg05255994 | 5.86E-27 | 2.08E-29 | -1.34E+01 | 56.0858832 | -3.54E-01 | 139029435 | 139029558 | NC_000003.11 |
| cg17152989 | 6.11E-27 | 2.17E-29 | -1.34E+01 | 56.0437037 | -1.46E-01 | 99527070  | 99527193  | NC_000007.13 |
| cg15034300 | 6.19E-27 | 2.20E-29 | -1.34E+01 | 56.030336  | -2.91E-01 | 85134468  | 85134591  | NC_000002.11 |
| cg17086141 | 6.28E-27 | 2.23E-29 | -1.34E+01 | 56.0149433 | -1.89E-01 | 45608114  | 45608237  | NC_000017.10 |
| cg08548498 | 6.40E-27 | 2.28E-29 | -1.34E+01 | 55.9929116 | -2.56E-01 | 43883546  | 43883669  | NC_000020.10 |
| cg23881697 | 6.43E-27 | 2.30E-29 | -1.34E+01 | 55.9879408 | -2.05E-01 | 64622239  | 64622362  | NC_000011.9  |
| cg17568962 | 6.43E-27 | 2.30E-29 | -1.34E+01 | 55.9858858 | -2.11E-01 | 35456312  | 35456435  | NC_000006.11 |
| cg13292703 | 6.43E-27 | 2.30E-29 | -1.34E+01 | 55.9855711 | -2.49E-01 | 61371808  | 61371931  | NC_000020.10 |
| cg13148085 | 6.44E-27 | 2.30E-29 | -1.34E+01 | 55.9844779 | -1.33E-01 | 65242711  | 65242834  | NC_000017.10 |
| cg18081863 | 6.52E-27 | 2.34E-29 | -1.34E+01 | 55.9704553 | -2.82E-01 | 50015527  | 50015650  | NC_000019.9  |
| cg02632362 | 6.56E-27 | 2.35E-29 | -1.34E+01 | 55.9636371 | -3.01E-01 | 236557579 | 236557702 | NC_000001.10 |
| cg27657983 | 6.64E-27 | 2.38E-29 | -1.34E+01 | 55.9512232 | -2.40E-01 | 12183850  | 12183973  | NC_000016.9  |
| cg24003508 | 6.65E-27 | 2.39E-29 | -1.34E+01 | 55.9490451 | -2.82E-01 | 3824387   | 3824510   | NC_000010.10 |
| cg25336892 | 6.66E-27 | 2.39E-29 | -1.34E+01 | 55.9473204 | -3.05E-01 | 30887962  | 30888085  | NC_000002.11 |
| cg12966875 | 6.77E-27 | 2.44E-29 | -1.34E+01 | 55.9288649 | -2.61E-01 | 43883746  | 43883869  | NC_000020.10 |
| cg17283781 | 6.82E-27 | 2.46E-29 | -1.34E+01 | 55.9208761 | -1.27E-01 | 52226707  | 52226830  | NC_000006.11 |
| cg06879394 | 6.83E-27 | 2.46E-29 | -1.34E+01 | 55.9194653 | -3.23E-01 | 13274151  | 13274274  | NC_000006.11 |
| cg21766592 | 6.92E-27 | 2.50E-29 | -1.34E+01 | 55.9048171 | -1.88E-01 | 47288066  | 47288189  | NC_000019.9  |

|            |          |          |           |            |           |           |           |              |
|------------|----------|----------|-----------|------------|-----------|-----------|-----------|--------------|
| cg26489497 | 6.97E-27 | 2.52E-29 | -1.34E+01 | 55.896357  | -1.98E-01 | 28512017  | 28512140  | NC_000016.9  |
| cg25511807 | 6.97E-27 | 2.52E-29 | -1.34E+01 | 55.8963235 | -2.04E-01 | 102401438 | 102401561 | NC_000011.9  |
| cg25962699 | 7.01E-27 | 2.54E-29 | -1.34E+01 | 55.8893004 | -2.36E-01 | 170332444 | 170332567 | NC_000003.11 |
| cg01753788 | 7.15E-27 | 2.59E-29 | -1.34E+01 | 55.8683005 | -2.09E-01 | 145024929 | 145025052 | NC_000008.10 |
| cg16541026 | 7.34E-27 | 2.66E-29 | -1.33E+01 | 55.8408304 | -2.00E-01 | 49026934  | 49027057  | NC_000003.11 |
| cg11342821 | 7.35E-27 | 2.67E-29 | -1.33E+01 | 55.8389301 | -2.44E-01 | 91557617  | 91557740  | NC_000001.10 |
| cg03196381 | 7.38E-27 | 2.68E-29 | -1.33E+01 | 55.8344333 | -8.37E-02 | 101817977 | 101818100 | NC_000015.9  |
| cg00960147 | 7.40E-27 | 2.69E-29 | -1.33E+01 | 55.8296599 | -3.06E-01 | 117052153 | 117052276 | NC_000001.10 |
| cg20765408 | 7.56E-27 | 2.75E-29 | -1.33E+01 | 55.8076309 | -3.65E-01 | 25085669  | 25085792  | NC_000013.10 |
| cg10241809 | 7.63E-27 | 2.78E-29 | -1.33E+01 | 55.7966584 | -1.93E-01 | 80197360  | 80197483  | NC_000017.10 |
| cg05068848 | 7.63E-27 | 2.78E-29 | -1.33E+01 | 55.7964344 | -3.37E-01 | 23335733  | 23335856  | NC_000004.11 |
| cg26541218 | 7.69E-27 | 2.81E-29 | -1.33E+01 | 55.7889079 | -2.89E-01 | 47826387  | 47826510  | NC_000007.13 |
| cg11012153 | 7.73E-27 | 2.82E-29 | -1.33E+01 | 55.7824396 | -2.71E-01 | 62313737  | 62313860  | NC_000020.10 |
| cg22373770 | 7.84E-27 | 2.87E-29 | -1.33E+01 | 55.7674682 | -1.92E-01 | 9224198   | 9224321   | NC_000001.10 |
| cg02954562 | 8.02E-27 | 2.93E-29 | -1.33E+01 | 55.7443693 | -3.09E-01 | 6649806   | 6649929   | NC_000012.11 |
| cg16082877 | 8.16E-27 | 2.99E-29 | -1.33E+01 | 55.7255279 | -1.65E-01 | 103011332 | 103011455 | NC_000014.8  |
| cg17297305 | 8.17E-27 | 3.00E-29 | -1.33E+01 | 55.7236557 | -1.40E-01 | 185287148 | 185287271 | NC_000001.10 |
| cg18155888 | 8.26E-27 | 3.03E-29 | -1.33E+01 | 55.7108911 | -2.08E-01 | 2266591   | 2266714   | NC_000001.10 |
| cg24939196 | 8.33E-27 | 3.06E-29 | -1.33E+01 | 55.7020207 | -2.62E-01 | 169588809 | 169588932 | NC_000006.11 |
| cg06261066 | 8.47E-27 | 3.12E-29 | -1.33E+01 | 55.6825638 | -3.04E-01 | 2360396   | 2360519   | NC_000020.10 |
| cg27116114 | 8.75E-27 | 3.24E-29 | -1.33E+01 | 55.645827  | -2.89E-01 | 130450543 | 130450666 | NC_000011.9  |
| cg05603985 | 8.75E-27 | 3.24E-29 | -1.33E+01 | 55.645489  | -1.45E-01 | 2161049   | 2161172   | NC_000001.10 |
| cg15174393 | 8.75E-27 | 3.24E-29 | -1.33E+01 | 55.6452762 | -2.96E-01 | 125259081 | 125259204 | NC_000012.11 |
| cg01607932 | 8.80E-27 | 3.26E-29 | -1.33E+01 | 55.6386552 | -3.22E-01 | 5027597   | 5027720   | NC_000003.11 |
| cg17431739 | 8.84E-27 | 3.28E-29 | -1.33E+01 | 55.6335524 | -1.62E-01 | 23384047  | 23384170  | NC_000010.10 |

|            |          |          |           |            |           |           |           |              |
|------------|----------|----------|-----------|------------|-----------|-----------|-----------|--------------|
| cg03666309 | 9.01E-27 | 3.34E-29 | -1.33E+01 | 55.6142003 | -2.06E-01 | 39234827  | 39234950  | NC_000019.9  |
| cg25360181 | 9.13E-27 | 3.39E-29 | -1.33E+01 | 55.5993194 | -2.30E-01 | 43970084  | 43970207  | NC_000006.11 |
| cg07469815 | 9.33E-27 | 3.48E-29 | -1.33E+01 | 55.5758246 | -3.14E-01 | 174049232 | 174049355 | NC_000002.11 |
| cg11884030 | 9.37E-27 | 3.49E-29 | -1.33E+01 | 55.5707795 | -2.01E-01 | 4652822   | 4652945   | NC_000007.13 |
| cg18361815 | 9.40E-27 | 3.51E-29 | -1.33E+01 | 55.567412  | -2.49E-01 | 46671334  | 46671457  | NC_000003.11 |
| cg04055049 | 9.65E-27 | 3.60E-29 | -1.33E+01 | 55.5402071 | -7.25E-02 | 6321553   | 6321676   | NC_000001.10 |
| cg12738718 | 9.85E-27 | 3.68E-29 | -1.33E+01 | 55.518165  | -1.51E-01 | 32121204  | 32121327  | NC_000006.11 |
| cg11674355 | 1.00E-26 | 3.76E-29 | -1.33E+01 | 55.4976949 | -1.13E-01 | 65610261  | 65610384  | NC_000002.11 |
| cg04293307 | 1.01E-26 | 3.78E-29 | -1.33E+01 | 55.4911156 | -2.43E-01 | 63553581  | 63553704  | NC_000017.10 |
| cg10549088 | 1.02E-26 | 3.82E-29 | -1.33E+01 | 55.4810385 | -2.80E-01 | 64277154  | 64277277  | NC_000003.11 |
| cg07011538 | 1.03E-26 | 3.85E-29 | -1.33E+01 | 55.4741488 | -2.77E-01 | 47497026  | 47497149  | NC_000002.11 |
| cg05398036 | 1.04E-26 | 3.89E-29 | -1.33E+01 | 55.4627549 | -2.94E-01 | 186504948 | 186505071 | NC_000001.10 |
| cg05981038 | 1.04E-26 | 3.90E-29 | -1.33E+01 | 55.4608838 | -2.92E-01 | 40841590  | 40841713  | NC_000005.9  |
| cg13323489 | 1.04E-26 | 3.91E-29 | -1.33E+01 | 55.4585012 | -3.43E-01 | 193587780 | 193587903 | NC_000003.11 |
| cg10318368 | 1.09E-26 | 4.10E-29 | -1.33E+01 | 55.4104797 | -2.78E-01 | 232507774 | 232507897 | NC_000002.11 |
| cg16688437 | 1.10E-26 | 4.15E-29 | -1.33E+01 | 55.3999925 | -2.02E-01 | 208632990 | 208633113 | NC_000002.11 |
| cg20533982 | 1.10E-26 | 4.15E-29 | -1.33E+01 | 55.3997014 | -2.67E-01 | 158533927 | 158534050 | NC_000007.13 |
| cg14515996 | 1.11E-26 | 4.20E-29 | -1.33E+01 | 55.3867136 | -2.99E-01 | 12755396  | 12755519  | NC_000007.13 |
| cg08409642 | 1.12E-26 | 4.25E-29 | -1.33E+01 | 55.3762062 | -2.89E-01 | 56641373  | 56641496  | NC_000016.9  |
| cg23834013 | 1.15E-26 | 4.34E-29 | -1.33E+01 | 55.3551783 | -3.30E-01 | 138729073 | 138729196 | NC_000007.13 |
| cg25742745 | 1.15E-26 | 4.36E-29 | -1.33E+01 | 55.3506228 | -2.40E-01 | 30689865  | 30689988  | NC_000006.11 |
| cg07147364 | 1.16E-26 | 4.38E-29 | -1.33E+01 | 55.3465616 | -1.19E-01 | 19970256  | 19970379  | NC_000001.10 |
| cg25898192 | 1.16E-26 | 4.41E-29 | -1.33E+01 | 55.3397798 | -2.27E-01 | 33418895  | 33419018  | NC_000015.9  |
| cg11278749 | 1.17E-26 | 4.45E-29 | -1.33E+01 | 55.3294537 | -3.14E-01 | 127563986 | 127564109 | NC_000005.9  |
| cg24425149 | 1.19E-26 | 4.53E-29 | -1.33E+01 | 55.3129953 | -2.00E-01 | 75991251  | 75991374  | NC_000013.10 |

|            |          |          |           |            |           |           |           |              |
|------------|----------|----------|-----------|------------|-----------|-----------|-----------|--------------|
| cg23654401 | 1.19E-26 | 4.53E-29 | -1.33E+01 | 55.3116487 | -3.71E-01 | 55606442  | 55606565  | NC_000007.13 |
| cg18887186 | 1.19E-26 | 4.54E-29 | -1.33E+01 | 55.3099677 | -8.23E-02 | 12330332  | 12330455  | NC_000003.11 |
| cg15350627 | 1.21E-26 | 4.62E-29 | -1.33E+01 | 55.2938917 | -1.76E-01 | 6642201   | 6642324   | NC_000012.11 |
| cg09338148 | 1.22E-26 | 4.63E-29 | -1.33E+01 | 55.2904152 | -1.89E-01 | 87359116  | 87359239  | NC_000016.9  |
| cg00805193 | 1.22E-26 | 4.64E-29 | -1.33E+01 | 55.2877321 | -2.32E-01 | 62609362  | 62609485  | NC_000020.10 |
| cg18538668 | 1.23E-26 | 4.69E-29 | -1.33E+01 | 55.2772472 | -2.39E-01 | 103839038 | 103839161 | NC_000014.8  |
| cg26476820 | 1.24E-26 | 4.72E-29 | -1.33E+01 | 55.2713674 | -2.76E-01 | 85637851  | 85637974  | NC_000002.11 |
| cg11790673 | 1.26E-26 | 4.81E-29 | -1.33E+01 | 55.253395  | -1.94E-01 | 212845129 | 212845252 | NC_000001.10 |
| cg18781966 | 1.26E-26 | 4.81E-29 | -1.33E+01 | 55.2520111 | -2.11E-01 | 51523159  | 51523282  | NC_000019.9  |
| cg06613738 | 1.27E-26 | 4.86E-29 | -1.33E+01 | 55.2427672 | -3.30E-01 | 15596423  | 15596546  | NC_000016.9  |
| cg13606889 | 1.27E-26 | 4.86E-29 | -1.33E+01 | 55.242345  | -2.97E-01 | 121335457 | 121335580 | NC_000011.9  |
| cg22962883 | 1.29E-26 | 4.96E-29 | -1.33E+01 | 55.2218404 | -2.12E-01 | 114178729 | 114178852 | NC_000011.9  |
| cg17707274 | 1.29E-26 | 4.96E-29 | -1.33E+01 | 55.2213657 | -1.43E-01 | 102401523 | 102401646 | NC_000011.9  |
| cg27085869 | 1.30E-26 | 4.99E-29 | -1.33E+01 | 55.2162391 | -1.58E-01 | 72416202  | 72416325  | NC_000005.9  |
| cg15879316 | 1.31E-26 | 5.03E-29 | -1.33E+01 | 55.2080578 | -1.29E-01 | 46934089  | 46934212  | NC_000022.10 |
| cg00898920 | 1.31E-26 | 5.05E-29 | -1.33E+01 | 55.2036415 | -2.43E-01 | 241504756 | 241504879 | NC_000002.11 |
| cg07675334 | 1.35E-26 | 5.19E-29 | -1.33E+01 | 55.1768872 | -2.29E-01 | 29819451  | 29819574  | NC_000016.9  |
| cg11170179 | 1.36E-26 | 5.24E-29 | -1.32E+01 | 55.166732  | -2.16E-01 | 51522767  | 51522890  | NC_000019.9  |
| cg15534212 | 1.37E-26 | 5.28E-29 | -1.32E+01 | 55.1594695 | -2.61E-01 | 173209194 | 173209317 | NC_000005.9  |
| cg24910675 | 1.37E-26 | 5.30E-29 | -1.32E+01 | 55.1562901 | -2.26E-01 | 130616917 | 130617040 | NC_000009.11 |
| cg06712013 | 1.38E-26 | 5.32E-29 | -1.32E+01 | 55.1534812 | -3.72E-01 | 49759545  | 49759668  | NC_000012.11 |
| cg14663278 | 1.39E-26 | 5.39E-29 | -1.32E+01 | 55.1401149 | -1.94E-01 | 156211409 | 156211532 | NC_000001.10 |
| cg20561863 | 1.41E-26 | 5.47E-29 | -1.32E+01 | 55.1242131 | -2.83E-01 | 66905630  | 66905753  | NC_000017.10 |
| cg24680129 | 1.43E-26 | 5.57E-29 | -1.32E+01 | 55.1076901 | -2.15E-01 | 13318625  | 13318748  | NC_000012.11 |
| cg01441777 | 1.44E-26 | 5.58E-29 | -1.32E+01 | 55.1048628 | -2.10E-01 | 38714416  | 38714539  | NC_000022.10 |



|            |          |          |           |            |           |           |           |              |
|------------|----------|----------|-----------|------------|-----------|-----------|-----------|--------------|
| cg08928958 | 1.46E-26 | 5.66E-29 | -1.32E+01 | 55.0911673 | -2.20E-01 | 149178783 | 149178906 | NC_000005.9  |
| cg00498024 | 1.49E-26 | 5.80E-29 | -1.32E+01 | 55.0671703 | -2.12E-01 | 41934170  | 41934293  | NC_000019.9  |
| cg09410512 | 1.50E-26 | 5.83E-29 | -1.32E+01 | 55.0621388 | -3.07E-01 | 224564400 | 224564523 | NC_000002.11 |
| cg16959758 | 1.52E-26 | 5.90E-29 | -1.32E+01 | 55.0490299 | -2.27E-01 | 36796513  | 36796636  | NC_000020.10 |
| cg25028542 | 1.53E-26 | 5.96E-29 | -1.32E+01 | 55.0398739 | -1.61E-01 | 36429120  | 36429243  | NC_000007.13 |
| cg21158815 | 1.53E-26 | 6.00E-29 | -1.32E+01 | 55.0333291 | -2.56E-01 | 75988735  | 75988858  | NC_000014.8  |
| cg07883823 | 1.55E-26 | 6.08E-29 | -1.32E+01 | 55.0202296 | -1.49E-01 | 160769116 | 160769239 | NC_000006.11 |
| cg01303372 | 1.57E-26 | 6.16E-29 | -1.32E+01 | 55.007549  | -4.09E-01 | 121415189 | 121415312 | NC_000010.10 |
| cg13182599 | 1.58E-26 | 6.20E-29 | -1.32E+01 | 55.0010872 | -1.79E-01 | 69282992  | 69283115  | NC_000014.8  |
| cg01115857 | 1.58E-26 | 6.20E-29 | -1.32E+01 | 55.0010066 | -1.82E-01 | 73695018  | 73695141  | NC_000014.8  |
| cg04650676 | 1.60E-26 | 6.28E-29 | -1.32E+01 | 54.9880413 | -2.76E-01 | 75315486  | 75315609  | NC_000017.10 |
| cg14183184 | 1.60E-26 | 6.31E-29 | -1.32E+01 | 54.983676  | -9.30E-02 | 99740091  | 99740214  | NC_000014.8  |
| cg24595261 | 1.61E-26 | 6.34E-29 | -1.32E+01 | 54.9775637 | -8.85E-02 | 146864491 | 146864614 | NC_000006.11 |
| cg13249591 | 1.62E-26 | 6.38E-29 | -1.32E+01 | 54.9711874 | -1.72E-01 | 151966892 | 151967015 | NC_000001.10 |
| cg23274561 | 1.63E-26 | 6.44E-29 | -1.32E+01 | 54.9630947 | -2.41E-01 | 156084271 | 156084394 | NC_000001.10 |
| cg10097313 | 1.65E-26 | 6.54E-29 | -1.32E+01 | 54.9480614 | -2.66E-01 | 25591076  | 25591199  | NC_000014.8  |
| cg05368966 | 1.67E-26 | 6.60E-29 | -1.32E+01 | 54.9376603 | -2.06E-01 | 14392531  | 14392654  | NC_000012.11 |
| cg15339720 | 1.71E-26 | 6.78E-29 | -1.32E+01 | 54.9111722 | -1.77E-01 | 20425649  | 20425772  | NC_000002.11 |
| cg23962483 | 1.73E-26 | 6.85E-29 | -1.32E+01 | 54.9014965 | -1.84E-01 | 40420537  | 40420660  | NC_000001.10 |
| cg20266715 | 1.74E-26 | 6.89E-29 | -1.32E+01 | 54.8952018 | -3.09E-01 | 223888869 | 223888992 | NC_000001.10 |
| cg17001034 | 1.77E-26 | 7.04E-29 | -1.32E+01 | 54.8743233 | -2.12E-01 | 55008516  | 55008639  | NC_000001.10 |
| cg03029127 | 1.78E-26 | 7.06E-29 | -1.32E+01 | 54.8716919 | -1.26E-01 | 57770913  | 57771036  | NC_000016.9  |
| cg12798097 | 1.80E-26 | 7.17E-29 | -1.32E+01 | 54.8562738 | -1.65E-01 | 44034258  | 44034381  | NC_000020.10 |
| cg06487082 | 1.81E-26 | 7.21E-29 | -1.32E+01 | 54.8508935 | -3.01E-01 | 56530106  | 56530229  | NC_000018.9  |
| cg26089541 | 1.82E-26 | 7.24E-29 | -1.32E+01 | 54.8456771 | -2.15E-01 | 53264923  | 53265046  | NC_000012.11 |

|            |          |          |           |            |           |           |           |              |
|------------|----------|----------|-----------|------------|-----------|-----------|-----------|--------------|
| cg24996979 | 1.84E-26 | 7.34E-29 | -1.32E+01 | 54.8320472 | -2.65E-01 | 74223355  | 74223478  | NC_000014.8  |
| cg02229757 | 1.85E-26 | 7.38E-29 | -1.32E+01 | 54.8274087 | -2.73E-01 | 15685126  | 15685249  | NC_000016.9  |
| cg10861146 | 1.88E-26 | 7.52E-29 | -1.32E+01 | 54.8091768 | -9.80E-02 | 155099324 | 155099447 | NC_000001.10 |
| cg20651995 | 1.88E-26 | 7.52E-29 | -1.32E+01 | 54.8082585 | -2.19E-01 | 69525471  | 69525594  | NC_000002.11 |
| cg25677394 | 1.90E-26 | 7.58E-29 | -1.32E+01 | 54.8003222 | -2.69E-01 | 11178758  | 11178881  | NC_000003.11 |
| cg16542322 | 1.90E-26 | 7.58E-29 | -1.32E+01 | 54.8000866 | -2.26E-01 | 5617288   | 5617411   | NC_000011.9  |
| cg01081096 | 1.92E-26 | 7.67E-29 | -1.32E+01 | 54.7882842 | -2.16E-01 | 150721518 | 150721641 | NC_000007.13 |
| cg09817016 | 1.94E-26 | 7.79E-29 | -1.32E+01 | 54.7738468 | -2.38E-01 | 137690920 | 137691043 | NC_000005.9  |
| cg06578342 | 1.95E-26 | 7.81E-29 | -1.32E+01 | 54.7706851 | -2.05E-01 | 4349215   | 4349338   | NC_000016.9  |
| cg04563996 | 1.95E-26 | 7.86E-29 | -1.32E+01 | 54.7646883 | -2.68E-01 | 57093519  | 57093642  | NC_000003.11 |
| cg16532438 | 1.96E-26 | 7.90E-29 | -1.32E+01 | 54.7594113 | -1.72E-01 | 138861941 | 138862064 | NC_000005.9  |
| cg07082267 | 2.01E-26 | 8.11E-29 | -1.32E+01 | 54.7338474 | -1.92E-01 | 85429035  | 85429158  | NC_000016.9  |
| cg20161029 | 2.03E-26 | 8.18E-29 | -1.32E+01 | 54.7244683 | -1.11E-01 | 31377406  | 31377529  | NC_000013.10 |
| cg18257574 | 2.10E-26 | 8.51E-29 | -1.32E+01 | 54.6852924 | -2.09E-01 | 43358343  | 43358466  | NC_000002.11 |
| cg27092594 | 2.11E-26 | 8.54E-29 | -1.32E+01 | 54.6824382 | -2.81E-01 | 227517346 | 227517469 | NC_000002.11 |
| cg08900316 | 2.17E-26 | 8.80E-29 | -1.32E+01 | 54.65171   | -3.31E-01 | 46301083  | 46301206  | NC_000002.11 |
| cg02149069 | 2.19E-26 | 8.89E-29 | -1.32E+01 | 54.6423201 | -2.30E-01 | 6649733   | 6649856   | NC_000012.11 |
| cg17854066 | 2.21E-26 | 8.97E-29 | -1.32E+01 | 54.6331119 | -1.63E-01 | 55575932  | 55576055  | NC_000004.11 |
| cg23684410 | 2.22E-26 | 9.01E-29 | -1.32E+01 | 54.6287464 | -2.11E-01 | 116897558 | 116897681 | NC_000011.9  |
| cg08554554 | 2.22E-26 | 9.04E-29 | -1.32E+01 | 54.6254676 | -2.70E-01 | 62330618  | 62330741  | NC_000020.10 |
| cg03354616 | 2.25E-26 | 9.19E-29 | -1.32E+01 | 54.6088762 | -3.18E-01 | 80838251  | 80838374  | NC_000006.11 |
| cg15564590 | 2.28E-26 | 9.31E-29 | -1.32E+01 | 54.5964605 | -1.33E-01 | 1566950   | 1567073   | NC_000019.9  |
| cg00311883 | 2.30E-26 | 9.39E-29 | -1.32E+01 | 54.5875002 | -1.53E-01 | 235099120 | 235099243 | NC_000001.10 |
| cg08128577 | 2.31E-26 | 9.42E-29 | -1.32E+01 | 54.5842436 | -1.29E-01 | 27413459  | 27413582  | NC_000016.9  |
| cg12946808 | 2.33E-26 | 9.53E-29 | -1.32E+01 | 54.5730764 | -2.19E-01 | 115493909 | 115494032 | NC_000011.9  |

|            |          |          |           |            |           |           |           |              |
|------------|----------|----------|-----------|------------|-----------|-----------|-----------|--------------|
| cg25885803 | 2.34E-26 | 9.56E-29 | -1.32E+01 | 54.5695204 | -2.02E-01 | 47290281  | 47290404  | NC_000011.9  |
| cg02204046 | 2.35E-26 | 9.61E-29 | -1.32E+01 | 54.5643861 | -1.15E-01 | 16080760  | 16080883  | NC_000002.11 |
| cg20524128 | 2.35E-26 | 9.64E-29 | -1.32E+01 | 54.5621529 | -8.72E-02 | 77965982  | 77966105  | NC_000017.10 |
| cg06769377 | 2.35E-26 | 9.64E-29 | -1.32E+01 | 54.561339  | -1.30E-01 | 228350860 | 228350983 | NC_000001.10 |
| cg17290213 | 2.36E-26 | 9.68E-29 | -1.32E+01 | 54.5579603 | -2.72E-01 | 65344355  | 65344478  | NC_000011.9  |
| cg13850019 | 2.38E-26 | 9.78E-29 | -1.32E+01 | 54.5475729 | -1.17E-01 | 2245895   | 2246018   | NC_000001.10 |
| cg08162372 | 2.43E-26 | 1.00E-28 | -1.32E+01 | 54.5250899 | -7.02E-02 | 54422925  | 54423048  | NC_000014.8  |
| cg16989719 | 2.46E-26 | 1.01E-28 | -1.32E+01 | 54.5137088 | -2.97E-01 | 238392110 | 238392233 | NC_000002.11 |
| cg23323158 | 2.59E-26 | 1.07E-28 | -1.31E+01 | 54.4597971 | -2.51E-01 | 132720020 | 132720143 | NC_000005.9  |
| cg23016080 | 2.60E-26 | 1.07E-28 | -1.31E+01 | 54.4555171 | -1.14E-01 | 44486450  | 44486573  | NC_000015.9  |
| cg14191134 | 2.62E-26 | 1.08E-28 | -1.31E+01 | 54.4455766 | -1.82E-01 | 80734594  | 80734717  | NC_000010.10 |
| cg13652008 | 2.65E-26 | 1.10E-28 | -1.31E+01 | 54.4346541 | -2.75E-01 | 33359356  | 33359479  | NC_000002.11 |
| cg21213593 | 2.68E-26 | 1.11E-28 | -1.31E+01 | 54.4200418 | -3.08E-01 | 123985368 | 123985491 | NC_000005.9  |
| cg12551957 | 2.68E-26 | 1.11E-28 | -1.31E+01 | 54.4192105 | -1.84E-01 | 5535006   | 5535129   | NC_000007.13 |
| cg22417613 | 2.70E-26 | 1.12E-28 | -1.31E+01 | 54.4134996 | -2.93E-01 | 138560796 | 138560919 | NC_000007.13 |
| cg17143518 | 2.70E-26 | 1.12E-28 | -1.31E+01 | 54.4129706 | -1.91E-01 | 20716545  | 20716668  | NC_000018.9  |
| cg11147309 | 2.70E-26 | 1.12E-28 | -1.31E+01 | 54.4124788 | -1.90E-01 | 145011888 | 145012011 | NC_000008.10 |
| cg26180015 | 2.72E-26 | 1.13E-28 | -1.31E+01 | 54.4031392 | -1.64E-01 | 100219300 | 100219423 | NC_000014.8  |
| cg13413719 | 2.72E-26 | 1.13E-28 | -1.31E+01 | 54.4018342 | -3.40E-01 | 3592887   | 3593010   | NC_000006.11 |
| cg16736018 | 2.76E-26 | 1.15E-28 | -1.31E+01 | 54.3851294 | -2.46E-01 | 156661648 | 156661771 | NC_000001.10 |
| cg09745336 | 2.79E-26 | 1.16E-28 | -1.31E+01 | 54.3762347 | -1.35E-01 | 43970294  | 43970417  | NC_000006.11 |
| cg04719574 | 2.81E-26 | 1.17E-28 | -1.31E+01 | 54.3671165 | -2.55E-01 | 169758340 | 169758463 | NC_000005.9  |
| cg08719577 | 2.92E-26 | 1.22E-28 | -1.31E+01 | 54.3265144 | -7.54E-02 | 3528355   | 3528478   | NC_000001.10 |
| cg03097134 | 2.93E-26 | 1.22E-28 | -1.31E+01 | 54.3242405 | -2.94E-01 | 37598264  | 37598387  | NC_000006.11 |
| cg13300689 | 3.03E-26 | 1.27E-28 | -1.31E+01 | 54.2870459 | -2.42E-01 | 9826503   | 9826626   | NC_000012.11 |

|            |          |          |           |            |           |           |           |              |
|------------|----------|----------|-----------|------------|-----------|-----------|-----------|--------------|
| cg17165848 | 3.05E-26 | 1.28E-28 | -1.31E+01 | 54.2814434 | -2.51E-01 | 175462452 | 175462575 | NC_000002.11 |
| cg25636466 | 3.07E-26 | 1.29E-28 | -1.31E+01 | 54.2735983 | -2.28E-01 | 46652700  | 46652823  | NC_000006.11 |
| cg02666638 | 3.08E-26 | 1.29E-28 | -1.31E+01 | 54.268808  | -1.40E-01 | 40732804  | 40732927  | NC_000019.9  |
| cg14415844 | 3.10E-26 | 1.30E-28 | -1.31E+01 | 54.2619905 | -1.33E-01 | 91884659  | 91884782  | NC_000014.8  |
| cg08580187 | 3.11E-26 | 1.31E-28 | -1.31E+01 | 54.2568685 | -2.97E-01 | 84027871  | 84027994  | NC_000016.9  |
| cg16297271 | 3.26E-26 | 1.37E-28 | -1.31E+01 | 54.2088984 | -1.63E-01 | 94984308  | 94984431  | NC_000014.8  |
| cg08911152 | 3.30E-26 | 1.39E-28 | -1.31E+01 | 54.1947814 | -2.13E-01 | 134105078 | 134105201 | NC_000008.10 |
| cg26853371 | 3.32E-26 | 1.40E-28 | -1.31E+01 | 54.1890681 | -2.09E-01 | 1791567   | 1791690   | NC_000004.11 |
| cg13882345 | 3.33E-26 | 1.41E-28 | -1.31E+01 | 54.1860627 | -1.79E-01 | 134858189 | 134858312 | NC_000010.10 |
| cg08824847 | 3.39E-26 | 1.43E-28 | -1.31E+01 | 54.1668123 | -2.93E-01 | 35052388  | 35052511  | NC_000011.9  |
| cg19769080 | 3.44E-26 | 1.46E-28 | -1.31E+01 | 54.1522411 | -2.07E-01 | 44460827  | 44460950  | NC_000002.11 |
| cg11093142 | 3.49E-26 | 1.48E-28 | -1.31E+01 | 54.1363307 | -3.41E-01 | 49075016  | 49075139  | NC_000013.10 |
| cg07664000 | 3.52E-26 | 1.49E-28 | -1.31E+01 | 54.1273534 | -2.54E-01 | 28659293  | 28659416  | NC_000017.10 |
| cg06233202 | 3.54E-26 | 1.50E-28 | -1.31E+01 | 54.1207914 | -2.34E-01 | 64501134  | 64501257  | NC_000002.11 |
| cg26484813 | 3.55E-26 | 1.51E-28 | -1.31E+01 | 54.1176742 | -3.02E-01 | 62311573  | 62311696  | NC_000011.9  |
| cg24965479 | 3.62E-26 | 1.54E-28 | -1.31E+01 | 54.096255  | -3.44E-01 | 59216714  | 59216837  | NC_000017.10 |
| cg04697265 | 3.64E-26 | 1.55E-28 | -1.31E+01 | 54.0899025 | -2.05E-01 | 130683700 | 130683823 | NC_000011.9  |
| cg10616300 | 3.64E-26 | 1.55E-28 | -1.31E+01 | 54.0890485 | -1.02E-01 | 66138557  | 66138680  | NC_000011.9  |
| cg08443563 | 3.65E-26 | 1.56E-28 | -1.31E+01 | 54.0862387 | -3.30E-01 | 112456811 | 112456934 | NC_000002.11 |
| cg20175702 | 3.65E-26 | 1.56E-28 | -1.31E+01 | 54.0849042 | -3.57E-01 | 70053398  | 70053521  | NC_000015.9  |
| cg17243957 | 3.67E-26 | 1.57E-28 | -1.31E+01 | 54.0797453 | -2.00E-01 | 47152551  | 47152674  | NC_000010.10 |
| cg15331705 | 3.68E-26 | 1.57E-28 | -1.31E+01 | 54.0763273 | -2.64E-01 | 129180010 | 129180133 | NC_000008.10 |
| cg09225373 | 3.73E-26 | 1.59E-28 | -1.31E+01 | 54.0612576 | -1.74E-01 | 52217264  | 52217387  | NC_000006.11 |
| cg19131313 | 3.75E-26 | 1.60E-28 | -1.31E+01 | 54.0557464 | -1.91E-01 | 1704013   | 1704136   | NC_000008.10 |
| cg00966920 | 3.77E-26 | 1.61E-28 | -1.31E+01 | 54.0511598 | -2.20E-01 | 88185021  | 88185144  | NC_000016.9  |

|            |          |          |           |            |           |           |           |              |
|------------|----------|----------|-----------|------------|-----------|-----------|-----------|--------------|
| cg00602295 | 3.81E-26 | 1.63E-28 | -1.31E+01 | 54.0386839 | -2.93E-01 | 81328089  | 81328212  | NC_000016.9  |
| cg12126038 | 3.81E-26 | 1.63E-28 | -1.31E+01 | 54.0384218 | -2.64E-01 | 34966313  | 34966436  | NC_000014.8  |
| cg03150378 | 3.89E-26 | 1.67E-28 | -1.31E+01 | 54.0182433 | -2.30E-01 | 29196699  | 29196822  | NC_000016.9  |
| cg25488206 | 3.96E-26 | 1.70E-28 | -1.31E+01 | 53.9973164 | -1.10E-01 | 36236303  | 36236426  | NC_000022.10 |
| cg22728904 | 3.99E-26 | 1.71E-28 | -1.31E+01 | 53.9895605 | -2.31E-01 | 100433983 | 100434106 | NC_000007.13 |
| cg10649647 | 4.04E-26 | 1.74E-28 | -1.31E+01 | 53.9770869 | -9.40E-02 | 27719310  | 27719433  | NC_000001.10 |
| cg25378181 | 4.04E-26 | 1.74E-28 | -1.31E+01 | 53.9753399 | -2.38E-01 | 79391490  | 79391613  | NC_000017.10 |
| cg26048523 | 4.08E-26 | 1.76E-28 | -1.31E+01 | 53.9647517 | -1.32E-01 | 197183416 | 197183539 | NC_000003.11 |
| cg03082779 | 4.13E-26 | 1.78E-28 | -1.31E+01 | 53.9520664 | -2.06E-01 | 45947025  | 45947148  | NC_000020.10 |
| cg04271792 | 4.13E-26 | 1.78E-28 | -1.31E+01 | 53.9516166 | -1.20E-01 | 28831393  | 28831516  | NC_000006.11 |
| cg00583001 | 4.13E-26 | 1.78E-28 | -1.31E+01 | 53.9511407 | -1.18E-01 | 102093477 | 102093600 | NC_000008.10 |
| cg00502597 | 4.32E-26 | 1.87E-28 | -1.31E+01 | 53.9037935 | -2.61E-01 | 60197222  | 60197345  | NC_000001.10 |
| cg17683908 | 4.33E-26 | 1.87E-28 | -1.31E+01 | 53.9013082 | -1.86E-01 | 105614429 | 105614552 | NC_000010.10 |
| cg22378252 | 4.37E-26 | 1.89E-28 | -1.31E+01 | 53.8911389 | -2.33E-01 | 10521452  | 10521575  | NC_000006.11 |
| cg08481002 | 4.38E-26 | 1.90E-28 | -1.31E+01 | 53.8874019 | -2.01E-01 | 78131601  | 78131724  | NC_000011.9  |
| cg01708377 | 4.42E-26 | 1.92E-28 | -1.31E+01 | 53.8787987 | -3.20E-01 | 1686746   | 1686869   | NC_000006.11 |
| cg17490196 | 4.42E-26 | 1.92E-28 | -1.31E+01 | 53.8777123 | -2.99E-01 | 232507842 | 232507965 | NC_000002.11 |
| cg14283454 | 4.43E-26 | 1.92E-28 | -1.31E+01 | 53.8753398 | -2.33E-01 | 46449389  | 46449512  | NC_000018.9  |
| cg22043588 | 4.44E-26 | 1.93E-28 | -1.31E+01 | 53.8717463 | -1.55E-01 | 17565769  | 17565892  | NC_000011.9  |
| cg27318157 | 4.52E-26 | 1.96E-28 | -1.31E+01 | 53.854422  | -2.04E-01 | 54982896  | 54983019  | NC_000019.9  |
| cg13074866 | 4.59E-26 | 2.00E-28 | -1.31E+01 | 53.8374412 | -1.96E-01 | 232929753 | 232929876 | NC_000001.10 |
| cg18450254 | 4.62E-26 | 2.01E-28 | -1.31E+01 | 53.8306987 | -3.36E-01 | 64200005  | 64200128  | NC_000003.11 |
| cg21796547 | 4.66E-26 | 2.03E-28 | -1.31E+01 | 53.8228565 | -1.57E-01 | 73705457  | 73705580  | NC_000014.8  |
| cg12209075 | 4.69E-26 | 2.04E-28 | -1.31E+01 | 53.8158089 | -2.88E-01 | 6649896   | 6650019   | NC_000012.11 |
| cg01281040 | 4.78E-26 | 2.08E-28 | -1.31E+01 | 53.7958013 | -2.29E-01 | 6349545   | 6349668   | NC_000005.9  |

|            |          |          |           |            |           |           |           |              |
|------------|----------|----------|-----------|------------|-----------|-----------|-----------|--------------|
| cg08218971 | 4.86E-26 | 2.12E-28 | -1.31E+01 | 53.7777229 | -1.52E-01 | 29826754  | 29826877  | NC_000016.9  |
| cg10077672 | 4.91E-26 | 2.14E-28 | -1.30E+01 | 53.7666393 | -1.81E-01 | 42063028  | 42063151  | NC_000022.10 |
| cg03784611 | 4.96E-26 | 2.17E-28 | -1.30E+01 | 53.7554539 | -2.04E-01 | 196754501 | 196754624 | NC_000003.11 |
| cg17262810 | 4.97E-26 | 2.18E-28 | -1.30E+01 | 53.7524575 | -3.22E-01 | 35676874  | 35676997  | NC_000010.10 |
| cg13860281 | 5.10E-26 | 2.23E-28 | -1.30E+01 | 53.7264084 | -3.41E-01 | 55638724  | 55638847  | NC_000007.13 |
| cg09511190 | 5.16E-26 | 2.26E-28 | -1.30E+01 | 53.7143188 | -2.36E-01 | 33416862  | 33416985  | NC_000017.10 |
| cg06822193 | 5.20E-26 | 2.28E-28 | -1.30E+01 | 53.7061775 | -2.58E-01 | 78133639  | 78133762  | NC_000015.9  |
| cg09278098 | 5.34E-26 | 2.34E-28 | -1.30E+01 | 53.6780435 | -2.27E-01 | 84902512  | 84902635  | NC_000012.11 |
| cg02304930 | 5.34E-26 | 2.35E-28 | -1.30E+01 | 53.6765955 | -1.32E-01 | 210405566 | 210405689 | NC_000001.10 |
| cg05617798 | 5.37E-26 | 2.36E-28 | -1.30E+01 | 53.6712167 | -1.02E-01 | 8113714   | 8113837   | NC_000017.10 |
| cg00091044 | 5.43E-26 | 2.39E-28 | -1.30E+01 | 53.658183  | -2.02E-01 | 30689640  | 30689763  | NC_000006.11 |
| cg09740450 | 5.52E-26 | 2.44E-28 | -1.30E+01 | 53.6394646 | -1.95E-01 | 125223650 | 125223773 | NC_000012.11 |
| cg16565696 | 5.58E-26 | 2.47E-28 | -1.30E+01 | 53.6275003 | -2.79E-01 | 44834899  | 44835022  | NC_000020.10 |
| cg26719625 | 5.59E-26 | 2.47E-28 | -1.30E+01 | 53.6260902 | -2.99E-01 | 16322482  | 16322605  | NC_000017.10 |
| cg05548488 | 5.67E-26 | 2.51E-28 | -1.30E+01 | 53.6118958 | -1.95E-01 | 50658472  | 50658595  | NC_000003.11 |
| cg15033552 | 5.73E-26 | 2.53E-28 | -1.30E+01 | 53.6005455 | -3.41E-01 | 223889141 | 223889264 | NC_000001.10 |
| cg20297544 | 5.86E-26 | 2.60E-28 | -1.30E+01 | 53.5769634 | -2.62E-01 | 23076988  | 23077111  | NC_000001.10 |
| cg17319198 | 5.88E-26 | 2.60E-28 | -1.30E+01 | 53.573943  | -2.68E-01 | 36045615  | 36045738  | NC_000011.9  |
| cg08051231 | 5.98E-26 | 2.65E-28 | -1.30E+01 | 53.556997  | -9.51E-02 | 19422492  | 19422615  | NC_000016.9  |
| cg17473382 | 6.05E-26 | 2.68E-28 | -1.30E+01 | 53.5436425 | -6.91E-02 | 59489098  | 59489221  | NC_000017.10 |
| cg12363375 | 6.14E-26 | 2.73E-28 | -1.30E+01 | 53.5279145 | -1.43E-01 | 30196492  | 30196615  | NC_000020.10 |
| cg14549249 | 6.20E-26 | 2.76E-28 | -1.30E+01 | 53.517392  | -1.34E-01 | 3083541   | 3083664   | NC_000007.13 |
| cg23965720 | 6.26E-26 | 2.79E-28 | -1.30E+01 | 53.5061857 | -2.45E-01 | 235805770 | 235805893 | NC_000001.10 |
| cg09026722 | 6.29E-26 | 2.80E-28 | -1.30E+01 | 53.5009308 | -2.48E-01 | 156867080 | 156867203 | NC_000001.10 |
| cg25032991 | 6.36E-26 | 2.84E-28 | -1.30E+01 | 53.4893362 | -2.90E-01 | 159981152 | 159981275 | NC_000002.11 |

|            |          |          |           |            |           |           |           |              |
|------------|----------|----------|-----------|------------|-----------|-----------|-----------|--------------|
| cg22137772 | 6.37E-26 | 2.84E-28 | -1.30E+01 | 53.4882127 | -2.00E-01 | 150755800 | 150755923 | NC_000003.11 |
| cg05793406 | 6.40E-26 | 2.86E-28 | -1.30E+01 | 53.4821321 | -8.15E-02 | 172964134 | 172964257 | NC_000002.11 |
| cg26618903 | 6.44E-26 | 2.87E-28 | -1.30E+01 | 53.4760067 | -1.53E-01 | 100175079 | 100175202 | NC_000010.10 |
| cg22530293 | 6.47E-26 | 2.89E-28 | -1.30E+01 | 53.4696253 | -1.26E-01 | 2458418   | 2458541   | NC_000001.10 |
| cg06172950 | 6.53E-26 | 2.92E-28 | -1.30E+01 | 53.4602909 | -2.26E-01 | 46075084  | 46075207  | NC_000013.10 |
| cg22768487 | 6.53E-26 | 2.92E-28 | -1.30E+01 | 53.4587679 | -2.11E-01 | 46770253  | 46770376  | NC_000022.10 |
| cg13869942 | 6.68E-26 | 3.00E-28 | -1.30E+01 | 53.4345049 | -2.89E-01 | 151878061 | 151878184 | NC_000001.10 |
| cg06142351 | 6.76E-26 | 3.04E-28 | -1.30E+01 | 53.4214454 | -2.87E-01 | 8683945   | 8684068   | NC_000002.11 |
| cg26203572 | 6.80E-26 | 3.05E-28 | -1.30E+01 | 53.4153215 | -3.02E-01 | 47797675  | 47797798  | NC_000007.13 |
| cg14488466 | 6.83E-26 | 3.07E-28 | -1.30E+01 | 53.411147  | -2.27E-01 | 93823465  | 93823588  | NC_000009.11 |
| cg13008315 | 6.93E-26 | 3.12E-28 | -1.30E+01 | 53.3957188 | -1.33E-01 | 42785474  | 42785597  | NC_000019.9  |
| cg25181684 | 7.00E-26 | 3.15E-28 | -1.30E+01 | 53.3839335 | -2.67E-01 | 105456466 | 105456589 | NC_000010.10 |
| cg02486332 | 7.09E-26 | 3.19E-28 | -1.30E+01 | 53.3713656 | -2.09E-01 | 3446251   | 3446374   | NC_000012.11 |
| cg25343618 | 7.17E-26 | 3.24E-28 | -1.30E+01 | 53.3576517 | -2.65E-01 | 156631235 | 156631358 | NC_000001.10 |
| cg13518625 | 7.19E-26 | 3.25E-28 | -1.30E+01 | 53.3543408 | -1.35E-01 | 29522838  | 29522961  | NC_000008.10 |
| cg15771683 | 7.48E-26 | 3.38E-28 | -1.30E+01 | 53.3144496 | -2.12E-01 | 62697566  | 62697689  | NC_000020.10 |
| cg11465213 | 7.51E-26 | 3.40E-28 | -1.30E+01 | 53.3093203 | -3.17E-01 | 90880158  | 90880281  | NC_000015.9  |
| cg03471571 | 7.54E-26 | 3.42E-28 | -1.30E+01 | 53.3042142 | -9.30E-02 | 123357075 | 123357198 | NC_000010.10 |
| cg09704415 | 7.58E-26 | 3.44E-28 | -1.30E+01 | 53.2985125 | -1.73E-01 | 48937250  | 48937373  | NC_000001.10 |
| cg11999631 | 7.58E-26 | 3.44E-28 | -1.30E+01 | 53.2976209 | -1.18E-01 | 59490484  | 59490607  | NC_000017.10 |
| cg27526774 | 7.70E-26 | 3.49E-28 | -1.30E+01 | 53.2815821 | -1.80E-01 | 235099089 | 235099212 | NC_000001.10 |
| cg23679344 | 7.78E-26 | 3.54E-28 | -1.30E+01 | 53.2697714 | -3.55E-01 | 37560925  | 37561048  | NC_000017.10 |
| cg00118808 | 7.86E-26 | 3.58E-28 | -1.30E+01 | 53.2575137 | -1.90E-01 | 132097931 | 132098054 | NC_000009.11 |
| cg04452095 | 7.86E-26 | 3.58E-28 | -1.30E+01 | 53.2569312 | -2.36E-01 | 75315868  | 75315991  | NC_000017.10 |
| cg04284535 | 7.86E-26 | 3.59E-28 | -1.30E+01 | 53.2551128 | -1.53E-01 | 41624145  | 41624268  | NC_000017.10 |

|            |          |          |           |            |           |           |           |              |
|------------|----------|----------|-----------|------------|-----------|-----------|-----------|--------------|
| cg13828047 | 7.87E-26 | 3.59E-28 | -1.30E+01 | 53.2533186 | -2.38E-01 | 75182130  | 75182253  | NC_000015.9  |
| cg01055871 | 8.00E-26 | 3.65E-28 | -1.30E+01 | 53.2368933 | -9.55E-02 | 48216390  | 48216513  | NC_000019.9  |
| cg17980404 | 8.08E-26 | 3.70E-28 | -1.30E+01 | 53.2256795 | -3.21E-01 | 38601676  | 38601799  | NC_000017.10 |
| cg04788288 | 8.16E-26 | 3.73E-28 | -1.30E+01 | 53.2154768 | -7.90E-02 | 89631044  | 89631167  | NC_000015.9  |
| cg14377703 | 8.44E-26 | 3.87E-28 | -1.30E+01 | 53.179664  | -1.70E-01 | 19647973  | 19648096  | NC_000017.10 |
| cg20970886 | 8.44E-26 | 3.88E-28 | -1.30E+01 | 53.1781192 | -3.20E-01 | 192568714 | 192568837 | NC_000003.11 |
| cg06783197 | 8.48E-26 | 3.90E-28 | -1.30E+01 | 53.1729822 | -2.38E-01 | 105796964 | 105797087 | NC_000014.8  |
| cg08272572 | 8.59E-26 | 3.95E-28 | -1.30E+01 | 53.1594472 | -2.74E-01 | 35953646  | 35953769  | NC_000019.9  |
| cg17043722 | 8.60E-26 | 3.96E-28 | -1.30E+01 | 53.1578233 | -1.72E-01 | 211688462 | 211688585 | NC_000001.10 |
| cg16550264 | 8.75E-26 | 4.04E-28 | -1.30E+01 | 53.1375395 | -1.47E-01 | 115813214 | 115813337 | NC_000012.11 |
| cg22291084 | 8.93E-26 | 4.14E-28 | -1.30E+01 | 53.1136331 | -2.28E-01 | 355901    | 356024    | NC_000011.9  |
| cg25310700 | 8.99E-26 | 4.17E-28 | -1.30E+01 | 53.1063294 | -1.81E-01 | 5702083   | 5702206   | NC_000010.10 |
| cg02254554 | 9.00E-26 | 4.17E-28 | -1.30E+01 | 53.1050342 | -7.70E-02 | 54421393  | 54421516  | NC_000014.8  |
| cg23516451 | 9.06E-26 | 4.21E-28 | -1.30E+01 | 53.0970049 | -2.48E-01 | 38845028  | 38845151  | NC_000005.9  |
| cg11895451 | 9.19E-26 | 4.27E-28 | -1.30E+01 | 53.0818679 | -1.59E-01 | 16533891  | 16534014  | NC_000001.10 |
| cg04003903 | 9.25E-26 | 4.30E-28 | -1.29E+01 | 53.0755699 | -1.99E-01 | 8601549   | 8601672   | NC_000004.11 |
| cg03118626 | 9.29E-26 | 4.32E-28 | -1.29E+01 | 53.0701101 | -1.90E-01 | 51523252  | 51523375  | NC_000019.9  |
| cg09244071 | 9.44E-26 | 4.40E-28 | -1.29E+01 | 53.0518161 | -3.07E-01 | 101768746 | 101768869 | NC_000007.13 |
| cg13531596 | 9.75E-26 | 4.55E-28 | -1.29E+01 | 53.0185082 | -2.18E-01 | 39894559  | 39894682  | NC_000019.9  |
| cg25461508 | 1.00E-25 | 4.68E-28 | -1.29E+01 | 52.9911715 | -2.54E-01 | 176784715 | 176784838 | NC_000005.9  |
| cg27183818 | 1.01E-25 | 4.73E-28 | -1.29E+01 | 52.9813106 | -2.99E-01 | 85764021  | 85764144  | NC_000001.10 |
| cg08594606 | 1.02E-25 | 4.77E-28 | -1.29E+01 | 52.9730672 | -2.34E-01 | 78556512  | 78556635  | NC_000015.9  |
| cg06635351 | 1.02E-25 | 4.77E-28 | -1.29E+01 | 52.972418  | -2.21E-01 | 8882925   | 8883048   | NC_000001.10 |
| cg13432294 | 1.03E-25 | 4.83E-28 | -1.29E+01 | 52.9589544 | -2.20E-01 | 8937640   | 8937763   | NC_000001.10 |
| cg02274788 | 1.03E-25 | 4.86E-28 | -1.29E+01 | 52.9537211 | -1.49E-01 | 68232457  | 68232580  | NC_000001.10 |



|            |          |          |           |            |           |           |           |              |
|------------|----------|----------|-----------|------------|-----------|-----------|-----------|--------------|
| cg27314998 | 1.04E-25 | 4.86E-28 | -1.29E+01 | 52.9529631 | -1.56E-01 | 30720246  | 30720369  | NC_000004.11 |
| cg18470815 | 1.04E-25 | 4.90E-28 | -1.29E+01 | 52.9445555 | -1.69E-01 | 96900643  | 96900766  | NC_000015.9  |
| cg11235594 | 1.05E-25 | 4.95E-28 | -1.29E+01 | 52.9356188 | -3.11E-01 | 110907413 | 110907536 | NC_000002.11 |
| cg04208434 | 1.05E-25 | 4.96E-28 | -1.29E+01 | 52.93322   | -2.42E-01 | 129513427 | 129513550 | NC_000003.11 |
| cg20768506 | 1.08E-25 | 5.10E-28 | -1.29E+01 | 52.9054957 | -2.21E-01 | 517708    | 517831    | NC_000007.13 |
| cg02376834 | 1.09E-25 | 5.16E-28 | -1.29E+01 | 52.8942609 | -1.47E-01 | 154134051 | 154134174 | NC_000005.9  |
| cg08841511 | 1.09E-25 | 5.16E-28 | -1.29E+01 | 52.8942542 | -1.69E-01 | 86184581  | 86184704  | NC_000010.10 |
| cg16407699 | 1.10E-25 | 5.19E-28 | -1.29E+01 | 52.8875522 | -3.22E-01 | 74020428  | 74020551  | NC_000010.10 |
| cg13409704 | 1.10E-25 | 5.21E-28 | -1.29E+01 | 52.8846638 | -1.52E-01 | 22012495  | 22012618  | NC_000022.10 |
| cg09501687 | 1.11E-25 | 5.24E-28 | -1.29E+01 | 52.879183  | -3.46E-01 | 150169781 | 150169904 | NC_000005.9  |
| cg03499161 | 1.11E-25 | 5.27E-28 | -1.29E+01 | 52.8724825 | -1.76E-01 | 22254996  | 22255119  | NC_000012.11 |
| cg11015549 | 1.12E-25 | 5.30E-28 | -1.29E+01 | 52.8679346 | -1.36E-01 | 1026207   | 1026330   | NC_000019.9  |
| cg22641201 | 1.13E-25 | 5.36E-28 | -1.29E+01 | 52.8557944 | -1.33E-01 | 60401105  | 60401228  | NC_000010.10 |
| cg04926881 | 1.14E-25 | 5.39E-28 | -1.29E+01 | 52.8502071 | -3.18E-01 | 29024378  | 29024501  | NC_000007.13 |
| cg23217940 | 1.15E-25 | 5.47E-28 | -1.29E+01 | 52.8352684 | -2.41E-01 | 22954817  | 22954940  | NC_000015.9  |
| cg07085895 | 1.16E-25 | 5.53E-28 | -1.29E+01 | 52.8254476 | -8.43E-02 | 19262124  | 19262247  | NC_000011.9  |
| cg10851251 | 1.16E-25 | 5.53E-28 | -1.29E+01 | 52.8254434 | -1.48E-01 | 68131281  | 68131404  | NC_000015.9  |
| cg14174912 | 1.16E-25 | 5.55E-28 | -1.29E+01 | 52.8208604 | -3.01E-01 | 3824516   | 3824639   | NC_000010.10 |
| cg11998932 | 1.18E-25 | 5.62E-28 | -1.29E+01 | 52.8088916 | -2.82E-01 | 3901843   | 3901966   | NC_000007.13 |
| cg04625914 | 1.18E-25 | 5.62E-28 | -1.29E+01 | 52.808743  | -2.44E-01 | 133805057 | 133805180 | NC_000011.9  |
| cg02184226 | 1.20E-25 | 5.72E-28 | -1.29E+01 | 52.7911065 | -3.06E-01 | 37385773  | 37385896  | NC_000017.10 |
| cg16677191 | 1.20E-25 | 5.73E-28 | -1.29E+01 | 52.7891234 | -3.36E-01 | 95159423  | 95159546  | NC_000005.9  |
| cg08467103 | 1.20E-25 | 5.77E-28 | -1.29E+01 | 52.7836496 | -3.58E-01 | 65593933  | 65594056  | NC_000002.11 |
| cg08134678 | 1.22E-25 | 5.82E-28 | -1.29E+01 | 52.7736123 | -2.57E-01 | 57872430  | 57872553  | NC_000012.11 |
| cg24851854 | 1.22E-25 | 5.83E-28 | -1.29E+01 | 52.7728034 | -1.92E-01 | 59042275  | 59042398  | NC_000001.10 |

|            |          |          |           |            |           |           |           |              |
|------------|----------|----------|-----------|------------|-----------|-----------|-----------|--------------|
| cg10959711 | 1.25E-25 | 5.99E-28 | -1.29E+01 | 52.7453327 | -2.23E-01 | 153509096 | 153509219 | NC_000001.10 |
| cg16472904 | 1.26E-25 | 6.07E-28 | -1.29E+01 | 52.7320872 | -2.69E-01 | 7597402   | 7597525   | NC_000011.9  |
| cg25702780 | 1.28E-25 | 6.14E-28 | -1.29E+01 | 52.7211722 | -1.52E-01 | 169376298 | 169376421 | NC_000003.11 |
| cg09960553 | 1.29E-25 | 6.23E-28 | -1.29E+01 | 52.7064274 | -6.95E-02 | 87840374  | 87840497  | NC_000016.9  |
| cg10976218 | 1.33E-25 | 6.39E-28 | -1.29E+01 | 52.6809175 | -2.16E-01 | 114880761 | 114880884 | NC_000013.10 |
| cg02033582 | 1.33E-25 | 6.41E-28 | -1.29E+01 | 52.6782926 | -3.13E-01 | 29394814  | 29394937  | NC_000017.10 |
| cg22110158 | 1.35E-25 | 6.54E-28 | -1.29E+01 | 52.658879  | -2.63E-01 | 130036542 | 130036665 | NC_000011.9  |
| cg13329912 | 1.35E-25 | 6.54E-28 | -1.29E+01 | 52.6585672 | -2.16E-01 | 16215786  | 16215909  | NC_000006.11 |
| cg15658784 | 1.35E-25 | 6.54E-28 | -1.29E+01 | 52.6583709 | -9.31E-02 | 2951243   | 2951366   | NC_000011.9  |
| cg14295924 | 1.36E-25 | 6.59E-28 | -1.29E+01 | 52.6514445 | -2.35E-01 | 1990900   | 1991023   | NC_000011.9  |
| cg00973309 | 1.36E-25 | 6.61E-28 | -1.29E+01 | 52.648039  | -2.30E-01 | 75111129  | 75111252  | NC_000015.9  |
| cg19627034 | 1.37E-25 | 6.65E-28 | -1.29E+01 | 52.6419738 | -2.66E-01 | 110476668 | 110476791 | NC_000001.10 |
| cg24852661 | 1.38E-25 | 6.68E-28 | -1.29E+01 | 52.6375534 | -1.29E-01 | 88715131  | 88715254  | NC_000009.11 |
| cg15972148 | 1.38E-25 | 6.69E-28 | -1.29E+01 | 52.6363418 | -2.76E-01 | 114880889 | 114881012 | NC_000013.10 |
| cg03573390 | 1.38E-25 | 6.72E-28 | -1.29E+01 | 52.6315131 | -2.63E-01 | 57294639  | 57294762  | NC_000016.9  |
| cg12627537 | 1.39E-25 | 6.77E-28 | -1.29E+01 | 52.6239556 | -8.31E-02 | 43485414  | 43485537  | NC_000022.10 |
| cg24405291 | 1.40E-25 | 6.80E-28 | -1.29E+01 | 52.6200855 | -1.88E-01 | 32050905  | 32051028  | NC_000006.11 |
| cg03690187 | 1.41E-25 | 6.84E-28 | -1.29E+01 | 52.6136048 | -1.23E-01 | 41233838  | 41233961  | NC_000015.9  |
| cg14066757 | 1.41E-25 | 6.86E-28 | -1.29E+01 | 52.6105147 | -1.74E-01 | 44285568  | 44285691  | NC_000019.9  |
| cg20073153 | 1.41E-25 | 6.87E-28 | -1.29E+01 | 52.6101875 | -1.81E-01 | 30238815  | 30238938  | NC_000010.10 |
| cg08889480 | 1.42E-25 | 6.91E-28 | -1.29E+01 | 52.6043113 | -2.50E-01 | 47746789  | 47746912  | NC_000010.10 |
| cg02505956 | 1.45E-25 | 7.07E-28 | -1.29E+01 | 52.5815032 | -2.98E-01 | 157348266 | 157348389 | NC_000007.13 |
| cg07093324 | 1.45E-25 | 7.07E-28 | -1.29E+01 | 52.5814226 | -2.66E-01 | 114652143 | 114652266 | NC_000002.11 |
| cg24328095 | 1.47E-25 | 7.18E-28 | -1.29E+01 | 52.5650415 | -2.32E-01 | 80205093  | 80205216  | NC_000017.10 |
| cg14939821 | 1.49E-25 | 7.30E-28 | -1.29E+01 | 52.5495917 | -3.56E-01 | 128947230 | 128947353 | NC_000010.10 |

|            |          |          |           |            |           |           |           |              |
|------------|----------|----------|-----------|------------|-----------|-----------|-----------|--------------|
| cg22958090 | 1.51E-25 | 7.38E-28 | -1.29E+01 | 52.5388609 | -3.04E-01 | 52627438  | 52627561  | NC_000012.11 |
| cg13118906 | 1.51E-25 | 7.38E-28 | -1.29E+01 | 52.5386105 | -2.55E-01 | 61524292  | 61524415  | NC_000017.10 |
| cg09442613 | 1.52E-25 | 7.46E-28 | -1.29E+01 | 52.5281242 | -3.10E-01 | 76054089  | 76054212  | NC_000012.11 |
| cg09075968 | 1.52E-25 | 7.47E-28 | -1.29E+01 | 52.5265547 | -2.75E-01 | 113841799 | 113841922 | NC_000013.10 |
| cg22492099 | 1.56E-25 | 7.65E-28 | -1.29E+01 | 52.5023831 | -2.10E-01 | 43414974  | 43415097  | NC_000015.9  |
| cg13759905 | 1.56E-25 | 7.66E-28 | -1.29E+01 | 52.5008389 | -2.50E-01 | 233741920 | 233742043 | NC_000002.11 |
| cg00832644 | 1.57E-25 | 7.70E-28 | -1.29E+01 | 52.4959375 | -2.60E-01 | 162343785 | 162343908 | NC_000001.10 |
| cg14302214 | 1.60E-25 | 7.88E-28 | -1.29E+01 | 52.4737049 | -2.65E-01 | 3805273   | 3805396   | NC_000010.10 |
| cg01862311 | 1.64E-25 | 8.07E-28 | -1.29E+01 | 52.4492038 | -3.35E-01 | 26308815  | 26308938  | NC_000008.10 |
| cg23004409 | 1.64E-25 | 8.08E-28 | -1.29E+01 | 52.4482385 | -1.45E-01 | 43128367  | 43128490  | NC_000017.10 |
| cg04244970 | 1.68E-25 | 8.29E-28 | -1.29E+01 | 52.422627  | -2.73E-01 | 160708987 | 160709110 | NC_000001.10 |
| cg05349059 | 1.74E-25 | 8.60E-28 | -1.29E+01 | 52.3863328 | -1.21E-01 | 134694753 | 134694876 | NC_000006.11 |
| cg13435464 | 1.75E-25 | 8.69E-28 | -1.28E+01 | 52.3764775 | -1.59E-01 | 91927197  | 91927320  | NC_000009.11 |
| cg12126243 | 1.78E-25 | 8.84E-28 | -1.28E+01 | 52.3586733 | -3.26E-01 | 59742285  | 59742408  | NC_000014.8  |
| cg10558233 | 1.80E-25 | 8.94E-28 | -1.28E+01 | 52.3474933 | -3.19E-01 | 94892613  | 94892736  | NC_000008.10 |
| cg17664128 | 1.81E-25 | 8.98E-28 | -1.28E+01 | 52.3434746 | -1.04E-01 | 42891265  | 42891388  | NC_000019.9  |
| cg06680852 | 1.83E-25 | 9.10E-28 | -1.28E+01 | 52.3305086 | -3.01E-01 | 22722951  | 22723074  | NC_000010.10 |
| cg26446832 | 1.83E-25 | 9.10E-28 | -1.28E+01 | 52.3298054 | -2.60E-01 | 12015695  | 12015818  | NC_000011.9  |
| cg16270485 | 1.87E-25 | 9.31E-28 | -1.28E+01 | 52.306998  | -2.42E-01 | 21901260  | 21901383  | NC_000001.10 |
| cg19734163 | 1.87E-25 | 9.32E-28 | -1.28E+01 | 52.3059583 | -2.03E-01 | 138720989 | 138721112 | NC_000007.13 |
| cg15260109 | 1.87E-25 | 9.34E-28 | -1.28E+01 | 52.3037393 | -1.09E-01 | 10363328  | 10363451  | NC_000019.9  |
| cg12048965 | 1.89E-25 | 9.42E-28 | -1.28E+01 | 52.2959527 | -3.19E-01 | 3848384   | 3848507   | NC_000010.10 |
| cg05372727 | 1.92E-25 | 9.60E-28 | -1.28E+01 | 52.2765811 | -3.04E-01 | 107029018 | 107029141 | NC_000013.10 |
| cg18778196 | 1.94E-25 | 9.70E-28 | -1.28E+01 | 52.2669936 | -2.44E-01 | 67054877  | 67055000  | NC_000015.9  |
| cg07495704 | 1.94E-25 | 9.70E-28 | -1.28E+01 | 52.2665272 | -2.21E-01 | 104091483 | 104091606 | NC_000014.8  |

|            |          |          |           |            |           |           |           |              |
|------------|----------|----------|-----------|------------|-----------|-----------|-----------|--------------|
| cg08229360 | 1.97E-25 | 9.86E-28 | -1.28E+01 | 52.2501379 | -1.45E-01 | 37904475  | 37904598  | NC_000003.11 |
| cg04291025 | 2.03E-25 | 1.02E-27 | -1.28E+01 | 52.2206261 | -1.72E-01 | 69746140  | 69746263  | NC_000015.9  |
| cg15978565 | 2.03E-25 | 1.02E-27 | -1.28E+01 | 52.2177083 | -2.48E-01 | 11894464  | 11894587  | NC_000002.11 |
| cg09997271 | 2.09E-25 | 1.05E-27 | -1.28E+01 | 52.1896354 | -1.29E-01 | 10542200  | 10542323  | NC_000019.9  |
| cg15934804 | 2.10E-25 | 1.05E-27 | -1.28E+01 | 52.1845192 | -2.34E-01 | 2672400   | 2672523   | NC_000007.13 |
| cg00251618 | 2.11E-25 | 1.06E-27 | -1.28E+01 | 52.1796304 | -7.73E-02 | 2835624   | 2835747   | NC_000016.9  |
| cg09796640 | 2.12E-25 | 1.07E-27 | -1.28E+01 | 52.1733695 | -1.92E-01 | 105434298 | 105434421 | NC_000014.8  |
| cg23366752 | 2.14E-25 | 1.08E-27 | -1.28E+01 | 52.1633518 | -2.28E-01 | 78556502  | 78556625  | NC_000015.9  |
| cg18054578 | 2.16E-25 | 1.09E-27 | -1.28E+01 | 52.1537139 | -1.29E-01 | 47735960  | 47736083  | NC_000019.9  |
| cg11767757 | 2.17E-25 | 1.10E-27 | -1.28E+01 | 52.1451933 | -2.36E-01 | 40145404  | 40145527  | NC_000021.8  |
| cg23350385 | 2.24E-25 | 1.13E-27 | -1.28E+01 | 52.1144682 | -3.19E-01 | 46448134  | 46448257  | NC_000003.11 |
| cg13419330 | 2.24E-25 | 1.13E-27 | -1.28E+01 | 52.1131624 | -2.61E-01 | 10247487  | 10247610  | NC_000003.11 |
| cg26148904 | 2.28E-25 | 1.15E-27 | -1.28E+01 | 52.0956645 | -1.22E-01 | 79339342  | 79339465  | NC_000017.10 |
| cg13022977 | 2.28E-25 | 1.15E-27 | -1.28E+01 | 52.0936256 | -1.66E-01 | 6420252   | 6420375   | NC_000012.11 |
| cg02771117 | 2.28E-25 | 1.16E-27 | -1.28E+01 | 52.0924703 | -3.02E-01 | 11279352  | 11279475  | NC_000008.10 |
| cg14055004 | 2.31E-25 | 1.17E-27 | -1.28E+01 | 52.0803019 | -2.32E-01 | 241860995 | 241861118 | NC_000002.11 |
| cg04588455 | 2.32E-25 | 1.18E-27 | -1.28E+01 | 52.0741933 | -2.41E-01 | 29819461  | 29819584  | NC_000016.9  |
| cg14118226 | 2.39E-25 | 1.21E-27 | -1.28E+01 | 52.0435983 | -2.21E-01 | 70010567  | 70010690  | NC_000014.8  |
| cg07398839 | 2.40E-25 | 1.22E-27 | -1.28E+01 | 52.0405844 | -1.75E-01 | 101661834 | 101661957 | NC_000015.9  |
| cg16395183 | 2.45E-25 | 1.25E-27 | -1.28E+01 | 52.0176496 | -3.00E-01 | 210771699 | 210771822 | NC_000001.10 |
| cg04473654 | 2.50E-25 | 1.27E-27 | -1.28E+01 | 51.9970737 | -3.42E-01 | 54187654  | 54187777  | NC_000004.11 |
| cg07207490 | 2.52E-25 | 1.28E-27 | -1.28E+01 | 51.9895006 | -2.55E-01 | 118492463 | 118492586 | NC_000011.9  |
| cg09396895 | 2.53E-25 | 1.29E-27 | -1.28E+01 | 51.9822638 | -1.79E-01 | 25021067  | 25021190  | NC_000007.13 |
| cg22234930 | 2.54E-25 | 1.30E-27 | -1.28E+01 | 51.9783532 | -2.99E-01 | 72519739  | 72519862  | NC_000015.9  |
| cg15574263 | 2.58E-25 | 1.31E-27 | -1.28E+01 | 51.9647932 | -1.66E-01 | 911693    | 911816    | NC_000011.9  |

|            |          |          |           |            |           |           |           |              |
|------------|----------|----------|-----------|------------|-----------|-----------|-----------|--------------|
| cg00523450 | 2.58E-25 | 1.32E-27 | -1.28E+01 | 51.9626182 | -1.17E-01 | 112290055 | 112290178 | NC_000010.10 |
| cg08416875 | 2.59E-25 | 1.32E-27 | -1.28E+01 | 51.9605809 | -1.16E-01 | 119669226 | 119669349 | NC_000006.11 |
| cg08881019 | 2.61E-25 | 1.34E-27 | -1.28E+01 | 51.9491921 | -1.78E-01 | 156096178 | 156096301 | NC_000001.10 |
| cg20703003 | 2.61E-25 | 1.34E-27 | -1.28E+01 | 51.947891  | -2.57E-01 | 115860280 | 115860403 | NC_000010.10 |
| cg23230478 | 2.68E-25 | 1.37E-27 | -1.28E+01 | 51.9208411 | -3.56E-01 | 6360620   | 6360743   | NC_000001.10 |
| cg15972294 | 2.72E-25 | 1.40E-27 | -1.28E+01 | 51.9042041 | -1.25E-01 | 50273096  | 50273219  | NC_000003.11 |
| cg20893203 | 2.73E-25 | 1.40E-27 | -1.28E+01 | 51.9003802 | -3.71E-01 | 41499799  | 41499922  | NC_000006.11 |
| cg22134923 | 2.74E-25 | 1.41E-27 | -1.28E+01 | 51.8974419 | -1.97E-01 | 62314874  | 62314997  | NC_000011.9  |
| cg25986240 | 2.75E-25 | 1.41E-27 | -1.28E+01 | 51.8923753 | -2.19E-01 | 9926439   | 9926562   | NC_000004.11 |
| cg26247168 | 2.76E-25 | 1.42E-27 | -1.28E+01 | 51.8892132 | -3.33E-01 | 119994722 | 119994845 | NC_000011.9  |
| cg25067702 | 2.80E-25 | 1.44E-27 | -1.28E+01 | 51.872541  | -2.85E-01 | 70723227  | 70723350  | NC_000017.10 |
| cg01910639 | 2.81E-25 | 1.45E-27 | -1.28E+01 | 51.8685002 | -2.38E-01 | 153507779 | 153507902 | NC_000001.10 |
| cg07134608 | 2.81E-25 | 1.45E-27 | -1.28E+01 | 51.8683109 | -1.27E-01 | 49436579  | 49436702  | NC_000019.9  |
| cg14811872 | 2.83E-25 | 1.46E-27 | -1.28E+01 | 51.862752  | -1.30E-01 | 236577984 | 236578107 | NC_000002.11 |
| cg10437265 | 2.87E-25 | 1.48E-27 | -1.28E+01 | 51.8440762 | -2.38E-01 | 77819839  | 77819962  | NC_000015.9  |
| cg10378521 | 2.88E-25 | 1.49E-27 | -1.28E+01 | 51.8411174 | -3.41E-01 | 133101612 | 133101735 | NC_000012.11 |
| cg18146074 | 2.93E-25 | 1.51E-27 | -1.28E+01 | 51.8241629 | -2.38E-01 | 232242955 | 232243078 | NC_000002.11 |
| cg24638828 | 2.94E-25 | 1.52E-27 | -1.28E+01 | 51.8190867 | -2.48E-01 | 72974572  | 72974695  | NC_000007.13 |
| cg20834178 | 2.94E-25 | 1.52E-27 | -1.28E+01 | 51.8189936 | -3.52E-01 | 6944071   | 6944194   | NC_000004.11 |
| cg07355757 | 2.95E-25 | 1.53E-27 | -1.28E+01 | 51.8152957 | -1.44E-01 | 221651747 | 221651870 | NC_000001.10 |
| cg18270378 | 3.00E-25 | 1.56E-27 | -1.28E+01 | 51.797573  | -3.12E-01 | 3284394   | 3284517   | NC_000007.13 |
| cg16919680 | 3.00E-25 | 1.56E-27 | -1.28E+01 | 51.796104  | -2.58E-01 | 53230033  | 53230156  | NC_000012.11 |
| cg14356919 | 3.03E-25 | 1.57E-27 | -1.28E+01 | 51.7851237 | -2.89E-01 | 46890997  | 46891120  | NC_000021.8  |
| cg24251890 | 3.04E-25 | 1.58E-27 | -1.28E+01 | 51.7830434 | -1.39E-01 | 47290825  | 47290948  | NC_000011.9  |
| cg25630380 | 3.08E-25 | 1.60E-27 | -1.28E+01 | 51.7663373 | -2.46E-01 | 156784869 | 156784992 | NC_000001.10 |

|            |          |          |           |            |           |           |           |              |
|------------|----------|----------|-----------|------------|-----------|-----------|-----------|--------------|
| cg19184897 | 3.15E-25 | 1.64E-27 | -1.28E+01 | 51.7440981 | -2.18E-01 | 58282506  | 58282629  | NC_000012.11 |
| cg27116253 | 3.20E-25 | 1.67E-27 | -1.28E+01 | 51.7262758 | -1.35E-01 | 746110    | 746233    | NC_000016.9  |
| cg07215695 | 3.20E-25 | 1.67E-27 | -1.28E+01 | 51.7261602 | -2.31E-01 | 85637834  | 85637957  | NC_000002.11 |
| cg12360424 | 3.21E-25 | 1.67E-27 | -1.28E+01 | 51.7245508 | -1.89E-01 | 54568961  | 54569084  | NC_000004.11 |
| cg07739369 | 3.22E-25 | 1.68E-27 | -1.28E+01 | 51.7208835 | -2.78E-01 | 80241456  | 80241579  | NC_000017.10 |
| cg07210669 | 3.22E-25 | 1.68E-27 | -1.28E+01 | 51.7197354 | -2.59E-01 | 6695475   | 6695598   | NC_000004.11 |
| cg14112958 | 3.23E-25 | 1.69E-27 | -1.28E+01 | 51.7156824 | -1.44E-01 | 57599225  | 57599348  | NC_000015.9  |
| cg02010342 | 3.30E-25 | 1.73E-27 | -1.28E+01 | 51.6921144 | -1.17E-01 | 79485934  | 79486057  | NC_000017.10 |
| cg27086308 | 3.40E-25 | 1.78E-27 | -1.27E+01 | 51.6623597 | -9.54E-02 | 154720213 | 154720336 | NC_000007.13 |
| cg26653714 | 3.42E-25 | 1.80E-27 | -1.27E+01 | 51.654052  | -2.06E-01 | 22932056  | 22932179  | NC_000008.10 |
| cg12999267 | 3.47E-25 | 1.82E-27 | -1.27E+01 | 51.6408715 | -1.68E-01 | 94376970  | 94377093  | NC_000012.11 |
| cg08619295 | 3.47E-25 | 1.83E-27 | -1.27E+01 | 51.6380367 | -2.35E-01 | 6364079   | 6364202   | NC_000010.10 |
| cg12141659 | 3.47E-25 | 1.83E-27 | -1.27E+01 | 51.6374701 | -2.23E-01 | 2847462   | 2847585   | NC_000011.9  |
| cg24201793 | 3.47E-25 | 1.83E-27 | -1.27E+01 | 51.6372089 | -3.25E-01 | 9144764   | 9144887   | NC_000002.11 |
| cg26539468 | 3.51E-25 | 1.85E-27 | -1.27E+01 | 51.6266342 | -2.92E-01 | 185609850 | 185609973 | NC_000004.11 |
| cg19236431 | 3.53E-25 | 1.86E-27 | -1.27E+01 | 51.6202811 | -2.23E-01 | 158447877 | 158448000 | NC_000006.11 |
| cg12203250 | 3.56E-25 | 1.87E-27 | -1.27E+01 | 51.6118581 | -1.03E-01 | 23863649  | 23863772  | NC_000022.10 |
| cg14900031 | 3.60E-25 | 1.90E-27 | -1.27E+01 | 51.5991186 | -2.68E-01 | 6695377   | 6695500   | NC_000004.11 |
| cg17486314 | 3.60E-25 | 1.90E-27 | -1.27E+01 | 51.5973742 | -3.07E-01 | 90778227  | 90778350  | NC_000006.11 |
| cg07443710 | 3.64E-25 | 1.93E-27 | -1.27E+01 | 51.5848678 | -2.56E-01 | 71206848  | 71206971  | NC_000010.10 |
| cg07842521 | 3.64E-25 | 1.93E-27 | -1.27E+01 | 51.5837031 | -2.25E-01 | 85157762  | 85157885  | NC_000016.9  |
| cg02704570 | 3.67E-25 | 1.95E-27 | -1.27E+01 | 51.5748893 | -2.31E-01 | 157647109 | 157647232 | NC_000007.13 |
| cg25418001 | 3.72E-25 | 1.97E-27 | -1.27E+01 | 51.5607643 | -1.77E-01 | 79780310  | 79780433  | NC_000007.13 |
| cg19843457 | 3.80E-25 | 2.01E-27 | -1.27E+01 | 51.540257  | -1.65E-01 | 132288611 | 132288734 | NC_000012.11 |
| cg14241836 | 3.84E-25 | 2.04E-27 | -1.27E+01 | 51.5283924 | -3.59E-01 | 48124921  | 48125044  | NC_000007.13 |

|            |          |          |           |            |           |           |           |              |
|------------|----------|----------|-----------|------------|-----------|-----------|-----------|--------------|
| cg20434422 | 3.92E-25 | 2.09E-27 | -1.27E+01 | 51.5054741 | -2.78E-01 | 84831593  | 84831716  | NC_000001.10 |
| cg07307388 | 3.93E-25 | 2.09E-27 | -1.27E+01 | 51.5019771 | -1.42E-01 | 25138416  | 25138539  | NC_000006.11 |
| cg24843609 | 3.95E-25 | 2.10E-27 | -1.27E+01 | 51.4986599 | -2.47E-01 | 156211434 | 156211557 | NC_000001.10 |
| cg22459664 | 3.95E-25 | 2.10E-27 | -1.27E+01 | 51.4979235 | -1.61E-01 | 139929764 | 139929887 | NC_000007.13 |
| cg16764274 | 3.97E-25 | 2.12E-27 | -1.27E+01 | 51.4906849 | -1.63E-01 | 223290168 | 223290291 | NC_000002.11 |
| cg05348708 | 4.02E-25 | 2.14E-27 | -1.27E+01 | 51.4793739 | -6.75E-02 | 79520615  | 79520738  | NC_000017.10 |
| cg26221105 | 4.06E-25 | 2.17E-27 | -1.27E+01 | 51.4681557 | -2.26E-01 | 223914343 | 223914466 | NC_000001.10 |
| cg22790839 | 4.07E-25 | 2.17E-27 | -1.27E+01 | 51.464161  | -2.59E-01 | 157883933 | 157884056 | NC_000005.9  |
| cg05726195 | 4.10E-25 | 2.19E-27 | -1.27E+01 | 51.4565777 | -2.97E-01 | 154997174 | 154997297 | NC_000007.13 |
| cg15428620 | 4.10E-25 | 2.20E-27 | -1.27E+01 | 51.4546935 | -2.18E-01 | 102792835 | 102792958 | NC_000010.10 |
| cg01066157 | 4.11E-25 | 2.20E-27 | -1.27E+01 | 51.4527312 | -2.77E-01 | 152451023 | 152451146 | NC_000006.11 |
| cg12198913 | 4.11E-25 | 2.20E-27 | -1.27E+01 | 51.4508798 | -1.26E-01 | 44972718  | 44972841  | NC_000011.9  |
| cg09545443 | 4.12E-25 | 2.21E-27 | -1.27E+01 | 51.4500232 | -2.36E-01 | 106960066 | 106960189 | NC_000003.11 |
| cg01439112 | 4.12E-25 | 2.21E-27 | -1.27E+01 | 51.4478539 | -1.64E-01 | 37904034  | 37904157  | NC_000003.11 |
| cg24789596 | 4.12E-25 | 2.21E-27 | -1.27E+01 | 51.4475891 | -2.21E-01 | 43038067  | 43038190  | NC_000002.11 |
| cg23261443 | 4.15E-25 | 2.22E-27 | -1.27E+01 | 51.4417697 | -3.24E-01 | 101596340 | 101596463 | NC_000007.13 |
| cg23005797 | 4.16E-25 | 2.23E-27 | -1.27E+01 | 51.4380445 | -2.82E-01 | 10302462  | 10302585  | NC_000002.11 |
| cg05776388 | 4.22E-25 | 2.27E-27 | -1.27E+01 | 51.4219434 | -1.34E-01 | 72983414  | 72983537  | NC_000017.10 |
| cg13713728 | 4.26E-25 | 2.29E-27 | -1.27E+01 | 51.4126297 | -2.47E-01 | 127262761 | 127262884 | NC_000010.10 |
| cg23206873 | 4.32E-25 | 2.33E-27 | -1.27E+01 | 51.3968849 | -2.09E-01 | 1303672   | 1303795   | NC_000020.10 |
| cg07447769 | 4.43E-25 | 2.39E-27 | -1.27E+01 | 51.3724689 | -2.49E-01 | 24723265  | 24723388  | NC_000013.10 |
| cg04251307 | 4.45E-25 | 2.40E-27 | -1.27E+01 | 51.3673508 | -9.23E-02 | 10827012  | 10827135  | NC_000012.11 |
| cg00223245 | 4.46E-25 | 2.41E-27 | -1.27E+01 | 51.3627192 | -2.90E-01 | 64307530  | 64307653  | NC_000003.11 |
| cg25395559 | 4.49E-25 | 2.42E-27 | -1.27E+01 | 51.3567438 | -1.13E-01 | 20371503  | 20371626  | NC_000007.13 |
| cg08090407 | 4.56E-25 | 2.46E-27 | -1.27E+01 | 51.3401478 | -2.44E-01 | 7139271   | 7139394   | NC_000007.13 |

|            |          |          |           |            |           |           |           |              |
|------------|----------|----------|-----------|------------|-----------|-----------|-----------|--------------|
| cg26248066 | 4.57E-25 | 2.47E-27 | -1.27E+01 | 51.3380694 | -2.78E-01 | 70303464  | 70303587  | NC_000011.9  |
| cg14806867 | 4.65E-25 | 2.51E-27 | -1.27E+01 | 51.3197711 | -9.08E-02 | 96329355  | 96329478  | NC_000013.10 |
| cg08904363 | 4.65E-25 | 2.52E-27 | -1.27E+01 | 51.3196203 | -1.32E-01 | 102790119 | 102790242 | NC_000007.13 |
| cg19373199 | 4.73E-25 | 2.56E-27 | -1.27E+01 | 51.3010215 | -1.87E-01 | 103010825 | 103010948 | NC_000014.8  |
| cg18420781 | 4.80E-25 | 2.61E-27 | -1.27E+01 | 51.2840588 | -1.81E-01 | 30124240  | 30124363  | NC_000006.11 |
| cg03536711 | 4.82E-25 | 2.62E-27 | -1.27E+01 | 51.2797042 | -2.18E-01 | 221509067 | 221509190 | NC_000001.10 |
| cg23072383 | 4.96E-25 | 2.70E-27 | -1.27E+01 | 51.2490368 | -2.15E-01 | 31031044  | 31031167  | NC_000022.10 |
| cg09232805 | 4.98E-25 | 2.72E-27 | -1.27E+01 | 51.2434275 | -2.38E-01 | 173935615 | 173935738 | NC_000004.11 |
| cg05226729 | 5.07E-25 | 2.76E-27 | -1.27E+01 | 51.2257875 | -2.72E-01 | 11839780  | 11839903  | NC_000008.10 |
| cg19453938 | 5.15E-25 | 2.81E-27 | -1.27E+01 | 51.2088113 | -2.70E-01 | 73265946  | 73266069  | NC_000007.13 |
| cg20665774 | 5.15E-25 | 2.81E-27 | -1.27E+01 | 51.2084592 | -2.15E-01 | 13134254  | 13134377  | NC_000019.9  |
| cg00355699 | 5.15E-25 | 2.82E-27 | -1.27E+01 | 51.2075499 | -2.80E-01 | 104667830 | 104667953 | NC_000013.10 |
| cg14686919 | 5.15E-25 | 2.82E-27 | -1.27E+01 | 51.2071968 | -1.57E-01 | 61584159  | 61584282  | NC_000020.10 |
| cg23072823 | 5.20E-25 | 2.85E-27 | -1.27E+01 | 51.1969905 | -1.32E-01 | 14445421  | 14445544  | NC_000003.11 |
| cg12351310 | 5.24E-25 | 2.87E-27 | -1.27E+01 | 51.1896593 | -2.82E-01 | 52937992  | 52938115  | NC_000005.9  |
| cg07235218 | 5.25E-25 | 2.87E-27 | -1.27E+01 | 51.187339  | -2.13E-01 | 2954824   | 2954947   | NC_000011.9  |
| cg07745671 | 5.34E-25 | 2.93E-27 | -1.27E+01 | 51.1689136 | -3.31E-01 | 177272848 | 177272971 | NC_000003.11 |
| cg19982230 | 5.34E-25 | 2.93E-27 | -1.27E+01 | 51.1680139 | -2.55E-01 | 27045302  | 27045425  | NC_000017.10 |
| cg05004855 | 5.47E-25 | 3.00E-27 | -1.27E+01 | 51.1428921 | -1.87E-01 | 149644009 | 149644132 | NC_000005.9  |
| cg15694809 | 5.47E-25 | 3.01E-27 | -1.27E+01 | 51.1412257 | -8.91E-02 | 101786117 | 101786240 | NC_000011.9  |
| cg06639923 | 5.48E-25 | 3.01E-27 | -1.27E+01 | 51.1396813 | -2.28E-01 | 5534978   | 5535101   | NC_000007.13 |
| cg15800421 | 5.48E-25 | 3.01E-27 | -1.27E+01 | 51.1396003 | -1.38E-01 | 40834743  | 40834866  | NC_000017.10 |
| cg13780718 | 5.51E-25 | 3.04E-27 | -1.27E+01 | 51.1327553 | -3.56E-01 | 44513768  | 44513891  | NC_000020.10 |
| cg17644208 | 5.53E-25 | 3.04E-27 | -1.27E+01 | 51.129777  | -2.19E-01 | 25142391  | 25142514  | NC_000002.11 |
| cg16235274 | 5.57E-25 | 3.07E-27 | -1.27E+01 | 51.1215656 | -8.52E-02 | 19928475  | 19928598  | NC_000018.9  |



|            |          |          |           |            |           |           |           |              |
|------------|----------|----------|-----------|------------|-----------|-----------|-----------|--------------|
| cg17696194 | 5.58E-25 | 3.08E-27 | -1.27E+01 | 51.1189046 | -2.12E-01 | 58941051  | 58941174  | NC_000011.9  |
| cg08639843 | 5.61E-25 | 3.10E-27 | -1.27E+01 | 51.1126165 | -1.28E-01 | 844536    | 844659    | NC_000011.9  |
| cg00275828 | 5.65E-25 | 3.12E-27 | -1.27E+01 | 51.1055224 | -2.80E-01 | 39222690  | 39222813  | NC_000017.10 |
| cg21283926 | 5.71E-25 | 3.16E-27 | -1.27E+01 | 51.093558  | -1.46E-01 | 74160917  | 74161040  | NC_000006.11 |
| cg18188010 | 5.77E-25 | 3.19E-27 | -1.27E+01 | 51.0831166 | -1.95E-01 | 42187036  | 42187159  | NC_000015.9  |
| cg17939977 | 5.77E-25 | 3.19E-27 | -1.27E+01 | 51.082407  | -2.70E-01 | 186170664 | 186170787 | NC_000003.11 |
| cg21594702 | 5.78E-25 | 3.20E-27 | -1.27E+01 | 51.0806684 | -1.79E-01 | 82771513  | 82771636  | NC_000005.9  |
| cg23662097 | 5.80E-25 | 3.21E-27 | -1.27E+01 | 51.0764034 | -3.78E-01 | 4873008   | 4873131   | NC_000003.11 |
| cg13942922 | 5.82E-25 | 3.23E-27 | -1.27E+01 | 51.0719487 | -2.18E-01 | 238383665 | 238383788 | NC_000002.11 |
| cg27404606 | 5.87E-25 | 3.26E-27 | -1.27E+01 | 51.0619552 | -1.71E-01 | 3747579   | 3747702   | NC_000020.10 |
| cg17266282 | 5.89E-25 | 3.27E-27 | -1.27E+01 | 51.0584939 | -2.82E-01 | 112294532 | 112294655 | NC_000006.11 |
| cg08905652 | 5.89E-25 | 3.27E-27 | -1.27E+01 | 51.0583867 | -1.20E-01 | 74161099  | 74161222  | NC_000006.11 |
| cg13220457 | 5.90E-25 | 3.28E-27 | -1.27E+01 | 51.0560111 | -1.18E-01 | 135504074 | 135504197 | NC_000006.11 |
| cg23512231 | 5.91E-25 | 3.29E-27 | -1.27E+01 | 51.0533547 | -3.34E-01 | 61538215  | 61538338  | NC_000017.10 |
| cg19416417 | 6.01E-25 | 3.34E-27 | -1.27E+01 | 51.0371231 | -1.78E-01 | 223290324 | 223290447 | NC_000002.11 |
| cg00797278 | 6.01E-25 | 3.34E-27 | -1.27E+01 | 51.0368431 | -1.34E-01 | 32442928  | 32443051  | NC_000003.11 |
| cg01477179 | 6.19E-25 | 3.45E-27 | -1.27E+01 | 51.0062435 | -1.20E-01 | 239068027 | 239068150 | NC_000002.11 |
| cg21531300 | 6.21E-25 | 3.46E-27 | -1.27E+01 | 51.0026077 | -2.65E-01 | 75988800  | 75988923  | NC_000014.8  |
| cg26366109 | 6.23E-25 | 3.47E-27 | -1.27E+01 | 50.9992537 | -2.06E-01 | 30689844  | 30689967  | NC_000006.11 |
| cg25588844 | 6.26E-25 | 3.49E-27 | -1.27E+01 | 50.9935775 | -3.44E-01 | 10037561  | 10037684  | NC_000002.11 |
| cg17178175 | 6.28E-25 | 3.51E-27 | -1.26E+01 | 50.9889239 | -2.88E-01 | 178109973 | 178110096 | NC_000002.11 |
| cg04540882 | 6.37E-25 | 3.56E-27 | -1.26E+01 | 50.9741334 | -2.53E-01 | 27703877  | 27704000  | NC_000017.10 |
| cg02124892 | 6.39E-25 | 3.57E-27 | -1.26E+01 | 50.971439  | -1.88E-01 | 185270360 | 185270483 | NC_000003.11 |
| cg15681255 | 6.40E-25 | 3.58E-27 | -1.26E+01 | 50.9692287 | -2.08E-01 | 27192141  | 27192264  | NC_000008.10 |
| cg12787405 | 6.48E-25 | 3.63E-27 | -1.26E+01 | 50.9543802 | -2.13E-01 | 42955658  | 42955781  | NC_000020.10 |

|            |          |          |           |            |           |           |           |              |
|------------|----------|----------|-----------|------------|-----------|-----------|-----------|--------------|
| cg21011133 | 6.49E-25 | 3.64E-27 | -1.26E+01 | 50.9523225 | -3.30E-01 | 25142198  | 25142321  | NC_000002.11 |
| cg07146104 | 6.51E-25 | 3.65E-27 | -1.26E+01 | 50.948495  | -2.25E-01 | 16489048  | 16489171  | NC_000001.10 |
| cg26429629 | 6.51E-25 | 3.66E-27 | -1.26E+01 | 50.9476125 | -1.03E-01 | 169758391 | 169758514 | NC_000005.9  |
| cg00891886 | 6.61E-25 | 3.72E-27 | -1.26E+01 | 50.9310285 | -1.79E-01 | 73417264  | 73417387  | NC_000007.13 |
| cg19313311 | 6.63E-25 | 3.73E-27 | -1.26E+01 | 50.9275682 | -2.03E-01 | 74058031  | 74058154  | NC_000007.13 |
| cg20014974 | 6.69E-25 | 3.77E-27 | -1.26E+01 | 50.9186969 | -2.35E-01 | 8271918   | 8272041   | NC_000001.10 |
| cg24326142 | 6.84E-25 | 3.85E-27 | -1.26E+01 | 50.8954557 | -2.14E-01 | 110453144 | 110453267 | NC_000001.10 |
| cg10075390 | 6.84E-25 | 3.86E-27 | -1.26E+01 | 50.8939697 | -1.21E-01 | 26032038  | 26032161  | NC_000006.11 |
| cg19478820 | 6.93E-25 | 3.91E-27 | -1.26E+01 | 50.8808284 | -2.69E-01 | 45044355  | 45044478  | NC_000011.9  |
| cg10505873 | 7.03E-25 | 3.97E-27 | -1.26E+01 | 50.8664559 | -1.40E-01 | 44637511  | 44637634  | NC_000020.10 |
| cg00159243 | 7.06E-25 | 3.99E-27 | -1.26E+01 | 50.8613179 | -2.75E-01 | 109023799 | 109023922 | NC_000012.11 |
| cg08554257 | 7.10E-25 | 4.01E-27 | -1.26E+01 | 50.8549544 | -1.44E-01 | 50730737  | 50730860  | NC_000016.9  |
| cg03139435 | 7.23E-25 | 4.09E-27 | -1.26E+01 | 50.8373134 | -1.82E-01 | 54966401  | 54966524  | NC_000020.10 |
| cg07354581 | 7.24E-25 | 4.10E-27 | -1.26E+01 | 50.834679  | -1.73E-01 | 35585747  | 35585870  | NC_000015.9  |
| cg21873674 | 7.35E-25 | 4.16E-27 | -1.26E+01 | 50.8193237 | -2.16E-01 | 13689339  | 13689462  | NC_000003.11 |
| cg26486099 | 7.40E-25 | 4.19E-27 | -1.26E+01 | 50.8113204 | -8.91E-02 | 74615154  | 74615277  | NC_000015.9  |
| cg13591783 | 7.47E-25 | 4.24E-27 | -1.26E+01 | 50.8004045 | -3.10E-01 | 75768868  | 75768991  | NC_000009.11 |
| cg24503796 | 7.52E-25 | 4.27E-27 | -1.26E+01 | 50.792702  | -1.86E-01 | 102107676 | 102107799 | NC_000010.10 |
| cg19182597 | 7.57E-25 | 4.30E-27 | -1.26E+01 | 50.7855982 | -1.21E-01 | 54426670  | 54426793  | NC_000012.11 |
| cg00316800 | 7.59E-25 | 4.32E-27 | -1.26E+01 | 50.7828562 | -2.97E-01 | 10406539  | 10406662  | NC_000002.11 |
| cg16038636 | 7.62E-25 | 4.33E-27 | -1.26E+01 | 50.7787101 | -1.53E-01 | 74138073  | 74138196  | NC_000017.10 |
| cg04654167 | 7.70E-25 | 4.39E-27 | -1.26E+01 | 50.7668569 | -2.25E-01 | 158090949 | 158091072 | NC_000006.11 |
| cg20617957 | 7.76E-25 | 4.43E-27 | -1.26E+01 | 50.7581892 | -2.58E-01 | 100085203 | 100085326 | NC_000013.10 |
| cg23792308 | 7.79E-25 | 4.45E-27 | -1.26E+01 | 50.7535622 | -2.30E-01 | 14104659  | 14104782  | NC_000017.10 |
| cg25755851 | 7.84E-25 | 4.48E-27 | -1.26E+01 | 50.7468751 | -2.24E-01 | 9335794   | 9335917   | NC_000001.10 |

|            |          |          |           |            |           |           |           |              |
|------------|----------|----------|-----------|------------|-----------|-----------|-----------|--------------|
| cg18200326 | 7.92E-25 | 4.53E-27 | -1.26E+01 | 50.7359103 | -1.13E-01 | 67282115  | 67282238  | NC_000016.9  |
| cg01383799 | 7.99E-25 | 4.57E-27 | -1.26E+01 | 50.7258876 | -3.15E-01 | 29819361  | 29819484  | NC_000016.9  |
| cg25660961 | 8.00E-25 | 4.58E-27 | -1.26E+01 | 50.7244443 | -1.09E-01 | 17764073  | 17764196  | NC_000001.10 |
| cg06069310 | 8.17E-25 | 4.68E-27 | -1.26E+01 | 50.7027248 | -1.51E-01 | 38179874  | 38179997  | NC_000003.11 |
| cg24020398 | 8.20E-25 | 4.70E-27 | -1.26E+01 | 50.6983615 | -6.81E-02 | 69455715  | 69455838  | NC_000011.9  |
| cg12918213 | 8.25E-25 | 4.73E-27 | -1.26E+01 | 50.6919245 | -2.89E-01 | 116581414 | 116581537 | NC_000012.11 |
| cg14278260 | 8.25E-25 | 4.74E-27 | -1.26E+01 | 50.6904048 | -1.37E-01 | 50280495  | 50280618  | NC_000016.9  |
| cg14742445 | 8.29E-25 | 4.76E-27 | -1.26E+01 | 50.6859384 | -2.44E-01 | 30195299  | 30195422  | NC_000022.10 |
| cg13693256 | 8.44E-25 | 4.85E-27 | -1.26E+01 | 50.6670445 | -2.65E-01 | 132098311 | 132098434 | NC_000009.11 |
| cg01321189 | 8.49E-25 | 4.88E-27 | -1.26E+01 | 50.6616186 | -1.30E-01 | 32259338  | 32259461  | NC_000012.11 |
| cg06674117 | 8.49E-25 | 4.88E-27 | -1.26E+01 | 50.6613301 | -3.06E-01 | 30488883  | 30489006  | NC_000017.10 |
| cg10728351 | 8.51E-25 | 4.90E-27 | -1.26E+01 | 50.6574965 | -3.57E-01 | 122628020 | 122628143 | NC_000004.11 |
| cg27268352 | 8.54E-25 | 4.92E-27 | -1.26E+01 | 50.6532021 | -2.82E-01 | 30387860  | 30387983  | NC_000010.10 |
| cg12371587 | 8.56E-25 | 4.93E-27 | -1.26E+01 | 50.6512996 | -1.43E-01 | 42093157  | 42093280  | NC_000022.10 |
| cg07984515 | 8.61E-25 | 4.96E-27 | -1.26E+01 | 50.6442156 | -2.13E-01 | 98793604  | 98793727  | NC_000012.11 |
| cg00685314 | 8.64E-25 | 4.98E-27 | -1.26E+01 | 50.6406397 | -2.53E-01 | 120307689 | 120307812 | NC_000012.11 |
| cg17494199 | 8.71E-25 | 5.03E-27 | -1.26E+01 | 50.6317136 | -3.06E-01 | 106834942 | 106835065 | NC_000013.10 |
| cg11060604 | 8.78E-25 | 5.07E-27 | -1.26E+01 | 50.6234325 | -2.98E-01 | 130572465 | 130572588 | NC_000007.13 |
| cg02155796 | 8.83E-25 | 5.10E-27 | -1.26E+01 | 50.6165    | -1.40E-01 | 105940179 | 105940302 | NC_000014.8  |
| cg02092885 | 8.84E-25 | 5.11E-27 | -1.26E+01 | 50.615048  | -1.84E-01 | 29379458  | 29379581  | NC_000017.10 |
| cg09183124 | 8.92E-25 | 5.16E-27 | -1.26E+01 | 50.6059885 | -3.12E-01 | 173092323 | 173092446 | NC_000001.10 |
| cg20327784 | 9.24E-25 | 5.35E-27 | -1.26E+01 | 50.5690024 | -2.14E-01 | 73703307  | 73703430  | NC_000017.10 |
| cg04880195 | 9.25E-25 | 5.36E-27 | -1.26E+01 | 50.5678273 | -1.13E-01 | 225841794 | 225841917 | NC_000001.10 |
| cg00355019 | 9.26E-25 | 5.36E-27 | -1.26E+01 | 50.566894  | -2.12E-01 | 119994877 | 119995000 | NC_000011.9  |
| cg05451210 | 9.28E-25 | 5.38E-27 | -1.26E+01 | 50.5641503 | -1.89E-01 | 98812695  | 98812818  | NC_000012.11 |

|            |          |          |           |            |           |           |           |              |
|------------|----------|----------|-----------|------------|-----------|-----------|-----------|--------------|
| cg21699330 | 9.32E-25 | 5.41E-27 | -1.26E+01 | 50.5591315 | -2.94E-01 | 26193032  | 26193155  | NC_000007.13 |
| cg16209064 | 9.40E-25 | 5.46E-27 | -1.26E+01 | 50.5500822 | -3.25E-01 | 187766591 | 187766714 | NC_000004.11 |
| cg04772575 | 9.58E-25 | 5.57E-27 | -1.26E+01 | 50.5303216 | -2.25E-01 | 123431865 | 123431988 | NC_000012.11 |
| cg21398275 | 9.58E-25 | 5.57E-27 | -1.26E+01 | 50.5301429 | -2.19E-01 | 45645497  | 45645620  | NC_000006.11 |
| cg23307858 | 9.88E-25 | 5.75E-27 | -1.26E+01 | 50.4988073 | -7.31E-02 | 144533454 | 144533577 | NC_000007.13 |
| cg15824323 | 9.94E-25 | 5.78E-27 | -1.26E+01 | 50.4920991 | -2.30E-01 | 141072814 | 141072937 | NC_000005.9  |
| cg23361127 | 9.99E-25 | 5.82E-27 | -1.26E+01 | 50.4865516 | -3.45E-01 | 73939283  | 73939406  | NC_000005.9  |
| cg22524864 | 1.00E-24 | 5.83E-27 | -1.26E+01 | 50.48412   | -2.60E-01 | 35613900  | 35614023  | NC_000019.9  |
| cg23899359 | 1.01E-24 | 5.86E-27 | -1.26E+01 | 50.4786091 | -1.00E-01 | 2051565   | 2051688   | NC_000019.9  |
| cg19238349 | 1.01E-24 | 5.87E-27 | -1.26E+01 | 50.4770087 | -2.11E-01 | 49888180  | 49888303  | NC_000013.10 |
| cg08169827 | 1.01E-24 | 5.92E-27 | -1.26E+01 | 50.4695179 | -2.06E-01 | 32054766  | 32054889  | NC_000001.10 |
| cg00768487 | 1.01E-24 | 5.92E-27 | -1.26E+01 | 50.4686896 | -2.77E-01 | 26611311  | 26611434  | NC_000001.10 |
| cg21027526 | 1.01E-24 | 5.93E-27 | -1.26E+01 | 50.4670614 | -1.84E-01 | 15743215  | 15743338  | NC_000012.11 |
| cg16033151 | 1.01E-24 | 5.93E-27 | -1.26E+01 | 50.4664786 | -2.23E-01 | 27966740  | 27966863  | NC_000017.10 |
| cg17453456 | 1.02E-24 | 6.00E-27 | -1.26E+01 | 50.4558149 | -2.45E-01 | 156094519 | 156094642 | NC_000001.10 |
| cg21474062 | 1.04E-24 | 6.07E-27 | -1.26E+01 | 50.4439519 | -2.23E-01 | 141087363 | 141087486 | NC_000003.11 |
| cg12406559 | 1.06E-24 | 6.19E-27 | -1.26E+01 | 50.4244711 | -3.61E-01 | 56530302  | 56530425  | NC_000018.9  |
| cg18220560 | 1.06E-24 | 6.22E-27 | -1.26E+01 | 50.4198291 | -1.36E-01 | 17936424  | 17936547  | NC_000002.11 |
| cg17469978 | 1.07E-24 | 6.25E-27 | -1.26E+01 | 50.4146922 | -1.82E-01 | 116164704 | 116164827 | NC_000007.13 |
| cg07861258 | 1.07E-24 | 6.26E-27 | -1.26E+01 | 50.4128316 | -1.54E-01 | 21092936  | 21093059  | NC_000014.8  |
| cg24567694 | 1.07E-24 | 6.27E-27 | -1.26E+01 | 50.4111731 | -8.05E-02 | 154719693 | 154719816 | NC_000007.13 |
| cg09453760 | 1.07E-24 | 6.29E-27 | -1.26E+01 | 50.409533  | -1.75E-01 | 47693630  | 47693753  | NC_000007.13 |
| cg21756208 | 1.07E-24 | 6.30E-27 | -1.26E+01 | 50.4065763 | -2.17E-01 | 134146405 | 134146528 | NC_000003.11 |
| cg22506605 | 1.08E-24 | 6.39E-27 | -1.26E+01 | 50.3929638 | -1.44E-01 | 44462172  | 44462295  | NC_000020.10 |
| cg03902729 | 1.09E-24 | 6.41E-27 | -1.26E+01 | 50.3895743 | -1.03E-01 | 42081932  | 42082055  | NC_000017.10 |

|            |          |          |           |            |           |           |           |              |
|------------|----------|----------|-----------|------------|-----------|-----------|-----------|--------------|
| cg03240301 | 1.09E-24 | 6.44E-27 | -1.26E+01 | 50.3858239 | -3.02E-01 | 23387383  | 23387506  | NC_000007.13 |
| cg15068733 | 1.10E-24 | 6.49E-27 | -1.26E+01 | 50.3772357 | -2.04E-01 | 7342846   | 7342969   | NC_000017.10 |
| cg19532731 | 1.10E-24 | 6.51E-27 | -1.26E+01 | 50.3750205 | -1.42E-01 | 89783448  | 89783571  | NC_000007.13 |
| cg00259234 | 1.11E-24 | 6.54E-27 | -1.26E+01 | 50.3694342 | -2.78E-01 | 79844397  | 79844520  | NC_000017.10 |
| cg18141386 | 1.11E-24 | 6.58E-27 | -1.26E+01 | 50.3632373 | -2.10E-01 | 101052970 | 101053093 | NC_000014.8  |
| cg26305174 | 1.12E-24 | 6.64E-27 | -1.26E+01 | 50.3552284 | -1.81E-01 | 100463583 | 100463706 | NC_000007.13 |
| cg05349016 | 1.15E-24 | 6.84E-27 | -1.26E+01 | 50.3253631 | -3.17E-01 | 43170343  | 43170466  | NC_000017.10 |
| cg04499701 | 1.16E-24 | 6.86E-27 | -1.26E+01 | 50.3223623 | -2.79E-01 | 111312453 | 111312576 | NC_000011.9  |
| cg21946299 | 1.16E-24 | 6.87E-27 | -1.26E+01 | 50.3210641 | -9.46E-02 | 12329166  | 12329289  | NC_000003.11 |
| cg02601475 | 1.17E-24 | 6.97E-27 | -1.26E+01 | 50.3062074 | -3.05E-01 | 121518272 | 121518395 | NC_000005.9  |
| cg02001991 | 1.18E-24 | 7.02E-27 | -1.26E+01 | 50.2989973 | -2.70E-01 | 71992842  | 71992965  | NC_000004.11 |
| cg08553467 | 1.21E-24 | 7.19E-27 | -1.25E+01 | 50.2754426 | -1.59E-01 | 128292922 | 128293045 | NC_000003.11 |
| cg17316966 | 1.22E-24 | 7.27E-27 | -1.25E+01 | 50.2642434 | -2.68E-01 | 74878476  | 74878599  | NC_000008.10 |
| cg16250754 | 1.22E-24 | 7.28E-27 | -1.25E+01 | 50.2638009 | -2.23E-01 | 40841579  | 40841702  | NC_000005.9  |
| cg04205616 | 1.22E-24 | 7.30E-27 | -1.25E+01 | 50.2613669 | -2.89E-01 | 79692516  | 79692639  | NC_000016.9  |
| cg27236629 | 1.23E-24 | 7.34E-27 | -1.25E+01 | 50.2555744 | -2.23E-01 | 96877720  | 96877843  | NC_000015.9  |
| cg13300246 | 1.24E-24 | 7.40E-27 | -1.25E+01 | 50.2476884 | -1.88E-01 | 64597604  | 64597727  | NC_000007.13 |
| cg09924669 | 1.24E-24 | 7.40E-27 | -1.25E+01 | 50.2471984 | -2.59E-01 | 1593214   | 1593337   | NC_000016.9  |
| cg23916646 | 1.25E-24 | 7.48E-27 | -1.25E+01 | 50.2372143 | -1.37E-01 | 31744545  | 31744668  | NC_000006.11 |
| cg03440556 | 1.29E-24 | 7.72E-27 | -1.25E+01 | 50.2052038 | -2.59E-01 | 102107757 | 102107880 | NC_000010.10 |
| cg19405484 | 1.29E-24 | 7.74E-27 | -1.25E+01 | 50.2030622 | -2.70E-01 | 29513210  | 29513333  | NC_000008.10 |
| cg18294332 | 1.31E-24 | 7.88E-27 | -1.25E+01 | 50.1848706 | -3.45E-01 | 56148274  | 56148397  | NC_000005.9  |
| cg14758525 | 1.31E-24 | 7.89E-27 | -1.25E+01 | 50.1836887 | -2.31E-01 | 12041672  | 12041795  | NC_000018.9  |
| cg16251626 | 1.32E-24 | 7.95E-27 | -1.25E+01 | 50.1758656 | -2.20E-01 | 43672622  | 43672745  | NC_000001.10 |
| cg13376120 | 1.33E-24 | 8.01E-27 | -1.25E+01 | 50.1686673 | -2.12E-01 | 208675738 | 208675861 | NC_000002.11 |

|            |          |          |           |            |           |           |           |              |
|------------|----------|----------|-----------|------------|-----------|-----------|-----------|--------------|
| cg12641569 | 1.33E-24 | 8.01E-27 | -1.25E+01 | 50.1684475 | -2.04E-01 | 70601781  | 70601904  | NC_000011.9  |
| cg18328965 | 1.35E-24 | 8.13E-27 | -1.25E+01 | 50.1539005 | -1.29E-01 | 102107584 | 102107707 | NC_000010.10 |
| cg05149307 | 1.36E-24 | 8.19E-27 | -1.25E+01 | 50.1460507 | -9.72E-02 | 113574071 | 113574194 | NC_000012.11 |
| cg08755130 | 1.36E-24 | 8.22E-27 | -1.25E+01 | 50.1430639 | -9.67E-02 | 29705878  | 29706001  | NC_000006.11 |
| cg06947286 | 1.39E-24 | 8.42E-27 | -1.25E+01 | 50.1186122 | -2.75E-01 | 131596602 | 131596725 | NC_000005.9  |
| cg07837078 | 1.39E-24 | 8.43E-27 | -1.25E+01 | 50.1178599 | -2.88E-01 | 12695813  | 12695936  | NC_000002.11 |
| cg03339910 | 1.40E-24 | 8.46E-27 | -1.25E+01 | 50.1140787 | -2.94E-01 | 62318482  | 62318605  | NC_000020.10 |
| cg09612099 | 1.40E-24 | 8.48E-27 | -1.25E+01 | 50.1120035 | -2.71E-01 | 102096840 | 102096963 | NC_000011.9  |
| cg08719608 | 1.41E-24 | 8.53E-27 | -1.25E+01 | 50.1056401 | -1.75E-01 | 138727887 | 138728010 | NC_000005.9  |
| cg27294841 | 1.42E-24 | 8.64E-27 | -1.25E+01 | 50.0936741 | -1.78E-01 | 33722046  | 33722169  | NC_000011.9  |
| cg06295590 | 1.43E-24 | 8.67E-27 | -1.25E+01 | 50.0896068 | -1.19E-01 | 62205981  | 62206104  | NC_000020.10 |
| cg04188920 | 1.43E-24 | 8.68E-27 | -1.25E+01 | 50.0886224 | -2.52E-01 | 3138534   | 3138657   | NC_000010.10 |
| cg16366686 | 1.43E-24 | 8.70E-27 | -1.25E+01 | 50.0862235 | -2.27E-01 | 75315837  | 75315960  | NC_000017.10 |
| cg02816297 | 1.45E-24 | 8.80E-27 | -1.25E+01 | 50.074689  | -8.34E-02 | 56224411  | 56224534  | NC_000012.11 |
| cg21155367 | 1.45E-24 | 8.84E-27 | -1.25E+01 | 50.070328  | -1.55E-01 | 90229095  | 90229218  | NC_000001.10 |
| cg22104744 | 1.46E-24 | 8.89E-27 | -1.25E+01 | 50.0644772 | -2.39E-01 | 114829833 | 114829956 | NC_000013.10 |
| cg21964564 | 1.47E-24 | 8.93E-27 | -1.25E+01 | 50.0600339 | -1.85E-01 | 204941271 | 204941394 | NC_000001.10 |
| cg20154618 | 1.48E-24 | 9.00E-27 | -1.25E+01 | 50.0527123 | -1.56E-01 | 4153677   | 4153800   | NC_000019.9  |
| cg10825530 | 1.51E-24 | 9.18E-27 | -1.25E+01 | 50.0326382 | -2.24E-01 | 16023708  | 16023831  | NC_000011.9  |
| cg00576774 | 1.52E-24 | 9.28E-27 | -1.25E+01 | 50.0220312 | -1.24E-01 | 28725676  | 28725799  | NC_000007.13 |
| cg02971381 | 1.53E-24 | 9.32E-27 | -1.25E+01 | 50.0175698 | -1.33E-01 | 6641751   | 6641874   | NC_000012.11 |
| cg05892674 | 1.55E-24 | 9.48E-27 | -1.25E+01 | 50.0006129 | -8.97E-02 | 101918304 | 101918427 | NC_000011.9  |
| cg22945473 | 1.59E-24 | 9.70E-27 | -1.25E+01 | 49.9784033 | -1.10E-01 | 74438852  | 74438975  | NC_000005.9  |
| cg16783204 | 1.60E-24 | 9.78E-27 | -1.25E+01 | 49.9697087 | -2.41E-01 | 89119371  | 89119494  | NC_000016.9  |
| cg26908505 | 1.60E-24 | 9.81E-27 | -1.25E+01 | 49.9674778 | -2.86E-01 | 126517611 | 126517734 | NC_000011.9  |

|            |          |          |           |            |           |           |           |              |
|------------|----------|----------|-----------|------------|-----------|-----------|-----------|--------------|
| cg02854902 | 1.60E-24 | 9.81E-27 | -1.25E+01 | 49.966963  | -3.18E-01 | 111312361 | 111312484 | NC_000011.9  |
| cg02591564 | 1.62E-24 | 9.91E-27 | -1.25E+01 | 49.9566071 | -2.63E-01 | 125578355 | 125578478 | NC_000012.11 |
| cg05336982 | 1.62E-24 | 9.92E-27 | -1.25E+01 | 49.9558112 | -2.82E-01 | 69564735  | 69564858  | NC_000016.9  |
| cg20475082 | 1.62E-24 | 9.95E-27 | -1.25E+01 | 49.9527743 | -2.62E-01 | 129166686 | 129166809 | NC_000002.11 |
| cg21243597 | 1.62E-24 | 9.97E-27 | -1.25E+01 | 49.9507559 | -2.58E-01 | 13375540  | 13375663  | NC_000018.9  |
| cg00622799 | 1.63E-24 | 9.99E-27 | -1.25E+01 | 49.9487731 | -2.55E-01 | 62318588  | 62318711  | NC_000020.10 |
| cg23167351 | 1.63E-24 | 1.00E-26 | -1.25E+01 | 49.947829  | -2.57E-01 | 30650737  | 30650860  | NC_000006.11 |
| cg22365276 | 1.66E-24 | 1.02E-26 | -1.25E+01 | 49.9263379 | -2.61E-01 | 60688622  | 60688745  | NC_000015.9  |
| cg25581222 | 1.67E-24 | 1.03E-26 | -1.25E+01 | 49.9203666 | -3.15E-01 | 64539239  | 64539362  | NC_000015.9  |
| cg22913903 | 1.68E-24 | 1.04E-26 | -1.25E+01 | 49.9135385 | -1.09E-01 | 49740968  | 49741091  | NC_000012.11 |
| cg14205663 | 1.68E-24 | 1.04E-26 | -1.25E+01 | 49.9101978 | -2.04E-01 | 96872827  | 96872950  | NC_000015.9  |
| cg04898939 | 1.70E-24 | 1.05E-26 | -1.25E+01 | 49.8980974 | -1.47E-01 | 30347333  | 30347456  | NC_000016.9  |
| cg20515580 | 1.71E-24 | 1.06E-26 | -1.25E+01 | 49.892076  | -2.52E-01 | 66800566  | 66800689  | NC_000011.9  |
| cg18114313 | 1.74E-24 | 1.07E-26 | -1.25E+01 | 49.8784429 | -2.89E-01 | 104614435 | 104614558 | NC_000007.13 |
| cg07911961 | 1.74E-24 | 1.07E-26 | -1.25E+01 | 49.8774036 | -2.41E-01 | 70083193  | 70083316  | NC_000012.11 |
| cg12003483 | 1.74E-24 | 1.07E-26 | -1.25E+01 | 49.8773119 | -8.56E-02 | 41624164  | 41624287  | NC_000017.10 |
| cg03190938 | 1.74E-24 | 1.08E-26 | -1.25E+01 | 49.8731244 | -1.37E-01 | 218621580 | 218621703 | NC_000002.11 |
| cg18599081 | 1.76E-24 | 1.09E-26 | -1.25E+01 | 49.8650297 | -2.53E-01 | 46448084  | 46448207  | NC_000003.11 |
| cg02636348 | 1.78E-24 | 1.10E-26 | -1.25E+01 | 49.8512441 | -2.73E-01 | 78923827  | 78923950  | NC_000010.10 |
| cg26178163 | 1.78E-24 | 1.11E-26 | -1.25E+01 | 49.8487875 | -2.66E-01 | 106805150 | 106805273 | NC_000005.9  |
| cg08564487 | 1.79E-24 | 1.11E-26 | -1.25E+01 | 49.847735  | -2.52E-01 | 75319751  | 75319874  | NC_000017.10 |
| cg03354554 | 1.80E-24 | 1.12E-26 | -1.25E+01 | 49.8374486 | -2.86E-01 | 9781412   | 9781535   | NC_000011.9  |
| cg21856334 | 1.83E-24 | 1.14E-26 | -1.25E+01 | 49.8199996 | -2.61E-01 | 196754664 | 196754787 | NC_000003.11 |
| cg23844623 | 1.84E-24 | 1.14E-26 | -1.25E+01 | 49.8148117 | -1.78E-01 | 47290730  | 47290853  | NC_000011.9  |
| cg19628739 | 1.88E-24 | 1.17E-26 | -1.25E+01 | 49.7930118 | -2.32E-01 | 44317517  | 44317640  | NC_000022.10 |

|            |          |          |           |            |           |           |           |              |
|------------|----------|----------|-----------|------------|-----------|-----------|-----------|--------------|
| cg15681358 | 1.88E-24 | 1.17E-26 | -1.25E+01 | 49.790512  | -1.60E-01 | 99474521  | 99474644  | NC_000010.10 |
| cg07982740 | 1.89E-24 | 1.18E-26 | -1.25E+01 | 49.7870954 | -3.10E-01 | 44410114  | 44410237  | NC_000020.10 |
| cg06419432 | 1.91E-24 | 1.19E-26 | -1.25E+01 | 49.7738278 | -1.08E-01 | 25707535  | 25707658  | NC_000017.10 |
| cg10462187 | 1.91E-24 | 1.19E-26 | -1.25E+01 | 49.7718752 | -2.54E-01 | 124067402 | 124067525 | NC_000010.10 |
| cg21911930 | 1.91E-24 | 1.19E-26 | -1.25E+01 | 49.7711579 | -2.86E-01 | 146009877 | 146010000 | NC_000006.11 |
| cg15161854 | 1.92E-24 | 1.20E-26 | -1.25E+01 | 49.7694313 | -2.07E-01 | 28836139  | 28836262  | NC_000001.10 |
| cg11009590 | 1.92E-24 | 1.20E-26 | -1.25E+01 | 49.7687596 | -3.25E-01 | 149082648 | 149082771 | NC_000006.11 |
| cg14700577 | 1.97E-24 | 1.23E-26 | -1.25E+01 | 49.7395128 | -1.31E-01 | 47517001  | 47517124  | NC_000003.11 |
| cg01152624 | 1.98E-24 | 1.24E-26 | -1.25E+01 | 49.7338315 | -2.44E-01 | 106239635 | 106239758 | NC_000011.9  |
| cg27067618 | 1.99E-24 | 1.24E-26 | -1.25E+01 | 49.7303486 | -1.97E-01 | 15751949  | 15752072  | NC_000019.9  |
| cg05493841 | 2.01E-24 | 1.26E-26 | -1.25E+01 | 49.7178587 | -1.89E-01 | 70083096  | 70083219  | NC_000012.11 |
| cg09926488 | 2.01E-24 | 1.26E-26 | -1.25E+01 | 49.7157764 | -1.48E-01 | 16178514  | 16178637  | NC_000019.9  |
| cg12925682 | 2.03E-24 | 1.27E-26 | -1.25E+01 | 49.7071444 | -3.33E-01 | 38872169  | 38872292  | NC_000005.9  |
| cg18437710 | 2.04E-24 | 1.28E-26 | -1.25E+01 | 49.701563  | -2.55E-01 | 51522894  | 51523017  | NC_000019.9  |
| cg20688651 | 2.04E-24 | 1.28E-26 | -1.25E+01 | 49.7004153 | -2.80E-01 | 66220754  | 66220877  | NC_000012.11 |
| cg15985132 | 2.04E-24 | 1.28E-26 | -1.25E+01 | 49.6998464 | -3.15E-01 | 130642799 | 130642922 | NC_000011.9  |
| cg22207139 | 2.06E-24 | 1.29E-26 | -1.25E+01 | 49.6919248 | -2.64E-01 | 59467736  | 59467859  | NC_000015.9  |
| cg04608177 | 2.06E-24 | 1.30E-26 | -1.25E+01 | 49.6874043 | -1.35E-01 | 37230389  | 37230512  | NC_000020.10 |
| cg05088433 | 2.07E-24 | 1.31E-26 | -1.25E+01 | 49.6830767 | -1.98E-01 | 239144301 | 239144424 | NC_000002.11 |
| cg10933959 | 2.08E-24 | 1.31E-26 | -1.25E+01 | 49.6792797 | -3.01E-01 | 100890907 | 100891030 | NC_000015.9  |
| cg13312702 | 2.09E-24 | 1.31E-26 | -1.25E+01 | 49.6759177 | -1.88E-01 | 4721531   | 4721654   | NC_000007.13 |
| cg16394551 | 2.09E-24 | 1.32E-26 | -1.25E+01 | 49.6739435 | -2.15E-01 | 3230357   | 3230480   | NC_000001.10 |
| cg13432339 | 2.09E-24 | 1.32E-26 | -1.25E+01 | 49.672271  | -2.56E-01 | 58211039  | 58211162  | NC_000004.11 |
| cg01292810 | 2.10E-24 | 1.32E-26 | -1.25E+01 | 49.6689006 | -2.11E-01 | 184241840 | 184241963 | NC_000003.11 |
| cg14550985 | 2.11E-24 | 1.33E-26 | -1.25E+01 | 49.6624318 | -2.38E-01 | 66104159  | 66104282  | NC_000011.9  |



|            |          |          |           |            |           |           |           |              |
|------------|----------|----------|-----------|------------|-----------|-----------|-----------|--------------|
| cg04927537 | 2.12E-24 | 1.34E-26 | -1.25E+01 | 49.6585137 | -1.89E-01 | 76976091  | 76976214  | NC_000017.10 |
| cg12850892 | 2.14E-24 | 1.35E-26 | -1.25E+01 | 49.6476995 | -2.25E-01 | 75945585  | 75945708  | NC_000011.9  |
| cg11610614 | 2.14E-24 | 1.36E-26 | -1.25E+01 | 49.6446865 | -2.49E-01 | 75877811  | 75877934  | NC_000017.10 |
| cg21126943 | 2.17E-24 | 1.37E-26 | -1.25E+01 | 49.6333964 | -1.89E-01 | 42259395  | 42259518  | NC_000019.9  |
| cg02840697 | 2.18E-24 | 1.38E-26 | -1.25E+01 | 49.6275188 | -1.03E-01 | 24861141  | 24861264  | NC_000008.10 |
| cg08928408 | 2.19E-24 | 1.39E-26 | -1.25E+01 | 49.620886  | -2.93E-01 | 149454106 | 149454229 | NC_000003.11 |
| cg00424451 | 2.19E-24 | 1.39E-26 | -1.25E+01 | 49.6207776 | -1.97E-01 | 76338660  | 76338783  | NC_000017.10 |
| cg00498419 | 2.23E-24 | 1.42E-26 | -1.24E+01 | 49.6012461 | -1.02E-01 | 129925077 | 129925200 | NC_000010.10 |
| cg25753473 | 2.23E-24 | 1.42E-26 | -1.24E+01 | 49.6005594 | -2.50E-01 | 170532835 | 170532958 | NC_000006.11 |
| cg15298059 | 2.25E-24 | 1.43E-26 | -1.24E+01 | 49.5929007 | -2.05E-01 | 157668141 | 157668264 | NC_000007.13 |
| cg15135286 | 2.29E-24 | 1.46E-26 | -1.24E+01 | 49.5730885 | -2.56E-01 | 33359281  | 33359404  | NC_000002.11 |
| cg17515024 | 2.30E-24 | 1.46E-26 | -1.24E+01 | 49.5688426 | -2.58E-01 | 228644963 | 228645086 | NC_000001.10 |
| cg06580800 | 2.31E-24 | 1.47E-26 | -1.24E+01 | 49.5658919 | -2.60E-01 | 39921535  | 39921658  | NC_000019.9  |
| cg08380379 | 2.34E-24 | 1.49E-26 | -1.24E+01 | 49.5508271 | -3.10E-01 | 201652352 | 201652475 | NC_000002.11 |
| cg08418670 | 2.34E-24 | 1.50E-26 | -1.24E+01 | 49.5478916 | -2.82E-01 | 4374567   | 4374690   | NC_000019.9  |
| cg17571559 | 2.36E-24 | 1.51E-26 | -1.24E+01 | 49.539738  | -3.23E-01 | 11267525  | 11267648  | NC_000003.11 |
| cg15792158 | 2.39E-24 | 1.53E-26 | -1.24E+01 | 49.5270619 | -6.92E-02 | 113574084 | 113574207 | NC_000012.11 |
| cg01140244 | 2.47E-24 | 1.58E-26 | -1.24E+01 | 49.4959926 | -1.53E-01 | 134498960 | 134499083 | NC_000010.10 |
| cg20942867 | 2.47E-24 | 1.58E-26 | -1.24E+01 | 49.4935658 | -2.37E-01 | 27426144  | 27426267  | NC_000001.10 |
| cg21118367 | 2.47E-24 | 1.58E-26 | -1.24E+01 | 49.4911209 | -9.77E-02 | 184460875 | 184460998 | NC_000001.10 |
| cg08314457 | 2.49E-24 | 1.60E-26 | -1.24E+01 | 49.4826529 | -1.38E-01 | 77507534  | 77507657  | NC_000014.8  |
| cg07719679 | 2.49E-24 | 1.60E-26 | -1.24E+01 | 49.4819502 | -2.16E-01 | 87936392  | 87936515  | NC_000007.13 |
| cg13709639 | 2.49E-24 | 1.60E-26 | -1.24E+01 | 49.4810537 | -1.73E-01 | 49526040  | 49526163  | NC_000012.11 |
| cg15526708 | 2.52E-24 | 1.61E-26 | -1.24E+01 | 49.4721824 | -1.28E-01 | 101866433 | 101866556 | NC_000009.11 |
| cg06959340 | 2.54E-24 | 1.63E-26 | -1.24E+01 | 49.4611272 | -1.13E-01 | 23450238  | 23450361  | NC_000014.8  |

|            |          |          |           |            |           |           |           |              |
|------------|----------|----------|-----------|------------|-----------|-----------|-----------|--------------|
| cg27181349 | 2.56E-24 | 1.64E-26 | -1.24E+01 | 49.4540578 | -2.51E-01 | 36574854  | 36574977  | NC_000001.10 |
| cg00206507 | 2.58E-24 | 1.66E-26 | -1.24E+01 | 49.4457057 | -2.59E-01 | 72199637  | 72199760  | NC_000006.11 |
| cg05279738 | 2.64E-24 | 1.70E-26 | -1.24E+01 | 49.4213693 | -2.38E-01 | 141560204 | 141560327 | NC_000003.11 |
| cg06647928 | 2.65E-24 | 1.71E-26 | -1.24E+01 | 49.4165375 | -2.02E-01 | 73612203  | 73612326  | NC_000005.9  |
| cg16549596 | 2.67E-24 | 1.72E-26 | -1.24E+01 | 49.4097255 | -1.90E-01 | 27188587  | 27188710  | NC_000001.10 |
| cg25109721 | 2.78E-24 | 1.80E-26 | -1.24E+01 | 49.3631935 | -3.05E-01 | 48125064  | 48125187  | NC_000017.10 |
| cg04094838 | 2.80E-24 | 1.81E-26 | -1.24E+01 | 49.3568859 | -2.58E-01 | 45186145  | 45186268  | NC_000002.11 |
| cg06972019 | 2.81E-24 | 1.82E-26 | -1.24E+01 | 49.3534611 | -2.43E-01 | 8937448   | 8937571   | NC_000001.10 |
| cg02888518 | 2.82E-24 | 1.83E-26 | -1.24E+01 | 49.3490337 | -1.96E-01 | 75716672  | 75716795  | NC_000010.10 |
| cg17386185 | 2.83E-24 | 1.84E-26 | -1.24E+01 | 49.3434072 | -1.08E-01 | 52321266  | 52321389  | NC_000003.11 |
| cg18080046 | 2.85E-24 | 1.85E-26 | -1.24E+01 | 49.3352928 | -1.45E-01 | 31704844  | 31704967  | NC_000006.11 |
| cg25433316 | 2.87E-24 | 1.86E-26 | -1.24E+01 | 49.3301208 | -2.62E-01 | 10197543  | 10197666  | NC_000002.11 |
| cg07621749 | 2.87E-24 | 1.87E-26 | -1.24E+01 | 49.3281216 | -2.46E-01 | 41806141  | 41806264  | NC_000015.9  |
| cg14091840 | 2.89E-24 | 1.88E-26 | -1.24E+01 | 49.3196804 | -2.73E-01 | 218759118 | 218759241 | NC_000001.10 |
| cg02499308 | 2.92E-24 | 1.90E-26 | -1.24E+01 | 49.3099826 | -3.00E-01 | 135594780 | 135594903 | NC_000002.11 |
| cg26856289 | 2.92E-24 | 1.90E-26 | -1.24E+01 | 49.3090634 | -3.10E-01 | 24307516  | 24307639  | NC_000001.10 |
| cg11454459 | 2.93E-24 | 1.91E-26 | -1.24E+01 | 49.3045673 | -2.70E-01 | 30472048  | 30472171  | NC_000010.10 |
| cg04349084 | 2.97E-24 | 1.93E-26 | -1.24E+01 | 49.2922916 | -2.94E-01 | 23602677  | 23602800  | NC_000008.10 |
| cg15029037 | 2.97E-24 | 1.94E-26 | -1.24E+01 | 49.2890463 | -2.63E-01 | 146729164 | 146729287 | NC_000004.11 |
| cg12885484 | 3.00E-24 | 1.96E-26 | -1.24E+01 | 49.2794423 | -3.34E-01 | 6116868   | 6116991   | NC_000007.13 |
| cg24592513 | 3.03E-24 | 1.98E-26 | -1.24E+01 | 49.2712488 | -2.24E-01 | 89099589  | 89099712  | NC_000004.11 |
| cg21341586 | 3.03E-24 | 1.98E-26 | -1.24E+01 | 49.2706868 | -1.98E-01 | 99851281  | 99851404  | NC_000004.11 |
| cg08930413 | 3.04E-24 | 1.99E-26 | -1.24E+01 | 49.2661205 | -2.56E-01 | 151548036 | 151548159 | NC_000007.13 |
| cg00319655 | 3.07E-24 | 2.01E-26 | -1.24E+01 | 49.2537166 | -1.78E-01 | 79473327  | 79473450  | NC_000004.11 |
| cg22893605 | 3.08E-24 | 2.02E-26 | -1.24E+01 | 49.2494331 | -2.67E-01 | 171185324 | 171185447 | NC_000005.9  |

|            |          |          |           |            |           |           |           |              |
|------------|----------|----------|-----------|------------|-----------|-----------|-----------|--------------|
| cg19768356 | 3.11E-24 | 2.04E-26 | -1.24E+01 | 49.239214  | -1.05E-01 | 36547772  | 36547895  | NC_000006.11 |
| cg09315887 | 3.12E-24 | 2.04E-26 | -1.24E+01 | 49.2375557 | -2.25E-01 | 105753386 | 105753509 | NC_000007.13 |
| cg03316864 | 3.14E-24 | 2.06E-26 | -1.24E+01 | 49.2286868 | -1.21E-01 | 17906309  | 17906432  | NC_000019.9  |
| cg07118796 | 3.16E-24 | 2.08E-26 | -1.24E+01 | 49.2225149 | -2.37E-01 | 126892022 | 126892145 | NC_000003.11 |
| cg10820936 | 3.20E-24 | 2.10E-26 | -1.24E+01 | 49.2106376 | -3.35E-01 | 216871234 | 216871357 | NC_000002.11 |
| cg11549874 | 3.21E-24 | 2.11E-26 | -1.24E+01 | 49.2045936 | -2.24E-01 | 31202478  | 31202601  | NC_000022.10 |
| cg14475875 | 3.23E-24 | 2.13E-26 | -1.24E+01 | 49.1978605 | -1.69E-01 | 193856076 | 193856199 | NC_000003.11 |
| cg01930756 | 3.24E-24 | 2.14E-26 | -1.24E+01 | 49.1942186 | -2.01E-01 | 135424444 | 135424567 | NC_000005.9  |
| cg02544257 | 3.26E-24 | 2.14E-26 | -1.24E+01 | 49.1901517 | -2.52E-01 | 70510663  | 70510786  | NC_000016.9  |
| cg12656085 | 3.26E-24 | 2.15E-26 | -1.24E+01 | 49.1882935 | -3.03E-01 | 85173360  | 85173483  | NC_000002.11 |
| cg21370924 | 3.26E-24 | 2.15E-26 | -1.24E+01 | 49.1880973 | -2.21E-01 | 141087313 | 141087436 | NC_000003.11 |
| cg00332680 | 3.27E-24 | 2.16E-26 | -1.24E+01 | 49.1848175 | -1.54E-01 | 74079303  | 74079426  | NC_000010.10 |
| cg11288831 | 3.29E-24 | 2.17E-26 | -1.24E+01 | 49.1783174 | -2.41E-01 | 114880831 | 114880954 | NC_000013.10 |
| cg05527430 | 3.30E-24 | 2.18E-26 | -1.24E+01 | 49.1729489 | -1.37E-01 | 175444181 | 175444304 | NC_000004.11 |
| cg00418071 | 3.33E-24 | 2.20E-26 | -1.24E+01 | 49.1638449 | -1.90E-01 | 86073001  | 86073124  | NC_000001.10 |
| cg24124145 | 3.35E-24 | 2.21E-26 | -1.24E+01 | 49.1587008 | -1.72E-01 | 139936112 | 139936235 | NC_000004.11 |
| cg01799671 | 3.37E-24 | 2.23E-26 | -1.24E+01 | 49.1521601 | -3.26E-01 | 81560752  | 81560875  | NC_000016.9  |
| cg06704631 | 3.38E-24 | 2.23E-26 | -1.24E+01 | 49.1493514 | -2.25E-01 | 2307998   | 2308121   | NC_000004.11 |
| cg00557360 | 3.38E-24 | 2.24E-26 | -1.24E+01 | 49.1487245 | -1.29E-01 | 37230386  | 37230509  | NC_000020.10 |
| cg04270489 | 3.39E-24 | 2.24E-26 | -1.24E+01 | 49.1451715 | -2.61E-01 | 85827505  | 85827628  | NC_000011.9  |
| cg08206881 | 3.41E-24 | 2.26E-26 | -1.24E+01 | 49.1383912 | -2.18E-01 | 12317357  | 12317480  | NC_000002.11 |
| cg16429927 | 3.45E-24 | 2.29E-26 | -1.24E+01 | 49.1257774 | -1.40E-01 | 172430723 | 172430846 | NC_000002.11 |
| cg12761965 | 3.52E-24 | 2.33E-26 | -1.24E+01 | 49.106006  | -2.82E-01 | 227051345 | 227051468 | NC_000001.10 |
| cg12593541 | 3.53E-24 | 2.35E-26 | -1.24E+01 | 49.1010653 | -1.96E-01 | 181110845 | 181110968 | NC_000001.10 |
| cg17852932 | 3.58E-24 | 2.38E-26 | -1.24E+01 | 49.0884268 | -2.53E-01 | 131596064 | 131596187 | NC_000005.9  |

|            |          |          |           |            |           |           |           |              |
|------------|----------|----------|-----------|------------|-----------|-----------|-----------|--------------|
| cg25292309 | 3.58E-24 | 2.38E-26 | -1.24E+01 | 49.0859779 | -2.17E-01 | 58989427  | 58989550  | NC_000002.11 |
| cg12126901 | 3.59E-24 | 2.39E-26 | -1.24E+01 | 49.0830256 | -2.37E-01 | 61623366  | 61623489  | NC_000001.10 |
| cg13600477 | 3.59E-24 | 2.39E-26 | -1.24E+01 | 49.0819394 | -2.92E-01 | 29387633  | 29387756  | NC_000008.10 |
| cg08800893 | 3.61E-24 | 2.40E-26 | -1.24E+01 | 49.0764819 | -2.48E-01 | 36727569  | 36727692  | NC_000022.10 |
| cg26262576 | 3.62E-24 | 2.41E-26 | -1.24E+01 | 49.073183  | -2.57E-01 | 20420028  | 20420151  | NC_000013.10 |
| cg25508319 | 3.63E-24 | 2.42E-26 | -1.24E+01 | 49.0704089 | -3.18E-01 | 128778506 | 128778629 | NC_000011.9  |
| cg01421539 | 3.63E-24 | 2.42E-26 | -1.24E+01 | 49.0703404 | -1.62E-01 | 10748125  | 10748248  | NC_000017.10 |
| cg26818786 | 3.63E-24 | 2.42E-26 | -1.24E+01 | 49.0693421 | -1.40E-01 | 40841493  | 40841616  | NC_000005.9  |
| cg08951051 | 3.65E-24 | 2.44E-26 | -1.24E+01 | 49.0632156 | -1.87E-01 | 4993543   | 4993666   | NC_000016.9  |
| cg07528209 | 3.67E-24 | 2.45E-26 | -1.24E+01 | 49.0563166 | -2.61E-01 | 121549725 | 121549848 | NC_000002.11 |
| cg18880986 | 3.70E-24 | 2.47E-26 | -1.24E+01 | 49.047582  | -1.98E-01 | 5534951   | 5535074   | NC_000007.13 |
| cg18322693 | 3.74E-24 | 2.50E-26 | -1.24E+01 | 49.0365555 | -2.62E-01 | 217217837 | 217217960 | NC_000002.11 |
| cg02920600 | 3.79E-24 | 2.53E-26 | -1.24E+01 | 49.0244752 | -3.04E-01 | 137367341 | 137367464 | NC_000007.13 |
| cg10227331 | 3.80E-24 | 2.54E-26 | -1.24E+01 | 49.0218006 | -1.76E-01 | 8181647   | 8181770   | NC_000001.10 |
| cg23314364 | 3.82E-24 | 2.55E-26 | -1.24E+01 | 49.0159776 | -3.14E-01 | 29230998  | 29231121  | NC_000008.10 |
| cg09077126 | 3.82E-24 | 2.56E-26 | -1.24E+01 | 49.0148367 | -1.24E-01 | 72015695  | 72015818  | NC_000010.10 |
| cg03547062 | 3.83E-24 | 2.57E-26 | -1.24E+01 | 49.0119409 | -1.88E-01 | 393606    | 393729    | NC_000011.9  |
| cg23976431 | 3.97E-24 | 2.66E-26 | -1.24E+01 | 48.9742422 | -1.77E-01 | 102867025 | 102867148 | NC_000011.9  |
| cg09903090 | 4.03E-24 | 2.70E-26 | -1.24E+01 | 48.959846  | -8.07E-02 | 41910019  | 41910142  | NC_000006.11 |
| cg01426968 | 4.11E-24 | 2.76E-26 | -1.24E+01 | 48.9391881 | -2.32E-01 | 15596369  | 15596492  | NC_000016.9  |
| cg23552820 | 4.14E-24 | 2.79E-26 | -1.24E+01 | 48.9297057 | -2.13E-01 | 64272071  | 64272194  | NC_000017.10 |
| cg23777956 | 4.15E-24 | 2.79E-26 | -1.24E+01 | 48.9280098 | -2.06E-01 | 4153671   | 4153794   | NC_000019.9  |
| cg05979170 | 4.21E-24 | 2.84E-26 | -1.24E+01 | 48.9122879 | -2.64E-01 | 131974369 | 131974492 | NC_000003.11 |
| cg24923516 | 4.22E-24 | 2.85E-26 | -1.23E+01 | 48.907383  | -2.94E-01 | 127955156 | 127955279 | NC_000002.11 |
| cg19531130 | 4.25E-24 | 2.87E-26 | -1.23E+01 | 48.9013511 | -2.53E-01 | 101786659 | 101786782 | NC_000011.9  |

|            |          |          |           |            |           |           |           |              |
|------------|----------|----------|-----------|------------|-----------|-----------|-----------|--------------|
| cg07125112 | 4.30E-24 | 2.90E-26 | -1.23E+01 | 48.8893924 | -1.68E-01 | 44486621  | 44486744  | NC_000015.9  |
| cg12549411 | 4.36E-24 | 2.95E-26 | -1.23E+01 | 48.8722128 | -2.57E-01 | 41032864  | 41032987  | NC_000021.8  |
| cg02088292 | 4.38E-24 | 2.97E-26 | -1.23E+01 | 48.8674233 | -2.44E-01 | 235099151 | 235099274 | NC_000001.10 |
| cg07838272 | 4.40E-24 | 2.98E-26 | -1.23E+01 | 48.8631466 | -1.49E-01 | 116164670 | 116164793 | NC_000007.13 |
| cg04835613 | 4.41E-24 | 2.99E-26 | -1.23E+01 | 48.8608602 | -1.36E-01 | 39410292  | 39410415  | NC_000022.10 |
| cg13509147 | 4.41E-24 | 2.99E-26 | -1.23E+01 | 48.8591128 | -1.54E-01 | 4153603   | 4153726   | NC_000019.9  |
| cg16730737 | 4.46E-24 | 3.03E-26 | -1.23E+01 | 48.8466761 | -2.07E-01 | 31702632  | 31702755  | NC_000006.11 |
| cg03819134 | 4.50E-24 | 3.06E-26 | -1.23E+01 | 48.8367106 | -2.88E-01 | 957584    | 957707    | NC_000005.9  |
| cg17037231 | 4.52E-24 | 3.07E-26 | -1.23E+01 | 48.8330951 | -9.77E-02 | 220387027 | 220387150 | NC_000002.11 |
| cg15699321 | 4.58E-24 | 3.12E-26 | -1.23E+01 | 48.8182461 | -3.05E-01 | 170147253 | 170147376 | NC_000004.11 |
| cg02204618 | 4.60E-24 | 3.13E-26 | -1.23E+01 | 48.8145431 | -2.28E-01 | 36842633  | 36842756  | NC_000002.11 |
| cg11580028 | 4.67E-24 | 3.18E-26 | -1.23E+01 | 48.797706  | -1.88E-01 | 819603    | 819726    | NC_000010.10 |
| cg03654299 | 4.75E-24 | 3.24E-26 | -1.23E+01 | 48.7811469 | -1.36E-01 | 54389264  | 54389387  | NC_000012.11 |
| cg05167973 | 4.77E-24 | 3.25E-26 | -1.23E+01 | 48.7761045 | -2.53E-01 | 2949546   | 2949669   | NC_000011.9  |
| cg04246167 | 4.79E-24 | 3.27E-26 | -1.23E+01 | 48.7719934 | -3.02E-01 | 58984465  | 58984588  | NC_000003.11 |
| cg05619598 | 4.79E-24 | 3.27E-26 | -1.23E+01 | 48.7715886 | -1.75E-01 | 33569228  | 33569351  | NC_000019.9  |
| cg24563804 | 4.79E-24 | 3.27E-26 | -1.23E+01 | 48.7706429 | -1.28E-01 | 6452882   | 6453005   | NC_000001.10 |
| cg22990967 | 4.81E-24 | 3.29E-26 | -1.23E+01 | 48.7660333 | -2.65E-01 | 167567203 | 167567326 | NC_000006.11 |
| cg14152591 | 4.83E-24 | 3.30E-26 | -1.23E+01 | 48.7608689 | -2.50E-01 | 14587920  | 14588043  | NC_000010.10 |
| cg14487665 | 4.85E-24 | 3.32E-26 | -1.23E+01 | 48.7559977 | -2.39E-01 | 140408634 | 140408757 | NC_000009.11 |
| cg14080050 | 4.85E-24 | 3.32E-26 | -1.23E+01 | 48.7559398 | -2.54E-01 | 33159025  | 33159148  | NC_000009.11 |
| cg10539418 | 4.86E-24 | 3.33E-26 | -1.23E+01 | 48.753319  | -8.10E-02 | 69455712  | 69455835  | NC_000011.9  |
| cg11385003 | 4.87E-24 | 3.34E-26 | -1.23E+01 | 48.7503363 | -2.26E-01 | 45148332  | 45148455  | NC_000021.8  |
| cg15128801 | 4.88E-24 | 3.35E-26 | -1.23E+01 | 48.7478104 | -2.34E-01 | 68202053  | 68202176  | NC_000001.10 |
| cg02495395 | 4.93E-24 | 3.38E-26 | -1.23E+01 | 48.7374996 | -1.73E-01 | 50383368  | 50383491  | NC_000003.11 |

|            |          |          |           |            |           |           |           |              |
|------------|----------|----------|-----------|------------|-----------|-----------|-----------|--------------|
| cg26847438 | 4.93E-24 | 3.39E-26 | -1.23E+01 | 48.7363125 | -1.50E-01 | 231191916 | 231192039 | NC_000002.11 |
| cg12384572 | 5.08E-24 | 3.49E-26 | -1.23E+01 | 48.7062265 | -8.51E-02 | 49377951  | 49378074  | NC_000003.11 |
| cg16809762 | 5.11E-24 | 3.51E-26 | -1.23E+01 | 48.700531  | -2.59E-01 | 81327958  | 81328081  | NC_000016.9  |
| cg01361351 | 5.15E-24 | 3.54E-26 | -1.23E+01 | 48.690851  | -1.64E-01 | 29467363  | 29467486  | NC_000022.10 |
| cg20457051 | 5.18E-24 | 3.56E-26 | -1.23E+01 | 48.6853977 | -3.27E-01 | 47668044  | 47668167  | NC_000006.11 |
| cg26450860 | 5.25E-24 | 3.62E-26 | -1.23E+01 | 48.6699691 | -1.37E-01 | 125413164 | 125413287 | NC_000012.11 |
| cg12591668 | 5.34E-24 | 3.68E-26 | -1.23E+01 | 48.652811  | -3.82E-01 | 192520335 | 192520458 | NC_000001.10 |
| cg18572413 | 5.38E-24 | 3.71E-26 | -1.23E+01 | 48.6443118 | -2.17E-01 | 233741639 | 233741762 | NC_000002.11 |
| cg05814312 | 5.44E-24 | 3.75E-26 | -1.23E+01 | 48.633844  | -1.49E-01 | 29760687  | 29760810  | NC_000010.10 |
| cg11967546 | 5.44E-24 | 3.76E-26 | -1.23E+01 | 48.6329547 | -1.49E-01 | 27655170  | 27655293  | NC_000006.11 |
| cg04999945 | 5.52E-24 | 3.81E-26 | -1.23E+01 | 48.6188222 | -9.62E-02 | 10973382  | 10973505  | NC_000016.9  |
| cg18178715 | 5.53E-24 | 3.82E-26 | -1.23E+01 | 48.6159261 | -3.16E-01 | 43795999  | 43796122  | NC_000001.10 |
| cg07143158 | 5.54E-24 | 3.83E-26 | -1.23E+01 | 48.6136137 | -1.94E-01 | 12609308  | 12609431  | NC_000001.10 |
| cg02614129 | 5.54E-24 | 3.83E-26 | -1.23E+01 | 48.6133006 | -1.54E-01 | 134733615 | 134733738 | NC_000005.9  |
| cg21184172 | 5.59E-24 | 3.87E-26 | -1.23E+01 | 48.6039941 | -9.41E-02 | 97657282  | 97657405  | NC_000008.10 |
| cg22689909 | 5.59E-24 | 3.87E-26 | -1.23E+01 | 48.6035827 | -3.43E-01 | 95159365  | 95159488  | NC_000005.9  |
| cg16562730 | 5.59E-24 | 3.87E-26 | -1.23E+01 | 48.6031415 | -3.07E-01 | 71560187  | 71560310  | NC_000016.9  |
| cg24618514 | 5.61E-24 | 3.88E-26 | -1.23E+01 | 48.6006291 | -2.32E-01 | 194868507 | 194868630 | NC_000003.11 |
| cg19791637 | 5.65E-24 | 3.91E-26 | -1.23E+01 | 48.5921986 | -2.66E-01 | 30633168  | 30633291  | NC_000002.11 |
| cg04462662 | 5.65E-24 | 3.92E-26 | -1.23E+01 | 48.5912847 | -3.14E-01 | 85019773  | 85019896  | NC_000016.9  |
| cg01406381 | 5.70E-24 | 3.95E-26 | -1.23E+01 | 48.5821764 | -1.64E-01 | 47288263  | 47288386  | NC_000019.9  |
| cg18006637 | 5.71E-24 | 3.96E-26 | -1.23E+01 | 48.5807288 | -2.67E-01 | 89713820  | 89713943  | NC_000004.11 |
| cg26365553 | 5.72E-24 | 3.97E-26 | -1.23E+01 | 48.577187  | -2.87E-01 | 47290613  | 47290736  | NC_000011.9  |
| cg14582057 | 5.78E-24 | 4.02E-26 | -1.23E+01 | 48.566357  | -1.61E-01 | 4765312   | 4765435   | NC_000007.13 |
| cg23033691 | 5.79E-24 | 4.02E-26 | -1.23E+01 | 48.5644124 | -1.05E-01 | 66185611  | 66185734  | NC_000011.9  |

|            |          |          |           |            |           |           |           |              |
|------------|----------|----------|-----------|------------|-----------|-----------|-----------|--------------|
| cg07190763 | 5.82E-24 | 4.04E-26 | -1.23E+01 | 48.5599681 | -2.26E-01 | 114894582 | 114894705 | NC_000013.10 |
| cg16094145 | 5.92E-24 | 4.11E-26 | -1.23E+01 | 48.5423283 | -2.13E-01 | 719491    | 719614    | NC_000012.11 |
| cg13500576 | 5.96E-24 | 4.15E-26 | -1.23E+01 | 48.5342197 | -8.37E-02 | 51796588  | 51796711  | NC_000001.10 |
| cg04691781 | 6.14E-24 | 4.28E-26 | -1.23E+01 | 48.5038614 | -2.42E-01 | 89668842  | 89668965  | NC_000016.9  |
| cg06594281 | 6.18E-24 | 4.31E-26 | -1.23E+01 | 48.4957705 | -2.00E-01 | 73083692  | 73083815  | NC_000017.10 |
| cg19773937 | 6.18E-24 | 4.31E-26 | -1.23E+01 | 48.4955995 | -2.91E-01 | 60216631  | 60216754  | NC_000001.10 |
| cg26402417 | 6.22E-24 | 4.34E-26 | -1.23E+01 | 48.4898471 | -3.25E-01 | 94841384  | 94841507  | NC_000011.9  |
| cg05133314 | 6.23E-24 | 4.35E-26 | -1.23E+01 | 48.4879027 | -7.40E-02 | 6321684   | 6321807   | NC_000001.10 |
| cg07671776 | 6.24E-24 | 4.36E-26 | -1.23E+01 | 48.485243  | -1.76E-01 | 105615678 | 105615801 | NC_000010.10 |
| cg23251790 | 6.33E-24 | 4.42E-26 | -1.23E+01 | 48.4707949 | -2.66E-01 | 223853949 | 223854072 | NC_000001.10 |
| cg22795471 | 6.43E-24 | 4.50E-26 | -1.23E+01 | 48.4531477 | -1.87E-01 | 29565099  | 29565222  | NC_000001.10 |
| cg06644105 | 6.47E-24 | 4.54E-26 | -1.23E+01 | 48.4455198 | -1.10E-01 | 1260674   | 1260797   | NC_000019.9  |
| cg06513470 | 6.48E-24 | 4.54E-26 | -1.23E+01 | 48.4443422 | -2.38E-01 | 90066769  | 90066892  | NC_000016.9  |
| cg25898076 | 6.57E-24 | 4.61E-26 | -1.23E+01 | 48.4293931 | -1.94E-01 | 131559071 | 131559194 | NC_000012.11 |
| cg09115713 | 6.59E-24 | 4.62E-26 | -1.23E+01 | 48.4264929 | -2.02E-01 | 88832476  | 88832599  | NC_000016.9  |
| cg13278004 | 6.61E-24 | 4.64E-26 | -1.23E+01 | 48.4233165 | -2.09E-01 | 231191876 | 231191999 | NC_000002.11 |
| cg07313701 | 6.62E-24 | 4.65E-26 | -1.23E+01 | 48.4206666 | -2.55E-01 | 42447165  | 42447288  | NC_000001.10 |
| cg23838005 | 6.62E-24 | 4.65E-26 | -1.23E+01 | 48.4205417 | -2.58E-01 | 74868604  | 74868727  | NC_000017.10 |
| cg01750157 | 6.72E-24 | 4.73E-26 | -1.23E+01 | 48.4032506 | -9.54E-02 | 72426840  | 72426963  | NC_000017.10 |
| cg26168881 | 6.81E-24 | 4.80E-26 | -1.23E+01 | 48.3900429 | -2.41E-01 | 9451170   | 9451293   | NC_000002.11 |
| cg04797957 | 6.88E-24 | 4.85E-26 | -1.23E+01 | 48.3792381 | -2.11E-01 | 76840488  | 76840611  | NC_000017.10 |
| cg04808179 | 6.89E-24 | 4.86E-26 | -1.23E+01 | 48.3771544 | -1.19E-01 | 58529306  | 58529429  | NC_000016.9  |
| cg14324585 | 6.90E-24 | 4.87E-26 | -1.23E+01 | 48.3752653 | -1.20E-01 | 145026051 | 145026174 | NC_000008.10 |
| cg20127859 | 6.91E-24 | 4.88E-26 | -1.23E+01 | 48.372106  | -2.37E-01 | 144656271 | 144656394 | NC_000008.10 |
| cg12685560 | 7.03E-24 | 4.97E-26 | -1.23E+01 | 48.3541376 | -1.72E-01 | 2302144   | 2302267   | NC_000017.10 |

|            |          |          |           |            |           |           |           |              |
|------------|----------|----------|-----------|------------|-----------|-----------|-----------|--------------|
| cg18576374 | 7.13E-24 | 5.05E-26 | -1.23E+01 | 48.3396251 | -1.76E-01 | 78549371  | 78549494  | NC_000017.10 |
| cg27461542 | 7.21E-24 | 5.11E-26 | -1.23E+01 | 48.3279083 | -2.80E-01 | 48317878  | 48318001  | NC_000010.10 |
| cg16677448 | 7.22E-24 | 5.11E-26 | -1.23E+01 | 48.3264246 | -2.29E-01 | 36004699  | 36004822  | NC_000019.9  |
| cg25788793 | 7.32E-24 | 5.19E-26 | -1.23E+01 | 48.3111935 | -1.49E-01 | 10034580  | 10034703  | NC_000004.11 |
| cg23526474 | 7.45E-24 | 5.28E-26 | -1.23E+01 | 48.2940719 | -2.24E-01 | 18111623  | 18111746  | NC_000019.9  |
| cg20329220 | 7.46E-24 | 5.29E-26 | -1.23E+01 | 48.2920743 | -1.82E-01 | 78286521  | 78286644  | NC_000015.9  |
| cg02386420 | 7.46E-24 | 5.30E-26 | -1.23E+01 | 48.2911504 | -2.40E-01 | 78806870  | 78806993  | NC_000017.10 |
| cg12307314 | 7.50E-24 | 5.33E-26 | -1.23E+01 | 48.2849732 | -2.04E-01 | 142206724 | 142206847 | NC_000005.9  |
| cg24983862 | 7.51E-24 | 5.34E-26 | -1.23E+01 | 48.2834492 | -1.32E-01 | 65242497  | 65242620  | NC_000017.10 |
| cg00941203 | 7.55E-24 | 5.37E-26 | -1.23E+01 | 48.2778905 | -1.39E-01 | 31016591  | 31016714  | NC_000010.10 |
| cg01336231 | 7.62E-24 | 5.42E-26 | -1.23E+01 | 48.2684028 | -2.88E-01 | 16523047  | 16523170  | NC_000003.11 |
| cg01888869 | 7.62E-24 | 5.43E-26 | -1.23E+01 | 48.266294  | -5.57E-02 | 31366418  | 31366541  | NC_000016.9  |
| cg17162475 | 7.69E-24 | 5.49E-26 | -1.23E+01 | 48.2562642 | -1.38E-01 | 74162074  | 74162197  | NC_000006.11 |
| cg13417862 | 7.69E-24 | 5.49E-26 | -1.23E+01 | 48.2558375 | -2.43E-01 | 855238    | 855361    | NC_000017.10 |
| cg21838115 | 7.70E-24 | 5.50E-26 | -1.23E+01 | 48.2539228 | -1.75E-01 | 45645436  | 45645559  | NC_000006.11 |
| cg21323106 | 7.70E-24 | 5.50E-26 | -1.23E+01 | 48.2537429 | -2.57E-01 | 157348237 | 157348360 | NC_000007.13 |
| cg03887721 | 7.70E-24 | 5.50E-26 | -1.23E+01 | 48.2536064 | -2.78E-01 | 106756690 | 106756813 | NC_000013.10 |
| cg16298481 | 7.82E-24 | 5.59E-26 | -1.23E+01 | 48.2378241 | -9.98E-02 | 89989717  | 89989840  | NC_000001.10 |
| cg23021584 | 7.88E-24 | 5.65E-26 | -1.23E+01 | 48.2277653 | -2.90E-01 | 124876101 | 124876224 | NC_000012.11 |
| cg07392702 | 8.05E-24 | 5.77E-26 | -1.22E+01 | 48.2057644 | -2.01E-01 | 158595915 | 158596038 | NC_000007.13 |
| cg22473727 | 8.14E-24 | 5.84E-26 | -1.22E+01 | 48.1940146 | -2.28E-01 | 172199667 | 172199790 | NC_000005.9  |
| cg17079034 | 8.17E-24 | 5.87E-26 | -1.22E+01 | 48.1895252 | -1.75E-01 | 239047280 | 239047403 | NC_000002.11 |
| cg04196298 | 8.20E-24 | 5.89E-26 | -1.22E+01 | 48.18569   | -1.97E-01 | 1480710   | 1480833   | NC_000017.10 |
| cg03921696 | 8.30E-24 | 5.97E-26 | -1.22E+01 | 48.1720883 | -2.43E-01 | 156848137 | 156848260 | NC_000003.11 |
| cg19781870 | 8.30E-24 | 5.98E-26 | -1.22E+01 | 48.171385  | -1.71E-01 | 38714285  | 38714408  | NC_000022.10 |



|            |          |          |           |            |           |           |           |              |
|------------|----------|----------|-----------|------------|-----------|-----------|-----------|--------------|
| cg07507418 | 8.32E-24 | 5.99E-26 | -1.22E+01 | 48.1693149 | -2.56E-01 | 42372284  | 42372407  | NC_000006.11 |
| cg13765004 | 8.36E-24 | 6.03E-26 | -1.22E+01 | 48.1634409 | -1.98E-01 | 46459462  | 46459585  | NC_000019.9  |
| cg23072161 | 8.51E-24 | 6.13E-26 | -1.22E+01 | 48.1455244 | -2.64E-01 | 16489115  | 16489238  | NC_000001.10 |
| cg19516647 | 8.62E-24 | 6.22E-26 | -1.22E+01 | 48.1326152 | -1.65E-01 | 2458256   | 2458379   | NC_000001.10 |
| cg07697770 | 8.73E-24 | 6.30E-26 | -1.22E+01 | 48.1195489 | -2.15E-01 | 135389705 | 135389828 | NC_000005.9  |
| cg05624300 | 8.75E-24 | 6.32E-26 | -1.22E+01 | 48.1166289 | -1.15E-01 | 2517622   | 2517745   | NC_000016.9  |
| cg21961202 | 8.79E-24 | 6.35E-26 | -1.22E+01 | 48.1111572 | -2.01E-01 | 145455384 | 145455507 | NC_000001.10 |
| cg10574566 | 8.82E-24 | 6.38E-26 | -1.22E+01 | 48.1067115 | -1.87E-01 | 203377808 | 203377931 | NC_000001.10 |
| cg27407935 | 8.83E-24 | 6.38E-26 | -1.22E+01 | 48.1061003 | -1.65E-01 | 17723235  | 17723358  | NC_000017.10 |
| cg17184704 | 9.00E-24 | 6.52E-26 | -1.22E+01 | 48.0857441 | -3.52E-01 | 11727286  | 11727409  | NC_000010.10 |
| cg05415131 | 9.11E-24 | 6.60E-26 | -1.22E+01 | 48.0725936 | -1.80E-01 | 58940866  | 58940989  | NC_000011.9  |
| cg25538881 | 9.12E-24 | 6.61E-26 | -1.22E+01 | 48.0718954 | -2.54E-01 | 129294825 | 129294948 | NC_000002.11 |
| cg02010852 | 9.12E-24 | 6.61E-26 | -1.22E+01 | 48.071351  | -2.14E-01 | 126118355 | 126118478 | NC_000009.11 |
| cg02931464 | 9.13E-24 | 6.62E-26 | -1.22E+01 | 48.0697646 | -1.94E-01 | 121826303 | 121826426 | NC_000012.11 |
| cg26700919 | 9.17E-24 | 6.66E-26 | -1.22E+01 | 48.0646503 | -3.15E-01 | 13375474  | 13375597  | NC_000018.9  |
| cg22117188 | 9.18E-24 | 6.67E-26 | -1.22E+01 | 48.0627977 | -2.03E-01 | 52347940  | 52348063  | NC_000003.11 |
| cg00399175 | 9.22E-24 | 6.70E-26 | -1.22E+01 | 48.0579011 | -1.22E-01 | 26395448  | 26395571  | NC_000002.11 |
| cg20031845 | 9.26E-24 | 6.74E-26 | -1.22E+01 | 48.0527383 | -3.14E-01 | 50306663  | 50306786  | NC_000007.13 |
| cg14254867 | 9.29E-24 | 6.76E-26 | -1.22E+01 | 48.0491938 | -1.01E-01 | 47088432  | 47088555  | NC_000018.9  |
| cg21574271 | 9.30E-24 | 6.77E-26 | -1.22E+01 | 48.0483584 | -3.01E-01 | 96051461  | 96051584  | NC_000004.11 |
| cg11201447 | 9.32E-24 | 6.79E-26 | -1.22E+01 | 48.0447418 | -3.57E-01 | 128808063 | 128808186 | NC_000008.10 |
| cg06735243 | 9.36E-24 | 6.82E-26 | -1.22E+01 | 48.0400539 | -1.98E-01 | 233766658 | 233766781 | NC_000002.11 |
| cg22321808 | 9.38E-24 | 6.83E-26 | -1.22E+01 | 48.0382877 | -2.38E-01 | 47257584  | 47257707  | NC_000002.11 |
| cg02394249 | 9.47E-24 | 6.90E-26 | -1.22E+01 | 48.0281376 | -2.85E-01 | 93140078  | 93140201  | NC_000012.11 |
| cg20697025 | 9.51E-24 | 6.94E-26 | -1.22E+01 | 48.023516  | -2.54E-01 | 1553203   | 1553326   | NC_000007.13 |

|            |          |          |           |            |           |           |           |              |
|------------|----------|----------|-----------|------------|-----------|-----------|-----------|--------------|
| cg24028809 | 9.52E-24 | 6.95E-26 | -1.22E+01 | 48.0215014 | -3.39E-01 | 153414101 | 153414224 | NC_000006.11 |
| cg06002952 | 9.54E-24 | 6.97E-26 | -1.22E+01 | 48.0191653 | -2.85E-01 | 129013349 | 129013472 | NC_000011.9  |
| cg15378219 | 9.74E-24 | 7.12E-26 | -1.22E+01 | 47.9979075 | -9.18E-02 | 23399599  | 23399722  | NC_000014.8  |
| cg18516619 | 9.74E-24 | 7.12E-26 | -1.22E+01 | 47.9972404 | -2.63E-01 | 78806891  | 78807014  | NC_000017.10 |
| cg19857761 | 9.82E-24 | 7.19E-26 | -1.22E+01 | 47.9880322 | -1.48E-01 | 1174522   | 1174645   | NC_000005.9  |
| cg09570214 | 9.90E-24 | 7.24E-26 | -1.22E+01 | 47.9803239 | -2.04E-01 | 110326108 | 110326231 | NC_000012.11 |
| cg04098194 | 9.91E-24 | 7.26E-26 | -1.22E+01 | 47.9786091 | -1.84E-01 | 1241087   | 1241210   | NC_000001.10 |
| cg16247269 | 9.93E-24 | 7.28E-26 | -1.22E+01 | 47.976096  | -2.09E-01 | 148513941 | 148514064 | NC_000005.9  |
| cg05582690 | 1.01E-23 | 7.39E-26 | -1.22E+01 | 47.9603408 | -2.23E-01 | 128158906 | 128159029 | NC_000002.11 |
| cg17333042 | 1.01E-23 | 7.41E-26 | -1.22E+01 | 47.9582659 | -2.00E-01 | 102822201 | 102822324 | NC_000010.10 |
| cg00568555 | 1.01E-23 | 7.41E-26 | -1.22E+01 | 47.957976  | -1.26E-01 | 35520846  | 35520969  | NC_000019.9  |
| cg13749927 | 1.01E-23 | 7.45E-26 | -1.22E+01 | 47.9527415 | -1.82E-01 | 47237958  | 47238081  | NC_000011.9  |
| cg07989851 | 1.04E-23 | 7.62E-26 | -1.22E+01 | 47.9300142 | -2.44E-01 | 38117466  | 38117589  | NC_000015.9  |
| cg00417094 | 1.04E-23 | 7.63E-26 | -1.22E+01 | 47.9283427 | -1.66E-01 | 167417043 | 167417166 | NC_000001.10 |
| cg16269418 | 1.05E-23 | 7.70E-26 | -1.22E+01 | 47.9194932 | -1.76E-01 | 155043883 | 155044006 | NC_000001.10 |
| cg20530855 | 1.05E-23 | 7.76E-26 | -1.22E+01 | 47.9119327 | -1.38E-01 | 125755151 | 125755274 | NC_000010.10 |
| cg02661728 | 1.06E-23 | 7.79E-26 | -1.22E+01 | 47.9085062 | -2.89E-01 | 17018326  | 17018449  | NC_000007.13 |
| cg14106234 | 1.06E-23 | 7.83E-26 | -1.22E+01 | 47.9025303 | -2.54E-01 | 3805326   | 3805449   | NC_000010.10 |
| cg10168494 | 1.07E-23 | 7.86E-26 | -1.22E+01 | 47.8993347 | -2.33E-01 | 187635183 | 187635306 | NC_000003.11 |
| cg26818489 | 1.07E-23 | 7.88E-26 | -1.22E+01 | 47.8964664 | -1.78E-01 | 119380820 | 119380943 | NC_000011.9  |
| cg27189973 | 1.07E-23 | 7.89E-26 | -1.22E+01 | 47.895176  | -1.96E-01 | 88850755  | 88850878  | NC_000016.9  |
| cg06942649 | 1.08E-23 | 7.97E-26 | -1.22E+01 | 47.8851247 | -2.87E-01 | 436813    | 436936    | NC_000008.10 |
| cg06081306 | 1.09E-23 | 8.02E-26 | -1.22E+01 | 47.8792909 | -1.18E-01 | 37760830  | 37760953  | NC_000017.10 |
| cg25298161 | 1.09E-23 | 8.06E-26 | -1.22E+01 | 47.8738675 | -2.73E-01 | 41806135  | 41806258  | NC_000015.9  |
| cg22007110 | 1.11E-23 | 8.22E-26 | -1.22E+01 | 47.8549416 | -2.70E-01 | 30737599  | 30737722  | NC_000007.13 |

|            |          |          |           |            |           |           |           |              |
|------------|----------|----------|-----------|------------|-----------|-----------|-----------|--------------|
| cg25355291 | 1.11E-23 | 8.26E-26 | -1.22E+01 | 47.8498677 | -2.64E-01 | 29369401  | 29369524  | NC_000008.10 |
| cg10206344 | 1.13E-23 | 8.37E-26 | -1.22E+01 | 47.8367501 | -1.34E-01 | 31483277  | 31483400  | NC_000016.9  |
| cg11533712 | 1.14E-23 | 8.44E-26 | -1.22E+01 | 47.8288285 | -2.40E-01 | 46934981  | 46935104  | NC_000022.10 |
| cg12359904 | 1.15E-23 | 8.51E-26 | -1.22E+01 | 47.8205176 | -2.94E-01 | 156848454 | 156848577 | NC_000003.11 |
| cg02231066 | 1.16E-23 | 8.62E-26 | -1.22E+01 | 47.8079625 | -2.65E-01 | 52567130  | 52567253  | NC_000003.11 |
| cg02462661 | 1.16E-23 | 8.65E-26 | -1.22E+01 | 47.8036133 | -2.22E-01 | 74275622  | 74275745  | NC_000015.9  |
| cg15491247 | 1.17E-23 | 8.74E-26 | -1.22E+01 | 47.7944129 | -2.09E-01 | 3230424   | 3230547   | NC_000001.10 |
| cg07086918 | 1.20E-23 | 8.93E-26 | -1.22E+01 | 47.7728094 | -2.37E-01 | 176784688 | 176784811 | NC_000005.9  |
| cg26824216 | 1.20E-23 | 8.96E-26 | -1.22E+01 | 47.7689952 | -1.84E-01 | 187086147 | 187086270 | NC_000003.11 |
| cg19343530 | 1.21E-23 | 9.06E-26 | -1.22E+01 | 47.7581121 | -1.14E-01 | 28831388  | 28831511  | NC_000006.11 |
| cg23283335 | 1.22E-23 | 9.08E-26 | -1.22E+01 | 47.7556863 | -2.20E-01 | 1013317   | 1013440   | NC_000017.10 |
| cg11911769 | 1.22E-23 | 9.09E-26 | -1.22E+01 | 47.7548842 | -2.94E-01 | 101768676 | 101768799 | NC_000007.13 |
| cg13092901 | 1.23E-23 | 9.18E-26 | -1.22E+01 | 47.7445701 | -2.19E-01 | 50965373  | 50965496  | NC_000022.10 |
| cg01722566 | 1.25E-23 | 9.39E-26 | -1.22E+01 | 47.7227517 | -1.98E-01 | 84975714  | 84975837  | NC_000016.9  |
| cg20598190 | 1.26E-23 | 9.40E-26 | -1.22E+01 | 47.7215858 | -2.75E-01 | 240866924 | 240867047 | NC_000002.11 |
| cg20827128 | 1.26E-23 | 9.41E-26 | -1.22E+01 | 47.7201684 | -2.55E-01 | 13274284  | 13274407  | NC_000006.11 |
| cg14096207 | 1.26E-23 | 9.45E-26 | -1.22E+01 | 47.7164153 | -1.99E-01 | 223407010 | 223407133 | NC_000001.10 |
| cg03590328 | 1.27E-23 | 9.54E-26 | -1.22E+01 | 47.7070474 | -1.52E-01 | 2684462   | 2684585   | NC_000007.13 |
| cg05127153 | 1.28E-23 | 9.63E-26 | -1.22E+01 | 47.6979511 | -4.49E-02 | 6452942   | 6453065   | NC_000001.10 |
| cg02577436 | 1.29E-23 | 9.65E-26 | -1.22E+01 | 47.6949772 | -1.34E-01 | 8271369   | 8271492   | NC_000004.11 |
| cg25095994 | 1.29E-23 | 9.68E-26 | -1.22E+01 | 47.6922573 | -3.03E-01 | 231191727 | 231191850 | NC_000002.11 |
| cg03211864 | 1.30E-23 | 9.80E-26 | -1.22E+01 | 47.6796614 | -1.42E-01 | 124060833 | 124060956 | NC_000010.10 |
| cg14329059 | 1.31E-23 | 9.87E-26 | -1.22E+01 | 47.6732966 | -1.63E-01 | 58940964  | 58941087  | NC_000011.9  |
| cg13019306 | 1.31E-23 | 9.89E-26 | -1.22E+01 | 47.6715367 | -2.62E-01 | 145155873 | 145155996 | NC_000005.9  |
| cg11918450 | 1.32E-23 | 9.94E-26 | -1.22E+01 | 47.6665382 | -2.69E-01 | 33359198  | 33359321  | NC_000002.11 |

|            |          |          |           |            |           |           |           |              |
|------------|----------|----------|-----------|------------|-----------|-----------|-----------|--------------|
| cg07115110 | 1.32E-23 | 9.97E-26 | -1.22E+01 | 47.663569  | -1.58E-01 | 46250024  | 46250147  | NC_000003.11 |
| cg26361436 | 1.32E-23 | 9.98E-26 | -1.22E+01 | 47.6617232 | -2.47E-01 | 10921186  | 10921309  | NC_000011.9  |
| cg01905967 | 1.33E-23 | 1.00E-25 | -1.22E+01 | 47.6577796 | -2.76E-01 | 172185201 | 172185324 | NC_000005.9  |
| cg17940587 | 1.34E-23 | 1.01E-25 | -1.22E+01 | 47.6474657 | -1.87E-01 | 89292231  | 89292354  | NC_000010.10 |
| cg06271128 | 1.35E-23 | 1.02E-25 | -1.22E+01 | 47.6424959 | -1.65E-01 | 34955525  | 34955648  | NC_000010.10 |
| cg09721427 | 1.38E-23 | 1.04E-25 | -1.22E+01 | 47.6202205 | -1.48E-01 | 94448702  | 94448825  | NC_000010.10 |
| cg11549025 | 1.40E-23 | 1.06E-25 | -1.22E+01 | 47.6039434 | -2.77E-01 | 75994082  | 75994205  | NC_000007.13 |
| cg24539599 | 1.40E-23 | 1.06E-25 | -1.22E+01 | 47.599867  | -1.87E-01 | 112824920 | 112825043 | NC_000005.9  |
| cg09884146 | 1.42E-23 | 1.07E-25 | -1.22E+01 | 47.5914967 | -3.27E-01 | 65593908  | 65594031  | NC_000002.11 |
| cg08764914 | 1.42E-23 | 1.07E-25 | -1.22E+01 | 47.5899541 | -1.69E-01 | 79553422  | 79553545  | NC_000005.9  |
| cg14566624 | 1.42E-23 | 1.08E-25 | -1.22E+01 | 47.5874439 | -1.37E-01 | 6321582   | 6321705   | NC_000001.10 |
| cg02313986 | 1.43E-23 | 1.09E-25 | -1.22E+01 | 47.5787519 | -1.91E-01 | 40672041  | 40672164  | NC_000015.9  |
| cg09825309 | 1.43E-23 | 1.09E-25 | -1.22E+01 | 47.5786828 | -2.45E-01 | 124990897 | 124991020 | NC_000012.11 |
| cg19028462 | 1.44E-23 | 1.09E-25 | -1.22E+01 | 47.5742236 | -2.65E-01 | 113677628 | 113677751 | NC_000013.10 |
| cg13579752 | 1.44E-23 | 1.09E-25 | -1.22E+01 | 47.5718129 | -2.21E-01 | 153577937 | 153578060 | NC_000005.9  |
| cg20972199 | 1.45E-23 | 1.10E-25 | -1.22E+01 | 47.5657943 | -2.47E-01 | 69065333  | 69065456  | NC_000011.9  |
| cg02518245 | 1.46E-23 | 1.11E-25 | -1.22E+01 | 47.5600523 | -2.29E-01 | 51573168  | 51573291  | NC_000016.9  |
| cg02697427 | 1.47E-23 | 1.11E-25 | -1.22E+01 | 47.5540381 | -2.30E-01 | 29196668  | 29196791  | NC_000016.9  |
| cg11583392 | 1.47E-23 | 1.11E-25 | -1.22E+01 | 47.5539568 | -1.96E-01 | 103087458 | 103087581 | NC_000007.13 |
| cg16405432 | 1.48E-23 | 1.12E-25 | -1.22E+01 | 47.5465041 | -2.62E-01 | 95973710  | 95973833  | NC_000014.8  |
| cg03741862 | 1.48E-23 | 1.13E-25 | -1.22E+01 | 47.5415961 | -1.98E-01 | 63225392  | 63225515  | NC_000017.10 |
| cg22900476 | 1.49E-23 | 1.13E-25 | -1.22E+01 | 47.5360153 | -2.69E-01 | 173647945 | 173648068 | NC_000002.11 |
| cg10397389 | 1.49E-23 | 1.14E-25 | -1.22E+01 | 47.5336767 | -3.13E-01 | 100738011 | 100738134 | NC_000004.11 |
| cg02181506 | 1.50E-23 | 1.14E-25 | -1.22E+01 | 47.5272118 | -1.09E-01 | 94856984  | 94857107  | NC_000014.8  |
| cg15281283 | 1.51E-23 | 1.15E-25 | -1.21E+01 | 47.5187067 | -2.63E-01 | 42733894  | 42734017  | NC_000021.8  |

|            |          |          |           |            |           |           |           |              |
|------------|----------|----------|-----------|------------|-----------|-----------|-----------|--------------|
| cg11293610 | 1.55E-23 | 1.18E-25 | -1.21E+01 | 47.4949195 | -1.19E-01 | 34755681  | 34755804  | NC_000021.8  |
| cg19451021 | 1.55E-23 | 1.18E-25 | -1.21E+01 | 47.4928053 | -2.44E-01 | 103538032 | 103538155 | NC_000014.8  |
| cg04019522 | 1.55E-23 | 1.18E-25 | -1.21E+01 | 47.4918692 | -2.07E-01 | 127852450 | 127852573 | NC_000002.11 |
| cg15536663 | 1.56E-23 | 1.19E-25 | -1.21E+01 | 47.4883718 | -2.37E-01 | 111665548 | 111665671 | NC_000005.9  |
| cg15369512 | 1.56E-23 | 1.19E-25 | -1.21E+01 | 47.4856789 | -1.33E-01 | 1012967   | 1013090   | NC_000017.10 |
| cg13905238 | 1.57E-23 | 1.20E-25 | -1.21E+01 | 47.4804587 | -2.63E-01 | 197155273 | 197155396 | NC_000003.11 |
| cg24851858 | 1.58E-23 | 1.21E-25 | -1.21E+01 | 47.4727054 | -2.47E-01 | 114927579 | 114927702 | NC_000013.10 |
| cg16063989 | 1.59E-23 | 1.21E-25 | -1.21E+01 | 47.4674308 | -1.50E-01 | 139929855 | 139929978 | NC_000007.13 |
| cg26954174 | 1.59E-23 | 1.22E-25 | -1.21E+01 | 47.4654252 | -2.38E-01 | 50730813  | 50730936  | NC_000016.9  |
| cg27020690 | 1.59E-23 | 1.22E-25 | -1.21E+01 | 47.4648475 | -1.55E-01 | 169482358 | 169482481 | NC_000003.11 |
| cg18002814 | 1.59E-23 | 1.22E-25 | -1.21E+01 | 47.4624987 | -2.18E-01 | 15406377  | 15406500  | NC_000017.10 |
| cg01088404 | 1.59E-23 | 1.22E-25 | -1.21E+01 | 47.4618912 | -1.69E-01 | 48214523  | 48214646  | NC_000012.11 |
| cg10452704 | 1.60E-23 | 1.23E-25 | -1.21E+01 | 47.4561674 | -1.62E-01 | 1993125   | 1993248   | NC_000008.10 |
| cg14506696 | 1.60E-23 | 1.23E-25 | -1.21E+01 | 47.4561624 | -2.86E-01 | 100737830 | 100737953 | NC_000004.11 |
| cg08772789 | 1.60E-23 | 1.23E-25 | -1.21E+01 | 47.4544053 | -2.43E-01 | 75318655  | 75318778  | NC_000017.10 |
| cg03568017 | 1.61E-23 | 1.23E-25 | -1.21E+01 | 47.4526587 | -2.30E-01 | 75315503  | 75315626  | NC_000017.10 |
| cg17758048 | 1.64E-23 | 1.26E-25 | -1.21E+01 | 47.4340955 | -3.13E-01 | 79352883  | 79353006  | NC_000010.10 |
| cg18205883 | 1.66E-23 | 1.28E-25 | -1.21E+01 | 47.4167052 | -2.37E-01 | 821718    | 821841    | NC_000010.10 |
| cg25793571 | 1.66E-23 | 1.28E-25 | -1.21E+01 | 47.4160361 | -7.01E-02 | 128597852 | 128597975 | NC_000003.11 |
| cg11970797 | 1.67E-23 | 1.28E-25 | -1.21E+01 | 47.4127391 | -3.24E-01 | 20994066  | 20994189  | NC_000013.10 |
| cg04396998 | 1.68E-23 | 1.29E-25 | -1.21E+01 | 47.4077693 | -2.18E-01 | 49376722  | 49376845  | NC_000019.9  |
| cg19940644 | 1.68E-23 | 1.29E-25 | -1.21E+01 | 47.404413  | -1.91E-01 | 12112386  | 12112509  | NC_000001.10 |
| cg02049833 | 1.69E-23 | 1.30E-25 | -1.21E+01 | 47.3999125 | -2.99E-01 | 101434611 | 101434734 | NC_000002.11 |
| cg19484680 | 1.69E-23 | 1.30E-25 | -1.21E+01 | 47.3998593 | -2.25E-01 | 53241452  | 53241575  | NC_000012.11 |
| cg10005565 | 1.69E-23 | 1.30E-25 | -1.21E+01 | 47.3964452 | -2.28E-01 | 235578952 | 235579075 | NC_000002.11 |

|            |          |          |           |            |           |           |           |              |
|------------|----------|----------|-----------|------------|-----------|-----------|-----------|--------------|
| cg25252598 | 1.69E-23 | 1.30E-25 | -1.21E+01 | 47.3962878 | -1.41E-01 | 6641602   | 6641725   | NC_000012.11 |
| cg05656374 | 1.70E-23 | 1.31E-25 | -1.21E+01 | 47.3935131 | -2.48E-01 | 42733825  | 42733948  | NC_000021.8  |
| cg00233633 | 1.73E-23 | 1.33E-25 | -1.21E+01 | 47.3761123 | -2.32E-01 | 29153560  | 29153683  | NC_000007.13 |
| cg01670771 | 1.73E-23 | 1.34E-25 | -1.21E+01 | 47.3726254 | -1.97E-01 | 31009232  | 31009355  | NC_000016.9  |
| cg19729744 | 1.74E-23 | 1.34E-25 | -1.21E+01 | 47.3659716 | -2.49E-01 | 194752020 | 194752143 | NC_000003.11 |
| cg16967583 | 1.75E-23 | 1.35E-25 | -1.21E+01 | 47.3644417 | -2.19E-01 | 241807859 | 241807982 | NC_000002.11 |
| cg06433467 | 1.77E-23 | 1.37E-25 | -1.21E+01 | 47.3496615 | -2.79E-01 | 67730071  | 67730194  | NC_000005.9  |
| cg27659974 | 1.78E-23 | 1.37E-25 | -1.21E+01 | 47.3448184 | -1.22E-01 | 172430816 | 172430939 | NC_000002.11 |
| cg16728539 | 1.78E-23 | 1.38E-25 | -1.21E+01 | 47.3407262 | -3.32E-01 | 2451169   | 2451292   | NC_000012.11 |
| cg09863659 | 1.80E-23 | 1.39E-25 | -1.21E+01 | 47.3306312 | -1.20E-01 | 30328246  | 30328369  | NC_000020.10 |
| cg00950497 | 1.81E-23 | 1.40E-25 | -1.21E+01 | 47.3281787 | -2.68E-01 | 116393423 | 116393546 | NC_000010.10 |
| cg26612165 | 1.81E-23 | 1.40E-25 | -1.21E+01 | 47.3261626 | -1.97E-01 | 181059499 | 181059622 | NC_000001.10 |
| cg09046979 | 1.81E-23 | 1.40E-25 | -1.21E+01 | 47.3254676 | -1.94E-01 | 28333134  | 28333257  | NC_000016.9  |
| cg02598079 | 1.82E-23 | 1.41E-25 | -1.21E+01 | 47.3189064 | -3.12E-01 | 64834106  | 64834229  | NC_000002.11 |
| cg18149745 | 1.84E-23 | 1.42E-25 | -1.21E+01 | 47.3090127 | -2.73E-01 | 197094595 | 197094718 | NC_000003.11 |
| cg10284771 | 1.84E-23 | 1.43E-25 | -1.21E+01 | 47.306109  | -1.58E-01 | 45645204  | 45645327  | NC_000006.11 |
| cg23542902 | 1.86E-23 | 1.45E-25 | -1.21E+01 | 47.2939919 | -3.09E-01 | 193807749 | 193807872 | NC_000003.11 |
| cg19464524 | 1.87E-23 | 1.45E-25 | -1.21E+01 | 47.2897452 | -2.54E-01 | 93870321  | 93870444  | NC_000010.10 |
| cg10732871 | 1.89E-23 | 1.46E-25 | -1.21E+01 | 47.2808232 | -1.68E-01 | 1102675   | 1102798   | NC_000019.9  |
| cg07274998 | 1.90E-23 | 1.48E-25 | -1.21E+01 | 47.2736727 | -1.08E-01 | 126107781 | 126107904 | NC_000010.10 |
| cg19273773 | 1.91E-23 | 1.49E-25 | -1.21E+01 | 47.265816  | -1.03E-01 | 102790112 | 102790235 | NC_000007.13 |
| cg15294851 | 1.91E-23 | 1.49E-25 | -1.21E+01 | 47.2656085 | -2.09E-01 | 71679959  | 71680082  | NC_000002.11 |
| cg02914097 | 1.92E-23 | 1.49E-25 | -1.21E+01 | 47.2616996 | -3.01E-01 | 31118948  | 31119071  | NC_000003.11 |
| cg16957313 | 1.95E-23 | 1.52E-25 | -1.21E+01 | 47.2439735 | -2.51E-01 | 172199661 | 172199784 | NC_000005.9  |
| cg24169486 | 1.95E-23 | 1.52E-25 | -1.21E+01 | 47.2426842 | -2.80E-01 | 106971568 | 106971691 | NC_000013.10 |

|            |          |          |           |            |           |           |           |              |
|------------|----------|----------|-----------|------------|-----------|-----------|-----------|--------------|
| cg00556407 | 1.95E-23 | 1.52E-25 | -1.21E+01 | 47.2421893 | -1.06E-01 | 95369439  | 95369562  | NC_000008.10 |
| cg20000220 | 1.97E-23 | 1.53E-25 | -1.21E+01 | 47.2350258 | -2.40E-01 | 144800997 | 144801120 | NC_000008.10 |
| cg03916189 | 2.02E-23 | 1.58E-25 | -1.21E+01 | 47.2080768 | -1.97E-01 | 132360049 | 132360172 | NC_000009.11 |
| cg05213661 | 2.02E-23 | 1.58E-25 | -1.21E+01 | 47.2078755 | -1.87E-01 | 1227968   | 1228091   | NC_000005.9  |
| cg26392708 | 2.03E-23 | 1.59E-25 | -1.21E+01 | 47.2005997 | -1.61E-01 | 6170926   | 6171049   | NC_000010.10 |
| cg09214398 | 2.04E-23 | 1.60E-25 | -1.21E+01 | 47.1957475 | -2.30E-01 | 78556534  | 78556657  | NC_000015.9  |
| cg25416067 | 2.05E-23 | 1.61E-25 | -1.21E+01 | 47.1892748 | -2.75E-01 | 75315667  | 75315790  | NC_000017.10 |
| cg09802186 | 2.05E-23 | 1.61E-25 | -1.21E+01 | 47.1880198 | -2.28E-01 | 88184998  | 88185121  | NC_000016.9  |
| cg24401262 | 2.07E-23 | 1.62E-25 | -1.21E+01 | 47.1797204 | -2.70E-01 | 31956405  | 31956528  | NC_000001.10 |
| cg02724909 | 2.07E-23 | 1.63E-25 | -1.21E+01 | 47.1773026 | -1.79E-01 | 149625104 | 149625227 | NC_000005.9  |
| cg08371391 | 2.08E-23 | 1.63E-25 | -1.21E+01 | 47.1761146 | -2.38E-01 | 19739935  | 19740058  | NC_000020.10 |
| cg23516310 | 2.08E-23 | 1.63E-25 | -1.21E+01 | 47.1758555 | -2.70E-01 | 73417197  | 73417320  | NC_000007.13 |
| cg12396969 | 2.08E-23 | 1.63E-25 | -1.21E+01 | 47.1736726 | -6.38E-02 | 27319532  | 27319655  | NC_000001.10 |
| cg10857221 | 2.09E-23 | 1.64E-25 | -1.21E+01 | 47.1700565 | -1.96E-01 | 75282140  | 75282263  | NC_000017.10 |
| cg13123723 | 2.10E-23 | 1.65E-25 | -1.21E+01 | 47.1613001 | -1.74E-01 | 37365885  | 37366008  | NC_000017.10 |
| cg01291854 | 2.11E-23 | 1.65E-25 | -1.21E+01 | 47.1598094 | -3.33E-01 | 96613911  | 96614034  | NC_000012.11 |
| cg27610941 | 2.11E-23 | 1.66E-25 | -1.21E+01 | 47.1567091 | -5.37E-02 | 72984467  | 72984590  | NC_000017.10 |
| cg04937184 | 2.15E-23 | 1.69E-25 | -1.21E+01 | 47.1365527 | -2.61E-01 | 54423845  | 54423968  | NC_000014.8  |
| cg06400428 | 2.17E-23 | 1.71E-25 | -1.21E+01 | 47.1291096 | -2.46E-01 | 102107666 | 102107789 | NC_000010.10 |
| cg04888360 | 2.17E-23 | 1.71E-25 | -1.21E+01 | 47.1284763 | -2.24E-01 | 99648780  | 99648903  | NC_000010.10 |
| cg19972648 | 2.18E-23 | 1.71E-25 | -1.21E+01 | 47.125875  | -2.86E-01 | 79110632  | 79110755  | NC_000010.10 |
| cg04510459 | 2.18E-23 | 1.71E-25 | -1.21E+01 | 47.1248871 | -2.11E-01 | 92048287  | 92048410  | NC_000001.10 |
| cg11906021 | 2.18E-23 | 1.72E-25 | -1.21E+01 | 47.1211385 | -2.66E-01 | 47467221  | 47467344  | NC_000017.10 |
| cg25607249 | 2.20E-23 | 1.74E-25 | -1.21E+01 | 47.1105057 | -1.63E-01 | 47288039  | 47288162  | NC_000019.9  |
| cg24935896 | 2.22E-23 | 1.75E-25 | -1.21E+01 | 47.1029968 | -2.61E-01 | 201431492 | 201431615 | NC_000001.10 |

|            |          |          |           |            |           |           |           |              |
|------------|----------|----------|-----------|------------|-----------|-----------|-----------|--------------|
| cg23378074 | 2.23E-23 | 1.76E-25 | -1.21E+01 | 47.0966245 | -2.31E-01 | 30947871  | 30947994  | NC_000012.11 |
| cg00004700 | 2.24E-23 | 1.77E-25 | -1.21E+01 | 47.0941358 | -3.09E-01 | 106013885 | 106014008 | NC_000002.11 |
| cg05376810 | 2.25E-23 | 1.78E-25 | -1.21E+01 | 47.089217  | -2.58E-01 | 74511493  | 74511616  | NC_000017.10 |
| cg12055114 | 2.26E-23 | 1.79E-25 | -1.21E+01 | 47.0840081 | -1.31E-01 | 2457232   | 2457355   | NC_000019.9  |
| cg21614638 | 2.27E-23 | 1.79E-25 | -1.21E+01 | 47.0804799 | -2.92E-01 | 100737821 | 100737944 | NC_000004.11 |
| cg15657641 | 2.28E-23 | 1.80E-25 | -1.21E+01 | 47.0743257 | -1.43E-01 | 47939769  | 47939892  | NC_000011.9  |
| cg20389635 | 2.28E-23 | 1.80E-25 | -1.21E+01 | 47.0743099 | -2.98E-01 | 28120054  | 28120177  | NC_000012.11 |
| cg22367310 | 2.34E-23 | 1.86E-25 | -1.21E+01 | 47.0462285 | -2.19E-01 | 241856114 | 241856237 | NC_000002.11 |
| cg24508974 | 2.36E-23 | 1.87E-25 | -1.21E+01 | 47.0382494 | -8.28E-02 | 103330391 | 103330514 | NC_000010.10 |
| cg27125645 | 2.39E-23 | 1.90E-25 | -1.21E+01 | 47.0220107 | -1.12E-01 | 124246434 | 124246557 | NC_000012.11 |
| cg24925163 | 2.44E-23 | 1.94E-25 | -1.21E+01 | 47.0025738 | -1.85E-01 | 128458248 | 128458371 | NC_000002.11 |
| cg15653254 | 2.45E-23 | 1.95E-25 | -1.21E+01 | 46.9978085 | -2.23E-01 | 227448670 | 227448793 | NC_000002.11 |
| cg21175642 | 2.48E-23 | 1.98E-25 | -1.21E+01 | 46.9828116 | -9.87E-02 | 48701770  | 48701893  | NC_000003.11 |
| cg26449680 | 2.49E-23 | 1.98E-25 | -1.21E+01 | 46.9811721 | -1.69E-01 | 38714272  | 38714395  | NC_000022.10 |
| cg08123444 | 2.50E-23 | 1.99E-25 | -1.21E+01 | 46.9739774 | -2.95E-01 | 9833101   | 9833224   | NC_000002.11 |
| cg24599709 | 2.51E-23 | 2.01E-25 | -1.21E+01 | 46.9688377 | -2.85E-01 | 26578508  | 26578631  | NC_000002.11 |
| cg26870803 | 2.54E-23 | 2.03E-25 | -1.21E+01 | 46.958676  | -1.15E-01 | 66624853  | 66624976  | NC_000011.9  |
| cg06748147 | 2.57E-23 | 2.05E-25 | -1.21E+01 | 46.94603   | -1.58E-01 | 38714287  | 38714410  | NC_000022.10 |
| cg17525411 | 2.58E-23 | 2.06E-25 | -1.21E+01 | 46.942478  | -1.20E-01 | 7341580   | 7341703   | NC_000012.11 |
| cg15342087 | 2.59E-23 | 2.07E-25 | -1.21E+01 | 46.9374395 | -2.54E-01 | 30720209  | 30720332  | NC_000006.11 |
| cg13186830 | 2.66E-23 | 2.13E-25 | -1.21E+01 | 46.9111019 | -1.84E-01 | 4141193   | 4141316   | NC_000012.11 |
| cg04995846 | 2.67E-23 | 2.13E-25 | -1.21E+01 | 46.9068495 | -1.01E-01 | 154943300 | 154943423 | NC_000001.10 |
| cg26690592 | 2.69E-23 | 2.15E-25 | -1.21E+01 | 46.8976291 | -1.47E-01 | 19261879  | 19262002  | NC_000011.9  |
| cg11075693 | 2.69E-23 | 2.16E-25 | -1.21E+01 | 46.8969466 | -1.01E-01 | 82461261  | 82461384  | NC_000006.11 |
| cg08412885 | 2.70E-23 | 2.16E-25 | -1.21E+01 | 46.8948749 | -1.75E-01 | 31649479  | 31649602  | NC_000006.11 |



|            |          |          |           |            |           |           |           |              |
|------------|----------|----------|-----------|------------|-----------|-----------|-----------|--------------|
| cg04212150 | 2.72E-23 | 2.18E-25 | -1.21E+01 | 46.8870047 | -2.32E-01 | 56531132  | 56531255  | NC_000018.9  |
| cg05899471 | 2.72E-23 | 2.18E-25 | -1.21E+01 | 46.8859812 | -2.57E-01 | 101456433 | 101456556 | NC_000014.8  |
| cg26400954 | 2.77E-23 | 2.23E-25 | -1.21E+01 | 46.8655367 | -3.14E-01 | 76291075  | 76291198  | NC_000013.10 |
| cg00590761 | 2.78E-23 | 2.23E-25 | -1.21E+01 | 46.8643831 | -1.58E-01 | 55008319  | 55008442  | NC_000001.10 |
| cg03597159 | 2.79E-23 | 2.24E-25 | -1.21E+01 | 46.8599089 | -2.94E-01 | 140910561 | 140910684 | NC_000004.11 |
| cg03585053 | 2.82E-23 | 2.27E-25 | -1.21E+01 | 46.8474619 | -2.34E-01 | 240169028 | 240169151 | NC_000002.11 |
| cg01749904 | 2.82E-23 | 2.27E-25 | -1.21E+01 | 46.8462656 | -2.29E-01 | 89687052  | 89687175  | NC_000016.9  |
| cg16277510 | 2.83E-23 | 2.28E-25 | -1.21E+01 | 46.8421154 | -5.87E-02 | 54421395  | 54421518  | NC_000014.8  |
| cg21868063 | 2.86E-23 | 2.30E-25 | -1.21E+01 | 46.8325425 | -2.64E-01 | 74869001  | 74869124  | NC_000017.10 |
| cg03257179 | 2.88E-23 | 2.32E-25 | -1.20E+01 | 46.8231173 | -2.19E-01 | 41805946  | 41806069  | NC_000015.9  |
| cg22301854 | 2.89E-23 | 2.33E-25 | -1.20E+01 | 46.820548  | -2.06E-01 | 8081109   | 8081232   | NC_000004.11 |
| cg16912957 | 2.90E-23 | 2.34E-25 | -1.20E+01 | 46.8155224 | -1.94E-01 | 30124214  | 30124337  | NC_000006.11 |
| cg08141959 | 2.94E-23 | 2.37E-25 | -1.20E+01 | 46.8019807 | -3.26E-01 | 106809125 | 106809248 | NC_000013.10 |
| cg22670759 | 2.94E-23 | 2.38E-25 | -1.20E+01 | 46.8003671 | -2.25E-01 | 50487955  | 50488078  | NC_000003.11 |
| cg13435834 | 2.95E-23 | 2.38E-25 | -1.20E+01 | 46.7967875 | -2.43E-01 | 1123508   | 1123631   | NC_000007.13 |
| cg00008629 | 2.96E-23 | 2.39E-25 | -1.20E+01 | 46.7945224 | -2.90E-01 | 115093661 | 115093784 | NC_000009.11 |
| cg17745211 | 2.96E-23 | 2.39E-25 | -1.20E+01 | 46.7930947 | -1.33E-01 | 74725369  | 74725492  | NC_000002.11 |
| cg04658027 | 2.96E-23 | 2.39E-25 | -1.20E+01 | 46.7928912 | -1.35E-01 | 31702774  | 31702897  | NC_000006.11 |
| cg26351132 | 2.98E-23 | 2.41E-25 | -1.20E+01 | 46.7868211 | -1.36E-01 | 47049890  | 47050013  | NC_000017.10 |
| cg26301953 | 2.99E-23 | 2.42E-25 | -1.20E+01 | 46.7803973 | -1.51E-01 | 32164503  | 32164626  | NC_000006.11 |
| cg21946631 | 3.00E-23 | 2.43E-25 | -1.20E+01 | 46.7771605 | -2.62E-01 | 90879360  | 90879483  | NC_000007.13 |
| cg01431184 | 3.03E-23 | 2.46E-25 | -1.20E+01 | 46.76612   | -2.42E-01 | 1921075   | 1921198   | NC_000016.9  |
| cg08360599 | 3.09E-23 | 2.51E-25 | -1.20E+01 | 46.7472122 | -1.83E-01 | 141087261 | 141087384 | NC_000003.11 |
| cg03303515 | 3.14E-23 | 2.55E-25 | -1.20E+01 | 46.7286882 | -1.37E-01 | 47213998  | 47214121  | NC_000002.11 |
| cg06000878 | 3.14E-23 | 2.56E-25 | -1.20E+01 | 46.7280783 | -2.75E-01 | 122051193 | 122051316 | NC_000011.9  |

|            |          |          |           |            |           |           |           |              |
|------------|----------|----------|-----------|------------|-----------|-----------|-----------|--------------|
| cg00522451 | 3.16E-23 | 2.57E-25 | -1.20E+01 | 46.7235547 | -2.73E-01 | 113464048 | 113464171 | NC_000002.11 |
| cg18621256 | 3.16E-23 | 2.57E-25 | -1.20E+01 | 46.7217173 | -1.41E-01 | 119221444 | 119221567 | NC_000010.10 |
| cg19907725 | 3.16E-23 | 2.58E-25 | -1.20E+01 | 46.7200265 | -2.07E-01 | 153539397 | 153539520 | NC_000001.10 |
| cg12797594 | 3.17E-23 | 2.58E-25 | -1.20E+01 | 46.7169194 | -1.34E-01 | 36236395  | 36236518  | NC_000022.10 |
| cg01787285 | 3.20E-23 | 2.61E-25 | -1.20E+01 | 46.7068043 | -2.36E-01 | 2162682   | 2162805   | NC_000001.10 |
| cg25292663 | 3.21E-23 | 2.62E-25 | -1.20E+01 | 46.7050462 | -2.27E-01 | 79386969  | 79387092  | NC_000017.10 |
| cg12265130 | 3.25E-23 | 2.66E-25 | -1.20E+01 | 46.6890593 | -2.03E-01 | 59437344  | 59437467  | NC_000011.9  |
| cg26682337 | 3.26E-23 | 2.66E-25 | -1.20E+01 | 46.6881463 | -1.25E-01 | 145429192 | 145429315 | NC_000005.9  |
| cg24039081 | 3.27E-23 | 2.68E-25 | -1.20E+01 | 46.6818006 | -2.91E-01 | 197155143 | 197155266 | NC_000003.11 |
| cg15755348 | 3.27E-23 | 2.68E-25 | -1.20E+01 | 46.6816036 | -2.76E-01 | 101768874 | 101768997 | NC_000007.13 |
| cg07507251 | 3.30E-23 | 2.70E-25 | -1.20E+01 | 46.6715779 | -2.54E-01 | 52567010  | 52567133  | NC_000003.11 |
| cg16669650 | 3.31E-23 | 2.71E-25 | -1.20E+01 | 46.6691294 | -1.60E-01 | 42110833  | 42110956  | NC_000006.11 |
| cg08525145 | 3.32E-23 | 2.72E-25 | -1.20E+01 | 46.6665697 | -1.54E-01 | 155911361 | 155911484 | NC_000001.10 |
| cg02225720 | 3.35E-23 | 2.75E-25 | -1.20E+01 | 46.6552121 | -3.22E-01 | 3623472   | 3623595   | NC_000017.10 |
| cg00840403 | 3.40E-23 | 2.79E-25 | -1.20E+01 | 46.6398889 | -2.31E-01 | 71560205  | 71560328  | NC_000016.9  |
| cg21863888 | 3.41E-23 | 2.79E-25 | -1.20E+01 | 46.6391652 | -1.92E-01 | 31127173  | 31127296  | NC_000006.11 |
| cg16854533 | 3.43E-23 | 2.82E-25 | -1.20E+01 | 46.6315782 | -2.61E-01 | 133727885 | 133728008 | NC_000003.11 |
| cg11186858 | 3.45E-23 | 2.83E-25 | -1.20E+01 | 46.6258296 | -2.56E-01 | 75096382  | 75096505  | NC_000017.10 |
| cg13309012 | 3.50E-23 | 2.87E-25 | -1.20E+01 | 46.6111106 | -2.65E-01 | 26946167  | 26946290  | NC_000021.8  |
| cg02698668 | 3.53E-23 | 2.90E-25 | -1.20E+01 | 46.6023967 | -2.09E-01 | 44261472  | 44261595  | NC_000019.9  |
| cg16059979 | 3.53E-23 | 2.91E-25 | -1.20E+01 | 46.6004299 | -1.63E-01 | 32050927  | 32051050  | NC_000006.11 |
| cg08528170 | 3.56E-23 | 2.93E-25 | -1.20E+01 | 46.5920975 | -2.55E-01 | 13947914  | 13948037  | NC_000019.9  |
| cg04413153 | 3.57E-23 | 2.94E-25 | -1.20E+01 | 46.588654  | -1.54E-01 | 94448728  | 94448851  | NC_000010.10 |
| cg06979118 | 3.58E-23 | 2.95E-25 | -1.20E+01 | 46.5861175 | -1.74E-01 | 70601971  | 70602094  | NC_000011.9  |
| cg00564759 | 3.61E-23 | 2.97E-25 | -1.20E+01 | 46.5777159 | -1.17E-01 | 29818771  | 29818894  | NC_000016.9  |

|            |          |          |           |            |           |           |           |              |
|------------|----------|----------|-----------|------------|-----------|-----------|-----------|--------------|
| cg13798825 | 3.62E-23 | 2.98E-25 | -1.20E+01 | 46.5748469 | -1.06E-01 | 28725358  | 28725481  | NC_000007.13 |
| cg18940830 | 3.62E-23 | 2.99E-25 | -1.20E+01 | 46.5726272 | -1.31E-01 | 22726858  | 22726981  | NC_000010.10 |
| cg17459219 | 3.63E-23 | 3.00E-25 | -1.20E+01 | 46.5702082 | -1.43E-01 | 42248927  | 42249050  | NC_000008.10 |
| cg25272655 | 3.64E-23 | 3.00E-25 | -1.20E+01 | 46.5675149 | -1.81E-01 | 228644958 | 228645081 | NC_000001.10 |
| cg02811627 | 3.65E-23 | 3.01E-25 | -1.20E+01 | 46.5653395 | -1.15E-01 | 103395368 | 103395491 | NC_000014.8  |
| cg01747591 | 3.65E-23 | 3.02E-25 | -1.20E+01 | 46.56332   | -1.75E-01 | 89703612  | 89703735  | NC_000016.9  |
| cg03879160 | 3.66E-23 | 3.02E-25 | -1.20E+01 | 46.561239  | -2.34E-01 | 173508156 | 173508279 | NC_000002.11 |
| cg00733115 | 3.69E-23 | 3.06E-25 | -1.20E+01 | 46.5505996 | -1.92E-01 | 37105406  | 37105529  | NC_000006.11 |
| cg14563196 | 3.75E-23 | 3.10E-25 | -1.20E+01 | 46.5352702 | -1.74E-01 | 89664582  | 89664705  | NC_000001.10 |
| cg09033006 | 3.78E-23 | 3.13E-25 | -1.20E+01 | 46.5273581 | -2.52E-01 | 244517177 | 244517300 | NC_000001.10 |
| cg06495586 | 3.79E-23 | 3.14E-25 | -1.20E+01 | 46.5242098 | -2.55E-01 | 54424787  | 54424910  | NC_000004.11 |
| cg04223548 | 3.80E-23 | 3.15E-25 | -1.20E+01 | 46.5203941 | -2.50E-01 | 22247214  | 22247337  | NC_000013.10 |
| cg03548415 | 3.81E-23 | 3.16E-25 | -1.20E+01 | 46.5168568 | -3.07E-01 | 111991342 | 111991465 | NC_000011.9  |
| cg05898591 | 3.81E-23 | 3.16E-25 | -1.20E+01 | 46.5163383 | -1.76E-01 | 174805715 | 174805838 | NC_000005.9  |
| cg12799029 | 3.82E-23 | 3.17E-25 | -1.20E+01 | 46.5132541 | -1.96E-01 | 984184    | 984307    | NC_000017.10 |
| cg17398515 | 3.83E-23 | 3.18E-25 | -1.20E+01 | 46.5103256 | -1.80E-01 | 102092795 | 102092918 | NC_000008.10 |
| cg20445727 | 3.94E-23 | 3.27E-25 | -1.20E+01 | 46.4835686 | -2.62E-01 | 110728789 | 110728912 | NC_000011.9  |
| cg23898497 | 3.95E-23 | 3.28E-25 | -1.20E+01 | 46.480204  | -2.23E-01 | 128822543 | 128822666 | NC_000008.10 |
| cg14969094 | 3.99E-23 | 3.31E-25 | -1.20E+01 | 46.4696079 | -1.79E-01 | 156848003 | 156848126 | NC_000003.11 |
| cg07531549 | 4.04E-23 | 3.36E-25 | -1.20E+01 | 46.455481  | -2.04E-01 | 145011406 | 145011529 | NC_000008.10 |
| cg06075789 | 4.08E-23 | 3.39E-25 | -1.20E+01 | 46.4460024 | -2.93E-01 | 39894767  | 39894890  | NC_000019.9  |
| cg11009596 | 4.11E-23 | 3.42E-25 | -1.20E+01 | 46.4387162 | -1.53E-01 | 8113758   | 8113881   | NC_000017.10 |
| cg27149973 | 4.11E-23 | 3.43E-25 | -1.20E+01 | 46.4363792 | -2.19E-01 | 74868725  | 74868848  | NC_000017.10 |
| cg06365898 | 4.13E-23 | 3.45E-25 | -1.20E+01 | 46.43119   | -1.63E-01 | 16533907  | 16534030  | NC_000001.10 |
| cg26546105 | 4.14E-23 | 3.45E-25 | -1.20E+01 | 46.4285651 | -1.61E-01 | 100168143 | 100168266 | NC_000007.13 |

|            |          |          |           |            |           |           |           |              |
|------------|----------|----------|-----------|------------|-----------|-----------|-----------|--------------|
| cg01362515 | 4.20E-23 | 3.50E-25 | -1.20E+01 | 46.4145322 | -1.42E-01 | 39782091  | 39782214  | NC_000017.10 |
| cg02443967 | 4.20E-23 | 3.51E-25 | -1.20E+01 | 46.4139418 | -1.85E-01 | 98129902  | 98130025  | NC_000010.10 |
| cg03638937 | 4.22E-23 | 3.53E-25 | -1.20E+01 | 46.4083191 | -2.37E-01 | 393570    | 393693    | NC_000011.9  |
| cg01392656 | 4.24E-23 | 3.55E-25 | -1.20E+01 | 46.4011498 | -2.66E-01 | 125578483 | 125578606 | NC_000012.11 |
| cg26354173 | 4.25E-23 | 3.56E-25 | -1.20E+01 | 46.3998702 | -4.23E-02 | 157108750 | 157108873 | NC_000001.10 |
| cg16038738 | 4.25E-23 | 3.56E-25 | -1.20E+01 | 46.3991364 | -2.19E-01 | 109103731 | 109103854 | NC_000001.10 |
| cg16001422 | 4.31E-23 | 3.61E-25 | -1.20E+01 | 46.3850357 | -2.64E-01 | 145022842 | 145022965 | NC_000008.10 |
| cg22365167 | 4.36E-23 | 3.65E-25 | -1.20E+01 | 46.3726944 | -1.65E-01 | 62306861  | 62306984  | NC_000011.9  |
| cg25827255 | 4.39E-23 | 3.68E-25 | -1.20E+01 | 46.3656989 | -1.47E-01 | 95256759  | 95256882  | NC_000010.10 |
| cg04075990 | 4.42E-23 | 3.71E-25 | -1.20E+01 | 46.3570746 | -1.30E-01 | 106176366 | 106176489 | NC_000003.11 |
| cg00965469 | 4.50E-23 | 3.78E-25 | -1.20E+01 | 46.3388777 | -1.70E-01 | 31649469  | 31649592  | NC_000006.11 |
| cg06976598 | 4.52E-23 | 3.80E-25 | -1.20E+01 | 46.3347645 | -3.34E-01 | 53639124  | 53639247  | NC_000010.10 |
| cg27660920 | 4.53E-23 | 3.81E-25 | -1.20E+01 | 46.3320846 | -5.60E-02 | 37554817  | 37554940  | NC_000020.10 |
| cg09923107 | 4.53E-23 | 3.81E-25 | -1.20E+01 | 46.3318344 | -2.16E-01 | 30193892  | 30194015  | NC_000020.10 |
| cg20557104 | 4.55E-23 | 3.82E-25 | -1.20E+01 | 46.3277961 | -2.28E-01 | 41934313  | 41934436  | NC_000019.9  |
| cg20911180 | 4.60E-23 | 3.87E-25 | -1.20E+01 | 46.314725  | -3.32E-01 | 76411795  | 76411918  | NC_000011.9  |
| cg13992911 | 4.63E-23 | 3.90E-25 | -1.20E+01 | 46.3073571 | -1.42E-01 | 1003504   | 1003627   | NC_000005.9  |
| cg01282174 | 4.64E-23 | 3.91E-25 | -1.20E+01 | 46.3063845 | -2.81E-01 | 119630144 | 119630267 | NC_000011.9  |
| cg00142266 | 4.68E-23 | 3.95E-25 | -1.20E+01 | 46.2956482 | -9.82E-02 | 77789307  | 77789430  | NC_000015.9  |
| cg04987122 | 4.71E-23 | 3.97E-25 | -1.20E+01 | 46.2896649 | -2.34E-01 | 2213440   | 2213563   | NC_000016.9  |
| cg13070763 | 4.71E-23 | 3.98E-25 | -1.20E+01 | 46.2890947 | -2.35E-01 | 46448963  | 46449086  | NC_000003.11 |
| cg14145074 | 4.74E-23 | 4.00E-25 | -1.20E+01 | 46.2822053 | -2.30E-01 | 5567891   | 5568014   | NC_000007.13 |
| cg06580318 | 4.75E-23 | 4.01E-25 | -1.20E+01 | 46.279898  | -8.99E-02 | 169747119 | 169747242 | NC_000002.11 |
| cg05970116 | 4.76E-23 | 4.02E-25 | -1.20E+01 | 46.2779815 | -1.56E-01 | 75351076  | 75351199  | NC_000010.10 |
| cg00754989 | 4.77E-23 | 4.04E-25 | -1.20E+01 | 46.2740116 | -2.74E-01 | 72530044  | 72530167  | NC_000015.9  |

|            |          |          |           |            |           |           |           |              |
|------------|----------|----------|-----------|------------|-----------|-----------|-----------|--------------|
| cg16997203 | 4.88E-23 | 4.13E-25 | -1.20E+01 | 46.2512092 | -1.79E-01 | 44972679  | 44972802  | NC_000011.9  |
| cg02200207 | 4.88E-23 | 4.13E-25 | -1.20E+01 | 46.2503379 | -3.16E-01 | 29605237  | 29605360  | NC_000007.13 |
| cg12343777 | 4.89E-23 | 4.14E-25 | -1.20E+01 | 46.2492297 | -9.82E-02 | 7942342   | 7942465   | NC_000017.10 |
| cg15542639 | 4.94E-23 | 4.18E-25 | -1.20E+01 | 46.2383729 | -2.72E-01 | 93885254  | 93885377  | NC_000011.9  |
| cg16650073 | 4.96E-23 | 4.20E-25 | -1.20E+01 | 46.2339384 | -1.83E-01 | 2089897   | 2090020   | NC_000016.9  |
| cg07165167 | 4.97E-23 | 4.22E-25 | -1.20E+01 | 46.2300322 | -2.62E-01 | 86045527  | 86045650  | NC_000001.10 |
| cg06521357 | 5.00E-23 | 4.24E-25 | -1.20E+01 | 46.2250535 | -2.02E-01 | 3486380   | 3486503   | NC_000004.11 |
| cg08556511 | 5.00E-23 | 4.24E-25 | -1.20E+01 | 46.2245273 | -2.98E-01 | 102048882 | 102049005 | NC_000011.9  |
| cg22214335 | 5.02E-23 | 4.26E-25 | -1.20E+01 | 46.219645  | -8.84E-02 | 20811408  | 20811531  | NC_000001.10 |
| cg21052873 | 5.04E-23 | 4.28E-25 | -1.20E+01 | 46.2159564 | -2.30E-01 | 124938573 | 124938696 | NC_000012.11 |
| cg08610982 | 5.05E-23 | 4.29E-25 | -1.20E+01 | 46.2134624 | -1.73E-01 | 31560871  | 31560994  | NC_000006.11 |
| cg11961138 | 5.07E-23 | 4.30E-25 | -1.20E+01 | 46.2099345 | -2.13E-01 | 38599366  | 38599489  | NC_000017.10 |
| cg06367321 | 5.07E-23 | 4.31E-25 | -1.20E+01 | 46.2092946 | -2.35E-01 | 30125232  | 30125355  | NC_000016.9  |
| cg10180092 | 5.07E-23 | 4.31E-25 | -1.20E+01 | 46.2086951 | -3.00E-01 | 171002363 | 171002486 | NC_000003.11 |
| cg07329251 | 5.07E-23 | 4.32E-25 | -1.20E+01 | 46.2072477 | -2.94E-01 | 10476662  | 10476785  | NC_000011.9  |
| cg14415629 | 5.09E-23 | 4.33E-25 | -1.20E+01 | 46.2047336 | -2.06E-01 | 33033607  | 33033730  | NC_000011.9  |
| cg19279257 | 5.10E-23 | 4.34E-25 | -1.20E+01 | 46.202319  | -1.97E-01 | 100463508 | 100463631 | NC_000007.13 |
| cg06815976 | 5.13E-23 | 4.37E-25 | -1.20E+01 | 46.1960101 | -1.60E-01 | 32164816  | 32164939  | NC_000006.11 |
| cg13252152 | 5.13E-23 | 4.37E-25 | -1.20E+01 | 46.1959046 | -1.70E-01 | 101950701 | 101950824 | NC_000007.13 |
| cg05371506 | 5.13E-23 | 4.37E-25 | -1.20E+01 | 46.1953304 | -2.29E-01 | 46649970  | 46650093  | NC_000001.10 |
| cg18670236 | 5.24E-23 | 4.47E-25 | -1.20E+01 | 46.1723863 | -3.32E-01 | 126630478 | 126630601 | NC_000003.11 |
| cg09555736 | 5.24E-23 | 4.47E-25 | -1.20E+01 | 46.1718717 | -2.37E-01 | 474271    | 474394    | NC_000016.9  |
| cg00302979 | 5.26E-23 | 4.49E-25 | -1.20E+01 | 46.1675498 | -2.47E-01 | 124261820 | 124261943 | NC_000004.11 |
| cg00083262 | 5.27E-23 | 4.50E-25 | -1.20E+01 | 46.1654711 | -8.49E-02 | 157125526 | 157125649 | NC_000001.10 |
| cg12484738 | 5.27E-23 | 4.50E-25 | -1.20E+01 | 46.1652695 | -1.30E-01 | 65280766  | 65280889  | NC_000010.10 |

|            |          |          |           |            |           |           |           |              |
|------------|----------|----------|-----------|------------|-----------|-----------|-----------|--------------|
| cg18132007 | 5.28E-23 | 4.51E-25 | -1.20E+01 | 46.1627963 | -1.42E-01 | 44972684  | 44972807  | NC_000011.9  |
| cg08908131 | 5.31E-23 | 4.54E-25 | -1.20E+01 | 46.1565058 | -3.23E-01 | 118706938 | 118707061 | NC_000010.10 |
| cg27549186 | 5.34E-23 | 4.57E-25 | -1.20E+01 | 46.150846  | -2.92E-01 | 76858248  | 76858371  | NC_000017.10 |
| cg25731807 | 5.34E-23 | 4.57E-25 | -1.20E+01 | 46.1506472 | -1.42E-01 | 72416182  | 72416305  | NC_000005.9  |
| cg11334730 | 5.37E-23 | 4.60E-25 | -1.20E+01 | 46.1441875 | -2.58E-01 | 6750455   | 6750578   | NC_000006.11 |
| cg11181587 | 5.42E-23 | 4.65E-25 | -1.19E+01 | 46.134059  | -2.36E-01 | 121772185 | 121772308 | NC_000010.10 |
| cg21293455 | 5.43E-23 | 4.66E-25 | -1.19E+01 | 46.1314608 | -2.89E-01 | 37000786  | 37000909  | NC_000008.10 |
| cg25744552 | 5.45E-23 | 4.68E-25 | -1.19E+01 | 46.1274136 | -1.97E-01 | 117368140 | 117368263 | NC_000001.10 |
| cg16588163 | 5.52E-23 | 4.74E-25 | -1.19E+01 | 46.114448  | -3.08E-01 | 190251464 | 190251587 | NC_000003.11 |
| cg19414980 | 5.60E-23 | 4.81E-25 | -1.19E+01 | 46.0987326 | -2.33E-01 | 92673176  | 92673299  | NC_000007.13 |
| cg19163395 | 5.63E-23 | 4.84E-25 | -1.19E+01 | 46.0929446 | -2.63E-01 | 42164433  | 42164556  | NC_000017.10 |
| cg10017843 | 5.72E-23 | 4.93E-25 | -1.19E+01 | 46.0758091 | -1.12E-01 | 67693452  | 67693575  | NC_000016.9  |
| cg15934095 | 5.76E-23 | 4.96E-25 | -1.19E+01 | 46.0690087 | -2.80E-01 | 156630343 | 156630466 | NC_000001.10 |
| cg21895314 | 5.82E-23 | 5.01E-25 | -1.19E+01 | 46.0582896 | -9.07E-02 | 44593708  | 44593831  | NC_000021.8  |
| cg03531754 | 5.84E-23 | 5.03E-25 | -1.19E+01 | 46.0546843 | -2.35E-01 | 124194312 | 124194435 | NC_000008.10 |
| cg03266686 | 5.86E-23 | 5.06E-25 | -1.19E+01 | 46.0501555 | -2.03E-01 | 47716097  | 47716220  | NC_000002.11 |
| cg00956142 | 5.87E-23 | 5.06E-25 | -1.19E+01 | 46.048573  | -2.05E-01 | 28765031  | 28765154  | NC_000001.10 |
| cg17694130 | 5.94E-23 | 5.13E-25 | -1.19E+01 | 46.0350342 | -2.38E-01 | 14858290  | 14858413  | NC_000004.11 |
| cg00630164 | 5.98E-23 | 5.17E-25 | -1.19E+01 | 46.0289222 | -1.76E-01 | 41250062  | 41250185  | NC_000001.10 |
| cg21560697 | 6.06E-23 | 5.24E-25 | -1.19E+01 | 46.0154383 | -2.42E-01 | 10054883  | 10055006  | NC_000002.11 |
| cg02465859 | 6.07E-23 | 5.24E-25 | -1.19E+01 | 46.0138012 | -1.97E-01 | 116080533 | 116080656 | NC_000010.10 |
| cg11868461 | 6.13E-23 | 5.30E-25 | -1.19E+01 | 46.0030717 | -2.34E-01 | 75830800  | 75830923  | NC_000017.10 |
| cg27143703 | 6.20E-23 | 5.37E-25 | -1.19E+01 | 45.9909054 | -2.52E-01 | 77961719  | 77961842  | NC_000017.10 |
| cg05817845 | 6.28E-23 | 5.44E-25 | -1.19E+01 | 45.9771027 | -2.26E-01 | 42816226  | 42816349  | NC_000020.10 |
| cg06214007 | 6.28E-23 | 5.44E-25 | -1.19E+01 | 45.9770194 | -2.38E-01 | 89829308  | 89829431  | NC_000001.10 |

|            |          |          |           |            |           |           |           |              |
|------------|----------|----------|-----------|------------|-----------|-----------|-----------|--------------|
| cg15484375 | 6.39E-23 | 5.54E-25 | -1.19E+01 | 45.9601867 | -2.01E-01 | 18287647  | 18287770  | NC_000011.9  |
| cg06388350 | 6.46E-23 | 5.61E-25 | -1.19E+01 | 45.9476298 | -1.79E-01 | 95334135  | 95334258  | NC_000004.11 |
| cg13942186 | 6.47E-23 | 5.62E-25 | -1.19E+01 | 45.9453793 | -2.05E-01 | 140305942 | 140306065 | NC_000009.11 |
| cg00919591 | 6.50E-23 | 5.64E-25 | -1.19E+01 | 45.9407765 | -2.37E-01 | 23524136  | 23524259  | NC_000022.10 |
| cg08995609 | 6.69E-23 | 5.82E-25 | -1.19E+01 | 45.9104485 | -2.37E-01 | 66104115  | 66104238  | NC_000011.9  |
| cg15635368 | 6.70E-23 | 5.83E-25 | -1.19E+01 | 45.9087344 | -5.75E-02 | 191208116 | 191208239 | NC_000002.11 |
| cg07588216 | 6.72E-23 | 5.85E-25 | -1.19E+01 | 45.9054729 | -3.05E-01 | 25204045  | 25204168  | NC_000020.10 |
| cg03072665 | 6.73E-23 | 5.87E-25 | -1.19E+01 | 45.9026724 | -1.92E-01 | 242501706 | 242501829 | NC_000002.11 |
| cg17983217 | 6.76E-23 | 5.89E-25 | -1.19E+01 | 45.8979187 | -2.00E-01 | 31698223  | 31698346  | NC_000006.11 |
| cg08202226 | 6.76E-23 | 5.90E-25 | -1.19E+01 | 45.8973923 | -3.03E-01 | 153896590 | 153896713 | NC_000001.10 |
| cg23907053 | 6.79E-23 | 5.92E-25 | -1.19E+01 | 45.8937366 | -1.61E-01 | 70215816  | 70215939  | NC_000012.11 |
| cg04682791 | 6.82E-23 | 5.95E-25 | -1.19E+01 | 45.8886686 | -1.86E-01 | 25313030  | 25313153  | NC_000006.11 |
| cg16526732 | 6.85E-23 | 5.98E-25 | -1.19E+01 | 45.8832554 | -2.67E-01 | 95598159  | 95598282  | NC_000012.11 |
| cg14671011 | 6.87E-23 | 6.00E-25 | -1.19E+01 | 45.8802566 | -2.59E-01 | 134544423 | 134544546 | NC_000005.9  |
| cg07482372 | 6.91E-23 | 6.04E-25 | -1.19E+01 | 45.8728789 | -1.75E-01 | 2951201   | 2951324   | NC_000011.9  |
| cg11785538 | 6.96E-23 | 6.09E-25 | -1.19E+01 | 45.8655828 | -1.43E-01 | 107221074 | 107221197 | NC_000007.13 |
| cg05191839 | 7.03E-23 | 6.15E-25 | -1.19E+01 | 45.8549276 | -2.55E-01 | 50819265  | 50819388  | NC_000013.10 |
| cg05091997 | 7.06E-23 | 6.18E-25 | -1.19E+01 | 45.8511346 | -1.92E-01 | 60897721  | 60897844  | NC_000017.10 |
| cg04470557 | 7.06E-23 | 6.18E-25 | -1.19E+01 | 45.8503338 | -2.28E-01 | 131630995 | 131631118 | NC_000005.9  |
| cg07263735 | 7.07E-23 | 6.19E-25 | -1.19E+01 | 45.8483838 | -1.95E-01 | 75229837  | 75229960  | NC_000017.10 |
| cg12457415 | 7.07E-23 | 6.20E-25 | -1.19E+01 | 45.8479883 | -2.47E-01 | 31702862  | 31702985  | NC_000006.11 |
| cg15723350 | 7.10E-23 | 6.22E-25 | -1.19E+01 | 45.8438896 | -1.27E-01 | 46954866  | 46954989  | NC_000001.10 |
| cg10897459 | 7.10E-23 | 6.23E-25 | -1.19E+01 | 45.8434369 | -2.00E-01 | 73237042  | 73237165  | NC_000007.13 |
| cg24809011 | 7.22E-23 | 6.33E-25 | -1.19E+01 | 45.8264516 | -2.37E-01 | 26219198  | 26219321  | NC_000001.10 |
| cg25423573 | 7.23E-23 | 6.35E-25 | -1.19E+01 | 45.8242831 | -2.29E-01 | 81158982  | 81159105  | NC_000010.10 |

|            |          |          |           |            |           |           |           |              |
|------------|----------|----------|-----------|------------|-----------|-----------|-----------|--------------|
| cg09187338 | 7.26E-23 | 6.38E-25 | -1.19E+01 | 45.8194191 | -2.85E-01 | 130588508 | 130588631 | NC_000007.13 |
| cg14776518 | 7.39E-23 | 6.50E-25 | -1.19E+01 | 45.8001977 | -9.13E-02 | 63892607  | 63892730  | NC_000015.9  |
| cg26342637 | 7.45E-23 | 6.55E-25 | -1.19E+01 | 45.7929453 | -1.23E-01 | 43743872  | 43743995  | NC_000020.10 |
| cg21226735 | 7.49E-23 | 6.60E-25 | -1.19E+01 | 45.786075  | -2.43E-01 | 92807111  | 92807234  | NC_000009.11 |
| cg14911690 | 7.50E-23 | 6.60E-25 | -1.19E+01 | 45.7853812 | -9.60E-02 | 19729395  | 19729518  | NC_000019.9  |
| cg17660833 | 7.60E-23 | 6.70E-25 | -1.19E+01 | 45.7707881 | -2.96E-01 | 11267020  | 11267143  | NC_000003.11 |
| cg16428612 | 7.71E-23 | 6.79E-25 | -1.19E+01 | 45.7565588 | -2.94E-01 | 89573535  | 89573658  | NC_000016.9  |
| cg27449114 | 7.73E-23 | 6.82E-25 | -1.19E+01 | 45.7530482 | -9.83E-02 | 241501342 | 241501465 | NC_000002.11 |
| cg10981580 | 7.73E-23 | 6.82E-25 | -1.19E+01 | 45.7529804 | -2.14E-01 | 236306767 | 236306890 | NC_000001.10 |
| cg04262471 | 7.82E-23 | 6.90E-25 | -1.19E+01 | 45.7406916 | -2.29E-01 | 33245585  | 33245708  | NC_000006.11 |
| cg13046271 | 7.83E-23 | 6.91E-25 | -1.19E+01 | 45.7393722 | -1.13E-01 | 133451243 | 133451366 | NC_000005.9  |
| cg06616710 | 7.84E-23 | 6.92E-25 | -1.19E+01 | 45.7385184 | -2.41E-01 | 99473224  | 99473347  | NC_000010.10 |
| cg15580052 | 7.93E-23 | 7.00E-25 | -1.19E+01 | 45.7267658 | -2.71E-01 | 618772    | 618895    | NC_000012.11 |
| cg08376992 | 7.95E-23 | 7.02E-25 | -1.19E+01 | 45.7235766 | -1.84E-01 | 68033509  | 68033632  | NC_000016.9  |
| cg10021364 | 8.01E-23 | 7.08E-25 | -1.19E+01 | 45.7162744 | -1.82E-01 | 54369015  | 54369138  | NC_000019.9  |
| cg02355558 | 8.03E-23 | 7.10E-25 | -1.19E+01 | 45.7135315 | -2.55E-01 | 37977733  | 37977856  | NC_000003.11 |
| cg13283739 | 8.12E-23 | 7.18E-25 | -1.19E+01 | 45.7014518 | -1.22E-01 | 1765550   | 1765673   | NC_000004.11 |
| cg02998240 | 8.22E-23 | 7.28E-25 | -1.19E+01 | 45.6885885 | -2.11E-01 | 16508668  | 16508791  | NC_000001.10 |
| cg02539809 | 8.23E-23 | 7.28E-25 | -1.19E+01 | 45.6875663 | -2.66E-01 | 120725046 | 120725169 | NC_000007.13 |
| cg09841889 | 8.29E-23 | 7.34E-25 | -1.19E+01 | 45.6800902 | -2.27E-01 | 113552033 | 113552156 | NC_000002.11 |
| cg06444575 | 8.30E-23 | 7.36E-25 | -1.19E+01 | 45.6772015 | -1.83E-01 | 1369772   | 1369895   | NC_000001.10 |
| cg11401568 | 8.45E-23 | 7.49E-25 | -1.19E+01 | 45.6591853 | -6.88E-02 | 19648157  | 19648280  | NC_000017.10 |
| cg06970472 | 8.47E-23 | 7.51E-25 | -1.19E+01 | 45.65678   | -1.42E-01 | 40910981  | 40911104  | NC_000004.11 |
| cg22166883 | 8.48E-23 | 7.53E-25 | -1.19E+01 | 45.6546034 | -1.75E-01 | 24116900  | 24117023  | NC_000001.10 |
| cg23580024 | 8.53E-23 | 7.57E-25 | -1.19E+01 | 45.6489243 | -2.70E-01 | 93811989  | 93812112  | NC_000010.10 |



|            |          |          |           |            |           |           |           |              |
|------------|----------|----------|-----------|------------|-----------|-----------|-----------|--------------|
| cg02099474 | 8.54E-23 | 7.59E-25 | -1.19E+01 | 45.6468201 | -2.56E-01 | 1027990   | 1028113   | NC_000007.13 |
| cg02107844 | 8.68E-23 | 7.72E-25 | -1.19E+01 | 45.6299792 | -2.41E-01 | 92612836  | 92612959  | NC_000015.9  |
| cg19008097 | 8.73E-23 | 7.77E-25 | -1.19E+01 | 45.6238256 | -1.84E-01 | 140012986 | 140013109 | NC_000005.9  |
| cg24608504 | 8.77E-23 | 7.80E-25 | -1.19E+01 | 45.6189727 | -2.88E-01 | 54760330  | 54760453  | NC_000002.11 |
| cg06679087 | 8.77E-23 | 7.81E-25 | -1.19E+01 | 45.617867  | -3.09E-01 | 99473206  | 99473329  | NC_000010.10 |
| cg02646515 | 8.79E-23 | 7.83E-25 | -1.19E+01 | 45.6158056 | -1.75E-01 | 128168987 | 128169110 | NC_000002.11 |
| cg04134818 | 8.80E-23 | 7.85E-25 | -1.19E+01 | 45.6137831 | -1.53E-01 | 148998446 | 148998569 | NC_000005.9  |
| cg08854834 | 8.85E-23 | 7.89E-25 | -1.19E+01 | 45.6079004 | -2.25E-01 | 30517941  | 30518064  | NC_000021.8  |
| cg01727625 | 8.88E-23 | 7.91E-25 | -1.19E+01 | 45.6050943 | -1.59E-01 | 35373     | 35496     | NC_000007.13 |
| cg21039631 | 8.91E-23 | 7.95E-25 | -1.19E+01 | 45.6002897 | -1.51E-01 | 117112854 | 117112977 | NC_000001.10 |
| cg21527078 | 8.94E-23 | 7.98E-25 | -1.19E+01 | 45.5968314 | -2.71E-01 | 11610214  | 11610337  | NC_000003.11 |
| cg27587125 | 8.94E-23 | 7.98E-25 | -1.19E+01 | 45.5965654 | -2.23E-01 | 109204207 | 109204330 | NC_000001.10 |
| cg26111575 | 8.94E-23 | 7.98E-25 | -1.19E+01 | 45.5964848 | -2.24E-01 | 123886914 | 123887037 | NC_000010.10 |
| cg27144670 | 8.95E-23 | 7.99E-25 | -1.19E+01 | 45.595213  | -2.78E-01 | 52161438  | 52161561  | NC_000015.9  |
| cg13747967 | 8.98E-23 | 8.03E-25 | -1.19E+01 | 45.5906956 | -2.47E-01 | 57392618  | 57392741  | NC_000016.9  |
| cg21646392 | 9.05E-23 | 8.09E-25 | -1.19E+01 | 45.5832951 | -2.54E-01 | 23710303  | 23710426  | NC_000003.11 |
| cg15129506 | 9.12E-23 | 8.15E-25 | -1.19E+01 | 45.5753734 | -1.21E-01 | 27958712  | 27958835  | NC_000002.11 |
| cg22013564 | 9.13E-23 | 8.17E-25 | -1.19E+01 | 45.5735567 | -1.18E-01 | 100743832 | 100743955 | NC_000007.13 |
| cg04990202 | 9.15E-23 | 8.19E-25 | -1.19E+01 | 45.5707434 | -2.59E-01 | 153581750 | 153581873 | NC_000001.10 |
| cg04631202 | 9.17E-23 | 8.21E-25 | -1.19E+01 | 45.568985  | -9.50E-02 | 25942460  | 25942583  | NC_000001.10 |
| cg21981144 | 9.17E-23 | 8.21E-25 | -1.19E+01 | 45.5683175 | -2.16E-01 | 45248572  | 45248695  | NC_000019.9  |
| cg10338338 | 9.23E-23 | 8.27E-25 | -1.19E+01 | 45.5612717 | -1.48E-01 | 8088931   | 8089054   | NC_000012.11 |
| cg23466749 | 9.27E-23 | 8.31E-25 | -1.19E+01 | 45.5568084 | -2.04E-01 | 100920825 | 100920948 | NC_000006.11 |
| cg14856585 | 9.48E-23 | 8.50E-25 | -1.19E+01 | 45.5339118 | -1.79E-01 | 94425764  | 94425887  | NC_000014.8  |
| cg21697198 | 9.55E-23 | 8.58E-25 | -1.19E+01 | 45.5251507 | -1.23E-01 | 129246394 | 129246517 | NC_000011.9  |

|            |          |          |           |            |           |           |           |              |
|------------|----------|----------|-----------|------------|-----------|-----------|-----------|--------------|
| cg06738887 | 9.56E-23 | 8.59E-25 | -1.19E+01 | 45.5239359 | -2.16E-01 | 60688010  | 60688133  | NC_000015.9  |
| cg02627216 | 9.59E-23 | 8.61E-25 | -1.19E+01 | 45.5211155 | -2.41E-01 | 38599056  | 38599179  | NC_000017.10 |
| cg23007325 | 9.61E-23 | 8.64E-25 | -1.19E+01 | 45.5182408 | -2.58E-01 | 10924633  | 10924756  | NC_000008.10 |
| cg17804100 | 9.71E-23 | 8.74E-25 | -1.19E+01 | 45.5070184 | -1.24E-01 | 42277934  | 42278057  | NC_000001.10 |
| cg14424070 | 9.71E-23 | 8.74E-25 | -1.19E+01 | 45.5063901 | -2.86E-01 | 75988820  | 75988943  | NC_000014.8  |
| cg02660643 | 9.84E-23 | 8.86E-25 | -1.19E+01 | 45.4931643 | -2.52E-01 | 87491587  | 87491710  | NC_000016.9  |
| cg14422498 | 9.88E-23 | 8.90E-25 | -1.19E+01 | 45.4885397 | -2.25E-01 | 100639423 | 100639546 | NC_000009.11 |
| cg09039664 | 9.90E-23 | 8.93E-25 | -1.19E+01 | 45.4856702 | -1.26E-01 | 44034247  | 44034370  | NC_000020.10 |
| cg23170186 | 9.93E-23 | 8.95E-25 | -1.19E+01 | 45.4827231 | -1.11E-01 | 42951711  | 42951834  | NC_000006.11 |
| cg09462956 | 9.96E-23 | 8.98E-25 | -1.19E+01 | 45.4792495 | -2.32E-01 | 2082777   | 2082900   | NC_000016.9  |
| cg23103346 | 9.98E-23 | 9.00E-25 | -1.19E+01 | 45.4774755 | -1.74E-01 | 73870105  | 73870228  | NC_000002.11 |
| cg03655330 | 9.99E-23 | 9.02E-25 | -1.19E+01 | 45.4755493 | -1.54E-01 | 50337494  | 50337617  | NC_000003.11 |
| cg14343713 | 1.00E-22 | 9.03E-25 | -1.19E+01 | 45.4744014 | -1.78E-01 | 74742501  | 74742624  | NC_000011.9  |
| cg26998850 | 1.00E-22 | 9.07E-25 | -1.19E+01 | 45.4695982 | -2.85E-01 | 50300322  | 50300445  | NC_000016.9  |
| cg02137956 | 1.02E-22 | 9.18E-25 | -1.19E+01 | 45.4577503 | -2.13E-01 | 157092982 | 157093105 | NC_000007.13 |
| cg13438961 | 1.02E-22 | 9.19E-25 | -1.19E+01 | 45.4568051 | -1.51E-01 | 41250071  | 41250194  | NC_000001.10 |
| cg01815263 | 1.02E-22 | 9.24E-25 | -1.19E+01 | 45.451374  | -1.72E-01 | 5237478   | 5237601   | NC_000003.11 |
| cg13066703 | 1.02E-22 | 9.25E-25 | -1.19E+01 | 45.4496872 | -2.62E-01 | 211526705 | 211526828 | NC_000001.10 |
| cg02805890 | 1.02E-22 | 9.26E-25 | -1.18E+01 | 45.4492619 | -2.87E-01 | 27778836  | 27778959  | NC_000006.11 |
| cg27270116 | 1.04E-22 | 9.42E-25 | -1.18E+01 | 45.4315616 | -1.46E-01 | 184319589 | 184319712 | NC_000004.11 |
| cg09908879 | 1.04E-22 | 9.44E-25 | -1.18E+01 | 45.4294554 | -6.27E-02 | 291244    | 291367    | NC_000019.9  |
| cg08599266 | 1.06E-22 | 9.57E-25 | -1.18E+01 | 45.4160687 | -1.08E-01 | 25142473  | 25142596  | NC_000002.11 |
| cg19728601 | 1.07E-22 | 9.70E-25 | -1.18E+01 | 45.4032629 | -1.60E-01 | 99526949  | 99527072  | NC_000007.13 |
| cg18960629 | 1.07E-22 | 9.71E-25 | -1.18E+01 | 45.4019235 | -2.15E-01 | 36585452  | 36585575  | NC_000017.10 |
| cg20656868 | 1.08E-22 | 9.79E-25 | -1.18E+01 | 45.3937604 | -2.25E-01 | 3177310   | 3177433   | NC_000019.9  |

|            |          |          |           |            |           |           |           |              |
|------------|----------|----------|-----------|------------|-----------|-----------|-----------|--------------|
| cg27235315 | 1.08E-22 | 9.79E-25 | -1.18E+01 | 45.3935537 | -2.70E-01 | 223853928 | 223854051 | NC_000001.10 |
| cg11332928 | 1.09E-22 | 9.93E-25 | -1.18E+01 | 45.3801408 | -9.72E-02 | 45273680  | 45273803  | NC_000001.10 |
| cg13269555 | 1.11E-22 | 1.01E-24 | -1.18E+01 | 45.3671126 | -2.74E-01 | 102822002 | 102822125 | NC_000010.10 |
| cg13003011 | 1.11E-22 | 1.01E-24 | -1.18E+01 | 45.3642816 | -1.31E-01 | 20425680  | 20425803  | NC_000002.11 |
| cg02862467 | 1.12E-22 | 1.02E-24 | -1.18E+01 | 45.354382  | -2.77E-01 | 19407897  | 19408020  | NC_000001.10 |
| cg17769442 | 1.13E-22 | 1.03E-24 | -1.18E+01 | 45.3468222 | -1.73E-01 | 45578863  | 45578986  | NC_000019.9  |
| cg03125765 | 1.14E-22 | 1.04E-24 | -1.18E+01 | 45.3377768 | -1.91E-01 | 30686808  | 30686931  | NC_000022.10 |
| cg24842334 | 1.15E-22 | 1.04E-24 | -1.18E+01 | 45.3304062 | -2.34E-01 | 157647224 | 157647347 | NC_000007.13 |
| cg07080653 | 1.15E-22 | 1.05E-24 | -1.18E+01 | 45.3271379 | -2.55E-01 | 54374249  | 54374372  | NC_000004.11 |
| cg05200540 | 1.15E-22 | 1.05E-24 | -1.18E+01 | 45.3224395 | -9.43E-02 | 103985853 | 103985976 | NC_000010.10 |
| cg09715059 | 1.15E-22 | 1.05E-24 | -1.18E+01 | 45.321935  | -2.40E-01 | 32223336  | 32223459  | NC_000006.11 |
| cg24862514 | 1.16E-22 | 1.06E-24 | -1.18E+01 | 45.3173108 | -1.69E-01 | 44972672  | 44972795  | NC_000011.9  |
| cg17932802 | 1.17E-22 | 1.06E-24 | -1.18E+01 | 45.3112599 | -1.53E-01 | 80189962  | 80190085  | NC_000017.10 |
| cg19082559 | 1.17E-22 | 1.07E-24 | -1.18E+01 | 45.3048692 | -2.68E-01 | 56289697  | 56289820  | NC_000020.10 |
| cg16762778 | 1.18E-22 | 1.07E-24 | -1.18E+01 | 45.3012682 | -2.20E-01 | 27449867  | 27449990  | NC_000008.10 |
| cg16851771 | 1.18E-22 | 1.08E-24 | -1.18E+01 | 45.2996688 | -1.09E-01 | 42360170  | 42360293  | NC_000002.11 |
| cg16661143 | 1.19E-22 | 1.09E-24 | -1.18E+01 | 45.2907857 | -2.30E-01 | 34226461  | 34226584  | NC_000011.9  |
| cg04138361 | 1.20E-22 | 1.10E-24 | -1.18E+01 | 45.282105  | -1.03E-01 | 33160304  | 33160427  | NC_000006.11 |
| cg25549791 | 1.21E-22 | 1.10E-24 | -1.18E+01 | 45.2738374 | -1.70E-01 | 24126230  | 24126353  | NC_000001.10 |
| cg04023915 | 1.22E-22 | 1.11E-24 | -1.18E+01 | 45.2669137 | -1.43E-01 | 33722062  | 33722185  | NC_000011.9  |
| cg23934955 | 1.22E-22 | 1.11E-24 | -1.18E+01 | 45.2662972 | -1.99E-01 | 145024939 | 145025062 | NC_000008.10 |
| cg11304234 | 1.23E-22 | 1.13E-24 | -1.18E+01 | 45.2535198 | -1.71E-01 | 112034801 | 112034924 | NC_000011.9  |
| cg12117684 | 1.25E-22 | 1.15E-24 | -1.18E+01 | 45.2376325 | -1.28E-01 | 96077623  | 96077746  | NC_000004.11 |
| cg10211252 | 1.26E-22 | 1.16E-24 | -1.18E+01 | 45.2259093 | -1.31E-01 | 48355286  | 48355409  | NC_000010.10 |
| cg00506866 | 1.27E-22 | 1.17E-24 | -1.18E+01 | 45.2188011 | -2.30E-01 | 10263480  | 10263603  | NC_000002.11 |

|            |          |          |           |            |           |           |           |              |
|------------|----------|----------|-----------|------------|-----------|-----------|-----------|--------------|
| cg19274341 | 1.28E-22 | 1.17E-24 | -1.18E+01 | 45.215402  | -2.98E-01 | 8143891   | 8144014   | NC_000001.10 |
| cg00918944 | 1.28E-22 | 1.18E-24 | -1.18E+01 | 45.20835   | -1.64E-01 | 35908117  | 35908240  | NC_000009.11 |
| cg02627966 | 1.30E-22 | 1.20E-24 | -1.18E+01 | 45.1952649 | -2.30E-01 | 54899537  | 54899660  | NC_000007.13 |
| cg17112426 | 1.30E-22 | 1.20E-24 | -1.18E+01 | 45.1922197 | -2.46E-01 | 36004716  | 36004839  | NC_000019.9  |
| cg19316148 | 1.31E-22 | 1.20E-24 | -1.18E+01 | 45.1902038 | -2.33E-01 | 31846089  | 31846212  | NC_000001.10 |
| cg22074858 | 1.31E-22 | 1.21E-24 | -1.18E+01 | 45.183857  | -1.92E-01 | 89488430  | 89488553  | NC_000001.10 |
| cg09094328 | 1.31E-22 | 1.21E-24 | -1.18E+01 | 45.1827183 | -1.05E-01 | 15250374  | 15250497  | NC_000001.10 |
| cg24956391 | 1.32E-22 | 1.22E-24 | -1.18E+01 | 45.1762999 | -2.68E-01 | 36011999  | 36012122  | NC_000020.10 |
| cg07906484 | 1.33E-22 | 1.22E-24 | -1.18E+01 | 45.173517  | -2.37E-01 | 43036036  | 43036159  | NC_000020.10 |
| cg11238542 | 1.33E-22 | 1.23E-24 | -1.18E+01 | 45.1679142 | -2.95E-01 | 64431470  | 64431593  | NC_000002.11 |
| cg13719746 | 1.33E-22 | 1.23E-24 | -1.18E+01 | 45.1667685 | -7.02E-02 | 100747559 | 100747682 | NC_000009.11 |
| cg01843804 | 1.33E-22 | 1.23E-24 | -1.18E+01 | 45.1667564 | -1.57E-01 | 30689878  | 30690001  | NC_000006.11 |
| cg07817608 | 1.33E-22 | 1.23E-24 | -1.18E+01 | 45.165137  | -2.68E-01 | 76219528  | 76219651  | NC_000012.11 |
| cg09106231 | 1.34E-22 | 1.24E-24 | -1.18E+01 | 45.1623728 | -2.79E-01 | 207455715 | 207455838 | NC_000001.10 |
| cg10699884 | 1.36E-22 | 1.25E-24 | -1.18E+01 | 45.1483781 | -2.33E-01 | 21661045  | 21661168  | NC_000001.10 |
| cg07638935 | 1.36E-22 | 1.26E-24 | -1.18E+01 | 45.145823  | -2.53E-01 | 102821427 | 102821550 | NC_000010.10 |
| cg22483610 | 1.37E-22 | 1.26E-24 | -1.18E+01 | 45.1400905 | -1.38E-01 | 37920947  | 37921070  | NC_000001.10 |
| cg24125648 | 1.37E-22 | 1.27E-24 | -1.18E+01 | 45.1388537 | -1.80E-01 | 44092606  | 44092729  | NC_000015.9  |
| cg27129922 | 1.37E-22 | 1.27E-24 | -1.18E+01 | 45.1333377 | -2.10E-01 | 30690346  | 30690469  | NC_000006.11 |
| cg12304937 | 1.38E-22 | 1.28E-24 | -1.18E+01 | 45.130103  | -2.20E-01 | 680013    | 680136    | NC_000007.13 |
| cg10824354 | 1.39E-22 | 1.29E-24 | -1.18E+01 | 45.1220423 | -1.36E-01 | 47049956  | 47050079  | NC_000017.10 |
| cg05318454 | 1.40E-22 | 1.30E-24 | -1.18E+01 | 45.1154053 | -2.45E-01 | 46117805  | 46117928  | NC_000019.9  |
| cg22627826 | 1.40E-22 | 1.30E-24 | -1.18E+01 | 45.1145624 | -2.03E-01 | 1240265   | 1240388   | NC_000019.9  |
| cg06766367 | 1.41E-22 | 1.31E-24 | -1.18E+01 | 45.1071553 | -1.06E-01 | 67062687  | 67062810  | NC_000016.9  |
| cg02713162 | 1.42E-22 | 1.32E-24 | -1.18E+01 | 45.100248  | -2.92E-01 | 141702373 | 141702496 | NC_000005.9  |

|            |          |          |           |            |           |           |           |              |
|------------|----------|----------|-----------|------------|-----------|-----------|-----------|--------------|
| cg03603530 | 1.42E-22 | 1.32E-24 | -1.18E+01 | 45.09693   | -1.30E-01 | 69365009  | 69365132  | NC_000016.9  |
| cg07931714 | 1.43E-22 | 1.33E-24 | -1.18E+01 | 45.0926082 | -1.48E-01 | 100174962 | 100175085 | NC_000010.10 |
| cg08268692 | 1.43E-22 | 1.33E-24 | -1.18E+01 | 45.0881258 | -2.82E-01 | 76998832  | 76998955  | NC_000011.9  |
| cg20025658 | 1.48E-22 | 1.37E-24 | -1.18E+01 | 45.0565373 | -2.78E-01 | 219031640 | 219031763 | NC_000002.11 |
| cg05745223 | 1.48E-22 | 1.38E-24 | -1.18E+01 | 45.0536341 | -1.24E-01 | 74730630  | 74730753  | NC_000002.11 |
| cg19430430 | 1.49E-22 | 1.38E-24 | -1.18E+01 | 45.050754  | -6.44E-02 | 10121323  | 10121446  | NC_000019.9  |
| cg17021798 | 1.49E-22 | 1.38E-24 | -1.18E+01 | 45.0492265 | -2.21E-01 | 226444    | 226567    | NC_000007.13 |
| cg12785694 | 1.49E-22 | 1.39E-24 | -1.18E+01 | 45.0463955 | -2.80E-01 | 160122168 | 160122291 | NC_000003.11 |
| cg15823982 | 1.50E-22 | 1.40E-24 | -1.18E+01 | 45.0416731 | -7.75E-02 | 61638155  | 61638278  | NC_000018.9  |
| cg13894021 | 1.50E-22 | 1.40E-24 | -1.18E+01 | 45.039528  | -1.01E-01 | 23487383  | 23487506  | NC_000022.10 |
| cg17918501 | 1.51E-22 | 1.40E-24 | -1.18E+01 | 45.0351339 | -1.36E-01 | 27717709  | 27717832  | NC_000002.11 |
| cg11263296 | 1.51E-22 | 1.41E-24 | -1.18E+01 | 45.0330684 | -1.41E-01 | 120428313 | 120428436 | NC_000012.11 |
| cg01966277 | 1.54E-22 | 1.44E-24 | -1.18E+01 | 45.0116058 | -2.54E-01 | 82435009  | 82435132  | NC_000007.13 |
| cg11841239 | 1.54E-22 | 1.44E-24 | -1.18E+01 | 45.0108563 | -1.23E-01 | 172419269 | 172419392 | NC_000001.10 |
| cg26689780 | 1.54E-22 | 1.44E-24 | -1.18E+01 | 45.0095763 | -2.31E-01 | 10079554  | 10079677  | NC_000004.11 |
| cg01604480 | 1.56E-22 | 1.46E-24 | -1.18E+01 | 44.9974698 | -1.29E-01 | 75877899  | 75878022  | NC_000017.10 |
| cg09769113 | 1.56E-22 | 1.46E-24 | -1.18E+01 | 44.9954569 | -2.17E-01 | 30131719  | 30131842  | NC_000006.11 |
| cg09229893 | 1.57E-22 | 1.46E-24 | -1.18E+01 | 44.9935866 | -2.69E-01 | 54423811  | 54423934  | NC_000014.8  |
| cg22011888 | 1.57E-22 | 1.47E-24 | -1.18E+01 | 44.9885611 | -2.03E-01 | 63856712  | 63856835  | NC_000011.9  |
| cg16389901 | 1.58E-22 | 1.48E-24 | -1.18E+01 | 44.9849859 | -3.23E-01 | 54423807  | 54423930  | NC_000014.8  |
| cg15628518 | 1.58E-22 | 1.48E-24 | -1.18E+01 | 44.9836898 | -2.60E-01 | 145025059 | 145025182 | NC_000008.10 |
| cg17069739 | 1.58E-22 | 1.48E-24 | -1.18E+01 | 44.9810561 | -1.35E-01 | 31703188  | 31703311  | NC_000006.11 |
| cg05901357 | 1.60E-22 | 1.50E-24 | -1.18E+01 | 44.9694739 | -1.85E-01 | 27529325  | 27529448  | NC_000002.11 |
| cg06854264 | 1.60E-22 | 1.50E-24 | -1.18E+01 | 44.9692808 | -1.75E-01 | 200861254 | 200861377 | NC_000001.10 |
| cg24739098 | 1.61E-22 | 1.51E-24 | -1.18E+01 | 44.9629321 | -1.45E-01 | 79297159  | 79297282  | NC_000015.9  |

|            |          |          |           |            |           |           |           |              |
|------------|----------|----------|-----------|------------|-----------|-----------|-----------|--------------|
| cg15225325 | 1.63E-22 | 1.54E-24 | -1.18E+01 | 44.9466971 | -2.22E-01 | 176921820 | 176921943 | NC_000005.9  |
| cg24203709 | 1.63E-22 | 1.54E-24 | -1.18E+01 | 44.9463093 | -1.25E-01 | 42187179  | 42187302  | NC_000015.9  |
| cg21812277 | 1.65E-22 | 1.55E-24 | -1.18E+01 | 44.9371405 | -1.92E-01 | 25085776  | 25085899  | NC_000013.10 |
| cg17958516 | 1.65E-22 | 1.55E-24 | -1.18E+01 | 44.93532   | -2.37E-01 | 80952606  | 80952729  | NC_000010.10 |
| cg23102014 | 1.65E-22 | 1.55E-24 | -1.18E+01 | 44.9342485 | -2.43E-01 | 70574295  | 70574418  | NC_000015.9  |
| cg22289360 | 1.65E-22 | 1.56E-24 | -1.18E+01 | 44.9333576 | -9.42E-02 | 79073908  | 79074031  | NC_000009.11 |
| cg03499675 | 1.65E-22 | 1.56E-24 | -1.18E+01 | 44.9314201 | -2.17E-01 | 31744339  | 31744462  | NC_000006.11 |
| cg23536138 | 1.67E-22 | 1.58E-24 | -1.18E+01 | 44.92023   | -2.16E-01 | 22084861  | 22084984  | NC_000008.10 |
| cg27436118 | 1.68E-22 | 1.59E-24 | -1.18E+01 | 44.9148841 | -2.45E-01 | 4729905   | 4730028   | NC_000016.9  |
| cg00691874 | 1.69E-22 | 1.59E-24 | -1.18E+01 | 44.910343  | -2.33E-01 | 1521312   | 1521435   | NC_000017.10 |
| cg18026626 | 1.70E-22 | 1.60E-24 | -1.18E+01 | 44.9051751 | -1.37E-01 | 78286614  | 78286737  | NC_000015.9  |
| cg13464117 | 1.70E-22 | 1.60E-24 | -1.18E+01 | 44.9029492 | -2.49E-01 | 157348161 | 157348284 | NC_000007.13 |
| cg04986675 | 1.71E-22 | 1.61E-24 | -1.18E+01 | 44.8981229 | -1.20E-01 | 97657294  | 97657417  | NC_000008.10 |
| cg13430819 | 1.71E-22 | 1.62E-24 | -1.18E+01 | 44.895541  | -1.82E-01 | 22349646  | 22349769  | NC_000001.10 |
| cg03852144 | 1.71E-22 | 1.62E-24 | -1.18E+01 | 44.8934923 | -3.71E-01 | 95159639  | 95159762  | NC_000005.9  |
| cg21737444 | 1.73E-22 | 1.63E-24 | -1.18E+01 | 44.8850709 | -2.15E-01 | 38071591  | 38071714  | NC_000022.10 |
| cg05740243 | 1.75E-22 | 1.65E-24 | -1.18E+01 | 44.8741108 | -1.37E-01 | 135160775 | 135160898 | NC_000010.10 |
| cg07157107 | 1.76E-22 | 1.67E-24 | -1.18E+01 | 44.8642197 | -2.28E-01 | 42623730  | 42623853  | NC_000008.10 |
| cg13002506 | 1.77E-22 | 1.68E-24 | -1.18E+01 | 44.8592047 | -2.75E-01 | 76998821  | 76998944  | NC_000011.9  |
| cg21328779 | 1.78E-22 | 1.69E-24 | -1.18E+01 | 44.8510886 | -2.29E-01 | 111629875 | 111629998 | NC_000003.11 |
| cg08302480 | 1.81E-22 | 1.71E-24 | -1.18E+01 | 44.8394068 | -2.41E-01 | 54369133  | 54369256  | NC_000019.9  |
| cg18696576 | 1.81E-22 | 1.72E-24 | -1.18E+01 | 44.8362653 | -1.84E-01 | 34203630  | 34203753  | NC_000006.11 |
| cg11893951 | 1.82E-22 | 1.72E-24 | -1.18E+01 | 44.833035  | -1.17E-01 | 141061521 | 141061644 | NC_000005.9  |
| cg03762081 | 1.82E-22 | 1.73E-24 | -1.18E+01 | 44.8304473 | -2.22E-01 | 51523565  | 51523688  | NC_000019.9  |
| cg09887589 | 1.82E-22 | 1.73E-24 | -1.18E+01 | 44.8303605 | -2.11E-01 | 31702785  | 31702908  | NC_000006.11 |

|            |          |          |           |            |           |           |           |              |
|------------|----------|----------|-----------|------------|-----------|-----------|-----------|--------------|
| cg26579550 | 1.83E-22 | 1.74E-24 | -1.18E+01 | 44.8227174 | -2.25E-01 | 71428996  | 71429119  | NC_000015.9  |
| cg00493341 | 1.85E-22 | 1.75E-24 | -1.18E+01 | 44.8150559 | -1.28E-01 | 18228948  | 18229071  | NC_000019.9  |
| cg20034617 | 1.86E-22 | 1.76E-24 | -1.18E+01 | 44.8088621 | -2.47E-01 | 140172277 | 140172400 | NC_000009.11 |
| cg13925895 | 1.86E-22 | 1.77E-24 | -1.18E+01 | 44.8073678 | -1.58E-01 | 201990619 | 201990742 | NC_000002.11 |
| cg04155862 | 1.87E-22 | 1.78E-24 | -1.18E+01 | 44.7989758 | -1.72E-01 | 127541172 | 127541295 | NC_000003.11 |
| cg03477080 | 1.88E-22 | 1.79E-24 | -1.18E+01 | 44.7948988 | -2.21E-01 | 46448920  | 46449043  | NC_000003.11 |
| cg14050053 | 1.88E-22 | 1.79E-24 | -1.18E+01 | 44.7942836 | -2.26E-01 | 33416834  | 33416957  | NC_000017.10 |
| cg10464462 | 1.89E-22 | 1.80E-24 | -1.18E+01 | 44.7888152 | -2.73E-01 | 33417059  | 33417182  | NC_000017.10 |
| cg11421182 | 1.91E-22 | 1.82E-24 | -1.18E+01 | 44.7801978 | -2.34E-01 | 36153479  | 36153602  | NC_000020.10 |
| cg12278705 | 1.91E-22 | 1.82E-24 | -1.18E+01 | 44.7768433 | -2.15E-01 | 86045474  | 86045597  | NC_000001.10 |
| cg03567939 | 1.91E-22 | 1.82E-24 | -1.18E+01 | 44.7764303 | -2.31E-01 | 151506147 | 151506270 | NC_000007.13 |
| cg03370270 | 1.92E-22 | 1.83E-24 | -1.18E+01 | 44.7721492 | -1.58E-01 | 106065603 | 106065726 | NC_000007.13 |
| cg12551029 | 1.93E-22 | 1.84E-24 | -1.18E+01 | 44.7676338 | -2.07E-01 | 113498106 | 113498229 | NC_000001.10 |
| cg19134347 | 1.93E-22 | 1.85E-24 | -1.18E+01 | 44.7639409 | -1.30E-01 | 104584279 | 104584402 | NC_000014.8  |
| cg16701133 | 1.95E-22 | 1.86E-24 | -1.17E+01 | 44.7566623 | -2.54E-01 | 75747961  | 75748084  | NC_000014.8  |
| cg25198007 | 1.96E-22 | 1.87E-24 | -1.17E+01 | 44.7495731 | -1.75E-01 | 26611319  | 26611442  | NC_000001.10 |
| cg05467676 | 1.97E-22 | 1.88E-24 | -1.17E+01 | 44.7459697 | -2.68E-01 | 72226965  | 72227088  | NC_000003.11 |
| cg08782899 | 1.98E-22 | 1.89E-24 | -1.17E+01 | 44.7420222 | -1.65E-01 | 79652389  | 79652512  | NC_000017.10 |
| cg03037030 | 1.98E-22 | 1.89E-24 | -1.17E+01 | 44.7418448 | -2.45E-01 | 31543300  | 31543423  | NC_000006.11 |
| cg08527124 | 1.98E-22 | 1.89E-24 | -1.17E+01 | 44.7411658 | -3.51E-01 | 89382891  | 89383014  | NC_000016.9  |
| cg26274662 | 1.98E-22 | 1.89E-24 | -1.17E+01 | 44.7390765 | -1.54E-01 | 63729230  | 63729353  | NC_000015.9  |
| cg12930176 | 1.98E-22 | 1.90E-24 | -1.17E+01 | 44.7365555 | -2.60E-01 | 232044866 | 232044989 | NC_000002.11 |
| cg17328839 | 1.99E-22 | 1.90E-24 | -1.17E+01 | 44.7345454 | -2.60E-01 | 64127751  | 64127874  | NC_000001.10 |
| cg16587838 | 1.99E-22 | 1.90E-24 | -1.17E+01 | 44.7333839 | -1.66E-01 | 31704705  | 31704828  | NC_000006.11 |
| cg20130571 | 2.00E-22 | 1.91E-24 | -1.17E+01 | 44.7291451 | -2.03E-01 | 35974541  | 35974664  | NC_000003.11 |

|            |          |          |           |            |           |           |           |              |
|------------|----------|----------|-----------|------------|-----------|-----------|-----------|--------------|
| cg14204735 | 2.00E-22 | 1.91E-24 | -1.17E+01 | 44.7284121 | -2.91E-01 | 61524304  | 61524427  | NC_000017.10 |
| cg03345805 | 2.05E-22 | 1.97E-24 | -1.17E+01 | 44.7002858 | -6.16E-02 | 191208171 | 191208294 | NC_000002.11 |
| cg16624272 | 2.06E-22 | 1.98E-24 | -1.17E+01 | 44.695136  | -1.20E-01 | 142012517 | 142012640 | NC_000008.10 |
| cg01713701 | 2.07E-22 | 1.99E-24 | -1.17E+01 | 44.6901622 | -1.15E-01 | 48045654  | 48045777  | NC_000017.10 |
| cg03891318 | 2.09E-22 | 2.00E-24 | -1.17E+01 | 44.6819958 | -2.45E-01 | 139372675 | 139372798 | NC_000003.11 |
| cg11954355 | 2.10E-22 | 2.01E-24 | -1.17E+01 | 44.6772471 | -2.05E-01 | 57393844  | 57393967  | NC_000020.10 |
| cg12570716 | 2.11E-22 | 2.02E-24 | -1.17E+01 | 44.6728682 | -2.36E-01 | 3822379   | 3822502   | NC_000010.10 |
| cg22749810 | 2.11E-22 | 2.03E-24 | -1.17E+01 | 44.6697849 | -2.18E-01 | 78237389  | 78237512  | NC_000017.10 |
| cg02224369 | 2.11E-22 | 2.03E-24 | -1.17E+01 | 44.6689851 | -1.48E-01 | 33758529  | 33758652  | NC_000011.9  |
| cg00430895 | 2.12E-22 | 2.03E-24 | -1.17E+01 | 44.6678078 | -2.37E-01 | 13136340  | 13136463  | NC_000018.9  |
| cg01777586 | 2.12E-22 | 2.04E-24 | -1.17E+01 | 44.6638666 | -2.30E-01 | 80163174  | 80163297  | NC_000017.10 |
| cg20570279 | 2.13E-22 | 2.04E-24 | -1.17E+01 | 44.662577  | -9.93E-02 | 116659129 | 116659252 | NC_000011.9  |
| cg19169932 | 2.13E-22 | 2.04E-24 | -1.17E+01 | 44.6623755 | -2.27E-01 | 62861955  | 62862078  | NC_000015.9  |
| cg21505923 | 2.13E-22 | 2.05E-24 | -1.17E+01 | 44.6600146 | -2.43E-01 | 72226668  | 72226791  | NC_000003.11 |
| cg18825531 | 2.14E-22 | 2.06E-24 | -1.17E+01 | 44.6552932 | -1.71E-01 | 62321136  | 62321259  | NC_000011.9  |
| cg23342625 | 2.14E-22 | 2.06E-24 | -1.17E+01 | 44.6533424 | -2.86E-01 | 20877340  | 20877463  | NC_000006.11 |
| cg26035171 | 2.16E-22 | 2.08E-24 | -1.17E+01 | 44.6455293 | -1.92E-01 | 28705464  | 28705587  | NC_000017.10 |
| cg08754149 | 2.18E-22 | 2.10E-24 | -1.17E+01 | 44.6362996 | -2.68E-01 | 78204159  | 78204282  | NC_000010.10 |
| cg00752263 | 2.18E-22 | 2.10E-24 | -1.17E+01 | 44.6357195 | -1.57E-01 | 3486116   | 3486239   | NC_000004.11 |
| cg23416439 | 2.18E-22 | 2.10E-24 | -1.17E+01 | 44.6357143 | -4.89E-02 | 55083945  | 55084068  | NC_000004.11 |
| cg23414330 | 2.18E-22 | 2.10E-24 | -1.17E+01 | 44.6339366 | -1.66E-01 | 125754900 | 125755023 | NC_000010.10 |
| cg07531860 | 2.18E-22 | 2.11E-24 | -1.17E+01 | 44.6323663 | -9.74E-02 | 154719718 | 154719841 | NC_000007.13 |
| cg09230905 | 2.22E-22 | 2.15E-24 | -1.17E+01 | 44.6146531 | -1.41E-01 | 33721903  | 33722026  | NC_000011.9  |
| cg12329178 | 2.24E-22 | 2.16E-24 | -1.17E+01 | 44.6067576 | -1.39E-01 | 26623786  | 26623909  | NC_000013.10 |
| cg17733616 | 2.27E-22 | 2.19E-24 | -1.17E+01 | 44.5925967 | -1.53E-01 | 73083887  | 73084010  | NC_000017.10 |



|            |          |          |           |            |           |           |           |              |
|------------|----------|----------|-----------|------------|-----------|-----------|-----------|--------------|
| cg09870609 | 2.27E-22 | 2.20E-24 | -1.17E+01 | 44.5892866 | -2.13E-01 | 81702952  | 81703075  | NC_000015.9  |
| cg09529667 | 2.28E-22 | 2.21E-24 | -1.17E+01 | 44.5861454 | -1.07E-01 | 18531111  | 18531234  | NC_000019.9  |
| cg10098729 | 2.31E-22 | 2.24E-24 | -1.17E+01 | 44.5729092 | -1.40E-01 | 29624206  | 29624329  | NC_000016.9  |
| cg14065109 | 2.32E-22 | 2.25E-24 | -1.17E+01 | 44.5680358 | -2.40E-01 | 47715006  | 47715129  | NC_000021.8  |
| cg22698604 | 2.33E-22 | 2.26E-24 | -1.17E+01 | 44.5632236 | -9.51E-02 | 116286502 | 116286625 | NC_000010.10 |
| cg09633081 | 2.33E-22 | 2.26E-24 | -1.17E+01 | 44.5617774 | -1.99E-01 | 7692342   | 7692465   | NC_000006.11 |
| cg26842024 | 2.35E-22 | 2.28E-24 | -1.17E+01 | 44.5543097 | -1.01E-01 | 16436122  | 16436245  | NC_000019.9  |
| cg27410595 | 2.35E-22 | 2.28E-24 | -1.17E+01 | 44.5528236 | -2.60E-01 | 119995754 | 119995877 | NC_000011.9  |
| cg09226388 | 2.37E-22 | 2.31E-24 | -1.17E+01 | 44.5428199 | -4.16E-02 | 54421578  | 54421701  | NC_000014.8  |
| cg03532331 | 2.38E-22 | 2.31E-24 | -1.17E+01 | 44.5405697 | -2.37E-01 | 4000474   | 4000597   | NC_000016.9  |
| cg03568041 | 2.45E-22 | 2.39E-24 | -1.17E+01 | 44.5075276 | -1.26E-01 | 1047623   | 1047746   | NC_000016.9  |
| cg22786465 | 2.47E-22 | 2.41E-24 | -1.17E+01 | 44.4987815 | -1.33E-01 | 31649502  | 31649625  | NC_000006.11 |
| cg00288598 | 2.49E-22 | 2.43E-24 | -1.17E+01 | 44.4922334 | -3.37E-01 | 141555295 | 141555418 | NC_000008.10 |
| cg20821187 | 2.51E-22 | 2.45E-24 | -1.17E+01 | 44.4832643 | -2.56E-01 | 200452917 | 200453040 | NC_000001.10 |
| cg11641006 | 2.51E-22 | 2.45E-24 | -1.17E+01 | 44.4829206 | -2.06E-01 | 235213874 | 235213997 | NC_000002.11 |
| cg23896816 | 2.55E-22 | 2.50E-24 | -1.17E+01 | 44.4640088 | -1.39E-01 | 39473253  | 39473376  | NC_000022.10 |
| cg12828331 | 2.60E-22 | 2.55E-24 | -1.17E+01 | 44.4443002 | -7.77E-02 | 42543469  | 42543592  | NC_000003.11 |
| cg23889010 | 2.61E-22 | 2.55E-24 | -1.17E+01 | 44.4418551 | -2.30E-01 | 43882990  | 43883113  | NC_000020.10 |
| cg17470397 | 2.65E-22 | 2.59E-24 | -1.17E+01 | 44.4259577 | -2.67E-01 | 193308169 | 193308292 | NC_000003.11 |
| cg07028869 | 2.65E-22 | 2.60E-24 | -1.17E+01 | 44.4248368 | -1.26E-01 | 49741164  | 49741287  | NC_000012.11 |
| cg13319286 | 2.67E-22 | 2.61E-24 | -1.17E+01 | 44.4191276 | -1.00E-01 | 62761500  | 62761623  | NC_000010.10 |
| cg18269493 | 2.67E-22 | 2.62E-24 | -1.17E+01 | 44.4158473 | -1.33E-01 | 8772984   | 8773107   | NC_000001.10 |
| cg02017041 | 2.69E-22 | 2.64E-24 | -1.17E+01 | 44.4099492 | -8.11E-02 | 35521054  | 35521177  | NC_000019.9  |
| cg24888257 | 2.72E-22 | 2.67E-24 | -1.17E+01 | 44.3967004 | -2.17E-01 | 31785597  | 31785720  | NC_000006.11 |
| cg01015663 | 2.75E-22 | 2.70E-24 | -1.17E+01 | 44.3845074 | -1.76E-01 | 23729692  | 23729815  | NC_000001.10 |

|            |          |          |           |            |           |           |           |              |
|------------|----------|----------|-----------|------------|-----------|-----------|-----------|--------------|
| cg11668419 | 2.77E-22 | 2.72E-24 | -1.17E+01 | 44.379452  | -2.53E-01 | 68025026  | 68025149  | NC_000001.10 |
| cg16643088 | 2.77E-22 | 2.72E-24 | -1.17E+01 | 44.3780801 | -2.08E-01 | 39188743  | 39188866  | NC_000003.11 |
| cg03157040 | 2.79E-22 | 2.74E-24 | -1.17E+01 | 44.3713615 | -1.74E-01 | 1861890   | 1862013   | NC_000019.9  |
| cg03347671 | 2.79E-22 | 2.75E-24 | -1.17E+01 | 44.3688074 | -8.88E-02 | 218875467 | 218875590 | NC_000002.11 |
| cg23731595 | 2.79E-22 | 2.75E-24 | -1.17E+01 | 44.3682538 | -1.84E-01 | 30346789  | 30346912  | NC_000010.10 |
| cg20143985 | 2.79E-22 | 2.75E-24 | -1.17E+01 | 44.3678007 | -2.12E-01 | 126920370 | 126920493 | NC_000010.10 |
| cg00974523 | 2.83E-22 | 2.79E-24 | -1.17E+01 | 44.3546258 | -2.00E-01 | 90124400  | 90124523  | NC_000016.9  |
| cg21108085 | 2.83E-22 | 2.79E-24 | -1.17E+01 | 44.352833  | -3.11E-01 | 44591098  | 44591221  | NC_000011.9  |
| cg19354746 | 2.84E-22 | 2.80E-24 | -1.17E+01 | 44.3515593 | -1.22E-01 | 50969673  | 50969796  | NC_000022.10 |
| cg24610231 | 2.84E-22 | 2.80E-24 | -1.17E+01 | 44.3492932 | -1.41E-01 | 29967620  | 29967743  | NC_000015.9  |
| cg07927540 | 2.87E-22 | 2.83E-24 | -1.17E+01 | 44.3384597 | -1.66E-01 | 169049163 | 169049286 | NC_000006.11 |
| cg15948536 | 2.88E-22 | 2.84E-24 | -1.17E+01 | 44.3343966 | -2.93E-01 | 169770092 | 169770215 | NC_000004.11 |
| cg24768093 | 2.89E-22 | 2.85E-24 | -1.17E+01 | 44.3314764 | -9.82E-02 | 48228034  | 48228157  | NC_000017.10 |
| cg26717066 | 2.90E-22 | 2.87E-24 | -1.17E+01 | 44.3269338 | -2.72E-01 | 132581310 | 132581433 | NC_000005.9  |
| cg24587185 | 2.91E-22 | 2.87E-24 | -1.17E+01 | 44.3239255 | -2.19E-01 | 109826107 | 109826230 | NC_000002.11 |
| cg18399183 | 2.91E-22 | 2.88E-24 | -1.17E+01 | 44.3229984 | -1.13E-01 | 51318138  | 51318261  | NC_000012.11 |
| cg00660272 | 2.91E-22 | 2.88E-24 | -1.17E+01 | 44.3223027 | -1.45E-01 | 24231353  | 24231476  | NC_000001.10 |
| cg17680767 | 2.92E-22 | 2.88E-24 | -1.17E+01 | 44.3209651 | -2.81E-01 | 73623208  | 73623331  | NC_000005.9  |
| cg18246298 | 2.92E-22 | 2.89E-24 | -1.17E+01 | 44.3201928 | -1.80E-01 | 111154934 | 111155057 | NC_000011.9  |
| cg17157725 | 2.93E-22 | 2.89E-24 | -1.17E+01 | 44.3174238 | -2.29E-01 | 45667757  | 45667880  | NC_000022.10 |
| cg13400203 | 2.93E-22 | 2.90E-24 | -1.17E+01 | 44.31486   | -1.89E-01 | 96055060  | 96055183  | NC_000002.11 |
| cg11100795 | 2.95E-22 | 2.92E-24 | -1.17E+01 | 44.3092562 | -2.95E-01 | 77583915  | 77584038  | NC_000005.9  |
| cg16041798 | 2.95E-22 | 2.92E-24 | -1.17E+01 | 44.3076847 | -2.49E-01 | 64905375  | 64905498  | NC_000014.8  |
| cg12313969 | 2.95E-22 | 2.92E-24 | -1.17E+01 | 44.3069289 | -2.94E-01 | 95143624  | 95143747  | NC_000010.10 |
| cg11297227 | 2.95E-22 | 2.93E-24 | -1.17E+01 | 44.3066782 | -2.03E-01 | 113677325 | 113677448 | NC_000013.10 |

|            |          |          |           |            |           |           |           |              |
|------------|----------|----------|-----------|------------|-----------|-----------|-----------|--------------|
| cg05654304 | 3.01E-22 | 2.99E-24 | -1.17E+01 | 44.2855437 | -1.13E-01 | 12538678  | 12538801  | NC_000001.10 |
| cg00259019 | 3.03E-22 | 3.01E-24 | -1.17E+01 | 44.2771246 | -2.48E-01 | 236611999 | 236612122 | NC_000002.11 |
| cg07469594 | 3.03E-22 | 3.01E-24 | -1.17E+01 | 44.2769313 | -1.88E-01 | 64456062  | 64456185  | NC_000015.9  |
| cg11318133 | 3.03E-22 | 3.02E-24 | -1.17E+01 | 44.2752606 | -2.15E-01 | 113416268 | 113416391 | NC_000012.11 |
| cg07126235 | 3.04E-22 | 3.02E-24 | -1.17E+01 | 44.2743539 | -2.23E-01 | 43192225  | 43192348  | NC_000006.11 |
| cg00175901 | 3.04E-22 | 3.03E-24 | -1.17E+01 | 44.2732746 | -1.65E-01 | 113416290 | 113416413 | NC_000012.11 |
| cg02880444 | 3.04E-22 | 3.03E-24 | -1.17E+01 | 44.2724249 | -1.74E-01 | 29860851  | 29860974  | NC_000017.10 |
| cg13036352 | 3.07E-22 | 3.06E-24 | -1.17E+01 | 44.261558  | -2.74E-01 | 30651825  | 30651948  | NC_000006.11 |
| cg13908299 | 3.08E-22 | 3.07E-24 | -1.17E+01 | 44.2576237 | -1.75E-01 | 124833194 | 124833317 | NC_000012.11 |
| cg05813803 | 3.12E-22 | 3.11E-24 | -1.17E+01 | 44.2447322 | -1.72E-01 | 89323084  | 89323207  | NC_000016.9  |
| cg27017658 | 3.14E-22 | 3.13E-24 | -1.17E+01 | 44.2387677 | -9.30E-02 | 21093081  | 21093204  | NC_000014.8  |
| cg27115863 | 3.15E-22 | 3.14E-24 | -1.17E+01 | 44.2360123 | -2.44E-01 | 37921640  | 37921763  | NC_000022.10 |
| cg04756223 | 3.19E-22 | 3.19E-24 | -1.17E+01 | 44.2204961 | -3.01E-01 | 46325268  | 46325391  | NC_000002.11 |
| cg07243147 | 3.20E-22 | 3.19E-24 | -1.17E+01 | 44.2201954 | -1.95E-01 | 150744274 | 150744397 | NC_000007.13 |
| cg23426156 | 3.20E-22 | 3.19E-24 | -1.17E+01 | 44.2192662 | -2.19E-01 | 126557901 | 126558024 | NC_000008.10 |
| cg02833110 | 3.21E-22 | 3.21E-24 | -1.17E+01 | 44.2141394 | -4.73E-02 | 98261952  | 98262075  | NC_000002.11 |
| cg15833534 | 3.23E-22 | 3.23E-24 | -1.17E+01 | 44.2088408 | -2.28E-01 | 31845985  | 31846108  | NC_000001.10 |
| cg15835664 | 3.23E-22 | 3.23E-24 | -1.17E+01 | 44.2080484 | -2.97E-01 | 62787266  | 62787389  | NC_000001.10 |
| cg08079052 | 3.25E-22 | 3.25E-24 | -1.17E+01 | 44.2027337 | -2.39E-01 | 145547895 | 145548018 | NC_000008.10 |
| cg18951977 | 3.29E-22 | 3.29E-24 | -1.17E+01 | 44.1896175 | -7.14E-02 | 54421397  | 54421520  | NC_000014.8  |
| cg09127107 | 3.30E-22 | 3.30E-24 | -1.17E+01 | 44.1858695 | -2.21E-01 | 3438702   | 3438825   | NC_000006.11 |
| cg11171825 | 3.31E-22 | 3.32E-24 | -1.17E+01 | 44.1800519 | -1.52E-01 | 42939029  | 42939152  | NC_000006.11 |
| cg08968863 | 3.31E-22 | 3.32E-24 | -1.17E+01 | 44.1798121 | -1.24E-01 | 43915835  | 43915958  | NC_000010.10 |
| cg11869510 | 3.32E-22 | 3.34E-24 | -1.17E+01 | 44.1761638 | -1.34E-01 | 65990431  | 65990554  | NC_000017.10 |
| cg16251079 | 3.36E-22 | 3.38E-24 | -1.17E+01 | 44.16371   | -2.08E-01 | 113497932 | 113498055 | NC_000001.10 |

|            |          |          |           |            |           |           |           |              |
|------------|----------|----------|-----------|------------|-----------|-----------|-----------|--------------|
| cg14723921 | 3.37E-22 | 3.38E-24 | -1.17E+01 | 44.1623206 | -1.15E-01 | 5969260   | 5969383   | NC_000006.11 |
| cg26727816 | 3.41E-22 | 3.43E-24 | -1.17E+01 | 44.1472247 | -1.71E-01 | 27413525  | 27413648  | NC_000016.9  |
| cg13029400 | 3.42E-22 | 3.44E-24 | -1.17E+01 | 44.1457079 | -2.29E-01 | 141087190 | 141087313 | NC_000003.11 |
| cg02094283 | 3.44E-22 | 3.47E-24 | -1.17E+01 | 44.1375823 | -2.59E-01 | 114165695 | 114165818 | NC_000011.9  |
| cg25588725 | 3.46E-22 | 3.48E-24 | -1.17E+01 | 44.1336367 | -1.25E-01 | 31703139  | 31703262  | NC_000006.11 |
| cg09296270 | 3.48E-22 | 3.50E-24 | -1.17E+01 | 44.1272429 | -1.61E-01 | 65087288  | 65087411  | NC_000002.11 |
| cg27262821 | 3.49E-22 | 3.52E-24 | -1.17E+01 | 44.1234226 | -2.73E-01 | 49184628  | 49184751  | NC_000019.9  |
| cg05125838 | 3.54E-22 | 3.57E-24 | -1.17E+01 | 44.1096049 | -1.59E-01 | 48601585  | 48601708  | NC_000003.11 |
| cg15058605 | 3.55E-22 | 3.58E-24 | -1.17E+01 | 44.1056193 | -8.52E-02 | 208031878 | 208032001 | NC_000002.11 |
| cg21684021 | 3.59E-22 | 3.63E-24 | -1.17E+01 | 44.0932677 | -2.37E-01 | 109800400 | 109800523 | NC_000001.10 |
| cg14240790 | 3.59E-22 | 3.63E-24 | -1.17E+01 | 44.0930983 | -2.40E-01 | 6378691   | 6378814   | NC_000011.9  |
| cg10086328 | 3.60E-22 | 3.64E-24 | -1.17E+01 | 44.0892142 | -1.08E-01 | 7341276   | 7341399   | NC_000012.11 |
| cg25982657 | 3.61E-22 | 3.65E-24 | -1.17E+01 | 44.0871007 | -2.27E-01 | 8193353   | 8193476   | NC_000004.11 |
| cg11025705 | 3.61E-22 | 3.66E-24 | -1.17E+01 | 44.0849631 | -1.27E-01 | 145697880 | 145698003 | NC_000008.10 |
| cg14190761 | 3.63E-22 | 3.67E-24 | -1.17E+01 | 44.0801108 | -6.66E-02 | 139939926 | 139940049 | NC_000009.11 |
| cg24744557 | 3.64E-22 | 3.69E-24 | -1.17E+01 | 44.0767074 | -1.74E-01 | 322649    | 322772    | NC_000012.11 |
| cg02042712 | 3.65E-22 | 3.70E-24 | -1.17E+01 | 44.0727784 | -2.00E-01 | 57702239  | 57702362  | NC_000016.9  |
| cg09811510 | 3.67E-22 | 3.73E-24 | -1.16E+01 | 44.0662675 | -2.87E-01 | 159590447 | 159590570 | NC_000003.11 |
| cg12395125 | 3.69E-22 | 3.75E-24 | -1.16E+01 | 44.0609657 | -8.06E-02 | 116659119 | 116659242 | NC_000011.9  |
| cg18664712 | 3.69E-22 | 3.75E-24 | -1.16E+01 | 44.0598669 | -1.59E-01 | 149792463 | 149792586 | NC_000005.9  |
| cg10808934 | 3.70E-22 | 3.75E-24 | -1.16E+01 | 44.058709  | -2.86E-01 | 109059268 | 109059391 | NC_000006.11 |
| cg10254690 | 3.70E-22 | 3.76E-24 | -1.16E+01 | 44.0579475 | -1.27E-01 | 126107861 | 126107984 | NC_000010.10 |
| cg01186980 | 3.75E-22 | 3.82E-24 | -1.16E+01 | 44.0428355 | -1.75E-01 | 75826713  | 75826836  | NC_000017.10 |
| cg25510838 | 3.75E-22 | 3.82E-24 | -1.16E+01 | 44.0418012 | -1.96E-01 | 1560381   | 1560504   | NC_000007.13 |
| cg26170244 | 3.78E-22 | 3.84E-24 | -1.16E+01 | 44.0355812 | -2.13E-01 | 65176353  | 65176476  | NC_000015.9  |

|               |          |          |           |            |           |           |           |              |
|---------------|----------|----------|-----------|------------|-----------|-----------|-----------|--------------|
| cg06479653    | 3.79E-22 | 3.86E-24 | -1.16E+01 | 44.031332  | -1.21E-01 | 10525737  | 10525860  | NC_000018.9  |
| cg05674199    | 3.79E-22 | 3.86E-24 | -1.16E+01 | 44.0302838 | -1.01E-01 | 32891428  | 32891551  | NC_000020.10 |
| cg24500959    | 3.83E-22 | 3.90E-24 | -1.16E+01 | 44.0215936 | -2.42E-01 | 99474813  | 99474936  | NC_000010.10 |
| cg01005180    | 3.83E-22 | 3.90E-24 | -1.16E+01 | 44.0203865 | -2.16E-01 | 151384763 | 151384886 | NC_000007.13 |
| ch.15.934240F | 3.84E-22 | 3.91E-24 | -1.16E+01 | 44.0179716 | -1.71E-01 | 64422261  | 64422384  | NC_000015.9  |
| cg27278017    | 3.86E-22 | 3.94E-24 | -1.16E+01 | 44.0119202 | -1.44E-01 | 33759645  | 33759768  | NC_000020.10 |
| cg05886626    | 3.86E-22 | 3.94E-24 | -1.16E+01 | 44.0106155 | -1.00E-01 | 39873553  | 39873676  | NC_000015.9  |
| cg08461352    | 3.89E-22 | 3.97E-24 | -1.16E+01 | 44.0027113 | -2.06E-01 | 58910391  | 58910514  | NC_000008.10 |
| cg14189116    | 3.90E-22 | 3.98E-24 | -1.16E+01 | 43.9998568 | -3.48E-01 | 30878975  | 30879098  | NC_000012.11 |
| cg16598810    | 3.97E-22 | 4.06E-24 | -1.16E+01 | 43.9803875 | -5.65E-02 | 68962176  | 68962299  | NC_000001.10 |
| cg22449980    | 3.98E-22 | 4.07E-24 | -1.16E+01 | 43.9774308 | -2.54E-01 | 157701149 | 157701272 | NC_000004.11 |
| cg04134048    | 4.01E-22 | 4.10E-24 | -1.16E+01 | 43.9709055 | -1.27E-01 | 23021610  | 23021733  | NC_000008.10 |
| cg21741998    | 4.04E-22 | 4.14E-24 | -1.16E+01 | 43.9627758 | -2.32E-01 | 36788637  | 36788760  | NC_000006.11 |
| cg00523604    | 4.08E-22 | 4.18E-24 | -1.16E+01 | 43.9518012 | -2.54E-01 | 32223341  | 32223464  | NC_000006.11 |
| cg04892643    | 4.09E-22 | 4.19E-24 | -1.16E+01 | 43.9499205 | -2.70E-01 | 18906433  | 18906556  | NC_000007.13 |
| cg22635096    | 4.12E-22 | 4.22E-24 | -1.16E+01 | 43.941919  | -3.14E-01 | 46550644  | 46550767  | NC_000021.8  |
| cg01152408    | 4.13E-22 | 4.23E-24 | -1.16E+01 | 43.9394775 | -1.39E-01 | 41496060  | 41496183  | NC_000006.11 |
| cg04002454    | 4.17E-22 | 4.28E-24 | -1.16E+01 | 43.9295923 | -1.50E-01 | 231191893 | 231192016 | NC_000002.11 |
| cg13178170    | 4.18E-22 | 4.29E-24 | -1.16E+01 | 43.9261402 | -2.38E-01 | 92270513  | 92270636  | NC_000001.10 |
| cg01949455    | 4.20E-22 | 4.31E-24 | -1.16E+01 | 43.92115   | -1.79E-01 | 131937559 | 131937682 | NC_000009.11 |
| cg04109923    | 4.20E-22 | 4.32E-24 | -1.16E+01 | 43.9202989 | -9.94E-02 | 28495600  | 28495723  | NC_000013.10 |
| cg06655216    | 4.21E-22 | 4.33E-24 | -1.16E+01 | 43.917564  | -2.24E-01 | 89619329  | 89619452  | NC_000012.11 |
| cg14398113    | 4.22E-22 | 4.34E-24 | -1.16E+01 | 43.9156696 | -2.52E-01 | 48105127  | 48105250  | NC_000015.9  |
| cg25061131    | 4.27E-22 | 4.39E-24 | -1.16E+01 | 43.9036213 | -1.92E-01 | 73088293  | 73088416  | NC_000011.9  |
| cg16668042    | 4.29E-22 | 4.41E-24 | -1.16E+01 | 43.8983551 | -7.45E-02 | 132388215 | 132388338 | NC_000005.9  |

|            |          |          |           |            |           |           |           |              |
|------------|----------|----------|-----------|------------|-----------|-----------|-----------|--------------|
| cg08817836 | 4.30E-22 | 4.43E-24 | -1.16E+01 | 43.8944756 | -2.40E-01 | 16955875  | 16955998  | NC_000007.13 |
| cg15971157 | 4.31E-22 | 4.44E-24 | -1.16E+01 | 43.8917287 | -1.36E-01 | 24464376  | 24464499  | NC_000013.10 |
| cg04006266 | 4.33E-22 | 4.47E-24 | -1.16E+01 | 43.8864731 | -1.39E-01 | 66300458  | 66300581  | NC_000011.9  |
| cg15990090 | 4.35E-22 | 4.48E-24 | -1.16E+01 | 43.8834373 | -2.06E-01 | 186306065 | 186306188 | NC_000004.11 |
| cg23340505 | 4.37E-22 | 4.51E-24 | -1.16E+01 | 43.8771305 | -2.47E-01 | 114927933 | 114928056 | NC_000013.10 |
| cg10649130 | 4.40E-22 | 4.54E-24 | -1.16E+01 | 43.8704178 | -2.32E-01 | 9682641   | 9682764   | NC_000011.9  |
| cg04160753 | 4.41E-22 | 4.55E-24 | -1.16E+01 | 43.8680472 | -1.42E-01 | 134257307 | 134257430 | NC_000010.10 |
| cg13427361 | 4.42E-22 | 4.56E-24 | -1.16E+01 | 43.8657537 | -3.16E-01 | 187650301 | 187650424 | NC_000004.11 |
| cg13912930 | 4.43E-22 | 4.58E-24 | -1.16E+01 | 43.861771  | -7.49E-02 | 34379890  | 34380013  | NC_000009.11 |
| cg25083732 | 4.44E-22 | 4.58E-24 | -1.16E+01 | 43.8611758 | -2.27E-01 | 6695464   | 6695587   | NC_000004.11 |
| cg22743884 | 4.45E-22 | 4.59E-24 | -1.16E+01 | 43.8582023 | -2.80E-01 | 11839844  | 11839967  | NC_000008.10 |
| cg18221226 | 4.46E-22 | 4.61E-24 | -1.16E+01 | 43.8555914 | -1.90E-01 | 124997487 | 124997610 | NC_000012.11 |
| cg04294677 | 4.50E-22 | 4.65E-24 | -1.16E+01 | 43.8459981 | -6.25E-02 | 99737297  | 99737420  | NC_000014.8  |
| cg02949186 | 4.52E-22 | 4.68E-24 | -1.16E+01 | 43.8400981 | -2.19E-01 | 42733776  | 42733899  | NC_000021.8  |
| cg02595219 | 4.58E-22 | 4.74E-24 | -1.16E+01 | 43.826731  | -1.52E-01 | 74178761  | 74178884  | NC_000011.9  |
| cg04582861 | 4.60E-22 | 4.77E-24 | -1.16E+01 | 43.821452  | -1.52E-01 | 41276606  | 41276729  | NC_000017.10 |
| cg13708645 | 4.61E-22 | 4.78E-24 | -1.16E+01 | 43.8198279 | -2.05E-01 | 121974305 | 121974428 | NC_000012.11 |
| cg00952054 | 4.66E-22 | 4.83E-24 | -1.16E+01 | 43.8089071 | -3.15E-01 | 9437047   | 9437170   | NC_000001.10 |
| cg24979161 | 4.69E-22 | 4.86E-24 | -1.16E+01 | 43.8020152 | -2.35E-01 | 94567367  | 94567490  | NC_000014.8  |
| cg05976283 | 4.70E-22 | 4.87E-24 | -1.16E+01 | 43.8003447 | -3.00E-01 | 103140765 | 103140888 | NC_000008.10 |
| cg15017278 | 4.70E-22 | 4.88E-24 | -1.16E+01 | 43.799126  | -2.80E-01 | 127449    | 127572    | NC_000016.9  |
| cg13947653 | 4.75E-22 | 4.93E-24 | -1.16E+01 | 43.7886731 | -1.27E-01 | 136343843 | 136343966 | NC_000009.11 |
| cg25956089 | 4.77E-22 | 4.95E-24 | -1.16E+01 | 43.7840525 | -2.87E-01 | 168822459 | 168822582 | NC_000003.11 |
| cg12963529 | 4.80E-22 | 4.99E-24 | -1.16E+01 | 43.7767159 | -1.56E-01 | 43540202  | 43540325  | NC_000020.10 |
| cg16508168 | 4.81E-22 | 5.00E-24 | -1.16E+01 | 43.7746779 | -1.05E-01 | 31107370  | 31107493  | NC_000016.9  |

|            |          |          |           |            |           |           |           |              |
|------------|----------|----------|-----------|------------|-----------|-----------|-----------|--------------|
| cg08106124 | 4.83E-22 | 5.02E-24 | -1.16E+01 | 43.7695672 | -1.46E-01 | 40926641  | 40926764  | NC_000004.11 |
| cg16516639 | 4.86E-22 | 5.05E-24 | -1.16E+01 | 43.7638957 | -1.85E-01 | 111050810 | 111050933 | NC_000001.10 |
| cg14385298 | 4.86E-22 | 5.06E-24 | -1.16E+01 | 43.7627452 | -1.26E-01 | 140026277 | 140026400 | NC_000007.13 |
| cg03246694 | 4.87E-22 | 5.07E-24 | -1.16E+01 | 43.7609737 | -7.89E-02 | 125109542 | 125109665 | NC_000009.11 |
| cg13317079 | 4.87E-22 | 5.07E-24 | -1.16E+01 | 43.7599282 | -8.62E-02 | 197504192 | 197504315 | NC_000002.11 |
| cg10338787 | 4.87E-22 | 5.07E-24 | -1.16E+01 | 43.7597994 | -1.31E-01 | 72931767  | 72931890  | NC_000017.10 |
| cg07705639 | 4.89E-22 | 5.09E-24 | -1.16E+01 | 43.755891  | -1.51E-01 | 174992861 | 174992984 | NC_000001.10 |
| cg08220120 | 4.90E-22 | 5.11E-24 | -1.16E+01 | 43.7521081 | -2.13E-01 | 138727711 | 138727834 | NC_000005.9  |
| cg20629315 | 4.97E-22 | 5.19E-24 | -1.16E+01 | 43.7379547 | -3.00E-01 | 43685377  | 43685500  | NC_000002.11 |
| cg06027254 | 4.99E-22 | 5.21E-24 | -1.16E+01 | 43.7333837 | -1.29E-01 | 187458083 | 187458206 | NC_000003.11 |
| cg23386895 | 5.04E-22 | 5.26E-24 | -1.16E+01 | 43.7238516 | -2.62E-01 | 65083974  | 65084097  | NC_000011.9  |
| cg03897866 | 5.04E-22 | 5.27E-24 | -1.16E+01 | 43.7218844 | -1.26E-01 | 181059633 | 181059756 | NC_000001.10 |
| cg01288184 | 5.05E-22 | 5.28E-24 | -1.16E+01 | 43.7205024 | -4.22E-01 | 20811408  | 20811531  | NC_000018.9  |
| cg03597525 | 5.05E-22 | 5.29E-24 | -1.16E+01 | 43.7191597 | -1.46E-01 | 51920435  | 51920558  | NC_000019.9  |
| cg08106792 | 5.06E-22 | 5.29E-24 | -1.16E+01 | 43.7175239 | -1.81E-01 | 153509323 | 153509446 | NC_000001.10 |
| cg08091666 | 5.09E-22 | 5.33E-24 | -1.16E+01 | 43.7115833 | -2.30E-01 | 79961769  | 79961892  | NC_000017.10 |
| cg15418499 | 5.10E-22 | 5.34E-24 | -1.16E+01 | 43.708908  | -2.36E-01 | 112028288 | 112028411 | NC_000011.9  |
| cg14480249 | 5.10E-22 | 5.34E-24 | -1.16E+01 | 43.7088037 | -2.48E-01 | 3487164   | 3487287   | NC_000004.11 |
| cg13533935 | 5.11E-22 | 5.35E-24 | -1.16E+01 | 43.7065914 | -1.49E-01 | 11416365  | 11416488  | NC_000008.10 |
| cg27016262 | 5.24E-22 | 5.50E-24 | -1.16E+01 | 43.6794931 | -1.48E-01 | 1012835   | 1012958   | NC_000017.10 |
| cg14921326 | 5.25E-22 | 5.52E-24 | -1.16E+01 | 43.6762208 | -2.41E-01 | 119358052 | 119358175 | NC_000008.10 |
| cg03402605 | 5.27E-22 | 5.54E-24 | -1.16E+01 | 43.6715879 | -2.09E-01 | 134257269 | 134257392 | NC_000010.10 |
| cg24833277 | 5.30E-22 | 5.58E-24 | -1.16E+01 | 43.6654297 | -2.20E-01 | 124194361 | 124194484 | NC_000008.10 |
| cg18326022 | 5.33E-22 | 5.61E-24 | -1.16E+01 | 43.6607208 | -2.30E-01 | 73719885  | 73720008  | NC_000017.10 |
| cg23512275 | 5.35E-22 | 5.63E-24 | -1.16E+01 | 43.6555386 | -1.92E-01 | 45232595  | 45232718  | NC_000021.8  |

|            |          |          |           |            |           |           |           |              |
|------------|----------|----------|-----------|------------|-----------|-----------|-----------|--------------|
| cg10024587 | 5.37E-22 | 5.66E-24 | -1.16E+01 | 43.6513817 | -2.13E-01 | 105211753 | 105211876 | NC_000010.10 |
| cg21323720 | 5.39E-22 | 5.67E-24 | -1.16E+01 | 43.6485854 | -2.66E-01 | 114357601 | 114357724 | NC_000004.11 |
| cg18508425 | 5.45E-22 | 5.75E-24 | -1.16E+01 | 43.6361007 | -1.96E-01 | 19660650  | 19660773  | NC_000019.9  |
| cg06388099 | 5.49E-22 | 5.79E-24 | -1.16E+01 | 43.6289306 | -1.62E-01 | 50400885  | 50401008  | NC_000019.9  |
| cg21748207 | 5.51E-22 | 5.82E-24 | -1.16E+01 | 43.6232633 | -1.77E-01 | 26395359  | 26395482  | NC_000002.11 |
| cg11169848 | 5.52E-22 | 5.83E-24 | -1.16E+01 | 43.6209876 | -2.30E-01 | 67142030  | 67142153  | NC_000011.9  |
| cg10682803 | 5.57E-22 | 5.89E-24 | -1.16E+01 | 43.6117564 | -1.20E-01 | 88850895  | 88851018  | NC_000016.9  |
| cg01257383 | 5.62E-22 | 5.94E-24 | -1.16E+01 | 43.6025986 | -1.66E-01 | 46408399  | 46408522  | NC_000011.9  |
| cg04416111 | 5.65E-22 | 5.97E-24 | -1.16E+01 | 43.5978748 | -2.63E-01 | 87234895  | 87235018  | NC_000016.9  |
| cg21758140 | 5.65E-22 | 5.97E-24 | -1.16E+01 | 43.5978501 | -1.72E-01 | 161083993 | 161084116 | NC_000002.11 |
| cg20318096 | 5.68E-22 | 6.01E-24 | -1.16E+01 | 43.592051  | -2.26E-01 | 31846110  | 31846233  | NC_000001.10 |
| cg07423363 | 5.72E-22 | 6.06E-24 | -1.16E+01 | 43.5834929 | -1.31E-01 | 113497999 | 113498122 | NC_000001.10 |
| cg24170085 | 5.77E-22 | 6.12E-24 | -1.16E+01 | 43.5741335 | -2.12E-01 | 15311269  | 15311392  | NC_000003.11 |
| cg15086279 | 5.78E-22 | 6.13E-24 | -1.16E+01 | 43.5726625 | -1.93E-01 | 22352348  | 22352471  | NC_000001.10 |
| cg25750901 | 5.82E-22 | 6.17E-24 | -1.16E+01 | 43.5649696 | -1.83E-01 | 30869272  | 30869395  | NC_000022.10 |
| cg14646244 | 5.83E-22 | 6.18E-24 | -1.16E+01 | 43.5639202 | -2.84E-01 | 107300287 | 107300410 | NC_000007.13 |
| cg04574090 | 5.83E-22 | 6.19E-24 | -1.16E+01 | 43.5622395 | -1.47E-01 | 74178749  | 74178872  | NC_000011.9  |
| cg18856652 | 5.92E-22 | 6.29E-24 | -1.16E+01 | 43.5470015 | -8.25E-02 | 43864913  | 43865036  | NC_000002.11 |
| cg25922329 | 5.94E-22 | 6.31E-24 | -1.16E+01 | 43.5438697 | -2.02E-01 | 128911766 | 128911889 | NC_000008.10 |
| cg15065340 | 5.99E-22 | 6.37E-24 | -1.16E+01 | 43.5343969 | -2.68E-01 | 195632915 | 195633038 | NC_000003.11 |
| cg02629106 | 6.01E-22 | 6.39E-24 | -1.16E+01 | 43.5311032 | -1.85E-01 | 120302419 | 120302542 | NC_000002.11 |
| cg07480754 | 6.08E-22 | 6.46E-24 | -1.16E+01 | 43.5198816 | -1.66E-01 | 88298508  | 88298631  | NC_000016.9  |
| cg24251814 | 6.09E-22 | 6.47E-24 | -1.16E+01 | 43.517978  | -1.27E-01 | 8013974   | 8014097   | NC_000001.10 |
| cg03183540 | 6.13E-22 | 6.52E-24 | -1.16E+01 | 43.5099842 | -1.59E-01 | 134931756 | 134931879 | NC_000008.10 |
| cg16688112 | 6.13E-22 | 6.53E-24 | -1.16E+01 | 43.5096641 | -8.53E-02 | 88922774  | 88922897  | NC_000016.9  |



|            |          |          |           |            |           |           |           |              |
|------------|----------|----------|-----------|------------|-----------|-----------|-----------|--------------|
| cg26644674 | 6.14E-22 | 6.53E-24 | -1.16E+01 | 43.508391  | -2.52E-01 | 3138505   | 3138628   | NC_000010.10 |
| cg07402003 | 6.19E-22 | 6.59E-24 | -1.16E+01 | 43.4995999 | -2.35E-01 | 52503883  | 52504006  | NC_000016.9  |
| cg10737521 | 6.22E-22 | 6.63E-24 | -1.16E+01 | 43.4938892 | -1.17E-01 | 179335243 | 179335366 | NC_000005.9  |
| cg27494897 | 6.27E-22 | 6.68E-24 | -1.16E+01 | 43.4859449 | -2.21E-01 | 151061125 | 151061248 | NC_000002.11 |
| cg21703606 | 6.27E-22 | 6.69E-24 | -1.16E+01 | 43.4852549 | -1.61E-01 | 54427884  | 54428007  | NC_000012.11 |
| cg12985065 | 6.29E-22 | 6.71E-24 | -1.16E+01 | 43.4817657 | -1.66E-01 | 140744488 | 140744611 | NC_000008.10 |
| cg01735398 | 6.29E-22 | 6.72E-24 | -1.16E+01 | 43.4809782 | -1.36E-01 | 18907305  | 18907428  | NC_000017.10 |
| cg14251009 | 6.29E-22 | 6.72E-24 | -1.16E+01 | 43.4808905 | -3.32E-01 | 90622205  | 90622328  | NC_000009.11 |
| cg09464206 | 6.33E-22 | 6.76E-24 | -1.16E+01 | 43.4753953 | -1.12E-01 | 202122309 | 202122432 | NC_000002.11 |
| cg06210447 | 6.35E-22 | 6.78E-24 | -1.16E+01 | 43.4721393 | -2.20E-01 | 70601842  | 70601965  | NC_000011.9  |
| cg13910493 | 6.39E-22 | 6.82E-24 | -1.16E+01 | 43.4659814 | -1.22E-01 | 53628120  | 53628243  | NC_000012.11 |
| cg11936643 | 6.42E-22 | 6.86E-24 | -1.16E+01 | 43.4599579 | -1.40E-01 | 116286411 | 116286534 | NC_000010.10 |
| cg26467269 | 6.45E-22 | 6.89E-24 | -1.16E+01 | 43.455389  | -2.01E-01 | 68179097  | 68179220  | NC_000011.9  |
| cg01723892 | 6.47E-22 | 6.91E-24 | -1.16E+01 | 43.4525564 | -2.17E-01 | 233004866 | 233004989 | NC_000001.10 |
| cg04065472 | 6.50E-22 | 6.95E-24 | -1.16E+01 | 43.4470231 | -1.97E-01 | 131148175 | 131148298 | NC_000002.11 |
| cg25446789 | 6.59E-22 | 7.05E-24 | -1.16E+01 | 43.4334402 | -2.41E-01 | 25810393  | 25810516  | NC_000002.11 |
| cg09715009 | 6.65E-22 | 7.11E-24 | -1.16E+01 | 43.4240999 | -2.56E-01 | 175241829 | 175241952 | NC_000005.9  |
| cg06264679 | 6.67E-22 | 7.14E-24 | -1.16E+01 | 43.4209626 | -1.66E-01 | 32121433  | 32121556  | NC_000006.11 |
| cg15994604 | 6.73E-22 | 7.21E-24 | -1.16E+01 | 43.4111112 | -2.25E-01 | 34676683  | 34676806  | NC_000011.9  |
| cg23591955 | 6.75E-22 | 7.24E-24 | -1.16E+01 | 43.4071076 | -1.60E-01 | 52294766  | 52294889  | NC_000014.8  |
| cg10257545 | 6.75E-22 | 7.24E-24 | -1.16E+01 | 43.4069889 | -6.26E-02 | 201450881 | 201451004 | NC_000001.10 |
| cg15608301 | 6.77E-22 | 7.26E-24 | -1.16E+01 | 43.4043925 | -2.07E-01 | 100085187 | 100085310 | NC_000013.10 |
| cg00499509 | 6.81E-22 | 7.30E-24 | -1.16E+01 | 43.3980536 | -1.12E-01 | 149605515 | 149605638 | NC_000001.10 |
| cg27060622 | 6.87E-22 | 7.38E-24 | -1.16E+01 | 43.3873934 | -6.36E-02 | 936346    | 936469    | NC_000001.10 |
| cg13545874 | 6.94E-22 | 7.45E-24 | -1.15E+01 | 43.3776235 | -2.35E-01 | 72984872  | 72984995  | NC_000017.10 |

|            |          |          |           |            |           |           |           |              |
|------------|----------|----------|-----------|------------|-----------|-----------|-----------|--------------|
| cg04374654 | 7.03E-22 | 7.56E-24 | -1.15E+01 | 43.3643118 | -7.40E-02 | 75479408  | 75479531  | NC_000011.9  |
| cg19266329 | 7.09E-22 | 7.63E-24 | -1.15E+01 | 43.3546058 | -2.28E-01 | 145456128 | 145456251 | NC_000001.10 |
| cg14173199 | 7.16E-22 | 7.70E-24 | -1.15E+01 | 43.3452847 | -8.88E-02 | 2458230   | 2458353   | NC_000001.10 |
| cg02142926 | 7.19E-22 | 7.74E-24 | -1.15E+01 | 43.3408867 | -2.09E-01 | 134994674 | 134994797 | NC_000006.11 |
| cg18278424 | 7.21E-22 | 7.76E-24 | -1.15E+01 | 43.3372461 | -1.99E-01 | 75473667  | 75473790  | NC_000017.10 |
| cg00868074 | 7.22E-22 | 7.78E-24 | -1.15E+01 | 43.3354027 | -1.85E-01 | 87441555  | 87441678  | NC_000016.9  |
| cg18919097 | 7.24E-22 | 7.80E-24 | -1.15E+01 | 43.3322251 | -1.44E-01 | 161090798 | 161090921 | NC_000003.11 |
| cg03604067 | 7.28E-22 | 7.84E-24 | -1.15E+01 | 43.3270625 | -3.36E-01 | 1980273   | 1980396   | NC_000007.13 |
| cg08053935 | 7.36E-22 | 7.94E-24 | -1.15E+01 | 43.314608  | -1.89E-01 | 41691270  | 41691393  | NC_000006.11 |
| cg23030853 | 7.37E-22 | 7.95E-24 | -1.15E+01 | 43.31404   | -2.47E-01 | 31620347  | 31620470  | NC_000013.10 |
| cg23037321 | 7.37E-22 | 7.95E-24 | -1.15E+01 | 43.3138854 | -2.67E-01 | 181003203 | 181003326 | NC_000001.10 |
| cg01270736 | 7.39E-22 | 7.97E-24 | -1.15E+01 | 43.31107   | -1.23E-01 | 3097736   | 3097859   | NC_000016.9  |
| cg12671632 | 7.46E-22 | 8.06E-24 | -1.15E+01 | 43.300335  | -2.11E-01 | 422935    | 423058    | NC_000006.11 |
| cg02516845 | 7.48E-22 | 8.07E-24 | -1.15E+01 | 43.2986691 | -1.96E-01 | 84076320  | 84076443  | NC_000016.9  |
| cg02071988 | 7.55E-22 | 8.15E-24 | -1.15E+01 | 43.2889771 | -2.67E-01 | 155448588 | 155448711 | NC_000006.11 |
| cg24824917 | 7.58E-22 | 8.20E-24 | -1.15E+01 | 43.2835587 | -9.53E-02 | 1101716   | 1101839   | NC_000019.9  |
| cg23481748 | 7.72E-22 | 8.34E-24 | -1.15E+01 | 43.2659414 | -1.45E-01 | 58862503  | 58862626  | NC_000014.8  |
| cg20893936 | 7.74E-22 | 8.37E-24 | -1.15E+01 | 43.2627403 | -2.37E-01 | 101680441 | 101680564 | NC_000002.11 |
| cg25690715 | 7.76E-22 | 8.40E-24 | -1.15E+01 | 43.2596493 | -2.61E-01 | 75315567  | 75315690  | NC_000017.10 |
| cg00535514 | 7.80E-22 | 8.45E-24 | -1.15E+01 | 43.2533509 | -1.99E-01 | 44205563  | 44205686  | NC_000019.9  |
| cg11847636 | 7.87E-22 | 8.52E-24 | -1.15E+01 | 43.2451707 | -2.67E-01 | 50015523  | 50015646  | NC_000019.9  |
| cg14454094 | 7.88E-22 | 8.53E-24 | -1.15E+01 | 43.2434085 | -2.68E-01 | 99352003  | 99352126  | NC_000004.11 |
| cg21241823 | 7.93E-22 | 8.59E-24 | -1.15E+01 | 43.2364108 | -2.08E-01 | 43300024  | 43300147  | NC_000021.8  |
| cg22478317 | 7.95E-22 | 8.62E-24 | -1.15E+01 | 43.2331817 | -1.80E-01 | 110271930 | 110272053 | NC_000002.11 |
| cg17215278 | 7.96E-22 | 8.63E-24 | -1.15E+01 | 43.2324015 | -2.12E-01 | 117114263 | 117114386 | NC_000001.10 |

|            |          |          |           |            |           |           |           |              |
|------------|----------|----------|-----------|------------|-----------|-----------|-----------|--------------|
| cg02319782 | 7.97E-22 | 8.65E-24 | -1.15E+01 | 43.2301992 | -1.58E-01 | 291668    | 291791    | NC_000012.11 |
| cg24368167 | 7.98E-22 | 8.66E-24 | -1.15E+01 | 43.2287068 | -5.62E-02 | 38179936  | 38180059  | NC_000003.11 |
| cg03930313 | 8.08E-22 | 8.76E-24 | -1.15E+01 | 43.2169137 | -2.30E-01 | 36621405  | 36621528  | NC_000017.10 |
| cg08169794 | 8.13E-22 | 8.83E-24 | -1.15E+01 | 43.2097614 | -2.72E-01 | 118709682 | 118709805 | NC_000006.11 |
| cg16199747 | 8.14E-22 | 8.84E-24 | -1.15E+01 | 43.2078867 | -2.83E-01 | 147235033 | 147235156 | NC_000006.11 |
| cg09046309 | 8.18E-22 | 8.89E-24 | -1.15E+01 | 43.2025129 | -2.06E-01 | 45947226  | 45947349  | NC_000020.10 |
| cg26204417 | 8.23E-22 | 8.94E-24 | -1.15E+01 | 43.1969598 | -2.67E-01 | 157347628 | 157347751 | NC_000007.13 |
| cg23837282 | 8.27E-22 | 8.99E-24 | -1.15E+01 | 43.1917475 | -1.66E-01 | 61818407  | 61818530  | NC_000020.10 |
| cg00883689 | 8.28E-22 | 9.00E-24 | -1.15E+01 | 43.1903582 | -2.56E-01 | 54802904  | 54803027  | NC_000002.11 |
| cg09991092 | 8.44E-22 | 9.18E-24 | -1.15E+01 | 43.1703886 | -2.25E-01 | 47151933  | 47152056  | NC_000010.10 |
| cg19627006 | 8.45E-22 | 9.19E-24 | -1.15E+01 | 43.1696326 | -2.44E-01 | 85637673  | 85637796  | NC_000002.11 |
| cg22495058 | 8.49E-22 | 9.24E-24 | -1.15E+01 | 43.1645065 | -1.83E-01 | 11752373  | 11752496  | NC_000002.11 |
| cg03930153 | 8.53E-22 | 9.29E-24 | -1.15E+01 | 43.1594913 | -2.21E-01 | 176868896 | 176869019 | NC_000003.11 |
| cg18643093 | 8.58E-22 | 9.35E-24 | -1.15E+01 | 43.1526097 | -2.70E-01 | 150521257 | 150521380 | NC_000005.9  |
| cg12848614 | 8.59E-22 | 9.36E-24 | -1.15E+01 | 43.1517816 | -1.57E-01 | 70193496  | 70193619  | NC_000014.8  |
| cg20979153 | 8.72E-22 | 9.51E-24 | -1.15E+01 | 43.1356902 | -2.11E-01 | 52199748  | 52199871  | NC_000020.10 |
| cg08752433 | 8.78E-22 | 9.58E-24 | -1.15E+01 | 43.1283074 | -2.76E-01 | 111016566 | 111016689 | NC_000012.11 |
| cg14897838 | 8.81E-22 | 9.62E-24 | -1.15E+01 | 43.1247983 | -1.59E-01 | 79339158  | 79339281  | NC_000017.10 |
| cg26937868 | 8.96E-22 | 9.78E-24 | -1.15E+01 | 43.1077443 | -1.08E-01 | 26202601  | 26202724  | NC_000001.10 |
| cg21675254 | 8.98E-22 | 9.81E-24 | -1.15E+01 | 43.1046716 | -1.64E-01 | 111127804 | 111127927 | NC_000012.11 |
| cg16840745 | 9.06E-22 | 9.91E-24 | -1.15E+01 | 43.0953373 | -1.25E-01 | 52091829  | 52091952  | NC_000003.11 |
| cg20358011 | 9.15E-22 | 1.00E-23 | -1.15E+01 | 43.0847972 | -2.25E-01 | 126581947 | 126582070 | NC_000011.9  |
| cg02614217 | 9.16E-22 | 1.00E-23 | -1.15E+01 | 43.0837279 | -2.04E-01 | 122632774 | 122632897 | NC_000004.11 |
| cg26645709 | 9.20E-22 | 1.01E-23 | -1.15E+01 | 43.0784002 | -2.03E-01 | 89987792  | 89987915  | NC_000015.9  |
| cg17818220 | 9.22E-22 | 1.01E-23 | -1.15E+01 | 43.0765033 | -1.03E-01 | 28725466  | 28725589  | NC_000007.13 |

|            |          |          |           |            |           |           |           |              |
|------------|----------|----------|-----------|------------|-----------|-----------|-----------|--------------|
| cg25867545 | 9.28E-22 | 1.02E-23 | -1.15E+01 | 43.0685646 | -9.53E-02 | 182880776 | 182880899 | NC_000003.11 |
| cg25730577 | 9.29E-22 | 1.02E-23 | -1.15E+01 | 43.0681983 | -1.11E-01 | 110453002 | 110453125 | NC_000001.10 |
| cg13410002 | 9.34E-22 | 1.02E-23 | -1.15E+01 | 43.0623789 | -1.45E-01 | 20353861  | 20353984  | NC_000020.10 |
| cg11588197 | 9.41E-22 | 1.03E-23 | -1.15E+01 | 43.0546919 | -2.53E-01 | 128391494 | 128391617 | NC_000011.9  |
| cg19579216 | 9.55E-22 | 1.05E-23 | -1.15E+01 | 43.0388767 | -1.15E-01 | 42081856  | 42081979  | NC_000017.10 |
| cg05595692 | 9.55E-22 | 1.05E-23 | -1.15E+01 | 43.0382811 | -1.96E-01 | 75059313  | 75059436  | NC_000002.11 |
| cg14575559 | 9.57E-22 | 1.05E-23 | -1.15E+01 | 43.0361193 | -1.24E-01 | 18111766  | 18111889  | NC_000019.9  |
| cg17375585 | 9.61E-22 | 1.06E-23 | -1.15E+01 | 43.0316434 | -2.60E-01 | 29172998  | 29173121  | NC_000008.10 |
| cg24592790 | 9.67E-22 | 1.06E-23 | -1.15E+01 | 43.0247517 | -2.43E-01 | 27450047  | 27450170  | NC_000008.10 |
| cg06808585 | 9.71E-22 | 1.07E-23 | -1.15E+01 | 43.0202691 | -1.91E-01 | 160051087 | 160051210 | NC_000001.10 |
| cg16424519 | 9.79E-22 | 1.08E-23 | -1.15E+01 | 43.012     | -1.02E-01 | 21531031  | 21531154  | NC_000016.9  |
| cg07979348 | 9.84E-22 | 1.08E-23 | -1.15E+01 | 43.0058361 | -1.90E-01 | 35198387  | 35198510  | NC_000020.10 |
| cg26182253 | 9.84E-22 | 1.08E-23 | -1.15E+01 | 43.0057898 | -2.85E-01 | 112236782 | 112236905 | NC_000013.10 |
| cg26184501 | 9.86E-22 | 1.09E-23 | -1.15E+01 | 43.003074  | -2.19E-01 | 48139723  | 48139846  | NC_000017.10 |
| cg05005301 | 9.91E-22 | 1.09E-23 | -1.15E+01 | 42.9984082 | -1.70E-01 | 110453107 | 110453230 | NC_000001.10 |
| cg00509485 | 9.91E-22 | 1.09E-23 | -1.15E+01 | 42.9980283 | -2.21E-01 | 69863098  | 69863221  | NC_000011.9  |
| cg21983531 | 9.91E-22 | 1.09E-23 | -1.15E+01 | 42.9977922 | -2.56E-01 | 74075317  | 74075440  | NC_000007.13 |
| cg22809726 | 9.93E-22 | 1.10E-23 | -1.15E+01 | 42.9953666 | -1.49E-01 | 48262067  | 48262190  | NC_000017.10 |
| cg05067286 | 9.94E-22 | 1.10E-23 | -1.15E+01 | 42.9941561 | -1.44E-01 | 129686365 | 129686488 | NC_000011.9  |
| cg08696192 | 1.00E-21 | 1.11E-23 | -1.15E+01 | 42.9865874 | -2.71E-01 | 38657310  | 38657433  | NC_000017.10 |
| cg24105314 | 1.00E-21 | 1.11E-23 | -1.15E+01 | 42.9861179 | -1.17E-01 | 42082924  | 42083047  | NC_000017.10 |
| cg00755063 | 1.01E-21 | 1.12E-23 | -1.15E+01 | 42.9776956 | -1.93E-01 | 13275288  | 13275411  | NC_000019.9  |
| cg06230674 | 1.01E-21 | 1.12E-23 | -1.15E+01 | 42.9772577 | -1.90E-01 | 20716991  | 20717114  | NC_000018.9  |
| cg14516948 | 1.02E-21 | 1.13E-23 | -1.15E+01 | 42.9650329 | -1.64E-01 | 42196187  | 42196310  | NC_000022.10 |
| cg05652225 | 1.03E-21 | 1.14E-23 | -1.15E+01 | 42.9537463 | -2.15E-01 | 37295709  | 37295832  | NC_000017.10 |

|            |          |          |           |            |           |           |           |              |
|------------|----------|----------|-----------|------------|-----------|-----------|-----------|--------------|
| cg23978449 | 1.05E-21 | 1.17E-23 | -1.15E+01 | 42.9322246 | -1.83E-01 | 47746733  | 47746856  | NC_000010.10 |
| cg09358481 | 1.06E-21 | 1.17E-23 | -1.15E+01 | 42.9287627 | -1.02E-01 | 38600305  | 38600428  | NC_000017.10 |
| cg13158199 | 1.07E-21 | 1.19E-23 | -1.15E+01 | 42.9130296 | -1.99E-01 | 69148896  | 69149019  | NC_000002.11 |
| cg08506924 | 1.08E-21 | 1.19E-23 | -1.15E+01 | 42.9091024 | -7.08E-02 | 3931286   | 3931409   | NC_000016.9  |
| cg04771433 | 1.08E-21 | 1.20E-23 | -1.15E+01 | 42.9018484 | -1.29E-01 | 2064216   | 2064339   | NC_000001.10 |
| cg04741284 | 1.08E-21 | 1.20E-23 | -1.15E+01 | 42.901144  | -6.98E-02 | 56324226  | 56324349  | NC_000020.10 |
| cg20150887 | 1.09E-21 | 1.21E-23 | -1.15E+01 | 42.8993674 | -5.43E-02 | 43210745  | 43210868  | NC_000017.10 |
| cg21022906 | 1.09E-21 | 1.21E-23 | -1.15E+01 | 42.8985903 | -2.57E-01 | 50474012  | 50474135  | NC_000014.8  |
| cg01311222 | 1.09E-21 | 1.21E-23 | -1.15E+01 | 42.8929025 | -2.80E-01 | 124776153 | 124776276 | NC_000003.11 |
| cg22705918 | 1.09E-21 | 1.21E-23 | -1.15E+01 | 42.892834  | -2.05E-01 | 25518238  | 25518361  | NC_000002.11 |
| cg07271561 | 1.09E-21 | 1.22E-23 | -1.15E+01 | 42.8913661 | -1.86E-01 | 50359363  | 50359486  | NC_000003.11 |
| cg05696706 | 1.09E-21 | 1.22E-23 | -1.15E+01 | 42.8904442 | -1.82E-01 | 145013932 | 145014055 | NC_000008.10 |
| cg04193415 | 1.10E-21 | 1.22E-23 | -1.15E+01 | 42.8857343 | -1.17E-01 | 30643063  | 30643186  | NC_000022.10 |
| cg17641252 | 1.10E-21 | 1.22E-23 | -1.15E+01 | 42.8849535 | -2.34E-01 | 67878535  | 67878658  | NC_000014.8  |
| cg17796043 | 1.10E-21 | 1.23E-23 | -1.15E+01 | 42.8804393 | -1.78E-01 | 91137788  | 91137911  | NC_000015.9  |
| cg25928474 | 1.11E-21 | 1.23E-23 | -1.15E+01 | 42.8795491 | -2.35E-01 | 48716301  | 48716424  | NC_000017.10 |
| cg02161471 | 1.11E-21 | 1.23E-23 | -1.15E+01 | 42.8769122 | -1.35E-01 | 1857442   | 1857565   | NC_000019.9  |
| cg05339305 | 1.12E-21 | 1.25E-23 | -1.15E+01 | 42.8680653 | -8.15E-02 | 65657822  | 65657945  | NC_000011.9  |
| cg26787801 | 1.12E-21 | 1.25E-23 | -1.15E+01 | 42.865374  | -1.23E-01 | 140211058 | 140211181 | NC_000009.11 |
| cg18582260 | 1.15E-21 | 1.29E-23 | -1.15E+01 | 42.8340668 | -2.83E-01 | 25085301  | 25085424  | NC_000013.10 |
| cg08831077 | 1.15E-21 | 1.29E-23 | -1.15E+01 | 42.8323069 | -2.29E-01 | 11178745  | 11178868  | NC_000003.11 |
| cg20815701 | 1.16E-21 | 1.30E-23 | -1.15E+01 | 42.8282883 | -1.07E-01 | 110454063 | 110454186 | NC_000001.10 |
| cg04324276 | 1.16E-21 | 1.30E-23 | -1.15E+01 | 42.8242958 | -1.96E-01 | 17817462  | 17817585  | NC_000017.10 |
| cg13283635 | 1.17E-21 | 1.31E-23 | -1.15E+01 | 42.8205656 | -1.96E-01 | 61450653  | 61450776  | NC_000020.10 |
| cg22525069 | 1.19E-21 | 1.33E-23 | -1.15E+01 | 42.8028447 | -1.98E-01 | 193587264 | 193587387 | NC_000003.11 |

|            |          |          |           |            |           |           |           |              |
|------------|----------|----------|-----------|------------|-----------|-----------|-----------|--------------|
| cg16053334 | 1.19E-21 | 1.33E-23 | -1.15E+01 | 42.7999837 | -1.13E-01 | 65343118  | 65343241  | NC_000011.9  |
| cg14684457 | 1.22E-21 | 1.37E-23 | -1.15E+01 | 42.7739523 | -2.57E-01 | 26192966  | 26193089  | NC_000007.13 |
| cg14212038 | 1.23E-21 | 1.37E-23 | -1.15E+01 | 42.7701273 | -2.09E-01 | 66738758  | 66738881  | NC_000011.9  |
| cg02276807 | 1.23E-21 | 1.38E-23 | -1.15E+01 | 42.7641706 | -2.37E-01 | 133022677 | 133022800 | NC_000012.11 |
| cg08347042 | 1.23E-21 | 1.38E-23 | -1.15E+01 | 42.7637348 | -1.17E-01 | 45579378  | 45579501  | NC_000019.9  |
| cg07242931 | 1.24E-21 | 1.39E-23 | -1.15E+01 | 42.760954  | -1.80E-01 | 26034297  | 26034420  | NC_000001.10 |
| cg06834507 | 1.24E-21 | 1.39E-23 | -1.15E+01 | 42.7575784 | -2.59E-01 | 200876957 | 200877080 | NC_000001.10 |
| cg15862165 | 1.26E-21 | 1.41E-23 | -1.15E+01 | 42.7433157 | -2.71E-01 | 94161116  | 94161239  | NC_000012.11 |
| cg14019757 | 1.26E-21 | 1.42E-23 | -1.15E+01 | 42.7402947 | -2.59E-01 | 67231728  | 67231851  | NC_000017.10 |
| cg24023258 | 1.26E-21 | 1.42E-23 | -1.15E+01 | 42.7381734 | -2.61E-01 | 143781297 | 143781420 | NC_000008.10 |
| cg00892567 | 1.26E-21 | 1.42E-23 | -1.15E+01 | 42.7377872 | -7.09E-02 | 56323934  | 56324057  | NC_000020.10 |
| cg26318265 | 1.29E-21 | 1.45E-23 | -1.15E+01 | 42.7163908 | -2.18E-01 | 1990435   | 1990558   | NC_000011.9  |
| cg14328115 | 1.29E-21 | 1.45E-23 | -1.15E+01 | 42.7153175 | -3.03E-01 | 2554562   | 2554685   | NC_000011.9  |
| cg06250720 | 1.29E-21 | 1.45E-23 | -1.15E+01 | 42.7153044 | -2.84E-01 | 5593949   | 5594072   | NC_000010.10 |
| cg06191357 | 1.29E-21 | 1.45E-23 | -1.15E+01 | 42.7152385 | -1.62E-01 | 172714273 | 172714396 | NC_000001.10 |
| cg19974448 | 1.29E-21 | 1.46E-23 | -1.15E+01 | 42.7134308 | -2.29E-01 | 127262774 | 127262897 | NC_000010.10 |
| cg03946955 | 1.29E-21 | 1.46E-23 | -1.15E+01 | 42.711197  | -1.29E-01 | 156096301 | 156096424 | NC_000001.10 |
| cg13622821 | 1.30E-21 | 1.47E-23 | -1.15E+01 | 42.7048847 | -1.30E-01 | 31702915  | 31703038  | NC_000006.11 |
| cg22641093 | 1.30E-21 | 1.47E-23 | -1.15E+01 | 42.7022013 | -1.34E-01 | 17536024  | 17536147  | NC_000019.9  |
| cg09516200 | 1.30E-21 | 1.47E-23 | -1.15E+01 | 42.7013348 | -3.05E-01 | 78735324  | 78735447  | NC_000017.10 |
| cg09159452 | 1.33E-21 | 1.50E-23 | -1.14E+01 | 42.6844235 | -3.16E-01 | 2609861   | 2609984   | NC_000007.13 |
| cg00718519 | 1.33E-21 | 1.50E-23 | -1.14E+01 | 42.6824053 | -7.06E-02 | 30689608  | 30689731  | NC_000006.11 |
| cg02006134 | 1.33E-21 | 1.51E-23 | -1.14E+01 | 42.6800187 | -2.02E-01 | 963333    | 963456    | NC_000007.13 |
| cg26330809 | 1.33E-21 | 1.51E-23 | -1.14E+01 | 42.6767027 | -2.48E-01 | 112620506 | 112620629 | NC_000006.11 |
| cg13480493 | 1.34E-21 | 1.51E-23 | -1.14E+01 | 42.6743262 | -2.81E-01 | 102613887 | 102614010 | NC_000009.11 |

|            |          |          |           |            |           |           |           |              |
|------------|----------|----------|-----------|------------|-----------|-----------|-----------|--------------|
| cg24450239 | 1.34E-21 | 1.51E-23 | -1.14E+01 | 42.6735814 | -2.88E-01 | 101348501 | 101348624 | NC_000008.10 |
| cg18642234 | 1.35E-21 | 1.53E-23 | -1.14E+01 | 42.6655719 | -2.22E-01 | 49394622  | 49394745  | NC_000003.11 |
| cg01986577 | 1.35E-21 | 1.53E-23 | -1.14E+01 | 42.664663  | -1.35E-01 | 27485373  | 27485496  | NC_000012.11 |
| cg18919478 | 1.36E-21 | 1.54E-23 | -1.14E+01 | 42.6593101 | -1.92E-01 | 104384584 | 104384707 | NC_000008.10 |
| cg11314684 | 1.36E-21 | 1.54E-23 | -1.14E+01 | 42.6579999 | -1.99E-01 | 244006288 | 244006411 | NC_000001.10 |
| cg03140135 | 1.36E-21 | 1.54E-23 | -1.14E+01 | 42.6579267 | -1.93E-01 | 13350820  | 13350943  | NC_000012.11 |
| cg06624951 | 1.36E-21 | 1.54E-23 | -1.14E+01 | 42.6567069 | -2.05E-01 | 133055588 | 133055711 | NC_000012.11 |
| cg04324821 | 1.36E-21 | 1.54E-23 | -1.14E+01 | 42.6566947 | -2.16E-01 | 101397191 | 101397314 | NC_000002.11 |
| cg18202080 | 1.36E-21 | 1.54E-23 | -1.14E+01 | 42.6547389 | -1.21E-01 | 232765247 | 232765370 | NC_000002.11 |
| cg04462652 | 1.37E-21 | 1.56E-23 | -1.14E+01 | 42.6447937 | -9.76E-02 | 133429088 | 133429211 | NC_000002.11 |
| cg06818532 | 1.38E-21 | 1.57E-23 | -1.14E+01 | 42.6411844 | -2.26E-01 | 107318032 | 107318155 | NC_000003.11 |
| cg10166664 | 1.38E-21 | 1.57E-23 | -1.14E+01 | 42.6405228 | -3.15E-01 | 60624229  | 60624352  | NC_000005.9  |
| cg21450381 | 1.39E-21 | 1.57E-23 | -1.14E+01 | 42.6352837 | -2.55E-01 | 19836352  | 19836475  | NC_000012.11 |
| cg22918360 | 1.40E-21 | 1.59E-23 | -1.14E+01 | 42.6254568 | -1.80E-01 | 1259039   | 1259162   | NC_000019.9  |
| cg19516340 | 1.40E-21 | 1.59E-23 | -1.14E+01 | 42.6238598 | -2.27E-01 | 10263696  | 10263819  | NC_000002.11 |
| cg17662083 | 1.40E-21 | 1.59E-23 | -1.14E+01 | 42.6231192 | -2.30E-01 | 36004632  | 36004755  | NC_000019.9  |
| cg21198586 | 1.41E-21 | 1.61E-23 | -1.14E+01 | 42.615947  | -2.14E-01 | 12791832  | 12791955  | NC_000011.9  |
| cg06710195 | 1.41E-21 | 1.61E-23 | -1.14E+01 | 42.614521  | -2.40E-01 | 108479452 | 108479575 | NC_000001.10 |
| cg03902450 | 1.41E-21 | 1.61E-23 | -1.14E+01 | 42.6135353 | -1.85E-01 | 125412894 | 125413017 | NC_000012.11 |
| cg19570940 | 1.43E-21 | 1.62E-23 | -1.14E+01 | 42.6046239 | -9.13E-02 | 73331567  | 73331690  | NC_000005.9  |
| cg27139457 | 1.44E-21 | 1.64E-23 | -1.14E+01 | 42.5959139 | -2.24E-01 | 85637739  | 85637862  | NC_000002.11 |
| cg12221087 | 1.45E-21 | 1.65E-23 | -1.14E+01 | 42.5887599 | -2.21E-01 | 78237432  | 78237555  | NC_000017.10 |
| cg17942763 | 1.45E-21 | 1.65E-23 | -1.14E+01 | 42.5873598 | -2.29E-01 | 2163472   | 2163595   | NC_000001.10 |
| cg03175417 | 1.45E-21 | 1.66E-23 | -1.14E+01 | 42.5856451 | -2.52E-01 | 20050298  | 20050421  | NC_000022.10 |
| cg20883831 | 1.46E-21 | 1.66E-23 | -1.14E+01 | 42.5812836 | -2.15E-01 | 150652948 | 150653071 | NC_000007.13 |

|            |          |          |           |            |           |           |           |              |
|------------|----------|----------|-----------|------------|-----------|-----------|-----------|--------------|
| cg06473927 | 1.46E-21 | 1.67E-23 | -1.14E+01 | 42.5783933 | -8.23E-02 | 1568614   | 1568737   | NC_000011.9  |
| cg05146922 | 1.46E-21 | 1.67E-23 | -1.14E+01 | 42.5777475 | -2.08E-01 | 10634174  | 10634297  | NC_000002.11 |
| cg19362478 | 1.46E-21 | 1.67E-23 | -1.14E+01 | 42.576445  | -2.56E-01 | 42420460  | 42420583  | NC_000001.10 |
| cg24908413 | 1.48E-21 | 1.69E-23 | -1.14E+01 | 42.5661753 | -8.71E-02 | 46663136  | 46663259  | NC_000017.10 |
| cg26683425 | 1.49E-21 | 1.70E-23 | -1.14E+01 | 42.5598732 | -2.29E-01 | 74210521  | 74210644  | NC_000014.8  |
| cg23309670 | 1.50E-21 | 1.71E-23 | -1.14E+01 | 42.5511059 | -3.01E-01 | 36756830  | 36756953  | NC_000006.11 |
| cg01883943 | 1.51E-21 | 1.72E-23 | -1.14E+01 | 42.5459121 | -1.18E-01 | 40799054  | 40799177  | NC_000005.9  |
| cg01040585 | 1.51E-21 | 1.73E-23 | -1.14E+01 | 42.541766  | -1.69E-01 | 36907054  | 36907177  | NC_000017.10 |
| cg07127410 | 1.52E-21 | 1.74E-23 | -1.14E+01 | 42.5346809 | -2.56E-01 | 29427851  | 29427974  | NC_000022.10 |
| cg11530995 | 1.53E-21 | 1.75E-23 | -1.14E+01 | 42.5310794 | -1.32E-01 | 68497992  | 68498115  | NC_000015.9  |
| cg12110216 | 1.54E-21 | 1.76E-23 | -1.14E+01 | 42.5235793 | -6.97E-02 | 119455041 | 119455164 | NC_000011.9  |
| cg05290300 | 1.54E-21 | 1.77E-23 | -1.14E+01 | 42.5210432 | -1.50E-01 | 80966763  | 80966886  | NC_000016.9  |
| cg18914023 | 1.54E-21 | 1.77E-23 | -1.14E+01 | 42.5196041 | -1.41E-01 | 74868443  | 74868566  | NC_000014.8  |
| cg09298313 | 1.55E-21 | 1.77E-23 | -1.14E+01 | 42.516266  | -2.04E-01 | 55569959  | 55570082  | NC_000014.8  |
| cg06719604 | 1.56E-21 | 1.79E-23 | -1.14E+01 | 42.5094524 | -2.79E-01 | 55361310  | 55361433  | NC_000002.11 |
| cg04987499 | 1.57E-21 | 1.80E-23 | -1.14E+01 | 42.5007101 | -2.30E-01 | 61524073  | 61524196  | NC_000017.10 |
| cg18047032 | 1.57E-21 | 1.81E-23 | -1.14E+01 | 42.4994907 | -1.42E-01 | 90576987  | 90577110  | NC_000005.9  |
| cg21459229 | 1.57E-21 | 1.81E-23 | -1.14E+01 | 42.4982441 | -7.27E-02 | 137834755 | 137834878 | NC_000003.11 |
| cg06942111 | 1.58E-21 | 1.81E-23 | -1.14E+01 | 42.4971994 | -2.52E-01 | 108115416 | 108115539 | NC_000001.10 |
| cg19961980 | 1.58E-21 | 1.81E-23 | -1.14E+01 | 42.4970053 | -2.47E-01 | 55063854  | 55063977  | NC_000007.13 |
| cg27413008 | 1.58E-21 | 1.81E-23 | -1.14E+01 | 42.4962556 | -2.37E-01 | 28519597  | 28519720  | NC_000016.9  |
| cg22481448 | 1.59E-21 | 1.83E-23 | -1.14E+01 | 42.4850984 | -3.13E-01 | 27480668  | 27480791  | NC_000001.10 |
| cg07948480 | 1.60E-21 | 1.84E-23 | -1.14E+01 | 42.4831194 | -2.66E-01 | 120996546 | 120996669 | NC_000002.11 |
| cg07830472 | 1.61E-21 | 1.85E-23 | -1.14E+01 | 42.4744533 | -2.91E-01 | 97983916  | 97984039  | NC_000007.13 |
| cg12386646 | 1.62E-21 | 1.87E-23 | -1.14E+01 | 42.4656756 | -1.81E-01 | 41787261  | 41787384  | NC_000015.9  |



|            |          |          |           |            |           |           |           |              |
|------------|----------|----------|-----------|------------|-----------|-----------|-----------|--------------|
| cg22786472 | 1.63E-21 | 1.87E-23 | -1.14E+01 | 42.4635179 | -2.95E-01 | 26198975  | 26199098  | NC_000004.11 |
| cg24724689 | 1.64E-21 | 1.89E-23 | -1.14E+01 | 42.4549821 | -2.45E-01 | 11087224  | 11087347  | NC_000002.11 |
| cg22619412 | 1.65E-21 | 1.90E-23 | -1.14E+01 | 42.4496518 | -1.08E-01 | 676009    | 676132    | NC_000019.9  |
| cg16223546 | 1.65E-21 | 1.90E-23 | -1.14E+01 | 42.447715  | -1.59E-01 | 158768976 | 158769099 | NC_000005.9  |
| cg21579399 | 1.65E-21 | 1.91E-23 | -1.14E+01 | 42.4455903 | -2.90E-01 | 11890700  | 11890823  | NC_000002.11 |
| cg26376241 | 1.65E-21 | 1.91E-23 | -1.14E+01 | 42.44456   | -2.82E-01 | 65594021  | 65594144  | NC_000002.11 |
| cg26280911 | 1.66E-21 | 1.91E-23 | -1.14E+01 | 42.4416106 | -2.22E-01 | 133891771 | 133891894 | NC_000005.9  |
| cg16757281 | 1.67E-21 | 1.92E-23 | -1.14E+01 | 42.4370219 | -1.26E-01 | 685785    | 685908    | NC_000016.9  |
| cg19651003 | 1.67E-21 | 1.92E-23 | -1.14E+01 | 42.4367681 | -1.72E-01 | 583049    | 583172    | NC_000019.9  |
| cg08548284 | 1.67E-21 | 1.93E-23 | -1.14E+01 | 42.4310752 | -2.61E-01 | 14382172  | 14382295  | NC_000001.10 |
| cg20366110 | 1.69E-21 | 1.95E-23 | -1.14E+01 | 42.421823  | -2.73E-01 | 124720897 | 124721020 | NC_000008.10 |
| cg11265749 | 1.69E-21 | 1.96E-23 | -1.14E+01 | 42.4200313 | -1.42E-01 | 560499    | 560622    | NC_000007.13 |
| cg07499182 | 1.69E-21 | 1.96E-23 | -1.14E+01 | 42.4187063 | -3.09E-01 | 33825496  | 33825619  | NC_000013.10 |
| cg22764374 | 1.70E-21 | 1.97E-23 | -1.14E+01 | 42.4138445 | -2.93E-01 | 12163421  | 12163544  | NC_000012.11 |
| cg06023661 | 1.72E-21 | 1.99E-23 | -1.14E+01 | 42.4045111 | -2.04E-01 | 32164801  | 32164924  | NC_000006.11 |
| cg18706476 | 1.73E-21 | 2.00E-23 | -1.14E+01 | 42.3982733 | -2.39E-01 | 49940245  | 49940368  | NC_000003.11 |
| cg21055684 | 1.73E-21 | 2.00E-23 | -1.14E+01 | 42.3975515 | -9.26E-02 | 107005047 | 107005170 | NC_000005.9  |
| cg27262041 | 1.73E-21 | 2.01E-23 | -1.14E+01 | 42.3949269 | -2.50E-01 | 19654032  | 19654155  | NC_000011.9  |
| cg05211768 | 1.73E-21 | 2.01E-23 | -1.14E+01 | 42.3947112 | -1.97E-01 | 91427848  | 91427971  | NC_000015.9  |
| cg08899105 | 1.75E-21 | 2.03E-23 | -1.14E+01 | 42.3821701 | -1.94E-01 | 93450671  | 93450794  | NC_000015.9  |
| cg19869746 | 1.76E-21 | 2.04E-23 | -1.14E+01 | 42.376896  | -2.18E-01 | 7107108   | 7107231   | NC_000006.11 |
| cg19061696 | 1.77E-21 | 2.05E-23 | -1.14E+01 | 42.3723431 | -2.70E-01 | 45581335  | 45581458  | NC_000002.11 |
| cg10800346 | 1.78E-21 | 2.07E-23 | -1.14E+01 | 42.3636488 | -3.15E-01 | 114829496 | 114829619 | NC_000013.10 |
| cg06048750 | 1.79E-21 | 2.07E-23 | -1.14E+01 | 42.3613021 | -2.68E-01 | 3823844   | 3823967   | NC_000010.10 |
| cg24278165 | 1.79E-21 | 2.08E-23 | -1.14E+01 | 42.3609124 | -2.59E-01 | 23083551  | 23083674  | NC_000008.10 |

|            |          |          |           |            |           |           |           |              |
|------------|----------|----------|-----------|------------|-----------|-----------|-----------|--------------|
| cg05951609 | 1.79E-21 | 2.08E-23 | -1.14E+01 | 42.3568405 | -2.56E-01 | 77356507  | 77356630  | NC_000004.11 |
| cg12902896 | 1.82E-21 | 2.12E-23 | -1.14E+01 | 42.3386741 | -2.05E-01 | 37987838  | 37987961  | NC_000003.11 |
| cg26169991 | 1.83E-21 | 2.13E-23 | -1.14E+01 | 42.3344063 | -2.39E-01 | 155049620 | 155049743 | NC_000007.13 |
| cg01657995 | 1.84E-21 | 2.14E-23 | -1.14E+01 | 42.3316895 | -1.97E-01 | 31804883  | 31805006  | NC_000006.11 |
| cg13306478 | 1.84E-21 | 2.14E-23 | -1.14E+01 | 42.3285796 | -2.97E-01 | 31317745  | 31317868  | NC_000013.10 |
| cg07441152 | 1.87E-21 | 2.18E-23 | -1.14E+01 | 42.3124229 | -2.38E-01 | 144814911 | 144815034 | NC_000008.10 |
| cg12458966 | 1.87E-21 | 2.18E-23 | -1.14E+01 | 42.311413  | -2.24E-01 | 223674115 | 223674238 | NC_000001.10 |
| cg05954120 | 1.88E-21 | 2.19E-23 | -1.14E+01 | 42.3078704 | -1.99E-01 | 156254757 | 156254880 | NC_000001.10 |
| cg03281139 | 1.90E-21 | 2.22E-23 | -1.14E+01 | 42.2921819 | -2.78E-01 | 3451135   | 3451258   | NC_000019.9  |
| cg16362949 | 1.91E-21 | 2.23E-23 | -1.14E+01 | 42.2893436 | -1.97E-01 | 1390671   | 1390794   | NC_000017.10 |
| cg23976388 | 1.92E-21 | 2.24E-23 | -1.14E+01 | 42.284384  | -2.02E-01 | 61510081  | 61510204  | NC_000011.9  |
| cg00547530 | 1.93E-21 | 2.25E-23 | -1.14E+01 | 42.2793003 | -2.26E-01 | 3559687   | 3559810   | NC_000016.9  |
| cg15095917 | 1.93E-21 | 2.26E-23 | -1.14E+01 | 42.2749158 | -1.51E-01 | 7482694   | 7482817   | NC_000017.10 |
| cg25356697 | 1.94E-21 | 2.28E-23 | -1.14E+01 | 42.2697622 | -1.31E-01 | 33282736  | 33282859  | NC_000006.11 |
| cg23413697 | 1.95E-21 | 2.28E-23 | -1.14E+01 | 42.2668706 | -5.49E-02 | 5602639   | 5602762   | NC_000007.13 |
| cg15543045 | 1.96E-21 | 2.30E-23 | -1.14E+01 | 42.2598996 | -2.40E-01 | 3487334   | 3487457   | NC_000004.11 |
| cg05572370 | 2.00E-21 | 2.34E-23 | -1.14E+01 | 42.2397403 | -1.59E-01 | 2323247   | 2323370   | NC_000011.9  |
| cg27159695 | 2.00E-21 | 2.35E-23 | -1.14E+01 | 42.2375947 | -9.27E-02 | 30382569  | 30382692  | NC_000016.9  |
| cg04089434 | 2.02E-21 | 2.37E-23 | -1.14E+01 | 42.2296341 | -1.38E-01 | 94516971  | 94517094  | NC_000010.10 |
| cg22450406 | 2.02E-21 | 2.37E-23 | -1.14E+01 | 42.2288892 | -2.70E-01 | 235422165 | 235422288 | NC_000002.11 |
| cg18449021 | 2.04E-21 | 2.39E-23 | -1.14E+01 | 42.2191342 | -1.89E-01 | 107004816 | 107004939 | NC_000005.9  |
| cg03523740 | 2.04E-21 | 2.40E-23 | -1.14E+01 | 42.2184482 | -1.40E-01 | 32645027  | 32645150  | NC_000001.10 |
| cg02149376 | 2.04E-21 | 2.40E-23 | -1.14E+01 | 42.2180073 | -2.10E-01 | 119270205 | 119270328 | NC_000004.11 |
| cg19628600 | 2.04E-21 | 2.40E-23 | -1.14E+01 | 42.2166327 | -2.22E-01 | 71032216  | 71032339  | NC_000003.11 |
| cg23060390 | 2.05E-21 | 2.41E-23 | -1.14E+01 | 42.2137265 | -8.99E-02 | 75863429  | 75863552  | NC_000011.9  |

|            |          |          |           |            |           |           |           |              |
|------------|----------|----------|-----------|------------|-----------|-----------|-----------|--------------|
| cg12907644 | 2.06E-21 | 2.42E-23 | -1.14E+01 | 42.2063693 | -1.95E-01 | 18270341  | 18270464  | NC_000011.9  |
| cg21538684 | 2.06E-21 | 2.43E-23 | -1.14E+01 | 42.2059359 | -2.77E-01 | 13274180  | 13274303  | NC_000006.11 |
| cg06255037 | 2.06E-21 | 2.43E-23 | -1.14E+01 | 42.2052412 | -1.84E-01 | 41634447  | 41634570  | NC_000022.10 |
| cg17799563 | 2.07E-21 | 2.43E-23 | -1.14E+01 | 42.2036855 | -2.14E-01 | 17422775  | 17422898  | NC_000019.9  |
| cg07754940 | 2.07E-21 | 2.44E-23 | -1.14E+01 | 42.2019116 | -2.92E-01 | 89912729  | 89912852  | NC_000010.10 |
| cg15701237 | 2.12E-21 | 2.49E-23 | -1.14E+01 | 42.17914   | -2.09E-01 | 187086154 | 187086277 | NC_000003.11 |
| cg11895596 | 2.12E-21 | 2.49E-23 | -1.14E+01 | 42.1784627 | -2.59E-01 | 57955820  | 57955943  | NC_000003.11 |
| cg21747271 | 2.13E-21 | 2.51E-23 | -1.14E+01 | 42.1711093 | -1.71E-01 | 67250052  | 67250175  | NC_000011.9  |
| cg00975270 | 2.15E-21 | 2.54E-23 | -1.14E+01 | 42.1619315 | -6.54E-02 | 127174816 | 127174939 | NC_000003.11 |
| cg19314352 | 2.17E-21 | 2.56E-23 | -1.14E+01 | 42.1538512 | -9.72E-02 | 38501397  | 38501520  | NC_000017.10 |
| cg24069962 | 2.17E-21 | 2.56E-23 | -1.14E+01 | 42.1525049 | -2.32E-01 | 46391729  | 46391852  | NC_000002.11 |
| cg24588162 | 2.17E-21 | 2.56E-23 | -1.14E+01 | 42.1516309 | -1.78E-01 | 113633484 | 113633607 | NC_000013.10 |
| cg15705813 | 2.17E-21 | 2.57E-23 | -1.14E+01 | 42.1485372 | -2.68E-01 | 70297499  | 70297622  | NC_000002.11 |
| cg23670794 | 2.19E-21 | 2.59E-23 | -1.14E+01 | 42.1423901 | -2.75E-01 | 111313065 | 111313188 | NC_000003.11 |
| cg16367976 | 2.21E-21 | 2.61E-23 | -1.14E+01 | 42.1338474 | -1.18E-01 | 50969678  | 50969801  | NC_000022.10 |
| cg12622958 | 2.29E-21 | 2.72E-23 | -1.14E+01 | 42.0932914 | -1.47E-01 | 41759997  | 41760120  | NC_000004.11 |
| cg15043615 | 2.31E-21 | 2.74E-23 | -1.14E+01 | 42.0855323 | -1.68E-01 | 74025708  | 74025831  | NC_000017.10 |
| cg00866556 | 2.34E-21 | 2.78E-23 | -1.14E+01 | 42.0715545 | -1.39E-01 | 29449356  | 29449479  | NC_000001.10 |
| cg17330303 | 2.35E-21 | 2.79E-23 | -1.14E+01 | 42.0667877 | -2.09E-01 | 27189648  | 27189771  | NC_000001.10 |
| cg18101140 | 2.35E-21 | 2.79E-23 | -1.14E+01 | 42.0666086 | -1.64E-01 | 67142001  | 67142124  | NC_000011.9  |
| cg21374048 | 2.35E-21 | 2.79E-23 | -1.14E+01 | 42.066392  | -2.04E-01 | 56013560  | 56013683  | NC_000017.10 |
| cg11764177 | 2.36E-21 | 2.80E-23 | -1.14E+01 | 42.0652718 | -9.26E-02 | 6266416   | 6266539   | NC_000001.10 |
| cg13374701 | 2.36E-21 | 2.80E-23 | -1.14E+01 | 42.0636331 | -2.03E-01 | 27190088  | 27190211  | NC_000001.10 |
| cg08418872 | 2.40E-21 | 2.85E-23 | -1.14E+01 | 42.0447967 | -2.43E-01 | 6442954   | 6443077   | NC_000012.11 |
| cg00146645 | 2.43E-21 | 2.88E-23 | -1.14E+01 | 42.0343067 | -1.84E-01 | 228644750 | 228644873 | NC_000001.10 |

|            |          |          |           |            |           |           |           |              |
|------------|----------|----------|-----------|------------|-----------|-----------|-----------|--------------|
| cg09632136 | 2.43E-21 | 2.89E-23 | -1.14E+01 | 42.0331211 | -2.65E-01 | 114165661 | 114165784 | NC_000011.9  |
| cg12410273 | 2.44E-21 | 2.90E-23 | -1.14E+01 | 42.0275969 | -1.69E-01 | 88714903  | 88715026  | NC_000009.11 |
| cg00674220 | 2.45E-21 | 2.91E-23 | -1.14E+01 | 42.0243902 | -2.60E-01 | 27610741  | 27610864  | NC_000013.10 |
| cg10752406 | 2.45E-21 | 2.92E-23 | -1.14E+01 | 42.0215055 | -1.84E-01 | 827776    | 827899    | NC_000019.9  |
| cg10342016 | 2.46E-21 | 2.93E-23 | -1.14E+01 | 42.0194049 | -2.20E-01 | 57802622  | 57802745  | NC_000008.10 |
| cg10949007 | 2.47E-21 | 2.94E-23 | -1.13E+01 | 42.0135939 | -3.44E-01 | 95159614  | 95159737  | NC_000005.9  |
| cg17371070 | 2.48E-21 | 2.95E-23 | -1.13E+01 | 42.0107773 | -2.53E-01 | 125239977 | 125240100 | NC_000008.10 |
| cg00003900 | 2.51E-21 | 3.00E-23 | -1.13E+01 | 41.9958887 | -1.19E-01 | 2897074   | 2897197   | NC_000016.9  |
| cg00167841 | 2.53E-21 | 3.01E-23 | -1.13E+01 | 41.9903714 | -1.53E-01 | 30923672  | 30923795  | NC_000006.11 |
| cg00335169 | 2.54E-21 | 3.03E-23 | -1.13E+01 | 41.9838065 | -8.45E-02 | 129705158 | 129705281 | NC_000010.10 |
| cg20758982 | 2.55E-21 | 3.04E-23 | -1.13E+01 | 41.9820127 | -1.59E-01 | 74162072  | 74162195  | NC_000006.11 |
| cg27049539 | 2.55E-21 | 3.05E-23 | -1.13E+01 | 41.980037  | -2.43E-01 | 234395837 | 234395960 | NC_000002.11 |
| cg21658153 | 2.56E-21 | 3.06E-23 | -1.13E+01 | 41.9759387 | -2.14E-01 | 16178570  | 16178693  | NC_000019.9  |
| cg03509949 | 2.57E-21 | 3.06E-23 | -1.13E+01 | 41.973837  | -2.46E-01 | 56236869  | 56236992  | NC_000012.11 |
| cg04058799 | 2.57E-21 | 3.07E-23 | -1.13E+01 | 41.9727136 | -2.37E-01 | 151547969 | 151548092 | NC_000007.13 |
| cg04322486 | 2.60E-21 | 3.11E-23 | -1.13E+01 | 41.960041  | -2.36E-01 | 55601226  | 55601349  | NC_000007.13 |
| cg02273436 | 2.62E-21 | 3.13E-23 | -1.13E+01 | 41.9531771 | -2.59E-01 | 55143269  | 55143392  | NC_000004.11 |
| cg16474725 | 2.63E-21 | 3.15E-23 | -1.13E+01 | 41.9464118 | -3.04E-01 | 45979349  | 45979472  | NC_000006.11 |
| cg04447362 | 2.64E-21 | 3.16E-23 | -1.13E+01 | 41.9436033 | -2.13E-01 | 237654635 | 237654758 | NC_000002.11 |
| cg02088237 | 2.68E-21 | 3.21E-23 | -1.13E+01 | 41.9292457 | -2.74E-01 | 39304008  | 39304131  | NC_000006.11 |
| cg26399164 | 2.68E-21 | 3.21E-23 | -1.13E+01 | 41.9289314 | -1.09E-01 | 69455217  | 69455340  | NC_000011.9  |
| cg27080119 | 2.68E-21 | 3.21E-23 | -1.13E+01 | 41.9284183 | -1.61E-01 | 120987409 | 120987532 | NC_000004.11 |
| cg07563611 | 2.68E-21 | 3.21E-23 | -1.13E+01 | 41.9277352 | -2.54E-01 | 70794856  | 70794979  | NC_000016.9  |
| cg23670779 | 2.70E-21 | 3.24E-23 | -1.13E+01 | 41.9190753 | -2.15E-01 | 582843    | 582966    | NC_000007.13 |
| cg18292904 | 2.74E-21 | 3.29E-23 | -1.13E+01 | 41.904661  | -2.79E-01 | 49939703  | 49939826  | NC_000003.11 |

|            |          |          |           |            |           |           |           |              |
|------------|----------|----------|-----------|------------|-----------|-----------|-----------|--------------|
| cg02532341 | 2.75E-21 | 3.30E-23 | -1.13E+01 | 41.900534  | -2.63E-01 | 10399439  | 10399562  | NC_000003.11 |
| cg17020695 | 2.75E-21 | 3.30E-23 | -1.13E+01 | 41.8989982 | -1.31E-01 | 113498174 | 113498297 | NC_000001.10 |
| cg05294243 | 2.76E-21 | 3.32E-23 | -1.13E+01 | 41.8955117 | -1.45E-01 | 51569106  | 51569229  | NC_000019.9  |
| cg03611598 | 2.76E-21 | 3.32E-23 | -1.13E+01 | 41.8941001 | -1.53E-01 | 48586076  | 48586199  | NC_000017.10 |
| cg17766007 | 2.77E-21 | 3.33E-23 | -1.13E+01 | 41.8905639 | -1.80E-01 | 51522921  | 51523044  | NC_000019.9  |
| cg07360076 | 2.77E-21 | 3.33E-23 | -1.13E+01 | 41.8903415 | -1.67E-01 | 1794639   | 1794762   | NC_000004.11 |
| cg23720331 | 2.78E-21 | 3.34E-23 | -1.13E+01 | 41.8875561 | -2.11E-01 | 123873670 | 123873793 | NC_000010.10 |
| cg04021497 | 2.79E-21 | 3.35E-23 | -1.13E+01 | 41.8847587 | -1.92E-01 | 24307291  | 24307414  | NC_000001.10 |
| cg19880942 | 2.80E-21 | 3.36E-23 | -1.13E+01 | 41.8811906 | -2.12E-01 | 69672404  | 69672527  | NC_000008.10 |
| cg00782811 | 2.81E-21 | 3.38E-23 | -1.13E+01 | 41.8752456 | -2.70E-01 | 46293734  | 46293857  | NC_000006.11 |
| cg03984209 | 2.83E-21 | 3.40E-23 | -1.13E+01 | 41.8702357 | -2.55E-01 | 55920018  | 55920141  | NC_000003.11 |
| cg07261419 | 2.83E-21 | 3.40E-23 | -1.13E+01 | 41.8696722 | -2.19E-01 | 36132507  | 36132630  | NC_000019.9  |
| cg19303682 | 2.88E-21 | 3.47E-23 | -1.13E+01 | 41.850514  | -1.19E-01 | 4229214   | 4229337   | NC_000019.9  |
| cg23191354 | 2.89E-21 | 3.49E-23 | -1.13E+01 | 41.8462765 | -2.13E-01 | 25018565  | 25018688  | NC_000007.13 |
| cg02523270 | 2.90E-21 | 3.49E-23 | -1.13E+01 | 41.8445771 | -2.64E-01 | 193987651 | 193987774 | NC_000003.11 |
| cg12750917 | 2.90E-21 | 3.49E-23 | -1.13E+01 | 41.8440303 | -2.15E-01 | 198204074 | 198204197 | NC_000001.10 |
| cg13700073 | 2.92E-21 | 3.53E-23 | -1.13E+01 | 41.83479   | -1.41E-01 | 79495324  | 79495447  | NC_000017.10 |
| cg10524915 | 2.93E-21 | 3.54E-23 | -1.13E+01 | 41.8314302 | -1.10E-01 | 94857046  | 94857169  | NC_000014.8  |
| cg23903301 | 3.00E-21 | 3.62E-23 | -1.13E+01 | 41.8092451 | -2.86E-01 | 33744366  | 33744489  | NC_000011.9  |
| cg05058204 | 3.01E-21 | 3.63E-23 | -1.13E+01 | 41.8051976 | -1.05E-01 | 173129681 | 173129804 | NC_000003.11 |
| cg20738274 | 3.02E-21 | 3.65E-23 | -1.13E+01 | 41.8014927 | -2.09E-01 | 207201020 | 207201143 | NC_000001.10 |
| cg15910208 | 3.02E-21 | 3.65E-23 | -1.13E+01 | 41.799803  | -1.72E-01 | 51522588  | 51522711  | NC_000019.9  |
| cg25132536 | 3.03E-21 | 3.66E-23 | -1.13E+01 | 41.796415  | -2.51E-01 | 19152434  | 19152557  | NC_000017.10 |
| cg11429044 | 3.04E-21 | 3.67E-23 | -1.13E+01 | 41.794496  | -2.39E-01 | 13947473  | 13947596  | NC_000019.9  |
| cg07387700 | 3.05E-21 | 3.69E-23 | -1.13E+01 | 41.7908802 | -1.04E-01 | 156848544 | 156848667 | NC_000003.11 |

|                |          |          |           |            |           |           |           |              |
|----------------|----------|----------|-----------|------------|-----------|-----------|-----------|--------------|
| ch.20.1295406F | 3.06E-21 | 3.70E-23 | -1.13E+01 | 41.7873599 | -9.49E-02 | 56228606  | 56228729  | NC_000020.10 |
| cg06136702     | 3.06E-21 | 3.70E-23 | -1.13E+01 | 41.7865988 | -1.73E-01 | 31082631  | 31082754  | NC_000006.11 |
| cg10223233     | 3.07E-21 | 3.72E-23 | -1.13E+01 | 41.7820674 | -1.59E-01 | 64373395  | 64373518  | NC_000010.10 |
| cg01957582     | 3.09E-21 | 3.74E-23 | -1.13E+01 | 41.7771117 | -1.29E-01 | 32341780  | 32341903  | NC_000022.10 |
| cg16303129     | 3.11E-21 | 3.76E-23 | -1.13E+01 | 41.7696234 | -1.53E-01 | 48105885  | 48106008  | NC_000017.10 |
| cg08909156     | 3.11E-21 | 3.77E-23 | -1.13E+01 | 41.7691596 | -2.20E-01 | 36616028  | 36616151  | NC_000001.10 |
| cg02153681     | 3.11E-21 | 3.77E-23 | -1.13E+01 | 41.76759   | -2.95E-01 | 20714818  | 20714941  | NC_000002.11 |
| cg25626472     | 3.15E-21 | 3.82E-23 | -1.13E+01 | 41.7552545 | -2.46E-01 | 31939075  | 31939198  | NC_000010.10 |
| cg10536999     | 3.15E-21 | 3.83E-23 | -1.13E+01 | 41.7537919 | -2.40E-01 | 26193109  | 26193232  | NC_000007.13 |
| cg10009657     | 3.17E-21 | 3.84E-23 | -1.13E+01 | 41.7491373 | -8.41E-02 | 4153419   | 4153542   | NC_000019.9  |
| cg07803108     | 3.17E-21 | 3.85E-23 | -1.13E+01 | 41.7481497 | -1.71E-01 | 42081927  | 42082050  | NC_000017.10 |
| cg04067276     | 3.17E-21 | 3.85E-23 | -1.13E+01 | 41.7473833 | -1.48E-01 | 106958303 | 106958426 | NC_000006.11 |
| cg19997384     | 3.20E-21 | 3.89E-23 | -1.13E+01 | 41.7382814 | -1.35E-01 | 41685595  | 41685718  | NC_000008.10 |
| cg07188648     | 3.21E-21 | 3.90E-23 | -1.13E+01 | 41.7342794 | -2.34E-01 | 111402694 | 111402817 | NC_000011.9  |
| cg11248450     | 3.21E-21 | 3.90E-23 | -1.13E+01 | 41.7340956 | -1.02E-01 | 41472657  | 41472780  | NC_000006.11 |
| cg03359362     | 3.22E-21 | 3.91E-23 | -1.13E+01 | 41.7318582 | -1.77E-01 | 47289611  | 47289734  | NC_000019.9  |
| cg13424870     | 3.23E-21 | 3.93E-23 | -1.13E+01 | 41.7274166 | -9.05E-02 | 73083812  | 73083935  | NC_000017.10 |
| cg18522931     | 3.24E-21 | 3.94E-23 | -1.13E+01 | 41.7249115 | -3.12E-01 | 63776828  | 63776951  | NC_000010.10 |
| cg14054279     | 3.25E-21 | 3.95E-23 | -1.13E+01 | 41.7211945 | -2.52E-01 | 185676640 | 185676763 | NC_000003.11 |
| cg03875819     | 3.27E-21 | 3.98E-23 | -1.13E+01 | 41.7146922 | -2.98E-01 | 4386802   | 4386925   | NC_000010.10 |
| cg14600987     | 3.28E-21 | 3.99E-23 | -1.13E+01 | 41.7116929 | -1.87E-01 | 1952678   | 1952801   | NC_000011.9  |
| cg19250790     | 3.28E-21 | 3.99E-23 | -1.13E+01 | 41.7112152 | -1.48E-01 | 2614086   | 2614209   | NC_000019.9  |
| cg06615754     | 3.32E-21 | 4.04E-23 | -1.13E+01 | 41.6996181 | -1.71E-01 | 58193071  | 58193194  | NC_000019.9  |
| cg25599475     | 3.32E-21 | 4.05E-23 | -1.13E+01 | 41.6974384 | -7.82E-02 | 853038    | 853161    | NC_000007.13 |
| cg02398682     | 3.33E-21 | 4.06E-23 | -1.13E+01 | 41.6939488 | -1.82E-01 | 32802228  | 32802351  | NC_000001.10 |

|               |          |          |           |            |           |           |           |              |
|---------------|----------|----------|-----------|------------|-----------|-----------|-----------|--------------|
| cg25565203    | 3.34E-21 | 4.07E-23 | -1.13E+01 | 41.6930792 | -2.38E-01 | 56989227  | 56989350  | NC_000005.9  |
| cg15269394    | 3.36E-21 | 4.10E-23 | -1.13E+01 | 41.6842491 | -2.44E-01 | 40672083  | 40672206  | NC_000017.10 |
| cg04416981    | 3.37E-21 | 4.11E-23 | -1.13E+01 | 41.6833591 | -1.13E-01 | 89043707  | 89043830  | NC_000016.9  |
| cg25979108    | 3.38E-21 | 4.12E-23 | -1.13E+01 | 41.6797771 | -1.84E-01 | 18700553  | 18700676  | NC_000019.9  |
| cg01301339    | 3.38E-21 | 4.12E-23 | -1.13E+01 | 41.6793057 | -8.63E-02 | 180673096 | 180673219 | NC_000005.9  |
| cg22331108    | 3.38E-21 | 4.12E-23 | -1.13E+01 | 41.6790684 | -1.37E-01 | 232478452 | 232478575 | NC_000002.11 |
| cg09173378    | 3.39E-21 | 4.14E-23 | -1.13E+01 | 41.6760602 | -2.68E-01 | 196370245 | 196370368 | NC_000001.10 |
| cg27494383    | 3.40E-21 | 4.15E-23 | -1.13E+01 | 41.6720088 | -1.98E-01 | 41805868  | 41805991  | NC_000015.9  |
| cg00939627    | 3.40E-21 | 4.16E-23 | -1.13E+01 | 41.6710345 | -1.37E-01 | 4994685   | 4994808   | NC_000016.9  |
| cg19782880    | 3.41E-21 | 4.17E-23 | -1.13E+01 | 41.6671406 | -1.57E-01 | 9757565   | 9757688   | NC_000003.11 |
| cg07611000    | 3.42E-21 | 4.18E-23 | -1.13E+01 | 41.666687  | -1.19E-01 | 65342262  | 65342385  | NC_000011.9  |
| cg01959516    | 3.43E-21 | 4.20E-23 | -1.13E+01 | 41.6620891 | -2.19E-01 | 2449276   | 2449399   | NC_000006.11 |
| cg23108232    | 3.43E-21 | 4.20E-23 | -1.13E+01 | 41.6610742 | -2.52E-01 | 59628483  | 59628606  | NC_000014.8  |
| cg19310148    | 3.46E-21 | 4.23E-23 | -1.13E+01 | 41.6530246 | -2.16E-01 | 26196274  | 26196397  | NC_000007.13 |
| cg22902400    | 3.47E-21 | 4.25E-23 | -1.13E+01 | 41.6489493 | -1.58E-01 | 39473197  | 39473320  | NC_000022.10 |
| cg22246295    | 3.48E-21 | 4.26E-23 | -1.13E+01 | 41.6474029 | -1.15E-01 | 10138705  | 10138828  | NC_000019.9  |
| cg15540371    | 3.50E-21 | 4.28E-23 | -1.13E+01 | 41.6416713 | -1.26E-01 | 105553520 | 105553643 | NC_000014.8  |
| cg16725050    | 3.51E-21 | 4.30E-23 | -1.13E+01 | 41.6376627 | -1.10E-01 | 220117771 | 220117894 | NC_000002.11 |
| cg06784691    | 3.52E-21 | 4.32E-23 | -1.13E+01 | 41.6335983 | -1.37E-01 | 2245988   | 2246111   | NC_000001.10 |
| cg17278453    | 3.55E-21 | 4.36E-23 | -1.13E+01 | 41.6230509 | -1.90E-01 | 45962576  | 45962699  | NC_000007.13 |
| cg02054358    | 3.56E-21 | 4.37E-23 | -1.13E+01 | 41.6209406 | -1.95E-01 | 70335431  | 70335554  | NC_000017.10 |
| cg26230275    | 3.58E-21 | 4.40E-23 | -1.13E+01 | 41.615986  | -1.79E-01 | 151965283 | 151965406 | NC_000001.10 |
| cg13988606    | 3.59E-21 | 4.41E-23 | -1.13E+01 | 41.6119005 | -5.59E-02 | 113258121 | 113258244 | NC_000001.10 |
| ch.2.4671106R | 3.60E-21 | 4.43E-23 | -1.13E+01 | 41.6076347 | -1.31E-01 | 233179995 | 233180118 | NC_000002.11 |
| cg15330584    | 3.60E-21 | 4.43E-23 | -1.13E+01 | 41.6076105 | -7.31E-02 | 69455512  | 69455635  | NC_000011.9  |

|            |          |          |           |            |           |           |           |              |
|------------|----------|----------|-----------|------------|-----------|-----------|-----------|--------------|
| cg03005261 | 3.65E-21 | 4.50E-23 | -1.13E+01 | 41.5934775 | -1.92E-01 | 110480828 | 110480951 | NC_000004.11 |
| cg07369606 | 3.65E-21 | 4.50E-23 | -1.13E+01 | 41.5934713 | -1.72E-01 | 80290169  | 80290292  | NC_000017.10 |
| cg17516247 | 3.67E-21 | 4.52E-23 | -1.13E+01 | 41.5882908 | -3.15E-01 | 174933574 | 174933697 | NC_000001.10 |
| cg05417332 | 3.68E-21 | 4.53E-23 | -1.13E+01 | 41.5852224 | -1.85E-01 | 30104025  | 30104148  | NC_000016.9  |
| cg18689504 | 3.70E-21 | 4.56E-23 | -1.13E+01 | 41.579496  | -1.24E-01 | 32164585  | 32164708  | NC_000006.11 |
| cg26076428 | 3.70E-21 | 4.56E-23 | -1.13E+01 | 41.5790202 | -1.31E-01 | 127175109 | 127175232 | NC_000003.11 |
| cg09715353 | 3.71E-21 | 4.57E-23 | -1.13E+01 | 41.5768577 | -2.77E-01 | 120190031 | 120190154 | NC_000002.11 |
| cg18055007 | 3.71E-21 | 4.57E-23 | -1.13E+01 | 41.5762846 | -2.22E-01 | 31698226  | 31698349  | NC_000006.11 |
| cg08530414 | 3.73E-21 | 4.60E-23 | -1.13E+01 | 41.5705619 | -6.97E-02 | 35160400  | 35160523  | NC_000011.9  |
| cg07303577 | 3.74E-21 | 4.62E-23 | -1.13E+01 | 41.5655345 | -3.27E-01 | 3280014   | 3280137   | NC_000012.11 |
| cg04890576 | 3.76E-21 | 4.64E-23 | -1.13E+01 | 41.5619169 | -2.29E-01 | 73032613  | 73032736  | NC_000017.10 |
| cg24426208 | 3.78E-21 | 4.67E-23 | -1.13E+01 | 41.5548462 | -1.35E-01 | 32050947  | 32051070  | NC_000006.11 |
| cg02732164 | 3.81E-21 | 4.71E-23 | -1.13E+01 | 41.5473138 | -1.73E-01 | 6869135   | 6869258   | NC_000007.13 |
| cg11957248 | 3.81E-21 | 4.72E-23 | -1.13E+01 | 41.5458994 | -2.06E-01 | 105238964 | 105239087 | NC_000010.10 |
| cg26542660 | 3.81E-21 | 4.72E-23 | -1.13E+01 | 41.5458832 | -2.48E-01 | 56813860  | 56813983  | NC_000004.11 |
| cg00124375 | 3.84E-21 | 4.75E-23 | -1.13E+01 | 41.5389776 | -2.04E-01 | 31698218  | 31698341  | NC_000006.11 |
| cg14051181 | 3.86E-21 | 4.78E-23 | -1.13E+01 | 41.5323965 | -1.69E-01 | 989228    | 989351    | NC_000007.13 |
| cg20349812 | 3.88E-21 | 4.81E-23 | -1.13E+01 | 41.5264259 | -2.14E-01 | 4764941   | 4765064   | NC_000007.13 |
| cg19308375 | 3.92E-21 | 4.85E-23 | -1.13E+01 | 41.5181422 | -2.83E-01 | 228324937 | 228325060 | NC_000002.11 |
| cg16242615 | 3.94E-21 | 4.88E-23 | -1.13E+01 | 41.5127017 | -2.57E-01 | 4059988   | 4060111   | NC_000019.9  |
| cg11756029 | 3.96E-21 | 4.91E-23 | -1.13E+01 | 41.5068181 | -2.36E-01 | 112568357 | 112568480 | NC_000012.11 |
| cg14753321 | 3.96E-21 | 4.91E-23 | -1.13E+01 | 41.5065936 | -2.08E-01 | 176784914 | 176785037 | NC_000005.9  |
| cg01692279 | 3.97E-21 | 4.93E-23 | -1.13E+01 | 41.5026521 | -1.87E-01 | 2569952   | 2570075   | NC_000007.13 |
| cg23316449 | 3.97E-21 | 4.93E-23 | -1.13E+01 | 41.5018575 | -2.07E-01 | 73704055  | 73704178  | NC_000014.8  |
| cg10057295 | 3.98E-21 | 4.94E-23 | -1.13E+01 | 41.4995587 | -1.24E-01 | 99230004  | 99230127  | NC_000013.10 |



|            |          |          |           |            |           |           |           |              |
|------------|----------|----------|-----------|------------|-----------|-----------|-----------|--------------|
| cg22433862 | 4.00E-21 | 4.97E-23 | -1.13E+01 | 41.4945018 | -1.88E-01 | 28013341  | 28013464  | NC_000001.10 |
| cg16382778 | 4.05E-21 | 5.03E-23 | -1.13E+01 | 41.4824889 | -1.19E-01 | 152007215 | 152007338 | NC_000001.10 |
| cg24657503 | 4.05E-21 | 5.03E-23 | -1.13E+01 | 41.4811298 | -1.10E-01 | 63687154  | 63687277  | NC_000011.9  |
| cg03128029 | 4.06E-21 | 5.05E-23 | -1.13E+01 | 41.4786859 | -2.37E-01 | 203143288 | 203143411 | NC_000002.11 |
| cg09723341 | 4.08E-21 | 5.07E-23 | -1.13E+01 | 41.4733126 | -1.20E-01 | 4986076   | 4986199   | NC_000016.9  |
| cg25388882 | 4.10E-21 | 5.09E-23 | -1.13E+01 | 41.4700591 | -2.19E-01 | 85098598  | 85098721  | NC_000001.10 |
| cg12495853 | 4.10E-21 | 5.09E-23 | -1.13E+01 | 41.469385  | -1.87E-01 | 167616968 | 167617091 | NC_000006.11 |
| cg07655487 | 4.13E-21 | 5.13E-23 | -1.13E+01 | 41.46164   | -2.06E-01 | 66849820  | 66849943  | NC_000011.9  |
| cg01808969 | 4.14E-21 | 5.14E-23 | -1.13E+01 | 41.4597203 | -2.48E-01 | 4786364   | 4786487   | NC_000007.13 |
| cg21661379 | 4.14E-21 | 5.16E-23 | -1.13E+01 | 41.4573892 | -2.71E-01 | 228324983 | 228325106 | NC_000002.11 |
| cg25136988 | 4.25E-21 | 5.30E-23 | -1.13E+01 | 41.4304833 | -2.61E-01 | 31649623  | 31649746  | NC_000006.11 |
| cg00294534 | 4.27E-21 | 5.32E-23 | -1.13E+01 | 41.4263056 | -2.17E-01 | 1607247   | 1607370   | NC_000007.13 |
| cg09784932 | 4.27E-21 | 5.33E-23 | -1.13E+01 | 41.4254226 | -2.25E-01 | 20229526  | 20229649  | NC_000022.10 |
| cg17969123 | 4.30E-21 | 5.36E-23 | -1.13E+01 | 41.4197885 | -1.21E-01 | 18745971  | 18746094  | NC_000019.9  |
| cg04737759 | 4.30E-21 | 5.36E-23 | -1.13E+01 | 41.418591  | -2.67E-01 | 155253937 | 155254060 | NC_000006.11 |
| cg20586328 | 4.32E-21 | 5.39E-23 | -1.13E+01 | 41.4143082 | -1.67E-01 | 1628814   | 1628937   | NC_000011.9  |
| cg12211091 | 4.34E-21 | 5.42E-23 | -1.13E+01 | 41.4084688 | -1.81E-01 | 2512999   | 2513122   | NC_000019.9  |
| cg15368872 | 4.34E-21 | 5.42E-23 | -1.13E+01 | 41.4076922 | -1.58E-01 | 10525233  | 10525356  | NC_000012.11 |
| cg10163776 | 4.40E-21 | 5.50E-23 | -1.13E+01 | 41.3928547 | -9.25E-02 | 32433833  | 32433956  | NC_000003.11 |
| cg26513837 | 4.41E-21 | 5.51E-23 | -1.13E+01 | 41.391871  | -1.03E-01 | 3014269   | 3014392   | NC_000011.9  |
| cg07120889 | 4.48E-21 | 5.59E-23 | -1.13E+01 | 41.3766813 | -1.65E-01 | 150535935 | 150536058 | NC_000001.10 |
| cg19846154 | 4.49E-21 | 5.61E-23 | -1.13E+01 | 41.3732454 | -2.74E-01 | 74332112  | 74332235  | NC_000008.10 |
| cg27474957 | 4.51E-21 | 5.64E-23 | -1.13E+01 | 41.3676209 | -1.11E-01 | 1567578   | 1567701   | NC_000011.9  |
| cg24641737 | 4.52E-21 | 5.66E-23 | -1.13E+01 | 41.3649349 | -2.31E-01 | 111743271 | 111743394 | NC_000001.10 |
| cg05113000 | 4.57E-21 | 5.72E-23 | -1.13E+01 | 41.3535554 | -1.39E-01 | 65343833  | 65343956  | NC_000011.9  |

|            |          |          |           |            |           |           |           |              |
|------------|----------|----------|-----------|------------|-----------|-----------|-----------|--------------|
| cg23627828 | 4.58E-21 | 5.73E-23 | -1.13E+01 | 41.3520304 | -1.64E-01 | 153540698 | 153540821 | NC_000001.10 |
| cg01174264 | 4.59E-21 | 5.75E-23 | -1.13E+01 | 41.3490335 | -2.02E-01 | 80992999  | 80993122  | NC_000004.11 |
| cg18550212 | 4.61E-21 | 5.78E-23 | -1.13E+01 | 41.3444363 | -2.43E-01 | 63435428  | 63435551  | NC_000011.9  |
| cg07090714 | 4.62E-21 | 5.80E-23 | -1.13E+01 | 41.3411527 | -1.71E-01 | 6857062   | 6857185   | NC_000006.11 |
| cg05695995 | 4.64E-21 | 5.81E-23 | -1.13E+01 | 41.3382505 | -1.60E-01 | 7468848   | 7468971   | NC_000006.11 |
| cg25731261 | 4.68E-21 | 5.87E-23 | -1.12E+01 | 41.32918   | -2.56E-01 | 47736018  | 47736141  | NC_000019.9  |
| cg26747885 | 4.68E-21 | 5.88E-23 | -1.12E+01 | 41.3275805 | -1.66E-01 | 76355701  | 76355824  | NC_000017.10 |
| cg02998936 | 4.71E-21 | 5.91E-23 | -1.12E+01 | 41.3217404 | -1.01E-01 | 76338383  | 76338506  | NC_000017.10 |
| cg20068496 | 4.71E-21 | 5.92E-23 | -1.12E+01 | 41.3211238 | -1.99E-01 | 78108822  | 78108945  | NC_000014.8  |
| cg09417209 | 4.72E-21 | 5.93E-23 | -1.12E+01 | 41.318963  | -2.35E-01 | 11715746  | 11715869  | NC_000016.9  |
| cg01741041 | 4.72E-21 | 5.93E-23 | -1.12E+01 | 41.3181112 | -1.99E-01 | 5567862   | 5567985   | NC_000007.13 |
| cg01544270 | 4.73E-21 | 5.94E-23 | -1.12E+01 | 41.3165737 | -1.80E-01 | 140300227 | 140300350 | NC_000009.11 |
| cg07540634 | 4.73E-21 | 5.95E-23 | -1.12E+01 | 41.3157256 | -2.39E-01 | 67878142  | 67878265  | NC_000014.8  |
| cg19747632 | 4.75E-21 | 5.97E-23 | -1.12E+01 | 41.3116686 | -1.79E-01 | 52472703  | 52472826  | NC_000015.9  |
| cg15045802 | 4.76E-21 | 5.98E-23 | -1.12E+01 | 41.3096943 | -2.11E-01 | 1857434   | 1857557   | NC_000019.9  |
| cg24174557 | 4.76E-21 | 5.98E-23 | -1.12E+01 | 41.3096098 | -2.38E-01 | 57903544  | 57903667  | NC_000017.10 |
| cg04257123 | 4.76E-21 | 5.98E-23 | -1.12E+01 | 41.3095312 | -1.48E-01 | 51341745  | 51341868  | NC_000019.9  |
| cg11326510 | 4.77E-21 | 6.00E-23 | -1.12E+01 | 41.3069165 | -2.94E-01 | 157347375 | 157347498 | NC_000007.13 |
| cg13738140 | 4.85E-21 | 6.10E-23 | -1.12E+01 | 41.2898423 | -1.10E-01 | 140189802 | 140189925 | NC_000009.11 |
| cg14458955 | 4.89E-21 | 6.16E-23 | -1.12E+01 | 41.2805264 | -1.50E-01 | 42062938  | 42063061  | NC_000022.10 |
| cg01610979 | 4.92E-21 | 6.20E-23 | -1.12E+01 | 41.2744672 | -2.58E-01 | 8193310   | 8193433   | NC_000004.11 |
| cg13829849 | 4.93E-21 | 6.22E-23 | -1.12E+01 | 41.2720019 | -2.33E-01 | 72735830  | 72735953  | NC_000009.11 |
| cg06478457 | 4.95E-21 | 6.25E-23 | -1.12E+01 | 41.2667484 | -6.54E-02 | 29604764  | 29604887  | NC_000007.13 |
| cg05776704 | 4.97E-21 | 6.28E-23 | -1.12E+01 | 41.26155   | -7.78E-02 | 149376672 | 149376795 | NC_000003.11 |
| cg02161084 | 4.98E-21 | 6.29E-23 | -1.12E+01 | 41.2603642 | -2.66E-01 | 73989526  | 73989649  | NC_000015.9  |

|            |          |          |           |            |           |           |           |              |
|------------|----------|----------|-----------|------------|-----------|-----------|-----------|--------------|
| cg25642955 | 5.01E-21 | 6.33E-23 | -1.12E+01 | 41.2545165 | -2.30E-01 | 33050111  | 33050234  | NC_000005.9  |
| cg21382890 | 5.01E-21 | 6.33E-23 | -1.12E+01 | 41.253488  | -2.10E-01 | 178104794 | 178104917 | NC_000002.11 |
| cg12315353 | 5.03E-21 | 6.35E-23 | -1.12E+01 | 41.249919  | -1.63E-01 | 29573089  | 29573212  | NC_000006.11 |
| cg00686823 | 5.05E-21 | 6.39E-23 | -1.12E+01 | 41.2451075 | -2.62E-01 | 127311038 | 127311161 | NC_000003.11 |
| cg02473237 | 5.07E-21 | 6.41E-23 | -1.12E+01 | 41.2409603 | -2.30E-01 | 139004011 | 139004134 | NC_000006.11 |
| cg25307724 | 5.08E-21 | 6.42E-23 | -1.12E+01 | 41.2394499 | -2.63E-01 | 113719172 | 113719295 | NC_000013.10 |
| cg12542656 | 5.09E-21 | 6.44E-23 | -1.12E+01 | 41.2364768 | -3.02E-01 | 43269469  | 43269592  | NC_000002.11 |
| cg05898618 | 5.09E-21 | 6.44E-23 | -1.12E+01 | 41.2361327 | -2.31E-01 | 2555576   | 2555699   | NC_000011.9  |
| cg06048910 | 5.11E-21 | 6.47E-23 | -1.12E+01 | 41.2319167 | -2.31E-01 | 2925473   | 2925596   | NC_000011.9  |
| cg26651303 | 5.12E-21 | 6.49E-23 | -1.12E+01 | 41.2296368 | -2.56E-01 | 158533204 | 158533327 | NC_000007.13 |
| cg08640824 | 5.13E-21 | 6.50E-23 | -1.12E+01 | 41.227091  | -2.04E-01 | 2162506   | 2162629   | NC_000001.10 |
| cg15564619 | 5.16E-21 | 6.54E-23 | -1.12E+01 | 41.2219515 | -2.76E-01 | 2163437   | 2163560   | NC_000001.10 |
| cg00252813 | 5.22E-21 | 6.62E-23 | -1.12E+01 | 41.2099284 | -1.08E-01 | 6642229   | 6642352   | NC_000012.11 |
| cg01811815 | 5.23E-21 | 6.63E-23 | -1.12E+01 | 41.2083659 | -2.20E-01 | 114881103 | 114881226 | NC_000013.10 |
| cg02733351 | 5.24E-21 | 6.65E-23 | -1.12E+01 | 41.2051324 | -2.52E-01 | 43802992  | 43803115  | NC_000020.10 |
| cg13836770 | 5.24E-21 | 6.65E-23 | -1.12E+01 | 41.2048514 | -8.88E-02 | 12226913  | 12227036  | NC_000001.10 |
| cg07971089 | 5.29E-21 | 6.71E-23 | -1.12E+01 | 41.1954239 | -1.88E-01 | 144629702 | 144629825 | NC_000008.10 |
| cg06155341 | 5.36E-21 | 6.80E-23 | -1.12E+01 | 41.182298  | -1.76E-01 | 66048759  | 66048882  | NC_000011.9  |
| cg08841829 | 5.36E-21 | 6.82E-23 | -1.12E+01 | 41.180439  | -9.79E-02 | 43638893  | 43639016  | NC_000021.8  |
| cg15887927 | 5.36E-21 | 6.82E-23 | -1.12E+01 | 41.1799402 | -2.62E-01 | 29148952  | 29149075  | NC_000013.10 |
| cg03144848 | 5.38E-21 | 6.84E-23 | -1.12E+01 | 41.1770461 | -8.75E-02 | 142377368 | 142377491 | NC_000008.10 |
| cg22202381 | 5.40E-21 | 6.87E-23 | -1.12E+01 | 41.1725032 | -2.31E-01 | 102103051 | 102103174 | NC_000013.10 |
| cg10560147 | 5.41E-21 | 6.89E-23 | -1.12E+01 | 41.1701158 | -8.16E-02 | 65779335  | 65779458  | NC_000011.9  |
| cg03193328 | 5.42E-21 | 6.89E-23 | -1.12E+01 | 41.1693411 | -2.80E-01 | 65746852  | 65746975  | NC_000007.13 |
| cg21052608 | 5.43E-21 | 6.91E-23 | -1.12E+01 | 41.1663876 | -2.42E-01 | 81652962  | 81653085  | NC_000005.9  |

|            |          |          |           |            |           |           |           |              |
|------------|----------|----------|-----------|------------|-----------|-----------|-----------|--------------|
| cg26834627 | 5.43E-21 | 6.91E-23 | -1.12E+01 | 41.1662345 | -2.27E-01 | 58686097  | 58686220  | NC_000016.9  |
| cg24371033 | 5.46E-21 | 6.96E-23 | -1.12E+01 | 41.1603007 | -1.95E-01 | 241807924 | 241808047 | NC_000002.11 |
| cg20424311 | 5.51E-21 | 7.02E-23 | -1.12E+01 | 41.1514161 | -2.04E-01 | 141221527 | 141221650 | NC_000004.11 |
| cg15378486 | 5.56E-21 | 7.09E-23 | -1.12E+01 | 41.1419433 | -1.86E-01 | 79491582  | 79491705  | NC_000017.10 |
| cg20772593 | 5.59E-21 | 7.13E-23 | -1.12E+01 | 41.1352444 | -2.66E-01 | 56778651  | 56778774  | NC_000005.9  |
| cg02147797 | 5.59E-21 | 7.14E-23 | -1.12E+01 | 41.1349457 | -2.14E-01 | 64211204  | 64211327  | NC_000003.11 |
| cg25034766 | 5.63E-21 | 7.18E-23 | -1.12E+01 | 41.1286288 | -2.59E-01 | 75747332  | 75747455  | NC_000014.8  |
| cg10950358 | 5.63E-21 | 7.19E-23 | -1.12E+01 | 41.1276535 | -1.68E-01 | 147253401 | 147253524 | NC_000001.10 |
| cg18854666 | 5.63E-21 | 7.19E-23 | -1.12E+01 | 41.1270596 | -1.94E-01 | 219247055 | 219247178 | NC_000002.11 |
| cg13181537 | 5.65E-21 | 7.22E-23 | -1.12E+01 | 41.1227685 | -1.20E-01 | 175444120 | 175444243 | NC_000004.11 |
| cg21845080 | 5.66E-21 | 7.23E-23 | -1.12E+01 | 41.1219487 | -2.25E-01 | 196065306 | 196065429 | NC_000003.11 |
| cg04342924 | 5.68E-21 | 7.26E-23 | -1.12E+01 | 41.1181646 | -8.02E-02 | 142185183 | 142185306 | NC_000008.10 |
| cg10623389 | 5.68E-21 | 7.26E-23 | -1.12E+01 | 41.1174546 | -8.42E-02 | 16679388  | 16679511  | NC_000001.10 |
| cg16977858 | 5.70E-21 | 7.29E-23 | -1.12E+01 | 41.1134262 | -1.01E-01 | 52567510  | 52567633  | NC_000003.11 |
| cg21175685 | 5.75E-21 | 7.36E-23 | -1.12E+01 | 41.103781  | -2.36E-01 | 99378032  | 99378155  | NC_000003.11 |
| cg02353048 | 5.76E-21 | 7.37E-23 | -1.12E+01 | 41.103363  | -2.89E-01 | 124718401 | 124718524 | NC_000012.11 |
| cg19965511 | 5.76E-21 | 7.37E-23 | -1.12E+01 | 41.102639  | -1.33E-01 | 40336475  | 40336598  | NC_000017.10 |
| cg09840623 | 5.77E-21 | 7.38E-23 | -1.12E+01 | 41.1008999 | -1.32E-01 | 42396402  | 42396525  | NC_000002.11 |
| cg12593746 | 5.77E-21 | 7.39E-23 | -1.12E+01 | 41.0997145 | -2.01E-01 | 98789535  | 98789658  | NC_000001.10 |
| cg04339692 | 5.84E-21 | 7.49E-23 | -1.12E+01 | 41.0869649 | -2.81E-01 | 48666418  | 48666541  | NC_000015.9  |
| cg20754348 | 5.85E-21 | 7.50E-23 | -1.12E+01 | 41.0850027 | -1.52E-01 | 96869220  | 96869343  | NC_000015.9  |
| cg15262317 | 5.89E-21 | 7.55E-23 | -1.12E+01 | 41.0790179 | -1.65E-01 | 208632832 | 208632955 | NC_000002.11 |
| cg12510708 | 5.91E-21 | 7.59E-23 | -1.12E+01 | 41.0735388 | -2.84E-01 | 26193805  | 26193928  | NC_000007.13 |
| cg26000536 | 5.94E-21 | 7.63E-23 | -1.12E+01 | 41.0683626 | -2.27E-01 | 3276535   | 3276658   | NC_000001.10 |
| cg11935153 | 5.97E-21 | 7.68E-23 | -1.12E+01 | 41.0623063 | -1.59E-01 | 30923306  | 30923429  | NC_000006.11 |

|            |          |          |           |            |           |           |           |              |
|------------|----------|----------|-----------|------------|-----------|-----------|-----------|--------------|
| cg00403955 | 6.01E-21 | 7.73E-23 | -1.12E+01 | 41.0559976 | -1.55E-01 | 11680241  | 11680364  | NC_000016.9  |
| cg22121647 | 6.11E-21 | 7.86E-23 | -1.12E+01 | 41.0389035 | -2.31E-01 | 134845376 | 134845499 | NC_000007.13 |
| cg18661868 | 6.11E-21 | 7.86E-23 | -1.12E+01 | 41.0385999 | -1.97E-01 | 91427965  | 91428088  | NC_000015.9  |
| cg26870567 | 6.13E-21 | 7.89E-23 | -1.12E+01 | 41.034962  | -1.98E-01 | 24862006  | 24862129  | NC_000016.9  |
| cg11972305 | 6.18E-21 | 7.97E-23 | -1.12E+01 | 41.0253035 | -1.96E-01 | 233791962 | 233792085 | NC_000002.11 |
| cg20998539 | 6.19E-21 | 7.98E-23 | -1.12E+01 | 41.0236848 | -2.27E-01 | 62208374  | 62208497  | NC_000017.10 |
| cg10764101 | 6.21E-21 | 8.00E-23 | -1.12E+01 | 41.021238  | -1.46E-01 | 241374174 | 241374297 | NC_000002.11 |
| cg03393966 | 6.22E-21 | 8.02E-23 | -1.12E+01 | 41.0194657 | -1.37E-01 | 18548015  | 18548138  | NC_000019.9  |
| cg08623215 | 6.25E-21 | 8.06E-23 | -1.12E+01 | 41.0142767 | -1.03E-01 | 19896644  | 19896767  | NC_000016.9  |
| cg00494337 | 6.35E-21 | 8.21E-23 | -1.12E+01 | 40.9956826 | -2.70E-01 | 30194024  | 30194147  | NC_000020.10 |
| cg15347108 | 6.40E-21 | 8.26E-23 | -1.12E+01 | 40.9890264 | -2.65E-01 | 25340920  | 25341043  | NC_000012.11 |
| cg12143499 | 6.40E-21 | 8.27E-23 | -1.12E+01 | 40.9882163 | -2.37E-01 | 27615389  | 27615512  | NC_000012.11 |
| cg16677144 | 6.43E-21 | 8.31E-23 | -1.12E+01 | 40.9834346 | -1.33E-01 | 1790217   | 1790340   | NC_000001.10 |
| cg02824980 | 6.45E-21 | 8.34E-23 | -1.12E+01 | 40.9799304 | -2.08E-01 | 15783725  | 15783848  | NC_000019.9  |
| cg24780263 | 6.45E-21 | 8.35E-23 | -1.12E+01 | 40.979024  | -6.56E-02 | 30064201  | 30064324  | NC_000016.9  |
| cg06751802 | 6.48E-21 | 8.39E-23 | -1.12E+01 | 40.9744021 | -8.45E-02 | 76777529  | 76777652  | NC_000011.9  |
| cg07340025 | 6.51E-21 | 8.42E-23 | -1.12E+01 | 40.9704907 | -2.37E-01 | 14926200  | 14926323  | NC_000005.9  |
| cg00082497 | 6.54E-21 | 8.47E-23 | -1.12E+01 | 40.9647038 | -1.78E-01 | 32802133  | 32802256  | NC_000001.10 |
| cg12232146 | 6.59E-21 | 8.54E-23 | -1.12E+01 | 40.9564105 | -2.72E-01 | 76347937  | 76348060  | NC_000012.11 |
| cg12492380 | 6.62E-21 | 8.58E-23 | -1.12E+01 | 40.9516599 | -2.72E-01 | 98872169  | 98872292  | NC_000007.13 |
| cg10316899 | 6.65E-21 | 8.62E-23 | -1.12E+01 | 40.9471815 | -2.84E-01 | 39658128  | 39658251  | NC_000001.10 |
| cg01433677 | 6.69E-21 | 8.68E-23 | -1.12E+01 | 40.9404083 | -1.48E-01 | 30365840  | 30365963  | NC_000016.9  |
| cg27547873 | 6.71E-21 | 8.71E-23 | -1.12E+01 | 40.9374273 | -6.28E-02 | 37424360  | 37424483  | NC_000002.11 |
| cg10438589 | 6.72E-21 | 8.72E-23 | -1.12E+01 | 40.9360425 | -2.05E-01 | 14531493  | 14531616  | NC_000004.11 |
| cg21605781 | 6.72E-21 | 8.72E-23 | -1.12E+01 | 40.9358621 | -1.74E-01 | 105630720 | 105630843 | NC_000012.11 |

|               |          |          |           |            |           |           |           |              |
|---------------|----------|----------|-----------|------------|-----------|-----------|-----------|--------------|
| cg05696969    | 6.79E-21 | 8.81E-23 | -1.12E+01 | 40.9253748 | -2.84E-01 | 145326228 | 145326351 | NC_000005.9  |
| cg09225321    | 6.86E-21 | 8.92E-23 | -1.12E+01 | 40.9128491 | -8.76E-02 | 72920278  | 72920401  | NC_000017.10 |
| cg25338563    | 6.87E-21 | 8.93E-23 | -1.12E+01 | 40.9116778 | -2.41E-01 | 103669495 | 103669618 | NC_000008.10 |
| cg10791260    | 6.89E-21 | 8.97E-23 | -1.12E+01 | 40.9080553 | -1.27E-01 | 117568588 | 117568711 | NC_000009.11 |
| cg11858226    | 6.93E-21 | 9.01E-23 | -1.12E+01 | 40.9029367 | -2.35E-01 | 2548262   | 2548385   | NC_000007.13 |
| cg05845533    | 6.94E-21 | 9.03E-23 | -1.12E+01 | 40.9010058 | -1.86E-01 | 64672205  | 64672328  | NC_000017.10 |
| cg00462994    | 6.96E-21 | 9.06E-23 | -1.12E+01 | 40.8978271 | -9.21E-02 | 42081955  | 42082078  | NC_000017.10 |
| cg22609522    | 6.96E-21 | 9.07E-23 | -1.12E+01 | 40.8970514 | -1.56E-01 | 46403218  | 46403341  | NC_000022.10 |
| cg26147935    | 7.07E-21 | 9.21E-23 | -1.12E+01 | 40.8818364 | -1.96E-01 | 37688980  | 37689103  | NC_000008.10 |
| cg13563728    | 7.10E-21 | 9.26E-23 | -1.12E+01 | 40.8760434 | -1.31E-01 | 101019042 | 101019165 | NC_000009.11 |
| cg22367631    | 7.11E-21 | 9.27E-23 | -1.12E+01 | 40.8750535 | -2.51E-01 | 39569079  | 39569202  | NC_000001.10 |
| cg06828335    | 7.12E-21 | 9.28E-23 | -1.12E+01 | 40.8737652 | -2.69E-01 | 79238225  | 79238348  | NC_000010.10 |
| cg25946059    | 7.13E-21 | 9.31E-23 | -1.12E+01 | 40.8710151 | -3.27E-01 | 242973936 | 242974059 | NC_000002.11 |
| cg05347456    | 7.13E-21 | 9.31E-23 | -1.12E+01 | 40.8708264 | -2.05E-01 | 89690262  | 89690385  | NC_000016.9  |
| cg10017293    | 7.22E-21 | 9.44E-23 | -1.12E+01 | 40.8572659 | -2.72E-01 | 51640305  | 51640428  | NC_000012.11 |
| cg07624479    | 7.24E-21 | 9.47E-23 | -1.12E+01 | 40.8535802 | -8.28E-02 | 3075888   | 3076011   | NC_000004.11 |
| cg17168630    | 7.24E-21 | 9.47E-23 | -1.12E+01 | 40.853398  | -2.53E-01 | 44174930  | 44175053  | NC_000019.9  |
| cg03373714    | 7.32E-21 | 9.58E-23 | -1.12E+01 | 40.8420613 | -2.49E-01 | 147632094 | 147632217 | NC_000002.11 |
| cg20331980    | 7.40E-21 | 9.68E-23 | -1.12E+01 | 40.8322627 | -2.06E-01 | 149554503 | 149554626 | NC_000006.11 |
| cg23807071    | 7.43E-21 | 9.72E-23 | -1.12E+01 | 40.8280155 | -3.08E-01 | 1980222   | 1980345   | NC_000007.13 |
| ch.1.2927887F | 7.46E-21 | 9.77E-23 | -1.12E+01 | 40.8230795 | -1.00E-01 | 151394110 | 151394233 | NC_000001.10 |
| cg20481171    | 7.56E-21 | 9.91E-23 | -1.12E+01 | 40.8089177 | -7.00E-02 | 161090648 | 161090771 | NC_000003.11 |
| cg16401270    | 7.59E-21 | 9.95E-23 | -1.12E+01 | 40.8044647 | -1.43E-01 | 32404469  | 32404592  | NC_000001.10 |
| cg02604730    | 7.63E-21 | 1.00E-22 | -1.12E+01 | 40.7998621 | -2.33E-01 | 87339708  | 87339831  | NC_000016.9  |
| cg05055782    | 7.63E-21 | 1.00E-22 | -1.12E+01 | 40.799844  | -1.46E-01 | 49396193  | 49396316  | NC_000003.11 |

|            |          |          |           |            |           |           |           |              |
|------------|----------|----------|-----------|------------|-----------|-----------|-----------|--------------|
| cg26995224 | 7.63E-21 | 1.00E-22 | -1.12E+01 | 40.7994668 | -2.22E-01 | 121974146 | 121974269 | NC_000012.11 |
| cg24822529 | 7.64E-21 | 1.00E-22 | -1.12E+01 | 40.7978083 | -2.58E-01 | 134582880 | 134583003 | NC_000005.9  |
| cg26490949 | 7.64E-21 | 1.00E-22 | -1.12E+01 | 40.7978056 | -8.93E-02 | 20532080  | 20532203  | NC_000013.10 |
| cg10853949 | 7.69E-21 | 1.01E-22 | -1.12E+01 | 40.7913809 | -1.76E-01 | 80290217  | 80290340  | NC_000017.10 |
| cg11845168 | 7.71E-21 | 1.01E-22 | -1.12E+01 | 40.7882848 | -2.65E-01 | 21457096  | 21457219  | NC_000013.10 |
| cg11736020 | 7.71E-21 | 1.01E-22 | -1.12E+01 | 40.7878712 | -2.17E-01 | 30651511  | 30651634  | NC_000006.11 |
| cg21151432 | 7.78E-21 | 1.02E-22 | -1.12E+01 | 40.7787618 | -3.37E-01 | 25142229  | 25142352  | NC_000002.11 |
| cg07742718 | 7.80E-21 | 1.02E-22 | -1.12E+01 | 40.7759796 | -7.79E-02 | 30064149  | 30064272  | NC_000016.9  |
| cg10785793 | 7.85E-21 | 1.03E-22 | -1.12E+01 | 40.7694307 | -2.41E-01 | 207392261 | 207392384 | NC_000001.10 |
| cg22708150 | 7.90E-21 | 1.04E-22 | -1.12E+01 | 40.762684  | -3.01E-01 | 31649619  | 31649742  | NC_000006.11 |
| cg27375378 | 7.91E-21 | 1.04E-22 | -1.12E+01 | 40.7617313 | -1.52E-01 | 77806402  | 77806525  | NC_000017.10 |
| cg18819791 | 7.93E-21 | 1.04E-22 | -1.12E+01 | 40.7586054 | -2.28E-01 | 59799583  | 59799706  | NC_000014.8  |
| cg20427318 | 7.96E-21 | 1.05E-22 | -1.12E+01 | 40.7548389 | -2.69E-01 | 134757763 | 134757886 | NC_000006.11 |
| cg26752701 | 7.96E-21 | 1.05E-22 | -1.12E+01 | 40.7537697 | -7.10E-02 | 50529485  | 50529608  | NC_000019.9  |
| cg18761976 | 7.99E-21 | 1.05E-22 | -1.12E+01 | 40.7501412 | -2.42E-01 | 91807630  | 91807753  | NC_000015.9  |
| cg13579607 | 8.03E-21 | 1.06E-22 | -1.12E+01 | 40.7450276 | -2.40E-01 | 203289788 | 203289911 | NC_000001.10 |
| cg09687025 | 8.08E-21 | 1.06E-22 | -1.12E+01 | 40.737427  | -9.93E-02 | 77459109  | 77459232  | NC_000013.10 |
| cg07866909 | 8.10E-21 | 1.07E-22 | -1.12E+01 | 40.73528   | -2.12E-01 | 19849829  | 19849952  | NC_000002.11 |
| cg02606081 | 8.14E-21 | 1.07E-22 | -1.12E+01 | 40.7308311 | -9.38E-02 | 536182    | 536305    | NC_000011.9  |
| cg10191240 | 8.15E-21 | 1.07E-22 | -1.12E+01 | 40.7287016 | -2.95E-01 | 134230101 | 134230224 | NC_000008.10 |
| cg18702012 | 8.15E-21 | 1.07E-22 | -1.12E+01 | 40.7284626 | -1.90E-01 | 126106555 | 126106678 | NC_000010.10 |
| cg04961225 | 8.16E-21 | 1.08E-22 | -1.12E+01 | 40.7275707 | -2.62E-01 | 91332479  | 91332602  | NC_000012.11 |
| cg23708763 | 8.22E-21 | 1.08E-22 | -1.12E+01 | 40.7197711 | -2.58E-01 | 23291897  | 23292020  | NC_000014.8  |
| cg09425247 | 8.22E-21 | 1.08E-22 | -1.12E+01 | 40.7197526 | -2.19E-01 | 52178225  | 52178348  | NC_000010.10 |
| cg10667102 | 8.22E-21 | 1.08E-22 | -1.12E+01 | 40.719646  | -2.34E-01 | 1265458   | 1265581   | NC_000019.9  |

|            |          |          |           |            |           |           |           |              |
|------------|----------|----------|-----------|------------|-----------|-----------|-----------|--------------|
| cg17758081 | 8.34E-21 | 1.10E-22 | -1.12E+01 | 40.7035461 | -7.64E-02 | 77021038  | 77021161  | NC_000017.10 |
| cg10163377 | 8.34E-21 | 1.10E-22 | -1.12E+01 | 40.7031414 | -1.53E-01 | 99478368  | 99478491  | NC_000010.10 |
| cg05623526 | 8.34E-21 | 1.10E-22 | -1.12E+01 | 40.7030579 | -2.41E-01 | 2548319   | 2548442   | NC_000011.9  |
| cg26601073 | 8.39E-21 | 1.11E-22 | -1.12E+01 | 40.6974581 | -2.06E-01 | 1614268   | 1614391   | NC_000017.10 |
| cg19255608 | 8.43E-21 | 1.11E-22 | -1.12E+01 | 40.6923863 | -2.22E-01 | 153581655 | 153581778 | NC_000001.10 |
| cg14327359 | 8.47E-21 | 1.12E-22 | -1.12E+01 | 40.6874668 | -2.49E-01 | 47419263  | 47419386  | NC_000002.11 |
| cg03063658 | 8.49E-21 | 1.12E-22 | -1.12E+01 | 40.6847573 | -2.43E-01 | 109949132 | 109949255 | NC_000002.11 |
| cg04881228 | 8.57E-21 | 1.13E-22 | -1.12E+01 | 40.6753092 | -1.58E-01 | 64557277  | 64557400  | NC_000002.11 |
| cg08913523 | 8.62E-21 | 1.14E-22 | -1.12E+01 | 40.6692348 | -3.12E-01 | 126649807 | 126649930 | NC_000008.10 |
| cg00184457 | 8.65E-21 | 1.15E-22 | -1.12E+01 | 40.6649904 | -2.93E-01 | 8946301   | 8946424   | NC_000008.10 |
| cg08438650 | 8.71E-21 | 1.15E-22 | -1.12E+01 | 40.6575693 | -9.63E-02 | 89558207  | 89558330  | NC_000016.9  |
| cg13451153 | 8.76E-21 | 1.16E-22 | -1.12E+01 | 40.6515299 | -9.89E-02 | 99736489  | 99736612  | NC_000014.8  |
| cg09148649 | 8.90E-21 | 1.18E-22 | -1.11E+01 | 40.6350689 | -8.20E-02 | 3253659   | 3253782   | NC_000011.9  |
| cg08055087 | 8.90E-21 | 1.18E-22 | -1.11E+01 | 40.6341655 | -2.61E-01 | 7107129   | 7107252   | NC_000006.11 |
| cg23739746 | 8.96E-21 | 1.19E-22 | -1.11E+01 | 40.6280437 | -2.54E-01 | 114905867 | 114905990 | NC_000013.10 |
| cg17714703 | 8.97E-21 | 1.19E-22 | -1.11E+01 | 40.6255971 | -1.62E-01 | 4912221   | 4912344   | NC_000019.9  |
| cg15474318 | 8.99E-21 | 1.19E-22 | -1.11E+01 | 40.6240053 | -1.85E-01 | 114830713 | 114830836 | NC_000013.10 |
| cg16002963 | 9.04E-21 | 1.20E-22 | -1.11E+01 | 40.6175395 | -7.52E-02 | 98703324  | 98703447  | NC_000002.11 |
| cg13492245 | 9.13E-21 | 1.21E-22 | -1.11E+01 | 40.6073837 | -1.49E-01 | 130566157 | 130566280 | NC_000009.11 |
| cg19571617 | 9.17E-21 | 1.22E-22 | -1.11E+01 | 40.6034801 | -1.53E-01 | 90209190  | 90209313  | NC_000015.9  |
| cg18139273 | 9.29E-21 | 1.24E-22 | -1.11E+01 | 40.5893862 | -1.64E-01 | 962582    | 962705    | NC_000007.13 |
| cg25899154 | 9.30E-21 | 1.24E-22 | -1.11E+01 | 40.5873427 | -2.17E-01 | 72897143  | 72897266  | NC_000011.9  |
| cg01870834 | 9.31E-21 | 1.24E-22 | -1.11E+01 | 40.586381  | -2.43E-01 | 145002835 | 145002958 | NC_000008.10 |
| cg10595785 | 9.34E-21 | 1.24E-22 | -1.11E+01 | 40.5834251 | -2.28E-01 | 64237585  | 64237708  | NC_000006.11 |
| cg24876187 | 9.36E-21 | 1.25E-22 | -1.11E+01 | 40.5797662 | -2.51E-01 | 31126871  | 31126994  | NC_000006.11 |



|            |          |          |           |            |           |           |           |              |
|------------|----------|----------|-----------|------------|-----------|-----------|-----------|--------------|
| cg13581922 | 9.38E-21 | 1.25E-22 | -1.11E+01 | 40.577538  | -2.36E-01 | 124938116 | 124938239 | NC_000012.11 |
| cg07227049 | 9.40E-21 | 1.25E-22 | -1.11E+01 | 40.5753071 | -2.53E-01 | 58335008  | 58335131  | NC_000002.11 |
| cg04720330 | 9.40E-21 | 1.25E-22 | -1.11E+01 | 40.5749872 | -1.39E-01 | 2949813   | 2949936   | NC_000011.9  |
| cg16497293 | 9.53E-21 | 1.27E-22 | -1.11E+01 | 40.5608438 | -2.60E-01 | 15596082  | 15596205  | NC_000016.9  |
| cg13797425 | 9.53E-21 | 1.27E-22 | -1.11E+01 | 40.560474  | -2.70E-01 | 102554977 | 102555100 | NC_000014.8  |
| cg22304399 | 9.56E-21 | 1.28E-22 | -1.11E+01 | 40.5575282 | -2.97E-01 | 13319324  | 13319447  | NC_000019.9  |
| cg15026265 | 9.71E-21 | 1.30E-22 | -1.11E+01 | 40.5419972 | -3.06E-01 | 28283812  | 28283935  | NC_000012.11 |
| cg20955688 | 9.71E-21 | 1.30E-22 | -1.11E+01 | 40.5412511 | -2.84E-01 | 133772889 | 133773012 | NC_000008.10 |
| cg01084693 | 9.71E-21 | 1.30E-22 | -1.11E+01 | 40.5412501 | -8.31E-02 | 56324074  | 56324197  | NC_000020.10 |
| cg19822229 | 9.86E-21 | 1.32E-22 | -1.11E+01 | 40.525733  | -2.09E-01 | 36616030  | 36616153  | NC_000001.10 |
| cg03476000 | 9.93E-21 | 1.33E-22 | -1.11E+01 | 40.5179878 | -1.14E-01 | 6480167   | 6480290   | NC_000001.10 |
| cg19573490 | 9.98E-21 | 1.34E-22 | -1.11E+01 | 40.5122227 | -2.49E-01 | 79870317  | 79870440  | NC_000017.10 |
| cg13650740 | 1.00E-20 | 1.34E-22 | -1.11E+01 | 40.5089172 | -1.96E-01 | 80516517  | 80516640  | NC_000010.10 |
| cg21306329 | 1.01E-20 | 1.35E-22 | -1.11E+01 | 40.503414  | -1.72E-01 | 73083876  | 73083999  | NC_000017.10 |
| cg24790676 | 1.01E-20 | 1.35E-22 | -1.11E+01 | 40.502283  | -2.29E-01 | 51523736  | 51523859  | NC_000019.9  |
| cg12358050 | 1.01E-20 | 1.36E-22 | -1.11E+01 | 40.4953088 | -1.77E-01 | 241309998 | 241310121 | NC_000002.11 |
| cg03014622 | 1.02E-20 | 1.37E-22 | -1.11E+01 | 40.4867246 | -1.32E-01 | 30901707  | 30901830  | NC_000022.10 |
| cg20167074 | 1.02E-20 | 1.37E-22 | -1.11E+01 | 40.4859184 | -1.75E-01 | 151967023 | 151967146 | NC_000001.10 |
| cg09428251 | 1.02E-20 | 1.37E-22 | -1.11E+01 | 40.485092  | -1.46E-01 | 68658408  | 68658531  | NC_000008.10 |
| cg27543334 | 1.02E-20 | 1.37E-22 | -1.11E+01 | 40.4845903 | -1.72E-01 | 31173966  | 31174089  | NC_000001.10 |
| cg12686441 | 1.03E-20 | 1.39E-22 | -1.11E+01 | 40.4745407 | -3.28E-01 | 436693    | 436816    | NC_000008.10 |
| cg15225991 | 1.04E-20 | 1.39E-22 | -1.11E+01 | 40.4708164 | -9.78E-02 | 134468436 | 134468559 | NC_000010.10 |
| cg10196558 | 1.04E-20 | 1.39E-22 | -1.11E+01 | 40.4699543 | -1.90E-01 | 155043921 | 155044044 | NC_000001.10 |
| cg04130557 | 1.04E-20 | 1.40E-22 | -1.11E+01 | 40.4677375 | -2.66E-01 | 186760378 | 186760501 | NC_000004.11 |
| cg01199721 | 1.04E-20 | 1.40E-22 | -1.11E+01 | 40.4643158 | -7.52E-02 | 120632764 | 120632887 | NC_000012.11 |

|            |          |          |           |            |           |           |           |              |
|------------|----------|----------|-----------|------------|-----------|-----------|-----------|--------------|
| cg26095405 | 1.04E-20 | 1.40E-22 | -1.11E+01 | 40.4629719 | -1.61E-01 | 74726486  | 74726609  | NC_000015.9  |
| cg22930859 | 1.04E-20 | 1.40E-22 | -1.11E+01 | 40.462959  | -1.86E-01 | 78108189  | 78108312  | NC_000014.8  |
| cg17819085 | 1.04E-20 | 1.40E-22 | -1.11E+01 | 40.4628701 | -1.67E-01 | 235122803 | 235122926 | NC_000001.10 |
| cg05316065 | 1.04E-20 | 1.41E-22 | -1.11E+01 | 40.4617226 | -2.00E-01 | 130799007 | 130799130 | NC_000008.10 |
| cg02934719 | 1.05E-20 | 1.41E-22 | -1.11E+01 | 40.4576288 | -2.54E-01 | 66545712  | 66545835  | NC_000016.9  |
| cg16960396 | 1.05E-20 | 1.42E-22 | -1.11E+01 | 40.4541807 | -2.27E-01 | 157588520 | 157588643 | NC_000007.13 |
| cg03963219 | 1.06E-20 | 1.42E-22 | -1.11E+01 | 40.4493567 | -2.88E-01 | 84709147  | 84709270  | NC_000002.11 |
| cg15552493 | 1.06E-20 | 1.43E-22 | -1.11E+01 | 40.4469238 | -2.02E-01 | 102387391 | 102387514 | NC_000002.11 |
| cg26575450 | 1.06E-20 | 1.43E-22 | -1.11E+01 | 40.4450011 | -3.13E-01 | 64834280  | 64834403  | NC_000002.11 |
| cg13827179 | 1.07E-20 | 1.45E-22 | -1.11E+01 | 40.4315735 | -1.69E-01 | 22668639  | 22668762  | NC_000001.10 |
| cg12737497 | 1.09E-20 | 1.47E-22 | -1.11E+01 | 40.4194396 | -2.06E-01 | 56530420  | 56530543  | NC_000018.9  |
| cg08060857 | 1.09E-20 | 1.47E-22 | -1.11E+01 | 40.4186208 | -1.66E-01 | 85202526  | 85202649  | NC_000016.9  |
| cg07804470 | 1.09E-20 | 1.48E-22 | -1.11E+01 | 40.4109723 | -2.41E-01 | 99201496  | 99201619  | NC_000013.10 |
| cg09360654 | 1.10E-20 | 1.48E-22 | -1.11E+01 | 40.4102517 | -1.90E-01 | 45806501  | 45806624  | NC_000001.10 |
| cg07517216 | 1.10E-20 | 1.48E-22 | -1.11E+01 | 40.4092374 | -1.18E-01 | 10541207  | 10541330  | NC_000019.9  |
| cg12882572 | 1.10E-20 | 1.49E-22 | -1.11E+01 | 40.4063246 | -2.59E-01 | 35851204  | 35851327  | NC_000017.10 |
| cg04762351 | 1.10E-20 | 1.49E-22 | -1.11E+01 | 40.4014903 | -2.54E-01 | 15110983  | 15111106  | NC_000010.10 |
| cg25247520 | 1.10E-20 | 1.49E-22 | -1.11E+01 | 40.4008504 | -3.18E-01 | 128808017 | 128808140 | NC_000008.10 |
| cg02623114 | 1.11E-20 | 1.50E-22 | -1.11E+01 | 40.3994024 | -1.55E-01 | 145015122 | 145015245 | NC_000008.10 |
| cg20886165 | 1.12E-20 | 1.52E-22 | -1.11E+01 | 40.3834842 | -1.15E-01 | 110482323 | 110482446 | NC_000004.11 |
| cg23056703 | 1.13E-20 | 1.53E-22 | -1.11E+01 | 40.3772321 | -1.64E-01 | 5470788   | 5470911   | NC_000003.11 |
| cg17367616 | 1.13E-20 | 1.53E-22 | -1.11E+01 | 40.3760535 | -1.99E-01 | 27485428  | 27485551  | NC_000012.11 |
| cg26848524 | 1.13E-20 | 1.54E-22 | -1.11E+01 | 40.3735402 | -1.27E-01 | 55294566  | 55294689  | NC_000008.10 |
| cg07821354 | 1.14E-20 | 1.54E-22 | -1.11E+01 | 40.3680601 | -1.01E-01 | 6768010   | 6768133   | NC_000019.9  |
| cg24165760 | 1.14E-20 | 1.55E-22 | -1.11E+01 | 40.3620819 | -1.14E-01 | 103243389 | 103243512 | NC_000014.8  |

|            |          |          |           |            |           |           |           |              |
|------------|----------|----------|-----------|------------|-----------|-----------|-----------|--------------|
| cg04360210 | 1.15E-20 | 1.56E-22 | -1.11E+01 | 40.3576022 | -1.15E-01 | 3064015   | 3064138   | NC_000020.10 |
| cg22579075 | 1.15E-20 | 1.57E-22 | -1.11E+01 | 40.3552046 | -2.34E-01 | 94250352  | 94250475  | NC_000007.13 |
| cg26584034 | 1.15E-20 | 1.57E-22 | -1.11E+01 | 40.3551078 | -2.03E-01 | 150017204 | 150017327 | NC_000005.9  |
| cg25816127 | 1.15E-20 | 1.57E-22 | -1.11E+01 | 40.3540696 | -2.65E-01 | 194600959 | 194601082 | NC_000003.11 |
| cg11769476 | 1.16E-20 | 1.58E-22 | -1.11E+01 | 40.3475414 | -2.60E-01 | 49410810  | 49410933  | NC_000020.10 |
| cg04084348 | 1.16E-20 | 1.58E-22 | -1.11E+01 | 40.3457834 | -1.90E-01 | 75677011  | 75677134  | NC_000010.10 |
| cg04589210 | 1.16E-20 | 1.58E-22 | -1.11E+01 | 40.3441008 | -2.21E-01 | 86038589  | 86038712  | NC_000002.11 |
| cg19042340 | 1.17E-20 | 1.59E-22 | -1.11E+01 | 40.3371154 | -1.18E-01 | 14647154  | 14647277  | NC_000010.10 |
| cg05787952 | 1.18E-20 | 1.61E-22 | -1.11E+01 | 40.3292073 | -1.09E-01 | 734667    | 734790    | NC_000016.9  |
| cg12026563 | 1.18E-20 | 1.61E-22 | -1.11E+01 | 40.3264566 | -2.49E-01 | 18415804  | 18415927  | NC_000019.9  |
| cg07957995 | 1.18E-20 | 1.61E-22 | -1.11E+01 | 40.3258882 | -1.84E-01 | 224644750 | 224644873 | NC_000001.10 |
| cg11316517 | 1.19E-20 | 1.62E-22 | -1.11E+01 | 40.3227364 | -2.66E-01 | 72666838  | 72666961  | NC_000005.9  |
| cg10262032 | 1.19E-20 | 1.62E-22 | -1.11E+01 | 40.3221393 | -1.99E-01 | 49078119  | 49078242  | NC_000019.9  |
| cg11818555 | 1.20E-20 | 1.63E-22 | -1.11E+01 | 40.3119466 | -2.87E-01 | 30700159  | 30700282  | NC_000013.10 |
| cg16430535 | 1.20E-20 | 1.64E-22 | -1.11E+01 | 40.3108999 | -1.27E-01 | 61342164  | 61342287  | NC_000020.10 |
| cg01579299 | 1.21E-20 | 1.65E-22 | -1.11E+01 | 40.3038077 | -2.13E-01 | 27450062  | 27450185  | NC_000008.10 |
| cg08054038 | 1.21E-20 | 1.65E-22 | -1.11E+01 | 40.3029937 | -9.70E-02 | 45348674  | 45348797  | NC_000019.9  |
| cg12510999 | 1.21E-20 | 1.65E-22 | -1.11E+01 | 40.3022777 | -2.85E-01 | 28022223  | 28022346  | NC_000002.11 |
| cg01947224 | 1.21E-20 | 1.65E-22 | -1.11E+01 | 40.3011511 | -4.81E-02 | 58089885  | 58090008  | NC_000019.9  |
| cg26980692 | 1.22E-20 | 1.66E-22 | -1.11E+01 | 40.2948152 | -1.92E-01 | 60719947  | 60720070  | NC_000011.9  |
| cg21196201 | 1.24E-20 | 1.69E-22 | -1.11E+01 | 40.277902  | -1.95E-01 | 49078045  | 49078168  | NC_000019.9  |
| cg09113560 | 1.24E-20 | 1.69E-22 | -1.11E+01 | 40.276754  | -6.57E-02 | 122812    | 122935    | NC_000016.9  |
| cg27227804 | 1.24E-20 | 1.70E-22 | -1.11E+01 | 40.2726455 | -2.16E-01 | 11085972  | 11086095  | NC_000016.9  |
| cg06578434 | 1.25E-20 | 1.71E-22 | -1.11E+01 | 40.2687758 | -2.10E-01 | 1155225   | 1155348   | NC_000019.9  |
| cg18221580 | 1.25E-20 | 1.71E-22 | -1.11E+01 | 40.2676166 | -1.37E-01 | 48575897  | 48576020  | NC_000013.10 |

|            |          |          |           |            |           |           |           |              |
|------------|----------|----------|-----------|------------|-----------|-----------|-----------|--------------|
| cg05449217 | 1.25E-20 | 1.72E-22 | -1.11E+01 | 40.2633965 | -1.57E-01 | 75034620  | 75034743  | NC_000016.9  |
| cg16429505 | 1.26E-20 | 1.72E-22 | -1.11E+01 | 40.2595995 | -1.55E-01 | 100488398 | 100488521 | NC_000007.13 |
| cg24754277 | 1.26E-20 | 1.72E-22 | -1.11E+01 | 40.2587226 | -1.68E-01 | 90114156  | 90114279  | NC_000009.11 |
| cg13580286 | 1.26E-20 | 1.73E-22 | -1.11E+01 | 40.2565154 | -1.72E-01 | 22925391  | 22925514  | NC_000008.10 |
| cg10264003 | 1.26E-20 | 1.73E-22 | -1.11E+01 | 40.2563323 | -2.31E-01 | 110198965 | 110199088 | NC_000011.9  |
| cg08686879 | 1.27E-20 | 1.75E-22 | -1.11E+01 | 40.2463473 | -2.08E-01 | 131409634 | 131409757 | NC_000005.9  |
| cg13382100 | 1.27E-20 | 1.75E-22 | -1.11E+01 | 40.2461371 | -8.39E-02 | 132414849 | 132414972 | NC_000012.11 |
| cg20569839 | 1.29E-20 | 1.77E-22 | -1.11E+01 | 40.2342608 | -1.54E-01 | 109618889 | 109619012 | NC_000001.10 |
| cg23721083 | 1.30E-20 | 1.78E-22 | -1.11E+01 | 40.2287159 | -2.11E-01 | 68682927  | 68683050  | NC_000015.9  |
| cg15335297 | 1.30E-20 | 1.78E-22 | -1.11E+01 | 40.2257916 | -9.51E-02 | 96488030  | 96488153  | NC_000012.11 |
| cg01318557 | 1.30E-20 | 1.78E-22 | -1.11E+01 | 40.224787  | -2.35E-01 | 73624319  | 73624442  | NC_000007.13 |
| cg05198733 | 1.30E-20 | 1.79E-22 | -1.11E+01 | 40.2231477 | -9.21E-02 | 58912052  | 58912175  | NC_000011.9  |
| cg22473846 | 1.31E-20 | 1.79E-22 | -1.11E+01 | 40.2201466 | -1.41E-01 | 38846743  | 38846866  | NC_000005.9  |
| cg25616514 | 1.31E-20 | 1.79E-22 | -1.11E+01 | 40.2200542 | -1.65E-01 | 11798996  | 11799119  | NC_000003.11 |
| cg03071808 | 1.32E-20 | 1.81E-22 | -1.11E+01 | 40.2096134 | -2.26E-01 | 242908131 | 242908254 | NC_000002.11 |
| cg11138227 | 1.32E-20 | 1.82E-22 | -1.11E+01 | 40.2066634 | -2.37E-01 | 105436973 | 105437096 | NC_000014.8  |
| cg26860066 | 1.32E-20 | 1.82E-22 | -1.11E+01 | 40.2059611 | -9.74E-02 | 46551005  | 46551128  | NC_000011.9  |
| cg06434732 | 1.33E-20 | 1.83E-22 | -1.11E+01 | 40.2009428 | -1.26E-01 | 12322653  | 12322776  | NC_000016.9  |
| cg03515829 | 1.35E-20 | 1.86E-22 | -1.11E+01 | 40.1857927 | -2.01E-01 | 134233829 | 134233952 | NC_000007.13 |
| cg14046043 | 1.35E-20 | 1.86E-22 | -1.11E+01 | 40.1815054 | -1.17E-01 | 233561679 | 233561802 | NC_000002.11 |
| cg02301079 | 1.36E-20 | 1.87E-22 | -1.11E+01 | 40.1781844 | -1.38E-01 | 11591651  | 11591774  | NC_000016.9  |
| cg27657537 | 1.36E-20 | 1.88E-22 | -1.11E+01 | 40.1743178 | -1.66E-01 | 20863762  | 20863885  | NC_000022.10 |
| cg11931116 | 1.38E-20 | 1.89E-22 | -1.11E+01 | 40.165453  | -8.19E-02 | 54074040  | 54074163  | NC_000010.10 |
| cg05214460 | 1.39E-20 | 1.91E-22 | -1.11E+01 | 40.1579102 | -1.55E-01 | 111766841 | 111766964 | NC_000010.10 |
| cg13877315 | 1.39E-20 | 1.92E-22 | -1.11E+01 | 40.1547528 | -2.68E-01 | 140172089 | 140172212 | NC_000009.11 |

|            |          |          |           |            |           |           |           |              |
|------------|----------|----------|-----------|------------|-----------|-----------|-----------|--------------|
| cg05361415 | 1.41E-20 | 1.94E-22 | -1.11E+01 | 40.1405782 | -2.21E-01 | 11610138  | 11610261  | NC_000003.11 |
| cg24127639 | 1.41E-20 | 1.95E-22 | -1.11E+01 | 40.1371813 | -1.62E-01 | 69064741  | 69064864  | NC_000011.9  |
| cg24199006 | 1.42E-20 | 1.97E-22 | -1.11E+01 | 40.1288531 | -2.89E-01 | 106089203 | 106089326 | NC_000010.10 |
| cg02812036 | 1.43E-20 | 1.97E-22 | -1.11E+01 | 40.1251413 | -1.00E-01 | 7198515   | 7198638   | NC_000017.10 |
| cg06082050 | 1.43E-20 | 1.98E-22 | -1.11E+01 | 40.1243231 | -6.47E-02 | 91630943  | 91631066  | NC_000001.10 |
| cg06738602 | 1.43E-20 | 1.98E-22 | -1.11E+01 | 40.1240369 | -1.11E-01 | 52780634  | 52780757  | NC_000014.8  |
| cg24947777 | 1.43E-20 | 1.98E-22 | -1.11E+01 | 40.1222828 | -1.68E-01 | 145700251 | 145700374 | NC_000008.10 |
| cg23289024 | 1.43E-20 | 1.98E-22 | -1.11E+01 | 40.1219576 | -2.74E-01 | 102554846 | 102554969 | NC_000014.8  |
| cg06971773 | 1.43E-20 | 1.98E-22 | -1.11E+01 | 40.1219111 | -1.63E-01 | 71169083  | 71169206  | NC_000010.10 |
| cg16172099 | 1.44E-20 | 1.99E-22 | -1.11E+01 | 40.1173033 | -1.84E-01 | 103750821 | 103750944 | NC_000008.10 |
| cg16182743 | 1.44E-20 | 2.00E-22 | -1.11E+01 | 40.1133718 | -1.74E-01 | 66085846  | 66085969  | NC_000011.9  |
| cg09477895 | 1.45E-20 | 2.01E-22 | -1.11E+01 | 40.1064912 | -2.18E-01 | 18140683  | 18140806  | NC_000003.11 |
| cg01523881 | 1.47E-20 | 2.04E-22 | -1.11E+01 | 40.0913126 | -1.63E-01 | 200985689 | 200985812 | NC_000001.10 |
| cg14780070 | 1.47E-20 | 2.04E-22 | -1.11E+01 | 40.0907448 | -2.53E-01 | 17951330  | 17951453  | NC_000001.10 |
| cg22469948 | 1.48E-20 | 2.06E-22 | -1.11E+01 | 40.0847652 | -2.01E-01 | 50290079  | 50290202  | NC_000019.9  |
| cg09988805 | 1.49E-20 | 2.07E-22 | -1.11E+01 | 40.0773996 | -2.76E-01 | 43278552  | 43278675  | NC_000002.11 |
| cg10180415 | 1.49E-20 | 2.07E-22 | -1.11E+01 | 40.0770714 | -2.98E-01 | 117057968 | 117058091 | NC_000001.10 |
| cg26954156 | 1.50E-20 | 2.07E-22 | -1.11E+01 | 40.0761849 | -1.35E-01 | 22138642  | 22138765  | NC_000001.10 |
| cg05790630 | 1.50E-20 | 2.09E-22 | -1.11E+01 | 40.0697417 | -2.50E-01 | 64963168  | 64963291  | NC_000003.11 |
| cg23595451 | 1.51E-20 | 2.09E-22 | -1.11E+01 | 40.066297  | -2.04E-01 | 1035462   | 1035585   | NC_000004.11 |
| cg27297263 | 1.51E-20 | 2.10E-22 | -1.11E+01 | 40.0643184 | -1.38E-01 | 86160468  | 86160591  | NC_000006.11 |
| cg07010146 | 1.52E-20 | 2.11E-22 | -1.11E+01 | 40.0586655 | -2.26E-01 | 105239205 | 105239328 | NC_000010.10 |
| cg08500112 | 1.54E-20 | 2.14E-22 | -1.11E+01 | 40.0467318 | -2.44E-01 | 59086432  | 59086555  | NC_000005.9  |
| cg10364630 | 1.54E-20 | 2.14E-22 | -1.11E+01 | 40.0427548 | -2.12E-01 | 36132567  | 36132690  | NC_000019.9  |
| cg21603806 | 1.55E-20 | 2.16E-22 | -1.11E+01 | 40.0368428 | -1.01E-01 | 73704007  | 73704130  | NC_000014.8  |

|            |          |          |           |            |           |           |           |              |
|------------|----------|----------|-----------|------------|-----------|-----------|-----------|--------------|
| cg05299342 | 1.55E-20 | 2.16E-22 | -1.11E+01 | 40.0361201 | -1.09E-01 | 225307672 | 225307795 | NC_000002.11 |
| cg13997068 | 1.55E-20 | 2.16E-22 | -1.11E+01 | 40.0360677 | -1.63E-01 | 1275785   | 1275908   | NC_000016.9  |
| cg16675525 | 1.55E-20 | 2.16E-22 | -1.11E+01 | 40.0352114 | -1.61E-01 | 112158529 | 112158652 | NC_000010.10 |
| cg09641486 | 1.56E-20 | 2.16E-22 | -1.11E+01 | 40.0336125 | -6.17E-02 | 150755542 | 150755665 | NC_000007.13 |
| cg06783423 | 1.56E-20 | 2.17E-22 | -1.11E+01 | 40.0305841 | -1.66E-01 | 42538831  | 42538954  | NC_000003.11 |
| cg13550401 | 1.56E-20 | 2.17E-22 | -1.11E+01 | 40.0301155 | -2.42E-01 | 2288716   | 2288839   | NC_000007.13 |
| cg04465154 | 1.57E-20 | 2.18E-22 | -1.11E+01 | 40.0254916 | -2.04E-01 | 9045558   | 9045681   | NC_000008.10 |
| cg20749576 | 1.58E-20 | 2.20E-22 | -1.11E+01 | 40.0159794 | -1.68E-01 | 128292718 | 128292841 | NC_000003.11 |
| cg14457284 | 1.59E-20 | 2.21E-22 | -1.11E+01 | 40.0138957 | -1.73E-01 | 135852984 | 135853107 | NC_000009.11 |
| cg11592230 | 1.59E-20 | 2.21E-22 | -1.11E+01 | 40.0129405 | -2.18E-01 | 26981306  | 26981429  | NC_000002.11 |
| cg26666978 | 1.59E-20 | 2.21E-22 | -1.11E+01 | 40.010745  | -1.31E-01 | 47038531  | 47038654  | NC_000021.8  |
| cg00135870 | 1.59E-20 | 2.22E-22 | -1.11E+01 | 40.007798  | -1.40E-01 | 22203854  | 22203977  | NC_000016.9  |
| cg06434490 | 1.60E-20 | 2.22E-22 | -1.11E+01 | 40.0071049 | -2.22E-01 | 31494261  | 31494384  | NC_000006.11 |
| cg20216309 | 1.61E-20 | 2.25E-22 | -1.11E+01 | 39.996638  | -3.10E-01 | 16024540  | 16024663  | NC_000003.11 |
| cg02560388 | 1.62E-20 | 2.25E-22 | -1.11E+01 | 39.9948402 | -1.40E-01 | 11969958  | 11970081  | NC_000002.11 |
| cg23395749 | 1.62E-20 | 2.25E-22 | -1.11E+01 | 39.992962  | -2.45E-01 | 176984246 | 176984369 | NC_000005.9  |
| cg05501682 | 1.63E-20 | 2.27E-22 | -1.11E+01 | 39.9858883 | -7.11E-02 | 2988723   | 2988846   | NC_000006.11 |
| cg16700779 | 1.63E-20 | 2.27E-22 | -1.11E+01 | 39.9846382 | -6.81E-02 | 100168182 | 100168305 | NC_000007.13 |
| cg12913097 | 1.63E-20 | 2.28E-22 | -1.11E+01 | 39.982482  | -1.52E-01 | 72511623  | 72511746  | NC_000005.9  |
| cg17164345 | 1.64E-20 | 2.29E-22 | -1.11E+01 | 39.9761587 | -2.46E-01 | 77271314  | 77271437  | NC_000011.9  |
| cg03139377 | 1.65E-20 | 2.30E-22 | -1.11E+01 | 39.9752729 | -2.35E-01 | 323242    | 323365    | NC_000012.11 |
| cg03033176 | 1.65E-20 | 2.31E-22 | -1.11E+01 | 39.9704899 | -1.76E-01 | 65343929  | 65344052  | NC_000011.9  |
| cg04364718 | 1.66E-20 | 2.31E-22 | -1.11E+01 | 39.9678143 | -6.39E-02 | 82598634  | 82598757  | NC_000008.10 |
| cg00410199 | 1.66E-20 | 2.31E-22 | -1.10E+01 | 39.9676041 | -7.69E-02 | 49298567  | 49298690  | NC_000019.9  |
| cg16755251 | 1.66E-20 | 2.31E-22 | -1.10E+01 | 39.9673082 | -2.04E-01 | 169740686 | 169740809 | NC_000006.11 |

|            |          |          |           |            |           |           |           |              |
|------------|----------|----------|-----------|------------|-----------|-----------|-----------|--------------|
| cg12521167 | 1.68E-20 | 2.35E-22 | -1.10E+01 | 39.9513148 | -2.12E-01 | 29819099  | 29819222  | NC_000016.9  |
| cg26703507 | 1.68E-20 | 2.35E-22 | -1.10E+01 | 39.9508525 | -2.35E-01 | 113404661 | 113404784 | NC_000002.11 |
| cg16554145 | 1.69E-20 | 2.35E-22 | -1.10E+01 | 39.9498302 | -1.34E-01 | 241790950 | 241791073 | NC_000001.10 |
| cg00094595 | 1.71E-20 | 2.39E-22 | -1.10E+01 | 39.9367461 | -1.48E-01 | 91775374  | 91775497  | NC_000012.11 |
| cg23172671 | 1.71E-20 | 2.39E-22 | -1.10E+01 | 39.9349233 | -2.78E-01 | 203482523 | 203482646 | NC_000001.10 |
| cg21402071 | 1.72E-20 | 2.40E-22 | -1.10E+01 | 39.9308023 | -1.19E-01 | 78933902  | 78934025  | NC_000015.9  |
| cg07639783 | 1.72E-20 | 2.41E-22 | -1.10E+01 | 39.9282372 | -2.20E-01 | 1610747   | 1610870   | NC_000007.13 |
| cg21346966 | 1.72E-20 | 2.41E-22 | -1.10E+01 | 39.925872  | -1.62E-01 | 238341793 | 238341916 | NC_000002.11 |
| cg17563773 | 1.73E-20 | 2.43E-22 | -1.10E+01 | 39.9205805 | -1.80E-01 | 120177486 | 120177609 | NC_000011.9  |
| cg00067414 | 1.74E-20 | 2.43E-22 | -1.10E+01 | 39.9174695 | -2.13E-01 | 151188081 | 151188204 | NC_000006.11 |
| cg15782228 | 1.74E-20 | 2.44E-22 | -1.10E+01 | 39.9149026 | -2.46E-01 | 60932415  | 60932538  | NC_000020.10 |
| cg06350524 | 1.75E-20 | 2.45E-22 | -1.10E+01 | 39.9113987 | -9.80E-02 | 169747178 | 169747301 | NC_000002.11 |
| cg12899248 | 1.75E-20 | 2.45E-22 | -1.10E+01 | 39.9099947 | -1.97E-01 | 15845357  | 15845480  | NC_000017.10 |
| cg19767896 | 1.77E-20 | 2.48E-22 | -1.10E+01 | 39.8963912 | -8.66E-02 | 14529108  | 14529231  | NC_000019.9  |
| cg19197419 | 1.77E-20 | 2.48E-22 | -1.10E+01 | 39.8963563 | -1.00E-01 | 44441612  | 44441735  | NC_000020.10 |
| cg11457534 | 1.78E-20 | 2.50E-22 | -1.10E+01 | 39.8896677 | -1.61E-01 | 133816062 | 133816185 | NC_000011.9  |
| cg27005749 | 1.79E-20 | 2.51E-22 | -1.10E+01 | 39.886963  | -2.75E-01 | 141608646 | 141608769 | NC_000008.10 |
| cg02124887 | 1.79E-20 | 2.51E-22 | -1.10E+01 | 39.8859938 | -1.28E-01 | 1174666   | 1174789   | NC_000005.9  |
| cg15250073 | 1.79E-20 | 2.51E-22 | -1.10E+01 | 39.8857341 | -2.12E-01 | 16769480  | 16769603  | NC_000006.11 |
| cg04404772 | 1.80E-20 | 2.53E-22 | -1.10E+01 | 39.8797774 | -1.82E-01 | 46876609  | 46876732  | NC_000019.9  |
| cg06173216 | 1.81E-20 | 2.54E-22 | -1.10E+01 | 39.8743759 | -2.40E-01 | 120219151 | 120219274 | NC_000008.10 |
| cg14416623 | 1.81E-20 | 2.54E-22 | -1.10E+01 | 39.8740639 | -2.74E-01 | 133561787 | 133561910 | NC_000002.11 |
| cg13446584 | 1.82E-20 | 2.55E-22 | -1.10E+01 | 39.8696986 | -3.15E-01 | 74024953  | 74025076  | NC_000007.13 |
| cg05605029 | 1.82E-20 | 2.56E-22 | -1.10E+01 | 39.8683963 | -1.39E-01 | 16189554  | 16189677  | NC_000017.10 |
| cg27269561 | 1.83E-20 | 2.57E-22 | -1.10E+01 | 39.8641954 | -7.55E-02 | 3072713   | 3072836   | NC_000016.9  |

|            |          |          |           |            |           |           |           |              |
|------------|----------|----------|-----------|------------|-----------|-----------|-----------|--------------|
| cg00101629 | 1.83E-20 | 2.57E-22 | -1.10E+01 | 39.8622325 | -2.29E-01 | 15068966  | 15069089  | NC_000001.10 |
| cg24146125 | 1.83E-20 | 2.58E-22 | -1.10E+01 | 39.8586659 | -1.97E-01 | 30690376  | 30690499  | NC_000006.11 |
| cg09265274 | 1.85E-20 | 2.60E-22 | -1.10E+01 | 39.8520205 | -1.62E-01 | 48585635  | 48585758  | NC_000017.10 |
| cg11312509 | 1.85E-20 | 2.60E-22 | -1.10E+01 | 39.8506533 | -5.74E-02 | 10121251  | 10121374  | NC_000019.9  |
| cg03026373 | 1.85E-20 | 2.61E-22 | -1.10E+01 | 39.849457  | -1.12E-01 | 36715787  | 36715910  | NC_000017.10 |
| cg24528923 | 1.85E-20 | 2.61E-22 | -1.10E+01 | 39.8479175 | -7.11E-02 | 90119427  | 90119550  | NC_000015.9  |
| cg15754112 | 1.85E-20 | 2.61E-22 | -1.10E+01 | 39.8473176 | -2.38E-01 | 78864253  | 78864376  | NC_000010.10 |
| cg21370522 | 1.86E-20 | 2.62E-22 | -1.10E+01 | 39.8442139 | -2.70E-01 | 31543219  | 31543342  | NC_000006.11 |
| cg21057046 | 1.86E-20 | 2.63E-22 | -1.10E+01 | 39.8409172 | -1.39E-01 | 19970204  | 19970327  | NC_000001.10 |
| cg12420383 | 1.87E-20 | 2.64E-22 | -1.10E+01 | 39.8366057 | -1.37E-01 | 18996815  | 18996938  | NC_000017.10 |
| cg20508274 | 1.88E-20 | 2.65E-22 | -1.10E+01 | 39.8341265 | -1.24E-01 | 33073114  | 33073237  | NC_000019.9  |
| cg16213217 | 1.88E-20 | 2.65E-22 | -1.10E+01 | 39.8315197 | -2.65E-01 | 50074189  | 50074312  | NC_000013.10 |
| cg22888181 | 1.90E-20 | 2.68E-22 | -1.10E+01 | 39.8197214 | -3.22E-01 | 106089003 | 106089126 | NC_000010.10 |
| cg00474080 | 1.90E-20 | 2.69E-22 | -1.10E+01 | 39.819255  | -2.03E-01 | 30923243  | 30923366  | NC_000006.11 |
| cg16271720 | 1.91E-20 | 2.69E-22 | -1.10E+01 | 39.8178186 | -7.30E-02 | 11760136  | 11760259  | NC_000008.10 |
| cg26130669 | 1.93E-20 | 2.73E-22 | -1.10E+01 | 39.8029214 | -2.47E-01 | 11771473  | 11771596  | NC_000006.11 |
| cg04603976 | 1.93E-20 | 2.73E-22 | -1.10E+01 | 39.8026391 | -1.39E-01 | 4052706   | 4052829   | NC_000019.9  |
| cg14175304 | 1.94E-20 | 2.73E-22 | -1.10E+01 | 39.8012196 | -1.85E-01 | 78237397  | 78237520  | NC_000017.10 |
| cg22018051 | 1.94E-20 | 2.74E-22 | -1.10E+01 | 39.8001991 | -2.36E-01 | 154943349 | 154943472 | NC_000001.10 |
| cg00085448 | 1.94E-20 | 2.74E-22 | -1.10E+01 | 39.7989678 | -1.84E-01 | 113416442 | 113416565 | NC_000012.11 |
| cg14150907 | 1.94E-20 | 2.75E-22 | -1.10E+01 | 39.7968849 | -2.43E-01 | 142275722 | 142275845 | NC_000008.10 |
| cg18335931 | 1.95E-20 | 2.75E-22 | -1.10E+01 | 39.7958617 | -1.89E-01 | 18229242  | 18229365  | NC_000019.9  |
| cg21620535 | 1.95E-20 | 2.75E-22 | -1.10E+01 | 39.795329  | -9.03E-02 | 17297732  | 17297855  | NC_000011.9  |
| cg26478401 | 1.97E-20 | 2.79E-22 | -1.10E+01 | 39.7825382 | -2.87E-01 | 90749920  | 90750043  | NC_000010.10 |
| cg04962621 | 1.98E-20 | 2.80E-22 | -1.10E+01 | 39.7779544 | -2.23E-01 | 4714733   | 4714856   | NC_000016.9  |



|            |          |          |           |            |           |           |           |              |
|------------|----------|----------|-----------|------------|-----------|-----------|-----------|--------------|
| cg14123232 | 1.99E-20 | 2.81E-22 | -1.10E+01 | 39.7728279 | -1.57E-01 | 121494701 | 121494824 | NC_000002.11 |
| cg22046201 | 2.04E-20 | 2.89E-22 | -1.10E+01 | 39.7474822 | -2.68E-01 | 64212080  | 64212203  | NC_000001.10 |
| cg10574006 | 2.10E-20 | 2.98E-22 | -1.10E+01 | 39.7160717 | -2.87E-01 | 123965051 | 123965174 | NC_000005.9  |
| cg08452061 | 2.10E-20 | 2.98E-22 | -1.10E+01 | 39.7159527 | -1.99E-01 | 172199642 | 172199765 | NC_000005.9  |
| cg08679800 | 2.10E-20 | 2.98E-22 | -1.10E+01 | 39.7143807 | -2.06E-01 | 101912325 | 101912448 | NC_000008.10 |
| cg26596307 | 2.11E-20 | 3.00E-22 | -1.10E+01 | 39.7105538 | -1.72E-01 | 57411505  | 57411628  | NC_000016.9  |
| cg01442005 | 2.11E-20 | 3.00E-22 | -1.10E+01 | 39.7085998 | -2.28E-01 | 47179278  | 47179401  | NC_000017.10 |
| cg04607844 | 2.12E-20 | 3.02E-22 | -1.10E+01 | 39.7039042 | -1.48E-01 | 213090203 | 213090326 | NC_000001.10 |
| cg07202214 | 2.13E-20 | 3.03E-22 | -1.10E+01 | 39.7006089 | -1.73E-01 | 76381081  | 76381204  | NC_000011.9  |
| cg03076037 | 2.13E-20 | 3.03E-22 | -1.10E+01 | 39.699736  | -1.84E-01 | 79071361  | 79071484  | NC_000017.10 |
| cg23598115 | 2.13E-20 | 3.03E-22 | -1.10E+01 | 39.6992224 | -1.68E-01 | 213681300 | 213681423 | NC_000001.10 |
| cg03063710 | 2.13E-20 | 3.03E-22 | -1.10E+01 | 39.6986672 | -2.30E-02 | 95705054  | 95705177  | NC_000007.13 |
| cg21683708 | 2.14E-20 | 3.04E-22 | -1.10E+01 | 39.6967172 | -1.09E-01 | 36628755  | 36628878  | NC_000006.11 |
| cg14511923 | 2.14E-20 | 3.05E-22 | -1.10E+01 | 39.6935161 | -2.57E-01 | 7842369   | 7842492   | NC_000001.10 |
| cg09920804 | 2.15E-20 | 3.06E-22 | -1.10E+01 | 39.6892155 | -2.25E-01 | 42053994  | 42054117  | NC_000008.10 |
| cg00685614 | 2.16E-20 | 3.07E-22 | -1.10E+01 | 39.6869417 | -2.56E-01 | 89118838  | 89118961  | NC_000016.9  |
| cg06752054 | 2.17E-20 | 3.09E-22 | -1.10E+01 | 39.6810954 | -2.82E-01 | 42733747  | 42733870  | NC_000021.8  |
| cg18594482 | 2.18E-20 | 3.10E-22 | -1.10E+01 | 39.6753323 | -1.86E-01 | 27480543  | 27480666  | NC_000001.10 |
| cg03787603 | 2.18E-20 | 3.11E-22 | -1.10E+01 | 39.6733934 | -3.29E-01 | 101768610 | 101768733 | NC_000007.13 |
| cg12581682 | 2.19E-20 | 3.12E-22 | -1.10E+01 | 39.6710872 | -2.72E-01 | 58733736  | 58733859  | NC_000015.9  |
| cg00377320 | 2.23E-20 | 3.18E-22 | -1.10E+01 | 39.650083  | -1.04E-01 | 47988100  | 47988223  | NC_000017.10 |
| cg26192309 | 2.24E-20 | 3.19E-22 | -1.10E+01 | 39.648937  | -2.38E-01 | 211765568 | 211765691 | NC_000001.10 |
| cg19311889 | 2.28E-20 | 3.25E-22 | -1.10E+01 | 39.62933   | -1.03E-01 | 57483793  | 57483916  | NC_000012.11 |
| cg08808367 | 2.29E-20 | 3.27E-22 | -1.10E+01 | 39.624613  | -7.99E-02 | 178063320 | 178063443 | NC_000001.10 |
| cg14270581 | 2.29E-20 | 3.27E-22 | -1.10E+01 | 39.6239856 | -2.06E-01 | 103394548 | 103394671 | NC_000014.8  |

|                |          |          |           |            |           |           |           |              |
|----------------|----------|----------|-----------|------------|-----------|-----------|-----------|--------------|
| ch.12.2515819F | 2.31E-20 | 3.30E-22 | -1.10E+01 | 39.6154524 | -1.65E-01 | 121434819 | 121434942 | NC_000012.11 |
| cg17536822     | 2.32E-20 | 3.31E-22 | -1.10E+01 | 39.6104186 | -2.41E-01 | 72226488  | 72226611  | NC_000003.11 |
| cg12586347     | 2.32E-20 | 3.32E-22 | -1.10E+01 | 39.6099326 | -1.58E-01 | 82025796  | 82025919  | NC_000010.10 |
| cg07635227     | 2.33E-20 | 3.34E-22 | -1.10E+01 | 39.6038152 | -2.69E-01 | 4714815   | 4714938   | NC_000016.9  |
| cg11470399     | 2.33E-20 | 3.34E-22 | -1.10E+01 | 39.6033395 | -8.18E-02 | 23690492  | 23690615  | NC_000016.9  |
| cg05649391     | 2.34E-20 | 3.35E-22 | -1.10E+01 | 39.6003001 | -2.71E-01 | 47359115  | 47359238  | NC_000011.9  |
| cg05829479     | 2.34E-20 | 3.35E-22 | -1.10E+01 | 39.599755  | -7.24E-02 | 49518079  | 49518202  | NC_000006.11 |
| cg24544082     | 2.36E-20 | 3.38E-22 | -1.10E+01 | 39.5919427 | -2.60E-01 | 54751507  | 54751630  | NC_000002.11 |
| cg10173586     | 2.37E-20 | 3.40E-22 | -1.10E+01 | 39.5858304 | -1.77E-01 | 145020593 | 145020716 | NC_000008.10 |
| cg15403283     | 2.38E-20 | 3.40E-22 | -1.10E+01 | 39.5839425 | -2.74E-01 | 65233334  | 65233457  | NC_000014.8  |
| cg26292918     | 2.38E-20 | 3.41E-22 | -1.10E+01 | 39.583571  | -1.96E-01 | 151826205 | 151826328 | NC_000001.10 |
| cg11776124     | 2.38E-20 | 3.42E-22 | -1.10E+01 | 39.5799775 | -9.41E-02 | 101395209 | 101395332 | NC_000003.11 |
| cg11072119     | 2.39E-20 | 3.42E-22 | -1.10E+01 | 39.5782791 | -1.78E-01 | 21934312  | 21934435  | NC_000001.10 |
| cg10275917     | 2.39E-20 | 3.42E-22 | -1.10E+01 | 39.5780592 | -2.46E-01 | 7478820   | 7478943   | NC_000007.13 |
| cg15248935     | 2.39E-20 | 3.43E-22 | -1.10E+01 | 39.5770501 | -2.16E-01 | 157180055 | 157180178 | NC_000007.13 |
| cg02010711     | 2.40E-20 | 3.44E-22 | -1.10E+01 | 39.574302  | -1.99E-01 | 31126864  | 31126987  | NC_000006.11 |
| cg11438560     | 2.40E-20 | 3.45E-22 | -1.10E+01 | 39.5718476 | -1.76E-01 | 148521623 | 148521746 | NC_000005.9  |
| cg03453870     | 2.41E-20 | 3.46E-22 | -1.10E+01 | 39.5674824 | -2.38E-01 | 39563291  | 39563414  | NC_000015.9  |
| cg08477158     | 2.42E-20 | 3.47E-22 | -1.10E+01 | 39.5638844 | -2.74E-01 | 58807667  | 58807790  | NC_000017.10 |
| cg00211115     | 2.42E-20 | 3.48E-22 | -1.10E+01 | 39.5630833 | -1.89E-01 | 69257736  | 69257859  | NC_000011.9  |
| cg26534425     | 2.43E-20 | 3.50E-22 | -1.10E+01 | 39.5575786 | -1.92E-01 | 112034925 | 112035048 | NC_000011.9  |
| cg09631880     | 2.44E-20 | 3.50E-22 | -1.10E+01 | 39.5563928 | -2.18E-01 | 94213192  | 94213315  | NC_000012.11 |
| cg08894532     | 2.44E-20 | 3.50E-22 | -1.10E+01 | 39.5560635 | -2.49E-01 | 8582606   | 8582729   | NC_000019.9  |
| cg06581978     | 2.44E-20 | 3.51E-22 | -1.10E+01 | 39.5531446 | -1.73E-01 | 34408891  | 34409014  | NC_000021.8  |
| cg09874659     | 2.47E-20 | 3.55E-22 | -1.10E+01 | 39.5433052 | -2.86E-01 | 74512598  | 74512721  | NC_000013.10 |

|            |          |          |           |            |           |           |           |              |
|------------|----------|----------|-----------|------------|-----------|-----------|-----------|--------------|
| cg05406954 | 2.48E-20 | 3.56E-22 | -1.10E+01 | 39.5387297 | -6.97E-02 | 52280124  | 52280247  | NC_000003.11 |
| cg04071967 | 2.48E-20 | 3.57E-22 | -1.10E+01 | 39.5373064 | -1.91E-01 | 53511321  | 53511444  | NC_000017.10 |
| cg18304280 | 2.50E-20 | 3.60E-22 | -1.10E+01 | 39.5293304 | -1.73E-01 | 103010694 | 103010817 | NC_000014.8  |
| cg19235974 | 2.54E-20 | 3.66E-22 | -1.10E+01 | 39.5120883 | -2.45E-01 | 1063197   | 1063320   | NC_000012.11 |
| cg09601800 | 2.54E-20 | 3.66E-22 | -1.10E+01 | 39.5112561 | -9.68E-02 | 79486170  | 79486293  | NC_000017.10 |
| cg24287110 | 2.58E-20 | 3.73E-22 | -1.10E+01 | 39.4944669 | -2.41E-01 | 3824687   | 3824810   | NC_000010.10 |
| cg15151685 | 2.59E-20 | 3.73E-22 | -1.10E+01 | 39.4933454 | -2.03E-02 | 69453354  | 69453477  | NC_000011.9  |
| cg11130630 | 2.59E-20 | 3.73E-22 | -1.10E+01 | 39.4928119 | -3.17E-01 | 109899089 | 109899212 | NC_000012.11 |
| cg11637968 | 2.59E-20 | 3.74E-22 | -1.10E+01 | 39.4916397 | -2.58E-01 | 159732036 | 159732159 | NC_000004.11 |
| cg26826183 | 2.61E-20 | 3.77E-22 | -1.10E+01 | 39.4822421 | -2.30E-01 | 10231701  | 10231824  | NC_000019.9  |
| cg05315321 | 2.63E-20 | 3.80E-22 | -1.10E+01 | 39.4756292 | -2.49E-01 | 68844276  | 68844399  | NC_000014.8  |
| cg08160253 | 2.64E-20 | 3.81E-22 | -1.10E+01 | 39.4722122 | -1.20E-01 | 10153013  | 10153136  | NC_000020.10 |
| cg01811187 | 2.67E-20 | 3.86E-22 | -1.10E+01 | 39.4582502 | -1.54E-01 | 48637445  | 48637568  | NC_000017.10 |
| cg03934069 | 2.68E-20 | 3.87E-22 | -1.10E+01 | 39.4559805 | -1.38E-01 | 109420722 | 109420845 | NC_000001.10 |
| cg23270841 | 2.68E-20 | 3.88E-22 | -1.10E+01 | 39.4541156 | -2.26E-01 | 205529703 | 205529826 | NC_000002.11 |
| cg18460175 | 2.69E-20 | 3.89E-22 | -1.10E+01 | 39.4508938 | -2.24E-01 | 36132561  | 36132684  | NC_000019.9  |
| cg10211456 | 2.70E-20 | 3.90E-22 | -1.10E+01 | 39.4485825 | -1.84E-01 | 963471    | 963594    | NC_000007.13 |
| cg08159594 | 2.72E-20 | 3.93E-22 | -1.10E+01 | 39.4414327 | -1.74E-01 | 102790168 | 102790291 | NC_000007.13 |
| cg12692386 | 2.73E-20 | 3.95E-22 | -1.10E+01 | 39.4361093 | -1.86E-01 | 79386350  | 79386473  | NC_000017.10 |
| cg08217285 | 2.73E-20 | 3.96E-22 | -1.10E+01 | 39.4349931 | -2.13E-01 | 27917879  | 27918002  | NC_000017.10 |
| cg16861964 | 2.76E-20 | 4.00E-22 | -1.10E+01 | 39.4235307 | -2.33E-01 | 104998531 | 104998654 | NC_000012.11 |
| cg24441324 | 2.77E-20 | 4.01E-22 | -1.10E+01 | 39.4217134 | -2.15E-01 | 150523231 | 150523354 | NC_000001.10 |
| cg14996583 | 2.77E-20 | 4.02E-22 | -1.10E+01 | 39.4195996 | -1.65E-01 | 24478590  | 24478713  | NC_000013.10 |
| cg24519146 | 2.78E-20 | 4.02E-22 | -1.10E+01 | 39.418145  | -1.21E-01 | 33160318  | 33160441  | NC_000006.11 |
| cg27145347 | 2.78E-20 | 4.03E-22 | -1.10E+01 | 39.4168129 | -2.50E-01 | 67795659  | 67795782  | NC_000011.9  |

|              |          |          |           |            |           |           |           |              |
|--------------|----------|----------|-----------|------------|-----------|-----------|-----------|--------------|
| cg16978268   | 2.78E-20 | 4.03E-22 | -1.10E+01 | 39.4156683 | -2.15E-01 | 60646671  | 60646794  | NC_000018.9  |
| cg07277633   | 2.78E-20 | 4.03E-22 | -1.10E+01 | 39.4154691 | -1.68E-01 | 84402496  | 84402619  | NC_000016.9  |
| cg01031400   | 2.80E-20 | 4.05E-22 | -1.10E+01 | 39.4109337 | -1.02E-01 | 23021513  | 23021636  | NC_000008.10 |
| cg16451803   | 2.81E-20 | 4.07E-22 | -1.10E+01 | 39.4062484 | -1.91E-01 | 67088990  | 67089113  | NC_000005.9  |
| cg27292264   | 2.83E-20 | 4.10E-22 | -1.10E+01 | 39.3993762 | -1.87E-01 | 128079636 | 128079759 | NC_000003.11 |
| cg10855395   | 2.83E-20 | 4.10E-22 | -1.10E+01 | 39.399076  | -1.53E-01 | 125413124 | 125413247 | NC_000012.11 |
| cg03742950   | 2.84E-20 | 4.12E-22 | -1.10E+01 | 39.3945407 | -7.15E-02 | 20154030  | 20154153  | NC_000011.9  |
| cg09043518   | 2.85E-20 | 4.13E-22 | -1.10E+01 | 39.3922238 | -2.44E-01 | 80290106  | 80290229  | NC_000017.10 |
| cg03000596   | 2.86E-20 | 4.15E-22 | -1.10E+01 | 39.3867625 | -2.09E-01 | 73624373  | 73624496  | NC_000007.13 |
| cg09956592   | 2.86E-20 | 4.16E-22 | -1.10E+01 | 39.3858035 | -1.71E-01 | 129793333 | 129793456 | NC_000007.13 |
| cg11654620   | 2.87E-20 | 4.17E-22 | -1.10E+01 | 39.3816207 | -4.78E-02 | 50969039  | 50969162  | NC_000022.10 |
| cg19241744   | 2.88E-20 | 4.18E-22 | -1.10E+01 | 39.3793852 | -1.31E-01 | 73078790  | 73078913  | NC_000010.10 |
| cg27489772   | 2.88E-20 | 4.19E-22 | -1.10E+01 | 39.377933  | -1.05E-01 | 121021490 | 121021613 | NC_000012.11 |
| cg15387123   | 2.90E-20 | 4.21E-22 | -1.10E+01 | 39.3734712 | -2.06E-01 | 139891058 | 139891181 | NC_000009.11 |
| cg02747950   | 2.91E-20 | 4.22E-22 | -1.10E+01 | 39.3701541 | -2.73E-01 | 63526883  | 63527006  | NC_000015.9  |
| cg19257402   | 2.94E-20 | 4.27E-22 | -1.10E+01 | 39.3588789 | -1.61E-01 | 132356988 | 132357111 | NC_000012.11 |
| cg14528142   | 2.94E-20 | 4.28E-22 | -1.10E+01 | 39.3571259 | -7.64E-02 | 113585408 | 113585531 | NC_000001.10 |
| cg19544746   | 2.96E-20 | 4.30E-22 | -1.10E+01 | 39.351179  | -1.24E-01 | 8405046   | 8405169   | NC_000004.11 |
| ch.5.725956F | 2.97E-20 | 4.33E-22 | -1.10E+01 | 39.3462558 | -6.89E-02 | 33457179  | 33457302  | NC_000005.9  |
| cg21056706   | 2.97E-20 | 4.33E-22 | -1.10E+01 | 39.3457512 | -1.44E-01 | 139929714 | 139929837 | NC_000007.13 |
| cg03290977   | 3.02E-20 | 4.40E-22 | -1.10E+01 | 39.3302282 | -3.08E-01 | 15402686  | 15402809  | NC_000004.11 |
| cg27409991   | 3.03E-20 | 4.41E-22 | -1.10E+01 | 39.3276133 | -2.07E-01 | 142677860 | 142677983 | NC_000003.11 |
| cg21912556   | 3.03E-20 | 4.41E-22 | -1.10E+01 | 39.3275569 | -3.35E-01 | 18605482  | 18605605  | NC_000008.10 |
| cg07101841   | 3.06E-20 | 4.46E-22 | -1.10E+01 | 39.316003  | -2.40E-01 | 75315527  | 75315650  | NC_000017.10 |
| cg03088525   | 3.07E-20 | 4.47E-22 | -1.10E+01 | 39.3139355 | -9.61E-02 | 19421907  | 19422030  | NC_000016.9  |

|            |          |          |           |            |           |           |           |              |
|------------|----------|----------|-----------|------------|-----------|-----------|-----------|--------------|
| cg08679238 | 3.11E-20 | 4.53E-22 | -1.10E+01 | 39.2999919 | -2.06E-01 | 46449100  | 46449223  | NC_000003.11 |
| cg18049167 | 3.11E-20 | 4.54E-22 | -1.10E+01 | 39.2989137 | -1.06E-01 | 32121261  | 32121384  | NC_000006.11 |
| cg24983523 | 3.17E-20 | 4.63E-22 | -1.09E+01 | 39.2783981 | -7.81E-02 | 28495638  | 28495761  | NC_000013.10 |
| cg10118545 | 3.17E-20 | 4.63E-22 | -1.09E+01 | 39.2780403 | -1.22E-01 | 4784090   | 4784213   | NC_000007.13 |
| cg16430505 | 3.18E-20 | 4.64E-22 | -1.09E+01 | 39.275658  | -1.12E-01 | 23551855  | 23551978  | NC_000001.10 |
| cg19429300 | 3.19E-20 | 4.66E-22 | -1.09E+01 | 39.2725924 | -2.81E-01 | 41114929  | 41115052  | NC_000013.10 |
| cg14697657 | 3.19E-20 | 4.67E-22 | -1.09E+01 | 39.2702154 | -1.41E-01 | 42858327  | 42858450  | NC_000005.9  |
| cg07368817 | 3.20E-20 | 4.68E-22 | -1.09E+01 | 39.2688314 | -1.90E-01 | 16318860  | 16318983  | NC_000017.10 |
| cg02070740 | 3.21E-20 | 4.69E-22 | -1.09E+01 | 39.2654105 | -2.44E-01 | 146763914 | 146764037 | NC_000001.10 |
| cg04761746 | 3.22E-20 | 4.71E-22 | -1.09E+01 | 39.2619504 | -1.96E-01 | 141177756 | 141177879 | NC_000004.11 |
| cg26723524 | 3.23E-20 | 4.72E-22 | -1.09E+01 | 39.2588377 | -2.32E-01 | 39775803  | 39775926  | NC_000007.13 |
| cg09266008 | 3.23E-20 | 4.73E-22 | -1.09E+01 | 39.2585177 | -1.27E-01 | 36635674  | 36635797  | NC_000022.10 |
| cg25594736 | 3.24E-20 | 4.74E-22 | -1.09E+01 | 39.2544086 | -3.00E-01 | 67391147  | 67391270  | NC_000015.9  |
| cg25382900 | 3.26E-20 | 4.77E-22 | -1.09E+01 | 39.2481698 | -2.27E-01 | 12148326  | 12148449  | NC_000001.10 |
| cg20974196 | 3.27E-20 | 4.79E-22 | -1.09E+01 | 39.2451944 | -1.69E-01 | 859983    | 860106    | NC_000019.9  |
| cg27118035 | 3.33E-20 | 4.88E-22 | -1.09E+01 | 39.2266336 | -1.33E-01 | 31891978  | 31892101  | NC_000016.9  |
| cg03364683 | 3.34E-20 | 4.90E-22 | -1.09E+01 | 39.2219262 | -1.46E-01 | 169402298 | 169402421 | NC_000004.11 |
| cg04685253 | 3.39E-20 | 4.97E-22 | -1.09E+01 | 39.207742  | -1.89E-01 | 50117948  | 50118071  | NC_000019.9  |
| cg26426690 | 3.39E-20 | 4.97E-22 | -1.09E+01 | 39.2076058 | -2.76E-01 | 93861824  | 93861947  | NC_000010.10 |
| cg02659568 | 3.40E-20 | 4.99E-22 | -1.09E+01 | 39.2046456 | -2.67E-01 | 116221763 | 116221886 | NC_000001.10 |
| cg07533239 | 3.40E-20 | 5.00E-22 | -1.09E+01 | 39.2033164 | -2.00E-01 | 6422131   | 6422254   | NC_000012.11 |
| cg16351569 | 3.46E-20 | 5.09E-22 | -1.09E+01 | 39.1854707 | -2.78E-01 | 43448493  | 43448616  | NC_000017.10 |
| cg25072336 | 3.47E-20 | 5.11E-22 | -1.09E+01 | 39.1811917 | -2.59E-01 | 43306802  | 43306925  | NC_000017.10 |
| cg09666573 | 3.48E-20 | 5.12E-22 | -1.09E+01 | 39.1784567 | -1.29E-01 | 11267627  | 11267750  | NC_000003.11 |
| cg11611580 | 3.51E-20 | 5.17E-22 | -1.09E+01 | 39.1696345 | -2.52E-01 | 114661277 | 114661400 | NC_000006.11 |

|            |          |          |           |            |           |           |           |              |
|------------|----------|----------|-----------|------------|-----------|-----------|-----------|--------------|
| cg08095522 | 3.51E-20 | 5.17E-22 | -1.09E+01 | 39.1687373 | -9.86E-02 | 83960312  | 83960435  | NC_000016.9  |
| cg04951797 | 3.52E-20 | 5.19E-22 | -1.09E+01 | 39.1650004 | -2.37E-01 | 20226964  | 20227087  | NC_000003.11 |
| cg06616245 | 3.53E-20 | 5.20E-22 | -1.09E+01 | 39.1627188 | -1.81E-01 | 57854236  | 57854359  | NC_000012.11 |
| cg02747748 | 3.53E-20 | 5.21E-22 | -1.09E+01 | 39.1615869 | -7.82E-02 | 43510205  | 43510328  | NC_000017.10 |
| cg26110900 | 3.54E-20 | 5.22E-22 | -1.09E+01 | 39.1594964 | -2.68E-01 | 62073066  | 62073189  | NC_000010.10 |
| cg06362313 | 3.54E-20 | 5.22E-22 | -1.09E+01 | 39.1594124 | -2.07E-01 | 6645287   | 6645410   | NC_000012.11 |
| cg02745494 | 3.54E-20 | 5.22E-22 | -1.09E+01 | 39.1590254 | -2.05E-01 | 114771098 | 114771221 | NC_000013.10 |
| cg05395679 | 3.56E-20 | 5.25E-22 | -1.09E+01 | 39.1535383 | -1.44E-01 | 61446832  | 61446955  | NC_000011.9  |
| cg05363955 | 3.59E-20 | 5.30E-22 | -1.09E+01 | 39.1444234 | -2.58E-01 | 225875689 | 225875812 | NC_000002.11 |
| cg26839512 | 3.62E-20 | 5.35E-22 | -1.09E+01 | 39.1351033 | -2.15E-01 | 52918489  | 52918612  | NC_000004.11 |
| cg06005318 | 3.63E-20 | 5.37E-22 | -1.09E+01 | 39.1324738 | -1.75E-01 | 30690213  | 30690336  | NC_000006.11 |
| cg14637919 | 3.65E-20 | 5.39E-22 | -1.09E+01 | 39.1271224 | -2.38E-01 | 227288327 | 227288450 | NC_000002.11 |
| cg20021784 | 3.68E-20 | 5.44E-22 | -1.09E+01 | 39.1189898 | -2.23E-01 | 201984386 | 201984509 | NC_000002.11 |
| cg03312427 | 3.69E-20 | 5.45E-22 | -1.09E+01 | 39.1163937 | -1.59E-01 | 226778381 | 226778504 | NC_000001.10 |
| cg16049246 | 3.71E-20 | 5.49E-22 | -1.09E+01 | 39.108904  | -1.28E-01 | 76464026  | 76464149  | NC_000011.9  |
| cg21322248 | 3.75E-20 | 5.55E-22 | -1.09E+01 | 39.0990428 | -1.63E-01 | 77289047  | 77289170  | NC_000015.9  |
| cg26113233 | 3.76E-20 | 5.57E-22 | -1.09E+01 | 39.0945803 | -2.43E-01 | 174673622 | 174673745 | NC_000005.9  |
| cg12905410 | 3.78E-20 | 5.60E-22 | -1.09E+01 | 39.0903758 | -6.81E-02 | 27805706  | 27805829  | NC_000002.11 |
| cg21390801 | 3.82E-20 | 5.67E-22 | -1.09E+01 | 39.0774775 | -2.66E-01 | 42733729  | 42733852  | NC_000021.8  |
| cg11558107 | 3.85E-20 | 5.71E-22 | -1.09E+01 | 39.0703219 | -2.59E-01 | 60700124  | 60700247  | NC_000015.9  |
| cg01116477 | 3.85E-20 | 5.72E-22 | -1.09E+01 | 39.0693215 | -2.75E-01 | 34053399  | 34053522  | NC_000005.9  |
| cg09044743 | 3.85E-20 | 5.72E-22 | -1.09E+01 | 39.0688245 | -1.10E-01 | 2458238   | 2458361   | NC_000001.10 |
| cg20009354 | 3.85E-20 | 5.72E-22 | -1.09E+01 | 39.0687197 | -1.69E-01 | 51421604  | 51421727  | NC_000014.8  |
| cg21488289 | 3.93E-20 | 5.84E-22 | -1.09E+01 | 39.0489193 | -1.85E-01 | 57233269  | 57233392  | NC_000008.10 |
| cg24448013 | 3.93E-20 | 5.84E-22 | -1.09E+01 | 39.0483976 | -1.43E-01 | 24126076  | 24126199  | NC_000001.10 |

|            |          |          |           |            |           |           |           |              |
|------------|----------|----------|-----------|------------|-----------|-----------|-----------|--------------|
| cg21582325 | 3.95E-20 | 5.86E-22 | -1.09E+01 | 39.044195  | -1.85E-01 | 121498343 | 121498466 | NC_000012.11 |
| cg21435684 | 3.95E-20 | 5.87E-22 | -1.09E+01 | 39.0429131 | -2.80E-01 | 80255457  | 80255580  | NC_000017.10 |
| cg11013544 | 3.95E-20 | 5.88E-22 | -1.09E+01 | 39.0421674 | -1.42E-01 | 42062791  | 42062914  | NC_000022.10 |
| cg21883293 | 3.96E-20 | 5.89E-22 | -1.09E+01 | 39.0398493 | -1.55E-01 | 32334657  | 32334780  | NC_000011.9  |
| cg07739179 | 3.98E-20 | 5.91E-22 | -1.09E+01 | 39.0360903 | -1.52E-01 | 42081810  | 42081933  | NC_000017.10 |
| cg06495763 | 4.01E-20 | 5.97E-22 | -1.09E+01 | 39.0260249 | -2.08E-01 | 2925470   | 2925593   | NC_000011.9  |
| cg17012665 | 4.02E-20 | 5.97E-22 | -1.09E+01 | 39.0257559 | -1.81E-01 | 1974195   | 1974318   | NC_000008.10 |
| cg00544436 | 4.02E-20 | 5.98E-22 | -1.09E+01 | 39.0243135 | -2.18E-01 | 34203564  | 34203687  | NC_000006.11 |
| cg21037184 | 4.02E-20 | 5.99E-22 | -1.09E+01 | 39.0232616 | -1.11E-01 | 90397684  | 90397807  | NC_000005.9  |
| cg24605325 | 4.03E-20 | 6.00E-22 | -1.09E+01 | 39.0222617 | -2.01E-01 | 128168798 | 128168921 | NC_000002.11 |
| cg04327247 | 4.03E-20 | 6.00E-22 | -1.09E+01 | 39.0211917 | -2.11E-01 | 100564659 | 100564782 | NC_000009.11 |
| cg20940675 | 4.05E-20 | 6.04E-22 | -1.09E+01 | 39.015496  | -2.33E-01 | 229714785 | 229714908 | NC_000001.10 |
| cg02577580 | 4.07E-20 | 6.08E-22 | -1.09E+01 | 39.0091285 | -1.99E-01 | 87552124  | 87552247  | NC_000016.9  |
| cg14688342 | 4.08E-20 | 6.08E-22 | -1.09E+01 | 39.007797  | -2.17E-01 | 55147074  | 55147197  | NC_000007.13 |
| cg09282289 | 4.09E-20 | 6.11E-22 | -1.09E+01 | 39.0038286 | -5.58E-02 | 20532174  | 20532297  | NC_000013.10 |
| cg24405567 | 4.10E-20 | 6.11E-22 | -1.09E+01 | 39.0027049 | -2.12E-01 | 70787565  | 70787688  | NC_000015.9  |
| cg25278144 | 4.12E-20 | 6.15E-22 | -1.09E+01 | 38.9974352 | -2.25E-01 | 77962240  | 77962363  | NC_000017.10 |
| cg05792169 | 4.14E-20 | 6.18E-22 | -1.09E+01 | 38.992782  | -2.34E-01 | 85874227  | 85874350  | NC_000015.9  |
| cg00245192 | 4.15E-20 | 6.19E-22 | -1.09E+01 | 38.9904617 | -5.98E-02 | 127541455 | 127541578 | NC_000003.11 |
| cg16010628 | 4.15E-20 | 6.19E-22 | -1.09E+01 | 38.9903624 | -1.15E-01 | 49692283  | 49692406  | NC_000012.11 |
| cg03364620 | 4.15E-20 | 6.19E-22 | -1.09E+01 | 38.9900874 | -2.03E-01 | 582347    | 582470    | NC_000007.13 |
| cg23411981 | 4.15E-20 | 6.20E-22 | -1.09E+01 | 38.9892053 | -8.08E-02 | 105940377 | 105940500 | NC_000014.8  |
| cg16513215 | 4.16E-20 | 6.22E-22 | -1.09E+01 | 38.9863032 | -9.45E-02 | 32164588  | 32164711  | NC_000006.11 |
| cg20932150 | 4.16E-20 | 6.22E-22 | -1.09E+01 | 38.9859123 | -1.58E-01 | 79495268  | 79495391  | NC_000017.10 |
| cg11988591 | 4.16E-20 | 6.22E-22 | -1.09E+01 | 38.9854924 | -1.47E-01 | 144451909 | 144452032 | NC_000008.10 |

|            |          |          |           |            |           |           |           |              |
|------------|----------|----------|-----------|------------|-----------|-----------|-----------|--------------|
| cg23941599 | 4.16E-20 | 6.22E-22 | -1.09E+01 | 38.9850762 | -1.08E-01 | 114880796 | 114880919 | NC_000005.9  |
| cg04318205 | 4.17E-20 | 6.23E-22 | -1.09E+01 | 38.9840008 | -1.18E-01 | 37309118  | 37309241  | NC_000017.10 |
| cg16490823 | 4.18E-20 | 6.26E-22 | -1.09E+01 | 38.979344  | -1.43E-01 | 167085508 | 167085631 | NC_000006.11 |
| cg07520608 | 4.19E-20 | 6.27E-22 | -1.09E+01 | 38.9779457 | -2.76E-01 | 23627401  | 23627524  | NC_000002.11 |
| cg24213196 | 4.20E-20 | 6.28E-22 | -1.09E+01 | 38.9761271 | -1.49E-01 | 40834836  | 40834959  | NC_000017.10 |
| cg05483184 | 4.20E-20 | 6.29E-22 | -1.09E+01 | 38.9741897 | -1.12E-01 | 32055393  | 32055516  | NC_000006.11 |
| cg27608102 | 4.23E-20 | 6.34E-22 | -1.09E+01 | 38.9674712 | -2.07E-01 | 39680504  | 39680627  | NC_000017.10 |
| cg13163521 | 4.24E-20 | 6.36E-22 | -1.09E+01 | 38.9631202 | -1.26E-01 | 41803428  | 41803551  | NC_000015.9  |
| cg15358855 | 4.25E-20 | 6.37E-22 | -1.09E+01 | 38.9628599 | -2.80E-01 | 129830237 | 129830360 | NC_000011.9  |
| cg09255732 | 4.27E-20 | 6.41E-22 | -1.09E+01 | 38.9560365 | -2.42E-01 | 32171050  | 32171173  | NC_000001.10 |
| cg23238834 | 4.28E-20 | 6.43E-22 | -1.09E+01 | 38.9529122 | -2.10E-01 | 31126879  | 31127002  | NC_000006.11 |
| cg17125585 | 4.29E-20 | 6.44E-22 | -1.09E+01 | 38.9512716 | -2.03E-01 | 68176471  | 68176594  | NC_000001.10 |
| cg12562828 | 4.30E-20 | 6.45E-22 | -1.09E+01 | 38.9499866 | -1.64E-01 | 65076843  | 65076966  | NC_000011.9  |
| cg03224418 | 4.30E-20 | 6.46E-22 | -1.09E+01 | 38.9479526 | -1.68E-01 | 62611858  | 62611981  | NC_000020.10 |
| cg03884543 | 4.31E-20 | 6.47E-22 | -1.09E+01 | 38.9472433 | -2.05E-01 | 109373104 | 109373227 | NC_000001.10 |
| cg23520347 | 4.31E-20 | 6.48E-22 | -1.09E+01 | 38.9447912 | -9.72E-02 | 206730839 | 206730962 | NC_000001.10 |
| cg26110130 | 4.32E-20 | 6.49E-22 | -1.09E+01 | 38.9439741 | -2.48E-01 | 42128455  | 42128578  | NC_000001.10 |
| cg07718903 | 4.34E-20 | 6.52E-22 | -1.09E+01 | 38.938401  | -1.97E-01 | 6104261   | 6104384   | NC_000020.10 |
| cg03330678 | 4.35E-20 | 6.54E-22 | -1.09E+01 | 38.9358143 | -2.50E-01 | 75316233  | 75316356  | NC_000017.10 |
| cg19565094 | 4.35E-20 | 6.54E-22 | -1.09E+01 | 38.935694  | -2.19E-01 | 71156035  | 71156158  | NC_000015.9  |
| cg00034755 | 4.37E-20 | 6.58E-22 | -1.09E+01 | 38.9299675 | -2.26E-01 | 50918361  | 50918484  | NC_000022.10 |
| cg05347216 | 4.40E-20 | 6.62E-22 | -1.09E+01 | 38.9235669 | -1.93E-01 | 1193884   | 1194007   | NC_000016.9  |
| cg02923485 | 4.40E-20 | 6.63E-22 | -1.09E+01 | 38.9223215 | -2.49E-01 | 223959609 | 223959732 | NC_000001.10 |
| cg07713361 | 4.41E-20 | 6.65E-22 | -1.09E+01 | 38.9199374 | -1.62E-01 | 36649144  | 36649267  | NC_000022.10 |
| cg09384035 | 4.43E-20 | 6.68E-22 | -1.09E+01 | 38.9153717 | -2.45E-01 | 104131768 | 104131891 | NC_000008.10 |



|            |          |          |           |            |           |           |           |              |
|------------|----------|----------|-----------|------------|-----------|-----------|-----------|--------------|
| cg00874230 | 4.44E-20 | 6.68E-22 | -1.09E+01 | 38.9145264 | -1.13E-01 | 117537584 | 117537707 | NC_000012.11 |
| cg09866102 | 4.44E-20 | 6.69E-22 | -1.09E+01 | 38.9128725 | -5.85E-02 | 31214134  | 31214257  | NC_000016.9  |
| cg20701183 | 4.45E-20 | 6.71E-22 | -1.09E+01 | 38.9111775 | -2.88E-01 | 87799914  | 87800037  | NC_000001.10 |
| cg23324953 | 4.45E-20 | 6.71E-22 | -1.09E+01 | 38.9102608 | -2.40E-01 | 145013728 | 145013851 | NC_000008.10 |
| cg00577202 | 4.50E-20 | 6.79E-22 | -1.09E+01 | 38.8991982 | -1.56E-01 | 156784152 | 156784275 | NC_000001.10 |
| cg03857640 | 4.53E-20 | 6.83E-22 | -1.09E+01 | 38.8926662 | -1.51E-01 | 46607688  | 46607811  | NC_000016.9  |
| cg11203985 | 4.56E-20 | 6.88E-22 | -1.09E+01 | 38.8851235 | -1.55E-01 | 89641054  | 89641177  | NC_000016.9  |
| cg07510303 | 4.57E-20 | 6.89E-22 | -1.09E+01 | 38.8837237 | -1.32E-01 | 143748526 | 143748649 | NC_000006.11 |
| cg21971800 | 4.60E-20 | 6.95E-22 | -1.09E+01 | 38.8756135 | -1.94E-01 | 831348    | 831471    | NC_000017.10 |
| cg11159295 | 4.61E-20 | 6.97E-22 | -1.09E+01 | 38.8734907 | -1.17E-01 | 52280139  | 52280262  | NC_000003.11 |
| cg19834071 | 4.63E-20 | 7.00E-22 | -1.09E+01 | 38.8692183 | -6.33E-02 | 41698987  | 41699110  | NC_000019.9  |
| cg15627710 | 4.64E-20 | 7.02E-22 | -1.09E+01 | 38.8661734 | -2.20E-01 | 154972140 | 154972263 | NC_000001.10 |
| cg21526750 | 4.66E-20 | 7.04E-22 | -1.09E+01 | 38.86249   | -2.87E-01 | 23291749  | 23291872  | NC_000014.8  |
| cg07552374 | 4.74E-20 | 7.17E-22 | -1.09E+01 | 38.8450598 | -2.33E-01 | 6418966   | 6419089   | NC_000011.9  |
| cg04608933 | 4.75E-20 | 7.19E-22 | -1.09E+01 | 38.8420289 | -1.71E-01 | 2554801   | 2554924   | NC_000011.9  |
| cg08380556 | 4.75E-20 | 7.19E-22 | -1.09E+01 | 38.8415851 | -1.03E-01 | 31020218  | 31020341  | NC_000013.10 |
| cg10695848 | 4.77E-20 | 7.22E-22 | -1.09E+01 | 38.8377484 | -1.46E-01 | 48206783  | 48206906  | NC_000012.11 |
| cg17884383 | 4.79E-20 | 7.26E-22 | -1.09E+01 | 38.8318596 | -1.87E-01 | 45848320  | 45848443  | NC_000019.9  |
| cg25201707 | 4.80E-20 | 7.27E-22 | -1.09E+01 | 38.8312194 | -1.47E-01 | 246772605 | 246772728 | NC_000001.10 |
| cg16098545 | 4.81E-20 | 7.29E-22 | -1.09E+01 | 38.8287128 | -2.22E-01 | 26492312  | 26492435  | NC_000012.11 |
| cg06968859 | 4.81E-20 | 7.30E-22 | -1.09E+01 | 38.8275409 | -2.33E-01 | 80724209  | 80724332  | NC_000002.11 |
| cg26559804 | 4.82E-20 | 7.31E-22 | -1.09E+01 | 38.8254235 | -1.76E-01 | 128391271 | 128391394 | NC_000011.9  |
| cg10112270 | 4.82E-20 | 7.31E-22 | -1.09E+01 | 38.8249145 | -1.41E-01 | 21913458  | 21913581  | NC_000001.10 |
| cg08227353 | 4.85E-20 | 7.35E-22 | -1.09E+01 | 38.8194986 | -2.62E-01 | 102821670 | 102821793 | NC_000010.10 |
| cg10453071 | 4.89E-20 | 7.43E-22 | -1.09E+01 | 38.8098342 | -2.09E-01 | 57513414  | 57513537  | NC_000016.9  |

|            |          |          |           |            |           |           |           |              |
|------------|----------|----------|-----------|------------|-----------|-----------|-----------|--------------|
| cg23283839 | 4.93E-20 | 7.49E-22 | -1.09E+01 | 38.8010594 | -1.27E-01 | 158939381 | 158939504 | NC_000006.11 |
| cg06616512 | 5.02E-20 | 7.63E-22 | -1.09E+01 | 38.7831988 | -9.82E-02 | 96692187  | 96692310  | NC_000014.8  |
| cg15013617 | 5.03E-20 | 7.64E-22 | -1.09E+01 | 38.7818851 | -2.62E-01 | 2795378   | 2795501   | NC_000020.10 |
| cg08553950 | 5.07E-20 | 7.71E-22 | -1.09E+01 | 38.7729663 | -2.06E-01 | 36012016  | 36012139  | NC_000020.10 |
| cg18369939 | 5.08E-20 | 7.73E-22 | -1.09E+01 | 38.7702407 | -1.05E-01 | 3239916   | 3240039   | NC_000001.10 |
| cg15056556 | 5.09E-20 | 7.74E-22 | -1.09E+01 | 38.7684623 | -8.40E-02 | 146864482 | 146864605 | NC_000006.11 |
| cg14986890 | 5.09E-20 | 7.75E-22 | -1.09E+01 | 38.7675275 | -2.86E-01 | 158427635 | 158427758 | NC_000003.11 |
| cg21418854 | 5.13E-20 | 7.80E-22 | -1.09E+01 | 38.7612599 | -1.72E-01 | 36771781  | 36771904  | NC_000001.10 |
| cg22254463 | 5.16E-20 | 7.86E-22 | -1.09E+01 | 38.7537497 | -3.03E-01 | 108422663 | 108422786 | NC_000011.9  |
| cg00953154 | 5.20E-20 | 7.91E-22 | -1.09E+01 | 38.7472948 | -1.39E-01 | 45025620  | 45025743  | NC_000007.13 |
| cg22642477 | 5.22E-20 | 7.95E-22 | -1.09E+01 | 38.7422568 | -1.40E-01 | 5488162   | 5488285   | NC_000017.10 |
| cg18693822 | 5.22E-20 | 7.95E-22 | -1.09E+01 | 38.7421539 | -2.65E-01 | 55620604  | 55620727  | NC_000007.13 |
| cg12002708 | 5.23E-20 | 7.97E-22 | -1.09E+01 | 38.7399395 | -1.15E-01 | 32899806  | 32899929  | NC_000020.10 |
| cg07373212 | 5.24E-20 | 7.99E-22 | -1.09E+01 | 38.7378368 | -2.65E-01 | 126577851 | 126577974 | NC_000003.11 |
| cg18739800 | 5.27E-20 | 8.03E-22 | -1.09E+01 | 38.7328306 | -1.23E-01 | 27806020  | 27806143  | NC_000006.11 |
| cg19249749 | 5.28E-20 | 8.05E-22 | -1.09E+01 | 38.7299423 | -2.84E-01 | 223853145 | 223853268 | NC_000001.10 |
| cg08918658 | 5.30E-20 | 8.08E-22 | -1.09E+01 | 38.7265708 | -2.16E-01 | 158447883 | 158448006 | NC_000006.11 |
| cg01520454 | 5.30E-20 | 8.08E-22 | -1.09E+01 | 38.7264437 | -1.56E-01 | 2304375   | 2304498   | NC_000001.10 |
| cg09915397 | 5.31E-20 | 8.10E-22 | -1.09E+01 | 38.7238486 | -6.79E-02 | 46234214  | 46234337  | NC_000019.9  |
| cg18497238 | 5.32E-20 | 8.12E-22 | -1.09E+01 | 38.7213797 | -2.22E-01 | 75083495  | 75083618  | NC_000014.8  |
| cg17815820 | 5.37E-20 | 8.19E-22 | -1.09E+01 | 38.7122622 | -2.31E-01 | 86219783  | 86219906  | NC_000015.9  |
| cg03799957 | 5.40E-20 | 8.24E-22 | -1.09E+01 | 38.7067305 | -5.66E-02 | 42249026  | 42249149  | NC_000008.10 |
| cg15446845 | 5.40E-20 | 8.24E-22 | -1.09E+01 | 38.7061887 | -1.01E-01 | 5470909   | 5471032   | NC_000003.11 |
| cg10505740 | 5.44E-20 | 8.31E-22 | -1.09E+01 | 38.6983387 | -6.43E-02 | 2478800   | 2478923   | NC_000016.9  |
| cg15208197 | 5.48E-20 | 8.36E-22 | -1.09E+01 | 38.6918253 | -1.42E-01 | 156561146 | 156561269 | NC_000001.10 |

|            |          |          |           |            |           |           |           |              |
|------------|----------|----------|-----------|------------|-----------|-----------|-----------|--------------|
| cg19695805 | 5.48E-20 | 8.37E-22 | -1.09E+01 | 38.6909326 | -1.56E-01 | 9385645   | 9385768   | NC_000011.9  |
| cg18668449 | 5.51E-20 | 8.41E-22 | -1.09E+01 | 38.6860608 | -2.52E-01 | 60925179  | 60925302  | NC_000020.10 |
| cg02960777 | 5.51E-20 | 8.41E-22 | -1.09E+01 | 38.6858856 | -2.45E-01 | 77562848  | 77562971  | NC_000007.13 |
| cg15126957 | 5.54E-20 | 8.48E-22 | -1.09E+01 | 38.6785197 | -9.23E-02 | 179246594 | 179246717 | NC_000005.9  |
| cg06523744 | 5.57E-20 | 8.51E-22 | -1.09E+01 | 38.6745134 | -1.09E-01 | 39410145  | 39410268  | NC_000022.10 |
| cg08041308 | 5.57E-20 | 8.51E-22 | -1.09E+01 | 38.6743118 | -1.74E-01 | 73028425  | 73028548  | NC_000017.10 |
| cg07361874 | 5.58E-20 | 8.54E-22 | -1.09E+01 | 38.671251  | -1.22E-01 | 132073577 | 132073700 | NC_000005.9  |
| cg27417997 | 5.58E-20 | 8.54E-22 | -1.09E+01 | 38.6707929 | -2.66E-01 | 77356416  | 77356539  | NC_000004.11 |
| cg04064032 | 5.58E-20 | 8.55E-22 | -1.09E+01 | 38.6700665 | -2.77E-01 | 114846876 | 114846999 | NC_000010.10 |
| cg09103187 | 5.61E-20 | 8.60E-22 | -1.09E+01 | 38.6644407 | -2.53E-01 | 42207510  | 42207633  | NC_000006.11 |
| cg13058457 | 5.65E-20 | 8.66E-22 | -1.09E+01 | 38.6571692 | -3.36E-01 | 38422160  | 38422283  | NC_000015.9  |
| cg07280206 | 5.74E-20 | 8.80E-22 | -1.09E+01 | 38.641714  | -1.23E-01 | 56554249  | 56554372  | NC_000016.9  |
| cg13512951 | 5.77E-20 | 8.84E-22 | -1.09E+01 | 38.6370493 | -1.75E-01 | 127029180 | 127029303 | NC_000009.11 |
| cg24996440 | 5.77E-20 | 8.85E-22 | -1.09E+01 | 38.6360623 | -1.86E-01 | 3583570   | 3583693   | NC_000002.11 |
| cg10769531 | 5.77E-20 | 8.85E-22 | -1.09E+01 | 38.6353358 | -2.48E-01 | 110753971 | 110754094 | NC_000007.13 |
| cg12967723 | 5.82E-20 | 8.93E-22 | -1.09E+01 | 38.6271496 | -1.54E-01 | 100464145 | 100464268 | NC_000007.13 |
| cg10248100 | 5.83E-20 | 8.95E-22 | -1.09E+01 | 38.6250128 | -1.46E-01 | 872053    | 872176    | NC_000007.13 |
| cg09072560 | 5.85E-20 | 8.98E-22 | -1.09E+01 | 38.6218188 | -2.13E-01 | 32802218  | 32802341  | NC_000001.10 |
| cg15355388 | 5.86E-20 | 8.99E-22 | -1.09E+01 | 38.6199251 | -1.23E-01 | 57004919  | 57005042  | NC_000011.9  |
| cg16594502 | 5.88E-20 | 9.04E-22 | -1.09E+01 | 38.615242  | -1.89E-01 | 40339900  | 40340023  | NC_000015.9  |
| cg23448635 | 5.90E-20 | 9.07E-22 | -1.09E+01 | 38.6117845 | -1.11E-01 | 79859809  | 79859932  | NC_000017.10 |
| cg10321156 | 5.93E-20 | 9.11E-22 | -1.08E+01 | 38.607312  | -1.96E-01 | 63687223  | 63687346  | NC_000011.9  |
| cg24343430 | 5.93E-20 | 9.11E-22 | -1.08E+01 | 38.6071584 | -2.34E-01 | 117457111 | 117457234 | NC_000008.10 |
| cg13639881 | 5.93E-20 | 9.11E-22 | -1.08E+01 | 38.6068425 | -1.49E-01 | 19421817  | 19421940  | NC_000016.9  |
| cg09851620 | 5.93E-20 | 9.12E-22 | -1.08E+01 | 38.6061845 | -2.47E-01 | 95403214  | 95403337  | NC_000001.10 |

|            |          |          |           |            |           |           |           |              |
|------------|----------|----------|-----------|------------|-----------|-----------|-----------|--------------|
| cg21603144 | 5.97E-20 | 9.19E-22 | -1.08E+01 | 38.5988961 | -2.25E-01 | 102608233 | 102608356 | NC_000002.11 |
| cg10207553 | 5.98E-20 | 9.20E-22 | -1.08E+01 | 38.5975863 | -2.13E-01 | 65277977  | 65278100  | NC_000015.9  |
| cg20512029 | 5.99E-20 | 9.22E-22 | -1.08E+01 | 38.5955247 | -6.77E-02 | 43104357  | 43104480  | NC_000020.10 |
| cg03006527 | 5.99E-20 | 9.22E-22 | -1.08E+01 | 38.5951736 | -1.66E-01 | 155043967 | 155044090 | NC_000001.10 |
| cg12091936 | 6.01E-20 | 9.25E-22 | -1.08E+01 | 38.5921098 | -2.69E-01 | 70303534  | 70303657  | NC_000011.9  |
| cg17951713 | 6.02E-20 | 9.27E-22 | -1.08E+01 | 38.5901202 | -2.64E-01 | 130698161 | 130698284 | NC_000008.10 |
| cg02966574 | 6.03E-20 | 9.28E-22 | -1.08E+01 | 38.5882324 | -7.29E-02 | 68872082  | 68872205  | NC_000015.9  |
| cg02683578 | 6.04E-20 | 9.31E-22 | -1.08E+01 | 38.5858825 | -5.42E-02 | 31649432  | 31649555  | NC_000006.11 |
| cg15599832 | 6.04E-20 | 9.32E-22 | -1.08E+01 | 38.5849458 | -2.31E-01 | 38845129  | 38845252  | NC_000005.9  |
| cg20410995 | 6.05E-20 | 9.33E-22 | -1.08E+01 | 38.5830418 | -1.09E-01 | 89664545  | 89664668  | NC_000001.10 |
| cg01141339 | 6.07E-20 | 9.36E-22 | -1.08E+01 | 38.5802742 | -2.20E-01 | 72530198  | 72530321  | NC_000005.9  |
| cg14074174 | 6.08E-20 | 9.38E-22 | -1.08E+01 | 38.5783843 | -1.92E-01 | 7986206   | 7986329   | NC_000019.9  |
| cg08153752 | 6.09E-20 | 9.40E-22 | -1.08E+01 | 38.5763747 | -1.38E-01 | 2458258   | 2458381   | NC_000001.10 |
| cg05956608 | 6.10E-20 | 9.42E-22 | -1.08E+01 | 38.5740204 | -3.07E-01 | 207999258 | 207999381 | NC_000001.10 |
| cg04807739 | 6.12E-20 | 9.46E-22 | -1.08E+01 | 38.5699593 | -1.38E-01 | 88779914  | 88780037  | NC_000010.10 |
| cg11066209 | 6.14E-20 | 9.48E-22 | -1.08E+01 | 38.5677728 | -1.37E-01 | 2282252   | 2282375   | NC_000007.13 |
| cg08822075 | 6.15E-20 | 9.50E-22 | -1.08E+01 | 38.5651934 | -2.72E-01 | 26193607  | 26193730  | NC_000007.13 |
| cg19722656 | 6.17E-20 | 9.54E-22 | -1.08E+01 | 38.561576  | -8.74E-02 | 119669372 | 119669495 | NC_000006.11 |
| cg17972655 | 6.21E-20 | 9.61E-22 | -1.08E+01 | 38.5541713 | -1.85E-01 | 90709123  | 90709246  | NC_000015.9  |
| cg02073525 | 6.23E-20 | 9.64E-22 | -1.08E+01 | 38.5506932 | -1.93E-01 | 78556423  | 78556546  | NC_000015.9  |
| cg03779326 | 6.24E-20 | 9.65E-22 | -1.08E+01 | 38.5496212 | -1.05E-01 | 128278532 | 128278655 | NC_000003.11 |
| cg23460250 | 6.30E-20 | 9.75E-22 | -1.08E+01 | 38.5393574 | -3.23E-01 | 73223852  | 73223975  | NC_000007.13 |
| cg14217589 | 6.33E-20 | 9.80E-22 | -1.08E+01 | 38.534442  | -1.34E-01 | 37979819  | 37979942  | NC_000004.11 |
| cg18637459 | 6.36E-20 | 9.85E-22 | -1.08E+01 | 38.5291657 | -1.11E-01 | 108991991 | 108992114 | NC_000012.11 |
| cg24599065 | 6.39E-20 | 9.90E-22 | -1.08E+01 | 38.5249675 | -1.79E-01 | 202093848 | 202093971 | NC_000002.11 |

|            |          |          |           |            |           |           |           |              |
|------------|----------|----------|-----------|------------|-----------|-----------|-----------|--------------|
| cg05743713 | 6.39E-20 | 9.91E-22 | -1.08E+01 | 38.5236175 | -2.47E-01 | 66885240  | 66885363  | NC_000011.9  |
| cg22878582 | 6.40E-20 | 9.92E-22 | -1.08E+01 | 38.5220989 | -1.86E-01 | 69944091  | 69944214  | NC_000002.11 |
| cg22942704 | 6.49E-20 | 1.01E-21 | -1.08E+01 | 38.5066918 | -7.55E-02 | 20813574  | 20813697  | NC_000001.10 |
| cg06002524 | 6.51E-20 | 1.01E-21 | -1.08E+01 | 38.5047977 | -7.56E-02 | 74225627  | 74225750  | NC_000014.8  |
| cg08378442 | 6.52E-20 | 1.01E-21 | -1.08E+01 | 38.5021363 | -1.01E-01 | 220117704 | 220117827 | NC_000002.11 |
| cg09474442 | 6.52E-20 | 1.01E-21 | -1.08E+01 | 38.5017669 | -2.46E-01 | 120189867 | 120189990 | NC_000002.11 |
| cg15123011 | 6.58E-20 | 1.02E-21 | -1.08E+01 | 38.4922972 | -6.10E-02 | 42136729  | 42136852  | NC_000020.10 |
| cg23656110 | 6.58E-20 | 1.02E-21 | -1.08E+01 | 38.4921952 | -1.85E-01 | 45232531  | 45232654  | NC_000021.8  |
| cg07095737 | 6.61E-20 | 1.03E-21 | -1.08E+01 | 38.4876906 | -1.88E-01 | 14458471  | 14458594  | NC_000016.9  |
| cg03310376 | 6.62E-20 | 1.03E-21 | -1.08E+01 | 38.4859091 | -3.13E-01 | 12229001  | 12229124  | NC_000003.11 |
| cg22444720 | 6.65E-20 | 1.03E-21 | -1.08E+01 | 38.480987  | -1.32E-01 | 126240414 | 126240537 | NC_000006.11 |
| cg10392768 | 6.66E-20 | 1.04E-21 | -1.08E+01 | 38.4788515 | -4.95E-02 | 8021828   | 8021951   | NC_000017.10 |
| cg18917853 | 6.69E-20 | 1.04E-21 | -1.08E+01 | 38.474672  | -1.04E-01 | 18723119  | 18723242  | NC_000019.9  |
| cg15987211 | 6.70E-20 | 1.04E-21 | -1.08E+01 | 38.4730474 | -1.16E-01 | 24438941  | 24439064  | NC_000001.10 |
| cg23904247 | 6.72E-20 | 1.05E-21 | -1.08E+01 | 38.4694215 | -2.38E-01 | 102554826 | 102554949 | NC_000014.8  |
| cg12261095 | 6.75E-20 | 1.05E-21 | -1.08E+01 | 38.4653323 | -1.43E-01 | 7764345   | 7764468   | NC_000019.9  |
| cg15896084 | 6.80E-20 | 1.06E-21 | -1.08E+01 | 38.4578358 | -2.88E-01 | 114927664 | 114927787 | NC_000013.10 |
| cg08596549 | 6.87E-20 | 1.07E-21 | -1.08E+01 | 38.4471303 | -2.04E-01 | 27777731  | 27777854  | NC_000006.11 |
| cg01655703 | 6.87E-20 | 1.07E-21 | -1.08E+01 | 38.4461622 | -9.41E-02 | 112856138 | 112856261 | NC_000012.11 |
| cg23304296 | 6.89E-20 | 1.07E-21 | -1.08E+01 | 38.4435423 | -1.20E-01 | 116961183 | 116961306 | NC_000001.10 |
| cg07018107 | 6.93E-20 | 1.08E-21 | -1.08E+01 | 38.436942  | -2.32E-01 | 129162406 | 129162529 | NC_000008.10 |
| cg20118643 | 6.96E-20 | 1.09E-21 | -1.08E+01 | 38.4322734 | -1.26E-01 | 60690852  | 60690975  | NC_000015.9  |
| cg06398114 | 6.98E-20 | 1.09E-21 | -1.08E+01 | 38.4301229 | -1.37E-01 | 2674181   | 2674304   | NC_000007.13 |
| cg27215916 | 6.99E-20 | 1.09E-21 | -1.08E+01 | 38.4285291 | -2.54E-01 | 120218354 | 120218477 | NC_000008.10 |
| cg05832051 | 7.00E-20 | 1.09E-21 | -1.08E+01 | 38.4269033 | -2.14E-01 | 54369469  | 54369592  | NC_000019.9  |

|            |          |          |           |            |           |           |           |              |
|------------|----------|----------|-----------|------------|-----------|-----------|-----------|--------------|
| cg17322774 | 7.04E-20 | 1.10E-21 | -1.08E+01 | 38.4199518 | -1.79E-01 | 158224817 | 158224940 | NC_000007.13 |
| cg15862406 | 7.05E-20 | 1.10E-21 | -1.08E+01 | 38.418741  | -1.21E-01 | 80188816  | 80188939  | NC_000017.10 |
| cg15534755 | 7.10E-20 | 1.11E-21 | -1.08E+01 | 38.4109085 | -2.03E-01 | 117069859 | 117069982 | NC_000011.9  |
| cg03096126 | 7.10E-20 | 1.11E-21 | -1.08E+01 | 38.4103193 | -2.74E-01 | 56531159  | 56531282  | NC_000018.9  |
| cg26203845 | 7.11E-20 | 1.11E-21 | -1.08E+01 | 38.4093473 | -6.92E-02 | 105293866 | 105293989 | NC_000014.8  |
| cg25174409 | 7.15E-20 | 1.12E-21 | -1.08E+01 | 38.4031739 | -1.23E-01 | 41239323  | 41239446  | NC_000021.8  |
| cg23987789 | 7.16E-20 | 1.12E-21 | -1.08E+01 | 38.4014749 | -2.66E-01 | 7842406   | 7842529   | NC_000001.10 |
| cg17385247 | 7.17E-20 | 1.12E-21 | -1.08E+01 | 38.4002052 | -2.20E-01 | 115718469 | 115718592 | NC_000010.10 |
| cg04766043 | 7.19E-20 | 1.13E-21 | -1.08E+01 | 38.3967269 | -2.24E-01 | 114770710 | 114770833 | NC_000013.10 |
| cg16569650 | 7.20E-20 | 1.13E-21 | -1.08E+01 | 38.3952655 | -2.33E-01 | 2773072   | 2773195   | NC_000007.13 |
| cg20559217 | 7.29E-20 | 1.14E-21 | -1.08E+01 | 38.3821864 | -1.10E-01 | 126173516 | 126173639 | NC_000011.9  |
| cg08884752 | 7.35E-20 | 1.15E-21 | -1.08E+01 | 38.374849  | -2.01E-01 | 2162001   | 2162124   | NC_000001.10 |
| cg16925459 | 7.37E-20 | 1.16E-21 | -1.08E+01 | 38.3708681 | -2.12E-01 | 18548581  | 18548704  | NC_000007.13 |
| cg27299047 | 7.41E-20 | 1.16E-21 | -1.08E+01 | 38.3652485 | -1.99E-01 | 2103248   | 2103371   | NC_000007.13 |
| cg05377162 | 7.43E-20 | 1.16E-21 | -1.08E+01 | 38.363422  | -6.73E-02 | 185286996 | 185287119 | NC_000001.10 |
| cg16708465 | 7.44E-20 | 1.17E-21 | -1.08E+01 | 38.3617709 | -2.39E-01 | 95933097  | 95933220  | NC_000013.10 |
| cg22417733 | 7.44E-20 | 1.17E-21 | -1.08E+01 | 38.3616932 | -2.11E-01 | 153303409 | 153303532 | NC_000006.11 |
| cg25840318 | 7.46E-20 | 1.17E-21 | -1.08E+01 | 38.3585713 | -1.68E-01 | 8249430   | 8249553   | NC_000004.11 |
| cg26311501 | 7.47E-20 | 1.17E-21 | -1.08E+01 | 38.3568259 | -2.77E-01 | 55865623  | 55865746  | NC_000014.8  |
| cg09678615 | 7.47E-20 | 1.17E-21 | -1.08E+01 | 38.3566744 | -1.40E-01 | 52579163  | 52579286  | NC_000016.9  |
| cg07129273 | 7.54E-20 | 1.18E-21 | -1.08E+01 | 38.3468409 | -4.03E-02 | 86158305  | 86158428  | NC_000008.10 |
| cg14484145 | 7.57E-20 | 1.19E-21 | -1.08E+01 | 38.3430425 | -1.16E-01 | 149792371 | 149792494 | NC_000005.9  |
| cg15263682 | 7.60E-20 | 1.19E-21 | -1.08E+01 | 38.3383879 | -1.54E-01 | 88779935  | 88780058  | NC_000010.10 |
| cg09989037 | 7.62E-20 | 1.20E-21 | -1.08E+01 | 38.3363496 | -2.78E-01 | 44300942  | 44301065  | NC_000001.10 |
| cg00417757 | 7.62E-20 | 1.20E-21 | -1.08E+01 | 38.3359761 | -7.30E-02 | 105172974 | 105173097 | NC_000007.13 |

|            |          |          |           |            |           |           |           |              |
|------------|----------|----------|-----------|------------|-----------|-----------|-----------|--------------|
| cg04033718 | 7.66E-20 | 1.20E-21 | -1.08E+01 | 38.3306192 | -1.95E-01 | 4419241   | 4419364   | NC_000016.9  |
| cg14183013 | 7.67E-20 | 1.21E-21 | -1.08E+01 | 38.3293216 | -9.40E-02 | 45985553  | 45985676  | NC_000020.10 |
| cg18773597 | 7.69E-20 | 1.21E-21 | -1.08E+01 | 38.3257847 | -2.68E-01 | 119854913 | 119855036 | NC_000006.11 |
| cg14869028 | 7.71E-20 | 1.21E-21 | -1.08E+01 | 38.3222771 | -1.17E-01 | 32042161  | 32042284  | NC_000001.10 |
| cg06966245 | 7.76E-20 | 1.22E-21 | -1.08E+01 | 38.3153447 | -2.00E-01 | 30043002  | 30043125  | NC_000001.10 |
| cg08529744 | 7.79E-20 | 1.23E-21 | -1.08E+01 | 38.3115982 | -1.54E-01 | 151818922 | 151819045 | NC_000001.10 |
| cg09926486 | 7.86E-20 | 1.24E-21 | -1.08E+01 | 38.3022743 | -1.44E-01 | 44486207  | 44486330  | NC_000015.9  |
| cg03225109 | 7.88E-20 | 1.24E-21 | -1.08E+01 | 38.2999491 | -1.21E-01 | 219773473 | 219773596 | NC_000002.11 |
| cg07924503 | 7.91E-20 | 1.25E-21 | -1.08E+01 | 38.2959526 | -2.48E-01 | 89573631  | 89573754  | NC_000016.9  |
| cg04770370 | 7.92E-20 | 1.25E-21 | -1.08E+01 | 38.2945459 | -1.39E-01 | 8022071   | 8022194   | NC_000004.11 |
| cg25742326 | 7.93E-20 | 1.25E-21 | -1.08E+01 | 38.292529  | -2.55E-01 | 901449    | 901572    | NC_000001.10 |
| cg22678398 | 7.98E-20 | 1.26E-21 | -1.08E+01 | 38.2871578 | -1.99E-01 | 152884214 | 152884337 | NC_000003.11 |
| cg15496085 | 8.00E-20 | 1.26E-21 | -1.08E+01 | 38.2844375 | -7.51E-02 | 16435203  | 16435326  | NC_000019.9  |
| cg05212892 | 8.00E-20 | 1.26E-21 | -1.08E+01 | 38.2839597 | -2.29E-01 | 158533877 | 158534000 | NC_000007.13 |
| cg16066354 | 8.06E-20 | 1.27E-21 | -1.08E+01 | 38.2756628 | -2.77E-01 | 39417451  | 39417574  | NC_000022.10 |
| cg25701646 | 8.09E-20 | 1.28E-21 | -1.08E+01 | 38.2720027 | -2.77E-01 | 57969522  | 57969645  | NC_000003.11 |
| cg06010111 | 8.12E-20 | 1.28E-21 | -1.08E+01 | 38.2670642 | -1.02E-01 | 99771192  | 99771315  | NC_000002.11 |
| cg10898058 | 8.13E-20 | 1.28E-21 | -1.08E+01 | 38.2659846 | -2.20E-01 | 170774610 | 170774733 | NC_000003.11 |
| cg19049754 | 8.18E-20 | 1.29E-21 | -1.08E+01 | 38.2596835 | -2.20E-01 | 81966990  | 81967113  | NC_000010.10 |
| cg04222728 | 8.25E-20 | 1.30E-21 | -1.08E+01 | 38.2511763 | -2.45E-01 | 138549665 | 138549788 | NC_000007.13 |
| cg19844653 | 8.25E-20 | 1.30E-21 | -1.08E+01 | 38.2506793 | -1.04E-01 | 133451294 | 133451417 | NC_000005.9  |
| cg21461300 | 8.26E-20 | 1.31E-21 | -1.08E+01 | 38.2490233 | -1.81E-01 | 114830702 | 114830825 | NC_000013.10 |
| cg13581866 | 8.30E-20 | 1.31E-21 | -1.08E+01 | 38.2446768 | -1.37E-01 | 11138138  | 11138261  | NC_000003.11 |
| cg18031663 | 8.30E-20 | 1.31E-21 | -1.08E+01 | 38.2444779 | -2.72E-01 | 77456902  | 77457025  | NC_000012.11 |
| cg25152942 | 8.30E-20 | 1.31E-21 | -1.08E+01 | 38.2440075 | -2.70E-01 | 41281080  | 41281203  | NC_000019.9  |

|            |          |          |           |            |           |           |           |              |
|------------|----------|----------|-----------|------------|-----------|-----------|-----------|--------------|
| cg16624013 | 8.31E-20 | 1.32E-21 | -1.08E+01 | 38.242489  | -6.70E-02 | 35437101  | 35437224  | NC_000006.11 |
| cg16849024 | 8.41E-20 | 1.33E-21 | -1.08E+01 | 38.229836  | -1.91E-01 | 41934210  | 41934333  | NC_000019.9  |
| cg19475067 | 8.45E-20 | 1.34E-21 | -1.08E+01 | 38.2252747 | -1.17E-01 | 110867756 | 110867879 | NC_000012.11 |
| cg13801056 | 8.45E-20 | 1.34E-21 | -1.08E+01 | 38.2251199 | -1.01E-01 | 99766467  | 99766590  | NC_000007.13 |
| cg20206377 | 8.47E-20 | 1.34E-21 | -1.08E+01 | 38.2228386 | -1.58E-01 | 2323272   | 2323395   | NC_000011.9  |
| cg07915516 | 8.49E-20 | 1.35E-21 | -1.08E+01 | 38.2200653 | -1.64E-01 | 377344    | 377467    | NC_000016.9  |
| cg25634141 | 8.52E-20 | 1.35E-21 | -1.08E+01 | 38.2163847 | -1.47E-01 | 39705046  | 39705169  | NC_000017.10 |
| cg08880817 | 8.53E-20 | 1.35E-21 | -1.08E+01 | 38.2153178 | -1.34E-01 | 7909642   | 7909765   | NC_000006.11 |
| cg05080966 | 8.54E-20 | 1.35E-21 | -1.08E+01 | 38.2131949 | -1.37E-01 | 145549812 | 145549935 | NC_000008.10 |
| cg07717632 | 8.58E-20 | 1.36E-21 | -1.08E+01 | 38.2079336 | -2.37E-01 | 140172631 | 140172754 | NC_000009.11 |
| cg13393585 | 8.62E-20 | 1.37E-21 | -1.08E+01 | 38.2039864 | -1.36E-01 | 1134906   | 1135029   | NC_000017.10 |
| cg26284735 | 8.64E-20 | 1.37E-21 | -1.08E+01 | 38.2012055 | -1.92E-01 | 5065165   | 5065288   | NC_000003.11 |
| cg21859053 | 8.69E-20 | 1.38E-21 | -1.08E+01 | 38.1956714 | -1.37E-01 | 12330363  | 12330486  | NC_000003.11 |
| cg24031764 | 8.74E-20 | 1.39E-21 | -1.08E+01 | 38.1885101 | -2.15E-01 | 188696743 | 188696866 | NC_000003.11 |
| cg01751245 | 8.78E-20 | 1.39E-21 | -1.08E+01 | 38.1843511 | -2.79E-01 | 65593761  | 65593884  | NC_000002.11 |
| cg07807026 | 8.81E-20 | 1.40E-21 | -1.08E+01 | 38.1804484 | -1.02E-01 | 2041581   | 2041704   | NC_000012.11 |
| cg23459424 | 8.88E-20 | 1.41E-21 | -1.08E+01 | 38.1718625 | -2.02E-01 | 28549125  | 28549248  | NC_000002.11 |
| cg19894975 | 8.93E-20 | 1.42E-21 | -1.08E+01 | 38.1663057 | -1.49E-01 | 76355674  | 76355797  | NC_000017.10 |
| cg19310430 | 9.11E-20 | 1.45E-21 | -1.08E+01 | 38.1451049 | -1.22E-01 | 128775026 | 128775149 | NC_000011.9  |
| cg09903452 | 9.16E-20 | 1.46E-21 | -1.08E+01 | 38.1399178 | -1.74E-01 | 75315244  | 75315367  | NC_000017.10 |
| cg08749736 | 9.18E-20 | 1.46E-21 | -1.08E+01 | 38.1368501 | -4.45E-02 | 205425944 | 205426067 | NC_000001.10 |
| cg03560879 | 9.18E-20 | 1.46E-21 | -1.08E+01 | 38.1362679 | -1.49E-01 | 34380608  | 34380731  | NC_000009.11 |
| cg25446086 | 9.30E-20 | 1.48E-21 | -1.08E+01 | 38.1229577 | -1.23E-01 | 155829549 | 155829672 | NC_000001.10 |
| cg03168587 | 9.33E-20 | 1.49E-21 | -1.08E+01 | 38.1198193 | -1.09E-01 | 65657818  | 65657941  | NC_000011.9  |
| cg10020892 | 9.34E-20 | 1.49E-21 | -1.08E+01 | 38.1178742 | -2.52E-01 | 147016901 | 147017024 | NC_000001.10 |



|            |          |          |           |            |           |           |           |              |
|------------|----------|----------|-----------|------------|-----------|-----------|-----------|--------------|
| cg09213124 | 9.37E-20 | 1.50E-21 | -1.08E+01 | 38.1146327 | -1.70E-01 | 38599508  | 38599631  | NC_000017.10 |
| cg02482460 | 9.45E-20 | 1.51E-21 | -1.08E+01 | 38.1064821 | -1.69E-01 | 89664338  | 89664461  | NC_000001.10 |
| cg03495053 | 9.49E-20 | 1.52E-21 | -1.08E+01 | 38.1014856 | -2.05E-01 | 169650832 | 169650955 | NC_000006.11 |
| cg14654171 | 9.49E-20 | 1.52E-21 | -1.08E+01 | 38.1009091 | -2.55E-01 | 130151001 | 130151124 | NC_000009.11 |
| cg02116612 | 9.54E-20 | 1.52E-21 | -1.08E+01 | 38.095905  | -1.94E-01 | 127542388 | 127542511 | NC_000003.11 |
| cg04948649 | 9.55E-20 | 1.53E-21 | -1.08E+01 | 38.0942611 | -2.08E-01 | 1901748   | 1901871   | NC_000011.9  |
| cg22437316 | 9.59E-20 | 1.53E-21 | -1.08E+01 | 38.0901646 | -1.19E-01 | 177664663 | 177664786 | NC_000005.9  |
| cg18097224 | 9.65E-20 | 1.54E-21 | -1.08E+01 | 38.0832679 | -8.18E-02 | 133451237 | 133451360 | NC_000005.9  |
| cg27582563 | 9.72E-20 | 1.56E-21 | -1.08E+01 | 38.0762261 | -1.92E-01 | 20384285  | 20384408  | NC_000002.11 |
| cg25888386 | 9.75E-20 | 1.56E-21 | -1.08E+01 | 38.0728996 | -3.41E-01 | 115141887 | 115142010 | NC_000010.10 |
| cg15878619 | 9.81E-20 | 1.57E-21 | -1.08E+01 | 38.0667307 | -1.93E-01 | 30687373  | 30687496  | NC_000006.11 |
| cg01550445 | 9.82E-20 | 1.57E-21 | -1.08E+01 | 38.0652478 | -1.94E-01 | 72929983  | 72930106  | NC_000011.9  |
| cg07557792 | 9.84E-20 | 1.58E-21 | -1.08E+01 | 38.0629132 | -9.34E-02 | 50969783  | 50969906  | NC_000022.10 |
| cg16748413 | 9.93E-20 | 1.59E-21 | -1.08E+01 | 38.0536311 | -1.55E-01 | 82543431  | 82543554  | NC_000008.10 |
| cg02305113 | 9.94E-20 | 1.59E-21 | -1.08E+01 | 38.052637  | -2.50E-01 | 2059212   | 2059335   | NC_000007.13 |
| cg03730474 | 9.98E-20 | 1.60E-21 | -1.08E+01 | 38.0476522 | -1.25E-01 | 15695817  | 15695940  | NC_000019.9  |
| cg08989979 | 1.00E-19 | 1.61E-21 | -1.08E+01 | 38.0440112 | -1.41E-01 | 192141    | 192264    | NC_000011.9  |
| cg23192683 | 1.01E-19 | 1.61E-21 | -1.08E+01 | 38.0389762 | -3.10E-01 | 194208907 | 194209030 | NC_000003.11 |
| cg14148156 | 1.01E-19 | 1.63E-21 | -1.08E+01 | 38.0326338 | -2.43E-01 | 35844507  | 35844630  | NC_000009.11 |
| cg06045337 | 1.01E-19 | 1.63E-21 | -1.08E+01 | 38.0324299 | -2.30E-01 | 145013910 | 145014033 | NC_000008.10 |
| cg19683417 | 1.01E-19 | 1.63E-21 | -1.08E+01 | 38.0318145 | -2.59E-01 | 67845133  | 67845256  | NC_000005.9  |
| cg16091269 | 1.02E-19 | 1.63E-21 | -1.08E+01 | 38.0282987 | -1.05E-01 | 197183271 | 197183394 | NC_000003.11 |
| cg23057051 | 1.02E-19 | 1.63E-21 | -1.08E+01 | 38.0273181 | -9.84E-02 | 89984268  | 89984391  | NC_000016.9  |
| cg05845928 | 1.02E-19 | 1.64E-21 | -1.08E+01 | 38.0231613 | -7.45E-02 | 6458752   | 6458875   | NC_000017.10 |
| cg21178378 | 1.02E-19 | 1.65E-21 | -1.08E+01 | 38.0192685 | -2.57E-01 | 64175242  | 64175365  | NC_000003.11 |

|            |          |          |           |            |           |           |           |              |
|------------|----------|----------|-----------|------------|-----------|-----------|-----------|--------------|
| cg21568661 | 1.03E-19 | 1.65E-21 | -1.08E+01 | 38.0180415 | -2.17E-01 | 62411575  | 62411698  | NC_000015.9  |
| cg06500792 | 1.03E-19 | 1.65E-21 | -1.08E+01 | 38.0170898 | -2.37E-01 | 65006618  | 65006741  | NC_000002.11 |
| cg24988684 | 1.03E-19 | 1.66E-21 | -1.08E+01 | 38.0127309 | -2.10E-01 | 76128556  | 76128679  | NC_000017.10 |
| cg12600030 | 1.06E-19 | 1.70E-21 | -1.08E+01 | 37.9872938 | -6.88E-02 | 5635820   | 5635943   | NC_000007.13 |
| cg13742752 | 1.06E-19 | 1.71E-21 | -1.08E+01 | 37.9842833 | -2.23E-01 | 21047569  | 21047692  | NC_000013.10 |
| cg23918953 | 1.06E-19 | 1.71E-21 | -1.08E+01 | 37.9830595 | -2.44E-01 | 68915528  | 68915651  | NC_000012.11 |
| cg22385764 | 1.07E-19 | 1.72E-21 | -1.08E+01 | 37.9765713 | -4.81E-02 | 48551594  | 48551717  | NC_000012.11 |
| cg15834395 | 1.07E-19 | 1.72E-21 | -1.08E+01 | 37.9745806 | -1.45E-01 | 134261413 | 134261536 | NC_000010.10 |
| cg09617556 | 1.08E-19 | 1.73E-21 | -1.08E+01 | 37.9693839 | -9.64E-02 | 219924408 | 219924531 | NC_000002.11 |
| cg06627532 | 1.08E-19 | 1.74E-21 | -1.08E+01 | 37.9661822 | -2.19E-01 | 81491312  | 81491435  | NC_000016.9  |
| cg19389370 | 1.08E-19 | 1.74E-21 | -1.08E+01 | 37.9634378 | -2.47E-01 | 10161484  | 10161607  | NC_000011.9  |
| cg09435170 | 1.08E-19 | 1.74E-21 | -1.08E+01 | 37.9622926 | -2.24E-01 | 184256627 | 184256750 | NC_000004.11 |
| cg06269559 | 1.09E-19 | 1.76E-21 | -1.08E+01 | 37.9546737 | -1.77E-01 | 15298785  | 15298908  | NC_000002.11 |
| cg13947995 | 1.09E-19 | 1.76E-21 | -1.08E+01 | 37.952425  | -1.36E-01 | 91427821  | 91427944  | NC_000015.9  |
| cg06094523 | 1.10E-19 | 1.77E-21 | -1.08E+01 | 37.9479564 | -1.52E-01 | 43398103  | 43398226  | NC_000001.10 |
| cg17329164 | 1.11E-19 | 1.79E-21 | -1.08E+01 | 37.9378687 | -1.44E-01 | 32121259  | 32121382  | NC_000006.11 |
| cg27559399 | 1.11E-19 | 1.80E-21 | -1.07E+01 | 37.9327128 | -1.51E-01 | 201450997 | 201451120 | NC_000001.10 |
| cg02372702 | 1.13E-19 | 1.82E-21 | -1.07E+01 | 37.9192071 | -1.95E-01 | 25304568  | 25304691  | NC_000012.11 |
| cg06327965 | 1.14E-19 | 1.83E-21 | -1.07E+01 | 37.9124284 | -9.45E-02 | 44302666  | 44302789  | NC_000019.9  |
| cg04422625 | 1.14E-19 | 1.85E-21 | -1.07E+01 | 37.9057334 | -1.53E-01 | 125053833 | 125053956 | NC_000008.10 |
| cg13306815 | 1.15E-19 | 1.85E-21 | -1.07E+01 | 37.9027375 | -2.57E-01 | 140364611 | 140364734 | NC_000006.11 |
| cg01502396 | 1.15E-19 | 1.86E-21 | -1.07E+01 | 37.8970072 | -1.18E-01 | 46403923  | 46404046  | NC_000011.9  |
| cg09387382 | 1.15E-19 | 1.87E-21 | -1.07E+01 | 37.8944846 | -1.49E-01 | 78418426  | 78418549  | NC_000017.10 |
| cg07199862 | 1.16E-19 | 1.87E-21 | -1.07E+01 | 37.8910497 | -2.41E-01 | 763485    | 763608    | NC_000011.9  |
| cg00583068 | 1.16E-19 | 1.88E-21 | -1.07E+01 | 37.8856441 | -2.47E-01 | 224972796 | 224972919 | NC_000001.10 |

|            |          |          |           |            |           |           |           |              |
|------------|----------|----------|-----------|------------|-----------|-----------|-----------|--------------|
| cg11136562 | 1.19E-19 | 1.92E-21 | -1.07E+01 | 37.8655383 | -2.08E-01 | 141061285 | 141061408 | NC_000005.9  |
| cg11819702 | 1.19E-19 | 1.92E-21 | -1.07E+01 | 37.8650735 | -2.55E-01 | 73529573  | 73529696  | NC_000005.9  |
| cg15549637 | 1.19E-19 | 1.93E-21 | -1.07E+01 | 37.8609348 | -2.27E-01 | 105489998 | 105490121 | NC_000007.13 |
| cg22642517 | 1.20E-19 | 1.94E-21 | -1.07E+01 | 37.8569916 | -1.19E-01 | 52701963  | 52702086  | NC_000012.11 |
| cg02195680 | 1.20E-19 | 1.95E-21 | -1.07E+01 | 37.8527838 | -1.65E-01 | 28519566  | 28519689  | NC_000016.9  |
| cg22809683 | 1.21E-19 | 1.97E-21 | -1.07E+01 | 37.8423085 | -1.97E-01 | 182998916 | 182999039 | NC_000001.10 |
| cg20388580 | 1.22E-19 | 1.97E-21 | -1.07E+01 | 37.8409281 | -2.34E-01 | 80345221  | 80345344  | NC_000017.10 |
| cg09228833 | 1.23E-19 | 1.99E-21 | -1.07E+01 | 37.8301999 | -2.20E-01 | 52199778  | 52199901  | NC_000020.10 |
| cg15141592 | 1.23E-19 | 1.99E-21 | -1.07E+01 | 37.8301254 | -1.04E-01 | 48207044  | 48207167  | NC_000012.11 |
| cg20092122 | 1.23E-19 | 2.00E-21 | -1.07E+01 | 37.82749   | -3.17E-01 | 17517221  | 17517344  | NC_000019.9  |
| cg27492458 | 1.23E-19 | 2.00E-21 | -1.07E+01 | 37.8271763 | -8.70E-02 | 149120109 | 149120232 | NC_000007.13 |
| cg16315928 | 1.23E-19 | 2.01E-21 | -1.07E+01 | 37.8241203 | -4.82E-02 | 109776240 | 109776363 | NC_000006.11 |
| cg14050824 | 1.24E-19 | 2.02E-21 | -1.07E+01 | 37.8167824 | -2.81E-01 | 140683797 | 140683920 | NC_000009.11 |
| cg10606923 | 1.25E-19 | 2.03E-21 | -1.07E+01 | 37.8113307 | -1.83E-01 | 156817610 | 156817733 | NC_000005.9  |
| cg13411336 | 1.26E-19 | 2.04E-21 | -1.07E+01 | 37.8061437 | -1.78E-01 | 43968842  | 43968965  | NC_000011.9  |
| cg27619475 | 1.26E-19 | 2.04E-21 | -1.07E+01 | 37.8048079 | -1.98E-01 | 73083881  | 73084004  | NC_000017.10 |
| cg06734342 | 1.26E-19 | 2.05E-21 | -1.07E+01 | 37.8015496 | -9.79E-02 | 45729807  | 45729930  | NC_000003.11 |
| cg01761729 | 1.26E-19 | 2.06E-21 | -1.07E+01 | 37.7998323 | -1.88E-01 | 128419650 | 128419773 | NC_000002.11 |
| cg25546651 | 1.27E-19 | 2.06E-21 | -1.07E+01 | 37.7970458 | -2.55E-01 | 25910053  | 25910176  | NC_000004.11 |
| cg27478224 | 1.28E-19 | 2.09E-21 | -1.07E+01 | 37.7832077 | -1.71E-01 | 91061115  | 91061238  | NC_000010.10 |
| cg13514772 | 1.29E-19 | 2.10E-21 | -1.07E+01 | 37.7800556 | -1.92E-01 | 38770414  | 38770537  | NC_000008.10 |
| cg14133945 | 1.29E-19 | 2.10E-21 | -1.07E+01 | 37.7783987 | -2.51E-01 | 60809985  | 60810108  | NC_000011.9  |
| cg09217157 | 1.29E-19 | 2.11E-21 | -1.07E+01 | 37.7743338 | -1.87E-01 | 97624891  | 97625014  | NC_000010.10 |
| cg13745870 | 1.30E-19 | 2.12E-21 | -1.07E+01 | 37.7711463 | -2.17E-01 | 57094763  | 57094886  | NC_000003.11 |
| cg14409810 | 1.30E-19 | 2.12E-21 | -1.07E+01 | 37.7697232 | -2.39E-01 | 140172908 | 140173031 | NC_000009.11 |

|               |          |          |           |            |           |           |           |              |
|---------------|----------|----------|-----------|------------|-----------|-----------|-----------|--------------|
| cg05208400    | 1.31E-19 | 2.14E-21 | -1.07E+01 | 37.7614303 | -1.39E-01 | 227538347 | 227538470 | NC_000002.11 |
| cg03826564    | 1.31E-19 | 2.14E-21 | -1.07E+01 | 37.7578928 | -1.24E-01 | 101629310 | 101629433 | NC_000015.9  |
| cg13428066    | 1.31E-19 | 2.14E-21 | -1.07E+01 | 37.7576917 | -2.02E-01 | 2677768   | 2677891   | NC_000011.9  |
| cg14780649    | 1.31E-19 | 2.14E-21 | -1.07E+01 | 37.7574926 | -1.03E-01 | 43534197  | 43534320  | NC_000001.10 |
| cg16463564    | 1.31E-19 | 2.15E-21 | -1.07E+01 | 37.7568933 | -1.73E-01 | 41321036  | 41321159  | NC_000017.10 |
| cg17596359    | 1.31E-19 | 2.15E-21 | -1.07E+01 | 37.7567595 | -2.01E-01 | 114844124 | 114844247 | NC_000013.10 |
| cg26336935    | 1.32E-19 | 2.16E-21 | -1.07E+01 | 37.7501752 | -1.87E-01 | 39769213  | 39769336  | NC_000017.10 |
| cg03147838    | 1.33E-19 | 2.17E-21 | -1.07E+01 | 37.7441348 | -1.14E-01 | 32226935  | 32227058  | NC_000001.10 |
| ch.9.2043201R | 1.34E-19 | 2.19E-21 | -1.07E+01 | 37.7385393 | -1.66E-01 | 128096393 | 128096516 | NC_000009.11 |
| cg22161562    | 1.34E-19 | 2.20E-21 | -1.07E+01 | 37.7327242 | -1.70E-01 | 25198596  | 25198719  | NC_000002.11 |
| cg02314348    | 1.35E-19 | 2.21E-21 | -1.07E+01 | 37.729582  | -2.24E-01 | 91224043  | 91224166  | NC_000015.9  |
| cg14482313    | 1.35E-19 | 2.21E-21 | -1.07E+01 | 37.7286403 | -1.11E-01 | 52626889  | 52627012  | NC_000012.11 |
| cg21669226    | 1.35E-19 | 2.21E-21 | -1.07E+01 | 37.7284543 | -2.07E-01 | 39917609  | 39917732  | NC_000008.10 |
| cg08432509    | 1.35E-19 | 2.22E-21 | -1.07E+01 | 37.7250506 | -2.14E-01 | 62317768  | 62317891  | NC_000020.10 |
| cg13311607    | 1.37E-19 | 2.25E-21 | -1.07E+01 | 37.7114936 | -9.80E-02 | 144451523 | 144451646 | NC_000008.10 |
| cg03222834    | 1.37E-19 | 2.25E-21 | -1.07E+01 | 37.709825  | -2.12E-01 | 13177060  | 13177183  | NC_000016.9  |
| cg18961281    | 1.37E-19 | 2.25E-21 | -1.07E+01 | 37.7087959 | -9.33E-02 | 3083773   | 3083896   | NC_000007.13 |
| cg24686551    | 1.38E-19 | 2.26E-21 | -1.07E+01 | 37.7057783 | -3.27E-01 | 134047274 | 134047397 | NC_000003.11 |
| cg02626929    | 1.38E-19 | 2.27E-21 | -1.07E+01 | 37.7013992 | -1.19E-01 | 3011661   | 3011784   | NC_000016.9  |
| cg10569694    | 1.39E-19 | 2.27E-21 | -1.07E+01 | 37.6994709 | -6.51E-02 | 5013509   | 5013632   | NC_000007.13 |
| cg02068689    | 1.39E-19 | 2.27E-21 | -1.07E+01 | 37.6991655 | -1.11E-01 | 131941464 | 131941587 | NC_000009.11 |
| cg02387244    | 1.39E-19 | 2.29E-21 | -1.07E+01 | 37.6936359 | -1.40E-01 | 746132    | 746255    | NC_000016.9  |
| cg27006169    | 1.39E-19 | 2.29E-21 | -1.07E+01 | 37.6925125 | -2.69E-01 | 85612912  | 85613035  | NC_000004.11 |
| cg27533700    | 1.40E-19 | 2.30E-21 | -1.07E+01 | 37.6875834 | -1.03E-01 | 38537683  | 38537806  | NC_000003.11 |
| cg05488681    | 1.40E-19 | 2.30E-21 | -1.07E+01 | 37.6864868 | -2.23E-01 | 74289464  | 74289587  | NC_000006.11 |

|            |          |          |           |            |           |           |           |              |
|------------|----------|----------|-----------|------------|-----------|-----------|-----------|--------------|
| cg08912801 | 1.41E-19 | 2.32E-21 | -1.07E+01 | 37.6784248 | -1.70E-01 | 3399260   | 3399383   | NC_000001.10 |
| cg05393086 | 1.42E-19 | 2.33E-21 | -1.07E+01 | 37.6749734 | -2.21E-01 | 5092012   | 5092135   | NC_000016.9  |
| cg01802532 | 1.42E-19 | 2.33E-21 | -1.07E+01 | 37.6745965 | -1.64E-01 | 56475905  | 56476028  | NC_000004.11 |
| cg08611163 | 1.42E-19 | 2.33E-21 | -1.07E+01 | 37.6738855 | -1.43E-01 | 6266360   | 6266483   | NC_000001.10 |
| cg10005270 | 1.43E-19 | 2.35E-21 | -1.07E+01 | 37.6664379 | -2.21E-01 | 128210036 | 128210159 | NC_000010.10 |
| cg17128799 | 1.45E-19 | 2.38E-21 | -1.07E+01 | 37.6544635 | -2.42E-01 | 2458466   | 2458589   | NC_000001.10 |
| cg07442907 | 1.45E-19 | 2.39E-21 | -1.07E+01 | 37.6515372 | -2.56E-01 | 5487958   | 5488081   | NC_000017.10 |
| cg18372930 | 1.45E-19 | 2.39E-21 | -1.07E+01 | 37.6488665 | -2.09E-01 | 137939469 | 137939592 | NC_000005.9  |
| cg19402314 | 1.47E-19 | 2.42E-21 | -1.07E+01 | 37.6387418 | -1.91E-01 | 173362434 | 173362557 | NC_000001.10 |
| cg14248553 | 1.48E-19 | 2.44E-21 | -1.07E+01 | 37.6308691 | -2.14E-01 | 201509308 | 201509431 | NC_000001.10 |
| cg03940103 | 1.49E-19 | 2.46E-21 | -1.07E+01 | 37.6228303 | -6.45E-02 | 41698823  | 41698946  | NC_000019.9  |
| cg23674358 | 1.49E-19 | 2.46E-21 | -1.07E+01 | 37.6197333 | -9.15E-02 | 22726885  | 22727008  | NC_000010.10 |
| cg23700125 | 1.49E-19 | 2.46E-21 | -1.07E+01 | 37.619627  | -1.01E-01 | 101157661 | 101157784 | NC_000008.10 |
| cg12272160 | 1.50E-19 | 2.48E-21 | -1.07E+01 | 37.6145315 | -2.28E-01 | 44062286  | 44062409  | NC_000020.10 |
| cg08586426 | 1.50E-19 | 2.48E-21 | -1.07E+01 | 37.6124819 | -2.33E-01 | 33915315  | 33915438  | NC_000011.9  |
| cg26448489 | 1.51E-19 | 2.50E-21 | -1.07E+01 | 37.606878  | -8.15E-02 | 238600469 | 238600592 | NC_000002.11 |
| cg14901671 | 1.51E-19 | 2.50E-21 | -1.07E+01 | 37.6062563 | -8.82E-02 | 70589079  | 70589202  | NC_000017.10 |
| cg01621390 | 1.51E-19 | 2.50E-21 | -1.07E+01 | 37.6056359 | -2.21E-01 | 5195150   | 5195273   | NC_000012.11 |
| cg22388417 | 1.51E-19 | 2.50E-21 | -1.07E+01 | 37.605622  | -2.98E-01 | 134657812 | 134657935 | NC_000008.10 |
| cg12157156 | 1.52E-19 | 2.51E-21 | -1.07E+01 | 37.6024212 | -1.92E-01 | 124880173 | 124880296 | NC_000012.11 |
| cg00069242 | 1.52E-19 | 2.51E-21 | -1.07E+01 | 37.6015478 | -1.05E-01 | 23450527  | 23450650  | NC_000014.8  |
| cg10110335 | 1.52E-19 | 2.52E-21 | -1.07E+01 | 37.5982153 | -2.58E-01 | 12197630  | 12197753  | NC_000003.11 |
| cg15528736 | 1.53E-19 | 2.53E-21 | -1.07E+01 | 37.5932243 | -1.91E-01 | 50015780  | 50015903  | NC_000019.9  |
| cg13378649 | 1.53E-19 | 2.53E-21 | -1.07E+01 | 37.5919228 | -3.16E-01 | 222927856 | 222927979 | NC_000001.10 |
| cg14963371 | 1.54E-19 | 2.54E-21 | -1.07E+01 | 37.5895393 | -1.24E-01 | 27719463  | 27719586  | NC_000001.10 |

|            |          |          |           |            |           |           |           |              |
|------------|----------|----------|-----------|------------|-----------|-----------|-----------|--------------|
| cg15626285 | 1.54E-19 | 2.54E-21 | -1.07E+01 | 37.5884432 | -1.80E-01 | 7167781   | 7167904   | NC_000012.11 |
| cg17117459 | 1.55E-19 | 2.56E-21 | -1.07E+01 | 37.5830041 | -2.70E-01 | 25085405  | 25085528  | NC_000013.10 |
| cg21289919 | 1.55E-19 | 2.57E-21 | -1.07E+01 | 37.5787041 | -1.98E-01 | 36164078  | 36164201  | NC_000019.9  |
| cg05624478 | 1.56E-19 | 2.58E-21 | -1.07E+01 | 37.5754762 | -2.39E-01 | 40574031  | 40574154  | NC_000017.10 |
| cg01496720 | 1.56E-19 | 2.59E-21 | -1.07E+01 | 37.571954  | -2.07E-01 | 3825398   | 3825521   | NC_000010.10 |
| cg21410633 | 1.56E-19 | 2.59E-21 | -1.07E+01 | 37.5719365 | -1.80E-01 | 40525679  | 40525802  | NC_000001.10 |
| cg25123566 | 1.57E-19 | 2.60E-21 | -1.07E+01 | 37.5648828 | -2.99E-01 | 47610734  | 47610857  | NC_000012.11 |
| cg23322242 | 1.59E-19 | 2.63E-21 | -1.07E+01 | 37.5552242 | -1.78E-01 | 37802565  | 37802688  | NC_000021.8  |
| cg23170771 | 1.59E-19 | 2.64E-21 | -1.07E+01 | 37.5532528 | -1.37E-01 | 157129064 | 157129187 | NC_000007.13 |
| cg10504885 | 1.59E-19 | 2.64E-21 | -1.07E+01 | 37.5513562 | -1.10E-01 | 27358363  | 27358486  | NC_000001.10 |
| cg21814178 | 1.59E-19 | 2.65E-21 | -1.07E+01 | 37.5492767 | -2.56E-01 | 51720755  | 51720878  | NC_000012.11 |
| cg23623251 | 1.60E-19 | 2.65E-21 | -1.07E+01 | 37.5468226 | -2.28E-01 | 7731280   | 7731403   | NC_000006.11 |
| cg06608359 | 1.62E-19 | 2.68E-21 | -1.07E+01 | 37.5350474 | -1.09E-01 | 28831300  | 28831423  | NC_000006.11 |
| cg27436264 | 1.62E-19 | 2.69E-21 | -1.07E+01 | 37.5337382 | -7.96E-02 | 36793608  | 36793731  | NC_000020.10 |
| cg02825887 | 1.62E-19 | 2.69E-21 | -1.07E+01 | 37.5331289 | -1.89E-01 | 34591041  | 34591164  | NC_000009.11 |
| cg18754389 | 1.63E-19 | 2.71E-21 | -1.07E+01 | 37.5262054 | -4.26E-02 | 63671126  | 63671249  | NC_000014.8  |
| cg05356564 | 1.63E-19 | 2.71E-21 | -1.07E+01 | 37.5258086 | -1.57E-01 | 21044770  | 21044893  | NC_000001.10 |
| cg16461134 | 1.63E-19 | 2.72E-21 | -1.07E+01 | 37.5227518 | -2.31E-01 | 133804886 | 133805009 | NC_000011.9  |
| cg26663590 | 1.64E-19 | 2.72E-21 | -1.07E+01 | 37.5212794 | -1.95E-01 | 28959310  | 28959433  | NC_000016.9  |
| cg24713667 | 1.64E-19 | 2.73E-21 | -1.07E+01 | 37.5190214 | -1.63E-01 | 74162063  | 74162186  | NC_000006.11 |
| cg25948980 | 1.65E-19 | 2.74E-21 | -1.07E+01 | 37.5142901 | -1.79E-01 | 76777325  | 76777448  | NC_000011.9  |
| cg14825555 | 1.65E-19 | 2.75E-21 | -1.07E+01 | 37.512547  | -1.77E-01 | 27190639  | 27190762  | NC_000001.10 |
| cg24335793 | 1.65E-19 | 2.75E-21 | -1.07E+01 | 37.5112891 | -1.79E-01 | 944752    | 944875    | NC_000007.13 |
| cg09272948 | 1.66E-19 | 2.76E-21 | -1.07E+01 | 37.5064972 | -2.22E-01 | 39958363  | 39958486  | NC_000020.10 |
| cg23410129 | 1.66E-19 | 2.77E-21 | -1.07E+01 | 37.5038817 | -2.01E-01 | 36012008  | 36012131  | NC_000020.10 |

|               |          |          |           |            |           |           |           |              |
|---------------|----------|----------|-----------|------------|-----------|-----------|-----------|--------------|
| cg02630790    | 1.66E-19 | 2.77E-21 | -1.07E+01 | 37.5036429 | -1.06E-01 | 46570247  | 46570370  | NC_000017.10 |
| cg10641714    | 1.67E-19 | 2.78E-21 | -1.07E+01 | 37.5007624 | -1.41E-01 | 43193681  | 43193804  | NC_000005.9  |
| cg07143863    | 1.67E-19 | 2.79E-21 | -1.07E+01 | 37.4980894 | -2.21E-01 | 64954729  | 64954852  | NC_000012.11 |
| cg23278235    | 1.67E-19 | 2.79E-21 | -1.07E+01 | 37.4963399 | -1.86E-01 | 133101168 | 133101291 | NC_000012.11 |
| cg16711650    | 1.69E-19 | 2.82E-21 | -1.07E+01 | 37.4876128 | -1.71E-01 | 61039539  | 61039662  | NC_000001.10 |
| cg24643393    | 1.69E-19 | 2.82E-21 | -1.07E+01 | 37.4850016 | -1.89E-01 | 73417261  | 73417384  | NC_000007.13 |
| cg06359703    | 1.69E-19 | 2.82E-21 | -1.07E+01 | 37.4845188 | -1.87E-01 | 41847297  | 41847420  | NC_000001.10 |
| cg16820615    | 1.69E-19 | 2.83E-21 | -1.07E+01 | 37.4829512 | -1.97E-01 | 114884918 | 114885041 | NC_000013.10 |
| cg16931664    | 1.69E-19 | 2.83E-21 | -1.07E+01 | 37.4825571 | -1.49E-01 | 11169707  | 11169830  | NC_000011.9  |
| cg07139440    | 1.71E-19 | 2.85E-21 | -1.07E+01 | 37.474575  | -2.38E-01 | 151030981 | 151031104 | NC_000001.10 |
| cg03384000    | 1.71E-19 | 2.86E-21 | -1.07E+01 | 37.4728006 | -1.46E-01 | 42081948  | 42082071  | NC_000017.10 |
| cg22006060    | 1.72E-19 | 2.87E-21 | -1.07E+01 | 37.4689078 | -1.84E-01 | 170001551 | 170001674 | NC_000004.11 |
| cg01620309    | 1.72E-19 | 2.87E-21 | -1.07E+01 | 37.4679843 | -7.32E-02 | 42856469  | 42856592  | NC_000017.10 |
| cg27282987    | 1.72E-19 | 2.87E-21 | -1.07E+01 | 37.4677232 | -1.20E-01 | 127349158 | 127349281 | NC_000003.11 |
| cg16204717    | 1.73E-19 | 2.89E-21 | -1.07E+01 | 37.4624733 | -1.75E-01 | 65894458  | 65894581  | NC_000012.11 |
| cg03313752    | 1.73E-19 | 2.90E-21 | -1.07E+01 | 37.4585461 | -1.05E-01 | 77835568  | 77835691  | NC_000015.9  |
| ch.19.931611R | 1.76E-19 | 2.95E-21 | -1.07E+01 | 37.4423377 | -1.19E-01 | 24232430  | 24232553  | NC_000019.9  |
| cg22370326    | 1.79E-19 | 2.99E-21 | -1.07E+01 | 37.4263436 | -1.84E-01 | 110373509 | 110373632 | NC_000002.11 |
| cg16071681    | 1.81E-19 | 3.03E-21 | -1.07E+01 | 37.4136954 | -2.82E-01 | 19925575  | 19925698  | NC_000018.9  |
| cg14691971    | 1.82E-19 | 3.05E-21 | -1.07E+01 | 37.4090786 | -2.62E-01 | 102300350 | 102300473 | NC_000008.10 |
| cg11844042    | 1.83E-19 | 3.07E-21 | -1.07E+01 | 37.4025536 | -2.11E-01 | 153602251 | 153602374 | NC_000004.11 |
| cg13714378    | 1.83E-19 | 3.07E-21 | -1.07E+01 | 37.4021538 | -2.08E-01 | 34702946  | 34703069  | NC_000011.9  |
| cg08674238    | 1.83E-19 | 3.08E-21 | -1.07E+01 | 37.4000416 | -1.31E-01 | 18525442  | 18525565  | NC_000019.9  |
| cg23172086    | 1.84E-19 | 3.08E-21 | -1.07E+01 | 37.3974589 | -2.11E-01 | 98129751  | 98129874  | NC_000010.10 |
| cg22816294    | 1.84E-19 | 3.10E-21 | -1.07E+01 | 37.3933461 | -2.01E-01 | 22458634  | 22458757  | NC_000014.8  |

|            |          |          |           |            |           |           |           |              |
|------------|----------|----------|-----------|------------|-----------|-----------|-----------|--------------|
| cg05357209 | 1.84E-19 | 3.10E-21 | -1.07E+01 | 37.3927927 | -2.49E-01 | 872208    | 872331    | NC_000007.13 |
| cg00290023 | 1.84E-19 | 3.10E-21 | -1.07E+01 | 37.3926734 | -1.73E-01 | 174962968 | 174963091 | NC_000005.9  |
| cg16326421 | 1.85E-19 | 3.11E-21 | -1.07E+01 | 37.3900558 | -2.29E-01 | 36151003  | 36151126  | NC_000020.10 |
| cg11001085 | 1.85E-19 | 3.12E-21 | -1.07E+01 | 37.3868085 | -2.26E-01 | 49940126  | 49940249  | NC_000003.11 |
| cg12009872 | 1.85E-19 | 3.12E-21 | -1.07E+01 | 37.386293  | -1.91E-01 | 51520739  | 51520862  | NC_000015.9  |
| cg04505972 | 1.87E-19 | 3.14E-21 | -1.07E+01 | 37.3781733 | -1.91E-01 | 173508040 | 173508163 | NC_000002.11 |
| cg00133476 | 1.88E-19 | 3.17E-21 | -1.07E+01 | 37.3710329 | -1.64E-01 | 80266884  | 80267007  | NC_000017.10 |
| cg08116711 | 1.88E-19 | 3.17E-21 | -1.07E+01 | 37.3701888 | -2.74E-01 | 101596218 | 101596341 | NC_000007.13 |
| cg05985821 | 1.89E-19 | 3.18E-21 | -1.07E+01 | 37.3658717 | -2.17E-01 | 328586    | 328709    | NC_000008.10 |
| cg24364398 | 1.89E-19 | 3.18E-21 | -1.07E+01 | 37.3655451 | -1.00E-01 | 86565216  | 86565339  | NC_000002.11 |
| cg20220678 | 1.91E-19 | 3.21E-21 | -1.07E+01 | 37.3576678 | -2.11E-01 | 19243209  | 19243332  | NC_000008.10 |
| cg14171514 | 1.91E-19 | 3.21E-21 | -1.07E+01 | 37.3559418 | -1.96E-01 | 62308492  | 62308615  | NC_000011.9  |
| cg14796755 | 1.91E-19 | 3.22E-21 | -1.07E+01 | 37.3552997 | -2.21E-01 | 91218263  | 91218386  | NC_000010.10 |
| cg01125010 | 1.91E-19 | 3.22E-21 | -1.07E+01 | 37.3536052 | -1.98E-01 | 76134099  | 76134222  | NC_000017.10 |
| cg16001384 | 1.91E-19 | 3.22E-21 | -1.07E+01 | 37.3533829 | -2.55E-01 | 134306801 | 134306924 | NC_000008.10 |
| cg11236311 | 1.91E-19 | 3.23E-21 | -1.07E+01 | 37.3518102 | -2.09E-01 | 105172168 | 105172291 | NC_000007.13 |
| cg08575883 | 1.92E-19 | 3.24E-21 | -1.07E+01 | 37.3481929 | -2.23E-01 | 3291355   | 3291478   | NC_000010.10 |
| cg05525106 | 1.94E-19 | 3.27E-21 | -1.07E+01 | 37.3386104 | -1.46E-01 | 74162089  | 74162212  | NC_000006.11 |
| cg11967592 | 1.95E-19 | 3.28E-21 | -1.07E+01 | 37.3347179 | -1.02E-01 | 28725406  | 28725529  | NC_000007.13 |
| cg11712835 | 1.95E-19 | 3.29E-21 | -1.07E+01 | 37.3343007 | -1.87E-01 | 201509152 | 201509275 | NC_000001.10 |
| cg02488653 | 1.96E-19 | 3.30E-21 | -1.07E+01 | 37.3297282 | -2.35E-01 | 1568987   | 1569110   | NC_000011.9  |
| cg03727673 | 1.96E-19 | 3.31E-21 | -1.07E+01 | 37.3283346 | -1.96E-01 | 21966420  | 21966543  | NC_000001.10 |
| cg05026393 | 1.96E-19 | 3.31E-21 | -1.07E+01 | 37.3280555 | -1.66E-01 | 125672795 | 125672918 | NC_000008.10 |
| cg12661744 | 1.96E-19 | 3.31E-21 | -1.07E+01 | 37.3255373 | -1.94E-01 | 112507322 | 112507445 | NC_000010.10 |
| cg25952192 | 1.97E-19 | 3.32E-21 | -1.07E+01 | 37.3227484 | -2.26E-01 | 21656374  | 21656497  | NC_000018.9  |



|            |          |          |           |            |           |           |           |              |
|------------|----------|----------|-----------|------------|-----------|-----------|-----------|--------------|
| cg03055671 | 1.97E-19 | 3.33E-21 | -1.07E+01 | 37.3223525 | -2.75E-01 | 172231528 | 172231651 | NC_000003.11 |
| cg11857033 | 1.97E-19 | 3.33E-21 | -1.07E+01 | 37.3207822 | -9.45E-02 | 29297552  | 29297675  | NC_000017.10 |
| cg07745373 | 1.98E-19 | 3.34E-21 | -1.07E+01 | 37.3165995 | -1.95E-01 | 58941415  | 58941538  | NC_000011.9  |
| cg09022993 | 1.98E-19 | 3.35E-21 | -1.07E+01 | 37.3145393 | -1.00E-01 | 52917875  | 52917998  | NC_000004.11 |
| cg05938607 | 1.99E-19 | 3.36E-21 | -1.07E+01 | 37.3123538 | -1.92E-01 | 60274200  | 60274323  | NC_000010.10 |
| cg14252164 | 1.99E-19 | 3.36E-21 | -1.07E+01 | 37.3121357 | -2.02E-01 | 44019598  | 44019721  | NC_000006.11 |
| cg02586182 | 1.99E-19 | 3.36E-21 | -1.07E+01 | 37.3109057 | -1.42E-01 | 102883550 | 102883673 | NC_000010.10 |
| cg08639339 | 2.00E-19 | 3.39E-21 | -1.07E+01 | 37.3046224 | -1.99E-01 | 205648336 | 205648459 | NC_000001.10 |
| cg06783668 | 2.00E-19 | 3.39E-21 | -1.07E+01 | 37.3041964 | -9.61E-02 | 71204585  | 71204708  | NC_000002.11 |
| cg15206445 | 2.00E-19 | 3.39E-21 | -1.07E+01 | 37.3037944 | -2.03E-01 | 89573312  | 89573435  | NC_000016.9  |
| cg15352367 | 2.00E-19 | 3.39E-21 | -1.07E+01 | 37.3032629 | -1.65E-01 | 36236732  | 36236855  | NC_000022.10 |
| cg19174643 | 2.01E-19 | 3.40E-21 | -1.07E+01 | 37.3002675 | -2.88E-01 | 13136426  | 13136549  | NC_000018.9  |
| cg15176413 | 2.02E-19 | 3.42E-21 | -1.07E+01 | 37.2938481 | -2.02E-01 | 4764443   | 4764566   | NC_000007.13 |
| cg04177148 | 2.03E-19 | 3.43E-21 | -1.07E+01 | 37.2911526 | -7.31E-02 | 46101987  | 46102110  | NC_000017.10 |
| cg00108282 | 2.03E-19 | 3.44E-21 | -1.07E+01 | 37.2883105 | -2.74E-01 | 845047    | 845170    | NC_000007.13 |
| cg08210322 | 2.03E-19 | 3.44E-21 | -1.07E+01 | 37.2875798 | -9.08E-02 | 231903056 | 231903179 | NC_000002.11 |
| cg11485451 | 2.04E-19 | 3.45E-21 | -1.07E+01 | 37.2860159 | -8.18E-02 | 133451240 | 133451363 | NC_000005.9  |
| cg06772295 | 2.04E-19 | 3.47E-21 | -1.07E+01 | 37.2810774 | -7.00E-02 | 24520956  | 24521079  | NC_000014.8  |
| cg02606840 | 2.05E-19 | 3.47E-21 | -1.07E+01 | 37.2808163 | -2.34E-01 | 99280930  | 99281053  | NC_000002.11 |
| cg26660801 | 2.05E-19 | 3.47E-21 | -1.07E+01 | 37.2795022 | -7.67E-02 | 20532108  | 20532231  | NC_000013.10 |
| cg02119927 | 2.06E-19 | 3.49E-21 | -1.07E+01 | 37.2753789 | -1.61E-01 | 71078141  | 71078264  | NC_000010.10 |
| cg13601855 | 2.07E-19 | 3.51E-21 | -1.07E+01 | 37.268584  | -1.94E-01 | 120190297 | 120190420 | NC_000002.11 |
| cg13536080 | 2.08E-19 | 3.53E-21 | -1.07E+01 | 37.2642867 | -2.29E-01 | 85659096  | 85659219  | NC_000011.9  |
| cg07841385 | 2.10E-19 | 3.56E-21 | -1.06E+01 | 37.2545241 | -1.34E-01 | 30687707  | 30687830  | NC_000006.11 |
| cg08640923 | 2.10E-19 | 3.57E-21 | -1.06E+01 | 37.2513955 | -8.98E-02 | 220117945 | 220118068 | NC_000002.11 |

|            |          |          |           |            |           |           |           |              |
|------------|----------|----------|-----------|------------|-----------|-----------|-----------|--------------|
| cg22699314 | 2.10E-19 | 3.57E-21 | -1.06E+01 | 37.2513129 | -2.12E-01 | 61847725  | 61847848  | NC_000002.11 |
| cg04760448 | 2.11E-19 | 3.59E-21 | -1.06E+01 | 37.2478133 | -2.64E-01 | 46890849  | 46890972  | NC_000021.8  |
| cg13856674 | 2.12E-19 | 3.60E-21 | -1.06E+01 | 37.2430737 | -1.88E-01 | 93722590  | 93722713  | NC_000015.9  |
| cg07429394 | 2.13E-19 | 3.62E-21 | -1.06E+01 | 37.2393243 | -4.34E-02 | 153918709 | 153918832 | NC_000001.10 |
| cg11701148 | 2.17E-19 | 3.69E-21 | -1.06E+01 | 37.2201506 | -2.39E-01 | 1993035   | 1993158   | NC_000008.10 |
| cg27585074 | 2.19E-19 | 3.73E-21 | -1.06E+01 | 37.2083508 | -1.85E-01 | 1947960   | 1948083   | NC_000019.9  |
| cg19803952 | 2.19E-19 | 3.73E-21 | -1.06E+01 | 37.208344  | -1.71E-01 | 44036136  | 44036259  | NC_000020.10 |
| cg24710671 | 2.20E-19 | 3.75E-21 | -1.06E+01 | 37.2033883 | -2.04E-01 | 45754203  | 45754326  | NC_000021.8  |
| cg02415029 | 2.21E-19 | 3.77E-21 | -1.06E+01 | 37.1972395 | -1.61E-01 | 110025642 | 110025765 | NC_000001.10 |
| cg23534216 | 2.23E-19 | 3.81E-21 | -1.06E+01 | 37.1873438 | -1.98E-01 | 102821552 | 102821675 | NC_000010.10 |
| cg17288102 | 2.24E-19 | 3.82E-21 | -1.06E+01 | 37.1842264 | -8.10E-02 | 111683471 | 111683594 | NC_000010.10 |
| cg23844967 | 2.26E-19 | 3.85E-21 | -1.06E+01 | 37.1762883 | -9.86E-02 | 43038158  | 43038281  | NC_000002.11 |
| cg24684077 | 2.26E-19 | 3.87E-21 | -1.06E+01 | 37.1726069 | -1.00E-01 | 30948712  | 30948835  | NC_000012.11 |
| cg03667317 | 2.27E-19 | 3.87E-21 | -1.06E+01 | 37.1717801 | -1.90E-01 | 145700239 | 145700362 | NC_000008.10 |
| cg00187380 | 2.27E-19 | 3.87E-21 | -1.06E+01 | 37.1708502 | -1.42E-01 | 54427384  | 54427507  | NC_000012.11 |
| cg22011731 | 2.28E-19 | 3.89E-21 | -1.06E+01 | 37.1668322 | -8.28E-02 | 126011549 | 126011672 | NC_000008.10 |
| cg13800005 | 2.29E-19 | 3.92E-21 | -1.06E+01 | 37.1604129 | -3.07E-01 | 39629290  | 39629413  | NC_000007.13 |
| cg14552947 | 2.30E-19 | 3.93E-21 | -1.06E+01 | 37.1573978 | -3.00E-01 | 28657329  | 28657452  | NC_000010.10 |
| cg20799268 | 2.30E-19 | 3.93E-21 | -1.06E+01 | 37.156879  | -2.52E-01 | 142275649 | 142275772 | NC_000008.10 |
| cg20928945 | 2.32E-19 | 3.97E-21 | -1.06E+01 | 37.1456624 | -3.07E-01 | 960411    | 960534    | NC_000007.13 |
| cg00328227 | 2.32E-19 | 3.98E-21 | -1.06E+01 | 37.1451329 | -2.18E-01 | 109204325 | 109204448 | NC_000001.10 |
| cg04921578 | 2.33E-19 | 3.98E-21 | -1.06E+01 | 37.1432462 | -1.93E-01 | 101143257 | 101143380 | NC_000013.10 |
| cg08422793 | 2.35E-19 | 4.02E-21 | -1.06E+01 | 37.1341141 | -2.92E-01 | 70051510  | 70051633  | NC_000015.9  |
| cg06606386 | 2.35E-19 | 4.02E-21 | -1.06E+01 | 37.1337666 | -2.44E-01 | 13947469  | 13947592  | NC_000019.9  |
| cg24917065 | 2.35E-19 | 4.03E-21 | -1.06E+01 | 37.1319613 | -2.07E-01 | 23418389  | 23418512  | NC_000008.10 |

|                  |          |          |           |            |           |           |           |              |
|------------------|----------|----------|-----------|------------|-----------|-----------|-----------|--------------|
| cg22221222       | 2.35E-19 | 4.03E-21 | -1.06E+01 | 37.1315184 | -5.99E-02 | 3751199   | 3751322   | NC_000006.11 |
| cg05447102       | 2.35E-19 | 4.04E-21 | -1.06E+01 | 37.1302312 | -2.29E-01 | 74185167  | 74185290  | NC_000013.10 |
| cg25361506       | 2.36E-19 | 4.05E-21 | -1.06E+01 | 37.1259346 | -2.45E-01 | 201426290 | 201426413 | NC_000001.10 |
| cg14207553       | 2.37E-19 | 4.06E-21 | -1.06E+01 | 37.1237056 | -1.55E-01 | 106071427 | 106071550 | NC_000002.11 |
| cg10410146       | 2.37E-19 | 4.07E-21 | -1.06E+01 | 37.1210648 | -2.38E-01 | 44112411  | 44112534  | NC_000007.13 |
| cg23367358       | 2.38E-19 | 4.08E-21 | -1.06E+01 | 37.1195836 | -2.43E-01 | 106043523 | 106043646 | NC_000002.11 |
| cg00089814       | 2.38E-19 | 4.09E-21 | -1.06E+01 | 37.1176467 | -2.29E-01 | 72641008  | 72641131  | NC_000003.11 |
| cg03505562       | 2.40E-19 | 4.12E-21 | -1.06E+01 | 37.1103853 | -5.08E-02 | 2077447   | 2077570   | NC_000016.9  |
| cg08242636       | 2.40E-19 | 4.12E-21 | -1.06E+01 | 37.1100019 | -2.36E-01 | 67062389  | 67062512  | NC_000016.9  |
| cg16499645       | 2.41E-19 | 4.13E-21 | -1.06E+01 | 37.1071207 | -1.43E-01 | 145654854 | 145654977 | NC_000008.10 |
| cg03070236       | 2.41E-19 | 4.14E-21 | -1.06E+01 | 37.1053657 | -2.85E-01 | 4012997   | 4013120   | NC_000016.9  |
| cg19009305       | 2.43E-19 | 4.17E-21 | -1.06E+01 | 37.0985394 | -1.68E-01 | 89181732  | 89181855  | NC_000015.9  |
| ch.11.125574265R | 2.43E-19 | 4.17E-21 | -1.06E+01 | 37.0981227 | -1.02E-01 | 126069055 | 126069178 | NC_000011.9  |
| cg13668314       | 2.43E-19 | 4.17E-21 | -1.06E+01 | 37.0975947 | -2.10E-01 | 130692638 | 130692761 | NC_000009.11 |
| cg06768251       | 2.43E-19 | 4.18E-21 | -1.06E+01 | 37.0947092 | -1.47E-01 | 73533035  | 73533158  | NC_000010.10 |
| cg13656752       | 2.43E-19 | 4.19E-21 | -1.06E+01 | 37.094159  | -2.63E-01 | 171538334 | 171538457 | NC_000005.9  |
| cg15633390       | 2.44E-19 | 4.19E-21 | -1.06E+01 | 37.0931377 | -1.57E-01 | 99851211  | 99851334  | NC_000004.11 |
| cg04352977       | 2.44E-19 | 4.20E-21 | -1.06E+01 | 37.0896223 | -1.08E-01 | 74069885  | 74070008  | NC_000016.9  |
| cg03344149       | 2.45E-19 | 4.21E-21 | -1.06E+01 | 37.0889808 | -1.33E-01 | 28535559  | 28535682  | NC_000013.10 |
| cg21079719       | 2.45E-19 | 4.22E-21 | -1.06E+01 | 37.086659  | -2.54E-01 | 98568785  | 98568908  | NC_000015.9  |
| cg05621157       | 2.46E-19 | 4.23E-21 | -1.06E+01 | 37.0836264 | -1.12E-01 | 99404279  | 99404402  | NC_000013.10 |
| cg01980793       | 2.46E-19 | 4.23E-21 | -1.06E+01 | 37.0831389 | -2.40E-01 | 141608401 | 141608524 | NC_000008.10 |
| cg03897318       | 2.47E-19 | 4.26E-21 | -1.06E+01 | 37.077763  | -8.02E-02 | 52272844  | 52272967  | NC_000003.11 |
| cg19659689       | 2.47E-19 | 4.26E-21 | -1.06E+01 | 37.0763536 | -5.38E-02 | 66360770  | 66360893  | NC_000011.9  |
| cg02854937       | 2.49E-19 | 4.29E-21 | -1.06E+01 | 37.068743  | -1.39E-01 | 1079879   | 1080002   | NC_000001.10 |

|                |          |          |           |            |           |           |           |              |
|----------------|----------|----------|-----------|------------|-----------|-----------|-----------|--------------|
| cg00908813     | 2.51E-19 | 4.32E-21 | -1.06E+01 | 37.0630957 | -2.05E-01 | 139464848 | 139464971 | NC_000003.11 |
| cg19373545     | 2.51E-19 | 4.33E-21 | -1.06E+01 | 37.060055  | -2.16E-01 | 36771793  | 36771916  | NC_000001.10 |
| ch.7.93764192R | 2.53E-19 | 4.36E-21 | -1.06E+01 | 37.0541112 | -1.09E-01 | 93926256  | 93926379  | NC_000007.13 |
| cg14459011     | 2.53E-19 | 4.37E-21 | -1.06E+01 | 37.0520665 | -2.32E-01 | 103998497 | 103998620 | NC_000004.11 |
| cg14700707     | 2.55E-19 | 4.39E-21 | -1.06E+01 | 37.0460489 | -1.84E-01 | 32191840  | 32191963  | NC_000006.11 |
| cg12537329     | 2.56E-19 | 4.42E-21 | -1.06E+01 | 37.0401779 | -2.39E-01 | 113677777 | 113677900 | NC_000013.10 |
| cg15313320     | 2.57E-19 | 4.43E-21 | -1.06E+01 | 37.0374872 | -1.64E-01 | 17374127  | 17374250  | NC_000011.9  |
| cg00640719     | 2.58E-19 | 4.46E-21 | -1.06E+01 | 37.0315826 | -1.88E-01 | 70426268  | 70426391  | NC_000016.9  |
| cg08543966     | 2.59E-19 | 4.47E-21 | -1.06E+01 | 37.0287992 | -1.33E-01 | 35646150  | 35646273  | NC_000019.9  |
| cg21727223     | 2.59E-19 | 4.48E-21 | -1.06E+01 | 37.027445  | -1.95E-01 | 66755770  | 66755893  | NC_000017.10 |
| cg25127692     | 2.61E-19 | 4.51E-21 | -1.06E+01 | 37.0201943 | -2.24E-01 | 185406536 | 185406659 | NC_000003.11 |
| cg06980169     | 2.61E-19 | 4.51E-21 | -1.06E+01 | 37.0191053 | -1.27E-01 | 111127139 | 111127262 | NC_000012.11 |
| cg14424579     | 2.62E-19 | 4.52E-21 | -1.06E+01 | 37.0175892 | -5.69E-02 | 27274309  | 27274432  | NC_000002.11 |
| cg15711508     | 2.63E-19 | 4.55E-21 | -1.06E+01 | 37.0120521 | -2.17E-01 | 193432241 | 193432364 | NC_000001.10 |
| cg14665192     | 2.63E-19 | 4.55E-21 | -1.06E+01 | 37.0119866 | -1.39E-01 | 6898711   | 6898834   | NC_000012.11 |
| cg17209188     | 2.64E-19 | 4.57E-21 | -1.06E+01 | 37.0080562 | -2.92E-01 | 23387396  | 23387519  | NC_000007.13 |
| cg09643139     | 2.66E-19 | 4.60E-21 | -1.06E+01 | 37.0001995 | -2.86E-01 | 59746288  | 59746411  | NC_000008.10 |
| cg00698602     | 2.68E-19 | 4.64E-21 | -1.06E+01 | 36.9925042 | -2.50E-01 | 44481324  | 44481447  | NC_000003.11 |
| cg05035061     | 2.68E-19 | 4.64E-21 | -1.06E+01 | 36.9922054 | -1.76E-01 | 85028831  | 85028954  | NC_000016.9  |
| cg22236626     | 2.69E-19 | 4.65E-21 | -1.06E+01 | 36.9895117 | -6.12E-02 | 212606819 | 212606942 | NC_000001.10 |
| cg15242225     | 2.70E-19 | 4.67E-21 | -1.06E+01 | 36.9849015 | -2.64E-01 | 36421857  | 36421980  | NC_000021.8  |
| cg05675373     | 2.70E-19 | 4.68E-21 | -1.06E+01 | 36.9827072 | -2.10E-01 | 110754257 | 110754380 | NC_000001.10 |
| cg26802256     | 2.70E-19 | 4.68E-21 | -1.06E+01 | 36.9826156 | -1.45E-01 | 4652765   | 4652888   | NC_000007.13 |
| cg17549878     | 2.71E-19 | 4.70E-21 | -1.06E+01 | 36.9796711 | -1.79E-01 | 18280849  | 18280972  | NC_000017.10 |
| cg03365548     | 2.71E-19 | 4.70E-21 | -1.06E+01 | 36.9783293 | -1.52E-01 | 50176163  | 50176286  | NC_000003.11 |

|            |          |          |           |            |           |           |           |              |
|------------|----------|----------|-----------|------------|-----------|-----------|-----------|--------------|
| cg04140553 | 2.72E-19 | 4.71E-21 | -1.06E+01 | 36.9765045 | -1.59E-01 | 41962232  | 41962355  | NC_000001.10 |
| cg05715828 | 2.74E-19 | 4.74E-21 | -1.06E+01 | 36.9701677 | -1.58E-01 | 131643131 | 131643254 | NC_000009.11 |
| cg14072120 | 2.74E-19 | 4.76E-21 | -1.06E+01 | 36.9666251 | -1.01E-01 | 37640402  | 37640525  | NC_000022.10 |
| cg07118000 | 2.75E-19 | 4.77E-21 | -1.06E+01 | 36.9653005 | -1.92E-01 | 37656246  | 37656369  | NC_000008.10 |
| cg14014720 | 2.75E-19 | 4.77E-21 | -1.06E+01 | 36.9647425 | -1.54E-01 | 90113998  | 90114121  | NC_000009.11 |
| cg20226122 | 2.76E-19 | 4.79E-21 | -1.06E+01 | 36.9598914 | -2.45E-01 | 155581623 | 155581746 | NC_000007.13 |
| cg26015888 | 2.77E-19 | 4.80E-21 | -1.06E+01 | 36.9581046 | -1.87E-01 | 22352103  | 22352226  | NC_000001.10 |
| cg22068743 | 2.77E-19 | 4.81E-21 | -1.06E+01 | 36.9552513 | -2.40E-01 | 238374408 | 238374531 | NC_000002.11 |
| cg14283328 | 2.78E-19 | 4.83E-21 | -1.06E+01 | 36.9519557 | -1.53E-01 | 66823587  | 66823710  | NC_000011.9  |
| cg01262133 | 2.79E-19 | 4.84E-21 | -1.06E+01 | 36.9492932 | -1.41E-01 | 45645147  | 45645270  | NC_000006.11 |
| cg02735652 | 2.79E-19 | 4.85E-21 | -1.06E+01 | 36.9475506 | -9.79E-02 | 32226179  | 32226302  | NC_000001.10 |
| cg06218079 | 2.80E-19 | 4.86E-21 | -1.06E+01 | 36.9456591 | -2.89E-01 | 80834228  | 80834351  | NC_000017.10 |
| cg27113419 | 2.80E-19 | 4.87E-21 | -1.06E+01 | 36.9445095 | -2.19E-01 | 58533979  | 58534102  | NC_000016.9  |
| cg22828110 | 2.82E-19 | 4.90E-21 | -1.06E+01 | 36.9378148 | -2.27E-01 | 75919242  | 75919365  | NC_000005.9  |
| cg18031270 | 2.83E-19 | 4.91E-21 | -1.06E+01 | 36.9352211 | -1.34E-01 | 42444187  | 42444310  | NC_000019.9  |
| cg02760939 | 2.83E-19 | 4.93E-21 | -1.06E+01 | 36.9325082 | -1.13E-01 | 41985144  | 41985267  | NC_000017.10 |
| cg19009471 | 2.84E-19 | 4.94E-21 | -1.06E+01 | 36.9301198 | -2.43E-01 | 101908998 | 101909121 | NC_000014.8  |
| cg04370247 | 2.86E-19 | 4.98E-21 | -1.06E+01 | 36.9214509 | -2.33E-01 | 126308552 | 126308675 | NC_000010.10 |
| cg16636692 | 2.88E-19 | 5.01E-21 | -1.06E+01 | 36.9154826 | -6.06E-02 | 27115249  | 27115372  | NC_000006.11 |
| cg19221369 | 2.88E-19 | 5.02E-21 | -1.06E+01 | 36.9144519 | -1.10E-01 | 109618856 | 109618979 | NC_000001.10 |
| cg04600055 | 2.90E-19 | 5.04E-21 | -1.06E+01 | 36.9095993 | -1.23E-01 | 102092805 | 102092928 | NC_000008.10 |
| cg04540406 | 2.91E-19 | 5.07E-21 | -1.06E+01 | 36.9043918 | -2.04E-01 | 46655675  | 46655798  | NC_000016.9  |
| cg24185397 | 2.91E-19 | 5.07E-21 | -1.06E+01 | 36.9035615 | -9.97E-02 | 25659609  | 25659732  | NC_000017.10 |
| cg01458495 | 2.96E-19 | 5.15E-21 | -1.06E+01 | 36.8882334 | -1.99E-01 | 48310544  | 48310667  | NC_000003.11 |
| cg23108728 | 2.96E-19 | 5.15E-21 | -1.06E+01 | 36.8876873 | -6.38E-02 | 220117875 | 220117998 | NC_000002.11 |

|                |          |          |           |            |           |           |           |              |
|----------------|----------|----------|-----------|------------|-----------|-----------|-----------|--------------|
| cg05681076     | 2.96E-19 | 5.16E-21 | -1.06E+01 | 36.8874268 | -1.38E-01 | 175066987 | 175067110 | NC_000005.9  |
| cg13065121     | 2.96E-19 | 5.17E-21 | -1.06E+01 | 36.8845191 | -9.39E-02 | 204159498 | 204159621 | NC_000001.10 |
| ch.9.2473665R  | 2.97E-19 | 5.19E-21 | -1.06E+01 | 36.8814183 | -7.99E-02 | 139311799 | 139311922 | NC_000009.11 |
| cg02215357     | 2.99E-19 | 5.21E-21 | -1.06E+01 | 36.8762618 | -1.70E-01 | 53191046  | 53191169  | NC_000013.10 |
| ch.11.1133244F | 2.99E-19 | 5.21E-21 | -1.06E+01 | 36.8761436 | -1.30E-01 | 59573526  | 59573649  | NC_000011.9  |
| cg04338890     | 2.99E-19 | 5.22E-21 | -1.06E+01 | 36.8754738 | -2.08E-01 | 57019755  | 57019878  | NC_000016.9  |
| cg04910041     | 3.01E-19 | 5.25E-21 | -1.06E+01 | 36.8694957 | -1.87E-01 | 22877791  | 22877914  | NC_000008.10 |
| cg23398508     | 3.01E-19 | 5.26E-21 | -1.06E+01 | 36.8669191 | -1.76E-01 | 70536199  | 70536322  | NC_000017.10 |
| cg07999953     | 3.01E-19 | 5.26E-21 | -1.06E+01 | 36.8665979 | -2.33E-01 | 35249327  | 35249450  | NC_000001.10 |
| cg22382836     | 3.04E-19 | 5.31E-21 | -1.06E+01 | 36.8572916 | -1.90E-01 | 723036    | 723159    | NC_000019.9  |
| cg22221320     | 3.05E-19 | 5.33E-21 | -1.06E+01 | 36.8539668 | -1.31E-01 | 89664340  | 89664463  | NC_000001.10 |
| cg24688248     | 3.07E-19 | 5.37E-21 | -1.06E+01 | 36.8467768 | -5.81E-02 | 73976389  | 73976512  | NC_000015.9  |
| cg10584986     | 3.10E-19 | 5.42E-21 | -1.06E+01 | 36.8370028 | -1.83E-01 | 29825929  | 29826052  | NC_000015.9  |
| cg18735402     | 3.12E-19 | 5.46E-21 | -1.06E+01 | 36.8296014 | -1.65E-01 | 46181330  | 46181453  | NC_000019.9  |
| cg06535396     | 3.12E-19 | 5.47E-21 | -1.06E+01 | 36.8292295 | -8.89E-02 | 180631143 | 180631266 | NC_000005.9  |
| cg22202558     | 3.13E-19 | 5.48E-21 | -1.06E+01 | 36.8265961 | -2.13E-01 | 101500303 | 101500426 | NC_000007.13 |
| cg03393040     | 3.16E-19 | 5.53E-21 | -1.06E+01 | 36.8177576 | -1.23E-01 | 113587340 | 113587463 | NC_000012.11 |
| cg26648579     | 3.16E-19 | 5.53E-21 | -1.06E+01 | 36.8171535 | -1.89E-01 | 604802    | 604925    | NC_000016.9  |
| ch.12.1173053R | 3.16E-19 | 5.54E-21 | -1.06E+01 | 36.816008  | -9.90E-02 | 56532803  | 56532926  | NC_000012.11 |
| cg11293828     | 3.17E-19 | 5.55E-21 | -1.06E+01 | 36.8150913 | -1.89E-01 | 3598335   | 3598458   | NC_000012.11 |
| cg11468953     | 3.17E-19 | 5.55E-21 | -1.06E+01 | 36.8147814 | -1.87E-01 | 48034953  | 48035076  | NC_000011.9  |
| cg07012999     | 3.18E-19 | 5.57E-21 | -1.06E+01 | 36.8106949 | -9.38E-02 | 46692446  | 46692569  | NC_000022.10 |
| cg27658026     | 3.18E-19 | 5.57E-21 | -1.06E+01 | 36.8106462 | -1.79E-01 | 105239085 | 105239208 | NC_000010.10 |
| cg09327847     | 3.18E-19 | 5.58E-21 | -1.06E+01 | 36.8093843 | -1.45E-01 | 24087793  | 24087916  | NC_000016.9  |
| cg19893585     | 3.19E-19 | 5.58E-21 | -1.06E+01 | 36.8083206 | -2.04E-01 | 145025064 | 145025187 | NC_000008.10 |

|            |          |          |           |            |           |           |           |              |
|------------|----------|----------|-----------|------------|-----------|-----------|-----------|--------------|
| cg24127989 | 3.20E-19 | 5.61E-21 | -1.06E+01 | 36.803354  | -1.71E-01 | 128049508 | 128049631 | NC_000007.13 |
| cg02408775 | 3.20E-19 | 5.62E-21 | -1.06E+01 | 36.8021617 | -1.68E-01 | 48206848  | 48206971  | NC_000012.11 |
| cg05392440 | 3.20E-19 | 5.62E-21 | -1.06E+01 | 36.8017684 | -1.83E-01 | 2478653   | 2478776   | NC_000001.10 |
| cg19750282 | 3.24E-19 | 5.69E-21 | -1.06E+01 | 36.7892207 | -1.11E-01 | 43670519  | 43670642  | NC_000006.11 |
| cg08231648 | 3.24E-19 | 5.69E-21 | -1.06E+01 | 36.7886913 | -1.84E-01 | 235011814 | 235011937 | NC_000001.10 |
| cg05734675 | 3.24E-19 | 5.70E-21 | -1.06E+01 | 36.788375  | -1.95E-01 | 537033    | 537156    | NC_000010.10 |
| cg05019423 | 3.26E-19 | 5.73E-21 | -1.06E+01 | 36.7830692 | -1.14E-01 | 105330230 | 105330353 | NC_000014.8  |
| cg24435571 | 3.26E-19 | 5.73E-21 | -1.06E+01 | 36.7830649 | -3.06E-01 | 104436140 | 104436263 | NC_000010.10 |
| cg09546258 | 3.27E-19 | 5.74E-21 | -1.06E+01 | 36.7804653 | -1.18E-01 | 68444995  | 68445118  | NC_000011.9  |
| cg19477977 | 3.27E-19 | 5.75E-21 | -1.06E+01 | 36.7800006 | -2.05E-01 | 235599692 | 235599815 | NC_000002.11 |
| cg23450938 | 3.29E-19 | 5.78E-21 | -1.06E+01 | 36.7731858 | -1.61E-01 | 102972792 | 102972915 | NC_000002.11 |
| cg10979364 | 3.32E-19 | 5.84E-21 | -1.06E+01 | 36.764326  | -1.97E-01 | 14038630  | 14038753  | NC_000005.9  |
| cg19996355 | 3.33E-19 | 5.85E-21 | -1.06E+01 | 36.7614798 | -9.43E-02 | 19729375  | 19729498  | NC_000019.9  |
| cg04931383 | 3.33E-19 | 5.85E-21 | -1.06E+01 | 36.7613939 | -1.27E-01 | 37978731  | 37978854  | NC_000004.11 |
| cg19802929 | 3.34E-19 | 5.88E-21 | -1.06E+01 | 36.7577983 | -2.21E-01 | 32396820  | 32396943  | NC_000014.8  |
| cg25338818 | 3.36E-19 | 5.91E-21 | -1.06E+01 | 36.7521648 | -2.51E-01 | 10417268  | 10417391  | NC_000018.9  |
| cg00839584 | 3.37E-19 | 5.93E-21 | -1.06E+01 | 36.748578  | -1.72E-01 | 113542091 | 113542214 | NC_000002.11 |
| cg08227583 | 3.38E-19 | 5.96E-21 | -1.06E+01 | 36.744115  | -1.65E-01 | 2118566   | 2118689   | NC_000011.9  |
| cg23452752 | 3.38E-19 | 5.96E-21 | -1.06E+01 | 36.7440268 | -1.65E-01 | 10572946  | 10573069  | NC_000002.11 |
| cg07211259 | 3.39E-19 | 5.97E-21 | -1.06E+01 | 36.7421013 | -2.56E-01 | 5510497   | 5510620   | NC_000009.11 |
| cg26666921 | 3.39E-19 | 5.97E-21 | -1.06E+01 | 36.7416975 | -5.17E-02 | 47088009  | 47088132  | NC_000018.9  |
| cg19889066 | 3.40E-19 | 5.98E-21 | -1.06E+01 | 36.7399323 | -2.37E-01 | 74330425  | 74330548  | NC_000005.9  |
| cg18773937 | 3.40E-19 | 5.99E-21 | -1.06E+01 | 36.7387316 | -2.25E-01 | 113594611 | 113594734 | NC_000002.11 |
| cg19867579 | 3.41E-19 | 6.02E-21 | -1.06E+01 | 36.7340749 | -2.36E-01 | 175643491 | 175643614 | NC_000002.11 |
| cg16439512 | 3.42E-19 | 6.02E-21 | -1.06E+01 | 36.733168  | -1.02E-01 | 57598924  | 57599047  | NC_000015.9  |

|            |          |          |           |            |           |           |           |              |
|------------|----------|----------|-----------|------------|-----------|-----------|-----------|--------------|
| cg12560128 | 3.47E-19 | 6.12E-21 | -1.06E+01 | 36.7174007 | -2.75E-01 | 113416061 | 113416184 | NC_000012.11 |
| cg20300541 | 3.48E-19 | 6.15E-21 | -1.06E+01 | 36.7130296 | -2.19E-01 | 15295802  | 15295925  | NC_000017.10 |
| cg01308827 | 3.48E-19 | 6.15E-21 | -1.06E+01 | 36.7129797 | -2.62E-01 | 36132627  | 36132750  | NC_000019.9  |
| cg06277638 | 3.50E-19 | 6.18E-21 | -1.06E+01 | 36.7072388 | -1.82E-01 | 195424838 | 195424961 | NC_000003.11 |
| cg16015285 | 3.50E-19 | 6.19E-21 | -1.06E+01 | 36.7064544 | -2.10E-01 | 127583661 | 127583784 | NC_000008.10 |
| cg19981409 | 3.51E-19 | 6.20E-21 | -1.06E+01 | 36.7041129 | -2.27E-01 | 89225042  | 89225165  | NC_000011.9  |
| cg12229082 | 3.51E-19 | 6.21E-21 | -1.06E+01 | 36.703144  | -1.90E-01 | 150721650 | 150721773 | NC_000007.13 |
| cg03625627 | 3.52E-19 | 6.22E-21 | -1.06E+01 | 36.701646  | -6.66E-02 | 31687370  | 31687493  | NC_000022.10 |
| cg00586537 | 3.54E-19 | 6.25E-21 | -1.06E+01 | 36.6967486 | -7.44E-02 | 67571354  | 67571477  | NC_000016.9  |
| cg12340503 | 3.54E-19 | 6.26E-21 | -1.06E+01 | 36.695295  | -2.18E-01 | 128212805 | 128212928 | NC_000011.9  |
| cg01340312 | 3.55E-19 | 6.28E-21 | -1.06E+01 | 36.6918264 | -1.45E-01 | 30687511  | 30687634  | NC_000006.11 |
| cg05350293 | 3.56E-19 | 6.29E-21 | -1.06E+01 | 36.6900627 | -1.28E-01 | 89119002  | 89119125  | NC_000016.9  |
| cg09550909 | 3.56E-19 | 6.30E-21 | -1.06E+01 | 36.6880735 | -2.02E-01 | 36949957  | 36950080  | NC_000003.11 |
| cg12024969 | 3.58E-19 | 6.33E-21 | -1.06E+01 | 36.6842254 | -1.08E-01 | 6768022   | 6768145   | NC_000019.9  |
| cg27491887 | 3.58E-19 | 6.34E-21 | -1.06E+01 | 36.6826339 | -2.27E-01 | 2554583   | 2554706   | NC_000011.9  |
| cg09862072 | 3.62E-19 | 6.40E-21 | -1.06E+01 | 36.6729426 | -9.61E-02 | 161993364 | 161993487 | NC_000001.10 |
| cg09504873 | 3.63E-19 | 6.42E-21 | -1.06E+01 | 36.6694936 | -2.13E-01 | 66774626  | 66774749  | NC_000016.9  |
| cg13787850 | 3.63E-19 | 6.42E-21 | -1.06E+01 | 36.6690741 | -1.85E-01 | 102195951 | 102196074 | NC_000009.11 |
| cg16609966 | 3.67E-19 | 6.51E-21 | -1.06E+01 | 36.6564439 | -1.90E-01 | 88121781  | 88121904  | NC_000016.9  |
| cg24226281 | 3.67E-19 | 6.51E-21 | -1.06E+01 | 36.6563923 | -8.34E-02 | 1862341   | 1862464   | NC_000019.9  |
| cg01184784 | 3.68E-19 | 6.51E-21 | -1.06E+01 | 36.6555545 | -1.29E-01 | 8823756   | 8823879   | NC_000002.11 |
| cg19543867 | 3.68E-19 | 6.51E-21 | -1.06E+01 | 36.6552418 | -2.78E-01 | 112124979 | 112125102 | NC_000007.13 |
| cg21335012 | 3.69E-19 | 6.54E-21 | -1.06E+01 | 36.6514657 | -2.25E-01 | 30496325  | 30496448  | NC_000002.11 |
| cg19310786 | 3.69E-19 | 6.54E-21 | -1.06E+01 | 36.6508006 | -6.86E-02 | 57582371  | 57582494  | NC_000020.10 |
| cg16068063 | 3.71E-19 | 6.57E-21 | -1.06E+01 | 36.6467471 | -7.90E-02 | 43640131  | 43640254  | NC_000021.8  |



|            |          |          |           |            |           |           |           |              |
|------------|----------|----------|-----------|------------|-----------|-----------|-----------|--------------|
| cg05864433 | 3.71E-19 | 6.57E-21 | -1.06E+01 | 36.6463101 | -1.30E-01 | 2738728   | 2738851   | NC_000007.13 |
| cg00360794 | 3.72E-19 | 6.59E-21 | -1.06E+01 | 36.643645  | -1.52E-01 | 41803850  | 41803973  | NC_000015.9  |
| cg26403843 | 3.72E-19 | 6.61E-21 | -1.06E+01 | 36.6414026 | -2.91E-01 | 158634085 | 158634208 | NC_000005.9  |
| cg02219601 | 3.72E-19 | 6.61E-21 | -1.06E+01 | 36.6406818 | -2.34E-01 | 35835511  | 35835634  | NC_000014.8  |
| cg02789515 | 3.72E-19 | 6.61E-21 | -1.06E+01 | 36.6405793 | -2.92E-01 | 25620677  | 25620800  | NC_000017.10 |
| cg25628433 | 3.75E-19 | 6.66E-21 | -1.06E+01 | 36.6340563 | -1.86E-01 | 101541328 | 101541451 | NC_000002.11 |
| cg16965552 | 3.75E-19 | 6.67E-21 | -1.06E+01 | 36.6326339 | -2.33E-01 | 48937016  | 48937139  | NC_000001.10 |
| cg03283990 | 3.77E-19 | 6.69E-21 | -1.06E+01 | 36.6288628 | -2.04E-01 | 35129641  | 35129764  | NC_000015.9  |
| cg26779608 | 3.77E-19 | 6.69E-21 | -1.06E+01 | 36.6285585 | -9.03E-02 | 190474477 | 190474600 | NC_000004.11 |
| cg05626664 | 3.78E-19 | 6.72E-21 | -1.06E+01 | 36.6250962 | -2.29E-01 | 208394231 | 208394354 | NC_000001.10 |
| cg09218076 | 3.78E-19 | 6.73E-21 | -1.06E+01 | 36.6235859 | -2.43E-01 | 73248514  | 73248637  | NC_000014.8  |
| cg27004870 | 3.79E-19 | 6.74E-21 | -1.06E+01 | 36.6220283 | -1.67E-01 | 88850384  | 88850507  | NC_000016.9  |
| cg18195165 | 3.83E-19 | 6.81E-21 | -1.06E+01 | 36.6114085 | -2.05E-01 | 5549570   | 5549693   | NC_000007.13 |
| cg24667603 | 3.83E-19 | 6.82E-21 | -1.06E+01 | 36.6092077 | -2.39E-01 | 96590566  | 96590689  | NC_000015.9  |
| cg26066724 | 3.83E-19 | 6.83E-21 | -1.06E+01 | 36.6089166 | -1.87E-01 | 104355829 | 104355952 | NC_000014.8  |
| cg11926776 | 3.84E-19 | 6.84E-21 | -1.06E+01 | 36.6063413 | -1.25E-01 | 75863530  | 75863653  | NC_000011.9  |
| cg08831594 | 3.85E-19 | 6.86E-21 | -1.06E+01 | 36.6038527 | -9.87E-02 | 71211006  | 71211129  | NC_000010.10 |
| cg23830937 | 3.87E-19 | 6.90E-21 | -1.06E+01 | 36.5983291 | -8.55E-02 | 145115827 | 145115950 | NC_000008.10 |
| cg18982625 | 3.88E-19 | 6.91E-21 | -1.06E+01 | 36.5974293 | -1.26E-01 | 43485660  | 43485783  | NC_000022.10 |
| cg01354782 | 3.89E-19 | 6.93E-21 | -1.06E+01 | 36.5941924 | -2.33E-01 | 26522758  | 26522881  | NC_000012.11 |
| cg05687563 | 3.89E-19 | 6.93E-21 | -1.06E+01 | 36.5934338 | -9.44E-02 | 2837658   | 2837781   | NC_000016.9  |
| cg23076913 | 3.91E-19 | 6.97E-21 | -1.06E+01 | 36.5887961 | -2.25E-01 | 24435582  | 24435705  | NC_000001.10 |
| cg01347048 | 3.91E-19 | 6.98E-21 | -1.06E+01 | 36.5867576 | -1.94E-01 | 104387773 | 104387896 | NC_000010.10 |
| cg25131452 | 3.92E-19 | 7.00E-21 | -1.05E+01 | 36.5840028 | -2.29E-01 | 22351735  | 22351858  | NC_000001.10 |
| cg01880463 | 3.94E-19 | 7.03E-21 | -1.05E+01 | 36.5799593 | -1.88E-01 | 45179413  | 45179536  | NC_000020.10 |

|                |          |          |           |            |           |           |           |              |
|----------------|----------|----------|-----------|------------|-----------|-----------|-----------|--------------|
| cg16393012     | 3.94E-19 | 7.04E-21 | -1.05E+01 | 36.5788994 | -1.93E-01 | 15114387  | 15114510  | NC_000012.11 |
| cg02399008     | 3.96E-19 | 7.07E-21 | -1.05E+01 | 36.5739954 | -2.09E-01 | 102464353 | 102464476 | NC_000008.10 |
| cg22354646     | 3.96E-19 | 7.07E-21 | -1.05E+01 | 36.573596  | -1.95E-01 | 58550723  | 58550846  | NC_000003.11 |
| ch.12.2647993F | 3.99E-19 | 7.13E-21 | -1.05E+01 | 36.5657851 | -9.63E-02 | 124837365 | 124837488 | NC_000012.11 |
| cg26215727     | 3.99E-19 | 7.13E-21 | -1.05E+01 | 36.565189  | -1.82E-01 | 6485537   | 6485660   | NC_000012.11 |
| cg00822241     | 4.00E-19 | 7.14E-21 | -1.05E+01 | 36.5640709 | -1.63E-01 | 49201468  | 49201591  | NC_000019.9  |
| cg00937742     | 4.00E-19 | 7.14E-21 | -1.05E+01 | 36.5638197 | -1.89E-01 | 133429299 | 133429422 | NC_000002.11 |
| cg15202500     | 4.02E-19 | 7.18E-21 | -1.05E+01 | 36.5583186 | -1.52E-01 | 78063693  | 78063816  | NC_000010.10 |
| cg25432300     | 4.02E-19 | 7.19E-21 | -1.05E+01 | 36.5578827 | -2.21E-01 | 90508265  | 90508388  | NC_000005.9  |
| cg01845036     | 4.02E-19 | 7.19E-21 | -1.05E+01 | 36.5573646 | -2.17E-01 | 141852077 | 141852200 | NC_000005.9  |
| cg13393476     | 4.05E-19 | 7.23E-21 | -1.05E+01 | 36.5513275 | -2.28E-01 | 39894666  | 39894789  | NC_000019.9  |
| cg15302379     | 4.05E-19 | 7.25E-21 | -1.05E+01 | 36.549441  | -2.14E-01 | 102821848 | 102821971 | NC_000010.10 |
| cg14575790     | 4.07E-19 | 7.28E-21 | -1.05E+01 | 36.5450725 | -2.17E-01 | 3984975   | 3985098   | NC_000010.10 |
| cg04914221     | 4.08E-19 | 7.30E-21 | -1.05E+01 | 36.5421396 | -2.50E-01 | 63116514  | 63116637  | NC_000015.9  |
| cg17842822     | 4.09E-19 | 7.31E-21 | -1.05E+01 | 36.5406421 | -2.28E-01 | 1310485   | 1310608   | NC_000006.11 |
| cg16316624     | 4.11E-19 | 7.36E-21 | -1.05E+01 | 36.5341368 | -1.45E-01 | 61159649  | 61159772  | NC_000011.9  |
| cg09077096     | 4.14E-19 | 7.41E-21 | -1.05E+01 | 36.5269565 | -3.05E-01 | 3033798   | 3033921   | NC_000007.13 |
| cg22713900     | 4.15E-19 | 7.42E-21 | -1.05E+01 | 36.5256893 | -1.34E-01 | 41803592  | 41803715  | NC_000015.9  |
| cg22985785     | 4.15E-19 | 7.42E-21 | -1.05E+01 | 36.5256058 | -1.81E-01 | 22352096  | 22352219  | NC_000001.10 |
| cg09354380     | 4.17E-19 | 7.46E-21 | -1.05E+01 | 36.5209621 | -1.54E-01 | 106258324 | 106258447 | NC_000006.11 |
| cg11838152     | 4.19E-19 | 7.50E-21 | -1.05E+01 | 36.5157911 | -3.03E-01 | 102359110 | 102359233 | NC_000013.10 |
| cg10728473     | 4.21E-19 | 7.54E-21 | -1.05E+01 | 36.5108162 | -2.11E-01 | 197226514 | 197226637 | NC_000003.11 |
| cg19772907     | 4.21E-19 | 7.54E-21 | -1.05E+01 | 36.5101322 | -1.15E-01 | 45985566  | 45985689  | NC_000020.10 |
| cg15118665     | 4.21E-19 | 7.55E-21 | -1.05E+01 | 36.5090424 | -1.04E-01 | 144451924 | 144452047 | NC_000008.10 |
| cg11606195     | 4.22E-19 | 7.56E-21 | -1.05E+01 | 36.507675  | -2.51E-01 | 124145110 | 124145233 | NC_000012.11 |

|            |          |          |           |            |           |           |           |              |
|------------|----------|----------|-----------|------------|-----------|-----------|-----------|--------------|
| cg14537533 | 4.24E-19 | 7.60E-21 | -1.05E+01 | 36.502828  | -1.21E-01 | 52626904  | 52627027  | NC_000012.11 |
| cg01619846 | 4.24E-19 | 7.60E-21 | -1.05E+01 | 36.5027903 | -2.19E-01 | 4911475   | 4911598   | NC_000019.9  |
| cg10130900 | 4.24E-19 | 7.60E-21 | -1.05E+01 | 36.5021196 | -1.20E-01 | 68003410  | 68003533  | NC_000016.9  |
| cg23813313 | 4.25E-19 | 7.62E-21 | -1.05E+01 | 36.4995517 | -9.34E-02 | 26572433  | 26572556  | NC_000006.11 |
| cg23320056 | 4.26E-19 | 7.64E-21 | -1.05E+01 | 36.4970411 | -1.60E-01 | 155948742 | 155948865 | NC_000001.10 |
| cg06280807 | 4.28E-19 | 7.68E-21 | -1.05E+01 | 36.4926537 | -2.62E-01 | 201831749 | 201831872 | NC_000002.11 |
| cg24709951 | 4.29E-19 | 7.69E-21 | -1.05E+01 | 36.4903676 | -2.27E-01 | 73033009  | 73033132  | NC_000017.10 |
| cg03592763 | 4.29E-19 | 7.70E-21 | -1.05E+01 | 36.4893563 | -1.29E-01 | 142377303 | 142377426 | NC_000008.10 |
| cg13552026 | 4.32E-19 | 7.76E-21 | -1.05E+01 | 36.4819012 | -2.05E-01 | 91369283  | 91369406  | NC_000009.11 |
| cg05506147 | 4.38E-19 | 7.87E-21 | -1.05E+01 | 36.4678721 | -2.08E-01 | 95950118  | 95950241  | NC_000005.9  |
| cg01117384 | 4.40E-19 | 7.90E-21 | -1.05E+01 | 36.463608  | -1.82E-01 | 56274096  | 56274219  | NC_000020.10 |
| cg27355141 | 4.40E-19 | 7.90E-21 | -1.05E+01 | 36.4635432 | -1.58E-01 | 80190136  | 80190259  | NC_000017.10 |
| cg07622193 | 4.41E-19 | 7.93E-21 | -1.05E+01 | 36.460279  | -1.39E-01 | 42701920  | 42702043  | NC_000019.9  |
| cg08428292 | 4.46E-19 | 8.03E-21 | -1.05E+01 | 36.4479428 | -2.06E-01 | 85981373  | 85981496  | NC_000016.9  |
| cg01094950 | 4.48E-19 | 8.06E-21 | -1.05E+01 | 36.4436565 | -6.36E-02 | 43455097  | 43455220  | NC_000002.11 |
| cg15581944 | 4.49E-19 | 8.08E-21 | -1.05E+01 | 36.4420881 | -2.21E-01 | 35551852  | 35551975  | NC_000011.9  |
| cg26187123 | 4.49E-19 | 8.09E-21 | -1.05E+01 | 36.4408306 | -1.01E-01 | 211496981 | 211497104 | NC_000001.10 |
| cg04111789 | 4.50E-19 | 8.11E-21 | -1.05E+01 | 36.4381849 | -2.84E-01 | 41908262  | 41908385  | NC_000006.11 |
| cg09984392 | 4.52E-19 | 8.14E-21 | -1.05E+01 | 36.4337472 | -1.42E-01 | 126011784 | 126011907 | NC_000008.10 |
| cg21018997 | 4.54E-19 | 8.18E-21 | -1.05E+01 | 36.4292215 | -2.21E-01 | 59572908  | 59573031  | NC_000017.10 |
| cg19571293 | 4.55E-19 | 8.19E-21 | -1.05E+01 | 36.4281131 | -5.60E-02 | 1028488   | 1028611   | NC_000019.9  |
| cg06028808 | 4.56E-19 | 8.21E-21 | -1.05E+01 | 36.4259659 | -2.13E-01 | 68637592  | 68637715  | NC_000011.9  |
| cg21408813 | 4.60E-19 | 8.30E-21 | -1.05E+01 | 36.4152628 | -1.89E-01 | 52736798  | 52736921  | NC_000013.10 |
| cg23680821 | 4.61E-19 | 8.32E-21 | -1.05E+01 | 36.4132384 | -1.65E-01 | 109204316 | 109204439 | NC_000001.10 |
| cg14643264 | 4.62E-19 | 8.34E-21 | -1.05E+01 | 36.4105222 | -2.64E-01 | 27408242  | 27408365  | NC_000009.11 |

|            |          |          |           |            |           |           |           |              |
|------------|----------|----------|-----------|------------|-----------|-----------|-----------|--------------|
| cg23983208 | 4.63E-19 | 8.36E-21 | -1.05E+01 | 36.4081655 | -1.12E-01 | 73565812  | 73565935  | NC_000010.10 |
| cg26142490 | 4.65E-19 | 8.38E-21 | -1.05E+01 | 36.4051643 | -2.41E-01 | 27070113  | 27070236  | NC_000010.10 |
| cg15646741 | 4.66E-19 | 8.41E-21 | -1.05E+01 | 36.4023484 | -2.50E-01 | 208021736 | 208021859 | NC_000001.10 |
| cg02792602 | 4.70E-19 | 8.49E-21 | -1.05E+01 | 36.3929461 | -9.21E-02 | 218808859 | 218808982 | NC_000002.11 |
| cg00874055 | 4.72E-19 | 8.53E-21 | -1.05E+01 | 36.3881779 | -1.81E-01 | 236306673 | 236306796 | NC_000001.10 |
| cg26874999 | 4.72E-19 | 8.53E-21 | -1.05E+01 | 36.3879215 | -2.29E-01 | 69107290  | 69107413  | NC_000016.9  |
| cg20346503 | 4.76E-19 | 8.59E-21 | -1.05E+01 | 36.3807857 | -2.33E-01 | 128994402 | 128994525 | NC_000002.11 |
| cg11306361 | 4.76E-19 | 8.60E-21 | -1.05E+01 | 36.3799686 | -1.39E-01 | 36649077  | 36649200  | NC_000022.10 |
| cg18776708 | 4.78E-19 | 8.64E-21 | -1.05E+01 | 36.3754308 | -1.39E-01 | 133007715 | 133007838 | NC_000012.11 |
| cg07739927 | 4.79E-19 | 8.65E-21 | -1.05E+01 | 36.3738233 | -2.21E-01 | 62778162  | 62778285  | NC_000017.10 |
| cg24561305 | 4.79E-19 | 8.65E-21 | -1.05E+01 | 36.3737263 | -1.61E-01 | 29149132  | 29149255  | NC_000013.10 |
| cg24624505 | 4.83E-19 | 8.73E-21 | -1.05E+01 | 36.365499  | -2.77E-01 | 69972248  | 69972371  | NC_000017.10 |
| cg04223606 | 4.84E-19 | 8.74E-21 | -1.05E+01 | 36.363523  | -5.50E-02 | 10532886  | 10533009  | NC_000001.10 |
| cg00929606 | 4.84E-19 | 8.74E-21 | -1.05E+01 | 36.3632638 | -1.04E-01 | 99680280  | 99680403  | NC_000007.13 |
| cg15350661 | 4.88E-19 | 8.83E-21 | -1.05E+01 | 36.3533537 | -1.69E-01 | 322641    | 322764    | NC_000012.11 |
| cg01726448 | 4.89E-19 | 8.85E-21 | -1.05E+01 | 36.3516261 | -2.18E-01 | 1604448   | 1604571   | NC_000007.13 |
| cg14399183 | 4.91E-19 | 8.89E-21 | -1.05E+01 | 36.346781  | -2.13E-01 | 124048308 | 124048431 | NC_000009.11 |
| cg22322277 | 4.92E-19 | 8.91E-21 | -1.05E+01 | 36.3446813 | -2.46E-01 | 75459158  | 75459281  | NC_000006.11 |
| cg09648727 | 4.95E-19 | 8.97E-21 | -1.05E+01 | 36.3385872 | -1.69E-01 | 79361742  | 79361865  | NC_000017.10 |
| cg14607660 | 4.96E-19 | 8.98E-21 | -1.05E+01 | 36.3370072 | -2.14E-01 | 36738765  | 36738888  | NC_000009.11 |
| cg25649765 | 4.96E-19 | 8.99E-21 | -1.05E+01 | 36.3363569 | -2.37E-01 | 11672761  | 11672884  | NC_000002.11 |
| cg26983198 | 4.97E-19 | 9.00E-21 | -1.05E+01 | 36.3348655 | -1.30E-01 | 1952756   | 1952879   | NC_000011.9  |
| cg13809441 | 5.00E-19 | 9.07E-21 | -1.05E+01 | 36.3272255 | -1.37E-01 | 6737631   | 6737754   | NC_000006.11 |
| cg25947970 | 5.01E-19 | 9.09E-21 | -1.05E+01 | 36.3251866 | -2.17E-01 | 186220484 | 186220607 | NC_000003.11 |
| cg25462858 | 5.03E-19 | 9.12E-21 | -1.05E+01 | 36.3213028 | -1.32E-01 | 105032988 | 105033111 | NC_000010.10 |

|            |          |          |           |            |           |           |           |              |
|------------|----------|----------|-----------|------------|-----------|-----------|-----------|--------------|
| cg16122628 | 5.03E-19 | 9.13E-21 | -1.05E+01 | 36.3208264 | -1.87E-01 | 3749968   | 3750091   | NC_000006.11 |
| cg04438395 | 5.03E-19 | 9.13E-21 | -1.05E+01 | 36.3208085 | -2.11E-01 | 132200182 | 132200305 | NC_000010.10 |
| cg04464085 | 5.03E-19 | 9.13E-21 | -1.05E+01 | 36.3200492 | -9.96E-02 | 30923327  | 30923450  | NC_000006.11 |
| cg12080675 | 5.04E-19 | 9.14E-21 | -1.05E+01 | 36.3189202 | -1.19E-01 | 179335223 | 179335346 | NC_000005.9  |
| cg23679615 | 5.13E-19 | 9.32E-21 | -1.05E+01 | 36.299753  | -1.88E-01 | 31127159  | 31127282  | NC_000006.11 |
| cg14337844 | 5.14E-19 | 9.33E-21 | -1.05E+01 | 36.298602  | -7.07E-02 | 99740585  | 99740708  | NC_000014.8  |
| cg22834542 | 5.14E-19 | 9.35E-21 | -1.05E+01 | 36.2972359 | -2.75E-01 | 88288530  | 88288653  | NC_000011.9  |
| cg25349729 | 5.21E-19 | 9.47E-21 | -1.05E+01 | 36.2845278 | -2.54E-01 | 214560352 | 214560475 | NC_000001.10 |
| cg27097386 | 5.21E-19 | 9.47E-21 | -1.05E+01 | 36.2838599 | -2.24E-01 | 96400610  | 96400733  | NC_000015.9  |
| cg10371155 | 5.21E-19 | 9.48E-21 | -1.05E+01 | 36.283182  | -2.55E-01 | 37561101  | 37561224  | NC_000017.10 |
| cg03048314 | 5.24E-19 | 9.53E-21 | -1.05E+01 | 36.2783356 | -6.06E-02 | 19970337  | 19970460  | NC_000001.10 |
| cg26705724 | 5.27E-19 | 9.59E-21 | -1.05E+01 | 36.271802  | -2.02E-01 | 41061984  | 41062107  | NC_000015.9  |
| cg11100933 | 5.28E-19 | 9.62E-21 | -1.05E+01 | 36.2691629 | -1.27E-01 | 1174646   | 1174769   | NC_000005.9  |
| cg08804626 | 5.28E-19 | 9.62E-21 | -1.05E+01 | 36.2686512 | -2.77E-01 | 1953086   | 1953209   | NC_000006.11 |
| cg27022584 | 5.29E-19 | 9.64E-21 | -1.05E+01 | 36.2669256 | -1.81E-01 | 79071378  | 79071501  | NC_000017.10 |
| cg21208682 | 5.33E-19 | 9.71E-21 | -1.05E+01 | 36.2597111 | -2.66E-01 | 141608434 | 141608557 | NC_000008.10 |
| cg01792640 | 5.37E-19 | 9.78E-21 | -1.05E+01 | 36.2527682 | -1.72E-01 | 195600916 | 195601039 | NC_000003.11 |
| cg23586595 | 5.39E-19 | 9.83E-21 | -1.05E+01 | 36.247295  | -2.83E-01 | 84034390  | 84034513  | NC_000004.11 |
| cg10122294 | 5.42E-19 | 9.87E-21 | -1.05E+01 | 36.2428482 | -2.54E-01 | 231765076 | 231765199 | NC_000001.10 |
| cg20610950 | 5.43E-19 | 9.89E-21 | -1.05E+01 | 36.2407298 | -2.47E-01 | 75096202  | 75096325  | NC_000017.10 |
| cg27499185 | 5.48E-19 | 1.00E-20 | -1.05E+01 | 36.2301897 | -1.68E-01 | 6138355   | 6138478   | NC_000019.9  |
| cg07355688 | 5.54E-19 | 1.01E-20 | -1.05E+01 | 36.2189521 | -1.36E-01 | 129246718 | 129246841 | NC_000011.9  |
| cg11861562 | 5.56E-19 | 1.02E-20 | -1.05E+01 | 36.2152452 | -2.00E-01 | 117069780 | 117069903 | NC_000011.9  |
| cg01483139 | 5.58E-19 | 1.02E-20 | -1.05E+01 | 36.2124315 | -2.32E-01 | 187549458 | 187549581 | NC_000004.11 |
| cg08514385 | 5.58E-19 | 1.02E-20 | -1.05E+01 | 36.2121979 | -2.58E-01 | 32596585  | 32596708  | NC_000013.10 |

|               |          |          |           |            |           |           |           |              |
|---------------|----------|----------|-----------|------------|-----------|-----------|-----------|--------------|
| cg24554151    | 5.58E-19 | 1.02E-20 | -1.05E+01 | 36.2116864 | -2.41E-01 | 93885823  | 93885946  | NC_000011.9  |
| cg09861057    | 5.59E-19 | 1.02E-20 | -1.05E+01 | 36.2102314 | -2.08E-01 | 154492947 | 154493070 | NC_000001.10 |
| cg00761125    | 5.61E-19 | 1.02E-20 | -1.05E+01 | 36.2057911 | -2.75E-01 | 96590115  | 96590238  | NC_000012.11 |
| cg08415592    | 5.62E-19 | 1.03E-20 | -1.05E+01 | 36.2041429 | -2.23E-01 | 36648973  | 36649096  | NC_000022.10 |
| cg02532700    | 5.62E-19 | 1.03E-20 | -1.05E+01 | 36.2039836 | -2.51E-01 | 37257404  | 37257527  | NC_000022.10 |
| cg20878275    | 5.63E-19 | 1.03E-20 | -1.05E+01 | 36.2014067 | -1.13E-01 | 6918840   | 6918963   | NC_000017.10 |
| cg02074956    | 5.65E-19 | 1.03E-20 | -1.05E+01 | 36.1980871 | -1.78E-01 | 4730657   | 4730780   | NC_000016.9  |
| cg11947493    | 5.65E-19 | 1.03E-20 | -1.05E+01 | 36.197325  | -9.26E-02 | 23021515  | 23021638  | NC_000008.10 |
| cg13924974    | 5.67E-19 | 1.04E-20 | -1.05E+01 | 36.1948466 | -1.52E-01 | 12656824  | 12656947  | NC_000018.9  |
| cg03935872    | 5.69E-19 | 1.04E-20 | -1.05E+01 | 36.190346  | -6.43E-02 | 17935919  | 17936042  | NC_000002.11 |
| cg00199753    | 5.70E-19 | 1.04E-20 | -1.05E+01 | 36.1887039 | -2.14E-01 | 113519288 | 113519411 | NC_000012.11 |
| cg19763108    | 5.70E-19 | 1.04E-20 | -1.05E+01 | 36.187474  | -2.34E-01 | 24187579  | 24187702  | NC_000003.11 |
| cg00349607    | 5.79E-19 | 1.06E-20 | -1.05E+01 | 36.1725348 | -1.46E-01 | 39546688  | 39546811  | NC_000001.10 |
| cg18564686    | 5.85E-19 | 1.07E-20 | -1.05E+01 | 36.1627431 | -2.18E-01 | 10169675  | 10169798  | NC_000002.11 |
| cg00339913    | 5.85E-19 | 1.07E-20 | -1.05E+01 | 36.1624622 | -1.98E-01 | 22085227  | 22085350  | NC_000008.10 |
| cg25450033    | 5.85E-19 | 1.07E-20 | -1.05E+01 | 36.1618943 | -1.25E-01 | 14444658  | 14444781  | NC_000019.9  |
| ch.7.2902493F | 5.95E-19 | 1.09E-20 | -1.05E+01 | 36.1451779 | -9.65E-02 | 138945421 | 138945544 | NC_000007.13 |
| cg06639053    | 5.98E-19 | 1.10E-20 | -1.05E+01 | 36.1401283 | -2.41E-01 | 111837470 | 111837593 | NC_000012.11 |
| cg18010348    | 5.99E-19 | 1.10E-20 | -1.05E+01 | 36.1375406 | -2.61E-01 | 129154745 | 129154868 | NC_000011.9  |
| cg10130564    | 6.00E-19 | 1.10E-20 | -1.05E+01 | 36.1352486 | -2.04E-01 | 117069849 | 117069972 | NC_000011.9  |
| cg00328720    | 6.01E-19 | 1.10E-20 | -1.05E+01 | 36.1334016 | -2.42E-01 | 28562890  | 28563013  | NC_000008.10 |
| cg08595656    | 6.02E-19 | 1.10E-20 | -1.05E+01 | 36.1317817 | -1.69E-01 | 17723733  | 17723856  | NC_000004.11 |
| cg03221483    | 6.03E-19 | 1.11E-20 | -1.05E+01 | 36.1299215 | -2.28E-01 | 75315081  | 75315204  | NC_000017.10 |
| cg26688993    | 6.03E-19 | 1.11E-20 | -1.05E+01 | 36.1298684 | -1.93E-01 | 39235001  | 39235124  | NC_000003.11 |
| cg01766718    | 6.06E-19 | 1.11E-20 | -1.05E+01 | 36.1257068 | -2.51E-01 | 86313851  | 86313974  | NC_000015.9  |

|            |          |          |           |            |           |           |           |              |
|------------|----------|----------|-----------|------------|-----------|-----------|-----------|--------------|
| cg18795955 | 6.07E-19 | 1.11E-20 | -1.05E+01 | 36.1226915 | -7.29E-02 | 31126736  | 31126859  | NC_000006.11 |
| cg26249450 | 6.07E-19 | 1.12E-20 | -1.05E+01 | 36.1222208 | -8.11E-02 | 36355732  | 36355855  | NC_000006.11 |
| cg27222669 | 6.08E-19 | 1.12E-20 | -1.05E+01 | 36.1218555 | -1.68E-01 | 48711658  | 48711781  | NC_000017.10 |
| cg06257132 | 6.09E-19 | 1.12E-20 | -1.05E+01 | 36.1198989 | -7.52E-02 | 71558461  | 71558584  | NC_000002.11 |
| cg14534848 | 6.12E-19 | 1.12E-20 | -1.05E+01 | 36.1148859 | -2.25E-01 | 139892531 | 139892654 | NC_000009.11 |
| cg02185971 | 6.14E-19 | 1.13E-20 | -1.05E+01 | 36.1109745 | -8.45E-02 | 6388334   | 6388457   | NC_000007.13 |
| cg14796565 | 6.14E-19 | 1.13E-20 | -1.05E+01 | 36.1104872 | -7.67E-02 | 911369    | 911492    | NC_000011.9  |
| cg05312962 | 6.14E-19 | 1.13E-20 | -1.05E+01 | 36.1100117 | -1.90E-01 | 2576254   | 2576377   | NC_000019.9  |
| cg05508862 | 6.17E-19 | 1.13E-20 | -1.05E+01 | 36.1060656 | -1.41E-01 | 18885437  | 18885560  | NC_000017.10 |
| cg07797853 | 6.22E-19 | 1.14E-20 | -1.05E+01 | 36.096663  | -1.59E-01 | 41472032  | 41472155  | NC_000006.11 |
| cg06913345 | 6.22E-19 | 1.14E-20 | -1.05E+01 | 36.0959846 | -2.49E-01 | 161253423 | 161253546 | NC_000002.11 |
| cg14420953 | 6.23E-19 | 1.15E-20 | -1.05E+01 | 36.0953999 | -2.56E-01 | 36558154  | 36558277  | NC_000006.11 |
| cg13781956 | 6.29E-19 | 1.16E-20 | -1.05E+01 | 36.0840946 | -1.63E-01 | 117826025 | 117826148 | NC_000009.11 |
| cg13120756 | 6.30E-19 | 1.16E-20 | -1.05E+01 | 36.0829525 | -1.96E-01 | 42386950  | 42387073  | NC_000017.10 |
| cg05028773 | 6.32E-19 | 1.16E-20 | -1.05E+01 | 36.0789179 | -1.51E-01 | 13947162  | 13947285  | NC_000019.9  |
| cg04165508 | 6.33E-19 | 1.17E-20 | -1.05E+01 | 36.0780693 | -2.43E-01 | 94167631  | 94167754  | NC_000001.10 |
| cg23684316 | 6.33E-19 | 1.17E-20 | -1.05E+01 | 36.0780518 | -1.57E-01 | 72946664  | 72946787  | NC_000002.11 |
| cg22203237 | 6.37E-19 | 1.17E-20 | -1.05E+01 | 36.0711837 | -1.58E-01 | 68983823  | 68983946  | NC_000007.13 |
| cg20531020 | 6.38E-19 | 1.18E-20 | -1.05E+01 | 36.0693164 | -1.76E-01 | 80188598  | 80188721  | NC_000017.10 |
| cg09240693 | 6.40E-19 | 1.18E-20 | -1.05E+01 | 36.0665435 | -2.43E-01 | 86038538  | 86038661  | NC_000002.11 |
| cg23090603 | 6.42E-19 | 1.18E-20 | -1.05E+01 | 36.0626782 | -2.08E-01 | 855187    | 855310    | NC_000017.10 |
| cg03160815 | 6.42E-19 | 1.18E-20 | -1.05E+01 | 36.0620985 | -1.30E-01 | 79859830  | 79859953  | NC_000017.10 |
| cg24191847 | 6.44E-19 | 1.19E-20 | -1.05E+01 | 36.0592261 | -1.56E-01 | 91037045  | 91037168  | NC_000014.8  |
| cg07987890 | 6.46E-19 | 1.19E-20 | -1.05E+01 | 36.0553619 | -1.21E-01 | 69366322  | 69366445  | NC_000015.9  |
| cg16464322 | 6.46E-19 | 1.19E-20 | -1.05E+01 | 36.0550851 | -9.25E-02 | 39343574  | 39343697  | NC_000019.9  |

|            |          |          |           |            |           |           |           |              |
|------------|----------|----------|-----------|------------|-----------|-----------|-----------|--------------|
| cg21116934 | 6.48E-19 | 1.20E-20 | -1.05E+01 | 36.0524485 | -8.40E-02 | 87034663  | 87034786  | NC_000002.11 |
| cg01025836 | 6.50E-19 | 1.20E-20 | -1.05E+01 | 36.0486549 | -1.72E-01 | 37230326  | 37230449  | NC_000020.10 |
| cg27179352 | 6.53E-19 | 1.21E-20 | -1.05E+01 | 36.0430668 | -2.04E-01 | 88029472  | 88029595  | NC_000004.11 |
| cg15028548 | 6.57E-19 | 1.21E-20 | -1.05E+01 | 36.0377602 | -1.60E-01 | 100712322 | 100712445 | NC_000003.11 |
| cg14696348 | 6.62E-19 | 1.22E-20 | -1.05E+01 | 36.0293539 | -8.94E-02 | 89984517  | 89984640  | NC_000016.9  |
| cg08864375 | 6.66E-19 | 1.23E-20 | -1.05E+01 | 36.0230583 | -2.09E-01 | 168107203 | 168107326 | NC_000006.11 |
| cg26052586 | 6.71E-19 | 1.24E-20 | -1.05E+01 | 36.0153926 | -2.19E-01 | 20717411  | 20717534  | NC_000018.9  |
| cg13301014 | 6.72E-19 | 1.24E-20 | -1.05E+01 | 36.0131782 | -6.64E-02 | 38754768  | 38754891  | NC_000019.9  |
| cg03782966 | 6.73E-19 | 1.25E-20 | -1.05E+01 | 36.0117961 | -1.08E-01 | 104585482 | 104585605 | NC_000007.13 |
| cg24737783 | 6.79E-19 | 1.26E-20 | -1.05E+01 | 36.0028448 | -1.79E-01 | 109204304 | 109204427 | NC_000001.10 |
| cg05670596 | 6.79E-19 | 1.26E-20 | -1.05E+01 | 36.0019197 | -1.47E-01 | 46448496  | 46448619  | NC_000003.11 |
| cg00864293 | 6.81E-19 | 1.26E-20 | -1.05E+01 | 35.9998782 | -1.77E-01 | 81586800  | 81586923  | NC_000016.9  |
| cg26435149 | 6.82E-19 | 1.26E-20 | -1.05E+01 | 35.9981514 | -2.18E-01 | 55605611  | 55605734  | NC_000003.11 |
| cg02196805 | 6.82E-19 | 1.27E-20 | -1.05E+01 | 35.9968212 | -2.13E-01 | 131409637 | 131409760 | NC_000005.9  |
| cg04012082 | 6.86E-19 | 1.27E-20 | -1.05E+01 | 35.9905639 | -1.33E-01 | 1905096   | 1905219   | NC_000012.11 |
| cg05885688 | 6.87E-19 | 1.27E-20 | -1.05E+01 | 35.9901051 | -2.32E-01 | 41628552  | 41628675  | NC_000008.10 |
| cg17372223 | 6.89E-19 | 1.28E-20 | -1.05E+01 | 35.987001  | -1.05E-01 | 52568218  | 52568341  | NC_000003.11 |
| cg01981417 | 6.90E-19 | 1.28E-20 | -1.05E+01 | 35.9854637 | -1.60E-01 | 30061044  | 30061167  | NC_000020.10 |
| cg10334750 | 6.90E-19 | 1.28E-20 | -1.05E+01 | 35.9851404 | -2.44E-01 | 101348456 | 101348579 | NC_000008.10 |
| cg02793828 | 6.91E-19 | 1.28E-20 | -1.05E+01 | 35.982977  | -2.39E-01 | 85196116  | 85196239  | NC_000016.9  |
| cg15393702 | 6.95E-19 | 1.29E-20 | -1.05E+01 | 35.977345  | -2.29E-01 | 21243529  | 21243652  | NC_000018.9  |
| cg02317299 | 6.97E-19 | 1.29E-20 | -1.05E+01 | 35.9742649 | -1.81E-01 | 1390182   | 1390305   | NC_000017.10 |
| cg13436110 | 7.03E-19 | 1.31E-20 | -1.05E+01 | 35.9647476 | -2.39E-01 | 30844133  | 30844256  | NC_000007.13 |
| cg25769450 | 7.05E-19 | 1.31E-20 | -1.05E+01 | 35.9619337 | -8.13E-02 | 23864945  | 23865068  | NC_000022.10 |
| cg05109049 | 7.11E-19 | 1.32E-20 | -1.05E+01 | 35.9537051 | -3.27E-01 | 29641333  | 29641456  | NC_000017.10 |



|            |          |          |           |            |           |           |           |              |
|------------|----------|----------|-----------|------------|-----------|-----------|-----------|--------------|
| cg10954944 | 7.12E-19 | 1.33E-20 | -1.05E+01 | 35.9510018 | -2.02E-01 | 184377617 | 184377740 | NC_000003.11 |
| cg02431672 | 7.16E-19 | 1.33E-20 | -1.05E+01 | 35.9461959 | -1.31E-01 | 43534324  | 43534447  | NC_000001.10 |
| cg23520422 | 7.16E-19 | 1.33E-20 | -1.05E+01 | 35.945616  | -1.28E-01 | 76423956  | 76424079  | NC_000012.11 |
| cg22039357 | 7.27E-19 | 1.35E-20 | -1.05E+01 | 35.9295005 | -2.48E-01 | 184388675 | 184388798 | NC_000001.10 |
| cg17820591 | 7.34E-19 | 1.37E-20 | -1.05E+01 | 35.920388  | -1.68E-01 | 4853706   | 4853829   | NC_000017.10 |
| cg26494916 | 7.34E-19 | 1.37E-20 | -1.05E+01 | 35.9200568 | -2.46E-01 | 148832884 | 148833007 | NC_000005.9  |
| cg26351966 | 7.40E-19 | 1.38E-20 | -1.04E+01 | 35.9121706 | -1.85E-01 | 102106080 | 102106203 | NC_000010.10 |
| cg26624026 | 7.41E-19 | 1.38E-20 | -1.04E+01 | 35.910535  | -1.55E-01 | 18416001  | 18416124  | NC_000019.9  |
| cg02669964 | 7.43E-19 | 1.38E-20 | -1.04E+01 | 35.9077223 | -9.08E-02 | 12894077  | 12894200  | NC_000019.9  |
| cg04510874 | 7.43E-19 | 1.39E-20 | -1.04E+01 | 35.9067777 | -1.99E-01 | 91427884  | 91428007  | NC_000015.9  |
| cg12808661 | 7.46E-19 | 1.39E-20 | -1.04E+01 | 35.9023721 | -7.93E-02 | 52002555  | 52002678  | NC_000003.11 |
| cg10377726 | 7.49E-19 | 1.40E-20 | -1.04E+01 | 35.8989132 | -1.07E-01 | 68679841  | 68679964  | NC_000016.9  |
| cg15282973 | 7.59E-19 | 1.42E-20 | -1.04E+01 | 35.8858265 | -2.12E-01 | 125346253 | 125346376 | NC_000012.11 |
| cg27625456 | 7.61E-19 | 1.42E-20 | -1.04E+01 | 35.8824073 | -1.84E-01 | 25958267  | 25958390  | NC_000017.10 |
| cg08179817 | 7.67E-19 | 1.43E-20 | -1.04E+01 | 35.87389   | -2.01E-01 | 4335184   | 4335307   | NC_000004.11 |
| cg15454486 | 7.68E-19 | 1.43E-20 | -1.04E+01 | 35.8726079 | -1.23E-01 | 192543810 | 192543933 | NC_000002.11 |
| cg19124521 | 7.70E-19 | 1.44E-20 | -1.04E+01 | 35.8703622 | -1.17E-01 | 128990465 | 128990588 | NC_000002.11 |
| cg17297634 | 7.71E-19 | 1.44E-20 | -1.04E+01 | 35.8677881 | -2.28E-01 | 27806022  | 27806145  | NC_000008.10 |
| cg04597532 | 7.72E-19 | 1.44E-20 | -1.04E+01 | 35.8669639 | -7.40E-02 | 138897363 | 138897486 | NC_000005.9  |
| cg21164050 | 7.73E-19 | 1.44E-20 | -1.04E+01 | 35.8656924 | -2.10E-01 | 27757411  | 27757534  | NC_000013.10 |
| cg02921887 | 7.87E-19 | 1.47E-20 | -1.04E+01 | 35.846836  | -1.32E-01 | 20226994  | 20227117  | NC_000003.11 |
| cg13878456 | 7.88E-19 | 1.47E-20 | -1.04E+01 | 35.845342  | -8.39E-02 | 38020344  | 38020467  | NC_000017.10 |
| cg11708454 | 7.91E-19 | 1.48E-20 | -1.04E+01 | 35.8422613 | -1.25E-01 | 38794664  | 38794787  | NC_000019.9  |
| cg24836946 | 7.95E-19 | 1.49E-20 | -1.04E+01 | 35.837011  | -1.33E-01 | 31625532  | 31625655  | NC_000001.10 |
| cg13424302 | 7.95E-19 | 1.49E-20 | -1.04E+01 | 35.83691   | -2.21E-01 | 80516893  | 80517016  | NC_000010.10 |

|               |          |          |           |            |           |           |           |              |
|---------------|----------|----------|-----------|------------|-----------|-----------|-----------|--------------|
| cg22789714    | 7.95E-19 | 1.49E-20 | -1.04E+01 | 35.8363835 | -1.71E-01 | 46261208  | 46261331  | NC_000011.9  |
| cg17418276    | 7.98E-19 | 1.49E-20 | -1.04E+01 | 35.8326479 | -1.93E-01 | 69065442  | 69065565  | NC_000011.9  |
| cg19556284    | 8.00E-19 | 1.50E-20 | -1.04E+01 | 35.8294376 | -2.47E-01 | 158909455 | 158909578 | NC_000006.11 |
| cg27558693    | 8.05E-19 | 1.51E-20 | -1.04E+01 | 35.8230355 | -1.90E-01 | 85710632  | 85710755  | NC_000001.10 |
| cg14737704    | 8.08E-19 | 1.51E-20 | -1.04E+01 | 35.8185529 | -1.42E-01 | 50728534  | 50728657  | NC_000022.10 |
| cg13278100    | 8.10E-19 | 1.52E-20 | -1.04E+01 | 35.8168702 | -7.15E-02 | 150920859 | 150920982 | NC_000006.11 |
| cg12919119    | 8.12E-19 | 1.52E-20 | -1.04E+01 | 35.8132642 | -1.53E-01 | 37904293  | 37904416  | NC_000003.11 |
| cg22700848    | 8.13E-19 | 1.52E-20 | -1.04E+01 | 35.8122916 | -1.84E-01 | 124990942 | 124991065 | NC_000012.11 |
| cg07717763    | 8.20E-19 | 1.54E-20 | -1.04E+01 | 35.8033114 | -7.27E-02 | 21059365  | 21059488  | NC_000001.10 |
| cg11679268    | 8.20E-19 | 1.54E-20 | -1.04E+01 | 35.8027431 | -2.02E-01 | 31649638  | 31649761  | NC_000006.11 |
| cg24809269    | 8.21E-19 | 1.54E-20 | -1.04E+01 | 35.802131  | -1.86E-01 | 74260692  | 74260815  | NC_000017.10 |
| cg18368411    | 8.22E-19 | 1.54E-20 | -1.04E+01 | 35.8009664 | -2.84E-01 | 31845959  | 31846082  | NC_000001.10 |
| cg20410997    | 8.22E-19 | 1.54E-20 | -1.04E+01 | 35.8001315 | -2.97E-02 | 141705144 | 141705267 | NC_000005.9  |
| cg09108532    | 8.30E-19 | 1.56E-20 | -1.04E+01 | 35.7902053 | -1.68E-01 | 76481977  | 76482100  | NC_000011.9  |
| cg12129796    | 8.31E-19 | 1.56E-20 | -1.04E+01 | 35.7890689 | -1.63E-01 | 79753073  | 79753196  | NC_000008.10 |
| cg24651977    | 8.31E-19 | 1.56E-20 | -1.04E+01 | 35.7886755 | -1.59E-01 | 37978758  | 37978881  | NC_000004.11 |
| ch.22.217069R | 8.32E-19 | 1.56E-20 | -1.04E+01 | 35.7872073 | -7.50E-02 | 24499583  | 24499706  | NC_000022.10 |
| cg26283496    | 8.34E-19 | 1.57E-20 | -1.04E+01 | 35.7843871 | -2.57E-01 | 146269126 | 146269249 | NC_000003.11 |
| cg27008230    | 8.36E-19 | 1.57E-20 | -1.04E+01 | 35.7823155 | -5.09E-02 | 116286623 | 116286746 | NC_000010.10 |
| cg13177275    | 8.41E-19 | 1.58E-20 | -1.04E+01 | 35.7754856 | -2.52E-01 | 201683549 | 201683672 | NC_000001.10 |
| cg09135529    | 8.45E-19 | 1.59E-20 | -1.04E+01 | 35.7708969 | -1.96E-01 | 62448703  | 62448826  | NC_000011.9  |
| cg00664697    | 8.50E-19 | 1.60E-20 | -1.04E+01 | 35.7655666 | -2.19E-01 | 80061290  | 80061413  | NC_000016.9  |
| cg02520707    | 8.50E-19 | 1.60E-20 | -1.04E+01 | 35.7644611 | -2.20E-01 | 205418278 | 205418401 | NC_000001.10 |
| cg22261694    | 8.53E-19 | 1.60E-20 | -1.04E+01 | 35.7613323 | -2.87E-01 | 106967720 | 106967843 | NC_000006.11 |
| cg01930441    | 8.57E-19 | 1.61E-20 | -1.04E+01 | 35.756488  | -9.01E-02 | 21289268  | 21289391  | NC_000016.9  |

|                |          |          |           |            |           |           |           |              |
|----------------|----------|----------|-----------|------------|-----------|-----------|-----------|--------------|
| cg08903631     | 8.58E-19 | 1.61E-20 | -1.04E+01 | 35.755148  | -1.11E-01 | 41924466  | 41924589  | NC_000017.10 |
| cg08119607     | 8.60E-19 | 1.62E-20 | -1.04E+01 | 35.7527411 | -8.70E-02 | 150347053 | 150347176 | NC_000006.11 |
| ch.10.2372731R | 8.72E-19 | 1.64E-20 | -1.04E+01 | 35.7384912 | -1.21E-01 | 112966440 | 112966563 | NC_000010.10 |
| cg13008538     | 8.73E-19 | 1.64E-20 | -1.04E+01 | 35.737296  | -1.27E-01 | 3083741   | 3083864   | NC_000007.13 |
| cg07002540     | 8.74E-19 | 1.65E-20 | -1.04E+01 | 35.7358401 | -2.25E-01 | 85281128  | 85281251  | NC_000002.11 |
| cg06186150     | 8.74E-19 | 1.65E-20 | -1.04E+01 | 35.7350081 | -1.29E-01 | 2458298   | 2458421   | NC_000001.10 |
| cg01261939     | 8.77E-19 | 1.65E-20 | -1.04E+01 | 35.7317534 | -1.07E-01 | 6725157   | 6725280   | NC_000006.11 |
| cg00806644     | 8.78E-19 | 1.65E-20 | -1.04E+01 | 35.7309497 | -2.90E-01 | 126889815 | 126889938 | NC_000010.10 |
| cg16735901     | 8.78E-19 | 1.66E-20 | -1.04E+01 | 35.7301585 | -1.35E-01 | 7465756   | 7465879   | NC_000008.10 |
| cg10796749     | 8.79E-19 | 1.66E-20 | -1.04E+01 | 35.7292436 | -2.08E-01 | 10056837  | 10056960  | NC_000001.10 |
| cg20359363     | 8.79E-19 | 1.66E-20 | -1.04E+01 | 35.7283599 | -1.84E-01 | 77905866  | 77905989  | NC_000017.10 |
| cg26544594     | 8.80E-19 | 1.66E-20 | -1.04E+01 | 35.728076  | -5.40E-02 | 63276833  | 63276956  | NC_000002.11 |
| cg12886406     | 8.82E-19 | 1.66E-20 | -1.04E+01 | 35.7249469 | -2.17E-01 | 13579728  | 13579851  | NC_000003.11 |
| cg06835483     | 8.86E-19 | 1.67E-20 | -1.04E+01 | 35.720943  | -1.12E-01 | 7991103   | 7991226   | NC_000017.10 |
| cg09057050     | 8.87E-19 | 1.67E-20 | -1.04E+01 | 35.7189288 | -1.31E-01 | 66639160  | 66639283  | NC_000016.9  |
| cg03033543     | 8.87E-19 | 1.67E-20 | -1.04E+01 | 35.7187763 | -1.84E-01 | 31870884  | 31871007  | NC_000020.10 |
| cg18001780     | 8.88E-19 | 1.68E-20 | -1.04E+01 | 35.7177917 | -1.69E-01 | 128500564 | 128500687 | NC_000011.9  |
| cg13160058     | 8.93E-19 | 1.69E-20 | -1.04E+01 | 35.7120028 | -1.29E-01 | 26243215  | 26243338  | NC_000008.10 |
| cg11092836     | 8.95E-19 | 1.69E-20 | -1.04E+01 | 35.7094179 | -2.21E-01 | 44037829  | 44037952  | NC_000011.9  |
| cg01869342     | 9.02E-19 | 1.70E-20 | -1.04E+01 | 35.7011001 | -2.49E-01 | 106983673 | 106983796 | NC_000004.11 |
| cg26539455     | 9.04E-19 | 1.71E-20 | -1.04E+01 | 35.6989716 | -2.27E-01 | 31786772  | 31786895  | NC_000006.11 |
| cg26611563     | 9.05E-19 | 1.71E-20 | -1.04E+01 | 35.6977095 | -1.37E-01 | 87811412  | 87811535  | NC_000016.9  |
| cg01569083     | 9.13E-19 | 1.73E-20 | -1.04E+01 | 35.6886632 | -1.86E-01 | 31543289  | 31543412  | NC_000006.11 |
| cg08003742     | 9.19E-19 | 1.74E-20 | -1.04E+01 | 35.6816312 | -5.09E-02 | 74904106  | 74904229  | NC_000004.11 |
| cg09250727     | 9.20E-19 | 1.74E-20 | -1.04E+01 | 35.6812723 | -8.61E-02 | 32899784  | 32899907  | NC_000020.10 |

|                |          |          |           |            |           |           |           |              |
|----------------|----------|----------|-----------|------------|-----------|-----------|-----------|--------------|
| cg04202892     | 9.27E-19 | 1.75E-20 | -1.04E+01 | 35.6728795 | -2.52E-01 | 111875749 | 111875872 | NC_000002.11 |
| cg12239557     | 9.37E-19 | 1.77E-20 | -1.04E+01 | 35.6613625 | -2.13E-01 | 123778187 | 123778310 | NC_000010.10 |
| cg03678098     | 9.42E-19 | 1.78E-20 | -1.04E+01 | 35.656068  | -1.31E-01 | 61054887  | 61055010  | NC_000020.10 |
| cg07133930     | 9.47E-19 | 1.79E-20 | -1.04E+01 | 35.6503209 | -1.91E-01 | 70821371  | 70821494  | NC_000010.10 |
| cg23425762     | 9.48E-19 | 1.80E-20 | -1.04E+01 | 35.6498349 | -2.60E-01 | 45664130  | 45664253  | NC_000018.9  |
| cg03885055     | 9.51E-19 | 1.80E-20 | -1.04E+01 | 35.6463287 | -1.99E-01 | 16723232  | 16723355  | NC_000001.10 |
| cg14082893     | 9.53E-19 | 1.81E-20 | -1.04E+01 | 35.6439406 | -2.43E-01 | 75400931  | 75401054  | NC_000015.9  |
| cg09518969     | 9.54E-19 | 1.81E-20 | -1.04E+01 | 35.6428078 | -2.29E-01 | 63378005  | 63378128  | NC_000011.9  |
| cg01769428     | 9.55E-19 | 1.81E-20 | -1.04E+01 | 35.6417341 | -1.66E-01 | 100651659 | 100651782 | NC_000015.9  |
| cg18014547     | 9.56E-19 | 1.81E-20 | -1.04E+01 | 35.6404252 | -2.47E-01 | 20366443  | 20366566  | NC_000002.11 |
| cg04362790     | 9.58E-19 | 1.82E-20 | -1.04E+01 | 35.637616  | -3.01E-01 | 100223811 | 100223934 | NC_000014.8  |
| cg08138025     | 9.62E-19 | 1.82E-20 | -1.04E+01 | 35.6336589 | -5.22E-02 | 36396366  | 36396489  | NC_000001.10 |
| ch.7.2184863F  | 9.66E-19 | 1.83E-20 | -1.04E+01 | 35.6290612 | -7.07E-02 | 101811420 | 101811543 | NC_000007.13 |
| cg13414679     | 9.66E-19 | 1.83E-20 | -1.04E+01 | 35.6287185 | -1.04E-01 | 70243843  | 70243966  | NC_000011.9  |
| ch.3.2438620R  | 9.66E-19 | 1.83E-20 | -1.04E+01 | 35.6282637 | -7.49E-02 | 124566910 | 124567033 | NC_000003.11 |
| cg12731349     | 9.71E-19 | 1.84E-20 | -1.04E+01 | 35.6237625 | -1.29E-01 | 204159619 | 204159742 | NC_000001.10 |
| cg16113433     | 9.78E-19 | 1.86E-20 | -1.04E+01 | 35.6163707 | -8.12E-02 | 172629464 | 172629587 | NC_000005.9  |
| ch.4.658374F   | 9.81E-19 | 1.86E-20 | -1.04E+01 | 35.6128247 | -8.79E-02 | 26457421  | 26457544  | NC_000004.11 |
| cg09183450     | 9.82E-19 | 1.86E-20 | -1.04E+01 | 35.6121297 | -2.20E-01 | 62308513  | 62308636  | NC_000011.9  |
| cg02713960     | 9.84E-19 | 1.87E-20 | -1.04E+01 | 35.6095682 | -1.22E-01 | 746048    | 746171    | NC_000016.9  |
| ch.2.25452096R | 9.85E-19 | 1.87E-20 | -1.04E+01 | 35.6080594 | -7.85E-02 | 25598592  | 25598715  | NC_000002.11 |
| cg07303450     | 9.88E-19 | 1.88E-20 | -1.04E+01 | 35.605649  | -1.27E-01 | 30023400  | 30023523  | NC_000016.9  |
| cg06255006     | 9.88E-19 | 1.88E-20 | -1.04E+01 | 35.604801  | -2.58E-01 | 86653215  | 86653338  | NC_000016.9  |
| cg27596415     | 9.93E-19 | 1.89E-20 | -1.04E+01 | 35.5992067 | -2.14E-01 | 75440995  | 75441118  | NC_000006.11 |
| cg00997853     | 9.98E-19 | 1.90E-20 | -1.04E+01 | 35.5942717 | -2.77E-01 | 26844579  | 26844702  | NC_000012.11 |

|            |          |          |           |            |           |           |           |              |
|------------|----------|----------|-----------|------------|-----------|-----------|-----------|--------------|
| cg06686156 | 9.98E-19 | 1.90E-20 | -1.04E+01 | 35.5942009 | -2.26E-01 | 20420222  | 20420345  | NC_000016.9  |
| cg03356490 | 1.00E-18 | 1.90E-20 | -1.04E+01 | 35.5926495 | -7.26E-02 | 35605867  | 35605990  | NC_000019.9  |
| cg12468850 | 1.00E-18 | 1.91E-20 | -1.04E+01 | 35.5905934 | -2.09E-01 | 21767224  | 21767347  | NC_000008.10 |
| cg01834856 | 1.00E-18 | 1.91E-20 | -1.04E+01 | 35.5905378 | -2.22E-01 | 99639091  | 99639214  | NC_000007.13 |
| cg20143982 | 1.01E-18 | 1.92E-20 | -1.04E+01 | 35.5856588 | -8.84E-02 | 7341252   | 7341375   | NC_000012.11 |
| cg03042020 | 1.01E-18 | 1.92E-20 | -1.04E+01 | 35.5851382 | -2.18E-01 | 110515444 | 110515567 | NC_000013.10 |
| cg02855302 | 1.01E-18 | 1.92E-20 | -1.04E+01 | 35.5843629 | -2.16E-01 | 103453791 | 103453914 | NC_000014.8  |
| cg02945646 | 1.01E-18 | 1.92E-20 | -1.04E+01 | 35.5824638 | -9.57E-02 | 24037169  | 24037292  | NC_000014.8  |
| cg16502747 | 1.01E-18 | 1.92E-20 | -1.04E+01 | 35.5809314 | -1.74E-01 | 23531625  | 23531748  | NC_000014.8  |
| cg03529003 | 1.01E-18 | 1.93E-20 | -1.04E+01 | 35.5804595 | -1.60E-01 | 11994281  | 11994404  | NC_000001.10 |
| cg04468198 | 1.01E-18 | 1.93E-20 | -1.04E+01 | 35.5801309 | -1.28E-01 | 85784951  | 85785074  | NC_000016.9  |
| cg13977355 | 1.01E-18 | 1.93E-20 | -1.04E+01 | 35.5794693 | -1.41E-01 | 140171765 | 140171888 | NC_000009.11 |
| cg12530994 | 1.01E-18 | 1.93E-20 | -1.04E+01 | 35.5788403 | -9.83E-02 | 5136782   | 5136905   | NC_000010.10 |
| cg06148264 | 1.02E-18 | 1.94E-20 | -1.04E+01 | 35.573625  | -7.40E-02 | 2841468   | 2841591   | NC_000006.11 |
| cg11316868 | 1.02E-18 | 1.94E-20 | -1.04E+01 | 35.5722328 | -1.69E-01 | 38593754  | 38593877  | NC_000021.8  |
| cg03167883 | 1.02E-18 | 1.95E-20 | -1.04E+01 | 35.5677605 | -2.04E-01 | 49502967  | 49503090  | NC_000008.10 |
| cg17337514 | 1.03E-18 | 1.96E-20 | -1.04E+01 | 35.5639398 | -7.27E-02 | 149322773 | 149322896 | NC_000007.13 |
| cg00013441 | 1.04E-18 | 1.99E-20 | -1.04E+01 | 35.5460936 | -7.33E-02 | 123258908 | 123259031 | NC_000012.11 |
| cg26929394 | 1.05E-18 | 2.00E-20 | -1.04E+01 | 35.5439172 | -1.37E-01 | 112435198 | 112435321 | NC_000011.9  |
| cg07220554 | 1.05E-18 | 2.00E-20 | -1.04E+01 | 35.5418337 | -1.08E-01 | 116961464 | 116961587 | NC_000001.10 |
| cg22413056 | 1.05E-18 | 2.01E-20 | -1.04E+01 | 35.5375792 | -1.89E-01 | 30650202  | 30650325  | NC_000006.11 |
| cg18065599 | 1.06E-18 | 2.02E-20 | -1.04E+01 | 35.5327249 | -2.00E-01 | 47968995  | 47969118  | NC_000011.9  |
| cg08163906 | 1.06E-18 | 2.02E-20 | -1.04E+01 | 35.5307469 | -8.75E-02 | 102227932 | 102228055 | NC_000014.8  |
| cg25863289 | 1.06E-18 | 2.03E-20 | -1.04E+01 | 35.5289749 | -2.45E-01 | 102193416 | 102193539 | NC_000015.9  |
| cg24897127 | 1.07E-18 | 2.04E-20 | -1.04E+01 | 35.5212052 | -1.06E-01 | 320439    | 320562    | NC_000011.9  |

|                 |          |          |           |            |           |           |           |              |
|-----------------|----------|----------|-----------|------------|-----------|-----------|-----------|--------------|
| cg02420480      | 1.07E-18 | 2.05E-20 | -1.04E+01 | 35.5170914 | -1.90E-01 | 41919892  | 41920015  | NC_000007.13 |
| cg24845998      | 1.07E-18 | 2.06E-20 | -1.04E+01 | 35.5152011 | -2.39E-01 | 14567945  | 14568068  | NC_000003.11 |
| cg10419556      | 1.08E-18 | 2.06E-20 | -1.04E+01 | 35.5133218 | -1.86E-01 | 98273126  | 98273249  | NC_000008.10 |
| cg10387761      | 1.08E-18 | 2.06E-20 | -1.04E+01 | 35.5121328 | -7.94E-02 | 42856823  | 42856946  | NC_000017.10 |
| ch.10.2988224F  | 1.08E-18 | 2.07E-20 | -1.04E+01 | 35.510429  | -1.10E-01 | 135102171 | 135102294 | NC_000010.10 |
| cg15128679      | 1.08E-18 | 2.07E-20 | -1.04E+01 | 35.5095664 | -1.96E-01 | 134476728 | 134476851 | NC_000005.9  |
| cg20512501      | 1.10E-18 | 2.11E-20 | -1.04E+01 | 35.4894522 | -1.33E-01 | 134785688 | 134785811 | NC_000002.11 |
| cg07607921      | 1.10E-18 | 2.11E-20 | -1.04E+01 | 35.4874836 | -7.66E-02 | 4047574   | 4047697   | NC_000017.10 |
| cg09238677      | 1.11E-18 | 2.12E-20 | -1.04E+01 | 35.4852607 | -2.65E-01 | 8218922   | 8219045   | NC_000012.11 |
| cg23762633      | 1.11E-18 | 2.12E-20 | -1.04E+01 | 35.4842258 | -7.29E-02 | 10589242  | 10589365  | NC_000002.11 |
| cg03944072      | 1.11E-18 | 2.12E-20 | -1.04E+01 | 35.4831587 | -2.21E-01 | 81617738  | 81617861  | NC_000016.9  |
| cg17992056      | 1.11E-18 | 2.14E-20 | -1.04E+01 | 35.4772725 | -1.04E-01 | 6296335   | 6296458   | NC_000001.10 |
| cg06737942      | 1.12E-18 | 2.14E-20 | -1.04E+01 | 35.4758469 | -2.43E-01 | 158613567 | 158613690 | NC_000007.13 |
| cg20283771      | 1.13E-18 | 2.17E-20 | -1.04E+01 | 35.4613797 | -1.80E-01 | 88943542  | 88943665  | NC_000016.9  |
| cg10225951      | 1.13E-18 | 2.17E-20 | -1.04E+01 | 35.4611134 | -2.71E-01 | 89647782  | 89647905  | NC_000016.9  |
| cg17179875      | 1.13E-18 | 2.17E-20 | -1.04E+01 | 35.4606198 | -9.36E-02 | 116961404 | 116961527 | NC_000001.10 |
| cg15691003      | 1.14E-18 | 2.20E-20 | -1.04E+01 | 35.4499242 | -2.05E-01 | 22351864  | 22351987  | NC_000001.10 |
| cg24807354      | 1.15E-18 | 2.21E-20 | -1.04E+01 | 35.4423973 | -5.53E-02 | 10629035  | 10629158  | NC_000019.9  |
| cg00417304      | 1.16E-18 | 2.22E-20 | -1.04E+01 | 35.4378524 | -2.12E-01 | 45124456  | 45124579  | NC_000011.9  |
| ch.12.66046708R | 1.16E-18 | 2.23E-20 | -1.04E+01 | 35.4327973 | -6.70E-02 | 67760441  | 67760564  | NC_000012.11 |
| cg18083597      | 1.18E-18 | 2.26E-20 | -1.04E+01 | 35.4201735 | -1.47E-01 | 80190129  | 80190252  | NC_000017.10 |
| ch.12.2506678F  | 1.18E-18 | 2.26E-20 | -1.04E+01 | 35.4198453 | -1.29E-01 | 121154867 | 121154990 | NC_000012.11 |
| cg06688014      | 1.18E-18 | 2.27E-20 | -1.04E+01 | 35.4173259 | -1.49E-01 | 111683554 | 111683677 | NC_000010.10 |
| cg09828411      | 1.18E-18 | 2.27E-20 | -1.04E+01 | 35.4163681 | -2.32E-01 | 244466428 | 244466551 | NC_000001.10 |
| cg27062571      | 1.18E-18 | 2.28E-20 | -1.04E+01 | 35.4140677 | -1.67E-01 | 124890314 | 124890437 | NC_000008.10 |

|                |          |          |           |            |           |           |           |              |
|----------------|----------|----------|-----------|------------|-----------|-----------|-----------|--------------|
| cg02656560     | 1.18E-18 | 2.28E-20 | -1.04E+01 | 35.4128013 | -2.14E-01 | 19967600  | 19967723  | NC_000017.10 |
| cg09029902     | 1.20E-18 | 2.30E-20 | -1.04E+01 | 35.4031951 | -1.70E-01 | 52199594  | 52199717  | NC_000020.10 |
| cg19015951     | 1.20E-18 | 2.31E-20 | -1.04E+01 | 35.3992209 | -1.13E-01 | 98130398  | 98130521  | NC_000010.10 |
| cg09974016     | 1.20E-18 | 2.32E-20 | -1.04E+01 | 35.3951752 | -6.88E-02 | 77591203  | 77591326  | NC_000014.8  |
| cg08892236     | 1.21E-18 | 2.33E-20 | -1.04E+01 | 35.3921485 | -2.11E-01 | 21978698  | 21978821  | NC_000001.10 |
| cg12217954     | 1.21E-18 | 2.34E-20 | -1.04E+01 | 35.3871495 | -2.17E-01 | 33474484  | 33474607  | NC_000011.9  |
| cg17712818     | 1.22E-18 | 2.35E-20 | -1.04E+01 | 35.3836552 | -1.84E-01 | 59402087  | 59402210  | NC_000017.10 |
| cg14894245     | 1.23E-18 | 2.36E-20 | -1.04E+01 | 35.3770911 | -1.63E-01 | 1106640   | 1106763   | NC_000019.9  |
| ch.11.1980478F | 1.23E-18 | 2.38E-20 | -1.04E+01 | 35.371356  | -1.10E-01 | 94597700  | 94597823  | NC_000011.9  |
| cg02241145     | 1.24E-18 | 2.39E-20 | -1.04E+01 | 35.3663999 | -1.64E-01 | 29706754  | 29706877  | NC_000022.10 |
| cg12253071     | 1.25E-18 | 2.41E-20 | -1.04E+01 | 35.3570431 | -2.62E-01 | 19740944  | 19741067  | NC_000004.11 |
| cg16622061     | 1.25E-18 | 2.42E-20 | -1.04E+01 | 35.3521138 | -1.52E-01 | 86888736  | 86888859  | NC_000016.9  |
| cg10586317     | 1.26E-18 | 2.43E-20 | -1.04E+01 | 35.3509448 | -1.51E-01 | 73979250  | 73979373  | NC_000015.9  |
| cg12405258     | 1.26E-18 | 2.43E-20 | -1.04E+01 | 35.3476813 | -2.54E-01 | 114927641 | 114927764 | NC_000013.10 |
| cg21553700     | 1.28E-18 | 2.47E-20 | -1.04E+01 | 35.3338616 | -2.86E-01 | 195600410 | 195600533 | NC_000003.11 |
| cg11580615     | 1.28E-18 | 2.47E-20 | -1.04E+01 | 35.332177  | -2.00E-01 | 127888073 | 127888196 | NC_000010.10 |
| cg05613116     | 1.28E-18 | 2.48E-20 | -1.04E+01 | 35.3299525 | -5.53E-02 | 27958722  | 27958845  | NC_000002.11 |
| cg15355111     | 1.28E-18 | 2.49E-20 | -1.04E+01 | 35.327192  | -2.32E-01 | 45433358  | 45433481  | NC_000011.9  |
| cg24952328     | 1.30E-18 | 2.51E-20 | -1.04E+01 | 35.3155517 | -1.29E-01 | 19383704  | 19383827  | NC_000019.9  |
| cg13734177     | 1.30E-18 | 2.52E-20 | -1.04E+01 | 35.315019  | -9.46E-02 | 146176436 | 146176559 | NC_000008.10 |
| cg10632728     | 1.30E-18 | 2.52E-20 | -1.04E+01 | 35.3126205 | -1.62E-01 | 18875315  | 18875438  | NC_000001.10 |
| cg11190277     | 1.31E-18 | 2.54E-20 | -1.04E+01 | 35.3043593 | -9.08E-02 | 69455213  | 69455336  | NC_000011.9  |
| cg10006762     | 1.32E-18 | 2.56E-20 | -1.04E+01 | 35.2997243 | -8.99E-02 | 65342202  | 65342325  | NC_000011.9  |
| cg02074116     | 1.32E-18 | 2.57E-20 | -1.04E+01 | 35.2955708 | -1.59E-01 | 231712981 | 231713104 | NC_000002.11 |
| cg03355101     | 1.33E-18 | 2.57E-20 | -1.04E+01 | 35.2923053 | -1.70E-01 | 16449718  | 16449841  | NC_000019.9  |

|                |          |          |           |            |           |           |           |              |
|----------------|----------|----------|-----------|------------|-----------|-----------|-----------|--------------|
| cg08887327     | 1.33E-18 | 2.58E-20 | -1.04E+01 | 35.2917792 | -1.93E-01 | 238582364 | 238582487 | NC_000002.11 |
| cg27474223     | 1.33E-18 | 2.58E-20 | -1.04E+01 | 35.2898172 | -1.84E-01 | 71509037  | 71509160  | NC_000016.9  |
| cg20628791     | 1.33E-18 | 2.58E-20 | -1.04E+01 | 35.2884371 | -9.74E-02 | 34652315  | 34652438  | NC_000009.11 |
| cg20143092     | 1.33E-18 | 2.59E-20 | -1.04E+01 | 35.2864743 | -8.16E-02 | 35160330  | 35160453  | NC_000011.9  |
| ch.20.393029F  | 1.34E-18 | 2.60E-20 | -1.04E+01 | 35.2833592 | -6.12E-02 | 18515025  | 18515148  | NC_000020.10 |
| ch.4.77087090F | 1.36E-18 | 2.63E-20 | -1.04E+01 | 35.2695994 | -9.06E-02 | 76868066  | 76868189  | NC_000004.11 |
| cg13135241     | 1.37E-18 | 2.66E-20 | -1.04E+01 | 35.2608161 | -1.60E-01 | 104765292 | 104765415 | NC_000012.11 |
| cg21967545     | 1.37E-18 | 2.66E-20 | -1.04E+01 | 35.2581992 | -1.45E-01 | 5838807   | 5838930   | NC_000019.9  |
| cg14844341     | 1.37E-18 | 2.67E-20 | -1.04E+01 | 35.2561562 | -2.47E-01 | 139089549 | 139089672 | NC_000005.9  |
| cg11464297     | 1.38E-18 | 2.68E-20 | -1.04E+01 | 35.2515361 | -2.00E-01 | 70302998  | 70303121  | NC_000010.10 |
| cg19565262     | 1.39E-18 | 2.71E-20 | -1.03E+01 | 35.2405282 | -1.65E-01 | 73869966  | 73870089  | NC_000002.11 |
| cg24964694     | 1.39E-18 | 2.71E-20 | -1.03E+01 | 35.2404328 | -1.19E-01 | 36308389  | 36308512  | NC_000006.11 |
| cg19901403     | 1.40E-18 | 2.73E-20 | -1.03E+01 | 35.2342231 | -2.14E-01 | 74332522  | 74332645  | NC_000008.10 |
| cg20042116     | 1.40E-18 | 2.73E-20 | -1.03E+01 | 35.2338145 | -9.73E-02 | 24655654  | 24655777  | NC_000022.10 |
| cg26357885     | 1.42E-18 | 2.75E-20 | -1.03E+01 | 35.2256789 | -1.02E-01 | 65006204  | 65006327  | NC_000014.8  |
| cg13385210     | 1.42E-18 | 2.76E-20 | -1.03E+01 | 35.2230721 | -2.07E-01 | 38599271  | 38599394  | NC_000017.10 |
| cg07788438     | 1.43E-18 | 2.78E-20 | -1.03E+01 | 35.2150204 | -1.92E-01 | 30936384  | 30936507  | NC_000017.10 |
| cg26803268     | 1.43E-18 | 2.79E-20 | -1.03E+01 | 35.2134238 | -1.57E-01 | 18549536  | 18549659  | NC_000010.10 |
| cg20669012     | 1.44E-18 | 2.81E-20 | -1.03E+01 | 35.2069466 | -1.09E-01 | 11102341  | 11102464  | NC_000003.11 |
| cg05754905     | 1.44E-18 | 2.81E-20 | -1.03E+01 | 35.2064034 | -2.50E-01 | 160992352 | 160992475 | NC_000001.10 |
| cg27051318     | 1.44E-18 | 2.81E-20 | -1.03E+01 | 35.2051031 | -2.32E-01 | 42623771  | 42623894  | NC_000008.10 |
| cg11072637     | 1.44E-18 | 2.81E-20 | -1.03E+01 | 35.2048571 | -2.32E-01 | 65773051  | 65773174  | NC_000007.13 |
| cg03698144     | 1.44E-18 | 2.82E-20 | -1.03E+01 | 35.2036183 | -1.99E-01 | 200868238 | 200868361 | NC_000002.11 |
| cg15582954     | 1.45E-18 | 2.82E-20 | -1.03E+01 | 35.2031467 | -1.09E-01 | 22470343  | 22470466  | NC_000001.10 |
| cg11496630     | 1.45E-18 | 2.82E-20 | -1.03E+01 | 35.2024856 | -2.32E-01 | 3024178   | 3024301   | NC_000006.11 |



|            |          |          |           |            |           |           |           |              |
|------------|----------|----------|-----------|------------|-----------|-----------|-----------|--------------|
| cg09099312 | 1.45E-18 | 2.82E-20 | -1.03E+01 | 35.2023095 | -4.83E-02 | 45808808  | 45808931  | NC_000007.13 |
| cg22719037 | 1.45E-18 | 2.82E-20 | -1.03E+01 | 35.2012128 | -1.47E-01 | 111842896 | 111843019 | NC_000012.11 |
| cg12620005 | 1.46E-18 | 2.85E-20 | -1.03E+01 | 35.1919039 | -2.00E-01 | 51779655  | 51779778  | NC_000001.10 |
| cg11217218 | 1.46E-18 | 2.85E-20 | -1.03E+01 | 35.1918913 | -1.74E-01 | 79521061  | 79521184  | NC_000017.10 |
| cg11029367 | 1.46E-18 | 2.85E-20 | -1.03E+01 | 35.1902216 | -2.70E-01 | 124705145 | 124705268 | NC_000003.11 |
| cg14833160 | 1.47E-18 | 2.87E-20 | -1.03E+01 | 35.1859479 | -6.54E-02 | 49457855  | 49457978  | NC_000019.9  |
| cg08166587 | 1.47E-18 | 2.87E-20 | -1.03E+01 | 35.1849695 | -1.53E-01 | 2696048   | 2696171   | NC_000012.11 |
| cg00715988 | 1.47E-18 | 2.87E-20 | -1.03E+01 | 35.1840502 | -5.69E-02 | 96968640  | 96968763  | NC_000014.8  |
| cg08565197 | 1.47E-18 | 2.87E-20 | -1.03E+01 | 35.1831414 | -1.82E-01 | 240196284 | 240196407 | NC_000002.11 |
| cg18618429 | 1.49E-18 | 2.91E-20 | -1.03E+01 | 35.1720412 | -2.33E-01 | 122043865 | 122043988 | NC_000003.11 |
| cg25799986 | 1.50E-18 | 2.92E-20 | -1.03E+01 | 35.1664965 | -9.69E-02 | 44098281  | 44098404  | NC_000020.10 |
| cg24865623 | 1.51E-18 | 2.95E-20 | -1.03E+01 | 35.1589612 | -1.44E-01 | 48232988  | 48233111  | NC_000019.9  |
| cg23324086 | 1.51E-18 | 2.95E-20 | -1.03E+01 | 35.1558203 | -7.12E-02 | 99739029  | 99739152  | NC_000014.8  |
| cg07824422 | 1.51E-18 | 2.96E-20 | -1.03E+01 | 35.1551809 | -2.12E-01 | 2555406   | 2555529   | NC_000011.9  |
| cg11505417 | 1.51E-18 | 2.96E-20 | -1.03E+01 | 35.1547371 | -2.29E-01 | 22966051  | 22966174  | NC_000001.10 |
| cg00333364 | 1.51E-18 | 2.96E-20 | -1.03E+01 | 35.1534693 | -7.94E-02 | 8704802   | 8704925   | NC_000011.9  |
| cg18082788 | 1.53E-18 | 2.99E-20 | -1.03E+01 | 35.1446405 | -2.67E-01 | 149806339 | 149806462 | NC_000006.11 |
| cg04356381 | 1.53E-18 | 2.99E-20 | -1.03E+01 | 35.1443366 | -2.26E-01 | 25050788  | 25050911  | NC_000006.11 |
| cg04246699 | 1.53E-18 | 2.99E-20 | -1.03E+01 | 35.1425704 | -8.00E-02 | 80674513  | 80674636  | NC_000017.10 |
| cg19631472 | 1.53E-18 | 3.00E-20 | -1.03E+01 | 35.1418689 | -1.31E-01 | 18415641  | 18415764  | NC_000011.9  |
| cg22941573 | 1.53E-18 | 3.00E-20 | -1.03E+01 | 35.1396193 | -2.52E-01 | 48761279  | 48761402  | NC_000020.10 |
| cg00038020 | 1.53E-18 | 3.00E-20 | -1.03E+01 | 35.1391606 | -1.96E-01 | 223575793 | 223575916 | NC_000001.10 |
| cg06308537 | 1.54E-18 | 3.01E-20 | -1.03E+01 | 35.1362969 | -1.09E-01 | 4850290   | 4850413   | NC_000017.10 |
| cg00204159 | 1.54E-18 | 3.02E-20 | -1.03E+01 | 35.1328028 | -9.10E-02 | 18907454  | 18907577  | NC_000017.10 |
| cg18692070 | 1.54E-18 | 3.02E-20 | -1.03E+01 | 35.1325565 | -1.86E-01 | 3466852   | 3466975   | NC_000010.10 |

|                |          |          |           |            |           |           |           |              |
|----------------|----------|----------|-----------|------------|-----------|-----------|-----------|--------------|
| cg20066496     | 1.54E-18 | 3.03E-20 | -1.03E+01 | 35.1310636 | -1.45E-01 | 43213993  | 43214116  | NC_000015.9  |
| cg08850274     | 1.55E-18 | 3.03E-20 | -1.03E+01 | 35.1305247 | -5.37E-02 | 111991173 | 111991296 | NC_000001.10 |
| cg23323669     | 1.55E-18 | 3.05E-20 | -1.03E+01 | 35.1244966 | -2.28E-01 | 31126866  | 31126989  | NC_000006.11 |
| cg17243289     | 1.55E-18 | 3.05E-20 | -1.03E+01 | 35.1244461 | -1.20E-01 | 45458021  | 45458144  | NC_000018.9  |
| cg21189611     | 1.56E-18 | 3.06E-20 | -1.03E+01 | 35.1200462 | -2.35E-01 | 97691844  | 97691967  | NC_000009.11 |
| cg04348222     | 1.56E-18 | 3.07E-20 | -1.03E+01 | 35.1192316 | -1.58E-01 | 32802307  | 32802430  | NC_000001.10 |
| cg02109507     | 1.56E-18 | 3.07E-20 | -1.03E+01 | 35.1179491 | -2.07E-01 | 15554603  | 15554726  | NC_000017.10 |
| cg22401939     | 1.57E-18 | 3.08E-20 | -1.03E+01 | 35.1137539 | -1.95E-01 | 206731166 | 206731289 | NC_000001.10 |
| cg18065174     | 1.57E-18 | 3.08E-20 | -1.03E+01 | 35.1130552 | -2.07E-01 | 4175359   | 4175482   | NC_000019.9  |
| cg06883868     | 1.58E-18 | 3.10E-20 | -1.03E+01 | 35.1091948 | -1.34E-01 | 13643516  | 13643639  | NC_000018.9  |
| cg19017142     | 1.59E-18 | 3.12E-20 | -1.03E+01 | 35.1017108 | -2.67E-01 | 64431245  | 64431368  | NC_000002.11 |
| cg06484572     | 1.59E-18 | 3.13E-20 | -1.03E+01 | 35.0983784 | -1.01E-01 | 41605494  | 41605617  | NC_000006.11 |
| cg25376593     | 1.59E-18 | 3.14E-20 | -1.03E+01 | 35.0968682 | -2.31E-01 | 75501541  | 75501664  | NC_000010.10 |
| cg23175074     | 1.60E-18 | 3.15E-20 | -1.03E+01 | 35.0937231 | -2.10E-01 | 105212490 | 105212613 | NC_000010.10 |
| cg27113059     | 1.60E-18 | 3.15E-20 | -1.03E+01 | 35.0919937 | -7.19E-02 | 47088248  | 47088371  | NC_000018.9  |
| cg17349081     | 1.62E-18 | 3.18E-20 | -1.03E+01 | 35.0829314 | -5.43E-02 | 82188559  | 82188682  | NC_000009.11 |
| cg25064395     | 1.62E-18 | 3.18E-20 | -1.03E+01 | 35.0822134 | -1.94E-01 | 55143557  | 55143680  | NC_000004.11 |
| cg16558770     | 1.62E-18 | 3.18E-20 | -1.03E+01 | 35.0819908 | -2.58E-01 | 90548037  | 90548160  | NC_000015.9  |
| cg02637086     | 1.62E-18 | 3.19E-20 | -1.03E+01 | 35.0785287 | -1.47E-01 | 41117232  | 41117355  | NC_000019.9  |
| cg01352906     | 1.63E-18 | 3.21E-20 | -1.03E+01 | 35.074491  | -1.92E-01 | 206679195 | 206679318 | NC_000001.10 |
| cg10285845     | 1.63E-18 | 3.21E-20 | -1.03E+01 | 35.0733371 | -1.02E-01 | 74079359  | 74079482  | NC_000010.10 |
| ch.19.1066737F | 1.64E-18 | 3.23E-20 | -1.03E+01 | 35.0689335 | -4.76E-02 | 33114318  | 33114441  | NC_000019.9  |
| cg16031973     | 1.64E-18 | 3.23E-20 | -1.03E+01 | 35.0672292 | -1.86E-01 | 163786073 | 163786196 | NC_000005.9  |
| cg01501551     | 1.66E-18 | 3.27E-20 | -1.03E+01 | 35.056147  | -1.14E-01 | 74100860  | 74100983  | NC_000014.8  |
| cg06733329     | 1.67E-18 | 3.29E-20 | -1.03E+01 | 35.0497913 | -1.70E-01 | 176740039 | 176740162 | NC_000005.9  |

|               |          |          |           |            |           |           |           |              |
|---------------|----------|----------|-----------|------------|-----------|-----------|-----------|--------------|
| cg13703437    | 1.69E-18 | 3.33E-20 | -1.03E+01 | 35.0370141 | -2.49E-01 | 39219698  | 39219821  | NC_000005.9  |
| cg12612420    | 1.72E-18 | 3.39E-20 | -1.03E+01 | 35.0201131 | -1.17E-01 | 23513316  | 23513439  | NC_000007.13 |
| cg00718831    | 1.72E-18 | 3.41E-20 | -1.03E+01 | 35.0144841 | -1.38E-01 | 278159    | 278282    | NC_000012.11 |
| cg12184624    | 1.73E-18 | 3.41E-20 | -1.03E+01 | 35.0137785 | -1.89E-01 | 105239164 | 105239287 | NC_000010.10 |
| ch.15.465126R | 1.75E-18 | 3.45E-20 | -1.03E+01 | 35.0009527 | -9.39E-02 | 42729071  | 42729194  | NC_000015.9  |
| cg24497819    | 1.75E-18 | 3.45E-20 | -1.03E+01 | 35.0007084 | -1.87E-01 | 109027683 | 109027806 | NC_000012.11 |
| cg10712091    | 1.76E-18 | 3.48E-20 | -1.03E+01 | 34.9925634 | -1.58E-01 | 108141883 | 108142006 | NC_000006.11 |
| cg10213328    | 1.77E-18 | 3.50E-20 | -1.03E+01 | 34.9891768 | -8.49E-02 | 37309414  | 37309537  | NC_000017.10 |
| cg11693709    | 1.79E-18 | 3.54E-20 | -1.03E+01 | 34.9776793 | -2.19E-01 | 40542019  | 40542142  | NC_000015.9  |
| cg07107130    | 1.79E-18 | 3.55E-20 | -1.03E+01 | 34.9749737 | -2.22E-01 | 76745431  | 76745554  | NC_000011.9  |
| cg06375539    | 1.79E-18 | 3.55E-20 | -1.03E+01 | 34.9732877 | -2.07E-01 | 35249239  | 35249362  | NC_000001.10 |
| cg11626629    | 1.80E-18 | 3.56E-20 | -1.03E+01 | 34.9715392 | -2.14E-01 | 33245460  | 33245583  | NC_000006.11 |
| cg25424279    | 1.80E-18 | 3.56E-20 | -1.03E+01 | 34.9713894 | -2.15E-01 | 65683543  | 65683666  | NC_000011.9  |
| cg12065285    | 1.80E-18 | 3.56E-20 | -1.03E+01 | 34.9703716 | -2.03E-01 | 155946346 | 155946469 | NC_000001.10 |
| cg03292675    | 1.80E-18 | 3.58E-20 | -1.03E+01 | 34.9666097 | -2.34E-01 | 21912864  | 21912987  | NC_000008.10 |
| cg03221073    | 1.81E-18 | 3.59E-20 | -1.03E+01 | 34.9615519 | -2.69E-01 | 186157555 | 186157678 | NC_000001.10 |
| cg01957897    | 1.85E-18 | 3.66E-20 | -1.03E+01 | 34.9437737 | -2.23E-01 | 70414247  | 70414370  | NC_000015.9  |
| cg24375627    | 1.85E-18 | 3.66E-20 | -1.03E+01 | 34.9430547 | -1.87E-01 | 153509284 | 153509407 | NC_000001.10 |
| cg20904475    | 1.85E-18 | 3.67E-20 | -1.03E+01 | 34.9412918 | -2.00E-01 | 61823027  | 61823150  | NC_000008.10 |
| cg02102075    | 1.86E-18 | 3.69E-20 | -1.03E+01 | 34.9361473 | -2.06E-01 | 474430    | 474553    | NC_000016.9  |
| cg08400159    | 1.86E-18 | 3.70E-20 | -1.03E+01 | 34.9338861 | -1.12E-01 | 45947786  | 45947909  | NC_000020.10 |
| cg13466284    | 1.87E-18 | 3.71E-20 | -1.03E+01 | 34.9311715 | -1.87E-01 | 27189679  | 27189802  | NC_000001.10 |
| cg19581816    | 1.87E-18 | 3.71E-20 | -1.03E+01 | 34.9300431 | -8.94E-02 | 43390507  | 43390630  | NC_000001.10 |
| cg19913118    | 1.87E-18 | 3.71E-20 | -1.03E+01 | 34.929768  | -1.89E-01 | 145471701 | 145471824 | NC_000001.10 |
| cg04477789    | 1.87E-18 | 3.71E-20 | -1.03E+01 | 34.9291896 | -1.40E-01 | 30935822  | 30935945  | NC_000016.9  |

|            |          |          |           |            |           |           |           |              |
|------------|----------|----------|-----------|------------|-----------|-----------|-----------|--------------|
| cg13672743 | 1.87E-18 | 3.72E-20 | -1.03E+01 | 34.9282224 | -2.28E-01 | 33417086  | 33417209  | NC_000017.10 |
| cg19819654 | 1.88E-18 | 3.73E-20 | -1.03E+01 | 34.9242807 | -2.53E-01 | 10370550  | 10370673  | NC_000019.9  |
| cg25329734 | 1.88E-18 | 3.73E-20 | -1.03E+01 | 34.924274  | -1.50E-01 | 63160487  | 63160610  | NC_000017.10 |
| cg09551996 | 1.88E-18 | 3.74E-20 | -1.03E+01 | 34.9219774 | -6.26E-02 | 69455530  | 69455653  | NC_000011.9  |
| cg07277869 | 1.91E-18 | 3.80E-20 | -1.03E+01 | 34.9072727 | -6.38E-02 | 69760850  | 69760973  | NC_000016.9  |
| cg02988698 | 1.91E-18 | 3.80E-20 | -1.03E+01 | 34.9064288 | -1.99E-01 | 17463620  | 17463743  | NC_000016.9  |
| cg00985388 | 1.91E-18 | 3.81E-20 | -1.03E+01 | 34.9049386 | -1.02E-01 | 183952212 | 183952335 | NC_000003.11 |
| cg27514336 | 1.91E-18 | 3.81E-20 | -1.03E+01 | 34.9042511 | -2.41E-01 | 131068941 | 131069064 | NC_000003.11 |
| cg09316347 | 1.91E-18 | 3.81E-20 | -1.03E+01 | 34.90305   | -2.05E-01 | 139932132 | 139932255 | NC_000007.13 |
| cg20185609 | 1.92E-18 | 3.82E-20 | -1.03E+01 | 34.9018862 | -1.11E-01 | 28543446  | 28543569  | NC_000013.10 |
| cg10709727 | 1.94E-18 | 3.87E-20 | -1.03E+01 | 34.8894273 | -9.98E-02 | 31698145  | 31698268  | NC_000006.11 |
| cg03879460 | 1.94E-18 | 3.87E-20 | -1.03E+01 | 34.8870389 | -1.11E-01 | 562272    | 562395    | NC_000012.11 |
| cg02154186 | 1.95E-18 | 3.89E-20 | -1.03E+01 | 34.8831873 | -1.21E-01 | 26371353  | 26371476  | NC_000008.10 |
| cg23506143 | 1.96E-18 | 3.90E-20 | -1.03E+01 | 34.8813197 | -2.02E-01 | 55761274  | 55761397  | NC_000005.9  |
| cg21994818 | 1.96E-18 | 3.90E-20 | -1.03E+01 | 34.879276  | -2.61E-01 | 96805352  | 96805475  | NC_000008.10 |
| cg04138181 | 1.96E-18 | 3.91E-20 | -1.03E+01 | 34.87699   | -1.35E-01 | 23690918  | 23691041  | NC_000016.9  |
| cg13576290 | 1.96E-18 | 3.92E-20 | -1.03E+01 | 34.8760376 | -1.91E-01 | 29256737  | 29256860  | NC_000002.11 |
| cg19620758 | 1.97E-18 | 3.92E-20 | -1.03E+01 | 34.8749263 | -2.15E-01 | 102826565 | 102826688 | NC_000011.9  |
| cg25572043 | 1.97E-18 | 3.93E-20 | -1.03E+01 | 34.8724038 | -1.73E-01 | 15839627  | 15839750  | NC_000003.11 |
| cg14280905 | 1.97E-18 | 3.94E-20 | -1.03E+01 | 34.8709848 | -1.94E-01 | 136424187 | 136424310 | NC_000009.11 |
| cg02872491 | 1.98E-18 | 3.95E-20 | -1.03E+01 | 34.8682726 | -1.84E-01 | 31374862  | 31374985  | NC_000007.13 |
| cg19132462 | 1.98E-18 | 3.95E-20 | -1.03E+01 | 34.8674196 | -2.58E-01 | 10476608  | 10476731  | NC_000011.9  |
| cg24755459 | 1.98E-18 | 3.96E-20 | -1.03E+01 | 34.8654122 | -1.63E-01 | 101908865 | 101908988 | NC_000014.8  |
| cg18565795 | 2.01E-18 | 4.02E-20 | -1.03E+01 | 34.8511912 | -2.30E-01 | 25350802  | 25350925  | NC_000010.10 |
| cg11902863 | 2.01E-18 | 4.02E-20 | -1.03E+01 | 34.850872  | -2.15E-01 | 3044737   | 3044860   | NC_000002.11 |

|                |          |          |           |            |           |           |           |              |
|----------------|----------|----------|-----------|------------|-----------|-----------|-----------|--------------|
| cg18160135     | 2.01E-18 | 4.02E-20 | -1.03E+01 | 34.8495017 | -9.68E-02 | 99851115  | 99851238  | NC_000004.11 |
| cg25198049     | 2.02E-18 | 4.04E-20 | -1.03E+01 | 34.8463063 | -2.26E-01 | 151509723 | 151509846 | NC_000001.10 |
| cg21478137     | 2.02E-18 | 4.04E-20 | -1.03E+01 | 34.845013  | -1.21E-01 | 51532386  | 51532509  | NC_000015.9  |
| ch.17.1996417R | 2.03E-18 | 4.05E-20 | -1.03E+01 | 34.8433099 | -1.01E-01 | 74408525  | 74408648  | NC_000017.10 |
| cg07992044     | 2.03E-18 | 4.06E-20 | -1.03E+01 | 34.8417553 | -1.52E-01 | 68096049  | 68096172  | NC_000011.9  |
| cg14370448     | 2.05E-18 | 4.10E-20 | -1.03E+01 | 34.8319321 | -2.13E-01 | 30103978  | 30104101  | NC_000016.9  |
| cg19774788     | 2.05E-18 | 4.10E-20 | -1.03E+01 | 34.8307976 | -1.96E-01 | 52127988  | 52128111  | NC_000003.11 |
| cg20947259     | 2.06E-18 | 4.12E-20 | -1.03E+01 | 34.8262051 | -2.06E-01 | 201572159 | 201572282 | NC_000001.10 |
| cg05075308     | 2.07E-18 | 4.14E-20 | -1.03E+01 | 34.8221666 | -2.53E-01 | 185329364 | 185329487 | NC_000004.11 |
| cg06958636     | 2.07E-18 | 4.14E-20 | -1.03E+01 | 34.8213435 | -1.91E-01 | 245255197 | 245255320 | NC_000001.10 |
| cg00030296     | 2.07E-18 | 4.15E-20 | -1.03E+01 | 34.8191037 | -1.63E-01 | 75318732  | 75318855  | NC_000017.10 |
| cg01612247     | 2.08E-18 | 4.16E-20 | -1.03E+01 | 34.8171045 | -2.84E-01 | 40705588  | 40705711  | NC_000017.10 |
| cg01821684     | 2.08E-18 | 4.17E-20 | -1.03E+01 | 34.8145762 | -2.48E-01 | 6415217   | 6415340   | NC_000007.13 |
| cg20035679     | 2.08E-18 | 4.17E-20 | -1.03E+01 | 34.8138373 | -2.13E-01 | 3563432   | 3563555   | NC_000012.11 |
| cg15916554     | 2.08E-18 | 4.18E-20 | -1.03E+01 | 34.8127514 | -2.21E-01 | 31508820  | 31508943  | NC_000015.9  |
| cg23507761     | 2.09E-18 | 4.20E-20 | -1.03E+01 | 34.8080115 | -2.03E-01 | 76993698  | 76993821  | NC_000017.10 |
| cg03049863     | 2.09E-18 | 4.20E-20 | -1.03E+01 | 34.8079138 | -1.46E-01 | 38794635  | 38794758  | NC_000019.9  |
| cg05798627     | 2.09E-18 | 4.20E-20 | -1.03E+01 | 34.8072768 | -1.81E-01 | 67291531  | 67291654  | NC_000011.9  |
| cg08169864     | 2.09E-18 | 4.20E-20 | -1.03E+01 | 34.806898  | -5.26E-02 | 54421413  | 54421536  | NC_000014.8  |
| cg22453826     | 2.10E-18 | 4.21E-20 | -1.03E+01 | 34.8045943 | -2.50E-01 | 169399683 | 169399806 | NC_000006.11 |
| cg12385021     | 2.11E-18 | 4.23E-20 | -1.03E+01 | 34.7992634 | -2.27E-01 | 1606859   | 1606982   | NC_000007.13 |
| cg03189210     | 2.13E-18 | 4.27E-20 | -1.03E+01 | 34.7914577 | -2.45E-01 | 33245474  | 33245597  | NC_000006.11 |
| cg12054171     | 2.13E-18 | 4.28E-20 | -1.03E+01 | 34.7871786 | -2.25E-01 | 157346614 | 157346737 | NC_000007.13 |
| cg03018256     | 2.13E-18 | 4.29E-20 | -1.03E+01 | 34.7870409 | -2.42E-01 | 72237019  | 72237142  | NC_000017.10 |
| cg18687314     | 2.13E-18 | 4.29E-20 | -1.03E+01 | 34.7868295 | -1.85E-01 | 43733672  | 43733795  | NC_000020.10 |

|               |          |          |           |            |           |           |           |              |
|---------------|----------|----------|-----------|------------|-----------|-----------|-----------|--------------|
| cg08398233    | 2.13E-18 | 4.29E-20 | -1.03E+01 | 34.7866441 | -1.24E-01 | 20811641  | 20811764  | NC_000001.10 |
| cg25058482    | 2.14E-18 | 4.31E-20 | -1.03E+01 | 34.7822888 | -2.38E-01 | 161993315 | 161993438 | NC_000002.11 |
| cg24111796    | 2.14E-18 | 4.31E-20 | -1.03E+01 | 34.7813234 | -2.92E-01 | 42945163  | 42945286  | NC_000005.9  |
| cg04908300    | 2.15E-18 | 4.33E-20 | -1.03E+01 | 34.7766865 | -1.12E-01 | 12330532  | 12330655  | NC_000003.11 |
| ch.2.1615265F | 2.17E-18 | 4.35E-20 | -1.03E+01 | 34.771347  | -8.91E-02 | 71303421  | 71303544  | NC_000002.11 |
| cg17501395    | 2.17E-18 | 4.36E-20 | -1.03E+01 | 34.7700562 | -2.62E-01 | 149806331 | 149806454 | NC_000006.11 |
| cg08140114    | 2.18E-18 | 4.38E-20 | -1.03E+01 | 34.7654553 | -2.10E-01 | 139482238 | 139482361 | NC_000006.11 |
| cg15756114    | 2.19E-18 | 4.40E-20 | -1.03E+01 | 34.7601549 | -2.18E-01 | 227515220 | 227515343 | NC_000002.11 |
| cg10011232    | 2.20E-18 | 4.42E-20 | -1.03E+01 | 34.7553198 | -1.63E-01 | 18654949  | 18655072  | NC_000019.9  |
| cg10316474    | 2.20E-18 | 4.43E-20 | -1.03E+01 | 34.7546793 | -1.62E-01 | 39410068  | 39410191  | NC_000022.10 |
| cg14586373    | 2.21E-18 | 4.45E-20 | -1.03E+01 | 34.7488715 | -2.31E-01 | 37447398  | 37447521  | NC_000022.10 |
| cg07455815    | 2.22E-18 | 4.46E-20 | -1.03E+01 | 34.7467379 | -1.98E-01 | 5606380   | 5606503   | NC_000010.10 |
| cg07956751    | 2.23E-18 | 4.50E-20 | -1.03E+01 | 34.7391974 | -2.19E-01 | 150211939 | 150212062 | NC_000007.13 |
| cg15552491    | 2.24E-18 | 4.51E-20 | -1.03E+01 | 34.7370695 | -2.03E-01 | 119037285 | 119037408 | NC_000011.9  |
| cg10340048    | 2.24E-18 | 4.52E-20 | -1.03E+01 | 34.7348627 | -2.25E-01 | 74258684  | 74258807  | NC_000008.10 |
| cg18449997    | 2.26E-18 | 4.55E-20 | -1.03E+01 | 34.7285107 | -7.16E-02 | 40574243  | 40574366  | NC_000017.10 |
| cg27255275    | 2.26E-18 | 4.55E-20 | -1.03E+01 | 34.7272376 | -1.98E-01 | 129766154 | 129766277 | NC_000011.9  |
| cg18395354    | 2.26E-18 | 4.56E-20 | -1.03E+01 | 34.7249582 | -2.37E-01 | 3801491   | 3801614   | NC_000007.13 |
| cg12799824    | 2.27E-18 | 4.57E-20 | -1.03E+01 | 34.7236777 | -1.93E-01 | 2155728   | 2155851   | NC_000001.10 |
| cg18318006    | 2.27E-18 | 4.58E-20 | -1.03E+01 | 34.7220896 | -2.15E-01 | 97169147  | 97169270  | NC_000010.10 |
| cg06399735    | 2.27E-18 | 4.58E-20 | -1.03E+01 | 34.7219736 | -2.28E-01 | 18836280  | 18836403  | NC_000008.10 |
| cg12899649    | 2.27E-18 | 4.58E-20 | -1.03E+01 | 34.7209531 | -1.54E-01 | 33043762  | 33043885  | NC_000006.11 |
| cg02479986    | 2.28E-18 | 4.59E-20 | -1.03E+01 | 34.7184007 | -1.19E-01 | 203027445 | 203027568 | NC_000001.10 |
| cg00920938    | 2.28E-18 | 4.61E-20 | -1.03E+01 | 34.7149995 | -2.06E-01 | 22036412  | 22036535  | NC_000008.10 |
| cg02895699    | 2.29E-18 | 4.63E-20 | -1.03E+01 | 34.7110275 | -2.44E-01 | 7813791   | 7813914   | NC_000004.11 |

|               |          |          |           |            |           |           |           |              |
|---------------|----------|----------|-----------|------------|-----------|-----------|-----------|--------------|
| cg19838087    | 2.30E-18 | 4.64E-20 | -1.03E+01 | 34.7086685 | -2.06E-01 | 61442541  | 61442664  | NC_000011.9  |
| cg08364093    | 2.30E-18 | 4.65E-20 | -1.03E+01 | 34.706666  | -8.59E-02 | 28114164  | 28114287  | NC_000002.11 |
| cg18956547    | 2.31E-18 | 4.67E-20 | -1.03E+01 | 34.7026255 | -2.18E-01 | 219031719 | 219031842 | NC_000002.11 |
| cg00294109    | 2.31E-18 | 4.67E-20 | -1.03E+01 | 34.7010092 | -1.25E-01 | 3219781   | 3219904   | NC_000003.11 |
| cg15354065    | 2.32E-18 | 4.69E-20 | -1.03E+01 | 34.6983882 | -1.95E-01 | 56327217  | 56327340  | NC_000012.11 |
| cg19194645    | 2.33E-18 | 4.70E-20 | -1.03E+01 | 34.6952694 | -1.47E-01 | 125223540 | 125223663 | NC_000012.11 |
| cg02601893    | 2.33E-18 | 4.70E-20 | -1.03E+01 | 34.6949671 | -1.54E-01 | 43523016  | 43523139  | NC_000022.10 |
| cg18004847    | 2.33E-18 | 4.71E-20 | -1.03E+01 | 34.6941058 | -1.75E-01 | 1155056   | 1155179   | NC_000019.9  |
| ch.2.3493243F | 2.34E-18 | 4.74E-20 | -1.03E+01 | 34.6870063 | -5.57E-02 | 172737063 | 172737186 | NC_000002.11 |
| cg13836518    | 2.34E-18 | 4.74E-20 | -1.03E+01 | 34.6868789 | -1.72E-01 | 100883593 | 100883716 | NC_000009.11 |
| cg26351104    | 2.34E-18 | 4.74E-20 | -1.03E+01 | 34.6868679 | -5.46E-02 | 51796558  | 51796681  | NC_000001.10 |
| cg09524613    | 2.36E-18 | 4.78E-20 | -1.03E+01 | 34.6782678 | -2.25E-01 | 149097976 | 149098099 | NC_000006.11 |
| cg23116115    | 2.37E-18 | 4.80E-20 | -1.03E+01 | 34.6753295 | -1.22E-01 | 1004261   | 1004384   | NC_000004.11 |
| cg20540235    | 2.37E-18 | 4.80E-20 | -1.03E+01 | 34.6743031 | -2.87E-01 | 91683243  | 91683366  | NC_000008.10 |
| cg12645616    | 2.37E-18 | 4.80E-20 | -1.03E+01 | 34.6741867 | -1.13E-01 | 103070480 | 103070603 | NC_000010.10 |
| cg26689077    | 2.39E-18 | 4.84E-20 | -1.03E+01 | 34.6670075 | -2.36E-01 | 53599806  | 53599929  | NC_000012.11 |
| cg23486853    | 2.40E-18 | 4.86E-20 | -1.03E+01 | 34.6631259 | -6.26E-02 | 30642980  | 30643103  | NC_000022.10 |
| cg00218649    | 2.41E-18 | 4.87E-20 | -1.03E+01 | 34.6598403 | -5.91E-02 | 180238208 | 180238331 | NC_000005.9  |
| cg26766403    | 2.41E-18 | 4.88E-20 | -1.03E+01 | 34.6591401 | -1.00E-01 | 49701487  | 49701610  | NC_000008.10 |
| cg15153141    | 2.41E-18 | 4.88E-20 | -1.03E+01 | 34.6572098 | -3.03E-01 | 81470056  | 81470179  | NC_000005.9  |
| cg02840964    | 2.42E-18 | 4.90E-20 | -1.03E+01 | 34.6547457 | -1.87E-01 | 133026047 | 133026170 | NC_000009.11 |
| cg17431888    | 2.42E-18 | 4.90E-20 | -1.03E+01 | 34.6531927 | -1.63E-01 | 183203863 | 183203986 | NC_000001.10 |
| cg03559836    | 2.42E-18 | 4.91E-20 | -1.03E+01 | 34.652504  | -5.16E-02 | 69634561  | 69634684  | NC_000012.11 |
| cg24030507    | 2.43E-18 | 4.92E-20 | -1.03E+01 | 34.650431  | -9.11E-02 | 139089274 | 139089397 | NC_000005.9  |
| cg07474682    | 2.44E-18 | 4.95E-20 | -1.03E+01 | 34.6449379 | -2.37E-01 | 89573562  | 89573685  | NC_000016.9  |

|               |          |          |           |            |           |           |           |              |
|---------------|----------|----------|-----------|------------|-----------|-----------|-----------|--------------|
| cg09852221    | 2.45E-18 | 4.96E-20 | -1.03E+01 | 34.6420002 | -1.71E-01 | 205912646 | 205912769 | NC_000001.10 |
| cg25268754    | 2.46E-18 | 5.00E-20 | -1.03E+01 | 34.6345917 | -1.22E-01 | 54982731  | 54982854  | NC_000019.9  |
| cg01062519    | 2.47E-18 | 5.01E-20 | -1.03E+01 | 34.6319711 | -5.55E-02 | 34122169  | 34122292  | NC_000017.10 |
| cg24666103    | 2.47E-18 | 5.01E-20 | -1.03E+01 | 34.6315746 | -9.68E-02 | 220550199 | 220550322 | NC_000002.11 |
| cg03481488    | 2.48E-18 | 5.03E-20 | -1.03E+01 | 34.6286845 | -1.90E-01 | 81091172  | 81091295  | NC_000010.10 |
| cg19023552    | 2.48E-18 | 5.03E-20 | -1.03E+01 | 34.6285911 | -1.57E-01 | 41281446  | 41281569  | NC_000019.9  |
| cg25646708    | 2.48E-18 | 5.04E-20 | -1.03E+01 | 34.6263971 | -2.17E-01 | 134031685 | 134031808 | NC_000003.11 |
| cg04251733    | 2.49E-18 | 5.05E-20 | -1.03E+01 | 34.6242216 | -1.17E-01 | 16081467  | 16081590  | NC_000002.11 |
| cg12371569    | 2.50E-18 | 5.07E-20 | -1.03E+01 | 34.6197364 | -1.98E-01 | 13278271  | 13278394  | NC_000012.11 |
| cg15642412    | 2.50E-18 | 5.08E-20 | -1.03E+01 | 34.617928  | -9.00E-02 | 69707341  | 69707464  | NC_000015.9  |
| cg18580385    | 2.51E-18 | 5.10E-20 | -1.03E+01 | 34.6138058 | -2.08E-01 | 104364518 | 104364641 | NC_000010.10 |
| cg22643740    | 2.52E-18 | 5.13E-20 | -1.03E+01 | 34.6094734 | -9.83E-02 | 37640514  | 37640637  | NC_000022.10 |
| cg02072495    | 2.52E-18 | 5.13E-20 | -1.03E+01 | 34.6089985 | -1.95E-01 | 60689285  | 60689408  | NC_000015.9  |
| ch.8.2197061F | 2.53E-18 | 5.14E-20 | -1.03E+01 | 34.60766   | -1.43E-01 | 109278439 | 109278562 | NC_000008.10 |
| cg13772742    | 2.53E-18 | 5.15E-20 | -1.03E+01 | 34.605754  | -1.93E-01 | 96878385  | 96878508  | NC_000015.9  |
| cg12894524    | 2.54E-18 | 5.18E-20 | -1.03E+01 | 34.5996103 | -2.13E-01 | 116997069 | 116997192 | NC_000012.11 |
| cg22876356    | 2.55E-18 | 5.18E-20 | -1.03E+01 | 34.5991567 | -1.92E-01 | 96592098  | 96592221  | NC_000012.11 |
| cg16547186    | 2.55E-18 | 5.19E-20 | -1.03E+01 | 34.5975002 | -2.40E-01 | 57512988  | 57513111  | NC_000016.9  |
| cg23218363    | 2.55E-18 | 5.19E-20 | -1.03E+01 | 34.5967289 | -2.74E-01 | 12674976  | 12675099  | NC_000002.11 |
| cg14130039    | 2.56E-18 | 5.20E-20 | -1.03E+01 | 34.5949307 | -1.66E-01 | 32121225  | 32121348  | NC_000006.11 |
| cg11266407    | 2.56E-18 | 5.21E-20 | -1.03E+01 | 34.5936818 | -1.48E-01 | 44843080  | 44843203  | NC_000020.10 |
| cg21333665    | 2.58E-18 | 5.25E-20 | -1.03E+01 | 34.5865934 | -1.13E-01 | 73840659  | 73840782  | NC_000017.10 |
| cg08626932    | 2.58E-18 | 5.26E-20 | -1.03E+01 | 34.5832872 | -1.13E-01 | 62259823  | 62259946  | NC_000020.10 |
| cg12727795    | 2.59E-18 | 5.28E-20 | -1.03E+01 | 34.5809966 | -2.18E-01 | 149535695 | 149535818 | NC_000005.9  |
| cg08228350    | 2.59E-18 | 5.28E-20 | -1.03E+01 | 34.5796722 | -1.37E-01 | 107149626 | 107149749 | NC_000003.11 |



|                 |          |          |           |            |           |           |           |              |
|-----------------|----------|----------|-----------|------------|-----------|-----------|-----------|--------------|
| cg25714865      | 2.59E-18 | 5.28E-20 | -1.03E+01 | 34.5792288 | -2.21E-01 | 5648122   | 5648245   | NC_000007.13 |
| cg09609649      | 2.59E-18 | 5.29E-20 | -1.03E+01 | 34.5791328 | -6.30E-02 | 30458060  | 30458183  | NC_000006.11 |
| cg19317433      | 2.61E-18 | 5.32E-20 | -1.02E+01 | 34.5716928 | -1.35E-01 | 89783464  | 89783587  | NC_000007.13 |
| cg14202757      | 2.62E-18 | 5.33E-20 | -1.02E+01 | 34.570296  | -1.60E-01 | 10056846  | 10056969  | NC_000001.10 |
| cg08528984      | 2.62E-18 | 5.34E-20 | -1.02E+01 | 34.5689908 | -8.01E-02 | 2985218   | 2985341   | NC_000001.10 |
| ch.13.39564907R | 2.62E-18 | 5.34E-20 | -1.02E+01 | 34.5688799 | -1.03E-01 | 40666907  | 40667030  | NC_000013.10 |
| cg01804343      | 2.62E-18 | 5.34E-20 | -1.02E+01 | 34.5684241 | -5.72E-02 | 73134065  | 73134188  | NC_000007.13 |
| cg13986249      | 2.62E-18 | 5.35E-20 | -1.02E+01 | 34.5668096 | -7.03E-02 | 37903631  | 37903754  | NC_000009.11 |
| cg06912282      | 2.63E-18 | 5.36E-20 | -1.02E+01 | 34.5644991 | -1.81E-01 | 1563001   | 1563124   | NC_000001.10 |
| cg25030644      | 2.64E-18 | 5.40E-20 | -1.02E+01 | 34.5585738 | -7.13E-02 | 227505910 | 227506033 | NC_000001.10 |
| cg17534029      | 2.65E-18 | 5.41E-20 | -1.02E+01 | 34.5552022 | -2.80E-01 | 62318426  | 62318549  | NC_000020.10 |
| cg02259081      | 2.67E-18 | 5.46E-20 | -1.02E+01 | 34.5470581 | -1.38E-01 | 53268433  | 53268556  | NC_000012.11 |
| cg06884882      | 2.69E-18 | 5.49E-20 | -1.02E+01 | 34.5413185 | -1.46E-01 | 45187946  | 45188069  | NC_000001.10 |
| cg07664990      | 2.69E-18 | 5.49E-20 | -1.02E+01 | 34.5409492 | -7.76E-02 | 55294721  | 55294844  | NC_000008.10 |
| cg10948220      | 2.69E-18 | 5.50E-20 | -1.02E+01 | 34.5397754 | -9.48E-02 | 75775319  | 75775442  | NC_000002.11 |
| cg11517309      | 2.74E-18 | 5.61E-20 | -1.02E+01 | 34.5203503 | -1.05E-01 | 86565390  | 86565513  | NC_000002.11 |
| cg24930915      | 2.75E-18 | 5.62E-20 | -1.02E+01 | 34.518594  | -7.03E-02 | 2199120   | 2199243   | NC_000016.9  |
| cg01647632      | 2.75E-18 | 5.62E-20 | -1.02E+01 | 34.5182898 | -1.63E-01 | 89438905  | 89439028  | NC_000015.9  |
| cg23423766      | 2.75E-18 | 5.63E-20 | -1.02E+01 | 34.5171635 | -6.38E-02 | 13614841  | 13614964  | NC_000006.11 |
| cg08455089      | 2.75E-18 | 5.63E-20 | -1.02E+01 | 34.517022  | -2.05E-01 | 37292135  | 37292258  | NC_000006.11 |
| cg21993290      | 2.75E-18 | 5.63E-20 | -1.02E+01 | 34.5169488 | -1.29E-01 | 233703120 | 233703243 | NC_000002.11 |
| cg23681440      | 2.76E-18 | 5.64E-20 | -1.02E+01 | 34.5140973 | -1.50E-01 | 27498239  | 27498362  | NC_000013.10 |
| cg08147181      | 2.76E-18 | 5.64E-20 | -1.02E+01 | 34.513988  | -2.42E-01 | 103394355 | 103394478 | NC_000014.8  |
| cg12277870      | 2.77E-18 | 5.68E-20 | -1.02E+01 | 34.5082571 | -2.12E-01 | 208137626 | 208137749 | NC_000001.10 |
| cg21640994      | 2.79E-18 | 5.71E-20 | -1.02E+01 | 34.5024652 | -9.93E-02 | 30454772  | 30454895  | NC_000017.10 |

|            |          |          |           |            |           |           |           |              |
|------------|----------|----------|-----------|------------|-----------|-----------|-----------|--------------|
| cg14345131 | 2.79E-18 | 5.71E-20 | -1.02E+01 | 34.5023219 | -1.68E-01 | 233741790 | 233741913 | NC_000002.11 |
| cg12371563 | 2.79E-18 | 5.71E-20 | -1.02E+01 | 34.5020478 | -1.89E-01 | 123986915 | 123987038 | NC_000005.9  |
| cg07103618 | 2.79E-18 | 5.71E-20 | -1.02E+01 | 34.5019584 | -1.76E-01 | 228337366 | 228337489 | NC_000001.10 |
| cg01638311 | 2.79E-18 | 5.72E-20 | -1.02E+01 | 34.5012229 | -2.46E-01 | 65887103  | 65887226  | NC_000011.9  |
| cg13772414 | 2.81E-18 | 5.76E-20 | -1.02E+01 | 34.4943607 | -2.34E-01 | 222383060 | 222383183 | NC_000002.11 |
| cg16609872 | 2.81E-18 | 5.77E-20 | -1.02E+01 | 34.4917195 | -1.53E-01 | 2828364   | 2828487   | NC_000011.9  |
| cg15186638 | 2.84E-18 | 5.82E-20 | -1.02E+01 | 34.4833357 | -1.51E-01 | 49231688  | 49231811  | NC_000008.10 |
| cg23437479 | 2.84E-18 | 5.83E-20 | -1.02E+01 | 34.4810064 | -2.24E-01 | 49940353  | 49940476  | NC_000003.11 |
| cg00607194 | 2.85E-18 | 5.84E-20 | -1.02E+01 | 34.4801109 | -2.67E-01 | 47479795  | 47479918  | NC_000012.11 |
| cg18419534 | 2.87E-18 | 5.89E-20 | -1.02E+01 | 34.4721092 | -1.95E-01 | 793009    | 793132    | NC_000004.11 |
| cg00330370 | 2.87E-18 | 5.90E-20 | -1.02E+01 | 34.4698609 | -6.79E-02 | 156630119 | 156630242 | NC_000001.10 |
| cg13984330 | 2.88E-18 | 5.91E-20 | -1.02E+01 | 34.4686723 | -2.45E-01 | 58637589  | 58637712  | NC_000017.10 |
| cg17474524 | 2.88E-18 | 5.91E-20 | -1.02E+01 | 34.467774  | -1.81E-01 | 62168831  | 62168954  | NC_000020.10 |
| cg21908110 | 2.90E-18 | 5.96E-20 | -1.02E+01 | 34.4605943 | -2.83E-01 | 50377755  | 50377878  | NC_000003.11 |
| cg20272979 | 2.91E-18 | 5.98E-20 | -1.02E+01 | 34.4570865 | -2.38E-01 | 41787780  | 41787903  | NC_000015.9  |
| cg13966710 | 2.92E-18 | 6.00E-20 | -1.02E+01 | 34.4537821 | -5.38E-02 | 113392781 | 113392904 | NC_000001.10 |
| cg13488556 | 2.92E-18 | 6.00E-20 | -1.02E+01 | 34.4526827 | -2.52E-01 | 43532047  | 43532170  | NC_000015.9  |
| cg07370464 | 2.93E-18 | 6.03E-20 | -1.02E+01 | 34.4486491 | -8.27E-02 | 43394456  | 43394579  | NC_000017.10 |
| cg18646521 | 2.93E-18 | 6.04E-20 | -1.02E+01 | 34.4473745 | -1.78E-01 | 111875858 | 111875981 | NC_000002.11 |
| cg02888838 | 2.96E-18 | 6.10E-20 | -1.02E+01 | 34.4375511 | -5.80E-02 | 128459936 | 128460059 | NC_000002.11 |
| cg02390725 | 2.96E-18 | 6.10E-20 | -1.02E+01 | 34.4364721 | -1.99E-01 | 2925768   | 2925891   | NC_000011.9  |
| cg04737087 | 2.98E-18 | 6.13E-20 | -1.02E+01 | 34.4322454 | -1.42E-01 | 71205052  | 71205175  | NC_000002.11 |
| cg06472476 | 2.99E-18 | 6.15E-20 | -1.02E+01 | 34.4286754 | -2.17E-01 | 54369471  | 54369594  | NC_000019.9  |
| cg09153448 | 2.99E-18 | 6.17E-20 | -1.02E+01 | 34.4260949 | -1.94E-01 | 67347724  | 67347847  | NC_000011.9  |
| cg26781303 | 3.00E-18 | 6.18E-20 | -1.02E+01 | 34.4233112 | -1.46E-01 | 4233131   | 4233254   | NC_000016.9  |

|            |          |          |           |            |           |           |           |              |
|------------|----------|----------|-----------|------------|-----------|-----------|-----------|--------------|
| cg27632911 | 3.00E-18 | 6.19E-20 | -1.02E+01 | 34.4225073 | -1.08E-01 | 34205182  | 34205305  | NC_000020.10 |
| cg04189320 | 3.01E-18 | 6.20E-20 | -1.02E+01 | 34.4215834 | -1.73E-01 | 31691214  | 31691337  | NC_000015.9  |
| cg12403162 | 3.01E-18 | 6.22E-20 | -1.02E+01 | 34.418098  | -2.36E-01 | 116394557 | 116394680 | NC_000010.10 |
| cg07895684 | 3.02E-18 | 6.22E-20 | -1.02E+01 | 34.4173022 | -7.36E-02 | 38179815  | 38179938  | NC_000003.11 |
| cg12232778 | 3.02E-18 | 6.23E-20 | -1.02E+01 | 34.4168083 | -6.70E-02 | 56324064  | 56324187  | NC_000020.10 |
| cg16888658 | 3.03E-18 | 6.25E-20 | -1.02E+01 | 34.4128554 | -2.93E-01 | 25142117  | 25142240  | NC_000002.11 |
| cg03765041 | 3.05E-18 | 6.30E-20 | -1.02E+01 | 34.404509  | -1.65E-01 | 158620335 | 158620458 | NC_000007.13 |
| cg18995788 | 3.06E-18 | 6.32E-20 | -1.02E+01 | 34.4014075 | -2.69E-01 | 62673444  | 62673567  | NC_000008.10 |
| cg06911744 | 3.06E-18 | 6.32E-20 | -1.02E+01 | 34.4011727 | -2.52E-01 | 3276507   | 3276630   | NC_000001.10 |
| cg04642300 | 3.06E-18 | 6.33E-20 | -1.02E+01 | 34.400532  | -2.29E-01 | 109288592 | 109288715 | NC_000006.11 |
| cg18936620 | 3.08E-18 | 6.36E-20 | -1.02E+01 | 34.3949115 | -1.57E-01 | 43811019  | 43811142  | NC_000001.10 |
| cg06208158 | 3.09E-18 | 6.38E-20 | -1.02E+01 | 34.3926462 | -1.91E-01 | 29168730  | 29168853  | NC_000016.9  |
| cg16777510 | 3.09E-18 | 6.39E-20 | -1.02E+01 | 34.3913303 | -2.41E-01 | 40440022  | 40440145  | NC_000017.10 |
| cg09644356 | 3.09E-18 | 6.40E-20 | -1.02E+01 | 34.3900469 | -1.87E-01 | 121322010 | 121322133 | NC_000002.11 |
| cg14397813 | 3.09E-18 | 6.40E-20 | -1.02E+01 | 34.3896735 | -1.96E-01 | 80522508  | 80522631  | NC_000009.11 |
| cg26900458 | 3.11E-18 | 6.43E-20 | -1.02E+01 | 34.3847945 | -6.35E-02 | 128806889 | 128807012 | NC_000008.10 |
| cg25318189 | 3.11E-18 | 6.43E-20 | -1.02E+01 | 34.3845787 | -1.82E-01 | 2800436   | 2800559   | NC_000007.13 |
| cg26605164 | 3.12E-18 | 6.45E-20 | -1.02E+01 | 34.3812863 | -2.36E-01 | 102821565 | 102821688 | NC_000010.10 |
| cg20343832 | 3.12E-18 | 6.46E-20 | -1.02E+01 | 34.3801558 | -1.27E-01 | 52207897  | 52208020  | NC_000012.11 |
| cg04264726 | 3.12E-18 | 6.46E-20 | -1.02E+01 | 34.3800855 | -1.24E-01 | 49710768  | 49710891  | NC_000003.11 |
| cg18190798 | 3.13E-18 | 6.49E-20 | -1.02E+01 | 34.3757953 | -1.89E-01 | 47029335  | 47029458  | NC_000003.11 |
| cg16714154 | 3.15E-18 | 6.52E-20 | -1.02E+01 | 34.3708445 | -2.49E-01 | 4652671   | 4652794   | NC_000007.13 |
| cg23303108 | 3.15E-18 | 6.53E-20 | -1.02E+01 | 34.3699012 | -2.09E-01 | 23083578  | 23083701  | NC_000008.10 |
| cg18749617 | 3.15E-18 | 6.53E-20 | -1.02E+01 | 34.3695705 | -1.87E-01 | 102028637 | 102028760 | NC_000015.9  |
| cg10261589 | 3.16E-18 | 6.54E-20 | -1.02E+01 | 34.368104  | -7.63E-02 | 103997969 | 103998092 | NC_000004.11 |

|            |          |          |           |            |           |           |           |              |
|------------|----------|----------|-----------|------------|-----------|-----------|-----------|--------------|
| cg26515162 | 3.19E-18 | 6.61E-20 | -1.02E+01 | 34.356967  | -2.05E-01 | 27480594  | 27480717  | NC_000001.10 |
| cg25362050 | 3.19E-18 | 6.62E-20 | -1.02E+01 | 34.3552901 | -1.45E-01 | 38470900  | 38471023  | NC_000017.10 |
| cg18452973 | 3.21E-18 | 6.65E-20 | -1.02E+01 | 34.351604  | -1.98E-01 | 3446004   | 3446127   | NC_000012.11 |
| cg20314331 | 3.21E-18 | 6.66E-20 | -1.02E+01 | 34.3501281 | -9.65E-02 | 131129567 | 131129690 | NC_000002.11 |
| cg18174530 | 3.22E-18 | 6.68E-20 | -1.02E+01 | 34.3475317 | -1.53E-01 | 67786085  | 67786208  | NC_000011.9  |
| cg19267205 | 3.22E-18 | 6.69E-20 | -1.02E+01 | 34.3452505 | -1.61E-01 | 9781963   | 9782086   | NC_000001.10 |
| cg05152300 | 3.23E-18 | 6.71E-20 | -1.02E+01 | 34.3419697 | -2.51E-01 | 17458534  | 17458657  | NC_000016.9  |
| cg09164913 | 3.24E-18 | 6.72E-20 | -1.02E+01 | 34.3406664 | -1.34E-01 | 78963221  | 78963344  | NC_000017.10 |
| cg19131731 | 3.25E-18 | 6.74E-20 | -1.02E+01 | 34.3377061 | -1.99E-01 | 30643042  | 30643165  | NC_000022.10 |
| cg16789230 | 3.25E-18 | 6.76E-20 | -1.02E+01 | 34.3358146 | -1.55E-01 | 197806891 | 197807014 | NC_000003.11 |
| cg12415569 | 3.25E-18 | 6.76E-20 | -1.02E+01 | 34.3352211 | -1.76E-01 | 322831    | 322954    | NC_000012.11 |
| cg22356324 | 3.25E-18 | 6.76E-20 | -1.02E+01 | 34.3349815 | -1.85E-01 | 71077947  | 71078070  | NC_000010.10 |
| cg23419907 | 3.26E-18 | 6.77E-20 | -1.02E+01 | 34.3331138 | -1.70E-01 | 220154319 | 220154442 | NC_000002.11 |
| cg19885306 | 3.26E-18 | 6.77E-20 | -1.02E+01 | 34.3330566 | -1.71E-01 | 44457781  | 44457904  | NC_000006.11 |
| cg01487910 | 3.26E-18 | 6.78E-20 | -1.02E+01 | 34.3322554 | -1.89E-01 | 35453938  | 35454061  | NC_000006.11 |
| cg09226692 | 3.28E-18 | 6.82E-20 | -1.02E+01 | 34.3267396 | -6.94E-02 | 43422490  | 43422613  | NC_000006.11 |
| cg07652189 | 3.28E-18 | 6.82E-20 | -1.02E+01 | 34.3266529 | -2.16E-01 | 4587217   | 4587340   | NC_000004.11 |
| cg25106461 | 3.29E-18 | 6.85E-20 | -1.02E+01 | 34.3223383 | -6.19E-02 | 105780340 | 105780463 | NC_000014.8  |
| cg05396212 | 3.29E-18 | 6.85E-20 | -1.02E+01 | 34.3215609 | -1.11E-01 | 39683705  | 39683828  | NC_000017.10 |
| cg15826479 | 3.30E-18 | 6.85E-20 | -1.02E+01 | 34.3213342 | -2.06E-01 | 78806493  | 78806616  | NC_000017.10 |
| cg01589998 | 3.30E-18 | 6.87E-20 | -1.02E+01 | 34.3192856 | -1.07E-01 | 109729478 | 109729601 | NC_000012.11 |
| cg20533899 | 3.32E-18 | 6.90E-20 | -1.02E+01 | 34.3149108 | -1.32E-01 | 76381105  | 76381228  | NC_000011.9  |
| cg26346796 | 3.33E-18 | 6.92E-20 | -1.02E+01 | 34.311394  | -1.75E-01 | 32054867  | 32054990  | NC_000006.11 |
| cg10960375 | 3.34E-18 | 6.95E-20 | -1.02E+01 | 34.3080351 | -1.64E-01 | 42694144  | 42694267  | NC_000003.11 |
| cg05468024 | 3.35E-18 | 6.97E-20 | -1.02E+01 | 34.3043725 | -9.93E-02 | 1748710   | 1748833   | NC_000019.9  |

|                 |          |          |           |            |           |           |           |              |
|-----------------|----------|----------|-----------|------------|-----------|-----------|-----------|--------------|
| cg04413069      | 3.35E-18 | 6.99E-20 | -1.02E+01 | 34.3025452 | -6.93E-02 | 9800446   | 9800569   | NC_000012.11 |
| ch.12.2480290F  | 3.36E-18 | 6.99E-20 | -1.02E+01 | 34.3021968 | -1.32E-01 | 120471011 | 120471134 | NC_000012.11 |
| cg03363565      | 3.36E-18 | 7.00E-20 | -1.02E+01 | 34.3008729 | -1.69E-01 | 474528    | 474651    | NC_000016.9  |
| cg24087613      | 3.36E-18 | 7.01E-20 | -1.02E+01 | 34.2994657 | -8.32E-02 | 129112470 | 129112593 | NC_000004.11 |
| cg26110645      | 3.37E-18 | 7.03E-20 | -1.02E+01 | 34.2960565 | -1.17E-01 | 73090063  | 73090186  | NC_000002.11 |
| cg14580081      | 3.38E-18 | 7.04E-20 | -1.02E+01 | 34.2954082 | -7.75E-02 | 45873861  | 45873984  | NC_000019.9  |
| cg05110133      | 3.42E-18 | 7.12E-20 | -1.02E+01 | 34.2832869 | -7.12E-02 | 3220565   | 3220688   | NC_000020.10 |
| cg15765546      | 3.42E-18 | 7.12E-20 | -1.02E+01 | 34.2831418 | -2.33E-01 | 133776357 | 133776480 | NC_000003.11 |
| cg13874654      | 3.42E-18 | 7.14E-20 | -1.02E+01 | 34.2807641 | -1.54E-01 | 9019336   | 9019459   | NC_000017.10 |
| cg24756403      | 3.42E-18 | 7.15E-20 | -1.02E+01 | 34.2799834 | -2.18E-01 | 115860310 | 115860433 | NC_000010.10 |
| cg05979320      | 3.43E-18 | 7.17E-20 | -1.02E+01 | 34.277297  | -8.59E-02 | 49629187  | 49629310  | NC_000012.11 |
| cg03620376      | 3.46E-18 | 7.23E-20 | -1.02E+01 | 34.2681436 | -1.94E-01 | 54984272  | 54984395  | NC_000019.9  |
| cg10307345      | 3.47E-18 | 7.25E-20 | -1.02E+01 | 34.2660149 | -1.65E-01 | 18771567  | 18771690  | NC_000011.9  |
| cg12720459      | 3.48E-18 | 7.27E-20 | -1.02E+01 | 34.2627817 | -7.61E-02 | 56585092  | 56585215  | NC_000014.8  |
| cg13329889      | 3.53E-18 | 7.38E-20 | -1.02E+01 | 34.2484039 | -7.98E-02 | 5705264   | 5705387   | NC_000007.13 |
| cg09981464      | 3.53E-18 | 7.38E-20 | -1.02E+01 | 34.2476346 | -2.26E-01 | 87441659  | 87441782  | NC_000016.9  |
| cg24884140      | 3.53E-18 | 7.39E-20 | -1.02E+01 | 34.2471579 | -2.28E-01 | 19250190  | 19250313  | NC_000017.10 |
| cg25916307      | 3.53E-18 | 7.39E-20 | -1.02E+01 | 34.2467273 | -8.73E-02 | 29467684  | 29467807  | NC_000022.10 |
| cg12273325      | 3.53E-18 | 7.39E-20 | -1.02E+01 | 34.2464674 | -1.63E-01 | 31689831  | 31689954  | NC_000022.10 |
| cg20608306      | 3.55E-18 | 7.43E-20 | -1.02E+01 | 34.2418351 | -1.00E-01 | 116969690 | 116969813 | NC_000011.9  |
| cg17749033      | 3.56E-18 | 7.44E-20 | -1.02E+01 | 34.2398134 | -1.73E-01 | 80197412  | 80197535  | NC_000017.10 |
| cg19727499      | 3.58E-18 | 7.49E-20 | -1.02E+01 | 34.2332888 | -2.15E-01 | 49628740  | 49628863  | NC_000019.9  |
| cg10175334      | 3.58E-18 | 7.50E-20 | -1.02E+01 | 34.2317674 | -2.42E-01 | 27449755  | 27449878  | NC_000008.10 |
| ch.19.11892768R | 3.59E-18 | 7.52E-20 | -1.02E+01 | 34.2288662 | -7.52E-02 | 12031768  | 12031891  | NC_000019.9  |
| cg09527362      | 3.61E-18 | 7.57E-20 | -1.02E+01 | 34.2227997 | -1.73E-01 | 74162142  | 74162265  | NC_000006.11 |

|            |          |          |           |            |           |           |           |              |
|------------|----------|----------|-----------|------------|-----------|-----------|-----------|--------------|
| cg08380391 | 3.62E-18 | 7.59E-20 | -1.02E+01 | 34.2208799 | -1.66E-01 | 79109729  | 79109852  | NC_000017.10 |
| cg21237959 | 3.63E-18 | 7.60E-20 | -1.02E+01 | 34.2191991 | -1.60E-01 | 90967496  | 90967619  | NC_000014.8  |
| cg24896460 | 3.63E-18 | 7.61E-20 | -1.02E+01 | 34.2173068 | -1.86E-01 | 73188814  | 73188937  | NC_000005.9  |
| cg20797699 | 3.64E-18 | 7.63E-20 | -1.02E+01 | 34.2146241 | -1.38E-01 | 61776851  | 61776974  | NC_000017.10 |
| cg05470166 | 3.64E-18 | 7.64E-20 | -1.02E+01 | 34.2144236 | -1.73E-01 | 35905608  | 35905731  | NC_000009.11 |
| cg05766251 | 3.65E-18 | 7.65E-20 | -1.02E+01 | 34.2129917 | -1.40E-01 | 37024760  | 37024883  | NC_000017.10 |
| cg00018181 | 3.66E-18 | 7.67E-20 | -1.02E+01 | 34.2098052 | -1.77E-01 | 101931734 | 101931857 | NC_000007.13 |
| cg05402319 | 3.68E-18 | 7.72E-20 | -1.02E+01 | 34.2029934 | -1.31E-01 | 45383543  | 45383666  | NC_000015.9  |
| cg23622047 | 3.71E-18 | 7.78E-20 | -1.02E+01 | 34.1951873 | -2.12E-01 | 173701464 | 173701587 | NC_000002.11 |
| cg16764778 | 3.71E-18 | 7.79E-20 | -1.02E+01 | 34.1940874 | -1.74E-01 | 41061410  | 41061533  | NC_000015.9  |
| cg21490635 | 3.72E-18 | 7.80E-20 | -1.02E+01 | 34.1928893 | -2.13E-01 | 13349273  | 13349396  | NC_000012.11 |
| cg06998507 | 3.73E-18 | 7.84E-20 | -1.02E+01 | 34.1884307 | -1.23E-01 | 84273740  | 84273863  | NC_000016.9  |
| cg08040836 | 3.75E-18 | 7.87E-20 | -1.02E+01 | 34.1839236 | -1.11E-01 | 53273301  | 53273424  | NC_000012.11 |
| cg19539004 | 3.78E-18 | 7.94E-20 | -1.02E+01 | 34.1759107 | -1.53E-01 | 30643376  | 30643499  | NC_000022.10 |
| cg13085530 | 3.78E-18 | 7.95E-20 | -1.02E+01 | 34.173875  | -1.00E-01 | 117665186 | 117665309 | NC_000001.10 |
| cg26395331 | 3.80E-18 | 7.98E-20 | -1.02E+01 | 34.1700761 | -1.82E-01 | 111856140 | 111856263 | NC_000003.11 |
| cg07859439 | 3.81E-18 | 8.02E-20 | -1.02E+01 | 34.16581   | -1.79E-01 | 197792757 | 197792880 | NC_000002.11 |
| cg25808809 | 3.84E-18 | 8.07E-20 | -1.02E+01 | 34.1590057 | -1.45E-01 | 114917199 | 114917322 | NC_000013.10 |
| cg02571534 | 3.85E-18 | 8.10E-20 | -1.02E+01 | 34.1554895 | -1.77E-01 | 66858375  | 66858498  | NC_000015.9  |
| cg00546897 | 3.87E-18 | 8.14E-20 | -1.02E+01 | 34.1509914 | -1.79E-01 | 45232232  | 45232355  | NC_000021.8  |
| cg27230882 | 3.87E-18 | 8.15E-20 | -1.02E+01 | 34.1500433 | -2.00E-01 | 110976749 | 110976872 | NC_000001.10 |
| cg06463142 | 3.88E-18 | 8.18E-20 | -1.02E+01 | 34.1457134 | -1.27E-01 | 144820826 | 144820949 | NC_000008.10 |
| cg17243654 | 3.89E-18 | 8.18E-20 | -1.02E+01 | 34.1455373 | -1.70E-01 | 109816280 | 109816403 | NC_000001.10 |
| cg04250837 | 3.90E-18 | 8.22E-20 | -1.02E+01 | 34.1417147 | -2.41E-01 | 231765185 | 231765308 | NC_000001.10 |
| cg09276883 | 3.90E-18 | 8.23E-20 | -1.02E+01 | 34.1402382 | -1.19E-01 | 210501966 | 210502089 | NC_000001.10 |

|            |          |          |           |            |           |           |           |              |
|------------|----------|----------|-----------|------------|-----------|-----------|-----------|--------------|
| cg21052656 | 3.91E-18 | 8.25E-20 | -1.02E+01 | 34.137565  | -1.51E-01 | 67250046  | 67250169  | NC_000011.9  |
| cg08321576 | 3.92E-18 | 8.27E-20 | -1.02E+01 | 34.1347532 | -7.86E-02 | 10022229  | 10022352  | NC_000012.11 |
| cg07992484 | 3.94E-18 | 8.32E-20 | -1.02E+01 | 34.1292129 | -1.70E-01 | 106724161 | 106724284 | NC_000002.11 |
| cg07807470 | 3.94E-18 | 8.32E-20 | -1.02E+01 | 34.1290647 | -1.93E-01 | 28837350  | 28837473  | NC_000001.10 |
| cg09043214 | 3.95E-18 | 8.33E-20 | -1.02E+01 | 34.1275889 | -2.54E-01 | 6442873   | 6442996   | NC_000012.11 |
| cg26758857 | 3.96E-18 | 8.35E-20 | -1.02E+01 | 34.1256512 | -1.56E-01 | 36649135  | 36649258  | NC_000022.10 |
| cg21365602 | 3.97E-18 | 8.38E-20 | -1.02E+01 | 34.1217069 | -1.38E-01 | 89664407  | 89664530  | NC_000001.10 |
| cg10046620 | 3.98E-18 | 8.40E-20 | -1.02E+01 | 34.1191983 | -1.57E-01 | 27775042  | 27775165  | NC_000006.11 |
| cg24104611 | 3.99E-18 | 8.43E-20 | -1.02E+01 | 34.1164821 | -1.74E-01 | 45637132  | 45637255  | NC_000022.10 |
| cg13065206 | 4.02E-18 | 8.49E-20 | -1.02E+01 | 34.1090911 | -1.87E-01 | 41062017  | 41062140  | NC_000015.9  |
| cg17162260 | 4.03E-18 | 8.51E-20 | -1.02E+01 | 34.106897  | -5.64E-02 | 63276779  | 63276902  | NC_000002.11 |
| cg05275832 | 4.03E-18 | 8.52E-20 | -1.02E+01 | 34.1054321 | -2.32E-01 | 27984686  | 27984809  | NC_000002.11 |
| cg25225070 | 4.06E-18 | 8.59E-20 | -1.02E+01 | 34.0979914 | -1.87E-01 | 9587743   | 9587866   | NC_000011.9  |
| cg18787437 | 4.07E-18 | 8.61E-20 | -1.02E+01 | 34.0947065 | -2.34E-01 | 16499673  | 16499796  | NC_000001.10 |
| cg23109530 | 4.08E-18 | 8.63E-20 | -1.02E+01 | 34.0925964 | -1.76E-01 | 94944912  | 94945035  | NC_000008.10 |
| cg20721542 | 4.09E-18 | 8.65E-20 | -1.02E+01 | 34.0908397 | -6.33E-02 | 48045906  | 48046029  | NC_000017.10 |
| cg22514963 | 4.10E-18 | 8.67E-20 | -1.02E+01 | 34.0878546 | -1.01E-01 | 49259997  | 49260120  | NC_000012.11 |
| cg03769927 | 4.11E-18 | 8.70E-20 | -1.02E+01 | 34.0846951 | -1.98E-01 | 27480849  | 27480972  | NC_000001.10 |
| cg01763453 | 4.13E-18 | 8.75E-20 | -1.02E+01 | 34.0791464 | -1.69E-01 | 81764614  | 81764737  | NC_000016.9  |
| cg12104698 | 4.13E-18 | 8.75E-20 | -1.02E+01 | 34.0789131 | -1.74E-01 | 139529130 | 139529253 | NC_000007.13 |
| cg26971423 | 4.15E-18 | 8.78E-20 | -1.02E+01 | 34.0758328 | -2.50E-01 | 63785031  | 63785154  | NC_000015.9  |
| cg23903252 | 4.15E-18 | 8.79E-20 | -1.02E+01 | 34.0750566 | -1.35E-01 | 149569998 | 149570121 | NC_000007.13 |
| cg17984022 | 4.18E-18 | 8.86E-20 | -1.02E+01 | 34.0666739 | -1.10E-01 | 105156566 | 105156689 | NC_000014.8  |
| cg11128212 | 4.18E-18 | 8.87E-20 | -1.02E+01 | 34.0662775 | -2.08E-01 | 46068618  | 46068741  | NC_000012.11 |
| cg14681629 | 4.20E-18 | 8.90E-20 | -1.02E+01 | 34.0619286 | -1.26E-01 | 43041808  | 43041931  | NC_000005.9  |

|            |          |          |           |            |           |           |           |              |
|------------|----------|----------|-----------|------------|-----------|-----------|-----------|--------------|
| cg02788146 | 4.21E-18 | 8.93E-20 | -1.02E+01 | 34.0588343 | -7.01E-02 | 134717975 | 134718098 | NC_000010.10 |
| cg20663219 | 4.22E-18 | 8.94E-20 | -1.02E+01 | 34.058332  | -1.97E-01 | 73130521  | 73130644  | NC_000007.13 |
| cg07157333 | 4.22E-18 | 8.95E-20 | -1.02E+01 | 34.0570466 | -2.03E-01 | 19422554  | 19422677  | NC_000016.9  |
| cg14085262 | 4.24E-18 | 8.99E-20 | -1.02E+01 | 34.052056  | -1.50E-01 | 203155938 | 203156061 | NC_000001.10 |
| cg12800047 | 4.24E-18 | 9.00E-20 | -1.02E+01 | 34.0510722 | -2.28E-01 | 106566411 | 106566534 | NC_000011.9  |
| cg04901835 | 4.25E-18 | 9.00E-20 | -1.02E+01 | 34.0508052 | -2.08E-01 | 9127501   | 9127624   | NC_000001.10 |
| cg02999711 | 4.27E-18 | 9.06E-20 | -1.02E+01 | 34.0444956 | -2.44E-01 | 205417436 | 205417559 | NC_000001.10 |
| cg11329058 | 4.28E-18 | 9.07E-20 | -1.02E+01 | 34.043572  | -1.77E-01 | 78549358  | 78549481  | NC_000017.10 |
| cg14533523 | 4.28E-18 | 9.08E-20 | -1.02E+01 | 34.0426087 | -2.76E-01 | 169852497 | 169852620 | NC_000006.11 |
| cg25856811 | 4.28E-18 | 9.09E-20 | -1.02E+01 | 34.0416846 | -2.12E-01 | 152973957 | 152974080 | NC_000001.10 |
| cg06818159 | 4.29E-18 | 9.11E-20 | -1.02E+01 | 34.0388514 | -2.02E-01 | 16628713  | 16628836  | NC_000004.11 |
| cg02186444 | 4.30E-18 | 9.14E-20 | -1.02E+01 | 34.0364915 | -2.12E-01 | 73120977  | 73121100  | NC_000017.10 |
| cg00850083 | 4.31E-18 | 9.14E-20 | -1.02E+01 | 34.0355161 | -1.71E-01 | 40985387  | 40985510  | NC_000021.8  |
| cg24527945 | 4.31E-18 | 9.15E-20 | -1.02E+01 | 34.0351146 | -7.64E-02 | 57844915  | 57845038  | NC_000004.11 |
| cg18994606 | 4.32E-18 | 9.17E-20 | -1.02E+01 | 34.0323161 | -2.22E-01 | 111827966 | 111828089 | NC_000010.10 |
| cg17345741 | 4.32E-18 | 9.18E-20 | -1.02E+01 | 34.0313399 | -1.72E-01 | 69472652  | 69472775  | NC_000014.8  |
| cg21252105 | 4.36E-18 | 9.27E-20 | -1.02E+01 | 34.0215455 | -2.16E-01 | 139459307 | 139459430 | NC_000009.11 |
| cg18612255 | 4.37E-18 | 9.29E-20 | -1.02E+01 | 34.0200168 | -1.86E-01 | 1770715   | 1770838   | NC_000012.11 |
| cg14757107 | 4.39E-18 | 9.33E-20 | -1.02E+01 | 34.0152476 | -2.48E-01 | 16277615  | 16277738  | NC_000006.11 |
| cg12072001 | 4.40E-18 | 9.36E-20 | -1.02E+01 | 34.0120642 | -1.85E-01 | 1166767   | 1166890   | NC_000004.11 |
| cg04428535 | 4.47E-18 | 9.52E-20 | -1.02E+01 | 33.9961166 | -7.30E-02 | 50432391  | 50432514  | NC_000019.9  |
| cg14325733 | 4.47E-18 | 9.52E-20 | -1.02E+01 | 33.9960958 | -9.98E-02 | 103875134 | 103875257 | NC_000010.10 |
| cg26188212 | 4.48E-18 | 9.53E-20 | -1.02E+01 | 33.9941099 | -1.63E-01 | 228967124 | 228967247 | NC_000001.10 |
| cg23018091 | 4.49E-18 | 9.56E-20 | -1.02E+01 | 33.9912243 | -5.46E-02 | 32758168  | 32758291  | NC_000001.10 |
| cg04132199 | 4.50E-18 | 9.59E-20 | -1.02E+01 | 33.9885828 | -1.42E-01 | 102172572 | 102172695 | NC_000014.8  |



|              |          |          |           |            |           |           |           |              |
|--------------|----------|----------|-----------|------------|-----------|-----------|-----------|--------------|
| cg00028135   | 4.53E-18 | 9.64E-20 | -1.02E+01 | 33.9834233 | -2.44E-01 | 114343673 | 114343796 | NC_000003.11 |
| ch.9.837340R | 4.53E-18 | 9.65E-20 | -1.02E+01 | 33.9818867 | -8.60E-02 | 72347081  | 72347204  | NC_000009.11 |
| cg15232319   | 4.54E-18 | 9.66E-20 | -1.02E+01 | 33.9807841 | -1.20E-01 | 4376459   | 4376582   | NC_000019.9  |
| cg04293526   | 4.55E-18 | 9.69E-20 | -1.02E+01 | 33.9777665 | -1.77E-01 | 231730788 | 231730911 | NC_000002.11 |
| cg06560379   | 4.56E-18 | 9.71E-20 | -1.02E+01 | 33.976172  | -1.88E-01 | 44231305  | 44231428  | NC_000006.11 |
| cg22460123   | 4.57E-18 | 9.75E-20 | -1.02E+01 | 33.9721587 | -1.22E-01 | 52638294  | 52638417  | NC_000012.11 |
| cg08022717   | 4.58E-18 | 9.76E-20 | -1.02E+01 | 33.971229  | -2.07E-01 | 127955187 | 127955310 | NC_000002.11 |
| cg10771489   | 4.58E-18 | 9.77E-20 | -1.02E+01 | 33.9696433 | -1.21E-01 | 95236834  | 95236957  | NC_000014.8  |
| cg14769754   | 4.61E-18 | 9.83E-20 | -1.02E+01 | 33.9641736 | -1.35E-01 | 77641453  | 77641576  | NC_000005.9  |
| cg18056600   | 4.62E-18 | 9.85E-20 | -1.02E+01 | 33.9618285 | -1.57E-01 | 4642047   | 4642170   | NC_000017.10 |
| cg02693857   | 4.63E-18 | 9.89E-20 | -1.02E+01 | 33.9582406 | -1.63E-01 | 176738937 | 176739060 | NC_000005.9  |
| cg20434178   | 4.64E-18 | 9.89E-20 | -1.02E+01 | 33.9578371 | -7.97E-02 | 172968684 | 172968807 | NC_000002.11 |
| cg07161179   | 4.64E-18 | 9.90E-20 | -1.02E+01 | 33.9565615 | -2.18E-01 | 698201    | 698324    | NC_000011.9  |
| cg02189785   | 4.65E-18 | 9.92E-20 | -1.02E+01 | 33.9543759 | -9.43E-02 | 139891008 | 139891131 | NC_000009.11 |
| cg09941363   | 4.67E-18 | 9.97E-20 | -1.02E+01 | 33.9499929 | -2.81E-01 | 51730449  | 51730572  | NC_000001.10 |
| cg08695830   | 4.67E-18 | 9.97E-20 | -1.02E+01 | 33.9494022 | -5.40E-02 | 73703459  | 73703582  | NC_000007.13 |
| cg08210681   | 4.69E-18 | 1.00E-19 | -1.02E+01 | 33.944922  | -2.10E-01 | 130026698 | 130026821 | NC_000011.9  |
| cg04399083   | 4.69E-18 | 1.00E-19 | -1.02E+01 | 33.9444683 | -5.26E-02 | 82461423  | 82461546  | NC_000006.11 |
| cg21372571   | 4.70E-18 | 1.00E-19 | -1.02E+01 | 33.9422687 | -6.38E-02 | 114665013 | 114665136 | NC_000006.11 |
| cg23386330   | 4.72E-18 | 1.01E-19 | -1.02E+01 | 33.9388348 | -1.02E-01 | 13977556  | 13977679  | NC_000011.9  |
| cg20658466   | 4.72E-18 | 1.01E-19 | -1.02E+01 | 33.9383863 | -1.54E-01 | 46330719  | 46330842  | NC_000007.13 |
| cg13573276   | 4.74E-18 | 1.01E-19 | -1.02E+01 | 33.9344089 | -7.85E-02 | 57232898  | 57233021  | NC_000008.10 |
| cg25040562   | 4.74E-18 | 1.01E-19 | -1.02E+01 | 33.9330654 | -2.07E-01 | 99850049  | 99850172  | NC_000014.8  |
| cg15172966   | 4.75E-18 | 1.02E-19 | -1.02E+01 | 33.9320383 | -1.89E-01 | 32590145  | 32590268  | NC_000012.11 |
| cg24439686   | 4.75E-18 | 1.02E-19 | -1.02E+01 | 33.9314017 | -2.89E-01 | 76588724  | 76588847  | NC_000017.10 |

|            |          |          |           |            |           |           |           |              |
|------------|----------|----------|-----------|------------|-----------|-----------|-----------|--------------|
| cg14462124 | 4.76E-18 | 1.02E-19 | -1.02E+01 | 33.9286967 | -3.22E-01 | 197031748 | 197031871 | NC_000002.11 |
| cg21554861 | 4.77E-18 | 1.02E-19 | -1.02E+01 | 33.9267203 | -8.59E-02 | 99851060  | 99851183  | NC_000004.11 |
| cg22084410 | 4.78E-18 | 1.02E-19 | -1.02E+01 | 33.9249898 | -1.99E-01 | 51987688  | 51987811  | NC_000003.11 |
| cg13050357 | 4.78E-18 | 1.02E-19 | -1.02E+01 | 33.9244172 | -2.33E-01 | 1332618   | 1332741   | NC_000004.11 |
| cg09709457 | 4.78E-18 | 1.02E-19 | -1.02E+01 | 33.9241729 | -2.68E-01 | 194875295 | 194875418 | NC_000003.11 |
| cg04150954 | 4.79E-18 | 1.03E-19 | -1.02E+01 | 33.9217171 | -1.90E-01 | 80911463  | 80911586  | NC_000010.10 |
| cg13683374 | 4.81E-18 | 1.03E-19 | -1.02E+01 | 33.9187617 | -1.15E-01 | 72364767  | 72364890  | NC_000017.10 |
| cg26747301 | 4.81E-18 | 1.03E-19 | -1.02E+01 | 33.9179499 | -7.33E-02 | 50980265  | 50980388  | NC_000019.9  |
| cg26926665 | 4.82E-18 | 1.03E-19 | -1.02E+01 | 33.9153079 | -9.58E-02 | 7942338   | 7942461   | NC_000017.10 |
| cg07070728 | 4.83E-18 | 1.03E-19 | -1.02E+01 | 33.91434   | -1.64E-01 | 141399954 | 141400077 | NC_000003.11 |
| cg13582028 | 4.84E-18 | 1.04E-19 | -1.02E+01 | 33.9100652 | -1.75E-01 | 631115    | 631238    | NC_000008.10 |
| cg22937172 | 4.85E-18 | 1.04E-19 | -1.01E+01 | 33.9092872 | -2.56E-01 | 240168862 | 240168985 | NC_000002.11 |
| cg17156534 | 4.87E-18 | 1.04E-19 | -1.01E+01 | 33.9053479 | -1.33E-01 | 39658922  | 39659045  | NC_000020.10 |
| cg27478659 | 4.89E-18 | 1.05E-19 | -1.01E+01 | 33.8997819 | -1.57E-01 | 39769012  | 39769135  | NC_000017.10 |
| cg07910075 | 4.89E-18 | 1.05E-19 | -1.01E+01 | 33.899638  | -2.50E-01 | 153581494 | 153581617 | NC_000001.10 |
| cg07612923 | 4.94E-18 | 1.06E-19 | -1.01E+01 | 33.8895472 | -1.45E-01 | 117604196 | 117604319 | NC_000003.11 |
| cg14089474 | 4.96E-18 | 1.06E-19 | -1.01E+01 | 33.8859078 | -1.47E-01 | 45280184  | 45280307  | NC_000019.9  |
| cg01746044 | 4.98E-18 | 1.07E-19 | -1.01E+01 | 33.8817389 | -1.15E-01 | 30234775  | 30234898  | NC_000022.10 |
| cg15869492 | 4.99E-18 | 1.07E-19 | -1.01E+01 | 33.8798764 | -9.84E-02 | 36907295  | 36907418  | NC_000017.10 |
| cg13505393 | 4.99E-18 | 1.07E-19 | -1.01E+01 | 33.8779848 | -2.02E-01 | 76377572  | 76377695  | NC_000011.9  |
| cg22071224 | 5.02E-18 | 1.08E-19 | -1.01E+01 | 33.8721927 | -7.05E-02 | 171572348 | 171572471 | NC_000002.11 |
| cg20796467 | 5.03E-18 | 1.08E-19 | -1.01E+01 | 33.8714421 | -1.75E-01 | 106957995 | 106958118 | NC_000006.11 |
| cg06665109 | 5.03E-18 | 1.08E-19 | -1.01E+01 | 33.8708289 | -2.68E-01 | 54369436  | 54369559  | NC_000019.9  |
| cg05847960 | 5.08E-18 | 1.09E-19 | -1.01E+01 | 33.8611613 | -1.26E-01 | 10152774  | 10152897  | NC_000020.10 |
| cg25085755 | 5.08E-18 | 1.09E-19 | -1.01E+01 | 33.8607897 | -1.51E-01 | 139294323 | 139294446 | NC_000005.9  |

|                |          |          |           |            |           |           |           |              |
|----------------|----------|----------|-----------|------------|-----------|-----------|-----------|--------------|
| cg00063982     | 5.08E-18 | 1.09E-19 | -1.01E+01 | 33.8595376 | -2.49E-01 | 53040491  | 53040614  | NC_000001.10 |
| cg08805500     | 5.09E-18 | 1.09E-19 | -1.01E+01 | 33.8569688 | -1.74E-01 | 100522155 | 100522278 | NC_000012.11 |
| cg21480043     | 5.10E-18 | 1.10E-19 | -1.01E+01 | 33.8561466 | -6.96E-02 | 41699282  | 41699405  | NC_000019.9  |
| cg04555312     | 5.10E-18 | 1.10E-19 | -1.01E+01 | 33.8558373 | -9.82E-02 | 54389114  | 54389237  | NC_000012.11 |
| cg13298859     | 5.11E-18 | 1.10E-19 | -1.01E+01 | 33.8531729 | -1.88E-01 | 2551996   | 2552119   | NC_000007.13 |
| cg08528735     | 5.13E-18 | 1.10E-19 | -1.01E+01 | 33.8503708 | -1.01E-01 | 184428879 | 184429002 | NC_000003.11 |
| cg16518266     | 5.13E-18 | 1.10E-19 | -1.01E+01 | 33.8498191 | -1.14E-01 | 218621552 | 218621675 | NC_000002.11 |
| cg00253228     | 5.14E-18 | 1.10E-19 | -1.01E+01 | 33.8481075 | -2.11E-01 | 145025610 | 145025733 | NC_000008.10 |
| cg02948884     | 5.25E-18 | 1.13E-19 | -1.01E+01 | 33.825074  | -9.72E-02 | 134369017 | 134369140 | NC_000005.9  |
| cg09884213     | 5.26E-18 | 1.13E-19 | -1.01E+01 | 33.8236569 | -1.98E-01 | 190788216 | 190788339 | NC_000003.11 |
| cg25597362     | 5.27E-18 | 1.14E-19 | -1.01E+01 | 33.8200192 | -1.81E-01 | 21767310  | 21767433  | NC_000008.10 |
| cg02363950     | 5.28E-18 | 1.14E-19 | -1.01E+01 | 33.8179725 | -1.83E-01 | 156676793 | 156676916 | NC_000001.10 |
| ch.6.40116829F | 5.35E-18 | 1.15E-19 | -1.01E+01 | 33.8045721 | -9.08E-02 | 40008851  | 40008974  | NC_000006.11 |
| cg20042662     | 5.36E-18 | 1.15E-19 | -1.01E+01 | 33.8042799 | -2.08E-01 | 143535580 | 143535703 | NC_000008.10 |
| cg08759026     | 5.38E-18 | 1.16E-19 | -1.01E+01 | 33.7988572 | -1.72E-01 | 69061454  | 69061577  | NC_000011.9  |
| cg23899779     | 5.40E-18 | 1.17E-19 | -1.01E+01 | 33.7950389 | -1.52E-01 | 241190395 | 241190518 | NC_000002.11 |
| cg24203315     | 5.43E-18 | 1.17E-19 | -1.01E+01 | 33.7895643 | -7.79E-02 | 69455488  | 69455611  | NC_000011.9  |
| cg18105279     | 5.47E-18 | 1.18E-19 | -1.01E+01 | 33.7818794 | -1.39E-01 | 169570610 | 169570733 | NC_000001.10 |
| cg03274800     | 5.51E-18 | 1.19E-19 | -1.01E+01 | 33.7758633 | -2.11E-01 | 22852120  | 22852243  | NC_000008.10 |
| cg11836585     | 5.52E-18 | 1.19E-19 | -1.01E+01 | 33.7737397 | -8.38E-02 | 59225166  | 59225289  | NC_000015.9  |
| cg03714916     | 5.52E-18 | 1.19E-19 | -1.01E+01 | 33.7731736 | -9.14E-02 | 36645886  | 36646009  | NC_000006.11 |
| cg12703333     | 5.56E-18 | 1.20E-19 | -1.01E+01 | 33.7662453 | -2.01E-01 | 76962548  | 76962671  | NC_000010.10 |
| cg21249659     | 5.57E-18 | 1.20E-19 | -1.01E+01 | 33.7624863 | -2.08E-01 | 10324843  | 10324966  | NC_000012.11 |
| cg19991916     | 5.59E-18 | 1.21E-19 | -1.01E+01 | 33.7589905 | -3.26E-01 | 55610624  | 55610747  | NC_000015.9  |
| cg06218726     | 5.60E-18 | 1.21E-19 | -1.01E+01 | 33.7585046 | -7.19E-02 | 104583740 | 104583863 | NC_000014.8  |

|            |          |          |           |            |           |           |           |              |
|------------|----------|----------|-----------|------------|-----------|-----------|-----------|--------------|
| cg25466245 | 5.60E-18 | 1.21E-19 | -1.01E+01 | 33.7576784 | -2.04E-01 | 223407095 | 223407218 | NC_000001.10 |
| cg16240480 | 5.61E-18 | 1.21E-19 | -1.01E+01 | 33.755964  | -2.75E-01 | 236557473 | 236557596 | NC_000001.10 |
| cg04216117 | 5.63E-18 | 1.22E-19 | -1.01E+01 | 33.7510864 | -1.63E-01 | 737965    | 738088    | NC_000011.9  |
| cg14275340 | 5.65E-18 | 1.22E-19 | -1.01E+01 | 33.7488196 | -1.47E-01 | 58862450  | 58862573  | NC_000014.8  |
| cg17182302 | 5.68E-18 | 1.23E-19 | -1.01E+01 | 33.7436848 | -6.91E-02 | 116961525 | 116961648 | NC_000001.10 |
| cg23047271 | 5.69E-18 | 1.23E-19 | -1.01E+01 | 33.7402412 | -2.58E-01 | 64210991  | 64211114  | NC_000003.11 |
| cg12596505 | 5.70E-18 | 1.23E-19 | -1.01E+01 | 33.738612  | -1.03E-01 | 213090240 | 213090363 | NC_000001.10 |
| cg13325529 | 5.70E-18 | 1.23E-19 | -1.01E+01 | 33.7383588 | -5.18E-02 | 8079954   | 8080077   | NC_000017.10 |
| cg06724409 | 5.74E-18 | 1.24E-19 | -1.01E+01 | 33.7323266 | -1.80E-01 | 3821491   | 3821614   | NC_000010.10 |
| cg02286549 | 5.74E-18 | 1.24E-19 | -1.01E+01 | 33.7317861 | -8.57E-02 | 41700710  | 41700833  | NC_000006.11 |
| cg23746050 | 5.75E-18 | 1.24E-19 | -1.01E+01 | 33.7301577 | -1.84E-01 | 69063559  | 69063682  | NC_000011.9  |
| cg20436206 | 5.75E-18 | 1.25E-19 | -1.01E+01 | 33.7293321 | -2.37E-01 | 146910671 | 146910794 | NC_000005.9  |
| cg13156207 | 5.80E-18 | 1.26E-19 | -1.01E+01 | 33.7205944 | -2.46E-01 | 28873060  | 28873183  | NC_000002.11 |
| cg06438559 | 5.80E-18 | 1.26E-19 | -1.01E+01 | 33.7202823 | -2.17E-01 | 136478693 | 136478816 | NC_000005.9  |
| cg01543300 | 5.81E-18 | 1.26E-19 | -1.01E+01 | 33.7188632 | -9.21E-02 | 2426874   | 2426997   | NC_000019.9  |
| cg01767862 | 5.90E-18 | 1.28E-19 | -1.01E+01 | 33.7028868 | -2.09E-01 | 101454843 | 101454966 | NC_000014.8  |
| cg26988617 | 5.91E-18 | 1.28E-19 | -1.01E+01 | 33.7008365 | -2.31E-01 | 34410961  | 34411084  | NC_000010.10 |
| cg26167249 | 5.92E-18 | 1.28E-19 | -1.01E+01 | 33.6989199 | -1.81E-01 | 34586278  | 34586401  | NC_000011.9  |
| cg14790115 | 5.93E-18 | 1.29E-19 | -1.01E+01 | 33.6981567 | -2.13E-01 | 77511917  | 77512040  | NC_000013.10 |
| cg10740054 | 5.95E-18 | 1.29E-19 | -1.01E+01 | 33.6933868 | -1.77E-01 | 18548004  | 18548127  | NC_000019.9  |
| cg08008692 | 5.96E-18 | 1.29E-19 | -1.01E+01 | 33.6924432 | -2.29E-01 | 159961591 | 159961714 | NC_000001.10 |
| cg07064720 | 6.00E-18 | 1.30E-19 | -1.01E+01 | 33.6847547 | -1.75E-01 | 62762737  | 62762860  | NC_000015.9  |
| cg19950069 | 6.02E-18 | 1.31E-19 | -1.01E+01 | 33.6819592 | -1.69E-01 | 80372534  | 80372657  | NC_000017.10 |
| cg13549082 | 6.03E-18 | 1.31E-19 | -1.01E+01 | 33.6793918 | -1.06E-01 | 132369679 | 132369802 | NC_000009.11 |
| cg21519654 | 6.06E-18 | 1.32E-19 | -1.01E+01 | 33.6738418 | -2.02E-01 | 6289847   | 6289970   | NC_000012.11 |

|            |          |          |           |            |           |           |           |              |
|------------|----------|----------|-----------|------------|-----------|-----------|-----------|--------------|
| cg24052475 | 6.07E-18 | 1.32E-19 | -1.01E+01 | 33.673189  | -1.85E-01 | 228337181 | 228337304 | NC_000001.10 |
| cg09476006 | 6.07E-18 | 1.32E-19 | -1.01E+01 | 33.6726777 | -2.59E-01 | 138032270 | 138032393 | NC_000005.9  |
| cg08269653 | 6.09E-18 | 1.32E-19 | -1.01E+01 | 33.6683015 | -1.26E-01 | 177225530 | 177225653 | NC_000001.10 |
| cg13126206 | 6.11E-18 | 1.33E-19 | -1.01E+01 | 33.6652859 | -1.65E-01 | 22930189  | 22930312  | NC_000008.10 |
| cg07348300 | 6.14E-18 | 1.34E-19 | -1.01E+01 | 33.6599959 | -1.29E-01 | 37949342  | 37949465  | NC_000001.10 |
| cg14053030 | 6.15E-18 | 1.34E-19 | -1.01E+01 | 33.6581125 | -2.10E-01 | 43405493  | 43405616  | NC_000018.9  |
| cg06476693 | 6.15E-18 | 1.34E-19 | -1.01E+01 | 33.6580541 | -2.01E-01 | 130283454 | 130283577 | NC_000011.9  |
| cg06376426 | 6.16E-18 | 1.34E-19 | -1.01E+01 | 33.6568065 | -1.86E-01 | 24648203  | 24648326  | NC_000001.10 |
| cg23404711 | 6.18E-18 | 1.34E-19 | -1.01E+01 | 33.6531394 | -2.27E-01 | 75747047  | 75747170  | NC_000014.8  |
| cg19442415 | 6.18E-18 | 1.35E-19 | -1.01E+01 | 33.6529169 | -1.48E-01 | 116567334 | 116567457 | NC_000011.9  |
| cg01065161 | 6.20E-18 | 1.35E-19 | -1.01E+01 | 33.6492619 | -2.07E-01 | 98130127  | 98130250  | NC_000010.10 |
| cg09223940 | 6.21E-18 | 1.35E-19 | -1.01E+01 | 33.6479532 | -2.65E-01 | 65095871  | 65095994  | NC_000014.8  |
| cg09134497 | 6.21E-18 | 1.35E-19 | -1.01E+01 | 33.6470971 | -2.01E-01 | 155973286 | 155973409 | NC_000001.10 |
| cg10662179 | 6.23E-18 | 1.36E-19 | -1.01E+01 | 33.643747  | -1.18E-01 | 4417170   | 4417293   | NC_000012.11 |
| cg26853536 | 6.24E-18 | 1.36E-19 | -1.01E+01 | 33.6426281 | -1.75E-01 | 125399964 | 125400087 | NC_000012.11 |
| cg07933926 | 6.26E-18 | 1.36E-19 | -1.01E+01 | 33.6393122 | -1.59E-01 | 6485881   | 6486004   | NC_000012.11 |
| cg05064852 | 6.26E-18 | 1.37E-19 | -1.01E+01 | 33.6379375 | -2.34E-01 | 205902673 | 205902796 | NC_000001.10 |
| cg14642259 | 6.30E-18 | 1.37E-19 | -1.01E+01 | 33.6324773 | -3.23E-01 | 47359017  | 47359140  | NC_000011.9  |
| cg02319354 | 6.31E-18 | 1.38E-19 | -1.01E+01 | 33.6308685 | -1.95E-01 | 72530186  | 72530309  | NC_000005.9  |
| cg27165884 | 6.32E-18 | 1.38E-19 | -1.01E+01 | 33.6287179 | -2.14E-01 | 99473085  | 99473208  | NC_000010.10 |
| cg23517752 | 6.32E-18 | 1.38E-19 | -1.01E+01 | 33.6285228 | -1.73E-01 | 2021945   | 2022068   | NC_000012.11 |
| cg12253931 | 6.33E-18 | 1.38E-19 | -1.01E+01 | 33.6265733 | -2.65E-01 | 4475538   | 4475661   | NC_000004.11 |
| cg25843426 | 6.33E-18 | 1.38E-19 | -1.01E+01 | 33.6259978 | -1.72E-01 | 1497307   | 1497430   | NC_000007.13 |
| cg12062282 | 6.34E-18 | 1.38E-19 | -1.01E+01 | 33.6244142 | -1.22E-01 | 49524228  | 49524351  | NC_000019.9  |
| cg18748525 | 6.37E-18 | 1.39E-19 | -1.01E+01 | 33.6204558 | -9.22E-02 | 36409367  | 36409490  | NC_000006.11 |

|            |          |          |           |            |           |           |           |              |
|------------|----------|----------|-----------|------------|-----------|-----------|-----------|--------------|
| cg10583414 | 6.37E-18 | 1.39E-19 | -1.01E+01 | 33.6200594 | -1.99E-01 | 48207063  | 48207186  | NC_000012.11 |
| cg04294383 | 6.37E-18 | 1.39E-19 | -1.01E+01 | 33.6198955 | -1.97E-01 | 22954791  | 22954914  | NC_000015.9  |
| cg25769469 | 6.39E-18 | 1.39E-19 | -1.01E+01 | 33.6169791 | -2.87E-01 | 71643841  | 71643964  | NC_000005.9  |
| cg05471169 | 6.40E-18 | 1.40E-19 | -1.01E+01 | 33.6145795 | -2.16E-01 | 80255419  | 80255542  | NC_000017.10 |
| cg21140160 | 6.41E-18 | 1.40E-19 | -1.01E+01 | 33.6132552 | -2.10E-01 | 25508351  | 25508474  | NC_000013.10 |
| cg05708497 | 6.43E-18 | 1.41E-19 | -1.01E+01 | 33.6093806 | -1.43E-01 | 67241345  | 67241468  | NC_000016.9  |
| cg02538557 | 6.45E-18 | 1.41E-19 | -1.01E+01 | 33.6064773 | -1.90E-01 | 56025683  | 56025806  | NC_000020.10 |
| cg14023573 | 6.46E-18 | 1.41E-19 | -1.01E+01 | 33.6053755 | -1.80E-01 | 140971379 | 140971502 | NC_000008.10 |
| cg25377915 | 6.49E-18 | 1.42E-19 | -1.01E+01 | 33.5990982 | -1.33E-01 | 95127949  | 95128072  | NC_000008.10 |
| cg15816503 | 6.50E-18 | 1.42E-19 | -1.01E+01 | 33.5982647 | -1.53E-01 | 10530053  | 10530176  | NC_000008.10 |
| cg08076266 | 6.51E-18 | 1.42E-19 | -1.01E+01 | 33.5959415 | -2.16E-01 | 120190202 | 120190325 | NC_000002.11 |
| cg04193065 | 6.52E-18 | 1.43E-19 | -1.01E+01 | 33.5948898 | -1.68E-01 | 31528995  | 31529118  | NC_000015.9  |
| cg07306604 | 6.52E-18 | 1.43E-19 | -1.01E+01 | 33.5948356 | -1.57E-01 | 20229546  | 20229669  | NC_000022.10 |
| cg23684521 | 6.54E-18 | 1.43E-19 | -1.01E+01 | 33.5919404 | -7.83E-02 | 73926058  | 73926181  | NC_000015.9  |
| cg17892259 | 6.56E-18 | 1.44E-19 | -1.01E+01 | 33.5887697 | -2.33E-01 | 42149829  | 42149952  | NC_000001.10 |
| cg14329285 | 6.56E-18 | 1.44E-19 | -1.01E+01 | 33.5878815 | -2.25E-01 | 8911424   | 8911547   | NC_000003.11 |
| cg00923634 | 6.62E-18 | 1.45E-19 | -1.01E+01 | 33.5789245 | -2.04E-01 | 25968448  | 25968571  | NC_000001.10 |
| cg07863240 | 6.63E-18 | 1.45E-19 | -1.01E+01 | 33.5771549 | -1.35E-01 | 6819474   | 6819597   | NC_000005.9  |
| cg26196531 | 6.64E-18 | 1.45E-19 | -1.01E+01 | 33.5760428 | -1.14E-01 | 36236656  | 36236779  | NC_000022.10 |
| cg17824540 | 6.64E-18 | 1.46E-19 | -1.01E+01 | 33.5748247 | -1.89E-01 | 161260031 | 161260154 | NC_000002.11 |
| cg19160624 | 6.65E-18 | 1.46E-19 | -1.01E+01 | 33.5733297 | -1.99E-01 | 68221623  | 68221746  | NC_000012.11 |
| cg03893663 | 6.66E-18 | 1.46E-19 | -1.01E+01 | 33.5725352 | -2.49E-01 | 110067118 | 110067241 | NC_000011.9  |
| cg24546463 | 6.73E-18 | 1.48E-19 | -1.01E+01 | 33.5612271 | -1.25E-01 | 101662053 | 101662176 | NC_000008.10 |
| cg04717699 | 6.80E-18 | 1.49E-19 | -1.01E+01 | 33.5509599 | -2.06E-01 | 200343899 | 200344022 | NC_000001.10 |
| cg25515997 | 6.81E-18 | 1.50E-19 | -1.01E+01 | 33.5481333 | -2.51E-01 | 60673898  | 60674021  | NC_000015.9  |

|               |          |          |           |            |           |           |           |              |
|---------------|----------|----------|-----------|------------|-----------|-----------|-----------|--------------|
| cg00944388    | 6.82E-18 | 1.50E-19 | -1.01E+01 | 33.54728   | -1.07E-01 | 2907695   | 2907818   | NC_000016.9  |
| cg06775420    | 6.83E-18 | 1.50E-19 | -1.01E+01 | 33.5462846 | -2.64E-01 | 1742245   | 1742368   | NC_000016.9  |
| cg08792423    | 6.85E-18 | 1.50E-19 | -1.01E+01 | 33.5419185 | -2.56E-01 | 29847991  | 29848114  | NC_000007.13 |
| cg07883622    | 6.87E-18 | 1.51E-19 | -1.01E+01 | 33.5397923 | -1.67E-01 | 62998134  | 62998257  | NC_000012.11 |
| cg17600393    | 6.87E-18 | 1.51E-19 | -1.01E+01 | 33.5397132 | -2.17E-01 | 1051107   | 1051230   | NC_000002.11 |
| cg20319926    | 6.87E-18 | 1.51E-19 | -1.01E+01 | 33.5392143 | -1.34E-01 | 685686    | 685809    | NC_000016.9  |
| cg14754494    | 6.90E-18 | 1.52E-19 | -1.01E+01 | 33.5349692 | -2.41E-01 | 50560743  | 50560866  | NC_000007.13 |
| cg27528695    | 6.92E-18 | 1.52E-19 | -1.01E+01 | 33.5310424 | -6.63E-02 | 109643479 | 109643602 | NC_000001.10 |
| cg25250013    | 6.93E-18 | 1.52E-19 | -1.01E+01 | 33.5306441 | -1.79E-01 | 11302225  | 11302348  | NC_000019.9  |
| cg08038974    | 6.93E-18 | 1.52E-19 | -1.01E+01 | 33.5295358 | -7.60E-02 | 45338122  | 45338245  | NC_000020.10 |
| cg10516701    | 6.94E-18 | 1.52E-19 | -1.01E+01 | 33.5289428 | -9.23E-02 | 155055166 | 155055289 | NC_000001.10 |
| cg06498232    | 6.94E-18 | 1.53E-19 | -1.01E+01 | 33.5277257 | -2.16E-01 | 72227063  | 72227186  | NC_000003.11 |
| cg13758331    | 6.97E-18 | 1.53E-19 | -1.01E+01 | 33.524214  | -1.97E-01 | 111893676 | 111893799 | NC_000002.11 |
| cg06530961    | 6.98E-18 | 1.54E-19 | -1.01E+01 | 33.5213466 | -2.09E-01 | 12038718  | 12038841  | NC_000018.9  |
| cg14169363    | 6.99E-18 | 1.54E-19 | -1.01E+01 | 33.5211408 | -8.17E-02 | 75747433  | 75747556  | NC_000009.11 |
| cg09367648    | 7.00E-18 | 1.54E-19 | -1.01E+01 | 33.5188774 | -4.30E-02 | 49027117  | 49027240  | NC_000003.11 |
| cg16357353    | 7.01E-18 | 1.54E-19 | -1.01E+01 | 33.516896  | -1.64E-01 | 20737787  | 20737910  | NC_000001.10 |
| cg03494634    | 7.03E-18 | 1.55E-19 | -1.01E+01 | 33.5144424 | -1.77E-01 | 9238958   | 9239081   | NC_000019.9  |
| cg11523020    | 7.04E-18 | 1.55E-19 | -1.01E+01 | 33.5120819 | -1.02E-01 | 45681036  | 45681159  | NC_000022.10 |
| ch.1.1248481R | 7.08E-18 | 1.56E-19 | -1.01E+01 | 33.5071959 | -9.56E-02 | 39766459  | 39766582  | NC_000001.10 |
| cg07556018    | 7.08E-18 | 1.56E-19 | -1.01E+01 | 33.5056856 | -1.84E-01 | 2677341   | 2677464   | NC_000011.9  |
| cg14174204    | 7.12E-18 | 1.57E-19 | -1.01E+01 | 33.5009129 | -1.04E-01 | 63276700  | 63276823  | NC_000002.11 |
| cg23987336    | 7.13E-18 | 1.57E-19 | -1.01E+01 | 33.4996587 | -1.44E-01 | 7959907   | 7960030   | NC_000017.10 |
| cg17125688    | 7.13E-18 | 1.57E-19 | -1.01E+01 | 33.4994679 | -1.26E-01 | 20646181  | 20646304  | NC_000002.11 |
| cg14526021    | 7.13E-18 | 1.57E-19 | -1.01E+01 | 33.499431  | -2.40E-01 | 101512931 | 101513054 | NC_000007.13 |

|            |          |          |           |            |           |           |           |              |
|------------|----------|----------|-----------|------------|-----------|-----------|-----------|--------------|
| cg22509504 | 7.13E-18 | 1.57E-19 | -1.01E+01 | 33.4992823 | -1.90E-01 | 19322114  | 19322237  | NC_000017.10 |
| cg07972954 | 7.15E-18 | 1.58E-19 | -1.01E+01 | 33.4953454 | -1.33E-01 | 30690392  | 30690515  | NC_000006.11 |
| cg24854861 | 7.20E-18 | 1.59E-19 | -1.01E+01 | 33.4885982 | -2.01E-01 | 24609900  | 24610023  | NC_000011.9  |
| cg10505902 | 7.20E-18 | 1.59E-19 | -1.01E+01 | 33.4880728 | -1.85E-01 | 144892111 | 144892234 | NC_000001.10 |
| cg04746197 | 7.21E-18 | 1.59E-19 | -1.01E+01 | 33.4876422 | -7.81E-02 | 2951300   | 2951423   | NC_000011.9  |
| cg25101061 | 7.21E-18 | 1.59E-19 | -1.01E+01 | 33.487563  | -1.46E-01 | 176739547 | 176739670 | NC_000005.9  |
| cg04662961 | 7.21E-18 | 1.59E-19 | -1.01E+01 | 33.4867224 | -9.94E-02 | 44486562  | 44486685  | NC_000015.9  |
| cg13286620 | 7.22E-18 | 1.59E-19 | -1.01E+01 | 33.4860161 | -1.87E-01 | 14715425  | 14715548  | NC_000003.11 |
| cg05641351 | 7.27E-18 | 1.60E-19 | -1.01E+01 | 33.4784392 | -3.68E-02 | 155099332 | 155099455 | NC_000001.10 |
| cg09678829 | 7.29E-18 | 1.61E-19 | -1.01E+01 | 33.4755253 | -1.98E-01 | 834456    | 834579    | NC_000007.13 |
| cg26172812 | 7.29E-18 | 1.61E-19 | -1.01E+01 | 33.4754559 | -1.14E-01 | 48837548  | 48837671  | NC_000019.9  |
| cg02541613 | 7.30E-18 | 1.61E-19 | -1.01E+01 | 33.473595  | -9.52E-02 | 54070297  | 54070420  | NC_000012.11 |
| cg24367957 | 7.31E-18 | 1.61E-19 | -1.01E+01 | 33.4722333 | -2.74E-01 | 161931993 | 161932116 | NC_000001.10 |
| cg03339817 | 7.31E-18 | 1.61E-19 | -1.01E+01 | 33.4718966 | -2.06E-01 | 128458281 | 128458404 | NC_000002.11 |
| cg16429819 | 7.31E-18 | 1.62E-19 | -1.01E+01 | 33.4711006 | -1.00E-01 | 49395585  | 49395708  | NC_000003.11 |
| cg13313836 | 7.34E-18 | 1.62E-19 | -1.01E+01 | 33.4665942 | -2.21E-01 | 60687284  | 60687407  | NC_000015.9  |
| cg13102294 | 7.39E-18 | 1.63E-19 | -1.01E+01 | 33.4608962 | -1.47E-01 | 32121393  | 32121516  | NC_000006.11 |
| cg19186380 | 7.44E-18 | 1.64E-19 | -1.01E+01 | 33.453877  | -1.40E-01 | 54427029  | 54427152  | NC_000012.11 |
| cg23095988 | 7.45E-18 | 1.65E-19 | -1.01E+01 | 33.4519306 | -1.49E-01 | 6445804   | 6445927   | NC_000001.10 |
| cg20495404 | 7.49E-18 | 1.66E-19 | -1.01E+01 | 33.4470472 | -1.73E-01 | 8823649   | 8823772   | NC_000002.11 |
| cg13831136 | 7.49E-18 | 1.66E-19 | -1.01E+01 | 33.4467872 | -1.74E-01 | 30070342  | 30070465  | NC_000006.11 |
| cg22507354 | 7.51E-18 | 1.66E-19 | -1.01E+01 | 33.4434985 | -1.33E-01 | 62493832  | 62493955  | NC_000017.10 |
| cg25417223 | 7.53E-18 | 1.67E-19 | -1.01E+01 | 33.4409704 | -1.09E-01 | 13209306  | 13209429  | NC_000019.9  |
| cg23061795 | 7.58E-18 | 1.68E-19 | -1.01E+01 | 33.4341525 | -2.22E-01 | 106269962 | 106270085 | NC_000011.9  |
| cg11107430 | 7.62E-18 | 1.69E-19 | -1.01E+01 | 33.4286828 | -1.56E-01 | 105230660 | 105230783 | NC_000010.10 |



|            |          |          |           |            |           |           |           |              |
|------------|----------|----------|-----------|------------|-----------|-----------|-----------|--------------|
| cg15774065 | 7.63E-18 | 1.69E-19 | -1.01E+01 | 33.4270468 | -1.52E-01 | 79495320  | 79495443  | NC_000017.10 |
| cg20142972 | 7.68E-18 | 1.70E-19 | -1.01E+01 | 33.4198673 | -1.52E-01 | 150652808 | 150652931 | NC_000007.13 |
| cg05693611 | 7.73E-18 | 1.71E-19 | -1.01E+01 | 33.413595  | -1.29E-01 | 150263722 | 150263845 | NC_000006.11 |
| cg19162768 | 7.73E-18 | 1.71E-19 | -1.01E+01 | 33.4131618 | -2.50E-01 | 96898476  | 96898599  | NC_000015.9  |
| cg26534508 | 7.73E-18 | 1.71E-19 | -1.01E+01 | 33.4129566 | -7.16E-02 | 236306311 | 236306434 | NC_000001.10 |
| cg07959046 | 7.76E-18 | 1.72E-19 | -1.01E+01 | 33.4087655 | -1.05E-01 | 31382025  | 31382148  | NC_000001.10 |
| cg02595280 | 7.78E-18 | 1.72E-19 | -1.01E+01 | 33.4070434 | -2.40E-01 | 117674278 | 117674401 | NC_000012.11 |
| cg16372520 | 7.79E-18 | 1.73E-19 | -1.01E+01 | 33.4052784 | -1.40E-01 | 78869751  | 78869874  | NC_000014.8  |
| cg25202280 | 7.80E-18 | 1.73E-19 | -1.01E+01 | 33.4042256 | -1.50E-01 | 79521089  | 79521212  | NC_000017.10 |
| cg00581334 | 7.81E-18 | 1.73E-19 | -1.01E+01 | 33.4028732 | -1.96E-01 | 137904059 | 137904182 | NC_000003.11 |
| cg13067634 | 7.81E-18 | 1.73E-19 | -1.01E+01 | 33.4026014 | -1.65E-01 | 45806350  | 45806473  | NC_000001.10 |
| cg23197867 | 7.82E-18 | 1.74E-19 | -1.01E+01 | 33.4004012 | -1.01E-01 | 100659756 | 100659879 | NC_000014.8  |
| cg15182320 | 7.83E-18 | 1.74E-19 | -1.01E+01 | 33.4001212 | -8.28E-02 | 192096    | 192219    | NC_000011.9  |
| cg23523648 | 7.84E-18 | 1.74E-19 | -1.01E+01 | 33.3984197 | -5.01E-02 | 65614897  | 65615020  | NC_000001.10 |
| cg07533529 | 7.85E-18 | 1.74E-19 | -1.01E+01 | 33.3971877 | -5.54E-02 | 62379499  | 62379622  | NC_000011.9  |
| cg07461501 | 7.85E-18 | 1.74E-19 | -1.01E+01 | 33.3963933 | -9.77E-02 | 79650226  | 79650349  | NC_000017.10 |
| cg11802692 | 7.90E-18 | 1.75E-19 | -1.01E+01 | 33.3897894 | -4.36E-02 | 30066348  | 30066471  | NC_000007.13 |
| cg01265597 | 7.92E-18 | 1.76E-19 | -1.01E+01 | 33.3870177 | -7.83E-02 | 116164633 | 116164756 | NC_000007.13 |
| cg25556008 | 7.93E-18 | 1.76E-19 | -1.01E+01 | 33.3856819 | -2.08E-01 | 2525384   | 2525507   | NC_000019.9  |
| cg23752828 | 7.94E-18 | 1.76E-19 | -1.01E+01 | 33.3839596 | -2.17E-01 | 57941309  | 57941432  | NC_000012.11 |
| cg03078767 | 8.04E-18 | 1.79E-19 | -1.01E+01 | 33.3710359 | -2.52E-01 | 111154742 | 111154865 | NC_000011.9  |
| cg10963033 | 8.11E-18 | 1.80E-19 | -1.01E+01 | 33.3622734 | -1.58E-01 | 79166715  | 79166838  | NC_000017.10 |
| cg17383236 | 8.16E-18 | 1.81E-19 | -1.01E+01 | 33.3561927 | -1.46E-01 | 100167504 | 100167627 | NC_000007.13 |
| cg06677416 | 8.20E-18 | 1.82E-19 | -1.01E+01 | 33.3508964 | -2.35E-01 | 64495627  | 64495750  | NC_000010.10 |
| cg07904051 | 8.22E-18 | 1.83E-19 | -1.01E+01 | 33.3479039 | -1.63E-01 | 322983    | 323106    | NC_000012.11 |

|               |          |          |           |            |           |           |           |              |
|---------------|----------|----------|-----------|------------|-----------|-----------|-----------|--------------|
| cg20311002    | 8.23E-18 | 1.83E-19 | -1.01E+01 | 33.3470198 | -2.45E-01 | 244763541 | 244763664 | NC_000001.10 |
| cg01464703    | 8.23E-18 | 1.83E-19 | -1.01E+01 | 33.3466923 | -2.52E-01 | 130903135 | 130903258 | NC_000011.9  |
| cg08005604    | 8.25E-18 | 1.84E-19 | -1.01E+01 | 33.3443634 | -1.27E-01 | 47128887  | 47129010  | NC_000013.10 |
| cg01758548    | 8.25E-18 | 1.84E-19 | -1.01E+01 | 33.3434644 | -1.69E-01 | 3209565   | 3209688   | NC_000006.11 |
| cg15450349    | 8.26E-18 | 1.84E-19 | -1.01E+01 | 33.3427072 | -2.24E-01 | 42269042  | 42269165  | NC_000008.10 |
| cg01854676    | 8.27E-18 | 1.84E-19 | -1.01E+01 | 33.3417181 | -2.29E-01 | 105147585 | 105147708 | NC_000014.8  |
| cg26920905    | 8.30E-18 | 1.85E-19 | -1.01E+01 | 33.3376545 | -4.76E-02 | 21718735  | 21718858  | NC_000018.9  |
| cg09363733    | 8.31E-18 | 1.85E-19 | -1.01E+01 | 33.3357646 | -1.02E-01 | 85767277  | 85767400  | NC_000002.11 |
| cg04431346    | 8.31E-18 | 1.85E-19 | -1.01E+01 | 33.3355374 | -1.75E-01 | 14494069  | 14494192  | NC_000016.9  |
| cg09194449    | 8.32E-18 | 1.85E-19 | -1.01E+01 | 33.3351473 | -1.99E-01 | 157482914 | 157483037 | NC_000007.13 |
| cg03880407    | 8.34E-18 | 1.86E-19 | -1.01E+01 | 33.3322246 | -1.38E-01 | 158830106 | 158830229 | NC_000007.13 |
| cg19285688    | 8.34E-18 | 1.86E-19 | -1.01E+01 | 33.3318795 | -1.35E-01 | 80994605  | 80994728  | NC_000004.11 |
| cg06333233    | 8.34E-18 | 1.86E-19 | -1.01E+01 | 33.3313272 | -2.23E-01 | 101966951 | 101967074 | NC_000002.11 |
| cg01681881    | 8.34E-18 | 1.86E-19 | -1.01E+01 | 33.3311026 | -1.38E-01 | 57407421  | 57407544  | NC_000011.9  |
| ch.3.1083063F | 8.39E-18 | 1.87E-19 | -1.01E+01 | 33.3252199 | -7.16E-02 | 50213698  | 50213821  | NC_000003.11 |
| cg24595586    | 8.43E-18 | 1.88E-19 | -1.01E+01 | 33.3199376 | -2.31E-01 | 172009861 | 172009984 | NC_000001.10 |
| cg07059469    | 8.48E-18 | 1.89E-19 | -1.01E+01 | 33.3147778 | -1.69E-01 | 152421432 | 152421555 | NC_000006.11 |
| cg22358580    | 8.53E-18 | 1.90E-19 | -1.01E+01 | 33.3080617 | -1.51E-01 | 54426725  | 54426848  | NC_000012.11 |
| cg09473396    | 8.53E-18 | 1.91E-19 | -1.01E+01 | 33.3079872 | -1.23E-01 | 65131979  | 65132102  | NC_000003.11 |
| cg17438737    | 8.53E-18 | 1.91E-19 | -1.01E+01 | 33.3079064 | -6.44E-02 | 27759399  | 27759522  | NC_000006.11 |
| cg00265634    | 8.54E-18 | 1.91E-19 | -1.01E+01 | 33.3071427 | -4.93E-02 | 144798319 | 144798442 | NC_000008.10 |
| cg00703843    | 8.54E-18 | 1.91E-19 | -1.01E+01 | 33.3066142 | -1.66E-01 | 17632263  | 17632386  | NC_000017.10 |
| cg16310077    | 8.56E-18 | 1.91E-19 | -1.01E+01 | 33.3036424 | -1.07E-01 | 105554214 | 105554337 | NC_000014.8  |
| cg02893550    | 8.58E-18 | 1.92E-19 | -1.01E+01 | 33.3018509 | -2.10E-01 | 89119418  | 89119541  | NC_000016.9  |
| cg20899781    | 8.67E-18 | 1.94E-19 | -1.01E+01 | 33.2907969 | -2.53E-01 | 9705768   | 9705891   | NC_000002.11 |

|            |          |          |           |            |           |           |           |              |
|------------|----------|----------|-----------|------------|-----------|-----------|-----------|--------------|
| cg04010006 | 8.70E-18 | 1.95E-19 | -1.01E+01 | 33.2870126 | -6.58E-02 | 8933103   | 8933226   | NC_000011.9  |
| cg24906819 | 8.75E-18 | 1.96E-19 | -1.01E+01 | 33.2816831 | -2.14E-01 | 8231531   | 8231654   | NC_000008.10 |
| cg06407111 | 8.81E-18 | 1.97E-19 | -1.01E+01 | 33.2735467 | -1.52E-01 | 73872650  | 73872773  | NC_000017.10 |
| cg01424145 | 8.82E-18 | 1.97E-19 | -1.01E+01 | 33.273018  | -9.35E-02 | 44285333  | 44285456  | NC_000019.9  |
| cg23068558 | 8.82E-18 | 1.97E-19 | -1.01E+01 | 33.2728219 | -2.92E-01 | 63220652  | 63220775  | NC_000015.9  |
| cg04615850 | 8.94E-18 | 2.00E-19 | -1.01E+01 | 33.2589645 | -1.66E-01 | 5048814   | 5048937   | NC_000019.9  |
| cg08243465 | 8.95E-18 | 2.01E-19 | -1.01E+01 | 33.2567579 | -1.96E-01 | 56274036  | 56274159  | NC_000020.10 |
| cg07733481 | 8.96E-18 | 2.01E-19 | -1.01E+01 | 33.2554264 | -2.04E-01 | 122694286 | 122694409 | NC_000003.11 |
| cg13758054 | 8.97E-18 | 2.01E-19 | -1.01E+01 | 33.2547521 | -1.87E-01 | 136930777 | 136930900 | NC_000009.11 |
| cg00417147 | 9.00E-18 | 2.02E-19 | -1.01E+01 | 33.2508605 | -2.08E-01 | 125578545 | 125578668 | NC_000012.11 |
| cg17691156 | 9.04E-18 | 2.03E-19 | -1.01E+01 | 33.2465313 | -1.24E-01 | 59572928  | 59573051  | NC_000008.10 |
| cg03875678 | 9.05E-18 | 2.03E-19 | -1.00E+01 | 33.244825  | -1.69E-01 | 25103546  | 25103669  | NC_000014.8  |
| cg04767756 | 9.09E-18 | 2.04E-19 | -1.00E+01 | 33.239875  | -1.96E-01 | 10652706  | 10652829  | NC_000016.9  |
| cg24038058 | 9.09E-18 | 2.04E-19 | -1.00E+01 | 33.2395465 | -3.64E-02 | 1611745   | 1611868   | NC_000006.11 |
| cg27062243 | 9.19E-18 | 2.06E-19 | -1.00E+01 | 33.2283868 | -2.19E-01 | 114833720 | 114833843 | NC_000010.10 |
| cg05701125 | 9.21E-18 | 2.07E-19 | -1.00E+01 | 33.2260307 | -6.26E-02 | 11351106  | 11351229  | NC_000016.9  |
| cg06221946 | 9.22E-18 | 2.07E-19 | -1.00E+01 | 33.2256111 | -1.50E-01 | 32802312  | 32802435  | NC_000001.10 |
| cg13521944 | 9.25E-18 | 2.08E-19 | -1.00E+01 | 33.2218483 | -1.83E-01 | 45596948  | 45597071  | NC_000022.10 |
| cg10215032 | 9.25E-18 | 2.08E-19 | -1.00E+01 | 33.2211966 | -1.64E-01 | 1895407   | 1895530   | NC_000002.11 |
| cg10070969 | 9.28E-18 | 2.09E-19 | -1.00E+01 | 33.2185109 | -3.20E-02 | 27861007  | 27861130  | NC_000006.11 |
| cg26211060 | 9.28E-18 | 2.09E-19 | -1.00E+01 | 33.2175713 | -1.84E-01 | 3345821   | 3345944   | NC_000012.11 |
| cg22301128 | 9.35E-18 | 2.10E-19 | -1.00E+01 | 33.2098576 | -2.51E-01 | 77011716  | 77011839  | NC_000004.11 |
| cg23667602 | 9.37E-18 | 2.11E-19 | -1.00E+01 | 33.2083555 | -1.95E-01 | 960528    | 960651    | NC_000007.13 |
| cg11118235 | 9.37E-18 | 2.11E-19 | -1.00E+01 | 33.2083553 | -2.04E-01 | 50284010  | 50284133  | NC_000003.11 |
| cg15877233 | 9.39E-18 | 2.11E-19 | -1.00E+01 | 33.2054276 | -2.33E-01 | 40611688  | 40611811  | NC_000007.13 |

|            |          |          |           |            |           |           |           |              |
|------------|----------|----------|-----------|------------|-----------|-----------|-----------|--------------|
| cg17388996 | 9.40E-18 | 2.12E-19 | -1.00E+01 | 33.2041173 | -1.73E-01 | 108145374 | 108145497 | NC_000006.11 |
| cg02223135 | 9.44E-18 | 2.12E-19 | -1.00E+01 | 33.2001953 | -2.04E-01 | 133287773 | 133287896 | NC_000003.11 |
| cg06596543 | 9.45E-18 | 2.13E-19 | -1.00E+01 | 33.1990347 | -9.62E-02 | 37823905  | 37824028  | NC_000017.10 |
| cg20408175 | 9.47E-18 | 2.13E-19 | -1.00E+01 | 33.1968873 | -1.23E-01 | 53693169  | 53693292  | NC_000012.11 |
| cg07319375 | 9.52E-18 | 2.14E-19 | -1.00E+01 | 33.1914089 | -9.20E-02 | 6169384   | 6169507   | NC_000001.10 |
| cg02035425 | 9.52E-18 | 2.14E-19 | -1.00E+01 | 33.1905184 | -7.57E-02 | 140062632 | 140062755 | NC_000009.11 |
| cg03078551 | 9.56E-18 | 2.15E-19 | -1.00E+01 | 33.1869126 | -1.82E-01 | 41656298  | 41656421  | NC_000017.10 |
| cg17076667 | 9.57E-18 | 2.15E-19 | -1.00E+01 | 33.1857985 | -2.00E-01 | 121418050 | 121418173 | NC_000010.10 |
| cg26300517 | 9.59E-18 | 2.16E-19 | -1.00E+01 | 33.1836306 | -2.65E-01 | 38732661  | 38732784  | NC_000004.11 |
| cg21184629 | 9.60E-18 | 2.16E-19 | -1.00E+01 | 33.1817805 | -6.04E-02 | 38621834  | 38621957  | NC_000009.11 |
| cg16122427 | 9.63E-18 | 2.17E-19 | -1.00E+01 | 33.1787736 | -1.70E-01 | 36947989  | 36948112  | NC_000001.10 |
| cg00067720 | 9.65E-18 | 2.18E-19 | -1.00E+01 | 33.1762585 | -1.64E-01 | 67521141  | 67521264  | NC_000005.9  |
| cg08310008 | 9.66E-18 | 2.18E-19 | -1.00E+01 | 33.1752553 | -1.52E-01 | 52836644  | 52836767  | NC_000012.11 |
| cg23822312 | 9.70E-18 | 2.19E-19 | -1.00E+01 | 33.1710983 | -2.06E-01 | 244361336 | 244361459 | NC_000001.10 |
| cg11810310 | 9.79E-18 | 2.21E-19 | -1.00E+01 | 33.1616241 | -9.32E-02 | 47292038  | 47292161  | NC_000019.9  |
| cg21000447 | 9.81E-18 | 2.21E-19 | -1.00E+01 | 33.1600108 | -7.56E-02 | 41634226  | 41634349  | NC_000022.10 |
| cg20164887 | 9.82E-18 | 2.21E-19 | -1.00E+01 | 33.158916  | -1.20E-01 | 50968250  | 50968373  | NC_000022.10 |
| cg03487935 | 9.85E-18 | 2.22E-19 | -1.00E+01 | 33.1557461 | -1.27E-01 | 51925284  | 51925407  | NC_000007.13 |
| cg21734707 | 9.85E-18 | 2.22E-19 | -1.00E+01 | 33.1554375 | -1.43E-01 | 3908241   | 3908364   | NC_000017.10 |
| cg01714284 | 9.88E-18 | 2.23E-19 | -1.00E+01 | 33.1522674 | -2.83E-01 | 185714524 | 185714647 | NC_000004.11 |
| cg19925558 | 9.89E-18 | 2.23E-19 | -1.00E+01 | 33.1513931 | -1.26E-01 | 1072370   | 1072493   | NC_000001.10 |
| cg06074896 | 9.90E-18 | 2.23E-19 | -1.00E+01 | 33.1500847 | -1.06E-01 | 1500176   | 1500299   | NC_000007.13 |
| cg14189441 | 9.90E-18 | 2.23E-19 | -1.00E+01 | 33.149717  | -2.00E-01 | 30971547  | 30971670  | NC_000010.10 |
| cg14602087 | 9.92E-18 | 2.24E-19 | -1.00E+01 | 33.1477344 | -2.45E-01 | 37556386  | 37556509  | NC_000008.10 |
| cg13235717 | 9.93E-18 | 2.24E-19 | -1.00E+01 | 33.1454901 | -1.74E-01 | 27188505  | 27188628  | NC_000001.10 |

|               |          |          |           |            |           |           |           |              |
|---------------|----------|----------|-----------|------------|-----------|-----------|-----------|--------------|
| cg00333483    | 1.01E-17 | 2.28E-19 | -1.00E+01 | 33.1279811 | -1.29E-01 | 79504180  | 79504303  | NC_000017.10 |
| cg11661534    | 1.01E-17 | 2.29E-19 | -1.00E+01 | 33.1253375 | -1.19E-01 | 58570605  | 58570728  | NC_000003.11 |
| cg25289198    | 1.02E-17 | 2.30E-19 | -1.00E+01 | 33.1225954 | -4.42E-02 | 45307997  | 45308120  | NC_000011.9  |
| cg01672129    | 1.02E-17 | 2.30E-19 | -1.00E+01 | 33.1218979 | -1.02E-01 | 103011800 | 103011923 | NC_000014.8  |
| cg21776583    | 1.02E-17 | 2.31E-19 | -1.00E+01 | 33.1171701 | -1.41E-01 | 30923545  | 30923668  | NC_000006.11 |
| cg16660220    | 1.02E-17 | 2.31E-19 | -1.00E+01 | 33.1164953 | -2.31E-01 | 46576948  | 46577071  | NC_000011.9  |
| cg07707031    | 1.03E-17 | 2.32E-19 | -1.00E+01 | 33.1114506 | -7.42E-02 | 79504142  | 79504265  | NC_000017.10 |
| ch.3.1444649R | 1.03E-17 | 2.32E-19 | -1.00E+01 | 33.1111371 | -7.76E-02 | 65894942  | 65895065  | NC_000003.11 |
| cg21005416    | 1.03E-17 | 2.33E-19 | -1.00E+01 | 33.1098361 | -2.10E-01 | 21606617  | 21606740  | NC_000001.10 |
| cg21010701    | 1.03E-17 | 2.33E-19 | -1.00E+01 | 33.1085892 | -1.91E-01 | 36283195  | 36283318  | NC_000004.11 |
| cg15736553    | 1.03E-17 | 2.33E-19 | -1.00E+01 | 33.1070699 | -1.36E-01 | 11610338  | 11610461  | NC_000003.11 |
| cg26340389    | 1.03E-17 | 2.34E-19 | -1.00E+01 | 33.105406  | -1.88E-01 | 36132426  | 36132549  | NC_000019.9  |
| cg24413842    | 1.03E-17 | 2.34E-19 | -1.00E+01 | 33.1045614 | -2.04E-01 | 150211820 | 150211943 | NC_000007.13 |
| cg09160216    | 1.03E-17 | 2.34E-19 | -1.00E+01 | 33.1033576 | -6.82E-02 | 329016    | 329139    | NC_000020.10 |
| cg14862207    | 1.03E-17 | 2.34E-19 | -1.00E+01 | 33.1023137 | -1.36E-01 | 36715798  | 36715921  | NC_000017.10 |
| cg18717146    | 1.05E-17 | 2.38E-19 | -1.00E+01 | 33.0891306 | -1.17E-01 | 1478715   | 1478838   | NC_000019.9  |
| cg23046844    | 1.05E-17 | 2.38E-19 | -1.00E+01 | 33.0877097 | -1.18E-01 | 102322911 | 102323034 | NC_000010.10 |
| cg11998200    | 1.05E-17 | 2.39E-19 | -1.00E+01 | 33.0845288 | -2.24E-01 | 92274858  | 92274981  | NC_000007.13 |
| cg01772014    | 1.05E-17 | 2.39E-19 | -1.00E+01 | 33.0825799 | -6.80E-02 | 30606095  | 30606218  | NC_000020.10 |
| cg05261596    | 1.06E-17 | 2.40E-19 | -1.00E+01 | 33.078891  | -1.37E-01 | 40220519  | 40220642  | NC_000003.11 |
| cg26936219    | 1.06E-17 | 2.40E-19 | -1.00E+01 | 33.0780789 | -1.84E-01 | 29543589  | 29543712  | NC_000012.11 |
| cg23148631    | 1.06E-17 | 2.40E-19 | -1.00E+01 | 33.0773237 | -1.55E-01 | 6950669   | 6950792   | NC_000017.10 |
| cg01373151    | 1.06E-17 | 2.42E-19 | -1.00E+01 | 33.0724238 | -7.22E-02 | 72613029  | 72613152  | NC_000015.9  |
| cg14815361    | 1.07E-17 | 2.44E-19 | -1.00E+01 | 33.0646353 | -2.25E-01 | 131589552 | 131589675 | NC_000005.9  |
| cg27338302    | 1.08E-17 | 2.45E-19 | -1.00E+01 | 33.0596296 | -1.87E-01 | 1271505   | 1271628   | NC_000016.9  |

|            |          |          |           |            |           |           |           |              |
|------------|----------|----------|-----------|------------|-----------|-----------|-----------|--------------|
| cg05845141 | 1.08E-17 | 2.45E-19 | -1.00E+01 | 33.0592054 | -1.92E-01 | 18120614  | 18120737  | NC_000019.9  |
| cg24391989 | 1.09E-17 | 2.47E-19 | -1.00E+01 | 33.0511516 | -2.21E-01 | 32010656  | 32010779  | NC_000003.11 |
| cg04627863 | 1.09E-17 | 2.47E-19 | -1.00E+01 | 33.0493186 | -1.80E-01 | 234741670 | 234741793 | NC_000002.11 |
| cg24461242 | 1.09E-17 | 2.48E-19 | -1.00E+01 | 33.0476686 | -1.84E-01 | 35612258  | 35612381  | NC_000019.9  |
| cg16163419 | 1.09E-17 | 2.48E-19 | -1.00E+01 | 33.047392  | -1.54E-01 | 100712326 | 100712449 | NC_000003.11 |
| cg02389317 | 1.09E-17 | 2.49E-19 | -1.00E+01 | 33.0434115 | -1.79E-01 | 76577488  | 76577611  | NC_000012.11 |
| cg23249922 | 1.09E-17 | 2.49E-19 | -1.00E+01 | 33.0430376 | -2.20E-01 | 134231549 | 134231672 | NC_000010.10 |
| cg02694676 | 1.10E-17 | 2.50E-19 | -1.00E+01 | 33.039221  | -6.24E-02 | 69455726  | 69455849  | NC_000011.9  |
| cg19955173 | 1.11E-17 | 2.53E-19 | -1.00E+01 | 33.0261698 | -2.20E-01 | 195603697 | 195603820 | NC_000003.11 |
| cg01460276 | 1.11E-17 | 2.53E-19 | -1.00E+01 | 33.0257922 | -8.72E-02 | 18871817  | 18871940  | NC_000008.10 |
| cg27174108 | 1.11E-17 | 2.54E-19 | -1.00E+01 | 33.0237631 | -1.25E-01 | 38794554  | 38794677  | NC_000019.9  |
| cg18411043 | 1.12E-17 | 2.54E-19 | -1.00E+01 | 33.0218421 | -1.05E-01 | 31221135  | 31221258  | NC_000001.10 |
| cg22672067 | 1.12E-17 | 2.55E-19 | -1.00E+01 | 33.0201906 | -1.59E-01 | 74495637  | 74495760  | NC_000015.9  |
| cg00103785 | 1.13E-17 | 2.56E-19 | -1.00E+01 | 33.0138527 | -7.60E-02 | 155043322 | 155043445 | NC_000001.10 |
| cg13542542 | 1.13E-17 | 2.57E-19 | -1.00E+01 | 33.0129171 | -1.40E-01 | 42821106  | 42821229  | NC_000019.9  |
| cg23257934 | 1.13E-17 | 2.57E-19 | -1.00E+01 | 33.0105805 | -1.82E-01 | 234858982 | 234859105 | NC_000001.10 |
| cg12018581 | 1.13E-17 | 2.58E-19 | -1.00E+01 | 33.0074449 | -1.31E-01 | 1031548   | 1031671   | NC_000007.13 |
| cg01749742 | 1.13E-17 | 2.58E-19 | -1.00E+01 | 33.0072519 | -1.63E-01 | 18944047  | 18944170  | NC_000002.11 |
| cg06745944 | 1.14E-17 | 2.60E-19 | -1.00E+01 | 33.0013538 | -9.22E-02 | 124246391 | 124246514 | NC_000012.11 |
| cg03628719 | 1.14E-17 | 2.60E-19 | -1.00E+01 | 33.000962  | -1.77E-01 | 89438964  | 89439087  | NC_000015.9  |
| cg17962854 | 1.15E-17 | 2.62E-19 | -1.00E+01 | 32.9935509 | -1.57E-01 | 134581043 | 134581166 | NC_000008.10 |
| cg13745142 | 1.16E-17 | 2.64E-19 | -1.00E+01 | 32.9853403 | -1.08E-01 | 72969277  | 72969400  | NC_000017.10 |
| cg23489883 | 1.16E-17 | 2.64E-19 | -1.00E+01 | 32.9853244 | -6.89E-02 | 72416270  | 72416393  | NC_000005.9  |
| cg09220050 | 1.16E-17 | 2.64E-19 | -1.00E+01 | 32.9827468 | -8.10E-02 | 48770642  | 48770765  | NC_000020.10 |
| cg25840433 | 1.16E-17 | 2.65E-19 | -1.00E+01 | 32.9801311 | -1.29E-01 | 167104903 | 167105026 | NC_000006.11 |

|            |          |          |           |            |           |           |           |              |
|------------|----------|----------|-----------|------------|-----------|-----------|-----------|--------------|
| cg21130374 | 1.16E-17 | 2.65E-19 | -1.00E+01 | 32.9796218 | -3.04E-01 | 42734266  | 42734389  | NC_000021.8  |
| cg10178628 | 1.16E-17 | 2.66E-19 | -1.00E+01 | 32.9770135 | -1.59E-01 | 17488445  | 17488568  | NC_000019.9  |
| cg22043788 | 1.17E-17 | 2.67E-19 | -1.00E+01 | 32.9734174 | -2.90E-01 | 80879483  | 80879606  | NC_000017.10 |
| cg11802797 | 1.17E-17 | 2.68E-19 | -1.00E+01 | 32.971076  | -1.33E-01 | 10437649  | 10437772  | NC_000001.10 |
| cg13775299 | 1.17E-17 | 2.68E-19 | -1.00E+01 | 32.9696182 | -1.12E-01 | 131937583 | 131937706 | NC_000009.11 |
| cg21062059 | 1.17E-17 | 2.68E-19 | -1.00E+01 | 32.9692002 | -1.08E-01 | 54677144  | 54677267  | NC_000019.9  |
| cg06378609 | 1.18E-17 | 2.69E-19 | -1.00E+01 | 32.9677578 | -4.20E-02 | 140484220 | 140484343 | NC_000009.11 |
| cg05045027 | 1.18E-17 | 2.69E-19 | -1.00E+01 | 32.9673739 | -1.69E-01 | 119331282 | 119331405 | NC_000011.9  |
| cg07626482 | 1.18E-17 | 2.69E-19 | -1.00E+01 | 32.9672862 | -1.26E-01 | 47289503  | 47289626  | NC_000019.9  |
| cg02514519 | 1.18E-17 | 2.69E-19 | -1.00E+01 | 32.9655538 | -8.41E-02 | 61348922  | 61349045  | NC_000011.9  |
| cg01929744 | 1.18E-17 | 2.70E-19 | -1.00E+01 | 32.9611932 | -1.62E-01 | 167104926 | 167105049 | NC_000006.11 |
| cg19291696 | 1.18E-17 | 2.71E-19 | -1.00E+01 | 32.9594203 | -2.65E-01 | 27769437  | 27769560  | NC_000013.10 |
| cg01566260 | 1.19E-17 | 2.72E-19 | -1.00E+01 | 32.9566463 | -1.56E-01 | 32180356  | 32180479  | NC_000001.10 |
| cg12506165 | 1.19E-17 | 2.72E-19 | -1.00E+01 | 32.9557285 | -2.05E-01 | 116997072 | 116997195 | NC_000012.11 |
| cg25395188 | 1.19E-17 | 2.73E-19 | -1.00E+01 | 32.95281   | -5.55E-02 | 60897782  | 60897905  | NC_000011.9  |
| cg15858483 | 1.19E-17 | 2.73E-19 | -1.00E+01 | 32.9502766 | -2.01E-01 | 56073589  | 56073712  | NC_000020.10 |
| cg14120636 | 1.20E-17 | 2.74E-19 | -1.00E+01 | 32.9485975 | -1.37E-01 | 33751249  | 33751372  | NC_000009.11 |
| cg00971050 | 1.20E-17 | 2.75E-19 | -1.00E+01 | 32.9453536 | -2.33E-01 | 40573764  | 40573887  | NC_000017.10 |
| cg23683674 | 1.21E-17 | 2.77E-19 | -1.00E+01 | 32.9359006 | -1.93E-01 | 73020562  | 73020685  | NC_000011.9  |
| cg03297731 | 1.21E-17 | 2.78E-19 | -1.00E+01 | 32.9335235 | -1.93E-01 | 30124293  | 30124416  | NC_000016.9  |
| cg08239753 | 1.22E-17 | 2.79E-19 | -1.00E+01 | 32.9308239 | -1.77E-01 | 23769690  | 23769813  | NC_000014.8  |
| cg05063895 | 1.22E-17 | 2.79E-19 | -1.00E+01 | 32.9297708 | -1.13E-01 | 2073518   | 2073641   | NC_000016.9  |
| cg21794767 | 1.22E-17 | 2.79E-19 | -1.00E+01 | 32.9289944 | -2.30E-01 | 120657213 | 120657336 | NC_000007.13 |
| cg08056069 | 1.22E-17 | 2.79E-19 | -1.00E+01 | 32.9288015 | -2.75E-01 | 95179425  | 95179548  | NC_000001.10 |
| cg21659575 | 1.22E-17 | 2.80E-19 | -1.00E+01 | 32.9269478 | -6.23E-02 | 120844832 | 120844955 | NC_000008.10 |

|               |          |          |           |            |           |           |           |              |
|---------------|----------|----------|-----------|------------|-----------|-----------|-----------|--------------|
| cg13273136    | 1.22E-17 | 2.81E-19 | -1.00E+01 | 32.9233543 | -2.10E-01 | 113931565 | 113931688 | NC_000002.11 |
| cg12579212    | 1.23E-17 | 2.81E-19 | -1.00E+01 | 32.9231661 | -2.00E-01 | 46448868  | 46448991  | NC_000003.11 |
| cg22551065    | 1.23E-17 | 2.81E-19 | -1.00E+01 | 32.9226717 | -1.58E-01 | 126565698 | 126565821 | NC_000005.9  |
| ch.7.1905850F | 1.23E-17 | 2.82E-19 | -1.00E+01 | 32.9208538 | -9.61E-02 | 90038364  | 90038487  | NC_000007.13 |
| cg14459710    | 1.23E-17 | 2.83E-19 | -1.00E+01 | 32.9154449 | -6.25E-02 | 62075409  | 62075532  | NC_000017.10 |
| cg27292099    | 1.24E-17 | 2.84E-19 | -1.00E+01 | 32.9135009 | -2.04E-01 | 39853529  | 39853652  | NC_000001.10 |
| cg07954941    | 1.24E-17 | 2.85E-19 | -1.00E+01 | 32.9099651 | -5.28E-02 | 132176642 | 132176765 | NC_000009.11 |
| cg06521827    | 1.24E-17 | 2.85E-19 | -1.00E+01 | 32.9094328 | -1.70E-01 | 16346434  | 16346557  | NC_000001.10 |
| cg20208009    | 1.25E-17 | 2.88E-19 | -1.00E+01 | 32.8995714 | -1.96E-01 | 19974048  | 19974171  | NC_000022.10 |
| cg26591162    | 1.25E-17 | 2.88E-19 | -1.00E+01 | 32.8982365 | -1.91E-01 | 4241254   | 4241377   | NC_000016.9  |
| cg13807509    | 1.26E-17 | 2.89E-19 | -1.00E+01 | 32.8947394 | -7.63E-02 | 65667116  | 65667239  | NC_000011.9  |
| cg04157272    | 1.26E-17 | 2.89E-19 | -1.00E+01 | 32.8940398 | -2.35E-01 | 68017838  | 68017961  | NC_000002.11 |
| cg09274344    | 1.26E-17 | 2.90E-19 | -1.00E+01 | 32.8899484 | -1.98E-01 | 1078689   | 1078812   | NC_000016.9  |
| cg06463800    | 1.26E-17 | 2.91E-19 | -1.00E+01 | 32.889232  | -1.16E-01 | 25754183  | 25754306  | NC_000013.10 |
| cg05266781    | 1.28E-17 | 2.94E-19 | -9.99     | 32.8771807 | -8.82E-02 | 54965492  | 54965615  | NC_000016.9  |
| cg01825818    | 1.29E-17 | 2.97E-19 | -9.99     | 32.8672404 | -1.82E-01 | 131554018 | 131554141 | NC_000002.11 |
| cg11450001    | 1.29E-17 | 2.98E-19 | -9.99     | 32.8651982 | -8.27E-02 | 10365596  | 10365719  | NC_000012.11 |
| cg23828876    | 1.30E-17 | 2.98E-19 | -9.99     | 32.8630263 | -2.64E-01 | 196001706 | 196001829 | NC_000003.11 |
| cg00460589    | 1.31E-17 | 3.01E-19 | -9.99     | 32.8559133 | -2.23E-01 | 13274354  | 13274477  | NC_000006.11 |
| cg14342532    | 1.31E-17 | 3.01E-19 | -9.99     | 32.8557716 | -1.48E-01 | 233916534 | 233916657 | NC_000002.11 |
| cg25711558    | 1.31E-17 | 3.01E-19 | -9.99     | 32.8556178 | -2.56E-01 | 101499638 | 101499761 | NC_000007.13 |
| cg13908359    | 1.32E-17 | 3.03E-19 | -9.99     | 32.8475884 | -2.31E-01 | 100077146 | 100077269 | NC_000015.9  |
| cg04864538    | 1.33E-17 | 3.05E-19 | -9.99     | 32.8403725 | -1.96E-01 | 158301178 | 158301301 | NC_000007.13 |
| cg21473545    | 1.33E-17 | 3.06E-19 | -9.99     | 32.8391297 | -1.61E-01 | 178203432 | 178203555 | NC_000005.9  |
| cg00058299    | 1.33E-17 | 3.08E-19 | -9.99     | 32.833267  | -9.95E-02 | 113498193 | 113498316 | NC_000001.10 |



|            |          |          |       |            |           |           |           |              |
|------------|----------|----------|-------|------------|-----------|-----------|-----------|--------------|
| cg18749404 | 1.34E-17 | 3.09E-19 | -9.99 | 32.8271834 | -1.99E-01 | 76975944  | 76976067  | NC_000017.10 |
| cg09093656 | 1.34E-17 | 3.10E-19 | -9.99 | 32.8264809 | -2.50E-01 | 16323481  | 16323604  | NC_000017.10 |
| cg20092936 | 1.35E-17 | 3.12E-19 | -9.99 | 32.8196917 | -2.33E-01 | 195600311 | 195600434 | NC_000003.11 |
| cg11348286 | 1.35E-17 | 3.12E-19 | -9.99 | 32.8190305 | -5.55E-02 | 57028674  | 57028797  | NC_000012.11 |
| cg23514324 | 1.35E-17 | 3.13E-19 | -9.99 | 32.8170402 | -5.20E-02 | 12329213  | 12329336  | NC_000003.11 |
| cg11958234 | 1.36E-17 | 3.13E-19 | -9.99 | 32.8167417 | -2.20E-01 | 118226828 | 118226951 | NC_000001.10 |
| cg07482936 | 1.38E-17 | 3.18E-19 | -9.98 | 32.7999935 | -1.42E-01 | 59488635  | 59488758  | NC_000017.10 |
| cg18098839 | 1.38E-17 | 3.18E-19 | -9.98 | 32.7989617 | -2.71E-01 | 167742700 | 167742823 | NC_000003.11 |
| cg02290880 | 1.38E-17 | 3.19E-19 | -9.98 | 32.7984038 | -2.16E-01 | 206317854 | 206317977 | NC_000001.10 |
| cg06186245 | 1.38E-17 | 3.19E-19 | -9.98 | 32.7957776 | -2.16E-01 | 100245062 | 100245185 | NC_000003.11 |
| cg17524021 | 1.39E-17 | 3.20E-19 | -9.98 | 32.7930732 | -1.74E-01 | 140381745 | 140381868 | NC_000005.9  |
| cg14967393 | 1.39E-17 | 3.21E-19 | -9.98 | 32.7903984 | -1.98E-01 | 55265996  | 55266119  | NC_000005.9  |
| cg24710179 | 1.39E-17 | 3.21E-19 | -9.98 | 32.7901753 | -2.01E-01 | 642975    | 643098    | NC_000011.9  |
| cg01182455 | 1.39E-17 | 3.22E-19 | -9.98 | 32.7871034 | -2.28E-01 | 131313189 | 131313312 | NC_000009.11 |
| cg09753839 | 1.40E-17 | 3.25E-19 | -9.98 | 32.7792321 | -1.27E-01 | 30458093  | 30458216  | NC_000006.11 |
| cg08666707 | 1.40E-17 | 3.25E-19 | -9.98 | 32.7790212 | -1.50E-01 | 41456441  | 41456564  | NC_000006.11 |
| cg01891711 | 1.41E-17 | 3.26E-19 | -9.98 | 32.7758935 | -6.50E-02 | 37640509  | 37640632  | NC_000022.10 |
| cg23704195 | 1.41E-17 | 3.26E-19 | -9.98 | 32.775613  | -2.04E-01 | 59531104  | 59531227  | NC_000017.10 |
| cg14679668 | 1.42E-17 | 3.28E-19 | -9.98 | 32.7707463 | -2.10E-01 | 102130344 | 102130467 | NC_000008.10 |
| cg04819580 | 1.42E-17 | 3.28E-19 | -9.98 | 32.7690724 | -1.72E-01 | 150635526 | 150635649 | NC_000007.13 |
| cg03887218 | 1.42E-17 | 3.28E-19 | -9.98 | 32.7681543 | -1.53E-01 | 16534349  | 16534472  | NC_000001.10 |
| cg15391464 | 1.42E-17 | 3.28E-19 | -9.98 | 32.7679746 | -1.09E-01 | 27047549  | 27047672  | NC_000017.10 |
| cg20776977 | 1.42E-17 | 3.28E-19 | -9.98 | 32.7679736 | -1.30E-01 | 2564584   | 2564707   | NC_000001.10 |
| cg16577647 | 1.42E-17 | 3.29E-19 | -9.98 | 32.7665084 | -1.92E-01 | 36393064  | 36393187  | NC_000019.9  |
| cg05435212 | 1.42E-17 | 3.30E-19 | -9.98 | 32.7639486 | -2.53E-01 | 27632180  | 27632303  | NC_000003.11 |

|                 |          |          |       |            |           |           |           |              |
|-----------------|----------|----------|-------|------------|-----------|-----------|-----------|--------------|
| cg10574494      | 1.42E-17 | 3.30E-19 | -9.98 | 32.763554  | -1.66E-01 | 52918457  | 52918580  | NC_000004.11 |
| cg01186457      | 1.43E-17 | 3.31E-19 | -9.98 | 32.7618225 | -7.79E-02 | 36336503  | 36336626  | NC_000019.9  |
| cg22027433      | 1.43E-17 | 3.31E-19 | -9.98 | 32.7609451 | -2.84E-01 | 62208049  | 62208172  | NC_000017.10 |
| cg18090918      | 1.43E-17 | 3.32E-19 | -9.98 | 32.7568719 | -3.52E-02 | 3987849   | 3987972   | NC_000019.9  |
| cg14605590      | 1.44E-17 | 3.34E-19 | -9.98 | 32.7524603 | -1.29E-01 | 94900583  | 94900706  | NC_000009.11 |
| cg26144629      | 1.44E-17 | 3.34E-19 | -9.98 | 32.7512991 | -6.94E-02 | 207926000 | 207926123 | NC_000001.10 |
| cg03356734      | 1.44E-17 | 3.34E-19 | -9.98 | 32.7507266 | -7.52E-02 | 37230413  | 37230536  | NC_000020.10 |
| cg09404642      | 1.45E-17 | 3.35E-19 | -9.97 | 32.7478896 | -1.06E-01 | 48585645  | 48585768  | NC_000017.10 |
| cg12666727      | 1.45E-17 | 3.35E-19 | -9.97 | 32.7476255 | -2.58E-01 | 42128487  | 42128610  | NC_000001.10 |
| cg14376988      | 1.45E-17 | 3.35E-19 | -9.97 | 32.7475809 | -1.30E-01 | 99179801  | 99179924  | NC_000009.11 |
| cg11202345      | 1.45E-17 | 3.35E-19 | -9.97 | 32.7471958 | -1.09E-01 | 76976057  | 76976180  | NC_000017.10 |
| cg01246622      | 1.46E-17 | 3.39E-19 | -9.97 | 32.7356697 | -2.78E-01 | 115141827 | 115141950 | NC_000010.10 |
| cg13670306      | 1.48E-17 | 3.43E-19 | -9.97 | 32.7243231 | -1.45E-01 | 7239771   | 7239894   | NC_000017.10 |
| cg07969785      | 1.48E-17 | 3.44E-19 | -9.97 | 32.723598  | -9.05E-02 | 113414850 | 113414973 | NC_000003.11 |
| cg27300194      | 1.48E-17 | 3.44E-19 | -9.97 | 32.7210991 | -1.37E-01 | 9339380   | 9339503   | NC_000001.10 |
| cg01111041      | 1.49E-17 | 3.45E-19 | -9.97 | 32.7184398 | -1.31E-01 | 32121055  | 32121178  | NC_000006.11 |
| cg20530204      | 1.49E-17 | 3.46E-19 | -9.97 | 32.7162003 | -1.35E-01 | 33244709  | 33244832  | NC_000006.11 |
| ch.9.137242878F | 1.49E-17 | 3.47E-19 | -9.97 | 32.714939  | -6.34E-02 | 138103057 | 138103180 | NC_000009.11 |
| cg26540315      | 1.49E-17 | 3.47E-19 | -9.97 | 32.7149371 | -1.94E-01 | 69264657  | 69264780  | NC_000011.9  |
| cg04852949      | 1.49E-17 | 3.47E-19 | -9.97 | 32.7140718 | -1.64E-01 | 32170929  | 32171052  | NC_000001.10 |
| cg21144462      | 1.50E-17 | 3.47E-19 | -9.97 | 32.7128753 | -9.11E-02 | 42082647  | 42082770  | NC_000017.10 |
| cg07640473      | 1.50E-17 | 3.48E-19 | -9.97 | 32.711762  | -1.25E-01 | 50193232  | 50193355  | NC_000003.11 |
| cg02749784      | 1.50E-17 | 3.48E-19 | -9.97 | 32.7099974 | -2.38E-01 | 120219927 | 120220050 | NC_000008.10 |
| cg03303585      | 1.50E-17 | 3.49E-19 | -9.97 | 32.7070025 | -1.84E-01 | 75585178  | 75585301  | NC_000004.11 |
| cg01156249      | 1.51E-17 | 3.50E-19 | -9.97 | 32.7053991 | -2.33E-01 | 4714794   | 4714917   | NC_000016.9  |

|            |          |          |       |            |           |           |           |              |
|------------|----------|----------|-------|------------|-----------|-----------|-----------|--------------|
| cg05329888 | 1.51E-17 | 3.50E-19 | -9.97 | 32.7046843 | -8.62E-02 | 50968312  | 50968435  | NC_000022.10 |
| cg01796223 | 1.51E-17 | 3.51E-19 | -9.97 | 32.7018215 | -2.09E-01 | 129933014 | 129933137 | NC_000007.13 |
| cg27640794 | 1.51E-17 | 3.52E-19 | -9.97 | 32.7004139 | -3.06E-01 | 169555699 | 169555822 | NC_000004.11 |
| cg06834177 | 1.51E-17 | 3.52E-19 | -9.97 | 32.6993313 | -2.85E-01 | 6333843   | 6333966   | NC_000001.10 |
| cg01535567 | 1.52E-17 | 3.53E-19 | -9.97 | 32.6980119 | -1.51E-01 | 698936    | 699059    | NC_000016.9  |
| cg08696866 | 1.52E-17 | 3.53E-19 | -9.97 | 32.6974796 | -7.68E-02 | 176961907 | 176962030 | NC_000002.11 |
| cg03116016 | 1.52E-17 | 3.53E-19 | -9.97 | 32.6973724 | -2.11E-01 | 15583606  | 15583729  | NC_000016.9  |
| cg27170458 | 1.52E-17 | 3.54E-19 | -9.97 | 32.6934481 | -1.01E-01 | 89988252  | 89988375  | NC_000016.9  |
| cg16205058 | 1.52E-17 | 3.54E-19 | -9.97 | 32.6932873 | -1.45E-01 | 20924369  | 20924492  | NC_000014.8  |
| cg01789576 | 1.52E-17 | 3.54E-19 | -9.97 | 32.6926106 | -1.26E-01 | 228337311 | 228337434 | NC_000001.10 |
| cg06112335 | 1.52E-17 | 3.55E-19 | -9.97 | 32.6919659 | -1.71E-01 | 119694495 | 119694618 | NC_000007.13 |
| cg16134491 | 1.53E-17 | 3.55E-19 | -9.97 | 32.6905518 | -1.20E-01 | 52780545  | 52780668  | NC_000014.8  |
| cg19022814 | 1.53E-17 | 3.56E-19 | -9.97 | 32.6885161 | -1.42E-01 | 62107477  | 62107600  | NC_000001.10 |
| cg09436907 | 1.53E-17 | 3.58E-19 | -9.97 | 32.6838851 | -6.57E-02 | 45307686  | 45307809  | NC_000011.9  |
| cg02717486 | 1.54E-17 | 3.60E-19 | -9.96 | 32.6785114 | -7.55E-02 | 133512833 | 133512956 | NC_000005.9  |
| cg12179658 | 1.55E-17 | 3.61E-19 | -9.96 | 32.6757974 | -1.79E-01 | 11178652  | 11178775  | NC_000003.11 |
| cg01406280 | 1.55E-17 | 3.61E-19 | -9.96 | 32.6745808 | -7.37E-02 | 69454447  | 69454570  | NC_000011.9  |
| cg23609082 | 1.56E-17 | 3.64E-19 | -9.96 | 32.6656837 | -8.04E-02 | 151585362 | 151585485 | NC_000001.10 |
| cg10500737 | 1.56E-17 | 3.64E-19 | -9.96 | 32.6652623 | -2.40E-01 | 17566381  | 17566504  | NC_000021.8  |
| cg23234434 | 1.56E-17 | 3.64E-19 | -9.96 | 32.6649848 | -7.02E-02 | 43390705  | 43390828  | NC_000001.10 |
| cg24512005 | 1.58E-17 | 3.68E-19 | -9.96 | 32.6565031 | -1.44E-01 | 3014291   | 3014414   | NC_000011.9  |
| cg00352043 | 1.59E-17 | 3.71E-19 | -9.96 | 32.6486857 | -5.57E-02 | 38863594  | 38863717  | NC_000022.10 |
| cg23884531 | 1.60E-17 | 3.73E-19 | -9.96 | 32.6419137 | -1.08E-01 | 6950103   | 6950226   | NC_000017.10 |
| cg15469171 | 1.60E-17 | 3.73E-19 | -9.96 | 32.6418224 | -1.73E-01 | 23541345  | 23541468  | NC_000001.10 |
| cg14476756 | 1.60E-17 | 3.73E-19 | -9.96 | 32.6407652 | -9.09E-02 | 136243436 | 136243559 | NC_000009.11 |

|              |          |          |       |            |           |           |           |              |
|--------------|----------|----------|-------|------------|-----------|-----------|-----------|--------------|
| cg24033633   | 1.60E-17 | 3.74E-19 | -9.96 | 32.6384938 | -2.64E-01 | 57945695  | 57945818  | NC_000003.11 |
| cg25437886   | 1.61E-17 | 3.75E-19 | -9.96 | 32.636536  | -2.57E-01 | 45677346  | 45677469  | NC_000003.11 |
| cg08557686   | 1.61E-17 | 3.75E-19 | -9.96 | 32.6354175 | -4.15E-02 | 20256063  | 20256186  | NC_000022.10 |
| cg14809544   | 1.61E-17 | 3.76E-19 | -9.96 | 32.6346082 | -5.87E-02 | 46366591  | 46366714  | NC_000019.9  |
| cg26250989   | 1.62E-17 | 3.80E-19 | -9.96 | 32.6248204 | -2.36E-01 | 6333502   | 6333625   | NC_000001.10 |
| cg22350926   | 1.63E-17 | 3.81E-19 | -9.96 | 32.6221619 | -5.11E-02 | 27632599  | 27632722  | NC_000008.10 |
| cg17355241   | 1.63E-17 | 3.81E-19 | -9.96 | 32.6201616 | -1.01E-01 | 17445073  | 17445196  | NC_000019.9  |
| cg01437411   | 1.64E-17 | 3.83E-19 | -9.95 | 32.6168215 | -1.37E-01 | 7033911   | 7034034   | NC_000012.11 |
| cg27178677   | 1.64E-17 | 3.83E-19 | -9.95 | 32.6161894 | -2.12E-01 | 8834803   | 8834926   | NC_000020.10 |
| cg01264106   | 1.64E-17 | 3.84E-19 | -9.95 | 32.6134978 | -9.66E-02 | 38071602  | 38071725  | NC_000022.10 |
| cg13808147   | 1.65E-17 | 3.85E-19 | -9.95 | 32.6098307 | -5.17E-02 | 32433055  | 32433178  | NC_000003.11 |
| cg19064302   | 1.65E-17 | 3.87E-19 | -9.95 | 32.606727  | -1.80E-01 | 106536036 | 106536159 | NC_000006.11 |
| cg06051311   | 1.65E-17 | 3.87E-19 | -9.95 | 32.6057156 | -2.35E-01 | 30131001  | 30131124  | NC_000006.11 |
| cg00310404   | 1.65E-17 | 3.87E-19 | -9.95 | 32.6047562 | -2.10E-01 | 27673775  | 27673898  | NC_000001.10 |
| cg21633134   | 1.68E-17 | 3.94E-19 | -9.95 | 32.5867544 | -7.37E-02 | 7816399   | 7816522   | NC_000005.9  |
| ch.7.163474F | 1.68E-17 | 3.95E-19 | -9.95 | 32.5864285 | -9.02E-02 | 3469498   | 3469621   | NC_000007.13 |
| cg08319417   | 1.69E-17 | 3.95E-19 | -9.95 | 32.5856785 | -1.80E-01 | 23291214  | 23291337  | NC_000014.8  |
| cg13008174   | 1.69E-17 | 3.96E-19 | -9.95 | 32.5823445 | -1.58E-01 | 11640960  | 11641083  | NC_000008.10 |
| cg01254505   | 1.69E-17 | 3.96E-19 | -9.95 | 32.5822054 | -2.00E-01 | 17516470  | 17516593  | NC_000019.9  |
| cg23166988   | 1.70E-17 | 3.99E-19 | -9.95 | 32.5745909 | -1.29E-01 | 2070861   | 2070984   | NC_000016.9  |
| cg09353563   | 1.71E-17 | 4.01E-19 | -9.95 | 32.5712602 | -2.42E-01 | 70994435  | 70994558  | NC_000015.9  |
| cg06921282   | 1.71E-17 | 4.01E-19 | -9.95 | 32.5701862 | -1.06E-01 | 536299    | 536422    | NC_000011.9  |
| cg02933362   | 1.71E-17 | 4.02E-19 | -9.95 | 32.5689479 | -2.82E-01 | 102091607 | 102091730 | NC_000002.11 |
| cg08017880   | 1.71E-17 | 4.02E-19 | -9.95 | 32.5667765 | -1.04E-01 | 407180    | 407303    | NC_000011.9  |
| cg17034181   | 1.72E-17 | 4.03E-19 | -9.95 | 32.5645179 | -7.54E-02 | 101362442 | 101362565 | NC_000001.10 |

|            |          |          |       |            |           |           |           |              |
|------------|----------|----------|-------|------------|-----------|-----------|-----------|--------------|
| cg11737941 | 1.72E-17 | 4.05E-19 | -9.95 | 32.5610721 | -2.25E-01 | 130450777 | 130450900 | NC_000012.11 |
| cg05988358 | 1.73E-17 | 4.07E-19 | -9.95 | 32.5567272 | -1.83E-01 | 74082489  | 74082612  | NC_000010.10 |
| cg04276626 | 1.73E-17 | 4.07E-19 | -9.95 | 32.5553725 | -2.30E-01 | 57918500  | 57918623  | NC_000017.10 |
| cg04446762 | 1.73E-17 | 4.07E-19 | -9.95 | 32.554765  | -6.99E-02 | 65222227  | 65222350  | NC_000011.9  |
| cg13750949 | 1.76E-17 | 4.15E-19 | -9.94 | 32.537408  | -1.13E-01 | 105293957 | 105294080 | NC_000014.8  |
| cg20938802 | 1.77E-17 | 4.15E-19 | -9.94 | 32.5352965 | -2.06E-01 | 89858378  | 89858501  | NC_000005.9  |
| cg00413849 | 1.77E-17 | 4.16E-19 | -9.94 | 32.5334576 | -7.74E-02 | 167906156 | 167906279 | NC_000001.10 |
| cg00596048 | 1.78E-17 | 4.18E-19 | -9.94 | 32.5282278 | -1.66E-01 | 41847267  | 41847390  | NC_000001.10 |
| cg05689413 | 1.78E-17 | 4.19E-19 | -9.94 | 32.5258935 | -1.66E-01 | 41885417  | 41885540  | NC_000006.11 |
| cg05783290 | 1.79E-17 | 4.22E-19 | -9.94 | 32.519472  | -2.40E-01 | 150383337 | 150383460 | NC_000007.13 |
| cg00510447 | 1.80E-17 | 4.24E-19 | -9.94 | 32.5161294 | -9.68E-02 | 3071608   | 3071731   | NC_000016.9  |
| cg15594444 | 1.80E-17 | 4.24E-19 | -9.94 | 32.513936  | -2.37E-01 | 59893192  | 59893315  | NC_000001.10 |
| cg22716262 | 1.81E-17 | 4.26E-19 | -9.94 | 32.5103941 | -2.29E-01 | 28419523  | 28419646  | NC_000010.10 |
| cg17318863 | 1.81E-17 | 4.27E-19 | -9.94 | 32.508923  | -1.60E-01 | 97308488  | 97308611  | NC_000002.11 |
| cg07545081 | 1.83E-17 | 4.30E-19 | -9.94 | 32.500324  | -2.02E-01 | 126308381 | 126308504 | NC_000010.10 |
| cg22163463 | 1.83E-17 | 4.30E-19 | -9.94 | 32.5002522 | -1.63E-01 | 6458640   | 6458763   | NC_000017.10 |
| cg00325968 | 1.83E-17 | 4.31E-19 | -9.94 | 32.499676  | -1.22E-01 | 139977703 | 139977826 | NC_000008.10 |
| cg04070188 | 1.83E-17 | 4.31E-19 | -9.94 | 32.4987012 | -2.12E-01 | 89809444  | 89809567  | NC_000007.13 |
| cg13784312 | 1.83E-17 | 4.32E-19 | -9.94 | 32.4958314 | -2.04E-01 | 134609065 | 134609188 | NC_000009.11 |
| cg16793781 | 1.83E-17 | 4.33E-19 | -9.94 | 32.4950169 | -3.38E-02 | 173558030 | 173558153 | NC_000002.11 |
| cg22329743 | 1.84E-17 | 4.33E-19 | -9.94 | 32.4943869 | -2.05E-01 | 208688774 | 208688897 | NC_000002.11 |
| cg07576409 | 1.84E-17 | 4.34E-19 | -9.94 | 32.4909228 | -2.00E-01 | 37554905  | 37555028  | NC_000008.10 |
| cg19893132 | 1.84E-17 | 4.35E-19 | -9.94 | 32.4892669 | -1.27E-01 | 125425209 | 125425332 | NC_000012.11 |
| cg19445588 | 1.85E-17 | 4.37E-19 | -9.94 | 32.4858321 | -1.96E-01 | 116904641 | 116904764 | NC_000012.11 |
| cg04588708 | 1.86E-17 | 4.39E-19 | -9.93 | 32.4798794 | -1.17E-01 | 811078    | 811201    | NC_000016.9  |

|              |          |          |       |            |           |           |           |              |
|--------------|----------|----------|-------|------------|-----------|-----------|-----------|--------------|
| cg23200774   | 1.87E-17 | 4.41E-19 | -9.93 | 32.475368  | -1.19E-01 | 100492376 | 100492499 | NC_000007.13 |
| cg26078793   | 1.87E-17 | 4.42E-19 | -9.93 | 32.4744359 | -7.80E-02 | 65006222  | 65006345  | NC_000014.8  |
| cg14823429   | 1.87E-17 | 4.43E-19 | -9.93 | 32.472574  | -2.59E-01 | 240187023 | 240187146 | NC_000002.11 |
| ch.6.115952F | 1.88E-17 | 4.44E-19 | -9.93 | 32.4698451 | -1.48E-01 | 4060315   | 4060438   | NC_000006.11 |
| cg00459078   | 1.88E-17 | 4.45E-19 | -9.93 | 32.4671964 | -4.89E-02 | 43024659  | 43024782  | NC_000017.10 |
| cg07045089   | 1.90E-17 | 4.49E-19 | -9.93 | 32.4571957 | -1.98E-01 | 3620218   | 3620341   | NC_000001.10 |
| cg13743052   | 1.90E-17 | 4.50E-19 | -9.93 | 32.4560359 | -1.23E-01 | 107253426 | 107253549 | NC_000014.8  |
| cg21063296   | 1.91E-17 | 4.52E-19 | -9.93 | 32.4523873 | -1.47E-01 | 10304422  | 10304545  | NC_000019.9  |
| cg19836199   | 1.91E-17 | 4.52E-19 | -9.93 | 32.4515672 | -2.84E-01 | 36421941  | 36422064  | NC_000021.8  |
| cg11409101   | 1.91E-17 | 4.53E-19 | -9.93 | 32.4495356 | -2.51E-01 | 37554832  | 37554955  | NC_000008.10 |
| cg18410110   | 1.92E-17 | 4.53E-19 | -9.93 | 32.4486816 | -1.97E-01 | 31963583  | 31963706  | NC_000005.9  |
| cg14519125   | 1.92E-17 | 4.54E-19 | -9.93 | 32.4475715 | -4.70E-02 | 49893811  | 49893934  | NC_000003.11 |
| cg14528056   | 1.92E-17 | 4.54E-19 | -9.93 | 32.4470104 | -2.80E-01 | 155194782 | 155194905 | NC_000001.10 |
| cg01497527   | 1.92E-17 | 4.55E-19 | -9.93 | 32.4460535 | -1.91E-01 | 65214165  | 65214288  | NC_000015.9  |
| cg16450097   | 1.92E-17 | 4.55E-19 | -9.93 | 32.4445963 | -2.45E-01 | 101348467 | 101348590 | NC_000008.10 |
| cg19414569   | 1.92E-17 | 4.55E-19 | -9.93 | 32.4444892 | -6.96E-02 | 116961131 | 116961254 | NC_000001.10 |
| cg02238461   | 1.92E-17 | 4.56E-19 | -9.93 | 32.4436506 | -2.13E-01 | 27985987  | 27986110  | NC_000001.10 |
| cg20414364   | 1.93E-17 | 4.57E-19 | -9.93 | 32.4397762 | -2.17E-01 | 1608614   | 1608737   | NC_000005.9  |
| cg24548564   | 1.93E-17 | 4.57E-19 | -9.93 | 32.4397079 | -1.49E-01 | 149792390 | 149792513 | NC_000005.9  |
| cg13623135   | 1.94E-17 | 4.59E-19 | -9.93 | 32.4359006 | -1.31E-01 | 145700499 | 145700622 | NC_000008.10 |
| cg10309886   | 1.94E-17 | 4.60E-19 | -9.93 | 32.4335517 | -1.89E-01 | 57407747  | 57407870  | NC_000020.10 |
| cg00719410   | 1.95E-17 | 4.61E-19 | -9.93 | 32.4313636 | -6.91E-02 | 94884479  | 94884602  | NC_000011.9  |
| cg08983279   | 1.95E-17 | 4.62E-19 | -9.93 | 32.4299734 | -2.00E-01 | 46663534  | 46663657  | NC_000016.9  |
| cg10231785   | 1.95E-17 | 4.63E-19 | -9.93 | 32.4267907 | -7.39E-02 | 46692440  | 46692563  | NC_000022.10 |
| cg01735621   | 1.96E-17 | 4.64E-19 | -9.93 | 32.4249131 | -1.28E-01 | 74162051  | 74162174  | NC_000006.11 |

|               |          |          |       |            |           |           |           |              |
|---------------|----------|----------|-------|------------|-----------|-----------|-----------|--------------|
| cg11048797    | 1.96E-17 | 4.64E-19 | -9.93 | 32.4248584 | -2.68E-01 | 80450903  | 80451026  | NC_000017.10 |
| cg25042258    | 1.96E-17 | 4.64E-19 | -9.93 | 32.4247913 | -1.54E-01 | 148427662 | 148427785 | NC_000007.13 |
| ch.14.769589F | 1.96E-17 | 4.65E-19 | -9.93 | 32.4225255 | -7.76E-02 | 60785506  | 60785629  | NC_000014.8  |
| cg23160829    | 1.97E-17 | 4.68E-19 | -9.92 | 32.4173542 | -1.88E-01 | 145219031 | 145219154 | NC_000006.11 |
| cg23477967    | 1.97E-17 | 4.69E-19 | -9.92 | 32.415711  | -1.64E-01 | 188419087 | 188419210 | NC_000002.11 |
| cg03059420    | 1.98E-17 | 4.70E-19 | -9.92 | 32.4119702 | -1.63E-01 | 30923241  | 30923364  | NC_000006.11 |
| cg23819836    | 1.98E-17 | 4.71E-19 | -9.92 | 32.4115405 | -5.55E-02 | 15663134  | 15663257  | NC_000006.11 |
| cg23981702    | 1.99E-17 | 4.72E-19 | -9.92 | 32.4089722 | -2.27E-01 | 115732999 | 115733122 | NC_000001.10 |
| cg27298570    | 1.99E-17 | 4.73E-19 | -9.92 | 32.4066206 | -7.50E-02 | 8623004   | 8623127   | NC_000016.9  |
| cg15694987    | 2.00E-17 | 4.76E-19 | -9.92 | 32.4008292 | -2.22E-01 | 119125345 | 119125468 | NC_000008.10 |
| cg19244029    | 2.01E-17 | 4.78E-19 | -9.92 | 32.3966082 | -2.18E-01 | 156022310 | 156022433 | NC_000003.11 |
| cg01756461    | 2.02E-17 | 4.80E-19 | -9.92 | 32.3922096 | -1.56E-01 | 102036983 | 102037106 | NC_000015.9  |
| cg11372831    | 2.02E-17 | 4.81E-19 | -9.92 | 32.3906507 | -4.14E-02 | 57303157  | 57303280  | NC_000004.11 |
| cg25334660    | 2.03E-17 | 4.82E-19 | -9.92 | 32.387661  | -1.55E-01 | 42270520  | 42270643  | NC_000008.10 |
| cg09508556    | 2.03E-17 | 4.83E-19 | -9.92 | 32.3848959 | -1.79E-01 | 31106982  | 31107105  | NC_000006.11 |
| cg25147026    | 2.03E-17 | 4.84E-19 | -9.92 | 32.3836989 | -2.32E-01 | 186650441 | 186650564 | NC_000001.10 |
| cg10654010    | 2.03E-17 | 4.84E-19 | -9.92 | 32.3833906 | -6.73E-02 | 54910524  | 54910647  | NC_000017.10 |
| cg08898653    | 2.03E-17 | 4.84E-19 | -9.92 | 32.3829859 | -5.27E-02 | 20811220  | 20811343  | NC_000001.10 |
| cg10304922    | 2.04E-17 | 4.86E-19 | -9.92 | 32.3797367 | -2.06E-01 | 133065924 | 133066047 | NC_000012.11 |
| cg23366832    | 2.04E-17 | 4.86E-19 | -9.92 | 32.3792592 | -2.10E-01 | 90712882  | 90713005  | NC_000006.11 |
| cg10324998    | 2.04E-17 | 4.86E-19 | -9.92 | 32.3791892 | -1.41E-01 | 92338262  | 92338385  | NC_000001.10 |
| cg26522361    | 2.04E-17 | 4.87E-19 | -9.92 | 32.3778584 | -2.44E-01 | 55625247  | 55625370  | NC_000005.9  |
| cg17376299    | 2.05E-17 | 4.88E-19 | -9.92 | 32.3754828 | -2.06E-01 | 74931583  | 74931706  | NC_000017.10 |
| cg01310482    | 2.06E-17 | 4.92E-19 | -9.92 | 32.368551  | -2.23E-01 | 101596140 | 101596263 | NC_000007.13 |
| cg00174718    | 2.07E-17 | 4.93E-19 | -9.92 | 32.365468  | -1.64E-01 | 47136110  | 47136233  | NC_000006.11 |

|               |          |          |       |            |           |           |           |              |
|---------------|----------|----------|-------|------------|-----------|-----------|-----------|--------------|
| ch.3.2399726R | 2.08E-17 | 4.95E-19 | -9.92 | 32.360654  | -4.90E-02 | 122832054 | 122832177 | NC_000003.11 |
| cg22976832    | 2.10E-17 | 5.01E-19 | -9.91 | 32.3504714 | -1.72E-01 | 112295835 | 112295958 | NC_000010.10 |
| cg05259946    | 2.10E-17 | 5.02E-19 | -9.91 | 32.3479818 | -5.83E-02 | 474937    | 475060    | NC_000016.9  |
| cg06431702    | 2.11E-17 | 5.04E-19 | -9.91 | 32.342982  | -1.36E-01 | 66624841  | 66624964  | NC_000011.9  |
| cg19325791    | 2.12E-17 | 5.06E-19 | -9.91 | 32.3395249 | -2.67E-01 | 46560683  | 46560806  | NC_000017.10 |
| cg26590603    | 2.12E-17 | 5.07E-19 | -9.91 | 32.3381196 | -1.63E-01 | 43478530  | 43478653  | NC_000006.11 |
| cg26550194    | 2.14E-17 | 5.11E-19 | -9.91 | 32.3295722 | -2.16E-01 | 74639928  | 74640051  | NC_000017.10 |
| cg05328461    | 2.15E-17 | 5.12E-19 | -9.91 | 32.3271466 | -2.21E-01 | 10231566  | 10231689  | NC_000019.9  |
| cg06935608    | 2.15E-17 | 5.13E-19 | -9.91 | 32.3260621 | -1.78E-01 | 26309176  | 26309299  | NC_000008.10 |
| cg01449818    | 2.15E-17 | 5.14E-19 | -9.91 | 32.325176  | -5.77E-02 | 116286605 | 116286728 | NC_000010.10 |
| cg17670650    | 2.15E-17 | 5.14E-19 | -9.91 | 32.3238995 | -1.71E-01 | 29565110  | 29565233  | NC_000001.10 |
| cg12123983    | 2.15E-17 | 5.14E-19 | -9.91 | 32.3238366 | -1.18E-01 | 62228668  | 62228791  | NC_000014.8  |
| cg21067652    | 2.16E-17 | 5.15E-19 | -9.91 | 32.3225065 | -1.38E-01 | 41548815  | 41548938  | NC_000013.10 |
| cg10437931    | 2.16E-17 | 5.17E-19 | -9.91 | 32.3179657 | -2.26E-01 | 12746791  | 12746914  | NC_000002.11 |
| cg11489918    | 2.16E-17 | 5.17E-19 | -9.91 | 32.317636  | -1.28E-01 | 62312720  | 62312843  | NC_000011.9  |
| cg23646614    | 2.18E-17 | 5.21E-19 | -9.91 | 32.3109606 | -1.40E-01 | 48083100  | 48083223  | NC_000011.9  |
| cg27031754    | 2.19E-17 | 5.24E-19 | -9.91 | 32.3051535 | -1.86E-01 | 54185940  | 54186063  | NC_000005.9  |
| cg14036776    | 2.20E-17 | 5.25E-19 | -9.91 | 32.3023409 | -1.39E-01 | 37595363  | 37595486  | NC_000008.10 |
| cg07287508    | 2.20E-17 | 5.26E-19 | -9.91 | 32.3014871 | -1.75E-01 | 59471566  | 59471689  | NC_000017.10 |
| cg00557308    | 2.21E-17 | 5.29E-19 | -9.91 | 32.2953603 | -1.53E-01 | 66274821  | 66274944  | NC_000015.9  |
| cg22569340    | 2.21E-17 | 5.30E-19 | -9.91 | 32.294208  | -6.76E-02 | 46000819  | 46000942  | NC_000019.9  |
| cg22888967    | 2.21E-17 | 5.30E-19 | -9.91 | 32.294133  | -1.88E-01 | 29293801  | 29293924  | NC_000013.10 |
| cg08320359    | 2.22E-17 | 5.32E-19 | -9.91 | 32.2898724 | -2.37E-01 | 15596053  | 15596176  | NC_000016.9  |
| cg18158670    | 2.22E-17 | 5.32E-19 | -9.91 | 32.2895504 | -2.34E-01 | 99433225  | 99433348  | NC_000015.9  |
| cg07323145    | 2.24E-17 | 5.37E-19 | -9.9  | 32.2816385 | -8.56E-02 | 67047620  | 67047743  | NC_000016.9  |



|            |          |          |       |            |           |           |           |              |
|------------|----------|----------|-------|------------|-----------|-----------|-----------|--------------|
| cg07177437 | 2.24E-17 | 5.38E-19 | -9.9  | 32.2795301 | -2.02E-01 | 160850377 | 160850500 | NC_000001.10 |
| cg07810884 | 2.24E-17 | 5.38E-19 | -9.9  | 32.2792086 | -2.00E-01 | 16178099  | 16178222  | NC_000019.9  |
| cg12251111 | 2.25E-17 | 5.39E-19 | -9.9  | 32.2776491 | -2.26E-01 | 34328592  | 34328715  | NC_000017.10 |
| cg08866794 | 2.27E-17 | 5.43E-19 | -9.9  | 32.2697161 | -1.94E-01 | 42104596  | 42104719  | NC_000006.11 |
| cg12961080 | 2.28E-17 | 5.46E-19 | -9.9  | 32.2650443 | -1.46E-01 | 99736143  | 99736266  | NC_000014.8  |
| cg24804768 | 2.28E-17 | 5.47E-19 | -9.9  | 32.262964  | -2.00E-01 | 754911    | 755034    | NC_000012.11 |
| cg01022670 | 2.29E-17 | 5.49E-19 | -9.9  | 32.2596405 | -2.72E-01 | 729711    | 729834    | NC_000010.10 |
| cg07822305 | 2.29E-17 | 5.49E-19 | -9.9  | 32.2592937 | -1.48E-01 | 116961213 | 116961336 | NC_000001.10 |
| cg18519072 | 2.29E-17 | 5.50E-19 | -9.9  | 32.2565709 | -2.24E-01 | 56185789  | 56185912  | NC_000002.11 |
| cg25030266 | 2.32E-17 | 5.56E-19 | -9.9  | 32.2466957 | -1.88E-01 | 106077741 | 106077864 | NC_000010.10 |
| cg02782895 | 2.32E-17 | 5.56E-19 | -9.9  | 32.246014  | -1.41E-01 | 127348828 | 127348951 | NC_000003.11 |
| cg18660898 | 2.32E-17 | 5.58E-19 | -9.9  | 32.2433365 | -2.60E-01 | 151030968 | 151031091 | NC_000001.10 |
| cg03562120 | 2.33E-17 | 5.58E-19 | -9.9  | 32.2420779 | -2.24E-01 | 43343997  | 43344120  | NC_000020.10 |
| cg02464551 | 2.33E-17 | 5.59E-19 | -9.9  | 32.2405555 | -2.08E-01 | 232482571 | 232482694 | NC_000002.11 |
| cg16058274 | 2.34E-17 | 5.62E-19 | -9.9  | 32.2350858 | -2.29E-01 | 94179847  | 94179970  | NC_000014.8  |
| cg18311360 | 2.35E-17 | 5.64E-19 | -9.9  | 32.2329069 | -1.42E-01 | 34311562  | 34311685  | NC_000019.9  |
| cg08501292 | 2.35E-17 | 5.65E-19 | -9.9  | 32.2310929 | -9.76E-02 | 25962987  | 25963110  | NC_000006.11 |
| cg08601673 | 2.36E-17 | 5.68E-19 | -9.9  | 32.225327  | -2.08E-01 | 2083393   | 2083516   | NC_000016.9  |
| cg07546943 | 2.38E-17 | 5.73E-19 | -9.89 | 32.2163155 | -2.31E-01 | 236523362 | 236523485 | NC_000002.11 |
| cg25849281 | 2.39E-17 | 5.74E-19 | -9.89 | 32.2143868 | -1.99E-01 | 8937077   | 8937200   | NC_000001.10 |
| cg02498311 | 2.39E-17 | 5.74E-19 | -9.89 | 32.2140154 | -1.50E-01 | 73020358  | 73020481  | NC_000011.9  |
| cg24353833 | 2.40E-17 | 5.77E-19 | -9.89 | 32.2100604 | -7.19E-02 | 30658612  | 30658735  | NC_000006.11 |
| cg04257163 | 2.41E-17 | 5.79E-19 | -9.89 | 32.2067015 | -1.88E-01 | 89620072  | 89620195  | NC_000012.11 |
| cg00182893 | 2.41E-17 | 5.79E-19 | -9.89 | 32.2059106 | -2.19E-01 | 139861189 | 139861312 | NC_000006.11 |
| cg10433327 | 2.41E-17 | 5.80E-19 | -9.89 | 32.2052189 | -2.29E-01 | 56209506  | 56209629  | NC_000015.9  |

|            |          |          |       |            |           |           |           |              |
|------------|----------|----------|-------|------------|-----------|-----------|-----------|--------------|
| cg24766327 | 2.41E-17 | 5.80E-19 | -9.89 | 32.2050316 | -1.81E-01 | 34011175  | 34011298  | NC_000010.10 |
| cg15447017 | 2.42E-17 | 5.81E-19 | -9.89 | 32.2021675 | -1.56E-01 | 156095882 | 156096005 | NC_000001.10 |
| cg13823169 | 2.42E-17 | 5.82E-19 | -9.89 | 32.2010304 | -1.65E-01 | 139776893 | 139777016 | NC_000009.11 |
| cg09642075 | 2.42E-17 | 5.84E-19 | -9.89 | 32.198072  | -2.22E-01 | 74303043  | 74303166  | NC_000015.9  |
| cg08692423 | 2.43E-17 | 5.84E-19 | -9.89 | 32.197566  | -1.95E-01 | 45148864  | 45148987  | NC_000021.8  |
| cg00795584 | 2.44E-17 | 5.87E-19 | -9.89 | 32.193027  | -1.82E-01 | 82649352  | 82649475  | NC_000006.11 |
| cg23908385 | 2.46E-17 | 5.92E-19 | -9.89 | 32.1845823 | -1.60E-01 | 77721565  | 77721688  | NC_000018.9  |
| cg13179549 | 2.46E-17 | 5.94E-19 | -9.89 | 32.1809752 | -1.69E-01 | 39769175  | 39769298  | NC_000017.10 |
| cg18660987 | 2.48E-17 | 5.98E-19 | -9.89 | 32.1748139 | -1.11E-01 | 23355743  | 23355866  | NC_000014.8  |
| cg05227549 | 2.48E-17 | 5.99E-19 | -9.89 | 32.1731892 | -1.47E-01 | 1770782   | 1770905   | NC_000012.11 |
| cg17250262 | 2.49E-17 | 6.01E-19 | -9.89 | 32.169903  | -1.75E-01 | 30457110  | 30457233  | NC_000002.11 |
| cg10195962 | 2.49E-17 | 6.01E-19 | -9.89 | 32.1688563 | -1.93E-01 | 47656369  | 47656492  | NC_000010.10 |
| cg17726575 | 2.50E-17 | 6.03E-19 | -9.89 | 32.16572   | -2.07E-01 | 11606945  | 11607068  | NC_000002.11 |
| cg07191839 | 2.51E-17 | 6.05E-19 | -9.89 | 32.1631662 | -1.71E-01 | 149109519 | 149109642 | NC_000001.10 |
| cg19404184 | 2.51E-17 | 6.05E-19 | -9.89 | 32.1622103 | -5.09E-02 | 20438655  | 20438778  | NC_000013.10 |
| cg13079333 | 2.51E-17 | 6.06E-19 | -9.89 | 32.1615193 | -1.28E-01 | 61937483  | 61937606  | NC_000020.10 |
| cg19272348 | 2.53E-17 | 6.11E-19 | -9.88 | 32.153611  | -1.83E-01 | 1521405   | 1521528   | NC_000017.10 |
| cg12235877 | 2.53E-17 | 6.12E-19 | -9.88 | 32.1516662 | -1.61E-01 | 323392    | 323515    | NC_000012.11 |
| cg17436656 | 2.53E-17 | 6.12E-19 | -9.88 | 32.1506042 | -1.54E-01 | 53627106  | 53627229  | NC_000012.11 |
| cg10230591 | 2.54E-17 | 6.15E-19 | -9.88 | 32.1472277 | -2.18E-01 | 44818496  | 44818619  | NC_000013.10 |
| cg21205978 | 2.55E-17 | 6.16E-19 | -9.88 | 32.1450749 | -2.23E-01 | 36044151  | 36044274  | NC_000022.10 |
| cg15503081 | 2.57E-17 | 6.21E-19 | -9.88 | 32.1363485 | -1.98E-01 | 12992867  | 12992990  | NC_000019.9  |
| cg25625514 | 2.57E-17 | 6.23E-19 | -9.88 | 32.1341102 | -1.74E-01 | 76535564  | 76535687  | NC_000011.9  |
| cg16374343 | 2.58E-17 | 6.25E-19 | -9.88 | 32.1311395 | -1.59E-01 | 1014352   | 1014475   | NC_000017.10 |
| cg08701429 | 2.59E-17 | 6.26E-19 | -9.88 | 32.1296491 | -2.10E-01 | 15394553  | 15394676  | NC_000017.10 |

|                 |          |          |       |            |           |           |           |              |
|-----------------|----------|----------|-------|------------|-----------|-----------|-----------|--------------|
| cg04849850      | 2.61E-17 | 6.32E-19 | -9.88 | 32.1190487 | -1.93E-01 | 86121000  | 86121123  | NC_000002.11 |
| cg07069934      | 2.61E-17 | 6.32E-19 | -9.88 | 32.1186904 | -1.96E-01 | 89192956  | 89193079  | NC_000015.9  |
| cg22881750      | 2.62E-17 | 6.34E-19 | -9.88 | 32.116895  | -2.35E-01 | 36795406  | 36795529  | NC_000006.11 |
| ch.15.37208706R | 2.63E-17 | 6.36E-19 | -9.88 | 32.1130118 | -1.23E-01 | 39421414  | 39421537  | NC_000015.9  |
| cg00318899      | 2.63E-17 | 6.36E-19 | -9.88 | 32.1128502 | -1.47E-01 | 50284137  | 50284260  | NC_000003.11 |
| cg20243544      | 2.63E-17 | 6.37E-19 | -9.88 | 32.1111769 | -3.34E-02 | 37824526  | 37824649  | NC_000017.10 |
| cg04625338      | 2.64E-17 | 6.39E-19 | -9.88 | 32.1078159 | -2.22E-01 | 55141971  | 55142094  | NC_000007.13 |
| cg09551613      | 2.66E-17 | 6.44E-19 | -9.88 | 32.1012677 | -1.36E-01 | 96478514  | 96478637  | NC_000005.9  |
| cg26841068      | 2.66E-17 | 6.45E-19 | -9.88 | 32.099363  | -1.28E-01 | 203456691 | 203456814 | NC_000001.10 |
| cg14644871      | 2.66E-17 | 6.45E-19 | -9.88 | 32.0989167 | -1.95E-01 | 26192756  | 26192879  | NC_000007.13 |
| cg17150809      | 2.69E-17 | 6.51E-19 | -9.88 | 32.0901881 | -1.49E-01 | 99461062  | 99461185  | NC_000006.11 |
| cg01783816      | 2.69E-17 | 6.53E-19 | -9.87 | 32.0864375 | -1.77E-01 | 103523190 | 103523313 | NC_000013.10 |
| cg13819005      | 2.70E-17 | 6.54E-19 | -9.87 | 32.0861672 | -1.35E-01 | 38310922  | 38311045  | NC_000009.11 |
| cg08866665      | 2.70E-17 | 6.54E-19 | -9.87 | 32.0850849 | -1.34E-01 | 169689892 | 169690015 | NC_000006.11 |
| cg01356872      | 2.71E-17 | 6.57E-19 | -9.87 | 32.0815777 | -2.23E-01 | 225086507 | 225086630 | NC_000002.11 |
| cg13630878      | 2.73E-17 | 6.62E-19 | -9.87 | 32.0741413 | -2.32E-01 | 31215822  | 31215945  | NC_000015.9  |
| cg07892126      | 2.73E-17 | 6.63E-19 | -9.87 | 32.0721781 | -6.21E-02 | 27986306  | 27986429  | NC_000001.10 |
| cg14397690      | 2.74E-17 | 6.65E-19 | -9.87 | 32.0692157 | -1.99E-01 | 60688948  | 60689071  | NC_000015.9  |
| cg07086674      | 2.75E-17 | 6.68E-19 | -9.87 | 32.0642775 | -2.66E-01 | 169852316 | 169852439 | NC_000006.11 |
| cg09621603      | 2.76E-17 | 6.70E-19 | -9.87 | 32.0621333 | -2.09E-01 | 128210076 | 128210199 | NC_000010.10 |
| cg00002837      | 2.76E-17 | 6.71E-19 | -9.87 | 32.0602756 | -1.48E-01 | 44513358  | 44513481  | NC_000001.10 |
| cg11807006      | 2.76E-17 | 6.71E-19 | -9.87 | 32.0599633 | -1.93E-01 | 7239821   | 7239944   | NC_000017.10 |
| cg09200260      | 2.78E-17 | 6.75E-19 | -9.87 | 32.0549397 | -2.85E-01 | 36577539  | 36577662  | NC_000021.8  |
| cg03670816      | 2.78E-17 | 6.75E-19 | -9.87 | 32.0548947 | -5.83E-02 | 53606426  | 53606549  | NC_000005.9  |
| cg09508119      | 2.79E-17 | 6.77E-19 | -9.87 | 32.0516275 | -7.68E-02 | 506588    | 506711    | NC_000019.9  |

|            |          |          |       |            |           |           |           |              |
|------------|----------|----------|-------|------------|-----------|-----------|-----------|--------------|
| cg00741986 | 2.79E-17 | 6.79E-19 | -9.87 | 32.0488648 | -1.88E-01 | 2748332   | 2748455   | NC_000004.11 |
| cg26081974 | 2.80E-17 | 6.80E-19 | -9.87 | 32.0472532 | -2.38E-01 | 114065897 | 114066020 | NC_000013.10 |
| cg20161089 | 2.80E-17 | 6.82E-19 | -9.87 | 32.0440906 | -2.42E-01 | 94577514  | 94577637  | NC_000014.8  |
| cg03792964 | 2.82E-17 | 6.85E-19 | -9.87 | 32.0401853 | -2.28E-01 | 73836161  | 73836284  | NC_000003.11 |
| cg03618113 | 2.82E-17 | 6.86E-19 | -9.87 | 32.038852  | -1.90E-01 | 90163145  | 90163268  | NC_000012.11 |
| cg12563847 | 2.82E-17 | 6.87E-19 | -9.87 | 32.0366522 | -1.53E-01 | 17529499  | 17529622  | NC_000017.10 |
| cg00246451 | 2.84E-17 | 6.90E-19 | -9.87 | 32.0326576 | -2.24E-01 | 155949012 | 155949135 | NC_000001.10 |
| cg05476182 | 2.84E-17 | 6.90E-19 | -9.87 | 32.0326481 | -1.81E-01 | 133913122 | 133913245 | NC_000005.9  |
| cg14189782 | 2.86E-17 | 6.95E-19 | -9.87 | 32.0255331 | -1.42E-01 | 65342283  | 65342406  | NC_000011.9  |
| cg19035908 | 2.87E-17 | 6.99E-19 | -9.86 | 32.020156  | -1.99E-01 | 33765633  | 33765756  | NC_000019.9  |
| cg18281439 | 2.88E-17 | 7.01E-19 | -9.86 | 32.0174093 | -6.64E-02 | 134662025 | 134662148 | NC_000010.10 |
| cg19284726 | 2.88E-17 | 7.02E-19 | -9.86 | 32.0147529 | -1.71E-01 | 3482743   | 3482866   | NC_000019.9  |
| cg13249774 | 2.89E-17 | 7.04E-19 | -9.86 | 32.0125564 | -1.94E-01 | 68121506  | 68121629  | NC_000011.9  |
| cg02742555 | 2.90E-17 | 7.06E-19 | -9.86 | 32.0092761 | -1.47E-01 | 15200692  | 15200815  | NC_000011.9  |
| cg09089053 | 2.90E-17 | 7.07E-19 | -9.86 | 32.0088757 | -1.17E-01 | 40731797  | 40731920  | NC_000019.9  |
| cg25694349 | 2.90E-17 | 7.07E-19 | -9.86 | 32.0082558 | -2.52E-01 | 133065906 | 133066029 | NC_000012.11 |
| cg01138652 | 2.91E-17 | 7.08E-19 | -9.86 | 32.0062975 | -1.70E-01 | 19973978  | 19974101  | NC_000022.10 |
| cg18767964 | 2.91E-17 | 7.10E-19 | -9.86 | 32.0039823 | -1.64E-01 | 38529973  | 38530096  | NC_000001.10 |
| cg19241689 | 2.92E-17 | 7.12E-19 | -9.86 | 32.0013445 | -2.45E-01 | 33245516  | 33245639  | NC_000006.11 |
| cg17183905 | 2.92E-17 | 7.13E-19 | -9.86 | 31.9999245 | -1.18E-01 | 110253842 | 110253965 | NC_000012.11 |
| cg23568538 | 2.92E-17 | 7.14E-19 | -9.86 | 31.9992007 | -1.82E-01 | 143491714 | 143491837 | NC_000008.10 |
| cg24882290 | 2.93E-17 | 7.14E-19 | -9.86 | 31.9980548 | -6.76E-02 | 17577254  | 17577377  | NC_000019.9  |
| cg26474043 | 2.93E-17 | 7.15E-19 | -9.86 | 31.9975612 | -1.90E-01 | 148442857 | 148442980 | NC_000005.9  |
| cg13272159 | 2.94E-17 | 7.18E-19 | -9.86 | 31.9935105 | -7.95E-02 | 77561197  | 77561320  | NC_000014.8  |
| cg12491643 | 2.94E-17 | 7.18E-19 | -9.86 | 31.9927185 | -2.33E-01 | 63753697  | 63753820  | NC_000015.9  |

|            |          |          |       |            |           |           |           |              |
|------------|----------|----------|-------|------------|-----------|-----------|-----------|--------------|
| cg26986147 | 2.94E-17 | 7.19E-19 | -9.86 | 31.992325  | -1.93E-01 | 30957711  | 30957834  | NC_000022.10 |
| cg15079885 | 2.95E-17 | 7.20E-19 | -9.86 | 31.9908408 | -1.55E-01 | 32041940  | 32042063  | NC_000001.10 |
| cg10954182 | 2.95E-17 | 7.20E-19 | -9.86 | 31.9902503 | -1.22E-01 | 104532377 | 104532500 | NC_000012.11 |
| cg06786773 | 2.95E-17 | 7.21E-19 | -9.86 | 31.9894615 | -7.88E-02 | 228566997 | 228567120 | NC_000001.10 |
| cg22248286 | 2.95E-17 | 7.21E-19 | -9.86 | 31.9892572 | -1.51E-01 | 236849184 | 236849307 | NC_000002.11 |
| cg02757488 | 2.97E-17 | 7.26E-19 | -9.86 | 31.9814036 | -1.55E-01 | 41193662  | 41193785  | NC_000019.9  |
| cg26381352 | 2.98E-17 | 7.27E-19 | -9.86 | 31.9802025 | -1.81E-01 | 33244799  | 33244922  | NC_000006.11 |
| cg26607258 | 3.00E-17 | 7.32E-19 | -9.86 | 31.9733392 | -2.15E-01 | 59582768  | 59582891  | NC_000001.10 |
| cg17035591 | 3.00E-17 | 7.34E-19 | -9.86 | 31.9715661 | -1.22E-01 | 39437295  | 39437418  | NC_000022.10 |
| cg10910862 | 3.03E-17 | 7.40E-19 | -9.86 | 31.9625076 | -1.95E-01 | 170414111 | 170414234 | NC_000004.11 |
| cg26295808 | 3.04E-17 | 7.44E-19 | -9.86 | 31.9572087 | -1.19E-01 | 61822816  | 61822939  | NC_000008.10 |
| cg02273797 | 3.05E-17 | 7.47E-19 | -9.85 | 31.9533771 | -1.73E-01 | 33191153  | 33191276  | NC_000001.10 |
| cg18928737 | 3.06E-17 | 7.48E-19 | -9.85 | 31.9528497 | -1.01E-01 | 38599465  | 38599588  | NC_000017.10 |
| cg00414077 | 3.06E-17 | 7.49E-19 | -9.85 | 31.9510267 | -1.59E-01 | 35504511  | 35504634  | NC_000020.10 |
| cg06344474 | 3.06E-17 | 7.49E-19 | -9.85 | 31.9505756 | -1.88E-01 | 144801223 | 144801346 | NC_000008.10 |
| cg23290217 | 3.06E-17 | 7.50E-19 | -9.85 | 31.9503396 | -5.47E-02 | 4909290   | 4909413   | NC_000019.9  |
| cg19165105 | 3.08E-17 | 7.53E-19 | -9.85 | 31.9459665 | -1.43E-01 | 121261602 | 121261725 | NC_000001.10 |
| cg14957186 | 3.08E-17 | 7.53E-19 | -9.85 | 31.9456911 | -1.33E-01 | 72977773  | 72977896  | NC_000010.10 |
| cg23788856 | 3.09E-17 | 7.56E-19 | -9.85 | 31.9413288 | -1.04E-01 | 204159729 | 204159852 | NC_000001.10 |
| cg00302479 | 3.10E-17 | 7.60E-19 | -9.85 | 31.9362805 | -1.75E-01 | 113931538 | 113931661 | NC_000002.11 |
| cg24990612 | 3.11E-17 | 7.61E-19 | -9.85 | 31.935222  | -4.95E-02 | 39641132  | 39641255  | NC_000022.10 |
| cg12674357 | 3.13E-17 | 7.67E-19 | -9.85 | 31.9281771 | -1.98E-01 | 106957945 | 106958068 | NC_000006.11 |
| cg15965583 | 3.13E-17 | 7.67E-19 | -9.85 | 31.9271232 | -9.20E-02 | 150601949 | 150602072 | NC_000001.10 |
| cg13195954 | 3.14E-17 | 7.70E-19 | -9.85 | 31.9238284 | -6.34E-02 | 142377489 | 142377612 | NC_000008.10 |
| cg18757155 | 3.14E-17 | 7.70E-19 | -9.85 | 31.9237714 | -1.52E-01 | 24151472  | 24151595  | NC_000008.10 |

|            |          |          |       |            |           |           |           |              |
|------------|----------|----------|-------|------------|-----------|-----------|-----------|--------------|
| cg02941008 | 3.15E-17 | 7.72E-19 | -9.85 | 31.9216886 | -1.04E-01 | 20810527  | 20810650  | NC_000001.10 |
| cg11491436 | 3.18E-17 | 7.79E-19 | -9.85 | 31.9121579 | -1.94E-01 | 87374513  | 87374636  | NC_000004.11 |
| cg27533454 | 3.19E-17 | 7.83E-19 | -9.85 | 31.9068255 | -1.59E-01 | 88121642  | 88121765  | NC_000016.9  |
| cg13885205 | 3.20E-17 | 7.86E-19 | -9.85 | 31.9029167 | -1.80E-01 | 197466195 | 197466318 | NC_000002.11 |
| cg24904103 | 3.22E-17 | 7.92E-19 | -9.85 | 31.8961763 | -8.53E-02 | 66146628  | 66146751  | NC_000007.13 |
| cg07286682 | 3.24E-17 | 7.97E-19 | -9.84 | 31.8899696 | -1.78E-01 | 69447132  | 69447255  | NC_000015.9  |
| cg19013611 | 3.26E-17 | 8.00E-19 | -9.84 | 31.8864025 | -1.59E-01 | 157668051 | 157668174 | NC_000007.13 |
| cg01620701 | 3.26E-17 | 8.01E-19 | -9.84 | 31.8852167 | -2.30E-01 | 75953954  | 75954077  | NC_000015.9  |
| cg13365340 | 3.27E-17 | 8.03E-19 | -9.84 | 31.8819708 | -2.16E-01 | 33245342  | 33245465  | NC_000006.11 |
| cg20594303 | 3.34E-17 | 8.22E-19 | -9.84 | 31.8585208 | -1.91E-01 | 60680256  | 60680379  | NC_000010.10 |
| cg13612936 | 3.34E-17 | 8.22E-19 | -9.84 | 31.8584412 | -1.87E-01 | 184360400 | 184360523 | NC_000002.11 |
| cg27001715 | 3.35E-17 | 8.23E-19 | -9.84 | 31.8575552 | -1.52E-01 | 150329845 | 150329968 | NC_000006.11 |
| cg12308965 | 3.35E-17 | 8.23E-19 | -9.84 | 31.8572085 | -1.54E-01 | 67291387  | 67291510  | NC_000011.9  |
| cg15026767 | 3.35E-17 | 8.25E-19 | -9.84 | 31.8552895 | -1.82E-01 | 153521758 | 153521881 | NC_000001.10 |
| cg27199976 | 3.35E-17 | 8.25E-19 | -9.84 | 31.8548168 | -1.99E-01 | 107149396 | 107149519 | NC_000003.11 |
| cg10211776 | 3.37E-17 | 8.29E-19 | -9.84 | 31.850382  | -2.09E-01 | 37744077  | 37744200  | NC_000008.10 |
| cg24375085 | 3.39E-17 | 8.33E-19 | -9.84 | 31.8454608 | -1.17E-01 | 49804625  | 49804748  | NC_000019.9  |
| cg00456299 | 3.40E-17 | 8.38E-19 | -9.84 | 31.8400428 | -1.70E-01 | 22677736  | 22677859  | NC_000001.10 |
| cg10125703 | 3.41E-17 | 8.40E-19 | -9.84 | 31.838049  | -1.22E-01 | 49228647  | 49228770  | NC_000019.9  |
| cg20983112 | 3.41E-17 | 8.40E-19 | -9.84 | 31.8370181 | -9.63E-02 | 75480246  | 75480369  | NC_000011.9  |
| cg19831846 | 3.43E-17 | 8.45E-19 | -9.84 | 31.831367  | -6.35E-02 | 47167859  | 47167982  | NC_000002.11 |
| cg10960266 | 3.43E-17 | 8.46E-19 | -9.84 | 31.8307878 | -2.34E-01 | 11610142  | 11610265  | NC_000003.11 |
| cg22101190 | 3.44E-17 | 8.48E-19 | -9.84 | 31.8286818 | -1.59E-01 | 77896096  | 77896219  | NC_000017.10 |
| cg21776286 | 3.46E-17 | 8.53E-19 | -9.83 | 31.8220399 | -1.45E-01 | 99964298  | 99964421  | NC_000007.13 |
| cg11225357 | 3.47E-17 | 8.55E-19 | -9.83 | 31.819566  | -1.47E-01 | 79339278  | 79339401  | NC_000017.10 |

|            |          |          |       |            |           |           |           |              |
|------------|----------|----------|-------|------------|-----------|-----------|-----------|--------------|
| cg10181192 | 3.47E-17 | 8.55E-19 | -9.83 | 31.8194566 | -1.97E-01 | 56840643  | 56840766  | NC_000001.10 |
| cg09049451 | 3.48E-17 | 8.58E-19 | -9.83 | 31.8162422 | -1.86E-01 | 64774295  | 64774418  | NC_000011.9  |
| cg00058887 | 3.49E-17 | 8.61E-19 | -9.83 | 31.8128375 | -2.08E-01 | 184909018 | 184909141 | NC_000004.11 |
| cg27493649 | 3.51E-17 | 8.65E-19 | -9.83 | 31.8079576 | -5.40E-02 | 30042987  | 30043110  | NC_000006.11 |
| cg10778971 | 3.52E-17 | 8.68E-19 | -9.83 | 31.8053817 | -2.33E-01 | 94577101  | 94577224  | NC_000014.8  |
| cg13136716 | 3.52E-17 | 8.68E-19 | -9.83 | 31.804649  | -7.24E-02 | 42275153  | 42275276  | NC_000002.11 |
| cg24968786 | 3.52E-17 | 8.70E-19 | -9.83 | 31.8029436 | -6.13E-02 | 66360800  | 66360923  | NC_000011.9  |
| cg04255391 | 3.52E-17 | 8.70E-19 | -9.83 | 31.8027556 | -2.43E-01 | 145008397 | 145008520 | NC_000008.10 |
| cg10395101 | 3.54E-17 | 8.73E-19 | -9.83 | 31.799061  | -2.02E-01 | 6420858   | 6420981   | NC_000008.10 |
| cg16282892 | 3.57E-17 | 8.82E-19 | -9.83 | 31.788946  | -3.02E-01 | 193987757 | 193987880 | NC_000003.11 |
| cg22177308 | 3.58E-17 | 8.83E-19 | -9.83 | 31.787496  | -2.50E-01 | 63624698  | 63624821  | NC_000017.10 |
| cg06211255 | 3.58E-17 | 8.85E-19 | -9.83 | 31.7861606 | -1.12E-01 | 65153842  | 65153965  | NC_000011.9  |
| cg16591816 | 3.58E-17 | 8.86E-19 | -9.83 | 31.7849273 | -5.72E-02 | 170190914 | 170191037 | NC_000006.11 |
| cg07225598 | 3.60E-17 | 8.91E-19 | -9.83 | 31.7795467 | -1.27E-01 | 228646916 | 228647039 | NC_000001.10 |
| cg26894259 | 3.61E-17 | 8.93E-19 | -9.83 | 31.7770806 | -7.84E-02 | 27817246  | 27817369  | NC_000001.10 |
| cg24571822 | 3.61E-17 | 8.93E-19 | -9.83 | 31.7763589 | -1.30E-01 | 17009592  | 17009715  | NC_000010.10 |
| cg02371376 | 3.62E-17 | 8.94E-19 | -9.83 | 31.7754679 | -2.56E-01 | 77314406  | 77314529  | NC_000015.9  |
| cg14328676 | 3.62E-17 | 8.95E-19 | -9.83 | 31.7747338 | -2.46E-01 | 49077983  | 49078106  | NC_000019.9  |
| cg12272369 | 3.65E-17 | 9.03E-19 | -9.83 | 31.7659018 | -1.56E-01 | 95848841  | 95848964  | NC_000010.10 |
| cg04818594 | 3.65E-17 | 9.04E-19 | -9.83 | 31.7647882 | -2.20E-01 | 119341250 | 119341373 | NC_000011.9  |
| cg13802966 | 3.68E-17 | 9.10E-19 | -9.82 | 31.7576698 | -1.47E-01 | 104905834 | 104905957 | NC_000011.9  |
| cg23726566 | 3.68E-17 | 9.12E-19 | -9.82 | 31.7564405 | -1.16E-01 | 7051754   | 7051877   | NC_000006.11 |
| cg25577023 | 3.69E-17 | 9.12E-19 | -9.82 | 31.7557564 | -6.17E-02 | 103394899 | 103395022 | NC_000014.8  |
| cg26364899 | 3.71E-17 | 9.18E-19 | -9.82 | 31.7491797 | -3.77E-02 | 12329070  | 12329193  | NC_000003.11 |
| cg22914057 | 3.73E-17 | 9.24E-19 | -9.82 | 31.7434414 | -2.13E-01 | 1331882   | 1332005   | NC_000004.11 |

|            |          |          |       |            |           |           |           |              |
|------------|----------|----------|-------|------------|-----------|-----------|-----------|--------------|
| cg17487170 | 3.74E-17 | 9.26E-19 | -9.82 | 31.7413889 | -1.08E-01 | 133451259 | 133451382 | NC_000005.9  |
| cg06245711 | 3.74E-17 | 9.26E-19 | -9.82 | 31.7409473 | -1.52E-01 | 74260776  | 74260899  | NC_000017.10 |
| cg21493727 | 3.75E-17 | 9.28E-19 | -9.82 | 31.7384467 | -2.27E-01 | 127938624 | 127938747 | NC_000008.10 |
| cg25771140 | 3.75E-17 | 9.29E-19 | -9.82 | 31.7380916 | -7.58E-02 | 207494472 | 207494595 | NC_000001.10 |
| cg14662181 | 3.77E-17 | 9.33E-19 | -9.82 | 31.7337593 | -2.16E-01 | 192408849 | 192408972 | NC_000001.10 |
| cg05445326 | 3.78E-17 | 9.37E-19 | -9.82 | 31.7295512 | -2.34E-01 | 196065569 | 196065692 | NC_000003.11 |
| cg16105620 | 3.78E-17 | 9.37E-19 | -9.82 | 31.7294935 | -5.00E-02 | 74178684  | 74178807  | NC_000011.9  |
| cg25637972 | 3.79E-17 | 9.39E-19 | -9.82 | 31.7274275 | -2.19E-01 | 17116181  | 17116304  | NC_000006.11 |
| cg04626878 | 3.79E-17 | 9.39E-19 | -9.82 | 31.7268037 | -1.59E-01 | 62168809  | 62168932  | NC_000020.10 |
| cg25358289 | 3.80E-17 | 9.41E-19 | -9.82 | 31.7248481 | -1.25E-01 | 140012728 | 140012851 | NC_000005.9  |
| cg12355681 | 3.80E-17 | 9.41E-19 | -9.82 | 31.7247496 | -1.35E-01 | 99404153  | 99404276  | NC_000013.10 |
| cg10614223 | 3.81E-17 | 9.44E-19 | -9.82 | 31.722289  | -1.35E-01 | 18111389  | 18111512  | NC_000019.9  |
| cg20673075 | 3.82E-17 | 9.47E-19 | -9.82 | 31.7188141 | -1.22E-01 | 99838488  | 99838611  | NC_000008.10 |
| cg08275025 | 3.82E-17 | 9.48E-19 | -9.82 | 31.7173774 | -2.04E-01 | 314493    | 314616    | NC_000011.9  |
| cg08739282 | 3.84E-17 | 9.54E-19 | -9.82 | 31.7117162 | -8.86E-02 | 24586511  | 24586634  | NC_000004.11 |
| cg17416730 | 3.85E-17 | 9.55E-19 | -9.82 | 31.7108172 | -2.41E-01 | 33245541  | 33245664  | NC_000006.11 |
| cg27076536 | 3.85E-17 | 9.57E-19 | -9.82 | 31.7086805 | -2.09E-01 | 70728001  | 70728124  | NC_000016.9  |
| cg07586026 | 3.87E-17 | 9.60E-19 | -9.82 | 31.7051766 | -1.85E-01 | 12600225  | 12600348  | NC_000001.10 |
| cg22507023 | 3.87E-17 | 9.60E-19 | -9.82 | 31.7048265 | -2.17E-01 | 55946195  | 55946318  | NC_000017.10 |
| cg19828516 | 3.88E-17 | 9.64E-19 | -9.82 | 31.7011724 | -1.59E-01 | 105531855 | 105531978 | NC_000014.8  |
| cg21268653 | 3.90E-17 | 9.70E-19 | -9.82 | 31.6944658 | -1.49E-01 | 116961672 | 116961795 | NC_000001.10 |
| cg07937427 | 3.91E-17 | 9.71E-19 | -9.82 | 31.693829  | -2.78E-01 | 59592763  | 59592886  | NC_000015.9  |
| cg04920527 | 3.91E-17 | 9.73E-19 | -9.81 | 31.6923006 | -8.65E-02 | 153505651 | 153505774 | NC_000001.10 |
| cg12235788 | 3.94E-17 | 9.80E-19 | -9.81 | 31.6848897 | -1.87E-01 | 123476518 | 123476641 | NC_000003.11 |
| cg04499514 | 3.94E-17 | 9.80E-19 | -9.81 | 31.6845817 | -2.84E-01 | 8219020   | 8219143   | NC_000012.11 |



|            |          |          |       |            |           |           |           |              |
|------------|----------|----------|-------|------------|-----------|-----------|-----------|--------------|
| cg16777057 | 3.94E-17 | 9.81E-19 | -9.81 | 31.6840403 | -4.46E-02 | 219774048 | 219774171 | NC_000002.11 |
| cg11545360 | 3.95E-17 | 9.81E-19 | -9.81 | 31.6833473 | -6.62E-02 | 96793417  | 96793540  | NC_000012.11 |
| cg11219400 | 3.97E-17 | 9.89E-19 | -9.81 | 31.6761674 | -1.96E-01 | 36949966  | 36950089  | NC_000003.11 |
| cg22908423 | 3.98E-17 | 9.90E-19 | -9.81 | 31.6745623 | -1.72E-01 | 101947241 | 101947364 | NC_000014.8  |
| cg01112020 | 3.98E-17 | 9.92E-19 | -9.81 | 31.6729583 | -1.30E-01 | 239008986 | 239009109 | NC_000002.11 |
| cg24512400 | 4.01E-17 | 9.99E-19 | -9.81 | 31.6653414 | -1.66E-01 | 51522561  | 51522684  | NC_000019.9  |
| cg14284257 | 4.02E-17 | 1.00E-18 | -9.81 | 31.6642941 | -2.55E-01 | 95060347  | 95060470  | NC_000007.13 |
| cg24626851 | 4.02E-17 | 1.00E-18 | -9.81 | 31.6630983 | -1.13E-01 | 35350721  | 35350844  | NC_000001.10 |
| cg01636582 | 4.03E-17 | 1.00E-18 | -9.81 | 31.6616551 | -1.42E-01 | 844593    | 844716    | NC_000011.9  |
| cg08943045 | 4.03E-17 | 1.00E-18 | -9.81 | 31.6611974 | -1.37E-01 | 9043919   | 9044042   | NC_000001.10 |
| cg19945931 | 4.06E-17 | 1.01E-18 | -9.81 | 31.6525832 | -2.27E-01 | 133022760 | 133022883 | NC_000012.11 |
| cg10764891 | 4.07E-17 | 1.01E-18 | -9.81 | 31.6512961 | -2.26E-01 | 100434934 | 100435057 | NC_000014.8  |
| cg02912371 | 4.08E-17 | 1.02E-18 | -9.81 | 31.647142  | -1.85E-01 | 205913859 | 205913982 | NC_000001.10 |
| cg20081244 | 4.09E-17 | 1.02E-18 | -9.81 | 31.6453353 | -9.12E-02 | 79859945  | 79860068  | NC_000017.10 |
| cg02132760 | 4.09E-17 | 1.02E-18 | -9.81 | 31.6447826 | -9.79E-02 | 18416547  | 18416670  | NC_000011.9  |
| cg14953730 | 4.10E-17 | 1.02E-18 | -9.81 | 31.642338  | -1.64E-01 | 134498830 | 134498953 | NC_000010.10 |
| cg24476153 | 4.12E-17 | 1.03E-18 | -9.81 | 31.6376795 | -1.17E-01 | 142139938 | 142140061 | NC_000008.10 |
| cg27348266 | 4.13E-17 | 1.03E-18 | -9.81 | 31.6335729 | -1.24E-01 | 104583972 | 104584095 | NC_000014.8  |
| cg07123038 | 4.15E-17 | 1.04E-18 | -9.81 | 31.6302407 | -1.31E-01 | 8403925   | 8404048   | NC_000001.10 |
| cg10609868 | 4.16E-17 | 1.04E-18 | -9.8  | 31.6268075 | -2.27E-01 | 81963379  | 81963502  | NC_000008.10 |
| cg02900441 | 4.18E-17 | 1.05E-18 | -9.8  | 31.6206996 | -2.27E-01 | 15911134  | 15911257  | NC_000001.10 |
| cg18719939 | 4.20E-17 | 1.05E-18 | -9.8  | 31.6176948 | -1.31E-01 | 48545308  | 48545431  | NC_000003.11 |
| cg14358282 | 4.20E-17 | 1.05E-18 | -9.8  | 31.6161328 | -6.12E-02 | 219866628 | 219866751 | NC_000002.11 |
| cg17031543 | 4.20E-17 | 1.05E-18 | -9.8  | 31.6153219 | -1.62E-01 | 52918471  | 52918594  | NC_000004.11 |
| cg13685506 | 4.22E-17 | 1.05E-18 | -9.8  | 31.6119234 | -2.13E-01 | 11851713  | 11851836  | NC_000005.9  |

|            |          |          |       |            |           |           |           |              |
|------------|----------|----------|-------|------------|-----------|-----------|-----------|--------------|
| cg27041554 | 4.22E-17 | 1.06E-18 | -9.8  | 31.6104183 | -7.94E-02 | 30068899  | 30069022  | NC_000006.11 |
| cg02243495 | 4.23E-17 | 1.06E-18 | -9.8  | 31.6080575 | -8.20E-02 | 48227139  | 48227262  | NC_000017.10 |
| cg26037936 | 4.25E-17 | 1.06E-18 | -9.8  | 31.6039856 | -2.30E-01 | 120417671 | 120417794 | NC_000011.9  |
| cg06595022 | 4.25E-17 | 1.06E-18 | -9.8  | 31.6036029 | -1.87E-01 | 1912448   | 1912571   | NC_000019.9  |
| cg18201505 | 4.26E-17 | 1.07E-18 | -9.8  | 31.6008525 | -1.69E-01 | 159052446 | 159052569 | NC_000006.11 |
| cg17187163 | 4.26E-17 | 1.07E-18 | -9.8  | 31.6007651 | -1.07E-01 | 238395007 | 238395130 | NC_000002.11 |
| cg11446240 | 4.27E-17 | 1.07E-18 | -9.8  | 31.598425  | -7.68E-02 | 136633306 | 136633429 | NC_000002.11 |
| cg27050612 | 4.29E-17 | 1.07E-18 | -9.8  | 31.5940511 | -1.61E-01 | 46133198  | 46133321  | NC_000017.10 |
| cg15120085 | 4.30E-17 | 1.08E-18 | -9.8  | 31.5916321 | -1.45E-01 | 32041898  | 32042021  | NC_000001.10 |
| cg07318287 | 4.32E-17 | 1.08E-18 | -9.8  | 31.5862226 | -7.75E-02 | 154377429 | 154377552 | NC_000001.10 |
| cg24722348 | 4.33E-17 | 1.09E-18 | -9.8  | 31.5836553 | -1.57E-01 | 21900987  | 21901110  | NC_000001.10 |
| cg01574788 | 4.33E-17 | 1.09E-18 | -9.8  | 31.5831899 | -1.84E-01 | 12184133  | 12184256  | NC_000016.9  |
| cg11888982 | 4.35E-17 | 1.09E-18 | -9.8  | 31.5780892 | -2.67E-01 | 116231420 | 116231543 | NC_000008.10 |
| cg27504369 | 4.39E-17 | 1.10E-18 | -9.8  | 31.5688944 | -2.02E-01 | 39353550  | 39353673  | NC_000022.10 |
| cg14442061 | 4.39E-17 | 1.10E-18 | -9.8  | 31.5684261 | -6.52E-02 | 17740468  | 17740591  | NC_000017.10 |
| cg04487659 | 4.41E-17 | 1.11E-18 | -9.8  | 31.5655354 | -1.24E-01 | 43510575  | 43510698  | NC_000017.10 |
| cg21255657 | 4.41E-17 | 1.11E-18 | -9.8  | 31.5649992 | -1.18E-01 | 77006304  | 77006427  | NC_000017.10 |
| cg08620095 | 4.41E-17 | 1.11E-18 | -9.8  | 31.5644666 | -1.11E-01 | 51530970  | 51531093  | NC_000019.9  |
| cg21937377 | 4.41E-17 | 1.11E-18 | -9.8  | 31.5640986 | -3.11E-01 | 194868750 | 194868873 | NC_000003.11 |
| cg27326514 | 4.41E-17 | 1.11E-18 | -9.8  | 31.5636738 | -1.97E-01 | 80527604  | 80527727  | NC_000008.10 |
| cg14409083 | 4.42E-17 | 1.11E-18 | -9.79 | 31.5611257 | -1.20E-01 | 13349724  | 13349847  | NC_000012.11 |
| cg26270195 | 4.43E-17 | 1.11E-18 | -9.79 | 31.5607967 | -2.38E-01 | 33245553  | 33245676  | NC_000006.11 |
| cg15740507 | 4.43E-17 | 1.11E-18 | -9.79 | 31.5597152 | -2.37E-01 | 99988576  | 99988699  | NC_000003.11 |
| cg19367918 | 4.44E-17 | 1.11E-18 | -9.79 | 31.5574933 | -2.09E-01 | 2154603   | 2154726   | NC_000019.9  |
| cg17709953 | 4.45E-17 | 1.12E-18 | -9.79 | 31.5537402 | -8.41E-02 | 97379796  | 97379919  | NC_000012.11 |

|            |          |          |       |            |           |           |           |              |
|------------|----------|----------|-------|------------|-----------|-----------|-----------|--------------|
| cg26026748 | 4.45E-17 | 1.12E-18 | -9.79 | 31.5536383 | -1.01E-01 | 164629875 | 164629998 | NC_000001.10 |
| cg01605783 | 4.46E-17 | 1.12E-18 | -9.79 | 31.5526629 | -1.74E-01 | 45232587  | 45232710  | NC_000021.8  |
| cg01899130 | 4.46E-17 | 1.12E-18 | -9.79 | 31.5520685 | -2.07E-01 | 55348681  | 55348804  | NC_000014.8  |
| cg18291443 | 4.48E-17 | 1.13E-18 | -9.79 | 31.5467619 | -2.12E-01 | 157178134 | 157178257 | NC_000003.11 |
| cg16100355 | 4.49E-17 | 1.13E-18 | -9.79 | 31.5448278 | -2.43E-01 | 113648607 | 113648730 | NC_000013.10 |
| cg09153812 | 4.50E-17 | 1.13E-18 | -9.79 | 31.5426346 | -7.47E-02 | 69112656  | 69112779  | NC_000015.9  |
| cg02082342 | 4.50E-17 | 1.13E-18 | -9.79 | 31.5423561 | -2.08E-01 | 124622373 | 124622496 | NC_000011.9  |
| cg14205632 | 4.51E-17 | 1.13E-18 | -9.79 | 31.5406865 | -1.38E-01 | 104524118 | 104524241 | NC_000007.13 |
| cg27173151 | 4.52E-17 | 1.14E-18 | -9.79 | 31.5382085 | -1.61E-01 | 203598330 | 203598453 | NC_000001.10 |
| cg14972328 | 4.52E-17 | 1.14E-18 | -9.79 | 31.5379991 | -5.80E-02 | 191046866 | 191046989 | NC_000003.11 |
| cg18866281 | 4.53E-17 | 1.14E-18 | -9.79 | 31.5357408 | -1.60E-01 | 246948597 | 246948720 | NC_000001.10 |
| cg14839501 | 4.55E-17 | 1.14E-18 | -9.79 | 31.5311333 | -1.49E-01 | 22836819  | 22836942  | NC_000015.9  |
| cg04772025 | 4.56E-17 | 1.15E-18 | -9.79 | 31.5285869 | -2.48E-01 | 68637568  | 68637691  | NC_000011.9  |
| cg06643271 | 4.57E-17 | 1.15E-18 | -9.79 | 31.5273773 | -1.30E-01 | 76128170  | 76128293  | NC_000017.10 |
| cg09856299 | 4.57E-17 | 1.15E-18 | -9.79 | 31.5271177 | -5.80E-02 | 145060532 | 145060655 | NC_000008.10 |
| cg03885664 | 4.57E-17 | 1.15E-18 | -9.79 | 31.5258471 | -1.08E-01 | 56554271  | 56554394  | NC_000016.9  |
| cg03507593 | 4.58E-17 | 1.15E-18 | -9.79 | 31.5239784 | -2.38E-01 | 124939480 | 124939603 | NC_000012.11 |
| cg13328209 | 4.58E-17 | 1.15E-18 | -9.79 | 31.523327  | -1.73E-01 | 125223502 | 125223625 | NC_000012.11 |
| cg18302786 | 4.60E-17 | 1.16E-18 | -9.79 | 31.5196855 | -1.15E-01 | 17488281  | 17488404  | NC_000019.9  |
| cg06469726 | 4.60E-17 | 1.16E-18 | -9.79 | 31.5195899 | -2.23E-01 | 242483467 | 242483590 | NC_000002.11 |
| cg17430214 | 4.61E-17 | 1.16E-18 | -9.79 | 31.5170763 | -1.15E-01 | 41246904  | 41247027  | NC_000006.11 |
| cg09418984 | 4.61E-17 | 1.16E-18 | -9.79 | 31.5161807 | -2.86E-01 | 54369447  | 54369570  | NC_000019.9  |
| cg03763873 | 4.67E-17 | 1.18E-18 | -9.79 | 31.5040049 | -1.14E-01 | 43565901  | 43566024  | NC_000013.10 |
| cg08140459 | 4.68E-17 | 1.18E-18 | -9.79 | 31.5017334 | -1.55E-01 | 75086513  | 75086636  | NC_000014.8  |
| cg10275770 | 4.70E-17 | 1.18E-18 | -9.79 | 31.497471  | -1.84E-01 | 62084205  | 62084328  | NC_000017.10 |

|            |          |          |       |            |           |           |           |              |
|------------|----------|----------|-------|------------|-----------|-----------|-----------|--------------|
| cg13423554 | 4.71E-17 | 1.19E-18 | -9.78 | 31.4947229 | -2.35E-01 | 42317463  | 42317586  | NC_000001.10 |
| cg24611351 | 4.74E-17 | 1.19E-18 | -9.78 | 31.4891415 | -1.07E-01 | 71228551  | 71228674  | NC_000002.11 |
| cg25461389 | 4.74E-17 | 1.19E-18 | -9.78 | 31.4887202 | -1.53E-01 | 52080778  | 52080901  | NC_000003.11 |
| cg26712743 | 4.75E-17 | 1.20E-18 | -9.78 | 31.4860782 | -2.10E-01 | 100164594 | 100164717 | NC_000010.10 |
| cg04388983 | 4.75E-17 | 1.20E-18 | -9.78 | 31.4853373 | -8.42E-02 | 72929844  | 72929967  | NC_000011.9  |
| cg10214581 | 4.79E-17 | 1.21E-18 | -9.78 | 31.4771241 | -1.76E-01 | 94811949  | 94812072  | NC_000014.8  |
| cg05504759 | 4.80E-17 | 1.21E-18 | -9.78 | 31.476221  | -1.89E-01 | 52087583  | 52087706  | NC_000003.11 |
| cg21498475 | 4.80E-17 | 1.21E-18 | -9.78 | 31.474975  | -1.73E-01 | 113737469 | 113737592 | NC_000012.11 |
| cg25104511 | 4.81E-17 | 1.21E-18 | -9.78 | 31.4729203 | -1.13E-01 | 38333503  | 38333626  | NC_000017.10 |
| cg09146232 | 4.81E-17 | 1.21E-18 | -9.78 | 31.4718504 | -2.17E-01 | 64672129  | 64672252  | NC_000017.10 |
| cg14518185 | 4.82E-17 | 1.22E-18 | -9.78 | 31.4708675 | -2.57E-01 | 68648563  | 68648686  | NC_000014.8  |
| cg01421380 | 4.84E-17 | 1.22E-18 | -9.78 | 31.4662979 | -1.09E-01 | 62446817  | 62446940  | NC_000011.9  |
| cg14777768 | 4.85E-17 | 1.22E-18 | -9.78 | 31.4648475 | -1.92E-01 | 170746265 | 170746388 | NC_000003.11 |
| cg22527425 | 4.85E-17 | 1.23E-18 | -9.78 | 31.4630428 | -1.02E-01 | 21044753  | 21044876  | NC_000001.10 |
| cg19229716 | 4.87E-17 | 1.23E-18 | -9.78 | 31.4605136 | -2.36E-01 | 134940972 | 134941095 | NC_000006.11 |
| cg11826008 | 4.89E-17 | 1.24E-18 | -9.78 | 31.4543827 | -2.25E-01 | 34249284  | 34249407  | NC_000020.10 |
| cg16466750 | 4.90E-17 | 1.24E-18 | -9.78 | 31.4530503 | -2.17E-01 | 214685    | 214808    | NC_000007.13 |
| cg10124440 | 4.90E-17 | 1.24E-18 | -9.78 | 31.4526471 | -1.61E-01 | 6960295   | 6960418   | NC_000012.11 |
| cg09723635 | 4.91E-17 | 1.24E-18 | -9.78 | 31.4507691 | -2.57E-01 | 17866039  | 17866162  | NC_000006.11 |
| cg13548265 | 4.93E-17 | 1.25E-18 | -9.78 | 31.4466749 | -7.63E-02 | 67889607  | 67889730  | NC_000011.9  |
| cg23509272 | 4.97E-17 | 1.26E-18 | -9.78 | 31.4372514 | -1.04E-01 | 40346296  | 40346419  | NC_000017.10 |
| cg15500907 | 4.99E-17 | 1.26E-18 | -9.78 | 31.4345442 | -3.02E-01 | 112438951 | 112439074 | NC_000006.11 |
| cg06060054 | 4.99E-17 | 1.26E-18 | -9.78 | 31.4337224 | -9.98E-02 | 19097732  | 19097855  | NC_000016.9  |
| cg01423643 | 5.01E-17 | 1.27E-18 | -9.77 | 31.4293544 | -2.16E-01 | 160992358 | 160992481 | NC_000001.10 |
| cg27085821 | 5.03E-17 | 1.27E-18 | -9.77 | 31.4248492 | -8.68E-02 | 30103624  | 30103747  | NC_000016.9  |

|                 |          |          |       |            |           |           |           |              |
|-----------------|----------|----------|-------|------------|-----------|-----------|-----------|--------------|
| ch.15.96924465R | 5.05E-17 | 1.28E-18 | -9.77 | 31.4216965 | -9.84E-02 | 99106942  | 99107065  | NC_000015.9  |
| cg05856951      | 5.06E-17 | 1.28E-18 | -9.77 | 31.4203821 | -2.01E-01 | 4545328   | 4545451   | NC_000016.9  |
| cg02101203      | 5.09E-17 | 1.29E-18 | -9.77 | 31.4141637 | -2.06E-01 | 14050521  | 14050644  | NC_000010.10 |
| cg17753212      | 5.10E-17 | 1.29E-18 | -9.77 | 31.4118789 | -2.36E-01 | 6659562   | 6659685   | NC_000017.10 |
| cg09937039      | 5.10E-17 | 1.29E-18 | -9.77 | 31.4116585 | -1.98E-01 | 75989203  | 75989326  | NC_000014.8  |
| cg22476269      | 5.10E-17 | 1.29E-18 | -9.77 | 31.4116417 | -7.43E-02 | 61335865  | 61335988  | NC_000020.10 |
| cg13833596      | 5.11E-17 | 1.29E-18 | -9.77 | 31.4091455 | -1.12E-01 | 120302499 | 120302622 | NC_000002.11 |
| cg07470207      | 5.11E-17 | 1.30E-18 | -9.77 | 31.4083861 | -2.70E-01 | 132828746 | 132828869 | NC_000008.10 |
| cg14754581      | 5.15E-17 | 1.31E-18 | -9.77 | 31.4002272 | -1.53E-01 | 46448753  | 46448876  | NC_000003.11 |
| cg11688949      | 5.17E-17 | 1.31E-18 | -9.77 | 31.3965201 | -1.46E-01 | 27115956  | 27116079  | NC_000008.10 |
| cg25378003      | 5.17E-17 | 1.31E-18 | -9.77 | 31.3958746 | -1.51E-01 | 41472488  | 41472611  | NC_000006.11 |
| cg07143451      | 5.18E-17 | 1.31E-18 | -9.77 | 31.3953731 | -1.24E-01 | 25676440  | 25676563  | NC_000017.10 |
| cg05407338      | 5.19E-17 | 1.32E-18 | -9.77 | 31.392596  | -1.80E-01 | 8213522   | 8213645   | NC_000017.10 |
| cg14693090      | 5.20E-17 | 1.32E-18 | -9.77 | 31.3905006 | -1.95E-01 | 11899281  | 11899404  | NC_000012.11 |
| cg18672998      | 5.22E-17 | 1.32E-18 | -9.77 | 31.3860814 | -1.66E-01 | 1157306   | 1157429   | NC_000017.10 |
| cg01055868      | 5.22E-17 | 1.33E-18 | -9.77 | 31.3858682 | -2.44E-01 | 71307284  | 71307407  | NC_000003.11 |
| cg00552704      | 5.25E-17 | 1.33E-18 | -9.77 | 31.3806612 | -1.27E-01 | 32121420  | 32121543  | NC_000006.11 |
| cg21072795      | 5.25E-17 | 1.33E-18 | -9.77 | 31.3793556 | -1.30E-01 | 54920931  | 54921054  | NC_000012.11 |
| cg22505962      | 5.26E-17 | 1.33E-18 | -9.77 | 31.378668  | -1.22E-01 | 45067627  | 45067750  | NC_000003.11 |
| cg14003265      | 5.26E-17 | 1.34E-18 | -9.77 | 31.3776186 | -1.79E-01 | 139796499 | 139796622 | NC_000009.11 |
| cg20627046      | 5.28E-17 | 1.34E-18 | -9.77 | 31.3746282 | -1.87E-01 | 201271178 | 201271301 | NC_000002.11 |
| cg04144611      | 5.28E-17 | 1.34E-18 | -9.77 | 31.3735034 | -1.33E-01 | 229477268 | 229477391 | NC_000001.10 |
| cg10696787      | 5.29E-17 | 1.34E-18 | -9.77 | 31.3715061 | -9.77E-02 | 65242740  | 65242863  | NC_000017.10 |
| cg00337466      | 5.29E-17 | 1.34E-18 | -9.77 | 31.3714074 | -1.81E-01 | 135090565 | 135090688 | NC_000010.10 |
| cg00716390      | 5.31E-17 | 1.35E-18 | -9.77 | 31.3687044 | -4.48E-02 | 99953809  | 99953932  | NC_000008.10 |

|             |          |          |       |            |           |           |           |              |
|-------------|----------|----------|-------|------------|-----------|-----------|-----------|--------------|
| cg08557246  | 5.32E-17 | 1.35E-18 | -9.77 | 31.366464  | -1.80E-01 | 8081417   | 8081540   | NC_000004.11 |
| cg13460980  | 5.32E-17 | 1.35E-18 | -9.76 | 31.364919  | -7.59E-02 | 55746328  | 55746451  | NC_000002.11 |
| cg19147390  | 5.33E-17 | 1.36E-18 | -9.76 | 31.3637445 | -1.72E-01 | 4911058   | 4911181   | NC_000019.9  |
| cg04015759  | 5.35E-17 | 1.36E-18 | -9.76 | 31.3589873 | -5.53E-02 | 27718181  | 27718304  | NC_000002.11 |
| cg25831439  | 5.38E-17 | 1.37E-18 | -9.76 | 31.3535376 | -2.10E-01 | 161508799 | 161508922 | NC_000002.11 |
| cg26457700  | 5.39E-17 | 1.37E-18 | -9.76 | 31.3522565 | -2.21E-01 | 80289541  | 80289664  | NC_000017.10 |
| cg01723876  | 5.40E-17 | 1.37E-18 | -9.76 | 31.3499912 | -1.63E-01 | 21978856  | 21978979  | NC_000001.10 |
| cg15618646  | 5.40E-17 | 1.38E-18 | -9.76 | 31.3492067 | -2.03E-01 | 154473202 | 154473325 | NC_000007.13 |
| cg25818214  | 5.44E-17 | 1.38E-18 | -9.76 | 31.3429358 | -1.93E-01 | 64211155  | 64211278  | NC_000003.11 |
| cg20663364  | 5.44E-17 | 1.38E-18 | -9.76 | 31.3422118 | -8.58E-02 | 120110627 | 120110750 | NC_000011.9  |
| cg22638491  | 5.44E-17 | 1.39E-18 | -9.76 | 31.3418244 | -1.19E-01 | 73706676  | 73706799  | NC_000014.8  |
| cg16384957  | 5.45E-17 | 1.39E-18 | -9.76 | 31.3406749 | -2.21E-01 | 1050848   | 1050971   | NC_000011.9  |
| cg23555340  | 5.45E-17 | 1.39E-18 | -9.76 | 31.3400931 | -8.02E-02 | 105865269 | 105865392 | NC_000014.8  |
| cg11667061  | 5.48E-17 | 1.39E-18 | -9.76 | 31.3352469 | -2.78E-01 | 101909021 | 101909144 | NC_000014.8  |
| cg07579404  | 5.48E-17 | 1.39E-18 | -9.76 | 31.3350714 | -1.02E-01 | 150346721 | 150346844 | NC_000006.11 |
| cg09657173  | 5.48E-17 | 1.39E-18 | -9.76 | 31.3350236 | -9.80E-02 | 30923593  | 30923716  | NC_000006.11 |
| cg27002516  | 5.48E-17 | 1.40E-18 | -9.76 | 31.3337813 | -8.04E-02 | 111835267 | 111835390 | NC_000012.11 |
| cg08908004  | 5.49E-17 | 1.40E-18 | -9.76 | 31.3324986 | -7.87E-02 | 25959712  | 25959835  | NC_000022.10 |
| cg21840041  | 5.51E-17 | 1.41E-18 | -9.76 | 31.3277099 | -1.01E-01 | 232478360 | 232478483 | NC_000002.11 |
| cg01146614  | 5.53E-17 | 1.41E-18 | -9.76 | 31.3239705 | -1.13E-01 | 159235211 | 159235334 | NC_000006.11 |
| cg03168497  | 5.54E-17 | 1.41E-18 | -9.76 | 31.3227028 | -2.33E-01 | 48586147  | 48586270  | NC_000017.10 |
| cg19928046  | 5.54E-17 | 1.41E-18 | -9.76 | 31.3226057 | -9.40E-02 | 149792249 | 149792372 | NC_000005.9  |
| ch.4.97150F | 5.58E-17 | 1.42E-18 | -9.76 | 31.3144929 | -7.08E-02 | 2368003   | 2368126   | NC_000004.11 |
| cg22605643  | 5.58E-17 | 1.42E-18 | -9.76 | 31.3144178 | -1.42E-01 | 163039012 | 163039135 | NC_000001.10 |
| cg14613540  | 5.59E-17 | 1.43E-18 | -9.76 | 31.3136766 | -1.20E-01 | 61616369  | 61616492  | NC_000018.9  |

|                  |          |          |       |            |           |           |           |              |
|------------------|----------|----------|-------|------------|-----------|-----------|-----------|--------------|
| cg05922057       | 5.60E-17 | 1.43E-18 | -9.76 | 31.311048  | -5.36E-02 | 4047571   | 4047694   | NC_000017.10 |
| cg02268951       | 5.62E-17 | 1.43E-18 | -9.76 | 31.3079673 | -5.44E-02 | 114018864 | 114018987 | NC_000013.10 |
| ch.12.105153690R | 5.67E-17 | 1.45E-18 | -9.75 | 31.2987258 | -1.04E-01 | 106629560 | 106629683 | NC_000012.11 |
| cg26055899       | 5.68E-17 | 1.45E-18 | -9.75 | 31.2959645 | -2.49E-01 | 154462759 | 154462882 | NC_000004.11 |
| cg06080831       | 5.71E-17 | 1.46E-18 | -9.75 | 31.2915318 | -7.78E-02 | 107150032 | 107150155 | NC_000003.11 |
| cg19084893       | 5.71E-17 | 1.46E-18 | -9.75 | 31.2912438 | -1.41E-01 | 31688959  | 31689082  | NC_000001.10 |
| cg01506917       | 5.72E-17 | 1.46E-18 | -9.75 | 31.2895533 | -1.57E-01 | 42417086  | 42417209  | NC_000006.11 |
| cg11095099       | 5.72E-17 | 1.46E-18 | -9.75 | 31.2893461 | -1.96E-01 | 195604374 | 195604497 | NC_000003.11 |
| cg07688490       | 5.72E-17 | 1.46E-18 | -9.75 | 31.2883046 | -1.88E-01 | 129685695 | 129685818 | NC_000011.9  |
| cg00592007       | 5.78E-17 | 1.48E-18 | -9.75 | 31.2787936 | -1.20E-01 | 1226235   | 1226358   | NC_000016.9  |
| cg09043456       | 5.79E-17 | 1.48E-18 | -9.75 | 31.2765618 | -1.53E-01 | 79024087  | 79024210  | NC_000017.10 |
| cg01120165       | 5.81E-17 | 1.49E-18 | -9.75 | 31.2726969 | -8.77E-02 | 50690152  | 50690275  | NC_000022.10 |
| cg14176942       | 5.83E-17 | 1.49E-18 | -9.75 | 31.269618  | -1.99E-01 | 125146434 | 125146557 | NC_000009.11 |
| cg13893707       | 5.84E-17 | 1.49E-18 | -9.75 | 31.266989  | -1.42E-01 | 101749605 | 101749728 | NC_000009.11 |
| cg00514486       | 5.89E-17 | 1.51E-18 | -9.75 | 31.2590105 | -1.59E-01 | 49837348  | 49837471  | NC_000003.11 |
| cg09056317       | 5.89E-17 | 1.51E-18 | -9.75 | 31.2589211 | -1.13E-01 | 36607008  | 36607131  | NC_000019.9  |
| cg04071779       | 5.89E-17 | 1.51E-18 | -9.75 | 31.2577869 | -1.46E-01 | 30517627  | 30517750  | NC_000007.13 |
| cg09920557       | 5.90E-17 | 1.51E-18 | -9.75 | 31.2561187 | -2.25E-01 | 61553938  | 61554061  | NC_000017.10 |
| cg19301742       | 5.90E-17 | 1.51E-18 | -9.75 | 31.2558109 | -1.15E-01 | 33421180  | 33421303  | NC_000006.11 |
| cg22492020       | 5.90E-17 | 1.51E-18 | -9.75 | 31.2553427 | -7.24E-02 | 66648688  | 66648811  | NC_000015.9  |
| cg12165685       | 5.90E-17 | 1.51E-18 | -9.75 | 31.2552868 | -1.16E-01 | 47288109  | 47288232  | NC_000019.9  |
| cg21735491       | 5.94E-17 | 1.52E-18 | -9.75 | 31.2493741 | -4.44E-02 | 66749665  | 66749788  | NC_000011.9  |
| cg26758551       | 5.95E-17 | 1.52E-18 | -9.75 | 31.2469951 | -1.08E-01 | 209921096 | 209921219 | NC_000001.10 |
| cg13655341       | 5.95E-17 | 1.53E-18 | -9.75 | 31.2463663 | -1.61E-01 | 79859826  | 79859949  | NC_000017.10 |
| cg03049445       | 5.97E-17 | 1.53E-18 | -9.75 | 31.2439247 | -2.04E-01 | 21277954  | 21278077  | NC_000006.11 |

|            |          |          |       |            |           |           |           |              |
|------------|----------|----------|-------|------------|-----------|-----------|-----------|--------------|
| cg16206504 | 5.97E-17 | 1.53E-18 | -9.75 | 31.2424701 | -1.50E-01 | 114917223 | 114917346 | NC_000013.10 |
| cg23665568 | 5.98E-17 | 1.53E-18 | -9.75 | 31.2421019 | -1.71E-01 | 85745053  | 85745176  | NC_000001.10 |
| cg17732894 | 5.98E-17 | 1.53E-18 | -9.75 | 31.2416504 | -1.16E-01 | 1004699   | 1004822   | NC_000007.13 |
| cg12166570 | 5.98E-17 | 1.53E-18 | -9.75 | 31.2412379 | -5.95E-02 | 74225642  | 74225765  | NC_000014.8  |
| cg13790576 | 5.99E-17 | 1.54E-18 | -9.75 | 31.2392441 | -1.41E-01 | 139640661 | 139640784 | NC_000009.11 |
| cg12793803 | 6.00E-17 | 1.54E-18 | -9.75 | 31.2383072 | -1.79E-01 | 62084217  | 62084340  | NC_000017.10 |
| cg09146813 | 6.00E-17 | 1.54E-18 | -9.75 | 31.237655  | -2.00E-01 | 178286626 | 178286749 | NC_000005.9  |
| cg19767205 | 6.00E-17 | 1.54E-18 | -9.75 | 31.2372718 | -1.92E-01 | 141255282 | 141255405 | NC_000005.9  |
| cg23681213 | 6.00E-17 | 1.54E-18 | -9.75 | 31.2365603 | -1.00E-01 | 74180391  | 74180514  | NC_000014.8  |
| cg04845060 | 6.01E-17 | 1.54E-18 | -9.75 | 31.2353695 | -1.65E-01 | 53455270  | 53455393  | NC_000004.11 |
| cg20699701 | 6.03E-17 | 1.55E-18 | -9.74 | 31.2328749 | -1.41E-01 | 3089762   | 3089885   | NC_000001.10 |
| cg19103704 | 6.04E-17 | 1.55E-18 | -9.74 | 31.2304781 | -1.47E-01 | 40440963  | 40441086  | NC_000019.9  |
| cg15229275 | 6.04E-17 | 1.55E-18 | -9.74 | 31.2300653 | -1.64E-01 | 46800054  | 46800177  | NC_000019.9  |
| cg00025357 | 6.05E-17 | 1.55E-18 | -9.74 | 31.2291797 | -1.64E-01 | 17577455  | 17577578  | NC_000001.10 |
| cg24900654 | 6.05E-17 | 1.55E-18 | -9.74 | 31.2284962 | -1.25E-01 | 44285594  | 44285717  | NC_000019.9  |
| cg18870532 | 6.07E-17 | 1.56E-18 | -9.74 | 31.2248412 | -8.14E-02 | 142139341 | 142139464 | NC_000008.10 |
| cg20912978 | 6.11E-17 | 1.57E-18 | -9.74 | 31.2186576 | -1.25E-01 | 48061990  | 48062113  | NC_000020.10 |
| cg04366628 | 6.13E-17 | 1.57E-18 | -9.74 | 31.2153248 | -2.36E-01 | 26290463  | 26290586  | NC_000004.11 |
| cg16651732 | 6.15E-17 | 1.58E-18 | -9.74 | 31.2119623 | -4.99E-02 | 89631057  | 89631180  | NC_000015.9  |
| cg01303055 | 6.18E-17 | 1.59E-18 | -9.74 | 31.206473  | -1.95E-01 | 11265429  | 11265552  | NC_000011.9  |
| cg23560676 | 6.18E-17 | 1.59E-18 | -9.74 | 31.2060275 | -2.73E-01 | 126272469 | 126272592 | NC_000008.10 |
| cg03429643 | 6.19E-17 | 1.59E-18 | -9.74 | 31.2049442 | -1.91E-01 | 99280963  | 99281086  | NC_000002.11 |
| cg19510206 | 6.19E-17 | 1.59E-18 | -9.74 | 31.2035687 | -2.70E-01 | 133101587 | 133101710 | NC_000012.11 |
| cg07145834 | 6.20E-17 | 1.59E-18 | -9.74 | 31.2023556 | -9.76E-02 | 123878522 | 123878645 | NC_000008.10 |
| cg05874913 | 6.22E-17 | 1.60E-18 | -9.74 | 31.1988879 | -8.76E-02 | 160569340 | 160569463 | NC_000002.11 |



|            |          |          |       |            |           |           |           |              |
|------------|----------|----------|-------|------------|-----------|-----------|-----------|--------------|
| cg26482939 | 6.22E-17 | 1.60E-18 | -9.74 | 31.1987445 | -2.10E-01 | 3136710   | 3136833   | NC_000019.9  |
| cg24293507 | 6.25E-17 | 1.61E-18 | -9.74 | 31.1949595 | -1.59E-01 | 10511793  | 10511916  | NC_000001.10 |
| cg24538029 | 6.26E-17 | 1.61E-18 | -9.74 | 31.1929724 | -9.66E-02 | 170846083 | 170846206 | NC_000005.9  |
| cg04263436 | 6.28E-17 | 1.62E-18 | -9.74 | 31.1888114 | -2.96E-01 | 33245467  | 33245590  | NC_000006.11 |
| cg01735318 | 6.28E-17 | 1.62E-18 | -9.74 | 31.1883306 | -5.45E-02 | 24307664  | 24307787  | NC_000002.11 |
| cg16181986 | 6.30E-17 | 1.62E-18 | -9.74 | 31.1857908 | -1.54E-01 | 102491129 | 102491252 | NC_000010.10 |
| cg10665892 | 6.35E-17 | 1.63E-18 | -9.74 | 31.1779521 | -2.02E-01 | 1921115   | 1921238   | NC_000012.11 |
| cg19128261 | 6.35E-17 | 1.64E-18 | -9.74 | 31.177101  | -1.71E-01 | 53839251  | 53839374  | NC_000003.11 |
| cg05798318 | 6.37E-17 | 1.64E-18 | -9.74 | 31.1751229 | -1.96E-01 | 536758    | 536881    | NC_000011.9  |
| cg18475969 | 6.39E-17 | 1.64E-18 | -9.74 | 31.1717051 | -1.50E-01 | 177077202 | 177077325 | NC_000003.11 |
| cg14263139 | 6.46E-17 | 1.66E-18 | -9.73 | 31.16019   | -1.15E-01 | 66104018  | 66104141  | NC_000011.9  |
| cg04424621 | 6.50E-17 | 1.68E-18 | -9.73 | 31.1523805 | -2.10E-01 | 27101941  | 27102064  | NC_000006.11 |
| cg10044470 | 6.52E-17 | 1.68E-18 | -9.73 | 31.1493808 | -1.10E-01 | 104866284 | 104866407 | NC_000014.8  |
| cg17217017 | 6.55E-17 | 1.69E-18 | -9.73 | 31.1445839 | -1.56E-01 | 158828449 | 158828572 | NC_000007.13 |
| cg02980249 | 6.58E-17 | 1.70E-18 | -9.73 | 31.1396426 | -1.98E-01 | 31760762  | 31760885  | NC_000006.11 |
| cg22992966 | 6.59E-17 | 1.70E-18 | -9.73 | 31.1392155 | -1.57E-01 | 43867024  | 43867147  | NC_000010.10 |
| cg12762733 | 6.61E-17 | 1.70E-18 | -9.73 | 31.136282  | -1.60E-01 | 149744041 | 149744164 | NC_000007.13 |
| cg00695391 | 6.63E-17 | 1.71E-18 | -9.73 | 31.1325412 | -1.19E-01 | 2525548   | 2525671   | NC_000001.10 |
| cg07047068 | 6.65E-17 | 1.72E-18 | -9.73 | 31.1286484 | -1.43E-01 | 844686    | 844809    | NC_000011.9  |
| cg10816760 | 6.65E-17 | 1.72E-18 | -9.73 | 31.1282308 | -1.67E-01 | 142890973 | 142891096 | NC_000006.11 |
| cg19513727 | 6.68E-17 | 1.73E-18 | -9.73 | 31.1240649 | -1.62E-01 | 110708125 | 110708248 | NC_000012.11 |
| cg19615406 | 6.68E-17 | 1.73E-18 | -9.73 | 31.1235946 | -7.78E-02 | 116164712 | 116164835 | NC_000010.10 |
| cg14679780 | 6.68E-17 | 1.73E-18 | -9.73 | 31.1234693 | -2.04E-01 | 4059525   | 4059648   | NC_000019.9  |
| cg06894612 | 6.71E-17 | 1.73E-18 | -9.73 | 31.1194448 | -2.17E-01 | 69042922  | 69043045  | NC_000014.8  |
| cg15636519 | 6.74E-17 | 1.74E-18 | -9.73 | 31.1150368 | -1.95E-01 | 191894418 | 191894541 | NC_000002.11 |

|            |          |          |       |            |           |           |           |              |
|------------|----------|----------|-------|------------|-----------|-----------|-----------|--------------|
| cg04287684 | 6.75E-17 | 1.75E-18 | -9.73 | 31.1131008 | -1.80E-01 | 166944375 | 166944498 | NC_000006.11 |
| cg25081201 | 6.76E-17 | 1.75E-18 | -9.73 | 31.1120382 | -1.43E-01 | 43867071  | 43867194  | NC_000010.10 |
| cg04115307 | 6.76E-17 | 1.75E-18 | -9.73 | 31.1116779 | -1.23E-01 | 101539612 | 101539735 | NC_000014.8  |
| cg05762671 | 6.76E-17 | 1.75E-18 | -9.73 | 31.111208  | -2.48E-01 | 67345737  | 67345860  | NC_000016.9  |
| cg15935736 | 6.77E-17 | 1.75E-18 | -9.73 | 31.1099713 | -9.38E-02 | 31476933  | 31477056  | NC_000012.11 |
| cg11982546 | 6.79E-17 | 1.76E-18 | -9.73 | 31.1066146 | -2.02E-01 | 56832362  | 56832485  | NC_000008.10 |
| cg03908688 | 6.81E-17 | 1.76E-18 | -9.73 | 31.1035076 | -1.74E-01 | 742683    | 742806    | NC_000020.10 |
| cg05622577 | 6.82E-17 | 1.76E-18 | -9.72 | 31.1026297 | -2.36E-01 | 33710900  | 33711023  | NC_000010.10 |
| cg18786995 | 6.82E-17 | 1.77E-18 | -9.72 | 31.1016811 | -1.17E-01 | 58988182  | 58988305  | NC_000019.9  |
| cg03534410 | 6.82E-17 | 1.77E-18 | -9.72 | 31.1016277 | -1.37E-01 | 12801112  | 12801235  | NC_000003.11 |
| cg18859033 | 6.83E-17 | 1.77E-18 | -9.72 | 31.10073   | -1.96E-01 | 153581793 | 153581916 | NC_000001.10 |
| cg08252585 | 6.86E-17 | 1.77E-18 | -9.72 | 31.096646  | -1.96E-01 | 24931616  | 24931739  | NC_000002.11 |
| cg17389813 | 6.87E-17 | 1.78E-18 | -9.72 | 31.0946437 | -2.79E-01 | 122060265 | 122060388 | NC_000011.9  |
| cg17115419 | 6.96E-17 | 1.80E-18 | -9.72 | 31.0821445 | -2.47E-01 | 5593926   | 5594049   | NC_000010.10 |
| cg13693328 | 6.98E-17 | 1.81E-18 | -9.72 | 31.0784327 | -1.85E-01 | 9256341   | 9256464   | NC_000001.10 |
| cg13159388 | 7.03E-17 | 1.82E-18 | -9.72 | 31.070774  | -9.86E-02 | 144451643 | 144451766 | NC_000008.10 |
| cg13326508 | 7.03E-17 | 1.82E-18 | -9.72 | 31.0706279 | -2.64E-01 | 41985720  | 41985843  | NC_000017.10 |
| cg07142010 | 7.03E-17 | 1.82E-18 | -9.72 | 31.0701622 | -1.90E-01 | 21901166  | 21901289  | NC_000001.10 |
| cg22380508 | 7.08E-17 | 1.83E-18 | -9.72 | 31.0638232 | -7.89E-02 | 63381144  | 63381267  | NC_000011.9  |
| cg15645309 | 7.08E-17 | 1.83E-18 | -9.72 | 31.0637331 | -2.63E-01 | 75988747  | 75988870  | NC_000014.8  |
| cg09023743 | 7.08E-17 | 1.83E-18 | -9.72 | 31.0634656 | -1.61E-01 | 95045763  | 95045886  | NC_000001.10 |
| cg12447832 | 7.11E-17 | 1.84E-18 | -9.72 | 31.0588866 | -1.13E-01 | 3383257   | 3383380   | NC_000002.11 |
| cg06764239 | 7.11E-17 | 1.84E-18 | -9.72 | 31.0581719 | -1.38E-01 | 119544772 | 119544895 | NC_000001.10 |
| cg17612535 | 7.12E-17 | 1.85E-18 | -9.72 | 31.0576218 | -1.50E-01 | 932900    | 933023    | NC_000005.9  |
| cg26451345 | 7.13E-17 | 1.85E-18 | -9.72 | 31.0555213 | -2.43E-01 | 47666248  | 47666371  | NC_000006.11 |

|                 |          |          |       |            |           |           |           |              |
|-----------------|----------|----------|-------|------------|-----------|-----------|-----------|--------------|
| cg27139956      | 7.18E-17 | 1.86E-18 | -9.72 | 31.0487094 | -7.91E-02 | 45470290  | 45470413  | NC_000010.10 |
| cg20971045      | 7.19E-17 | 1.86E-18 | -9.72 | 31.0473958 | -1.32E-01 | 53075687  | 53075810  | NC_000005.9  |
| cg10142520      | 7.22E-17 | 1.87E-18 | -9.72 | 31.0429605 | -2.38E-01 | 65344604  | 65344727  | NC_000011.9  |
| cg09645475      | 7.25E-17 | 1.88E-18 | -9.72 | 31.0389169 | -1.71E-01 | 815316    | 815439    | NC_000020.10 |
| cg02145220      | 7.25E-17 | 1.88E-18 | -9.72 | 31.0388888 | -2.40E-01 | 79223378  | 79223501  | NC_000015.9  |
| cg02449638      | 7.27E-17 | 1.89E-18 | -9.71 | 31.0362425 | -1.32E-01 | 36607078  | 36607201  | NC_000019.9  |
| cg15453396      | 7.28E-17 | 1.89E-18 | -9.71 | 31.0345217 | -1.66E-01 | 2684536   | 2684659   | NC_000006.11 |
| cg18427091      | 7.29E-17 | 1.89E-18 | -9.71 | 31.0328433 | -1.78E-01 | 30115417  | 30115540  | NC_000017.10 |
| cg17018082      | 7.29E-17 | 1.89E-18 | -9.71 | 31.0325725 | -2.08E-01 | 119428220 | 119428343 | NC_000008.10 |
| cg07795964      | 7.36E-17 | 1.91E-18 | -9.71 | 31.0222603 | -1.89E-01 | 2066320   | 2066443   | NC_000004.11 |
| cg16591228      | 7.42E-17 | 1.93E-18 | -9.71 | 31.0143831 | -7.33E-02 | 149792515 | 149792638 | NC_000005.9  |
| cg05490924      | 7.42E-17 | 1.93E-18 | -9.71 | 31.0141523 | -1.33E-01 | 74730755  | 74730878  | NC_000002.11 |
| cg01716680      | 7.42E-17 | 1.93E-18 | -9.71 | 31.0137273 | -1.56E-01 | 35259750  | 35259873  | NC_000001.10 |
| cg06011086      | 7.45E-17 | 1.94E-18 | -9.71 | 31.0093597 | -1.92E-01 | 61823275  | 61823398  | NC_000008.10 |
| cg08210688      | 7.47E-17 | 1.94E-18 | -9.71 | 31.0073822 | -1.08E-01 | 63276723  | 63276846  | NC_000002.11 |
| cg19324997      | 7.50E-17 | 1.95E-18 | -9.71 | 31.0024729 | -1.53E-01 | 240169161 | 240169284 | NC_000002.11 |
| ch.4.113910337F | 7.50E-17 | 1.95E-18 | -9.71 | 31.0020266 | -6.98E-02 | 113690888 | 113691011 | NC_000004.11 |
| cg00503321      | 7.52E-17 | 1.96E-18 | -9.71 | 30.9998566 | -9.14E-02 | 7297230   | 7297353   | NC_000017.10 |
| cg12442242      | 7.57E-17 | 1.97E-18 | -9.71 | 30.993115  | -8.26E-02 | 141437720 | 141437843 | NC_000007.13 |
| cg00397585      | 7.59E-17 | 1.98E-18 | -9.71 | 30.9898833 | -7.47E-02 | 26570033  | 26570156  | NC_000002.11 |
| cg02179499      | 7.63E-17 | 1.99E-18 | -9.71 | 30.9843011 | -6.07E-02 | 123358183 | 123358306 | NC_000010.10 |
| cg21579209      | 7.64E-17 | 1.99E-18 | -9.71 | 30.983742  | -9.40E-02 | 138620362 | 138620485 | NC_000007.13 |
| cg19784721      | 7.67E-17 | 2.00E-18 | -9.71 | 30.9785837 | -1.02E-01 | 126043521 | 126043644 | NC_000010.10 |
| cg09613192      | 7.68E-17 | 2.00E-18 | -9.71 | 30.9773563 | -2.33E-01 | 181388538 | 181388661 | NC_000002.11 |
| cg10835083      | 7.72E-17 | 2.01E-18 | -9.71 | 30.9717766 | -2.22E-01 | 222395101 | 222395224 | NC_000002.11 |

|                 |          |          |       |            |           |           |           |              |
|-----------------|----------|----------|-------|------------|-----------|-----------|-----------|--------------|
| cg02999224      | 7.77E-17 | 2.02E-18 | -9.7  | 30.9658277 | -1.68E-01 | 23284559  | 23284682  | NC_000014.8  |
| cg04295322      | 7.78E-17 | 2.03E-18 | -9.7  | 30.9644731 | -1.67E-01 | 26833208  | 26833331  | NC_000017.10 |
| cg19640821      | 7.78E-17 | 2.03E-18 | -9.7  | 30.9639825 | -2.37E-01 | 18503517  | 18503640  | NC_000019.9  |
| cg06160973      | 7.82E-17 | 2.04E-18 | -9.7  | 30.9586307 | -2.14E-01 | 57522813  | 57522936  | NC_000012.11 |
| cg11299964      | 7.85E-17 | 2.05E-18 | -9.7  | 30.9548861 | -9.72E-02 | 128469783 | 128469906 | NC_000009.11 |
| cg24472574      | 7.88E-17 | 2.06E-18 | -9.7  | 30.9509781 | -1.16E-01 | 103070503 | 103070626 | NC_000010.10 |
| cg10548034      | 7.93E-17 | 2.07E-18 | -9.7  | 30.943836  | -2.06E-02 | 39872389  | 39872512  | NC_000015.9  |
| cg06137072      | 7.93E-17 | 2.07E-18 | -9.7  | 30.9436387 | -1.72E-01 | 141087187 | 141087310 | NC_000003.11 |
| cg19735514      | 7.96E-17 | 2.08E-18 | -9.7  | 30.9395109 | -1.66E-01 | 161762739 | 161762862 | NC_000001.10 |
| cg05645904      | 7.98E-17 | 2.08E-18 | -9.7  | 30.9375596 | -1.33E-01 | 33300514  | 33300637  | NC_000005.9  |
| cg04090604      | 8.03E-17 | 2.10E-18 | -9.7  | 30.9310244 | -9.69E-02 | 46222557  | 46222680  | NC_000021.8  |
| cg26656884      | 8.07E-17 | 2.11E-18 | -9.7  | 30.9263743 | -1.33E-01 | 31743820  | 31743943  | NC_000006.11 |
| cg10582639      | 8.08E-17 | 2.11E-18 | -9.7  | 30.9251774 | -5.96E-02 | 121526840 | 121526963 | NC_000011.9  |
| cg06525280      | 8.10E-17 | 2.12E-18 | -9.7  | 30.9225687 | -9.35E-02 | 216177303 | 216177426 | NC_000002.11 |
| cg03079132      | 8.12E-17 | 2.12E-18 | -9.7  | 30.9185186 | -1.46E-01 | 727212    | 727335    | NC_000016.9  |
| cg00300298      | 8.13E-17 | 2.12E-18 | -9.7  | 30.9182348 | -1.64E-01 | 30308956  | 30309079  | NC_000020.10 |
| cg07556059      | 8.13E-17 | 2.13E-18 | -9.7  | 30.9176051 | -1.22E-01 | 29449513  | 29449636  | NC_000001.10 |
| cg04872610      | 8.14E-17 | 2.13E-18 | -9.7  | 30.9164162 | -1.21E-01 | 114448489 | 114448612 | NC_000001.10 |
| cg01589580      | 8.16E-17 | 2.13E-18 | -9.7  | 30.9136134 | -1.28E-01 | 77440800  | 77440923  | NC_000018.9  |
| ch.16.73882809F | 8.20E-17 | 2.15E-18 | -9.7  | 30.9078492 | -4.50E-02 | 75325308  | 75325431  | NC_000016.9  |
| cg11126762      | 8.25E-17 | 2.16E-18 | -9.69 | 30.9025242 | -1.57E-01 | 38846973  | 38847096  | NC_000005.9  |
| cg13289553      | 8.32E-17 | 2.18E-18 | -9.69 | 30.8938336 | -5.36E-02 | 32585524  | 32585647  | NC_000005.9  |
| cg02144874      | 8.32E-17 | 2.18E-18 | -9.69 | 30.8927402 | -1.88E-01 | 239047336 | 239047459 | NC_000002.11 |
| cg07837085      | 8.34E-17 | 2.18E-18 | -9.69 | 30.8905997 | -1.85E-01 | 160708990 | 160709113 | NC_000001.10 |
| cg06785293      | 8.35E-17 | 2.19E-18 | -9.69 | 30.889745  | -1.84E-01 | 157187520 | 157187643 | NC_000006.11 |

|                 |          |          |       |            |           |           |           |              |
|-----------------|----------|----------|-------|------------|-----------|-----------|-----------|--------------|
| cg13567299      | 8.37E-17 | 2.19E-18 | -9.69 | 30.8872707 | -2.10E-01 | 75201685  | 75201808  | NC_000011.9  |
| cg10968815      | 8.40E-17 | 2.20E-18 | -9.69 | 30.8835579 | -1.81E-01 | 31595346  | 31595469  | NC_000020.10 |
| cg20282941      | 8.42E-17 | 2.21E-18 | -9.69 | 30.8809489 | -4.38E-02 | 27760082  | 27760205  | NC_000006.11 |
| cg14989661      | 8.42E-17 | 2.21E-18 | -9.69 | 30.8809302 | -1.66E-01 | 38216354  | 38216477  | NC_000003.11 |
| cg15177359      | 8.42E-17 | 2.21E-18 | -9.69 | 30.8804226 | -1.58E-01 | 73840750  | 73840873  | NC_000017.10 |
| cg26502456      | 8.46E-17 | 2.22E-18 | -9.69 | 30.8760951 | -6.59E-02 | 3958437   | 3958560   | NC_000004.11 |
| cg14321284      | 8.46E-17 | 2.22E-18 | -9.69 | 30.8758715 | -1.31E-01 | 137186149 | 137186272 | NC_000009.11 |
| cg22441543      | 8.46E-17 | 2.22E-18 | -9.69 | 30.8757113 | -8.72E-02 | 50355555  | 50355678  | NC_000022.10 |
| cg05295023      | 8.48E-17 | 2.22E-18 | -9.69 | 30.8732358 | -1.67E-01 | 67079729  | 67079852  | NC_000011.9  |
| cg15360181      | 8.50E-17 | 2.23E-18 | -9.69 | 30.8711387 | -2.67E-01 | 143567492 | 143567615 | NC_000003.11 |
| cg23786580      | 8.54E-17 | 2.24E-18 | -9.69 | 30.8653039 | -2.40E-01 | 43204506  | 43204629  | NC_000007.13 |
| cg13366863      | 8.55E-17 | 2.24E-18 | -9.69 | 30.8645947 | -1.81E-01 | 177505451 | 177505574 | NC_000005.9  |
| cg04055345      | 8.56E-17 | 2.25E-18 | -9.69 | 30.8629355 | -2.04E-01 | 116264862 | 116264985 | NC_000010.10 |
| cg08282784      | 8.58E-17 | 2.25E-18 | -9.69 | 30.8606517 | -8.00E-02 | 121454133 | 121454256 | NC_000012.11 |
| cg14724298      | 8.60E-17 | 2.26E-18 | -9.69 | 30.8583932 | -1.96E-01 | 54424764  | 54424887  | NC_000004.11 |
| cg06927878      | 8.60E-17 | 2.26E-18 | -9.69 | 30.8581725 | -7.11E-02 | 15096495  | 15096618  | NC_000011.9  |
| cg22214889      | 8.64E-17 | 2.27E-18 | -9.69 | 30.8539702 | -2.60E-01 | 49410828  | 49410951  | NC_000020.10 |
| ch.19.50335620F | 8.72E-17 | 2.29E-18 | -9.69 | 30.8445433 | -8.97E-02 | 45643780  | 45643903  | NC_000019.9  |
| cg11851804      | 8.76E-17 | 2.30E-18 | -9.68 | 30.8393898 | -1.29E-01 | 848379    | 848502    | NC_000001.10 |
| cg22912331      | 8.76E-17 | 2.30E-18 | -9.68 | 30.8387162 | -1.82E-01 | 24042251  | 24042374  | NC_000014.8  |
| cg02402368      | 8.79E-17 | 2.31E-18 | -9.68 | 30.8355755 | -2.08E-01 | 6420726   | 6420849   | NC_000008.10 |
| cg07220366      | 8.79E-17 | 2.31E-18 | -9.68 | 30.83487   | -1.80E-01 | 10405379  | 10405502  | NC_000008.10 |
| cg13666041      | 8.80E-17 | 2.31E-18 | -9.68 | 30.8337243 | -2.32E-01 | 69442697  | 69442820  | NC_000014.8  |
| cg13728308      | 8.81E-17 | 2.32E-18 | -9.68 | 30.8329091 | -2.03E-01 | 34532891  | 34533014  | NC_000014.8  |
| cg08985530      | 8.83E-17 | 2.32E-18 | -9.68 | 30.8302619 | -2.00E-01 | 77694045  | 77694168  | NC_000012.11 |

|            |          |          |       |            |           |           |           |              |
|------------|----------|----------|-------|------------|-----------|-----------|-----------|--------------|
| cg19851401 | 8.83E-17 | 2.32E-18 | -9.68 | 30.8299258 | -1.15E-01 | 49437267  | 49437390  | NC_000019.9  |
| cg25165932 | 8.87E-17 | 2.33E-18 | -9.68 | 30.8262505 | -2.08E-01 | 109025846 | 109025969 | NC_000012.11 |
| cg10131026 | 8.90E-17 | 2.34E-18 | -9.68 | 30.8222941 | -2.04E-01 | 122823862 | 122823985 | NC_000008.10 |
| cg16773067 | 8.90E-17 | 2.34E-18 | -9.68 | 30.8216188 | -1.74E-01 | 37027357  | 37027480  | NC_000006.11 |
| cg18413830 | 8.93E-17 | 2.35E-18 | -9.68 | 30.8184302 | -1.80E-01 | 81031536  | 81031659  | NC_000017.10 |
| cg06082883 | 8.94E-17 | 2.35E-18 | -9.68 | 30.8171576 | -1.87E-01 | 89686744  | 89686867  | NC_000016.9  |
| cg12453675 | 9.06E-17 | 2.39E-18 | -9.68 | 30.8032113 | -1.22E-01 | 124120737 | 124120860 | NC_000011.9  |
| cg02931642 | 9.06E-17 | 2.39E-18 | -9.68 | 30.8031159 | -1.52E-01 | 184320734 | 184320857 | NC_000003.11 |
| cg03214697 | 9.07E-17 | 2.39E-18 | -9.68 | 30.8022514 | -1.28E-01 | 30901532  | 30901655  | NC_000022.10 |
| cg06329491 | 9.11E-17 | 2.40E-18 | -9.68 | 30.79824   | -1.45E-01 | 49031751  | 49031874  | NC_000017.10 |
| cg06732666 | 9.11E-17 | 2.40E-18 | -9.68 | 30.7977434 | -1.01E-01 | 208890496 | 208890619 | NC_000002.11 |
| cg14802951 | 9.13E-17 | 2.40E-18 | -9.68 | 30.7957497 | -1.62E-01 | 136287409 | 136287532 | NC_000009.11 |
| cg07403899 | 9.14E-17 | 2.41E-18 | -9.68 | 30.7947388 | -2.12E-01 | 39283540  | 39283663  | NC_000019.9  |
| cg01963702 | 9.18E-17 | 2.42E-18 | -9.68 | 30.7896009 | -2.27E-01 | 12188996  | 12189119  | NC_000011.9  |
| cg10891521 | 9.18E-17 | 2.42E-18 | -9.68 | 30.7895286 | -1.70E-01 | 81047941  | 81048064  | NC_000017.10 |
| cg06875832 | 9.20E-17 | 2.42E-18 | -9.68 | 30.7872221 | -2.34E-01 | 178980927 | 178981050 | NC_000005.9  |
| cg03131358 | 9.20E-17 | 2.43E-18 | -9.68 | 30.7866883 | -1.15E-01 | 42195972  | 42196095  | NC_000022.10 |
| cg02399371 | 9.21E-17 | 2.43E-18 | -9.68 | 30.786227  | -2.25E-01 | 79306875  | 79306998  | NC_000017.10 |
| cg12242204 | 9.24E-17 | 2.44E-18 | -9.68 | 30.7825265 | -9.16E-02 | 62607811  | 62607934  | NC_000011.9  |
| cg20667796 | 9.27E-17 | 2.44E-18 | -9.68 | 30.7797347 | -1.80E-01 | 73720234  | 73720357  | NC_000017.10 |
| cg14619716 | 9.28E-17 | 2.45E-18 | -9.68 | 30.778287  | -1.58E-01 | 7927625   | 7927748   | NC_000011.9  |
| cg09887367 | 9.29E-17 | 2.45E-18 | -9.68 | 30.7772697 | -1.71E-01 | 18690185  | 18690308  | NC_000011.9  |
| cg10297105 | 9.32E-17 | 2.46E-18 | -9.67 | 30.7741998 | -1.45E-01 | 41470812  | 41470935  | NC_000006.11 |
| cg10009968 | 9.32E-17 | 2.46E-18 | -9.67 | 30.7739064 | -2.56E-01 | 3033408   | 3033531   | NC_000007.13 |
| cg03160883 | 9.35E-17 | 2.47E-18 | -9.67 | 30.7700002 | -1.20E-01 | 36628713  | 36628836  | NC_000006.11 |

|            |          |          |       |            |           |           |           |              |
|------------|----------|----------|-------|------------|-----------|-----------|-----------|--------------|
| cg24023553 | 9.35E-17 | 2.47E-18 | -9.67 | 30.7694724 | -7.08E-02 | 42285728  | 42285851  | NC_000020.10 |
| cg24631526 | 9.42E-17 | 2.49E-18 | -9.67 | 30.7616749 | -2.16E-01 | 62367961  | 62368084  | NC_000020.10 |
| cg27655716 | 9.45E-17 | 2.50E-18 | -9.67 | 30.7585141 | -1.48E-01 | 133100670 | 133100793 | NC_000012.11 |
| cg15692360 | 9.50E-17 | 2.51E-18 | -9.67 | 30.7533938 | -1.67E-01 | 6104267   | 6104390   | NC_000020.10 |
| cg03714531 | 9.50E-17 | 2.51E-18 | -9.67 | 30.7531492 | -1.49E-01 | 30923590  | 30923713  | NC_000006.11 |
| cg20644981 | 9.50E-17 | 2.51E-18 | -9.67 | 30.7530706 | -1.23E-01 | 152020400 | 152020523 | NC_000004.11 |
| cg26552650 | 9.52E-17 | 2.51E-18 | -9.67 | 30.7511685 | -1.94E-01 | 113682475 | 113682598 | NC_000006.11 |
| cg10090591 | 9.54E-17 | 2.52E-18 | -9.67 | 30.7489677 | -2.26E-01 | 118869922 | 118870045 | NC_000011.9  |
| cg01878963 | 9.54E-17 | 2.52E-18 | -9.67 | 30.7483562 | -2.28E-01 | 112147900 | 112148023 | NC_000001.10 |
| cg15318570 | 9.55E-17 | 2.52E-18 | -9.67 | 30.7475908 | -1.12E-01 | 22726874  | 22726997  | NC_000010.10 |
| cg16107628 | 9.55E-17 | 2.52E-18 | -9.67 | 30.7475267 | -1.29E-01 | 159894061 | 159894184 | NC_000001.10 |
| cg00599410 | 9.57E-17 | 2.53E-18 | -9.67 | 30.7454936 | -6.72E-02 | 21399663  | 21399786  | NC_000022.10 |
| cg07863022 | 9.60E-17 | 2.54E-18 | -9.67 | 30.7415074 | -2.15E-01 | 75315108  | 75315231  | NC_000017.10 |
| cg21197266 | 9.66E-17 | 2.56E-18 | -9.67 | 30.7348177 | -5.94E-02 | 72511827  | 72511950  | NC_000005.9  |
| cg14696444 | 9.67E-17 | 2.56E-18 | -9.67 | 30.7346661 | -1.78E-01 | 45596957  | 45597080  | NC_000022.10 |
| cg04125273 | 9.67E-17 | 2.56E-18 | -9.67 | 30.7338619 | -1.57E-01 | 29790933  | 29791056  | NC_000016.9  |
| cg08435674 | 9.68E-17 | 2.56E-18 | -9.67 | 30.7329151 | -1.70E-01 | 36308494  | 36308617  | NC_000006.11 |
| cg07153010 | 9.72E-17 | 2.57E-18 | -9.67 | 30.7281513 | -1.98E-01 | 21312388  | 21312511  | NC_000022.10 |
| cg17102269 | 9.73E-17 | 2.58E-18 | -9.67 | 30.7269496 | -1.72E-01 | 3830691   | 3830814   | NC_000008.10 |
| cg15294435 | 9.73E-17 | 2.58E-18 | -9.67 | 30.7269333 | -7.24E-02 | 116391467 | 116391590 | NC_000010.10 |
| cg19911168 | 9.74E-17 | 2.58E-18 | -9.67 | 30.7263235 | -2.52E-01 | 5631814   | 5631937   | NC_000010.10 |
| cg14329189 | 9.74E-17 | 2.58E-18 | -9.67 | 30.7261989 | -1.13E-01 | 118915832 | 118915955 | NC_000009.11 |
| cg14394617 | 9.76E-17 | 2.59E-18 | -9.67 | 30.7233271 | -6.56E-02 | 54674541  | 54674664  | NC_000012.11 |
| cg05490864 | 9.81E-17 | 2.60E-18 | -9.67 | 30.71881   | -1.71E-01 | 227526367 | 227526490 | NC_000002.11 |
| cg07568296 | 9.81E-17 | 2.60E-18 | -9.67 | 30.7180688 | -2.52E-01 | 2059150   | 2059273   | NC_000007.13 |

|                 |          |          |       |            |           |           |           |              |
|-----------------|----------|----------|-------|------------|-----------|-----------|-----------|--------------|
| cg03607573      | 9.87E-17 | 2.62E-18 | -9.67 | 30.7124165 | -1.86E-01 | 93471889  | 93472012  | NC_000011.9  |
| cg05895618      | 9.91E-17 | 2.63E-18 | -9.66 | 30.7074025 | -2.21E-01 | 19222395  | 19222518  | NC_000011.9  |
| cg06700061      | 9.91E-17 | 2.63E-18 | -9.66 | 30.707251  | -1.97E-01 | 126134218 | 126134341 | NC_000006.11 |
| ch.8.127920202R | 9.94E-17 | 2.64E-18 | -9.66 | 30.7038224 | -9.34E-02 | 127851020 | 127851143 | NC_000008.10 |
| cg09092280      | 9.96E-17 | 2.64E-18 | -9.66 | 30.7024548 | -1.63E-01 | 62646214  | 62646337  | NC_000008.10 |
| cg05820959      | 9.97E-17 | 2.65E-18 | -9.66 | 30.700868  | -2.09E-01 | 151248135 | 151248258 | NC_000007.13 |
| cg07190778      | 1.00E-16 | 2.66E-18 | -9.66 | 30.6943125 | -1.33E-01 | 117604296 | 117604419 | NC_000003.11 |
| cg04658243      | 1.01E-16 | 2.67E-18 | -9.66 | 30.6904707 | -1.93E-01 | 78865755  | 78865878  | NC_000017.10 |
| cg24681963      | 1.01E-16 | 2.68E-18 | -9.66 | 30.6873148 | -2.01E-01 | 72012367  | 72012490  | NC_000002.11 |
| ch.4.1616659F   | 1.01E-16 | 2.69E-18 | -9.66 | 30.6846352 | -7.06E-02 | 84178312  | 84178435  | NC_000004.11 |
| cg18303242      | 1.01E-16 | 2.69E-18 | -9.66 | 30.6846124 | -2.24E-01 | 25879250  | 25879373  | NC_000017.10 |
| cg11755201      | 1.01E-16 | 2.69E-18 | -9.66 | 30.6843499 | -1.61E-01 | 7551851   | 7551974   | NC_000001.10 |
| cg01554089      | 1.02E-16 | 2.72E-18 | -9.66 | 30.6746488 | -1.94E-01 | 32378171  | 32378294  | NC_000020.10 |
| cg26557179      | 1.03E-16 | 2.73E-18 | -9.66 | 30.6683566 | -1.78E-01 | 46538716  | 46538839  | NC_000003.11 |
| cg19284277      | 1.03E-16 | 2.73E-18 | -9.66 | 30.6680258 | -1.68E-01 | 80190054  | 80190177  | NC_000017.10 |
| cg10300255      | 1.03E-16 | 2.75E-18 | -9.66 | 30.6640431 | -1.17E-01 | 73706367  | 73706490  | NC_000014.8  |
| cg20430773      | 1.03E-16 | 2.75E-18 | -9.66 | 30.6631758 | -2.12E-01 | 16534157  | 16534280  | NC_000001.10 |
| cg00506168      | 1.03E-16 | 2.75E-18 | -9.66 | 30.6623333 | -2.34E-01 | 45148460  | 45148583  | NC_000021.8  |
| cg03498081      | 1.05E-16 | 2.80E-18 | -9.66 | 30.6443723 | -2.35E-01 | 80061357  | 80061480  | NC_000016.9  |
| cg16651780      | 1.05E-16 | 2.80E-18 | -9.65 | 30.6437695 | -1.73E-01 | 81037892  | 81038015  | NC_000016.9  |
| cg04388548      | 1.06E-16 | 2.81E-18 | -9.65 | 30.6410523 | -1.60E-01 | 114905640 | 114905763 | NC_000013.10 |
| cg09903879      | 1.06E-16 | 2.82E-18 | -9.65 | 30.6393733 | -2.00E-01 | 13348386  | 13348509  | NC_000012.11 |
| cg13146484      | 1.06E-16 | 2.83E-18 | -9.65 | 30.6346737 | -1.38E-01 | 61645461  | 61645584  | NC_000014.8  |
| cg20151476      | 1.06E-16 | 2.83E-18 | -9.65 | 30.6345112 | -2.76E-01 | 1607408   | 1607531   | NC_000007.13 |
| cg19635897      | 1.06E-16 | 2.83E-18 | -9.65 | 30.6344155 | -1.17E-01 | 33360195  | 33360318  | NC_000015.9  |



|                 |          |          |       |            |           |           |           |              |
|-----------------|----------|----------|-------|------------|-----------|-----------|-----------|--------------|
| cg05617413      | 1.06E-16 | 2.83E-18 | -9.65 | 30.6338513 | -1.91E-01 | 133065912 | 133066035 | NC_000012.11 |
| cg26984624      | 1.06E-16 | 2.83E-18 | -9.65 | 30.6332844 | -1.24E-01 | 41656079  | 41656202  | NC_000008.10 |
| cg02711872      | 1.06E-16 | 2.83E-18 | -9.65 | 30.6329664 | -1.28E-01 | 150652702 | 150652825 | NC_000007.13 |
| cg18047920      | 1.06E-16 | 2.84E-18 | -9.65 | 30.6322672 | -1.52E-01 | 144656997 | 144657120 | NC_000008.10 |
| ch.6.107578927F | 1.07E-16 | 2.85E-18 | -9.65 | 30.627023  | -9.37E-02 | 107472234 | 107472357 | NC_000006.11 |
| cg21752469      | 1.08E-16 | 2.89E-18 | -9.65 | 30.614888  | -1.41E-01 | 57594909  | 57595032  | NC_000008.10 |
| cg02190353      | 1.09E-16 | 2.90E-18 | -9.65 | 30.6112246 | -2.12E-01 | 23405296  | 23405419  | NC_000008.10 |
| cg18585314      | 1.09E-16 | 2.90E-18 | -9.65 | 30.610633  | -1.34E-01 | 176272093 | 176272216 | NC_000005.9  |
| cg13985437      | 1.09E-16 | 2.90E-18 | -9.65 | 30.6100476 | -1.07E-01 | 76381044  | 76381167  | NC_000011.9  |
| cg26986871      | 1.09E-16 | 2.90E-18 | -9.65 | 30.6091876 | -2.93E-01 | 10545083  | 10545206  | NC_000012.11 |
| cg24242280      | 1.10E-16 | 2.93E-18 | -9.65 | 30.6007557 | -1.33E-01 | 38104580  | 38104703  | NC_000006.11 |
| cg08999895      | 1.10E-16 | 2.94E-18 | -9.65 | 30.5979349 | -1.75E-01 | 2925869   | 2925992   | NC_000011.9  |
| cg11823230      | 1.10E-16 | 2.94E-18 | -9.65 | 30.5951358 | -9.17E-02 | 32055385  | 32055508  | NC_000006.11 |
| cg20856545      | 1.10E-16 | 2.94E-18 | -9.65 | 30.5947643 | -1.65E-01 | 114917297 | 114917420 | NC_000013.10 |
| cg05461841      | 1.10E-16 | 2.95E-18 | -9.65 | 30.5939222 | -1.21E-01 | 2879944   | 2880067   | NC_000016.9  |
| cg08866557      | 1.11E-16 | 2.95E-18 | -9.65 | 30.5917353 | -1.98E-01 | 49647167  | 49647290  | NC_000010.10 |
| cg06726231      | 1.11E-16 | 2.96E-18 | -9.65 | 30.5902349 | -1.95E-01 | 17672168  | 17672291  | NC_000022.10 |
| cg16567330      | 1.11E-16 | 2.96E-18 | -9.65 | 30.5898255 | -1.89E-01 | 106577558 | 106577681 | NC_000006.11 |
| cg13919908      | 1.11E-16 | 2.96E-18 | -9.65 | 30.5891558 | -2.12E-01 | 33394273  | 33394396  | NC_000011.9  |
| cg19524238      | 1.11E-16 | 2.98E-18 | -9.65 | 30.5835807 | -2.05E-01 | 2802976   | 2803099   | NC_000007.13 |
| cg15597364      | 1.11E-16 | 2.98E-18 | -9.65 | 30.5832036 | -1.67E-01 | 22919937  | 22920060  | NC_000001.10 |
| cg20138458      | 1.11E-16 | 2.98E-18 | -9.65 | 30.5830426 | -1.07E-01 | 74110979  | 74111102  | NC_000018.9  |
| cg01806427      | 1.12E-16 | 2.98E-18 | -9.65 | 30.5827043 | -2.14E-01 | 123737813 | 123737936 | NC_000005.9  |
| cg06180606      | 1.12E-16 | 2.98E-18 | -9.65 | 30.5817056 | -1.69E-01 | 450904    | 451027    | NC_000016.9  |
| cg14557510      | 1.12E-16 | 2.99E-18 | -9.65 | 30.5804246 | -7.48E-02 | 122042345 | 122042468 | NC_000002.11 |

|            |          |          |       |            |           |           |           |              |
|------------|----------|----------|-------|------------|-----------|-----------|-----------|--------------|
| cg21492882 | 1.12E-16 | 2.99E-18 | -9.65 | 30.5797586 | -1.38E-01 | 1201639   | 1201762   | NC_000005.9  |
| cg11136886 | 1.12E-16 | 2.99E-18 | -9.64 | 30.5781129 | -1.68E-01 | 33609509  | 33609632  | NC_000001.10 |
| cg13948456 | 1.13E-16 | 3.01E-18 | -9.64 | 30.5728021 | -1.11E-01 | 139239853 | 139239976 | NC_000009.11 |
| cg04826040 | 1.13E-16 | 3.02E-18 | -9.64 | 30.5709692 | -1.89E-01 | 132933643 | 132933766 | NC_000012.11 |
| cg25499746 | 1.13E-16 | 3.03E-18 | -9.64 | 30.568     | -2.11E-01 | 16346054  | 16346177  | NC_000006.11 |
| cg03462053 | 1.13E-16 | 3.03E-18 | -9.64 | 30.5662463 | -1.84E-01 | 52887263  | 52887386  | NC_000012.11 |
| cg03980366 | 1.13E-16 | 3.04E-18 | -9.64 | 30.5643292 | -2.23E-01 | 230882959 | 230883082 | NC_000001.10 |
| cg18892446 | 1.14E-16 | 3.05E-18 | -9.64 | 30.5593143 | -1.81E-01 | 73938574  | 73938697  | NC_000005.9  |
| cg25502086 | 1.14E-16 | 3.05E-18 | -9.64 | 30.5589236 | -9.02E-02 | 71892093  | 71892216  | NC_000010.10 |
| cg13249008 | 1.14E-16 | 3.06E-18 | -9.64 | 30.5562323 | -8.37E-02 | 67381930  | 67382053  | NC_000011.9  |
| cg03165356 | 1.14E-16 | 3.07E-18 | -9.64 | 30.5545625 | -2.02E-01 | 216882347 | 216882470 | NC_000002.11 |
| cg17799287 | 1.16E-16 | 3.10E-18 | -9.64 | 30.5438998 | -1.81E-01 | 92001764  | 92001887  | NC_000013.10 |
| cg27404351 | 1.16E-16 | 3.10E-18 | -9.64 | 30.5433303 | -1.72E-01 | 123847741 | 123847864 | NC_000011.9  |
| cg16090599 | 1.16E-16 | 3.10E-18 | -9.64 | 30.5423768 | -1.53E-01 | 45105153  | 45105276  | NC_000011.9  |
| cg09490523 | 1.16E-16 | 3.11E-18 | -9.64 | 30.5399091 | -1.89E-01 | 75314308  | 75314431  | NC_000016.9  |
| cg03547355 | 1.16E-16 | 3.12E-18 | -9.64 | 30.5382169 | -1.49E-01 | 227003060 | 227003183 | NC_000001.10 |
| cg24676612 | 1.17E-16 | 3.13E-18 | -9.64 | 30.5342293 | -1.76E-01 | 111148105 | 111148228 | NC_000001.10 |
| cg21182960 | 1.18E-16 | 3.16E-18 | -9.64 | 30.5262641 | -1.43E-01 | 156812171 | 156812294 | NC_000007.13 |
| cg04620015 | 1.18E-16 | 3.16E-18 | -9.64 | 30.5253335 | -1.12E-01 | 111754296 | 111754419 | NC_000005.9  |
| cg20240931 | 1.18E-16 | 3.16E-18 | -9.64 | 30.5252395 | -1.04E-01 | 2613894   | 2614017   | NC_000019.9  |
| cg20687940 | 1.18E-16 | 3.16E-18 | -9.64 | 30.5251124 | -1.19E-01 | 63753228  | 63753351  | NC_000011.9  |
| cg16396284 | 1.18E-16 | 3.18E-18 | -9.64 | 30.5180953 | -2.57E-01 | 33245537  | 33245660  | NC_000006.11 |
| cg14439572 | 1.19E-16 | 3.19E-18 | -9.64 | 30.5166005 | -1.60E-01 | 102121398 | 102121521 | NC_000008.10 |
| cg09680131 | 1.19E-16 | 3.19E-18 | -9.64 | 30.5163022 | -2.53E-01 | 111100754 | 111100877 | NC_000013.10 |
| cg10599446 | 1.19E-16 | 3.19E-18 | -9.64 | 30.514217  | -1.78E-01 | 189073674 | 189073797 | NC_000003.11 |

|            |          |          |       |            |           |           |           |              |
|------------|----------|----------|-------|------------|-----------|-----------|-----------|--------------|
| cg13178372 | 1.19E-16 | 3.20E-18 | -9.63 | 30.5115989 | -2.07E-01 | 150333953 | 150334076 | NC_000001.10 |
| cg24260847 | 1.19E-16 | 3.21E-18 | -9.63 | 30.5100919 | -1.10E-01 | 37595307  | 37595430  | NC_000008.10 |
| cg07189204 | 1.19E-16 | 3.21E-18 | -9.63 | 30.5098653 | -6.42E-02 | 155225808 | 155225931 | NC_000001.10 |
| cg13144059 | 1.20E-16 | 3.23E-18 | -9.63 | 30.5046657 | -2.63E-01 | 201245077 | 201245200 | NC_000002.11 |
| cg10254082 | 1.21E-16 | 3.24E-18 | -9.63 | 30.4988795 | -1.95E-01 | 997346    | 997469    | NC_000007.13 |
| cg17445605 | 1.21E-16 | 3.25E-18 | -9.63 | 30.4970035 | -5.32E-02 | 2458226   | 2458349   | NC_000001.10 |
| cg23615938 | 1.21E-16 | 3.25E-18 | -9.63 | 30.4966911 | -3.39E-02 | 105753134 | 105753257 | NC_000007.13 |
| cg16608498 | 1.21E-16 | 3.26E-18 | -9.63 | 30.494992  | -2.38E-01 | 158612132 | 158612255 | NC_000005.9  |
| cg02925248 | 1.21E-16 | 3.26E-18 | -9.63 | 30.4926564 | -1.81E-01 | 2213749   | 2213872   | NC_000016.9  |
| cg18423852 | 1.21E-16 | 3.27E-18 | -9.63 | 30.4913441 | -1.53E-01 | 150653001 | 150653124 | NC_000007.13 |
| cg10794973 | 1.22E-16 | 3.28E-18 | -9.63 | 30.4881216 | -1.80E-01 | 43692678  | 43692801  | NC_000006.11 |
| cg02666257 | 1.22E-16 | 3.29E-18 | -9.63 | 30.4841612 | -1.83E-01 | 128627260 | 128627383 | NC_000011.9  |
| cg24366211 | 1.23E-16 | 3.31E-18 | -9.63 | 30.4789239 | -2.81E-01 | 68610706  | 68610829  | NC_000011.9  |
| cg17552471 | 1.23E-16 | 3.32E-18 | -9.63 | 30.476627  | -1.74E-01 | 4678661   | 4678784   | NC_000007.13 |
| cg01738022 | 1.23E-16 | 3.32E-18 | -9.63 | 30.474898  | -2.59E-01 | 4012936   | 4013059   | NC_000016.9  |
| cg14599823 | 1.24E-16 | 3.33E-18 | -9.63 | 30.472739  | -1.95E-01 | 77973731  | 77973854  | NC_000005.9  |
| cg02116757 | 1.24E-16 | 3.34E-18 | -9.63 | 30.4711905 | -2.23E-01 | 71854836  | 71854959  | NC_000015.9  |
| cg01463644 | 1.25E-16 | 3.36E-18 | -9.63 | 30.4636607 | -1.98E-01 | 48115640  | 48115763  | NC_000016.9  |
| cg18174834 | 1.25E-16 | 3.37E-18 | -9.63 | 30.4621936 | -8.38E-02 | 212740460 | 212740583 | NC_000001.10 |
| cg10075378 | 1.25E-16 | 3.37E-18 | -9.63 | 30.4607228 | -1.05E-01 | 67207864  | 67207987  | NC_000016.9  |
| cg03572680 | 1.26E-16 | 3.41E-18 | -9.63 | 30.4508315 | -1.76E-01 | 124768554 | 124768677 | NC_000011.9  |
| cg14460003 | 1.27E-16 | 3.43E-18 | -9.62 | 30.4423345 | -5.05E-02 | 31173015  | 31173138  | NC_000020.10 |
| cg06153893 | 1.28E-16 | 3.44E-18 | -9.62 | 30.4410684 | -1.04E-01 | 25963109  | 25963232  | NC_000006.11 |
| cg19700682 | 1.28E-16 | 3.44E-18 | -9.62 | 30.4409006 | -2.05E-01 | 88734481  | 88734604  | NC_000010.10 |
| cg01675238 | 1.28E-16 | 3.44E-18 | -9.62 | 30.4403418 | -1.66E-01 | 42123717  | 42123840  | NC_000015.9  |

|            |          |          |       |            |           |           |           |              |
|------------|----------|----------|-------|------------|-----------|-----------|-----------|--------------|
| cg26071033 | 1.28E-16 | 3.45E-18 | -9.62 | 30.4375298 | -1.47E-01 | 104916018 | 104916141 | NC_000011.9  |
| cg26688315 | 1.28E-16 | 3.45E-18 | -9.62 | 30.4370278 | -1.97E-01 | 218027591 | 218027714 | NC_000002.11 |
| cg06074582 | 1.28E-16 | 3.46E-18 | -9.62 | 30.4338043 | -3.30E-02 | 65657849  | 65657972  | NC_000011.9  |
| cg14856698 | 1.28E-16 | 3.47E-18 | -9.62 | 30.4329819 | -7.64E-02 | 2135945   | 2136068   | NC_000001.10 |
| cg05886367 | 1.29E-16 | 3.48E-18 | -9.62 | 30.4300808 | -1.37E-01 | 180467233 | 180467356 | NC_000005.9  |
| cg02810967 | 1.30E-16 | 3.50E-18 | -9.62 | 30.4225877 | -1.47E-01 | 17813558  | 17813681  | NC_000004.11 |
| cg13185046 | 1.30E-16 | 3.51E-18 | -9.62 | 30.421754  | -1.58E-01 | 32165321  | 32165444  | NC_000006.11 |
| cg10923018 | 1.30E-16 | 3.52E-18 | -9.62 | 30.4182454 | -1.56E-01 | 31743769  | 31743892  | NC_000006.11 |
| cg05368731 | 1.30E-16 | 3.52E-18 | -9.62 | 30.4168492 | -1.07E-01 | 41323189  | 41323312  | NC_000017.10 |
| cg04175872 | 1.30E-16 | 3.53E-18 | -9.62 | 30.4165292 | -1.80E-01 | 176784550 | 176784673 | NC_000005.9  |
| cg05695106 | 1.31E-16 | 3.53E-18 | -9.62 | 30.4146574 | -2.57E-01 | 114780992 | 114781115 | NC_000013.10 |
| cg02069592 | 1.31E-16 | 3.54E-18 | -9.62 | 30.4135864 | -2.69E-01 | 59198210  | 59198333  | NC_000014.8  |
| cg02405476 | 1.31E-16 | 3.54E-18 | -9.62 | 30.4134202 | -6.72E-02 | 44441818  | 44441941  | NC_000020.10 |
| cg24617444 | 1.31E-16 | 3.55E-18 | -9.62 | 30.4085515 | -1.88E-01 | 111916921 | 111917044 | NC_000010.10 |
| cg08654262 | 1.31E-16 | 3.56E-18 | -9.62 | 30.4078095 | -2.01E-01 | 85796055  | 85796178  | NC_000001.10 |
| cg14774305 | 1.32E-16 | 3.56E-18 | -9.62 | 30.4067217 | -8.51E-02 | 137430567 | 137430690 | NC_000005.9  |
| cg01784507 | 1.32E-16 | 3.58E-18 | -9.62 | 30.4002624 | -1.03E-01 | 227016024 | 227016147 | NC_000001.10 |
| cg19535096 | 1.33E-16 | 3.59E-18 | -9.62 | 30.3988419 | -2.78E-01 | 68751711  | 68751834  | NC_000004.11 |
| cg00131261 | 1.33E-16 | 3.60E-18 | -9.62 | 30.3961838 | -2.57E-01 | 142287264 | 142287387 | NC_000008.10 |
| cg02131870 | 1.33E-16 | 3.61E-18 | -9.62 | 30.3923675 | -2.22E-01 | 101585659 | 101585782 | NC_000007.13 |
| cg05275236 | 1.35E-16 | 3.65E-18 | -9.61 | 30.3811968 | -1.09E-01 | 14499630  | 14499753  | NC_000016.9  |
| cg27272363 | 1.35E-16 | 3.65E-18 | -9.61 | 30.3810835 | -1.67E-01 | 125951852 | 125951975 | NC_000008.10 |
| cg14741474 | 1.35E-16 | 3.66E-18 | -9.61 | 30.3798011 | -1.20E-01 | 109027631 | 109027754 | NC_000012.11 |
| cg03977831 | 1.35E-16 | 3.67E-18 | -9.61 | 30.3769184 | -1.80E-01 | 11979188  | 11979311  | NC_000001.10 |
| cg20041612 | 1.36E-16 | 3.67E-18 | -9.61 | 30.3764388 | -2.08E-01 | 55146373  | 55146496  | NC_000007.13 |

|                 |          |          |       |            |           |           |           |              |
|-----------------|----------|----------|-------|------------|-----------|-----------|-----------|--------------|
| cg03667871      | 1.36E-16 | 3.69E-18 | -9.61 | 30.372559  | -2.18E-01 | 198125222 | 198125345 | NC_000001.10 |
| cg20168495      | 1.36E-16 | 3.69E-18 | -9.61 | 30.3711134 | -2.05E-01 | 148283066 | 148283189 | NC_000004.11 |
| cg01997884      | 1.36E-16 | 3.69E-18 | -9.61 | 30.370812  | -2.02E-01 | 224967286 | 224967409 | NC_000002.11 |
| cg10641483      | 1.36E-16 | 3.70E-18 | -9.61 | 30.3698306 | -9.58E-02 | 125052746 | 125052869 | NC_000012.11 |
| cg12146864      | 1.36E-16 | 3.70E-18 | -9.61 | 30.3689987 | -1.82E-01 | 57569768  | 57569891  | NC_000012.11 |
| cg06231244      | 1.37E-16 | 3.72E-18 | -9.61 | 30.3638818 | -1.18E-01 | 2460761   | 2460884   | NC_000001.10 |
| cg18119644      | 1.37E-16 | 3.73E-18 | -9.61 | 30.3613985 | -1.98E-01 | 1469112   | 1469235   | NC_000011.9  |
| cg27093944      | 1.38E-16 | 3.73E-18 | -9.61 | 30.3597821 | -3.12E-01 | 242908218 | 242908341 | NC_000002.11 |
| cg01453052      | 1.38E-16 | 3.75E-18 | -9.61 | 30.3540792 | -1.54E-01 | 73892097  | 73892220  | NC_000017.10 |
| cg18437077      | 1.39E-16 | 3.76E-18 | -9.61 | 30.3529294 | -1.03E-01 | 100860918 | 100861041 | NC_000007.13 |
| cg22240424      | 1.39E-16 | 3.76E-18 | -9.61 | 30.3519711 | -5.92E-02 | 69707465  | 69707588  | NC_000015.9  |
| cg03344767      | 1.39E-16 | 3.77E-18 | -9.61 | 30.3509594 | -1.99E-01 | 10475318  | 10475441  | NC_000001.10 |
| cg02526838      | 1.41E-16 | 3.82E-18 | -9.61 | 30.3366562 | -2.03E-01 | 56731252  | 56731375  | NC_000005.9  |
| cg22234119      | 1.41E-16 | 3.82E-18 | -9.61 | 30.336412  | -1.88E-01 | 114635699 | 114635822 | NC_000002.11 |
| cg21559943      | 1.41E-16 | 3.83E-18 | -9.61 | 30.3340533 | -2.19E-01 | 55721290  | 55721413  | NC_000019.9  |
| cg18729298      | 1.41E-16 | 3.84E-18 | -9.61 | 30.3328348 | -2.04E-01 | 2555203   | 2555326   | NC_000011.9  |
| cg22578843      | 1.42E-16 | 3.86E-18 | -9.61 | 30.3272276 | -7.42E-02 | 28495598  | 28495721  | NC_000013.10 |
| cg01476222      | 1.42E-16 | 3.86E-18 | -9.61 | 30.3254572 | -2.71E-01 | 36522143  | 36522266  | NC_000011.9  |
| cg12141030      | 1.42E-16 | 3.87E-18 | -9.61 | 30.3238435 | -1.34E-01 | 44803447  | 44803570  | NC_000003.11 |
| cg08142884      | 1.43E-16 | 3.89E-18 | -9.61 | 30.3186136 | -1.91E-01 | 155369424 | 155369547 | NC_000007.13 |
| cg27178401      | 1.44E-16 | 3.91E-18 | -9.6  | 30.3135645 | -2.12E-01 | 10652711  | 10652834  | NC_000016.9  |
| cg27340958      | 1.44E-16 | 3.92E-18 | -9.6  | 30.3111914 | -1.06E-01 | 7755730   | 7755853   | NC_000004.11 |
| cg00870242      | 1.44E-16 | 3.92E-18 | -9.6  | 30.310547  | -1.47E-01 | 10530148  | 10530271  | NC_000008.10 |
| ch.2.128981206F | 1.44E-16 | 3.93E-18 | -9.6  | 30.3092778 | -6.03E-02 | 129264738 | 129264861 | NC_000002.11 |
| cg10474712      | 1.45E-16 | 3.95E-18 | -9.6  | 30.3037349 | -1.21E-01 | 42062693  | 42062816  | NC_000022.10 |

|                 |          |          |      |            |           |           |           |              |
|-----------------|----------|----------|------|------------|-----------|-----------|-----------|--------------|
| cg00739593      | 1.45E-16 | 3.95E-18 | -9.6 | 30.3028429 | -8.22E-02 | 116164714 | 116164837 | NC_000010.10 |
| cg09382850      | 1.45E-16 | 3.96E-18 | -9.6 | 30.301808  | -4.72E-02 | 105753147 | 105753270 | NC_000007.13 |
| ch.17.45797972F | 1.46E-16 | 3.96E-18 | -9.6 | 30.3012395 | -8.04E-02 | 48442973  | 48443096  | NC_000017.10 |
| cg16446738      | 1.46E-16 | 3.97E-18 | -9.6 | 30.2992868 | -2.47E-01 | 51176931  | 51177054  | NC_000015.9  |
| cg12585943      | 1.46E-16 | 3.99E-18 | -9.6 | 30.2942024 | -1.18E-01 | 32121368  | 32121491  | NC_000006.11 |
| ch.9.98936572R  | 1.47E-16 | 4.00E-18 | -9.6 | 30.2926046 | -8.49E-02 | 99896751  | 99896874  | NC_000009.11 |
| ch.2.2017299F   | 1.47E-16 | 4.00E-18 | -9.6 | 30.292451  | -7.38E-02 | 97269742  | 97269865  | NC_000002.11 |
| cg22923514      | 1.47E-16 | 4.00E-18 | -9.6 | 30.2914006 | -1.39E-01 | 115999708 | 115999831 | NC_000010.10 |
| cg27130954      | 1.48E-16 | 4.02E-18 | -9.6 | 30.2854651 | -1.14E-01 | 67464331  | 67464454  | NC_000016.9  |
| cg19694978      | 1.48E-16 | 4.03E-18 | -9.6 | 30.2829834 | -3.31E-02 | 40420603  | 40420726  | NC_000001.10 |
| cg19040266      | 1.48E-16 | 4.04E-18 | -9.6 | 30.2824731 | -1.99E-01 | 131723239 | 131723362 | NC_000005.9  |
| cg19386379      | 1.48E-16 | 4.04E-18 | -9.6 | 30.2821837 | -1.08E-01 | 844284    | 844407    | NC_000011.9  |
| cg13401658      | 1.48E-16 | 4.04E-18 | -9.6 | 30.2803677 | -1.92E-01 | 177311027 | 177311150 | NC_000002.11 |
| cg19147990      | 1.49E-16 | 4.05E-18 | -9.6 | 30.2782853 | -8.09E-02 | 62537802  | 62537925  | NC_000010.10 |
| cg08482837      | 1.49E-16 | 4.05E-18 | -9.6 | 30.2781673 | -2.02E-01 | 86038423  | 86038546  | NC_000002.11 |
| cg07086226      | 1.49E-16 | 4.07E-18 | -9.6 | 30.2737316 | -1.97E-01 | 681509    | 681632    | NC_000004.11 |
| cg06907053      | 1.49E-16 | 4.08E-18 | -9.6 | 30.27231   | -1.16E-01 | 106015869 | 106015992 | NC_000002.11 |
| cg20253856      | 1.50E-16 | 4.08E-18 | -9.6 | 30.2721207 | -1.18E-01 | 99394591  | 99394714  | NC_000015.9  |
| cg13630493      | 1.50E-16 | 4.08E-18 | -9.6 | 30.2719765 | -1.19E-01 | 36190154  | 36190277  | NC_000009.11 |
| cg04470676      | 1.50E-16 | 4.09E-18 | -9.6 | 30.2704142 | -1.68E-01 | 142858878 | 142859001 | NC_000003.11 |
| cg23920016      | 1.50E-16 | 4.09E-18 | -9.6 | 30.2697669 | -2.38E-01 | 162106832 | 162106955 | NC_000001.10 |
| cg07519235      | 1.50E-16 | 4.09E-18 | -9.6 | 30.2696801 | -2.37E-01 | 19894978  | 19895101  | NC_000016.9  |
| cg00348467      | 1.50E-16 | 4.09E-18 | -9.6 | 30.2686543 | -1.20E-01 | 43222121  | 43222244  | NC_000017.10 |
| cg03638211      | 1.50E-16 | 4.10E-18 | -9.6 | 30.2677553 | -1.39E-01 | 22538875  | 22538998  | NC_000007.13 |
| cg20420007      | 1.50E-16 | 4.11E-18 | -9.6 | 30.2652673 | -6.03E-02 | 173399241 | 173399364 | NC_000001.10 |

|                |          |          |       |            |           |           |           |              |
|----------------|----------|----------|-------|------------|-----------|-----------|-----------|--------------|
| cg02844852     | 1.53E-16 | 4.19E-18 | -9.59 | 30.2458078 | -1.79E-01 | 84840283  | 84840406  | NC_000016.9  |
| cg02610723     | 1.53E-16 | 4.19E-18 | -9.59 | 30.2457018 | -1.62E-01 | 88850534  | 88850657  | NC_000016.9  |
| ch.16.2068605F | 1.53E-16 | 4.19E-18 | -9.59 | 30.2447754 | -1.29E-01 | 87437924  | 87438047  | NC_000016.9  |
| cg06251289     | 1.53E-16 | 4.19E-18 | -9.59 | 30.2445243 | -2.55E-01 | 66639593  | 66639716  | NC_000016.9  |
| cg02578070     | 1.54E-16 | 4.20E-18 | -9.59 | 30.2420248 | -1.27E-01 | 119669305 | 119669428 | NC_000006.11 |
| cg23305567     | 1.56E-16 | 4.26E-18 | -9.59 | 30.2290443 | -2.17E-01 | 54369576  | 54369699  | NC_000019.9  |
| cg05022368     | 1.56E-16 | 4.27E-18 | -9.59 | 30.2278704 | -2.32E-01 | 38858552  | 38858675  | NC_000008.10 |
| cg06963672     | 1.56E-16 | 4.27E-18 | -9.59 | 30.2278546 | -1.87E-01 | 101450261 | 101450384 | NC_000014.8  |
| cg10926330     | 1.57E-16 | 4.28E-18 | -9.59 | 30.2239361 | -9.29E-02 | 76268981  | 76269104  | NC_000017.10 |
| cg25598159     | 1.57E-16 | 4.31E-18 | -9.59 | 30.2182633 | -1.50E-01 | 111127533 | 111127656 | NC_000012.11 |
| cg06559575     | 1.58E-16 | 4.31E-18 | -9.59 | 30.2175476 | -2.17E-01 | 53490352  | 53490475  | NC_000012.11 |
| cg25087341     | 1.58E-16 | 4.31E-18 | -9.59 | 30.2167684 | -2.33E-01 | 111487811 | 111487934 | NC_000003.11 |
| cg13986294     | 1.58E-16 | 4.32E-18 | -9.59 | 30.2162621 | -9.78E-02 | 14316462  | 14316585  | NC_000009.11 |
| cg16584172     | 1.58E-16 | 4.33E-18 | -9.59 | 30.2130511 | -9.10E-02 | 100633446 | 100633569 | NC_000013.10 |
| cg04338156     | 1.58E-16 | 4.33E-18 | -9.59 | 30.2118902 | -1.54E-01 | 29195900  | 29196023  | NC_000016.9  |
| cg11786870     | 1.59E-16 | 4.36E-18 | -9.59 | 30.2063166 | -1.60E-01 | 203576481 | 203576604 | NC_000001.10 |
| cg03532815     | 1.59E-16 | 4.37E-18 | -9.59 | 30.2046707 | -1.62E-01 | 18771327  | 18771450  | NC_000019.9  |
| cg23051926     | 1.60E-16 | 4.38E-18 | -9.59 | 30.2023914 | -2.20E-01 | 105466016 | 105466139 | NC_000003.11 |
| cg01805480     | 1.60E-16 | 4.38E-18 | -9.59 | 30.2010118 | -1.09E-01 | 133137879 | 133138002 | NC_000012.11 |
| cg00218620     | 1.61E-16 | 4.41E-18 | -9.59 | 30.1948208 | -6.61E-02 | 219866460 | 219866583 | NC_000002.11 |
| cg22199361     | 1.61E-16 | 4.41E-18 | -9.59 | 30.194649  | -9.67E-02 | 5081567   | 5081690   | NC_000020.10 |
| cg16099687     | 1.61E-16 | 4.42E-18 | -9.59 | 30.1930217 | -2.66E-01 | 96839959  | 96840082  | NC_000012.11 |
| cg22626525     | 1.62E-16 | 4.44E-18 | -9.59 | 30.1888695 | -1.21E-01 | 20008900  | 20009023  | NC_000001.10 |
| cg09960641     | 1.63E-16 | 4.47E-18 | -9.58 | 30.1823292 | -1.96E-01 | 35598494  | 35598617  | NC_000019.9  |
| cg18298997     | 1.63E-16 | 4.47E-18 | -9.58 | 30.1818598 | -2.18E-01 | 133804557 | 133804680 | NC_000011.9  |

|            |          |          |       |            |           |           |           |              |
|------------|----------|----------|-------|------------|-----------|-----------|-----------|--------------|
| cg11409620 | 1.63E-16 | 4.47E-18 | -9.58 | 30.1808723 | -8.70E-02 | 23487458  | 23487581  | NC_000022.10 |
| cg21968765 | 1.63E-16 | 4.48E-18 | -9.58 | 30.1791412 | -9.42E-02 | 100712345 | 100712468 | NC_000003.11 |
| cg04167096 | 1.63E-16 | 4.48E-18 | -9.58 | 30.1784031 | -2.42E-01 | 227001602 | 227001725 | NC_000002.11 |
| cg20478934 | 1.64E-16 | 4.49E-18 | -9.58 | 30.1779019 | -1.16E-01 | 10120794  | 10120917  | NC_000019.9  |
| cg22229039 | 1.64E-16 | 4.50E-18 | -9.58 | 30.1753642 | -2.29E-01 | 7842159   | 7842282   | NC_000001.10 |
| cg15601361 | 1.64E-16 | 4.51E-18 | -9.58 | 30.1725883 | -1.93E-01 | 11771493  | 11771616  | NC_000006.11 |
| cg02147126 | 1.65E-16 | 4.52E-18 | -9.58 | 30.1702741 | -1.84E-01 | 827715    | 827838    | NC_000019.9  |
| cg11211952 | 1.65E-16 | 4.53E-18 | -9.58 | 30.1678726 | -2.21E-01 | 63710728  | 63710851  | NC_000003.11 |
| cg27561567 | 1.66E-16 | 4.55E-18 | -9.58 | 30.1636266 | -8.43E-02 | 37380258  | 37380381  | NC_000018.9  |
| cg00335908 | 1.66E-16 | 4.55E-18 | -9.58 | 30.1629888 | -1.28E-01 | 89002930  | 89003053  | NC_000016.9  |
| cg08224888 | 1.66E-16 | 4.56E-18 | -9.58 | 30.1606918 | -1.42E-01 | 3969522   | 3969645   | NC_000019.9  |
| cg08326468 | 1.67E-16 | 4.59E-18 | -9.58 | 30.1547638 | -1.80E-01 | 2091106   | 2091229   | NC_000016.9  |
| cg11631011 | 1.67E-16 | 4.59E-18 | -9.58 | 30.1545193 | -2.09E-01 | 52436047  | 52436170  | NC_000013.10 |
| cg14893857 | 1.67E-16 | 4.60E-18 | -9.58 | 30.1536316 | -2.27E-01 | 102554969 | 102555092 | NC_000014.8  |
| cg23369529 | 1.68E-16 | 4.62E-18 | -9.58 | 30.1476875 | -1.30E-01 | 68149989  | 68150112  | NC_000001.10 |
| cg16490209 | 1.69E-16 | 4.63E-18 | -9.58 | 30.1456876 | -1.96E-01 | 25051773  | 25051896  | NC_000012.11 |
| cg23110109 | 1.70E-16 | 4.67E-18 | -9.58 | 30.1385485 | -9.62E-02 | 122092127 | 122092250 | NC_000012.11 |
| cg14242680 | 1.70E-16 | 4.68E-18 | -9.58 | 30.1353538 | -1.02E-01 | 104004787 | 104004910 | NC_000010.10 |
| cg18575809 | 1.71E-16 | 4.71E-18 | -9.58 | 30.1302382 | -1.53E-01 | 21540329  | 21540452  | NC_000014.8  |
| cg17298269 | 1.72E-16 | 4.73E-18 | -9.58 | 30.1245114 | -8.50E-02 | 45338083  | 45338206  | NC_000020.10 |
| cg21666367 | 1.73E-16 | 4.75E-18 | -9.57 | 30.121218  | -1.97E-01 | 27450279  | 27450402  | NC_000008.10 |
| cg21118780 | 1.73E-16 | 4.75E-18 | -9.57 | 30.1203199 | -1.76E-01 | 102379567 | 102379690 | NC_000002.11 |
| cg20313522 | 1.74E-16 | 4.78E-18 | -9.57 | 30.1143114 | -1.58E-01 | 125259531 | 125259654 | NC_000012.11 |
| cg01227028 | 1.74E-16 | 4.80E-18 | -9.57 | 30.1105339 | -8.61E-02 | 43277745  | 43277868  | NC_000010.10 |
| cg18396660 | 1.75E-16 | 4.83E-18 | -9.57 | 30.105499  | -8.92E-02 | 68599196  | 68599319  | NC_000006.11 |



|            |          |          |       |            |           |           |           |              |
|------------|----------|----------|-------|------------|-----------|-----------|-----------|--------------|
| cg13168012 | 1.76E-16 | 4.84E-18 | -9.57 | 30.1018292 | -1.52E-01 | 60692978  | 60693101  | NC_000011.9  |
| cg07180475 | 1.76E-16 | 4.84E-18 | -9.57 | 30.1016492 | -1.29E-01 | 87551658  | 87551781  | NC_000016.9  |
| cg02987249 | 1.76E-16 | 4.85E-18 | -9.57 | 30.1010622 | -1.76E-01 | 6750327   | 6750450   | NC_000019.9  |
| cg19051042 | 1.76E-16 | 4.85E-18 | -9.57 | 30.0996543 | -1.92E-01 | 39680319  | 39680442  | NC_000017.10 |
| cg09260048 | 1.78E-16 | 4.90E-18 | -9.57 | 30.090415  | -2.30E-01 | 82415405  | 82415528  | NC_000015.9  |
| cg02597894 | 1.78E-16 | 4.90E-18 | -9.57 | 30.0897889 | -1.88E-01 | 31760796  | 31760919  | NC_000006.11 |
| cg16218715 | 1.78E-16 | 4.90E-18 | -9.57 | 30.0895599 | -1.59E-01 | 63926253  | 63926376  | NC_000002.11 |
| cg20218460 | 1.78E-16 | 4.92E-18 | -9.57 | 30.0868549 | -1.66E-01 | 238583504 | 238583627 | NC_000002.11 |
| cg13520770 | 1.79E-16 | 4.93E-18 | -9.57 | 30.0842776 | -2.12E-01 | 3117181   | 3117304   | NC_000011.9  |
| cg26815395 | 1.80E-16 | 4.97E-18 | -9.57 | 30.0767129 | -9.54E-02 | 180485043 | 180485166 | NC_000001.10 |
| cg00396991 | 1.80E-16 | 4.98E-18 | -9.57 | 30.0750138 | -1.09E-01 | 161494029 | 161494152 | NC_000001.10 |
| cg04038932 | 1.80E-16 | 4.98E-18 | -9.57 | 30.0744809 | -8.71E-02 | 135286214 | 135286337 | NC_000009.11 |
| cg02480666 | 1.81E-16 | 5.00E-18 | -9.57 | 30.0702562 | -1.46E-01 | 35259746  | 35259869  | NC_000001.10 |
| cg09961083 | 1.81E-16 | 5.00E-18 | -9.57 | 30.0694965 | -4.67E-02 | 75761431  | 75761554  | NC_000014.8  |
| cg09213733 | 1.81E-16 | 5.01E-18 | -9.57 | 30.0693885 | -5.84E-02 | 156023044 | 156023167 | NC_000001.10 |
| cg14031473 | 1.81E-16 | 5.01E-18 | -9.57 | 30.0686202 | -1.52E-01 | 134206000 | 134206123 | NC_000009.11 |
| cg06377221 | 1.81E-16 | 5.01E-18 | -9.57 | 30.0684455 | -4.30E-02 | 18111739  | 18111862  | NC_000019.9  |
| cg11299264 | 1.81E-16 | 5.01E-18 | -9.57 | 30.0675946 | -1.88E-01 | 18920396  | 18920519  | NC_000019.9  |
| cg03654169 | 1.82E-16 | 5.03E-18 | -9.57 | 30.0643481 | -1.82E-01 | 11710911  | 11711034  | NC_000008.10 |
| cg13999606 | 1.83E-16 | 5.06E-18 | -9.57 | 30.0591226 | -1.37E-01 | 58862457  | 58862580  | NC_000014.8  |
| cg07405121 | 1.84E-16 | 5.08E-18 | -9.56 | 30.0555587 | -2.37E-01 | 2083168   | 2083291   | NC_000016.9  |
| cg04035553 | 1.84E-16 | 5.08E-18 | -9.56 | 30.0552773 | -1.63E-01 | 143757498 | 143757621 | NC_000008.10 |
| cg09493150 | 1.84E-16 | 5.09E-18 | -9.56 | 30.0523547 | -9.36E-02 | 172199605 | 172199728 | NC_000005.9  |
| cg11857093 | 1.84E-16 | 5.09E-18 | -9.56 | 30.0519699 | -2.11E-01 | 115642150 | 115642273 | NC_000001.10 |
| cg11909137 | 1.86E-16 | 5.15E-18 | -9.56 | 30.0403652 | -2.51E-01 | 46461202  | 46461325  | NC_000018.9  |

|            |          |          |       |            |           |           |           |              |
|------------|----------|----------|-------|------------|-----------|-----------|-----------|--------------|
| cg22650458 | 1.86E-16 | 5.16E-18 | -9.56 | 30.0398951 | -1.63E-01 | 30188720  | 30188843  | NC_000007.13 |
| cg15923943 | 1.87E-16 | 5.16E-18 | -9.56 | 30.0385759 | -1.69E-01 | 140383566 | 140383689 | NC_000005.9  |
| cg01782097 | 1.87E-16 | 5.16E-18 | -9.56 | 30.0383028 | -1.20E-01 | 846637    | 846760    | NC_000001.10 |
| cg24715988 | 1.87E-16 | 5.17E-18 | -9.56 | 30.036794  | -1.26E-01 | 244237941 | 244238064 | NC_000001.10 |
| cg05884649 | 1.87E-16 | 5.18E-18 | -9.56 | 30.0356275 | -9.63E-02 | 44143806  | 44143929  | NC_000010.10 |
| cg10231182 | 1.87E-16 | 5.18E-18 | -9.56 | 30.0355777 | -2.24E-01 | 15815827  | 15815950  | NC_000012.11 |
| cg19310908 | 1.88E-16 | 5.20E-18 | -9.56 | 30.0320704 | -1.11E-01 | 46800064  | 46800187  | NC_000019.9  |
| cg26831416 | 1.88E-16 | 5.20E-18 | -9.56 | 30.0320432 | -2.16E-01 | 39142011  | 39142134  | NC_000019.9  |
| cg21049361 | 1.89E-16 | 5.22E-18 | -9.56 | 30.0268107 | -1.09E-01 | 30655870  | 30655993  | NC_000006.11 |
| cg09346775 | 1.89E-16 | 5.23E-18 | -9.56 | 30.0257551 | -1.58E-01 | 1028067   | 1028190   | NC_000004.11 |
| cg08850641 | 1.92E-16 | 5.32E-18 | -9.56 | 30.0087213 | -2.21E-01 | 66818270  | 66818393  | NC_000017.10 |
| cg02713832 | 1.93E-16 | 5.34E-18 | -9.56 | 30.0050534 | -2.10E-01 | 60772559  | 60772682  | NC_000011.9  |
| cg27552912 | 1.94E-16 | 5.38E-18 | -9.56 | 29.998147  | -2.44E-01 | 81233441  | 81233564  | NC_000007.13 |
| cg20292636 | 1.95E-16 | 5.40E-18 | -9.56 | 29.9941504 | -1.99E-01 | 204328377 | 204328500 | NC_000001.10 |
| cg26451547 | 1.95E-16 | 5.41E-18 | -9.56 | 29.992304  | -1.16E-01 | 36397596  | 36397719  | NC_000011.9  |
| cg01411366 | 1.96E-16 | 5.44E-18 | -9.55 | 29.9877296 | -1.15E-01 | 112012867 | 112012990 | NC_000003.11 |
| cg25840237 | 1.96E-16 | 5.45E-18 | -9.55 | 29.985928  | -1.23E-01 | 29967593  | 29967716  | NC_000015.9  |
| cg17023034 | 1.96E-16 | 5.45E-18 | -9.55 | 29.9854642 | -2.04E-01 | 152919487 | 152919610 | NC_000002.11 |
| cg02425732 | 1.96E-16 | 5.46E-18 | -9.55 | 29.9838805 | -6.37E-02 | 17662212  | 17662335  | NC_000020.10 |
| cg02531439 | 1.97E-16 | 5.46E-18 | -9.55 | 29.9827608 | -1.99E-01 | 98701226  | 98701349  | NC_000007.13 |
| cg14550828 | 1.97E-16 | 5.48E-18 | -9.55 | 29.9792091 | -1.38E-01 | 160876992 | 160877115 | NC_000006.11 |
| cg03735308 | 1.98E-16 | 5.50E-18 | -9.55 | 29.9762394 | -1.06E-01 | 69455331  | 69455454  | NC_000011.9  |
| cg25133376 | 1.98E-16 | 5.51E-18 | -9.55 | 29.9748204 | -2.32E-01 | 73392981  | 73393104  | NC_000007.13 |
| cg09088576 | 1.99E-16 | 5.52E-18 | -9.55 | 29.9719508 | -2.03E-01 | 36947785  | 36947908  | NC_000001.10 |
| cg16999568 | 1.99E-16 | 5.55E-18 | -9.55 | 29.9673698 | -8.27E-02 | 3601547   | 3601670   | NC_000011.9  |

|            |          |          |       |            |           |           |           |              |
|------------|----------|----------|-------|------------|-----------|-----------|-----------|--------------|
| cg21407354 | 2.00E-16 | 5.56E-18 | -9.55 | 29.9648267 | -1.70E-01 | 45596969  | 45597092  | NC_000022.10 |
| cg07317846 | 2.01E-16 | 5.59E-18 | -9.55 | 29.9604552 | -2.58E-01 | 42648344  | 42648467  | NC_000002.11 |
| cg27173717 | 2.01E-16 | 5.59E-18 | -9.55 | 29.9602109 | -1.99E-01 | 40420503  | 40420626  | NC_000001.10 |
| cg03510435 | 2.02E-16 | 5.61E-18 | -9.55 | 29.9564337 | -1.22E-01 | 14094558  | 14094681  | NC_000012.11 |
| cg27081634 | 2.02E-16 | 5.62E-18 | -9.55 | 29.9550374 | -9.89E-02 | 68778745  | 68778868  | NC_000011.9  |
| cg11056055 | 2.02E-16 | 5.63E-18 | -9.55 | 29.9527317 | -2.04E-01 | 116356738 | 116356861 | NC_000007.13 |
| cg16677162 | 2.04E-16 | 5.67E-18 | -9.55 | 29.9456245 | -1.26E-01 | 22465502  | 22465625  | NC_000022.10 |
| cg21069965 | 2.04E-16 | 5.67E-18 | -9.55 | 29.9451213 | -2.24E-01 | 25230306  | 25230429  | NC_000006.11 |
| cg07168939 | 2.04E-16 | 5.68E-18 | -9.55 | 29.9446126 | -1.24E-01 | 143763412 | 143763535 | NC_000008.10 |
| cg16492833 | 2.04E-16 | 5.69E-18 | -9.55 | 29.9425155 | -5.71E-02 | 33679775  | 33679898  | NC_000006.11 |
| cg15138846 | 2.05E-16 | 5.70E-18 | -9.55 | 29.9403511 | -7.76E-02 | 18067560  | 18067683  | NC_000008.10 |
| cg03594078 | 2.05E-16 | 5.71E-18 | -9.55 | 29.9387275 | -1.94E-01 | 22131675  | 22131798  | NC_000008.10 |
| cg05806819 | 2.06E-16 | 5.73E-18 | -9.55 | 29.9354005 | -1.87E-01 | 132432637 | 132432760 | NC_000011.9  |
| cg26073844 | 2.06E-16 | 5.74E-18 | -9.55 | 29.9343906 | -2.26E-01 | 130799093 | 130799216 | NC_000008.10 |
| cg23695131 | 2.06E-16 | 5.74E-18 | -9.55 | 29.9340881 | -1.49E-01 | 94642928  | 94643051  | NC_000011.9  |
| cg13266292 | 2.07E-16 | 5.76E-18 | -9.55 | 29.9305384 | -1.14E-01 | 1438084   | 1438207   | NC_000019.9  |
| cg19095187 | 2.08E-16 | 5.80E-18 | -9.54 | 29.9238309 | -1.21E-01 | 108437051 | 108437174 | NC_000006.11 |
| cg05319515 | 2.08E-16 | 5.81E-18 | -9.54 | 29.9215772 | -1.10E-01 | 105212620 | 105212743 | NC_000010.10 |
| cg10156042 | 2.09E-16 | 5.82E-18 | -9.54 | 29.9191686 | -7.61E-02 | 32149463  | 32149586  | NC_000022.10 |
| cg14640149 | 2.09E-16 | 5.83E-18 | -9.54 | 29.9185442 | -1.67E-01 | 216546226 | 216546349 | NC_000002.11 |
| cg24980893 | 2.09E-16 | 5.83E-18 | -9.54 | 29.9179521 | -6.44E-02 | 116164709 | 116164832 | NC_000007.13 |
| cg14537247 | 2.10E-16 | 5.86E-18 | -9.54 | 29.9126111 | -1.94E-01 | 126656547 | 126656670 | NC_000009.11 |
| cg22772930 | 2.10E-16 | 5.87E-18 | -9.54 | 29.9121603 | -2.12E-01 | 155369317 | 155369440 | NC_000007.13 |
| cg13866129 | 2.10E-16 | 5.87E-18 | -9.54 | 29.9113936 | -7.14E-02 | 62623438  | 62623561  | NC_000011.9  |
| cg17025683 | 2.10E-16 | 5.87E-18 | -9.54 | 29.9107813 | -7.67E-02 | 173836220 | 173836343 | NC_000001.10 |

|            |          |          |       |            |           |           |           |              |
|------------|----------|----------|-------|------------|-----------|-----------|-----------|--------------|
| cg27659109 | 2.11E-16 | 5.88E-18 | -9.54 | 29.9098483 | -1.59E-01 | 3509838   | 3509961   | NC_000019.9  |
| cg13376404 | 2.11E-16 | 5.88E-18 | -9.54 | 29.9094985 | -1.47E-01 | 34077293  | 34077416  | NC_000017.10 |
| cg17224837 | 2.12E-16 | 5.91E-18 | -9.54 | 29.9046505 | -1.03E-01 | 15148638  | 15148761  | NC_000010.10 |
| cg16248515 | 2.12E-16 | 5.93E-18 | -9.54 | 29.9020691 | -1.65E-01 | 156840234 | 156840357 | NC_000003.11 |
| cg21068610 | 2.12E-16 | 5.93E-18 | -9.54 | 29.9019072 | -7.19E-02 | 7790179   | 7790302   | NC_000017.10 |
| cg23004960 | 2.15E-16 | 6.02E-18 | -9.54 | 29.8863497 | -8.07E-02 | 101268430 | 101268553 | NC_000007.13 |
| cg07013787 | 2.16E-16 | 6.04E-18 | -9.54 | 29.8838481 | -1.03E-01 | 171572499 | 171572622 | NC_000002.11 |
| cg11724602 | 2.16E-16 | 6.04E-18 | -9.54 | 29.8830267 | -2.73E-01 | 197099072 | 197099195 | NC_000003.11 |
| cg13775050 | 2.16E-16 | 6.04E-18 | -9.54 | 29.8829468 | -2.55E-01 | 104916075 | 104916198 | NC_000011.9  |
| cg01371233 | 2.17E-16 | 6.06E-18 | -9.54 | 29.8791957 | -2.84E-01 | 30456325  | 30456448  | NC_000016.9  |
| cg00442282 | 2.17E-16 | 6.07E-18 | -9.54 | 29.8783439 | -7.51E-02 | 38471064  | 38471187  | NC_000017.10 |
| cg23395310 | 2.17E-16 | 6.07E-18 | -9.54 | 29.8780117 | -1.76E-01 | 139623427 | 139623550 | NC_000009.11 |
| cg16874185 | 2.17E-16 | 6.07E-18 | -9.54 | 29.8776204 | -1.36E-01 | 75210723  | 75210846  | NC_000011.9  |
| cg12905085 | 2.18E-16 | 6.09E-18 | -9.54 | 29.8744682 | -1.81E-01 | 32054510  | 32054633  | NC_000001.10 |
| cg09517106 | 2.18E-16 | 6.09E-18 | -9.54 | 29.8744321 | -1.19E-01 | 198904195 | 198904318 | NC_000001.10 |
| cg01259329 | 2.18E-16 | 6.11E-18 | -9.54 | 29.8720999 | -2.32E-01 | 166944191 | 166944314 | NC_000006.11 |
| cg08049614 | 2.18E-16 | 6.11E-18 | -9.54 | 29.8719926 | -1.54E-01 | 1172036   | 1172159   | NC_000016.9  |
| cg08843492 | 2.18E-16 | 6.11E-18 | -9.54 | 29.8716211 | -1.30E-01 | 308231    | 308354    | NC_000011.9  |
| cg26733301 | 2.19E-16 | 6.14E-18 | -9.54 | 29.8667912 | -2.75E-01 | 61585924  | 61586047  | NC_000020.10 |
| cg24253618 | 2.19E-16 | 6.15E-18 | -9.54 | 29.866102  | -1.27E-01 | 32054460  | 32054583  | NC_000001.10 |
| cg04949632 | 2.20E-16 | 6.15E-18 | -9.54 | 29.8653116 | -1.20E-01 | 118123304 | 118123427 | NC_000012.11 |
| cg03079497 | 2.20E-16 | 6.15E-18 | -9.54 | 29.8649583 | -1.94E-01 | 1390554   | 1390677   | NC_000017.10 |
| cg06698332 | 2.20E-16 | 6.17E-18 | -9.54 | 29.8627603 | -2.14E-01 | 151967449 | 151967572 | NC_000001.10 |
| cg25734089 | 2.20E-16 | 6.17E-18 | -9.54 | 29.8622054 | -2.49E-01 | 46969919  | 46970042  | NC_000019.9  |
| cg00414041 | 2.20E-16 | 6.17E-18 | -9.54 | 29.861791  | -2.42E-01 | 166944283 | 166944406 | NC_000006.11 |

|               |          |          |       |            |           |           |           |              |
|---------------|----------|----------|-------|------------|-----------|-----------|-----------|--------------|
| cg05708550    | 2.21E-16 | 6.19E-18 | -9.53 | 29.8590294 | -8.33E-02 | 137688227 | 137688350 | NC_000005.9  |
| cg09354692    | 2.22E-16 | 6.22E-18 | -9.53 | 29.854337  | -2.07E-01 | 160122650 | 160122773 | NC_000006.11 |
| cg03338209    | 2.22E-16 | 6.23E-18 | -9.53 | 29.8531794 | -1.80E-01 | 37908796  | 37908919  | NC_000022.10 |
| cg17611046    | 2.25E-16 | 6.31E-18 | -9.53 | 29.8395209 | -2.30E-01 | 5672954   | 5673077   | NC_000006.11 |
| cg09373676    | 2.25E-16 | 6.32E-18 | -9.53 | 29.8390578 | -2.32E-01 | 186227243 | 186227366 | NC_000004.11 |
| cg26042725    | 2.25E-16 | 6.32E-18 | -9.53 | 29.8387045 | -7.02E-02 | 3827226   | 3827349   | NC_000020.10 |
| cg11165626    | 2.25E-16 | 6.32E-18 | -9.53 | 29.838374  | -6.20E-02 | 21786221  | 21786344  | NC_000010.10 |
| cg23883632    | 2.25E-16 | 6.32E-18 | -9.53 | 29.8379743 | -2.03E-01 | 71174292  | 71174415  | NC_000014.8  |
| ch.13.233184R | 2.25E-16 | 6.32E-18 | -9.53 | 29.8377708 | -7.12E-02 | 28567843  | 28567966  | NC_000013.10 |
| cg21865249    | 2.26E-16 | 6.33E-18 | -9.53 | 29.8363705 | -1.74E-01 | 208144007 | 208144130 | NC_000001.10 |
| cg06400255    | 2.26E-16 | 6.35E-18 | -9.53 | 29.8340146 | -1.46E-01 | 30063046  | 30063169  | NC_000016.9  |
| cg12821702    | 2.27E-16 | 6.37E-18 | -9.53 | 29.8312772 | -2.03E-01 | 42165504  | 42165627  | NC_000002.11 |
| cg03198733    | 2.27E-16 | 6.38E-18 | -9.53 | 29.8282571 | -2.04E-01 | 7167584   | 7167707   | NC_000012.11 |
| cg05473871    | 2.28E-16 | 6.40E-18 | -9.53 | 29.8265631 | -1.01E-01 | 1513513   | 1513636   | NC_000019.9  |
| cg09784307    | 2.28E-16 | 6.40E-18 | -9.53 | 29.8261413 | -8.67E-02 | 75248768  | 75248891  | NC_000015.9  |
| cg18965179    | 2.28E-16 | 6.41E-18 | -9.53 | 29.8250143 | -1.54E-01 | 101500514 | 101500637 | NC_000007.13 |
| cg10658666    | 2.28E-16 | 6.41E-18 | -9.53 | 29.8247741 | -1.16E-01 | 63276718  | 63276841  | NC_000002.11 |
| ch.2.2007613R | 2.28E-16 | 6.41E-18 | -9.53 | 29.8245975 | -9.45E-02 | 96939558  | 96939681  | NC_000002.11 |
| cg12753631    | 2.28E-16 | 6.42E-18 | -9.53 | 29.8229768 | -8.43E-02 | 31566610  | 31566733  | NC_000006.11 |
| cg20098887    | 2.29E-16 | 6.44E-18 | -9.53 | 29.8193934 | -1.01E-01 | 146864520 | 146864643 | NC_000006.11 |
| cg06341590    | 2.31E-16 | 6.49E-18 | -9.53 | 29.8126338 | -2.04E-01 | 57624431  | 57624554  | NC_000004.11 |
| cg14066905    | 2.31E-16 | 6.51E-18 | -9.53 | 29.8087388 | -1.53E-01 | 124953090 | 124953213 | NC_000011.9  |
| cg13888509    | 2.33E-16 | 6.56E-18 | -9.53 | 29.8020594 | -1.76E-01 | 74495603  | 74495726  | NC_000015.9  |
| cg11997708    | 2.34E-16 | 6.59E-18 | -9.53 | 29.7972785 | -2.28E-01 | 114927854 | 114927977 | NC_000013.10 |
| cg09347959    | 2.34E-16 | 6.59E-18 | -9.53 | 29.7970511 | -1.36E-01 | 33360271  | 33360394  | NC_000015.9  |

|               |          |          |       |            |           |           |           |              |
|---------------|----------|----------|-------|------------|-----------|-----------|-----------|--------------|
| cg03585419    | 2.34E-16 | 6.60E-18 | -9.52 | 29.7953601 | -1.87E-01 | 54369681  | 54369804  | NC_000019.9  |
| cg22243298    | 2.35E-16 | 6.61E-18 | -9.52 | 29.7938927 | -2.58E-01 | 86313901  | 86314024  | NC_000015.9  |
| cg25890640    | 2.35E-16 | 6.61E-18 | -9.52 | 29.7938452 | -1.85E-01 | 68610632  | 68610755  | NC_000011.9  |
| cg07382129    | 2.35E-16 | 6.61E-18 | -9.52 | 29.7934692 | -1.87E-01 | 100249186 | 100249309 | NC_000015.9  |
| cg03487637    | 2.35E-16 | 6.62E-18 | -9.52 | 29.7926469 | -7.11E-02 | 45940039  | 45940162  | NC_000011.9  |
| cg25286679    | 2.35E-16 | 6.62E-18 | -9.52 | 29.7926419 | -2.09E-01 | 245879613 | 245879736 | NC_000001.10 |
| cg12781915    | 2.35E-16 | 6.62E-18 | -9.52 | 29.7925662 | -1.11E-01 | 185544099 | 185544222 | NC_000003.11 |
| cg08136020    | 2.35E-16 | 6.63E-18 | -9.52 | 29.7904833 | -2.84E-01 | 14735175  | 14735298  | NC_000006.11 |
| cg13858455    | 2.36E-16 | 6.64E-18 | -9.52 | 29.7887709 | -8.29E-02 | 87445161  | 87445284  | NC_000002.11 |
| cg17755386    | 2.36E-16 | 6.66E-18 | -9.52 | 29.7866612 | -9.73E-02 | 45242191  | 45242314  | NC_000001.10 |
| cg04735509    | 2.37E-16 | 6.67E-18 | -9.52 | 29.7854478 | -1.14E-01 | 63545783  | 63545906  | NC_000012.11 |
| ch.1.1540554F | 2.39E-16 | 6.73E-18 | -9.52 | 29.7763737 | -1.13E-01 | 52516807  | 52516930  | NC_000001.10 |
| cg14444140    | 2.40E-16 | 6.77E-18 | -9.52 | 29.7698655 | -3.26E-02 | 3752499   | 3752622   | NC_000006.11 |
| cg00427150    | 2.46E-16 | 6.94E-18 | -9.52 | 29.7455393 | -2.01E-01 | 114770568 | 114770691 | NC_000013.10 |
| cg24741598    | 2.48E-16 | 6.99E-18 | -9.52 | 29.7385642 | -6.30E-02 | 242011743 | 242011866 | NC_000001.10 |
| ch.19.103226F | 2.48E-16 | 7.01E-18 | -9.52 | 29.7363251 | -3.84E-02 | 1919419   | 1919542   | NC_000019.9  |
| cg17050693    | 2.49E-16 | 7.02E-18 | -9.52 | 29.7349121 | -7.31E-02 | 40346448  | 40346571  | NC_000017.10 |
| cg20625334    | 2.49E-16 | 7.03E-18 | -9.52 | 29.7323807 | -2.01E-01 | 152991620 | 152991743 | NC_000002.11 |
| cg18504989    | 2.49E-16 | 7.04E-18 | -9.52 | 29.7321845 | -1.62E-01 | 46286198  | 46286321  | NC_000019.9  |
| cg14310034    | 2.49E-16 | 7.04E-18 | -9.52 | 29.7311355 | -4.14E-02 | 54423433  | 54423556  | NC_000014.8  |
| cg16715129    | 2.50E-16 | 7.05E-18 | -9.51 | 29.7304893 | -1.62E-01 | 10477821  | 10477944  | NC_000011.9  |
| cg10399269    | 2.52E-16 | 7.13E-18 | -9.51 | 29.7195126 | -1.91E-01 | 1205342   | 1205465   | NC_000016.9  |
| cg27504292    | 2.54E-16 | 7.16E-18 | -9.51 | 29.7143846 | -1.45E-01 | 124779532 | 124779655 | NC_000012.11 |
| cg07285675    | 2.54E-16 | 7.18E-18 | -9.51 | 29.7119154 | -2.02E-01 | 30667873  | 30667996  | NC_000003.11 |
| cg18664508    | 2.54E-16 | 7.19E-18 | -9.51 | 29.7104778 | -1.45E-01 | 169487465 | 169487588 | NC_000003.11 |

|            |          |          |       |            |           |           |           |              |
|------------|----------|----------|-------|------------|-----------|-----------|-----------|--------------|
| cg24011261 | 2.55E-16 | 7.21E-18 | -9.51 | 29.708053  | -1.33E-01 | 49396226  | 49396349  | NC_000003.11 |
| cg14105536 | 2.56E-16 | 7.23E-18 | -9.51 | 29.7054006 | -2.12E-01 | 47666329  | 47666452  | NC_000006.11 |
| cg13457841 | 2.56E-16 | 7.24E-18 | -9.51 | 29.7038413 | -7.88E-02 | 37415248  | 37415371  | NC_000009.11 |
| cg21547763 | 2.56E-16 | 7.24E-18 | -9.51 | 29.7036099 | -2.23E-01 | 162351976 | 162352099 | NC_000001.10 |
| cg03140412 | 2.57E-16 | 7.27E-18 | -9.51 | 29.7003556 | -2.79E-01 | 415111    | 415234    | NC_000011.9  |
| cg15885043 | 2.57E-16 | 7.28E-18 | -9.51 | 29.6983929 | -1.55E-01 | 29383103  | 29383226  | NC_000015.9  |
| cg14094027 | 2.58E-16 | 7.29E-18 | -9.51 | 29.6968552 | -1.95E-01 | 120669080 | 120669203 | NC_000012.11 |
| cg08608523 | 2.59E-16 | 7.34E-18 | -9.51 | 29.6902999 | -1.79E-01 | 128866525 | 128866648 | NC_000008.10 |
| cg17722469 | 2.60E-16 | 7.36E-18 | -9.51 | 29.6878993 | -6.85E-02 | 146077906 | 146078029 | NC_000008.10 |
| cg24189696 | 2.61E-16 | 7.40E-18 | -9.51 | 29.6827173 | -1.30E-01 | 10585866  | 10585989  | NC_000019.9  |
| cg18008766 | 2.62E-16 | 7.41E-18 | -9.51 | 29.6804007 | -9.62E-02 | 38978896  | 38979019  | NC_000002.11 |
| cg05260466 | 2.62E-16 | 7.42E-18 | -9.51 | 29.6788814 | -6.93E-02 | 27756661  | 27756784  | NC_000003.11 |
| cg05217983 | 2.63E-16 | 7.46E-18 | -9.51 | 29.6747832 | -2.53E-01 | 45406867  | 45406990  | NC_000006.11 |
| cg13941508 | 2.64E-16 | 7.49E-18 | -9.51 | 29.6704555 | -2.19E-01 | 101434082 | 101434205 | NC_000002.11 |
| cg24690054 | 2.64E-16 | 7.49E-18 | -9.51 | 29.6699582 | -9.94E-02 | 127176257 | 127176380 | NC_000003.11 |
| cg13316404 | 2.65E-16 | 7.50E-18 | -9.51 | 29.6693459 | -1.62E-01 | 6191076   | 6191199   | NC_000010.10 |
| cg01342115 | 2.66E-16 | 7.54E-18 | -9.5  | 29.6633016 | -2.35E-01 | 134031663 | 134031786 | NC_000003.11 |
| cg27274542 | 2.67E-16 | 7.57E-18 | -9.5  | 29.660281  | -1.41E-01 | 57267680  | 57267803  | NC_000020.10 |
| cg09670263 | 2.67E-16 | 7.57E-18 | -9.5  | 29.6592696 | -2.22E-01 | 46558636  | 46558759  | NC_000003.11 |
| cg05913906 | 2.67E-16 | 7.58E-18 | -9.5  | 29.6580956 | -1.03E-01 | 30923370  | 30923493  | NC_000006.11 |
| cg07632771 | 2.68E-16 | 7.61E-18 | -9.5  | 29.6550165 | -2.03E-01 | 148611823 | 148611946 | NC_000007.13 |
| cg16836355 | 2.70E-16 | 7.65E-18 | -9.5  | 29.649607  | -8.39E-02 | 41218333  | 41218456  | NC_000015.9  |
| cg14847626 | 2.70E-16 | 7.65E-18 | -9.5  | 29.6492039 | -2.01E-01 | 124939526 | 124939649 | NC_000012.11 |
| cg09354294 | 2.70E-16 | 7.66E-18 | -9.5  | 29.647728  | -1.48E-01 | 68188118  | 68188241  | NC_000001.10 |
| cg06100324 | 2.71E-16 | 7.68E-18 | -9.5  | 29.6450253 | -1.87E-01 | 811347    | 811470    | NC_000016.9  |

|            |          |          |       |            |           |           |           |              |
|------------|----------|----------|-------|------------|-----------|-----------|-----------|--------------|
| cg13873263 | 2.71E-16 | 7.69E-18 | -9.5  | 29.6438758 | -1.90E-01 | 42011490  | 42011613  | NC_000017.10 |
| cg26052635 | 2.72E-16 | 7.73E-18 | -9.5  | 29.6383123 | -1.83E-01 | 29339307  | 29339430  | NC_000002.11 |
| cg00020474 | 2.73E-16 | 7.75E-18 | -9.5  | 29.636909  | -1.41E-01 | 8214963   | 8215086   | NC_000001.10 |
| cg18436214 | 2.73E-16 | 7.76E-18 | -9.5  | 29.63565   | -2.28E-01 | 77268489  | 77268612  | NC_000010.10 |
| cg07717512 | 2.75E-16 | 7.80E-18 | -9.5  | 29.6305514 | -2.27E-01 | 31026287  | 31026410  | NC_000006.11 |
| cg15367247 | 2.75E-16 | 7.82E-18 | -9.5  | 29.6275801 | -1.19E-01 | 185960440 | 185960563 | NC_000003.11 |
| cg17745339 | 2.76E-16 | 7.84E-18 | -9.5  | 29.624398  | -1.98E-01 | 176755199 | 176755322 | NC_000005.9  |
| cg03181524 | 2.77E-16 | 7.87E-18 | -9.5  | 29.6213713 | -1.91E-01 | 39048014  | 39048137  | NC_000019.9  |
| cg07023459 | 2.77E-16 | 7.88E-18 | -9.5  | 29.6196822 | -1.60E-01 | 113265410 | 113265533 | NC_000001.10 |
| cg05900810 | 2.78E-16 | 7.90E-18 | -9.5  | 29.617999  | -3.47E-02 | 113574066 | 113574189 | NC_000012.11 |
| cg09416154 | 2.78E-16 | 7.90E-18 | -9.5  | 29.617899  | -1.30E-01 | 109701201 | 109701324 | NC_000006.11 |
| cg21468728 | 2.78E-16 | 7.90E-18 | -9.5  | 29.6173003 | -9.32E-02 | 27918207  | 27918330  | NC_000017.10 |
| cg16452248 | 2.78E-16 | 7.90E-18 | -9.5  | 29.617267  | -2.24E-01 | 613526    | 613649    | NC_000016.9  |
| cg14935626 | 2.83E-16 | 8.04E-18 | -9.49 | 29.5994335 | -1.74E-01 | 17776015  | 17776138  | NC_000002.11 |
| cg10499172 | 2.85E-16 | 8.09E-18 | -9.49 | 29.5938071 | -1.58E-01 | 126173246 | 126173369 | NC_000011.9  |
| cg16210979 | 2.85E-16 | 8.11E-18 | -9.49 | 29.5918568 | -2.51E-01 | 112882744 | 112882867 | NC_000005.9  |
| cg03634833 | 2.87E-16 | 8.16E-18 | -9.49 | 29.5857288 | -1.91E-01 | 965534    | 965657    | NC_000007.13 |
| cg17457391 | 2.89E-16 | 8.21E-18 | -9.49 | 29.5792776 | -1.01E-01 | 140117443 | 140117566 | NC_000009.11 |
| cg01442959 | 2.89E-16 | 8.24E-18 | -9.49 | 29.5761006 | -7.71E-02 | 27861410  | 27861533  | NC_000006.11 |
| cg04272682 | 2.90E-16 | 8.24E-18 | -9.49 | 29.5751612 | -1.65E-01 | 70315994  | 70316117  | NC_000014.8  |
| cg19259199 | 2.90E-16 | 8.25E-18 | -9.49 | 29.5745706 | -6.43E-02 | 681730    | 681853    | NC_000008.10 |
| cg09090048 | 2.90E-16 | 8.26E-18 | -9.49 | 29.5728587 | -6.26E-02 | 134093731 | 134093854 | NC_000011.9  |
| cg15610437 | 2.90E-16 | 8.27E-18 | -9.49 | 29.5726243 | -1.50E-01 | 827821    | 827944    | NC_000019.9  |
| cg12722469 | 2.91E-16 | 8.27E-18 | -9.49 | 29.5717631 | -1.01E-01 | 41725053  | 41725176  | NC_000019.9  |
| cg09839874 | 2.91E-16 | 8.29E-18 | -9.49 | 29.5701744 | -2.36E-01 | 66604187  | 66604310  | NC_000016.9  |



|            |          |          |       |            |           |           |           |              |
|------------|----------|----------|-------|------------|-----------|-----------|-----------|--------------|
| cg21572000 | 2.91E-16 | 8.29E-18 | -9.49 | 29.5693569 | -2.14E-01 | 69546193  | 69546316  | NC_000014.8  |
| cg00563566 | 2.92E-16 | 8.31E-18 | -9.49 | 29.5667474 | -1.62E-01 | 230883182 | 230883305 | NC_000001.10 |
| cg03764062 | 2.92E-16 | 8.31E-18 | -9.49 | 29.5667133 | -3.12E-02 | 64008174  | 64008297  | NC_000011.9  |
| cg02389859 | 2.92E-16 | 8.33E-18 | -9.49 | 29.5652893 | -1.39E-01 | 1201691   | 1201814   | NC_000005.9  |
| cg17631150 | 2.94E-16 | 8.37E-18 | -9.49 | 29.5595941 | -1.54E-01 | 126173261 | 126173384 | NC_000011.9  |
| cg16281322 | 2.94E-16 | 8.38E-18 | -9.49 | 29.5594247 | -1.43E-01 | 43510478  | 43510601  | NC_000017.10 |
| cg07058988 | 2.94E-16 | 8.38E-18 | -9.49 | 29.5588338 | -1.35E-01 | 80297159  | 80297282  | NC_000017.10 |
| cg02734505 | 2.95E-16 | 8.40E-18 | -9.49 | 29.5563745 | -1.33E-01 | 54763081  | 54763204  | NC_000012.11 |
| cg03508409 | 2.95E-16 | 8.40E-18 | -9.49 | 29.5561636 | -6.74E-02 | 30662237  | 30662360  | NC_000016.9  |
| cg01615453 | 2.95E-16 | 8.41E-18 | -9.49 | 29.5550558 | -7.87E-02 | 2598506   | 2598629   | NC_000007.13 |
| cg10970409 | 2.96E-16 | 8.45E-18 | -9.49 | 29.5504785 | -7.20E-02 | 42543566  | 42543689  | NC_000003.11 |
| cg02014797 | 2.97E-16 | 8.46E-18 | -9.49 | 29.5492039 | -2.70E-02 | 59489343  | 59489466  | NC_000017.10 |
| cg15551096 | 2.97E-16 | 8.47E-18 | -9.49 | 29.5486733 | -2.69E-01 | 166901788 | 166901911 | NC_000006.11 |
| cg06306927 | 2.97E-16 | 8.48E-18 | -9.49 | 29.5470887 | -1.08E-01 | 40346279  | 40346402  | NC_000017.10 |
| cg04957132 | 2.98E-16 | 8.52E-18 | -9.49 | 29.5427789 | -9.25E-02 | 1395371   | 1395494   | NC_000017.10 |
| cg00450651 | 2.99E-16 | 8.54E-18 | -9.49 | 29.5407394 | -1.37E-01 | 139485902 | 139486025 | NC_000005.9  |
| cg25541968 | 3.00E-16 | 8.57E-18 | -9.49 | 29.5371426 | -1.56E-01 | 7848142   | 7848265   | NC_000011.9  |
| cg25271976 | 3.01E-16 | 8.59E-18 | -9.48 | 29.5350356 | -1.85E-01 | 9894165   | 9894288   | NC_000002.11 |
| cg04363470 | 3.03E-16 | 8.64E-18 | -9.48 | 29.5286096 | -1.93E-01 | 7597814   | 7597937   | NC_000011.9  |
| cg16057598 | 3.03E-16 | 8.65E-18 | -9.48 | 29.527171  | -9.68E-02 | 172967819 | 172967942 | NC_000002.11 |
| cg06892049 | 3.03E-16 | 8.66E-18 | -9.48 | 29.5260598 | -1.02E-01 | 32055738  | 32055861  | NC_000006.11 |
| cg16518772 | 3.04E-16 | 8.69E-18 | -9.48 | 29.5226307 | -2.11E-01 | 29819081  | 29819204  | NC_000016.9  |
| cg16405308 | 3.05E-16 | 8.72E-18 | -9.48 | 29.519669  | -1.84E-01 | 93723250  | 93723373  | NC_000015.9  |
| cg11038073 | 3.05E-16 | 8.73E-18 | -9.48 | 29.5184957 | -9.09E-02 | 47088421  | 47088544  | NC_000018.9  |
| cg12141611 | 3.05E-16 | 8.73E-18 | -9.48 | 29.5181524 | -7.57E-02 | 91581030  | 91581153  | NC_000014.8  |

|                |          |          |       |            |           |           |           |              |
|----------------|----------|----------|-------|------------|-----------|-----------|-----------|--------------|
| cg04724556     | 3.07E-16 | 8.77E-18 | -9.48 | 29.5138384 | -2.09E-01 | 44507997  | 44508120  | NC_000015.9  |
| cg02004632     | 3.10E-16 | 8.86E-18 | -9.48 | 29.5043857 | -1.47E-01 | 17598735  | 17598858  | NC_000011.9  |
| cg04539476     | 3.10E-16 | 8.86E-18 | -9.48 | 29.504224  | -1.14E-01 | 23351487  | 23351610  | NC_000014.8  |
| cg05247391     | 3.10E-16 | 8.87E-18 | -9.48 | 29.5030062 | -7.32E-02 | 71581649  | 71581772  | NC_000008.10 |
| cg24044501     | 3.10E-16 | 8.88E-18 | -9.48 | 29.5013382 | -1.50E-01 | 72056549  | 72056672  | NC_000010.10 |
| cg06565975     | 3.11E-16 | 8.91E-18 | -9.48 | 29.4983985 | -1.77E-01 | 143823917 | 143824040 | NC_000008.10 |
| cg12890903     | 3.11E-16 | 8.92E-18 | -9.48 | 29.4973991 | -9.71E-02 | 24867954  | 24868077  | NC_000014.8  |
| cg19673376     | 3.14E-16 | 8.98E-18 | -9.48 | 29.490605  | -1.95E-01 | 55721180  | 55721303  | NC_000019.9  |
| cg10856296     | 3.14E-16 | 9.01E-18 | -9.48 | 29.4876232 | -1.95E-01 | 4890074   | 4890197   | NC_000010.10 |
| cg23636941     | 3.14E-16 | 9.01E-18 | -9.48 | 29.4875231 | -1.56E-01 | 32899839  | 32899962  | NC_000020.10 |
| cg17624073     | 3.15E-16 | 9.02E-18 | -9.48 | 29.4865364 | -1.41E-01 | 79393583  | 79393706  | NC_000017.10 |
| cg07560741     | 3.16E-16 | 9.05E-18 | -9.48 | 29.4831342 | -2.18E-01 | 167734054 | 167734177 | NC_000006.11 |
| cg25655096     | 3.17E-16 | 9.10E-18 | -9.48 | 29.4776902 | -1.77E-01 | 6745292   | 6745415   | NC_000012.11 |
| cg08313880     | 3.19E-16 | 9.14E-18 | -9.48 | 29.473535  | -1.20E-01 | 4643401   | 4643524   | NC_000017.10 |
| cg01418153     | 3.19E-16 | 9.15E-18 | -9.48 | 29.4724274 | -1.29E-01 | 3240129   | 3240252   | NC_000001.10 |
| cg08036899     | 3.22E-16 | 9.24E-18 | -9.47 | 29.4621291 | -2.06E-01 | 94577218  | 94577341  | NC_000014.8  |
| cg05730975     | 3.23E-16 | 9.27E-18 | -9.47 | 29.45906   | -1.88E-01 | 214992482 | 214992605 | NC_000002.11 |
| cg16113793     | 3.24E-16 | 9.29E-18 | -9.47 | 29.4571237 | -1.92E-01 | 21451607  | 21451730  | NC_000018.9  |
| ch.14.1513839R | 3.24E-16 | 9.29E-18 | -9.47 | 29.4563902 | -6.47E-02 | 93819181  | 93819304  | NC_000014.8  |
| cg00120932     | 3.25E-16 | 9.33E-18 | -9.47 | 29.4531133 | -1.79E-01 | 30079436  | 30079559  | NC_000006.11 |
| cg25011003     | 3.25E-16 | 9.33E-18 | -9.47 | 29.4525795 | -1.03E-01 | 22470341  | 22470464  | NC_000001.10 |
| cg00326231     | 3.25E-16 | 9.34E-18 | -9.47 | 29.452052  | -2.01E-01 | 19278249  | 19278372  | NC_000022.10 |
| cg07779313     | 3.27E-16 | 9.39E-18 | -9.47 | 29.4468204 | -1.76E-01 | 192731534 | 192731657 | NC_000002.11 |
| cg01573472     | 3.28E-16 | 9.41E-18 | -9.47 | 29.4442049 | -2.03E-01 | 22351524  | 22351647  | NC_000001.10 |
| cg26667975     | 3.28E-16 | 9.42E-18 | -9.47 | 29.4427812 | -7.47E-02 | 1238229   | 1238352   | NC_000019.9  |

|            |          |          |       |            |           |           |           |              |
|------------|----------|----------|-------|------------|-----------|-----------|-----------|--------------|
| cg23350889 | 3.28E-16 | 9.43E-18 | -9.47 | 29.4418047 | -8.90E-02 | 133100618 | 133100741 | NC_000012.11 |
| cg27282058 | 3.29E-16 | 9.46E-18 | -9.47 | 29.4391389 | -1.20E-01 | 102701271 | 102701394 | NC_000014.8  |
| cg15509705 | 3.30E-16 | 9.49E-18 | -9.47 | 29.4362464 | -6.11E-02 | 95047720  | 95047843  | NC_000014.8  |
| cg16671079 | 3.30E-16 | 9.49E-18 | -9.47 | 29.4359481 | -1.65E-01 | 74868561  | 74868684  | NC_000017.10 |
| cg06149671 | 3.31E-16 | 9.51E-18 | -9.47 | 29.433931  | -2.01E-01 | 71951051  | 71951174  | NC_000017.10 |
| cg02443306 | 3.31E-16 | 9.51E-18 | -9.47 | 29.4338163 | -1.99E-01 | 268923    | 269046    | NC_000011.9  |
| cg26395694 | 3.31E-16 | 9.52E-18 | -9.47 | 29.4322419 | -1.70E-01 | 4783306   | 4783429   | NC_000003.11 |
| cg22521129 | 3.33E-16 | 9.59E-18 | -9.47 | 29.4251255 | -6.37E-02 | 1345308   | 1345431   | NC_000005.9  |
| cg12679308 | 3.34E-16 | 9.60E-18 | -9.47 | 29.4248423 | -1.99E-01 | 101500014 | 101500137 | NC_000007.13 |
| cg21002651 | 3.34E-16 | 9.60E-18 | -9.47 | 29.4245117 | -1.57E-01 | 104905889 | 104906012 | NC_000011.9  |
| cg09473745 | 3.34E-16 | 9.62E-18 | -9.47 | 29.4224791 | -2.15E-01 | 31423550  | 31423673  | NC_000010.10 |
| cg09241324 | 3.34E-16 | 9.62E-18 | -9.47 | 29.4223887 | -1.42E-01 | 11847798  | 11847921  | NC_000019.9  |
| cg05579652 | 3.35E-16 | 9.63E-18 | -9.47 | 29.421414  | -1.91E-01 | 2173351   | 2173474   | NC_000012.11 |
| cg25954705 | 3.35E-16 | 9.64E-18 | -9.47 | 29.4197909 | -1.70E-01 | 105194980 | 105195103 | NC_000014.8  |
| cg24374538 | 3.36E-16 | 9.67E-18 | -9.47 | 29.4170315 | -8.09E-02 | 54704434  | 54704557  | NC_000019.9  |
| cg25884488 | 3.37E-16 | 9.71E-18 | -9.47 | 29.4131117 | -1.22E-01 | 153601388 | 153601511 | NC_000004.11 |
| cg01188244 | 3.37E-16 | 9.72E-18 | -9.47 | 29.412216  | -6.06E-02 | 45496452  | 45496575  | NC_000010.10 |
| cg01368219 | 3.40E-16 | 9.78E-18 | -9.46 | 29.4055222 | -1.94E-01 | 54999791  | 54999914  | NC_000003.11 |
| cg20257553 | 3.40E-16 | 9.79E-18 | -9.46 | 29.4053585 | -9.30E-02 | 160919462 | 160919585 | NC_000002.11 |
| cg26728422 | 3.40E-16 | 9.81E-18 | -9.46 | 29.4028529 | -1.32E-01 | 1429015   | 1429138   | NC_000016.9  |
| cg14003231 | 3.41E-16 | 9.84E-18 | -9.46 | 29.4004219 | -2.01E-01 | 33640908  | 33641031  | NC_000006.11 |
| cg03844380 | 3.41E-16 | 9.84E-18 | -9.46 | 29.4002637 | -5.95E-02 | 100680408 | 100680531 | NC_000014.8  |
| cg14848772 | 3.42E-16 | 9.86E-18 | -9.46 | 29.3978756 | -1.23E-01 | 27099813  | 27099936  | NC_000006.11 |
| cg07226162 | 3.42E-16 | 9.87E-18 | -9.46 | 29.3968888 | -2.38E-01 | 112293247 | 112293370 | NC_000010.10 |
| cg06030535 | 3.42E-16 | 9.87E-18 | -9.46 | 29.3968494 | -2.41E-01 | 158637684 | 158637807 | NC_000005.9  |

|            |          |          |       |            |           |           |           |              |
|------------|----------|----------|-------|------------|-----------|-----------|-----------|--------------|
| cg00798876 | 3.44E-16 | 9.92E-18 | -9.46 | 29.3914843 | -1.11E-01 | 2670978   | 2671101   | NC_000007.13 |
| cg08629043 | 3.44E-16 | 9.94E-18 | -9.46 | 29.3903502 | -2.08E-01 | 240196078 | 240196201 | NC_000002.11 |
| cg00423291 | 3.45E-16 | 9.95E-18 | -9.46 | 29.3893356 | -1.56E-01 | 40855639  | 40855762  | NC_000007.13 |
| cg10940251 | 3.45E-16 | 9.96E-18 | -9.46 | 29.3880741 | -1.23E-01 | 23857507  | 23857630  | NC_000014.8  |
| cg10365447 | 3.45E-16 | 9.96E-18 | -9.46 | 29.3879594 | -4.91E-02 | 1611850   | 1611973   | NC_000006.11 |
| cg26681975 | 3.47E-16 | 1.00E-17 | -9.46 | 29.3827164 | -1.18E-01 | 36238123  | 36238246  | NC_000006.11 |
| cg07925415 | 3.47E-16 | 1.00E-17 | -9.46 | 29.3813163 | -1.51E-01 | 155191898 | 155192021 | NC_000007.13 |
| cg23425079 | 3.48E-16 | 1.00E-17 | -9.46 | 29.3801016 | -9.36E-02 | 31703503  | 31703626  | NC_000006.11 |
| cg12285409 | 3.48E-16 | 1.01E-17 | -9.46 | 29.3789874 | -6.12E-02 | 9614722   | 9614845   | NC_000002.11 |
| cg00041401 | 3.49E-16 | 1.01E-17 | -9.46 | 29.3753555 | -3.13E-01 | 114414408 | 114414531 | NC_000001.10 |
| cg00290373 | 3.49E-16 | 1.01E-17 | -9.46 | 29.3750095 | -7.11E-02 | 68462622  | 68462745  | NC_000005.9  |
| cg22492271 | 3.49E-16 | 1.01E-17 | -9.46 | 29.3749788 | -2.24E-01 | 36959489  | 36959612  | NC_000007.13 |
| cg04994795 | 3.50E-16 | 1.01E-17 | -9.46 | 29.3728663 | -1.73E-01 | 8404050   | 8404173   | NC_000001.10 |
| cg05290274 | 3.50E-16 | 1.01E-17 | -9.46 | 29.3714671 | -1.27E-01 | 39534096  | 39534219  | NC_000017.10 |
| cg05346832 | 3.51E-16 | 1.01E-17 | -9.46 | 29.369865  | -5.00E-02 | 10680117  | 10680240  | NC_000019.9  |
| cg13048911 | 3.51E-16 | 1.01E-17 | -9.46 | 29.3692305 | -1.16E-01 | 139691821 | 139691944 | NC_000005.9  |
| cg17519449 | 3.51E-16 | 1.02E-17 | -9.46 | 29.3689518 | -1.29E-01 | 32205031  | 32205154  | NC_000001.10 |
| cg15580355 | 3.51E-16 | 1.02E-17 | -9.46 | 29.3685387 | -7.95E-02 | 183003859 | 183003982 | NC_000003.11 |
| cg06817454 | 3.53E-16 | 1.02E-17 | -9.46 | 29.363841  | -1.92E-01 | 48360454  | 48360577  | NC_000001.10 |
| cg25151532 | 3.57E-16 | 1.03E-17 | -9.46 | 29.3516577 | -1.14E-01 | 43920103  | 43920226  | NC_000001.10 |
| cg17244340 | 3.57E-16 | 1.03E-17 | -9.46 | 29.3516495 | -1.77E-01 | 36973448  | 36973571  | NC_000006.11 |
| cg06733155 | 3.57E-16 | 1.03E-17 | -9.46 | 29.3510533 | -2.40E-01 | 73508868  | 73508991  | NC_000007.13 |
| cg18753958 | 3.58E-16 | 1.04E-17 | -9.46 | 29.3498447 | -1.06E-01 | 61446962  | 61447085  | NC_000020.10 |
| cg24391122 | 3.58E-16 | 1.04E-17 | -9.46 | 29.3494616 | -9.40E-02 | 7986137   | 7986260   | NC_000019.9  |
| cg03723321 | 3.59E-16 | 1.04E-17 | -9.46 | 29.346255  | -1.62E-01 | 1604407   | 1604530   | NC_000007.13 |

|            |          |          |       |            |           |           |           |              |
|------------|----------|----------|-------|------------|-----------|-----------|-----------|--------------|
| cg13290254 | 3.61E-16 | 1.05E-17 | -9.45 | 29.3401454 | -2.10E-01 | 125197730 | 125197853 | NC_000012.11 |
| cg24597131 | 3.62E-16 | 1.05E-17 | -9.45 | 29.3378555 | -1.83E-01 | 15354730  | 15354853  | NC_000001.10 |
| cg12186771 | 3.62E-16 | 1.05E-17 | -9.45 | 29.3370829 | -2.59E-01 | 17206725  | 17206848  | NC_000008.10 |
| cg15743533 | 3.65E-16 | 1.06E-17 | -9.45 | 29.3277758 | -2.23E-01 | 815345    | 815468    | NC_000020.10 |
| cg09891100 | 3.65E-16 | 1.06E-17 | -9.45 | 29.3272336 | -7.45E-02 | 12893992  | 12894115  | NC_000019.9  |
| cg18786125 | 3.66E-16 | 1.06E-17 | -9.45 | 29.3243203 | -8.96E-02 | 3528467   | 3528590   | NC_000001.10 |
| cg17961378 | 3.67E-16 | 1.06E-17 | -9.45 | 29.3229683 | -4.87E-02 | 39641154  | 39641277  | NC_000022.10 |
| cg11961845 | 3.67E-16 | 1.06E-17 | -9.45 | 29.3225102 | -1.53E-01 | 129008179 | 129008302 | NC_000007.13 |
| cg10633838 | 3.67E-16 | 1.06E-17 | -9.45 | 29.3220328 | -2.52E-01 | 33245359  | 33245482  | NC_000006.11 |
| cg18753928 | 3.68E-16 | 1.07E-17 | -9.45 | 29.3194728 | -1.30E-01 | 113234510 | 113234633 | NC_000003.11 |
| cg12911256 | 3.69E-16 | 1.07E-17 | -9.45 | 29.3170846 | -1.01E-01 | 6265879   | 6266002   | NC_000001.10 |
| cg26588076 | 3.69E-16 | 1.07E-17 | -9.45 | 29.3169853 | -1.83E-01 | 17741631  | 17741754  | NC_000017.10 |
| cg08966188 | 3.71E-16 | 1.08E-17 | -9.45 | 29.3104147 | -2.06E-01 | 39685912  | 39686035  | NC_000017.10 |
| cg08912860 | 3.72E-16 | 1.08E-17 | -9.45 | 29.3088995 | -2.17E-01 | 132863782 | 132863905 | NC_000012.11 |
| cg08865522 | 3.72E-16 | 1.08E-17 | -9.45 | 29.3079188 | -1.93E-01 | 113574276 | 113574399 | NC_000012.11 |
| cg16174196 | 3.75E-16 | 1.09E-17 | -9.45 | 29.2999957 | -1.44E-01 | 30687540  | 30687663  | NC_000006.11 |
| cg03699904 | 3.75E-16 | 1.09E-17 | -9.45 | 29.2989875 | -1.32E-01 | 170746029 | 170746152 | NC_000003.11 |
| cg23565821 | 3.76E-16 | 1.09E-17 | -9.45 | 29.2976023 | -1.26E-01 | 33385056  | 33385179  | NC_000006.11 |
| cg25332357 | 3.76E-16 | 1.09E-17 | -9.45 | 29.2969702 | -1.04E-01 | 180238296 | 180238419 | NC_000005.9  |
| cg10009380 | 3.76E-16 | 1.09E-17 | -9.45 | 29.2968489 | -1.56E-01 | 36487194  | 36487317  | NC_000017.10 |
| cg14064268 | 3.77E-16 | 1.10E-17 | -9.45 | 29.2940655 | -1.64E-01 | 1463554   | 1463677   | NC_000011.9  |
| cg23404877 | 3.78E-16 | 1.10E-17 | -9.45 | 29.2915222 | -1.18E-01 | 85553759  | 85553882  | NC_000002.11 |
| cg07006935 | 3.79E-16 | 1.10E-17 | -9.45 | 29.2868134 | -2.37E-01 | 55620641  | 55620764  | NC_000007.13 |
| cg13699808 | 3.80E-16 | 1.10E-17 | -9.45 | 29.2861745 | -1.61E-01 | 45985339  | 45985462  | NC_000020.10 |
| cg23260754 | 3.80E-16 | 1.10E-17 | -9.45 | 29.2853128 | -1.07E-01 | 6725335   | 6725458   | NC_000006.11 |

|            |          |          |       |            |           |           |           |              |
|------------|----------|----------|-------|------------|-----------|-----------|-----------|--------------|
| cg19477921 | 3.81E-16 | 1.11E-17 | -9.45 | 29.2826793 | -1.24E-01 | 127805476 | 127805599 | NC_000006.11 |
| cg03807919 | 3.81E-16 | 1.11E-17 | -9.45 | 29.2809592 | -1.13E-01 | 67757297  | 67757420  | NC_000011.9  |
| cg12941931 | 3.81E-16 | 1.11E-17 | -9.45 | 29.2808458 | -1.97E-01 | 4559799   | 4559922   | NC_000019.9  |
| cg11820824 | 3.83E-16 | 1.12E-17 | -9.44 | 29.2757004 | -2.12E-01 | 153581535 | 153581658 | NC_000001.10 |
| cg10655396 | 3.86E-16 | 1.12E-17 | -9.44 | 29.2687274 | -1.89E-01 | 1077244   | 1077367   | NC_000019.9  |
| cg21978618 | 3.86E-16 | 1.12E-17 | -9.44 | 29.2676793 | -5.64E-02 | 49298898  | 49299021  | NC_000019.9  |
| cg24836281 | 3.88E-16 | 1.13E-17 | -9.44 | 29.2643289 | -1.87E-01 | 41100790  | 41100913  | NC_000019.9  |
| cg20835708 | 3.88E-16 | 1.13E-17 | -9.44 | 29.2630365 | -1.48E-01 | 71524500  | 71524623  | NC_000011.9  |
| cg16958189 | 3.88E-16 | 1.13E-17 | -9.44 | 29.2629229 | -7.20E-02 | 83736204  | 83736327  | NC_000015.9  |
| cg01999701 | 3.88E-16 | 1.13E-17 | -9.44 | 29.2620034 | -1.44E-01 | 184456165 | 184456288 | NC_000003.11 |
| cg06502279 | 3.90E-16 | 1.14E-17 | -9.44 | 29.2569874 | -1.75E-01 | 474467    | 474590    | NC_000016.9  |
| cg02284625 | 3.91E-16 | 1.14E-17 | -9.44 | 29.2547646 | -6.46E-02 | 177418905 | 177419028 | NC_000002.11 |
| cg14865034 | 3.91E-16 | 1.14E-17 | -9.44 | 29.2536788 | -1.52E-01 | 80267030  | 80267153  | NC_000017.10 |
| cg03295554 | 3.92E-16 | 1.14E-17 | -9.44 | 29.2530133 | -1.94E-01 | 128395450 | 128395573 | NC_000011.9  |
| cg22050157 | 3.92E-16 | 1.14E-17 | -9.44 | 29.2522775 | -1.53E-01 | 1054176   | 1054299   | NC_000011.9  |
| cg04925824 | 3.93E-16 | 1.14E-17 | -9.44 | 29.2502471 | -8.16E-02 | 113862971 | 113863094 | NC_000013.10 |
| cg18330338 | 3.93E-16 | 1.15E-17 | -9.44 | 29.2490117 | -2.18E-01 | 9047211   | 9047334   | NC_000005.9  |
| cg21147708 | 3.93E-16 | 1.15E-17 | -9.44 | 29.2482998 | -1.80E-01 | 7611002   | 7611125   | NC_000006.11 |
| cg13954090 | 3.97E-16 | 1.16E-17 | -9.44 | 29.2395295 | -9.35E-02 | 73533106  | 73533229  | NC_000010.10 |
| cg25480799 | 3.97E-16 | 1.16E-17 | -9.44 | 29.2389495 | -8.73E-02 | 184472883 | 184473006 | NC_000002.11 |
| cg24165747 | 3.98E-16 | 1.16E-17 | -9.44 | 29.2372316 | -1.05E-01 | 42440198  | 42440321  | NC_000019.9  |
| cg01930947 | 3.98E-16 | 1.16E-17 | -9.44 | 29.2371029 | -2.10E-01 | 162343861 | 162343984 | NC_000001.10 |
| cg02101876 | 3.98E-16 | 1.16E-17 | -9.44 | 29.2367525 | -1.90E-01 | 40765110  | 40765233  | NC_000013.10 |
| cg22658979 | 3.98E-16 | 1.16E-17 | -9.44 | 29.2356036 | -1.74E-01 | 102826469 | 102826592 | NC_000011.9  |
| cg01924596 | 4.00E-16 | 1.17E-17 | -9.44 | 29.2315554 | -1.70E-01 | 31854504  | 31854627  | NC_000005.9  |

|               |          |          |       |            |           |           |           |              |
|---------------|----------|----------|-------|------------|-----------|-----------|-----------|--------------|
| cg27181765    | 4.01E-16 | 1.17E-17 | -9.44 | 29.2289428 | -6.77E-02 | 33160250  | 33160373  | NC_000006.11 |
| cg15345396    | 4.01E-16 | 1.17E-17 | -9.44 | 29.2283805 | -1.64E-01 | 99928727  | 99928850  | NC_000014.8  |
| cg06582202    | 4.02E-16 | 1.17E-17 | -9.44 | 29.2254476 | -1.15E-01 | 2889886   | 2890009   | NC_000011.9  |
| cg00886780    | 4.04E-16 | 1.18E-17 | -9.44 | 29.2191051 | -1.55E-01 | 35149727  | 35149850  | NC_000006.11 |
| cg03475190    | 4.05E-16 | 1.18E-17 | -9.44 | 29.2174871 | -2.01E-01 | 30919932  | 30920055  | NC_000007.13 |
| ch.6.2925136R | 4.05E-16 | 1.18E-17 | -9.44 | 29.2167976 | -1.51E-01 | 151283923 | 151284046 | NC_000006.11 |
| cg09244312    | 4.07E-16 | 1.19E-17 | -9.44 | 29.2125047 | -2.31E-01 | 42120657  | 42120780  | NC_000013.10 |
| cg23512558    | 4.08E-16 | 1.19E-17 | -9.43 | 29.2107814 | -1.67E-01 | 116997079 | 116997202 | NC_000012.11 |
| cg27401989    | 4.08E-16 | 1.19E-17 | -9.43 | 29.208734  | -6.06E-02 | 53774447  | 53774570  | NC_000012.11 |
| cg21761639    | 4.09E-16 | 1.19E-17 | -9.43 | 29.207929  | -1.64E-01 | 31533786  | 31533909  | NC_000007.13 |
| cg24348240    | 4.10E-16 | 1.20E-17 | -9.43 | 29.2055492 | -1.71E-01 | 26611453  | 26611576  | NC_000001.10 |
| cg11874976    | 4.10E-16 | 1.20E-17 | -9.43 | 29.204035  | -2.01E-01 | 101908830 | 101908953 | NC_000014.8  |
| cg00252781    | 4.10E-16 | 1.20E-17 | -9.43 | 29.2034772 | -8.25E-02 | 179334658 | 179334781 | NC_000001.10 |
| cg24692177    | 4.11E-16 | 1.20E-17 | -9.43 | 29.2027606 | -5.54E-02 | 86045936  | 86046059  | NC_000001.10 |
| cg10502324    | 4.11E-16 | 1.20E-17 | -9.43 | 29.2020247 | -1.64E-01 | 76372038  | 76372161  | NC_000012.11 |
| cg25632577    | 4.12E-16 | 1.21E-17 | -9.43 | 29.1991905 | -2.73E-01 | 128048403 | 128048526 | NC_000008.10 |
| cg09262230    | 4.12E-16 | 1.21E-17 | -9.43 | 29.1986555 | -1.57E-01 | 159052937 | 159053060 | NC_000006.11 |
| cg10331989    | 4.12E-16 | 1.21E-17 | -9.43 | 29.1986342 | -1.06E-01 | 15229931  | 15230054  | NC_000016.9  |
| cg17515702    | 4.14E-16 | 1.21E-17 | -9.43 | 29.1947658 | -5.12E-02 | 76210520  | 76210643  | NC_000017.10 |
| cg21808406    | 4.19E-16 | 1.23E-17 | -9.43 | 29.1825958 | -1.58E-01 | 7482475   | 7482598   | NC_000017.10 |
| cg08698997    | 4.20E-16 | 1.23E-17 | -9.43 | 29.1795773 | -1.67E-01 | 88989212  | 88989335  | NC_000016.9  |
| cg16891298    | 4.21E-16 | 1.23E-17 | -9.43 | 29.1778027 | -5.26E-02 | 159825303 | 159825426 | NC_000002.11 |
| cg08802944    | 4.22E-16 | 1.24E-17 | -9.43 | 29.1740541 | -1.99E-01 | 53874760  | 53874883  | NC_000012.11 |
| cg21207450    | 4.25E-16 | 1.25E-17 | -9.43 | 29.166772  | -2.20E-01 | 29570795  | 29570918  | NC_000015.9  |
| cg19697359    | 4.26E-16 | 1.25E-17 | -9.43 | 29.1651009 | -1.16E-01 | 22927298  | 22927421  | NC_000001.10 |

|                 |          |          |       |            |           |           |           |              |
|-----------------|----------|----------|-------|------------|-----------|-----------|-----------|--------------|
| ch.3.1012680R   | 4.27E-16 | 1.25E-17 | -9.43 | 29.1629086 | -7.83E-02 | 48211137  | 48211260  | NC_000003.11 |
| cg09530438      | 4.29E-16 | 1.26E-17 | -9.43 | 29.1579165 | -1.84E-01 | 106095350 | 106095473 | NC_000010.10 |
| cg03254465      | 4.31E-16 | 1.26E-17 | -9.43 | 29.1518643 | -1.59E-01 | 3240227   | 3240350   | NC_000001.10 |
| cg21097788      | 4.32E-16 | 1.27E-17 | -9.43 | 29.1492401 | -1.92E-01 | 93502930  | 93503053  | NC_000014.8  |
| cg03321553      | 4.34E-16 | 1.27E-17 | -9.42 | 29.1456842 | -1.64E-01 | 41806234  | 41806357  | NC_000015.9  |
| cg19595750      | 4.36E-16 | 1.28E-17 | -9.42 | 29.1408523 | -2.51E-01 | 133065939 | 133066062 | NC_000012.11 |
| cg24974982      | 4.36E-16 | 1.28E-17 | -9.42 | 29.140724  | -1.63E-01 | 46403316  | 46403439  | NC_000022.10 |
| cg02712464      | 4.36E-16 | 1.28E-17 | -9.42 | 29.139278  | -1.78E-01 | 30951156  | 30951279  | NC_000013.10 |
| cg09972569      | 4.36E-16 | 1.28E-17 | -9.42 | 29.138743  | -1.15E-01 | 231712971 | 231713094 | NC_000002.11 |
| cg00074818      | 4.37E-16 | 1.28E-17 | -9.42 | 29.1378019 | -1.76E-01 | 8560427   | 8560550   | NC_000008.10 |
| cg25327013      | 4.39E-16 | 1.29E-17 | -9.42 | 29.133569  | -6.88E-02 | 21151223  | 21151346  | NC_000014.8  |
| cg23323203      | 4.43E-16 | 1.30E-17 | -9.42 | 29.1245927 | -1.08E-01 | 117688338 | 117688461 | NC_000011.9  |
| cg05159799      | 4.44E-16 | 1.30E-17 | -9.42 | 29.1211915 | -1.42E-01 | 78043031  | 78043154  | NC_000017.10 |
| cg09004581      | 4.44E-16 | 1.30E-17 | -9.42 | 29.1206561 | -7.90E-02 | 74171029  | 74171152  | NC_000006.11 |
| cg10991475      | 4.45E-16 | 1.31E-17 | -9.42 | 29.1193011 | -1.73E-01 | 134651602 | 134651725 | NC_000011.9  |
| cg05890898      | 4.46E-16 | 1.31E-17 | -9.42 | 29.1167934 | -1.61E-01 | 37076913  | 37077036  | NC_000020.10 |
| cg06131879      | 4.48E-16 | 1.32E-17 | -9.42 | 29.1116244 | -1.39E-01 | 51909122  | 51909245  | NC_000003.11 |
| cg04643969      | 4.49E-16 | 1.32E-17 | -9.42 | 29.1099798 | -1.66E-01 | 63753210  | 63753333  | NC_000011.9  |
| cg14979609      | 4.52E-16 | 1.33E-17 | -9.42 | 29.1032025 | -6.24E-02 | 8086686   | 8086809   | NC_000008.10 |
| cg13023014      | 4.52E-16 | 1.33E-17 | -9.42 | 29.1012357 | -1.72E-01 | 184908794 | 184908917 | NC_000004.11 |
| cg17028652      | 4.52E-16 | 1.33E-17 | -9.42 | 29.1008355 | -8.23E-02 | 115805442 | 115805565 | NC_000010.10 |
| ch.7.137529584R | 4.53E-16 | 1.33E-17 | -9.42 | 29.100263  | -5.69E-02 | 137879044 | 137879167 | NC_000007.13 |
| cg08468599      | 4.54E-16 | 1.34E-17 | -9.42 | 29.0961594 | -1.70E-01 | 2182126   | 2182249   | NC_000001.10 |
| cg02989244      | 4.56E-16 | 1.34E-17 | -9.42 | 29.0933703 | -2.67E-01 | 28657270  | 28657393  | NC_000010.10 |
| cg04657325      | 4.58E-16 | 1.35E-17 | -9.42 | 29.0888195 | -2.28E-01 | 185435601 | 185435724 | NC_000004.11 |



|            |          |          |       |            |           |           |           |              |
|------------|----------|----------|-------|------------|-----------|-----------|-----------|--------------|
| cg00812861 | 4.58E-16 | 1.35E-17 | -9.42 | 29.0882203 | -8.45E-02 | 35114699  | 35114822  | NC_000009.11 |
| cg01810863 | 4.59E-16 | 1.35E-17 | -9.42 | 29.0858656 | -1.34E-01 | 56359916  | 56360039  | NC_000012.11 |
| cg14025606 | 4.60E-16 | 1.36E-17 | -9.42 | 29.0825952 | -6.89E-02 | 150487872 | 150487995 | NC_000001.10 |
| cg20024827 | 4.62E-16 | 1.36E-17 | -9.41 | 29.0780275 | -1.40E-01 | 44882188  | 44882311  | NC_000020.10 |
| cg23424357 | 4.63E-16 | 1.36E-17 | -9.41 | 29.0771989 | -1.60E-01 | 88779941  | 88780064  | NC_000010.10 |
| cg21690505 | 4.65E-16 | 1.37E-17 | -9.41 | 29.0723199 | -1.45E-01 | 226314883 | 226315006 | NC_000001.10 |
| cg01017257 | 4.65E-16 | 1.37E-17 | -9.41 | 29.0719214 | -1.51E-01 | 15059738  | 15059861  | NC_000001.10 |
| cg20138264 | 4.66E-16 | 1.37E-17 | -9.41 | 29.0688399 | -1.06E-01 | 48585640  | 48585763  | NC_000017.10 |
| cg25753817 | 4.67E-16 | 1.38E-17 | -9.41 | 29.0680265 | -6.13E-02 | 191208232 | 191208355 | NC_000002.11 |
| cg17372941 | 4.67E-16 | 1.38E-17 | -9.41 | 29.0669978 | -7.72E-02 | 43222115  | 43222238  | NC_000017.10 |
| cg11206634 | 4.68E-16 | 1.38E-17 | -9.41 | 29.064327  | -1.86E-01 | 128458399 | 128458522 | NC_000002.11 |
| cg05744487 | 4.69E-16 | 1.38E-17 | -9.41 | 29.0617639 | -7.91E-02 | 18720220  | 18720343  | NC_000011.9  |
| cg26814703 | 4.70E-16 | 1.39E-17 | -9.41 | 29.0600374 | -1.10E-01 | 31019673  | 31019796  | NC_000013.10 |
| cg01795894 | 4.71E-16 | 1.39E-17 | -9.41 | 29.0584101 | -2.03E-01 | 43107725  | 43107848  | NC_000021.8  |
| cg04361556 | 4.71E-16 | 1.39E-17 | -9.41 | 29.0577696 | -1.75E-01 | 85034766  | 85034889  | NC_000002.11 |
| cg11576424 | 4.71E-16 | 1.39E-17 | -9.41 | 29.0573511 | -1.82E-01 | 131750756 | 131750879 | NC_000005.9  |
| cg09794680 | 4.73E-16 | 1.40E-17 | -9.41 | 29.0542301 | -1.31E-01 | 24540452  | 24540575  | NC_000014.8  |
| cg11348442 | 4.75E-16 | 1.40E-17 | -9.41 | 29.0485975 | -1.42E-01 | 220117784 | 220117907 | NC_000002.11 |
| cg08528204 | 4.78E-16 | 1.41E-17 | -9.41 | 29.0427424 | -8.26E-02 | 112452096 | 112452219 | NC_000012.11 |
| cg17896636 | 4.79E-16 | 1.41E-17 | -9.41 | 29.040824  | -1.40E-01 | 45394028  | 45394151  | NC_000015.9  |
| cg03211098 | 4.80E-16 | 1.42E-17 | -9.41 | 29.0395345 | -1.81E-01 | 32039682  | 32039805  | NC_000001.10 |
| cg03180426 | 4.80E-16 | 1.42E-17 | -9.41 | 29.038497  | -1.31E-01 | 139964156 | 139964279 | NC_000009.11 |
| cg23189044 | 4.80E-16 | 1.42E-17 | -9.41 | 29.0375992 | -1.24E-01 | 74178114  | 74178237  | NC_000011.9  |
| cg17756105 | 4.81E-16 | 1.42E-17 | -9.41 | 29.0352983 | -2.00E-01 | 3613164   | 3613287   | NC_000007.13 |
| cg06090053 | 4.82E-16 | 1.42E-17 | -9.41 | 29.0350201 | -1.55E-01 | 66032875  | 66032998  | NC_000017.10 |

|                |          |          |       |            |           |           |           |              |
|----------------|----------|----------|-------|------------|-----------|-----------|-----------|--------------|
| cg15645287     | 4.85E-16 | 1.43E-17 | -9.41 | 29.0269171 | -2.18E-01 | 34569552  | 34569675  | NC_000010.10 |
| cg08614301     | 4.85E-16 | 1.44E-17 | -9.41 | 29.0262929 | -5.94E-02 | 19729716  | 19729839  | NC_000019.9  |
| cg01357892     | 4.86E-16 | 1.44E-17 | -9.41 | 29.0249148 | -1.65E-01 | 126191181 | 126191304 | NC_000003.11 |
| cg18919720     | 4.86E-16 | 1.44E-17 | -9.41 | 29.0241939 | -1.39E-01 | 79495335  | 79495458  | NC_000017.10 |
| cg03979241     | 4.88E-16 | 1.44E-17 | -9.41 | 29.0214356 | -2.02E-01 | 21916824  | 21916947  | NC_000008.10 |
| cg00966557     | 4.89E-16 | 1.45E-17 | -9.41 | 29.0191869 | -1.76E-01 | 149219027 | 149219150 | NC_000005.9  |
| cg06599546     | 4.89E-16 | 1.45E-17 | -9.41 | 29.0188037 | -7.37E-02 | 1360715   | 1360838   | NC_000016.9  |
| cg15658306     | 4.89E-16 | 1.45E-17 | -9.41 | 29.0178993 | -1.43E-01 | 41168972  | 41169095  | NC_000006.11 |
| ch.15.1632650F | 4.90E-16 | 1.45E-17 | -9.4  | 29.0157423 | -3.62E-02 | 93486863  | 93486986  | NC_000015.9  |
| cg04804772     | 4.90E-16 | 1.45E-17 | -9.4  | 29.0153098 | -1.97E-01 | 105238873 | 105238996 | NC_000010.10 |
| cg26467538     | 4.91E-16 | 1.45E-17 | -9.4  | 29.0144658 | -6.94E-02 | 125486086 | 125486209 | NC_000003.11 |
| cg05935904     | 4.92E-16 | 1.46E-17 | -9.4  | 29.01174   | -2.44E-01 | 170405014 | 170405137 | NC_000006.11 |
| cg13520327     | 4.94E-16 | 1.46E-17 | -9.4  | 29.0083807 | -1.44E-01 | 61600957  | 61601080  | NC_000017.10 |
| cg25997722     | 4.95E-16 | 1.47E-17 | -9.4  | 29.0057865 | -2.03E-01 | 159158883 | 159159006 | NC_000006.11 |
| cg20890440     | 4.95E-16 | 1.47E-17 | -9.4  | 29.0047043 | -1.61E-01 | 124867473 | 124867596 | NC_000008.10 |
| cg05001389     | 4.96E-16 | 1.47E-17 | -9.4  | 29.0029253 | -1.79E-01 | 135853034 | 135853157 | NC_000009.11 |
| cg24302235     | 4.96E-16 | 1.47E-17 | -9.4  | 29.0023214 | -1.49E-01 | 170746073 | 170746196 | NC_000003.11 |
| cg08287306     | 4.97E-16 | 1.47E-17 | -9.4  | 29.0017094 | -8.66E-02 | 66585924  | 66586047  | NC_000016.9  |
| cg07853489     | 4.99E-16 | 1.48E-17 | -9.4  | 28.9969202 | -1.66E-01 | 183411982 | 183412105 | NC_000003.11 |
| cg18195130     | 4.99E-16 | 1.48E-17 | -9.4  | 28.9968857 | -7.82E-02 | 110833944 | 110834067 | NC_000004.11 |
| cg06348773     | 5.00E-16 | 1.48E-17 | -9.4  | 28.9954472 | -1.29E-01 | 1087129   | 1087252   | NC_000016.9  |
| cg26931990     | 5.00E-16 | 1.48E-17 | -9.4  | 28.9953847 | -6.90E-02 | 1661230   | 1661353   | NC_000016.9  |
| cg03374643     | 5.00E-16 | 1.48E-17 | -9.4  | 28.9952612 | -8.58E-02 | 98272422  | 98272545  | NC_000010.10 |
| cg20997028     | 5.02E-16 | 1.49E-17 | -9.4  | 28.9904532 | -7.81E-02 | 62493664  | 62493787  | NC_000017.10 |
| cg02013274     | 5.02E-16 | 1.49E-17 | -9.4  | 28.9892518 | -6.04E-02 | 28614438  | 28614561  | NC_000002.11 |

|               |          |          |       |            |           |           |           |              |
|---------------|----------|----------|-------|------------|-----------|-----------|-----------|--------------|
| cg13705556    | 5.04E-16 | 1.49E-17 | -9.4  | 28.9862481 | -1.56E-01 | 4058760   | 4058883   | NC_000019.9  |
| cg21050240    | 5.04E-16 | 1.49E-17 | -9.4  | 28.9859157 | -8.04E-02 | 41108423  | 41108546  | NC_000019.9  |
| cg21846949    | 5.07E-16 | 1.51E-17 | -9.4  | 28.97888   | -2.13E-01 | 33500889  | 33501012  | NC_000002.11 |
| cg24904145    | 5.08E-16 | 1.51E-17 | -9.4  | 28.9780651 | -9.92E-02 | 100182075 | 100182198 | NC_000007.13 |
| cg17405000    | 5.08E-16 | 1.51E-17 | -9.4  | 28.9774471 | -2.27E-01 | 55147245  | 55147368  | NC_000005.9  |
| cg03297163    | 5.08E-16 | 1.51E-17 | -9.4  | 28.9766704 | -2.29E-01 | 2548137   | 2548260   | NC_000007.13 |
| cg16426215    | 5.10E-16 | 1.51E-17 | -9.4  | 28.9730479 | -1.51E-01 | 56706854  | 56706977  | NC_000016.9  |
| cg22097731    | 5.12E-16 | 1.52E-17 | -9.4  | 28.9700779 | -1.60E-01 | 63334436  | 63334559  | NC_000015.9  |
| cg24325991    | 5.17E-16 | 1.54E-17 | -9.4  | 28.9590062 | -1.20E-01 | 184943911 | 184944034 | NC_000001.10 |
| cg03309393    | 5.19E-16 | 1.54E-17 | -9.4  | 28.9555299 | -2.51E-01 | 12491383  | 12491506  | NC_000006.11 |
| cg14385738    | 5.19E-16 | 1.54E-17 | -9.4  | 28.9545898 | -2.94E-01 | 114414340 | 114414463 | NC_000001.10 |
| cg10836809    | 5.20E-16 | 1.55E-17 | -9.4  | 28.952094  | -1.54E-01 | 4300203   | 4300326   | NC_000009.11 |
| cg18210026    | 5.22E-16 | 1.55E-17 | -9.39 | 28.9490944 | -9.75E-02 | 121495096 | 121495219 | NC_000002.11 |
| cg05492387    | 5.23E-16 | 1.56E-17 | -9.39 | 28.9468057 | -2.46E-01 | 99298930  | 99299053  | NC_000004.11 |
| cg25553799    | 5.23E-16 | 1.56E-17 | -9.39 | 28.9465755 | -1.40E-01 | 26623894  | 26624017  | NC_000013.10 |
| cg24707023    | 5.23E-16 | 1.56E-17 | -9.39 | 28.9458686 | -4.39E-02 | 27860984  | 27861107  | NC_000006.11 |
| ch.2.3504351F | 5.24E-16 | 1.56E-17 | -9.39 | 28.9439387 | -8.44E-02 | 173215253 | 173215376 | NC_000002.11 |
| cg00564163    | 5.27E-16 | 1.57E-17 | -9.39 | 28.9391013 | -9.15E-02 | 87935979  | 87936102  | NC_000007.13 |
| cg02550119    | 5.28E-16 | 1.57E-17 | -9.39 | 28.9365995 | -1.91E-01 | 33306727  | 33306850  | NC_000017.10 |
| cg07773769    | 5.29E-16 | 1.58E-17 | -9.39 | 28.9336028 | -1.51E-01 | 52280329  | 52280452  | NC_000003.11 |
| cg00643392    | 5.29E-16 | 1.58E-17 | -9.39 | 28.9334599 | -1.14E-01 | 12946856  | 12946979  | NC_000019.9  |
| cg09376008    | 5.30E-16 | 1.58E-17 | -9.39 | 28.9322705 | -9.79E-02 | 142377275 | 142377398 | NC_000007.13 |
| cg25743481    | 5.32E-16 | 1.58E-17 | -9.39 | 28.9292121 | -6.21E-02 | 44803289  | 44803412  | NC_000003.11 |
| cg17892871    | 5.34E-16 | 1.59E-17 | -9.39 | 28.9248216 | -6.22E-02 | 54618653  | 54618776  | NC_000019.9  |
| cg11462533    | 5.35E-16 | 1.60E-17 | -9.39 | 28.9214604 | -1.69E-01 | 40156840  | 40156963  | NC_000001.10 |

|            |          |          |       |            |           |           |           |              |
|------------|----------|----------|-------|------------|-----------|-----------|-----------|--------------|
| cg23703963 | 5.36E-16 | 1.60E-17 | -9.39 | 28.9207146 | -1.00E-01 | 105953300 | 105953423 | NC_000014.8  |
| cg23474190 | 5.36E-16 | 1.60E-17 | -9.39 | 28.920567  | -1.14E-01 | 38937109  | 38937232  | NC_000021.8  |
| cg25702651 | 5.38E-16 | 1.60E-17 | -9.39 | 28.9163249 | -2.64E-01 | 192675515 | 192675638 | NC_000003.11 |
| cg21650866 | 5.40E-16 | 1.61E-17 | -9.39 | 28.9133722 | -1.97E-01 | 142297256 | 142297379 | NC_000008.10 |
| cg12700449 | 5.40E-16 | 1.61E-17 | -9.39 | 28.9120747 | -1.04E-01 | 34121837  | 34121960  | NC_000017.10 |
| cg01839430 | 5.40E-16 | 1.61E-17 | -9.39 | 28.9116493 | -6.00E-02 | 216177098 | 216177221 | NC_000002.11 |
| cg12578480 | 5.43E-16 | 1.62E-17 | -9.39 | 28.9073352 | -1.03E-01 | 23384902  | 23385025  | NC_000010.10 |
| cg20536369 | 5.43E-16 | 1.62E-17 | -9.39 | 28.9072709 | -5.82E-02 | 2427244   | 2427367   | NC_000019.9  |
| cg06306219 | 5.43E-16 | 1.62E-17 | -9.39 | 28.9069663 | -6.14E-02 | 154075044 | 154075167 | NC_000004.11 |
| cg05887082 | 5.43E-16 | 1.62E-17 | -9.39 | 28.9064428 | -1.41E-01 | 10959073  | 10959196  | NC_000019.9  |
| cg19905587 | 5.45E-16 | 1.63E-17 | -9.39 | 28.9030385 | -1.41E-01 | 85554135  | 85554258  | NC_000002.11 |
| cg10373891 | 5.45E-16 | 1.63E-17 | -9.39 | 28.9022148 | -1.39E-01 | 52338758  | 52338881  | NC_000013.10 |
| cg24746726 | 5.46E-16 | 1.63E-17 | -9.39 | 28.9013071 | -1.91E-01 | 70726093  | 70726216  | NC_000004.11 |
| cg05736393 | 5.49E-16 | 1.64E-17 | -9.39 | 28.895154  | -5.44E-02 | 74775957  | 74776080  | NC_000002.11 |
| cg25449441 | 5.50E-16 | 1.64E-17 | -9.39 | 28.8930778 | -2.07E-01 | 157644471 | 157644594 | NC_000007.13 |
| cg12783491 | 5.52E-16 | 1.65E-17 | -9.39 | 28.8897381 | -6.22E-02 | 20212831  | 20212954  | NC_000002.11 |
| cg03653573 | 5.53E-16 | 1.65E-17 | -9.39 | 28.8878568 | -1.97E-01 | 131762326 | 131762449 | NC_000005.9  |
| cg05376738 | 5.57E-16 | 1.66E-17 | -9.38 | 28.8805084 | -2.24E-01 | 212923780 | 212923903 | NC_000001.10 |
| cg23499977 | 5.60E-16 | 1.67E-17 | -9.38 | 28.8741767 | -1.09E-01 | 47835458  | 47835581  | NC_000020.10 |
| cg00979348 | 5.61E-16 | 1.68E-17 | -9.38 | 28.8728323 | -2.40E-02 | 84256345  | 84256468  | NC_000004.11 |
| cg04044418 | 5.62E-16 | 1.68E-17 | -9.38 | 28.8709166 | -1.12E-01 | 89789362  | 89789485  | NC_000016.9  |
| cg00223899 | 5.62E-16 | 1.68E-17 | -9.38 | 28.8699661 | -1.55E-01 | 88299326  | 88299449  | NC_000016.9  |
| cg05429895 | 5.67E-16 | 1.69E-17 | -9.38 | 28.8622206 | -2.03E-01 | 120466640 | 120466763 | NC_000009.11 |
| cg08865458 | 5.69E-16 | 1.70E-17 | -9.38 | 28.8590104 | -1.06E-01 | 36793866  | 36793989  | NC_000020.10 |
| cg04590638 | 5.69E-16 | 1.70E-17 | -9.38 | 28.858977  | -1.86E-01 | 84256865  | 84256988  | NC_000016.9  |

|                |          |          |       |            |           |           |           |              |
|----------------|----------|----------|-------|------------|-----------|-----------|-----------|--------------|
| cg25109663     | 5.69E-16 | 1.70E-17 | -9.38 | 28.8582451 | -8.88E-02 | 114102785 | 114102908 | NC_000003.11 |
| cg06466222     | 5.69E-16 | 1.70E-17 | -9.38 | 28.8577785 | -1.99E-01 | 72027126  | 72027249  | NC_000010.10 |
| cg13625026     | 5.70E-16 | 1.70E-17 | -9.38 | 28.8562161 | -1.39E-01 | 1146419   | 1146542   | NC_000011.9  |
| cg11542165     | 5.70E-16 | 1.71E-17 | -9.38 | 28.8556689 | -2.05E-01 | 43029992  | 43030115  | NC_000020.10 |
| cg08201690     | 5.70E-16 | 1.71E-17 | -9.38 | 28.8553221 | -3.38E-02 | 122744276 | 122744399 | NC_000004.11 |
| cg19841506     | 5.72E-16 | 1.71E-17 | -9.38 | 28.8519988 | -1.27E-01 | 4642056   | 4642179   | NC_000017.10 |
| cg00232535     | 5.73E-16 | 1.72E-17 | -9.38 | 28.84984   | -2.21E-01 | 5593287   | 5593410   | NC_000007.13 |
| cg07781399     | 5.74E-16 | 1.72E-17 | -9.38 | 28.8490156 | -1.13E-01 | 69455287  | 69455410  | NC_000011.9  |
| cg03584056     | 5.74E-16 | 1.72E-17 | -9.38 | 28.849006  | -1.34E-01 | 4910798   | 4910921   | NC_000019.9  |
| cg25432336     | 5.74E-16 | 1.72E-17 | -9.38 | 28.8479682 | -2.30E-01 | 20648580  | 20648703  | NC_000002.11 |
| cg07483273     | 5.74E-16 | 1.72E-17 | -9.38 | 28.8477851 | -6.19E-02 | 2901388   | 2901511   | NC_000019.9  |
| cg26260789     | 5.77E-16 | 1.73E-17 | -9.38 | 28.842309  | -8.00E-02 | 8008433   | 8008556   | NC_000011.9  |
| cg17438457     | 5.79E-16 | 1.73E-17 | -9.38 | 28.8398577 | -1.74E-01 | 53094893  | 53095016  | NC_000001.10 |
| cg09958560     | 5.80E-16 | 1.74E-17 | -9.38 | 28.8374334 | -2.22E-01 | 114571695 | 114571818 | NC_000010.10 |
| cg15318662     | 5.83E-16 | 1.75E-17 | -9.38 | 28.8320699 | -1.70E-01 | 31743775  | 31743898  | NC_000006.11 |
| cg13443768     | 5.84E-16 | 1.75E-17 | -9.38 | 28.831251  | -1.91E-01 | 65084386  | 65084509  | NC_000011.9  |
| cg03128635     | 5.84E-16 | 1.75E-17 | -9.38 | 28.8308001 | -1.17E-01 | 85980756  | 85980879  | NC_000002.11 |
| cg26674445     | 5.84E-16 | 1.75E-17 | -9.38 | 28.8295479 | -1.87E-01 | 53726532  | 53726655  | NC_000015.9  |
| cg20770006     | 5.85E-16 | 1.75E-17 | -9.38 | 28.8288347 | -1.69E-01 | 129609690 | 129609813 | NC_000007.13 |
| cg07572052     | 5.85E-16 | 1.75E-17 | -9.38 | 28.8285313 | -1.10E-01 | 149821168 | 149821291 | NC_000001.10 |
| cg06716730     | 5.90E-16 | 1.77E-17 | -9.37 | 28.8198935 | -2.02E-01 | 35851459  | 35851582  | NC_000017.10 |
| cg19252931     | 5.90E-16 | 1.77E-17 | -9.37 | 28.819353  | -2.16E-01 | 33721847  | 33721970  | NC_000011.9  |
| ch.12.1121679R | 5.91E-16 | 1.77E-17 | -9.37 | 28.8175986 | -8.66E-02 | 54067875  | 54067998  | NC_000012.11 |
| cg07190229     | 5.92E-16 | 1.78E-17 | -9.37 | 28.8154139 | -5.71E-02 | 142377361 | 142377484 | NC_000008.10 |
| cg12950030     | 5.93E-16 | 1.78E-17 | -9.37 | 28.8140476 | -1.55E-01 | 104356109 | 104356232 | NC_000014.8  |

|                 |          |          |       |            |           |           |           |              |
|-----------------|----------|----------|-------|------------|-----------|-----------|-----------|--------------|
| cg18284089      | 5.93E-16 | 1.78E-17 | -9.37 | 28.8133475 | -1.44E-01 | 153601384 | 153601507 | NC_000004.11 |
| cg07440826      | 5.94E-16 | 1.78E-17 | -9.37 | 28.8126534 | -1.12E-01 | 89882328  | 89882451  | NC_000016.9  |
| cg10987840      | 5.94E-16 | 1.78E-17 | -9.37 | 28.8115541 | -2.23E-01 | 9319526   | 9319649   | NC_000002.11 |
| cg21052766      | 5.97E-16 | 1.79E-17 | -9.37 | 28.8077734 | -1.30E-01 | 20134289  | 20134412  | NC_000011.9  |
| cg06893491      | 5.97E-16 | 1.79E-17 | -9.37 | 28.8075354 | -1.22E-01 | 14675165  | 14675288  | NC_000019.9  |
| cg13185702      | 5.97E-16 | 1.79E-17 | -9.37 | 28.80718   | -1.73E-01 | 125024498 | 125024621 | NC_000012.11 |
| cg07636142      | 5.98E-16 | 1.79E-17 | -9.37 | 28.8056271 | -1.82E-01 | 69292759  | 69292882  | NC_000007.13 |
| cg27554954      | 5.98E-16 | 1.79E-17 | -9.37 | 28.8052067 | -2.26E-01 | 60691595  | 60691718  | NC_000015.9  |
| cg00974835      | 5.98E-16 | 1.79E-17 | -9.37 | 28.8049244 | -5.92E-02 | 74960278  | 74960401  | NC_000014.8  |
| cg10009930      | 6.01E-16 | 1.80E-17 | -9.37 | 28.7995055 | -5.73E-02 | 9599403   | 9599526   | NC_000001.10 |
| cg10022788      | 6.01E-16 | 1.81E-17 | -9.37 | 28.7991314 | -2.05E-01 | 3136019   | 3136142   | NC_000019.9  |
| cg15078284      | 6.03E-16 | 1.81E-17 | -9.37 | 28.7960681 | -1.40E-01 | 36004994  | 36005117  | NC_000019.9  |
| cg00419564      | 6.03E-16 | 1.81E-17 | -9.37 | 28.7951826 | -5.28E-02 | 153508860 | 153508983 | NC_000001.10 |
| cg24647820      | 6.06E-16 | 1.82E-17 | -9.37 | 28.7911071 | -1.81E-01 | 7505514   | 7505637   | NC_000006.11 |
| cg17285325      | 6.07E-16 | 1.82E-17 | -9.37 | 28.789554  | -4.90E-02 | 50968343  | 50968466  | NC_000022.10 |
| cg09764221      | 6.09E-16 | 1.83E-17 | -9.37 | 28.7845037 | -1.10E-01 | 51039625  | 51039748  | NC_000022.10 |
| cg10459087      | 6.10E-16 | 1.83E-17 | -9.37 | 28.783507  | -1.62E-01 | 40628704  | 40628827  | NC_000004.11 |
| cg23934927      | 6.11E-16 | 1.84E-17 | -9.37 | 28.7824875 | -1.01E-01 | 74162623  | 74162746  | NC_000005.9  |
| ch.8.125388564R | 6.11E-16 | 1.84E-17 | -9.37 | 28.781735  | -8.67E-02 | 125319383 | 125319506 | NC_000008.10 |
| cg00463577      | 6.13E-16 | 1.84E-17 | -9.37 | 28.7788364 | -1.29E-01 | 74161911  | 74162034  | NC_000006.11 |
| cg00416710      | 6.13E-16 | 1.84E-17 | -9.37 | 28.7784153 | -2.05E-01 | 29196027  | 29196150  | NC_000016.9  |
| cg05592959      | 6.13E-16 | 1.84E-17 | -9.37 | 28.7780992 | -1.43E-01 | 2548788   | 2548911   | NC_000007.13 |
| cg13864937      | 6.14E-16 | 1.85E-17 | -9.37 | 28.7758141 | -5.71E-02 | 58874733  | 58874856  | NC_000011.9  |
| cg11869784      | 6.16E-16 | 1.85E-17 | -9.37 | 28.773575  | -8.51E-02 | 21738303  | 21738426  | NC_000014.8  |
| cg08903855      | 6.16E-16 | 1.85E-17 | -9.37 | 28.7727525 | -1.58E-01 | 37056769  | 37056892  | NC_000001.10 |

|            |          |          |       |            |           |           |           |              |
|------------|----------|----------|-------|------------|-----------|-----------|-----------|--------------|
| cg07633853 | 6.17E-16 | 1.86E-17 | -9.37 | 28.7714471 | -1.28E-01 | 35569471  | 35569594  | NC_000006.11 |
| cg22541038 | 6.17E-16 | 1.86E-17 | -9.37 | 28.7710501 | -1.68E-01 | 1049653   | 1049776   | NC_000004.11 |
| cg04921824 | 6.18E-16 | 1.86E-17 | -9.37 | 28.7695834 | -1.85E-01 | 27449716  | 27449839  | NC_000008.10 |
| cg04525491 | 6.22E-16 | 1.87E-17 | -9.37 | 28.7628372 | -9.44E-02 | 8823683   | 8823806   | NC_000002.11 |
| cg26907768 | 6.22E-16 | 1.87E-17 | -9.37 | 28.762591  | -1.18E-01 | 87902420  | 87902543  | NC_000016.9  |
| cg10557907 | 6.22E-16 | 1.87E-17 | -9.37 | 28.7624752 | -1.87E-01 | 3286322   | 3286445   | NC_000001.10 |
| cg27201297 | 6.22E-16 | 1.87E-17 | -9.37 | 28.7623596 | -6.57E-02 | 37902413  | 37902536  | NC_000003.11 |
| cg02250357 | 6.22E-16 | 1.87E-17 | -9.37 | 28.7621051 | -1.06E-01 | 69795965  | 69796088  | NC_000016.9  |
| cg02855983 | 6.24E-16 | 1.88E-17 | -9.37 | 28.7595475 | -6.21E-02 | 201252324 | 201252447 | NC_000001.10 |
| cg00586700 | 6.24E-16 | 1.88E-17 | -9.37 | 28.7593815 | -1.98E-01 | 50015178  | 50015301  | NC_000019.9  |
| cg03866192 | 6.25E-16 | 1.88E-17 | -9.36 | 28.7568348 | -1.82E-01 | 2699542   | 2699665   | NC_000017.10 |
| cg26031954 | 6.26E-16 | 1.89E-17 | -9.36 | 28.7559899 | -2.02E-01 | 2139327   | 2139450   | NC_000001.10 |
| cg04957903 | 6.28E-16 | 1.89E-17 | -9.36 | 28.7515645 | -1.78E-01 | 38880852  | 38880975  | NC_000007.13 |
| cg01772439 | 6.29E-16 | 1.90E-17 | -9.36 | 28.7505458 | -2.29E-01 | 149012102 | 149012225 | NC_000005.9  |
| cg14985891 | 6.30E-16 | 1.90E-17 | -9.36 | 28.7493213 | -2.70E-01 | 116270626 | 116270749 | NC_000001.10 |
| cg22781074 | 6.31E-16 | 1.90E-17 | -9.36 | 28.7464398 | -9.72E-02 | 777456    | 777579    | NC_000016.9  |
| cg04038680 | 6.33E-16 | 1.91E-17 | -9.36 | 28.7441634 | -1.41E-01 | 13011675  | 13011798  | NC_000016.9  |
| cg03944375 | 6.33E-16 | 1.91E-17 | -9.36 | 28.7439828 | -2.30E-01 | 22143533  | 22143656  | NC_000001.10 |
| cg23359810 | 6.35E-16 | 1.92E-17 | -9.36 | 28.7395614 | -1.34E-01 | 51572113  | 51572236  | NC_000010.10 |
| cg21245135 | 6.36E-16 | 1.92E-17 | -9.36 | 28.7385659 | -5.07E-02 | 99186516  | 99186639  | NC_000010.10 |
| cg01054622 | 6.37E-16 | 1.92E-17 | -9.36 | 28.7365754 | -1.27E-01 | 21044691  | 21044814  | NC_000001.10 |
| cg11558551 | 6.39E-16 | 1.93E-17 | -9.36 | 28.7336932 | -2.28E-01 | 17516442  | 17516565  | NC_000019.9  |
| cg02570493 | 6.41E-16 | 1.93E-17 | -9.36 | 28.730877  | -1.93E-01 | 42089403  | 42089526  | NC_000006.11 |
| cg02716826 | 6.41E-16 | 1.94E-17 | -9.36 | 28.7299709 | -9.74E-02 | 33447032  | 33447155  | NC_000009.11 |
| cg06004033 | 6.42E-16 | 1.94E-17 | -9.36 | 28.7282848 | -1.37E-01 | 104173675 | 104173798 | NC_000012.11 |

|              |          |          |       |            |           |           |           |              |
|--------------|----------|----------|-------|------------|-----------|-----------|-----------|--------------|
| cg23536675   | 6.43E-16 | 1.94E-17 | -9.36 | 28.7272981 | -2.56E-01 | 25620638  | 25620761  | NC_000017.10 |
| cg25161912   | 6.44E-16 | 1.94E-17 | -9.36 | 28.725325  | -1.83E-01 | 66220771  | 66220894  | NC_000012.11 |
| cg08375396   | 6.44E-16 | 1.95E-17 | -9.36 | 28.7248244 | -2.24E-01 | 8033848   | 8033971   | NC_000011.9  |
| cg20539366   | 6.45E-16 | 1.95E-17 | -9.36 | 28.7226182 | -1.47E-01 | 46370644  | 46370767  | NC_000022.10 |
| cg13567169   | 6.46E-16 | 1.95E-17 | -9.36 | 28.7211273 | -1.29E-01 | 121410855 | 121410978 | NC_000012.11 |
| cg21576256   | 6.47E-16 | 1.95E-17 | -9.36 | 28.7206754 | -1.97E-01 | 158655372 | 158655495 | NC_000005.9  |
| cg26960939   | 6.47E-16 | 1.96E-17 | -9.36 | 28.7189741 | -1.45E-01 | 38717206  | 38717329  | NC_000017.10 |
| cg18244487   | 6.48E-16 | 1.96E-17 | -9.36 | 28.7187693 | -1.53E-01 | 681280    | 681403    | NC_000004.11 |
| cg12569592   | 6.48E-16 | 1.96E-17 | -9.36 | 28.7184141 | -2.08E-01 | 16753450  | 16753573  | NC_000006.11 |
| cg27189341   | 6.49E-16 | 1.96E-17 | -9.36 | 28.7167061 | -1.06E-01 | 80966703  | 80966826  | NC_000016.9  |
| cg00475131   | 6.49E-16 | 1.96E-17 | -9.36 | 28.7164901 | -1.89E-01 | 41117096  | 41117219  | NC_000019.9  |
| cg20716202   | 6.49E-16 | 1.96E-17 | -9.36 | 28.7158099 | -2.04E-01 | 2925847   | 2925970   | NC_000011.9  |
| cg15362894   | 6.50E-16 | 1.97E-17 | -9.36 | 28.7151432 | -1.61E-01 | 44702663  | 44702786  | NC_000011.9  |
| cg06751366   | 6.51E-16 | 1.97E-17 | -9.36 | 28.7126718 | -2.06E-01 | 50280723  | 50280846  | NC_000016.9  |
| cg05337743   | 6.54E-16 | 1.98E-17 | -9.36 | 28.7089352 | -2.22E-01 | 54369571  | 54369694  | NC_000019.9  |
| cg22180410   | 6.56E-16 | 1.99E-17 | -9.36 | 28.7044971 | -6.73E-02 | 187646446 | 187646569 | NC_000004.11 |
| cg04171808   | 6.58E-16 | 1.99E-17 | -9.36 | 28.7026873 | -2.32E-01 | 35188437  | 35188560  | NC_000011.9  |
| ch.4.938375R | 6.58E-16 | 1.99E-17 | -9.36 | 28.7011554 | -7.92E-02 | 41264221  | 41264344  | NC_000004.11 |
| cg19695777   | 6.61E-16 | 2.00E-17 | -9.36 | 28.6971888 | -9.14E-02 | 28543438  | 28543561  | NC_000013.10 |
| cg19254047   | 6.61E-16 | 2.00E-17 | -9.36 | 28.6965648 | -4.03E-02 | 102315097 | 102315220 | NC_000002.11 |
| cg11126215   | 6.63E-16 | 2.01E-17 | -9.36 | 28.6946172 | -7.19E-02 | 94596163  | 94596286  | NC_000014.8  |
| cg09362047   | 6.63E-16 | 2.01E-17 | -9.36 | 28.6941822 | -2.51E-01 | 70389968  | 70390091  | NC_000017.10 |
| cg08122151   | 6.65E-16 | 2.01E-17 | -9.35 | 28.6905826 | -1.87E-01 | 66764409  | 66764532  | NC_000011.9  |
| cg23149881   | 6.66E-16 | 2.02E-17 | -9.35 | 28.6897593 | -2.26E-01 | 113594654 | 113594777 | NC_000002.11 |
| cg22156842   | 6.66E-16 | 2.02E-17 | -9.35 | 28.6892075 | -1.79E-01 | 136537169 | 136537292 | NC_000003.11 |



|            |          |          |       |            |           |           |           |              |
|------------|----------|----------|-------|------------|-----------|-----------|-----------|--------------|
| cg07611887 | 6.68E-16 | 2.02E-17 | -9.35 | 28.6866807 | -1.32E-01 | 21831372  | 21831495  | NC_000016.9  |
| cg21484834 | 6.68E-16 | 2.02E-17 | -9.35 | 28.6859315 | -1.38E-01 | 62168579  | 62168702  | NC_000020.10 |
| cg26380291 | 6.71E-16 | 2.03E-17 | -9.35 | 28.6818256 | -1.91E-01 | 114787843 | 114787966 | NC_000010.10 |
| cg09539496 | 6.74E-16 | 2.04E-17 | -9.35 | 28.6761485 | -1.84E-01 | 20164433  | 20164556  | NC_000008.10 |
| cg10938600 | 6.79E-16 | 2.06E-17 | -9.35 | 28.669776  | -1.59E-01 | 57137590  | 57137713  | NC_000005.9  |
| cg18080670 | 6.79E-16 | 2.06E-17 | -9.35 | 28.6697143 | -3.84E-02 | 5569112   | 5569235   | NC_000007.13 |
| cg25784280 | 6.81E-16 | 2.07E-17 | -9.35 | 28.6656968 | -2.30E-01 | 32289350  | 32289473  | NC_000018.9  |
| cg12091331 | 6.81E-16 | 2.07E-17 | -9.35 | 28.6653089 | -1.71E-01 | 42065314  | 42065437  | NC_000008.10 |
| cg08916374 | 6.82E-16 | 2.07E-17 | -9.35 | 28.6645509 | -1.88E-01 | 145471727 | 145471850 | NC_000001.10 |
| cg04713108 | 6.82E-16 | 2.07E-17 | -9.35 | 28.6638585 | -2.09E-01 | 44807541  | 44807664  | NC_000005.9  |
| cg00321901 | 6.84E-16 | 2.08E-17 | -9.35 | 28.6605123 | -1.07E-01 | 10512459  | 10512582  | NC_000008.10 |
| cg14363992 | 6.85E-16 | 2.08E-17 | -9.35 | 28.6587293 | -8.70E-02 | 27776350  | 27776473  | NC_000006.11 |
| cg22184944 | 6.86E-16 | 2.08E-17 | -9.35 | 28.6571667 | -1.97E-01 | 79031091  | 79031214  | NC_000017.10 |
| cg08698159 | 6.89E-16 | 2.09E-17 | -9.35 | 28.6529548 | -1.63E-01 | 27294743  | 27294866  | NC_000017.10 |
| cg16984944 | 6.90E-16 | 2.09E-17 | -9.35 | 28.6520421 | -1.07E-01 | 99979425  | 99979548  | NC_000003.11 |
| cg13580002 | 6.90E-16 | 2.09E-17 | -9.35 | 28.6518067 | -1.79E-01 | 57626444  | 57626567  | NC_000015.9  |
| cg13559306 | 6.91E-16 | 2.10E-17 | -9.35 | 28.6505145 | -1.43E-01 | 41534491  | 41534614  | NC_000017.10 |
| cg24112628 | 6.95E-16 | 2.11E-17 | -9.35 | 28.6448834 | -2.11E-01 | 150174215 | 150174338 | NC_000006.11 |
| cg23599820 | 6.95E-16 | 2.11E-17 | -9.35 | 28.6446978 | -1.86E-01 | 73456199  | 73456322  | NC_000017.10 |
| cg10367412 | 6.95E-16 | 2.11E-17 | -9.35 | 28.6442366 | -1.73E-01 | 103590195 | 103590318 | NC_000014.8  |
| cg11579059 | 6.97E-16 | 2.12E-17 | -9.35 | 28.6413506 | -1.13E-01 | 156300245 | 156300368 | NC_000004.11 |
| cg26948274 | 6.97E-16 | 2.12E-17 | -9.35 | 28.64061   | -1.13E-01 | 1201698   | 1201821   | NC_000005.9  |
| cg08970347 | 6.98E-16 | 2.12E-17 | -9.35 | 28.6392576 | -1.42E-01 | 27449907  | 27450030  | NC_000008.10 |
| cg12157761 | 7.00E-16 | 2.13E-17 | -9.35 | 28.6367828 | -2.42E-01 | 71005778  | 71005901  | NC_000015.9  |
| cg22193912 | 7.02E-16 | 2.14E-17 | -9.35 | 28.6325943 | -1.86E-01 | 79881523  | 79881646  | NC_000017.10 |

|              |          |          |       |            |           |           |           |              |
|--------------|----------|----------|-------|------------|-----------|-----------|-----------|--------------|
| cg18040354   | 7.03E-16 | 2.14E-17 | -9.35 | 28.6323049 | -1.18E-01 | 53800484  | 53800607  | NC_000017.10 |
| cg20476019   | 7.03E-16 | 2.14E-17 | -9.35 | 28.6311052 | -2.94E-01 | 33157881  | 33158004  | NC_000022.10 |
| cg05551003   | 7.06E-16 | 2.15E-17 | -9.34 | 28.6274079 | -1.57E-01 | 11267072  | 11267195  | NC_000003.11 |
| cg08102516   | 7.06E-16 | 2.15E-17 | -9.34 | 28.6269303 | -2.21E-01 | 3411356   | 3411479   | NC_000007.13 |
| cg08783616   | 7.07E-16 | 2.15E-17 | -9.34 | 28.6256629 | -1.54E-01 | 16389293  | 16389416  | NC_000017.10 |
| cg25203962   | 7.08E-16 | 2.15E-17 | -9.34 | 28.6239567 | -1.41E-01 | 170746291 | 170746414 | NC_000003.11 |
| cg01467789   | 7.11E-16 | 2.16E-17 | -9.34 | 28.6196693 | -1.18E-01 | 37595333  | 37595456  | NC_000008.10 |
| cg03913456   | 7.13E-16 | 2.17E-17 | -9.34 | 28.6163762 | -1.09E-01 | 97000924  | 97001047  | NC_000002.11 |
| cg13990958   | 7.15E-16 | 2.18E-17 | -9.34 | 28.6136967 | -7.34E-02 | 6487999   | 6488122   | NC_000007.13 |
| ch.2.740763F | 7.21E-16 | 2.19E-17 | -9.34 | 28.6060386 | -7.82E-02 | 30043545  | 30043668  | NC_000002.11 |
| cg24414363   | 7.21E-16 | 2.20E-17 | -9.34 | 28.6051721 | -2.06E-01 | 42336273  | 42336396  | NC_000022.10 |
| cg04489786   | 7.24E-16 | 2.21E-17 | -9.34 | 28.6003657 | -6.20E-02 | 212004408 | 212004531 | NC_000001.10 |
| cg07185174   | 7.26E-16 | 2.21E-17 | -9.34 | 28.5975483 | -1.14E-01 | 61435829  | 61435952  | NC_000020.10 |
| cg06301550   | 7.27E-16 | 2.22E-17 | -9.34 | 28.5959576 | -1.18E-01 | 37230484  | 37230607  | NC_000020.10 |
| cg04194674   | 7.28E-16 | 2.22E-17 | -9.34 | 28.5951184 | -1.70E-01 | 36715953  | 36716076  | NC_000017.10 |
| cg16500987   | 7.28E-16 | 2.22E-17 | -9.34 | 28.5946287 | -1.28E-01 | 167104761 | 167104884 | NC_000006.11 |
| cg08015107   | 7.28E-16 | 2.22E-17 | -9.34 | 28.5944084 | -1.78E-01 | 8618950   | 8619073   | NC_000011.9  |
| cg17830716   | 7.29E-16 | 2.22E-17 | -9.34 | 28.5928194 | -5.52E-02 | 57855694  | 57855817  | NC_000012.11 |
| cg03177084   | 7.32E-16 | 2.23E-17 | -9.34 | 28.5887489 | -7.11E-02 | 40985069  | 40985192  | NC_000017.10 |
| cg09285418   | 7.33E-16 | 2.24E-17 | -9.34 | 28.5876889 | -1.33E-01 | 101768973 | 101769096 | NC_000002.11 |
| cg16736826   | 7.34E-16 | 2.24E-17 | -9.34 | 28.5866299 | -1.25E-01 | 41951512  | 41951635  | NC_000001.10 |
| cg05394294   | 7.34E-16 | 2.24E-17 | -9.34 | 28.5855974 | -2.64E-01 | 3160926   | 3161049   | NC_000010.10 |
| cg14042799   | 7.35E-16 | 2.24E-17 | -9.34 | 28.584209  | -1.26E-01 | 111806031 | 111806154 | NC_000003.11 |
| cg16558172   | 7.38E-16 | 2.25E-17 | -9.34 | 28.5810569 | -5.81E-02 | 27191067  | 27191190  | NC_000001.10 |
| cg20223392   | 7.41E-16 | 2.26E-17 | -9.34 | 28.5765786 | -2.40E-01 | 328499    | 328622    | NC_000008.10 |

|            |          |          |       |            |           |           |           |              |
|------------|----------|----------|-------|------------|-----------|-----------|-----------|--------------|
| cg07981044 | 7.42E-16 | 2.26E-17 | -9.34 | 28.5749511 | -1.04E-01 | 128510184 | 128510307 | NC_000007.13 |
| cg22581200 | 7.48E-16 | 2.28E-17 | -9.34 | 28.5668425 | -1.85E-01 | 60666575  | 60666698  | NC_000015.9  |
| cg02114946 | 7.49E-16 | 2.29E-17 | -9.34 | 28.5650557 | -9.88E-02 | 21386494  | 21386617  | NC_000022.10 |
| cg20587236 | 7.50E-16 | 2.29E-17 | -9.34 | 28.5641912 | -2.26E-01 | 109900956 | 109901079 | NC_000012.11 |
| cg08314781 | 7.50E-16 | 2.29E-17 | -9.33 | 28.5629272 | -1.93E-01 | 55131029  | 55131152  | NC_000002.11 |
| cg22891191 | 7.50E-16 | 2.29E-17 | -9.33 | 28.5628477 | -1.57E-01 | 129706234 | 129706357 | NC_000010.10 |
| cg27165794 | 7.51E-16 | 2.30E-17 | -9.33 | 28.5613472 | -2.49E-01 | 74179674  | 74179797  | NC_000014.8  |
| cg04446653 | 7.52E-16 | 2.30E-17 | -9.33 | 28.560507  | -1.81E-01 | 181500537 | 181500660 | NC_000003.11 |
| cg06634950 | 7.55E-16 | 2.31E-17 | -9.33 | 28.5566484 | -1.29E-01 | 169487146 | 169487269 | NC_000003.11 |
| cg26039298 | 7.55E-16 | 2.31E-17 | -9.33 | 28.5565688 | -1.15E-01 | 15323186  | 15323309  | NC_000001.10 |
| cg26023303 | 7.55E-16 | 2.31E-17 | -9.33 | 28.5559282 | -1.02E-01 | 103541561 | 103541684 | NC_000014.8  |
| cg14012294 | 7.56E-16 | 2.31E-17 | -9.33 | 28.5553078 | -2.77E-02 | 72794041  | 72794164  | NC_000005.9  |
| cg06518387 | 7.59E-16 | 2.32E-17 | -9.33 | 28.5513198 | -1.57E-01 | 76040637  | 76040760  | NC_000011.9  |
| cg14972228 | 7.61E-16 | 2.33E-17 | -9.33 | 28.5477326 | -1.69E-01 | 38570495  | 38570618  | NC_000019.9  |
| cg01005425 | 7.61E-16 | 2.33E-17 | -9.33 | 28.5476268 | -1.12E-01 | 95309323  | 95309446  | NC_000013.10 |
| cg10081994 | 7.61E-16 | 2.33E-17 | -9.33 | 28.5474052 | -2.01E-01 | 100908637 | 100908760 | NC_000002.11 |
| cg19917083 | 7.62E-16 | 2.33E-17 | -9.33 | 28.5461073 | -1.22E-01 | 112814452 | 112814575 | NC_000002.11 |
| cg09791621 | 7.64E-16 | 2.34E-17 | -9.33 | 28.5429643 | -2.58E-01 | 1078722   | 1078845   | NC_000016.9  |
| cg19164997 | 7.65E-16 | 2.34E-17 | -9.33 | 28.5426994 | -1.86E-01 | 76818702  | 76818825  | NC_000011.9  |
| cg27416337 | 7.69E-16 | 2.35E-17 | -9.33 | 28.5369967 | -2.60E-01 | 32748004  | 32748127  | NC_000003.11 |
| cg18440692 | 7.70E-16 | 2.36E-17 | -9.33 | 28.5354252 | -2.21E-01 | 126308034 | 126308157 | NC_000010.10 |
| cg17881007 | 7.70E-16 | 2.36E-17 | -9.33 | 28.5349971 | -1.83E-01 | 151106022 | 151106145 | NC_000007.13 |
| cg06653796 | 7.71E-16 | 2.36E-17 | -9.33 | 28.5344607 | -2.24E-01 | 62367805  | 62367928  | NC_000020.10 |
| cg04659582 | 7.73E-16 | 2.36E-17 | -9.33 | 28.5317516 | -1.53E-01 | 231276073 | 231276196 | NC_000002.11 |
| cg27226320 | 7.74E-16 | 2.37E-17 | -9.33 | 28.5302436 | -2.46E-01 | 175158326 | 175158449 | NC_000001.10 |

|            |          |          |       |            |           |           |           |              |
|------------|----------|----------|-------|------------|-----------|-----------|-----------|--------------|
| cg21949194 | 7.75E-16 | 2.37E-17 | -9.33 | 28.5290158 | -2.14E-01 | 39355435  | 39355558  | NC_000002.11 |
| cg26239850 | 7.76E-16 | 2.38E-17 | -9.33 | 28.5274976 | -1.91E-01 | 44977160  | 44977283  | NC_000011.9  |
| cg03611868 | 7.79E-16 | 2.39E-17 | -9.33 | 28.5226522 | -9.66E-02 | 43818603  | 43818726  | NC_000010.10 |
| cg14702787 | 7.82E-16 | 2.39E-17 | -9.33 | 28.5192733 | -1.91E-01 | 219032885 | 219033008 | NC_000002.11 |
| cg22125838 | 7.82E-16 | 2.40E-17 | -9.33 | 28.5188113 | -8.93E-02 | 219757961 | 219758084 | NC_000002.11 |
| cg03678729 | 7.83E-16 | 2.40E-17 | -9.33 | 28.5175593 | -2.21E-01 | 144658851 | 144658974 | NC_000002.11 |
| cg15012692 | 7.84E-16 | 2.40E-17 | -9.33 | 28.5156771 | -5.46E-02 | 134209903 | 134210026 | NC_000010.10 |
| cg01143309 | 7.85E-16 | 2.41E-17 | -9.33 | 28.5146938 | -6.57E-02 | 72889783  | 72889906  | NC_000017.10 |
| cg09347176 | 7.85E-16 | 2.41E-17 | -9.33 | 28.5141405 | -1.75E-01 | 89686618  | 89686741  | NC_000016.9  |
| cg19218607 | 7.87E-16 | 2.41E-17 | -9.33 | 28.5120126 | -1.59E-01 | 49928924  | 49929047  | NC_000012.11 |
| cg04976075 | 7.88E-16 | 2.42E-17 | -9.33 | 28.5102172 | -1.29E-01 | 1230850   | 1230973   | NC_000010.10 |
| cg05226061 | 7.88E-16 | 2.42E-17 | -9.33 | 28.5098619 | -1.60E-01 | 37308828  | 37308951  | NC_000017.10 |
| cg00328210 | 7.89E-16 | 2.42E-17 | -9.33 | 28.5089278 | -1.57E-01 | 1993016   | 1993139   | NC_000001.10 |
| cg23214755 | 7.91E-16 | 2.43E-17 | -9.33 | 28.5066835 | -2.10E-01 | 11607042  | 11607165  | NC_000002.11 |
| cg26527913 | 7.92E-16 | 2.43E-17 | -9.33 | 28.5053484 | -6.53E-02 | 38375376  | 38375499  | NC_000007.13 |
| cg04138756 | 7.92E-16 | 2.43E-17 | -9.33 | 28.5044118 | -1.74E-01 | 152973849 | 152973972 | NC_000001.10 |
| cg14001157 | 7.93E-16 | 2.43E-17 | -9.33 | 28.5033159 | -1.60E-01 | 157483006 | 157483129 | NC_000007.13 |
| cg00428382 | 7.93E-16 | 2.43E-17 | -9.33 | 28.5032277 | -1.72E-01 | 124427390 | 124427513 | NC_000004.11 |
| cg08407620 | 7.94E-16 | 2.44E-17 | -9.33 | 28.5018215 | -2.01E-01 | 24743861  | 24743984  | NC_000006.11 |
| cg16381059 | 7.96E-16 | 2.44E-17 | -9.33 | 28.4999574 | -1.94E-01 | 835927    | 836050    | NC_000017.10 |
| cg12820481 | 8.01E-16 | 2.46E-17 | -9.32 | 28.4929529 | -8.69E-02 | 211848760 | 211848883 | NC_000001.10 |
| cg10953317 | 8.02E-16 | 2.46E-17 | -9.32 | 28.4922308 | -1.76E-01 | 72462417  | 72462540  | NC_000017.10 |
| cg16801374 | 8.04E-16 | 2.47E-17 | -9.32 | 28.4891248 | -1.68E-01 | 102872708 | 102872831 | NC_000012.11 |
| cg15329133 | 8.06E-16 | 2.47E-17 | -9.32 | 28.4868704 | -1.30E-01 | 135467951 | 135468074 | NC_000005.9  |
| cg17672850 | 8.06E-16 | 2.47E-17 | -9.32 | 28.486738  | -1.35E-01 | 40206354  | 40206477  | NC_000017.10 |

|                |          |          |       |            |           |           |           |              |
|----------------|----------|----------|-------|------------|-----------|-----------|-----------|--------------|
| cg02510736     | 8.06E-16 | 2.48E-17 | -9.32 | 28.486351  | -1.03E-01 | 81205445  | 81205568  | NC_000010.10 |
| cg14076239     | 8.14E-16 | 2.50E-17 | -9.32 | 28.476311  | -2.19E-01 | 53712850  | 53712973  | NC_000013.10 |
| ch.12.2487434F | 8.14E-16 | 2.50E-17 | -9.32 | 28.475868  | -1.22E-01 | 120634424 | 120634547 | NC_000012.11 |
| cg02227496     | 8.17E-16 | 2.51E-17 | -9.32 | 28.4725598 | -2.24E-01 | 33750617  | 33750740  | NC_000009.11 |
| cg05462761     | 8.18E-16 | 2.51E-17 | -9.32 | 28.4710574 | -1.92E-01 | 6545157   | 6545280   | NC_000001.10 |
| cg22304285     | 8.20E-16 | 2.52E-17 | -9.32 | 28.4680373 | -1.78E-01 | 41634744  | 41634867  | NC_000022.10 |
| cg01155039     | 8.26E-16 | 2.54E-17 | -9.32 | 28.4607171 | -9.22E-02 | 103389814 | 103389937 | NC_000014.8  |
| cg19899505     | 8.29E-16 | 2.55E-17 | -9.32 | 28.4575112 | -3.89E-02 | 55596862  | 55596985  | NC_000014.8  |
| cg13334135     | 8.29E-16 | 2.55E-17 | -9.32 | 28.4569921 | -7.15E-02 | 102986636 | 102986759 | NC_000010.10 |
| cg22495480     | 8.30E-16 | 2.56E-17 | -9.32 | 28.4551111 | -4.03E-02 | 40350820  | 40350943  | NC_000003.11 |
| cg11835657     | 8.32E-16 | 2.56E-17 | -9.32 | 28.4532248 | -1.94E-01 | 95967697  | 95967820  | NC_000014.8  |
| cg02331830     | 8.32E-16 | 2.56E-17 | -9.32 | 28.45272   | -2.24E-01 | 145008288 | 145008411 | NC_000008.10 |
| cg08827454     | 8.32E-16 | 2.56E-17 | -9.32 | 28.4523371 | -2.06E-01 | 30922981  | 30923104  | NC_000006.11 |
| cg22681001     | 8.36E-16 | 2.57E-17 | -9.32 | 28.4482489 | -1.58E-01 | 29141663  | 29141786  | NC_000011.9  |
| cg25939853     | 8.38E-16 | 2.58E-17 | -9.32 | 28.445582  | -1.66E-01 | 133343428 | 133343551 | NC_000012.11 |
| cg00840694     | 8.38E-16 | 2.58E-17 | -9.32 | 28.4454766 | -1.62E-01 | 1994574   | 1994697   | NC_000008.10 |
| cg24060040     | 8.41E-16 | 2.59E-17 | -9.32 | 28.4414001 | -1.90E-01 | 5802267   | 5802390   | NC_000019.9  |
| cg10257263     | 8.45E-16 | 2.60E-17 | -9.32 | 28.4368142 | -9.83E-02 | 36462525  | 36462648  | NC_000022.10 |
| cg19623237     | 8.45E-16 | 2.60E-17 | -9.32 | 28.4361895 | -5.25E-02 | 77818582  | 77818705  | NC_000017.10 |
| cg11558474     | 8.46E-16 | 2.61E-17 | -9.32 | 28.4355109 | -7.70E-02 | 74382743  | 74382866  | NC_000009.11 |
| cg04153489     | 8.47E-16 | 2.61E-17 | -9.31 | 28.4336399 | -1.59E-01 | 41655983  | 41656106  | NC_000008.10 |
| cg08043565     | 8.56E-16 | 2.64E-17 | -9.31 | 28.422969  | -1.85E-01 | 12308645  | 12308768  | NC_000011.9  |
| cg11571304     | 8.59E-16 | 2.65E-17 | -9.31 | 28.4194715 | -5.25E-02 | 25963022  | 25963145  | NC_000006.11 |
| cg23046934     | 8.61E-16 | 2.66E-17 | -9.31 | 28.4167125 | -1.11E-01 | 77154321  | 77154444  | NC_000018.9  |
| cg20773521     | 8.62E-16 | 2.66E-17 | -9.31 | 28.4156618 | -1.67E-01 | 93374979  | 93375102  | NC_000001.10 |

|            |          |          |       |            |           |           |           |              |
|------------|----------|----------|-------|------------|-----------|-----------|-----------|--------------|
| cg10534672 | 8.67E-16 | 2.68E-17 | -9.31 | 28.4092421 | -6.62E-02 | 159797275 | 159797398 | NC_000005.9  |
| cg18348690 | 8.67E-16 | 2.68E-17 | -9.31 | 28.4090988 | -1.64E-01 | 151967697 | 151967820 | NC_000001.10 |
| cg16063312 | 8.71E-16 | 2.69E-17 | -9.31 | 28.4051763 | -1.37E-01 | 22725587  | 22725710  | NC_000010.10 |
| cg27378180 | 8.72E-16 | 2.69E-17 | -9.31 | 28.4035567 | -7.23E-02 | 76005446  | 76005569  | NC_000015.9  |
| cg20299802 | 8.73E-16 | 2.70E-17 | -9.31 | 28.4016545 | -2.17E-01 | 162319575 | 162319698 | NC_000001.10 |
| cg17575314 | 8.74E-16 | 2.70E-17 | -9.31 | 28.4009374 | -1.58E-01 | 71142526  | 71142649  | NC_000010.10 |
| cg01182154 | 8.75E-16 | 2.70E-17 | -9.31 | 28.3996004 | -1.82E-01 | 112202929 | 112203052 | NC_000013.10 |
| cg18060185 | 8.79E-16 | 2.71E-17 | -9.31 | 28.3954088 | -6.42E-02 | 72416268  | 72416391  | NC_000005.9  |
| cg20785674 | 8.79E-16 | 2.72E-17 | -9.31 | 28.3950989 | -2.88E-01 | 150123490 | 150123613 | NC_000001.10 |
| cg01582066 | 8.81E-16 | 2.72E-17 | -9.31 | 28.3926437 | -1.33E-01 | 32057065  | 32057188  | NC_000022.10 |
| cg09539538 | 8.81E-16 | 2.72E-17 | -9.31 | 28.3922581 | -1.67E-01 | 6104215   | 6104338   | NC_000020.10 |
| cg20405918 | 8.87E-16 | 2.74E-17 | -9.31 | 28.3853337 | -3.39E-02 | 50478976  | 50479099  | NC_000012.11 |
| cg00039489 | 8.89E-16 | 2.75E-17 | -9.31 | 28.3830557 | -1.94E-01 | 24712522  | 24712645  | NC_000016.9  |
| cg27290215 | 8.90E-16 | 2.75E-17 | -9.31 | 28.3817972 | -1.80E-01 | 116392933 | 116393056 | NC_000010.10 |
| cg20870559 | 8.90E-16 | 2.75E-17 | -9.31 | 28.3816887 | -1.82E-01 | 113416518 | 113416641 | NC_000012.11 |
| cg13766329 | 8.90E-16 | 2.75E-17 | -9.31 | 28.3815374 | -1.90E-01 | 45596980  | 45597103  | NC_000022.10 |
| cg27278470 | 8.91E-16 | 2.76E-17 | -9.31 | 28.3797861 | -1.77E-01 | 52540778  | 52540901  | NC_000012.11 |
| cg26736232 | 8.92E-16 | 2.76E-17 | -9.31 | 28.3792975 | -2.73E-01 | 628603    | 628726    | NC_000011.9  |
| cg22166739 | 8.93E-16 | 2.76E-17 | -9.31 | 28.3778361 | -1.76E-01 | 73694868  | 73694991  | NC_000011.9  |
| cg08261525 | 8.96E-16 | 2.77E-17 | -9.31 | 28.3748202 | -1.49E-01 | 44239135  | 44239258  | NC_000013.10 |
| cg12970171 | 8.96E-16 | 2.77E-17 | -9.31 | 28.374333  | -1.62E-01 | 6766613   | 6766736   | NC_000005.9  |
| cg26960492 | 8.96E-16 | 2.77E-17 | -9.31 | 28.3742774 | -8.76E-02 | 114048670 | 114048793 | NC_000013.10 |
| cg08649360 | 8.96E-16 | 2.77E-17 | -9.31 | 28.3738787 | -1.13E-01 | 9833841   | 9833964   | NC_000003.11 |
| cg00502926 | 8.97E-16 | 2.78E-17 | -9.31 | 28.3730515 | -2.20E-01 | 21510056  | 21510179  | NC_000014.8  |
| cg24935121 | 9.05E-16 | 2.80E-17 | -9.3  | 28.3633489 | -1.20E-01 | 155022635 | 155022758 | NC_000001.10 |

|               |          |          |      |            |           |           |           |              |
|---------------|----------|----------|------|------------|-----------|-----------|-----------|--------------|
| cg01509243    | 9.05E-16 | 2.80E-17 | -9.3 | 28.3632164 | -2.04E-01 | 105123576 | 105123699 | NC_000014.8  |
| cg00566961    | 9.07E-16 | 2.81E-17 | -9.3 | 28.3609668 | -2.13E-01 | 119488431 | 119488554 | NC_000005.9  |
| cg20642413    | 9.08E-16 | 2.81E-17 | -9.3 | 28.3607571 | -8.77E-02 | 62338338  | 62338461  | NC_000020.10 |
| cg16817668    | 9.14E-16 | 2.83E-17 | -9.3 | 28.353265  | -1.85E-01 | 32055006  | 32055129  | NC_000001.10 |
| cg14089943    | 9.14E-16 | 2.83E-17 | -9.3 | 28.3529439 | -6.88E-02 | 103990076 | 103990199 | NC_000010.10 |
| cg25025297    | 9.15E-16 | 2.83E-17 | -9.3 | 28.352362  | -6.23E-02 | 15480555  | 15480678  | NC_000001.10 |
| cg11962078    | 9.16E-16 | 2.84E-17 | -9.3 | 28.3508665 | -1.28E-01 | 136849317 | 136849440 | NC_000007.13 |
| cg08812235    | 9.20E-16 | 2.85E-17 | -9.3 | 28.3469867 | -6.89E-02 | 23397533  | 23397656  | NC_000007.13 |
| cg07594674    | 9.20E-16 | 2.85E-17 | -9.3 | 28.3463949 | -7.81E-02 | 47499812  | 47499935  | NC_000002.11 |
| cg22025854    | 9.23E-16 | 2.86E-17 | -9.3 | 28.3434842 | -1.25E-01 | 54494493  | 54494616  | NC_000019.9  |
| cg01773185    | 9.25E-16 | 2.87E-17 | -9.3 | 28.3412426 | -7.92E-02 | 74724152  | 74724275  | NC_000014.8  |
| cg15282732    | 9.30E-16 | 2.88E-17 | -9.3 | 28.3351558 | -7.36E-02 | 150346863 | 150346986 | NC_000006.11 |
| cg09331335    | 9.32E-16 | 2.89E-17 | -9.3 | 28.3332307 | -7.82E-02 | 13209485  | 13209608  | NC_000019.9  |
| cg15826891    | 9.32E-16 | 2.89E-17 | -9.3 | 28.332831  | -1.93E-01 | 122037845 | 122037968 | NC_000011.9  |
| cg23381028    | 9.32E-16 | 2.89E-17 | -9.3 | 28.3322548 | -1.57E-01 | 164088958 | 164089081 | NC_000006.11 |
| cg19511316    | 9.36E-16 | 2.90E-17 | -9.3 | 28.3282809 | -5.29E-02 | 197183353 | 197183476 | NC_000003.11 |
| cg23088810    | 9.38E-16 | 2.91E-17 | -9.3 | 28.3267006 | -1.67E-01 | 106100228 | 106100351 | NC_000012.11 |
| cg13525448    | 9.38E-16 | 2.91E-17 | -9.3 | 28.3257106 | -9.54E-02 | 102986601 | 102986724 | NC_000010.10 |
| cg14207654    | 9.40E-16 | 2.92E-17 | -9.3 | 28.3238293 | -1.04E-01 | 43533913  | 43534036  | NC_000001.10 |
| cg19319487    | 9.42E-16 | 2.92E-17 | -9.3 | 28.322024  | -2.44E-01 | 73232747  | 73232870  | NC_000011.9  |
| cg21462844    | 9.48E-16 | 2.94E-17 | -9.3 | 28.3148742 | -1.71E-01 | 67628165  | 67628288  | NC_000008.10 |
| ch.7.3273938R | 9.49E-16 | 2.95E-17 | -9.3 | 28.313813  | -4.91E-02 | 154766961 | 154767084 | NC_000007.13 |
| cg07069514    | 9.52E-16 | 2.96E-17 | -9.3 | 28.3108075 | -7.91E-02 | 100494380 | 100494503 | NC_000007.13 |
| cg21182694    | 9.53E-16 | 2.96E-17 | -9.3 | 28.3090843 | -6.31E-02 | 139062771 | 139062894 | NC_000003.11 |
| cg26252794    | 9.56E-16 | 2.97E-17 | -9.3 | 28.3054545 | -1.72E-01 | 88097221  | 88097344  | NC_000014.8  |

|            |          |          |       |            |           |           |           |              |
|------------|----------|----------|-------|------------|-----------|-----------|-----------|--------------|
| cg06315390 | 9.63E-16 | 2.99E-17 | -9.29 | 28.298235  | -2.04E-01 | 45704914  | 45705037  | NC_000022.10 |
| cg20709530 | 9.69E-16 | 3.01E-17 | -9.29 | 28.2926609 | -2.10E-01 | 36040249  | 36040372  | NC_000020.10 |
| cg18943383 | 9.73E-16 | 3.02E-17 | -9.29 | 28.2881152 | -1.75E-01 | 27777858  | 27777981  | NC_000006.11 |
| cg03049846 | 9.76E-16 | 3.04E-17 | -9.29 | 28.2840011 | -1.64E-01 | 33712790  | 33712913  | NC_000019.9  |
| cg12862820 | 9.76E-16 | 3.04E-17 | -9.29 | 28.2839653 | -1.54E-01 | 83817398  | 83817521  | NC_000007.13 |
| cg20066750 | 9.83E-16 | 3.06E-17 | -9.29 | 28.277087  | -5.49E-02 | 62389892  | 62390015  | NC_000011.9  |
| cg02495552 | 9.91E-16 | 3.08E-17 | -9.29 | 28.2690277 | -2.48E-01 | 132221669 | 132221792 | NC_000012.11 |
| cg02788637 | 9.94E-16 | 3.09E-17 | -9.29 | 28.2661192 | -1.39E-01 | 853229    | 853352    | NC_000007.13 |
| cg04590184 | 9.94E-16 | 3.09E-17 | -9.29 | 28.2661106 | -8.55E-02 | 29297604  | 29297727  | NC_000017.10 |
| cg10833393 | 9.97E-16 | 3.11E-17 | -9.29 | 28.2622353 | -1.53E-01 | 46651227  | 46651350  | NC_000019.9  |
| cg01229943 | 9.98E-16 | 3.11E-17 | -9.29 | 28.261949  | -1.91E-01 | 40904807  | 40904930  | NC_000006.11 |
| cg03510349 | 9.98E-16 | 3.11E-17 | -9.29 | 28.261211  | -1.24E-01 | 3861616   | 3861739   | NC_000012.11 |
| cg06318676 | 1.00E-15 | 3.12E-17 | -9.29 | 28.2584805 | -1.68E-01 | 92077357  | 92077480  | NC_000001.10 |
| cg23088157 | 1.00E-15 | 3.12E-17 | -9.29 | 28.2561636 | -1.60E-01 | 11851316  | 11851439  | NC_000001.10 |
| cg01836137 | 1.00E-15 | 3.13E-17 | -9.29 | 28.2556983 | -1.24E-01 | 105167300 | 105167423 | NC_000014.8  |
| cg18608055 | 1.00E-15 | 3.13E-17 | -9.29 | 28.2554131 | -2.15E-01 | 1130866   | 1130989   | NC_000019.9  |
| cg01917266 | 1.01E-15 | 3.14E-17 | -9.29 | 28.2521777 | -2.01E-01 | 79810788  | 79810911  | NC_000016.9  |
| cg09633579 | 1.01E-15 | 3.15E-17 | -9.29 | 28.249028  | -1.26E-01 | 61395464  | 61395587  | NC_000011.9  |
| cg19596755 | 1.02E-15 | 3.17E-17 | -9.29 | 28.2432498 | -1.55E-01 | 68609747  | 68609870  | NC_000011.9  |
| cg06993413 | 1.02E-15 | 3.17E-17 | -9.29 | 28.2426459 | -4.63E-02 | 65810204  | 65810327  | NC_000015.9  |
| cg06458698 | 1.02E-15 | 3.17E-17 | -9.29 | 28.2408611 | -8.84E-02 | 3623210   | 3623333   | NC_000002.11 |
| cg05725721 | 1.02E-15 | 3.18E-17 | -9.28 | 28.2401242 | -1.01E-01 | 160823387 | 160823510 | NC_000003.11 |
| cg14546466 | 1.02E-15 | 3.18E-17 | -9.28 | 28.2373045 | -1.42E-01 | 11796974  | 11797097  | NC_000002.11 |
| cg26233914 | 1.02E-15 | 3.19E-17 | -9.28 | 28.2348286 | -1.07E-01 | 31366536  | 31366659  | NC_000016.9  |
| cg19853703 | 1.03E-15 | 3.22E-17 | -9.28 | 28.2271632 | -8.43E-02 | 36044792  | 36044915  | NC_000022.10 |



|                |          |          |       |            |           |           |           |              |
|----------------|----------|----------|-------|------------|-----------|-----------|-----------|--------------|
| cg05912338     | 1.03E-15 | 3.23E-17 | -9.28 | 28.2242692 | -1.95E-01 | 86701746  | 86701869  | NC_000011.9  |
| cg10508778     | 1.03E-15 | 3.23E-17 | -9.28 | 28.2232264 | -1.25E-01 | 110840579 | 110840702 | NC_000012.11 |
| ch.17.1730525R | 1.04E-15 | 3.25E-17 | -9.28 | 28.2173658 | -8.17E-02 | 65196202  | 65196325  | NC_000017.10 |
| cg04752257     | 1.04E-15 | 3.25E-17 | -9.28 | 28.2168049 | -1.60E-01 | 58862417  | 58862540  | NC_000014.8  |
| cg26163458     | 1.04E-15 | 3.26E-17 | -9.28 | 28.2131957 | -6.48E-02 | 95620976  | 95621099  | NC_000013.10 |
| cg02049243     | 1.05E-15 | 3.27E-17 | -9.28 | 28.2106555 | -1.75E-01 | 85424402  | 85424525  | NC_000016.9  |
| cg23664708     | 1.05E-15 | 3.27E-17 | -9.28 | 28.2105884 | -1.61E-01 | 80196903  | 80197026  | NC_000017.10 |
| cg04322105     | 1.05E-15 | 3.28E-17 | -9.28 | 28.2086927 | -1.07E-01 | 50383309  | 50383432  | NC_000003.11 |
| cg00781658     | 1.06E-15 | 3.30E-17 | -9.28 | 28.2016869 | -1.82E-01 | 41805850  | 41805973  | NC_000019.9  |
| cg25400746     | 1.06E-15 | 3.31E-17 | -9.28 | 28.1990379 | -1.15E-01 | 131965635 | 131965758 | NC_000009.11 |
| cg17318642     | 1.06E-15 | 3.32E-17 | -9.28 | 28.1953463 | -2.87E-02 | 111842773 | 111842896 | NC_000012.11 |
| cg15848159     | 1.06E-15 | 3.32E-17 | -9.28 | 28.194599  | -2.04E-01 | 85791643  | 85791766  | NC_000004.11 |
| cg26359133     | 1.06E-15 | 3.33E-17 | -9.28 | 28.1934942 | -1.85E-01 | 111847419 | 111847542 | NC_000012.11 |
| cg03023952     | 1.07E-15 | 3.33E-17 | -9.28 | 28.1927651 | -6.71E-02 | 40791701  | 40791824  | NC_000019.9  |
| cg14274621     | 1.07E-15 | 3.33E-17 | -9.28 | 28.192571  | -6.57E-02 | 8825107   | 8825230   | NC_000002.11 |
| cg00519208     | 1.07E-15 | 3.33E-17 | -9.28 | 28.1921953 | -1.71E-01 | 93258319  | 93258442  | NC_000001.10 |
| cg09694300     | 1.07E-15 | 3.34E-17 | -9.28 | 28.1912847 | -1.73E-01 | 159429667 | 159429790 | NC_000003.11 |
| cg21637761     | 1.07E-15 | 3.34E-17 | -9.28 | 28.1893218 | -1.64E-01 | 20107320  | 20107443  | NC_000017.10 |
| cg00362657     | 1.07E-15 | 3.36E-17 | -9.28 | 28.1851556 | -2.37E-01 | 44876670  | 44876793  | NC_000021.8  |
| cg08012275     | 1.07E-15 | 3.36E-17 | -9.28 | 28.1848966 | -1.61E-01 | 1464300   | 1464423   | NC_000011.9  |
| cg24069376     | 1.07E-15 | 3.36E-17 | -9.28 | 28.1848178 | -8.70E-02 | 38537580  | 38537703  | NC_000003.11 |
| cg27153327     | 1.07E-15 | 3.36E-17 | -9.28 | 28.1847255 | -2.07E-01 | 1920815   | 1920938   | NC_000016.9  |
| cg25296938     | 1.07E-15 | 3.36E-17 | -9.28 | 28.1831132 | -3.03E-01 | 98976900  | 98977023  | NC_000007.13 |
| cg07060794     | 1.08E-15 | 3.37E-17 | -9.28 | 28.1824588 | -2.28E-01 | 23387365  | 23387488  | NC_000007.13 |
| cg16202564     | 1.08E-15 | 3.37E-17 | -9.28 | 28.1820101 | -6.57E-02 | 98881927  | 98882050  | NC_000008.10 |

|            |          |          |       |            |           |           |           |              |
|------------|----------|----------|-------|------------|-----------|-----------|-----------|--------------|
| cg05572410 | 1.08E-15 | 3.37E-17 | -9.28 | 28.1804935 | -1.50E-01 | 5882304   | 5882427   | NC_000010.10 |
| cg05405914 | 1.08E-15 | 3.38E-17 | -9.28 | 28.1783804 | -1.37E-01 | 8972233   | 8972356   | NC_000016.9  |
| cg19489509 | 1.09E-15 | 3.40E-17 | -9.27 | 28.1711895 | -1.28E-01 | 133878202 | 133878325 | NC_000010.10 |
| cg17361154 | 1.09E-15 | 3.43E-17 | -9.27 | 28.1643001 | -1.90E-01 | 140336563 | 140336686 | NC_000009.11 |
| cg07442639 | 1.10E-15 | 3.44E-17 | -9.27 | 28.1612515 | -4.38E-02 | 3014225   | 3014348   | NC_000011.9  |
| cg16643542 | 1.10E-15 | 3.45E-17 | -9.27 | 28.1585887 | -1.48E-01 | 827843    | 827966    | NC_000019.9  |
| cg04230910 | 1.10E-15 | 3.45E-17 | -9.27 | 28.1571459 | -5.58E-02 | 134373852 | 134373975 | NC_000006.11 |
| cg00867694 | 1.11E-15 | 3.48E-17 | -9.27 | 28.1503315 | -8.16E-02 | 91884854  | 91884977  | NC_000014.8  |
| cg00073460 | 1.12E-15 | 3.51E-17 | -9.27 | 28.1403348 | -2.21E-01 | 149806502 | 149806625 | NC_000006.11 |
| cg22016649 | 1.12E-15 | 3.51E-17 | -9.27 | 28.1394806 | -9.78E-02 | 818917    | 819040    | NC_000011.9  |
| cg12955084 | 1.12E-15 | 3.52E-17 | -9.27 | 28.1388866 | -2.26E-01 | 41886265  | 41886388  | NC_000019.9  |
| cg21812313 | 1.12E-15 | 3.52E-17 | -9.27 | 28.1379217 | -2.20E-01 | 94158618  | 94158741  | NC_000001.10 |
| cg17389988 | 1.12E-15 | 3.52E-17 | -9.27 | 28.1370116 | -2.00E-01 | 40740924  | 40741047  | NC_000007.13 |
| cg18455249 | 1.12E-15 | 3.53E-17 | -9.27 | 28.135533  | -1.57E-01 | 56813898  | 56814021  | NC_000004.11 |
| cg27642771 | 1.12E-15 | 3.53E-17 | -9.27 | 28.1352019 | -6.59E-02 | 3762167   | 3762290   | NC_000020.10 |
| cg19137818 | 1.13E-15 | 3.53E-17 | -9.27 | 28.1341354 | -1.25E-01 | 45837556  | 45837679  | NC_000003.11 |
| cg02798548 | 1.13E-15 | 3.53E-17 | -9.27 | 28.1338706 | -7.80E-02 | 57832235  | 57832358  | NC_000019.9  |
| cg26143752 | 1.13E-15 | 3.55E-17 | -9.27 | 28.1303316 | -4.48E-02 | 27806326  | 27806449  | NC_000002.11 |
| cg16365424 | 1.14E-15 | 3.59E-17 | -9.27 | 28.117568  | -2.14E-01 | 234700636 | 234700759 | NC_000001.10 |
| cg15205204 | 1.14E-15 | 3.60E-17 | -9.27 | 28.116785  | -1.40E-01 | 6545172   | 6545295   | NC_000001.10 |
| cg15601807 | 1.15E-15 | 3.61E-17 | -9.27 | 28.1140216 | -1.60E-01 | 45495677  | 45495800  | NC_000010.10 |
| cg05136724 | 1.15E-15 | 3.63E-17 | -9.26 | 28.1087968 | -2.00E-01 | 65793962  | 65794085  | NC_000002.11 |
| cg17186066 | 1.16E-15 | 3.63E-17 | -9.26 | 28.1070128 | -2.64E-01 | 80740613  | 80740736  | NC_000008.10 |
| cg15903956 | 1.16E-15 | 3.65E-17 | -9.26 | 28.1013377 | -1.83E-01 | 74676231  | 74676354  | NC_000015.9  |
| cg25199322 | 1.16E-15 | 3.66E-17 | -9.26 | 28.0993407 | -1.13E-01 | 151693838 | 151693961 | NC_000001.10 |

|            |          |          |       |            |           |           |           |              |
|------------|----------|----------|-------|------------|-----------|-----------|-----------|--------------|
| cg02920604 | 1.17E-15 | 3.67E-17 | -9.26 | 28.0968931 | -1.98E-01 | 59484170  | 59484293  | NC_000015.9  |
| cg08282145 | 1.17E-15 | 3.68E-17 | -9.26 | 28.094294  | -1.54E-01 | 24868755  | 24868878  | NC_000014.8  |
| cg03622371 | 1.18E-15 | 3.70E-17 | -9.26 | 28.0876955 | -7.15E-02 | 73000436  | 73000559  | NC_000011.9  |
| cg03046705 | 1.18E-15 | 3.71E-17 | -9.26 | 28.0855904 | -6.11E-02 | 131746062 | 131746185 | NC_000005.9  |
| cg16177481 | 1.18E-15 | 3.72E-17 | -9.26 | 28.0820702 | -1.06E-01 | 61740158  | 61740281  | NC_000011.9  |
| cg21046940 | 1.19E-15 | 3.73E-17 | -9.26 | 28.0803023 | -5.42E-02 | 10760858  | 10760981  | NC_000005.9  |
| cg23508201 | 1.19E-15 | 3.74E-17 | -9.26 | 28.0789602 | -2.11E-01 | 38677884  | 38678007  | NC_000017.10 |
| cg04241652 | 1.19E-15 | 3.74E-17 | -9.26 | 28.0777482 | -1.83E-01 | 2984830   | 2984953   | NC_000001.10 |
| cg05759347 | 1.19E-15 | 3.74E-17 | -9.26 | 28.0774673 | -2.23E-01 | 243416723 | 243416846 | NC_000001.10 |
| cg17552357 | 1.19E-15 | 3.74E-17 | -9.26 | 28.0771246 | -2.43E-01 | 76932332  | 76932455  | NC_000017.10 |
| cg10537718 | 1.19E-15 | 3.75E-17 | -9.26 | 28.0759332 | -6.63E-02 | 1479488   | 1479611   | NC_000019.9  |
| cg17715243 | 1.19E-15 | 3.75E-17 | -9.26 | 28.0752361 | -2.25E-01 | 1156212   | 1156335   | NC_000010.10 |
| cg13720316 | 1.19E-15 | 3.75E-17 | -9.26 | 28.0750191 | -7.93E-02 | 69455111  | 69455234  | NC_000011.9  |
| cg03599547 | 1.20E-15 | 3.77E-17 | -9.26 | 28.0707943 | -7.03E-02 | 56123102  | 56123225  | NC_000012.11 |
| cg15332871 | 1.20E-15 | 3.77E-17 | -9.26 | 28.0701709 | -1.72E-01 | 168489054 | 168489177 | NC_000006.11 |
| cg07875068 | 1.20E-15 | 3.78E-17 | -9.26 | 28.0681732 | -1.51E-01 | 116814302 | 116814425 | NC_000012.11 |
| cg19938199 | 1.20E-15 | 3.78E-17 | -9.26 | 28.0663401 | -2.22E-01 | 63233164  | 63233287  | NC_000015.9  |
| cg00946187 | 1.21E-15 | 3.81E-17 | -9.26 | 28.0589084 | -1.48E-01 | 1396953   | 1397076   | NC_000017.10 |
| cg20413202 | 1.22E-15 | 3.84E-17 | -9.26 | 28.0522313 | -2.16E-01 | 10056853  | 10056976  | NC_000001.10 |
| cg06123346 | 1.22E-15 | 3.84E-17 | -9.26 | 28.0510371 | -1.61E-01 | 36054519  | 36054642  | NC_000019.9  |
| cg03962527 | 1.22E-15 | 3.85E-17 | -9.26 | 28.0496116 | -1.90E-01 | 111766879 | 111767002 | NC_000010.10 |
| cg23537419 | 1.22E-15 | 3.85E-17 | -9.26 | 28.0483431 | -2.09E-01 | 128533587 | 128533710 | NC_000007.13 |
| cg07195224 | 1.23E-15 | 3.88E-17 | -9.25 | 28.0426005 | -1.84E-01 | 159047034 | 159047157 | NC_000001.10 |
| cg22073507 | 1.23E-15 | 3.88E-17 | -9.25 | 28.041094  | -6.91E-02 | 68291089  | 68291212  | NC_000002.11 |
| cg14159336 | 1.23E-15 | 3.88E-17 | -9.25 | 28.040524  | -1.03E-01 | 228645796 | 228645919 | NC_000001.10 |

|                |          |          |       |            |           |           |           |              |
|----------------|----------|----------|-------|------------|-----------|-----------|-----------|--------------|
| cg04455646     | 1.24E-15 | 3.90E-17 | -9.25 | 28.0354549 | -9.30E-02 | 10206344  | 10206467  | NC_000003.11 |
| cg24180219     | 1.24E-15 | 3.92E-17 | -9.25 | 28.0327048 | -1.43E-01 | 105239190 | 105239313 | NC_000010.10 |
| cg14995062     | 1.24E-15 | 3.92E-17 | -9.25 | 28.032129  | -1.70E-01 | 102826570 | 102826693 | NC_000011.9  |
| cg13936846     | 1.24E-15 | 3.92E-17 | -9.25 | 28.0308997 | -1.87E-01 | 137216064 | 137216187 | NC_000009.11 |
| cg07929164     | 1.24E-15 | 3.92E-17 | -9.25 | 28.0307559 | -1.40E-01 | 80372499  | 80372622  | NC_000017.10 |
| cg10383933     | 1.25E-15 | 3.94E-17 | -9.25 | 28.0274023 | -8.79E-02 | 95465250  | 95465373  | NC_000014.8  |
| cg25810357     | 1.25E-15 | 3.94E-17 | -9.25 | 28.0268577 | -7.10E-02 | 127267066 | 127267189 | NC_000003.11 |
| ch.3.38006391R | 1.25E-15 | 3.94E-17 | -9.25 | 28.0255721 | -5.85E-02 | 38031387  | 38031510  | NC_000003.11 |
| cg15964159     | 1.25E-15 | 3.94E-17 | -9.25 | 28.0254429 | -1.60E-01 | 52912487  | 52912610  | NC_000013.10 |
| cg23175055     | 1.25E-15 | 3.95E-17 | -9.25 | 28.0234572 | -9.17E-02 | 31704738  | 31704861  | NC_000006.11 |
| cg24045357     | 1.26E-15 | 3.97E-17 | -9.25 | 28.0182848 | -1.65E-01 | 177448447 | 177448570 | NC_000002.11 |
| cg15132013     | 1.26E-15 | 3.98E-17 | -9.25 | 28.0174734 | -2.17E-01 | 2163529   | 2163652   | NC_000001.10 |
| cg01733438     | 1.26E-15 | 3.98E-17 | -9.25 | 28.0154955 | -2.22E-01 | 75276069  | 75276192  | NC_000017.10 |
| cg15217044     | 1.26E-15 | 3.99E-17 | -9.25 | 28.0129954 | -1.99E-01 | 159466054 | 159466177 | NC_000006.11 |
| cg14210454     | 1.27E-15 | 4.00E-17 | -9.25 | 28.0109489 | -1.67E-01 | 463460    | 463583    | NC_000019.9  |
| cg03883275     | 1.27E-15 | 4.01E-17 | -9.25 | 28.0102468 | -1.63E-01 | 49608385  | 49608508  | NC_000010.10 |
| cg10574365     | 1.27E-15 | 4.01E-17 | -9.25 | 28.0101835 | -1.67E-01 | 32054836  | 32054959  | NC_000001.10 |
| cg06601581     | 1.27E-15 | 4.01E-17 | -9.25 | 28.0094801 | -1.68E-01 | 85404654  | 85404777  | NC_000016.9  |
| cg04283637     | 1.27E-15 | 4.01E-17 | -9.25 | 28.0083829 | -1.40E-01 | 74405447  | 74405570  | NC_000006.11 |
| cg08977639     | 1.27E-15 | 4.03E-17 | -9.25 | 28.0043951 | -8.39E-02 | 1047820   | 1047943   | NC_000016.9  |
| cg01280080     | 1.27E-15 | 4.03E-17 | -9.25 | 28.0037828 | -9.84E-02 | 216177276 | 216177399 | NC_000002.11 |
| cg22057234     | 1.28E-15 | 4.05E-17 | -9.25 | 28.0003941 | -1.44E-01 | 34206710  | 34206833  | NC_000020.10 |
| cg02772121     | 1.28E-15 | 4.06E-17 | -9.25 | 27.995712  | -2.34E-01 | 30130881  | 30131004  | NC_000006.11 |
| cg25311470     | 1.29E-15 | 4.08E-17 | -9.25 | 27.9927512 | -1.22E-01 | 107950866 | 107950989 | NC_000007.13 |
| cg26531231     | 1.29E-15 | 4.09E-17 | -9.25 | 27.9883564 | -2.28E-01 | 40336255  | 40336378  | NC_000004.11 |

|                |          |          |       |            |           |           |           |              |
|----------------|----------|----------|-------|------------|-----------|-----------|-----------|--------------|
| cg14396214     | 1.29E-15 | 4.10E-17 | -9.25 | 27.9866829 | -1.64E-01 | 62367998  | 62368121  | NC_000020.10 |
| cg15948030     | 1.31E-15 | 4.14E-17 | -9.24 | 27.977469  | -1.70E-01 | 31760825  | 31760948  | NC_000006.11 |
| cg18076124     | 1.31E-15 | 4.16E-17 | -9.24 | 27.9732897 | -1.39E-01 | 57204141  | 57204264  | NC_000003.11 |
| cg21673010     | 1.31E-15 | 4.16E-17 | -9.24 | 27.9732442 | -8.46E-02 | 125425518 | 125425641 | NC_000012.11 |
| cg11201177     | 1.31E-15 | 4.16E-17 | -9.24 | 27.973015  | -1.88E-01 | 2961805   | 2961928   | NC_000011.9  |
| cg18382353     | 1.32E-15 | 4.19E-17 | -9.24 | 27.9664594 | -2.43E-01 | 45495981  | 45496104  | NC_000010.10 |
| cg00734567     | 1.33E-15 | 4.22E-17 | -9.24 | 27.9588137 | -1.25E-01 | 86172782  | 86172905  | NC_000001.10 |
| cg13854219     | 1.33E-15 | 4.22E-17 | -9.24 | 27.9580007 | -2.06E-01 | 101757037 | 101757160 | NC_000001.10 |
| cg08178956     | 1.33E-15 | 4.23E-17 | -9.24 | 27.9569084 | -1.89E-01 | 42345201  | 42345324  | NC_000002.11 |
| cg11374871     | 1.34E-15 | 4.24E-17 | -9.24 | 27.9531708 | -7.13E-02 | 26785513  | 26785636  | NC_000002.11 |
| ch.19.1787100F | 1.34E-15 | 4.27E-17 | -9.24 | 27.9475376 | -5.76E-02 | 54635630  | 54635753  | NC_000019.9  |
| cg04793090     | 1.35E-15 | 4.29E-17 | -9.24 | 27.9424566 | -5.20E-02 | 128903277 | 128903400 | NC_000003.11 |
| cg12944183     | 1.35E-15 | 4.30E-17 | -9.24 | 27.9391864 | -1.85E-01 | 104073931 | 104074054 | NC_000014.8  |
| cg12740037     | 1.36E-15 | 4.31E-17 | -9.24 | 27.937171  | -2.10E-01 | 100891257 | 100891380 | NC_000015.9  |
| cg07414961     | 1.36E-15 | 4.34E-17 | -9.24 | 27.9318405 | -3.15E-02 | 70587753  | 70587876  | NC_000017.10 |
| cg22608655     | 1.37E-15 | 4.35E-17 | -9.24 | 27.9296062 | -1.15E-01 | 154933512 | 154933635 | NC_000001.10 |
| cg11802469     | 1.37E-15 | 4.36E-17 | -9.24 | 27.9261706 | -8.84E-02 | 84743086  | 84743209  | NC_000006.11 |
| cg07177395     | 1.37E-15 | 4.37E-17 | -9.24 | 27.9247014 | -2.07E-01 | 79968686  | 79968809  | NC_000014.8  |
| cg13703584     | 1.37E-15 | 4.37E-17 | -9.24 | 27.9238195 | -8.54E-02 | 64059916  | 64060039  | NC_000011.9  |
| cg24428040     | 1.37E-15 | 4.38E-17 | -9.24 | 27.9219417 | -1.43E-01 | 72969293  | 72969416  | NC_000017.10 |
| cg02768671     | 1.38E-15 | 4.38E-17 | -9.24 | 27.9215814 | -1.58E-01 | 169470822 | 169470945 | NC_000006.11 |
| cg27409401     | 1.38E-15 | 4.39E-17 | -9.23 | 27.9186326 | -1.41E-01 | 614852    | 614975    | NC_000016.9  |
| cg00234261     | 1.38E-15 | 4.40E-17 | -9.23 | 27.9166849 | -1.64E-01 | 151106082 | 151106205 | NC_000007.13 |
| cg00647859     | 1.39E-15 | 4.42E-17 | -9.23 | 27.9117257 | -2.31E-01 | 185534625 | 185534748 | NC_000001.10 |
| cg13762691     | 1.39E-15 | 4.43E-17 | -9.23 | 27.9111723 | -1.50E-01 | 17956560  | 17956683  | NC_000022.10 |

|                |          |          |       |            |           |           |           |              |
|----------------|----------|----------|-------|------------|-----------|-----------|-----------|--------------|
| cg05824936     | 1.39E-15 | 4.44E-17 | -9.23 | 27.9088145 | -1.13E-01 | 1134909   | 1135032   | NC_000017.10 |
| cg20513418     | 1.39E-15 | 4.44E-17 | -9.23 | 27.9076931 | -2.66E-01 | 131457460 | 131457583 | NC_000008.10 |
| cg17946995     | 1.39E-15 | 4.44E-17 | -9.23 | 27.9075555 | -8.35E-02 | 113796032 | 113796155 | NC_000012.11 |
| cg18552520     | 1.40E-15 | 4.48E-17 | -9.23 | 27.8998985 | -1.23E-01 | 192746489 | 192746612 | NC_000002.11 |
| cg16224018     | 1.40E-15 | 4.48E-17 | -9.23 | 27.8987075 | -8.72E-02 | 124069324 | 124069447 | NC_000012.11 |
| cg03277652     | 1.41E-15 | 4.50E-17 | -9.23 | 27.895     | -7.22E-02 | 142011117 | 142011240 | NC_000008.10 |
| cg11061343     | 1.41E-15 | 4.50E-17 | -9.23 | 27.8941575 | -1.89E-01 | 73993843  | 73993966  | NC_000017.10 |
| cg06794253     | 1.41E-15 | 4.52E-17 | -9.23 | 27.891388  | -1.49E-01 | 22668658  | 22668781  | NC_000001.10 |
| cg12173498     | 1.41E-15 | 4.52E-17 | -9.23 | 27.8913063 | -6.89E-02 | 36355764  | 36355887  | NC_000006.11 |
| cg25054907     | 1.41E-15 | 4.52E-17 | -9.23 | 27.8909687 | -2.19E-01 | 61553954  | 61554077  | NC_000017.10 |
| cg08269900     | 1.42E-15 | 4.53E-17 | -9.23 | 27.8889703 | -6.81E-02 | 126565042 | 126565165 | NC_000005.9  |
| cg15553155     | 1.42E-15 | 4.53E-17 | -9.23 | 27.8881825 | -1.72E-01 | 6649176   | 6649299   | NC_000006.11 |
| cg00913954     | 1.42E-15 | 4.53E-17 | -9.23 | 27.8873207 | -1.93E-01 | 36852956  | 36853079  | NC_000001.10 |
| cg04011253     | 1.42E-15 | 4.54E-17 | -9.23 | 27.8856457 | -1.74E-01 | 129685613 | 129685736 | NC_000011.9  |
| ch.17.1131311F | 1.42E-15 | 4.55E-17 | -9.23 | 27.8838843 | -6.39E-02 | 41573041  | 41573164  | NC_000017.10 |
| cg24659758     | 1.43E-15 | 4.56E-17 | -9.23 | 27.8821724 | -1.76E-01 | 71891123  | 71891246  | NC_000010.10 |
| cg07716663     | 1.43E-15 | 4.57E-17 | -9.23 | 27.8801158 | -1.84E-01 | 42636625  | 42636748  | NC_000019.9  |
| cg16773677     | 1.43E-15 | 4.57E-17 | -9.23 | 27.8791514 | -1.32E-01 | 65635328  | 65635451  | NC_000007.13 |
| cg00625783     | 1.43E-15 | 4.58E-17 | -9.23 | 27.8778235 | -8.77E-02 | 43222106  | 43222229  | NC_000017.10 |
| cg21513352     | 1.43E-15 | 4.58E-17 | -9.23 | 27.8766725 | -1.73E-01 | 85553841  | 85553964  | NC_000002.11 |
| cg05657292     | 1.44E-15 | 4.59E-17 | -9.23 | 27.8747846 | -1.30E-01 | 17980996  | 17981119  | NC_000022.10 |
| ch.3.2442921F  | 1.45E-15 | 4.63E-17 | -9.23 | 27.8676313 | -1.15E-01 | 124726246 | 124726369 | NC_000003.11 |
| cg06434451     | 1.45E-15 | 4.63E-17 | -9.23 | 27.8669212 | -1.45E-01 | 32802291  | 32802414  | NC_000001.10 |
| cg00387964     | 1.45E-15 | 4.65E-17 | -9.23 | 27.8634412 | -2.42E-01 | 7651935   | 7652058   | NC_000004.11 |
| cg26366554     | 1.45E-15 | 4.65E-17 | -9.23 | 27.861777  | -1.84E-01 | 138610113 | 138610236 | NC_000006.11 |

|               |          |          |       |            |           |           |           |              |
|---------------|----------|----------|-------|------------|-----------|-----------|-----------|--------------|
| cg23934700    | 1.45E-15 | 4.66E-17 | -9.23 | 27.8612075 | -2.28E-01 | 105126697 | 105126820 | NC_000014.8  |
| cg05597349    | 1.46E-15 | 4.66E-17 | -9.23 | 27.8594956 | -1.50E-01 | 102882978 | 102883101 | NC_000010.10 |
| cg08059845    | 1.46E-15 | 4.68E-17 | -9.23 | 27.8564795 | -6.63E-02 | 50015975  | 50016098  | NC_000019.9  |
| cg14036828    | 1.46E-15 | 4.68E-17 | -9.23 | 27.8555597 | -1.49E-01 | 109816201 | 109816324 | NC_000001.10 |
| cg06552563    | 1.46E-15 | 4.69E-17 | -9.23 | 27.8549172 | -1.83E-01 | 89632749  | 89632872  | NC_000016.9  |
| cg05793240    | 1.46E-15 | 4.69E-17 | -9.23 | 27.8547679 | -1.62E-01 | 2802953   | 2803076   | NC_000007.13 |
| cg17779002    | 1.47E-15 | 4.69E-17 | -9.22 | 27.8532684 | -2.26E-01 | 145129278 | 145129401 | NC_000008.10 |
| cg16240816    | 1.47E-15 | 4.70E-17 | -9.22 | 27.8526807 | -1.95E-01 | 65861662  | 65861785  | NC_000002.11 |
| cg09120877    | 1.47E-15 | 4.71E-17 | -9.22 | 27.8492931 | -1.67E-01 | 147721261 | 147721384 | NC_000001.10 |
| cg13887966    | 1.47E-15 | 4.71E-17 | -9.22 | 27.8490066 | -2.24E-01 | 59568712  | 59568835  | NC_000015.9  |
| ch.3.2456622F | 1.48E-15 | 4.73E-17 | -9.22 | 27.8457212 | -8.13E-02 | 125269750 | 125269873 | NC_000003.11 |
| cg03781727    | 1.48E-15 | 4.74E-17 | -9.22 | 27.8436447 | -2.26E-01 | 22007540  | 22007663  | NC_000007.13 |
| cg07730673    | 1.48E-15 | 4.74E-17 | -9.22 | 27.8433771 | -1.41E-01 | 196438540 | 196438663 | NC_000003.11 |
| cg16564525    | 1.49E-15 | 4.78E-17 | -9.22 | 27.8343682 | -1.28E-01 | 156561143 | 156561266 | NC_000001.10 |
| cg17082856    | 1.49E-15 | 4.79E-17 | -9.22 | 27.8334665 | -2.54E-01 | 65303710  | 65303833  | NC_000002.11 |
| cg03206044    | 1.50E-15 | 4.80E-17 | -9.22 | 27.8307512 | -1.92E-01 | 148657866 | 148657989 | NC_000004.11 |
| cg07381778    | 1.50E-15 | 4.80E-17 | -9.22 | 27.830406  | -4.97E-02 | 41786692  | 41786815  | NC_000015.9  |
| cg01119452    | 1.50E-15 | 4.81E-17 | -9.22 | 27.8291311 | -2.12E-01 | 37287850  | 37287973  | NC_000007.13 |
| cg19901523    | 1.50E-15 | 4.82E-17 | -9.22 | 27.827403  | -1.90E-01 | 107253273 | 107253396 | NC_000014.8  |
| cg07775147    | 1.50E-15 | 4.82E-17 | -9.22 | 27.8271902 | -2.19E-01 | 133101495 | 133101618 | NC_000012.11 |
| cg21840434    | 1.51E-15 | 4.83E-17 | -9.22 | 27.8239781 | -1.66E-01 | 79297210  | 79297333  | NC_000015.9  |
| cg27139419    | 1.51E-15 | 4.85E-17 | -9.22 | 27.8214367 | -2.42E-01 | 99212404  | 99212527  | NC_000015.9  |
| cg01122251    | 1.52E-15 | 4.87E-17 | -9.22 | 27.81777   | -6.18E-02 | 14995625  | 14995748  | NC_000010.10 |
| cg23925650    | 1.52E-15 | 4.88E-17 | -9.22 | 27.8157366 | -1.15E-01 | 77507461  | 77507584  | NC_000014.8  |
| cg02503763    | 1.52E-15 | 4.89E-17 | -9.22 | 27.8122024 | -1.70E-01 | 127542386 | 127542509 | NC_000003.11 |

|                 |          |          |       |            |           |           |           |              |
|-----------------|----------|----------|-------|------------|-----------|-----------|-----------|--------------|
| cg09456289      | 1.54E-15 | 4.93E-17 | -9.22 | 27.80365   | -2.17E-01 | 43038399  | 43038522  | NC_000002.11 |
| cg05110391      | 1.54E-15 | 4.94E-17 | -9.22 | 27.8025672 | -1.99E-01 | 76588634  | 76588757  | NC_000017.10 |
| cg07488141      | 1.54E-15 | 4.95E-17 | -9.22 | 27.8013598 | -2.17E-01 | 47560215  | 47560338  | NC_000007.13 |
| cg08729279      | 1.54E-15 | 4.95E-17 | -9.22 | 27.8000324 | -2.41E-01 | 216708378 | 216708501 | NC_000002.11 |
| cg23355992      | 1.54E-15 | 4.96E-17 | -9.22 | 27.7976479 | -1.28E-01 | 48998616  | 48998739  | NC_000020.10 |
| cg00036347      | 1.55E-15 | 5.00E-17 | -9.22 | 27.7916205 | -1.97E-01 | 151811923 | 151812046 | NC_000001.10 |
| cg27481708      | 1.56E-15 | 5.00E-17 | -9.22 | 27.7905792 | -1.77E-01 | 37659837  | 37659960  | NC_000008.10 |
| cg21235823      | 1.56E-15 | 5.01E-17 | -9.21 | 27.7888023 | -1.16E-01 | 93260203  | 93260326  | NC_000014.8  |
| ch.7.137597056R | 1.56E-15 | 5.01E-17 | -9.21 | 27.7886269 | -4.22E-02 | 137946516 | 137946639 | NC_000007.13 |
| cg13522882      | 1.56E-15 | 5.01E-17 | -9.21 | 27.7884353 | -1.63E-01 | 102316496 | 102316619 | NC_000002.11 |
| cg20749059      | 1.57E-15 | 5.04E-17 | -9.21 | 27.7821796 | -1.71E-01 | 57094404  | 57094527  | NC_000003.11 |
| cg09558427      | 1.57E-15 | 5.04E-17 | -9.21 | 27.7819349 | -3.10E-02 | 45985705  | 45985828  | NC_000020.10 |
| cg07458712      | 1.57E-15 | 5.06E-17 | -9.21 | 27.7784242 | -8.88E-02 | 1769731   | 1769854   | NC_000004.11 |
| cg00665114      | 1.58E-15 | 5.07E-17 | -9.21 | 27.7760709 | -2.15E-01 | 175403347 | 175403470 | NC_000001.10 |
| cg02602699      | 1.58E-15 | 5.08E-17 | -9.21 | 27.775926  | -9.51E-02 | 235235    | 235358    | NC_000017.10 |
| cg03491895      | 1.58E-15 | 5.10E-17 | -9.21 | 27.7719471 | -1.72E-01 | 213587996 | 213588119 | NC_000002.11 |
| cg21439129      | 1.58E-15 | 5.10E-17 | -9.21 | 27.7714773 | -1.56E-01 | 72844212  | 72844335  | NC_000007.13 |
| ch.3.3303606F   | 1.59E-15 | 5.10E-17 | -9.21 | 27.7706171 | -8.07E-02 | 169994002 | 169994125 | NC_000003.11 |
| cg00263677      | 1.59E-15 | 5.11E-17 | -9.21 | 27.7696994 | -2.49E-01 | 84885230  | 84885353  | NC_000016.9  |
| cg20111980      | 1.59E-15 | 5.11E-17 | -9.21 | 27.7688808 | -1.42E-01 | 6676796   | 6676919   | NC_000004.11 |
| cg11531272      | 1.59E-15 | 5.12E-17 | -9.21 | 27.7664434 | -2.35E-01 | 21934679  | 21934802  | NC_000001.10 |
| cg05606039      | 1.59E-15 | 5.13E-17 | -9.21 | 27.7648205 | -5.27E-02 | 73511506  | 73511629  | NC_000017.10 |
| cg13825574      | 1.59E-15 | 5.14E-17 | -9.21 | 27.7639925 | -1.29E-01 | 140117257 | 140117380 | NC_000009.11 |
| cg04358685      | 1.60E-15 | 5.15E-17 | -9.21 | 27.7621431 | -6.82E-02 | 12598421  | 12598544  | NC_000003.11 |
| ch.19.16251119F | 1.60E-15 | 5.15E-17 | -9.21 | 27.7606396 | -5.26E-02 | 16390119  | 16390242  | NC_000019.9  |



|               |          |          |       |            |           |           |           |              |
|---------------|----------|----------|-------|------------|-----------|-----------|-----------|--------------|
| cg17818196    | 1.60E-15 | 5.16E-17 | -9.21 | 27.7593019 | -5.27E-02 | 63336009  | 63336132  | NC_000015.9  |
| cg16326998    | 1.60E-15 | 5.16E-17 | -9.21 | 27.758792  | -8.98E-02 | 5553266   | 5553389   | NC_000007.13 |
| cg17942666    | 1.62E-15 | 5.23E-17 | -9.21 | 27.7456774 | -2.23E-01 | 59415548  | 59415671  | NC_000017.10 |
| ch.1.2582316R | 1.63E-15 | 5.26E-17 | -9.21 | 27.7410261 | -5.96E-02 | 109957975 | 109958098 | NC_000001.10 |
| cg16800111    | 1.63E-15 | 5.27E-17 | -9.21 | 27.7391294 | -1.34E-01 | 105293760 | 105293883 | NC_000014.8  |
| cg01330280    | 1.64E-15 | 5.29E-17 | -9.21 | 27.7348077 | -1.36E-01 | 27776566  | 27776689  | NC_000006.11 |
| cg00255699    | 1.64E-15 | 5.29E-17 | -9.21 | 27.7342262 | -1.74E-01 | 40307257  | 40307380  | NC_000001.10 |
| cg12731325    | 1.65E-15 | 5.33E-17 | -9.21 | 27.7273544 | -1.45E-01 | 7671330   | 7671453   | NC_000017.10 |
| cg24230340    | 1.65E-15 | 5.33E-17 | -9.21 | 27.7269527 | -8.28E-02 | 74758080  | 74758203  | NC_000002.11 |
| cg09560549    | 1.65E-15 | 5.34E-17 | -9.21 | 27.7260719 | -2.11E-01 | 89573369  | 89573492  | NC_000016.9  |
| cg06099014    | 1.66E-15 | 5.35E-17 | -9.2  | 27.7238084 | -1.78E-01 | 43786627  | 43786750  | NC_000021.8  |
| cg13401301    | 1.67E-15 | 5.38E-17 | -9.2  | 27.718588  | -1.91E-01 | 134132080 | 134132203 | NC_000009.11 |
| cg10551058    | 1.67E-15 | 5.38E-17 | -9.2  | 27.7180293 | -1.05E-01 | 123324826 | 123324949 | NC_000012.11 |
| cg27385959    | 1.68E-15 | 5.41E-17 | -9.2  | 27.7125551 | -1.74E-01 | 51523889  | 51524012  | NC_000019.9  |
| cg13984040    | 1.68E-15 | 5.41E-17 | -9.2  | 27.7120598 | -2.15E-01 | 125258948 | 125259071 | NC_000012.11 |
| cg00690609    | 1.68E-15 | 5.41E-17 | -9.2  | 27.7119113 | -1.15E-01 | 72218900  | 72219023  | NC_000010.10 |
| cg01060358    | 1.68E-15 | 5.42E-17 | -9.2  | 27.7103208 | -5.92E-02 | 51483867  | 51483990  | NC_000013.10 |
| cg16705300    | 1.70E-15 | 5.48E-17 | -9.2  | 27.6998851 | -1.83E-01 | 149096884 | 149097007 | NC_000003.11 |
| cg09537553    | 1.70E-15 | 5.49E-17 | -9.2  | 27.6990205 | -2.11E-01 | 962492    | 962615    | NC_000007.13 |
| cg03509329    | 1.70E-15 | 5.49E-17 | -9.2  | 27.6989682 | -1.41E-01 | 24520788  | 24520911  | NC_000014.8  |
| cg01008256    | 1.70E-15 | 5.49E-17 | -9.2  | 27.6978869 | -1.33E-01 | 100463985 | 100464108 | NC_000007.13 |
| cg19573198    | 1.70E-15 | 5.51E-17 | -9.2  | 27.6953667 | -7.57E-02 | 54476240  | 54476363  | NC_000012.11 |
| cg19440734    | 1.70E-15 | 5.51E-17 | -9.2  | 27.6949691 | -2.15E-01 | 48264753  | 48264876  | NC_000003.11 |
| cg16986921    | 1.71E-15 | 5.53E-17 | -9.2  | 27.6907966 | -5.88E-02 | 95753828  | 95753951  | NC_000010.10 |
| cg06015525    | 1.71E-15 | 5.53E-17 | -9.2  | 27.6907674 | -1.52E-01 | 57872123  | 57872246  | NC_000012.11 |

|               |          |          |       |            |           |           |           |              |
|---------------|----------|----------|-------|------------|-----------|-----------|-----------|--------------|
| cg25314624    | 1.71E-15 | 5.54E-17 | -9.2  | 27.6892644 | -2.02E-01 | 95256917  | 95257040  | NC_000010.10 |
| cg01767053    | 1.71E-15 | 5.54E-17 | -9.2  | 27.6884904 | -2.33E-01 | 85678884  | 85679007  | NC_000016.9  |
| cg21749091    | 1.72E-15 | 5.55E-17 | -9.2  | 27.6878097 | -9.16E-02 | 49338493  | 49338616  | NC_000017.10 |
| cg25494395    | 1.72E-15 | 5.55E-17 | -9.2  | 27.6870051 | -1.13E-01 | 180034939 | 180035062 | NC_000005.9  |
| cg19610615    | 1.73E-15 | 5.58E-17 | -9.2  | 27.6818626 | -1.99E-01 | 78446340  | 78446463  | NC_000014.8  |
| cg01702055    | 1.73E-15 | 5.58E-17 | -9.2  | 27.6812153 | -2.68E-01 | 13303065  | 13303188  | NC_000006.11 |
| cg15078013    | 1.73E-15 | 5.61E-17 | -9.2  | 27.6767863 | -4.77E-02 | 45496216  | 45496339  | NC_000010.10 |
| cg16761550    | 1.74E-15 | 5.64E-17 | -9.2  | 27.6711057 | -8.67E-02 | 3029823   | 3029946   | NC_000016.9  |
| cg04911139    | 1.75E-15 | 5.67E-17 | -9.2  | 27.6654571 | -2.69E-01 | 25871790  | 25871913  | NC_000017.10 |
| cg09390594    | 1.76E-15 | 5.69E-17 | -9.2  | 27.6624996 | -1.20E-01 | 62028791  | 62028914  | NC_000014.8  |
| cg08064261    | 1.77E-15 | 5.72E-17 | -9.19 | 27.6571576 | -8.42E-02 | 41946035  | 41946158  | NC_000019.9  |
| cg12390344    | 1.77E-15 | 5.72E-17 | -9.19 | 27.65687   | -1.31E-01 | 21270348  | 21270471  | NC_000018.9  |
| cg10596692    | 1.77E-15 | 5.73E-17 | -9.19 | 27.656658  | -1.59E-01 | 10633457  | 10633580  | NC_000006.11 |
| cg09369124    | 1.77E-15 | 5.73E-17 | -9.19 | 27.6560314 | -1.50E-01 | 89650950  | 89651073  | NC_000016.9  |
| cg22708944    | 1.77E-15 | 5.74E-17 | -9.19 | 27.6547802 | -1.85E-01 | 74164906  | 74165029  | NC_000015.9  |
| cg20870885    | 1.77E-15 | 5.74E-17 | -9.19 | 27.6546564 | -9.27E-02 | 122043074 | 122043197 | NC_000002.11 |
| cg19879479    | 1.77E-15 | 5.74E-17 | -9.19 | 27.6545156 | -7.26E-02 | 80246572  | 80246695  | NC_000006.11 |
| cg27388587    | 1.77E-15 | 5.74E-17 | -9.19 | 27.6540056 | -1.68E-01 | 97763993  | 97764116  | NC_000002.11 |
| cg21509105    | 1.77E-15 | 5.74E-17 | -9.19 | 27.6536848 | -1.39E-01 | 151555029 | 151555152 | NC_000003.11 |
| cg19267254    | 1.77E-15 | 5.75E-17 | -9.19 | 27.6531441 | -1.91E-01 | 15828075  | 15828198  | NC_000001.10 |
| cg10625247    | 1.77E-15 | 5.75E-17 | -9.19 | 27.6529675 | -2.16E-01 | 221063983 | 221064106 | NC_000002.11 |
| cg15572436    | 1.78E-15 | 5.77E-17 | -9.19 | 27.6493751 | -1.40E-01 | 62767169  | 62767292  | NC_000011.9  |
| cg24629380    | 1.78E-15 | 5.77E-17 | -9.19 | 27.648183  | -2.16E-01 | 116214059 | 116214182 | NC_000001.10 |
| cg23619910    | 1.79E-15 | 5.79E-17 | -9.19 | 27.6449928 | -1.30E-01 | 10477452  | 10477575  | NC_000011.9  |
| ch.10.410979F | 1.79E-15 | 5.80E-17 | -9.19 | 27.6436786 | -8.70E-02 | 14166253  | 14166376  | NC_000010.10 |

|                 |          |          |       |            |           |           |           |              |
|-----------------|----------|----------|-------|------------|-----------|-----------|-----------|--------------|
| cg22762189      | 1.79E-15 | 5.80E-17 | -9.19 | 27.6436259 | -1.70E-01 | 17996994  | 17997117  | NC_000002.11 |
| cg27187881      | 1.79E-15 | 5.81E-17 | -9.19 | 27.6413554 | -6.60E-02 | 42466345  | 42466468  | NC_000022.10 |
| cg26971420      | 1.79E-15 | 5.82E-17 | -9.19 | 27.640751  | -2.24E-01 | 38085230  | 38085353  | NC_000017.10 |
| cg15518950      | 1.79E-15 | 5.82E-17 | -9.19 | 27.6399674 | -2.06E-01 | 72415770  | 72415893  | NC_000005.9  |
| cg09215282      | 1.79E-15 | 5.82E-17 | -9.19 | 27.6396371 | -1.48E-01 | 811744    | 811867    | NC_000016.9  |
| cg09115275      | 1.80E-15 | 5.84E-17 | -9.19 | 27.6364067 | -1.10E-01 | 6093271   | 6093394   | NC_000010.10 |
| cg08475827      | 1.80E-15 | 5.84E-17 | -9.19 | 27.6362769 | -7.39E-02 | 152266230 | 152266353 | NC_000002.11 |
| cg06574229      | 1.80E-15 | 5.84E-17 | -9.19 | 27.6362655 | -1.72E-01 | 140064863 | 140064986 | NC_000009.11 |
| cg04780086      | 1.81E-15 | 5.89E-17 | -9.19 | 27.6288124 | -1.71E-01 | 111875790 | 111875913 | NC_000002.11 |
| cg24940967      | 1.81E-15 | 5.89E-17 | -9.19 | 27.6287216 | -1.97E-01 | 45837197  | 45837320  | NC_000003.11 |
| cg22198603      | 1.82E-15 | 5.90E-17 | -9.19 | 27.6276711 | -2.17E-01 | 38230110  | 38230233  | NC_000006.11 |
| cg00273863      | 1.82E-15 | 5.90E-17 | -9.19 | 27.6265705 | -1.45E-01 | 31743961  | 31744084  | NC_000006.11 |
| cg04245131      | 1.82E-15 | 5.92E-17 | -9.19 | 27.624164  | -1.43E-01 | 235133338 | 235133461 | NC_000001.10 |
| cg16577356      | 1.82E-15 | 5.93E-17 | -9.19 | 27.6225325 | -2.04E-01 | 53600006  | 53600129  | NC_000006.11 |
| cg03082060      | 1.83E-15 | 5.94E-17 | -9.19 | 27.619651  | -1.57E-01 | 236680224 | 236680347 | NC_000001.10 |
| cg14391855      | 1.83E-15 | 5.95E-17 | -9.19 | 27.617841  | -1.86E-01 | 66104174  | 66104297  | NC_000011.9  |
| cg07773593      | 1.83E-15 | 5.96E-17 | -9.19 | 27.6174247 | -1.64E-01 | 45417793  | 45417916  | NC_000019.9  |
| cg21888214      | 1.83E-15 | 5.96E-17 | -9.19 | 27.6164441 | -1.26E-01 | 200992283 | 200992406 | NC_000001.10 |
| cg06939851      | 1.83E-15 | 5.96E-17 | -9.19 | 27.6162903 | -1.67E-01 | 226112534 | 226112657 | NC_000001.10 |
| cg16067628      | 1.84E-15 | 5.99E-17 | -9.19 | 27.6119465 | -1.83E-01 | 79109808  | 79109931  | NC_000017.10 |
| cg05556361      | 1.84E-15 | 5.99E-17 | -9.19 | 27.6118617 | -2.12E-01 | 93097402  | 93097525  | NC_000008.10 |
| ch.1.171672612F | 1.85E-15 | 6.02E-17 | -9.19 | 27.6062699 | -1.23E-01 | 173405989 | 173406112 | NC_000001.10 |
| cg11203211      | 1.85E-15 | 6.03E-17 | -9.19 | 27.6059921 | -2.01E-01 | 144301594 | 144301717 | NC_000008.10 |
| cg15437528      | 1.86E-15 | 6.04E-17 | -9.19 | 27.6035446 | -5.42E-02 | 72427628  | 72427751  | NC_000017.10 |
| cg05107361      | 1.86E-15 | 6.04E-17 | -9.19 | 27.6035273 | -7.66E-02 | 91884912  | 91885035  | NC_000014.8  |

|            |          |          |       |            |           |           |           |              |
|------------|----------|----------|-------|------------|-----------|-----------|-----------|--------------|
| cg06267075 | 1.86E-15 | 6.06E-17 | -9.19 | 27.6006782 | -2.15E-01 | 69092182  | 69092305  | NC_000016.9  |
| cg13223721 | 1.86E-15 | 6.06E-17 | -9.19 | 27.6004817 | -1.76E-01 | 131720532 | 131720655 | NC_000007.13 |
| cg24327307 | 1.86E-15 | 6.07E-17 | -9.19 | 27.5991175 | -1.38E-01 | 54753071  | 54753194  | NC_000001.10 |
| cg07986257 | 1.87E-15 | 6.07E-17 | -9.19 | 27.5983957 | -2.00E-01 | 22321172  | 22321295  | NC_000006.11 |
| cg05462328 | 1.87E-15 | 6.08E-17 | -9.18 | 27.5966229 | -4.83E-02 | 172963910 | 172964033 | NC_000002.11 |
| cg07794367 | 1.87E-15 | 6.10E-17 | -9.18 | 27.5936651 | -1.18E-01 | 13107052  | 13107175  | NC_000016.9  |
| cg00852245 | 1.88E-15 | 6.10E-17 | -9.18 | 27.5932472 | -1.20E-01 | 43129800  | 43129923  | NC_000017.10 |
| cg20889322 | 1.88E-15 | 6.11E-17 | -9.18 | 27.5928046 | -1.31E-01 | 65196622  | 65196745  | NC_000011.9  |
| cg03802231 | 1.89E-15 | 6.15E-17 | -9.18 | 27.5860779 | -6.08E-02 | 42911648  | 42911771  | NC_000008.10 |
| cg00980784 | 1.89E-15 | 6.16E-17 | -9.18 | 27.5842017 | -1.65E-01 | 47287577  | 47287700  | NC_000017.10 |
| cg20271511 | 1.89E-15 | 6.16E-17 | -9.18 | 27.5839928 | -2.02E-01 | 17566989  | 17567112  | NC_000022.10 |
| cg24733497 | 1.89E-15 | 6.16E-17 | -9.18 | 27.5836367 | -7.99E-02 | 50356079  | 50356202  | NC_000022.10 |
| cg17616283 | 1.89E-15 | 6.17E-17 | -9.18 | 27.5828918 | -1.51E-01 | 65635258  | 65635381  | NC_000011.9  |
| cg11426563 | 1.90E-15 | 6.18E-17 | -9.18 | 27.5816416 | -9.41E-02 | 74020802  | 74020925  | NC_000007.13 |
| cg12487464 | 1.90E-15 | 6.18E-17 | -9.18 | 27.5815741 | -2.84E-02 | 38218943  | 38219066  | NC_000017.10 |
| cg04526361 | 1.90E-15 | 6.18E-17 | -9.18 | 27.5810502 | -1.97E-01 | 22007577  | 22007700  | NC_000007.13 |
| cg02932689 | 1.90E-15 | 6.18E-17 | -9.18 | 27.5805685 | -3.94E-02 | 87425223  | 87425346  | NC_000016.9  |
| cg16481365 | 1.91E-15 | 6.21E-17 | -9.18 | 27.5761001 | -1.57E-01 | 105554352 | 105554475 | NC_000014.8  |
| cg16015593 | 1.91E-15 | 6.22E-17 | -9.18 | 27.5748957 | -2.01E-01 | 51794932  | 51795055  | NC_000014.8  |
| cg27492584 | 1.91E-15 | 6.22E-17 | -9.18 | 27.5740947 | -1.53E-01 | 70599307  | 70599430  | NC_000017.10 |
| cg27270412 | 1.91E-15 | 6.22E-17 | -9.18 | 27.5740021 | -2.10E-01 | 33622332  | 33622455  | NC_000010.10 |
| cg05243438 | 1.94E-15 | 6.32E-17 | -9.18 | 27.5582537 | -1.26E-01 | 113265611 | 113265734 | NC_000001.10 |
| cg22844232 | 1.94E-15 | 6.33E-17 | -9.18 | 27.5568973 | -1.13E-01 | 193776047 | 193776170 | NC_000003.11 |
| cg20004634 | 1.94E-15 | 6.33E-17 | -9.18 | 27.5567404 | -8.22E-02 | 21399591  | 21399714  | NC_000022.10 |
| cg24659037 | 1.95E-15 | 6.36E-17 | -9.18 | 27.5519459 | -2.47E-01 | 168064901 | 168065024 | NC_000006.11 |

|               |          |          |       |            |           |           |           |              |
|---------------|----------|----------|-------|------------|-----------|-----------|-----------|--------------|
| cg26271591    | 1.95E-15 | 6.38E-17 | -9.18 | 27.5495381 | -1.85E-01 | 178125956 | 178126079 | NC_000002.11 |
| cg11916054    | 1.96E-15 | 6.41E-17 | -9.18 | 27.5454166 | -1.79E-01 | 177423311 | 177423434 | NC_000005.9  |
| cg04384689    | 1.96E-15 | 6.41E-17 | -9.18 | 27.5453158 | -2.07E-01 | 44039689  | 44039812  | NC_000006.11 |
| cg13985198    | 1.96E-15 | 6.41E-17 | -9.18 | 27.5447213 | -1.24E-01 | 45242073  | 45242196  | NC_000001.10 |
| cg13293729    | 1.96E-15 | 6.41E-17 | -9.18 | 27.5441697 | -1.45E-01 | 28911902  | 28912025  | NC_000006.11 |
| cg13569051    | 1.97E-15 | 6.43E-17 | -9.18 | 27.542278  | -1.86E-01 | 124051703 | 124051826 | NC_000009.11 |
| cg05310920    | 1.97E-15 | 6.43E-17 | -9.18 | 27.5413679 | -7.03E-02 | 150186634 | 150186757 | NC_000002.11 |
| cg04602939    | 1.97E-15 | 6.44E-17 | -9.18 | 27.5401942 | -2.01E-01 | 62184207  | 62184330  | NC_000020.10 |
| cg06885175    | 1.97E-15 | 6.45E-17 | -9.18 | 27.5393416 | -1.58E-01 | 25788879  | 25789002  | NC_000006.11 |
| cg13892257    | 1.97E-15 | 6.45E-17 | -9.18 | 27.5379878 | -2.02E-01 | 86313941  | 86314064  | NC_000015.9  |
| cg25621096    | 1.98E-15 | 6.46E-17 | -9.18 | 27.5363734 | -6.77E-02 | 151032116 | 151032239 | NC_000001.10 |
| ch.13.650435R | 1.98E-15 | 6.47E-17 | -9.18 | 27.5352609 | -7.16E-02 | 48581080  | 48581203  | NC_000013.10 |
| cg19707677    | 1.98E-15 | 6.48E-17 | -9.18 | 27.5343004 | -2.04E-01 | 207271346 | 207271469 | NC_000001.10 |
| cg13687834    | 1.98E-15 | 6.48E-17 | -9.18 | 27.5341843 | -1.35E-01 | 3514783   | 3514906   | NC_000010.10 |
| cg22720029    | 1.99E-15 | 6.50E-17 | -9.17 | 27.5304974 | -8.93E-02 | 32058579  | 32058702  | NC_000022.10 |
| cg27184903    | 1.99E-15 | 6.52E-17 | -9.17 | 27.5276776 | -1.43E-01 | 29285727  | 29285850  | NC_000015.9  |
| cg16340618    | 2.00E-15 | 6.55E-17 | -9.17 | 27.5235544 | -5.51E-02 | 55104628  | 55104751  | NC_000018.9  |
| cg11696165    | 2.00E-15 | 6.55E-17 | -9.17 | 27.5229013 | -1.74E-01 | 120663824 | 120663947 | NC_000012.11 |
| cg04800715    | 2.00E-15 | 6.56E-17 | -9.17 | 27.5223644 | -9.08E-02 | 29826926  | 29827049  | NC_000016.9  |
| cg02097203    | 2.02E-15 | 6.60E-17 | -9.17 | 27.5153119 | -2.00E-01 | 2548282   | 2548405   | NC_000011.9  |
| cg05212465    | 2.02E-15 | 6.61E-17 | -9.17 | 27.5147272 | -1.11E-01 | 158253572 | 158253695 | NC_000006.11 |
| cg26411522    | 2.02E-15 | 6.62E-17 | -9.17 | 27.512929  | -1.51E-01 | 8403712   | 8403835   | NC_000001.10 |
| cg07162085    | 2.02E-15 | 6.62E-17 | -9.17 | 27.5126554 | -1.79E-01 | 95751894  | 95752017  | NC_000010.10 |
| cg12281620    | 2.02E-15 | 6.63E-17 | -9.17 | 27.510846  | -1.42E-01 | 2525290   | 2525413   | NC_000019.9  |
| cg13753946    | 2.03E-15 | 6.64E-17 | -9.17 | 27.5102077 | -2.08E-01 | 61040773  | 61040896  | NC_000017.10 |

|                |          |          |       |            |           |           |           |              |
|----------------|----------|----------|-------|------------|-----------|-----------|-----------|--------------|
| cg11860005     | 2.03E-15 | 6.64E-17 | -9.17 | 27.5095656 | -1.73E-01 | 32149125  | 32149248  | NC_000022.10 |
| cg04022194     | 2.03E-15 | 6.67E-17 | -9.17 | 27.5061355 | -1.53E-01 | 8317995   | 8318118   | NC_000004.11 |
| cg04770813     | 2.04E-15 | 6.69E-17 | -9.17 | 27.502543  | -5.81E-02 | 33160297  | 33160420  | NC_000006.11 |
| cg15169121     | 2.05E-15 | 6.73E-17 | -9.17 | 27.497096  | -1.62E-01 | 177534417 | 177534540 | NC_000002.11 |
| cg20908204     | 2.05E-15 | 6.73E-17 | -9.17 | 27.4968382 | -9.91E-02 | 46285434  | 46285557  | NC_000019.9  |
| cg10037049     | 2.05E-15 | 6.74E-17 | -9.17 | 27.4957774 | -2.23E-01 | 48276633  | 48276756  | NC_000012.11 |
| cg00320862     | 2.05E-15 | 6.74E-17 | -9.17 | 27.4955554 | -4.00E-02 | 170588302 | 170588425 | NC_000003.11 |
| cg15427004     | 2.06E-15 | 6.74E-17 | -9.17 | 27.4944996 | -4.57E-02 | 38179858  | 38179981  | NC_000003.11 |
| cg04585787     | 2.06E-15 | 6.75E-17 | -9.17 | 27.4934112 | -1.43E-01 | 241235366 | 241235489 | NC_000002.11 |
| cg18222590     | 2.06E-15 | 6.75E-17 | -9.17 | 27.4929577 | -1.60E-01 | 204290972 | 204291095 | NC_000001.10 |
| cg15704408     | 2.07E-15 | 6.78E-17 | -9.17 | 27.4898165 | -1.84E-01 | 77245548  | 77245671  | NC_000018.9  |
| cg05664039     | 2.07E-15 | 6.78E-17 | -9.17 | 27.4886491 | -2.18E-01 | 30131755  | 30131878  | NC_000006.11 |
| cg03216580     | 2.07E-15 | 6.80E-17 | -9.17 | 27.4856786 | -1.28E-01 | 3818357   | 3818480   | NC_000010.10 |
| cg18787478     | 2.07E-15 | 6.81E-17 | -9.17 | 27.4847166 | -3.91E-02 | 42950995  | 42951118  | NC_000005.9  |
| cg25171685     | 2.08E-15 | 6.82E-17 | -9.17 | 27.482788  | -1.43E-01 | 63334355  | 63334478  | NC_000015.9  |
| cg22219089     | 2.08E-15 | 6.83E-17 | -9.17 | 27.4815374 | -2.04E-01 | 187071162 | 187071285 | NC_000004.11 |
| ch.15.1197129R | 2.08E-15 | 6.84E-17 | -9.17 | 27.4799909 | -1.10E-01 | 74874974  | 74875097  | NC_000015.9  |
| cg19104757     | 2.09E-15 | 6.86E-17 | -9.17 | 27.4782603 | -1.82E-01 | 226563    | 226686    | NC_000007.13 |
| cg05781996     | 2.11E-15 | 6.92E-17 | -9.16 | 27.4687786 | -2.01E-01 | 65481537  | 65481660  | NC_000015.9  |
| cg22732126     | 2.11E-15 | 6.93E-17 | -9.16 | 27.4678039 | -1.62E-01 | 4993033   | 4993156   | NC_000004.11 |
| cg00537837     | 2.11E-15 | 6.94E-17 | -9.16 | 27.466171  | -1.98E-01 | 85363209  | 85363332  | NC_000016.9  |
| cg13552742     | 2.11E-15 | 6.94E-17 | -9.16 | 27.4659302 | -1.32E-01 | 77229061  | 77229184  | NC_000014.8  |
| cg08352268     | 2.12E-15 | 6.95E-17 | -9.16 | 27.464154  | -1.32E-01 | 6947337   | 6947460   | NC_000017.10 |
| cg18477949     | 2.12E-15 | 6.98E-17 | -9.16 | 27.4603102 | -1.76E-01 | 69760994  | 69761117  | NC_000015.9  |
| cg09851528     | 2.13E-15 | 6.99E-17 | -9.16 | 27.4589631 | -1.45E-01 | 117778029 | 117778152 | NC_000011.9  |

|            |          |          |       |            |           |           |           |              |
|------------|----------|----------|-------|------------|-----------|-----------|-----------|--------------|
| cg16274098 | 2.13E-15 | 7.02E-17 | -9.16 | 27.4552115 | -4.97E-02 | 92053265  | 92053388  | NC_000008.10 |
| cg12610519 | 2.13E-15 | 7.02E-17 | -9.16 | 27.454543  | -7.81E-02 | 16494002  | 16494125  | NC_000001.10 |
| cg13495235 | 2.15E-15 | 7.06E-17 | -9.16 | 27.4492113 | -5.09E-02 | 34379714  | 34379837  | NC_000009.11 |
| cg16567815 | 2.16E-15 | 7.09E-17 | -9.16 | 27.4445005 | -8.52E-02 | 1386887   | 1387010   | NC_000005.9  |
| cg12027068 | 2.17E-15 | 7.15E-17 | -9.16 | 27.4371509 | -1.57E-01 | 159176057 | 159176180 | NC_000003.11 |
| cg23681339 | 2.17E-15 | 7.16E-17 | -9.16 | 27.4350121 | -1.94E-01 | 133065808 | 133065931 | NC_000012.11 |
| cg10582648 | 2.18E-15 | 7.19E-17 | -9.16 | 27.4311054 | -1.02E-01 | 19283761  | 19283884  | NC_000001.10 |
| cg20539142 | 2.18E-15 | 7.20E-17 | -9.16 | 27.4303161 | -1.95E-01 | 42623718  | 42623841  | NC_000008.10 |
| cg13786863 | 2.19E-15 | 7.20E-17 | -9.16 | 27.4299546 | -2.84E-01 | 68610743  | 68610866  | NC_000011.9  |
| cg06858559 | 2.19E-15 | 7.21E-17 | -9.16 | 27.4290747 | -1.31E-01 | 9291773   | 9291896   | NC_000003.11 |
| cg18879828 | 2.20E-15 | 7.25E-17 | -9.16 | 27.4231783 | -1.66E-01 | 46942432  | 46942555  | NC_000011.9  |
| cg07804749 | 2.20E-15 | 7.26E-17 | -9.16 | 27.4222386 | -1.68E-01 | 12610104  | 12610227  | NC_000001.10 |
| cg04582424 | 2.20E-15 | 7.27E-17 | -9.16 | 27.4208202 | -8.20E-02 | 203764710 | 203764833 | NC_000001.10 |
| cg22482700 | 2.22E-15 | 7.30E-17 | -9.16 | 27.4157894 | -1.98E-01 | 68594186  | 68594309  | NC_000001.10 |
| cg05789714 | 2.22E-15 | 7.30E-17 | -9.16 | 27.4157631 | -5.72E-02 | 74178462  | 74178585  | NC_000011.9  |
| cg16673929 | 2.22E-15 | 7.31E-17 | -9.16 | 27.4150764 | -1.63E-01 | 13134830  | 13134953  | NC_000019.9  |
| cg03069383 | 2.22E-15 | 7.31E-17 | -9.16 | 27.414632  | -7.15E-02 | 18741691  | 18741814  | NC_000002.11 |
| cg10409560 | 2.22E-15 | 7.33E-17 | -9.16 | 27.4122989 | -1.83E-01 | 76481299  | 76481422  | NC_000004.11 |
| cg15657686 | 2.22E-15 | 7.33E-17 | -9.16 | 27.4120814 | -7.85E-02 | 37978666  | 37978789  | NC_000004.11 |
| cg27205941 | 2.23E-15 | 7.34E-17 | -9.16 | 27.4108066 | -9.62E-02 | 2245854   | 2245977   | NC_000006.11 |
| cg00004421 | 2.23E-15 | 7.36E-17 | -9.16 | 27.4075378 | -2.33E-01 | 7475079   | 7475202   | NC_000017.10 |
| cg18422268 | 2.24E-15 | 7.40E-17 | -9.15 | 27.4030767 | -1.99E-01 | 66274767  | 66274890  | NC_000015.9  |
| cg14327296 | 2.24E-15 | 7.40E-17 | -9.15 | 27.4026493 | -1.30E-01 | 101051064 | 101051187 | NC_000014.8  |
| cg19717193 | 2.24E-15 | 7.41E-17 | -9.15 | 27.401972  | -3.57E-02 | 105162577 | 105162700 | NC_000007.13 |
| cg26110898 | 2.24E-15 | 7.41E-17 | -9.15 | 27.4019062 | -8.82E-02 | 58419937  | 58420060  | NC_000003.11 |

|            |          |          |       |            |           |           |           |              |
|------------|----------|----------|-------|------------|-----------|-----------|-----------|--------------|
| cg00019654 | 2.25E-15 | 7.41E-17 | -9.15 | 27.4010779 | -1.92E-01 | 82148289  | 82148412  | NC_000014.8  |
| cg01923775 | 2.25E-15 | 7.41E-17 | -9.15 | 27.400961  | -2.21E-01 | 169687969 | 169688092 | NC_000004.11 |
| cg00148825 | 2.25E-15 | 7.44E-17 | -9.15 | 27.3972679 | -7.65E-02 | 124427195 | 124427318 | NC_000004.11 |
| cg23202253 | 2.26E-15 | 7.45E-17 | -9.15 | 27.3956441 | -2.19E-01 | 26902211  | 26902334  | NC_000012.11 |
| cg00293245 | 2.26E-15 | 7.47E-17 | -9.15 | 27.3928431 | -1.62E-01 | 94884652  | 94884775  | NC_000011.9  |
| cg15983109 | 2.27E-15 | 7.50E-17 | -9.15 | 27.3894683 | -4.20E-02 | 68880714  | 68880837  | NC_000002.11 |
| cg04629204 | 2.27E-15 | 7.51E-17 | -9.15 | 27.3883487 | -1.46E-01 | 26348325  | 26348448  | NC_000001.10 |
| cg04517323 | 2.28E-15 | 7.53E-17 | -9.15 | 27.3853413 | -1.48E-01 | 98788873  | 98788996  | NC_000008.10 |
| cg23525500 | 2.28E-15 | 7.53E-17 | -9.15 | 27.3850569 | -1.36E-01 | 33083886  | 33084009  | NC_000017.10 |
| cg24082880 | 2.29E-15 | 7.57E-17 | -9.15 | 27.379875  | -1.66E-01 | 119496816 | 119496939 | NC_000002.11 |
| cg16109381 | 2.29E-15 | 7.58E-17 | -9.15 | 27.3790363 | -1.92E-01 | 34339800  | 34339923  | NC_000015.9  |
| cg07572930 | 2.29E-15 | 7.58E-17 | -9.15 | 27.3783677 | -1.84E-01 | 81527107  | 81527230  | NC_000016.9  |
| cg22704780 | 2.29E-15 | 7.59E-17 | -9.15 | 27.3782003 | -1.51E-01 | 42916673  | 42916796  | NC_000019.9  |
| cg15975980 | 2.30E-15 | 7.59E-17 | -9.15 | 27.3774899 | -1.98E-01 | 151101020 | 151101143 | NC_000007.13 |
| cg23451221 | 2.30E-15 | 7.60E-17 | -9.15 | 27.3764104 | -1.21E-01 | 135160726 | 135160849 | NC_000010.10 |
| cg03753936 | 2.30E-15 | 7.62E-17 | -9.15 | 27.3731717 | -1.95E-01 | 64736754  | 64736877  | NC_000011.9  |
| cg21847393 | 2.31E-15 | 7.63E-17 | -9.15 | 27.3725208 | -1.65E-01 | 50383483  | 50383606  | NC_000003.11 |
| cg03264209 | 2.32E-15 | 7.68E-17 | -9.15 | 27.3656287 | -1.31E-01 | 3931885   | 3932008   | NC_000016.9  |
| cg03219657 | 2.32E-15 | 7.69E-17 | -9.15 | 27.3643154 | -1.64E-01 | 64981125  | 64981248  | NC_000011.9  |
| cg06761584 | 2.33E-15 | 7.72E-17 | -9.15 | 27.3603668 | -1.57E-01 | 128469799 | 128469922 | NC_000007.13 |
| cg25264101 | 2.34E-15 | 7.75E-17 | -9.15 | 27.3570898 | -1.65E-01 | 14064374  | 14064497  | NC_000019.9  |
| cg19735151 | 2.34E-15 | 7.76E-17 | -9.15 | 27.3559633 | -2.15E-01 | 31388636  | 31388759  | NC_000010.10 |
| cg01974549 | 2.34E-15 | 7.76E-17 | -9.15 | 27.3555143 | -1.84E-01 | 190151266 | 190151389 | NC_000002.11 |
| cg05538432 | 2.35E-15 | 7.78E-17 | -9.15 | 27.352986  | -2.10E-01 | 7167751   | 7167874   | NC_000012.11 |
| cg26546113 | 2.35E-15 | 7.80E-17 | -9.15 | 27.350721  | -2.05E-01 | 182810711 | 182810834 | NC_000001.10 |



|            |          |          |       |            |           |           |           |              |
|------------|----------|----------|-------|------------|-----------|-----------|-----------|--------------|
| cg03015585 | 2.37E-15 | 7.87E-17 | -9.15 | 27.3423139 | -1.95E-01 | 43523322  | 43523445  | NC_000022.10 |
| cg12469001 | 2.39E-15 | 7.91E-17 | -9.14 | 27.3371972 | -1.30E-01 | 129650050 | 129650173 | NC_000007.13 |
| cg02511456 | 2.39E-15 | 7.91E-17 | -9.14 | 27.336956  | -1.73E-01 | 156801419 | 156801542 | NC_000007.13 |
| cg07492281 | 2.39E-15 | 7.93E-17 | -9.14 | 27.3341587 | -1.92E-01 | 966947    | 967070    | NC_000007.13 |
| cg13882046 | 2.40E-15 | 7.95E-17 | -9.14 | 27.3312527 | -1.74E-01 | 123485043 | 123485166 | NC_000007.13 |
| cg00579036 | 2.41E-15 | 8.00E-17 | -9.14 | 27.3259712 | -1.88E-01 | 25138551  | 25138674  | NC_000006.11 |
| cg12535109 | 2.42E-15 | 8.02E-17 | -9.14 | 27.3227073 | -2.44E-01 | 216708370 | 216708493 | NC_000002.11 |
| cg19534021 | 2.42E-15 | 8.04E-17 | -9.14 | 27.3205986 | -1.85E-01 | 16178091  | 16178214  | NC_000019.9  |
| cg04784724 | 2.42E-15 | 8.04E-17 | -9.14 | 27.3200179 | -1.60E-01 | 50464453  | 50464576  | NC_000019.9  |
| cg23105130 | 2.43E-15 | 8.06E-17 | -9.14 | 27.3186605 | -1.09E-01 | 144799022 | 144799145 | NC_000008.10 |
| cg16396191 | 2.43E-15 | 8.06E-17 | -9.14 | 27.3184519 | -2.57E-01 | 42184765  | 42184888  | NC_000013.10 |
| cg14264496 | 2.43E-15 | 8.08E-17 | -9.14 | 27.3160266 | -1.67E-01 | 3823918   | 3824041   | NC_000001.10 |
| cg11835512 | 2.44E-15 | 8.09E-17 | -9.14 | 27.3149311 | -3.81E-02 | 11266792  | 11266915  | NC_000019.9  |
| cg01987417 | 2.45E-15 | 8.14E-17 | -9.14 | 27.3086988 | -6.01E-02 | 105434159 | 105434282 | NC_000014.8  |
| cg18128976 | 2.45E-15 | 8.14E-17 | -9.14 | 27.3082116 | -1.79E-01 | 40355992  | 40356115  | NC_000015.9  |
| cg03596178 | 2.46E-15 | 8.18E-17 | -9.14 | 27.3032582 | -1.82E-01 | 76138514  | 76138637  | NC_000017.10 |
| cg05379350 | 2.47E-15 | 8.22E-17 | -9.14 | 27.299162  | -1.18E-01 | 27917157  | 27917280  | NC_000017.10 |
| cg17841099 | 2.47E-15 | 8.22E-17 | -9.14 | 27.2988393 | -7.10E-02 | 153940090 | 153940213 | NC_000001.10 |
| cg26403171 | 2.48E-15 | 8.26E-17 | -9.14 | 27.2942886 | -2.01E-01 | 148507714 | 148507837 | NC_000005.9  |
| cg27005906 | 2.50E-15 | 8.31E-17 | -9.14 | 27.2885135 | -1.74E-01 | 6540162   | 6540285   | NC_000012.11 |
| cg06085726 | 2.51E-15 | 8.34E-17 | -9.14 | 27.2849107 | -1.71E-01 | 6561043   | 6561166   | NC_000001.10 |
| cg25128781 | 2.51E-15 | 8.35E-17 | -9.14 | 27.2832748 | -1.79E-01 | 47597438  | 47597561  | NC_000007.13 |
| cg25522867 | 2.51E-15 | 8.36E-17 | -9.14 | 27.2825019 | -1.68E-01 | 34236648  | 34236771  | NC_000011.9  |
| cg12056210 | 2.52E-15 | 8.38E-17 | -9.14 | 27.2801434 | -1.48E-01 | 144330701 | 144330824 | NC_000008.10 |
| cg15819128 | 2.52E-15 | 8.38E-17 | -9.14 | 27.2798441 | -2.56E-01 | 238604020 | 238604143 | NC_000002.11 |

|            |          |          |       |            |           |           |           |              |
|------------|----------|----------|-------|------------|-----------|-----------|-----------|--------------|
| cg26240842 | 2.52E-15 | 8.38E-17 | -9.14 | 27.2796917 | -8.08E-02 | 54704459  | 54704582  | NC_000019.9  |
| cg18815025 | 2.52E-15 | 8.38E-17 | -9.14 | 27.2791008 | -1.03E-01 | 85980731  | 85980854  | NC_000002.11 |
| cg24846573 | 2.52E-15 | 8.40E-17 | -9.14 | 27.2775731 | -1.42E-01 | 133065806 | 133065929 | NC_000012.11 |
| cg19974120 | 2.53E-15 | 8.40E-17 | -9.14 | 27.2769639 | -1.78E-01 | 42839625  | 42839748  | NC_000021.8  |
| cg21642988 | 2.53E-15 | 8.41E-17 | -9.13 | 27.2761758 | -2.16E-01 | 78558406  | 78558529  | NC_000015.9  |
| cg27583604 | 2.53E-15 | 8.43E-17 | -9.13 | 27.2735785 | -1.59E-01 | 45267345  | 45267468  | NC_000001.10 |
| cg11543725 | 2.53E-15 | 8.43E-17 | -9.13 | 27.2734334 | -5.99E-02 | 10329292  | 10329415  | NC_000011.9  |
| cg05105919 | 2.54E-15 | 8.46E-17 | -9.13 | 27.2697093 | -1.68E-01 | 25958673  | 25958796  | NC_000017.10 |
| cg19194924 | 2.54E-15 | 8.47E-17 | -9.13 | 27.2691154 | -1.02E-01 | 90168307  | 90168430  | NC_000014.8  |
| cg15793563 | 2.55E-15 | 8.48E-17 | -9.13 | 27.2677685 | -7.16E-02 | 910950    | 911073    | NC_000011.9  |
| cg01312394 | 2.55E-15 | 8.50E-17 | -9.13 | 27.2650672 | -2.07E-01 | 47109380  | 47109503  | NC_000002.11 |
| cg03708045 | 2.56E-15 | 8.52E-17 | -9.13 | 27.2637188 | -2.16E-01 | 48595620  | 48595743  | NC_000008.10 |
| cg20826224 | 2.56E-15 | 8.52E-17 | -9.13 | 27.2628763 | -8.40E-02 | 2732946   | 2733069   | NC_000020.10 |
| cg14016177 | 2.56E-15 | 8.53E-17 | -9.13 | 27.2621744 | -1.87E-01 | 131965610 | 131965733 | NC_000009.11 |
| cg11131549 | 2.57E-15 | 8.55E-17 | -9.13 | 27.2600527 | -1.16E-01 | 211500852 | 211500975 | NC_000001.10 |
| cg16466870 | 2.60E-15 | 8.67E-17 | -9.13 | 27.2462856 | -1.73E-01 | 101926959 | 101927082 | NC_000014.8  |
| cg19083634 | 2.62E-15 | 8.71E-17 | -9.13 | 27.2411699 | -4.81E-02 | 117256864 | 117256987 | NC_000012.11 |
| cg04301614 | 2.62E-15 | 8.72E-17 | -9.13 | 27.2408142 | -1.99E-01 | 37585993  | 37586116  | NC_000004.11 |
| cg15481493 | 2.62E-15 | 8.73E-17 | -9.13 | 27.2390387 | -2.07E-01 | 35133274  | 35133397  | NC_000011.9  |
| cg26623753 | 2.62E-15 | 8.74E-17 | -9.13 | 27.237652  | -1.46E-01 | 39224370  | 39224493  | NC_000019.9  |
| cg09957933 | 2.62E-15 | 8.74E-17 | -9.13 | 27.2375031 | -1.71E-01 | 57065793  | 57065916  | NC_000015.9  |
| cg16683060 | 2.64E-15 | 8.80E-17 | -9.13 | 27.2309957 | -2.97E-01 | 99974673  | 99974796  | NC_000013.10 |
| cg14879645 | 2.65E-15 | 8.83E-17 | -9.13 | 27.228376  | -1.39E-01 | 41048474  | 41048597  | NC_000022.10 |
| cg20373634 | 2.65E-15 | 8.85E-17 | -9.13 | 27.225989  | -1.88E-01 | 103911536 | 103911659 | NC_000010.10 |
| cg17397004 | 2.67E-15 | 8.91E-17 | -9.13 | 27.2188582 | -1.57E-01 | 38863644  | 38863767  | NC_000022.10 |

|            |          |          |       |            |           |           |           |              |
|------------|----------|----------|-------|------------|-----------|-----------|-----------|--------------|
| cg16736889 | 2.67E-15 | 8.91E-17 | -9.13 | 27.2187733 | -2.16E-01 | 20421627  | 20421750  | NC_000016.9  |
| cg24389488 | 2.68E-15 | 8.95E-17 | -9.13 | 27.2143278 | -1.39E-01 | 44849857  | 44849980  | NC_000017.10 |
| cg26164488 | 2.69E-15 | 8.98E-17 | -9.12 | 27.2109821 | -2.39E-01 | 64440295  | 64440418  | NC_000002.11 |
| cg12229523 | 2.70E-15 | 9.00E-17 | -9.12 | 27.2086113 | -8.16E-02 | 12408304  | 12408427  | NC_000018.9  |
| cg17795059 | 2.70E-15 | 9.01E-17 | -9.12 | 27.2081207 | -1.59E-01 | 45704902  | 45705025  | NC_000022.10 |
| cg12155676 | 2.70E-15 | 9.03E-17 | -9.12 | 27.2059046 | -1.14E-01 | 11970561  | 11970684  | NC_000002.11 |
| cg08324925 | 2.71E-15 | 9.06E-17 | -9.12 | 27.2022358 | -1.84E-01 | 131409159 | 131409282 | NC_000005.9  |
| cg17401635 | 2.72E-15 | 9.07E-17 | -9.12 | 27.2014889 | -7.36E-02 | 176944162 | 176944285 | NC_000005.9  |
| cg03309328 | 2.72E-15 | 9.08E-17 | -9.12 | 27.2001951 | -1.84E-01 | 99525864  | 99525987  | NC_000012.11 |
| cg15979932 | 2.73E-15 | 9.10E-17 | -9.12 | 27.19767   | -2.03E-01 | 55980107  | 55980230  | NC_000017.10 |
| cg17347851 | 2.73E-15 | 9.11E-17 | -9.12 | 27.1975115 | -1.85E-01 | 37310064  | 37310187  | NC_000017.10 |
| cg12118863 | 2.73E-15 | 9.13E-17 | -9.12 | 27.1948313 | -5.37E-02 | 37225588  | 37225711  | NC_000006.11 |
| cg13883671 | 2.75E-15 | 9.19E-17 | -9.12 | 27.1886613 | -2.02E-01 | 144965812 | 144965935 | NC_000008.10 |
| cg09303159 | 2.76E-15 | 9.21E-17 | -9.12 | 27.1856771 | -8.74E-02 | 26284866  | 26284989  | NC_000006.11 |
| cg05817765 | 2.76E-15 | 9.24E-17 | -9.12 | 27.1833802 | -9.56E-02 | 8324998   | 8325121   | NC_000012.11 |
| cg17156828 | 2.77E-15 | 9.26E-17 | -9.12 | 27.1813412 | -2.16E-01 | 240020174 | 240020297 | NC_000002.11 |
| cg13603551 | 2.77E-15 | 9.27E-17 | -9.12 | 27.1797759 | -1.79E-01 | 150549406 | 150549529 | NC_000007.13 |
| cg17482237 | 2.77E-15 | 9.28E-17 | -9.12 | 27.1786967 | -1.90E-01 | 236900382 | 236900505 | NC_000001.10 |
| cg19649900 | 2.78E-15 | 9.31E-17 | -9.12 | 27.1757739 | -1.44E-01 | 1155030   | 1155153   | NC_000019.9  |
| cg14876117 | 2.78E-15 | 9.31E-17 | -9.12 | 27.1754236 | -1.92E-01 | 51428973  | 51429096  | NC_000014.8  |
| cg14489570 | 2.78E-15 | 9.31E-17 | -9.12 | 27.1750467 | -1.41E-01 | 144099280 | 144099403 | NC_000008.10 |
| cg11294750 | 2.80E-15 | 9.38E-17 | -9.12 | 27.1684252 | -2.01E-01 | 94957721  | 94957844  | NC_000013.10 |
| cg16806195 | 2.80E-15 | 9.39E-17 | -9.12 | 27.1675299 | -1.50E-01 | 1487784   | 1487907   | NC_000007.13 |
| cg25738786 | 2.81E-15 | 9.40E-17 | -9.12 | 27.1657058 | -1.80E-01 | 170532786 | 170532909 | NC_000006.11 |
| cg15723784 | 2.81E-15 | 9.41E-17 | -9.12 | 27.1648345 | -1.59E-01 | 67441067  | 67441190  | NC_000015.9  |

|               |          |          |       |            |           |           |           |              |
|---------------|----------|----------|-------|------------|-----------|-----------|-----------|--------------|
| cg11756518    | 2.81E-15 | 9.42E-17 | -9.12 | 27.1634336 | -1.32E-01 | 107809929 | 107810052 | NC_000006.11 |
| cg19106326    | 2.82E-15 | 9.43E-17 | -9.12 | 27.1631716 | -2.04E-01 | 38575349  | 38575472  | NC_000008.10 |
| cg05383910    | 2.82E-15 | 9.44E-17 | -9.12 | 27.1614313 | -2.08E-01 | 37431792  | 37431915  | NC_000007.13 |
| ch.6.2771202R | 2.82E-15 | 9.45E-17 | -9.12 | 27.1608667 | -7.12E-02 | 144123518 | 144123641 | NC_000006.11 |
| cg19880465    | 2.82E-15 | 9.46E-17 | -9.12 | 27.1597425 | -9.72E-02 | 38038709  | 38038832  | NC_000003.11 |
| cg03553715    | 2.83E-15 | 9.49E-17 | -9.12 | 27.1567706 | -2.13E-01 | 9052489   | 9052612   | NC_000016.9  |
| cg14396008    | 2.83E-15 | 9.49E-17 | -9.12 | 27.1565464 | -1.82E-01 | 241856143 | 241856266 | NC_000002.11 |
| cg15466909    | 2.84E-15 | 9.51E-17 | -9.12 | 27.1541053 | -9.61E-02 | 144842965 | 144843088 | NC_000008.10 |
| cg02376553    | 2.84E-15 | 9.53E-17 | -9.12 | 27.1526478 | -7.11E-02 | 10413523  | 10413646  | NC_000006.11 |
| cg15067907    | 2.86E-15 | 9.57E-17 | -9.11 | 27.1477986 | -1.26E-01 | 5838779   | 5838902   | NC_000019.9  |
| cg11202887    | 2.86E-15 | 9.57E-17 | -9.11 | 27.1477782 | -1.85E-01 | 112076016 | 112076139 | NC_000013.10 |
| cg11978890    | 2.86E-15 | 9.60E-17 | -9.11 | 27.1454939 | -1.53E-01 | 1048069   | 1048192   | NC_000016.9  |
| cg10717722    | 2.87E-15 | 9.62E-17 | -9.11 | 27.1435362 | -7.13E-02 | 124134020 | 124134143 | NC_000010.10 |
| cg11775521    | 2.88E-15 | 9.67E-17 | -9.11 | 27.1383775 | -1.60E-01 | 74178795  | 74178918  | NC_000011.9  |
| cg01618928    | 2.88E-15 | 9.67E-17 | -9.11 | 27.1381253 | -1.83E-01 | 79870762  | 79870885  | NC_000017.10 |
| cg24141382    | 2.89E-15 | 9.68E-17 | -9.11 | 27.1367086 | -1.47E-01 | 41446726  | 41446849  | NC_000001.10 |
| cg07241084    | 2.89E-15 | 9.69E-17 | -9.11 | 27.1356994 | -1.67E-01 | 47493388  | 47493511  | NC_000007.13 |
| cg13790426    | 2.90E-15 | 9.73E-17 | -9.11 | 27.1313436 | -1.26E-01 | 109506963 | 109507086 | NC_000001.10 |
| cg03967448    | 2.91E-15 | 9.77E-17 | -9.11 | 27.1279814 | -1.68E-01 | 3527443   | 3527566   | NC_000006.11 |
| cg14305454    | 2.92E-15 | 9.80E-17 | -9.11 | 27.1247646 | -7.05E-02 | 36278047  | 36278170  | NC_000014.8  |
| cg17941109    | 2.92E-15 | 9.81E-17 | -9.11 | 27.1234691 | -1.61E-01 | 17407198  | 17407321  | NC_000019.9  |
| cg19470372    | 2.94E-15 | 9.89E-17 | -9.11 | 27.1159876 | -9.96E-02 | 46145190  | 46145313  | NC_000019.9  |
| cg24500441    | 2.95E-15 | 9.89E-17 | -9.11 | 27.1154815 | -1.71E-01 | 66274709  | 66274832  | NC_000015.9  |
| cg03782043    | 2.95E-15 | 9.90E-17 | -9.11 | 27.1143814 | -1.12E-01 | 30044206  | 30044329  | NC_000006.11 |
| cg23038074    | 2.95E-15 | 9.92E-17 | -9.11 | 27.112595  | -9.15E-02 | 24808650  | 24808773  | NC_000014.8  |

|            |          |          |       |            |           |           |           |              |
|------------|----------|----------|-------|------------|-----------|-----------|-----------|--------------|
| cg09981198 | 2.96E-15 | 9.93E-17 | -9.11 | 27.111943  | -1.87E-01 | 10316831  | 10316954  | NC_000006.11 |
| cg24251439 | 2.96E-15 | 9.93E-17 | -9.11 | 27.1114787 | -1.07E-01 | 1112327   | 1112450   | NC_000019.9  |
| cg26462055 | 2.96E-15 | 9.95E-17 | -9.11 | 27.1100411 | -2.21E-01 | 175307665 | 175307788 | NC_000002.11 |
| cg10113526 | 2.96E-15 | 9.95E-17 | -9.11 | 27.1096104 | -2.15E-01 | 142163737 | 142163860 | NC_000008.10 |
| cg26315221 | 2.97E-15 | 9.97E-17 | -9.11 | 27.1078694 | -2.14E-01 | 38742622  | 38742745  | NC_000002.11 |
| cg17114584 | 2.97E-15 | 9.98E-17 | -9.11 | 27.1064379 | -1.58E-01 | 613792    | 613915    | NC_000011.9  |
| cg26269286 | 2.98E-15 | 1.00E-16 | -9.11 | 27.1037437 | -2.03E-01 | 103848982 | 103849105 | NC_000014.8  |
| cg08675092 | 2.98E-15 | 1.00E-16 | -9.11 | 27.1022688 | -1.15E-01 | 32811181  | 32811304  | NC_000006.11 |
| cg02500152 | 2.98E-15 | 1.00E-16 | -9.11 | 27.1019404 | -5.21E-02 | 48357316  | 48357439  | NC_000012.11 |
| cg24960291 | 2.99E-15 | 1.00E-16 | -9.11 | 27.1009022 | -1.70E-01 | 185538892 | 185539015 | NC_000003.11 |
| cg23258611 | 3.00E-15 | 1.01E-16 | -9.11 | 27.0957179 | -1.81E-01 | 70536160  | 70536283  | NC_000017.10 |
| cg17861277 | 3.00E-15 | 1.01E-16 | -9.11 | 27.0956797 | -2.34E-01 | 150385659 | 150385782 | NC_000005.9  |
| cg15759721 | 3.02E-15 | 1.02E-16 | -9.11 | 27.0885203 | -1.60E-01 | 57918630  | 57918753  | NC_000017.10 |
| cg08386009 | 3.02E-15 | 1.02E-16 | -9.11 | 27.0881267 | -1.44E-01 | 32094845  | 32094968  | NC_000006.11 |
| cg20565740 | 3.03E-15 | 1.02E-16 | -9.11 | 27.0862627 | -4.66E-02 | 85061215  | 85061338  | NC_000016.9  |
| cg12467226 | 3.03E-15 | 1.02E-16 | -9.11 | 27.0856494 | -1.30E-01 | 13694484  | 13694607  | NC_000003.11 |
| cg22888463 | 3.04E-15 | 1.02E-16 | -9.1  | 27.0813486 | -1.16E-01 | 71779016  | 71779139  | NC_000003.11 |
| cg21876869 | 3.06E-15 | 1.03E-16 | -9.1  | 27.0756983 | -9.97E-02 | 119352425 | 119352548 | NC_000011.9  |
| cg08429256 | 3.06E-15 | 1.03E-16 | -9.1  | 27.0741758 | -1.74E-01 | 80188425  | 80188548  | NC_000017.10 |
| cg26126806 | 3.06E-15 | 1.03E-16 | -9.1  | 27.0734096 | -1.77E-01 | 17685031  | 17685154  | NC_000017.10 |
| cg16325482 | 3.06E-15 | 1.03E-16 | -9.1  | 27.0731579 | -1.32E-01 | 76989499  | 76989622  | NC_000017.10 |
| cg04977528 | 3.07E-15 | 1.03E-16 | -9.1  | 27.0707082 | -2.07E-01 | 40091349  | 40091472  | NC_000001.10 |
| cg09651136 | 3.08E-15 | 1.04E-16 | -9.1  | 27.0682662 | -1.60E-01 | 72525012  | 72525135  | NC_000015.9  |
| cg12400025 | 3.09E-15 | 1.04E-16 | -9.1  | 27.0636654 | -2.20E-01 | 111913206 | 111913329 | NC_000006.11 |
| cg17152423 | 3.13E-15 | 1.05E-16 | -9.1  | 27.0522096 | -1.50E-01 | 133065729 | 133065852 | NC_000012.11 |

|                  |          |          |       |            |           |           |           |              |
|------------------|----------|----------|-------|------------|-----------|-----------|-----------|--------------|
| ch.22.137888R    | 3.13E-15 | 1.06E-16 | -9.1  | 27.0516853 | -6.30E-02 | 21290185  | 21290308  | NC_000022.10 |
| cg05413061       | 3.13E-15 | 1.06E-16 | -9.1  | 27.0515904 | -2.06E-01 | 16225307  | 16225430  | NC_000003.11 |
| cg25651505       | 3.13E-15 | 1.06E-16 | -9.1  | 27.0507195 | -1.53E-01 | 85812023  | 85812146  | NC_000002.11 |
| cg09838336       | 3.13E-15 | 1.06E-16 | -9.1  | 27.0502654 | -1.70E-01 | 43733719  | 43733842  | NC_000007.13 |
| cg25299319       | 3.13E-15 | 1.06E-16 | -9.1  | 27.0497379 | -1.58E-01 | 57559728  | 57559851  | NC_000012.11 |
| cg26701815       | 3.14E-15 | 1.06E-16 | -9.1  | 27.0472697 | -1.91E-01 | 3446566   | 3446689   | NC_000018.9  |
| ch.10.2535095F   | 3.15E-15 | 1.06E-16 | -9.1  | 27.043952  | -8.62E-02 | 120437770 | 120437893 | NC_000010.10 |
| ch.10.119748781R | 3.15E-15 | 1.06E-16 | -9.1  | 27.0430087 | -1.44E-01 | 119758791 | 119758914 | NC_000010.10 |
| cg11428886       | 3.16E-15 | 1.07E-16 | -9.1  | 27.0401931 | -1.81E-01 | 67340775  | 67340898  | NC_000011.9  |
| cg14667273       | 3.17E-15 | 1.07E-16 | -9.1  | 27.0371606 | -1.97E-01 | 1369934   | 1370057   | NC_000001.10 |
| cg12243133       | 3.17E-15 | 1.07E-16 | -9.1  | 27.0365257 | -1.28E-01 | 66823616  | 66823739  | NC_000011.9  |
| cg07303143       | 3.18E-15 | 1.07E-16 | -9.1  | 27.035435  | -1.42E-01 | 44803452  | 44803575  | NC_000003.11 |
| cg06580770       | 3.19E-15 | 1.08E-16 | -9.1  | 27.0312484 | -1.76E-01 | 32054790  | 32054913  | NC_000006.11 |
| cg22737241       | 3.19E-15 | 1.08E-16 | -9.1  | 27.0297494 | -2.01E-01 | 557605    | 557728    | NC_000010.10 |
| cg09910067       | 3.20E-15 | 1.08E-16 | -9.1  | 27.0277851 | -2.07E-01 | 157357758 | 157357881 | NC_000007.13 |
| cg17156491       | 3.21E-15 | 1.09E-16 | -9.1  | 27.0238899 | -1.14E-01 | 43259508  | 43259631  | NC_000002.11 |
| cg19161251       | 3.22E-15 | 1.09E-16 | -9.1  | 27.0219598 | -2.24E-01 | 87798568  | 87798691  | NC_000001.10 |
| cg19838154       | 3.22E-15 | 1.09E-16 | -9.1  | 27.0213951 | -1.11E-01 | 39323202  | 39323325  | NC_000003.11 |
| cg19053686       | 3.22E-15 | 1.09E-16 | -9.1  | 27.0205243 | -1.20E-01 | 43479485  | 43479608  | NC_000007.13 |
| cg10533493       | 3.22E-15 | 1.09E-16 | -9.09 | 27.0200917 | -1.17E-01 | 33721242  | 33721365  | NC_000017.10 |
| cg25471639       | 3.22E-15 | 1.09E-16 | -9.09 | 27.0200393 | -1.60E-01 | 26063077  | 26063200  | NC_000004.11 |
| cg05013942       | 3.23E-15 | 1.09E-16 | -9.09 | 27.0168931 | -5.13E-02 | 36003336  | 36003459  | NC_000017.10 |
| cg24109790       | 3.25E-15 | 1.10E-16 | -9.09 | 27.011711  | -1.76E-01 | 113575128 | 113575251 | NC_000012.11 |
| cg24349919       | 3.25E-15 | 1.10E-16 | -9.09 | 27.0108331 | -3.42E-02 | 41487761  | 41487884  | NC_000022.10 |
| cg03002479       | 3.25E-15 | 1.10E-16 | -9.09 | 27.0101672 | -5.91E-02 | 143106004 | 143106127 | NC_000007.13 |

|                |          |          |       |            |           |           |           |              |
|----------------|----------|----------|-------|------------|-----------|-----------|-----------|--------------|
| cg10178498     | 3.25E-15 | 1.10E-16 | -9.09 | 27.0101292 | -1.29E-01 | 124103021 | 124103144 | NC_000003.11 |
| cg01390445     | 3.27E-15 | 1.11E-16 | -9.09 | 27.0032983 | -2.35E-01 | 185271312 | 185271435 | NC_000003.11 |
| cg11681959     | 3.28E-15 | 1.11E-16 | -9.09 | 27.0005716 | -6.82E-02 | 43374369  | 43374492  | NC_000020.10 |
| cg20992785     | 3.28E-15 | 1.11E-16 | -9.09 | 27.0005665 | -1.58E-01 | 168533507 | 168533630 | NC_000006.11 |
| cg19611886     | 3.29E-15 | 1.11E-16 | -9.09 | 26.9990584 | -1.77E-01 | 103821171 | 103821294 | NC_000008.10 |
| cg08443845     | 3.29E-15 | 1.11E-16 | -9.09 | 26.9971004 | -2.95E-01 | 36421955  | 36422078  | NC_000021.8  |
| cg08396863     | 3.30E-15 | 1.12E-16 | -9.09 | 26.995677  | -1.14E-01 | 220117599 | 220117722 | NC_000002.11 |
| cg25934064     | 3.30E-15 | 1.12E-16 | -9.09 | 26.9947743 | -1.29E-01 | 52569026  | 52569149  | NC_000003.11 |
| cg00558224     | 3.31E-15 | 1.12E-16 | -9.09 | 26.9902886 | -1.10E-01 | 177591100 | 177591223 | NC_000005.9  |
| cg14722509     | 3.32E-15 | 1.12E-16 | -9.09 | 26.9889533 | -6.29E-02 | 170815938 | 170816061 | NC_000005.9  |
| cg02071670     | 3.32E-15 | 1.13E-16 | -9.09 | 26.9872536 | -1.68E-01 | 89438918  | 89439041  | NC_000015.9  |
| cg21399807     | 3.33E-15 | 1.13E-16 | -9.09 | 26.9843391 | -1.74E-01 | 54955581  | 54955704  | NC_000002.11 |
| cg19777771     | 3.33E-15 | 1.13E-16 | -9.09 | 26.9842894 | -9.92E-02 | 30676863  | 30676986  | NC_000017.10 |
| cg16164619     | 3.34E-15 | 1.13E-16 | -9.09 | 26.9815151 | -1.73E-01 | 57871855  | 57871978  | NC_000012.11 |
| cg24704287     | 3.35E-15 | 1.14E-16 | -9.09 | 26.9774297 | -1.75E-01 | 13951481  | 13951604  | NC_000019.9  |
| cg11220043     | 3.35E-15 | 1.14E-16 | -9.09 | 26.9773349 | -1.88E-01 | 58275014  | 58275137  | NC_000012.11 |
| cg22547737     | 3.36E-15 | 1.14E-16 | -9.09 | 26.9767021 | -1.40E-01 | 90744188  | 90744311  | NC_000015.9  |
| cg19907968     | 3.37E-15 | 1.14E-16 | -9.09 | 26.9726253 | -2.46E-01 | 1560598   | 1560721   | NC_000007.13 |
| cg26339924     | 3.37E-15 | 1.14E-16 | -9.09 | 26.9708102 | -1.56E-01 | 47029475  | 47029598  | NC_000003.11 |
| cg12640305     | 3.38E-15 | 1.15E-16 | -9.09 | 26.9682371 | -1.53E-01 | 80278279  | 80278402  | NC_000017.10 |
| cg13134297     | 3.39E-15 | 1.15E-16 | -9.09 | 26.9658566 | -2.30E-01 | 30737556  | 30737679  | NC_000007.13 |
| cg02084046     | 3.40E-15 | 1.16E-16 | -9.09 | 26.9620121 | -6.65E-02 | 139027359 | 139027482 | NC_000005.9  |
| ch.15.1525362R | 3.42E-15 | 1.16E-16 | -9.09 | 26.9568825 | -5.96E-02 | 89706202  | 89706325  | NC_000015.9  |
| cg04751032     | 3.43E-15 | 1.16E-16 | -9.08 | 26.9551618 | -2.27E-01 | 66443287  | 66443410  | NC_000016.9  |
| cg26824126     | 3.44E-15 | 1.17E-16 | -9.08 | 26.9503683 | -1.74E-01 | 35646675  | 35646798  | NC_000019.9  |

|            |          |          |       |            |           |           |           |              |
|------------|----------|----------|-------|------------|-----------|-----------|-----------|--------------|
| cg20943039 | 3.45E-15 | 1.17E-16 | -9.08 | 26.9479079 | -2.07E-01 | 65186445  | 65186568  | NC_000015.9  |
| cg17515760 | 3.46E-15 | 1.17E-16 | -9.08 | 26.9455468 | -1.78E-01 | 129949171 | 129949294 | NC_000002.11 |
| cg17258816 | 3.46E-15 | 1.18E-16 | -9.08 | 26.9450765 | -1.19E-01 | 73029361  | 73029484  | NC_000017.10 |
| cg16210447 | 3.46E-15 | 1.18E-16 | -9.08 | 26.944129  | -2.44E-01 | 54987076  | 54987199  | NC_000020.10 |
| cg12297590 | 3.46E-15 | 1.18E-16 | -9.08 | 26.9436131 | -2.17E-01 | 158080750 | 158080873 | NC_000006.11 |
| cg05725404 | 3.49E-15 | 1.19E-16 | -9.08 | 26.9363064 | -2.03E-01 | 58534157  | 58534280  | NC_000016.9  |
| cg01565824 | 3.49E-15 | 1.19E-16 | -9.08 | 26.9347374 | -7.99E-02 | 79361553  | 79361676  | NC_000017.10 |
| cg25957300 | 3.51E-15 | 1.19E-16 | -9.08 | 26.9295536 | -2.16E-01 | 129907095 | 129907218 | NC_000011.9  |
| cg12768145 | 3.51E-15 | 1.19E-16 | -9.08 | 26.9286082 | -1.81E-01 | 12839595  | 12839718  | NC_000010.10 |
| cg12830119 | 3.52E-15 | 1.20E-16 | -9.08 | 26.9281295 | -5.14E-02 | 100154292 | 100154415 | NC_000014.8  |
| cg12707926 | 3.52E-15 | 1.20E-16 | -9.08 | 26.9258343 | -1.45E-01 | 85363117  | 85363240  | NC_000016.9  |
| cg23144063 | 3.53E-15 | 1.20E-16 | -9.08 | 26.9230534 | -1.42E-01 | 58570828  | 58570951  | NC_000003.11 |
| cg15037004 | 3.54E-15 | 1.20E-16 | -9.08 | 26.9211682 | -1.86E-01 | 71803938  | 71804061  | NC_000005.9  |
| cg11476241 | 3.55E-15 | 1.21E-16 | -9.08 | 26.9190511 | -2.27E-01 | 78866235  | 78866358  | NC_000017.10 |
| cg23597162 | 3.56E-15 | 1.21E-16 | -9.08 | 26.9157958 | -2.13E-01 | 28102341  | 28102464  | NC_000007.13 |
| cg06228828 | 3.58E-15 | 1.22E-16 | -9.08 | 26.9096507 | -1.68E-01 | 50653048  | 50653171  | NC_000013.10 |
| cg26263421 | 3.60E-15 | 1.22E-16 | -9.08 | 26.9039782 | -1.13E-01 | 35071637  | 35071760  | NC_000019.9  |
| cg08231730 | 3.60E-15 | 1.23E-16 | -9.08 | 26.9029803 | -1.61E-01 | 63753169  | 63753292  | NC_000011.9  |
| cg01260010 | 3.61E-15 | 1.23E-16 | -9.08 | 26.8995729 | -5.00E-02 | 73062573  | 73062696  | NC_000007.13 |
| cg10895547 | 3.62E-15 | 1.23E-16 | -9.08 | 26.8977123 | -1.19E-01 | 78071255  | 78071378  | NC_000001.10 |
| cg03553819 | 3.62E-15 | 1.23E-16 | -9.08 | 26.8973032 | -1.84E-01 | 1271741   | 1271864   | NC_000016.9  |
| cg20853702 | 3.63E-15 | 1.24E-16 | -9.08 | 26.8956073 | -6.19E-02 | 65655426  | 65655549  | NC_000011.9  |
| cg13316433 | 3.63E-15 | 1.24E-16 | -9.08 | 26.8949267 | -1.60E-01 | 83140500  | 83140623  | NC_000005.9  |
| cg19025525 | 3.65E-15 | 1.24E-16 | -9.07 | 26.8898757 | -9.31E-02 | 228566824 | 228566947 | NC_000001.10 |
| cg04031093 | 3.65E-15 | 1.24E-16 | -9.07 | 26.8894954 | -2.64E-01 | 233027124 | 233027247 | NC_000001.10 |



|            |          |          |       |            |           |           |           |              |
|------------|----------|----------|-------|------------|-----------|-----------|-----------|--------------|
| cg23950157 | 3.66E-15 | 1.25E-16 | -9.07 | 26.8860654 | -1.05E-01 | 48275919  | 48276042  | NC_000017.10 |
| cg03973622 | 3.67E-15 | 1.25E-16 | -9.07 | 26.8832974 | -1.40E-01 | 55520759  | 55520882  | NC_000017.10 |
| cg15431934 | 3.67E-15 | 1.25E-16 | -9.07 | 26.8829899 | -1.32E-01 | 40759208  | 40759331  | NC_000015.9  |
| cg10560420 | 3.68E-15 | 1.25E-16 | -9.07 | 26.8814444 | -1.83E-01 | 159911769 | 159911892 | NC_000002.11 |
| cg20742182 | 3.68E-15 | 1.25E-16 | -9.07 | 26.8806536 | -4.92E-02 | 101629240 | 101629363 | NC_000015.9  |
| cg00578614 | 3.68E-15 | 1.26E-16 | -9.07 | 26.8793931 | -2.03E-01 | 30070403  | 30070526  | NC_000006.11 |
| cg06757385 | 3.69E-15 | 1.26E-16 | -9.07 | 26.8782765 | -1.09E-01 | 228644917 | 228645040 | NC_000001.10 |
| cg06069457 | 3.69E-15 | 1.26E-16 | -9.07 | 26.8781689 | -2.17E-01 | 196754722 | 196754845 | NC_000003.11 |
| cg05975710 | 3.69E-15 | 1.26E-16 | -9.07 | 26.8778778 | -1.39E-01 | 73078836  | 73078959  | NC_000011.9  |
| cg10274208 | 3.70E-15 | 1.26E-16 | -9.07 | 26.8754389 | -1.27E-01 | 41351044  | 41351167  | NC_000013.10 |
| cg25164589 | 3.70E-15 | 1.26E-16 | -9.07 | 26.8738817 | -2.36E-01 | 63540024  | 63540147  | NC_000010.10 |
| cg26473110 | 3.71E-15 | 1.26E-16 | -9.07 | 26.8730012 | -1.56E-01 | 46385365  | 46385488  | NC_000011.9  |
| cg26055210 | 3.73E-15 | 1.27E-16 | -9.07 | 26.8674475 | -7.39E-02 | 62310752  | 62310875  | NC_000011.9  |
| cg17960769 | 3.73E-15 | 1.27E-16 | -9.07 | 26.8651679 | -5.84E-02 | 36772837  | 36772960  | NC_000001.10 |
| cg03029752 | 3.74E-15 | 1.28E-16 | -9.07 | 26.8639404 | -1.64E-01 | 119038708 | 119038831 | NC_000011.9  |
| cg15898408 | 3.74E-15 | 1.28E-16 | -9.07 | 26.8634337 | -6.83E-02 | 161720174 | 161720297 | NC_000001.10 |
| cg13492331 | 3.74E-15 | 1.28E-16 | -9.07 | 26.8630054 | -1.37E-01 | 14779377  | 14779500  | NC_000010.10 |
| cg15028458 | 3.75E-15 | 1.28E-16 | -9.07 | 26.8606685 | -2.09E-01 | 58860290  | 58860413  | NC_000003.11 |
| cg26020069 | 3.75E-15 | 1.28E-16 | -9.07 | 26.8606254 | -1.80E-01 | 52382441  | 52382564  | NC_000006.11 |
| cg26243894 | 3.76E-15 | 1.28E-16 | -9.07 | 26.8587021 | -9.52E-02 | 128049684 | 128049807 | NC_000007.13 |
| cg16017979 | 3.76E-15 | 1.29E-16 | -9.07 | 26.8566269 | -2.25E-01 | 74333589  | 74333712  | NC_000008.10 |
| cg13736939 | 3.78E-15 | 1.29E-16 | -9.07 | 26.8518189 | -1.73E-01 | 157647241 | 157647364 | NC_000007.13 |
| cg02994582 | 3.78E-15 | 1.29E-16 | -9.07 | 26.8512589 | -6.57E-02 | 61129864  | 61129987  | NC_000011.9  |
| cg13586608 | 3.78E-15 | 1.29E-16 | -9.07 | 26.8507184 | -6.85E-02 | 74724071  | 74724194  | NC_000014.8  |
| cg22502206 | 3.80E-15 | 1.30E-16 | -9.07 | 26.8474369 | -8.28E-02 | 60690826  | 60690949  | NC_000015.9  |

|            |          |          |       |            |           |           |           |              |
|------------|----------|----------|-------|------------|-----------|-----------|-----------|--------------|
| cg15962197 | 3.80E-15 | 1.30E-16 | -9.07 | 26.8460481 | -1.73E-01 | 41704561  | 41704684  | NC_000001.10 |
| cg24683185 | 3.81E-15 | 1.30E-16 | -9.07 | 26.8449703 | -1.78E-01 | 31214501  | 31214624  | NC_000015.9  |
| cg12833508 | 3.81E-15 | 1.30E-16 | -9.07 | 26.8445596 | -6.92E-02 | 224701802 | 224701925 | NC_000002.11 |
| cg20721738 | 3.82E-15 | 1.30E-16 | -9.07 | 26.8417045 | -1.84E-01 | 23487104  | 23487227  | NC_000022.10 |
| cg10675725 | 3.82E-15 | 1.30E-16 | -9.07 | 26.8416646 | -6.09E-02 | 144640310 | 144640433 | NC_000008.10 |
| cg11655490 | 3.82E-15 | 1.31E-16 | -9.07 | 26.8408047 | -1.33E-01 | 12038352  | 12038475  | NC_000012.11 |
| cg11230435 | 3.83E-15 | 1.31E-16 | -9.07 | 26.8380416 | -2.29E-01 | 30724374  | 30724497  | NC_000010.10 |
| cg19206910 | 3.84E-15 | 1.31E-16 | -9.07 | 26.8367203 | -6.21E-02 | 93781998  | 93782121  | NC_000003.11 |
| cg02911077 | 3.84E-15 | 1.31E-16 | -9.07 | 26.8348026 | -1.24E-01 | 76128621  | 76128744  | NC_000017.10 |
| cg09024962 | 3.85E-15 | 1.32E-16 | -9.07 | 26.8327183 | -1.84E-01 | 132707300 | 132707423 | NC_000005.9  |
| cg17176619 | 3.86E-15 | 1.32E-16 | -9.07 | 26.8303191 | -1.01E-01 | 99218657  | 99218780  | NC_000013.10 |
| cg16624210 | 3.86E-15 | 1.32E-16 | -9.07 | 26.8290038 | -1.31E-01 | 671434    | 671557    | NC_000005.9  |
| cg03683132 | 3.86E-15 | 1.32E-16 | -9.07 | 26.8287509 | -2.27E-01 | 72104067  | 72104190  | NC_000012.11 |
| cg01963059 | 3.86E-15 | 1.32E-16 | -9.06 | 26.8286192 | -1.83E-01 | 116658288 | 116658411 | NC_000001.10 |
| cg03482123 | 3.87E-15 | 1.33E-16 | -9.06 | 26.8260246 | -4.35E-02 | 54964029  | 54964152  | NC_000016.9  |
| cg16723381 | 3.88E-15 | 1.33E-16 | -9.06 | 26.8257247 | -1.75E-01 | 127590178 | 127590301 | NC_000002.11 |
| cg01368780 | 3.89E-15 | 1.33E-16 | -9.06 | 26.8224525 | -2.31E-01 | 169937196 | 169937319 | NC_000006.11 |
| cg26042300 | 3.90E-15 | 1.33E-16 | -9.06 | 26.819896  | -1.33E-01 | 40887988  | 40888111  | NC_000001.10 |
| cg24854914 | 3.90E-15 | 1.33E-16 | -9.06 | 26.8189847 | -1.24E-01 | 89784790  | 89784913  | NC_000007.13 |
| cg16789849 | 3.90E-15 | 1.34E-16 | -9.06 | 26.8175112 | -1.89E-01 | 84772737  | 84772860  | NC_000004.11 |
| cg08769507 | 3.92E-15 | 1.34E-16 | -9.06 | 26.8135384 | -1.47E-01 | 167592669 | 167592792 | NC_000005.9  |
| cg06441362 | 3.93E-15 | 1.34E-16 | -9.06 | 26.8119302 | -1.12E-01 | 73136972  | 73137095  | NC_000010.10 |
| cg24410214 | 3.94E-15 | 1.35E-16 | -9.06 | 26.8070488 | -1.09E-01 | 202097173 | 202097296 | NC_000002.11 |
| cg14957943 | 3.97E-15 | 1.36E-16 | -9.06 | 26.7992196 | -8.08E-02 | 48632783  | 48632906  | NC_000003.11 |
| cg07144720 | 3.99E-15 | 1.37E-16 | -9.06 | 26.7957969 | -1.99E-01 | 95038960  | 95039083  | NC_000003.11 |

|               |          |          |       |            |           |           |           |              |
|---------------|----------|----------|-------|------------|-----------|-----------|-----------|--------------|
| cg07426848    | 3.99E-15 | 1.37E-16 | -9.06 | 26.7944548 | -1.44E-01 | 153521712 | 153521835 | NC_000001.10 |
| cg02931058    | 4.00E-15 | 1.37E-16 | -9.06 | 26.7934311 | -1.87E-01 | 239047245 | 239047368 | NC_000002.11 |
| cg23268630    | 4.00E-15 | 1.37E-16 | -9.06 | 26.7928539 | -1.34E-01 | 32264315  | 32264438  | NC_000001.10 |
| cg04998447    | 4.01E-15 | 1.37E-16 | -9.06 | 26.7907924 | -1.53E-01 | 90209223  | 90209346  | NC_000015.9  |
| cg25722029    | 4.02E-15 | 1.38E-16 | -9.06 | 26.7875681 | -1.09E-01 | 13907696  | 13907819  | NC_000019.9  |
| cg03779374    | 4.04E-15 | 1.39E-16 | -9.06 | 26.7811335 | -1.95E-01 | 114343825 | 114343948 | NC_000003.11 |
| cg03892045    | 4.06E-15 | 1.39E-16 | -9.06 | 26.7762126 | -1.75E-01 | 6947288   | 6947411   | NC_000017.10 |
| ch.3.1135669F | 4.07E-15 | 1.40E-16 | -9.06 | 26.7750387 | -5.99E-02 | 52245261  | 52245384  | NC_000003.11 |
| cg27221631    | 4.07E-15 | 1.40E-16 | -9.06 | 26.7735898 | -2.26E-01 | 77703381  | 77703504  | NC_000004.11 |
| cg04982834    | 4.08E-15 | 1.40E-16 | -9.06 | 26.7705476 | -1.45E-01 | 93258288  | 93258411  | NC_000001.10 |
| cg12423493    | 4.09E-15 | 1.40E-16 | -9.06 | 26.7693801 | -1.54E-01 | 64007813  | 64007936  | NC_000011.9  |
| cg25632316    | 4.09E-15 | 1.40E-16 | -9.06 | 26.7690061 | -6.03E-02 | 131085470 | 131085593 | NC_000009.11 |
| cg03441171    | 4.10E-15 | 1.41E-16 | -9.06 | 26.7674134 | -1.81E-01 | 144965352 | 144965475 | NC_000008.10 |
| cg14141919    | 4.10E-15 | 1.41E-16 | -9.06 | 26.7661486 | -1.15E-01 | 10572524  | 10572647  | NC_000002.11 |
| cg00045275    | 4.11E-15 | 1.41E-16 | -9.05 | 26.7637588 | -1.51E-01 | 43389643  | 43389766  | NC_000001.10 |
| cg03029146    | 4.12E-15 | 1.41E-16 | -9.05 | 26.7622028 | -1.32E-01 | 77265894  | 77266017  | NC_000015.9  |
| cg22402224    | 4.14E-15 | 1.42E-16 | -9.05 | 26.7550591 | -2.11E-01 | 102080713 | 102080836 | NC_000007.13 |
| cg20062458    | 4.15E-15 | 1.43E-16 | -9.05 | 26.7536539 | -3.72E-02 | 3367090   | 3367213   | NC_000019.9  |
| cg10758902    | 4.15E-15 | 1.43E-16 | -9.05 | 26.7534932 | -1.90E-01 | 65560174  | 65560297  | NC_000011.9  |
| cg11231434    | 4.17E-15 | 1.44E-16 | -9.05 | 26.7465894 | -1.85E-01 | 1232590   | 1232713   | NC_000005.9  |
| cg09030187    | 4.18E-15 | 1.44E-16 | -9.05 | 26.7455907 | -1.79E-01 | 205263738 | 205263861 | NC_000001.10 |
| cg10071493    | 4.20E-15 | 1.44E-16 | -9.05 | 26.7406104 | -1.64E-01 | 1179514   | 1179637   | NC_000016.9  |
| cg18052274    | 4.20E-15 | 1.45E-16 | -9.05 | 26.7404405 | -1.53E-01 | 19737158  | 19737281  | NC_000011.9  |
| cg03126567    | 4.21E-15 | 1.45E-16 | -9.05 | 26.736086  | -1.72E-01 | 169689773 | 169689896 | NC_000006.11 |
| cg05637903    | 4.24E-15 | 1.46E-16 | -9.05 | 26.7307399 | -6.77E-02 | 27100593  | 27100716  | NC_000006.11 |

|                 |          |          |       |            |           |           |           |              |
|-----------------|----------|----------|-------|------------|-----------|-----------|-----------|--------------|
| cg14244636      | 4.24E-15 | 1.46E-16 | -9.05 | 26.7296177 | -1.79E-01 | 100055918 | 100056041 | NC_000010.10 |
| cg14511586      | 4.26E-15 | 1.47E-16 | -9.05 | 26.7255977 | -1.65E-01 | 24116942  | 24117065  | NC_000001.10 |
| cg11556559      | 4.26E-15 | 1.47E-16 | -9.05 | 26.7243392 | -1.14E-01 | 17465162  | 17465285  | NC_000017.10 |
| cg00240880      | 4.26E-15 | 1.47E-16 | -9.05 | 26.7241314 | -1.65E-01 | 43343233  | 43343356  | NC_000020.10 |
| ch.7.1651382F   | 4.27E-15 | 1.47E-16 | -9.05 | 26.7212537 | -6.41E-02 | 75264394  | 75264517  | NC_000007.13 |
| cg16387532      | 4.28E-15 | 1.48E-16 | -9.05 | 26.7193798 | -2.05E-01 | 124747822 | 124747945 | NC_000005.9  |
| cg06207778      | 4.30E-15 | 1.48E-16 | -9.05 | 26.7136364 | -2.03E-01 | 15672633  | 15672756  | NC_000001.10 |
| cg22388948      | 4.31E-15 | 1.49E-16 | -9.05 | 26.7120083 | -1.52E-01 | 82460558  | 82460681  | NC_000006.11 |
| cg27469719      | 4.31E-15 | 1.49E-16 | -9.05 | 26.7112407 | -4.99E-02 | 73134089  | 73134212  | NC_000007.13 |
| ch.16.82520294R | 4.32E-15 | 1.49E-16 | -9.05 | 26.7085905 | -1.10E-01 | 83962793  | 83962916  | NC_000016.9  |
| cg17146738      | 4.33E-15 | 1.49E-16 | -9.05 | 26.7081993 | -1.33E-01 | 98739698  | 98739821  | NC_000007.13 |
| cg11300809      | 4.33E-15 | 1.50E-16 | -9.05 | 26.7068659 | -1.39E-01 | 223288637 | 223288760 | NC_000002.11 |
| cg16863617      | 4.34E-15 | 1.50E-16 | -9.05 | 26.7055007 | -9.86E-02 | 100368380 | 100368503 | NC_000004.11 |
| cg26013357      | 4.39E-15 | 1.52E-16 | -9.04 | 26.6934584 | -5.23E-02 | 2951060   | 2951183   | NC_000011.9  |
| cg27023597      | 4.39E-15 | 1.52E-16 | -9.04 | 26.692175  | -1.79E-01 | 57918262  | 57918385  | NC_000017.10 |
| cg10201668      | 4.42E-15 | 1.53E-16 | -9.04 | 26.6864745 | -1.31E-01 | 45422393  | 45422516  | NC_000015.9  |
| cg16332435      | 4.43E-15 | 1.53E-16 | -9.04 | 26.6847723 | -2.33E-01 | 124894955 | 124895078 | NC_000005.9  |
| cg24710503      | 4.43E-15 | 1.53E-16 | -9.04 | 26.6828138 | -1.89E-01 | 65078974  | 65079097  | NC_000011.9  |
| cg03460049      | 4.45E-15 | 1.54E-16 | -9.04 | 26.6802694 | -5.16E-02 | 142138643 | 142138766 | NC_000008.10 |
| cg19495444      | 4.45E-15 | 1.54E-16 | -9.04 | 26.6788281 | -1.59E-01 | 44291407  | 44291530  | NC_000011.9  |
| cg19184885      | 4.45E-15 | 1.54E-16 | -9.04 | 26.6788232 | -2.08E-01 | 45699322  | 45699445  | NC_000017.10 |
| cg02097120      | 4.46E-15 | 1.54E-16 | -9.04 | 26.6775306 | -1.49E-01 | 154492952 | 154493075 | NC_000001.10 |
| cg05492904      | 4.46E-15 | 1.54E-16 | -9.04 | 26.6772371 | -2.05E-01 | 51604503  | 51604626  | NC_000015.9  |
| cg01106572      | 4.47E-15 | 1.54E-16 | -9.04 | 26.6750884 | -1.63E-01 | 150744384 | 150744507 | NC_000007.13 |
| cg19419914      | 4.48E-15 | 1.55E-16 | -9.04 | 26.672708  | -6.56E-02 | 65128184  | 65128307  | NC_000015.9  |

|            |          |          |       |            |           |           |           |              |
|------------|----------|----------|-------|------------|-----------|-----------|-----------|--------------|
| cg18310639 | 4.50E-15 | 1.56E-16 | -9.04 | 26.6666544 | -2.20E-01 | 223904225 | 223904348 | NC_000001.10 |
| cg02447879 | 4.52E-15 | 1.56E-16 | -9.04 | 26.6637277 | -1.73E-01 | 79393682  | 79393805  | NC_000017.10 |
| cg07169826 | 4.52E-15 | 1.56E-16 | -9.04 | 26.663481  | -1.48E-01 | 142334043 | 142334166 | NC_000007.13 |
| cg14483391 | 4.53E-15 | 1.57E-16 | -9.04 | 26.6615162 | -1.67E-01 | 183749227 | 183749350 | NC_000003.11 |
| cg21235359 | 4.56E-15 | 1.58E-16 | -9.04 | 26.6546438 | -6.62E-02 | 32598716  | 32598839  | NC_000022.10 |
| cg04920761 | 4.61E-15 | 1.60E-16 | -9.04 | 26.6427311 | -6.43E-02 | 43455103  | 43455226  | NC_000002.11 |
| cg12251803 | 4.62E-15 | 1.60E-16 | -9.04 | 26.640819  | -1.85E-01 | 238639781 | 238639904 | NC_000002.11 |
| cg20337996 | 4.66E-15 | 1.61E-16 | -9.03 | 26.6317584 | -2.38E-01 | 124780809 | 124780932 | NC_000012.11 |
| cg03440989 | 4.66E-15 | 1.61E-16 | -9.03 | 26.6317477 | -1.99E-01 | 40155391  | 40155514  | NC_000017.10 |
| cg21908664 | 4.66E-15 | 1.61E-16 | -9.03 | 26.6308811 | -2.46E-01 | 222987586 | 222987709 | NC_000001.10 |
| cg25658385 | 4.66E-15 | 1.61E-16 | -9.03 | 26.6308467 | -8.01E-02 | 35265341  | 35265464  | NC_000006.11 |
| cg13255056 | 4.66E-15 | 1.62E-16 | -9.03 | 26.6303764 | -5.37E-02 | 52280128  | 52280251  | NC_000003.11 |
| cg04045327 | 4.68E-15 | 1.62E-16 | -9.03 | 26.625688  | -2.44E-01 | 905805    | 905928    | NC_000004.11 |
| cg04822278 | 4.69E-15 | 1.63E-16 | -9.03 | 26.6240305 | -1.82E-01 | 125023878 | 125024001 | NC_000012.11 |
| cg02985541 | 4.71E-15 | 1.63E-16 | -9.03 | 26.6185673 | -1.56E-01 | 219472218 | 219472341 | NC_000002.11 |
| cg00814580 | 4.74E-15 | 1.64E-16 | -9.03 | 26.6141309 | -1.05E-01 | 45680969  | 45681092  | NC_000019.9  |
| cg07780528 | 4.75E-15 | 1.65E-16 | -9.03 | 26.6115945 | -1.31E-01 | 35630334  | 35630457  | NC_000019.9  |
| cg13112511 | 4.75E-15 | 1.65E-16 | -9.03 | 26.6104471 | -1.72E-01 | 58882753  | 58882876  | NC_000005.9  |
| cg13964030 | 4.76E-15 | 1.65E-16 | -9.03 | 26.6082703 | -9.85E-02 | 118926672 | 118926795 | NC_000010.10 |
| cg17897445 | 4.77E-15 | 1.65E-16 | -9.03 | 26.6069926 | -9.12E-02 | 7537473   | 7537596   | NC_000008.10 |
| cg21604970 | 4.77E-15 | 1.66E-16 | -9.03 | 26.6062672 | -1.98E-01 | 77505574  | 77505697  | NC_000001.10 |
| cg07133729 | 4.78E-15 | 1.66E-16 | -9.03 | 26.6049411 | -2.09E-01 | 98977840  | 98977963  | NC_000007.13 |
| cg10059450 | 4.78E-15 | 1.66E-16 | -9.03 | 26.604264  | -1.25E-01 | 66405549  | 66405672  | NC_000011.9  |
| cg21341520 | 4.80E-15 | 1.67E-16 | -9.03 | 26.5996712 | -1.62E-01 | 1756269   | 1756392   | NC_000007.13 |
| cg18304704 | 4.81E-15 | 1.67E-16 | -9.03 | 26.5983106 | -7.72E-02 | 18229454  | 18229577  | NC_000019.9  |

|            |          |          |       |            |           |           |           |              |
|------------|----------|----------|-------|------------|-----------|-----------|-----------|--------------|
| cg09904304 | 4.85E-15 | 1.69E-16 | -9.03 | 26.5881363 | -1.10E-01 | 17488225  | 17488348  | NC_000019.9  |
| cg03822873 | 4.89E-15 | 1.70E-16 | -9.03 | 26.5814652 | -2.02E-01 | 128899554 | 128899677 | NC_000007.13 |
| cg20200605 | 4.89E-15 | 1.70E-16 | -9.03 | 26.5809424 | -2.12E-02 | 116706864 | 116706987 | NC_000011.9  |
| cg09690632 | 4.90E-15 | 1.70E-16 | -9.03 | 26.5782515 | -1.81E-01 | 79609290  | 79609413  | NC_000017.10 |
| cg08547691 | 4.90E-15 | 1.70E-16 | -9.03 | 26.5773869 | -1.42E-01 | 9143754   | 9143877   | NC_000017.10 |
| cg07052251 | 4.91E-15 | 1.70E-16 | -9.03 | 26.5770469 | -8.93E-02 | 47392592  | 47392715  | NC_000021.8  |
| cg04302618 | 4.91E-15 | 1.71E-16 | -9.03 | 26.5749139 | -1.99E-01 | 158034588 | 158034711 | NC_000006.11 |
| cg04147593 | 4.92E-15 | 1.71E-16 | -9.03 | 26.5737923 | -2.24E-01 | 80196719  | 80196842  | NC_000017.10 |
| cg18129996 | 4.93E-15 | 1.71E-16 | -9.02 | 26.5722665 | -1.89E-01 | 65334477  | 65334600  | NC_000007.13 |
| cg15967304 | 4.94E-15 | 1.72E-16 | -9.02 | 26.5698921 | -6.11E-02 | 56727896  | 56728019  | NC_000012.11 |
| cg10825839 | 4.94E-15 | 1.72E-16 | -9.02 | 26.5694138 | -1.67E-01 | 46332068  | 46332191  | NC_000021.8  |
| cg12588476 | 4.94E-15 | 1.72E-16 | -9.02 | 26.568687  | -5.74E-02 | 99647494  | 99647617  | NC_000007.13 |
| cg03885037 | 4.95E-15 | 1.72E-16 | -9.02 | 26.5674884 | -1.41E-01 | 135090098 | 135090221 | NC_000010.10 |
| cg27359566 | 4.96E-15 | 1.72E-16 | -9.02 | 26.565664  | -2.42E-01 | 73098174  | 73098297  | NC_000016.9  |
| cg20463995 | 4.96E-15 | 1.72E-16 | -9.02 | 26.5654504 | -1.97E-01 | 96817359  | 96817482  | NC_000015.9  |
| cg09057412 | 4.97E-15 | 1.73E-16 | -9.02 | 26.5626989 | -2.03E-01 | 158903203 | 158903326 | NC_000006.11 |
| cg01385669 | 4.98E-15 | 1.73E-16 | -9.02 | 26.5614161 | -2.09E-01 | 232230258 | 232230381 | NC_000002.11 |
| cg11070772 | 4.98E-15 | 1.73E-16 | -9.02 | 26.5612927 | -6.06E-02 | 50710489  | 50710612  | NC_000022.10 |
| cg25840926 | 4.98E-15 | 1.73E-16 | -9.02 | 26.5603854 | -1.34E-01 | 20647987  | 20648110  | NC_000002.11 |
| cg15403198 | 4.98E-15 | 1.73E-16 | -9.02 | 26.560331  | -1.41E-01 | 41410759  | 41410882  | NC_000006.11 |
| cg08050006 | 4.98E-15 | 1.73E-16 | -9.02 | 26.5597957 | -8.13E-02 | 74958947  | 74959070  | NC_000014.8  |
| cg14530930 | 4.99E-15 | 1.74E-16 | -9.02 | 26.5592082 | -1.65E-01 | 7758517   | 7758640   | NC_000004.11 |
| cg19587779 | 4.99E-15 | 1.74E-16 | -9.02 | 26.5581907 | -1.01E-01 | 34638023  | 34638146  | NC_000020.10 |
| cg21074260 | 5.01E-15 | 1.74E-16 | -9.02 | 26.5541955 | -4.70E-02 | 45307563  | 45307686  | NC_000011.9  |
| cg16838001 | 5.05E-15 | 1.76E-16 | -9.02 | 26.5467087 | -7.08E-02 | 14543874  | 14543997  | NC_000019.9  |

|               |          |          |       |            |           |           |           |              |
|---------------|----------|----------|-------|------------|-----------|-----------|-----------|--------------|
| cg00246121    | 5.05E-15 | 1.76E-16 | -9.02 | 26.5453483 | -1.20E-01 | 141030607 | 141030730 | NC_000005.9  |
| cg00467529    | 5.07E-15 | 1.77E-16 | -9.02 | 26.5411356 | -8.02E-02 | 117857293 | 117857416 | NC_000011.9  |
| cg22143064    | 5.07E-15 | 1.77E-16 | -9.02 | 26.5410461 | -1.75E-01 | 162948592 | 162948715 | NC_000002.11 |
| cg08642285    | 5.07E-15 | 1.77E-16 | -9.02 | 26.5408918 | -1.83E-01 | 68498589  | 68498712  | NC_000015.9  |
| cg18586886    | 5.08E-15 | 1.77E-16 | -9.02 | 26.5402768 | -2.96E-01 | 30652399  | 30652522  | NC_000006.11 |
| cg16449636    | 5.09E-15 | 1.77E-16 | -9.02 | 26.5383993 | -2.28E-01 | 73234433  | 73234556  | NC_000005.9  |
| cg04708888    | 5.09E-15 | 1.77E-16 | -9.02 | 26.5375528 | -1.49E-01 | 176739561 | 176739684 | NC_000005.9  |
| cg17904988    | 5.09E-15 | 1.77E-16 | -9.02 | 26.5373699 | -1.07E-01 | 161168451 | 161168574 | NC_000001.10 |
| cg12706938    | 5.12E-15 | 1.79E-16 | -9.02 | 26.5304682 | -1.04E-01 | 1566839   | 1566962   | NC_000019.9  |
| cg25143652    | 5.12E-15 | 1.79E-16 | -9.02 | 26.5303256 | -1.20E-01 | 62168670  | 62168793  | NC_000020.10 |
| cg12159464    | 5.14E-15 | 1.79E-16 | -9.02 | 26.5266368 | -1.86E-01 | 19295809  | 19295932  | NC_000008.10 |
| cg26202898    | 5.14E-15 | 1.79E-16 | -9.02 | 26.5263474 | -2.43E-02 | 10748473  | 10748596  | NC_000017.10 |
| cg00376129    | 5.20E-15 | 1.82E-16 | -9.02 | 26.5146485 | -6.12E-02 | 61547524  | 61547647  | NC_000003.11 |
| ch.1.4414893F | 5.21E-15 | 1.82E-16 | -9.02 | 26.512555  | -6.29E-02 | 226245765 | 226245888 | NC_000001.10 |
| cg02071074    | 5.23E-15 | 1.83E-16 | -9.01 | 26.5092879 | -9.85E-02 | 52585283  | 52585406  | NC_000013.10 |
| cg06576873    | 5.23E-15 | 1.83E-16 | -9.01 | 26.5085529 | -1.03E-01 | 121499363 | 121499486 | NC_000002.11 |
| cg10100887    | 5.24E-15 | 1.83E-16 | -9.01 | 26.5062871 | -1.94E-01 | 56273259  | 56273382  | NC_000020.10 |
| cg10620680    | 5.25E-15 | 1.83E-16 | -9.01 | 26.5050092 | -1.88E-01 | 178025100 | 178025223 | NC_000001.10 |
| cg22049858    | 5.28E-15 | 1.84E-16 | -9.01 | 26.4995352 | -1.87E-01 | 94884121  | 94884244  | NC_000011.9  |
| cg09999348    | 5.28E-15 | 1.85E-16 | -9.01 | 26.4987436 | -1.94E-01 | 46398848  | 46398971  | NC_000002.11 |
| cg19015997    | 5.31E-15 | 1.85E-16 | -9.01 | 26.4936546 | -1.87E-01 | 12611607  | 12611730  | NC_000007.13 |
| cg05766107    | 5.33E-15 | 1.86E-16 | -9.01 | 26.4903941 | -1.16E-01 | 63702235  | 63702358  | NC_000011.9  |
| cg02395127    | 5.33E-15 | 1.86E-16 | -9.01 | 26.4903254 | -1.08E-01 | 75104987  | 75105110  | NC_000015.9  |
| cg12974599    | 5.33E-15 | 1.86E-16 | -9.01 | 26.4897252 | -1.84E-01 | 46770195  | 46770318  | NC_000022.10 |
| cg01046026    | 5.34E-15 | 1.87E-16 | -9.01 | 26.4878259 | -9.31E-02 | 100203730 | 100203853 | NC_000014.8  |

|            |          |          |       |            |           |           |           |              |
|------------|----------|----------|-------|------------|-----------|-----------|-----------|--------------|
| cg08431693 | 5.37E-15 | 1.88E-16 | -9.01 | 26.4813824 | -9.25E-02 | 99680287  | 99680410  | NC_000007.13 |
| cg05296057 | 5.37E-15 | 1.88E-16 | -9.01 | 26.4807423 | -1.81E-01 | 3030247   | 3030370   | NC_000019.9  |
| cg02524834 | 5.39E-15 | 1.88E-16 | -9.01 | 26.4783664 | -2.27E-01 | 41934765  | 41934888  | NC_000006.11 |
| cg25404375 | 5.39E-15 | 1.88E-16 | -9.01 | 26.4779118 | -1.48E-01 | 99409942  | 99410065  | NC_000015.9  |
| cg15271029 | 5.39E-15 | 1.88E-16 | -9.01 | 26.4776958 | -1.34E-01 | 21871156  | 21871279  | NC_000013.10 |
| cg18018913 | 5.43E-15 | 1.90E-16 | -9.01 | 26.4693631 | -1.77E-01 | 168517728 | 168517851 | NC_000006.11 |
| cg18304766 | 5.44E-15 | 1.90E-16 | -9.01 | 26.4687688 | -8.19E-02 | 66220165  | 66220288  | NC_000012.11 |
| cg27305460 | 5.44E-15 | 1.90E-16 | -9.01 | 26.4685908 | -1.78E-01 | 29969096  | 29969219  | NC_000015.9  |
| cg14563637 | 5.44E-15 | 1.90E-16 | -9.01 | 26.468566  | -1.44E-01 | 98931801  | 98931924  | NC_000009.11 |
| cg18456933 | 5.44E-15 | 1.90E-16 | -9.01 | 26.467831  | -2.28E-01 | 15692171  | 15692294  | NC_000004.11 |
| cg07306253 | 5.44E-15 | 1.90E-16 | -9.01 | 26.4677927 | -2.01E-01 | 41062224  | 41062347  | NC_000015.9  |
| cg00955967 | 5.45E-15 | 1.91E-16 | -9.01 | 26.4662388 | -5.83E-02 | 148079717 | 148079840 | NC_000004.11 |
| cg09776041 | 5.48E-15 | 1.92E-16 | -9.01 | 26.4594604 | -1.82E-01 | 71200489  | 71200612  | NC_000011.9  |
| cg06674873 | 5.48E-15 | 1.92E-16 | -9.01 | 26.4594487 | -9.13E-02 | 56128075  | 56128198  | NC_000007.13 |
| cg04396850 | 5.48E-15 | 1.92E-16 | -9.01 | 26.4593062 | -1.28E-01 | 127256977 | 127257100 | NC_000012.11 |
| cg18513344 | 5.48E-15 | 1.92E-16 | -9.01 | 26.4590905 | -1.03E-01 | 195531298 | 195531421 | NC_000003.11 |
| cg00686132 | 5.49E-15 | 1.92E-16 | -9.01 | 26.4575713 | -1.98E-01 | 168257835 | 168257958 | NC_000006.11 |
| cg04032226 | 5.52E-15 | 1.94E-16 | -9.01 | 26.4516192 | -1.07E-01 | 42082392  | 42082515  | NC_000017.10 |
| cg26276556 | 5.54E-15 | 1.94E-16 | -9.01 | 26.4485314 | -8.35E-02 | 24931606  | 24931729  | NC_000008.10 |
| cg08986840 | 5.55E-15 | 1.94E-16 | -9.01 | 26.4470919 | -1.55E-01 | 38409865  | 38409988  | NC_000008.10 |
| cg24136690 | 5.56E-15 | 1.95E-16 | -9    | 26.4451501 | -2.23E-01 | 5580951   | 5581074   | NC_000010.10 |
| cg04472001 | 5.57E-15 | 1.95E-16 | -9    | 26.4435514 | -9.83E-02 | 126398566 | 126398689 | NC_000003.11 |
| cg06743312 | 5.57E-15 | 1.95E-16 | -9    | 26.4430103 | -1.39E-01 | 6661122   | 6661245   | NC_000012.11 |
| cg26800893 | 5.59E-15 | 1.96E-16 | -9    | 26.4392896 | -1.66E-01 | 67184596  | 67184719  | NC_000011.9  |
| cg08501622 | 5.60E-15 | 1.96E-16 | -9    | 26.4379902 | -4.67E-02 | 151138456 | 151138579 | NC_000005.9  |



|                 |          |          |    |            |           |           |           |              |
|-----------------|----------|----------|----|------------|-----------|-----------|-----------|--------------|
| cg21347644      | 5.60E-15 | 1.96E-16 | -9 | 26.4364367 | -6.43E-02 | 149401942 | 149402065 | NC_000002.11 |
| cg18241555      | 5.61E-15 | 1.97E-16 | -9 | 26.4346402 | -1.73E-01 | 3563268   | 3563391   | NC_000012.11 |
| cg20820543      | 5.66E-15 | 1.98E-16 | -9 | 26.4266415 | -4.07E-02 | 135503889 | 135504012 | NC_000006.11 |
| cg19202618      | 5.67E-15 | 1.99E-16 | -9 | 26.4247535 | -1.08E-01 | 8021551   | 8021674   | NC_000002.11 |
| cg12515917      | 5.67E-15 | 1.99E-16 | -9 | 26.4244538 | -2.01E-01 | 133894086 | 133894209 | NC_000008.10 |
| cg12988118      | 5.67E-15 | 1.99E-16 | -9 | 26.424074  | -9.60E-02 | 31744524  | 31744647  | NC_000006.11 |
| cg20566118      | 5.70E-15 | 2.00E-16 | -9 | 26.4194937 | -6.11E-02 | 117880556 | 117880679 | NC_000009.11 |
| cg18502617      | 5.72E-15 | 2.01E-16 | -9 | 26.4156116 | -8.45E-02 | 64067409  | 64067532  | NC_000011.9  |
| cg17714147      | 5.72E-15 | 2.01E-16 | -9 | 26.4148527 | -1.13E-01 | 113487757 | 113487880 | NC_000013.10 |
| cg01034813      | 5.73E-15 | 2.01E-16 | -9 | 26.412948  | -2.13E-01 | 27487047  | 27487170  | NC_000016.9  |
| cg18806997      | 5.75E-15 | 2.02E-16 | -9 | 26.4097132 | -1.16E-01 | 45242078  | 45242201  | NC_000001.10 |
| cg21487099      | 5.76E-15 | 2.02E-16 | -9 | 26.4077702 | -1.24E-01 | 1201608   | 1201731   | NC_000005.9  |
| cg00216504      | 5.79E-15 | 2.03E-16 | -9 | 26.4031597 | -6.58E-02 | 91763516  | 91763639  | NC_000007.13 |
| cg25984996      | 5.79E-15 | 2.03E-16 | -9 | 26.4029889 | -1.17E-01 | 140098398 | 140098521 | NC_000005.9  |
| cg00921574      | 5.79E-15 | 2.03E-16 | -9 | 26.4029484 | -1.01E-01 | 1513873   | 1513996   | NC_000007.13 |
| cg15426869      | 5.79E-15 | 2.03E-16 | -9 | 26.402746  | -1.39E-01 | 127266149 | 127266272 | NC_000003.11 |
| cg27165456      | 5.79E-15 | 2.03E-16 | -9 | 26.4024994 | -9.13E-02 | 1782577   | 1782700   | NC_000007.13 |
| cg23169762      | 5.80E-15 | 2.04E-16 | -9 | 26.4005439 | -1.31E-01 | 3749854   | 3749977   | NC_000006.11 |
| cg22830638      | 5.82E-15 | 2.04E-16 | -9 | 26.3970083 | -1.52E-01 | 73209573  | 73209696  | NC_000002.11 |
| cg00346556      | 5.84E-15 | 2.05E-16 | -9 | 26.3935328 | -6.96E-02 | 15942191  | 15942314  | NC_000012.11 |
| cg17822706      | 5.86E-15 | 2.06E-16 | -9 | 26.3901105 | -1.66E-01 | 18415538  | 18415661  | NC_000019.9  |
| cg08985333      | 5.86E-15 | 2.06E-16 | -9 | 26.3899315 | -1.57E-01 | 10970960  | 10971083  | NC_000016.9  |
| cg05576245      | 5.87E-15 | 2.06E-16 | -9 | 26.3878133 | -1.62E-01 | 138719784 | 138719907 | NC_000007.13 |
| cg08314176      | 5.87E-15 | 2.07E-16 | -9 | 26.3871065 | -1.71E-01 | 118743243 | 118743366 | NC_000008.10 |
| ch.15.65986670F | 5.87E-15 | 2.07E-16 | -9 | 26.3868778 | -1.33E-01 | 68199616  | 68199739  | NC_000015.9  |

|                |          |          |       |            |           |           |           |              |
|----------------|----------|----------|-------|------------|-----------|-----------|-----------|--------------|
| ch.5.79606571R | 5.93E-15 | 2.09E-16 | -8.99 | 26.3770575 | -8.64E-02 | 79570815  | 79570938  | NC_000005.9  |
| cg14601770     | 5.94E-15 | 2.09E-16 | -8.99 | 26.3748105 | -2.05E-01 | 481319    | 481442    | NC_000008.10 |
| cg11019923     | 5.95E-15 | 2.09E-16 | -8.99 | 26.3741085 | -1.57E-01 | 78557532  | 78557655  | NC_000015.9  |
| cg16411668     | 5.97E-15 | 2.10E-16 | -8.99 | 26.3707268 | -1.53E-01 | 123704747 | 123704870 | NC_000004.11 |
| cg18961788     | 5.98E-15 | 2.11E-16 | -8.99 | 26.3680478 | -1.69E-01 | 102019326 | 102019449 | NC_000014.8  |
| cg11778563     | 6.00E-15 | 2.11E-16 | -8.99 | 26.3655001 | -1.83E-01 | 18531353  | 18531476  | NC_000019.9  |
| cg13030331     | 6.01E-15 | 2.12E-16 | -8.99 | 26.3631613 | -1.06E-01 | 241497599 | 241497722 | NC_000002.11 |
| cg00227156     | 6.02E-15 | 2.12E-16 | -8.99 | 26.3621049 | -1.47E-01 | 18463646  | 18463769  | NC_000022.10 |
| cg05865746     | 6.03E-15 | 2.12E-16 | -8.99 | 26.3598799 | -1.74E-01 | 2699553   | 2699676   | NC_000017.10 |
| cg15541583     | 6.03E-15 | 2.12E-16 | -8.99 | 26.3595352 | -1.12E-01 | 112013063 | 112013186 | NC_000003.11 |
| ch.17.1756372F | 6.04E-15 | 2.13E-16 | -8.99 | 26.3584462 | -8.78E-02 | 65919449  | 65919572  | NC_000017.10 |
| cg11035100     | 6.04E-15 | 2.13E-16 | -8.99 | 26.3579051 | -1.18E-01 | 31870935  | 31871058  | NC_000020.10 |
| cg26997880     | 6.04E-15 | 2.13E-16 | -8.99 | 26.3574863 | -6.96E-02 | 32055370  | 32055493  | NC_000006.11 |
| cg01033642     | 6.07E-15 | 2.14E-16 | -8.99 | 26.3527746 | -2.35E-01 | 81564192  | 81564315  | NC_000016.9  |
| cg24632582     | 6.07E-15 | 2.14E-16 | -8.99 | 26.3526792 | -1.01E-01 | 41233701  | 41233824  | NC_000015.9  |
| cg10924776     | 6.07E-15 | 2.14E-16 | -8.99 | 26.352059  | -7.62E-02 | 36265810  | 36265933  | NC_000005.9  |
| cg10761804     | 6.11E-15 | 2.15E-16 | -8.99 | 26.3455752 | -1.49E-01 | 1865012   | 1865135   | NC_000019.9  |
| cg03069731     | 6.12E-15 | 2.16E-16 | -8.99 | 26.3443802 | -1.76E-01 | 116738693 | 116738816 | NC_000007.13 |
| cg11653519     | 6.12E-15 | 2.16E-16 | -8.99 | 26.343974  | -1.76E-01 | 125222790 | 125222913 | NC_000010.10 |
| cg16666708     | 6.12E-15 | 2.16E-16 | -8.99 | 26.342598  | -2.86E-02 | 17797733  | 17797856  | NC_000019.9  |
| cg05363382     | 6.17E-15 | 2.18E-16 | -8.99 | 26.3350932 | -1.76E-01 | 45767653  | 45767776  | NC_000017.10 |
| cg13058710     | 6.17E-15 | 2.18E-16 | -8.99 | 26.3349512 | -1.41E-01 | 70119609  | 70119732  | NC_000017.10 |
| cg18930012     | 6.17E-15 | 2.18E-16 | -8.99 | 26.3349024 | -1.22E-01 | 86001418  | 86001541  | NC_000010.10 |
| cg24686189     | 6.18E-15 | 2.18E-16 | -8.99 | 26.3334006 | -8.83E-02 | 47913532  | 47913655  | NC_000017.10 |
| cg20934596     | 6.18E-15 | 2.18E-16 | -8.99 | 26.333118  | -1.69E-01 | 31481480  | 31481603  | NC_000022.10 |

|            |          |          |       |            |           |           |           |              |
|------------|----------|----------|-------|------------|-----------|-----------|-----------|--------------|
| cg23049307 | 6.18E-15 | 2.18E-16 | -8.99 | 26.332847  | -7.30E-02 | 55353163  | 55353286  | NC_000001.10 |
| cg19368016 | 6.18E-15 | 2.18E-16 | -8.99 | 26.3326613 | -2.08E-01 | 11187764  | 11187887  | NC_000010.10 |
| cg15437231 | 6.19E-15 | 2.19E-16 | -8.99 | 26.3314291 | -1.45E-01 | 72259306  | 72259429  | NC_000012.11 |
| cg11161550 | 6.21E-15 | 2.19E-16 | -8.99 | 26.3269353 | -1.21E-01 | 218897276 | 218897399 | NC_000002.11 |
| cg01601628 | 6.23E-15 | 2.20E-16 | -8.99 | 26.3237922 | -1.25E-01 | 149792348 | 149792471 | NC_000005.9  |
| cg01279632 | 6.24E-15 | 2.20E-16 | -8.99 | 26.3224686 | -1.73E-01 | 31760767  | 31760890  | NC_000006.11 |
| cg15938671 | 6.24E-15 | 2.21E-16 | -8.99 | 26.3219732 | -1.80E-01 | 170560157 | 170560280 | NC_000006.11 |
| cg07304526 | 6.26E-15 | 2.21E-16 | -8.98 | 26.3183783 | -7.99E-02 | 124221058 | 124221181 | NC_000010.10 |
| cg06884262 | 6.27E-15 | 2.21E-16 | -8.98 | 26.3181568 | -1.24E-01 | 6425638   | 6425761   | NC_000019.9  |
| cg09829636 | 6.27E-15 | 2.22E-16 | -8.98 | 26.3172905 | -1.63E-01 | 102976856 | 102976979 | NC_000014.8  |
| cg27478485 | 6.29E-15 | 2.23E-16 | -8.98 | 26.3133461 | -1.47E-01 | 6898682   | 6898805   | NC_000012.11 |
| cg00988350 | 6.30E-15 | 2.23E-16 | -8.98 | 26.3128663 | -1.35E-01 | 24126048  | 24126171  | NC_000001.10 |
| cg20229788 | 6.30E-15 | 2.23E-16 | -8.98 | 26.3116345 | -1.64E-01 | 27718498  | 27718621  | NC_000002.11 |
| cg22169874 | 6.31E-15 | 2.23E-16 | -8.98 | 26.3108724 | -1.56E-01 | 19273596  | 19273719  | NC_000002.11 |
| cg20124376 | 6.31E-15 | 2.23E-16 | -8.98 | 26.3105674 | -1.97E-01 | 2522340   | 2522463   | NC_000019.9  |
| cg03423916 | 6.33E-15 | 2.24E-16 | -8.98 | 26.3073795 | -2.03E-01 | 153670787 | 153670910 | NC_000001.10 |
| cg04513882 | 6.36E-15 | 2.25E-16 | -8.98 | 26.3019916 | -2.80E-01 | 185271385 | 185271508 | NC_000003.11 |
| cg10169971 | 6.39E-15 | 2.26E-16 | -8.98 | 26.2982146 | -6.16E-02 | 83902988  | 83903111  | NC_000006.11 |
| cg21379639 | 6.40E-15 | 2.26E-16 | -8.98 | 26.2962291 | -9.77E-02 | 49056420  | 49056543  | NC_000003.11 |
| cg12593223 | 6.42E-15 | 2.27E-16 | -8.98 | 26.2932842 | -1.71E-01 | 80255510  | 80255633  | NC_000017.10 |
| cg07865607 | 6.44E-15 | 2.28E-16 | -8.98 | 26.2893442 | -1.26E-01 | 3136076   | 3136199   | NC_000019.9  |
| cg14002301 | 6.46E-15 | 2.29E-16 | -8.98 | 26.2864286 | -1.09E-01 | 24914941  | 24915064  | NC_000004.11 |
| cg22572779 | 6.46E-15 | 2.29E-16 | -8.98 | 26.2857746 | -1.95E-01 | 10434761  | 10434884  | NC_000006.11 |
| cg01593886 | 6.47E-15 | 2.29E-16 | -8.98 | 26.2848722 | -7.45E-02 | 48278778  | 48278901  | NC_000017.10 |
| cg01057552 | 6.47E-15 | 2.29E-16 | -8.98 | 26.2841691 | -1.75E-01 | 228415374 | 228415497 | NC_000001.10 |

|                 |          |          |       |            |           |           |           |              |
|-----------------|----------|----------|-------|------------|-----------|-----------|-----------|--------------|
| cg15693937      | 6.54E-15 | 2.32E-16 | -8.98 | 26.2738642 | -2.14E-01 | 76429218  | 76429341  | NC_000005.9  |
| cg08367318      | 6.55E-15 | 2.32E-16 | -8.98 | 26.27208   | -1.80E-01 | 31743952  | 31744075  | NC_000006.11 |
| cg26870745      | 6.57E-15 | 2.33E-16 | -8.98 | 26.2694753 | -2.00E-01 | 3133503   | 3133626   | NC_000019.9  |
| cg21727359      | 6.57E-15 | 2.33E-16 | -8.98 | 26.2686599 | -2.17E-01 | 82459006  | 82459129  | NC_000006.11 |
| cg03160057      | 6.58E-15 | 2.33E-16 | -8.98 | 26.2676275 | -6.74E-02 | 122432338 | 122432461 | NC_000012.11 |
| cg16336494      | 6.59E-15 | 2.34E-16 | -8.98 | 26.2653536 | -2.41E-01 | 151188259 | 151188382 | NC_000006.11 |
| cg00893242      | 6.60E-15 | 2.34E-16 | -8.98 | 26.2637092 | -1.18E-01 | 127291580 | 127291703 | NC_000007.13 |
| cg01540571      | 6.64E-15 | 2.35E-16 | -8.98 | 26.2574599 | -1.31E-01 | 15911089  | 15911212  | NC_000001.10 |
| cg15774391      | 6.64E-15 | 2.36E-16 | -8.98 | 26.2570703 | -2.36E-01 | 40439628  | 40439751  | NC_000017.10 |
| cg14527050      | 6.66E-15 | 2.36E-16 | -8.97 | 26.2541047 | -1.72E-01 | 34077244  | 34077367  | NC_000017.10 |
| cg22699620      | 6.66E-15 | 2.36E-16 | -8.97 | 26.2540668 | -1.48E-01 | 46348691  | 46348814  | NC_000021.8  |
| cg01657511      | 6.66E-15 | 2.36E-16 | -8.97 | 26.2537383 | -5.86E-02 | 142318170 | 142318293 | NC_000008.10 |
| cg21491443      | 6.66E-15 | 2.37E-16 | -8.97 | 26.2528719 | -2.29E-01 | 122586654 | 122586777 | NC_000008.10 |
| cg22475576      | 6.67E-15 | 2.37E-16 | -8.97 | 26.2517729 | -9.46E-02 | 1252813   | 1252936   | NC_000019.9  |
| cg05038216      | 6.69E-15 | 2.37E-16 | -8.97 | 26.2491601 | -1.91E-01 | 29339091  | 29339214  | NC_000002.11 |
| cg13573036      | 6.69E-15 | 2.38E-16 | -8.97 | 26.2486608 | -1.08E-01 | 119551851 | 119551974 | NC_000001.10 |
| cg27002271      | 6.69E-15 | 2.38E-16 | -8.97 | 26.2482425 | -8.61E-02 | 9695555   | 9695678   | NC_000019.9  |
| ch.20.12652500F | 6.70E-15 | 2.38E-16 | -8.97 | 26.2480092 | -9.02E-02 | 12704500  | 12704623  | NC_000020.10 |
| cg20389678      | 6.70E-15 | 2.38E-16 | -8.97 | 26.2477547 | -1.55E-01 | 119426116 | 119426239 | NC_000002.11 |
| cg12146829      | 6.70E-15 | 2.38E-16 | -8.97 | 26.247418  | -1.93E-01 | 1107855   | 1107978   | NC_000005.9  |
| cg09300856      | 6.71E-15 | 2.38E-16 | -8.97 | 26.245977  | -1.06E-01 | 42083686  | 42083809  | NC_000017.10 |
| cg24465329      | 6.71E-15 | 2.38E-16 | -8.97 | 26.2453165 | -1.91E-01 | 172452502 | 172452625 | NC_000002.11 |
| cg12188416      | 6.72E-15 | 2.39E-16 | -8.97 | 26.2433114 | -2.02E-01 | 189349003 | 189349126 | NC_000003.11 |
| ch.9.109447758R | 6.73E-15 | 2.39E-16 | -8.97 | 26.2428912 | -6.13E-02 | 110407937 | 110408060 | NC_000009.11 |
| cg13817046      | 6.75E-15 | 2.40E-16 | -8.97 | 26.2391383 | -1.80E-01 | 29609310  | 29609433  | NC_000007.13 |

|            |          |          |       |            |           |           |           |              |
|------------|----------|----------|-------|------------|-----------|-----------|-----------|--------------|
| cg06596075 | 6.77E-15 | 2.40E-16 | -8.97 | 26.2368098 | -1.31E-01 | 75728752  | 75728875  | NC_000012.11 |
| cg02452500 | 6.78E-15 | 2.41E-16 | -8.97 | 26.2343915 | -1.23E-01 | 13161927  | 13162050  | NC_000011.9  |
| cg10709282 | 6.84E-15 | 2.43E-16 | -8.97 | 26.2265261 | -8.77E-02 | 29172607  | 29172730  | NC_000008.10 |
| cg18331263 | 6.84E-15 | 2.43E-16 | -8.97 | 26.2251469 | -8.86E-02 | 68630796  | 68630919  | NC_000005.9  |
| cg07143559 | 6.87E-15 | 2.44E-16 | -8.97 | 26.2211677 | -1.48E-01 | 230489903 | 230490026 | NC_000001.10 |
| cg19515245 | 6.88E-15 | 2.45E-16 | -8.97 | 26.2195643 | -8.74E-02 | 97151922  | 97152045  | NC_000002.11 |
| cg03301332 | 6.89E-15 | 2.45E-16 | -8.97 | 26.2181109 | -7.94E-02 | 37731494  | 37731617  | NC_000022.10 |
| cg03982897 | 6.89E-15 | 2.45E-16 | -8.97 | 26.217827  | -1.39E-01 | 1990108   | 1990231   | NC_000011.9  |
| cg17000128 | 6.90E-15 | 2.46E-16 | -8.97 | 26.2159352 | -6.63E-02 | 43904791  | 43904914  | NC_000010.10 |
| cg20918682 | 6.91E-15 | 2.46E-16 | -8.97 | 26.2148306 | -1.37E-01 | 6034694   | 6034817   | NC_000020.10 |
| cg20611850 | 6.93E-15 | 2.47E-16 | -8.97 | 26.211891  | -7.20E-02 | 41284006  | 41284129  | NC_000019.9  |
| cg01342196 | 6.95E-15 | 2.47E-16 | -8.97 | 26.2088642 | -2.28E-01 | 158979538 | 158979661 | NC_000001.10 |
| cg03129324 | 6.95E-15 | 2.47E-16 | -8.97 | 26.2083425 | -1.30E-01 | 124889295 | 124889418 | NC_000010.10 |
| cg23304318 | 6.98E-15 | 2.48E-16 | -8.97 | 26.2046264 | -7.23E-02 | 144843290 | 144843413 | NC_000008.10 |
| cg14738290 | 6.98E-15 | 2.49E-16 | -8.97 | 26.2038638 | -4.31E-02 | 29690998  | 29691121  | NC_000006.11 |
| cg23236169 | 6.99E-15 | 2.49E-16 | -8.97 | 26.203213  | -1.54E-01 | 112022442 | 112022565 | NC_000003.11 |
| cg10321973 | 7.01E-15 | 2.50E-16 | -8.97 | 26.1997394 | -1.68E-01 | 105659807 | 105659930 | NC_000014.8  |
| cg13197560 | 7.05E-15 | 2.51E-16 | -8.97 | 26.193844  | -2.20E-01 | 113649953 | 113650076 | NC_000013.10 |
| cg22442730 | 7.07E-15 | 2.52E-16 | -8.96 | 26.1909159 | -8.78E-02 | 62179233  | 62179356  | NC_000020.10 |
| cg04902811 | 7.07E-15 | 2.52E-16 | -8.96 | 26.1906111 | -9.26E-02 | 99478719  | 99478842  | NC_000010.10 |
| cg26751469 | 7.08E-15 | 2.52E-16 | -8.96 | 26.1889691 | -7.35E-02 | 56116382  | 56116505  | NC_000019.9  |
| cg16451306 | 7.09E-15 | 2.53E-16 | -8.96 | 26.1878686 | -1.80E-01 | 71475356  | 71475479  | NC_000005.9  |
| cg18842107 | 7.12E-15 | 2.54E-16 | -8.96 | 26.1835119 | -2.24E-01 | 114853855 | 114853978 | NC_000010.10 |
| cg02470690 | 7.13E-15 | 2.54E-16 | -8.96 | 26.1825312 | -1.78E-01 | 27839548  | 27839671  | NC_000006.11 |
| cg21190595 | 7.14E-15 | 2.54E-16 | -8.96 | 26.1807806 | -1.28E-01 | 3071167   | 3071290   | NC_000011.9  |

|              |          |          |       |            |           |           |           |              |
|--------------|----------|----------|-------|------------|-----------|-----------|-----------|--------------|
| cg25401210   | 7.16E-15 | 2.55E-16 | -8.96 | 26.178469  | -1.94E-01 | 944776    | 944899    | NC_000007.13 |
| cg13362637   | 7.21E-15 | 2.57E-16 | -8.96 | 26.1701518 | -1.22E-01 | 149790296 | 149790419 | NC_000005.9  |
| cg09375033   | 7.22E-15 | 2.57E-16 | -8.96 | 26.169268  | -2.19E-01 | 137833634 | 137833757 | NC_000003.11 |
| ch.11.42038R | 7.25E-15 | 2.58E-16 | -8.96 | 26.1655296 | -6.80E-02 | 967971    | 968094    | NC_000011.9  |
| cg00049616   | 7.25E-15 | 2.59E-16 | -8.96 | 26.1647385 | -1.73E-01 | 100308186 | 100308309 | NC_000013.10 |
| cg02466933   | 7.25E-15 | 2.59E-16 | -8.96 | 26.1646384 | -9.04E-02 | 9770529   | 9770652   | NC_000002.11 |
| cg24346686   | 7.29E-15 | 2.60E-16 | -8.96 | 26.1588568 | -1.37E-01 | 154377364 | 154377487 | NC_000001.10 |
| cg01110839   | 7.36E-15 | 2.63E-16 | -8.96 | 26.1496926 | -1.74E-01 | 47437783  | 47437906  | NC_000011.9  |
| cg14032089   | 7.42E-15 | 2.65E-16 | -8.96 | 26.1416026 | -1.87E-01 | 57917589  | 57917712  | NC_000017.10 |
| cg04133293   | 7.43E-15 | 2.65E-16 | -8.96 | 26.1396726 | -1.88E-01 | 200863171 | 200863294 | NC_000001.10 |
| cg01638792   | 7.47E-15 | 2.67E-16 | -8.96 | 26.134599  | -2.20E-01 | 69061344  | 69061467  | NC_000011.9  |
| cg07615493   | 7.53E-15 | 2.69E-16 | -8.95 | 26.1257646 | -2.00E-01 | 4215043   | 4215166   | NC_000019.9  |
| cg01710158   | 7.55E-15 | 2.70E-16 | -8.95 | 26.1236171 | -9.54E-02 | 65081843  | 65081966  | NC_000011.9  |
| cg14434242   | 7.57E-15 | 2.70E-16 | -8.95 | 26.1209884 | -1.83E-01 | 58637740  | 58637863  | NC_000017.10 |
| cg27371125   | 7.58E-15 | 2.71E-16 | -8.95 | 26.1188921 | -1.80E-01 | 350906    | 351029    | NC_000011.9  |
| cg08339172   | 7.60E-15 | 2.72E-16 | -8.95 | 26.1161938 | -2.00E-01 | 63692987  | 63693110  | NC_000017.10 |
| cg03623835   | 7.63E-15 | 2.73E-16 | -8.95 | 26.1117888 | -1.51E-01 | 190040974 | 190041097 | NC_000003.11 |
| cg19813226   | 7.65E-15 | 2.74E-16 | -8.95 | 26.1087991 | -9.65E-02 | 235257141 | 235257264 | NC_000001.10 |
| cg26976108   | 7.65E-15 | 2.74E-16 | -8.95 | 26.1084053 | -1.44E-01 | 52867568  | 52867691  | NC_000012.11 |
| cg04850286   | 7.66E-15 | 2.74E-16 | -8.95 | 26.1070363 | -1.87E-01 | 81895943  | 81896066  | NC_000010.10 |
| cg18665334   | 7.72E-15 | 2.76E-16 | -8.95 | 26.0992043 | -1.81E-01 | 231735434 | 231735557 | NC_000002.11 |
| cg08151809   | 7.73E-15 | 2.77E-16 | -8.95 | 26.0976957 | -1.04E-01 | 151480352 | 151480475 | NC_000007.13 |
| cg25298754   | 7.76E-15 | 2.78E-16 | -8.95 | 26.0937912 | -1.98E-01 | 111314102 | 111314225 | NC_000003.11 |
| cg15862215   | 7.78E-15 | 2.78E-16 | -8.95 | 26.0918785 | -5.65E-02 | 63277010  | 63277133  | NC_000002.11 |
| cg17259952   | 7.79E-15 | 2.79E-16 | -8.95 | 26.0905868 | -7.74E-02 | 58838244  | 58838367  | NC_000020.10 |

|            |          |          |       |            |           |           |           |              |
|------------|----------|----------|-------|------------|-----------|-----------|-----------|--------------|
| cg14944696 | 7.80E-15 | 2.79E-16 | -8.95 | 26.0891939 | -1.52E-01 | 115155686 | 115155809 | NC_000003.11 |
| cg26664528 | 7.86E-15 | 2.82E-16 | -8.95 | 26.0804597 | -2.33E-01 | 69327013  | 69327136  | NC_000015.9  |
| cg00097794 | 7.87E-15 | 2.82E-16 | -8.95 | 26.0801053 | -6.58E-02 | 51442472  | 51442595  | NC_000012.11 |
| cg17696377 | 7.87E-15 | 2.82E-16 | -8.95 | 26.0789164 | -6.90E-02 | 23724561  | 23724684  | NC_000016.9  |
| cg07249224 | 7.89E-15 | 2.83E-16 | -8.95 | 26.0769513 | -1.75E-01 | 30101680  | 30101803  | NC_000016.9  |
| cg21658968 | 7.90E-15 | 2.83E-16 | -8.95 | 26.0752338 | -1.94E-01 | 92754025  | 92754148  | NC_000011.9  |
| cg06157219 | 7.90E-15 | 2.83E-16 | -8.95 | 26.0745587 | -1.72E-01 | 2063875   | 2063998   | NC_000001.10 |
| cg10097651 | 7.93E-15 | 2.84E-16 | -8.95 | 26.0714804 | -1.96E-01 | 35802397  | 35802520  | NC_000014.8  |
| cg27072893 | 7.94E-15 | 2.85E-16 | -8.95 | 26.0691785 | -1.04E-01 | 6376784   | 6376907   | NC_000017.10 |
| cg22488745 | 7.96E-15 | 2.85E-16 | -8.95 | 26.0674477 | -1.31E-01 | 53096763  | 53096886  | NC_000015.9  |
| cg13118545 | 7.99E-15 | 2.87E-16 | -8.94 | 26.0631927 | -9.36E-02 | 26191599  | 26191722  | NC_000007.13 |
| cg25068071 | 7.99E-15 | 2.87E-16 | -8.94 | 26.0629796 | -1.45E-01 | 2033843   | 2033966   | NC_000011.9  |
| cg19740361 | 8.00E-15 | 2.87E-16 | -8.94 | 26.0613516 | -5.38E-02 | 45596828  | 45596951  | NC_000019.9  |
| cg08115556 | 8.01E-15 | 2.87E-16 | -8.94 | 26.0603857 | -5.38E-02 | 142137922 | 142138045 | NC_000008.10 |
| cg04364504 | 8.01E-15 | 2.88E-16 | -8.94 | 26.0598673 | -7.33E-02 | 58035198  | 58035321  | NC_000016.9  |
| cg02003184 | 8.01E-15 | 2.88E-16 | -8.94 | 26.0597971 | -8.44E-02 | 51324465  | 51324588  | NC_000019.9  |
| cg00086488 | 8.03E-15 | 2.88E-16 | -8.94 | 26.0580113 | -2.16E-01 | 113648882 | 113649005 | NC_000013.10 |
| cg23385208 | 8.04E-15 | 2.89E-16 | -8.94 | 26.0562063 | -1.74E-01 | 105439913 | 105440036 | NC_000014.8  |
| cg26704870 | 8.05E-15 | 2.89E-16 | -8.94 | 26.0551006 | -1.35E-01 | 73144279  | 73144402  | NC_000002.11 |
| cg03141971 | 8.05E-15 | 2.89E-16 | -8.94 | 26.0549329 | -8.68E-02 | 11707834  | 11707957  | NC_000019.9  |
| cg05860566 | 8.06E-15 | 2.89E-16 | -8.94 | 26.0541136 | -1.42E-01 | 19017211  | 19017334  | NC_000016.9  |
| cg16864825 | 8.06E-15 | 2.89E-16 | -8.94 | 26.0538633 | -6.91E-02 | 37183552  | 37183675  | NC_000017.10 |
| cg09099500 | 8.08E-15 | 2.90E-16 | -8.94 | 26.0508197 | -1.72E-01 | 117635821 | 117635944 | NC_000001.10 |
| cg06869641 | 8.11E-15 | 2.91E-16 | -8.94 | 26.0470174 | -1.55E-01 | 71947929  | 71948052  | NC_000002.11 |
| cg15002541 | 8.13E-15 | 2.92E-16 | -8.94 | 26.045085  | -2.17E-01 | 392903    | 393026    | NC_000011.9  |

|                 |          |          |       |            |           |           |           |              |
|-----------------|----------|----------|-------|------------|-----------|-----------|-----------|--------------|
| ch.12.45348862R | 8.14E-15 | 2.92E-16 | -8.94 | 26.043735  | -1.16E-01 | 47062595  | 47062718  | NC_000012.11 |
| cg01727585      | 8.17E-15 | 2.93E-16 | -8.94 | 26.0397702 | -1.40E-01 | 86313372  | 86313495  | NC_000015.9  |
| cg09762778      | 8.17E-15 | 2.94E-16 | -8.94 | 26.0394785 | -7.54E-02 | 37783879  | 37784002  | NC_000017.10 |
| cg05966241      | 8.23E-15 | 2.96E-16 | -8.94 | 26.0318733 | -1.16E-01 | 67515938  | 67516061  | NC_000016.9  |
| cg00194146      | 8.23E-15 | 2.96E-16 | -8.94 | 26.031139  | -9.71E-02 | 13488404  | 13488527  | NC_000006.11 |
| cg14340336      | 8.26E-15 | 2.97E-16 | -8.94 | 26.0279762 | -1.78E-01 | 40089267  | 40089390  | NC_000017.10 |
| cg07558894      | 8.26E-15 | 2.97E-16 | -8.94 | 26.0278517 | -7.06E-02 | 98030477  | 98030600  | NC_000007.13 |
| cg00838397      | 8.26E-15 | 2.97E-16 | -8.94 | 26.0274295 | -2.36E-01 | 70992225  | 70992348  | NC_000010.10 |
| cg24652919      | 8.26E-15 | 2.97E-16 | -8.94 | 26.0273189 | -1.89E-01 | 3073191   | 3073314   | NC_000016.9  |
| cg24385709      | 8.30E-15 | 2.99E-16 | -8.94 | 26.0223419 | -4.23E-02 | 31126689  | 31126812  | NC_000006.11 |
| cg09872104      | 8.30E-15 | 2.99E-16 | -8.94 | 26.0222162 | -8.31E-02 | 134855509 | 134855632 | NC_000007.13 |
| cg01657005      | 8.32E-15 | 2.99E-16 | -8.94 | 26.0203589 | -1.85E-01 | 46709125  | 46709248  | NC_000002.11 |
| cg03639603      | 8.33E-15 | 3.00E-16 | -8.94 | 26.0193588 | -4.06E-02 | 27806234  | 27806357  | NC_000006.11 |
| cg18879590      | 8.34E-15 | 3.00E-16 | -8.94 | 26.0181922 | -1.98E-01 | 236306640 | 236306763 | NC_000001.10 |
| cg16485385      | 8.34E-15 | 3.00E-16 | -8.94 | 26.0177959 | -7.90E-02 | 67881857  | 67881980  | NC_000016.9  |
| cg02375201      | 8.36E-15 | 3.01E-16 | -8.94 | 26.0152352 | -7.83E-02 | 27114675  | 27114798  | NC_000001.10 |
| cg16580985      | 8.37E-15 | 3.01E-16 | -8.94 | 26.0140525 | -1.88E-01 | 1550194   | 1550317   | NC_000004.11 |
| cg13804575      | 8.40E-15 | 3.02E-16 | -8.94 | 26.0099954 | -2.28E-01 | 109626999 | 109627122 | NC_000009.11 |
| cg14072016      | 8.42E-15 | 3.03E-16 | -8.94 | 26.0074102 | -2.13E-01 | 384652    | 384775    | NC_000010.10 |
| cg00782355      | 8.42E-15 | 3.03E-16 | -8.94 | 26.0071987 | -1.28E-01 | 85881502  | 85881625  | NC_000016.9  |
| cg23733029      | 8.43E-15 | 3.04E-16 | -8.94 | 26.005651  | -1.81E-01 | 30110856  | 30110979  | NC_000015.9  |
| cg19294311      | 8.44E-15 | 3.04E-16 | -8.94 | 26.0039836 | -8.53E-02 | 62358920  | 62359043  | NC_000015.9  |
| cg05235525      | 8.44E-15 | 3.04E-16 | -8.94 | 26.0037956 | -1.66E-01 | 102687624 | 102687747 | NC_000014.8  |
| cg25535982      | 8.45E-15 | 3.04E-16 | -8.94 | 26.0036739 | -1.96E-01 | 74030400  | 74030523  | NC_000011.9  |
| cg17052816      | 8.48E-15 | 3.06E-16 | -8.93 | 25.9988453 | -5.71E-02 | 71377145  | 71377268  | NC_000006.11 |



|            |          |          |       |            |           |           |           |              |
|------------|----------|----------|-------|------------|-----------|-----------|-----------|--------------|
| cg06730183 | 8.51E-15 | 3.07E-16 | -8.93 | 25.9952933 | -2.08E-01 | 76005699  | 76005822  | NC_000005.9  |
| cg13285213 | 8.52E-15 | 3.07E-16 | -8.93 | 25.9949263 | -1.84E-01 | 50056949  | 50057072  | NC_000012.11 |
| cg17510957 | 8.53E-15 | 3.08E-16 | -8.93 | 25.9934674 | -2.46E-01 | 121466629 | 121466752 | NC_000011.9  |
| cg20000107 | 8.53E-15 | 3.08E-16 | -8.93 | 25.9929001 | -2.03E-01 | 85832     | 85955     | NC_000007.13 |
| cg24603730 | 8.53E-15 | 3.08E-16 | -8.93 | 25.9928877 | -7.21E-02 | 47151566  | 47151689  | NC_000010.10 |
| cg12453623 | 8.53E-15 | 3.08E-16 | -8.93 | 25.9926907 | -2.19E-01 | 148394181 | 148394304 | NC_000002.11 |
| cg22546318 | 8.54E-15 | 3.08E-16 | -8.93 | 25.9921617 | -1.30E-01 | 54070378  | 54070501  | NC_000012.11 |
| cg14635269 | 8.57E-15 | 3.09E-16 | -8.93 | 25.9876865 | -1.51E-01 | 129439339 | 129439462 | NC_000009.11 |
| cg16378015 | 8.58E-15 | 3.10E-16 | -8.93 | 25.9866281 | -1.49E-01 | 100611694 | 100611817 | NC_000014.8  |
| cg04508870 | 8.59E-15 | 3.10E-16 | -8.93 | 25.9853125 | -2.21E-01 | 8298617   | 8298740   | NC_000001.10 |
| cg11016293 | 8.63E-15 | 3.12E-16 | -8.93 | 25.9804248 | -7.44E-02 | 152684694 | 152684817 | NC_000002.11 |
| cg09415366 | 8.65E-15 | 3.12E-16 | -8.93 | 25.9783888 | -1.38E-01 | 134385407 | 134385530 | NC_000010.10 |
| cg01595366 | 8.68E-15 | 3.13E-16 | -8.93 | 25.9744475 | -1.19E-01 | 103605032 | 103605155 | NC_000014.8  |
| cg05290708 | 8.69E-15 | 3.14E-16 | -8.93 | 25.9730308 | -5.89E-02 | 140372864 | 140372987 | NC_000007.13 |
| cg07688604 | 8.71E-15 | 3.15E-16 | -8.93 | 25.9709008 | -2.31E-01 | 133065928 | 133066051 | NC_000012.11 |
| cg19036773 | 8.73E-15 | 3.15E-16 | -8.93 | 25.9691143 | -1.42E-01 | 151843255 | 151843378 | NC_000007.13 |
| cg19473623 | 8.73E-15 | 3.15E-16 | -8.93 | 25.9689725 | -2.14E-01 | 7224869   | 7224992   | NC_000007.13 |
| cg27319188 | 8.75E-15 | 3.16E-16 | -8.93 | 25.9664543 | -1.25E-01 | 65880175  | 65880298  | NC_000011.9  |
| cg21664281 | 8.82E-15 | 3.19E-16 | -8.93 | 25.9582935 | -2.24E-01 | 193561005 | 193561128 | NC_000003.11 |
| cg13026370 | 8.82E-15 | 3.19E-16 | -8.93 | 25.9579962 | -1.35E-01 | 8367098   | 8367221   | NC_000018.9  |
| cg02463513 | 8.84E-15 | 3.19E-16 | -8.93 | 25.956     | -1.87E-01 | 145883489 | 145883612 | NC_000003.11 |
| cg09872737 | 8.85E-15 | 3.20E-16 | -8.93 | 25.9543865 | -7.22E-02 | 32076270  | 32076393  | NC_000006.11 |
| cg12566747 | 8.88E-15 | 3.21E-16 | -8.93 | 25.9514375 | -1.27E-01 | 13134817  | 13134940  | NC_000019.9  |
| cg17839366 | 8.88E-15 | 3.21E-16 | -8.93 | 25.9513463 | -1.09E-01 | 121003270 | 121003393 | NC_000002.11 |
| cg11123595 | 8.91E-15 | 3.22E-16 | -8.93 | 25.9473874 | -1.43E-01 | 169376618 | 169376741 | NC_000003.11 |

|            |          |          |       |            |           |           |           |              |
|------------|----------|----------|-------|------------|-----------|-----------|-----------|--------------|
| cg06974662 | 8.93E-15 | 3.23E-16 | -8.93 | 25.9454734 | -1.26E-01 | 8277080   | 8277203   | NC_000001.10 |
| cg19234983 | 8.93E-15 | 3.23E-16 | -8.93 | 25.944601  | -1.69E-01 | 211688020 | 211688143 | NC_000001.10 |
| cg25165975 | 8.94E-15 | 3.23E-16 | -8.93 | 25.9436717 | -1.24E-01 | 31855202  | 31855325  | NC_000006.11 |
| cg15472092 | 8.94E-15 | 3.23E-16 | -8.93 | 25.9435541 | -1.51E-01 | 150653079 | 150653202 | NC_000007.13 |
| cg27051231 | 8.95E-15 | 3.24E-16 | -8.93 | 25.9428336 | -1.69E-01 | 232213012 | 232213135 | NC_000002.11 |
| cg06240652 | 8.95E-15 | 3.24E-16 | -8.93 | 25.9423367 | -1.44E-01 | 201312367 | 201312490 | NC_000002.11 |
| cg13917047 | 8.95E-15 | 3.24E-16 | -8.93 | 25.9422572 | -1.56E-01 | 15406213  | 15406336  | NC_000017.10 |
| cg16009407 | 9.04E-15 | 3.27E-16 | -8.92 | 25.9323217 | -1.89E-01 | 8022191   | 8022314   | NC_000004.11 |
| cg16417118 | 9.09E-15 | 3.29E-16 | -8.92 | 25.9268285 | -1.58E-01 | 2162931   | 2163054   | NC_000001.10 |
| cg02171804 | 9.11E-15 | 3.30E-16 | -8.92 | 25.9244811 | -1.44E-01 | 105145974 | 105146097 | NC_000014.8  |
| cg13811955 | 9.11E-15 | 3.30E-16 | -8.92 | 25.924158  | -1.56E-01 | 1508375   | 1508498   | NC_000011.9  |
| cg05494269 | 9.15E-15 | 3.31E-16 | -8.92 | 25.9194896 | -8.64E-02 | 33373732  | 33373855  | NC_000008.10 |
| cg24728912 | 9.16E-15 | 3.32E-16 | -8.92 | 25.9182445 | -6.41E-02 | 14143221  | 14143344  | NC_000005.9  |
| cg05138403 | 9.19E-15 | 3.33E-16 | -8.92 | 25.9151527 | -2.06E-01 | 93510791  | 93510914  | NC_000014.8  |
| cg03678566 | 9.19E-15 | 3.33E-16 | -8.92 | 25.9145723 | -1.88E-01 | 68106018  | 68106141  | NC_000011.9  |
| cg08541297 | 9.22E-15 | 3.34E-16 | -8.92 | 25.9115063 | -1.26E-01 | 45962236  | 45962359  | NC_000007.13 |
| cg24505687 | 9.23E-15 | 3.34E-16 | -8.92 | 25.910685  | -1.30E-01 | 33548425  | 33548548  | NC_000006.11 |
| cg07761197 | 9.23E-15 | 3.34E-16 | -8.92 | 25.9106552 | -1.12E-01 | 1196657   | 1196780   | NC_000016.9  |
| cg06221393 | 9.23E-15 | 3.35E-16 | -8.92 | 25.9097745 | -1.11E-01 | 139089315 | 139089438 | NC_000005.9  |
| cg18674234 | 9.24E-15 | 3.35E-16 | -8.92 | 25.9092021 | -1.98E-01 | 78107677  | 78107800  | NC_000014.8  |
| cg27555944 | 9.25E-15 | 3.35E-16 | -8.92 | 25.9081649 | -5.08E-02 | 49056208  | 49056331  | NC_000003.11 |
| cg02685680 | 9.26E-15 | 3.36E-16 | -8.92 | 25.9067775 | -1.61E-01 | 1201978   | 1202101   | NC_000005.9  |
| cg25347526 | 9.28E-15 | 3.36E-16 | -8.92 | 25.9046469 | -2.05E-01 | 124778319 | 124778442 | NC_000004.11 |
| cg24169915 | 9.29E-15 | 3.37E-16 | -8.92 | 25.9032093 | -1.79E-01 | 99177987  | 99178110  | NC_000014.8  |
| cg02892189 | 9.30E-15 | 3.37E-16 | -8.92 | 25.9024064 | -5.95E-02 | 6321676   | 6321799   | NC_000001.10 |

|            |          |          |       |            |           |           |           |              |
|------------|----------|----------|-------|------------|-----------|-----------|-----------|--------------|
| cg19103536 | 9.30E-15 | 3.37E-16 | -8.92 | 25.9020518 | -1.33E-01 | 63397887  | 63398010  | NC_000017.10 |
| cg05451722 | 9.30E-15 | 3.37E-16 | -8.92 | 25.9019679 | -9.33E-02 | 145065385 | 145065508 | NC_000008.10 |
| cg02849953 | 9.33E-15 | 3.39E-16 | -8.92 | 25.8984675 | -1.17E-01 | 127984185 | 127984308 | NC_000007.13 |
| cg16399664 | 9.34E-15 | 3.39E-16 | -8.92 | 25.8973525 | -2.21E-01 | 113417284 | 113417407 | NC_000012.11 |
| cg04860852 | 9.35E-15 | 3.39E-16 | -8.92 | 25.8962915 | -8.45E-02 | 200993069 | 200993192 | NC_000001.10 |
| cg05940703 | 9.38E-15 | 3.40E-16 | -8.92 | 25.8926814 | -7.53E-02 | 6947032   | 6947155   | NC_000017.10 |
| cg21423741 | 9.39E-15 | 3.41E-16 | -8.92 | 25.8919351 | -1.66E-01 | 71099193  | 71099316  | NC_000003.11 |
| cg15856454 | 9.49E-15 | 3.45E-16 | -8.92 | 25.8805195 | -6.85E-02 | 50298001  | 50298124  | NC_000003.11 |
| cg19426827 | 9.51E-15 | 3.46E-16 | -8.92 | 25.8780433 | -1.23E-01 | 105191118 | 105191241 | NC_000014.8  |
| cg11331556 | 9.55E-15 | 3.47E-16 | -8.92 | 25.8745911 | -8.89E-02 | 32312356  | 32312479  | NC_000005.9  |
| cg06784339 | 9.55E-15 | 3.47E-16 | -8.92 | 25.8743924 | -5.14E-02 | 140179139 | 140179262 | NC_000007.13 |
| cg18798289 | 9.62E-15 | 3.50E-16 | -8.91 | 25.8668246 | -2.15E-01 | 72530245  | 72530368  | NC_000005.9  |
| cg05251269 | 9.63E-15 | 3.50E-16 | -8.91 | 25.8655472 | -1.93E-01 | 2083128   | 2083251   | NC_000016.9  |
| cg15572086 | 9.63E-15 | 3.50E-16 | -8.91 | 25.8650111 | -6.52E-02 | 116961459 | 116961582 | NC_000001.10 |
| cg17654660 | 9.64E-15 | 3.50E-16 | -8.91 | 25.8640841 | -1.59E-01 | 176784965 | 176785088 | NC_000005.9  |
| cg16468910 | 9.65E-15 | 3.51E-16 | -8.91 | 25.8625884 | -7.86E-02 | 125238791 | 125238914 | NC_000003.11 |
| cg20077028 | 9.68E-15 | 3.52E-16 | -8.91 | 25.8596366 | -1.95E-01 | 52208899  | 52209022  | NC_000012.11 |
| cg13488011 | 9.73E-15 | 3.54E-16 | -8.91 | 25.8543105 | -2.26E-01 | 81466841  | 81466964  | NC_000015.9  |
| cg04560630 | 9.74E-15 | 3.54E-16 | -8.91 | 25.8530077 | -1.43E-01 | 720683    | 720806    | NC_000011.9  |
| cg19794706 | 9.75E-15 | 3.55E-16 | -8.91 | 25.8526037 | -6.34E-02 | 75643232  | 75643355  | NC_000014.8  |
| cg01466741 | 9.76E-15 | 3.55E-16 | -8.91 | 25.8510856 | -1.40E-01 | 134733519 | 134733642 | NC_000005.9  |
| cg05729480 | 9.80E-15 | 3.57E-16 | -8.91 | 25.8466834 | -1.82E-01 | 75276428  | 75276551  | NC_000017.10 |
| cg24392889 | 9.81E-15 | 3.57E-16 | -8.91 | 25.8454656 | -8.33E-02 | 77775305  | 77775428  | NC_000017.10 |
| cg08196138 | 9.83E-15 | 3.58E-16 | -8.91 | 25.8440154 | -1.43E-01 | 114830277 | 114830400 | NC_000013.10 |
| cg15639045 | 9.83E-15 | 3.58E-16 | -8.91 | 25.8438476 | -5.48E-02 | 6947200   | 6947323   | NC_000017.10 |

|                 |          |          |       |            |           |           |           |              |
|-----------------|----------|----------|-------|------------|-----------|-----------|-----------|--------------|
| cg09831553      | 9.83E-15 | 3.58E-16 | -8.91 | 25.8434651 | -1.26E-01 | 60943241  | 60943364  | NC_000020.10 |
| cg12425700      | 9.88E-15 | 3.60E-16 | -8.91 | 25.8377771 | -1.47E-01 | 75186779  | 75186902  | NC_000004.11 |
| cg20305578      | 9.91E-15 | 3.61E-16 | -8.91 | 25.8344709 | -1.84E-01 | 1908301   | 1908424   | NC_000008.10 |
| cg17560015      | 9.92E-15 | 3.61E-16 | -8.91 | 25.833778  | -1.94E-01 | 145013249 | 145013372 | NC_000008.10 |
| cg21419528      | 9.95E-15 | 3.62E-16 | -8.91 | 25.8308146 | -6.52E-02 | 70481597  | 70481720  | NC_000010.10 |
| cg09406107      | 9.95E-15 | 3.63E-16 | -8.91 | 25.8304979 | -1.35E-01 | 236172440 | 236172563 | NC_000002.11 |
| cg08134301      | 9.97E-15 | 3.63E-16 | -8.91 | 25.8282647 | -7.50E-02 | 46415506  | 46415629  | NC_000020.10 |
| cg15688324      | 1.00E-14 | 3.65E-16 | -8.91 | 25.824482  | -2.16E-01 | 8102944   | 8103067   | NC_000004.11 |
| cg26987697      | 1.00E-14 | 3.65E-16 | -8.91 | 25.8240436 | -7.81E-02 | 47916498  | 47916621  | NC_000004.11 |
| cg21282282      | 1.00E-14 | 3.65E-16 | -8.91 | 25.8229649 | -2.05E-01 | 109705170 | 109705293 | NC_000001.10 |
| cg12876620      | 1.00E-14 | 3.66E-16 | -8.91 | 25.821279  | -1.51E-01 | 187635598 | 187635721 | NC_000004.11 |
| cg05750047      | 1.01E-14 | 3.67E-16 | -8.91 | 25.8183395 | -2.01E-01 | 149908085 | 149908208 | NC_000001.10 |
| cg01224366      | 1.01E-14 | 3.68E-16 | -8.91 | 25.8164002 | -2.15E-01 | 45148694  | 45148817  | NC_000021.8  |
| cg22376262      | 1.02E-14 | 3.71E-16 | -8.9  | 25.8073382 | -2.03E-01 | 148959887 | 148960010 | NC_000007.13 |
| cg27172175      | 1.02E-14 | 3.71E-16 | -8.9  | 25.8073191 | -1.92E-01 | 41495032  | 41495155  | NC_000017.10 |
| ch.13.1109452R  | 1.02E-14 | 3.72E-16 | -8.9  | 25.8041663 | -2.13E-02 | 75900802  | 75900925  | NC_000013.10 |
| cg16934235      | 1.03E-14 | 3.75E-16 | -8.9  | 25.7967088 | -2.31E-01 | 108423124 | 108423247 | NC_000011.9  |
| ch.7.313144R    | 1.03E-14 | 3.75E-16 | -8.9  | 25.7965006 | -6.25E-02 | 7827461   | 7827584   | NC_000007.13 |
| cg02829601      | 1.03E-14 | 3.76E-16 | -8.9  | 25.7954342 | -2.50E-01 | 159070959 | 159071082 | NC_000006.11 |
| cg07873848      | 1.03E-14 | 3.76E-16 | -8.9  | 25.7942043 | -1.12E-01 | 223288635 | 223288758 | NC_000002.11 |
| cg03254161      | 1.03E-14 | 3.77E-16 | -8.9  | 25.7930269 | -8.78E-02 | 76481199  | 76481322  | NC_000017.10 |
| cg02780120      | 1.03E-14 | 3.77E-16 | -8.9  | 25.7924433 | -7.81E-02 | 198300127 | 198300250 | NC_000002.11 |
| ch.7.134603089F | 1.03E-14 | 3.77E-16 | -8.9  | 25.7910793 | -4.72E-02 | 134952549 | 134952672 | NC_000007.13 |
| cg01550473      | 1.04E-14 | 3.78E-16 | -8.9  | 25.7882028 | -8.06E-02 | 161493932 | 161494055 | NC_000001.10 |
| cg10770046      | 1.05E-14 | 3.82E-16 | -8.9  | 25.7779755 | -1.66E-01 | 6446787   | 6446910   | NC_000001.10 |

|            |          |          |       |            |           |           |           |              |
|------------|----------|----------|-------|------------|-----------|-----------|-----------|--------------|
| cg22675922 | 1.05E-14 | 3.82E-16 | -8.9  | 25.7776719 | -1.68E-01 | 2889840   | 2889963   | NC_000011.9  |
| cg12176793 | 1.05E-14 | 3.84E-16 | -8.9  | 25.7743043 | -2.05E-01 | 90624127  | 90624250  | NC_000008.10 |
| cg16419342 | 1.05E-14 | 3.84E-16 | -8.9  | 25.774269  | -1.61E-01 | 2821200   | 2821323   | NC_000011.9  |
| cg00556029 | 1.06E-14 | 3.86E-16 | -8.9  | 25.7684201 | -1.40E-01 | 32802033  | 32802156  | NC_000001.10 |
| cg01710361 | 1.06E-14 | 3.86E-16 | -8.9  | 25.7674021 | -2.14E-01 | 51769687  | 51769810  | NC_000001.10 |
| cg17646250 | 1.06E-14 | 3.87E-16 | -8.9  | 25.7664604 | -1.72E-01 | 6759768   | 6759891   | NC_000006.11 |
| cg10585371 | 1.06E-14 | 3.89E-16 | -8.9  | 25.7615518 | -2.23E-01 | 30161665  | 30161788  | NC_000001.10 |
| cg07550267 | 1.07E-14 | 3.91E-16 | -8.9  | 25.7570296 | -7.38E-02 | 45241824  | 45241947  | NC_000001.10 |
| cg11031737 | 1.07E-14 | 3.92E-16 | -8.9  | 25.7534855 | -1.97E-01 | 27255755  | 27255878  | NC_000011.9  |
| cg10601624 | 1.07E-14 | 3.92E-16 | -8.9  | 25.752514  | -1.71E-01 | 6404377   | 6404500   | NC_000012.11 |
| cg14588027 | 1.07E-14 | 3.93E-16 | -8.9  | 25.7502424 | -6.26E-02 | 212872986 | 212873109 | NC_000001.10 |
| cg07220903 | 1.08E-14 | 3.93E-16 | -8.9  | 25.7498679 | -2.30E-01 | 46973284  | 46973407  | NC_000003.11 |
| cg14117138 | 1.08E-14 | 3.97E-16 | -8.89 | 25.7416335 | -1.23E-01 | 46800085  | 46800208  | NC_000019.9  |
| cg01970336 | 1.09E-14 | 3.98E-16 | -8.89 | 25.739538  | -1.46E-01 | 51986254  | 51986377  | NC_000001.10 |
| cg24662231 | 1.09E-14 | 3.98E-16 | -8.89 | 25.7377278 | -1.35E-01 | 41002433  | 41002556  | NC_000017.10 |
| cg13760060 | 1.09E-14 | 3.99E-16 | -8.89 | 25.7362582 | -1.88E-01 | 73212577  | 73212700  | NC_000014.8  |
| cg06196379 | 1.09E-14 | 3.99E-16 | -8.89 | 25.7350087 | -1.55E-01 | 41254885  | 41255008  | NC_000006.11 |
| cg06582411 | 1.10E-14 | 4.01E-16 | -8.89 | 25.7304135 | -1.63E-01 | 100229865 | 100229988 | NC_000007.13 |
| cg18887096 | 1.10E-14 | 4.01E-16 | -8.89 | 25.7297328 | -1.31E-01 | 219472410 | 219472533 | NC_000002.11 |
| cg27495223 | 1.10E-14 | 4.02E-16 | -8.89 | 25.7294996 | -1.68E-01 | 14758289  | 14758412  | NC_000003.11 |
| cg03457485 | 1.10E-14 | 4.02E-16 | -8.89 | 25.72847   | -1.31E-01 | 63753251  | 63753374  | NC_000011.9  |
| cg06866686 | 1.10E-14 | 4.02E-16 | -8.89 | 25.7282723 | -9.92E-02 | 95236879  | 95237002  | NC_000014.8  |
| cg01037823 | 1.10E-14 | 4.02E-16 | -8.89 | 25.7279588 | -1.64E-01 | 2879998   | 2880121   | NC_000016.9  |
| cg21283302 | 1.10E-14 | 4.03E-16 | -8.89 | 25.7268798 | -1.76E-01 | 101596131 | 101596254 | NC_000007.13 |
| cg03532013 | 1.10E-14 | 4.04E-16 | -8.89 | 25.7231217 | -2.21E-01 | 42592983  | 42593106  | NC_000019.9  |

|                 |          |          |       |            |           |           |           |              |
|-----------------|----------|----------|-------|------------|-----------|-----------|-----------|--------------|
| ch.16.55305377R | 1.10E-14 | 4.05E-16 | -8.89 | 25.7213378 | -5.53E-02 | 56747876  | 56747999  | NC_000016.9  |
| cg16419414      | 1.11E-14 | 4.07E-16 | -8.89 | 25.7158094 | -1.79E-01 | 76576713  | 76576836  | NC_000010.10 |
| cg14032261      | 1.12E-14 | 4.09E-16 | -8.89 | 25.7109922 | -1.97E-01 | 211909305 | 211909428 | NC_000001.10 |
| cg08772302      | 1.12E-14 | 4.09E-16 | -8.89 | 25.7106685 | -1.61E-01 | 37826337  | 37826460  | NC_000008.10 |
| ch.2.396050F    | 1.12E-14 | 4.09E-16 | -8.89 | 25.7101659 | -7.12E-02 | 15050905  | 15051028  | NC_000002.11 |
| ch.7.3189261R   | 1.12E-14 | 4.10E-16 | -8.89 | 25.7092494 | -1.32E-01 | 151489100 | 151489223 | NC_000007.13 |
| cg08724369      | 1.12E-14 | 4.10E-16 | -8.89 | 25.7077434 | -6.88E-02 | 43423757  | 43423880  | NC_000006.11 |
| ch.7.1700983F   | 1.13E-14 | 4.13E-16 | -8.89 | 25.7011742 | -7.19E-02 | 77269758  | 77269881  | NC_000007.13 |
| cg07947615      | 1.13E-14 | 4.15E-16 | -8.89 | 25.6967916 | -1.81E-01 | 101449311 | 101449434 | NC_000014.8  |
| cg12322672      | 1.13E-14 | 4.15E-16 | -8.89 | 25.6958204 | -1.76E-01 | 126761638 | 126761761 | NC_000011.9  |
| cg04951638      | 1.13E-14 | 4.16E-16 | -8.89 | 25.6951023 | -1.74E-01 | 78593781  | 78593904  | NC_000017.10 |
| cg24185852      | 1.14E-14 | 4.18E-16 | -8.89 | 25.6889946 | -1.30E-01 | 168690818 | 168690941 | NC_000005.9  |
| cg19860160      | 1.14E-14 | 4.19E-16 | -8.89 | 25.6883688 | -1.81E-01 | 1045382   | 1045505   | NC_000001.10 |
| cg19907293      | 1.14E-14 | 4.20E-16 | -8.89 | 25.6844476 | -1.85E-01 | 217448253 | 217448376 | NC_000002.11 |
| cg01161936      | 1.15E-14 | 4.21E-16 | -8.88 | 25.6825851 | -6.00E-02 | 57224878  | 57225001  | NC_000011.9  |
| cg07216976      | 1.15E-14 | 4.21E-16 | -8.88 | 25.6816391 | -9.71E-02 | 116581248 | 116581371 | NC_000010.10 |
| cg03297966      | 1.15E-14 | 4.22E-16 | -8.88 | 25.6799657 | -6.04E-02 | 77818419  | 77818542  | NC_000004.11 |
| cg23954655      | 1.15E-14 | 4.24E-16 | -8.88 | 25.675713  | -1.69E-01 | 99223562  | 99223685  | NC_000013.10 |
| cg11672772      | 1.15E-14 | 4.25E-16 | -8.88 | 25.6742499 | -1.92E-01 | 75078286  | 75078409  | NC_000002.11 |
| cg05474943      | 1.16E-14 | 4.25E-16 | -8.88 | 25.6732338 | -1.70E-01 | 6732464   | 6732587   | NC_000004.11 |
| cg16377880      | 1.16E-14 | 4.25E-16 | -8.88 | 25.6728753 | -1.63E-01 | 15751167  | 15751290  | NC_000019.9  |
| cg19563510      | 1.16E-14 | 4.27E-16 | -8.88 | 25.6689878 | -1.47E-01 | 79881483  | 79881606  | NC_000017.10 |
| cg14702960      | 1.16E-14 | 4.27E-16 | -8.88 | 25.6677055 | -1.64E-01 | 68634040  | 68634163  | NC_000012.11 |
| cg12903224      | 1.16E-14 | 4.28E-16 | -8.88 | 25.6659942 | -1.71E-01 | 29470962  | 29471085  | NC_000012.11 |
| cg09888283      | 1.17E-14 | 4.29E-16 | -8.88 | 25.6637185 | -1.69E-01 | 2211524   | 2211647   | NC_000001.10 |

|            |          |          |       |            |           |           |           |              |
|------------|----------|----------|-------|------------|-----------|-----------|-----------|--------------|
| cg09148608 | 1.17E-14 | 4.29E-16 | -8.88 | 25.6636249 | -1.72E-01 | 31464034  | 31464157  | NC_000016.9  |
| cg15584221 | 1.18E-14 | 4.33E-16 | -8.88 | 25.6555937 | -1.89E-01 | 210546902 | 210547025 | NC_000001.10 |
| cg27146152 | 1.18E-14 | 4.34E-16 | -8.88 | 25.6535558 | -1.69E-01 | 6659364   | 6659487   | NC_000017.10 |
| cg07718444 | 1.18E-14 | 4.34E-16 | -8.88 | 25.6521086 | -1.02E-01 | 1094080   | 1094203   | NC_000001.10 |
| cg22730655 | 1.18E-14 | 4.35E-16 | -8.88 | 25.6515287 | -1.46E-01 | 9350073   | 9350196   | NC_000001.10 |
| cg23199907 | 1.18E-14 | 4.35E-16 | -8.88 | 25.6510747 | -1.87E-01 | 33305966  | 33306089  | NC_000013.10 |
| cg24735307 | 1.19E-14 | 4.37E-16 | -8.88 | 25.6468361 | -6.33E-02 | 102881114 | 102881237 | NC_000010.10 |
| cg15175581 | 1.19E-14 | 4.37E-16 | -8.88 | 25.6463538 | -1.19E-01 | 33360262  | 33360385  | NC_000015.9  |
| cg02575483 | 1.19E-14 | 4.37E-16 | -8.88 | 25.6463517 | -2.13E-01 | 117826706 | 117826829 | NC_000006.11 |
| cg07812957 | 1.19E-14 | 4.40E-16 | -8.88 | 25.6400666 | -1.97E-01 | 16466298  | 16466421  | NC_000019.9  |
| cg27613174 | 1.19E-14 | 4.40E-16 | -8.88 | 25.6392623 | -4.11E-02 | 2559966   | 2560089   | NC_000007.13 |
| cg03272310 | 1.20E-14 | 4.41E-16 | -8.88 | 25.6361152 | -1.42E-01 | 39704454  | 39704577  | NC_000017.10 |
| cg13630114 | 1.20E-14 | 4.42E-16 | -8.88 | 25.6345754 | -1.85E-01 | 102208423 | 102208546 | NC_000009.11 |
| cg13354934 | 1.20E-14 | 4.42E-16 | -8.88 | 25.6336839 | -1.31E-01 | 1296093   | 1296216   | NC_000001.10 |
| cg18900669 | 1.20E-14 | 4.43E-16 | -8.88 | 25.6331025 | -1.22E-01 | 7482456   | 7482579   | NC_000017.10 |
| cg07354371 | 1.20E-14 | 4.43E-16 | -8.88 | 25.6325895 | -5.58E-02 | 43736391  | 43736514  | NC_000001.10 |
| cg02938926 | 1.20E-14 | 4.44E-16 | -8.88 | 25.6312608 | -1.43E-01 | 19897553  | 19897676  | NC_000016.9  |
| cg26992186 | 1.20E-14 | 4.44E-16 | -8.88 | 25.6290931 | -1.81E-01 | 44224132  | 44224255  | NC_000007.13 |
| cg00221185 | 1.20E-14 | 4.45E-16 | -8.88 | 25.6289261 | -2.46E-01 | 30652268  | 30652391  | NC_000006.11 |
| cg04973925 | 1.21E-14 | 4.45E-16 | -8.88 | 25.6280393 | -1.21E-01 | 49218062  | 49218185  | NC_000015.9  |
| cg05129050 | 1.21E-14 | 4.45E-16 | -8.88 | 25.6279218 | -1.31E-01 | 7178026   | 7178149   | NC_000001.10 |
| cg14752525 | 1.21E-14 | 4.46E-16 | -8.88 | 25.6247334 | -1.83E-01 | 223927446 | 223927569 | NC_000002.11 |
| cg01279378 | 1.21E-14 | 4.47E-16 | -8.88 | 25.623252  | -1.03E-01 | 40531871  | 40531994  | NC_000015.9  |
| cg08108911 | 1.21E-14 | 4.48E-16 | -8.87 | 25.6201871 | -4.05E-02 | 157015297 | 157015420 | NC_000001.10 |
| cg01916724 | 1.22E-14 | 4.49E-16 | -8.87 | 25.6187109 | -8.42E-02 | 51975220  | 51975343  | NC_000003.11 |

|                 |          |          |       |            |           |           |           |              |
|-----------------|----------|----------|-------|------------|-----------|-----------|-----------|--------------|
| cg24699699      | 1.23E-14 | 4.53E-16 | -8.87 | 25.6105659 | -1.48E-01 | 93258316  | 93258439  | NC_000001.10 |
| cg08220149      | 1.23E-14 | 4.54E-16 | -8.87 | 25.6079096 | -2.18E-01 | 15766327  | 15766450  | NC_000016.9  |
| cg20587127      | 1.23E-14 | 4.54E-16 | -8.87 | 25.6075572 | -4.35E-02 | 84255925  | 84256048  | NC_000004.11 |
| cg19046216      | 1.23E-14 | 4.55E-16 | -8.87 | 25.6067621 | -4.34E-02 | 84743257  | 84743380  | NC_000006.11 |
| cg05523897      | 1.23E-14 | 4.56E-16 | -8.87 | 25.6044095 | -1.77E-01 | 2139175   | 2139298   | NC_000001.10 |
| cg05798664      | 1.24E-14 | 4.57E-16 | -8.87 | 25.6025524 | -1.95E-01 | 36825645  | 36825768  | NC_000001.10 |
| cg22661082      | 1.24E-14 | 4.57E-16 | -8.87 | 25.6013303 | -1.69E-01 | 189558080 | 189558203 | NC_000002.11 |
| cg04772683      | 1.24E-14 | 4.57E-16 | -8.87 | 25.6007028 | -1.73E-01 | 51522641  | 51522764  | NC_000019.9  |
| cg04308040      | 1.24E-14 | 4.59E-16 | -8.87 | 25.5973859 | -1.37E-01 | 44942303  | 44942426  | NC_000013.10 |
| cg04379703      | 1.24E-14 | 4.59E-16 | -8.87 | 25.5963328 | -2.01E-01 | 13053208  | 13053331  | NC_000003.11 |
| cg20327105      | 1.24E-14 | 4.60E-16 | -8.87 | 25.5958186 | -9.60E-02 | 170043996 | 170044119 | NC_000001.10 |
| cg14537800      | 1.24E-14 | 4.60E-16 | -8.87 | 25.5950524 | -9.02E-02 | 15964950  | 15965073  | NC_000004.11 |
| cg16534399      | 1.24E-14 | 4.60E-16 | -8.87 | 25.594962  | -1.82E-01 | 82226584  | 82226707  | NC_000016.9  |
| cg13446235      | 1.25E-14 | 4.61E-16 | -8.87 | 25.5920775 | -5.50E-02 | 90039146  | 90039269  | NC_000016.9  |
| cg18070470      | 1.25E-14 | 4.62E-16 | -8.87 | 25.5910656 | -8.70E-02 | 130614013 | 130614136 | NC_000003.11 |
| ch.7.109945386F | 1.25E-14 | 4.62E-16 | -8.87 | 25.5909459 | -6.61E-02 | 110158150 | 110158273 | NC_000007.13 |
| cg13247117      | 1.25E-14 | 4.62E-16 | -8.87 | 25.5907718 | -1.68E-01 | 41118770  | 41118893  | NC_000001.10 |
| cg07702819      | 1.25E-14 | 4.63E-16 | -8.87 | 25.5890138 | -8.27E-02 | 322876    | 322999    | NC_000012.11 |
| cg02698806      | 1.25E-14 | 4.63E-16 | -8.87 | 25.588834  | -1.86E-01 | 10522874  | 10522997  | NC_000002.11 |
| cg02187196      | 1.25E-14 | 4.64E-16 | -8.87 | 25.586184  | -9.78E-02 | 3869020   | 3869143   | NC_000020.10 |
| cg04139043      | 1.26E-14 | 4.66E-16 | -8.87 | 25.5821083 | -1.79E-01 | 18193291  | 18193414  | NC_000001.10 |
| cg20161791      | 1.26E-14 | 4.66E-16 | -8.87 | 25.581854  | -1.41E-01 | 2558431   | 2558554   | NC_000007.13 |
| cg03693486      | 1.26E-14 | 4.66E-16 | -8.87 | 25.5813695 | -1.26E-01 | 20914322  | 20914445  | NC_000001.10 |
| cg25960191      | 1.26E-14 | 4.67E-16 | -8.87 | 25.579562  | -5.42E-02 | 30601454  | 30601577  | NC_000008.10 |
| cg04213073      | 1.26E-14 | 4.68E-16 | -8.87 | 25.5789496 | -1.55E-01 | 169309596 | 169309719 | NC_000006.11 |



|            |          |          |       |            |           |           |           |              |
|------------|----------|----------|-------|------------|-----------|-----------|-----------|--------------|
| cg25635864 | 1.27E-14 | 4.69E-16 | -8.87 | 25.5749588 | -9.52E-02 | 66103386  | 66103509  | NC_000011.9  |
| cg26036443 | 1.27E-14 | 4.70E-16 | -8.87 | 25.5742263 | -8.56E-02 | 48216402  | 48216525  | NC_000019.9  |
| cg25388447 | 1.27E-14 | 4.70E-16 | -8.87 | 25.5729742 | -7.72E-02 | 13975628  | 13975751  | NC_000019.9  |
| cg13257690 | 1.27E-14 | 4.71E-16 | -8.87 | 25.5725163 | -2.14E-01 | 101908752 | 101908875 | NC_000014.8  |
| cg08439439 | 1.27E-14 | 4.72E-16 | -8.87 | 25.5699038 | -1.79E-01 | 149190883 | 149191006 | NC_000006.11 |
| cg20359793 | 1.28E-14 | 4.74E-16 | -8.87 | 25.5654289 | -1.51E-01 | 52887054  | 52887177  | NC_000012.11 |
| cg00352106 | 1.28E-14 | 4.74E-16 | -8.87 | 25.5652706 | -1.65E-01 | 39864197  | 39864320  | NC_000001.10 |
| cg13373343 | 1.28E-14 | 4.74E-16 | -8.87 | 25.5648254 | -1.67E-01 | 95552972  | 95553095  | NC_000001.10 |
| cg01244006 | 1.28E-14 | 4.75E-16 | -8.87 | 25.5637888 | -1.39E-01 | 6485916   | 6486039   | NC_000012.11 |
| cg22844623 | 1.28E-14 | 4.75E-16 | -8.87 | 25.5625099 | -1.68E-01 | 228336130 | 228336253 | NC_000001.10 |
| cg02047661 | 1.28E-14 | 4.76E-16 | -8.87 | 25.5623316 | -1.70E-01 | 51976883  | 51977006  | NC_000003.11 |
| cg17346857 | 1.29E-14 | 4.77E-16 | -8.87 | 25.5598037 | -2.23E-01 | 66639560  | 66639683  | NC_000016.9  |
| cg23051272 | 1.30E-14 | 4.81E-16 | -8.86 | 25.5515434 | -1.25E-01 | 17589471  | 17589594  | NC_000017.10 |
| cg20251199 | 1.30E-14 | 4.83E-16 | -8.86 | 25.5468177 | -9.18E-02 | 235291349 | 235291472 | NC_000001.10 |
| cg25116882 | 1.30E-14 | 4.84E-16 | -8.86 | 25.5457592 | -8.88E-02 | 40013680  | 40013803  | NC_000012.11 |
| cg19979896 | 1.30E-14 | 4.84E-16 | -8.86 | 25.5448742 | -1.52E-01 | 150212118 | 150212241 | NC_000006.11 |
| cg23419447 | 1.30E-14 | 4.84E-16 | -8.86 | 25.5443285 | -1.29E-01 | 1507347   | 1507470   | NC_000011.9  |
| cg14152785 | 1.31E-14 | 4.86E-16 | -8.86 | 25.5410832 | -1.17E-01 | 37557185  | 37557308  | NC_000008.10 |
| cg25227335 | 1.31E-14 | 4.86E-16 | -8.86 | 25.5408024 | -5.66E-02 | 27528703  | 27528826  | NC_000011.9  |
| cg04637454 | 1.31E-14 | 4.86E-16 | -8.86 | 25.5405403 | -1.57E-01 | 41651066  | 41651189  | NC_000006.11 |
| cg20778199 | 1.31E-14 | 4.86E-16 | -8.86 | 25.5403953 | -1.62E-01 | 148020881 | 148021004 | NC_000006.11 |
| cg10105262 | 1.31E-14 | 4.87E-16 | -8.86 | 25.5381761 | -1.86E-01 | 224730478 | 224730601 | NC_000001.10 |
| cg15983605 | 1.31E-14 | 4.88E-16 | -8.86 | 25.5368524 | -1.64E-01 | 7927557   | 7927680   | NC_000011.9  |
| cg18339598 | 1.32E-14 | 4.89E-16 | -8.86 | 25.5338952 | -1.30E-01 | 238065252 | 238065375 | NC_000002.11 |
| cg12594803 | 1.32E-14 | 4.90E-16 | -8.86 | 25.5336131 | -2.11E-01 | 196908930 | 196909053 | NC_000003.11 |

|                |          |          |       |            |           |           |           |              |
|----------------|----------|----------|-------|------------|-----------|-----------|-----------|--------------|
| cg00500936     | 1.32E-14 | 4.91E-16 | -8.86 | 25.5312595 | -6.10E-02 | 121735583 | 121735706 | NC_000012.11 |
| cg01397449     | 1.32E-14 | 4.91E-16 | -8.86 | 25.5311766 | -1.33E-01 | 67220541  | 67220664  | NC_000016.9  |
| cg03718883     | 1.32E-14 | 4.91E-16 | -8.86 | 25.5304303 | -1.55E-01 | 2098414   | 2098537   | NC_000011.9  |
| cg24078695     | 1.32E-14 | 4.92E-16 | -8.86 | 25.5288988 | -2.18E-01 | 230882977 | 230883100 | NC_000001.10 |
| cg17440044     | 1.32E-14 | 4.92E-16 | -8.86 | 25.527988  | -1.63E-01 | 100167198 | 100167321 | NC_000007.13 |
| cg21525032     | 1.32E-14 | 4.92E-16 | -8.86 | 25.5279037 | -1.93E-01 | 80372493  | 80372616  | NC_000017.10 |
| cg02262553     | 1.33E-14 | 4.94E-16 | -8.86 | 25.525294  | -2.09E-01 | 87849250  | 87849373  | NC_000004.11 |
| cg25193885     | 1.33E-14 | 4.96E-16 | -8.86 | 25.5214087 | -1.73E-01 | 70328867  | 70328990  | NC_000011.9  |
| ch.19.1079710R | 1.33E-14 | 4.96E-16 | -8.86 | 25.5208351 | -5.48E-02 | 33483456  | 33483579  | NC_000019.9  |
| cg05574870     | 1.34E-14 | 4.98E-16 | -8.86 | 25.5163259 | -2.38E-01 | 4054124   | 4054247   | NC_000019.9  |
| cg07744912     | 1.34E-14 | 4.99E-16 | -8.86 | 25.5147455 | -1.18E-01 | 3063680   | 3063803   | NC_000016.9  |
| cg04802386     | 1.34E-14 | 4.99E-16 | -8.86 | 25.5145067 | -2.00E-01 | 103998345 | 103998468 | NC_000004.11 |
| cg02499614     | 1.34E-14 | 5.00E-16 | -8.86 | 25.5118396 | -1.31E-01 | 141250718 | 141250841 | NC_000005.9  |
| cg18894552     | 1.35E-14 | 5.01E-16 | -8.86 | 25.5115698 | -1.89E-01 | 53478112  | 53478235  | NC_000014.8  |
| cg13967646     | 1.35E-14 | 5.01E-16 | -8.86 | 25.5113319 | -4.19E-02 | 219263467 | 219263590 | NC_000002.11 |
| cg19628758     | 1.35E-14 | 5.01E-16 | -8.86 | 25.5111901 | -5.96E-02 | 47973951  | 47974074  | NC_000001.10 |
| ch.17.1746650F | 1.35E-14 | 5.02E-16 | -8.86 | 25.5095359 | -6.37E-02 | 65640171  | 65640294  | NC_000017.10 |
| cg21167046     | 1.35E-14 | 5.02E-16 | -8.86 | 25.5092039 | -1.62E-01 | 1295078   | 1295201   | NC_000004.11 |
| cg27133034     | 1.35E-14 | 5.02E-16 | -8.86 | 25.5091801 | -1.79E-01 | 12235611  | 12235734  | NC_000011.9  |
| cg10715147     | 1.35E-14 | 5.03E-16 | -8.86 | 25.507002  | -1.79E-01 | 42186473  | 42186596  | NC_000015.9  |
| cg09900436     | 1.35E-14 | 5.04E-16 | -8.86 | 25.5041697 | -1.56E-01 | 58630954  | 58631077  | NC_000020.10 |
| cg15044760     | 1.36E-14 | 5.05E-16 | -8.86 | 25.5025957 | -1.42E-01 | 45177243  | 45177366  | NC_000002.11 |
| cg23937993     | 1.36E-14 | 5.06E-16 | -8.86 | 25.500856  | -1.78E-01 | 10477847  | 10477970  | NC_000011.9  |
| cg00722081     | 1.36E-14 | 5.07E-16 | -8.86 | 25.4985234 | -2.21E-01 | 61147668  | 61147791  | NC_000010.10 |
| cg27477067     | 1.36E-14 | 5.08E-16 | -8.86 | 25.4976914 | -1.57E-01 | 2966810   | 2966933   | NC_000011.9  |

|            |          |          |       |            |           |           |           |              |
|------------|----------|----------|-------|------------|-----------|-----------|-----------|--------------|
| cg18587504 | 1.36E-14 | 5.09E-16 | -8.86 | 25.4956343 | -1.48E-01 | 57598576  | 57598699  | NC_000015.9  |
| cg04233669 | 1.37E-14 | 5.11E-16 | -8.85 | 25.4916968 | -2.17E-01 | 135173201 | 135173324 | NC_000005.9  |
| cg03106056 | 1.37E-14 | 5.12E-16 | -8.85 | 25.4891257 | -1.87E-01 | 217237937 | 217238060 | NC_000002.11 |
| cg20811730 | 1.38E-14 | 5.15E-16 | -8.85 | 25.4829872 | -7.86E-02 | 150293902 | 150294025 | NC_000001.10 |
| cg08932727 | 1.39E-14 | 5.17E-16 | -8.85 | 25.4798439 | -1.68E-01 | 328182    | 328305    | NC_000006.11 |
| cg13798885 | 1.39E-14 | 5.17E-16 | -8.85 | 25.4787504 | -1.70E-01 | 13968277  | 13968400  | NC_000004.11 |
| cg21449597 | 1.39E-14 | 5.18E-16 | -8.85 | 25.4778728 | -1.64E-01 | 154036828 | 154036951 | NC_000004.11 |
| cg17758721 | 1.40E-14 | 5.23E-16 | -8.85 | 25.4675344 | -3.15E-02 | 2451208   | 2451331   | NC_000020.10 |
| cg17176423 | 1.41E-14 | 5.26E-16 | -8.85 | 25.4618344 | -8.85E-02 | 85278581  | 85278704  | NC_000015.9  |
| cg15440661 | 1.42E-14 | 5.30E-16 | -8.85 | 25.455345  | -1.24E-01 | 43395871  | 43395994  | NC_000002.11 |
| cg01184520 | 1.42E-14 | 5.31E-16 | -8.85 | 25.4530198 | -7.48E-02 | 75032509  | 75032632  | NC_000016.9  |
| cg00600477 | 1.42E-14 | 5.32E-16 | -8.85 | 25.4504392 | -1.64E-01 | 144715010 | 144715133 | NC_000008.10 |
| cg18271897 | 1.43E-14 | 5.33E-16 | -8.85 | 25.4500363 | -2.03E-01 | 75316784  | 75316907  | NC_000017.10 |
| cg01422467 | 1.43E-14 | 5.33E-16 | -8.85 | 25.44926   | -2.01E-01 | 103998289 | 103998412 | NC_000004.11 |
| cg11945668 | 1.43E-14 | 5.33E-16 | -8.85 | 25.448724  | -2.06E-01 | 436905    | 437028    | NC_000006.11 |
| cg26470101 | 1.43E-14 | 5.35E-16 | -8.85 | 25.445934  | -1.71E-01 | 173099597 | 173099720 | NC_000002.11 |
| cg19458497 | 1.43E-14 | 5.35E-16 | -8.85 | 25.4457413 | -1.50E-01 | 63403371  | 63403494  | NC_000011.9  |
| cg10549071 | 1.43E-14 | 5.36E-16 | -8.85 | 25.4441959 | -1.90E-01 | 235160451 | 235160574 | NC_000002.11 |
| cg23340875 | 1.44E-14 | 5.37E-16 | -8.85 | 25.4421576 | -3.10E-02 | 48711990  | 48712113  | NC_000017.10 |
| cg06623778 | 1.44E-14 | 5.37E-16 | -8.85 | 25.4417778 | -1.68E-01 | 848409    | 848532    | NC_000001.10 |
| cg11119767 | 1.44E-14 | 5.38E-16 | -8.85 | 25.4409483 | -1.64E-01 | 174024669 | 174024792 | NC_000002.11 |
| cg13285077 | 1.44E-14 | 5.38E-16 | -8.85 | 25.4399443 | -1.42E-01 | 134651819 | 134651942 | NC_000011.9  |
| cg02037573 | 1.44E-14 | 5.40E-16 | -8.85 | 25.4369219 | -1.31E-01 | 45148056  | 45148179  | NC_000003.11 |
| cg07499317 | 1.44E-14 | 5.40E-16 | -8.85 | 25.4359212 | -1.50E-01 | 179758012 | 179758135 | NC_000005.9  |
| cg02111705 | 1.45E-14 | 5.41E-16 | -8.85 | 25.4353205 | -6.02E-02 | 43065244  | 43065367  | NC_000005.9  |

|                |          |          |       |            |           |           |           |              |
|----------------|----------|----------|-------|------------|-----------|-----------|-----------|--------------|
| cg18780489     | 1.45E-14 | 5.43E-16 | -8.85 | 25.4313637 | -1.48E-01 | 28807568  | 28807691  | NC_000002.11 |
| cg12142865     | 1.45E-14 | 5.44E-16 | -8.84 | 25.4292294 | -8.31E-02 | 112211993 | 112212116 | NC_000012.11 |
| cg02104392     | 1.45E-14 | 5.44E-16 | -8.84 | 25.4287607 | -1.69E-01 | 134578960 | 134579083 | NC_000002.11 |
| cg04903600     | 1.46E-14 | 5.45E-16 | -8.84 | 25.4280468 | -1.33E-01 | 1105746   | 1105869   | NC_000019.9  |
| cg27098900     | 1.46E-14 | 5.45E-16 | -8.84 | 25.4268738 | -2.44E-01 | 33245128  | 33245251  | NC_000006.11 |
| cg24542725     | 1.46E-14 | 5.46E-16 | -8.84 | 25.4252537 | -5.49E-02 | 99724244  | 99724367  | NC_000007.13 |
| ch.12.2545474F | 1.46E-14 | 5.47E-16 | -8.84 | 25.4243906 | -5.09E-02 | 122169458 | 122169581 | NC_000012.11 |
| cg01127300     | 1.46E-14 | 5.47E-16 | -8.84 | 25.4230582 | -1.35E-01 | 38614796  | 38614919  | NC_000022.10 |
| cg12829045     | 1.46E-14 | 5.48E-16 | -8.84 | 25.421804  | -1.83E-01 | 77228852  | 77228975  | NC_000010.10 |
| cg26247309     | 1.47E-14 | 5.49E-16 | -8.84 | 25.4206075 | -9.18E-02 | 149501835 | 149501958 | NC_000005.9  |
| cg04024572     | 1.47E-14 | 5.50E-16 | -8.84 | 25.4177647 | -8.02E-02 | 65657704  | 65657827  | NC_000011.9  |
| cg16102971     | 1.47E-14 | 5.51E-16 | -8.84 | 25.4172905 | -1.08E-01 | 78424330  | 78424453  | NC_000017.10 |
| cg00845319     | 1.47E-14 | 5.51E-16 | -8.84 | 25.4157442 | -1.46E-01 | 28520623  | 28520746  | NC_000001.10 |
| cg16477417     | 1.47E-14 | 5.52E-16 | -8.84 | 25.4156404 | -1.44E-01 | 73342168  | 73342291  | NC_000017.10 |
| cg10927461     | 1.47E-14 | 5.52E-16 | -8.84 | 25.4151327 | -1.97E-01 | 122530159 | 122530282 | NC_000002.11 |
| cg25737218     | 1.47E-14 | 5.52E-16 | -8.84 | 25.4144719 | -1.52E-01 | 944415    | 944538    | NC_000019.9  |
| cg14160433     | 1.48E-14 | 5.54E-16 | -8.84 | 25.4120865 | -1.64E-01 | 138749560 | 138749683 | NC_000009.11 |
| cg09895653     | 1.48E-14 | 5.54E-16 | -8.84 | 25.411868  | -1.56E-01 | 50925201  | 50925324  | NC_000022.10 |
| cg08076617     | 1.48E-14 | 5.54E-16 | -8.84 | 25.4112736 | -1.65E-01 | 176739172 | 176739295 | NC_000005.9  |
| cg03865524     | 1.48E-14 | 5.54E-16 | -8.84 | 25.4107401 | -1.18E-01 | 45360781  | 45360904  | NC_000010.10 |
| cg04057956     | 1.48E-14 | 5.55E-16 | -8.84 | 25.4089874 | -2.16E-01 | 6339200   | 6339323   | NC_000012.11 |
| cg02709321     | 1.49E-14 | 5.58E-16 | -8.84 | 25.4044529 | -1.50E-01 | 52581551  | 52581674  | NC_000016.9  |
| cg07277818     | 1.49E-14 | 5.59E-16 | -8.84 | 25.4029955 | -5.95E-02 | 137774639 | 137774762 | NC_000005.9  |
| cg13521048     | 1.50E-14 | 5.61E-16 | -8.84 | 25.3982429 | -1.33E-01 | 46294356  | 46294479  | NC_000021.8  |
| cg24775616     | 1.50E-14 | 5.62E-16 | -8.84 | 25.3976639 | -1.00E-01 | 1157257   | 1157380   | NC_000017.10 |

|            |          |          |       |            |           |           |           |              |
|------------|----------|----------|-------|------------|-----------|-----------|-----------|--------------|
| cg14705643 | 1.50E-14 | 5.62E-16 | -8.84 | 25.3968481 | -1.07E-01 | 184287328 | 184287451 | NC_000003.11 |
| cg26817573 | 1.50E-14 | 5.63E-16 | -8.84 | 25.3959705 | -8.78E-02 | 64126729  | 64126852  | NC_000015.9  |
| cg01267262 | 1.50E-14 | 5.63E-16 | -8.84 | 25.395661  | -5.30E-02 | 219926062 | 219926185 | NC_000002.11 |
| cg18914962 | 1.50E-14 | 5.63E-16 | -8.84 | 25.3952711 | -1.83E-01 | 136914796 | 136914919 | NC_000006.11 |
| cg00500428 | 1.50E-14 | 5.64E-16 | -8.84 | 25.3940635 | -6.29E-02 | 3074502   | 3074625   | NC_000016.9  |
| cg23897302 | 1.50E-14 | 5.64E-16 | -8.84 | 25.3933774 | -1.66E-01 | 103393970 | 103394093 | NC_000014.8  |
| cg06182329 | 1.50E-14 | 5.64E-16 | -8.84 | 25.3931469 | -7.52E-02 | 50706483  | 50706606  | NC_000019.9  |
| cg25033360 | 1.50E-14 | 5.65E-16 | -8.84 | 25.3924463 | -1.38E-01 | 36886443  | 36886566  | NC_000001.10 |
| cg22611163 | 1.51E-14 | 5.65E-16 | -8.84 | 25.3915817 | -1.10E-01 | 201829094 | 201829217 | NC_000002.11 |
| cg03719032 | 1.51E-14 | 5.66E-16 | -8.84 | 25.3908167 | -1.21E-01 | 19374710  | 19374833  | NC_000019.9  |
| cg06568535 | 1.51E-14 | 5.66E-16 | -8.84 | 25.3903702 | -9.77E-02 | 29323042  | 29323165  | NC_000003.11 |
| cg27537048 | 1.51E-14 | 5.66E-16 | -8.84 | 25.3893407 | -4.58E-02 | 5147165   | 5147288   | NC_000016.9  |
| cg15902874 | 1.51E-14 | 5.67E-16 | -8.84 | 25.3885903 | -7.40E-02 | 31677716  | 31677839  | NC_000014.8  |
| cg08535779 | 1.51E-14 | 5.67E-16 | -8.84 | 25.3882511 | -1.47E-01 | 2475961   | 2476084   | NC_000001.10 |
| cg01435109 | 1.51E-14 | 5.67E-16 | -8.84 | 25.3877586 | -1.41E-01 | 23496648  | 23496771  | NC_000001.10 |
| cg25512587 | 1.51E-14 | 5.68E-16 | -8.84 | 25.3868704 | -3.19E-02 | 136344026 | 136344149 | NC_000009.11 |
| cg11401820 | 1.52E-14 | 5.69E-16 | -8.84 | 25.3846131 | -1.90E-01 | 82425284  | 82425407  | NC_000015.9  |
| cg13639341 | 1.52E-14 | 5.70E-16 | -8.84 | 25.3832158 | -1.18E-01 | 271672    | 271795    | NC_000020.10 |
| cg27117792 | 1.52E-14 | 5.71E-16 | -8.84 | 25.3817808 | -1.68E-01 | 102330180 | 102330303 | NC_000012.11 |
| cg21680327 | 1.52E-14 | 5.72E-16 | -8.84 | 25.3794281 | -1.15E-01 | 36108225  | 36108348  | NC_000001.10 |
| cg26859016 | 1.52E-14 | 5.72E-16 | -8.84 | 25.3791527 | -1.33E-01 | 206643375 | 206643498 | NC_000001.10 |
| cg05907835 | 1.53E-14 | 5.73E-16 | -8.84 | 25.3780376 | -2.04E-01 | 31214346  | 31214469  | NC_000016.9  |
| cg12634276 | 1.53E-14 | 5.73E-16 | -8.84 | 25.3773486 | -8.49E-02 | 53578311  | 53578434  | NC_000004.11 |
| cg03553308 | 1.53E-14 | 5.74E-16 | -8.84 | 25.3766559 | -9.49E-02 | 30069250  | 30069373  | NC_000006.11 |
| cg23104951 | 1.53E-14 | 5.74E-16 | -8.84 | 25.376034  | -1.74E-01 | 39855586  | 39855709  | NC_000006.11 |

|                |          |          |       |            |           |           |           |              |
|----------------|----------|----------|-------|------------|-----------|-----------|-----------|--------------|
| cg11949874     | 1.53E-14 | 5.74E-16 | -8.84 | 25.3754981 | -1.15E-01 | 11381935  | 11382058  | NC_000001.10 |
| cg05026186     | 1.53E-14 | 5.77E-16 | -8.84 | 25.3718661 | -1.08E-01 | 148520876 | 148520999 | NC_000005.9  |
| cg22013019     | 1.53E-14 | 5.77E-16 | -8.84 | 25.3717837 | -1.55E-01 | 1558789   | 1558912   | NC_000006.11 |
| cg22862656     | 1.54E-14 | 5.78E-16 | -8.84 | 25.3695335 | -1.70E-01 | 62037659  | 62037782  | NC_000011.9  |
| cg16715194     | 1.54E-14 | 5.78E-16 | -8.84 | 25.3685253 | -9.01E-02 | 233430825 | 233430948 | NC_000001.10 |
| cg19641327     | 1.54E-14 | 5.79E-16 | -8.84 | 25.3679734 | -1.41E-01 | 15834770  | 15834893  | NC_000005.9  |
| cg24848602     | 1.54E-14 | 5.79E-16 | -8.84 | 25.3677338 | -5.61E-02 | 182573453 | 182573576 | NC_000001.10 |
| cg06675784     | 1.54E-14 | 5.79E-16 | -8.83 | 25.3668589 | -5.68E-02 | 86775122  | 86775245  | NC_000016.9  |
| cg02844899     | 1.54E-14 | 5.80E-16 | -8.83 | 25.3655064 | -1.34E-01 | 47182345  | 47182468  | NC_000002.11 |
| cg23516634     | 1.55E-14 | 5.82E-16 | -8.83 | 25.3632415 | -4.44E-02 | 5068177   | 5068300   | NC_000003.11 |
| cg12097550     | 1.55E-14 | 5.83E-16 | -8.83 | 25.361185  | -1.32E-01 | 54068942  | 54069065  | NC_000012.11 |
| cg04960065     | 1.55E-14 | 5.83E-16 | -8.83 | 25.3607805 | -2.04E-01 | 185189300 | 185189423 | NC_000004.11 |
| cg05146544     | 1.55E-14 | 5.83E-16 | -8.83 | 25.3605645 | -9.79E-02 | 134785775 | 134785898 | NC_000002.11 |
| cg22905866     | 1.56E-14 | 5.85E-16 | -8.83 | 25.3569067 | -1.91E-01 | 185468777 | 185468900 | NC_000004.11 |
| cg03907847     | 1.56E-14 | 5.85E-16 | -8.83 | 25.3567649 | -1.51E-01 | 28495908  | 28496031  | NC_000013.10 |
| cg20703752     | 1.56E-14 | 5.88E-16 | -8.83 | 25.3520659 | -6.27E-02 | 42977117  | 42977240  | NC_000017.10 |
| cg08494738     | 1.56E-14 | 5.88E-16 | -8.83 | 25.3519903 | -2.20E-01 | 4369512   | 4369635   | NC_000016.9  |
| ch.11.1684505R | 1.57E-14 | 5.91E-16 | -8.83 | 25.3478115 | -6.54E-02 | 77410861  | 77410984  | NC_000011.9  |
| cg23980760     | 1.57E-14 | 5.91E-16 | -8.83 | 25.3472787 | -1.57E-01 | 44069581  | 44069704  | NC_000011.9  |
| cg06281680     | 1.57E-14 | 5.91E-16 | -8.83 | 25.3467241 | -6.95E-02 | 232347922 | 232348045 | NC_000002.11 |
| cg02520399     | 1.57E-14 | 5.91E-16 | -8.83 | 25.3464991 | -1.74E-01 | 8168661   | 8168784   | NC_000008.10 |
| cg24531401     | 1.58E-14 | 5.95E-16 | -8.83 | 25.3407955 | -1.18E-01 | 1513791   | 1513914   | NC_000007.13 |
| cg11378101     | 1.58E-14 | 5.95E-16 | -8.83 | 25.3400456 | -2.25E-01 | 94826095  | 94826218  | NC_000011.9  |
| cg04156850     | 1.58E-14 | 5.96E-16 | -8.83 | 25.3386324 | -7.22E-02 | 73402572  | 73402695  | NC_000017.10 |
| cg24499839     | 1.58E-14 | 5.97E-16 | -8.83 | 25.3370063 | -4.72E-02 | 231762238 | 231762361 | NC_000001.10 |

|            |          |          |       |            |           |           |           |              |
|------------|----------|----------|-------|------------|-----------|-----------|-----------|--------------|
| cg12554573 | 1.59E-14 | 5.98E-16 | -8.83 | 25.3357078 | -1.73E-01 | 51976667  | 51976790  | NC_000003.11 |
| cg20459687 | 1.59E-14 | 5.98E-16 | -8.83 | 25.3355747 | -2.11E-01 | 99128579  | 99128702  | NC_000013.10 |
| cg23298114 | 1.59E-14 | 5.98E-16 | -8.83 | 25.3351689 | -2.10E-01 | 118933411 | 118933534 | NC_000008.10 |
| cg03992830 | 1.59E-14 | 6.00E-16 | -8.83 | 25.332572  | -1.75E-01 | 67681065  | 67681188  | NC_000016.9  |
| cg19670610 | 1.59E-14 | 6.00E-16 | -8.83 | 25.3319201 | -2.09E-01 | 89455337  | 89455460  | NC_000004.11 |
| cg00117599 | 1.60E-14 | 6.01E-16 | -8.83 | 25.3300289 | -1.34E-01 | 45962589  | 45962712  | NC_000017.10 |
| cg06139893 | 1.60E-14 | 6.02E-16 | -8.83 | 25.328747  | -1.52E-01 | 47404109  | 47404232  | NC_000021.8  |
| cg10575376 | 1.60E-14 | 6.03E-16 | -8.83 | 25.3278688 | -7.13E-02 | 124246446 | 124246569 | NC_000012.11 |
| cg18232841 | 1.61E-14 | 6.05E-16 | -8.83 | 25.3233887 | -1.52E-01 | 35615103  | 35615226  | NC_000019.9  |
| cg06028605 | 1.61E-14 | 6.07E-16 | -8.83 | 25.3215422 | -1.23E-01 | 24865363  | 24865486  | NC_000016.9  |
| cg19741026 | 1.61E-14 | 6.07E-16 | -8.83 | 25.3215382 | -1.48E-01 | 962743    | 962866    | NC_000007.13 |
| cg15520443 | 1.61E-14 | 6.07E-16 | -8.83 | 25.3209202 | -1.98E-01 | 119018877 | 119019000 | NC_000010.10 |
| cg10098541 | 1.61E-14 | 6.08E-16 | -8.83 | 25.3187913 | -1.43E-01 | 122785650 | 122785773 | NC_000003.11 |
| cg15163247 | 1.61E-14 | 6.09E-16 | -8.83 | 25.3169364 | -5.64E-02 | 49617468  | 49617591  | NC_000019.9  |
| cg03398156 | 1.62E-14 | 6.10E-16 | -8.83 | 25.3167717 | -1.46E-01 | 220154779 | 220154902 | NC_000002.11 |
| cg24087403 | 1.62E-14 | 6.11E-16 | -8.83 | 25.3145781 | -4.66E-02 | 71078535  | 71078658  | NC_000010.10 |
| cg01378158 | 1.62E-14 | 6.11E-16 | -8.83 | 25.3142673 | -1.54E-01 | 67312308  | 67312431  | NC_000016.9  |
| cg23116540 | 1.62E-14 | 6.13E-16 | -8.83 | 25.3113397 | -1.76E-01 | 39871808  | 39871931  | NC_000015.9  |
| cg12209165 | 1.62E-14 | 6.13E-16 | -8.83 | 25.3109207 | -7.22E-02 | 132073546 | 132073669 | NC_000005.9  |
| cg07183691 | 1.62E-14 | 6.13E-16 | -8.83 | 25.3106339 | -1.46E-01 | 43241683  | 43241806  | NC_000021.8  |
| cg11709405 | 1.63E-14 | 6.16E-16 | -8.83 | 25.3067063 | -2.30E-01 | 24649398  | 24649521  | NC_000001.10 |
| cg12743031 | 1.64E-14 | 6.18E-16 | -8.82 | 25.3034276 | -1.79E-01 | 27219512  | 27219635  | NC_000008.10 |
| cg03257417 | 1.64E-14 | 6.18E-16 | -8.82 | 25.3023817 | -1.42E-01 | 111189871 | 111189994 | NC_000001.10 |
| cg13309027 | 1.65E-14 | 6.21E-16 | -8.82 | 25.2977534 | -1.09E-01 | 47870224  | 47870347  | NC_000011.9  |
| cg05416911 | 1.65E-14 | 6.22E-16 | -8.82 | 25.2968421 | -1.36E-01 | 7176049   | 7176172   | NC_000012.11 |

|                |          |          |       |            |           |           |           |              |
|----------------|----------|----------|-------|------------|-----------|-----------|-----------|--------------|
| cg25826546     | 1.65E-14 | 6.23E-16 | -8.82 | 25.2958331 | -7.27E-02 | 100770060 | 100770183 | NC_000007.13 |
| cg21325822     | 1.65E-14 | 6.23E-16 | -8.82 | 25.2946935 | -1.07E-01 | 154497591 | 154497714 | NC_000003.11 |
| cg18874307     | 1.65E-14 | 6.25E-16 | -8.82 | 25.2926463 | -8.07E-02 | 58027504  | 58027627  | NC_000012.11 |
| cg19673155     | 1.66E-14 | 6.27E-16 | -8.82 | 25.2886767 | -1.73E-01 | 72995181  | 72995304  | NC_000010.10 |
| cg27293078     | 1.66E-14 | 6.27E-16 | -8.82 | 25.2882984 | -1.32E-01 | 129685609 | 129685732 | NC_000011.9  |
| cg19730813     | 1.66E-14 | 6.28E-16 | -8.82 | 25.2874063 | -1.06E-01 | 128470217 | 128470340 | NC_000007.13 |
| ch.8.120035F   | 1.67E-14 | 6.30E-16 | -8.82 | 25.2845212 | -8.36E-02 | 3631202   | 3631325   | NC_000008.10 |
| cg07821739     | 1.67E-14 | 6.30E-16 | -8.82 | 25.2842924 | -1.08E-01 | 26347541  | 26347664  | NC_000001.10 |
| cg14560364     | 1.67E-14 | 6.30E-16 | -8.82 | 25.2836756 | -1.71E-01 | 34686892  | 34687015  | NC_000009.11 |
| cg03052794     | 1.67E-14 | 6.31E-16 | -8.82 | 25.2830513 | -1.30E-01 | 908894    | 909017    | NC_000019.9  |
| cg12215294     | 1.67E-14 | 6.32E-16 | -8.82 | 25.2811018 | -7.85E-02 | 40350768  | 40350891  | NC_000003.11 |
| cg01435678     | 1.67E-14 | 6.33E-16 | -8.82 | 25.2801979 | -1.55E-01 | 154377379 | 154377502 | NC_000001.10 |
| cg00042568     | 1.67E-14 | 6.33E-16 | -8.82 | 25.2801926 | -8.25E-02 | 14987939  | 14988062  | NC_000003.11 |
| cg19915762     | 1.67E-14 | 6.33E-16 | -8.82 | 25.2797891 | -1.28E-01 | 64023086  | 64023209  | NC_000011.9  |
| cg15744128     | 1.67E-14 | 6.33E-16 | -8.82 | 25.2792972 | -1.49E-01 | 27850964  | 27851087  | NC_000002.11 |
| cg15818008     | 1.68E-14 | 6.35E-16 | -8.82 | 25.275859  | -2.26E-01 | 112126170 | 112126293 | NC_000011.9  |
| cg12384236     | 1.68E-14 | 6.36E-16 | -8.82 | 25.2750371 | -1.30E-01 | 42880714  | 42880837  | NC_000021.8  |
| ch.4.90357449R | 1.69E-14 | 6.39E-16 | -8.82 | 25.2706728 | -4.00E-02 | 90138426  | 90138549  | NC_000004.11 |
| cg11526866     | 1.69E-14 | 6.39E-16 | -8.82 | 25.270048  | -7.59E-02 | 20813614  | 20813737  | NC_000001.10 |
| ch.8.2599852F  | 1.69E-14 | 6.39E-16 | -8.82 | 25.2694388 | -5.42E-02 | 131171898 | 131172021 | NC_000008.10 |
| cg25897519     | 1.69E-14 | 6.40E-16 | -8.82 | 25.269133  | -1.89E-01 | 41427415  | 41427538  | NC_000008.10 |
| cg12171863     | 1.69E-14 | 6.40E-16 | -8.82 | 25.2688089 | -4.91E-02 | 8704534   | 8704657   | NC_000018.9  |
| cg14277925     | 1.69E-14 | 6.41E-16 | -8.82 | 25.2665281 | -1.91E-01 | 859532    | 859655    | NC_000011.9  |
| ch.1.3128389F  | 1.70E-14 | 6.43E-16 | -8.82 | 25.2642567 | -6.50E-02 | 160061098 | 160061221 | NC_000001.10 |
| cg04580872     | 1.70E-14 | 6.44E-16 | -8.82 | 25.2627662 | -1.28E-01 | 67198367  | 67198490  | NC_000016.9  |



|              |          |          |       |            |           |           |           |              |
|--------------|----------|----------|-------|------------|-----------|-----------|-----------|--------------|
| cg18024487   | 1.70E-14 | 6.44E-16 | -8.82 | 25.2621118 | -4.77E-02 | 24181665  | 24181788  | NC_000022.10 |
| cg01314044   | 1.71E-14 | 6.46E-16 | -8.82 | 25.2593605 | -1.22E-01 | 94246036  | 94246159  | NC_000011.9  |
| cg21345826   | 1.71E-14 | 6.46E-16 | -8.82 | 25.2586477 | -1.88E-01 | 39353650  | 39353773  | NC_000022.10 |
| cg24278841   | 1.71E-14 | 6.47E-16 | -8.82 | 25.2572517 | -1.48E-01 | 81031249  | 81031372  | NC_000017.10 |
| cg18921475   | 1.71E-14 | 6.48E-16 | -8.82 | 25.2555933 | -2.04E-01 | 66417818  | 66417941  | NC_000007.13 |
| cg02027123   | 1.71E-14 | 6.49E-16 | -8.82 | 25.2553175 | -2.05E-01 | 18804395  | 18804518  | NC_000016.9  |
| cg15536165   | 1.71E-14 | 6.49E-16 | -8.82 | 25.255011  | -1.45E-01 | 35639492  | 35639615  | NC_000011.9  |
| cg00700866   | 1.72E-14 | 6.51E-16 | -8.82 | 25.2519803 | -1.20E-01 | 38096105  | 38096228  | NC_000001.10 |
| cg00964484   | 1.72E-14 | 6.51E-16 | -8.82 | 25.2509931 | -1.51E-01 | 29625235  | 29625358  | NC_000016.9  |
| cg08817867   | 1.72E-14 | 6.52E-16 | -8.82 | 25.2497961 | -1.73E-01 | 19656554  | 19656677  | NC_000017.10 |
| cg08276755   | 1.72E-14 | 6.54E-16 | -8.82 | 25.2472491 | -1.62E-01 | 30196714  | 30196837  | NC_000020.10 |
| cg02591487   | 1.73E-14 | 6.55E-16 | -8.82 | 25.245632  | -1.23E-01 | 8088741   | 8088864   | NC_000012.11 |
| ch.4.868459F | 1.73E-14 | 6.56E-16 | -8.82 | 25.2443387 | -6.02E-02 | 38934393  | 38934516  | NC_000004.11 |
| cg26734579   | 1.73E-14 | 6.56E-16 | -8.82 | 25.2435678 | -1.80E-01 | 10509596  | 10509719  | NC_000019.9  |
| cg16411857   | 1.73E-14 | 6.57E-16 | -8.82 | 25.2430793 | -1.78E-01 | 57023191  | 57023314  | NC_000016.9  |
| cg11346718   | 1.73E-14 | 6.57E-16 | -8.82 | 25.2421216 | -1.32E-01 | 75631     | 75754     | NC_000005.9  |
| cg19308227   | 1.74E-14 | 6.61E-16 | -8.81 | 25.2362873 | -1.64E-01 | 6206323   | 6206446   | NC_000001.10 |
| cg16524733   | 1.74E-14 | 6.62E-16 | -8.81 | 25.2348996 | -1.97E-01 | 117070046 | 117070169 | NC_000011.9  |
| cg17127823   | 1.75E-14 | 6.63E-16 | -8.81 | 25.2331116 | -8.73E-02 | 71520941  | 71521064  | NC_000008.10 |
| cg11247087   | 1.75E-14 | 6.63E-16 | -8.81 | 25.2329485 | -1.55E-01 | 32961864  | 32961987  | NC_000017.10 |
| cg08415137   | 1.75E-14 | 6.64E-16 | -8.81 | 25.2323783 | -6.26E-02 | 86176688  | 86176811  | NC_000005.9  |
| cg12847502   | 1.75E-14 | 6.64E-16 | -8.81 | 25.2317972 | -1.17E-01 | 43437911  | 43438034  | NC_000002.11 |
| cg25776343   | 1.75E-14 | 6.66E-16 | -8.81 | 25.2289463 | -1.65E-01 | 72336097  | 72336220  | NC_000010.10 |
| cg22948959   | 1.76E-14 | 6.69E-16 | -8.81 | 25.2250008 | -1.35E-01 | 2509272   | 2509395   | NC_000001.10 |
| cg11862081   | 1.76E-14 | 6.69E-16 | -8.81 | 25.224091  | -1.67E-01 | 66625106  | 66625229  | NC_000011.9  |

|            |          |          |       |            |           |           |           |              |
|------------|----------|----------|-------|------------|-----------|-----------|-----------|--------------|
| cg03712541 | 1.76E-14 | 6.70E-16 | -8.81 | 25.2229974 | -1.47E-01 | 6947294   | 6947417   | NC_000017.10 |
| cg11958449 | 1.77E-14 | 6.71E-16 | -8.81 | 25.2213691 | -7.16E-02 | 18547762  | 18547885  | NC_000020.10 |
| cg10947827 | 1.78E-14 | 6.75E-16 | -8.81 | 25.215561  | -6.26E-02 | 201980652 | 201980775 | NC_000002.11 |
| cg26955845 | 1.78E-14 | 6.76E-16 | -8.81 | 25.2149499 | -2.14E-01 | 57680131  | 57680254  | NC_000016.9  |
| cg24632944 | 1.78E-14 | 6.76E-16 | -8.81 | 25.2142015 | -9.97E-02 | 13664715  | 13664838  | NC_000003.11 |
| cg18964590 | 1.78E-14 | 6.76E-16 | -8.81 | 25.21416   | -1.43E-01 | 1521483   | 1521606   | NC_000017.10 |
| cg12404590 | 1.78E-14 | 6.77E-16 | -8.81 | 25.2132086 | -1.58E-01 | 50455653  | 50455776  | NC_000022.10 |
| cg09133953 | 1.78E-14 | 6.78E-16 | -8.81 | 25.2117162 | -9.39E-02 | 37824468  | 37824591  | NC_000017.10 |
| cg11772919 | 1.78E-14 | 6.78E-16 | -8.81 | 25.2115283 | -2.45E-01 | 33245328  | 33245451  | NC_000006.11 |
| cg27496793 | 1.78E-14 | 6.78E-16 | -8.81 | 25.2113344 | -1.03E-01 | 46926433  | 46926556  | NC_000002.11 |
| cg24162579 | 1.78E-14 | 6.78E-16 | -8.81 | 25.2109802 | -1.56E-01 | 27817404  | 27817527  | NC_000001.10 |
| cg12675848 | 1.79E-14 | 6.80E-16 | -8.81 | 25.2080036 | -8.80E-02 | 125109120 | 125109243 | NC_000009.11 |
| cg14845282 | 1.80E-14 | 6.85E-16 | -8.81 | 25.2012027 | -6.11E-02 | 131080593 | 131080716 | NC_000003.11 |
| cg04107773 | 1.80E-14 | 6.86E-16 | -8.81 | 25.2003685 | -8.55E-02 | 62273555  | 62273678  | NC_000020.10 |
| cg09796886 | 1.80E-14 | 6.86E-16 | -8.81 | 25.1998111 | -7.25E-02 | 39640558  | 39640681  | NC_000004.11 |
| cg00357958 | 1.81E-14 | 6.88E-16 | -8.81 | 25.1971485 | -1.63E-01 | 123215010 | 123215133 | NC_000012.11 |
| cg11721177 | 1.81E-14 | 6.88E-16 | -8.81 | 25.1969607 | -1.26E-01 | 22919873  | 22919996  | NC_000001.10 |
| cg12303084 | 1.81E-14 | 6.89E-16 | -8.81 | 25.196118  | -6.68E-02 | 45985741  | 45985864  | NC_000020.10 |
| cg07819010 | 1.81E-14 | 6.89E-16 | -8.81 | 25.1959049 | -1.80E-01 | 46619375  | 46619498  | NC_000011.9  |
| cg01941278 | 1.81E-14 | 6.89E-16 | -8.81 | 25.1949891 | -1.99E-01 | 71895997  | 71896120  | NC_000005.9  |
| cg14310606 | 1.81E-14 | 6.90E-16 | -8.81 | 25.1941695 | -7.17E-02 | 139693852 | 139693975 | NC_000009.11 |
| cg03998476 | 1.81E-14 | 6.91E-16 | -8.81 | 25.1928647 | -5.18E-02 | 56884536  | 56884659  | NC_000020.10 |
| cg12382557 | 1.81E-14 | 6.91E-16 | -8.81 | 25.1922221 | -2.41E-01 | 1332964   | 1333087   | NC_000004.11 |
| cg02327719 | 1.82E-14 | 6.92E-16 | -8.81 | 25.1913178 | -1.37E-01 | 26185386  | 26185509  | NC_000001.10 |
| cg14617041 | 1.82E-14 | 6.92E-16 | -8.81 | 25.1911148 | -2.26E-01 | 72415687  | 72415810  | NC_000005.9  |

|            |          |          |       |            |           |           |           |              |
|------------|----------|----------|-------|------------|-----------|-----------|-----------|--------------|
| cg11737831 | 1.82E-14 | 6.92E-16 | -8.81 | 25.1910253 | -7.83E-02 | 980707    | 980830    | NC_000019.9  |
| cg09427944 | 1.82E-14 | 6.92E-16 | -8.81 | 25.1906164 | -1.89E-01 | 30579519  | 30579642  | NC_000016.9  |
| cg18724061 | 1.82E-14 | 6.93E-16 | -8.81 | 25.1894463 | -6.20E-02 | 27861294  | 27861417  | NC_000006.11 |
| cg05415606 | 1.82E-14 | 6.95E-16 | -8.81 | 25.1873837 | -1.51E-01 | 38357299  | 38357422  | NC_000002.11 |
| cg18474885 | 1.82E-14 | 6.95E-16 | -8.81 | 25.1873088 | -8.30E-02 | 46292084  | 46292207  | NC_000021.8  |
| cg14219787 | 1.83E-14 | 6.96E-16 | -8.81 | 25.1860181 | -8.74E-02 | 148787290 | 148787413 | NC_000007.13 |
| cg03807842 | 1.83E-14 | 6.96E-16 | -8.81 | 25.1857596 | -2.04E-01 | 967038    | 967161    | NC_000007.13 |
| cg00048838 | 1.83E-14 | 6.96E-16 | -8.81 | 25.1850271 | -2.41E-02 | 27806471  | 27806594  | NC_000006.11 |
| cg02432312 | 1.83E-14 | 6.97E-16 | -8.81 | 25.1838935 | -1.45E-01 | 64497074  | 64497197  | NC_000007.13 |
| cg25828207 | 1.83E-14 | 6.99E-16 | -8.81 | 25.1819262 | -1.82E-01 | 134261655 | 134261778 | NC_000010.10 |
| cg24897320 | 1.84E-14 | 7.01E-16 | -8.81 | 25.1781489 | -1.79E-01 | 110042528 | 110042651 | NC_000001.10 |
| cg16290996 | 1.84E-14 | 7.01E-16 | -8.81 | 25.1780138 | -1.20E-01 | 173835989 | 173836112 | NC_000001.10 |
| cg23686365 | 1.86E-14 | 7.09E-16 | -8.8  | 25.1673607 | -6.56E-02 | 35544887  | 35545010  | NC_000001.10 |
| cg10454258 | 1.87E-14 | 7.12E-16 | -8.8  | 25.1635622 | -1.81E-01 | 27443933  | 27444056  | NC_000016.9  |
| cg12983285 | 1.87E-14 | 7.13E-16 | -8.8  | 25.1619372 | -1.60E-01 | 62168794  | 62168917  | NC_000020.10 |
| cg13261536 | 1.87E-14 | 7.15E-16 | -8.8  | 25.1595673 | -2.65E-01 | 144343915 | 144344038 | NC_000008.10 |
| cg16810519 | 1.87E-14 | 7.16E-16 | -8.8  | 25.1581945 | -6.25E-02 | 61429399  | 61429522  | NC_000008.10 |
| cg15256164 | 1.88E-14 | 7.16E-16 | -8.8  | 25.1570297 | -7.24E-02 | 174220625 | 174220748 | NC_000002.11 |
| cg01361499 | 1.89E-14 | 7.21E-16 | -8.8  | 25.1513739 | -2.15E-01 | 75467997  | 75468120  | NC_000015.9  |
| cg18437039 | 1.89E-14 | 7.21E-16 | -8.8  | 25.1510343 | -1.76E-01 | 1444202   | 1444325   | NC_000019.9  |
| cg24143137 | 1.89E-14 | 7.21E-16 | -8.8  | 25.1500818 | -1.24E-01 | 103995782 | 103995905 | NC_000010.10 |
| cg00244040 | 1.91E-14 | 7.30E-16 | -8.8  | 25.1379288 | -7.35E-02 | 61788914  | 61789037  | NC_000014.8  |
| cg20698113 | 1.91E-14 | 7.31E-16 | -8.8  | 25.1371803 | -1.51E-01 | 50357214  | 50357337  | NC_000022.10 |
| cg26758396 | 1.92E-14 | 7.32E-16 | -8.8  | 25.1351575 | -1.66E-01 | 6104274   | 6104397   | NC_000020.10 |
| cg21494132 | 1.92E-14 | 7.33E-16 | -8.8  | 25.1343814 | -1.64E-01 | 216284009 | 216284132 | NC_000002.11 |

|            |          |          |       |            |           |           |           |              |
|------------|----------|----------|-------|------------|-----------|-----------|-----------|--------------|
| cg25407528 | 1.92E-14 | 7.34E-16 | -8.8  | 25.1324723 | -2.05E-01 | 54860603  | 54860726  | NC_000002.11 |
| cg00656735 | 1.92E-14 | 7.34E-16 | -8.8  | 25.1324442 | -2.18E-01 | 41470922  | 41471045  | NC_000006.11 |
| cg02733847 | 1.92E-14 | 7.36E-16 | -8.8  | 25.1299181 | -5.06E-02 | 31649519  | 31649642  | NC_000006.11 |
| cg18061327 | 1.93E-14 | 7.37E-16 | -8.8  | 25.129093  | -1.80E-01 | 2916738   | 2916861   | NC_000018.9  |
| cg07009895 | 1.93E-14 | 7.37E-16 | -8.8  | 25.128783  | -6.70E-02 | 105877491 | 105877614 | NC_000014.8  |
| cg10418263 | 1.93E-14 | 7.37E-16 | -8.8  | 25.128584  | -1.03E-01 | 35265544  | 35265667  | NC_000006.11 |
| cg21145248 | 1.93E-14 | 7.40E-16 | -8.8  | 25.1254293 | -2.52E-01 | 176816679 | 176816802 | NC_000005.9  |
| cg03616827 | 1.93E-14 | 7.40E-16 | -8.8  | 25.1254086 | -2.07E-01 | 135697767 | 135697890 | NC_000008.10 |
| cg04368724 | 1.93E-14 | 7.40E-16 | -8.8  | 25.1245091 | -1.70E-01 | 31760593  | 31760716  | NC_000006.11 |
| cg04515913 | 1.94E-14 | 7.41E-16 | -8.8  | 25.1239446 | -7.55E-02 | 89182103  | 89182226  | NC_000015.9  |
| cg05882699 | 1.94E-14 | 7.42E-16 | -8.8  | 25.1218932 | -9.70E-02 | 126840591 | 126840714 | NC_000010.10 |
| cg22951989 | 1.94E-14 | 7.44E-16 | -8.8  | 25.120079  | -8.37E-02 | 27491676  | 27491799  | NC_000008.10 |
| cg19091447 | 1.94E-14 | 7.45E-16 | -8.8  | 25.1189198 | -5.51E-02 | 37555378  | 37555501  | NC_000020.10 |
| cg07404363 | 1.95E-14 | 7.47E-16 | -8.8  | 25.1163332 | -6.91E-02 | 112197029 | 112197152 | NC_000005.9  |
| cg01277155 | 1.95E-14 | 7.48E-16 | -8.8  | 25.1149382 | -8.65E-02 | 103086237 | 103086360 | NC_000007.13 |
| cg13468041 | 1.95E-14 | 7.48E-16 | -8.79 | 25.1139183 | -2.13E-01 | 74902951  | 74903074  | NC_000004.11 |
| cg26371327 | 1.96E-14 | 7.50E-16 | -8.79 | 25.1113524 | -1.66E-01 | 16473143  | 16473266  | NC_000001.10 |
| cg21115691 | 1.96E-14 | 7.50E-16 | -8.79 | 25.1112001 | -1.89E-01 | 207140927 | 207141050 | NC_000001.10 |
| cg03712487 | 1.96E-14 | 7.52E-16 | -8.79 | 25.1096875 | -7.78E-02 | 112505362 | 112505485 | NC_000002.11 |
| cg23678594 | 1.96E-14 | 7.52E-16 | -8.79 | 25.1087308 | -1.10E-01 | 1712021   | 1712144   | NC_000001.10 |
| cg13856405 | 1.96E-14 | 7.53E-16 | -8.79 | 25.1082548 | -1.49E-01 | 821395    | 821518    | NC_000010.10 |
| cg26019472 | 1.96E-14 | 7.53E-16 | -8.79 | 25.1076784 | -2.11E-01 | 1170201   | 1170324   | NC_000019.9  |
| cg14325112 | 1.97E-14 | 7.55E-16 | -8.79 | 25.1057518 | -1.97E-01 | 4115070   | 4115193   | NC_000009.11 |
| cg22340072 | 1.97E-14 | 7.55E-16 | -8.79 | 25.1047245 | -8.69E-02 | 61822740  | 61822863  | NC_000008.10 |
| cg18374625 | 1.97E-14 | 7.56E-16 | -8.79 | 25.104282  | -1.13E-01 | 50004152  | 50004275  | NC_000019.9  |

|            |          |          |       |            |           |           |           |              |
|------------|----------|----------|-------|------------|-----------|-----------|-----------|--------------|
| cg11362820 | 1.97E-14 | 7.57E-16 | -8.79 | 25.1021151 | -1.58E-01 | 41234614  | 41234737  | NC_000015.9  |
| cg07777652 | 1.98E-14 | 7.60E-16 | -8.79 | 25.0989975 | -2.08E-01 | 40756696  | 40756819  | NC_000021.8  |
| cg09379385 | 1.99E-14 | 7.63E-16 | -8.79 | 25.0942427 | -9.62E-02 | 27774865  | 27774988  | NC_000006.11 |
| cg13296436 | 2.00E-14 | 7.66E-16 | -8.79 | 25.0905134 | -5.07E-02 | 38474488  | 38474611  | NC_000017.10 |
| cg09695261 | 2.00E-14 | 7.68E-16 | -8.79 | 25.08868   | -2.06E-01 | 79304600  | 79304723  | NC_000017.10 |
| cg07516511 | 2.00E-14 | 7.68E-16 | -8.79 | 25.0886395 | -1.35E-01 | 2907819   | 2907942   | NC_000016.9  |
| cg25804541 | 2.00E-14 | 7.69E-16 | -8.79 | 25.0868829 | -1.08E-01 | 80189381  | 80189504  | NC_000017.10 |
| cg20938170 | 2.01E-14 | 7.70E-16 | -8.79 | 25.0861875 | -1.51E-01 | 75428910  | 75429033  | NC_000011.9  |
| cg26565018 | 2.01E-14 | 7.72E-16 | -8.79 | 25.0835613 | -9.65E-02 | 1799609   | 1799732   | NC_000012.11 |
| cg02985293 | 2.02E-14 | 7.75E-16 | -8.79 | 25.0797349 | -1.54E-01 | 2064854   | 2064977   | NC_000019.9  |
| cg02914652 | 2.02E-14 | 7.75E-16 | -8.79 | 25.0797021 | -1.28E-01 | 4417142   | 4417265   | NC_000012.11 |
| cg17918326 | 2.02E-14 | 7.76E-16 | -8.79 | 25.077713  | -2.49E-01 | 34823957  | 34824080  | NC_000020.10 |
| cg24314564 | 2.02E-14 | 7.76E-16 | -8.79 | 25.0775975 | -1.88E-01 | 188668940 | 188669063 | NC_000003.11 |
| cg09182533 | 2.03E-14 | 7.81E-16 | -8.79 | 25.0717173 | -9.48E-02 | 63775071  | 63775194  | NC_000011.9  |
| cg17949316 | 2.03E-14 | 7.81E-16 | -8.79 | 25.071204  | -1.65E-01 | 8389808   | 8389931   | NC_000004.11 |
| cg27528222 | 2.04E-14 | 7.82E-16 | -8.79 | 25.0704159 | -1.27E-01 | 2138953   | 2139076   | NC_000001.10 |
| cg24106661 | 2.04E-14 | 7.82E-16 | -8.79 | 25.0700872 | -2.09E-01 | 61886946  | 61887069  | NC_000002.11 |
| cg24159636 | 2.04E-14 | 7.83E-16 | -8.79 | 25.0694855 | -1.63E-01 | 18043467  | 18043590  | NC_000006.11 |
| cg07204711 | 2.04E-14 | 7.84E-16 | -8.79 | 25.0680417 | -1.66E-01 | 74001139  | 74001262  | NC_000017.10 |
| cg13977597 | 2.04E-14 | 7.86E-16 | -8.79 | 25.0658093 | -9.67E-02 | 49568000  | 49568123  | NC_000019.9  |
| cg16379316 | 2.05E-14 | 7.87E-16 | -8.79 | 25.0638247 | -6.42E-02 | 75019367  | 75019490  | NC_000016.9  |
| cg25130385 | 2.05E-14 | 7.89E-16 | -8.79 | 25.0620464 | -1.25E-01 | 135646027 | 135646150 | NC_000009.11 |
| cg27558387 | 2.06E-14 | 7.93E-16 | -8.79 | 25.0564446 | -1.69E-01 | 156966620 | 156966743 | NC_000003.11 |
| cg07368796 | 2.06E-14 | 7.93E-16 | -8.79 | 25.0563444 | -1.19E-01 | 43800133  | 43800256  | NC_000010.10 |
| cg18541087 | 2.07E-14 | 7.94E-16 | -8.79 | 25.0548716 | -1.60E-01 | 3293448   | 3293571   | NC_000019.9  |

|                |          |          |       |            |           |           |           |              |
|----------------|----------|----------|-------|------------|-----------|-----------|-----------|--------------|
| cg09537259     | 2.07E-14 | 7.98E-16 | -8.78 | 25.0505831 | -1.01E-01 | 94987522  | 94987645  | NC_000011.9  |
| cg20327163     | 2.07E-14 | 7.98E-16 | -8.78 | 25.0501259 | -1.30E-01 | 96877194  | 96877317  | NC_000015.9  |
| cg01806195     | 2.08E-14 | 8.01E-16 | -8.78 | 25.0471636 | -8.18E-02 | 102701850 | 102701973 | NC_000014.8  |
| cg19721221     | 2.08E-14 | 8.01E-16 | -8.78 | 25.0468488 | -1.71E-01 | 181081214 | 181081337 | NC_000001.10 |
| cg22193247     | 2.09E-14 | 8.02E-16 | -8.78 | 25.0449112 | -1.22E-01 | 242448557 | 242448680 | NC_000002.11 |
| cg22883889     | 2.09E-14 | 8.03E-16 | -8.78 | 25.0438766 | -1.35E-01 | 61583686  | 61583809  | NC_000020.10 |
| cg01404893     | 2.10E-14 | 8.07E-16 | -8.78 | 25.0392747 | -1.66E-01 | 89043547  | 89043670  | NC_000016.9  |
| cg01928143     | 2.10E-14 | 8.07E-16 | -8.78 | 25.039103  | -1.80E-01 | 85038564  | 85038687  | NC_000016.9  |
| cg23778358     | 2.10E-14 | 8.10E-16 | -8.78 | 25.0361218 | -2.12E-01 | 30131749  | 30131872  | NC_000006.11 |
| cg05377120     | 2.11E-14 | 8.13E-16 | -8.78 | 25.0314971 | -2.24E-01 | 10456885  | 10457008  | NC_000012.11 |
| cg26157803     | 2.11E-14 | 8.14E-16 | -8.78 | 25.0312417 | -1.16E-01 | 100773599 | 100773722 | NC_000014.8  |
| cg09318763     | 2.11E-14 | 8.14E-16 | -8.78 | 25.0304263 | -1.88E-01 | 128798565 | 128798688 | NC_000011.9  |
| cg24143287     | 2.12E-14 | 8.16E-16 | -8.78 | 25.0277902 | -1.94E-01 | 128209980 | 128210103 | NC_000010.10 |
| cg05711445     | 2.12E-14 | 8.17E-16 | -8.78 | 25.0274426 | -1.91E-01 | 139528855 | 139528978 | NC_000007.13 |
| cg09611620     | 2.13E-14 | 8.20E-16 | -8.78 | 25.024055  | -2.18E-01 | 71545533  | 71545656  | NC_000003.11 |
| cg11324467     | 2.13E-14 | 8.20E-16 | -8.78 | 25.0236541 | -1.80E-01 | 142047998 | 142048121 | NC_000008.10 |
| cg21041956     | 2.13E-14 | 8.22E-16 | -8.78 | 25.0216046 | -1.12E-01 | 57119681  | 57119804  | NC_000012.11 |
| cg00343092     | 2.14E-14 | 8.25E-16 | -8.78 | 25.0176038 | -8.04E-02 | 43547974  | 43548097  | NC_000022.10 |
| cg10900663     | 2.15E-14 | 8.28E-16 | -8.78 | 25.0142963 | -1.60E-01 | 74942544  | 74942667  | NC_000014.8  |
| ch.15.1582754F | 2.16E-14 | 8.31E-16 | -8.78 | 25.0099991 | -7.25E-02 | 91495089  | 91495212  | NC_000015.9  |
| cg14736458     | 2.16E-14 | 8.33E-16 | -8.78 | 25.0078674 | -1.80E-01 | 99595658  | 99595781  | NC_000007.13 |
| cg11762031     | 2.16E-14 | 8.33E-16 | -8.78 | 25.0076452 | -6.14E-02 | 105864488 | 105864611 | NC_000014.8  |
| cg11294312     | 2.17E-14 | 8.36E-16 | -8.78 | 25.0049834 | -1.31E-01 | 28900046  | 28900169  | NC_000017.10 |
| cg02175578     | 2.17E-14 | 8.37E-16 | -8.78 | 25.0029844 | -7.94E-02 | 62533502  | 62533625  | NC_000015.9  |
| cg08928696     | 2.17E-14 | 8.37E-16 | -8.78 | 25.0028174 | -1.41E-01 | 225632889 | 225633012 | NC_000001.10 |

|               |          |          |       |            |           |           |           |              |
|---------------|----------|----------|-------|------------|-----------|-----------|-----------|--------------|
| ch.14.190588F | 2.18E-14 | 8.41E-16 | -8.78 | 24.9983761 | -7.56E-02 | 30075494  | 30075617  | NC_000014.8  |
| cg24877842    | 2.18E-14 | 8.42E-16 | -8.78 | 24.9978152 | -1.24E-01 | 42201898  | 42202021  | NC_000003.11 |
| cg17415265    | 2.18E-14 | 8.42E-16 | -8.78 | 24.9974418 | -3.25E-01 | 63225111  | 63225234  | NC_000017.10 |
| cg07759570    | 2.18E-14 | 8.43E-16 | -8.78 | 24.9960438 | -8.10E-02 | 35491951  | 35492074  | NC_000019.9  |
| cg05935961    | 2.19E-14 | 8.45E-16 | -8.78 | 24.9933167 | -1.40E-01 | 32352728  | 32352851  | NC_000011.9  |
| cg19300549    | 2.19E-14 | 8.47E-16 | -8.78 | 24.9916261 | -1.78E-01 | 54200888  | 54201011  | NC_000006.11 |
| cg16369987    | 2.20E-14 | 8.49E-16 | -8.78 | 24.9895663 | -1.24E-01 | 127804217 | 127804340 | NC_000007.13 |
| cg16874930    | 2.20E-14 | 8.49E-16 | -8.78 | 24.98896   | -1.25E-01 | 5889808   | 5889931   | NC_000019.9  |
| cg01686739    | 2.21E-14 | 8.52E-16 | -8.77 | 24.986019  | -2.12E-01 | 107855547 | 107855670 | NC_000012.11 |
| cg08138544    | 2.21E-14 | 8.54E-16 | -8.77 | 24.9833876 | -1.84E-01 | 99395845  | 99395968  | NC_000015.9  |
| cg02584867    | 2.21E-14 | 8.54E-16 | -8.77 | 24.9828958 | -1.27E-01 | 1861099   | 1861222   | NC_000019.9  |
| cg24791666    | 2.22E-14 | 8.56E-16 | -8.77 | 24.980724  | -1.69E-01 | 39192215  | 39192338  | NC_000003.11 |
| cg24711224    | 2.22E-14 | 8.57E-16 | -8.77 | 24.9794806 | -4.52E-02 | 176561865 | 176561988 | NC_000005.9  |
| cg13520525    | 2.24E-14 | 8.65E-16 | -8.77 | 24.9706248 | -1.50E-01 | 62168463  | 62168586  | NC_000020.10 |
| cg03925642    | 2.24E-14 | 8.65E-16 | -8.77 | 24.9701845 | -1.74E-01 | 87339657  | 87339780  | NC_000016.9  |
| cg00747849    | 2.26E-14 | 8.72E-16 | -8.77 | 24.9621972 | -9.13E-02 | 19165386  | 19165509  | NC_000022.10 |
| cg20007836    | 2.27E-14 | 8.76E-16 | -8.77 | 24.9583226 | -1.27E-01 | 37844870  | 37844993  | NC_000017.10 |
| cg09341448    | 2.27E-14 | 8.78E-16 | -8.77 | 24.9564797 | -8.80E-02 | 49164383  | 49164506  | NC_000019.9  |
| cg11198589    | 2.27E-14 | 8.78E-16 | -8.77 | 24.9561428 | -7.89E-02 | 33721369  | 33721492  | NC_000001.10 |
| cg02196734    | 2.28E-14 | 8.82E-16 | -8.77 | 24.9513546 | -6.34E-02 | 75018032  | 75018155  | NC_000015.9  |
| cg03889263    | 2.28E-14 | 8.82E-16 | -8.77 | 24.9510029 | -1.36E-01 | 177002388 | 177002511 | NC_000003.11 |
| cg02435593    | 2.28E-14 | 8.84E-16 | -8.77 | 24.9494107 | -7.74E-02 | 32399369  | 32399492  | NC_000020.10 |
| cg06100147    | 2.29E-14 | 8.85E-16 | -8.77 | 24.9480952 | -7.52E-02 | 143059260 | 143059383 | NC_000007.13 |
| cg08584947    | 2.29E-14 | 8.85E-16 | -8.77 | 24.9479696 | -1.76E-01 | 93468317  | 93468440  | NC_000008.10 |
| cg15195292    | 2.29E-14 | 8.88E-16 | -8.77 | 24.9452055 | -2.53E-02 | 37554840  | 37554963  | NC_000020.10 |

|               |          |          |       |            |           |           |           |              |
|---------------|----------|----------|-------|------------|-----------|-----------|-----------|--------------|
| cg01231543    | 2.30E-14 | 8.89E-16 | -8.77 | 24.9441545 | -1.53E-01 | 68741748  | 68741871  | NC_000016.9  |
| cg05692837    | 2.30E-14 | 8.89E-16 | -8.77 | 24.943808  | -6.71E-02 | 49583094  | 49583217  | NC_000012.11 |
| cg13008252    | 2.32E-14 | 8.96E-16 | -8.77 | 24.9355201 | -1.90E-01 | 91083495  | 91083618  | NC_000014.8  |
| ch.12.859106F | 2.32E-14 | 8.97E-16 | -8.77 | 24.9343862 | -4.31E-02 | 42882094  | 42882217  | NC_000012.11 |
| cg07242540    | 2.32E-14 | 8.97E-16 | -8.77 | 24.9342637 | -1.95E-01 | 12600348  | 12600471  | NC_000001.10 |
| cg10205038    | 2.32E-14 | 8.98E-16 | -8.77 | 24.9341676 | -2.59E-01 | 93052501  | 93052624  | NC_000014.8  |
| cg20909017    | 2.32E-14 | 8.99E-16 | -8.77 | 24.9321105 | -2.23E-01 | 54805345  | 54805468  | NC_000012.11 |
| cg00345744    | 2.32E-14 | 9.00E-16 | -8.77 | 24.9313569 | -9.87E-02 | 156929167 | 156929290 | NC_000007.13 |
| cg09584521    | 2.33E-14 | 9.04E-16 | -8.77 | 24.9266288 | -1.48E-01 | 117112727 | 117112850 | NC_000001.10 |
| cg27500292    | 2.35E-14 | 9.10E-16 | -8.76 | 24.9205777 | -1.55E-01 | 17506177  | 17506300  | NC_000020.10 |
| cg00824141    | 2.35E-14 | 9.13E-16 | -8.76 | 24.9177743 | -2.59E-02 | 106015518 | 106015641 | NC_000002.11 |
| cg14541209    | 2.36E-14 | 9.13E-16 | -8.76 | 24.9171021 | -1.34E-01 | 113530566 | 113530689 | NC_000012.11 |
| cg14231674    | 2.36E-14 | 9.15E-16 | -8.76 | 24.9154128 | -7.98E-02 | 35657560  | 35657683  | NC_000009.11 |
| cg19683989    | 2.36E-14 | 9.15E-16 | -8.76 | 24.9153681 | -1.26E-01 | 95938185  | 95938308  | NC_000015.9  |
| cg09380069    | 2.36E-14 | 9.15E-16 | -8.76 | 24.9151881 | -1.59E-01 | 53847116  | 53847239  | NC_000017.10 |
| cg12964881    | 2.37E-14 | 9.19E-16 | -8.76 | 24.9112484 | -1.88E-01 | 2611301   | 2611424   | NC_000007.13 |
| cg16388983    | 2.37E-14 | 9.19E-16 | -8.76 | 24.9103356 | -2.04E-01 | 214720805 | 214720928 | NC_000001.10 |
| cg03969763    | 2.37E-14 | 9.20E-16 | -8.76 | 24.9102585 | -1.50E-01 | 90440438  | 90440561  | NC_000001.10 |
| cg02905198    | 2.37E-14 | 9.20E-16 | -8.76 | 24.9098248 | -1.67E-01 | 54070610  | 54070733  | NC_000012.11 |
| cg19654882    | 2.37E-14 | 9.21E-16 | -8.76 | 24.9082365 | -1.06E-01 | 3829219   | 3829342   | NC_000011.9  |
| cg02185007    | 2.38E-14 | 9.24E-16 | -8.76 | 24.9056024 | -2.09E-01 | 117587078 | 117587201 | NC_000008.10 |
| cg02172824    | 2.38E-14 | 9.24E-16 | -8.76 | 24.905152  | -6.52E-02 | 75467946  | 75468069  | NC_000016.9  |
| cg06712204    | 2.39E-14 | 9.26E-16 | -8.76 | 24.9032687 | -1.25E-01 | 85542816  | 85542939  | NC_000016.9  |
| cg27322103    | 2.40E-14 | 9.33E-16 | -8.76 | 24.8962091 | -6.38E-02 | 23513335  | 23513458  | NC_000007.13 |
| cg21737039    | 2.41E-14 | 9.37E-16 | -8.76 | 24.8919153 | -1.11E-01 | 8271391   | 8271514   | NC_000004.11 |



|                 |          |          |       |            |           |           |           |              |
|-----------------|----------|----------|-------|------------|-----------|-----------|-----------|--------------|
| cg26159723      | 2.41E-14 | 9.37E-16 | -8.76 | 24.8912975 | -4.76E-02 | 103236300 | 103236423 | NC_000002.11 |
| cg01198434      | 2.42E-14 | 9.41E-16 | -8.76 | 24.8877727 | -1.13E-01 | 38409725  | 38409848  | NC_000007.13 |
| cg01117833      | 2.42E-14 | 9.41E-16 | -8.76 | 24.8871118 | -8.09E-02 | 94547303  | 94547426  | NC_000014.8  |
| cg25073708      | 2.42E-14 | 9.42E-16 | -8.76 | 24.8865305 | -1.82E-01 | 132083538 | 132083661 | NC_000009.11 |
| cg21617903      | 2.43E-14 | 9.44E-16 | -8.76 | 24.8838616 | -1.74E-01 | 11599713  | 11599836  | NC_000003.11 |
| cg26296653      | 2.44E-14 | 9.48E-16 | -8.76 | 24.8798933 | -1.74E-01 | 3899234   | 3899357   | NC_000011.9  |
| cg12362118      | 2.44E-14 | 9.49E-16 | -8.76 | 24.8791723 | -2.13E-01 | 148995174 | 148995297 | NC_000003.11 |
| cg01027750      | 2.44E-14 | 9.50E-16 | -8.76 | 24.8780949 | -1.79E-01 | 42636639  | 42636762  | NC_000019.9  |
| cg18324583      | 2.46E-14 | 9.55E-16 | -8.76 | 24.8731408 | -2.08E-01 | 142975083 | 142975206 | NC_000005.9  |
| cg06719391      | 2.46E-14 | 9.58E-16 | -8.76 | 24.8701443 | -3.98E-02 | 2554330   | 2554453   | NC_000011.9  |
| cg23707289      | 2.46E-14 | 9.58E-16 | -8.76 | 24.8693499 | -5.02E-02 | 60988099  | 60988222  | NC_000018.9  |
| cg17515545      | 2.47E-14 | 9.59E-16 | -8.76 | 24.8685534 | -8.82E-02 | 84257034  | 84257157  | NC_000004.11 |
| cg27237706      | 2.48E-14 | 9.63E-16 | -8.76 | 24.8643428 | -5.47E-02 | 73104816  | 73104939  | NC_000016.9  |
| cg03602014      | 2.49E-14 | 9.67E-16 | -8.75 | 24.8603204 | -2.19E-01 | 126564681 | 126564804 | NC_000005.9  |
| cg05599155      | 2.49E-14 | 9.67E-16 | -8.75 | 24.8603039 | -1.99E-01 | 29188654  | 29188777  | NC_000016.9  |
| cg27220117      | 2.49E-14 | 9.67E-16 | -8.75 | 24.8601535 | -1.48E-01 | 95218729  | 95218852  | NC_000010.10 |
| cg00967711      | 2.50E-14 | 9.72E-16 | -8.75 | 24.8553567 | -1.94E-01 | 100281202 | 100281325 | NC_000003.11 |
| cg09101941      | 2.50E-14 | 9.72E-16 | -8.75 | 24.8553307 | -1.99E-01 | 133775258 | 133775381 | NC_000005.9  |
| cg12089032      | 2.50E-14 | 9.74E-16 | -8.75 | 24.8533046 | -1.85E-01 | 72881203  | 72881326  | NC_000008.10 |
| cg09357740      | 2.50E-14 | 9.74E-16 | -8.75 | 24.853017  | -1.42E-01 | 21131543  | 21131666  | NC_000014.8  |
| cg23091777      | 2.51E-14 | 9.75E-16 | -8.75 | 24.8521476 | -2.09E-01 | 111154754 | 111154877 | NC_000011.9  |
| cg05517233      | 2.51E-14 | 9.75E-16 | -8.75 | 24.8518863 | -1.06E-01 | 135468041 | 135468164 | NC_000005.9  |
| cg11784887      | 2.51E-14 | 9.76E-16 | -8.75 | 24.8514943 | -1.73E-01 | 8729819   | 8729942   | NC_000008.10 |
| ch.17.41650897R | 2.51E-14 | 9.76E-16 | -8.75 | 24.8510939 | -4.66E-02 | 44295120  | 44295243  | NC_000017.10 |
| ch.7.1566587F   | 2.51E-14 | 9.79E-16 | -8.75 | 24.8480367 | -6.03E-02 | 72002664  | 72002787  | NC_000007.13 |

|                |          |          |       |            |           |           |           |              |
|----------------|----------|----------|-------|------------|-----------|-----------|-----------|--------------|
| cg10194536     | 2.52E-14 | 9.82E-16 | -8.75 | 24.8451847 | -1.79E-01 | 807457    | 807580    | NC_000017.10 |
| cg15593187     | 2.53E-14 | 9.84E-16 | -8.75 | 24.8427626 | -5.89E-02 | 137911699 | 137911822 | NC_000005.9  |
| cg02258534     | 2.53E-14 | 9.86E-16 | -8.75 | 24.8417499 | -1.63E-01 | 2555497   | 2555620   | NC_000011.9  |
| cg15701612     | 2.53E-14 | 9.86E-16 | -8.75 | 24.8410775 | -2.30E-01 | 130253770 | 130253893 | NC_000011.9  |
| cg06624527     | 2.54E-14 | 9.91E-16 | -8.75 | 24.8362802 | -1.64E-01 | 6898647   | 6898770   | NC_000012.11 |
| cg22076228     | 2.54E-14 | 9.91E-16 | -8.75 | 24.8362143 | -4.57E-02 | 129831635 | 129831758 | NC_000003.11 |
| cg12705693     | 2.56E-14 | 9.96E-16 | -8.75 | 24.8310915 | -2.23E-01 | 912860    | 912983    | NC_000005.9  |
| cg00431050     | 2.56E-14 | 9.98E-16 | -8.75 | 24.8291064 | -1.45E-01 | 103985730 | 103985853 | NC_000010.10 |
| ch.2.2008119R  | 2.56E-14 | 9.99E-16 | -8.75 | 24.8287621 | -3.03E-02 | 96948848  | 96948971  | NC_000002.11 |
| cg01763884     | 2.56E-14 | 9.99E-16 | -8.75 | 24.8286832 | -1.48E-01 | 50721626  | 50721749  | NC_000022.10 |
| cg25682097     | 2.57E-14 | 1.00E-15 | -8.75 | 24.8267314 | -6.93E-02 | 105954118 | 105954241 | NC_000014.8  |
| ch.11.1369160F | 2.57E-14 | 1.00E-15 | -8.75 | 24.8237779 | -6.50E-02 | 66922185  | 66922308  | NC_000011.9  |
| cg25007705     | 2.58E-14 | 1.00E-15 | -8.75 | 24.8232264 | -1.38E-01 | 21588799  | 21588922  | NC_000001.10 |
| cg00822451     | 2.59E-14 | 1.01E-15 | -8.75 | 24.8187382 | -6.52E-02 | 24868585  | 24868708  | NC_000014.8  |
| cg09251914     | 2.60E-14 | 1.01E-15 | -8.75 | 24.8149584 | -8.77E-02 | 85364534  | 85364657  | NC_000016.9  |
| cg08895260     | 2.60E-14 | 1.01E-15 | -8.75 | 24.8141551 | -1.87E-01 | 82756563  | 82756686  | NC_000011.9  |
| cg21723486     | 2.60E-14 | 1.01E-15 | -8.75 | 24.8131933 | -1.80E-01 | 189349323 | 189349446 | NC_000003.11 |
| cg14339750     | 2.60E-14 | 1.01E-15 | -8.75 | 24.8128278 | -1.19E-01 | 52271331  | 52271454  | NC_000003.11 |
| cg14408823     | 2.60E-14 | 1.02E-15 | -8.75 | 24.8120112 | -1.61E-01 | 2458481   | 2458604   | NC_000011.9  |
| cg03661616     | 2.60E-14 | 1.02E-15 | -8.75 | 24.8120021 | -5.86E-02 | 112327538 | 112327661 | NC_000010.10 |
| cg08696890     | 2.64E-14 | 1.03E-15 | -8.74 | 24.7986283 | -6.41E-02 | 57126212  | 57126335  | NC_000016.9  |
| cg01171368     | 2.64E-14 | 1.03E-15 | -8.74 | 24.7984916 | -7.99E-02 | 62456106  | 62456229  | NC_000015.9  |
| cg26124526     | 2.64E-14 | 1.03E-15 | -8.74 | 24.7959935 | -1.63E-01 | 60618932  | 60619055  | NC_000005.9  |
| cg26443127     | 2.65E-14 | 1.03E-15 | -8.74 | 24.7942186 | -1.93E-01 | 31987230  | 31987353  | NC_000010.10 |
| cg05643592     | 2.65E-14 | 1.03E-15 | -8.74 | 24.7941232 | -1.50E-01 | 161195527 | 161195650 | NC_000001.10 |

|              |          |          |       |            |           |           |           |              |
|--------------|----------|----------|-------|------------|-----------|-----------|-----------|--------------|
| cg02038492   | 2.65E-14 | 1.03E-15 | -8.74 | 24.7940966 | -1.82E-01 | 2235025   | 2235148   | NC_000016.9  |
| cg09853936   | 2.65E-14 | 1.03E-15 | -8.74 | 24.7935866 | -1.68E-01 | 3388196   | 3388319   | NC_000001.10 |
| cg15401418   | 2.65E-14 | 1.03E-15 | -8.74 | 24.7933613 | -2.10E-01 | 75316383  | 75316506  | NC_000017.10 |
| cg18699466   | 2.65E-14 | 1.04E-15 | -8.74 | 24.7931364 | -1.95E-01 | 45415640  | 45415763  | NC_000006.11 |
| cg08798862   | 2.65E-14 | 1.04E-15 | -8.74 | 24.7919825 | -1.24E-01 | 88832532  | 88832655  | NC_000016.9  |
| cg11963006   | 2.66E-14 | 1.04E-15 | -8.74 | 24.7899514 | -1.75E-01 | 201507574 | 201507697 | NC_000001.10 |
| cg19964320   | 2.66E-14 | 1.04E-15 | -8.74 | 24.7889895 | -1.05E-01 | 25096573  | 25096696  | NC_000015.9  |
| cg24906410   | 2.66E-14 | 1.04E-15 | -8.74 | 24.78784   | -1.20E-01 | 44249756  | 44249879  | NC_000019.9  |
| cg18862210   | 2.67E-14 | 1.04E-15 | -8.74 | 24.7871418 | -1.95E-01 | 168815477 | 168815600 | NC_000006.11 |
| cg14341289   | 2.67E-14 | 1.04E-15 | -8.74 | 24.7844386 | -1.55E-01 | 108209784 | 108209907 | NC_000009.11 |
| cg08428188   | 2.68E-14 | 1.05E-15 | -8.74 | 24.7816122 | -2.05E-01 | 85363174  | 85363297  | NC_000016.9  |
| cg14294321   | 2.68E-14 | 1.05E-15 | -8.74 | 24.7809657 | -1.60E-01 | 12895288  | 12895411  | NC_000019.9  |
| cg07636095   | 2.68E-14 | 1.05E-15 | -8.74 | 24.7800909 | -3.16E-02 | 27759817  | 27759940  | NC_000006.11 |
| cg18927901   | 2.69E-14 | 1.05E-15 | -8.74 | 24.7792245 | -1.50E-01 | 36238043  | 36238166  | NC_000006.11 |
| ch.6.499655F | 2.69E-14 | 1.05E-15 | -8.74 | 24.7783704 | -1.14E-01 | 19860052  | 19860175  | NC_000006.11 |
| cg17967224   | 2.69E-14 | 1.05E-15 | -8.74 | 24.7762608 | -8.37E-02 | 43506194  | 43506317  | NC_000022.10 |
| cg20312457   | 2.69E-14 | 1.05E-15 | -8.74 | 24.7756659 | -1.79E-01 | 7813475   | 7813598   | NC_000004.11 |
| cg24310786   | 2.71E-14 | 1.06E-15 | -8.74 | 24.7714797 | -1.44E-01 | 33080054  | 33080177  | NC_000006.11 |
| cg18253802   | 2.72E-14 | 1.06E-15 | -8.74 | 24.7668319 | -5.47E-02 | 135501780 | 135501903 | NC_000006.11 |
| cg22663872   | 2.73E-14 | 1.07E-15 | -8.74 | 24.7636342 | -7.30E-02 | 149120266 | 149120389 | NC_000007.13 |
| cg01080713   | 2.73E-14 | 1.07E-15 | -8.74 | 24.7634372 | -1.94E-01 | 190126396 | 190126519 | NC_000002.11 |
| cg20333292   | 2.73E-14 | 1.07E-15 | -8.74 | 24.7629171 | -1.82E-01 | 105532012 | 105532135 | NC_000014.8  |
| cg13910174   | 2.73E-14 | 1.07E-15 | -8.74 | 24.7614086 | -1.72E-01 | 46715231  | 46715354  | NC_000002.11 |
| cg01544812   | 2.73E-14 | 1.07E-15 | -8.74 | 24.7610743 | -9.12E-02 | 22540154  | 22540277  | NC_000007.13 |
| cg08912666   | 2.74E-14 | 1.07E-15 | -8.74 | 24.7572566 | -2.34E-01 | 17516535  | 17516658  | NC_000001.10 |

|                 |          |          |       |            |           |           |           |              |
|-----------------|----------|----------|-------|------------|-----------|-----------|-----------|--------------|
| cg01120953      | 2.74E-14 | 1.07E-15 | -8.74 | 24.7568848 | -1.15E-01 | 149643466 | 149643589 | NC_000005.9  |
| cg21406144      | 2.75E-14 | 1.08E-15 | -8.74 | 24.7551685 | -1.77E-01 | 59919051  | 59919174  | NC_000002.11 |
| cg05326378      | 2.75E-14 | 1.08E-15 | -8.74 | 24.7533634 | -1.91E-01 | 71081264  | 71081387  | NC_000015.9  |
| cg04009456      | 2.75E-14 | 1.08E-15 | -8.74 | 24.7531331 | -1.20E-01 | 25379436  | 25379559  | NC_000004.11 |
| cg23452957      | 2.76E-14 | 1.08E-15 | -8.74 | 24.7496171 | -1.14E-01 | 135091431 | 135091554 | NC_000010.10 |
| cg00532451      | 2.77E-14 | 1.08E-15 | -8.74 | 24.7471054 | -2.27E-01 | 228528913 | 228529036 | NC_000001.10 |
| cg22499893      | 2.77E-14 | 1.09E-15 | -8.74 | 24.7466203 | -2.01E-01 | 24307535  | 24307658  | NC_000001.10 |
| cg25689499      | 2.77E-14 | 1.09E-15 | -8.74 | 24.7456348 | -1.58E-01 | 81042554  | 81042677  | NC_000017.10 |
| cg15999887      | 2.78E-14 | 1.09E-15 | -8.74 | 24.7445052 | -1.83E-01 | 159423743 | 159423866 | NC_000006.11 |
| cg18231054      | 2.79E-14 | 1.09E-15 | -8.74 | 24.7405231 | -1.92E-01 | 1858037   | 1858160   | NC_000001.10 |
| cg11815057      | 2.79E-14 | 1.09E-15 | -8.74 | 24.7383246 | -1.63E-01 | 153670855 | 153670978 | NC_000001.10 |
| ch.9.120878154R | 2.80E-14 | 1.10E-15 | -8.73 | 24.735586  | -6.48E-02 | 121838333 | 121838456 | NC_000009.11 |
| cg08212913      | 2.81E-14 | 1.10E-15 | -8.73 | 24.7332393 | -1.24E-01 | 8634827   | 8634950   | NC_000002.11 |
| cg22464883      | 2.82E-14 | 1.10E-15 | -8.73 | 24.7296138 | -7.58E-02 | 31407537  | 31407660  | NC_000020.10 |
| cg16027343      | 2.82E-14 | 1.10E-15 | -8.73 | 24.729121  | -1.08E-01 | 180632948 | 180633071 | NC_000005.9  |
| cg17186132      | 2.82E-14 | 1.10E-15 | -8.73 | 24.7289116 | -1.36E-01 | 90703444  | 90703567  | NC_000015.9  |
| cg17476701      | 2.82E-14 | 1.11E-15 | -8.73 | 24.7275965 | -2.15E-01 | 30651563  | 30651686  | NC_000006.11 |
| ch.7.2371643F   | 2.84E-14 | 1.11E-15 | -8.73 | 24.7202839 | -6.27E-02 | 111377460 | 111377583 | NC_000007.13 |
| cg18721397      | 2.85E-14 | 1.12E-15 | -8.73 | 24.7163548 | -2.07E-01 | 32584912  | 32585035  | NC_000005.9  |
| cg26771582      | 2.85E-14 | 1.12E-15 | -8.73 | 24.716323  | -1.21E-01 | 87415899  | 87416022  | NC_000016.9  |
| cg17502594      | 2.85E-14 | 1.12E-15 | -8.73 | 24.7158693 | -1.81E-01 | 62107542  | 62107665  | NC_000001.10 |
| cg07927984      | 2.86E-14 | 1.12E-15 | -8.73 | 24.714776  | -1.71E-01 | 102028909 | 102029032 | NC_000015.9  |
| cg04677326      | 2.86E-14 | 1.12E-15 | -8.73 | 24.7146812 | -5.97E-02 | 3557664   | 3557787   | NC_000019.9  |
| cg06639320      | 2.86E-14 | 1.12E-15 | -8.73 | 24.7136608 | -1.27E-01 | 106015739 | 106015862 | NC_000002.11 |
| cg10548968      | 2.86E-14 | 1.12E-15 | -8.73 | 24.7131133 | -1.56E-01 | 76802004  | 76802127  | NC_000011.9  |

|            |          |          |       |            |           |           |           |              |
|------------|----------|----------|-------|------------|-----------|-----------|-----------|--------------|
| cg13797825 | 2.87E-14 | 1.13E-15 | -8.73 | 24.7100678 | -8.66E-02 | 102972758 | 102972881 | NC_000002.11 |
| cg07869023 | 2.88E-14 | 1.13E-15 | -8.73 | 24.7074665 | -1.96E-01 | 17212376  | 17212499  | NC_000020.10 |
| cg26445794 | 2.88E-14 | 1.13E-15 | -8.73 | 24.7057117 | -1.16E-01 | 10837274  | 10837397  | NC_000016.9  |
| cg00926238 | 2.88E-14 | 1.13E-15 | -8.73 | 24.7038746 | -9.38E-02 | 26436304  | 26436427  | NC_000008.10 |
| cg09976369 | 2.89E-14 | 1.13E-15 | -8.73 | 24.7034762 | -1.58E-01 | 3199889   | 3200012   | NC_000002.11 |
| cg09994756 | 2.89E-14 | 1.13E-15 | -8.73 | 24.7030376 | -1.58E-01 | 8185163   | 8185286   | NC_000004.11 |
| cg21686890 | 2.89E-14 | 1.13E-15 | -8.73 | 24.7027619 | -4.70E-02 | 35773089  | 35773212  | NC_000022.10 |
| cg00207428 | 2.89E-14 | 1.14E-15 | -8.73 | 24.7006682 | -1.76E-01 | 2031785   | 2031908   | NC_000016.9  |
| cg27190398 | 2.91E-14 | 1.14E-15 | -8.73 | 24.6942641 | -1.37E-01 | 731844    | 731967    | NC_000016.9  |
| cg21772953 | 2.92E-14 | 1.15E-15 | -8.73 | 24.691722  | -1.81E-01 | 23770435  | 23770558  | NC_000003.11 |
| cg18126802 | 2.92E-14 | 1.15E-15 | -8.73 | 24.6913318 | -1.72E-01 | 172321067 | 172321190 | NC_000001.10 |
| cg02192746 | 2.93E-14 | 1.15E-15 | -8.73 | 24.6890843 | -1.23E-01 | 99971016  | 99971139  | NC_000007.13 |
| cg20721917 | 2.94E-14 | 1.16E-15 | -8.73 | 24.6830089 | -1.30E-01 | 46089218  | 46089341  | NC_000017.10 |
| cg01924434 | 2.95E-14 | 1.16E-15 | -8.73 | 24.6803351 | -9.12E-02 | 1275121   | 1275244   | NC_000019.9  |
| cg15558558 | 2.95E-14 | 1.16E-15 | -8.73 | 24.6800876 | -1.27E-01 | 83477965  | 83478088  | NC_000015.9  |
| cg16563180 | 2.95E-14 | 1.16E-15 | -8.73 | 24.6796357 | -9.04E-02 | 1570208   | 1570331   | NC_000007.13 |
| cg26057969 | 2.95E-14 | 1.16E-15 | -8.73 | 24.6794845 | -9.00E-02 | 127310291 | 127310414 | NC_000003.11 |
| cg25410739 | 2.96E-14 | 1.16E-15 | -8.73 | 24.6779284 | -1.81E-01 | 223743086 | 223743209 | NC_000001.10 |
| cg24993194 | 2.96E-14 | 1.17E-15 | -8.73 | 24.6754865 | -6.32E-02 | 25963187  | 25963310  | NC_000006.11 |
| cg03661324 | 2.97E-14 | 1.17E-15 | -8.73 | 24.6747521 | -2.15E-01 | 79411917  | 79412040  | NC_000002.11 |
| cg12915715 | 2.97E-14 | 1.17E-15 | -8.72 | 24.6738052 | -8.43E-02 | 6894477   | 6894600   | NC_000007.13 |
| cg25383479 | 2.97E-14 | 1.17E-15 | -8.72 | 24.6726524 | -1.49E-01 | 108491702 | 108491825 | NC_000006.11 |
| cg00096328 | 2.98E-14 | 1.17E-15 | -8.72 | 24.6714222 | -1.24E-01 | 41200046  | 41200169  | NC_000003.11 |
| cg10665891 | 2.98E-14 | 1.17E-15 | -8.72 | 24.6713534 | -2.52E-01 | 117042917 | 117043040 | NC_000012.11 |
| cg10186605 | 2.99E-14 | 1.18E-15 | -8.72 | 24.6676656 | -1.95E-01 | 29667326  | 29667449  | NC_000017.10 |

|               |          |          |       |            |           |           |           |              |
|---------------|----------|----------|-------|------------|-----------|-----------|-----------|--------------|
| cg02343254    | 2.99E-14 | 1.18E-15 | -8.72 | 24.6652735 | -1.34E-01 | 3583963   | 3584086   | NC_000002.11 |
| cg12127162    | 3.01E-14 | 1.18E-15 | -8.72 | 24.6599231 | -1.68E-01 | 48140412  | 48140535  | NC_000017.10 |
| cg10851739    | 3.01E-14 | 1.19E-15 | -8.72 | 24.6579526 | -2.08E-01 | 131996019 | 131996142 | NC_000012.11 |
| cg00057272    | 3.02E-14 | 1.19E-15 | -8.72 | 24.6568632 | -1.33E-01 | 135726252 | 135726375 | NC_000008.10 |
| cg09366118    | 3.03E-14 | 1.19E-15 | -8.72 | 24.6523792 | -1.46E-01 | 113931525 | 113931648 | NC_000002.11 |
| cg08097817    | 3.03E-14 | 1.20E-15 | -8.72 | 24.6506405 | -1.79E-01 | 32255313  | 32255436  | NC_000021.8  |
| cg19798881    | 3.04E-14 | 1.20E-15 | -8.72 | 24.6495627 | -2.05E-01 | 7758958   | 7759081   | NC_000006.11 |
| cg07802625    | 3.05E-14 | 1.20E-15 | -8.72 | 24.6461827 | -1.28E-01 | 32281665  | 32281788  | NC_000001.10 |
| cg23526147    | 3.05E-14 | 1.20E-15 | -8.72 | 24.6445606 | -9.38E-02 | 13134813  | 13134936  | NC_000019.9  |
| cg09162518    | 3.06E-14 | 1.21E-15 | -8.72 | 24.6413753 | -1.41E-01 | 95089526  | 95089649  | NC_000001.10 |
| cg03537591    | 3.07E-14 | 1.21E-15 | -8.72 | 24.6389293 | -1.56E-01 | 72727859  | 72727982  | NC_000010.10 |
| cg01314165    | 3.07E-14 | 1.21E-15 | -8.72 | 24.6386804 | -2.04E-01 | 36320227  | 36320350  | NC_000007.13 |
| cg21402096    | 3.08E-14 | 1.22E-15 | -8.72 | 24.6343264 | -1.98E-01 | 221990385 | 221990508 | NC_000001.10 |
| cg21697812    | 3.09E-14 | 1.22E-15 | -8.72 | 24.6308529 | -2.02E-01 | 33721714  | 33721837  | NC_000011.9  |
| cg05990312    | 3.09E-14 | 1.22E-15 | -8.72 | 24.6307834 | -1.73E-01 | 19628421  | 19628544  | NC_000017.10 |
| cg10156499    | 3.09E-14 | 1.22E-15 | -8.72 | 24.6306995 | -7.63E-02 | 112161291 | 112161414 | NC_000011.9  |
| ch.3.2372016F | 3.11E-14 | 1.23E-15 | -8.72 | 24.6247519 | -6.09E-02 | 121497031 | 121497154 | NC_000003.11 |
| cg01935400    | 3.12E-14 | 1.23E-15 | -8.72 | 24.6230454 | -1.56E-01 | 80393124  | 80393247  | NC_000017.10 |
| cg03519180    | 3.12E-14 | 1.23E-15 | -8.72 | 24.6223289 | -1.88E-01 | 119102524 | 119102647 | NC_000010.10 |
| cg26844633    | 3.12E-14 | 1.23E-15 | -8.72 | 24.6219649 | -1.94E-01 | 40635904  | 40636027  | NC_000015.9  |
| cg16615927    | 3.12E-14 | 1.23E-15 | -8.72 | 24.6214519 | -8.83E-02 | 12377398  | 12377521  | NC_000018.9  |
| cg19820705    | 3.13E-14 | 1.24E-15 | -8.72 | 24.6184403 | -1.33E-01 | 4455316   | 4455439   | NC_000019.9  |
| cg26657240    | 3.14E-14 | 1.24E-15 | -8.72 | 24.6150078 | -2.26E-01 | 81475061  | 81475184  | NC_000015.9  |
| cg02316735    | 3.14E-14 | 1.24E-15 | -8.72 | 24.6139004 | -1.07E-01 | 17449042  | 17449165  | NC_000019.9  |
| cg24534743    | 3.15E-14 | 1.24E-15 | -8.72 | 24.6128755 | -1.28E-01 | 27884345  | 27884468  | NC_000001.10 |

|               |          |          |       |            |           |           |           |              |
|---------------|----------|----------|-------|------------|-----------|-----------|-----------|--------------|
| cg14480116    | 3.15E-14 | 1.24E-15 | -8.72 | 24.6116037 | -1.85E-01 | 65594890  | 65595013  | NC_000002.11 |
| cg16680451    | 3.16E-14 | 1.25E-15 | -8.71 | 24.6077682 | -1.17E-01 | 73121744  | 73121867  | NC_000007.13 |
| cg00777636    | 3.17E-14 | 1.25E-15 | -8.71 | 24.6066474 | -1.74E-01 | 6446216   | 6446339   | NC_000001.10 |
| cg15221739    | 3.17E-14 | 1.25E-15 | -8.71 | 24.6057789 | -1.24E-01 | 90236557  | 90236680  | NC_000005.9  |
| cg17616646    | 3.17E-14 | 1.25E-15 | -8.71 | 24.604131  | -1.12E-01 | 67271660  | 67271783  | NC_000011.9  |
| cg17213713    | 3.18E-14 | 1.25E-15 | -8.71 | 24.6031018 | -1.61E-01 | 37617628  | 37617751  | NC_000007.13 |
| cg07139495    | 3.18E-14 | 1.26E-15 | -8.71 | 24.6012119 | -1.59E-01 | 246860416 | 246860539 | NC_000001.10 |
| cg01617285    | 3.21E-14 | 1.27E-15 | -8.71 | 24.5922251 | -6.77E-02 | 104211410 | 104211533 | NC_000009.11 |
| ch.16.406779R | 3.22E-14 | 1.27E-15 | -8.71 | 24.5882005 | -8.20E-02 | 11063656  | 11063779  | NC_000016.9  |
| cg12464820    | 3.22E-14 | 1.27E-15 | -8.71 | 24.5876509 | -8.82E-02 | 50690166  | 50690289  | NC_000022.10 |
| cg02133716    | 3.22E-14 | 1.28E-15 | -8.71 | 24.5868905 | -9.44E-02 | 128981622 | 128981745 | NC_000008.10 |
| cg07796002    | 3.24E-14 | 1.28E-15 | -8.71 | 24.5804023 | -1.18E-01 | 42392337  | 42392460  | NC_000019.9  |
| cg27052418    | 3.25E-14 | 1.29E-15 | -8.71 | 24.5772391 | -2.01E-01 | 66611496  | 66611619  | NC_000005.9  |
| cg17201124    | 3.27E-14 | 1.29E-15 | -8.71 | 24.5731586 | -1.17E-01 | 1976627   | 1976750   | NC_000001.10 |
| cg02046143    | 3.27E-14 | 1.30E-15 | -8.71 | 24.5711774 | -1.36E-01 | 133797911 | 133798034 | NC_000011.9  |
| cg06824013    | 3.28E-14 | 1.30E-15 | -8.71 | 24.5682247 | -9.81E-02 | 53097247  | 53097370  | NC_000015.9  |
| ch.14.471449F | 3.29E-14 | 1.30E-15 | -8.71 | 24.5664462 | -5.32E-02 | 45480793  | 45480916  | NC_000014.8  |
| cg19414383    | 3.31E-14 | 1.31E-15 | -8.71 | 24.5588473 | -1.99E-01 | 17528238  | 17528361  | NC_000001.10 |
| cg27619353    | 3.31E-14 | 1.31E-15 | -8.71 | 24.5582392 | -8.80E-02 | 38071651  | 38071774  | NC_000022.10 |
| cg05886115    | 3.32E-14 | 1.32E-15 | -8.71 | 24.5550254 | -1.42E-01 | 42349113  | 42349236  | NC_000015.9  |
| ch.5.5396883R | 3.33E-14 | 1.32E-15 | -8.71 | 24.554191  | -1.06E-01 | 5343883   | 5344006   | NC_000005.9  |
| cg07201215    | 3.34E-14 | 1.32E-15 | -8.71 | 24.5499917 | -5.62E-02 | 36419478  | 36419601  | NC_000021.8  |
| cg06871311    | 3.34E-14 | 1.33E-15 | -8.71 | 24.5486553 | -7.06E-02 | 178062849 | 178062972 | NC_000001.10 |
| cg06551493    | 3.35E-14 | 1.33E-15 | -8.7  | 24.5462658 | -7.91E-02 | 77166702  | 77166825  | NC_000007.13 |
| cg14847502    | 3.36E-14 | 1.33E-15 | -8.7  | 24.5444938 | -7.79E-02 | 30724194  | 30724317  | NC_000010.10 |

|            |          |          |      |            |           |           |           |              |
|------------|----------|----------|------|------------|-----------|-----------|-----------|--------------|
| cg04121938 | 3.36E-14 | 1.33E-15 | -8.7 | 24.5441248 | -2.37E-01 | 201509415 | 201509538 | NC_000001.10 |
| cg21468416 | 3.37E-14 | 1.34E-15 | -8.7 | 24.5410987 | -1.08E-01 | 127019914 | 127020037 | NC_000009.11 |
| cg08344174 | 3.37E-14 | 1.34E-15 | -8.7 | 24.5400809 | -1.78E-01 | 3926662   | 3926785   | NC_000006.11 |
| cg17114402 | 3.37E-14 | 1.34E-15 | -8.7 | 24.5397698 | -8.03E-02 | 97778470  | 97778593  | NC_000002.11 |
| cg17142183 | 3.37E-14 | 1.34E-15 | -8.7 | 24.5393277 | -2.02E-01 | 102608192 | 102608315 | NC_000002.11 |
| cg19689330 | 3.38E-14 | 1.34E-15 | -8.7 | 24.5364678 | -1.56E-01 | 5512308   | 5512431   | NC_000006.11 |
| cg02246928 | 3.38E-14 | 1.34E-15 | -8.7 | 24.5358629 | -1.62E-01 | 144586678 | 144586801 | NC_000006.11 |
| cg08736918 | 3.39E-14 | 1.34E-15 | -8.7 | 24.5355517 | -1.26E-01 | 9241615   | 9241738   | NC_000001.10 |
| cg10373607 | 3.39E-14 | 1.34E-15 | -8.7 | 24.53456   | -2.34E-01 | 51592177  | 51592300  | NC_000020.10 |
| cg22198179 | 3.39E-14 | 1.35E-15 | -8.7 | 24.5342189 | -2.08E-01 | 114770495 | 114770618 | NC_000013.10 |
| cg23907586 | 3.39E-14 | 1.35E-15 | -8.7 | 24.5328164 | -6.70E-02 | 121163367 | 121163490 | NC_000012.11 |
| cg16155122 | 3.40E-14 | 1.35E-15 | -8.7 | 24.530645  | -6.38E-02 | 25201958  | 25202081  | NC_000022.10 |
| cg11966998 | 3.40E-14 | 1.35E-15 | -8.7 | 24.53036   | -2.12E-01 | 15692519  | 15692642  | NC_000011.9  |
| cg14218480 | 3.40E-14 | 1.35E-15 | -8.7 | 24.5295114 | -1.38E-01 | 139842749 | 139842872 | NC_000009.11 |
| cg21950196 | 3.41E-14 | 1.35E-15 | -8.7 | 24.527978  | -8.35E-02 | 228327428 | 228327551 | NC_000001.10 |
| cg21058973 | 3.41E-14 | 1.35E-15 | -8.7 | 24.5277086 | -2.18E-01 | 43029997  | 43030120  | NC_000020.10 |
| cg20237595 | 3.43E-14 | 1.36E-15 | -8.7 | 24.5224682 | -1.60E-01 | 124301252 | 124301375 | NC_000003.11 |
| cg03055021 | 3.43E-14 | 1.36E-15 | -8.7 | 24.5212785 | -1.69E-01 | 15664770  | 15664893  | NC_000001.10 |
| cg23219253 | 3.44E-14 | 1.37E-15 | -8.7 | 24.5183666 | -1.54E-01 | 9518751   | 9518874   | NC_000002.11 |
| cg08195176 | 3.44E-14 | 1.37E-15 | -8.7 | 24.5176659 | -1.35E-01 | 116781303 | 116781426 | NC_000011.9  |
| cg22962982 | 3.46E-14 | 1.38E-15 | -8.7 | 24.5116076 | -5.15E-02 | 43818365  | 43818488  | NC_000010.10 |
| cg22688802 | 3.47E-14 | 1.38E-15 | -8.7 | 24.5103853 | -2.08E-01 | 7980661   | 7980784   | NC_000004.11 |
| cg09020181 | 3.47E-14 | 1.38E-15 | -8.7 | 24.5096728 | -7.97E-02 | 46467123  | 46467246  | NC_000022.10 |
| cg02863988 | 3.47E-14 | 1.38E-15 | -8.7 | 24.5091412 | -1.61E-01 | 4525572   | 4525695   | NC_000019.9  |
| cg01919768 | 3.47E-14 | 1.38E-15 | -8.7 | 24.5089534 | -1.88E-01 | 100239764 | 100239887 | NC_000007.13 |



|                |          |          |       |            |           |           |           |              |
|----------------|----------|----------|-------|------------|-----------|-----------|-----------|--------------|
| cg06521149     | 3.48E-14 | 1.38E-15 | -8.7  | 24.5078925 | -2.04E-01 | 151813779 | 151813902 | NC_000001.10 |
| cg06907033     | 3.48E-14 | 1.38E-15 | -8.7  | 24.5058523 | -1.88E-01 | 54873990  | 54874113  | NC_000001.10 |
| cg03557733     | 3.48E-14 | 1.38E-15 | -8.7  | 24.5057499 | -1.23E-01 | 41985183  | 41985306  | NC_000017.10 |
| cg03668763     | 3.49E-14 | 1.39E-15 | -8.7  | 24.5032382 | -2.27E-01 | 9549286   | 9549409   | NC_000011.9  |
| cg03471047     | 3.49E-14 | 1.39E-15 | -8.7  | 24.5022315 | -1.18E-01 | 51455849  | 51455972  | NC_000015.9  |
| cg15700009     | 3.50E-14 | 1.39E-15 | -8.7  | 24.5008586 | -9.90E-02 | 18415711  | 18415834  | NC_000011.9  |
| cg27117828     | 3.51E-14 | 1.40E-15 | -8.7  | 24.4962534 | -2.07E-01 | 175499377 | 175499500 | NC_000002.11 |
| cg03953626     | 3.52E-14 | 1.40E-15 | -8.7  | 24.4957103 | -2.72E-01 | 30652396  | 30652519  | NC_000006.11 |
| cg25863967     | 3.52E-14 | 1.40E-15 | -8.7  | 24.4943916 | -1.22E-01 | 130049683 | 130049806 | NC_000007.13 |
| cg15888301     | 3.52E-14 | 1.40E-15 | -8.7  | 24.4937318 | -7.74E-02 | 73344233  | 73344356  | NC_000015.9  |
| cg14934280     | 3.53E-14 | 1.40E-15 | -8.7  | 24.4927774 | -5.87E-02 | 47494587  | 47494710  | NC_000019.9  |
| ch.4.38162960R | 3.53E-14 | 1.40E-15 | -8.7  | 24.492191  | -7.06E-02 | 38486565  | 38486688  | NC_000004.11 |
| cg13720262     | 3.53E-14 | 1.41E-15 | -8.7  | 24.4900286 | -1.75E-01 | 39278997  | 39279120  | NC_000019.9  |
| cg14871010     | 3.54E-14 | 1.41E-15 | -8.7  | 24.4894178 | -1.92E-01 | 55603225  | 55603348  | NC_000014.8  |
| cg12494529     | 3.54E-14 | 1.41E-15 | -8.7  | 24.4877291 | -2.14E-01 | 1082432   | 1082555   | NC_000010.10 |
| cg14026238     | 3.55E-14 | 1.41E-15 | -8.69 | 24.4845675 | -1.96E-01 | 57616123  | 57616246  | NC_000015.9  |
| cg08246632     | 3.55E-14 | 1.42E-15 | -8.69 | 24.483972  | -1.29E-01 | 132396826 | 132396949 | NC_000012.11 |
| cg23506979     | 3.56E-14 | 1.42E-15 | -8.69 | 24.4836304 | -1.43E-01 | 79090958  | 79091081  | NC_000015.9  |
| cg01546820     | 3.56E-14 | 1.42E-15 | -8.69 | 24.4821981 | -1.45E-01 | 35453638  | 35453761  | NC_000006.11 |
| cg23171103     | 3.56E-14 | 1.42E-15 | -8.69 | 24.4810872 | -2.15E-01 | 174771462 | 174771585 | NC_000005.9  |
| cg05599550     | 3.57E-14 | 1.42E-15 | -8.69 | 24.478123  | -7.76E-02 | 48711902  | 48712025  | NC_000017.10 |
| cg27472701     | 3.60E-14 | 1.43E-15 | -8.69 | 24.4705401 | -2.02E-01 | 116332586 | 116332709 | NC_000007.13 |
| cg03967627     | 3.61E-14 | 1.44E-15 | -8.69 | 24.4663813 | -1.04E-01 | 144655030 | 144655153 | NC_000008.10 |
| cg06889339     | 3.61E-14 | 1.44E-15 | -8.69 | 24.4663507 | -1.52E-01 | 168197625 | 168197748 | NC_000006.11 |
| cg24688471     | 3.62E-14 | 1.44E-15 | -8.69 | 24.4656592 | -7.06E-02 | 2542815   | 2542938   | NC_000001.10 |

|            |          |          |       |            |           |           |           |              |
|------------|----------|----------|-------|------------|-----------|-----------|-----------|--------------|
| cg10914815 | 3.62E-14 | 1.44E-15 | -8.69 | 24.465034  | -1.69E-01 | 99148667  | 99148790  | NC_000013.10 |
| cg17171127 | 3.62E-14 | 1.44E-15 | -8.69 | 24.4635752 | -1.59E-01 | 130248270 | 130248393 | NC_000011.9  |
| cg15973234 | 3.64E-14 | 1.45E-15 | -8.69 | 24.4598319 | -5.16E-02 | 81072152  | 81072275  | NC_000015.9  |
| cg27391934 | 3.65E-14 | 1.45E-15 | -8.69 | 24.4568719 | -2.29E-01 | 1369948   | 1370071   | NC_000001.10 |
| cg19152770 | 3.65E-14 | 1.46E-15 | -8.69 | 24.455295  | -1.92E-01 | 7755760   | 7755883   | NC_000004.11 |
| cg00077904 | 3.66E-14 | 1.46E-15 | -8.69 | 24.4528305 | -1.49E-01 | 151078909 | 151079032 | NC_000005.9  |
| cg21293464 | 3.66E-14 | 1.46E-15 | -8.69 | 24.4519147 | -2.20E-01 | 66885276  | 66885399  | NC_000011.9  |
| cg04077979 | 3.67E-14 | 1.46E-15 | -8.69 | 24.4505785 | -1.77E-01 | 76147474  | 76147597  | NC_000006.11 |
| cg23151401 | 3.67E-14 | 1.46E-15 | -8.69 | 24.450575  | -7.77E-02 | 73149130  | 73149253  | NC_000007.13 |
| cg08401725 | 3.69E-14 | 1.47E-15 | -8.69 | 24.4458084 | -1.85E-01 | 34296462  | 34296585  | NC_000011.9  |
| cg17856005 | 3.71E-14 | 1.48E-15 | -8.69 | 24.4377216 | -1.23E-01 | 148809826 | 148809949 | NC_000005.9  |
| cg08867471 | 3.72E-14 | 1.48E-15 | -8.69 | 24.4367181 | -1.76E-01 | 56738244  | 56738367  | NC_000005.9  |
| cg21679730 | 3.73E-14 | 1.49E-15 | -8.69 | 24.4333424 | -1.87E-01 | 65047485  | 65047608  | NC_000001.10 |
| cg09564133 | 3.74E-14 | 1.49E-15 | -8.69 | 24.4317933 | -1.86E-01 | 176738847 | 176738970 | NC_000005.9  |
| cg03026939 | 3.74E-14 | 1.49E-15 | -8.69 | 24.4301258 | -7.71E-02 | 180573421 | 180573544 | NC_000003.11 |
| cg07120806 | 3.74E-14 | 1.49E-15 | -8.69 | 24.4298226 | -7.37E-02 | 1873451   | 1873574   | NC_000004.11 |
| cg20124188 | 3.74E-14 | 1.50E-15 | -8.69 | 24.4292251 | -9.09E-02 | 6348200   | 6348323   | NC_000017.10 |
| cg21393051 | 3.75E-14 | 1.50E-15 | -8.69 | 24.4288034 | -2.25E-01 | 209585310 | 209585433 | NC_000001.10 |
| cg11669877 | 3.75E-14 | 1.50E-15 | -8.69 | 24.4280068 | -4.52E-02 | 204043026 | 204043149 | NC_000001.10 |
| cg14285788 | 3.75E-14 | 1.50E-15 | -8.69 | 24.42712   | -1.75E-01 | 128458556 | 128458679 | NC_000002.11 |
| cg16747928 | 3.76E-14 | 1.50E-15 | -8.69 | 24.4257205 | -1.86E-01 | 4370460   | 4370583   | NC_000006.11 |
| cg26003813 | 3.76E-14 | 1.50E-15 | -8.69 | 24.424223  | -3.50E-02 | 23689802  | 23689925  | NC_000016.9  |
| cg24717799 | 3.77E-14 | 1.51E-15 | -8.69 | 24.4230249 | -1.08E-01 | 83680832  | 83680955  | NC_000015.9  |
| cg11479035 | 3.77E-14 | 1.51E-15 | -8.68 | 24.422464  | -2.29E-01 | 86313891  | 86314014  | NC_000015.9  |
| cg02101833 | 3.77E-14 | 1.51E-15 | -8.68 | 24.4212848 | -1.89E-01 | 10471388  | 10471511  | NC_000002.11 |

|            |          |          |       |            |           |           |           |              |
|------------|----------|----------|-------|------------|-----------|-----------|-----------|--------------|
| cg09308942 | 3.78E-14 | 1.51E-15 | -8.68 | 24.4200023 | -1.71E-01 | 91573372  | 91573495  | NC_000012.11 |
| cg08616234 | 3.78E-14 | 1.51E-15 | -8.68 | 24.4199323 | -1.94E-01 | 86313973  | 86314096  | NC_000015.9  |
| cg16235748 | 3.78E-14 | 1.51E-15 | -8.68 | 24.4190658 | -1.47E-01 | 149772707 | 149772830 | NC_000006.11 |
| cg20561830 | 3.78E-14 | 1.51E-15 | -8.68 | 24.4182604 | -1.85E-01 | 81893829  | 81893952  | NC_000014.8  |
| cg08464208 | 3.78E-14 | 1.51E-15 | -8.68 | 24.4181721 | -1.32E-01 | 27792307  | 27792430  | NC_000006.11 |
| cg00738772 | 3.79E-14 | 1.51E-15 | -8.68 | 24.4167655 | -1.86E-01 | 149053061 | 149053184 | NC_000007.13 |
| cg00576550 | 3.79E-14 | 1.51E-15 | -8.68 | 24.4166714 | -1.62E-01 | 183749212 | 183749335 | NC_000003.11 |
| cg11396746 | 3.79E-14 | 1.52E-15 | -8.68 | 24.4161474 | -6.57E-02 | 1877632   | 1877755   | NC_000016.9  |
| cg14375890 | 3.79E-14 | 1.52E-15 | -8.68 | 24.4144001 | -2.09E-01 | 13355672  | 13355795  | NC_000006.11 |
| cg19495013 | 3.79E-14 | 1.52E-15 | -8.68 | 24.4142744 | -1.15E-01 | 52214119  | 52214242  | NC_000012.11 |
| cg05673966 | 3.80E-14 | 1.52E-15 | -8.68 | 24.4122456 | -1.85E-01 | 85431095  | 85431218  | NC_000016.9  |
| cg22749051 | 3.82E-14 | 1.53E-15 | -8.68 | 24.4066137 | -1.75E-01 | 80668944  | 80669067  | NC_000017.10 |
| cg05055712 | 3.83E-14 | 1.53E-15 | -8.68 | 24.4059158 | -9.75E-02 | 2880431   | 2880554   | NC_000016.9  |
| cg11879354 | 3.84E-14 | 1.54E-15 | -8.68 | 24.4019902 | -1.31E-01 | 159075773 | 159075896 | NC_000006.11 |
| cg04259001 | 3.85E-14 | 1.54E-15 | -8.68 | 24.3994617 | -9.47E-02 | 141097242 | 141097365 | NC_000008.10 |
| cg07256473 | 3.86E-14 | 1.55E-15 | -8.68 | 24.3955633 | -1.09E-01 | 29710276  | 29710399  | NC_000022.10 |
| cg07526904 | 3.87E-14 | 1.55E-15 | -8.68 | 24.3932674 | -1.81E-01 | 3794264   | 3794387   | NC_000007.13 |
| cg17574812 | 3.87E-14 | 1.55E-15 | -8.68 | 24.3932033 | -2.10E-01 | 58246371  | 58246494  | NC_000003.11 |
| cg17858100 | 3.87E-14 | 1.55E-15 | -8.68 | 24.393058  | -7.75E-02 | 207224510 | 207224633 | NC_000001.10 |
| cg07380219 | 3.88E-14 | 1.56E-15 | -8.68 | 24.3896439 | -9.52E-02 | 2245534   | 2245657   | NC_000016.9  |
| cg08841257 | 3.89E-14 | 1.56E-15 | -8.68 | 24.3891886 | -1.57E-01 | 10191002  | 10191125  | NC_000008.10 |
| cg13136655 | 3.89E-14 | 1.56E-15 | -8.68 | 24.3887543 | -2.26E-01 | 149806131 | 149806254 | NC_000006.11 |
| cg07830557 | 3.90E-14 | 1.56E-15 | -8.68 | 24.3860448 | -1.86E-01 | 4374239   | 4374362   | NC_000019.9  |
| cg01790498 | 3.90E-14 | 1.56E-15 | -8.68 | 24.3859662 | -9.95E-02 | 44888626  | 44888749  | NC_000007.13 |
| cg02399571 | 3.90E-14 | 1.56E-15 | -8.68 | 24.3847692 | -4.11E-02 | 7118430   | 7118553   | NC_000017.10 |

|                |          |          |       |            |           |           |           |              |
|----------------|----------|----------|-------|------------|-----------|-----------|-----------|--------------|
| cg25146814     | 3.91E-14 | 1.57E-15 | -8.68 | 24.3837929 | -8.39E-02 | 78977970  | 78978093  | NC_000017.10 |
| cg09866565     | 3.91E-14 | 1.57E-15 | -8.68 | 24.3837275 | -1.88E-01 | 137844436 | 137844559 | NC_000003.11 |
| cg21791017     | 3.91E-14 | 1.57E-15 | -8.68 | 24.3822237 | -1.25E-01 | 41803772  | 41803895  | NC_000015.9  |
| cg26363039     | 3.92E-14 | 1.57E-15 | -8.68 | 24.3808356 | -1.26E-01 | 1609549   | 1609672   | NC_000012.11 |
| cg11177614     | 3.92E-14 | 1.57E-15 | -8.68 | 24.3801299 | -1.62E-01 | 90608993  | 90609116  | NC_000010.10 |
| cg27606396     | 3.92E-14 | 1.57E-15 | -8.68 | 24.3800956 | -1.50E-01 | 113542117 | 113542240 | NC_000002.11 |
| cg09938406     | 3.93E-14 | 1.58E-15 | -8.68 | 24.3779591 | -2.10E-01 | 2890369   | 2890492   | NC_000001.10 |
| cg13393327     | 3.93E-14 | 1.58E-15 | -8.68 | 24.3774325 | -2.06E-01 | 128306948 | 128307071 | NC_000008.10 |
| cg05814135     | 3.93E-14 | 1.58E-15 | -8.68 | 24.3774006 | -1.70E-01 | 9241160   | 9241283   | NC_000001.10 |
| cg24542821     | 3.94E-14 | 1.58E-15 | -8.68 | 24.3740033 | -1.77E-01 | 219759404 | 219759527 | NC_000002.11 |
| cg18832247     | 3.94E-14 | 1.58E-15 | -8.68 | 24.3728036 | -2.13E-01 | 15300007  | 15300130  | NC_000006.11 |
| cg25355803     | 3.96E-14 | 1.59E-15 | -8.68 | 24.3675626 | -1.21E-01 | 99473032  | 99473155  | NC_000010.10 |
| cg15705203     | 3.98E-14 | 1.60E-15 | -8.68 | 24.3644252 | -1.33E-01 | 46089693  | 46089816  | NC_000001.10 |
| cg22911867     | 3.99E-14 | 1.60E-15 | -8.68 | 24.3622413 | -1.12E-01 | 126173548 | 126173671 | NC_000011.9  |
| cg17056676     | 3.99E-14 | 1.60E-15 | -8.68 | 24.3603495 | -1.65E-01 | 116301354 | 116301477 | NC_000010.10 |
| cg16147544     | 3.99E-14 | 1.60E-15 | -8.68 | 24.3602391 | -1.37E-01 | 5935002   | 5935125   | NC_000007.13 |
| cg18877271     | 3.99E-14 | 1.60E-15 | -8.67 | 24.3601788 | -2.02E-01 | 1952638   | 1952761   | NC_000011.9  |
| cg07863159     | 4.00E-14 | 1.61E-15 | -8.67 | 24.3591709 | -2.29E-01 | 50524410  | 50524533  | NC_000022.10 |
| cg03757387     | 4.00E-14 | 1.61E-15 | -8.67 | 24.3579192 | -1.99E-01 | 109770908 | 109771031 | NC_000004.11 |
| cg01839639     | 4.01E-14 | 1.61E-15 | -8.67 | 24.3558424 | -1.15E-01 | 202542    | 202665    | NC_000016.9  |
| cg15498134     | 4.01E-14 | 1.61E-15 | -8.67 | 24.3556295 | -1.74E-01 | 25246854  | 25246977  | NC_000001.10 |
| cg09871637     | 4.01E-14 | 1.61E-15 | -8.67 | 24.3554845 | -1.33E-01 | 87800511  | 87800634  | NC_000001.10 |
| cg18311708     | 4.03E-14 | 1.62E-15 | -8.67 | 24.3498068 | -1.52E-01 | 149322908 | 149323031 | NC_000007.13 |
| ch.10.2545189R | 4.04E-14 | 1.62E-15 | -8.67 | 24.348163  | -5.79E-02 | 120817404 | 120817527 | NC_000010.10 |
| cg05133205     | 4.04E-14 | 1.63E-15 | -8.67 | 24.3469932 | -1.62E-01 | 32121249  | 32121372  | NC_000006.11 |

|            |          |          |       |            |           |           |           |              |
|------------|----------|----------|-------|------------|-----------|-----------|-----------|--------------|
| cg21093618 | 4.05E-14 | 1.63E-15 | -8.67 | 24.3442781 | -1.41E-01 | 195560967 | 195561090 | NC_000003.11 |
| cg16890563 | 4.05E-14 | 1.63E-15 | -8.67 | 24.3440513 | -1.52E-01 | 82136223  | 82136346  | NC_000007.13 |
| cg02187259 | 4.06E-14 | 1.63E-15 | -8.67 | 24.3436389 | -2.47E-01 | 16804452  | 16804575  | NC_000002.11 |
| cg04757411 | 4.06E-14 | 1.63E-15 | -8.67 | 24.3420089 | -1.66E-01 | 76259545  | 76259668  | NC_000013.10 |
| cg10021428 | 4.08E-14 | 1.64E-15 | -8.67 | 24.3365418 | -1.47E-01 | 53588038  | 53588161  | NC_000004.11 |
| cg04012884 | 4.10E-14 | 1.65E-15 | -8.67 | 24.3333942 | -7.96E-02 | 6950093   | 6950216   | NC_000017.10 |
| cg03793407 | 4.10E-14 | 1.65E-15 | -8.67 | 24.3321508 | -5.00E-02 | 141705077 | 141705200 | NC_000005.9  |
| cg10720997 | 4.10E-14 | 1.65E-15 | -8.67 | 24.3319802 | -1.20E-01 | 997858    | 997981    | NC_000001.10 |
| cg00422488 | 4.11E-14 | 1.65E-15 | -8.67 | 24.3299792 | -2.09E-01 | 100747767 | 100747890 | NC_000009.11 |
| cg18668780 | 4.11E-14 | 1.65E-15 | -8.67 | 24.3298149 | -1.09E-01 | 102883165 | 102883288 | NC_000010.10 |
| cg21091128 | 4.11E-14 | 1.65E-15 | -8.67 | 24.3296269 | -1.11E-01 | 104583799 | 104583922 | NC_000014.8  |
| cg24450508 | 4.12E-14 | 1.66E-15 | -8.67 | 24.3282937 | -1.36E-01 | 5141352   | 5141475   | NC_000019.9  |
| cg01981960 | 4.12E-14 | 1.66E-15 | -8.67 | 24.3282177 | -1.65E-01 | 101274037 | 101274160 | NC_000007.13 |
| cg23039201 | 4.14E-14 | 1.67E-15 | -8.67 | 24.3213203 | -7.28E-02 | 27851887  | 27852010  | NC_000002.11 |
| cg16849268 | 4.15E-14 | 1.67E-15 | -8.67 | 24.3198466 | -2.22E-01 | 125721998 | 125722121 | NC_000008.10 |
| cg00339782 | 4.15E-14 | 1.67E-15 | -8.67 | 24.3191939 | -2.04E-01 | 149908099 | 149908222 | NC_000001.10 |
| cg20151301 | 4.15E-14 | 1.67E-15 | -8.67 | 24.3190726 | -1.56E-01 | 1366415   | 1366538   | NC_000010.10 |
| cg05214748 | 4.15E-14 | 1.67E-15 | -8.67 | 24.3190229 | -1.99E-01 | 31214335  | 31214458  | NC_000016.9  |
| cg26894079 | 4.15E-14 | 1.67E-15 | -8.67 | 24.3187279 | -1.32E-01 | 122954435 | 122954558 | NC_000011.9  |
| cg03286387 | 4.16E-14 | 1.68E-15 | -8.67 | 24.3151554 | -1.46E-01 | 1891050   | 1891173   | NC_000011.9  |
| cg14240304 | 4.16E-14 | 1.68E-15 | -8.67 | 24.3150882 | -1.73E-01 | 65323116  | 65323239  | NC_000011.9  |
| cg04851348 | 4.18E-14 | 1.69E-15 | -8.67 | 24.3110863 | -2.28E-01 | 162826115 | 162826238 | NC_000001.10 |
| cg01329577 | 4.18E-14 | 1.69E-15 | -8.67 | 24.3110202 | -1.84E-01 | 157698543 | 157698666 | NC_000007.13 |
| cg27478879 | 4.18E-14 | 1.69E-15 | -8.67 | 24.3104622 | -1.26E-01 | 139239957 | 139240080 | NC_000009.11 |
| cg05705089 | 4.19E-14 | 1.69E-15 | -8.67 | 24.3097796 | -6.26E-02 | 42839217  | 42839340  | NC_000020.10 |

|               |          |          |       |            |           |           |           |              |
|---------------|----------|----------|-------|------------|-----------|-----------|-----------|--------------|
| cg09709565    | 4.20E-14 | 1.69E-15 | -8.67 | 24.3068768 | -1.73E-01 | 46316283  | 46316406  | NC_000011.9  |
| cg09704422    | 4.21E-14 | 1.70E-15 | -8.67 | 24.3045531 | -1.12E-01 | 135725874 | 135725997 | NC_000008.10 |
| cg05516821    | 4.21E-14 | 1.70E-15 | -8.67 | 24.3033841 | -1.34E-01 | 186358472 | 186358595 | NC_000003.11 |
| cg23728447    | 4.23E-14 | 1.70E-15 | -8.67 | 24.30025   | -1.47E-01 | 126429267 | 126429390 | NC_000010.10 |
| cg10644544    | 4.23E-14 | 1.71E-15 | -8.67 | 24.2989697 | -1.34E-01 | 73872584  | 73872707  | NC_000017.10 |
| cg10890829    | 4.23E-14 | 1.71E-15 | -8.67 | 24.2987182 | -1.89E-01 | 119450707 | 119450830 | NC_000006.11 |
| ch.2.4963927F | 4.23E-14 | 1.71E-15 | -8.67 | 24.2983209 | -2.23E-02 | 242179805 | 242179928 | NC_000002.11 |
| cg14557690    | 4.25E-14 | 1.72E-15 | -8.66 | 24.2930229 | -1.74E-01 | 139978293 | 139978416 | NC_000009.11 |
| ch.3.344014F  | 4.27E-14 | 1.72E-15 | -8.66 | 24.2897602 | -3.63E-02 | 15074400  | 15074523  | NC_000003.11 |
| cg02292066    | 4.27E-14 | 1.72E-15 | -8.66 | 24.2885262 | -8.32E-02 | 2518269   | 2518392   | NC_000001.10 |
| cg16411216    | 4.27E-14 | 1.73E-15 | -8.66 | 24.2881274 | -3.51E-02 | 9340507   | 9340630   | NC_000001.10 |
| cg15391651    | 4.28E-14 | 1.73E-15 | -8.66 | 24.2878315 | -1.51E-01 | 165132273 | 165132396 | NC_000001.10 |
| cg15902830    | 4.28E-14 | 1.73E-15 | -8.66 | 24.287056  | -1.82E-01 | 3387913   | 3388036   | NC_000001.10 |
| cg00521048    | 4.28E-14 | 1.73E-15 | -8.66 | 24.2855086 | -8.79E-02 | 50159798  | 50159921  | NC_000013.10 |
| cg03717961    | 4.28E-14 | 1.73E-15 | -8.66 | 24.2852985 | -2.11E-01 | 49705591  | 49705714  | NC_000010.10 |
| cg07440264    | 4.29E-14 | 1.73E-15 | -8.66 | 24.2846251 | -1.91E-01 | 33744977  | 33745100  | NC_000011.9  |
| cg05214511    | 4.31E-14 | 1.74E-15 | -8.66 | 24.2797293 | -1.98E-01 | 80572259  | 80572382  | NC_000004.11 |
| cg20173170    | 4.31E-14 | 1.74E-15 | -8.66 | 24.2793158 | -9.71E-02 | 31127120  | 31127243  | NC_000006.11 |
| cg02297879    | 4.31E-14 | 1.74E-15 | -8.66 | 24.2786003 | -1.04E-01 | 134144761 | 134144884 | NC_000010.10 |
| cg23009123    | 4.36E-14 | 1.76E-15 | -8.66 | 24.2683124 | -2.03E-01 | 94450531  | 94450654  | NC_000010.10 |
| cg17276021    | 4.36E-14 | 1.76E-15 | -8.66 | 24.2675571 | -1.31E-01 | 16084445  | 16084568  | NC_000001.10 |
| cg02247160    | 4.36E-14 | 1.76E-15 | -8.66 | 24.2664743 | -8.56E-02 | 41243829  | 41243952  | NC_000003.11 |
| cg01511806    | 4.38E-14 | 1.77E-15 | -8.66 | 24.26279   | -1.08E-01 | 85157939  | 85158062  | NC_000016.9  |
| cg02232751    | 4.38E-14 | 1.77E-15 | -8.66 | 24.2627704 | -1.02E-01 | 18415742  | 18415865  | NC_000011.9  |
| cg27342837    | 4.39E-14 | 1.77E-15 | -8.66 | 24.2606577 | -2.22E-01 | 188419568 | 188419691 | NC_000002.11 |

|            |          |          |       |            |           |           |           |              |
|------------|----------|----------|-------|------------|-----------|-----------|-----------|--------------|
| cg24362923 | 4.39E-14 | 1.78E-15 | -8.66 | 24.2588843 | -3.15E-02 | 103985861 | 103985984 | NC_000010.10 |
| cg06868095 | 4.41E-14 | 1.78E-15 | -8.66 | 24.2561072 | -6.41E-02 | 8084610   | 8084733   | NC_000008.10 |
| cg04748988 | 4.41E-14 | 1.78E-15 | -8.66 | 24.2548369 | -2.08E-02 | 12329223  | 12329346  | NC_000003.11 |
| cg06966613 | 4.42E-14 | 1.79E-15 | -8.66 | 24.2528271 | -1.33E-01 | 85542891  | 85543014  | NC_000016.9  |
| cg27196194 | 4.42E-14 | 1.79E-15 | -8.66 | 24.252176  | -2.00E-01 | 4054253   | 4054376   | NC_000019.9  |
| cg18077304 | 4.44E-14 | 1.80E-15 | -8.66 | 24.2470087 | -2.37E-01 | 51818049  | 51818172  | NC_000012.11 |
| cg23003500 | 4.45E-14 | 1.80E-15 | -8.66 | 24.2454127 | -2.89E-02 | 42543530  | 42543653  | NC_000003.11 |
| cg26648185 | 4.45E-14 | 1.80E-15 | -8.66 | 24.2453659 | -1.29E-01 | 32927013  | 32927136  | NC_000021.8  |
| cg18186771 | 4.45E-14 | 1.80E-15 | -8.66 | 24.2452366 | -2.12E-01 | 76993506  | 76993629  | NC_000017.10 |
| cg13265740 | 4.47E-14 | 1.81E-15 | -8.66 | 24.2414896 | -1.89E-01 | 139349120 | 139349243 | NC_000006.11 |
| cg17213154 | 4.47E-14 | 1.81E-15 | -8.66 | 24.2408587 | -1.70E-01 | 8832956   | 8833079   | NC_000011.9  |
| cg21414636 | 4.50E-14 | 1.82E-15 | -8.65 | 24.23482   | -1.20E-01 | 144925328 | 144925451 | NC_000008.10 |
| cg06148974 | 4.50E-14 | 1.82E-15 | -8.65 | 24.2348159 | -2.26E-01 | 1864183   | 1864306   | NC_000004.11 |
| cg07093825 | 4.50E-14 | 1.82E-15 | -8.65 | 24.2330626 | -9.33E-02 | 69728392  | 69728515  | NC_000014.8  |
| cg05054831 | 4.50E-14 | 1.82E-15 | -8.65 | 24.232851  | -7.83E-02 | 33265543  | 33265666  | NC_000020.10 |
| cg24075296 | 4.51E-14 | 1.83E-15 | -8.65 | 24.2314381 | -1.67E-01 | 152960525 | 152960648 | NC_000004.11 |
| cg02653521 | 4.51E-14 | 1.83E-15 | -8.65 | 24.2312947 | -2.32E-01 | 241373820 | 241373943 | NC_000002.11 |
| cg23257859 | 4.51E-14 | 1.83E-15 | -8.65 | 24.2310399 | -1.48E-01 | 32772432  | 32772555  | NC_000007.13 |
| cg24682012 | 4.51E-14 | 1.83E-15 | -8.65 | 24.2309157 | -8.81E-02 | 6411087   | 6411210   | NC_000011.9  |
| cg09762897 | 4.51E-14 | 1.83E-15 | -8.65 | 24.230663  | -1.45E-01 | 30388914  | 30389037  | NC_000016.9  |
| cg25976170 | 4.52E-14 | 1.83E-15 | -8.65 | 24.229856  | -1.43E-01 | 29707585  | 29707708  | NC_000022.10 |
| cg26073542 | 4.52E-14 | 1.83E-15 | -8.65 | 24.2288274 | -1.06E-01 | 3174128   | 3174251   | NC_000011.9  |
| cg01426818 | 4.53E-14 | 1.84E-15 | -8.65 | 24.2265445 | -1.20E-01 | 77806444  | 77806567  | NC_000017.10 |
| cg16889489 | 4.55E-14 | 1.84E-15 | -8.65 | 24.222481  | -7.21E-02 | 44191036  | 44191159  | NC_000006.11 |
| cg09981407 | 4.55E-14 | 1.84E-15 | -8.65 | 24.2220273 | -1.77E-01 | 2699505   | 2699628   | NC_000017.10 |

|            |          |          |       |            |           |           |           |              |
|------------|----------|----------|-------|------------|-----------|-----------|-----------|--------------|
| cg20539816 | 4.56E-14 | 1.85E-15 | -8.65 | 24.2203245 | -1.56E-01 | 5988249   | 5988372   | NC_000017.10 |
| cg07191657 | 4.58E-14 | 1.86E-15 | -8.65 | 24.214788  | -1.90E-01 | 14478541  | 14478664  | NC_000010.10 |
| cg14909495 | 4.58E-14 | 1.86E-15 | -8.65 | 24.2140352 | -1.14E-01 | 150549472 | 150549595 | NC_000007.13 |
| cg19447221 | 4.58E-14 | 1.86E-15 | -8.65 | 24.2140155 | -1.75E-01 | 23985722  | 23985845  | NC_000010.10 |
| cg04333863 | 4.59E-14 | 1.86E-15 | -8.65 | 24.2115771 | -8.73E-02 | 70121129  | 70121252  | NC_000002.11 |
| cg09501509 | 4.60E-14 | 1.87E-15 | -8.65 | 24.2104145 | -1.62E-01 | 89745356  | 89745479  | NC_000006.11 |
| cg14666972 | 4.61E-14 | 1.87E-15 | -8.65 | 24.2079964 | -7.24E-02 | 90745322  | 90745445  | NC_000015.9  |
| cg22368413 | 4.62E-14 | 1.87E-15 | -8.65 | 24.2064648 | -6.11E-02 | 218751627 | 218751750 | NC_000002.11 |
| cg27409154 | 4.62E-14 | 1.88E-15 | -8.65 | 24.2048186 | -1.50E-01 | 53490412  | 53490535  | NC_000012.11 |
| cg18414579 | 4.63E-14 | 1.88E-15 | -8.65 | 24.2041305 | -1.73E-01 | 102266325 | 102266448 | NC_000004.11 |
| cg13963033 | 4.65E-14 | 1.89E-15 | -8.65 | 24.1987277 | -1.54E-01 | 126220247 | 126220370 | NC_000005.9  |
| cg07943832 | 4.65E-14 | 1.89E-15 | -8.65 | 24.1977498 | -2.02E-01 | 155568918 | 155569041 | NC_000006.11 |
| cg24008908 | 4.66E-14 | 1.89E-15 | -8.65 | 24.1957583 | -8.46E-02 | 19615453  | 19615576  | NC_000001.10 |
| cg07091529 | 4.68E-14 | 1.90E-15 | -8.65 | 24.1930783 | -2.32E-01 | 16804409  | 16804532  | NC_000002.11 |
| cg18089397 | 4.68E-14 | 1.90E-15 | -8.65 | 24.1928525 | -1.57E-01 | 2264747   | 2264870   | NC_000004.11 |
| cg09472004 | 4.69E-14 | 1.90E-15 | -8.65 | 24.190435  | -4.90E-02 | 87240156  | 87240279  | NC_000001.10 |
| cg22778790 | 4.69E-14 | 1.91E-15 | -8.65 | 24.1900798 | -6.47E-02 | 64761409  | 64761532  | NC_000014.8  |
| cg01607369 | 4.69E-14 | 1.91E-15 | -8.65 | 24.1890149 | -1.82E-01 | 7598673   | 7598796   | NC_000011.9  |
| cg08607108 | 4.70E-14 | 1.91E-15 | -8.65 | 24.1872795 | -1.96E-01 | 2109890   | 2110013   | NC_000007.13 |
| cg13318572 | 4.71E-14 | 1.91E-15 | -8.65 | 24.1858617 | -1.00E-01 | 1993007   | 1993130   | NC_000008.10 |
| cg04915566 | 4.71E-14 | 1.91E-15 | -8.65 | 24.1858403 | -3.01E-01 | 36421472  | 36421595  | NC_000021.8  |
| cg08425760 | 4.71E-14 | 1.91E-15 | -8.65 | 24.185394  | -1.31E-01 | 11795897  | 11796020  | NC_000001.10 |
| cg24074594 | 4.72E-14 | 1.92E-15 | -8.65 | 24.1822374 | -1.93E-01 | 161676581 | 161676704 | NC_000001.10 |
| cg13783238 | 4.73E-14 | 1.92E-15 | -8.65 | 24.1812936 | -2.21E-01 | 160121821 | 160121944 | NC_000003.11 |
| cg07283896 | 4.74E-14 | 1.93E-15 | -8.65 | 24.178374  | -9.28E-02 | 11855283  | 11855406  | NC_000006.11 |



|            |          |          |       |            |           |           |           |              |
|------------|----------|----------|-------|------------|-----------|-----------|-----------|--------------|
| cg07918814 | 4.75E-14 | 1.93E-15 | -8.65 | 24.1753459 | -1.93E-01 | 230882481 | 230882604 | NC_000001.10 |
| cg11993436 | 4.76E-14 | 1.94E-15 | -8.65 | 24.1743349 | -7.13E-02 | 155437098 | 155437221 | NC_000007.13 |
| cg21766667 | 4.78E-14 | 1.94E-15 | -8.64 | 24.1709494 | -1.58E-01 | 48287888  | 48288011  | NC_000017.10 |
| cg00830285 | 4.78E-14 | 1.94E-15 | -8.64 | 24.1701375 | -1.53E-01 | 149119905 | 149120028 | NC_000007.13 |
| cg16414691 | 4.78E-14 | 1.94E-15 | -8.64 | 24.170016  | -1.96E-01 | 98534089  | 98534212  | NC_000003.11 |
| cg06528601 | 4.79E-14 | 1.95E-15 | -8.64 | 24.1669658 | -1.17E-01 | 84652562  | 84652685  | NC_000016.9  |
| cg02903907 | 4.80E-14 | 1.95E-15 | -8.64 | 24.1646487 | -9.34E-02 | 232941055 | 232941178 | NC_000001.10 |
| cg07199894 | 4.81E-14 | 1.96E-15 | -8.64 | 24.1620435 | -8.43E-02 | 132379104 | 132379227 | NC_000012.11 |
| cg06905130 | 4.82E-14 | 1.96E-15 | -8.64 | 24.1618994 | -8.26E-02 | 287148    | 287271    | NC_000002.11 |
| cg14904662 | 4.82E-14 | 1.96E-15 | -8.64 | 24.1615881 | -1.43E-01 | 41655673  | 41655796  | NC_000008.10 |
| cg04130572 | 4.83E-14 | 1.97E-15 | -8.64 | 24.1589445 | -1.48E-01 | 42806000  | 42806123  | NC_000020.10 |
| cg08599294 | 4.83E-14 | 1.97E-15 | -8.64 | 24.1585457 | -8.46E-02 | 96329351  | 96329474  | NC_000013.10 |
| cg03132202 | 4.84E-14 | 1.97E-15 | -8.64 | 24.1558564 | -8.17E-02 | 64686950  | 64687073  | NC_000012.11 |
| cg03739129 | 4.85E-14 | 1.98E-15 | -8.64 | 24.1545132 | -5.12E-02 | 220252547 | 220252670 | NC_000002.11 |
| cg24027572 | 4.86E-14 | 1.98E-15 | -8.64 | 24.1528968 | -5.87E-02 | 47804943  | 47805066  | NC_000020.10 |
| cg14579560 | 4.87E-14 | 1.98E-15 | -8.64 | 24.1498901 | -5.97E-02 | 47103803  | 47103926  | NC_000019.9  |
| cg07611933 | 4.87E-14 | 1.99E-15 | -8.64 | 24.1494487 | -2.06E-01 | 2773245   | 2773368   | NC_000016.9  |
| cg02390115 | 4.87E-14 | 1.99E-15 | -8.64 | 24.148932  | -1.05E-01 | 21767211  | 21767334  | NC_000001.10 |
| cg02322908 | 4.88E-14 | 1.99E-15 | -8.64 | 24.1484648 | -9.86E-02 | 11051802  | 11051925  | NC_000002.11 |
| cg00615377 | 4.88E-14 | 1.99E-15 | -8.64 | 24.1469301 | -9.82E-02 | 36236649  | 36236772  | NC_000022.10 |
| cg17822779 | 4.89E-14 | 1.99E-15 | -8.64 | 24.1461969 | -1.24E-01 | 135174326 | 135174449 | NC_000008.10 |
| cg24079727 | 4.89E-14 | 1.99E-15 | -8.64 | 24.1447253 | -2.04E-01 | 57317980  | 57318103  | NC_000015.9  |
| cg15118204 | 4.91E-14 | 2.00E-15 | -8.64 | 24.1414246 | -4.67E-02 | 79876231  | 79876354  | NC_000017.10 |
| cg25940485 | 4.92E-14 | 2.01E-15 | -8.64 | 24.1395708 | -1.73E-01 | 117636616 | 117636739 | NC_000001.10 |
| cg11673920 | 4.92E-14 | 2.01E-15 | -8.64 | 24.1393471 | -6.24E-02 | 13629624  | 13629747  | NC_000010.10 |

|                |          |          |       |            |           |           |           |              |
|----------------|----------|----------|-------|------------|-----------|-----------|-----------|--------------|
| cg26078976     | 4.92E-14 | 2.01E-15 | -8.64 | 24.1383447 | -1.86E-01 | 149564268 | 149564391 | NC_000006.11 |
| cg10258817     | 4.93E-14 | 2.01E-15 | -8.64 | 24.1364528 | -2.08E-01 | 29955304  | 29955427  | NC_000016.9  |
| cg08378742     | 4.94E-14 | 2.02E-15 | -8.64 | 24.1340746 | -1.72E-01 | 45596974  | 45597097  | NC_000022.10 |
| cg13834453     | 4.96E-14 | 2.02E-15 | -8.64 | 24.1310963 | -4.45E-02 | 33167337  | 33167460  | NC_000009.11 |
| cg21205031     | 4.96E-14 | 2.02E-15 | -8.64 | 24.1299433 | -1.29E-01 | 32502699  | 32502822  | NC_000002.11 |
| cg27179693     | 4.96E-14 | 2.03E-15 | -8.64 | 24.1295471 | -1.88E-01 | 120530818 | 120530941 | NC_000011.9  |
| cg11186344     | 4.97E-14 | 2.03E-15 | -8.64 | 24.1285294 | -1.30E-01 | 19253694  | 19253817  | NC_000001.10 |
| cg08699270     | 4.98E-14 | 2.03E-15 | -8.64 | 24.1258597 | -1.62E-01 | 57607029  | 57607152  | NC_000012.11 |
| cg01142811     | 4.99E-14 | 2.04E-15 | -8.64 | 24.1247104 | -7.64E-02 | 96144364  | 96144487  | NC_000005.9  |
| cg16565031     | 5.00E-14 | 2.04E-15 | -8.64 | 24.1227492 | -1.95E-01 | 70186289  | 70186412  | NC_000014.8  |
| cg01160557     | 5.06E-14 | 2.06E-15 | -8.64 | 24.1106401 | -7.65E-02 | 44651777  | 44651900  | NC_000020.10 |
| cg07548213     | 5.06E-14 | 2.07E-15 | -8.64 | 24.1103994 | -9.11E-02 | 162271751 | 162271874 | NC_000002.11 |
| cg14323984     | 5.06E-14 | 2.07E-15 | -8.64 | 24.1100979 | -2.25E-01 | 6695203   | 6695326   | NC_000004.11 |
| cg07687554     | 5.07E-14 | 2.07E-15 | -8.63 | 24.1083774 | -8.71E-02 | 55587039  | 55587162  | NC_000019.9  |
| ch.10.2760753F | 5.07E-14 | 2.07E-15 | -8.63 | 24.1079144 | -1.15E-01 | 128591800 | 128591923 | NC_000010.10 |
| cg17964844     | 5.07E-14 | 2.07E-15 | -8.63 | 24.1074777 | -1.00E-01 | 49367911  | 49368034  | NC_000012.11 |
| cg14894144     | 5.08E-14 | 2.07E-15 | -8.63 | 24.1061653 | -1.47E-01 | 21270554  | 21270677  | NC_000018.9  |
| cg18396675     | 5.09E-14 | 2.08E-15 | -8.63 | 24.1042531 | -1.14E-01 | 56605391  | 56605514  | NC_000017.10 |
| cg00656881     | 5.13E-14 | 2.09E-15 | -8.63 | 24.0966039 | -1.46E-01 | 2138757   | 2138880   | NC_000001.10 |
| cg00179940     | 5.13E-14 | 2.10E-15 | -8.63 | 24.0954845 | -1.69E-01 | 126978053 | 126978176 | NC_000012.11 |
| cg15444626     | 5.13E-14 | 2.10E-15 | -8.63 | 24.0954688 | -1.51E-01 | 48205558  | 48205681  | NC_000017.10 |
| cg15002761     | 5.14E-14 | 2.10E-15 | -8.63 | 24.0932239 | -2.06E-01 | 133816097 | 133816220 | NC_000011.9  |
| cg08887400     | 5.14E-14 | 2.10E-15 | -8.63 | 24.0923822 | -2.81E-01 | 30652376  | 30652499  | NC_000006.11 |
| cg25578013     | 5.14E-14 | 2.10E-15 | -8.63 | 24.0923734 | -1.58E-01 | 21047444  | 21047567  | NC_000013.10 |
| cg18037826     | 5.15E-14 | 2.11E-15 | -8.63 | 24.0903957 | -1.33E-01 | 109273835 | 109273958 | NC_000012.11 |

|               |          |          |       |            |           |           |           |              |
|---------------|----------|----------|-------|------------|-----------|-----------|-----------|--------------|
| cg21307155    | 5.16E-14 | 2.11E-15 | -8.63 | 24.0902179 | -1.49E-01 | 3216740   | 3216863   | NC_000020.10 |
| cg08685733    | 5.16E-14 | 2.11E-15 | -8.63 | 24.0892778 | -1.08E-01 | 42215609  | 42215732  | NC_000017.10 |
| cg11321083    | 5.16E-14 | 2.11E-15 | -8.63 | 24.0888083 | -2.11E-01 | 64638190  | 64638313  | NC_000011.9  |
| cg11046421    | 5.19E-14 | 2.12E-15 | -8.63 | 24.0839632 | -1.82E-01 | 44806923  | 44807046  | NC_000005.9  |
| cg20267101    | 5.21E-14 | 2.13E-15 | -8.63 | 24.0798406 | -1.02E-01 | 113006232 | 113006355 | NC_000003.11 |
| cg03271650    | 5.21E-14 | 2.13E-15 | -8.63 | 24.0792882 | -7.92E-02 | 114135881 | 114136004 | NC_000010.10 |
| cg01543184    | 5.22E-14 | 2.13E-15 | -8.63 | 24.07773   | -1.70E-01 | 79881543  | 79881666  | NC_000017.10 |
| cg19201009    | 5.22E-14 | 2.14E-15 | -8.63 | 24.0766012 | -1.36E-01 | 99475406  | 99475529  | NC_000010.10 |
| cg04635504    | 5.23E-14 | 2.14E-15 | -8.63 | 24.0741988 | -1.44E-01 | 2829241   | 2829364   | NC_000011.9  |
| cg16258854    | 5.24E-14 | 2.15E-15 | -8.63 | 24.0726301 | -1.75E-01 | 20648194  | 20648317  | NC_000002.11 |
| cg01824919    | 5.24E-14 | 2.15E-15 | -8.63 | 24.0722191 | -5.19E-02 | 116711339 | 116711462 | NC_000001.10 |
| cg03014589    | 5.26E-14 | 2.15E-15 | -8.63 | 24.0684044 | -1.42E-01 | 144965836 | 144965959 | NC_000008.10 |
| cg12972064    | 5.27E-14 | 2.16E-15 | -8.63 | 24.0668335 | -1.80E-01 | 171887393 | 171887516 | NC_000003.11 |
| cg07917978    | 5.28E-14 | 2.16E-15 | -8.63 | 24.0649687 | -1.16E-01 | 21650166  | 21650289  | NC_000016.9  |
| cg03981685    | 5.30E-14 | 2.17E-15 | -8.63 | 24.0619071 | -1.91E-01 | 87615654  | 87615777  | NC_000001.10 |
| cg02812767    | 5.31E-14 | 2.17E-15 | -8.63 | 24.0595421 | -1.49E-01 | 74218468  | 74218591  | NC_000015.9  |
| cg21625464    | 5.31E-14 | 2.17E-15 | -8.63 | 24.0595186 | -1.59E-01 | 314044    | 314167    | NC_000011.9  |
| cg23371476    | 5.33E-14 | 2.18E-15 | -8.63 | 24.0550747 | -1.96E-01 | 105877824 | 105877947 | NC_000002.11 |
| cg18307912    | 5.33E-14 | 2.18E-15 | -8.63 | 24.0548568 | -6.37E-02 | 42856773  | 42856896  | NC_000017.10 |
| cg06058576    | 5.36E-14 | 2.20E-15 | -8.63 | 24.0498626 | -1.72E-01 | 506472    | 506595    | NC_000005.9  |
| cg20829834    | 5.36E-14 | 2.20E-15 | -8.63 | 24.048335  | -1.69E-01 | 63946048  | 63946171  | NC_000003.11 |
| ch.2.4964537R | 5.38E-14 | 2.21E-15 | -8.62 | 24.044896  | -2.46E-02 | 242189929 | 242190052 | NC_000002.11 |
| cg14176088    | 5.39E-14 | 2.21E-15 | -8.62 | 24.0436992 | -1.07E-01 | 9785289   | 9785412   | NC_000001.10 |
| cg16527939    | 5.40E-14 | 2.21E-15 | -8.62 | 24.0418015 | -1.27E-01 | 1253970   | 1254093   | NC_000001.10 |
| cg14574037    | 5.41E-14 | 2.22E-15 | -8.62 | 24.0385149 | -5.38E-02 | 155553986 | 155554109 | NC_000002.11 |

|               |          |          |       |            |           |           |           |              |
|---------------|----------|----------|-------|------------|-----------|-----------|-----------|--------------|
| cg18384681    | 5.41E-14 | 2.22E-15 | -8.62 | 24.0384877 | -7.71E-02 | 55462126  | 55462249  | NC_000001.10 |
| cg17172595    | 5.41E-14 | 2.22E-15 | -8.62 | 24.0384571 | -4.96E-02 | 54813531  | 54813654  | NC_000012.11 |
| cg05875421    | 5.42E-14 | 2.22E-15 | -8.62 | 24.0380168 | -2.49E-01 | 91709951  | 91710074  | NC_000014.8  |
| cg09247695    | 5.42E-14 | 2.22E-15 | -8.62 | 24.0376479 | -1.45E-01 | 157644273 | 157644396 | NC_000007.13 |
| cg08047629    | 5.42E-14 | 2.22E-15 | -8.62 | 24.0368357 | -1.62E-01 | 30125047  | 30125170  | NC_000016.9  |
| cg11166108    | 5.43E-14 | 2.23E-15 | -8.62 | 24.0356772 | -1.47E-01 | 18416767  | 18416890  | NC_000011.9  |
| cg11839681    | 5.44E-14 | 2.23E-15 | -8.62 | 24.0341754 | -1.14E-01 | 49940919  | 49941042  | NC_000003.11 |
| cg09874213    | 5.44E-14 | 2.23E-15 | -8.62 | 24.0327176 | -1.19E-01 | 24968352  | 24968475  | NC_000001.10 |
| cg02879423    | 5.44E-14 | 2.23E-15 | -8.62 | 24.0325892 | -2.06E-01 | 224806760 | 224806883 | NC_000002.11 |
| cg02502233    | 5.44E-14 | 2.24E-15 | -8.62 | 24.0321919 | -2.34E-01 | 86379603  | 86379726  | NC_000006.11 |
| cg11336539    | 5.45E-14 | 2.24E-15 | -8.62 | 24.0320773 | -7.61E-02 | 28994987  | 28995110  | NC_000001.10 |
| cg18995031    | 5.46E-14 | 2.24E-15 | -8.62 | 24.0296951 | -1.56E-01 | 114780876 | 114780999 | NC_000013.10 |
| cg22673583    | 5.47E-14 | 2.25E-15 | -8.62 | 24.0271573 | -5.59E-02 | 12719049  | 12719172  | NC_000001.10 |
| cg24800655    | 5.49E-14 | 2.25E-15 | -8.62 | 24.0240677 | -2.30E-01 | 133065941 | 133066064 | NC_000012.11 |
| cg24429533    | 5.49E-14 | 2.25E-15 | -8.62 | 24.0238379 | -1.57E-01 | 107886896 | 107887019 | NC_000007.13 |
| cg11666857    | 5.50E-14 | 2.26E-15 | -8.62 | 24.0214697 | -1.41E-01 | 1207464   | 1207587   | NC_000005.9  |
| cg24845165    | 5.52E-14 | 2.27E-15 | -8.62 | 24.0178642 | -1.47E-01 | 39968231  | 39968354  | NC_000020.10 |
| cg21878918    | 5.52E-14 | 2.27E-15 | -8.62 | 24.0173672 | -8.36E-02 | 57634762  | 57634885  | NC_000012.11 |
| cg15048534    | 5.52E-14 | 2.27E-15 | -8.62 | 24.0172077 | -9.04E-02 | 74381192  | 74381315  | NC_000017.10 |
| cg14184873    | 5.54E-14 | 2.28E-15 | -8.62 | 24.0146187 | -5.28E-02 | 151342350 | 151342473 | NC_000002.11 |
| cg22298548    | 5.54E-14 | 2.28E-15 | -8.62 | 24.0138801 | -1.19E-01 | 35424933  | 35425056  | NC_000017.10 |
| cg00454770    | 5.55E-14 | 2.28E-15 | -8.62 | 24.0116518 | -1.58E-01 | 116286974 | 116287097 | NC_000010.10 |
| ch.3.2410502F | 5.57E-14 | 2.29E-15 | -8.62 | 24.0083739 | -3.37E-02 | 123216572 | 123216695 | NC_000003.11 |
| cg11887996    | 5.57E-14 | 2.29E-15 | -8.62 | 24.0082087 | -1.28E-01 | 120559003 | 120559126 | NC_000012.11 |
| cg02423574    | 5.59E-14 | 2.30E-15 | -8.62 | 24.0053683 | -6.86E-02 | 119066560 | 119066683 | NC_000011.9  |

|            |          |          |       |            |           |           |           |              |
|------------|----------|----------|-------|------------|-----------|-----------|-----------|--------------|
| cg01924561 | 5.59E-14 | 2.30E-15 | -8.62 | 24.0048117 | -2.19E-01 | 43416103  | 43416226  | NC_000001.10 |
| cg09917123 | 5.59E-14 | 2.30E-15 | -8.62 | 24.0041349 | -8.21E-02 | 201766393 | 201766516 | NC_000002.11 |
| cg02229095 | 5.60E-14 | 2.30E-15 | -8.62 | 24.0026761 | -1.47E-01 | 146011663 | 146011786 | NC_000008.10 |
| cg14861518 | 5.61E-14 | 2.31E-15 | -8.62 | 24.0007374 | -6.74E-02 | 30688295  | 30688418  | NC_000006.11 |
| cg24236839 | 5.63E-14 | 2.32E-15 | -8.62 | 23.997221  | -1.45E-01 | 5038822   | 5038945   | NC_000019.9  |
| cg08263140 | 5.63E-14 | 2.32E-15 | -8.62 | 23.9961879 | -1.67E-01 | 32864238  | 32864361  | NC_000001.10 |
| cg15237152 | 5.63E-14 | 2.32E-15 | -8.62 | 23.9958333 | -1.12E-01 | 11649631  | 11649754  | NC_000019.9  |
| cg26663742 | 5.65E-14 | 2.32E-15 | -8.62 | 23.993929  | -9.14E-02 | 70906136  | 70906259  | NC_000005.9  |
| cg16275295 | 5.65E-14 | 2.33E-15 | -8.62 | 23.992562  | -1.59E-01 | 101661984 | 101662107 | NC_000015.9  |
| cg08448622 | 5.65E-14 | 2.33E-15 | -8.62 | 23.9922931 | -2.02E-01 | 31026105  | 31026228  | NC_000006.11 |
| cg07749943 | 5.66E-14 | 2.33E-15 | -8.62 | 23.9906537 | -1.31E-01 | 3468188   | 3468311   | NC_000004.11 |
| cg01319701 | 5.67E-14 | 2.34E-15 | -8.62 | 23.9885296 | -1.06E-01 | 749264    | 749387    | NC_000020.10 |
| cg04262934 | 5.68E-14 | 2.34E-15 | -8.62 | 23.987702  | -1.21E-01 | 33173581  | 33173704  | NC_000006.11 |
| cg13710969 | 5.70E-14 | 2.35E-15 | -8.61 | 23.9845356 | -1.07E-01 | 79393463  | 79393586  | NC_000017.10 |
| cg25255988 | 5.70E-14 | 2.35E-15 | -8.61 | 23.9832724 | -1.33E-01 | 75428927  | 75429050  | NC_000011.9  |
| cg17470723 | 5.71E-14 | 2.35E-15 | -8.61 | 23.9819267 | -5.27E-02 | 74884337  | 74884460  | NC_000008.10 |
| cg03068346 | 5.71E-14 | 2.35E-15 | -8.61 | 23.9807846 | -1.87E-01 | 3113919   | 3114042   | NC_000010.10 |
| cg25848158 | 5.73E-14 | 2.36E-15 | -8.61 | 23.976953  | -4.42E-02 | 151966808 | 151966931 | NC_000001.10 |
| cg00004082 | 5.74E-14 | 2.37E-15 | -8.61 | 23.9751141 | -1.05E-01 | 10020360  | 10020483  | NC_000004.11 |
| cg02515217 | 5.75E-14 | 2.37E-15 | -8.61 | 23.9735293 | -2.01E-01 | 57918600  | 57918723  | NC_000017.10 |
| cg22845912 | 5.76E-14 | 2.37E-15 | -8.61 | 23.9725849 | -1.56E-01 | 134059874 | 134059997 | NC_000008.10 |
| cg07835482 | 5.77E-14 | 2.38E-15 | -8.61 | 23.9699665 | -1.94E-01 | 182656091 | 182656214 | NC_000002.11 |
| cg11467015 | 5.78E-14 | 2.39E-15 | -8.61 | 23.9680364 | -7.00E-02 | 77786853  | 77786976  | NC_000017.10 |
| cg03463778 | 5.79E-14 | 2.39E-15 | -8.61 | 23.966265  | -1.18E-01 | 48185200  | 48185323  | NC_000010.10 |
| cg15999356 | 5.80E-14 | 2.39E-15 | -8.61 | 23.9649465 | -1.70E-01 | 101990755 | 101990878 | NC_000011.9  |

|            |          |          |       |            |           |           |           |              |
|------------|----------|----------|-------|------------|-----------|-----------|-----------|--------------|
| cg26883251 | 5.80E-14 | 2.39E-15 | -8.61 | 23.964586  | -1.14E-01 | 213169046 | 213169169 | NC_000001.10 |
| cg26228577 | 5.80E-14 | 2.39E-15 | -8.61 | 23.9640108 | -1.24E-01 | 121624862 | 121624985 | NC_000002.11 |
| cg25270886 | 5.81E-14 | 2.40E-15 | -8.61 | 23.9630715 | -1.29E-01 | 77752742  | 77752865  | NC_000017.10 |
| cg19515510 | 5.81E-14 | 2.40E-15 | -8.61 | 23.9624564 | -8.45E-02 | 73201236  | 73201359  | NC_000017.10 |
| cg13026629 | 5.81E-14 | 2.40E-15 | -8.61 | 23.9620666 | -2.02E-01 | 36347703  | 36347826  | NC_000014.8  |
| cg09516349 | 5.82E-14 | 2.40E-15 | -8.61 | 23.9604989 | -9.68E-02 | 18529339  | 18529462  | NC_000019.9  |
| cg09429111 | 5.83E-14 | 2.40E-15 | -8.61 | 23.9601755 | -5.21E-02 | 96792562  | 96792685  | NC_000009.11 |
| cg14611816 | 5.83E-14 | 2.41E-15 | -8.61 | 23.9588707 | -1.56E-01 | 79068961  | 79069084  | NC_000017.10 |
| cg15231794 | 5.83E-14 | 2.41E-15 | -8.61 | 23.9587939 | -1.16E-01 | 4639844   | 4639967   | NC_000019.9  |
| cg27640763 | 5.85E-14 | 2.41E-15 | -8.61 | 23.956182  | -1.20E-01 | 91503109  | 91503232  | NC_000012.11 |
| cg26028440 | 5.85E-14 | 2.41E-15 | -8.61 | 23.9560003 | -1.77E-01 | 27982716  | 27982839  | NC_000001.10 |
| cg15052747 | 5.85E-14 | 2.41E-15 | -8.61 | 23.9559053 | -1.77E-01 | 138942591 | 138942714 | NC_000009.11 |
| cg15899738 | 5.86E-14 | 2.42E-15 | -8.61 | 23.9532771 | -2.23E-01 | 3033579   | 3033702   | NC_000007.13 |
| cg26348487 | 5.88E-14 | 2.43E-15 | -8.61 | 23.9505219 | -2.24E-01 | 2488560   | 2488683   | NC_000019.9  |
| cg01347553 | 5.88E-14 | 2.43E-15 | -8.61 | 23.9504081 | -1.69E-01 | 1906764   | 1906887   | NC_000012.11 |
| cg07693238 | 5.88E-14 | 2.43E-15 | -8.61 | 23.9498051 | -1.83E-01 | 99595437  | 99595560  | NC_000007.13 |
| cg00817377 | 5.88E-14 | 2.43E-15 | -8.61 | 23.9493743 | -8.68E-02 | 73441057  | 73441180  | NC_000007.13 |
| cg21386573 | 5.89E-14 | 2.43E-15 | -8.61 | 23.9478104 | -1.82E-01 | 94219800  | 94219923  | NC_000001.10 |
| cg08301518 | 5.90E-14 | 2.44E-15 | -8.61 | 23.9462291 | -1.41E-01 | 3672411   | 3672534   | NC_000019.9  |
| cg06873564 | 5.90E-14 | 2.44E-15 | -8.61 | 23.9458651 | -2.16E-01 | 220554043 | 220554166 | NC_000002.11 |
| cg25214792 | 5.91E-14 | 2.44E-15 | -8.61 | 23.9455901 | -1.08E-01 | 21369513  | 21369636  | NC_000022.10 |
| cg11681321 | 5.91E-14 | 2.44E-15 | -8.61 | 23.9444307 | -1.93E-01 | 60683059  | 60683182  | NC_000015.9  |
| cg25839663 | 5.91E-14 | 2.44E-15 | -8.61 | 23.9442621 | -1.69E-01 | 3207588   | 3207711   | NC_000001.10 |
| cg04424605 | 5.92E-14 | 2.45E-15 | -8.61 | 23.943475  | -7.39E-02 | 149939210 | 149939333 | NC_000003.11 |
| cg25154801 | 5.93E-14 | 2.45E-15 | -8.61 | 23.9407676 | -9.87E-02 | 41655826  | 41655949  | NC_000008.10 |

|            |          |          |       |            |           |           |           |              |
|------------|----------|----------|-------|------------|-----------|-----------|-----------|--------------|
| cg02373152 | 5.95E-14 | 2.46E-15 | -8.61 | 23.9382361 | -5.93E-02 | 52227767  | 52227890  | NC_000006.11 |
| cg02352370 | 5.95E-14 | 2.46E-15 | -8.61 | 23.9376968 | -1.38E-01 | 32054845  | 32054968  | NC_000006.11 |
| cg14335069 | 5.96E-14 | 2.46E-15 | -8.61 | 23.9363446 | -9.72E-02 | 41956810  | 41956933  | NC_000022.10 |
| cg09552692 | 5.96E-14 | 2.47E-15 | -8.61 | 23.9354194 | -1.11E-01 | 66274614  | 66274737  | NC_000015.9  |
| cg04102510 | 5.96E-14 | 2.47E-15 | -8.61 | 23.9351363 | -2.65E-01 | 226850741 | 226850864 | NC_000001.10 |
| cg14165142 | 5.97E-14 | 2.47E-15 | -8.61 | 23.9344587 | -2.05E-01 | 3778655   | 3778778   | NC_000020.10 |
| cg04260955 | 5.98E-14 | 2.47E-15 | -8.61 | 23.9316536 | -6.92E-02 | 225039676 | 225039799 | NC_000001.10 |
| cg02314896 | 6.00E-14 | 2.48E-15 | -8.61 | 23.9294545 | -1.43E-01 | 49059802  | 49059925  | NC_000019.9  |
| cg08399230 | 6.00E-14 | 2.48E-15 | -8.61 | 23.9287887 | -4.89E-02 | 4665037   | 4665160   | NC_000016.9  |
| cg22083684 | 6.00E-14 | 2.48E-15 | -8.61 | 23.9287015 | -7.24E-02 | 100425827 | 100425950 | NC_000007.13 |
| cg21593149 | 6.00E-14 | 2.48E-15 | -8.61 | 23.9280211 | -2.32E-01 | 1300163   | 1300286   | NC_000004.11 |
| cg22717593 | 6.00E-14 | 2.48E-15 | -8.61 | 23.9278562 | -1.33E-01 | 45647012  | 45647135  | NC_000019.9  |
| cg02992311 | 6.01E-14 | 2.49E-15 | -8.61 | 23.9275064 | -1.61E-01 | 39523626  | 39523749  | NC_000019.9  |
| cg18949415 | 6.01E-14 | 2.49E-15 | -8.61 | 23.9262359 | -1.51E-01 | 43969136  | 43969259  | NC_000006.11 |
| cg11989674 | 6.04E-14 | 2.50E-15 | -8.6  | 23.9219819 | -5.73E-02 | 175351902 | 175352025 | NC_000002.11 |
| cg12596243 | 6.04E-14 | 2.50E-15 | -8.6  | 23.9214413 | -1.70E-01 | 218597777 | 218597900 | NC_000002.11 |
| cg10857905 | 6.06E-14 | 2.51E-15 | -8.6  | 23.9183275 | -1.46E-01 | 80026963  | 80027086  | NC_000010.10 |
| cg03851496 | 6.07E-14 | 2.51E-15 | -8.6  | 23.91646   | -1.56E-01 | 150488805 | 150488928 | NC_000001.10 |
| cg21197796 | 6.07E-14 | 2.51E-15 | -8.6  | 23.9160679 | -1.91E-01 | 111313996 | 111314119 | NC_000009.11 |
| cg23995459 | 6.07E-14 | 2.52E-15 | -8.6  | 23.9154667 | -1.31E-01 | 53191787  | 53191910  | NC_000001.10 |
| cg15015340 | 6.08E-14 | 2.52E-15 | -8.6  | 23.9145109 | -1.46E-01 | 61486220  | 61486343  | NC_000011.9  |
| cg15224459 | 6.10E-14 | 2.53E-15 | -8.6  | 23.9104016 | -2.27E-01 | 81042023  | 81042146  | NC_000017.10 |
| cg01012026 | 6.11E-14 | 2.53E-15 | -8.6  | 23.9100259 | -1.48E-01 | 229388    | 229511    | NC_000007.13 |
| cg08623810 | 6.14E-14 | 2.54E-15 | -8.6  | 23.9044604 | -1.56E-01 | 64427416  | 64427539  | NC_000011.9  |
| cg26116560 | 6.14E-14 | 2.55E-15 | -8.6  | 23.9037424 | -5.52E-02 | 86565259  | 86565382  | NC_000002.11 |

|               |          |          |      |            |           |           |           |              |
|---------------|----------|----------|------|------------|-----------|-----------|-----------|--------------|
| cg07041720    | 6.16E-14 | 2.55E-15 | -8.6 | 23.9015289 | -1.64E-01 | 2556962   | 2557085   | NC_000007.13 |
| cg14785527    | 6.16E-14 | 2.55E-15 | -8.6 | 23.9006    | -2.37E-01 | 90656978  | 90657101  | NC_000010.10 |
| cg11478273    | 6.16E-14 | 2.55E-15 | -8.6 | 23.900512  | -5.36E-02 | 128806682 | 128806805 | NC_000008.10 |
| cg07334977    | 6.16E-14 | 2.56E-15 | -8.6 | 23.8999916 | -5.99E-02 | 182880768 | 182880891 | NC_000003.11 |
| cg08104568    | 6.17E-14 | 2.56E-15 | -8.6 | 23.8989333 | -1.15E-01 | 23623728  | 23623851  | NC_000014.8  |
| cg17904739    | 6.18E-14 | 2.56E-15 | -8.6 | 23.8976006 | -1.96E-01 | 3861567   | 3861690   | NC_000012.11 |
| ch.12.193030F | 6.18E-14 | 2.56E-15 | -8.6 | 23.8966062 | -7.57E-02 | 6684032   | 6684155   | NC_000012.11 |
| cg06192883    | 6.19E-14 | 2.57E-15 | -8.6 | 23.8948813 | -1.92E-01 | 52554171  | 52554294  | NC_000015.9  |
| cg03992022    | 6.20E-14 | 2.57E-15 | -8.6 | 23.8942016 | -5.81E-02 | 57770483  | 57770606  | NC_000016.9  |
| cg18195228    | 6.20E-14 | 2.57E-15 | -8.6 | 23.8941209 | -1.82E-01 | 50474181  | 50474304  | NC_000014.8  |
| cg23791011    | 6.21E-14 | 2.57E-15 | -8.6 | 23.8925455 | -2.44E-01 | 124219564 | 124219687 | NC_000010.10 |
| cg15655495    | 6.22E-14 | 2.58E-15 | -8.6 | 23.8907213 | -9.37E-02 | 38532458  | 38532581  | NC_000012.11 |
| cg24214260    | 6.22E-14 | 2.58E-15 | -8.6 | 23.890572  | -6.05E-02 | 58193221  | 58193344  | NC_000019.9  |
| cg02512902    | 6.22E-14 | 2.58E-15 | -8.6 | 23.8896589 | -1.69E-01 | 25799447  | 25799570  | NC_000017.10 |
| cg01965380    | 6.24E-14 | 2.59E-15 | -8.6 | 23.8870458 | -1.88E-01 | 90321064  | 90321187  | NC_000001.10 |
| cg10583319    | 6.24E-14 | 2.59E-15 | -8.6 | 23.8858123 | -1.54E-01 | 61203879  | 61204002  | NC_000020.10 |
| cg16345226    | 6.25E-14 | 2.59E-15 | -8.6 | 23.8848263 | -1.02E-01 | 16771394  | 16771517  | NC_000019.9  |
| cg21325715    | 6.27E-14 | 2.60E-15 | -8.6 | 23.8813902 | -1.14E-01 | 80297128  | 80297251  | NC_000017.10 |
| cg25276752    | 6.27E-14 | 2.61E-15 | -8.6 | 23.8808146 | -1.35E-01 | 17961566  | 17961689  | NC_000019.9  |
| cg22757362    | 6.29E-14 | 2.61E-15 | -8.6 | 23.8786802 | -1.80E-01 | 43721445  | 43721568  | NC_000010.10 |
| cg24679890    | 6.31E-14 | 2.62E-15 | -8.6 | 23.8741639 | -2.13E-01 | 17246356  | 17246479  | NC_000019.9  |
| cg12531003    | 6.32E-14 | 2.63E-15 | -8.6 | 23.8726686 | -3.62E-02 | 56152621  | 56152744  | NC_000019.9  |
| cg02819851    | 6.34E-14 | 2.63E-15 | -8.6 | 23.8701743 | -6.84E-02 | 66406003  | 66406126  | NC_000011.9  |
| cg03224627    | 6.35E-14 | 2.64E-15 | -8.6 | 23.869155  | -2.23E-01 | 177896505 | 177896628 | NC_000001.10 |
| ch.8.419879R  | 6.35E-14 | 2.64E-15 | -8.6 | 23.8690674 | -9.76E-02 | 17087500  | 17087623  | NC_000008.10 |



|                |          |          |       |            |           |           |           |              |
|----------------|----------|----------|-------|------------|-----------|-----------|-----------|--------------|
| cg23996241     | 6.35E-14 | 2.64E-15 | -8.6  | 23.867897  | -6.14E-02 | 33914362  | 33914485  | NC_000017.10 |
| cg09760618     | 6.36E-14 | 2.64E-15 | -8.6  | 23.8671507 | -1.61E-01 | 233243204 | 233243327 | NC_000002.11 |
| cg17316564     | 6.36E-14 | 2.64E-15 | -8.6  | 23.8666176 | -1.64E-01 | 100557738 | 100557861 | NC_000012.11 |
| cg00868476     | 6.36E-14 | 2.64E-15 | -8.6  | 23.8663413 | -1.56E-01 | 30186006  | 30186129  | NC_000008.10 |
| cg03171003     | 6.36E-14 | 2.64E-15 | -8.6  | 23.8662795 | -2.35E-01 | 111875934 | 111876057 | NC_000002.11 |
| cg08989290     | 6.36E-14 | 2.64E-15 | -8.6  | 23.8662023 | -1.35E-01 | 615782    | 615905    | NC_000016.9  |
| cg16711332     | 6.37E-14 | 2.65E-15 | -8.6  | 23.8650868 | -1.71E-01 | 6531727   | 6531850   | NC_000001.10 |
| cg07385501     | 6.38E-14 | 2.65E-15 | -8.6  | 23.8629902 | -6.12E-02 | 30913935  | 30914058  | NC_000016.9  |
| ch.9.93402636R | 6.38E-14 | 2.65E-15 | -8.6  | 23.8628827 | -9.16E-02 | 94362815  | 94362938  | NC_000009.11 |
| cg24724832     | 6.38E-14 | 2.65E-15 | -8.6  | 23.862771  | -1.95E-01 | 11779395  | 11779518  | NC_000001.10 |
| cg09226288     | 6.39E-14 | 2.66E-15 | -8.6  | 23.8603439 | -1.45E-01 | 51225561  | 51225684  | NC_000022.10 |
| cg23043143     | 6.40E-14 | 2.66E-15 | -8.59 | 23.858937  | -1.36E-01 | 2612101   | 2612224   | NC_000007.13 |
| cg24397007     | 6.40E-14 | 2.66E-15 | -8.59 | 23.8585831 | -1.64E-01 | 28619094  | 28619217  | NC_000002.11 |
| cg24360617     | 6.41E-14 | 2.67E-15 | -8.59 | 23.8580317 | -1.23E-01 | 39353495  | 39353618  | NC_000022.10 |
| ch.11.1000958R | 6.45E-14 | 2.68E-15 | -8.59 | 23.8517436 | -3.21E-02 | 47762775  | 47762898  | NC_000011.9  |
| cg24110396     | 6.46E-14 | 2.69E-15 | -8.59 | 23.8496076 | -1.67E-01 | 35589246  | 35589369  | NC_000010.10 |
| cg19403377     | 6.47E-14 | 2.69E-15 | -8.59 | 23.8487311 | -1.38E-01 | 53800225  | 53800348  | NC_000017.10 |
| cg00168634     | 6.47E-14 | 2.70E-15 | -8.59 | 23.8471407 | -1.68E-01 | 154572830 | 154572953 | NC_000004.11 |
| cg08523343     | 6.49E-14 | 2.70E-15 | -8.59 | 23.844706  | -7.38E-02 | 14872934  | 14873057  | NC_000005.9  |
| cg21243348     | 6.49E-14 | 2.70E-15 | -8.59 | 23.8439498 | -2.59E-02 | 32899773  | 32899896  | NC_000020.10 |
| cg13527921     | 6.50E-14 | 2.71E-15 | -8.59 | 23.8429088 | -1.14E-01 | 100819928 | 100820051 | NC_000009.11 |
| cg24432193     | 6.51E-14 | 2.71E-15 | -8.59 | 23.8410447 | -1.54E-01 | 102062733 | 102062856 | NC_000006.11 |
| cg11314042     | 6.51E-14 | 2.71E-15 | -8.59 | 23.8404871 | -9.01E-02 | 143380966 | 143381089 | NC_000006.11 |
| cg24189917     | 6.53E-14 | 2.72E-15 | -8.59 | 23.8378704 | -1.85E-01 | 1970923   | 1971046   | NC_000007.13 |
| cg03978041     | 6.53E-14 | 2.72E-15 | -8.59 | 23.8376582 | -1.95E-01 | 200862726 | 200862849 | NC_000001.10 |

|                |          |          |       |            |           |           |           |              |
|----------------|----------|----------|-------|------------|-----------|-----------|-----------|--------------|
| cg23508591     | 6.53E-14 | 2.72E-15 | -8.59 | 23.8375202 | -6.46E-02 | 75871807  | 75871930  | NC_000015.9  |
| cg26452771     | 6.54E-14 | 2.72E-15 | -8.59 | 23.8365543 | -2.01E-01 | 78955619  | 78955742  | NC_000011.9  |
| cg08035234     | 6.55E-14 | 2.73E-15 | -8.59 | 23.8354753 | -1.62E-01 | 62107430  | 62107553  | NC_000001.10 |
| cg00040016     | 6.55E-14 | 2.73E-15 | -8.59 | 23.8351207 | -1.30E-01 | 57833286  | 57833409  | NC_000017.10 |
| cg06792126     | 6.55E-14 | 2.73E-15 | -8.59 | 23.8350109 | -1.97E-01 | 90365488  | 90365611  | NC_000015.9  |
| cg25194328     | 6.55E-14 | 2.73E-15 | -8.59 | 23.8344459 | -4.24E-02 | 54472477  | 54472600  | NC_000005.9  |
| cg11471401     | 6.59E-14 | 2.75E-15 | -8.59 | 23.8290401 | -1.75E-01 | 52888480  | 52888603  | NC_000012.11 |
| cg25210134     | 6.62E-14 | 2.76E-15 | -8.59 | 23.8228417 | -1.52E-01 | 40600265  | 40600388  | NC_000015.9  |
| ch.11.1434436R | 6.63E-14 | 2.76E-15 | -8.59 | 23.8222787 | -3.86E-02 | 68667313  | 68667436  | NC_000011.9  |
| ch.6.1093576F  | 6.65E-14 | 2.78E-15 | -8.59 | 23.8181905 | -4.44E-02 | 44080318  | 44080441  | NC_000006.11 |
| cg01801643     | 6.66E-14 | 2.78E-15 | -8.59 | 23.8170529 | -1.70E-01 | 43387641  | 43387764  | NC_000003.11 |
| cg03301165     | 6.68E-14 | 2.79E-15 | -8.59 | 23.8146885 | -1.99E-01 | 19712046  | 19712169  | NC_000016.9  |
| cg00509921     | 6.69E-14 | 2.79E-15 | -8.59 | 23.8127766 | -1.28E-01 | 79632331  | 79632454  | NC_000016.9  |
| cg05924780     | 6.70E-14 | 2.80E-15 | -8.59 | 23.8105068 | -1.02E-01 | 6745524   | 6745647   | NC_000012.11 |
| cg12395299     | 6.71E-14 | 2.80E-15 | -8.59 | 23.8099304 | -1.48E-01 | 29349218  | 29349341  | NC_000015.9  |
| cg20858173     | 6.72E-14 | 2.80E-15 | -8.59 | 23.8083427 | -5.84E-02 | 145214769 | 145214892 | NC_000005.9  |
| cg27040708     | 6.72E-14 | 2.80E-15 | -8.59 | 23.808115  | -1.59E-01 | 49553788  | 49553911  | NC_000019.9  |
| cg22835157     | 6.75E-14 | 2.82E-15 | -8.59 | 23.803399  | -7.80E-02 | 41218352  | 41218475  | NC_000015.9  |
| cg20207443     | 6.75E-14 | 2.82E-15 | -8.59 | 23.8028073 | -1.64E-01 | 118144311 | 118144434 | NC_000003.11 |
| cg19671553     | 6.77E-14 | 2.83E-15 | -8.59 | 23.8000863 | -1.90E-01 | 50004444  | 50004567  | NC_000019.9  |
| cg22745143     | 6.78E-14 | 2.83E-15 | -8.59 | 23.7979191 | -1.72E-01 | 14478042  | 14478165  | NC_000010.10 |
| cg09790226     | 6.79E-14 | 2.84E-15 | -8.58 | 23.7969916 | -1.59E-01 | 33571230  | 33571353  | NC_000015.9  |
| cg26359488     | 6.79E-14 | 2.84E-15 | -8.58 | 23.7965196 | -1.29E-01 | 153606037 | 153606160 | NC_000001.10 |
| cg11235015     | 6.81E-14 | 2.84E-15 | -8.58 | 23.7942255 | -1.47E-01 | 148762393 | 148762516 | NC_000006.11 |
| cg22643110     | 6.84E-14 | 2.86E-15 | -8.58 | 23.7893675 | -1.24E-01 | 72319345  | 72319468  | NC_000010.10 |

|               |          |          |       |            |           |           |           |              |
|---------------|----------|----------|-------|------------|-----------|-----------|-----------|--------------|
| cg17533116    | 6.85E-14 | 2.86E-15 | -8.58 | 23.7874226 | -1.05E-01 | 127518847 | 127518970 | NC_000003.11 |
| ch.1.1363396R | 6.88E-14 | 2.88E-15 | -8.58 | 23.7827843 | -5.76E-02 | 44168444  | 44168567  | NC_000001.10 |
| ch.20.983686F | 6.89E-14 | 2.88E-15 | -8.58 | 23.7822073 | -4.81E-02 | 45308612  | 45308735  | NC_000020.10 |
| cg00165631    | 6.89E-14 | 2.88E-15 | -8.58 | 23.7818305 | -1.16E-01 | 201159988 | 201160111 | NC_000001.10 |
| cg17281365    | 6.92E-14 | 2.89E-15 | -8.58 | 23.7776305 | -5.38E-02 | 45871073  | 45871196  | NC_000002.11 |
| cg02936493    | 6.93E-14 | 2.90E-15 | -8.58 | 23.7750554 | -1.92E-01 | 73223935  | 73224058  | NC_000007.13 |
| cg14018735    | 6.95E-14 | 2.91E-15 | -8.58 | 23.772884  | -1.43E-01 | 136270734 | 136270857 | NC_000009.11 |
| cg01795122    | 6.95E-14 | 2.91E-15 | -8.58 | 23.7722982 | -8.16E-02 | 48828859  | 48828982  | NC_000019.9  |
| cg22079077    | 6.97E-14 | 2.92E-15 | -8.58 | 23.7694168 | -1.53E-01 | 41061384  | 41061507  | NC_000015.9  |
| cg15746620    | 6.97E-14 | 2.92E-15 | -8.58 | 23.7687933 | -1.30E-01 | 14785849  | 14785972  | NC_000019.9  |
| cg00231049    | 7.01E-14 | 2.94E-15 | -8.58 | 23.7630066 | -9.06E-02 | 23855119  | 23855242  | NC_000001.10 |
| cg08978350    | 7.02E-14 | 2.94E-15 | -8.58 | 23.7621083 | -2.47E-02 | 98273903  | 98274026  | NC_000010.10 |
| cg20811266    | 7.03E-14 | 2.94E-15 | -8.58 | 23.7611893 | -2.58E-02 | 116164877 | 116165000 | NC_000007.13 |
| cg03827720    | 7.05E-14 | 2.95E-15 | -8.58 | 23.7583872 | -1.99E-01 | 18843724  | 18843847  | NC_000012.11 |
| cg11402505    | 7.06E-14 | 2.96E-15 | -8.58 | 23.7560077 | -1.30E-01 | 39523436  | 39523559  | NC_000019.9  |
| cg02921779    | 7.07E-14 | 2.96E-15 | -8.58 | 23.7549822 | -3.96E-02 | 52904682  | 52904805  | NC_000004.11 |
| cg24267699    | 7.08E-14 | 2.97E-15 | -8.58 | 23.7527386 | -1.36E-01 | 136151359 | 136151482 | NC_000009.11 |
| cg14973995    | 7.09E-14 | 2.97E-15 | -8.58 | 23.7519454 | -1.05E-01 | 2935692   | 2935815   | NC_000004.11 |
| cg03321829    | 7.09E-14 | 2.97E-15 | -8.58 | 23.7513085 | -1.62E-01 | 172295653 | 172295776 | NC_000005.9  |
| cg02487499    | 7.10E-14 | 2.98E-15 | -8.58 | 23.7496743 | -6.11E-02 | 33937968  | 33938091  | NC_000001.10 |
| cg06551697    | 7.11E-14 | 2.98E-15 | -8.58 | 23.7490015 | -1.78E-01 | 56612362  | 56612485  | NC_000017.10 |
| cg04309212    | 7.12E-14 | 2.98E-15 | -8.58 | 23.7478911 | -5.91E-02 | 223183932 | 223184055 | NC_000002.11 |
| cg03406535    | 7.12E-14 | 2.98E-15 | -8.58 | 23.7476299 | -1.26E-01 | 10056957  | 10057080  | NC_000001.10 |
| cg16630229    | 7.12E-14 | 2.98E-15 | -8.58 | 23.7473337 | -6.25E-02 | 33160604  | 33160727  | NC_000006.11 |
| cg01248010    | 7.13E-14 | 2.99E-15 | -8.58 | 23.7462429 | -8.89E-02 | 242448543 | 242448666 | NC_000002.11 |

|            |          |          |       |            |           |           |           |              |
|------------|----------|----------|-------|------------|-----------|-----------|-----------|--------------|
| cg13100600 | 7.13E-14 | 2.99E-15 | -8.58 | 23.7461776 | -1.79E-01 | 958351    | 958474    | NC_000001.10 |
| cg24014795 | 7.14E-14 | 2.99E-15 | -8.58 | 23.7443366 | -1.60E-01 | 81893935  | 81894058  | NC_000014.8  |
| cg06862136 | 7.15E-14 | 3.00E-15 | -8.58 | 23.742135  | -1.55E-01 | 112370277 | 112370400 | NC_000011.9  |
| cg12368702 | 7.16E-14 | 3.00E-15 | -8.58 | 23.7412954 | -5.71E-02 | 53165711  | 53165834  | NC_000016.9  |
| cg21839856 | 7.16E-14 | 3.00E-15 | -8.58 | 23.7409081 | -1.65E-01 | 111372486 | 111372609 | NC_000012.11 |
| cg15618908 | 7.17E-14 | 3.00E-15 | -8.58 | 23.7401881 | -1.89E-01 | 173141761 | 173141884 | NC_000005.9  |
| cg22129276 | 7.17E-14 | 3.01E-15 | -8.58 | 23.7391662 | -1.33E-01 | 169926103 | 169926226 | NC_000002.11 |
| cg13013841 | 7.18E-14 | 3.01E-15 | -8.58 | 23.7375965 | -1.58E-01 | 18281021  | 18281144  | NC_000017.10 |
| cg10094358 | 7.20E-14 | 3.02E-15 | -8.58 | 23.7357565 | -1.30E-01 | 31127271  | 31127394  | NC_000006.11 |
| cg12090740 | 7.24E-14 | 3.04E-15 | -8.57 | 23.7294801 | -1.18E-01 | 60988058  | 60988181  | NC_000018.9  |
| cg20788021 | 7.24E-14 | 3.04E-15 | -8.57 | 23.7287927 | -1.62E-01 | 58164168  | 58164291  | NC_000003.11 |
| cg07064544 | 7.25E-14 | 3.04E-15 | -8.57 | 23.7284914 | -2.11E-01 | 43029994  | 43030117  | NC_000020.10 |
| cg10938446 | 7.27E-14 | 3.05E-15 | -8.57 | 23.7254739 | -1.69E-01 | 113875723 | 113875846 | NC_000002.11 |
| cg00433917 | 7.27E-14 | 3.05E-15 | -8.57 | 23.7253603 | -1.79E-01 | 7915517   | 7915640   | NC_000019.9  |
| cg27606464 | 7.27E-14 | 3.05E-15 | -8.57 | 23.7247323 | -4.34E-02 | 36793614  | 36793737  | NC_000020.10 |
| cg11795753 | 7.27E-14 | 3.05E-15 | -8.57 | 23.7242182 | -1.09E-01 | 133337036 | 133337159 | NC_000012.11 |
| cg07470314 | 7.29E-14 | 3.06E-15 | -8.57 | 23.7218241 | -7.65E-02 | 21766704  | 21766827  | NC_000008.10 |
| cg01325840 | 7.30E-14 | 3.06E-15 | -8.57 | 23.7202387 | -5.68E-02 | 37508476  | 37508599  | NC_000021.8  |
| cg06970228 | 7.30E-14 | 3.07E-15 | -8.57 | 23.7197763 | -3.94E-02 | 21831943  | 21832066  | NC_000016.9  |
| cg07605241 | 7.32E-14 | 3.07E-15 | -8.57 | 23.7177616 | -3.23E-02 | 6302729   | 6302852   | NC_000001.10 |
| cg18002602 | 7.32E-14 | 3.07E-15 | -8.57 | 23.7177507 | -9.01E-02 | 66138449  | 66138572  | NC_000011.9  |
| cg21956150 | 7.32E-14 | 3.07E-15 | -8.57 | 23.7175104 | -7.03E-02 | 1438388   | 1438511   | NC_000019.9  |
| cg18960218 | 7.35E-14 | 3.09E-15 | -8.57 | 23.7126244 | -1.32E-01 | 23285365  | 23285488  | NC_000014.8  |
| cg06150148 | 7.37E-14 | 3.10E-15 | -8.57 | 23.710202  | -1.68E-01 | 100902129 | 100902252 | NC_000002.11 |
| cg03876424 | 7.40E-14 | 3.11E-15 | -8.57 | 23.7067363 | -7.27E-02 | 103569948 | 103570071 | NC_000014.8  |

|               |          |          |       |            |           |           |           |              |
|---------------|----------|----------|-------|------------|-----------|-----------|-----------|--------------|
| cg13043815    | 7.41E-14 | 3.11E-15 | -8.57 | 23.7048484 | -1.93E-01 | 33867551  | 33867674  | NC_000021.8  |
| cg20326928    | 7.46E-14 | 3.13E-15 | -8.57 | 23.6979632 | -7.58E-02 | 16399560  | 16399683  | NC_000001.10 |
| cg16543027    | 7.47E-14 | 3.14E-15 | -8.57 | 23.6970159 | -1.49E-01 | 40599680  | 40599803  | NC_000015.9  |
| cg25332717    | 7.47E-14 | 3.14E-15 | -8.57 | 23.6970149 | -1.52E-01 | 106020669 | 106020792 | NC_000002.11 |
| cg00644814    | 7.48E-14 | 3.15E-15 | -8.57 | 23.6944922 | -1.63E-01 | 6480929   | 6481052   | NC_000001.10 |
| cg16286735    | 7.51E-14 | 3.16E-15 | -8.57 | 23.6911825 | -2.10E-01 | 45371778  | 45371901  | NC_000017.10 |
| cg26081162    | 7.53E-14 | 3.17E-15 | -8.57 | 23.6883527 | -5.78E-02 | 49518449  | 49518572  | NC_000006.11 |
| cg01940753    | 7.54E-14 | 3.17E-15 | -8.57 | 23.687378  | -1.82E-01 | 81069622  | 81069745  | NC_000015.9  |
| cg16483490    | 7.56E-14 | 3.18E-15 | -8.57 | 23.6837784 | -7.04E-02 | 111879711 | 111879834 | NC_000002.11 |
| cg23703060    | 7.56E-14 | 3.18E-15 | -8.57 | 23.6837269 | -1.65E-01 | 168768172 | 168768295 | NC_000006.11 |
| cg27145042    | 7.58E-14 | 3.19E-15 | -8.57 | 23.6814957 | -6.27E-02 | 25026956  | 25027079  | NC_000016.9  |
| cg25591377    | 7.59E-14 | 3.19E-15 | -8.57 | 23.6797505 | -1.54E-01 | 16184961  | 16185084  | NC_000017.10 |
| cg02770313    | 7.60E-14 | 3.20E-15 | -8.57 | 23.6787051 | -9.33E-02 | 27371397  | 27371520  | NC_000001.10 |
| cg01020263    | 7.61E-14 | 3.20E-15 | -8.57 | 23.6771454 | -1.45E-01 | 50732073  | 50732196  | NC_000016.9  |
| cg17342588    | 7.62E-14 | 3.21E-15 | -8.57 | 23.6757782 | -2.00E-01 | 27737875  | 27737998  | NC_000007.13 |
| cg26987613    | 7.62E-14 | 3.21E-15 | -8.57 | 23.675529  | -1.33E-01 | 33219410  | 33219533  | NC_000006.11 |
| cg13488851    | 7.62E-14 | 3.21E-15 | -8.57 | 23.6751786 | -1.80E-01 | 35246223  | 35246346  | NC_000001.10 |
| cg16237031    | 7.63E-14 | 3.21E-15 | -8.57 | 23.6748036 | -1.44E-01 | 149657288 | 149657411 | NC_000006.11 |
| cg24885246    | 7.63E-14 | 3.21E-15 | -8.57 | 23.6743397 | -1.80E-01 | 17618903  | 17619026  | NC_000019.9  |
| cg05097643    | 7.63E-14 | 3.21E-15 | -8.57 | 23.6739699 | -1.26E-01 | 3018470   | 3018593   | NC_000016.9  |
| cg24495350    | 7.64E-14 | 3.22E-15 | -8.57 | 23.6726938 | -1.85E-01 | 72651198  | 72651321  | NC_000015.9  |
| cg25479708    | 7.66E-14 | 3.23E-15 | -8.56 | 23.6696167 | -9.49E-02 | 8067759   | 8067882   | NC_000017.10 |
| cg18763629    | 7.67E-14 | 3.23E-15 | -8.56 | 23.6685662 | -1.71E-01 | 1199037   | 1199160   | NC_000004.11 |
| ch.7.1628533R | 7.67E-14 | 3.23E-15 | -8.56 | 23.668275  | -6.74E-02 | 73938938  | 73939061  | NC_000007.13 |
| cg22174486    | 7.67E-14 | 3.23E-15 | -8.56 | 23.6678502 | -1.21E-01 | 536817    | 536940    | NC_000011.9  |

|                |          |          |       |            |           |           |           |              |
|----------------|----------|----------|-------|------------|-----------|-----------|-----------|--------------|
| cg03434509     | 7.68E-14 | 3.24E-15 | -8.56 | 23.6664442 | -2.01E-01 | 82543424  | 82543547  | NC_000008.10 |
| cg05418915     | 7.69E-14 | 3.24E-15 | -8.56 | 23.6660521 | -2.62E-01 | 196426178 | 196426301 | NC_000002.11 |
| cg05963604     | 7.69E-14 | 3.24E-15 | -8.56 | 23.6653819 | -1.10E-01 | 57263543  | 57263666  | NC_000003.11 |
| cg24768595     | 7.72E-14 | 3.25E-15 | -8.56 | 23.6611898 | -2.19E-01 | 76677111  | 76677234  | NC_000017.10 |
| ch.22.528917R  | 7.72E-14 | 3.25E-15 | -8.56 | 23.6609277 | -1.09E-01 | 35670551  | 35670674  | NC_000022.10 |
| cg24554987     | 7.74E-14 | 3.26E-15 | -8.56 | 23.6590748 | -1.62E-01 | 155943952 | 155944075 | NC_000007.13 |
| cg12098441     | 7.74E-14 | 3.26E-15 | -8.56 | 23.6590189 | -1.63E-01 | 119217672 | 119217795 | NC_000006.11 |
| cg00339319     | 7.75E-14 | 3.27E-15 | -8.56 | 23.6574763 | -9.08E-02 | 223899845 | 223899968 | NC_000001.10 |
| cg24446429     | 7.75E-14 | 3.27E-15 | -8.56 | 23.6569831 | -2.05E-01 | 74798054  | 74798177  | NC_000018.9  |
| cg06925882     | 7.77E-14 | 3.27E-15 | -8.56 | 23.6551208 | -1.21E-01 | 85157885  | 85158008  | NC_000016.9  |
| cg11282353     | 7.77E-14 | 3.27E-15 | -8.56 | 23.6549165 | -1.20E-01 | 133706085 | 133706208 | NC_000003.11 |
| cg01611017     | 7.77E-14 | 3.28E-15 | -8.56 | 23.6541938 | -1.40E-01 | 95780344  | 95780467  | NC_000014.8  |
| cg17344040     | 7.77E-14 | 3.28E-15 | -8.56 | 23.6539028 | -1.81E-01 | 64626220  | 64626343  | NC_000011.9  |
| cg03505817     | 7.77E-14 | 3.28E-15 | -8.56 | 23.6536621 | -1.07E-01 | 93735925  | 93736048  | NC_000014.8  |
| ch.10.2548028F | 7.81E-14 | 3.30E-15 | -8.56 | 23.6485148 | -6.59E-02 | 120887417 | 120887540 | NC_000010.10 |
| cg26369382     | 7.82E-14 | 3.30E-15 | -8.56 | 23.6470201 | -2.06E-01 | 100240341 | 100240464 | NC_000007.13 |
| cg17052170     | 7.85E-14 | 3.31E-15 | -8.56 | 23.6429623 | -1.87E-01 | 144099482 | 144099605 | NC_000008.10 |
| cg14704980     | 7.86E-14 | 3.32E-15 | -8.56 | 23.6422651 | -1.93E-01 | 41607500  | 41607623  | NC_000007.13 |
| cg25683444     | 7.87E-14 | 3.32E-15 | -8.56 | 23.6410196 | -5.97E-02 | 42841115  | 42841238  | NC_000015.9  |
| cg21413797     | 7.89E-14 | 3.33E-15 | -8.56 | 23.63822   | -1.91E-01 | 134165843 | 134165966 | NC_000003.11 |
| cg08144503     | 7.92E-14 | 3.34E-15 | -8.56 | 23.6341882 | -6.42E-02 | 67450471  | 67450594  | NC_000016.9  |
| cg15491102     | 7.96E-14 | 3.36E-15 | -8.56 | 23.6293262 | -1.87E-01 | 51027597  | 51027720  | NC_000013.10 |
| cg00373436     | 7.96E-14 | 3.36E-15 | -8.56 | 23.62866   | -1.48E-01 | 111721343 | 111721466 | NC_000003.11 |
| cg22824738     | 7.97E-14 | 3.37E-15 | -8.56 | 23.6275358 | -1.21E-01 | 54765988  | 54766111  | NC_000012.11 |
| cg08218101     | 7.97E-14 | 3.37E-15 | -8.56 | 23.6273966 | -8.77E-02 | 15704393  | 15704516  | NC_000004.11 |

|               |          |          |       |            |           |           |           |              |
|---------------|----------|----------|-------|------------|-----------|-----------|-----------|--------------|
| cg00368059    | 7.98E-14 | 3.37E-15 | -8.56 | 23.6264671 | -4.95E-02 | 106034747 | 106034870 | NC_000010.10 |
| cg18320648    | 7.99E-14 | 3.38E-15 | -8.56 | 23.624782  | -6.80E-02 | 152266336 | 152266459 | NC_000002.11 |
| cg23097499    | 8.01E-14 | 3.38E-15 | -8.56 | 23.6226328 | -1.42E-01 | 12225569  | 12225692  | NC_000001.10 |
| cg19311153    | 8.01E-14 | 3.39E-15 | -8.56 | 23.6217734 | -1.19E-01 | 71659830  | 71659953  | NC_000016.9  |
| cg11615029    | 8.03E-14 | 3.39E-15 | -8.56 | 23.6200222 | -1.21E-01 | 48263189  | 48263312  | NC_000017.10 |
| cg26279261    | 8.04E-14 | 3.40E-15 | -8.56 | 23.6184281 | -2.04E-01 | 17346089  | 17346212  | NC_000019.9  |
| ch.7.2252844R | 8.05E-14 | 3.40E-15 | -8.56 | 23.6173743 | -9.89E-02 | 105105864 | 105105987 | NC_000007.13 |
| cg16751781    | 8.07E-14 | 3.41E-15 | -8.56 | 23.6148996 | -7.11E-02 | 78858589  | 78858712  | NC_000015.9  |
| cg05051117    | 8.07E-14 | 3.41E-15 | -8.56 | 23.6143049 | -7.25E-02 | 205719564 | 205719687 | NC_000001.10 |
| cg06057079    | 8.10E-14 | 3.43E-15 | -8.55 | 23.6099881 | -1.59E-01 | 2048520   | 2048643   | NC_000004.11 |
| cg24646529    | 8.11E-14 | 3.43E-15 | -8.55 | 23.6092493 | -5.44E-02 | 30689576  | 30689699  | NC_000006.11 |
| cg14157073    | 8.12E-14 | 3.43E-15 | -8.55 | 23.6083683 | -6.19E-02 | 7765564   | 7765687   | NC_000001.10 |
| cg06661994    | 8.13E-14 | 3.44E-15 | -8.55 | 23.606257  | -1.91E-01 | 62184363  | 62184486  | NC_000020.10 |
| cg13884879    | 8.14E-14 | 3.44E-15 | -8.55 | 23.6056975 | -1.79E-01 | 9540759   | 9540882   | NC_000002.11 |
| cg03220447    | 8.15E-14 | 3.45E-15 | -8.55 | 23.6043589 | -1.33E-01 | 19745293  | 19745416  | NC_000011.9  |
| cg13226135    | 8.16E-14 | 3.45E-15 | -8.55 | 23.602481  | -1.19E-01 | 40051471  | 40051594  | NC_000022.10 |
| cg16120196    | 8.19E-14 | 3.46E-15 | -8.55 | 23.5992618 | -1.53E-01 | 2922569   | 2922692   | NC_000001.10 |
| cg02088366    | 8.20E-14 | 3.47E-15 | -8.55 | 23.5971888 | -5.65E-02 | 220906720 | 220906843 | NC_000001.10 |
| cg06679538    | 8.21E-14 | 3.48E-15 | -8.55 | 23.5961533 | -4.97E-02 | 101458783 | 101458906 | NC_000015.9  |
| cg20600404    | 8.22E-14 | 3.48E-15 | -8.55 | 23.5952926 | -1.86E-01 | 9960583   | 9960706   | NC_000002.11 |
| cg20729768    | 8.26E-14 | 3.49E-15 | -8.55 | 23.5905728 | -1.44E-01 | 10399379  | 10399502  | NC_000003.11 |
| cg11462252    | 8.28E-14 | 3.50E-15 | -8.55 | 23.5879106 | -1.90E-01 | 168139607 | 168139730 | NC_000005.9  |
| cg04164584    | 8.28E-14 | 3.50E-15 | -8.55 | 23.5877592 | -1.88E-01 | 27235821  | 27235944  | NC_000017.10 |
| cg02297801    | 8.28E-14 | 3.51E-15 | -8.55 | 23.5872281 | -9.57E-02 | 1710663   | 1710786   | NC_000001.10 |
| cg03164969    | 8.29E-14 | 3.51E-15 | -8.55 | 23.5863413 | -1.21E-01 | 1855884   | 1856007   | NC_000011.9  |

|            |          |          |       |            |           |           |           |              |
|------------|----------|----------|-------|------------|-----------|-----------|-----------|--------------|
| cg14671004 | 8.30E-14 | 3.51E-15 | -8.55 | 23.5849761 | -6.04E-02 | 39227758  | 39227881  | NC_000019.9  |
| cg23647264 | 8.33E-14 | 3.53E-15 | -8.55 | 23.5813291 | -4.87E-02 | 174998950 | 174999073 | NC_000001.10 |
| cg25700533 | 8.34E-14 | 3.53E-15 | -8.55 | 23.5798628 | -1.88E-01 | 41062088  | 41062211  | NC_000015.9  |
| cg01400671 | 8.34E-14 | 3.53E-15 | -8.55 | 23.5796222 | -1.81E-01 | 90622100  | 90622223  | NC_000009.11 |
| cg07994696 | 8.35E-14 | 3.54E-15 | -8.55 | 23.5777951 | -1.43E-01 | 11680075  | 11680198  | NC_000016.9  |
| cg01154966 | 8.36E-14 | 3.54E-15 | -8.55 | 23.577341  | -5.75E-02 | 33680989  | 33681112  | NC_000020.10 |
| cg12818493 | 8.36E-14 | 3.54E-15 | -8.55 | 23.5773291 | -5.97E-02 | 44527599  | 44527722  | NC_000021.8  |
| cg21640654 | 8.36E-14 | 3.54E-15 | -8.55 | 23.5766603 | -1.82E-01 | 234389140 | 234389263 | NC_000002.11 |
| cg08151370 | 8.36E-14 | 3.54E-15 | -8.55 | 23.5766248 | -2.05E-01 | 43073152  | 43073275  | NC_000003.11 |
| cg13717434 | 8.41E-14 | 3.56E-15 | -8.55 | 23.5712248 | -1.70E-01 | 97854044  | 97854167  | NC_000009.11 |
| cg27629513 | 8.41E-14 | 3.57E-15 | -8.55 | 23.5707137 | -1.89E-01 | 33130973  | 33131096  | NC_000007.13 |
| cg09789590 | 8.41E-14 | 3.57E-15 | -8.55 | 23.5700279 | -8.67E-02 | 46800479  | 46800602  | NC_000019.9  |
| cg00227578 | 8.44E-14 | 3.58E-15 | -8.55 | 23.5669918 | -1.39E-01 | 34657676  | 34657799  | NC_000005.9  |
| cg06865913 | 8.47E-14 | 3.59E-15 | -8.55 | 23.5632574 | -1.39E-01 | 85796371  | 85796494  | NC_000015.9  |
| cg03420978 | 8.47E-14 | 3.59E-15 | -8.55 | 23.5627046 | -1.62E-01 | 37542310  | 37542433  | NC_000004.11 |
| cg08375658 | 8.49E-14 | 3.60E-15 | -8.55 | 23.5602016 | -1.67E-01 | 51538653  | 51538776  | NC_000019.9  |
| cg11737334 | 8.51E-14 | 3.61E-15 | -8.55 | 23.5588225 | -1.89E-01 | 17862210  | 17862333  | NC_000019.9  |
| cg04565274 | 8.51E-14 | 3.61E-15 | -8.55 | 23.5578463 | -1.02E-01 | 52083294  | 52083417  | NC_000001.10 |
| cg01334735 | 8.59E-14 | 3.65E-15 | -8.55 | 23.5486217 | -1.74E-01 | 170520549 | 170520672 | NC_000003.11 |
| cg02349334 | 8.59E-14 | 3.65E-15 | -8.55 | 23.5485464 | -1.02E-01 | 76363851  | 76363974  | NC_000013.10 |
| cg08939850 | 8.59E-14 | 3.65E-15 | -8.55 | 23.5483987 | -2.47E-01 | 78800806  | 78800929  | NC_000017.10 |
| cg00786747 | 8.59E-14 | 3.65E-15 | -8.55 | 23.5483181 | -1.47E-01 | 102042221 | 102042344 | NC_000015.9  |
| cg21440776 | 8.59E-14 | 3.65E-15 | -8.54 | 23.5478706 | -1.81E-01 | 6658378   | 6658501   | NC_000012.11 |
| cg04397884 | 8.62E-14 | 3.66E-15 | -8.54 | 23.544772  | -1.51E-01 | 56666067  | 56666190  | NC_000014.8  |
| cg10446401 | 8.62E-14 | 3.66E-15 | -8.54 | 23.5445274 | -7.54E-02 | 101619230 | 101619353 | NC_000002.11 |



|               |          |          |       |            |           |           |           |              |
|---------------|----------|----------|-------|------------|-----------|-----------|-----------|--------------|
| cg17560073    | 8.65E-14 | 3.67E-15 | -8.54 | 23.5409536 | -2.63E-01 | 124850602 | 124850725 | NC_000008.10 |
| cg11586448    | 8.65E-14 | 3.67E-15 | -8.54 | 23.5409305 | -1.40E-01 | 123383399 | 123383522 | NC_000012.11 |
| cg16136068    | 8.66E-14 | 3.68E-15 | -8.54 | 23.5403387 | -1.70E-01 | 51589507  | 51589630  | NC_000010.10 |
| cg02237734    | 8.66E-14 | 3.68E-15 | -8.54 | 23.5396146 | -1.03E-01 | 145139063 | 145139186 | NC_000001.10 |
| cg17869933    | 8.67E-14 | 3.68E-15 | -8.54 | 23.5385626 | -9.40E-02 | 56015627  | 56015750  | NC_000019.9  |
| cg09063683    | 8.67E-14 | 3.69E-15 | -8.54 | 23.5379226 | -1.88E-01 | 37890150  | 37890273  | NC_000005.9  |
| cg01674147    | 8.67E-14 | 3.69E-15 | -8.54 | 23.5378978 | -1.78E-01 | 153878055 | 153878178 | NC_000004.11 |
| cg13017983    | 8.69E-14 | 3.69E-15 | -8.54 | 23.5356141 | -1.16E-01 | 36869435  | 36869558  | NC_000008.10 |
| cg05155047    | 8.77E-14 | 3.73E-15 | -8.54 | 23.5269061 | -1.84E-01 | 168719    | 168842    | NC_000005.9  |
| cg16391242    | 8.77E-14 | 3.73E-15 | -8.54 | 23.5260368 | -1.82E-01 | 3234697   | 3234820   | NC_000007.13 |
| cg24932788    | 8.78E-14 | 3.73E-15 | -8.54 | 23.5257283 | -6.06E-02 | 70118912  | 70119035  | NC_000017.10 |
| cg21249771    | 8.79E-14 | 3.74E-15 | -8.54 | 23.524106  | -1.90E-01 | 242484705 | 242484828 | NC_000002.11 |
| cg04793096    | 8.81E-14 | 3.75E-15 | -8.54 | 23.5219036 | -1.52E-01 | 23077202  | 23077325  | NC_000008.10 |
| cg07781701    | 8.82E-14 | 3.75E-15 | -8.54 | 23.5211011 | -1.69E-01 | 105542204 | 105542327 | NC_000003.11 |
| cg22534097    | 8.82E-14 | 3.75E-15 | -8.54 | 23.5207616 | -1.91E-01 | 92681082  | 92681205  | NC_000010.10 |
| cg25948982    | 8.83E-14 | 3.76E-15 | -8.54 | 23.51873   | -1.43E-01 | 45179157  | 45179280  | NC_000020.10 |
| cg20239639    | 8.84E-14 | 3.76E-15 | -8.54 | 23.5178421 | -1.32E-01 | 32739493  | 32739616  | NC_000001.10 |
| cg23180891    | 8.86E-14 | 3.77E-15 | -8.54 | 23.5161888 | -1.12E-01 | 19995510  | 19995633  | NC_000020.10 |
| cg11733958    | 8.88E-14 | 3.78E-15 | -8.54 | 23.5128802 | -1.74E-01 | 17023057  | 17023180  | NC_000017.10 |
| cg19927565    | 8.92E-14 | 3.79E-15 | -8.54 | 23.5092288 | -1.24E-01 | 74023625  | 74023748  | NC_000017.10 |
| cg18626035    | 8.92E-14 | 3.80E-15 | -8.54 | 23.5082998 | -1.70E-01 | 103998293 | 103998416 | NC_000004.11 |
| cg01221209    | 8.93E-14 | 3.80E-15 | -8.54 | 23.5069705 | -2.32E-01 | 554886    | 555009    | NC_000005.9  |
| cg10514593    | 8.97E-14 | 3.82E-15 | -8.54 | 23.5030048 | -1.77E-01 | 134578406 | 134578529 | NC_000010.10 |
| cg00839434    | 8.97E-14 | 3.82E-15 | -8.54 | 23.5027644 | -1.25E-01 | 170601062 | 170601185 | NC_000006.11 |
| ch.10.896173F | 9.00E-14 | 3.83E-15 | -8.54 | 23.499862  | -7.19E-02 | 35428323  | 35428446  | NC_000010.10 |

|             |          |          |       |            |           |           |           |              |
|-------------|----------|----------|-------|------------|-----------|-----------|-----------|--------------|
| cg00686915  | 9.00E-14 | 3.83E-15 | -8.54 | 23.4988128 | -1.72E-01 | 99076604  | 99076727  | NC_000007.13 |
| cg27626331  | 9.01E-14 | 3.84E-15 | -8.54 | 23.497913  | -8.82E-02 | 74162602  | 74162725  | NC_000005.9  |
| cg13650535  | 9.02E-14 | 3.84E-15 | -8.54 | 23.4972816 | -8.24E-02 | 126716056 | 126716179 | NC_000009.11 |
| cg05998301  | 9.06E-14 | 3.86E-15 | -8.54 | 23.4921513 | -1.46E-01 | 224562787 | 224562910 | NC_000002.11 |
| cg04254487  | 9.07E-14 | 3.87E-15 | -8.54 | 23.4907719 | -2.11E-01 | 134304883 | 134305006 | NC_000006.11 |
| cg23539753  | 9.09E-14 | 3.87E-15 | -8.54 | 23.4886649 | -1.21E-01 | 231280698 | 231280821 | NC_000002.11 |
| cg22600832  | 9.09E-14 | 3.88E-15 | -8.54 | 23.4881161 | -1.50E-01 | 89746837  | 89746960  | NC_000015.9  |
| cg16553051  | 9.12E-14 | 3.89E-15 | -8.53 | 23.4849084 | -7.24E-02 | 35806496  | 35806619  | NC_000020.10 |
| ch.3.90857F | 9.13E-14 | 3.89E-15 | -8.53 | 23.4841564 | -5.75E-02 | 4990079   | 4990202   | NC_000003.11 |
| cg02088996  | 9.14E-14 | 3.90E-15 | -8.53 | 23.4833951 | -1.43E-01 | 41817771  | 41817894  | NC_000007.13 |
| cg16002660  | 9.14E-14 | 3.90E-15 | -8.53 | 23.4828762 | -1.92E-01 | 2310278   | 2310401   | NC_000017.10 |
| cg10888900  | 9.16E-14 | 3.91E-15 | -8.53 | 23.4806923 | -1.98E-01 | 134872087 | 134872210 | NC_000010.10 |
| cg23034134  | 9.18E-14 | 3.92E-15 | -8.53 | 23.4783329 | -4.74E-02 | 148761738 | 148761861 | NC_000005.9  |
| cg11026555  | 9.18E-14 | 3.92E-15 | -8.53 | 23.4779604 | -6.67E-02 | 124247223 | 124247346 | NC_000012.11 |
| cg23291865  | 9.22E-14 | 3.94E-15 | -8.53 | 23.4733199 | -7.98E-02 | 5093660   | 5093783   | NC_000020.10 |
| cg08765100  | 9.23E-14 | 3.94E-15 | -8.53 | 23.4718832 | -1.82E-01 | 64211659  | 64211782  | NC_000003.11 |
| cg15908975  | 9.26E-14 | 3.95E-15 | -8.53 | 23.4687688 | -1.65E-01 | 126698829 | 126698952 | NC_000007.13 |
| cg06750524  | 9.27E-14 | 3.96E-15 | -8.53 | 23.468003  | -1.30E-01 | 45409955  | 45410078  | NC_000019.9  |
| cg02768875  | 9.28E-14 | 3.96E-15 | -8.53 | 23.4667823 | -6.97E-02 | 43603375  | 43603498  | NC_000006.11 |
| cg07345515  | 9.28E-14 | 3.96E-15 | -8.53 | 23.4663534 | -1.39E-01 | 32054771  | 32054894  | NC_000006.11 |
| cg12128483  | 9.30E-14 | 3.97E-15 | -8.53 | 23.4639434 | -6.71E-02 | 129691109 | 129691232 | NC_000007.13 |
| cg11844970  | 9.31E-14 | 3.98E-15 | -8.53 | 23.4632483 | -7.64E-02 | 100492186 | 100492309 | NC_000007.13 |
| cg09940032  | 9.31E-14 | 3.98E-15 | -8.53 | 23.4626115 | -2.05E-01 | 142215736 | 142215859 | NC_000008.10 |
| cg04069927  | 9.33E-14 | 3.98E-15 | -8.53 | 23.4610214 | -1.55E-01 | 153601329 | 153601452 | NC_000004.11 |
| cg12433395  | 9.33E-14 | 3.98E-15 | -8.53 | 23.461006  | -1.23E-01 | 106533667 | 106533790 | NC_000012.11 |

|               |          |          |       |            |           |           |           |              |
|---------------|----------|----------|-------|------------|-----------|-----------|-----------|--------------|
| cg21982437    | 9.33E-14 | 3.99E-15 | -8.53 | 23.4607501 | -1.39E-01 | 51670432  | 51670555  | NC_000019.9  |
| cg07167962    | 9.36E-14 | 4.00E-15 | -8.53 | 23.4572717 | -5.77E-02 | 137367923 | 137368046 | NC_000005.9  |
| cg16523185    | 9.38E-14 | 4.01E-15 | -8.53 | 23.4550786 | -1.38E-01 | 2337334   | 2337457   | NC_000001.10 |
| cg04452203    | 9.39E-14 | 4.01E-15 | -8.53 | 23.454121  | -1.67E-01 | 114332844 | 114332967 | NC_000004.11 |
| cg27510503    | 9.39E-14 | 4.01E-15 | -8.53 | 23.4541067 | -8.19E-02 | 22012035  | 22012158  | NC_000022.10 |
| cg09079593    | 9.39E-14 | 4.01E-15 | -8.53 | 23.4537173 | -3.33E-02 | 180632555 | 180632678 | NC_000005.9  |
| cg26256521    | 9.42E-14 | 4.03E-15 | -8.53 | 23.4502736 | -1.45E-01 | 105147537 | 105147660 | NC_000014.8  |
| cg15451258    | 9.43E-14 | 4.03E-15 | -8.53 | 23.4492173 | -2.66E-01 | 30117681  | 30117804  | NC_000015.9  |
| cg18566883    | 9.44E-14 | 4.04E-15 | -8.53 | 23.4483966 | -2.29E-01 | 38919676  | 38919799  | NC_000021.8  |
| cg19232929    | 9.49E-14 | 4.06E-15 | -8.53 | 23.4433588 | -2.00E-01 | 52299524  | 52299647  | NC_000012.11 |
| ch.1.3577855R | 9.49E-14 | 4.06E-15 | -8.53 | 23.4426768 | -5.65E-02 | 183094577 | 183094700 | NC_000001.10 |
| cg08094614    | 9.49E-14 | 4.06E-15 | -8.53 | 23.4422519 | -1.92E-01 | 53319217  | 53319340  | NC_000012.11 |
| cg24338491    | 9.52E-14 | 4.07E-15 | -8.53 | 23.4398361 | -1.31E-01 | 91775501  | 91775624  | NC_000012.11 |
| cg07889201    | 9.52E-14 | 4.07E-15 | -8.53 | 23.4396369 | -7.93E-02 | 2490030   | 2490153   | NC_000020.10 |
| cg03133269    | 9.52E-14 | 4.07E-15 | -8.53 | 23.4388461 | -7.58E-02 | 22468902  | 22469025  | NC_000001.10 |
| cg20180364    | 9.53E-14 | 4.08E-15 | -8.53 | 23.4385963 | -1.76E-01 | 94448532  | 94448655  | NC_000010.10 |
| cg10945917    | 9.57E-14 | 4.10E-15 | -8.53 | 23.4331979 | -1.27E-01 | 156400160 | 156400283 | NC_000001.10 |
| cg10289074    | 9.58E-14 | 4.10E-15 | -8.53 | 23.4326113 | -1.50E-01 | 24682916  | 24683039  | NC_000014.8  |
| cg07593977    | 9.62E-14 | 4.12E-15 | -8.53 | 23.4281623 | -2.38E-01 | 11735419  | 11735542  | NC_000008.10 |
| cg26674715    | 9.63E-14 | 4.12E-15 | -8.53 | 23.4273559 | -6.37E-02 | 52780607  | 52780730  | NC_000014.8  |
| cg01923099    | 9.64E-14 | 4.13E-15 | -8.53 | 23.4252966 | -1.73E-01 | 2889875   | 2889998   | NC_000011.9  |
| cg25291941    | 9.65E-14 | 4.13E-15 | -8.53 | 23.4248997 | -8.11E-02 | 99129319  | 99129442  | NC_000008.10 |
| cg17132079    | 9.65E-14 | 4.13E-15 | -8.53 | 23.4248941 | -1.49E-01 | 1294140   | 1294263   | NC_000001.10 |
| cg07923666    | 9.67E-14 | 4.14E-15 | -8.52 | 23.4222596 | -5.83E-02 | 49932857  | 49932980  | NC_000012.11 |
| cg06034933    | 9.71E-14 | 4.16E-15 | -8.52 | 23.4181918 | -1.23E-01 | 228645634 | 228645757 | NC_000001.10 |

|                |          |          |       |            |           |           |           |              |
|----------------|----------|----------|-------|------------|-----------|-----------|-----------|--------------|
| cg05606455     | 9.71E-14 | 4.16E-15 | -8.52 | 23.4181344 | -1.64E-01 | 43288757  | 43288880  | NC_000007.13 |
| cg11578066     | 9.72E-14 | 4.16E-15 | -8.52 | 23.4172356 | -6.46E-02 | 129033893 | 129034016 | NC_000003.11 |
| cg14695663     | 9.73E-14 | 4.17E-15 | -8.52 | 23.4160009 | -1.76E-01 | 145013478 | 145013601 | NC_000008.10 |
| cg27308445     | 9.75E-14 | 4.18E-15 | -8.52 | 23.4143674 | -1.85E-01 | 149699675 | 149699798 | NC_000005.9  |
| cg18279625     | 9.75E-14 | 4.18E-15 | -8.52 | 23.4141114 | -1.80E-01 | 150317877 | 150318000 | NC_000003.11 |
| cg00577030     | 9.75E-14 | 4.18E-15 | -8.52 | 23.4137545 | -3.71E-02 | 62496404  | 62496527  | NC_000020.10 |
| cg04689606     | 9.75E-14 | 4.18E-15 | -8.52 | 23.4133467 | -1.93E-01 | 116019713 | 116019836 | NC_000010.10 |
| cg07669403     | 9.77E-14 | 4.19E-15 | -8.52 | 23.4117557 | -1.34E-01 | 19477059  | 19477182  | NC_000018.9  |
| cg10661002     | 9.78E-14 | 4.19E-15 | -8.52 | 23.4108956 | -1.94E-01 | 25018503  | 25018626  | NC_000007.13 |
| cg04940329     | 9.78E-14 | 4.19E-15 | -8.52 | 23.4101308 | -1.81E-01 | 39093054  | 39093177  | NC_000017.10 |
| cg12925881     | 9.78E-14 | 4.20E-15 | -8.52 | 23.4099171 | -1.75E-01 | 26050407  | 26050530  | NC_000004.11 |
| cg05783998     | 9.79E-14 | 4.20E-15 | -8.52 | 23.4096292 | -1.12E-01 | 74295921  | 74296044  | NC_000006.11 |
| cg01565584     | 9.79E-14 | 4.20E-15 | -8.52 | 23.4096181 | -1.97E-01 | 11180077  | 11180200  | NC_000006.11 |
| cg26808921     | 9.80E-14 | 4.20E-15 | -8.52 | 23.4079728 | -3.00E-02 | 134373925 | 134374048 | NC_000006.11 |
| cg23527468     | 9.81E-14 | 4.21E-15 | -8.52 | 23.4069529 | -1.84E-01 | 133418844 | 133418967 | NC_000003.11 |
| ch.1.38337696R | 9.86E-14 | 4.23E-15 | -8.52 | 23.4014492 | -9.29E-02 | 38565109  | 38565232  | NC_000001.10 |
| cg12907876     | 9.87E-14 | 4.24E-15 | -8.52 | 23.4002087 | -1.49E-01 | 160050877 | 160051000 | NC_000001.10 |
| cg26233331     | 9.87E-14 | 4.24E-15 | -8.52 | 23.399977  | -1.40E-01 | 6695614   | 6695737   | NC_000004.11 |
| cg02643580     | 9.89E-14 | 4.24E-15 | -8.52 | 23.3985616 | -1.91E-01 | 95671146  | 95671269  | NC_000012.11 |
| cg16185457     | 9.89E-14 | 4.25E-15 | -8.52 | 23.3980255 | -2.09E-01 | 28200724  | 28200847  | NC_000002.11 |
| cg04552852     | 9.89E-14 | 4.25E-15 | -8.52 | 23.3980091 | -1.30E-01 | 844390    | 844513    | NC_000011.9  |
| cg26027052     | 9.89E-14 | 4.25E-15 | -8.52 | 23.3977971 | -2.15E-01 | 36821364  | 36821487  | NC_000006.11 |
| cg01335980     | 9.91E-14 | 4.25E-15 | -8.52 | 23.3961897 | -2.05E-01 | 27733133  | 27733256  | NC_000016.9  |
| cg03761477     | 9.91E-14 | 4.26E-15 | -8.52 | 23.395945  | -1.53E-01 | 41472416  | 41472539  | NC_000006.11 |
| cg16822095     | 9.91E-14 | 4.26E-15 | -8.52 | 23.395846  | -1.76E-01 | 38074753  | 38074876  | NC_000017.10 |

|            |          |          |       |            |           |           |           |              |
|------------|----------|----------|-------|------------|-----------|-----------|-----------|--------------|
| cg25447873 | 9.92E-14 | 4.26E-15 | -8.52 | 23.3951228 | -1.95E-01 | 63548963  | 63549086  | NC_000015.9  |
| cg07042104 | 9.92E-14 | 4.26E-15 | -8.52 | 23.3950391 | -1.12E-01 | 34206951  | 34207074  | NC_000020.10 |
| cg10176185 | 9.92E-14 | 4.26E-15 | -8.52 | 23.394389  | -1.52E-01 | 25894479  | 25894602  | NC_000001.10 |
| cg10914115 | 9.92E-14 | 4.26E-15 | -8.52 | 23.3941473 | -1.22E-01 | 31704828  | 31704951  | NC_000006.11 |
| cg10313463 | 9.93E-14 | 4.27E-15 | -8.52 | 23.3930665 | -8.02E-02 | 30440564  | 30440687  | NC_000016.9  |
| cg09141303 | 9.95E-14 | 4.27E-15 | -8.52 | 23.3914631 | -1.95E-01 | 103998291 | 103998414 | NC_000004.11 |
| cg07704554 | 9.96E-14 | 4.28E-15 | -8.52 | 23.3902027 | -9.49E-02 | 72931736  | 72931859  | NC_000017.10 |
| cg02464555 | 9.97E-14 | 4.29E-15 | -8.52 | 23.3889189 | -9.85E-02 | 101922985 | 101923108 | NC_000007.13 |
| cg00797651 | 9.98E-14 | 4.29E-15 | -8.52 | 23.3879716 | -1.97E-01 | 207494336 | 207494459 | NC_000001.10 |
| cg02089348 | 1.00E-13 | 4.30E-15 | -8.52 | 23.3847258 | -1.10E-01 | 1724449   | 1724572   | NC_000004.11 |
| cg15918766 | 1.00E-13 | 4.31E-15 | -8.52 | 23.3844115 | -4.09E-02 | 53662405  | 53662528  | NC_000012.11 |
| cg27527593 | 1.00E-13 | 4.31E-15 | -8.52 | 23.3842285 | -3.58E-02 | 8818326   | 8818449   | NC_000002.11 |
| cg08507178 | 1.00E-13 | 4.31E-15 | -8.52 | 23.3831874 | -9.26E-02 | 50357265  | 50357388  | NC_000022.10 |
| cg15474859 | 1.00E-13 | 4.32E-15 | -8.52 | 23.3820558 | -7.62E-02 | 208030304 | 208030427 | NC_000002.11 |
| cg00093433 | 1.00E-13 | 4.32E-15 | -8.52 | 23.3806512 | -1.58E-01 | 85981310  | 85981433  | NC_000016.9  |
| cg08905114 | 1.01E-13 | 4.33E-15 | -8.52 | 23.3781057 | -5.21E-02 | 95897015  | 95897138  | NC_000009.11 |
| cg03326606 | 1.01E-13 | 4.34E-15 | -8.52 | 23.3773087 | -2.13E-01 | 49345567  | 49345690  | NC_000020.10 |
| cg14191279 | 1.01E-13 | 4.34E-15 | -8.52 | 23.3772829 | -1.34E-01 | 8567538   | 8567661   | NC_000019.9  |
| cg17980508 | 1.01E-13 | 4.34E-15 | -8.52 | 23.3768168 | -1.67E-01 | 79085713  | 79085836  | NC_000001.10 |
| cg23581088 | 1.01E-13 | 4.34E-15 | -8.52 | 23.3764754 | -1.87E-01 | 3912160   | 3912283   | NC_000006.11 |
| cg03004198 | 1.01E-13 | 4.34E-15 | -8.52 | 23.3763647 | -5.25E-02 | 105293578 | 105293701 | NC_000014.8  |
| cg01860897 | 1.01E-13 | 4.35E-15 | -8.52 | 23.374863  | -1.39E-01 | 90309605  | 90309728  | NC_000001.10 |
| cg10869531 | 1.01E-13 | 4.36E-15 | -8.52 | 23.3726178 | -1.73E-01 | 2808489   | 2808612   | NC_000004.11 |
| cg05514909 | 1.02E-13 | 4.37E-15 | -8.52 | 23.3691425 | -1.56E-01 | 133022853 | 133022976 | NC_000012.11 |
| cg21467935 | 1.02E-13 | 4.38E-15 | -8.52 | 23.3676847 | -1.85E-01 | 31781906  | 31782029  | NC_000006.11 |

|            |          |          |       |            |           |           |           |              |
|------------|----------|----------|-------|------------|-----------|-----------|-----------|--------------|
| cg23730696 | 1.02E-13 | 4.39E-15 | -8.52 | 23.3649001 | -1.61E-01 | 124622444 | 124622567 | NC_000011.9  |
| cg05573626 | 1.02E-13 | 4.40E-15 | -8.52 | 23.3634847 | -1.18E-01 | 49672687  | 49672810  | NC_000016.9  |
| cg17628894 | 1.02E-13 | 4.40E-15 | -8.52 | 23.36321   | -1.37E-01 | 804452    | 804575    | NC_000011.9  |
| cg10041416 | 1.03E-13 | 4.45E-15 | -8.51 | 23.3511938 | -5.03E-02 | 1215871   | 1215994   | NC_000007.13 |
| cg02696798 | 1.04E-13 | 4.47E-15 | -8.51 | 23.3480214 | -1.74E-01 | 107301935 | 107302058 | NC_000010.10 |
| cg02416424 | 1.04E-13 | 4.48E-15 | -8.51 | 23.3446688 | -1.10E-01 | 39684825  | 39684948  | NC_000017.10 |
| cg02806739 | 1.04E-13 | 4.49E-15 | -8.51 | 23.3429887 | -1.06E-01 | 80273242  | 80273365  | NC_000017.10 |
| cg10949576 | 1.04E-13 | 4.50E-15 | -8.51 | 23.3409325 | -1.26E-01 | 61248556  | 61248679  | NC_000011.9  |
| cg19445335 | 1.05E-13 | 4.51E-15 | -8.51 | 23.3385969 | -2.07E-01 | 960350    | 960473    | NC_000007.13 |
| cg17197774 | 1.05E-13 | 4.51E-15 | -8.51 | 23.33774   | -2.11E-01 | 59467209  | 59467332  | NC_000008.10 |
| cg04289385 | 1.05E-13 | 4.53E-15 | -8.51 | 23.3334077 | -1.29E-01 | 36355825  | 36355948  | NC_000006.11 |
| cg19600528 | 1.05E-13 | 4.54E-15 | -8.51 | 23.3329325 | -1.63E-01 | 95074231  | 95074354  | NC_000001.10 |
| cg22452122 | 1.05E-13 | 4.54E-15 | -8.51 | 23.3321359 | -1.04E-01 | 4531790   | 4531913   | NC_000019.9  |
| cg12096762 | 1.05E-13 | 4.55E-15 | -8.51 | 23.3304044 | -1.18E-01 | 88296044  | 88296167  | NC_000015.9  |
| cg26714425 | 1.05E-13 | 4.55E-15 | -8.51 | 23.3296997 | -1.45E-01 | 10330845  | 10330968  | NC_000005.9  |
| cg08062049 | 1.06E-13 | 4.55E-15 | -8.51 | 23.3293075 | -9.34E-02 | 121427380 | 121427503 | NC_000002.11 |
| cg20850602 | 1.06E-13 | 4.57E-15 | -8.51 | 23.3262187 | -1.26E-01 | 17379752  | 17379875  | NC_000017.10 |
| cg12753606 | 1.06E-13 | 4.57E-15 | -8.51 | 23.3255817 | -1.05E-01 | 135504989 | 135505112 | NC_000006.11 |
| cg21785536 | 1.06E-13 | 4.59E-15 | -8.51 | 23.3215853 | -6.01E-02 | 69063328  | 69063451  | NC_000003.11 |
| cg18426142 | 1.06E-13 | 4.60E-15 | -8.51 | 23.3199647 | -1.40E-01 | 51984246  | 51984369  | NC_000012.11 |
| cg13541456 | 1.07E-13 | 4.60E-15 | -8.51 | 23.3191795 | -1.51E-01 | 136603618 | 136603741 | NC_000009.11 |
| cg14761454 | 1.07E-13 | 4.61E-15 | -8.51 | 23.3173028 | -1.63E-01 | 108092087 | 108092210 | NC_000011.9  |
| cg18010131 | 1.07E-13 | 4.64E-15 | -8.51 | 23.311227  | -2.03E-01 | 10476620  | 10476743  | NC_000011.9  |
| cg27382058 | 1.07E-13 | 4.64E-15 | -8.51 | 23.3107206 | -5.72E-02 | 43506933  | 43507056  | NC_000022.10 |
| cg16016465 | 1.08E-13 | 4.65E-15 | -8.51 | 23.3090908 | -1.60E-01 | 9048528   | 9048651   | NC_000008.10 |

|                |          |          |       |            |           |           |           |              |
|----------------|----------|----------|-------|------------|-----------|-----------|-----------|--------------|
| cg14017402     | 1.08E-13 | 4.65E-15 | -8.51 | 23.3090088 | -1.86E-01 | 86225602  | 86225725  | NC_000002.11 |
| cg22055891     | 1.08E-13 | 4.65E-15 | -8.51 | 23.3080347 | -2.17E-01 | 138829973 | 138830096 | NC_000002.11 |
| cg13227551     | 1.08E-13 | 4.66E-15 | -8.51 | 23.3063214 | -1.60E-01 | 144011222 | 144011345 | NC_000006.11 |
| cg08423857     | 1.08E-13 | 4.67E-15 | -8.51 | 23.3047292 | -2.28E-01 | 84840454  | 84840577  | NC_000016.9  |
| cg11469587     | 1.08E-13 | 4.67E-15 | -8.51 | 23.3037021 | -1.53E-01 | 74639849  | 74639972  | NC_000017.10 |
| cg10083464     | 1.08E-13 | 4.68E-15 | -8.51 | 23.3028763 | -1.39E-01 | 1230997   | 1231120   | NC_000016.9  |
| cg16594913     | 1.08E-13 | 4.68E-15 | -8.51 | 23.3017595 | -1.95E-01 | 5607455   | 5607578   | NC_000012.11 |
| cg26130864     | 1.08E-13 | 4.69E-15 | -8.51 | 23.3006674 | -1.75E-01 | 3208100   | 3208223   | NC_000020.10 |
| cg07065217     | 1.09E-13 | 4.69E-15 | -8.51 | 23.2991087 | -9.52E-02 | 105953092 | 105953215 | NC_000014.8  |
| cg27418164     | 1.09E-13 | 4.72E-15 | -8.5  | 23.2940051 | -7.49E-02 | 47614620  | 47614743  | NC_000019.9  |
| ch.12.4168779F | 1.09E-13 | 4.73E-15 | -8.5  | 23.2921538 | -7.07E-02 | 4298518   | 4298641   | NC_000012.11 |
| cg05494152     | 1.09E-13 | 4.73E-15 | -8.5  | 23.2906162 | -6.69E-02 | 75544339  | 75544462  | NC_000007.13 |
| cg11249486     | 1.10E-13 | 4.76E-15 | -8.5  | 23.2846879 | -1.54E-01 | 322659    | 322782    | NC_000012.11 |
| cg27183737     | 1.10E-13 | 4.77E-15 | -8.5  | 23.2833661 | -7.13E-02 | 135207468 | 135207591 | NC_000010.10 |
| cg10211062     | 1.10E-13 | 4.77E-15 | -8.5  | 23.2827552 | -1.78E-01 | 47915862  | 47915985  | NC_000002.11 |
| cg18763536     | 1.11E-13 | 4.79E-15 | -8.5  | 23.2786376 | -1.86E-01 | 11812062  | 11812185  | NC_000012.11 |
| cg09631475     | 1.11E-13 | 4.79E-15 | -8.5  | 23.2781578 | -3.90E-02 | 55033192  | 55033315  | NC_000014.8  |
| cg08944318     | 1.11E-13 | 4.80E-15 | -8.5  | 23.2766778 | -6.28E-02 | 15139147  | 15139270  | NC_000010.10 |
| cg01524174     | 1.11E-13 | 4.82E-15 | -8.5  | 23.2730133 | -9.68E-02 | 70119015  | 70119138  | NC_000017.10 |
| cg10182421     | 1.11E-13 | 4.82E-15 | -8.5  | 23.272702  | -1.82E-01 | 49651102  | 49651225  | NC_000008.10 |
| cg21456083     | 1.11E-13 | 4.82E-15 | -8.5  | 23.2722111 | -1.09E-01 | 49524256  | 49524379  | NC_000019.9  |
| cg12505390     | 1.12E-13 | 4.83E-15 | -8.5  | 23.2700101 | -9.54E-02 | 4848355   | 4848478   | NC_000017.10 |
| cg01135464     | 1.12E-13 | 4.84E-15 | -8.5  | 23.2681256 | -2.00E-01 | 48971001  | 48971124  | NC_000017.10 |
| cg14069088     | 1.12E-13 | 4.85E-15 | -8.5  | 23.2670467 | -2.04E-01 | 21996207  | 21996330  | NC_000009.11 |
| cg01315323     | 1.12E-13 | 4.85E-15 | -8.5  | 23.2665616 | -5.23E-02 | 26569874  | 26569997  | NC_000002.11 |

|                |          |          |       |            |           |           |           |              |
|----------------|----------|----------|-------|------------|-----------|-----------|-----------|--------------|
| ch.14.1182433R | 1.12E-13 | 4.85E-15 | -8.5  | 23.2664498 | -7.30E-02 | 78024853  | 78024976  | NC_000014.8  |
| cg03142741     | 1.12E-13 | 4.86E-15 | -8.5  | 23.2648982 | -1.81E-01 | 227947250 | 227947373 | NC_000001.10 |
| cg14993491     | 1.13E-13 | 4.87E-15 | -8.5  | 23.2619043 | -1.57E-01 | 55504971  | 55505094  | NC_000001.10 |
| cg19145218     | 1.13E-13 | 4.91E-15 | -8.5  | 23.2553454 | -1.29E-01 | 749336    | 749459    | NC_000020.10 |
| cg26311208     | 1.13E-13 | 4.91E-15 | -8.5  | 23.2549941 | -6.40E-02 | 59012484  | 59012607  | NC_000001.10 |
| cg05265484     | 1.14E-13 | 4.92E-15 | -8.5  | 23.2517108 | -1.25E-01 | 52977445  | 52977568  | NC_000017.10 |
| cg11802027     | 1.14E-13 | 4.93E-15 | -8.5  | 23.2503708 | -1.74E-01 | 14049442  | 14049565  | NC_000019.9  |
| cg26765385     | 1.14E-13 | 4.93E-15 | -8.5  | 23.2497988 | -1.75E-01 | 2611244   | 2611367   | NC_000007.13 |
| cg23035449     | 1.14E-13 | 4.94E-15 | -8.5  | 23.2494754 | -1.81E-01 | 90578555  | 90578678  | NC_000015.9  |
| cg00009196     | 1.14E-13 | 4.94E-15 | -8.5  | 23.2486921 | -1.73E-01 | 19954588  | 19954711  | NC_000020.10 |
| cg22442617     | 1.14E-13 | 4.94E-15 | -8.5  | 23.248528  | -1.70E-01 | 37958953  | 37959076  | NC_000006.11 |
| cg06856840     | 1.15E-13 | 4.97E-15 | -8.5  | 23.2428722 | -1.71E-01 | 80446451  | 80446574  | NC_000015.9  |
| cg24580071     | 1.15E-13 | 4.97E-15 | -8.5  | 23.2420599 | -1.10E-01 | 76620271  | 76620394  | NC_000001.10 |
| cg26874367     | 1.15E-13 | 4.98E-15 | -8.5  | 23.2409936 | -2.41E-01 | 129381792 | 129381915 | NC_000002.11 |
| cg16523850     | 1.15E-13 | 4.98E-15 | -8.5  | 23.240912  | -1.86E-01 | 54156824  | 54156947  | NC_000006.11 |
| cg21210090     | 1.15E-13 | 4.98E-15 | -8.5  | 23.2399542 | -1.07E-01 | 15704429  | 15704552  | NC_000004.11 |
| cg08114617     | 1.15E-13 | 5.00E-15 | -8.5  | 23.2376147 | -1.19E-01 | 110271441 | 110271564 | NC_000012.11 |
| cg27150417     | 1.15E-13 | 5.00E-15 | -8.49 | 23.2367255 | -1.84E-01 | 44462035  | 44462158  | NC_000020.10 |
| cg03701575     | 1.15E-13 | 5.00E-15 | -8.49 | 23.2363879 | -1.12E-01 | 83960119  | 83960242  | NC_000016.9  |
| cg17744997     | 1.15E-13 | 5.01E-15 | -8.49 | 23.2346715 | -1.25E-01 | 167401611 | 167401734 | NC_000006.11 |
| cg06664254     | 1.16E-13 | 5.02E-15 | -8.49 | 23.2320437 | -1.75E-01 | 75628226  | 75628349  | NC_000016.9  |
| cg15054077     | 1.16E-13 | 5.03E-15 | -8.49 | 23.2310043 | -2.93E-01 | 13124215  | 13124338  | NC_000019.9  |
| cg17744295     | 1.16E-13 | 5.05E-15 | -8.49 | 23.2275798 | -1.40E-01 | 16178097  | 16178220  | NC_000019.9  |
| ch.8.1077192R  | 1.17E-13 | 5.07E-15 | -8.49 | 23.2227018 | -5.02E-02 | 48728513  | 48728636  | NC_000008.10 |
| cg05924583     | 1.18E-13 | 5.10E-15 | -8.49 | 23.2167394 | -1.29E-01 | 3569624   | 3569747   | NC_000001.10 |



|            |          |          |       |            |           |           |           |              |
|------------|----------|----------|-------|------------|-----------|-----------|-----------|--------------|
| cg17085710 | 1.18E-13 | 5.11E-15 | -8.49 | 23.2152733 | -1.74E-01 | 98842834  | 98842957  | NC_000007.13 |
| cg01008854 | 1.18E-13 | 5.12E-15 | -8.49 | 23.2133596 | -7.26E-02 | 111126998 | 111127121 | NC_000012.11 |
| cg05134325 | 1.18E-13 | 5.12E-15 | -8.49 | 23.2129126 | -1.66E-01 | 52423122  | 52423245  | NC_000013.10 |
| cg11245806 | 1.18E-13 | 5.14E-15 | -8.49 | 23.2086335 | -1.18E-01 | 20252225  | 20252348  | NC_000002.11 |
| cg21690450 | 1.18E-13 | 5.14E-15 | -8.49 | 23.2084452 | -2.17E-01 | 102276634 | 102276757 | NC_000013.10 |
| cg02325250 | 1.19E-13 | 5.15E-15 | -8.49 | 23.2070101 | -1.39E-01 | 131409289 | 131409412 | NC_000005.9  |
| cg25104124 | 1.19E-13 | 5.15E-15 | -8.49 | 23.20688   | -1.64E-01 | 74021022  | 74021145  | NC_000010.10 |
| cg20641675 | 1.19E-13 | 5.15E-15 | -8.49 | 23.2068426 | -1.77E-01 | 48124396  | 48124519  | NC_000007.13 |
| cg19654743 | 1.19E-13 | 5.16E-15 | -8.49 | 23.2062486 | -1.78E-01 | 75446592  | 75446715  | NC_000017.10 |
| cg10440877 | 1.19E-13 | 5.16E-15 | -8.49 | 23.2059877 | -2.22E-01 | 208378475 | 208378598 | NC_000002.11 |
| cg14241894 | 1.20E-13 | 5.20E-15 | -8.49 | 23.1971385 | -2.27E-01 | 235879289 | 235879412 | NC_000002.11 |
| cg10909080 | 1.20E-13 | 5.21E-15 | -8.49 | 23.1963374 | -1.35E-01 | 79881468  | 79881591  | NC_000017.10 |
| cg22037648 | 1.20E-13 | 5.22E-15 | -8.49 | 23.1950567 | -1.13E-01 | 50311009  | 50311132  | NC_000003.11 |
| cg03517776 | 1.20E-13 | 5.24E-15 | -8.49 | 23.191178  | -2.86E-01 | 64834430  | 64834553  | NC_000002.11 |
| cg09298818 | 1.21E-13 | 5.24E-15 | -8.49 | 23.1902916 | -8.74E-02 | 111181546 | 111181669 | NC_000012.11 |
| cg14608199 | 1.21E-13 | 5.25E-15 | -8.49 | 23.1889052 | -3.95E-02 | 2949963   | 2950086   | NC_000011.9  |
| cg12222597 | 1.21E-13 | 5.25E-15 | -8.49 | 23.188152  | -2.86E-02 | 72977235  | 72977358  | NC_000010.10 |
| cg09080114 | 1.21E-13 | 5.27E-15 | -8.49 | 23.1855721 | -7.56E-02 | 6983111   | 6983234   | NC_000012.11 |
| cg10721220 | 1.21E-13 | 5.27E-15 | -8.49 | 23.1854002 | -2.17E-01 | 29743492  | 29743615  | NC_000008.10 |
| cg21226965 | 1.22E-13 | 5.29E-15 | -8.49 | 23.1813845 | -1.90E-01 | 169852806 | 169852929 | NC_000006.11 |
| cg09864345 | 1.22E-13 | 5.30E-15 | -8.49 | 23.1800042 | -1.84E-01 | 6531813   | 6531936   | NC_000001.10 |
| cg00290974 | 1.22E-13 | 5.31E-15 | -8.49 | 23.1765308 | -1.68E-01 | 10316461  | 10316584  | NC_000011.9  |
| cg24671245 | 1.22E-13 | 5.32E-15 | -8.48 | 23.1747205 | -5.24E-02 | 76585406  | 76585529  | NC_000010.10 |
| cg10055235 | 1.22E-13 | 5.33E-15 | -8.48 | 23.1740826 | -1.19E-01 | 7257885   | 7258008   | NC_000017.10 |
| cg14776168 | 1.23E-13 | 5.35E-15 | -8.48 | 23.1703248 | -1.38E-01 | 61152209  | 61152332  | NC_000015.9  |

|               |          |          |       |            |           |           |           |              |
|---------------|----------|----------|-------|------------|-----------|-----------|-----------|--------------|
| cg09941208    | 1.23E-13 | 5.35E-15 | -8.48 | 23.170324  | -1.77E-01 | 45308248  | 45308371  | NC_000001.10 |
| cg17910564    | 1.23E-13 | 5.36E-15 | -8.48 | 23.1674755 | -1.90E-01 | 42248702  | 42248825  | NC_000008.10 |
| cg26118131    | 1.24E-13 | 5.39E-15 | -8.48 | 23.1630467 | -1.74E-01 | 117947214 | 117947337 | NC_000011.9  |
| cg13213755    | 1.24E-13 | 5.40E-15 | -8.48 | 23.1613091 | -2.43E-01 | 73926454  | 73926577  | NC_000015.9  |
| cg05488523    | 1.24E-13 | 5.41E-15 | -8.48 | 23.1594222 | -6.40E-02 | 79481108  | 79481231  | NC_000017.10 |
| cg14414911    | 1.24E-13 | 5.42E-15 | -8.48 | 23.1575777 | -1.65E-01 | 43964296  | 43964419  | NC_000006.11 |
| cg26133068    | 1.24E-13 | 5.42E-15 | -8.48 | 23.1564679 | -1.28E-01 | 24199008  | 24199131  | NC_000022.10 |
| cg13940444    | 1.24E-13 | 5.42E-15 | -8.48 | 23.1564319 | -2.09E-01 | 53617382  | 53617505  | NC_000012.11 |
| cg07761386    | 1.25E-13 | 5.43E-15 | -8.48 | 23.1557992 | -5.89E-02 | 67495517  | 67495640  | NC_000003.11 |
| cg08119325    | 1.25E-13 | 5.44E-15 | -8.48 | 23.1540838 | -1.40E-01 | 195613212 | 195613335 | NC_000003.11 |
| cg10183885    | 1.25E-13 | 5.44E-15 | -8.48 | 23.1534884 | -2.03E-01 | 80187886  | 80188009  | NC_000017.10 |
| cg06581409    | 1.25E-13 | 5.44E-15 | -8.48 | 23.1530398 | -1.87E-01 | 41139370  | 41139493  | NC_000019.9  |
| cg03912774    | 1.25E-13 | 5.46E-15 | -8.48 | 23.1490198 | -1.28E-01 | 14597539  | 14597662  | NC_000003.11 |
| cg18198461    | 1.25E-13 | 5.47E-15 | -8.48 | 23.1484195 | -1.35E-01 | 143523293 | 143523416 | NC_000008.10 |
| cg12865939    | 1.26E-13 | 5.47E-15 | -8.48 | 23.1473558 | -1.49E-01 | 8832938   | 8833061   | NC_000011.9  |
| cg07177115    | 1.26E-13 | 5.48E-15 | -8.48 | 23.1455045 | -1.28E-01 | 113762795 | 113762918 | NC_000002.11 |
| cg04332442    | 1.26E-13 | 5.49E-15 | -8.48 | 23.1446937 | -2.03E-01 | 46770063  | 46770186  | NC_000022.10 |
| ch.6.2124703F | 1.26E-13 | 5.49E-15 | -8.48 | 23.1437281 | -6.48E-02 | 108782937 | 108783060 | NC_000006.11 |
| cg17834289    | 1.26E-13 | 5.50E-15 | -8.48 | 23.1421424 | -1.06E-01 | 41878006  | 41878129  | NC_000015.9  |
| cg10523140    | 1.26E-13 | 5.51E-15 | -8.48 | 23.1412873 | -1.71E-01 | 101768941 | 101769064 | NC_000002.11 |
| cg06342072    | 1.27E-13 | 5.53E-15 | -8.48 | 23.137211  | -1.92E-01 | 50985639  | 50985762  | NC_000013.10 |
| cg15786827    | 1.27E-13 | 5.54E-15 | -8.48 | 23.1353225 | -1.60E-01 | 133014399 | 133014522 | NC_000012.11 |
| cg07949217    | 1.27E-13 | 5.56E-15 | -8.48 | 23.131923  | -1.28E-01 | 124497981 | 124498104 | NC_000009.11 |
| cg09325164    | 1.28E-13 | 5.56E-15 | -8.48 | 23.1310553 | -1.29E-01 | 32537942  | 32538065  | NC_000001.10 |
| cg25574175    | 1.28E-13 | 5.57E-15 | -8.48 | 23.13086   | -1.97E-01 | 119500929 | 119501052 | NC_000003.11 |

|               |          |          |       |            |           |           |           |              |
|---------------|----------|----------|-------|------------|-----------|-----------|-----------|--------------|
| cg08874598    | 1.28E-13 | 5.57E-15 | -8.48 | 23.1304848 | -5.97E-02 | 102217901 | 102218024 | NC_000008.10 |
| cg07012178    | 1.28E-13 | 5.58E-15 | -8.48 | 23.1283871 | -1.70E-01 | 151304708 | 151304831 | NC_000007.13 |
| cg03984009    | 1.29E-13 | 5.61E-15 | -8.48 | 23.1222222 | -1.79E-01 | 136172553 | 136172676 | NC_000006.11 |
| ch.19.777701F | 1.29E-13 | 5.62E-15 | -8.48 | 23.1207451 | -6.44E-02 | 18464295  | 18464418  | NC_000019.9  |
| cg08354699    | 1.29E-13 | 5.62E-15 | -8.48 | 23.1206789 | -5.57E-02 | 63796895  | 63797018  | NC_000015.9  |
| cg21080473    | 1.29E-13 | 5.63E-15 | -8.48 | 23.1201986 | -2.34E-01 | 50560524  | 50560647  | NC_000007.13 |
| cg00743081    | 1.29E-13 | 5.64E-15 | -8.48 | 23.1183641 | -1.70E-01 | 61724970  | 61725093  | NC_000017.10 |
| cg00615145    | 1.29E-13 | 5.65E-15 | -8.48 | 23.1159565 | -4.81E-02 | 157016135 | 157016258 | NC_000001.10 |
| cg27130630    | 1.29E-13 | 5.65E-15 | -8.48 | 23.1156838 | -8.52E-02 | 7260666   | 7260789   | NC_000012.11 |
| cg04184716    | 1.30E-13 | 5.68E-15 | -8.47 | 23.110524  | -1.89E-01 | 75084887  | 75085010  | NC_000014.8  |
| cg02939781    | 1.30E-13 | 5.69E-15 | -8.47 | 23.1096157 | -1.94E-01 | 183208857 | 183208980 | NC_000003.11 |
| cg23667551    | 1.30E-13 | 5.69E-15 | -8.47 | 23.1084472 | -6.59E-02 | 3528449   | 3528572   | NC_000001.10 |
| cg05516537    | 1.30E-13 | 5.69E-15 | -8.47 | 23.1082604 | -1.15E-01 | 114239958 | 114240081 | NC_000013.10 |
| cg20820107    | 1.31E-13 | 5.71E-15 | -8.47 | 23.1052788 | -1.65E-01 | 12193099  | 12193222  | NC_000001.10 |
| cg01174240    | 1.31E-13 | 5.71E-15 | -8.47 | 23.1050203 | -1.20E-01 | 24785310  | 24785433  | NC_000014.8  |
| cg16004427    | 1.31E-13 | 5.72E-15 | -8.47 | 23.1037808 | -1.18E-01 | 16083101  | 16083224  | NC_000001.10 |
| cg03355690    | 1.31E-13 | 5.74E-15 | -8.47 | 23.1004876 | -1.18E-01 | 35265616  | 35265739  | NC_000006.11 |
| cg16018921    | 1.31E-13 | 5.75E-15 | -8.47 | 23.0990798 | -2.08E-01 | 169616009 | 169616132 | NC_000004.11 |
| cg06691616    | 1.31E-13 | 5.75E-15 | -8.47 | 23.0988707 | -1.89E-01 | 139531098 | 139531221 | NC_000004.11 |
| cg10753610    | 1.31E-13 | 5.75E-15 | -8.47 | 23.0987818 | -1.69E-01 | 45335202  | 45335325  | NC_000017.10 |
| cg06692120    | 1.31E-13 | 5.75E-15 | -8.47 | 23.0987236 | -8.84E-02 | 26646884  | 26647007  | NC_000017.10 |
| cg08390021    | 1.31E-13 | 5.75E-15 | -8.47 | 23.0987041 | -2.87E-02 | 51884793  | 51884916  | NC_000018.9  |
| cg05627138    | 1.32E-13 | 5.75E-15 | -8.47 | 23.0986318 | -1.95E-01 | 548499    | 548622    | NC_000005.9  |
| cg19145320    | 1.32E-13 | 5.76E-15 | -8.47 | 23.0976797 | -1.82E-01 | 75130069  | 75130192  | NC_000011.9  |
| cg20898829    | 1.32E-13 | 5.76E-15 | -8.47 | 23.0976702 | -1.35E-01 | 3229660   | 3229783   | NC_000020.10 |

|            |          |          |       |            |           |           |           |              |
|------------|----------|----------|-------|------------|-----------|-----------|-----------|--------------|
| cg06850996 | 1.32E-13 | 5.77E-15 | -8.47 | 23.0953573 | -1.27E-01 | 48152355  | 48152478  | NC_000012.11 |
| cg00264419 | 1.32E-13 | 5.77E-15 | -8.47 | 23.0952996 | -1.63E-01 | 22922124  | 22922247  | NC_000008.10 |
| cg04746851 | 1.32E-13 | 5.77E-15 | -8.47 | 23.0946784 | -7.70E-02 | 66496148  | 66496271  | NC_000011.9  |
| cg01697487 | 1.32E-13 | 5.78E-15 | -8.47 | 23.094038  | -1.46E-01 | 48588559  | 48588682  | NC_000017.10 |
| cg26907082 | 1.32E-13 | 5.78E-15 | -8.47 | 23.0928011 | -7.12E-02 | 18971840  | 18971963  | NC_000001.10 |
| cg08730348 | 1.32E-13 | 5.79E-15 | -8.47 | 23.0909376 | -1.90E-01 | 31214307  | 31214430  | NC_000016.9  |
| cg19596227 | 1.33E-13 | 5.80E-15 | -8.47 | 23.0893195 | -8.19E-02 | 53191480  | 53191603  | NC_000003.11 |
| cg17745097 | 1.33E-13 | 5.81E-15 | -8.47 | 23.088152  | -2.06E-01 | 11863365  | 11863488  | NC_000001.10 |
| cg10037913 | 1.33E-13 | 5.82E-15 | -8.47 | 23.0870552 | -1.75E-01 | 27246970  | 27247093  | NC_000016.9  |
| cg09416188 | 1.33E-13 | 5.82E-15 | -8.47 | 23.0860245 | -1.88E-01 | 49538552  | 49538675  | NC_000003.11 |
| cg05276753 | 1.33E-13 | 5.82E-15 | -8.47 | 23.0859319 | -2.11E-01 | 57844149  | 57844272  | NC_000015.9  |
| cg23101776 | 1.33E-13 | 5.83E-15 | -8.47 | 23.0853517 | -1.04E-01 | 219866072 | 219866195 | NC_000002.11 |
| cg09432234 | 1.33E-13 | 5.83E-15 | -8.47 | 23.0843383 | -5.80E-02 | 49211807  | 49211930  | NC_000012.11 |
| cg07288476 | 1.34E-13 | 5.86E-15 | -8.47 | 23.0805761 | -1.23E-01 | 32180486  | 32180609  | NC_000001.10 |
| cg14036402 | 1.34E-13 | 5.86E-15 | -8.47 | 23.0797501 | -1.56E-01 | 15743671  | 15743794  | NC_000001.10 |
| cg19553402 | 1.34E-13 | 5.86E-15 | -8.47 | 23.0791087 | -1.51E-01 | 50747014  | 50747137  | NC_000022.10 |
| cg21324402 | 1.34E-13 | 5.88E-15 | -8.47 | 23.0766252 | -1.73E-01 | 31786808  | 31786931  | NC_000006.11 |
| cg18644653 | 1.35E-13 | 5.90E-15 | -8.47 | 23.0727348 | -1.08E-01 | 49696053  | 49696176  | NC_000003.11 |
| cg20840426 | 1.35E-13 | 5.90E-15 | -8.47 | 23.0723842 | -1.77E-01 | 117800609 | 117800732 | NC_000012.11 |
| cg16762308 | 1.35E-13 | 5.91E-15 | -8.47 | 23.0716442 | -1.37E-01 | 31870888  | 31871011  | NC_000020.10 |
| cg22450974 | 1.35E-13 | 5.91E-15 | -8.47 | 23.0715594 | -1.66E-01 | 181283348 | 181283471 | NC_000001.10 |
| cg03710889 | 1.35E-13 | 5.91E-15 | -8.47 | 23.0708841 | -1.72E-01 | 219252818 | 219252941 | NC_000002.11 |
| cg03934681 | 1.35E-13 | 5.92E-15 | -8.47 | 23.070594  | -9.80E-02 | 116697604 | 116697727 | NC_000010.10 |
| cg15540723 | 1.35E-13 | 5.92E-15 | -8.47 | 23.0702195 | -1.36E-01 | 35290612  | 35290735  | NC_000017.10 |
| cg08155908 | 1.36E-13 | 5.95E-15 | -8.47 | 23.065359  | -1.40E-01 | 50717778  | 50717901  | NC_000019.9  |

|            |          |          |       |            |           |           |           |              |
|------------|----------|----------|-------|------------|-----------|-----------|-----------|--------------|
| cg25676471 | 1.36E-13 | 5.95E-15 | -8.47 | 23.0643431 | -1.88E-01 | 39633497  | 39633620  | NC_000022.10 |
| cg25529535 | 1.36E-13 | 5.97E-15 | -8.47 | 23.0622068 | -1.22E-01 | 6125715   | 6125838   | NC_000010.10 |
| cg17865265 | 1.36E-13 | 5.98E-15 | -8.47 | 23.0598102 | -1.73E-01 | 56236845  | 56236968  | NC_000012.11 |
| cg27187375 | 1.37E-13 | 5.99E-15 | -8.47 | 23.0579657 | -1.82E-01 | 155912569 | 155912692 | NC_000001.10 |
| cg17804071 | 1.37E-13 | 5.99E-15 | -8.47 | 23.0575059 | -2.22E-01 | 73596205  | 73596328  | NC_000003.11 |
| cg09209510 | 1.37E-13 | 6.00E-15 | -8.47 | 23.0566927 | -1.61E-01 | 100288389 | 100288512 | NC_000014.8  |
| cg14488592 | 1.37E-13 | 6.01E-15 | -8.47 | 23.0544847 | -9.99E-02 | 139125903 | 139126026 | NC_000005.9  |
| cg09747827 | 1.37E-13 | 6.02E-15 | -8.47 | 23.053237  | -6.07E-02 | 128181313 | 128181436 | NC_000002.11 |
| cg16398956 | 1.37E-13 | 6.02E-15 | -8.47 | 23.052881  | -1.91E-01 | 100212958 | 100213081 | NC_000014.8  |
| cg09529655 | 1.37E-13 | 6.03E-15 | -8.47 | 23.0514015 | -3.76E-02 | 10052896  | 10053019  | NC_000003.11 |
| cg03687765 | 1.37E-13 | 6.03E-15 | -8.47 | 23.0512403 | -1.13E-01 | 43867041  | 43867164  | NC_000010.10 |
| cg07843576 | 1.38E-13 | 6.04E-15 | -8.46 | 23.0500603 | -1.58E-01 | 85881375  | 85881498  | NC_000016.9  |
| cg19687075 | 1.38E-13 | 6.06E-15 | -8.46 | 23.0472208 | -1.75E-01 | 139428384 | 139428507 | NC_000009.11 |
| cg15519786 | 1.38E-13 | 6.06E-15 | -8.46 | 23.046112  | -1.61E-01 | 3266440   | 3266563   | NC_000001.10 |
| cg21922731 | 1.39E-13 | 6.09E-15 | -8.46 | 23.0425993 | -1.09E-01 | 57157130  | 57157253  | NC_000012.11 |
| cg12691620 | 1.39E-13 | 6.09E-15 | -8.46 | 23.041629  | -1.19E-01 | 53152081  | 53152204  | NC_000001.10 |
| cg02284982 | 1.39E-13 | 6.10E-15 | -8.46 | 23.0404874 | -4.89E-02 | 128145269 | 128145392 | NC_000002.11 |
| cg27195421 | 1.39E-13 | 6.10E-15 | -8.46 | 23.0399163 | -1.59E-01 | 62685785  | 62685908  | NC_000012.11 |
| cg18973863 | 1.39E-13 | 6.11E-15 | -8.46 | 23.0386204 | -1.21E-01 | 97794113  | 97794236  | NC_000013.10 |
| cg25683744 | 1.39E-13 | 6.12E-15 | -8.46 | 23.0361988 | -1.66E-01 | 681324    | 681447    | NC_000012.11 |
| cg02675173 | 1.39E-13 | 6.13E-15 | -8.46 | 23.0359629 | -1.95E-01 | 99738789  | 99738912  | NC_000008.10 |
| cg14043316 | 1.40E-13 | 6.16E-15 | -8.46 | 23.0301146 | -1.36E-01 | 50743420  | 50743543  | NC_000022.10 |
| cg03940776 | 1.40E-13 | 6.16E-15 | -8.46 | 23.0300303 | -1.03E-01 | 158490013 | 158490136 | NC_000006.11 |
| cg10376286 | 1.40E-13 | 6.17E-15 | -8.46 | 23.029064  | -1.50E-01 | 116710606 | 116710729 | NC_000001.10 |
| cg12486493 | 1.41E-13 | 6.17E-15 | -8.46 | 23.0282821 | -2.12E-01 | 99417267  | 99417390  | NC_000015.9  |

|                |          |          |       |            |           |           |           |              |
|----------------|----------|----------|-------|------------|-----------|-----------|-----------|--------------|
| cg06069616     | 1.42E-13 | 6.23E-15 | -8.46 | 23.0194572 | -1.04E-01 | 33783773  | 33783896  | NC_000021.8  |
| cg27601906     | 1.42E-13 | 6.24E-15 | -8.46 | 23.0172716 | -1.89E-01 | 95271635  | 95271758  | NC_000008.10 |
| cg23440331     | 1.42E-13 | 6.26E-15 | -8.46 | 23.0153025 | -8.50E-02 | 101917981 | 101918104 | NC_000011.9  |
| cg07016556     | 1.42E-13 | 6.26E-15 | -8.46 | 23.0152014 | -1.50E-01 | 79393532  | 79393655  | NC_000017.10 |
| cg09138430     | 1.42E-13 | 6.26E-15 | -8.46 | 23.0151218 | -6.84E-02 | 44084267  | 44084390  | NC_000007.13 |
| cg19414708     | 1.43E-13 | 6.27E-15 | -8.46 | 23.0125689 | -7.84E-02 | 58163924  | 58164047  | NC_000003.11 |
| ch.9.1241711R  | 1.43E-13 | 6.28E-15 | -8.46 | 23.0118809 | -3.72E-02 | 91968142  | 91968265  | NC_000009.11 |
| cg19187564     | 1.43E-13 | 6.28E-15 | -8.46 | 23.0114055 | -8.47E-02 | 42133492  | 42133615  | NC_000019.9  |
| cg03292149     | 1.43E-13 | 6.30E-15 | -8.46 | 23.0082825 | -2.07E-01 | 45279765  | 45279888  | NC_000019.9  |
| cg14195059     | 1.43E-13 | 6.31E-15 | -8.46 | 23.0068269 | -1.20E-01 | 43594617  | 43594740  | NC_000015.9  |
| ch.6.614588F   | 1.44E-13 | 6.32E-15 | -8.46 | 23.0048441 | -6.42E-02 | 24874614  | 24874737  | NC_000006.11 |
| cg22700854     | 1.45E-13 | 6.36E-15 | -8.46 | 22.9983421 | -8.20E-02 | 79859932  | 79860055  | NC_000017.10 |
| cg11536940     | 1.45E-13 | 6.37E-15 | -8.46 | 22.9974325 | -1.01E-01 | 97658076  | 97658199  | NC_000008.10 |
| cg19008371     | 1.45E-13 | 6.38E-15 | -8.46 | 22.996104  | -1.83E-01 | 126226766 | 126226889 | NC_000011.9  |
| cg23431175     | 1.45E-13 | 6.39E-15 | -8.46 | 22.9947234 | -8.22E-02 | 31846813  | 31846936  | NC_000006.11 |
| cg11192808     | 1.45E-13 | 6.40E-15 | -8.46 | 22.9933002 | -5.78E-02 | 101170185 | 101170308 | NC_000008.10 |
| cg22749173     | 1.45E-13 | 6.40E-15 | -8.46 | 22.9926342 | -1.11E-01 | 2614039   | 2614162   | NC_000019.9  |
| cg05238069     | 1.45E-13 | 6.41E-15 | -8.46 | 22.991933  | -9.45E-02 | 16257135  | 16257258  | NC_000017.10 |
| cg02687883     | 1.46E-13 | 6.41E-15 | -8.46 | 22.9911821 | -1.44E-01 | 2266431   | 2266554   | NC_000001.10 |
| ch.11.1435292F | 1.46E-13 | 6.41E-15 | -8.46 | 22.990558  | -4.72E-02 | 68685684  | 68685807  | NC_000011.9  |
| cg09444426     | 1.46E-13 | 6.45E-15 | -8.45 | 22.9855478 | -1.49E-01 | 160518    | 160641    | NC_000005.9  |
| cg08767936     | 1.47E-13 | 6.46E-15 | -8.45 | 22.9840138 | -1.85E-01 | 195600608 | 195600731 | NC_000003.11 |
| cg16583315     | 1.47E-13 | 6.46E-15 | -8.45 | 22.9831457 | -1.26E-01 | 65563665  | 65563788  | NC_000014.8  |
| cg14616574     | 1.47E-13 | 6.47E-15 | -8.45 | 22.9824078 | -1.28E-01 | 127175638 | 127175761 | NC_000003.11 |
| cg18563987     | 1.47E-13 | 6.47E-15 | -8.45 | 22.9822675 | -1.91E-01 | 73696509  | 73696632  | NC_000017.10 |

|                 |          |          |       |            |           |           |           |              |
|-----------------|----------|----------|-------|------------|-----------|-----------|-----------|--------------|
| cg05206840      | 1.47E-13 | 6.47E-15 | -8.45 | 22.9819671 | -1.09E-01 | 38695848  | 38695971  | NC_000005.9  |
| ch.19.21460585R | 1.47E-13 | 6.48E-15 | -8.45 | 22.9803433 | -1.41E-01 | 21668745  | 21668868  | NC_000019.9  |
| cg26248460      | 1.48E-13 | 6.50E-15 | -8.45 | 22.977129  | -1.35E-01 | 229757677 | 229757800 | NC_000001.10 |
| cg13061767      | 1.48E-13 | 6.50E-15 | -8.45 | 22.9767996 | -1.93E-01 | 205418410 | 205418533 | NC_000001.10 |
| cg27391403      | 1.48E-13 | 6.50E-15 | -8.45 | 22.9767479 | -1.14E-01 | 113416621 | 113416744 | NC_000013.10 |
| cg13898106      | 1.48E-13 | 6.51E-15 | -8.45 | 22.9756396 | -8.47E-02 | 117665142 | 117665265 | NC_000001.10 |
| cg24553862      | 1.48E-13 | 6.52E-15 | -8.45 | 22.9750942 | -2.07E-01 | 176238150 | 176238273 | NC_000002.11 |
| cg11515215      | 1.48E-13 | 6.52E-15 | -8.45 | 22.9743945 | -1.14E-01 | 29698152  | 29698275  | NC_000010.10 |
| cg07564690      | 1.48E-13 | 6.52E-15 | -8.45 | 22.974242  | -2.22E-01 | 32597733  | 32597856  | NC_000014.8  |
| cg00325491      | 1.48E-13 | 6.55E-15 | -8.45 | 22.9705472 | -1.81E-01 | 93286170  | 93286293  | NC_000011.9  |
| cg10735319      | 1.49E-13 | 6.55E-15 | -8.45 | 22.9696756 | -6.20E-02 | 65121324  | 65121447  | NC_000014.8  |
| cg22758846      | 1.49E-13 | 6.57E-15 | -8.45 | 22.9671501 | -1.73E-01 | 30869112  | 30869235  | NC_000022.10 |
| cg07613278      | 1.49E-13 | 6.57E-15 | -8.45 | 22.967047  | -6.73E-02 | 43333327  | 43333450  | NC_000011.9  |
| cg13931250      | 1.49E-13 | 6.57E-15 | -8.45 | 22.966514  | -2.05E-01 | 179777372 | 179777495 | NC_000001.10 |
| cg12475590      | 1.49E-13 | 6.57E-15 | -8.45 | 22.9662381 | -2.09E-01 | 21288062  | 21288185  | NC_000013.10 |
| cg14290210      | 1.49E-13 | 6.58E-15 | -8.45 | 22.9659011 | -1.89E-01 | 41162942  | 41163065  | NC_000004.11 |
| ch.7.2968824F   | 1.49E-13 | 6.59E-15 | -8.45 | 22.9636826 | -9.01E-02 | 141329506 | 141329629 | NC_000007.13 |
| cg11815984      | 1.50E-13 | 6.61E-15 | -8.45 | 22.9604292 | -1.65E-01 | 158921186 | 158921309 | NC_000006.11 |
| cg04064998      | 1.50E-13 | 6.61E-15 | -8.45 | 22.960277  | -1.68E-01 | 109786133 | 109786256 | NC_000011.9  |
| cg19741077      | 1.50E-13 | 6.63E-15 | -8.45 | 22.9586302 | -5.96E-02 | 74306995  | 74307118  | NC_000007.13 |
| ch.13.1149345F  | 1.50E-13 | 6.63E-15 | -8.45 | 22.9574995 | -5.46E-02 | 78085182  | 78085305  | NC_000013.10 |
| cg00284420      | 1.51E-13 | 6.65E-15 | -8.45 | 22.9546651 | -2.49E-01 | 87311948  | 87312071  | NC_000016.9  |
| cg20794273      | 1.51E-13 | 6.65E-15 | -8.45 | 22.954444  | -7.24E-02 | 21059215  | 21059338  | NC_000001.10 |
| cg02640572      | 1.51E-13 | 6.67E-15 | -8.45 | 22.9520523 | -8.43E-02 | 30075788  | 30075911  | NC_000016.9  |
| cg01430385      | 1.51E-13 | 6.68E-15 | -8.45 | 22.9511418 | -1.63E-01 | 1033349   | 1033472   | NC_000010.10 |

|                |          |          |       |            |           |           |           |              |
|----------------|----------|----------|-------|------------|-----------|-----------|-----------|--------------|
| cg10864680     | 1.51E-13 | 6.69E-15 | -8.45 | 22.9486328 | -1.22E-01 | 108922274 | 108922397 | NC_000013.10 |
| cg15497006     | 1.51E-13 | 6.69E-15 | -8.45 | 22.9485053 | -1.85E-01 | 27147585  | 27147708  | NC_000001.10 |
| cg06324094     | 1.51E-13 | 6.69E-15 | -8.45 | 22.9484039 | -6.36E-02 | 153950482 | 153950605 | NC_000001.10 |
| cg15668538     | 1.52E-13 | 6.70E-15 | -8.45 | 22.9474521 | -1.63E-01 | 15931082  | 15931205  | NC_000017.10 |
| cg00887848     | 1.52E-13 | 6.74E-15 | -8.45 | 22.9419666 | -1.47E-01 | 3482507   | 3482630   | NC_000004.11 |
| cg07477282     | 1.52E-13 | 6.74E-15 | -8.45 | 22.941737  | -1.04E-01 | 44956107  | 44956230  | NC_000015.9  |
| ch.8.314562F   | 1.52E-13 | 6.74E-15 | -8.45 | 22.9415212 | -2.24E-02 | 11693785  | 11693908  | NC_000008.10 |
| cg19407392     | 1.53E-13 | 6.77E-15 | -8.45 | 22.9378335 | -1.52E-01 | 4665569   | 4665692   | NC_000020.10 |
| cg09668344     | 1.53E-13 | 6.77E-15 | -8.45 | 22.9370174 | -1.82E-01 | 77122506  | 77122629  | NC_000011.9  |
| cg04169483     | 1.53E-13 | 6.77E-15 | -8.45 | 22.9367106 | -1.53E-01 | 144965509 | 144965632 | NC_000008.10 |
| cg23003085     | 1.53E-13 | 6.78E-15 | -8.45 | 22.9353367 | -9.97E-02 | 64084321  | 64084444  | NC_000011.9  |
| cg19484761     | 1.54E-13 | 6.80E-15 | -8.45 | 22.9326446 | -8.41E-02 | 66511804  | 66511927  | NC_000011.9  |
| cg13686799     | 1.54E-13 | 6.81E-15 | -8.45 | 22.9315784 | -6.18E-02 | 60524194  | 60524317  | NC_000011.9  |
| cg25450266     | 1.54E-13 | 6.81E-15 | -8.45 | 22.9309217 | -2.45E-01 | 35494294  | 35494417  | NC_000019.9  |
| cg26734620     | 1.54E-13 | 6.82E-15 | -8.45 | 22.9305104 | -7.27E-02 | 56694298  | 56694421  | NC_000012.11 |
| cg26493306     | 1.54E-13 | 6.83E-15 | -8.45 | 22.9284088 | -1.64E-01 | 134463458 | 134463581 | NC_000005.9  |
| cg27056436     | 1.54E-13 | 6.83E-15 | -8.45 | 22.9281415 | -7.09E-02 | 5569463   | 5569586   | NC_000007.13 |
| cg09907068     | 1.54E-13 | 6.83E-15 | -8.45 | 22.9279345 | -2.27E-01 | 197159060 | 197159183 | NC_000002.11 |
| cg17081063     | 1.54E-13 | 6.84E-15 | -8.45 | 22.927752  | -1.77E-02 | 113161994 | 113162117 | NC_000001.10 |
| ch.10.2563868F | 1.55E-13 | 6.84E-15 | -8.45 | 22.9272768 | -1.08E-01 | 121344024 | 121344147 | NC_000010.10 |
| cg06968912     | 1.55E-13 | 6.84E-15 | -8.45 | 22.9269032 | -2.15E-01 | 40573643  | 40573766  | NC_000017.10 |
| cg00483217     | 1.55E-13 | 6.85E-15 | -8.44 | 22.926235  | -1.66E-01 | 25321917  | 25322040  | NC_000002.11 |
| cg17934470     | 1.55E-13 | 6.86E-15 | -8.44 | 22.9243796 | -1.99E-01 | 49959703  | 49959826  | NC_000005.9  |
| cg24437104     | 1.55E-13 | 6.87E-15 | -8.44 | 22.9223713 | -1.23E-01 | 227951794 | 227951917 | NC_000001.10 |
| cg09272225     | 1.56E-13 | 6.89E-15 | -8.44 | 22.9192841 | -1.98E-01 | 101519794 | 101519917 | NC_000002.11 |



|            |          |          |       |            |           |           |           |              |
|------------|----------|----------|-------|------------|-----------|-----------|-----------|--------------|
| cg01032675 | 1.56E-13 | 6.92E-15 | -8.44 | 22.9160752 | -1.23E-01 | 3136430   | 3136553   | NC_000019.9  |
| cg02819734 | 1.57E-13 | 6.94E-15 | -8.44 | 22.9121719 | -1.67E-01 | 3610582   | 3610705   | NC_000016.9  |
| cg00425213 | 1.57E-13 | 6.96E-15 | -8.44 | 22.9103257 | -1.63E-01 | 6446095   | 6446218   | NC_000001.10 |
| cg05091736 | 1.57E-13 | 6.97E-15 | -8.44 | 22.9082765 | -1.65E-01 | 14942129  | 14942252  | NC_000017.10 |
| cg00013804 | 1.58E-13 | 7.00E-15 | -8.44 | 22.904696  | -1.45E-01 | 9358577   | 9358700   | NC_000002.11 |
| cg00206063 | 1.58E-13 | 7.00E-15 | -8.44 | 22.9044844 | -1.97E-01 | 3805252   | 3805375   | NC_000010.10 |
| cg18560776 | 1.58E-13 | 7.02E-15 | -8.44 | 22.9011976 | -6.11E-02 | 18884508  | 18884631  | NC_000001.10 |
| cg04275806 | 1.60E-13 | 7.09E-15 | -8.44 | 22.8910304 | -1.32E-01 | 46999248  | 46999371  | NC_000001.10 |
| cg03248158 | 1.60E-13 | 7.10E-15 | -8.44 | 22.8899963 | -1.11E-01 | 122632918 | 122633041 | NC_000004.11 |
| cg14663914 | 1.61E-13 | 7.14E-15 | -8.44 | 22.8845762 | -1.06E-01 | 827739    | 827862    | NC_000019.9  |
| cg07637365 | 1.61E-13 | 7.14E-15 | -8.44 | 22.8844152 | -3.03E-02 | 160568836 | 160568959 | NC_000002.11 |
| cg04874562 | 1.61E-13 | 7.15E-15 | -8.44 | 22.8839585 | -1.42E-01 | 5462540   | 5462663   | NC_000011.9  |
| cg24696728 | 1.61E-13 | 7.15E-15 | -8.44 | 22.8830195 | -1.39E-01 | 1052717   | 1052840   | NC_000004.11 |
| cg08026735 | 1.61E-13 | 7.15E-15 | -8.44 | 22.8829943 | -1.29E-01 | 98703888  | 98704011  | NC_000002.11 |
| cg09305680 | 1.61E-13 | 7.16E-15 | -8.44 | 22.8821222 | -1.43E-01 | 117778069 | 117778192 | NC_000008.10 |
| cg03328299 | 1.62E-13 | 7.17E-15 | -8.44 | 22.8800767 | -1.49E-01 | 74281983  | 74282106  | NC_000015.9  |
| cg05820491 | 1.62E-13 | 7.17E-15 | -8.44 | 22.8799132 | -1.44E-01 | 35169594  | 35169717  | NC_000020.10 |
| cg06489653 | 1.62E-13 | 7.18E-15 | -8.44 | 22.8798232 | -4.76E-02 | 99061716  | 99061839  | NC_000002.11 |
| cg13155421 | 1.62E-13 | 7.19E-15 | -8.44 | 22.8777696 | -1.86E-01 | 105717036 | 105717159 | NC_000003.11 |
| cg13323097 | 1.62E-13 | 7.20E-15 | -8.44 | 22.8770909 | -6.37E-02 | 205649211 | 205649334 | NC_000001.10 |
| cg00287773 | 1.62E-13 | 7.21E-15 | -8.44 | 22.8757426 | -1.81E-01 | 139594619 | 139594742 | NC_000005.9  |
| cg04346283 | 1.62E-13 | 7.21E-15 | -8.44 | 22.8749021 | -1.64E-01 | 82459454  | 82459577  | NC_000006.11 |
| cg19759788 | 1.63E-13 | 7.24E-15 | -8.44 | 22.8708512 | -1.31E-01 | 16084493  | 16084616  | NC_000001.10 |
| cg09294739 | 1.64E-13 | 7.26E-15 | -8.44 | 22.8678824 | -1.77E-01 | 55218782  | 55218905  | NC_000016.9  |
| cg08233218 | 1.64E-13 | 7.30E-15 | -8.43 | 22.8634554 | -1.21E-01 | 19823125  | 19823248  | NC_000001.10 |

|            |          |          |       |            |           |           |           |              |
|------------|----------|----------|-------|------------|-----------|-----------|-----------|--------------|
| cg26688257 | 1.64E-13 | 7.30E-15 | -8.43 | 22.8628559 | -5.08E-02 | 17763961  | 17764084  | NC_000001.10 |
| cg26472938 | 1.64E-13 | 7.30E-15 | -8.43 | 22.8624249 | -1.69E-01 | 238394205 | 238394328 | NC_000002.11 |
| cg14450231 | 1.64E-13 | 7.30E-15 | -8.43 | 22.86228   | -5.33E-02 | 172199425 | 172199548 | NC_000005.9  |
| cg01117627 | 1.64E-13 | 7.31E-15 | -8.43 | 22.8620597 | -5.46E-02 | 100150713 | 100150836 | NC_000014.8  |
| cg22727641 | 1.64E-13 | 7.31E-15 | -8.43 | 22.8618059 | -8.92E-02 | 101157742 | 101157865 | NC_000008.10 |
| cg26469387 | 1.65E-13 | 7.32E-15 | -8.43 | 22.8599648 | -2.16E-01 | 31846670  | 31846793  | NC_000015.9  |
| cg25974476 | 1.65E-13 | 7.33E-15 | -8.43 | 22.8584122 | -6.47E-02 | 65447451  | 65447574  | NC_000007.13 |
| cg07744502 | 1.65E-13 | 7.35E-15 | -8.43 | 22.8559936 | -1.22E-01 | 93271083  | 93271206  | NC_000011.9  |
| cg11447551 | 1.66E-13 | 7.36E-15 | -8.43 | 22.8549144 | -1.35E-01 | 232552014 | 232552137 | NC_000002.11 |
| cg11532182 | 1.66E-13 | 7.37E-15 | -8.43 | 22.8536803 | -1.05E-01 | 834669    | 834792    | NC_000007.13 |
| cg00751072 | 1.66E-13 | 7.37E-15 | -8.43 | 22.8532467 | -9.53E-02 | 18529121  | 18529244  | NC_000019.9  |
| cg08479629 | 1.66E-13 | 7.38E-15 | -8.43 | 22.8520645 | -1.48E-01 | 19387323  | 19387446  | NC_000002.11 |
| cg16928487 | 1.66E-13 | 7.39E-15 | -8.43 | 22.8513729 | -1.58E-01 | 17741425  | 17741548  | NC_000017.10 |
| cg15914463 | 1.67E-13 | 7.41E-15 | -8.43 | 22.8486374 | -4.07E-02 | 62860103  | 62860226  | NC_000003.11 |
| cg09981432 | 1.67E-13 | 7.41E-15 | -8.43 | 22.8482661 | -1.82E-01 | 118614378 | 118614501 | NC_000002.11 |
| cg13535903 | 1.67E-13 | 7.41E-15 | -8.43 | 22.8482426 | -1.50E-01 | 197094201 | 197094324 | NC_000003.11 |
| cg03401997 | 1.67E-13 | 7.44E-15 | -8.43 | 22.8446488 | -4.83E-02 | 104583071 | 104583194 | NC_000014.8  |
| cg05204123 | 1.67E-13 | 7.44E-15 | -8.43 | 22.8445151 | -1.52E-01 | 1613017   | 1613140   | NC_000017.10 |
| cg20890989 | 1.67E-13 | 7.44E-15 | -8.43 | 22.8441871 | -2.08E-01 | 223574238 | 223574361 | NC_000002.11 |
| cg08970083 | 1.67E-13 | 7.45E-15 | -8.43 | 22.8432636 | -4.85E-02 | 184871070 | 184871193 | NC_000003.11 |
| cg13457496 | 1.67E-13 | 7.45E-15 | -8.43 | 22.8422937 | -2.22E-01 | 2609648   | 2609771   | NC_000007.13 |
| cg01276169 | 1.68E-13 | 7.48E-15 | -8.43 | 22.8383948 | -1.18E-01 | 57569898  | 57570021  | NC_000012.11 |
| cg14429381 | 1.68E-13 | 7.49E-15 | -8.43 | 22.8369712 | -1.57E-01 | 103342099 | 103342222 | NC_000009.11 |
| cg13830835 | 1.69E-13 | 7.53E-15 | -8.43 | 22.8326186 | -7.62E-02 | 140301825 | 140301948 | NC_000009.11 |
| cg09135399 | 1.69E-13 | 7.54E-15 | -8.43 | 22.8302996 | -1.51E-01 | 39493114  | 39493237  | NC_000022.10 |

|               |          |          |       |            |           |           |           |              |
|---------------|----------|----------|-------|------------|-----------|-----------|-----------|--------------|
| cg10284310    | 1.70E-13 | 7.58E-15 | -8.43 | 22.8251994 | -1.92E-01 | 12108679  | 12108802  | NC_000011.9  |
| cg10300814    | 1.71E-13 | 7.63E-15 | -8.43 | 22.819164  | -1.33E-01 | 35565116  | 35565239  | NC_000006.11 |
| cg04519626    | 1.71E-13 | 7.63E-15 | -8.43 | 22.8189143 | -1.35E-01 | 3208493   | 3208616   | NC_000007.13 |
| cg06599949    | 1.72E-13 | 7.65E-15 | -8.43 | 22.8159648 | -1.34E-01 | 6389055   | 6389178   | NC_000012.11 |
| cg05317714    | 1.72E-13 | 7.66E-15 | -8.43 | 22.8149133 | -1.41E-01 | 145698116 | 145698239 | NC_000008.10 |
| cg17295666    | 1.72E-13 | 7.67E-15 | -8.43 | 22.8139544 | -8.12E-02 | 3140861   | 3140984   | NC_000020.10 |
| cg02375320    | 1.72E-13 | 7.67E-15 | -8.43 | 22.8138741 | -9.37E-02 | 38978881  | 38979004  | NC_000002.11 |
| cg11537355    | 1.72E-13 | 7.67E-15 | -8.43 | 22.8136698 | -2.04E-01 | 154473324 | 154473447 | NC_000007.13 |
| cg25350872    | 1.73E-13 | 7.71E-15 | -8.43 | 22.809156  | -1.67E-01 | 158816149 | 158816272 | NC_000007.13 |
| cg14583406    | 1.73E-13 | 7.72E-15 | -8.43 | 22.8074479 | -1.70E-01 | 9248024   | 9248147   | NC_000002.11 |
| cg21572731    | 1.73E-13 | 7.73E-15 | -8.43 | 22.8068172 | -7.76E-02 | 111804981 | 111805104 | NC_000003.11 |
| cg03379131    | 1.73E-13 | 7.74E-15 | -8.43 | 22.805237  | -4.94E-02 | 155024281 | 155024404 | NC_000001.10 |
| cg27077228    | 1.74E-13 | 7.75E-15 | -8.43 | 22.804304  | -6.73E-02 | 67236780  | 67236903  | NC_000011.9  |
| cg12438392    | 1.74E-13 | 7.75E-15 | -8.43 | 22.8034928 | -5.53E-02 | 122513569 | 122513692 | NC_000002.11 |
| cg12897502    | 1.74E-13 | 7.76E-15 | -8.42 | 22.8018932 | -1.71E-01 | 67425316  | 67425439  | NC_000008.10 |
| cg14424963    | 1.74E-13 | 7.77E-15 | -8.42 | 22.800994  | -1.75E-01 | 139472899 | 139473022 | NC_000009.11 |
| cg17500202    | 1.74E-13 | 7.78E-15 | -8.42 | 22.7994741 | -1.48E-01 | 241722099 | 241722222 | NC_000002.11 |
| cg15903562    | 1.75E-13 | 7.79E-15 | -8.42 | 22.7980323 | -1.98E-01 | 204407794 | 204407917 | NC_000001.10 |
| cg03294491    | 1.75E-13 | 7.80E-15 | -8.42 | 22.7972338 | -1.73E-01 | 45458243  | 45458366  | NC_000018.9  |
| cg25242729    | 1.75E-13 | 7.81E-15 | -8.42 | 22.7963104 | -1.40E-01 | 63854047  | 63854170  | NC_000011.9  |
| cg04245540    | 1.75E-13 | 7.81E-15 | -8.42 | 22.7962472 | -1.53E-01 | 55148534  | 55148657  | NC_000005.9  |
| cg09859293    | 1.75E-13 | 7.82E-15 | -8.42 | 22.7944244 | -8.27E-02 | 3605851   | 3605974   | NC_000002.11 |
| cg13180375    | 1.75E-13 | 7.83E-15 | -8.42 | 22.7941959 | -1.22E-01 | 22298119  | 22298242  | NC_000008.10 |
| cg27541349    | 1.75E-13 | 7.83E-15 | -8.42 | 22.7939048 | -4.90E-02 | 6296337   | 6296460   | NC_000001.10 |
| ch.1.4707864F | 1.76E-13 | 7.84E-15 | -8.42 | 22.7924149 | -6.50E-02 | 237351020 | 237351143 | NC_000001.10 |

|                |          |          |       |            |           |           |           |              |
|----------------|----------|----------|-------|------------|-----------|-----------|-----------|--------------|
| cg15050051     | 1.76E-13 | 7.85E-15 | -8.42 | 22.7913526 | -1.65E-01 | 1782000   | 1782123   | NC_000007.13 |
| cg02856688     | 1.76E-13 | 7.86E-15 | -8.42 | 22.7900389 | -1.76E-01 | 2266542   | 2266665   | NC_000019.9  |
| cg20012607     | 1.76E-13 | 7.87E-15 | -8.42 | 22.7882626 | -1.42E-01 | 100085455 | 100085578 | NC_000013.10 |
| cg12299829     | 1.77E-13 | 7.90E-15 | -8.42 | 22.7844949 | -6.60E-02 | 24742324  | 24742447  | NC_000001.10 |
| cg23717764     | 1.77E-13 | 7.91E-15 | -8.42 | 22.7838784 | -1.04E-01 | 12526205  | 12526328  | NC_000008.10 |
| cg18089380     | 1.77E-13 | 7.91E-15 | -8.42 | 22.783513  | -1.55E-01 | 55232663  | 55232786  | NC_000003.11 |
| cg10036402     | 1.78E-13 | 7.94E-15 | -8.42 | 22.7802414 | -8.12E-02 | 77787255  | 77787378  | NC_000014.8  |
| cg24180759     | 1.78E-13 | 7.94E-15 | -8.42 | 22.7799903 | -1.81E-01 | 167551234 | 167551357 | NC_000005.9  |
| cg10349874     | 1.78E-13 | 7.95E-15 | -8.42 | 22.7787682 | -1.16E-01 | 420996    | 421119    | NC_000016.9  |
| cg10593047     | 1.78E-13 | 7.95E-15 | -8.42 | 22.7787196 | -1.66E-01 | 232526667 | 232526790 | NC_000002.11 |
| cg18463595     | 1.80E-13 | 8.04E-15 | -8.42 | 22.7674946 | -1.18E-01 | 105222699 | 105222822 | NC_000007.13 |
| cg10632328     | 1.80E-13 | 8.05E-15 | -8.42 | 22.7665014 | -8.83E-02 | 78389079  | 78389202  | NC_000017.10 |
| cg07483989     | 1.81E-13 | 8.09E-15 | -8.42 | 22.7617692 | -1.33E-01 | 33751159  | 33751282  | NC_000009.11 |
| cg06573644     | 1.81E-13 | 8.11E-15 | -8.42 | 22.7594198 | -3.46E-02 | 12329101  | 12329224  | NC_000003.11 |
| ch.3.44023473F | 1.82E-13 | 8.12E-15 | -8.42 | 22.7573725 | -6.57E-02 | 44048469  | 44048592  | NC_000003.11 |
| cg17561241     | 1.82E-13 | 8.12E-15 | -8.42 | 22.7573411 | -8.65E-02 | 54070294  | 54070417  | NC_000012.11 |
| cg08594888     | 1.82E-13 | 8.13E-15 | -8.42 | 22.7570507 | -1.84E-01 | 53183773  | 53183896  | NC_000012.11 |
| cg06366789     | 1.82E-13 | 8.13E-15 | -8.42 | 22.756071  | -1.52E-01 | 100486596 | 100486719 | NC_000013.10 |
| ch.5.3491617R  | 1.83E-13 | 8.19E-15 | -8.42 | 22.7495465 | -4.48E-02 | 179142161 | 179142284 | NC_000005.9  |
| cg26370729     | 1.83E-13 | 8.20E-15 | -8.42 | 22.7474064 | -9.07E-02 | 76115672  | 76115795  | NC_000005.9  |
| cg27080259     | 1.84E-13 | 8.24E-15 | -8.42 | 22.7428448 | -1.10E-01 | 3087875   | 3087998   | NC_000016.9  |
| cg13513288     | 1.84E-13 | 8.25E-15 | -8.42 | 22.7415486 | -7.33E-02 | 4299830   | 4299953   | NC_000009.11 |
| cg22379436     | 1.84E-13 | 8.25E-15 | -8.42 | 22.7415364 | -1.94E-01 | 73789574  | 73789697  | NC_000003.11 |
| cg00952516     | 1.84E-13 | 8.26E-15 | -8.42 | 22.7412688 | -1.69E-01 | 22573179  | 22573302  | NC_000008.10 |
| cg05467828     | 1.85E-13 | 8.28E-15 | -8.41 | 22.7386656 | -1.91E-01 | 134207130 | 134207253 | NC_000010.10 |

|            |          |          |       |            |           |           |           |              |
|------------|----------|----------|-------|------------|-----------|-----------|-----------|--------------|
| cg05205664 | 1.85E-13 | 8.28E-15 | -8.41 | 22.7385183 | -7.84E-02 | 73694566  | 73694689  | NC_000011.9  |
| cg20954870 | 1.85E-13 | 8.29E-15 | -8.41 | 22.7376595 | -1.84E-01 | 173070254 | 173070377 | NC_000005.9  |
| cg20051772 | 1.85E-13 | 8.29E-15 | -8.41 | 22.7367476 | -1.36E-01 | 56325015  | 56325138  | NC_000012.11 |
| cg04311473 | 1.85E-13 | 8.30E-15 | -8.41 | 22.7360147 | -1.49E-01 | 33686435  | 33686558  | NC_000001.10 |
| cg12642006 | 1.85E-13 | 8.31E-15 | -8.41 | 22.7350051 | -7.46E-02 | 11350118  | 11350241  | NC_000016.9  |
| cg02518216 | 1.86E-13 | 8.32E-15 | -8.41 | 22.7335397 | -1.73E-01 | 106533903 | 106534026 | NC_000012.11 |
| cg17578639 | 1.86E-13 | 8.33E-15 | -8.41 | 22.7325723 | -1.71E-01 | 176862949 | 176863072 | NC_000003.11 |
| cg14911766 | 1.86E-13 | 8.35E-15 | -8.41 | 22.7303942 | -1.70E-01 | 14001633  | 14001756  | NC_000006.11 |
| cg14244402 | 1.87E-13 | 8.36E-15 | -8.41 | 22.7290121 | -1.68E-01 | 130681102 | 130681225 | NC_000009.11 |
| cg23456144 | 1.87E-13 | 8.37E-15 | -8.41 | 22.7279925 | -5.05E-02 | 45496230  | 45496353  | NC_000010.10 |
| cg14131220 | 1.87E-13 | 8.37E-15 | -8.41 | 22.7274889 | -1.46E-01 | 34590742  | 34590865  | NC_000009.11 |
| cg16582517 | 1.88E-13 | 8.44E-15 | -8.41 | 22.7199363 | -1.46E-01 | 5025885   | 5026008   | NC_000003.11 |
| cg04799329 | 1.88E-13 | 8.44E-15 | -8.41 | 22.7190739 | -1.75E-01 | 114881194 | 114881317 | NC_000013.10 |
| cg23181035 | 1.89E-13 | 8.48E-15 | -8.41 | 22.7149729 | -1.41E-01 | 42593016  | 42593139  | NC_000019.9  |
| cg24873592 | 1.89E-13 | 8.49E-15 | -8.41 | 22.7131017 | -1.20E-01 | 32042092  | 32042215  | NC_000001.10 |
| cg04942251 | 1.89E-13 | 8.50E-15 | -8.41 | 22.7124356 | -1.62E-01 | 63687247  | 63687370  | NC_000011.9  |
| cg04737124 | 1.90E-13 | 8.50E-15 | -8.41 | 22.7121893 | -1.85E-01 | 114344988 | 114345111 | NC_000010.10 |
| cg11808228 | 1.90E-13 | 8.52E-15 | -8.41 | 22.7096623 | -6.78E-02 | 202317252 | 202317375 | NC_000002.11 |
| cg16094412 | 1.90E-13 | 8.53E-15 | -8.41 | 22.7094919 | -1.15E-01 | 6266029   | 6266152   | NC_000001.10 |
| cg12366772 | 1.90E-13 | 8.53E-15 | -8.41 | 22.7084997 | -9.76E-02 | 122041891 | 122042014 | NC_000002.11 |
| cg06074534 | 1.91E-13 | 8.56E-15 | -8.41 | 22.7060176 | -2.24E-01 | 85020055  | 85020178  | NC_000016.9  |
| cg25080973 | 1.91E-13 | 8.56E-15 | -8.41 | 22.7057184 | -1.54E-01 | 8743670   | 8743793   | NC_000011.9  |
| cg17969683 | 1.91E-13 | 8.56E-15 | -8.41 | 22.7053287 | -1.80E-01 | 24151514  | 24151637  | NC_000008.10 |
| cg12559827 | 1.91E-13 | 8.60E-15 | -8.41 | 22.7011369 | -2.05E-01 | 73316585  | 73316708  | NC_000002.11 |
| cg00988346 | 1.92E-13 | 8.63E-15 | -8.41 | 22.6974272 | -1.92E-01 | 27729801  | 27729924  | NC_000001.10 |

|               |          |          |       |            |           |           |           |              |
|---------------|----------|----------|-------|------------|-----------|-----------|-----------|--------------|
| cg07241909    | 1.93E-13 | 8.65E-15 | -8.41 | 22.695214  | -1.48E-01 | 17566163  | 17566286  | NC_000011.9  |
| cg25440893    | 1.93E-13 | 8.65E-15 | -8.41 | 22.6949357 | -1.33E-01 | 35091802  | 35091925  | NC_000015.9  |
| cg21229482    | 1.93E-13 | 8.69E-15 | -8.41 | 22.6908981 | -1.23E-01 | 139081755 | 139081878 | NC_000009.11 |
| cg03701795    | 1.94E-13 | 8.70E-15 | -8.41 | 22.6899605 | -8.61E-02 | 158323482 | 158323605 | NC_000001.10 |
| cg01518279    | 1.94E-13 | 8.71E-15 | -8.41 | 22.6883383 | -1.31E-01 | 156401601 | 156401724 | NC_000001.10 |
| cg24296761    | 1.94E-13 | 8.72E-15 | -8.41 | 22.6876925 | -1.78E-01 | 42408458  | 42408581  | NC_000019.9  |
| cg14583999    | 1.94E-13 | 8.74E-15 | -8.41 | 22.68543   | -1.74E-01 | 10019040  | 10019163  | NC_000003.11 |
| cg06472341    | 1.95E-13 | 8.74E-15 | -8.41 | 22.6845519 | -9.73E-02 | 1073641   | 1073764   | NC_000011.9  |
| cg15379400    | 1.95E-13 | 8.76E-15 | -8.41 | 22.6831819 | -1.77E-01 | 38655492  | 38655615  | NC_000017.10 |
| cg17127015    | 1.95E-13 | 8.76E-15 | -8.41 | 22.6825462 | -1.04E-01 | 73050598  | 73050721  | NC_000015.9  |
| cg14793611    | 1.95E-13 | 8.77E-15 | -8.41 | 22.6811865 | -1.39E-01 | 11917683  | 11917806  | NC_000010.10 |
| cg13199615    | 1.96E-13 | 8.79E-15 | -8.4  | 22.6790931 | -7.07E-02 | 155146785 | 155146908 | NC_000001.10 |
| ch.22.569473R | 1.96E-13 | 8.83E-15 | -8.4  | 22.6753161 | -6.60E-02 | 36895405  | 36895528  | NC_000022.10 |
| cg10734044    | 1.96E-13 | 8.83E-15 | -8.4  | 22.6746559 | -1.97E-01 | 16245632  | 16245755  | NC_000003.11 |
| cg10051299    | 1.97E-13 | 8.87E-15 | -8.4  | 22.6706939 | -4.13E-02 | 105780431 | 105780554 | NC_000014.8  |
| cg15466952    | 1.98E-13 | 8.89E-15 | -8.4  | 22.6680391 | -1.81E-01 | 65889855  | 65889978  | NC_000001.10 |
| cg01768814    | 1.98E-13 | 8.91E-15 | -8.4  | 22.6661752 | -2.29E-01 | 65437355  | 65437478  | NC_000017.10 |
| cg12065616    | 1.99E-13 | 8.95E-15 | -8.4  | 22.6613264 | -1.37E-01 | 94954828  | 94954951  | NC_000012.11 |
| cg13001963    | 1.99E-13 | 8.96E-15 | -8.4  | 22.6601565 | -1.61E-01 | 10467973  | 10468096  | NC_000005.9  |
| cg22193726    | 2.00E-13 | 8.98E-15 | -8.4  | 22.6585769 | -9.64E-02 | 112857626 | 112857749 | NC_000012.11 |
| cg09671309    | 2.00E-13 | 9.01E-15 | -8.4  | 22.6547379 | -1.79E-01 | 122158208 | 122158331 | NC_000012.11 |
| cg19554522    | 2.00E-13 | 9.02E-15 | -8.4  | 22.6542507 | -4.81E-02 | 32908359  | 32908482  | NC_000015.9  |
| cg09256716    | 2.01E-13 | 9.03E-15 | -8.4  | 22.6526575 | -1.73E-01 | 70451947  | 70452070  | NC_000017.10 |
| cg07177756    | 2.01E-13 | 9.03E-15 | -8.4  | 22.6523249 | -8.21E-02 | 173836307 | 173836430 | NC_000001.10 |
| cg14174336    | 2.01E-13 | 9.07E-15 | -8.4  | 22.6480429 | -1.69E-01 | 67208654  | 67208777  | NC_000016.9  |

|            |          |          |       |            |           |           |           |              |
|------------|----------|----------|-------|------------|-----------|-----------|-----------|--------------|
| cg02909991 | 2.02E-13 | 9.08E-15 | -8.4  | 22.6476254 | -6.39E-02 | 76127829  | 76127952  | NC_000017.10 |
| cg21330727 | 2.02E-13 | 9.08E-15 | -8.4  | 22.6470778 | -1.87E-01 | 38336206  | 38336329  | NC_000017.10 |
| cg04991639 | 2.02E-13 | 9.09E-15 | -8.4  | 22.6466311 | -1.58E-01 | 25175737  | 25175860  | NC_000001.10 |
| cg03066050 | 2.02E-13 | 9.10E-15 | -8.4  | 22.644705  | -1.75E-01 | 110249749 | 110249872 | NC_000009.11 |
| cg15277914 | 2.02E-13 | 9.11E-15 | -8.4  | 22.6444786 | -1.41E-01 | 154042611 | 154042734 | NC_000003.11 |
| cg21450008 | 2.03E-13 | 9.15E-15 | -8.4  | 22.6395954 | -7.27E-02 | 131028232 | 131028355 | NC_000008.10 |
| cg27121309 | 2.04E-13 | 9.17E-15 | -8.4  | 22.6372682 | -2.02E-01 | 76731589  | 76731712  | NC_000011.9  |
| cg02579668 | 2.04E-13 | 9.18E-15 | -8.4  | 22.6365001 | -1.87E-01 | 28928325  | 28928448  | NC_000001.10 |
| cg03331035 | 2.05E-13 | 9.22E-15 | -8.4  | 22.6325875 | -1.75E-01 | 135813886 | 135814009 | NC_000008.10 |
| cg19676502 | 2.05E-13 | 9.24E-15 | -8.4  | 22.6298524 | -1.99E-01 | 50438151  | 50438274  | NC_000014.8  |
| cg04682845 | 2.05E-13 | 9.25E-15 | -8.4  | 22.628518  | -5.84E-02 | 44904059  | 44904182  | NC_000003.11 |
| cg16393713 | 2.06E-13 | 9.28E-15 | -8.4  | 22.6262333 | -2.08E-01 | 76149509  | 76149632  | NC_000007.13 |
| cg03586240 | 2.06E-13 | 9.31E-15 | -8.4  | 22.622771  | -1.87E-01 | 1966361   | 1966484   | NC_000007.13 |
| cg08090621 | 2.07E-13 | 9.34E-15 | -8.4  | 22.6193544 | -1.82E-01 | 40162374  | 40162497  | NC_000001.10 |
| cg12965095 | 2.07E-13 | 9.35E-15 | -8.4  | 22.6185368 | -1.88E-01 | 18120626  | 18120749  | NC_000019.9  |
| cg09773238 | 2.07E-13 | 9.35E-15 | -8.4  | 22.6181008 | -2.01E-01 | 113424208 | 113424331 | NC_000011.9  |
| cg23907852 | 2.07E-13 | 9.35E-15 | -8.4  | 22.6180949 | -1.27E-01 | 43922244  | 43922367  | NC_000017.10 |
| cg01756899 | 2.07E-13 | 9.35E-15 | -8.4  | 22.6179342 | -1.98E-01 | 1070137   | 1070260   | NC_000016.9  |
| cg21229979 | 2.07E-13 | 9.36E-15 | -8.4  | 22.6177687 | -1.26E-01 | 163746175 | 163746298 | NC_000006.11 |
| cg23138250 | 2.07E-13 | 9.36E-15 | -8.39 | 22.6173464 | -1.47E-01 | 33401870  | 33401993  | NC_000005.9  |
| cg11160572 | 2.08E-13 | 9.37E-15 | -8.39 | 22.6163541 | -1.72E-01 | 169706422 | 169706545 | NC_000004.11 |
| cg17208748 | 2.08E-13 | 9.39E-15 | -8.39 | 22.614026  | -1.41E-01 | 197194394 | 197194517 | NC_000003.11 |
| cg03957109 | 2.08E-13 | 9.41E-15 | -8.39 | 22.6119965 | -1.89E-01 | 60654693  | 60654816  | NC_000015.9  |
| cg20449614 | 2.09E-13 | 9.41E-15 | -8.39 | 22.6118185 | -1.93E-01 | 22438122  | 22438245  | NC_000008.10 |
| cg12684668 | 2.09E-13 | 9.43E-15 | -8.39 | 22.6096689 | -1.84E-01 | 150403466 | 150403589 | NC_000005.9  |

|            |          |          |       |            |           |           |           |              |
|------------|----------|----------|-------|------------|-----------|-----------|-----------|--------------|
| cg24377133 | 2.09E-13 | 9.45E-15 | -8.39 | 22.6078989 | -1.06E-01 | 144170375 | 144170498 | NC_000008.10 |
| cg15726807 | 2.10E-13 | 9.47E-15 | -8.39 | 22.6054643 | -9.83E-02 | 41857198  | 41857321  | NC_000019.9  |
| cg25450482 | 2.10E-13 | 9.49E-15 | -8.39 | 22.6039665 | -6.48E-02 | 34895039  | 34895162  | NC_000019.9  |
| cg20528787 | 2.10E-13 | 9.49E-15 | -8.39 | 22.6039217 | -1.68E-01 | 158032352 | 158032475 | NC_000007.13 |
| cg10662871 | 2.11E-13 | 9.53E-15 | -8.39 | 22.5998753 | -2.55E-02 | 36784627  | 36784750  | NC_000022.10 |
| cg26928080 | 2.12E-13 | 9.58E-15 | -8.39 | 22.5946669 | -8.46E-02 | 95236825  | 95236948  | NC_000014.8  |
| cg15221831 | 2.12E-13 | 9.59E-15 | -8.39 | 22.5937732 | -1.65E-01 | 42408464  | 42408587  | NC_000019.9  |
| cg16336227 | 2.12E-13 | 9.60E-15 | -8.39 | 22.5926079 | -1.95E-01 | 134665178 | 134665301 | NC_000010.10 |
| cg12777588 | 2.13E-13 | 9.61E-15 | -8.39 | 22.5912002 | -1.61E-01 | 4019913   | 4020036   | NC_000007.13 |
| cg26610812 | 2.13E-13 | 9.62E-15 | -8.39 | 22.5905342 | -4.09E-02 | 20716451  | 20716574  | NC_000018.9  |
| cg00506299 | 2.13E-13 | 9.63E-15 | -8.39 | 22.5897131 | -1.47E-01 | 16469127  | 16469250  | NC_000003.11 |
| cg07925311 | 2.14E-13 | 9.66E-15 | -8.39 | 22.5859407 | -1.58E-01 | 57835436  | 57835559  | NC_000016.9  |
| cg05698069 | 2.14E-13 | 9.67E-15 | -8.39 | 22.5852917 | -5.72E-02 | 22436246  | 22436369  | NC_000008.10 |
| cg06297541 | 2.14E-13 | 9.70E-15 | -8.39 | 22.5823742 | -1.25E-01 | 22384949  | 22385072  | NC_000016.9  |
| cg10876928 | 2.15E-13 | 9.71E-15 | -8.39 | 22.581114  | -1.39E-01 | 43977473  | 43977596  | NC_000020.10 |
| cg26389465 | 2.15E-13 | 9.71E-15 | -8.39 | 22.5810804 | -6.54E-02 | 112097071 | 112097194 | NC_000011.9  |
| cg10648763 | 2.15E-13 | 9.71E-15 | -8.39 | 22.5807119 | -1.48E-01 | 135364451 | 135364574 | NC_000005.9  |
| cg15932627 | 2.15E-13 | 9.72E-15 | -8.39 | 22.5802647 | -1.61E-01 | 139048065 | 139048188 | NC_000003.11 |
| cg15718528 | 2.15E-13 | 9.74E-15 | -8.39 | 22.5776287 | -1.87E-01 | 244327251 | 244327374 | NC_000001.10 |
| cg27391982 | 2.16E-13 | 9.76E-15 | -8.39 | 22.5757322 | -1.83E-01 | 76957970  | 76958093  | NC_000013.10 |
| cg12323347 | 2.16E-13 | 9.78E-15 | -8.39 | 22.5743824 | -1.31E-01 | 112256517 | 112256640 | NC_000010.10 |
| cg01132502 | 2.16E-13 | 9.78E-15 | -8.39 | 22.5743595 | -1.42E-01 | 179335607 | 179335730 | NC_000005.9  |
| cg14369648 | 2.16E-13 | 9.78E-15 | -8.39 | 22.5743503 | -2.28E-01 | 33750687  | 33750810  | NC_000009.11 |
| cg16512144 | 2.16E-13 | 9.79E-15 | -8.39 | 22.5726797 | -1.56E-01 | 170458976 | 170459099 | NC_000003.11 |
| cg05582310 | 2.17E-13 | 9.80E-15 | -8.39 | 22.571857  | -2.04E-01 | 5760808   | 5760931   | NC_000004.11 |



|            |          |          |       |            |           |           |           |              |
|------------|----------|----------|-------|------------|-----------|-----------|-----------|--------------|
| cg06655361 | 2.17E-13 | 9.81E-15 | -8.39 | 22.5710402 | -8.44E-02 | 73533561  | 73533684  | NC_000010.10 |
| cg19191454 | 2.17E-13 | 9.82E-15 | -8.39 | 22.5703989 | -2.03E-02 | 102106596 | 102106719 | NC_000010.10 |
| cg22972519 | 2.19E-13 | 9.89E-15 | -8.39 | 22.5625232 | -1.38E-01 | 3438413   | 3438536   | NC_000017.10 |
| cg06768939 | 2.19E-13 | 9.89E-15 | -8.39 | 22.5624135 | -1.65E-01 | 79024447  | 79024570  | NC_000017.10 |
| cg12923215 | 2.19E-13 | 9.90E-15 | -8.39 | 22.5614228 | -3.77E-02 | 32433061  | 32433184  | NC_000003.11 |
| cg00974095 | 2.19E-13 | 9.92E-15 | -8.39 | 22.5603068 | -1.72E-01 | 40154614  | 40154737  | NC_000001.10 |
| cg00581764 | 2.19E-13 | 9.92E-15 | -8.39 | 22.5601675 | -1.63E-01 | 158183853 | 158183976 | NC_000006.11 |
| cg07036991 | 2.19E-13 | 9.93E-15 | -8.39 | 22.5586655 | -1.63E-01 | 59565187  | 59565310  | NC_000014.8  |
| cg24384816 | 2.20E-13 | 9.97E-15 | -8.38 | 22.5547345 | -1.29E-01 | 35972312  | 35972435  | NC_000020.10 |
| cg01027411 | 2.21E-13 | 1.00E-14 | -8.38 | 22.5512226 | -7.48E-02 | 45579986  | 45580109  | NC_000019.9  |
| cg05982757 | 2.21E-13 | 1.00E-14 | -8.38 | 22.549473  | -1.21E-01 | 54427528  | 54427651  | NC_000012.11 |
| cg25340711 | 2.22E-13 | 1.00E-14 | -8.38 | 22.5472192 | -2.29E-01 | 1080611   | 1080734   | NC_000001.10 |
| cg11380624 | 2.22E-13 | 1.01E-14 | -8.38 | 22.5443267 | -1.09E-01 | 56222881  | 56223004  | NC_000012.11 |
| cg17888259 | 2.23E-13 | 1.01E-14 | -8.38 | 22.5438823 | -1.92E-01 | 179557662 | 179557785 | NC_000001.10 |
| cg17353057 | 2.23E-13 | 1.01E-14 | -8.38 | 22.5420685 | -1.05E-01 | 46294185  | 46294308  | NC_000021.8  |
| cg14606256 | 2.23E-13 | 1.01E-14 | -8.38 | 22.5418255 | -1.25E-01 | 54132568  | 54132691  | NC_000012.11 |
| cg07540983 | 2.23E-13 | 1.01E-14 | -8.38 | 22.5408338 | -5.97E-02 | 117857297 | 117857420 | NC_000011.9  |
| cg24155129 | 2.23E-13 | 1.01E-14 | -8.38 | 22.5391488 | -4.27E-02 | 153505790 | 153505913 | NC_000001.10 |
| cg01028163 | 2.24E-13 | 1.01E-14 | -8.38 | 22.5383179 | -9.52E-02 | 19894948  | 19895071  | NC_000016.9  |
| cg14405137 | 2.24E-13 | 1.01E-14 | -8.38 | 22.5382141 | -1.98E-01 | 50219283  | 50219406  | NC_000012.11 |
| cg08454015 | 2.24E-13 | 1.02E-14 | -8.38 | 22.5367749 | -1.87E-01 | 240078452 | 240078575 | NC_000001.10 |
| cg23413349 | 2.25E-13 | 1.02E-14 | -8.38 | 22.5335438 | -4.56E-02 | 106958388 | 106958511 | NC_000006.11 |
| cg17588294 | 2.25E-13 | 1.02E-14 | -8.38 | 22.5326582 | -1.47E-01 | 129548156 | 129548279 | NC_000002.11 |
| cg17299456 | 2.25E-13 | 1.02E-14 | -8.38 | 22.5306508 | -1.75E-01 | 10696311  | 10696434  | NC_000011.9  |
| cg26928531 | 2.28E-13 | 1.03E-14 | -8.38 | 22.5197301 | -1.56E-01 | 32407714  | 32407837  | NC_000006.11 |

|            |          |          |       |            |           |           |           |              |
|------------|----------|----------|-------|------------|-----------|-----------|-----------|--------------|
| cg24402880 | 2.28E-13 | 1.04E-14 | -8.38 | 22.517674  | -1.95E-01 | 84035837  | 84035960  | NC_000004.11 |
| cg10821261 | 2.28E-13 | 1.04E-14 | -8.38 | 22.517374  | -1.82E-01 | 54822725  | 54822848  | NC_000012.11 |
| cg01412321 | 2.29E-13 | 1.04E-14 | -8.38 | 22.5159235 | -4.74E-02 | 36429799  | 36429922  | NC_000007.13 |
| cg10244770 | 2.29E-13 | 1.04E-14 | -8.38 | 22.5152322 | -1.73E-01 | 19018111  | 19018234  | NC_000012.11 |
| cg27025856 | 2.29E-13 | 1.04E-14 | -8.38 | 22.5147556 | -5.54E-02 | 13521023  | 13521146  | NC_000003.11 |
| cg00356999 | 2.29E-13 | 1.04E-14 | -8.38 | 22.5138618 | -1.82E-01 | 234119529 | 234119652 | NC_000002.11 |
| cg02628016 | 2.29E-13 | 1.04E-14 | -8.38 | 22.5138129 | -1.96E-01 | 183382726 | 183382849 | NC_000003.11 |
| cg03607644 | 2.29E-13 | 1.04E-14 | -8.38 | 22.5133858 | -2.10E-01 | 134679636 | 134679759 | NC_000008.10 |
| cg24164702 | 2.30E-13 | 1.04E-14 | -8.38 | 22.5111732 | -1.52E-01 | 39225147  | 39225270  | NC_000019.9  |
| cg12841020 | 2.30E-13 | 1.04E-14 | -8.38 | 22.5111036 | -7.49E-02 | 75422604  | 75422727  | NC_000014.8  |
| cg03340667 | 2.30E-13 | 1.05E-14 | -8.38 | 22.5079896 | -1.57E-01 | 150464285 | 150464408 | NC_000005.9  |
| cg17020895 | 2.30E-13 | 1.05E-14 | -8.38 | 22.5070741 | -1.25E-01 | 3423790   | 3423913   | NC_000012.11 |
| cg06236559 | 2.31E-13 | 1.05E-14 | -8.38 | 22.5060832 | -1.83E-01 | 45458303  | 45458426  | NC_000018.9  |
| cg26112929 | 2.31E-13 | 1.05E-14 | -8.38 | 22.5055878 | -5.62E-02 | 5821500   | 5821623   | NC_000007.13 |
| cg03802998 | 2.31E-13 | 1.05E-14 | -8.38 | 22.5054931 | -9.74E-02 | 44972744  | 44972867  | NC_000011.9  |
| cg26074025 | 2.31E-13 | 1.05E-14 | -8.38 | 22.5046249 | -1.23E-01 | 89467057  | 89467180  | NC_000014.8  |
| cg26680127 | 2.31E-13 | 1.05E-14 | -8.38 | 22.5034215 | -8.54E-02 | 46783018  | 46783141  | NC_000016.9  |
| cg10063663 | 2.32E-13 | 1.05E-14 | -8.38 | 22.5012795 | -2.17E-01 | 79038712  | 79038835  | NC_000017.10 |
| cg15745401 | 2.32E-13 | 1.05E-14 | -8.38 | 22.4996233 | -1.76E-01 | 72974126  | 72974249  | NC_000011.9  |
| cg17237804 | 2.32E-13 | 1.06E-14 | -8.38 | 22.4983675 | -1.48E-01 | 71199355  | 71199478  | NC_000010.10 |
| cg17768957 | 2.33E-13 | 1.06E-14 | -8.38 | 22.4965344 | -1.94E-01 | 159071076 | 159071199 | NC_000006.11 |
| cg23975375 | 2.33E-13 | 1.06E-14 | -8.38 | 22.4961337 | -3.19E-02 | 103997221 | 103997344 | NC_000004.11 |
| cg21046160 | 2.33E-13 | 1.06E-14 | -8.38 | 22.4954957 | -1.29E-01 | 24105147  | 24105270  | NC_000022.10 |
| cg02010478 | 2.33E-13 | 1.06E-14 | -8.38 | 22.4948953 | -6.34E-02 | 66059798  | 66059921  | NC_000011.9  |
| cg22794078 | 2.33E-13 | 1.06E-14 | -8.38 | 22.4943392 | -6.49E-02 | 65904012  | 65904135  | NC_000015.9  |

|                |          |          |       |            |           |           |           |              |
|----------------|----------|----------|-------|------------|-----------|-----------|-----------|--------------|
| ch.9.2793850R  | 2.33E-13 | 1.06E-14 | -8.37 | 22.4940213 | -3.66E-02 | 2803850   | 2803973   | NC_000009.11 |
| cg25577648     | 2.34E-13 | 1.06E-14 | -8.37 | 22.4927651 | -1.03E-01 | 73137008  | 73137131  | NC_000010.10 |
| cg09635667     | 2.34E-13 | 1.06E-14 | -8.37 | 22.4921119 | -1.22E-01 | 2300514   | 2300637   | NC_000017.10 |
| cg19283806     | 2.34E-13 | 1.07E-14 | -8.37 | 22.4888221 | -2.03E-01 | 66389420  | 66389543  | NC_000018.9  |
| cg09644157     | 2.34E-13 | 1.07E-14 | -8.37 | 22.4885324 | -1.38E-01 | 124896212 | 124896335 | NC_000012.11 |
| cg06474082     | 2.35E-13 | 1.07E-14 | -8.37 | 22.487358  | -8.34E-02 | 45579580  | 45579703  | NC_000019.9  |
| cg00147332     | 2.35E-13 | 1.07E-14 | -8.37 | 22.4861567 | -1.34E-01 | 23094174  | 23094297  | NC_000015.9  |
| cg20567368     | 2.35E-13 | 1.07E-14 | -8.37 | 22.4858732 | -1.68E-01 | 7583081   | 7583204   | NC_000010.10 |
| cg21839984     | 2.35E-13 | 1.07E-14 | -8.37 | 22.484582  | -2.01E-01 | 30846986  | 30847109  | NC_000017.10 |
| cg00972420     | 2.35E-13 | 1.07E-14 | -8.37 | 22.4839557 | -1.19E-01 | 49204792  | 49204915  | NC_000020.10 |
| cg04270264     | 2.36E-13 | 1.07E-14 | -8.37 | 22.4806735 | -1.61E-01 | 31961615  | 31961738  | NC_000020.10 |
| cg22136753     | 2.36E-13 | 1.08E-14 | -8.37 | 22.4801153 | -6.20E-02 | 18118066  | 18118189  | NC_000020.10 |
| ch.6.43016614F | 2.36E-13 | 1.08E-14 | -8.37 | 22.4797472 | -3.93E-02 | 42908636  | 42908759  | NC_000006.11 |
| cg10950111     | 2.37E-13 | 1.08E-14 | -8.37 | 22.4768923 | -1.81E-01 | 228337379 | 228337502 | NC_000001.10 |
| cg14505256     | 2.37E-13 | 1.08E-14 | -8.37 | 22.4759188 | -1.34E-01 | 20978594  | 20978717  | NC_000022.10 |
| cg05176551     | 2.37E-13 | 1.08E-14 | -8.37 | 22.4755135 | -1.98E-01 | 32701586  | 32701709  | NC_000010.10 |
| cg09558425     | 2.38E-13 | 1.08E-14 | -8.37 | 22.4745779 | -1.95E-01 | 30073283  | 30073406  | NC_000010.10 |
| cg20847766     | 2.38E-13 | 1.08E-14 | -8.37 | 22.4729109 | -1.89E-01 | 111840490 | 111840613 | NC_000013.10 |
| cg16038868     | 2.39E-13 | 1.09E-14 | -8.37 | 22.4698234 | -9.26E-02 | 10192619  | 10192742  | NC_000008.10 |
| cg09238049     | 2.39E-13 | 1.09E-14 | -8.37 | 22.4697638 | -1.44E-01 | 1205018   | 1205141   | NC_000016.9  |
| cg17240760     | 2.39E-13 | 1.09E-14 | -8.37 | 22.4688714 | -1.67E-01 | 111417994 | 111418117 | NC_000001.10 |
| ch.9.2215767R  | 2.39E-13 | 1.09E-14 | -8.37 | 22.4687444 | -4.08E-02 | 132996898 | 132997021 | NC_000009.11 |
| cg12724357     | 2.40E-13 | 1.09E-14 | -8.37 | 22.4632521 | -6.34E-02 | 66790285  | 66790408  | NC_000011.9  |
| cg26771272     | 2.40E-13 | 1.10E-14 | -8.37 | 22.4621972 | -1.72E-01 | 18163183  | 18163306  | NC_000017.10 |
| cg09481483     | 2.40E-13 | 1.10E-14 | -8.37 | 22.462133  | -1.13E-01 | 11734383  | 11734506  | NC_000016.9  |

|                 |          |          |       |            |           |           |           |              |
|-----------------|----------|----------|-------|------------|-----------|-----------|-----------|--------------|
| cg21576728      | 2.40E-13 | 1.10E-14 | -8.37 | 22.4614864 | -1.32E-01 | 113683521 | 113683644 | NC_000001.10 |
| cg08290628      | 2.41E-13 | 1.10E-14 | -8.37 | 22.4612048 | -1.61E-01 | 68936551  | 68936674  | NC_000015.9  |
| cg03090940      | 2.41E-13 | 1.10E-14 | -8.37 | 22.4606993 | -1.21E-01 | 65058954  | 65059077  | NC_000002.11 |
| cg08711320      | 2.42E-13 | 1.10E-14 | -8.37 | 22.457084  | -1.62E-01 | 3387932   | 3388055   | NC_000001.10 |
| cg22122760      | 2.42E-13 | 1.10E-14 | -8.37 | 22.4561457 | -6.58E-02 | 33160946  | 33161069  | NC_000006.11 |
| ch.10.65513755F | 2.42E-13 | 1.10E-14 | -8.37 | 22.4553211 | -6.24E-02 | 65843749  | 65843872  | NC_000010.10 |
| cg01315572      | 2.42E-13 | 1.10E-14 | -8.37 | 22.4543663 | -1.06E-01 | 116391550 | 116391673 | NC_000010.10 |
| cg12380609      | 2.42E-13 | 1.10E-14 | -8.37 | 22.4540571 | -5.77E-02 | 102455982 | 102456105 | NC_000012.11 |
| cg12182124      | 2.42E-13 | 1.11E-14 | -8.37 | 22.4532787 | -1.78E-01 | 21451563  | 21451686  | NC_000018.9  |
| cg11906781      | 2.43E-13 | 1.11E-14 | -8.37 | 22.4524616 | -2.40E-01 | 28183394  | 28183517  | NC_000002.11 |
| cg05844193      | 2.43E-13 | 1.11E-14 | -8.37 | 22.451777  | -9.79E-02 | 25033206  | 25033329  | NC_000004.11 |
| cg14377171      | 2.43E-13 | 1.11E-14 | -8.37 | 22.4513283 | -1.78E-01 | 138022131 | 138022254 | NC_000009.11 |
| ch.2.202877934R | 2.43E-13 | 1.11E-14 | -8.37 | 22.4491104 | -4.67E-02 | 203169689 | 203169812 | NC_000002.11 |
| cg07156929      | 2.43E-13 | 1.11E-14 | -8.37 | 22.4485089 | -5.89E-02 | 34856927  | 34857050  | NC_000006.11 |
| cg03417788      | 2.45E-13 | 1.12E-14 | -8.37 | 22.441431  | -1.96E-01 | 14605870  | 14605993  | NC_000003.11 |
| cg00018010      | 2.45E-13 | 1.12E-14 | -8.37 | 22.4412563 | -1.44E-01 | 20105626  | 20105749  | NC_000017.10 |
| cg23202722      | 2.45E-13 | 1.12E-14 | -8.37 | 22.4401366 | -1.88E-01 | 33793808  | 33793931  | NC_000001.10 |
| cg05546575      | 2.45E-13 | 1.12E-14 | -8.37 | 22.4395883 | -1.79E-01 | 6483368   | 6483491   | NC_000007.13 |
| cg25745642      | 2.47E-13 | 1.13E-14 | -8.37 | 22.4348889 | -1.49E-01 | 155050609 | 155050732 | NC_000001.10 |
| cg06851151      | 2.47E-13 | 1.13E-14 | -8.37 | 22.4335654 | -1.79E-01 | 133436368 | 133436491 | NC_000005.9  |
| cg12489934      | 2.47E-13 | 1.13E-14 | -8.37 | 22.432995  | -9.99E-02 | 57631687  | 57631810  | NC_000012.11 |
| cg16341979      | 2.48E-13 | 1.13E-14 | -8.36 | 22.4290766 | -2.05E-01 | 94576977  | 94577100  | NC_000014.8  |
| cg17668756      | 2.48E-13 | 1.13E-14 | -8.36 | 22.4285341 | -1.62E-01 | 73020218  | 73020341  | NC_000010.10 |
| cg22933646      | 2.48E-13 | 1.13E-14 | -8.36 | 22.4285103 | -8.95E-02 | 62342512  | 62342635  | NC_000011.9  |
| cg07175945      | 2.48E-13 | 1.13E-14 | -8.36 | 22.4280847 | -7.19E-02 | 32444062  | 32444185  | NC_000005.9  |

|                |          |          |       |            |           |           |           |              |
|----------------|----------|----------|-------|------------|-----------|-----------|-----------|--------------|
| cg01056400     | 2.48E-13 | 1.13E-14 | -8.36 | 22.4277891 | -1.39E-01 | 208119426 | 208119549 | NC_000002.11 |
| cg04849985     | 2.48E-13 | 1.14E-14 | -8.36 | 22.4266018 | -1.09E-01 | 68215783  | 68215906  | NC_000001.10 |
| cg15813090     | 2.49E-13 | 1.14E-14 | -8.36 | 22.4258305 | -9.57E-02 | 442598    | 442721    | NC_000005.9  |
| cg13172432     | 2.49E-13 | 1.14E-14 | -8.36 | 22.4258221 | -1.43E-01 | 205912842 | 205912965 | NC_000001.10 |
| cg12537003     | 2.49E-13 | 1.14E-14 | -8.36 | 22.422799  | -1.99E-01 | 2886453   | 2886576   | NC_000017.10 |
| cg02210123     | 2.50E-13 | 1.14E-14 | -8.36 | 22.4216603 | -3.62E-02 | 63670835  | 63670958  | NC_000014.8  |
| cg03058163     | 2.51E-13 | 1.15E-14 | -8.36 | 22.4177161 | -1.63E-01 | 1153338   | 1153461   | NC_000001.10 |
| cg07635132     | 2.51E-13 | 1.15E-14 | -8.36 | 22.4155129 | -1.56E-01 | 30441833  | 30441956  | NC_000016.9  |
| cg04198215     | 2.51E-13 | 1.15E-14 | -8.36 | 22.4152038 | -1.24E-01 | 231730425 | 231730548 | NC_000002.11 |
| cg04972979     | 2.51E-13 | 1.15E-14 | -8.36 | 22.4137467 | -1.15E-01 | 749148    | 749271    | NC_000020.10 |
| cg26737223     | 2.52E-13 | 1.15E-14 | -8.36 | 22.4133225 | -2.10E-01 | 74488855  | 74488978  | NC_000017.10 |
| cg11243680     | 2.52E-13 | 1.15E-14 | -8.36 | 22.4129851 | -5.64E-02 | 31881778  | 31881901  | NC_000012.11 |
| cg09610018     | 2.52E-13 | 1.15E-14 | -8.36 | 22.41196   | -1.37E-01 | 121433074 | 121433197 | NC_000002.11 |
| cg20743744     | 2.52E-13 | 1.15E-14 | -8.36 | 22.4108183 | -1.20E-01 | 1243849   | 1243972   | NC_000004.11 |
| cg04685954     | 2.52E-13 | 1.15E-14 | -8.36 | 22.4103032 | -1.25E-01 | 10515574  | 10515697  | NC_000012.11 |
| cg10208610     | 2.52E-13 | 1.15E-14 | -8.36 | 22.409989  | -1.26E-01 | 27326422  | 27326545  | NC_000001.10 |
| cg22278106     | 2.52E-13 | 1.16E-14 | -8.36 | 22.409407  | -8.73E-02 | 169746720 | 169746843 | NC_000002.11 |
| cg21157094     | 2.53E-13 | 1.16E-14 | -8.36 | 22.409172  | -1.15E-01 | 25958282  | 25958405  | NC_000017.10 |
| ch.14.1097636R | 2.55E-13 | 1.17E-14 | -8.36 | 22.4006894 | -9.14E-02 | 74948378  | 74948501  | NC_000014.8  |
| cg05977376     | 2.55E-13 | 1.17E-14 | -8.36 | 22.3976763 | -1.80E-01 | 28561585  | 28561708  | NC_000002.11 |
| cg07950002     | 2.56E-13 | 1.17E-14 | -8.36 | 22.3963223 | -1.13E-01 | 131465811 | 131465934 | NC_000009.11 |
| cg23264429     | 2.56E-13 | 1.17E-14 | -8.36 | 22.3936607 | -2.48E-01 | 90642003  | 90642126  | NC_000010.10 |
| cg09820729     | 2.56E-13 | 1.17E-14 | -8.36 | 22.3933424 | -1.58E-01 | 12039712  | 12039835  | NC_000001.10 |
| cg04064380     | 2.57E-13 | 1.18E-14 | -8.36 | 22.3923145 | -1.03E-01 | 117688259 | 117688382 | NC_000011.9  |
| cg04163475     | 2.57E-13 | 1.18E-14 | -8.36 | 22.3906126 | -1.15E-01 | 30069065  | 30069188  | NC_000006.11 |

|               |          |          |       |            |           |           |           |              |
|---------------|----------|----------|-------|------------|-----------|-----------|-----------|--------------|
| cg03719555    | 2.57E-13 | 1.18E-14 | -8.36 | 22.3904913 | -1.76E-01 | 4455413   | 4455536   | NC_000019.9  |
| cg16548261    | 2.57E-13 | 1.18E-14 | -8.36 | 22.390432  | -9.74E-02 | 66790373  | 66790496  | NC_000011.9  |
| cg21470600    | 2.57E-13 | 1.18E-14 | -8.36 | 22.3894218 | -1.65E-01 | 6040824   | 6040947   | NC_000001.10 |
| cg18255008    | 2.58E-13 | 1.18E-14 | -8.36 | 22.3862205 | -5.93E-02 | 11908503  | 11908626  | NC_000019.9  |
| cg13928417    | 2.58E-13 | 1.18E-14 | -8.36 | 22.3858865 | -1.62E-01 | 124498782 | 124498905 | NC_000009.11 |
| cg20128802    | 2.59E-13 | 1.19E-14 | -8.36 | 22.382279  | -1.13E-01 | 41601612  | 41601735  | NC_000006.11 |
| cg02441103    | 2.59E-13 | 1.19E-14 | -8.36 | 22.3807959 | -1.49E-01 | 133591209 | 133591332 | NC_000005.9  |
| cg23383531    | 2.61E-13 | 1.19E-14 | -8.36 | 22.3761981 | -1.89E-01 | 121688317 | 121688440 | NC_000012.11 |
| cg00309133    | 2.61E-13 | 1.20E-14 | -8.36 | 22.3750325 | -7.57E-02 | 69452320  | 69452443  | NC_000015.9  |
| cg24500630    | 2.61E-13 | 1.20E-14 | -8.36 | 22.3740854 | -1.31E-01 | 110436181 | 110436304 | NC_000011.9  |
| cg26531076    | 2.62E-13 | 1.20E-14 | -8.36 | 22.3719051 | -1.67E-01 | 73743377  | 73743500  | NC_000013.10 |
| cg22531801    | 2.62E-13 | 1.20E-14 | -8.36 | 22.3713531 | -1.96E-01 | 235806070 | 235806193 | NC_000001.10 |
| cg19111030    | 2.62E-13 | 1.20E-14 | -8.35 | 22.3701553 | -7.88E-02 | 71204600  | 71204723  | NC_000002.11 |
| cg20541344    | 2.62E-13 | 1.20E-14 | -8.35 | 22.369404  | -8.77E-02 | 79095182  | 79095305  | NC_000017.10 |
| cg04830629    | 2.63E-13 | 1.20E-14 | -8.35 | 22.3681842 | -1.69E-01 | 71558336  | 71558459  | NC_000012.11 |
| cg01630691    | 2.63E-13 | 1.21E-14 | -8.35 | 22.367247  | -1.86E-01 | 203359167 | 203359290 | NC_000002.11 |
| cg23368579    | 2.63E-13 | 1.21E-14 | -8.35 | 22.3670732 | -1.77E-01 | 519265    | 519388    | NC_000018.9  |
| cg03731896    | 2.64E-13 | 1.21E-14 | -8.35 | 22.3622975 | -1.21E-01 | 49474391  | 49474514  | NC_000019.9  |
| cg05287529    | 2.65E-13 | 1.21E-14 | -8.35 | 22.3604011 | -5.73E-02 | 101380128 | 101380251 | NC_000010.10 |
| cg14698665    | 2.65E-13 | 1.21E-14 | -8.35 | 22.3602435 | -2.03E-01 | 11389290  | 11389413  | NC_000005.9  |
| ch.3.1121988R | 2.65E-13 | 1.22E-14 | -8.35 | 22.3589081 | -6.50E-02 | 51728593  | 51728716  | NC_000003.11 |
| cg26538691    | 2.65E-13 | 1.22E-14 | -8.35 | 22.3577218 | -1.57E-01 | 5328219   | 5328342   | NC_000001.10 |
| cg21491201    | 2.66E-13 | 1.22E-14 | -8.35 | 22.355412  | -1.08E-01 | 30545074  | 30545197  | NC_000007.13 |
| cg02649547    | 2.66E-13 | 1.22E-14 | -8.35 | 22.3546774 | -1.86E-01 | 95848791  | 95848914  | NC_000010.10 |
| cg09498440    | 2.66E-13 | 1.22E-14 | -8.35 | 22.3534871 | -1.09E-01 | 72415429  | 72415552  | NC_000005.9  |

|                |          |          |       |            |           |           |           |              |
|----------------|----------|----------|-------|------------|-----------|-----------|-----------|--------------|
| cg05020822     | 2.66E-13 | 1.22E-14 | -8.35 | 22.3534738 | -6.20E-02 | 144373356 | 144373479 | NC_000008.10 |
| cg01999086     | 2.67E-13 | 1.22E-14 | -8.35 | 22.3522567 | -7.36E-02 | 52824411  | 52824534  | NC_000020.10 |
| cg10208113     | 2.67E-13 | 1.23E-14 | -8.35 | 22.3512367 | -1.44E-01 | 1179747   | 1179870   | NC_000001.10 |
| cg02227015     | 2.67E-13 | 1.23E-14 | -8.35 | 22.3507607 | -5.71E-02 | 12909976  | 12910099  | NC_000003.11 |
| cg12960126     | 2.67E-13 | 1.23E-14 | -8.35 | 22.3501132 | -1.52E-01 | 187686256 | 187686379 | NC_000004.11 |
| cg01858698     | 2.67E-13 | 1.23E-14 | -8.35 | 22.3497072 | -2.05E-01 | 46954407  | 46954530  | NC_000001.10 |
| ch.19.1364541R | 2.67E-13 | 1.23E-14 | -8.35 | 22.3489861 | -4.38E-02 | 42374382  | 42374505  | NC_000019.9  |
| cg19621411     | 2.68E-13 | 1.23E-14 | -8.35 | 22.3469614 | -4.96E-02 | 63429038  | 63429161  | NC_000001.10 |
| cg15022420     | 2.68E-13 | 1.23E-14 | -8.35 | 22.3453082 | -1.42E-01 | 157322652 | 157322775 | NC_000007.13 |
| cg06415153     | 2.69E-13 | 1.23E-14 | -8.35 | 22.3447296 | -1.31E-01 | 123519476 | 123519599 | NC_000012.11 |
| cg04314261     | 2.69E-13 | 1.23E-14 | -8.35 | 22.344019  | -1.17E-01 | 10163030  | 10163153  | NC_000012.11 |
| cg19914919     | 2.69E-13 | 1.24E-14 | -8.35 | 22.3427844 | -2.50E-01 | 161992878 | 161993001 | NC_000002.11 |
| cg10106388     | 2.70E-13 | 1.24E-14 | -8.35 | 22.3375733 | -2.10E-01 | 160832662 | 160832785 | NC_000001.10 |
| cg20430807     | 2.72E-13 | 1.25E-14 | -8.35 | 22.3309265 | -6.14E-02 | 62168955  | 62169078  | NC_000020.10 |
| cg22927510     | 2.73E-13 | 1.25E-14 | -8.35 | 22.3287033 | -3.98E-02 | 50968328  | 50968451  | NC_000022.10 |
| cg18887230     | 2.74E-13 | 1.26E-14 | -8.35 | 22.3246383 | -1.43E-01 | 98739627  | 98739750  | NC_000007.13 |
| cg23401796     | 2.74E-13 | 1.26E-14 | -8.35 | 22.3236025 | -2.67E-01 | 141248667 | 141248790 | NC_000008.10 |
| cg19167907     | 2.74E-13 | 1.26E-14 | -8.35 | 22.3221406 | -4.35E-02 | 50964993  | 50965116  | NC_000022.10 |
| ch.2.43155345R | 2.74E-13 | 1.26E-14 | -8.35 | 22.3220623 | -6.80E-02 | 43301841  | 43301964  | NC_000002.11 |
| cg19234738     | 2.76E-13 | 1.27E-14 | -8.35 | 22.3177637 | -1.61E-01 | 134031551 | 134031674 | NC_000003.11 |
| cg13566851     | 2.76E-13 | 1.27E-14 | -8.35 | 22.3172895 | -5.60E-02 | 143857813 | 143857936 | NC_000006.11 |
| cg15013019     | 2.76E-13 | 1.27E-14 | -8.35 | 22.3155096 | -7.49E-02 | 13213451  | 13213574  | NC_000019.9  |
| cg20283449     | 2.76E-13 | 1.27E-14 | -8.35 | 22.3152307 | -6.86E-02 | 61190829  | 61190952  | NC_000014.8  |
| cg04811592     | 2.77E-13 | 1.27E-14 | -8.35 | 22.3122981 | -2.06E-01 | 69834386  | 69834509  | NC_000003.11 |
| ch.3.1042115R  | 2.78E-13 | 1.28E-14 | -8.34 | 22.308249  | -3.69E-02 | 49069395  | 49069518  | NC_000003.11 |

|            |          |          |       |            |           |           |           |              |
|------------|----------|----------|-------|------------|-----------|-----------|-----------|--------------|
| cg18006990 | 2.78E-13 | 1.28E-14 | -8.34 | 22.3067954 | -1.03E-01 | 43594962  | 43595085  | NC_000006.11 |
| cg26396492 | 2.80E-13 | 1.29E-14 | -8.34 | 22.3025559 | -1.48E-01 | 19915762  | 19915885  | NC_000020.10 |
| cg13237068 | 2.81E-13 | 1.29E-14 | -8.34 | 22.2978328 | -1.88E-01 | 25485381  | 25485504  | NC_000013.10 |
| cg00222982 | 2.81E-13 | 1.29E-14 | -8.34 | 22.2971263 | -7.38E-02 | 125439225 | 125439348 | NC_000011.9  |
| cg24221715 | 2.82E-13 | 1.30E-14 | -8.34 | 22.2953068 | -3.13E-02 | 40453006  | 40453129  | NC_000015.9  |
| cg07029024 | 2.82E-13 | 1.30E-14 | -8.34 | 22.2940867 | -1.68E-01 | 65249342  | 65249465  | NC_000011.9  |
| cg07745674 | 2.82E-13 | 1.30E-14 | -8.34 | 22.2925786 | -1.07E-01 | 124171207 | 124171330 | NC_000008.10 |
| cg00524374 | 2.83E-13 | 1.30E-14 | -8.34 | 22.2912714 | -7.34E-02 | 3894968   | 3895091   | NC_000010.10 |
| cg14261868 | 2.83E-13 | 1.30E-14 | -8.34 | 22.2906329 | -3.03E-02 | 149815294 | 149815417 | NC_000001.10 |
| cg05650632 | 2.83E-13 | 1.31E-14 | -8.34 | 22.2887614 | -5.43E-02 | 182751640 | 182751763 | NC_000001.10 |
| cg23032936 | 2.83E-13 | 1.31E-14 | -8.34 | 22.2882807 | -2.43E-01 | 48573365  | 48573488  | NC_000010.10 |
| cg25875163 | 2.83E-13 | 1.31E-14 | -8.34 | 22.2879301 | -1.90E-01 | 143763340 | 143763463 | NC_000008.10 |
| cg05625526 | 2.84E-13 | 1.31E-14 | -8.34 | 22.2857189 | -1.41E-01 | 49653080  | 49653203  | NC_000010.10 |
| cg14434293 | 2.84E-13 | 1.31E-14 | -8.34 | 22.2845758 | -1.41E-01 | 1596108   | 1596231   | NC_000010.10 |
| cg03082108 | 2.87E-13 | 1.32E-14 | -8.34 | 22.276289  | -7.28E-02 | 12071430  | 12071553  | NC_000016.9  |
| cg27611827 | 2.87E-13 | 1.32E-14 | -8.34 | 22.2761484 | -7.09E-02 | 41392569  | 41392692  | NC_000017.10 |
| cg16348158 | 2.87E-13 | 1.32E-14 | -8.34 | 22.27613   | -1.09E-01 | 3036916   | 3037039   | NC_000001.10 |
| cg07402062 | 2.87E-13 | 1.32E-14 | -8.34 | 22.275497  | -1.06E-01 | 89894098  | 89894221  | NC_000016.9  |
| cg19430780 | 2.87E-13 | 1.32E-14 | -8.34 | 22.2745681 | -7.54E-02 | 38397004  | 38397127  | NC_000019.9  |
| cg19482842 | 2.87E-13 | 1.32E-14 | -8.34 | 22.2744208 | -5.05E-02 | 16790314  | 16790437  | NC_000002.11 |
| cg25475538 | 2.87E-13 | 1.33E-14 | -8.34 | 22.2733733 | -1.63E-01 | 22414555  | 22414678  | NC_000008.10 |
| cg27002325 | 2.88E-13 | 1.33E-14 | -8.34 | 22.2719903 | -2.36E-01 | 68174209  | 68174332  | NC_000011.9  |
| cg02753354 | 2.89E-13 | 1.33E-14 | -8.34 | 22.2671861 | -1.50E-01 | 1074727   | 1074850   | NC_000019.9  |
| cg25855001 | 2.89E-13 | 1.34E-14 | -8.34 | 22.2661881 | -1.93E-01 | 2886346   | 2886469   | NC_000017.10 |
| cg00476608 | 2.89E-13 | 1.34E-14 | -8.34 | 22.2657937 | -1.63E-01 | 7044787   | 7044910   | NC_000012.11 |



|               |          |          |       |            |           |           |           |              |
|---------------|----------|----------|-------|------------|-----------|-----------|-----------|--------------|
| cg01093065    | 2.90E-13 | 1.34E-14 | -8.34 | 22.2649358 | -1.39E-01 | 49372101  | 49372224  | NC_000019.9  |
| cg24048437    | 2.90E-13 | 1.34E-14 | -8.34 | 22.2649263 | -1.57E-01 | 53656287  | 53656410  | NC_000005.9  |
| cg26292910    | 2.90E-13 | 1.34E-14 | -8.34 | 22.2647957 | -1.25E-01 | 48732762  | 48732885  | NC_000003.11 |
| cg08399733    | 2.90E-13 | 1.34E-14 | -8.34 | 22.2644576 | -1.84E-01 | 2278773   | 2278896   | NC_000019.9  |
| cg23018755    | 2.90E-13 | 1.34E-14 | -8.34 | 22.2644109 | -1.40E-01 | 79881529  | 79881652  | NC_000017.10 |
| cg06242449    | 2.90E-13 | 1.34E-14 | -8.34 | 22.263277  | -1.49E-01 | 144965577 | 144965700 | NC_000008.10 |
| cg02277850    | 2.90E-13 | 1.34E-14 | -8.34 | 22.2625168 | -2.02E-01 | 7842393   | 7842516   | NC_000001.10 |
| cg00568027    | 2.91E-13 | 1.34E-14 | -8.34 | 22.2616659 | -3.77E-02 | 229644024 | 229644147 | NC_000001.10 |
| cg13803071    | 2.91E-13 | 1.34E-14 | -8.34 | 22.2616153 | -7.28E-02 | 9771081   | 9771204   | NC_000002.11 |
| cg03086663    | 2.91E-13 | 1.34E-14 | -8.34 | 22.2608117 | -8.82E-02 | 92918912  | 92919035  | NC_000005.9  |
| cg24373369    | 2.91E-13 | 1.35E-14 | -8.34 | 22.2583206 | -2.00E-01 | 65320737  | 65320860  | NC_000015.9  |
| cg16139749    | 2.91E-13 | 1.35E-14 | -8.34 | 22.2581923 | -1.52E-01 | 113044432 | 113044555 | NC_000001.10 |
| cg20236089    | 2.92E-13 | 1.35E-14 | -8.34 | 22.2569754 | -2.33E-01 | 15629162  | 15629285  | NC_000006.11 |
| cg02401792    | 2.92E-13 | 1.35E-14 | -8.34 | 22.2564637 | -3.77E-02 | 46664110  | 46664233  | NC_000022.10 |
| cg06654691    | 2.93E-13 | 1.35E-14 | -8.34 | 22.2524322 | -2.03E-01 | 40825980  | 40826103  | NC_000017.10 |
| cg12194336    | 2.93E-13 | 1.36E-14 | -8.34 | 22.2511436 | -1.58E-01 | 58067906  | 58068029  | NC_000003.11 |
| cg04618171    | 2.94E-13 | 1.36E-14 | -8.34 | 22.2508243 | -2.36E-01 | 10470465  | 10470588  | NC_000002.11 |
| cg21308365    | 2.94E-13 | 1.36E-14 | -8.34 | 22.2503522 | -1.79E-01 | 119031399 | 119031522 | NC_000006.11 |
| cg14009561    | 2.94E-13 | 1.36E-14 | -8.34 | 22.2485772 | -1.80E-01 | 6443045   | 6443168   | NC_000012.11 |
| cg01347228    | 2.94E-13 | 1.36E-14 | -8.34 | 22.2483759 | -1.27E-01 | 29297391  | 29297514  | NC_000017.10 |
| ch.14.955325R | 2.94E-13 | 1.36E-14 | -8.34 | 22.2479393 | -6.31E-02 | 69350231  | 69350354  | NC_000014.8  |
| cg24667756    | 2.95E-13 | 1.36E-14 | -8.33 | 22.2470647 | -2.32E-01 | 78698822  | 78698945  | NC_000017.10 |
| cg21626163    | 2.95E-13 | 1.36E-14 | -8.33 | 22.2455783 | -1.04E-01 | 70882722  | 70882845  | NC_000005.9  |
| cg16615211    | 2.96E-13 | 1.37E-14 | -8.33 | 22.2430766 | -1.38E-01 | 44902933  | 44903056  | NC_000003.11 |
| cg26877648    | 2.96E-13 | 1.37E-14 | -8.33 | 22.2426542 | -4.21E-02 | 38210959  | 38211082  | NC_000017.10 |

|            |          |          |       |            |           |           |           |              |
|------------|----------|----------|-------|------------|-----------|-----------|-----------|--------------|
| cg00735080 | 2.96E-13 | 1.37E-14 | -8.33 | 22.2406553 | -1.47E-01 | 47285121  | 47285244  | NC_000021.8  |
| cg19251326 | 2.96E-13 | 1.37E-14 | -8.33 | 22.2404991 | -1.68E-01 | 31688080  | 31688203  | NC_000006.11 |
| cg11363527 | 2.97E-13 | 1.37E-14 | -8.33 | 22.2396965 | -1.63E-01 | 72125918  | 72126041  | NC_000004.11 |
| cg07375150 | 2.97E-13 | 1.37E-14 | -8.33 | 22.2383397 | -1.78E-01 | 151046450 | 151046573 | NC_000003.11 |
| cg22054191 | 2.97E-13 | 1.37E-14 | -8.33 | 22.2375238 | -1.62E-01 | 42637630  | 42637753  | NC_000019.9  |
| cg27400746 | 2.99E-13 | 1.38E-14 | -8.33 | 22.2305665 | -9.16E-02 | 89904261  | 89904384  | NC_000016.9  |
| cg01455178 | 3.00E-13 | 1.39E-14 | -8.33 | 22.2292375 | -2.03E-01 | 205648187 | 205648310 | NC_000001.10 |
| cg01958086 | 3.00E-13 | 1.39E-14 | -8.33 | 22.2279258 | -1.96E-01 | 37389951  | 37390074  | NC_000015.9  |
| cg12681001 | 3.00E-13 | 1.39E-14 | -8.33 | 22.2268844 | -1.40E-01 | 31543540  | 31543663  | NC_000006.11 |
| cg09516202 | 3.01E-13 | 1.39E-14 | -8.33 | 22.2233906 | -5.43E-02 | 186544945 | 186545068 | NC_000003.11 |
| cg21846790 | 3.02E-13 | 1.40E-14 | -8.33 | 22.221029  | -1.24E-01 | 4666047   | 4666170   | NC_000016.9  |
| cg06414073 | 3.02E-13 | 1.40E-14 | -8.33 | 22.219561  | -7.76E-02 | 100967130 | 100967253 | NC_000012.11 |
| cg16320427 | 3.03E-13 | 1.40E-14 | -8.33 | 22.2188908 | -1.43E-01 | 71158765  | 71158888  | NC_000003.11 |
| cg14341131 | 3.04E-13 | 1.41E-14 | -8.33 | 22.2151366 | -1.62E-01 | 138605049 | 138605172 | NC_000009.11 |
| cg20769334 | 3.04E-13 | 1.41E-14 | -8.33 | 22.214624  | -7.20E-02 | 50913335  | 50913458  | NC_000022.10 |
| cg00079598 | 3.04E-13 | 1.41E-14 | -8.33 | 22.2139959 | -1.72E-01 | 123676903 | 123677026 | NC_000011.9  |
| cg26967619 | 3.05E-13 | 1.41E-14 | -8.33 | 22.2114755 | -1.53E-01 | 218621497 | 218621620 | NC_000002.11 |
| cg26978064 | 3.05E-13 | 1.41E-14 | -8.33 | 22.2102672 | -1.64E-01 | 70461791  | 70461914  | NC_000017.10 |
| cg24289912 | 3.05E-13 | 1.41E-14 | -8.33 | 22.2092756 | -1.75E-01 | 129845739 | 129845862 | NC_000010.10 |
| cg13175173 | 3.07E-13 | 1.42E-14 | -8.33 | 22.2044814 | -1.74E-01 | 55914753  | 55914876  | NC_000014.8  |
| cg13199127 | 3.07E-13 | 1.42E-14 | -8.33 | 22.204426  | -1.36E-01 | 32049196  | 32049319  | NC_000006.11 |
| cg01519261 | 3.07E-13 | 1.42E-14 | -8.33 | 22.2043107 | -2.44E-01 | 36421467  | 36421590  | NC_000021.8  |
| cg09650189 | 3.07E-13 | 1.42E-14 | -8.33 | 22.2041627 | -1.81E-01 | 15820841  | 15820964  | NC_000016.9  |
| cg13562284 | 3.09E-13 | 1.43E-14 | -8.33 | 22.1972733 | -1.12E-01 | 32110323  | 32110446  | NC_000011.9  |
| cg16109297 | 3.09E-13 | 1.43E-14 | -8.33 | 22.195889  | -7.68E-02 | 43824900  | 43825023  | NC_000001.10 |

|              |          |          |       |            |           |           |           |              |
|--------------|----------|----------|-------|------------|-----------|-----------|-----------|--------------|
| cg00909232   | 3.10E-13 | 1.44E-14 | -8.33 | 22.1940055 | -1.65E-01 | 323439    | 323562    | NC_000012.11 |
| ch.10.33269R | 3.10E-13 | 1.44E-14 | -8.33 | 22.1938858 | -4.47E-02 | 927563    | 927686    | NC_000010.10 |
| cg18937875   | 3.10E-13 | 1.44E-14 | -8.33 | 22.1936141 | -8.57E-02 | 14930189  | 14930312  | NC_000011.9  |
| cg15381769   | 3.10E-13 | 1.44E-14 | -8.33 | 22.1919606 | -2.20E-02 | 128841972 | 128842095 | NC_000006.11 |
| cg09491901   | 3.11E-13 | 1.44E-14 | -8.33 | 22.1913316 | -1.62E-01 | 1040709   | 1040832   | NC_000006.11 |
| cg06583813   | 3.11E-13 | 1.44E-14 | -8.33 | 22.1895546 | -1.09E-01 | 62710295  | 62710418  | NC_000020.10 |
| cg22159939   | 3.11E-13 | 1.44E-14 | -8.33 | 22.1885182 | -1.63E-01 | 214755489 | 214755612 | NC_000001.10 |
| cg09389160   | 3.12E-13 | 1.45E-14 | -8.33 | 22.1865722 | -5.83E-02 | 30688828  | 30688951  | NC_000006.11 |
| cg25611254   | 3.12E-13 | 1.45E-14 | -8.32 | 22.1853578 | -9.02E-02 | 124931985 | 124932108 | NC_000003.11 |
| cg11205224   | 3.12E-13 | 1.45E-14 | -8.32 | 22.185226  | -8.38E-02 | 74002417  | 74002540  | NC_000005.9  |
| cg05602648   | 3.13E-13 | 1.45E-14 | -8.32 | 22.183995  | -2.74E-02 | 230778078 | 230778201 | NC_000001.10 |
| cg13568106   | 3.14E-13 | 1.46E-14 | -8.32 | 22.1785265 | -1.77E-01 | 26835115  | 26835238  | NC_000017.10 |
| cg03372353   | 3.15E-13 | 1.46E-14 | -8.32 | 22.1759789 | -8.07E-02 | 1993707   | 1993830   | NC_000016.9  |
| cg03375679   | 3.16E-13 | 1.47E-14 | -8.32 | 22.1727887 | -1.31E-01 | 124610713 | 124610836 | NC_000011.9  |
| cg03777575   | 3.17E-13 | 1.47E-14 | -8.32 | 22.1701261 | -5.12E-02 | 62413296  | 62413419  | NC_000011.9  |
| cg14889768   | 3.17E-13 | 1.47E-14 | -8.32 | 22.1688641 | -6.35E-02 | 146864529 | 146864652 | NC_000006.11 |
| cg18501264   | 3.18E-13 | 1.48E-14 | -8.32 | 22.1659974 | -3.43E-02 | 33555827  | 33555950  | NC_000019.9  |
| cg07450219   | 3.18E-13 | 1.48E-14 | -8.32 | 22.1651486 | -7.73E-02 | 78428858  | 78428981  | NC_000017.10 |
| cg06685080   | 3.18E-13 | 1.48E-14 | -8.32 | 22.1647431 | -1.52E-01 | 134190981 | 134191104 | NC_000003.11 |
| cg14459021   | 3.19E-13 | 1.48E-14 | -8.32 | 22.1642392 | -2.14E-01 | 140683212 | 140683335 | NC_000009.11 |
| cg01135165   | 3.19E-13 | 1.48E-14 | -8.32 | 22.1636946 | -2.07E-01 | 108191083 | 108191206 | NC_000003.11 |
| cg01975672   | 3.19E-13 | 1.48E-14 | -8.32 | 22.1627915 | -4.41E-02 | 55880593  | 55880716  | NC_000019.9  |
| cg07991139   | 3.20E-13 | 1.49E-14 | -8.32 | 22.1610327 | -1.64E-01 | 122191244 | 122191367 | NC_000011.9  |
| cg01066431   | 3.20E-13 | 1.49E-14 | -8.32 | 22.1582709 | -1.03E-01 | 48185197  | 48185320  | NC_000010.10 |
| cg17960080   | 3.21E-13 | 1.49E-14 | -8.32 | 22.1570986 | -8.99E-02 | 26926868  | 26926991  | NC_000017.10 |

|                |          |          |       |            |           |           |           |              |
|----------------|----------|----------|-------|------------|-----------|-----------|-----------|--------------|
| ch.10.1853020F | 3.21E-13 | 1.49E-14 | -8.32 | 22.1569307 | -3.71E-02 | 88491461  | 88491584  | NC_000010.10 |
| cg17383842     | 3.21E-13 | 1.49E-14 | -8.32 | 22.1559853 | -1.82E-01 | 50553718  | 50553841  | NC_000003.11 |
| cg04921315     | 3.21E-13 | 1.49E-14 | -8.32 | 22.1551719 | -2.49E-01 | 4000587   | 4000710   | NC_000016.9  |
| cg16621790     | 3.22E-13 | 1.50E-14 | -8.32 | 22.1535805 | -1.84E-01 | 50383485  | 50383608  | NC_000003.11 |
| cg01881993     | 3.22E-13 | 1.50E-14 | -8.32 | 22.1532114 | -9.68E-02 | 66205003  | 66205126  | NC_000007.13 |
| cg14977069     | 3.22E-13 | 1.50E-14 | -8.32 | 22.1527664 | -1.90E-01 | 62367698  | 62367821  | NC_000020.10 |
| cg19979222     | 3.22E-13 | 1.50E-14 | -8.32 | 22.1521829 | -7.39E-02 | 96648520  | 96648643  | NC_000011.9  |
| cg13709054     | 3.24E-13 | 1.51E-14 | -8.32 | 22.1462059 | -7.06E-02 | 31940004  | 31940127  | NC_000006.11 |
| cg04813834     | 3.24E-13 | 1.51E-14 | -8.32 | 22.145634  | -1.68E-01 | 81434930  | 81435053  | NC_000016.9  |
| cg27641961     | 3.25E-13 | 1.52E-14 | -8.32 | 22.1416704 | -1.98E-01 | 75097037  | 75097160  | NC_000016.9  |
| cg19619028     | 3.26E-13 | 1.52E-14 | -8.32 | 22.1408114 | -2.00E-01 | 42327967  | 42328090  | NC_000001.10 |
| cg03402926     | 3.26E-13 | 1.52E-14 | -8.32 | 22.1399839 | -1.28E-01 | 27340767  | 27340890  | NC_000011.9  |
| cg04178634     | 3.28E-13 | 1.53E-14 | -8.32 | 22.13337   | -1.51E-01 | 2525231   | 2525354   | NC_000019.9  |
| cg16578549     | 3.28E-13 | 1.53E-14 | -8.32 | 22.1329962 | -1.98E-01 | 9950732   | 9950855   | NC_000001.10 |
| cg03213374     | 3.28E-13 | 1.53E-14 | -8.32 | 22.1325563 | -2.09E-01 | 8112512   | 8112635   | NC_000012.11 |
| cg22273555     | 3.29E-13 | 1.53E-14 | -8.32 | 22.1305725 | -9.38E-02 | 33130034  | 33130157  | NC_000006.11 |
| cg25966128     | 3.29E-13 | 1.54E-14 | -8.32 | 22.128748  | -3.78E-02 | 18447905  | 18448028  | NC_000020.10 |
| cg09442403     | 3.29E-13 | 1.54E-14 | -8.32 | 22.1286018 | -1.24E-01 | 149089298 | 149089421 | NC_000003.11 |
| cg13094338     | 3.30E-13 | 1.54E-14 | -8.32 | 22.1255633 | -4.61E-02 | 62258937  | 62259060  | NC_000020.10 |
| cg11471062     | 3.31E-13 | 1.54E-14 | -8.31 | 22.1230561 | -1.65E-01 | 94459183  | 94459306  | NC_000010.10 |
| cg20305489     | 3.31E-13 | 1.54E-14 | -8.31 | 22.1227012 | -2.34E-01 | 75316480  | 75316603  | NC_000017.10 |
| cg18610930     | 3.32E-13 | 1.55E-14 | -8.31 | 22.1221725 | -6.12E-02 | 46237456  | 46237579  | NC_000021.8  |
| cg15596666     | 3.32E-13 | 1.55E-14 | -8.31 | 22.12187   | -1.30E-01 | 135160792 | 135160915 | NC_000010.10 |
| cg07863402     | 3.32E-13 | 1.55E-14 | -8.31 | 22.1208547 | -1.28E-01 | 77863987  | 77864110  | NC_000017.10 |
| cg12764314     | 3.32E-13 | 1.55E-14 | -8.31 | 22.1206689 | -1.58E-01 | 184654165 | 184654288 | NC_000001.10 |

|                 |          |          |       |            |           |           |           |              |
|-----------------|----------|----------|-------|------------|-----------|-----------|-----------|--------------|
| cg10316141      | 3.32E-13 | 1.55E-14 | -8.31 | 22.1191598 | -1.35E-01 | 99068324  | 99068447  | NC_000015.9  |
| ch.22.17803970R | 3.33E-13 | 1.55E-14 | -8.31 | 22.1176158 | -6.76E-02 | 19423970  | 19424093  | NC_000022.10 |
| cg03152385      | 3.33E-13 | 1.55E-14 | -8.31 | 22.1171747 | -8.35E-02 | 15188596  | 15188719  | NC_000016.9  |
| cg16215705      | 3.35E-13 | 1.56E-14 | -8.31 | 22.1127313 | -1.87E-01 | 7846669   | 7846792   | NC_000004.11 |
| cg11430718      | 3.35E-13 | 1.56E-14 | -8.31 | 22.1123395 | -8.30E-02 | 57113702  | 57113825  | NC_000003.11 |
| cg22664064      | 3.35E-13 | 1.56E-14 | -8.31 | 22.1110761 | -4.25E-02 | 152146702 | 152146825 | NC_000002.11 |
| cg07183060      | 3.35E-13 | 1.56E-14 | -8.31 | 22.1099376 | -4.00E-02 | 32288561  | 32288684  | NC_000002.11 |
| cg04669407      | 3.36E-13 | 1.57E-14 | -8.31 | 22.1092277 | -1.02E-01 | 148521450 | 148521573 | NC_000005.9  |
| ch.12.2586863F  | 3.36E-13 | 1.57E-14 | -8.31 | 22.108924  | -4.72E-02 | 123245624 | 123245747 | NC_000012.11 |
| cg13501090      | 3.36E-13 | 1.57E-14 | -8.31 | 22.1086728 | -6.16E-02 | 115212659 | 115212782 | NC_000001.10 |
| cg17524180      | 3.37E-13 | 1.57E-14 | -8.31 | 22.1060204 | -1.46E-01 | 113633600 | 113633723 | NC_000013.10 |
| cg26808293      | 3.38E-13 | 1.58E-14 | -8.31 | 22.1013457 | -6.35E-02 | 3072207   | 3072330   | NC_000016.9  |
| cg01451604      | 3.38E-13 | 1.58E-14 | -8.31 | 22.1008899 | -1.66E-01 | 80691791  | 80691914  | NC_000010.10 |
| cg02138953      | 3.39E-13 | 1.58E-14 | -8.31 | 22.0992983 | -1.86E-01 | 75666279  | 75666402  | NC_000010.10 |
| cg12703194      | 3.39E-13 | 1.58E-14 | -8.31 | 22.0987159 | -6.91E-02 | 3086867   | 3086990   | NC_000016.9  |
| cg14849262      | 3.39E-13 | 1.59E-14 | -8.31 | 22.0970441 | -6.90E-02 | 238767990 | 238768113 | NC_000002.11 |
| cg23805594      | 3.40E-13 | 1.59E-14 | -8.31 | 22.0955317 | -1.77E-01 | 221933302 | 221933425 | NC_000001.10 |
| cg27539746      | 3.42E-13 | 1.60E-14 | -8.31 | 22.0894115 | -6.54E-02 | 118764201 | 118764324 | NC_000010.10 |
| cg16477611      | 3.43E-13 | 1.60E-14 | -8.31 | 22.0870604 | -1.70E-01 | 50896074  | 50896197  | NC_000016.9  |
| cg12550600      | 3.43E-13 | 1.60E-14 | -8.31 | 22.086498  | -2.12E-01 | 1971169   | 1971292   | NC_000007.13 |
| cg04966972      | 3.43E-13 | 1.60E-14 | -8.31 | 22.0848486 | -1.23E-01 | 43374276  | 43374399  | NC_000020.10 |
| cg14530528      | 3.44E-13 | 1.61E-14 | -8.31 | 22.0842428 | -7.19E-02 | 32821814  | 32821937  | NC_000006.11 |
| cg00305740      | 3.45E-13 | 1.61E-14 | -8.31 | 22.0816661 | -2.20E-01 | 73392697  | 73392820  | NC_000007.13 |
| cg22109262      | 3.45E-13 | 1.61E-14 | -8.31 | 22.0805736 | -6.55E-02 | 17578738  | 17578861  | NC_000004.11 |
| cg09547190      | 3.45E-13 | 1.61E-14 | -8.31 | 22.0795785 | -1.11E-01 | 95857577  | 95857700  | NC_000009.11 |

|            |          |          |       |            |           |           |           |              |
|------------|----------|----------|-------|------------|-----------|-----------|-----------|--------------|
| cg21155609 | 3.46E-13 | 1.62E-14 | -8.31 | 22.0762165 | -1.05E-01 | 32713275  | 32713398  | NC_000001.10 |
| cg03443887 | 3.47E-13 | 1.62E-14 | -8.31 | 22.0755515 | -5.73E-02 | 126138300 | 126138423 | NC_000011.9  |
| cg15764058 | 3.47E-13 | 1.62E-14 | -8.31 | 22.0747043 | -6.96E-02 | 66024691  | 66024814  | NC_000003.11 |
| cg16091981 | 3.47E-13 | 1.62E-14 | -8.31 | 22.0736415 | -1.52E-01 | 17634543  | 17634666  | NC_000001.10 |
| cg06919159 | 3.47E-13 | 1.62E-14 | -8.31 | 22.0734019 | -1.60E-01 | 80286535  | 80286658  | NC_000005.9  |
| cg24902461 | 3.48E-13 | 1.63E-14 | -8.31 | 22.0724857 | -1.67E-01 | 121031392 | 121031515 | NC_000010.10 |
| cg08248849 | 3.50E-13 | 1.64E-14 | -8.31 | 22.0649541 | -7.79E-02 | 65172195  | 65172318  | NC_000014.8  |
| cg14622879 | 3.51E-13 | 1.64E-14 | -8.3  | 22.0623645 | -2.12E-01 | 12234001  | 12234124  | NC_000006.11 |
| cg03233490 | 3.51E-13 | 1.64E-14 | -8.3  | 22.0619971 | -2.23E-01 | 59018422  | 59018545  | NC_000017.10 |
| cg14177914 | 3.52E-13 | 1.65E-14 | -8.3  | 22.0591919 | -1.77E-01 | 156400432 | 156400555 | NC_000001.10 |
| cg16792548 | 3.52E-13 | 1.65E-14 | -8.3  | 22.0588781 | -1.35E-01 | 219695072 | 219695195 | NC_000002.11 |
| cg06128161 | 3.52E-13 | 1.65E-14 | -8.3  | 22.0578646 | -1.45E-01 | 133000497 | 133000620 | NC_000012.11 |
| cg17947364 | 3.54E-13 | 1.66E-14 | -8.3  | 22.0538378 | -2.03E-01 | 106056667 | 106056790 | NC_000006.11 |
| cg09473249 | 3.54E-13 | 1.66E-14 | -8.3  | 22.053714  | -1.79E-01 | 16122741  | 16122864  | NC_000016.9  |
| cg09432376 | 3.55E-13 | 1.66E-14 | -8.3  | 22.0507217 | -2.10E-01 | 36044226  | 36044349  | NC_000022.10 |
| cg06422757 | 3.55E-13 | 1.66E-14 | -8.3  | 22.0495771 | -9.60E-02 | 36409495  | 36409618  | NC_000006.11 |
| cg06458557 | 3.55E-13 | 1.66E-14 | -8.3  | 22.0494788 | -1.88E-01 | 88316505  | 88316628  | NC_000016.9  |
| cg18345635 | 3.55E-13 | 1.66E-14 | -8.3  | 22.049128  | -1.63E-01 | 80186080  | 80186203  | NC_000017.10 |
| cg21330034 | 3.56E-13 | 1.67E-14 | -8.3  | 22.0482012 | -6.00E-02 | 7919996   | 7920119   | NC_000017.10 |
| cg19720347 | 3.56E-13 | 1.67E-14 | -8.3  | 22.0471261 | -4.42E-02 | 7024121   | 7024244   | NC_000012.11 |
| cg25202503 | 3.57E-13 | 1.67E-14 | -8.3  | 22.0435307 | -1.84E-01 | 111468250 | 111468373 | NC_000013.10 |
| cg23106865 | 3.57E-13 | 1.67E-14 | -8.3  | 22.0432876 | -7.79E-02 | 142374345 | 142374468 | NC_000007.13 |
| cg02958895 | 3.58E-13 | 1.68E-14 | -8.3  | 22.0411505 | -1.04E-01 | 46999348  | 46999471  | NC_000001.10 |
| cg10915772 | 3.59E-13 | 1.68E-14 | -8.3  | 22.0371099 | -2.98E-02 | 12610078  | 12610201  | NC_000007.13 |
| cg13525397 | 3.60E-13 | 1.69E-14 | -8.3  | 22.0366439 | -1.45E-01 | 31025933  | 31026056  | NC_000006.11 |

|              |          |          |       |            |           |           |           |              |
|--------------|----------|----------|-------|------------|-----------|-----------|-----------|--------------|
| cg03501666   | 3.60E-13 | 1.69E-14 | -8.3  | 22.0363264 | -1.88E-01 | 99264415  | 99264538  | NC_000012.11 |
| cg07434438   | 3.60E-13 | 1.69E-14 | -8.3  | 22.0346233 | -1.89E-01 | 72961899  | 72962022  | NC_000016.9  |
| cg07825294   | 3.60E-13 | 1.69E-14 | -8.3  | 22.0341468 | -1.44E-01 | 1415757   | 1415880   | NC_000019.9  |
| cg12944192   | 3.61E-13 | 1.69E-14 | -8.3  | 22.0330847 | -1.55E-01 | 35683834  | 35683957  | NC_000014.8  |
| cg13638983   | 3.61E-13 | 1.69E-14 | -8.3  | 22.0326262 | -1.46E-01 | 14619577  | 14619700  | NC_000003.11 |
| cg19069346   | 3.66E-13 | 1.72E-14 | -8.3  | 22.0170035 | -1.41E-01 | 41239214  | 41239337  | NC_000021.8  |
| cg03628186   | 3.67E-13 | 1.72E-14 | -8.3  | 22.0158547 | -6.21E-02 | 17739914  | 17740037  | NC_000017.10 |
| cg11783497   | 3.67E-13 | 1.72E-14 | -8.3  | 22.0156613 | -1.68E-01 | 113875292 | 113875415 | NC_000002.11 |
| cg09575280   | 3.67E-13 | 1.72E-14 | -8.3  | 22.0146763 | -7.18E-02 | 150347012 | 150347135 | NC_000006.11 |
| ch.5.754313F | 3.67E-13 | 1.72E-14 | -8.3  | 22.0146259 | -4.75E-02 | 34829875  | 34829998  | NC_000005.9  |
| cg01414934   | 3.69E-13 | 1.73E-14 | -8.3  | 22.0084856 | -9.06E-02 | 26605969  | 26606092  | NC_000001.10 |
| cg18545695   | 3.71E-13 | 1.74E-14 | -8.3  | 22.004321  | -1.49E-01 | 69665987  | 69666110  | NC_000008.10 |
| cg05067717   | 3.71E-13 | 1.74E-14 | -8.3  | 22.0037652 | -1.10E-01 | 32051067  | 32051190  | NC_000006.11 |
| cg09636245   | 3.71E-13 | 1.74E-14 | -8.3  | 22.0032379 | -1.86E-01 | 7699330   | 7699453   | NC_000011.9  |
| cg23400169   | 3.72E-13 | 1.75E-14 | -8.29 | 21.9997999 | -1.63E-01 | 18611395  | 18611518  | NC_000008.10 |
| cg19512969   | 3.72E-13 | 1.75E-14 | -8.29 | 21.9997756 | -1.96E-01 | 62014016  | 62014139  | NC_000014.8  |
| cg01403010   | 3.74E-13 | 1.76E-14 | -8.29 | 21.9961578 | -1.38E-01 | 38609534  | 38609657  | NC_000022.10 |
| cg09566023   | 3.74E-13 | 1.76E-14 | -8.29 | 21.9951526 | -1.60E-01 | 48970898  | 48971021  | NC_000004.11 |
| cg21908886   | 3.74E-13 | 1.76E-14 | -8.29 | 21.9949175 | -1.61E-01 | 166039444 | 166039567 | NC_000001.10 |
| cg23052826   | 3.74E-13 | 1.76E-14 | -8.29 | 21.9943187 | -1.31E-01 | 232479675 | 232479798 | NC_000002.11 |
| cg15394763   | 3.75E-13 | 1.76E-14 | -8.29 | 21.9935161 | -6.65E-02 | 77054788  | 77054911  | NC_000010.10 |
| cg12223253   | 3.75E-13 | 1.76E-14 | -8.29 | 21.9931407 | -8.96E-02 | 110841967 | 110842090 | NC_000012.11 |
| cg22917372   | 3.78E-13 | 1.78E-14 | -8.29 | 21.983049  | -1.37E-01 | 122186536 | 122186659 | NC_000012.11 |
| cg06943912   | 3.79E-13 | 1.78E-14 | -8.29 | 21.9819622 | -2.15E-01 | 10715612  | 10715735  | NC_000019.9  |
| cg19553158   | 3.79E-13 | 1.78E-14 | -8.29 | 21.9809072 | -1.49E-01 | 10233247  | 10233370  | NC_000003.11 |

|                |          |          |       |            |           |           |           |              |
|----------------|----------|----------|-------|------------|-----------|-----------|-----------|--------------|
| cg10904867     | 3.79E-13 | 1.78E-14 | -8.29 | 21.980386  | -1.48E-01 | 119218027 | 119218150 | NC_000011.9  |
| cg06654127     | 3.80E-13 | 1.79E-14 | -8.29 | 21.9789871 | -1.63E-01 | 41395230  | 41395353  | NC_000006.11 |
| cg04704449     | 3.80E-13 | 1.79E-14 | -8.29 | 21.9787561 | -1.01E-01 | 33738291  | 33738414  | NC_000006.11 |
| cg13014333     | 3.80E-13 | 1.79E-14 | -8.29 | 21.9782176 | -4.56E-02 | 31762776  | 31762899  | NC_000006.11 |
| cg19511435     | 3.80E-13 | 1.79E-14 | -8.29 | 21.9780332 | -3.25E-02 | 94595985  | 94596108  | NC_000014.8  |
| cg15985338     | 3.81E-13 | 1.79E-14 | -8.29 | 21.9764821 | -5.95E-02 | 6048868   | 6048991   | NC_000007.13 |
| cg05671732     | 3.82E-13 | 1.80E-14 | -8.29 | 21.9738371 | -4.79E-02 | 70716866  | 70716989  | NC_000010.10 |
| cg21166775     | 3.82E-13 | 1.80E-14 | -8.29 | 21.9735878 | -1.24E-01 | 48152204  | 48152327  | NC_000012.11 |
| cg00702647     | 3.82E-13 | 1.80E-14 | -8.29 | 21.9735417 | -1.88E-01 | 15655764  | 15655887  | NC_000001.10 |
| cg17069873     | 3.82E-13 | 1.80E-14 | -8.29 | 21.9729654 | -1.39E-01 | 40732784  | 40732907  | NC_000019.9  |
| cg21621482     | 3.83E-13 | 1.80E-14 | -8.29 | 21.9692442 | -1.08E-01 | 79228937  | 79229060  | NC_000017.10 |
| cg23705155     | 3.84E-13 | 1.81E-14 | -8.29 | 21.9680048 | -1.86E-01 | 32835962  | 32836085  | NC_000013.10 |
| cg21689902     | 3.85E-13 | 1.81E-14 | -8.29 | 21.965739  | -1.89E-01 | 123984775 | 123984898 | NC_000011.9  |
| cg06431864     | 3.85E-13 | 1.81E-14 | -8.29 | 21.9644552 | -1.72E-01 | 179868587 | 179868710 | NC_000005.9  |
| cg20683057     | 3.86E-13 | 1.82E-14 | -8.29 | 21.9628588 | -1.22E-01 | 40054124  | 40054247  | NC_000022.10 |
| ch.1.93382935F | 3.86E-13 | 1.82E-14 | -8.29 | 21.9615809 | -6.28E-02 | 93610347  | 93610470  | NC_000001.10 |
| cg18002896     | 3.86E-13 | 1.82E-14 | -8.29 | 21.9607112 | -4.90E-02 | 144465845 | 144465968 | NC_000008.10 |
| cg06396724     | 3.88E-13 | 1.83E-14 | -8.29 | 21.9557965 | -9.38E-02 | 61188239  | 61188362  | NC_000014.8  |
| cg00145118     | 3.89E-13 | 1.83E-14 | -8.29 | 21.9534104 | -1.26E-01 | 141393931 | 141394054 | NC_000005.9  |
| cg09500672     | 3.90E-13 | 1.84E-14 | -8.29 | 21.9509061 | -5.67E-02 | 150186706 | 150186829 | NC_000002.11 |
| cg17086219     | 3.91E-13 | 1.84E-14 | -8.29 | 21.9494305 | -7.66E-02 | 71250854  | 71250977  | NC_000002.11 |
| cg00948520     | 3.92E-13 | 1.84E-14 | -8.29 | 21.9472114 | -2.08E-01 | 4000652   | 4000775   | NC_000016.9  |
| cg03020863     | 3.92E-13 | 1.85E-14 | -8.29 | 21.9470897 | -1.30E-01 | 104005644 | 104005767 | NC_000011.9  |
| cg11629955     | 3.92E-13 | 1.85E-14 | -8.29 | 21.9461542 | -1.81E-01 | 126679199 | 126679322 | NC_000003.11 |
| ch.15.1310449F | 3.93E-13 | 1.85E-14 | -8.29 | 21.9443727 | -3.12E-02 | 79183823  | 79183946  | NC_000015.9  |



|                 |          |          |       |            |           |           |           |              |
|-----------------|----------|----------|-------|------------|-----------|-----------|-----------|--------------|
| cg14760797      | 3.93E-13 | 1.85E-14 | -8.29 | 21.9439527 | -2.08E-01 | 753199    | 753322    | NC_000012.11 |
| cg23543396      | 3.93E-13 | 1.85E-14 | -8.29 | 21.9438854 | -6.26E-02 | 28591431  | 28591554  | NC_000010.10 |
| cg11208869      | 3.93E-13 | 1.85E-14 | -8.29 | 21.9433152 | -1.54E-01 | 153667063 | 153667186 | NC_000005.9  |
| cg02235659      | 3.94E-13 | 1.86E-14 | -8.29 | 21.9415448 | -1.38E-01 | 45066580  | 45066703  | NC_000003.11 |
| cg02978544      | 3.94E-13 | 1.86E-14 | -8.28 | 21.9400913 | -1.50E-01 | 19716338  | 19716461  | NC_000016.9  |
| cg07586042      | 3.95E-13 | 1.86E-14 | -8.28 | 21.9388316 | -8.30E-02 | 3692495   | 3692618   | NC_000001.10 |
| cg04290779      | 3.95E-13 | 1.86E-14 | -8.28 | 21.9387534 | -1.46E-01 | 41962067  | 41962190  | NC_000001.10 |
| ch.19.24042144R | 3.95E-13 | 1.86E-14 | -8.28 | 21.9373196 | -2.77E-02 | 24250304  | 24250427  | NC_000019.9  |
| cg06705366      | 3.95E-13 | 1.86E-14 | -8.28 | 21.9368918 | -8.17E-02 | 74162621  | 74162744  | NC_000005.9  |
| cg25376491      | 3.95E-13 | 1.87E-14 | -8.28 | 21.9364379 | -2.09E-01 | 179192524 | 179192647 | NC_000005.9  |
| cg13586420      | 3.95E-13 | 1.87E-14 | -8.28 | 21.936347  | -5.12E-02 | 33160262  | 33160385  | NC_000006.11 |
| cg09573585      | 3.96E-13 | 1.87E-14 | -8.28 | 21.9351105 | -1.32E-01 | 88728128  | 88728251  | NC_000010.10 |
| cg00852846      | 3.96E-13 | 1.87E-14 | -8.28 | 21.9341868 | -1.73E-01 | 85664713  | 85664836  | NC_000002.11 |
| cg23621463      | 3.96E-13 | 1.87E-14 | -8.28 | 21.9340427 | -1.17E-01 | 11600100  | 11600223  | NC_000003.11 |
| cg16217610      | 3.96E-13 | 1.87E-14 | -8.28 | 21.9337149 | -4.44E-02 | 108746323 | 108746446 | NC_000004.11 |
| cg27289463      | 3.98E-13 | 1.88E-14 | -8.28 | 21.9305847 | -1.64E-01 | 110649234 | 110649357 | NC_000011.9  |
| cg07031551      | 3.99E-13 | 1.88E-14 | -8.28 | 21.9265588 | -5.31E-02 | 72463331  | 72463454  | NC_000011.9  |
| cg14660676      | 4.00E-13 | 1.89E-14 | -8.28 | 21.9255089 | -2.02E-01 | 126012434 | 126012557 | NC_000008.10 |
| cg09044296      | 4.00E-13 | 1.89E-14 | -8.28 | 21.9244927 | -1.23E-01 | 176739296 | 176739419 | NC_000005.9  |
| cg16238523      | 4.01E-13 | 1.89E-14 | -8.28 | 21.9224177 | -9.15E-02 | 49395303  | 49395426  | NC_000003.11 |
| cg07440414      | 4.01E-13 | 1.89E-14 | -8.28 | 21.9215104 | -4.79E-02 | 133451021 | 133451144 | NC_000005.9  |
| ch.9.129616782F | 4.01E-13 | 1.89E-14 | -8.28 | 21.9213355 | -4.33E-02 | 130576961 | 130577084 | NC_000009.11 |
| cg02952361      | 4.04E-13 | 1.91E-14 | -8.28 | 21.9149561 | -5.86E-02 | 36355661  | 36355784  | NC_000006.11 |
| cg21136371      | 4.04E-13 | 1.91E-14 | -8.28 | 21.912761  | -1.22E-01 | 1991065   | 1991188   | NC_000011.9  |
| cg13680337      | 4.04E-13 | 1.91E-14 | -8.28 | 21.9126068 | -1.36E-01 | 71626580  | 71626703  | NC_000010.10 |

|               |          |          |       |            |           |           |           |              |
|---------------|----------|----------|-------|------------|-----------|-----------|-----------|--------------|
| cg01651169    | 4.07E-13 | 1.92E-14 | -8.28 | 21.9070413 | -1.00E-01 | 98960493  | 98960616  | NC_000007.13 |
| cg08597019    | 4.07E-13 | 1.92E-14 | -8.28 | 21.9056292 | -2.22E-01 | 89900495  | 89900618  | NC_000016.9  |
| cg24525763    | 4.08E-13 | 1.93E-14 | -8.28 | 21.9046099 | -5.43E-02 | 135075002 | 135075125 | NC_000010.10 |
| ch.7.135065R  | 4.08E-13 | 1.93E-14 | -8.28 | 21.9034086 | -9.27E-02 | 2696746   | 2696869   | NC_000007.13 |
| cg02611675    | 4.09E-13 | 1.93E-14 | -8.28 | 21.9023452 | -6.62E-02 | 23908273  | 23908396  | NC_000022.10 |
| ch.1.2604911R | 4.10E-13 | 1.94E-14 | -8.28 | 21.8987541 | -6.19E-02 | 110900694 | 110900817 | NC_000001.10 |
| ch.6.609614F  | 4.10E-13 | 1.94E-14 | -8.28 | 21.8980957 | -7.08E-02 | 24693000  | 24693123  | NC_000006.11 |
| cg15354666    | 4.11E-13 | 1.94E-14 | -8.28 | 21.8955484 | -6.22E-02 | 236044927 | 236045050 | NC_000002.11 |
| cg27583038    | 4.11E-13 | 1.95E-14 | -8.28 | 21.89499   | -6.70E-02 | 234735904 | 234736027 | NC_000001.10 |
| cg01377911    | 4.12E-13 | 1.95E-14 | -8.28 | 21.8942684 | -1.09E-01 | 49568036  | 49568159  | NC_000019.9  |
| cg20444381    | 4.12E-13 | 1.95E-14 | -8.28 | 21.8936313 | -6.51E-02 | 109456000 | 109456123 | NC_000008.10 |
| cg24024833    | 4.12E-13 | 1.95E-14 | -8.28 | 21.8930962 | -1.14E-01 | 1892608   | 1892731   | NC_000011.9  |
| cg06745511    | 4.12E-13 | 1.95E-14 | -8.28 | 21.8924094 | -1.08E-01 | 10585774  | 10585897  | NC_000004.11 |
| cg26631454    | 4.13E-13 | 1.95E-14 | -8.28 | 21.8914708 | -1.72E-01 | 114065669 | 114065792 | NC_000013.10 |
| cg23465978    | 4.13E-13 | 1.95E-14 | -8.28 | 21.8906088 | -2.08E-01 | 131330293 | 131330416 | NC_000010.10 |
| cg00172872    | 4.13E-13 | 1.95E-14 | -8.28 | 21.8902609 | -2.00E-01 | 89461426  | 89461549  | NC_000012.11 |
| cg07265541    | 4.13E-13 | 1.96E-14 | -8.28 | 21.8895718 | -1.66E-01 | 159071008 | 159071131 | NC_000006.11 |
| cg13920768    | 4.15E-13 | 1.96E-14 | -8.28 | 21.886812  | -6.15E-02 | 133557644 | 133557767 | NC_000009.11 |
| cg00850453    | 4.15E-13 | 1.96E-14 | -8.28 | 21.8866417 | -5.75E-02 | 12726919  | 12727042  | NC_000007.13 |
| cg24062389    | 4.15E-13 | 1.96E-14 | -8.28 | 21.8864475 | -1.84E-01 | 103478447 | 103478570 | NC_000013.10 |
| cg20214067    | 4.16E-13 | 1.97E-14 | -8.28 | 21.8823253 | -2.02E-01 | 133065776 | 133065899 | NC_000012.11 |
| cg25473438    | 4.17E-13 | 1.97E-14 | -8.28 | 21.8813318 | -1.33E-01 | 41169049  | 41169172  | NC_000006.11 |
| cg04225554    | 4.18E-13 | 1.98E-14 | -8.27 | 21.8771764 | -1.06E-01 | 135082008 | 135082131 | NC_000010.10 |
| cg08508455    | 4.19E-13 | 1.98E-14 | -8.27 | 21.8764904 | -1.59E-01 | 470429    | 470552    | NC_000011.9  |
| cg08827700    | 4.19E-13 | 1.98E-14 | -8.27 | 21.8764386 | -1.70E-01 | 2925969   | 2926092   | NC_000011.9  |

|               |          |          |       |            |           |           |           |              |
|---------------|----------|----------|-------|------------|-----------|-----------|-----------|--------------|
| cg16214492    | 4.19E-13 | 1.98E-14 | -8.27 | 21.8752419 | -1.18E-01 | 76128676  | 76128799  | NC_000017.10 |
| cg12699599    | 4.19E-13 | 1.99E-14 | -8.27 | 21.8748628 | -9.18E-02 | 40643142  | 40643265  | NC_000015.9  |
| cg12080687    | 4.20E-13 | 1.99E-14 | -8.27 | 21.8736996 | -1.83E-01 | 47063626  | 47063749  | NC_000002.11 |
| cg14010720    | 4.22E-13 | 2.00E-14 | -8.27 | 21.8681216 | -1.24E-01 | 62168878  | 62169001  | NC_000020.10 |
| cg18723553    | 4.22E-13 | 2.00E-14 | -8.27 | 21.8681148 | -1.56E-01 | 32160909  | 32161032  | NC_000006.11 |
| cg06971353    | 4.22E-13 | 2.00E-14 | -8.27 | 21.8676298 | -6.53E-02 | 77867044  | 77867167  | NC_000018.9  |
| cg04179819    | 4.22E-13 | 2.00E-14 | -8.27 | 21.8672227 | -7.15E-02 | 7860513   | 7860636   | NC_000010.10 |
| cg20477160    | 4.22E-13 | 2.00E-14 | -8.27 | 21.8671108 | -2.07E-01 | 235936596 | 235936719 | NC_000002.11 |
| cg03621406    | 4.22E-13 | 2.00E-14 | -8.27 | 21.8668798 | -8.13E-02 | 9930365   | 9930488   | NC_000019.9  |
| cg25866173    | 4.23E-13 | 2.00E-14 | -8.27 | 21.8661726 | -8.98E-02 | 105615767 | 105615890 | NC_000010.10 |
| cg24489237    | 4.23E-13 | 2.00E-14 | -8.27 | 21.8657245 | -6.88E-02 | 164529170 | 164529293 | NC_000001.10 |
| cg10590925    | 4.23E-13 | 2.01E-14 | -8.27 | 21.8644077 | -1.67E-01 | 1463620   | 1463743   | NC_000011.9  |
| cg10104252    | 4.24E-13 | 2.01E-14 | -8.27 | 21.8637254 | -1.96E-01 | 3563899   | 3564022   | NC_000012.11 |
| cg05905844    | 4.25E-13 | 2.01E-14 | -8.27 | 21.8610674 | -1.51E-01 | 136280002 | 136280125 | NC_000007.13 |
| cg22885777    | 4.25E-13 | 2.01E-14 | -8.27 | 21.8603199 | -7.34E-02 | 15947555  | 15947678  | NC_000019.9  |
| cg23957643    | 4.25E-13 | 2.02E-14 | -8.27 | 21.8594086 | -1.73E-01 | 110305591 | 110305714 | NC_000001.10 |
| cg18648932    | 4.26E-13 | 2.02E-14 | -8.27 | 21.8577538 | -1.13E-01 | 131553741 | 131553864 | NC_000012.11 |
| cg04551092    | 4.26E-13 | 2.02E-14 | -8.27 | 21.8572834 | -4.75E-02 | 89237573  | 89237696  | NC_000016.9  |
| cg09282946    | 4.26E-13 | 2.02E-14 | -8.27 | 21.8569943 | -1.47E-01 | 43551751  | 43551874  | NC_000022.10 |
| cg18202205    | 4.27E-13 | 2.02E-14 | -8.27 | 21.8556742 | -1.53E-01 | 40958639  | 40958762  | NC_000007.13 |
| cg16851482    | 4.27E-13 | 2.03E-14 | -8.27 | 21.8547325 | -1.59E-01 | 6955953   | 6956076   | NC_000004.11 |
| cg27183030    | 4.29E-13 | 2.03E-14 | -8.27 | 21.8509281 | -1.74E-01 | 99595458  | 99595581  | NC_000007.13 |
| cg11195298    | 4.29E-13 | 2.03E-14 | -8.27 | 21.8504303 | -9.32E-02 | 93630456  | 93630579  | NC_000015.9  |
| ch.10.344997F | 4.30E-13 | 2.04E-14 | -8.27 | 21.8476363 | -6.19E-02 | 12216551  | 12216674  | NC_000010.10 |
| cg14063182    | 4.30E-13 | 2.04E-14 | -8.27 | 21.8474207 | -6.42E-02 | 4682116   | 4682239   | NC_000007.13 |

|                |          |          |       |            |           |           |           |              |
|----------------|----------|----------|-------|------------|-----------|-----------|-----------|--------------|
| cg25601661     | 4.31E-13 | 2.04E-14 | -8.27 | 21.8465754 | -6.78E-02 | 72525334  | 72525457  | NC_000011.9  |
| cg04722643     | 4.31E-13 | 2.04E-14 | -8.27 | 21.8458191 | -1.86E-01 | 80289500  | 80289623  | NC_000017.10 |
| cg16497945     | 4.32E-13 | 2.05E-14 | -8.27 | 21.8431918 | -1.91E-01 | 70147094  | 70147217  | NC_000015.9  |
| cg04088338     | 4.33E-13 | 2.05E-14 | -8.27 | 21.8412176 | -1.51E-01 | 58187171  | 58187294  | NC_000005.9  |
| cg06460511     | 4.34E-13 | 2.06E-14 | -8.27 | 21.8378314 | -5.30E-02 | 144653944 | 144654067 | NC_000008.10 |
| cg07520919     | 4.34E-13 | 2.06E-14 | -8.27 | 21.8373527 | -1.48E-01 | 160721435 | 160721558 | NC_000006.11 |
| cg16306870     | 4.35E-13 | 2.06E-14 | -8.27 | 21.836304  | -2.30E-01 | 194868790 | 194868913 | NC_000003.11 |
| cg00836662     | 4.35E-13 | 2.07E-14 | -8.27 | 21.8349594 | -6.68E-02 | 100844445 | 100844568 | NC_000007.13 |
| cg20777796     | 4.36E-13 | 2.07E-14 | -8.27 | 21.834299  | -2.57E-01 | 1980117   | 1980240   | NC_000007.13 |
| cg03323793     | 4.36E-13 | 2.07E-14 | -8.27 | 21.8322619 | -1.47E-01 | 151548111 | 151548234 | NC_000007.13 |
| cg08779305     | 4.37E-13 | 2.07E-14 | -8.27 | 21.83183   | -4.19E-02 | 14380039  | 14380162  | NC_000016.9  |
| cg13785223     | 4.37E-13 | 2.08E-14 | -8.27 | 21.8305072 | -1.85E-01 | 114905788 | 114905911 | NC_000013.10 |
| cg18015534     | 4.37E-13 | 2.08E-14 | -8.27 | 21.8299148 | -1.75E-01 | 119993934 | 119994057 | NC_000011.9  |
| cg14077270     | 4.37E-13 | 2.08E-14 | -8.27 | 21.8298694 | -4.46E-02 | 45879818  | 45879941  | NC_000015.9  |
| cg22545138     | 4.39E-13 | 2.09E-14 | -8.27 | 21.8259607 | -1.11E-01 | 23510005  | 23510128  | NC_000007.13 |
| cg22076676     | 4.39E-13 | 2.09E-14 | -8.27 | 21.825604  | -1.31E-01 | 43503935  | 43504058  | NC_000002.11 |
| cg15350899     | 4.41E-13 | 2.10E-14 | -8.27 | 21.8214105 | -1.43E-01 | 118781763 | 118781886 | NC_000011.9  |
| cg04764812     | 4.41E-13 | 2.10E-14 | -8.27 | 21.8204516 | -1.46E-01 | 76582315  | 76582438  | NC_000010.10 |
| cg12760479     | 4.42E-13 | 2.10E-14 | -8.27 | 21.8179354 | -6.91E-02 | 50323140  | 50323263  | NC_000022.10 |
| ch.12.2583928F | 4.43E-13 | 2.11E-14 | -8.26 | 21.8165373 | -6.06E-02 | 123160012 | 123160135 | NC_000012.11 |
| cg05228377     | 4.43E-13 | 2.11E-14 | -8.26 | 21.8154364 | -1.19E-01 | 27384293  | 27384416  | NC_000011.9  |
| cg08172221     | 4.44E-13 | 2.11E-14 | -8.26 | 21.8147446 | -2.98E-02 | 233416078 | 233416201 | NC_000002.11 |
| cg08657247     | 4.44E-13 | 2.11E-14 | -8.26 | 21.8137276 | -1.19E-01 | 27279763  | 27279886  | NC_000017.10 |
| cg17298403     | 4.44E-13 | 2.11E-14 | -8.26 | 21.813658  | -7.63E-02 | 15218155  | 15218278  | NC_000019.9  |
| cg22628512     | 4.45E-13 | 2.12E-14 | -8.26 | 21.8120577 | -1.92E-01 | 200348658 | 200348781 | NC_000001.10 |

|                 |          |          |       |            |           |           |           |              |
|-----------------|----------|----------|-------|------------|-----------|-----------|-----------|--------------|
| cg10902850      | 4.45E-13 | 2.12E-14 | -8.26 | 21.8112785 | -2.21E-01 | 106447444 | 106447567 | NC_000003.11 |
| cg06121469      | 4.46E-13 | 2.12E-14 | -8.26 | 21.8091567 | -9.76E-02 | 44956098  | 44956221  | NC_000015.9  |
| cg21552081      | 4.46E-13 | 2.12E-14 | -8.26 | 21.8086703 | -1.24E-01 | 60688411  | 60688534  | NC_000002.11 |
| cg17015704      | 4.46E-13 | 2.12E-14 | -8.26 | 21.8084241 | -6.00E-02 | 119400380 | 119400503 | NC_000006.11 |
| cg03045323      | 4.46E-13 | 2.12E-14 | -8.26 | 21.8083214 | -9.32E-02 | 11484448  | 11484571  | NC_000019.9  |
| cg01053766      | 4.48E-13 | 2.13E-14 | -8.26 | 21.8053292 | -1.39E-01 | 10479730  | 10479853  | NC_000005.9  |
| cg13086586      | 4.48E-13 | 2.13E-14 | -8.26 | 21.8048469 | -8.42E-02 | 57303149  | 57303272  | NC_000004.11 |
| cg20289045      | 4.48E-13 | 2.13E-14 | -8.26 | 21.8037634 | -2.01E-01 | 94270260  | 94270383  | NC_000011.9  |
| cg21943938      | 4.48E-13 | 2.13E-14 | -8.26 | 21.8031608 | -5.51E-02 | 90198832  | 90198955  | NC_000015.9  |
| cg24724917      | 4.49E-13 | 2.14E-14 | -8.26 | 21.8013981 | -1.65E-01 | 2925439   | 2925562   | NC_000011.9  |
| cg12738349      | 4.50E-13 | 2.14E-14 | -8.26 | 21.8004698 | -6.57E-02 | 24236284  | 24236407  | NC_000022.10 |
| cg16402443      | 4.50E-13 | 2.14E-14 | -8.26 | 21.7995558 | -7.83E-02 | 2598526   | 2598649   | NC_000007.13 |
| cg13864868      | 4.50E-13 | 2.14E-14 | -8.26 | 21.7993841 | -1.11E-01 | 95820799  | 95820922  | NC_000009.11 |
| cg15077012      | 4.53E-13 | 2.16E-14 | -8.26 | 21.7932787 | -6.52E-02 | 99400394  | 99400517  | NC_000010.10 |
| cg15423853      | 4.54E-13 | 2.16E-14 | -8.26 | 21.7910384 | -6.68E-02 | 11323943  | 11324066  | NC_000012.11 |
| cg09232358      | 4.54E-13 | 2.16E-14 | -8.26 | 21.7907424 | -2.13E-01 | 23015657  | 23015780  | NC_000014.8  |
| cg07011163      | 4.54E-13 | 2.16E-14 | -8.26 | 21.7905703 | -1.31E-01 | 6947325   | 6947448   | NC_000017.10 |
| cg18736676      | 4.55E-13 | 2.17E-14 | -8.26 | 21.7872579 | -1.74E-01 | 109053447 | 109053570 | NC_000006.11 |
| cg23484380      | 4.55E-13 | 2.17E-14 | -8.26 | 21.7871917 | -1.60E-01 | 31560776  | 31560899  | NC_000006.11 |
| cg09292873      | 4.56E-13 | 2.17E-14 | -8.26 | 21.7862793 | -5.89E-02 | 111683347 | 111683470 | NC_000010.10 |
| cg14774288      | 4.56E-13 | 2.17E-14 | -8.26 | 21.7852753 | -6.62E-02 | 30669556  | 30669679  | NC_000008.10 |
| cg18181703      | 4.57E-13 | 2.18E-14 | -8.26 | 21.7835773 | -1.27E-01 | 76354621  | 76354744  | NC_000017.10 |
| ch.15.68126615R | 4.59E-13 | 2.19E-14 | -8.26 | 21.7782087 | -6.35E-02 | 70339561  | 70339684  | NC_000015.9  |
| cg25420298      | 4.60E-13 | 2.19E-14 | -8.26 | 21.7761781 | -7.54E-02 | 11456894  | 11457017  | NC_000019.9  |
| cg19618955      | 4.62E-13 | 2.20E-14 | -8.26 | 21.7717661 | -6.43E-02 | 175209865 | 175209988 | NC_000002.11 |

|            |          |          |       |            |           |           |           |              |
|------------|----------|----------|-------|------------|-----------|-----------|-----------|--------------|
| cg03628441 | 4.63E-13 | 2.21E-14 | -8.26 | 21.7689528 | -1.74E-01 | 40337411  | 40337534  | NC_000017.10 |
| cg21530174 | 4.66E-13 | 2.22E-14 | -8.26 | 21.7633511 | -6.90E-02 | 151031796 | 151031919 | NC_000005.9  |
| cg10449466 | 4.68E-13 | 2.23E-14 | -8.26 | 21.7589682 | -1.57E-01 | 16505650  | 16505773  | NC_000012.11 |
| cg05668043 | 4.68E-13 | 2.24E-14 | -8.26 | 21.7574275 | -4.54E-02 | 84733982  | 84734105  | NC_000016.9  |
| cg05950943 | 4.69E-13 | 2.24E-14 | -8.25 | 21.7554159 | -1.37E-01 | 2520971   | 2521094   | NC_000016.9  |
| cg15429888 | 4.69E-13 | 2.24E-14 | -8.25 | 21.7552815 | -1.39E-01 | 66742827  | 66742950  | NC_000011.9  |
| cg11848254 | 4.70E-13 | 2.24E-14 | -8.25 | 21.7534702 | -1.43E-01 | 134939464 | 134939587 | NC_000007.13 |
| cg02707357 | 4.72E-13 | 2.25E-14 | -8.25 | 21.7503849 | -1.46E-01 | 28483997  | 28484120  | NC_000008.10 |
| cg23696214 | 4.72E-13 | 2.25E-14 | -8.25 | 21.7499742 | -1.51E-01 | 141136170 | 141136293 | NC_000007.13 |
| cg14372245 | 4.72E-13 | 2.26E-14 | -8.25 | 21.748968  | -1.83E-01 | 97683653  | 97683776  | NC_000009.11 |
| cg24530728 | 4.73E-13 | 2.26E-14 | -8.25 | 21.7476033 | -1.40E-01 | 224759763 | 224759886 | NC_000001.10 |
| cg14695751 | 4.73E-13 | 2.26E-14 | -8.25 | 21.747291  | -1.59E-01 | 202671292 | 202671415 | NC_000002.11 |
| cg08636385 | 4.73E-13 | 2.26E-14 | -8.25 | 21.7469648 | -1.91E-01 | 71816668  | 71816791  | NC_000006.11 |
| cg19923393 | 4.73E-13 | 2.26E-14 | -8.25 | 21.7465891 | -1.07E-01 | 7252587   | 7252710   | NC_000004.11 |
| cg11253886 | 4.74E-13 | 2.26E-14 | -8.25 | 21.7456049 | -1.36E-01 | 47039669  | 47039792  | NC_000002.11 |
| cg03089940 | 4.74E-13 | 2.26E-14 | -8.25 | 21.7450358 | -1.38E-01 | 21767146  | 21767269  | NC_000008.10 |
| cg21187068 | 4.74E-13 | 2.26E-14 | -8.25 | 21.7450008 | -1.65E-01 | 144659627 | 144659750 | NC_000008.10 |
| cg10643916 | 4.74E-13 | 2.27E-14 | -8.25 | 21.7443754 | -8.12E-02 | 69754609  | 69754732  | NC_000015.9  |
| cg27059228 | 4.74E-13 | 2.27E-14 | -8.25 | 21.7440793 | -1.69E-01 | 89545813  | 89545936  | NC_000015.9  |
| cg07563033 | 4.75E-13 | 2.27E-14 | -8.25 | 21.7418423 | -1.72E-01 | 73717790  | 73717913  | NC_000003.11 |
| cg24012756 | 4.76E-13 | 2.27E-14 | -8.25 | 21.7406849 | -5.66E-02 | 11761015  | 11761138  | NC_000003.11 |
| cg07952815 | 4.76E-13 | 2.27E-14 | -8.25 | 21.7405953 | -1.62E-01 | 104073479 | 104073602 | NC_000014.8  |
| cg24535475 | 4.76E-13 | 2.28E-14 | -8.25 | 21.7400065 | -1.60E-01 | 7167900   | 7168023   | NC_000012.11 |
| cg25580254 | 4.77E-13 | 2.28E-14 | -8.25 | 21.7380106 | -7.12E-02 | 8088937   | 8089060   | NC_000012.11 |
| cg14209064 | 4.78E-13 | 2.29E-14 | -8.25 | 21.7352173 | -9.50E-02 | 135724695 | 135724818 | NC_000009.11 |

|                |          |          |       |            |           |           |           |              |
|----------------|----------|----------|-------|------------|-----------|-----------|-----------|--------------|
| cg23124755     | 4.79E-13 | 2.29E-14 | -8.25 | 21.7334088 | -3.72E-02 | 33447476  | 33447599  | NC_000009.11 |
| cg24527881     | 4.79E-13 | 2.29E-14 | -8.25 | 21.7328486 | -2.09E-01 | 45187630  | 45187753  | NC_000001.10 |
| cg21629394     | 4.80E-13 | 2.29E-14 | -8.25 | 21.7323215 | -7.99E-02 | 138739270 | 138739393 | NC_000005.9  |
| cg15474337     | 4.80E-13 | 2.29E-14 | -8.25 | 21.7318447 | -2.09E-01 | 50848247  | 50848370  | NC_000019.9  |
| ch.16.2085963R | 4.80E-13 | 2.30E-14 | -8.25 | 21.7311113 | -5.39E-02 | 87763908  | 87764031  | NC_000016.9  |
| cg01294686     | 4.82E-13 | 2.30E-14 | -8.25 | 21.7282168 | -9.92E-02 | 26606093  | 26606216  | NC_000001.10 |
| cg10391212     | 4.82E-13 | 2.31E-14 | -8.25 | 21.7272322 | -6.64E-02 | 47840136  | 47840259  | NC_000004.11 |
| cg02638589     | 4.82E-13 | 2.31E-14 | -8.25 | 21.7269433 | -1.19E-01 | 72477069  | 72477192  | NC_000015.9  |
| cg00700485     | 4.84E-13 | 2.31E-14 | -8.25 | 21.7230807 | -5.83E-02 | 44098223  | 44098346  | NC_000020.10 |
| cg02965295     | 4.85E-13 | 2.32E-14 | -8.25 | 21.7213336 | -1.94E-01 | 197944718 | 197944841 | NC_000002.11 |
| cg07051684     | 4.85E-13 | 2.32E-14 | -8.25 | 21.7193622 | -1.19E-01 | 18346502  | 18346625  | NC_000019.9  |
| cg21591452     | 4.86E-13 | 2.32E-14 | -8.25 | 21.7190501 | -1.81E-01 | 79304628  | 79304751  | NC_000017.10 |
| cg27505627     | 4.86E-13 | 2.33E-14 | -8.25 | 21.7187403 | -1.99E-01 | 38506589  | 38506712  | NC_000022.10 |
| cg25512791     | 4.86E-13 | 2.33E-14 | -8.25 | 21.717658  | -1.05E-01 | 56949074  | 56949197  | NC_000011.9  |
| cg02153286     | 4.86E-13 | 2.33E-14 | -8.25 | 21.7174597 | -1.88E-01 | 436928    | 437051    | NC_000006.11 |
| cg15503752     | 4.88E-13 | 2.34E-14 | -8.25 | 21.7143798 | -1.90E-01 | 74639731  | 74639854  | NC_000017.10 |
| cg25545917     | 4.88E-13 | 2.34E-14 | -8.25 | 21.7131685 | -1.20E-01 | 1550349   | 1550472   | NC_000004.11 |
| cg16021018     | 4.90E-13 | 2.35E-14 | -8.25 | 21.7097626 | -1.64E-01 | 46449313  | 46449436  | NC_000003.11 |
| cg09363892     | 4.90E-13 | 2.35E-14 | -8.25 | 21.7089488 | -7.91E-02 | 954619    | 954742    | NC_000001.10 |
| cg02566391     | 4.90E-13 | 2.35E-14 | -8.25 | 21.7087484 | -2.26E-01 | 67805528  | 67805651  | NC_000001.10 |
| cg08423149     | 4.90E-13 | 2.35E-14 | -8.25 | 21.7086311 | -6.28E-02 | 5013451   | 5013574   | NC_000007.13 |
| cg16862624     | 4.91E-13 | 2.35E-14 | -8.25 | 21.7069306 | -4.52E-02 | 56976039  | 56976162  | NC_000018.9  |
| cg14578677     | 4.92E-13 | 2.35E-14 | -8.25 | 21.7061942 | -2.02E-01 | 38859770  | 38859893  | NC_000004.11 |
| cg14042056     | 4.92E-13 | 2.36E-14 | -8.25 | 21.7061564 | -4.39E-02 | 145064193 | 145064316 | NC_000008.10 |
| cg03160740     | 4.92E-13 | 2.36E-14 | -8.25 | 21.7061054 | -3.99E-02 | 42544400  | 42544523  | NC_000003.11 |

|              |          |          |       |            |           |           |           |              |
|--------------|----------|----------|-------|------------|-----------|-----------|-----------|--------------|
| cg26035201   | 4.93E-13 | 2.36E-14 | -8.25 | 21.7036487 | -1.97E-01 | 1607146   | 1607269   | NC_000007.13 |
| cg17393917   | 4.93E-13 | 2.36E-14 | -8.25 | 21.7030754 | -1.85E-01 | 106533840 | 106533963 | NC_000012.11 |
| cg07467323   | 4.93E-13 | 2.36E-14 | -8.25 | 21.7021691 | -7.44E-02 | 65134028  | 65134151  | NC_000015.9  |
| cg03862760   | 4.94E-13 | 2.37E-14 | -8.25 | 21.7003939 | -7.02E-02 | 1609483   | 1609606   | NC_000007.13 |
| cg18853435   | 4.95E-13 | 2.37E-14 | -8.25 | 21.6990675 | -3.30E-02 | 219263149 | 219263272 | NC_000002.11 |
| cg22461324   | 4.95E-13 | 2.37E-14 | -8.25 | 21.6983447 | -1.72E-01 | 155252944 | 155253067 | NC_000007.13 |
| cg18555142   | 4.96E-13 | 2.38E-14 | -8.25 | 21.6973274 | -1.48E-01 | 155133222 | 155133345 | NC_000007.13 |
| cg02352181   | 4.96E-13 | 2.38E-14 | -8.25 | 21.6964809 | -1.38E-01 | 74058083  | 74058206  | NC_000002.11 |
| cg19194454   | 4.96E-13 | 2.38E-14 | -8.25 | 21.6963342 | -3.92E-02 | 69760878  | 69761001  | NC_000016.9  |
| cg20448748   | 4.97E-13 | 2.38E-14 | -8.24 | 21.6943679 | -7.40E-02 | 31091392  | 31091515  | NC_000014.8  |
| cg11854007   | 4.97E-13 | 2.38E-14 | -8.24 | 21.6942118 | -1.19E-01 | 31781697  | 31781820  | NC_000020.10 |
| cg09942743   | 4.97E-13 | 2.39E-14 | -8.24 | 21.693357  | -1.62E-01 | 29532008  | 29532131  | NC_000002.11 |
| cg24534258   | 4.97E-13 | 2.39E-14 | -8.24 | 21.6927533 | -1.41E-01 | 116674019 | 116674142 | NC_000006.11 |
| ch.1.897769F | 4.98E-13 | 2.39E-14 | -8.24 | 21.6920859 | -5.68E-02 | 27220448  | 27220571  | NC_000001.10 |
| cg05592245   | 4.98E-13 | 2.39E-14 | -8.24 | 21.6920225 | -1.80E-01 | 65280473  | 65280596  | NC_000010.10 |
| cg14904363   | 4.98E-13 | 2.39E-14 | -8.24 | 21.6916403 | -1.26E-01 | 43032587  | 43032710  | NC_000019.9  |
| cg21454362   | 4.99E-13 | 2.39E-14 | -8.24 | 21.6902989 | -1.90E-01 | 2609875   | 2609998   | NC_000007.13 |
| cg18284523   | 5.00E-13 | 2.40E-14 | -8.24 | 21.6870676 | -4.77E-02 | 24711562  | 24711685  | NC_000014.8  |
| cg02152631   | 5.00E-13 | 2.40E-14 | -8.24 | 21.6867231 | -1.78E-01 | 29133647  | 29133770  | NC_000008.10 |
| cg09140531   | 5.04E-13 | 2.42E-14 | -8.24 | 21.67969   | -1.61E-01 | 48078914  | 48079037  | NC_000006.11 |
| cg21937887   | 5.04E-13 | 2.42E-14 | -8.24 | 21.6788084 | -8.06E-02 | 132765062 | 132765185 | NC_000002.11 |
| cg15415160   | 5.05E-13 | 2.42E-14 | -8.24 | 21.6775603 | -3.91E-02 | 26569060  | 26569183  | NC_000002.11 |
| cg19223579   | 5.05E-13 | 2.43E-14 | -8.24 | 21.6769152 | -1.69E-01 | 115370894 | 115371017 | NC_000010.10 |
| cg02645563   | 5.05E-13 | 2.43E-14 | -8.24 | 21.6768525 | -1.47E-01 | 54610102  | 54610225  | NC_000012.11 |
| cg17767319   | 5.05E-13 | 2.43E-14 | -8.24 | 21.6764021 | -5.81E-02 | 121124020 | 121124143 | NC_000012.11 |



|                |          |          |       |            |           |           |           |              |
|----------------|----------|----------|-------|------------|-----------|-----------|-----------|--------------|
| cg04105091     | 5.07E-13 | 2.44E-14 | -8.24 | 21.6719942 | -8.83E-02 | 32121355  | 32121478  | NC_000006.11 |
| cg20069718     | 5.08E-13 | 2.44E-14 | -8.24 | 21.669895  | -1.91E-01 | 50898249  | 50898372  | NC_000012.11 |
| cg09946832     | 5.08E-13 | 2.44E-14 | -8.24 | 21.6697724 | -9.97E-02 | 143690524 | 143690647 | NC_000008.10 |
| cg13904520     | 5.09E-13 | 2.44E-14 | -8.24 | 21.6692725 | -1.96E-01 | 160783054 | 160783177 | NC_000001.10 |
| cg02635869     | 5.10E-13 | 2.45E-14 | -8.24 | 21.6671881 | -5.51E-02 | 36262100  | 36262223  | NC_000021.8  |
| cg23112821     | 5.11E-13 | 2.46E-14 | -8.24 | 21.6641388 | -1.71E-01 | 100658902 | 100659025 | NC_000014.8  |
| cg17827670     | 5.11E-13 | 2.46E-14 | -8.24 | 21.6635921 | -8.93E-02 | 129008130 | 129008253 | NC_000007.13 |
| cg21172011     | 5.13E-13 | 2.46E-14 | -8.24 | 21.6611941 | -1.61E-01 | 36577638  | 36577761  | NC_000021.8  |
| ch.2.10906491R | 5.13E-13 | 2.47E-14 | -8.24 | 21.6607508 | -4.37E-02 | 10989040  | 10989163  | NC_000002.11 |
| cg20567355     | 5.15E-13 | 2.47E-14 | -8.24 | 21.6572269 | -1.76E-01 | 52754434  | 52754557  | NC_000008.10 |
| cg20701977     | 5.15E-13 | 2.48E-14 | -8.24 | 21.6567727 | -9.29E-02 | 180644504 | 180644627 | NC_000005.9  |
| cg21699894     | 5.15E-13 | 2.48E-14 | -8.24 | 21.6566267 | -1.16E-01 | 42545443  | 42545566  | NC_000020.10 |
| cg01944226     | 5.15E-13 | 2.48E-14 | -8.24 | 21.6555542 | -2.00E-01 | 80188056  | 80188179  | NC_000017.10 |
| cg17360854     | 5.15E-13 | 2.48E-14 | -8.24 | 21.655286  | -2.03E-01 | 161224771 | 161224894 | NC_000002.11 |
| cg18525352     | 5.15E-13 | 2.48E-14 | -8.24 | 21.6551895 | -2.00E-01 | 106533867 | 106533990 | NC_000012.11 |
| cg24251135     | 5.16E-13 | 2.48E-14 | -8.24 | 21.6549342 | -1.51E-01 | 144109657 | 144109780 | NC_000004.11 |
| cg16339434     | 5.16E-13 | 2.48E-14 | -8.24 | 21.6545122 | -1.88E-01 | 2286788   | 2286911   | NC_000011.9  |
| cg17941846     | 5.16E-13 | 2.48E-14 | -8.24 | 21.6539764 | -3.76E-02 | 219264013 | 219264136 | NC_000002.11 |
| cg18033628     | 5.16E-13 | 2.48E-14 | -8.24 | 21.6535898 | -1.14E-01 | 17655229  | 17655352  | NC_000017.10 |
| cg09331409     | 5.16E-13 | 2.48E-14 | -8.24 | 21.6533054 | -1.49E-01 | 75315116  | 75315239  | NC_000011.9  |
| cg10858909     | 5.17E-13 | 2.49E-14 | -8.24 | 21.6515999 | -7.10E-02 | 99850288  | 99850411  | NC_000004.11 |
| cg05042708     | 5.17E-13 | 2.49E-14 | -8.24 | 21.6513661 | -1.27E-01 | 105212813 | 105212936 | NC_000010.10 |
| cg09037025     | 5.18E-13 | 2.49E-14 | -8.24 | 21.6500698 | -7.69E-02 | 27745785  | 27745908  | NC_000013.10 |
| cg14912727     | 5.19E-13 | 2.50E-14 | -8.24 | 21.6476253 | -6.57E-02 | 36916005  | 36916128  | NC_000001.10 |
| cg20593868     | 5.19E-13 | 2.50E-14 | -8.24 | 21.647285  | -6.82E-02 | 62588672  | 62588795  | NC_000020.10 |

|            |          |          |       |            |           |           |           |              |
|------------|----------|----------|-------|------------|-----------|-----------|-----------|--------------|
| cg16198990 | 5.19E-13 | 2.50E-14 | -8.24 | 21.6470408 | -1.00E-01 | 151647133 | 151647256 | NC_000006.11 |
| cg12869362 | 5.20E-13 | 2.50E-14 | -8.24 | 21.6464988 | -7.90E-02 | 21369411  | 21369534  | NC_000022.10 |
| cg17947461 | 5.20E-13 | 2.50E-14 | -8.24 | 21.6452738 | -7.04E-02 | 87797169  | 87797292  | NC_000001.10 |
| cg21791662 | 5.21E-13 | 2.51E-14 | -8.24 | 21.6443092 | -1.58E-01 | 121625208 | 121625331 | NC_000002.11 |
| cg01034754 | 5.22E-13 | 2.51E-14 | -8.24 | 21.6418926 | -1.75E-01 | 30720817  | 30720940  | NC_000010.10 |
| cg21800400 | 5.22E-13 | 2.52E-14 | -8.24 | 21.6412232 | -1.16E-01 | 42845622  | 42845745  | NC_000013.10 |
| cg14658948 | 5.22E-13 | 2.52E-14 | -8.24 | 21.6409335 | -7.63E-02 | 31708287  | 31708410  | NC_000006.11 |
| cg17942750 | 5.23E-13 | 2.52E-14 | -8.24 | 21.6404254 | -2.35E-01 | 140683527 | 140683650 | NC_000009.11 |
| cg01481784 | 5.23E-13 | 2.52E-14 | -8.24 | 21.6402165 | -6.87E-02 | 161369725 | 161369848 | NC_000001.10 |
| cg27315958 | 5.24E-13 | 2.53E-14 | -8.24 | 21.6369177 | -2.12E-01 | 17206819  | 17206942  | NC_000008.10 |
| cg22561329 | 5.27E-13 | 2.54E-14 | -8.23 | 21.6319279 | -1.06E-01 | 57346735  | 57346858  | NC_000019.9  |
| cg02397720 | 5.27E-13 | 2.54E-14 | -8.23 | 21.6311028 | -2.56E-01 | 238512407 | 238512530 | NC_000002.11 |
| cg03521656 | 5.28E-13 | 2.55E-14 | -8.23 | 21.6287922 | -2.82E-02 | 19422243  | 19422366  | NC_000016.9  |
| cg06901893 | 5.29E-13 | 2.55E-14 | -8.23 | 21.6281862 | -1.62E-01 | 73400692  | 73400815  | NC_000007.13 |
| cg24406917 | 5.30E-13 | 2.55E-14 | -8.23 | 21.625723  | -9.40E-02 | 25507612  | 25507735  | NC_000022.10 |
| cg13710297 | 5.31E-13 | 2.56E-14 | -8.23 | 21.6243055 | -2.08E-01 | 55752980  | 55753103  | NC_000003.11 |
| cg10920297 | 5.31E-13 | 2.56E-14 | -8.23 | 21.6231292 | -1.51E-01 | 94803188  | 94803311  | NC_000011.9  |
| cg17436946 | 5.31E-13 | 2.56E-14 | -8.23 | 21.6229691 | -6.27E-02 | 39699568  | 39699691  | NC_000004.11 |
| cg12573119 | 5.32E-13 | 2.56E-14 | -8.23 | 21.622171  | -7.35E-02 | 78977690  | 78977813  | NC_000004.11 |
| cg22160267 | 5.32E-13 | 2.57E-14 | -8.23 | 21.6211213 | -1.39E-01 | 16181372  | 16181495  | NC_000019.9  |
| cg13857354 | 5.34E-13 | 2.58E-14 | -8.23 | 21.6175787 | -1.60E-01 | 241519705 | 241519828 | NC_000002.11 |
| cg11453058 | 5.34E-13 | 2.58E-14 | -8.23 | 21.6167607 | -8.88E-02 | 14064176  | 14064299  | NC_000019.9  |
| cg11600734 | 5.34E-13 | 2.58E-14 | -8.23 | 21.6165752 | -1.60E-01 | 4794020   | 4794143   | NC_000003.11 |
| cg26433838 | 5.34E-13 | 2.58E-14 | -8.23 | 21.6164827 | -5.68E-02 | 160167749 | 160167872 | NC_000003.11 |
| cg08882472 | 5.38E-13 | 2.60E-14 | -8.23 | 21.6100174 | -8.68E-02 | 56607099  | 56607222  | NC_000006.11 |

|               |          |          |       |            |           |           |           |              |
|---------------|----------|----------|-------|------------|-----------|-----------|-----------|--------------|
| cg26351468    | 5.38E-13 | 2.60E-14 | -8.23 | 21.6091321 | -5.33E-02 | 74572950  | 74573073  | NC_000007.13 |
| cg06520300    | 5.39E-13 | 2.60E-14 | -8.23 | 21.6076635 | -1.42E-01 | 16081824  | 16081947  | NC_000002.11 |
| cg07622575    | 5.39E-13 | 2.60E-14 | -8.23 | 21.6075188 | -2.25E-01 | 11487955  | 11488078  | NC_000002.11 |
| cg24482747    | 5.40E-13 | 2.61E-14 | -8.23 | 21.6051645 | -1.36E-01 | 123315780 | 123315903 | NC_000012.11 |
| cg16348668    | 5.41E-13 | 2.61E-14 | -8.23 | 21.6044873 | -2.24E-01 | 240196171 | 240196294 | NC_000002.11 |
| cg06080300    | 5.41E-13 | 2.61E-14 | -8.23 | 21.603577  | -1.53E-01 | 1563096   | 1563219   | NC_000001.10 |
| cg12529801    | 5.42E-13 | 2.62E-14 | -8.23 | 21.6024292 | -2.80E-02 | 9184705   | 9184828   | NC_000016.9  |
| cg14539532    | 5.43E-13 | 2.62E-14 | -8.23 | 21.6003636 | -1.09E-01 | 42440113  | 42440236  | NC_000019.9  |
| cg14125468    | 5.43E-13 | 2.62E-14 | -8.23 | 21.6003216 | -1.45E-01 | 132113996 | 132114119 | NC_000009.11 |
| cg16754857    | 5.44E-13 | 2.62E-14 | -8.23 | 21.5990907 | -1.77E-01 | 159052400 | 159052523 | NC_000006.11 |
| cg07271261    | 5.44E-13 | 2.63E-14 | -8.23 | 21.5983044 | -1.60E-01 | 11610613  | 11610736  | NC_000003.11 |
| cg00166372    | 5.44E-13 | 2.63E-14 | -8.23 | 21.5980511 | -2.03E-01 | 50232459  | 50232582  | NC_000003.11 |
| cg18485596    | 5.44E-13 | 2.63E-14 | -8.23 | 21.597681  | -8.78E-02 | 111435084 | 111435207 | NC_000006.11 |
| ch.11.319992F | 5.46E-13 | 2.64E-14 | -8.23 | 21.5939432 | -7.83E-02 | 11914496  | 11914619  | NC_000011.9  |
| cg05343665    | 5.47E-13 | 2.64E-14 | -8.23 | 21.5930136 | -1.13E-01 | 15790461  | 15790584  | NC_000012.11 |
| cg00324097    | 5.50E-13 | 2.66E-14 | -8.23 | 21.5873643 | -1.63E-01 | 75446549  | 75446672  | NC_000017.10 |
| cg18185665    | 5.51E-13 | 2.66E-14 | -8.23 | 21.5851703 | -8.99E-02 | 16257111  | 16257234  | NC_000017.10 |
| cg00532936    | 5.51E-13 | 2.66E-14 | -8.23 | 21.5847052 | -1.52E-01 | 53588449  | 53588572  | NC_000001.10 |
| cg08165291    | 5.51E-13 | 2.66E-14 | -8.23 | 21.584204  | -6.66E-02 | 27047555  | 27047678  | NC_000017.10 |
| cg11436113    | 5.53E-13 | 2.67E-14 | -8.23 | 21.5809322 | -1.06E-01 | 19191145  | 19191268  | NC_000020.10 |
| cg25735490    | 5.53E-13 | 2.67E-14 | -8.23 | 21.5807603 | -1.30E-01 | 48263204  | 48263327  | NC_000017.10 |
| cg24670330    | 5.53E-13 | 2.68E-14 | -8.23 | 21.5799597 | -1.39E-01 | 25346920  | 25347043  | NC_000022.10 |
| cg00264467    | 5.55E-13 | 2.68E-14 | -8.23 | 21.577992  | -6.59E-02 | 4401424   | 4401547   | NC_000016.9  |
| cg25840173    | 5.56E-13 | 2.69E-14 | -8.23 | 21.5751094 | -1.58E-01 | 45914379  | 45914502  | NC_000007.13 |
| cg19095568    | 5.56E-13 | 2.69E-14 | -8.23 | 21.5750338 | -2.21E-01 | 41062113  | 41062236  | NC_000015.9  |

|            |          |          |       |            |           |           |           |              |
|------------|----------|----------|-------|------------|-----------|-----------|-----------|--------------|
| cg18886062 | 5.57E-13 | 2.69E-14 | -8.23 | 21.5739976 | -9.25E-02 | 49224454  | 49224577  | NC_000019.9  |
| cg05325061 | 5.58E-13 | 2.70E-14 | -8.22 | 21.5714933 | -1.11E-01 | 87929403  | 87929526  | NC_000016.9  |
| cg19534681 | 5.58E-13 | 2.70E-14 | -8.22 | 21.5710358 | -8.11E-02 | 134785761 | 134785884 | NC_000002.11 |
| cg00600454 | 5.59E-13 | 2.71E-14 | -8.22 | 21.5691548 | -1.55E-01 | 65468017  | 65468140  | NC_000001.10 |
| cg24743283 | 5.59E-13 | 2.71E-14 | -8.22 | 21.5687222 | -3.28E-02 | 2884365   | 2884488   | NC_000007.13 |
| cg23876285 | 5.60E-13 | 2.71E-14 | -8.22 | 21.5682952 | -1.50E-01 | 35078971  | 35079094  | NC_000017.10 |
| cg22876402 | 5.60E-13 | 2.71E-14 | -8.22 | 21.5682785 | -1.69E-01 | 71553543  | 71553666  | NC_000003.11 |
| cg01752462 | 5.60E-13 | 2.71E-14 | -8.22 | 21.5673271 | -7.07E-02 | 242156822 | 242156945 | NC_000002.11 |
| cg01806956 | 5.61E-13 | 2.71E-14 | -8.22 | 21.566147  | -1.72E-01 | 9460830   | 9460953   | NC_000001.10 |
| cg12341429 | 5.61E-13 | 2.71E-14 | -8.22 | 21.5659973 | -1.81E-01 | 161887154 | 161887277 | NC_000002.11 |
| cg07328688 | 5.61E-13 | 2.72E-14 | -8.22 | 21.5653385 | -1.61E-01 | 114304349 | 114304472 | NC_000004.11 |
| cg22528270 | 5.61E-13 | 2.72E-14 | -8.22 | 21.5648914 | -1.83E-01 | 151505116 | 151505239 | NC_000007.13 |
| cg11200568 | 5.62E-13 | 2.72E-14 | -8.22 | 21.5639161 | -1.23E-01 | 226540    | 226663    | NC_000007.13 |
| cg11406388 | 5.63E-13 | 2.73E-14 | -8.22 | 21.5617193 | -1.98E-01 | 76522937  | 76523060  | NC_000017.10 |
| cg06512918 | 5.63E-13 | 2.73E-14 | -8.22 | 21.5609515 | -9.86E-02 | 228350199 | 228350322 | NC_000001.10 |
| cg03753813 | 5.64E-13 | 2.73E-14 | -8.22 | 21.5606064 | -1.71E-01 | 116088501 | 116088624 | NC_000001.10 |
| cg19795866 | 5.64E-13 | 2.73E-14 | -8.22 | 21.5597721 | -1.36E-01 | 157085473 | 157085596 | NC_000007.13 |
| cg02974085 | 5.65E-13 | 2.74E-14 | -8.22 | 21.558378  | -2.36E-01 | 222990921 | 222991044 | NC_000001.10 |
| cg17462560 | 5.65E-13 | 2.74E-14 | -8.22 | 21.5582187 | -1.86E-01 | 77814551  | 77814674  | NC_000005.9  |
| cg03016975 | 5.66E-13 | 2.74E-14 | -8.22 | 21.5563647 | -3.26E-02 | 4124072   | 4124195   | NC_000019.9  |
| cg14903680 | 5.66E-13 | 2.74E-14 | -8.22 | 21.5558408 | -1.29E-01 | 50638648  | 50638771  | NC_000022.10 |
| cg11854392 | 5.66E-13 | 2.74E-14 | -8.22 | 21.5553797 | -2.23E-01 | 19879320  | 19879443  | NC_000022.10 |
| cg11442280 | 5.69E-13 | 2.76E-14 | -8.22 | 21.5502468 | -1.62E-01 | 164461604 | 164461727 | NC_000002.11 |
| cg12446045 | 5.70E-13 | 2.76E-14 | -8.22 | 21.5482852 | -1.57E-01 | 25857419  | 25857542  | NC_000001.10 |
| cg27280366 | 5.72E-13 | 2.77E-14 | -8.22 | 21.5458062 | -7.27E-02 | 49736416  | 49736539  | NC_000012.11 |

|                 |          |          |       |            |           |           |           |              |
|-----------------|----------|----------|-------|------------|-----------|-----------|-----------|--------------|
| cg27651143      | 5.72E-13 | 2.77E-14 | -8.22 | 21.5450501 | -7.42E-02 | 26572464  | 26572587  | NC_000006.11 |
| cg05062814      | 5.73E-13 | 2.78E-14 | -8.22 | 21.5431982 | -6.99E-02 | 39083007  | 39083130  | NC_000006.11 |
| cg02682520      | 5.74E-13 | 2.78E-14 | -8.22 | 21.5417817 | -6.55E-02 | 159895160 | 159895283 | NC_000005.9  |
| cg10438089      | 5.74E-13 | 2.78E-14 | -8.22 | 21.5411109 | -1.60E-01 | 47818514  | 47818637  | NC_000017.10 |
| cg03369289      | 5.74E-13 | 2.78E-14 | -8.22 | 21.5408055 | -1.30E-01 | 152619168 | 152619291 | NC_000007.13 |
| cg19771372      | 5.75E-13 | 2.79E-14 | -8.22 | 21.5401008 | -1.16E-01 | 4153713   | 4153836   | NC_000019.9  |
| cg08310837      | 5.76E-13 | 2.79E-14 | -8.22 | 21.5377478 | -1.00E-01 | 67572860  | 67572983  | NC_000016.9  |
| cg09444186      | 5.77E-13 | 2.80E-14 | -8.22 | 21.5368329 | -1.15E-01 | 46001605  | 46001728  | NC_000019.9  |
| cg05374263      | 5.77E-13 | 2.80E-14 | -8.22 | 21.535256  | -1.82E-01 | 66417182  | 66417305  | NC_000016.9  |
| cg09788003      | 5.77E-13 | 2.80E-14 | -8.22 | 21.5351221 | -1.23E-01 | 77941556  | 77941679  | NC_000014.8  |
| ch.8.975024F    | 5.79E-13 | 2.81E-14 | -8.22 | 21.5320003 | -6.82E-02 | 41396493  | 41396616  | NC_000008.10 |
| cg06346505      | 5.82E-13 | 2.82E-14 | -8.22 | 21.527262  | -1.16E-01 | 116164640 | 116164763 | NC_000010.10 |
| cg20088969      | 5.84E-13 | 2.83E-14 | -8.22 | 21.5242074 | -6.45E-02 | 74032886  | 74033009  | NC_000010.10 |
| cg08508368      | 5.84E-13 | 2.84E-14 | -8.22 | 21.522895  | -9.07E-02 | 86157364  | 86157487  | NC_000008.10 |
| cg23011788      | 5.85E-13 | 2.84E-14 | -8.22 | 21.5216577 | -2.14E-01 | 14050305  | 14050428  | NC_000010.10 |
| cg06548416      | 5.87E-13 | 2.85E-14 | -8.22 | 21.5184746 | -9.06E-02 | 24438703  | 24438826  | NC_000001.10 |
| cg09896403      | 5.88E-13 | 2.85E-14 | -8.22 | 21.5162096 | -7.62E-02 | 24110173  | 24110296  | NC_000022.10 |
| cg10210571      | 5.90E-13 | 2.86E-14 | -8.22 | 21.5134412 | -4.71E-02 | 231664364 | 231664487 | NC_000001.10 |
| cg26774156      | 5.90E-13 | 2.87E-14 | -8.22 | 21.5122382 | -1.70E-01 | 74495384  | 74495507  | NC_000015.9  |
| cg07781445      | 5.92E-13 | 2.87E-14 | -8.21 | 21.5097671 | -1.66E-01 | 2886250   | 2886373   | NC_000017.10 |
| cg02265318      | 5.94E-13 | 2.89E-14 | -8.21 | 21.5055284 | -6.21E-02 | 220960539 | 220960662 | NC_000001.10 |
| cg15318690      | 5.95E-13 | 2.89E-14 | -8.21 | 21.5038093 | -4.66E-02 | 54422052  | 54422175  | NC_000014.8  |
| ch.16.364290R   | 5.97E-13 | 2.90E-14 | -8.21 | 21.4998391 | -3.54E-02 | 9436357   | 9436480   | NC_000016.9  |
| cg08216768      | 5.97E-13 | 2.90E-14 | -8.21 | 21.4997262 | -8.60E-02 | 127175552 | 127175675 | NC_000003.11 |
| ch.1.172034581R | 5.98E-13 | 2.90E-14 | -8.21 | 21.4990332 | -1.98E-02 | 173767958 | 173768081 | NC_000001.10 |

|            |          |          |       |            |           |           |           |              |
|------------|----------|----------|-------|------------|-----------|-----------|-----------|--------------|
| cg17488937 | 5.99E-13 | 2.91E-14 | -8.21 | 21.4976038 | -1.08E-01 | 11878864  | 11878987  | NC_000002.11 |
| cg18661819 | 6.01E-13 | 2.92E-14 | -8.21 | 21.49303   | -3.90E-02 | 131113440 | 131113563 | NC_000002.11 |
| cg05877694 | 6.01E-13 | 2.92E-14 | -8.21 | 21.4926708 | -4.91E-02 | 128775743 | 128775866 | NC_000011.9  |
| cg10317175 | 6.02E-13 | 2.92E-14 | -8.21 | 21.4922936 | -1.06E-01 | 25247855  | 25247978  | NC_000010.10 |
| cg26011210 | 6.03E-13 | 2.93E-14 | -8.21 | 21.4889085 | -6.54E-02 | 122125276 | 122125399 | NC_000012.11 |
| cg19878838 | 6.04E-13 | 2.94E-14 | -8.21 | 21.487707  | -9.09E-02 | 77135506  | 77135629  | NC_000004.11 |
| cg07294541 | 6.04E-13 | 2.94E-14 | -8.21 | 21.4875832 | -9.50E-02 | 35265555  | 35265678  | NC_000006.11 |
| cg01381109 | 6.06E-13 | 2.95E-14 | -8.21 | 21.4841232 | -1.46E-01 | 96054917  | 96055040  | NC_000002.11 |
| cg26892635 | 6.06E-13 | 2.95E-14 | -8.21 | 21.4839082 | -1.12E-01 | 3253043   | 3253166   | NC_000016.9  |
| cg13100137 | 6.08E-13 | 2.96E-14 | -8.21 | 21.4806844 | -1.59E-01 | 37937945  | 37938068  | NC_000001.10 |
| cg24686684 | 6.10E-13 | 2.97E-14 | -8.21 | 21.47698   | -6.50E-02 | 48330546  | 48330669  | NC_000020.10 |
| cg10780778 | 6.11E-13 | 2.97E-14 | -8.21 | 21.4764044 | -1.46E-01 | 26351915  | 26352038  | NC_000006.11 |
| cg21028946 | 6.11E-13 | 2.97E-14 | -8.21 | 21.4763647 | -1.08E-01 | 34680004  | 34680127  | NC_000020.10 |
| cg20513976 | 6.12E-13 | 2.98E-14 | -8.21 | 21.4737026 | -2.24E-01 | 62367893  | 62368016  | NC_000020.10 |
| cg07706776 | 6.12E-13 | 2.98E-14 | -8.21 | 21.4733815 | -9.95E-02 | 5568004   | 5568127   | NC_000010.10 |
| cg16594273 | 6.13E-13 | 2.98E-14 | -8.21 | 21.4730838 | -1.10E-01 | 58131312  | 58131435  | NC_000016.9  |
| cg11491247 | 6.13E-13 | 2.99E-14 | -8.21 | 21.4715441 | -6.00E-02 | 155035530 | 155035653 | NC_000001.10 |
| cg06462174 | 6.13E-13 | 2.99E-14 | -8.21 | 21.4715413 | -7.26E-02 | 30813688  | 30813811  | NC_000017.10 |
| cg06287548 | 6.14E-13 | 2.99E-14 | -8.21 | 21.4709213 | -1.99E-01 | 34773372  | 34773495  | NC_000021.8  |
| cg02426464 | 6.17E-13 | 3.00E-14 | -8.21 | 21.4658449 | -9.02E-02 | 1481305   | 1481428   | NC_000017.10 |
| cg12997404 | 6.17E-13 | 3.00E-14 | -8.21 | 21.4657873 | -1.03E-01 | 118977474 | 118977597 | NC_000011.9  |
| cg25304816 | 6.17E-13 | 3.01E-14 | -8.21 | 21.4651086 | -1.85E-01 | 36627734  | 36627857  | NC_000001.10 |
| cg18021623 | 6.18E-13 | 3.01E-14 | -8.21 | 21.4636905 | -1.82E-01 | 158225083 | 158225206 | NC_000007.13 |
| cg05783554 | 6.19E-13 | 3.02E-14 | -8.21 | 21.4620747 | -1.31E-01 | 232466435 | 232466558 | NC_000002.11 |
| cg12525736 | 6.20E-13 | 3.02E-14 | -8.21 | 21.4606555 | -5.20E-02 | 228269915 | 228270038 | NC_000001.10 |

|            |          |          |       |            |           |           |           |              |
|------------|----------|----------|-------|------------|-----------|-----------|-----------|--------------|
| cg16526705 | 6.21E-13 | 3.03E-14 | -8.21 | 21.4580648 | -1.06E-01 | 17284481  | 17284604  | NC_000019.9  |
| cg21013710 | 6.21E-13 | 3.03E-14 | -8.21 | 21.4577467 | -1.37E-01 | 15128655  | 15128778  | NC_000011.9  |
| cg03304763 | 6.22E-13 | 3.03E-14 | -8.21 | 21.4567487 | -2.04E-01 | 112037427 | 112037550 | NC_000011.9  |
| cg22266824 | 6.22E-13 | 3.03E-14 | -8.21 | 21.4560104 | -1.52E-01 | 159918056 | 159918179 | NC_000004.11 |
| cg09202851 | 6.24E-13 | 3.04E-14 | -8.21 | 21.4534398 | -1.66E-01 | 567966    | 568089    | NC_000011.9  |
| cg10094886 | 6.24E-13 | 3.05E-14 | -8.21 | 21.4523219 | -2.30E-01 | 204301278 | 204301401 | NC_000001.10 |
| cg24189559 | 6.25E-13 | 3.05E-14 | -8.21 | 21.4512575 | -6.58E-02 | 12851674  | 12851797  | NC_000003.11 |
| cg04503319 | 6.26E-13 | 3.05E-14 | -8.2  | 21.4495678 | -1.44E-01 | 89368367  | 89368490  | NC_000016.9  |
| cg15601682 | 6.29E-13 | 3.07E-14 | -8.2  | 21.4446377 | -2.12E-01 | 78060121  | 78060244  | NC_000017.10 |
| cg10807698 | 6.29E-13 | 3.07E-14 | -8.2  | 21.444261  | -6.90E-02 | 103243805 | 103243928 | NC_000014.8  |
| cg24690479 | 6.30E-13 | 3.07E-14 | -8.2  | 21.4436815 | -1.78E-01 | 10521142  | 10521265  | NC_000006.11 |
| cg26753608 | 6.31E-13 | 3.08E-14 | -8.2  | 21.4417429 | -1.91E-01 | 128938630 | 128938753 | NC_000008.10 |
| cg06172942 | 6.31E-13 | 3.08E-14 | -8.2  | 21.4408834 | -2.49E-01 | 50378529  | 50378652  | NC_000003.11 |
| cg05756257 | 6.31E-13 | 3.08E-14 | -8.2  | 21.4407512 | -3.97E-02 | 46415544  | 46415667  | NC_000020.10 |
| cg05338167 | 6.32E-13 | 3.08E-14 | -8.2  | 21.4404453 | -1.75E-01 | 68498251  | 68498374  | NC_000015.9  |
| cg18637486 | 6.32E-13 | 3.08E-14 | -8.2  | 21.4401917 | -1.40E-01 | 79099777  | 79099900  | NC_000017.10 |
| cg17810853 | 6.35E-13 | 3.10E-14 | -8.2  | 21.4354451 | -5.43E-02 | 53879737  | 53879860  | NC_000003.11 |
| cg24837084 | 6.37E-13 | 3.11E-14 | -8.2  | 21.431027  | -1.70E-01 | 122310688 | 122310811 | NC_000012.11 |
| cg13686042 | 6.38E-13 | 3.11E-14 | -8.2  | 21.430665  | -6.51E-02 | 50913831  | 50913954  | NC_000022.10 |
| cg20524040 | 6.39E-13 | 3.12E-14 | -8.2  | 21.4280466 | -9.94E-02 | 62701344  | 62701467  | NC_000020.10 |
| cg03234557 | 6.40E-13 | 3.13E-14 | -8.2  | 21.4264624 | -1.69E-01 | 99404186  | 99404309  | NC_000004.11 |
| cg06390606 | 6.40E-13 | 3.13E-14 | -8.2  | 21.4263992 | -2.91E-02 | 3751076   | 3751199   | NC_000006.11 |
| cg22137236 | 6.40E-13 | 3.13E-14 | -8.2  | 21.4261692 | -1.46E-01 | 46506533  | 46506656  | NC_000018.9  |
| cg12640109 | 6.41E-13 | 3.13E-14 | -8.2  | 21.4251766 | -1.21E-01 | 62104720  | 62104843  | NC_000011.9  |
| cg18951352 | 6.44E-13 | 3.15E-14 | -8.2  | 21.4205768 | -1.89E-01 | 149806077 | 149806200 | NC_000006.11 |

|                 |          |          |       |            |           |           |           |              |
|-----------------|----------|----------|-------|------------|-----------|-----------|-----------|--------------|
| cg25430995      | 6.44E-13 | 3.15E-14 | -8.2  | 21.4203704 | -7.16E-02 | 73611082  | 73611205  | NC_000010.10 |
| cg11307623      | 6.44E-13 | 3.15E-14 | -8.2  | 21.4199631 | -1.22E-01 | 79306957  | 79307080  | NC_000017.10 |
| cg07575086      | 6.44E-13 | 3.15E-14 | -8.2  | 21.4194055 | -1.14E-01 | 1790905   | 1791028   | NC_000008.10 |
| cg06438797      | 6.46E-13 | 3.16E-14 | -8.2  | 21.4170987 | -1.39E-01 | 66876872  | 66876995  | NC_000016.9  |
| cg01721754      | 6.47E-13 | 3.16E-14 | -8.2  | 21.4153119 | -1.36E-01 | 616935    | 617058    | NC_000016.9  |
| cg00037186      | 6.48E-13 | 3.17E-14 | -8.2  | 21.4140869 | -9.97E-02 | 66959402  | 66959525  | NC_000016.9  |
| ch.19.23069876R | 6.48E-13 | 3.17E-14 | -8.2  | 21.4135896 | -4.66E-02 | 23278036  | 23278159  | NC_000019.9  |
| ch.1.4359995F   | 6.49E-13 | 3.17E-14 | -8.2  | 21.4118862 | -7.58E-02 | 224005787 | 224005910 | NC_000001.10 |
| cg05977781      | 6.49E-13 | 3.17E-14 | -8.2  | 21.4115236 | -1.19E-01 | 25676386  | 25676509  | NC_000017.10 |
| cg12198769      | 6.51E-13 | 3.18E-14 | -8.2  | 21.4094619 | -8.01E-02 | 98262341  | 98262464  | NC_000002.11 |
| cg09477292      | 6.53E-13 | 3.19E-14 | -8.2  | 21.4060818 | -6.14E-02 | 6577027   | 6577150   | NC_000004.11 |
| cg23065101      | 6.54E-13 | 3.20E-14 | -8.2  | 21.4045664 | -6.90E-02 | 100964734 | 100964857 | NC_000007.13 |
| cg25212701      | 6.54E-13 | 3.20E-14 | -8.2  | 21.4043174 | -1.96E-01 | 162351664 | 162351787 | NC_000001.10 |
| cg17659271      | 6.54E-13 | 3.20E-14 | -8.2  | 21.4041532 | -1.06E-01 | 5334261   | 5334384   | NC_000007.13 |
| cg25602765      | 6.57E-13 | 3.21E-14 | -8.2  | 21.3988776 | -8.52E-02 | 140090846 | 140090969 | NC_000005.9  |
| cg04617905      | 6.59E-13 | 3.22E-14 | -8.2  | 21.3963503 | -6.98E-02 | 93107718  | 93107841  | NC_000008.10 |
| cg05233946      | 6.59E-13 | 3.22E-14 | -8.2  | 21.3962674 | -1.64E-01 | 32078088  | 32078211  | NC_000022.10 |
| cg15891991      | 6.60E-13 | 3.23E-14 | -8.2  | 21.3952477 | -1.16E-01 | 117396695 | 117396818 | NC_000001.10 |
| cg05623562      | 6.60E-13 | 3.23E-14 | -8.2  | 21.3945339 | -4.49E-02 | 77793509  | 77793632  | NC_000018.9  |
| cg25645310      | 6.61E-13 | 3.23E-14 | -8.2  | 21.3936099 | -2.62E-02 | 116581305 | 116581428 | NC_000010.10 |
| cg01880902      | 6.61E-13 | 3.24E-14 | -8.2  | 21.3922029 | -3.45E-02 | 145826525 | 145826648 | NC_000005.9  |
| cg04742719      | 6.62E-13 | 3.24E-14 | -8.2  | 21.3919562 | -1.05E-01 | 100463759 | 100463882 | NC_000007.13 |
| cg22615730      | 6.62E-13 | 3.24E-14 | -8.2  | 21.3918956 | -1.82E-01 | 69997225  | 69997348  | NC_000002.11 |
| cg20414935      | 6.63E-13 | 3.25E-14 | -8.2  | 21.3896329 | -1.19E-01 | 6445872   | 6445995   | NC_000001.10 |
| cg03048889      | 6.66E-13 | 3.26E-14 | -8.19 | 21.3851977 | -1.84E-01 | 20433168  | 20433291  | NC_000020.10 |



|               |          |          |       |            |           |           |           |              |
|---------------|----------|----------|-------|------------|-----------|-----------|-----------|--------------|
| cg21189909    | 6.66E-13 | 3.26E-14 | -8.19 | 21.3851519 | -1.37E-01 | 16399649  | 16399772  | NC_000001.10 |
| cg24135211    | 6.66E-13 | 3.26E-14 | -8.19 | 21.3844115 | -1.48E-01 | 64342282  | 64342405  | NC_000014.8  |
| cg09776772    | 6.71E-13 | 3.28E-14 | -8.19 | 21.3778476 | -2.53E-01 | 2150534   | 2150657   | NC_000007.13 |
| cg16488974    | 6.72E-13 | 3.29E-14 | -8.19 | 21.3749847 | -3.43E-02 | 99736462  | 99736585  | NC_000014.8  |
| cg11074968    | 6.76E-13 | 3.31E-14 | -8.19 | 21.3699154 | -1.51E-01 | 83241300  | 83241423  | NC_000015.9  |
| cg00095629    | 6.76E-13 | 3.31E-14 | -8.19 | 21.3697011 | -1.53E-01 | 168811070 | 168811193 | NC_000006.11 |
| cg10718894    | 6.77E-13 | 3.32E-14 | -8.19 | 21.3679037 | -1.77E-01 | 1094057   | 1094180   | NC_000017.10 |
| cg08009313    | 6.78E-13 | 3.32E-14 | -8.19 | 21.3662799 | -7.70E-02 | 130682432 | 130682555 | NC_000003.11 |
| cg05007997    | 6.79E-13 | 3.33E-14 | -8.19 | 21.3651747 | -1.64E-01 | 219246985 | 219247108 | NC_000002.11 |
| cg22039204    | 6.82E-13 | 3.35E-14 | -8.19 | 21.3597111 | -1.84E-01 | 82855568  | 82855691  | NC_000005.9  |
| cg26200976    | 6.84E-13 | 3.35E-14 | -8.19 | 21.3569043 | -2.85E-02 | 73201441  | 73201564  | NC_000017.10 |
| cg09970941    | 6.84E-13 | 3.36E-14 | -8.19 | 21.3562803 | -1.33E-01 | 2302519   | 2302642   | NC_000016.9  |
| cg05280527    | 6.87E-13 | 3.37E-14 | -8.19 | 21.3523596 | -1.35E-01 | 80328450  | 80328573  | NC_000014.8  |
| cg09629954    | 6.88E-13 | 3.38E-14 | -8.19 | 21.3502764 | -6.54E-02 | 42143874  | 42143997  | NC_000017.10 |
| cg17901584    | 6.88E-13 | 3.38E-14 | -8.19 | 21.350133  | -1.42E-01 | 55353706  | 55353829  | NC_000001.10 |
| cg14065697    | 6.90E-13 | 3.39E-14 | -8.19 | 21.3478333 | -5.05E-02 | 93583672  | 93583795  | NC_000011.9  |
| cg27573291    | 6.94E-13 | 3.41E-14 | -8.19 | 21.3416131 | -5.45E-02 | 1266391   | 1266514   | NC_000019.9  |
| cg26522585    | 6.96E-13 | 3.41E-14 | -8.19 | 21.3392933 | -5.64E-02 | 661747    | 661870    | NC_000019.9  |
| ch.3.1045756F | 6.96E-13 | 3.42E-14 | -8.19 | 21.3380601 | -2.69E-02 | 49148793  | 49148916  | NC_000003.11 |
| cg26038318    | 6.97E-13 | 3.42E-14 | -8.19 | 21.3379277 | -8.19E-02 | 34205095  | 34205218  | NC_000020.10 |
| cg06665535    | 6.97E-13 | 3.42E-14 | -8.19 | 21.3367263 | -7.55E-02 | 205719527 | 205719650 | NC_000001.10 |
| cg14918548    | 6.97E-13 | 3.42E-14 | -8.19 | 21.336578  | -1.35E-01 | 101350221 | 101350344 | NC_000002.11 |
| cg00370293    | 6.97E-13 | 3.43E-14 | -8.19 | 21.33632   | -1.44E-01 | 43397113  | 43397236  | NC_000005.9  |
| cg19203836    | 6.99E-13 | 3.44E-14 | -8.19 | 21.333502  | -8.07E-02 | 31940801  | 31940924  | NC_000006.11 |
| cg06790019    | 7.00E-13 | 3.44E-14 | -8.19 | 21.3330839 | -5.89E-02 | 44435457  | 44435580  | NC_000001.10 |

|              |          |          |       |            |           |           |           |              |
|--------------|----------|----------|-------|------------|-----------|-----------|-----------|--------------|
| cg07136635   | 7.00E-13 | 3.44E-14 | -8.19 | 21.3321885 | -7.17E-02 | 52096641  | 52096764  | NC_000005.9  |
| cg17818731   | 7.01E-13 | 3.44E-14 | -8.19 | 21.3313707 | -1.48E-01 | 43295753  | 43295876  | NC_000002.11 |
| cg18458353   | 7.01E-13 | 3.44E-14 | -8.19 | 21.3311219 | -1.20E-01 | 42211171  | 42211294  | NC_000019.9  |
| cg18028536   | 7.02E-13 | 3.45E-14 | -8.19 | 21.3294556 | -8.49E-02 | 9457681   | 9457804   | NC_000004.11 |
| ch.7.794895F | 7.02E-13 | 3.45E-14 | -8.19 | 21.3290934 | -5.89E-02 | 32915159  | 32915282  | NC_000007.13 |
| cg01198591   | 7.07E-13 | 3.47E-14 | -8.18 | 21.3225618 | -9.13E-02 | 28909005  | 28909128  | NC_000001.10 |
| cg02710534   | 7.07E-13 | 3.48E-14 | -8.18 | 21.3218397 | -2.10E-01 | 141225619 | 141225742 | NC_000005.9  |
| cg01703780   | 7.08E-13 | 3.48E-14 | -8.18 | 21.321127  | -1.77E-01 | 192353242 | 192353365 | NC_000002.11 |
| cg23797471   | 7.08E-13 | 3.48E-14 | -8.18 | 21.3204491 | -3.17E-02 | 135504410 | 135504533 | NC_000006.11 |
| cg13694400   | 7.08E-13 | 3.48E-14 | -8.18 | 21.3197242 | -8.08E-02 | 13254673  | 13254796  | NC_000012.11 |
| cg07217063   | 7.09E-13 | 3.49E-14 | -8.18 | 21.3185946 | -1.15E-01 | 30901886  | 30902009  | NC_000022.10 |
| cg22969914   | 7.10E-13 | 3.49E-14 | -8.18 | 21.3173396 | -1.83E-01 | 76638216  | 76638339  | NC_000015.9  |
| cg12738347   | 7.13E-13 | 3.51E-14 | -8.18 | 21.3125925 | -1.23E-01 | 53096854  | 53096977  | NC_000015.9  |
| cg12003463   | 7.13E-13 | 3.51E-14 | -8.18 | 21.3125797 | -1.80E-01 | 41523968  | 41524091  | NC_000008.10 |
| cg10031995   | 7.15E-13 | 3.52E-14 | -8.18 | 21.309576  | -1.54E-01 | 45064086  | 45064209  | NC_000022.10 |
| cg07018087   | 7.16E-13 | 3.52E-14 | -8.18 | 21.3080663 | -9.33E-02 | 170860508 | 170860631 | NC_000005.9  |
| cg03611265   | 7.17E-13 | 3.53E-14 | -8.18 | 21.307255  | -2.23E-01 | 13132894  | 13133017  | NC_000012.11 |
| cg27294678   | 7.17E-13 | 3.53E-14 | -8.18 | 21.3066495 | -5.91E-02 | 129686210 | 129686333 | NC_000011.9  |
| cg18039296   | 7.17E-13 | 3.53E-14 | -8.18 | 21.3066407 | -1.21E-01 | 11465809  | 11465932  | NC_000019.9  |
| cg02961101   | 7.17E-13 | 3.53E-14 | -8.18 | 21.3064184 | -1.89E-01 | 48533155  | 48533278  | NC_000016.9  |
| cg09147131   | 7.18E-13 | 3.53E-14 | -8.18 | 21.3052731 | -7.40E-02 | 80189225  | 80189348  | NC_000017.10 |
| cg14637649   | 7.20E-13 | 3.54E-14 | -8.18 | 21.3033468 | -5.47E-02 | 81057526  | 81057649  | NC_000017.10 |
| cg25470561   | 7.20E-13 | 3.55E-14 | -8.18 | 21.3020003 | -1.74E-01 | 65646656  | 65646779  | NC_000011.9  |
| cg22867066   | 7.22E-13 | 3.55E-14 | -8.18 | 21.2999407 | -7.12E-02 | 128694666 | 128694789 | NC_000007.13 |
| cg13462576   | 7.22E-13 | 3.55E-14 | -8.18 | 21.2998503 | -1.55E-01 | 74726520  | 74726643  | NC_000015.9  |

|            |          |          |       |            |           |           |           |              |
|------------|----------|----------|-------|------------|-----------|-----------|-----------|--------------|
| cg02392575 | 7.23E-13 | 3.56E-14 | -8.18 | 21.2981172 | -6.86E-02 | 100536662 | 100536785 | NC_000012.11 |
| cg19958593 | 7.25E-13 | 3.57E-14 | -8.18 | 21.2958339 | -1.61E-01 | 87265617  | 87265740  | NC_000014.8  |
| cg01830154 | 7.25E-13 | 3.57E-14 | -8.18 | 21.294869  | -1.54E-01 | 1134911   | 1135034   | NC_000017.10 |
| cg17533684 | 7.26E-13 | 3.57E-14 | -8.18 | 21.2942595 | -3.05E-02 | 46597933  | 46598056  | NC_000001.10 |
| cg04622541 | 7.26E-13 | 3.58E-14 | -8.18 | 21.2937349 | -2.94E-02 | 179159255 | 179159378 | NC_000005.9  |
| cg07068980 | 7.26E-13 | 3.58E-14 | -8.18 | 21.2934417 | -1.70E-01 | 93924162  | 93924285  | NC_000015.9  |
| cg11839020 | 7.27E-13 | 3.58E-14 | -8.18 | 21.2927031 | -1.97E-01 | 90309998  | 90310121  | NC_000001.10 |
| cg18966152 | 7.27E-13 | 3.58E-14 | -8.18 | 21.2920925 | -1.97E-01 | 86077581  | 86077704  | NC_000001.10 |
| cg25877299 | 7.32E-13 | 3.61E-14 | -8.18 | 21.285201  | -1.21E-01 | 80273290  | 80273413  | NC_000017.10 |
| cg05295841 | 7.33E-13 | 3.61E-14 | -8.18 | 21.2836841 | -1.67E-01 | 18771126  | 18771249  | NC_000019.9  |
| cg14482902 | 7.33E-13 | 3.61E-14 | -8.18 | 21.2835928 | -1.29E-01 | 36714803  | 36714926  | NC_000017.10 |
| cg02030219 | 7.34E-13 | 3.62E-14 | -8.18 | 21.2825405 | -1.35E-01 | 1958654   | 1958777   | NC_000016.9  |
| cg09990169 | 7.39E-13 | 3.65E-14 | -8.18 | 21.2748023 | -1.42E-01 | 241835740 | 241835863 | NC_000002.11 |
| cg13782615 | 7.39E-13 | 3.65E-14 | -8.18 | 21.2747576 | -2.45E-01 | 4079556   | 4079679   | NC_000011.9  |
| cg11306441 | 7.40E-13 | 3.65E-14 | -8.18 | 21.2730536 | -5.05E-02 | 54520919  | 54521042  | NC_000012.11 |
| cg06861037 | 7.41E-13 | 3.66E-14 | -8.18 | 21.2720582 | -1.22E-01 | 50278918  | 50279041  | NC_000016.9  |
| cg11946458 | 7.41E-13 | 3.66E-14 | -8.18 | 21.2720546 | -7.21E-02 | 37190305  | 37190428  | NC_000006.11 |
| cg10629420 | 7.45E-13 | 3.67E-14 | -8.17 | 21.2669727 | -1.67E-01 | 3377918   | 3378041   | NC_000001.10 |
| cg03376089 | 7.46E-13 | 3.68E-14 | -8.17 | 21.2657588 | -1.78E-01 | 17839409  | 17839532  | NC_000017.10 |
| cg14297444 | 7.46E-13 | 3.68E-14 | -8.17 | 21.2649298 | -1.35E-01 | 130978697 | 130978820 | NC_000009.11 |
| cg15626405 | 7.47E-13 | 3.68E-14 | -8.17 | 21.2642102 | -1.19E-01 | 536047    | 536170    | NC_000005.9  |
| cg23632791 | 7.48E-13 | 3.69E-14 | -8.17 | 21.2624366 | -2.21E-01 | 90794647  | 90794770  | NC_000008.10 |
| cg15463309 | 7.51E-13 | 3.71E-14 | -8.17 | 21.2583992 | -1.95E-01 | 141598157 | 141598280 | NC_000008.10 |
| cg00941010 | 7.51E-13 | 3.71E-14 | -8.17 | 21.2583788 | -1.71E-01 | 107218994 | 107219117 | NC_000008.10 |
| cg08850243 | 7.51E-13 | 3.71E-14 | -8.17 | 21.2577689 | -1.90E-01 | 30169768  | 30169891  | NC_000006.11 |

|            |          |          |       |            |           |           |           |              |
|------------|----------|----------|-------|------------|-----------|-----------|-----------|--------------|
| cg05472974 | 7.53E-13 | 3.72E-14 | -8.17 | 21.2558192 | -7.30E-02 | 71205399  | 71205522  | NC_000002.11 |
| cg26900750 | 7.54E-13 | 3.72E-14 | -8.17 | 21.2548031 | -5.58E-02 | 41109870  | 41109993  | NC_000019.9  |
| cg22436562 | 7.54E-13 | 3.72E-14 | -8.17 | 21.2543774 | -8.62E-02 | 78139859  | 78139982  | NC_000013.10 |
| cg15721238 | 7.54E-13 | 3.73E-14 | -8.17 | 21.2533682 | -1.50E-01 | 196520408 | 196520531 | NC_000003.11 |
| cg00190795 | 7.57E-13 | 3.74E-14 | -8.17 | 21.2502315 | -1.80E-01 | 195599898 | 195600021 | NC_000003.11 |
| cg23797839 | 7.61E-13 | 3.76E-14 | -8.17 | 21.2446099 | -6.89E-02 | 60094994  | 60095117  | NC_000010.10 |
| cg11453712 | 7.61E-13 | 3.76E-14 | -8.17 | 21.2444661 | -1.46E-01 | 139741803 | 139741926 | NC_000009.11 |
| cg25565850 | 7.65E-13 | 3.78E-14 | -8.17 | 21.2386441 | -9.43E-02 | 220424853 | 220424976 | NC_000002.11 |
| cg25960063 | 7.65E-13 | 3.78E-14 | -8.17 | 21.2386182 | -1.52E-01 | 101790505 | 101790628 | NC_000015.9  |
| cg11691990 | 7.65E-13 | 3.78E-14 | -8.17 | 21.2383227 | -5.25E-02 | 44099044  | 44099167  | NC_000019.9  |
| cg06164260 | 7.65E-13 | 3.78E-14 | -8.17 | 21.2381795 | -1.48E-01 | 187454439 | 187454562 | NC_000003.11 |
| cg24296478 | 7.67E-13 | 3.79E-14 | -8.17 | 21.235344  | -1.29E-01 | 98590574  | 98590697  | NC_000010.10 |
| cg03497895 | 7.68E-13 | 3.80E-14 | -8.17 | 21.2339844 | -1.59E-01 | 59598984  | 59599107  | NC_000015.9  |
| cg02928885 | 7.69E-13 | 3.80E-14 | -8.17 | 21.2334774 | -1.91E-01 | 26558154  | 26558277  | NC_000010.10 |
| cg01771479 | 7.69E-13 | 3.80E-14 | -8.17 | 21.2327508 | -1.19E-01 | 144198810 | 144198933 | NC_000008.10 |
| cg26607748 | 7.71E-13 | 3.82E-14 | -8.17 | 21.229837  | -1.56E-01 | 35690226  | 35690349  | NC_000009.11 |
| cg26869512 | 7.72E-13 | 3.82E-14 | -8.17 | 21.2297614 | -1.41E-01 | 8389770   | 8389893   | NC_000004.11 |
| cg27182012 | 7.72E-13 | 3.82E-14 | -8.17 | 21.2294098 | -1.89E-01 | 156095157 | 156095280 | NC_000001.10 |
| cg04366994 | 7.74E-13 | 3.83E-14 | -8.17 | 21.2270522 | -1.73E-01 | 134361203 | 134361326 | NC_000010.10 |
| cg10274029 | 7.74E-13 | 3.83E-14 | -8.17 | 21.2265224 | -1.33E-01 | 85981336  | 85981459  | NC_000016.9  |
| cg03883572 | 7.74E-13 | 3.83E-14 | -8.17 | 21.2263832 | -1.80E-01 | 66461884  | 66462007  | NC_000005.9  |
| cg03320441 | 7.74E-13 | 3.83E-14 | -8.17 | 21.2263322 | -3.63E-02 | 245316885 | 245317008 | NC_000001.10 |
| cg03725536 | 7.75E-13 | 3.83E-14 | -8.17 | 21.2252116 | -1.15E-01 | 27275738  | 27275861  | NC_000007.13 |
| cg23586996 | 7.75E-13 | 3.83E-14 | -8.17 | 21.2248602 | -1.29E-01 | 77893850  | 77893973  | NC_000017.10 |
| cg19897979 | 7.76E-13 | 3.84E-14 | -8.17 | 21.2233834 | -1.19E-01 | 25687812  | 25687935  | NC_000001.10 |

|               |          |          |       |            |           |           |           |              |
|---------------|----------|----------|-------|------------|-----------|-----------|-----------|--------------|
| cg14592376    | 7.78E-13 | 3.85E-14 | -8.17 | 21.2211365 | -9.20E-02 | 129063341 | 129063464 | NC_000003.11 |
| cg22612448    | 7.78E-13 | 3.85E-14 | -8.17 | 21.2209605 | -1.64E-01 | 217203173 | 217203296 | NC_000001.10 |
| cg07645228    | 7.79E-13 | 3.85E-14 | -8.17 | 21.2198875 | -1.79E-01 | 73867009  | 73867132  | NC_000007.13 |
| cg19290577    | 7.79E-13 | 3.85E-14 | -8.17 | 21.2198572 | -1.95E-01 | 119590573 | 119590696 | NC_000010.10 |
| cg09916599    | 7.79E-13 | 3.85E-14 | -8.17 | 21.2197357 | -1.14E-01 | 74234325  | 74234448  | NC_000015.9  |
| cg20646490    | 7.80E-13 | 3.86E-14 | -8.17 | 21.2177303 | -5.29E-02 | 45971291  | 45971414  | NC_000019.9  |
| cg10963398    | 7.80E-13 | 3.86E-14 | -8.17 | 21.2175198 | -7.34E-02 | 72932651  | 72932774  | NC_000017.10 |
| cg06207460    | 7.81E-13 | 3.87E-14 | -8.17 | 21.2168817 | -7.03E-02 | 4741011   | 4741134   | NC_000009.11 |
| cg14360014    | 7.81E-13 | 3.87E-14 | -8.17 | 21.2163306 | -1.53E-01 | 136603716 | 136603839 | NC_000009.11 |
| cg18415822    | 7.82E-13 | 3.87E-14 | -8.17 | 21.2154065 | -8.55E-02 | 155857781 | 155857904 | NC_000007.13 |
| cg05362417    | 7.82E-13 | 3.87E-14 | -8.17 | 21.2150518 | -3.81E-02 | 205425940 | 205426063 | NC_000001.10 |
| cg25786651    | 7.84E-13 | 3.88E-14 | -8.17 | 21.2127449 | -1.18E-01 | 150884486 | 150884609 | NC_000007.13 |
| cg18742814    | 7.84E-13 | 3.89E-14 | -8.17 | 21.2118069 | -1.20E-01 | 41828276  | 41828399  | NC_000001.10 |
| cg14568203    | 7.87E-13 | 3.90E-14 | -8.17 | 21.2088599 | -1.54E-01 | 79931578  | 79931701  | NC_000010.10 |
| cg26598152    | 7.87E-13 | 3.90E-14 | -8.17 | 21.2077598 | -2.65E-02 | 69760928  | 69761051  | NC_000016.9  |
| cg26495711    | 7.90E-13 | 3.92E-14 | -8.16 | 21.2040605 | -1.18E-01 | 240169280 | 240169403 | NC_000002.11 |
| ch.2.1028977R | 7.92E-13 | 3.93E-14 | -8.16 | 21.2012028 | -4.28E-02 | 43171019  | 43171142  | NC_000002.11 |
| cg21880020    | 7.93E-13 | 3.93E-14 | -8.16 | 21.1999638 | -1.26E-01 | 168453194 | 168453317 | NC_000006.11 |
| cg03637066    | 7.94E-13 | 3.93E-14 | -8.16 | 21.1996729 | -1.62E-01 | 913111    | 913234    | NC_000005.9  |
| cg17087907    | 7.94E-13 | 3.94E-14 | -8.16 | 21.1988991 | -1.52E-01 | 167104677 | 167104800 | NC_000006.11 |
| cg10808102    | 7.94E-13 | 3.94E-14 | -8.16 | 21.1987448 | -6.35E-02 | 25783956  | 25784079  | NC_000017.10 |
| cg01263877    | 7.95E-13 | 3.94E-14 | -8.16 | 21.1978844 | -1.06E-01 | 3721303   | 3721426   | NC_000019.9  |
| cg17801256    | 7.98E-13 | 3.96E-14 | -8.16 | 21.1931986 | -5.86E-02 | 35734334  | 35734457  | NC_000001.10 |
| cg18747104    | 7.99E-13 | 3.96E-14 | -8.16 | 21.192619  | -3.56E-02 | 100167717 | 100167840 | NC_000007.13 |
| cg08248751    | 8.00E-13 | 3.97E-14 | -8.16 | 21.191456  | -1.22E-01 | 44043192  | 44043315  | NC_000006.11 |

|            |          |          |       |            |           |           |           |              |
|------------|----------|----------|-------|------------|-----------|-----------|-----------|--------------|
| cg25366404 | 8.02E-13 | 3.98E-14 | -8.16 | 21.1885392 | -1.26E-01 | 39895360  | 39895483  | NC_000006.11 |
| cg21480680 | 8.04E-13 | 3.99E-14 | -8.16 | 21.1863082 | -5.97E-02 | 6075279   | 6075402   | NC_000012.11 |
| cg03661110 | 8.05E-13 | 4.00E-14 | -8.16 | 21.1840675 | -2.01E-01 | 48581622  | 48581745  | NC_000017.10 |
| cg07548257 | 8.06E-13 | 4.00E-14 | -8.16 | 21.1836647 | -1.07E-01 | 31686466  | 31686589  | NC_000022.10 |
| cg09278695 | 8.06E-13 | 4.00E-14 | -8.16 | 21.1828238 | -1.41E-01 | 98438683  | 98438806  | NC_000007.13 |
| cg09184315 | 8.07E-13 | 4.00E-14 | -8.16 | 21.1823038 | -1.96E-01 | 127748477 | 127748600 | NC_000008.10 |
| cg00093544 | 8.07E-13 | 4.00E-14 | -8.16 | 21.1820551 | -1.56E-01 | 30901640  | 30901763  | NC_000022.10 |
| cg20127899 | 8.11E-13 | 4.03E-14 | -8.16 | 21.1765003 | -1.56E-01 | 32579253  | 32579376  | NC_000008.10 |
| cg14277677 | 8.15E-13 | 4.05E-14 | -8.16 | 21.1714719 | -1.33E-01 | 123336568 | 123336691 | NC_000012.11 |
| cg09931909 | 8.15E-13 | 4.05E-14 | -8.16 | 21.1712369 | -2.11E-01 | 74160206  | 74160329  | NC_000006.11 |
| cg12830327 | 8.17E-13 | 4.06E-14 | -8.16 | 21.1689993 | -7.13E-02 | 85339628  | 85339751  | NC_000011.9  |
| cg03451296 | 8.20E-13 | 4.07E-14 | -8.16 | 21.1655394 | -2.18E-02 | 105940391 | 105940514 | NC_000014.8  |
| cg14812474 | 8.20E-13 | 4.07E-14 | -8.16 | 21.1652595 | -1.64E-01 | 7632386   | 7632509   | NC_000004.11 |
| cg22277154 | 8.23E-13 | 4.09E-14 | -8.16 | 21.1617589 | -1.09E-01 | 31020468  | 31020591  | NC_000013.10 |
| cg21270074 | 8.24E-13 | 4.09E-14 | -8.16 | 21.1607158 | -3.61E-02 | 49412129  | 49412252  | NC_000020.10 |
| cg22236073 | 8.26E-13 | 4.10E-14 | -8.16 | 21.1577363 | -6.85E-02 | 31555946  | 31556069  | NC_000022.10 |
| cg11065634 | 8.27E-13 | 4.11E-14 | -8.16 | 21.1567894 | -1.83E-02 | 99736978  | 99737101  | NC_000014.8  |
| cg00402956 | 8.29E-13 | 4.12E-14 | -8.16 | 21.1542707 | -1.74E-01 | 88949636  | 88949759  | NC_000016.9  |
| cg10238080 | 8.29E-13 | 4.12E-14 | -8.16 | 21.1534423 | -1.02E-01 | 50445058  | 50445181  | NC_000012.11 |
| cg04414274 | 8.29E-13 | 4.12E-14 | -8.16 | 21.153408  | -7.28E-02 | 1957866   | 1957989   | NC_000017.10 |
| cg08359099 | 8.30E-13 | 4.13E-14 | -8.16 | 21.1520636 | -3.17E-02 | 73105631  | 73105754  | NC_000017.10 |
| cg03783391 | 8.31E-13 | 4.13E-14 | -8.16 | 21.1508861 | -1.74E-01 | 13908414  | 13908537  | NC_000010.10 |
| cg18793799 | 8.34E-13 | 4.15E-14 | -8.16 | 21.1475242 | -5.85E-02 | 8818257   | 8818380   | NC_000002.11 |
| cg04337618 | 8.36E-13 | 4.16E-14 | -8.15 | 21.1450101 | -8.26E-02 | 777215    | 777338    | NC_000016.9  |
| cg01194336 | 8.36E-13 | 4.16E-14 | -8.15 | 21.1446392 | -1.44E-01 | 66627997  | 66628120  | NC_000012.11 |

|            |          |          |       |            |           |           |           |              |
|------------|----------|----------|-------|------------|-----------|-----------|-----------|--------------|
| cg27496526 | 8.37E-13 | 4.17E-14 | -8.15 | 21.1428732 | -1.62E-01 | 41805530  | 41805653  | NC_000015.9  |
| cg17179881 | 8.40E-13 | 4.18E-14 | -8.15 | 21.139427  | -1.12E-01 | 43507665  | 43507788  | NC_000022.10 |
| cg02923264 | 8.43E-13 | 4.19E-14 | -8.15 | 21.1365823 | -1.65E-01 | 30901647  | 30901770  | NC_000022.10 |
| cg02579140 | 8.43E-13 | 4.20E-14 | -8.15 | 21.1358171 | -2.68E-01 | 3160982   | 3161105   | NC_000010.10 |
| cg23539381 | 8.45E-13 | 4.21E-14 | -8.15 | 21.1335666 | -4.54E-02 | 36606612  | 36606735  | NC_000019.9  |
| cg05398260 | 8.48E-13 | 4.22E-14 | -8.15 | 21.1296619 | -6.82E-02 | 64363546  | 64363669  | NC_000007.13 |
| cg03141298 | 8.49E-13 | 4.23E-14 | -8.15 | 21.1289936 | -1.78E-01 | 133772657 | 133772780 | NC_000008.10 |
| cg10157862 | 8.50E-13 | 4.23E-14 | -8.15 | 21.1269549 | -9.50E-02 | 69725695  | 69725818  | NC_000012.11 |
| cg26794364 | 8.52E-13 | 4.24E-14 | -8.15 | 21.1254698 | -7.56E-02 | 9691143   | 9691266   | NC_000003.11 |
| cg07928695 | 8.54E-13 | 4.25E-14 | -8.15 | 21.1224673 | -3.17E-02 | 45681899  | 45682022  | NC_000019.9  |
| cg11812748 | 8.54E-13 | 4.26E-14 | -8.15 | 21.1221079 | -1.23E-01 | 246733057 | 246733180 | NC_000001.10 |
| cg23792934 | 8.55E-13 | 4.26E-14 | -8.15 | 21.1207578 | -1.38E-01 | 70403785  | 70403908  | NC_000017.10 |
| cg19931348 | 8.58E-13 | 4.27E-14 | -8.15 | 21.1177785 | -1.90E-01 | 43803224  | 43803347  | NC_000020.10 |
| cg03802185 | 8.58E-13 | 4.28E-14 | -8.15 | 21.117298  | -1.55E-01 | 101927846 | 101927969 | NC_000007.13 |
| cg03127349 | 8.59E-13 | 4.28E-14 | -8.15 | 21.1159965 | -1.05E-01 | 31101116  | 31101239  | NC_000010.10 |
| cg07369374 | 8.62E-13 | 4.30E-14 | -8.15 | 21.1124687 | -1.71E-01 | 40359130  | 40359253  | NC_000006.11 |
| cg14498492 | 8.62E-13 | 4.30E-14 | -8.15 | 21.1119751 | -3.58E-02 | 76995113  | 76995236  | NC_000010.10 |
| cg06812693 | 8.64E-13 | 4.31E-14 | -8.15 | 21.1102804 | -5.96E-02 | 26323246  | 26323369  | NC_000004.11 |
| cg05991902 | 8.65E-13 | 4.31E-14 | -8.15 | 21.1093179 | -1.75E-01 | 9385082   | 9385205   | NC_000002.11 |
| cg12286295 | 8.66E-13 | 4.32E-14 | -8.15 | 21.1070191 | -3.54E-02 | 1445579   | 1445702   | NC_000019.9  |
| cg19653417 | 8.69E-13 | 4.33E-14 | -8.15 | 21.1042266 | -1.56E-01 | 132654924 | 132655047 | NC_000012.11 |
| cg13512204 | 8.70E-13 | 4.34E-14 | -8.15 | 21.1023235 | -7.31E-02 | 78506874  | 78506997  | NC_000009.11 |
| cg05653887 | 8.71E-13 | 4.35E-14 | -8.15 | 21.101078  | -1.46E-01 | 46767176  | 46767299  | NC_000022.10 |
| cg02449762 | 8.73E-13 | 4.36E-14 | -8.15 | 21.098635  | -1.34E-01 | 5661741   | 5661864   | NC_000010.10 |
| cg02667677 | 8.75E-13 | 4.36E-14 | -8.15 | 21.0972108 | -1.20E-01 | 106545984 | 106546107 | NC_000006.11 |

|            |          |          |       |            |           |           |           |              |
|------------|----------|----------|-------|------------|-----------|-----------|-----------|--------------|
| cg08296680 | 8.75E-13 | 4.37E-14 | -8.15 | 21.0968898 | -1.87E-01 | 80186275  | 80186398  | NC_000017.10 |
| cg00682487 | 8.75E-13 | 4.37E-14 | -8.15 | 21.0964563 | -1.47E-01 | 36283275  | 36283398  | NC_000004.11 |
| cg15000813 | 8.75E-13 | 4.37E-14 | -8.15 | 21.0961058 | -1.60E-01 | 17454394  | 17454517  | NC_000008.10 |
| cg27403810 | 8.76E-13 | 4.37E-14 | -8.15 | 21.0954349 | -9.95E-02 | 48585974  | 48586097  | NC_000017.10 |
| cg07824081 | 8.76E-13 | 4.37E-14 | -8.15 | 21.0949608 | -9.43E-02 | 30124904  | 30125027  | NC_000016.9  |
| cg06615380 | 8.77E-13 | 4.38E-14 | -8.15 | 21.0939019 | -4.04E-02 | 1072902   | 1073025   | NC_000001.10 |
| cg02319392 | 8.82E-13 | 4.40E-14 | -8.15 | 21.0881173 | -1.17E-01 | 83841324  | 83841447  | NC_000016.9  |
| cg15581235 | 8.83E-13 | 4.41E-14 | -8.15 | 21.0875282 | -7.58E-02 | 41708917  | 41709040  | NC_000015.9  |
| cg23843484 | 8.83E-13 | 4.41E-14 | -8.15 | 21.0871671 | -2.29E-01 | 1560248   | 1560371   | NC_000007.13 |
| cg02217247 | 8.88E-13 | 4.44E-14 | -8.14 | 21.0812952 | -1.77E-01 | 15355978  | 15356101  | NC_000010.10 |
| cg24382070 | 8.88E-13 | 4.44E-14 | -8.14 | 21.0805105 | -1.24E-01 | 22013694  | 22013817  | NC_000008.10 |
| cg21762222 | 8.88E-13 | 4.44E-14 | -8.14 | 21.08044   | -7.21E-02 | 75874556  | 75874679  | NC_000012.11 |
| cg04415689 | 8.89E-13 | 4.44E-14 | -8.14 | 21.0797451 | -1.12E-01 | 242128250 | 242128373 | NC_000002.11 |
| cg06807993 | 8.89E-13 | 4.44E-14 | -8.14 | 21.0795423 | -1.67E-01 | 79099785  | 79099908  | NC_000017.10 |
| cg13730105 | 8.89E-13 | 4.44E-14 | -8.14 | 21.07918   | -1.56E-01 | 120466837 | 120466960 | NC_000009.11 |
| cg08565003 | 8.90E-13 | 4.45E-14 | -8.14 | 21.0779805 | -1.68E-01 | 87447920  | 87448043  | NC_000016.9  |
| cg06621060 | 8.91E-13 | 4.45E-14 | -8.14 | 21.0775242 | -1.31E-01 | 102413151 | 102413274 | NC_000010.10 |
| cg17062938 | 8.91E-13 | 4.45E-14 | -8.14 | 21.077065  | -9.85E-02 | 154706880 | 154707003 | NC_000007.13 |
| cg21336235 | 8.92E-13 | 4.46E-14 | -8.14 | 21.0761603 | -5.90E-02 | 74904397  | 74904520  | NC_000004.11 |
| cg26566046 | 8.92E-13 | 4.46E-14 | -8.14 | 21.0754757 | -5.18E-02 | 80083628  | 80083751  | NC_000012.11 |
| cg04130507 | 8.94E-13 | 4.47E-14 | -8.14 | 21.0736138 | -9.97E-02 | 182030753 | 182030876 | NC_000001.10 |
| cg18704527 | 8.95E-13 | 4.48E-14 | -8.14 | 21.0720449 | -2.01E-01 | 19962042  | 19962165  | NC_000022.10 |
| cg16678159 | 8.96E-13 | 4.48E-14 | -8.14 | 21.0716338 | -1.71E-01 | 63529520  | 63529643  | NC_000011.9  |
| cg26925114 | 8.96E-13 | 4.48E-14 | -8.14 | 21.0712339 | -3.65E-02 | 74381380  | 74381503  | NC_000017.10 |
| cg00375608 | 8.98E-13 | 4.49E-14 | -8.14 | 21.0693652 | -1.94E-01 | 1607787   | 1607910   | NC_000007.13 |



|            |          |          |       |            |           |           |           |              |
|------------|----------|----------|-------|------------|-----------|-----------|-----------|--------------|
| cg07260017 | 9.00E-13 | 4.50E-14 | -8.14 | 21.0668145 | -1.55E-01 | 149492480 | 149492603 | NC_000005.9  |
| cg01347529 | 9.02E-13 | 4.51E-14 | -8.14 | 21.0646834 | -1.23E-01 | 92495342  | 92495465  | NC_000001.10 |
| cg15547662 | 9.02E-13 | 4.51E-14 | -8.14 | 21.0643802 | -7.80E-02 | 26324823  | 26324946  | NC_000001.10 |
| cg20294304 | 9.05E-13 | 4.53E-14 | -8.14 | 21.0602035 | -1.43E-01 | 34203153  | 34203276  | NC_000006.11 |
| cg18752785 | 9.06E-13 | 4.53E-14 | -8.14 | 21.0593588 | -5.19E-02 | 3996394   | 3996517   | NC_000020.10 |
| cg21010407 | 9.06E-13 | 4.54E-14 | -8.14 | 21.0592576 | -5.24E-02 | 46955679  | 46955802  | NC_000001.10 |
| cg03749697 | 9.06E-13 | 4.54E-14 | -8.14 | 21.058895  | -1.40E-01 | 85177860  | 85177983  | NC_000001.10 |
| cg13754251 | 9.09E-13 | 4.55E-14 | -8.14 | 21.0560664 | -3.60E-02 | 43583855  | 43583978  | NC_000022.10 |
| cg12506013 | 9.09E-13 | 4.55E-14 | -8.14 | 21.0559072 | -8.33E-02 | 14991752  | 14991875  | NC_000019.9  |
| cg06513149 | 9.10E-13 | 4.56E-14 | -8.14 | 21.0549809 | -7.58E-02 | 33002431  | 33002554  | NC_000013.10 |
| cg01142676 | 9.10E-13 | 4.56E-14 | -8.14 | 21.0548087 | -1.46E-01 | 117695591 | 117695714 | NC_000011.9  |
| cg11267810 | 9.10E-13 | 4.56E-14 | -8.14 | 21.0542426 | -1.41E-01 | 19867026  | 19867149  | NC_000020.10 |
| cg19766988 | 9.12E-13 | 4.57E-14 | -8.14 | 21.0524238 | -1.98E-01 | 10231711  | 10231834  | NC_000019.9  |
| cg03550233 | 9.16E-13 | 4.59E-14 | -8.14 | 21.0471825 | -1.14E-01 | 39685482  | 39685605  | NC_000017.10 |
| cg05678658 | 9.17E-13 | 4.59E-14 | -8.14 | 21.0465401 | -1.52E-01 | 1500117   | 1500240   | NC_000002.11 |
| cg24556382 | 9.18E-13 | 4.60E-14 | -8.14 | 21.0452771 | -1.80E-01 | 174173455 | 174173578 | NC_000004.11 |
| cg00827318 | 9.21E-13 | 4.61E-14 | -8.14 | 21.0424676 | -1.35E-01 | 43867064  | 43867187  | NC_000010.10 |
| cg09049660 | 9.21E-13 | 4.61E-14 | -8.14 | 21.0423476 | -5.52E-02 | 3869033   | 3869156   | NC_000020.10 |
| cg07679836 | 9.22E-13 | 4.62E-14 | -8.14 | 21.040352  | -1.16E-01 | 33548423  | 33548546  | NC_000006.11 |
| cg25722983 | 9.23E-13 | 4.63E-14 | -8.14 | 21.0389609 | -1.15E-01 | 36840028  | 36840151  | NC_000001.10 |
| cg20386487 | 9.25E-13 | 4.64E-14 | -8.14 | 21.0373068 | -1.41E-01 | 96898045  | 96898168  | NC_000015.9  |
| cg00422716 | 9.25E-13 | 4.64E-14 | -8.14 | 21.0372889 | -1.19E-01 | 123484985 | 123485108 | NC_000007.13 |
| cg21447717 | 9.28E-13 | 4.66E-14 | -8.14 | 21.0331715 | -1.69E-01 | 197228950 | 197229073 | NC_000003.11 |
| cg09238199 | 9.30E-13 | 4.67E-14 | -8.14 | 21.0310736 | -2.19E-01 | 111097777 | 111097900 | NC_000013.10 |
| cg26223654 | 9.30E-13 | 4.67E-14 | -8.14 | 21.0309765 | -7.43E-02 | 12949372  | 12949495  | NC_000019.9  |

|               |          |          |       |            |           |           |           |              |
|---------------|----------|----------|-------|------------|-----------|-----------|-----------|--------------|
| cg03464232    | 9.33E-13 | 4.68E-14 | -8.14 | 21.0281298 | -6.04E-02 | 146278302 | 146278425 | NC_000008.10 |
| cg12945324    | 9.35E-13 | 4.69E-14 | -8.14 | 21.0259579 | -7.00E-02 | 144853583 | 144853706 | NC_000008.10 |
| cg25668117    | 9.35E-13 | 4.69E-14 | -8.14 | 21.0258132 | -1.73E-01 | 959904    | 960027    | NC_000007.13 |
| cg21544219    | 9.35E-13 | 4.70E-14 | -8.14 | 21.02486   | -1.61E-01 | 566410    | 566533    | NC_000005.9  |
| cg05071383    | 9.37E-13 | 4.70E-14 | -8.13 | 21.0231819 | -1.25E-01 | 105370983 | 105371106 | NC_000014.8  |
| cg09886558    | 9.39E-13 | 4.71E-14 | -8.13 | 21.0211711 | -1.38E-01 | 77899670  | 77899793  | NC_000015.9  |
| cg18568843    | 9.44E-13 | 4.74E-14 | -8.13 | 21.0156515 | -4.73E-02 | 52535550  | 52535673  | NC_000006.11 |
| cg20154657    | 9.44E-13 | 4.74E-14 | -8.13 | 21.0154111 | -5.55E-02 | 49126819  | 49126942  | NC_000020.10 |
| cg17815841    | 9.44E-13 | 4.74E-14 | -8.13 | 21.0153926 | -4.60E-02 | 39979368  | 39979491  | NC_000004.11 |
| cg05003322    | 9.45E-13 | 4.75E-14 | -8.13 | 21.0144987 | -1.22E-01 | 32169706  | 32169829  | NC_000001.10 |
| ch.17.849637R | 9.45E-13 | 4.75E-14 | -8.13 | 21.0140376 | -6.27E-02 | 31089634  | 31089757  | NC_000017.10 |
| cg24488506    | 9.47E-13 | 4.76E-14 | -8.13 | 21.0116449 | -6.89E-02 | 65667952  | 65668075  | NC_000011.9  |
| cg04770088    | 9.49E-13 | 4.77E-14 | -8.13 | 21.0096365 | -2.39E-01 | 63225020  | 63225143  | NC_000017.10 |
| cg13397649    | 9.49E-13 | 4.77E-14 | -8.13 | 21.0094836 | -6.08E-02 | 12376968  | 12377091  | NC_000018.9  |
| cg24672624    | 9.52E-13 | 4.79E-14 | -8.13 | 21.0062136 | -1.61E-01 | 24239771  | 24239894  | NC_000001.10 |
| cg20615827    | 9.53E-13 | 4.79E-14 | -8.13 | 21.0053213 | -1.11E-01 | 9515447   | 9515570   | NC_000001.10 |
| cg21531389    | 9.54E-13 | 4.80E-14 | -8.13 | 21.0042509 | -1.58E-01 | 27006498  | 27006621  | NC_000022.10 |
| cg22317846    | 9.57E-13 | 4.81E-14 | -8.13 | 21.0011316 | -1.45E-01 | 17862385  | 17862508  | NC_000019.9  |
| cg16576160    | 9.57E-13 | 4.81E-14 | -8.13 | 21.0010566 | -1.64E-01 | 88296770  | 88296893  | NC_000016.9  |
| cg14787269    | 9.60E-13 | 4.82E-14 | -8.13 | 20.9982843 | -1.15E-01 | 46380394  | 46380517  | NC_000019.9  |
| cg11216682    | 9.62E-13 | 4.84E-14 | -8.13 | 20.9953557 | -3.29E-02 | 131113867 | 131113990 | NC_000002.11 |
| cg14517863    | 9.63E-13 | 4.84E-14 | -8.13 | 20.9951503 | -1.31E-01 | 44321492  | 44321615  | NC_000017.10 |
| cg04880546    | 9.64E-13 | 4.85E-14 | -8.13 | 20.9932811 | -7.78E-02 | 120868468 | 120868591 | NC_000012.11 |
| cg09039163    | 9.67E-13 | 4.87E-14 | -8.13 | 20.9899339 | -1.50E-01 | 239009036 | 239009159 | NC_000002.11 |
| cg06437396    | 9.68E-13 | 4.87E-14 | -8.13 | 20.9897348 | -1.03E-01 | 108437013 | 108437136 | NC_000006.11 |

|                |          |          |       |            |           |           |           |              |
|----------------|----------|----------|-------|------------|-----------|-----------|-----------|--------------|
| cg07213830     | 9.68E-13 | 4.87E-14 | -8.13 | 20.9893746 | -1.05E-01 | 1093940   | 1094063   | NC_000001.10 |
| cg13344344     | 9.69E-13 | 4.87E-14 | -8.13 | 20.9879895 | -9.34E-02 | 12958803  | 12958926  | NC_000019.9  |
| cg15497834     | 9.71E-13 | 4.88E-14 | -8.13 | 20.9861364 | -1.74E-01 | 48998834  | 48998957  | NC_000020.10 |
| cg04979435     | 9.75E-13 | 4.91E-14 | -8.13 | 20.9817656 | -8.38E-02 | 67875655  | 67875778  | NC_000016.9  |
| cg08690876     | 9.77E-13 | 4.92E-14 | -8.13 | 20.9793801 | -1.47E-01 | 43040721  | 43040844  | NC_000022.10 |
| cg16626967     | 9.77E-13 | 4.92E-14 | -8.13 | 20.9792231 | -6.26E-02 | 16068861  | 16068984  | NC_000001.10 |
| cg08125401     | 9.78E-13 | 4.92E-14 | -8.13 | 20.9781604 | -7.56E-02 | 74726457  | 74726580  | NC_000015.9  |
| cg04605532     | 9.79E-13 | 4.93E-14 | -8.13 | 20.9772542 | -1.97E-01 | 234843592 | 234843715 | NC_000001.10 |
| cg13627451     | 9.79E-13 | 4.93E-14 | -8.13 | 20.9769788 | -5.44E-02 | 52043674  | 52043797  | NC_000015.9  |
| cg26786974     | 9.81E-13 | 4.94E-14 | -8.13 | 20.9755234 | -1.67E-01 | 39849807  | 39849930  | NC_000006.11 |
| cg24286372     | 9.83E-13 | 4.95E-14 | -8.13 | 20.973496  | -9.48E-02 | 89783499  | 89783622  | NC_000007.13 |
| cg15925478     | 9.83E-13 | 4.95E-14 | -8.13 | 20.9731108 | -1.93E-01 | 94081080  | 94081203  | NC_000001.10 |
| cg05062178     | 9.84E-13 | 4.95E-14 | -8.13 | 20.9719344 | -5.95E-02 | 124605247 | 124605370 | NC_000003.11 |
| cg04233620     | 9.91E-13 | 4.99E-14 | -8.13 | 20.9645315 | -1.60E-01 | 46629219  | 46629342  | NC_000021.8  |
| cg01613691     | 9.93E-13 | 5.00E-14 | -8.13 | 20.9628779 | -1.12E-01 | 1105380   | 1105503   | NC_000019.9  |
| cg03736781     | 9.94E-13 | 5.00E-14 | -8.12 | 20.9621827 | -1.10E-01 | 158784655 | 158784778 | NC_000007.13 |
| cg10465028     | 9.94E-13 | 5.01E-14 | -8.12 | 20.961881  | -1.58E-01 | 63753203  | 63753326  | NC_000011.9  |
| cg26212966     | 9.96E-13 | 5.02E-14 | -8.12 | 20.9592895 | -6.10E-02 | 71351271  | 71351394  | NC_000011.9  |
| cg25813109     | 9.97E-13 | 5.02E-14 | -8.12 | 20.9585512 | -1.27E-01 | 32900076  | 32900199  | NC_000020.10 |
| cg00220225     | 9.99E-13 | 5.03E-14 | -8.12 | 20.9562536 | -1.92E-01 | 50194470  | 50194593  | NC_000003.11 |
| cg00858400     | 1.00E-12 | 5.05E-14 | -8.12 | 20.9538564 | -1.70E-01 | 87904580  | 87904703  | NC_000016.9  |
| ch.17.2138644F | 1.00E-12 | 5.05E-14 | -8.12 | 20.9522245 | -4.69E-02 | 77985282  | 77985405  | NC_000017.10 |
| cg23381232     | 1.00E-12 | 5.06E-14 | -8.12 | 20.9518422 | -1.62E-01 | 95696973  | 95697096  | NC_000007.13 |
| cg16538604     | 1.00E-12 | 5.06E-14 | -8.12 | 20.9515266 | -4.96E-02 | 2010703   | 2010826   | NC_000004.11 |
| cg23771661     | 1.00E-12 | 5.06E-14 | -8.12 | 20.9509082 | -1.17E-01 | 17905332  | 17905455  | NC_000019.9  |

|               |          |          |       |            |           |           |           |              |
|---------------|----------|----------|-------|------------|-----------|-----------|-----------|--------------|
| cg21863499    | 1.01E-12 | 5.07E-14 | -8.12 | 20.949511  | -8.79E-02 | 27113640  | 27113763  | NC_000001.10 |
| cg00165535    | 1.01E-12 | 5.07E-14 | -8.12 | 20.9489689 | -4.68E-02 | 100599025 | 100599148 | NC_000001.10 |
| cg24306962    | 1.01E-12 | 5.07E-14 | -8.12 | 20.9485193 | -1.34E-01 | 16345491  | 16345614  | NC_000001.10 |
| ch.4.3354065F | 1.01E-12 | 5.07E-14 | -8.12 | 20.9483961 | -4.79E-02 | 183646454 | 183646577 | NC_000004.11 |
| cg01403607    | 1.01E-12 | 5.08E-14 | -8.12 | 20.948273  | -1.43E-01 | 162838907 | 162839030 | NC_000001.10 |
| cg05778494    | 1.01E-12 | 5.10E-14 | -8.12 | 20.9436826 | -1.93E-01 | 155165346 | 155165469 | NC_000001.10 |
| cg17001531    | 1.01E-12 | 5.10E-14 | -8.12 | 20.9436198 | -6.73E-02 | 16825540  | 16825663  | NC_000001.10 |
| cg05871756    | 1.01E-12 | 5.10E-14 | -8.12 | 20.9427294 | -1.79E-01 | 173216171 | 173216294 | NC_000005.9  |
| cg07900823    | 1.01E-12 | 5.10E-14 | -8.12 | 20.9426207 | -6.13E-02 | 81586541  | 81586664  | NC_000010.10 |
| cg03590237    | 1.01E-12 | 5.11E-14 | -8.12 | 20.9408625 | -1.96E-01 | 52439807  | 52439930  | NC_000006.11 |
| cg23839680    | 1.01E-12 | 5.12E-14 | -8.12 | 20.939615  | -2.01E-01 | 56118238  | 56118361  | NC_000007.13 |
| cg07431199    | 1.02E-12 | 5.13E-14 | -8.12 | 20.9372503 | -5.86E-02 | 41218265  | 41218388  | NC_000015.9  |
| cg16094511    | 1.02E-12 | 5.15E-14 | -8.12 | 20.9340484 | -7.42E-02 | 69262103  | 69262226  | NC_000014.8  |
| cg12695612    | 1.02E-12 | 5.16E-14 | -8.12 | 20.9325323 | -1.59E-01 | 17308092  | 17308215  | NC_000001.10 |
| cg17333242    | 1.02E-12 | 5.16E-14 | -8.12 | 20.9311604 | -9.22E-02 | 31359928  | 31360051  | NC_000002.11 |
| cg10378667    | 1.02E-12 | 5.17E-14 | -8.12 | 20.9302093 | -7.60E-02 | 122326303 | 122326426 | NC_000012.11 |
| cg21372107    | 1.02E-12 | 5.17E-14 | -8.12 | 20.9302088 | -1.45E-01 | 134900674 | 134900797 | NC_000002.11 |
| cg02828768    | 1.02E-12 | 5.17E-14 | -8.12 | 20.9301737 | -6.05E-02 | 33269612  | 33269735  | NC_000010.10 |
| cg16567056    | 1.02E-12 | 5.17E-14 | -8.12 | 20.9297232 | -1.89E-01 | 40599985  | 40600108  | NC_000015.9  |
| cg07562821    | 1.03E-12 | 5.20E-14 | -8.12 | 20.9249486 | -1.01E-01 | 43810131  | 43810254  | NC_000015.9  |
| cg06225154    | 1.03E-12 | 5.20E-14 | -8.12 | 20.9237153 | -3.32E-02 | 37640364  | 37640487  | NC_000022.10 |
| cg26464892    | 1.03E-12 | 5.22E-14 | -8.12 | 20.9211248 | -6.57E-02 | 55966440  | 55966563  | NC_000020.10 |
| cg04990571    | 1.03E-12 | 5.23E-14 | -8.12 | 20.9189141 | -7.47E-02 | 43892908  | 43893031  | NC_000010.10 |
| cg19514694    | 1.04E-12 | 5.24E-14 | -8.12 | 20.9168753 | -8.82E-02 | 147830561 | 147830684 | NC_000006.11 |
| cg22026616    | 1.04E-12 | 5.24E-14 | -8.12 | 20.9160615 | -1.71E-01 | 45275340  | 45275463  | NC_000001.10 |

|               |          |          |       |            |           |           |           |              |
|---------------|----------|----------|-------|------------|-----------|-----------|-----------|--------------|
| cg08437570    | 1.04E-12 | 5.24E-14 | -8.12 | 20.9159015 | -1.63E-01 | 104195699 | 104195822 | NC_000010.10 |
| cg07092880    | 1.04E-12 | 5.25E-14 | -8.12 | 20.9152199 | -1.51E-01 | 85601106  | 85601229  | NC_000011.9  |
| cg20140201    | 1.04E-12 | 5.26E-14 | -8.12 | 20.9136397 | -1.83E-01 | 241835670 | 241835793 | NC_000002.11 |
| cg05894719    | 1.04E-12 | 5.27E-14 | -8.12 | 20.9109127 | -1.41E-01 | 1989899   | 1990022   | NC_000011.9  |
| cg12556823    | 1.04E-12 | 5.27E-14 | -8.12 | 20.9106812 | -1.82E-01 | 21023485  | 21023608  | NC_000006.11 |
| cg06481431    | 1.05E-12 | 5.29E-14 | -8.12 | 20.9079984 | -1.67E-01 | 6745321   | 6745444   | NC_000019.9  |
| cg21072937    | 1.05E-12 | 5.30E-14 | -8.12 | 20.9056406 | -1.07E-01 | 7982306   | 7982429   | NC_000019.9  |
| cg07678594    | 1.05E-12 | 5.33E-14 | -8.11 | 20.9005668 | -1.50E-01 | 39929383  | 39929506  | NC_000017.10 |
| cg03466986    | 1.05E-12 | 5.33E-14 | -8.11 | 20.899583  | -1.31E-01 | 13617171  | 13617294  | NC_000003.11 |
| cg01446731    | 1.05E-12 | 5.34E-14 | -8.11 | 20.898784  | -1.74E-01 | 80770633  | 80770756  | NC_000015.9  |
| cg24343361    | 1.06E-12 | 5.35E-14 | -8.11 | 20.8969782 | -9.70E-02 | 48884089  | 48884212  | NC_000022.10 |
| cg12263377    | 1.06E-12 | 5.37E-14 | -8.11 | 20.8931752 | -1.29E-01 | 237982246 | 237982369 | NC_000002.11 |
| cg07563400    | 1.06E-12 | 5.37E-14 | -8.11 | 20.8931161 | -1.18E-01 | 15849556  | 15849679  | NC_000017.10 |
| ch.3.1226245F | 1.06E-12 | 5.37E-14 | -8.11 | 20.8927174 | -1.34E-01 | 55731563  | 55731686  | NC_000003.11 |
| cg24197567    | 1.06E-12 | 5.38E-14 | -8.11 | 20.8904844 | -1.50E-01 | 116346853 | 116346976 | NC_000007.13 |
| cg15869463    | 1.07E-12 | 5.39E-14 | -8.11 | 20.8883193 | -7.86E-02 | 62777690  | 62777813  | NC_000017.10 |
| cg04482628    | 1.07E-12 | 5.39E-14 | -8.11 | 20.8882837 | -1.71E-01 | 36581751  | 36581874  | NC_000001.10 |
| cg22718891    | 1.07E-12 | 5.39E-14 | -8.11 | 20.8882155 | -1.42E-01 | 52035148  | 52035271  | NC_000001.10 |
| cg20170271    | 1.07E-12 | 5.40E-14 | -8.11 | 20.8861697 | -1.86E-01 | 38034681  | 38034804  | NC_000022.10 |
| cg11756095    | 1.07E-12 | 5.42E-14 | -8.11 | 20.8840212 | -2.31E-01 | 32410614  | 32410737  | NC_000001.10 |
| cg04563438    | 1.07E-12 | 5.42E-14 | -8.11 | 20.8833474 | -6.73E-02 | 42065244  | 42065367  | NC_000008.10 |
| cg09399371    | 1.07E-12 | 5.42E-14 | -8.11 | 20.8825411 | -1.19E-01 | 24702584  | 24702707  | NC_000014.8  |
| cg09808774    | 1.07E-12 | 5.43E-14 | -8.11 | 20.8815782 | -1.29E-01 | 72933718  | 72933841  | NC_000017.10 |
| cg00006459    | 1.07E-12 | 5.43E-14 | -8.11 | 20.8815544 | -1.43E-01 | 148635716 | 148635839 | NC_000004.11 |
| cg00244634    | 1.07E-12 | 5.43E-14 | -8.11 | 20.8809466 | -6.59E-02 | 100661419 | 100661542 | NC_000012.11 |

|            |          |          |       |            |           |           |           |              |
|------------|----------|----------|-------|------------|-----------|-----------|-----------|--------------|
| cg20910408 | 1.07E-12 | 5.44E-14 | -8.11 | 20.8801473 | -1.80E-01 | 44801589  | 44801712  | NC_000007.13 |
| cg14352298 | 1.07E-12 | 5.44E-14 | -8.11 | 20.8797285 | -1.22E-01 | 112236639 | 112236762 | NC_000013.10 |
| cg05492810 | 1.07E-12 | 5.44E-14 | -8.11 | 20.8795359 | -6.88E-02 | 78129288  | 78129411  | NC_000011.9  |
| cg19672993 | 1.07E-12 | 5.44E-14 | -8.11 | 20.879451  | -7.27E-02 | 70160734  | 70160857  | NC_000007.13 |
| cg05334655 | 1.07E-12 | 5.44E-14 | -8.11 | 20.8792433 | -1.50E-01 | 23890294  | 23890417  | NC_000014.8  |
| cg23982279 | 1.08E-12 | 5.47E-14 | -8.11 | 20.8746277 | -9.82E-02 | 178790077 | 178790200 | NC_000003.11 |
| cg23040782 | 1.08E-12 | 5.48E-14 | -8.11 | 20.8718844 | -1.22E-01 | 6762215   | 6762338   | NC_000001.10 |
| cg16449262 | 1.08E-12 | 5.48E-14 | -8.11 | 20.8717631 | -1.05E-01 | 49307459  | 49307582  | NC_000016.9  |
| cg15898874 | 1.09E-12 | 5.50E-14 | -8.11 | 20.8681283 | -1.62E-01 | 96515411  | 96515534  | NC_000015.9  |
| cg02524236 | 1.09E-12 | 5.52E-14 | -8.11 | 20.8654314 | -2.07E-01 | 128086694 | 128086817 | NC_000010.10 |
| cg18098065 | 1.09E-12 | 5.52E-14 | -8.11 | 20.8652333 | -1.89E-01 | 1765820   | 1765943   | NC_000008.10 |
| cg21774136 | 1.09E-12 | 5.52E-14 | -8.11 | 20.8652318 | -1.79E-01 | 8593495   | 8593618   | NC_000001.10 |
| cg12774559 | 1.09E-12 | 5.53E-14 | -8.11 | 20.8631937 | -6.72E-02 | 68519071  | 68519194  | NC_000011.9  |
| cg08828193 | 1.09E-12 | 5.54E-14 | -8.11 | 20.8620917 | -1.78E-01 | 179725    | 179848    | NC_000010.10 |
| cg09031790 | 1.09E-12 | 5.55E-14 | -8.11 | 20.8608265 | -1.47E-01 | 24129948  | 24130071  | NC_000016.9  |
| cg12952136 | 1.10E-12 | 5.56E-14 | -8.11 | 20.8587207 | -5.42E-02 | 71705777  | 71705900  | NC_000004.11 |
| cg18951718 | 1.10E-12 | 5.56E-14 | -8.11 | 20.8584046 | -1.13E-01 | 6745343   | 6745466   | NC_000012.11 |
| cg18838431 | 1.10E-12 | 5.57E-14 | -8.11 | 20.8572651 | -1.38E-01 | 74178800  | 74178923  | NC_000011.9  |
| cg23677291 | 1.10E-12 | 5.57E-14 | -8.11 | 20.856556  | -1.27E-01 | 56923527  | 56923650  | NC_000011.9  |
| cg17126924 | 1.10E-12 | 5.58E-14 | -8.11 | 20.8541284 | -2.17E-01 | 25773641  | 25773764  | NC_000017.10 |
| cg25026715 | 1.10E-12 | 5.59E-14 | -8.11 | 20.8526592 | -6.11E-02 | 26989248  | 26989371  | NC_000017.10 |
| cg20250396 | 1.10E-12 | 5.59E-14 | -8.11 | 20.8522025 | -3.89E-02 | 65880036  | 65880159  | NC_000014.8  |
| cg26796518 | 1.10E-12 | 5.61E-14 | -8.11 | 20.8499951 | -1.57E-01 | 6184516   | 6184639   | NC_000012.11 |
| cg14571004 | 1.10E-12 | 5.61E-14 | -8.11 | 20.8498965 | -1.89E-01 | 101568975 | 101569098 | NC_000009.11 |
| cg05040348 | 1.11E-12 | 5.61E-14 | -8.11 | 20.8492792 | -1.72E-01 | 69497246  | 69497369  | NC_000008.10 |

|               |          |          |       |            |           |           |           |              |
|---------------|----------|----------|-------|------------|-----------|-----------|-----------|--------------|
| cg16273051    | 1.11E-12 | 5.61E-14 | -8.11 | 20.8486886 | -1.71E-01 | 129132966 | 129133089 | NC_000003.11 |
| cg14543953    | 1.11E-12 | 5.62E-14 | -8.11 | 20.8483904 | -2.13E-01 | 102669090 | 102669213 | NC_000011.9  |
| cg05570980    | 1.11E-12 | 5.63E-14 | -8.11 | 20.8461403 | -6.96E-02 | 111804983 | 111805106 | NC_000003.11 |
| cg23953133    | 1.11E-12 | 5.64E-14 | -8.11 | 20.8444493 | -6.12E-02 | 126112875 | 126112998 | NC_000005.9  |
| cg15259904    | 1.11E-12 | 5.64E-14 | -8.11 | 20.8440351 | -1.75E-01 | 55559213  | 55559336  | NC_000006.11 |
| cg04647835    | 1.11E-12 | 5.64E-14 | -8.11 | 20.8438877 | -1.96E-01 | 131495998 | 131496121 | NC_000008.10 |
| cg05942508    | 1.11E-12 | 5.64E-14 | -8.11 | 20.8435155 | -1.51E-01 | 113846922 | 113847045 | NC_000011.9  |
| cg23028654    | 1.11E-12 | 5.66E-14 | -8.1  | 20.8405343 | -9.61E-02 | 14597729  | 14597852  | NC_000003.11 |
| cg05095774    | 1.12E-12 | 5.67E-14 | -8.1  | 20.8392607 | -5.41E-02 | 52495848  | 52495971  | NC_000018.9  |
| cg13512948    | 1.12E-12 | 5.68E-14 | -8.1  | 20.837082  | -1.65E-01 | 53427431  | 53427554  | NC_000014.8  |
| cg03809847    | 1.12E-12 | 5.69E-14 | -8.1  | 20.8361602 | -1.58E-01 | 79093482  | 79093605  | NC_000017.10 |
| cg06786219    | 1.12E-12 | 5.69E-14 | -8.1  | 20.83458   | -2.06E-01 | 124499653 | 124499776 | NC_000003.11 |
| cg20490126    | 1.12E-12 | 5.71E-14 | -8.1  | 20.8325622 | -5.33E-02 | 25870007  | 25870130  | NC_000001.10 |
| cg11480762    | 1.12E-12 | 5.71E-14 | -8.1  | 20.8312966 | -1.52E-01 | 73103395  | 73103518  | NC_000010.10 |
| cg08038409    | 1.12E-12 | 5.72E-14 | -8.1  | 20.8302977 | -9.66E-02 | 825155    | 825278    | NC_000020.10 |
| cg05380304    | 1.13E-12 | 5.72E-14 | -8.1  | 20.8297303 | -1.27E-01 | 7755739   | 7755862   | NC_000004.11 |
| cg12134570    | 1.13E-12 | 5.72E-14 | -8.1  | 20.8294418 | -8.76E-02 | 13213428  | 13213551  | NC_000019.9  |
| cg07601804    | 1.13E-12 | 5.73E-14 | -8.1  | 20.828877  | -9.16E-02 | 9023134   | 9023257   | NC_000001.10 |
| cg20324262    | 1.13E-12 | 5.73E-14 | -8.1  | 20.8281036 | -6.19E-02 | 12958871  | 12958994  | NC_000019.9  |
| cg00458927    | 1.13E-12 | 5.75E-14 | -8.1  | 20.824816  | -1.90E-01 | 62116573  | 62116696  | NC_000002.11 |
| cg14551182    | 1.13E-12 | 5.77E-14 | -8.1  | 20.8219089 | -3.96E-02 | 16626476  | 16626599  | NC_000011.9  |
| cg02057755    | 1.13E-12 | 5.77E-14 | -8.1  | 20.8215616 | -1.37E-01 | 48998823  | 48998946  | NC_000001.10 |
| cg17727529    | 1.14E-12 | 5.77E-14 | -8.1  | 20.8208248 | -8.21E-02 | 156399685 | 156399808 | NC_000001.10 |
| ch.6.1541695F | 1.14E-12 | 5.78E-14 | -8.1  | 20.8202829 | -5.74E-02 | 74179016  | 74179139  | NC_000006.11 |
| cg05726239    | 1.14E-12 | 5.79E-14 | -8.1  | 20.8176612 | -2.22E-01 | 107816677 | 107816800 | NC_000006.11 |

|               |          |          |      |            |           |           |           |              |
|---------------|----------|----------|------|------------|-----------|-----------|-----------|--------------|
| cg14313310    | 1.14E-12 | 5.79E-14 | -8.1 | 20.8174209 | -6.19E-02 | 184006816 | 184006939 | NC_000001.10 |
| cg21222743    | 1.14E-12 | 5.80E-14 | -8.1 | 20.816764  | -1.31E-01 | 31543545  | 31543668  | NC_000006.11 |
| cg15563184    | 1.15E-12 | 5.83E-14 | -8.1 | 20.8114392 | -1.39E-01 | 33228498  | 33228621  | NC_000006.11 |
| cg24146408    | 1.15E-12 | 5.85E-14 | -8.1 | 20.8084731 | -6.46E-02 | 15374317  | 15374440  | NC_000003.11 |
| cg03091776    | 1.15E-12 | 5.86E-14 | -8.1 | 20.8067735 | -7.22E-02 | 74735468  | 74735591  | NC_000004.11 |
| cg27127099    | 1.15E-12 | 5.87E-14 | -8.1 | 20.8039295 | -5.10E-02 | 150158597 | 150158720 | NC_000005.9  |
| cg23838943    | 1.15E-12 | 5.88E-14 | -8.1 | 20.8033664 | -1.76E-01 | 5049135   | 5049258   | NC_000019.9  |
| cg08284233    | 1.16E-12 | 5.88E-14 | -8.1 | 20.8027649 | -1.88E-01 | 20370531  | 20370654  | NC_000016.9  |
| cg16846518    | 1.16E-12 | 5.88E-14 | -8.1 | 20.8027438 | -1.17E-01 | 128062608 | 128062731 | NC_000003.11 |
| cg05682581    | 1.16E-12 | 5.90E-14 | -8.1 | 20.8002898 | -1.61E-01 | 929958    | 930081    | NC_000008.10 |
| cg01017395    | 1.16E-12 | 5.90E-14 | -8.1 | 20.7994978 | -1.51E-01 | 12609957  | 12610080  | NC_000001.10 |
| cg04374102    | 1.16E-12 | 5.90E-14 | -8.1 | 20.7990512 | -5.38E-02 | 7340813   | 7340936   | NC_000017.10 |
| cg07868195    | 1.16E-12 | 5.91E-14 | -8.1 | 20.7981099 | -6.86E-02 | 85581697  | 85581820  | NC_000002.11 |
| ch.1.2988748F | 1.16E-12 | 5.92E-14 | -8.1 | 20.7967064 | -5.91E-02 | 154230586 | 154230709 | NC_000001.10 |
| cg00969823    | 1.16E-12 | 5.92E-14 | -8.1 | 20.7958535 | -9.66E-02 | 34958499  | 34958622  | NC_000009.11 |
| cg25383615    | 1.16E-12 | 5.93E-14 | -8.1 | 20.7946854 | -1.04E-01 | 65652312  | 65652435  | NC_000003.11 |
| cg15615645    | 1.17E-12 | 5.95E-14 | -8.1 | 20.7915191 | -2.28E-01 | 104543040 | 104543163 | NC_000010.10 |
| cg18034299    | 1.17E-12 | 5.95E-14 | -8.1 | 20.7908339 | -8.74E-02 | 172359680 | 172359803 | NC_000005.9  |
| cg03459008    | 1.17E-12 | 5.96E-14 | -8.1 | 20.789545  | -3.59E-02 | 160472720 | 160472843 | NC_000002.11 |
| cg05429448    | 1.17E-12 | 5.97E-14 | -8.1 | 20.7888184 | -2.41E-01 | 101659630 | 101659753 | NC_000003.11 |
| cg07699978    | 1.17E-12 | 5.97E-14 | -8.1 | 20.7883341 | -1.93E-01 | 63194001  | 63194124  | NC_000012.11 |
| cg18188916    | 1.17E-12 | 5.97E-14 | -8.1 | 20.7880528 | -1.83E-01 | 158103335 | 158103458 | NC_000002.11 |
| cg23753748    | 1.17E-12 | 5.99E-14 | -8.1 | 20.7849298 | -1.31E-01 | 105212808 | 105212931 | NC_000010.10 |
| cg08717396    | 1.17E-12 | 5.99E-14 | -8.1 | 20.7848068 | -8.08E-02 | 27100775  | 27100898  | NC_000006.11 |
| cg14083146    | 1.18E-12 | 6.01E-14 | -8.1 | 20.7816361 | -1.55E-01 | 20694136  | 20694259  | NC_000020.10 |



|               |          |          |       |            |           |           |           |              |
|---------------|----------|----------|-------|------------|-----------|-----------|-----------|--------------|
| cg10092158    | 1.19E-12 | 6.05E-14 | -8.09 | 20.775339  | -6.87E-02 | 151584907 | 151585030 | NC_000001.10 |
| ch.8.214553F  | 1.19E-12 | 6.05E-14 | -8.09 | 20.7753149 | -6.60E-02 | 8189620   | 8189743   | NC_000008.10 |
| cg23094080    | 1.19E-12 | 6.08E-14 | -8.09 | 20.770135  | -5.86E-02 | 145550361 | 145550484 | NC_000008.10 |
| cg16479173    | 1.19E-12 | 6.08E-14 | -8.09 | 20.7692929 | -5.89E-02 | 47290859  | 47290982  | NC_000011.9  |
| cg10414736    | 1.19E-12 | 6.09E-14 | -8.09 | 20.769162  | -4.89E-02 | 26521747  | 26521870  | NC_000006.11 |
| ch.10.202299R | 1.19E-12 | 6.09E-14 | -8.09 | 20.7685099 | -8.05E-02 | 6548100   | 6548223   | NC_000010.10 |
| cg12591315    | 1.19E-12 | 6.09E-14 | -8.09 | 20.7682825 | -1.79E-01 | 10022688  | 10022811  | NC_000012.11 |
| cg24235037    | 1.19E-12 | 6.09E-14 | -8.09 | 20.7677639 | -6.03E-02 | 160919532 | 160919655 | NC_000002.11 |
| cg11006812    | 1.19E-12 | 6.10E-14 | -8.09 | 20.7672709 | -1.09E-01 | 113044437 | 113044560 | NC_000001.10 |
| cg19451435    | 1.20E-12 | 6.10E-14 | -8.09 | 20.7667177 | -7.04E-02 | 158402916 | 158403039 | NC_000006.11 |
| cg06435363    | 1.20E-12 | 6.13E-14 | -8.09 | 20.7620015 | -2.25E-01 | 17206671  | 17206794  | NC_000008.10 |
| cg00852033    | 1.20E-12 | 6.13E-14 | -8.09 | 20.7615542 | -1.01E-01 | 2058572   | 2058695   | NC_000016.9  |
| cg14405839    | 1.20E-12 | 6.13E-14 | -8.09 | 20.761493  | -1.12E-01 | 72774855  | 72774978  | NC_000009.11 |
| cg10538454    | 1.20E-12 | 6.14E-14 | -8.09 | 20.7600709 | -5.16E-02 | 48238843  | 48238966  | NC_000017.10 |
| cg16850150    | 1.21E-12 | 6.16E-14 | -8.09 | 20.757774  | -1.29E-01 | 16490241  | 16490364  | NC_000003.11 |
| cg11074232    | 1.21E-12 | 6.16E-14 | -8.09 | 20.7569117 | -1.01E-01 | 173037800 | 173037923 | NC_000002.11 |
| cg10047740    | 1.21E-12 | 6.17E-14 | -8.09 | 20.7557319 | -1.51E-01 | 18499098  | 18499221  | NC_000019.9  |
| cg19474571    | 1.21E-12 | 6.17E-14 | -8.09 | 20.7553233 | -1.18E-01 | 31701944  | 31702067  | NC_000006.11 |
| cg18276135    | 1.21E-12 | 6.18E-14 | -8.09 | 20.7541972 | -1.04E-01 | 194498    | 194621    | NC_000011.9  |
| cg05204532    | 1.21E-12 | 6.20E-14 | -8.09 | 20.7506215 | -1.09E-01 | 8597177   | 8597300   | NC_000002.11 |
| cg23973417    | 1.22E-12 | 6.21E-14 | -8.09 | 20.7486899 | -8.87E-02 | 116164753 | 116164876 | NC_000007.13 |
| cg25755057    | 1.22E-12 | 6.22E-14 | -8.09 | 20.7477593 | -1.52E-01 | 76323667  | 76323790  | NC_000013.10 |
| ch.5.1264897R | 1.22E-12 | 6.22E-14 | -8.09 | 20.747644  | -3.93E-02 | 66306121  | 66306244  | NC_000005.9  |
| cg15062470    | 1.22E-12 | 6.23E-14 | -8.09 | 20.7455863 | -1.41E-01 | 27718710  | 27718833  | NC_000002.11 |
| cg07789559    | 1.22E-12 | 6.24E-14 | -8.09 | 20.7446104 | -4.44E-02 | 47730030  | 47730153  | NC_000019.9  |

|                |          |          |       |            |           |           |           |              |
|----------------|----------|----------|-------|------------|-----------|-----------|-----------|--------------|
| cg19106968     | 1.22E-12 | 6.25E-14 | -8.09 | 20.7425882 | -2.04E-01 | 135149666 | 135149789 | NC_000002.11 |
| cg04099180     | 1.22E-12 | 6.25E-14 | -8.09 | 20.7423708 | -4.88E-02 | 46662651  | 46662774  | NC_000017.10 |
| cg15384453     | 1.22E-12 | 6.26E-14 | -8.09 | 20.7413499 | -7.40E-02 | 30070082  | 30070205  | NC_000006.11 |
| cg22839308     | 1.23E-12 | 6.27E-14 | -8.09 | 20.7390021 | -2.29E-01 | 38807259  | 38807382  | NC_000004.11 |
| cg04587910     | 1.23E-12 | 6.29E-14 | -8.09 | 20.737009  | -7.52E-02 | 220025744 | 220025867 | NC_000002.11 |
| cg07959609     | 1.23E-12 | 6.29E-14 | -8.09 | 20.7359977 | -1.52E-01 | 16466380  | 16466503  | NC_000001.10 |
| cg02552255     | 1.23E-12 | 6.31E-14 | -8.09 | 20.7336334 | -1.67E-01 | 103104330 | 103104453 | NC_000002.11 |
| cg20447538     | 1.23E-12 | 6.31E-14 | -8.09 | 20.7327009 | -1.10E-01 | 99625515  | 99625638  | NC_000010.10 |
| cg09060469     | 1.24E-12 | 6.33E-14 | -8.09 | 20.7298381 | -1.58E-01 | 204912595 | 204912718 | NC_000001.10 |
| ch.10.845914F  | 1.24E-12 | 6.34E-14 | -8.09 | 20.727981  | -6.72E-02 | 33501874  | 33501997  | NC_000010.10 |
| cg08194212     | 1.24E-12 | 6.36E-14 | -8.09 | 20.7252511 | -1.28E-01 | 69179935  | 69180058  | NC_000004.11 |
| cg15663823     | 1.24E-12 | 6.36E-14 | -8.09 | 20.7250805 | -1.60E-01 | 64103336  | 64103459  | NC_000005.9  |
| cg07438888     | 1.24E-12 | 6.37E-14 | -8.09 | 20.7239973 | -8.26E-02 | 34529890  | 34530013  | NC_000014.8  |
| ch.11.1155333R | 1.25E-12 | 6.37E-14 | -8.09 | 20.7235014 | -5.56E-02 | 60687684  | 60687807  | NC_000011.9  |
| cg08639379     | 1.25E-12 | 6.38E-14 | -8.09 | 20.7220231 | -1.60E-01 | 95018889  | 95019012  | NC_000001.10 |
| cg25140945     | 1.25E-12 | 6.39E-14 | -8.09 | 20.7211392 | -5.70E-02 | 3816479   | 3816602   | NC_000001.10 |
| cg06810490     | 1.25E-12 | 6.39E-14 | -8.09 | 20.7208041 | -1.50E-01 | 65449491  | 65449614  | NC_000007.13 |
| cg08032476     | 1.25E-12 | 6.39E-14 | -8.09 | 20.7205822 | -1.74E-01 | 27045176  | 27045299  | NC_000017.10 |
| cg14118062     | 1.25E-12 | 6.41E-14 | -8.08 | 20.7172011 | -7.30E-02 | 25258833  | 25258956  | NC_000013.10 |
| cg01742680     | 1.25E-12 | 6.42E-14 | -8.08 | 20.7169336 | -6.55E-02 | 152879841 | 152879964 | NC_000003.11 |
| cg05564090     | 1.25E-12 | 6.42E-14 | -8.08 | 20.7160808 | -9.00E-02 | 33181864  | 33181987  | NC_000006.11 |
| cg09657538     | 1.25E-12 | 6.42E-14 | -8.08 | 20.7159652 | -5.37E-02 | 89445094  | 89445217  | NC_000004.11 |
| cg14204619     | 1.26E-12 | 6.43E-14 | -8.08 | 20.7152761 | -2.01E-01 | 1469370   | 1469493   | NC_000011.9  |
| cg19772651     | 1.26E-12 | 6.43E-14 | -8.08 | 20.7150725 | -1.50E-01 | 57351191  | 57351314  | NC_000012.11 |
| cg06944112     | 1.26E-12 | 6.44E-14 | -8.08 | 20.7137394 | -1.66E-01 | 71578685  | 71578808  | NC_000008.10 |

|                 |          |          |       |            |           |           |           |              |
|-----------------|----------|----------|-------|------------|-----------|-----------|-----------|--------------|
| cg13313294      | 1.26E-12 | 6.44E-14 | -8.08 | 20.712881  | -1.45E-01 | 231646024 | 231646147 | NC_000002.11 |
| cg03963011      | 1.26E-12 | 6.45E-14 | -8.08 | 20.7117945 | -6.43E-02 | 128418551 | 128418674 | NC_000011.9  |
| cg06345909      | 1.26E-12 | 6.45E-14 | -8.08 | 20.7116695 | -1.42E-01 | 30645310  | 30645433  | NC_000022.10 |
| cg14974711      | 1.26E-12 | 6.45E-14 | -8.08 | 20.7115037 | -4.46E-02 | 3096477   | 3096600   | NC_000016.9  |
| cg01402409      | 1.26E-12 | 6.46E-14 | -8.08 | 20.7106057 | -7.09E-02 | 78978133  | 78978256  | NC_000004.11 |
| cg23051349      | 1.26E-12 | 6.46E-14 | -8.08 | 20.7104032 | -1.14E-01 | 104094779 | 104094902 | NC_000014.8  |
| cg00851154      | 1.26E-12 | 6.47E-14 | -8.08 | 20.7083215 | -7.15E-02 | 26690578  | 26690701  | NC_000001.10 |
| cg22603542      | 1.26E-12 | 6.48E-14 | -8.08 | 20.7076323 | -5.21E-02 | 166945234 | 166945357 | NC_000001.10 |
| cg05341549      | 1.27E-12 | 6.48E-14 | -8.08 | 20.7067383 | -1.24E-01 | 9774742   | 9774865   | NC_000001.10 |
| cg21205663      | 1.27E-12 | 6.48E-14 | -8.08 | 20.7067328 | -2.10E-01 | 31269011  | 31269134  | NC_000003.11 |
| cg21330896      | 1.27E-12 | 6.49E-14 | -8.08 | 20.704981  | -2.40E-01 | 28205705  | 28205828  | NC_000008.10 |
| cg12564526      | 1.27E-12 | 6.49E-14 | -8.08 | 20.7048692 | -5.94E-02 | 66767603  | 66767726  | NC_000007.13 |
| ch.16.2072386R  | 1.27E-12 | 6.50E-14 | -8.08 | 20.7038477 | -5.45E-02 | 87503022  | 87503145  | NC_000016.9  |
| cg13300911      | 1.27E-12 | 6.52E-14 | -8.08 | 20.701324  | -4.48E-02 | 42119951  | 42120074  | NC_000015.9  |
| cg22263405      | 1.27E-12 | 6.53E-14 | -8.08 | 20.6996176 | -5.89E-02 | 42259244  | 42259367  | NC_000018.9  |
| cg25203286      | 1.28E-12 | 6.54E-14 | -8.08 | 20.6979905 | -1.53E-01 | 32070275  | 32070398  | NC_000018.9  |
| cg22841110      | 1.28E-12 | 6.58E-14 | -8.08 | 20.6917936 | -5.95E-02 | 64053472  | 64053595  | NC_000011.9  |
| cg12940991      | 1.28E-12 | 6.58E-14 | -8.08 | 20.6917832 | -1.21E-01 | 77525744  | 77525867  | NC_000014.8  |
| cg23752651      | 1.29E-12 | 6.59E-14 | -8.08 | 20.6900393 | -2.21E-01 | 6442966   | 6443089   | NC_000012.11 |
| ch.8.102115565R | 1.29E-12 | 6.60E-14 | -8.08 | 20.6896112 | -5.63E-02 | 102046389 | 102046512 | NC_000008.10 |
| cg07261186      | 1.29E-12 | 6.60E-14 | -8.08 | 20.6883867 | -2.05E-01 | 81070689  | 81070812  | NC_000010.10 |
| cg24055398      | 1.29E-12 | 6.62E-14 | -8.08 | 20.6866988 | -3.74E-02 | 73127994  | 73128117  | NC_000017.10 |
| cg05211836      | 1.29E-12 | 6.63E-14 | -8.08 | 20.6844336 | -1.28E-01 | 16999576  | 16999699  | NC_000019.9  |
| cg05913197      | 1.29E-12 | 6.63E-14 | -8.08 | 20.6841779 | -4.92E-02 | 166796386 | 166796509 | NC_000006.11 |
| cg03798986      | 1.29E-12 | 6.64E-14 | -8.08 | 20.6834078 | -1.51E-01 | 101979368 | 101979491 | NC_000015.9  |

|            |          |          |       |            |           |           |           |              |
|------------|----------|----------|-------|------------|-----------|-----------|-----------|--------------|
| cg08467687 | 1.29E-12 | 6.64E-14 | -8.08 | 20.6832996 | -8.11E-02 | 31317914  | 31318037  | NC_000022.10 |
| cg16241861 | 1.29E-12 | 6.64E-14 | -8.08 | 20.683103  | -7.97E-02 | 103995231 | 103995354 | NC_000014.8  |
| cg09528494 | 1.30E-12 | 6.66E-14 | -8.08 | 20.6800946 | -1.55E-01 | 11338675  | 11338798  | NC_000008.10 |
| cg25261059 | 1.30E-12 | 6.68E-14 | -8.08 | 20.67776   | -7.52E-02 | 44031185  | 44031308  | NC_000019.9  |
| cg23590159 | 1.30E-12 | 6.69E-14 | -8.08 | 20.6750131 | -1.20E-01 | 26629895  | 26630018  | NC_000001.10 |
| cg15044181 | 1.31E-12 | 6.71E-14 | -8.08 | 20.6729115 | -1.38E-01 | 160458148 | 160458271 | NC_000006.11 |
| cg01638175 | 1.31E-12 | 6.73E-14 | -8.08 | 20.6700727 | -6.40E-02 | 49171179  | 49171302  | NC_000003.11 |
| cg04899273 | 1.31E-12 | 6.73E-14 | -8.08 | 20.6695628 | -1.48E-01 | 96443195  | 96443318  | NC_000010.10 |
| cg17173187 | 1.31E-12 | 6.74E-14 | -8.08 | 20.6687445 | -1.05E-01 | 85201210  | 85201333  | NC_000015.9  |
| cg18376288 | 1.31E-12 | 6.74E-14 | -8.08 | 20.6682503 | -1.33E-01 | 8181555   | 8181678   | NC_000001.10 |
| cg18067134 | 1.31E-12 | 6.74E-14 | -8.08 | 20.6678103 | -1.58E-01 | 71084634  | 71084757  | NC_000003.11 |
| cg12533496 | 1.31E-12 | 6.75E-14 | -8.08 | 20.6671861 | -1.29E-01 | 26859931  | 26860054  | NC_000017.10 |
| cg06034096 | 1.32E-12 | 6.76E-14 | -8.08 | 20.6647287 | -7.05E-02 | 74663680  | 74663803  | NC_000001.10 |
| cg21578195 | 1.32E-12 | 6.77E-14 | -8.08 | 20.6646359 | -1.21E-01 | 62168727  | 62168850  | NC_000020.10 |
| cg26370484 | 1.32E-12 | 6.77E-14 | -8.08 | 20.6639526 | -1.40E-01 | 104007480 | 104007603 | NC_000008.10 |
| cg01423916 | 1.32E-12 | 6.78E-14 | -8.08 | 20.6619032 | -2.44E-01 | 47885166  | 47885289  | NC_000011.9  |
| cg24659295 | 1.32E-12 | 6.80E-14 | -8.08 | 20.6597625 | -1.58E-01 | 51680516  | 51680639  | NC_000001.10 |
| cg02227879 | 1.32E-12 | 6.80E-14 | -8.08 | 20.6594    | -2.03E-01 | 75576192  | 75576315  | NC_000010.10 |
| cg01790530 | 1.32E-12 | 6.81E-14 | -8.07 | 20.6581305 | -1.16E-01 | 73929765  | 73929888  | NC_000002.11 |
| cg15369784 | 1.33E-12 | 6.81E-14 | -8.07 | 20.6578788 | -1.58E-01 | 36906565  | 36906688  | NC_000006.11 |
| cg11691093 | 1.33E-12 | 6.82E-14 | -8.07 | 20.6560586 | -2.25E-01 | 36727373  | 36727496  | NC_000022.10 |
| cg14602393 | 1.33E-12 | 6.84E-14 | -8.07 | 20.6544531 | -1.48E-01 | 133343405 | 133343528 | NC_000012.11 |
| cg08529654 | 1.33E-12 | 6.85E-14 | -8.07 | 20.6524699 | -1.10E-01 | 15305938  | 15306061  | NC_000019.9  |
| cg03460527 | 1.33E-12 | 6.86E-14 | -8.07 | 20.6508086 | -6.93E-02 | 95008117  | 95008240  | NC_000001.10 |
| cg09104660 | 1.34E-12 | 6.87E-14 | -8.07 | 20.6496174 | -1.46E-01 | 57635479  | 57635602  | NC_000012.11 |

|                 |          |          |       |            |           |           |           |              |
|-----------------|----------|----------|-------|------------|-----------|-----------|-----------|--------------|
| cg26087862      | 1.34E-12 | 6.88E-14 | -8.07 | 20.6485279 | -7.41E-02 | 150602029 | 150602152 | NC_000001.10 |
| cg17447502      | 1.34E-12 | 6.88E-14 | -8.07 | 20.6476665 | -8.93E-02 | 6478857   | 6478980   | NC_000001.10 |
| cg18108818      | 1.34E-12 | 6.89E-14 | -8.07 | 20.6469483 | -2.24E-01 | 102574475 | 102574598 | NC_000007.13 |
| cg03338933      | 1.34E-12 | 6.89E-14 | -8.07 | 20.6466195 | -1.38E-01 | 77287345  | 77287468  | NC_000015.9  |
| cg08426898      | 1.34E-12 | 6.89E-14 | -8.07 | 20.645911  | -1.95E-01 | 174916731 | 174916854 | NC_000002.11 |
| cg07472196      | 1.34E-12 | 6.90E-14 | -8.07 | 20.6456003 | -9.35E-02 | 99801503  | 99801626  | NC_000003.11 |
| cg03421657      | 1.34E-12 | 6.90E-14 | -8.07 | 20.6455365 | -1.81E-01 | 166039754 | 166039877 | NC_000001.10 |
| ch.1.2890885R   | 1.34E-12 | 6.91E-14 | -8.07 | 20.6434579 | -6.34E-02 | 150319305 | 150319428 | NC_000001.10 |
| ch.5.1325793F   | 1.35E-12 | 6.93E-14 | -8.07 | 20.6411803 | -3.99E-02 | 70784859  | 70784982  | NC_000005.9  |
| cg20977448      | 1.35E-12 | 6.93E-14 | -8.07 | 20.6406688 | -7.32E-02 | 148725594 | 148725717 | NC_000005.9  |
| cg13697387      | 1.35E-12 | 6.93E-14 | -8.07 | 20.6405911 | -9.01E-02 | 152670843 | 152670966 | NC_000001.10 |
| cg14830371      | 1.35E-12 | 6.94E-14 | -8.07 | 20.6395305 | -9.71E-02 | 25991602  | 25991725  | NC_000008.10 |
| cg17518962      | 1.35E-12 | 6.94E-14 | -8.07 | 20.6393318 | -7.79E-02 | 99766552  | 99766675  | NC_000007.13 |
| cg01250001      | 1.35E-12 | 6.95E-14 | -8.07 | 20.6379385 | -1.83E-01 | 103758088 | 103758211 | NC_000008.10 |
| cg19867107      | 1.35E-12 | 6.96E-14 | -8.07 | 20.6372582 | -2.29E-01 | 142255537 | 142255660 | NC_000008.10 |
| cg27515255      | 1.35E-12 | 6.96E-14 | -8.07 | 20.6361149 | -6.74E-02 | 30279318  | 30279441  | NC_000022.10 |
| cg24056567      | 1.35E-12 | 6.98E-14 | -8.07 | 20.6344781 | -8.91E-02 | 18871909  | 18872032  | NC_000008.10 |
| cg02427576      | 1.36E-12 | 7.02E-14 | -8.07 | 20.6279305 | -1.93E-01 | 125808164 | 125808287 | NC_000005.9  |
| cg13266096      | 1.36E-12 | 7.03E-14 | -8.07 | 20.6269957 | -1.73E-01 | 62366806  | 62366929  | NC_000011.9  |
| cg06255601      | 1.36E-12 | 7.03E-14 | -8.07 | 20.6267872 | -2.13E-01 | 51086835  | 51086958  | NC_000013.10 |
| cg04903916      | 1.37E-12 | 7.05E-14 | -8.07 | 20.6245013 | -1.44E-01 | 33638413  | 33638536  | NC_000006.11 |
| cg04500239      | 1.37E-12 | 7.06E-14 | -8.07 | 20.6221903 | -8.41E-02 | 118502178 | 118502301 | NC_000001.10 |
| cg13390372      | 1.37E-12 | 7.07E-14 | -8.07 | 20.6218053 | -1.31E-01 | 6753778   | 6753901   | NC_000004.11 |
| cg07671221      | 1.37E-12 | 7.07E-14 | -8.07 | 20.6212425 | -7.35E-02 | 150070714 | 150070837 | NC_000006.11 |
| ch.9.138894394R | 1.37E-12 | 7.08E-14 | -8.07 | 20.6201982 | -5.76E-02 | 139774573 | 139774696 | NC_000009.11 |

|            |          |          |       |            |           |           |           |              |
|------------|----------|----------|-------|------------|-----------|-----------|-----------|--------------|
| cg13432945 | 1.37E-12 | 7.08E-14 | -8.07 | 20.6195161 | -1.59E-01 | 59193388  | 59193511  | NC_000001.10 |
| cg25388707 | 1.37E-12 | 7.09E-14 | -8.07 | 20.6190432 | -5.78E-02 | 33168462  | 33168585  | NC_000006.11 |
| cg14976391 | 1.37E-12 | 7.09E-14 | -8.07 | 20.6190309 | -1.10E-01 | 119181492 | 119181615 | NC_000011.9  |
| cg27131176 | 1.37E-12 | 7.09E-14 | -8.07 | 20.6186475 | -6.36E-02 | 46450114  | 46450237  | NC_000022.10 |
| cg25144893 | 1.38E-12 | 7.09E-14 | -8.07 | 20.6179726 | -1.02E-01 | 63792210  | 63792333  | NC_000001.10 |
| cg09407223 | 1.38E-12 | 7.10E-14 | -8.07 | 20.6162907 | -1.09E-01 | 67302039  | 67302162  | NC_000016.9  |
| cg20161984 | 1.38E-12 | 7.11E-14 | -8.07 | 20.6150376 | -6.48E-02 | 84205961  | 84206084  | NC_000004.11 |
| cg04214573 | 1.38E-12 | 7.13E-14 | -8.07 | 20.6121722 | -1.08E-01 | 114135847 | 114135970 | NC_000010.10 |
| cg12596182 | 1.38E-12 | 7.14E-14 | -8.07 | 20.611207  | -1.36E-01 | 70082885  | 70083008  | NC_000012.11 |
| cg02051941 | 1.39E-12 | 7.16E-14 | -8.07 | 20.6092169 | -1.33E-01 | 54954596  | 54954719  | NC_000014.8  |
| cg20630683 | 1.39E-12 | 7.19E-14 | -8.07 | 20.6051797 | -4.48E-02 | 32812637  | 32812760  | NC_000006.11 |
| cg10593028 | 1.40E-12 | 7.20E-14 | -8.07 | 20.6033961 | -2.21E-01 | 108422791 | 108422914 | NC_000011.9  |
| cg03462604 | 1.40E-12 | 7.20E-14 | -8.07 | 20.6031921 | -1.46E-01 | 26995110  | 26995233  | NC_000002.11 |
| cg14527456 | 1.40E-12 | 7.20E-14 | -8.07 | 20.6026789 | -1.03E-01 | 74100987  | 74101110  | NC_000014.8  |
| cg26617272 | 1.40E-12 | 7.23E-14 | -8.07 | 20.5990366 | -1.12E-01 | 43279726  | 43279849  | NC_000001.10 |
| cg23970523 | 1.40E-12 | 7.23E-14 | -8.07 | 20.598847  | -7.78E-02 | 18654267  | 18654390  | NC_000019.9  |
| cg26530341 | 1.40E-12 | 7.24E-14 | -8.06 | 20.5974467 | -1.89E-01 | 23083353  | 23083476  | NC_000008.10 |
| cg02683846 | 1.40E-12 | 7.25E-14 | -8.06 | 20.5964663 | -9.95E-02 | 36238178  | 36238301  | NC_000006.11 |
| cg26706803 | 1.40E-12 | 7.25E-14 | -8.06 | 20.5963901 | -2.44E-01 | 50293530  | 50293653  | NC_000016.9  |
| cg20443278 | 1.40E-12 | 7.25E-14 | -8.06 | 20.5963406 | -1.12E-01 | 77962098  | 77962221  | NC_000017.10 |
| cg08949621 | 1.40E-12 | 7.25E-14 | -8.06 | 20.596203  | -5.84E-02 | 42265044  | 42265167  | NC_000015.9  |
| cg12963656 | 1.41E-12 | 7.28E-14 | -8.06 | 20.5924445 | -2.31E-01 | 101659687 | 101659810 | NC_000003.11 |
| cg09890077 | 1.41E-12 | 7.31E-14 | -8.06 | 20.5883382 | -1.58E-01 | 175056652 | 175056775 | NC_000003.11 |
| cg05308792 | 1.42E-12 | 7.31E-14 | -8.06 | 20.5875915 | -1.62E-01 | 1578807   | 1578930   | NC_000016.9  |
| cg17046823 | 1.42E-12 | 7.32E-14 | -8.06 | 20.5862005 | -8.08E-02 | 16256992  | 16257115  | NC_000017.10 |

|            |          |          |       |            |           |           |           |              |
|------------|----------|----------|-------|------------|-----------|-----------|-----------|--------------|
| cg06874323 | 1.42E-12 | 7.33E-14 | -8.06 | 20.5851973 | -1.08E-01 | 102986525 | 102986648 | NC_000010.10 |
| cg12073167 | 1.42E-12 | 7.35E-14 | -8.06 | 20.582977  | -3.71E-02 | 19770448  | 19770571  | NC_000017.10 |
| cg26360953 | 1.43E-12 | 7.36E-14 | -8.06 | 20.5809291 | -1.70E-01 | 6784749   | 6784872   | NC_000001.10 |
| cg00979582 | 1.43E-12 | 7.37E-14 | -8.06 | 20.5803609 | -5.36E-02 | 976940    | 977063    | NC_000010.10 |
| cg27353361 | 1.43E-12 | 7.40E-14 | -8.06 | 20.5761514 | -1.18E-01 | 108145420 | 108145543 | NC_000006.11 |
| cg03720390 | 1.43E-12 | 7.41E-14 | -8.06 | 20.5745993 | -1.34E-01 | 28912126  | 28912249  | NC_000006.11 |
| cg26902350 | 1.43E-12 | 7.41E-14 | -8.06 | 20.574454  | -1.59E-01 | 137984018 | 137984141 | NC_000007.13 |
| cg19554281 | 1.43E-12 | 7.42E-14 | -8.06 | 20.5739126 | -1.79E-01 | 39726997  | 39727120  | NC_000015.9  |
| cg23253961 | 1.44E-12 | 7.45E-14 | -8.06 | 20.5699648 | -1.64E-01 | 62394494  | 62394617  | NC_000014.8  |
| cg11155265 | 1.44E-12 | 7.45E-14 | -8.06 | 20.569829  | -1.06E-01 | 23811445  | 23811568  | NC_000001.10 |
| cg27380915 | 1.44E-12 | 7.45E-14 | -8.06 | 20.5689657 | -1.79E-01 | 12796513  | 12796636  | NC_000007.13 |
| cg20670679 | 1.45E-12 | 7.49E-14 | -8.06 | 20.5643859 | -1.84E-01 | 157561786 | 157561909 | NC_000007.13 |
| cg20923885 | 1.45E-12 | 7.52E-14 | -8.06 | 20.5602091 | -1.96E-01 | 75473610  | 75473733  | NC_000017.10 |
| cg23328404 | 1.45E-12 | 7.52E-14 | -8.06 | 20.5600235 | -2.43E-01 | 19539991  | 19540114  | NC_000008.10 |
| cg08066035 | 1.46E-12 | 7.53E-14 | -8.06 | 20.5584059 | -1.48E-01 | 16999614  | 16999737  | NC_000019.9  |
| cg04762129 | 1.46E-12 | 7.56E-14 | -8.06 | 20.5546937 | -1.21E-01 | 34105785  | 34105908  | NC_000006.11 |
| cg06007201 | 1.46E-12 | 7.57E-14 | -8.06 | 20.5541174 | -1.74E-01 | 88850218  | 88850341  | NC_000016.9  |
| cg10963192 | 1.47E-12 | 7.59E-14 | -8.06 | 20.5511586 | -5.61E-02 | 100751514 | 100751637 | NC_000014.8  |
| cg12978582 | 1.47E-12 | 7.59E-14 | -8.06 | 20.5510579 | -1.23E-01 | 44150888  | 44151011  | NC_000007.13 |
| cg01084379 | 1.47E-12 | 7.59E-14 | -8.06 | 20.5507891 | -6.27E-02 | 179160712 | 179160835 | NC_000005.9  |
| cg24351658 | 1.47E-12 | 7.60E-14 | -8.06 | 20.5503706 | -1.18E-01 | 42126724  | 42126847  | NC_000001.10 |
| cg05383531 | 1.47E-12 | 7.62E-14 | -8.06 | 20.5471192 | -1.52E-01 | 49384054  | 49384177  | NC_000003.11 |
| cg02893823 | 1.47E-12 | 7.63E-14 | -8.06 | 20.5464876 | -5.77E-02 | 39684544  | 39684667  | NC_000017.10 |
| cg09184502 | 1.47E-12 | 7.63E-14 | -8.06 | 20.5460389 | -3.99E-02 | 106958474 | 106958597 | NC_000006.11 |
| cg20005923 | 1.47E-12 | 7.63E-14 | -8.06 | 20.5458332 | -1.01E-01 | 76227280  | 76227403  | NC_000017.10 |

|            |          |          |       |            |           |           |           |              |
|------------|----------|----------|-------|------------|-----------|-----------|-----------|--------------|
| cg12827601 | 1.48E-12 | 7.64E-14 | -8.06 | 20.5452248 | -1.44E-01 | 73196969  | 73197092  | NC_000005.9  |
| cg07737503 | 1.48E-12 | 7.64E-14 | -8.06 | 20.5443231 | -1.88E-01 | 1132895   | 1133018   | NC_000019.9  |
| cg16414143 | 1.48E-12 | 7.66E-14 | -8.06 | 20.5422314 | -1.53E-01 | 6507490   | 6507613   | NC_000001.10 |
| cg12788666 | 1.48E-12 | 7.66E-14 | -8.06 | 20.5420191 | -1.48E-01 | 75443246  | 75443369  | NC_000007.13 |
| cg13935127 | 1.48E-12 | 7.66E-14 | -8.06 | 20.5415421 | -1.48E-01 | 41128874  | 41128997  | NC_000001.10 |
| cg26800802 | 1.48E-12 | 7.67E-14 | -8.06 | 20.5414045 | -1.02E-01 | 139859464 | 139859587 | NC_000007.13 |
| cg09036996 | 1.48E-12 | 7.67E-14 | -8.06 | 20.5412757 | -1.44E-01 | 6752895   | 6753018   | NC_000019.9  |
| cg12235073 | 1.48E-12 | 7.67E-14 | -8.06 | 20.5410804 | -1.60E-01 | 6270423   | 6270546   | NC_000010.10 |
| cg14281092 | 1.48E-12 | 7.67E-14 | -8.06 | 20.5406731 | -1.17E-01 | 153226118 | 153226241 | NC_000002.11 |
| cg09934056 | 1.48E-12 | 7.69E-14 | -8.06 | 20.5385317 | -9.91E-02 | 8400203   | 8400326   | NC_000019.9  |
| cg00261668 | 1.49E-12 | 7.72E-14 | -8.05 | 20.5338951 | -1.28E-01 | 16346317  | 16346440  | NC_000001.10 |
| cg11718677 | 1.50E-12 | 7.77E-14 | -8.05 | 20.5276791 | -5.03E-02 | 241172452 | 241172575 | NC_000002.11 |
| cg18982477 | 1.50E-12 | 7.77E-14 | -8.05 | 20.5274332 | -1.56E-01 | 37644098  | 37644221  | NC_000004.11 |
| cg06586775 | 1.50E-12 | 7.79E-14 | -8.05 | 20.5258212 | -4.92E-02 | 34204993  | 34205116  | NC_000020.10 |
| cg24963443 | 1.51E-12 | 7.82E-14 | -8.05 | 20.5219626 | -6.21E-02 | 180673122 | 180673245 | NC_000005.9  |
| cg17893669 | 1.51E-12 | 7.82E-14 | -8.05 | 20.5217383 | -1.75E-01 | 18771179  | 18771302  | NC_000019.9  |
| cg19278744 | 1.51E-12 | 7.82E-14 | -8.05 | 20.5216468 | -6.57E-02 | 78079628  | 78079751  | NC_000004.11 |
| cg13957126 | 1.51E-12 | 7.82E-14 | -8.05 | 20.5215776 | -1.59E-01 | 5597849   | 5597972   | NC_000007.13 |
| cg23483894 | 1.51E-12 | 7.82E-14 | -8.05 | 20.5213661 | -1.29E-01 | 65646612  | 65646735  | NC_000011.9  |
| cg08664568 | 1.51E-12 | 7.86E-14 | -8.05 | 20.5171702 | -1.22E-01 | 39598712  | 39598835  | NC_000001.10 |
| cg14556762 | 1.52E-12 | 7.86E-14 | -8.05 | 20.5161442 | -2.03E-01 | 170532470 | 170532593 | NC_000001.10 |
| cg13984512 | 1.52E-12 | 7.87E-14 | -8.05 | 20.5158036 | -6.67E-02 | 145438431 | 145438554 | NC_000001.10 |
| cg16626405 | 1.52E-12 | 7.87E-14 | -8.05 | 20.5157135 | -4.14E-02 | 33297424  | 33297547  | NC_000020.10 |
| cg01518465 | 1.52E-12 | 7.90E-14 | -8.05 | 20.5121213 | -8.87E-02 | 49351708  | 49351831  | NC_000012.11 |
| cg00561903 | 1.52E-12 | 7.90E-14 | -8.05 | 20.5121141 | -1.74E-01 | 86638859  | 86638982  | NC_000016.9  |



|            |          |          |       |            |           |           |           |              |
|------------|----------|----------|-------|------------|-----------|-----------|-----------|--------------|
| cg08022147 | 1.52E-12 | 7.90E-14 | -8.05 | 20.5114385 | -1.29E-01 | 39681217  | 39681340  | NC_000003.11 |
| cg19964641 | 1.52E-12 | 7.91E-14 | -8.05 | 20.5108897 | -1.08E-01 | 30901780  | 30901903  | NC_000022.10 |
| cg12974832 | 1.53E-12 | 7.92E-14 | -8.05 | 20.5089356 | -1.85E-01 | 121666457 | 121666580 | NC_000008.10 |
| cg13694746 | 1.53E-12 | 7.93E-14 | -8.05 | 20.5082926 | -7.20E-02 | 106959864 | 106959987 | NC_000003.11 |
| cg26334507 | 1.53E-12 | 7.94E-14 | -8.05 | 20.5068399 | -1.71E-01 | 16275539  | 16275662  | NC_000001.10 |
| cg03784628 | 1.53E-12 | 7.94E-14 | -8.05 | 20.5062284 | -9.45E-02 | 64059937  | 64060060  | NC_000011.9  |
| cg07375367 | 1.53E-12 | 7.95E-14 | -8.05 | 20.505985  | -6.92E-02 | 28194831  | 28194954  | NC_000013.10 |
| cg00406369 | 1.53E-12 | 7.96E-14 | -8.05 | 20.5043238 | -8.66E-02 | 134954447 | 134954570 | NC_000006.11 |
| cg11612799 | 1.54E-12 | 7.98E-14 | -8.05 | 20.5017174 | -1.49E-01 | 113933175 | 113933298 | NC_000003.11 |
| cg15560337 | 1.54E-12 | 8.00E-14 | -8.05 | 20.4994038 | -1.33E-01 | 123484898 | 123485021 | NC_000007.13 |
| cg07480640 | 1.54E-12 | 8.01E-14 | -8.05 | 20.4981632 | -1.80E-01 | 64211328  | 64211451  | NC_000003.11 |
| cg06261926 | 1.54E-12 | 8.02E-14 | -8.05 | 20.4967811 | -1.35E-01 | 161264607 | 161264730 | NC_000002.11 |
| cg22557641 | 1.55E-12 | 8.03E-14 | -8.05 | 20.4957453 | -6.22E-02 | 22292012  | 22292135  | NC_000010.10 |
| cg24422900 | 1.55E-12 | 8.03E-14 | -8.05 | 20.4954145 | -6.26E-02 | 19753746  | 19753869  | NC_000019.9  |
| cg13304638 | 1.55E-12 | 8.05E-14 | -8.05 | 20.4932251 | -2.14E-01 | 80834089  | 80834212  | NC_000017.10 |
| cg00423969 | 1.55E-12 | 8.06E-14 | -8.05 | 20.4915195 | -1.31E-01 | 97359879  | 97360002  | NC_000002.11 |
| cg08866144 | 1.55E-12 | 8.08E-14 | -8.05 | 20.4896491 | -5.54E-02 | 31371784  | 31371907  | NC_000006.11 |
| cg22957691 | 1.56E-12 | 8.08E-14 | -8.05 | 20.4888741 | -1.91E-01 | 36790185  | 36790308  | NC_000002.11 |
| cg09357684 | 1.56E-12 | 8.10E-14 | -8.05 | 20.4870102 | -1.15E-01 | 6684860   | 6684983   | NC_000001.10 |
| cg19882268 | 1.56E-12 | 8.10E-14 | -8.05 | 20.4865987 | -1.47E-01 | 33245779  | 33245902  | NC_000006.11 |
| cg00148114 | 1.56E-12 | 8.13E-14 | -8.05 | 20.4831379 | -7.17E-02 | 5468197   | 5468320   | NC_000007.13 |
| cg06534586 | 1.56E-12 | 8.13E-14 | -8.05 | 20.4829279 | -1.66E-01 | 130664529 | 130664652 | NC_000005.9  |
| cg27473406 | 1.56E-12 | 8.14E-14 | -8.05 | 20.4824243 | -1.26E-01 | 63119899  | 63120022  | NC_000017.10 |
| cg07205883 | 1.57E-12 | 8.17E-14 | -8.05 | 20.4789648 | -1.34E-01 | 116187407 | 116187530 | NC_000010.10 |
| cg26175343 | 1.57E-12 | 8.17E-14 | -8.05 | 20.4779793 | -1.41E-01 | 6034888   | 6035011   | NC_000020.10 |

|               |          |          |       |            |           |           |           |              |
|---------------|----------|----------|-------|------------|-----------|-----------|-----------|--------------|
| cg26296337    | 1.57E-12 | 8.19E-14 | -8.04 | 20.4765976 | -1.04E-01 | 72931792  | 72931915  | NC_000017.10 |
| cg23120541    | 1.57E-12 | 8.19E-14 | -8.04 | 20.4759559 | -1.74E-01 | 75422456  | 75422579  | NC_000017.10 |
| cg22584435    | 1.58E-12 | 8.20E-14 | -8.04 | 20.474808  | -1.32E-01 | 128467688 | 128467811 | NC_000007.13 |
| cg04104609    | 1.58E-12 | 8.20E-14 | -8.04 | 20.4747142 | -6.80E-02 | 219523980 | 219524103 | NC_000002.11 |
| ch.15.920727F | 1.58E-12 | 8.21E-14 | -8.04 | 20.4734816 | -4.23E-02 | 63902777  | 63902900  | NC_000015.9  |
| cg14788660    | 1.58E-12 | 8.21E-14 | -8.04 | 20.4732897 | -6.04E-02 | 155278430 | 155278553 | NC_000001.10 |
| cg10250177    | 1.58E-12 | 8.23E-14 | -8.04 | 20.4716809 | -1.26E-01 | 32739752  | 32739875  | NC_000001.10 |
| cg02637031    | 1.58E-12 | 8.23E-14 | -8.04 | 20.4712819 | -1.53E-01 | 114887230 | 114887353 | NC_000005.9  |
| cg26504229    | 1.58E-12 | 8.23E-14 | -8.04 | 20.4712097 | -1.45E-01 | 45149038  | 45149161  | NC_000021.8  |
| cg26614229    | 1.58E-12 | 8.24E-14 | -8.04 | 20.4697123 | -1.59E-01 | 231156204 | 231156327 | NC_000001.10 |
| cg24563094    | 1.59E-12 | 8.27E-14 | -8.04 | 20.4669105 | -3.75E-02 | 26395458  | 26395581  | NC_000002.11 |
| cg11193342    | 1.59E-12 | 8.28E-14 | -8.04 | 20.4657367 | -1.10E-01 | 116872185 | 116872308 | NC_000012.11 |
| cg21593001    | 1.59E-12 | 8.29E-14 | -8.04 | 20.4640805 | -1.11E-01 | 113531060 | 113531183 | NC_000012.11 |
| cg00917031    | 1.59E-12 | 8.29E-14 | -8.04 | 20.4635114 | -9.98E-02 | 123477533 | 123477656 | NC_000009.11 |
| ch.7.3273335R | 1.59E-12 | 8.31E-14 | -8.04 | 20.4622335 | -5.36E-02 | 154752264 | 154752387 | NC_000007.13 |
| cg10331105    | 1.60E-12 | 8.31E-14 | -8.04 | 20.4616061 | -1.47E-01 | 54061366  | 54061489  | NC_000016.9  |
| cg19760965    | 1.60E-12 | 8.31E-14 | -8.04 | 20.4614028 | -2.10E-01 | 194868843 | 194868966 | NC_000003.11 |
| cg22307769    | 1.60E-12 | 8.31E-14 | -8.04 | 20.4612562 | -5.86E-02 | 182402    | 182525    | NC_000008.10 |
| cg00354941    | 1.60E-12 | 8.31E-14 | -8.04 | 20.4612555 | -5.55E-02 | 48833206  | 48833329  | NC_000004.11 |
| cg03778909    | 1.60E-12 | 8.32E-14 | -8.04 | 20.4607535 | -2.48E-01 | 80833393  | 80833516  | NC_000017.10 |
| cg24575083    | 1.60E-12 | 8.32E-14 | -8.04 | 20.4599464 | -1.21E-01 | 7695485   | 7695608   | NC_000011.9  |
| cg01414215    | 1.60E-12 | 8.34E-14 | -8.04 | 20.4584727 | -3.09E-02 | 102091665 | 102091788 | NC_000005.9  |
| cg20469733    | 1.60E-12 | 8.35E-14 | -8.04 | 20.4573039 | -6.65E-02 | 99766203  | 99766326  | NC_000007.13 |
| cg21502048    | 1.61E-12 | 8.38E-14 | -8.04 | 20.4538347 | -1.69E-01 | 52780158  | 52780281  | NC_000014.8  |
| cg16321116    | 1.61E-12 | 8.38E-14 | -8.04 | 20.453212  | -6.08E-02 | 59655311  | 59655434  | NC_000014.8  |

|            |          |          |       |            |           |           |           |              |
|------------|----------|----------|-------|------------|-----------|-----------|-----------|--------------|
| cg13687274 | 1.61E-12 | 8.39E-14 | -8.04 | 20.451822  | -1.94E-01 | 960246    | 960369    | NC_000007.13 |
| cg05365578 | 1.61E-12 | 8.40E-14 | -8.04 | 20.4509684 | -2.17E-02 | 94595914  | 94596037  | NC_000014.8  |
| cg00975587 | 1.61E-12 | 8.41E-14 | -8.04 | 20.4498011 | -6.35E-02 | 201728351 | 201728474 | NC_000002.11 |
| cg26567736 | 1.61E-12 | 8.41E-14 | -8.04 | 20.4494397 | -1.87E-01 | 131758433 | 131758556 | NC_000011.9  |
| cg21623865 | 1.62E-12 | 8.42E-14 | -8.04 | 20.4482136 | -6.48E-02 | 9746317   | 9746440   | NC_000003.11 |
| cg14771313 | 1.62E-12 | 8.44E-14 | -8.04 | 20.4462716 | -1.57E-01 | 71161285  | 71161408  | NC_000003.11 |
| cg27202037 | 1.62E-12 | 8.45E-14 | -8.04 | 20.444768  | -6.20E-02 | 130298544 | 130298667 | NC_000011.9  |
| cg25008156 | 1.62E-12 | 8.46E-14 | -8.04 | 20.443653  | -4.88E-02 | 170893875 | 170893998 | NC_000006.11 |
| cg18453965 | 1.63E-12 | 8.48E-14 | -8.04 | 20.4420193 | -2.26E-01 | 175458567 | 175458690 | NC_000002.11 |
| cg04865506 | 1.63E-12 | 8.48E-14 | -8.04 | 20.4416678 | -6.58E-02 | 29422776  | 29422899  | NC_000017.10 |
| cg06363034 | 1.63E-12 | 8.49E-14 | -8.04 | 20.4408908 | -1.31E-01 | 62225388  | 62225511  | NC_000020.10 |
| cg17643598 | 1.63E-12 | 8.49E-14 | -8.04 | 20.4408597 | -1.58E-01 | 150211855 | 150211978 | NC_000007.13 |
| cg00031277 | 1.63E-12 | 8.49E-14 | -8.04 | 20.4404788 | -1.51E-01 | 101943443 | 101943566 | NC_000004.11 |
| cg08310439 | 1.63E-12 | 8.50E-14 | -8.04 | 20.4398967 | -7.41E-02 | 8571692   | 8571815   | NC_000012.11 |
| cg08151750 | 1.63E-12 | 8.51E-14 | -8.04 | 20.43871   | -5.67E-02 | 27718289  | 27718412  | NC_000002.11 |
| cg19381811 | 1.63E-12 | 8.52E-14 | -8.04 | 20.4365027 | -1.65E-01 | 49851713  | 49851836  | NC_000003.11 |
| cg20747741 | 1.63E-12 | 8.53E-14 | -8.04 | 20.4363385 | -5.34E-02 | 161067886 | 161068009 | NC_000001.10 |
| cg24375215 | 1.63E-12 | 8.53E-14 | -8.04 | 20.4362364 | -1.90E-01 | 72462559  | 72462682  | NC_000017.10 |
| cg01872593 | 1.64E-12 | 8.53E-14 | -8.04 | 20.4354143 | -1.83E-01 | 54446260  | 54446383  | NC_000014.8  |
| cg02064300 | 1.64E-12 | 8.54E-14 | -8.04 | 20.4347388 | -9.69E-02 | 6053801   | 6053924   | NC_000001.10 |
| cg18767057 | 1.64E-12 | 8.56E-14 | -8.04 | 20.4321857 | -1.03E-01 | 76175611  | 76175734  | NC_000017.10 |
| cg08764509 | 1.64E-12 | 8.58E-14 | -8.04 | 20.4303037 | -8.87E-02 | 62159941  | 62160064  | NC_000011.9  |
| cg11084474 | 1.65E-12 | 8.60E-14 | -8.04 | 20.4282517 | -1.45E-01 | 133007675 | 133007798 | NC_000012.11 |
| cg04380269 | 1.65E-12 | 8.61E-14 | -8.04 | 20.4269724 | -1.74E-01 | 71027592  | 71027715  | NC_000002.11 |
| cg12260146 | 1.65E-12 | 8.61E-14 | -8.04 | 20.4264092 | -7.19E-02 | 33840237  | 33840360  | NC_000003.11 |

|            |          |          |       |            |           |           |           |              |
|------------|----------|----------|-------|------------|-----------|-----------|-----------|--------------|
| cg09467433 | 1.65E-12 | 8.62E-14 | -8.04 | 20.4250537 | -1.87E-01 | 171283606 | 171283729 | NC_000003.11 |
| cg07591515 | 1.65E-12 | 8.63E-14 | -8.04 | 20.4245331 | -1.67E-01 | 51810132  | 51810255  | NC_000001.10 |
| cg21281463 | 1.65E-12 | 8.63E-14 | -8.04 | 20.4244297 | -1.46E-01 | 38423760  | 38423883  | NC_000019.9  |
| cg11659942 | 1.66E-12 | 8.66E-14 | -8.04 | 20.4205011 | -9.20E-02 | 8833764   | 8833887   | NC_000002.11 |
| cg02023138 | 1.66E-12 | 8.67E-14 | -8.04 | 20.419933  | -1.98E-01 | 51701979  | 51702102  | NC_000012.11 |
| cg21384971 | 1.66E-12 | 8.67E-14 | -8.04 | 20.4195765 | -7.13E-02 | 46114574  | 46114697  | NC_000017.10 |
| cg09869882 | 1.66E-12 | 8.69E-14 | -8.04 | 20.4177829 | -6.72E-02 | 9340583   | 9340706   | NC_000001.10 |
| cg09790325 | 1.66E-12 | 8.69E-14 | -8.04 | 20.4176351 | -1.47E-01 | 55903504  | 55903627  | NC_000005.9  |
| cg19841859 | 1.66E-12 | 8.70E-14 | -8.03 | 20.4167827 | -7.67E-02 | 23399596  | 23399719  | NC_000014.8  |
| cg00221035 | 1.67E-12 | 8.73E-14 | -8.03 | 20.4135144 | -4.50E-02 | 7222342   | 7222465   | NC_000007.13 |
| cg27554782 | 1.67E-12 | 8.74E-14 | -8.03 | 20.4122222 | -1.13E-01 | 78933106  | 78933229  | NC_000015.9  |
| cg08588180 | 1.68E-12 | 8.76E-14 | -8.03 | 20.409724  | -1.34E-01 | 25138905  | 25139028  | NC_000006.11 |
| cg25492985 | 1.68E-12 | 8.76E-14 | -8.03 | 20.4091144 | -6.72E-02 | 31555856  | 31555979  | NC_000022.10 |
| cg19205533 | 1.68E-12 | 8.81E-14 | -8.03 | 20.4043749 | -1.19E-01 | 15373987  | 15374110  | NC_000012.11 |
| cg23975840 | 1.68E-12 | 8.81E-14 | -8.03 | 20.4043361 | -1.73E-01 | 117042895 | 117043018 | NC_000012.11 |
| cg03850057 | 1.68E-12 | 8.81E-14 | -8.03 | 20.4039289 | -6.80E-02 | 118727977 | 118728100 | NC_000001.10 |
| cg15565576 | 1.69E-12 | 8.82E-14 | -8.03 | 20.4031008 | -1.46E-01 | 50451108  | 50451231  | NC_000022.10 |
| cg12002745 | 1.69E-12 | 8.83E-14 | -8.03 | 20.4021421 | -1.46E-01 | 124179875 | 124179998 | NC_000008.10 |
| cg20276750 | 1.69E-12 | 8.83E-14 | -8.03 | 20.4018223 | -1.23E-01 | 52279555  | 52279678  | NC_000003.11 |
| cg21201401 | 1.69E-12 | 8.83E-14 | -8.03 | 20.4014847 | -2.44E-01 | 62367884  | 62368007  | NC_000020.10 |
| cg02947498 | 1.69E-12 | 8.84E-14 | -8.03 | 20.4003047 | -1.97E-01 | 90139566  | 90139689  | NC_000014.8  |
| cg24101009 | 1.69E-12 | 8.85E-14 | -8.03 | 20.3992567 | -1.23E-01 | 93863858  | 93863981  | NC_000011.9  |
| cg05697909 | 1.69E-12 | 8.86E-14 | -8.03 | 20.3980022 | -7.20E-02 | 2462364   | 2462487   | NC_000001.10 |
| cg25113767 | 1.70E-12 | 8.87E-14 | -8.03 | 20.3971691 | -1.27E-01 | 124907367 | 124907490 | NC_000012.11 |
| cg19414706 | 1.70E-12 | 8.88E-14 | -8.03 | 20.3966642 | -1.09E-01 | 76319215  | 76319338  | NC_000008.10 |

|            |          |          |       |            |           |           |           |              |
|------------|----------|----------|-------|------------|-----------|-----------|-----------|--------------|
| cg08290756 | 1.70E-12 | 8.89E-14 | -8.03 | 20.3951319 | -1.22E-01 | 80882768  | 80882891  | NC_000017.10 |
| cg10706013 | 1.70E-12 | 8.91E-14 | -8.03 | 20.3926709 | -2.03E-01 | 44104950  | 44105073  | NC_000021.8  |
| cg05119831 | 1.70E-12 | 8.92E-14 | -8.03 | 20.3920828 | -3.68E-02 | 158380179 | 158380302 | NC_000007.13 |
| cg26752663 | 1.71E-12 | 8.93E-14 | -8.03 | 20.3912061 | -2.02E-01 | 25142016  | 25142139  | NC_000002.11 |
| cg09354267 | 1.71E-12 | 8.93E-14 | -8.03 | 20.390209  | -9.45E-02 | 106774064 | 106774187 | NC_000006.11 |
| cg26106316 | 1.71E-12 | 8.94E-14 | -8.03 | 20.3895415 | -1.70E-01 | 56701451  | 56701574  | NC_000002.11 |
| cg16638092 | 1.71E-12 | 8.95E-14 | -8.03 | 20.3887829 | -2.01E-01 | 78800774  | 78800897  | NC_000017.10 |
| cg04450032 | 1.71E-12 | 8.97E-14 | -8.03 | 20.3868268 | -7.14E-02 | 7382860   | 7382983   | NC_000017.10 |
| cg18023251 | 1.71E-12 | 8.98E-14 | -8.03 | 20.3853713 | -1.67E-01 | 56281839  | 56281962  | NC_000020.10 |
| cg05355142 | 1.72E-12 | 8.98E-14 | -8.03 | 20.3848482 | -8.24E-02 | 1851372   | 1851495   | NC_000001.10 |
| cg18030943 | 1.72E-12 | 8.98E-14 | -8.03 | 20.3847796 | -1.60E-01 | 182876556 | 182876679 | NC_000003.11 |
| cg19544919 | 1.72E-12 | 9.02E-14 | -8.03 | 20.38124   | -7.48E-02 | 18451228  | 18451351  | NC_000019.9  |
| cg06932535 | 1.72E-12 | 9.03E-14 | -8.03 | 20.3802238 | -1.80E-01 | 32350324  | 32350447  | NC_000014.8  |
| cg06118312 | 1.73E-12 | 9.04E-14 | -8.03 | 20.3785054 | -2.01E-01 | 54398555  | 54398678  | NC_000005.9  |
| cg01396723 | 1.73E-12 | 9.05E-14 | -8.03 | 20.3778589 | -6.13E-02 | 45146828  | 45146951  | NC_000019.9  |
| cg10061532 | 1.73E-12 | 9.06E-14 | -8.03 | 20.3769237 | -1.64E-01 | 201886748 | 201886871 | NC_000001.10 |
| cg01987941 | 1.73E-12 | 9.06E-14 | -8.03 | 20.3759732 | -6.92E-02 | 99738006  | 99738129  | NC_000014.8  |
| cg12282830 | 1.73E-12 | 9.09E-14 | -8.03 | 20.3731163 | -6.53E-02 | 29784441  | 29784564  | NC_000022.10 |
| cg04408488 | 1.74E-12 | 9.11E-14 | -8.03 | 20.3713941 | -4.21E-02 | 28494116  | 28494239  | NC_000013.10 |
| cg14958889 | 1.74E-12 | 9.12E-14 | -8.03 | 20.3700471 | -2.38E-02 | 6320471   | 6320594   | NC_000001.10 |
| cg01777397 | 1.74E-12 | 9.12E-14 | -8.03 | 20.3696559 | -2.02E-01 | 29337946  | 29338069  | NC_000002.11 |
| cg27662454 | 1.74E-12 | 9.13E-14 | -8.03 | 20.3684549 | -9.10E-02 | 13975669  | 13975792  | NC_000019.9  |
| cg19323289 | 1.75E-12 | 9.16E-14 | -8.03 | 20.3660505 | -1.14E-01 | 19463903  | 19464026  | NC_000011.9  |
| cg07491375 | 1.75E-12 | 9.16E-14 | -8.03 | 20.3655974 | -6.61E-02 | 71705274  | 71705397  | NC_000004.11 |
| cg03517250 | 1.75E-12 | 9.17E-14 | -8.03 | 20.3643899 | -1.10E-01 | 85196491  | 85196614  | NC_000016.9  |

|            |          |          |       |            |           |           |           |              |
|------------|----------|----------|-------|------------|-----------|-----------|-----------|--------------|
| cg27628849 | 1.75E-12 | 9.18E-14 | -8.03 | 20.3635459 | -9.33E-02 | 129775059 | 129775182 | NC_000004.11 |
| cg06803850 | 1.75E-12 | 9.18E-14 | -8.03 | 20.3634217 | -2.80E-02 | 26926738  | 26926861  | NC_000017.10 |
| cg02375166 | 1.76E-12 | 9.22E-14 | -8.03 | 20.3593068 | -2.13E-01 | 58291656  | 58291779  | NC_000011.9  |
| cg17097293 | 1.76E-12 | 9.24E-14 | -8.03 | 20.357491  | -1.47E-01 | 3655825   | 3655948   | NC_000019.9  |
| cg26918754 | 1.76E-12 | 9.25E-14 | -8.02 | 20.3561375 | -1.15E-01 | 17634629  | 17634752  | NC_000001.10 |
| cg11044099 | 1.76E-12 | 9.25E-14 | -8.02 | 20.3557622 | -4.02E-02 | 102092965 | 102093088 | NC_000008.10 |
| cg05070273 | 1.77E-12 | 9.29E-14 | -8.02 | 20.3522394 | -1.68E-01 | 48310897  | 48311020  | NC_000003.11 |
| cg13207733 | 1.77E-12 | 9.29E-14 | -8.02 | 20.3514387 | -1.36E-01 | 45232211  | 45232334  | NC_000007.13 |
| cg25471557 | 1.77E-12 | 9.30E-14 | -8.02 | 20.3504971 | -1.17E-01 | 209862480 | 209862603 | NC_000001.10 |
| cg26620147 | 1.77E-12 | 9.30E-14 | -8.02 | 20.3504643 | -1.83E-01 | 58210716  | 58210839  | NC_000012.11 |
| cg08172927 | 1.78E-12 | 9.37E-14 | -8.02 | 20.3434911 | -1.47E-01 | 101927997 | 101928120 | NC_000014.8  |
| cg04252762 | 1.79E-12 | 9.39E-14 | -8.02 | 20.3416773 | -1.58E-01 | 165329268 | 165329391 | NC_000001.10 |
| cg23827531 | 1.79E-12 | 9.39E-14 | -8.02 | 20.3411217 | -1.11E-01 | 58563097  | 58563220  | NC_000003.11 |
| cg03012028 | 1.79E-12 | 9.39E-14 | -8.02 | 20.3410806 | -1.26E-01 | 30739812  | 30739935  | NC_000007.13 |
| cg10995381 | 1.79E-12 | 9.39E-14 | -8.02 | 20.3408071 | -1.42E-01 | 7877198   | 7877321   | NC_000005.9  |
| cg25223263 | 1.79E-12 | 9.40E-14 | -8.02 | 20.3399155 | -5.69E-02 | 119020168 | 119020291 | NC_000011.9  |
| cg14560006 | 1.79E-12 | 9.42E-14 | -8.02 | 20.3376284 | -8.51E-02 | 140171342 | 140171465 | NC_000009.11 |
| cg01120874 | 1.80E-12 | 9.45E-14 | -8.02 | 20.3344028 | -1.31E-01 | 133811816 | 133811939 | NC_000009.11 |
| cg15468095 | 1.80E-12 | 9.46E-14 | -8.02 | 20.3339779 | -1.35E-01 | 31214401  | 31214524  | NC_000016.9  |
| cg07903989 | 1.80E-12 | 9.46E-14 | -8.02 | 20.3337379 | -8.90E-02 | 71205335  | 71205458  | NC_000002.11 |
| cg27409771 | 1.80E-12 | 9.48E-14 | -8.02 | 20.3318781 | -1.25E-01 | 10711296  | 10711419  | NC_000016.9  |
| cg16611234 | 1.81E-12 | 9.49E-14 | -8.02 | 20.3306864 | -1.10E-01 | 58870075  | 58870198  | NC_000011.9  |
| cg05968268 | 1.81E-12 | 9.52E-14 | -8.02 | 20.3277343 | -1.37E-01 | 97656988  | 97657111  | NC_000013.10 |
| cg08500417 | 1.81E-12 | 9.52E-14 | -8.02 | 20.327575  | -2.07E-01 | 102574445 | 102574568 | NC_000007.13 |
| cg18649438 | 1.82E-12 | 9.56E-14 | -8.02 | 20.3235807 | -7.95E-02 | 156829008 | 156829131 | NC_000001.10 |

|            |          |          |       |            |           |           |           |              |
|------------|----------|----------|-------|------------|-----------|-----------|-----------|--------------|
| cg19696794 | 1.82E-12 | 9.56E-14 | -8.02 | 20.3232605 | -1.96E-01 | 7106952   | 7107075   | NC_000006.11 |
| cg13420413 | 1.82E-12 | 9.57E-14 | -8.02 | 20.3221058 | -1.08E-01 | 2347015   | 2347138   | NC_000001.10 |
| cg16416152 | 1.82E-12 | 9.58E-14 | -8.02 | 20.3213783 | -5.58E-02 | 67193901  | 67194024  | NC_000016.9  |
| cg04192580 | 1.83E-12 | 9.60E-14 | -8.02 | 20.3198183 | -6.11E-02 | 223726348 | 223726471 | NC_000002.11 |
| cg20224218 | 1.83E-12 | 9.60E-14 | -8.02 | 20.3194955 | -1.30E-01 | 129261375 | 129261498 | NC_000009.11 |
| cg12633985 | 1.83E-12 | 9.62E-14 | -8.02 | 20.316858  | -5.45E-02 | 26056540  | 26056663  | NC_000006.11 |
| cg22932220 | 1.83E-12 | 9.63E-14 | -8.02 | 20.3159647 | -8.53E-02 | 49244634  | 49244757  | NC_000017.10 |
| cg07007050 | 1.83E-12 | 9.64E-14 | -8.02 | 20.3150674 | -4.94E-02 | 31882290  | 31882413  | NC_000012.11 |
| cg07868366 | 1.83E-12 | 9.64E-14 | -8.02 | 20.3147754 | -9.40E-02 | 55756911  | 55757034  | NC_000007.13 |
| cg20700731 | 1.84E-12 | 9.65E-14 | -8.02 | 20.313995  | -1.34E-01 | 41951480  | 41951603  | NC_000001.10 |
| cg24806326 | 1.84E-12 | 9.67E-14 | -8.02 | 20.3123316 | -1.53E-01 | 43207588  | 43207711  | NC_000017.10 |
| cg22550815 | 1.84E-12 | 9.68E-14 | -8.02 | 20.3115487 | -1.22E-01 | 11276529  | 11276652  | NC_000019.9  |
| cg11039361 | 1.84E-12 | 9.68E-14 | -8.02 | 20.3108714 | -5.53E-02 | 63655748  | 63655871  | NC_000011.9  |
| cg21520002 | 1.84E-12 | 9.70E-14 | -8.02 | 20.3090724 | -8.61E-02 | 118814505 | 118814628 | NC_000012.11 |
| cg06360604 | 1.85E-12 | 9.72E-14 | -8.02 | 20.307086  | -1.91E-01 | 19725051  | 19725174  | NC_000001.10 |
| cg14082886 | 1.85E-12 | 9.73E-14 | -8.02 | 20.3060298 | -2.11E-01 | 35164485  | 35164608  | NC_000011.9  |
| cg07099588 | 1.85E-12 | 9.73E-14 | -8.02 | 20.3056914 | -6.61E-02 | 126006495 | 126006618 | NC_000003.11 |
| cg12468786 | 1.85E-12 | 9.75E-14 | -8.02 | 20.3039454 | -1.57E-01 | 50925108  | 50925231  | NC_000022.10 |
| cg20994118 | 1.86E-12 | 9.77E-14 | -8.02 | 20.3025085 | -1.27E-01 | 209780966 | 209781089 | NC_000001.10 |
| cg05674444 | 1.86E-12 | 9.77E-14 | -8.02 | 20.3019118 | -7.73E-02 | 14414818  | 14414941  | NC_000021.8  |
| cg22661239 | 1.86E-12 | 9.80E-14 | -8.02 | 20.2993588 | -9.88E-02 | 105331690 | 105331813 | NC_000007.13 |
| cg13523649 | 1.86E-12 | 9.81E-14 | -8.02 | 20.2984477 | -1.03E-01 | 37230741  | 37230864  | NC_000020.10 |
| cg26877720 | 1.86E-12 | 9.81E-14 | -8.02 | 20.2982863 | -1.24E-01 | 14647530  | 14647653  | NC_000010.10 |
| cg18076651 | 1.87E-12 | 9.83E-14 | -8.01 | 20.2958198 | -5.36E-02 | 53625605  | 53625728  | NC_000012.11 |
| cg03088332 | 1.87E-12 | 9.84E-14 | -8.01 | 20.2953691 | -7.75E-02 | 27146328  | 27146451  | NC_000006.11 |

|            |          |          |       |            |           |           |           |              |
|------------|----------|----------|-------|------------|-----------|-----------|-----------|--------------|
| cg09592121 | 1.87E-12 | 9.87E-14 | -8.01 | 20.2921575 | -1.82E-01 | 41090985  | 41091108  | NC_000015.9  |
| cg14140118 | 1.87E-12 | 9.87E-14 | -8.01 | 20.2920419 | -2.33E-01 | 108423031 | 108423154 | NC_000011.9  |
| cg09910207 | 1.88E-12 | 9.90E-14 | -8.01 | 20.2891423 | -1.40E-01 | 91452697  | 91452820  | NC_000012.11 |
| cg23555120 | 1.88E-12 | 9.92E-14 | -8.01 | 20.2873598 | -1.85E-01 | 106533863 | 106533986 | NC_000012.11 |
| cg15900980 | 1.88E-12 | 9.92E-14 | -8.01 | 20.2871071 | -1.07E-01 | 49395991  | 49396114  | NC_000003.11 |
| cg05391011 | 1.88E-12 | 9.93E-14 | -8.01 | 20.286366  | -6.77E-02 | 103986245 | 103986368 | NC_000010.10 |
| cg13604445 | 1.88E-12 | 9.93E-14 | -8.01 | 20.2862785 | -1.71E-01 | 116342046 | 116342169 | NC_000009.11 |
| cg22725222 | 1.89E-12 | 9.95E-14 | -8.01 | 20.2842413 | -1.16E-01 | 53899066  | 53899189  | NC_000012.11 |
| cg13752254 | 1.89E-12 | 9.95E-14 | -8.01 | 20.2835309 | -7.19E-02 | 55940813  | 55940936  | NC_000019.9  |
| cg10988628 | 1.89E-12 | 9.96E-14 | -8.01 | 20.2833271 | -1.30E-01 | 135160697 | 135160820 | NC_000010.10 |
| cg03648020 | 1.89E-12 | 9.97E-14 | -8.01 | 20.282477  | -1.38E-01 | 931327    | 931450    | NC_000001.10 |
| cg19592742 | 1.89E-12 | 9.98E-14 | -8.01 | 20.2809474 | -6.60E-02 | 1034166   | 1034289   | NC_000010.10 |
| cg10693635 | 1.89E-12 | 9.99E-14 | -8.01 | 20.2804437 | -1.88E-01 | 16215614  | 16215737  | NC_000006.11 |
| cg02486325 | 1.90E-12 | 1.00E-13 | -8.01 | 20.2779084 | -1.41E-01 | 156917534 | 156917657 | NC_000007.13 |
| cg14574369 | 1.90E-12 | 1.00E-13 | -8.01 | 20.2775733 | -7.01E-02 | 57483631  | 57483754  | NC_000012.11 |
| cg20965866 | 1.90E-12 | 1.00E-13 | -8.01 | 20.2773522 | -1.48E-01 | 185767168 | 185767291 | NC_000004.11 |
| cg10759972 | 1.90E-12 | 1.00E-13 | -8.01 | 20.2769904 | -1.82E-01 | 1971471   | 1971594   | NC_000008.10 |
| cg23007665 | 1.90E-12 | 1.00E-13 | -8.01 | 20.2766732 | -1.86E-01 | 43690247  | 43690370  | NC_000007.13 |
| cg21526357 | 1.91E-12 | 1.01E-13 | -8.01 | 20.2741238 | -1.14E-01 | 2699249   | 2699372   | NC_000017.10 |
| cg21165122 | 1.91E-12 | 1.01E-13 | -8.01 | 20.2728493 | -6.77E-02 | 149321434 | 149321557 | NC_000007.13 |
| cg05687083 | 1.91E-12 | 1.01E-13 | -8.01 | 20.2714565 | -2.42E-01 | 5371160   | 5371283   | NC_000007.13 |
| cg07581623 | 1.91E-12 | 1.01E-13 | -8.01 | 20.2710656 | -1.74E-01 | 26498830  | 26498953  | NC_000008.10 |
| cg04486886 | 1.91E-12 | 1.01E-13 | -8.01 | 20.2708759 | -2.31E-01 | 56784195  | 56784318  | NC_000005.9  |
| cg26140483 | 1.91E-12 | 1.01E-13 | -8.01 | 20.2691641 | -1.88E-01 | 47952611  | 47952734  | NC_000003.11 |
| cg11970177 | 1.91E-12 | 1.01E-13 | -8.01 | 20.2689671 | -1.44E-01 | 66336157  | 66336280  | NC_000015.9  |



|                |          |          |       |            |           |           |           |              |
|----------------|----------|----------|-------|------------|-----------|-----------|-----------|--------------|
| cg15765889     | 1.92E-12 | 1.01E-13 | -8.01 | 20.2672772 | -1.79E-01 | 204447782 | 204447905 | NC_000002.11 |
| cg00360077     | 1.92E-12 | 1.01E-13 | -8.01 | 20.2663444 | -1.33E-01 | 80889593  | 80889716  | NC_000015.9  |
| cg17855045     | 1.93E-12 | 1.02E-13 | -8.01 | 20.259486  | -1.36E-01 | 802348    | 802471    | NC_000004.11 |
| cg08170519     | 1.94E-12 | 1.03E-13 | -8.01 | 20.2540632 | -1.32E-01 | 133804959 | 133805082 | NC_000011.9  |
| cg05569328     | 1.95E-12 | 1.03E-13 | -8.01 | 20.2514646 | -1.30E-01 | 32044384  | 32044507  | NC_000006.11 |
| cg16083838     | 1.95E-12 | 1.03E-13 | -8.01 | 20.2513422 | -2.01E-01 | 2889809   | 2889932   | NC_000011.9  |
| cg19533977     | 1.95E-12 | 1.03E-13 | -8.01 | 20.250574  | -1.26E-01 | 57719682  | 57719805  | NC_000017.10 |
| cg03198372     | 1.95E-12 | 1.03E-13 | -8.01 | 20.2500552 | -7.11E-02 | 29468588  | 29468711  | NC_000022.10 |
| cg04581214     | 1.95E-12 | 1.03E-13 | -8.01 | 20.2495998 | -1.23E-01 | 1267741   | 1267864   | NC_000019.9  |
| cg10792923     | 1.95E-12 | 1.03E-13 | -8.01 | 20.248131  | -4.86E-02 | 103789516 | 103789639 | NC_000004.11 |
| ch.10.1963761R | 1.95E-12 | 1.03E-13 | -8.01 | 20.2481206 | -6.73E-02 | 94373483  | 94373606  | NC_000010.10 |
| cg14571682     | 1.95E-12 | 1.03E-13 | -8.01 | 20.2471341 | -7.01E-02 | 184050946 | 184051069 | NC_000002.11 |
| cg03478610     | 1.96E-12 | 1.03E-13 | -8.01 | 20.2466198 | -1.89E-01 | 135702110 | 135702233 | NC_000003.11 |
| cg24634577     | 1.96E-12 | 1.03E-13 | -8.01 | 20.2464957 | -1.52E-01 | 76859350  | 76859473  | NC_000010.10 |
| cg07892167     | 1.96E-12 | 1.04E-13 | -8.01 | 20.244297  | -1.94E-01 | 23144983  | 23145106  | NC_000008.10 |
| cg06406619     | 1.96E-12 | 1.04E-13 | -8.01 | 20.2436619 | -1.07E-01 | 851045    | 851168    | NC_000019.9  |
| cg22540040     | 1.97E-12 | 1.04E-13 | -8.01 | 20.2413818 | -1.27E-01 | 68978235  | 68978358  | NC_000012.11 |
| cg02646779     | 1.97E-12 | 1.04E-13 | -8.01 | 20.2413057 | -1.88E-01 | 72342554  | 72342677  | NC_000002.11 |
| cg16171484     | 1.97E-12 | 1.04E-13 | -8.01 | 20.2405317 | -1.79E-01 | 223290515 | 223290638 | NC_000002.11 |
| cg02279181     | 1.97E-12 | 1.04E-13 | -8.01 | 20.2399214 | -1.61E-01 | 71957579  | 71957702  | NC_000005.9  |
| cg17079987     | 1.97E-12 | 1.04E-13 | -8.01 | 20.2399115 | -1.75E-01 | 557562    | 557685    | NC_000010.10 |
| cg04745079     | 1.97E-12 | 1.04E-13 | -8.01 | 20.2374802 | -1.67E-01 | 119993751 | 119993874 | NC_000011.9  |
| cg26061357     | 1.97E-12 | 1.04E-13 | -8.01 | 20.2370928 | -9.58E-02 | 150969275 | 150969398 | NC_000007.13 |
| cg08951638     | 1.97E-12 | 1.04E-13 | -8.01 | 20.2363851 | -1.55E-01 | 141706213 | 141706336 | NC_000005.9  |
| cg22820285     | 1.98E-12 | 1.04E-13 | -8    | 20.2357166 | -2.12E-02 | 55008241  | 55008364  | NC_000001.10 |

|            |          |          |    |            |           |           |           |              |
|------------|----------|----------|----|------------|-----------|-----------|-----------|--------------|
| cg05573829 | 1.98E-12 | 1.05E-13 | -8 | 20.2352071 | -2.33E-01 | 132175434 | 132175557 | NC_000005.9  |
| cg00000714 | 1.98E-12 | 1.05E-13 | -8 | 20.2344731 | -5.54E-02 | 54695678  | 54695801  | NC_000019.9  |
| cg02370222 | 1.98E-12 | 1.05E-13 | -8 | 20.2341952 | -9.77E-02 | 38580256  | 38580379  | NC_000006.11 |
| cg24531955 | 1.98E-12 | 1.05E-13 | -8 | 20.233726  | -2.28E-01 | 23154691  | 23154814  | NC_000008.10 |
| cg16444062 | 1.98E-12 | 1.05E-13 | -8 | 20.2321706 | -1.84E-01 | 2770298   | 2770421   | NC_000016.9  |
| cg09414620 | 1.98E-12 | 1.05E-13 | -8 | 20.2310059 | -1.29E-01 | 1213469   | 1213592   | NC_000016.9  |
| cg01257145 | 1.98E-12 | 1.05E-13 | -8 | 20.2309013 | -7.61E-02 | 74349804  | 74349927  | NC_000005.9  |
| cg24313303 | 1.99E-12 | 1.05E-13 | -8 | 20.2282172 | -1.99E-01 | 27113219  | 27113342  | NC_000001.10 |
| cg25851671 | 1.99E-12 | 1.05E-13 | -8 | 20.2282029 | -7.28E-02 | 37502825  | 37502948  | NC_000021.8  |
| cg14296990 | 1.99E-12 | 1.05E-13 | -8 | 20.2275004 | -1.80E-02 | 9385838   | 9385961   | NC_000011.9  |
| cg24015817 | 1.99E-12 | 1.06E-13 | -8 | 20.226087  | -5.60E-02 | 96025855  | 96025978  | NC_000006.11 |
| cg07701049 | 1.99E-12 | 1.06E-13 | -8 | 20.2259582 | -1.56E-01 | 141559946 | 141560069 | NC_000008.10 |
| cg03463990 | 2.00E-12 | 1.06E-13 | -8 | 20.2234187 | -1.30E-01 | 74534692  | 74534815  | NC_000015.9  |
| cg03280026 | 2.00E-12 | 1.06E-13 | -8 | 20.222253  | -1.45E-01 | 112430707 | 112430830 | NC_000007.13 |
| cg05908960 | 2.00E-12 | 1.06E-13 | -8 | 20.2216079 | -1.14E-01 | 123472150 | 123472273 | NC_000012.11 |
| cg01097897 | 2.00E-12 | 1.06E-13 | -8 | 20.2213415 | -1.85E-01 | 63097264  | 63097387  | NC_000012.11 |
| cg03887092 | 2.01E-12 | 1.06E-13 | -8 | 20.2201339 | -1.89E-01 | 1080885   | 1081008   | NC_000006.11 |
| cg04113075 | 2.01E-12 | 1.06E-13 | -8 | 20.2200591 | -1.16E-01 | 146865487 | 146865610 | NC_000006.11 |
| cg14059921 | 2.01E-12 | 1.06E-13 | -8 | 20.2194797 | -6.74E-02 | 34628952  | 34629075  | NC_000009.11 |
| cg18002862 | 2.01E-12 | 1.06E-13 | -8 | 20.2186847 | -1.70E-01 | 2718230   | 2718353   | NC_000017.10 |
| cg01298102 | 2.01E-12 | 1.06E-13 | -8 | 20.2170618 | -1.12E-01 | 21199840  | 21199963  | NC_000016.9  |
| cg25827670 | 2.02E-12 | 1.07E-13 | -8 | 20.213426  | -1.66E-01 | 15255513  | 15255636  | NC_000017.10 |
| cg06204730 | 2.02E-12 | 1.07E-13 | -8 | 20.2132236 | -8.19E-02 | 48785992  | 48786115  | NC_000017.10 |
| cg09003023 | 2.02E-12 | 1.07E-13 | -8 | 20.2131942 | -1.11E-01 | 29974253  | 29974376  | NC_000006.11 |
| cg20856330 | 2.02E-12 | 1.07E-13 | -8 | 20.2127914 | -9.36E-02 | 30313546  | 30313669  | NC_000006.11 |

|                |          |          |    |            |           |           |           |              |
|----------------|----------|----------|----|------------|-----------|-----------|-----------|--------------|
| cg16356630     | 2.02E-12 | 1.07E-13 | -8 | 20.2109974 | -6.52E-02 | 14683035  | 14683158  | NC_000011.9  |
| cg15474754     | 2.03E-12 | 1.07E-13 | -8 | 20.2084434 | -5.26E-02 | 175444096 | 175444219 | NC_000004.11 |
| cg15792145     | 2.03E-12 | 1.08E-13 | -8 | 20.2076139 | -6.04E-02 | 23385077  | 23385200  | NC_000010.10 |
| cg14818960     | 2.03E-12 | 1.08E-13 | -8 | 20.2075339 | -1.58E-01 | 71903119  | 71903242  | NC_000011.9  |
| cg00107970     | 2.03E-12 | 1.08E-13 | -8 | 20.2066603 | -9.12E-02 | 156119457 | 156119580 | NC_000001.10 |
| ch.11.1623093R | 2.03E-12 | 1.08E-13 | -8 | 20.2061665 | -6.27E-02 | 75006971  | 75007094  | NC_000011.9  |
| cg13415566     | 2.04E-12 | 1.08E-13 | -8 | 20.203854  | -1.03E-01 | 125423240 | 125423363 | NC_000010.10 |
| cg19859993     | 2.04E-12 | 1.08E-13 | -8 | 20.2037067 | -1.56E-01 | 207013239 | 207013362 | NC_000001.10 |
| cg08254353     | 2.04E-12 | 1.08E-13 | -8 | 20.2030502 | -7.97E-02 | 31254670  | 31254793  | NC_000017.10 |
| cg00052588     | 2.04E-12 | 1.08E-13 | -8 | 20.2027027 | -1.28E-01 | 89672139  | 89672262  | NC_000016.9  |
| cg27657226     | 2.04E-12 | 1.08E-13 | -8 | 20.2025841 | -9.84E-02 | 88296628  | 88296751  | NC_000016.9  |
| cg13800802     | 2.05E-12 | 1.09E-13 | -8 | 20.1969944 | -1.67E-01 | 98619666  | 98619789  | NC_000009.11 |
| cg12799885     | 2.05E-12 | 1.09E-13 | -8 | 20.19492   | -1.77E-01 | 74020976  | 74021099  | NC_000010.10 |
| cg06310844     | 2.06E-12 | 1.09E-13 | -8 | 20.1937743 | -8.10E-02 | 33072506  | 33072629  | NC_000019.9  |
| cg02500990     | 2.06E-12 | 1.09E-13 | -8 | 20.1927132 | -1.23E-01 | 89640906  | 89641029  | NC_000016.9  |
| cg18244845     | 2.06E-12 | 1.10E-13 | -8 | 20.1892355 | -1.72E-01 | 6111541   | 6111664   | NC_000019.9  |
| ch.9.80193246F | 2.07E-12 | 1.10E-13 | -8 | 20.1888158 | -3.93E-02 | 81003426  | 81003549  | NC_000009.11 |
| cg03349134     | 2.07E-12 | 1.10E-13 | -8 | 20.1870956 | -2.05E-01 | 25655241  | 25655364  | NC_000006.11 |
| cg11692371     | 2.07E-12 | 1.10E-13 | -8 | 20.1869118 | -1.98E-02 | 42891346  | 42891469  | NC_000019.9  |
| cg10687219     | 2.07E-12 | 1.10E-13 | -8 | 20.1858109 | -2.48E-01 | 68174286  | 68174409  | NC_000011.9  |
| cg26482052     | 2.07E-12 | 1.10E-13 | -8 | 20.185698  | -4.95E-02 | 66660462  | 66660585  | NC_000002.11 |
| cg12931523     | 2.07E-12 | 1.10E-13 | -8 | 20.1845963 | -5.49E-02 | 90793003  | 90793126  | NC_000015.9  |
| cg09485853     | 2.08E-12 | 1.10E-13 | -8 | 20.1831329 | -1.57E-01 | 72495878  | 72496001  | NC_000015.9  |
| cg15816464     | 2.08E-12 | 1.11E-13 | -8 | 20.1802281 | -1.84E-01 | 2026533   | 2026656   | NC_000017.10 |
| cg23877497     | 2.09E-12 | 1.11E-13 | -8 | 20.1766809 | -1.50E-01 | 158838943 | 158839066 | NC_000006.11 |

|            |          |          |       |            |           |           |           |              |
|------------|----------|----------|-------|------------|-----------|-----------|-----------|--------------|
| cg24478966 | 2.10E-12 | 1.11E-13 | -7.99 | 20.1737339 | -1.99E-01 | 42460930  | 42461053  | NC_000019.9  |
| cg09281364 | 2.10E-12 | 1.11E-13 | -7.99 | 20.1722735 | -9.66E-02 | 50936093  | 50936216  | NC_000019.9  |
| cg27252776 | 2.10E-12 | 1.12E-13 | -7.99 | 20.1716477 | -1.33E-01 | 124564252 | 124564375 | NC_000003.11 |
| cg22339338 | 2.10E-12 | 1.12E-13 | -7.99 | 20.1713647 | -1.73E-01 | 159891638 | 159891761 | NC_000001.10 |
| cg21114004 | 2.10E-12 | 1.12E-13 | -7.99 | 20.1710889 | -9.83E-02 | 62067245  | 62067368  | NC_000011.9  |
| cg07965110 | 2.10E-12 | 1.12E-13 | -7.99 | 20.1704683 | -2.04E-01 | 24863166  | 24863289  | NC_000001.10 |
| cg11215644 | 2.11E-12 | 1.12E-13 | -7.99 | 20.1670389 | -1.24E-01 | 12296435  | 12296558  | NC_000006.11 |
| cg00982984 | 2.11E-12 | 1.12E-13 | -7.99 | 20.1668104 | -7.87E-02 | 45493530  | 45493653  | NC_000015.9  |
| cg25579648 | 2.11E-12 | 1.12E-13 | -7.99 | 20.1657528 | -3.99E-02 | 102091873 | 102091996 | NC_000005.9  |
| cg06065019 | 2.11E-12 | 1.12E-13 | -7.99 | 20.1643715 | -1.84E-01 | 177356276 | 177356399 | NC_000002.11 |
| cg24738627 | 2.12E-12 | 1.12E-13 | -7.99 | 20.1631981 | -1.12E-01 | 11563023  | 11563146  | NC_000008.10 |
| cg01065960 | 2.12E-12 | 1.13E-13 | -7.99 | 20.1616209 | -1.01E-01 | 27181503  | 27181626  | NC_000017.10 |
| cg27383335 | 2.12E-12 | 1.13E-13 | -7.99 | 20.1606693 | -6.70E-02 | 75600057  | 75600180  | NC_000016.9  |
| cg17593721 | 2.12E-12 | 1.13E-13 | -7.99 | 20.160542  | -3.13E-02 | 118788746 | 118788869 | NC_000005.9  |
| cg21566177 | 2.12E-12 | 1.13E-13 | -7.99 | 20.159462  | -1.98E-01 | 173312866 | 173312989 | NC_000005.9  |
| cg08312412 | 2.13E-12 | 1.13E-13 | -7.99 | 20.1584624 | -1.53E-01 | 141443781 | 141443904 | NC_000005.9  |
| cg17418055 | 2.13E-12 | 1.13E-13 | -7.99 | 20.1575429 | -1.29E-01 | 30061002  | 30061125  | NC_000020.10 |
| cg03447547 | 2.13E-12 | 1.13E-13 | -7.99 | 20.1552417 | -1.81E-01 | 94577039  | 94577162  | NC_000014.8  |
| cg02174232 | 2.13E-12 | 1.13E-13 | -7.99 | 20.1545492 | -5.40E-02 | 49712164  | 49712287  | NC_000003.11 |
| cg16787624 | 2.14E-12 | 1.14E-13 | -7.99 | 20.15376   | -5.85E-02 | 238601425 | 238601548 | NC_000002.11 |
| cg03229682 | 2.14E-12 | 1.14E-13 | -7.99 | 20.1525804 | -1.56E-01 | 66724428  | 66724551  | NC_000011.9  |
| cg00721772 | 2.14E-12 | 1.14E-13 | -7.99 | 20.1522043 | -1.26E-01 | 25122070  | 25122193  | NC_000016.9  |
| cg25395653 | 2.14E-12 | 1.14E-13 | -7.99 | 20.1515491 | -2.80E-02 | 69455731  | 69455854  | NC_000011.9  |
| cg07022048 | 2.14E-12 | 1.14E-13 | -7.99 | 20.1508961 | -1.15E-01 | 52638592  | 52638715  | NC_000012.11 |
| cg21095280 | 2.15E-12 | 1.14E-13 | -7.99 | 20.1466385 | -1.80E-01 | 36724036  | 36724159  | NC_000006.11 |

|            |          |          |       |            |           |           |           |              |
|------------|----------|----------|-------|------------|-----------|-----------|-----------|--------------|
| cg05099121 | 2.15E-12 | 1.14E-13 | -7.99 | 20.1463733 | -6.34E-02 | 91764089  | 91764212  | NC_000007.13 |
| cg26546884 | 2.15E-12 | 1.14E-13 | -7.99 | 20.1462141 | -1.80E-01 | 1768004   | 1768127   | NC_000006.11 |
| cg18005280 | 2.15E-12 | 1.15E-13 | -7.99 | 20.1441383 | -1.52E-01 | 66463731  | 66463854  | NC_000003.11 |
| cg20994686 | 2.16E-12 | 1.15E-13 | -7.99 | 20.1431819 | -6.89E-02 | 71306668  | 71306791  | NC_000017.10 |
| cg13505279 | 2.16E-12 | 1.15E-13 | -7.99 | 20.1421841 | -1.03E-01 | 55611881  | 55612004  | NC_000015.9  |
| cg21817750 | 2.16E-12 | 1.15E-13 | -7.99 | 20.1410615 | -1.95E-01 | 71543106  | 71543229  | NC_000005.9  |
| cg18468088 | 2.16E-12 | 1.15E-13 | -7.99 | 20.1391144 | -7.98E-02 | 35490818  | 35490941  | NC_000006.11 |
| cg06513247 | 2.17E-12 | 1.15E-13 | -7.99 | 20.138164  | -1.43E-01 | 75446661  | 75446784  | NC_000017.10 |
| cg14143723 | 2.17E-12 | 1.15E-13 | -7.99 | 20.1380751 | -2.01E-01 | 27638612  | 27638735  | NC_000003.11 |
| cg00004773 | 2.17E-12 | 1.16E-13 | -7.99 | 20.1367996 | -1.82E-01 | 76722955  | 76723078  | NC_000012.11 |
| cg02135122 | 2.17E-12 | 1.16E-13 | -7.99 | 20.1365259 | -1.40E-01 | 76642824  | 76642947  | NC_000010.10 |
| cg19921355 | 2.18E-12 | 1.16E-13 | -7.99 | 20.1339367 | -1.22E-01 | 14049093  | 14049216  | NC_000019.9  |
| cg00181432 | 2.18E-12 | 1.16E-13 | -7.99 | 20.1337672 | -1.34E-01 | 194393818 | 194393941 | NC_000003.11 |
| cg22211092 | 2.18E-12 | 1.16E-13 | -7.99 | 20.1302701 | -1.41E-01 | 156361584 | 156361707 | NC_000003.11 |
| cg20623052 | 2.19E-12 | 1.16E-13 | -7.99 | 20.1290297 | -4.11E-02 | 65419955  | 65420078  | NC_000011.9  |
| cg13119182 | 2.19E-12 | 1.17E-13 | -7.99 | 20.1276642 | -1.42E-01 | 87770782  | 87770905  | NC_000004.11 |
| cg14525390 | 2.19E-12 | 1.17E-13 | -7.99 | 20.127455  | -1.68E-01 | 91017836  | 91017959  | NC_000014.8  |
| cg05355436 | 2.19E-12 | 1.17E-13 | -7.99 | 20.1260205 | -1.83E-01 | 63520873  | 63520996  | NC_000010.10 |
| cg08111832 | 2.19E-12 | 1.17E-13 | -7.99 | 20.1251841 | -7.22E-02 | 24868082  | 24868205  | NC_000014.8  |
| cg03342114 | 2.19E-12 | 1.17E-13 | -7.99 | 20.1242588 | -5.27E-02 | 10381577  | 10381700  | NC_000019.9  |
| cg03818034 | 2.20E-12 | 1.17E-13 | -7.99 | 20.1227909 | -7.08E-02 | 99746088  | 99746211  | NC_000007.13 |
| cg01858712 | 2.20E-12 | 1.17E-13 | -7.99 | 20.1226741 | -1.75E-01 | 12156525  | 12156648  | NC_000016.9  |
| cg18016565 | 2.20E-12 | 1.17E-13 | -7.99 | 20.1209042 | -1.55E-01 | 150552671 | 150552794 | NC_000001.10 |
| cg17653411 | 2.20E-12 | 1.17E-13 | -7.99 | 20.1203532 | -1.11E-01 | 112908185 | 112908308 | NC_000002.11 |
| cg02445447 | 2.21E-12 | 1.18E-13 | -7.99 | 20.1182213 | -4.26E-02 | 106015594 | 106015717 | NC_000002.11 |

|            |          |          |       |            |           |           |           |              |
|------------|----------|----------|-------|------------|-----------|-----------|-----------|--------------|
| cg27591920 | 2.21E-12 | 1.18E-13 | -7.99 | 20.1172605 | -1.13E-01 | 111918681 | 111918804 | NC_000002.11 |
| cg02652891 | 2.21E-12 | 1.18E-13 | -7.99 | 20.1165204 | -1.03E-01 | 163525424 | 163525547 | NC_000006.11 |
| cg16444942 | 2.21E-12 | 1.18E-13 | -7.99 | 20.1157693 | -8.99E-02 | 129309117 | 129309240 | NC_000012.11 |
| cg12186219 | 2.21E-12 | 1.18E-13 | -7.99 | 20.1151987 | -8.15E-02 | 1463541   | 1463664   | NC_000011.9  |
| cg02210967 | 2.22E-12 | 1.18E-13 | -7.98 | 20.1140502 | -1.35E-01 | 5572794   | 5572917   | NC_000007.13 |
| cg21206949 | 2.22E-12 | 1.19E-13 | -7.98 | 20.1105811 | -7.85E-02 | 94595582  | 94595705  | NC_000014.8  |
| cg02630604 | 2.22E-12 | 1.19E-13 | -7.98 | 20.1098774 | -1.34E-01 | 129781596 | 129781719 | NC_000007.13 |
| cg21990700 | 2.23E-12 | 1.19E-13 | -7.98 | 20.1080763 | -7.37E-02 | 7260776   | 7260899   | NC_000012.11 |
| cg01198338 | 2.23E-12 | 1.19E-13 | -7.98 | 20.1069154 | -2.98E-02 | 75508496  | 75508619  | NC_000007.13 |
| cg26058971 | 2.23E-12 | 1.19E-13 | -7.98 | 20.10651   | -1.61E-01 | 16251246  | 16251369  | NC_000001.10 |
| cg09129839 | 2.24E-12 | 1.19E-13 | -7.98 | 20.1048002 | -1.19E-01 | 2304315   | 2304438   | NC_000001.10 |
| cg00922281 | 2.24E-12 | 1.19E-13 | -7.98 | 20.1043479 | -1.67E-01 | 87715775  | 87715898  | NC_000016.9  |
| cg21197219 | 2.24E-12 | 1.20E-13 | -7.98 | 20.10125   | -1.41E-01 | 3374906   | 3375029   | NC_000001.10 |
| cg19921577 | 2.25E-12 | 1.20E-13 | -7.98 | 20.0995353 | -1.90E-01 | 98704488  | 98704611  | NC_000007.13 |
| cg02716776 | 2.25E-12 | 1.20E-13 | -7.98 | 20.0970601 | -2.23E-01 | 3178413   | 3178536   | NC_000019.9  |
| cg16708938 | 2.26E-12 | 1.20E-13 | -7.98 | 20.0955239 | -1.26E-01 | 44832350  | 44832473  | NC_000021.8  |
| cg06528773 | 2.26E-12 | 1.21E-13 | -7.98 | 20.0949358 | -9.82E-02 | 62382998  | 62383121  | NC_000011.9  |
| cg18766864 | 2.26E-12 | 1.21E-13 | -7.98 | 20.0948708 | -5.61E-02 | 38863605  | 38863728  | NC_000022.10 |
| cg04709120 | 2.28E-12 | 1.22E-13 | -7.98 | 20.0860591 | -6.81E-02 | 74451858  | 74451981  | NC_000010.10 |
| cg01109135 | 2.28E-12 | 1.22E-13 | -7.98 | 20.0859433 | -1.15E-01 | 105532252 | 105532375 | NC_000014.8  |
| cg07229001 | 2.28E-12 | 1.22E-13 | -7.98 | 20.0854809 | -1.38E-01 | 70897224  | 70897347  | NC_000015.9  |
| cg11032810 | 2.28E-12 | 1.22E-13 | -7.98 | 20.0832079 | -1.54E-01 | 141057042 | 141057165 | NC_000004.11 |
| cg25818882 | 2.28E-12 | 1.22E-13 | -7.98 | 20.0826441 | -5.91E-02 | 12886379  | 12886502  | NC_000019.9  |
| cg03471346 | 2.29E-12 | 1.22E-13 | -7.98 | 20.08133   | -2.17E-01 | 179112077 | 179112200 | NC_000001.10 |
| cg05099145 | 2.29E-12 | 1.22E-13 | -7.98 | 20.0804338 | -2.23E-01 | 1796333   | 1796456   | NC_000016.9  |

|               |          |          |       |            |           |           |           |              |
|---------------|----------|----------|-------|------------|-----------|-----------|-----------|--------------|
| cg26208764    | 2.29E-12 | 1.22E-13 | -7.98 | 20.0803122 | -1.46E-01 | 69384505  | 69384628  | NC_000015.9  |
| cg03096732    | 2.29E-12 | 1.22E-13 | -7.98 | 20.0790064 | -8.84E-02 | 6946527   | 6946650   | NC_000017.10 |
| cg26562921    | 2.30E-12 | 1.23E-13 | -7.98 | 20.076986  | -1.65E-01 | 84760429  | 84760552  | NC_000016.9  |
| cg04427462    | 2.30E-12 | 1.23E-13 | -7.98 | 20.0764953 | -6.77E-02 | 47218031  | 47218154  | NC_000019.9  |
| cg05038268    | 2.30E-12 | 1.23E-13 | -7.98 | 20.0732971 | -1.94E-01 | 66885281  | 66885404  | NC_000011.9  |
| cg11642891    | 2.31E-12 | 1.24E-13 | -7.98 | 20.0707862 | -2.18E-01 | 3452563   | 3452686   | NC_000002.11 |
| cg05250241    | 2.32E-12 | 1.24E-13 | -7.98 | 20.0682529 | -1.73E-01 | 43321328  | 43321451  | NC_000017.10 |
| cg09415957    | 2.32E-12 | 1.24E-13 | -7.98 | 20.0666812 | -1.03E-01 | 62609886  | 62610009  | NC_000011.9  |
| cg21931317    | 2.32E-12 | 1.24E-13 | -7.98 | 20.065083  | -2.05E-01 | 43411533  | 43411656  | NC_000002.11 |
| cg16634661    | 2.32E-12 | 1.24E-13 | -7.98 | 20.0641181 | -7.70E-02 | 46954794  | 46954917  | NC_000001.10 |
| cg19885625    | 2.33E-12 | 1.25E-13 | -7.98 | 20.0611947 | -1.98E-01 | 64815313  | 64815436  | NC_000011.9  |
| cg10084993    | 2.33E-12 | 1.25E-13 | -7.98 | 20.0598494 | -1.17E-01 | 2077647   | 2077770   | NC_000016.9  |
| ch.7.2897584R | 2.34E-12 | 1.25E-13 | -7.98 | 20.055688  | -5.91E-02 | 138762727 | 138762850 | NC_000007.13 |
| cg21218363    | 2.35E-12 | 1.26E-13 | -7.97 | 20.0512787 | -1.43E-01 | 189247165 | 189247288 | NC_000002.11 |
| cg06042148    | 2.35E-12 | 1.26E-13 | -7.97 | 20.0510403 | -1.86E-01 | 97138161  | 97138284  | NC_000008.10 |
| cg14179944    | 2.35E-12 | 1.26E-13 | -7.97 | 20.0509513 | -1.57E-01 | 35867515  | 35867638  | NC_000014.8  |
| cg16710099    | 2.36E-12 | 1.26E-13 | -7.97 | 20.0488982 | -1.30E-01 | 3162173   | 3162296   | NC_000001.10 |
| cg10076931    | 2.36E-12 | 1.26E-13 | -7.97 | 20.0484415 | -2.53E-02 | 27100556  | 27100679  | NC_000006.11 |
| cg26571760    | 2.36E-12 | 1.27E-13 | -7.97 | 20.046268  | -6.29E-02 | 148538954 | 148539077 | NC_000004.11 |
| cg26489057    | 2.37E-12 | 1.27E-13 | -7.97 | 20.0453789 | -1.16E-01 | 10712874  | 10712997  | NC_000019.9  |
| cg16590991    | 2.37E-12 | 1.27E-13 | -7.97 | 20.0445289 | -5.57E-02 | 155437209 | 155437332 | NC_000007.13 |
| cg06892907    | 2.37E-12 | 1.27E-13 | -7.97 | 20.0444386 | -1.88E-01 | 103818062 | 103818185 | NC_000008.10 |
| cg24845380    | 2.37E-12 | 1.27E-13 | -7.97 | 20.0426794 | -3.41E-02 | 149570183 | 149570306 | NC_000007.13 |
| cg02449821    | 2.38E-12 | 1.27E-13 | -7.97 | 20.039696  | -1.05E-01 | 89641296  | 89641419  | NC_000016.9  |
| cg03651054    | 2.38E-12 | 1.28E-13 | -7.97 | 20.0386754 | -1.73E-01 | 50194643  | 50194766  | NC_000013.10 |

|            |          |          |       |            |           |           |           |              |
|------------|----------|----------|-------|------------|-----------|-----------|-----------|--------------|
| cg17491759 | 2.38E-12 | 1.28E-13 | -7.97 | 20.0378202 | -1.09E-01 | 100676774 | 100676897 | NC_000006.11 |
| cg13792714 | 2.38E-12 | 1.28E-13 | -7.97 | 20.0372197 | -2.13E-01 | 114103345 | 114103468 | NC_000003.11 |
| cg11405655 | 2.39E-12 | 1.28E-13 | -7.97 | 20.0354255 | -8.30E-02 | 999599    | 999722    | NC_000001.10 |
| cg02578560 | 2.39E-12 | 1.28E-13 | -7.97 | 20.0350541 | -2.75E-02 | 43243245  | 43243368  | NC_000006.11 |
| cg22370694 | 2.39E-12 | 1.28E-13 | -7.97 | 20.0331815 | -8.80E-02 | 228395660 | 228395783 | NC_000001.10 |
| cg16356737 | 2.40E-12 | 1.28E-13 | -7.97 | 20.0318357 | -1.58E-01 | 25729805  | 25729928  | NC_000006.11 |
| cg17223698 | 2.40E-12 | 1.28E-13 | -7.97 | 20.0317841 | -1.15E-01 | 39416631  | 39416754  | NC_000015.9  |
| cg08770935 | 2.40E-12 | 1.29E-13 | -7.97 | 20.0282461 | -1.15E-01 | 17255562  | 17255685  | NC_000017.10 |
| cg26211349 | 2.41E-12 | 1.29E-13 | -7.97 | 20.0258646 | -1.19E-01 | 77404555  | 77404678  | NC_000017.10 |
| cg04571189 | 2.41E-12 | 1.29E-13 | -7.97 | 20.0254217 | -1.20E-01 | 10638072  | 10638195  | NC_000002.11 |
| cg26643476 | 2.42E-12 | 1.30E-13 | -7.97 | 20.0235238 | -1.98E-01 | 123215684 | 123215807 | NC_000012.11 |
| cg16232071 | 2.42E-12 | 1.30E-13 | -7.97 | 20.0220984 | -7.74E-02 | 10907718  | 10907841  | NC_000008.10 |
| cg18268492 | 2.42E-12 | 1.30E-13 | -7.97 | 20.0218379 | -6.07E-02 | 99185986  | 99186109  | NC_000010.10 |
| cg06098761 | 2.42E-12 | 1.30E-13 | -7.97 | 20.0212152 | -7.79E-02 | 210405808 | 210405931 | NC_000001.10 |
| cg01205584 | 2.42E-12 | 1.30E-13 | -7.97 | 20.0204731 | -8.70E-02 | 226270724 | 226270847 | NC_000001.10 |
| cg07299819 | 2.43E-12 | 1.30E-13 | -7.97 | 20.0187415 | -8.62E-02 | 153651009 | 153651132 | NC_000001.10 |
| cg02689072 | 2.43E-12 | 1.30E-13 | -7.97 | 20.018632  | -1.69E-01 | 802844    | 802967    | NC_000004.11 |
| cg04085585 | 2.43E-12 | 1.30E-13 | -7.97 | 20.0185091 | -1.08E-01 | 77648378  | 77648501  | NC_000007.13 |
| cg05047095 | 2.43E-12 | 1.30E-13 | -7.97 | 20.0171031 | -5.16E-02 | 30428842  | 30428965  | NC_000016.9  |
| cg05406088 | 2.43E-12 | 1.30E-13 | -7.97 | 20.0167208 | -2.06E-01 | 66947617  | 66947740  | NC_000015.9  |
| cg08722675 | 2.43E-12 | 1.31E-13 | -7.97 | 20.0163944 | -1.63E-01 | 8412549   | 8412672   | NC_000004.11 |
| cg11528995 | 2.44E-12 | 1.31E-13 | -7.97 | 20.0136539 | -3.82E-02 | 117210575 | 117210698 | NC_000001.10 |
| cg16109647 | 2.44E-12 | 1.31E-13 | -7.97 | 20.0132184 | -1.25E-01 | 21621725  | 21621848  | NC_000022.10 |
| cg03528519 | 2.45E-12 | 1.31E-13 | -7.97 | 20.0103565 | -1.88E-01 | 53513817  | 53513940  | NC_000001.10 |
| cg27207881 | 2.45E-12 | 1.31E-13 | -7.97 | 20.009735  | -1.64E-01 | 1864134   | 1864257   | NC_000004.11 |



|               |          |          |       |            |           |           |           |              |
|---------------|----------|----------|-------|------------|-----------|-----------|-----------|--------------|
| cg05293365    | 2.45E-12 | 1.31E-13 | -7.97 | 20.0093607 | -1.69E-01 | 77287338  | 77287461  | NC_000015.9  |
| cg10487998    | 2.45E-12 | 1.32E-13 | -7.97 | 20.0086392 | -1.20E-01 | 21838665  | 21838788  | NC_000001.10 |
| cg03756485    | 2.45E-12 | 1.32E-13 | -7.97 | 20.0061539 | -1.50E-01 | 102218837 | 102218960 | NC_000012.11 |
| cg10979020    | 2.46E-12 | 1.32E-13 | -7.97 | 20.0055697 | -6.27E-02 | 23425983  | 23426106  | NC_000014.8  |
| cg10266336    | 2.46E-12 | 1.32E-13 | -7.97 | 20.002252  | -1.34E-01 | 18270324  | 18270447  | NC_000011.9  |
| cg11147155    | 2.46E-12 | 1.32E-13 | -7.97 | 20.0021575 | -1.75E-01 | 150595206 | 150595329 | NC_000001.10 |
| cg07067090    | 2.46E-12 | 1.32E-13 | -7.97 | 20.0021423 | -3.20E-02 | 6680932   | 6681055   | NC_000009.11 |
| cg27570992    | 2.46E-12 | 1.32E-13 | -7.97 | 20.0019883 | -1.74E-01 | 105470737 | 105470860 | NC_000007.13 |
| cg16105591    | 2.47E-12 | 1.33E-13 | -7.97 | 20.0004281 | -1.48E-01 | 175270184 | 175270307 | NC_000005.9  |
| cg01048751    | 2.48E-12 | 1.33E-13 | -7.97 | 19.9971508 | -8.14E-02 | 27718495  | 27718618  | NC_000001.10 |
| cg13425174    | 2.48E-12 | 1.33E-13 | -7.97 | 19.9969124 | -5.52E-02 | 35265568  | 35265691  | NC_000006.11 |
| cg20669049    | 2.48E-12 | 1.33E-13 | -7.97 | 19.9968572 | -1.56E-01 | 55573572  | 55573695  | NC_000019.9  |
| cg24059075    | 2.49E-12 | 1.34E-13 | -7.96 | 19.9929931 | -1.05E-01 | 49688316  | 49688439  | NC_000012.11 |
| cg14659814    | 2.49E-12 | 1.34E-13 | -7.96 | 19.992276  | -1.57E-01 | 3209910   | 3210033   | NC_000001.10 |
| ch.15.814613R | 2.49E-12 | 1.34E-13 | -7.96 | 19.991644  | -9.28E-02 | 59520991  | 59521114  | NC_000015.9  |
| cg12699174    | 2.49E-12 | 1.34E-13 | -7.96 | 19.9901979 | -4.86E-02 | 156024477 | 156024600 | NC_000001.10 |
| cg22380178    | 2.49E-12 | 1.34E-13 | -7.96 | 19.9895585 | -1.33E-01 | 29980695  | 29980818  | NC_000015.9  |
| cg01711986    | 2.49E-12 | 1.34E-13 | -7.96 | 19.9895583 | -6.98E-02 | 24712561  | 24712684  | NC_000014.8  |
| cg00264133    | 2.50E-12 | 1.34E-13 | -7.96 | 19.9889246 | -1.71E-01 | 73154796  | 73154919  | NC_000017.10 |
| cg00042246    | 2.50E-12 | 1.34E-13 | -7.96 | 19.9884685 | -7.20E-02 | 139493490 | 139493613 | NC_000005.9  |
| cg01829817    | 2.50E-12 | 1.34E-13 | -7.96 | 19.9884545 | -1.43E-01 | 86774519  | 86774642  | NC_000016.9  |
| cg19872681    | 2.50E-12 | 1.34E-13 | -7.96 | 19.9881889 | -1.56E-01 | 23284518  | 23284641  | NC_000014.8  |
| cg03420846    | 2.50E-12 | 1.35E-13 | -7.96 | 19.9860341 | -1.33E-01 | 31406864  | 31406987  | NC_000001.10 |
| cg09091424    | 2.50E-12 | 1.35E-13 | -7.96 | 19.9859598 | -1.20E-01 | 67057304  | 67057427  | NC_000011.9  |
| cg14030904    | 2.51E-12 | 1.35E-13 | -7.96 | 19.9807753 | -1.81E-01 | 149806732 | 149806855 | NC_000006.11 |

|            |          |          |       |            |           |           |           |              |
|------------|----------|----------|-------|------------|-----------|-----------|-----------|--------------|
| cg06933574 | 2.52E-12 | 1.36E-13 | -7.96 | 19.9788398 | -1.16E-01 | 134370282 | 134370405 | NC_000005.9  |
| cg11464885 | 2.52E-12 | 1.36E-13 | -7.96 | 19.978421  | -1.67E-01 | 99966968  | 99967091  | NC_000015.9  |
| cg11226562 | 2.52E-12 | 1.36E-13 | -7.96 | 19.9780935 | -1.05E-01 | 65280795  | 65280918  | NC_000010.10 |
| cg04029168 | 2.52E-12 | 1.36E-13 | -7.96 | 19.9779081 | -9.09E-02 | 23963538  | 23963661  | NC_000016.9  |
| cg17571266 | 2.52E-12 | 1.36E-13 | -7.96 | 19.9767578 | -1.42E-01 | 54763211  | 54763334  | NC_000012.11 |
| cg15653855 | 2.53E-12 | 1.36E-13 | -7.96 | 19.9747003 | -1.57E-01 | 38735761  | 38735884  | NC_000002.11 |
| cg20828084 | 2.53E-12 | 1.36E-13 | -7.96 | 19.9745574 | -1.57E-01 | 81070851  | 81070974  | NC_000015.9  |
| cg18039133 | 2.53E-12 | 1.36E-13 | -7.96 | 19.9742241 | -1.31E-01 | 6750956   | 6751079   | NC_000020.10 |
| cg05096700 | 2.55E-12 | 1.37E-13 | -7.96 | 19.966442  | -7.64E-02 | 185926319 | 185926442 | NC_000004.11 |
| cg06016354 | 2.56E-12 | 1.38E-13 | -7.96 | 19.9637783 | -4.23E-02 | 32163966  | 32164089  | NC_000006.11 |
| cg07463059 | 2.56E-12 | 1.38E-13 | -7.96 | 19.9613642 | -6.38E-02 | 158979810 | 158979933 | NC_000001.10 |
| cg05662664 | 2.56E-12 | 1.38E-13 | -7.96 | 19.960978  | -1.80E-01 | 241110281 | 241110404 | NC_000002.11 |
| cg12298562 | 2.56E-12 | 1.38E-13 | -7.96 | 19.9602094 | -4.02E-02 | 95361132  | 95361255  | NC_000010.10 |
| cg03951724 | 2.57E-12 | 1.39E-13 | -7.96 | 19.9558922 | -6.37E-02 | 30723125  | 30723248  | NC_000022.10 |
| cg18459489 | 2.58E-12 | 1.39E-13 | -7.96 | 19.9549579 | -1.60E-01 | 118890977 | 118891100 | NC_000010.10 |
| cg05457881 | 2.58E-12 | 1.39E-13 | -7.96 | 19.9526059 | -7.37E-02 | 10435578  | 10435701  | NC_000006.11 |
| cg11821439 | 2.58E-12 | 1.39E-13 | -7.96 | 19.9524078 | -1.50E-01 | 29833650  | 29833773  | NC_000007.13 |
| cg04231701 | 2.58E-12 | 1.39E-13 | -7.96 | 19.9520794 | -1.46E-01 | 1032855   | 1032978   | NC_000004.11 |
| cg02215815 | 2.59E-12 | 1.39E-13 | -7.96 | 19.9509636 | -5.62E-02 | 28962783  | 28962906  | NC_000016.9  |
| cg10732611 | 2.59E-12 | 1.40E-13 | -7.96 | 19.9497997 | -1.60E-01 | 33700592  | 33700715  | NC_000013.10 |
| cg11801110 | 2.59E-12 | 1.40E-13 | -7.96 | 19.9491134 | -1.53E-01 | 50356763  | 50356886  | NC_000022.10 |
| cg19900852 | 2.59E-12 | 1.40E-13 | -7.96 | 19.9482067 | -7.33E-02 | 35451793  | 35451916  | NC_000014.8  |
| cg06468454 | 2.60E-12 | 1.40E-13 | -7.96 | 19.9471927 | -1.44E-01 | 3591377   | 3591500   | NC_000017.10 |
| cg23302989 | 2.60E-12 | 1.40E-13 | -7.96 | 19.9460266 | -1.53E-01 | 25174492  | 25174615  | NC_000007.13 |
| cg21531679 | 2.60E-12 | 1.40E-13 | -7.96 | 19.9447402 | -1.63E-01 | 185455026 | 185455149 | NC_000003.11 |

|                 |          |          |       |            |           |           |           |              |
|-----------------|----------|----------|-------|------------|-----------|-----------|-----------|--------------|
| ch.7.2186304R   | 2.60E-12 | 1.40E-13 | -7.96 | 19.9443131 | -4.93E-02 | 101838045 | 101838168 | NC_000007.13 |
| cg05159804      | 2.61E-12 | 1.41E-13 | -7.96 | 19.9422046 | -1.67E-01 | 44343776  | 44343899  | NC_000017.10 |
| cg21915337      | 2.61E-12 | 1.41E-13 | -7.96 | 19.9417176 | -1.74E-01 | 5011403   | 5011526   | NC_000007.13 |
| cg03027244      | 2.61E-12 | 1.41E-13 | -7.96 | 19.9399221 | -1.13E-01 | 66914883  | 66915006  | NC_000015.9  |
| cg05965029      | 2.62E-12 | 1.41E-13 | -7.96 | 19.9391499 | -7.67E-02 | 120315182 | 120315305 | NC_000003.11 |
| cg07613333      | 2.62E-12 | 1.41E-13 | -7.96 | 19.9381983 | -2.16E-01 | 19940827  | 19940950  | NC_000011.9  |
| cg20464884      | 2.62E-12 | 1.42E-13 | -7.96 | 19.9357058 | -8.60E-02 | 2773876   | 2773999   | NC_000006.11 |
| cg06738379      | 2.63E-12 | 1.42E-13 | -7.96 | 19.9349431 | -1.50E-01 | 167062104 | 167062227 | NC_000006.11 |
| ch.7.114165642F | 2.63E-12 | 1.42E-13 | -7.96 | 19.9347661 | -6.20E-02 | 114378406 | 114378529 | NC_000007.13 |
| cg21763952      | 2.63E-12 | 1.42E-13 | -7.95 | 19.9343829 | -5.75E-02 | 111051697 | 111051820 | NC_000012.11 |
| cg00368356      | 2.63E-12 | 1.42E-13 | -7.95 | 19.9342596 | -1.75E-01 | 39395717  | 39395840  | NC_000019.9  |
| cg00227093      | 2.63E-12 | 1.42E-13 | -7.95 | 19.9321253 | -9.00E-02 | 149979838 | 149979961 | NC_000005.9  |
| cg22179564      | 2.64E-12 | 1.42E-13 | -7.95 | 19.9301557 | -1.29E-01 | 74199422  | 74199545  | NC_000005.9  |
| cg18288462      | 2.64E-12 | 1.43E-13 | -7.95 | 19.9293427 | -1.04E-01 | 103986268 | 103986391 | NC_000010.10 |
| cg05040232      | 2.64E-12 | 1.43E-13 | -7.95 | 19.9272419 | -1.40E-01 | 194117403 | 194117526 | NC_000003.11 |
| cg20607293      | 2.65E-12 | 1.43E-13 | -7.95 | 19.9263862 | -9.36E-02 | 147112703 | 147112826 | NC_000001.10 |
| cg19802243      | 2.65E-12 | 1.43E-13 | -7.95 | 19.9231187 | -1.08E-01 | 160321205 | 160321328 | NC_000006.11 |
| cg15146720      | 2.66E-12 | 1.43E-13 | -7.95 | 19.9229164 | -3.41E-02 | 151722621 | 151722744 | NC_000007.13 |
| cg25178683      | 2.66E-12 | 1.44E-13 | -7.95 | 19.9225247 | -1.38E-01 | 76976267  | 76976390  | NC_000017.10 |
| cg00665832      | 2.66E-12 | 1.44E-13 | -7.95 | 19.9209637 | -6.91E-02 | 22862401  | 22862524  | NC_000007.13 |
| cg14010619      | 2.66E-12 | 1.44E-13 | -7.95 | 19.9209618 | -8.05E-02 | 39612741  | 39612864  | NC_000019.9  |
| cg11495854      | 2.66E-12 | 1.44E-13 | -7.95 | 19.9204808 | -2.35E-02 | 158635673 | 158635796 | NC_000005.9  |
| cg27227042      | 2.66E-12 | 1.44E-13 | -7.95 | 19.9193852 | -1.76E-01 | 93754094  | 93754217  | NC_000011.9  |
| cg16862821      | 2.67E-12 | 1.44E-13 | -7.95 | 19.9173221 | -6.40E-02 | 32938469  | 32938592  | NC_000006.11 |
| cg26664737      | 2.67E-12 | 1.44E-13 | -7.95 | 19.917067  | -6.46E-02 | 60145067  | 60145190  | NC_000012.11 |

|                 |          |          |       |            |           |           |           |              |
|-----------------|----------|----------|-------|------------|-----------|-----------|-----------|--------------|
| ch.2.200726997F | 2.68E-12 | 1.45E-13 | -7.95 | 19.9144848 | -4.66E-02 | 201018752 | 201018875 | NC_000002.11 |
| cg05995607      | 2.68E-12 | 1.45E-13 | -7.95 | 19.9135713 | -1.34E-01 | 59953045  | 59953168  | NC_000011.9  |
| cg27485075      | 2.69E-12 | 1.46E-13 | -7.95 | 19.9077089 | -1.26E-01 | 47054963  | 47055086  | NC_000002.11 |
| cg09193477      | 2.71E-12 | 1.46E-13 | -7.95 | 19.9033429 | -1.69E-01 | 158188683 | 158188806 | NC_000007.13 |
| cg20113820      | 2.71E-12 | 1.47E-13 | -7.95 | 19.9018389 | -8.93E-02 | 1765074   | 1765197   | NC_000008.10 |
| cg07622079      | 2.71E-12 | 1.47E-13 | -7.95 | 19.900298  | -1.53E-01 | 149658453 | 149658576 | NC_000005.9  |
| cg06521280      | 2.71E-12 | 1.47E-13 | -7.95 | 19.9001852 | -9.23E-02 | 75671378  | 75671501  | NC_000010.10 |
| cg17583957      | 2.71E-12 | 1.47E-13 | -7.95 | 19.9001559 | -2.21E-01 | 67536299  | 67536422  | NC_000017.10 |
| cg23494957      | 2.72E-12 | 1.47E-13 | -7.95 | 19.8988649 | -5.01E-02 | 64761548  | 64761671  | NC_000014.8  |
| cg11227075      | 2.72E-12 | 1.47E-13 | -7.95 | 19.8978787 | -7.07E-02 | 52750930  | 52751053  | NC_000010.10 |
| cg07526656      | 2.72E-12 | 1.47E-13 | -7.95 | 19.8966756 | -5.34E-02 | 7260660   | 7260783   | NC_000012.11 |
| cg09728393      | 2.73E-12 | 1.48E-13 | -7.95 | 19.8949499 | -1.80E-01 | 17851756  | 17851879  | NC_000006.11 |
| cg03483464      | 2.73E-12 | 1.48E-13 | -7.95 | 19.8949267 | -7.61E-02 | 98312971  | 98313094  | NC_000003.11 |
| cg07146435      | 2.73E-12 | 1.48E-13 | -7.95 | 19.8929182 | -7.31E-02 | 100028499 | 100028622 | NC_000010.10 |
| cg03291825      | 2.74E-12 | 1.49E-13 | -7.95 | 19.8889453 | -1.18E-01 | 76182433  | 76182556  | NC_000017.10 |
| cg13708974      | 2.74E-12 | 1.49E-13 | -7.95 | 19.8888519 | -1.51E-01 | 131466143 | 131466266 | NC_000009.11 |
| cg26894311      | 2.75E-12 | 1.49E-13 | -7.95 | 19.8880586 | -4.87E-02 | 104153930 | 104154053 | NC_000010.10 |
| cg26392737      | 2.75E-12 | 1.49E-13 | -7.95 | 19.8867196 | -1.58E-01 | 21916853  | 21916976  | NC_000008.10 |
| cg15618336      | 2.75E-12 | 1.49E-13 | -7.95 | 19.8851917 | -1.61E-01 | 52182759  | 52182882  | NC_000012.11 |
| cg23866166      | 2.75E-12 | 1.49E-13 | -7.95 | 19.8847211 | -2.41E-02 | 27863246  | 27863369  | NC_000006.11 |
| cg27275193      | 2.75E-12 | 1.49E-13 | -7.95 | 19.8845271 | -1.47E-01 | 14862453  | 14862576  | NC_000010.10 |
| cg20335959      | 2.76E-12 | 1.49E-13 | -7.95 | 19.8843436 | -4.83E-02 | 79480594  | 79480717  | NC_000017.10 |
| cg02859866      | 2.77E-12 | 1.50E-13 | -7.95 | 19.880219  | -8.48E-02 | 13760165  | 13760288  | NC_000010.10 |
| cg21932368      | 2.77E-12 | 1.50E-13 | -7.95 | 19.8799959 | -1.95E-02 | 45493106  | 45493229  | NC_000015.9  |
| cg15945287      | 2.77E-12 | 1.50E-13 | -7.95 | 19.8786624 | -1.04E-01 | 53809462  | 53809585  | NC_000017.10 |

|                |          |          |       |            |           |           |           |              |
|----------------|----------|----------|-------|------------|-----------|-----------|-----------|--------------|
| cg03312716     | 2.77E-12 | 1.50E-13 | -7.95 | 19.8776689 | -1.38E-01 | 110271581 | 110271704 | NC_000012.11 |
| cg12801391     | 2.78E-12 | 1.51E-13 | -7.95 | 19.8750444 | -1.36E-01 | 98126436  | 98126559  | NC_000010.10 |
| cg19896639     | 2.78E-12 | 1.51E-13 | -7.95 | 19.8746049 | -4.25E-02 | 9599276   | 9599399   | NC_000001.10 |
| cg11398299     | 2.79E-12 | 1.51E-13 | -7.94 | 19.8727439 | -8.09E-02 | 161178574 | 161178697 | NC_000005.9  |
| cg04152629     | 2.79E-12 | 1.51E-13 | -7.94 | 19.8726409 | -3.23E-02 | 49211867  | 49211990  | NC_000012.11 |
| cg06762176     | 2.79E-12 | 1.51E-13 | -7.94 | 19.8711777 | -7.63E-02 | 38398839  | 38398962  | NC_000007.13 |
| cg00134295     | 2.79E-12 | 1.51E-13 | -7.94 | 19.8695929 | -2.21E-01 | 9269178   | 9269301   | NC_000012.11 |
| cg22117193     | 2.80E-12 | 1.52E-13 | -7.94 | 19.8690621 | -9.26E-02 | 150122683 | 150122806 | NC_000005.9  |
| cg13636636     | 2.80E-12 | 1.52E-13 | -7.94 | 19.8681197 | -1.11E-01 | 131965921 | 131966044 | NC_000009.11 |
| cg08693231     | 2.80E-12 | 1.52E-13 | -7.94 | 19.8666061 | -5.97E-02 | 34216354  | 34216477  | NC_000006.11 |
| cg20638683     | 2.80E-12 | 1.52E-13 | -7.94 | 19.8664048 | -1.07E-01 | 45982569  | 45982692  | NC_000006.11 |
| cg14573876     | 2.80E-12 | 1.52E-13 | -7.94 | 19.8656638 | -2.39E-01 | 4105153   | 4105276   | NC_000019.9  |
| ch.17.1646506R | 2.81E-12 | 1.52E-13 | -7.94 | 19.8653309 | -6.26E-02 | 62164903  | 62165026  | NC_000017.10 |
| cg22511889     | 2.81E-12 | 1.52E-13 | -7.94 | 19.8651052 | -1.23E-01 | 4868496   | 4868619   | NC_000019.9  |
| cg01316516     | 2.81E-12 | 1.52E-13 | -7.94 | 19.863987  | -4.88E-02 | 18415964  | 18416087  | NC_000011.9  |
| cg05002071     | 2.81E-12 | 1.52E-13 | -7.94 | 19.8638252 | -1.07E-01 | 76510323  | 76510446  | NC_000011.9  |
| cg05506446     | 2.81E-12 | 1.52E-13 | -7.94 | 19.8631576 | -1.85E-01 | 46409501  | 46409624  | NC_000011.9  |
| cg26924747     | 2.82E-12 | 1.53E-13 | -7.94 | 19.8597447 | -9.52E-02 | 127984319 | 127984442 | NC_000007.13 |
| cg08844698     | 2.82E-12 | 1.53E-13 | -7.94 | 19.8581931 | -1.66E-01 | 85185607  | 85185730  | NC_000016.9  |
| cg19031085     | 2.83E-12 | 1.54E-13 | -7.94 | 19.8552198 | -1.44E-01 | 135228288 | 135228411 | NC_000005.9  |
| cg15132169     | 2.84E-12 | 1.54E-13 | -7.94 | 19.8541594 | -1.70E-01 | 149805995 | 149806118 | NC_000006.11 |
| cg22014579     | 2.84E-12 | 1.54E-13 | -7.94 | 19.8540008 | -1.80E-01 | 38795051  | 38795174  | NC_000019.9  |
| cg15396799     | 2.84E-12 | 1.54E-13 | -7.94 | 19.8532469 | -7.14E-02 | 95953574  | 95953697  | NC_000013.10 |
| cg00145103     | 2.84E-12 | 1.54E-13 | -7.94 | 19.8520534 | -8.49E-02 | 21360741  | 21360864  | NC_000017.10 |
| cg01833675     | 2.84E-12 | 1.54E-13 | -7.94 | 19.8511905 | -2.08E-01 | 225266876 | 225266999 | NC_000002.11 |

|               |          |          |       |            |           |           |           |              |
|---------------|----------|----------|-------|------------|-----------|-----------|-----------|--------------|
| cg05990579    | 2.85E-12 | 1.55E-13 | -7.94 | 19.8475226 | -4.39E-02 | 40531343  | 40531466  | NC_000015.9  |
| cg11543397    | 2.86E-12 | 1.55E-13 | -7.94 | 19.8466972 | -9.24E-02 | 120220094 | 120220217 | NC_000008.10 |
| cg18099096    | 2.86E-12 | 1.55E-13 | -7.94 | 19.8452041 | -1.75E-01 | 23936764  | 23936887  | NC_000004.11 |
| cg19382019    | 2.86E-12 | 1.55E-13 | -7.94 | 19.8443471 | -1.63E-01 | 48796188  | 48796311  | NC_000019.9  |
| cg02780181    | 2.86E-12 | 1.55E-13 | -7.94 | 19.8441471 | -4.43E-02 | 6704622   | 6704745   | NC_000011.9  |
| cg09866104    | 2.86E-12 | 1.56E-13 | -7.94 | 19.843585  | -1.04E-01 | 128039279 | 128039402 | NC_000010.10 |
| cg27359972    | 2.87E-12 | 1.56E-13 | -7.94 | 19.8415397 | -5.36E-02 | 49375733  | 49375856  | NC_000019.9  |
| cg13405631    | 2.87E-12 | 1.56E-13 | -7.94 | 19.8397365 | -1.39E-01 | 36259166  | 36259289  | NC_000006.11 |
| ch.3.2480551F | 2.88E-12 | 1.57E-13 | -7.94 | 19.8367876 | -1.23E-01 | 126188702 | 126188825 | NC_000003.11 |
| cg09478857    | 2.89E-12 | 1.57E-13 | -7.94 | 19.8353581 | -8.98E-02 | 117664976 | 117665099 | NC_000001.10 |
| cg00555085    | 2.89E-12 | 1.57E-13 | -7.94 | 19.8350117 | -1.38E-01 | 87616248  | 87616371  | NC_000016.9  |
| cg04408104    | 2.89E-12 | 1.57E-13 | -7.94 | 19.8342501 | -1.77E-01 | 160106670 | 160106793 | NC_000002.11 |
| cg03060603    | 2.89E-12 | 1.57E-13 | -7.94 | 19.8322636 | -1.17E-01 | 24464620  | 24464743  | NC_000013.10 |
| cg08536838    | 2.91E-12 | 1.58E-13 | -7.94 | 19.8263021 | -1.58E-01 | 63559901  | 63560024  | NC_000017.10 |
| cg19138538    | 2.91E-12 | 1.58E-13 | -7.94 | 19.8256827 | -1.33E-01 | 60623415  | 60623538  | NC_000011.9  |
| cg05199904    | 2.91E-12 | 1.58E-13 | -7.94 | 19.8248739 | -1.65E-01 | 71251691  | 71251814  | NC_000005.9  |
| cg21582831    | 2.92E-12 | 1.59E-13 | -7.94 | 19.8246293 | -1.70E-01 | 47029458  | 47029581  | NC_000003.11 |
| cg06461306    | 2.92E-12 | 1.59E-13 | -7.94 | 19.8237421 | -1.32E-01 | 767490    | 767613    | NC_000007.13 |
| cg12642431    | 2.93E-12 | 1.59E-13 | -7.94 | 19.8211537 | -1.95E-01 | 70994672  | 70994795  | NC_000015.9  |
| cg20429911    | 2.93E-12 | 1.59E-13 | -7.94 | 19.8210184 | -1.40E-01 | 18416535  | 18416658  | NC_000011.9  |
| cg25526061    | 2.93E-12 | 1.59E-13 | -7.94 | 19.8203345 | -1.56E-01 | 135088451 | 135088574 | NC_000010.10 |
| cg07102937    | 2.94E-12 | 1.60E-13 | -7.94 | 19.8168669 | -1.39E-01 | 966968    | 967091    | NC_000007.13 |
| cg04867406    | 2.94E-12 | 1.60E-13 | -7.94 | 19.8145292 | -3.37E-02 | 67211057  | 67211180  | NC_000011.9  |
| cg01627597    | 2.95E-12 | 1.60E-13 | -7.93 | 19.8140745 | -1.32E-01 | 26927436  | 26927559  | NC_000002.11 |
| cg12726927    | 2.95E-12 | 1.60E-13 | -7.93 | 19.8138422 | -6.02E-02 | 7941431   | 7941554   | NC_000004.11 |

|            |          |          |       |            |           |           |           |              |
|------------|----------|----------|-------|------------|-----------|-----------|-----------|--------------|
| cg18066690 | 2.95E-12 | 1.61E-13 | -7.93 | 19.8111106 | -1.25E-01 | 48344060  | 48344183  | NC_000008.10 |
| cg27466235 | 2.95E-12 | 1.61E-13 | -7.93 | 19.8109316 | -1.71E-01 | 77625095  | 77625218  | NC_000004.11 |
| cg02630888 | 2.96E-12 | 1.61E-13 | -7.93 | 19.8098985 | -1.68E-01 | 15657820  | 15657943  | NC_000004.11 |
| cg18127823 | 2.96E-12 | 1.61E-13 | -7.93 | 19.8076872 | -1.43E-01 | 966081    | 966204    | NC_000007.13 |
| cg26182263 | 2.97E-12 | 1.61E-13 | -7.93 | 19.8064895 | -6.40E-02 | 22224973  | 22225096  | NC_000008.10 |
| cg27360527 | 2.97E-12 | 1.62E-13 | -7.93 | 19.8059372 | -4.04E-02 | 85722694  | 85722817  | NC_000016.9  |
| cg21042919 | 2.97E-12 | 1.62E-13 | -7.93 | 19.8043089 | -1.19E-01 | 36621139  | 36621262  | NC_000017.10 |
| cg05298628 | 2.98E-12 | 1.62E-13 | -7.93 | 19.8008626 | -1.10E-01 | 123379569 | 123379692 | NC_000012.11 |
| cg11306628 | 2.99E-12 | 1.63E-13 | -7.93 | 19.7999501 | -7.15E-02 | 560119    | 560242    | NC_000007.13 |
| cg17052756 | 2.99E-12 | 1.63E-13 | -7.93 | 19.7996935 | -1.49E-01 | 28143676  | 28143799  | NC_000007.13 |
| cg04275695 | 2.99E-12 | 1.63E-13 | -7.93 | 19.7986211 | -1.89E-01 | 149806273 | 149806396 | NC_000006.11 |
| cg22821355 | 3.00E-12 | 1.63E-13 | -7.93 | 19.7959682 | -1.08E-01 | 10117479  | 10117602  | NC_000004.11 |
| cg04122324 | 3.00E-12 | 1.63E-13 | -7.93 | 19.7947949 | -7.48E-02 | 45563586  | 45563709  | NC_000013.10 |
| cg27051290 | 3.00E-12 | 1.64E-13 | -7.93 | 19.7936694 | -2.54E-02 | 85521839  | 85521962  | NC_000011.9  |
| cg06378498 | 3.01E-12 | 1.64E-13 | -7.93 | 19.7912056 | -6.12E-02 | 40540460  | 40540583  | NC_000017.10 |
| cg05781984 | 3.01E-12 | 1.64E-13 | -7.93 | 19.7902232 | -1.02E-01 | 43237642  | 43237765  | NC_000006.11 |
| cg03051979 | 3.02E-12 | 1.64E-13 | -7.93 | 19.7888648 | -6.68E-02 | 58283909  | 58284032  | NC_000016.9  |
| cg24889829 | 3.02E-12 | 1.65E-13 | -7.93 | 19.7878525 | -1.31E-01 | 1776347   | 1776470   | NC_000008.10 |
| cg08772163 | 3.02E-12 | 1.65E-13 | -7.93 | 19.7876165 | -1.11E-01 | 50202570  | 50202693  | NC_000013.10 |
| cg15589354 | 3.03E-12 | 1.65E-13 | -7.93 | 19.7835909 | -9.13E-02 | 229760606 | 229760729 | NC_000001.10 |
| cg04003327 | 3.03E-12 | 1.65E-13 | -7.93 | 19.7830462 | -1.98E-01 | 239007828 | 239007951 | NC_000002.11 |
| cg11185991 | 3.05E-12 | 1.66E-13 | -7.93 | 19.7788301 | -1.74E-01 | 98194116  | 98194239  | NC_000008.10 |
| cg04636834 | 3.05E-12 | 1.66E-13 | -7.93 | 19.7784506 | -1.13E-01 | 685580    | 685703    | NC_000016.9  |
| cg12238291 | 3.05E-12 | 1.66E-13 | -7.93 | 19.7773958 | -1.62E-01 | 46415744  | 46415867  | NC_000020.10 |
| cg24967811 | 3.05E-12 | 1.66E-13 | -7.93 | 19.7766987 | -2.21E-01 | 123503709 | 123503832 | NC_000012.11 |

|                |          |          |       |            |           |           |           |              |
|----------------|----------|----------|-------|------------|-----------|-----------|-----------|--------------|
| cg19714347     | 3.07E-12 | 1.67E-13 | -7.93 | 19.7712021 | -1.41E-01 | 30175092  | 30175215  | NC_000006.11 |
| cg11346754     | 3.07E-12 | 1.68E-13 | -7.93 | 19.7694728 | -7.62E-02 | 105946772 | 105946895 | NC_000002.11 |
| cg22877570     | 3.08E-12 | 1.68E-13 | -7.93 | 19.7682965 | -1.58E-01 | 171175950 | 171176073 | NC_000003.11 |
| cg05442902     | 3.08E-12 | 1.68E-13 | -7.93 | 19.7668741 | -9.28E-02 | 21369010  | 21369133  | NC_000022.10 |
| cg02864638     | 3.08E-12 | 1.68E-13 | -7.93 | 19.7661922 | -1.78E-01 | 20840716  | 20840839  | NC_000017.10 |
| cg14911460     | 3.09E-12 | 1.69E-13 | -7.93 | 19.7643543 | -7.17E-02 | 30810852  | 30810975  | NC_000007.13 |
| cg10531864     | 3.11E-12 | 1.70E-13 | -7.93 | 19.7562243 | -4.55E-02 | 64014518  | 64014641  | NC_000011.9  |
| cg15504730     | 3.12E-12 | 1.70E-13 | -7.93 | 19.7554795 | -1.25E-01 | 98969199  | 98969322  | NC_000007.13 |
| cg09744759     | 3.13E-12 | 1.71E-13 | -7.92 | 19.7520482 | -7.51E-02 | 5469255   | 5469378   | NC_000007.13 |
| cg24500422     | 3.13E-12 | 1.71E-13 | -7.92 | 19.7511329 | -6.87E-02 | 31708278  | 31708401  | NC_000006.11 |
| cg05674737     | 3.13E-12 | 1.71E-13 | -7.92 | 19.7500888 | -5.74E-02 | 10723046  | 10723169  | NC_000006.11 |
| cg01561528     | 3.14E-12 | 1.71E-13 | -7.92 | 19.7486476 | -9.32E-02 | 156593698 | 156593821 | NC_000001.10 |
| cg06955158     | 3.14E-12 | 1.71E-13 | -7.92 | 19.7473893 | -5.65E-02 | 10249878  | 10250001  | NC_000005.9  |
| cg01229567     | 3.14E-12 | 1.71E-13 | -7.92 | 19.7470394 | -9.52E-02 | 1549818   | 1549941   | NC_000001.10 |
| cg00753924     | 3.14E-12 | 1.72E-13 | -7.92 | 19.7464968 | -1.56E-01 | 137298813 | 137298936 | NC_000009.11 |
| cg23164850     | 3.14E-12 | 1.72E-13 | -7.92 | 19.7457788 | -1.09E-01 | 79495348  | 79495471  | NC_000017.10 |
| cg09342417     | 3.14E-12 | 1.72E-13 | -7.92 | 19.7457466 | -1.69E-01 | 17715813  | 17715936  | NC_000010.10 |
| cg15172381     | 3.15E-12 | 1.72E-13 | -7.92 | 19.745038  | -7.48E-02 | 133404647 | 133404770 | NC_000012.11 |
| cg00314750     | 3.15E-12 | 1.72E-13 | -7.92 | 19.7443692 | -6.48E-02 | 107281821 | 107281944 | NC_000008.10 |
| cg24924502     | 3.16E-12 | 1.72E-13 | -7.92 | 19.7420839 | -1.70E-01 | 79109777  | 79109900  | NC_000017.10 |
| cg01554963     | 3.17E-12 | 1.73E-13 | -7.92 | 19.7377454 | -1.54E-01 | 773023    | 773146    | NC_000017.10 |
| cg25793692     | 3.17E-12 | 1.73E-13 | -7.92 | 19.7367414 | -3.09E-02 | 62538781  | 62538904  | NC_000010.10 |
| ch.10.1028651F | 3.17E-12 | 1.73E-13 | -7.92 | 19.7360123 | -5.77E-02 | 44969997  | 44970120  | NC_000010.10 |
| cg10721755     | 3.18E-12 | 1.74E-13 | -7.92 | 19.7353709 | -1.63E-01 | 211547951 | 211548074 | NC_000001.10 |
| cg27361011     | 3.18E-12 | 1.74E-13 | -7.92 | 19.7341411 | -9.51E-02 | 121280106 | 121280229 | NC_000002.11 |



|            |          |          |       |            |           |           |           |              |
|------------|----------|----------|-------|------------|-----------|-----------|-----------|--------------|
| cg14839808 | 3.18E-12 | 1.74E-13 | -7.92 | 19.7322752 | -5.24E-02 | 28343774  | 28343897  | NC_000012.11 |
| cg02171500 | 3.19E-12 | 1.74E-13 | -7.92 | 19.7319949 | -7.13E-02 | 67888269  | 67888392  | NC_000011.9  |
| cg15503799 | 3.19E-12 | 1.74E-13 | -7.92 | 19.7316437 | -5.06E-02 | 156737481 | 156737604 | NC_000001.10 |
| cg25843651 | 3.19E-12 | 1.74E-13 | -7.92 | 19.730429  | -1.06E-01 | 86329602  | 86329725  | NC_000015.9  |
| cg18526870 | 3.19E-12 | 1.75E-13 | -7.92 | 19.7290862 | -1.64E-01 | 234545177 | 234545300 | NC_000002.11 |
| cg21733911 | 3.20E-12 | 1.75E-13 | -7.92 | 19.7274862 | -6.75E-02 | 180397238 | 180397361 | NC_000003.11 |
| cg09829838 | 3.20E-12 | 1.75E-13 | -7.92 | 19.7261275 | -6.30E-02 | 42952307  | 42952430  | NC_000006.11 |
| cg04621997 | 3.21E-12 | 1.75E-13 | -7.92 | 19.7255274 | -1.79E-01 | 45357075  | 45357198  | NC_000010.10 |
| cg20775840 | 3.21E-12 | 1.76E-13 | -7.92 | 19.7237861 | -6.46E-02 | 151150431 | 151150554 | NC_000005.9  |
| cg16349093 | 3.21E-12 | 1.76E-13 | -7.92 | 19.7228227 | -2.00E-01 | 90485840  | 90485963  | NC_000005.9  |
| cg10498984 | 3.21E-12 | 1.76E-13 | -7.92 | 19.7225917 | -5.37E-02 | 28874827  | 28874950  | NC_000016.9  |
| cg21510892 | 3.23E-12 | 1.76E-13 | -7.92 | 19.7190795 | -4.52E-02 | 155604819 | 155604942 | NC_000007.13 |
| cg02893212 | 3.23E-12 | 1.77E-13 | -7.92 | 19.718577  | -1.25E-01 | 81375505  | 81375628  | NC_000004.11 |
| cg17028105 | 3.24E-12 | 1.77E-13 | -7.92 | 19.7148401 | -4.62E-02 | 238027783 | 238027906 | NC_000001.10 |
| cg16945415 | 3.24E-12 | 1.77E-13 | -7.92 | 19.7134781 | -1.47E-01 | 125980095 | 125980218 | NC_000003.11 |
| cg18838605 | 3.24E-12 | 1.77E-13 | -7.92 | 19.7133082 | -1.31E-01 | 185520416 | 185520539 | NC_000004.11 |
| cg01941018 | 3.24E-12 | 1.77E-13 | -7.92 | 19.7132181 | -6.85E-02 | 7125774   | 7125897   | NC_000012.11 |
| cg18691564 | 3.24E-12 | 1.78E-13 | -7.92 | 19.7130707 | -7.72E-02 | 43242911  | 43243034  | NC_000006.11 |
| cg01542384 | 3.25E-12 | 1.78E-13 | -7.92 | 19.7106373 | -1.59E-01 | 50284305  | 50284428  | NC_000003.11 |
| cg22541143 | 3.25E-12 | 1.78E-13 | -7.92 | 19.7103425 | -7.99E-02 | 84377292  | 84377415  | NC_000004.11 |
| cg12190057 | 3.25E-12 | 1.78E-13 | -7.92 | 19.7103335 | -5.92E-02 | 53469041  | 53469164  | NC_000016.9  |
| cg01604401 | 3.26E-12 | 1.78E-13 | -7.92 | 19.7083973 | -1.72E-01 | 36153186  | 36153309  | NC_000020.10 |
| cg23978657 | 3.26E-12 | 1.79E-13 | -7.92 | 19.7071427 | -1.07E-01 | 89664260  | 89664383  | NC_000001.10 |
| cg21426065 | 3.27E-12 | 1.79E-13 | -7.92 | 19.7048626 | -1.69E-01 | 31743986  | 31744109  | NC_000006.11 |
| cg09634659 | 3.27E-12 | 1.79E-13 | -7.92 | 19.7028113 | -1.69E-01 | 26678100  | 26678223  | NC_000001.10 |

|                 |          |          |       |            |           |           |           |              |
|-----------------|----------|----------|-------|------------|-----------|-----------|-----------|--------------|
| ch.17.10619372R | 3.28E-12 | 1.80E-13 | -7.92 | 19.7014808 | -5.40E-02 | 10678647  | 10678770  | NC_000017.10 |
| cg06231863      | 3.30E-12 | 1.81E-13 | -7.92 | 19.6948826 | -8.99E-02 | 67559939  | 67560062  | NC_000011.9  |
| cg00986910      | 3.30E-12 | 1.81E-13 | -7.91 | 19.6940171 | -1.76E-01 | 55450569  | 55450692  | NC_000003.11 |
| cg18513624      | 3.30E-12 | 1.81E-13 | -7.91 | 19.6938068 | -5.04E-02 | 19974307  | 19974430  | NC_000022.10 |
| cg09548403      | 3.31E-12 | 1.81E-13 | -7.91 | 19.6926935 | -7.89E-02 | 232840764 | 232840887 | NC_000001.10 |
| cg16482761      | 3.31E-12 | 1.81E-13 | -7.91 | 19.6924713 | -1.87E-01 | 138061348 | 138061471 | NC_000005.9  |
| cg26893787      | 3.31E-12 | 1.81E-13 | -7.91 | 19.6916334 | -1.24E-01 | 5838760   | 5838883   | NC_000019.9  |
| cg24137543      | 3.31E-12 | 1.81E-13 | -7.91 | 19.6913286 | -1.61E-01 | 140893634 | 140893757 | NC_000005.9  |
| cg14186336      | 3.31E-12 | 1.82E-13 | -7.91 | 19.691097  | -1.59E-01 | 124045139 | 124045262 | NC_000009.11 |
| cg11843502      | 3.31E-12 | 1.82E-13 | -7.91 | 19.6904074 | -5.49E-02 | 7843515   | 7843638   | NC_000001.10 |
| cg00492873      | 3.31E-12 | 1.82E-13 | -7.91 | 19.6900558 | -6.68E-02 | 35247496  | 35247619  | NC_000001.10 |
| cg09363618      | 3.32E-12 | 1.82E-13 | -7.91 | 19.6894931 | -5.27E-02 | 196045435 | 196045558 | NC_000003.11 |
| cg16362480      | 3.32E-12 | 1.82E-13 | -7.91 | 19.688304  | -9.23E-02 | 30077084  | 30077207  | NC_000016.9  |
| cg09729274      | 3.33E-12 | 1.83E-13 | -7.91 | 19.6853427 | -1.75E-01 | 102550720 | 102550843 | NC_000008.10 |
| cg16900604      | 3.33E-12 | 1.83E-13 | -7.91 | 19.685205  | -1.71E-01 | 208260036 | 208260159 | NC_000002.11 |
| cg09668030      | 3.33E-12 | 1.83E-13 | -7.91 | 19.6833657 | -2.20E-01 | 27852173  | 27852296  | NC_000001.10 |
| cg03873049      | 3.34E-12 | 1.83E-13 | -7.91 | 19.6817819 | -1.48E-01 | 149625194 | 149625317 | NC_000005.9  |
| cg06758255      | 3.36E-12 | 1.84E-13 | -7.91 | 19.677055  | -2.39E-01 | 52532750  | 52532873  | NC_000016.9  |
| cg15825304      | 3.36E-12 | 1.84E-13 | -7.91 | 19.676808  | -1.37E-01 | 241505201 | 241505324 | NC_000002.11 |
| cg17239678      | 3.36E-12 | 1.84E-13 | -7.91 | 19.6754018 | -6.36E-02 | 38273928  | 38274051  | NC_000001.10 |
| cg14446406      | 3.36E-12 | 1.84E-13 | -7.91 | 19.675363  | -1.62E-01 | 93919335  | 93919458  | NC_000009.11 |
| cg14965524      | 3.36E-12 | 1.84E-13 | -7.91 | 19.675068  | -9.64E-02 | 10541267  | 10541390  | NC_000019.9  |
| cg07144730      | 3.37E-12 | 1.85E-13 | -7.91 | 19.6732428 | -7.93E-02 | 151344076 | 151344199 | NC_000002.11 |
| cg23172853      | 3.37E-12 | 1.85E-13 | -7.91 | 19.6731278 | -1.70E-01 | 231842206 | 231842329 | NC_000001.10 |
| cg13393785      | 3.37E-12 | 1.85E-13 | -7.91 | 19.671262  | -1.38E-01 | 8317932   | 8318055   | NC_000019.9  |

|            |          |          |       |            |           |           |           |              |
|------------|----------|----------|-------|------------|-----------|-----------|-----------|--------------|
| cg21806747 | 3.37E-12 | 1.85E-13 | -7.91 | 19.6711707 | -1.60E-01 | 96089695  | 96089818  | NC_000008.10 |
| cg15153383 | 3.38E-12 | 1.86E-13 | -7.91 | 19.6692485 | -4.02E-02 | 57770620  | 57770743  | NC_000016.9  |
| cg00273813 | 3.39E-12 | 1.86E-13 | -7.91 | 19.6650122 | -3.79E-02 | 18477993  | 18478116  | NC_000020.10 |
| cg26055488 | 3.40E-12 | 1.87E-13 | -7.91 | 19.663801  | -1.76E-01 | 76993618  | 76993741  | NC_000017.10 |
| cg13447566 | 3.40E-12 | 1.87E-13 | -7.91 | 19.6632001 | -1.73E-01 | 133801544 | 133801667 | NC_000009.11 |
| cg06549530 | 3.40E-12 | 1.87E-13 | -7.91 | 19.6623721 | -6.22E-02 | 125755119 | 125755242 | NC_000010.10 |
| cg16182447 | 3.41E-12 | 1.87E-13 | -7.91 | 19.6615341 | -1.79E-01 | 69264617  | 69264740  | NC_000011.9  |
| cg02131018 | 3.41E-12 | 1.87E-13 | -7.91 | 19.6601858 | -1.44E-01 | 73723546  | 73723669  | NC_000003.11 |
| cg08158518 | 3.41E-12 | 1.87E-13 | -7.91 | 19.6598703 | -1.82E-01 | 140866589 | 140866712 | NC_000003.11 |
| cg10795659 | 3.42E-12 | 1.88E-13 | -7.91 | 19.6576086 | -2.16E-01 | 72415998  | 72416121  | NC_000005.9  |
| cg13445177 | 3.42E-12 | 1.88E-13 | -7.91 | 19.6563262 | -1.60E-01 | 151967021 | 151967144 | NC_000001.10 |
| cg02780269 | 3.43E-12 | 1.89E-13 | -7.91 | 19.6531041 | -1.80E-01 | 80292252  | 80292375  | NC_000017.10 |
| cg17038235 | 3.44E-12 | 1.89E-13 | -7.91 | 19.6524135 | -1.35E-01 | 172370524 | 172370647 | NC_000005.9  |
| cg18830978 | 3.44E-12 | 1.89E-13 | -7.91 | 19.6510785 | -7.98E-02 | 45563598  | 45563721  | NC_000013.10 |
| cg08753297 | 3.44E-12 | 1.89E-13 | -7.91 | 19.6508862 | -3.73E-02 | 56716612  | 56716735  | NC_000006.11 |
| cg19008858 | 3.44E-12 | 1.89E-13 | -7.91 | 19.6506933 | -6.95E-02 | 72208433  | 72208556  | NC_000017.10 |
| cg21331510 | 3.44E-12 | 1.89E-13 | -7.91 | 19.6500798 | -1.40E-01 | 45597727  | 45597850  | NC_000022.10 |
| cg16371860 | 3.45E-12 | 1.90E-13 | -7.91 | 19.6482184 | -7.86E-02 | 42880448  | 42880571  | NC_000021.8  |
| cg26028571 | 3.45E-12 | 1.90E-13 | -7.91 | 19.6474959 | -1.36E-01 | 38172403  | 38172526  | NC_000022.10 |
| cg22685903 | 3.46E-12 | 1.90E-13 | -7.91 | 19.6461325 | -1.72E-01 | 76856176  | 76856299  | NC_000011.9  |
| cg19255136 | 3.46E-12 | 1.90E-13 | -7.91 | 19.6460232 | -1.09E-01 | 179529599 | 179529722 | NC_000003.11 |
| cg20631044 | 3.46E-12 | 1.90E-13 | -7.91 | 19.6446882 | -9.96E-02 | 41255890  | 41256013  | NC_000019.9  |
| cg14001360 | 3.46E-12 | 1.90E-13 | -7.91 | 19.6444383 | -6.11E-02 | 28113654  | 28113777  | NC_000002.11 |
| cg22172610 | 3.46E-12 | 1.90E-13 | -7.91 | 19.6437543 | -1.44E-01 | 79141661  | 79141784  | NC_000005.9  |
| cg27588093 | 3.46E-12 | 1.91E-13 | -7.91 | 19.6432732 | -1.45E-01 | 3276413   | 3276536   | NC_000001.10 |

|               |          |          |       |            |           |           |           |              |
|---------------|----------|----------|-------|------------|-----------|-----------|-----------|--------------|
| ch.19.565153F | 3.47E-12 | 1.91E-13 | -7.91 | 19.6425795 | -2.29E-02 | 12824987  | 12825110  | NC_000019.9  |
| cg14594187    | 3.47E-12 | 1.91E-13 | -7.91 | 19.6407422 | -1.52E-01 | 124498961 | 124499084 | NC_000009.11 |
| cg24083923    | 3.48E-12 | 1.91E-13 | -7.91 | 19.639196  | -7.22E-02 | 56123522  | 56123645  | NC_000012.11 |
| ch.6.1080076F | 3.48E-12 | 1.91E-13 | -7.91 | 19.6385646 | -5.92E-02 | 43570680  | 43570803  | NC_000006.11 |
| cg08357125    | 3.48E-12 | 1.92E-13 | -7.91 | 19.6381691 | -8.03E-02 | 73404999  | 73405122  | NC_000002.11 |
| cg24331384    | 3.48E-12 | 1.92E-13 | -7.91 | 19.6370397 | -8.35E-02 | 110337835 | 110337958 | NC_000012.11 |
| cg08120226    | 3.49E-12 | 1.92E-13 | -7.9  | 19.6338641 | -1.13E-01 | 195531633 | 195531756 | NC_000003.11 |
| cg08945450    | 3.50E-12 | 1.92E-13 | -7.9  | 19.6333554 | -9.55E-02 | 11795905  | 11796028  | NC_000001.10 |
| cg23359385    | 3.50E-12 | 1.93E-13 | -7.9  | 19.6320958 | -1.25E-01 | 145759815 | 145759938 | NC_000008.10 |
| cg08797444    | 3.50E-12 | 1.93E-13 | -7.9  | 19.6319229 | -1.59E-01 | 116384079 | 116384202 | NC_000010.10 |
| cg08336938    | 3.51E-12 | 1.93E-13 | -7.9  | 19.629397  | -1.87E-01 | 126703882 | 126704005 | NC_000011.9  |
| cg01903799    | 3.52E-12 | 1.94E-13 | -7.9  | 19.6272261 | -1.49E-01 | 148467709 | 148467832 | NC_000004.11 |
| cg23250795    | 3.52E-12 | 1.94E-13 | -7.9  | 19.6264932 | -2.36E-01 | 130059791 | 130059914 | NC_000011.9  |
| cg15695155    | 3.53E-12 | 1.95E-13 | -7.9  | 19.6218686 | -1.56E-01 | 121973871 | 121973994 | NC_000012.11 |
| cg02871021    | 3.54E-12 | 1.95E-13 | -7.9  | 19.6216394 | -1.58E-01 | 10715715  | 10715838  | NC_000011.9  |
| cg03468382    | 3.54E-12 | 1.95E-13 | -7.9  | 19.6208969 | -9.47E-02 | 94353952  | 94354075  | NC_000010.10 |
| cg14613470    | 3.54E-12 | 1.95E-13 | -7.9  | 19.6204149 | -1.21E-01 | 137071799 | 137071922 | NC_000005.9  |
| cg09310383    | 3.55E-12 | 1.95E-13 | -7.9  | 19.6178728 | -3.08E-02 | 37218128  | 37218251  | NC_000003.11 |
| cg24937877    | 3.55E-12 | 1.96E-13 | -7.9  | 19.6176568 | -9.91E-02 | 11444066  | 11444189  | NC_000001.10 |
| cg11831006    | 3.55E-12 | 1.96E-13 | -7.9  | 19.6173727 | -1.59E-01 | 125100635 | 125100758 | NC_000003.11 |
| cg16514513    | 3.56E-12 | 1.96E-13 | -7.9  | 19.6158119 | -9.81E-02 | 48263159  | 48263282  | NC_000017.10 |
| cg14475772    | 3.56E-12 | 1.96E-13 | -7.9  | 19.6157898 | -7.13E-02 | 150207136 | 150207259 | NC_000001.10 |
| cg01558215    | 3.56E-12 | 1.96E-13 | -7.9  | 19.6147423 | -1.42E-01 | 31778815  | 31778938  | NC_000013.10 |
| cg08382072    | 3.56E-12 | 1.96E-13 | -7.9  | 19.6147309 | -1.66E-01 | 10521309  | 10521432  | NC_000006.11 |
| cg10299448    | 3.56E-12 | 1.96E-13 | -7.9  | 19.6146429 | -6.32E-02 | 10018532  | 10018655  | NC_000017.10 |

|            |          |          |      |            |           |           |           |              |
|------------|----------|----------|------|------------|-----------|-----------|-----------|--------------|
| cg00904258 | 3.56E-12 | 1.96E-13 | -7.9 | 19.6144359 | -1.75E-01 | 968194    | 968317    | NC_000007.13 |
| cg16847396 | 3.57E-12 | 1.97E-13 | -7.9 | 19.611539  | -1.07E-01 | 10489236  | 10489359  | NC_000008.10 |
| cg09195081 | 3.57E-12 | 1.97E-13 | -7.9 | 19.609999  | -5.89E-02 | 24951395  | 24951518  | NC_000022.10 |
| cg10384569 | 3.57E-12 | 1.97E-13 | -7.9 | 19.6099459 | -9.27E-02 | 50000586  | 50000709  | NC_000019.9  |
| cg22352499 | 3.57E-12 | 1.97E-13 | -7.9 | 19.6098699 | -1.73E-01 | 30812642  | 30812765  | NC_000022.10 |
| cg22996605 | 3.57E-12 | 1.97E-13 | -7.9 | 19.609721  | -5.46E-02 | 43138883  | 43139006  | NC_000006.11 |
| cg06233503 | 3.58E-12 | 1.98E-13 | -7.9 | 19.6077415 | -1.68E-01 | 2812674   | 2812797   | NC_000011.9  |
| cg12210836 | 3.58E-12 | 1.98E-13 | -7.9 | 19.6074143 | -1.65E-01 | 131481003 | 131481126 | NC_000006.11 |
| cg09652509 | 3.58E-12 | 1.98E-13 | -7.9 | 19.6071621 | -1.33E-01 | 181252554 | 181252677 | NC_000003.11 |
| cg07703358 | 3.59E-12 | 1.98E-13 | -7.9 | 19.6062551 | -5.06E-02 | 138702117 | 138702240 | NC_000007.13 |
| cg03754143 | 3.59E-12 | 1.98E-13 | -7.9 | 19.6042651 | -6.12E-02 | 1981548   | 1981671   | NC_000001.10 |
| cg08306303 | 3.60E-12 | 1.99E-13 | -7.9 | 19.6021816 | -1.63E-01 | 119567761 | 119567884 | NC_000011.9  |
| cg16207110 | 3.62E-12 | 2.00E-13 | -7.9 | 19.5967235 | -1.05E-01 | 37024401  | 37024524  | NC_000017.10 |
| cg16037981 | 3.62E-12 | 2.00E-13 | -7.9 | 19.5966032 | -1.83E-01 | 2700093   | 2700216   | NC_000017.10 |
| cg20868668 | 3.63E-12 | 2.01E-13 | -7.9 | 19.5924766 | -9.45E-02 | 100435035 | 100435158 | NC_000001.10 |
| cg17864646 | 3.64E-12 | 2.01E-13 | -7.9 | 19.591513  | -1.22E-01 | 80297148  | 80297271  | NC_000017.10 |
| cg02916470 | 3.65E-12 | 2.01E-13 | -7.9 | 19.5889971 | -6.45E-02 | 17659454  | 17659577  | NC_000010.10 |
| cg03737424 | 3.65E-12 | 2.01E-13 | -7.9 | 19.5881954 | -1.44E-01 | 67550511  | 67550634  | NC_000016.9  |
| cg13609040 | 3.65E-12 | 2.02E-13 | -7.9 | 19.5869785 | -9.41E-02 | 118960340 | 118960463 | NC_000003.11 |
| cg10616672 | 3.66E-12 | 2.02E-13 | -7.9 | 19.585772  | -6.95E-02 | 32112379  | 32112502  | NC_000012.11 |
| cg01733904 | 3.66E-12 | 2.02E-13 | -7.9 | 19.5856155 | -2.16E-01 | 110493045 | 110493168 | NC_000013.10 |
| cg11481582 | 3.66E-12 | 2.02E-13 | -7.9 | 19.5842615 | -1.92E-01 | 74080805  | 74080928  | NC_000010.10 |
| cg03910767 | 3.68E-12 | 2.03E-13 | -7.9 | 19.5799216 | -7.22E-02 | 110626977 | 110627100 | NC_000001.10 |
| cg03703171 | 3.68E-12 | 2.03E-13 | -7.9 | 19.5796217 | -1.82E-01 | 113875226 | 113875349 | NC_000002.11 |
| cg16714752 | 3.68E-12 | 2.03E-13 | -7.9 | 19.5795304 | -1.04E-01 | 39368184  | 39368307  | NC_000004.11 |

|                 |          |          |       |            |           |           |           |              |
|-----------------|----------|----------|-------|------------|-----------|-----------|-----------|--------------|
| cg02064724      | 3.68E-12 | 2.03E-13 | -7.9  | 19.579207  | -2.05E-01 | 74179953  | 74180076  | NC_000014.8  |
| cg05187247      | 3.68E-12 | 2.03E-13 | -7.9  | 19.5783296 | -1.61E-01 | 101455260 | 101455383 | NC_000014.8  |
| cg20491838      | 3.69E-12 | 2.04E-13 | -7.9  | 19.5777851 | -6.23E-02 | 1611451   | 1611574   | NC_000006.11 |
| cg04229842      | 3.69E-12 | 2.04E-13 | -7.9  | 19.5769037 | -5.26E-02 | 55038233  | 55038356  | NC_000017.10 |
| cg01965822      | 3.69E-12 | 2.04E-13 | -7.9  | 19.5768824 | -5.11E-02 | 55322307  | 55322430  | NC_000007.13 |
| cg19081843      | 3.69E-12 | 2.04E-13 | -7.9  | 19.5759618 | -8.82E-02 | 68606654  | 68606777  | NC_000011.9  |
| cg01152073      | 3.70E-12 | 2.04E-13 | -7.9  | 19.5749343 | -6.78E-02 | 179246575 | 179246698 | NC_000005.9  |
| cg13926833      | 3.70E-12 | 2.04E-13 | -7.89 | 19.5741581 | -1.11E-01 | 109274429 | 109274552 | NC_000006.11 |
| cg14535884      | 3.71E-12 | 2.05E-13 | -7.89 | 19.5720748 | -6.93E-02 | 117349621 | 117349744 | NC_000009.11 |
| cg01799338      | 3.71E-12 | 2.05E-13 | -7.89 | 19.5720201 | -5.66E-02 | 36348937  | 36349060  | NC_000001.10 |
| cg24327877      | 3.72E-12 | 2.05E-13 | -7.89 | 19.5691769 | -1.18E-01 | 131222276 | 131222399 | NC_000006.11 |
| cg25025455      | 3.72E-12 | 2.06E-13 | -7.89 | 19.5683111 | -3.55E-02 | 134204912 | 134205035 | NC_000003.11 |
| cg27527018      | 3.72E-12 | 2.06E-13 | -7.89 | 19.5671213 | -1.12E-01 | 149570040 | 149570163 | NC_000007.13 |
| cg24826392      | 3.72E-12 | 2.06E-13 | -7.89 | 19.5671035 | -4.19E-02 | 73964445  | 73964568  | NC_000002.11 |
| cg17868893      | 3.73E-12 | 2.06E-13 | -7.89 | 19.5663883 | -1.87E-01 | 201217491 | 201217614 | NC_000002.11 |
| cg22797884      | 3.73E-12 | 2.06E-13 | -7.89 | 19.5659144 | -1.09E-01 | 37800967  | 37801090  | NC_000019.9  |
| cg18337363      | 3.74E-12 | 2.07E-13 | -7.89 | 19.5616524 | -1.59E-01 | 52569053  | 52569176  | NC_000003.11 |
| cg18912103      | 3.74E-12 | 2.07E-13 | -7.89 | 19.5611019 | -1.38E-01 | 2944692   | 2944815   | NC_000004.11 |
| ch.16.47020004F | 3.75E-12 | 2.07E-13 | -7.89 | 19.5606202 | -5.97E-02 | 48462503  | 48462626  | NC_000016.9  |
| cg15754878      | 3.75E-12 | 2.07E-13 | -7.89 | 19.5605005 | -2.07E-01 | 174917344 | 174917467 | NC_000002.11 |
| cg26608221      | 3.75E-12 | 2.07E-13 | -7.89 | 19.5603387 | -3.61E-02 | 74692293  | 74692416  | NC_000002.11 |
| cg26804772      | 3.75E-12 | 2.07E-13 | -7.89 | 19.5598267 | -1.30E-01 | 68084465  | 68084588  | NC_000001.10 |
| cg09311964      | 3.76E-12 | 2.08E-13 | -7.89 | 19.5578962 | -7.65E-02 | 40831349  | 40831472  | NC_000017.10 |
| cg11417612      | 3.76E-12 | 2.08E-13 | -7.89 | 19.5567376 | -1.45E-01 | 107779567 | 107779690 | NC_000012.11 |
| cg02709840      | 3.76E-12 | 2.08E-13 | -7.89 | 19.5564133 | -7.41E-02 | 67062875  | 67062998  | NC_000016.9  |

|                 |          |          |       |            |           |           |           |              |
|-----------------|----------|----------|-------|------------|-----------|-----------|-----------|--------------|
| cg19092396      | 3.76E-12 | 2.08E-13 | -7.89 | 19.5563445 | -1.34E-01 | 1143751   | 1143874   | NC_000001.10 |
| cg22858169      | 3.77E-12 | 2.08E-13 | -7.89 | 19.5546949 | -1.19E-01 | 128832645 | 128832768 | NC_000007.13 |
| cg14841540      | 3.77E-12 | 2.09E-13 | -7.89 | 19.5536896 | -2.04E-01 | 90427858  | 90427981  | NC_000001.10 |
| ch.2.8786390R   | 3.77E-12 | 2.09E-13 | -7.89 | 19.5532987 | -3.12E-02 | 8868939   | 8869062   | NC_000002.11 |
| cg11326613      | 3.77E-12 | 2.09E-13 | -7.89 | 19.5532589 | -4.72E-02 | 35657478  | 35657601  | NC_000009.11 |
| cg03950253      | 3.77E-12 | 2.09E-13 | -7.89 | 19.552995  | -1.71E-01 | 134345856 | 134345979 | NC_000007.13 |
| cg04604708      | 3.77E-12 | 2.09E-13 | -7.89 | 19.5520416 | -1.89E-01 | 137638053 | 137638176 | NC_000007.13 |
| cg01165442      | 3.78E-12 | 2.09E-13 | -7.89 | 19.5519695 | -1.51E-01 | 74465188  | 74465311  | NC_000004.11 |
| cg21531126      | 3.78E-12 | 2.09E-13 | -7.89 | 19.5518377 | -1.60E-01 | 40361439  | 40361562  | NC_000006.11 |
| ch.8.123133581F | 3.79E-12 | 2.10E-13 | -7.89 | 19.5482558 | -5.51E-02 | 123064400 | 123064523 | NC_000008.10 |
| cg19607021      | 3.80E-12 | 2.10E-13 | -7.89 | 19.5459824 | -1.56E-01 | 139104833 | 139104956 | NC_000005.9  |
| cg25324164      | 3.80E-12 | 2.10E-13 | -7.89 | 19.5454576 | -1.49E-01 | 61598330  | 61598453  | NC_000011.9  |
| cg07905054      | 3.80E-12 | 2.10E-13 | -7.89 | 19.5454322 | -1.41E-01 | 102272136 | 102272259 | NC_000012.11 |
| cg24704396      | 3.80E-12 | 2.11E-13 | -7.89 | 19.5448315 | -1.49E-01 | 134617238 | 134617361 | NC_000010.10 |
| ch.17.2196713R  | 3.81E-12 | 2.11E-13 | -7.89 | 19.5422418 | -2.96E-02 | 79124036  | 79124159  | NC_000017.10 |
| cg07554496      | 3.81E-12 | 2.11E-13 | -7.89 | 19.5417114 | -1.89E-01 | 240020152 | 240020275 | NC_000002.11 |
| cg18272538      | 3.82E-12 | 2.12E-13 | -7.89 | 19.5390849 | -1.28E-01 | 210425852 | 210425975 | NC_000001.10 |
| cg11837267      | 3.85E-12 | 2.13E-13 | -7.89 | 19.5320353 | -6.95E-02 | 24898889  | 24899012  | NC_000014.8  |
| cg20222562      | 3.85E-12 | 2.14E-13 | -7.89 | 19.5308491 | -1.73E-01 | 113993995 | 113994118 | NC_000006.11 |
| cg08508763      | 3.86E-12 | 2.14E-13 | -7.89 | 19.5297548 | -1.05E-01 | 42201380  | 42201503  | NC_000003.11 |
| cg09015246      | 3.86E-12 | 2.14E-13 | -7.89 | 19.5286971 | -1.97E-01 | 10971105  | 10971228  | NC_000016.9  |
| cg26412374      | 3.86E-12 | 2.14E-13 | -7.89 | 19.5283123 | -1.54E-01 | 63437874  | 63437997  | NC_000011.9  |
| cg07164659      | 3.86E-12 | 2.14E-13 | -7.89 | 19.5277418 | -9.94E-02 | 22526889  | 22527012  | NC_000008.10 |
| cg07641807      | 3.87E-12 | 2.14E-13 | -7.89 | 19.5270306 | -1.26E-01 | 92001959  | 92002082  | NC_000013.10 |
| cg10089193      | 3.87E-12 | 2.14E-13 | -7.89 | 19.5268319 | -1.04E-01 | 1140939   | 1141062   | NC_000016.9  |

|            |          |          |       |            |           |           |           |              |
|------------|----------|----------|-------|------------|-----------|-----------|-----------|--------------|
| cg02988312 | 3.87E-12 | 2.15E-13 | -7.89 | 19.5256973 | -2.58E-01 | 1342161   | 1342284   | NC_000004.11 |
| cg04878119 | 3.87E-12 | 2.15E-13 | -7.89 | 19.5253775 | -6.10E-02 | 97558075  | 97558198  | NC_000007.13 |
| cg09935766 | 3.87E-12 | 2.15E-13 | -7.89 | 19.5248008 | -3.55E-02 | 25219892  | 25220015  | NC_000007.13 |
| cg14919082 | 3.87E-12 | 2.15E-13 | -7.89 | 19.5244509 | -1.60E-01 | 54901055  | 54901178  | NC_000002.11 |
| cg17720231 | 3.88E-12 | 2.15E-13 | -7.89 | 19.5237366 | -7.90E-02 | 159915374 | 159915497 | NC_000001.10 |
| cg19898668 | 3.88E-12 | 2.15E-13 | -7.89 | 19.5231305 | -7.69E-02 | 23356370  | 23356493  | NC_000014.8  |
| cg05771157 | 3.89E-12 | 2.16E-13 | -7.89 | 19.5200871 | -1.75E-01 | 15595999  | 15596122  | NC_000016.9  |
| cg00050872 | 3.89E-12 | 2.16E-13 | -7.89 | 19.5190085 | -9.63E-02 | 128092224 | 128092347 | NC_000007.13 |
| cg04829830 | 3.90E-12 | 2.16E-13 | -7.89 | 19.5184651 | -1.60E-01 | 105339549 | 105339672 | NC_000014.8  |
| cg15073462 | 3.90E-12 | 2.16E-13 | -7.89 | 19.5175946 | -6.13E-02 | 172469117 | 172469240 | NC_000003.11 |
| cg05048402 | 3.90E-12 | 2.17E-13 | -7.89 | 19.5166937 | -1.33E-01 | 42282128  | 42282251  | NC_000006.11 |
| cg08379212 | 3.90E-12 | 2.17E-13 | -7.89 | 19.5161426 | -5.00E-02 | 97803058  | 97803181  | NC_000010.10 |
| cg18628646 | 3.90E-12 | 2.17E-13 | -7.89 | 19.5159515 | -1.70E-01 | 184908739 | 184908862 | NC_000004.11 |
| cg22230584 | 3.90E-12 | 2.17E-13 | -7.89 | 19.5159438 | -6.11E-02 | 37011528  | 37011651  | NC_000017.10 |
| cg03340026 | 3.91E-12 | 2.17E-13 | -7.89 | 19.514786  | -1.24E-01 | 1403530   | 1403653   | NC_000019.9  |
| cg13127386 | 3.91E-12 | 2.17E-13 | -7.88 | 19.5132714 | -1.52E-01 | 51818768  | 51818891  | NC_000012.11 |
| cg03080336 | 3.92E-12 | 2.18E-13 | -7.88 | 19.5120159 | -1.90E-01 | 186033378 | 186033501 | NC_000004.11 |
| cg27016579 | 3.92E-12 | 2.18E-13 | -7.88 | 19.5113434 | -1.26E-01 | 168778028 | 168778151 | NC_000005.9  |
| cg01759437 | 3.93E-12 | 2.18E-13 | -7.88 | 19.5096495 | -4.21E-02 | 44925080  | 44925203  | NC_000007.13 |
| cg11909975 | 3.93E-12 | 2.18E-13 | -7.88 | 19.5081714 | -1.34E-01 | 128159058 | 128159181 | NC_000002.11 |
| cg17404403 | 3.94E-12 | 2.19E-13 | -7.88 | 19.5065777 | -6.60E-02 | 110737017 | 110737140 | NC_000004.11 |
| cg16033723 | 3.94E-12 | 2.19E-13 | -7.88 | 19.5054348 | -1.57E-01 | 31402883  | 31403006  | NC_000003.11 |
| cg15298286 | 3.95E-12 | 2.19E-13 | -7.88 | 19.5044162 | -1.63E-01 | 62075324  | 62075447  | NC_000017.10 |
| cg02328326 | 3.95E-12 | 2.19E-13 | -7.88 | 19.504015  | -1.66E-01 | 68038930  | 68039053  | NC_000015.9  |
| cg17516156 | 3.95E-12 | 2.19E-13 | -7.88 | 19.5038843 | -1.54E-01 | 191207820 | 191207943 | NC_000002.11 |



|                 |          |          |       |            |           |           |           |              |
|-----------------|----------|----------|-------|------------|-----------|-----------|-----------|--------------|
| cg19884658      | 3.95E-12 | 2.20E-13 | -7.88 | 19.5035885 | -1.81E-01 | 6664268   | 6664391   | NC_000001.10 |
| cg05551922      | 3.95E-12 | 2.20E-13 | -7.88 | 19.5028296 | -1.14E-01 | 49396232  | 49396355  | NC_000003.11 |
| cg01902036      | 3.96E-12 | 2.20E-13 | -7.88 | 19.500206  | -1.44E-01 | 80551401  | 80551524  | NC_000007.13 |
| ch.14.71046539R | 3.97E-12 | 2.21E-13 | -7.88 | 19.4968537 | -4.89E-02 | 71976786  | 71976909  | NC_000014.8  |
| cg16547869      | 3.99E-12 | 2.22E-13 | -7.88 | 19.4932505 | -1.49E-01 | 130578379 | 130578502 | NC_000005.9  |
| cg02721693      | 3.99E-12 | 2.22E-13 | -7.88 | 19.4928365 | -1.78E-01 | 182922705 | 182922828 | NC_000001.10 |
| cg12846656      | 3.99E-12 | 2.22E-13 | -7.88 | 19.4923443 | -1.78E-01 | 72683866  | 72683989  | NC_000005.9  |
| cg10718608      | 4.00E-12 | 2.23E-13 | -7.88 | 19.4899706 | -1.75E-01 | 19438221  | 19438344  | NC_000017.10 |
| ch.1.89724558F  | 4.00E-12 | 2.23E-13 | -7.88 | 19.4899324 | -6.05E-02 | 89951970  | 89952093  | NC_000001.10 |
| cg02678414      | 4.01E-12 | 2.23E-13 | -7.88 | 19.4879912 | -1.29E-01 | 2209840   | 2209963   | NC_000016.9  |
| cg04285710      | 4.01E-12 | 2.23E-13 | -7.88 | 19.4872907 | -1.54E-01 | 74891564  | 74891687  | NC_000001.10 |
| cg25385366      | 4.02E-12 | 2.23E-13 | -7.88 | 19.4859028 | -9.30E-02 | 43809360  | 43809483  | NC_000021.8  |
| cg12825880      | 4.02E-12 | 2.24E-13 | -7.88 | 19.4843169 | -2.44E-02 | 69455671  | 69455794  | NC_000011.9  |
| cg03116409      | 4.02E-12 | 2.24E-13 | -7.88 | 19.484045  | -1.61E-01 | 66042554  | 66042677  | NC_000012.11 |
| cg05955210      | 4.03E-12 | 2.24E-13 | -7.88 | 19.4829068 | -1.45E-01 | 38846698  | 38846821  | NC_000005.9  |
| cg07126783      | 4.03E-12 | 2.24E-13 | -7.88 | 19.4818887 | -1.93E-01 | 78800767  | 78800890  | NC_000017.10 |
| cg23991055      | 4.05E-12 | 2.25E-13 | -7.88 | 19.4772524 | -7.46E-02 | 64880626  | 64880749  | NC_000011.9  |
| cg25765569      | 4.06E-12 | 2.26E-13 | -7.88 | 19.4749196 | -5.12E-02 | 117175636 | 117175759 | NC_000012.11 |
| cg24280607      | 4.06E-12 | 2.26E-13 | -7.88 | 19.4742159 | -8.37E-02 | 41709584  | 41709707  | NC_000015.9  |
| cg16236228      | 4.07E-12 | 2.26E-13 | -7.88 | 19.4727954 | -1.79E-01 | 49205158  | 49205281  | NC_000012.11 |
| cg18879300      | 4.07E-12 | 2.27E-13 | -7.88 | 19.4717327 | -1.01E-01 | 17446768  | 17446891  | NC_000001.10 |
| cg06772221      | 4.08E-12 | 2.27E-13 | -7.88 | 19.4704537 | -1.55E-01 | 134062192 | 134062315 | NC_000008.10 |
| cg24207698      | 4.08E-12 | 2.27E-13 | -7.88 | 19.4703209 | -1.69E-01 | 166811308 | 166811431 | NC_000002.11 |
| cg07345934      | 4.08E-12 | 2.27E-13 | -7.88 | 19.4685202 | -2.46E-01 | 31845943  | 31846066  | NC_000001.10 |
| cg02952078      | 4.09E-12 | 2.28E-13 | -7.88 | 19.4669555 | -7.98E-02 | 205419204 | 205419327 | NC_000001.10 |

|                 |          |          |       |            |           |           |           |              |
|-----------------|----------|----------|-------|------------|-----------|-----------|-----------|--------------|
| cg06762457      | 4.10E-12 | 2.28E-13 | -7.88 | 19.4651346 | -1.59E-01 | 149806635 | 149806758 | NC_000006.11 |
| cg11641370      | 4.10E-12 | 2.28E-13 | -7.88 | 19.4644314 | -1.07E-01 | 145700190 | 145700313 | NC_000008.10 |
| cg03723907      | 4.10E-12 | 2.29E-13 | -7.88 | 19.4638342 | -1.20E-01 | 61262350  | 61262473  | NC_000005.9  |
| cg20389981      | 4.10E-12 | 2.29E-13 | -7.88 | 19.4638073 | -7.99E-02 | 128432280 | 128432403 | NC_000007.13 |
| cg04852977      | 4.10E-12 | 2.29E-13 | -7.88 | 19.4633263 | -1.23E-01 | 104510831 | 104510954 | NC_000008.10 |
| cg20154287      | 4.11E-12 | 2.29E-13 | -7.88 | 19.4623849 | -1.08E-01 | 1267350   | 1267473   | NC_000019.9  |
| cg13791379      | 4.11E-12 | 2.29E-13 | -7.88 | 19.4612762 | -1.68E-01 | 228528979 | 228529102 | NC_000001.10 |
| cg18883317      | 4.12E-12 | 2.30E-13 | -7.88 | 19.4586861 | -1.49E-01 | 6349400   | 6349523   | NC_000005.9  |
| cg26161816      | 4.13E-12 | 2.30E-13 | -7.88 | 19.4568504 | -1.69E-01 | 7414043   | 7414166   | NC_000019.9  |
| cg15681239      | 4.13E-12 | 2.30E-13 | -7.88 | 19.4568006 | -1.91E-01 | 38080203  | 38080326  | NC_000003.11 |
| ch.22.740407F   | 4.14E-12 | 2.31E-13 | -7.88 | 19.4549105 | -2.45E-02 | 41649341  | 41649464  | NC_000022.10 |
| ch.22.728807R   | 4.14E-12 | 2.31E-13 | -7.87 | 19.4543339 | -6.30E-02 | 41365631  | 41365754  | NC_000022.10 |
| cg20388732      | 4.15E-12 | 2.31E-13 | -7.87 | 19.4527366 | -2.44E-01 | 40439433  | 40439556  | NC_000017.10 |
| cg21125112      | 4.15E-12 | 2.31E-13 | -7.87 | 19.4525947 | -1.32E-01 | 109243325 | 109243448 | NC_000006.11 |
| cg00032246      | 4.15E-12 | 2.31E-13 | -7.87 | 19.4524787 | -1.39E-01 | 33913953  | 33914076  | NC_000017.10 |
| cg16178855      | 4.15E-12 | 2.31E-13 | -7.87 | 19.4523985 | -1.45E-01 | 56269979  | 56270102  | NC_000020.10 |
| cg12762029      | 4.15E-12 | 2.31E-13 | -7.87 | 19.451866  | -8.23E-02 | 119191624 | 119191747 | NC_000011.9  |
| cg16058607      | 4.15E-12 | 2.32E-13 | -7.87 | 19.4510551 | -6.33E-02 | 60298730  | 60298853  | NC_000015.9  |
| cg03574306      | 4.15E-12 | 2.32E-13 | -7.87 | 19.4507642 | -9.92E-02 | 85470662  | 85470785  | NC_000016.9  |
| cg16897462      | 4.15E-12 | 2.32E-13 | -7.87 | 19.450527  | -1.66E-01 | 77910840  | 77910963  | NC_000017.10 |
| ch.2.154083652F | 4.16E-12 | 2.32E-13 | -7.87 | 19.4497285 | -8.26E-02 | 154375406 | 154375529 | NC_000002.11 |
| cg08917664      | 4.16E-12 | 2.32E-13 | -7.87 | 19.4494995 | -1.70E-01 | 147052445 | 147052568 | NC_000001.10 |
| cg04915300      | 4.16E-12 | 2.32E-13 | -7.87 | 19.4492096 | -1.54E-01 | 157314925 | 157315048 | NC_000002.11 |
| cg18608610      | 4.17E-12 | 2.33E-13 | -7.87 | 19.4462927 | -1.52E-01 | 43288889  | 43289012  | NC_000007.13 |
| cg25918080      | 4.17E-12 | 2.33E-13 | -7.87 | 19.4460476 | -1.11E-01 | 153990882 | 153991005 | NC_000005.9  |

|               |          |          |       |            |           |           |           |              |
|---------------|----------|----------|-------|------------|-----------|-----------|-----------|--------------|
| cg11699125    | 4.17E-12 | 2.33E-13 | -7.87 | 19.4454726 | -1.53E-01 | 6341327   | 6341450   | NC_000001.10 |
| cg24868150    | 4.17E-12 | 2.33E-13 | -7.87 | 19.4453071 | -9.03E-02 | 20861653  | 20861776  | NC_000002.11 |
| cg02076624    | 4.18E-12 | 2.33E-13 | -7.87 | 19.4448741 | -1.52E-01 | 4140935   | 4141058   | NC_000012.11 |
| cg04823921    | 4.18E-12 | 2.33E-13 | -7.87 | 19.4447896 | -4.96E-02 | 57556776  | 57556899  | NC_000020.10 |
| cg01243823    | 4.18E-12 | 2.33E-13 | -7.87 | 19.4446186 | -1.42E-01 | 50732212  | 50732335  | NC_000016.9  |
| cg03149958    | 4.18E-12 | 2.33E-13 | -7.87 | 19.4427803 | -1.54E-01 | 36326677  | 36326800  | NC_000006.11 |
| cg26160416    | 4.19E-12 | 2.34E-13 | -7.87 | 19.4406045 | -7.22E-02 | 37860602  | 37860725  | NC_000001.10 |
| cg18728264    | 4.19E-12 | 2.34E-13 | -7.87 | 19.4398227 | -1.35E-01 | 118766491 | 118766614 | NC_000011.9  |
| cg14796708    | 4.20E-12 | 2.35E-13 | -7.87 | 19.4380216 | -1.09E-01 | 41157075  | 41157198  | NC_000001.10 |
| cg06392426    | 4.20E-12 | 2.35E-13 | -7.87 | 19.4374798 | -5.70E-02 | 10676186  | 10676309  | NC_000019.9  |
| cg06191068    | 4.21E-12 | 2.35E-13 | -7.87 | 19.4361726 | -8.58E-02 | 76989451  | 76989574  | NC_000017.10 |
| cg05455747    | 4.22E-12 | 2.36E-13 | -7.87 | 19.4336402 | -9.42E-02 | 122573042 | 122573165 | NC_000008.10 |
| cg24137216    | 4.22E-12 | 2.36E-13 | -7.87 | 19.4330757 | -1.54E-01 | 145020381 | 145020504 | NC_000008.10 |
| cg10460350    | 4.23E-12 | 2.36E-13 | -7.87 | 19.4320087 | -1.19E-01 | 60658361  | 60658484  | NC_000011.9  |
| cg24863706    | 4.23E-12 | 2.37E-13 | -7.87 | 19.4299438 | -3.75E-02 | 120549163 | 120549286 | NC_000004.11 |
| cg04291430    | 4.24E-12 | 2.37E-13 | -7.87 | 19.4288824 | -1.28E-01 | 48206283  | 48206406  | NC_000017.10 |
| cg03591467    | 4.24E-12 | 2.37E-13 | -7.87 | 19.4285207 | -1.92E-01 | 163101493 | 163101616 | NC_000002.11 |
| cg08381620    | 4.24E-12 | 2.37E-13 | -7.87 | 19.4282376 | -1.52E-01 | 24062873  | 24062996  | NC_000013.10 |
| cg27469726    | 4.25E-12 | 2.37E-13 | -7.87 | 19.426321  | -1.54E-01 | 77394799  | 77394922  | NC_000018.9  |
| cg03047965    | 4.25E-12 | 2.38E-13 | -7.87 | 19.424795  | -1.16E-01 | 22935905  | 22936028  | NC_000001.10 |
| cg03854564    | 4.25E-12 | 2.38E-13 | -7.87 | 19.4246757 | -2.58E-01 | 1626477   | 1626600   | NC_000017.10 |
| ch.5.3276032R | 4.26E-12 | 2.38E-13 | -7.87 | 19.4242829 | -9.84E-02 | 171862495 | 171862618 | NC_000005.9  |
| cg07665060    | 4.26E-12 | 2.38E-13 | -7.87 | 19.4240008 | -1.21E-01 | 38794598  | 38794721  | NC_000019.9  |
| cg00855901    | 4.26E-12 | 2.38E-13 | -7.87 | 19.4236732 | -1.45E-01 | 79085765  | 79085888  | NC_000001.10 |
| cg16724070    | 4.28E-12 | 2.39E-13 | -7.87 | 19.4192082 | -1.48E-01 | 183133736 | 183133859 | NC_000001.10 |

|                 |          |          |       |            |           |           |           |              |
|-----------------|----------|----------|-------|------------|-----------|-----------|-----------|--------------|
| cg15961044      | 4.28E-12 | 2.39E-13 | -7.87 | 19.4178214 | -5.05E-02 | 59992280  | 59992403  | NC_000018.9  |
| cg03806501      | 4.29E-12 | 2.40E-13 | -7.87 | 19.415558  | -1.81E-01 | 81130829  | 81130952  | NC_000007.13 |
| cg25117600      | 4.29E-12 | 2.40E-13 | -7.87 | 19.415516  | -1.72E-01 | 10023201  | 10023324  | NC_000004.11 |
| cg19879772      | 4.29E-12 | 2.40E-13 | -7.87 | 19.4146355 | -4.20E-02 | 45603385  | 45603508  | NC_000014.8  |
| cg27484412      | 4.30E-12 | 2.40E-13 | -7.87 | 19.4141083 | -2.09E-01 | 44876687  | 44876810  | NC_000021.8  |
| cg08968603      | 4.30E-12 | 2.40E-13 | -7.87 | 19.4140827 | -7.04E-02 | 1993659   | 1993782   | NC_000016.9  |
| cg20121012      | 4.30E-12 | 2.41E-13 | -7.87 | 19.4128017 | -1.69E-01 | 93516072  | 93516195  | NC_000012.11 |
| cg21647532      | 4.30E-12 | 2.41E-13 | -7.87 | 19.4121579 | -1.50E-01 | 85641985  | 85642108  | NC_000002.11 |
| cg25024734      | 4.31E-12 | 2.41E-13 | -7.87 | 19.4117864 | -1.39E-01 | 112152815 | 112152938 | NC_000010.10 |
| cg08063160      | 4.31E-12 | 2.41E-13 | -7.87 | 19.4111662 | -1.40E-01 | 238578376 | 238578499 | NC_000002.11 |
| cg03339458      | 4.31E-12 | 2.41E-13 | -7.87 | 19.4105529 | -7.05E-02 | 151300581 | 151300704 | NC_000001.10 |
| ch.19.253092F   | 4.32E-12 | 2.42E-13 | -7.87 | 19.4090996 | -4.75E-02 | 4694205   | 4694328   | NC_000019.9  |
| cg25631739      | 4.33E-12 | 2.42E-13 | -7.87 | 19.4068435 | -1.37E-01 | 1673510   | 1673633   | NC_000005.9  |
| cg16903174      | 4.33E-12 | 2.42E-13 | -7.87 | 19.406054  | -1.50E-01 | 9468351   | 9468474   | NC_000002.11 |
| cg01069845      | 4.33E-12 | 2.42E-13 | -7.87 | 19.4058551 | -1.88E-02 | 98273911  | 98274034  | NC_000010.10 |
| cg14574951      | 4.34E-12 | 2.43E-13 | -7.87 | 19.403494  | -1.58E-01 | 55861102  | 55861225  | NC_000003.11 |
| cg02301528      | 4.35E-12 | 2.44E-13 | -7.87 | 19.4011056 | -1.44E-01 | 12939519  | 12939642  | NC_000012.11 |
| cg19257762      | 4.35E-12 | 2.44E-13 | -7.87 | 19.400169  | -1.42E-01 | 157577893 | 157578016 | NC_000007.13 |
| cg04844574      | 4.35E-12 | 2.44E-13 | -7.87 | 19.3999681 | -2.30E-01 | 122028594 | 122028717 | NC_000012.11 |
| cg01396034      | 4.36E-12 | 2.44E-13 | -7.87 | 19.398927  | -2.85E-02 | 27623367  | 27623490  | NC_000001.10 |
| cg25013303      | 4.36E-12 | 2.44E-13 | -7.87 | 19.3976765 | -1.23E-01 | 10961257  | 10961380  | NC_000001.10 |
| ch.1.213506027F | 4.37E-12 | 2.45E-13 | -7.87 | 19.3963825 | -6.05E-02 | 215439404 | 215439527 | NC_000001.10 |
| cg10196459      | 4.38E-12 | 2.46E-13 | -7.86 | 19.3932473 | -9.84E-02 | 1133631   | 1133754   | NC_000017.10 |
| ch.14.1824732F  | 4.38E-12 | 2.46E-13 | -7.86 | 19.393069  | -3.51E-02 | 104149315 | 104149438 | NC_000014.8  |
| cg18596043      | 4.39E-12 | 2.46E-13 | -7.86 | 19.3912657 | -1.49E-01 | 19127172  | 19127295  | NC_000016.9  |

|            |          |          |       |            |           |           |           |              |
|------------|----------|----------|-------|------------|-----------|-----------|-----------|--------------|
| cg21304211 | 4.40E-12 | 2.47E-13 | -7.86 | 19.3889612 | -6.24E-02 | 112281877 | 112282000 | NC_000001.10 |
| cg14030586 | 4.41E-12 | 2.47E-13 | -7.86 | 19.3872008 | -1.49E-01 | 136658254 | 136658377 | NC_000009.11 |
| cg15428904 | 4.41E-12 | 2.47E-13 | -7.86 | 19.3870054 | -1.67E-01 | 57394097  | 57394220  | NC_000020.10 |
| cg15468521 | 4.41E-12 | 2.47E-13 | -7.86 | 19.3865952 | -1.26E-01 | 102883343 | 102883466 | NC_000010.10 |
| cg02356551 | 4.42E-12 | 2.48E-13 | -7.86 | 19.3840191 | -1.09E-01 | 53013726  | 53013849  | NC_000008.10 |
| cg00708486 | 4.42E-12 | 2.48E-13 | -7.86 | 19.3836865 | -1.62E-01 | 55355071  | 55355194  | NC_000014.8  |
| cg22325530 | 4.43E-12 | 2.48E-13 | -7.86 | 19.3821286 | -1.29E-01 | 111127346 | 111127469 | NC_000012.11 |
| cg06043315 | 4.43E-12 | 2.49E-13 | -7.86 | 19.3807728 | -9.11E-02 | 144640306 | 144640429 | NC_000008.10 |
| cg27665449 | 4.44E-12 | 2.49E-13 | -7.86 | 19.3789532 | -7.92E-02 | 71204401  | 71204524  | NC_000002.11 |
| cg24900923 | 4.45E-12 | 2.50E-13 | -7.86 | 19.3767091 | -5.23E-02 | 30434072  | 30434195  | NC_000006.11 |
| cg17384457 | 4.46E-12 | 2.50E-13 | -7.86 | 19.3757797 | -1.44E-01 | 45034961  | 45035084  | NC_000019.9  |
| cg15829116 | 4.46E-12 | 2.50E-13 | -7.86 | 19.3749981 | -1.27E-01 | 30901876  | 30901999  | NC_000022.10 |
| cg17378509 | 4.48E-12 | 2.51E-13 | -7.86 | 19.3698887 | -1.86E-01 | 4557712   | 4557835   | NC_000004.11 |
| cg20146967 | 4.48E-12 | 2.52E-13 | -7.86 | 19.368922  | -1.57E-01 | 35822357  | 35822480  | NC_000022.10 |
| cg09967647 | 4.50E-12 | 2.52E-13 | -7.86 | 19.3664252 | -1.17E-01 | 208632434 | 208632557 | NC_000002.11 |
| cg00085790 | 4.52E-12 | 2.54E-13 | -7.86 | 19.3603848 | -1.69E-01 | 211722100 | 211722223 | NC_000001.10 |
| cg16658460 | 4.53E-12 | 2.54E-13 | -7.86 | 19.359638  | -1.85E-01 | 166711687 | 166711810 | NC_000005.9  |
| cg02976843 | 4.53E-12 | 2.54E-13 | -7.86 | 19.3595944 | -1.33E-01 | 2843257   | 2843380   | NC_000017.10 |
| cg12464638 | 4.53E-12 | 2.54E-13 | -7.86 | 19.3595051 | -1.33E-01 | 844400    | 844523    | NC_000011.9  |
| cg01219549 | 4.53E-12 | 2.54E-13 | -7.86 | 19.357783  | -1.55E-01 | 140683649 | 140683772 | NC_000009.11 |
| cg03418659 | 4.55E-12 | 2.55E-13 | -7.86 | 19.3546059 | -6.88E-02 | 31128414  | 31128537  | NC_000016.9  |
| cg19864539 | 4.56E-12 | 2.56E-13 | -7.86 | 19.3512584 | -1.80E-01 | 25747688  | 25747811  | NC_000022.10 |
| cg05144345 | 4.56E-12 | 2.56E-13 | -7.86 | 19.3511246 | -9.16E-02 | 1686368   | 1686491   | NC_000004.11 |
| cg10755085 | 4.56E-12 | 2.56E-13 | -7.86 | 19.3508873 | -8.12E-02 | 72732722  | 72732845  | NC_000017.10 |
| cg20894936 | 4.57E-12 | 2.56E-13 | -7.86 | 19.350267  | -9.97E-02 | 1630266   | 1630389   | NC_000011.9  |

|                 |          |          |       |            |           |           |           |              |
|-----------------|----------|----------|-------|------------|-----------|-----------|-----------|--------------|
| ch.11.17063585R | 4.57E-12 | 2.57E-13 | -7.86 | 19.3500284 | -5.28E-02 | 17107009  | 17107132  | NC_000011.9  |
| cg04111344      | 4.57E-12 | 2.57E-13 | -7.86 | 19.3484153 | -1.67E-01 | 131095784 | 131095907 | NC_000002.11 |
| cg07944862      | 4.58E-12 | 2.57E-13 | -7.86 | 19.3464574 | -1.81E-01 | 38501174  | 38501297  | NC_000017.10 |
| cg10864794      | 4.60E-12 | 2.58E-13 | -7.86 | 19.343339  | -1.34E-01 | 78203170  | 78203293  | NC_000005.9  |
| cg19107296      | 4.60E-12 | 2.58E-13 | -7.86 | 19.3426566 | -1.56E-01 | 80565010  | 80565133  | NC_000005.9  |
| cg02770724      | 4.60E-12 | 2.58E-13 | -7.86 | 19.3425657 | -1.73E-01 | 73132837  | 73132960  | NC_000007.13 |
| cg11188223      | 4.60E-12 | 2.59E-13 | -7.86 | 19.3419667 | -1.56E-01 | 79658903  | 79659026  | NC_000001.10 |
| cg08283682      | 4.60E-12 | 2.59E-13 | -7.86 | 19.3416453 | -3.94E-02 | 26056902  | 26057025  | NC_000006.11 |
| cg20707323      | 4.61E-12 | 2.59E-13 | -7.86 | 19.3410964 | -1.09E-01 | 178006917 | 178007040 | NC_000001.10 |
| cg23957144      | 4.61E-12 | 2.59E-13 | -7.86 | 19.339702  | -5.46E-02 | 145635364 | 145635487 | NC_000008.10 |
| cg02085953      | 4.62E-12 | 2.60E-13 | -7.86 | 19.3373583 | -1.02E-01 | 97202260  | 97202383  | NC_000002.11 |
| ch.3.32825806F  | 4.62E-12 | 2.60E-13 | -7.86 | 19.3368605 | -6.26E-02 | 32850802  | 32850925  | NC_000003.11 |
| cg05924882      | 4.64E-12 | 2.61E-13 | -7.85 | 19.3336509 | -1.58E-01 | 40883034  | 40883157  | NC_000015.9  |
| cg11331344      | 4.64E-12 | 2.61E-13 | -7.85 | 19.3330982 | -6.31E-02 | 73629463  | 73629586  | NC_000017.10 |
| cg19933320      | 4.64E-12 | 2.61E-13 | -7.85 | 19.3328398 | -8.03E-02 | 64125401  | 64125524  | NC_000007.13 |
| cg03312572      | 4.65E-12 | 2.62E-13 | -7.85 | 19.3304411 | -5.23E-02 | 17979929  | 17980052  | NC_000007.13 |
| cg12413156      | 4.66E-12 | 2.62E-13 | -7.85 | 19.3295233 | -1.95E-01 | 62368256  | 62368379  | NC_000020.10 |
| cg20691595      | 4.66E-12 | 2.62E-13 | -7.85 | 19.3274618 | -1.32E-01 | 38184354  | 38184477  | NC_000015.9  |
| cg21083556      | 4.67E-12 | 2.62E-13 | -7.85 | 19.3273105 | -1.45E-01 | 105193326 | 105193449 | NC_000014.8  |
| cg26700215      | 4.68E-12 | 2.63E-13 | -7.85 | 19.3245092 | -1.70E-01 | 67070006  | 67070129  | NC_000008.10 |
| cg07813495      | 4.68E-12 | 2.63E-13 | -7.85 | 19.3242479 | -1.26E-01 | 37947276  | 37947399  | NC_000001.10 |
| cg09001777      | 4.68E-12 | 2.64E-13 | -7.85 | 19.3230246 | -1.04E-01 | 5851504   | 5851627   | NC_000019.9  |
| cg03478739      | 4.68E-12 | 2.64E-13 | -7.85 | 19.3229658 | -2.04E-01 | 175712381 | 175712504 | NC_000002.11 |
| cg03480935      | 4.69E-12 | 2.64E-13 | -7.85 | 19.3225869 | -1.45E-01 | 67417860  | 67417983  | NC_000015.9  |
| cg12150817      | 4.69E-12 | 2.64E-13 | -7.85 | 19.3207644 | -6.71E-02 | 24768737  | 24768860  | NC_000014.8  |

|            |          |          |       |            |           |           |           |              |
|------------|----------|----------|-------|------------|-----------|-----------|-----------|--------------|
| cg13010373 | 4.70E-12 | 2.65E-13 | -7.85 | 19.3187146 | -1.50E-01 | 86113013  | 86113136  | NC_000006.11 |
| cg11953749 | 4.70E-12 | 2.65E-13 | -7.85 | 19.3184569 | -1.59E-01 | 119590608 | 119590731 | NC_000010.10 |
| cg02495767 | 4.70E-12 | 2.65E-13 | -7.85 | 19.3183341 | -1.69E-01 | 1030999   | 1031122   | NC_000007.13 |
| cg21840121 | 4.71E-12 | 2.65E-13 | -7.85 | 19.3181306 | -6.20E-02 | 70721531  | 70721654  | NC_000014.8  |
| cg04743609 | 4.71E-12 | 2.65E-13 | -7.85 | 19.3181159 | -1.01E-01 | 149052364 | 149052487 | NC_000003.11 |
| cg26918957 | 4.71E-12 | 2.65E-13 | -7.85 | 19.3173239 | -6.65E-02 | 22926800  | 22926923  | NC_000008.10 |
| cg24815934 | 4.71E-12 | 2.65E-13 | -7.85 | 19.3163521 | -1.46E-01 | 46332181  | 46332304  | NC_000021.8  |
| cg24173049 | 4.71E-12 | 2.65E-13 | -7.85 | 19.316079  | -1.27E-01 | 6939795   | 6939918   | NC_000017.10 |
| cg16634544 | 4.73E-12 | 2.66E-13 | -7.85 | 19.3134812 | -1.68E-01 | 117520653 | 117520776 | NC_000003.11 |
| cg14195377 | 4.73E-12 | 2.66E-13 | -7.85 | 19.3130585 | -5.67E-02 | 60928647  | 60928770  | NC_000011.9  |
| cg21451869 | 4.74E-12 | 2.67E-13 | -7.85 | 19.3103718 | -1.21E-01 | 44636831  | 44636954  | NC_000020.10 |
| cg20385508 | 4.74E-12 | 2.67E-13 | -7.85 | 19.3099678 | -2.43E-02 | 128180829 | 128180952 | NC_000002.11 |
| cg14606082 | 4.75E-12 | 2.68E-13 | -7.85 | 19.3072888 | -1.12E-01 | 2557174   | 2557297   | NC_000007.13 |
| cg08983253 | 4.76E-12 | 2.68E-13 | -7.85 | 19.3066918 | -1.02E-01 | 71248448  | 71248571  | NC_000011.9  |
| cg18473335 | 4.76E-12 | 2.68E-13 | -7.85 | 19.3064499 | -1.59E-01 | 24540174  | 24540297  | NC_000014.8  |
| cg11368409 | 4.76E-12 | 2.68E-13 | -7.85 | 19.3063998 | -9.59E-02 | 184320187 | 184320310 | NC_000004.11 |
| cg15555985 | 4.76E-12 | 2.68E-13 | -7.85 | 19.3059505 | -1.61E-01 | 73533854  | 73533977  | NC_000003.11 |
| cg02705918 | 4.76E-12 | 2.68E-13 | -7.85 | 19.3059474 | -8.40E-02 | 114087236 | 114087359 | NC_000012.11 |
| cg04503093 | 4.76E-12 | 2.68E-13 | -7.85 | 19.3055455 | -1.22E-01 | 127663097 | 127663220 | NC_000007.13 |
| cg10727673 | 4.77E-12 | 2.69E-13 | -7.85 | 19.3043723 | -1.29E-01 | 136537267 | 136537390 | NC_000003.11 |
| cg26799474 | 4.77E-12 | 2.69E-13 | -7.85 | 19.3042405 | -1.93E-01 | 202098951 | 202099074 | NC_000002.11 |
| cg07860992 | 4.77E-12 | 2.69E-13 | -7.85 | 19.3035318 | -7.32E-02 | 156273081 | 156273204 | NC_000003.11 |
| cg14237567 | 4.77E-12 | 2.69E-13 | -7.85 | 19.3022359 | -1.86E-01 | 232057245 | 232057368 | NC_000002.11 |
| cg01252713 | 4.78E-12 | 2.69E-13 | -7.85 | 19.3014484 | -1.60E-01 | 235549589 | 235549712 | NC_000002.11 |
| cg10275766 | 4.79E-12 | 2.70E-13 | -7.85 | 19.2990957 | -1.57E-01 | 173591150 | 173591273 | NC_000002.11 |

|               |          |          |       |            |           |           |           |              |
|---------------|----------|----------|-------|------------|-----------|-----------|-----------|--------------|
| cg15549126    | 4.80E-12 | 2.71E-13 | -7.85 | 19.2975599 | -1.00E-01 | 135160910 | 135161033 | NC_000010.10 |
| ch.1.1603567F | 4.81E-12 | 2.71E-13 | -7.85 | 19.2954519 | -4.90E-02 | 54678630  | 54678753  | NC_000001.10 |
| cg05467458    | 4.81E-12 | 2.71E-13 | -7.85 | 19.2947506 | -1.69E-01 | 33361032  | 33361155  | NC_000019.9  |
| cg23209537    | 4.82E-12 | 2.72E-13 | -7.85 | 19.2916916 | -7.01E-02 | 5463409   | 5463532   | NC_000007.13 |
| cg26828017    | 4.83E-12 | 2.72E-13 | -7.85 | 19.2906853 | -2.16E-01 | 22409023  | 22409146  | NC_000016.9  |
| cg10950050    | 4.83E-12 | 2.73E-13 | -7.85 | 19.2895738 | -5.54E-02 | 62902319  | 62902442  | NC_000001.10 |
| cg19154116    | 4.84E-12 | 2.73E-13 | -7.85 | 19.287197  | -9.35E-02 | 32005786  | 32005909  | NC_000006.11 |
| cg18564167    | 4.84E-12 | 2.74E-13 | -7.85 | 19.2867102 | -1.81E-01 | 53720312  | 53720435  | NC_000006.11 |
| cg18688392    | 4.85E-12 | 2.74E-13 | -7.85 | 19.2859327 | -1.43E-01 | 81059414  | 81059537  | NC_000010.10 |
| cg22282672    | 4.85E-12 | 2.74E-13 | -7.85 | 19.2858826 | -7.79E-02 | 121465223 | 121465346 | NC_000005.9  |
| cg20788020    | 4.85E-12 | 2.74E-13 | -7.85 | 19.2855503 | -1.85E-01 | 105677501 | 105677624 | NC_000008.10 |
| cg13221363    | 4.85E-12 | 2.74E-13 | -7.85 | 19.2854168 | -1.55E-01 | 12859103  | 12859226  | NC_000002.11 |
| cg13229972    | 4.85E-12 | 2.74E-13 | -7.85 | 19.2850888 | -9.86E-02 | 110335018 | 110335141 | NC_000001.10 |
| cg12592179    | 4.85E-12 | 2.74E-13 | -7.85 | 19.2850008 | -1.68E-01 | 133920644 | 133920767 | NC_000003.11 |
| cg16014060    | 4.85E-12 | 2.74E-13 | -7.85 | 19.2846191 | -1.42E-01 | 69020214  | 69020337  | NC_000014.8  |
| cg09412707    | 4.86E-12 | 2.75E-13 | -7.85 | 19.2827826 | -1.80E-01 | 26085653  | 26085776  | NC_000004.11 |
| cg19756068    | 4.87E-12 | 2.75E-13 | -7.85 | 19.2818208 | -1.56E-01 | 41497222  | 41497345  | NC_000019.9  |
| cg01922891    | 4.87E-12 | 2.75E-13 | -7.85 | 19.2808607 | -1.40E-01 | 4714647   | 4714770   | NC_000016.9  |
| cg07224215    | 4.88E-12 | 2.75E-13 | -7.85 | 19.2796375 | -5.64E-02 | 169747227 | 169747350 | NC_000002.11 |
| cg20452609    | 4.88E-12 | 2.76E-13 | -7.85 | 19.2788812 | -8.25E-02 | 31775252  | 31775375  | NC_000006.11 |
| cg09449150    | 4.88E-12 | 2.76E-13 | -7.85 | 19.2784605 | -1.77E-01 | 129731815 | 129731938 | NC_000011.9  |
| cg17130251    | 4.88E-12 | 2.76E-13 | -7.85 | 19.2784315 | -1.38E-01 | 3945936   | 3946059   | NC_000019.9  |
| cg16424138    | 4.89E-12 | 2.76E-13 | -7.85 | 19.2766886 | -5.95E-02 | 14581771  | 14581894  | NC_000005.9  |
| cg17654470    | 4.89E-12 | 2.76E-13 | -7.85 | 19.2762507 | -7.06E-02 | 20254932  | 20255055  | NC_000022.10 |
| cg10680376    | 4.90E-12 | 2.77E-13 | -7.84 | 19.2734305 | -6.19E-02 | 116391843 | 116391966 | NC_000010.10 |



|            |          |          |       |            |           |           |           |              |
|------------|----------|----------|-------|------------|-----------|-----------|-----------|--------------|
| cg19306948 | 4.90E-12 | 2.77E-13 | -7.84 | 19.2733196 | -1.14E-01 | 17308206  | 17308329  | NC_000001.10 |
| cg14086122 | 4.91E-12 | 2.78E-13 | -7.84 | 19.2712068 | -8.53E-02 | 123921793 | 123921916 | NC_000012.11 |
| cg02848448 | 4.92E-12 | 2.78E-13 | -7.84 | 19.2706261 | -1.26E-01 | 70279003  | 70279126  | NC_000011.9  |
| cg16003790 | 4.92E-12 | 2.78E-13 | -7.84 | 19.2701264 | -1.16E-01 | 205909935 | 205910058 | NC_000001.10 |
| cg23505823 | 4.92E-12 | 2.78E-13 | -7.84 | 19.2700741 | -1.36E-01 | 123215524 | 123215647 | NC_000012.11 |
| cg19094530 | 4.92E-12 | 2.78E-13 | -7.84 | 19.2695716 | -1.70E-01 | 79470169  | 79470292  | NC_000010.10 |
| cg06045579 | 4.92E-12 | 2.78E-13 | -7.84 | 19.2693134 | -5.70E-02 | 87425660  | 87425783  | NC_000016.9  |
| cg10723020 | 4.93E-12 | 2.79E-13 | -7.84 | 19.2669637 | -5.78E-02 | 208393829 | 208393952 | NC_000002.11 |
| cg08805037 | 4.93E-12 | 2.79E-13 | -7.84 | 19.2668365 | -7.56E-02 | 20009275  | 20009398  | NC_000022.10 |
| cg04687437 | 4.94E-12 | 2.80E-13 | -7.84 | 19.2648031 | -1.33E-01 | 511113    | 511236    | NC_000019.9  |
| cg00560722 | 4.95E-12 | 2.80E-13 | -7.84 | 19.2640684 | -6.30E-02 | 101989177 | 101989300 | NC_000010.10 |
| cg01407062 | 4.95E-12 | 2.80E-13 | -7.84 | 19.2633214 | -1.33E-01 | 91538575  | 91538698  | NC_000015.9  |
| cg04257903 | 4.95E-12 | 2.80E-13 | -7.84 | 19.2628464 | -1.67E-01 | 86638847  | 86638970  | NC_000016.9  |
| cg26932364 | 4.96E-12 | 2.81E-13 | -7.84 | 19.2606963 | -1.64E-01 | 50603292  | 50603415  | NC_000007.13 |
| cg09961550 | 4.96E-12 | 2.81E-13 | -7.84 | 19.260187  | -1.46E-01 | 21531948  | 21532071  | NC_000016.9  |
| cg06934092 | 4.97E-12 | 2.81E-13 | -7.84 | 19.2591775 | -1.03E-01 | 93205284  | 93205407  | NC_000007.13 |
| cg08210297 | 4.98E-12 | 2.82E-13 | -7.84 | 19.2559953 | -1.72E-01 | 233320854 | 233320977 | NC_000002.11 |
| cg07475000 | 5.01E-12 | 2.83E-13 | -7.84 | 19.2514079 | -1.36E-01 | 22162928  | 22163051  | NC_000007.13 |
| cg04733624 | 5.01E-12 | 2.84E-13 | -7.84 | 19.2512902 | -6.57E-02 | 75936339  | 75936462  | NC_000010.10 |
| cg03324421 | 5.03E-12 | 2.85E-13 | -7.84 | 19.2454233 | -2.33E-02 | 5569067   | 5569190   | NC_000007.13 |
| cg00645755 | 5.04E-12 | 2.86E-13 | -7.84 | 19.2442593 | -1.24E-01 | 1514031   | 1514154   | NC_000007.13 |
| cg26612409 | 5.04E-12 | 2.86E-13 | -7.84 | 19.2439048 | -1.16E-01 | 160335    | 160458    | NC_000005.9  |
| cg22433398 | 5.04E-12 | 2.86E-13 | -7.84 | 19.243697  | -6.25E-02 | 27825486  | 27825609  | NC_000013.10 |
| cg02107842 | 5.05E-12 | 2.86E-13 | -7.84 | 19.243061  | -1.23E-01 | 66255772  | 66255895  | NC_000005.9  |
| cg01330456 | 5.05E-12 | 2.86E-13 | -7.84 | 19.2428763 | -1.99E-01 | 77996051  | 77996174  | NC_000005.9  |

|              |          |          |       |            |           |           |           |              |
|--------------|----------|----------|-------|------------|-----------|-----------|-----------|--------------|
| cg16289618   | 5.06E-12 | 2.87E-13 | -7.84 | 19.2400825 | -1.23E-01 | 29705939  | 29706062  | NC_000006.11 |
| cg01420491   | 5.08E-12 | 2.88E-13 | -7.84 | 19.2358376 | -1.45E-01 | 20834624  | 20834747  | NC_000002.11 |
| cg02839123   | 5.09E-12 | 2.88E-13 | -7.84 | 19.2344922 | -1.01E-01 | 40390264  | 40390387  | NC_000022.10 |
| cg13773247   | 5.09E-12 | 2.88E-13 | -7.84 | 19.2344441 | -1.84E-01 | 42276988  | 42277111  | NC_000002.11 |
| cg26293590   | 5.09E-12 | 2.88E-13 | -7.84 | 19.2344041 | -9.27E-02 | 117688335 | 117688458 | NC_000011.9  |
| cg05802386   | 5.09E-12 | 2.89E-13 | -7.84 | 19.23405   | -1.70E-01 | 43422920  | 43423043  | NC_000001.10 |
| cg26107476   | 5.09E-12 | 2.89E-13 | -7.84 | 19.233539  | -1.63E-01 | 202054898 | 202055021 | NC_000001.10 |
| cg10714639   | 5.10E-12 | 2.89E-13 | -7.84 | 19.2307939 | -1.70E-01 | 1075104   | 1075227   | NC_000019.9  |
| cg06778183   | 5.11E-12 | 2.90E-13 | -7.84 | 19.229096  | -1.93E-01 | 94129156  | 94129279  | NC_000005.9  |
| cg14270346   | 5.12E-12 | 2.90E-13 | -7.84 | 19.2285159 | -1.69E-01 | 38026076  | 38026199  | NC_000009.11 |
| cg04890607   | 5.13E-12 | 2.91E-13 | -7.84 | 19.2252428 | -1.91E-01 | 66262214  | 66262337  | NC_000012.11 |
| cg24371383   | 5.13E-12 | 2.91E-13 | -7.84 | 19.2252268 | -6.45E-02 | 95256104  | 95256227  | NC_000010.10 |
| cg07092805   | 5.13E-12 | 2.91E-13 | -7.84 | 19.2251226 | -1.47E-01 | 21005388  | 21005511  | NC_000013.10 |
| cg20320717   | 5.17E-12 | 2.93E-13 | -7.84 | 19.2179497 | -4.33E-02 | 151043708 | 151043831 | NC_000001.10 |
| cg25343246   | 5.17E-12 | 2.93E-13 | -7.84 | 19.2172818 | -8.58E-02 | 34756291  | 34756414  | NC_000012.11 |
| cg22146312   | 5.18E-12 | 2.94E-13 | -7.84 | 19.2162392 | -5.02E-02 | 47852819  | 47852942  | NC_000019.9  |
| cg04180114   | 5.21E-12 | 2.96E-13 | -7.83 | 19.2098605 | -1.44E-01 | 144543568 | 144543691 | NC_000008.10 |
| cg14553853   | 5.21E-12 | 2.96E-13 | -7.83 | 19.2090627 | -6.26E-02 | 85888001  | 85888124  | NC_000004.11 |
| cg15318861   | 5.22E-12 | 2.96E-13 | -7.83 | 19.2087631 | -5.23E-02 | 36044328  | 36044451  | NC_000022.10 |
| cg24820936   | 5.23E-12 | 2.97E-13 | -7.83 | 19.2058932 | -2.29E-01 | 101270745 | 101270868 | NC_000008.10 |
| cg14899357   | 5.23E-12 | 2.97E-13 | -7.83 | 19.2056842 | -3.78E-02 | 85153373  | 85153496  | NC_000002.11 |
| cg27507284   | 5.24E-12 | 2.97E-13 | -7.83 | 19.2042675 | -1.79E-01 | 178116991 | 178117114 | NC_000002.11 |
| cg14387312   | 5.24E-12 | 2.98E-13 | -7.83 | 19.2035039 | -1.72E-01 | 53704546  | 53704669  | NC_000004.11 |
| cg14777903   | 5.24E-12 | 2.98E-13 | -7.83 | 19.2034913 | -1.05E-01 | 192958565 | 192958688 | NC_000003.11 |
| ch.6.137329F | 5.24E-12 | 2.98E-13 | -7.83 | 19.2028009 | -6.00E-02 | 4939770   | 4939893   | NC_000006.11 |

|            |          |          |       |            |           |           |           |              |
|------------|----------|----------|-------|------------|-----------|-----------|-----------|--------------|
| cg06828143 | 5.25E-12 | 2.98E-13 | -7.83 | 19.202269  | -1.80E-01 | 10490335  | 10490458  | NC_000005.9  |
| cg19086540 | 5.25E-12 | 2.98E-13 | -7.83 | 19.2009127 | -1.28E-01 | 36397458  | 36397581  | NC_000011.9  |
| cg00429477 | 5.27E-12 | 3.00E-13 | -7.83 | 19.1972322 | -9.46E-02 | 6798907   | 6799030   | NC_000012.11 |
| cg25025992 | 5.30E-12 | 3.01E-13 | -7.83 | 19.1921442 | -1.64E-01 | 78557584  | 78557707  | NC_000015.9  |
| cg22846611 | 5.30E-12 | 3.01E-13 | -7.83 | 19.1915895 | -4.22E-02 | 39969379  | 39969502  | NC_000020.10 |
| cg02845204 | 5.31E-12 | 3.02E-13 | -7.83 | 19.1901201 | -1.78E-01 | 71259439  | 71259562  | NC_000011.9  |
| cg06758448 | 5.32E-12 | 3.02E-13 | -7.83 | 19.1880511 | -1.82E-01 | 192067742 | 192067865 | NC_000002.11 |
| cg23620049 | 5.34E-12 | 3.03E-13 | -7.83 | 19.1845107 | -1.52E-01 | 185270558 | 185270681 | NC_000003.11 |
| cg10322499 | 5.36E-12 | 3.05E-13 | -7.83 | 19.1807863 | -6.76E-02 | 110950903 | 110951026 | NC_000001.10 |
| cg04067506 | 5.36E-12 | 3.05E-13 | -7.83 | 19.1790853 | -6.69E-02 | 176943966 | 176944089 | NC_000005.9  |
| cg18606630 | 5.38E-12 | 3.06E-13 | -7.83 | 19.177029  | -1.03E-01 | 75400792  | 75400915  | NC_000014.8  |
| cg27468224 | 5.38E-12 | 3.06E-13 | -7.83 | 19.1760984 | -8.39E-02 | 55031503  | 55031626  | NC_000004.11 |
| cg23434815 | 5.39E-12 | 3.07E-13 | -7.83 | 19.1735829 | -2.14E-01 | 75839302  | 75839425  | NC_000010.10 |
| cg02366624 | 5.40E-12 | 3.07E-13 | -7.83 | 19.1723597 | -8.42E-02 | 2726100   | 2726223   | NC_000016.9  |
| cg14222479 | 5.41E-12 | 3.08E-13 | -7.83 | 19.1695425 | -8.39E-02 | 169487675 | 169487798 | NC_000003.11 |
| cg22438603 | 5.42E-12 | 3.08E-13 | -7.83 | 19.1682618 | -5.49E-02 | 127418940 | 127419063 | NC_000005.9  |
| cg21368566 | 5.42E-12 | 3.09E-13 | -7.83 | 19.1680394 | -1.86E-01 | 236568913 | 236569036 | NC_000002.11 |
| cg01754423 | 5.43E-12 | 3.09E-13 | -7.83 | 19.1659031 | -1.34E-01 | 51465744  | 51465867  | NC_000016.9  |
| cg09934894 | 5.44E-12 | 3.09E-13 | -7.83 | 19.1650106 | -6.43E-02 | 95982881  | 95983004  | NC_000014.8  |
| cg01111842 | 5.46E-12 | 3.11E-13 | -7.83 | 19.1606867 | -4.71E-02 | 140444966 | 140445089 | NC_000009.11 |
| cg00975791 | 5.46E-12 | 3.11E-13 | -7.83 | 19.159961  | -1.57E-01 | 101442201 | 101442324 | NC_000014.8  |
| cg14060519 | 5.47E-12 | 3.11E-13 | -7.83 | 19.1596593 | -2.10E-01 | 95222867  | 95222990  | NC_000010.10 |
| cg19326023 | 5.47E-12 | 3.11E-13 | -7.83 | 19.1588319 | -5.35E-02 | 78424152  | 78424275  | NC_000015.9  |
| cg12876009 | 5.47E-12 | 3.12E-13 | -7.83 | 19.1583948 | -7.23E-02 | 37915443  | 37915566  | NC_000022.10 |
| cg24541279 | 5.48E-12 | 3.12E-13 | -7.83 | 19.1569774 | -7.55E-02 | 71993373  | 71993496  | NC_000010.10 |

|                 |          |          |       |            |           |           |           |              |
|-----------------|----------|----------|-------|------------|-----------|-----------|-----------|--------------|
| cg21491308      | 5.48E-12 | 3.12E-13 | -7.83 | 19.1563145 | -8.51E-02 | 43892826  | 43892949  | NC_000019.9  |
| cg14928734      | 5.48E-12 | 3.12E-13 | -7.83 | 19.1558227 | -9.68E-02 | 232572399 | 232572522 | NC_000002.11 |
| cg05934196      | 5.49E-12 | 3.12E-13 | -7.83 | 19.1556336 | -6.98E-02 | 22925766  | 22925889  | NC_000008.10 |
| cg15778335      | 5.50E-12 | 3.13E-13 | -7.82 | 19.1532003 | -4.22E-02 | 43011005  | 43011128  | NC_000022.10 |
| cg06723301      | 5.51E-12 | 3.14E-13 | -7.82 | 19.1515161 | -5.75E-02 | 21213449  | 21213572  | NC_000022.10 |
| cg18085636      | 5.52E-12 | 3.14E-13 | -7.82 | 19.1497554 | -1.04E-01 | 89993734  | 89993857  | NC_000010.10 |
| cg27311092      | 5.52E-12 | 3.14E-13 | -7.82 | 19.1496105 | -1.41E-01 | 19142612  | 19142735  | NC_000016.9  |
| cg09904140      | 5.52E-12 | 3.15E-13 | -7.82 | 19.148634  | -1.05E-01 | 84328208  | 84328331  | NC_000016.9  |
| cg23882019      | 5.53E-12 | 3.15E-13 | -7.82 | 19.1473152 | -1.06E-01 | 23082951  | 23083074  | NC_000008.10 |
| cg15918732      | 5.54E-12 | 3.16E-13 | -7.82 | 19.1453857 | -1.56E-01 | 57364939  | 57365062  | NC_000011.9  |
| cg26796190      | 5.54E-12 | 3.16E-13 | -7.82 | 19.145272  | -6.67E-02 | 42083195  | 42083318  | NC_000017.10 |
| ch.10.16904721F | 5.54E-12 | 3.16E-13 | -7.82 | 19.1451218 | -3.52E-02 | 16864715  | 16864838  | NC_000010.10 |
| cg06161099      | 5.54E-12 | 3.16E-13 | -7.82 | 19.1447643 | -1.73E-01 | 7973701   | 7973824   | NC_000004.11 |
| cg08767044      | 5.55E-12 | 3.16E-13 | -7.82 | 19.1435245 | -2.23E-01 | 11678785  | 11678908  | NC_000016.9  |
| cg19150029      | 5.55E-12 | 3.16E-13 | -7.82 | 19.1429157 | -9.79E-02 | 74020819  | 74020942  | NC_000007.13 |
| cg03947749      | 5.55E-12 | 3.17E-13 | -7.82 | 19.1426123 | -1.40E-01 | 62330072  | 62330195  | NC_000020.10 |
| cg09364122      | 5.56E-12 | 3.17E-13 | -7.82 | 19.1418572 | -1.77E-01 | 942198    | 942321    | NC_000001.10 |
| cg20916237      | 5.57E-12 | 3.18E-13 | -7.82 | 19.1396552 | -6.62E-02 | 105487215 | 105487338 | NC_000014.8  |
| cg25181170      | 5.57E-12 | 3.18E-13 | -7.82 | 19.1390315 | -2.55E-01 | 25162298  | 25162421  | NC_000010.10 |
| cg09869811      | 5.58E-12 | 3.18E-13 | -7.82 | 19.1379357 | -1.95E-01 | 67897346  | 67897469  | NC_000016.9  |
| cg20446334      | 5.60E-12 | 3.19E-13 | -7.82 | 19.1345907 | -2.61E-01 | 79010458  | 79010581  | NC_000017.10 |
| cg22423363      | 5.60E-12 | 3.19E-13 | -7.82 | 19.1343864 | -2.18E-01 | 65042722  | 65042845  | NC_000015.9  |
| cg10716494      | 5.60E-12 | 3.19E-13 | -7.82 | 19.1343839 | -6.34E-02 | 96076302  | 96076425  | NC_000011.9  |
| cg17371350      | 5.61E-12 | 3.20E-13 | -7.82 | 19.1318472 | -6.92E-02 | 655677    | 655800    | NC_000017.10 |
| cg15947176      | 5.61E-12 | 3.20E-13 | -7.82 | 19.1316965 | -1.62E-01 | 67429795  | 67429918  | NC_000008.10 |

|               |          |          |       |            |           |           |           |              |
|---------------|----------|----------|-------|------------|-----------|-----------|-----------|--------------|
| cg15685424    | 5.62E-12 | 3.21E-13 | -7.82 | 19.1299214 | -5.97E-02 | 993417    | 993540    | NC_000007.13 |
| cg26912131    | 5.63E-12 | 3.21E-13 | -7.82 | 19.1286286 | -1.36E-01 | 129978694 | 129978817 | NC_000007.13 |
| cg06331185    | 5.63E-12 | 3.21E-13 | -7.82 | 19.1278412 | -1.80E-02 | 23689892  | 23690015  | NC_000016.9  |
| cg14715961    | 5.63E-12 | 3.21E-13 | -7.82 | 19.127381  | -5.76E-02 | 27545909  | 27546032  | NC_000002.11 |
| cg14410072    | 5.64E-12 | 3.22E-13 | -7.82 | 19.1263717 | -5.57E-02 | 139838381 | 139838504 | NC_000009.11 |
| cg07759833    | 5.65E-12 | 3.22E-13 | -7.82 | 19.1244867 | -1.52E-01 | 44619208  | 44619331  | NC_000013.10 |
| cg08353172    | 5.65E-12 | 3.23E-13 | -7.82 | 19.1237606 | -6.99E-02 | 12074907  | 12075030  | NC_000019.9  |
| cg08968034    | 5.66E-12 | 3.23E-13 | -7.82 | 19.1229007 | -1.32E-01 | 3022836   | 3022959   | NC_000004.11 |
| cg27615603    | 5.66E-12 | 3.23E-13 | -7.82 | 19.1228356 | -1.43E-01 | 31213045  | 31213168  | NC_000016.9  |
| ch.2.1382002F | 5.66E-12 | 3.23E-13 | -7.82 | 19.1222996 | -7.49E-02 | 60745480  | 60745603  | NC_000002.11 |
| cg25364619    | 5.66E-12 | 3.23E-13 | -7.82 | 19.1222652 | -1.40E-01 | 783451    | 783574    | NC_000017.10 |
| cg27037969    | 5.67E-12 | 3.24E-13 | -7.82 | 19.1205085 | -5.52E-02 | 125549952 | 125550075 | NC_000012.11 |
| cg10421194    | 5.68E-12 | 3.24E-13 | -7.82 | 19.1188218 | -1.55E-01 | 43133914  | 43134037  | NC_000002.11 |
| cg08457158    | 5.68E-12 | 3.25E-13 | -7.82 | 19.1181213 | -1.56E-01 | 41367714  | 41367837  | NC_000001.10 |
| cg00306721    | 5.69E-12 | 3.25E-13 | -7.82 | 19.1170878 | -1.92E-01 | 62477480  | 62477603  | NC_000011.9  |
| cg22877504    | 5.71E-12 | 3.26E-13 | -7.82 | 19.1135403 | -1.36E-01 | 216844602 | 216844725 | NC_000002.11 |
| cg08862564    | 5.72E-12 | 3.27E-13 | -7.82 | 19.1119319 | -4.89E-02 | 208395069 | 208395192 | NC_000002.11 |
| cg14359680    | 5.72E-12 | 3.27E-13 | -7.82 | 19.1111919 | -1.62E-01 | 105532208 | 105532331 | NC_000014.8  |
| cg19612068    | 5.73E-12 | 3.27E-13 | -7.82 | 19.1099802 | -9.22E-02 | 33130024  | 33130147  | NC_000006.11 |
| cg14024579    | 5.73E-12 | 3.28E-13 | -7.82 | 19.1086221 | -1.65E-01 | 139332845 | 139332968 | NC_000009.11 |
| cg01622018    | 5.74E-12 | 3.28E-13 | -7.82 | 19.1078395 | -1.26E-01 | 34122943  | 34123066  | NC_000017.10 |
| cg07744430    | 5.74E-12 | 3.28E-13 | -7.82 | 19.1076958 | -9.17E-02 | 132345502 | 132345625 | NC_000012.11 |
| cg24859158    | 5.75E-12 | 3.29E-13 | -7.82 | 19.1058847 | -9.44E-02 | 26605913  | 26606036  | NC_000001.10 |
| cg15717250    | 5.75E-12 | 3.29E-13 | -7.82 | 19.1051335 | -1.73E-01 | 118895485 | 118895608 | NC_000003.11 |
| cg10927178    | 5.77E-12 | 3.30E-13 | -7.82 | 19.1017397 | -1.18E-01 | 56883965  | 56884088  | NC_000020.10 |

|            |          |          |       |            |           |           |           |              |
|------------|----------|----------|-------|------------|-----------|-----------|-----------|--------------|
| cg01485645 | 5.78E-12 | 3.30E-13 | -7.82 | 19.1007267 | -6.31E-02 | 36862199  | 36862322  | NC_000017.10 |
| cg14685356 | 5.78E-12 | 3.30E-13 | -7.82 | 19.1002177 | -1.62E-01 | 152639548 | 152639671 | NC_000006.11 |
| cg09033691 | 5.78E-12 | 3.31E-13 | -7.82 | 19.1000237 | -5.23E-02 | 10829409  | 10829532  | NC_000011.9  |
| cg00549601 | 5.79E-12 | 3.31E-13 | -7.82 | 19.0980902 | -1.36E-01 | 52208872  | 52208995  | NC_000012.11 |
| cg24728479 | 5.79E-12 | 3.31E-13 | -7.82 | 19.0977719 | -5.18E-02 | 146228505 | 146228628 | NC_000008.10 |
| cg01545079 | 5.81E-12 | 3.33E-13 | -7.81 | 19.0941472 | -1.36E-01 | 24541377  | 24541500  | NC_000014.8  |
| cg13902498 | 5.84E-12 | 3.34E-13 | -7.81 | 19.0900074 | -5.31E-02 | 75249203  | 75249326  | NC_000015.9  |
| cg06216293 | 5.84E-12 | 3.34E-13 | -7.81 | 19.0894906 | -5.41E-02 | 156339250 | 156339373 | NC_000001.10 |
| cg19532942 | 5.85E-12 | 3.35E-13 | -7.81 | 19.0876112 | -1.56E-01 | 62109173  | 62109296  | NC_000014.8  |
| cg04646987 | 5.87E-12 | 3.36E-13 | -7.81 | 19.0847878 | -2.75E-01 | 14406732  | 14406855  | NC_000005.9  |
| cg00340958 | 5.87E-12 | 3.36E-13 | -7.81 | 19.0844295 | -1.43E-01 | 48328658  | 48328781  | NC_000020.10 |
| cg08455073 | 5.87E-12 | 3.36E-13 | -7.81 | 19.084349  | -1.92E-01 | 23286463  | 23286586  | NC_000007.13 |
| cg17346246 | 5.88E-12 | 3.37E-13 | -7.81 | 19.0823682 | -1.57E-01 | 123214864 | 123214987 | NC_000012.11 |
| cg03856723 | 5.88E-12 | 3.37E-13 | -7.81 | 19.0816921 | -4.89E-02 | 14229466  | 14229589  | NC_000019.9  |
| cg26523175 | 5.89E-12 | 3.37E-13 | -7.81 | 19.081153  | -1.65E-01 | 47656423  | 47656546  | NC_000001.10 |
| cg03461725 | 5.89E-12 | 3.37E-13 | -7.81 | 19.0806295 | -5.58E-02 | 85525160  | 85525283  | NC_000015.9  |
| cg10028983 | 5.89E-12 | 3.37E-13 | -7.81 | 19.0802247 | -2.05E-01 | 68174077  | 68174200  | NC_000011.9  |
| cg27002522 | 5.89E-12 | 3.37E-13 | -7.81 | 19.079947  | -1.20E-01 | 54426772  | 54426895  | NC_000012.11 |
| cg24073074 | 5.90E-12 | 3.38E-13 | -7.81 | 19.0780627 | -9.80E-02 | 66432759  | 66432882  | NC_000017.10 |
| cg23379309 | 5.94E-12 | 3.40E-13 | -7.81 | 19.0718054 | -8.01E-02 | 102057328 | 102057451 | NC_000009.11 |
| cg07702424 | 5.95E-12 | 3.41E-13 | -7.81 | 19.0703389 | -1.33E-01 | 12306515  | 12306638  | NC_000011.9  |
| cg04118741 | 5.95E-12 | 3.41E-13 | -7.81 | 19.0688628 | -1.83E-01 | 12551013  | 12551136  | NC_000012.11 |
| cg09149896 | 5.96E-12 | 3.42E-13 | -7.81 | 19.0671885 | -5.53E-02 | 48624438  | 48624561  | NC_000017.10 |
| cg22482278 | 5.96E-12 | 3.42E-13 | -7.81 | 19.0670613 | -1.82E-01 | 80289631  | 80289754  | NC_000017.10 |
| cg26408382 | 5.98E-12 | 3.43E-13 | -7.81 | 19.0639575 | -1.75E-01 | 156087717 | 156087840 | NC_000001.10 |

|               |          |          |       |            |           |           |           |              |
|---------------|----------|----------|-------|------------|-----------|-----------|-----------|--------------|
| cg09113530    | 5.99E-12 | 3.43E-13 | -7.81 | 19.0626678 | -1.20E-01 | 110873741 | 110873864 | NC_000002.11 |
| cg12445424    | 5.99E-12 | 3.43E-13 | -7.81 | 19.0622477 | -1.62E-01 | 26605141  | 26605264  | NC_000001.10 |
| cg08611549    | 6.00E-12 | 3.44E-13 | -7.81 | 19.0605213 | -1.60E-01 | 108064394 | 108064517 | NC_000012.11 |
| cg05256179    | 6.01E-12 | 3.45E-13 | -7.81 | 19.0586815 | -1.87E-01 | 31658176  | 31658299  | NC_000006.11 |
| cg11623922    | 6.02E-12 | 3.45E-13 | -7.81 | 19.057236  | -3.54E-02 | 27759386  | 27759509  | NC_000006.11 |
| cg09090582    | 6.03E-12 | 3.46E-13 | -7.81 | 19.0562319 | -1.25E-01 | 155324691 | 155324814 | NC_000007.13 |
| cg22148827    | 6.03E-12 | 3.46E-13 | -7.81 | 19.0558576 | -1.81E-01 | 129196929 | 129197052 | NC_000008.10 |
| cg12154153    | 6.03E-12 | 3.46E-13 | -7.81 | 19.0553714 | -7.26E-02 | 168195108 | 168195231 | NC_000001.10 |
| cg10546210    | 6.04E-12 | 3.46E-13 | -7.81 | 19.0540815 | -1.57E-01 | 21175838  | 21175961  | NC_000014.8  |
| cg09388058    | 6.04E-12 | 3.47E-13 | -7.81 | 19.0530987 | -5.26E-02 | 47494735  | 47494858  | NC_000016.9  |
| cg07198365    | 6.05E-12 | 3.47E-13 | -7.81 | 19.0523972 | -1.80E-01 | 3572665   | 3572788   | NC_000010.10 |
| cg06219310    | 6.06E-12 | 3.47E-13 | -7.81 | 19.051141  | -1.42E-01 | 802229    | 802352    | NC_000004.11 |
| cg06196145    | 6.06E-12 | 3.48E-13 | -7.81 | 19.0499338 | -8.57E-02 | 818752    | 818875    | NC_000011.9  |
| ch.5.2733100F | 6.07E-12 | 3.48E-13 | -7.81 | 19.0482758 | -7.14E-02 | 145613708 | 145613831 | NC_000005.9  |
| cg22868034    | 6.09E-12 | 3.49E-13 | -7.81 | 19.0455535 | -5.33E-02 | 49092375  | 49092498  | NC_000019.9  |
| cg22534509    | 6.09E-12 | 3.49E-13 | -7.81 | 19.0450539 | -1.48E-01 | 123215119 | 123215242 | NC_000012.11 |
| cg13654195    | 6.09E-12 | 3.50E-13 | -7.81 | 19.0448957 | -4.92E-02 | 7390091   | 7390214   | NC_000006.11 |
| cg23100370    | 6.11E-12 | 3.51E-13 | -7.81 | 19.04163   | -7.25E-02 | 109336342 | 109336465 | NC_000002.11 |
| cg24536349    | 6.11E-12 | 3.51E-13 | -7.81 | 19.0414228 | -2.38E-01 | 143781340 | 143781463 | NC_000008.10 |
| cg10262052    | 6.12E-12 | 3.51E-13 | -7.81 | 19.0403827 | -2.21E-01 | 39770525  | 39770648  | NC_000008.10 |
| cg22843797    | 6.12E-12 | 3.51E-13 | -7.81 | 19.0401082 | -1.04E-01 | 23082961  | 23083084  | NC_000008.10 |
| cg00837398    | 6.12E-12 | 3.51E-13 | -7.81 | 19.0399029 | -1.27E-01 | 148958537 | 148958660 | NC_000007.13 |
| cg06594008    | 6.12E-12 | 3.52E-13 | -7.81 | 19.0393759 | -9.15E-02 | 41033637  | 41033760  | NC_000022.10 |
| cg25406518    | 6.13E-12 | 3.52E-13 | -7.81 | 19.0389396 | -1.18E-01 | 61102165  | 61102288  | NC_000011.9  |
| cg11807153    | 6.13E-12 | 3.52E-13 | -7.81 | 19.0384172 | -9.96E-02 | 140098496 | 140098619 | NC_000005.9  |

|            |          |          |       |            |           |           |           |              |
|------------|----------|----------|-------|------------|-----------|-----------|-----------|--------------|
| cg03462322 | 6.14E-12 | 3.52E-13 | -7.81 | 19.0368341 | -1.92E-01 | 126397    | 126520    | NC_000016.9  |
| cg01606628 | 6.14E-12 | 3.53E-13 | -7.81 | 19.036535  | -9.08E-02 | 3063768   | 3063891   | NC_000006.11 |
| cg20365336 | 6.14E-12 | 3.53E-13 | -7.8  | 19.0356503 | -2.15E-01 | 16986186  | 16986309  | NC_000006.11 |
| cg24782497 | 6.15E-12 | 3.53E-13 | -7.8  | 19.03518   | -1.51E-01 | 18385409  | 18385532  | NC_000019.9  |
| cg09380636 | 6.15E-12 | 3.53E-13 | -7.8  | 19.0342415 | -7.39E-02 | 4791861   | 4791984   | NC_000019.9  |
| cg00743788 | 6.16E-12 | 3.54E-13 | -7.8  | 19.0332    | -9.83E-02 | 50701157  | 50701280  | NC_000022.10 |
| cg00064778 | 6.18E-12 | 3.55E-13 | -7.8  | 19.030099  | -2.11E-01 | 126564742 | 126564865 | NC_000005.9  |
| cg12519998 | 6.18E-12 | 3.55E-13 | -7.8  | 19.0297349 | -1.45E-01 | 384286    | 384409    | NC_000010.10 |
| cg00464046 | 6.18E-12 | 3.55E-13 | -7.8  | 19.0287653 | -1.11E-01 | 134854551 | 134854674 | NC_000007.13 |
| cg07763516 | 6.19E-12 | 3.56E-13 | -7.8  | 19.0277856 | -4.73E-02 | 71496321  | 71496444  | NC_000016.9  |
| cg15454698 | 6.22E-12 | 3.57E-13 | -7.8  | 19.0234974 | -2.06E-01 | 14473580  | 14473703  | NC_000003.11 |
| cg18575863 | 6.23E-12 | 3.58E-13 | -7.8  | 19.0217947 | -1.20E-01 | 109274464 | 109274587 | NC_000006.11 |
| cg20918393 | 6.24E-12 | 3.58E-13 | -7.8  | 19.0203203 | -1.53E-01 | 19867136  | 19867259  | NC_000020.10 |
| cg05303842 | 6.24E-12 | 3.58E-13 | -7.8  | 19.02023   | -7.20E-02 | 48673523  | 48673646  | NC_000003.11 |
| cg19344315 | 6.24E-12 | 3.59E-13 | -7.8  | 19.0198285 | -2.01E-01 | 16669649  | 16669772  | NC_000006.11 |
| cg08202972 | 6.24E-12 | 3.59E-13 | -7.8  | 19.0191344 | -1.50E-01 | 54851464  | 54851587  | NC_000016.9  |
| cg07421969 | 6.25E-12 | 3.59E-13 | -7.8  | 19.0174231 | -1.40E-01 | 30131634  | 30131757  | NC_000006.11 |
| cg18738857 | 6.25E-12 | 3.59E-13 | -7.8  | 19.0172502 | -8.06E-02 | 3606974   | 3607097   | NC_000019.9  |
| cg13755866 | 6.27E-12 | 3.60E-13 | -7.8  | 19.0150748 | -1.91E-01 | 74920620  | 74920743  | NC_000009.11 |
| cg20174893 | 6.28E-12 | 3.61E-13 | -7.8  | 19.0129914 | -4.59E-02 | 97600926  | 97601049  | NC_000007.13 |
| cg17757055 | 6.28E-12 | 3.61E-13 | -7.8  | 19.0121116 | -4.38E-02 | 75858107  | 75858230  | NC_000004.11 |
| cg21489622 | 6.29E-12 | 3.62E-13 | -7.8  | 19.0112208 | -5.97E-02 | 143247772 | 143247895 | NC_000006.11 |
| cg07244783 | 6.29E-12 | 3.62E-13 | -7.8  | 19.0110342 | -1.26E-01 | 4432211   | 4432334   | NC_000004.11 |
| cg10476585 | 6.29E-12 | 3.62E-13 | -7.8  | 19.0108277 | -1.59E-01 | 94499653  | 94499776  | NC_000013.10 |
| cg16545821 | 6.30E-12 | 3.62E-13 | -7.8  | 19.0092917 | -1.31E-01 | 204118840 | 204118963 | NC_000001.10 |



|                |          |          |      |            |           |           |           |              |
|----------------|----------|----------|------|------------|-----------|-----------|-----------|--------------|
| ch.10.736188R  | 6.31E-12 | 3.63E-13 | -7.8 | 19.0077614 | -4.54E-02 | 28878992  | 28879115  | NC_000010.10 |
| cg18842353     | 6.32E-12 | 3.63E-13 | -7.8 | 19.0064089 | -1.42E-01 | 97794052  | 97794175  | NC_000013.10 |
| cg12331331     | 6.32E-12 | 3.64E-13 | -7.8 | 19.0059968 | -1.45E-01 | 10800098  | 10800221  | NC_000002.11 |
| cg08343754     | 6.33E-12 | 3.64E-13 | -7.8 | 19.0052151 | -1.91E-02 | 73980834  | 73980957  | NC_000005.9  |
| cg05968010     | 6.34E-12 | 3.65E-13 | -7.8 | 19.0034083 | -1.22E-01 | 210000883 | 210001006 | NC_000001.10 |
| cg03195164     | 6.34E-12 | 3.65E-13 | -7.8 | 19.0030036 | -1.29E-01 | 128998642 | 128998765 | NC_000003.11 |
| cg02236941     | 6.34E-12 | 3.65E-13 | -7.8 | 19.0026338 | -1.77E-01 | 1734990   | 1735113   | NC_000008.10 |
| cg09914060     | 6.34E-12 | 3.65E-13 | -7.8 | 19.002407  | -1.18E-01 | 27903168  | 27903291  | NC_000017.10 |
| cg03360490     | 6.34E-12 | 3.65E-13 | -7.8 | 19.0023095 | -4.17E-02 | 49622030  | 49622153  | NC_000019.9  |
| cg21886042     | 6.34E-12 | 3.65E-13 | -7.8 | 19.002184  | -1.64E-01 | 112076036 | 112076159 | NC_000013.10 |
| cg27022853     | 6.35E-12 | 3.65E-13 | -7.8 | 19.0009622 | -1.71E-01 | 196377815 | 196377938 | NC_000003.11 |
| cg25881850     | 6.36E-12 | 3.66E-13 | -7.8 | 18.9990833 | -9.83E-02 | 64058704  | 64058827  | NC_000011.9  |
| cg10531263     | 6.36E-12 | 3.66E-13 | -7.8 | 18.9987434 | -2.09E-01 | 8037325   | 8037448   | NC_000004.11 |
| cg10586546     | 6.36E-12 | 3.66E-13 | -7.8 | 18.9985799 | -9.77E-02 | 31634657  | 31634780  | NC_000006.11 |
| cg14577211     | 6.38E-12 | 3.67E-13 | -7.8 | 18.9955912 | -5.18E-02 | 48744457  | 48744580  | NC_000012.11 |
| cg04368058     | 6.39E-12 | 3.68E-13 | -7.8 | 18.9949563 | -1.30E-01 | 45772629  | 45772752  | NC_000017.10 |
| cg19861914     | 6.39E-12 | 3.68E-13 | -7.8 | 18.9943689 | -2.09E-01 | 76334039  | 76334162  | NC_000013.10 |
| cg13597554     | 6.39E-12 | 3.68E-13 | -7.8 | 18.9938231 | -1.80E-01 | 49732282  | 49732405  | NC_000015.9  |
| cg08726863     | 6.40E-12 | 3.69E-13 | -7.8 | 18.9927984 | -1.53E-01 | 128458401 | 128458524 | NC_000002.11 |
| cg25428494     | 6.42E-12 | 3.70E-13 | -7.8 | 18.9891033 | -1.41E-01 | 84255411  | 84255534  | NC_000004.11 |
| cg20554353     | 6.43E-12 | 3.70E-13 | -7.8 | 18.9885796 | -1.43E-01 | 72839549  | 72839672  | NC_000007.13 |
| cg21219903     | 6.43E-12 | 3.70E-13 | -7.8 | 18.9881545 | -1.08E-01 | 43920090  | 43920213  | NC_000001.10 |
| cg17466082     | 6.43E-12 | 3.70E-13 | -7.8 | 18.9875235 | -1.60E-01 | 1557859   | 1557982   | NC_000002.11 |
| ch.10.1683814F | 6.45E-12 | 3.72E-13 | -7.8 | 18.9840463 | -1.78E-02 | 79737911  | 79738034  | NC_000010.10 |
| cg09361094     | 6.46E-12 | 3.72E-13 | -7.8 | 18.9838778 | -1.60E-01 | 834503    | 834626    | NC_000010.10 |

|            |          |          |       |            |           |           |           |              |
|------------|----------|----------|-------|------------|-----------|-----------|-----------|--------------|
| cg19558860 | 6.46E-12 | 3.72E-13 | -7.8  | 18.9833153 | -5.81E-02 | 93582779  | 93582902  | NC_000014.8  |
| cg01949002 | 6.46E-12 | 3.72E-13 | -7.8  | 18.9833049 | -1.34E-01 | 2203589   | 2203712   | NC_000001.10 |
| cg23543539 | 6.47E-12 | 3.73E-13 | -7.8  | 18.9814397 | -5.68E-02 | 125461746 | 125461869 | NC_000011.9  |
| cg10336193 | 6.47E-12 | 3.73E-13 | -7.8  | 18.9810285 | -1.51E-01 | 206848389 | 206848512 | NC_000001.10 |
| cg01972394 | 6.47E-12 | 3.73E-13 | -7.8  | 18.9809112 | -6.96E-02 | 19229528  | 19229651  | NC_000001.10 |
| cg19397176 | 6.50E-12 | 3.75E-13 | -7.79 | 18.9764711 | -1.43E-01 | 4671358   | 4671481   | NC_000019.9  |
| cg23416197 | 6.50E-12 | 3.75E-13 | -7.79 | 18.976357  | -1.08E-01 | 187458630 | 187458753 | NC_000003.11 |
| cg27636740 | 6.51E-12 | 3.76E-13 | -7.79 | 18.9742894 | -6.85E-02 | 87936414  | 87936537  | NC_000007.13 |
| cg11150074 | 6.52E-12 | 3.76E-13 | -7.79 | 18.9741252 | -1.74E-01 | 200863559 | 200863682 | NC_000001.10 |
| cg10466987 | 6.53E-12 | 3.76E-13 | -7.79 | 18.9723816 | -6.27E-02 | 76921528  | 76921651  | NC_000017.10 |
| cg14281591 | 6.53E-12 | 3.76E-13 | -7.79 | 18.9723157 | -1.90E-01 | 73636077  | 73636200  | NC_000013.10 |
| cg23272369 | 6.55E-12 | 3.78E-13 | -7.79 | 18.9688786 | -1.70E-01 | 11002071  | 11002194  | NC_000012.11 |
| cg22365119 | 6.57E-12 | 3.79E-13 | -7.79 | 18.9660739 | -1.21E-01 | 76017858  | 76017981  | NC_000012.11 |
| cg25296710 | 6.57E-12 | 3.79E-13 | -7.79 | 18.965615  | -5.07E-02 | 49268336  | 49268459  | NC_000015.9  |
| cg15106294 | 6.57E-12 | 3.79E-13 | -7.79 | 18.9652563 | -1.36E-01 | 36626044  | 36626167  | NC_000006.11 |
| cg05021636 | 6.58E-12 | 3.79E-13 | -7.79 | 18.9643179 | -1.13E-01 | 77023266  | 77023389  | NC_000017.10 |
| cg25311764 | 6.59E-12 | 3.80E-13 | -7.79 | 18.9615745 | -1.51E-01 | 59907427  | 59907550  | NC_000015.9  |
| cg17179923 | 6.62E-12 | 3.82E-13 | -7.79 | 18.9578747 | -1.71E-01 | 28956088  | 28956211  | NC_000010.10 |
| cg14135809 | 6.63E-12 | 3.83E-13 | -7.79 | 18.9554899 | -1.61E-01 | 140502926 | 140503049 | NC_000009.11 |
| cg25562306 | 6.64E-12 | 3.83E-13 | -7.79 | 18.9541779 | -5.48E-02 | 189157510 | 189157633 | NC_000002.11 |
| cg06844165 | 6.64E-12 | 3.84E-13 | -7.79 | 18.9534769 | -1.31E-01 | 3768599   | 3768722   | NC_000017.10 |
| cg15722679 | 6.65E-12 | 3.84E-13 | -7.79 | 18.9532983 | -1.23E-01 | 1638393   | 1638516   | NC_000020.10 |
| cg08854586 | 6.66E-12 | 3.85E-13 | -7.79 | 18.9505951 | -1.18E-01 | 34094789  | 34094912  | NC_000013.10 |
| cg15998505 | 6.67E-12 | 3.85E-13 | -7.79 | 18.9501008 | -1.53E-01 | 153479701 | 153479824 | NC_000001.10 |
| cg21890646 | 6.67E-12 | 3.85E-13 | -7.79 | 18.9498715 | -2.00E-01 | 91816120  | 91816243  | NC_000014.8  |

|               |          |          |       |            |           |           |           |              |
|---------------|----------|----------|-------|------------|-----------|-----------|-----------|--------------|
| cg19734536    | 6.67E-12 | 3.85E-13 | -7.79 | 18.9492427 | -1.64E-01 | 160607887 | 160608010 | NC_000001.10 |
| cg12409226    | 6.67E-12 | 3.85E-13 | -7.79 | 18.9491245 | -3.55E-02 | 100076985 | 100077108 | NC_000007.13 |
| cg09071093    | 6.68E-12 | 3.86E-13 | -7.79 | 18.9480787 | -1.33E-01 | 57865987  | 57866110  | NC_000012.11 |
| cg16031065    | 6.68E-12 | 3.86E-13 | -7.79 | 18.9477327 | -1.02E-01 | 70719115  | 70719238  | NC_000016.9  |
| cg14791747    | 6.68E-12 | 3.86E-13 | -7.79 | 18.9476453 | -7.87E-02 | 20752902  | 20753025  | NC_000016.9  |
| cg21040360    | 6.68E-12 | 3.86E-13 | -7.79 | 18.9474415 | -3.06E-02 | 3383326   | 3383449   | NC_000002.11 |
| cg00166750    | 6.69E-12 | 3.86E-13 | -7.79 | 18.946262  | -4.84E-02 | 102138594 | 102138717 | NC_000008.10 |
| cg18332146    | 6.73E-12 | 3.89E-13 | -7.79 | 18.9398681 | -6.80E-02 | 88071004  | 88071127  | NC_000011.9  |
| ch.19.848927R | 6.73E-12 | 3.89E-13 | -7.79 | 18.9397249 | -6.74E-02 | 20215680  | 20215803  | NC_000019.9  |
| cg18623836    | 6.74E-12 | 3.89E-13 | -7.79 | 18.9388716 | -1.63E-01 | 10261907  | 10262030  | NC_000002.11 |
| cg22509816    | 6.74E-12 | 3.89E-13 | -7.79 | 18.9384732 | -1.64E-01 | 143732362 | 143732485 | NC_000002.11 |
| cg09136245    | 6.74E-12 | 3.90E-13 | -7.79 | 18.9375273 | -6.37E-02 | 20631761  | 20631884  | NC_000011.9  |
| cg17035997    | 6.76E-12 | 3.91E-13 | -7.79 | 18.9354161 | -1.51E-01 | 40705708  | 40705831  | NC_000017.10 |
| cg08024127    | 6.76E-12 | 3.91E-13 | -7.79 | 18.9352127 | -5.60E-02 | 55611607  | 55611730  | NC_000015.9  |
| cg06836406    | 6.76E-12 | 3.91E-13 | -7.79 | 18.9346278 | -1.31E-01 | 130461544 | 130461667 | NC_000009.11 |
| cg07776049    | 6.77E-12 | 3.92E-13 | -7.79 | 18.9329837 | -1.27E-01 | 928870    | 928993    | NC_000002.11 |
| cg09685682    | 6.78E-12 | 3.92E-13 | -7.79 | 18.9313408 | -1.01E-01 | 89778914  | 89779037  | NC_000016.9  |
| cg27431500    | 6.79E-12 | 3.93E-13 | -7.79 | 18.9297574 | -2.05E-01 | 1742281   | 1742404   | NC_000016.9  |
| cg11640208    | 6.80E-12 | 3.93E-13 | -7.79 | 18.9286324 | -1.74E-01 | 42857157  | 42857280  | NC_000017.10 |
| cg19898828    | 6.81E-12 | 3.94E-13 | -7.79 | 18.9272986 | -7.26E-02 | 110346621 | 110346744 | NC_000008.10 |
| cg23645885    | 6.82E-12 | 3.95E-13 | -7.79 | 18.9251521 | -1.14E-01 | 3247958   | 3248081   | NC_000006.11 |
| cg03669698    | 6.83E-12 | 3.95E-13 | -7.79 | 18.9246175 | -1.67E-01 | 29707524  | 29707647  | NC_000022.10 |
| cg01091099    | 6.83E-12 | 3.95E-13 | -7.79 | 18.9239151 | -1.41E-01 | 54815680  | 54815803  | NC_000002.11 |
| cg00080125    | 6.84E-12 | 3.96E-13 | -7.79 | 18.9230205 | -1.80E-01 | 59490613  | 59490736  | NC_000017.10 |
| cg15005368    | 6.85E-12 | 3.96E-13 | -7.79 | 18.9214982 | -1.51E-01 | 35786821  | 35786944  | NC_000019.9  |

|               |          |          |       |            |           |           |           |              |
|---------------|----------|----------|-------|------------|-----------|-----------|-----------|--------------|
| cg01933240    | 6.85E-12 | 3.96E-13 | -7.79 | 18.9212388 | -8.59E-02 | 228160601 | 228160724 | NC_000001.10 |
| cg20420867    | 6.85E-12 | 3.96E-13 | -7.79 | 18.9208739 | -5.31E-02 | 160175396 | 160175519 | NC_000001.10 |
| cg11166252    | 6.86E-12 | 3.97E-13 | -7.79 | 18.9199932 | -6.33E-02 | 17338258  | 17338381  | NC_000007.13 |
| cg16260298    | 6.86E-12 | 3.97E-13 | -7.79 | 18.9187663 | -1.02E-01 | 116140342 | 116140465 | NC_000007.13 |
| ch.2.1424431R | 6.86E-12 | 3.97E-13 | -7.79 | 18.9186808 | -6.20E-02 | 62229026  | 62229149  | NC_000002.11 |
| cg16512882    | 6.87E-12 | 3.97E-13 | -7.79 | 18.9184244 | -8.43E-02 | 45496087  | 45496210  | NC_000010.10 |
| cg25912009    | 6.88E-12 | 3.98E-13 | -7.78 | 18.9164895 | -1.60E-01 | 7844982   | 7845105   | NC_000004.11 |
| cg08477744    | 6.92E-12 | 4.00E-13 | -7.78 | 18.9107834 | -1.36E-01 | 17308032  | 17308155  | NC_000001.10 |
| cg08381722    | 6.93E-12 | 4.01E-13 | -7.78 | 18.9090156 | -9.87E-02 | 48646288  | 48646411  | NC_000016.9  |
| cg10294853    | 6.94E-12 | 4.02E-13 | -7.78 | 18.9075022 | -1.86E-01 | 79391030  | 79391153  | NC_000017.10 |
| cg09461545    | 6.94E-12 | 4.02E-13 | -7.78 | 18.9073135 | -1.27E-01 | 25845210  | 25845333  | NC_000004.11 |
| cg10800620    | 6.95E-12 | 4.03E-13 | -7.78 | 18.9055047 | -2.14E-01 | 196398826 | 196398949 | NC_000002.11 |
| cg01457986    | 6.96E-12 | 4.03E-13 | -7.78 | 18.9044124 | -5.17E-02 | 97889574  | 97889697  | NC_000010.10 |
| cg09352789    | 6.96E-12 | 4.03E-13 | -7.78 | 18.9035394 | -7.26E-02 | 111682693 | 111682816 | NC_000010.10 |
| cg26822986    | 6.96E-12 | 4.03E-13 | -7.78 | 18.903441  | -7.86E-02 | 21199691  | 21199814  | NC_000018.9  |
| cg23398173    | 6.97E-12 | 4.04E-13 | -7.78 | 18.9026442 | -8.25E-02 | 135662345 | 135662468 | NC_000007.13 |
| cg16254756    | 6.97E-12 | 4.04E-13 | -7.78 | 18.9020348 | -1.53E-01 | 154943676 | 154943799 | NC_000001.10 |
| cg09500328    | 6.99E-12 | 4.05E-13 | -7.78 | 18.8998299 | -3.56E-02 | 33413629  | 33413752  | NC_000020.10 |
| cg15986590    | 7.02E-12 | 4.07E-13 | -7.78 | 18.8948497 | -3.37E-02 | 1862404   | 1862527   | NC_000019.9  |
| cg21437157    | 7.03E-12 | 4.08E-13 | -7.78 | 18.8936226 | -1.25E-01 | 27346608  | 27346731  | NC_000008.10 |
| cg00292107    | 7.03E-12 | 4.08E-13 | -7.78 | 18.8929213 | -1.27E-01 | 32800350  | 32800473  | NC_000001.10 |
| cg06015781    | 7.03E-12 | 4.08E-13 | -7.78 | 18.892762  | -1.66E-01 | 119613693 | 119613816 | NC_000011.9  |
| cg00231006    | 7.04E-12 | 4.08E-13 | -7.78 | 18.8921676 | -6.01E-02 | 130599637 | 130599760 | NC_000005.9  |
| cg26992245    | 7.05E-12 | 4.09E-13 | -7.78 | 18.8905531 | -1.75E-01 | 29848579  | 29848702  | NC_000008.10 |
| cg04037470    | 7.05E-12 | 4.09E-13 | -7.78 | 18.8898236 | -6.50E-02 | 42196210  | 42196333  | NC_000022.10 |

|            |          |          |       |            |           |           |           |              |
|------------|----------|----------|-------|------------|-----------|-----------|-----------|--------------|
| cg27266257 | 7.06E-12 | 4.09E-13 | -7.78 | 18.8894874 | -4.78E-02 | 5707799   | 5707922   | NC_000010.10 |
| cg23286353 | 7.07E-12 | 4.10E-13 | -7.78 | 18.8879341 | -4.95E-02 | 97523832  | 97523955  | NC_000002.11 |
| cg04424930 | 7.08E-12 | 4.11E-13 | -7.78 | 18.885986  | -2.68E-02 | 43892790  | 43892913  | NC_000010.10 |
| cg27543403 | 7.09E-12 | 4.11E-13 | -7.78 | 18.8852062 | -1.20E-01 | 58335880  | 58336003  | NC_000005.9  |
| cg17585031 | 7.09E-12 | 4.11E-13 | -7.78 | 18.8847897 | -1.21E-01 | 25798942  | 25799065  | NC_000017.10 |
| cg22982014 | 7.10E-12 | 4.12E-13 | -7.78 | 18.8836302 | -6.35E-02 | 39322497  | 39322620  | NC_000019.9  |
| cg17784808 | 7.10E-12 | 4.12E-13 | -7.78 | 18.8827876 | -9.46E-02 | 36410268  | 36410391  | NC_000006.11 |
| cg03954991 | 7.11E-12 | 4.12E-13 | -7.78 | 18.881932  | -9.27E-02 | 36916605  | 36916728  | NC_000001.10 |
| cg26366616 | 7.12E-12 | 4.13E-13 | -7.78 | 18.8798566 | -1.40E-01 | 22439831  | 22439954  | NC_000008.10 |
| cg00697703 | 7.13E-12 | 4.14E-13 | -7.78 | 18.8787873 | -7.36E-02 | 25018855  | 25018978  | NC_000007.13 |
| cg20468415 | 7.13E-12 | 4.14E-13 | -7.78 | 18.8781486 | -1.52E-01 | 41592973  | 41593096  | NC_000008.10 |
| cg03034696 | 7.14E-12 | 4.14E-13 | -7.78 | 18.877551  | -1.93E-01 | 47400023  | 47400146  | NC_000002.11 |
| cg13077865 | 7.14E-12 | 4.14E-13 | -7.78 | 18.8775263 | -1.73E-01 | 105655901 | 105656024 | NC_000008.10 |
| cg26087598 | 7.15E-12 | 4.15E-13 | -7.78 | 18.8762316 | -1.33E-01 | 176739400 | 176739523 | NC_000005.9  |
| cg19573230 | 7.15E-12 | 4.15E-13 | -7.78 | 18.8747884 | -1.91E-01 | 137637323 | 137637446 | NC_000007.13 |
| cg07991100 | 7.16E-12 | 4.16E-13 | -7.78 | 18.8733573 | -1.42E-01 | 36283184  | 36283307  | NC_000004.11 |
| cg02851944 | 7.18E-12 | 4.17E-13 | -7.78 | 18.87163   | -7.86E-02 | 53468125  | 53468248  | NC_000016.9  |
| cg06283342 | 7.19E-12 | 4.17E-13 | -7.78 | 18.8698374 | -7.33E-02 | 233740669 | 233740792 | NC_000002.11 |
| cg22211507 | 7.20E-12 | 4.18E-13 | -7.78 | 18.8684425 | -1.50E-01 | 108564871 | 108564994 | NC_000003.11 |
| cg02280644 | 7.21E-12 | 4.19E-13 | -7.78 | 18.8663293 | -1.30E-01 | 128158661 | 128158784 | NC_000002.11 |
| cg17816893 | 7.21E-12 | 4.19E-13 | -7.78 | 18.8662305 | -4.88E-02 | 118934735 | 118934858 | NC_000010.10 |
| cg27406919 | 7.23E-12 | 4.20E-13 | -7.78 | 18.8628949 | -1.86E-01 | 87212733  | 87212856  | NC_000016.9  |
| cg19829001 | 7.23E-12 | 4.20E-13 | -7.78 | 18.8628595 | -2.01E-01 | 74640078  | 74640201  | NC_000017.10 |
| cg20724032 | 7.24E-12 | 4.21E-13 | -7.78 | 18.8618921 | -1.44E-01 | 41460736  | 41460859  | NC_000003.11 |
| cg09351881 | 7.24E-12 | 4.21E-13 | -7.78 | 18.8617872 | -2.12E-01 | 188190184 | 188190307 | NC_000004.11 |

|                 |          |          |       |            |           |           |           |              |
|-----------------|----------|----------|-------|------------|-----------|-----------|-----------|--------------|
| cg19363607      | 7.25E-12 | 4.21E-13 | -7.78 | 18.861105  | -1.49E-01 | 98097019  | 98097142  | NC_000007.13 |
| cg27455331      | 7.25E-12 | 4.21E-13 | -7.78 | 18.8603999 | -3.30E-02 | 47338178  | 47338301  | NC_000017.10 |
| cg03631656      | 7.26E-12 | 4.22E-13 | -7.78 | 18.8591551 | -1.46E-01 | 6420770   | 6420893   | NC_000008.10 |
| ch.1.1254747R   | 7.27E-12 | 4.23E-13 | -7.77 | 18.8572145 | -4.49E-02 | 39934760  | 39934883  | NC_000001.10 |
| cg22517356      | 7.28E-12 | 4.23E-13 | -7.77 | 18.8559855 | -1.20E-01 | 1361216   | 1361339   | NC_000001.10 |
| cg11566172      | 7.28E-12 | 4.23E-13 | -7.77 | 18.8558638 | -8.33E-02 | 159751352 | 159751475 | NC_000001.10 |
| cg12068816      | 7.29E-12 | 4.24E-13 | -7.77 | 18.8544974 | -7.53E-02 | 40390595  | 40390718  | NC_000022.10 |
| cg10109635      | 7.30E-12 | 4.24E-13 | -7.77 | 18.8536875 | -1.19E-01 | 20203992  | 20204115  | NC_000017.10 |
| ch.15.23774000R | 7.30E-12 | 4.24E-13 | -7.77 | 18.8535641 | -4.72E-02 | 26222907  | 26223030  | NC_000015.9  |
| cg27579097      | 7.30E-12 | 4.25E-13 | -7.77 | 18.8532355 | -1.16E-01 | 734844    | 734967    | NC_000016.9  |
| cg13763516      | 7.32E-12 | 4.26E-13 | -7.77 | 18.8510446 | -3.61E-02 | 20947094  | 20947217  | NC_000017.10 |
| cg03335207      | 7.33E-12 | 4.26E-13 | -7.77 | 18.8492833 | -1.06E-01 | 135911783 | 135911906 | NC_000003.11 |
| cg05262777      | 7.33E-12 | 4.26E-13 | -7.77 | 18.8489227 | -1.32E-01 | 129119447 | 129119570 | NC_000011.9  |
| cg11716608      | 7.33E-12 | 4.26E-13 | -7.77 | 18.8488706 | -3.31E-02 | 65447332  | 65447455  | NC_000007.13 |
| cg04355801      | 7.35E-12 | 4.28E-13 | -7.77 | 18.8458522 | -1.56E-01 | 1911974   | 1912097   | NC_000019.9  |
| cg19417168      | 7.35E-12 | 4.28E-13 | -7.77 | 18.8458489 | -1.38E-01 | 4531961   | 4532084   | NC_000019.9  |
| cg03646329      | 7.37E-12 | 4.29E-13 | -7.77 | 18.8439124 | -1.77E-01 | 48987165  | 48987288  | NC_000013.10 |
| cg13021857      | 7.37E-12 | 4.29E-13 | -7.77 | 18.8433381 | -1.93E-01 | 131740091 | 131740214 | NC_000008.10 |
| cg08498833      | 7.38E-12 | 4.29E-13 | -7.77 | 18.842568  | -1.80E-01 | 134003896 | 134004019 | NC_000008.10 |
| cg11314274      | 7.38E-12 | 4.30E-13 | -7.77 | 18.8415674 | -1.88E-01 | 132004064 | 132004187 | NC_000003.11 |
| cg02098923      | 7.38E-12 | 4.30E-13 | -7.77 | 18.8415582 | -6.22E-02 | 167789646 | 167789769 | NC_000001.10 |
| cg08267250      | 7.39E-12 | 4.30E-13 | -7.77 | 18.840294  | -1.75E-01 | 134872255 | 134872378 | NC_000010.10 |
| cg20550520      | 7.42E-12 | 4.32E-13 | -7.77 | 18.8359741 | -6.22E-02 | 32545277  | 32545400  | NC_000014.8  |
| cg27504582      | 7.43E-12 | 4.33E-13 | -7.77 | 18.8347538 | -1.21E-01 | 1609490   | 1609613   | NC_000012.11 |
| cg24385322      | 7.43E-12 | 4.33E-13 | -7.77 | 18.8345459 | -1.24E-01 | 141017773 | 141017896 | NC_000005.9  |

|               |          |          |       |            |           |           |           |              |
|---------------|----------|----------|-------|------------|-----------|-----------|-----------|--------------|
| cg16480368    | 7.43E-12 | 4.33E-13 | -7.77 | 18.8341982 | -7.01E-02 | 105892745 | 105892868 | NC_000011.9  |
| cg00334507    | 7.44E-12 | 4.33E-13 | -7.77 | 18.8335769 | -1.61E-01 | 29824599  | 29824722  | NC_000016.9  |
| cg02442305    | 7.44E-12 | 4.33E-13 | -7.77 | 18.8329056 | -6.66E-02 | 73975286  | 73975409  | NC_000010.10 |
| cg14099718    | 7.45E-12 | 4.34E-13 | -7.77 | 18.8324653 | -1.29E-01 | 36879449  | 36879572  | NC_000009.11 |
| cg08510077    | 7.45E-12 | 4.34E-13 | -7.77 | 18.8316715 | -5.55E-02 | 113666901 | 113667024 | NC_000003.11 |
| cg12226635    | 7.46E-12 | 4.35E-13 | -7.77 | 18.8303942 | -8.84E-02 | 20561913  | 20562036  | NC_000015.9  |
| cg20697075    | 7.47E-12 | 4.35E-13 | -7.77 | 18.8292682 | -5.51E-02 | 23578377  | 23578500  | NC_000019.9  |
| cg02952816    | 7.47E-12 | 4.35E-13 | -7.77 | 18.8290279 | -8.41E-02 | 80372912  | 80373035  | NC_000017.10 |
| cg25603927    | 7.47E-12 | 4.35E-13 | -7.77 | 18.8285389 | -1.50E-01 | 99185264  | 99185387  | NC_000010.10 |
| cg19176998    | 7.48E-12 | 4.36E-13 | -7.77 | 18.8276477 | -4.81E-02 | 141206759 | 141206882 | NC_000003.11 |
| cg17033166    | 7.48E-12 | 4.36E-13 | -7.77 | 18.8271304 | -1.04E-01 | 52221959  | 52222082  | NC_000012.11 |
| cg01287592    | 7.48E-12 | 4.36E-13 | -7.77 | 18.8269322 | -1.12E-01 | 142139839 | 142139962 | NC_000008.10 |
| cg01746532    | 7.50E-12 | 4.37E-13 | -7.77 | 18.8248238 | -4.11E-02 | 55791817  | 55791940  | NC_000019.9  |
| cg02905964    | 7.51E-12 | 4.37E-13 | -7.77 | 18.8239337 | -6.68E-02 | 29704262  | 29704385  | NC_000019.9  |
| cg00545681    | 7.51E-12 | 4.37E-13 | -7.77 | 18.8238822 | -6.62E-02 | 95007593  | 95007716  | NC_000001.10 |
| cg11631158    | 7.51E-12 | 4.38E-13 | -7.77 | 18.8232813 | -1.05E-01 | 26623620  | 26623743  | NC_000013.10 |
| cg10158715    | 7.52E-12 | 4.38E-13 | -7.77 | 18.8217015 | -1.41E-01 | 83382987  | 83383110  | NC_000015.9  |
| cg27095222    | 7.53E-12 | 4.39E-13 | -7.77 | 18.8211558 | -1.79E-01 | 88090861  | 88090984  | NC_000011.9  |
| cg18449135    | 7.53E-12 | 4.39E-13 | -7.77 | 18.8206706 | -1.90E-01 | 48833062  | 48833185  | NC_000019.9  |
| cg16179720    | 7.53E-12 | 4.39E-13 | -7.77 | 18.8199119 | -1.62E-01 | 201175660 | 201175783 | NC_000002.11 |
| cg24567537    | 7.56E-12 | 4.41E-13 | -7.77 | 18.8165377 | -1.28E-01 | 29520527  | 29520650  | NC_000006.11 |
| cg23333878    | 7.56E-12 | 4.41E-13 | -7.77 | 18.8164179 | -5.02E-02 | 4299768   | 4299891   | NC_000009.11 |
| ch.7.2086776R | 7.56E-12 | 4.41E-13 | -7.77 | 18.8156243 | -6.04E-02 | 99012084  | 99012207  | NC_000007.13 |
| cg20137147    | 7.58E-12 | 4.42E-13 | -7.77 | 18.8136684 | -1.05E-01 | 5342830   | 5342953   | NC_000017.10 |
| cg23294158    | 7.58E-12 | 4.42E-13 | -7.77 | 18.8135609 | -7.07E-02 | 47548493  | 47548616  | NC_000017.10 |

|               |          |          |       |            |           |           |           |              |
|---------------|----------|----------|-------|------------|-----------|-----------|-----------|--------------|
| cg02942766    | 7.59E-12 | 4.42E-13 | -7.77 | 18.8126642 | -1.86E-01 | 42328937  | 42329060  | NC_000002.11 |
| cg06529459    | 7.60E-12 | 4.43E-13 | -7.77 | 18.8106926 | -3.68E-02 | 67397595  | 67397718  | NC_000011.9  |
| cg15331834    | 7.61E-12 | 4.44E-13 | -7.77 | 18.8092807 | -1.05E-01 | 45360969  | 45361092  | NC_000010.10 |
| cg00446123    | 7.63E-12 | 4.45E-13 | -7.77 | 18.8062642 | -2.39E-01 | 62367888  | 62368011  | NC_000020.10 |
| cg10283277    | 7.64E-12 | 4.46E-13 | -7.77 | 18.8054645 | -4.35E-02 | 111472630 | 111472753 | NC_000011.9  |
| cg23989156    | 7.65E-12 | 4.46E-13 | -7.77 | 18.8044265 | -6.99E-02 | 27572583  | 27572706  | NC_000017.10 |
| cg07081725    | 7.65E-12 | 4.46E-13 | -7.77 | 18.8037664 | -1.15E-01 | 70626329  | 70626452  | NC_000004.11 |
| cg19256314    | 7.70E-12 | 4.49E-13 | -7.76 | 18.7972994 | -1.90E-01 | 109227237 | 109227360 | NC_000012.11 |
| cg12251075    | 7.70E-12 | 4.50E-13 | -7.76 | 18.7967874 | -1.03E-01 | 49244717  | 49244840  | NC_000017.10 |
| cg17263974    | 7.71E-12 | 4.50E-13 | -7.76 | 18.7959514 | -7.60E-02 | 102030215 | 102030338 | NC_000015.9  |
| cg06373660    | 7.72E-12 | 4.51E-13 | -7.76 | 18.7945408 | -1.61E-01 | 81414986  | 81415109  | NC_000013.10 |
| cg00381684    | 7.73E-12 | 4.51E-13 | -7.76 | 18.7932123 | -1.12E-01 | 31913814  | 31913937  | NC_000006.11 |
| cg00690143    | 7.73E-12 | 4.52E-13 | -7.76 | 18.7924528 | -2.90E-02 | 30810858  | 30810981  | NC_000007.13 |
| cg13320146    | 7.74E-12 | 4.52E-13 | -7.76 | 18.7919816 | -1.48E-01 | 150954826 | 150954949 | NC_000001.10 |
| cg06055249    | 7.74E-12 | 4.52E-13 | -7.76 | 18.7912644 | -6.32E-02 | 153988192 | 153988315 | NC_000005.9  |
| ch.18.975209F | 7.74E-12 | 4.52E-13 | -7.76 | 18.7910462 | -6.03E-02 | 49689826  | 49689949  | NC_000018.9  |
| cg14657417    | 7.75E-12 | 4.53E-13 | -7.76 | 18.7899914 | -4.63E-02 | 2344183   | 2344306   | NC_000001.10 |
| cg27529628    | 7.76E-12 | 4.53E-13 | -7.76 | 18.7887971 | -4.58E-02 | 100967219 | 100967342 | NC_000012.11 |
| cg24400517    | 7.78E-12 | 4.54E-13 | -7.76 | 18.7866719 | -6.40E-02 | 139876520 | 139876643 | NC_000007.13 |
| cg22451233    | 7.78E-12 | 4.55E-13 | -7.76 | 18.785671  | -7.31E-02 | 157892765 | 157892888 | NC_000004.11 |
| cg26019259    | 7.79E-12 | 4.55E-13 | -7.76 | 18.7849145 | -1.37E-01 | 7677608   | 7677731   | NC_000017.10 |
| ch.2.2685596F | 7.80E-12 | 4.56E-13 | -7.76 | 18.7838816 | -2.88E-02 | 128768557 | 128768680 | NC_000002.11 |
| cg18604876    | 7.81E-12 | 4.56E-13 | -7.76 | 18.7824863 | -7.13E-02 | 5164258   | 5164381   | NC_000003.11 |
| cg21653878    | 7.82E-12 | 4.57E-13 | -7.76 | 18.7808129 | -8.49E-02 | 54606055  | 54606178  | NC_000019.9  |
| cg00737593    | 7.83E-12 | 4.58E-13 | -7.76 | 18.7795668 | -1.32E-01 | 43422337  | 43422460  | NC_000001.10 |



|               |          |          |       |            |           |           |           |              |
|---------------|----------|----------|-------|------------|-----------|-----------|-----------|--------------|
| cg02386725    | 7.86E-12 | 4.59E-13 | -7.76 | 18.775911  | -6.14E-02 | 162467755 | 162467878 | NC_000001.10 |
| cg18382599    | 7.86E-12 | 4.60E-13 | -7.76 | 18.775044  | -4.73E-02 | 43124310  | 43124433  | NC_000001.10 |
| cg24363020    | 7.86E-12 | 4.60E-13 | -7.76 | 18.7750142 | -1.59E-01 | 72706849  | 72706972  | NC_000003.11 |
| cg00051483    | 7.86E-12 | 4.60E-13 | -7.76 | 18.7747552 | -1.25E-01 | 150211811 | 150211934 | NC_000007.13 |
| cg17379860    | 7.86E-12 | 4.60E-13 | -7.76 | 18.7746877 | -1.30E-01 | 61159602  | 61159725  | NC_000011.9  |
| cg21561157    | 7.87E-12 | 4.60E-13 | -7.76 | 18.774509  | -9.66E-02 | 59065835  | 59065958  | NC_000019.9  |
| cg13781938    | 7.87E-12 | 4.60E-13 | -7.76 | 18.7740471 | -5.87E-02 | 76880863  | 76880986  | NC_000002.11 |
| cg01888129    | 7.88E-12 | 4.61E-13 | -7.76 | 18.7726181 | -5.73E-02 | 64126210  | 64126333  | NC_000015.9  |
| cg27620174    | 7.88E-12 | 4.61E-13 | -7.76 | 18.7720883 | -1.61E-01 | 102034278 | 102034401 | NC_000007.13 |
| cg03774957    | 7.89E-12 | 4.61E-13 | -7.76 | 18.7716147 | -1.41E-01 | 141227950 | 141228073 | NC_000005.9  |
| cg14069214    | 7.89E-12 | 4.61E-13 | -7.76 | 18.7713611 | -1.56E-01 | 120933194 | 120933317 | NC_000012.11 |
| cg14094521    | 7.89E-12 | 4.62E-13 | -7.76 | 18.7707011 | -1.68E-01 | 246869082 | 246869205 | NC_000001.10 |
| cg17972352    | 7.92E-12 | 4.63E-13 | -7.76 | 18.7677014 | -1.42E-01 | 45939668  | 45939791  | NC_000010.10 |
| cg23414001    | 7.92E-12 | 4.64E-13 | -7.76 | 18.7666053 | -1.02E-01 | 33681070  | 33681193  | NC_000020.10 |
| cg20393620    | 7.93E-12 | 4.64E-13 | -7.76 | 18.7652524 | -2.43E-01 | 134609828 | 134609951 | NC_000006.11 |
| cg07543823    | 7.94E-12 | 4.65E-13 | -7.76 | 18.7640425 | -7.08E-02 | 20254968  | 20255091  | NC_000022.10 |
| cg12894711    | 7.96E-12 | 4.66E-13 | -7.76 | 18.7625039 | -1.72E-01 | 43821949  | 43822072  | NC_000007.13 |
| cg04650271    | 7.98E-12 | 4.67E-13 | -7.76 | 18.7589242 | -8.16E-02 | 897024    | 897147    | NC_000020.10 |
| cg26510017    | 7.99E-12 | 4.68E-13 | -7.76 | 18.758266  | -7.73E-02 | 39299546  | 39299669  | NC_000012.11 |
| cg03860038    | 8.00E-12 | 4.68E-13 | -7.76 | 18.7571446 | -1.66E-01 | 134231517 | 134231640 | NC_000010.10 |
| cg26610624    | 8.01E-12 | 4.69E-13 | -7.76 | 18.7560377 | -6.93E-02 | 1981268   | 1981391   | NC_000001.10 |
| cg03862437    | 8.01E-12 | 4.69E-13 | -7.76 | 18.7554601 | -1.67E-01 | 194353432 | 194353555 | NC_000003.11 |
| ch.19.732135R | 8.01E-12 | 4.69E-13 | -7.76 | 18.7549881 | -3.70E-02 | 17385198  | 17385321  | NC_000019.9  |
| cg01859228    | 8.04E-12 | 4.70E-13 | -7.76 | 18.7520007 | -1.47E-01 | 64208452  | 64208575  | NC_000015.9  |
| cg27337803    | 8.06E-12 | 4.72E-13 | -7.76 | 18.7487052 | -6.95E-02 | 29937932  | 29938055  | NC_000016.9  |

|                |          |          |       |            |           |           |           |              |
|----------------|----------|----------|-------|------------|-----------|-----------|-----------|--------------|
| cg22900681     | 8.08E-12 | 4.73E-13 | -7.76 | 18.7471127 | -1.47E-01 | 25301413  | 25301536  | NC_000002.11 |
| cg19934294     | 8.08E-12 | 4.73E-13 | -7.76 | 18.7460795 | -1.31E-01 | 2933421   | 2933544   | NC_000004.11 |
| cg03184472     | 8.09E-12 | 4.74E-13 | -7.76 | 18.7448709 | -1.87E-01 | 39174738  | 39174861  | NC_000002.11 |
| cg00042059     | 8.11E-12 | 4.75E-13 | -7.76 | 18.7422313 | -1.56E-01 | 55087588  | 55087711  | NC_000002.11 |
| cg16277776     | 8.12E-12 | 4.76E-13 | -7.76 | 18.7409364 | -1.22E-01 | 1490676   | 1490799   | NC_000001.10 |
| cg18161025     | 8.13E-12 | 4.76E-13 | -7.76 | 18.7401112 | -1.52E-01 | 177144293 | 177144416 | NC_000001.10 |
| cg26488978     | 8.15E-12 | 4.78E-13 | -7.75 | 18.7370671 | -1.34E-01 | 42247372  | 42247495  | NC_000006.11 |
| cg09832245     | 8.16E-12 | 4.78E-13 | -7.75 | 18.7363099 | -1.73E-01 | 85494611  | 85494734  | NC_000016.9  |
| cg25888881     | 8.16E-12 | 4.78E-13 | -7.75 | 18.7354944 | -1.50E-01 | 31288287  | 31288410  | NC_000010.10 |
| cg07165066     | 8.18E-12 | 4.80E-13 | -7.75 | 18.7330309 | -2.58E-01 | 23952576  | 23952699  | NC_000013.10 |
| cg19579446     | 8.20E-12 | 4.81E-13 | -7.75 | 18.7310269 | -6.57E-02 | 57335474  | 57335597  | NC_000011.9  |
| cg10104290     | 8.21E-12 | 4.81E-13 | -7.75 | 18.7299854 | -1.60E-01 | 167597441 | 167597564 | NC_000001.10 |
| cg27507473     | 8.22E-12 | 4.82E-13 | -7.75 | 18.7285879 | -1.03E-01 | 86002958  | 86003081  | NC_000016.9  |
| cg19513321     | 8.22E-12 | 4.82E-13 | -7.75 | 18.72818   | -1.85E-01 | 85811432  | 85811555  | NC_000002.11 |
| ch.16.1687320F | 8.23E-12 | 4.82E-13 | -7.75 | 18.7271925 | -6.19E-02 | 74666840  | 74666963  | NC_000016.9  |
| cg03716999     | 8.23E-12 | 4.83E-13 | -7.75 | 18.7270802 | -9.17E-02 | 6265802   | 6265925   | NC_000001.10 |
| cg22504175     | 8.23E-12 | 4.83E-13 | -7.75 | 18.7265828 | -6.37E-02 | 143042585 | 143042708 | NC_000007.13 |
| cg14389122     | 8.24E-12 | 4.83E-13 | -7.75 | 18.7262694 | -1.76E-01 | 74945851  | 74945974  | NC_000015.9  |
| cg20798677     | 8.24E-12 | 4.83E-13 | -7.75 | 18.7258941 | -6.24E-02 | 39968547  | 39968670  | NC_000017.10 |
| cg01243950     | 8.25E-12 | 4.84E-13 | -7.75 | 18.7241254 | -1.44E-01 | 45908640  | 45908763  | NC_000002.11 |
| cg09682913     | 8.26E-12 | 4.84E-13 | -7.75 | 18.7236506 | -1.06E-01 | 30455589  | 30455712  | NC_000002.11 |
| cg02313130     | 8.28E-12 | 4.86E-13 | -7.75 | 18.720807  | -1.51E-01 | 223854447 | 223854570 | NC_000001.10 |
| cg03619586     | 8.29E-12 | 4.86E-13 | -7.75 | 18.7198865 | -1.33E-01 | 31705409  | 31705532  | NC_000006.11 |
| cg13755614     | 8.30E-12 | 4.87E-13 | -7.75 | 18.7184391 | -6.39E-02 | 131710194 | 131710317 | NC_000009.11 |
| cg19836471     | 8.30E-12 | 4.87E-13 | -7.75 | 18.7175747 | -1.72E-01 | 79638108  | 79638231  | NC_000010.10 |

|               |          |          |       |            |           |           |           |              |
|---------------|----------|----------|-------|------------|-----------|-----------|-----------|--------------|
| cg10652956    | 8.31E-12 | 4.87E-13 | -7.75 | 18.7171987 | -6.20E-02 | 44144380  | 44144503  | NC_000010.10 |
| cg20656856    | 8.31E-12 | 4.88E-13 | -7.75 | 18.7164175 | -6.59E-02 | 75871799  | 75871922  | NC_000015.9  |
| cg13550419    | 8.32E-12 | 4.88E-13 | -7.75 | 18.7157157 | -1.63E-01 | 44898510  | 44898633  | NC_000017.10 |
| cg02554317    | 8.35E-12 | 4.90E-13 | -7.75 | 18.7120081 | -5.78E-02 | 46728312  | 46728435  | NC_000016.9  |
| cg22609277    | 8.36E-12 | 4.91E-13 | -7.75 | 18.7108689 | -6.57E-02 | 111746873 | 111746996 | NC_000001.10 |
| cg15871086    | 8.36E-12 | 4.91E-13 | -7.75 | 18.7104343 | -1.29E-01 | 56526595  | 56526718  | NC_000018.9  |
| cg26229607    | 8.36E-12 | 4.91E-13 | -7.75 | 18.7100969 | -5.38E-02 | 94703098  | 94703221  | NC_000001.10 |
| cg01329789    | 8.37E-12 | 4.91E-13 | -7.75 | 18.709061  | -7.70E-02 | 219157515 | 219157638 | NC_000002.11 |
| cg25260176    | 8.38E-12 | 4.92E-13 | -7.75 | 18.7082737 | -1.72E-01 | 57569940  | 57570063  | NC_000012.11 |
| cg23518541    | 8.40E-12 | 4.93E-13 | -7.75 | 18.7052402 | -1.63E-01 | 25472652  | 25472775  | NC_000003.11 |
| cg11153694    | 8.40E-12 | 4.93E-13 | -7.75 | 18.7051254 | -1.12E-01 | 141017797 | 141017920 | NC_000005.9  |
| cg04609912    | 8.41E-12 | 4.94E-13 | -7.75 | 18.7045554 | -1.29E-01 | 78528146  | 78528269  | NC_000016.9  |
| cg04399632    | 8.41E-12 | 4.94E-13 | -7.75 | 18.703655  | -1.22E-01 | 11837547  | 11837670  | NC_000016.9  |
| ch.7.1667959R | 8.41E-12 | 4.94E-13 | -7.75 | 18.7036429 | -6.06E-02 | 75693231  | 75693354  | NC_000007.13 |
| cg05499012    | 8.42E-12 | 4.95E-13 | -7.75 | 18.702558  | -1.49E-01 | 94967291  | 94967414  | NC_000005.9  |
| cg27471901    | 8.42E-12 | 4.95E-13 | -7.75 | 18.7022514 | -7.51E-02 | 65097394  | 65097517  | NC_000011.9  |
| cg10113582    | 8.45E-12 | 4.97E-13 | -7.75 | 18.6989305 | -1.84E-01 | 905918    | 906041    | NC_000004.11 |
| cg19716816    | 8.46E-12 | 4.97E-13 | -7.75 | 18.6979495 | -6.52E-02 | 70056267  | 70056390  | NC_000002.11 |
| cg07010486    | 8.47E-12 | 4.97E-13 | -7.75 | 18.6973835 | -1.48E-01 | 204301350 | 204301473 | NC_000001.10 |
| cg02667467    | 8.47E-12 | 4.97E-13 | -7.75 | 18.6972189 | -1.02E-01 | 72920176  | 72920299  | NC_000017.10 |
| cg15770046    | 8.47E-12 | 4.98E-13 | -7.75 | 18.6960928 | -1.18E-01 | 35764710  | 35764833  | NC_000019.9  |
| cg13487918    | 8.48E-12 | 4.98E-13 | -7.75 | 18.695863  | -1.64E-01 | 38067350  | 38067473  | NC_000003.11 |
| cg19712821    | 8.49E-12 | 4.99E-13 | -7.75 | 18.694673  | -1.18E-01 | 15965016  | 15965139  | NC_000004.11 |
| cg19082496    | 8.50E-12 | 4.99E-13 | -7.75 | 18.6934815 | -2.35E-01 | 33899352  | 33899475  | NC_000001.10 |
| cg00916635    | 8.50E-12 | 4.99E-13 | -7.75 | 18.6931786 | -2.81E-01 | 114414312 | 114414435 | NC_000001.10 |

|            |          |          |       |            |           |           |           |              |
|------------|----------|----------|-------|------------|-----------|-----------|-----------|--------------|
| cg02797271 | 8.51E-12 | 5.00E-13 | -7.75 | 18.6918774 | -1.87E-01 | 105532159 | 105532282 | NC_000014.8  |
| cg12583970 | 8.53E-12 | 5.01E-13 | -7.75 | 18.6899705 | -1.66E-01 | 27190330  | 27190453  | NC_000001.10 |
| cg16620032 | 8.53E-12 | 5.02E-13 | -7.75 | 18.6889301 | -7.56E-02 | 46097075  | 46097198  | NC_000019.9  |
| cg26769838 | 8.54E-12 | 5.02E-13 | -7.75 | 18.6877599 | -2.13E-01 | 3164844   | 3164967   | NC_000010.10 |
| cg22502856 | 8.56E-12 | 5.04E-13 | -7.75 | 18.6851099 | -1.85E-01 | 209825678 | 209825801 | NC_000001.10 |
| cg22800830 | 8.59E-12 | 5.05E-13 | -7.75 | 18.6824882 | -1.32E-01 | 134608238 | 134608361 | NC_000010.10 |
| cg18533282 | 8.60E-12 | 5.06E-13 | -7.75 | 18.6807805 | -7.63E-02 | 52917660  | 52917783  | NC_000004.11 |
| cg00282706 | 8.60E-12 | 5.06E-13 | -7.75 | 18.6803823 | -1.58E-01 | 6055430   | 6055553   | NC_000012.11 |
| cg03078972 | 8.61E-12 | 5.07E-13 | -7.74 | 18.6790836 | -9.43E-02 | 48598634  | 48598757  | NC_000020.10 |
| cg24475622 | 8.62E-12 | 5.07E-13 | -7.74 | 18.6782095 | -6.09E-02 | 1003851   | 1003974   | NC_000001.10 |
| cg12484072 | 8.62E-12 | 5.07E-13 | -7.74 | 18.678203  | -2.16E-02 | 39872463  | 39872586  | NC_000015.9  |
| cg13035032 | 8.62E-12 | 5.07E-13 | -7.74 | 18.6778043 | -8.06E-02 | 519484    | 519607    | NC_000007.13 |
| cg26115276 | 8.62E-12 | 5.07E-13 | -7.74 | 18.6777868 | -7.24E-02 | 178977181 | 178977304 | NC_000005.9  |
| cg14489794 | 8.65E-12 | 5.09E-13 | -7.74 | 18.6749845 | -1.37E-01 | 46972462  | 46972585  | NC_000022.10 |
| cg21214232 | 8.68E-12 | 5.11E-13 | -7.74 | 18.6712661 | -8.31E-02 | 25426273  | 25426396  | NC_000015.9  |
| cg00021237 | 8.69E-12 | 5.11E-13 | -7.74 | 18.6699753 | -7.19E-02 | 67525849  | 67525972  | NC_000008.10 |
| cg22326553 | 8.70E-12 | 5.12E-13 | -7.74 | 18.6684433 | -8.96E-02 | 124155458 | 124155581 | NC_000012.11 |
| cg02117775 | 8.74E-12 | 5.14E-13 | -7.74 | 18.6639661 | -6.34E-02 | 5596539   | 5596662   | NC_000007.13 |
| cg11646259 | 8.74E-12 | 5.14E-13 | -7.74 | 18.6639301 | -1.76E-01 | 34026657  | 34026780  | NC_000007.13 |
| cg13146553 | 8.74E-12 | 5.15E-13 | -7.74 | 18.6638627 | -1.22E-01 | 61343563  | 61343686  | NC_000015.9  |
| cg13849525 | 8.74E-12 | 5.15E-13 | -7.74 | 18.6633738 | -1.24E-01 | 46418069  | 46418192  | NC_000019.9  |
| cg17670237 | 8.75E-12 | 5.15E-13 | -7.74 | 18.6620475 | -1.73E-01 | 79642491  | 79642614  | NC_000004.11 |
| cg05135541 | 8.76E-12 | 5.16E-13 | -7.74 | 18.6609284 | -7.05E-02 | 150039387 | 150039510 | NC_000001.10 |
| cg23010344 | 8.76E-12 | 5.16E-13 | -7.74 | 18.6608478 | -6.75E-02 | 228871301 | 228871424 | NC_000001.10 |
| cg26069066 | 8.77E-12 | 5.17E-13 | -7.74 | 18.6598105 | -7.01E-02 | 44044698  | 44044821  | NC_000020.10 |

|                |          |          |       |            |           |           |           |              |
|----------------|----------|----------|-------|------------|-----------|-----------|-----------|--------------|
| cg20805133     | 8.79E-12 | 5.17E-13 | -7.74 | 18.6583341 | -1.95E-01 | 242802192 | 242802315 | NC_000002.11 |
| cg27551895     | 8.79E-12 | 5.17E-13 | -7.74 | 18.6583341 | -5.13E-02 | 118935341 | 118935464 | NC_000010.10 |
| cg00867901     | 8.79E-12 | 5.18E-13 | -7.74 | 18.6578753 | -9.20E-02 | 99787006  | 99787129  | NC_000014.8  |
| cg19910648     | 8.79E-12 | 5.18E-13 | -7.74 | 18.6576993 | -8.27E-02 | 149736763 | 149736886 | NC_000005.9  |
| ch.12.2890353F | 8.82E-12 | 5.19E-13 | -7.74 | 18.6544956 | -3.28E-02 | 132599781 | 132599904 | NC_000012.11 |
| cg03630386     | 8.82E-12 | 5.20E-13 | -7.74 | 18.6539001 | -1.36E-01 | 1041088   | 1041211   | NC_000016.9  |
| cg27617775     | 8.83E-12 | 5.20E-13 | -7.74 | 18.6532078 | -1.13E-01 | 1989850   | 1989973   | NC_000011.9  |
| cg16567216     | 8.83E-12 | 5.20E-13 | -7.74 | 18.6529801 | -1.54E-01 | 59385695  | 59385818  | NC_000017.10 |
| cg10590964     | 8.84E-12 | 5.21E-13 | -7.74 | 18.6517309 | -1.12E-01 | 202929157 | 202929280 | NC_000002.11 |
| cg06768944     | 8.85E-12 | 5.22E-13 | -7.74 | 18.6504142 | -1.70E-01 | 142216276 | 142216399 | NC_000008.10 |
| cg13551141     | 8.88E-12 | 5.23E-13 | -7.74 | 18.6468031 | -1.61E-01 | 127155187 | 127155310 | NC_000009.11 |
| cg09787580     | 8.88E-12 | 5.24E-13 | -7.74 | 18.6466622 | -1.05E-01 | 140227335 | 140227458 | NC_000007.13 |
| cg13924580     | 8.91E-12 | 5.25E-13 | -7.74 | 18.6434592 | -8.63E-02 | 99306716  | 99306839  | NC_000008.10 |
| cg26340149     | 8.92E-12 | 5.25E-13 | -7.74 | 18.6430981 | -1.31E-01 | 69988497  | 69988620  | NC_000011.9  |
| cg16442450     | 8.92E-12 | 5.26E-13 | -7.74 | 18.6429351 | -7.00E-02 | 69111511  | 69111634  | NC_000015.9  |
| cg03743861     | 8.92E-12 | 5.26E-13 | -7.74 | 18.6427062 | -9.30E-02 | 48263173  | 48263296  | NC_000017.10 |
| cg00063111     | 8.93E-12 | 5.27E-13 | -7.74 | 18.6410437 | -7.62E-02 | 39448952  | 39449075  | NC_000003.11 |
| cg01875467     | 8.93E-12 | 5.27E-13 | -7.74 | 18.6408841 | -1.08E-01 | 149493008 | 149493131 | NC_000005.9  |
| cg03752935     | 8.94E-12 | 5.27E-13 | -7.74 | 18.6401507 | -1.48E-01 | 128592524 | 128592647 | NC_000010.10 |
| ch.3.1042801R  | 8.95E-12 | 5.28E-13 | -7.74 | 18.6392377 | -3.30E-02 | 49084142  | 49084265  | NC_000003.11 |
| cg22502502     | 8.95E-12 | 5.28E-13 | -7.74 | 18.6387121 | -1.73E-01 | 25962567  | 25962690  | NC_000006.11 |
| cg02202169     | 8.96E-12 | 5.29E-13 | -7.74 | 18.6373145 | -1.14E-01 | 41241867  | 41241990  | NC_000013.10 |
| cg10283371     | 8.97E-12 | 5.29E-13 | -7.74 | 18.6368062 | -9.18E-02 | 2494595   | 2494718   | NC_000019.9  |
| cg26925980     | 8.98E-12 | 5.29E-13 | -7.74 | 18.6357168 | -1.34E-01 | 19002068  | 19002191  | NC_000010.10 |
| cg21195277     | 8.99E-12 | 5.30E-13 | -7.74 | 18.6340261 | -1.24E-01 | 32339208  | 32339331  | NC_000006.11 |

|               |          |          |       |            |           |           |           |              |
|---------------|----------|----------|-------|------------|-----------|-----------|-----------|--------------|
| cg23030200    | 8.99E-12 | 5.31E-13 | -7.74 | 18.6335706 | -1.35E-01 | 64575346  | 64575469  | NC_000012.11 |
| cg01343363    | 9.00E-12 | 5.31E-13 | -7.74 | 18.6326233 | -1.99E-01 | 58533808  | 58533931  | NC_000016.9  |
| cg11118413    | 9.01E-12 | 5.31E-13 | -7.74 | 18.632212  | -1.53E-01 | 128292699 | 128292822 | NC_000003.11 |
| cg10066186    | 9.01E-12 | 5.32E-13 | -7.74 | 18.6316242 | -2.01E-01 | 23083160  | 23083283  | NC_000014.8  |
| cg26772116    | 9.03E-12 | 5.33E-13 | -7.74 | 18.6292452 | -1.69E-01 | 28016624  | 28016747  | NC_000013.10 |
| ch.1.4292830F | 9.05E-12 | 5.34E-13 | -7.74 | 18.626884  | -5.07E-02 | 220514352 | 220514475 | NC_000001.10 |
| cg26470696    | 9.06E-12 | 5.34E-13 | -7.74 | 18.6264812 | -1.61E-01 | 19383613  | 19383736  | NC_000019.9  |
| cg22387253    | 9.06E-12 | 5.35E-13 | -7.74 | 18.6255969 | -1.32E-01 | 61310104  | 61310227  | NC_000015.9  |
| cg22115196    | 9.07E-12 | 5.35E-13 | -7.74 | 18.6248908 | -1.40E-01 | 54829461  | 54829584  | NC_000004.11 |
| cg16635948    | 9.08E-12 | 5.36E-13 | -7.74 | 18.623891  | -2.03E-01 | 109834011 | 109834134 | NC_000002.11 |
| cg12616177    | 9.10E-12 | 5.37E-13 | -7.74 | 18.6218714 | -1.68E-01 | 100434510 | 100434633 | NC_000007.13 |
| cg21690777    | 9.13E-12 | 5.39E-13 | -7.73 | 18.6185286 | -9.60E-02 | 6583834   | 6583957   | NC_000001.10 |
| cg07699845    | 9.15E-12 | 5.40E-13 | -7.73 | 18.6162805 | -1.43E-01 | 38068205  | 38068328  | NC_000008.10 |
| cg07114810    | 9.16E-12 | 5.41E-13 | -7.73 | 18.6148336 | -9.04E-02 | 7070679   | 7070802   | NC_000012.11 |
| cg26878995    | 9.19E-12 | 5.42E-13 | -7.73 | 18.6117327 | -4.19E-02 | 168106731 | 168106854 | NC_000001.10 |
| cg18268631    | 9.19E-12 | 5.42E-13 | -7.73 | 18.6117034 | -6.31E-02 | 49822384  | 49822507  | NC_000013.10 |
| cg24883642    | 9.19E-12 | 5.43E-13 | -7.73 | 18.6115186 | -5.27E-02 | 40226588  | 40226711  | NC_000015.9  |
| ch.11.152092R | 9.19E-12 | 5.43E-13 | -7.73 | 18.6114938 | -3.42E-02 | 3780240   | 3780363   | NC_000011.9  |
| cg25021530    | 9.20E-12 | 5.43E-13 | -7.73 | 18.609922  | -1.29E-01 | 44333003  | 44333126  | NC_000005.9  |
| cg23807924    | 9.20E-12 | 5.44E-13 | -7.73 | 18.6095799 | -1.35E-01 | 246860361 | 246860484 | NC_000001.10 |
| cg16336556    | 9.21E-12 | 5.44E-13 | -7.73 | 18.6087463 | -1.83E-01 | 33295138  | 33295261  | NC_000002.11 |
| cg15406343    | 9.23E-12 | 5.45E-13 | -7.73 | 18.6068698 | -1.69E-01 | 8311700   | 8311823   | NC_000017.10 |
| cg26685501    | 9.23E-12 | 5.45E-13 | -7.73 | 18.6068062 | -6.60E-02 | 38019921  | 38020044  | NC_000001.10 |
| cg01514828    | 9.23E-12 | 5.45E-13 | -7.73 | 18.6066128 | -1.58E-01 | 36715074  | 36715197  | NC_000017.10 |
| cg14965639    | 9.23E-12 | 5.46E-13 | -7.73 | 18.6059026 | -1.97E-01 | 48795994  | 48796117  | NC_000002.11 |

|            |          |          |       |            |           |           |           |              |
|------------|----------|----------|-------|------------|-----------|-----------|-----------|--------------|
| cg05385282 | 9.23E-12 | 5.46E-13 | -7.73 | 18.6056719 | -1.45E-01 | 201562364 | 201562487 | NC_000001.10 |
| cg10188797 | 9.24E-12 | 5.46E-13 | -7.73 | 18.6055204 | -1.54E-01 | 77962048  | 77962171  | NC_000017.10 |
| cg09359933 | 9.24E-12 | 5.46E-13 | -7.73 | 18.6046032 | -5.92E-02 | 4670669   | 4670792   | NC_000019.9  |
| cg00618155 | 9.25E-12 | 5.47E-13 | -7.73 | 18.6042904 | -1.87E-01 | 72459629  | 72459752  | NC_000010.10 |
| cg03674157 | 9.25E-12 | 5.47E-13 | -7.73 | 18.6040031 | -1.74E-02 | 161090019 | 161090142 | NC_000003.11 |
| cg16920189 | 9.25E-12 | 5.47E-13 | -7.73 | 18.6035568 | -4.19E-02 | 100105709 | 100105832 | NC_000015.9  |
| cg19825758 | 9.28E-12 | 5.48E-13 | -7.73 | 18.6008146 | -6.73E-02 | 182880692 | 182880815 | NC_000003.11 |
| cg20597486 | 9.29E-12 | 5.49E-13 | -7.73 | 18.5999039 | -1.45E-01 | 158979841 | 158979964 | NC_000001.10 |
| cg26687844 | 9.29E-12 | 5.49E-13 | -7.73 | 18.5998444 | -4.72E-02 | 116164935 | 116165058 | NC_000007.13 |
| cg00619207 | 9.30E-12 | 5.50E-13 | -7.73 | 18.5987009 | -1.33E-01 | 111743368 | 111743491 | NC_000001.10 |
| cg23305899 | 9.31E-12 | 5.50E-13 | -7.73 | 18.5975816 | -1.69E-01 | 101539489 | 101539612 | NC_000014.8  |
| cg20974482 | 9.33E-12 | 5.52E-13 | -7.73 | 18.5944379 | -6.74E-02 | 37321680  | 37321803  | NC_000006.11 |
| cg26433333 | 9.33E-12 | 5.52E-13 | -7.73 | 18.594291  | -1.08E-01 | 78842844  | 78842967  | NC_000005.9  |
| cg01286930 | 9.35E-12 | 5.53E-13 | -7.73 | 18.5930514 | -1.68E-01 | 54783773  | 54783896  | NC_000002.11 |
| cg08241785 | 9.37E-12 | 5.54E-13 | -7.73 | 18.5900841 | -1.28E-01 | 75919281  | 75919404  | NC_000005.9  |
| cg07409680 | 9.39E-12 | 5.55E-13 | -7.73 | 18.5886749 | -7.92E-02 | 32260442  | 32260565  | NC_000012.11 |
| cg19456996 | 9.39E-12 | 5.56E-13 | -7.73 | 18.5878525 | -6.96E-02 | 29600642  | 29600765  | NC_000006.11 |
| cg26348348 | 9.40E-12 | 5.56E-13 | -7.73 | 18.586651  | -1.58E-01 | 133428993 | 133429116 | NC_000002.11 |
| cg24778896 | 9.41E-12 | 5.57E-13 | -7.73 | 18.5859542 | -1.22E-01 | 65394063  | 65394186  | NC_000015.9  |
| cg05824225 | 9.42E-12 | 5.57E-13 | -7.73 | 18.5849151 | -5.08E-02 | 23618481  | 23618604  | NC_000020.10 |
| cg12255995 | 9.43E-12 | 5.58E-13 | -7.73 | 18.5841503 | -2.41E-01 | 1132537   | 1132660   | NC_000019.9  |
| cg22847190 | 9.44E-12 | 5.59E-13 | -7.73 | 18.5828374 | -6.70E-02 | 2598508   | 2598631   | NC_000007.13 |
| cg06366107 | 9.44E-12 | 5.59E-13 | -7.73 | 18.5822155 | -1.59E-01 | 154990562 | 154990685 | NC_000001.10 |
| cg19058189 | 9.45E-12 | 5.60E-13 | -7.73 | 18.581206  | -9.77E-02 | 1958090   | 1958213   | NC_000017.10 |
| cg22746584 | 9.45E-12 | 5.60E-13 | -7.73 | 18.5808779 | -1.92E-01 | 136676672 | 136676795 | NC_000003.11 |

|                 |          |          |       |            |           |           |           |              |
|-----------------|----------|----------|-------|------------|-----------|-----------|-----------|--------------|
| cg19601636      | 9.46E-12 | 5.60E-13 | -7.73 | 18.5796479 | -1.56E-01 | 20001066  | 20001189  | NC_000022.10 |
| cg18503829      | 9.47E-12 | 5.61E-13 | -7.73 | 18.5785528 | -2.13E-01 | 729956    | 730079    | NC_000010.10 |
| cg13279476      | 9.48E-12 | 5.62E-13 | -7.73 | 18.5773694 | -1.82E-01 | 15372965  | 15373088  | NC_000003.11 |
| cg10265472      | 9.49E-12 | 5.62E-13 | -7.73 | 18.5771186 | -6.05E-02 | 20753215  | 20753338  | NC_000016.9  |
| cg26064460      | 9.50E-12 | 5.63E-13 | -7.73 | 18.5755258 | -1.88E-01 | 23703928  | 23704051  | NC_000001.10 |
| cg23662675      | 9.50E-12 | 5.63E-13 | -7.73 | 18.5754823 | -4.15E-02 | 45985596  | 45985719  | NC_000020.10 |
| cg04317047      | 9.52E-12 | 5.64E-13 | -7.73 | 18.5733669 | -1.48E-01 | 148808388 | 148808511 | NC_000005.9  |
| cg17413194      | 9.53E-12 | 5.64E-13 | -7.73 | 18.5726238 | -1.60E-01 | 63053996  | 63054119  | NC_000017.10 |
| cg03440799      | 9.54E-12 | 5.65E-13 | -7.73 | 18.5709415 | -2.11E-01 | 179334176 | 179334299 | NC_000001.10 |
| cg18515872      | 9.55E-12 | 5.66E-13 | -7.73 | 18.569739  | -2.04E-01 | 72943461  | 72943584  | NC_000014.8  |
| cg00945293      | 9.57E-12 | 5.67E-13 | -7.73 | 18.5681757 | -1.62E-01 | 2984869   | 2984992   | NC_000001.10 |
| cg12110437      | 9.59E-12 | 5.68E-13 | -7.73 | 18.5656183 | -1.97E-01 | 144098888 | 144099011 | NC_000008.10 |
| cg21144922      | 9.60E-12 | 5.69E-13 | -7.73 | 18.5647112 | -1.21E-01 | 109204168 | 109204291 | NC_000001.10 |
| cg14899408      | 9.60E-12 | 5.69E-13 | -7.73 | 18.5644228 | -9.92E-02 | 117698932 | 117699055 | NC_000011.9  |
| cg24525364      | 9.60E-12 | 5.69E-13 | -7.73 | 18.564278  | -9.75E-02 | 35730504  | 35730627  | NC_000001.10 |
| cg19312085      | 9.62E-12 | 5.70E-13 | -7.73 | 18.5621991 | -1.46E-01 | 247553836 | 247553959 | NC_000001.10 |
| ch.22.43177094F | 9.62E-12 | 5.71E-13 | -7.73 | 18.561831  | -3.34E-02 | 44798430  | 44798553  | NC_000022.10 |
| ch.6.3866157F   | 9.64E-12 | 5.72E-13 | -7.72 | 18.5601175 | -5.45E-02 | 3921158   | 3921281   | NC_000006.11 |
| cg01917416      | 9.65E-12 | 5.72E-13 | -7.72 | 18.5589957 | -6.86E-02 | 61116782  | 61116905  | NC_000014.8  |
| cg19303849      | 9.65E-12 | 5.73E-13 | -7.72 | 18.5582009 | -3.64E-02 | 145090156 | 145090279 | NC_000002.11 |
| cg25310081      | 9.66E-12 | 5.73E-13 | -7.72 | 18.5574446 | -2.13E-01 | 56959642  | 56959765  | NC_000012.11 |
| cg13120798      | 9.67E-12 | 5.73E-13 | -7.72 | 18.5570737 | -1.07E-01 | 21090264  | 21090387  | NC_000022.10 |
| cg16442044      | 9.68E-12 | 5.74E-13 | -7.72 | 18.5554567 | -3.74E-02 | 129705218 | 129705341 | NC_000010.10 |
| cg06468476      | 9.70E-12 | 5.75E-13 | -7.72 | 18.5538905 | -4.38E-02 | 47744347  | 47744470  | NC_000021.8  |
| cg03208951      | 9.71E-12 | 5.76E-13 | -7.72 | 18.5526996 | -7.42E-02 | 48828835  | 48828958  | NC_000019.9  |



|               |          |          |       |            |           |           |           |              |
|---------------|----------|----------|-------|------------|-----------|-----------|-----------|--------------|
| cg20294328    | 9.71E-12 | 5.76E-13 | -7.72 | 18.5521131 | -1.47E-01 | 46584618  | 46584741  | NC_000007.13 |
| cg00170438    | 9.72E-12 | 5.77E-13 | -7.72 | 18.5514662 | -1.10E-01 | 60792389  | 60792512  | NC_000020.10 |
| cg16887070    | 9.72E-12 | 5.77E-13 | -7.72 | 18.5510272 | -1.68E-01 | 3324467   | 3324590   | NC_000006.11 |
| cg22935207    | 9.73E-12 | 5.78E-13 | -7.72 | 18.5500013 | -3.24E-02 | 90701850  | 90701973  | NC_000014.8  |
| cg25247183    | 9.75E-12 | 5.78E-13 | -7.72 | 18.5483479 | -5.50E-02 | 38073049  | 38073172  | NC_000022.10 |
| cg20587874    | 9.77E-12 | 5.80E-13 | -7.72 | 18.5452509 | -1.74E-01 | 179269232 | 179269355 | NC_000002.11 |
| cg01821967    | 9.78E-12 | 5.80E-13 | -7.72 | 18.5449875 | -2.58E-02 | 219925939 | 219926062 | NC_000002.11 |
| cg12679230    | 9.81E-12 | 5.82E-13 | -7.72 | 18.5418163 | -1.22E-01 | 155463133 | 155463256 | NC_000003.11 |
| cg11442608    | 9.81E-12 | 5.82E-13 | -7.72 | 18.5417269 | -1.73E-01 | 81456832  | 81456955  | NC_000015.9  |
| cg21173440    | 9.82E-12 | 5.83E-13 | -7.72 | 18.5402098 | -5.64E-02 | 55008212  | 55008335  | NC_000005.9  |
| cg08568298    | 9.82E-12 | 5.84E-13 | -7.72 | 18.5398127 | -1.45E-01 | 43922240  | 43922363  | NC_000017.10 |
| cg10967176    | 9.83E-12 | 5.84E-13 | -7.72 | 18.5396285 | -1.11E-01 | 32013699  | 32013822  | NC_000006.11 |
| cg21317428    | 9.84E-12 | 5.85E-13 | -7.72 | 18.5380706 | -1.29E-01 | 1157267   | 1157390   | NC_000017.10 |
| cg06085579    | 9.85E-12 | 5.85E-13 | -7.72 | 18.5374255 | -1.22E-01 | 171509822 | 171509945 | NC_000003.11 |
| cg05607079    | 9.88E-12 | 5.87E-13 | -7.72 | 18.5343373 | -1.42E-01 | 72387937  | 72388060  | NC_000003.11 |
| cg21416968    | 9.88E-12 | 5.87E-13 | -7.72 | 18.5339976 | -6.35E-02 | 44441199  | 44441322  | NC_000001.10 |
| cg08940490    | 9.90E-12 | 5.89E-13 | -7.72 | 18.5313243 | -1.46E-01 | 237514003 | 237514126 | NC_000002.11 |
| cg19088635    | 9.91E-12 | 5.89E-13 | -7.72 | 18.5301748 | -2.18E-01 | 114065008 | 114065131 | NC_000013.10 |
| ch.1.1026209F | 9.91E-12 | 5.89E-13 | -7.72 | 18.5300326 | -7.08E-02 | 31638974  | 31639097  | NC_000001.10 |
| cg10504632    | 9.92E-12 | 5.90E-13 | -7.72 | 18.5294302 | -1.93E-01 | 40591610  | 40591733  | NC_000007.13 |
| cg19372602    | 9.93E-12 | 5.90E-13 | -7.72 | 18.5288013 | -1.54E-01 | 156116207 | 156116330 | NC_000001.10 |
| cg25554496    | 9.93E-12 | 5.90E-13 | -7.72 | 18.5281094 | -1.81E-01 | 63036095  | 63036218  | NC_000017.10 |
| cg09657114    | 9.94E-12 | 5.91E-13 | -7.72 | 18.5272038 | -2.06E-01 | 62853598  | 62853721  | NC_000015.9  |
| cg19954146    | 9.95E-12 | 5.91E-13 | -7.72 | 18.5267237 | -4.04E-02 | 1312822   | 1312945   | NC_000006.11 |
| cg10080732    | 9.96E-12 | 5.92E-13 | -7.72 | 18.5248967 | -2.22E-01 | 1626575   | 1626698   | NC_000017.10 |

|               |          |          |       |            |           |           |           |              |
|---------------|----------|----------|-------|------------|-----------|-----------|-----------|--------------|
| cg15992932    | 9.97E-12 | 5.93E-13 | -7.72 | 18.5242016 | -1.51E-01 | 30899405  | 30899528  | NC_000006.11 |
| cg05998577    | 9.98E-12 | 5.93E-13 | -7.72 | 18.5234445 | -1.48E-01 | 176781490 | 176781613 | NC_000005.9  |
| cg24109975    | 9.98E-12 | 5.93E-13 | -7.72 | 18.5232972 | -6.29E-02 | 59055787  | 59055910  | NC_000019.9  |
| cg23144123    | 1.00E-11 | 5.95E-13 | -7.72 | 18.5202209 | -4.88E-02 | 147828073 | 147828196 | NC_000006.11 |
| cg23239612    | 1.00E-11 | 5.95E-13 | -7.72 | 18.5201954 | -1.77E-02 | 137549391 | 137549514 | NC_000005.9  |
| cg06761850    | 1.00E-11 | 5.96E-13 | -7.72 | 18.5189202 | -8.90E-02 | 102904469 | 102904592 | NC_000014.8  |
| cg04722977    | 1.00E-11 | 5.96E-13 | -7.72 | 18.5181293 | -3.50E-02 | 42724320  | 42724443  | NC_000019.9  |
| cg21932983    | 1.00E-11 | 5.97E-13 | -7.72 | 18.5167462 | -6.63E-02 | 6321378   | 6321501   | NC_000001.10 |
| cg07382923    | 1.01E-11 | 5.99E-13 | -7.72 | 18.514039  | -2.33E-01 | 48573444  | 48573567  | NC_000010.10 |
| cg07497511    | 1.01E-11 | 6.01E-13 | -7.72 | 18.5111352 | -8.43E-02 | 59457396  | 59457519  | NC_000017.10 |
| ch.2.1903814R | 1.01E-11 | 6.02E-13 | -7.72 | 18.5091049 | -5.12E-02 | 86274157  | 86274280  | NC_000002.11 |
| cg09010372    | 1.02E-11 | 6.05E-13 | -7.72 | 18.504989  | -1.58E-01 | 1323433   | 1323556   | NC_000004.11 |
| cg02792821    | 1.02E-11 | 6.05E-13 | -7.72 | 18.5047981 | -8.17E-02 | 44451783  | 44451906  | NC_000020.10 |
| cg18728780    | 1.02E-11 | 6.05E-13 | -7.72 | 18.5042746 | -1.72E-01 | 62120470  | 62120593  | NC_000014.8  |
| cg07179634    | 1.02E-11 | 6.06E-13 | -7.72 | 18.5019203 | -1.54E-01 | 60906582  | 60906705  | NC_000011.9  |
| cg07080244    | 1.02E-11 | 6.07E-13 | -7.71 | 18.5011303 | -1.23E-01 | 120051676 | 120051799 | NC_000011.9  |
| cg00484484    | 1.02E-11 | 6.07E-13 | -7.71 | 18.5006515 | -1.51E-01 | 70936009  | 70936132  | NC_000015.9  |
| cg04213854    | 1.02E-11 | 6.08E-13 | -7.71 | 18.4992212 | -1.27E-01 | 168517792 | 168517915 | NC_000006.11 |
| cg05112617    | 1.02E-11 | 6.09E-13 | -7.71 | 18.4977098 | -6.62E-02 | 93698932  | 93699055  | NC_000003.11 |
| cg00333528    | 1.02E-11 | 6.09E-13 | -7.71 | 18.4970908 | -1.34E-01 | 89927485  | 89927608  | NC_000006.11 |
| cg23987134    | 1.02E-11 | 6.10E-13 | -7.71 | 18.4958044 | -1.69E-01 | 17158319  | 17158442  | NC_000005.9  |
| cg18724342    | 1.02E-11 | 6.10E-13 | -7.71 | 18.4957921 | -5.70E-02 | 37468057  | 37468180  | NC_000006.11 |
| cg21110052    | 1.03E-11 | 6.11E-13 | -7.71 | 18.4946424 | -5.26E-02 | 29234262  | 29234385  | NC_000007.13 |
| cg25659902    | 1.03E-11 | 6.11E-13 | -7.71 | 18.494467  | -2.47E-01 | 30652202  | 30652325  | NC_000006.11 |
| cg20796298    | 1.03E-11 | 6.12E-13 | -7.71 | 18.4922642 | -8.97E-02 | 65687852  | 65687975  | NC_000015.9  |

|               |          |          |       |            |           |           |           |              |
|---------------|----------|----------|-------|------------|-----------|-----------|-----------|--------------|
| cg25276892    | 1.03E-11 | 6.12E-13 | -7.71 | 18.4922144 | -1.32E-01 | 40573076  | 40573199  | NC_000022.10 |
| cg03700121    | 1.03E-11 | 6.14E-13 | -7.71 | 18.4902495 | -7.10E-02 | 60610004  | 60610127  | NC_000011.9  |
| cg02131967    | 1.03E-11 | 6.14E-13 | -7.71 | 18.4901841 | -2.10E-01 | 61554106  | 61554229  | NC_000017.10 |
| cg16438210    | 1.03E-11 | 6.15E-13 | -7.71 | 18.4886478 | -9.82E-02 | 91885492  | 91885615  | NC_000014.8  |
| cg09394306    | 1.03E-11 | 6.15E-13 | -7.71 | 18.4884975 | -1.80E-01 | 20330742  | 20330865  | NC_000002.11 |
| cg09530156    | 1.03E-11 | 6.15E-13 | -7.71 | 18.4883258 | -1.60E-01 | 69867139  | 69867262  | NC_000011.9  |
| cg27314336    | 1.03E-11 | 6.16E-13 | -7.71 | 18.4862813 | -6.05E-02 | 104582743 | 104582866 | NC_000014.8  |
| cg22663389    | 1.04E-11 | 6.18E-13 | -7.71 | 18.4834689 | -1.95E-01 | 57929274  | 57929397  | NC_000017.10 |
| cg15802555    | 1.04E-11 | 6.20E-13 | -7.71 | 18.4798996 | -1.49E-01 | 41984994  | 41985117  | NC_000017.10 |
| cg09122223    | 1.04E-11 | 6.21E-13 | -7.71 | 18.4790159 | -1.72E-01 | 112035175 | 112035298 | NC_000011.9  |
| cg27229484    | 1.04E-11 | 6.23E-13 | -7.71 | 18.4748493 | -1.54E-01 | 37947371  | 37947494  | NC_000001.10 |
| cg10521403    | 1.04E-11 | 6.23E-13 | -7.71 | 18.4746268 | -2.21E-01 | 1763211   | 1763334   | NC_000004.11 |
| cg11646240    | 1.05E-11 | 6.24E-13 | -7.71 | 18.4741153 | -1.09E-01 | 232253064 | 232253187 | NC_000002.11 |
| cg00534919    | 1.05E-11 | 6.25E-13 | -7.71 | 18.4714168 | -1.06E-01 | 185139671 | 185139794 | NC_000001.10 |
| cg07201717    | 1.05E-11 | 6.26E-13 | -7.71 | 18.4699123 | -1.12E-01 | 25031947  | 25032070  | NC_000001.10 |
| cg07800544    | 1.05E-11 | 6.28E-13 | -7.71 | 18.467259  | -1.90E-01 | 35129387  | 35129510  | NC_000005.9  |
| cg03276982    | 1.05E-11 | 6.28E-13 | -7.71 | 18.4668423 | -1.68E-01 | 119024055 | 119024178 | NC_000008.10 |
| cg02127209    | 1.05E-11 | 6.29E-13 | -7.71 | 18.4656816 | -1.55E-01 | 35786961  | 35787084  | NC_000019.9  |
| cg01411912    | 1.05E-11 | 6.29E-13 | -7.71 | 18.4656171 | -1.59E-01 | 153517265 | 153517388 | NC_000001.10 |
| cg05242257    | 1.06E-11 | 6.30E-13 | -7.71 | 18.4637532 | -4.23E-02 | 2588092   | 2588215   | NC_000016.9  |
| ch.2.1892000F | 1.06E-11 | 6.31E-13 | -7.71 | 18.4629973 | -4.99E-02 | 85858578  | 85858701  | NC_000002.11 |
| cg07381872    | 1.06E-11 | 6.32E-13 | -7.71 | 18.4612237 | -1.33E-01 | 61408076  | 61408199  | NC_000001.10 |
| cg07741984    | 1.06E-11 | 6.33E-13 | -7.71 | 18.46036   | -4.90E-02 | 111805005 | 111805128 | NC_000003.11 |
| cg13795689    | 1.06E-11 | 6.33E-13 | -7.71 | 18.4599054 | -1.34E-01 | 143508777 | 143508900 | NC_000008.10 |
| cg08584627    | 1.06E-11 | 6.33E-13 | -7.71 | 18.4595192 | -4.47E-02 | 98703355  | 98703478  | NC_000002.11 |

|              |          |          |       |            |           |           |           |              |
|--------------|----------|----------|-------|------------|-----------|-----------|-----------|--------------|
| cg19807286   | 1.06E-11 | 6.33E-13 | -7.71 | 18.459052  | -1.33E-01 | 174680743 | 174680866 | NC_000005.9  |
| cg06452915   | 1.06E-11 | 6.34E-13 | -7.71 | 18.4581739 | -8.28E-02 | 49521747  | 49521870  | NC_000019.9  |
| cg15046507   | 1.06E-11 | 6.35E-13 | -7.71 | 18.4567612 | -8.24E-02 | 44999202  | 44999325  | NC_000011.9  |
| cg04450003   | 1.06E-11 | 6.35E-13 | -7.71 | 18.4562708 | -1.60E-01 | 50355995  | 50356118  | NC_000012.11 |
| cg27209729   | 1.06E-11 | 6.35E-13 | -7.71 | 18.4560029 | -1.70E-01 | 64428925  | 64429048  | NC_000011.9  |
| cg22357379   | 1.07E-11 | 6.37E-13 | -7.71 | 18.4538293 | -1.09E-01 | 1257217   | 1257340   | NC_000019.9  |
| cg03462130   | 1.07E-11 | 6.37E-13 | -7.71 | 18.4533457 | -9.21E-02 | 5631268   | 5631391   | NC_000007.13 |
| cg18951390   | 1.07E-11 | 6.38E-13 | -7.71 | 18.4512013 | -2.07E-01 | 78735268  | 78735391  | NC_000017.10 |
| cg09093409   | 1.07E-11 | 6.39E-13 | -7.71 | 18.4501155 | -1.67E-01 | 67113285  | 67113408  | NC_000011.9  |
| cg00848245   | 1.07E-11 | 6.42E-13 | -7.71 | 18.4464438 | -1.34E-01 | 28224134  | 28224257  | NC_000016.9  |
| cg26558862   | 1.07E-11 | 6.42E-13 | -7.71 | 18.4454196 | -1.66E-01 | 52704647  | 52704770  | NC_000003.11 |
| cg03272170   | 1.07E-11 | 6.42E-13 | -7.71 | 18.4453499 | -1.18E-01 | 45458708  | 45458831  | NC_000013.10 |
| cg06682402   | 1.07E-11 | 6.42E-13 | -7.71 | 18.444996  | -3.76E-02 | 51565087  | 51565210  | NC_000010.10 |
| cg22681709   | 1.08E-11 | 6.43E-13 | -7.71 | 18.4440856 | -1.91E-01 | 178499509 | 178499632 | NC_000002.11 |
| cg04674421   | 1.08E-11 | 6.43E-13 | -7.71 | 18.4433905 | -1.31E-01 | 28079611  | 28079734  | NC_000016.9  |
| cg21294616   | 1.08E-11 | 6.44E-13 | -7.71 | 18.4427691 | -1.25E-01 | 143093848 | 143093971 | NC_000007.13 |
| ch.1.541122F | 1.08E-11 | 6.45E-13 | -7.7  | 18.4404551 | -5.48E-02 | 15891913  | 15892036  | NC_000001.10 |
| cg26642420   | 1.08E-11 | 6.47E-13 | -7.7  | 18.4383554 | -1.35E-01 | 146601345 | 146601468 | NC_000004.11 |
| cg00092400   | 1.08E-11 | 6.47E-13 | -7.7  | 18.437518  | -2.00E-01 | 51788285  | 51788408  | NC_000012.11 |
| cg22670819   | 1.08E-11 | 6.48E-13 | -7.7  | 18.4366874 | -1.09E-01 | 31913759  | 31913882  | NC_000006.11 |
| cg06105296   | 1.08E-11 | 6.48E-13 | -7.7  | 18.4363164 | -1.69E-01 | 50004294  | 50004417  | NC_000019.9  |
| cg01259619   | 1.08E-11 | 6.48E-13 | -7.7  | 18.4358184 | -9.45E-02 | 226925702 | 226925825 | NC_000001.10 |
| cg20624980   | 1.08E-11 | 6.49E-13 | -7.7  | 18.4352522 | -3.79E-02 | 50432627  | 50432750  | NC_000019.9  |
| cg25203007   | 1.08E-11 | 6.49E-13 | -7.7  | 18.4351729 | -1.05E-01 | 24126017  | 24126140  | NC_000001.10 |
| cg05252487   | 1.08E-11 | 6.49E-13 | -7.7  | 18.4350846 | -1.39E-01 | 124670562 | 124670685 | NC_000010.10 |

|               |          |          |      |            |           |           |           |              |
|---------------|----------|----------|------|------------|-----------|-----------|-----------|--------------|
| cg08409451    | 1.08E-11 | 6.49E-13 | -7.7 | 18.4348654 | -6.24E-02 | 2273123   | 2273246   | NC_000016.9  |
| cg15719255    | 1.09E-11 | 6.51E-13 | -7.7 | 18.431779  | -1.65E-01 | 18508620  | 18508743  | NC_000019.9  |
| cg07544392    | 1.09E-11 | 6.52E-13 | -7.7 | 18.4310476 | -8.98E-02 | 73868917  | 73869040  | NC_000002.11 |
| cg24638235    | 1.09E-11 | 6.54E-13 | -7.7 | 18.4279642 | -4.65E-02 | 21988805  | 21988928  | NC_000008.10 |
| cg14214856    | 1.09E-11 | 6.54E-13 | -7.7 | 18.4275074 | -1.31E-01 | 36965362  | 36965485  | NC_000010.10 |
| cg12340144    | 1.09E-11 | 6.55E-13 | -7.7 | 18.426255  | -9.46E-02 | 38388808  | 38388931  | NC_000003.11 |
| cg26090045    | 1.10E-11 | 6.56E-13 | -7.7 | 18.4242738 | -1.60E-01 | 68025978  | 68026101  | NC_000017.10 |
| cg07774251    | 1.10E-11 | 6.56E-13 | -7.7 | 18.4241288 | -1.60E-01 | 108408981 | 108409104 | NC_000011.9  |
| ch.11.452299R | 1.10E-11 | 6.56E-13 | -7.7 | 18.423949  | -6.02E-02 | 18584337  | 18584460  | NC_000011.9  |
| cg07891533    | 1.10E-11 | 6.57E-13 | -7.7 | 18.4236047 | -1.21E-01 | 45209039  | 45209162  | NC_000003.11 |
| cg12024828    | 1.10E-11 | 6.57E-13 | -7.7 | 18.4228331 | -1.28E-01 | 1166528   | 1166651   | NC_000004.11 |
| ch.2.2570960F | 1.10E-11 | 6.58E-13 | -7.7 | 18.4211344 | -3.41E-02 | 123152930 | 123153053 | NC_000002.11 |
| cg25750719    | 1.10E-11 | 6.58E-13 | -7.7 | 18.4208305 | -3.00E-02 | 26033975  | 26034098  | NC_000006.11 |
| cg14093526    | 1.10E-11 | 6.59E-13 | -7.7 | 18.4198327 | -6.58E-02 | 134094620 | 134094743 | NC_000011.9  |
| cg09459740    | 1.10E-11 | 6.60E-13 | -7.7 | 18.4189224 | -6.71E-02 | 108244548 | 108244671 | NC_000011.9  |
| cg24987259    | 1.11E-11 | 6.64E-13 | -7.7 | 18.4122365 | -6.94E-02 | 66336293  | 66336416  | NC_000011.9  |
| cg11039729    | 1.11E-11 | 6.65E-13 | -7.7 | 18.4107854 | -1.83E-01 | 35668325  | 35668448  | NC_000010.10 |
| cg18060846    | 1.11E-11 | 6.66E-13 | -7.7 | 18.4089788 | -3.19E-02 | 111683482 | 111683605 | NC_000010.10 |
| cg09302904    | 1.11E-11 | 6.67E-13 | -7.7 | 18.4080048 | -4.68E-02 | 62340561  | 62340684  | NC_000017.10 |
| cg06213287    | 1.11E-11 | 6.67E-13 | -7.7 | 18.4078851 | -5.82E-02 | 96478495  | 96478618  | NC_000005.9  |
| cg00079216    | 1.12E-11 | 6.69E-13 | -7.7 | 18.4048901 | -5.14E-02 | 6716557   | 6716680   | NC_000012.11 |
| cg14486634    | 1.12E-11 | 6.70E-13 | -7.7 | 18.4039    | -1.21E-01 | 98792175  | 98792298  | NC_000009.11 |
| cg14707834    | 1.12E-11 | 6.71E-13 | -7.7 | 18.4028696 | -1.89E-01 | 415457    | 415580    | NC_000011.9  |
| cg16101601    | 1.12E-11 | 6.71E-13 | -7.7 | 18.4026501 | -1.51E-01 | 217181663 | 217181786 | NC_000002.11 |
| cg11484115    | 1.12E-11 | 6.72E-13 | -7.7 | 18.4011561 | -1.40E-01 | 179335704 | 179335827 | NC_000005.9  |

|               |          |          |       |            |           |           |           |              |
|---------------|----------|----------|-------|------------|-----------|-----------|-----------|--------------|
| cg07408456    | 1.12E-11 | 6.72E-13 | -7.7  | 18.401066  | -1.11E-01 | 15590532  | 15590655  | NC_000019.9  |
| cg02177646    | 1.12E-11 | 6.72E-13 | -7.7  | 18.4006312 | -6.97E-02 | 63439120  | 63439243  | NC_000011.9  |
| cg04906242    | 1.12E-11 | 6.72E-13 | -7.7  | 18.4001572 | -1.05E-01 | 75150880  | 75151003  | NC_000016.9  |
| cg03861496    | 1.12E-11 | 6.73E-13 | -7.7  | 18.399357  | -7.06E-02 | 1248371   | 1248494   | NC_000019.9  |
| cg19928195    | 1.13E-11 | 6.78E-13 | -7.7  | 18.392285  | -1.71E-01 | 123813191 | 123813314 | NC_000003.11 |
| cg11261264    | 1.13E-11 | 6.78E-13 | -7.7  | 18.3920652 | -1.60E-01 | 55720737  | 55720860  | NC_000019.9  |
| cg22256354    | 1.13E-11 | 6.78E-13 | -7.7  | 18.3920187 | -1.44E-01 | 131554148 | 131554271 | NC_000008.10 |
| cg05427381    | 1.13E-11 | 6.79E-13 | -7.7  | 18.3903082 | -1.49E-01 | 62309707  | 62309830  | NC_000011.9  |
| cg24629215    | 1.13E-11 | 6.80E-13 | -7.7  | 18.3889393 | -6.10E-02 | 120068787 | 120068910 | NC_000003.11 |
| ch.6.1693624F | 1.13E-11 | 6.81E-13 | -7.7  | 18.3882509 | -1.10E-01 | 83767401  | 83767524  | NC_000006.11 |
| cg24145685    | 1.14E-11 | 6.82E-13 | -7.7  | 18.3860748 | -1.41E-01 | 1227852   | 1227975   | NC_000019.9  |
| cg14213105    | 1.14E-11 | 6.82E-13 | -7.7  | 18.3855901 | -2.09E-01 | 126980322 | 126980445 | NC_000009.11 |
| cg24748262    | 1.14E-11 | 6.83E-13 | -7.7  | 18.3853296 | -8.98E-02 | 128044502 | 128044625 | NC_000012.11 |
| cg16157895    | 1.14E-11 | 6.83E-13 | -7.7  | 18.3843331 | -1.39E-01 | 93412666  | 93412789  | NC_000014.8  |
| cg22136020    | 1.14E-11 | 6.83E-13 | -7.7  | 18.3842493 | -1.47E-01 | 75986581  | 75986704  | NC_000015.9  |
| cg19948914    | 1.14E-11 | 6.84E-13 | -7.69 | 18.3830241 | -2.66E-02 | 43509479  | 43509602  | NC_000017.10 |
| cg08595011    | 1.14E-11 | 6.86E-13 | -7.69 | 18.3802287 | -3.60E-02 | 43147479  | 43147602  | NC_000003.11 |
| cg05934592    | 1.14E-11 | 6.87E-13 | -7.69 | 18.3794375 | -8.09E-02 | 54642178  | 54642301  | NC_000014.8  |
| ch.3.3261545R | 1.15E-11 | 6.88E-13 | -7.69 | 18.3780876 | -2.53E-02 | 167742416 | 167742539 | NC_000003.11 |
| cg00933411    | 1.15E-11 | 6.88E-13 | -7.69 | 18.3777346 | -1.40E-01 | 13373090  | 13373213  | NC_000008.10 |
| cg16148593    | 1.15E-11 | 6.88E-13 | -7.69 | 18.3774672 | -7.46E-02 | 22085417  | 22085540  | NC_000008.10 |
| cg21919719    | 1.15E-11 | 6.89E-13 | -7.69 | 18.3761721 | -8.01E-02 | 1446802   | 1446925   | NC_000011.9  |
| cg21679509    | 1.15E-11 | 6.92E-13 | -7.69 | 18.3719187 | -5.77E-02 | 28219613  | 28219736  | NC_000007.13 |
| cg00439981    | 1.15E-11 | 6.92E-13 | -7.69 | 18.3714949 | -1.53E-01 | 170684299 | 170684422 | NC_000006.11 |
| cg16692277    | 1.15E-11 | 6.92E-13 | -7.69 | 18.3713568 | -1.61E-01 | 51640948  | 51641071  | NC_000013.10 |

|            |          |          |       |            |           |           |           |              |
|------------|----------|----------|-------|------------|-----------|-----------|-----------|--------------|
| cg12587087 | 1.15E-11 | 6.92E-13 | -7.69 | 18.3712748 | -1.86E-01 | 155971907 | 155972030 | NC_000001.10 |
| cg19301114 | 1.15E-11 | 6.93E-13 | -7.69 | 18.3699991 | -1.79E-01 | 161796785 | 161796908 | NC_000006.11 |
| cg17453250 | 1.15E-11 | 6.93E-13 | -7.69 | 18.3697334 | -5.59E-02 | 75870836  | 75870959  | NC_000015.9  |
| cg07367601 | 1.15E-11 | 6.94E-13 | -7.69 | 18.3695008 | -1.50E-01 | 235114342 | 235114465 | NC_000001.10 |
| cg03956820 | 1.15E-11 | 6.94E-13 | -7.69 | 18.3694982 | -1.42E-01 | 80190154  | 80190277  | NC_000017.10 |
| cg21540984 | 1.16E-11 | 6.94E-13 | -7.69 | 18.3686654 | -1.47E-01 | 70996031  | 70996154  | NC_000015.9  |
| cg23436960 | 1.16E-11 | 6.94E-13 | -7.69 | 18.3684833 | -9.92E-02 | 77239540  | 77239663  | NC_000014.8  |
| cg20992708 | 1.16E-11 | 6.95E-13 | -7.69 | 18.3673134 | -2.10E-01 | 5637894   | 5638017   | NC_000004.11 |
| cg25949363 | 1.16E-11 | 6.97E-13 | -7.69 | 18.3647268 | -9.53E-02 | 48352008  | 48352131  | NC_000017.10 |
| cg10712623 | 1.16E-11 | 6.99E-13 | -7.69 | 18.3618732 | -5.94E-02 | 25469577  | 25469700  | NC_000003.11 |
| cg03333699 | 1.16E-11 | 7.00E-13 | -7.69 | 18.3602368 | -1.37E-01 | 966569    | 966692    | NC_000007.13 |
| cg22784964 | 1.17E-11 | 7.00E-13 | -7.69 | 18.3597673 | -2.91E-02 | 21151036  | 21151159  | NC_000014.8  |
| cg13219080 | 1.17E-11 | 7.01E-13 | -7.69 | 18.3589747 | -1.53E-01 | 942161    | 942284    | NC_000001.10 |
| cg01581326 | 1.17E-11 | 7.03E-13 | -7.69 | 18.3565605 | -1.30E-01 | 159052435 | 159052558 | NC_000006.11 |
| cg03974286 | 1.17E-11 | 7.03E-13 | -7.69 | 18.3558049 | -8.28E-02 | 201980638 | 201980761 | NC_000002.11 |
| cg22496377 | 1.17E-11 | 7.05E-13 | -7.69 | 18.353351  | -7.24E-02 | 45493207  | 45493330  | NC_000015.9  |
| cg25015290 | 1.18E-11 | 7.07E-13 | -7.69 | 18.3507685 | -6.38E-02 | 14996185  | 14996308  | NC_000010.10 |
| cg13827582 | 1.18E-11 | 7.07E-13 | -7.69 | 18.3507482 | -1.68E-01 | 99971213  | 99971336  | NC_000015.9  |
| cg06635952 | 1.18E-11 | 7.07E-13 | -7.69 | 18.3504319 | -1.29E-01 | 70025869  | 70025992  | NC_000002.11 |
| cg16928044 | 1.18E-11 | 7.07E-13 | -7.69 | 18.3500497 | -6.94E-02 | 145589929 | 145590052 | NC_000001.10 |
| cg06423252 | 1.18E-11 | 7.08E-13 | -7.69 | 18.3495878 | -1.31E-01 | 115861227 | 115861350 | NC_000010.10 |
| cg18891604 | 1.18E-11 | 7.08E-13 | -7.69 | 18.3489367 | -1.90E-01 | 36319055  | 36319178  | NC_000006.11 |
| cg01051318 | 1.18E-11 | 7.08E-13 | -7.69 | 18.3488347 | -4.27E-02 | 27440764  | 27440887  | NC_000002.11 |
| cg07854113 | 1.18E-11 | 7.09E-13 | -7.69 | 18.3484975 | -1.47E-01 | 172347685 | 172347808 | NC_000005.9  |
| cg21210224 | 1.18E-11 | 7.09E-13 | -7.69 | 18.3474233 | -1.73E-01 | 65186306  | 65186429  | NC_000015.9  |

|            |          |          |       |            |           |           |           |              |
|------------|----------|----------|-------|------------|-----------|-----------|-----------|--------------|
| cg27359633 | 1.18E-11 | 7.10E-13 | -7.69 | 18.3462794 | -5.75E-02 | 33104463  | 33104586  | NC_000020.10 |
| cg18366169 | 1.18E-11 | 7.12E-13 | -7.69 | 18.3431481 | -1.70E-01 | 1948875   | 1948998   | NC_000005.9  |
| cg18229767 | 1.18E-11 | 7.13E-13 | -7.69 | 18.3426321 | -1.31E-01 | 67776576  | 67776699  | NC_000011.9  |
| cg00148223 | 1.18E-11 | 7.13E-13 | -7.69 | 18.341889  | -1.61E-01 | 957913    | 958036    | NC_000005.9  |
| cg16616449 | 1.19E-11 | 7.14E-13 | -7.69 | 18.3412415 | -1.65E-01 | 176739309 | 176739432 | NC_000005.9  |
| cg12458179 | 1.19E-11 | 7.14E-13 | -7.69 | 18.3405354 | -5.51E-02 | 238969828 | 238969951 | NC_000002.11 |
| cg25828093 | 1.19E-11 | 7.17E-13 | -7.69 | 18.337208  | -7.98E-02 | 26041003  | 26041126  | NC_000008.10 |
| cg20675173 | 1.19E-11 | 7.17E-13 | -7.69 | 18.3367637 | -1.54E-01 | 43795541  | 43795664  | NC_000003.11 |
| cg23541273 | 1.19E-11 | 7.18E-13 | -7.69 | 18.3361187 | -6.98E-02 | 27631826  | 27631949  | NC_000002.11 |
| cg18915450 | 1.20E-11 | 7.21E-13 | -7.69 | 18.3318821 | -1.82E-01 | 9960773   | 9960896   | NC_000002.11 |
| cg06912623 | 1.20E-11 | 7.21E-13 | -7.69 | 18.3307633 | -1.85E-01 | 224781135 | 224781258 | NC_000001.10 |
| cg09570855 | 1.20E-11 | 7.22E-13 | -7.69 | 18.3306335 | -1.12E-01 | 66050646  | 66050769  | NC_000017.10 |
| cg10482024 | 1.20E-11 | 7.22E-13 | -7.69 | 18.3304448 | -6.95E-02 | 65613042  | 65613165  | NC_000001.10 |
| cg21606226 | 1.20E-11 | 7.22E-13 | -7.69 | 18.3300918 | -6.08E-02 | 27146292  | 27146415  | NC_000006.11 |
| cg27535687 | 1.20E-11 | 7.23E-13 | -7.69 | 18.3292314 | -1.20E-01 | 56979041  | 56979164  | NC_000018.9  |
| cg24793722 | 1.20E-11 | 7.24E-13 | -7.69 | 18.3276828 | -1.25E-01 | 824416    | 824539    | NC_000004.11 |
| cg06377473 | 1.20E-11 | 7.25E-13 | -7.69 | 18.3256961 | -5.15E-02 | 116528363 | 116528486 | NC_000010.10 |
| cg18274619 | 1.21E-11 | 7.28E-13 | -7.68 | 18.3222052 | -1.54E-01 | 127494852 | 127494975 | NC_000003.11 |
| cg16434510 | 1.21E-11 | 7.29E-13 | -7.68 | 18.3198642 | -1.93E-01 | 129800022 | 129800145 | NC_000008.10 |
| cg16072664 | 1.21E-11 | 7.31E-13 | -7.68 | 18.3179427 | -7.84E-02 | 35014885  | 35015008  | NC_000021.8  |
| cg19381766 | 1.21E-11 | 7.32E-13 | -7.68 | 18.316345  | -1.09E-01 | 5597647   | 5597770   | NC_000007.13 |
| cg03437675 | 1.22E-11 | 7.33E-13 | -7.68 | 18.3150636 | -1.34E-01 | 110271625 | 110271748 | NC_000012.11 |
| cg16702713 | 1.22E-11 | 7.33E-13 | -7.68 | 18.3147635 | -5.79E-02 | 118407037 | 118407160 | NC_000005.9  |
| cg03248820 | 1.22E-11 | 7.35E-13 | -7.68 | 18.3129553 | -5.67E-02 | 102822873 | 102822996 | NC_000010.10 |
| cg14395844 | 1.22E-11 | 7.35E-13 | -7.68 | 18.312564  | -7.78E-02 | 139980277 | 139980400 | NC_000009.11 |



|                 |          |          |       |            |           |           |           |              |
|-----------------|----------|----------|-------|------------|-----------|-----------|-----------|--------------|
| cg18958693      | 1.22E-11 | 7.36E-13 | -7.68 | 18.3111313 | -2.02E-01 | 1607601   | 1607724   | NC_000007.13 |
| cg11279021      | 1.22E-11 | 7.36E-13 | -7.68 | 18.3110827 | -8.39E-02 | 14028690  | 14028813  | NC_000007.13 |
| cg12062900      | 1.22E-11 | 7.36E-13 | -7.68 | 18.3110188 | -9.73E-02 | 5564075   | 5564198   | NC_000019.9  |
| cg19911430      | 1.22E-11 | 7.36E-13 | -7.68 | 18.3108026 | -1.67E-01 | 16430654  | 16430777  | NC_000002.11 |
| cg07536328      | 1.22E-11 | 7.37E-13 | -7.68 | 18.3097676 | -1.23E-01 | 51592253  | 51592376  | NC_000010.10 |
| cg06081951      | 1.22E-11 | 7.38E-13 | -7.68 | 18.3089722 | -1.27E-01 | 14991413  | 14991536  | NC_000011.9  |
| cg17854416      | 1.22E-11 | 7.38E-13 | -7.68 | 18.3087719 | -1.30E-01 | 37720647  | 37720770  | NC_000022.10 |
| cg16099404      | 1.22E-11 | 7.38E-13 | -7.68 | 18.3080424 | -1.27E-01 | 202336282 | 202336405 | NC_000002.11 |
| cg18544888      | 1.22E-11 | 7.39E-13 | -7.68 | 18.3069165 | -1.50E-01 | 122259959 | 122260082 | NC_000002.11 |
| cg22392793      | 1.23E-11 | 7.40E-13 | -7.68 | 18.3062538 | -1.29E-01 | 99554416  | 99554539  | NC_000002.11 |
| cg23501005      | 1.23E-11 | 7.40E-13 | -7.68 | 18.3061676 | -1.59E-01 | 195870009 | 195870132 | NC_000003.11 |
| cg00598335      | 1.23E-11 | 7.44E-13 | -7.68 | 18.3006637 | -5.32E-02 | 11627530  | 11627653  | NC_000008.10 |
| cg06088032      | 1.23E-11 | 7.44E-13 | -7.68 | 18.3004152 | -1.68E-01 | 50383227  | 50383350  | NC_000003.11 |
| cg21221899      | 1.24E-11 | 7.45E-13 | -7.68 | 18.29843   | -7.16E-02 | 72921439  | 72921562  | NC_000005.9  |
| cg19375403      | 1.24E-11 | 7.46E-13 | -7.68 | 18.2974159 | -2.10E-01 | 3807709   | 3807832   | NC_000001.10 |
| cg14851846      | 1.24E-11 | 7.47E-13 | -7.68 | 18.2969615 | -4.67E-02 | 99716985  | 99717108  | NC_000007.13 |
| cg12068124      | 1.24E-11 | 7.47E-13 | -7.68 | 18.2964931 | -1.62E-01 | 1238538   | 1238661   | NC_000019.9  |
| cg03470772      | 1.24E-11 | 7.48E-13 | -7.68 | 18.2953341 | -9.43E-02 | 85503328  | 85503451  | NC_000004.11 |
| cg04399565      | 1.24E-11 | 7.50E-13 | -7.68 | 18.2920324 | -1.68E-01 | 24856162  | 24856285  | NC_000016.9  |
| cg05897963      | 1.24E-11 | 7.51E-13 | -7.68 | 18.2906326 | -1.63E-01 | 30157918  | 30158041  | NC_000019.9  |
| ch.19.45344413F | 1.25E-11 | 7.53E-13 | -7.68 | 18.2890921 | -5.94E-02 | 40652573  | 40652696  | NC_000019.9  |
| cg12552820      | 1.25E-11 | 7.53E-13 | -7.68 | 18.2879994 | -1.77E-01 | 2231925   | 2232048   | NC_000001.10 |
| cg10854819      | 1.25E-11 | 7.54E-13 | -7.68 | 18.2870034 | -2.02E-01 | 31515852  | 31515975  | NC_000015.9  |
| cg06829584      | 1.25E-11 | 7.55E-13 | -7.68 | 18.2864508 | -1.41E-01 | 75659483  | 75659606  | NC_000010.10 |
| cg13684305      | 1.25E-11 | 7.55E-13 | -7.68 | 18.2854427 | -1.66E-01 | 223566278 | 223566401 | NC_000001.10 |

|            |          |          |       |            |           |           |           |              |
|------------|----------|----------|-------|------------|-----------|-----------|-----------|--------------|
| cg01294490 | 1.25E-11 | 7.56E-13 | -7.68 | 18.2852023 | -5.72E-02 | 35656906  | 35657029  | NC_000006.11 |
| cg16914151 | 1.25E-11 | 7.56E-13 | -7.68 | 18.2849313 | -4.30E-02 | 75249787  | 75249910  | NC_000015.9  |
| cg00136547 | 1.25E-11 | 7.56E-13 | -7.68 | 18.2848395 | -1.69E-01 | 56507796  | 56507919  | NC_000006.11 |
| cg03188495 | 1.25E-11 | 7.57E-13 | -7.68 | 18.2830148 | -1.04E-01 | 3136515   | 3136638   | NC_000019.9  |
| cg05231888 | 1.25E-11 | 7.58E-13 | -7.68 | 18.2818056 | -6.20E-02 | 131630754 | 131630877 | NC_000005.9  |
| cg01533108 | 1.26E-11 | 7.59E-13 | -7.68 | 18.280844  | -1.10E-01 | 27101662  | 27101785  | NC_000006.11 |
| cg23971987 | 1.26E-11 | 7.60E-13 | -7.68 | 18.279948  | -1.53E-01 | 11652505  | 11652628  | NC_000004.11 |
| cg04492496 | 1.26E-11 | 7.60E-13 | -7.68 | 18.2790451 | -1.24E-01 | 32043739  | 32043862  | NC_000006.11 |
| cg25978327 | 1.26E-11 | 7.61E-13 | -7.68 | 18.2782258 | -1.56E-01 | 8065039   | 8065162   | NC_000001.10 |
| cg07744562 | 1.26E-11 | 7.61E-13 | -7.68 | 18.278092  | -5.90E-02 | 90539506  | 90539629  | NC_000006.11 |
| cg16786703 | 1.26E-11 | 7.63E-13 | -7.68 | 18.2754269 | -1.65E-01 | 135090255 | 135090378 | NC_000010.10 |
| cg06368978 | 1.26E-11 | 7.63E-13 | -7.68 | 18.2752577 | -9.92E-02 | 2249896   | 2250019   | NC_000001.10 |
| cg04876072 | 1.26E-11 | 7.64E-13 | -7.68 | 18.2742843 | -6.67E-02 | 48594239  | 48594362  | NC_000003.11 |
| cg15600430 | 1.26E-11 | 7.64E-13 | -7.68 | 18.2738923 | -1.26E-01 | 127630383 | 127630506 | NC_000003.11 |
| cg23378546 | 1.27E-11 | 7.66E-13 | -7.68 | 18.27206   | -2.26E-01 | 76352717  | 76352840  | NC_000017.10 |
| cg09083945 | 1.27E-11 | 7.67E-13 | -7.68 | 18.2706848 | -9.51E-02 | 79069042  | 79069165  | NC_000017.10 |
| cg21763718 | 1.27E-11 | 7.67E-13 | -7.68 | 18.2704612 | -8.26E-02 | 30159991  | 30160114  | NC_000006.11 |
| cg04308337 | 1.27E-11 | 7.67E-13 | -7.68 | 18.2702985 | -2.21E-02 | 42867303  | 42867426  | NC_000015.9  |
| cg07951151 | 1.27E-11 | 7.67E-13 | -7.68 | 18.270154  | -1.60E-01 | 10155062  | 10155185  | NC_000002.11 |
| cg22792660 | 1.27E-11 | 7.68E-13 | -7.68 | 18.2689232 | -4.25E-02 | 74349644  | 74349767  | NC_000005.9  |
| cg17971251 | 1.27E-11 | 7.70E-13 | -7.68 | 18.2671204 | -1.10E-01 | 177907297 | 177907420 | NC_000001.10 |
| cg15073164 | 1.27E-11 | 7.70E-13 | -7.68 | 18.2669025 | -1.44E-01 | 140119568 | 140119691 | NC_000009.11 |
| cg12795208 | 1.27E-11 | 7.70E-13 | -7.68 | 18.2668722 | -1.48E-01 | 52845938  | 52846061  | NC_000012.11 |
| cg22136351 | 1.27E-11 | 7.70E-13 | -7.68 | 18.2659263 | -7.38E-02 | 94982375  | 94982498  | NC_000005.9  |
| cg02903275 | 1.27E-11 | 7.71E-13 | -7.67 | 18.2650867 | -1.11E-01 | 67653661  | 67653784  | NC_000014.8  |

|                |          |          |       |            |           |           |           |              |
|----------------|----------|----------|-------|------------|-----------|-----------|-----------|--------------|
| cg18613324     | 1.27E-11 | 7.72E-13 | -7.67 | 18.264491  | -1.55E-01 | 36236760  | 36236883  | NC_000022.10 |
| cg21012061     | 1.28E-11 | 7.73E-13 | -7.67 | 18.2621325 | -2.07E-01 | 205568557 | 205568680 | NC_000001.10 |
| cg24803138     | 1.28E-11 | 7.74E-13 | -7.67 | 18.2613888 | -9.57E-02 | 66636369  | 66636492  | NC_000011.9  |
| cg02095937     | 1.28E-11 | 7.74E-13 | -7.67 | 18.2613777 | -6.41E-02 | 160166877 | 160167000 | NC_000003.11 |
| cg17510385     | 1.28E-11 | 7.75E-13 | -7.67 | 18.2600771 | -2.69E-01 | 912821    | 912944    | NC_000005.9  |
| cg00818899     | 1.28E-11 | 7.78E-13 | -7.67 | 18.2567923 | -1.24E-01 | 23291485  | 23291608  | NC_000014.8  |
| cg18656024     | 1.28E-11 | 7.78E-13 | -7.67 | 18.256624  | -1.29E-01 | 48633144  | 48633267  | NC_000003.11 |
| cg13185005     | 1.28E-11 | 7.78E-13 | -7.67 | 18.2562426 | -1.96E-01 | 268950    | 269073    | NC_000011.9  |
| cg02927679     | 1.29E-11 | 7.78E-13 | -7.67 | 18.2557726 | -1.62E-01 | 112260509 | 112260632 | NC_000010.10 |
| cg00537121     | 1.29E-11 | 7.79E-13 | -7.67 | 18.254577  | -1.41E-01 | 67055633  | 67055756  | NC_000011.9  |
| cg00292447     | 1.29E-11 | 7.81E-13 | -7.67 | 18.2520674 | -1.26E-01 | 126276006 | 126276129 | NC_000011.9  |
| cg18212039     | 1.29E-11 | 7.81E-13 | -7.67 | 18.2519547 | -9.98E-02 | 26346812  | 26346935  | NC_000001.10 |
| ch.1.59471444R | 1.29E-11 | 7.82E-13 | -7.67 | 18.2515456 | -4.32E-02 | 59698856  | 59698979  | NC_000001.10 |
| cg00693710     | 1.29E-11 | 7.83E-13 | -7.67 | 18.2499348 | -6.09E-02 | 102313771 | 102313894 | NC_000008.10 |
| cg07363880     | 1.29E-11 | 7.84E-13 | -7.67 | 18.2488301 | -1.07E-01 | 29466740  | 29466863  | NC_000016.9  |
| cg03598513     | 1.29E-11 | 7.84E-13 | -7.67 | 18.2482316 | -8.40E-02 | 47780452  | 47780575  | NC_000001.10 |
| cg19375539     | 1.30E-11 | 7.85E-13 | -7.67 | 18.2469208 | -1.43E-01 | 64008069  | 64008192  | NC_000002.11 |
| cg05224642     | 1.30E-11 | 7.86E-13 | -7.67 | 18.2468452 | -8.16E-02 | 87984259  | 87984382  | NC_000016.9  |
| cg12900583     | 1.30E-11 | 7.86E-13 | -7.67 | 18.2465639 | -5.96E-02 | 38260410  | 38260533  | NC_000001.10 |
| cg03750909     | 1.30E-11 | 7.86E-13 | -7.67 | 18.2461789 | -5.65E-02 | 1992631   | 1992754   | NC_000016.9  |
| cg25172185     | 1.30E-11 | 7.87E-13 | -7.67 | 18.2450926 | -1.39E-01 | 31689788  | 31689911  | NC_000017.10 |
| cg10078639     | 1.30E-11 | 7.90E-13 | -7.67 | 18.2416588 | -7.66E-02 | 116286586 | 116286709 | NC_000010.10 |
| cg00477302     | 1.30E-11 | 7.90E-13 | -7.67 | 18.2407855 | -1.39E-01 | 129411088 | 129411211 | NC_000007.13 |
| cg26425691     | 1.31E-11 | 7.96E-13 | -7.67 | 18.2336213 | -6.91E-02 | 99724197  | 99724320  | NC_000007.13 |
| cg15930380     | 1.31E-11 | 7.97E-13 | -7.67 | 18.2328078 | -2.46E-01 | 67399983  | 67400106  | NC_000001.10 |

|            |          |          |       |            |           |           |           |              |
|------------|----------|----------|-------|------------|-----------|-----------|-----------|--------------|
| cg20181420 | 1.32E-11 | 7.98E-13 | -7.67 | 18.2310662 | -8.27E-02 | 60028918  | 60029041  | NC_000010.10 |
| cg08343786 | 1.32E-11 | 7.98E-13 | -7.67 | 18.231016  | -2.16E-02 | 10747564  | 10747687  | NC_000006.11 |
| cg09972561 | 1.32E-11 | 7.98E-13 | -7.67 | 18.230814  | -1.11E-01 | 62353371  | 62353494  | NC_000015.9  |
| cg21423973 | 1.32E-11 | 8.00E-13 | -7.67 | 18.228508  | -5.83E-02 | 72298667  | 72298790  | NC_000007.13 |
| cg24067652 | 1.32E-11 | 8.02E-13 | -7.67 | 18.2269865 | -1.89E-01 | 139626136 | 139626259 | NC_000005.9  |
| cg17130567 | 1.32E-11 | 8.02E-13 | -7.67 | 18.2262213 | -4.39E-02 | 66218057  | 66218180  | NC_000012.11 |
| cg00344422 | 1.32E-11 | 8.02E-13 | -7.67 | 18.2260362 | -1.96E-01 | 100149311 | 100149434 | NC_000013.10 |
| cg10855978 | 1.32E-11 | 8.02E-13 | -7.67 | 18.226018  | -1.25E-01 | 23780241  | 23780364  | NC_000008.10 |
| cg03364193 | 1.32E-11 | 8.02E-13 | -7.67 | 18.2260171 | -2.13E-02 | 100167564 | 100167687 | NC_000007.13 |
| cg18194353 | 1.32E-11 | 8.03E-13 | -7.67 | 18.2255963 | -4.63E-02 | 100315666 | 100315789 | NC_000001.10 |
| cg09076339 | 1.32E-11 | 8.03E-13 | -7.67 | 18.2250938 | -1.79E-01 | 226830923 | 226831046 | NC_000001.10 |
| cg11547448 | 1.33E-11 | 8.05E-13 | -7.67 | 18.223164  | -1.11E-01 | 111922848 | 111922971 | NC_000010.10 |
| cg14621254 | 1.33E-11 | 8.08E-13 | -7.67 | 18.2195871 | -1.61E-01 | 57569787  | 57569910  | NC_000012.11 |
| cg18680107 | 1.33E-11 | 8.09E-13 | -7.67 | 18.2183026 | -1.92E-02 | 120971108 | 120971231 | NC_000004.11 |
| cg00206999 | 1.33E-11 | 8.10E-13 | -7.67 | 18.216998  | -7.44E-02 | 58222569  | 58222692  | NC_000003.11 |
| cg26050975 | 1.33E-11 | 8.10E-13 | -7.67 | 18.2169433 | -1.64E-01 | 179231109 | 179231232 | NC_000005.9  |
| cg27518892 | 1.34E-11 | 8.11E-13 | -7.67 | 18.215366  | -1.24E-01 | 57566936  | 57567059  | NC_000016.9  |
| cg13340481 | 1.34E-11 | 8.12E-13 | -7.67 | 18.214108  | -6.15E-02 | 27275985  | 27276108  | NC_000017.10 |
| cg26808637 | 1.34E-11 | 8.15E-13 | -7.67 | 18.2101363 | -1.80E-01 | 95228650  | 95228773  | NC_000010.10 |
| cg07319315 | 1.34E-11 | 8.16E-13 | -7.67 | 18.2098131 | -2.10E-01 | 135149599 | 135149722 | NC_000002.11 |
| cg03021329 | 1.34E-11 | 8.17E-13 | -7.67 | 18.2082096 | -1.59E-01 | 124554058 | 124554181 | NC_000003.11 |
| cg02926005 | 1.35E-11 | 8.17E-13 | -7.67 | 18.207729  | -2.62E-02 | 26496421  | 26496544  | NC_000001.10 |
| cg03302135 | 1.35E-11 | 8.18E-13 | -7.67 | 18.2067279 | -1.18E-01 | 61040825  | 61040948  | NC_000020.10 |
| cg14699651 | 1.35E-11 | 8.18E-13 | -7.67 | 18.2067107 | -4.20E-02 | 1325099   | 1325222   | NC_000019.9  |
| cg03918756 | 1.35E-11 | 8.18E-13 | -7.67 | 18.2064916 | -1.94E-01 | 141248632 | 141248755 | NC_000008.10 |

|            |          |          |       |            |           |           |           |              |
|------------|----------|----------|-------|------------|-----------|-----------|-----------|--------------|
| cg00107241 | 1.35E-11 | 8.21E-13 | -7.66 | 18.2029789 | -1.30E-01 | 29461070  | 29461193  | NC_000001.10 |
| cg20338307 | 1.35E-11 | 8.21E-13 | -7.66 | 18.2028965 | -7.95E-02 | 27114586  | 27114709  | NC_000006.11 |
| cg03925157 | 1.35E-11 | 8.23E-13 | -7.66 | 18.2007854 | -4.45E-02 | 17549955  | 17550078  | NC_000020.10 |
| cg23621418 | 1.36E-11 | 8.24E-13 | -7.66 | 18.1999767 | -6.90E-02 | 75670653  | 75670776  | NC_000010.10 |
| cg13524311 | 1.36E-11 | 8.24E-13 | -7.66 | 18.1992861 | -1.16E-01 | 238871750 | 238871873 | NC_000002.11 |
| cg27294796 | 1.36E-11 | 8.26E-13 | -7.66 | 18.1974293 | -7.87E-02 | 90456387  | 90456510  | NC_000015.9  |
| cg12453905 | 1.36E-11 | 8.26E-13 | -7.66 | 18.1973898 | -2.19E-01 | 154143694 | 154143817 | NC_000004.11 |
| cg02729269 | 1.36E-11 | 8.28E-13 | -7.66 | 18.1950668 | -6.79E-02 | 127772    | 127895    | NC_000016.9  |
| cg07348922 | 1.36E-11 | 8.29E-13 | -7.66 | 18.1936316 | -2.04E-01 | 33244990  | 33245113  | NC_000006.11 |
| cg01269795 | 1.36E-11 | 8.30E-13 | -7.66 | 18.193149  | -1.08E-01 | 26440101  | 26440224  | NC_000006.11 |
| cg20312012 | 1.36E-11 | 8.30E-13 | -7.66 | 18.1927901 | -2.13E-01 | 97331035  | 97331158  | NC_000002.11 |
| cg05534152 | 1.36E-11 | 8.30E-13 | -7.66 | 18.1924582 | -7.51E-02 | 1340978   | 1341101   | NC_000004.11 |
| cg01363198 | 1.37E-11 | 8.30E-13 | -7.66 | 18.1920868 | -1.34E-01 | 134878739 | 134878862 | NC_000003.11 |
| cg20316614 | 1.37E-11 | 8.33E-13 | -7.66 | 18.1885714 | -1.10E-01 | 226065637 | 226065760 | NC_000001.10 |
| cg13181928 | 1.37E-11 | 8.34E-13 | -7.66 | 18.1882067 | -1.49E-01 | 6947323   | 6947446   | NC_000017.10 |
| cg26639666 | 1.37E-11 | 8.35E-13 | -7.66 | 18.1867996 | -1.10E-01 | 75455052  | 75455175  | NC_000016.9  |
| cg24069602 | 1.37E-11 | 8.36E-13 | -7.66 | 18.1858925 | -8.69E-02 | 62045522  | 62045645  | NC_000017.10 |
| cg16009970 | 1.38E-11 | 8.37E-13 | -7.66 | 18.1842957 | -1.02E-01 | 7198721   | 7198844   | NC_000017.10 |
| cg15878568 | 1.38E-11 | 8.37E-13 | -7.66 | 18.1841575 | -1.26E-01 | 30923865  | 30923988  | NC_000006.11 |
| cg03093944 | 1.38E-11 | 8.38E-13 | -7.66 | 18.1836015 | -8.60E-02 | 2919407   | 2919530   | NC_000017.10 |
| cg10458734 | 1.38E-11 | 8.38E-13 | -7.66 | 18.1834207 | -1.89E-01 | 1742021   | 1742144   | NC_000016.9  |
| cg14269096 | 1.38E-11 | 8.38E-13 | -7.66 | 18.1829781 | -1.62E-01 | 56532433  | 56532556  | NC_000018.9  |
| cg19618622 | 1.38E-11 | 8.38E-13 | -7.66 | 18.1828248 | -1.74E-01 | 166901831 | 166901954 | NC_000006.11 |
| cg08717751 | 1.38E-11 | 8.41E-13 | -7.66 | 18.1799969 | -1.64E-01 | 37881008  | 37881131  | NC_000013.10 |
| cg15297799 | 1.38E-11 | 8.41E-13 | -7.66 | 18.1797335 | -6.88E-02 | 77794239  | 77794362  | NC_000018.9  |

|            |          |          |       |            |           |           |           |              |
|------------|----------|----------|-------|------------|-----------|-----------|-----------|--------------|
| cg09088050 | 1.38E-11 | 8.42E-13 | -7.66 | 18.1788398 | -1.00E-01 | 8090206   | 8090329   | NC_000011.9  |
| cg08924284 | 1.38E-11 | 8.43E-13 | -7.66 | 18.1773067 | -1.04E-01 | 13971252  | 13971375  | NC_000003.11 |
| cg18149657 | 1.38E-11 | 8.43E-13 | -7.66 | 18.1767312 | -8.37E-02 | 35773231  | 35773354  | NC_000019.9  |
| cg05565562 | 1.39E-11 | 8.44E-13 | -7.66 | 18.1763985 | -7.29E-02 | 116960898 | 116961021 | NC_000001.10 |
| cg04292830 | 1.39E-11 | 8.44E-13 | -7.66 | 18.1761519 | -8.65E-02 | 25991114  | 25991237  | NC_000020.10 |
| cg10952220 | 1.39E-11 | 8.44E-13 | -7.66 | 18.1760044 | -1.08E-01 | 46448671  | 46448794  | NC_000003.11 |
| cg00689651 | 1.39E-11 | 8.44E-13 | -7.66 | 18.1756143 | -9.81E-02 | 13209548  | 13209671  | NC_000019.9  |
| cg21399203 | 1.39E-11 | 8.48E-13 | -7.66 | 18.1712859 | -2.24E-01 | 57623913  | 57624036  | NC_000004.11 |
| cg07028950 | 1.39E-11 | 8.49E-13 | -7.66 | 18.170746  | -1.29E-01 | 144302512 | 144302635 | NC_000008.10 |
| cg10764196 | 1.39E-11 | 8.49E-13 | -7.66 | 18.1701737 | -1.41E-01 | 10489270  | 10489393  | NC_000008.10 |
| cg23514532 | 1.39E-11 | 8.49E-13 | -7.66 | 18.1697963 | -9.44E-02 | 45338072  | 45338195  | NC_000020.10 |
| cg04510209 | 1.39E-11 | 8.50E-13 | -7.66 | 18.1693665 | -1.02E-01 | 134607879 | 134608002 | NC_000010.10 |
| cg17131579 | 1.40E-11 | 8.51E-13 | -7.66 | 18.1684505 | -8.93E-02 | 33256216  | 33256339  | NC_000006.11 |
| cg01359246 | 1.40E-11 | 8.51E-13 | -7.66 | 18.1678386 | -6.58E-02 | 83775753  | 83775876  | NC_000006.11 |
| cg26671873 | 1.40E-11 | 8.52E-13 | -7.66 | 18.1664654 | -1.05E-01 | 188104526 | 188104649 | NC_000004.11 |
| cg08856420 | 1.40E-11 | 8.56E-13 | -7.66 | 18.1626756 | -8.72E-02 | 31047558  | 31047681  | NC_000006.11 |
| cg16416718 | 1.41E-11 | 8.57E-13 | -7.66 | 18.1613794 | -4.95E-02 | 6844519   | 6844642   | NC_000001.10 |
| cg20544516 | 1.41E-11 | 8.58E-13 | -7.66 | 18.1599405 | -7.73E-02 | 17717183  | 17717306  | NC_000017.10 |
| cg03499808 | 1.41E-11 | 8.59E-13 | -7.66 | 18.1590427 | -2.20E-01 | 73020459  | 73020582  | NC_000011.9  |
| cg04947157 | 1.41E-11 | 8.60E-13 | -7.66 | 18.1579868 | -1.62E-01 | 76128481  | 76128604  | NC_000017.10 |
| cg27340648 | 1.42E-11 | 8.64E-13 | -7.66 | 18.1530823 | -1.70E-01 | 3254739   | 3254862   | NC_000008.10 |
| cg23041250 | 1.42E-11 | 8.65E-13 | -7.66 | 18.1521139 | -1.34E-01 | 50725605  | 50725728  | NC_000022.10 |
| cg07473553 | 1.42E-11 | 8.66E-13 | -7.66 | 18.1508475 | -2.20E-01 | 125655407 | 125655530 | NC_000003.11 |
| cg27373387 | 1.42E-11 | 8.66E-13 | -7.66 | 18.1503355 | -1.49E-01 | 10592414  | 10592537  | NC_000002.11 |
| cg07229688 | 1.42E-11 | 8.69E-13 | -7.65 | 18.1468856 | -1.23E-01 | 59564213  | 59564336  | NC_000018.9  |

|            |          |          |       |            |           |           |           |              |
|------------|----------|----------|-------|------------|-----------|-----------|-----------|--------------|
| cg18114040 | 1.43E-11 | 8.70E-13 | -7.65 | 18.146126  | -1.85E-01 | 111062247 | 111062370 | NC_000013.10 |
| cg21397993 | 1.43E-11 | 8.71E-13 | -7.65 | 18.145392  | -4.76E-02 | 243418055 | 243418178 | NC_000001.10 |
| cg04789420 | 1.43E-11 | 8.73E-13 | -7.65 | 18.1433967 | -1.31E-01 | 44080117  | 44080240  | NC_000007.13 |
| cg24965322 | 1.43E-11 | 8.73E-13 | -7.65 | 18.1428008 | -1.43E-01 | 131810054 | 131810177 | NC_000007.13 |
| cg17740752 | 1.43E-11 | 8.73E-13 | -7.65 | 18.1423349 | -1.14E-01 | 2529902   | 2530025   | NC_000001.10 |
| cg27657862 | 1.43E-11 | 8.74E-13 | -7.65 | 18.1418194 | -5.56E-02 | 46172501  | 46172624  | NC_000019.9  |
| cg07945335 | 1.43E-11 | 8.75E-13 | -7.65 | 18.1407513 | -1.35E-01 | 41924478  | 41924601  | NC_000017.10 |
| cg05831315 | 1.44E-11 | 8.76E-13 | -7.65 | 18.1394441 | -1.06E-01 | 69216882  | 69217005  | NC_000008.10 |
| cg15125868 | 1.44E-11 | 8.77E-13 | -7.65 | 18.1383049 | -1.62E-01 | 35746798  | 35746921  | NC_000021.8  |
| cg17751776 | 1.44E-11 | 8.81E-13 | -7.65 | 18.1343233 | -7.22E-02 | 27370117  | 27370240  | NC_000017.10 |
| cg07671976 | 1.44E-11 | 8.81E-13 | -7.65 | 18.1337889 | -9.59E-02 | 1142215   | 1142338   | NC_000001.10 |
| cg19478539 | 1.44E-11 | 8.81E-13 | -7.65 | 18.1335444 | -1.37E-01 | 39957639  | 39957762  | NC_000017.10 |
| cg06690609 | 1.44E-11 | 8.82E-13 | -7.65 | 18.1330795 | -8.46E-02 | 2723314   | 2723437   | NC_000019.9  |
| cg01979352 | 1.44E-11 | 8.82E-13 | -7.65 | 18.1330454 | -9.51E-02 | 182569418 | 182569541 | NC_000001.10 |
| cg17073169 | 1.45E-11 | 8.84E-13 | -7.65 | 18.1309894 | -1.98E-01 | 110533292 | 110533415 | NC_000003.11 |
| cg16520225 | 1.45E-11 | 8.85E-13 | -7.65 | 18.1298824 | -6.04E-02 | 72266155  | 72266278  | NC_000018.9  |
| cg19582265 | 1.45E-11 | 8.86E-13 | -7.65 | 18.1287931 | -8.30E-02 | 4229293   | 4229416   | NC_000019.9  |
| cg04603818 | 1.45E-11 | 8.86E-13 | -7.65 | 18.1287639 | -9.83E-02 | 17255771  | 17255894  | NC_000017.10 |
| cg10317717 | 1.45E-11 | 8.86E-13 | -7.65 | 18.12824   | -1.63E-01 | 48129904  | 48130027  | NC_000007.13 |
| cg05774698 | 1.45E-11 | 8.86E-13 | -7.65 | 18.12802   | -1.68E-01 | 27681678  | 27681801  | NC_000007.13 |
| cg19322788 | 1.46E-11 | 8.91E-13 | -7.65 | 18.12253   | -1.24E-01 | 125831167 | 125831290 | NC_000012.11 |
| cg09638264 | 1.46E-11 | 8.92E-13 | -7.65 | 18.1221308 | -1.49E-01 | 228735722 | 228735845 | NC_000002.11 |
| cg12580943 | 1.46E-11 | 8.94E-13 | -7.65 | 18.1197376 | -1.68E-01 | 2203648   | 2203771   | NC_000001.10 |
| cg18640660 | 1.47E-11 | 8.96E-13 | -7.65 | 18.1169023 | -1.27E-01 | 74495657  | 74495780  | NC_000015.9  |
| cg09209257 | 1.48E-11 | 9.02E-13 | -7.65 | 18.1103635 | -1.08E-01 | 78907020  | 78907143  | NC_000014.8  |

|               |          |          |       |            |           |           |           |              |
|---------------|----------|----------|-------|------------|-----------|-----------|-----------|--------------|
| cg07464201    | 1.48E-11 | 9.03E-13 | -7.65 | 18.1092253 | -6.81E-02 | 75422611  | 75422734  | NC_000014.8  |
| cg19737225    | 1.48E-11 | 9.03E-13 | -7.65 | 18.1091027 | -1.34E-01 | 17392320  | 17392443  | NC_000019.9  |
| cg13271228    | 1.48E-11 | 9.04E-13 | -7.65 | 18.1079792 | -5.43E-02 | 33412355  | 33412478  | NC_000020.10 |
| ch.2.1904847R | 1.48E-11 | 9.06E-13 | -7.65 | 18.1065587 | -2.67E-02 | 86300405  | 86300528  | NC_000002.11 |
| cg01794555    | 1.48E-11 | 9.07E-13 | -7.65 | 18.1050067 | -1.69E-01 | 46742767  | 46742890  | NC_000013.10 |
| cg25936381    | 1.49E-11 | 9.10E-13 | -7.65 | 18.1021775 | -1.74E-01 | 38657875  | 38657998  | NC_000017.10 |
| cg19513744    | 1.49E-11 | 9.10E-13 | -7.65 | 18.1016887 | -5.54E-02 | 56836209  | 56836332  | NC_000003.11 |
| cg01359236    | 1.49E-11 | 9.11E-13 | -7.65 | 18.1010098 | -1.22E-01 | 11763828  | 11763951  | NC_000008.10 |
| cg00859280    | 1.49E-11 | 9.14E-13 | -7.65 | 18.0977061 | -8.44E-02 | 101137068 | 101137191 | NC_000014.8  |
| cg09911316    | 1.49E-11 | 9.14E-13 | -7.65 | 18.0976093 | -1.42E-01 | 3610600   | 3610723   | NC_000006.11 |
| cg00968640    | 1.50E-11 | 9.15E-13 | -7.65 | 18.09635   | -1.64E-01 | 185834094 | 185834217 | NC_000001.10 |
| cg18487508    | 1.50E-11 | 9.17E-13 | -7.65 | 18.0942094 | -6.95E-02 | 39926862  | 39926985  | NC_000019.9  |
| cg04121261    | 1.50E-11 | 9.18E-13 | -7.65 | 18.0935723 | -1.01E-01 | 12038580  | 12038703  | NC_000018.9  |
| cg11387340    | 1.51E-11 | 9.23E-13 | -7.65 | 18.0884962 | -1.28E-01 | 166970727 | 166970850 | NC_000006.11 |
| cg15112747    | 1.51E-11 | 9.24E-13 | -7.64 | 18.0873312 | -1.33E-01 | 129120791 | 129120914 | NC_000002.11 |
| cg12062782    | 1.51E-11 | 9.24E-13 | -7.64 | 18.08706   | -1.29E-01 | 66102686  | 66102809  | NC_000011.9  |
| cg20566450    | 1.51E-11 | 9.25E-13 | -7.64 | 18.0856555 | -9.66E-02 | 31854651  | 31854774  | NC_000005.9  |
| cg24752644    | 1.51E-11 | 9.26E-13 | -7.64 | 18.0851306 | -8.19E-02 | 58858686  | 58858809  | NC_000005.9  |
| cg00522276    | 1.51E-11 | 9.26E-13 | -7.64 | 18.0845724 | -1.37E-01 | 67452722  | 67452845  | NC_000008.10 |
| cg04529938    | 1.51E-11 | 9.26E-13 | -7.64 | 18.0845348 | -1.56E-01 | 73084494  | 73084617  | NC_000017.10 |
| cg26282283    | 1.51E-11 | 9.27E-13 | -7.64 | 18.0834509 | -1.47E-01 | 2704368   | 2704491   | NC_000007.13 |
| cg16470140    | 1.52E-11 | 9.29E-13 | -7.64 | 18.0817361 | -1.25E-01 | 77862098  | 77862221  | NC_000015.9  |
| cg06010667    | 1.52E-11 | 9.29E-13 | -7.64 | 18.0811128 | -1.59E-01 | 169309818 | 169309941 | NC_000006.11 |
| cg10185424    | 1.52E-11 | 9.30E-13 | -7.64 | 18.08004   | -1.46E-01 | 66478491  | 66478614  | NC_000005.9  |
| cg04089901    | 1.52E-11 | 9.32E-13 | -7.64 | 18.0784659 | -1.40E-01 | 7557590   | 7557713   | NC_000007.13 |



|               |          |          |       |            |           |           |           |              |
|---------------|----------|----------|-------|------------|-----------|-----------|-----------|--------------|
| cg10754705    | 1.52E-11 | 9.33E-13 | -7.64 | 18.0772919 | -8.01E-02 | 22085381  | 22085504  | NC_000008.10 |
| cg25652751    | 1.53E-11 | 9.37E-13 | -7.64 | 18.0730075 | -1.53E-01 | 77748245  | 77748368  | NC_000015.9  |
| cg26785702    | 1.53E-11 | 9.38E-13 | -7.64 | 18.0715746 | -1.40E-01 | 118846877 | 118847000 | NC_000011.9  |
| cg27409802    | 1.53E-11 | 9.39E-13 | -7.64 | 18.0709429 | -1.53E-01 | 188664928 | 188665051 | NC_000003.11 |
| cg04034685    | 1.53E-11 | 9.40E-13 | -7.64 | 18.0703614 | -1.49E-01 | 62085532  | 62085655  | NC_000017.10 |
| cg14667235    | 1.54E-11 | 9.43E-13 | -7.64 | 18.066981  | -1.23E-01 | 76026648  | 76026771  | NC_000007.13 |
| cg26588061    | 1.54E-11 | 9.43E-13 | -7.64 | 18.0669727 | -1.66E-01 | 12086036  | 12086159  | NC_000010.10 |
| cg04047146    | 1.54E-11 | 9.44E-13 | -7.64 | 18.0653769 | -9.02E-02 | 58570898  | 58571021  | NC_000003.11 |
| cg25730142    | 1.54E-11 | 9.45E-13 | -7.64 | 18.0652525 | -4.36E-02 | 32031702  | 32031825  | NC_000020.10 |
| ch.15.859615F | 1.54E-11 | 9.46E-13 | -7.64 | 18.0637077 | -4.96E-02 | 61367401  | 61367524  | NC_000015.9  |
| cg01374398    | 1.54E-11 | 9.46E-13 | -7.64 | 18.0636204 | -5.83E-02 | 47516975  | 47517098  | NC_000003.11 |
| cg18790325    | 1.55E-11 | 9.47E-13 | -7.64 | 18.0622151 | -1.39E-01 | 116881705 | 116881828 | NC_000012.11 |
| cg02770112    | 1.55E-11 | 9.48E-13 | -7.64 | 18.0616014 | -5.45E-02 | 9066984   | 9067107   | NC_000012.11 |
| cg12024811    | 1.55E-11 | 9.49E-13 | -7.64 | 18.0607405 | -1.25E-01 | 123979446 | 123979569 | NC_000003.11 |
| cg06009267    | 1.55E-11 | 9.51E-13 | -7.64 | 18.0587687 | -1.46E-01 | 144948764 | 144948887 | NC_000008.10 |
| cg24160371    | 1.55E-11 | 9.51E-13 | -7.64 | 18.0580529 | -1.45E-01 | 107333404 | 107333527 | NC_000005.9  |
| cg13837747    | 1.55E-11 | 9.54E-13 | -7.64 | 18.0557096 | -1.15E-01 | 149178676 | 149178799 | NC_000006.11 |
| cg06339706    | 1.55E-11 | 9.54E-13 | -7.64 | 18.0555922 | -1.62E-01 | 49371285  | 49371408  | NC_000019.9  |
| cg24575128    | 1.56E-11 | 9.56E-13 | -7.64 | 18.0538159 | -1.22E-01 | 52502445  | 52502568  | NC_000003.11 |
| cg26124968    | 1.56E-11 | 9.56E-13 | -7.64 | 18.0537144 | -1.71E-01 | 44801571  | 44801694  | NC_000007.13 |
| cg06869171    | 1.56E-11 | 9.56E-13 | -7.64 | 18.0537026 | -1.30E-01 | 155949839 | 155949962 | NC_000001.10 |
| cg06919790    | 1.56E-11 | 9.57E-13 | -7.64 | 18.052475  | -6.19E-02 | 33378912  | 33379035  | NC_000006.11 |
| cg25655489    | 1.56E-11 | 9.58E-13 | -7.64 | 18.0511758 | -1.51E-01 | 57484208  | 57484331  | NC_000005.9  |
| cg04638014    | 1.56E-11 | 9.58E-13 | -7.64 | 18.0509399 | -1.10E-01 | 57371368  | 57371491  | NC_000004.11 |
| ch.1.2348804F | 1.56E-11 | 9.61E-13 | -7.64 | 18.0486574 | -4.50E-02 | 95363108  | 95363231  | NC_000001.10 |

|              |          |          |       |            |           |           |           |              |
|--------------|----------|----------|-------|------------|-----------|-----------|-----------|--------------|
| cg03568305   | 1.57E-11 | 9.62E-13 | -7.64 | 18.0472251 | -8.59E-02 | 38183559  | 38183682  | NC_000017.10 |
| cg03956353   | 1.57E-11 | 9.63E-13 | -7.64 | 18.046633  | -1.51E-01 | 110306642 | 110306765 | NC_000001.10 |
| cg18213979   | 1.57E-11 | 9.64E-13 | -7.64 | 18.0452315 | -2.59E-02 | 29297873  | 29297996  | NC_000017.10 |
| cg08886546   | 1.57E-11 | 9.64E-13 | -7.64 | 18.0448096 | -4.31E-02 | 19051335  | 19051458  | NC_000019.9  |
| cg04390004   | 1.57E-11 | 9.67E-13 | -7.64 | 18.0421815 | -1.32E-01 | 39279324  | 39279447  | NC_000019.9  |
| cg05506475   | 1.58E-11 | 9.67E-13 | -7.64 | 18.0418611 | -6.26E-02 | 180308335 | 180308458 | NC_000003.11 |
| ch.9.377428R | 1.58E-11 | 9.69E-13 | -7.64 | 18.0396794 | -2.54E-02 | 19439561  | 19439684  | NC_000009.11 |
| cg11585805   | 1.58E-11 | 9.70E-13 | -7.64 | 18.0393179 | -1.24E-01 | 47973566  | 47973689  | NC_000001.10 |
| cg24207161   | 1.58E-11 | 9.70E-13 | -7.64 | 18.0388779 | -2.30E-01 | 155464712 | 155464835 | NC_000006.11 |
| cg08599635   | 1.58E-11 | 9.71E-13 | -7.64 | 18.03843   | -2.00E-01 | 78496508  | 78496631  | NC_000016.9  |
| cg11097717   | 1.58E-11 | 9.72E-13 | -7.64 | 18.0374042 | -4.46E-02 | 191045635 | 191045758 | NC_000002.11 |
| cg05775067   | 1.58E-11 | 9.72E-13 | -7.64 | 18.0372239 | -2.08E-01 | 30602982  | 30603105  | NC_000007.13 |
| cg21785723   | 1.59E-11 | 9.75E-13 | -7.64 | 18.0336265 | -1.51E-01 | 6551782   | 6551905   | NC_000001.10 |
| cg07935264   | 1.59E-11 | 9.76E-13 | -7.64 | 18.0327047 | -1.87E-01 | 113594375 | 113594498 | NC_000002.11 |
| cg22379463   | 1.59E-11 | 9.77E-13 | -7.64 | 18.0316421 | -9.48E-02 | 45260330  | 45260453  | NC_000003.11 |
| cg03112033   | 1.59E-11 | 9.79E-13 | -7.64 | 18.0303607 | -1.50E-01 | 31515551  | 31515674  | NC_000012.11 |
| cg23189692   | 1.59E-11 | 9.79E-13 | -7.64 | 18.0296967 | -2.12E-01 | 184050393 | 184050516 | NC_000003.11 |
| cg27266479   | 1.60E-11 | 9.81E-13 | -7.63 | 18.0280547 | -6.42E-02 | 9294882   | 9295005   | NC_000001.10 |
| cg03068958   | 1.60E-11 | 9.81E-13 | -7.63 | 18.027771  | -7.01E-02 | 810321    | 810444    | NC_000011.9  |
| cg24682551   | 1.60E-11 | 9.81E-13 | -7.63 | 18.0277511 | -9.85E-02 | 116519623 | 116519746 | NC_000001.10 |
| cg10803935   | 1.60E-11 | 9.82E-13 | -7.63 | 18.0272662 | -9.73E-02 | 91293630  | 91293753  | NC_000008.10 |
| cg27321913   | 1.60E-11 | 9.85E-13 | -7.63 | 18.0243387 | -7.81E-02 | 35265379  | 35265502  | NC_000006.11 |
| cg19420129   | 1.60E-11 | 9.85E-13 | -7.63 | 18.0234304 | -1.37E-01 | 49228152  | 49228275  | NC_000019.9  |
| cg13413982   | 1.61E-11 | 9.91E-13 | -7.63 | 18.0176083 | -1.64E-01 | 44868172  | 44868295  | NC_000013.10 |
| cg04675747   | 1.61E-11 | 9.93E-13 | -7.63 | 18.0163172 | -1.35E-01 | 29626439  | 29626562  | NC_000016.9  |

|            |          |          |       |            |           |           |           |              |
|------------|----------|----------|-------|------------|-----------|-----------|-----------|--------------|
| cg20646120 | 1.62E-11 | 9.97E-13 | -7.63 | 18.0115026 | -5.61E-02 | 60982720  | 60982843  | NC_000020.10 |
| cg00071887 | 1.62E-11 | 9.98E-13 | -7.63 | 18.0114419 | -1.35E-01 | 74218529  | 74218652  | NC_000015.9  |
| cg11557823 | 1.62E-11 | 9.98E-13 | -7.63 | 18.0105976 | -6.16E-02 | 88429167  | 88429290  | NC_000012.11 |
| cg14343701 | 1.62E-11 | 9.99E-13 | -7.63 | 18.0103898 | -1.45E-01 | 64672341  | 64672464  | NC_000017.10 |
| cg07821197 | 1.62E-11 | 9.99E-13 | -7.63 | 18.0099131 | -2.18E-02 | 75681616  | 75681739  | NC_000016.9  |
| cg17454094 | 1.62E-11 | 1.00E-12 | -7.63 | 18.0094038 | -1.25E-01 | 12610062  | 12610185  | NC_000001.10 |
| cg24495008 | 1.63E-11 | 1.00E-12 | -7.63 | 18.0088367 | -1.38E-01 | 90198882  | 90199005  | NC_000015.9  |
| cg08757420 | 1.63E-11 | 1.00E-12 | -7.63 | 18.0072694 | -3.44E-02 | 75234148  | 75234271  | NC_000008.10 |
| cg11288144 | 1.63E-11 | 1.00E-12 | -7.63 | 18.0069326 | -2.44E-01 | 30649909  | 30650032  | NC_000006.11 |
| cg08189448 | 1.63E-11 | 1.00E-12 | -7.63 | 18.006543  | -1.17E-01 | 118915907 | 118916030 | NC_000009.11 |
| cg03245733 | 1.63E-11 | 1.00E-12 | -7.63 | 18.006061  | -1.83E-02 | 124407825 | 124407948 | NC_000008.10 |
| cg03849851 | 1.63E-11 | 1.00E-12 | -7.63 | 18.0054604 | -1.58E-01 | 166980629 | 166980752 | NC_000006.11 |
| cg01499736 | 1.63E-11 | 1.00E-12 | -7.63 | 18.0048572 | -6.57E-02 | 36164655  | 36164778  | NC_000006.11 |
| cg03348978 | 1.63E-11 | 1.01E-12 | -7.63 | 18.0039981 | -4.65E-02 | 36103230  | 36103353  | NC_000017.10 |
| cg14286048 | 1.64E-11 | 1.01E-12 | -7.63 | 18.0022597 | -3.94E-02 | 46354342  | 46354465  | NC_000020.10 |
| cg14311362 | 1.64E-11 | 1.01E-12 | -7.63 | 18.0001051 | -1.49E-01 | 121498812 | 121498935 | NC_000002.11 |
| cg01369114 | 1.64E-11 | 1.01E-12 | -7.63 | 17.999382  | -4.47E-02 | 31002991  | 31003114  | NC_000022.10 |
| cg01905589 | 1.64E-11 | 1.01E-12 | -7.63 | 17.9991966 | -6.62E-02 | 26856408  | 26856531  | NC_000001.10 |
| cg27079194 | 1.64E-11 | 1.01E-12 | -7.63 | 17.9980858 | -1.75E-01 | 32350428  | 32350551  | NC_000014.8  |
| cg12791476 | 1.64E-11 | 1.01E-12 | -7.63 | 17.9979026 | -5.85E-02 | 44059249  | 44059372  | NC_000007.13 |
| cg01579218 | 1.64E-11 | 1.01E-12 | -7.63 | 17.9963393 | -1.42E-01 | 87312047  | 87312170  | NC_000016.9  |
| cg23691223 | 1.64E-11 | 1.01E-12 | -7.63 | 17.9959594 | -1.52E-01 | 57785036  | 57785159  | NC_000001.10 |
| cg13804854 | 1.65E-11 | 1.02E-12 | -7.63 | 17.993071  | -7.79E-02 | 49458488  | 49458611  | NC_000019.9  |
| cg10485466 | 1.65E-11 | 1.02E-12 | -7.63 | 17.9917173 | -5.70E-02 | 90777350  | 90777473  | NC_000015.9  |
| cg13593758 | 1.65E-11 | 1.02E-12 | -7.63 | 17.9898642 | -1.59E-01 | 11178365  | 11178488  | NC_000003.11 |

|            |          |          |       |            |           |           |           |              |
|------------|----------|----------|-------|------------|-----------|-----------|-----------|--------------|
| cg09739932 | 1.66E-11 | 1.02E-12 | -7.63 | 17.9875081 | -1.01E-01 | 2178621   | 2178744   | NC_000016.9  |
| cg20214328 | 1.66E-11 | 1.02E-12 | -7.63 | 17.9869881 | -8.80E-02 | 39378302  | 39378425  | NC_000019.9  |
| cg08777211 | 1.66E-11 | 1.02E-12 | -7.63 | 17.9862399 | -1.65E-01 | 130060960 | 130061083 | NC_000007.13 |
| cg09447808 | 1.66E-11 | 1.02E-12 | -7.63 | 17.9854504 | -6.47E-02 | 103267071 | 103267194 | NC_000004.11 |
| cg24301350 | 1.67E-11 | 1.03E-12 | -7.63 | 17.9819822 | -7.13E-02 | 200776224 | 200776347 | NC_000002.11 |
| cg17142931 | 1.67E-11 | 1.03E-12 | -7.63 | 17.980197  | -1.37E-01 | 942295    | 942418    | NC_000001.10 |
| cg03742808 | 1.67E-11 | 1.03E-12 | -7.63 | 17.9799662 | -1.07E-01 | 76128634  | 76128757  | NC_000017.10 |
| cg05714094 | 1.67E-11 | 1.03E-12 | -7.63 | 17.978842  | -7.03E-02 | 117102988 | 117103111 | NC_000011.9  |
| cg08592493 | 1.67E-11 | 1.03E-12 | -7.63 | 17.9781591 | -1.27E-01 | 88563934  | 88564057  | NC_000016.9  |
| cg08335767 | 1.67E-11 | 1.03E-12 | -7.63 | 17.9775997 | -1.09E-01 | 34206495  | 34206618  | NC_000006.11 |
| cg06745955 | 1.68E-11 | 1.03E-12 | -7.63 | 17.9766313 | -7.94E-02 | 27038470  | 27038593  | NC_000017.10 |
| cg08621957 | 1.68E-11 | 1.03E-12 | -7.63 | 17.9754657 | -2.11E-01 | 219181531 | 219181654 | NC_000002.11 |
| cg09098720 | 1.68E-11 | 1.04E-12 | -7.63 | 17.9751361 | -1.53E-01 | 49412842  | 49412965  | NC_000017.10 |
| cg24030173 | 1.68E-11 | 1.04E-12 | -7.63 | 17.9749351 | -1.37E-01 | 48922140  | 48922263  | NC_000019.9  |
| cg24389730 | 1.68E-11 | 1.04E-12 | -7.63 | 17.9723736 | -8.18E-02 | 46114615  | 46114738  | NC_000017.10 |
| cg17311587 | 1.68E-11 | 1.04E-12 | -7.63 | 17.9723576 | -6.57E-02 | 1250088   | 1250211   | NC_000007.13 |
| cg02066650 | 1.68E-11 | 1.04E-12 | -7.63 | 17.972172  | -2.07E-02 | 111435449 | 111435572 | NC_000002.11 |
| cg09308777 | 1.69E-11 | 1.04E-12 | -7.63 | 17.9707194 | -1.71E-01 | 169852575 | 169852698 | NC_000006.11 |
| cg10020787 | 1.69E-11 | 1.04E-12 | -7.62 | 17.9663923 | -1.14E-01 | 50626838  | 50626961  | NC_000010.10 |
| cg03980764 | 1.70E-11 | 1.05E-12 | -7.62 | 17.9644452 | -1.11E-01 | 31698492  | 31698615  | NC_000006.11 |
| cg25163015 | 1.70E-11 | 1.05E-12 | -7.62 | 17.9627295 | -5.68E-02 | 64052221  | 64052344  | NC_000011.9  |
| cg09113070 | 1.70E-11 | 1.05E-12 | -7.62 | 17.9590545 | -1.63E-01 | 86114036  | 86114159  | NC_000002.11 |
| cg22106577 | 1.71E-11 | 1.05E-12 | -7.62 | 17.9575371 | -2.21E-02 | 137514936 | 137515059 | NC_000005.9  |
| cg04335562 | 1.71E-11 | 1.05E-12 | -7.62 | 17.9573765 | -6.06E-02 | 2945000   | 2945123   | NC_000019.9  |
| cg03386595 | 1.71E-11 | 1.05E-12 | -7.62 | 17.9572058 | -1.63E-01 | 48194304  | 48194427  | NC_000001.10 |

|               |          |          |       |            |           |           |           |              |
|---------------|----------|----------|-------|------------|-----------|-----------|-----------|--------------|
| cg27507254    | 1.71E-11 | 1.05E-12 | -7.62 | 17.9569368 | -1.16E-01 | 43206037  | 43206160  | NC_000001.10 |
| cg14113958    | 1.71E-11 | 1.06E-12 | -7.62 | 17.9559716 | -1.60E-01 | 117657237 | 117657360 | NC_000009.11 |
| cg10285525    | 1.71E-11 | 1.06E-12 | -7.62 | 17.955828  | -9.30E-02 | 62167942  | 62168065  | NC_000020.10 |
| cg00986445    | 1.71E-11 | 1.06E-12 | -7.62 | 17.9555055 | -8.39E-02 | 145507653 | 145507776 | NC_000001.10 |
| cg01051583    | 1.72E-11 | 1.06E-12 | -7.62 | 17.9520152 | -1.70E-01 | 93196072  | 93196195  | NC_000014.8  |
| cg18642576    | 1.72E-11 | 1.06E-12 | -7.62 | 17.9495588 | -1.47E-01 | 74752765  | 74752888  | NC_000016.9  |
| cg11585357    | 1.73E-11 | 1.07E-12 | -7.62 | 17.9439888 | -1.81E-01 | 52794869  | 52794992  | NC_000006.11 |
| cg22266967    | 1.73E-11 | 1.07E-12 | -7.62 | 17.9429877 | -1.33E-01 | 6695698   | 6695821   | NC_000004.11 |
| cg27626102    | 1.74E-11 | 1.07E-12 | -7.62 | 17.9385052 | -5.54E-02 | 89840731  | 89840854  | NC_000007.13 |
| cg12347757    | 1.74E-11 | 1.08E-12 | -7.62 | 17.9356071 | -1.04E-01 | 139779027 | 139779150 | NC_000007.13 |
| cg18882156    | 1.74E-11 | 1.08E-12 | -7.62 | 17.9350255 | -1.53E-01 | 42276442  | 42276565  | NC_000002.11 |
| cg02671204    | 1.75E-11 | 1.08E-12 | -7.62 | 17.9345313 | -1.64E-01 | 84076834  | 84076957  | NC_000016.9  |
| cg22078079    | 1.75E-11 | 1.08E-12 | -7.62 | 17.9343369 | -4.24E-02 | 52739121  | 52739244  | NC_000003.11 |
| cg02375503    | 1.75E-11 | 1.08E-12 | -7.62 | 17.9326838 | -1.03E-01 | 69591110  | 69591233  | NC_000015.9  |
| ch.21.825836R | 1.75E-11 | 1.08E-12 | -7.62 | 17.9306682 | -7.35E-02 | 47810293  | 47810416  | NC_000021.8  |
| cg16561266    | 1.76E-11 | 1.09E-12 | -7.62 | 17.9281003 | -1.30E-01 | 62777777  | 62777900  | NC_000017.10 |
| cg02100674    | 1.76E-11 | 1.09E-12 | -7.62 | 17.9265574 | -1.28E-01 | 83636325  | 83636448  | NC_000010.10 |
| cg01516372    | 1.76E-11 | 1.09E-12 | -7.62 | 17.9265151 | -1.57E-01 | 87617972  | 87618095  | NC_000001.10 |
| cg22412747    | 1.76E-11 | 1.09E-12 | -7.62 | 17.9261017 | -1.71E-01 | 28768014  | 28768137  | NC_000002.11 |
| cg26909981    | 1.76E-11 | 1.09E-12 | -7.62 | 17.9260589 | -1.66E-01 | 49377294  | 49377417  | NC_000019.9  |
| cg25174844    | 1.76E-11 | 1.09E-12 | -7.62 | 17.9236548 | -1.49E-01 | 73195113  | 73195236  | NC_000015.9  |
| cg24282826    | 1.76E-11 | 1.09E-12 | -7.62 | 17.9228007 | -5.90E-02 | 35288546  | 35288669  | NC_000021.8  |
| cg15948124    | 1.77E-11 | 1.09E-12 | -7.62 | 17.9216154 | -1.56E-01 | 90021803  | 90021926  | NC_000006.11 |
| cg06043201    | 1.77E-11 | 1.09E-12 | -7.62 | 17.9210198 | -1.73E-01 | 28974428  | 28974551  | NC_000008.10 |
| cg06755427    | 1.77E-11 | 1.09E-12 | -7.62 | 17.9202855 | -1.35E-01 | 223824319 | 223824442 | NC_000002.11 |

|            |          |          |       |            |           |           |           |              |
|------------|----------|----------|-------|------------|-----------|-----------|-----------|--------------|
| cg23973162 | 1.77E-11 | 1.10E-12 | -7.62 | 17.9189443 | -6.13E-02 | 40745761  | 40745884  | NC_000013.10 |
| cg02515800 | 1.78E-11 | 1.10E-12 | -7.62 | 17.9159064 | -8.01E-02 | 149339754 | 149339877 | NC_000005.9  |
| cg20072001 | 1.78E-11 | 1.10E-12 | -7.62 | 17.915805  | -6.63E-02 | 101142384 | 101142507 | NC_000015.9  |
| cg08309251 | 1.78E-11 | 1.10E-12 | -7.62 | 17.9148319 | -1.04E-01 | 46348306  | 46348429  | NC_000021.8  |
| cg00556514 | 1.78E-11 | 1.10E-12 | -7.62 | 17.9143381 | -6.70E-02 | 38066524  | 38066647  | NC_000003.11 |
| cg24054649 | 1.78E-11 | 1.10E-12 | -7.61 | 17.9109969 | -5.32E-02 | 24604912  | 24605035  | NC_000014.8  |
| cg04896048 | 1.78E-11 | 1.10E-12 | -7.61 | 17.9109422 | -1.45E-01 | 119993780 | 119993903 | NC_000011.9  |
| cg07180649 | 1.79E-11 | 1.11E-12 | -7.61 | 17.9098949 | -5.07E-02 | 22470290  | 22470413  | NC_000001.10 |
| cg25616869 | 1.79E-11 | 1.11E-12 | -7.61 | 17.9074409 | -1.65E-01 | 48443867  | 48443990  | NC_000003.11 |
| cg10646368 | 1.79E-11 | 1.11E-12 | -7.61 | 17.9074328 | -9.82E-02 | 83974335  | 83974458  | NC_000015.9  |
| cg18105725 | 1.80E-11 | 1.11E-12 | -7.61 | 17.9044563 | -1.50E-01 | 160554003 | 160554126 | NC_000006.11 |
| cg05590619 | 1.80E-11 | 1.11E-12 | -7.61 | 17.9035503 | -9.29E-02 | 42056814  | 42056937  | NC_000003.11 |
| cg07328664 | 1.80E-11 | 1.11E-12 | -7.61 | 17.9030212 | -1.78E-01 | 233125062 | 233125185 | NC_000002.11 |
| cg03304815 | 1.80E-11 | 1.12E-12 | -7.61 | 17.9007105 | -2.64E-02 | 134083139 | 134083262 | NC_000003.11 |
| cg06908460 | 1.80E-11 | 1.12E-12 | -7.61 | 17.8999885 | -1.25E-01 | 35676104  | 35676227  | NC_000009.11 |
| cg24899846 | 1.81E-11 | 1.12E-12 | -7.61 | 17.897689  | -6.17E-02 | 31371967  | 31372090  | NC_000006.11 |
| cg26643377 | 1.81E-11 | 1.12E-12 | -7.61 | 17.8972917 | -1.16E-01 | 11710460  | 11710583  | NC_000001.10 |
| cg08116137 | 1.81E-11 | 1.12E-12 | -7.61 | 17.8966308 | -1.48E-01 | 73870653  | 73870776  | NC_000002.11 |
| cg13175329 | 1.81E-11 | 1.12E-12 | -7.61 | 17.8954802 | -1.58E-01 | 25035073  | 25035196  | NC_000006.11 |
| cg23752696 | 1.81E-11 | 1.12E-12 | -7.61 | 17.8952821 | -2.07E-01 | 241949400 | 241949523 | NC_000002.11 |
| cg18125510 | 1.81E-11 | 1.12E-12 | -7.61 | 17.8950421 | -1.83E-01 | 100841768 | 100841891 | NC_000014.8  |
| cg05671644 | 1.81E-11 | 1.12E-12 | -7.61 | 17.8949094 | -1.43E-01 | 102632303 | 102632426 | NC_000007.13 |
| cg04113056 | 1.81E-11 | 1.12E-12 | -7.61 | 17.8944915 | -6.35E-02 | 64010798  | 64010921  | NC_000014.8  |
| cg08159447 | 1.81E-11 | 1.12E-12 | -7.61 | 17.8940811 | -3.52E-02 | 40728895  | 40729018  | NC_000015.9  |
| cg24035104 | 1.81E-11 | 1.12E-12 | -7.61 | 17.8937758 | -5.42E-02 | 44445524  | 44445647  | NC_000001.10 |

|               |          |          |       |            |           |           |           |              |
|---------------|----------|----------|-------|------------|-----------|-----------|-----------|--------------|
| cg24310711    | 1.82E-11 | 1.13E-12 | -7.61 | 17.892274  | -1.51E-01 | 70026605  | 70026728  | NC_000017.10 |
| cg23572944    | 1.82E-11 | 1.13E-12 | -7.61 | 17.8911068 | -1.74E-01 | 60720130  | 60720253  | NC_000011.9  |
| cg00876678    | 1.83E-11 | 1.13E-12 | -7.61 | 17.8858739 | -9.93E-02 | 2319586   | 2319709   | NC_000016.9  |
| cg09227277    | 1.83E-11 | 1.13E-12 | -7.61 | 17.8855449 | -1.29E-01 | 155283982 | 155284105 | NC_000006.11 |
| cg24737324    | 1.83E-11 | 1.13E-12 | -7.61 | 17.8845109 | -1.09E-01 | 19867143  | 19867266  | NC_000020.10 |
| cg08781403    | 1.83E-11 | 1.14E-12 | -7.61 | 17.884103  | -1.21E-01 | 67434868  | 67434991  | NC_000008.10 |
| cg13024761    | 1.83E-11 | 1.14E-12 | -7.61 | 17.881755  | -1.43E-01 | 121487296 | 121487419 | NC_000002.11 |
| cg17129400    | 1.84E-11 | 1.14E-12 | -7.61 | 17.8799296 | -9.04E-02 | 33413709  | 33413832  | NC_000020.10 |
| cg11422156    | 1.84E-11 | 1.14E-12 | -7.61 | 17.8784295 | -1.27E-01 | 45477807  | 45477930  | NC_000010.10 |
| cg02152578    | 1.84E-11 | 1.14E-12 | -7.61 | 17.8772411 | -2.64E-02 | 110526899 | 110527022 | NC_000001.10 |
| cg20011360    | 1.84E-11 | 1.14E-12 | -7.61 | 17.8762097 | -1.64E-01 | 37585660  | 37585783  | NC_000004.11 |
| cg22871559    | 1.84E-11 | 1.14E-12 | -7.61 | 17.8760519 | -7.09E-02 | 206730254 | 206730377 | NC_000001.10 |
| cg10528484    | 1.85E-11 | 1.15E-12 | -7.61 | 17.8741817 | -1.50E-01 | 204265410 | 204265533 | NC_000001.10 |
| cg04890560    | 1.85E-11 | 1.15E-12 | -7.61 | 17.8732548 | -1.11E-01 | 88459527  | 88459650  | NC_000016.9  |
| cg01869067    | 1.85E-11 | 1.15E-12 | -7.61 | 17.8715635 | -5.12E-02 | 46374411  | 46374534  | NC_000022.10 |
| cg11158374    | 1.85E-11 | 1.15E-12 | -7.61 | 17.8705234 | -1.52E-01 | 43771664  | 43771787  | NC_000021.8  |
| cg11878242    | 1.85E-11 | 1.15E-12 | -7.61 | 17.8698023 | -4.24E-02 | 64881772  | 64881895  | NC_000002.11 |
| cg01272428    | 1.85E-11 | 1.15E-12 | -7.61 | 17.8696213 | -7.35E-02 | 74477456  | 74477579  | NC_000002.11 |
| cg22405558    | 1.85E-11 | 1.15E-12 | -7.61 | 17.8695074 | -5.88E-02 | 208489735 | 208489858 | NC_000002.11 |
| cg00221718    | 1.85E-11 | 1.15E-12 | -7.61 | 17.8693907 | -1.91E-01 | 128914668 | 128914791 | NC_000003.11 |
| ch.5.2313526R | 1.86E-11 | 1.15E-12 | -7.61 | 17.8674407 | -1.26E-01 | 126507609 | 126507732 | NC_000005.9  |
| cg00297767    | 1.86E-11 | 1.15E-12 | -7.61 | 17.8671702 | -5.77E-02 | 40721426  | 40721549  | NC_000021.8  |
| cg21921361    | 1.86E-11 | 1.16E-12 | -7.61 | 17.8665998 | -1.52E-01 | 146130070 | 146130193 | NC_000008.10 |
| cg18144742    | 1.87E-11 | 1.16E-12 | -7.61 | 17.8617895 | -7.57E-02 | 107252125 | 107252248 | NC_000014.8  |
| cg04585669    | 1.87E-11 | 1.17E-12 | -7.61 | 17.8583578 | -1.57E-01 | 11599640  | 11599763  | NC_000003.11 |

|            |          |          |       |            |           |           |           |              |
|------------|----------|----------|-------|------------|-----------|-----------|-----------|--------------|
| cg19308989 | 1.88E-11 | 1.17E-12 | -7.61 | 17.8571984 | -1.43E-01 | 7820248   | 7820371   | NC_000017.10 |
| cg01329687 | 1.88E-11 | 1.17E-12 | -7.61 | 17.8535997 | -1.05E-01 | 11761803  | 11761926  | NC_000016.9  |
| cg15478441 | 1.88E-11 | 1.17E-12 | -7.6  | 17.8529538 | -3.45E-02 | 2758381   | 2758504   | NC_000004.11 |
| cg02805871 | 1.88E-11 | 1.17E-12 | -7.6  | 17.8527516 | -8.53E-02 | 6939695   | 6939818   | NC_000017.10 |
| cg09490007 | 1.89E-11 | 1.17E-12 | -7.6  | 17.8505613 | -1.46E-01 | 41704003  | 41704126  | NC_000006.11 |
| cg06128920 | 1.89E-11 | 1.17E-12 | -7.6  | 17.8505397 | -6.76E-02 | 1447374   | 1447497   | NC_000001.10 |
| cg19609923 | 1.89E-11 | 1.17E-12 | -7.6  | 17.8503277 | -1.51E-01 | 30421774  | 30421897  | NC_000020.10 |
| cg06500365 | 1.89E-11 | 1.18E-12 | -7.6  | 17.8483823 | -1.21E-01 | 46959737  | 46959860  | NC_000010.10 |
| cg21270243 | 1.89E-11 | 1.18E-12 | -7.6  | 17.8480937 | -9.45E-02 | 216176248 | 216176371 | NC_000002.11 |
| cg10092799 | 1.89E-11 | 1.18E-12 | -7.6  | 17.8477848 | -1.60E-01 | 93811958  | 93812081  | NC_000010.10 |
| cg26369308 | 1.89E-11 | 1.18E-12 | -7.6  | 17.8472495 | -1.26E-01 | 41172324  | 41172447  | NC_000019.9  |
| cg13617671 | 1.90E-11 | 1.18E-12 | -7.6  | 17.8469022 | -9.55E-02 | 80073082  | 80073205  | NC_000009.11 |
| cg02367708 | 1.90E-11 | 1.18E-12 | -7.6  | 17.8468322 | -1.09E-01 | 136873789 | 136873912 | NC_000002.11 |
| cg09086087 | 1.90E-11 | 1.18E-12 | -7.6  | 17.8468069 | -1.32E-01 | 68000763  | 68000886  | NC_000016.9  |
| cg16568681 | 1.90E-11 | 1.18E-12 | -7.6  | 17.8445736 | -1.17E-01 | 33758505  | 33758628  | NC_000011.9  |
| cg12227505 | 1.90E-11 | 1.18E-12 | -7.6  | 17.8441819 | -6.25E-02 | 78194145  | 78194268  | NC_000017.10 |
| cg26556537 | 1.91E-11 | 1.19E-12 | -7.6  | 17.840908  | -6.87E-02 | 10250271  | 10250394  | NC_000005.9  |
| cg12462224 | 1.91E-11 | 1.19E-12 | -7.6  | 17.8400403 | -1.26E-01 | 232545380 | 232545503 | NC_000002.11 |
| cg12505153 | 1.91E-11 | 1.19E-12 | -7.6  | 17.8397589 | -1.25E-01 | 859545    | 859668    | NC_000019.9  |
| cg08699681 | 1.91E-11 | 1.19E-12 | -7.6  | 17.8395509 | -8.23E-02 | 135160713 | 135160836 | NC_000010.10 |
| cg06779123 | 1.91E-11 | 1.19E-12 | -7.6  | 17.8383448 | -4.79E-02 | 25020962  | 25021085  | NC_000007.13 |
| cg24561419 | 1.91E-11 | 1.19E-12 | -7.6  | 17.8382547 | -1.95E-01 | 79553606  | 79553729  | NC_000005.9  |
| cg03064940 | 1.92E-11 | 1.19E-12 | -7.6  | 17.8342721 | -1.57E-01 | 129320987 | 129321110 | NC_000002.11 |
| cg17172773 | 1.92E-11 | 1.19E-12 | -7.6  | 17.8336013 | -6.17E-02 | 150980817 | 150980940 | NC_000001.10 |
| cg21583412 | 1.92E-11 | 1.20E-12 | -7.6  | 17.8334935 | -6.01E-02 | 27621436  | 27621559  | NC_000017.10 |



|                |          |          |      |            |           |           |           |              |
|----------------|----------|----------|------|------------|-----------|-----------|-----------|--------------|
| cg04114665     | 1.93E-11 | 1.20E-12 | -7.6 | 17.8288756 | -7.44E-02 | 75299491  | 75299614  | NC_000016.9  |
| cg25866212     | 1.93E-11 | 1.20E-12 | -7.6 | 17.828801  | -1.71E-01 | 93901973  | 93902096  | NC_000013.10 |
| cg05931684     | 1.93E-11 | 1.20E-12 | -7.6 | 17.8283386 | -5.29E-02 | 31865274  | 31865397  | NC_000006.11 |
| cg25354657     | 1.93E-11 | 1.20E-12 | -7.6 | 17.8280646 | -1.84E-01 | 129991445 | 129991568 | NC_000011.9  |
| cg20060685     | 1.94E-11 | 1.21E-12 | -7.6 | 17.8231426 | -1.57E-01 | 106533898 | 106534021 | NC_000012.11 |
| cg17738375     | 1.94E-11 | 1.21E-12 | -7.6 | 17.821686  | -2.31E-02 | 12900572  | 12900695  | NC_000019.9  |
| cg09751842     | 1.95E-11 | 1.21E-12 | -7.6 | 17.8196869 | -6.42E-02 | 9661422   | 9661545   | NC_000004.11 |
| ch.2.42814419F | 1.95E-11 | 1.21E-12 | -7.6 | 17.8191783 | -5.40E-02 | 42960915  | 42961038  | NC_000002.11 |
| cg01883662     | 1.95E-11 | 1.21E-12 | -7.6 | 17.8172245 | -1.82E-01 | 196065289 | 196065412 | NC_000003.11 |
| cg21707131     | 1.95E-11 | 1.22E-12 | -7.6 | 17.8160762 | -4.65E-02 | 39378283  | 39378406  | NC_000022.10 |
| cg24596729     | 1.95E-11 | 1.22E-12 | -7.6 | 17.8155621 | -3.75E-02 | 165345813 | 165345936 | NC_000001.10 |
| cg26949055     | 1.96E-11 | 1.22E-12 | -7.6 | 17.8140963 | -1.89E-01 | 34144832  | 34144955  | NC_000015.9  |
| cg19166347     | 1.96E-11 | 1.22E-12 | -7.6 | 17.8140012 | -8.43E-02 | 37955598  | 37955721  | NC_000007.13 |
| ch.15.1428309R | 1.96E-11 | 1.22E-12 | -7.6 | 17.8138532 | -3.66E-02 | 85225048  | 85225171  | NC_000015.9  |
| cg12165551     | 1.96E-11 | 1.22E-12 | -7.6 | 17.811598  | -1.72E-01 | 8385712   | 8385835   | NC_000011.9  |
| cg15241786     | 1.96E-11 | 1.22E-12 | -7.6 | 17.8110493 | -7.21E-02 | 33547978  | 33548101  | NC_000006.11 |
| cg24295985     | 1.96E-11 | 1.22E-12 | -7.6 | 17.8109193 | -8.31E-02 | 2431385   | 2431508   | NC_000001.10 |
| cg16762684     | 1.96E-11 | 1.22E-12 | -7.6 | 17.8101512 | -1.74E-01 | 74820493  | 74820616  | NC_000018.9  |
| cg09320210     | 1.96E-11 | 1.22E-12 | -7.6 | 17.8099386 | -2.14E-01 | 219989959 | 219990082 | NC_000002.11 |
| cg15950795     | 1.96E-11 | 1.22E-12 | -7.6 | 17.8094523 | -1.21E-01 | 141556902 | 141557025 | NC_000004.11 |
| cg08334022     | 1.96E-11 | 1.22E-12 | -7.6 | 17.8092873 | -1.19E-01 | 75879348  | 75879471  | NC_000011.9  |
| cg08872313     | 1.96E-11 | 1.23E-12 | -7.6 | 17.8086596 | -1.11E-01 | 69292290  | 69292413  | NC_000003.11 |
| cg08424427     | 1.97E-11 | 1.23E-12 | -7.6 | 17.8081902 | -3.10E-02 | 180670815 | 180670938 | NC_000005.9  |
| cg00460268     | 1.97E-11 | 1.23E-12 | -7.6 | 17.8071174 | -1.45E-01 | 50383175  | 50383298  | NC_000003.11 |
| cg19497767     | 1.97E-11 | 1.23E-12 | -7.6 | 17.8065004 | -1.48E-01 | 77893704  | 77893827  | NC_000017.10 |

|                 |          |          |       |            |           |           |           |              |
|-----------------|----------|----------|-------|------------|-----------|-----------|-----------|--------------|
| cg03074984      | 1.97E-11 | 1.23E-12 | -7.6  | 17.806463  | -5.89E-02 | 64126431  | 64126554  | NC_000011.9  |
| cg09189978      | 1.97E-11 | 1.23E-12 | -7.6  | 17.8045199 | -6.69E-02 | 38240632  | 38240755  | NC_000022.10 |
| cg22139555      | 1.97E-11 | 1.23E-12 | -7.6  | 17.8037927 | -5.82E-02 | 17434123  | 17434246  | NC_000008.10 |
| cg05191006      | 1.98E-11 | 1.23E-12 | -7.6  | 17.8023357 | -4.10E-02 | 69760966  | 69761089  | NC_000016.9  |
| cg04078608      | 1.98E-11 | 1.24E-12 | -7.6  | 17.8010056 | -1.27E-01 | 47394533  | 47394656  | NC_000021.8  |
| cg07110009      | 1.98E-11 | 1.24E-12 | -7.6  | 17.8008809 | -1.68E-01 | 25005464  | 25005587  | NC_000007.13 |
| ch.21.36723363F | 1.98E-11 | 1.24E-12 | -7.6  | 17.7999978 | -5.95E-02 | 37801493  | 37801616  | NC_000021.8  |
| cg23602829      | 1.98E-11 | 1.24E-12 | -7.6  | 17.7992431 | -4.97E-02 | 76757171  | 76757294  | NC_000011.9  |
| cg08067617      | 1.99E-11 | 1.24E-12 | -7.6  | 17.7967734 | -1.29E-01 | 16999641  | 16999764  | NC_000019.9  |
| cg01062113      | 1.99E-11 | 1.24E-12 | -7.6  | 17.7943717 | -1.23E-01 | 93865443  | 93865566  | NC_000011.9  |
| cg05255168      | 1.99E-11 | 1.25E-12 | -7.59 | 17.7928628 | -8.10E-02 | 1518657   | 1518780   | NC_000016.9  |
| cg12230983      | 2.00E-11 | 1.25E-12 | -7.59 | 17.7920866 | -1.65E-01 | 15439701  | 15439824  | NC_000006.11 |
| cg06172871      | 2.00E-11 | 1.25E-12 | -7.59 | 17.7918022 | -1.53E-01 | 72088244  | 72088367  | NC_000016.9  |
| cg22855405      | 2.00E-11 | 1.25E-12 | -7.59 | 17.79141   | -1.13E-01 | 32042037  | 32042160  | NC_000001.10 |
| cg12940993      | 2.00E-11 | 1.25E-12 | -7.59 | 17.7913439 | -1.15E-01 | 21271148  | 21271271  | NC_000014.8  |
| cg23650249      | 2.00E-11 | 1.25E-12 | -7.59 | 17.7906565 | -1.04E-01 | 1284764   | 1284887   | NC_000019.9  |
| cg11466094      | 2.00E-11 | 1.25E-12 | -7.59 | 17.788929  | -5.63E-02 | 89493389  | 89493512  | NC_000014.8  |
| cg04459086      | 2.00E-11 | 1.25E-12 | -7.59 | 17.7878751 | -1.05E-01 | 45429742  | 45429865  | NC_000003.11 |
| cg18724200      | 2.02E-11 | 1.26E-12 | -7.59 | 17.7821436 | -8.71E-02 | 105132022 | 105132145 | NC_000014.8  |
| cg03648631      | 2.02E-11 | 1.26E-12 | -7.59 | 17.7800675 | -6.06E-02 | 103749307 | 103749430 | NC_000004.11 |
| cg25473115      | 2.02E-11 | 1.26E-12 | -7.59 | 17.7793727 | -1.32E-01 | 65626919  | 65627042  | NC_000003.11 |
| cg24530660      | 2.02E-11 | 1.26E-12 | -7.59 | 17.778375  | -9.00E-02 | 204192481 | 204192604 | NC_000002.11 |
| cg16033299      | 2.03E-11 | 1.27E-12 | -7.59 | 17.7768707 | -7.66E-02 | 55918225  | 55918348  | NC_000019.9  |
| cg08005460      | 2.03E-11 | 1.27E-12 | -7.59 | 17.7760214 | -1.10E-01 | 38473382  | 38473505  | NC_000017.10 |
| cg05306029      | 2.03E-11 | 1.27E-12 | -7.59 | 17.7755578 | -1.70E-01 | 102117488 | 102117611 | NC_000002.11 |

|                |          |          |       |            |           |           |           |              |
|----------------|----------|----------|-------|------------|-----------|-----------|-----------|--------------|
| cg26730763     | 2.03E-11 | 1.27E-12 | -7.59 | 17.7740315 | -1.62E-01 | 28205389  | 28205512  | NC_000016.9  |
| cg16625119     | 2.03E-11 | 1.27E-12 | -7.59 | 17.7736236 | -1.56E-01 | 86653176  | 86653299  | NC_000016.9  |
| cg02900356     | 2.03E-11 | 1.27E-12 | -7.59 | 17.7726425 | -1.91E-01 | 31214494  | 31214617  | NC_000016.9  |
| cg15698299     | 2.03E-11 | 1.27E-12 | -7.59 | 17.7723012 | -1.26E-01 | 52233019  | 52233142  | NC_000003.11 |
| ch.6.51066775R | 2.04E-11 | 1.27E-12 | -7.59 | 17.7716786 | -2.85E-02 | 50958816  | 50958939  | NC_000006.11 |
| cg17756730     | 2.04E-11 | 1.27E-12 | -7.59 | 17.771564  | -1.75E-01 | 172608644 | 172608767 | NC_000001.10 |
| cg13495381     | 2.04E-11 | 1.27E-12 | -7.59 | 17.771294  | -8.56E-02 | 124102444 | 124102567 | NC_000010.10 |
| cg19826026     | 2.04E-11 | 1.27E-12 | -7.59 | 17.7710298 | -1.56E-01 | 15114393  | 15114516  | NC_000012.11 |
| cg16163324     | 2.04E-11 | 1.28E-12 | -7.59 | 17.769207  | -5.51E-02 | 46712932  | 46713055  | NC_000001.10 |
| cg08864105     | 2.04E-11 | 1.28E-12 | -7.59 | 17.7685013 | -1.78E-01 | 111743020 | 111743143 | NC_000001.10 |
| cg09507761     | 2.05E-11 | 1.28E-12 | -7.59 | 17.7663982 | -1.96E-01 | 96152293  | 96152416  | NC_000005.9  |
| cg01348086     | 2.05E-11 | 1.28E-12 | -7.59 | 17.7653054 | -1.27E-01 | 176785296 | 176785419 | NC_000005.9  |
| cg04650653     | 2.05E-11 | 1.28E-12 | -7.59 | 17.7649478 | -1.68E-01 | 1890901   | 1891024   | NC_000011.9  |
| cg17055950     | 2.05E-11 | 1.28E-12 | -7.59 | 17.763573  | -5.33E-02 | 18161888  | 18162011  | NC_000017.10 |
| cg06136199     | 2.05E-11 | 1.28E-12 | -7.59 | 17.762818  | -2.16E-01 | 9597577   | 9597700   | NC_000011.9  |
| cg23276399     | 2.05E-11 | 1.28E-12 | -7.59 | 17.7625861 | -5.32E-02 | 102427771 | 102427894 | NC_000014.8  |
| cg02719508     | 2.05E-11 | 1.28E-12 | -7.59 | 17.7622109 | -9.45E-02 | 105445224 | 105445347 | NC_000014.8  |
| cg23526087     | 2.06E-11 | 1.29E-12 | -7.59 | 17.7592829 | -1.27E-01 | 68973466  | 68973589  | NC_000014.8  |
| cg12238593     | 2.06E-11 | 1.29E-12 | -7.59 | 17.758374  | -7.82E-02 | 26440340  | 26440463  | NC_000006.11 |
| cg13419087     | 2.06E-11 | 1.29E-12 | -7.59 | 17.7581939 | -1.42E-01 | 124907105 | 124907228 | NC_000012.11 |
| cg01494614     | 2.06E-11 | 1.29E-12 | -7.59 | 17.757206  | -6.68E-02 | 10562837  | 10562960  | NC_000011.9  |
| cg13004635     | 2.07E-11 | 1.29E-12 | -7.59 | 17.7552931 | -1.20E-01 | 498425    | 498548    | NC_000005.9  |
| cg11243251     | 2.07E-11 | 1.29E-12 | -7.59 | 17.7552473 | -2.51E-01 | 36209708  | 36209831  | NC_000006.11 |
| cg11505841     | 2.07E-11 | 1.30E-12 | -7.59 | 17.7541592 | -1.56E-01 | 19540576  | 19540699  | NC_000008.10 |
| cg19268017     | 2.07E-11 | 1.30E-12 | -7.59 | 17.7519003 | -9.24E-02 | 70060835  | 70060958  | NC_000007.13 |

|               |          |          |       |            |           |           |           |              |
|---------------|----------|----------|-------|------------|-----------|-----------|-----------|--------------|
| cg09778828    | 2.08E-11 | 1.30E-12 | -7.59 | 17.7495008 | -7.28E-02 | 132245624 | 132245747 | NC_000009.11 |
| cg03088958    | 2.08E-11 | 1.30E-12 | -7.59 | 17.7494673 | -1.50E-01 | 75232330  | 75232453  | NC_000016.9  |
| cg04411625    | 2.08E-11 | 1.30E-12 | -7.59 | 17.7476025 | -4.88E-02 | 105953462 | 105953585 | NC_000014.8  |
| cg01176538    | 2.08E-11 | 1.30E-12 | -7.59 | 17.7471411 | -4.21E-02 | 97405546  | 97405669  | NC_000002.11 |
| cg05869537    | 2.08E-11 | 1.31E-12 | -7.59 | 17.7467053 | -1.56E-01 | 43405547  | 43405670  | NC_000018.9  |
| cg10547761    | 2.08E-11 | 1.31E-12 | -7.59 | 17.7460092 | -1.59E-01 | 5829461   | 5829584   | NC_000020.10 |
| cg02860543    | 2.09E-11 | 1.31E-12 | -7.59 | 17.7442225 | -1.10E-01 | 23510648  | 23510771  | NC_000007.13 |
| cg19698200    | 2.09E-11 | 1.31E-12 | -7.59 | 17.7439944 | -1.67E-01 | 8121893   | 8122016   | NC_000001.10 |
| cg14316440    | 2.09E-11 | 1.31E-12 | -7.59 | 17.7439366 | -2.64E-02 | 127020740 | 127020863 | NC_000009.11 |
| cg23659333    | 2.09E-11 | 1.31E-12 | -7.59 | 17.7436764 | -4.47E-02 | 12833292  | 12833415  | NC_000019.9  |
| cg11793783    | 2.09E-11 | 1.31E-12 | -7.59 | 17.7436123 | -1.41E-01 | 176103447 | 176103570 | NC_000005.9  |
| ch.9.1976398F | 2.09E-11 | 1.31E-12 | -7.59 | 17.7409323 | -1.83E-02 | 125862548 | 125862671 | NC_000009.11 |
| cg15669092    | 2.10E-11 | 1.31E-12 | -7.59 | 17.7396985 | -3.49E-02 | 89989024  | 89989147  | NC_000016.9  |
| cg23056966    | 2.10E-11 | 1.32E-12 | -7.59 | 17.7382276 | -5.23E-02 | 91475721  | 91475844  | NC_000015.9  |
| cg26201213    | 2.10E-11 | 1.32E-12 | -7.59 | 17.7369498 | -1.12E-01 | 131265796 | 131265919 | NC_000010.10 |
| cg06993467    | 2.11E-11 | 1.32E-12 | -7.59 | 17.735561  | -1.32E-01 | 21966500  | 21966623  | NC_000001.10 |
| cg14181576    | 2.11E-11 | 1.32E-12 | -7.58 | 17.7351615 | -1.85E-01 | 27961563  | 27961686  | NC_000001.10 |
| cg20961037    | 2.11E-11 | 1.32E-12 | -7.58 | 17.7319666 | -4.72E-02 | 43096356  | 43096479  | NC_000017.10 |
| cg06415906    | 2.11E-11 | 1.33E-12 | -7.58 | 17.7313479 | -4.02E-02 | 121944902 | 121945025 | NC_000007.13 |
| cg25944720    | 2.12E-11 | 1.33E-12 | -7.58 | 17.7277052 | -2.85E-02 | 106958640 | 106958763 | NC_000006.11 |
| cg07450210    | 2.13E-11 | 1.33E-12 | -7.58 | 17.7257462 | -2.04E-01 | 99880947  | 99881070  | NC_000013.10 |
| cg16320419    | 2.13E-11 | 1.33E-12 | -7.58 | 17.7244464 | -1.40E-01 | 5025570   | 5025693   | NC_000003.11 |
| cg18659867    | 2.13E-11 | 1.34E-12 | -7.58 | 17.7236935 | -1.85E-01 | 80007739  | 80007862  | NC_000010.10 |
| cg16652769    | 2.13E-11 | 1.34E-12 | -7.58 | 17.7223624 | -5.94E-02 | 49242037  | 49242160  | NC_000019.9  |
| cg09887955    | 2.13E-11 | 1.34E-12 | -7.58 | 17.7220496 | -1.03E-01 | 202129854 | 202129977 | NC_000001.10 |

|                |          |          |       |            |           |           |           |              |
|----------------|----------|----------|-------|------------|-----------|-----------|-----------|--------------|
| cg04717143     | 2.13E-11 | 1.34E-12 | -7.58 | 17.7217518 | -1.59E-01 | 37555391  | 37555514  | NC_000008.10 |
| cg12562461     | 2.14E-11 | 1.34E-12 | -7.58 | 17.7209119 | -1.20E-01 | 62778131  | 62778254  | NC_000017.10 |
| cg15168816     | 2.14E-11 | 1.34E-12 | -7.58 | 17.7196967 | -1.10E-01 | 17282533  | 17282656  | NC_000006.11 |
| cg02364551     | 2.14E-11 | 1.34E-12 | -7.58 | 17.7191952 | -4.79E-02 | 48176118  | 48176241  | NC_000001.10 |
| cg22954687     | 2.14E-11 | 1.34E-12 | -7.58 | 17.7187805 | -1.54E-01 | 216947743 | 216947866 | NC_000002.11 |
| cg16153549     | 2.15E-11 | 1.35E-12 | -7.58 | 17.7156153 | -1.42E-01 | 3496821   | 3496944   | NC_000002.11 |
| cg24265280     | 2.15E-11 | 1.35E-12 | -7.58 | 17.7145303 | -4.12E-02 | 154832000 | 154832123 | NC_000006.11 |
| cg03752885     | 2.15E-11 | 1.35E-12 | -7.58 | 17.7134134 | -1.52E-01 | 3969736   | 3969859   | NC_000019.9  |
| cg25333602     | 2.15E-11 | 1.35E-12 | -7.58 | 17.7128904 | -9.22E-02 | 62778230  | 62778353  | NC_000017.10 |
| cg20016569     | 2.15E-11 | 1.35E-12 | -7.58 | 17.7118421 | -1.41E-01 | 191208002 | 191208125 | NC_000002.11 |
| cg08616943     | 2.15E-11 | 1.35E-12 | -7.58 | 17.7116434 | -1.32E-01 | 130552600 | 130552723 | NC_000007.13 |
| cg14078053     | 2.16E-11 | 1.36E-12 | -7.58 | 17.7096219 | -1.02E-01 | 227661656 | 227661779 | NC_000002.11 |
| cg25205375     | 2.16E-11 | 1.36E-12 | -7.58 | 17.7081731 | -5.23E-02 | 66093715  | 66093838  | NC_000007.13 |
| cg07271186     | 2.16E-11 | 1.36E-12 | -7.58 | 17.7065209 | -1.73E-01 | 142028043 | 142028166 | NC_000007.13 |
| cg05393509     | 2.17E-11 | 1.36E-12 | -7.58 | 17.7054768 | -5.66E-02 | 30294475  | 30294598  | NC_000006.11 |
| ch.8.24555156R | 2.17E-11 | 1.36E-12 | -7.58 | 17.7040266 | -6.48E-02 | 24499266  | 24499389  | NC_000008.10 |
| cg02978297     | 2.18E-11 | 1.37E-12 | -7.58 | 17.7000749 | -1.07E-01 | 94057587  | 94057710  | NC_000001.10 |
| cg15890707     | 2.18E-11 | 1.37E-12 | -7.58 | 17.7000147 | -4.53E-02 | 172197278 | 172197401 | NC_000005.9  |
| cg02958014     | 2.18E-11 | 1.37E-12 | -7.58 | 17.6999271 | -1.63E-01 | 127206602 | 127206725 | NC_000012.11 |
| cg17552801     | 2.18E-11 | 1.37E-12 | -7.58 | 17.6981439 | -6.25E-02 | 99332121  | 99332244  | NC_000010.10 |
| cg12739419     | 2.18E-11 | 1.37E-12 | -7.58 | 17.6971471 | -1.10E-01 | 116140593 | 116140716 | NC_000007.13 |
| cg19909117     | 2.18E-11 | 1.37E-12 | -7.58 | 17.6968813 | -1.69E-01 | 96219318  | 96219441  | NC_000014.8  |
| cg03801691     | 2.19E-11 | 1.37E-12 | -7.58 | 17.6962573 | -1.07E-01 | 11599816  | 11599939  | NC_000003.11 |
| cg18302460     | 2.19E-11 | 1.37E-12 | -7.58 | 17.6961477 | -1.01E-01 | 6902932   | 6903055   | NC_000004.11 |
| cg16274762     | 2.19E-11 | 1.38E-12 | -7.58 | 17.6928067 | -8.81E-02 | 1481779   | 1481902   | NC_000011.9  |

|            |          |          |       |            |           |           |           |              |
|------------|----------|----------|-------|------------|-----------|-----------|-----------|--------------|
| cg23725986 | 2.20E-11 | 1.38E-12 | -7.58 | 17.6913294 | -8.59E-02 | 75938438  | 75938561  | NC_000002.11 |
| cg03111100 | 2.20E-11 | 1.38E-12 | -7.58 | 17.6902848 | -5.60E-02 | 14989983  | 14990106  | NC_000003.11 |
| cg08828868 | 2.20E-11 | 1.38E-12 | -7.58 | 17.6900562 | -5.53E-02 | 70715731  | 70715854  | NC_000010.10 |
| cg08555912 | 2.20E-11 | 1.38E-12 | -7.58 | 17.6892636 | -1.14E-01 | 674399    | 674522    | NC_000004.11 |
| cg23250019 | 2.20E-11 | 1.38E-12 | -7.58 | 17.6885251 | -1.41E-01 | 66138472  | 66138595  | NC_000011.9  |
| cg03278514 | 2.20E-11 | 1.39E-12 | -7.58 | 17.6873036 | -2.59E-01 | 70779346  | 70779469  | NC_000015.9  |
| cg06276429 | 2.21E-11 | 1.39E-12 | -7.58 | 17.6857466 | -6.06E-02 | 33167798  | 33167921  | NC_000006.11 |
| cg02400474 | 2.21E-11 | 1.39E-12 | -7.58 | 17.6839366 | -1.65E-01 | 58842213  | 58842336  | NC_000019.9  |
| cg15028052 | 2.21E-11 | 1.39E-12 | -7.58 | 17.6834609 | -1.86E-02 | 62588587  | 62588710  | NC_000020.10 |
| cg05122950 | 2.22E-11 | 1.39E-12 | -7.58 | 17.6821297 | -1.10E-01 | 105254488 | 105254611 | NC_000010.10 |
| cg22725830 | 2.22E-11 | 1.39E-12 | -7.58 | 17.6821119 | -1.69E-01 | 112075959 | 112076082 | NC_000013.10 |
| cg03469682 | 2.22E-11 | 1.39E-12 | -7.58 | 17.6817721 | -1.83E-01 | 100889156 | 100889279 | NC_000003.11 |
| cg14685946 | 2.22E-11 | 1.40E-12 | -7.58 | 17.680783  | -1.46E-01 | 223784609 | 223784732 | NC_000002.11 |
| cg19746873 | 2.22E-11 | 1.40E-12 | -7.58 | 17.6807303 | -1.28E-01 | 153601349 | 153601472 | NC_000004.11 |
| cg01213342 | 2.23E-11 | 1.40E-12 | -7.58 | 17.6773587 | -1.26E-01 | 66121172  | 66121295  | NC_000007.13 |
| cg09370867 | 2.23E-11 | 1.40E-12 | -7.57 | 17.6765389 | -1.35E-01 | 27961680  | 27961803  | NC_000001.10 |
| cg20623503 | 2.23E-11 | 1.40E-12 | -7.57 | 17.676471  | -1.82E-01 | 78152219  | 78152342  | NC_000017.10 |
| cg19062108 | 2.23E-11 | 1.40E-12 | -7.57 | 17.6764418 | -1.30E-01 | 57630834  | 57630957  | NC_000012.11 |
| cg25139649 | 2.23E-11 | 1.40E-12 | -7.57 | 17.6763712 | -1.82E-01 | 2165579   | 2165702   | NC_000001.10 |
| cg27060912 | 2.23E-11 | 1.40E-12 | -7.57 | 17.6745942 | -7.08E-02 | 6517005   | 6517128   | NC_000019.9  |
| cg11303561 | 2.23E-11 | 1.40E-12 | -7.57 | 17.6744354 | -6.06E-02 | 1206399   | 1206522   | NC_000019.9  |
| cg14503815 | 2.23E-11 | 1.40E-12 | -7.57 | 17.6743095 | -1.54E-01 | 96674333  | 96674456  | NC_000009.11 |
| cg13112524 | 2.23E-11 | 1.41E-12 | -7.57 | 17.6736259 | -1.33E-01 | 1983102   | 1983225   | NC_000004.11 |
| cg03995457 | 2.24E-11 | 1.41E-12 | -7.57 | 17.6726375 | -1.76E-01 | 52596676  | 52596799  | NC_000016.9  |
| cg02043994 | 2.24E-11 | 1.41E-12 | -7.57 | 17.6719294 | -7.68E-02 | 15244878  | 15245001  | NC_000006.11 |

|                 |          |          |       |            |           |           |           |              |
|-----------------|----------|----------|-------|------------|-----------|-----------|-----------|--------------|
| ch.12.50831229F | 2.24E-11 | 1.41E-12 | -7.57 | 17.6701675 | -9.77E-02 | 52544962  | 52545085  | NC_000012.11 |
| cg14851544      | 2.24E-11 | 1.41E-12 | -7.57 | 17.6693694 | -1.39E-01 | 102438734 | 102438857 | NC_000014.8  |
| cg27138194      | 2.24E-11 | 1.41E-12 | -7.57 | 17.6690407 | -5.94E-02 | 139477959 | 139478082 | NC_000007.13 |
| cg11224334      | 2.25E-11 | 1.41E-12 | -7.57 | 17.6673605 | -7.29E-02 | 53030489  | 53030612  | NC_000019.9  |
| cg08992366      | 2.25E-11 | 1.42E-12 | -7.57 | 17.6669911 | -5.59E-02 | 22292943  | 22293066  | NC_000010.10 |
| cg01717649      | 2.25E-11 | 1.42E-12 | -7.57 | 17.666308  | -1.11E-01 | 66821665  | 66821788  | NC_000011.9  |
| cg03822754      | 2.25E-11 | 1.42E-12 | -7.57 | 17.6662396 | -3.93E-02 | 85201913  | 85202036  | NC_000015.9  |
| cg00965121      | 2.25E-11 | 1.42E-12 | -7.57 | 17.6650281 | -5.17E-02 | 3689519   | 3689642   | NC_000001.10 |
| cg02667656      | 2.25E-11 | 1.42E-12 | -7.57 | 17.664925  | -1.39E-01 | 167689228 | 167689351 | NC_000005.9  |
| cg14571813      | 2.25E-11 | 1.42E-12 | -7.57 | 17.6641123 | -7.72E-02 | 129062831 | 129062954 | NC_000003.11 |
| cg16270885      | 2.25E-11 | 1.42E-12 | -7.57 | 17.6639056 | -1.65E-01 | 48130197  | 48130320  | NC_000007.13 |
| cg07284286      | 2.26E-11 | 1.42E-12 | -7.57 | 17.6621743 | -5.83E-02 | 58662935  | 58663058  | NC_000016.9  |
| cg04232128      | 2.26E-11 | 1.42E-12 | -7.57 | 17.6616733 | -1.55E-01 | 138861241 | 138861364 | NC_000005.9  |
| cg17821168      | 2.26E-11 | 1.43E-12 | -7.57 | 17.6595543 | -7.02E-02 | 127175050 | 127175173 | NC_000003.11 |
| cg21927975      | 2.27E-11 | 1.43E-12 | -7.57 | 17.6577541 | -4.95E-02 | 6320757   | 6320880   | NC_000001.10 |
| cg19648552      | 2.27E-11 | 1.43E-12 | -7.57 | 17.6570498 | -1.38E-01 | 56200391  | 56200514  | NC_000019.9  |
| cg09168153      | 2.27E-11 | 1.43E-12 | -7.57 | 17.6539856 | -1.06E-01 | 110779117 | 110779240 | NC_000013.10 |
| cg10533277      | 2.28E-11 | 1.44E-12 | -7.57 | 17.6521857 | -1.65E-01 | 176739312 | 176739435 | NC_000005.9  |
| cg07479843      | 2.29E-11 | 1.44E-12 | -7.57 | 17.6493238 | -1.50E-01 | 3276687   | 3276810   | NC_000001.10 |
| cg23787321      | 2.29E-11 | 1.44E-12 | -7.57 | 17.6489811 | -8.08E-02 | 43385844  | 43385967  | NC_000002.11 |
| cg16944092      | 2.29E-11 | 1.44E-12 | -7.57 | 17.648969  | -2.65E-02 | 57634555  | 57634678  | NC_000012.11 |
| cg25440811      | 2.29E-11 | 1.45E-12 | -7.57 | 17.6453904 | -1.39E-01 | 149535765 | 149535888 | NC_000005.9  |
| cg14781394      | 2.29E-11 | 1.45E-12 | -7.57 | 17.6450811 | -8.22E-02 | 16441457  | 16441580  | NC_000019.9  |
| cg04512704      | 2.30E-11 | 1.45E-12 | -7.57 | 17.6435083 | -4.67E-02 | 54694060  | 54694183  | NC_000019.9  |
| cg20441130      | 2.30E-11 | 1.45E-12 | -7.57 | 17.6430439 | -1.39E-01 | 834565    | 834688    | NC_000007.13 |

|                 |          |          |       |            |           |           |           |              |
|-----------------|----------|----------|-------|------------|-----------|-----------|-----------|--------------|
| cg13337740      | 2.30E-11 | 1.45E-12 | -7.57 | 17.6411576 | -1.33E-01 | 33446298  | 33446421  | NC_000017.10 |
| cg24967096      | 2.30E-11 | 1.45E-12 | -7.57 | 17.6401834 | -1.92E-01 | 30652237  | 30652360  | NC_000006.11 |
| cg06452558      | 2.31E-11 | 1.46E-12 | -7.57 | 17.639148  | -1.54E-01 | 1401887   | 1402010   | NC_000008.10 |
| cg16317734      | 2.32E-11 | 1.46E-12 | -7.57 | 17.6340519 | -6.31E-02 | 94822598  | 94822721  | NC_000011.9  |
| cg25666919      | 2.32E-11 | 1.47E-12 | -7.57 | 17.632645  | -1.25E-01 | 102074615 | 102074738 | NC_000007.13 |
| ch.2.229228416R | 2.33E-11 | 1.47E-12 | -7.57 | 17.6300856 | -7.52E-02 | 229520172 | 229520295 | NC_000002.11 |
| cg24361808      | 2.33E-11 | 1.47E-12 | -7.57 | 17.6294492 | -1.30E-01 | 46477834  | 46477957  | NC_000022.10 |
| cg16668903      | 2.33E-11 | 1.47E-12 | -7.57 | 17.6292459 | -1.48E-01 | 122206322 | 122206445 | NC_000005.9  |
| cg23747342      | 2.33E-11 | 1.47E-12 | -7.57 | 17.6274429 | -1.42E-02 | 25539794  | 25539917  | NC_000012.11 |
| cg20241952      | 2.33E-11 | 1.47E-12 | -7.57 | 17.627262  | -7.43E-02 | 77752713  | 77752836  | NC_000017.10 |
| cg15663074      | 2.33E-11 | 1.47E-12 | -7.57 | 17.626862  | -1.24E-01 | 134582868 | 134582991 | NC_000005.9  |
| cg17411135      | 2.33E-11 | 1.47E-12 | -7.57 | 17.6265499 | -1.04E-01 | 55092375  | 55092498  | NC_000004.11 |
| cg07791418      | 2.34E-11 | 1.48E-12 | -7.57 | 17.6259672 | -1.19E-01 | 35272095  | 35272218  | NC_000001.10 |
| ch.16.1562336F  | 2.34E-11 | 1.48E-12 | -7.57 | 17.6248847 | -4.06E-02 | 70172531  | 70172654  | NC_000016.9  |
| cg09476611      | 2.34E-11 | 1.48E-12 | -7.57 | 17.6244048 | -1.05E-01 | 76639212  | 76639335  | NC_000015.9  |
| cg08213444      | 2.34E-11 | 1.48E-12 | -7.57 | 17.6241304 | -5.19E-02 | 784871    | 784994    | NC_000005.9  |
| cg26236329      | 2.34E-11 | 1.48E-12 | -7.57 | 17.6236648 | -1.68E-01 | 57200325  | 57200448  | NC_000011.9  |
| cg03238359      | 2.34E-11 | 1.48E-12 | -7.57 | 17.6233302 | -6.03E-02 | 60623567  | 60623690  | NC_000011.9  |
| cg23403864      | 2.35E-11 | 1.49E-12 | -7.57 | 17.6186934 | -3.60E-02 | 9770130   | 9770253   | NC_000002.11 |
| cg06613840      | 2.35E-11 | 1.49E-12 | -7.56 | 17.6181817 | -8.08E-02 | 49395574  | 49395697  | NC_000003.11 |
| cg11175476      | 2.35E-11 | 1.49E-12 | -7.56 | 17.6180051 | -7.53E-02 | 12419201  | 12419324  | NC_000012.11 |
| cg10529845      | 2.35E-11 | 1.49E-12 | -7.56 | 17.6179771 | -1.40E-01 | 49522337  | 49522460  | NC_000016.9  |
| cg05262335      | 2.35E-11 | 1.49E-12 | -7.56 | 17.6176813 | -1.86E-01 | 159466062 | 159466185 | NC_000006.11 |
| cg04494791      | 2.36E-11 | 1.49E-12 | -7.56 | 17.6161725 | -1.23E-01 | 70196247  | 70196370  | NC_000016.9  |
| cg24416232      | 2.36E-11 | 1.49E-12 | -7.56 | 17.6152413 | -1.31E-01 | 134405482 | 134405605 | NC_000010.10 |



|               |          |          |       |            |           |           |           |              |
|---------------|----------|----------|-------|------------|-----------|-----------|-----------|--------------|
| cg21963535    | 2.36E-11 | 1.49E-12 | -7.56 | 17.6144134 | -4.28E-02 | 44098285  | 44098408  | NC_000020.10 |
| cg19598685    | 2.36E-11 | 1.49E-12 | -7.56 | 17.6131463 | -7.49E-02 | 109592525 | 109592648 | NC_000012.11 |
| cg24794881    | 2.37E-11 | 1.50E-12 | -7.56 | 17.6095749 | -9.24E-02 | 73699244  | 73699367  | NC_000007.13 |
| cg07160118    | 2.38E-11 | 1.50E-12 | -7.56 | 17.60793   | -2.88E-02 | 33282418  | 33282541  | NC_000006.11 |
| cg19988367    | 2.38E-11 | 1.50E-12 | -7.56 | 17.6072085 | -1.21E-01 | 21808465  | 21808588  | NC_000006.11 |
| cg08080396    | 2.38E-11 | 1.50E-12 | -7.56 | 17.6071635 | -1.55E-01 | 11102832  | 11102955  | NC_000003.11 |
| cg14628914    | 2.38E-11 | 1.51E-12 | -7.56 | 17.6063003 | -1.24E-01 | 24659344  | 24659467  | NC_000006.11 |
| cg15991309    | 2.38E-11 | 1.51E-12 | -7.56 | 17.6048701 | -1.18E-01 | 80291688  | 80291811  | NC_000017.10 |
| cg02643667    | 2.38E-11 | 1.51E-12 | -7.56 | 17.6045514 | -1.65E-01 | 43786699  | 43786822  | NC_000021.8  |
| cg17500754    | 2.38E-11 | 1.51E-12 | -7.56 | 17.6041152 | -5.61E-02 | 1581635   | 1581758   | NC_000004.11 |
| ch.2.7317635R | 2.39E-11 | 1.51E-12 | -7.56 | 17.602286  | -1.88E-02 | 7400184   | 7400307   | NC_000002.11 |
| ch.10.983355R | 2.39E-11 | 1.51E-12 | -7.56 | 17.601254  | -4.91E-02 | 43130566  | 43130689  | NC_000010.10 |
| cg09508189    | 2.40E-11 | 1.52E-12 | -7.56 | 17.5981387 | -1.16E-01 | 34161049  | 34161172  | NC_000011.9  |
| cg07591362    | 2.40E-11 | 1.52E-12 | -7.56 | 17.5977753 | -1.34E-01 | 232278709 | 232278832 | NC_000001.10 |
| cg06929449    | 2.40E-11 | 1.52E-12 | -7.56 | 17.5960627 | -9.48E-02 | 199414    | 199537    | NC_000016.9  |
| cg19385725    | 2.41E-11 | 1.52E-12 | -7.56 | 17.5939206 | -6.23E-02 | 21166173  | 21166296  | NC_000018.9  |
| cg05122040    | 2.41E-11 | 1.53E-12 | -7.56 | 17.5930504 | -1.47E-01 | 205903433 | 205903556 | NC_000001.10 |
| cg00575135    | 2.41E-11 | 1.53E-12 | -7.56 | 17.5919572 | -1.01E-01 | 2174255   | 2174378   | NC_000016.9  |
| cg04941127    | 2.41E-11 | 1.53E-12 | -7.56 | 17.591798  | -7.14E-02 | 8892760   | 8892883   | NC_000011.9  |
| cg26686415    | 2.41E-11 | 1.53E-12 | -7.56 | 17.5910407 | -4.15E-02 | 32996816  | 32996939  | NC_000007.13 |
| cg08291506    | 2.42E-11 | 1.53E-12 | -7.56 | 17.5892361 | -1.12E-01 | 89525620  | 89525743  | NC_000015.9  |
| cg24968629    | 2.42E-11 | 1.53E-12 | -7.56 | 17.5890502 | -2.43E-01 | 46770644  | 46770767  | NC_000022.10 |
| cg20011983    | 2.42E-11 | 1.53E-12 | -7.56 | 17.5875348 | -1.10E-01 | 74347215  | 74347338  | NC_000002.11 |
| cg12476044    | 2.42E-11 | 1.53E-12 | -7.56 | 17.5871233 | -1.69E-01 | 38403758  | 38403881  | NC_000005.9  |
| cg13823919    | 2.43E-11 | 1.54E-12 | -7.56 | 17.5841064 | -1.91E-01 | 132436239 | 132436362 | NC_000007.13 |

|               |          |          |       |            |           |           |           |              |
|---------------|----------|----------|-------|------------|-----------|-----------|-----------|--------------|
| cg10108710    | 2.43E-11 | 1.54E-12 | -7.56 | 17.5826391 | -1.54E-01 | 90990086  | 90990209  | NC_000014.8  |
| cg07100542    | 2.43E-11 | 1.54E-12 | -7.56 | 17.58255   | -1.54E-01 | 17402079  | 17402202  | NC_000001.10 |
| cg25356736    | 2.44E-11 | 1.54E-12 | -7.56 | 17.581794  | -8.01E-02 | 2775022   | 2775145   | NC_000011.9  |
| cg15425827    | 2.45E-11 | 1.55E-12 | -7.56 | 17.5769268 | -1.03E-01 | 124194965 | 124195088 | NC_000008.10 |
| cg18393722    | 2.45E-11 | 1.55E-12 | -7.56 | 17.5760179 | -8.43E-02 | 85113863  | 85113986  | NC_000015.9  |
| cg19403339    | 2.45E-11 | 1.55E-12 | -7.56 | 17.5744043 | -7.27E-02 | 183580841 | 183580964 | NC_000002.11 |
| cg02285155    | 2.45E-11 | 1.55E-12 | -7.56 | 17.5743329 | -1.75E-01 | 21653473  | 21653596  | NC_000010.10 |
| cg11500660    | 2.46E-11 | 1.56E-12 | -7.56 | 17.572044  | -8.27E-02 | 44036692  | 44036815  | NC_000021.8  |
| cg03421300    | 2.46E-11 | 1.56E-12 | -7.56 | 17.5711624 | -1.30E-01 | 27189787  | 27189910  | NC_000001.10 |
| cg02017155    | 2.46E-11 | 1.56E-12 | -7.56 | 17.5695955 | -9.25E-02 | 35849393  | 35849516  | NC_000019.9  |
| cg14334587    | 2.47E-11 | 1.56E-12 | -7.56 | 17.5679631 | -1.28E-01 | 76254353  | 76254476  | NC_000017.10 |
| cg02068090    | 2.47E-11 | 1.57E-12 | -7.56 | 17.566562  | -2.76E-02 | 169386822 | 169386945 | NC_000003.11 |
| cg25101327    | 2.47E-11 | 1.57E-12 | -7.56 | 17.5658227 | -5.13E-02 | 119981142 | 119981265 | NC_000002.11 |
| cg13909669    | 2.47E-11 | 1.57E-12 | -7.56 | 17.565422  | -5.36E-02 | 231901948 | 231902071 | NC_000002.11 |
| cg04105453    | 2.47E-11 | 1.57E-12 | -7.56 | 17.5652903 | -4.70E-02 | 27440337  | 27440460  | NC_000002.11 |
| cg19186356    | 2.48E-11 | 1.57E-12 | -7.56 | 17.5635561 | -8.90E-02 | 112204327 | 112204450 | NC_000012.11 |
| cg25339052    | 2.48E-11 | 1.57E-12 | -7.56 | 17.5622652 | -1.43E-01 | 196399403 | 196399526 | NC_000002.11 |
| cg00805360    | 2.48E-11 | 1.58E-12 | -7.56 | 17.5608623 | -1.34E-01 | 135091210 | 135091333 | NC_000010.10 |
| cg17693865    | 2.49E-11 | 1.58E-12 | -7.56 | 17.560369  | -3.48E-02 | 41698814  | 41698937  | NC_000019.9  |
| cg03246914    | 2.49E-11 | 1.58E-12 | -7.56 | 17.5602783 | -1.79E-01 | 57596113  | 57596236  | NC_000020.10 |
| cg11540001    | 2.49E-11 | 1.58E-12 | -7.55 | 17.5581125 | -4.11E-02 | 27115116  | 27115239  | NC_000006.11 |
| cg02927821    | 2.50E-11 | 1.58E-12 | -7.55 | 17.5556256 | -1.88E-01 | 39216677  | 39216800  | NC_000017.10 |
| ch.2.1222844F | 2.50E-11 | 1.59E-12 | -7.55 | 17.5534546 | -4.38E-02 | 52109852  | 52109975  | NC_000002.11 |
| cg10219789    | 2.51E-11 | 1.59E-12 | -7.55 | 17.5521494 | -1.15E-01 | 2092526   | 2092649   | NC_000001.10 |
| cg23725454    | 2.51E-11 | 1.59E-12 | -7.55 | 17.5519617 | -1.17E-01 | 67350195  | 67350318  | NC_000011.9  |

|                |          |          |       |            |           |           |           |              |
|----------------|----------|----------|-------|------------|-----------|-----------|-----------|--------------|
| cg26306329     | 2.51E-11 | 1.59E-12 | -7.55 | 17.5516694 | -1.40E-01 | 124400196 | 124400319 | NC_000004.11 |
| cg14960043     | 2.51E-11 | 1.59E-12 | -7.55 | 17.5501799 | -1.00E-01 | 35265624  | 35265747  | NC_000006.11 |
| cg18370200     | 2.51E-11 | 1.60E-12 | -7.55 | 17.5485559 | -7.17E-02 | 33267248  | 33267371  | NC_000006.11 |
| cg15016481     | 2.52E-11 | 1.60E-12 | -7.55 | 17.5462011 | -1.73E-01 | 238639819 | 238639942 | NC_000002.11 |
| cg24079038     | 2.53E-11 | 1.60E-12 | -7.55 | 17.5440284 | -1.32E-01 | 2465279   | 2465402   | NC_000011.9  |
| ch.2.42601115R | 2.53E-11 | 1.60E-12 | -7.55 | 17.5430196 | -4.26E-02 | 42747611  | 42747734  | NC_000002.11 |
| cg06722282     | 2.53E-11 | 1.61E-12 | -7.55 | 17.5425392 | -1.31E-01 | 105212680 | 105212803 | NC_000010.10 |
| cg23269029     | 2.53E-11 | 1.61E-12 | -7.55 | 17.5418255 | -6.14E-02 | 117037408 | 117037531 | NC_000012.11 |
| cg21208539     | 2.53E-11 | 1.61E-12 | -7.55 | 17.5401143 | -1.71E-01 | 93864142  | 93864265  | NC_000011.9  |
| cg07475178     | 2.54E-11 | 1.61E-12 | -7.55 | 17.5389847 | -1.99E-01 | 75149110  | 75149233  | NC_000016.9  |
| cg05850869     | 2.54E-11 | 1.61E-12 | -7.55 | 17.5381363 | -8.07E-02 | 133308364 | 133308487 | NC_000012.11 |
| cg04398950     | 2.54E-11 | 1.61E-12 | -7.55 | 17.5372971 | -7.26E-02 | 103395423 | 103395546 | NC_000014.8  |
| cg00039463     | 2.55E-11 | 1.62E-12 | -7.55 | 17.5328968 | -1.08E-01 | 3931489   | 3931612   | NC_000016.9  |
| cg25492364     | 2.55E-11 | 1.62E-12 | -7.55 | 17.5324673 | -7.59E-02 | 18266219  | 18266342  | NC_000017.10 |
| cg14457132     | 2.56E-11 | 1.62E-12 | -7.55 | 17.5317892 | -5.15E-02 | 7389888   | 7390011   | NC_000006.11 |
| cg12655542     | 2.56E-11 | 1.62E-12 | -7.55 | 17.5309996 | -1.42E-01 | 20357306  | 20357429  | NC_000002.11 |
| cg19994779     | 2.56E-11 | 1.63E-12 | -7.55 | 17.5304113 | -1.29E-01 | 105482622 | 105482745 | NC_000014.8  |
| cg09580336     | 2.56E-11 | 1.63E-12 | -7.55 | 17.5298531 | -1.00E-01 | 116915122 | 116915245 | NC_000001.10 |
| cg06512263     | 2.57E-11 | 1.63E-12 | -7.55 | 17.5271693 | -1.60E-01 | 20709867  | 20709990  | NC_000006.11 |
| cg21832142     | 2.57E-11 | 1.63E-12 | -7.55 | 17.5268141 | -1.51E-01 | 160334793 | 160334916 | NC_000003.11 |
| cg22475071     | 2.57E-11 | 1.64E-12 | -7.55 | 17.5245247 | -1.51E-01 | 64338594  | 64338717  | NC_000003.11 |
| cg06573604     | 2.57E-11 | 1.64E-12 | -7.55 | 17.524507  | -1.70E-01 | 160760825 | 160760948 | NC_000002.11 |
| cg22389270     | 2.57E-11 | 1.64E-12 | -7.55 | 17.5242776 | -7.38E-02 | 101162769 | 101162892 | NC_000008.10 |
| cg14565465     | 2.57E-11 | 1.64E-12 | -7.55 | 17.5241859 | -1.69E-01 | 74298933  | 74299056  | NC_000009.11 |
| cg10853533     | 2.57E-11 | 1.64E-12 | -7.55 | 17.5240253 | -1.08E-01 | 50716505  | 50716628  | NC_000022.10 |

|               |          |          |       |            |           |           |           |              |
|---------------|----------|----------|-------|------------|-----------|-----------|-----------|--------------|
| cg04895475    | 2.58E-11 | 1.64E-12 | -7.55 | 17.5231545 | -1.23E-01 | 160364127 | 160364250 | NC_000006.11 |
| cg10366786    | 2.58E-11 | 1.64E-12 | -7.55 | 17.5229845 | -1.25E-01 | 53578129  | 53578252  | NC_000004.11 |
| cg21519058    | 2.58E-11 | 1.64E-12 | -7.55 | 17.5223449 | -1.49E-01 | 76404601  | 76404724  | NC_000012.11 |
| cg21068293    | 2.58E-11 | 1.64E-12 | -7.55 | 17.5219445 | -1.24E-01 | 74496576  | 74496699  | NC_000015.9  |
| cg13521045    | 2.58E-11 | 1.64E-12 | -7.55 | 17.5204719 | -1.21E-01 | 139231283 | 139231406 | NC_000009.11 |
| cg16485482    | 2.59E-11 | 1.65E-12 | -7.55 | 17.5184645 | -8.87E-02 | 56362574  | 56362697  | NC_000008.10 |
| ch.1.4798357R | 2.59E-11 | 1.65E-12 | -7.55 | 17.5172753 | -4.85E-02 | 241340019 | 241340142 | NC_000001.10 |
| cg01249187    | 2.59E-11 | 1.65E-12 | -7.55 | 17.5169967 | -1.30E-01 | 1204617   | 1204740   | NC_000016.9  |
| cg11935459    | 2.59E-11 | 1.65E-12 | -7.55 | 17.5169876 | -8.12E-02 | 49563246  | 49563369  | NC_000015.9  |
| cg16983541    | 2.59E-11 | 1.65E-12 | -7.55 | 17.5161902 | -9.71E-02 | 52231347  | 52231470  | NC_000003.11 |
| cg14839932    | 2.59E-11 | 1.65E-12 | -7.55 | 17.5161428 | -4.87E-02 | 43139162  | 43139285  | NC_000006.11 |
| cg11569478    | 2.59E-11 | 1.65E-12 | -7.55 | 17.5154237 | -1.35E-01 | 119910700 | 119910823 | NC_000004.11 |
| cg18151345    | 2.60E-11 | 1.65E-12 | -7.55 | 17.5136214 | -1.51E-01 | 60720229  | 60720352  | NC_000011.9  |
| cg08011119    | 2.60E-11 | 1.65E-12 | -7.55 | 17.5134825 | -7.87E-02 | 119913996 | 119914119 | NC_000002.11 |
| cg21789849    | 2.60E-11 | 1.65E-12 | -7.55 | 17.5127941 | -6.81E-02 | 107809536 | 107809659 | NC_000003.11 |
| cg06595693    | 2.61E-11 | 1.66E-12 | -7.55 | 17.5094167 | -7.12E-02 | 40649989  | 40650112  | NC_000015.9  |
| cg12019893    | 2.61E-11 | 1.66E-12 | -7.55 | 17.5083547 | -1.42E-01 | 42950090  | 42950213  | NC_000003.11 |
| cg16922810    | 2.61E-11 | 1.66E-12 | -7.55 | 17.5081041 | -6.31E-02 | 143696531 | 143696654 | NC_000008.10 |
| cg23029021    | 2.62E-11 | 1.67E-12 | -7.55 | 17.5042085 | -2.13E-01 | 414951    | 415074    | NC_000011.9  |
| cg19681528    | 2.62E-11 | 1.67E-12 | -7.55 | 17.5040358 | -6.52E-02 | 69644405  | 69644528  | NC_000010.10 |
| cg17024257    | 2.62E-11 | 1.67E-12 | -7.55 | 17.5034066 | -1.69E-01 | 171528758 | 171528881 | NC_000003.11 |
| cg17979952    | 2.63E-11 | 1.67E-12 | -7.55 | 17.5028638 | -4.42E-02 | 117803953 | 117804076 | NC_000006.11 |
| cg13809915    | 2.63E-11 | 1.67E-12 | -7.55 | 17.5026901 | -1.55E-01 | 158789111 | 158789234 | NC_000002.11 |
| cg11370814    | 2.63E-11 | 1.67E-12 | -7.55 | 17.5016511 | -1.70E-01 | 242927418 | 242927541 | NC_000002.11 |
| cg14403090    | 2.63E-11 | 1.67E-12 | -7.55 | 17.5015777 | -1.80E-01 | 105573866 | 105573989 | NC_000007.13 |

|               |          |          |       |            |           |           |           |              |
|---------------|----------|----------|-------|------------|-----------|-----------|-----------|--------------|
| cg13396246    | 2.63E-11 | 1.67E-12 | -7.54 | 17.5011935 | -7.11E-02 | 54619133  | 54619256  | NC_000019.9  |
| cg07871059    | 2.64E-11 | 1.68E-12 | -7.54 | 17.4979892 | -1.22E-01 | 67516493  | 67516616  | NC_000016.9  |
| cg12197656    | 2.64E-11 | 1.68E-12 | -7.54 | 17.4978379 | -5.50E-02 | 85108351  | 85108474  | NC_000002.11 |
| cg27405644    | 2.64E-11 | 1.68E-12 | -7.54 | 17.4952606 | -1.89E-02 | 40834479  | 40834602  | NC_000017.10 |
| ch.1.4505949F | 2.65E-11 | 1.69E-12 | -7.54 | 17.4949699 | -4.24E-02 | 229598574 | 229598697 | NC_000001.10 |
| cg21686171    | 2.65E-11 | 1.69E-12 | -7.54 | 17.4946077 | -1.04E-01 | 9504429   | 9504552   | NC_000001.10 |
| cg10130860    | 2.65E-11 | 1.69E-12 | -7.54 | 17.4922362 | -5.50E-02 | 43124230  | 43124353  | NC_000001.10 |
| cg18917486    | 2.65E-11 | 1.69E-12 | -7.54 | 17.4921284 | -1.20E-01 | 74093431  | 74093554  | NC_000015.9  |
| cg05475172    | 2.65E-11 | 1.69E-12 | -7.54 | 17.4913622 | -1.57E-01 | 46371152  | 46371275  | NC_000022.10 |
| cg15202848    | 2.66E-11 | 1.69E-12 | -7.54 | 17.4909555 | -1.71E-01 | 64618819  | 64618942  | NC_000011.9  |
| cg18062064    | 2.66E-11 | 1.69E-12 | -7.54 | 17.4908651 | -9.27E-02 | 35504553  | 35504676  | NC_000020.10 |
| cg03320492    | 2.66E-11 | 1.69E-12 | -7.54 | 17.4898049 | -1.93E-01 | 45187810  | 45187933  | NC_000001.10 |
| cg11073255    | 2.66E-11 | 1.70E-12 | -7.54 | 17.489071  | -8.88E-02 | 31762455  | 31762578  | NC_000006.11 |
| cg09619786    | 2.66E-11 | 1.70E-12 | -7.54 | 17.4880192 | -4.82E-02 | 75249914  | 75250037  | NC_000015.9  |
| cg19071035    | 2.67E-11 | 1.70E-12 | -7.54 | 17.4841679 | -2.37E-02 | 20404090  | 20404213  | NC_000006.11 |
| cg02057783    | 2.68E-11 | 1.71E-12 | -7.54 | 17.4825843 | -5.13E-02 | 38278486  | 38278609  | NC_000017.10 |
| cg21064451    | 2.68E-11 | 1.71E-12 | -7.54 | 17.4816943 | -1.16E-01 | 38071534  | 38071657  | NC_000022.10 |
| cg02644610    | 2.68E-11 | 1.71E-12 | -7.54 | 17.4814562 | -6.68E-02 | 14646258  | 14646381  | NC_000010.10 |
| cg26665516    | 2.68E-11 | 1.71E-12 | -7.54 | 17.4810731 | -1.60E-01 | 134760038 | 134760161 | NC_000002.11 |
| cg14638662    | 2.68E-11 | 1.71E-12 | -7.54 | 17.4805998 | -1.14E-01 | 73033177  | 73033300  | NC_000017.10 |
| cg13861219    | 2.68E-11 | 1.71E-12 | -7.54 | 17.4796264 | -1.11E-01 | 3228943   | 3229066   | NC_000006.11 |
| cg02169981    | 2.69E-11 | 1.71E-12 | -7.54 | 17.4791107 | -1.43E-01 | 75905917  | 75906040  | NC_000011.9  |
| cg10858677    | 2.69E-11 | 1.71E-12 | -7.54 | 17.4789857 | -1.30E-01 | 49356663  | 49356786  | NC_000015.9  |
| cg06602545    | 2.69E-11 | 1.72E-12 | -7.54 | 17.4765481 | -1.64E-01 | 85120870  | 85120993  | NC_000016.9  |
| cg14663208    | 2.70E-11 | 1.72E-12 | -7.54 | 17.4750693 | -1.67E-01 | 42367407  | 42367530  | NC_000001.10 |

|               |          |          |       |            |           |           |           |              |
|---------------|----------|----------|-------|------------|-----------|-----------|-----------|--------------|
| cg00324693    | 2.70E-11 | 1.73E-12 | -7.54 | 17.4716519 | -4.46E-02 | 2821357   | 2821480   | NC_000020.10 |
| cg26943189    | 2.71E-11 | 1.73E-12 | -7.54 | 17.4691465 | -9.54E-02 | 3002278   | 3002401   | NC_000006.11 |
| cg16413675    | 2.72E-11 | 1.74E-12 | -7.54 | 17.4659839 | -1.17E-01 | 2520055   | 2520178   | NC_000016.9  |
| cg01655781    | 2.72E-11 | 1.74E-12 | -7.54 | 17.4656307 | -3.77E-02 | 102513797 | 102513920 | NC_000012.11 |
| cg19642408    | 2.73E-11 | 1.74E-12 | -7.54 | 17.4621661 | -1.38E-01 | 9894335   | 9894458   | NC_000002.11 |
| cg25015662    | 2.73E-11 | 1.74E-12 | -7.54 | 17.4621397 | -6.74E-02 | 34742333  | 34742456  | NC_000020.10 |
| cg25895490    | 2.73E-11 | 1.75E-12 | -7.54 | 17.4603578 | -1.14E-01 | 99146745  | 99146868  | NC_000012.11 |
| cg10907866    | 2.73E-11 | 1.75E-12 | -7.54 | 17.4601179 | -1.94E-01 | 42190778  | 42190901  | NC_000003.11 |
| cg10831391    | 2.74E-11 | 1.75E-12 | -7.54 | 17.4575044 | -6.80E-02 | 3109765   | 3109888   | NC_000010.10 |
| cg17574958    | 2.74E-11 | 1.75E-12 | -7.54 | 17.4574163 | -1.19E-01 | 137718043 | 137718166 | NC_000003.11 |
| cg12349030    | 2.75E-11 | 1.75E-12 | -7.54 | 17.4552492 | -4.36E-02 | 3818695   | 3818818   | NC_000011.9  |
| cg11342106    | 2.75E-11 | 1.76E-12 | -7.54 | 17.4524751 | -1.36E-01 | 73020351  | 73020474  | NC_000011.9  |
| cg10589330    | 2.75E-11 | 1.76E-12 | -7.54 | 17.4521711 | -1.71E-01 | 60383523  | 60383646  | NC_000015.9  |
| cg10482356    | 2.76E-11 | 1.76E-12 | -7.54 | 17.4494289 | -1.38E-01 | 56328421  | 56328544  | NC_000016.9  |
| cg01036779    | 2.76E-11 | 1.77E-12 | -7.54 | 17.4493494 | -7.04E-02 | 6768251   | 6768374   | NC_000019.9  |
| cg01340542    | 2.76E-11 | 1.77E-12 | -7.54 | 17.4493172 | -3.18E-02 | 65468273  | 65468396  | NC_000001.10 |
| cg00926502    | 2.77E-11 | 1.77E-12 | -7.54 | 17.4483122 | -4.29E-02 | 103451549 | 103451672 | NC_000013.10 |
| cg26985711    | 2.77E-11 | 1.77E-12 | -7.54 | 17.4478701 | -1.08E-01 | 91572276  | 91572399  | NC_000012.11 |
| cg06305048    | 2.77E-11 | 1.77E-12 | -7.54 | 17.4477856 | -6.85E-02 | 53466199  | 53466322  | NC_000019.9  |
| cg17820025    | 2.77E-11 | 1.77E-12 | -7.54 | 17.4461441 | -1.29E-01 | 36152813  | 36152936  | NC_000020.10 |
| cg07020001    | 2.77E-11 | 1.77E-12 | -7.54 | 17.4460582 | -1.50E-01 | 122019031 | 122019154 | NC_000012.11 |
| ch.6.1239582F | 2.77E-11 | 1.77E-12 | -7.54 | 17.4447013 | -4.03E-02 | 52412686  | 52412809  | NC_000006.11 |
| cg05707844    | 2.77E-11 | 1.77E-12 | -7.54 | 17.4445303 | -7.60E-02 | 37383994  | 37384117  | NC_000002.11 |
| cg22524514    | 2.78E-11 | 1.78E-12 | -7.54 | 17.4438059 | -8.33E-02 | 65779676  | 65779799  | NC_000011.9  |
| cg22874802    | 2.78E-11 | 1.78E-12 | -7.54 | 17.4431064 | -1.45E-01 | 16477614  | 16477737  | NC_000001.10 |

|               |          |          |       |            |           |           |           |              |
|---------------|----------|----------|-------|------------|-----------|-----------|-----------|--------------|
| cg15434337    | 2.78E-11 | 1.78E-12 | -7.54 | 17.4427324 | -3.53E-02 | 155164363 | 155164486 | NC_000001.10 |
| cg09350411    | 2.78E-11 | 1.78E-12 | -7.53 | 17.4424602 | -1.86E-01 | 157667935 | 157668058 | NC_000007.13 |
| cg18095109    | 2.78E-11 | 1.78E-12 | -7.53 | 17.4424452 | -4.00E-02 | 29720427  | 29720550  | NC_000006.11 |
| cg02747253    | 2.78E-11 | 1.78E-12 | -7.53 | 17.4421557 | -1.73E-01 | 105662805 | 105662928 | NC_000014.8  |
| cg18502397    | 2.78E-11 | 1.78E-12 | -7.53 | 17.440982  | -1.21E-01 | 45798436  | 45798559  | NC_000006.11 |
| cg19649172    | 2.78E-11 | 1.78E-12 | -7.53 | 17.4407416 | -1.52E-01 | 134499266 | 134499389 | NC_000010.10 |
| cg16657448    | 2.78E-11 | 1.78E-12 | -7.53 | 17.4405645 | -2.22E-02 | 47902371  | 47902494  | NC_000001.10 |
| cg14158573    | 2.78E-11 | 1.78E-12 | -7.53 | 17.4404784 | -6.40E-02 | 17549682  | 17549805  | NC_000020.10 |
| cg12131620    | 2.79E-11 | 1.79E-12 | -7.53 | 17.4368739 | -1.54E-01 | 3188985   | 3189108   | NC_000019.9  |
| cg25581932    | 2.80E-11 | 1.79E-12 | -7.53 | 17.436543  | -7.31E-02 | 7892150   | 7892273   | NC_000017.10 |
| cg16788286    | 2.80E-11 | 1.79E-12 | -7.53 | 17.4355376 | -2.12E-01 | 142216031 | 142216154 | NC_000008.10 |
| cg17827328    | 2.80E-11 | 1.79E-12 | -7.53 | 17.4352509 | -1.73E-01 | 36817299  | 36817422  | NC_000001.10 |
| cg11963365    | 2.80E-11 | 1.79E-12 | -7.53 | 17.4329988 | -1.70E-01 | 141320784 | 141320907 | NC_000005.9  |
| cg24809407    | 2.81E-11 | 1.80E-12 | -7.53 | 17.4325273 | -7.38E-02 | 27274919  | 27275042  | NC_000007.13 |
| cg25392995    | 2.81E-11 | 1.80E-12 | -7.53 | 17.4319716 | -1.50E-01 | 50625926  | 50626049  | NC_000022.10 |
| cg03941745    | 2.81E-11 | 1.80E-12 | -7.53 | 17.4296179 | -1.50E-01 | 30442009  | 30442132  | NC_000016.9  |
| ch.1.1337107R | 2.82E-11 | 1.81E-12 | -7.53 | 17.42654   | -2.87E-02 | 43307123  | 43307246  | NC_000001.10 |
| cg20265043    | 2.84E-11 | 1.82E-12 | -7.53 | 17.4218098 | -1.30E-01 | 23510089  | 23510212  | NC_000007.13 |
| cg22929787    | 2.84E-11 | 1.82E-12 | -7.53 | 17.4211343 | -1.50E-01 | 141737266 | 141737389 | NC_000005.9  |
| cg17046322    | 2.84E-11 | 1.82E-12 | -7.53 | 17.4194446 | -7.57E-02 | 44972791  | 44972914  | NC_000011.9  |
| cg01142596    | 2.84E-11 | 1.82E-12 | -7.53 | 17.4191814 | -6.21E-02 | 68680250  | 68680373  | NC_000016.9  |
| cg06818307    | 2.84E-11 | 1.82E-12 | -7.53 | 17.4183089 | -1.09E-01 | 6750782   | 6750905   | NC_000020.10 |
| cg16790560    | 2.85E-11 | 1.82E-12 | -7.53 | 17.4174657 | -1.19E-01 | 1223782   | 1223905   | NC_000011.9  |
| cg06686709    | 2.85E-11 | 1.82E-12 | -7.53 | 17.416877  | -1.23E-01 | 152830614 | 152830737 | NC_000002.11 |
| cg07359183    | 2.85E-11 | 1.82E-12 | -7.53 | 17.4167591 | -1.57E-01 | 208358018 | 208358141 | NC_000001.10 |

|               |          |          |       |            |           |           |           |              |
|---------------|----------|----------|-------|------------|-----------|-----------|-----------|--------------|
| ch.3.3938922F | 2.86E-11 | 1.83E-12 | -7.53 | 17.4129566 | -4.02E-02 | 197558925 | 197559048 | NC_000003.11 |
| cg11470941    | 2.87E-11 | 1.84E-12 | -7.53 | 17.4104873 | -1.86E-01 | 174042502 | 174042625 | NC_000004.11 |
| cg00162969    | 2.87E-11 | 1.84E-12 | -7.53 | 17.408958  | -1.14E-01 | 132933532 | 132933655 | NC_000012.11 |
| cg06058699    | 2.88E-11 | 1.84E-12 | -7.53 | 17.4061873 | -1.28E-01 | 111300711 | 111300834 | NC_000003.11 |
| cg22726373    | 2.88E-11 | 1.84E-12 | -7.53 | 17.4057858 | -1.55E-01 | 79048467  | 79048590  | NC_000015.9  |
| cg04732357    | 2.88E-11 | 1.85E-12 | -7.53 | 17.4045235 | -6.66E-02 | 96658324  | 96658447  | NC_000002.11 |
| cg25985103    | 2.89E-11 | 1.85E-12 | -7.53 | 17.4035883 | -4.91E-02 | 75660389  | 75660512  | NC_000015.9  |
| cg15510593    | 2.89E-11 | 1.85E-12 | -7.53 | 17.4010496 | -3.17E-02 | 67955960  | 67956083  | NC_000018.9  |
| cg22779330    | 2.89E-11 | 1.85E-12 | -7.53 | 17.4008627 | -1.48E-01 | 69061911  | 69062034  | NC_000011.9  |
| cg17454592    | 2.90E-11 | 1.86E-12 | -7.53 | 17.3995754 | -1.05E-01 | 33360353  | 33360476  | NC_000015.9  |
| cg03928812    | 2.90E-11 | 1.86E-12 | -7.53 | 17.3987051 | -1.63E-01 | 59634276  | 59634399  | NC_000011.9  |
| cg07961479    | 2.90E-11 | 1.86E-12 | -7.53 | 17.398694  | -9.96E-02 | 159825173 | 159825296 | NC_000001.10 |
| cg09157272    | 2.90E-11 | 1.86E-12 | -7.53 | 17.3982938 | -1.23E-01 | 72460750  | 72460873  | NC_000015.9  |
| cg24155427    | 2.90E-11 | 1.86E-12 | -7.53 | 17.3967368 | -1.15E-01 | 31242051  | 31242174  | NC_000001.10 |
| cg02335909    | 2.90E-11 | 1.86E-12 | -7.53 | 17.3965554 | -1.32E-01 | 85743628  | 85743751  | NC_000010.10 |
| cg26069719    | 2.91E-11 | 1.86E-12 | -7.53 | 17.3957634 | -1.43E-01 | 51716108  | 51716231  | NC_000003.11 |
| cg06273763    | 2.91E-11 | 1.87E-12 | -7.53 | 17.3939261 | -5.85E-02 | 59664907  | 59665030  | NC_000015.9  |
| cg15347788    | 2.91E-11 | 1.87E-12 | -7.53 | 17.3936603 | -1.50E-01 | 74172098  | 74172221  | NC_000018.9  |
| cg25608949    | 2.91E-11 | 1.87E-12 | -7.53 | 17.3931978 | -1.44E-01 | 43816355  | 43816478  | NC_000021.8  |
| cg09932730    | 2.92E-11 | 1.87E-12 | -7.53 | 17.392126  | -9.98E-02 | 135198360 | 135198483 | NC_000007.13 |
| cg17281677    | 2.92E-11 | 1.87E-12 | -7.53 | 17.3918096 | -9.94E-02 | 6658557   | 6658680   | NC_000012.11 |
| cg06113298    | 2.92E-11 | 1.87E-12 | -7.53 | 17.3917525 | -1.31E-01 | 21532834  | 21532957  | NC_000016.9  |
| cg22828900    | 2.92E-11 | 1.87E-12 | -7.53 | 17.3906592 | -4.74E-02 | 96184787  | 96184910  | NC_000012.11 |
| cg05998333    | 2.92E-11 | 1.88E-12 | -7.53 | 17.3897942 | -1.44E-01 | 54246879  | 54247002  | NC_000010.10 |
| cg10065530    | 2.93E-11 | 1.88E-12 | -7.53 | 17.3886669 | -1.33E-01 | 3800567   | 3800690   | NC_000020.10 |



|               |          |          |       |            |           |           |           |              |
|---------------|----------|----------|-------|------------|-----------|-----------|-----------|--------------|
| cg02330683    | 2.93E-11 | 1.88E-12 | -7.53 | 17.3876042 | -1.69E-01 | 41787940  | 41788063  | NC_000015.9  |
| cg19881557    | 2.93E-11 | 1.88E-12 | -7.53 | 17.3869671 | -1.27E-01 | 20967426  | 20967549  | NC_000014.8  |
| cg05380003    | 2.93E-11 | 1.88E-12 | -7.53 | 17.3857269 | -1.34E-01 | 175842222 | 175842345 | NC_000005.9  |
| cg19245296    | 2.94E-11 | 1.89E-12 | -7.52 | 17.3829924 | -6.20E-02 | 10015646  | 10015769  | NC_000020.10 |
| cg01275297    | 2.94E-11 | 1.89E-12 | -7.52 | 17.3826412 | -5.97E-02 | 35201324  | 35201447  | NC_000020.10 |
| cg00959334    | 2.94E-11 | 1.89E-12 | -7.52 | 17.3825089 | -6.88E-02 | 21823558  | 21823681  | NC_000022.10 |
| cg07504977    | 2.95E-11 | 1.89E-12 | -7.52 | 17.3811349 | -1.20E-01 | 102131012 | 102131135 | NC_000010.10 |
| cg00067814    | 2.95E-11 | 1.89E-12 | -7.52 | 17.3804125 | -5.85E-02 | 134896357 | 134896480 | NC_000007.13 |
| ch.2.4636382R | 2.95E-11 | 1.89E-12 | -7.52 | 17.3798619 | -2.41E-02 | 232032866 | 232032989 | NC_000002.11 |
| cg04881103    | 2.95E-11 | 1.90E-12 | -7.52 | 17.3791848 | -1.77E-01 | 32410413  | 32410536  | NC_000001.10 |
| cg01786048    | 2.96E-11 | 1.90E-12 | -7.52 | 17.3779878 | -2.29E-01 | 239035964 | 239036087 | NC_000002.11 |
| cg12636538    | 2.96E-11 | 1.90E-12 | -7.52 | 17.3751003 | -6.72E-02 | 118901039 | 118901162 | NC_000011.9  |
| cg15761609    | 2.96E-11 | 1.90E-12 | -7.52 | 17.3749343 | -1.49E-01 | 66598067  | 66598190  | NC_000017.10 |
| cg15936999    | 2.97E-11 | 1.91E-12 | -7.52 | 17.3734993 | -1.01E-01 | 73840853  | 73840976  | NC_000017.10 |
| cg21879320    | 2.97E-11 | 1.91E-12 | -7.52 | 17.3720577 | -7.31E-02 | 185125698 | 185125821 | NC_000001.10 |
| cg23965429    | 2.97E-11 | 1.91E-12 | -7.52 | 17.3714732 | -4.10E-02 | 99740998  | 99741121  | NC_000014.8  |
| cg23167287    | 2.98E-11 | 1.91E-12 | -7.52 | 17.3710698 | -1.31E-01 | 230139541 | 230139664 | NC_000002.11 |
| cg13496324    | 2.98E-11 | 1.91E-12 | -7.52 | 17.3709709 | -4.54E-02 | 90893736  | 90893859  | NC_000007.13 |
| cg18068487    | 2.98E-11 | 1.91E-12 | -7.52 | 17.3707864 | -6.04E-02 | 150778340 | 150778463 | NC_000007.13 |
| cg22076160    | 2.98E-11 | 1.91E-12 | -7.52 | 17.3702122 | -1.67E-01 | 235805690 | 235805813 | NC_000001.10 |
| cg26321969    | 2.98E-11 | 1.91E-12 | -7.52 | 17.3692228 | -5.07E-02 | 118799402 | 118799525 | NC_000011.9  |
| cg03786920    | 2.98E-11 | 1.92E-12 | -7.52 | 17.3689929 | -1.04E-01 | 2113886   | 2114009   | NC_000020.10 |
| ch.1.2890724F | 2.98E-11 | 1.92E-12 | -7.52 | 17.368538  | -4.20E-02 | 150315420 | 150315543 | NC_000001.10 |
| cg13018448    | 2.98E-11 | 1.92E-12 | -7.52 | 17.3681783 | -6.01E-02 | 33385440  | 33385563  | NC_000006.11 |
| cg02340063    | 2.98E-11 | 1.92E-12 | -7.52 | 17.3679595 | -6.48E-02 | 37009328  | 37009451  | NC_000017.10 |

|            |          |          |       |            |           |           |           |              |
|------------|----------|----------|-------|------------|-----------|-----------|-----------|--------------|
| cg16124975 | 2.99E-11 | 1.92E-12 | -7.52 | 17.3669028 | -2.22E-01 | 79938941  | 79939064  | NC_000017.10 |
| cg06655560 | 3.00E-11 | 1.93E-12 | -7.52 | 17.3630845 | -6.82E-02 | 99205921  | 99206044  | NC_000010.10 |
| cg07908984 | 3.00E-11 | 1.93E-12 | -7.52 | 17.3624481 | -1.33E-01 | 12800836  | 12800959  | NC_000003.11 |
| cg17836014 | 3.00E-11 | 1.93E-12 | -7.52 | 17.361626  | -1.21E-01 | 201630341 | 201630464 | NC_000002.11 |
| cg08104310 | 3.01E-11 | 1.93E-12 | -7.52 | 17.3601272 | -1.49E-01 | 176831160 | 176831283 | NC_000001.10 |
| cg00107046 | 3.01E-11 | 1.93E-12 | -7.52 | 17.3600068 | -8.00E-02 | 16465562  | 16465685  | NC_000001.10 |
| cg07582829 | 3.01E-11 | 1.93E-12 | -7.52 | 17.3597211 | -9.41E-02 | 54408440  | 54408563  | NC_000019.9  |
| cg04324758 | 3.01E-11 | 1.94E-12 | -7.52 | 17.3573181 | -1.15E-01 | 16436671  | 16436794  | NC_000019.9  |
| cg20050877 | 3.02E-11 | 1.94E-12 | -7.52 | 17.357     | -1.30E-01 | 17487895  | 17488018  | NC_000008.10 |
| cg09005679 | 3.02E-11 | 1.94E-12 | -7.52 | 17.3545269 | -7.82E-02 | 57875326  | 57875449  | NC_000020.10 |
| cg23937893 | 3.02E-11 | 1.94E-12 | -7.52 | 17.3541721 | -3.23E-02 | 219757464 | 219757587 | NC_000002.11 |
| cg05985655 | 3.03E-11 | 1.95E-12 | -7.52 | 17.3530533 | -3.67E-02 | 16616805  | 16616928  | NC_000005.9  |
| cg10530169 | 3.03E-11 | 1.95E-12 | -7.52 | 17.3515913 | -6.90E-02 | 57529952  | 57530075  | NC_000003.11 |
| cg23403980 | 3.04E-11 | 1.95E-12 | -7.52 | 17.3487702 | -1.59E-01 | 2060623   | 2060746   | NC_000017.10 |
| cg21806580 | 3.04E-11 | 1.96E-12 | -7.52 | 17.3479548 | -1.57E-01 | 18746010  | 18746133  | NC_000005.9  |
| cg06181697 | 3.04E-11 | 1.96E-12 | -7.52 | 17.3478131 | -9.52E-02 | 50294603  | 50294726  | NC_000003.11 |
| cg07139301 | 3.04E-11 | 1.96E-12 | -7.52 | 17.3475263 | -1.06E-01 | 170746207 | 170746330 | NC_000003.11 |
| cg17079026 | 3.05E-11 | 1.97E-12 | -7.52 | 17.3435699 | -6.68E-02 | 95858880  | 95859003  | NC_000002.11 |
| cg09058317 | 3.06E-11 | 1.97E-12 | -7.52 | 17.3419183 | -1.84E-01 | 85491089  | 85491212  | NC_000011.9  |
| cg19031565 | 3.06E-11 | 1.97E-12 | -7.52 | 17.3406287 | -7.58E-02 | 72978794  | 72978917  | NC_000017.10 |
| cg20695611 | 3.06E-11 | 1.97E-12 | -7.52 | 17.3401598 | -1.63E-01 | 35853648  | 35853771  | NC_000017.10 |
| cg25953130 | 3.07E-11 | 1.97E-12 | -7.52 | 17.3393482 | -1.47E-01 | 63753550  | 63753673  | NC_000010.10 |
| cg14352032 | 3.07E-11 | 1.98E-12 | -7.52 | 17.3386297 | -1.44E-01 | 28564834  | 28564957  | NC_000017.10 |
| cg12840336 | 3.07E-11 | 1.98E-12 | -7.52 | 17.3384411 | -1.30E-01 | 11422730  | 11422853  | NC_000008.10 |
| cg04764584 | 3.07E-11 | 1.98E-12 | -7.52 | 17.3370045 | -9.17E-02 | 505985    | 506108    | NC_000005.9  |

|                |          |          |       |            |           |           |           |              |
|----------------|----------|----------|-------|------------|-----------|-----------|-----------|--------------|
| cg03661752     | 3.08E-11 | 1.98E-12 | -7.52 | 17.3362793 | -9.41E-02 | 74455360  | 74455483  | NC_000016.9  |
| cg17867471     | 3.08E-11 | 1.99E-12 | -7.52 | 17.3332608 | -9.75E-02 | 32984496  | 32984619  | NC_000013.10 |
| cg17185622     | 3.09E-11 | 1.99E-12 | -7.52 | 17.3318243 | -2.13E-01 | 98103016  | 98103139  | NC_000008.10 |
| cg00569673     | 3.09E-11 | 1.99E-12 | -7.52 | 17.330897  | -2.02E-01 | 32160462  | 32160585  | NC_000006.11 |
| cg21694044     | 3.09E-11 | 1.99E-12 | -7.52 | 17.3305488 | -5.60E-02 | 41215540  | 41215663  | NC_000022.10 |
| cg06144311     | 3.09E-11 | 1.99E-12 | -7.52 | 17.3300444 | -1.22E-01 | 4814294   | 4814417   | NC_000007.13 |
| cg04526584     | 3.10E-11 | 2.00E-12 | -7.52 | 17.3278115 | -1.11E-01 | 115860606 | 115860729 | NC_000010.10 |
| cg24957950     | 3.10E-11 | 2.00E-12 | -7.52 | 17.3271453 | -5.12E-02 | 39616336  | 39616459  | NC_000019.9  |
| cg23303070     | 3.10E-11 | 2.00E-12 | -7.52 | 17.3266004 | -8.06E-02 | 140747874 | 140747997 | NC_000007.13 |
| cg06155229     | 3.10E-11 | 2.00E-12 | -7.52 | 17.3264701 | -9.81E-02 | 102937535 | 102937658 | NC_000007.13 |
| cg04801085     | 3.11E-11 | 2.00E-12 | -7.52 | 17.3261089 | -1.74E-01 | 103150012 | 103150135 | NC_000014.8  |
| cg00004089     | 3.12E-11 | 2.01E-12 | -7.51 | 17.32301   | -1.70E-01 | 74678836  | 74678959  | NC_000017.10 |
| cg02359433     | 3.12E-11 | 2.01E-12 | -7.51 | 17.3216699 | -1.76E-01 | 1315143   | 1315266   | NC_000006.11 |
| cg05905184     | 3.12E-11 | 2.01E-12 | -7.51 | 17.3213766 | -5.72E-02 | 220252704 | 220252827 | NC_000002.11 |
| cg19454930     | 3.13E-11 | 2.01E-12 | -7.51 | 17.319469  | -7.75E-02 | 74347776  | 74347899  | NC_000002.11 |
| ch.10.2404278R | 3.14E-11 | 2.02E-12 | -7.51 | 17.3148803 | -6.66E-02 | 114567719 | 114567842 | NC_000010.10 |
| cg06601203     | 3.15E-11 | 2.03E-12 | -7.51 | 17.3115776 | -1.27E-01 | 112113375 | 112113498 | NC_000010.10 |
| cg02216380     | 3.15E-11 | 2.03E-12 | -7.51 | 17.310207  | -8.95E-02 | 137833675 | 137833798 | NC_000003.11 |
| cg17104843     | 3.16E-11 | 2.04E-12 | -7.51 | 17.3087185 | -6.40E-02 | 213032108 | 213032231 | NC_000001.10 |
| cg11583475     | 3.16E-11 | 2.04E-12 | -7.51 | 17.3077506 | -1.29E-01 | 24914929  | 24915052  | NC_000004.11 |
| cg05438508     | 3.16E-11 | 2.04E-12 | -7.51 | 17.3077083 | -3.53E-02 | 58222756  | 58222879  | NC_000003.11 |
| cg06307567     | 3.16E-11 | 2.04E-12 | -7.51 | 17.3068295 | -6.71E-02 | 323616    | 323739    | NC_000004.11 |
| ch.9.319861R   | 3.17E-11 | 2.04E-12 | -7.51 | 17.3056872 | -5.36E-02 | 16700700  | 16700823  | NC_000009.11 |
| cg25778479     | 3.17E-11 | 2.04E-12 | -7.51 | 17.3055162 | -1.06E-01 | 16686771  | 16686894  | NC_000007.13 |
| cg13160331     | 3.17E-11 | 2.04E-12 | -7.51 | 17.3049988 | -6.63E-02 | 43547217  | 43547340  | NC_000022.10 |

|                |          |          |       |            |           |           |           |              |
|----------------|----------|----------|-------|------------|-----------|-----------|-----------|--------------|
| cg02756107     | 3.17E-11 | 2.05E-12 | -7.51 | 17.3041289 | -1.48E-01 | 99517460  | 99517583  | NC_000007.13 |
| cg02130905     | 3.18E-11 | 2.05E-12 | -7.51 | 17.3005842 | -1.47E-01 | 27116213  | 27116336  | NC_000008.10 |
| cg27658254     | 3.19E-11 | 2.06E-12 | -7.51 | 17.2975674 | -1.37E-01 | 142140021 | 142140144 | NC_000008.10 |
| cg20840174     | 3.19E-11 | 2.06E-12 | -7.51 | 17.2968396 | -1.52E-01 | 44087784  | 44087907  | NC_000017.10 |
| cg19603195     | 3.20E-11 | 2.06E-12 | -7.51 | 17.2960917 | -4.56E-02 | 74284877  | 74285000  | NC_000015.9  |
| cg21532088     | 3.20E-11 | 2.06E-12 | -7.51 | 17.2955814 | -1.54E-01 | 80662567  | 80662690  | NC_000017.10 |
| cg07078789     | 3.20E-11 | 2.06E-12 | -7.51 | 17.2955264 | -6.41E-02 | 31465720  | 31465843  | NC_000006.11 |
| cg15423315     | 3.21E-11 | 2.07E-12 | -7.51 | 17.2923534 | -1.56E-01 | 93296554  | 93296677  | NC_000010.10 |
| cg24816455     | 3.21E-11 | 2.07E-12 | -7.51 | 17.292192  | -1.81E-01 | 50310766  | 50310889  | NC_000003.11 |
| cg07858848     | 3.21E-11 | 2.07E-12 | -7.51 | 17.2902016 | -1.74E-01 | 43087177  | 43087300  | NC_000002.11 |
| cg21988950     | 3.21E-11 | 2.08E-12 | -7.51 | 17.2899885 | -1.17E-01 | 30131691  | 30131814  | NC_000006.11 |
| cg21085001     | 3.21E-11 | 2.08E-12 | -7.51 | 17.2899458 | -5.97E-02 | 167691333 | 167691456 | NC_000001.10 |
| cg03302008     | 3.22E-11 | 2.08E-12 | -7.51 | 17.2897431 | -9.97E-02 | 96012735  | 96012858  | NC_000002.11 |
| cg15228441     | 3.22E-11 | 2.08E-12 | -7.51 | 17.2882508 | -1.64E-01 | 78829930  | 78830053  | NC_000017.10 |
| cg02590088     | 3.22E-11 | 2.08E-12 | -7.51 | 17.2880853 | -1.52E-01 | 47761452  | 47761575  | NC_000002.11 |
| cg14830815     | 3.23E-11 | 2.08E-12 | -7.51 | 17.2861737 | -6.63E-02 | 51420611  | 51420734  | NC_000012.11 |
| cg25072179     | 3.23E-11 | 2.08E-12 | -7.51 | 17.2855556 | -1.38E-01 | 57004934  | 57005057  | NC_000011.9  |
| cg27451550     | 3.23E-11 | 2.08E-12 | -7.51 | 17.2855457 | -1.56E-01 | 65610331  | 65610454  | NC_000001.10 |
| cg05782078     | 3.23E-11 | 2.08E-12 | -7.51 | 17.2853827 | -7.87E-02 | 140179173 | 140179296 | NC_000007.13 |
| cg15768443     | 3.23E-11 | 2.09E-12 | -7.51 | 17.2844615 | -1.97E-01 | 30652347  | 30652470  | NC_000006.11 |
| cg27039625     | 3.23E-11 | 2.09E-12 | -7.51 | 17.2839576 | -1.64E-01 | 86159096  | 86159219  | NC_000006.11 |
| ch.16.1297555R | 3.24E-11 | 2.09E-12 | -7.51 | 17.2826128 | -5.71E-02 | 58606277  | 58606400  | NC_000016.9  |
| cg14310696     | 3.24E-11 | 2.10E-12 | -7.51 | 17.2804531 | -3.36E-02 | 87276184  | 87276307  | NC_000003.11 |
| cg01501476     | 3.24E-11 | 2.10E-12 | -7.51 | 17.2799236 | -1.26E-01 | 41411128  | 41411251  | NC_000006.11 |
| cg20321251     | 3.25E-11 | 2.10E-12 | -7.51 | 17.2794329 | -1.19E-01 | 27406724  | 27406847  | NC_000002.11 |

|            |          |          |       |            |           |           |           |              |
|------------|----------|----------|-------|------------|-----------|-----------|-----------|--------------|
| cg10147507 | 3.25E-11 | 2.10E-12 | -7.51 | 17.2790963 | -8.48E-02 | 57113767  | 57113890  | NC_000003.11 |
| cg12253200 | 3.25E-11 | 2.10E-12 | -7.51 | 17.2781215 | -8.86E-02 | 49123013  | 49123136  | NC_000019.9  |
| cg14553705 | 3.25E-11 | 2.10E-12 | -7.51 | 17.2773294 | -1.21E-01 | 55347056  | 55347179  | NC_000005.9  |
| cg21917728 | 3.25E-11 | 2.10E-12 | -7.51 | 17.2770835 | -1.60E-01 | 41471064  | 41471187  | NC_000006.11 |
| cg19005955 | 3.25E-11 | 2.10E-12 | -7.51 | 17.2770411 | -1.81E-01 | 132938694 | 132938817 | NC_000005.9  |
| cg22142686 | 3.25E-11 | 2.10E-12 | -7.51 | 17.2768912 | -1.11E-01 | 2984155   | 2984278   | NC_000019.9  |
| cg04264549 | 3.25E-11 | 2.10E-12 | -7.51 | 17.2768754 | -9.54E-02 | 128543924 | 128544047 | NC_000004.11 |
| cg05295427 | 3.26E-11 | 2.11E-12 | -7.51 | 17.275505  | -6.85E-02 | 62330970  | 62331093  | NC_000014.8  |
| cg14101500 | 3.26E-11 | 2.11E-12 | -7.51 | 17.2755026 | -1.04E-01 | 2925594   | 2925717   | NC_000011.9  |
| cg22711811 | 3.26E-11 | 2.11E-12 | -7.51 | 17.2752591 | -5.25E-02 | 1260514   | 1260637   | NC_000019.9  |
| cg19643921 | 3.26E-11 | 2.11E-12 | -7.51 | 17.2750097 | -9.03E-02 | 41197106  | 41197229  | NC_000019.9  |
| cg10182418 | 3.26E-11 | 2.11E-12 | -7.51 | 17.274622  | -7.41E-02 | 38858536  | 38858659  | NC_000004.11 |
| cg10847094 | 3.28E-11 | 2.12E-12 | -7.51 | 17.2684316 | -1.37E-01 | 15965384  | 15965507  | NC_000004.11 |
| cg12396368 | 3.28E-11 | 2.12E-12 | -7.51 | 17.2683143 | -9.89E-02 | 6294850   | 6294973   | NC_000001.10 |
| cg06176471 | 3.28E-11 | 2.12E-12 | -7.51 | 17.2678233 | -1.46E-01 | 169088807 | 169088930 | NC_000001.10 |
| cg03188000 | 3.28E-11 | 2.12E-12 | -7.5  | 17.2672191 | -2.49E-01 | 68634913  | 68635036  | NC_000012.11 |
| cg11577329 | 3.29E-11 | 2.13E-12 | -7.5  | 17.2663408 | -1.66E-01 | 1093738   | 1093861   | NC_000005.9  |
| cg16709874 | 3.29E-11 | 2.13E-12 | -7.5  | 17.2661958 | -6.27E-02 | 211433282 | 211433405 | NC_000001.10 |
| cg26796815 | 3.29E-11 | 2.13E-12 | -7.5  | 17.2648821 | -6.81E-02 | 134094372 | 134094495 | NC_000005.9  |
| cg01574513 | 3.29E-11 | 2.13E-12 | -7.5  | 17.2647576 | -1.45E-01 | 85981720  | 85981843  | NC_000016.9  |
| cg00295259 | 3.29E-11 | 2.13E-12 | -7.5  | 17.2643166 | -1.66E-01 | 121691795 | 121691918 | NC_000002.11 |
| cg10055265 | 3.29E-11 | 2.13E-12 | -7.5  | 17.2640534 | -1.42E-01 | 119288990 | 119289113 | NC_000011.9  |
| cg05449607 | 3.30E-11 | 2.14E-12 | -7.5  | 17.2619116 | -6.80E-02 | 111279612 | 111279735 | NC_000006.11 |
| cg00344308 | 3.30E-11 | 2.14E-12 | -7.5  | 17.2606216 | -1.71E-01 | 30273887  | 30274010  | NC_000003.11 |
| cg23328556 | 3.31E-11 | 2.14E-12 | -7.5  | 17.2590459 | -1.47E-01 | 123374731 | 123374854 | NC_000012.11 |

|            |          |          |      |            |           |           |           |              |
|------------|----------|----------|------|------------|-----------|-----------|-----------|--------------|
| cg06813382 | 3.31E-11 | 2.14E-12 | -7.5 | 17.2580243 | -1.04E-01 | 81967195  | 81967318  | NC_000010.10 |
| cg17891715 | 3.31E-11 | 2.14E-12 | -7.5 | 17.257939  | -6.07E-02 | 50529185  | 50529308  | NC_000019.9  |
| cg19003803 | 3.32E-11 | 2.15E-12 | -7.5 | 17.2552309 | -1.27E-01 | 143416716 | 143416839 | NC_000008.10 |
| cg04236263 | 3.32E-11 | 2.15E-12 | -7.5 | 17.2551924 | -1.23E-01 | 17305798  | 17305921  | NC_000001.10 |
| cg07053162 | 3.32E-11 | 2.15E-12 | -7.5 | 17.2548191 | -1.50E-01 | 4965391   | 4965514   | NC_000016.9  |
| cg01458484 | 3.33E-11 | 2.15E-12 | -7.5 | 17.2539022 | -8.13E-02 | 30689681  | 30689804  | NC_000006.11 |
| cg14558573 | 3.33E-11 | 2.15E-12 | -7.5 | 17.2529217 | -7.55E-02 | 9811813   | 9811936   | NC_000003.11 |
| cg23995753 | 3.33E-11 | 2.16E-12 | -7.5 | 17.2517897 | -1.47E-01 | 160760732 | 160760855 | NC_000002.11 |
| cg15491047 | 3.33E-11 | 2.16E-12 | -7.5 | 17.251498  | -8.24E-02 | 39573006  | 39573129  | NC_000014.8  |
| cg04165840 | 3.33E-11 | 2.16E-12 | -7.5 | 17.2511441 | -5.02E-02 | 105156204 | 105156327 | NC_000010.10 |
| cg19249516 | 3.33E-11 | 2.16E-12 | -7.5 | 17.2509466 | -1.57E-01 | 156667493 | 156667616 | NC_000004.11 |
| cg27364319 | 3.34E-11 | 2.16E-12 | -7.5 | 17.249988  | -4.33E-02 | 53626837  | 53626960  | NC_000012.11 |
| cg12073319 | 3.34E-11 | 2.16E-12 | -7.5 | 17.2496013 | -1.34E-01 | 15965025  | 15965148  | NC_000004.11 |
| cg03227037 | 3.34E-11 | 2.16E-12 | -7.5 | 17.2492061 | -1.41E-01 | 62212228  | 62212351  | NC_000020.10 |
| cg27193691 | 3.36E-11 | 2.17E-12 | -7.5 | 17.2442269 | -4.11E-02 | 568206    | 568329    | NC_000011.9  |
| cg26876101 | 3.36E-11 | 2.17E-12 | -7.5 | 17.2439161 | -1.17E-01 | 2321877   | 2322000   | NC_000001.10 |
| cg19016972 | 3.36E-11 | 2.17E-12 | -7.5 | 17.243821  | -9.17E-02 | 8012926   | 8013049   | NC_000012.11 |
| cg11335133 | 3.36E-11 | 2.18E-12 | -7.5 | 17.2436774 | -1.61E-01 | 90309559  | 90309682  | NC_000001.10 |
| cg22208022 | 3.36E-11 | 2.18E-12 | -7.5 | 17.2424345 | -1.71E-01 | 14553107  | 14553230  | NC_000012.11 |
| cg25737397 | 3.37E-11 | 2.18E-12 | -7.5 | 17.2411357 | -1.29E-01 | 170725297 | 170725420 | NC_000002.11 |
| cg15067015 | 3.37E-11 | 2.18E-12 | -7.5 | 17.2409314 | -1.26E-01 | 175671657 | 175671780 | NC_000001.10 |
| cg04064452 | 3.37E-11 | 2.18E-12 | -7.5 | 17.2406873 | -1.14E-01 | 242486462 | 242486585 | NC_000002.11 |
| cg20066782 | 3.37E-11 | 2.18E-12 | -7.5 | 17.2398102 | -1.83E-01 | 102574504 | 102574627 | NC_000007.13 |
| cg07996992 | 3.37E-11 | 2.18E-12 | -7.5 | 17.2395337 | -6.27E-02 | 85040343  | 85040466  | NC_000001.10 |
| cg20653986 | 3.38E-11 | 2.19E-12 | -7.5 | 17.2370587 | -6.25E-02 | 107349535 | 107349658 | NC_000006.11 |

|            |          |          |      |            |           |           |           |              |
|------------|----------|----------|------|------------|-----------|-----------|-----------|--------------|
| cg08678898 | 3.38E-11 | 2.19E-12 | -7.5 | 17.2366712 | -3.79E-02 | 42758009  | 42758132  | NC_000019.9  |
| cg08595501 | 3.38E-11 | 2.19E-12 | -7.5 | 17.2363826 | -1.74E-01 | 75878300  | 75878423  | NC_000005.9  |
| cg25845463 | 3.38E-11 | 2.19E-12 | -7.5 | 17.2363642 | -1.60E-01 | 2064046   | 2064169   | NC_000001.10 |
| cg04236924 | 3.39E-11 | 2.19E-12 | -7.5 | 17.2348649 | -1.57E-01 | 34951024  | 34951147  | NC_000011.9  |
| cg23492413 | 3.40E-11 | 2.20E-12 | -7.5 | 17.2312632 | -7.28E-02 | 43905074  | 43905197  | NC_000010.10 |
| cg15160686 | 3.40E-11 | 2.21E-12 | -7.5 | 17.2302191 | -1.04E-01 | 24562825  | 24562948  | NC_000001.10 |
| cg27574980 | 3.40E-11 | 2.21E-12 | -7.5 | 17.2301575 | -5.36E-02 | 31744636  | 31744759  | NC_000006.11 |
| cg16214153 | 3.40E-11 | 2.21E-12 | -7.5 | 17.2297112 | -1.73E-01 | 42099392  | 42099515  | NC_000006.11 |
| cg00550340 | 3.40E-11 | 2.21E-12 | -7.5 | 17.229554  | -1.42E-01 | 72985299  | 72985422  | NC_000017.10 |
| cg14846368 | 3.41E-11 | 2.21E-12 | -7.5 | 17.227931  | -1.02E-01 | 37955623  | 37955746  | NC_000007.13 |
| cg24806066 | 3.41E-11 | 2.21E-12 | -7.5 | 17.2272339 | -1.09E-01 | 184633039 | 184633162 | NC_000001.10 |
| cg27493371 | 3.42E-11 | 2.22E-12 | -7.5 | 17.225258  | -5.40E-02 | 89080220  | 89080343  | NC_000004.11 |
| cg11644973 | 3.42E-11 | 2.22E-12 | -7.5 | 17.2250444 | -1.36E-01 | 157085979 | 157086102 | NC_000007.13 |
| cg26027780 | 3.42E-11 | 2.22E-12 | -7.5 | 17.2246852 | -4.91E-02 | 27100370  | 27100493  | NC_000006.11 |
| cg10898730 | 3.42E-11 | 2.22E-12 | -7.5 | 17.2241918 | -3.48E-02 | 113404519 | 113404642 | NC_000002.11 |
| cg10111599 | 3.43E-11 | 2.22E-12 | -7.5 | 17.2223593 | -1.81E-01 | 1573451   | 1573574   | NC_000007.13 |
| cg10438282 | 3.43E-11 | 2.22E-12 | -7.5 | 17.2221156 | -1.40E-01 | 79471586  | 79471709  | NC_000015.9  |
| cg07694621 | 3.43E-11 | 2.22E-12 | -7.5 | 17.2214926 | -1.75E-01 | 43151938  | 43152061  | NC_000002.11 |
| cg13287553 | 3.43E-11 | 2.23E-12 | -7.5 | 17.2203866 | -8.64E-02 | 4784419   | 4784542   | NC_000007.13 |
| cg19704288 | 3.43E-11 | 2.23E-12 | -7.5 | 17.2201472 | -1.48E-01 | 1582181   | 1582304   | NC_000004.11 |
| cg16000544 | 3.44E-11 | 2.23E-12 | -7.5 | 17.2178305 | -5.69E-02 | 42995380  | 42995503  | NC_000008.10 |
| cg09883188 | 3.44E-11 | 2.24E-12 | -7.5 | 17.2165492 | -1.42E-01 | 160502317 | 160502440 | NC_000003.11 |
| cg25101764 | 3.45E-11 | 2.24E-12 | -7.5 | 17.2162371 | -1.90E-01 | 227291401 | 227291524 | NC_000002.11 |
| cg16120811 | 3.45E-11 | 2.24E-12 | -7.5 | 17.2154112 | -1.67E-02 | 9594484   | 9594607   | NC_000011.9  |
| cg27105123 | 3.45E-11 | 2.24E-12 | -7.5 | 17.2139184 | -1.35E-01 | 55582635  | 55582758  | NC_000019.9  |

|            |          |          |       |            |           |           |           |              |
|------------|----------|----------|-------|------------|-----------|-----------|-----------|--------------|
| cg14771419 | 3.45E-11 | 2.24E-12 | -7.5  | 17.2138945 | -1.62E-01 | 142012988 | 142013111 | NC_000007.13 |
| cg18507032 | 3.45E-11 | 2.24E-12 | -7.5  | 17.2134268 | -1.56E-01 | 61382092  | 61382215  | NC_000011.9  |
| cg06067372 | 3.45E-11 | 2.24E-12 | -7.5  | 17.2132512 | -1.21E-01 | 55106337  | 55106460  | NC_000018.9  |
| cg11335179 | 3.46E-11 | 2.24E-12 | -7.5  | 17.2131422 | -1.46E-01 | 205906409 | 205906532 | NC_000001.10 |
| cg21773220 | 3.46E-11 | 2.25E-12 | -7.5  | 17.2115747 | -1.36E-01 | 94883919  | 94884042  | NC_000011.9  |
| cg17586984 | 3.46E-11 | 2.25E-12 | -7.5  | 17.2112543 | -3.78E-02 | 96329587  | 96329710  | NC_000013.10 |
| cg21913652 | 3.46E-11 | 2.25E-12 | -7.5  | 17.2109789 | -1.58E-01 | 35651841  | 35651964  | NC_000011.9  |
| cg18833788 | 3.46E-11 | 2.25E-12 | -7.5  | 17.2109144 | -1.87E-01 | 48994043  | 48994166  | NC_000019.9  |
| cg05207077 | 3.47E-11 | 2.25E-12 | -7.5  | 17.2094527 | -7.43E-02 | 148077    | 148200    | NC_000012.11 |
| cg08458733 | 3.47E-11 | 2.25E-12 | -7.49 | 17.2086159 | -1.24E-01 | 37555577  | 37555700  | NC_000008.10 |
| cg08850169 | 3.47E-11 | 2.25E-12 | -7.49 | 17.2086143 | -1.70E-01 | 161171469 | 161171592 | NC_000001.10 |
| cg01679206 | 3.47E-11 | 2.26E-12 | -7.49 | 17.207943  | -1.37E-01 | 73253049  | 73253172  | NC_000007.13 |
| cg18815398 | 3.47E-11 | 2.26E-12 | -7.49 | 17.2071626 | -1.33E-01 | 61506981  | 61507104  | NC_000020.10 |
| cg15140619 | 3.48E-11 | 2.26E-12 | -7.49 | 17.2067369 | -4.84E-02 | 128597795 | 128597918 | NC_000003.11 |
| cg18594054 | 3.48E-11 | 2.26E-12 | -7.49 | 17.2066364 | -1.84E-01 | 142623446 | 142623569 | NC_000005.9  |
| cg01025842 | 3.48E-11 | 2.26E-12 | -7.49 | 17.2044632 | -3.93E-02 | 67195069  | 67195192  | NC_000016.9  |
| cg22924269 | 3.48E-11 | 2.26E-12 | -7.49 | 17.204452  | -8.02E-02 | 50069722  | 50069845  | NC_000013.10 |
| cg25344142 | 3.48E-11 | 2.26E-12 | -7.49 | 17.2040279 | -1.64E-01 | 230882603 | 230882726 | NC_000001.10 |
| cg01020774 | 3.48E-11 | 2.26E-12 | -7.49 | 17.2039759 | -1.47E-01 | 85197540  | 85197663  | NC_000016.9  |
| cg25607643 | 3.48E-11 | 2.26E-12 | -7.49 | 17.203866  | -1.31E-01 | 40730161  | 40730284  | NC_000015.9  |
| cg22812275 | 3.48E-11 | 2.26E-12 | -7.49 | 17.2038102 | -1.25E-01 | 159240814 | 159240937 | NC_000006.11 |
| cg16013630 | 3.49E-11 | 2.27E-12 | -7.49 | 17.2032875 | -7.06E-02 | 1406606   | 1406729   | NC_000001.10 |
| cg07853919 | 3.49E-11 | 2.27E-12 | -7.49 | 17.2029195 | -3.53E-02 | 77711868  | 77711991  | NC_000018.9  |
| cg25723459 | 3.49E-11 | 2.27E-12 | -7.49 | 17.2015632 | -1.60E-01 | 126245829 | 126245952 | NC_000011.9  |
| cg07431748 | 3.49E-11 | 2.27E-12 | -7.49 | 17.2011704 | -5.28E-02 | 99094531  | 99094654  | NC_000010.10 |



|            |          |          |       |            |           |           |           |              |
|------------|----------|----------|-------|------------|-----------|-----------|-----------|--------------|
| cg15244778 | 3.49E-11 | 2.27E-12 | -7.49 | 17.2008394 | -1.65E-01 | 69048637  | 69048760  | NC_000011.9  |
| cg14035521 | 3.50E-11 | 2.27E-12 | -7.49 | 17.2003907 | -5.43E-02 | 37486469  | 37486592  | NC_000009.11 |
| cg18403478 | 3.50E-11 | 2.27E-12 | -7.49 | 17.1999118 | -1.47E-01 | 1683424   | 1683547   | NC_000017.10 |
| cg05733026 | 3.50E-11 | 2.27E-12 | -7.49 | 17.1997382 | -7.06E-02 | 48474950  | 48475073  | NC_000017.10 |
| cg06456738 | 3.50E-11 | 2.28E-12 | -7.49 | 17.1991554 | -1.31E-01 | 66361081  | 66361204  | NC_000011.9  |
| cg23820772 | 3.50E-11 | 2.28E-12 | -7.49 | 17.1978206 | -6.58E-02 | 181998981 | 181999104 | NC_000001.10 |
| cg26427498 | 3.51E-11 | 2.28E-12 | -7.49 | 17.1975544 | -2.22E-01 | 105987258 | 105987381 | NC_000007.13 |
| cg13527872 | 3.51E-11 | 2.28E-12 | -7.49 | 17.1968617 | -8.77E-02 | 90114037  | 90114160  | NC_000009.11 |
| cg01350934 | 3.51E-11 | 2.28E-12 | -7.49 | 17.1958499 | -9.52E-02 | 57335130  | 57335253  | NC_000016.9  |
| cg02612927 | 3.51E-11 | 2.29E-12 | -7.49 | 17.1948549 | -1.35E-01 | 30060884  | 30061007  | NC_000020.10 |
| cg14757738 | 3.52E-11 | 2.29E-12 | -7.49 | 17.1925494 | -9.73E-02 | 20928037  | 20928160  | NC_000002.11 |
| cg09542690 | 3.52E-11 | 2.29E-12 | -7.49 | 17.1916595 | -6.27E-02 | 44519182  | 44519305  | NC_000003.11 |
| cg05573133 | 3.53E-11 | 2.29E-12 | -7.49 | 17.1911222 | -6.03E-02 | 46037470  | 46037593  | NC_000003.11 |
| cg09924848 | 3.53E-11 | 2.29E-12 | -7.49 | 17.1910228 | -1.44E-01 | 126308486 | 126308609 | NC_000010.10 |
| cg26831001 | 3.53E-11 | 2.30E-12 | -7.49 | 17.1903043 | -4.91E-02 | 102092959 | 102093082 | NC_000008.10 |
| cg16755067 | 3.53E-11 | 2.30E-12 | -7.49 | 17.1898608 | -9.66E-02 | 72259202  | 72259325  | NC_000017.10 |
| cg00729654 | 3.53E-11 | 2.30E-12 | -7.49 | 17.1888077 | -1.56E-01 | 31123895  | 31124018  | NC_000020.10 |
| cg18642369 | 3.54E-11 | 2.30E-12 | -7.49 | 17.1878067 | -1.95E-01 | 99651231  | 99651354  | NC_000013.10 |
| cg11079936 | 3.54E-11 | 2.30E-12 | -7.49 | 17.1872047 | -9.20E-02 | 30124299  | 30124422  | NC_000006.11 |
| cg19258177 | 3.54E-11 | 2.31E-12 | -7.49 | 17.1855113 | -1.53E-01 | 95056619  | 95056742  | NC_000001.10 |
| cg18356190 | 3.55E-11 | 2.31E-12 | -7.49 | 17.1853381 | -1.47E-01 | 74964260  | 74964383  | NC_000004.11 |
| cg22668740 | 3.55E-11 | 2.31E-12 | -7.49 | 17.1853288 | -9.00E-02 | 54788291  | 54788414  | NC_000012.11 |
| cg16055914 | 3.55E-11 | 2.31E-12 | -7.49 | 17.1846214 | -1.75E-01 | 30231887  | 30232010  | NC_000006.11 |
| cg08378342 | 3.55E-11 | 2.31E-12 | -7.49 | 17.1844384 | -6.02E-02 | 171880856 | 171880979 | NC_000005.9  |
| cg19933135 | 3.55E-11 | 2.31E-12 | -7.49 | 17.1840108 | -2.65E-02 | 86338399  | 86338522  | NC_000015.9  |

|            |          |          |       |            |           |           |           |              |
|------------|----------|----------|-------|------------|-----------|-----------|-----------|--------------|
| cg18993757 | 3.55E-11 | 2.31E-12 | -7.49 | 17.1839142 | -7.73E-02 | 4889754   | 4889877   | NC_000017.10 |
| cg08639279 | 3.56E-11 | 2.32E-12 | -7.49 | 17.181609  | -1.84E-01 | 124770463 | 124770586 | NC_000011.9  |
| cg01881939 | 3.56E-11 | 2.32E-12 | -7.49 | 17.1809097 | -4.73E-02 | 79480981  | 79481104  | NC_000017.10 |
| cg04895166 | 3.57E-11 | 2.32E-12 | -7.49 | 17.1790067 | -1.38E-01 | 133010900 | 133011023 | NC_000012.11 |
| cg18413706 | 3.57E-11 | 2.32E-12 | -7.49 | 17.1786136 | -1.53E-01 | 39759139  | 39759262  | NC_000021.8  |
| cg00859858 | 3.57E-11 | 2.32E-12 | -7.49 | 17.1781312 | -1.40E-01 | 37944257  | 37944380  | NC_000001.10 |
| cg02744793 | 3.57E-11 | 2.33E-12 | -7.49 | 17.1780254 | -5.55E-02 | 35378717  | 35378840  | NC_000010.10 |
| cg07771160 | 3.57E-11 | 2.33E-12 | -7.49 | 17.1769269 | -1.55E-01 | 28335945  | 28336068  | NC_000021.8  |
| cg16451371 | 3.58E-11 | 2.33E-12 | -7.49 | 17.1761937 | -1.02E-01 | 32810391  | 32810514  | NC_000022.10 |
| cg14685095 | 3.58E-11 | 2.33E-12 | -7.49 | 17.1753618 | -1.16E-01 | 59488988  | 59489111  | NC_000017.10 |
| cg19997922 | 3.58E-11 | 2.33E-12 | -7.49 | 17.1748981 | -1.10E-01 | 35615923  | 35616046  | NC_000010.10 |
| cg22734058 | 3.59E-11 | 2.34E-12 | -7.49 | 17.1725573 | -1.94E-01 | 238578491 | 238578614 | NC_000002.11 |
| cg17168093 | 3.59E-11 | 2.34E-12 | -7.49 | 17.17199   | -1.73E-01 | 85531486  | 85531609  | NC_000002.11 |
| cg22881265 | 3.59E-11 | 2.34E-12 | -7.49 | 17.171633  | -1.28E-01 | 128801132 | 128801255 | NC_000003.11 |
| cg11685391 | 3.59E-11 | 2.34E-12 | -7.49 | 17.1709597 | -1.56E-01 | 103594334 | 103594457 | NC_000010.10 |
| cg14196186 | 3.59E-11 | 2.34E-12 | -7.49 | 17.1705548 | -8.76E-02 | 72732698  | 72732821  | NC_000017.10 |
| cg17809170 | 3.60E-11 | 2.34E-12 | -7.49 | 17.169691  | -1.41E-01 | 149461325 | 149461448 | NC_000005.9  |
| cg13282068 | 3.60E-11 | 2.35E-12 | -7.49 | 17.1692992 | -1.81E-01 | 73360252  | 73360375  | NC_000017.10 |
| cg00510539 | 3.61E-11 | 2.35E-12 | -7.49 | 17.1669171 | -5.70E-02 | 27958611  | 27958734  | NC_000002.11 |
| cg23873406 | 3.61E-11 | 2.35E-12 | -7.49 | 17.1664049 | -1.35E-01 | 1957026   | 1957149   | NC_000007.13 |
| cg23251970 | 3.62E-11 | 2.36E-12 | -7.49 | 17.163388  | -5.58E-02 | 68298816  | 68298939  | NC_000001.10 |
| cg13163919 | 3.62E-11 | 2.36E-12 | -7.49 | 17.1633009 | -8.85E-02 | 70388014  | 70388137  | NC_000015.9  |
| cg22212156 | 3.62E-11 | 2.36E-12 | -7.49 | 17.1632575 | -5.54E-02 | 32031449  | 32031572  | NC_000020.10 |
| cg20252067 | 3.62E-11 | 2.36E-12 | -7.49 | 17.162128  | -6.43E-02 | 65438456  | 65438579  | NC_000014.8  |
| cg06717492 | 3.63E-11 | 2.36E-12 | -7.49 | 17.1614045 | -2.79E-02 | 65447339  | 65447462  | NC_000007.13 |

|            |          |          |       |            |           |           |           |              |
|------------|----------|----------|-------|------------|-----------|-----------|-----------|--------------|
| cg10640398 | 3.63E-11 | 2.37E-12 | -7.49 | 17.1612151 | -1.36E-01 | 126582317 | 126582440 | NC_000011.9  |
| cg18074834 | 3.63E-11 | 2.37E-12 | -7.49 | 17.160858  | -9.39E-02 | 143085529 | 143085652 | NC_000007.13 |
| cg25064853 | 3.63E-11 | 2.37E-12 | -7.49 | 17.1601753 | -4.75E-02 | 209131103 | 209131226 | NC_000002.11 |
| cg07625383 | 3.63E-11 | 2.37E-12 | -7.49 | 17.1597679 | -1.47E-01 | 134626083 | 134626206 | NC_000007.13 |
| cg17463508 | 3.63E-11 | 2.37E-12 | -7.49 | 17.1594026 | -5.45E-02 | 4737022   | 4737145   | NC_000017.10 |
| cg22649187 | 3.63E-11 | 2.37E-12 | -7.49 | 17.1592511 | -1.68E-01 | 69197324  | 69197447  | NC_000011.9  |
| cg11374368 | 3.65E-11 | 2.38E-12 | -7.49 | 17.1536775 | -8.48E-02 | 242497960 | 242498083 | NC_000002.11 |
| cg26603656 | 3.65E-11 | 2.38E-12 | -7.49 | 17.1536417 | -1.82E-01 | 5671107   | 5671230   | NC_000010.10 |
| cg13434570 | 3.66E-11 | 2.39E-12 | -7.49 | 17.1523869 | -1.90E-01 | 206317133 | 206317256 | NC_000001.10 |
| cg13872831 | 3.66E-11 | 2.39E-12 | -7.49 | 17.152264  | -1.81E-01 | 50377988  | 50378111  | NC_000003.11 |
| cg07864883 | 3.66E-11 | 2.39E-12 | -7.49 | 17.1518621 | -1.10E-01 | 42743077  | 42743200  | NC_000003.11 |
| cg09738156 | 3.66E-11 | 2.39E-12 | -7.48 | 17.1507749 | -6.67E-02 | 183543587 | 183543710 | NC_000003.11 |
| cg11224423 | 3.66E-11 | 2.39E-12 | -7.48 | 17.150615  | -5.51E-02 | 56136943  | 56137066  | NC_000012.11 |
| cg02584756 | 3.66E-11 | 2.39E-12 | -7.48 | 17.1504066 | -9.47E-02 | 43533796  | 43533919  | NC_000001.10 |
| cg09329266 | 3.66E-11 | 2.39E-12 | -7.48 | 17.1498999 | -1.00E-01 | 31127357  | 31127480  | NC_000006.11 |
| cg05018648 | 3.67E-11 | 2.40E-12 | -7.48 | 17.1478582 | -1.39E-01 | 794683    | 794806    | NC_000002.11 |
| cg13803915 | 3.67E-11 | 2.40E-12 | -7.48 | 17.1475467 | -8.95E-02 | 10490063  | 10490186  | NC_000001.10 |
| cg07032359 | 3.67E-11 | 2.40E-12 | -7.48 | 17.1470046 | -1.52E-01 | 7755806   | 7755929   | NC_000004.11 |
| cg26898166 | 3.69E-11 | 2.41E-12 | -7.48 | 17.1439364 | -1.63E-01 | 73143799  | 73143922  | NC_000002.11 |
| cg09678939 | 3.69E-11 | 2.41E-12 | -7.48 | 17.142039  | -2.06E-01 | 149806081 | 149806204 | NC_000006.11 |
| cg02469655 | 3.69E-11 | 2.41E-12 | -7.48 | 17.1417247 | -8.33E-02 | 33313375  | 33313498  | NC_000006.11 |
| cg13982366 | 3.69E-11 | 2.41E-12 | -7.48 | 17.1415066 | -1.58E-01 | 138018566 | 138018689 | NC_000009.11 |
| cg22204954 | 3.70E-11 | 2.42E-12 | -7.48 | 17.140454  | -7.59E-02 | 153085998 | 153086121 | NC_000001.10 |
| cg18919659 | 3.70E-11 | 2.42E-12 | -7.48 | 17.1388821 | -1.28E-01 | 43343084  | 43343207  | NC_000022.10 |
| cg24022152 | 3.70E-11 | 2.42E-12 | -7.48 | 17.1387766 | -1.30E-01 | 12133196  | 12133319  | NC_000011.9  |

|                |          |          |       |            |           |           |           |              |
|----------------|----------|----------|-------|------------|-----------|-----------|-----------|--------------|
| cg27342919     | 3.71E-11 | 2.42E-12 | -7.48 | 17.1382405 | -1.58E-01 | 30079256  | 30079379  | NC_000006.11 |
| cg14387743     | 3.71E-11 | 2.42E-12 | -7.48 | 17.1367245 | -1.28E-01 | 133056278 | 133056401 | NC_000006.11 |
| ch.17.1213878F | 3.71E-11 | 2.43E-12 | -7.48 | 17.1361363 | -5.46E-02 | 44143499  | 44143622  | NC_000017.10 |
| cg24405650     | 3.72E-11 | 2.43E-12 | -7.48 | 17.1351575 | -3.77E-02 | 173793317 | 173793440 | NC_000001.10 |
| cg18826958     | 3.73E-11 | 2.43E-12 | -7.48 | 17.132845  | -1.34E-01 | 46275235  | 46275358  | NC_000022.10 |
| cg09360044     | 3.73E-11 | 2.44E-12 | -7.48 | 17.1322006 | -1.54E-01 | 68557960  | 68558083  | NC_000002.11 |
| cg11220060     | 3.73E-11 | 2.44E-12 | -7.48 | 17.1310147 | -1.00E-01 | 12997418  | 12997541  | NC_000019.9  |
| cg12527260     | 3.73E-11 | 2.44E-12 | -7.48 | 17.1304624 | -6.73E-02 | 63683744  | 63683867  | NC_000011.9  |
| cg18329780     | 3.74E-11 | 2.44E-12 | -7.48 | 17.1295821 | -6.31E-02 | 57884048  | 57884171  | NC_000015.9  |
| cg26688472     | 3.74E-11 | 2.44E-12 | -7.48 | 17.128618  | -7.34E-02 | 203638928 | 203639051 | NC_000002.11 |
| cg17722571     | 3.74E-11 | 2.45E-12 | -7.48 | 17.1281869 | -6.88E-02 | 58176348  | 58176471  | NC_000012.11 |
| cg03744043     | 3.74E-11 | 2.45E-12 | -7.48 | 17.127872  | -1.28E-01 | 45662275  | 45662398  | NC_000018.9  |
| cg24562081     | 3.75E-11 | 2.45E-12 | -7.48 | 17.1256792 | -1.53E-01 | 10875604  | 10875727  | NC_000005.9  |
| cg03260781     | 3.75E-11 | 2.45E-12 | -7.48 | 17.1256324 | -1.18E-01 | 16346299  | 16346422  | NC_000001.10 |
| cg26511337     | 3.75E-11 | 2.45E-12 | -7.48 | 17.1248879 | -7.85E-02 | 12807673  | 12807796  | NC_000019.9  |
| cg26240939     | 3.76E-11 | 2.46E-12 | -7.48 | 17.1238897 | -1.35E-01 | 20913414  | 20913537  | NC_000016.9  |
| cg18593210     | 3.76E-11 | 2.46E-12 | -7.48 | 17.1224378 | -1.35E-01 | 81021770  | 81021893  | NC_000017.10 |
| cg05347914     | 3.76E-11 | 2.46E-12 | -7.48 | 17.1222265 | -9.47E-02 | 38521067  | 38521190  | NC_000017.10 |
| cg18908845     | 3.76E-11 | 2.46E-12 | -7.48 | 17.1215345 | -3.67E-02 | 78121495  | 78121618  | NC_000014.8  |
| cg21367838     | 3.77E-11 | 2.47E-12 | -7.48 | 17.1201695 | -4.41E-02 | 47805154  | 47805277  | NC_000020.10 |
| cg04046364     | 3.77E-11 | 2.47E-12 | -7.48 | 17.1187283 | -1.68E-01 | 58210661  | 58210784  | NC_000012.11 |
| cg03862705     | 3.78E-11 | 2.48E-12 | -7.48 | 17.1164514 | -1.05E-01 | 73928492  | 73928615  | NC_000002.11 |
| cg10900049     | 3.79E-11 | 2.48E-12 | -7.48 | 17.1153745 | -2.63E-01 | 8849962   | 8850085   | NC_000002.11 |
| cg16174234     | 3.79E-11 | 2.48E-12 | -7.48 | 17.1134755 | -4.44E-02 | 33463305  | 33463428  | NC_000019.9  |
| cg00842687     | 3.80E-11 | 2.49E-12 | -7.48 | 17.1119758 | -1.52E-01 | 73816009  | 73816132  | NC_000003.11 |

|            |          |          |       |            |           |           |           |              |
|------------|----------|----------|-------|------------|-----------|-----------|-----------|--------------|
| cg16998718 | 3.80E-11 | 2.49E-12 | -7.48 | 17.1112131 | -2.95E-02 | 19674847  | 19674970  | NC_000008.10 |
| cg00106565 | 3.82E-11 | 2.50E-12 | -7.48 | 17.1073745 | -2.09E-01 | 146784171 | 146784294 | NC_000005.9  |
| cg27019250 | 3.82E-11 | 2.50E-12 | -7.48 | 17.1066362 | -4.45E-02 | 48019388  | 48019511  | NC_000007.13 |
| cg10878287 | 3.82E-11 | 2.50E-12 | -7.48 | 17.1063922 | -2.30E-02 | 66864990  | 66865113  | NC_000016.9  |
| cg10144336 | 3.82E-11 | 2.50E-12 | -7.48 | 17.1062696 | -7.88E-02 | 3088123   | 3088246   | NC_000010.10 |
| cg21139496 | 3.83E-11 | 2.51E-12 | -7.48 | 17.102625  | -1.52E-01 | 124055146 | 124055269 | NC_000008.10 |
| cg27219955 | 3.84E-11 | 2.51E-12 | -7.48 | 17.1015556 | -1.15E-01 | 89377583  | 89377706  | NC_000015.9  |
| cg05001848 | 3.84E-11 | 2.51E-12 | -7.48 | 17.1010747 | -1.42E-01 | 30566045  | 30566168  | NC_000019.9  |
| cg03651219 | 3.84E-11 | 2.52E-12 | -7.48 | 17.0995957 | -2.25E-01 | 5576480   | 5576603   | NC_000010.10 |
| cg07312312 | 3.84E-11 | 2.52E-12 | -7.48 | 17.099575  | -1.14E-01 | 109652455 | 109652578 | NC_000001.10 |
| cg06371582 | 3.86E-11 | 2.53E-12 | -7.48 | 17.0941449 | -1.71E-01 | 153601466 | 153601589 | NC_000004.11 |
| cg12471051 | 3.87E-11 | 2.53E-12 | -7.48 | 17.0937183 | -1.01E-01 | 17848742  | 17848865  | NC_000001.10 |
| cg10664971 | 3.87E-11 | 2.53E-12 | -7.48 | 17.0934594 | -1.29E-01 | 81915574  | 81915697  | NC_000010.10 |
| cg11830695 | 3.87E-11 | 2.54E-12 | -7.48 | 17.0927399 | -5.86E-02 | 52007678  | 52007801  | NC_000003.11 |
| cg27590591 | 3.87E-11 | 2.54E-12 | -7.47 | 17.0925618 | -3.69E-02 | 137368964 | 137369087 | NC_000005.9  |
| cg06171971 | 3.87E-11 | 2.54E-12 | -7.47 | 17.0923674 | -1.24E-01 | 45948591  | 45948714  | NC_000003.11 |
| cg16099169 | 3.88E-11 | 2.54E-12 | -7.47 | 17.0898774 | -1.99E-01 | 106886729 | 106886852 | NC_000002.11 |
| cg20682326 | 3.89E-11 | 2.55E-12 | -7.47 | 17.0869756 | -9.91E-02 | 100844173 | 100844296 | NC_000007.13 |
| cg14444710 | 3.89E-11 | 2.55E-12 | -7.47 | 17.0862378 | -1.53E-01 | 2587080   | 2587203   | NC_000016.9  |
| cg11575220 | 3.90E-11 | 2.56E-12 | -7.47 | 17.0846282 | -5.94E-02 | 59578239  | 59578362  | NC_000011.9  |
| cg01001472 | 3.90E-11 | 2.56E-12 | -7.47 | 17.0845432 | -1.47E-01 | 97947958  | 97948081  | NC_000013.10 |
| cg11827082 | 3.91E-11 | 2.56E-12 | -7.47 | 17.0828634 | -1.17E-01 | 50202584  | 50202707  | NC_000013.10 |
| cg21364077 | 3.91E-11 | 2.56E-12 | -7.47 | 17.0816286 | -1.50E-01 | 41394456  | 41394579  | NC_000006.11 |
| cg02035039 | 3.91E-11 | 2.57E-12 | -7.47 | 17.0812198 | -6.58E-02 | 29691888  | 29692011  | NC_000006.11 |
| cg00306426 | 3.91E-11 | 2.57E-12 | -7.47 | 17.0808805 | -7.37E-02 | 70687415  | 70687538  | NC_000001.10 |

|                |          |          |       |            |           |           |           |              |
|----------------|----------|----------|-------|------------|-----------|-----------|-----------|--------------|
| cg16039071     | 3.91E-11 | 2.57E-12 | -7.47 | 17.0803774 | -8.63E-02 | 43968282  | 43968405  | NC_000006.11 |
| cg17436460     | 3.91E-11 | 2.57E-12 | -7.47 | 17.0802387 | -1.27E-01 | 17028480  | 17028603  | NC_000010.10 |
| cg11832281     | 3.91E-11 | 2.57E-12 | -7.47 | 17.0801889 | -1.78E-01 | 11211022  | 11211145  | NC_000010.10 |
| cg07265444     | 3.92E-11 | 2.57E-12 | -7.47 | 17.0785907 | -1.39E-01 | 76956562  | 76956685  | NC_000007.13 |
| cg26686150     | 3.92E-11 | 2.57E-12 | -7.47 | 17.0784711 | -1.00E-01 | 93637466  | 93637589  | NC_000012.11 |
| cg15070897     | 3.92E-11 | 2.57E-12 | -7.47 | 17.077662  | -1.36E-01 | 23284968  | 23285091  | NC_000014.8  |
| cg23463533     | 3.92E-11 | 2.57E-12 | -7.47 | 17.0776186 | -1.73E-01 | 154473289 | 154473412 | NC_000007.13 |
| cg24954967     | 3.93E-11 | 2.58E-12 | -7.47 | 17.0772999 | -1.63E-01 | 46130858  | 46130981  | NC_000003.11 |
| cg10087092     | 3.93E-11 | 2.58E-12 | -7.47 | 17.0768806 | -9.92E-02 | 62711744  | 62711867  | NC_000020.10 |
| cg26983839     | 3.94E-11 | 2.59E-12 | -7.47 | 17.0732643 | -5.18E-02 | 11872882  | 11873005  | NC_000008.10 |
| cg11577898     | 3.94E-11 | 2.59E-12 | -7.47 | 17.072062  | -9.38E-02 | 78094446  | 78094569  | NC_000005.9  |
| cg18741044     | 3.94E-11 | 2.59E-12 | -7.47 | 17.0720118 | -1.48E-01 | 117507563 | 117507686 | NC_000003.11 |
| cg03121168     | 3.95E-11 | 2.59E-12 | -7.47 | 17.0716753 | -5.24E-02 | 61558123  | 61558246  | NC_000020.10 |
| cg07999090     | 3.95E-11 | 2.59E-12 | -7.47 | 17.0710955 | -1.36E-01 | 28882299  | 28882422  | NC_000013.10 |
| cg10181016     | 3.95E-11 | 2.59E-12 | -7.47 | 17.0705879 | -1.30E-01 | 76087172  | 76087295  | NC_000005.9  |
| cg11797364     | 3.95E-11 | 2.60E-12 | -7.47 | 17.0696501 | -1.98E-01 | 436969    | 437092    | NC_000006.11 |
| cg27488807     | 3.97E-11 | 2.61E-12 | -7.47 | 17.0657853 | -1.58E-01 | 147691898 | 147692021 | NC_000005.9  |
| cg08189186     | 3.97E-11 | 2.61E-12 | -7.47 | 17.0655541 | -1.62E-01 | 38793546  | 38793669  | NC_000019.9  |
| cg18868540     | 3.97E-11 | 2.61E-12 | -7.47 | 17.0654333 | -1.49E-01 | 46740032  | 46740155  | NC_000011.9  |
| cg16426459     | 3.97E-11 | 2.61E-12 | -7.47 | 17.0644373 | -6.69E-02 | 238396155 | 238396278 | NC_000002.11 |
| cg06316133     | 3.98E-11 | 2.61E-12 | -7.47 | 17.0633849 | -6.12E-02 | 1922372   | 1922495   | NC_000008.10 |
| cg07554231     | 3.98E-11 | 2.61E-12 | -7.47 | 17.0628969 | -5.14E-02 | 50083850  | 50083973  | NC_000019.9  |
| ch.20.1003652F | 3.98E-11 | 2.61E-12 | -7.47 | 17.0628645 | -5.72E-02 | 45956831  | 45956954  | NC_000020.10 |
| cg08748913     | 3.98E-11 | 2.61E-12 | -7.47 | 17.0627199 | -1.29E-01 | 137071788 | 137071911 | NC_000005.9  |
| cg24429836     | 3.98E-11 | 2.61E-12 | -7.47 | 17.0627098 | -1.14E-01 | 75150744  | 75150867  | NC_000016.9  |

|                |          |          |       |            |           |           |           |              |
|----------------|----------|----------|-------|------------|-----------|-----------|-----------|--------------|
| cg25120284     | 3.98E-11 | 2.61E-12 | -7.47 | 17.0624634 | -5.05E-02 | 46894671  | 46894794  | NC_000017.10 |
| cg03806812     | 3.98E-11 | 2.62E-12 | -7.47 | 17.0616196 | -1.31E-01 | 86180836  | 86180959  | NC_000002.11 |
| ch.14.1251344R | 3.98E-11 | 2.62E-12 | -7.47 | 17.0610138 | -7.48E-02 | 81663815  | 81663938  | NC_000014.8  |
| cg02340915     | 3.99E-11 | 2.62E-12 | -7.47 | 17.0596055 | -3.10E-02 | 121904480 | 121904603 | NC_000012.11 |
| cg15121877     | 3.99E-11 | 2.62E-12 | -7.47 | 17.0588225 | -1.25E-01 | 38081287  | 38081410  | NC_000003.11 |
| cg15445281     | 3.99E-11 | 2.62E-12 | -7.47 | 17.0586189 | -1.58E-01 | 51163726  | 51163849  | NC_000013.10 |
| cg00860425     | 3.99E-11 | 2.62E-12 | -7.47 | 17.0585858 | -1.72E-01 | 3852027   | 3852150   | NC_000019.9  |
| cg09288962     | 4.00E-11 | 2.63E-12 | -7.47 | 17.0573944 | -1.30E-01 | 56640057  | 56640180  | NC_000016.9  |
| cg13100449     | 4.00E-11 | 2.63E-12 | -7.47 | 17.0571045 | -2.64E-01 | 184836205 | 184836328 | NC_000001.10 |
| cg16996242     | 4.00E-11 | 2.63E-12 | -7.47 | 17.0568368 | -1.09E-01 | 35754118  | 35754241  | NC_000001.10 |
| cg10019844     | 4.01E-11 | 2.64E-12 | -7.47 | 17.0538935 | -7.03E-02 | 154948144 | 154948267 | NC_000001.10 |
| cg05132782     | 4.01E-11 | 2.64E-12 | -7.47 | 17.0538457 | -1.11E-01 | 150126392 | 150126515 | NC_000007.13 |
| cg26956245     | 4.03E-11 | 2.65E-12 | -7.47 | 17.0489033 | -1.04E-01 | 30518972  | 30519095  | NC_000007.13 |
| cg02422603     | 4.04E-11 | 2.66E-12 | -7.47 | 17.0463269 | -1.16E-01 | 114890566 | 114890689 | NC_000013.10 |
| cg25004838     | 4.04E-11 | 2.66E-12 | -7.47 | 17.0458714 | -1.69E-01 | 32112189  | 32112312  | NC_000006.11 |
| cg18026955     | 4.04E-11 | 2.66E-12 | -7.47 | 17.0458443 | -1.19E-01 | 12541215  | 12541338  | NC_000001.10 |
| cg03458316     | 4.04E-11 | 2.66E-12 | -7.47 | 17.0450386 | -1.83E-01 | 77258084  | 77258207  | NC_000010.10 |
| cg25136605     | 4.05E-11 | 2.66E-12 | -7.47 | 17.0445658 | -6.15E-02 | 173400737 | 173400860 | NC_000005.9  |
| cg14097304     | 4.05E-11 | 2.66E-12 | -7.47 | 17.0444049 | -1.15E-01 | 156801587 | 156801710 | NC_000007.13 |
| ch.9.2262725R  | 4.05E-11 | 2.66E-12 | -7.47 | 17.0442266 | -1.49E-02 | 134308523 | 134308646 | NC_000009.11 |
| cg26890181     | 4.06E-11 | 2.68E-12 | -7.47 | 17.0399891 | -1.10E-01 | 44285940  | 44286063  | NC_000019.9  |
| cg07663813     | 4.07E-11 | 2.68E-12 | -7.47 | 17.0389476 | -4.53E-02 | 81785835  | 81785958  | NC_000008.10 |
| cg11817533     | 4.07E-11 | 2.68E-12 | -7.47 | 17.0388989 | -1.13E-01 | 21523501  | 21523624  | NC_000006.11 |
| cg12393108     | 4.07E-11 | 2.68E-12 | -7.47 | 17.03853   | -1.65E-01 | 124064793 | 124064916 | NC_000011.9  |
| cg10234477     | 4.07E-11 | 2.68E-12 | -7.47 | 17.0379389 | -1.54E-01 | 6585594   | 6585717   | NC_000012.11 |

|            |          |          |       |            |           |           |           |              |
|------------|----------|----------|-------|------------|-----------|-----------|-----------|--------------|
| cg16007019 | 4.08E-11 | 2.68E-12 | -7.47 | 17.0369195 | -4.06E-02 | 43916710  | 43916833  | NC_000021.8  |
| cg19074496 | 4.08E-11 | 2.69E-12 | -7.47 | 17.0356662 | -3.04E-02 | 220117868 | 220117991 | NC_000002.11 |
| cg06862696 | 4.08E-11 | 2.69E-12 | -7.47 | 17.0348381 | -1.19E-01 | 11470209  | 11470332  | NC_000019.9  |
| cg17163425 | 4.09E-11 | 2.69E-12 | -7.46 | 17.03394   | -9.17E-02 | 232764492 | 232764615 | NC_000001.10 |
| cg14018648 | 4.09E-11 | 2.69E-12 | -7.46 | 17.0331909 | -1.10E-01 | 7083015   | 7083138   | NC_000017.10 |
| cg13640518 | 4.10E-11 | 2.70E-12 | -7.46 | 17.0309491 | -2.70E-02 | 27886333  | 27886456  | NC_000002.11 |
| cg01479818 | 4.10E-11 | 2.70E-12 | -7.46 | 17.0303016 | -3.83E-02 | 103986012 | 103986135 | NC_000010.10 |
| cg18273417 | 4.10E-11 | 2.70E-12 | -7.46 | 17.0298615 | -1.98E-01 | 153518418 | 153518541 | NC_000001.10 |
| cg02574101 | 4.11E-11 | 2.71E-12 | -7.46 | 17.02899   | -1.16E-01 | 78286737  | 78286860  | NC_000015.9  |
| cg26561681 | 4.12E-11 | 2.71E-12 | -7.46 | 17.0265704 | -1.58E-01 | 21376633  | 21376756  | NC_000001.10 |
| cg04602081 | 4.12E-11 | 2.71E-12 | -7.46 | 17.0265503 | -1.39E-01 | 16498086  | 16498209  | NC_000001.10 |
| cg15329642 | 4.12E-11 | 2.71E-12 | -7.46 | 17.0257099 | -1.14E-01 | 45308298  | 45308421  | NC_000001.10 |
| cg25930662 | 4.13E-11 | 2.72E-12 | -7.46 | 17.023882  | -1.18E-01 | 168121243 | 168121366 | NC_000006.11 |
| cg24107728 | 4.13E-11 | 2.72E-12 | -7.46 | 17.0238043 | -1.49E-01 | 53760337  | 53760460  | NC_000001.10 |
| cg00214012 | 4.14E-11 | 2.73E-12 | -7.46 | 17.0204248 | -1.51E-01 | 29326467  | 29326590  | NC_000015.9  |
| cg09084279 | 4.15E-11 | 2.73E-12 | -7.46 | 17.0191611 | -1.62E-01 | 79495006  | 79495129  | NC_000017.10 |
| cg20367923 | 4.15E-11 | 2.73E-12 | -7.46 | 17.0188396 | -9.56E-02 | 169624501 | 169624624 | NC_000006.11 |
| cg02794779 | 4.17E-11 | 2.75E-12 | -7.46 | 17.0131401 | -7.56E-02 | 100150711 | 100150834 | NC_000013.10 |
| cg05951521 | 4.17E-11 | 2.75E-12 | -7.46 | 17.0128214 | -3.16E-02 | 19421937  | 19422060  | NC_000016.9  |
| cg01328119 | 4.17E-11 | 2.75E-12 | -7.46 | 17.0125057 | -2.14E-02 | 228783545 | 228783668 | NC_000001.10 |
| cg15231942 | 4.18E-11 | 2.75E-12 | -7.46 | 17.0117123 | -1.57E-01 | 873330    | 873453    | NC_000019.9  |
| cg07759857 | 4.18E-11 | 2.76E-12 | -7.46 | 17.0095964 | -1.72E-01 | 79060804  | 79060927  | NC_000017.10 |
| cg06455032 | 4.19E-11 | 2.76E-12 | -7.46 | 17.0091058 | -6.25E-02 | 45251911  | 45252034  | NC_000019.9  |
| cg08736072 | 4.19E-11 | 2.76E-12 | -7.46 | 17.0089831 | -1.23E-01 | 1471543   | 1471666   | NC_000016.9  |
| cg02709167 | 4.19E-11 | 2.76E-12 | -7.46 | 17.0083638 | -1.61E-01 | 31996811  | 31996934  | NC_000001.10 |



|               |          |          |       |            |           |           |           |              |
|---------------|----------|----------|-------|------------|-----------|-----------|-----------|--------------|
| cg26088629    | 4.19E-11 | 2.77E-12 | -7.46 | 17.0068158 | -1.52E-01 | 113676938 | 113677061 | NC_000013.10 |
| cg08893087    | 4.20E-11 | 2.77E-12 | -7.46 | 17.0052277 | -1.60E-01 | 93416982  | 93417105  | NC_000001.10 |
| cg26434881    | 4.20E-11 | 2.77E-12 | -7.46 | 17.0050536 | -1.15E-01 | 87669476  | 87669599  | NC_000016.9  |
| cg01869896    | 4.20E-11 | 2.77E-12 | -7.46 | 17.0049029 | -1.23E-01 | 40420299  | 40420422  | NC_000001.10 |
| cg17625224    | 4.21E-11 | 2.77E-12 | -7.46 | 17.0038951 | -1.32E-01 | 47031262  | 47031385  | NC_000022.10 |
| cg05928581    | 4.21E-11 | 2.78E-12 | -7.46 | 17.0035217 | -1.18E-01 | 1885097   | 1885220   | NC_000011.9  |
| cg04799722    | 4.22E-11 | 2.78E-12 | -7.46 | 17.0015174 | -1.32E-01 | 52317475  | 52317598  | NC_000012.11 |
| cg23778363    | 4.22E-11 | 2.79E-12 | -7.46 | 16.9999403 | -1.51E-01 | 106546038 | 106546161 | NC_000006.11 |
| cg27514286    | 4.22E-11 | 2.79E-12 | -7.46 | 16.9998576 | -6.09E-02 | 183892688 | 183892811 | NC_000003.11 |
| cg12002139    | 4.22E-11 | 2.79E-12 | -7.46 | 16.9994772 | -2.11E-01 | 158478872 | 158478995 | NC_000006.11 |
| cg01165043    | 4.23E-11 | 2.79E-12 | -7.46 | 16.9983231 | -1.80E-01 | 64994401  | 64994524  | NC_000002.11 |
| cg01183826    | 4.23E-11 | 2.79E-12 | -7.46 | 16.9977133 | -2.76E-02 | 45496237  | 45496360  | NC_000010.10 |
| cg15408497    | 4.23E-11 | 2.79E-12 | -7.46 | 16.9975316 | -1.80E-01 | 35133653  | 35133776  | NC_000021.8  |
| cg20353496    | 4.23E-11 | 2.79E-12 | -7.46 | 16.997023  | -1.11E-01 | 825268    | 825391    | NC_000020.10 |
| ch.22.427671F | 4.23E-11 | 2.80E-12 | -7.46 | 16.9967538 | -1.83E-02 | 31819360  | 31819483  | NC_000022.10 |
| cg15935121    | 4.24E-11 | 2.80E-12 | -7.46 | 16.9943092 | -7.60E-02 | 2230601   | 2230724   | NC_000001.10 |
| cg11344950    | 4.24E-11 | 2.80E-12 | -7.46 | 16.9941676 | -1.36E-01 | 151826167 | 151826290 | NC_000001.10 |
| cg06765219    | 4.25E-11 | 2.81E-12 | -7.46 | 16.9928128 | -1.27E-01 | 644572    | 644695    | NC_000008.10 |
| cg19778647    | 4.25E-11 | 2.81E-12 | -7.46 | 16.9917934 | -1.77E-01 | 24974720  | 24974843  | NC_000012.11 |
| cg25790435    | 4.26E-11 | 2.81E-12 | -7.46 | 16.9911403 | -8.89E-02 | 75104978  | 75105101  | NC_000015.9  |
| cg14537825    | 4.26E-11 | 2.81E-12 | -7.46 | 16.9906079 | -1.03E-01 | 98344873  | 98344996  | NC_000002.11 |
| cg15238519    | 4.26E-11 | 2.81E-12 | -7.46 | 16.9902706 | -6.69E-02 | 50683529  | 50683652  | NC_000022.10 |
| cg01588581    | 4.28E-11 | 2.82E-12 | -7.46 | 16.9863667 | -1.26E-01 | 241832900 | 241833023 | NC_000002.11 |
| cg15090714    | 4.28E-11 | 2.83E-12 | -7.46 | 16.9841349 | -6.80E-02 | 60142985  | 60143108  | NC_000017.10 |
| cg25847835    | 4.29E-11 | 2.84E-12 | -7.46 | 16.9821634 | -4.55E-02 | 147763803 | 147763926 | NC_000005.9  |

|                |          |          |       |            |           |           |           |              |
|----------------|----------|----------|-------|------------|-----------|-----------|-----------|--------------|
| cg03861200     | 4.30E-11 | 2.84E-12 | -7.46 | 16.9801907 | -3.05E-02 | 133340900 | 133341023 | NC_000005.9  |
| cg07321032     | 4.30E-11 | 2.84E-12 | -7.46 | 16.9794773 | -8.70E-02 | 24926290  | 24926413  | NC_000004.11 |
| cg17308661     | 4.30E-11 | 2.85E-12 | -7.46 | 16.9792471 | -5.09E-02 | 57857235  | 57857358  | NC_000014.8  |
| ch.5.2455726F  | 4.31E-11 | 2.85E-12 | -7.46 | 16.9781687 | -5.35E-02 | 133729232 | 133729355 | NC_000005.9  |
| cg03096286     | 4.31E-11 | 2.85E-12 | -7.46 | 16.9781007 | -1.09E-01 | 219219811 | 219219934 | NC_000002.11 |
| cg27368606     | 4.31E-11 | 2.85E-12 | -7.46 | 16.9779392 | -1.74E-01 | 186768730 | 186768853 | NC_000004.11 |
| cg21498503     | 4.31E-11 | 2.85E-12 | -7.46 | 16.9777707 | -9.34E-02 | 895763    | 895886    | NC_000004.11 |
| ch.3.35408643R | 4.31E-11 | 2.85E-12 | -7.46 | 16.9774473 | -5.31E-02 | 35433639  | 35433762  | NC_000003.11 |
| cg07247810     | 4.33E-11 | 2.86E-12 | -7.45 | 16.9732858 | -1.30E-01 | 220684758 | 220684881 | NC_000001.10 |
| cg14294115     | 4.33E-11 | 2.86E-12 | -7.45 | 16.9729088 | -5.47E-02 | 21688755  | 21688878  | NC_000019.9  |
| cg05996573     | 4.34E-11 | 2.87E-12 | -7.45 | 16.9712314 | -1.42E-01 | 66627943  | 66628066  | NC_000012.11 |
| cg03203287     | 4.34E-11 | 2.87E-12 | -7.45 | 16.9704464 | -1.95E-01 | 38033770  | 38033893  | NC_000003.11 |
| cg14089045     | 4.35E-11 | 2.87E-12 | -7.45 | 16.9692811 | -9.54E-02 | 91820590  | 91820713  | NC_000014.8  |
| cg11869514     | 4.35E-11 | 2.87E-12 | -7.45 | 16.9690361 | -7.17E-02 | 155052946 | 155053069 | NC_000001.10 |
| cg01260146     | 4.35E-11 | 2.88E-12 | -7.45 | 16.9683393 | -4.51E-02 | 48175984  | 48176107  | NC_000001.10 |
| cg09231418     | 4.35E-11 | 2.88E-12 | -7.45 | 16.9672682 | -1.48E-01 | 36202390  | 36202513  | NC_000019.9  |
| cg01091029     | 4.36E-11 | 2.88E-12 | -7.45 | 16.9669181 | -8.61E-02 | 31232532  | 31232655  | NC_000007.13 |
| cg10804254     | 4.36E-11 | 2.88E-12 | -7.45 | 16.9669064 | -1.63E-01 | 218633247 | 218633370 | NC_000001.10 |
| cg21909475     | 4.36E-11 | 2.88E-12 | -7.45 | 16.9664292 | -3.33E-02 | 169764459 | 169764582 | NC_000001.10 |
| cg04863197     | 4.36E-11 | 2.88E-12 | -7.45 | 16.9661883 | -1.25E-01 | 79897974  | 79898097  | NC_000017.10 |
| cg13929079     | 4.36E-11 | 2.88E-12 | -7.45 | 16.9659402 | -4.65E-02 | 49246153  | 49246276  | NC_000012.11 |
| cg22840216     | 4.36E-11 | 2.88E-12 | -7.45 | 16.9657009 | -1.32E-01 | 117549516 | 117549639 | NC_000012.11 |
| cg04699104     | 4.36E-11 | 2.89E-12 | -7.45 | 16.9648562 | -1.24E-01 | 12858912  | 12859035  | NC_000002.11 |
| cg15410276     | 4.37E-11 | 2.89E-12 | -7.45 | 16.9640606 | -9.18E-02 | 27778076  | 27778199  | NC_000006.11 |
| cg20867674     | 4.37E-11 | 2.89E-12 | -7.45 | 16.9638319 | -1.38E-01 | 163768411 | 163768534 | NC_000006.11 |

|            |          |          |       |            |           |           |           |              |
|------------|----------|----------|-------|------------|-----------|-----------|-----------|--------------|
| cg00924265 | 4.38E-11 | 2.90E-12 | -7.45 | 16.9606383 | -1.61E-01 | 28258117  | 28258240  | NC_000008.10 |
| cg09249980 | 4.38E-11 | 2.90E-12 | -7.45 | 16.9601722 | -1.71E-01 | 1213919   | 1214042   | NC_000016.9  |
| cg25179358 | 4.38E-11 | 2.90E-12 | -7.45 | 16.9601373 | -4.58E-02 | 49741623  | 49741746  | NC_000012.11 |
| cg12384926 | 4.38E-11 | 2.90E-12 | -7.45 | 16.9599009 | -1.48E-01 | 74644143  | 74644266  | NC_000011.9  |
| cg14128973 | 4.39E-11 | 2.90E-12 | -7.45 | 16.9591398 | -8.79E-02 | 11649462  | 11649585  | NC_000019.9  |
| cg09097916 | 4.39E-11 | 2.91E-12 | -7.45 | 16.9584091 | -1.23E-01 | 297168    | 297291    | NC_000005.9  |
| cg23507945 | 4.40E-11 | 2.91E-12 | -7.45 | 16.9563831 | -2.43E-01 | 137477184 | 137477307 | NC_000006.11 |
| cg07373957 | 4.40E-11 | 2.91E-12 | -7.45 | 16.955659  | -1.48E-01 | 68148896  | 68149019  | NC_000001.10 |
| cg08864714 | 4.40E-11 | 2.92E-12 | -7.45 | 16.9552187 | -2.95E-02 | 75019079  | 75019202  | NC_000016.9  |
| cg14461571 | 4.40E-11 | 2.92E-12 | -7.45 | 16.9549202 | -8.20E-02 | 30458099  | 30458222  | NC_000006.11 |
| cg10308673 | 4.41E-11 | 2.92E-12 | -7.45 | 16.953821  | -1.59E-01 | 268976    | 269099    | NC_000011.9  |
| cg24313473 | 4.41E-11 | 2.92E-12 | -7.45 | 16.9527132 | -1.10E-01 | 43240516  | 43240639  | NC_000019.9  |
| cg11746651 | 4.42E-11 | 2.93E-12 | -7.45 | 16.9515449 | -1.19E-01 | 3664612   | 3664735   | NC_000001.10 |
| cg04103837 | 4.43E-11 | 2.93E-12 | -7.45 | 16.9494165 | -1.59E-01 | 68469580  | 68469703  | NC_000008.10 |
| cg19645639 | 4.45E-11 | 2.95E-12 | -7.45 | 16.9452041 | -1.76E-01 | 113500384 | 113500507 | NC_000001.10 |
| cg20319457 | 4.45E-11 | 2.95E-12 | -7.45 | 16.9449404 | -1.59E-01 | 20133404  | 20133527  | NC_000002.11 |
| cg09792970 | 4.45E-11 | 2.95E-12 | -7.45 | 16.9448756 | -1.59E-01 | 111374169 | 111374292 | NC_000012.11 |
| cg02887458 | 4.45E-11 | 2.95E-12 | -7.45 | 16.9431364 | -1.29E-01 | 19495540  | 19495663  | NC_000019.9  |
| cg13084536 | 4.45E-11 | 2.95E-12 | -7.45 | 16.9430485 | -8.57E-02 | 139076824 | 139076947 | NC_000005.9  |
| cg12868583 | 4.46E-11 | 2.96E-12 | -7.45 | 16.9413931 | -1.26E-01 | 44320504  | 44320627  | NC_000022.10 |
| cg11726507 | 4.47E-11 | 2.96E-12 | -7.45 | 16.9390219 | -1.88E-01 | 101155519 | 101155642 | NC_000014.8  |
| cg24954207 | 4.48E-11 | 2.97E-12 | -7.45 | 16.9380422 | -1.02E-01 | 128217091 | 128217214 | NC_000003.11 |
| cg26668151 | 4.48E-11 | 2.97E-12 | -7.45 | 16.9369984 | -2.14E-01 | 157180005 | 157180128 | NC_000007.13 |
| cg23214628 | 4.48E-11 | 2.97E-12 | -7.45 | 16.9358931 | -1.71E-01 | 75989305  | 75989428  | NC_000007.13 |
| cg00150785 | 4.49E-11 | 2.97E-12 | -7.45 | 16.9354588 | -1.06E-01 | 25581368  | 25581491  | NC_000020.10 |

|              |          |          |       |            |           |           |           |              |
|--------------|----------|----------|-------|------------|-----------|-----------|-----------|--------------|
| cg24127869   | 4.49E-11 | 2.98E-12 | -7.45 | 16.9345964 | -3.72E-02 | 37506839  | 37506962  | NC_000021.8  |
| cg13899420   | 4.49E-11 | 2.98E-12 | -7.45 | 16.9342484 | -9.51E-02 | 135853978 | 135854101 | NC_000009.11 |
| cg11793449   | 4.49E-11 | 2.98E-12 | -7.45 | 16.9338261 | -1.02E-01 | 76313872  | 76313995  | NC_000017.10 |
| cg19666541   | 4.49E-11 | 2.98E-12 | -7.45 | 16.9334789 | -1.61E-01 | 31516111  | 31516234  | NC_000015.9  |
| cg02767093   | 4.50E-11 | 2.98E-12 | -7.45 | 16.9330717 | -1.73E-01 | 99130655  | 99130778  | NC_000013.10 |
| cg15248989   | 4.50E-11 | 2.98E-12 | -7.45 | 16.9330051 | -6.45E-02 | 14682900  | 14683023  | NC_000019.9  |
| cg07786776   | 4.50E-11 | 2.99E-12 | -7.45 | 16.9315505 | -1.13E-01 | 40250289  | 40250412  | NC_000017.10 |
| cg14014890   | 4.51E-11 | 2.99E-12 | -7.45 | 16.9296748 | -4.31E-02 | 11295833  | 11295956  | NC_000002.11 |
| cg02061948   | 4.52E-11 | 3.00E-12 | -7.45 | 16.9279782 | -4.92E-02 | 90015428  | 90015551  | NC_000016.9  |
| cg21388327   | 4.52E-11 | 3.00E-12 | -7.45 | 16.9274094 | -2.17E-01 | 22351548  | 22351671  | NC_000001.10 |
| cg17166103   | 4.53E-11 | 3.01E-12 | -7.45 | 16.9253243 | -3.85E-02 | 49298422  | 49298545  | NC_000019.9  |
| cg16984981   | 4.54E-11 | 3.01E-12 | -7.45 | 16.9226541 | -6.13E-02 | 74516049  | 74516172  | NC_000018.9  |
| cg15261730   | 4.54E-11 | 3.01E-12 | -7.45 | 16.9224603 | -1.29E-01 | 55280797  | 55280920  | NC_000007.13 |
| cg24304714   | 4.54E-11 | 3.01E-12 | -7.45 | 16.92235   | -9.74E-02 | 152779374 | 152779497 | NC_000001.10 |
| cg09923954   | 4.55E-11 | 3.02E-12 | -7.45 | 16.9213876 | -1.64E-01 | 65460017  | 65460140  | NC_000010.10 |
| ch.1.374405F | 4.55E-11 | 3.02E-12 | -7.45 | 16.9201758 | -2.63E-02 | 10177152  | 10177275  | NC_000001.10 |
| cg25291653   | 4.56E-11 | 3.02E-12 | -7.45 | 16.9191356 | -1.40E-01 | 19867145  | 19867268  | NC_000020.10 |
| cg13169373   | 4.56E-11 | 3.03E-12 | -7.45 | 16.9184434 | -7.26E-02 | 27542843  | 27542966  | NC_000021.8  |
| cg27316453   | 4.56E-11 | 3.03E-12 | -7.44 | 16.9181923 | -1.39E-01 | 18476131  | 18476254  | NC_000011.9  |
| cg01943337   | 4.56E-11 | 3.03E-12 | -7.44 | 16.9169331 | -1.40E-01 | 35042742  | 35042865  | NC_000007.13 |
| cg03503642   | 4.56E-11 | 3.03E-12 | -7.44 | 16.9169111 | -1.46E-01 | 75912711  | 75912834  | NC_000006.11 |
| cg10919522   | 4.57E-11 | 3.03E-12 | -7.44 | 16.9165294 | -1.27E-01 | 74227441  | 74227564  | NC_000014.8  |
| cg12895810   | 4.57E-11 | 3.04E-12 | -7.44 | 16.9149596 | -5.16E-02 | 142138638 | 142138761 | NC_000008.10 |
| cg12065800   | 4.57E-11 | 3.04E-12 | -7.44 | 16.9144936 | -9.92E-02 | 18666531  | 18666654  | NC_000008.10 |
| cg06251129   | 4.58E-11 | 3.04E-12 | -7.44 | 16.9126704 | -5.50E-02 | 155990657 | 155990780 | NC_000001.10 |

|            |          |          |       |            |           |           |           |              |
|------------|----------|----------|-------|------------|-----------|-----------|-----------|--------------|
| cg15634747 | 4.58E-11 | 3.05E-12 | -7.44 | 16.9124147 | -1.46E-01 | 11652441  | 11652564  | NC_000004.11 |
| cg08679808 | 4.59E-11 | 3.05E-12 | -7.44 | 16.911392  | -3.31E-02 | 79886116  | 79886239  | NC_000017.10 |
| cg26674132 | 4.59E-11 | 3.05E-12 | -7.44 | 16.9113633 | -7.12E-02 | 9434637   | 9434760   | NC_000019.9  |
| cg27059140 | 4.60E-11 | 3.05E-12 | -7.44 | 16.9096713 | -1.55E-01 | 47355215  | 47355338  | NC_000017.10 |
| cg07884168 | 4.60E-11 | 3.05E-12 | -7.44 | 16.9096211 | -2.71E-01 | 28874307  | 28874430  | NC_000016.9  |
| cg15127702 | 4.60E-11 | 3.06E-12 | -7.44 | 16.9092021 | -2.38E-01 | 101079617 | 101079740 | NC_000007.13 |
| cg02980075 | 4.60E-11 | 3.06E-12 | -7.44 | 16.9087508 | -1.14E-01 | 41131966  | 41132089  | NC_000017.10 |
| cg24097814 | 4.60E-11 | 3.06E-12 | -7.44 | 16.9076645 | -1.65E-01 | 53320632  | 53320755  | NC_000012.11 |
| cg12588880 | 4.61E-11 | 3.06E-12 | -7.44 | 16.9061802 | -1.28E-01 | 8597159   | 8597282   | NC_000002.11 |
| cg18815565 | 4.62E-11 | 3.07E-12 | -7.44 | 16.9047017 | -1.39E-01 | 17540008  | 17540131  | NC_000020.10 |
| cg21242002 | 4.62E-11 | 3.07E-12 | -7.44 | 16.9040474 | -1.33E-01 | 3265080   | 3265203   | NC_000004.11 |
| cg03107659 | 4.63E-11 | 3.08E-12 | -7.44 | 16.900874  | -3.58E-02 | 40834984  | 40835107  | NC_000017.10 |
| cg02915225 | 4.64E-11 | 3.08E-12 | -7.44 | 16.9006248 | -1.38E-01 | 93812043  | 93812166  | NC_000010.10 |
| cg20060655 | 4.64E-11 | 3.08E-12 | -7.44 | 16.9005362 | -2.82E-02 | 1748322   | 1748445   | NC_000019.9  |
| cg08495245 | 4.64E-11 | 3.08E-12 | -7.44 | 16.9003363 | -1.49E-01 | 168925668 | 168925791 | NC_000006.11 |
| cg15842884 | 4.64E-11 | 3.08E-12 | -7.44 | 16.8998951 | -2.52E-02 | 5591925   | 5592048   | NC_000020.10 |
| cg24831391 | 4.65E-11 | 3.09E-12 | -7.44 | 16.8969225 | -1.73E-01 | 2743145   | 2743268   | NC_000012.11 |
| cg20646556 | 4.66E-11 | 3.10E-12 | -7.44 | 16.8956151 | -1.48E-01 | 1022806   | 1022929   | NC_000007.13 |
| cg02719634 | 4.67E-11 | 3.10E-12 | -7.44 | 16.8937281 | -1.57E-01 | 2924899   | 2925022   | NC_000011.9  |
| cg10213488 | 4.67E-11 | 3.10E-12 | -7.44 | 16.8936387 | -4.94E-02 | 93799600  | 93799723  | NC_000014.8  |
| cg23256480 | 4.67E-11 | 3.10E-12 | -7.44 | 16.8933957 | -1.27E-01 | 93252030  | 93252153  | NC_000014.8  |
| cg19606356 | 4.67E-11 | 3.11E-12 | -7.44 | 16.8932265 | -6.52E-02 | 86563843  | 86563966  | NC_000005.9  |
| cg15773716 | 4.68E-11 | 3.11E-12 | -7.44 | 16.8902377 | -4.93E-02 | 44355950  | 44356073  | NC_000006.11 |
| cg13697968 | 4.69E-11 | 3.12E-12 | -7.44 | 16.889321  | -1.88E-01 | 114917586 | 114917709 | NC_000013.10 |
| cg22809017 | 4.69E-11 | 3.12E-12 | -7.44 | 16.8887748 | -1.27E-01 | 169373347 | 169373470 | NC_000005.9  |

|            |          |          |       |            |           |           |           |              |
|------------|----------|----------|-------|------------|-----------|-----------|-----------|--------------|
| cg26546646 | 4.69E-11 | 3.12E-12 | -7.44 | 16.8877549 | -5.24E-02 | 150602168 | 150602291 | NC_000001.10 |
| cg10743062 | 4.69E-11 | 3.12E-12 | -7.44 | 16.8877456 | -1.04E-01 | 33413713  | 33413836  | NC_000020.10 |
| cg08644381 | 4.69E-11 | 3.12E-12 | -7.44 | 16.887423  | -1.26E-01 | 149480305 | 149480428 | NC_000007.13 |
| cg04222933 | 4.70E-11 | 3.13E-12 | -7.44 | 16.8867661 | -1.02E-01 | 160783181 | 160783304 | NC_000001.10 |
| cg27309189 | 4.70E-11 | 3.13E-12 | -7.44 | 16.8861079 | -5.47E-02 | 1464772   | 1464895   | NC_000016.9  |
| cg20625065 | 4.70E-11 | 3.13E-12 | -7.44 | 16.8860403 | -7.93E-02 | 47537715  | 47537838  | NC_000020.10 |
| cg00166770 | 4.70E-11 | 3.13E-12 | -7.44 | 16.8856313 | -8.33E-02 | 55043239  | 55043362  | NC_000020.10 |
| cg14745529 | 4.70E-11 | 3.13E-12 | -7.44 | 16.8856312 | -4.92E-02 | 116594207 | 116594330 | NC_000007.13 |
| cg26152923 | 4.71E-11 | 3.13E-12 | -7.44 | 16.8840609 | -1.41E-01 | 18284120  | 18284243  | NC_000019.9  |
| cg20802826 | 4.71E-11 | 3.14E-12 | -7.44 | 16.8825792 | -1.49E-01 | 30782080  | 30782203  | NC_000006.11 |
| cg15845525 | 4.72E-11 | 3.14E-12 | -7.44 | 16.8817007 | -1.29E-01 | 33665698  | 33665821  | NC_000010.10 |
| cg17035984 | 4.73E-11 | 3.15E-12 | -7.44 | 16.8795805 | -7.58E-02 | 54619655  | 54619778  | NC_000001.10 |
| cg27437413 | 4.73E-11 | 3.15E-12 | -7.44 | 16.8784622 | -1.77E-01 | 15596215  | 15596338  | NC_000016.9  |
| cg11565911 | 4.74E-11 | 3.16E-12 | -7.44 | 16.8773968 | -1.06E-01 | 72233249  | 72233372  | NC_000012.11 |
| cg24482286 | 4.74E-11 | 3.16E-12 | -7.44 | 16.8758964 | -3.92E-02 | 150981652 | 150981775 | NC_000001.10 |
| cg05234552 | 4.75E-11 | 3.16E-12 | -7.44 | 16.8749036 | -1.51E-01 | 41438700  | 41438823  | NC_000006.11 |
| cg08262002 | 4.75E-11 | 3.17E-12 | -7.44 | 16.8737033 | -1.37E-01 | 16575323  | 16575446  | NC_000004.11 |
| cg05836043 | 4.75E-11 | 3.17E-12 | -7.44 | 16.8736811 | -1.46E-01 | 7011388   | 7011511   | NC_000018.9  |
| cg20150565 | 4.76E-11 | 3.17E-12 | -7.44 | 16.8730813 | -6.86E-02 | 47893859  | 47893982  | NC_000020.10 |
| cg08341079 | 4.76E-11 | 3.17E-12 | -7.44 | 16.8729755 | -1.27E-01 | 25962136  | 25962259  | NC_000016.9  |
| cg16311192 | 4.76E-11 | 3.18E-12 | -7.44 | 16.8712111 | -5.73E-02 | 91875427  | 91875550  | NC_000007.13 |
| cg19586661 | 4.77E-11 | 3.18E-12 | -7.44 | 16.8689884 | -5.68E-02 | 66079705  | 66079828  | NC_000011.9  |
| cg23534766 | 4.78E-11 | 3.18E-12 | -7.44 | 16.8686893 | -1.47E-01 | 860157    | 860280    | NC_000011.9  |
| cg08243401 | 4.78E-11 | 3.19E-12 | -7.44 | 16.8674678 | -1.58E-01 | 22231844  | 22231967  | NC_000013.10 |
| cg14428669 | 4.78E-11 | 3.19E-12 | -7.44 | 16.8671699 | -4.54E-02 | 114659192 | 114659315 | NC_000009.11 |

|            |          |          |       |            |           |           |           |              |
|------------|----------|----------|-------|------------|-----------|-----------|-----------|--------------|
| cg05275153 | 4.79E-11 | 3.19E-12 | -7.44 | 16.8663761 | -7.53E-02 | 3431837   | 3431960   | NC_000004.11 |
| cg15701281 | 4.79E-11 | 3.19E-12 | -7.44 | 16.8655238 | -6.07E-02 | 1462569   | 1462692   | NC_000007.13 |
| cg21815063 | 4.80E-11 | 3.20E-12 | -7.44 | 16.864085  | -2.19E-01 | 131800430 | 131800553 | NC_000005.9  |
| cg17069533 | 4.80E-11 | 3.20E-12 | -7.44 | 16.8624    | -1.82E-01 | 64657833  | 64657956  | NC_000017.10 |
| cg24877792 | 4.80E-11 | 3.20E-12 | -7.44 | 16.862399  | -6.23E-02 | 180287685 | 180287808 | NC_000005.9  |
| cg22284302 | 4.82E-11 | 3.21E-12 | -7.43 | 16.8597264 | -7.14E-02 | 53163523  | 53163646  | NC_000001.10 |
| cg22402467 | 4.82E-11 | 3.21E-12 | -7.43 | 16.8595316 | -1.16E-01 | 7168056   | 7168179   | NC_000012.11 |
| cg16354802 | 4.82E-11 | 3.21E-12 | -7.43 | 16.8590342 | -1.36E-01 | 42955781  | 42955904  | NC_000020.10 |
| cg26332488 | 4.84E-11 | 3.23E-12 | -7.43 | 16.8535333 | -1.32E-01 | 2230640   | 2230763   | NC_000001.10 |
| cg14071324 | 4.85E-11 | 3.24E-12 | -7.43 | 16.852832  | -1.18E-01 | 5998570   | 5998693   | NC_000001.10 |
| cg10481982 | 4.85E-11 | 3.24E-12 | -7.43 | 16.8514597 | -6.70E-02 | 132379278 | 132379401 | NC_000012.11 |
| cg11933232 | 4.86E-11 | 3.24E-12 | -7.43 | 16.8512903 | -3.64E-02 | 123451206 | 123451329 | NC_000012.11 |
| cg08998192 | 4.86E-11 | 3.24E-12 | -7.43 | 16.8509643 | -1.29E-01 | 32805570  | 32805693  | NC_000006.11 |
| cg03399609 | 4.86E-11 | 3.24E-12 | -7.43 | 16.8500061 | -1.13E-01 | 114830255 | 114830378 | NC_000013.10 |
| cg18040788 | 4.87E-11 | 3.25E-12 | -7.43 | 16.8483886 | -6.74E-02 | 173852421 | 173852544 | NC_000005.9  |
| cg09041527 | 4.87E-11 | 3.25E-12 | -7.43 | 16.8480099 | -6.16E-02 | 11659497  | 11659620  | NC_000008.10 |
| cg11552078 | 4.88E-11 | 3.26E-12 | -7.43 | 16.8466378 | -4.61E-02 | 39971816  | 39971939  | NC_000019.9  |
| cg08710564 | 4.88E-11 | 3.26E-12 | -7.43 | 16.8465613 | -2.12E-01 | 8829438   | 8829561   | NC_000011.9  |
| cg10147075 | 4.88E-11 | 3.26E-12 | -7.43 | 16.84524   | -8.35E-02 | 100845122 | 100845245 | NC_000007.13 |
| cg10594543 | 4.88E-11 | 3.26E-12 | -7.43 | 16.8452166 | -1.30E-01 | 33649717  | 33649840  | NC_000005.9  |
| cg00149473 | 4.89E-11 | 3.27E-12 | -7.43 | 16.8429443 | -1.22E-01 | 94459330  | 94459453  | NC_000010.10 |
| cg17928869 | 4.89E-11 | 3.27E-12 | -7.43 | 16.8426041 | -7.85E-02 | 39822542  | 39822665  | NC_000017.10 |
| cg13847070 | 4.91E-11 | 3.28E-12 | -7.43 | 16.8402072 | -1.90E-01 | 137071523 | 137071646 | NC_000005.9  |
| cg01512532 | 4.92E-11 | 3.28E-12 | -7.43 | 16.8380174 | -1.35E-01 | 79495039  | 79495162  | NC_000017.10 |
| cg06640593 | 4.92E-11 | 3.29E-12 | -7.43 | 16.8369527 | -1.86E-01 | 568321    | 568444    | NC_000002.11 |

|            |          |          |       |            |           |           |           |              |
|------------|----------|----------|-------|------------|-----------|-----------|-----------|--------------|
| cg18129178 | 4.93E-11 | 3.29E-12 | -7.43 | 16.8360347 | -1.26E-01 | 148520854 | 148520977 | NC_000005.9  |
| cg14250740 | 4.93E-11 | 3.29E-12 | -7.43 | 16.8357832 | -1.10E-01 | 175244596 | 175244719 | NC_000003.11 |
| cg01894498 | 4.94E-11 | 3.30E-12 | -7.43 | 16.8337711 | -8.19E-02 | 61655848  | 61655971  | NC_000014.8  |
| cg22956205 | 4.94E-11 | 3.30E-12 | -7.43 | 16.8337423 | -1.84E-01 | 43321660  | 43321783  | NC_000013.10 |
| cg13321259 | 4.94E-11 | 3.30E-12 | -7.43 | 16.8320935 | -8.71E-02 | 194090730 | 194090853 | NC_000003.11 |
| cg09560161 | 4.95E-11 | 3.31E-12 | -7.43 | 16.8315854 | -1.66E-01 | 2065242   | 2065365   | NC_000001.10 |
| cg00462488 | 4.95E-11 | 3.31E-12 | -7.43 | 16.8308139 | -9.71E-02 | 173417637 | 173417760 | NC_000002.11 |
| cg03091668 | 4.96E-11 | 3.31E-12 | -7.43 | 16.8294109 | -1.63E-01 | 24903402  | 24903525  | NC_000022.10 |
| cg26945361 | 4.96E-11 | 3.31E-12 | -7.43 | 16.8289408 | -6.34E-02 | 23941718  | 23941841  | NC_000019.9  |
| cg20537521 | 4.97E-11 | 3.32E-12 | -7.43 | 16.8272922 | -1.38E-01 | 52538433  | 52538556  | NC_000012.11 |
| cg05593667 | 4.97E-11 | 3.32E-12 | -7.43 | 16.8262926 | -5.72E-02 | 35490744  | 35490867  | NC_000006.11 |
| cg18611245 | 4.97E-11 | 3.33E-12 | -7.43 | 16.8257685 | -8.06E-02 | 62338235  | 62338358  | NC_000020.10 |
| cg06850660 | 4.98E-11 | 3.33E-12 | -7.43 | 16.8254304 | -9.06E-02 | 53902829  | 53902952  | NC_000012.11 |
| cg04953061 | 4.99E-11 | 3.33E-12 | -7.43 | 16.8231999 | -8.92E-02 | 53620393  | 53620516  | NC_000014.8  |
| cg19107055 | 4.99E-11 | 3.33E-12 | -7.43 | 16.8231217 | -1.96E-01 | 50560686  | 50560809  | NC_000007.13 |
| cg20583073 | 4.99E-11 | 3.33E-12 | -7.43 | 16.8231139 | -1.43E-01 | 3178759   | 3178882   | NC_000019.9  |
| cg14525458 | 4.99E-11 | 3.34E-12 | -7.43 | 16.8223985 | -1.14E-01 | 48896100  | 48896223  | NC_000019.9  |
| cg07336751 | 5.00E-11 | 3.34E-12 | -7.43 | 16.821126  | -5.22E-02 | 30465916  | 30466039  | NC_000017.10 |
| cg25763306 | 5.00E-11 | 3.34E-12 | -7.43 | 16.8206945 | -1.07E-01 | 7741216   | 7741339   | NC_000001.10 |
| cg04822495 | 5.00E-11 | 3.34E-12 | -7.43 | 16.8199676 | -1.76E-01 | 94676688  | 94676811  | NC_000012.11 |
| cg07413497 | 5.00E-11 | 3.35E-12 | -7.43 | 16.8195399 | -2.80E-02 | 71276640  | 71276763  | NC_000006.11 |
| cg16795804 | 5.01E-11 | 3.35E-12 | -7.43 | 16.8185416 | -9.02E-02 | 37384523  | 37384646  | NC_000002.11 |
| cg23451291 | 5.01E-11 | 3.35E-12 | -7.43 | 16.8172109 | -2.68E-02 | 25891427  | 25891550  | NC_000007.13 |
| cg10997190 | 5.03E-11 | 3.36E-12 | -7.43 | 16.8143524 | -1.29E-01 | 75589206  | 75589329  | NC_000006.11 |
| cg21140054 | 5.04E-11 | 3.38E-12 | -7.43 | 16.8111337 | -6.25E-02 | 42632404  | 42632527  | NC_000003.11 |



|               |          |          |       |            |           |           |           |              |
|---------------|----------|----------|-------|------------|-----------|-----------|-----------|--------------|
| cg07236691    | 5.07E-11 | 3.39E-12 | -7.43 | 16.8054163 | -1.67E-01 | 120599284 | 120599407 | NC_000008.10 |
| cg22878535    | 5.07E-11 | 3.40E-12 | -7.43 | 16.8053206 | -1.37E-01 | 78431627  | 78431750  | NC_000017.10 |
| cg18424072    | 5.07E-11 | 3.40E-12 | -7.43 | 16.8047656 | -1.54E-01 | 39656880  | 39657003  | NC_000020.10 |
| cg06892898    | 5.08E-11 | 3.40E-12 | -7.43 | 16.8041548 | -1.28E-01 | 37024713  | 37024836  | NC_000007.13 |
| cg00231644    | 5.09E-11 | 3.41E-12 | -7.42 | 16.8011047 | -8.94E-02 | 3158512   | 3158635   | NC_000006.11 |
| cg14313576    | 5.10E-11 | 3.41E-12 | -7.42 | 16.8003896 | -1.56E-01 | 134339988 | 134340111 | NC_000003.11 |
| cg17407331    | 5.10E-11 | 3.42E-12 | -7.42 | 16.7992212 | -8.72E-02 | 42082570  | 42082693  | NC_000019.9  |
| cg24924505    | 5.10E-11 | 3.42E-12 | -7.42 | 16.7986023 | -1.33E-01 | 54926024  | 54926147  | NC_000003.11 |
| cg02235918    | 5.11E-11 | 3.42E-12 | -7.42 | 16.7977745 | -1.44E-01 | 72043561  | 72043684  | NC_000006.11 |
| cg13443911    | 5.11E-11 | 3.42E-12 | -7.42 | 16.7967466 | -1.89E-01 | 101866107 | 101866230 | NC_000009.11 |
| cg00965985    | 5.11E-11 | 3.43E-12 | -7.42 | 16.7965759 | -8.65E-02 | 122232605 | 122232728 | NC_000003.11 |
| cg14808759    | 5.12E-11 | 3.43E-12 | -7.42 | 16.7954616 | -8.81E-02 | 40854069  | 40854192  | NC_000019.9  |
| cg19422565    | 5.12E-11 | 3.43E-12 | -7.42 | 16.7952832 | -1.52E-01 | 82395569  | 82395692  | NC_000008.10 |
| cg07005353    | 5.12E-11 | 3.43E-12 | -7.42 | 16.7952784 | -1.74E-01 | 220097971 | 220098094 | NC_000001.10 |
| cg19494588    | 5.12E-11 | 3.43E-12 | -7.42 | 16.7947742 | -1.40E-01 | 146195103 | 146195226 | NC_000005.9  |
| cg14839935    | 5.13E-11 | 3.44E-12 | -7.42 | 16.7932208 | -5.72E-02 | 10975543  | 10975666  | NC_000002.11 |
| ch.4.111469F  | 5.13E-11 | 3.44E-12 | -7.42 | 16.7929353 | -1.68E-02 | 2705309   | 2705432   | NC_000004.11 |
| cg04117832    | 5.14E-11 | 3.44E-12 | -7.42 | 16.7913864 | -5.48E-02 | 152685230 | 152685353 | NC_000002.11 |
| cg19842134    | 5.14E-11 | 3.45E-12 | -7.42 | 16.7906996 | -1.12E-01 | 54070591  | 54070714  | NC_000012.11 |
| cg11828180    | 5.14E-11 | 3.45E-12 | -7.42 | 16.790493  | -1.58E-01 | 41848985  | 41849108  | NC_000001.10 |
| cg02579959    | 5.15E-11 | 3.45E-12 | -7.42 | 16.7896081 | -1.88E-01 | 100890963 | 100891086 | NC_000015.9  |
| cg25851803    | 5.15E-11 | 3.45E-12 | -7.42 | 16.7893804 | -3.99E-02 | 79481404  | 79481527  | NC_000017.10 |
| cg22642495    | 5.15E-11 | 3.45E-12 | -7.42 | 16.7893287 | -1.67E-01 | 10197856  | 10197979  | NC_000019.9  |
| ch.1.3958639R | 5.16E-11 | 3.46E-12 | -7.42 | 16.7865968 | -3.04E-02 | 204088385 | 204088508 | NC_000001.10 |
| cg25320668    | 5.16E-11 | 3.46E-12 | -7.42 | 16.786521  | -6.33E-02 | 205196970 | 205197093 | NC_000001.10 |

|                 |          |          |       |            |           |           |           |              |
|-----------------|----------|----------|-------|------------|-----------|-----------|-----------|--------------|
| cg00172803      | 5.16E-11 | 3.46E-12 | -7.42 | 16.7864244 | -1.15E-01 | 84076941  | 84077064  | NC_000016.9  |
| cg22703113      | 5.16E-11 | 3.46E-12 | -7.42 | 16.785844  | -1.05E-01 | 7185164   | 7185287   | NC_000004.11 |
| cg05384724      | 5.17E-11 | 3.46E-12 | -7.42 | 16.7854597 | -1.32E-01 | 124155451 | 124155574 | NC_000012.11 |
| ch.10.30081984F | 5.17E-11 | 3.47E-12 | -7.42 | 16.7847553 | -1.06E-01 | 30041978  | 30042101  | NC_000010.10 |
| cg05173058      | 5.17E-11 | 3.47E-12 | -7.42 | 16.7841695 | -1.35E-01 | 93573245  | 93573368  | NC_000015.9  |
| cg09983459      | 5.20E-11 | 3.49E-12 | -7.42 | 16.7794023 | -5.17E-02 | 33282495  | 33282618  | NC_000006.11 |
| cg04508114      | 5.20E-11 | 3.49E-12 | -7.42 | 16.7780435 | -1.25E-01 | 116444414 | 116444537 | NC_000010.10 |
| cg18183240      | 5.21E-11 | 3.49E-12 | -7.42 | 16.7768822 | -1.30E-01 | 127373519 | 127373642 | NC_000003.11 |
| cg06800301      | 5.21E-11 | 3.50E-12 | -7.42 | 16.7765504 | -9.88E-02 | 16766912  | 16767035  | NC_000001.10 |
| cg03715070      | 5.23E-11 | 3.51E-12 | -7.42 | 16.7725819 | -1.58E-01 | 46124684  | 46124807  | NC_000017.10 |
| cg09595202      | 5.23E-11 | 3.51E-12 | -7.42 | 16.7719214 | -1.62E-01 | 156812104 | 156812227 | NC_000007.13 |
| cg02611031      | 5.23E-11 | 3.51E-12 | -7.42 | 16.7718544 | -5.94E-02 | 17640532  | 17640655  | NC_000022.10 |
| cg02150344      | 5.23E-11 | 3.51E-12 | -7.42 | 16.7717192 | -1.82E-01 | 222987721 | 222987844 | NC_000001.10 |
| cg18450072      | 5.24E-11 | 3.52E-12 | -7.42 | 16.7696896 | -5.70E-02 | 40058936  | 40059059  | NC_000004.11 |
| cg14622819      | 5.26E-11 | 3.53E-12 | -7.42 | 16.7659036 | -1.59E-01 | 76944817  | 76944940  | NC_000004.11 |
| cg13859346      | 5.27E-11 | 3.54E-12 | -7.42 | 16.7654263 | -1.78E-01 | 384506    | 384629    | NC_000010.10 |
| cg04207306      | 5.27E-11 | 3.54E-12 | -7.42 | 16.7638318 | -1.15E-01 | 130638259 | 130638382 | NC_000009.11 |
| cg22157027      | 5.28E-11 | 3.54E-12 | -7.42 | 16.7634226 | -1.31E-01 | 10638113  | 10638236  | NC_000002.11 |
| cg26391794      | 5.28E-11 | 3.54E-12 | -7.42 | 16.7631641 | -1.36E-01 | 49323899  | 49324022  | NC_000013.10 |
| cg02544429      | 5.28E-11 | 3.54E-12 | -7.42 | 16.7630075 | -3.58E-02 | 144679651 | 144679774 | NC_000008.10 |
| cg10771518      | 5.28E-11 | 3.55E-12 | -7.42 | 16.7626218 | -6.21E-02 | 115439279 | 115439402 | NC_000010.10 |
| cg09605254      | 5.28E-11 | 3.55E-12 | -7.42 | 16.7621945 | -6.14E-02 | 124780730 | 124780853 | NC_000008.10 |
| cg27367960      | 5.28E-11 | 3.55E-12 | -7.42 | 16.7615742 | -7.41E-02 | 56702038  | 56702161  | NC_000016.9  |
| cg05845831      | 5.29E-11 | 3.55E-12 | -7.42 | 16.7604491 | -1.38E-01 | 232476255 | 232476378 | NC_000002.11 |
| cg25605289      | 5.29E-11 | 3.56E-12 | -7.42 | 16.7597279 | -7.22E-02 | 151974222 | 151974345 | NC_000001.10 |

|            |          |          |       |            |           |           |           |              |
|------------|----------|----------|-------|------------|-----------|-----------|-----------|--------------|
| cg01357334 | 5.30E-11 | 3.56E-12 | -7.42 | 16.7577866 | -7.39E-02 | 8395052   | 8395175   | NC_000012.11 |
| cg26205217 | 5.30E-11 | 3.56E-12 | -7.42 | 16.7576968 | -4.85E-02 | 37529764  | 37529887  | NC_000021.8  |
| cg02858512 | 5.31E-11 | 3.56E-12 | -7.42 | 16.7574217 | -2.32E-01 | 1992954   | 1993077   | NC_000017.10 |
| cg12434312 | 5.31E-11 | 3.57E-12 | -7.42 | 16.7561146 | -1.16E-01 | 129845509 | 129845632 | NC_000010.10 |
| cg24441975 | 5.31E-11 | 3.57E-12 | -7.42 | 16.7557261 | -5.08E-02 | 39339062  | 39339185  | NC_000001.10 |
| cg01934632 | 5.32E-11 | 3.57E-12 | -7.42 | 16.7553965 | -2.67E-02 | 47633820  | 47633943  | NC_000017.10 |
| cg26493188 | 5.32E-11 | 3.57E-12 | -7.42 | 16.7550282 | -1.16E-01 | 2975209   | 2975332   | NC_000016.9  |
| cg03954086 | 5.32E-11 | 3.57E-12 | -7.42 | 16.7547021 | -1.14E-01 | 117540072 | 117540195 | NC_000012.11 |
| cg13725899 | 5.32E-11 | 3.58E-12 | -7.42 | 16.7539283 | -1.48E-01 | 139422109 | 139422232 | NC_000009.11 |
| cg06197377 | 5.34E-11 | 3.59E-12 | -7.42 | 16.751392  | -8.04E-02 | 55505061  | 55505184  | NC_000001.10 |
| cg10167235 | 5.34E-11 | 3.59E-12 | -7.42 | 16.7506914 | -1.72E-01 | 100807646 | 100807769 | NC_000014.8  |
| cg03255379 | 5.35E-11 | 3.59E-12 | -7.42 | 16.7493585 | -1.12E-01 | 85531470  | 85531593  | NC_000002.11 |
| cg23414595 | 5.35E-11 | 3.59E-12 | -7.42 | 16.7491011 | -1.10E-01 | 30129607  | 30129730  | NC_000022.10 |
| cg19146448 | 5.35E-11 | 3.59E-12 | -7.42 | 16.7491008 | -7.91E-02 | 3263082   | 3263205   | NC_000018.9  |
| cg22884857 | 5.35E-11 | 3.60E-12 | -7.42 | 16.7486607 | -1.03E-01 | 24803181  | 24803304  | NC_000015.9  |
| cg24657473 | 5.36E-11 | 3.60E-12 | -7.42 | 16.7474022 | -8.03E-02 | 986485    | 986608    | NC_000020.10 |
| cg22524951 | 5.36E-11 | 3.60E-12 | -7.42 | 16.7464075 | -7.63E-02 | 91775247  | 91775370  | NC_000012.11 |
| cg09512406 | 5.37E-11 | 3.61E-12 | -7.42 | 16.7447723 | -1.27E-01 | 609103    | 609226    | NC_000016.9  |
| cg18186672 | 5.37E-11 | 3.61E-12 | -7.41 | 16.7441411 | -1.59E-01 | 71679841  | 71679964  | NC_000002.11 |
| cg18199664 | 5.38E-11 | 3.62E-12 | -7.41 | 16.7433725 | -9.34E-02 | 78869963  | 78870086  | NC_000014.8  |
| cg00408597 | 5.38E-11 | 3.62E-12 | -7.41 | 16.7425608 | -5.30E-02 | 9685941   | 9686064   | NC_000011.9  |
| cg12033014 | 5.38E-11 | 3.62E-12 | -7.41 | 16.7423367 | -6.50E-02 | 176514432 | 176514555 | NC_000005.9  |
| cg20118422 | 5.39E-11 | 3.62E-12 | -7.41 | 16.7416675 | -2.78E-02 | 64455210  | 64455333  | NC_000015.9  |
| cg18681014 | 5.39E-11 | 3.62E-12 | -7.41 | 16.7416435 | -9.94E-02 | 105660876 | 105660999 | NC_000014.8  |
| cg18085400 | 5.39E-11 | 3.62E-12 | -7.41 | 16.7411472 | -3.01E-02 | 2794637   | 2794760   | NC_000004.11 |

|               |          |          |       |            |           |           |           |              |
|---------------|----------|----------|-------|------------|-----------|-----------|-----------|--------------|
| cg06973760    | 5.39E-11 | 3.63E-12 | -7.41 | 16.7405922 | -2.20E-02 | 77154869  | 77154992  | NC_000018.9  |
| ch.3.3439883F | 5.40E-11 | 3.63E-12 | -7.41 | 16.7392341 | -4.15E-02 | 176977391 | 176977514 | NC_000003.11 |
| cg03504039    | 5.40E-11 | 3.63E-12 | -7.41 | 16.7390454 | -1.53E-01 | 238578435 | 238578558 | NC_000002.11 |
| cg09182678    | 5.41E-11 | 3.64E-12 | -7.41 | 16.7365208 | -1.47E-01 | 50328711  | 50328834  | NC_000022.10 |
| cg01591152    | 5.41E-11 | 3.64E-12 | -7.41 | 16.7364073 | -1.30E-01 | 119994800 | 119994923 | NC_000011.9  |
| cg14967899    | 5.41E-11 | 3.64E-12 | -7.41 | 16.7363097 | -4.73E-02 | 26434689  | 26434812  | NC_000008.10 |
| cg27664687    | 5.42E-11 | 3.65E-12 | -7.41 | 16.7343316 | -1.05E-01 | 167126705 | 167126828 | NC_000005.9  |
| ch.8.1011566R | 5.42E-11 | 3.65E-12 | -7.41 | 16.7340701 | -4.49E-02 | 42507619  | 42507742  | NC_000008.10 |
| cg19559392    | 5.43E-11 | 3.65E-12 | -7.41 | 16.7331449 | -4.77E-02 | 39103372  | 39103495  | NC_000002.11 |
| cg26606904    | 5.43E-11 | 3.65E-12 | -7.41 | 16.7329692 | -1.15E-01 | 247242975 | 247243098 | NC_000001.10 |
| cg15451548    | 5.43E-11 | 3.66E-12 | -7.41 | 16.7321508 | -1.06E-01 | 2144873   | 2144996   | NC_000001.10 |
| cg16142218    | 5.45E-11 | 3.67E-12 | -7.41 | 16.7285569 | -1.27E-01 | 23101221  | 23101344  | NC_000008.10 |
| cg05897255    | 5.46E-11 | 3.67E-12 | -7.41 | 16.7276314 | -6.37E-02 | 149535402 | 149535525 | NC_000007.13 |
| cg06819445    | 5.46E-11 | 3.67E-12 | -7.41 | 16.7274504 | -4.39E-02 | 172199278 | 172199401 | NC_000005.9  |
| cg06058923    | 5.47E-11 | 3.68E-12 | -7.41 | 16.7259886 | -4.52E-02 | 80488001  | 80488124  | NC_000006.11 |
| cg15857329    | 5.48E-11 | 3.69E-12 | -7.41 | 16.7239563 | -1.22E-01 | 144653570 | 144653693 | NC_000008.10 |
| cg03005191    | 5.48E-11 | 3.69E-12 | -7.41 | 16.722898  | -1.18E-01 | 12124419  | 12124542  | NC_000011.9  |
| cg25743268    | 5.48E-11 | 3.69E-12 | -7.41 | 16.7227201 | -1.36E-01 | 79910595  | 79910718  | NC_000017.10 |
| cg16361253    | 5.48E-11 | 3.69E-12 | -7.41 | 16.7225079 | -1.31E-01 | 47624276  | 47624399  | NC_000006.11 |
| cg08980461    | 5.50E-11 | 3.71E-12 | -7.41 | 16.7188645 | -7.25E-02 | 124413513 | 124413636 | NC_000009.11 |
| cg13993197    | 5.50E-11 | 3.71E-12 | -7.41 | 16.7186074 | -1.76E-01 | 111817803 | 111817926 | NC_000001.10 |
| cg24545602    | 5.51E-11 | 3.71E-12 | -7.41 | 16.717902  | -1.44E-01 | 46344839  | 46344962  | NC_000002.11 |
| cg17960556    | 5.51E-11 | 3.71E-12 | -7.41 | 16.7178141 | -1.05E-01 | 156837017 | 156837140 | NC_000007.13 |
| cg26348180    | 5.51E-11 | 3.71E-12 | -7.41 | 16.7176998 | -6.53E-02 | 193852754 | 193852877 | NC_000003.11 |
| cg10423842    | 5.51E-11 | 3.71E-12 | -7.41 | 16.7168783 | -1.27E-01 | 56200769  | 56200892  | NC_000006.11 |

|                 |          |          |       |            |           |           |           |              |
|-----------------|----------|----------|-------|------------|-----------|-----------|-----------|--------------|
| cg00702126      | 5.51E-11 | 3.72E-12 | -7.41 | 16.71647   | -1.78E-01 | 1369793   | 1369916   | NC_000001.10 |
| cg19764940      | 5.52E-11 | 3.72E-12 | -7.41 | 16.7152538 | -1.16E-01 | 5141399   | 5141522   | NC_000019.9  |
| cg24323726      | 5.53E-11 | 3.73E-12 | -7.41 | 16.7140415 | -1.71E-01 | 111314186 | 111314309 | NC_000003.11 |
| cg09575442      | 5.53E-11 | 3.73E-12 | -7.41 | 16.713139  | -1.63E-01 | 223888431 | 223888554 | NC_000001.10 |
| cg23634134      | 5.53E-11 | 3.73E-12 | -7.41 | 16.7128428 | -8.77E-02 | 21082393  | 21082516  | NC_000014.8  |
| cg04972459      | 5.54E-11 | 3.73E-12 | -7.41 | 16.7119885 | -1.46E-01 | 9460204   | 9460327   | NC_000001.10 |
| cg11891925      | 5.54E-11 | 3.74E-12 | -7.41 | 16.7110973 | -1.49E-01 | 13091949  | 13092072  | NC_000010.10 |
| cg21088438      | 5.55E-11 | 3.74E-12 | -7.41 | 16.7104576 | -1.57E-01 | 70264869  | 70264992  | NC_000014.8  |
| cg16399368      | 5.55E-11 | 3.74E-12 | -7.41 | 16.7094759 | -1.16E-01 | 85517462  | 85517585  | NC_000016.9  |
| cg07621385      | 5.56E-11 | 3.75E-12 | -7.41 | 16.7085242 | -1.71E-01 | 123535716 | 123535839 | NC_000003.11 |
| cg14184954      | 5.56E-11 | 3.75E-12 | -7.41 | 16.7071043 | -1.25E-01 | 20003184  | 20003307  | NC_000012.11 |
| cg00866814      | 5.59E-11 | 3.77E-12 | -7.41 | 16.7029826 | -4.81E-02 | 49017364  | 49017487  | NC_000019.9  |
| cg24994360      | 5.59E-11 | 3.77E-12 | -7.41 | 16.7025788 | -1.39E-01 | 242491944 | 242492067 | NC_000002.11 |
| ch.7.2860922R   | 5.60E-11 | 3.78E-12 | -7.41 | 16.7006328 | -3.68E-02 | 137545379 | 137545502 | NC_000007.13 |
| cg17341765      | 5.60E-11 | 3.78E-12 | -7.41 | 16.7004611 | -1.56E-01 | 65997206  | 65997329  | NC_000012.11 |
| cg17746570      | 5.61E-11 | 3.78E-12 | -7.41 | 16.6987318 | -1.41E-01 | 9804355   | 9804478   | NC_000017.10 |
| cg01818776      | 5.61E-11 | 3.79E-12 | -7.41 | 16.6979046 | -2.45E-01 | 25202910  | 25203033  | NC_000008.10 |
| cg25763127      | 5.62E-11 | 3.79E-12 | -7.41 | 16.6971117 | -1.58E-01 | 33527263  | 33527386  | NC_000010.10 |
| ch.9.109254566R | 5.63E-11 | 3.80E-12 | -7.41 | 16.6953438 | -5.12E-02 | 110214745 | 110214868 | NC_000009.11 |
| cg18011078      | 5.63E-11 | 3.80E-12 | -7.41 | 16.6943663 | -2.04E-01 | 1971098   | 1971221   | NC_000007.13 |
| cg14777817      | 5.64E-11 | 3.80E-12 | -7.41 | 16.693409  | -3.40E-02 | 80055594  | 80055717  | NC_000013.10 |
| cg03283031      | 5.64E-11 | 3.81E-12 | -7.41 | 16.6920432 | -7.17E-02 | 37824238  | 37824361  | NC_000017.10 |
| cg05406923      | 5.65E-11 | 3.81E-12 | -7.41 | 16.6913979 | -1.23E-01 | 99090481  | 99090604  | NC_000006.11 |
| cg14803350      | 5.65E-11 | 3.81E-12 | -7.41 | 16.6910193 | -6.74E-02 | 159545855 | 159545978 | NC_000005.9  |
| cg21691367      | 5.66E-11 | 3.82E-12 | -7.41 | 16.6896287 | -1.25E-01 | 151325642 | 151325765 | NC_000006.11 |

|              |          |          |       |            |           |           |           |              |
|--------------|----------|----------|-------|------------|-----------|-----------|-----------|--------------|
| cg20775959   | 5.66E-11 | 3.82E-12 | -7.41 | 16.6896193 | -9.41E-02 | 80696264  | 80696387  | NC_000015.9  |
| cg01520586   | 5.66E-11 | 3.82E-12 | -7.41 | 16.6884638 | -1.68E-01 | 50280404  | 50280527  | NC_000003.11 |
| cg11991903   | 5.67E-11 | 3.83E-12 | -7.41 | 16.6874313 | -1.72E-01 | 157794519 | 157794642 | NC_000007.13 |
| cg06431514   | 5.67E-11 | 3.83E-12 | -7.41 | 16.6864907 | -1.61E-01 | 11299076  | 11299199  | NC_000010.10 |
| cg16676676   | 5.68E-11 | 3.83E-12 | -7.4  | 16.6856621 | -1.55E-01 | 228558987 | 228559110 | NC_000001.10 |
| cg10688514   | 5.69E-11 | 3.84E-12 | -7.4  | 16.6843691 | -5.76E-02 | 48354852  | 48354975  | NC_000010.10 |
| cg10701640   | 5.69E-11 | 3.84E-12 | -7.4  | 16.6828422 | -1.14E-01 | 43249399  | 43249522  | NC_000017.10 |
| cg20636714   | 5.71E-11 | 3.85E-12 | -7.4  | 16.6807118 | -1.18E-01 | 5476521   | 5476644   | NC_000010.10 |
| cg23418219   | 5.71E-11 | 3.85E-12 | -7.4  | 16.6803439 | -8.23E-02 | 28338684  | 28338807  | NC_000007.13 |
| ch.3.753362R | 5.71E-11 | 3.86E-12 | -7.4  | 16.6795155 | -5.38E-02 | 37048044  | 37048167  | NC_000003.11 |
| cg10936879   | 5.71E-11 | 3.86E-12 | -7.4  | 16.6791174 | -1.91E-01 | 74397277  | 74397400  | NC_000010.10 |
| cg00092309   | 5.72E-11 | 3.86E-12 | -7.4  | 16.6780266 | -1.03E-01 | 185934797 | 185934920 | NC_000004.11 |
| cg17545652   | 5.72E-11 | 3.87E-12 | -7.4  | 16.6774148 | -1.18E-01 | 6261011   | 6261134   | NC_000010.10 |
| cg20040765   | 5.74E-11 | 3.88E-12 | -7.4  | 16.6735297 | -1.92E-01 | 67358546  | 67358669  | NC_000008.10 |
| cg14799927   | 5.75E-11 | 3.88E-12 | -7.4  | 16.6730096 | -1.19E-01 | 30175074  | 30175197  | NC_000006.11 |
| cg26924440   | 5.75E-11 | 3.89E-12 | -7.4  | 16.6721832 | -1.67E-01 | 19276353  | 19276476  | NC_000001.10 |
| cg08883213   | 5.76E-11 | 3.89E-12 | -7.4  | 16.6711827 | -1.40E-01 | 55728836  | 55728959  | NC_000019.9  |
| cg16489193   | 5.78E-11 | 3.91E-12 | -7.4  | 16.666765  | -3.65E-02 | 33240059  | 33240182  | NC_000006.11 |
| cg27532187   | 5.78E-11 | 3.91E-12 | -7.4  | 16.6665132 | -3.41E-02 | 30043354  | 30043477  | NC_000006.11 |
| cg05982271   | 5.79E-11 | 3.91E-12 | -7.4  | 16.6652829 | -1.21E-01 | 76555948  | 76556071  | NC_000004.11 |
| cg01999046   | 5.80E-11 | 3.92E-12 | -7.4  | 16.6637151 | -1.93E-01 | 139779708 | 139779831 | NC_000009.11 |
| cg07669147   | 5.80E-11 | 3.92E-12 | -7.4  | 16.6635524 | -5.08E-02 | 36134735  | 36134858  | NC_000019.9  |
| cg04560093   | 5.81E-11 | 3.93E-12 | -7.4  | 16.6622416 | -1.93E-01 | 142217405 | 142217528 | NC_000008.10 |
| cg11745084   | 5.81E-11 | 3.93E-12 | -7.4  | 16.6622293 | -6.13E-02 | 47537722  | 47537845  | NC_000020.10 |
| cg10503007   | 5.81E-11 | 3.93E-12 | -7.4  | 16.6616369 | -1.24E-01 | 11796989  | 11797112  | NC_000002.11 |

|            |          |          |      |            |           |           |           |              |
|------------|----------|----------|------|------------|-----------|-----------|-----------|--------------|
| cg12828018 | 5.81E-11 | 3.93E-12 | -7.4 | 16.6615437 | -1.52E-01 | 59437416  | 59437539  | NC_000011.9  |
| cg02803141 | 5.84E-11 | 3.95E-12 | -7.4 | 16.6570638 | -1.47E-01 | 85244771  | 85244894  | NC_000016.9  |
| cg00088844 | 5.84E-11 | 3.95E-12 | -7.4 | 16.6565003 | -1.46E-01 | 52317349  | 52317472  | NC_000012.11 |
| cg20929922 | 5.85E-11 | 3.96E-12 | -7.4 | 16.6541915 | -1.04E-01 | 43484725  | 43484848  | NC_000005.9  |
| cg00347746 | 5.85E-11 | 3.96E-12 | -7.4 | 16.6539054 | -1.28E-01 | 48970082  | 48970205  | NC_000019.9  |
| cg07776629 | 5.86E-11 | 3.96E-12 | -7.4 | 16.6530916 | -1.37E-01 | 57989122  | 57989245  | NC_000016.9  |
| cg06310422 | 5.86E-11 | 3.97E-12 | -7.4 | 16.651648  | -1.98E-02 | 234763532 | 234763655 | NC_000002.11 |
| cg01212071 | 5.87E-11 | 3.97E-12 | -7.4 | 16.6508411 | -1.16E-01 | 122041650 | 122041773 | NC_000002.11 |
| cg24547910 | 5.88E-11 | 3.98E-12 | -7.4 | 16.6496952 | -9.91E-02 | 100632951 | 100633074 | NC_000004.11 |
| cg09594075 | 5.88E-11 | 3.98E-12 | -7.4 | 16.6494123 | -7.44E-02 | 1358505   | 1358628   | NC_000017.10 |
| cg07132183 | 5.88E-11 | 3.98E-12 | -7.4 | 16.6482476 | -1.72E-01 | 182873955 | 182874078 | NC_000004.11 |
| cg11316887 | 5.89E-11 | 3.99E-12 | -7.4 | 16.6473972 | -1.67E-01 | 29924694  | 29924817  | NC_000010.10 |
| cg19995899 | 5.89E-11 | 3.99E-12 | -7.4 | 16.6473302 | -1.39E-01 | 216274747 | 216274870 | NC_000002.11 |
| cg02243386 | 5.92E-11 | 4.01E-12 | -7.4 | 16.6423985 | -1.24E-01 | 39234924  | 39235047  | NC_000003.11 |
| cg18548043 | 5.93E-11 | 4.01E-12 | -7.4 | 16.6403677 | -6.72E-02 | 100660829 | 100660952 | NC_000012.11 |
| cg03956042 | 5.93E-11 | 4.02E-12 | -7.4 | 16.640084  | -1.01E-01 | 194206497 | 194206620 | NC_000003.11 |
| cg01761552 | 5.93E-11 | 4.02E-12 | -7.4 | 16.6395386 | -5.90E-02 | 81634971  | 81635094  | NC_000016.9  |
| cg08253374 | 5.93E-11 | 4.02E-12 | -7.4 | 16.6392143 | -8.97E-02 | 63670940  | 63671063  | NC_000014.8  |
| cg10690747 | 5.94E-11 | 4.03E-12 | -7.4 | 16.6375578 | -1.28E-01 | 43823835  | 43823958  | NC_000021.8  |
| cg05055844 | 5.95E-11 | 4.03E-12 | -7.4 | 16.6371618 | -1.27E-01 | 126275997 | 126276120 | NC_000011.9  |
| cg26561207 | 5.97E-11 | 4.04E-12 | -7.4 | 16.6338858 | -6.69E-02 | 171615258 | 171615381 | NC_000005.9  |
| cg09269848 | 5.97E-11 | 4.04E-12 | -7.4 | 16.6337902 | -1.12E-01 | 1396074   | 1396197   | NC_000017.10 |
| cg02812142 | 5.97E-11 | 4.05E-12 | -7.4 | 16.6325142 | -1.31E-01 | 135595323 | 135595446 | NC_000002.11 |
| cg24074448 | 5.98E-11 | 4.05E-12 | -7.4 | 16.6321233 | -1.27E-01 | 18768688  | 18768811  | NC_000019.9  |
| cg18019509 | 5.98E-11 | 4.05E-12 | -7.4 | 16.6316485 | -1.48E-01 | 86370111  | 86370234  | NC_000006.11 |

|            |          |          |       |            |           |           |           |              |
|------------|----------|----------|-------|------------|-----------|-----------|-----------|--------------|
| cg18503234 | 5.99E-11 | 4.06E-12 | -7.4  | 16.6296355 | -1.52E-01 | 68847839  | 68847962  | NC_000011.9  |
| cg08194458 | 5.99E-11 | 4.06E-12 | -7.4  | 16.6293853 | -6.81E-02 | 42054606  | 42054729  | NC_000003.11 |
| cg08759238 | 5.99E-11 | 4.06E-12 | -7.4  | 16.628866  | -1.45E-01 | 80879439  | 80879562  | NC_000017.10 |
| cg14095048 | 6.02E-11 | 4.08E-12 | -7.39 | 16.6250362 | -1.47E-01 | 25342876  | 25342999  | NC_000022.10 |
| cg01772563 | 6.02E-11 | 4.08E-12 | -7.39 | 16.6237037 | -7.61E-02 | 95064399  | 95064522  | NC_000007.13 |
| cg07339138 | 6.03E-11 | 4.09E-12 | -7.39 | 16.6228474 | -9.83E-02 | 42820274  | 42820397  | NC_000003.11 |
| cg00615913 | 6.04E-11 | 4.09E-12 | -7.39 | 16.6216936 | -7.76E-02 | 37063096  | 37063219  | NC_000020.10 |
| cg24580635 | 6.04E-11 | 4.09E-12 | -7.39 | 16.6208698 | -7.68E-02 | 76178542  | 76178665  | NC_000007.13 |
| cg04577212 | 6.04E-11 | 4.10E-12 | -7.39 | 16.6201929 | -1.50E-01 | 32179862  | 32179985  | NC_000001.10 |
| cg01040624 | 6.05E-11 | 4.10E-12 | -7.39 | 16.6197036 | -9.15E-02 | 124828123 | 124828246 | NC_000003.11 |
| cg26232308 | 6.05E-11 | 4.10E-12 | -7.39 | 16.619313  | -1.57E-01 | 18201537  | 18201660  | NC_000001.10 |
| cg19269264 | 6.05E-11 | 4.10E-12 | -7.39 | 16.6185089 | -6.60E-02 | 238600693 | 238600816 | NC_000002.11 |
| cg23409613 | 6.05E-11 | 4.11E-12 | -7.39 | 16.6184193 | -6.79E-02 | 53196849  | 53196972  | NC_000014.8  |
| cg10525372 | 6.06E-11 | 4.11E-12 | -7.39 | 16.616425  | -1.70E-01 | 112375333 | 112375456 | NC_000006.11 |
| cg26532812 | 6.07E-11 | 4.12E-12 | -7.39 | 16.6154377 | -2.09E-01 | 133804526 | 133804649 | NC_000011.9  |
| cg05739816 | 6.07E-11 | 4.12E-12 | -7.39 | 16.6151769 | -2.01E-01 | 135989395 | 135989518 | NC_000006.11 |
| cg15592062 | 6.09E-11 | 4.13E-12 | -7.39 | 16.6122311 | -1.15E-01 | 167189543 | 167189666 | NC_000006.11 |
| cg17484944 | 6.11E-11 | 4.14E-12 | -7.39 | 16.6090548 | -1.29E-01 | 122736417 | 122736540 | NC_000008.10 |
| cg15910928 | 6.12E-11 | 4.15E-12 | -7.39 | 16.6077267 | -5.46E-02 | 17658838  | 17658961  | NC_000008.10 |
| cg18869709 | 6.12E-11 | 4.15E-12 | -7.39 | 16.6074505 | -1.42E-01 | 43342938  | 43343061  | NC_000022.10 |
| cg06109529 | 6.12E-11 | 4.16E-12 | -7.39 | 16.6063322 | -5.94E-02 | 134205091 | 134205214 | NC_000003.11 |
| cg09936663 | 6.12E-11 | 4.16E-12 | -7.39 | 16.6060897 | -1.50E-01 | 1942462   | 1942585   | NC_000008.10 |
| cg05956058 | 6.13E-11 | 4.16E-12 | -7.39 | 16.605765  | -7.75E-02 | 60871066  | 60871189  | NC_000005.9  |
| cg27090007 | 6.13E-11 | 4.16E-12 | -7.39 | 16.6047249 | -7.05E-02 | 28519388  | 28519511  | NC_000013.10 |
| cg19005168 | 6.14E-11 | 4.17E-12 | -7.39 | 16.6028628 | -1.04E-01 | 27092836  | 27092959  | NC_000013.10 |



|                 |          |          |       |            |           |           |           |              |
|-----------------|----------|----------|-------|------------|-----------|-----------|-----------|--------------|
| cg02917889      | 6.15E-11 | 4.17E-12 | -7.39 | 16.602521  | -1.21E-01 | 131791737 | 131791860 | NC_000002.11 |
| cg16520815      | 6.15E-11 | 4.17E-12 | -7.39 | 16.6023744 | -1.30E-01 | 4733181   | 4733304   | NC_000016.9  |
| cg25840824      | 6.16E-11 | 4.18E-12 | -7.39 | 16.600431  | -1.49E-01 | 56269575  | 56269698  | NC_000020.10 |
| cg26775751      | 6.16E-11 | 4.18E-12 | -7.39 | 16.5998036 | -7.27E-02 | 18610271  | 18610394  | NC_000011.9  |
| cg01738406      | 6.16E-11 | 4.18E-12 | -7.39 | 16.5996404 | -1.45E-01 | 124619288 | 124619411 | NC_000011.9  |
| cg11816838      | 6.17E-11 | 4.19E-12 | -7.39 | 16.5982242 | -1.34E-01 | 150484093 | 150484216 | NC_000003.11 |
| cg10691866      | 6.18E-11 | 4.19E-12 | -7.39 | 16.5972107 | -9.05E-02 | 65817282  | 65817405  | NC_000007.13 |
| cg06470558      | 6.18E-11 | 4.20E-12 | -7.39 | 16.5964105 | -1.12E-01 | 176816828 | 176816951 | NC_000005.9  |
| cg26431550      | 6.19E-11 | 4.20E-12 | -7.39 | 16.594943  | -1.39E-01 | 24691176  | 24691299  | NC_000001.10 |
| cg12570756      | 6.20E-11 | 4.21E-12 | -7.39 | 16.5935063 | -4.72E-02 | 809538    | 809661    | NC_000011.9  |
| cg05431626      | 6.20E-11 | 4.21E-12 | -7.39 | 16.5934534 | -8.66E-02 | 80054976  | 80055099  | NC_000013.10 |
| cg25840608      | 6.20E-11 | 4.21E-12 | -7.39 | 16.5931444 | -1.46E-01 | 71149242  | 71149365  | NC_000015.9  |
| cg14854901      | 6.20E-11 | 4.21E-12 | -7.39 | 16.5931049 | -3.85E-02 | 72793969  | 72794092  | NC_000005.9  |
| cg21090033      | 6.21E-11 | 4.22E-12 | -7.39 | 16.591695  | -2.15E-01 | 196065357 | 196065480 | NC_000003.11 |
| cg14645545      | 6.21E-11 | 4.22E-12 | -7.39 | 16.5913279 | -9.68E-02 | 219252551 | 219252674 | NC_000002.11 |
| ch.15.47805190R | 6.21E-11 | 4.22E-12 | -7.39 | 16.590947  | -4.79E-02 | 50017898  | 50018021  | NC_000015.9  |
| cg05923595      | 6.22E-11 | 4.22E-12 | -7.39 | 16.5900988 | -9.89E-02 | 33547713  | 33547836  | NC_000001.10 |
| cg14751503      | 6.23E-11 | 4.23E-12 | -7.39 | 16.5887208 | -6.72E-02 | 8008354   | 8008477   | NC_000011.9  |
| cg10057218      | 6.24E-11 | 4.24E-12 | -7.39 | 16.5870338 | -1.91E-01 | 38074149  | 38074272  | NC_000017.10 |
| cg08179771      | 6.24E-11 | 4.24E-12 | -7.39 | 16.5866866 | -2.57E-02 | 44509642  | 44509765  | NC_000020.10 |
| cg08509236      | 6.24E-11 | 4.24E-12 | -7.39 | 16.586043  | -8.80E-02 | 49208409  | 49208532  | NC_000012.11 |
| cg21412928      | 6.24E-11 | 4.24E-12 | -7.39 | 16.5856332 | -3.54E-02 | 30640498  | 30640621  | NC_000006.11 |
| cg08339719      | 6.25E-11 | 4.25E-12 | -7.39 | 16.5852111 | -6.00E-02 | 103347733 | 103347856 | NC_000010.10 |
| cg25912717      | 6.25E-11 | 4.25E-12 | -7.39 | 16.5844699 | -4.24E-02 | 155176951 | 155177074 | NC_000001.10 |
| cg14742187      | 6.25E-11 | 4.25E-12 | -7.39 | 16.5843918 | -1.33E-01 | 111842681 | 111842804 | NC_000010.10 |

|            |          |          |       |            |           |           |           |              |
|------------|----------|----------|-------|------------|-----------|-----------|-----------|--------------|
| cg13216351 | 6.25E-11 | 4.25E-12 | -7.39 | 16.5842661 | -4.81E-02 | 49575105  | 49575228  | NC_000020.10 |
| cg26622211 | 6.25E-11 | 4.25E-12 | -7.39 | 16.5836888 | -8.35E-02 | 25021720  | 25021843  | NC_000007.13 |
| cg11614622 | 6.26E-11 | 4.26E-12 | -7.39 | 16.5824432 | -5.13E-02 | 66623681  | 66623804  | NC_000011.9  |
| cg20221707 | 6.26E-11 | 4.26E-12 | -7.39 | 16.5822751 | -1.37E-01 | 48348059  | 48348182  | NC_000017.10 |
| cg00818480 | 6.27E-11 | 4.26E-12 | -7.39 | 16.581773  | -3.34E-02 | 57609685  | 57609808  | NC_000012.11 |
| cg00774100 | 6.27E-11 | 4.26E-12 | -7.39 | 16.5816356 | -6.55E-02 | 31465369  | 31465492  | NC_000006.11 |
| cg24830314 | 6.29E-11 | 4.28E-12 | -7.39 | 16.5782233 | -6.20E-02 | 83775579  | 83775702  | NC_000006.11 |
| cg13450596 | 6.29E-11 | 4.28E-12 | -7.39 | 16.5775479 | -6.02E-02 | 62438980  | 62439103  | NC_000011.9  |
| cg09551160 | 6.29E-11 | 4.28E-12 | -7.39 | 16.5770001 | -5.41E-02 | 80828924  | 80829047  | NC_000010.10 |
| cg01269299 | 6.30E-11 | 4.28E-12 | -7.39 | 16.5767314 | -1.27E-01 | 112287792 | 112287915 | NC_000010.10 |
| cg00591333 | 6.30E-11 | 4.28E-12 | -7.39 | 16.5766203 | -1.45E-01 | 79109910  | 79110033  | NC_000017.10 |
| cg24108286 | 6.30E-11 | 4.28E-12 | -7.39 | 16.5763918 | -4.75E-02 | 114238719 | 114238842 | NC_000013.10 |
| cg01207951 | 6.30E-11 | 4.29E-12 | -7.39 | 16.5755582 | -7.10E-02 | 74208655  | 74208778  | NC_000002.11 |
| cg09535841 | 6.31E-11 | 4.29E-12 | -7.39 | 16.5745921 | -5.88E-02 | 177576684 | 177576807 | NC_000005.9  |
| cg02916472 | 6.32E-11 | 4.30E-12 | -7.39 | 16.5719221 | -1.15E-01 | 218151983 | 218152106 | NC_000002.11 |
| cg16479476 | 6.33E-11 | 4.31E-12 | -7.39 | 16.5714905 | -1.17E-01 | 108019687 | 108019810 | NC_000006.11 |
| cg24156555 | 6.34E-11 | 4.32E-12 | -7.38 | 16.5691452 | -8.84E-02 | 2835064   | 2835187   | NC_000016.9  |
| cg22968401 | 6.34E-11 | 4.32E-12 | -7.38 | 16.5688908 | -1.27E-01 | 27370009  | 27370132  | NC_000017.10 |
| cg20058270 | 6.35E-11 | 4.32E-12 | -7.38 | 16.5680621 | -4.19E-02 | 43149950  | 43150073  | NC_000006.11 |
| cg20322093 | 6.36E-11 | 4.33E-12 | -7.38 | 16.5665164 | -1.13E-01 | 72931788  | 72931911  | NC_000017.10 |
| cg19225602 | 6.36E-11 | 4.33E-12 | -7.38 | 16.5653143 | -1.38E-01 | 75269316  | 75269439  | NC_000011.9  |
| cg07061579 | 6.38E-11 | 4.34E-12 | -7.38 | 16.5632361 | -6.96E-02 | 41196715  | 41196838  | NC_000019.9  |
| cg11906607 | 6.39E-11 | 4.35E-12 | -7.38 | 16.5613239 | -1.41E-01 | 2524064   | 2524187   | NC_000019.9  |
| cg08107987 | 6.39E-11 | 4.35E-12 | -7.38 | 16.5613008 | -1.07E-01 | 3377869   | 3377992   | NC_000001.10 |
| cg26625319 | 6.40E-11 | 4.36E-12 | -7.38 | 16.5600276 | -1.89E-02 | 97001960  | 97002083  | NC_000002.11 |

|            |          |          |       |            |           |           |           |              |
|------------|----------|----------|-------|------------|-----------|-----------|-----------|--------------|
| cg14290616 | 6.40E-11 | 4.36E-12 | -7.38 | 16.5588018 | -1.34E-01 | 40420987  | 40421110  | NC_000022.10 |
| cg07167185 | 6.41E-11 | 4.36E-12 | -7.38 | 16.5581101 | -1.23E-01 | 24120017  | 24120140  | NC_000001.10 |
| cg06710735 | 6.41E-11 | 4.37E-12 | -7.38 | 16.5578158 | -1.39E-01 | 48264567  | 48264690  | NC_000003.11 |
| cg12142501 | 6.42E-11 | 4.37E-12 | -7.38 | 16.5567041 | -6.86E-02 | 1765358   | 1765481   | NC_000008.10 |
| cg04167833 | 6.42E-11 | 4.37E-12 | -7.38 | 16.5560606 | -9.58E-02 | 169724831 | 169724954 | NC_000005.9  |
| cg09179691 | 6.42E-11 | 4.37E-12 | -7.38 | 16.5558575 | -1.42E-01 | 35094251  | 35094374  | NC_000020.10 |
| cg22873177 | 6.42E-11 | 4.38E-12 | -7.38 | 16.5554158 | -5.35E-02 | 229761584 | 229761707 | NC_000001.10 |
| cg24870568 | 6.43E-11 | 4.38E-12 | -7.38 | 16.554961  | -8.69E-02 | 6265806   | 6265929   | NC_000001.10 |
| cg05168378 | 6.43E-11 | 4.38E-12 | -7.38 | 16.5547068 | -6.69E-02 | 100425517 | 100425640 | NC_000007.13 |
| cg04460364 | 6.45E-11 | 4.40E-12 | -7.38 | 16.5506527 | -1.13E-01 | 8370017   | 8370140   | NC_000017.10 |
| cg04122467 | 6.46E-11 | 4.40E-12 | -7.38 | 16.5500053 | -8.34E-02 | 150521777 | 150521900 | NC_000001.10 |
| cg01935122 | 6.47E-11 | 4.41E-12 | -7.38 | 16.5476995 | -3.88E-02 | 41234390  | 41234513  | NC_000015.9  |
| cg03357727 | 6.47E-11 | 4.41E-12 | -7.38 | 16.5473276 | -1.85E-01 | 41360280  | 41360403  | NC_000003.11 |
| cg02959816 | 6.48E-11 | 4.42E-12 | -7.38 | 16.5465981 | -1.31E-01 | 16829666  | 16829789  | NC_000019.9  |
| cg14551562 | 6.48E-11 | 4.42E-12 | -7.38 | 16.5464205 | -1.21E-01 | 130461838 | 130461961 | NC_000009.11 |
| cg07897069 | 6.49E-11 | 4.42E-12 | -7.38 | 16.5447172 | -1.53E-01 | 126564606 | 126564729 | NC_000005.9  |
| cg14325851 | 6.49E-11 | 4.43E-12 | -7.38 | 16.5440094 | -3.24E-02 | 129705132 | 129705255 | NC_000010.10 |
| cg21177112 | 6.50E-11 | 4.43E-12 | -7.38 | 16.5429416 | -1.43E-01 | 63193647  | 63193770  | NC_000012.11 |
| cg14492992 | 6.51E-11 | 4.44E-12 | -7.38 | 16.5418538 | -1.17E-01 | 53101548  | 53101671  | NC_000015.9  |
| cg17104151 | 6.52E-11 | 4.44E-12 | -7.38 | 16.5403699 | -1.38E-01 | 22970132  | 22970255  | NC_000001.10 |
| cg13349179 | 6.52E-11 | 4.44E-12 | -7.38 | 16.5402243 | -3.46E-02 | 134373485 | 134373608 | NC_000006.11 |
| cg13140106 | 6.52E-11 | 4.45E-12 | -7.38 | 16.5395084 | -3.23E-02 | 26825553  | 26825676  | NC_000022.10 |
| cg02997796 | 6.52E-11 | 4.45E-12 | -7.38 | 16.5392038 | -1.46E-01 | 82781482  | 82781605  | NC_000011.9  |
| cg10740282 | 6.54E-11 | 4.46E-12 | -7.38 | 16.5357741 | -1.26E-01 | 56709141  | 56709264  | NC_000006.11 |
| cg14153897 | 6.55E-11 | 4.47E-12 | -7.38 | 16.5346546 | -4.63E-02 | 122513049 | 122513172 | NC_000002.11 |

|                 |          |          |       |            |           |           |           |              |
|-----------------|----------|----------|-------|------------|-----------|-----------|-----------|--------------|
| cg22900705      | 6.55E-11 | 4.47E-12 | -7.38 | 16.5345789 | -3.54E-02 | 155023903 | 155024026 | NC_000001.10 |
| cg00762468      | 6.56E-11 | 4.47E-12 | -7.38 | 16.5337741 | -4.83E-02 | 103568    | 103691    | NC_000016.9  |
| cg03638940      | 6.56E-11 | 4.47E-12 | -7.38 | 16.5335239 | -3.96E-02 | 58149384  | 58149507  | NC_000012.11 |
| cg16101346      | 6.58E-11 | 4.49E-12 | -7.38 | 16.5305968 | -1.82E-01 | 186650479 | 186650602 | NC_000001.10 |
| cg10203223      | 6.58E-11 | 4.49E-12 | -7.38 | 16.5305828 | -8.63E-02 | 114075670 | 114075793 | NC_000013.10 |
| cg02490847      | 6.58E-11 | 4.49E-12 | -7.38 | 16.530383  | -8.05E-02 | 75282051  | 75282174  | NC_000016.9  |
| cg13514049      | 6.59E-11 | 4.50E-12 | -7.38 | 16.5290124 | -1.62E-01 | 110495709 | 110495832 | NC_000009.11 |
| cg03887584      | 6.60E-11 | 4.50E-12 | -7.38 | 16.5269295 | -1.73E-01 | 98130310  | 98130433  | NC_000010.10 |
| cg11381792      | 6.61E-11 | 4.51E-12 | -7.38 | 16.5258877 | -8.60E-02 | 45432451  | 45432574  | NC_000021.8  |
| cg16756419      | 6.63E-11 | 4.53E-12 | -7.38 | 16.5215609 | -5.19E-02 | 6704627   | 6704750   | NC_000011.9  |
| cg00660305      | 6.63E-11 | 4.53E-12 | -7.38 | 16.521449  | -9.55E-02 | 597575    | 597698    | NC_000007.13 |
| cg06263834      | 6.64E-11 | 4.54E-12 | -7.38 | 16.5201134 | -7.00E-02 | 74726469  | 74726592  | NC_000015.9  |
| cg20925954      | 6.65E-11 | 4.54E-12 | -7.38 | 16.5192721 | -1.24E-01 | 112256640 | 112256763 | NC_000010.10 |
| cg08828286      | 6.65E-11 | 4.54E-12 | -7.38 | 16.5192395 | -1.40E-01 | 859680    | 859803    | NC_000019.9  |
| cg18227944      | 6.65E-11 | 4.55E-12 | -7.38 | 16.5181996 | -5.51E-02 | 20439201  | 20439324  | NC_000013.10 |
| cg25241102      | 6.67E-11 | 4.56E-12 | -7.38 | 16.515492  | -8.89E-02 | 138721836 | 138721959 | NC_000002.11 |
| ch.19.16613897R | 6.68E-11 | 4.57E-12 | -7.38 | 16.5135235 | -2.77E-02 | 16752897  | 16753020  | NC_000019.9  |
| cg15043926      | 6.69E-11 | 4.57E-12 | -7.38 | 16.5133514 | -6.69E-02 | 26863112  | 26863235  | NC_000004.11 |
| cg23256971      | 6.70E-11 | 4.57E-12 | -7.37 | 16.5118045 | -7.29E-02 | 71792206  | 71792329  | NC_000011.9  |
| cg08137852      | 6.70E-11 | 4.58E-12 | -7.37 | 16.5117156 | -1.30E-01 | 1856025   | 1856148   | NC_000011.9  |
| cg26846864      | 6.71E-11 | 4.58E-12 | -7.37 | 16.5101329 | -1.62E-01 | 3307326   | 3307449   | NC_000016.9  |
| cg20845544      | 6.71E-11 | 4.59E-12 | -7.37 | 16.5095508 | -4.43E-02 | 26185473  | 26185596  | NC_000001.10 |
| cg13846682      | 6.72E-11 | 4.59E-12 | -7.37 | 16.5079959 | -4.56E-02 | 34931391  | 34931514  | NC_000014.8  |
| cg16745283      | 6.73E-11 | 4.60E-12 | -7.37 | 16.5070366 | -6.44E-02 | 123942416 | 123942539 | NC_000012.11 |
| cg13711950      | 6.73E-11 | 4.60E-12 | -7.37 | 16.5069739 | -7.86E-02 | 43729527  | 43729650  | NC_000020.10 |

|            |          |          |       |            |           |           |           |              |
|------------|----------|----------|-------|------------|-----------|-----------|-----------|--------------|
| cg08766762 | 6.74E-11 | 4.61E-12 | -7.37 | 16.5043662 | -1.67E-01 | 37521698  | 37521821  | NC_000006.11 |
| cg24880997 | 6.74E-11 | 4.61E-12 | -7.37 | 16.5041799 | -1.48E-01 | 30079662  | 30079785  | NC_000006.11 |
| cg06170203 | 6.75E-11 | 4.61E-12 | -7.37 | 16.5035185 | -1.01E-01 | 182897718 | 182897841 | NC_000003.11 |
| cg11461836 | 6.77E-11 | 4.63E-12 | -7.37 | 16.5007995 | -1.76E-01 | 176739316 | 176739439 | NC_000005.9  |
| cg25851152 | 6.77E-11 | 4.63E-12 | -7.37 | 16.4996336 | -1.02E-01 | 104195371 | 104195494 | NC_000010.10 |
| cg13327134 | 6.78E-11 | 4.63E-12 | -7.37 | 16.4992475 | -8.55E-02 | 53618407  | 53618530  | NC_000012.11 |
| cg27525524 | 6.78E-11 | 4.64E-12 | -7.37 | 16.4988879 | -1.31E-01 | 16468313  | 16468436  | NC_000001.10 |
| cg16026035 | 6.78E-11 | 4.64E-12 | -7.37 | 16.4980414 | -1.58E-01 | 70742893  | 70743016  | NC_000005.9  |
| cg20936443 | 6.79E-11 | 4.64E-12 | -7.37 | 16.4969347 | -1.42E-01 | 158517462 | 158517585 | NC_000003.11 |
| cg18816098 | 6.80E-11 | 4.65E-12 | -7.37 | 16.4949554 | -4.76E-02 | 18335182  | 18335305  | NC_000019.9  |
| cg25451249 | 6.81E-11 | 4.66E-12 | -7.37 | 16.4936141 | -1.50E-01 | 19736241  | 19736364  | NC_000011.9  |
| cg00934997 | 6.82E-11 | 4.67E-12 | -7.37 | 16.4920873 | -5.25E-02 | 73957439  | 73957562  | NC_000014.8  |
| cg27639613 | 6.82E-11 | 4.67E-12 | -7.37 | 16.4917882 | -1.73E-01 | 28408263  | 28408386  | NC_000002.11 |
| cg25867973 | 6.83E-11 | 4.67E-12 | -7.37 | 16.4914812 | -9.82E-02 | 77885066  | 77885189  | NC_000017.10 |
| cg13448978 | 6.84E-11 | 4.68E-12 | -7.37 | 16.4899173 | -1.56E-01 | 27961796  | 27961919  | NC_000001.10 |
| cg10586672 | 6.85E-11 | 4.69E-12 | -7.37 | 16.4878864 | -1.83E-01 | 14514657  | 14514780  | NC_000003.11 |
| cg14765969 | 6.86E-11 | 4.69E-12 | -7.37 | 16.4864454 | -4.69E-02 | 164415453 | 164415576 | NC_000004.11 |
| cg06473276 | 6.86E-11 | 4.69E-12 | -7.37 | 16.4863629 | -1.64E-01 | 39399221  | 39399344  | NC_000006.11 |
| cg03883228 | 6.89E-11 | 4.71E-12 | -7.37 | 16.4824589 | -3.48E-02 | 68778570  | 68778693  | NC_000011.9  |
| cg25228510 | 6.89E-11 | 4.72E-12 | -7.37 | 16.4818147 | -5.65E-02 | 62538235  | 62538358  | NC_000010.10 |
| cg20247486 | 6.90E-11 | 4.72E-12 | -7.37 | 16.4804409 | -1.40E-01 | 119544329 | 119544452 | NC_000001.10 |
| cg16578568 | 6.90E-11 | 4.73E-12 | -7.37 | 16.479938  | -1.47E-01 | 29757405  | 29757528  | NC_000016.9  |
| cg10518262 | 6.91E-11 | 4.74E-12 | -7.37 | 16.4779046 | -1.65E-02 | 69455666  | 69455789  | NC_000011.9  |
| cg26888463 | 6.92E-11 | 4.74E-12 | -7.37 | 16.477672  | -2.20E-01 | 73186844  | 73186967  | NC_000016.9  |
| cg19826439 | 6.92E-11 | 4.74E-12 | -7.37 | 16.4774346 | -5.42E-02 | 226297528 | 226297651 | NC_000001.10 |

|            |          |          |       |            |           |           |           |              |
|------------|----------|----------|-------|------------|-----------|-----------|-----------|--------------|
| cg07607008 | 6.92E-11 | 4.74E-12 | -7.37 | 16.4770171 | -4.65E-02 | 47621905  | 47622028  | NC_000007.13 |
| cg07631828 | 6.93E-11 | 4.74E-12 | -7.37 | 16.4761548 | -7.94E-02 | 57582581  | 57582704  | NC_000020.10 |
| cg00458932 | 6.93E-11 | 4.74E-12 | -7.37 | 16.4759842 | -1.17E-01 | 208199465 | 208199588 | NC_000002.11 |
| cg05113410 | 6.93E-11 | 4.75E-12 | -7.37 | 16.4756427 | -1.75E-01 | 102327511 | 102327634 | NC_000002.11 |
| cg18367578 | 6.94E-11 | 4.75E-12 | -7.37 | 16.4743166 | -1.85E-01 | 114166446 | 114166569 | NC_000011.9  |
| cg22915945 | 6.94E-11 | 4.76E-12 | -7.37 | 16.473453  | -1.59E-01 | 24151625  | 24151748  | NC_000008.10 |
| cg06036471 | 6.95E-11 | 4.76E-12 | -7.37 | 16.4721469 | -1.50E-01 | 93861385  | 93861508  | NC_000010.10 |
| cg00532667 | 6.96E-11 | 4.77E-12 | -7.37 | 16.4715622 | -6.35E-02 | 9692836   | 9692959   | NC_000004.11 |
| cg21837443 | 6.96E-11 | 4.77E-12 | -7.37 | 16.470846  | -1.42E-02 | 110481957 | 110482080 | NC_000004.11 |
| cg03186004 | 6.96E-11 | 4.77E-12 | -7.37 | 16.4706566 | -3.94E-02 | 6480288   | 6480411   | NC_000001.10 |
| cg00391031 | 6.98E-11 | 4.78E-12 | -7.37 | 16.4678636 | -1.42E-01 | 72237473  | 72237596  | NC_000010.10 |
| cg18545991 | 6.99E-11 | 4.79E-12 | -7.37 | 16.4669239 | -1.11E-01 | 45740677  | 45740800  | NC_000015.9  |
| cg02054108 | 6.99E-11 | 4.79E-12 | -7.37 | 16.4660826 | -9.15E-02 | 61607478  | 61607601  | NC_000002.11 |
| cg12556134 | 7.00E-11 | 4.79E-12 | -7.37 | 16.4657077 | -1.37E-01 | 35201610  | 35201733  | NC_000020.10 |
| cg13169491 | 7.00E-11 | 4.79E-12 | -7.37 | 16.465635  | -1.22E-01 | 128368940 | 128369063 | NC_000007.13 |
| cg00906908 | 7.00E-11 | 4.80E-12 | -7.37 | 16.4648833 | -1.48E-01 | 1514623   | 1514746   | NC_000007.13 |
| cg07969769 | 7.00E-11 | 4.80E-12 | -7.37 | 16.4642633 | -6.90E-02 | 49961846  | 49961969  | NC_000005.9  |
| cg05596650 | 7.01E-11 | 4.80E-12 | -7.37 | 16.4636333 | -9.92E-02 | 37060693  | 37060816  | NC_000006.11 |
| cg04185310 | 7.01E-11 | 4.81E-12 | -7.37 | 16.4630779 | -1.34E-01 | 47717244  | 47717367  | NC_000002.11 |
| cg09999563 | 7.02E-11 | 4.81E-12 | -7.37 | 16.4615326 | -6.55E-02 | 57253666  | 57253789  | NC_000004.11 |
| cg08423142 | 7.03E-11 | 4.82E-12 | -7.37 | 16.4609776 | -1.39E-01 | 59588622  | 59588745  | NC_000015.9  |
| cg19884965 | 7.03E-11 | 4.82E-12 | -7.37 | 16.4609377 | -6.90E-02 | 79150305  | 79150428  | NC_000011.9  |
| cg16504939 | 7.03E-11 | 4.82E-12 | -7.37 | 16.4607283 | -4.08E-02 | 10263023  | 10263146  | NC_000002.11 |
| cg09781307 | 7.03E-11 | 4.82E-12 | -7.37 | 16.4606463 | -1.24E-01 | 27648324  | 27648447  | NC_000011.9  |
| cg25820960 | 7.04E-11 | 4.83E-12 | -7.37 | 16.458165  | -1.50E-01 | 141176036 | 141176159 | NC_000003.11 |

|            |          |          |       |            |           |           |           |              |
|------------|----------|----------|-------|------------|-----------|-----------|-----------|--------------|
| cg16920551 | 7.05E-11 | 4.83E-12 | -7.37 | 16.4578077 | -1.30E-01 | 114136073 | 114136196 | NC_000010.10 |
| cg27517897 | 7.06E-11 | 4.84E-12 | -7.37 | 16.4557449 | -6.97E-02 | 45874080  | 45874203  | NC_000019.9  |
| cg18402166 | 7.06E-11 | 4.84E-12 | -7.37 | 16.4553414 | -1.35E-01 | 62778279  | 62778402  | NC_000017.10 |
| cg00003578 | 7.07E-11 | 4.85E-12 | -7.36 | 16.4546948 | -1.18E-01 | 12600529  | 12600652  | NC_000001.10 |
| cg08098420 | 7.07E-11 | 4.85E-12 | -7.36 | 16.4545523 | -1.49E-01 | 66164601  | 66164724  | NC_000016.9  |
| cg10884614 | 7.07E-11 | 4.85E-12 | -7.36 | 16.4538445 | -6.59E-02 | 7215252   | 7215375   | NC_000017.10 |
| cg01602621 | 7.08E-11 | 4.86E-12 | -7.36 | 16.4531263 | -1.51E-01 | 11689813  | 11689936  | NC_000019.9  |
| cg19286986 | 7.08E-11 | 4.86E-12 | -7.36 | 16.4530846 | -5.88E-02 | 6931017   | 6931140   | NC_000012.11 |
| cg12725760 | 7.09E-11 | 4.86E-12 | -7.36 | 16.4515562 | -1.37E-01 | 192873912 | 192874035 | NC_000001.10 |
| cg05882691 | 7.11E-11 | 4.88E-12 | -7.36 | 16.4489849 | -8.82E-02 | 27777739  | 27777862  | NC_000006.11 |
| cg06784218 | 7.11E-11 | 4.88E-12 | -7.36 | 16.4489499 | -1.24E-01 | 46089804  | 46089927  | NC_000001.10 |
| cg15158847 | 7.11E-11 | 4.88E-12 | -7.36 | 16.4483636 | -1.33E-01 | 207095315 | 207095438 | NC_000001.10 |
| cg09662852 | 7.11E-11 | 4.88E-12 | -7.36 | 16.4479159 | -1.30E-01 | 11707685  | 11707808  | NC_000016.9  |
| cg03394159 | 7.12E-11 | 4.89E-12 | -7.36 | 16.4468463 | -1.18E-01 | 29197844  | 29197967  | NC_000008.10 |
| cg18900812 | 7.12E-11 | 4.89E-12 | -7.36 | 16.4464507 | -1.24E-01 | 36646127  | 36646250  | NC_000006.11 |
| cg04476341 | 7.12E-11 | 4.89E-12 | -7.36 | 16.4462892 | -1.45E-01 | 669733    | 669856    | NC_000005.9  |
| cg10460946 | 7.13E-11 | 4.90E-12 | -7.36 | 16.4451492 | -1.02E-01 | 76247467  | 76247590  | NC_000017.10 |
| cg21747160 | 7.13E-11 | 4.90E-12 | -7.36 | 16.4450268 | -9.02E-02 | 49504981  | 49505104  | NC_000012.11 |
| cg10492240 | 7.14E-11 | 4.90E-12 | -7.36 | 16.4435567 | -1.65E-01 | 3313636   | 3313759   | NC_000004.11 |
| cg11973777 | 7.15E-11 | 4.91E-12 | -7.36 | 16.4425786 | -6.25E-02 | 8244085   | 8244208   | NC_000008.10 |
| cg21365364 | 7.15E-11 | 4.91E-12 | -7.36 | 16.4424338 | -8.47E-02 | 18568287  | 18568410  | NC_000020.10 |
| cg06357561 | 7.15E-11 | 4.91E-12 | -7.36 | 16.441985  | -2.32E-01 | 40439501  | 40439624  | NC_000017.10 |
| cg25810857 | 7.16E-11 | 4.92E-12 | -7.36 | 16.4400517 | -1.51E-01 | 75279120  | 75279243  | NC_000017.10 |
| cg05102422 | 7.17E-11 | 4.92E-12 | -7.36 | 16.4398094 | -4.94E-02 | 68118149  | 68118272  | NC_000014.8  |
| cg01844235 | 7.17E-11 | 4.93E-12 | -7.36 | 16.4391739 | -1.50E-01 | 23487969  | 23488092  | NC_000022.10 |

|            |          |          |       |            |           |           |           |              |
|------------|----------|----------|-------|------------|-----------|-----------|-----------|--------------|
| cg03249047 | 7.18E-11 | 4.93E-12 | -7.36 | 16.4374584 | -1.16E-01 | 80872472  | 80872595  | NC_000017.10 |
| cg14893690 | 7.20E-11 | 4.95E-12 | -7.36 | 16.4351693 | -5.14E-02 | 48807223  | 48807346  | NC_000013.10 |
| cg20690667 | 7.21E-11 | 4.95E-12 | -7.36 | 16.4337288 | -1.89E-01 | 30652228  | 30652351  | NC_000006.11 |
| cg20373635 | 7.23E-11 | 4.97E-12 | -7.36 | 16.4298275 | -1.52E-01 | 3466795   | 3466918   | NC_000010.10 |
| cg19130175 | 7.24E-11 | 4.97E-12 | -7.36 | 16.4295967 | -7.36E-02 | 61354875  | 61354998  | NC_000011.9  |
| cg15952840 | 7.25E-11 | 4.98E-12 | -7.36 | 16.4282393 | -1.44E-01 | 11451312  | 11451435  | NC_000008.10 |
| cg01928779 | 7.26E-11 | 4.99E-12 | -7.36 | 16.4266474 | -3.78E-02 | 34125731  | 34125854  | NC_000009.11 |
| cg25523704 | 7.27E-11 | 5.00E-12 | -7.36 | 16.4250006 | -1.21E-01 | 218621486 | 218621609 | NC_000002.11 |
| cg22621731 | 7.27E-11 | 5.00E-12 | -7.36 | 16.4248323 | -5.70E-02 | 20404881  | 20405004  | NC_000006.11 |
| cg11599718 | 7.29E-11 | 5.01E-12 | -7.36 | 16.4217704 | -1.47E-01 | 123357128 | 123357251 | NC_000012.11 |
| cg20911165 | 7.29E-11 | 5.01E-12 | -7.36 | 16.4216322 | -1.46E-01 | 1244397   | 1244520   | NC_000011.9  |
| cg04263391 | 7.29E-11 | 5.02E-12 | -7.36 | 16.4212465 | -1.16E-01 | 134578261 | 134578384 | NC_000010.10 |
| cg14553881 | 7.31E-11 | 5.03E-12 | -7.36 | 16.4184632 | -7.08E-02 | 79361650  | 79361773  | NC_000017.10 |
| cg17954957 | 7.32E-11 | 5.04E-12 | -7.36 | 16.4170632 | -3.12E-02 | 56136072  | 56136195  | NC_000019.9  |
| cg20901170 | 7.33E-11 | 5.04E-12 | -7.36 | 16.4166163 | -1.24E-01 | 43919306  | 43919429  | NC_000007.13 |
| cg13072214 | 7.33E-11 | 5.04E-12 | -7.36 | 16.4157388 | -1.27E-01 | 145060799 | 145060922 | NC_000008.10 |
| cg21820652 | 7.33E-11 | 5.04E-12 | -7.36 | 16.4156576 | -1.41E-01 | 104902678 | 104902801 | NC_000014.8  |
| cg05742564 | 7.34E-11 | 5.05E-12 | -7.36 | 16.4148698 | -4.45E-02 | 23568708  | 23568831  | NC_000016.9  |
| cg01892528 | 7.34E-11 | 5.05E-12 | -7.36 | 16.414586  | -4.02E-02 | 43485485  | 43485608  | NC_000022.10 |
| cg02483458 | 7.37E-11 | 5.07E-12 | -7.36 | 16.4109243 | -4.66E-02 | 21030859  | 21030982  | NC_000017.10 |
| cg10584914 | 7.38E-11 | 5.08E-12 | -7.36 | 16.4090386 | -9.35E-02 | 113680977 | 113681100 | NC_000013.10 |
| cg06753439 | 7.40E-11 | 5.09E-12 | -7.36 | 16.4060961 | -1.71E-01 | 33245488  | 33245611  | NC_000006.11 |
| cg01235795 | 7.41E-11 | 5.10E-12 | -7.36 | 16.4054698 | -8.44E-02 | 6396083   | 6396206   | NC_000012.11 |
| cg09130963 | 7.41E-11 | 5.10E-12 | -7.36 | 16.4050456 | -3.60E-02 | 55353157  | 55353280  | NC_000001.10 |
| cg10172675 | 7.42E-11 | 5.10E-12 | -7.36 | 16.4039988 | -1.50E-01 | 104132683 | 104132806 | NC_000008.10 |



|            |          |          |       |            |           |           |           |              |
|------------|----------|----------|-------|------------|-----------|-----------|-----------|--------------|
| cg22524332 | 7.42E-11 | 5.11E-12 | -7.36 | 16.4032478 | -1.41E-01 | 17960353  | 17960476  | NC_000001.10 |
| cg10887309 | 7.42E-11 | 5.11E-12 | -7.36 | 16.402976  | -5.88E-02 | 49412603  | 49412726  | NC_000012.11 |
| cg20984924 | 7.43E-11 | 5.11E-12 | -7.36 | 16.4021098 | -9.54E-02 | 31005837  | 31005960  | NC_000006.11 |
| cg01255465 | 7.43E-11 | 5.12E-12 | -7.36 | 16.4017926 | -8.23E-02 | 31619581  | 31619704  | NC_000006.11 |
| cg26571739 | 7.44E-11 | 5.12E-12 | -7.36 | 16.4002206 | -9.10E-02 | 6772688   | 6772811   | NC_000019.9  |
| cg14532541 | 7.44E-11 | 5.12E-12 | -7.36 | 16.4001437 | -1.23E-01 | 102095139 | 102095262 | NC_000014.8  |
| cg00313642 | 7.46E-11 | 5.13E-12 | -7.36 | 16.3982831 | -6.16E-02 | 196014711 | 196014834 | NC_000003.11 |
| cg26764980 | 7.46E-11 | 5.14E-12 | -7.35 | 16.3971607 | -6.42E-02 | 35235229  | 35235352  | NC_000008.10 |
| cg15050577 | 7.47E-11 | 5.15E-12 | -7.35 | 16.3959817 | -5.88E-02 | 27024100  | 27024223  | NC_000001.10 |
| cg22494505 | 7.48E-11 | 5.15E-12 | -7.35 | 16.3949826 | -6.03E-02 | 26560657  | 26560780  | NC_000001.10 |
| cg14022550 | 7.48E-11 | 5.15E-12 | -7.35 | 16.3946264 | -8.98E-02 | 158184192 | 158184315 | NC_000002.11 |
| cg02653117 | 7.49E-11 | 5.16E-12 | -7.35 | 16.3940533 | -7.67E-02 | 32938824  | 32938947  | NC_000006.11 |
| cg14807793 | 7.49E-11 | 5.16E-12 | -7.35 | 16.3929062 | -7.49E-02 | 34164564  | 34164687  | NC_000006.11 |
| cg19853760 | 7.50E-11 | 5.16E-12 | -7.35 | 16.3925462 | -1.12E-01 | 38071677  | 38071800  | NC_000022.10 |
| cg15674175 | 7.50E-11 | 5.17E-12 | -7.35 | 16.3918364 | -4.02E-02 | 278095    | 278218    | NC_000020.10 |
| cg12769994 | 7.50E-11 | 5.17E-12 | -7.35 | 16.3918277 | -9.44E-02 | 149784571 | 149784694 | NC_000001.10 |
| cg19453154 | 7.50E-11 | 5.17E-12 | -7.35 | 16.3915682 | -6.38E-02 | 157250627 | 157250750 | NC_000003.11 |
| cg23365392 | 7.51E-11 | 5.18E-12 | -7.35 | 16.3902492 | -9.24E-02 | 99970074  | 99970197  | NC_000007.13 |
| cg04047127 | 7.52E-11 | 5.18E-12 | -7.35 | 16.3897512 | -4.74E-02 | 203500074 | 203500197 | NC_000002.11 |
| cg25221207 | 7.52E-11 | 5.18E-12 | -7.35 | 16.3895843 | -1.41E-01 | 119555633 | 119555756 | NC_000011.9  |
| cg02090654 | 7.52E-11 | 5.18E-12 | -7.35 | 16.388756  | -1.48E-01 | 126698344 | 126698467 | NC_000007.13 |
| cg03065165 | 7.54E-11 | 5.20E-12 | -7.35 | 16.3863941 | -1.64E-01 | 228337503 | 228337626 | NC_000001.10 |
| cg01016637 | 7.54E-11 | 5.20E-12 | -7.35 | 16.3860629 | -7.20E-02 | 40499947  | 40500070  | NC_000012.11 |
| cg03126821 | 7.55E-11 | 5.20E-12 | -7.35 | 16.3854274 | -6.81E-02 | 99076526  | 99076649  | NC_000008.10 |
| cg01397661 | 7.55E-11 | 5.20E-12 | -7.35 | 16.3852719 | -1.72E-02 | 6098964   | 6099087   | NC_000007.13 |

|            |          |          |       |            |           |           |           |              |
|------------|----------|----------|-------|------------|-----------|-----------|-----------|--------------|
| cg25943481 | 7.55E-11 | 5.21E-12 | -7.35 | 16.3844691 | -1.55E-01 | 39505883  | 39506006  | NC_000015.9  |
| cg13681496 | 7.57E-11 | 5.22E-12 | -7.35 | 16.3817366 | -1.05E-01 | 95817516  | 95817639  | NC_000009.11 |
| cg17709049 | 7.58E-11 | 5.23E-12 | -7.35 | 16.3808159 | -7.04E-02 | 106183120 | 106183243 | NC_000007.13 |
| cg23204384 | 7.58E-11 | 5.23E-12 | -7.35 | 16.3804134 | -7.06E-02 | 29994089  | 29994212  | NC_000020.10 |
| cg23909079 | 7.58E-11 | 5.23E-12 | -7.35 | 16.3803258 | -1.53E-01 | 87403707  | 87403830  | NC_000010.10 |
| cg23895722 | 7.59E-11 | 5.23E-12 | -7.35 | 16.3798256 | -1.51E-01 | 128776112 | 128776235 | NC_000011.9  |
| cg05102190 | 7.59E-11 | 5.23E-12 | -7.35 | 16.3795567 | -6.83E-02 | 143078242 | 143078365 | NC_000007.13 |
| cg19255783 | 7.59E-11 | 5.24E-12 | -7.35 | 16.3788213 | -1.43E-01 | 84035953  | 84036076  | NC_000004.11 |
| cg23083049 | 7.60E-11 | 5.24E-12 | -7.35 | 16.3786877 | -1.58E-01 | 126462779 | 126462902 | NC_000011.9  |
| cg05929132 | 7.60E-11 | 5.24E-12 | -7.35 | 16.3781657 | -6.12E-02 | 66586024  | 66586147  | NC_000015.9  |
| cg19189310 | 7.60E-11 | 5.24E-12 | -7.35 | 16.3778533 | -5.46E-02 | 34393779  | 34393902  | NC_000006.11 |
| cg02307880 | 7.62E-11 | 5.25E-12 | -7.35 | 16.3755272 | -7.65E-02 | 101566857 | 101566980 | NC_000007.13 |
| cg17914753 | 7.62E-11 | 5.25E-12 | -7.35 | 16.3755226 | -4.24E-02 | 41699364  | 41699487  | NC_000019.9  |
| cg22237425 | 7.64E-11 | 5.27E-12 | -7.35 | 16.372088  | -1.57E-01 | 738822    | 738945    | NC_000017.10 |
| cg25650256 | 7.65E-11 | 5.27E-12 | -7.35 | 16.37197   | -1.29E-01 | 171538557 | 171538680 | NC_000005.9  |
| cg14195915 | 7.66E-11 | 5.29E-12 | -7.35 | 16.3695975 | -6.04E-02 | 29507864  | 29507987  | NC_000001.10 |
| cg04949225 | 7.67E-11 | 5.29E-12 | -7.35 | 16.3686562 | -1.79E-01 | 50796845  | 50796968  | NC_000013.10 |
| cg23741006 | 7.67E-11 | 5.29E-12 | -7.35 | 16.3682827 | -1.30E-01 | 59634191  | 59634314  | NC_000011.9  |
| cg18428707 | 7.68E-11 | 5.30E-12 | -7.35 | 16.3677952 | -5.51E-02 | 67281983  | 67282106  | NC_000016.9  |
| cg17311132 | 7.69E-11 | 5.30E-12 | -7.35 | 16.3664765 | -1.67E-01 | 88693546  | 88693669  | NC_000012.11 |
| cg04499506 | 7.69E-11 | 5.31E-12 | -7.35 | 16.3653042 | -8.27E-02 | 785867    | 785990    | NC_000005.9  |
| cg08360666 | 7.69E-11 | 5.31E-12 | -7.35 | 16.365272  | -1.10E-01 | 2488496   | 2488619   | NC_000020.10 |
| cg18760360 | 7.70E-11 | 5.31E-12 | -7.35 | 16.3647985 | -1.56E-01 | 60953215  | 60953338  | NC_000015.9  |
| cg11714341 | 7.70E-11 | 5.31E-12 | -7.35 | 16.3644412 | -1.37E-01 | 158605914 | 158606037 | NC_000005.9  |
| cg20196291 | 7.70E-11 | 5.32E-12 | -7.35 | 16.3637767 | -8.46E-02 | 116164849 | 116164972 | NC_000010.10 |

|              |          |          |       |            |           |           |           |              |
|--------------|----------|----------|-------|------------|-----------|-----------|-----------|--------------|
| cg16307860   | 7.71E-11 | 5.32E-12 | -7.35 | 16.3628875 | -6.99E-02 | 222886951 | 222887074 | NC_000001.10 |
| cg09399878   | 7.72E-11 | 5.33E-12 | -7.35 | 16.3617626 | -1.18E-01 | 67326220  | 67326343  | NC_000011.9  |
| cg03975815   | 7.72E-11 | 5.33E-12 | -7.35 | 16.3616826 | -1.58E-01 | 240270565 | 240270688 | NC_000001.10 |
| cg10380165   | 7.73E-11 | 5.34E-12 | -7.35 | 16.3604309 | -7.06E-02 | 50360598  | 50360721  | NC_000014.8  |
| cg01338834   | 7.74E-11 | 5.34E-12 | -7.35 | 16.3593107 | -7.22E-02 | 40720919  | 40721042  | NC_000021.8  |
| cg19115610   | 7.74E-11 | 5.34E-12 | -7.35 | 16.3587709 | -1.15E-01 | 50348255  | 50348378  | NC_000007.13 |
| cg16295461   | 7.74E-11 | 5.35E-12 | -7.35 | 16.3581942 | -1.76E-01 | 154058383 | 154058506 | NC_000004.11 |
| cg09514588   | 7.75E-11 | 5.35E-12 | -7.35 | 16.3577613 | -1.49E-01 | 118586556 | 118586679 | NC_000010.10 |
| cg13826618   | 7.75E-11 | 5.35E-12 | -7.35 | 16.3571781 | -5.20E-02 | 11828697  | 11828820  | NC_000002.11 |
| cg04823796   | 7.75E-11 | 5.35E-12 | -7.35 | 16.3571745 | -5.56E-02 | 139948927 | 139949050 | NC_000009.11 |
| cg07383076   | 7.75E-11 | 5.36E-12 | -7.35 | 16.3567687 | -1.54E-01 | 48266305  | 48266428  | NC_000016.9  |
| ch.6.347904R | 7.77E-11 | 5.36E-12 | -7.35 | 16.3552334 | -5.33E-02 | 13786377  | 13786500  | NC_000006.11 |
| cg10378898   | 7.77E-11 | 5.36E-12 | -7.35 | 16.3550216 | -4.73E-02 | 55738124  | 55738247  | NC_000014.8  |
| cg24475146   | 7.77E-11 | 5.37E-12 | -7.35 | 16.3539725 | -4.92E-02 | 154530781 | 154530904 | NC_000001.10 |
| cg18353563   | 7.80E-11 | 5.39E-12 | -7.35 | 16.3512252 | -5.62E-02 | 127390935 | 127391058 | NC_000003.11 |
| cg03628148   | 7.82E-11 | 5.40E-12 | -7.35 | 16.3485159 | -2.73E-02 | 18415880  | 18416003  | NC_000011.9  |
| cg01303236   | 7.83E-11 | 5.41E-12 | -7.35 | 16.3471781 | -1.68E-01 | 73934842  | 73934965  | NC_000005.9  |
| cg06927337   | 7.85E-11 | 5.43E-12 | -7.35 | 16.3432874 | -1.69E-01 | 2557028   | 2557151   | NC_000007.13 |
| cg03093786   | 7.86E-11 | 5.43E-12 | -7.35 | 16.3430294 | -4.38E-02 | 27413786  | 27413909  | NC_000016.9  |
| cg06098801   | 7.86E-11 | 5.43E-12 | -7.35 | 16.342677  | -1.51E-01 | 19097036  | 19097159  | NC_000016.9  |
| cg09082823   | 7.87E-11 | 5.44E-12 | -7.35 | 16.3407778 | -1.54E-01 | 17564696  | 17564819  | NC_000011.9  |
| cg19491415   | 7.88E-11 | 5.45E-12 | -7.35 | 16.3402983 | -6.21E-02 | 32217948  | 32218071  | NC_000010.10 |
| cg13783323   | 7.89E-11 | 5.45E-12 | -7.34 | 16.3389096 | -1.03E-01 | 26347092  | 26347215  | NC_000001.10 |
| cg03668274   | 7.91E-11 | 5.47E-12 | -7.34 | 16.3361212 | -1.12E-01 | 54426903  | 54427026  | NC_000012.11 |
| cg00423597   | 7.91E-11 | 5.47E-12 | -7.34 | 16.3355135 | -1.26E-01 | 33235531  | 33235654  | NC_000001.10 |

|            |          |          |       |            |           |           |           |              |
|------------|----------|----------|-------|------------|-----------|-----------|-----------|--------------|
| cg06817840 | 7.92E-11 | 5.47E-12 | -7.34 | 16.3351235 | -3.42E-02 | 122744213 | 122744336 | NC_000004.11 |
| cg25568061 | 7.93E-11 | 5.48E-12 | -7.34 | 16.3335589 | -1.30E-01 | 71291953  | 71292076  | NC_000002.11 |
| cg11329482 | 7.94E-11 | 5.49E-12 | -7.34 | 16.331743  | -1.34E-01 | 91493337  | 91493460  | NC_000012.11 |
| cg12658400 | 7.96E-11 | 5.50E-12 | -7.34 | 16.3297334 | -1.54E-01 | 1974826   | 1974949   | NC_000001.10 |
| cg02700845 | 7.96E-11 | 5.51E-12 | -7.34 | 16.3293977 | -4.41E-02 | 135003128 | 135003251 | NC_000002.11 |
| cg20881888 | 7.96E-11 | 5.51E-12 | -7.34 | 16.3293209 | -1.76E-01 | 50383079  | 50383202  | NC_000003.11 |
| cg10786622 | 7.97E-11 | 5.52E-12 | -7.34 | 16.3275015 | -4.47E-02 | 17706560  | 17706683  | NC_000006.11 |
| cg11683364 | 7.97E-11 | 5.52E-12 | -7.34 | 16.3271579 | -9.80E-02 | 202205348 | 202205471 | NC_000001.10 |
| cg27303933 | 7.99E-11 | 5.53E-12 | -7.34 | 16.3251784 | -1.44E-01 | 56029418  | 56029541  | NC_000005.9  |
| cg17277821 | 8.01E-11 | 5.54E-12 | -7.34 | 16.3228039 | -4.58E-02 | 123942602 | 123942725 | NC_000012.11 |
| cg13093793 | 8.02E-11 | 5.55E-12 | -7.34 | 16.3214364 | -7.16E-02 | 35099518  | 35099641  | NC_000014.8  |
| cg25450061 | 8.04E-11 | 5.57E-12 | -7.34 | 16.3189108 | -6.81E-02 | 86376842  | 86376965  | NC_000008.10 |
| cg16689761 | 8.04E-11 | 5.57E-12 | -7.34 | 16.318662  | -1.90E-01 | 141360223 | 141360346 | NC_000007.13 |
| cg25948591 | 8.05E-11 | 5.58E-12 | -7.34 | 16.3170625 | -1.00E-01 | 42676997  | 42677120  | NC_000017.10 |
| cg00316341 | 8.06E-11 | 5.58E-12 | -7.34 | 16.3165539 | -1.46E-01 | 16898311  | 16898434  | NC_000010.10 |
| cg19653211 | 8.06E-11 | 5.58E-12 | -7.34 | 16.3159086 | -1.44E-01 | 18785792  | 18785915  | NC_000011.9  |
| cg09507567 | 8.06E-11 | 5.59E-12 | -7.34 | 16.315235  | -1.63E-01 | 124027408 | 124027531 | NC_000010.10 |
| cg21988972 | 8.07E-11 | 5.59E-12 | -7.34 | 16.3146003 | -1.13E-01 | 100759623 | 100759746 | NC_000002.11 |
| cg01798385 | 8.07E-11 | 5.59E-12 | -7.34 | 16.3140459 | -1.46E-01 | 47284667  | 47284790  | NC_000020.10 |
| cg02398663 | 8.08E-11 | 5.59E-12 | -7.34 | 16.3138636 | -2.77E-02 | 45663510  | 45663633  | NC_000018.9  |
| cg03919650 | 8.08E-11 | 5.59E-12 | -7.34 | 16.3138244 | -1.15E-01 | 3306855   | 3306978   | NC_000016.9  |
| cg19576798 | 8.09E-11 | 5.60E-12 | -7.34 | 16.31244   | -1.12E-01 | 116893334 | 116893457 | NC_000012.11 |
| cg26015973 | 8.09E-11 | 5.60E-12 | -7.34 | 16.3119835 | -1.13E-01 | 103599705 | 103599828 | NC_000010.10 |
| cg15193228 | 8.11E-11 | 5.62E-12 | -7.34 | 16.3095947 | -1.71E-01 | 30855332  | 30855455  | NC_000022.10 |
| cg21593513 | 8.11E-11 | 5.62E-12 | -7.34 | 16.3087662 | -3.12E-02 | 109915530 | 109915653 | NC_000012.11 |

|            |          |          |       |            |           |           |           |              |
|------------|----------|----------|-------|------------|-----------|-----------|-----------|--------------|
| cg26736099 | 8.12E-11 | 5.63E-12 | -7.34 | 16.3077769 | -7.74E-02 | 61989275  | 61989398  | NC_000017.10 |
| cg01345136 | 8.14E-11 | 5.64E-12 | -7.34 | 16.305242  | -1.20E-01 | 132904123 | 132904246 | NC_000012.11 |
| cg02959609 | 8.15E-11 | 5.65E-12 | -7.34 | 16.3044596 | -1.46E-01 | 151693503 | 151693626 | NC_000001.10 |
| cg22007638 | 8.15E-11 | 5.65E-12 | -7.34 | 16.3040478 | -8.99E-02 | 3398886   | 3399009   | NC_000001.10 |
| cg19239930 | 8.16E-11 | 5.65E-12 | -7.34 | 16.3035997 | -1.10E-01 | 54368806  | 54368929  | NC_000019.9  |
| cg03020545 | 8.16E-11 | 5.66E-12 | -7.34 | 16.3026364 | -1.05E-01 | 73330358  | 73330481  | NC_000006.11 |
| cg09649347 | 8.17E-11 | 5.67E-12 | -7.34 | 16.3012344 | -1.39E-01 | 116307551 | 116307674 | NC_000010.10 |
| cg15345388 | 8.17E-11 | 5.67E-12 | -7.34 | 16.3010441 | -1.42E-01 | 62116697  | 62116820  | NC_000002.11 |
| cg11053466 | 8.18E-11 | 5.67E-12 | -7.34 | 16.2998411 | -1.33E-01 | 6648770   | 6648893   | NC_000012.11 |
| cg03134947 | 8.18E-11 | 5.68E-12 | -7.34 | 16.2996516 | -1.37E-01 | 28996021  | 28996144  | NC_000016.9  |
| cg22363368 | 8.19E-11 | 5.68E-12 | -7.34 | 16.2993408 | -1.59E-01 | 59126860  | 59126983  | NC_000002.11 |
| cg21148594 | 8.20E-11 | 5.69E-12 | -7.34 | 16.2978894 | -1.19E-01 | 65704156  | 65704279  | NC_000014.8  |
| cg24438687 | 8.21E-11 | 5.69E-12 | -7.34 | 16.2968411 | -3.70E-02 | 155145879 | 155146002 | NC_000001.10 |
| cg10601968 | 8.21E-11 | 5.69E-12 | -7.34 | 16.2963886 | -5.84E-02 | 137090200 | 137090323 | NC_000005.9  |
| cg09657673 | 8.21E-11 | 5.70E-12 | -7.34 | 16.2961256 | -7.81E-02 | 24769827  | 24769950  | NC_000016.9  |
| cg11419575 | 8.21E-11 | 5.70E-12 | -7.34 | 16.2960209 | -1.35E-01 | 153057378 | 153057501 | NC_000002.11 |
| cg14582226 | 8.22E-11 | 5.70E-12 | -7.34 | 16.2953776 | -2.29E-02 | 116164743 | 116164866 | NC_000007.13 |
| cg19460792 | 8.22E-11 | 5.70E-12 | -7.34 | 16.2952688 | -1.44E-01 | 47676823  | 47676946  | NC_000015.9  |
| cg10816700 | 8.22E-11 | 5.70E-12 | -7.34 | 16.2949592 | -4.80E-02 | 4291837   | 4291960   | NC_000004.11 |
| cg21818361 | 8.22E-11 | 5.70E-12 | -7.34 | 16.2945365 | -5.12E-02 | 150740393 | 150740516 | NC_000006.11 |
| cg19197212 | 8.23E-11 | 5.71E-12 | -7.34 | 16.2942622 | -4.21E-02 | 62457456  | 62457579  | NC_000015.9  |
| cg06570967 | 8.23E-11 | 5.71E-12 | -7.34 | 16.2939432 | -1.77E-01 | 96989650  | 96989773  | NC_000010.10 |
| cg25103766 | 8.23E-11 | 5.71E-12 | -7.34 | 16.293839  | -5.44E-02 | 120838445 | 120838568 | NC_000001.10 |
| cg16776981 | 8.23E-11 | 5.71E-12 | -7.34 | 16.2935846 | -1.84E-01 | 79428142  | 79428265  | NC_000017.10 |
| cg23921459 | 8.23E-11 | 5.71E-12 | -7.34 | 16.2931742 | -8.69E-02 | 207224567 | 207224690 | NC_000001.10 |

|               |          |          |       |            |           |           |           |              |
|---------------|----------|----------|-------|------------|-----------|-----------|-----------|--------------|
| cg14361409    | 8.23E-11 | 5.71E-12 | -7.34 | 16.2929887 | -7.90E-02 | 104584098 | 104584221 | NC_000014.8  |
| cg09785394    | 8.23E-11 | 5.71E-12 | -7.34 | 16.292971  | -1.40E-01 | 131585563 | 131585686 | NC_000002.11 |
| cg07562487    | 8.24E-11 | 5.71E-12 | -7.34 | 16.2928191 | -1.28E-01 | 30759432  | 30759555  | NC_000004.11 |
| ch.2.2787684R | 8.24E-11 | 5.72E-12 | -7.34 | 16.2916927 | -4.20E-02 | 133314520 | 133314643 | NC_000002.11 |
| cg14731570    | 8.25E-11 | 5.73E-12 | -7.34 | 16.291026  | -9.76E-02 | 231917214 | 231917337 | NC_000002.11 |
| cg17037491    | 8.25E-11 | 5.73E-12 | -7.34 | 16.2904959 | -5.32E-02 | 25280491  | 25280614  | NC_000006.11 |
| cg13537102    | 8.26E-11 | 5.73E-12 | -7.34 | 16.2894457 | -1.21E-01 | 132360781 | 132360904 | NC_000009.11 |
| cg23939875    | 8.26E-11 | 5.74E-12 | -7.34 | 16.2891439 | -8.16E-02 | 8832272   | 8832395   | NC_000011.9  |
| cg12652585    | 8.30E-11 | 5.76E-12 | -7.34 | 16.2852409 | -9.18E-02 | 2634373   | 2634496   | NC_000006.11 |
| cg07810476    | 8.30E-11 | 5.76E-12 | -7.34 | 16.2849974 | -1.29E-01 | 59374884  | 59375007  | NC_000001.10 |
| cg03133777    | 8.30E-11 | 5.76E-12 | -7.34 | 16.2848818 | -7.38E-02 | 170361364 | 170361487 | NC_000002.11 |
| cg02959939    | 8.30E-11 | 5.77E-12 | -7.34 | 16.2839861 | -1.18E-01 | 47813025  | 47813148  | NC_000021.8  |
| cg25161283    | 8.30E-11 | 5.77E-12 | -7.34 | 16.2839801 | -6.10E-02 | 20103922  | 20104045  | NC_000022.10 |
| cg14107975    | 8.33E-11 | 5.78E-12 | -7.33 | 16.2811903 | -4.81E-02 | 96076498  | 96076621  | NC_000011.9  |
| cg04812351    | 8.37E-11 | 5.81E-12 | -7.33 | 16.2763254 | -1.41E-01 | 73177995  | 73178118  | NC_000004.11 |
| cg09763439    | 8.37E-11 | 5.82E-12 | -7.33 | 16.2753761 | -1.13E-01 | 3473380   | 3473503   | NC_000006.11 |
| cg23675433    | 8.38E-11 | 5.82E-12 | -7.33 | 16.2748086 | -2.48E-02 | 131934541 | 131934664 | NC_000010.10 |
| cg07119067    | 8.38E-11 | 5.82E-12 | -7.33 | 16.274748  | -1.61E-01 | 115487685 | 115487808 | NC_000011.9  |
| cg23063374    | 8.38E-11 | 5.82E-12 | -7.33 | 16.2743058 | -1.14E-01 | 22030131  | 22030254  | NC_000013.10 |
| cg12624641    | 8.39E-11 | 5.83E-12 | -7.33 | 16.2736311 | -9.82E-02 | 90420569  | 90420692  | NC_000014.8  |
| cg16681830    | 8.39E-11 | 5.83E-12 | -7.33 | 16.2734549 | -3.56E-02 | 62586920  | 62587043  | NC_000020.10 |
| cg01452581    | 8.39E-11 | 5.83E-12 | -7.33 | 16.2732967 | -1.50E-01 | 30131915  | 30132038  | NC_000006.11 |
| cg15833339    | 8.42E-11 | 5.85E-12 | -7.33 | 16.2701444 | -7.01E-02 | 86862273  | 86862396  | NC_000001.10 |
| cg09177080    | 8.45E-11 | 5.87E-12 | -7.33 | 16.2663306 | -9.34E-02 | 73840822  | 73840945  | NC_000017.10 |
| cg26263773    | 8.46E-11 | 5.88E-12 | -7.33 | 16.265138  | -5.47E-02 | 49521926  | 49522049  | NC_000019.9  |

|            |          |          |       |            |           |           |           |              |
|------------|----------|----------|-------|------------|-----------|-----------|-----------|--------------|
| cg26393630 | 8.46E-11 | 5.88E-12 | -7.33 | 16.2647186 | -1.48E-01 | 30399576  | 30399699  | NC_000014.8  |
| cg17588094 | 8.47E-11 | 5.89E-12 | -7.33 | 16.2638177 | -2.06E-01 | 128755270 | 128755393 | NC_000008.10 |
| cg24226238 | 8.47E-11 | 5.89E-12 | -7.33 | 16.2633742 | -1.47E-01 | 120530774 | 120530897 | NC_000011.9  |
| cg27352063 | 8.48E-11 | 5.89E-12 | -7.33 | 16.2625374 | -6.93E-02 | 81107211  | 81107334  | NC_000010.10 |
| cg14947929 | 8.49E-11 | 5.90E-12 | -7.33 | 16.2611215 | -4.23E-02 | 43187372  | 43187495  | NC_000021.8  |
| cg14861020 | 8.49E-11 | 5.90E-12 | -7.33 | 16.2607094 | -2.88E-02 | 1772352   | 1772475   | NC_000008.10 |
| cg10853231 | 8.49E-11 | 5.91E-12 | -7.33 | 16.2604789 | -8.49E-02 | 48111307  | 48111430  | NC_000019.9  |
| cg10380585 | 8.50E-11 | 5.91E-12 | -7.33 | 16.2598865 | -1.28E-01 | 211500971 | 211501094 | NC_000001.10 |
| cg06913958 | 8.52E-11 | 5.92E-12 | -7.33 | 16.2575365 | -4.65E-02 | 85744641  | 85744764  | NC_000001.10 |
| cg01466967 | 8.52E-11 | 5.92E-12 | -7.33 | 16.2573553 | -3.25E-02 | 59995837  | 59995960  | NC_000005.9  |
| cg11544529 | 8.52E-11 | 5.93E-12 | -7.33 | 16.2566253 | -5.57E-02 | 27545924  | 27546047  | NC_000002.11 |
| cg18536118 | 8.53E-11 | 5.93E-12 | -7.33 | 16.2558806 | -1.73E-01 | 14901012  | 14901135  | NC_000005.9  |
| cg21529807 | 8.56E-11 | 5.96E-12 | -7.33 | 16.2522079 | -1.01E-01 | 42134478  | 42134601  | NC_000019.9  |
| cg09873544 | 8.57E-11 | 5.97E-12 | -7.33 | 16.2505216 | -1.07E-01 | 132882986 | 132883109 | NC_000010.10 |
| cg25824052 | 8.58E-11 | 5.97E-12 | -7.33 | 16.2504128 | -4.86E-02 | 12852040  | 12852163  | NC_000003.11 |
| cg02483661 | 8.59E-11 | 5.98E-12 | -7.33 | 16.2490121 | -1.33E-01 | 2460621   | 2460744   | NC_000001.10 |
| cg25621991 | 8.59E-11 | 5.98E-12 | -7.33 | 16.2486664 | -1.31E-01 | 142942670 | 142942793 | NC_000005.9  |
| cg25424659 | 8.59E-11 | 5.98E-12 | -7.33 | 16.2484123 | -6.40E-02 | 11450592  | 11450715  | NC_000019.9  |
| cg20742385 | 8.60E-11 | 5.98E-12 | -7.33 | 16.2474961 | -1.24E-01 | 113633654 | 113633777 | NC_000013.10 |
| cg26117137 | 8.61E-11 | 6.00E-12 | -7.33 | 16.24561   | -1.24E-01 | 123747250 | 123747373 | NC_000010.10 |
| cg14455403 | 8.61E-11 | 6.00E-12 | -7.33 | 16.2455708 | -1.07E-01 | 8596772   | 8596895   | NC_000003.11 |
| cg25637966 | 8.62E-11 | 6.00E-12 | -7.33 | 16.2449934 | -1.47E-01 | 117950329 | 117950452 | NC_000011.9  |
| cg23222488 | 8.62E-11 | 6.00E-12 | -7.33 | 16.2448224 | -1.16E-01 | 176755393 | 176755516 | NC_000005.9  |
| cg01594214 | 8.62E-11 | 6.00E-12 | -7.33 | 16.2443254 | -3.66E-02 | 123110554 | 123110677 | NC_000006.11 |
| cg21029201 | 8.63E-11 | 6.01E-12 | -7.33 | 16.2436032 | -2.94E-02 | 26022192  | 26022315  | NC_000006.11 |

|            |          |          |       |            |           |           |           |              |
|------------|----------|----------|-------|------------|-----------|-----------|-----------|--------------|
| cg19558628 | 8.63E-11 | 6.01E-12 | -7.33 | 16.2433857 | -4.81E-02 | 24801616  | 24801739  | NC_000014.8  |
| cg06040925 | 8.63E-11 | 6.01E-12 | -7.33 | 16.2432205 | -1.08E-01 | 103334345 | 103334468 | NC_000002.11 |
| cg24263283 | 8.64E-11 | 6.01E-12 | -7.33 | 16.2428825 | -1.66E-01 | 59587546  | 59587669  | NC_000015.9  |
| cg09414673 | 8.64E-11 | 6.02E-12 | -7.33 | 16.24174   | -1.19E-01 | 1022797   | 1022920   | NC_000007.13 |
| cg26297462 | 8.67E-11 | 6.04E-12 | -7.33 | 16.2390972 | -1.53E-01 | 45292204  | 45292327  | NC_000001.10 |
| cg11851772 | 8.67E-11 | 6.04E-12 | -7.33 | 16.2389802 | -4.23E-02 | 40834459  | 40834582  | NC_000017.10 |
| cg22993937 | 8.69E-11 | 6.05E-12 | -7.33 | 16.2368119 | -8.44E-02 | 8477915   | 8478038   | NC_000004.11 |
| cg10992590 | 8.69E-11 | 6.05E-12 | -7.33 | 16.2365001 | -6.21E-02 | 130940487 | 130940610 | NC_000002.11 |
| cg13278267 | 8.70E-11 | 6.06E-12 | -7.33 | 16.2356054 | -1.95E-01 | 38742843  | 38742966  | NC_000002.11 |
| cg14223856 | 8.70E-11 | 6.06E-12 | -7.33 | 16.235494  | -1.12E-01 | 139508740 | 139508863 | NC_000009.11 |
| cg00249974 | 8.70E-11 | 6.06E-12 | -7.33 | 16.2353494 | -1.62E-01 | 156254149 | 156254272 | NC_000001.10 |
| cg19584803 | 8.75E-11 | 6.10E-12 | -7.33 | 16.2290859 | -1.49E-01 | 37794056  | 37794179  | NC_000017.10 |
| cg06449934 | 8.77E-11 | 6.11E-12 | -7.33 | 16.2266825 | -1.21E-01 | 1130697   | 1130820   | NC_000007.13 |
| cg00378144 | 8.77E-11 | 6.11E-12 | -7.33 | 16.2264698 | -5.14E-02 | 149895643 | 149895766 | NC_000002.11 |
| cg13432087 | 8.78E-11 | 6.11E-12 | -7.33 | 16.2262556 | -1.59E-01 | 41523480  | 41523603  | NC_000008.10 |
| cg02042997 | 8.79E-11 | 6.13E-12 | -7.32 | 16.2242323 | -1.67E-01 | 28505886  | 28506009  | NC_000016.9  |
| cg13411879 | 8.80E-11 | 6.14E-12 | -7.32 | 16.2228566 | -7.19E-02 | 30068273  | 30068396  | NC_000007.13 |
| cg15646463 | 8.81E-11 | 6.14E-12 | -7.32 | 16.2217208 | -1.64E-01 | 51446925  | 51447048  | NC_000002.11 |
| cg02232529 | 8.82E-11 | 6.15E-12 | -7.32 | 16.220801  | -1.30E-01 | 88551191  | 88551314  | NC_000016.9  |
| cg19725989 | 8.85E-11 | 6.17E-12 | -7.32 | 16.2167743 | -3.37E-02 | 67007604  | 67007727  | NC_000011.9  |
| cg01353464 | 8.86E-11 | 6.18E-12 | -7.32 | 16.2157126 | -4.65E-02 | 38180116  | 38180239  | NC_000003.11 |
| cg09967633 | 8.86E-11 | 6.18E-12 | -7.32 | 16.2155941 | -1.52E-01 | 84918794  | 84918917  | NC_000016.9  |
| cg07332757 | 8.87E-11 | 6.19E-12 | -7.32 | 16.2149234 | -1.49E-01 | 88593924  | 88594047  | NC_000016.9  |
| cg07048479 | 8.87E-11 | 6.19E-12 | -7.32 | 16.2148934 | -4.65E-02 | 134351208 | 134351331 | NC_000010.10 |
| cg17501210 | 8.87E-11 | 6.19E-12 | -7.32 | 16.214528  | -1.25E-01 | 166970252 | 166970375 | NC_000006.11 |



|               |          |          |       |            |           |           |           |              |
|---------------|----------|----------|-------|------------|-----------|-----------|-----------|--------------|
| cg19111408    | 8.87E-11 | 6.19E-12 | -7.32 | 16.2142881 | -1.54E-01 | 67335041  | 67335164  | NC_000015.9  |
| cg02388783    | 8.88E-11 | 6.19E-12 | -7.32 | 16.2139431 | -4.07E-02 | 151254619 | 151254742 | NC_000001.10 |
| cg12191293    | 8.89E-11 | 6.20E-12 | -7.32 | 16.2123881 | -5.92E-02 | 56882314  | 56882437  | NC_000012.11 |
| cg11386011    | 8.89E-11 | 6.20E-12 | -7.32 | 16.2121016 | -1.40E-01 | 32121156  | 32121279  | NC_000006.11 |
| cg21091547    | 8.89E-11 | 6.21E-12 | -7.32 | 16.2117987 | -1.33E-01 | 36645500  | 36645623  | NC_000006.11 |
| cg19428417    | 8.90E-11 | 6.21E-12 | -7.32 | 16.2111772 | -1.41E-01 | 66959729  | 66959852  | NC_000016.9  |
| cg13073302    | 8.91E-11 | 6.21E-12 | -7.32 | 16.2104568 | -8.15E-02 | 637000    | 637123    | NC_000017.10 |
| cg26522239    | 8.92E-11 | 6.23E-12 | -7.32 | 16.2086046 | -1.42E-01 | 21199097  | 21199220  | NC_000018.9  |
| cg19845809    | 8.92E-11 | 6.23E-12 | -7.32 | 16.2083396 | -7.50E-02 | 57598803  | 57598926  | NC_000015.9  |
| cg04987614    | 8.93E-11 | 6.24E-12 | -7.32 | 16.2069612 | -4.31E-02 | 27805362  | 27805485  | NC_000006.11 |
| cg07663723    | 8.96E-11 | 6.25E-12 | -7.32 | 16.2042017 | -2.09E-02 | 121264278 | 121264401 | NC_000003.11 |
| ch.9.2793549R | 8.98E-11 | 6.27E-12 | -7.32 | 16.2021351 | -2.75E-02 | 2803549   | 2803672   | NC_000009.11 |
| cg08750554    | 8.98E-11 | 6.27E-12 | -7.32 | 16.2019833 | -5.54E-02 | 1005100   | 1005223   | NC_000001.10 |
| cg21074350    | 9.00E-11 | 6.28E-12 | -7.32 | 16.1997019 | -7.58E-02 | 101335435 | 101335558 | NC_000007.13 |
| cg21132536    | 9.00E-11 | 6.29E-12 | -7.32 | 16.1989919 | -1.20E-01 | 33465180  | 33465303  | NC_000020.10 |
| cg10257729    | 9.00E-11 | 6.29E-12 | -7.32 | 16.1988281 | -4.78E-02 | 48216406  | 48216529  | NC_000019.9  |
| cg15832822    | 9.02E-11 | 6.30E-12 | -7.32 | 16.1973365 | -1.48E-01 | 45018591  | 45018714  | NC_000015.9  |
| cg27588356    | 9.02E-11 | 6.30E-12 | -7.32 | 16.1964767 | -1.80E-01 | 161459571 | 161459694 | NC_000006.11 |
| cg08979352    | 9.03E-11 | 6.31E-12 | -7.32 | 16.1957854 | -1.46E-01 | 99580530  | 99580653  | NC_000004.11 |
| ch.15.365777F | 9.03E-11 | 6.31E-12 | -7.32 | 16.1957733 | -6.78E-02 | 39416067  | 39416190  | NC_000015.9  |
| cg07351322    | 9.04E-11 | 6.31E-12 | -7.32 | 16.1947696 | -1.28E-01 | 104738380 | 104738503 | NC_000007.13 |
| cg22590522    | 9.04E-11 | 6.32E-12 | -7.32 | 16.1942187 | -1.35E-01 | 73629390  | 73629513  | NC_000017.10 |
| cg06878499    | 9.06E-11 | 6.33E-12 | -7.32 | 16.1924296 | -1.84E-01 | 239621510 | 239621633 | NC_000001.10 |
| cg07267166    | 9.07E-11 | 6.34E-12 | -7.32 | 16.1912774 | -5.56E-02 | 28324019  | 28324142  | NC_000006.11 |
| cg23090046    | 9.08E-11 | 6.35E-12 | -7.32 | 16.1898849 | -1.25E-01 | 104094619 | 104094742 | NC_000014.8  |

|            |          |          |       |            |           |           |           |              |
|------------|----------|----------|-------|------------|-----------|-----------|-----------|--------------|
| cg00705661 | 9.08E-11 | 6.35E-12 | -7.32 | 16.1898222 | -2.27E-01 | 93706609  | 93706732  | NC_000014.8  |
| cg03313070 | 9.08E-11 | 6.35E-12 | -7.32 | 16.189628  | -7.89E-02 | 24372133  | 24372256  | NC_000022.10 |
| cg24308604 | 9.10E-11 | 6.36E-12 | -7.32 | 16.1870691 | -9.57E-02 | 174092462 | 174092585 | NC_000004.11 |
| cg18412304 | 9.11E-11 | 6.37E-12 | -7.32 | 16.1867181 | -9.99E-02 | 159742714 | 159742837 | NC_000002.11 |
| cg01240444 | 9.12E-11 | 6.37E-12 | -7.32 | 16.1858516 | -9.86E-02 | 124247047 | 124247170 | NC_000012.11 |
| cg00187686 | 9.12E-11 | 6.38E-12 | -7.32 | 16.1852298 | -1.44E-01 | 59634218  | 59634341  | NC_000011.9  |
| cg07232063 | 9.12E-11 | 6.38E-12 | -7.32 | 16.1850301 | -9.38E-02 | 86953050  | 86953173  | NC_000001.10 |
| cg03312170 | 9.13E-11 | 6.38E-12 | -7.32 | 16.1846047 | -1.52E-01 | 53815126  | 53815249  | NC_000016.9  |
| cg15822908 | 9.14E-11 | 6.39E-12 | -7.32 | 16.1832977 | -5.69E-02 | 33502755  | 33502878  | NC_000001.10 |
| cg00022688 | 9.14E-11 | 6.39E-12 | -7.32 | 16.1830517 | -9.17E-02 | 114136011 | 114136134 | NC_000010.10 |
| cg25804773 | 9.15E-11 | 6.40E-12 | -7.32 | 16.1814021 | -6.47E-02 | 97242763  | 97242886  | NC_000010.10 |
| cg27573017 | 9.15E-11 | 6.40E-12 | -7.32 | 16.1812133 | -1.12E-01 | 48258708  | 48258831  | NC_000017.10 |
| cg08737815 | 9.16E-11 | 6.40E-12 | -7.32 | 16.1811283 | -1.29E-01 | 17381800  | 17381923  | NC_000001.10 |
| cg15030712 | 9.17E-11 | 6.41E-12 | -7.32 | 16.1796955 | -1.51E-01 | 29304984  | 29305107  | NC_000007.13 |
| cg15149205 | 9.18E-11 | 6.42E-12 | -7.32 | 16.1786057 | -1.70E-01 | 126403700 | 126403823 | NC_000008.10 |
| cg00162064 | 9.19E-11 | 6.42E-12 | -7.32 | 16.1776772 | -1.05E-01 | 44998151  | 44998274  | NC_000001.10 |
| cg03255749 | 9.19E-11 | 6.42E-12 | -7.32 | 16.1776172 | -1.25E-01 | 739405    | 739528    | NC_000017.10 |
| cg09635874 | 9.19E-11 | 6.43E-12 | -7.32 | 16.1766803 | -1.17E-01 | 98952518  | 98952641  | NC_000013.10 |
| cg17183362 | 9.20E-11 | 6.43E-12 | -7.32 | 16.1764874 | -8.10E-02 | 31804159  | 31804282  | NC_000006.11 |
| cg15888699 | 9.20E-11 | 6.43E-12 | -7.32 | 16.1762773 | -6.65E-02 | 57298252  | 57298375  | NC_000011.9  |
| cg27379587 | 9.20E-11 | 6.44E-12 | -7.32 | 16.1760042 | -5.69E-02 | 85201911  | 85202034  | NC_000015.9  |
| cg08975197 | 9.24E-11 | 6.46E-12 | -7.32 | 16.171864  | -1.71E-01 | 70173946  | 70174069  | NC_000012.11 |
| cg09667170 | 9.26E-11 | 6.48E-12 | -7.32 | 16.1697398 | -3.29E-02 | 172068089 | 172068212 | NC_000005.9  |
| cg25327839 | 9.26E-11 | 6.48E-12 | -7.32 | 16.1695776 | -3.23E-02 | 73308997  | 73309120  | NC_000011.9  |
| cg00033165 | 9.27E-11 | 6.48E-12 | -7.32 | 16.1686179 | -1.73E-01 | 169952114 | 169952237 | NC_000004.11 |

|                |          |          |       |            |           |           |           |              |
|----------------|----------|----------|-------|------------|-----------|-----------|-----------|--------------|
| cg10801633     | 9.28E-11 | 6.50E-12 | -7.31 | 16.1666988 | -1.01E-01 | 10579190  | 10579313  | NC_000001.10 |
| cg23704082     | 9.28E-11 | 6.50E-12 | -7.31 | 16.1665803 | -2.80E-02 | 160167518 | 160167641 | NC_000003.11 |
| cg18163092     | 9.31E-11 | 6.52E-12 | -7.31 | 16.163218  | -1.95E-01 | 197246936 | 197247059 | NC_000003.11 |
| cg08035351     | 9.32E-11 | 6.52E-12 | -7.31 | 16.1631507 | -1.55E-01 | 130005993 | 130006116 | NC_000007.13 |
| cg00256675     | 9.33E-11 | 6.53E-12 | -7.31 | 16.1616037 | -1.30E-01 | 802962    | 803085    | NC_000004.11 |
| ch.8.53573583F | 9.34E-11 | 6.54E-12 | -7.31 | 16.1605705 | -3.80E-02 | 53411030  | 53411153  | NC_000008.10 |
| cg25619717     | 9.35E-11 | 6.54E-12 | -7.31 | 16.1596204 | -1.50E-01 | 114867569 | 114867692 | NC_000005.9  |
| cg26585416     | 9.35E-11 | 6.54E-12 | -7.31 | 16.159613  | -1.49E-01 | 3969745   | 3969868   | NC_000019.9  |
| cg19070139     | 9.37E-11 | 6.56E-12 | -7.31 | 16.1574413 | -4.31E-02 | 42928517  | 42928640  | NC_000006.11 |
| cg05255580     | 9.37E-11 | 6.56E-12 | -7.31 | 16.1570966 | -1.30E-01 | 4207676   | 4207799   | NC_000019.9  |
| cg24462992     | 9.37E-11 | 6.56E-12 | -7.31 | 16.1565423 | -1.49E-01 | 84502511  | 84502634  | NC_000010.10 |
| cg25211525     | 9.38E-11 | 6.57E-12 | -7.31 | 16.1559931 | -2.08E-02 | 3751739   | 3751862   | NC_000006.11 |
| cg00633768     | 9.38E-11 | 6.57E-12 | -7.31 | 16.1559192 | -1.54E-01 | 131496287 | 131496410 | NC_000012.11 |
| cg06034771     | 9.41E-11 | 6.59E-12 | -7.31 | 16.1529796 | -5.12E-02 | 91260647  | 91260770  | NC_000015.9  |
| cg09974772     | 9.42E-11 | 6.60E-12 | -7.31 | 16.1514246 | -1.13E-01 | 1896512   | 1896635   | NC_000006.11 |
| cg23914149     | 9.42E-11 | 6.60E-12 | -7.31 | 16.1514096 | -1.05E-01 | 61725773  | 61725896  | NC_000010.10 |
| cg09408366     | 9.44E-11 | 6.61E-12 | -7.31 | 16.1494595 | -1.54E-01 | 84462335  | 84462458  | NC_000001.10 |
| cg05734220     | 9.44E-11 | 6.61E-12 | -7.31 | 16.1492549 | -3.24E-02 | 103524410 | 103524533 | NC_000014.8  |
| cg16698814     | 9.45E-11 | 6.62E-12 | -7.31 | 16.1481793 | -8.25E-02 | 51524763  | 51524886  | NC_000019.9  |
| cg00783730     | 9.45E-11 | 6.62E-12 | -7.31 | 16.1480867 | -6.37E-02 | 30689216  | 30689339  | NC_000006.11 |
| cg23632393     | 9.45E-11 | 6.62E-12 | -7.31 | 16.1480246 | -1.34E-01 | 2145116   | 2145239   | NC_000001.10 |
| cg08944347     | 9.47E-11 | 6.64E-12 | -7.31 | 16.1459142 | -9.38E-02 | 76087149  | 76087272  | NC_000007.13 |
| cg01917209     | 9.51E-11 | 6.67E-12 | -7.31 | 16.1412093 | -1.57E-01 | 49938721  | 49938844  | NC_000003.11 |
| cg13253856     | 9.51E-11 | 6.67E-12 | -7.31 | 16.1411176 | -8.35E-02 | 1702693   | 1702816   | NC_000006.11 |
| cg02702693     | 9.51E-11 | 6.67E-12 | -7.31 | 16.1410277 | -1.30E-01 | 116808845 | 116808968 | NC_000012.11 |

|            |          |          |       |            |           |           |           |              |
|------------|----------|----------|-------|------------|-----------|-----------|-----------|--------------|
| cg15203735 | 9.52E-11 | 6.67E-12 | -7.31 | 16.1402463 | -2.15E-01 | 48573302  | 48573425  | NC_000010.10 |
| cg17633300 | 9.52E-11 | 6.68E-12 | -7.31 | 16.1398001 | -5.83E-02 | 172356674 | 172356797 | NC_000005.9  |
| cg05634376 | 9.53E-11 | 6.68E-12 | -7.31 | 16.1387069 | -1.54E-01 | 66659993  | 66660116  | NC_000011.9  |
| cg16069079 | 9.55E-11 | 6.69E-12 | -7.31 | 16.1372514 | -1.03E-01 | 41219238  | 41219361  | NC_000015.9  |
| cg21759837 | 9.55E-11 | 6.70E-12 | -7.31 | 16.1370902 | -9.50E-02 | 70925809  | 70925932  | NC_000015.9  |
| cg05769106 | 9.55E-11 | 6.70E-12 | -7.31 | 16.1367794 | -1.27E-01 | 178649743 | 178649866 | NC_000004.11 |
| cg26680517 | 9.56E-11 | 6.70E-12 | -7.31 | 16.1358153 | -5.74E-02 | 39005834  | 39005957  | NC_000002.11 |
| cg01200021 | 9.57E-11 | 6.71E-12 | -7.31 | 16.1344873 | -1.68E-01 | 40359007  | 40359130  | NC_000006.11 |
| cg23865980 | 9.58E-11 | 6.72E-12 | -7.31 | 16.1341197 | -1.72E-01 | 80904376  | 80904499  | NC_000010.10 |
| cg23138772 | 9.59E-11 | 6.72E-12 | -7.31 | 16.1329921 | -1.09E-01 | 179108129 | 179108252 | NC_000005.9  |
| cg18445292 | 9.59E-11 | 6.73E-12 | -7.31 | 16.1320663 | -2.24E-01 | 68610381  | 68610504  | NC_000011.9  |
| cg02737384 | 9.61E-11 | 6.74E-12 | -7.31 | 16.1303241 | -9.24E-02 | 45470199  | 45470322  | NC_000010.10 |
| cg04841389 | 9.62E-11 | 6.75E-12 | -7.31 | 16.1292279 | -1.05E-01 | 32015083  | 32015206  | NC_000006.11 |
| cg21505886 | 9.62E-11 | 6.75E-12 | -7.31 | 16.1291395 | -1.29E-01 | 1724428   | 1724551   | NC_000004.11 |
| cg15700850 | 9.63E-11 | 6.76E-12 | -7.31 | 16.1279121 | -1.23E-01 | 73720840  | 73720963  | NC_000017.10 |
| cg24765602 | 9.64E-11 | 6.76E-12 | -7.31 | 16.1276154 | -8.94E-02 | 65006071  | 65006194  | NC_000014.8  |
| cg17770096 | 9.64E-11 | 6.76E-12 | -7.31 | 16.1272697 | -7.86E-02 | 121078022 | 121078145 | NC_000012.11 |
| cg26861995 | 9.65E-11 | 6.77E-12 | -7.31 | 16.1260035 | -1.74E-01 | 127831673 | 127831796 | NC_000003.11 |
| cg17223520 | 9.69E-11 | 6.80E-12 | -7.31 | 16.1217178 | -1.41E-01 | 32739114  | 32739237  | NC_000001.10 |
| cg03317463 | 9.70E-11 | 6.81E-12 | -7.31 | 16.120883  | -2.10E-02 | 67193191  | 67193314  | NC_000016.9  |
| cg04061752 | 9.70E-11 | 6.81E-12 | -7.31 | 16.120342  | -1.39E-01 | 19350090  | 19350213  | NC_000012.11 |
| cg18977656 | 9.71E-11 | 6.82E-12 | -7.31 | 16.119373  | -6.30E-02 | 101965385 | 101965508 | NC_000008.10 |
| cg26413691 | 9.71E-11 | 6.82E-12 | -7.31 | 16.1193688 | -1.44E-01 | 7119074   | 7119197   | NC_000001.10 |
| cg09164206 | 9.72E-11 | 6.83E-12 | -7.31 | 16.11815   | -1.47E-01 | 70786271  | 70786394  | NC_000015.9  |
| cg16563178 | 9.73E-11 | 6.83E-12 | -7.31 | 16.1178301 | -6.21E-02 | 50358443  | 50358566  | NC_000003.11 |

|                |          |          |       |            |           |           |           |              |
|----------------|----------|----------|-------|------------|-----------|-----------|-----------|--------------|
| cg25673241     | 9.73E-11 | 6.83E-12 | -7.31 | 16.1173896 | -1.46E-01 | 78694856  | 78694979  | NC_000017.10 |
| cg09856611     | 9.73E-11 | 6.83E-12 | -7.31 | 16.1173325 | -1.11E-01 | 73403300  | 73403423  | NC_000003.11 |
| cg02674114     | 9.74E-11 | 6.84E-12 | -7.31 | 16.1160272 | -3.73E-02 | 44821169  | 44821292  | NC_000001.10 |
| cg26843872     | 9.76E-11 | 6.85E-12 | -7.31 | 16.1142987 | -1.06E-01 | 30368792  | 30368915  | NC_000016.9  |
| cg10759590     | 9.77E-11 | 6.86E-12 | -7.31 | 16.1131376 | -8.53E-02 | 24898874  | 24898997  | NC_000014.8  |
| cg14507088     | 9.78E-11 | 6.86E-12 | -7.31 | 16.1125833 | -9.60E-02 | 130690399 | 130690522 | NC_000009.11 |
| cg15754630     | 9.79E-11 | 6.87E-12 | -7.31 | 16.1115286 | -1.00E-01 | 101733491 | 101733614 | NC_000015.9  |
| cg22507639     | 9.80E-11 | 6.88E-12 | -7.31 | 16.1103141 | -7.52E-02 | 45580011  | 45580134  | NC_000019.9  |
| cg16489259     | 9.80E-11 | 6.88E-12 | -7.31 | 16.1102561 | -1.20E-01 | 32438418  | 32438541  | NC_000010.10 |
| cg19559891     | 9.80E-11 | 6.88E-12 | -7.31 | 16.1095841 | -1.65E-01 | 31515984  | 31516107  | NC_000015.9  |
| cg16106360     | 9.81E-11 | 6.89E-12 | -7.3  | 16.1091982 | -1.55E-01 | 37308900  | 37309023  | NC_000017.10 |
| cg05512561     | 9.81E-11 | 6.89E-12 | -7.3  | 16.1091789 | -1.56E-01 | 33925656  | 33925779  | NC_000013.10 |
| cg06303875     | 9.82E-11 | 6.90E-12 | -7.3  | 16.1073706 | -1.28E-01 | 28543515  | 28543638  | NC_000013.10 |
| cg18776992     | 9.83E-11 | 6.90E-12 | -7.3  | 16.1067112 | -4.55E-02 | 48113764  | 48113887  | NC_000019.9  |
| cg19450816     | 9.83E-11 | 6.91E-12 | -7.3  | 16.1065312 | -1.93E-01 | 237551858 | 237551981 | NC_000002.11 |
| cg02855836     | 9.83E-11 | 6.91E-12 | -7.3  | 16.1064253 | -9.36E-02 | 116710530 | 116710653 | NC_000001.10 |
| cg21650243     | 9.84E-11 | 6.91E-12 | -7.3  | 16.1054016 | -1.52E-01 | 239330171 | 239330294 | NC_000002.11 |
| cg18355311     | 9.84E-11 | 6.91E-12 | -7.3  | 16.1052923 | -1.25E-01 | 86269650  | 86269773  | NC_000011.9  |
| cg14387452     | 9.84E-11 | 6.92E-12 | -7.3  | 16.1052466 | -1.01E-01 | 20512334  | 20512457  | NC_000009.11 |
| cg09389280     | 9.85E-11 | 6.92E-12 | -7.3  | 16.1040883 | -1.21E-01 | 170141005 | 170141128 | NC_000003.11 |
| cg12062099     | 9.85E-11 | 6.92E-12 | -7.3  | 16.1038756 | -7.48E-02 | 85527597  | 85527720  | NC_000001.10 |
| cg01940708     | 9.87E-11 | 6.94E-12 | -7.3  | 16.1024325 | -1.08E-01 | 29721727  | 29721850  | NC_000017.10 |
| cg02334660     | 9.87E-11 | 6.94E-12 | -7.3  | 16.102142  | -1.57E-01 | 75312483  | 75312606  | NC_000004.11 |
| cg19809988     | 9.87E-11 | 6.94E-12 | -7.3  | 16.1017103 | -1.38E-01 | 149569883 | 149570006 | NC_000007.13 |
| ch.9.87682774F | 9.87E-11 | 6.94E-12 | -7.3  | 16.1016652 | -5.61E-02 | 88492954  | 88493077  | NC_000009.11 |

|                 |          |          |      |            |           |           |           |              |
|-----------------|----------|----------|------|------------|-----------|-----------|-----------|--------------|
| cg07126115      | 9.88E-11 | 6.94E-12 | -7.3 | 16.1012911 | -1.40E-01 | 133028089 | 133028212 | NC_000012.11 |
| cg12100751      | 9.89E-11 | 6.96E-12 | -7.3 | 16.0995914 | -1.11E-01 | 109203672 | 109203795 | NC_000001.10 |
| cg05202720      | 9.91E-11 | 6.97E-12 | -7.3 | 16.0974082 | -6.75E-02 | 44486028  | 44486151  | NC_000020.10 |
| ch.7.109948253R | 9.93E-11 | 6.98E-12 | -7.3 | 16.0958647 | -1.44E-02 | 110161017 | 110161140 | NC_000007.13 |
| cg15812586      | 9.95E-11 | 7.00E-12 | -7.3 | 16.0934819 | -1.86E-01 | 139953117 | 139953240 | NC_000007.13 |
| cg19650755      | 9.96E-11 | 7.00E-12 | -7.3 | 16.0928688 | -7.24E-02 | 68617143  | 68617266  | NC_000012.11 |
| cg22209573      | 9.96E-11 | 7.01E-12 | -7.3 | 16.0924845 | -1.42E-01 | 79652244  | 79652367  | NC_000017.10 |
| cg09109724      | 9.96E-11 | 7.01E-12 | -7.3 | 16.092325  | -1.14E-01 | 135093195 | 135093318 | NC_000010.10 |
| cg20351171      | 9.97E-11 | 7.01E-12 | -7.3 | 16.0914886 | -9.06E-02 | 37720723  | 37720846  | NC_000022.10 |
| cg23052861      | 9.99E-11 | 7.03E-12 | -7.3 | 16.0897448 | -9.16E-02 | 69448387  | 69448510  | NC_000014.8  |
| cg09950681      | 1.00E-10 | 7.06E-12 | -7.3 | 16.0848913 | -1.30E-01 | 393392    | 393515    | NC_000011.9  |
| cg05081953      | 1.00E-10 | 7.07E-12 | -7.3 | 16.083795  | -1.08E-01 | 158184543 | 158184666 | NC_000002.11 |
| cg17971649      | 1.00E-10 | 7.07E-12 | -7.3 | 16.0837823 | -1.38E-01 | 36153225  | 36153348  | NC_000020.10 |
| cg22188603      | 1.00E-10 | 7.07E-12 | -7.3 | 16.0836869 | -1.55E-01 | 142243769 | 142243892 | NC_000005.9  |
| cg25049341      | 1.00E-10 | 7.07E-12 | -7.3 | 16.0832758 | -1.02E-01 | 102906949 | 102907072 | NC_000010.10 |
| cg15757019      | 1.00E-10 | 7.07E-12 | -7.3 | 16.0832169 | -1.29E-01 | 149756665 | 149756788 | NC_000004.11 |
| cg24239195      | 1.01E-10 | 7.09E-12 | -7.3 | 16.0812731 | -1.19E-01 | 116828932 | 116829055 | NC_000012.11 |
| cg05457221      | 1.01E-10 | 7.10E-12 | -7.3 | 16.0795473 | -1.37E-01 | 134272437 | 134272560 | NC_000010.10 |
| cg07505293      | 1.01E-10 | 7.10E-12 | -7.3 | 16.0791517 | -1.99E-02 | 36546291  | 36546414  | NC_000019.9  |
| cg00078025      | 1.01E-10 | 7.11E-12 | -7.3 | 16.0781193 | -7.34E-02 | 117159975 | 117160098 | NC_000009.11 |
| cg14159818      | 1.01E-10 | 7.11E-12 | -7.3 | 16.0778335 | -5.98E-02 | 3749519   | 3749642   | NC_000020.10 |
| cg03669367      | 1.01E-10 | 7.12E-12 | -7.3 | 16.076346  | -1.41E-01 | 1031588   | 1031711   | NC_000007.13 |
| cg26298737      | 1.01E-10 | 7.13E-12 | -7.3 | 16.0752506 | -1.87E-01 | 225964937 | 225965060 | NC_000001.10 |
| cg19250113      | 1.01E-10 | 7.14E-12 | -7.3 | 16.0741917 | -1.77E-01 | 29298832  | 29298955  | NC_000017.10 |
| cg21836827      | 1.01E-10 | 7.15E-12 | -7.3 | 16.0728381 | -4.38E-02 | 29720549  | 29720672  | NC_000006.11 |

|                |          |          |       |            |           |           |           |              |
|----------------|----------|----------|-------|------------|-----------|-----------|-----------|--------------|
| cg13249593     | 1.02E-10 | 7.16E-12 | -7.3  | 16.0715607 | -2.13E-02 | 39705234  | 39705357  | NC_000017.10 |
| cg07757885     | 1.02E-10 | 7.16E-12 | -7.3  | 16.0712934 | -9.10E-02 | 50219072  | 50219195  | NC_000005.9  |
| cg15712520     | 1.02E-10 | 7.17E-12 | -7.3  | 16.0703312 | -1.28E-01 | 32049263  | 32049386  | NC_000006.11 |
| cg08478685     | 1.02E-10 | 7.17E-12 | -7.3  | 16.069501  | -1.53E-01 | 10471301  | 10471424  | NC_000002.11 |
| cg04919519     | 1.02E-10 | 7.18E-12 | -7.3  | 16.0688362 | -7.38E-02 | 103524989 | 103525112 | NC_000014.8  |
| cg05360477     | 1.02E-10 | 7.19E-12 | -7.3  | 16.0673975 | -1.19E-01 | 12959313  | 12959436  | NC_000002.11 |
| cg25293251     | 1.02E-10 | 7.19E-12 | -7.3  | 16.0666951 | -8.94E-02 | 93260171  | 93260294  | NC_000014.8  |
| ch.6.751103R   | 1.02E-10 | 7.20E-12 | -7.3  | 16.0654578 | -4.90E-02 | 31113865  | 31113988  | NC_000006.11 |
| cg22782017     | 1.02E-10 | 7.20E-12 | -7.3  | 16.0654194 | -1.22E-01 | 168785895 | 168786018 | NC_000006.11 |
| cg18265887     | 1.02E-10 | 7.21E-12 | -7.3  | 16.0637258 | -5.43E-02 | 37640250  | 37640373  | NC_000022.10 |
| cg11051139     | 1.02E-10 | 7.21E-12 | -7.3  | 16.063685  | -1.66E-01 | 52580428  | 52580551  | NC_000012.11 |
| cg18791730     | 1.02E-10 | 7.21E-12 | -7.3  | 16.0635094 | -9.62E-02 | 119910205 | 119910328 | NC_000001.10 |
| cg14419740     | 1.03E-10 | 7.26E-12 | -7.3  | 16.0579037 | -1.46E-01 | 157483335 | 157483458 | NC_000007.13 |
| cg08679951     | 1.03E-10 | 7.26E-12 | -7.3  | 16.0570251 | -1.18E-01 | 116737690 | 116737813 | NC_000003.11 |
| cg23950233     | 1.03E-10 | 7.27E-12 | -7.3  | 16.0566045 | -1.93E-01 | 33245739  | 33245862  | NC_000006.11 |
| cg27140441     | 1.03E-10 | 7.27E-12 | -7.3  | 16.0556831 | -3.49E-02 | 184328596 | 184328719 | NC_000004.11 |
| ch.10.1515233F | 1.03E-10 | 7.29E-12 | -7.3  | 16.0536667 | -5.18E-02 | 73039321  | 73039444  | NC_000010.10 |
| cg24586039     | 1.03E-10 | 7.30E-12 | -7.3  | 16.0522661 | -1.49E-01 | 30359221  | 30359344  | NC_000008.10 |
| cg13650687     | 1.04E-10 | 7.30E-12 | -7.29 | 16.0519828 | -6.22E-02 | 71655974  | 71656097  | NC_000010.10 |
| cg20385686     | 1.04E-10 | 7.30E-12 | -7.29 | 16.0519805 | -6.90E-02 | 27024451  | 27024574  | NC_000001.10 |
| cg01262865     | 1.04E-10 | 7.33E-12 | -7.29 | 16.047833  | -9.60E-02 | 75282094  | 75282217  | NC_000016.9  |
| cg22655521     | 1.04E-10 | 7.34E-12 | -7.29 | 16.0462189 | -8.08E-02 | 48194939  | 48195062  | NC_000017.10 |
| cg07706375     | 1.04E-10 | 7.35E-12 | -7.29 | 16.0448241 | -1.56E-01 | 13947646  | 13947769  | NC_000019.9  |
| cg00175573     | 1.04E-10 | 7.36E-12 | -7.29 | 16.0445444 | -1.84E-01 | 20433203  | 20433326  | NC_000020.10 |
| cg05178604     | 1.04E-10 | 7.36E-12 | -7.29 | 16.0435623 | -2.88E-02 | 67193015  | 67193138  | NC_000016.9  |

|               |          |          |       |            |           |           |           |              |
|---------------|----------|----------|-------|------------|-----------|-----------|-----------|--------------|
| cg19655128    | 1.04E-10 | 7.37E-12 | -7.29 | 16.0425355 | -5.63E-02 | 48227965  | 48228088  | NC_000017.10 |
| cg05779441    | 1.04E-10 | 7.37E-12 | -7.29 | 16.0421072 | -1.23E-01 | 201574716 | 201574839 | NC_000001.10 |
| cg10491122    | 1.04E-10 | 7.37E-12 | -7.29 | 16.0420006 | -1.28E-01 | 217886461 | 217886584 | NC_000001.10 |
| cg13275679    | 1.04E-10 | 7.38E-12 | -7.29 | 16.0418358 | -1.33E-01 | 73151149  | 73151272  | NC_000017.10 |
| cg01646665    | 1.05E-10 | 7.38E-12 | -7.29 | 16.0406322 | -9.30E-02 | 156251436 | 156251559 | NC_000001.10 |
| cg00597087    | 1.05E-10 | 7.39E-12 | -7.29 | 16.0398992 | -5.70E-02 | 3557418   | 3557541   | NC_000019.9  |
| cg24333189    | 1.05E-10 | 7.40E-12 | -7.29 | 16.0389207 | -1.33E-01 | 169483132 | 169483255 | NC_000003.11 |
| cg09578353    | 1.05E-10 | 7.41E-12 | -7.29 | 16.0377657 | -6.85E-02 | 10490236  | 10490359  | NC_000001.10 |
| cg15450966    | 1.05E-10 | 7.41E-12 | -7.29 | 16.0372839 | -9.78E-02 | 3486039   | 3486162   | NC_000004.11 |
| cg13892750    | 1.05E-10 | 7.41E-12 | -7.29 | 16.0372169 | -6.24E-02 | 136293722 | 136293845 | NC_000009.11 |
| cg24104128    | 1.05E-10 | 7.41E-12 | -7.29 | 16.0367958 | -4.25E-02 | 33796038  | 33796161  | NC_000011.9  |
| cg06927323    | 1.05E-10 | 7.43E-12 | -7.29 | 16.0345768 | -1.34E-01 | 45809727  | 45809850  | NC_000017.10 |
| cg03898562    | 1.05E-10 | 7.44E-12 | -7.29 | 16.0333129 | -4.17E-02 | 151047520 | 151047643 | NC_000007.13 |
| cg10785340    | 1.06E-10 | 7.46E-12 | -7.29 | 16.0301926 | -1.40E-01 | 134715577 | 134715700 | NC_000005.9  |
| cg07364927    | 1.06E-10 | 7.47E-12 | -7.29 | 16.029732  | -1.21E-01 | 230307593 | 230307716 | NC_000001.10 |
| cg13124080    | 1.06E-10 | 7.47E-12 | -7.29 | 16.0293257 | -1.46E-01 | 157227290 | 157227413 | NC_000007.13 |
| cg14539658    | 1.06E-10 | 7.47E-12 | -7.29 | 16.0288637 | -1.04E-01 | 21495146  | 21495269  | NC_000014.8  |
| cg19865134    | 1.06E-10 | 7.47E-12 | -7.29 | 16.0288581 | -8.52E-02 | 27170041  | 27170164  | NC_000017.10 |
| cg02299940    | 1.06E-10 | 7.48E-12 | -7.29 | 16.0280107 | -1.19E-01 | 23765912  | 23766035  | NC_000016.9  |
| cg06513075    | 1.06E-10 | 7.49E-12 | -7.29 | 16.0269338 | -2.40E-02 | 34126714  | 34126837  | NC_000011.9  |
| cg23885932    | 1.06E-10 | 7.50E-12 | -7.29 | 16.024928  | -2.19E-01 | 1132294   | 1132417   | NC_000019.9  |
| ch.1.4634054R | 1.06E-10 | 7.51E-12 | -7.29 | 16.0244737 | -3.75E-02 | 234802569 | 234802692 | NC_000001.10 |
| ch.1.1416966F | 1.06E-10 | 7.51E-12 | -7.29 | 16.0242023 | -6.38E-02 | 46120786  | 46120909  | NC_000001.10 |
| cg24536146    | 1.06E-10 | 7.52E-12 | -7.29 | 16.0231903 | -8.47E-02 | 207997166 | 207997289 | NC_000001.10 |
| cg06882340    | 1.06E-10 | 7.53E-12 | -7.29 | 16.0214287 | -2.27E-01 | 16475233  | 16475356  | NC_000001.10 |



|               |          |          |       |            |           |           |           |              |
|---------------|----------|----------|-------|------------|-----------|-----------|-----------|--------------|
| cg17645677    | 1.06E-10 | 7.53E-12 | -7.29 | 16.0213369 | -1.39E-01 | 149185704 | 149185827 | NC_000005.9  |
| cg07441944    | 1.07E-10 | 7.53E-12 | -7.29 | 16.0211838 | -1.90E-01 | 44623459  | 44623582  | NC_000011.9  |
| cg25254739    | 1.07E-10 | 7.53E-12 | -7.29 | 16.0210725 | -1.10E-01 | 3290345   | 3290468   | NC_000019.9  |
| cg26273886    | 1.07E-10 | 7.53E-12 | -7.29 | 16.0208242 | -2.62E-02 | 17950694  | 17950817  | NC_000020.10 |
| ch.18.925095F | 1.07E-10 | 7.54E-12 | -7.29 | 16.020446  | -4.73E-02 | 47307628  | 47307751  | NC_000018.9  |
| cg20574153    | 1.07E-10 | 7.54E-12 | -7.29 | 16.0203188 | -2.77E-02 | 62493555  | 62493678  | NC_000017.10 |
| cg01617018    | 1.07E-10 | 7.54E-12 | -7.29 | 16.0198701 | -1.62E-01 | 30116135  | 30116258  | NC_000016.9  |
| cg00261665    | 1.07E-10 | 7.55E-12 | -7.29 | 16.018551  | -5.55E-02 | 131101138 | 131101261 | NC_000003.11 |
| cg17948798    | 1.07E-10 | 7.55E-12 | -7.29 | 16.0185111 | -6.14E-02 | 65292462  | 65292585  | NC_000011.9  |
| cg23577033    | 1.07E-10 | 7.56E-12 | -7.29 | 16.0175629 | -1.69E-01 | 75636861  | 75636984  | NC_000010.10 |
| cg07774299    | 1.07E-10 | 7.56E-12 | -7.29 | 16.0170414 | -7.33E-02 | 76253445  | 76253568  | NC_000001.10 |
| cg14796406    | 1.07E-10 | 7.57E-12 | -7.29 | 16.0157418 | -1.28E-01 | 80547689  | 80547812  | NC_000007.13 |
| cg16616971    | 1.07E-10 | 7.58E-12 | -7.29 | 16.0154422 | -1.07E-01 | 3876783   | 3876906   | NC_000004.11 |
| cg24500304    | 1.07E-10 | 7.58E-12 | -7.29 | 16.0150821 | -7.80E-02 | 235291357 | 235291480 | NC_000001.10 |
| cg17651255    | 1.07E-10 | 7.58E-12 | -7.29 | 16.0150757 | -9.39E-02 | 25559743  | 25559866  | NC_000001.10 |
| cg14278345    | 1.07E-10 | 7.59E-12 | -7.29 | 16.0130212 | -1.08E-01 | 50451054  | 50451177  | NC_000022.10 |
| cg12077487    | 1.07E-10 | 7.60E-12 | -7.29 | 16.0129808 | -1.84E-01 | 3290030   | 3290153   | NC_000019.9  |
| cg13248847    | 1.07E-10 | 7.60E-12 | -7.29 | 16.0126515 | -6.69E-02 | 7137857   | 7137980   | NC_000017.10 |
| cg06481786    | 1.07E-10 | 7.60E-12 | -7.29 | 16.0121821 | -5.11E-02 | 34257936  | 34258059  | NC_000017.10 |
| cg17422915    | 1.07E-10 | 7.60E-12 | -7.29 | 16.0120014 | -1.68E-01 | 126507786 | 126507909 | NC_000011.9  |
| cg10313368    | 1.07E-10 | 7.60E-12 | -7.29 | 16.011962  | -1.28E-01 | 8935228   | 8935351   | NC_000001.10 |
| cg02965250    | 1.08E-10 | 7.62E-12 | -7.29 | 16.0102694 | -2.42E-02 | 41132138  | 41132261  | NC_000017.10 |
| cg02068981    | 1.08E-10 | 7.62E-12 | -7.29 | 16.0097097 | -1.21E-01 | 54907137  | 54907260  | NC_000014.8  |
| cg05644480    | 1.08E-10 | 7.62E-12 | -7.29 | 16.0092208 | -1.35E-01 | 45418020  | 45418143  | NC_000019.9  |
| cg22378095    | 1.08E-10 | 7.63E-12 | -7.29 | 16.0087809 | -1.48E-01 | 113340447 | 113340570 | NC_000006.11 |

|                 |          |          |       |            |           |           |           |              |
|-----------------|----------|----------|-------|------------|-----------|-----------|-----------|--------------|
| cg00978855      | 1.08E-10 | 7.66E-12 | -7.29 | 16.0042231 | -8.88E-02 | 28928948  | 28929071  | NC_000008.10 |
| cg08811509      | 1.08E-10 | 7.67E-12 | -7.29 | 16.0034778 | -6.60E-02 | 95640366  | 95640489  | NC_000009.11 |
| cg02713951      | 1.09E-10 | 7.69E-12 | -7.29 | 16.0011619 | -9.05E-02 | 46516291  | 46516414  | NC_000022.10 |
| cg01435643      | 1.09E-10 | 7.69E-12 | -7.29 | 16.0009392 | -1.65E-01 | 113689776 | 113689899 | NC_000013.10 |
| cg13675721      | 1.09E-10 | 7.69E-12 | -7.29 | 16.0005104 | -2.42E-01 | 140227273 | 140227396 | NC_000007.13 |
| cg14258078      | 1.09E-10 | 7.70E-12 | -7.29 | 15.9995999 | -1.53E-01 | 62051773  | 62051896  | NC_000017.10 |
| cg01300684      | 1.09E-10 | 7.70E-12 | -7.29 | 15.9993265 | -1.18E-01 | 141230118 | 141230241 | NC_000004.11 |
| cg22191981      | 1.09E-10 | 7.71E-12 | -7.29 | 15.9979648 | -2.24E-01 | 41472382  | 41472505  | NC_000006.11 |
| cg22356009      | 1.09E-10 | 7.71E-12 | -7.29 | 15.9977918 | -6.03E-02 | 25143672  | 25143795  | NC_000002.11 |
| cg07899983      | 1.09E-10 | 7.72E-12 | -7.29 | 15.9972849 | -7.78E-02 | 73929634  | 73929757  | NC_000002.11 |
| cg05100917      | 1.09E-10 | 7.72E-12 | -7.29 | 15.9970319 | -7.42E-02 | 117198460 | 117198583 | NC_000011.9  |
| cg08661469      | 1.09E-10 | 7.72E-12 | -7.29 | 15.9965577 | -8.17E-02 | 72732823  | 72732946  | NC_000017.10 |
| ch.7.107350695F | 1.09E-10 | 7.72E-12 | -7.29 | 15.9965371 | -2.03E-02 | 107563459 | 107563582 | NC_000007.13 |
| cg12044693      | 1.09E-10 | 7.74E-12 | -7.29 | 15.9946949 | -1.57E-01 | 80873769  | 80873892  | NC_000006.11 |
| cg10914749      | 1.09E-10 | 7.75E-12 | -7.28 | 15.9935484 | -1.26E-01 | 45272255  | 45272378  | NC_000001.10 |
| cg03179435      | 1.09E-10 | 7.75E-12 | -7.28 | 15.9932122 | -1.98E-01 | 14051821  | 14051944  | NC_000010.10 |
| cg18523886      | 1.09E-10 | 7.75E-12 | -7.28 | 15.9929682 | -1.77E-01 | 39126551  | 39126674  | NC_000020.10 |
| cg25636933      | 1.10E-10 | 7.76E-12 | -7.28 | 15.9912361 | -1.26E-01 | 56816405  | 56816528  | NC_000004.11 |
| cg11818841      | 1.10E-10 | 7.77E-12 | -7.28 | 15.9909663 | -9.02E-02 | 18666537  | 18666660  | NC_000008.10 |
| cg05396156      | 1.10E-10 | 7.77E-12 | -7.28 | 15.9909018 | -1.63E-01 | 219497045 | 219497168 | NC_000001.10 |
| cg02326058      | 1.10E-10 | 7.77E-12 | -7.28 | 15.9906648 | -1.37E-01 | 8993102   | 8993225   | NC_000008.10 |
| cg02965078      | 1.10E-10 | 7.77E-12 | -7.28 | 15.9899761 | -8.30E-02 | 60623504  | 60623627  | NC_000011.9  |
| cg08550026      | 1.10E-10 | 7.79E-12 | -7.28 | 15.9885328 | -4.16E-02 | 19734588  | 19734711  | NC_000011.9  |
| cg11586605      | 1.10E-10 | 7.80E-12 | -7.28 | 15.9869998 | -4.35E-02 | 108535779 | 108535902 | NC_000011.9  |
| cg17083504      | 1.10E-10 | 7.80E-12 | -7.28 | 15.9867525 | -3.03E-02 | 49365123  | 49365246  | NC_000012.11 |

|            |          |          |       |            |           |           |           |              |
|------------|----------|----------|-------|------------|-----------|-----------|-----------|--------------|
| cg18542842 | 1.10E-10 | 7.80E-12 | -7.28 | 15.9864555 | -1.80E-01 | 63857914  | 63858037  | NC_000003.11 |
| cg09314984 | 1.10E-10 | 7.80E-12 | -7.28 | 15.9862162 | -1.30E-01 | 5627625   | 5627748   | NC_000019.9  |
| cg18390816 | 1.10E-10 | 7.81E-12 | -7.28 | 15.9859699 | -8.73E-02 | 209921031 | 209921154 | NC_000001.10 |
| cg11943058 | 1.10E-10 | 7.82E-12 | -7.28 | 15.9838457 | -9.16E-02 | 44253516  | 44253639  | NC_000021.8  |
| cg23612030 | 1.10E-10 | 7.83E-12 | -7.28 | 15.9832711 | -9.74E-02 | 96811533  | 96811656  | NC_000002.11 |
| cg17790273 | 1.11E-10 | 7.84E-12 | -7.28 | 15.9816124 | -1.49E-01 | 49040709  | 49040832  | NC_000017.10 |
| cg09455823 | 1.11E-10 | 7.84E-12 | -7.28 | 15.9811633 | -1.45E-01 | 201606912 | 201607035 | NC_000002.11 |
| cg08167085 | 1.11E-10 | 7.89E-12 | -7.28 | 15.9758238 | -1.35E-01 | 123211133 | 123211256 | NC_000012.11 |
| cg00946479 | 1.11E-10 | 7.90E-12 | -7.28 | 15.9743891 | -1.57E-01 | 36903611  | 36903734  | NC_000022.10 |
| cg11270633 | 1.11E-10 | 7.90E-12 | -7.28 | 15.9742696 | -1.37E-01 | 39736956  | 39737079  | NC_000019.9  |
| cg03203239 | 1.11E-10 | 7.90E-12 | -7.28 | 15.97419   | -5.13E-02 | 74735315  | 74735438  | NC_000002.11 |
| cg05057976 | 1.11E-10 | 7.91E-12 | -7.28 | 15.9730626 | -7.97E-02 | 65779667  | 65779790  | NC_000011.9  |
| cg01062691 | 1.12E-10 | 7.92E-12 | -7.28 | 15.9721203 | -7.63E-02 | 11763141  | 11763264  | NC_000016.9  |
| cg07449091 | 1.12E-10 | 7.92E-12 | -7.28 | 15.9715619 | -1.11E-01 | 100192882 | 100193005 | NC_000014.8  |
| cg22315542 | 1.12E-10 | 7.94E-12 | -7.28 | 15.9699233 | -7.59E-02 | 18024261  | 18024384  | NC_000004.11 |
| cg20250250 | 1.12E-10 | 7.95E-12 | -7.28 | 15.9685859 | -1.47E-01 | 100479169 | 100479292 | NC_000014.8  |
| cg25622928 | 1.12E-10 | 7.95E-12 | -7.28 | 15.9684207 | -8.89E-02 | 92496160  | 92496283  | NC_000001.10 |
| cg07113549 | 1.12E-10 | 7.95E-12 | -7.28 | 15.9675739 | -3.37E-02 | 98312651  | 98312774  | NC_000003.11 |
| cg08779649 | 1.12E-10 | 7.96E-12 | -7.28 | 15.9665579 | -2.15E-01 | 50194554  | 50194677  | NC_000013.10 |
| cg05146756 | 1.12E-10 | 7.97E-12 | -7.28 | 15.9655306 | -1.52E-01 | 21558871  | 21558994  | NC_000009.11 |
| cg08041573 | 1.12E-10 | 7.98E-12 | -7.28 | 15.9641456 | -4.10E-02 | 33651723  | 33651846  | NC_000021.8  |
| cg16139249 | 1.12E-10 | 7.98E-12 | -7.28 | 15.9641113 | -1.17E-01 | 328689    | 328812    | NC_000008.10 |
| cg25362248 | 1.13E-10 | 7.99E-12 | -7.28 | 15.9629895 | -4.41E-02 | 31192015  | 31192138  | NC_000001.10 |
| cg25287149 | 1.13E-10 | 8.00E-12 | -7.28 | 15.9623944 | -1.54E-01 | 125353337 | 125353460 | NC_000004.11 |
| cg03646740 | 1.13E-10 | 8.00E-12 | -7.28 | 15.9616328 | -1.73E-01 | 114813015 | 114813138 | NC_000013.10 |

|            |          |          |       |            |           |           |           |              |
|------------|----------|----------|-------|------------|-----------|-----------|-----------|--------------|
| cg12078510 | 1.13E-10 | 8.02E-12 | -7.28 | 15.9589443 | -5.99E-02 | 53030774  | 53030897  | NC_000019.9  |
| cg10221172 | 1.13E-10 | 8.04E-12 | -7.28 | 15.9567687 | -9.49E-02 | 148840821 | 148840944 | NC_000006.11 |
| cg00930615 | 1.13E-10 | 8.04E-12 | -7.28 | 15.9564937 | -6.88E-02 | 60690667  | 60690790  | NC_000015.9  |
| cg02652597 | 1.13E-10 | 8.05E-12 | -7.28 | 15.9562396 | -1.26E-01 | 85811292  | 85811415  | NC_000002.11 |
| cg07625783 | 1.14E-10 | 8.07E-12 | -7.28 | 15.9527615 | -1.88E-01 | 159796617 | 159796740 | NC_000001.10 |
| cg00637802 | 1.14E-10 | 8.08E-12 | -7.28 | 15.9517186 | -1.00E-01 | 113590234 | 113590357 | NC_000012.11 |
| cg14084896 | 1.14E-10 | 8.09E-12 | -7.28 | 15.9511368 | -1.44E-01 | 40530702  | 40530825  | NC_000006.11 |
| cg02999385 | 1.14E-10 | 8.10E-12 | -7.28 | 15.9501554 | -1.58E-01 | 57846754  | 57846877  | NC_000016.9  |
| cg10574843 | 1.14E-10 | 8.11E-12 | -7.28 | 15.9490241 | -1.13E-01 | 1994902   | 1995025   | NC_000011.9  |
| cg00719439 | 1.14E-10 | 8.11E-12 | -7.28 | 15.9488648 | -7.89E-02 | 30409325  | 30409448  | NC_000020.10 |
| cg22331017 | 1.14E-10 | 8.11E-12 | -7.28 | 15.948297  | -2.39E-02 | 45936214  | 45936337  | NC_000018.9  |
| cg25560965 | 1.14E-10 | 8.11E-12 | -7.28 | 15.9478932 | -6.69E-02 | 12510064  | 12510187  | NC_000012.11 |
| cg26576657 | 1.14E-10 | 8.12E-12 | -7.28 | 15.9472182 | -2.25E-02 | 30718510  | 30718633  | NC_000004.11 |
| cg12947138 | 1.14E-10 | 8.13E-12 | -7.28 | 15.9462165 | -1.12E-01 | 71475303  | 71475426  | NC_000005.9  |
| cg10598776 | 1.14E-10 | 8.13E-12 | -7.28 | 15.9459016 | -1.37E-01 | 29738578  | 29738701  | NC_000010.10 |
| cg26343667 | 1.14E-10 | 8.14E-12 | -7.28 | 15.9447413 | -6.01E-02 | 156391915 | 156392038 | NC_000003.11 |
| cg23154272 | 1.15E-10 | 8.15E-12 | -7.28 | 15.9434656 | -1.20E-01 | 154966068 | 154966191 | NC_000001.10 |
| cg01109535 | 1.15E-10 | 8.15E-12 | -7.28 | 15.9432962 | -8.97E-02 | 24856104  | 24856227  | NC_000016.9  |
| cg13448625 | 1.15E-10 | 8.17E-12 | -7.28 | 15.9414174 | -1.52E-01 | 105845238 | 105845361 | NC_000010.10 |
| cg17351154 | 1.15E-10 | 8.20E-12 | -7.27 | 15.9371564 | -9.61E-02 | 46181428  | 46181551  | NC_000019.9  |
| cg26188825 | 1.15E-10 | 8.21E-12 | -7.27 | 15.9369157 | -1.58E-01 | 15578074  | 15578197  | NC_000006.11 |
| cg01817521 | 1.15E-10 | 8.21E-12 | -7.27 | 15.9366389 | -9.09E-02 | 61584108  | 61584231  | NC_000020.10 |
| cg07139284 | 1.15E-10 | 8.22E-12 | -7.27 | 15.9355556 | -8.09E-02 | 30948641  | 30948764  | NC_000012.11 |
| cg17497049 | 1.16E-10 | 8.22E-12 | -7.27 | 15.9353379 | -4.58E-02 | 56110871  | 56110994  | NC_000019.9  |
| cg21386933 | 1.16E-10 | 8.23E-12 | -7.27 | 15.9342051 | -1.49E-01 | 83477608  | 83477731  | NC_000015.9  |

|            |          |          |       |            |           |           |           |              |
|------------|----------|----------|-------|------------|-----------|-----------|-----------|--------------|
| cg00962000 | 1.16E-10 | 8.23E-12 | -7.27 | 15.9341377 | -5.62E-02 | 100065660 | 100065783 | NC_000001.10 |
| cg11735008 | 1.16E-10 | 8.23E-12 | -7.27 | 15.9336194 | -1.61E-01 | 42380309  | 42380432  | NC_000001.10 |
| cg19444950 | 1.16E-10 | 8.24E-12 | -7.27 | 15.9330204 | -2.67E-02 | 180320022 | 180320145 | NC_000003.11 |
| cg20548744 | 1.16E-10 | 8.24E-12 | -7.27 | 15.9326415 | -6.28E-02 | 131790754 | 131790877 | NC_000009.11 |
| cg19942083 | 1.16E-10 | 8.25E-12 | -7.27 | 15.9316728 | -1.06E-01 | 7070562   | 7070685   | NC_000012.11 |
| cg01886855 | 1.16E-10 | 8.27E-12 | -7.27 | 15.9289128 | -1.50E-01 | 43786997  | 43787120  | NC_000021.8  |
| cg23996349 | 1.16E-10 | 8.28E-12 | -7.27 | 15.9285871 | -7.68E-02 | 22831506  | 22831629  | NC_000008.10 |
| cg05529278 | 1.17E-10 | 8.32E-12 | -7.27 | 15.9238818 | -1.10E-01 | 28336181  | 28336304  | NC_000021.8  |
| cg18019810 | 1.17E-10 | 8.32E-12 | -7.27 | 15.9229585 | -1.79E-01 | 236619304 | 236619427 | NC_000002.11 |
| cg05482050 | 1.17E-10 | 8.33E-12 | -7.27 | 15.92243   | -6.05E-02 | 177409334 | 177409457 | NC_000005.9  |
| cg11278107 | 1.17E-10 | 8.33E-12 | -7.27 | 15.9222486 | -1.50E-01 | 16142263  | 16142386  | NC_000004.11 |
| cg08391380 | 1.17E-10 | 8.33E-12 | -7.27 | 15.9217627 | -1.81E-01 | 601208    | 601331    | NC_000005.9  |
| cg04774374 | 1.17E-10 | 8.34E-12 | -7.27 | 15.9215331 | -4.89E-02 | 128379134 | 128379257 | NC_000007.13 |
| cg27134084 | 1.17E-10 | 8.34E-12 | -7.27 | 15.9212242 | -1.00E-01 | 129793154 | 129793277 | NC_000007.13 |
| cg18997901 | 1.17E-10 | 8.35E-12 | -7.27 | 15.9200886 | -1.63E-01 | 76461321  | 76461444  | NC_000006.11 |
| cg09264091 | 1.17E-10 | 8.36E-12 | -7.27 | 15.9191877 | -6.16E-02 | 85219265  | 85219388  | NC_000001.10 |
| cg11108890 | 1.17E-10 | 8.37E-12 | -7.27 | 15.9171796 | -1.55E-01 | 85811471  | 85811594  | NC_000002.11 |
| cg24659854 | 1.18E-10 | 8.37E-12 | -7.27 | 15.9169825 | -5.62E-02 | 65222491  | 65222614  | NC_000011.9  |
| cg27439480 | 1.18E-10 | 8.38E-12 | -7.27 | 15.9166806 | -7.16E-02 | 69999859  | 69999982  | NC_000016.9  |
| cg07059360 | 1.18E-10 | 8.39E-12 | -7.27 | 15.9149987 | -1.01E-01 | 22102032  | 22102155  | NC_000008.10 |
| cg17720286 | 1.18E-10 | 8.40E-12 | -7.27 | 15.9144726 | -6.79E-02 | 1513941   | 1514064   | NC_000019.9  |
| cg26631039 | 1.18E-10 | 8.40E-12 | -7.27 | 15.9141563 | -1.59E-01 | 121625022 | 121625145 | NC_000002.11 |
| cg00423068 | 1.18E-10 | 8.40E-12 | -7.27 | 15.9141525 | -1.32E-01 | 145101998 | 145102121 | NC_000008.10 |
| cg14405768 | 1.18E-10 | 8.41E-12 | -7.27 | 15.9128361 | -1.59E-01 | 15147652  | 15147775  | NC_000009.11 |
| cg08795557 | 1.18E-10 | 8.42E-12 | -7.27 | 15.9118431 | -1.71E-01 | 70921332  | 70921455  | NC_000007.13 |

|            |          |          |       |            |           |           |           |              |
|------------|----------|----------|-------|------------|-----------|-----------|-----------|--------------|
| cg25067197 | 1.18E-10 | 8.42E-12 | -7.27 | 15.9114975 | -4.90E-02 | 71088707  | 71088830  | NC_000017.10 |
| cg19085699 | 1.18E-10 | 8.42E-12 | -7.27 | 15.9111803 | -6.63E-02 | 231004314 | 231004437 | NC_000001.10 |
| cg21935113 | 1.18E-10 | 8.43E-12 | -7.27 | 15.9103383 | -1.02E-01 | 63531732  | 63531855  | NC_000011.9  |
| cg00476054 | 1.18E-10 | 8.43E-12 | -7.27 | 15.9101044 | -1.15E-01 | 50705383  | 50705506  | NC_000013.10 |
| cg04802018 | 1.18E-10 | 8.44E-12 | -7.27 | 15.9096985 | -7.97E-02 | 12728102  | 12728225  | NC_000002.11 |
| cg13242871 | 1.18E-10 | 8.44E-12 | -7.27 | 15.9086573 | -1.30E-01 | 47278547  | 47278670  | NC_000020.10 |
| cg14291900 | 1.18E-10 | 8.45E-12 | -7.27 | 15.908227  | -1.64E-01 | 23294368  | 23294491  | NC_000014.8  |
| cg03062944 | 1.19E-10 | 8.46E-12 | -7.27 | 15.9071632 | -1.50E-01 | 6183455   | 6183578   | NC_000010.10 |
| cg09864712 | 1.19E-10 | 8.46E-12 | -7.27 | 15.9066288 | -1.63E-01 | 726786    | 726909    | NC_000016.9  |
| cg06877366 | 1.19E-10 | 8.50E-12 | -7.27 | 15.9017493 | -1.69E-01 | 1997203   | 1997326   | NC_000007.13 |
| cg09404334 | 1.19E-10 | 8.51E-12 | -7.27 | 15.9013658 | -3.23E-02 | 86304180  | 86304303  | NC_000006.11 |
| cg25170956 | 1.19E-10 | 8.51E-12 | -7.27 | 15.9007667 | -7.83E-02 | 68816067  | 68816190  | NC_000011.9  |
| cg15207055 | 1.19E-10 | 8.52E-12 | -7.27 | 15.9001395 | -8.72E-02 | 152096590 | 152096713 | NC_000004.11 |
| cg10717214 | 1.20E-10 | 8.53E-12 | -7.27 | 15.898889  | -1.07E-01 | 31543557  | 31543680  | NC_000006.11 |
| cg10909154 | 1.20E-10 | 8.53E-12 | -7.27 | 15.8986027 | -6.09E-02 | 2723619   | 2723742   | NC_000016.9  |
| cg25707722 | 1.20E-10 | 8.54E-12 | -7.27 | 15.8981944 | -1.26E-01 | 63025490  | 63025613  | NC_000012.11 |
| cg08693344 | 1.20E-10 | 8.55E-12 | -7.27 | 15.8967754 | -5.30E-02 | 56691562  | 56691685  | NC_000016.9  |
| cg26668608 | 1.20E-10 | 8.55E-12 | -7.27 | 15.8964932 | -1.09E-01 | 113931518 | 113931641 | NC_000002.11 |
| cg21616935 | 1.20E-10 | 8.58E-12 | -7.27 | 15.8935517 | -1.65E-01 | 47794231  | 47794354  | NC_000018.9  |
| cg09716807 | 1.20E-10 | 8.59E-12 | -7.27 | 15.8919947 | -1.22E-01 | 574169    | 574292    | NC_000005.9  |
| cg10262357 | 1.20E-10 | 8.60E-12 | -7.27 | 15.8906337 | -6.94E-02 | 29691832  | 29691955  | NC_000006.11 |
| cg26835302 | 1.21E-10 | 8.61E-12 | -7.27 | 15.8900713 | -1.96E-01 | 90343791  | 90343914  | NC_000012.11 |
| cg05996671 | 1.21E-10 | 8.62E-12 | -7.27 | 15.8882324 | -1.50E-01 | 123518635 | 123518758 | NC_000003.11 |
| cg22646210 | 1.21E-10 | 8.63E-12 | -7.27 | 15.8867699 | -1.18E-01 | 72380726  | 72380849  | NC_000011.9  |
| cg19823138 | 1.21E-10 | 8.64E-12 | -7.27 | 15.885851  | -6.42E-02 | 99559002  | 99559125  | NC_000015.9  |

|            |          |          |       |            |           |           |           |              |
|------------|----------|----------|-------|------------|-----------|-----------|-----------|--------------|
| cg14743812 | 1.21E-10 | 8.64E-12 | -7.27 | 15.8856714 | -1.07E-01 | 113006248 | 113006371 | NC_000013.10 |
| cg00406621 | 1.21E-10 | 8.65E-12 | -7.27 | 15.8852377 | -1.20E-01 | 29466731  | 29466854  | NC_000016.9  |
| cg02835848 | 1.21E-10 | 8.66E-12 | -7.27 | 15.8842266 | -7.40E-02 | 15250381  | 15250504  | NC_000001.10 |
| cg08748415 | 1.21E-10 | 8.66E-12 | -7.27 | 15.8839162 | -6.36E-02 | 45983741  | 45983864  | NC_000006.11 |
| cg07091412 | 1.21E-10 | 8.67E-12 | -7.27 | 15.8832924 | -4.17E-02 | 20810651  | 20810774  | NC_000001.10 |
| cg21008969 | 1.21E-10 | 8.67E-12 | -7.27 | 15.8825839 | -1.34E-01 | 3680597   | 3680720   | NC_000012.11 |
| cg20295120 | 1.21E-10 | 8.67E-12 | -7.27 | 15.8822462 | -6.96E-02 | 111757141 | 111757264 | NC_000001.10 |
| cg15804432 | 1.21E-10 | 8.68E-12 | -7.27 | 15.8819946 | -4.32E-02 | 64454965  | 64455088  | NC_000015.9  |
| cg20103692 | 1.21E-10 | 8.68E-12 | -7.27 | 15.8817731 | -1.63E-01 | 29454672  | 29454795  | NC_000006.11 |
| cg05828191 | 1.22E-10 | 8.70E-12 | -7.26 | 15.8793946 | -1.30E-01 | 75019382  | 75019505  | NC_000016.9  |
| cg06246094 | 1.22E-10 | 8.70E-12 | -7.26 | 15.8791105 | -9.71E-02 | 42174085  | 42174208  | NC_000015.9  |
| cg23352146 | 1.22E-10 | 8.71E-12 | -7.26 | 15.8778365 | -8.06E-02 | 12701929  | 12702052  | NC_000011.9  |
| cg23956238 | 1.22E-10 | 8.72E-12 | -7.26 | 15.8775402 | -5.70E-02 | 55672036  | 55672159  | NC_000019.9  |
| cg26276572 | 1.22E-10 | 8.72E-12 | -7.26 | 15.8770242 | -1.10E-01 | 46421023  | 46421146  | NC_000021.8  |
| cg10208457 | 1.22E-10 | 8.73E-12 | -7.26 | 15.8757634 | -3.61E-02 | 176874324 | 176874447 | NC_000005.9  |
| cg10807894 | 1.22E-10 | 8.74E-12 | -7.26 | 15.8749027 | -1.09E-01 | 125169804 | 125169927 | NC_000012.11 |
| cg05655555 | 1.22E-10 | 8.74E-12 | -7.26 | 15.8744995 | -1.69E-01 | 2054816   | 2054939   | NC_000019.9  |
| cg06917772 | 1.22E-10 | 8.75E-12 | -7.26 | 15.873209  | -1.22E-01 | 126286370 | 126286493 | NC_000011.9  |
| cg11296937 | 1.23E-10 | 8.76E-12 | -7.26 | 15.8726613 | -6.79E-02 | 64084966  | 64085089  | NC_000011.9  |
| cg01869233 | 1.23E-10 | 8.76E-12 | -7.26 | 15.8724418 | -1.11E-01 | 6035139   | 6035262   | NC_000020.10 |
| cg14199276 | 1.23E-10 | 8.76E-12 | -7.26 | 15.8722652 | -9.76E-02 | 140117005 | 140117128 | NC_000009.11 |
| cg08853318 | 1.23E-10 | 8.77E-12 | -7.26 | 15.8709619 | -1.03E-01 | 71089186  | 71089309  | NC_000017.10 |
| cg07438246 | 1.23E-10 | 8.78E-12 | -7.26 | 15.8709195 | -1.72E-01 | 14446645  | 14446768  | NC_000003.11 |
| cg17083411 | 1.23E-10 | 8.79E-12 | -7.26 | 15.8697283 | -6.37E-02 | 203274503 | 203274626 | NC_000001.10 |
| cg16985952 | 1.23E-10 | 8.79E-12 | -7.26 | 15.8687165 | -1.10E-01 | 15068172  | 15068295  | NC_000001.10 |

|                |          |          |       |            |           |           |           |              |
|----------------|----------|----------|-------|------------|-----------|-----------|-----------|--------------|
| cg21805788     | 1.23E-10 | 8.80E-12 | -7.26 | 15.8686104 | -1.35E-01 | 109134372 | 109134495 | NC_000001.10 |
| cg00828762     | 1.23E-10 | 8.80E-12 | -7.26 | 15.8684559 | -8.49E-02 | 42234732  | 42234855  | NC_000008.10 |
| cg08165361     | 1.23E-10 | 8.80E-12 | -7.26 | 15.8680281 | -8.62E-02 | 48474400  | 48474523  | NC_000008.10 |
| cg12271317     | 1.23E-10 | 8.82E-12 | -7.26 | 15.8659052 | -8.34E-02 | 108972693 | 108972816 | NC_000004.11 |
| cg01832586     | 1.23E-10 | 8.83E-12 | -7.26 | 15.8650219 | -9.67E-02 | 49594703  | 49594826  | NC_000016.9  |
| ch.2.30415474F | 1.24E-10 | 8.85E-12 | -7.26 | 15.8624267 | -7.68E-02 | 30561970  | 30562093  | NC_000002.11 |
| cg10259111     | 1.24E-10 | 8.85E-12 | -7.26 | 15.8622    | -1.29E-01 | 52429547  | 52429670  | NC_000014.8  |
| cg22274234     | 1.24E-10 | 8.86E-12 | -7.26 | 15.8611181 | -1.10E-01 | 109888858 | 109888981 | NC_000012.11 |
| cg03916783     | 1.24E-10 | 8.87E-12 | -7.26 | 15.8602205 | -6.26E-02 | 95977018  | 95977141  | NC_000011.9  |
| cg14130141     | 1.24E-10 | 8.87E-12 | -7.26 | 15.8600101 | -7.73E-02 | 45406886  | 45407009  | NC_000019.9  |
| cg14519252     | 1.24E-10 | 8.88E-12 | -7.26 | 15.8590773 | -1.25E-01 | 41397795  | 41397918  | NC_000001.10 |
| cg16680214     | 1.24E-10 | 8.89E-12 | -7.26 | 15.8583474 | -1.03E-01 | 154839983 | 154840106 | NC_000001.10 |
| cg00440980     | 1.24E-10 | 8.90E-12 | -7.26 | 15.8565843 | -1.67E-01 | 74639894  | 74640017  | NC_000017.10 |
| cg21614107     | 1.25E-10 | 8.92E-12 | -7.26 | 15.8552544 | -1.42E-01 | 1633073   | 1633196   | NC_000019.9  |
| cg18352162     | 1.25E-10 | 8.92E-12 | -7.26 | 15.8546524 | -8.81E-02 | 156848854 | 156848977 | NC_000003.11 |
| cg12062995     | 1.25E-10 | 8.92E-12 | -7.26 | 15.8545816 | -5.28E-02 | 39368212  | 39368335  | NC_000004.11 |
| cg15522171     | 1.25E-10 | 8.93E-12 | -7.26 | 15.854255  | -7.03E-02 | 33547626  | 33547749  | NC_000001.10 |
| cg06636244     | 1.25E-10 | 8.94E-12 | -7.26 | 15.852121  | -1.58E-01 | 3572706   | 3572829   | NC_000010.10 |
| cg16073408     | 1.25E-10 | 8.95E-12 | -7.26 | 15.8519121 | -1.32E-01 | 44128218  | 44128341  | NC_000007.13 |
| ch.3.52786R    | 1.25E-10 | 8.95E-12 | -7.26 | 15.8512189 | -6.25E-02 | 3083388   | 3083511   | NC_000003.11 |
| cg11165391     | 1.25E-10 | 8.97E-12 | -7.26 | 15.8492853 | -1.56E-01 | 185614930 | 185615053 | NC_000001.10 |
| ch.14.1124768F | 1.25E-10 | 8.98E-12 | -7.26 | 15.84872   | -3.06E-02 | 75910539  | 75910662  | NC_000014.8  |
| cg04889106     | 1.25E-10 | 8.98E-12 | -7.26 | 15.8483429 | -1.70E-02 | 3751618   | 3751741   | NC_000006.11 |
| cg05106269     | 1.25E-10 | 8.98E-12 | -7.26 | 15.8477959 | -1.14E-01 | 10381393  | 10381516  | NC_000019.9  |
| cg04214866     | 1.26E-10 | 8.99E-12 | -7.26 | 15.8470183 | -4.70E-02 | 1021098   | 1021221   | NC_000016.9  |



|            |          |          |       |            |           |           |           |              |
|------------|----------|----------|-------|------------|-----------|-----------|-----------|--------------|
| cg01444574 | 1.26E-10 | 9.00E-12 | -7.26 | 15.8462688 | -7.24E-02 | 128617328 | 128617451 | NC_000002.11 |
| cg23121547 | 1.26E-10 | 9.00E-12 | -7.26 | 15.8459335 | -6.77E-02 | 1593657   | 1593780   | NC_000011.9  |
| cg11932113 | 1.26E-10 | 9.01E-12 | -7.26 | 15.8454445 | -1.45E-01 | 132194886 | 132195009 | NC_000007.13 |
| cg11760395 | 1.26E-10 | 9.01E-12 | -7.26 | 15.8446428 | -1.17E-01 | 33701708  | 33701831  | NC_000010.10 |
| cg13650062 | 1.26E-10 | 9.03E-12 | -7.26 | 15.8430133 | -1.59E-01 | 31096669  | 31096792  | NC_000005.9  |
| cg22602019 | 1.26E-10 | 9.03E-12 | -7.26 | 15.8428599 | -8.90E-02 | 32714308  | 32714431  | NC_000001.10 |
| cg13560619 | 1.26E-10 | 9.03E-12 | -7.26 | 15.8427045 | -1.61E-01 | 65621695  | 65621818  | NC_000011.9  |
| cg04030584 | 1.26E-10 | 9.03E-12 | -7.26 | 15.8422628 | -1.77E-01 | 67871218  | 67871341  | NC_000016.9  |
| cg22642485 | 1.26E-10 | 9.04E-12 | -7.26 | 15.8421561 | -2.09E-01 | 139089846 | 139089969 | NC_000005.9  |
| cg09785099 | 1.26E-10 | 9.04E-12 | -7.26 | 15.8419951 | -3.89E-02 | 65904008  | 65904131  | NC_000015.9  |
| cg24691105 | 1.26E-10 | 9.04E-12 | -7.26 | 15.8418218 | -3.13E-02 | 50700331  | 50700454  | NC_000013.10 |
| cg22685816 | 1.26E-10 | 9.04E-12 | -7.26 | 15.8417066 | -9.17E-02 | 1036679   | 1036802   | NC_000011.9  |
| cg07396495 | 1.26E-10 | 9.06E-12 | -7.26 | 15.8397842 | -3.41E-02 | 53468716  | 53468839  | NC_000016.9  |
| cg25865120 | 1.26E-10 | 9.06E-12 | -7.26 | 15.8394644 | -1.59E-01 | 48625058  | 48625181  | NC_000015.9  |
| cg25062539 | 1.26E-10 | 9.06E-12 | -7.26 | 15.8390297 | -1.14E-01 | 79718482  | 79718605  | NC_000008.10 |
| cg16249105 | 1.26E-10 | 9.07E-12 | -7.26 | 15.8388963 | -6.97E-02 | 120938029 | 120938152 | NC_000010.10 |
| cg04135372 | 1.26E-10 | 9.07E-12 | -7.26 | 15.8388038 | -5.79E-02 | 99061383  | 99061506  | NC_000002.11 |
| cg06369349 | 1.27E-10 | 9.07E-12 | -7.26 | 15.8382336 | -9.33E-02 | 49503178  | 49503301  | NC_000019.9  |
| cg23014871 | 1.27E-10 | 9.08E-12 | -7.26 | 15.837237  | -1.69E-01 | 43656166  | 43656289  | NC_000010.10 |
| cg00732383 | 1.27E-10 | 9.09E-12 | -7.26 | 15.8364628 | -1.59E-01 | 46482439  | 46482562  | NC_000018.9  |
| cg15095427 | 1.27E-10 | 9.09E-12 | -7.26 | 15.8364475 | -9.09E-02 | 234651180 | 234651303 | NC_000001.10 |
| cg08564527 | 1.27E-10 | 9.10E-12 | -7.26 | 15.8353134 | -5.32E-02 | 67571988  | 67572111  | NC_000016.9  |
| cg24726965 | 1.27E-10 | 9.10E-12 | -7.26 | 15.8351666 | -1.42E-01 | 63606136  | 63606259  | NC_000002.11 |
| cg20939723 | 1.27E-10 | 9.11E-12 | -7.26 | 15.8338232 | -5.60E-02 | 171570700 | 171570823 | NC_000002.11 |
| cg17318138 | 1.27E-10 | 9.12E-12 | -7.26 | 15.8334557 | -8.04E-02 | 657287    | 657410    | NC_000020.10 |

|                |          |          |       |            |           |           |           |              |
|----------------|----------|----------|-------|------------|-----------|-----------|-----------|--------------|
| ch.11.1421098F | 1.27E-10 | 9.12E-12 | -7.26 | 15.8332944 | -6.19E-02 | 68338008  | 68338131  | NC_000011.9  |
| cg11742268     | 1.27E-10 | 9.14E-12 | -7.26 | 15.8309812 | -1.36E-01 | 60673288  | 60673411  | NC_000012.11 |
| cg15708127     | 1.28E-10 | 9.15E-12 | -7.26 | 15.8299415 | -1.40E-01 | 224914799 | 224914922 | NC_000001.10 |
| cg10878966     | 1.28E-10 | 9.15E-12 | -7.26 | 15.8297136 | -7.98E-02 | 47813443  | 47813566  | NC_000021.8  |
| cg01800297     | 1.28E-10 | 9.15E-12 | -7.26 | 15.8295369 | -1.16E-01 | 113394591 | 113394714 | NC_000005.9  |
| cg04839409     | 1.28E-10 | 9.16E-12 | -7.26 | 15.8285704 | -9.99E-02 | 126700661 | 126700784 | NC_000010.10 |
| cg27143824     | 1.28E-10 | 9.17E-12 | -7.26 | 15.8277773 | -4.49E-02 | 184580738 | 184580861 | NC_000004.11 |
| cg23307203     | 1.28E-10 | 9.17E-12 | -7.26 | 15.8273803 | -2.53E-01 | 18499309  | 18499432  | NC_000019.9  |
| cg19178742     | 1.28E-10 | 9.17E-12 | -7.26 | 15.8272068 | -6.16E-02 | 30070099  | 30070222  | NC_000006.11 |
| cg21204860     | 1.28E-10 | 9.19E-12 | -7.26 | 15.8260123 | -1.41E-01 | 75446565  | 75446688  | NC_000017.10 |
| cg11608447     | 1.28E-10 | 9.19E-12 | -7.26 | 15.8250612 | -7.13E-02 | 38620746  | 38620869  | NC_000009.11 |
| cg04825119     | 1.28E-10 | 9.22E-12 | -7.25 | 15.8221259 | -6.60E-02 | 50361467  | 50361590  | NC_000012.11 |
| cg11267802     | 1.29E-10 | 9.23E-12 | -7.25 | 15.821478  | -1.65E-01 | 153123593 | 153123716 | NC_000001.10 |
| cg27233997     | 1.29E-10 | 9.25E-12 | -7.25 | 15.8191393 | -5.76E-02 | 97360444  | 97360567  | NC_000003.11 |
| cg10227024     | 1.29E-10 | 9.25E-12 | -7.25 | 15.8188538 | -1.19E-01 | 11234662  | 11234785  | NC_000017.10 |
| cg06181286     | 1.29E-10 | 9.26E-12 | -7.25 | 15.8175292 | -1.46E-01 | 27064121  | 27064244  | NC_000003.11 |
| ch.19.1125306R | 1.29E-10 | 9.28E-12 | -7.25 | 15.8162144 | -1.99E-02 | 34858318  | 34858441  | NC_000019.9  |
| cg25418777     | 1.29E-10 | 9.29E-12 | -7.25 | 15.8153215 | -6.54E-02 | 44035099  | 44035222  | NC_000020.10 |
| cg02670637     | 1.30E-10 | 9.32E-12 | -7.25 | 15.811676  | -1.50E-01 | 56184693  | 56184816  | NC_000001.10 |
| cg24311251     | 1.30E-10 | 9.37E-12 | -7.25 | 15.8059127 | -5.26E-02 | 44453387  | 44453510  | NC_000013.10 |
| cg27346988     | 1.31E-10 | 9.38E-12 | -7.25 | 15.8055665 | -1.21E-01 | 73719693  | 73719816  | NC_000017.10 |
| cg20737909     | 1.31E-10 | 9.38E-12 | -7.25 | 15.8050951 | -1.84E-01 | 1507020   | 1507143   | NC_000011.9  |
| ch.1.893623F   | 1.31E-10 | 9.38E-12 | -7.25 | 15.8050025 | -4.88E-02 | 27102602  | 27102725  | NC_000001.10 |
| cg00067758     | 1.31E-10 | 9.39E-12 | -7.25 | 15.8043039 | -1.24E-01 | 92185790  | 92185913  | NC_000006.11 |
| cg06805925     | 1.31E-10 | 9.39E-12 | -7.25 | 15.804266  | -1.61E-01 | 16233044  | 16233167  | NC_000017.10 |

|            |          |          |       |            |           |           |           |              |
|------------|----------|----------|-------|------------|-----------|-----------|-----------|--------------|
| cg06770322 | 1.31E-10 | 9.40E-12 | -7.25 | 15.8033018 | -1.11E-01 | 142851098 | 142851221 | NC_000005.9  |
| cg06807905 | 1.31E-10 | 9.40E-12 | -7.25 | 15.8031459 | -9.44E-02 | 110776546 | 110776669 | NC_000001.10 |
| cg08832596 | 1.31E-10 | 9.41E-12 | -7.25 | 15.8024209 | -1.01E-01 | 76757006  | 76757129  | NC_000011.9  |
| cg27311654 | 1.31E-10 | 9.41E-12 | -7.25 | 15.8021065 | -9.41E-02 | 19638435  | 19638558  | NC_000001.10 |
| cg07356753 | 1.31E-10 | 9.42E-12 | -7.25 | 15.8012674 | -5.17E-02 | 81810745  | 81810868  | NC_000003.11 |
| cg09251317 | 1.31E-10 | 9.43E-12 | -7.25 | 15.8006568 | -1.13E-01 | 77393865  | 77393988  | NC_000014.8  |
| cg14480266 | 1.31E-10 | 9.43E-12 | -7.25 | 15.8002428 | -1.32E-01 | 23134523  | 23134646  | NC_000011.9  |
| cg21396539 | 1.31E-10 | 9.45E-12 | -7.25 | 15.7983174 | -4.75E-02 | 156164025 | 156164148 | NC_000001.10 |
| cg02516513 | 1.31E-10 | 9.45E-12 | -7.25 | 15.7980899 | -9.26E-02 | 27950396  | 27950519  | NC_000008.10 |
| cg18322822 | 1.32E-10 | 9.46E-12 | -7.25 | 15.7972923 | -1.43E-01 | 1119648   | 1119771   | NC_000005.9  |
| cg17838754 | 1.32E-10 | 9.46E-12 | -7.25 | 15.7971661 | -1.06E-01 | 1281005   | 1281128   | NC_000001.10 |
| cg10664272 | 1.32E-10 | 9.46E-12 | -7.25 | 15.7970115 | -1.08E-01 | 85638053  | 85638176  | NC_000002.11 |
| cg23208152 | 1.32E-10 | 9.47E-12 | -7.25 | 15.7962435 | -1.68E-01 | 50383134  | 50383257  | NC_000003.11 |
| cg02499214 | 1.32E-10 | 9.48E-12 | -7.25 | 15.7944514 | -1.98E-01 | 122230490 | 122230613 | NC_000012.11 |
| cg27568165 | 1.32E-10 | 9.50E-12 | -7.25 | 15.7933616 | -1.55E-01 | 205631978 | 205632101 | NC_000001.10 |
| cg17469019 | 1.32E-10 | 9.50E-12 | -7.25 | 15.7932074 | -4.17E-02 | 117452517 | 117452640 | NC_000001.10 |
| cg05663278 | 1.32E-10 | 9.52E-12 | -7.25 | 15.7904218 | -1.25E-01 | 8979125   | 8979248   | NC_000016.9  |
| cg02703598 | 1.32E-10 | 9.52E-12 | -7.25 | 15.790404  | -1.28E-01 | 12831463  | 12831586  | NC_000011.9  |
| cg05903609 | 1.33E-10 | 9.54E-12 | -7.25 | 15.7889114 | -6.39E-02 | 1587888   | 1588011   | NC_000017.10 |
| cg08755026 | 1.33E-10 | 9.54E-12 | -7.25 | 15.7884538 | -1.56E-01 | 85819614  | 85819737  | NC_000002.11 |
| cg08691567 | 1.33E-10 | 9.55E-12 | -7.25 | 15.7876277 | -1.08E-01 | 53183930  | 53184053  | NC_000012.11 |
| cg10421029 | 1.33E-10 | 9.55E-12 | -7.25 | 15.7874966 | -1.31E-01 | 30936028  | 30936151  | NC_000016.9  |
| cg04087271 | 1.33E-10 | 9.56E-12 | -7.25 | 15.7869437 | -1.13E-01 | 20915334  | 20915457  | NC_000001.10 |
| cg13445486 | 1.33E-10 | 9.57E-12 | -7.25 | 15.7859006 | -1.23E-01 | 70847794  | 70847917  | NC_000010.10 |
| cg26838949 | 1.33E-10 | 9.57E-12 | -7.25 | 15.7858015 | -1.55E-01 | 200985069 | 200985192 | NC_000001.10 |

|               |          |          |       |            |           |           |           |              |
|---------------|----------|----------|-------|------------|-----------|-----------|-----------|--------------|
| cg13119035    | 1.33E-10 | 9.57E-12 | -7.25 | 15.7857527 | -7.32E-02 | 42951436  | 42951559  | NC_000007.13 |
| cg04848925    | 1.33E-10 | 9.57E-12 | -7.25 | 15.7855205 | -3.14E-02 | 46894294  | 46894417  | NC_000017.10 |
| cg05174942    | 1.33E-10 | 9.58E-12 | -7.25 | 15.7850622 | -1.83E-01 | 140098392 | 140098515 | NC_000005.9  |
| cg16243195    | 1.33E-10 | 9.58E-12 | -7.25 | 15.7841423 | -1.10E-01 | 7252323   | 7252446   | NC_000004.11 |
| cg03332597    | 1.33E-10 | 9.60E-12 | -7.25 | 15.7827325 | -4.93E-02 | 185125704 | 185125827 | NC_000001.10 |
| cg21629821    | 1.33E-10 | 9.60E-12 | -7.25 | 15.7825445 | -1.76E-01 | 46713473  | 46713596  | NC_000019.9  |
| cg23375068    | 1.34E-10 | 9.61E-12 | -7.25 | 15.7810673 | -1.32E-01 | 50925113  | 50925236  | NC_000022.10 |
| ch.1.3571292R | 1.34E-10 | 9.62E-12 | -7.25 | 15.7802864 | -4.12E-02 | 182831125 | 182831248 | NC_000001.10 |
| cg11781986    | 1.34E-10 | 9.62E-12 | -7.25 | 15.7801152 | -6.73E-02 | 24808787  | 24808910  | NC_000014.8  |
| cg05592363    | 1.34E-10 | 9.63E-12 | -7.25 | 15.7799083 | -3.99E-02 | 78908495  | 78908618  | NC_000005.9  |
| cg20495206    | 1.34E-10 | 9.66E-12 | -7.25 | 15.7768589 | -7.20E-02 | 151215566 | 151215689 | NC_000007.13 |
| cg14661225    | 1.34E-10 | 9.68E-12 | -7.25 | 15.7744975 | -7.01E-02 | 46171451  | 46171574  | NC_000019.9  |
| cg15225810    | 1.35E-10 | 9.69E-12 | -7.25 | 15.7734271 | -1.15E-01 | 750790    | 750913    | NC_000019.9  |
| cg17043922    | 1.35E-10 | 9.71E-12 | -7.25 | 15.7716921 | -7.32E-02 | 34664305  | 34664428  | NC_000006.11 |
| cg00976949    | 1.35E-10 | 9.73E-12 | -7.25 | 15.7690948 | -6.82E-02 | 127950782 | 127950905 | NC_000003.11 |
| cg03496978    | 1.35E-10 | 9.74E-12 | -7.25 | 15.7685109 | -3.82E-02 | 224302360 | 224302483 | NC_000001.10 |
| cg02870741    | 1.35E-10 | 9.74E-12 | -7.25 | 15.7684876 | -1.37E-01 | 16272369  | 16272492  | NC_000019.9  |
| cg26331625    | 1.35E-10 | 9.75E-12 | -7.25 | 15.7676183 | -3.29E-02 | 42128098  | 42128221  | NC_000001.10 |
| cg05509510    | 1.36E-10 | 9.76E-12 | -7.25 | 15.7658053 | -1.42E-01 | 27006149  | 27006272  | NC_000002.11 |
| cg15216925    | 1.36E-10 | 9.80E-12 | -7.24 | 15.7623507 | -6.32E-02 | 179921655 | 179921778 | NC_000005.9  |
| cg02493604    | 1.36E-10 | 9.83E-12 | -7.24 | 15.7592541 | -5.50E-02 | 54073445  | 54073568  | NC_000010.10 |
| cg20334252    | 1.36E-10 | 9.83E-12 | -7.24 | 15.7589737 | -1.07E-01 | 53096248  | 53096371  | NC_000015.9  |
| cg07363131    | 1.37E-10 | 9.85E-12 | -7.24 | 15.7575027 | -1.53E-01 | 86965114  | 86965237  | NC_000016.9  |
| cg21286782    | 1.37E-10 | 9.85E-12 | -7.24 | 15.7574841 | -1.39E-01 | 113265602 | 113265725 | NC_000001.10 |
| cg06679990    | 1.37E-10 | 9.86E-12 | -7.24 | 15.7558772 | -1.15E-01 | 57863266  | 57863389  | NC_000012.11 |

|               |          |          |       |            |           |           |           |              |
|---------------|----------|----------|-------|------------|-----------|-----------|-----------|--------------|
| cg25005112    | 1.37E-10 | 9.88E-12 | -7.24 | 15.7544231 | -1.20E-01 | 28911938  | 28912061  | NC_000006.11 |
| cg15803845    | 1.37E-10 | 9.88E-12 | -7.24 | 15.7543092 | -1.17E-01 | 1474777   | 1474900   | NC_000011.9  |
| cg10347555    | 1.37E-10 | 9.90E-12 | -7.24 | 15.7524877 | -1.42E-01 | 2569925   | 2570048   | NC_000016.9  |
| cg23370170    | 1.37E-10 | 9.90E-12 | -7.24 | 15.7522641 | -3.84E-02 | 12634832  | 12634955  | NC_000004.11 |
| cg23955417    | 1.38E-10 | 9.92E-12 | -7.24 | 15.7505288 | -1.27E-01 | 26880928  | 26881051  | NC_000001.10 |
| cg03250480    | 1.38E-10 | 9.93E-12 | -7.24 | 15.7490938 | -1.36E-01 | 30689295  | 30689418  | NC_000016.9  |
| cg26111265    | 1.38E-10 | 9.94E-12 | -7.24 | 15.7488233 | -7.07E-02 | 117210620 | 117210743 | NC_000001.10 |
| ch.3.946759R  | 1.38E-10 | 9.94E-12 | -7.24 | 15.7482647 | -4.03E-02 | 45979073  | 45979196  | NC_000003.11 |
| cg15682194    | 1.38E-10 | 9.95E-12 | -7.24 | 15.7472613 | -9.09E-02 | 69925136  | 69925259  | NC_000011.9  |
| cg04810063    | 1.38E-10 | 9.95E-12 | -7.24 | 15.7470521 | -1.56E-01 | 88703634  | 88703757  | NC_000016.9  |
| cg18492943    | 1.38E-10 | 9.95E-12 | -7.24 | 15.7468496 | -1.75E-01 | 44203304  | 44203427  | NC_000007.13 |
| cg22803868    | 1.38E-10 | 9.96E-12 | -7.24 | 15.7461139 | -1.68E-01 | 27045164  | 27045287  | NC_000017.10 |
| cg17629796    | 1.38E-10 | 9.97E-12 | -7.24 | 15.7450417 | -1.93E-01 | 30707265  | 30707388  | NC_000013.10 |
| cg24610044    | 1.38E-10 | 9.98E-12 | -7.24 | 15.7442728 | -1.37E-01 | 115727622 | 115727745 | NC_000001.10 |
| ch.9.2295001F | 1.38E-10 | 9.98E-12 | -7.24 | 15.7439071 | -4.16E-02 | 135143580 | 135143703 | NC_000009.11 |
| cg20465143    | 1.38E-10 | 9.99E-12 | -7.24 | 15.7438877 | -4.36E-02 | 144653962 | 144654085 | NC_000008.10 |
| cg01529404    | 1.38E-10 | 9.99E-12 | -7.24 | 15.7438751 | -1.49E-01 | 126755385 | 126755508 | NC_000003.11 |
| cg26870903    | 1.39E-10 | 1.00E-11 | -7.24 | 15.7426748 | -9.71E-02 | 166846008 | 166846131 | NC_000001.10 |
| cg20509092    | 1.39E-10 | 1.00E-11 | -7.24 | 15.7419488 | -1.26E-01 | 74162771  | 74162894  | NC_000005.9  |
| cg04603130    | 1.39E-10 | 1.00E-11 | -7.24 | 15.7419063 | -1.82E-01 | 2550027   | 2550150   | NC_000019.9  |
| cg25541958    | 1.39E-10 | 1.00E-11 | -7.24 | 15.7415332 | -1.06E-01 | 1992965   | 1993088   | NC_000008.10 |
| cg02906238    | 1.39E-10 | 1.00E-11 | -7.24 | 15.7411972 | -2.27E-02 | 122042701 | 122042824 | NC_000002.11 |
| cg14540555    | 1.39E-10 | 1.00E-11 | -7.24 | 15.7408798 | -4.62E-02 | 86667375  | 86667498  | NC_000011.9  |
| cg27421105    | 1.39E-10 | 1.00E-11 | -7.24 | 15.7391991 | -8.31E-02 | 8477708   | 8477831   | NC_000019.9  |
| cg11440375    | 1.39E-10 | 1.00E-11 | -7.24 | 15.738236  | -8.68E-02 | 2988321   | 2988444   | NC_000006.11 |

|            |          |          |       |            |           |           |           |              |
|------------|----------|----------|-------|------------|-----------|-----------|-----------|--------------|
| cg02999146 | 1.39E-10 | 1.01E-11 | -7.24 | 15.7359488 | -1.06E-01 | 61926731  | 61926854  | NC_000020.10 |
| cg05266345 | 1.39E-10 | 1.01E-11 | -7.24 | 15.7355657 | -5.18E-02 | 16439350  | 16439473  | NC_000017.10 |
| cg19273668 | 1.40E-10 | 1.01E-11 | -7.24 | 15.73497   | -1.20E-01 | 201199004 | 201199127 | NC_000001.10 |
| cg11347165 | 1.40E-10 | 1.01E-11 | -7.24 | 15.7339531 | -1.28E-01 | 17631644  | 17631767  | NC_000001.10 |
| cg17380160 | 1.40E-10 | 1.01E-11 | -7.24 | 15.7336984 | -7.81E-02 | 150260358 | 150260481 | NC_000006.11 |
| cg13570892 | 1.40E-10 | 1.01E-11 | -7.24 | 15.732196  | -9.19E-02 | 45449437  | 45449560  | NC_000015.9  |
| cg24693436 | 1.40E-10 | 1.01E-11 | -7.24 | 15.7311817 | -1.68E-01 | 3033636   | 3033759   | NC_000007.13 |
| cg16008979 | 1.40E-10 | 1.01E-11 | -7.24 | 15.7302506 | -1.40E-01 | 101427765 | 101427888 | NC_000007.13 |
| cg01640727 | 1.40E-10 | 1.01E-11 | -7.24 | 15.7284388 | -1.10E-01 | 44029468  | 44029591  | NC_000017.10 |
| cg04055874 | 1.41E-10 | 1.02E-11 | -7.24 | 15.7262464 | -1.35E-01 | 16282434  | 16282557  | NC_000017.10 |
| cg16755038 | 1.41E-10 | 1.02E-11 | -7.24 | 15.7251038 | -3.46E-02 | 55939089  | 55939212  | NC_000017.10 |
| cg10133725 | 1.41E-10 | 1.02E-11 | -7.24 | 15.7237407 | -1.66E-01 | 64981081  | 64981204  | NC_000011.9  |
| cg24079702 | 1.41E-10 | 1.02E-11 | -7.24 | 15.7235787 | -9.76E-02 | 106015771 | 106015894 | NC_000002.11 |
| cg24146518 | 1.41E-10 | 1.02E-11 | -7.24 | 15.7229308 | -4.80E-02 | 183155097 | 183155220 | NC_000001.10 |
| cg03358982 | 1.41E-10 | 1.02E-11 | -7.24 | 15.7216504 | -5.96E-02 | 80994409  | 80994532  | NC_000004.11 |
| cg25428297 | 1.41E-10 | 1.02E-11 | -7.24 | 15.7207078 | -1.15E-01 | 1022841   | 1022964   | NC_000007.13 |
| cg25065981 | 1.42E-10 | 1.02E-11 | -7.24 | 15.7197536 | -3.61E-02 | 32086755  | 32086878  | NC_000006.11 |
| cg20947082 | 1.42E-10 | 1.02E-11 | -7.24 | 15.7193494 | -4.42E-02 | 233749643 | 233749766 | NC_000001.10 |
| cg06801385 | 1.42E-10 | 1.02E-11 | -7.24 | 15.718366  | -1.21E-01 | 1152362   | 1152485   | NC_000005.9  |
| cg18204684 | 1.42E-10 | 1.03E-11 | -7.24 | 15.7179731 | -1.37E-01 | 99859711  | 99859834  | NC_000004.11 |
| cg13617753 | 1.42E-10 | 1.03E-11 | -7.24 | 15.717204  | -1.43E-01 | 58096512  | 58096635  | NC_000019.9  |
| cg26555664 | 1.42E-10 | 1.03E-11 | -7.24 | 15.7165354 | -1.32E-01 | 1250038   | 1250161   | NC_000007.13 |
| cg10981439 | 1.42E-10 | 1.03E-11 | -7.24 | 15.7149971 | -2.01E-01 | 41254433  | 41254556  | NC_000006.11 |
| cg02502358 | 1.42E-10 | 1.03E-11 | -7.24 | 15.7144357 | -1.75E-01 | 26221089  | 26221212  | NC_000017.10 |
| cg00389341 | 1.43E-10 | 1.03E-11 | -7.24 | 15.7113799 | -7.49E-02 | 37190260  | 37190383  | NC_000006.11 |

|            |          |          |       |            |           |           |           |              |
|------------|----------|----------|-------|------------|-----------|-----------|-----------|--------------|
| cg00858599 | 1.43E-10 | 1.03E-11 | -7.24 | 15.7094626 | -9.32E-02 | 3220929   | 3221052   | NC_000020.10 |
| cg14414903 | 1.43E-10 | 1.03E-11 | -7.24 | 15.7094564 | -1.88E-01 | 240171712 | 240171835 | NC_000002.11 |
| cg00835771 | 1.43E-10 | 1.03E-11 | -7.24 | 15.7086905 | -2.19E-02 | 27718336  | 27718459  | NC_000002.11 |
| cg10212537 | 1.43E-10 | 1.04E-11 | -7.23 | 15.7082025 | -6.84E-02 | 93799559  | 93799682  | NC_000014.8  |
| cg03867607 | 1.43E-10 | 1.04E-11 | -7.23 | 15.7072507 | -1.86E-01 | 56554439  | 56554562  | NC_000012.11 |
| cg04252044 | 1.44E-10 | 1.04E-11 | -7.23 | 15.7039222 | -1.38E-01 | 188664747 | 188664870 | NC_000003.11 |
| cg24611264 | 1.44E-10 | 1.04E-11 | -7.23 | 15.7034551 | -8.93E-02 | 120008944 | 120009067 | NC_000011.9  |
| cg06872548 | 1.44E-10 | 1.04E-11 | -7.23 | 15.7016769 | -1.06E-01 | 78716983  | 78717106  | NC_000017.10 |
| cg21245092 | 1.44E-10 | 1.04E-11 | -7.23 | 15.7014975 | -1.16E-01 | 74813995  | 74814118  | NC_000014.8  |
| cg08251025 | 1.44E-10 | 1.04E-11 | -7.23 | 15.6997435 | -1.51E-01 | 124322371 | 124322494 | NC_000004.11 |
| cg02787306 | 1.44E-10 | 1.05E-11 | -7.23 | 15.6991002 | -4.22E-02 | 34957963  | 34958086  | NC_000017.10 |
| cg01020987 | 1.45E-10 | 1.05E-11 | -7.23 | 15.6958533 | -9.82E-02 | 3816166   | 3816289   | NC_000001.10 |
| cg00359661 | 1.45E-10 | 1.05E-11 | -7.23 | 15.695632  | -1.12E-01 | 7725787   | 7725910   | NC_000006.11 |
| cg14145151 | 1.45E-10 | 1.05E-11 | -7.23 | 15.6947877 | -1.04E-01 | 73607754  | 73607877  | NC_000003.11 |
| cg26562263 | 1.45E-10 | 1.05E-11 | -7.23 | 15.6942798 | -1.80E-01 | 21863715  | 21863838  | NC_000019.9  |
| cg02334187 | 1.45E-10 | 1.05E-11 | -7.23 | 15.6940411 | -3.54E-02 | 175970714 | 175970837 | NC_000005.9  |
| cg08177453 | 1.45E-10 | 1.05E-11 | -7.23 | 15.6940293 | -9.13E-02 | 130697718 | 130697841 | NC_000011.9  |
| cg23646343 | 1.45E-10 | 1.05E-11 | -7.23 | 15.6919282 | -1.74E-01 | 139333410 | 139333533 | NC_000007.13 |
| cg22571926 | 1.45E-10 | 1.05E-11 | -7.23 | 15.6910996 | -3.25E-02 | 56112222  | 56112345  | NC_000005.9  |
| cg10006817 | 1.46E-10 | 1.05E-11 | -7.23 | 15.6901138 | -1.57E-01 | 33162876  | 33162999  | NC_000015.9  |
| cg22599563 | 1.46E-10 | 1.05E-11 | -7.23 | 15.6897871 | -1.83E-02 | 21059247  | 21059370  | NC_000001.10 |
| cg07017125 | 1.46E-10 | 1.06E-11 | -7.23 | 15.689719  | -1.60E-01 | 44418481  | 44418604  | NC_000007.13 |
| cg27612695 | 1.46E-10 | 1.06E-11 | -7.23 | 15.6896713 | -5.10E-02 | 29059191  | 29059314  | NC_000017.10 |
| cg03627468 | 1.46E-10 | 1.06E-11 | -7.23 | 15.6890189 | -1.53E-01 | 79331759  | 79331882  | NC_000016.9  |
| cg03780927 | 1.46E-10 | 1.06E-11 | -7.23 | 15.6888112 | -1.12E-01 | 118781150 | 118781273 | NC_000011.9  |

|            |          |          |       |            |           |           |           |              |
|------------|----------|----------|-------|------------|-----------|-----------|-----------|--------------|
| cg19100169 | 1.46E-10 | 1.06E-11 | -7.23 | 15.6882368 | -1.44E-01 | 159688203 | 159688326 | NC_000005.9  |
| cg14479136 | 1.46E-10 | 1.06E-11 | -7.23 | 15.6882338 | -8.08E-02 | 139222701 | 139222824 | NC_000009.11 |
| cg05817709 | 1.46E-10 | 1.06E-11 | -7.23 | 15.6878645 | -1.92E-01 | 63304098  | 63304221  | NC_000011.9  |
| cg03534847 | 1.46E-10 | 1.06E-11 | -7.23 | 15.6876128 | -1.69E-01 | 13053055  | 13053178  | NC_000012.11 |
| cg22923895 | 1.46E-10 | 1.06E-11 | -7.23 | 15.6838159 | -1.15E-01 | 101180719 | 101180842 | NC_000007.13 |
| cg23849826 | 1.46E-10 | 1.06E-11 | -7.23 | 15.6837209 | -1.26E-01 | 39872186  | 39872309  | NC_000015.9  |
| cg20315690 | 1.46E-10 | 1.06E-11 | -7.23 | 15.6836584 | -8.85E-02 | 124707157 | 124707280 | NC_000011.9  |
| cg20689294 | 1.46E-10 | 1.06E-11 | -7.23 | 15.6835538 | -1.44E-01 | 129846082 | 129846205 | NC_000010.10 |
| cg20373326 | 1.47E-10 | 1.06E-11 | -7.23 | 15.6820053 | -1.24E-01 | 82068803  | 82068926  | NC_000016.9  |
| cg18785467 | 1.47E-10 | 1.06E-11 | -7.23 | 15.6819798 | -5.52E-02 | 88412083  | 88412206  | NC_000006.11 |
| cg25606172 | 1.47E-10 | 1.06E-11 | -7.23 | 15.6805389 | -1.66E-01 | 7373343   | 7373466   | NC_000004.11 |
| cg15947283 | 1.47E-10 | 1.07E-11 | -7.23 | 15.679291  | -7.04E-02 | 38398836  | 38398959  | NC_000007.13 |
| cg11050793 | 1.47E-10 | 1.07E-11 | -7.23 | 15.6792725 | -1.74E-01 | 124876650 | 124876773 | NC_000012.11 |
| cg09248276 | 1.47E-10 | 1.07E-11 | -7.23 | 15.6786977 | -8.62E-02 | 160696468 | 160696591 | NC_000001.10 |
| cg06002157 | 1.47E-10 | 1.07E-11 | -7.23 | 15.6784496 | -1.26E-01 | 168453261 | 168453384 | NC_000006.11 |
| cg09508490 | 1.47E-10 | 1.07E-11 | -7.23 | 15.6776092 | -1.11E-01 | 89972339  | 89972462  | NC_000016.9  |
| cg22815214 | 1.48E-10 | 1.07E-11 | -7.23 | 15.676263  | -9.28E-02 | 201083145 | 201083268 | NC_000001.10 |
| cg19543453 | 1.48E-10 | 1.07E-11 | -7.23 | 15.6749175 | -2.29E-02 | 43589127  | 43589250  | NC_000020.10 |
| cg05244682 | 1.48E-10 | 1.07E-11 | -7.23 | 15.674635  | -1.55E-01 | 7839613   | 7839736   | NC_000010.10 |
| cg09433910 | 1.48E-10 | 1.07E-11 | -7.23 | 15.6741945 | -2.01E-01 | 1626509   | 1626632   | NC_000017.10 |
| cg07421596 | 1.48E-10 | 1.07E-11 | -7.23 | 15.6738243 | -1.07E-01 | 31913770  | 31913893  | NC_000006.11 |
| cg16562251 | 1.48E-10 | 1.07E-11 | -7.23 | 15.673767  | -6.11E-02 | 166845621 | 166845744 | NC_000001.10 |
| cg01619416 | 1.48E-10 | 1.07E-11 | -7.23 | 15.6723584 | -1.34E-01 | 1110991   | 1111114   | NC_000016.9  |
| cg16947947 | 1.48E-10 | 1.07E-11 | -7.23 | 15.6716531 | -3.60E-02 | 84206068  | 84206191  | NC_000004.11 |
| cg27365991 | 1.48E-10 | 1.08E-11 | -7.23 | 15.6706149 | -1.34E-01 | 123036376 | 123036499 | NC_000005.9  |



|            |          |          |       |            |           |           |           |              |
|------------|----------|----------|-------|------------|-----------|-----------|-----------|--------------|
| cg03600512 | 1.48E-10 | 1.08E-11 | -7.23 | 15.6695274 | -6.46E-02 | 9368158   | 9368281   | NC_000002.11 |
| cg23224396 | 1.49E-10 | 1.08E-11 | -7.23 | 15.6687963 | -1.71E-01 | 55196989  | 55197112  | NC_000014.8  |
| cg04589673 | 1.49E-10 | 1.08E-11 | -7.23 | 15.6685397 | -7.31E-02 | 90016295  | 90016418  | NC_000010.10 |
| cg16808310 | 1.49E-10 | 1.08E-11 | -7.23 | 15.6680673 | -1.78E-02 | 37555834  | 37555957  | NC_000020.10 |
| cg25230532 | 1.49E-10 | 1.08E-11 | -7.23 | 15.6674053 | -6.53E-02 | 34646550  | 34646673  | NC_000009.11 |
| cg19521693 | 1.49E-10 | 1.08E-11 | -7.23 | 15.6659188 | -1.06E-01 | 54468577  | 54468700  | NC_000019.9  |
| cg23196549 | 1.49E-10 | 1.08E-11 | -7.23 | 15.6655029 | -1.66E-01 | 110480700 | 110480823 | NC_000004.11 |
| cg21769969 | 1.49E-10 | 1.08E-11 | -7.23 | 15.6649352 | -7.55E-02 | 108396498 | 108396621 | NC_000006.11 |
| cg03530006 | 1.49E-10 | 1.08E-11 | -7.23 | 15.664735  | -1.16E-01 | 38920380  | 38920503  | NC_000013.10 |
| cg04169469 | 1.49E-10 | 1.08E-11 | -7.23 | 15.6643483 | -3.85E-02 | 10588434  | 10588557  | NC_000002.11 |
| cg11032208 | 1.49E-10 | 1.08E-11 | -7.23 | 15.6640513 | -3.05E-02 | 95997736  | 95997859  | NC_000005.9  |
| cg15722404 | 1.49E-10 | 1.08E-11 | -7.23 | 15.6622743 | -1.97E-02 | 12329242  | 12329365  | NC_000003.11 |
| cg16506378 | 1.50E-10 | 1.09E-11 | -7.23 | 15.66177   | -1.32E-01 | 121881190 | 121881313 | NC_000008.10 |
| cg00772000 | 1.50E-10 | 1.09E-11 | -7.23 | 15.6614962 | -4.98E-02 | 18123049  | 18123172  | NC_000006.11 |
| cg19775672 | 1.50E-10 | 1.09E-11 | -7.23 | 15.660801  | -8.30E-02 | 7104195   | 7104318   | NC_000004.11 |
| cg02240622 | 1.50E-10 | 1.09E-11 | -7.23 | 15.660696  | -1.50E-01 | 40601467  | 40601590  | NC_000015.9  |
| cg07246206 | 1.50E-10 | 1.09E-11 | -7.23 | 15.6595858 | -3.72E-02 | 67980532  | 67980655  | NC_000011.9  |
| cg10037654 | 1.50E-10 | 1.09E-11 | -7.23 | 15.6593129 | -3.40E-02 | 713921    | 714044    | NC_000001.10 |
| cg17818798 | 1.50E-10 | 1.09E-11 | -7.23 | 15.6555533 | -4.79E-02 | 14228473  | 14228596  | NC_000019.9  |
| cg06632214 | 1.51E-10 | 1.09E-11 | -7.23 | 15.6547114 | -2.42E-01 | 314074    | 314197    | NC_000011.9  |
| cg05209306 | 1.51E-10 | 1.09E-11 | -7.23 | 15.6535019 | -1.56E-01 | 39899376  | 39899499  | NC_000019.9  |
| cg26996569 | 1.51E-10 | 1.10E-11 | -7.23 | 15.6527431 | -2.40E-01 | 121829743 | 121829866 | NC_000012.11 |
| cg20014778 | 1.51E-10 | 1.10E-11 | -7.23 | 15.6519365 | -6.66E-02 | 229761614 | 229761737 | NC_000001.10 |
| cg11969526 | 1.51E-10 | 1.10E-11 | -7.23 | 15.6517183 | -1.65E-01 | 209145835 | 209145958 | NC_000002.11 |
| cg07817810 | 1.51E-10 | 1.10E-11 | -7.23 | 15.651614  | -4.13E-02 | 47205858  | 47205981  | NC_000003.11 |

|                 |          |          |       |            |           |           |           |              |
|-----------------|----------|----------|-------|------------|-----------|-----------|-----------|--------------|
| cg26309655      | 1.51E-10 | 1.10E-11 | -7.22 | 15.6500465 | -4.55E-02 | 150459725 | 150459848 | NC_000001.10 |
| cg02691192      | 1.51E-10 | 1.10E-11 | -7.22 | 15.649737  | -1.32E-01 | 59693501  | 59693624  | NC_000017.10 |
| cg04466743      | 1.51E-10 | 1.10E-11 | -7.22 | 15.6497366 | -1.32E-01 | 19915794  | 19915917  | NC_000020.10 |
| cg07181702      | 1.52E-10 | 1.10E-11 | -7.22 | 15.6466745 | -1.46E-01 | 57918682  | 57918805  | NC_000017.10 |
| cg17662387      | 1.52E-10 | 1.10E-11 | -7.22 | 15.6462183 | -8.18E-02 | 116286880 | 116287003 | NC_000010.10 |
| cg09227563      | 1.52E-10 | 1.10E-11 | -7.22 | 15.6461501 | -1.51E-01 | 54984705  | 54984828  | NC_000019.9  |
| cg00338479      | 1.52E-10 | 1.10E-11 | -7.22 | 15.6461261 | -1.46E-01 | 38551357  | 38551480  | NC_000001.10 |
| cg07734293      | 1.52E-10 | 1.10E-11 | -7.22 | 15.6457512 | -1.16E-01 | 16040682  | 16040805  | NC_000016.9  |
| ch.12.41606343F | 1.52E-10 | 1.10E-11 | -7.22 | 15.6450481 | -8.16E-02 | 43320076  | 43320199  | NC_000012.11 |
| cg14779106      | 1.52E-10 | 1.10E-11 | -7.22 | 15.6449334 | -6.62E-02 | 133747446 | 133747569 | NC_000005.9  |
| cg00197993      | 1.52E-10 | 1.11E-11 | -7.22 | 15.6431554 | -2.33E-01 | 1201056   | 1201179   | NC_000006.11 |
| cg06996175      | 1.53E-10 | 1.11E-11 | -7.22 | 15.6401843 | -9.27E-02 | 2546877   | 2547000   | NC_000019.9  |
| cg24473594      | 1.53E-10 | 1.11E-11 | -7.22 | 15.6399889 | -1.29E-01 | 46714834  | 46714957  | NC_000019.9  |
| cg25210796      | 1.53E-10 | 1.11E-11 | -7.22 | 15.6398673 | -1.47E-01 | 65089808  | 65089931  | NC_000001.10 |
| cg14925260      | 1.53E-10 | 1.11E-11 | -7.22 | 15.6392748 | -7.33E-02 | 48807254  | 48807377  | NC_000013.10 |
| cg21901300      | 1.53E-10 | 1.11E-11 | -7.22 | 15.6385271 | -6.62E-02 | 47928050  | 47928173  | NC_000019.9  |
| cg26386436      | 1.53E-10 | 1.11E-11 | -7.22 | 15.6375724 | -6.74E-02 | 90084672  | 90084795  | NC_000014.8  |
| cg02347881      | 1.53E-10 | 1.11E-11 | -7.22 | 15.63748   | -1.57E-01 | 91579373  | 91579496  | NC_000013.10 |
| cg16718760      | 1.53E-10 | 1.11E-11 | -7.22 | 15.6373366 | -1.78E-01 | 55721067  | 55721190  | NC_000003.11 |
| cg06105694      | 1.53E-10 | 1.11E-11 | -7.22 | 15.6366775 | -1.62E-01 | 36585340  | 36585463  | NC_000017.10 |
| cg07887168      | 1.53E-10 | 1.12E-11 | -7.22 | 15.6350538 | -1.16E-01 | 4263893   | 4264016   | NC_000016.9  |
| cg12831086      | 1.53E-10 | 1.12E-11 | -7.22 | 15.6350202 | -1.43E-01 | 44099675  | 44099798  | NC_000020.10 |
| ch.4.66343068R  | 1.53E-10 | 1.12E-11 | -7.22 | 15.6345698 | -5.27E-02 | 66660473  | 66660596  | NC_000004.11 |
| cg08460399      | 1.54E-10 | 1.12E-11 | -7.22 | 15.6332722 | -1.50E-01 | 42879935  | 42880058  | NC_000020.10 |
| cg04558166      | 1.54E-10 | 1.12E-11 | -7.22 | 15.6320174 | -6.41E-02 | 210001279 | 210001402 | NC_000001.10 |

|               |          |          |       |            |           |           |           |              |
|---------------|----------|----------|-------|------------|-----------|-----------|-----------|--------------|
| cg24777762    | 1.54E-10 | 1.12E-11 | -7.22 | 15.6316687 | -4.01E-02 | 73087230  | 73087353  | NC_000011.9  |
| cg12002455    | 1.54E-10 | 1.12E-11 | -7.22 | 15.6307565 | -1.28E-01 | 121609179 | 121609302 | NC_000010.10 |
| cg06020978    | 1.54E-10 | 1.12E-11 | -7.22 | 15.6291999 | -1.66E-01 | 27044605  | 27044728  | NC_000010.10 |
| cg25858249    | 1.55E-10 | 1.13E-11 | -7.22 | 15.6261387 | -1.17E-01 | 150920485 | 150920608 | NC_000006.11 |
| cg01774477    | 1.55E-10 | 1.13E-11 | -7.22 | 15.6257169 | -6.26E-02 | 21059978  | 21060101  | NC_000001.10 |
| cg06288351    | 1.55E-10 | 1.13E-11 | -7.22 | 15.6236663 | -7.59E-02 | 43729897  | 43730020  | NC_000020.10 |
| cg15979344    | 1.55E-10 | 1.13E-11 | -7.22 | 15.6235137 | -6.40E-02 | 99496871  | 99496994  | NC_000010.10 |
| cg00278366    | 1.55E-10 | 1.13E-11 | -7.22 | 15.6218828 | -1.25E-01 | 110940287 | 110940410 | NC_000012.11 |
| cg09347134    | 1.56E-10 | 1.13E-11 | -7.22 | 15.6202755 | -1.33E-01 | 62138845  | 62138968  | NC_000011.9  |
| cg02960688    | 1.56E-10 | 1.13E-11 | -7.22 | 15.6197268 | -6.90E-02 | 101419519 | 101419642 | NC_000010.10 |
| cg02662417    | 1.56E-10 | 1.13E-11 | -7.22 | 15.6192295 | -1.05E-01 | 157161545 | 157161668 | NC_000006.11 |
| cg26206185    | 1.56E-10 | 1.13E-11 | -7.22 | 15.6190418 | -1.29E-01 | 50451151  | 50451274  | NC_000022.10 |
| cg14090916    | 1.56E-10 | 1.13E-11 | -7.22 | 15.6185372 | -8.47E-02 | 140044904 | 140045027 | NC_000009.11 |
| ch.4.1893073F | 1.56E-10 | 1.14E-11 | -7.22 | 15.6165798 | -4.19E-02 | 99973275  | 99973398  | NC_000004.11 |
| cg24618387    | 1.56E-10 | 1.14E-11 | -7.22 | 15.6157277 | -2.02E-01 | 114917640 | 114917763 | NC_000013.10 |
| cg02306654    | 1.57E-10 | 1.14E-11 | -7.22 | 15.6119213 | -2.20E-01 | 157357887 | 157358010 | NC_000007.13 |
| cg07544451    | 1.57E-10 | 1.14E-11 | -7.22 | 15.6118225 | -1.09E-01 | 62228636  | 62228759  | NC_000014.8  |
| cg00334976    | 1.57E-10 | 1.14E-11 | -7.22 | 15.6101955 | -1.38E-01 | 61003303  | 61003426  | NC_000020.10 |
| cg27232482    | 1.57E-10 | 1.14E-11 | -7.22 | 15.6096601 | -8.58E-02 | 159174001 | 159174124 | NC_000001.10 |
| cg13688474    | 1.58E-10 | 1.15E-11 | -7.22 | 15.6067328 | -8.36E-02 | 9600443   | 9600566   | NC_000001.10 |
| cg01931502    | 1.58E-10 | 1.15E-11 | -7.22 | 15.606715  | -5.90E-02 | 161284176 | 161284299 | NC_000001.10 |
| cg19613740    | 1.58E-10 | 1.15E-11 | -7.22 | 15.603549  | -7.68E-02 | 153931224 | 153931347 | NC_000001.10 |
| cg02833725    | 1.58E-10 | 1.16E-11 | -7.22 | 15.6005466 | -9.66E-02 | 156696768 | 156696891 | NC_000001.10 |
| cg08206267    | 1.59E-10 | 1.16E-11 | -7.22 | 15.5992807 | -1.73E-01 | 17862104  | 17862227  | NC_000019.9  |
| cg15043318    | 1.59E-10 | 1.16E-11 | -7.22 | 15.5987553 | -1.20E-01 | 170947897 | 170948020 | NC_000005.9  |

|            |          |          |       |            |           |           |           |              |
|------------|----------|----------|-------|------------|-----------|-----------|-----------|--------------|
| cg25587868 | 1.59E-10 | 1.16E-11 | -7.22 | 15.5971374 | -5.90E-02 | 1066728   | 1066851   | NC_000004.11 |
| cg11335411 | 1.59E-10 | 1.16E-11 | -7.22 | 15.5966301 | -7.94E-02 | 58694111  | 58694234  | NC_000019.9  |
| cg03271293 | 1.59E-10 | 1.16E-11 | -7.22 | 15.5965361 | -9.62E-02 | 6920924   | 6921047   | NC_000002.11 |
| cg16608617 | 1.59E-10 | 1.16E-11 | -7.22 | 15.5960176 | -5.74E-02 | 202898681 | 202898804 | NC_000002.11 |
| cg02384859 | 1.59E-10 | 1.16E-11 | -7.22 | 15.5958395 | -1.05E-01 | 74862662  | 74862785  | NC_000015.9  |
| cg08443345 | 1.60E-10 | 1.16E-11 | -7.21 | 15.5938682 | -5.90E-02 | 52232454  | 52232577  | NC_000003.11 |
| cg21242584 | 1.60E-10 | 1.16E-11 | -7.21 | 15.5926073 | -4.74E-02 | 25041785  | 25041908  | NC_000008.10 |
| cg12147622 | 1.60E-10 | 1.17E-11 | -7.21 | 15.5920972 | -1.50E-01 | 74021432  | 74021555  | NC_000010.10 |
| cg01367005 | 1.60E-10 | 1.17E-11 | -7.21 | 15.589954  | -5.94E-02 | 38518966  | 38519089  | NC_000017.10 |
| cg25207224 | 1.60E-10 | 1.17E-11 | -7.21 | 15.5891669 | -1.21E-01 | 34211189  | 34211312  | NC_000006.11 |
| cg07941108 | 1.60E-10 | 1.17E-11 | -7.21 | 15.5882237 | -1.39E-01 | 90741814  | 90741937  | NC_000014.8  |
| cg05184607 | 1.61E-10 | 1.17E-11 | -7.21 | 15.5855324 | -1.19E-01 | 89686885  | 89687008  | NC_000016.9  |
| cg10725937 | 1.61E-10 | 1.17E-11 | -7.21 | 15.5853296 | -1.63E-01 | 41130978  | 41131101  | NC_000006.11 |
| cg09176957 | 1.61E-10 | 1.17E-11 | -7.21 | 15.5852432 | -1.78E-01 | 94799641  | 94799764  | NC_000010.10 |
| cg01749539 | 1.61E-10 | 1.18E-11 | -7.21 | 15.5826196 | -1.40E-01 | 75473969  | 75474092  | NC_000017.10 |
| cg22196610 | 1.61E-10 | 1.18E-11 | -7.21 | 15.5814452 | -4.87E-02 | 43042233  | 43042356  | NC_000005.9  |
| cg20951444 | 1.62E-10 | 1.18E-11 | -7.21 | 15.5771846 | -1.25E-01 | 33337112  | 33337235  | NC_000001.10 |
| cg01285783 | 1.62E-10 | 1.18E-11 | -7.21 | 15.5768998 | -1.48E-01 | 2623778   | 2623901   | NC_000006.11 |
| cg09258150 | 1.62E-10 | 1.18E-11 | -7.21 | 15.5759929 | -1.82E-01 | 10397429  | 10397552  | NC_000019.9  |
| cg04730047 | 1.62E-10 | 1.18E-11 | -7.21 | 15.5756132 | -1.17E-01 | 99979355  | 99979478  | NC_000003.11 |
| cg24531536 | 1.62E-10 | 1.19E-11 | -7.21 | 15.5750167 | -1.86E-01 | 29520698  | 29520821  | NC_000006.11 |
| cg11064935 | 1.63E-10 | 1.19E-11 | -7.21 | 15.5740895 | -3.98E-02 | 34164525  | 34164648  | NC_000006.11 |
| cg02334775 | 1.63E-10 | 1.19E-11 | -7.21 | 15.5732442 | -1.05E-01 | 89182676  | 89182799  | NC_000015.9  |
| cg01810186 | 1.63E-10 | 1.19E-11 | -7.21 | 15.5722435 | -1.52E-01 | 120058222 | 120058345 | NC_000008.10 |
| cg05890855 | 1.63E-10 | 1.19E-11 | -7.21 | 15.572036  | -1.78E-01 | 216783091 | 216783214 | NC_000002.11 |

|            |          |          |       |            |           |           |           |              |
|------------|----------|----------|-------|------------|-----------|-----------|-----------|--------------|
| cg18555117 | 1.63E-10 | 1.19E-11 | -7.21 | 15.5719463 | -6.35E-02 | 53620401  | 53620524  | NC_000014.8  |
| cg02098786 | 1.63E-10 | 1.19E-11 | -7.21 | 15.571763  | -9.27E-02 | 24801794  | 24801917  | NC_000014.8  |
| cg19513868 | 1.63E-10 | 1.19E-11 | -7.21 | 15.5700302 | -3.75E-02 | 55895400  | 55895523  | NC_000019.9  |
| cg04565464 | 1.63E-10 | 1.19E-11 | -7.21 | 15.5693179 | -6.10E-02 | 145669602 | 145669725 | NC_000008.10 |
| cg10103635 | 1.64E-10 | 1.19E-11 | -7.21 | 15.5672327 | -1.36E-01 | 67326002  | 67326125  | NC_000011.9  |
| cg10637425 | 1.64E-10 | 1.20E-11 | -7.21 | 15.5672052 | -5.81E-02 | 79008593  | 79008716  | NC_000017.10 |
| cg17125267 | 1.64E-10 | 1.20E-11 | -7.21 | 15.565322  | -3.19E-02 | 115520931 | 115521054 | NC_000004.11 |
| cg18052511 | 1.64E-10 | 1.20E-11 | -7.21 | 15.56357   | -1.49E-01 | 46410222  | 46410345  | NC_000003.11 |
| cg00554539 | 1.64E-10 | 1.20E-11 | -7.21 | 15.5622287 | -1.30E-01 | 101448585 | 101448708 | NC_000014.8  |
| cg10549018 | 1.64E-10 | 1.20E-11 | -7.21 | 15.5620397 | -1.31E-01 | 98176740  | 98176863  | NC_000010.10 |
| cg18297705 | 1.65E-10 | 1.20E-11 | -7.21 | 15.5598411 | -1.14E-01 | 1994927   | 1995050   | NC_000011.9  |
| cg21243889 | 1.65E-10 | 1.21E-11 | -7.21 | 15.5583322 | -1.09E-01 | 20207356  | 20207479  | NC_000008.10 |
| cg07129696 | 1.65E-10 | 1.21E-11 | -7.21 | 15.5579097 | -3.01E-02 | 209119949 | 209120072 | NC_000002.11 |
| cg14714727 | 1.65E-10 | 1.21E-11 | -7.21 | 15.5561199 | -5.70E-02 | 141302942 | 141303065 | NC_000005.9  |
| cg27139805 | 1.65E-10 | 1.21E-11 | -7.21 | 15.5558966 | -1.23E-01 | 35992791  | 35992914  | NC_000019.9  |
| cg12700271 | 1.66E-10 | 1.21E-11 | -7.21 | 15.5550513 | -1.24E-01 | 30458237  | 30458360  | NC_000006.11 |
| cg23273866 | 1.66E-10 | 1.21E-11 | -7.21 | 15.5540142 | -1.59E-01 | 196477730 | 196477853 | NC_000002.11 |
| cg01102307 | 1.66E-10 | 1.21E-11 | -7.21 | 15.5513677 | -6.21E-02 | 9340416   | 9340539   | NC_000001.10 |
| cg02992067 | 1.66E-10 | 1.21E-11 | -7.21 | 15.5511525 | -1.52E-01 | 53856169  | 53856292  | NC_000016.9  |
| cg02131513 | 1.66E-10 | 1.22E-11 | -7.21 | 15.5507609 | -3.65E-02 | 1358964   | 1359087   | NC_000016.9  |
| cg24324441 | 1.66E-10 | 1.22E-11 | -7.21 | 15.5498899 | -9.04E-02 | 158519002 | 158519125 | NC_000003.11 |
| cg22873412 | 1.67E-10 | 1.22E-11 | -7.21 | 15.5489486 | -6.40E-02 | 66753150  | 66753273  | NC_000008.10 |
| cg02491878 | 1.67E-10 | 1.22E-11 | -7.21 | 15.5488863 | -1.26E-01 | 138482580 | 138482703 | NC_000007.13 |
| cg04179940 | 1.67E-10 | 1.22E-11 | -7.21 | 15.5481843 | -4.63E-02 | 33871836  | 33871959  | NC_000020.10 |
| cg25129541 | 1.67E-10 | 1.22E-11 | -7.21 | 15.548014  | -1.02E-01 | 53273196  | 53273319  | NC_000012.11 |

|                 |          |          |       |            |           |           |           |              |
|-----------------|----------|----------|-------|------------|-----------|-----------|-----------|--------------|
| cg19969113      | 1.67E-10 | 1.22E-11 | -7.21 | 15.5471599 | -5.44E-02 | 118810441 | 118810564 | NC_000012.11 |
| cg04145193      | 1.67E-10 | 1.22E-11 | -7.21 | 15.5471534 | -5.00E-02 | 38083691  | 38083814  | NC_000017.10 |
| cg19450025      | 1.67E-10 | 1.22E-11 | -7.21 | 15.5452574 | -1.08E-01 | 30206073  | 30206196  | NC_000016.9  |
| cg03409548      | 1.67E-10 | 1.22E-11 | -7.21 | 15.5450767 | -4.12E-02 | 47082691  | 47082814  | NC_000001.10 |
| cg12420107      | 1.68E-10 | 1.23E-11 | -7.21 | 15.5413694 | -1.10E-01 | 140090300 | 140090423 | NC_000005.9  |
| cg13704911      | 1.68E-10 | 1.23E-11 | -7.21 | 15.5405757 | -1.28E-01 | 140341606 | 140341729 | NC_000009.11 |
| cg00351750      | 1.68E-10 | 1.23E-11 | -7.21 | 15.5404036 | -1.48E-01 | 246038775 | 246038898 | NC_000001.10 |
| cg14194983      | 1.68E-10 | 1.23E-11 | -7.21 | 15.5395873 | -1.06E-01 | 11908298  | 11908421  | NC_000001.10 |
| ch.7.130936447R | 1.68E-10 | 1.23E-11 | -7.21 | 15.539234  | -2.77E-02 | 131285907 | 131286030 | NC_000007.13 |
| cg21304234      | 1.68E-10 | 1.23E-11 | -7.21 | 15.5384806 | -8.80E-02 | 839646    | 839769    | NC_000004.11 |
| cg12011522      | 1.68E-10 | 1.23E-11 | -7.21 | 15.5378029 | -1.42E-01 | 179192421 | 179192544 | NC_000002.11 |
| cg01113538      | 1.68E-10 | 1.23E-11 | -7.2  | 15.5369897 | -3.14E-02 | 53658866  | 53658989  | NC_000006.11 |
| cg09276315      | 1.69E-10 | 1.23E-11 | -7.2  | 15.5353948 | -2.49E-02 | 47614071  | 47614194  | NC_000019.9  |
| cg09151742      | 1.69E-10 | 1.24E-11 | -7.2  | 15.5335625 | -1.21E-01 | 122018897 | 122019020 | NC_000012.11 |
| cg08617645      | 1.69E-10 | 1.24E-11 | -7.2  | 15.5319728 | -1.08E-01 | 59666274  | 59666397  | NC_000011.9  |
| cg03843892      | 1.69E-10 | 1.24E-11 | -7.2  | 15.5318104 | -6.43E-02 | 33852801  | 33852924  | NC_000016.9  |
| cg09577804      | 1.69E-10 | 1.24E-11 | -7.2  | 15.5311498 | -4.84E-02 | 3235532   | 3235655   | NC_000010.10 |
| cg02165670      | 1.69E-10 | 1.24E-11 | -7.2  | 15.5310685 | -1.55E-01 | 94764647  | 94764770  | NC_000013.10 |
| cg15498274      | 1.70E-10 | 1.24E-11 | -7.2  | 15.5296443 | -9.61E-02 | 47742558  | 47742681  | NC_000019.9  |
| cg00238349      | 1.70E-10 | 1.24E-11 | -7.2  | 15.5288744 | -7.09E-02 | 52187791  | 52187914  | NC_000003.11 |
| cg20029881      | 1.70E-10 | 1.24E-11 | -7.2  | 15.5280366 | -1.67E-01 | 57545877  | 57546000  | NC_000012.11 |
| cg03957108      | 1.70E-10 | 1.24E-11 | -7.2  | 15.5276282 | -8.62E-02 | 63276545  | 63276668  | NC_000002.11 |
| cg09843272      | 1.70E-10 | 1.24E-11 | -7.2  | 15.5273857 | -1.12E-01 | 44258799  | 44258922  | NC_000007.13 |
| cg16907514      | 1.70E-10 | 1.25E-11 | -7.2  | 15.5261582 | -8.59E-02 | 56046098  | 56046221  | NC_000014.8  |
| ch.9.84366407R  | 1.70E-10 | 1.25E-11 | -7.2  | 15.5250788 | -1.23E-01 | 85176587  | 85176710  | NC_000009.11 |

|            |          |          |      |            |           |           |           |              |
|------------|----------|----------|------|------------|-----------|-----------|-----------|--------------|
| cg10950949 | 1.70E-10 | 1.25E-11 | -7.2 | 15.5247613 | -1.13E-01 | 4752739   | 4752862   | NC_000017.10 |
| cg06884875 | 1.70E-10 | 1.25E-11 | -7.2 | 15.5246171 | -9.76E-02 | 46313051  | 46313174  | NC_000011.9  |
| cg16182375 | 1.70E-10 | 1.25E-11 | -7.2 | 15.5240755 | -8.71E-02 | 80900894  | 80901017  | NC_000010.10 |
| cg23516949 | 1.71E-10 | 1.25E-11 | -7.2 | 15.5225703 | -6.84E-02 | 44092937  | 44093060  | NC_000015.9  |
| cg26902557 | 1.71E-10 | 1.25E-11 | -7.2 | 15.5212474 | -1.27E-01 | 1585852   | 1585975   | NC_000011.9  |
| cg04343045 | 1.71E-10 | 1.25E-11 | -7.2 | 15.5207768 | -7.27E-02 | 32859896  | 32860019  | NC_000020.10 |
| cg20998319 | 1.71E-10 | 1.25E-11 | -7.2 | 15.5203853 | -5.88E-02 | 157177345 | 157177468 | NC_000002.11 |
| cg08194009 | 1.71E-10 | 1.25E-11 | -7.2 | 15.5203152 | -8.96E-02 | 25707428  | 25707551  | NC_000017.10 |
| cg25837909 | 1.71E-10 | 1.25E-11 | -7.2 | 15.5193948 | -9.18E-02 | 63570396  | 63570519  | NC_000015.9  |
| cg01966974 | 1.71E-10 | 1.26E-11 | -7.2 | 15.518803  | -1.37E-01 | 212830395 | 212830518 | NC_000001.10 |
| cg09407429 | 1.71E-10 | 1.26E-11 | -7.2 | 15.5185711 | -5.13E-02 | 4534383   | 4534506   | NC_000003.11 |
| cg04675539 | 1.72E-10 | 1.26E-11 | -7.2 | 15.5164436 | -1.09E-01 | 1765397   | 1765520   | NC_000004.11 |
| cg21771714 | 1.72E-10 | 1.26E-11 | -7.2 | 15.5156717 | -6.53E-02 | 119031342 | 119031465 | NC_000006.11 |
| cg23348081 | 1.72E-10 | 1.26E-11 | -7.2 | 15.5146397 | -1.05E-01 | 14413690  | 14413813  | NC_000012.11 |
| cg18644543 | 1.72E-10 | 1.26E-11 | -7.2 | 15.5142629 | -6.86E-02 | 1067356   | 1067479   | NC_000019.9  |
| cg12922032 | 1.72E-10 | 1.26E-11 | -7.2 | 15.5133353 | -4.33E-02 | 32582209  | 32582332  | NC_000002.11 |
| cg17819732 | 1.72E-10 | 1.26E-11 | -7.2 | 15.513055  | -1.48E-01 | 203147367 | 203147490 | NC_000001.10 |
| cg07919197 | 1.72E-10 | 1.26E-11 | -7.2 | 15.5126818 | -4.62E-02 | 32646027  | 32646150  | NC_000001.10 |
| cg05727199 | 1.72E-10 | 1.26E-11 | -7.2 | 15.5125998 | -1.72E-01 | 108408907 | 108409030 | NC_000011.9  |
| cg05305046 | 1.72E-10 | 1.26E-11 | -7.2 | 15.5120097 | -9.83E-02 | 40841315  | 40841438  | NC_000005.9  |
| cg25315351 | 1.72E-10 | 1.26E-11 | -7.2 | 15.5116514 | -2.91E-02 | 227505447 | 227505570 | NC_000001.10 |
| cg02773192 | 1.73E-10 | 1.27E-11 | -7.2 | 15.5106336 | -1.40E-01 | 8893478   | 8893601   | NC_000003.11 |
| cg17573625 | 1.73E-10 | 1.27E-11 | -7.2 | 15.5102893 | -3.82E-02 | 7052664   | 7052787   | NC_000012.11 |
| cg24272559 | 1.73E-10 | 1.27E-11 | -7.2 | 15.5100649 | -1.75E-01 | 166572716 | 166572839 | NC_000001.10 |
| cg18677906 | 1.73E-10 | 1.27E-11 | -7.2 | 15.5091951 | -9.44E-02 | 132851967 | 132852090 | NC_000012.11 |

|                |          |          |       |            |           |           |           |              |
|----------------|----------|----------|-------|------------|-----------|-----------|-----------|--------------|
| cg02333875     | 1.73E-10 | 1.27E-11 | -7.2  | 15.5087463 | -8.84E-02 | 29618205  | 29618328  | NC_000006.11 |
| cg18996141     | 1.73E-10 | 1.27E-11 | -7.2  | 15.5072855 | -9.45E-02 | 71359873  | 71359996  | NC_000003.11 |
| cg23351030     | 1.74E-10 | 1.27E-11 | -7.2  | 15.5037234 | -6.25E-02 | 31549043  | 31549166  | NC_000006.11 |
| cg17435683     | 1.74E-10 | 1.27E-11 | -7.2  | 15.5035255 | -1.40E-01 | 3230609   | 3230732   | NC_000001.10 |
| cg00585174     | 1.74E-10 | 1.28E-11 | -7.2  | 15.5027923 | -1.54E-01 | 134499472 | 134499595 | NC_000010.10 |
| cg19998150     | 1.74E-10 | 1.28E-11 | -7.2  | 15.5022572 | -1.90E-01 | 14051838  | 14051961  | NC_000010.10 |
| cg17723156     | 1.74E-10 | 1.28E-11 | -7.2  | 15.5021105 | -1.05E-01 | 124247117 | 124247240 | NC_000010.10 |
| cg13431028     | 1.74E-10 | 1.28E-11 | -7.2  | 15.501375  | -1.82E-01 | 169073609 | 169073732 | NC_000002.11 |
| cg05854892     | 1.74E-10 | 1.28E-11 | -7.2  | 15.5005124 | -1.49E-01 | 100016352 | 100016475 | NC_000015.9  |
| cg15326513     | 1.74E-10 | 1.28E-11 | -7.2  | 15.4999189 | -1.49E-01 | 55859577  | 55859700  | NC_000017.10 |
| ch.5.87268879R | 1.75E-10 | 1.28E-11 | -7.2  | 15.4987445 | -6.70E-02 | 87233123  | 87233246  | NC_000005.9  |
| cg09107315     | 1.75E-10 | 1.28E-11 | -7.2  | 15.4969493 | -8.28E-02 | 78511488  | 78511611  | NC_000001.10 |
| cg15319576     | 1.75E-10 | 1.29E-11 | -7.2  | 15.4955692 | -2.33E-01 | 127909557 | 127909680 | NC_000011.9  |
| cg05865161     | 1.75E-10 | 1.29E-11 | -7.2  | 15.4948615 | -5.60E-02 | 97557134  | 97557257  | NC_000007.13 |
| cg05992340     | 1.75E-10 | 1.29E-11 | -7.2  | 15.4944403 | -1.28E-01 | 58882243  | 58882366  | NC_000005.9  |
| cg03936495     | 1.75E-10 | 1.29E-11 | -7.2  | 15.4941168 | -8.35E-02 | 59539251  | 59539374  | NC_000017.10 |
| cg26169783     | 1.75E-10 | 1.29E-11 | -7.2  | 15.4940583 | -1.37E-01 | 34371837  | 34371960  | NC_000013.10 |
| cg09499414     | 1.75E-10 | 1.29E-11 | -7.2  | 15.4940125 | -4.76E-02 | 121414029 | 121414152 | NC_000005.9  |
| cg02906784     | 1.76E-10 | 1.29E-11 | -7.2  | 15.4922765 | -1.36E-01 | 54815664  | 54815787  | NC_000003.11 |
| cg01791669     | 1.76E-10 | 1.29E-11 | -7.2  | 15.489788  | -7.07E-02 | 109203673 | 109203796 | NC_000012.11 |
| cg12123502     | 1.77E-10 | 1.30E-11 | -7.2  | 15.4857314 | -1.14E-01 | 29980826  | 29980949  | NC_000015.9  |
| cg07410217     | 1.77E-10 | 1.30E-11 | -7.2  | 15.4850413 | -9.88E-02 | 38153736  | 38153859  | NC_000004.11 |
| cg20648272     | 1.77E-10 | 1.30E-11 | -7.2  | 15.4846426 | -8.22E-02 | 35068341  | 35068464  | NC_000020.10 |
| cg23158811     | 1.78E-10 | 1.31E-11 | -7.19 | 15.4800519 | -3.26E-02 | 19729732  | 19729855  | NC_000019.9  |
| cg03635300     | 1.78E-10 | 1.31E-11 | -7.19 | 15.4782782 | -1.64E-01 | 5802444   | 5802567   | NC_000019.9  |



|                 |          |          |       |            |           |           |           |              |
|-----------------|----------|----------|-------|------------|-----------|-----------|-----------|--------------|
| cg25364822      | 1.78E-10 | 1.31E-11 | -7.19 | 15.4776968 | -1.37E-01 | 33337257  | 33337380  | NC_000001.10 |
| cg05997730      | 1.78E-10 | 1.31E-11 | -7.19 | 15.4767965 | -9.02E-02 | 1036727   | 1036850   | NC_000011.9  |
| cg26962295      | 1.79E-10 | 1.31E-11 | -7.19 | 15.4758245 | -6.98E-02 | 28961797  | 28961920  | NC_000016.9  |
| cg22469388      | 1.79E-10 | 1.31E-11 | -7.19 | 15.4742706 | -7.56E-02 | 48912860  | 48912983  | NC_000017.10 |
| cg19237691      | 1.79E-10 | 1.32E-11 | -7.19 | 15.4715043 | -1.21E-01 | 1141617   | 1141740   | NC_000001.10 |
| cg18461436      | 1.79E-10 | 1.32E-11 | -7.19 | 15.4707136 | -1.33E-01 | 149096828 | 149096951 | NC_000003.11 |
| cg07397616      | 1.79E-10 | 1.32E-11 | -7.19 | 15.4703683 | -1.42E-01 | 38035109  | 38035232  | NC_000022.10 |
| cg02532672      | 1.80E-10 | 1.32E-11 | -7.19 | 15.4688149 | -1.15E-01 | 808649    | 808772    | NC_000007.13 |
| cg26118358      | 1.80E-10 | 1.32E-11 | -7.19 | 15.468313  | -1.77E-01 | 23321005  | 23321128  | NC_000014.8  |
| cg05068951      | 1.80E-10 | 1.32E-11 | -7.19 | 15.4657266 | -1.17E-01 | 95722106  | 95722229  | NC_000014.8  |
| cg03721978      | 1.80E-10 | 1.33E-11 | -7.19 | 15.4653886 | -1.20E-01 | 33245706  | 33245829  | NC_000006.11 |
| cg26260408      | 1.81E-10 | 1.33E-11 | -7.19 | 15.4620935 | -7.10E-02 | 53727979  | 53728102  | NC_000004.11 |
| cg14598846      | 1.81E-10 | 1.33E-11 | -7.19 | 15.461978  | -1.66E-01 | 145008909 | 145009032 | NC_000008.10 |
| cg07443717      | 1.81E-10 | 1.33E-11 | -7.19 | 15.4611501 | -1.57E-01 | 129383357 | 129383480 | NC_000003.11 |
| cg01976784      | 1.81E-10 | 1.33E-11 | -7.19 | 15.4603492 | -5.49E-02 | 58869823  | 58869946  | NC_000011.9  |
| cg07911682      | 1.81E-10 | 1.33E-11 | -7.19 | 15.4588962 | -3.54E-02 | 51425659  | 51425782  | NC_000001.10 |
| cg21059786      | 1.81E-10 | 1.33E-11 | -7.19 | 15.4585569 | -1.65E-01 | 10361064  | 10361187  | NC_000002.11 |
| cg08985885      | 1.82E-10 | 1.34E-11 | -7.19 | 15.4547672 | -1.44E-01 | 53719903  | 53720026  | NC_000012.11 |
| ch.14.55474310F | 1.82E-10 | 1.34E-11 | -7.19 | 15.4529167 | -3.84E-02 | 56404557  | 56404680  | NC_000014.8  |
| cg14582970      | 1.83E-10 | 1.34E-11 | -7.19 | 15.4527278 | -5.05E-02 | 125676085 | 125676208 | NC_000009.11 |
| cg03977657      | 1.83E-10 | 1.34E-11 | -7.19 | 15.4525362 | -1.16E-01 | 209825747 | 209825870 | NC_000001.10 |
| cg08692903      | 1.83E-10 | 1.34E-11 | -7.19 | 15.4518969 | -1.13E-01 | 85424553  | 85424676  | NC_000016.9  |
| cg13933279      | 1.83E-10 | 1.35E-11 | -7.19 | 15.450379  | -1.31E-01 | 88418502  | 88418625  | NC_000015.9  |
| cg15631690      | 1.84E-10 | 1.35E-11 | -7.19 | 15.4468409 | -5.04E-02 | 51436073  | 51436196  | NC_000001.10 |
| cg07148024      | 1.84E-10 | 1.35E-11 | -7.19 | 15.4460841 | -1.64E-01 | 15753347  | 15753470  | NC_000001.10 |

|            |          |          |       |            |           |           |           |              |
|------------|----------|----------|-------|------------|-----------|-----------|-----------|--------------|
| cg03212674 | 1.84E-10 | 1.35E-11 | -7.19 | 15.4458792 | -1.49E-01 | 155243807 | 155243930 | NC_000001.10 |
| cg13209613 | 1.84E-10 | 1.35E-11 | -7.19 | 15.4450061 | -1.03E-01 | 44849789  | 44849912  | NC_000017.10 |
| cg24537836 | 1.85E-10 | 1.36E-11 | -7.19 | 15.4414321 | -1.29E-01 | 51782159  | 51782282  | NC_000012.11 |
| cg19157696 | 1.85E-10 | 1.36E-11 | -7.19 | 15.440724  | -3.90E-02 | 27384984  | 27385107  | NC_000011.9  |
| cg26390400 | 1.85E-10 | 1.36E-11 | -7.19 | 15.4406023 | -1.55E-01 | 10556455  | 10556578  | NC_000005.9  |
| cg03448362 | 1.85E-10 | 1.36E-11 | -7.19 | 15.4404019 | -1.65E-01 | 172864347 | 172864470 | NC_000001.10 |
| cg02474195 | 1.85E-10 | 1.36E-11 | -7.19 | 15.440285  | -7.72E-02 | 43391449  | 43391572  | NC_000003.11 |
| cg18800827 | 1.85E-10 | 1.36E-11 | -7.19 | 15.4396055 | -3.62E-02 | 42633783  | 42633906  | NC_000017.10 |
| cg22113807 | 1.85E-10 | 1.36E-11 | -7.19 | 15.4379158 | -8.18E-02 | 3140865   | 3140988   | NC_000020.10 |
| cg05179805 | 1.86E-10 | 1.37E-11 | -7.19 | 15.4342237 | -5.65E-02 | 28289142  | 28289265  | NC_000016.9  |
| cg20317738 | 1.86E-10 | 1.37E-11 | -7.19 | 15.4330882 | -3.19E-02 | 9749717   | 9749840   | NC_000001.10 |
| cg08136806 | 1.86E-10 | 1.37E-11 | -7.19 | 15.4327357 | -1.05E-01 | 52867793  | 52867916  | NC_000012.11 |
| cg03203294 | 1.86E-10 | 1.37E-11 | -7.19 | 15.4317329 | -1.19E-01 | 18579403  | 18579526  | NC_000016.9  |
| cg09077530 | 1.86E-10 | 1.37E-11 | -7.19 | 15.4309244 | -9.95E-02 | 3229195   | 3229318   | NC_000001.10 |
| cg07337793 | 1.87E-10 | 1.38E-11 | -7.19 | 15.4290887 | -1.80E-01 | 43038584  | 43038707  | NC_000002.11 |
| cg12413579 | 1.87E-10 | 1.38E-11 | -7.19 | 15.4284756 | -1.14E-01 | 36108206  | 36108329  | NC_000001.10 |
| cg02165713 | 1.87E-10 | 1.38E-11 | -7.19 | 15.4272954 | -3.29E-02 | 37447630  | 37447753  | NC_000022.10 |
| cg17034030 | 1.87E-10 | 1.38E-11 | -7.19 | 15.4261001 | -2.28E-02 | 38179885  | 38180008  | NC_000003.11 |
| cg17951613 | 1.87E-10 | 1.38E-11 | -7.19 | 15.4250543 | -6.47E-02 | 131705445 | 131705568 | NC_000005.9  |
| cg03513893 | 1.87E-10 | 1.38E-11 | -7.19 | 15.4248367 | -1.10E-01 | 184052502 | 184052625 | NC_000003.11 |
| cg06748584 | 1.87E-10 | 1.38E-11 | -7.19 | 15.4246748 | -1.42E-02 | 79520919  | 79521042  | NC_000017.10 |
| cg03110300 | 1.88E-10 | 1.38E-11 | -7.19 | 15.4237923 | -1.05E-01 | 56976186  | 56976309  | NC_000018.9  |
| cg21206816 | 1.88E-10 | 1.38E-11 | -7.19 | 15.4236548 | -1.21E-01 | 112013079 | 112013202 | NC_000003.11 |
| cg22191973 | 1.88E-10 | 1.38E-11 | -7.18 | 15.4224276 | -1.10E-01 | 55292558  | 55292681  | NC_000018.9  |
| cg18700744 | 1.88E-10 | 1.39E-11 | -7.18 | 15.421817  | -1.18E-01 | 112534559 | 112534682 | NC_000012.11 |

|                 |          |          |       |            |           |           |           |              |
|-----------------|----------|----------|-------|------------|-----------|-----------|-----------|--------------|
| cg25631249      | 1.88E-10 | 1.39E-11 | -7.18 | 15.4198723 | -5.30E-02 | 44092630  | 44092753  | NC_000015.9  |
| cg09834049      | 1.89E-10 | 1.39E-11 | -7.18 | 15.4179894 | -9.40E-02 | 23525720  | 23525843  | NC_000014.8  |
| cg14223017      | 1.89E-10 | 1.39E-11 | -7.18 | 15.4173593 | -7.23E-02 | 2151266   | 2151389   | NC_000019.9  |
| cg19705764      | 1.89E-10 | 1.39E-11 | -7.18 | 15.4163981 | -3.81E-02 | 30458626  | 30458749  | NC_000020.10 |
| cg18842717      | 1.89E-10 | 1.39E-11 | -7.18 | 15.4152072 | -3.66E-02 | 3400387   | 3400510   | NC_000011.9  |
| cg18914751      | 1.89E-10 | 1.39E-11 | -7.18 | 15.4151022 | -1.78E-01 | 135342478 | 135342601 | NC_000005.9  |
| cg00032609      | 1.89E-10 | 1.40E-11 | -7.18 | 15.4139645 | -8.41E-02 | 57606607  | 57606730  | NC_000020.10 |
| cg18810022      | 1.89E-10 | 1.40E-11 | -7.18 | 15.4137187 | -1.74E-01 | 134989811 | 134989934 | NC_000002.11 |
| cg20987067      | 1.90E-10 | 1.40E-11 | -7.18 | 15.4121613 | -1.23E-01 | 8747297   | 8747420   | NC_000008.10 |
| cg06383088      | 1.90E-10 | 1.40E-11 | -7.18 | 15.4118171 | -4.37E-02 | 100459634 | 100459757 | NC_000009.11 |
| cg10881749      | 1.90E-10 | 1.40E-11 | -7.18 | 15.4108392 | -2.08E-01 | 234792390 | 234792513 | NC_000001.10 |
| cg08445226      | 1.90E-10 | 1.40E-11 | -7.18 | 15.4093569 | -3.72E-02 | 99536904  | 99537027  | NC_000003.11 |
| cg14414943      | 1.90E-10 | 1.40E-11 | -7.18 | 15.408993  | -1.18E-01 | 111770718 | 111770841 | NC_000001.10 |
| cg21871091      | 1.90E-10 | 1.40E-11 | -7.18 | 15.4083459 | -1.58E-01 | 38349937  | 38350060  | NC_000021.8  |
| cg02544614      | 1.91E-10 | 1.41E-11 | -7.18 | 15.4064193 | -1.42E-01 | 61657117  | 61657240  | NC_000020.10 |
| cg01704105      | 1.91E-10 | 1.41E-11 | -7.18 | 15.403869  | -1.07E-01 | 225666    | 225789    | NC_000016.9  |
| cg08186915      | 1.91E-10 | 1.41E-11 | -7.18 | 15.4031772 | -1.21E-01 | 52938420  | 52938543  | NC_000012.11 |
| cg01332534      | 1.91E-10 | 1.41E-11 | -7.18 | 15.4026798 | -1.77E-01 | 42066091  | 42066214  | NC_000002.11 |
| cg24932925      | 1.92E-10 | 1.41E-11 | -7.18 | 15.4011417 | -6.58E-02 | 31708299  | 31708422  | NC_000006.11 |
| cg18793198      | 1.92E-10 | 1.42E-11 | -7.18 | 15.4001017 | -1.14E-01 | 131390894 | 131391017 | NC_000012.11 |
| cg26197254      | 1.92E-10 | 1.42E-11 | -7.18 | 15.3999877 | -9.10E-02 | 60994303  | 60994426  | NC_000005.9  |
| cg03983837      | 1.92E-10 | 1.42E-11 | -7.18 | 15.3998276 | -1.44E-01 | 2323801   | 2323924   | NC_000011.9  |
| cg23729763      | 1.92E-10 | 1.42E-11 | -7.18 | 15.3995249 | -1.80E-01 | 129991544 | 129991667 | NC_000011.9  |
| cg20363891      | 1.92E-10 | 1.42E-11 | -7.18 | 15.3990728 | -1.14E-01 | 241938818 | 241938941 | NC_000002.11 |
| ch.2.132864912R | 1.92E-10 | 1.42E-11 | -7.18 | 15.3981895 | -3.93E-02 | 133148442 | 133148565 | NC_000002.11 |

|                |          |          |       |            |           |           |           |              |
|----------------|----------|----------|-------|------------|-----------|-----------|-----------|--------------|
| cg16096836     | 1.92E-10 | 1.42E-11 | -7.18 | 15.3980485 | -1.54E-01 | 36863573  | 36863696  | NC_000022.10 |
| cg15065821     | 1.92E-10 | 1.42E-11 | -7.18 | 15.3973807 | -9.56E-02 | 2696631   | 2696754   | NC_000004.11 |
| cg01165142     | 1.93E-10 | 1.42E-11 | -7.18 | 15.3963018 | -1.29E-01 | 27367172  | 27367295  | NC_000016.9  |
| cg04206742     | 1.93E-10 | 1.42E-11 | -7.18 | 15.3944769 | -7.96E-02 | 95248882  | 95249005  | NC_000013.10 |
| cg04257969     | 1.93E-10 | 1.43E-11 | -7.18 | 15.3937004 | -7.98E-02 | 74932579  | 74932702  | NC_000012.11 |
| cg15705746     | 1.93E-10 | 1.43E-11 | -7.18 | 15.3931043 | -1.48E-01 | 11546576  | 11546699  | NC_000002.11 |
| cg12699321     | 1.93E-10 | 1.43E-11 | -7.18 | 15.3930312 | -1.55E-01 | 117158482 | 117158605 | NC_000003.11 |
| cg05670953     | 1.93E-10 | 1.43E-11 | -7.18 | 15.3915204 | -1.84E-01 | 37033903  | 37034026  | NC_000003.11 |
| cg09247020     | 1.94E-10 | 1.44E-11 | -7.18 | 15.3871413 | -1.60E-01 | 56247892  | 56248015  | NC_000014.8  |
| cg18202623     | 1.94E-10 | 1.44E-11 | -7.18 | 15.3866352 | -4.86E-02 | 126236316 | 126236439 | NC_000004.11 |
| cg26384034     | 1.95E-10 | 1.44E-11 | -7.18 | 15.3845566 | -2.47E-02 | 84744055  | 84744178  | NC_000006.11 |
| cg26913669     | 1.95E-10 | 1.44E-11 | -7.18 | 15.3842935 | -1.39E-01 | 103574958 | 103575081 | NC_000001.10 |
| cg15159104     | 1.95E-10 | 1.44E-11 | -7.18 | 15.3819586 | -1.44E-01 | 43809865  | 43809988  | NC_000015.9  |
| ch.10.1432102R | 1.95E-10 | 1.44E-11 | -7.18 | 15.3806726 | -5.43E-02 | 70200132  | 70200255  | NC_000010.10 |
| cg10070151     | 1.96E-10 | 1.45E-11 | -7.18 | 15.3796802 | -5.74E-02 | 39881965  | 39882088  | NC_000019.9  |
| cg03820795     | 1.96E-10 | 1.45E-11 | -7.18 | 15.37845   | -1.17E-01 | 4337140   | 4337263   | NC_000017.10 |
| cg02033694     | 1.96E-10 | 1.45E-11 | -7.18 | 15.3783642 | -8.41E-02 | 29296797  | 29296920  | NC_000016.9  |
| cg08456420     | 1.96E-10 | 1.45E-11 | -7.18 | 15.3769907 | -1.16E-01 | 39570175  | 39570298  | NC_000001.10 |
| cg20265951     | 1.96E-10 | 1.45E-11 | -7.18 | 15.376947  | -1.25E-01 | 134466907 | 134467030 | NC_000008.10 |
| cg15961887     | 1.96E-10 | 1.45E-11 | -7.18 | 15.3769066 | -7.18E-02 | 71554203  | 71554326  | NC_000004.11 |
| cg06103301     | 1.96E-10 | 1.45E-11 | -7.18 | 15.3763612 | -6.59E-02 | 23987730  | 23987853  | NC_000003.11 |
| cg14212983     | 1.96E-10 | 1.45E-11 | -7.18 | 15.3763037 | -5.18E-02 | 21985742  | 21985865  | NC_000001.10 |
| cg05808709     | 1.96E-10 | 1.45E-11 | -7.18 | 15.3759683 | -1.37E-01 | 160094954 | 160095077 | NC_000001.10 |
| cg09092093     | 1.96E-10 | 1.45E-11 | -7.18 | 15.3757034 | -9.78E-02 | 58335954  | 58336077  | NC_000005.9  |
| cg14859417     | 1.97E-10 | 1.45E-11 | -7.18 | 15.374045  | -9.58E-02 | 129704949 | 129705072 | NC_000010.10 |

|            |          |          |       |            |           |           |           |              |
|------------|----------|----------|-------|------------|-----------|-----------|-----------|--------------|
| cg09718037 | 1.97E-10 | 1.45E-11 | -7.18 | 15.3736997 | -1.82E-01 | 117042854 | 117042977 | NC_000012.11 |
| cg25602159 | 1.97E-10 | 1.46E-11 | -7.18 | 15.3736123 | -4.75E-02 | 41222284  | 41222407  | NC_000019.9  |
| cg01656216 | 1.97E-10 | 1.46E-11 | -7.18 | 15.3735158 | -1.44E-01 | 31273710  | 31273833  | NC_000010.10 |
| cg19161424 | 1.97E-10 | 1.46E-11 | -7.18 | 15.3731099 | -1.05E-01 | 33360901  | 33361024  | NC_000015.9  |
| cg03542891 | 1.97E-10 | 1.46E-11 | -7.18 | 15.3725766 | -7.05E-02 | 83018357  | 83018480  | NC_000005.9  |
| cg13909661 | 1.97E-10 | 1.46E-11 | -7.18 | 15.372437  | -1.15E-01 | 26386833  | 26386956  | NC_000012.11 |
| cg17303833 | 1.97E-10 | 1.46E-11 | -7.18 | 15.3715292 | -6.57E-02 | 97889448  | 97889571  | NC_000010.10 |
| cg16716883 | 1.97E-10 | 1.46E-11 | -7.18 | 15.370971  | -5.28E-02 | 74079772  | 74079895  | NC_000010.10 |
| cg16027728 | 1.97E-10 | 1.46E-11 | -7.18 | 15.370959  | -6.62E-02 | 27441300  | 27441423  | NC_000006.11 |
| cg07493197 | 1.97E-10 | 1.46E-11 | -7.18 | 15.3706304 | -1.96E-01 | 53573969  | 53574092  | NC_000017.10 |
| cg15263021 | 1.97E-10 | 1.46E-11 | -7.18 | 15.3700751 | -1.26E-01 | 61273282  | 61273405  | NC_000011.9  |
| cg23425280 | 1.98E-10 | 1.46E-11 | -7.18 | 15.3677819 | -6.89E-02 | 56401806  | 56401929  | NC_000012.11 |
| cg14018024 | 1.98E-10 | 1.46E-11 | -7.18 | 15.3670517 | -1.75E-01 | 133908909 | 133909032 | NC_000009.11 |
| cg02260482 | 1.98E-10 | 1.47E-11 | -7.18 | 15.366653  | -3.38E-02 | 104359603 | 104359726 | NC_000012.11 |
| cg22162225 | 1.98E-10 | 1.47E-11 | -7.18 | 15.3665036 | -5.63E-02 | 62932835  | 62932958  | NC_000002.11 |
| cg24940155 | 1.98E-10 | 1.47E-11 | -7.17 | 15.3657433 | -1.65E-01 | 93896820  | 93896943  | NC_000013.10 |
| cg00701951 | 1.98E-10 | 1.47E-11 | -7.17 | 15.36418   | -1.59E-01 | 124228478 | 124228601 | NC_000010.10 |
| cg25048202 | 1.98E-10 | 1.47E-11 | -7.17 | 15.363673  | -5.35E-02 | 66993412  | 66993535  | NC_000015.9  |
| cg01623485 | 1.99E-10 | 1.47E-11 | -7.17 | 15.3630634 | -1.49E-01 | 1471699   | 1471822   | NC_000011.9  |
| cg00215611 | 1.99E-10 | 1.47E-11 | -7.17 | 15.3626836 | -6.32E-02 | 219860717 | 219860840 | NC_000002.11 |
| cg12373982 | 1.99E-10 | 1.47E-11 | -7.17 | 15.361671  | -3.45E-02 | 54857549  | 54857672  | NC_000017.10 |
| cg08430604 | 1.99E-10 | 1.47E-11 | -7.17 | 15.3616398 | -1.05E-01 | 44902960  | 44903083  | NC_000003.11 |
| cg03043827 | 1.99E-10 | 1.47E-11 | -7.17 | 15.3613703 | -2.75E-02 | 128981985 | 128982108 | NC_000004.11 |
| cg14827924 | 2.00E-10 | 1.48E-11 | -7.17 | 15.357199  | -1.34E-01 | 40900714  | 40900837  | NC_000017.10 |
| cg07722358 | 2.00E-10 | 1.48E-11 | -7.17 | 15.3569666 | -1.30E-01 | 36808414  | 36808537  | NC_000006.11 |

|            |          |          |       |            |           |           |           |              |
|------------|----------|----------|-------|------------|-----------|-----------|-----------|--------------|
| cg03338903 | 2.00E-10 | 1.48E-11 | -7.17 | 15.3565115 | -3.59E-02 | 44191871  | 44191994  | NC_000006.11 |
| cg16415411 | 2.00E-10 | 1.48E-11 | -7.17 | 15.3561785 | -8.29E-02 | 6910871   | 6910994   | NC_000007.13 |
| cg15242570 | 2.00E-10 | 1.48E-11 | -7.17 | 15.355008  | -5.87E-02 | 90341048  | 90341171  | NC_000009.11 |
| cg18730865 | 2.00E-10 | 1.48E-11 | -7.17 | 15.3544004 | -1.05E-01 | 34792020  | 34792143  | NC_000005.9  |
| cg17978727 | 2.00E-10 | 1.48E-11 | -7.17 | 15.3540229 | -8.12E-02 | 4991028   | 4991151   | NC_000020.10 |
| cg13483797 | 2.00E-10 | 1.48E-11 | -7.17 | 15.35367   | -9.17E-02 | 132431581 | 132431704 | NC_000009.11 |
| cg05301124 | 2.01E-10 | 1.49E-11 | -7.17 | 15.3528258 | -1.54E-01 | 168517769 | 168517892 | NC_000006.11 |
| cg27128322 | 2.01E-10 | 1.49E-11 | -7.17 | 15.3516781 | -2.60E-02 | 43547338  | 43547461  | NC_000018.9  |
| cg10833826 | 2.01E-10 | 1.49E-11 | -7.17 | 15.3510916 | -2.99E-02 | 76837038  | 76837161  | NC_000017.10 |
| cg24985756 | 2.01E-10 | 1.49E-11 | -7.17 | 15.3508049 | -2.27E-02 | 42054870  | 42054993  | NC_000003.11 |
| cg03046346 | 2.01E-10 | 1.49E-11 | -7.17 | 15.3500397 | -4.15E-02 | 61658150  | 61658273  | NC_000011.9  |
| cg08151470 | 2.02E-10 | 1.49E-11 | -7.17 | 15.3478874 | -1.41E-01 | 10092299  | 10092422  | NC_000001.10 |
| cg08977130 | 2.02E-10 | 1.49E-11 | -7.17 | 15.3472849 | -4.30E-02 | 176915099 | 176915222 | NC_000003.11 |
| cg13446288 | 2.02E-10 | 1.50E-11 | -7.17 | 15.3465932 | -3.99E-02 | 102313644 | 102313767 | NC_000002.11 |
| cg16255307 | 2.02E-10 | 1.50E-11 | -7.17 | 15.3455782 | -1.60E-01 | 185271383 | 185271506 | NC_000003.11 |
| cg15323253 | 2.02E-10 | 1.50E-11 | -7.17 | 15.3441372 | -1.70E-01 | 3766662   | 3766785   | NC_000006.11 |
| cg09042678 | 2.02E-10 | 1.50E-11 | -7.17 | 15.3439968 | -1.20E-01 | 18117663  | 18117786  | NC_000020.10 |
| cg01087129 | 2.02E-10 | 1.50E-11 | -7.17 | 15.3438418 | -1.76E-01 | 100317741 | 100317864 | NC_000007.13 |
| cg13896608 | 2.02E-10 | 1.50E-11 | -7.17 | 15.3435908 | -4.50E-02 | 9811407   | 9811530   | NC_000003.11 |
| cg16076930 | 2.02E-10 | 1.50E-11 | -7.17 | 15.3434888 | -7.30E-02 | 71880278  | 71880401  | NC_000016.9  |
| cg05447343 | 2.03E-10 | 1.50E-11 | -7.17 | 15.3423853 | -1.47E-01 | 19648925  | 19649048  | NC_000017.10 |
| cg04258138 | 2.03E-10 | 1.50E-11 | -7.17 | 15.3416494 | -1.44E-01 | 636227    | 636350    | NC_000016.9  |
| cg17687367 | 2.03E-10 | 1.50E-11 | -7.17 | 15.3413296 | -1.79E-01 | 80510936  | 80511059  | NC_000013.10 |
| cg11854227 | 2.03E-10 | 1.50E-11 | -7.17 | 15.3409855 | -1.44E-01 | 121714109 | 121714232 | NC_000003.11 |
| cg07775417 | 2.03E-10 | 1.50E-11 | -7.17 | 15.3406414 | -1.53E-01 | 84469563  | 84469686  | NC_000004.11 |

|                |          |          |       |            |           |           |           |              |
|----------------|----------|----------|-------|------------|-----------|-----------|-----------|--------------|
| cg04119593     | 2.03E-10 | 1.51E-11 | -7.17 | 15.3398048 | -1.17E-01 | 40985406  | 40985529  | NC_000021.8  |
| cg25948831     | 2.03E-10 | 1.51E-11 | -7.17 | 15.338469  | -1.42E-01 | 78038002  | 78038125  | NC_000017.10 |
| cg02251014     | 2.04E-10 | 1.51E-11 | -7.17 | 15.3373549 | -1.18E-01 | 67048397  | 67048520  | NC_000016.9  |
| cg09133363     | 2.04E-10 | 1.51E-11 | -7.17 | 15.3371702 | -1.10E-01 | 85153928  | 85154051  | NC_000002.11 |
| cg27383975     | 2.04E-10 | 1.51E-11 | -7.17 | 15.336777  | -3.19E-02 | 17356182  | 17356305  | NC_000019.9  |
| cg17442752     | 2.04E-10 | 1.51E-11 | -7.17 | 15.3364669 | -2.13E-02 | 24988758  | 24988881  | NC_000022.10 |
| cg15118503     | 2.04E-10 | 1.51E-11 | -7.17 | 15.3362998 | -5.06E-02 | 61404861  | 61404984  | NC_000002.11 |
| cg11070176     | 2.04E-10 | 1.51E-11 | -7.17 | 15.3359748 | -9.56E-02 | 70489806  | 70489929  | NC_000011.9  |
| cg12516954     | 2.04E-10 | 1.52E-11 | -7.17 | 15.3335641 | -1.42E-01 | 134714262 | 134714385 | NC_000005.9  |
| ch.14.1187653R | 2.04E-10 | 1.52E-11 | -7.17 | 15.3331953 | -2.99E-02 | 78192905  | 78193028  | NC_000014.8  |
| cg11864490     | 2.04E-10 | 1.52E-11 | -7.17 | 15.3330809 | -7.92E-02 | 33759605  | 33759728  | NC_000020.10 |
| cg13702185     | 2.05E-10 | 1.52E-11 | -7.17 | 15.3314286 | -1.39E-01 | 3438579   | 3438702   | NC_000004.11 |
| cg03527077     | 2.05E-10 | 1.52E-11 | -7.17 | 15.3313323 | -1.76E-01 | 158059704 | 158059827 | NC_000007.13 |
| cg18104015     | 2.05E-10 | 1.52E-11 | -7.17 | 15.3311323 | -1.02E-01 | 81031724  | 81031847  | NC_000017.10 |
| cg03659126     | 2.05E-10 | 1.52E-11 | -7.17 | 15.3308519 | -5.09E-02 | 52535799  | 52535922  | NC_000006.11 |
| cg26539663     | 2.05E-10 | 1.52E-11 | -7.17 | 15.330213  | -4.66E-02 | 7590939   | 7591062   | NC_000017.10 |
| cg16957758     | 2.05E-10 | 1.52E-11 | -7.17 | 15.330161  | -1.03E-01 | 1559112   | 1559235   | NC_000010.10 |
| cg07958387     | 2.05E-10 | 1.52E-11 | -7.17 | 15.3298261 | -1.36E-01 | 172069173 | 172069296 | NC_000005.9  |
| cg00966522     | 2.05E-10 | 1.52E-11 | -7.17 | 15.3297465 | -1.22E-01 | 6734722   | 6734845   | NC_000004.11 |
| ch.2.154144R   | 2.05E-10 | 1.52E-11 | -7.17 | 15.3286977 | -5.91E-02 | 5374307   | 5374430   | NC_000002.11 |
| cg25577322     | 2.05E-10 | 1.52E-11 | -7.17 | 15.3281269 | -4.31E-02 | 17338213  | 17338336  | NC_000007.13 |
| cg24497813     | 2.06E-10 | 1.53E-11 | -7.17 | 15.3258991 | -5.43E-02 | 145910623 | 145910746 | NC_000008.10 |
| cg05489252     | 2.06E-10 | 1.53E-11 | -7.17 | 15.325501  | -1.12E-01 | 183109869 | 183109992 | NC_000003.11 |
| cg21550219     | 2.06E-10 | 1.53E-11 | -7.17 | 15.3242678 | -1.26E-01 | 135394043 | 135394166 | NC_000005.9  |
| cg20201475     | 2.06E-10 | 1.53E-11 | -7.17 | 15.3229195 | -5.50E-02 | 168867307 | 168867430 | NC_000003.11 |

|                |          |          |       |            |           |           |           |              |
|----------------|----------|----------|-------|------------|-----------|-----------|-----------|--------------|
| cg12219434     | 2.06E-10 | 1.53E-11 | -7.17 | 15.3226471 | -1.61E-01 | 80820415  | 80820538  | NC_000003.11 |
| cg24799947     | 2.06E-10 | 1.53E-11 | -7.17 | 15.3220332 | -1.08E-01 | 44958131  | 44958254  | NC_000015.9  |
| cg23299254     | 2.07E-10 | 1.54E-11 | -7.17 | 15.3209289 | -1.94E-01 | 145008957 | 145009080 | NC_000008.10 |
| cg12449049     | 2.07E-10 | 1.54E-11 | -7.17 | 15.320819  | -1.38E-01 | 25088999  | 25089122  | NC_000006.11 |
| cg15105060     | 2.07E-10 | 1.54E-11 | -7.17 | 15.3191655 | -1.49E-01 | 7024189   | 7024312   | NC_000004.11 |
| cg06711306     | 2.07E-10 | 1.54E-11 | -7.17 | 15.3182909 | -5.15E-02 | 159895052 | 159895175 | NC_000005.9  |
| cg09361748     | 2.07E-10 | 1.54E-11 | -7.17 | 15.3174908 | -1.29E-01 | 71682306  | 71682429  | NC_000007.13 |
| cg22778120     | 2.07E-10 | 1.54E-11 | -7.17 | 15.3174267 | -9.10E-02 | 45094531  | 45094654  | NC_000022.10 |
| cg12180319     | 2.07E-10 | 1.54E-11 | -7.17 | 15.3171152 | -9.14E-02 | 48705662  | 48705785  | NC_000015.9  |
| cg10591516     | 2.08E-10 | 1.54E-11 | -7.17 | 15.3160858 | -1.89E-01 | 125405786 | 125405909 | NC_000012.11 |
| cg23612095     | 2.08E-10 | 1.55E-11 | -7.17 | 15.3136419 | -6.72E-02 | 124445492 | 124445615 | NC_000002.11 |
| cg06921552     | 2.09E-10 | 1.55E-11 | -7.17 | 15.3112299 | -1.37E-01 | 69258203  | 69258326  | NC_000011.9  |
| cg03084710     | 2.09E-10 | 1.55E-11 | -7.17 | 15.3101965 | -1.75E-01 | 150603058 | 150603181 | NC_000001.10 |
| cg04742282     | 2.09E-10 | 1.55E-11 | -7.16 | 15.3085622 | -1.03E-01 | 28911873  | 28911996  | NC_000006.11 |
| ch.16.1235821R | 2.09E-10 | 1.55E-11 | -7.16 | 15.3085315 | -2.19E-02 | 56503846  | 56503969  | NC_000016.9  |
| cg18865990     | 2.09E-10 | 1.55E-11 | -7.16 | 15.3084756 | -1.45E-01 | 45970273  | 45970396  | NC_000013.10 |
| cg02916409     | 2.09E-10 | 1.56E-11 | -7.16 | 15.3081876 | -6.14E-02 | 2510063   | 2510186   | NC_000016.9  |
| cg02304370     | 2.09E-10 | 1.56E-11 | -7.16 | 15.3070395 | -1.64E-01 | 587926    | 588049    | NC_000011.9  |
| cg14899046     | 2.09E-10 | 1.56E-11 | -7.16 | 15.3065314 | -8.85E-02 | 46784677  | 46784800  | NC_000021.8  |
| cg05411199     | 2.10E-10 | 1.56E-11 | -7.16 | 15.3061436 | -1.02E-01 | 3749715   | 3749838   | NC_000006.11 |
| cg11808677     | 2.10E-10 | 1.56E-11 | -7.16 | 15.3055943 | -1.24E-01 | 6960079   | 6960202   | NC_000012.11 |
| cg08699355     | 2.10E-10 | 1.56E-11 | -7.16 | 15.3052293 | -4.66E-02 | 80328999  | 80329122  | NC_000012.11 |
| cg02598224     | 2.10E-10 | 1.56E-11 | -7.16 | 15.3048533 | -4.27E-02 | 97001430  | 97001553  | NC_000002.11 |
| cg09977361     | 2.10E-10 | 1.56E-11 | -7.16 | 15.3035025 | -6.46E-02 | 120008836 | 120008959 | NC_000011.9  |
| cg22294773     | 2.11E-10 | 1.57E-11 | -7.16 | 15.3008718 | -1.34E-01 | 2606054   | 2606177   | NC_000019.9  |



|            |          |          |       |            |           |           |           |              |
|------------|----------|----------|-------|------------|-----------|-----------|-----------|--------------|
| cg19915087 | 2.11E-10 | 1.57E-11 | -7.16 | 15.2992404 | -1.17E-01 | 203453744 | 203453867 | NC_000002.11 |
| cg10391906 | 2.11E-10 | 1.57E-11 | -7.16 | 15.2989499 | -6.31E-02 | 1753640   | 1753763   | NC_000019.9  |
| cg09059511 | 2.11E-10 | 1.57E-11 | -7.16 | 15.2985205 | -5.12E-02 | 125933236 | 125933359 | NC_000011.9  |
| cg15924971 | 2.11E-10 | 1.57E-11 | -7.16 | 15.298082  | -1.57E-01 | 63376268  | 63376391  | NC_000011.9  |
| cg27531236 | 2.12E-10 | 1.58E-11 | -7.16 | 15.2956882 | -1.01E-01 | 47854334  | 47854457  | NC_000004.11 |
| cg09340639 | 2.12E-10 | 1.58E-11 | -7.16 | 15.2943447 | -1.26E-01 | 157789662 | 157789785 | NC_000001.10 |
| cg11597043 | 2.12E-10 | 1.58E-11 | -7.16 | 15.2941671 | -6.10E-02 | 15751612  | 15751735  | NC_000019.9  |
| cg03286735 | 2.12E-10 | 1.58E-11 | -7.16 | 15.2935566 | -1.50E-01 | 906491    | 906614    | NC_000004.11 |
| cg20546518 | 2.12E-10 | 1.58E-11 | -7.16 | 15.2934786 | -1.25E-01 | 105195480 | 105195603 | NC_000014.8  |
| cg01040181 | 2.12E-10 | 1.58E-11 | -7.16 | 15.2928744 | -6.58E-02 | 146278358 | 146278481 | NC_000008.10 |
| cg09273059 | 2.12E-10 | 1.58E-11 | -7.16 | 15.2919311 | -1.23E-01 | 71077221  | 71077344  | NC_000010.10 |
| cg23461926 | 2.13E-10 | 1.58E-11 | -7.16 | 15.2908716 | -1.42E-01 | 147691991 | 147692114 | NC_000005.9  |
| cg22422251 | 2.13E-10 | 1.58E-11 | -7.16 | 15.2907004 | -1.37E-01 | 112370191 | 112370314 | NC_000005.9  |
| cg13702536 | 2.13E-10 | 1.58E-11 | -7.16 | 15.2904998 | -1.88E-01 | 123215553 | 123215676 | NC_000012.11 |
| cg00475815 | 2.13E-10 | 1.58E-11 | -7.16 | 15.2900148 | -4.20E-02 | 196594767 | 196594890 | NC_000003.11 |
| cg23059701 | 2.13E-10 | 1.59E-11 | -7.16 | 15.2881003 | -1.31E-01 | 2428889   | 2429012   | NC_000019.9  |
| cg23720898 | 2.13E-10 | 1.59E-11 | -7.16 | 15.2880019 | -1.41E-01 | 175411861 | 175411984 | NC_000002.11 |
| cg11152412 | 2.13E-10 | 1.59E-11 | -7.16 | 15.2871083 | -8.32E-02 | 74927688  | 74927811  | NC_000015.9  |
| cg24069479 | 2.14E-10 | 1.60E-11 | -7.16 | 15.2822443 | -7.27E-02 | 41861108  | 41861231  | NC_000001.10 |
| cg05277407 | 2.14E-10 | 1.60E-11 | -7.16 | 15.2821001 | -1.40E-01 | 88184819  | 88184942  | NC_000016.9  |
| cg06705548 | 2.14E-10 | 1.60E-11 | -7.16 | 15.2820414 | -8.09E-02 | 49218579  | 49218702  | NC_000010.10 |
| cg19095784 | 2.15E-10 | 1.60E-11 | -7.16 | 15.2807245 | -5.87E-02 | 37070475  | 37070598  | NC_000006.11 |
| cg22421417 | 2.15E-10 | 1.60E-11 | -7.16 | 15.2797311 | -1.26E-01 | 30707585  | 30707708  | NC_000013.10 |
| cg00412772 | 2.15E-10 | 1.60E-11 | -7.16 | 15.2784989 | -1.26E-01 | 38794845  | 38794968  | NC_000019.9  |
| cg17018517 | 2.15E-10 | 1.61E-11 | -7.16 | 15.276748  | -5.92E-02 | 139947922 | 139948045 | NC_000009.11 |

|            |          |          |       |            |           |           |           |              |
|------------|----------|----------|-------|------------|-----------|-----------|-----------|--------------|
| cg05968601 | 2.16E-10 | 1.61E-11 | -7.16 | 15.2765829 | -4.04E-02 | 97657259  | 97657382  | NC_000008.10 |
| cg15451250 | 2.16E-10 | 1.61E-11 | -7.16 | 15.2750634 | -1.21E-01 | 6955660   | 6955783   | NC_000004.11 |
| cg12595697 | 2.16E-10 | 1.61E-11 | -7.16 | 15.2739005 | -1.03E-01 | 128127108 | 128127231 | NC_000003.11 |
| cg09538682 | 2.16E-10 | 1.61E-11 | -7.16 | 15.2721129 | -1.49E-01 | 8833314   | 8833437   | NC_000002.11 |
| cg18048544 | 2.17E-10 | 1.62E-11 | -7.16 | 15.2694762 | -4.47E-02 | 38033938  | 38034061  | NC_000008.10 |
| cg06803406 | 2.17E-10 | 1.62E-11 | -7.16 | 15.2685263 | -6.44E-02 | 3071383   | 3071506   | NC_000020.10 |
| cg01860753 | 2.17E-10 | 1.62E-11 | -7.16 | 15.2678715 | -4.67E-02 | 206730586 | 206730709 | NC_000001.10 |
| cg16153547 | 2.17E-10 | 1.62E-11 | -7.16 | 15.267742  | -1.22E-01 | 74725925  | 74726048  | NC_000002.11 |
| cg27135125 | 2.17E-10 | 1.62E-11 | -7.16 | 15.2671472 | -1.00E-01 | 23510082  | 23510205  | NC_000007.13 |
| cg01225317 | 2.18E-10 | 1.62E-11 | -7.16 | 15.2663266 | -3.10E-02 | 205473878 | 205474001 | NC_000001.10 |
| cg09850137 | 2.18E-10 | 1.62E-11 | -7.16 | 15.2655057 | -1.36E-01 | 112390601 | 112390724 | NC_000003.11 |
| cg16131053 | 2.18E-10 | 1.63E-11 | -7.16 | 15.2647447 | -1.30E-01 | 45459276  | 45459399  | NC_000018.9  |
| cg24975342 | 2.18E-10 | 1.63E-11 | -7.16 | 15.2636944 | -1.19E-01 | 55193659  | 55193782  | NC_000005.9  |
| cg19502920 | 2.18E-10 | 1.63E-11 | -7.16 | 15.2636551 | -6.55E-02 | 35290635  | 35290758  | NC_000017.10 |
| cg24664570 | 2.18E-10 | 1.63E-11 | -7.16 | 15.2629676 | -4.08E-02 | 159825143 | 159825266 | NC_000002.11 |
| cg13691961 | 2.18E-10 | 1.63E-11 | -7.16 | 15.2625487 | -1.49E-01 | 89743281  | 89743404  | NC_000012.11 |
| cg05498539 | 2.18E-10 | 1.63E-11 | -7.16 | 15.2619754 | -1.10E-01 | 88719848  | 88719971  | NC_000010.10 |
| cg08650426 | 2.19E-10 | 1.63E-11 | -7.16 | 15.260313  | -6.28E-02 | 180471293 | 180471416 | NC_000001.10 |
| cg10519271 | 2.19E-10 | 1.63E-11 | -7.16 | 15.2602561 | -3.43E-02 | 28286837  | 28286960  | NC_000001.10 |
| cg20782252 | 2.19E-10 | 1.63E-11 | -7.16 | 15.2598749 | -9.87E-02 | 2153774   | 2153897   | NC_000007.13 |
| cg09293559 | 2.19E-10 | 1.64E-11 | -7.16 | 15.2586016 | -1.37E-01 | 72911729  | 72911852  | NC_000016.9  |
| cg19812050 | 2.19E-10 | 1.64E-11 | -7.16 | 15.25852   | -5.18E-02 | 1471537   | 1471660   | NC_000019.9  |
| cg16865965 | 2.20E-10 | 1.64E-11 | -7.16 | 15.2564556 | -2.00E-01 | 85811662  | 85811785  | NC_000002.11 |
| cg11721249 | 2.20E-10 | 1.64E-11 | -7.16 | 15.255518  | -1.23E-01 | 52702231  | 52702354  | NC_000012.11 |
| cg20219891 | 2.20E-10 | 1.64E-11 | -7.16 | 15.2544961 | -1.39E-01 | 121496875 | 121496998 | NC_000002.11 |

|            |          |          |       |            |           |           |           |              |
|------------|----------|----------|-------|------------|-----------|-----------|-----------|--------------|
| cg24501831 | 2.20E-10 | 1.64E-11 | -7.16 | 15.2538188 | -1.19E-01 | 81194777  | 81194900  | NC_000010.10 |
| cg06366345 | 2.20E-10 | 1.64E-11 | -7.16 | 15.2533439 | -1.20E-01 | 101459591 | 101459714 | NC_000014.8  |
| cg16679650 | 2.20E-10 | 1.65E-11 | -7.16 | 15.2527719 | -1.08E-01 | 24239820  | 24239943  | NC_000001.10 |
| cg23779604 | 2.20E-10 | 1.65E-11 | -7.15 | 15.2525828 | -1.76E-01 | 2760784   | 2760907   | NC_000007.13 |
| cg16398761 | 2.20E-10 | 1.65E-11 | -7.15 | 15.2522859 | -1.12E-01 | 74220238  | 74220361  | NC_000014.8  |
| cg19452060 | 2.21E-10 | 1.65E-11 | -7.15 | 15.2491595 | -6.43E-02 | 57914632  | 57914755  | NC_000012.11 |
| cg25190001 | 2.21E-10 | 1.65E-11 | -7.15 | 15.2483073 | -7.45E-02 | 49371310  | 49371433  | NC_000012.11 |
| cg20726804 | 2.22E-10 | 1.65E-11 | -7.15 | 15.2473264 | -3.66E-02 | 85553966  | 85554089  | NC_000002.11 |
| cg18939928 | 2.22E-10 | 1.66E-11 | -7.15 | 15.2464726 | -5.73E-02 | 1407468   | 1407591   | NC_000019.9  |
| cg04995826 | 2.22E-10 | 1.66E-11 | -7.15 | 15.2457506 | -6.08E-02 | 43333458  | 43333581  | NC_000011.9  |
| cg02527375 | 2.22E-10 | 1.66E-11 | -7.15 | 15.2447324 | -1.37E-01 | 41724686  | 41724809  | NC_000003.11 |
| cg19008809 | 2.22E-10 | 1.66E-11 | -7.15 | 15.244707  | -4.03E-02 | 53080682  | 53080805  | NC_000003.11 |
| cg08333555 | 2.22E-10 | 1.66E-11 | -7.15 | 15.2442052 | -3.25E-02 | 20817571  | 20817694  | NC_000016.9  |
| cg14648237 | 2.22E-10 | 1.66E-11 | -7.15 | 15.2440568 | -1.48E-01 | 64422393  | 64422516  | NC_000017.10 |
| cg23647768 | 2.22E-10 | 1.66E-11 | -7.15 | 15.2436476 | -8.93E-02 | 1054538   | 1054661   | NC_000011.9  |
| cg20382867 | 2.22E-10 | 1.66E-11 | -7.15 | 15.243046  | -1.62E-01 | 12310085  | 12310208  | NC_000002.11 |
| cg03985555 | 2.23E-10 | 1.66E-11 | -7.15 | 15.2415212 | -1.33E-01 | 98729117  | 98729240  | NC_000001.10 |
| cg26182406 | 2.23E-10 | 1.66E-11 | -7.15 | 15.2412829 | -1.72E-01 | 105491309 | 105491432 | NC_000014.8  |
| cg11331422 | 2.23E-10 | 1.66E-11 | -7.15 | 15.2411807 | -4.81E-02 | 10491258  | 10491381  | NC_000019.9  |
| cg27154627 | 2.23E-10 | 1.66E-11 | -7.15 | 15.2410929 | -7.13E-02 | 74398649  | 74398772  | NC_000011.9  |
| cg18101225 | 2.23E-10 | 1.67E-11 | -7.15 | 15.2408642 | -8.03E-02 | 15964913  | 15965036  | NC_000004.11 |
| cg06191203 | 2.23E-10 | 1.67E-11 | -7.15 | 15.2394059 | -6.63E-02 | 152266755 | 152266878 | NC_000002.11 |
| cg07201835 | 2.23E-10 | 1.67E-11 | -7.15 | 15.2388706 | -2.04E-01 | 32831369  | 32831492  | NC_000012.11 |
| cg06239064 | 2.24E-10 | 1.67E-11 | -7.15 | 15.2353319 | -1.46E-01 | 66697621  | 66697744  | NC_000012.11 |
| cg00290994 | 2.24E-10 | 1.68E-11 | -7.15 | 15.2350037 | -9.52E-02 | 41848739  | 41848862  | NC_000001.10 |

|              |          |          |       |            |           |           |           |              |
|--------------|----------|----------|-------|------------|-----------|-----------|-----------|--------------|
| cg02679291   | 2.24E-10 | 1.68E-11 | -7.15 | 15.2332542 | -7.60E-02 | 48248902  | 48249025  | NC_000019.9  |
| cg11708690   | 2.25E-10 | 1.68E-11 | -7.15 | 15.2318304 | -1.33E-01 | 239330202 | 239330325 | NC_000002.11 |
| cg07474957   | 2.25E-10 | 1.68E-11 | -7.15 | 15.2313262 | -2.20E-01 | 30650844  | 30650967  | NC_000006.11 |
| cg13165139   | 2.25E-10 | 1.68E-11 | -7.15 | 15.2299216 | -3.76E-02 | 42698151  | 42698274  | NC_000008.10 |
| cg13997720   | 2.25E-10 | 1.69E-11 | -7.15 | 15.2286398 | -7.65E-02 | 68780984  | 68781107  | NC_000011.9  |
| cg07670188   | 2.26E-10 | 1.69E-11 | -7.15 | 15.2246016 | -7.55E-02 | 124066860 | 124066983 | NC_000012.11 |
| cg05533615   | 2.26E-10 | 1.69E-11 | -7.15 | 15.224286  | -8.47E-02 | 46291868  | 46291991  | NC_000021.8  |
| cg07843390   | 2.27E-10 | 1.69E-11 | -7.15 | 15.2236808 | -1.34E-01 | 2541015   | 2541138   | NC_000019.9  |
| cg01266338   | 2.27E-10 | 1.70E-11 | -7.15 | 15.2231287 | -6.88E-02 | 86237590  | 86237713  | NC_000009.11 |
| cg22522598   | 2.27E-10 | 1.70E-11 | -7.15 | 15.2225894 | -1.62E-01 | 15360953  | 15361076  | NC_000019.9  |
| ch.3.360440R | 2.27E-10 | 1.70E-11 | -7.15 | 15.2217365 | -5.87E-02 | 15726373  | 15726496  | NC_000003.11 |
| cg13855276   | 2.28E-10 | 1.71E-11 | -7.15 | 15.2165249 | -6.51E-02 | 37080062  | 37080185  | NC_000009.11 |
| cg19916364   | 2.28E-10 | 1.71E-11 | -7.15 | 15.2160067 | -1.16E-01 | 68961838  | 68961961  | NC_000001.10 |
| cg20912172   | 2.28E-10 | 1.71E-11 | -7.15 | 15.215985  | -2.19E-02 | 211500571 | 211500694 | NC_000001.10 |
| cg27084303   | 2.28E-10 | 1.71E-11 | -7.15 | 15.2158871 | -5.33E-02 | 23755009  | 23755132  | NC_000014.8  |
| cg17291435   | 2.28E-10 | 1.71E-11 | -7.15 | 15.215546  | -1.83E-02 | 106015527 | 106015650 | NC_000002.11 |
| cg09594475   | 2.29E-10 | 1.71E-11 | -7.15 | 15.2138007 | -1.15E-01 | 60884601  | 60884724  | NC_000020.10 |
| cg07202353   | 2.29E-10 | 1.72E-11 | -7.15 | 15.2118582 | -1.18E-01 | 42210119  | 42210242  | NC_000015.9  |
| cg02474563   | 2.29E-10 | 1.72E-11 | -7.15 | 15.2112756 | -1.44E-01 | 134442032 | 134442155 | NC_000010.10 |
| cg23001905   | 2.29E-10 | 1.72E-11 | -7.15 | 15.2108668 | -1.30E-01 | 1265302   | 1265425   | NC_000019.9  |
| cg04950342   | 2.30E-10 | 1.72E-11 | -7.15 | 15.2079863 | -1.45E-01 | 30544522  | 30544645  | NC_000003.11 |
| cg00145683   | 2.30E-10 | 1.72E-11 | -7.15 | 15.2063319 | -1.51E-01 | 51915089  | 51915212  | NC_000016.9  |
| cg20825023   | 2.31E-10 | 1.73E-11 | -7.15 | 15.2049811 | -8.19E-02 | 846742    | 846865    | NC_000001.10 |
| cg03432948   | 2.31E-10 | 1.73E-11 | -7.15 | 15.2044955 | -7.72E-02 | 53712982  | 53713105  | NC_000013.10 |
| cg13335388   | 2.31E-10 | 1.73E-11 | -7.15 | 15.2044773 | -1.00E-01 | 31550241  | 31550364  | NC_000006.11 |

|            |          |          |       |            |           |           |           |              |
|------------|----------|----------|-------|------------|-----------|-----------|-----------|--------------|
| cg02849401 | 2.31E-10 | 1.73E-11 | -7.15 | 15.2036848 | -1.38E-01 | 19668740  | 19668863  | NC_000011.9  |
| cg21432302 | 2.31E-10 | 1.73E-11 | -7.15 | 15.202136  | -5.57E-02 | 5343586   | 5343709   | NC_000007.13 |
| cg10349687 | 2.31E-10 | 1.73E-11 | -7.15 | 15.201894  | -1.27E-01 | 157072813 | 157072936 | NC_000007.13 |
| cg22258045 | 2.32E-10 | 1.73E-11 | -7.15 | 15.2009114 | -1.51E-01 | 145002534 | 145002657 | NC_000008.10 |
| cg27286957 | 2.32E-10 | 1.73E-11 | -7.15 | 15.200881  | -1.15E-01 | 33740409  | 33740532  | NC_000006.11 |
| cg14549078 | 2.32E-10 | 1.74E-11 | -7.15 | 15.1997417 | -1.61E-01 | 48752032  | 48752155  | NC_000015.9  |
| cg15551105 | 2.32E-10 | 1.74E-11 | -7.15 | 15.1995579 | -4.69E-02 | 10260366  | 10260489  | NC_000002.11 |
| cg22510662 | 2.32E-10 | 1.74E-11 | -7.15 | 15.1991388 | -1.35E-01 | 36202853  | 36202976  | NC_000005.9  |
| cg05143954 | 2.32E-10 | 1.74E-11 | -7.15 | 15.1990301 | -6.74E-02 | 103424275 | 103424398 | NC_000008.10 |
| cg15120925 | 2.32E-10 | 1.74E-11 | -7.15 | 15.1983097 | -3.72E-02 | 113573809 | 113573932 | NC_000012.11 |
| cg14218108 | 2.32E-10 | 1.74E-11 | -7.15 | 15.1979757 | -1.45E-01 | 10658271  | 10658394  | NC_000004.11 |
| cg00854324 | 2.32E-10 | 1.74E-11 | -7.15 | 15.1972234 | -4.10E-02 | 69941269  | 69941392  | NC_000016.9  |
| cg07918509 | 2.33E-10 | 1.75E-11 | -7.14 | 15.1944825 | -1.38E-01 | 62083407  | 62083530  | NC_000017.10 |
| cg22294288 | 2.33E-10 | 1.75E-11 | -7.14 | 15.1938566 | -8.85E-02 | 4829690   | 4829813   | NC_000012.11 |
| cg05797623 | 2.33E-10 | 1.75E-11 | -7.14 | 15.1928336 | -1.43E-01 | 73178007  | 73178130  | NC_000004.11 |
| cg13817395 | 2.34E-10 | 1.76E-11 | -7.14 | 15.1891335 | -1.03E-01 | 32014926  | 32015049  | NC_000006.11 |
| cg05792022 | 2.34E-10 | 1.76E-11 | -7.14 | 15.1882649 | -5.34E-02 | 41239732  | 41239855  | NC_000013.10 |
| cg12623930 | 2.35E-10 | 1.76E-11 | -7.14 | 15.1873993 | -5.18E-02 | 52008802  | 52008925  | NC_000003.11 |
| cg16421467 | 2.35E-10 | 1.76E-11 | -7.14 | 15.186757  | -1.43E-01 | 67654854  | 67654977  | NC_000014.8  |
| cg08746496 | 2.35E-10 | 1.76E-11 | -7.14 | 15.1839772 | -1.20E-01 | 89765045  | 89765168  | NC_000015.9  |
| cg04305621 | 2.35E-10 | 1.76E-11 | -7.14 | 15.18375   | -1.58E-01 | 73084263  | 73084386  | NC_000017.10 |
| cg12129596 | 2.36E-10 | 1.77E-11 | -7.14 | 15.181402  | -3.88E-02 | 55770037  | 55770160  | NC_000019.9  |
| cg01883159 | 2.36E-10 | 1.77E-11 | -7.14 | 15.1812946 | -7.95E-02 | 43243461  | 43243584  | NC_000006.11 |
| cg00596521 | 2.36E-10 | 1.77E-11 | -7.14 | 15.1808497 | -2.72E-02 | 175260560 | 175260683 | NC_000002.11 |
| cg19021318 | 2.36E-10 | 1.77E-11 | -7.14 | 15.180699  | -3.97E-02 | 30689568  | 30689691  | NC_000006.11 |

|            |          |          |       |            |           |           |           |              |
|------------|----------|----------|-------|------------|-----------|-----------|-----------|--------------|
| cg18345369 | 2.36E-10 | 1.77E-11 | -7.14 | 15.1795494 | -7.80E-02 | 2907859   | 2907982   | NC_000016.9  |
| cg22512768 | 2.37E-10 | 1.78E-11 | -7.14 | 15.1769305 | -1.53E-01 | 139932535 | 139932658 | NC_000004.11 |
| cg16554164 | 2.37E-10 | 1.78E-11 | -7.14 | 15.1760774 | -1.90E-01 | 32410678  | 32410801  | NC_000001.10 |
| cg02806012 | 2.37E-10 | 1.78E-11 | -7.14 | 15.1748895 | -1.59E-01 | 2649139   | 2649262   | NC_000017.10 |
| cg12499211 | 2.37E-10 | 1.78E-11 | -7.14 | 15.1744757 | -1.35E-01 | 156786643 | 156786766 | NC_000001.10 |
| cg22903773 | 2.38E-10 | 1.78E-11 | -7.14 | 15.1736192 | -4.56E-02 | 40247691  | 40247814  | NC_000020.10 |
| cg11339912 | 2.38E-10 | 1.78E-11 | -7.14 | 15.1731293 | -1.13E-01 | 145421667 | 145421790 | NC_000005.9  |
| cg05926606 | 2.38E-10 | 1.78E-11 | -7.14 | 15.1728451 | -5.10E-02 | 40685342  | 40685465  | NC_000021.8  |
| cg15187665 | 2.38E-10 | 1.79E-11 | -7.14 | 15.1719074 | -1.35E-01 | 123679203 | 123679326 | NC_000005.9  |
| cg10513161 | 2.38E-10 | 1.79E-11 | -7.14 | 15.1716783 | -6.07E-02 | 183705727 | 183705850 | NC_000003.11 |
| cg05624196 | 2.38E-10 | 1.79E-11 | -7.14 | 15.1702096 | -1.56E-01 | 195310883 | 195311006 | NC_000003.11 |
| cg25440932 | 2.39E-10 | 1.79E-11 | -7.14 | 15.16913   | -5.26E-02 | 74659490  | 74659613  | NC_000008.10 |
| cg23875404 | 2.39E-10 | 1.79E-11 | -7.14 | 15.1680343 | -1.48E-01 | 36728869  | 36728992  | NC_000013.10 |
| cg20992002 | 2.39E-10 | 1.79E-11 | -7.14 | 15.1675943 | -1.30E-01 | 393328    | 393451    | NC_000011.9  |
| cg08670715 | 2.39E-10 | 1.79E-11 | -7.14 | 15.1674238 | -1.37E-01 | 44341754  | 44341877  | NC_000017.10 |
| cg21851534 | 2.39E-10 | 1.79E-11 | -7.14 | 15.1671811 | -1.55E-01 | 3907994   | 3908117   | NC_000017.10 |
| cg03855706 | 2.39E-10 | 1.79E-11 | -7.14 | 15.1671786 | -2.48E-02 | 770778    | 770901    | NC_000016.9  |
| cg03109660 | 2.39E-10 | 1.80E-11 | -7.14 | 15.1658338 | -1.80E-01 | 37684505  | 37684628  | NC_000004.11 |
| cg25781868 | 2.39E-10 | 1.80E-11 | -7.14 | 15.1654951 | -1.17E-01 | 67289522  | 67289645  | NC_000011.9  |
| cg18629334 | 2.39E-10 | 1.80E-11 | -7.14 | 15.1652185 | -1.39E-01 | 27101763  | 27101886  | NC_000006.11 |
| cg09473847 | 2.40E-10 | 1.80E-11 | -7.14 | 15.1645334 | -4.63E-02 | 21213087  | 21213210  | NC_000022.10 |
| cg20228731 | 2.40E-10 | 1.80E-11 | -7.14 | 15.1629783 | -2.45E-01 | 130646051 | 130646174 | NC_000007.13 |
| cg27400923 | 2.40E-10 | 1.80E-11 | -7.14 | 15.1622941 | -6.06E-02 | 185826929 | 185827052 | NC_000003.11 |
| cg10946295 | 2.40E-10 | 1.80E-11 | -7.14 | 15.1619226 | -1.05E-01 | 119913307 | 119913430 | NC_000002.11 |
| cg11964099 | 2.40E-10 | 1.81E-11 | -7.14 | 15.1613479 | -9.18E-02 | 3905835   | 3905958   | NC_000017.10 |

|            |          |          |       |            |           |           |           |              |
|------------|----------|----------|-------|------------|-----------|-----------|-----------|--------------|
| cg10233401 | 2.41E-10 | 1.81E-11 | -7.14 | 15.1599811 | -1.11E-01 | 45192368  | 45192491  | NC_000010.10 |
| cg13956095 | 2.41E-10 | 1.81E-11 | -7.14 | 15.1592156 | -5.07E-02 | 81037419  | 81037542  | NC_000017.10 |
| cg01592662 | 2.41E-10 | 1.81E-11 | -7.14 | 15.1579991 | -2.84E-02 | 15150200  | 15150323  | NC_000016.9  |
| cg22705016 | 2.41E-10 | 1.81E-11 | -7.14 | 15.1574684 | -5.90E-02 | 27272692  | 27272815  | NC_000002.11 |
| cg09715672 | 2.41E-10 | 1.81E-11 | -7.14 | 15.1565537 | -1.34E-01 | 88728278  | 88728401  | NC_000010.10 |
| cg05420867 | 2.42E-10 | 1.82E-11 | -7.14 | 15.1561307 | -1.40E-01 | 121112773 | 121112896 | NC_000011.9  |
| cg21752517 | 2.42E-10 | 1.82E-11 | -7.14 | 15.1559825 | -1.53E-01 | 74951359  | 74951482  | NC_000011.9  |
| cg21429551 | 2.42E-10 | 1.82E-11 | -7.14 | 15.155233  | -8.18E-02 | 30635762  | 30635885  | NC_000007.13 |
| cg17761898 | 2.42E-10 | 1.82E-11 | -7.14 | 15.1531926 | -9.76E-02 | 27782909  | 27783032  | NC_000006.11 |
| cg24165921 | 2.42E-10 | 1.82E-11 | -7.14 | 15.1521021 | -9.13E-02 | 79941506  | 79941629  | NC_000012.11 |
| cg18766475 | 2.42E-10 | 1.82E-11 | -7.14 | 15.1519642 | -1.23E-01 | 179923022 | 179923145 | NC_000001.10 |
| cg27307975 | 2.43E-10 | 1.82E-11 | -7.14 | 15.1513687 | -1.26E-01 | 58797839  | 58797962  | NC_000015.9  |
| cg22911074 | 2.43E-10 | 1.83E-11 | -7.14 | 15.1506213 | -3.61E-02 | 6632973   | 6633096   | NC_000005.9  |
| cg07833104 | 2.43E-10 | 1.83E-11 | -7.14 | 15.1503661 | -1.17E-01 | 109797333 | 109797456 | NC_000001.10 |
| cg06438056 | 2.43E-10 | 1.83E-11 | -7.14 | 15.1498674 | -8.25E-02 | 33502433  | 33502556  | NC_000001.10 |
| cg02239453 | 2.43E-10 | 1.83E-11 | -7.14 | 15.1490192 | -1.67E-01 | 33797523  | 33797646  | NC_000011.9  |
| cg05917988 | 2.43E-10 | 1.83E-11 | -7.14 | 15.1482133 | -4.43E-02 | 44281197  | 44281320  | NC_000006.11 |
| cg08734853 | 2.43E-10 | 1.83E-11 | -7.14 | 15.1475988 | -7.80E-02 | 14598345  | 14598468  | NC_000019.9  |
| cg23051970 | 2.44E-10 | 1.83E-11 | -7.14 | 15.1467319 | -1.46E-01 | 75284193  | 75284316  | NC_000017.10 |
| cg13617248 | 2.44E-10 | 1.83E-11 | -7.14 | 15.1457898 | -8.27E-02 | 38640479  | 38640602  | NC_000021.8  |
| cg19442730 | 2.44E-10 | 1.83E-11 | -7.14 | 15.1456934 | -4.13E-02 | 73634476  | 73634599  | NC_000013.10 |
| cg21207616 | 2.44E-10 | 1.84E-11 | -7.14 | 15.1452981 | -8.77E-02 | 102139262 | 102139385 | NC_000011.9  |
| cg22842510 | 2.44E-10 | 1.84E-11 | -7.14 | 15.145009  | -2.21E-02 | 11456965  | 11457088  | NC_000019.9  |
| cg08023809 | 2.44E-10 | 1.84E-11 | -7.14 | 15.1447222 | -5.53E-02 | 53645616  | 53645739  | NC_000012.11 |
| cg27475088 | 2.44E-10 | 1.84E-11 | -7.14 | 15.1444338 | -7.61E-02 | 194509    | 194632    | NC_000011.9  |

|               |          |          |       |            |           |           |           |              |
|---------------|----------|----------|-------|------------|-----------|-----------|-----------|--------------|
| cg10670430    | 2.44E-10 | 1.84E-11 | -7.14 | 15.1433907 | -1.65E-01 | 196755688 | 196755811 | NC_000003.11 |
| cg19006130    | 2.45E-10 | 1.84E-11 | -7.14 | 15.1425793 | -5.33E-02 | 118478252 | 118478375 | NC_000011.9  |
| cg18444702    | 2.45E-10 | 1.84E-11 | -7.14 | 15.142403  | -1.19E-01 | 15366862  | 15366985  | NC_000003.11 |
| cg06179606    | 2.45E-10 | 1.84E-11 | -7.14 | 15.142257  | -9.58E-02 | 96055142  | 96055265  | NC_000002.11 |
| cg13356175    | 2.45E-10 | 1.84E-11 | -7.14 | 15.1408485 | -1.26E-01 | 153413641 | 153413764 | NC_000001.10 |
| cg12356155    | 2.45E-10 | 1.84E-11 | -7.14 | 15.1401794 | -1.28E-01 | 7673324   | 7673447   | NC_000017.10 |
| cg01316378    | 2.46E-10 | 1.85E-11 | -7.13 | 15.1382472 | -1.45E-01 | 63629580  | 63629703  | NC_000010.10 |
| cg04658357    | 2.46E-10 | 1.85E-11 | -7.13 | 15.1368457 | -1.14E-01 | 18911043  | 18911166  | NC_000017.10 |
| cg14289738    | 2.46E-10 | 1.85E-11 | -7.13 | 15.1361079 | -1.12E-01 | 127071570 | 127071693 | NC_000009.11 |
| cg12798338    | 2.47E-10 | 1.86E-11 | -7.13 | 15.1340666 | -1.26E-01 | 76128683  | 76128806  | NC_000017.10 |
| cg09119776    | 2.47E-10 | 1.86E-11 | -7.13 | 15.1316347 | -9.55E-02 | 104387263 | 104387386 | NC_000010.10 |
| cg20529923    | 2.47E-10 | 1.86E-11 | -7.13 | 15.1315452 | -8.17E-02 | 32110187  | 32110310  | NC_000011.9  |
| cg23256579    | 2.48E-10 | 1.86E-11 | -7.13 | 15.1299248 | -1.46E-01 | 11002403  | 11002526  | NC_000012.11 |
| cg05910615    | 2.48E-10 | 1.86E-11 | -7.13 | 15.1299018 | -6.10E-02 | 36248877  | 36249000  | NC_000019.9  |
| cg02452985    | 2.48E-10 | 1.87E-11 | -7.13 | 15.1293592 | -3.01E-02 | 99737548  | 99737671  | NC_000014.8  |
| cg17191558    | 2.48E-10 | 1.87E-11 | -7.13 | 15.1282774 | -9.36E-02 | 144992837 | 144992960 | NC_000008.10 |
| ch.7.3356624R | 2.48E-10 | 1.87E-11 | -7.13 | 15.12678   | -5.43E-02 | 157205374 | 157205497 | NC_000007.13 |
| cg19088634    | 2.49E-10 | 1.87E-11 | -7.13 | 15.1252606 | -1.09E-01 | 35229391  | 35229514  | NC_000001.10 |
| cg10796931    | 2.49E-10 | 1.87E-11 | -7.13 | 15.1250501 | -9.77E-02 | 162467363 | 162467486 | NC_000001.10 |
| cg12242086    | 2.49E-10 | 1.88E-11 | -7.13 | 15.1241006 | -1.54E-01 | 155252796 | 155252919 | NC_000007.13 |
| cg04256834    | 2.49E-10 | 1.88E-11 | -7.13 | 15.1228167 | -1.52E-01 | 132502809 | 132502932 | NC_000011.9  |
| cg07310500    | 2.50E-10 | 1.88E-11 | -7.13 | 15.1212594 | -1.93E-01 | 65528222  | 65528345  | NC_000002.11 |
| cg18917270    | 2.50E-10 | 1.88E-11 | -7.13 | 15.1202264 | -6.56E-02 | 86296346  | 86296469  | NC_000001.10 |
| cg09186101    | 2.50E-10 | 1.88E-11 | -7.13 | 15.1202039 | -1.45E-01 | 80197062  | 80197185  | NC_000017.10 |
| cg26605086    | 2.50E-10 | 1.89E-11 | -7.13 | 15.1182597 | -5.67E-02 | 30302655  | 30302778  | NC_000019.9  |



|                  |          |          |       |            |           |           |           |              |
|------------------|----------|----------|-------|------------|-----------|-----------|-----------|--------------|
| cg00820581       | 2.50E-10 | 1.89E-11 | -7.13 | 15.1179827 | -2.82E-02 | 174969299 | 174969422 | NC_000001.10 |
| cg02237704       | 2.51E-10 | 1.89E-11 | -7.13 | 15.1174055 | -5.65E-02 | 34724845  | 34724968  | NC_000006.11 |
| cg23439966       | 2.51E-10 | 1.89E-11 | -7.13 | 15.1171941 | -1.38E-01 | 27674472  | 27674595  | NC_000003.11 |
| cg04576630       | 2.51E-10 | 1.89E-11 | -7.13 | 15.1165759 | -3.66E-02 | 20817619  | 20817742  | NC_000016.9  |
| cg10582860       | 2.52E-10 | 1.90E-11 | -7.13 | 15.1109669 | -1.57E-01 | 55347991  | 55348114  | NC_000002.11 |
| ch.12.109182886F | 2.52E-10 | 1.90E-11 | -7.13 | 15.1109253 | -9.63E-02 | 110698503 | 110698626 | NC_000012.11 |
| cg24851260       | 2.52E-10 | 1.90E-11 | -7.13 | 15.1108214 | -1.32E-01 | 7297992   | 7298115   | NC_000019.9  |
| cg21950720       | 2.52E-10 | 1.90E-11 | -7.13 | 15.1097125 | -8.63E-02 | 26347088  | 26347211  | NC_000001.10 |
| cg06357807       | 2.53E-10 | 1.90E-11 | -7.13 | 15.1090403 | -1.68E-02 | 135503203 | 135503326 | NC_000006.11 |
| cg06595632       | 2.53E-10 | 1.91E-11 | -7.13 | 15.1086568 | -7.72E-02 | 69697369  | 69697492  | NC_000005.9  |
| cg05751310       | 2.53E-10 | 1.91E-11 | -7.13 | 15.1079532 | -1.48E-01 | 88963738  | 88963861  | NC_000016.9  |
| cg08779779       | 2.53E-10 | 1.91E-11 | -7.13 | 15.1070134 | -5.71E-02 | 200322566 | 200322689 | NC_000002.11 |
| cg01014224       | 2.54E-10 | 1.91E-11 | -7.13 | 15.1050029 | -1.60E-01 | 44379186  | 44379309  | NC_000013.10 |
| cg22261612       | 2.54E-10 | 1.91E-11 | -7.13 | 15.1044783 | -6.81E-02 | 117187137 | 117187260 | NC_000011.9  |
| cg11920449       | 2.54E-10 | 1.91E-11 | -7.13 | 15.1042465 | -1.43E-01 | 36645608  | 36645731  | NC_000006.11 |
| cg04108502       | 2.54E-10 | 1.91E-11 | -7.13 | 15.1039245 | -3.75E-02 | 56360908  | 56361031  | NC_000012.11 |
| cg13398782       | 2.54E-10 | 1.91E-11 | -7.13 | 15.1039035 | -3.62E-02 | 23857288  | 23857411  | NC_000001.10 |
| cg27032184       | 2.54E-10 | 1.91E-11 | -7.13 | 15.1037385 | -9.65E-02 | 46731129  | 46731252  | NC_000022.10 |
| cg16520038       | 2.54E-10 | 1.92E-11 | -7.13 | 15.1027261 | -1.06E-01 | 57408660  | 57408783  | NC_000011.9  |
| cg18772376       | 2.54E-10 | 1.92E-11 | -7.13 | 15.1010886 | -1.51E-01 | 22474765  | 22474888  | NC_000012.11 |
| cg09060908       | 2.55E-10 | 1.92E-11 | -7.13 | 15.1007776 | -1.79E-01 | 223743126 | 223743249 | NC_000001.10 |
| cg20708135       | 2.55E-10 | 1.92E-11 | -7.13 | 15.100377  | -1.66E-01 | 76493489  | 76493612  | NC_000011.9  |
| cg11155735       | 2.55E-10 | 1.92E-11 | -7.13 | 15.0998487 | -1.53E-01 | 19540479  | 19540602  | NC_000008.10 |
| cg05955566       | 2.55E-10 | 1.92E-11 | -7.13 | 15.0987358 | -5.47E-02 | 99038273  | 99038396  | NC_000012.11 |
| cg08629176       | 2.55E-10 | 1.93E-11 | -7.13 | 15.0983831 | -1.12E-01 | 55427708  | 55427831  | NC_000017.10 |

|            |          |          |       |            |           |           |           |              |
|------------|----------|----------|-------|------------|-----------|-----------|-----------|--------------|
| cg11934427 | 2.55E-10 | 1.93E-11 | -7.13 | 15.0977663 | -6.96E-02 | 25982162  | 25982285  | NC_000017.10 |
| cg02760495 | 2.55E-10 | 1.93E-11 | -7.13 | 15.0968615 | -1.63E-01 | 139678075 | 139678198 | NC_000003.11 |
| cg21151355 | 2.56E-10 | 1.93E-11 | -7.13 | 15.0958902 | -1.02E-01 | 35246607  | 35246730  | NC_000001.10 |
| cg21563471 | 2.57E-10 | 1.94E-11 | -7.13 | 15.0923751 | -9.83E-02 | 158184535 | 158184658 | NC_000002.11 |
| cg15280363 | 2.57E-10 | 1.94E-11 | -7.13 | 15.0921942 | -1.26E-01 | 12245710  | 12245833  | NC_000012.11 |
| cg23867562 | 2.57E-10 | 1.94E-11 | -7.13 | 15.090851  | -8.08E-02 | 12861921  | 12862044  | NC_000019.9  |
| cg05236972 | 2.57E-10 | 1.94E-11 | -7.13 | 15.0890933 | -6.21E-02 | 46933233  | 46933356  | NC_000022.10 |
| cg06295784 | 2.58E-10 | 1.95E-11 | -7.13 | 15.0878724 | -1.48E-01 | 160771074 | 160771197 | NC_000006.11 |
| cg00820919 | 2.58E-10 | 1.95E-11 | -7.13 | 15.0872147 | -7.67E-02 | 43863839  | 43863962  | NC_000002.11 |
| cg21973527 | 2.58E-10 | 1.95E-11 | -7.13 | 15.085863  | -8.65E-02 | 5090962   | 5091085   | NC_000019.9  |
| cg02483593 | 2.58E-10 | 1.95E-11 | -7.13 | 15.0857947 | -7.59E-02 | 63792183  | 63792306  | NC_000001.10 |
| cg04184297 | 2.58E-10 | 1.95E-11 | -7.13 | 15.0853964 | -1.35E-01 | 80186266  | 80186389  | NC_000017.10 |
| cg03095288 | 2.58E-10 | 1.95E-11 | -7.13 | 15.0851638 | -1.46E-01 | 50667086  | 50667209  | NC_000019.9  |
| cg17304336 | 2.58E-10 | 1.95E-11 | -7.13 | 15.0850802 | -2.26E-02 | 65343565  | 65343688  | NC_000011.9  |
| cg01959416 | 2.58E-10 | 1.95E-11 | -7.13 | 15.0850109 | -5.83E-02 | 150020818 | 150020941 | NC_000007.13 |
| cg14590331 | 2.59E-10 | 1.95E-11 | -7.13 | 15.0838961 | -1.17E-01 | 138782572 | 138782695 | NC_000009.11 |
| cg26818197 | 2.59E-10 | 1.95E-11 | -7.13 | 15.0837478 | -1.44E-01 | 110986361 | 110986484 | NC_000006.11 |
| cg19399402 | 2.59E-10 | 1.96E-11 | -7.13 | 15.0827626 | -4.73E-02 | 41984774  | 41984897  | NC_000017.10 |
| cg19995049 | 2.59E-10 | 1.96E-11 | -7.12 | 15.0825738 | -1.33E-01 | 99059026  | 99059149  | NC_000008.10 |
| cg27003309 | 2.59E-10 | 1.96E-11 | -7.12 | 15.0811384 | -1.50E-01 | 5343752   | 5343875   | NC_000007.13 |
| cg00061635 | 2.59E-10 | 1.96E-11 | -7.12 | 15.0808657 | -1.40E-01 | 8311836   | 8311959   | NC_000017.10 |
| cg00157638 | 2.60E-10 | 1.96E-11 | -7.12 | 15.0801549 | -1.09E-01 | 10963932  | 10964055  | NC_000001.10 |
| cg13040693 | 2.60E-10 | 1.96E-11 | -7.12 | 15.0799585 | -1.36E-01 | 45886102  | 45886225  | NC_000013.10 |
| cg24852883 | 2.60E-10 | 1.96E-11 | -7.12 | 15.0795121 | -1.12E-01 | 170560097 | 170560220 | NC_000006.11 |
| cg07589899 | 2.60E-10 | 1.96E-11 | -7.12 | 15.0790726 | -1.07E-01 | 62020677  | 62020800  | NC_000002.11 |

|               |          |          |       |            |           |           |           |              |
|---------------|----------|----------|-------|------------|-----------|-----------|-----------|--------------|
| cg09656690    | 2.60E-10 | 1.96E-11 | -7.12 | 15.078588  | -1.26E-01 | 174875230 | 174875353 | NC_000005.9  |
| ch.5.1324828F | 2.60E-10 | 1.97E-11 | -7.12 | 15.0781945 | -5.84E-02 | 70760973  | 70761096  | NC_000005.9  |
| cg12177087    | 2.61E-10 | 1.97E-11 | -7.12 | 15.0763936 | -2.02E-01 | 45116903  | 45117026  | NC_000019.9  |
| cg27614319    | 2.61E-10 | 1.97E-11 | -7.12 | 15.0756908 | -1.87E-01 | 35079061  | 35079184  | NC_000017.10 |
| cg23222201    | 2.61E-10 | 1.97E-11 | -7.12 | 15.0749637 | -1.19E-01 | 111985261 | 111985384 | NC_000010.10 |
| cg01611134    | 2.61E-10 | 1.97E-11 | -7.12 | 15.0737467 | -5.18E-02 | 48499475  | 48499598  | NC_000012.11 |
| cg21656672    | 2.61E-10 | 1.97E-11 | -7.12 | 15.0736501 | -6.69E-02 | 2272667   | 2272790   | NC_000007.13 |
| cg21931938    | 2.61E-10 | 1.98E-11 | -7.12 | 15.0732192 | -1.82E-01 | 40600493  | 40600616  | NC_000015.9  |
| cg12573002    | 2.62E-10 | 1.98E-11 | -7.12 | 15.0720004 | -1.23E-01 | 31560624  | 31560747  | NC_000006.11 |
| cg08498836    | 2.62E-10 | 1.98E-11 | -7.12 | 15.0713079 | -1.68E-01 | 149292366 | 149292489 | NC_000003.11 |
| cg15608277    | 2.62E-10 | 1.98E-11 | -7.12 | 15.0709674 | -1.29E-01 | 53184086  | 53184209  | NC_000012.11 |
| cg04618613    | 2.62E-10 | 1.98E-11 | -7.12 | 15.0702643 | -4.36E-02 | 101053356 | 101053479 | NC_000014.8  |
| cg09668964    | 2.62E-10 | 1.98E-11 | -7.12 | 15.0694031 | -1.49E-01 | 129335695 | 129335818 | NC_000003.11 |
| cg23623386    | 2.62E-10 | 1.98E-11 | -7.12 | 15.068298  | -5.60E-02 | 63793318  | 63793441  | NC_000001.10 |
| cg18626954    | 2.63E-10 | 1.99E-11 | -7.12 | 15.0672815 | -1.33E-01 | 33866749  | 33866872  | NC_000006.11 |
| cg01511534    | 2.63E-10 | 1.99E-11 | -7.12 | 15.0662029 | -5.52E-02 | 3284640   | 3284763   | NC_000016.9  |
| cg16634193    | 2.63E-10 | 1.99E-11 | -7.12 | 15.0661717 | -7.17E-02 | 135207476 | 135207599 | NC_000010.10 |
| cg13769548    | 2.63E-10 | 1.99E-11 | -7.12 | 15.0653595 | -1.49E-01 | 54984708  | 54984831  | NC_000019.9  |
| cg13981360    | 2.63E-10 | 1.99E-11 | -7.12 | 15.0651121 | -9.98E-02 | 78113237  | 78113360  | NC_000015.9  |
| cg00871133    | 2.63E-10 | 1.99E-11 | -7.12 | 15.0645388 | -2.85E-02 | 37793028  | 37793151  | NC_000017.10 |
| cg12640930    | 2.63E-10 | 1.99E-11 | -7.12 | 15.0641774 | -1.06E-01 | 175051172 | 175051295 | NC_000001.10 |
| cg00821483    | 2.64E-10 | 1.99E-11 | -7.12 | 15.0638283 | -5.93E-02 | 55320776  | 55320899  | NC_000017.10 |
| cg02198988    | 2.64E-10 | 1.99E-11 | -7.12 | 15.063329  | -1.36E-01 | 134661102 | 134661225 | NC_000005.9  |
| cg09611756    | 2.64E-10 | 2.00E-11 | -7.12 | 15.063261  | -4.73E-02 | 75018200  | 75018323  | NC_000015.9  |
| cg22818423    | 2.64E-10 | 2.00E-11 | -7.12 | 15.0628535 | -5.68E-02 | 31632722  | 31632845  | NC_000006.11 |

|            |          |          |       |            |           |           |           |              |
|------------|----------|----------|-------|------------|-----------|-----------|-----------|--------------|
| cg08237521 | 2.64E-10 | 2.00E-11 | -7.12 | 15.0625664 | -1.20E-01 | 66360304  | 66360427  | NC_000016.9  |
| cg03772020 | 2.64E-10 | 2.00E-11 | -7.12 | 15.0607589 | -1.77E-01 | 148879122 | 148879245 | NC_000006.11 |
| cg12600378 | 2.65E-10 | 2.00E-11 | -7.12 | 15.059299  | -4.07E-02 | 52405361  | 52405484  | NC_000005.9  |
| cg04854189 | 2.65E-10 | 2.00E-11 | -7.12 | 15.0587482 | -1.21E-01 | 1562771   | 1562894   | NC_000001.10 |
| cg05651903 | 2.65E-10 | 2.01E-11 | -7.12 | 15.0579192 | -1.10E-01 | 186543527 | 186543650 | NC_000003.11 |
| cg17987651 | 2.65E-10 | 2.01E-11 | -7.12 | 15.057309  | -6.50E-02 | 155548273 | 155548396 | NC_000004.11 |
| cg00023750 | 2.65E-10 | 2.01E-11 | -7.12 | 15.057298  | -1.12E-01 | 29211284  | 29211407  | NC_000016.9  |
| cg13411962 | 2.66E-10 | 2.01E-11 | -7.12 | 15.0550337 | -6.57E-02 | 28243934  | 28244057  | NC_000008.10 |
| cg07095530 | 2.66E-10 | 2.01E-11 | -7.12 | 15.0539712 | -1.19E-01 | 100859728 | 100859851 | NC_000007.13 |
| cg24129356 | 2.66E-10 | 2.02E-11 | -7.12 | 15.0535155 | -1.85E-01 | 32920735  | 32920858  | NC_000006.11 |
| cg25265226 | 2.66E-10 | 2.02E-11 | -7.12 | 15.0535032 | -1.05E-01 | 155284448 | 155284571 | NC_000007.13 |
| cg00471159 | 2.66E-10 | 2.02E-11 | -7.12 | 15.0534759 | -1.79E-01 | 107641796 | 107641919 | NC_000007.13 |
| cg13209762 | 2.66E-10 | 2.02E-11 | -7.12 | 15.0531639 | -1.34E-01 | 53882937  | 53883060  | NC_000001.10 |
| cg12644353 | 2.67E-10 | 2.02E-11 | -7.12 | 15.0517367 | -5.02E-02 | 114647787 | 114647910 | NC_000002.11 |
| cg23166765 | 2.67E-10 | 2.03E-11 | -7.12 | 15.048561  | -8.00E-02 | 73867948  | 73868071  | NC_000007.13 |
| cg12481212 | 2.68E-10 | 2.03E-11 | -7.12 | 15.047025  | -1.52E-01 | 44020245  | 44020368  | NC_000006.11 |
| cg27176614 | 2.68E-10 | 2.03E-11 | -7.12 | 15.0454927 | -1.20E-01 | 88717989  | 88718112  | NC_000016.9  |
| cg21067465 | 2.69E-10 | 2.04E-11 | -7.12 | 15.0424662 | -1.29E-01 | 86304288  | 86304411  | NC_000011.9  |
| cg07337914 | 2.69E-10 | 2.04E-11 | -7.12 | 15.0412421 | -8.33E-02 | 85881624  | 85881747  | NC_000016.9  |
| cg04823455 | 2.69E-10 | 2.04E-11 | -7.12 | 15.0405209 | -3.79E-02 | 114900602 | 114900725 | NC_000004.11 |
| cg15462862 | 2.70E-10 | 2.05E-11 | -7.12 | 15.038854  | -9.78E-02 | 21671245  | 21671368  | NC_000001.10 |
| cg10637995 | 2.70E-10 | 2.05E-11 | -7.12 | 15.0384154 | -1.27E-01 | 31781151  | 31781274  | NC_000020.10 |
| cg14365143 | 2.70E-10 | 2.05E-11 | -7.12 | 15.0383367 | -1.08E-01 | 48088046  | 48088169  | NC_000021.8  |
| cg22793860 | 2.70E-10 | 2.05E-11 | -7.12 | 15.0374104 | -3.68E-02 | 98030482  | 98030605  | NC_000007.13 |
| cg17072465 | 2.70E-10 | 2.05E-11 | -7.12 | 15.0373323 | -5.63E-02 | 8924309   | 8924432   | NC_000017.10 |

|                |          |          |       |            |           |           |           |              |
|----------------|----------|----------|-------|------------|-----------|-----------|-----------|--------------|
| cg15059474     | 2.70E-10 | 2.05E-11 | -7.12 | 15.0367809 | -1.57E-01 | 97990184  | 97990307  | NC_000007.13 |
| cg04816302     | 2.71E-10 | 2.05E-11 | -7.12 | 15.0344834 | -9.20E-02 | 145473213 | 145473336 | NC_000001.10 |
| cg03216846     | 2.71E-10 | 2.06E-11 | -7.12 | 15.0338632 | -1.20E-01 | 119543883 | 119544006 | NC_000001.10 |
| cg12498409     | 2.71E-10 | 2.06E-11 | -7.12 | 15.0338113 | -5.64E-02 | 40174463  | 40174586  | NC_000007.13 |
| cg03529744     | 2.71E-10 | 2.06E-11 | -7.12 | 15.0330756 | -4.51E-02 | 9600884   | 9601007   | NC_000012.11 |
| cg27266425     | 2.71E-10 | 2.06E-11 | -7.12 | 15.033057  | -4.53E-02 | 38893620  | 38893743  | NC_000019.9  |
| cg12491114     | 2.71E-10 | 2.06E-11 | -7.12 | 15.0328507 | -1.62E-01 | 39685524  | 39685647  | NC_000017.10 |
| cg26775695     | 2.72E-10 | 2.06E-11 | -7.12 | 15.0316725 | -1.47E-01 | 1229901   | 1230024   | NC_000011.9  |
| cg06012872     | 2.72E-10 | 2.06E-11 | -7.12 | 15.0308152 | -1.60E-01 | 45374841  | 45374964  | NC_000010.10 |
| cg20792436     | 2.72E-10 | 2.06E-11 | -7.12 | 15.0296195 | -1.75E-01 | 79972570  | 79972693  | NC_000017.10 |
| cg26686009     | 2.72E-10 | 2.07E-11 | -7.12 | 15.0288779 | -1.37E-01 | 45495739  | 45495862  | NC_000010.10 |
| cg03226872     | 2.72E-10 | 2.07E-11 | -7.12 | 15.0286816 | -1.55E-01 | 36153865  | 36153988  | NC_000020.10 |
| cg15661865     | 2.72E-10 | 2.07E-11 | -7.12 | 15.0285226 | -9.29E-02 | 27632926  | 27633049  | NC_000002.11 |
| cg05724257     | 2.73E-10 | 2.07E-11 | -7.12 | 15.026003  | -1.21E-01 | 34524290  | 34524413  | NC_000006.11 |
| cg13850344     | 2.74E-10 | 2.08E-11 | -7.11 | 15.0241368 | -5.97E-02 | 121648450 | 121648573 | NC_000012.11 |
| cg18500968     | 2.74E-10 | 2.08E-11 | -7.11 | 15.0238905 | -1.31E-01 | 43816263  | 43816386  | NC_000021.8  |
| ch.11.1353882R | 2.74E-10 | 2.08E-11 | -7.11 | 15.0231477 | -6.15E-02 | 66527663  | 66527786  | NC_000011.9  |
| cg00356694     | 2.74E-10 | 2.08E-11 | -7.11 | 15.0230046 | -1.62E-01 | 4337202   | 4337325   | NC_000017.10 |
| cg21633669     | 2.74E-10 | 2.08E-11 | -7.11 | 15.0222051 | -1.07E-01 | 54800662  | 54800785  | NC_000002.11 |
| cg15891076     | 2.74E-10 | 2.08E-11 | -7.11 | 15.0211714 | -8.02E-02 | 65930618  | 65930741  | NC_000010.10 |
| cg20335309     | 2.74E-10 | 2.08E-11 | -7.11 | 15.0210304 | -1.22E-01 | 22899442  | 22899565  | NC_000001.10 |
| cg20947849     | 2.75E-10 | 2.09E-11 | -7.11 | 15.0196001 | -1.22E-01 | 7514232   | 7514355   | NC_000001.10 |
| cg16299747     | 2.75E-10 | 2.09E-11 | -7.11 | 15.0172388 | -1.20E-01 | 118429952 | 118430075 | NC_000010.10 |
| cg15963417     | 2.76E-10 | 2.09E-11 | -7.11 | 15.0163899 | -9.74E-02 | 103311300 | 103311423 | NC_000012.11 |
| cg08337633     | 2.76E-10 | 2.09E-11 | -7.11 | 15.0158772 | -2.09E-01 | 55602109  | 55602232  | NC_000007.13 |

|            |          |          |       |            |           |           |           |              |
|------------|----------|----------|-------|------------|-----------|-----------|-----------|--------------|
| cg17073733 | 2.76E-10 | 2.09E-11 | -7.11 | 15.0158428 | -5.49E-02 | 49374657  | 49374780  | NC_000012.11 |
| cg21252523 | 2.76E-10 | 2.09E-11 | -7.11 | 15.0156605 | -1.11E-01 | 27254071  | 27254194  | NC_000007.13 |
| cg19140928 | 2.76E-10 | 2.09E-11 | -7.11 | 15.0154804 | -1.36E-01 | 187632328 | 187632451 | NC_000003.11 |
| cg22328837 | 2.76E-10 | 2.10E-11 | -7.11 | 15.0137032 | -1.76E-01 | 45422120  | 45422243  | NC_000006.11 |
| cg16614638 | 2.76E-10 | 2.10E-11 | -7.11 | 15.0132505 | -4.09E-02 | 34073070  | 34073193  | NC_000011.9  |
| cg27150476 | 2.77E-10 | 2.10E-11 | -7.11 | 15.0126384 | -1.03E-01 | 1844878   | 1845001   | NC_000004.11 |
| cg18196453 | 2.77E-10 | 2.10E-11 | -7.11 | 15.011765  | -1.49E-01 | 125334555 | 125334678 | NC_000006.11 |
| cg00332146 | 2.77E-10 | 2.10E-11 | -7.11 | 15.0114908 | -1.38E-01 | 175975901 | 175976024 | NC_000005.9  |
| cg12177551 | 2.77E-10 | 2.10E-11 | -7.11 | 15.0110633 | -3.19E-02 | 65190180  | 65190303  | NC_000011.9  |
| cg27405706 | 2.77E-10 | 2.11E-11 | -7.11 | 15.0096145 | -1.28E-01 | 43786824  | 43786947  | NC_000021.8  |
| cg19791221 | 2.77E-10 | 2.11E-11 | -7.11 | 15.0094148 | -1.56E-01 | 36168288  | 36168411  | NC_000021.8  |
| cg01512084 | 2.78E-10 | 2.11E-11 | -7.11 | 15.0077566 | -1.03E-01 | 45754232  | 45754355  | NC_000021.8  |
| cg12270485 | 2.78E-10 | 2.11E-11 | -7.11 | 15.0077264 | -1.08E-01 | 130299947 | 130300070 | NC_000011.9  |
| cg02897366 | 2.78E-10 | 2.11E-11 | -7.11 | 15.0074272 | -1.41E-01 | 201425990 | 201426113 | NC_000001.10 |
| cg24902478 | 2.78E-10 | 2.11E-11 | -7.11 | 15.0073891 | -1.17E-01 | 78241621  | 78241744  | NC_000012.11 |
| cg26477856 | 2.79E-10 | 2.12E-11 | -7.11 | 15.0050318 | -1.38E-01 | 56324915  | 56325038  | NC_000012.11 |
| cg13505631 | 2.79E-10 | 2.12E-11 | -7.11 | 15.0047325 | -1.44E-01 | 127018840 | 127018963 | NC_000009.11 |
| cg19473989 | 2.80E-10 | 2.12E-11 | -7.11 | 15.0017838 | -1.38E-01 | 7912384   | 7912507   | NC_000004.11 |
| cg08398147 | 2.80E-10 | 2.12E-11 | -7.11 | 15.0013715 | -5.85E-02 | 99766376  | 99766499  | NC_000007.13 |
| cg01862418 | 2.80E-10 | 2.12E-11 | -7.11 | 15.001312  | -3.46E-02 | 105953145 | 105953268 | NC_000014.8  |
| cg14879279 | 2.80E-10 | 2.13E-11 | -7.11 | 14.9997768 | -1.07E-01 | 68427020  | 68427143  | NC_000011.9  |
| cg26053526 | 2.80E-10 | 2.13E-11 | -7.11 | 14.9992295 | -9.32E-02 | 18609735  | 18609858  | NC_000001.10 |
| cg19293162 | 2.80E-10 | 2.13E-11 | -7.11 | 14.9992212 | -1.03E-01 | 2513302   | 2513425   | NC_000019.9  |
| cg13862851 | 2.80E-10 | 2.13E-11 | -7.11 | 14.9989672 | -9.31E-02 | 233791890 | 233792013 | NC_000002.11 |
| cg18295536 | 2.80E-10 | 2.13E-11 | -7.11 | 14.9984205 | -3.34E-02 | 137090169 | 137090292 | NC_000005.9  |

|                |          |          |       |            |           |           |           |              |
|----------------|----------|----------|-------|------------|-----------|-----------|-----------|--------------|
| cg14313833     | 2.81E-10 | 2.13E-11 | -7.11 | 14.9969338 | -9.86E-02 | 107666037 | 107666160 | NC_000009.11 |
| cg26119740     | 2.81E-10 | 2.14E-11 | -7.11 | 14.9948239 | -5.16E-02 | 73881915  | 73882038  | NC_000011.9  |
| cg18168672     | 2.81E-10 | 2.14E-11 | -7.11 | 14.9947981 | -8.11E-02 | 61905223  | 61905346  | NC_000020.10 |
| cg21799473     | 2.82E-10 | 2.14E-11 | -7.11 | 14.9938187 | -1.24E-01 | 31127379  | 31127502  | NC_000006.11 |
| cg27425383     | 2.82E-10 | 2.14E-11 | -7.11 | 14.9931987 | -1.19E-01 | 125776273 | 125776396 | NC_000003.11 |
| cg05310309     | 2.82E-10 | 2.14E-11 | -7.11 | 14.992704  | -1.86E-01 | 109257429 | 109257552 | NC_000002.11 |
| cg16836589     | 2.82E-10 | 2.15E-11 | -7.11 | 14.9909199 | -6.41E-02 | 30303674  | 30303797  | NC_000019.9  |
| cg23162310     | 2.82E-10 | 2.15E-11 | -7.11 | 14.9906452 | -4.89E-02 | 172199255 | 172199378 | NC_000005.9  |
| cg00151251     | 2.83E-10 | 2.15E-11 | -7.11 | 14.9899877 | -1.73E-01 | 198173194 | 198173317 | NC_000002.11 |
| cg20786367     | 2.83E-10 | 2.15E-11 | -7.11 | 14.9893183 | -8.14E-02 | 49395925  | 49396048  | NC_000003.11 |
| cg13847640     | 2.83E-10 | 2.15E-11 | -7.11 | 14.9885967 | -8.66E-02 | 87035982  | 87036105  | NC_000002.11 |
| cg02055963     | 2.83E-10 | 2.15E-11 | -7.11 | 14.9880573 | -1.10E-01 | 28543520  | 28543643  | NC_000013.10 |
| cg19016694     | 2.83E-10 | 2.16E-11 | -7.11 | 14.9874265 | -1.30E-01 | 80821826  | 80821949  | NC_000017.10 |
| cg18173859     | 2.84E-10 | 2.16E-11 | -7.11 | 14.9837322 | -1.41E-01 | 202091160 | 202091283 | NC_000001.10 |
| cg14095850     | 2.85E-10 | 2.17E-11 | -7.11 | 14.9824962 | -6.81E-02 | 45196584  | 45196707  | NC_000021.8  |
| cg21528620     | 2.85E-10 | 2.17E-11 | -7.11 | 14.9819399 | -4.17E-02 | 110753221 | 110753344 | NC_000001.10 |
| cg12865818     | 2.85E-10 | 2.17E-11 | -7.11 | 14.9816015 | -1.68E-01 | 96126599  | 96126722  | NC_000008.10 |
| cg12584100     | 2.85E-10 | 2.17E-11 | -7.11 | 14.9815051 | -2.26E-01 | 3023894   | 3024017   | NC_000006.11 |
| cg26606789     | 2.85E-10 | 2.17E-11 | -7.11 | 14.9812055 | -1.03E-01 | 44253219  | 44253342  | NC_000021.8  |
| cg11936145     | 2.85E-10 | 2.17E-11 | -7.11 | 14.9800333 | -2.69E-02 | 142297737 | 142297860 | NC_000003.11 |
| cg06915722     | 2.86E-10 | 2.18E-11 | -7.11 | 14.9776486 | -3.37E-02 | 65454554  | 65454677  | NC_000002.11 |
| cg23933216     | 2.86E-10 | 2.18E-11 | -7.11 | 14.9773694 | -7.82E-02 | 145059467 | 145059590 | NC_000001.10 |
| cg24401490     | 2.86E-10 | 2.18E-11 | -7.11 | 14.9772618 | -3.48E-02 | 159483186 | 159483309 | NC_000003.11 |
| cg14694075     | 2.86E-10 | 2.18E-11 | -7.11 | 14.9765661 | -1.23E-01 | 36059830  | 36059953  | NC_000017.10 |
| ch.19.1348515F | 2.87E-10 | 2.18E-11 | -7.11 | 14.9750603 | -1.51E-02 | 41779996  | 41780119  | NC_000019.9  |

|            |          |          |       |            |           |           |           |              |
|------------|----------|----------|-------|------------|-----------|-----------|-----------|--------------|
| cg23730109 | 2.87E-10 | 2.19E-11 | -7.11 | 14.9738175 | -1.22E-01 | 73731100  | 73731223  | NC_000003.11 |
| cg07241090 | 2.87E-10 | 2.19E-11 | -7.11 | 14.973576  | -1.71E-01 | 124864594 | 124864717 | NC_000012.11 |
| cg00652846 | 2.88E-10 | 2.19E-11 | -7.11 | 14.971756  | -1.60E-01 | 112934087 | 112934210 | NC_000003.11 |
| cg04762615 | 2.88E-10 | 2.19E-11 | -7.11 | 14.9703076 | -6.34E-02 | 7541788   | 7541911   | NC_000006.11 |
| cg00645593 | 2.88E-10 | 2.20E-11 | -7.1  | 14.9687327 | -5.19E-02 | 35930499  | 35930622  | NC_000010.10 |
| cg09216236 | 2.88E-10 | 2.20E-11 | -7.1  | 14.9684695 | -9.38E-02 | 65719627  | 65719750  | NC_000001.10 |
| cg24657687 | 2.89E-10 | 2.20E-11 | -7.1  | 14.9672867 | -1.55E-02 | 69707291  | 69707414  | NC_000015.9  |
| cg25275331 | 2.90E-10 | 2.21E-11 | -7.1  | 14.9647335 | -6.35E-02 | 40723935  | 40724058  | NC_000001.10 |
| cg14417329 | 2.90E-10 | 2.21E-11 | -7.1  | 14.9617681 | -1.39E-01 | 80186273  | 80186396  | NC_000017.10 |
| cg18103836 | 2.91E-10 | 2.22E-11 | -7.1  | 14.9599923 | -1.11E-01 | 2877211   | 2877334   | NC_000006.11 |
| cg00792966 | 2.91E-10 | 2.22E-11 | -7.1  | 14.9577781 | -2.30E-02 | 21595983  | 21596106  | NC_000006.11 |
| cg27292547 | 2.91E-10 | 2.22E-11 | -7.1  | 14.957696  | -1.47E-01 | 1672440   | 1672563   | NC_000012.11 |
| cg13831124 | 2.92E-10 | 2.22E-11 | -7.1  | 14.9562062 | -8.12E-02 | 220253143 | 220253266 | NC_000002.11 |
| cg14789529 | 2.93E-10 | 2.23E-11 | -7.1  | 14.9524183 | -9.49E-02 | 206941464 | 206941587 | NC_000001.10 |
| cg11915218 | 2.93E-10 | 2.24E-11 | -7.1  | 14.9516432 | -4.44E-02 | 40335849  | 40335972  | NC_000017.10 |
| cg24127278 | 2.93E-10 | 2.24E-11 | -7.1  | 14.9506144 | -6.93E-02 | 27009715  | 27009838  | NC_000002.11 |
| cg01241018 | 2.94E-10 | 2.24E-11 | -7.1  | 14.9504402 | -3.21E-02 | 33176386  | 33176509  | NC_000006.11 |
| cg04132472 | 2.94E-10 | 2.24E-11 | -7.1  | 14.9499882 | -7.90E-02 | 19861366  | 19861489  | NC_000017.10 |
| cg09757158 | 2.94E-10 | 2.24E-11 | -7.1  | 14.9473654 | -1.38E-01 | 444632    | 444755    | NC_000002.11 |
| cg21667069 | 2.94E-10 | 2.24E-11 | -7.1  | 14.9473304 | -1.44E-01 | 67778641  | 67778764  | NC_000011.9  |
| cg22576236 | 2.94E-10 | 2.25E-11 | -7.1  | 14.9472129 | -1.32E-01 | 1166933   | 1167056   | NC_000004.11 |
| cg15410675 | 2.96E-10 | 2.26E-11 | -7.1  | 14.9428146 | -1.84E-01 | 154144800 | 154144923 | NC_000004.11 |
| cg06135480 | 2.96E-10 | 2.26E-11 | -7.1  | 14.9423518 | -3.99E-02 | 85644718  | 85644841  | NC_000016.9  |
| cg26742275 | 2.97E-10 | 2.26E-11 | -7.1  | 14.9390238 | -1.44E-01 | 99971423  | 99971546  | NC_000015.9  |
| cg05202204 | 2.97E-10 | 2.26E-11 | -7.1  | 14.9389639 | -1.51E-01 | 38460950  | 38461073  | NC_000001.10 |



|            |          |          |      |            |           |           |           |              |
|------------|----------|----------|------|------------|-----------|-----------|-----------|--------------|
| cg21735384 | 2.97E-10 | 2.26E-11 | -7.1 | 14.9389512 | -1.36E-01 | 79304613  | 79304736  | NC_000017.10 |
| cg15239904 | 2.97E-10 | 2.27E-11 | -7.1 | 14.9385569 | -1.05E-01 | 55901954  | 55902077  | NC_000020.10 |
| cg06015993 | 2.97E-10 | 2.27E-11 | -7.1 | 14.9379581 | -7.05E-02 | 54755599  | 54755722  | NC_000004.11 |
| cg21218883 | 2.97E-10 | 2.27E-11 | -7.1 | 14.9373784 | -9.81E-02 | 46378287  | 46378410  | NC_000002.11 |
| cg25424299 | 2.98E-10 | 2.27E-11 | -7.1 | 14.9356266 | -1.22E-01 | 13319638  | 13319761  | NC_000003.11 |
| cg15219320 | 2.98E-10 | 2.27E-11 | -7.1 | 14.9349935 | -6.95E-02 | 139090356 | 139090479 | NC_000005.9  |
| cg12797987 | 2.99E-10 | 2.28E-11 | -7.1 | 14.9321827 | -1.61E-01 | 42908205  | 42908328  | NC_000013.10 |
| cg16719560 | 2.99E-10 | 2.28E-11 | -7.1 | 14.9321437 | -1.85E-01 | 85811421  | 85811544  | NC_000002.11 |
| cg26435198 | 2.99E-10 | 2.28E-11 | -7.1 | 14.9316824 | -1.24E-01 | 10703283  | 10703406  | NC_000016.9  |
| cg16024133 | 2.99E-10 | 2.28E-11 | -7.1 | 14.931627  | -1.93E-02 | 2733136   | 2733259   | NC_000020.10 |
| cg18605031 | 3.00E-10 | 2.29E-11 | -7.1 | 14.9277675 | -1.20E-01 | 49314155  | 49314278  | NC_000003.11 |
| cg04366385 | 3.00E-10 | 2.29E-11 | -7.1 | 14.9265277 | -6.57E-02 | 78980382  | 78980505  | NC_000004.11 |
| cg09566392 | 3.01E-10 | 2.30E-11 | -7.1 | 14.9245346 | -5.82E-02 | 11295383  | 11295506  | NC_000002.11 |
| cg00435692 | 3.01E-10 | 2.30E-11 | -7.1 | 14.9237582 | -1.76E-01 | 71999487  | 71999610  | NC_000015.9  |
| cg02088785 | 3.01E-10 | 2.30E-11 | -7.1 | 14.9227322 | -1.49E-01 | 99223336  | 99223459  | NC_000013.10 |
| cg27013360 | 3.02E-10 | 2.30E-11 | -7.1 | 14.9223463 | -6.86E-02 | 41040518  | 41040641  | NC_000006.11 |
| cg23729443 | 3.02E-10 | 2.30E-11 | -7.1 | 14.922265  | -1.26E-01 | 156211840 | 156211963 | NC_000001.10 |
| cg10616974 | 3.02E-10 | 2.30E-11 | -7.1 | 14.9221053 | -1.94E-01 | 74511719  | 74511842  | NC_000017.10 |
| cg08327690 | 3.02E-10 | 2.31E-11 | -7.1 | 14.9198388 | -1.77E-01 | 720859    | 720982    | NC_000011.9  |
| cg26314240 | 3.03E-10 | 2.31E-11 | -7.1 | 14.9182002 | -1.16E-01 | 45599468  | 45599591  | NC_000011.9  |
| cg01359822 | 3.03E-10 | 2.31E-11 | -7.1 | 14.9178307 | -1.47E-01 | 40176597  | 40176720  | NC_000021.8  |
| cg06310712 | 3.03E-10 | 2.31E-11 | -7.1 | 14.9173    | -1.60E-01 | 79104782  | 79104905  | NC_000017.10 |
| cg06994589 | 3.03E-10 | 2.32E-11 | -7.1 | 14.9159904 | -8.74E-02 | 11771376  | 11771499  | NC_000001.10 |
| cg18118198 | 3.04E-10 | 2.32E-11 | -7.1 | 14.9153965 | -1.39E-01 | 25100740  | 25100863  | NC_000014.8  |
| cg05578030 | 3.04E-10 | 2.32E-11 | -7.1 | 14.9147361 | -3.35E-02 | 104681435 | 104681558 | NC_000012.11 |

|            |          |          |       |            |           |           |           |              |
|------------|----------|----------|-------|------------|-----------|-----------|-----------|--------------|
| cg11692403 | 3.04E-10 | 2.32E-11 | -7.1  | 14.9140426 | -9.72E-02 | 72191087  | 72191210  | NC_000010.10 |
| cg15487251 | 3.04E-10 | 2.33E-11 | -7.09 | 14.9126834 | -1.30E-01 | 185544216 | 185544339 | NC_000003.11 |
| cg16908740 | 3.05E-10 | 2.33E-11 | -7.09 | 14.9105556 | -1.36E-01 | 152118444 | 152118567 | NC_000001.10 |
| cg05979457 | 3.05E-10 | 2.33E-11 | -7.09 | 14.909272  | -2.12E-01 | 105373628 | 105373751 | NC_000008.10 |
| cg25316569 | 3.06E-10 | 2.34E-11 | -7.09 | 14.9083153 | -7.03E-02 | 120530952 | 120531075 | NC_000011.9  |
| cg12806521 | 3.06E-10 | 2.34E-11 | -7.09 | 14.9072122 | -4.60E-02 | 6677729   | 6677852   | NC_000012.11 |
| cg19130824 | 3.07E-10 | 2.34E-11 | -7.09 | 14.904982  | -1.27E-01 | 122589969 | 122590092 | NC_000004.11 |
| cg23514211 | 3.07E-10 | 2.34E-11 | -7.09 | 14.9045326 | -7.63E-02 | 79304188  | 79304311  | NC_000017.10 |
| cg27000534 | 3.07E-10 | 2.34E-11 | -7.09 | 14.9045171 | -2.05E-01 | 105126571 | 105126694 | NC_000014.8  |
| cg13806031 | 3.07E-10 | 2.35E-11 | -7.09 | 14.9039099 | -6.04E-02 | 103454441 | 103454564 | NC_000010.10 |
| cg07151406 | 3.07E-10 | 2.35E-11 | -7.09 | 14.9026921 | -9.32E-02 | 99185290  | 99185413  | NC_000010.10 |
| cg00619628 | 3.08E-10 | 2.35E-11 | -7.09 | 14.9018892 | -1.07E-01 | 151258451 | 151258574 | NC_000006.11 |
| cg19789473 | 3.08E-10 | 2.35E-11 | -7.09 | 14.9012044 | -8.61E-02 | 27170043  | 27170166  | NC_000017.10 |
| cg05332270 | 3.08E-10 | 2.35E-11 | -7.09 | 14.9008718 | -6.63E-02 | 37384401  | 37384524  | NC_000002.11 |
| cg16932827 | 3.08E-10 | 2.35E-11 | -7.09 | 14.9007878 | -1.67E-01 | 193988639 | 193988762 | NC_000003.11 |
| cg24324755 | 3.08E-10 | 2.35E-11 | -7.09 | 14.9004405 | -5.59E-02 | 44115813  | 44115936  | NC_000001.10 |
| cg07919145 | 3.09E-10 | 2.36E-11 | -7.09 | 14.8984157 | -1.08E-01 | 39780408  | 39780531  | NC_000022.10 |
| cg13538865 | 3.09E-10 | 2.36E-11 | -7.09 | 14.8977478 | -4.81E-02 | 7538373   | 7538496   | NC_000008.10 |
| cg19256236 | 3.10E-10 | 2.37E-11 | -7.09 | 14.8946271 | -7.95E-02 | 49932216  | 49932339  | NC_000012.11 |
| cg11621113 | 3.10E-10 | 2.37E-11 | -7.09 | 14.8943604 | -9.13E-02 | 12776725  | 12776848  | NC_000019.9  |
| cg05520308 | 3.10E-10 | 2.37E-11 | -7.09 | 14.8919613 | -6.04E-02 | 77904256  | 77904379  | NC_000017.10 |
| cg15460093 | 3.11E-10 | 2.38E-11 | -7.09 | 14.8907034 | -1.68E-01 | 135090381 | 135090504 | NC_000010.10 |
| cg01768433 | 3.11E-10 | 2.38E-11 | -7.09 | 14.890473  | -1.42E-01 | 90185030  | 90185153  | NC_000005.9  |
| cg00194681 | 3.11E-10 | 2.38E-11 | -7.09 | 14.8887416 | -2.90E-02 | 124428640 | 124428763 | NC_000008.10 |
| cg01902704 | 3.12E-10 | 2.38E-11 | -7.09 | 14.8882174 | -1.18E-01 | 24999103  | 24999226  | NC_000016.9  |

|               |          |          |       |            |           |           |           |              |
|---------------|----------|----------|-------|------------|-----------|-----------|-----------|--------------|
| cg22436103    | 3.12E-10 | 2.38E-11 | -7.09 | 14.8880138 | -7.09E-02 | 159705548 | 159705671 | NC_000002.11 |
| cg22380652    | 3.12E-10 | 2.39E-11 | -7.09 | 14.8868315 | -3.67E-02 | 43389667  | 43389790  | NC_000001.10 |
| cg18426009    | 3.12E-10 | 2.39E-11 | -7.09 | 14.8866136 | -7.62E-02 | 75013471  | 75013594  | NC_000005.9  |
| cg12377816    | 3.12E-10 | 2.39E-11 | -7.09 | 14.8863988 | -1.37E-01 | 58758818  | 58758941  | NC_000012.11 |
| cg07179617    | 3.12E-10 | 2.39E-11 | -7.09 | 14.8863272 | -5.17E-02 | 33257475  | 33257598  | NC_000006.11 |
| cg01510278    | 3.13E-10 | 2.39E-11 | -7.09 | 14.8842685 | -1.87E-01 | 11456238  | 11456361  | NC_000016.9  |
| cg14236862    | 3.13E-10 | 2.39E-11 | -7.09 | 14.8840351 | -5.56E-02 | 43133935  | 43134058  | NC_000010.10 |
| cg01077846    | 3.13E-10 | 2.40E-11 | -7.09 | 14.8830049 | -2.08E-01 | 18499128  | 18499251  | NC_000019.9  |
| cg10777347    | 3.13E-10 | 2.40E-11 | -7.09 | 14.8821688 | -1.42E-01 | 87556005  | 87556128  | NC_000007.13 |
| cg12241367    | 3.13E-10 | 2.40E-11 | -7.09 | 14.8818463 | -5.75E-02 | 13203349  | 13203472  | NC_000010.10 |
| cg11386376    | 3.13E-10 | 2.40E-11 | -7.09 | 14.8817423 | -7.26E-02 | 55106106  | 55106229  | NC_000001.10 |
| ch.6.945235F  | 3.13E-10 | 2.40E-11 | -7.09 | 14.881635  | -1.64E-02 | 38099503  | 38099626  | NC_000006.11 |
| cg14071496    | 3.14E-10 | 2.40E-11 | -7.09 | 14.8803825 | -4.93E-02 | 14322503  | 14322626  | NC_000009.11 |
| cg09533087    | 3.14E-10 | 2.41E-11 | -7.09 | 14.879533  | -6.45E-02 | 436965    | 437088    | NC_000008.10 |
| cg02012159    | 3.15E-10 | 2.41E-11 | -7.09 | 14.8776125 | -1.48E-01 | 229477078 | 229477201 | NC_000001.10 |
| cg13500388    | 3.15E-10 | 2.41E-11 | -7.09 | 14.8770589 | -1.03E-01 | 67062135  | 67062258  | NC_000016.9  |
| cg17333886    | 3.15E-10 | 2.41E-11 | -7.09 | 14.8768224 | -1.42E-01 | 711676    | 711799    | NC_000010.10 |
| cg16029838    | 3.15E-10 | 2.41E-11 | -7.09 | 14.8762965 | -5.71E-02 | 44530503  | 44530626  | NC_000007.13 |
| cg23184556    | 3.15E-10 | 2.41E-11 | -7.09 | 14.8760651 | -1.27E-01 | 123600215 | 123600338 | NC_000003.11 |
| cg10175203    | 3.15E-10 | 2.42E-11 | -7.09 | 14.8754639 | -1.65E-01 | 128143634 | 128143757 | NC_000003.11 |
| cg08539067    | 3.15E-10 | 2.42E-11 | -7.09 | 14.8752714 | -9.90E-02 | 49395985  | 49396108  | NC_000003.11 |
| cg01920536    | 3.16E-10 | 2.42E-11 | -7.09 | 14.8747532 | -7.99E-02 | 39222754  | 39222877  | NC_000003.11 |
| cg12988996    | 3.16E-10 | 2.42E-11 | -7.09 | 14.8746482 | -3.11E-02 | 37828944  | 37829067  | NC_000004.11 |
| cg01124539    | 3.16E-10 | 2.42E-11 | -7.09 | 14.873202  | -1.39E-01 | 132312108 | 132312231 | NC_000009.11 |
| ch.1.2988325R | 3.16E-10 | 2.42E-11 | -7.09 | 14.8731818 | -4.93E-02 | 154222154 | 154222277 | NC_000001.10 |

|            |          |          |       |            |           |           |           |              |
|------------|----------|----------|-------|------------|-----------|-----------|-----------|--------------|
| cg01104250 | 3.16E-10 | 2.42E-11 | -7.09 | 14.8729353 | -1.35E-01 | 57567919  | 57568042  | NC_000016.9  |
| cg02352281 | 3.16E-10 | 2.42E-11 | -7.09 | 14.8722411 | -1.86E-01 | 46139305  | 46139428  | NC_000003.11 |
| cg04719634 | 3.16E-10 | 2.42E-11 | -7.09 | 14.8719499 | -1.57E-01 | 73872294  | 73872417  | NC_000005.9  |
| cg12035827 | 3.17E-10 | 2.43E-11 | -7.09 | 14.871338  | -3.69E-02 | 10855226  | 10855349  | NC_000001.10 |
| cg25381747 | 3.17E-10 | 2.43E-11 | -7.09 | 14.8710686 | -1.44E-01 | 115425899 | 115426022 | NC_000010.10 |
| cg24599650 | 3.17E-10 | 2.43E-11 | -7.09 | 14.8702408 | -9.85E-02 | 146015804 | 146015927 | NC_000008.10 |
| cg17510320 | 3.17E-10 | 2.43E-11 | -7.09 | 14.8693923 | -4.31E-02 | 66360559  | 66360682  | NC_000011.9  |
| cg11272232 | 3.17E-10 | 2.43E-11 | -7.09 | 14.869287  | -8.80E-02 | 38794814  | 38794937  | NC_000019.9  |
| cg01618851 | 3.17E-10 | 2.43E-11 | -7.09 | 14.8681614 | -8.66E-02 | 7812265   | 7812388   | NC_000019.9  |
| cg12290217 | 3.18E-10 | 2.44E-11 | -7.09 | 14.8656434 | -1.54E-01 | 99563030  | 99563153  | NC_000015.9  |
| cg24726705 | 3.19E-10 | 2.44E-11 | -7.09 | 14.8645142 | -9.44E-02 | 80799910  | 80800033  | NC_000015.9  |
| cg11424962 | 3.19E-10 | 2.44E-11 | -7.09 | 14.864335  | -6.47E-02 | 42383900  | 42384023  | NC_000001.10 |
| cg16837338 | 3.19E-10 | 2.45E-11 | -7.09 | 14.863087  | -1.14E-01 | 122018770 | 122018893 | NC_000012.11 |
| cg04337651 | 3.19E-10 | 2.45E-11 | -7.09 | 14.8622346 | -9.25E-02 | 239344738 | 239344861 | NC_000002.11 |
| cg18325315 | 3.19E-10 | 2.45E-11 | -7.09 | 14.8617966 | -1.66E-01 | 73897230  | 73897353  | NC_000007.13 |
| cg00919126 | 3.20E-10 | 2.45E-11 | -7.09 | 14.8611396 | -1.63E-01 | 187761401 | 187761524 | NC_000004.11 |
| cg11790417 | 3.20E-10 | 2.45E-11 | -7.09 | 14.8603875 | -1.26E-01 | 67089009  | 67089132  | NC_000005.9  |
| cg01286319 | 3.20E-10 | 2.45E-11 | -7.09 | 14.8600178 | -1.23E-01 | 2695343   | 2695466   | NC_000019.9  |
| cg08585351 | 3.21E-10 | 2.46E-11 | -7.09 | 14.8579937 | -6.36E-02 | 22178326  | 22178449  | NC_000013.10 |
| cg03613942 | 3.21E-10 | 2.46E-11 | -7.09 | 14.8575885 | -1.52E-01 | 86416413  | 86416536  | NC_000005.9  |
| cg15353612 | 3.21E-10 | 2.46E-11 | -7.09 | 14.856974  | -8.64E-02 | 52904965  | 52905088  | NC_000004.11 |
| cg08570034 | 3.21E-10 | 2.46E-11 | -7.08 | 14.8558682 | -1.33E-01 | 175227702 | 175227825 | NC_000005.9  |
| cg02405193 | 3.21E-10 | 2.46E-11 | -7.08 | 14.8554023 | -1.72E-01 | 3639839   | 3639962   | NC_000016.9  |
| cg22115994 | 3.21E-10 | 2.47E-11 | -7.08 | 14.8551383 | -1.40E-01 | 44834701  | 44834824  | NC_000021.8  |
| cg04584872 | 3.21E-10 | 2.47E-11 | -7.08 | 14.8551299 | -1.35E-01 | 109126397 | 109126520 | NC_000012.11 |

|            |          |          |       |            |           |           |           |              |
|------------|----------|----------|-------|------------|-----------|-----------|-----------|--------------|
| cg07803218 | 3.21E-10 | 2.47E-11 | -7.08 | 14.8548067 | -1.62E-01 | 49346624  | 49346747  | NC_000020.10 |
| cg08675364 | 3.22E-10 | 2.47E-11 | -7.08 | 14.8542137 | -1.78E-01 | 85362963  | 85363086  | NC_000016.9  |
| cg10965749 | 3.22E-10 | 2.47E-11 | -7.08 | 14.8530881 | -1.49E-01 | 54619895  | 54620018  | NC_000001.10 |
| cg16526047 | 3.22E-10 | 2.47E-11 | -7.08 | 14.8529235 | -1.15E-01 | 949893    | 950016    | NC_000001.10 |
| cg20289854 | 3.22E-10 | 2.47E-11 | -7.08 | 14.8526182 | -1.42E-01 | 247457841 | 247457964 | NC_000001.10 |
| cg03511638 | 3.22E-10 | 2.47E-11 | -7.08 | 14.8525082 | -5.51E-02 | 104180870 | 104180993 | NC_000010.10 |
| cg01888441 | 3.22E-10 | 2.47E-11 | -7.08 | 14.8524423 | -5.36E-02 | 102313988 | 102314111 | NC_000002.11 |
| cg08695724 | 3.22E-10 | 2.47E-11 | -7.08 | 14.8523373 | -3.91E-02 | 95527179  | 95527302  | NC_000009.11 |
| cg08607533 | 3.22E-10 | 2.47E-11 | -7.08 | 14.8519705 | -4.49E-02 | 132991766 | 132991889 | NC_000012.11 |
| cg05498379 | 3.22E-10 | 2.47E-11 | -7.08 | 14.8516806 | -6.68E-02 | 28821244  | 28821367  | NC_000010.10 |
| cg05926640 | 3.23E-10 | 2.48E-11 | -7.08 | 14.8497297 | -1.62E-01 | 235091187 | 235091310 | NC_000001.10 |
| cg11483105 | 3.23E-10 | 2.48E-11 | -7.08 | 14.8492227 | -1.42E-01 | 90515572  | 90515695  | NC_000005.9  |
| cg03592345 | 3.23E-10 | 2.48E-11 | -7.08 | 14.8489182 | -1.25E-01 | 76645123  | 76645246  | NC_000006.11 |
| cg13172906 | 3.24E-10 | 2.48E-11 | -7.08 | 14.8477309 | -1.63E-01 | 143694295 | 143694418 | NC_000008.10 |
| cg00965133 | 3.24E-10 | 2.49E-11 | -7.08 | 14.8466886 | -1.40E-01 | 36157577  | 36157700  | NC_000020.10 |
| cg26811385 | 3.25E-10 | 2.49E-11 | -7.08 | 14.8435515 | -8.04E-02 | 150832003 | 150832126 | NC_000004.11 |
| cg04148163 | 3.25E-10 | 2.50E-11 | -7.08 | 14.8433359 | -1.39E-01 | 65442289  | 65442412  | NC_000010.10 |
| cg12062198 | 3.25E-10 | 2.50E-11 | -7.08 | 14.8432282 | -8.08E-02 | 22419460  | 22419583  | NC_000008.10 |
| cg04510919 | 3.25E-10 | 2.50E-11 | -7.08 | 14.84233   | -1.69E-01 | 7282819   | 7282942   | NC_000004.11 |
| cg19711724 | 3.25E-10 | 2.50E-11 | -7.08 | 14.8417572 | -4.84E-02 | 19188166  | 19188289  | NC_000003.11 |
| cg04128307 | 3.25E-10 | 2.50E-11 | -7.08 | 14.8416712 | -9.28E-02 | 75018930  | 75019053  | NC_000016.9  |
| cg01962509 | 3.25E-10 | 2.50E-11 | -7.08 | 14.8415904 | -3.17E-02 | 232479195 | 232479318 | NC_000002.11 |
| cg19454081 | 3.25E-10 | 2.50E-11 | -7.08 | 14.8413263 | -1.04E-01 | 152593563 | 152593686 | NC_000007.13 |
| cg10885988 | 3.26E-10 | 2.50E-11 | -7.08 | 14.8408032 | -5.20E-02 | 68454903  | 68455026  | NC_000009.11 |
| cg01541846 | 3.26E-10 | 2.51E-11 | -7.08 | 14.8386023 | -1.34E-01 | 16272242  | 16272365  | NC_000019.9  |

|                 |          |          |       |            |           |           |           |              |
|-----------------|----------|----------|-------|------------|-----------|-----------|-----------|--------------|
| cg08096684      | 3.26E-10 | 2.51E-11 | -7.08 | 14.838423  | -1.65E-01 | 56708199  | 56708322  | NC_000004.11 |
| cg22761315      | 3.27E-10 | 2.51E-11 | -7.08 | 14.8356916 | -4.00E-02 | 40075054  | 40075177  | NC_000015.9  |
| cg05493580      | 3.27E-10 | 2.52E-11 | -7.08 | 14.8351897 | -1.99E-01 | 23569664  | 23569787  | NC_000010.10 |
| cg22907295      | 3.28E-10 | 2.52E-11 | -7.08 | 14.833664  | -1.42E-01 | 84659234  | 84659357  | NC_000011.9  |
| cg19385321      | 3.28E-10 | 2.52E-11 | -7.08 | 14.8334032 | -5.84E-02 | 132314041 | 132314164 | NC_000012.11 |
| cg03368358      | 3.28E-10 | 2.52E-11 | -7.08 | 14.8330471 | -1.26E-01 | 3820044   | 3820167   | NC_000017.10 |
| cg27370104      | 3.29E-10 | 2.53E-11 | -7.08 | 14.8298192 | -1.48E-01 | 42417938  | 42418061  | NC_000006.11 |
| cg00283986      | 3.29E-10 | 2.53E-11 | -7.08 | 14.8288849 | -1.13E-01 | 20875062  | 20875185  | NC_000002.11 |
| cg23193730      | 3.30E-10 | 2.54E-11 | -7.08 | 14.8273509 | -3.59E-02 | 133657550 | 133657673 | NC_000012.11 |
| cg17808646      | 3.30E-10 | 2.54E-11 | -7.08 | 14.8270238 | -4.04E-02 | 207226112 | 207226235 | NC_000001.10 |
| cg23028436      | 3.30E-10 | 2.54E-11 | -7.08 | 14.8268209 | -3.83E-02 | 27396983  | 27397106  | NC_000012.11 |
| cg27632959      | 3.30E-10 | 2.54E-11 | -7.08 | 14.826766  | -1.01E-01 | 35220839  | 35220962  | NC_000001.10 |
| cg03152187      | 3.30E-10 | 2.54E-11 | -7.08 | 14.8262482 | -1.43E-01 | 75417165  | 75417288  | NC_000017.10 |
| cg25468169      | 3.30E-10 | 2.54E-11 | -7.08 | 14.8257866 | -7.50E-02 | 195481    | 195604    | NC_000008.10 |
| cg01224063      | 3.30E-10 | 2.54E-11 | -7.08 | 14.8253888 | -1.66E-01 | 99395633  | 99395756  | NC_000015.9  |
| cg27009246      | 3.31E-10 | 2.54E-11 | -7.08 | 14.8249547 | -1.72E-01 | 5276490   | 5276613   | NC_000011.9  |
| cg09227144      | 3.31E-10 | 2.55E-11 | -7.08 | 14.823213  | -1.73E-01 | 73021344  | 73021467  | NC_000007.13 |
| cg04561791      | 3.31E-10 | 2.55E-11 | -7.08 | 14.822764  | -1.25E-01 | 85478769  | 85478892  | NC_000016.9  |
| cg19646538      | 3.31E-10 | 2.55E-11 | -7.08 | 14.8226575 | -4.66E-02 | 65837255  | 65837378  | NC_000011.9  |
| cg18571156      | 3.32E-10 | 2.55E-11 | -7.08 | 14.8209511 | -1.18E-01 | 3766344   | 3766467   | NC_000020.10 |
| cg18474081      | 3.32E-10 | 2.56E-11 | -7.08 | 14.8198072 | -1.30E-01 | 89923541  | 89923664  | NC_000012.11 |
| cg01799015      | 3.32E-10 | 2.56E-11 | -7.08 | 14.8189953 | -1.22E-01 | 707791    | 707914    | NC_000019.9  |
| ch.16.74794652R | 3.33E-10 | 2.56E-11 | -7.08 | 14.8176984 | -3.02E-02 | 76237151  | 76237274  | NC_000016.9  |
| cg13381110      | 3.34E-10 | 2.57E-11 | -7.08 | 14.815051  | -1.43E-01 | 60646614  | 60646737  | NC_000018.9  |
| cg26794221      | 3.34E-10 | 2.57E-11 | -7.08 | 14.8133742 | -1.50E-01 | 131646362 | 131646485 | NC_000005.9  |

|            |          |          |       |            |           |           |           |              |
|------------|----------|----------|-------|------------|-----------|-----------|-----------|--------------|
| cg27170158 | 3.34E-10 | 2.57E-11 | -7.08 | 14.8132468 | -3.72E-02 | 1382005   | 1382128   | NC_000016.9  |
| cg22540129 | 3.34E-10 | 2.57E-11 | -7.08 | 14.8130936 | -6.63E-02 | 134855664 | 134855787 | NC_000007.13 |
| cg16432022 | 3.35E-10 | 2.58E-11 | -7.08 | 14.8102474 | -4.54E-02 | 209921129 | 209921252 | NC_000001.10 |
| cg23045991 | 3.35E-10 | 2.58E-11 | -7.08 | 14.8095518 | -1.24E-01 | 101943005 | 101943128 | NC_000007.13 |
| cg07141504 | 3.35E-10 | 2.58E-11 | -7.08 | 14.8094928 | -1.34E-01 | 194030706 | 194030829 | NC_000003.11 |
| cg00463562 | 3.36E-10 | 2.58E-11 | -7.08 | 14.8089095 | -3.32E-02 | 65118189  | 65118312  | NC_000015.9  |
| cg09549827 | 3.36E-10 | 2.59E-11 | -7.08 | 14.8085839 | -5.26E-02 | 6484616   | 6484739   | NC_000001.10 |
| cg22498987 | 3.36E-10 | 2.59E-11 | -7.08 | 14.806954  | -6.22E-02 | 120427182 | 120427305 | NC_000012.11 |
| cg11807280 | 3.36E-10 | 2.59E-11 | -7.08 | 14.8067093 | -1.43E-01 | 66654644  | 66654767  | NC_000002.11 |
| cg21706771 | 3.37E-10 | 2.59E-11 | -7.08 | 14.8058553 | -1.24E-01 | 41873091  | 41873214  | NC_000008.10 |
| cg25839482 | 3.37E-10 | 2.59E-11 | -7.08 | 14.8057391 | -3.18E-02 | 75931953  | 75932076  | NC_000015.9  |
| cg25134818 | 3.37E-10 | 2.59E-11 | -7.08 | 14.8053195 | -1.39E-01 | 16690052  | 16690175  | NC_000007.13 |
| cg22829164 | 3.37E-10 | 2.60E-11 | -7.08 | 14.8043776 | -1.47E-01 | 101156363 | 101156486 | NC_000010.10 |
| cg01402448 | 3.37E-10 | 2.60E-11 | -7.08 | 14.8037726 | -3.12E-02 | 136571605 | 136571728 | NC_000006.11 |
| cg01940425 | 3.38E-10 | 2.60E-11 | -7.08 | 14.8026513 | -7.28E-02 | 63276565  | 63276688  | NC_000002.11 |
| cg22030032 | 3.38E-10 | 2.61E-11 | -7.08 | 14.8004936 | -1.86E-01 | 41312792  | 41312915  | NC_000019.9  |
| cg26402405 | 3.39E-10 | 2.61E-11 | -7.07 | 14.7996886 | -9.11E-02 | 148693811 | 148693934 | NC_000005.9  |
| cg14058476 | 3.39E-10 | 2.61E-11 | -7.07 | 14.798219  | -8.71E-02 | 24835609  | 24835732  | NC_000014.8  |
| cg24005169 | 3.39E-10 | 2.61E-11 | -7.07 | 14.7975311 | -1.44E-01 | 31146942  | 31147065  | NC_000006.11 |
| cg02936679 | 3.40E-10 | 2.62E-11 | -7.07 | 14.7966678 | -1.46E-01 | 60650136  | 60650259  | NC_000002.11 |
| cg27012908 | 3.40E-10 | 2.62E-11 | -7.07 | 14.7956166 | -6.67E-02 | 22345154  | 22345277  | NC_000016.9  |
| cg04463607 | 3.41E-10 | 2.63E-11 | -7.07 | 14.7923281 | -1.86E-01 | 114549162 | 114549285 | NC_000011.9  |
| cg11088227 | 3.42E-10 | 2.63E-11 | -7.07 | 14.7901618 | -8.20E-02 | 3063824   | 3063947   | NC_000006.11 |
| cg02111433 | 3.42E-10 | 2.64E-11 | -7.07 | 14.7889783 | -8.63E-02 | 53947953  | 53948076  | NC_000016.9  |
| cg08327038 | 3.43E-10 | 2.64E-11 | -7.07 | 14.7870047 | -1.28E-01 | 69200251  | 69200374  | NC_000016.9  |

|            |          |          |       |            |           |           |           |              |
|------------|----------|----------|-------|------------|-----------|-----------|-----------|--------------|
| cg15531512 | 3.43E-10 | 2.64E-11 | -7.07 | 14.7867305 | -1.45E-01 | 123706630 | 123706753 | NC_000008.10 |
| cg10104336 | 3.43E-10 | 2.65E-11 | -7.07 | 14.7849923 | -1.46E-01 | 19925091  | 19925214  | NC_000012.11 |
| cg03279206 | 3.44E-10 | 2.65E-11 | -7.07 | 14.7841647 | -1.06E-01 | 3064001   | 3064124   | NC_000020.10 |
| cg13402217 | 3.44E-10 | 2.65E-11 | -7.07 | 14.7838175 | -4.49E-02 | 151584375 | 151584498 | NC_000001.10 |
| cg26167861 | 3.44E-10 | 2.65E-11 | -7.07 | 14.7825697 | -6.48E-02 | 16035689  | 16035812  | NC_000012.11 |
| cg08024038 | 3.44E-10 | 2.66E-11 | -7.07 | 14.781967  | -1.28E-01 | 17616235  | 17616358  | NC_000017.10 |
| cg13868393 | 3.45E-10 | 2.66E-11 | -7.07 | 14.7815663 | -6.00E-02 | 75136249  | 75136372  | NC_000017.10 |
| cg02447239 | 3.45E-10 | 2.66E-11 | -7.07 | 14.7808672 | -9.66E-02 | 235936137 | 235936260 | NC_000002.11 |
| cg27305009 | 3.45E-10 | 2.66E-11 | -7.07 | 14.7807204 | -1.35E-01 | 175471320 | 175471443 | NC_000002.11 |
| cg19906608 | 3.45E-10 | 2.66E-11 | -7.07 | 14.7804721 | -2.07E-02 | 94344521  | 94344644  | NC_000001.10 |
| cg14825905 | 3.45E-10 | 2.66E-11 | -7.07 | 14.7796781 | -1.35E-01 | 80994016  | 80994139  | NC_000010.10 |
| cg02589576 | 3.45E-10 | 2.66E-11 | -7.07 | 14.779434  | -1.27E-01 | 201344793 | 201344916 | NC_000001.10 |
| cg18382707 | 3.45E-10 | 2.66E-11 | -7.07 | 14.7790001 | -2.22E-02 | 99740239  | 99740362  | NC_000014.8  |
| cg15191021 | 3.46E-10 | 2.67E-11 | -7.07 | 14.7772815 | -1.43E-01 | 41321218  | 41321341  | NC_000017.10 |
| cg26968544 | 3.46E-10 | 2.67E-11 | -7.07 | 14.776808  | -1.29E-01 | 136481972 | 136482095 | NC_000005.9  |
| cg21225667 | 3.46E-10 | 2.67E-11 | -7.07 | 14.7757905 | -7.15E-02 | 59440595  | 59440718  | NC_000015.9  |
| cg17841782 | 3.46E-10 | 2.67E-11 | -7.07 | 14.7756141 | -2.48E-02 | 59762205  | 59762328  | NC_000001.10 |
| cg05692819 | 3.47E-10 | 2.68E-11 | -7.07 | 14.7748186 | -1.18E-01 | 149432332 | 149432455 | NC_000002.11 |
| cg06319919 | 3.47E-10 | 2.68E-11 | -7.07 | 14.7743719 | -1.46E-01 | 86774597  | 86774720  | NC_000016.9  |
| cg19056664 | 3.47E-10 | 2.68E-11 | -7.07 | 14.7743311 | -1.15E-01 | 1335965   | 1336088   | NC_000005.9  |
| cg02046552 | 3.47E-10 | 2.68E-11 | -7.07 | 14.7740589 | -1.32E-01 | 21914287  | 21914410  | NC_000008.10 |
| cg00713278 | 3.47E-10 | 2.68E-11 | -7.07 | 14.7726213 | -8.44E-02 | 784961    | 785084    | NC_000004.11 |
| cg00394823 | 3.48E-10 | 2.68E-11 | -7.07 | 14.7721722 | -5.74E-02 | 20775166  | 20775289  | NC_000016.9  |
| cg25765315 | 3.48E-10 | 2.69E-11 | -7.07 | 14.7698051 | -1.63E-01 | 92472232  | 92472355  | NC_000012.11 |
| cg04136456 | 3.49E-10 | 2.69E-11 | -7.07 | 14.7683189 | -1.36E-01 | 11413470  | 11413593  | NC_000001.10 |



|            |          |          |       |            |           |           |           |              |
|------------|----------|----------|-------|------------|-----------|-----------|-----------|--------------|
| cg17393572 | 3.49E-10 | 2.70E-11 | -7.07 | 14.7676382 | -1.20E-01 | 176326365 | 176326488 | NC_000005.9  |
| cg11218176 | 3.49E-10 | 2.70E-11 | -7.07 | 14.7670691 | -1.07E-01 | 16403434  | 16403557  | NC_000001.10 |
| cg16798537 | 3.49E-10 | 2.70E-11 | -7.07 | 14.7668855 | -9.65E-02 | 66943891  | 66944014  | NC_000016.9  |
| cg06987246 | 3.50E-10 | 2.70E-11 | -7.07 | 14.7663101 | -1.72E-01 | 6659785   | 6659908   | NC_000007.13 |
| cg05386230 | 3.50E-10 | 2.70E-11 | -7.07 | 14.7646784 | -8.55E-02 | 18268439  | 18268562  | NC_000020.10 |
| cg03903278 | 3.50E-10 | 2.70E-11 | -7.07 | 14.764128  | -1.41E-01 | 161577612 | 161577735 | NC_000003.11 |
| cg02606018 | 3.50E-10 | 2.71E-11 | -7.07 | 14.7637725 | -8.00E-02 | 10658281  | 10658404  | NC_000012.11 |
| cg22454769 | 3.51E-10 | 2.71E-11 | -7.07 | 14.7620545 | -1.29E-01 | 106015767 | 106015890 | NC_000002.11 |
| cg27022558 | 3.51E-10 | 2.71E-11 | -7.07 | 14.7618565 | -1.90E-01 | 64141041  | 64141164  | NC_000011.9  |
| cg20125501 | 3.51E-10 | 2.71E-11 | -7.07 | 14.7615935 | -1.31E-01 | 3176608   | 3176731   | NC_000019.9  |
| cg17864041 | 3.52E-10 | 2.72E-11 | -7.07 | 14.7601605 | -1.08E-01 | 31175309  | 31175432  | NC_000015.9  |
| cg00393050 | 3.52E-10 | 2.72E-11 | -7.07 | 14.7598374 | -8.45E-02 | 14435541  | 14435664  | NC_000003.11 |
| cg15617950 | 3.52E-10 | 2.72E-11 | -7.07 | 14.7596218 | -1.29E-01 | 50004158  | 50004281  | NC_000019.9  |
| cg14575950 | 3.52E-10 | 2.72E-11 | -7.07 | 14.7595433 | -1.45E-01 | 45382681  | 45382804  | NC_000017.10 |
| cg02362505 | 3.52E-10 | 2.72E-11 | -7.07 | 14.7587167 | -1.59E-01 | 185930976 | 185931099 | NC_000001.10 |
| cg02283238 | 3.52E-10 | 2.72E-11 | -7.07 | 14.7584092 | -1.69E-01 | 118691126 | 118691249 | NC_000005.9  |
| cg07135660 | 3.52E-10 | 2.72E-11 | -7.07 | 14.7581207 | -1.70E-01 | 133343843 | 133343966 | NC_000005.9  |
| cg18119407 | 3.52E-10 | 2.72E-11 | -7.07 | 14.757901  | -1.31E-01 | 201980504 | 201980627 | NC_000002.11 |
| cg02537106 | 3.52E-10 | 2.72E-11 | -7.07 | 14.7575058 | -6.01E-02 | 27441298  | 27441421  | NC_000006.11 |
| cg27093949 | 3.53E-10 | 2.72E-11 | -7.07 | 14.756924  | -9.18E-02 | 107771400 | 107771523 | NC_000007.13 |
| cg02712878 | 3.53E-10 | 2.73E-11 | -7.07 | 14.7559026 | -9.57E-02 | 138327370 | 138327493 | NC_000003.11 |
| cg17827767 | 3.53E-10 | 2.73E-11 | -7.07 | 14.7557123 | -1.33E-01 | 86001154  | 86001277  | NC_000010.10 |
| cg04283838 | 3.53E-10 | 2.73E-11 | -7.07 | 14.7555061 | -7.77E-02 | 6878257   | 6878380   | NC_000004.11 |
| cg02460652 | 3.54E-10 | 2.73E-11 | -7.07 | 14.754104  | -6.33E-02 | 76431858  | 76431981  | NC_000015.9  |
| cg10196163 | 3.54E-10 | 2.74E-11 | -7.07 | 14.7531261 | -6.52E-02 | 105560628 | 105560751 | NC_000014.8  |

|            |          |          |       |            |           |           |           |              |
|------------|----------|----------|-------|------------|-----------|-----------|-----------|--------------|
| cg07479988 | 3.55E-10 | 2.74E-11 | -7.07 | 14.7508631 | -5.34E-02 | 39103277  | 39103400  | NC_000002.11 |
| cg16259317 | 3.55E-10 | 2.75E-11 | -7.07 | 14.748974  | -2.23E-02 | 80733297  | 80733420  | NC_000010.10 |
| cg26250086 | 3.55E-10 | 2.75E-11 | -7.07 | 14.7489178 | -1.24E-01 | 6830972   | 6831095   | NC_000001.10 |
| cg02021442 | 3.56E-10 | 2.75E-11 | -7.07 | 14.7464738 | -1.05E-01 | 54475010  | 54475133  | NC_000012.11 |
| cg02288859 | 3.56E-10 | 2.76E-11 | -7.07 | 14.7457307 | -1.21E-01 | 29470264  | 29470387  | NC_000022.10 |
| cg25417551 | 3.57E-10 | 2.76E-11 | -7.07 | 14.7451817 | -6.53E-02 | 35767582  | 35767705  | NC_000017.10 |
| cg14439774 | 3.57E-10 | 2.76E-11 | -7.07 | 14.7443047 | -1.55E-01 | 1988012   | 1988135   | NC_000017.10 |
| cg12748639 | 3.58E-10 | 2.77E-11 | -7.06 | 14.7420687 | -1.24E-01 | 71035898  | 71036021  | NC_000002.11 |
| cg09599862 | 3.58E-10 | 2.77E-11 | -7.06 | 14.7417458 | -1.46E-01 | 139262297 | 139262420 | NC_000002.11 |
| cg25117062 | 3.58E-10 | 2.77E-11 | -7.06 | 14.7415177 | -2.56E-02 | 10442836  | 10442959  | NC_000002.11 |
| cg19712659 | 3.58E-10 | 2.77E-11 | -7.06 | 14.7413212 | -1.08E-01 | 28906356  | 28906479  | NC_000001.10 |
| cg18298706 | 3.58E-10 | 2.77E-11 | -7.06 | 14.7411113 | -5.48E-02 | 57857370  | 57857493  | NC_000014.8  |
| cg16235197 | 3.58E-10 | 2.77E-11 | -7.06 | 14.7402402 | -8.39E-02 | 111758873 | 111758996 | NC_000012.11 |
| cg21885134 | 3.59E-10 | 2.77E-11 | -7.06 | 14.7391668 | -1.22E-01 | 1794994   | 1795117   | NC_000005.9  |
| cg11562153 | 3.59E-10 | 2.78E-11 | -7.06 | 14.7389434 | -1.53E-01 | 28493500  | 28493623  | NC_000006.11 |
| cg16339943 | 3.59E-10 | 2.78E-11 | -7.06 | 14.7389397 | -4.89E-02 | 43277938  | 43278061  | NC_000010.10 |
| cg07005654 | 3.59E-10 | 2.78E-11 | -7.06 | 14.738441  | -1.20E-01 | 108918439 | 108918562 | NC_000004.11 |
| cg08877374 | 3.59E-10 | 2.78E-11 | -7.06 | 14.7381292 | -1.82E-01 | 31845904  | 31846027  | NC_000001.10 |
| cg06348477 | 3.59E-10 | 2.78E-11 | -7.06 | 14.7376952 | -3.98E-02 | 119217354 | 119217477 | NC_000003.11 |
| cg07520163 | 3.59E-10 | 2.78E-11 | -7.06 | 14.7374169 | -1.09E-01 | 75232227  | 75232350  | NC_000016.9  |
| cg16657244 | 3.60E-10 | 2.78E-11 | -7.06 | 14.7354622 | -1.05E-01 | 103911592 | 103911715 | NC_000010.10 |
| cg02266452 | 3.60E-10 | 2.79E-11 | -7.06 | 14.734216  | -4.10E-02 | 82905235  | 82905358  | NC_000011.9  |
| cg23788418 | 3.60E-10 | 2.79E-11 | -7.06 | 14.7341906 | -1.70E-01 | 65904983  | 65905106  | NC_000012.11 |
| cg26246133 | 3.60E-10 | 2.79E-11 | -7.06 | 14.7340115 | -5.11E-02 | 93276703  | 93276826  | NC_000011.9  |
| cg20142535 | 3.60E-10 | 2.79E-11 | -7.06 | 14.733771  | -5.08E-02 | 203097628 | 203097751 | NC_000001.10 |

|               |          |          |       |            |           |           |           |              |
|---------------|----------|----------|-------|------------|-----------|-----------|-----------|--------------|
| cg22697864    | 3.60E-10 | 2.79E-11 | -7.06 | 14.733761  | -1.22E-01 | 46954754  | 46954877  | NC_000001.10 |
| cg13194260    | 3.61E-10 | 2.79E-11 | -7.06 | 14.7335033 | -9.55E-02 | 201659991 | 201660114 | NC_000002.11 |
| cg00341606    | 3.61E-10 | 2.79E-11 | -7.06 | 14.7334682 | -1.74E-02 | 17740405  | 17740528  | NC_000017.10 |
| cg14307223    | 3.61E-10 | 2.79E-11 | -7.06 | 14.7328003 | -8.76E-02 | 128221129 | 128221252 | NC_000002.11 |
| cg04750536    | 3.62E-10 | 2.80E-11 | -7.06 | 14.7300681 | -1.09E-01 | 19915857  | 19915980  | NC_000020.10 |
| cg13382288    | 3.62E-10 | 2.80E-11 | -7.06 | 14.7299994 | -1.10E-01 | 202614046 | 202614169 | NC_000001.10 |
| cg01471572    | 3.62E-10 | 2.80E-11 | -7.06 | 14.7296114 | -1.43E-01 | 93620189  | 93620312  | NC_000008.10 |
| cg00886669    | 3.62E-10 | 2.80E-11 | -7.06 | 14.7295346 | -1.88E-01 | 11529264  | 11529387  | NC_000002.11 |
| cg14029663    | 3.62E-10 | 2.81E-11 | -7.06 | 14.7280946 | -6.92E-02 | 50582909  | 50583032  | NC_000014.8  |
| ch.20.998519F | 3.63E-10 | 2.81E-11 | -7.06 | 14.7259739 | -4.72E-02 | 45846381  | 45846504  | NC_000020.10 |
| cg21606527    | 3.63E-10 | 2.81E-11 | -7.06 | 14.7259006 | -1.60E-01 | 7597983   | 7598106   | NC_000011.9  |
| cg02977443    | 3.64E-10 | 2.82E-11 | -7.06 | 14.7231884 | -1.57E-01 | 184523815 | 184523938 | NC_000003.11 |
| cg20157753    | 3.64E-10 | 2.82E-11 | -7.06 | 14.7223207 | -1.81E-01 | 113594343 | 113594466 | NC_000002.11 |
| cg18633197    | 3.65E-10 | 2.83E-11 | -7.06 | 14.7211892 | -8.66E-02 | 135387962 | 135388085 | NC_000010.10 |
| cg16447311    | 3.65E-10 | 2.83E-11 | -7.06 | 14.7211454 | -1.64E-01 | 1604134   | 1604257   | NC_000006.11 |
| cg07173218    | 3.65E-10 | 2.83E-11 | -7.06 | 14.7210791 | -9.45E-02 | 9410333   | 9410456   | NC_000001.10 |
| cg27098574    | 3.65E-10 | 2.83E-11 | -7.06 | 14.7194656 | -5.56E-02 | 75285489  | 75285612  | NC_000016.9  |
| cg14478475    | 3.66E-10 | 2.83E-11 | -7.06 | 14.7189336 | -1.55E-01 | 37905113  | 37905236  | NC_000009.11 |
| cg00378218    | 3.66E-10 | 2.83E-11 | -7.06 | 14.7187075 | -3.94E-02 | 1546841   | 1546964   | NC_000017.10 |
| cg16462648    | 3.66E-10 | 2.83E-11 | -7.06 | 14.7183235 | -1.47E-01 | 55385250  | 55385373  | NC_000005.9  |
| cg06081030    | 3.66E-10 | 2.84E-11 | -7.06 | 14.7178311 | -2.98E-02 | 65687220  | 65687343  | NC_000011.9  |
| cg09242721    | 3.66E-10 | 2.84E-11 | -7.06 | 14.7168014 | -4.95E-02 | 3168535   | 3168658   | NC_000003.11 |
| cg26684289    | 3.66E-10 | 2.84E-11 | -7.06 | 14.7165146 | -5.01E-02 | 1771122   | 1771245   | NC_000012.11 |
| cg02225346    | 3.66E-10 | 2.84E-11 | -7.06 | 14.7165116 | -1.52E-01 | 8833307   | 8833430   | NC_000002.11 |
| cg23408990    | 3.66E-10 | 2.84E-11 | -7.06 | 14.7162557 | -1.41E-01 | 222864086 | 222864209 | NC_000002.11 |

|            |          |          |       |            |           |           |           |              |
|------------|----------|----------|-------|------------|-----------|-----------|-----------|--------------|
| cg05947699 | 3.67E-10 | 2.84E-11 | -7.06 | 14.716045  | -1.66E-01 | 173345670 | 173345793 | NC_000005.9  |
| cg05978154 | 3.67E-10 | 2.84E-11 | -7.06 | 14.7156207 | -1.54E-01 | 1100209   | 1100332   | NC_000005.9  |
| cg27115721 | 3.67E-10 | 2.84E-11 | -7.06 | 14.7146724 | -2.05E-02 | 16790338  | 16790461  | NC_000002.11 |
| cg12466022 | 3.67E-10 | 2.84E-11 | -7.06 | 14.7145969 | -1.59E-01 | 244777505 | 244777628 | NC_000001.10 |
| cg18488733 | 3.67E-10 | 2.85E-11 | -7.06 | 14.714225  | -1.60E-01 | 86313834  | 86313957  | NC_000015.9  |
| cg01869229 | 3.67E-10 | 2.85E-11 | -7.06 | 14.7138373 | -4.10E-02 | 144417236 | 144417359 | NC_000008.10 |
| cg07828024 | 3.68E-10 | 2.85E-11 | -7.06 | 14.7124559 | -1.79E-01 | 149772892 | 149773015 | NC_000006.11 |
| cg11890639 | 3.68E-10 | 2.85E-11 | -7.06 | 14.7118634 | -1.00E-01 | 51703814  | 51703937  | NC_000003.11 |
| cg25399309 | 3.68E-10 | 2.85E-11 | -7.06 | 14.7118601 | -1.21E-01 | 66462293  | 66462416  | NC_000005.9  |
| cg10611753 | 3.68E-10 | 2.85E-11 | -7.06 | 14.7114259 | -5.89E-02 | 55489541  | 55489664  | NC_000015.9  |
| cg09378105 | 3.69E-10 | 2.86E-11 | -7.06 | 14.7094384 | -3.26E-02 | 100895380 | 100895503 | NC_000007.13 |
| cg09541248 | 3.70E-10 | 2.87E-11 | -7.06 | 14.70694   | -1.49E-01 | 57443622  | 57443745  | NC_000012.11 |
| cg16022580 | 3.70E-10 | 2.87E-11 | -7.06 | 14.7060286 | -9.94E-02 | 79962286  | 79962409  | NC_000017.10 |
| cg18128495 | 3.70E-10 | 2.87E-11 | -7.06 | 14.7048653 | -1.40E-01 | 176728620 | 176728743 | NC_000005.9  |
| cg12453539 | 3.71E-10 | 2.88E-11 | -7.06 | 14.7037673 | -1.22E-01 | 6033866   | 6033989   | NC_000020.10 |
| cg21181942 | 3.71E-10 | 2.88E-11 | -7.06 | 14.7037386 | -5.77E-02 | 3726450   | 3726573   | NC_000004.11 |
| cg26411822 | 3.71E-10 | 2.88E-11 | -7.06 | 14.7036418 | -1.45E-01 | 28099013  | 28099136  | NC_000001.10 |
| cg25259564 | 3.71E-10 | 2.88E-11 | -7.06 | 14.7027455 | -2.23E-01 | 1060659   | 1060782   | NC_000011.9  |
| cg02569759 | 3.71E-10 | 2.88E-11 | -7.06 | 14.7024815 | -7.28E-02 | 10052551  | 10052674  | NC_000003.11 |
| cg08714753 | 3.71E-10 | 2.88E-11 | -7.06 | 14.7022587 | -1.42E-01 | 35639590  | 35639713  | NC_000011.9  |
| cg13628514 | 3.72E-10 | 2.88E-11 | -7.06 | 14.7014076 | -1.19E-01 | 110271439 | 110271562 | NC_000012.11 |
| cg26634885 | 3.72E-10 | 2.89E-11 | -7.06 | 14.6996064 | -4.36E-02 | 43209687  | 43209810  | NC_000017.10 |
| cg24083746 | 3.72E-10 | 2.89E-11 | -7.06 | 14.6993483 | -1.12E-01 | 45826152  | 45826275  | NC_000019.9  |
| cg14035238 | 3.72E-10 | 2.89E-11 | -7.06 | 14.6991215 | -1.85E-01 | 175499365 | 175499488 | NC_000002.11 |
| cg00904578 | 3.74E-10 | 2.90E-11 | -7.06 | 14.6960717 | -8.86E-02 | 63009964  | 63010087  | NC_000017.10 |

|               |          |          |       |            |           |           |           |              |
|---------------|----------|----------|-------|------------|-----------|-----------|-----------|--------------|
| cg14661886    | 3.74E-10 | 2.90E-11 | -7.06 | 14.6953304 | -1.53E-01 | 9994197   | 9994320   | NC_000003.11 |
| cg16746901    | 3.74E-10 | 2.90E-11 | -7.06 | 14.6948637 | -1.34E-01 | 2428431   | 2428554   | NC_000011.9  |
| cg03290213    | 3.74E-10 | 2.90E-11 | -7.06 | 14.6946367 | -1.80E-01 | 78152232  | 78152355  | NC_000017.10 |
| cg04779999    | 3.74E-10 | 2.90E-11 | -7.06 | 14.6945346 | -3.24E-02 | 37633965  | 37634088  | NC_000013.10 |
| cg05986956    | 3.74E-10 | 2.91E-11 | -7.06 | 14.6939212 | -7.89E-02 | 2720577   | 2720700   | NC_000007.13 |
| cg15133098    | 3.75E-10 | 2.91E-11 | -7.06 | 14.6909073 | -1.66E-01 | 195648538 | 195648661 | NC_000003.11 |
| cg01289541    | 3.76E-10 | 2.92E-11 | -7.06 | 14.689637  | -1.77E-01 | 170282058 | 170282181 | NC_000003.11 |
| cg26549326    | 3.76E-10 | 2.92E-11 | -7.06 | 14.6882309 | -1.75E-02 | 157108763 | 157108886 | NC_000001.10 |
| cg01099300    | 3.77E-10 | 2.92E-11 | -7.06 | 14.6875259 | -1.48E-01 | 101779926 | 101780049 | NC_000010.10 |
| cg00146027    | 3.77E-10 | 2.93E-11 | -7.05 | 14.6869643 | -1.19E-01 | 33299147  | 33299270  | NC_000010.10 |
| ch.15.843512R | 3.77E-10 | 2.93E-11 | -7.05 | 14.6861998 | -4.95E-02 | 60727917  | 60728040  | NC_000015.9  |
| cg10792625    | 3.77E-10 | 2.93E-11 | -7.05 | 14.6860788 | -1.64E-01 | 47742264  | 47742387  | NC_000013.10 |
| cg13628022    | 3.77E-10 | 2.93E-11 | -7.05 | 14.685853  | -1.71E-01 | 124726047 | 124726170 | NC_000009.11 |
| cg25499181    | 3.78E-10 | 2.93E-11 | -7.05 | 14.6845059 | -1.19E-01 | 30894357  | 30894480  | NC_000010.10 |
| cg26381918    | 3.78E-10 | 2.93E-11 | -7.05 | 14.6844567 | -4.40E-02 | 99225517  | 99225640  | NC_000002.11 |
| cg23204680    | 3.78E-10 | 2.94E-11 | -7.05 | 14.6838802 | -9.93E-02 | 16352745  | 16352868  | NC_000006.11 |
| cg09827071    | 3.78E-10 | 2.94E-11 | -7.05 | 14.6836457 | -1.06E-01 | 57569262  | 57569385  | NC_000012.11 |
| cg00129196    | 3.79E-10 | 2.94E-11 | -7.05 | 14.6820784 | -4.24E-02 | 20190016  | 20190139  | NC_000002.11 |
| cg08348990    | 3.79E-10 | 2.94E-11 | -7.05 | 14.6810941 | -1.54E-01 | 110425835 | 110425958 | NC_000013.10 |
| cg23685994    | 3.79E-10 | 2.94E-11 | -7.05 | 14.6808359 | -1.60E-01 | 101959022 | 101959145 | NC_000002.11 |
| cg20203915    | 3.79E-10 | 2.95E-11 | -7.05 | 14.6800323 | -6.54E-02 | 187871836 | 187871959 | NC_000003.11 |
| cg17695682    | 3.80E-10 | 2.95E-11 | -7.05 | 14.6786257 | -9.52E-02 | 118551771 | 118551894 | NC_000011.9  |
| cg00942293    | 3.80E-10 | 2.95E-11 | -7.05 | 14.6783587 | -1.24E-01 | 67224629  | 67224752  | NC_000016.9  |
| cg24283921    | 3.80E-10 | 2.95E-11 | -7.05 | 14.6778588 | -1.39E-01 | 10477461  | 10477584  | NC_000011.9  |
| cg23620279    | 3.81E-10 | 2.96E-11 | -7.05 | 14.6756529 | -1.02E-01 | 79793495  | 79793618  | NC_000010.10 |

|            |          |          |       |            |           |           |           |              |
|------------|----------|----------|-------|------------|-----------|-----------|-----------|--------------|
| cg27445386 | 3.82E-10 | 2.97E-11 | -7.05 | 14.6736161 | -6.63E-02 | 42897250  | 42897373  | NC_000006.11 |
| cg14392755 | 3.82E-10 | 2.97E-11 | -7.05 | 14.673593  | -1.13E-01 | 99696521  | 99696644  | NC_000009.11 |
| cg02650128 | 3.82E-10 | 2.97E-11 | -7.05 | 14.6723565 | -1.16E-01 | 132556650 | 132556773 | NC_000005.9  |
| cg15985344 | 3.83E-10 | 2.98E-11 | -7.05 | 14.6705288 | -1.76E-01 | 1299155   | 1299278   | NC_000004.11 |
| cg12867237 | 3.83E-10 | 2.98E-11 | -7.05 | 14.6703256 | -5.07E-02 | 44087540  | 44087663  | NC_000011.9  |
| cg19847963 | 3.83E-10 | 2.98E-11 | -7.05 | 14.6699204 | -4.64E-02 | 131356126 | 131356249 | NC_000012.11 |
| cg04946315 | 3.83E-10 | 2.98E-11 | -7.05 | 14.6694269 | -1.17E-01 | 105103494 | 105103617 | NC_000014.8  |
| cg23727520 | 3.83E-10 | 2.98E-11 | -7.05 | 14.6694101 | -7.93E-02 | 121741145 | 121741268 | NC_000003.11 |
| cg25953504 | 3.84E-10 | 2.98E-11 | -7.05 | 14.6683116 | -3.49E-02 | 79981121  | 79981244  | NC_000017.10 |
| cg00785738 | 3.84E-10 | 2.98E-11 | -7.05 | 14.6682911 | -9.91E-02 | 35617323  | 35617446  | NC_000009.11 |
| cg07147614 | 3.84E-10 | 2.99E-11 | -7.05 | 14.6659306 | -9.52E-02 | 134095646 | 134095769 | NC_000010.10 |
| cg08193322 | 3.85E-10 | 2.99E-11 | -7.05 | 14.6653146 | -3.20E-02 | 74730586  | 74730709  | NC_000002.11 |
| cg10622019 | 3.85E-10 | 2.99E-11 | -7.05 | 14.6641168 | -1.11E-01 | 4221485   | 4221608   | NC_000001.10 |
| cg14348397 | 3.85E-10 | 3.00E-11 | -7.05 | 14.6629817 | -1.09E-01 | 109623731 | 109623854 | NC_000009.11 |
| cg06440404 | 3.86E-10 | 3.00E-11 | -7.05 | 14.6625578 | -1.39E-01 | 170176388 | 170176511 | NC_000004.11 |
| cg19311448 | 3.86E-10 | 3.00E-11 | -7.05 | 14.6623213 | -1.01E-01 | 11797017  | 11797140  | NC_000002.11 |
| cg11584989 | 3.86E-10 | 3.00E-11 | -7.05 | 14.6621082 | -6.97E-02 | 19387371  | 19387494  | NC_000019.9  |
| cg16372825 | 3.86E-10 | 3.00E-11 | -7.05 | 14.6620461 | -1.44E-01 | 87823925  | 87824048  | NC_000016.9  |
| cg22117819 | 3.86E-10 | 3.00E-11 | -7.05 | 14.6611278 | -9.86E-02 | 19556601  | 19556724  | NC_000022.10 |
| cg15578332 | 3.87E-10 | 3.01E-11 | -7.05 | 14.6590509 | -1.20E-01 | 195870249 | 195870372 | NC_000003.11 |
| cg18832152 | 3.87E-10 | 3.01E-11 | -7.05 | 14.6587265 | -5.45E-02 | 155035183 | 155035306 | NC_000001.10 |
| cg16585619 | 3.88E-10 | 3.02E-11 | -7.05 | 14.6561676 | -1.61E-01 | 39685250  | 39685373  | NC_000017.10 |
| cg24354624 | 3.88E-10 | 3.02E-11 | -7.05 | 14.6560566 | -5.73E-02 | 40732728  | 40732851  | NC_000019.9  |
| cg25835954 | 3.89E-10 | 3.02E-11 | -7.05 | 14.654552  | -4.18E-02 | 50160062  | 50160185  | NC_000013.10 |
| cg00392257 | 3.89E-10 | 3.03E-11 | -7.05 | 14.6537686 | -1.13E-01 | 156696747 | 156696870 | NC_000001.10 |

|            |          |          |       |            |           |           |           |              |
|------------|----------|----------|-------|------------|-----------|-----------|-----------|--------------|
| cg09503974 | 3.89E-10 | 3.03E-11 | -7.05 | 14.6533129 | -9.06E-02 | 158449660 | 158449783 | NC_000003.11 |
| cg12830829 | 3.90E-10 | 3.03E-11 | -7.05 | 14.651568  | -5.52E-02 | 51707081  | 51707204  | NC_000014.8  |
| cg10731606 | 3.90E-10 | 3.03E-11 | -7.05 | 14.651462  | -5.29E-02 | 134671120 | 134671243 | NC_000007.13 |
| cg00119811 | 3.90E-10 | 3.03E-11 | -7.05 | 14.6510388 | -1.52E-01 | 73092353  | 73092476  | NC_000005.9  |
| cg00727590 | 3.90E-10 | 3.04E-11 | -7.05 | 14.650504  | -8.61E-02 | 31536549  | 31536672  | NC_000022.10 |
| cg04477202 | 3.90E-10 | 3.04E-11 | -7.05 | 14.6495859 | -4.77E-02 | 32289458  | 32289581  | NC_000002.11 |
| cg02331808 | 3.91E-10 | 3.04E-11 | -7.05 | 14.6480739 | -1.58E-01 | 29301402  | 29301525  | NC_000015.9  |
| cg09550810 | 3.91E-10 | 3.05E-11 | -7.05 | 14.6471831 | -1.10E-01 | 61519890  | 61520013  | NC_000001.10 |
| cg22507772 | 3.91E-10 | 3.05E-11 | -7.05 | 14.6469311 | -1.45E-01 | 6759831   | 6759954   | NC_000006.11 |
| cg23441018 | 3.91E-10 | 3.05E-11 | -7.05 | 14.6468694 | -1.97E-01 | 34657364  | 34657487  | NC_000015.9  |
| cg03564506 | 3.92E-10 | 3.06E-11 | -7.05 | 14.6444971 | -4.64E-02 | 98475901  | 98476024  | NC_000007.13 |
| cg05617127 | 3.92E-10 | 3.06E-11 | -7.05 | 14.643568  | -7.18E-02 | 99051840  | 99051963  | NC_000010.10 |
| cg17641346 | 3.92E-10 | 3.06E-11 | -7.05 | 14.6435636 | -5.04E-02 | 112328140 | 112328263 | NC_000010.10 |
| cg25317911 | 3.92E-10 | 3.06E-11 | -7.05 | 14.6435484 | -2.20E-02 | 9800438   | 9800561   | NC_000012.11 |
| cg14418802 | 3.93E-10 | 3.06E-11 | -7.05 | 14.6431109 | -2.36E-01 | 9299979   | 9300102   | NC_000001.10 |
| cg25895971 | 3.93E-10 | 3.06E-11 | -7.05 | 14.64284   | -4.00E-02 | 77904396  | 77904519  | NC_000017.10 |
| cg02522367 | 3.93E-10 | 3.06E-11 | -7.05 | 14.6427439 | -1.56E-01 | 139640325 | 139640448 | NC_000009.11 |
| cg19924352 | 3.94E-10 | 3.07E-11 | -7.05 | 14.6399258 | -1.42E-01 | 124195402 | 124195525 | NC_000008.10 |
| cg19614643 | 3.95E-10 | 3.07E-11 | -7.05 | 14.6381308 | -1.57E-01 | 19499118  | 19499241  | NC_000002.11 |
| cg20110591 | 3.95E-10 | 3.08E-11 | -7.05 | 14.6377164 | -6.87E-02 | 49521109  | 49521232  | NC_000019.9  |
| cg01099024 | 3.95E-10 | 3.08E-11 | -7.05 | 14.6368836 | -1.30E-01 | 70347833  | 70347956  | NC_000014.8  |
| cg20515377 | 3.95E-10 | 3.08E-11 | -7.05 | 14.6364914 | -1.06E-01 | 167276650 | 167276773 | NC_000006.11 |
| cg25354348 | 3.96E-10 | 3.09E-11 | -7.05 | 14.6346254 | -1.27E-01 | 670562    | 670685    | NC_000010.10 |
| cg04247829 | 3.96E-10 | 3.09E-11 | -7.05 | 14.6337851 | -9.02E-02 | 38218080  | 38218203  | NC_000001.10 |
| cg06602478 | 3.97E-10 | 3.09E-11 | -7.05 | 14.6317654 | -1.55E-01 | 195159296 | 195159419 | NC_000003.11 |

|            |          |          |       |            |           |           |           |              |
|------------|----------|----------|-------|------------|-----------|-----------|-----------|--------------|
| cg00510541 | 3.97E-10 | 3.10E-11 | -7.05 | 14.6317094 | -1.35E-01 | 44040208  | 44040331  | NC_000006.11 |
| cg08193579 | 3.97E-10 | 3.10E-11 | -7.05 | 14.6316452 | -1.56E-01 | 169529701 | 169529824 | NC_000003.11 |
| cg25059899 | 3.98E-10 | 3.10E-11 | -7.04 | 14.6300628 | -8.30E-02 | 60904328  | 60904451  | NC_000018.9  |
| cg20299263 | 3.98E-10 | 3.11E-11 | -7.04 | 14.6278846 | -2.49E-02 | 129705196 | 129705319 | NC_000010.10 |
| cg12930553 | 3.99E-10 | 3.11E-11 | -7.04 | 14.6275952 | -1.18E-01 | 85980742  | 85980865  | NC_000002.11 |
| cg02052762 | 3.99E-10 | 3.11E-11 | -7.04 | 14.627297  | -1.19E-01 | 4090525   | 4090648   | NC_000017.10 |
| cg15616496 | 3.99E-10 | 3.11E-11 | -7.04 | 14.6266655 | -1.94E-01 | 73860607  | 73860730  | NC_000017.10 |
| cg19074748 | 3.99E-10 | 3.11E-11 | -7.04 | 14.6258281 | -1.09E-01 | 76348764  | 76348887  | NC_000011.9  |
| cg03542721 | 3.99E-10 | 3.11E-11 | -7.04 | 14.6255854 | -6.02E-02 | 22926253  | 22926376  | NC_000008.10 |
| cg12058544 | 4.00E-10 | 3.12E-11 | -7.04 | 14.623739  | -1.33E-01 | 29598283  | 29598406  | NC_000001.10 |
| cg21519787 | 4.00E-10 | 3.12E-11 | -7.04 | 14.6230887 | -1.91E-01 | 49133421  | 49133544  | NC_000019.9  |
| cg21814550 | 4.00E-10 | 3.12E-11 | -7.04 | 14.622253  | -1.57E-01 | 53170147  | 53170270  | NC_000014.8  |
| cg01808706 | 4.01E-10 | 3.13E-11 | -7.04 | 14.6216677 | -6.30E-02 | 41786623  | 41786746  | NC_000015.9  |
| cg26221631 | 4.01E-10 | 3.13E-11 | -7.04 | 14.6213732 | -3.35E-02 | 129245988 | 129246111 | NC_000011.9  |
| cg20173259 | 4.01E-10 | 3.13E-11 | -7.04 | 14.620709  | -5.25E-02 | 49520930  | 49521053  | NC_000019.9  |
| cg27147306 | 4.01E-10 | 3.13E-11 | -7.04 | 14.6195958 | -4.00E-02 | 99837480  | 99837603  | NC_000008.10 |
| cg22389654 | 4.02E-10 | 3.14E-11 | -7.04 | 14.6190397 | -1.32E-01 | 120273819 | 120273942 | NC_000001.10 |
| cg12854371 | 4.02E-10 | 3.14E-11 | -7.04 | 14.6176027 | -5.86E-02 | 62776373  | 62776496  | NC_000017.10 |
| cg08799173 | 4.02E-10 | 3.14E-11 | -7.04 | 14.6175109 | -3.43E-02 | 41473208  | 41473331  | NC_000006.11 |
| cg00883505 | 4.02E-10 | 3.14E-11 | -7.04 | 14.6169436 | -3.30E-02 | 52703362  | 52703485  | NC_000013.10 |
| cg11917694 | 4.03E-10 | 3.14E-11 | -7.04 | 14.6162947 | -2.90E-02 | 90639684  | 90639807  | NC_000010.10 |
| cg04230891 | 4.04E-10 | 3.15E-11 | -7.04 | 14.6131498 | -1.53E-01 | 100582403 | 100582526 | NC_000006.11 |
| cg27175112 | 4.04E-10 | 3.16E-11 | -7.04 | 14.6125623 | -1.34E-01 | 11515031  | 11515154  | NC_000002.11 |
| cg19038506 | 4.04E-10 | 3.16E-11 | -7.04 | 14.6122622 | -3.09E-02 | 7069182   | 7069305   | NC_000019.9  |
| cg14779622 | 4.04E-10 | 3.16E-11 | -7.04 | 14.6119256 | -8.23E-02 | 76932315  | 76932438  | NC_000017.10 |



|            |          |          |       |            |           |           |           |              |
|------------|----------|----------|-------|------------|-----------|-----------|-----------|--------------|
| cg23570810 | 4.05E-10 | 3.16E-11 | -7.04 | 14.610677  | -1.51E-01 | 315102    | 315225    | NC_000011.9  |
| cg13828610 | 4.05E-10 | 3.16E-11 | -7.04 | 14.6102665 | -1.64E-01 | 3825986   | 3826109   | NC_000006.11 |
| cg13857933 | 4.05E-10 | 3.16E-11 | -7.04 | 14.61016   | -1.35E-01 | 208046539 | 208046662 | NC_000001.10 |
| cg23517251 | 4.05E-10 | 3.16E-11 | -7.04 | 14.6100663 | -4.28E-02 | 44587077  | 44587200  | NC_000011.9  |
| cg27279809 | 4.05E-10 | 3.17E-11 | -7.04 | 14.6096881 | -5.43E-02 | 49183212  | 49183335  | NC_000012.11 |
| cg07506334 | 4.05E-10 | 3.17E-11 | -7.04 | 14.6095836 | -2.37E-02 | 3073707   | 3073830   | NC_000016.9  |
| cg02737458 | 4.05E-10 | 3.17E-11 | -7.04 | 14.6095449 | -1.32E-01 | 80178491  | 80178614  | NC_000016.9  |
| cg15061008 | 4.05E-10 | 3.17E-11 | -7.04 | 14.6089806 | -4.35E-02 | 24407907  | 24408030  | NC_000022.10 |
| cg14686297 | 4.06E-10 | 3.17E-11 | -7.04 | 14.6081775 | -1.31E-01 | 46650375  | 46650498  | NC_000022.10 |
| cg10638657 | 4.06E-10 | 3.17E-11 | -7.04 | 14.6081348 | -1.37E-01 | 26235609  | 26235732  | NC_000006.11 |
| cg00542975 | 4.06E-10 | 3.17E-11 | -7.04 | 14.6079041 | -1.05E-01 | 122392291 | 122392414 | NC_000002.11 |
| cg24501381 | 4.06E-10 | 3.17E-11 | -7.04 | 14.6075627 | -1.50E-01 | 43001072  | 43001195  | NC_000001.10 |
| cg12229555 | 4.07E-10 | 3.18E-11 | -7.04 | 14.6060342 | -1.70E-01 | 80260329  | 80260452  | NC_000017.10 |
| cg09350536 | 4.07E-10 | 3.18E-11 | -7.04 | 14.6057974 | -7.05E-02 | 23236725  | 23236848  | NC_000014.8  |
| cg22118147 | 4.07E-10 | 3.18E-11 | -7.04 | 14.6056257 | -7.84E-02 | 172144013 | 172144136 | NC_000005.9  |
| cg19463471 | 4.07E-10 | 3.18E-11 | -7.04 | 14.6047684 | -8.33E-02 | 10197190  | 10197313  | NC_000019.9  |
| cg08285151 | 4.07E-10 | 3.18E-11 | -7.04 | 14.6047328 | -2.18E-01 | 18534872  | 18534995  | NC_000007.13 |
| cg14338073 | 4.08E-10 | 3.18E-11 | -7.04 | 14.6036032 | -1.42E-01 | 44359161  | 44359284  | NC_000010.10 |
| cg18389931 | 4.09E-10 | 3.19E-11 | -7.04 | 14.6005392 | -1.36E-01 | 72978724  | 72978847  | NC_000010.10 |
| cg26944851 | 4.09E-10 | 3.20E-11 | -7.04 | 14.5999299 | -1.16E-01 | 23479645  | 23479768  | NC_000010.10 |
| cg00588853 | 4.09E-10 | 3.20E-11 | -7.04 | 14.599898  | -1.10E-01 | 29624485  | 29624608  | NC_000016.9  |
| cg18189994 | 4.09E-10 | 3.20E-11 | -7.04 | 14.5990497 | -1.17E-01 | 53096816  | 53096939  | NC_000015.9  |
| cg03898845 | 4.09E-10 | 3.20E-11 | -7.04 | 14.5989112 | -3.07E-02 | 117114009 | 117114132 | NC_000001.10 |
| cg26309311 | 4.10E-10 | 3.20E-11 | -7.04 | 14.5980686 | -1.11E-01 | 48896065  | 48896188  | NC_000019.9  |
| cg01314252 | 4.10E-10 | 3.20E-11 | -7.04 | 14.5978404 | -1.14E-01 | 9943828   | 9943951   | NC_000003.11 |

|            |          |          |       |            |           |           |           |              |
|------------|----------|----------|-------|------------|-----------|-----------|-----------|--------------|
| cg15522570 | 4.10E-10 | 3.21E-11 | -7.04 | 14.5973214 | -6.05E-02 | 50065333  | 50065456  | NC_000014.8  |
| cg25756470 | 4.10E-10 | 3.21E-11 | -7.04 | 14.5963215 | -1.06E-01 | 37256947  | 37257070  | NC_000022.10 |
| cg11986760 | 4.10E-10 | 3.21E-11 | -7.04 | 14.5961401 | -1.80E-01 | 112420098 | 112420221 | NC_000002.11 |
| cg06436488 | 4.10E-10 | 3.21E-11 | -7.04 | 14.596134  | -1.60E-01 | 84560887  | 84561010  | NC_000016.9  |
| cg10025830 | 4.10E-10 | 3.21E-11 | -7.04 | 14.5959665 | -1.17E-01 | 4136722   | 4136845   | NC_000012.11 |
| cg04674143 | 4.11E-10 | 3.21E-11 | -7.04 | 14.5947894 | -5.52E-02 | 4831543   | 4831666   | NC_000019.9  |
| cg16786868 | 4.12E-10 | 3.22E-11 | -7.04 | 14.593189  | -2.57E-02 | 65242413  | 65242536  | NC_000017.10 |
| cg25820971 | 4.12E-10 | 3.22E-11 | -7.04 | 14.5929154 | -6.84E-02 | 21852127  | 21852250  | NC_000014.8  |
| cg05208178 | 4.12E-10 | 3.22E-11 | -7.04 | 14.5928035 | -1.47E-01 | 233928423 | 233928546 | NC_000002.11 |
| cg07391913 | 4.12E-10 | 3.22E-11 | -7.04 | 14.5926656 | -1.56E-01 | 56818298  | 56818421  | NC_000003.11 |
| cg05173159 | 4.12E-10 | 3.22E-11 | -7.04 | 14.5926246 | -1.31E-01 | 95491799  | 95491922  | NC_000012.11 |
| cg17536465 | 4.12E-10 | 3.22E-11 | -7.04 | 14.5918971 | -1.36E-01 | 126707043 | 126707166 | NC_000005.9  |
| cg26637901 | 4.12E-10 | 3.22E-11 | -7.04 | 14.5916565 | -5.89E-02 | 14518526  | 14518649  | NC_000012.11 |
| cg02303801 | 4.12E-10 | 3.22E-11 | -7.04 | 14.591596  | -1.24E-01 | 3399318   | 3399441   | NC_000001.10 |
| cg25579729 | 4.13E-10 | 3.23E-11 | -7.04 | 14.5901043 | -1.38E-01 | 15993627  | 15993750  | NC_000005.9  |
| cg23628478 | 4.13E-10 | 3.23E-11 | -7.04 | 14.5900623 | -1.32E-01 | 100784781 | 100784904 | NC_000014.8  |
| cg02662658 | 4.14E-10 | 3.24E-11 | -7.04 | 14.5877759 | -8.14E-02 | 34257571  | 34257694  | NC_000017.10 |
| cg23339629 | 4.14E-10 | 3.24E-11 | -7.04 | 14.5861523 | -7.28E-02 | 71168951  | 71169074  | NC_000010.10 |
| cg03706109 | 4.14E-10 | 3.24E-11 | -7.04 | 14.5858135 | -1.13E-01 | 43090472  | 43090595  | NC_000017.10 |
| cg12093976 | 4.15E-10 | 3.25E-11 | -7.04 | 14.5836567 | -1.08E-01 | 110833884 | 110834007 | NC_000004.11 |
| cg12431977 | 4.16E-10 | 3.25E-11 | -7.04 | 14.5829111 | -3.13E-02 | 24769227  | 24769350  | NC_000014.8  |
| cg11254726 | 4.16E-10 | 3.25E-11 | -7.04 | 14.5828163 | -8.85E-02 | 204460191 | 204460314 | NC_000001.10 |
| cg22208536 | 4.16E-10 | 3.26E-11 | -7.04 | 14.5816071 | -1.10E-01 | 186180006 | 186180129 | NC_000004.11 |
| cg24704476 | 4.17E-10 | 3.26E-11 | -7.04 | 14.5797362 | -7.55E-02 | 956799    | 956922    | NC_000001.10 |
| cg15826519 | 4.17E-10 | 3.27E-11 | -7.04 | 14.5783809 | -8.30E-02 | 19808575  | 19808698  | NC_000001.10 |

|                 |          |          |       |            |           |           |           |              |
|-----------------|----------|----------|-------|------------|-----------|-----------|-----------|--------------|
| cg13797468      | 4.18E-10 | 3.27E-11 | -7.04 | 14.5767969 | -1.85E-01 | 98848062  | 98848185  | NC_000003.11 |
| ch.6.139914509F | 4.19E-10 | 3.28E-11 | -7.04 | 14.5750004 | -4.18E-02 | 139872816 | 139872939 | NC_000006.11 |
| cg12069475      | 4.21E-10 | 3.30E-11 | -7.03 | 14.5690612 | -1.13E-01 | 131246544 | 131246667 | NC_000012.11 |
| cg27258272      | 4.22E-10 | 3.30E-11 | -7.03 | 14.568224  | -9.21E-02 | 57424773  | 57424896  | NC_000011.9  |
| ch.20.905431R   | 4.22E-10 | 3.31E-11 | -7.03 | 14.5664744 | -2.63E-02 | 42339567  | 42339690  | NC_000020.10 |
| cg02265379      | 4.23E-10 | 3.31E-11 | -7.03 | 14.5644263 | -8.30E-02 | 87898506  | 87898629  | NC_000005.9  |
| cg19542987      | 4.24E-10 | 3.32E-11 | -7.03 | 14.5629247 | -1.18E-01 | 23216695  | 23216818  | NC_000010.10 |
| cg08643339      | 4.24E-10 | 3.32E-11 | -7.03 | 14.5622945 | -7.82E-02 | 173759487 | 173759610 | NC_000004.11 |
| cg13714271      | 4.24E-10 | 3.32E-11 | -7.03 | 14.5622747 | -5.06E-02 | 33076774  | 33076897  | NC_000009.11 |
| cg26070865      | 4.24E-10 | 3.32E-11 | -7.03 | 14.5618777 | -8.49E-02 | 959141    | 959264    | NC_000005.9  |
| cg05445221      | 4.24E-10 | 3.32E-11 | -7.03 | 14.5615912 | -9.38E-02 | 88512529  | 88512652  | NC_000016.9  |
| cg15139668      | 4.25E-10 | 3.33E-11 | -7.03 | 14.5598987 | -5.99E-02 | 4577005   | 4577128   | NC_000004.11 |
| cg22721827      | 4.25E-10 | 3.33E-11 | -7.03 | 14.5594269 | -1.58E-01 | 2520958   | 2521081   | NC_000016.9  |
| cg00402873      | 4.25E-10 | 3.33E-11 | -7.03 | 14.5587922 | -1.84E-01 | 1333032   | 1333155   | NC_000004.11 |
| cg06206357      | 4.26E-10 | 3.33E-11 | -7.03 | 14.5584891 | -1.40E-01 | 101274027 | 101274150 | NC_000007.13 |
| cg27208903      | 4.26E-10 | 3.33E-11 | -7.03 | 14.5584018 | -1.56E-01 | 29625225  | 29625348  | NC_000016.9  |
| cg20519670      | 4.26E-10 | 3.34E-11 | -7.03 | 14.5579378 | -4.93E-02 | 65172006  | 65172129  | NC_000014.8  |
| cg09158336      | 4.26E-10 | 3.34E-11 | -7.03 | 14.5578573 | -5.06E-02 | 76338205  | 76338328  | NC_000017.10 |
| cg20811788      | 4.26E-10 | 3.34E-11 | -7.03 | 14.5578457 | -9.62E-02 | 50721368  | 50721491  | NC_000022.10 |
| cg22276612      | 4.26E-10 | 3.34E-11 | -7.03 | 14.5571547 | -1.27E-01 | 133105171 | 133105294 | NC_000012.11 |
| cg27586682      | 4.27E-10 | 3.34E-11 | -7.03 | 14.5558562 | -5.38E-02 | 26437624  | 26437747  | NC_000001.10 |
| cg21211730      | 4.27E-10 | 3.34E-11 | -7.03 | 14.5555227 | -1.53E-01 | 45279770  | 45279893  | NC_000019.9  |
| cg25578967      | 4.27E-10 | 3.35E-11 | -7.03 | 14.5550202 | -1.25E-01 | 25018440  | 25018563  | NC_000007.13 |
| cg13877631      | 4.27E-10 | 3.35E-11 | -7.03 | 14.55432   | -1.48E-01 | 3124167   | 3124290   | NC_000004.11 |
| cg24338780      | 4.28E-10 | 3.36E-11 | -7.03 | 14.551997  | -7.90E-02 | 174968123 | 174968246 | NC_000001.10 |

|                 |          |          |       |            |           |           |           |              |
|-----------------|----------|----------|-------|------------|-----------|-----------|-----------|--------------|
| cg24509919      | 4.28E-10 | 3.36E-11 | -7.03 | 14.5515707 | -1.71E-01 | 168230886 | 168231009 | NC_000001.10 |
| cg21192376      | 4.28E-10 | 3.36E-11 | -7.03 | 14.5511948 | -6.13E-02 | 53020168  | 53020291  | NC_000014.8  |
| cg02974484      | 4.29E-10 | 3.36E-11 | -7.03 | 14.5506621 | -5.63E-02 | 16825139  | 16825262  | NC_000001.10 |
| cg05241134      | 4.29E-10 | 3.36E-11 | -7.03 | 14.550028  | -9.97E-02 | 1994419   | 1994542   | NC_000008.10 |
| cg11270070      | 4.29E-10 | 3.37E-11 | -7.03 | 14.5488812 | -1.89E-01 | 50383118  | 50383241  | NC_000003.11 |
| cg05850205      | 4.30E-10 | 3.37E-11 | -7.03 | 14.5485245 | -1.01E-01 | 67350187  | 67350310  | NC_000008.10 |
| cg09112371      | 4.31E-10 | 3.38E-11 | -7.03 | 14.5454829 | -4.28E-02 | 33240090  | 33240213  | NC_000006.11 |
| cg26750893      | 4.31E-10 | 3.38E-11 | -7.03 | 14.5447819 | -1.34E-01 | 38043481  | 38043604  | NC_000002.11 |
| cg11071070      | 4.32E-10 | 3.39E-11 | -7.03 | 14.5437128 | -4.50E-02 | 27632322  | 27632445  | NC_000008.10 |
| cg11061177      | 4.32E-10 | 3.39E-11 | -7.03 | 14.5434784 | -7.07E-02 | 119134785 | 119134908 | NC_000010.10 |
| cg06563943      | 4.32E-10 | 3.39E-11 | -7.03 | 14.5427845 | -6.32E-02 | 71188271  | 71188394  | NC_000017.10 |
| cg17376960      | 4.32E-10 | 3.39E-11 | -7.03 | 14.5427035 | -5.78E-02 | 7197987   | 7198110   | NC_000017.10 |
| cg20270775      | 4.32E-10 | 3.39E-11 | -7.03 | 14.5426306 | -6.88E-02 | 28282967  | 28283090  | NC_000003.11 |
| cg06933924      | 4.32E-10 | 3.39E-11 | -7.03 | 14.5426259 | -3.09E-02 | 121571068 | 121571191 | NC_000012.11 |
| cg09966895      | 4.32E-10 | 3.39E-11 | -7.03 | 14.5424597 | -2.15E-01 | 78738326  | 78738449  | NC_000011.9  |
| cg27255239      | 4.32E-10 | 3.39E-11 | -7.03 | 14.5417003 | -2.14E-01 | 102091656 | 102091779 | NC_000002.11 |
| cg16591502      | 4.32E-10 | 3.39E-11 | -7.03 | 14.541663  | -5.03E-02 | 76210838  | 76210961  | NC_000013.10 |
| cg21849812      | 4.32E-10 | 3.39E-11 | -7.03 | 14.5414687 | -1.44E-01 | 17848522  | 17848645  | NC_000001.10 |
| cg18235078      | 4.33E-10 | 3.39E-11 | -7.03 | 14.5410623 | -1.43E-01 | 110478280 | 110478403 | NC_000012.11 |
| cg16879574      | 4.33E-10 | 3.40E-11 | -7.03 | 14.5406717 | -6.05E-02 | 18123047  | 18123170  | NC_000006.11 |
| cg22469870      | 4.33E-10 | 3.40E-11 | -7.03 | 14.5404406 | -1.57E-01 | 56272964  | 56273087  | NC_000020.10 |
| ch.4.108890154R | 4.33E-10 | 3.40E-11 | -7.03 | 14.5404004 | -3.18E-02 | 108670705 | 108670828 | NC_000004.11 |
| cg20240462      | 4.34E-10 | 3.40E-11 | -7.03 | 14.5383254 | -4.82E-02 | 83206604  | 83206727  | NC_000004.11 |
| cg09516448      | 4.34E-10 | 3.41E-11 | -7.03 | 14.5363688 | -7.76E-02 | 615735    | 615858    | NC_000007.13 |
| ch.6.3068315F   | 4.35E-10 | 3.42E-11 | -7.03 | 14.5341625 | -4.50E-02 | 157454527 | 157454650 | NC_000006.11 |

|            |          |          |       |            |           |           |           |              |
|------------|----------|----------|-------|------------|-----------|-----------|-----------|--------------|
| cg16337430 | 4.36E-10 | 3.42E-11 | -7.03 | 14.532392  | -1.71E-01 | 124876433 | 124876556 | NC_000012.11 |
| cg01645401 | 4.36E-10 | 3.42E-11 | -7.03 | 14.5323395 | -1.39E-01 | 73649892  | 73650015  | NC_000013.10 |
| cg06117855 | 4.36E-10 | 3.42E-11 | -7.03 | 14.5322028 | -9.33E-02 | 45067788  | 45067911  | NC_000003.11 |
| cg11673687 | 4.37E-10 | 3.43E-11 | -7.03 | 14.5301151 | -1.28E-01 | 27426555  | 27426678  | NC_000001.10 |
| cg09328466 | 4.37E-10 | 3.43E-11 | -7.03 | 14.5294132 | -6.64E-02 | 64023458  | 64023581  | NC_000007.13 |
| cg00385620 | 4.38E-10 | 3.44E-11 | -7.03 | 14.5281331 | -7.66E-02 | 34759158  | 34759281  | NC_000006.11 |
| cg21308656 | 4.38E-10 | 3.44E-11 | -7.03 | 14.5268918 | -1.20E-01 | 151093019 | 151093142 | NC_000007.13 |
| cg07837534 | 4.39E-10 | 3.44E-11 | -7.03 | 14.5266318 | -1.44E-01 | 161038506 | 161038629 | NC_000001.10 |
| cg17740959 | 4.39E-10 | 3.45E-11 | -7.03 | 14.5260726 | -2.88E-02 | 46101256  | 46101379  | NC_000017.10 |
| cg22116041 | 4.39E-10 | 3.45E-11 | -7.03 | 14.5256204 | -1.59E-01 | 153564653 | 153564776 | NC_000004.11 |
| cg02310296 | 4.39E-10 | 3.45E-11 | -7.03 | 14.5248481 | -1.10E-01 | 44637358  | 44637481  | NC_000020.10 |
| cg02672229 | 4.40E-10 | 3.46E-11 | -7.03 | 14.5227447 | -1.40E-01 | 101594256 | 101594379 | NC_000010.10 |
| cg13591648 | 4.40E-10 | 3.46E-11 | -7.03 | 14.522686  | -1.05E-01 | 44821451  | 44821574  | NC_000021.8  |
| cg24413235 | 4.40E-10 | 3.46E-11 | -7.03 | 14.5221705 | -6.55E-02 | 27851648  | 27851771  | NC_000002.11 |
| cg07538206 | 4.40E-10 | 3.46E-11 | -7.03 | 14.5219367 | -1.05E-01 | 43374650  | 43374773  | NC_000021.8  |
| cg14193806 | 4.41E-10 | 3.46E-11 | -7.03 | 14.5213893 | -8.71E-02 | 10264673  | 10264796  | NC_000012.11 |
| cg18911861 | 4.41E-10 | 3.47E-11 | -7.03 | 14.5201205 | -5.76E-02 | 42858743  | 42858866  | NC_000006.11 |
| cg08371852 | 4.41E-10 | 3.47E-11 | -7.03 | 14.5198824 | -1.65E-01 | 80878744  | 80878867  | NC_000015.9  |
| cg12213414 | 4.42E-10 | 3.47E-11 | -7.03 | 14.5190885 | -1.40E-01 | 99867344  | 99867467  | NC_000002.11 |
| cg05482498 | 4.42E-10 | 3.47E-11 | -7.02 | 14.5181788 | -8.56E-02 | 28866178  | 28866301  | NC_000006.11 |
| cg14138287 | 4.42E-10 | 3.47E-11 | -7.02 | 14.5180912 | -1.21E-01 | 16534283  | 16534406  | NC_000001.10 |
| cg14166131 | 4.42E-10 | 3.48E-11 | -7.02 | 14.5175622 | -1.24E-01 | 139555134 | 139555257 | NC_000009.11 |
| cg25575688 | 4.43E-10 | 3.48E-11 | -7.02 | 14.5160551 | -5.52E-02 | 305917    | 306040    | NC_000020.10 |
| cg14361132 | 4.43E-10 | 3.48E-11 | -7.02 | 14.5157608 | -1.39E-01 | 210288244 | 210288367 | NC_000002.11 |
| cg08140412 | 4.44E-10 | 3.49E-11 | -7.02 | 14.5136611 | -1.11E-01 | 52014778  | 52014901  | NC_000012.11 |

|            |          |          |       |            |           |           |           |              |
|------------|----------|----------|-------|------------|-----------|-----------|-----------|--------------|
| cg05584950 | 4.44E-10 | 3.49E-11 | -7.02 | 14.5129407 | -1.53E-01 | 86012847  | 86012970  | NC_000002.11 |
| cg00948524 | 4.44E-10 | 3.49E-11 | -7.02 | 14.512635  | -6.05E-02 | 29297757  | 29297880  | NC_000017.10 |
| cg09547756 | 4.45E-10 | 3.50E-11 | -7.02 | 14.511603  | -1.44E-01 | 3671903   | 3672026   | NC_000019.9  |
| cg01811583 | 4.45E-10 | 3.50E-11 | -7.02 | 14.511074  | -1.18E-01 | 100225060 | 100225183 | NC_000014.8  |
| cg06663644 | 4.46E-10 | 3.51E-11 | -7.02 | 14.5088375 | -7.91E-02 | 40971204  | 40971327  | NC_000019.9  |
| cg07099567 | 4.46E-10 | 3.51E-11 | -7.02 | 14.5088373 | -1.38E-01 | 81780369  | 81780492  | NC_000014.8  |
| cg13442606 | 4.47E-10 | 3.51E-11 | -7.02 | 14.5073592 | -1.14E-01 | 3071269   | 3071392   | NC_000011.9  |
| cg19734190 | 4.47E-10 | 3.51E-11 | -7.02 | 14.507239  | -1.84E-01 | 6993556   | 6993679   | NC_000004.11 |
| cg14603605 | 4.47E-10 | 3.52E-11 | -7.02 | 14.5057638 | -1.66E-01 | 12279778  | 12279901  | NC_000011.9  |
| cg27214687 | 4.48E-10 | 3.52E-11 | -7.02 | 14.5049318 | -1.34E-01 | 241383517 | 241383640 | NC_000002.11 |
| cg27269903 | 4.48E-10 | 3.52E-11 | -7.02 | 14.504373  | -6.12E-02 | 86351016  | 86351139  | NC_000006.11 |
| cg04299274 | 4.49E-10 | 3.53E-11 | -7.02 | 14.5029929 | -1.30E-01 | 25798741  | 25798864  | NC_000017.10 |
| cg20401945 | 4.49E-10 | 3.53E-11 | -7.02 | 14.5025631 | -1.14E-01 | 29912460  | 29912583  | NC_000016.9  |
| cg06961439 | 4.49E-10 | 3.53E-11 | -7.02 | 14.502213  | -9.28E-02 | 149570036 | 149570159 | NC_000007.13 |
| cg02010829 | 4.49E-10 | 3.53E-11 | -7.02 | 14.5017193 | -1.03E-01 | 16090604  | 16090727  | NC_000016.9  |
| cg08918845 | 4.50E-10 | 3.54E-11 | -7.02 | 14.4989326 | -1.34E-01 | 31595432  | 31595555  | NC_000020.10 |
| cg11788465 | 4.51E-10 | 3.54E-11 | -7.02 | 14.4984014 | -6.22E-02 | 134370313 | 134370436 | NC_000005.9  |
| cg07430153 | 4.52E-10 | 3.56E-11 | -7.02 | 14.4954353 | -2.27E-02 | 76424847  | 76424970  | NC_000012.11 |
| cg23057567 | 4.52E-10 | 3.56E-11 | -7.02 | 14.4953475 | -1.32E-01 | 47017629  | 47017752  | NC_000019.9  |
| cg26152038 | 4.52E-10 | 3.56E-11 | -7.02 | 14.4948216 | -1.32E-01 | 146543596 | 146543719 | NC_000001.10 |
| cg21769117 | 4.52E-10 | 3.56E-11 | -7.02 | 14.4947406 | -1.57E-01 | 31705273  | 31705396  | NC_000006.11 |
| cg21300072 | 4.53E-10 | 3.57E-11 | -7.02 | 14.4920015 | -5.55E-02 | 12850082  | 12850205  | NC_000012.11 |
| cg23888375 | 4.54E-10 | 3.57E-11 | -7.02 | 14.4911892 | -7.61E-02 | 203776317 | 203776440 | NC_000002.11 |
| cg05774672 | 4.54E-10 | 3.58E-11 | -7.02 | 14.4896234 | -8.00E-02 | 208631916 | 208632039 | NC_000002.11 |
| cg01662942 | 4.55E-10 | 3.58E-11 | -7.02 | 14.4890308 | -1.46E-01 | 241722113 | 241722236 | NC_000002.11 |

|              |          |          |       |            |           |           |           |              |
|--------------|----------|----------|-------|------------|-----------|-----------|-----------|--------------|
| cg22998610   | 4.55E-10 | 3.58E-11 | -7.02 | 14.4889816 | -4.02E-02 | 62538411  | 62538534  | NC_000011.9  |
| cg21893394   | 4.55E-10 | 3.58E-11 | -7.02 | 14.4886678 | -3.33E-02 | 10342123  | 10342246  | NC_000019.9  |
| cg17147440   | 4.55E-10 | 3.58E-11 | -7.02 | 14.4876404 | -1.58E-01 | 63337352  | 63337475  | NC_000015.9  |
| cg22262140   | 4.56E-10 | 3.59E-11 | -7.02 | 14.4854083 | -1.16E-01 | 21986976  | 21987099  | NC_000022.10 |
| ch.6.839713R | 4.56E-10 | 3.59E-11 | -7.02 | 14.4847101 | -1.50E-02 | 34385746  | 34385869  | NC_000006.11 |
| cg14971544   | 4.57E-10 | 3.60E-11 | -7.02 | 14.4840306 | -5.39E-02 | 54955149  | 54955272  | NC_000001.10 |
| cg00238570   | 4.57E-10 | 3.60E-11 | -7.02 | 14.482633  | -1.51E-01 | 110871644 | 110871767 | NC_000002.11 |
| cg08635723   | 4.58E-10 | 3.61E-11 | -7.02 | 14.4814263 | -7.07E-02 | 16399244  | 16399367  | NC_000006.11 |
| cg17969271   | 4.58E-10 | 3.61E-11 | -7.02 | 14.4811176 | -9.62E-02 | 171430188 | 171430311 | NC_000005.9  |
| cg01917164   | 4.58E-10 | 3.61E-11 | -7.02 | 14.4808997 | -5.60E-02 | 105111002 | 105111125 | NC_000010.10 |
| cg08205396   | 4.58E-10 | 3.61E-11 | -7.02 | 14.4805245 | -1.51E-01 | 142217653 | 142217776 | NC_000008.10 |
| cg23959119   | 4.58E-10 | 3.61E-11 | -7.02 | 14.4801945 | -2.56E-02 | 42806179  | 42806302  | NC_000019.9  |
| cg25270498   | 4.58E-10 | 3.61E-11 | -7.02 | 14.4800081 | -8.01E-02 | 81037414  | 81037537  | NC_000017.10 |
| cg12018809   | 4.60E-10 | 3.62E-11 | -7.02 | 14.4769394 | -8.19E-02 | 6745171   | 6745294   | NC_000012.11 |
| cg08398554   | 4.60E-10 | 3.62E-11 | -7.02 | 14.4764211 | -2.20E-02 | 71736409  | 71736532  | NC_000009.11 |
| cg07569385   | 4.60E-10 | 3.63E-11 | -7.02 | 14.4759954 | -7.69E-02 | 20766226  | 20766349  | NC_000013.10 |
| cg04012857   | 4.60E-10 | 3.63E-11 | -7.02 | 14.4757383 | -1.62E-01 | 30080405  | 30080528  | NC_000006.11 |
| cg14583871   | 4.60E-10 | 3.63E-11 | -7.02 | 14.4754762 | -1.02E-01 | 36043191  | 36043314  | NC_000021.8  |
| cg03684513   | 4.61E-10 | 3.63E-11 | -7.02 | 14.4741576 | -5.08E-02 | 24882451  | 24882574  | NC_000001.10 |
| cg05187833   | 4.61E-10 | 3.63E-11 | -7.02 | 14.4740959 | -4.47E-02 | 17706939  | 17707062  | NC_000006.11 |
| cg22081371   | 4.62E-10 | 3.65E-11 | -7.02 | 14.4708427 | -2.35E-01 | 177827903 | 177828026 | NC_000001.10 |
| cg17628700   | 4.63E-10 | 3.65E-11 | -7.02 | 14.4696234 | -6.43E-02 | 46402601  | 46402724  | NC_000011.9  |
| cg13662724   | 4.63E-10 | 3.65E-11 | -7.02 | 14.4691622 | -9.32E-02 | 164133838 | 164133961 | NC_000004.11 |
| cg01059100   | 4.64E-10 | 3.66E-11 | -7.02 | 14.4675044 | -1.96E-01 | 31214607  | 31214730  | NC_000016.9  |
| cg01413582   | 4.64E-10 | 3.66E-11 | -7.02 | 14.4674461 | -2.34E-01 | 30652688  | 30652811  | NC_000006.11 |

|            |          |          |       |            |           |           |           |              |
|------------|----------|----------|-------|------------|-----------|-----------|-----------|--------------|
| cg15248777 | 4.64E-10 | 3.66E-11 | -7.02 | 14.4664615 | -6.88E-02 | 9334699   | 9334822   | NC_000018.9  |
| cg23237801 | 4.65E-10 | 3.66E-11 | -7.02 | 14.4660187 | -1.08E-01 | 16476620  | 16476743  | NC_000001.10 |
| cg08012156 | 4.65E-10 | 3.66E-11 | -7.02 | 14.4658404 | -7.61E-02 | 74305752  | 74305875  | NC_000007.13 |
| cg07572233 | 4.65E-10 | 3.66E-11 | -7.02 | 14.4657857 | -1.42E-01 | 234689565 | 234689688 | NC_000001.10 |
| cg02233197 | 4.65E-10 | 3.67E-11 | -7.02 | 14.4652014 | -1.22E-01 | 51390542  | 51390665  | NC_000015.9  |
| cg04186657 | 4.65E-10 | 3.67E-11 | -7.02 | 14.464835  | -1.07E-01 | 29690893  | 29691016  | NC_000006.11 |
| cg03396896 | 4.65E-10 | 3.67E-11 | -7.02 | 14.4646293 | -1.40E-01 | 194117107 | 194117230 | NC_000003.11 |
| cg26608667 | 4.65E-10 | 3.67E-11 | -7.02 | 14.4644838 | -1.34E-01 | 1196370   | 1196493   | NC_000007.13 |
| cg11294761 | 4.65E-10 | 3.67E-11 | -7.02 | 14.4644496 | -9.75E-02 | 80275530  | 80275653  | NC_000017.10 |
| cg11033588 | 4.65E-10 | 3.67E-11 | -7.02 | 14.4644245 | -1.34E-01 | 140495807 | 140495930 | NC_000006.11 |
| cg20062691 | 4.65E-10 | 3.67E-11 | -7.02 | 14.4640972 | -1.33E-01 | 949392    | 949515    | NC_000001.10 |
| cg20728746 | 4.66E-10 | 3.68E-11 | -7.01 | 14.4620518 | -3.54E-02 | 95831012  | 95831135  | NC_000002.11 |
| cg00010168 | 4.67E-10 | 3.68E-11 | -7.01 | 14.460983  | -3.74E-02 | 99258642  | 99258765  | NC_000010.10 |
| cg12286154 | 4.67E-10 | 3.69E-11 | -7.01 | 14.4602571 | -1.15E-01 | 32015215  | 32015338  | NC_000006.11 |
| cg13753183 | 4.67E-10 | 3.69E-11 | -7.01 | 14.4600825 | -7.78E-02 | 32989852  | 32989975  | NC_000009.11 |
| cg23223044 | 4.67E-10 | 3.69E-11 | -7.01 | 14.4598719 | -4.80E-02 | 49990882  | 49991005  | NC_000019.9  |
| cg15614917 | 4.67E-10 | 3.69E-11 | -7.01 | 14.4593192 | -7.69E-02 | 19384165  | 19384288  | NC_000019.9  |
| cg18648343 | 4.68E-10 | 3.70E-11 | -7.01 | 14.457119  | -4.95E-02 | 39644430  | 39644553  | NC_000014.8  |
| cg02671819 | 4.69E-10 | 3.70E-11 | -7.01 | 14.4554467 | -8.68E-02 | 62778370  | 62778493  | NC_000017.10 |
| cg16403326 | 4.70E-10 | 3.71E-11 | -7.01 | 14.4538835 | -1.18E-01 | 50359051  | 50359174  | NC_000012.11 |
| cg02584432 | 4.70E-10 | 3.71E-11 | -7.01 | 14.4537893 | -6.76E-02 | 138740366 | 138740489 | NC_000005.9  |
| cg08800670 | 4.70E-10 | 3.71E-11 | -7.01 | 14.4527774 | -1.07E-01 | 436684    | 436807    | NC_000006.11 |
| cg15981995 | 4.70E-10 | 3.71E-11 | -7.01 | 14.4527534 | -8.78E-02 | 169487311 | 169487434 | NC_000003.11 |
| cg16982658 | 4.71E-10 | 3.72E-11 | -7.01 | 14.4518151 | -6.71E-02 | 20104937  | 20105060  | NC_000022.10 |
| cg22730864 | 4.72E-10 | 3.73E-11 | -7.01 | 14.4495657 | -1.25E-01 | 3161448   | 3161571   | NC_000001.10 |



|                 |          |          |       |            |           |           |           |              |
|-----------------|----------|----------|-------|------------|-----------|-----------|-----------|--------------|
| cg13604132      | 4.73E-10 | 3.74E-11 | -7.01 | 14.4468614 | -3.88E-02 | 75023629  | 75023752  | NC_000004.11 |
| cg24959938      | 4.73E-10 | 3.74E-11 | -7.01 | 14.4467786 | -1.33E-01 | 77866767  | 77866890  | NC_000018.9  |
| cg00313981      | 4.73E-10 | 3.74E-11 | -7.01 | 14.4465403 | -5.17E-02 | 228595062 | 228595185 | NC_000001.10 |
| cg04093633      | 4.74E-10 | 3.74E-11 | -7.01 | 14.4456053 | -1.61E-01 | 82469848  | 82469971  | NC_000015.9  |
| cg14939765      | 4.74E-10 | 3.74E-11 | -7.01 | 14.4455271 | -1.36E-01 | 70442137  | 70442260  | NC_000017.10 |
| ch.15.45894638R | 4.74E-10 | 3.74E-11 | -7.01 | 14.4449299 | -4.41E-02 | 48107346  | 48107469  | NC_000015.9  |
| cg25383505      | 4.74E-10 | 3.74E-11 | -7.01 | 14.4446309 | -3.99E-02 | 39343506  | 39343629  | NC_000019.9  |
| cg04614440      | 4.74E-10 | 3.74E-11 | -7.01 | 14.4446292 | -2.60E-02 | 42642033  | 42642156  | NC_000003.11 |
| cg23932658      | 4.76E-10 | 3.76E-11 | -7.01 | 14.4407345 | -3.15E-02 | 57637574  | 57637697  | NC_000012.11 |
| cg00151728      | 4.76E-10 | 3.76E-11 | -7.01 | 14.4407192 | -1.32E-01 | 169478456 | 169478579 | NC_000003.11 |
| cg10508185      | 4.76E-10 | 3.76E-11 | -7.01 | 14.4406489 | -1.15E-01 | 175796500 | 175796623 | NC_000002.11 |
| cg02525756      | 4.76E-10 | 3.76E-11 | -7.01 | 14.4397126 | -6.72E-02 | 28919362  | 28919485  | NC_000001.10 |
| cg02558476      | 4.77E-10 | 3.77E-11 | -7.01 | 14.4383859 | -1.03E-01 | 2880326   | 2880449   | NC_000016.9  |
| cg16462183      | 4.77E-10 | 3.77E-11 | -7.01 | 14.4383339 | -1.12E-01 | 54281733  | 54281856  | NC_000005.9  |
| cg01851450      | 4.77E-10 | 3.77E-11 | -7.01 | 14.4377064 | -1.21E-01 | 146864335 | 146864458 | NC_000006.11 |
| cg22715094      | 4.77E-10 | 3.77E-11 | -7.01 | 14.4373284 | -6.88E-02 | 31783021  | 31783144  | NC_000006.11 |
| cg23732845      | 4.79E-10 | 3.78E-11 | -7.01 | 14.4345948 | -1.10E-01 | 26663426  | 26663549  | NC_000001.10 |
| cg01432692      | 4.79E-10 | 3.78E-11 | -7.01 | 14.434187  | -1.43E-01 | 232674637 | 232674760 | NC_000001.10 |
| cg20990478      | 4.79E-10 | 3.79E-11 | -7.01 | 14.4331372 | -7.37E-02 | 272354    | 272477    | NC_000005.9  |
| cg07068998      | 4.79E-10 | 3.79E-11 | -7.01 | 14.4327686 | -5.32E-02 | 115259668 | 115259791 | NC_000001.10 |
| cg15157945      | 4.80E-10 | 3.79E-11 | -7.01 | 14.4321074 | -1.12E-01 | 47023603  | 47023726  | NC_000003.11 |
| cg16013454      | 4.80E-10 | 3.79E-11 | -7.01 | 14.4319301 | -5.86E-02 | 63660070  | 63660193  | NC_000010.10 |
| cg26762136      | 4.80E-10 | 3.79E-11 | -7.01 | 14.4315913 | -6.38E-02 | 37249669  | 37249792  | NC_000022.10 |
| cg03463523      | 4.80E-10 | 3.80E-11 | -7.01 | 14.4312642 | -1.30E-01 | 73099917  | 73100040  | NC_000016.9  |
| cg06663317      | 4.81E-10 | 3.80E-11 | -7.01 | 14.4289818 | -1.68E-01 | 56641101  | 56641224  | NC_000016.9  |

|            |          |          |       |            |           |           |           |              |
|------------|----------|----------|-------|------------|-----------|-----------|-----------|--------------|
| cg25634742 | 4.82E-10 | 3.81E-11 | -7.01 | 14.4264786 | -1.33E-01 | 146864328 | 146864451 | NC_000006.11 |
| cg01768686 | 4.82E-10 | 3.82E-11 | -7.01 | 14.4260384 | -1.34E-01 | 4337111   | 4337234   | NC_000017.10 |
| cg09303236 | 4.83E-10 | 3.82E-11 | -7.01 | 14.4252728 | -1.40E-01 | 38657915  | 38658038  | NC_000017.10 |
| cg11928064 | 4.83E-10 | 3.82E-11 | -7.01 | 14.4247468 | -1.79E-01 | 124537810 | 124537933 | NC_000003.11 |
| cg11742383 | 4.84E-10 | 3.83E-11 | -7.01 | 14.4232084 | -9.44E-02 | 89228552  | 89228675  | NC_000011.9  |
| cg05826677 | 4.85E-10 | 3.84E-11 | -7.01 | 14.4210104 | -5.91E-02 | 48031468  | 48031591  | NC_000007.13 |
| cg05826458 | 4.85E-10 | 3.84E-11 | -7.01 | 14.4205847 | -4.03E-02 | 111875031 | 111875154 | NC_000002.11 |
| cg19639873 | 4.85E-10 | 3.84E-11 | -7.01 | 14.4200845 | -6.43E-02 | 49716966  | 49717089  | NC_000012.11 |
| cg07878955 | 4.85E-10 | 3.84E-11 | -7.01 | 14.4200286 | -4.92E-02 | 104068488 | 104068611 | NC_000001.10 |
| cg21767207 | 4.85E-10 | 3.84E-11 | -7.01 | 14.4199405 | -5.57E-02 | 36236454  | 36236577  | NC_000019.9  |
| cg21560076 | 4.86E-10 | 3.84E-11 | -7.01 | 14.4193475 | -1.68E-01 | 108422996 | 108423119 | NC_000011.9  |
| cg14555350 | 4.86E-10 | 3.84E-11 | -7.01 | 14.4192293 | -1.42E-01 | 142580618 | 142580741 | NC_000005.9  |
| cg22293458 | 4.86E-10 | 3.85E-11 | -7.01 | 14.4180542 | -1.91E-01 | 184483865 | 184483988 | NC_000003.11 |
| cg00260647 | 4.86E-10 | 3.85E-11 | -7.01 | 14.4180064 | -7.24E-02 | 30524003  | 30524126  | NC_000006.11 |
| cg09648239 | 4.86E-10 | 3.85E-11 | -7.01 | 14.4173242 | -1.37E-01 | 117243548 | 117243671 | NC_000003.11 |
| cg01711344 | 4.87E-10 | 3.85E-11 | -7.01 | 14.4166026 | -1.46E-01 | 67770404  | 67770527  | NC_000011.9  |
| cg08849542 | 4.87E-10 | 3.86E-11 | -7.01 | 14.4154013 | -7.27E-02 | 40175572  | 40175695  | NC_000003.11 |
| cg21048812 | 4.88E-10 | 3.86E-11 | -7.01 | 14.4136007 | -1.21E-01 | 35992883  | 35993006  | NC_000019.9  |
| cg03653026 | 4.88E-10 | 3.87E-11 | -7.01 | 14.413372  | -1.72E-01 | 135115118 | 135115241 | NC_000009.11 |
| cg06852652 | 4.88E-10 | 3.87E-11 | -7.01 | 14.4130301 | -1.28E-01 | 96442031  | 96442154  | NC_000010.10 |
| cg26275848 | 4.89E-10 | 3.87E-11 | -7.01 | 14.4121678 | -1.15E-01 | 49355334  | 49355457  | NC_000012.11 |
| cg02780210 | 4.89E-10 | 3.87E-11 | -7.01 | 14.4119739 | -1.48E-01 | 37732690  | 37732813  | NC_000017.10 |
| cg24025995 | 4.90E-10 | 3.88E-11 | -7.01 | 14.4093888 | -4.86E-02 | 13875323  | 13875446  | NC_000019.9  |
| cg18764358 | 4.90E-10 | 3.88E-11 | -7.01 | 14.4085828 | -1.54E-01 | 85138606  | 85138729  | NC_000007.13 |
| cg04961911 | 4.90E-10 | 3.88E-11 | -7.01 | 14.4084386 | -7.21E-02 | 35079141  | 35079264  | NC_000009.11 |

|            |          |          |       |            |           |           |           |              |
|------------|----------|----------|-------|------------|-----------|-----------|-----------|--------------|
| cg22225802 | 4.91E-10 | 3.89E-11 | -7.01 | 14.4079102 | -5.93E-02 | 48672629  | 48672752  | NC_000003.11 |
| cg26895804 | 4.91E-10 | 3.89E-11 | -7.01 | 14.4078577 | -1.67E-01 | 145917243 | 145917366 | NC_000008.10 |
| cg15190149 | 4.91E-10 | 3.89E-11 | -7.01 | 14.4077478 | -1.08E-01 | 1257347   | 1257470   | NC_000019.9  |
| cg27123273 | 4.91E-10 | 3.89E-11 | -7.01 | 14.4070494 | -1.27E-01 | 72405329  | 72405452  | NC_000016.9  |
| cg22851080 | 4.92E-10 | 3.89E-11 | -7    | 14.4059064 | -9.71E-02 | 32044404  | 32044527  | NC_000006.11 |
| cg06209740 | 4.93E-10 | 3.90E-11 | -7    | 14.4033442 | -4.54E-02 | 35435693  | 35435816  | NC_000006.11 |
| cg13491480 | 4.93E-10 | 3.91E-11 | -7    | 14.4029099 | -9.85E-02 | 130880369 | 130880492 | NC_000009.11 |
| cg09206774 | 4.93E-10 | 3.91E-11 | -7    | 14.4022105 | -1.85E-01 | 3581233   | 3581356   | NC_000010.10 |
| cg11896923 | 4.93E-10 | 3.91E-11 | -7    | 14.4021767 | -7.47E-02 | 37825027  | 37825150  | NC_000017.10 |
| cg09839204 | 4.94E-10 | 3.91E-11 | -7    | 14.4015551 | -1.12E-01 | 47049879  | 47050002  | NC_000010.10 |
| cg21235678 | 4.94E-10 | 3.91E-11 | -7    | 14.4009583 | -1.53E-01 | 1130967   | 1131090   | NC_000007.13 |
| cg16138458 | 4.94E-10 | 3.91E-11 | -7    | 14.4008758 | -1.20E-01 | 27841120  | 27841243  | NC_000006.11 |
| cg13005635 | 4.94E-10 | 3.92E-11 | -7    | 14.4002479 | -1.36E-01 | 11093283  | 11093406  | NC_000012.11 |
| cg04141129 | 4.94E-10 | 3.92E-11 | -7    | 14.3998668 | -1.14E-01 | 32530696  | 32530819  | NC_000012.11 |
| cg23581541 | 4.96E-10 | 3.93E-11 | -7    | 14.3964628 | -9.05E-02 | 2731176   | 2731299   | NC_000020.10 |
| cg05784862 | 4.97E-10 | 3.94E-11 | -7    | 14.3937097 | -1.56E-01 | 25799018  | 25799141  | NC_000017.10 |
| cg23449544 | 4.97E-10 | 3.94E-11 | -7    | 14.3934499 | -1.29E-01 | 126937396 | 126937519 | NC_000003.11 |
| cg09180629 | 4.98E-10 | 3.95E-11 | -7    | 14.3930526 | -4.46E-02 | 49395208  | 49395331  | NC_000003.11 |
| cg08535184 | 4.98E-10 | 3.95E-11 | -7    | 14.3915538 | -1.06E-01 | 27152066  | 27152189  | NC_000001.10 |
| cg24107163 | 4.99E-10 | 3.96E-11 | -7    | 14.3900589 | -1.89E-01 | 207095332 | 207095455 | NC_000001.10 |
| cg24156261 | 4.99E-10 | 3.96E-11 | -7    | 14.3895785 | -1.57E-01 | 99721850  | 99721973  | NC_000003.11 |
| cg19629208 | 5.00E-10 | 3.97E-11 | -7    | 14.3880321 | -1.01E-01 | 176810904 | 176811027 | NC_000005.9  |
| cg09385936 | 5.01E-10 | 3.98E-11 | -7    | 14.3857312 | -1.26E-01 | 100791876 | 100791999 | NC_000014.8  |
| cg21926875 | 5.02E-10 | 3.98E-11 | -7    | 14.3838909 | -2.66E-02 | 47596410  | 47596533  | NC_000002.11 |
| cg14426312 | 5.02E-10 | 3.98E-11 | -7    | 14.383747  | -3.31E-02 | 71395063  | 71395186  | NC_000009.11 |

|                |          |          |    |            |           |           |           |              |
|----------------|----------|----------|----|------------|-----------|-----------|-----------|--------------|
| cg01145353     | 5.02E-10 | 3.99E-11 | -7 | 14.383293  | -7.52E-02 | 124274203 | 124274326 | NC_000010.10 |
| cg00400532     | 5.03E-10 | 3.99E-11 | -7 | 14.3820411 | -1.48E-01 | 53093509  | 53093632  | NC_000015.9  |
| ch.2.88242814R | 5.04E-10 | 4.00E-11 | -7 | 14.3799552 | -4.19E-02 | 88461699  | 88461822  | NC_000002.11 |
| cg10149296     | 5.04E-10 | 4.00E-11 | -7 | 14.3792336 | -1.81E-01 | 20795912  | 20796035  | NC_000002.11 |
| cg21236500     | 5.05E-10 | 4.01E-11 | -7 | 14.3774378 | -1.65E-01 | 139779897 | 139780020 | NC_000009.11 |
| cg07181902     | 5.05E-10 | 4.01E-11 | -7 | 14.3771573 | -3.05E-02 | 85829892  | 85830015  | NC_000002.11 |
| cg18413237     | 5.06E-10 | 4.02E-11 | -7 | 14.3749662 | -1.44E-01 | 41742795  | 41742918  | NC_000007.13 |
| cg07713293     | 5.07E-10 | 4.02E-11 | -7 | 14.3743535 | -7.62E-02 | 2903893   | 2904016   | NC_000006.11 |
| cg01909921     | 5.07E-10 | 4.02E-11 | -7 | 14.3742874 | -1.02E-01 | 135854246 | 135854369 | NC_000009.11 |
| cg25507121     | 5.07E-10 | 4.02E-11 | -7 | 14.3740856 | -1.27E-01 | 62051767  | 62051890  | NC_000017.10 |
| cg14355939     | 5.07E-10 | 4.03E-11 | -7 | 14.373453  | -1.39E-01 | 136401278 | 136401401 | NC_000009.11 |
| cg27034294     | 5.07E-10 | 4.03E-11 | -7 | 14.3729975 | -1.20E-01 | 29448872  | 29448995  | NC_000010.10 |
| ch.2.20642108R | 5.07E-10 | 4.03E-11 | -7 | 14.3728855 | -1.11E-01 | 20778627  | 20778750  | NC_000002.11 |
| cg27517424     | 5.09E-10 | 4.04E-11 | -7 | 14.3704324 | -1.06E-01 | 6751457   | 6751580   | NC_000004.11 |
| cg03656863     | 5.09E-10 | 4.04E-11 | -7 | 14.3702366 | -1.44E-01 | 67467992  | 67468115  | NC_000008.10 |
| cg25943661     | 5.09E-10 | 4.04E-11 | -7 | 14.3696541 | -1.07E-01 | 122662714 | 122662837 | NC_000011.9  |
| cg03051116     | 5.10E-10 | 4.05E-11 | -7 | 14.3684322 | -1.25E-01 | 30720703  | 30720826  | NC_000010.10 |
| cg02615599     | 5.10E-10 | 4.05E-11 | -7 | 14.3669476 | -4.15E-02 | 150725389 | 150725512 | NC_000007.13 |
| cg21124714     | 5.11E-10 | 4.06E-11 | -7 | 14.366034  | -1.37E-01 | 72983097  | 72983220  | NC_000011.9  |
| cg07696842     | 5.11E-10 | 4.06E-11 | -7 | 14.3658287 | -2.09E-01 | 105089508 | 105089631 | NC_000012.11 |
| cg12796229     | 5.11E-10 | 4.06E-11 | -7 | 14.3655792 | -2.94E-02 | 12408045  | 12408168  | NC_000018.9  |
| cg09360715     | 5.14E-10 | 4.08E-11 | -7 | 14.3594091 | -6.23E-02 | 13389395  | 13389518  | NC_000010.10 |
| cg13491490     | 5.15E-10 | 4.09E-11 | -7 | 14.3586211 | -1.50E-01 | 55646231  | 55646354  | NC_000003.11 |
| cg20916427     | 5.15E-10 | 4.09E-11 | -7 | 14.3579013 | -1.65E-01 | 44627440  | 44627563  | NC_000018.9  |
| cg13990486     | 5.15E-10 | 4.09E-11 | -7 | 14.3576128 | -3.24E-02 | 130795028 | 130795151 | NC_000007.13 |

|            |          |          |       |            |           |           |           |              |
|------------|----------|----------|-------|------------|-----------|-----------|-----------|--------------|
| cg07048210 | 5.15E-10 | 4.09E-11 | -7    | 14.3571236 | -1.11E-01 | 2139235   | 2139358   | NC_000001.10 |
| cg11582223 | 5.16E-10 | 4.10E-11 | -7    | 14.3552772 | -9.65E-02 | 308126    | 308249    | NC_000011.9  |
| cg10994126 | 5.16E-10 | 4.10E-11 | -7    | 14.3550715 | -1.28E-01 | 176432498 | 176432621 | NC_000001.10 |
| cg01555014 | 5.17E-10 | 4.11E-11 | -7    | 14.3536859 | -5.35E-02 | 32827710  | 32827833  | NC_000001.10 |
| cg05363574 | 5.18E-10 | 4.11E-11 | -7    | 14.3525577 | -1.66E-01 | 74919244  | 74919367  | NC_000002.11 |
| cg20664109 | 5.18E-10 | 4.11E-11 | -7    | 14.3519076 | -6.67E-02 | 37267996  | 37268119  | NC_000011.9  |
| cg07981599 | 5.18E-10 | 4.12E-11 | -7    | 14.3508971 | -1.82E-02 | 68119049  | 68119172  | NC_000016.9  |
| cg22090713 | 5.19E-10 | 4.12E-11 | -6.99 | 14.3500213 | -1.07E-01 | 50379032  | 50379155  | NC_000003.11 |
| cg10435609 | 5.19E-10 | 4.13E-11 | -6.99 | 14.3488578 | -1.68E-01 | 78805320  | 78805443  | NC_000001.10 |
| cg00149976 | 5.21E-10 | 4.14E-11 | -6.99 | 14.3462529 | -3.45E-02 | 127541529 | 127541652 | NC_000003.11 |
| cg05141578 | 5.22E-10 | 4.15E-11 | -6.99 | 14.3443973 | -9.98E-02 | 104306658 | 104306781 | NC_000010.10 |
| cg02687026 | 5.22E-10 | 4.15E-11 | -6.99 | 14.3442367 | -1.33E-01 | 85133210  | 85133333  | NC_000016.9  |
| cg10837843 | 5.23E-10 | 4.15E-11 | -6.99 | 14.3426486 | -4.76E-02 | 172199244 | 172199367 | NC_000005.9  |
| cg08422844 | 5.23E-10 | 4.16E-11 | -6.99 | 14.3420644 | -4.83E-02 | 17565178  | 17565301  | NC_000016.9  |
| cg06822304 | 5.23E-10 | 4.16E-11 | -6.99 | 14.3413099 | -8.58E-02 | 72497734  | 72497857  | NC_000005.9  |
| cg17935875 | 5.24E-10 | 4.16E-11 | -6.99 | 14.3403357 | -2.98E-02 | 49412184  | 49412307  | NC_000020.10 |
| cg08580254 | 5.24E-10 | 4.17E-11 | -6.99 | 14.3399346 | -1.28E-01 | 38478807  | 38478930  | NC_000017.10 |
| cg03397894 | 5.24E-10 | 4.17E-11 | -6.99 | 14.339293  | -6.56E-02 | 56708250  | 56708373  | NC_000006.11 |
| cg02253440 | 5.26E-10 | 4.18E-11 | -6.99 | 14.3368441 | -3.64E-02 | 97911390  | 97911513  | NC_000007.13 |
| cg08907118 | 5.27E-10 | 4.19E-11 | -6.99 | 14.3341398 | -9.09E-02 | 27482516  | 27482639  | NC_000016.9  |
| cg15252509 | 5.27E-10 | 4.19E-11 | -6.99 | 14.3335139 | -1.23E-01 | 56337165  | 56337288  | NC_000018.9  |
| cg23599026 | 5.27E-10 | 4.19E-11 | -6.99 | 14.3334368 | -9.44E-02 | 102268546 | 102268669 | NC_000010.10 |
| cg19703240 | 5.27E-10 | 4.19E-11 | -6.99 | 14.3332041 | -1.30E-01 | 101512828 | 101512951 | NC_000007.13 |
| cg14389924 | 5.29E-10 | 4.20E-11 | -6.99 | 14.3308908 | -7.40E-02 | 4606729   | 4606852   | NC_000017.10 |
| cg09899215 | 5.29E-10 | 4.21E-11 | -6.99 | 14.3293326 | -1.24E-01 | 75150799  | 75150922  | NC_000016.9  |

|            |          |          |       |            |           |           |           |              |
|------------|----------|----------|-------|------------|-----------|-----------|-----------|--------------|
| cg17968946 | 5.30E-10 | 4.22E-11 | -6.99 | 14.3276919 | -1.17E-01 | 138539198 | 138539321 | NC_000007.13 |
| cg13859212 | 5.30E-10 | 4.22E-11 | -6.99 | 14.327451  | -6.43E-02 | 99580143  | 99580266  | NC_000004.11 |
| cg22853588 | 5.31E-10 | 4.22E-11 | -6.99 | 14.3261129 | -8.64E-02 | 35169881  | 35170004  | NC_000020.10 |
| cg26226576 | 5.31E-10 | 4.23E-11 | -6.99 | 14.3253031 | -1.13E-01 | 234721577 | 234721700 | NC_000001.10 |
| cg10033612 | 5.32E-10 | 4.23E-11 | -6.99 | 14.323953  | -3.99E-02 | 1664176   | 1664299   | NC_000016.9  |
| cg16042652 | 5.32E-10 | 4.24E-11 | -6.99 | 14.3235827 | -1.34E-01 | 40396777  | 40396900  | NC_000013.10 |
| cg23490074 | 5.33E-10 | 4.24E-11 | -6.99 | 14.3222507 | -4.84E-02 | 30433024  | 30433147  | NC_000019.9  |
| cg18591136 | 5.33E-10 | 4.24E-11 | -6.99 | 14.3221015 | -1.53E-01 | 121282670 | 121282793 | NC_000010.10 |
| cg02452416 | 5.33E-10 | 4.24E-11 | -6.99 | 14.3216146 | -7.00E-02 | 33160450  | 33160573  | NC_000006.11 |
| cg26557617 | 5.34E-10 | 4.25E-11 | -6.99 | 14.3201426 | -1.66E-01 | 53654271  | 53654394  | NC_000017.10 |
| cg25096582 | 5.34E-10 | 4.25E-11 | -6.99 | 14.3199727 | -6.00E-02 | 35183928  | 35184051  | NC_000014.8  |
| cg17080138 | 5.34E-10 | 4.25E-11 | -6.99 | 14.3199272 | -1.04E-01 | 115524190 | 115524313 | NC_000003.11 |
| cg04285378 | 5.34E-10 | 4.25E-11 | -6.99 | 14.3191494 | -3.09E-02 | 33168180  | 33168303  | NC_000006.11 |
| cg17240454 | 5.35E-10 | 4.26E-11 | -6.99 | 14.3178702 | -1.32E-01 | 34524278  | 34524401  | NC_000006.11 |
| cg20724257 | 5.36E-10 | 4.26E-11 | -6.99 | 14.3170962 | -1.51E-01 | 32407784  | 32407907  | NC_000006.11 |
| cg04756252 | 5.36E-10 | 4.26E-11 | -6.99 | 14.3168369 | -1.66E-01 | 134049349 | 134049472 | NC_000008.10 |
| cg26458557 | 5.36E-10 | 4.27E-11 | -6.99 | 14.3162555 | -1.39E-01 | 285704    | 285827    | NC_000012.11 |
| cg10861390 | 5.37E-10 | 4.28E-11 | -6.99 | 14.3143878 | -1.44E-01 | 94442922  | 94443045  | NC_000014.8  |
| cg09387914 | 5.37E-10 | 4.28E-11 | -6.99 | 14.3140422 | -1.18E-01 | 53187374  | 53187497  | NC_000006.11 |
| cg24874425 | 5.37E-10 | 4.28E-11 | -6.99 | 14.3140026 | -6.88E-02 | 17846708  | 17846831  | NC_000001.10 |
| cg01425021 | 5.37E-10 | 4.28E-11 | -6.99 | 14.3137844 | -6.79E-02 | 1995036   | 1995159   | NC_000004.11 |
| cg22467301 | 5.38E-10 | 4.28E-11 | -6.99 | 14.3125091 | -6.84E-02 | 50265698  | 50265821  | NC_000003.11 |
| cg27059698 | 5.38E-10 | 4.28E-11 | -6.99 | 14.3121925 | -1.07E-01 | 17625521  | 17625644  | NC_000017.10 |
| cg21287411 | 5.38E-10 | 4.29E-11 | -6.99 | 14.3117313 | -2.99E-02 | 150247624 | 150247747 | NC_000006.11 |
| cg24566261 | 5.39E-10 | 4.29E-11 | -6.99 | 14.311008  | -8.56E-02 | 30854164  | 30854287  | NC_000006.11 |

|                |          |          |       |            |           |           |           |              |
|----------------|----------|----------|-------|------------|-----------|-----------|-----------|--------------|
| cg18657788     | 5.39E-10 | 4.29E-11 | -6.99 | 14.3106284 | -7.54E-02 | 47163923  | 47164046  | NC_000006.11 |
| cg07061145     | 5.39E-10 | 4.29E-11 | -6.99 | 14.3103569 | -8.59E-02 | 78556178  | 78556301  | NC_000015.9  |
| cg06580745     | 5.40E-10 | 4.30E-11 | -6.99 | 14.3090755 | -3.44E-02 | 4692790   | 4692913   | NC_000017.10 |
| cg14790396     | 5.42E-10 | 4.31E-11 | -6.99 | 14.3053656 | -8.13E-02 | 72381323  | 72381446  | NC_000011.9  |
| cg01904216     | 5.42E-10 | 4.32E-11 | -6.99 | 14.3036284 | -6.53E-02 | 85454460  | 85454583  | NC_000016.9  |
| cg21204530     | 5.43E-10 | 4.32E-11 | -6.99 | 14.3032481 | -1.64E-01 | 172306136 | 172306259 | NC_000005.9  |
| cg23283614     | 5.43E-10 | 4.32E-11 | -6.99 | 14.3029858 | -1.10E-01 | 60632532  | 60632655  | NC_000014.8  |
| cg05485663     | 5.44E-10 | 4.33E-11 | -6.99 | 14.3008385 | -7.45E-02 | 38846475  | 38846598  | NC_000005.9  |
| cg00667525     | 5.44E-10 | 4.34E-11 | -6.99 | 14.3006515 | -1.15E-01 | 18699118  | 18699241  | NC_000019.9  |
| cg21201657     | 5.45E-10 | 4.34E-11 | -6.99 | 14.2992824 | -7.99E-02 | 5624574   | 5624697   | NC_000019.9  |
| cg03976366     | 5.45E-10 | 4.34E-11 | -6.99 | 14.2992637 | -1.50E-01 | 71057572  | 71057695  | NC_000002.11 |
| cg19531536     | 5.45E-10 | 4.34E-11 | -6.99 | 14.2989232 | -1.40E-01 | 76873334  | 76873457  | NC_000014.8  |
| cg13061910     | 5.45E-10 | 4.34E-11 | -6.99 | 14.298703  | -1.29E-01 | 21288715  | 21288838  | NC_000014.8  |
| ch.10.1020819F | 5.47E-10 | 4.36E-11 | -6.99 | 14.2953166 | -5.99E-02 | 44585416  | 44585539  | NC_000010.10 |
| cg23695222     | 5.47E-10 | 4.36E-11 | -6.99 | 14.2947405 | -1.32E-01 | 29833265  | 29833388  | NC_000008.10 |
| cg15999165     | 5.47E-10 | 4.36E-11 | -6.99 | 14.2945589 | -1.17E-01 | 102201421 | 102201544 | NC_000005.9  |
| cg05966498     | 5.48E-10 | 4.37E-11 | -6.98 | 14.2937027 | -5.53E-02 | 10761293  | 10761416  | NC_000005.9  |
| cg27090988     | 5.48E-10 | 4.37E-11 | -6.98 | 14.2934558 | -1.26E-01 | 9789110   | 9789233   | NC_000003.11 |
| cg15921824     | 5.50E-10 | 4.38E-11 | -6.98 | 14.2894547 | -1.22E-01 | 569826    | 569949    | NC_000007.13 |
| cg06885459     | 5.50E-10 | 4.39E-11 | -6.98 | 14.28935   | -1.46E-01 | 113689728 | 113689851 | NC_000013.10 |
| cg14435695     | 5.50E-10 | 4.39E-11 | -6.98 | 14.2890106 | -6.84E-02 | 71950660  | 71950783  | NC_000011.9  |
| cg17543112     | 5.51E-10 | 4.39E-11 | -6.98 | 14.2879455 | -1.13E-01 | 131594335 | 131594458 | NC_000005.9  |
| cg00934322     | 5.51E-10 | 4.39E-11 | -6.98 | 14.2876803 | -1.17E-01 | 30854109  | 30854232  | NC_000006.11 |
| cg19945957     | 5.51E-10 | 4.39E-11 | -6.98 | 14.2875334 | -8.03E-02 | 33264901  | 33265024  | NC_000020.10 |
| cg01889956     | 5.51E-10 | 4.40E-11 | -6.98 | 14.2871762 | -1.14E-01 | 100650602 | 100650725 | NC_000006.11 |

|               |          |          |       |            |           |           |           |              |
|---------------|----------|----------|-------|------------|-----------|-----------|-----------|--------------|
| cg22347678    | 5.52E-10 | 4.40E-11 | -6.98 | 14.2862414 | -1.20E-01 | 13048001  | 13048124  | NC_000012.11 |
| cg12381074    | 5.52E-10 | 4.40E-11 | -6.98 | 14.2862247 | -1.94E-01 | 959759    | 959882    | NC_000007.13 |
| cg20341504    | 5.52E-10 | 4.40E-11 | -6.98 | 14.2861557 | -8.06E-02 | 54900998  | 54901121  | NC_000002.11 |
| cg26038708    | 5.52E-10 | 4.40E-11 | -6.98 | 14.2852751 | -5.45E-02 | 30160787  | 30160910  | NC_000020.10 |
| cg21643265    | 5.52E-10 | 4.40E-11 | -6.98 | 14.2850134 | -1.38E-01 | 120963957 | 120964080 | NC_000012.11 |
| cg01555791    | 5.52E-10 | 4.41E-11 | -6.98 | 14.2843292 | -2.79E-02 | 1012288   | 1012411   | NC_000017.10 |
| cg14832908    | 5.52E-10 | 4.41E-11 | -6.98 | 14.2842131 | -7.29E-02 | 6479424   | 6479547   | NC_000001.10 |
| cg13042250    | 5.54E-10 | 4.42E-11 | -6.98 | 14.2813351 | -1.58E-01 | 1607868   | 1607991   | NC_000007.13 |
| cg10705503    | 5.55E-10 | 4.43E-11 | -6.98 | 14.2804247 | -2.78E-02 | 102513685 | 102513808 | NC_000012.11 |
| cg20459655    | 5.55E-10 | 4.43E-11 | -6.98 | 14.2788561 | -6.68E-02 | 135675569 | 135675692 | NC_000002.11 |
| cg15659911    | 5.56E-10 | 4.43E-11 | -6.98 | 14.2783739 | -7.87E-02 | 13431373  | 13431496  | NC_000012.11 |
| cg10788371    | 5.57E-10 | 4.44E-11 | -6.98 | 14.2761927 | -1.21E-01 | 76381040  | 76381163  | NC_000011.9  |
| cg21433768    | 5.57E-10 | 4.45E-11 | -6.98 | 14.2759292 | -4.55E-02 | 7695187   | 7695310   | NC_000011.9  |
| cg00839844    | 5.57E-10 | 4.45E-11 | -6.98 | 14.2758374 | -8.86E-02 | 46474644  | 46474767  | NC_000018.9  |
| cg02695969    | 5.57E-10 | 4.45E-11 | -6.98 | 14.275011  | -1.77E-01 | 932813    | 932936    | NC_000019.9  |
| cg09741917    | 5.58E-10 | 4.45E-11 | -6.98 | 14.2746905 | -1.34E-01 | 98702260  | 98702383  | NC_000002.11 |
| cg15299721    | 5.58E-10 | 4.46E-11 | -6.98 | 14.2736015 | -3.50E-02 | 103997510 | 103997633 | NC_000004.11 |
| cg15754548    | 5.59E-10 | 4.46E-11 | -6.98 | 14.2729034 | -2.08E-01 | 8192281   | 8192404   | NC_000017.10 |
| ch.1.3188690F | 5.60E-10 | 4.47E-11 | -6.98 | 14.2709799 | -5.14E-02 | 162763344 | 162763467 | NC_000001.10 |
| cg15701317    | 5.60E-10 | 4.47E-11 | -6.98 | 14.2704055 | -6.76E-02 | 73868919  | 73869042  | NC_000002.11 |
| cg04219446    | 5.60E-10 | 4.48E-11 | -6.98 | 14.2692336 | -6.33E-02 | 73629082  | 73629205  | NC_000017.10 |
| cg05583848    | 5.61E-10 | 4.48E-11 | -6.98 | 14.2690648 | -9.20E-02 | 35265411  | 35265534  | NC_000006.11 |
| cg23015138    | 5.61E-10 | 4.48E-11 | -6.98 | 14.267718  | -1.63E-01 | 2756341   | 2756464   | NC_000017.10 |
| cg22451412    | 5.62E-10 | 4.49E-11 | -6.98 | 14.2667201 | -1.61E-01 | 42227210  | 42227333  | NC_000015.9  |
| cg02061820    | 5.62E-10 | 4.49E-11 | -6.98 | 14.2657929 | -1.49E-01 | 152046751 | 152046874 | NC_000003.11 |



|            |          |          |       |            |           |           |           |              |
|------------|----------|----------|-------|------------|-----------|-----------|-----------|--------------|
| cg19073171 | 5.63E-10 | 4.50E-11 | -6.98 | 14.2645691 | -9.47E-02 | 154793806 | 154793929 | NC_000007.13 |
| cg17699214 | 5.64E-10 | 4.50E-11 | -6.98 | 14.2632597 | -1.03E-01 | 40890013  | 40890136  | NC_000004.11 |
| cg00154846 | 5.64E-10 | 4.51E-11 | -6.98 | 14.2625939 | -1.17E-01 | 2130580   | 2130703   | NC_000001.10 |
| cg08627397 | 5.65E-10 | 4.51E-11 | -6.98 | 14.2612415 | -1.17E-01 | 89984028  | 89984151  | NC_000016.9  |
| cg22975723 | 5.65E-10 | 4.52E-11 | -6.98 | 14.2602672 | -3.81E-02 | 93258103  | 93258226  | NC_000015.9  |
| cg21432842 | 5.66E-10 | 4.52E-11 | -6.98 | 14.2586438 | -8.28E-02 | 38171697  | 38171820  | NC_000017.10 |
| cg09723979 | 5.67E-10 | 4.53E-11 | -6.98 | 14.2567548 | -1.54E-01 | 19736248  | 19736371  | NC_000011.9  |
| cg21920221 | 5.68E-10 | 4.54E-11 | -6.98 | 14.255647  | -1.55E-01 | 171612889 | 171613012 | NC_000005.9  |
| cg21679468 | 5.69E-10 | 4.54E-11 | -6.98 | 14.2543486 | -8.15E-02 | 127785332 | 127785455 | NC_000006.11 |
| cg20855296 | 5.69E-10 | 4.54E-11 | -6.98 | 14.2543352 | -7.99E-02 | 16255560  | 16255683  | NC_000017.10 |
| cg09081913 | 5.69E-10 | 4.54E-11 | -6.98 | 14.2542676 | -3.19E-02 | 180199374 | 180199497 | NC_000001.10 |
| cg14535518 | 5.69E-10 | 4.55E-11 | -6.98 | 14.2541291 | -8.40E-02 | 35782015  | 35782138  | NC_000019.9  |
| cg23798332 | 5.70E-10 | 4.56E-11 | -6.98 | 14.2512143 | -3.06E-02 | 74932007  | 74932130  | NC_000012.11 |
| cg10342899 | 5.70E-10 | 4.56E-11 | -6.98 | 14.2512034 | -3.85E-02 | 102822249 | 102822372 | NC_000010.10 |
| cg17779336 | 5.72E-10 | 4.57E-11 | -6.98 | 14.2483156 | -4.64E-02 | 24299434  | 24299557  | NC_000002.11 |
| cg10075976 | 5.72E-10 | 4.57E-11 | -6.98 | 14.2478198 | -1.59E-01 | 99303715  | 99303838  | NC_000012.11 |
| cg14161399 | 5.73E-10 | 4.58E-11 | -6.98 | 14.2456593 | -1.48E-01 | 1102446   | 1102569   | NC_000001.10 |
| cg09896503 | 5.74E-10 | 4.59E-11 | -6.98 | 14.2451878 | -4.25E-02 | 99102090  | 99102213  | NC_000007.13 |
| cg13587915 | 5.74E-10 | 4.59E-11 | -6.98 | 14.2448102 | -1.77E-01 | 116307486 | 116307609 | NC_000010.10 |
| cg04159878 | 5.75E-10 | 4.60E-11 | -6.98 | 14.2430286 | -1.05E-01 | 110179127 | 110179250 | NC_000001.10 |
| cg02352107 | 5.75E-10 | 4.60E-11 | -6.98 | 14.2424066 | -4.87E-02 | 76603736  | 76603859  | NC_000015.9  |
| cg06571687 | 5.75E-10 | 4.60E-11 | -6.98 | 14.2421429 | -1.10E-01 | 152259    | 152382    | NC_000017.10 |
| cg10418289 | 5.75E-10 | 4.60E-11 | -6.98 | 14.2419582 | -1.30E-01 | 23308294  | 23308417  | NC_000014.8  |
| cg02124446 | 5.76E-10 | 4.61E-11 | -6.98 | 14.2411554 | -7.82E-02 | 85783537  | 85783660  | NC_000016.9  |
| cg10340033 | 5.76E-10 | 4.61E-11 | -6.98 | 14.2398278 | -4.49E-02 | 220071009 | 220071132 | NC_000002.11 |

|               |          |          |       |            |           |           |           |              |
|---------------|----------|----------|-------|------------|-----------|-----------|-----------|--------------|
| cg13251484    | 5.77E-10 | 4.62E-11 | -6.98 | 14.2388567 | -1.34E-01 | 74180217  | 74180340  | NC_000014.8  |
| cg04837922    | 5.77E-10 | 4.62E-11 | -6.98 | 14.2387069 | -4.21E-02 | 139126907 | 139127030 | NC_000005.9  |
| cg26351764    | 5.77E-10 | 4.62E-11 | -6.98 | 14.2386397 | -1.57E-02 | 37554909  | 37555032  | NC_000020.10 |
| cg16136262    | 5.78E-10 | 4.62E-11 | -6.97 | 14.2374075 | -1.20E-01 | 169429604 | 169429727 | NC_000001.10 |
| cg18617808    | 5.78E-10 | 4.63E-11 | -6.97 | 14.2364928 | -1.41E-01 | 5717675   | 5717798   | NC_000007.13 |
| cg02900757    | 5.79E-10 | 4.63E-11 | -6.97 | 14.2354287 | -6.79E-02 | 126782576 | 126782699 | NC_000010.10 |
| ch.1.3533603R | 5.79E-10 | 4.63E-11 | -6.97 | 14.2353196 | -5.89E-02 | 180957186 | 180957309 | NC_000001.10 |
| cg25677376    | 5.79E-10 | 4.63E-11 | -6.97 | 14.2350978 | -8.06E-02 | 90016258  | 90016381  | NC_000010.10 |
| cg00899659    | 5.80E-10 | 4.64E-11 | -6.97 | 14.2334549 | -1.90E-01 | 45495971  | 45496094  | NC_000010.10 |
| cg21453831    | 5.80E-10 | 4.65E-11 | -6.97 | 14.232376  | -9.99E-02 | 228645045 | 228645168 | NC_000001.10 |
| cg14977018    | 5.81E-10 | 4.65E-11 | -6.97 | 14.2321453 | -1.66E-01 | 194314457 | 194314580 | NC_000003.11 |
| cg27457925    | 5.81E-10 | 4.65E-11 | -6.97 | 14.2319992 | -6.31E-02 | 121009855 | 121009978 | NC_000002.11 |
| cg09692449    | 5.81E-10 | 4.65E-11 | -6.97 | 14.2318072 | -1.36E-01 | 39680217  | 39680340  | NC_000017.10 |
| cg00508334    | 5.81E-10 | 4.65E-11 | -6.97 | 14.2311798 | -7.60E-02 | 23510438  | 23510561  | NC_000007.13 |
| cg13279927    | 5.81E-10 | 4.65E-11 | -6.97 | 14.2309708 | -8.54E-02 | 60939416  | 60939539  | NC_000020.10 |
| cg12118246    | 5.82E-10 | 4.66E-11 | -6.97 | 14.2302661 | -1.64E-01 | 72462441  | 72462564  | NC_000017.10 |
| cg23337086    | 5.82E-10 | 4.66E-11 | -6.97 | 14.2301595 | -3.46E-02 | 61325237  | 61325360  | NC_000008.10 |
| cg04721790    | 5.84E-10 | 4.68E-11 | -6.97 | 14.2252149 | -5.09E-02 | 5390088   | 5390211   | NC_000017.10 |
| cg18153322    | 5.85E-10 | 4.69E-11 | -6.97 | 14.2235273 | -4.69E-02 | 43534145  | 43534268  | NC_000001.10 |
| cg11741753    | 5.86E-10 | 4.70E-11 | -6.97 | 14.2219836 | -1.12E-01 | 15541217  | 15541340  | NC_000001.10 |
| cg02086952    | 5.87E-10 | 4.70E-11 | -6.97 | 14.2214407 | -6.87E-02 | 54911499  | 54911622  | NC_000017.10 |
| cg10570662    | 5.87E-10 | 4.70E-11 | -6.97 | 14.2211226 | -3.66E-02 | 19159548  | 19159671  | NC_000022.10 |
| cg10752508    | 5.88E-10 | 4.71E-11 | -6.97 | 14.2193065 | -1.56E-01 | 98313516  | 98313639  | NC_000003.11 |
| cg25343661    | 5.88E-10 | 4.71E-11 | -6.97 | 14.2190247 | -1.17E-01 | 43743181  | 43743304  | NC_000006.11 |
| cg15320059    | 5.88E-10 | 4.71E-11 | -6.97 | 14.2189482 | -1.41E-01 | 66625164  | 66625287  | NC_000011.9  |

|            |          |          |       |            |           |           |           |              |
|------------|----------|----------|-------|------------|-----------|-----------|-----------|--------------|
| cg13576178 | 5.88E-10 | 4.71E-11 | -6.97 | 14.2189258 | -4.67E-02 | 58962846  | 58962969  | NC_000019.9  |
| cg18459152 | 5.88E-10 | 4.71E-11 | -6.97 | 14.218734  | -7.73E-02 | 75986921  | 75987044  | NC_000005.9  |
| cg08240847 | 5.89E-10 | 4.72E-11 | -6.97 | 14.2176864 | -1.31E-01 | 134354024 | 134354147 | NC_000008.10 |
| cg27657131 | 5.89E-10 | 4.72E-11 | -6.97 | 14.2175169 | -5.10E-02 | 61847587  | 61847710  | NC_000020.10 |
| cg22868961 | 5.89E-10 | 4.72E-11 | -6.97 | 14.2167677 | -1.55E-01 | 135596044 | 135596167 | NC_000006.11 |
| cg09284719 | 5.90E-10 | 4.73E-11 | -6.97 | 14.2153796 | -6.97E-02 | 107644024 | 107644147 | NC_000007.13 |
| cg20039443 | 5.91E-10 | 4.74E-11 | -6.97 | 14.2135744 | -1.41E-01 | 50108912  | 50109035  | NC_000020.10 |
| cg14380517 | 5.92E-10 | 4.75E-11 | -6.97 | 14.2116188 | -7.02E-02 | 18985761  | 18985884  | NC_000021.8  |
| cg17523027 | 5.92E-10 | 4.75E-11 | -6.97 | 14.2111031 | -2.11E-02 | 37447622  | 37447745  | NC_000022.10 |
| cg21780859 | 5.93E-10 | 4.75E-11 | -6.97 | 14.2102029 | -4.37E-02 | 30002907  | 30003030  | NC_000013.10 |
| cg05139728 | 5.93E-10 | 4.75E-11 | -6.97 | 14.2100319 | -1.19E-01 | 28306816  | 28306939  | NC_000016.9  |
| cg26260038 | 5.94E-10 | 4.76E-11 | -6.97 | 14.2085045 | -1.21E-01 | 16085716  | 16085839  | NC_000004.11 |
| cg25821168 | 5.94E-10 | 4.76E-11 | -6.97 | 14.2083132 | -9.24E-02 | 32281703  | 32281826  | NC_000001.10 |
| cg25843346 | 5.94E-10 | 4.77E-11 | -6.97 | 14.207447  | -6.30E-02 | 31762555  | 31762678  | NC_000006.11 |
| cg27573806 | 5.94E-10 | 4.77E-11 | -6.97 | 14.2073415 | -5.04E-02 | 31774911  | 31775034  | NC_000006.11 |
| cg26611070 | 5.94E-10 | 4.77E-11 | -6.97 | 14.2072685 | -1.49E-01 | 75482238  | 75482361  | NC_000004.11 |
| cg10154973 | 5.95E-10 | 4.77E-11 | -6.97 | 14.2067187 | -1.35E-01 | 114367529 | 114367652 | NC_000004.11 |
| cg26886066 | 5.95E-10 | 4.78E-11 | -6.97 | 14.2055018 | -1.73E-01 | 113677034 | 113677157 | NC_000013.10 |
| cg14900579 | 5.96E-10 | 4.78E-11 | -6.97 | 14.2037181 | -3.94E-02 | 7294137   | 7294260   | NC_000019.9  |
| cg25702480 | 5.97E-10 | 4.79E-11 | -6.97 | 14.2032967 | -7.75E-02 | 28731535  | 28731658  | NC_000012.11 |
| cg03262802 | 5.97E-10 | 4.79E-11 | -6.97 | 14.2031878 | -1.41E-01 | 234118754 | 234118877 | NC_000002.11 |
| cg10092231 | 5.97E-10 | 4.79E-11 | -6.97 | 14.2023466 | -8.10E-02 | 241543863 | 241543986 | NC_000002.11 |
| cg00119241 | 5.97E-10 | 4.79E-11 | -6.97 | 14.2018241 | -9.82E-02 | 15152595  | 15152718  | NC_000001.10 |
| cg03530756 | 5.98E-10 | 4.79E-11 | -6.97 | 14.2017101 | -5.15E-02 | 3285262   | 3285385   | NC_000016.9  |
| cg01337514 | 5.98E-10 | 4.80E-11 | -6.97 | 14.2015675 | -1.26E-01 | 6511026   | 6511149   | NC_000001.10 |

|            |          |          |       |            |           |           |           |              |
|------------|----------|----------|-------|------------|-----------|-----------|-----------|--------------|
| cg03184011 | 5.98E-10 | 4.80E-11 | -6.97 | 14.2010957 | -7.22E-02 | 39945503  | 39945626  | NC_000020.10 |
| cg25786388 | 5.98E-10 | 4.80E-11 | -6.97 | 14.2005253 | -1.37E-01 | 100578831 | 100578954 | NC_000013.10 |
| cg24720038 | 5.98E-10 | 4.80E-11 | -6.97 | 14.2004829 | -9.33E-02 | 128291538 | 128291661 | NC_000003.11 |
| cg25231972 | 5.98E-10 | 4.80E-11 | -6.97 | 14.1999636 | -5.40E-02 | 31608136  | 31608259  | NC_000010.10 |
| cg09226792 | 5.99E-10 | 4.81E-11 | -6.97 | 14.1989787 | -1.11E-01 | 113499526 | 113499649 | NC_000001.10 |
| cg14911204 | 6.00E-10 | 4.82E-11 | -6.97 | 14.1970095 | -9.76E-02 | 41808989  | 41809112  | NC_000022.10 |
| cg04997606 | 6.01E-10 | 4.82E-11 | -6.97 | 14.1958364 | -3.57E-02 | 170065837 | 170065960 | NC_000005.9  |
| cg15025598 | 6.01E-10 | 4.82E-11 | -6.97 | 14.1956567 | -1.91E-01 | 519077    | 519200    | NC_000011.9  |
| cg18770442 | 6.01E-10 | 4.83E-11 | -6.97 | 14.19503   | -4.15E-02 | 116692922 | 116693045 | NC_000006.11 |
| cg15833353 | 6.01E-10 | 4.83E-11 | -6.97 | 14.1949336 | -1.24E-01 | 33807278  | 33807401  | NC_000005.9  |
| cg09837314 | 6.02E-10 | 4.83E-11 | -6.97 | 14.1935471 | -1.28E-01 | 67815656  | 67815779  | NC_000017.10 |
| cg21793948 | 6.02E-10 | 4.84E-11 | -6.97 | 14.1933291 | -3.59E-02 | 60988096  | 60988219  | NC_000018.9  |
| cg26065488 | 6.02E-10 | 4.84E-11 | -6.97 | 14.1932995 | -1.73E-01 | 171176016 | 171176139 | NC_000003.11 |
| cg21591938 | 6.04E-10 | 4.85E-11 | -6.97 | 14.1907527 | -1.60E-01 | 29195033  | 29195156  | NC_000012.11 |
| cg05868813 | 6.05E-10 | 4.86E-11 | -6.97 | 14.1886867 | -1.44E-01 | 26594483  | 26594606  | NC_000013.10 |
| cg14079545 | 6.06E-10 | 4.87E-11 | -6.97 | 14.1870133 | -1.06E-01 | 33418310  | 33418433  | NC_000006.11 |
| cg17992670 | 6.06E-10 | 4.87E-11 | -6.97 | 14.1868004 | -1.20E-01 | 11216306  | 11216429  | NC_000019.9  |
| cg09754272 | 6.07E-10 | 4.88E-11 | -6.97 | 14.1853259 | -7.78E-02 | 156399638 | 156399761 | NC_000001.10 |
| cg17024643 | 6.07E-10 | 4.88E-11 | -6.97 | 14.1842728 | -4.05E-02 | 214725274 | 214725397 | NC_000001.10 |
| cg03026004 | 6.11E-10 | 4.91E-11 | -6.96 | 14.1789635 | -1.74E-01 | 6833417   | 6833540   | NC_000018.9  |
| cg17172980 | 6.11E-10 | 4.91E-11 | -6.96 | 14.1778831 | -1.33E-01 | 196755973 | 196756096 | NC_000003.11 |
| cg21328082 | 6.12E-10 | 4.92E-11 | -6.96 | 14.1771728 | -1.76E-01 | 41254471  | 41254594  | NC_000006.11 |
| cg20184464 | 6.12E-10 | 4.92E-11 | -6.96 | 14.1766114 | -1.54E-01 | 187739371 | 187739494 | NC_000003.11 |
| cg10143751 | 6.12E-10 | 4.92E-11 | -6.96 | 14.1764552 | -1.49E-01 | 135230548 | 135230671 | NC_000006.11 |
| cg26514337 | 6.13E-10 | 4.93E-11 | -6.96 | 14.1748201 | -6.14E-02 | 57026503  | 57026626  | NC_000018.9  |

|                 |          |          |       |            |           |           |           |              |
|-----------------|----------|----------|-------|------------|-----------|-----------|-----------|--------------|
| cg11992241      | 6.13E-10 | 4.93E-11 | -6.96 | 14.1745327 | -1.24E-01 | 7036993   | 7037116   | NC_000017.10 |
| cg22054912      | 6.13E-10 | 4.93E-11 | -6.96 | 14.1740393 | -1.35E-01 | 66478674  | 66478797  | NC_000015.9  |
| cg19517525      | 6.13E-10 | 4.93E-11 | -6.96 | 14.174012  | -4.48E-02 | 79480921  | 79481044  | NC_000017.10 |
| cg07018389      | 6.14E-10 | 4.94E-11 | -6.96 | 14.1730435 | -1.45E-01 | 172195678 | 172195801 | NC_000005.9  |
| cg26522708      | 6.14E-10 | 4.94E-11 | -6.96 | 14.1727902 | -1.22E-01 | 10839450  | 10839573  | NC_000001.10 |
| cg15296538      | 6.15E-10 | 4.94E-11 | -6.96 | 14.1714738 | -8.04E-02 | 178203469 | 178203592 | NC_000005.9  |
| cg21287883      | 6.15E-10 | 4.95E-11 | -6.96 | 14.1712217 | -1.19E-01 | 50104944  | 50105067  | NC_000020.10 |
| cg11365983      | 6.17E-10 | 4.96E-11 | -6.96 | 14.1683359 | -1.61E-01 | 157638062 | 157638185 | NC_000007.13 |
| cg23554129      | 6.17E-10 | 4.96E-11 | -6.96 | 14.1679171 | -3.81E-02 | 53413076  | 53413199  | NC_000006.11 |
| cg24859722      | 6.17E-10 | 4.96E-11 | -6.96 | 14.1675705 | -1.95E-01 | 50377836  | 50377959  | NC_000003.11 |
| cg27513339      | 6.19E-10 | 4.98E-11 | -6.96 | 14.1639444 | -1.04E-01 | 9904903   | 9905026   | NC_000003.11 |
| cg22021322      | 6.20E-10 | 4.98E-11 | -6.96 | 14.1635718 | -3.19E-02 | 33359576  | 33359699  | NC_000001.10 |
| cg03503785      | 6.20E-10 | 4.99E-11 | -6.96 | 14.1628988 | -1.18E-01 | 23962572  | 23962695  | NC_000016.9  |
| cg05504025      | 6.20E-10 | 4.99E-11 | -6.96 | 14.1621334 | -1.33E-01 | 66799218  | 66799341  | NC_000011.9  |
| ch.l.159013533R | 6.21E-10 | 4.99E-11 | -6.96 | 14.1615069 | -2.48E-02 | 160746909 | 160747032 | NC_000001.10 |
| cg12001456      | 6.21E-10 | 5.00E-11 | -6.96 | 14.1603037 | -1.71E-01 | 157357803 | 157357926 | NC_000007.13 |
| cg00431549      | 6.22E-10 | 5.01E-11 | -6.96 | 14.1592145 | -2.08E-01 | 15039025  | 15039148  | NC_000012.11 |
| cg14172126      | 6.24E-10 | 5.02E-11 | -6.96 | 14.1556518 | -1.14E-01 | 139608277 | 139608400 | NC_000009.11 |
| cg26521708      | 6.24E-10 | 5.03E-11 | -6.96 | 14.1555921 | -1.36E-01 | 91573301  | 91573424  | NC_000012.11 |
| cg09070522      | 6.25E-10 | 5.03E-11 | -6.96 | 14.1545235 | -2.70E-02 | 57774717  | 57774840  | NC_000004.11 |
| cg00688311      | 6.25E-10 | 5.03E-11 | -6.96 | 14.1539851 | -1.06E-01 | 133100714 | 133100837 | NC_000012.11 |
| cg24211157      | 6.25E-10 | 5.03E-11 | -6.96 | 14.1537554 | -1.00E-01 | 36829393  | 36829516  | NC_000017.10 |
| cg00429618      | 6.25E-10 | 5.04E-11 | -6.96 | 14.1535673 | -7.91E-02 | 99962350  | 99962473  | NC_000009.11 |
| cg25743482      | 6.26E-10 | 5.04E-11 | -6.96 | 14.1529106 | -1.59E-01 | 19775505  | 19775628  | NC_000011.9  |
| cg14605396      | 6.27E-10 | 5.05E-11 | -6.96 | 14.1510069 | -1.43E-01 | 120478054 | 120478177 | NC_000009.11 |

|                 |          |          |       |            |           |           |           |              |
|-----------------|----------|----------|-------|------------|-----------|-----------|-----------|--------------|
| cg25992382      | 6.28E-10 | 5.06E-11 | -6.96 | 14.1495964 | -1.36E-01 | 93066811  | 93066934  | NC_000014.8  |
| cg26185061      | 6.28E-10 | 5.06E-11 | -6.96 | 14.1492959 | -1.14E-01 | 81744786  | 81744909  | NC_000010.10 |
| cg26223797      | 6.31E-10 | 5.09E-11 | -6.96 | 14.1437609 | -1.53E-01 | 54131694  | 54131817  | NC_000005.9  |
| cg12768993      | 6.32E-10 | 5.09E-11 | -6.96 | 14.1430477 | -9.78E-02 | 108767893 | 108768016 | NC_000011.9  |
| cg21244322      | 6.32E-10 | 5.09E-11 | -6.96 | 14.1428985 | -1.64E-01 | 64303084  | 64303207  | NC_000015.9  |
| cg12302526      | 6.33E-10 | 5.10E-11 | -6.96 | 14.1416424 | -1.31E-01 | 69235282  | 69235405  | NC_000011.9  |
| cg09508668      | 6.33E-10 | 5.10E-11 | -6.96 | 14.1410558 | -1.52E-01 | 28531046  | 28531169  | NC_000013.10 |
| cg16574310      | 6.33E-10 | 5.10E-11 | -6.96 | 14.1402552 | -7.03E-02 | 811013    | 811136    | NC_000016.9  |
| ch.8.128185533F | 6.34E-10 | 5.11E-11 | -6.96 | 14.1394007 | -6.67E-02 | 128116351 | 128116474 | NC_000008.10 |
| cg06964912      | 6.35E-10 | 5.12E-11 | -6.96 | 14.1380904 | -5.48E-02 | 1173622   | 1173745   | NC_000001.10 |
| cg25674709      | 6.35E-10 | 5.12E-11 | -6.96 | 14.1380645 | -4.77E-02 | 105724273 | 105724396 | NC_000012.11 |
| cg25318470      | 6.35E-10 | 5.12E-11 | -6.96 | 14.1380413 | -9.94E-02 | 75410747  | 75410870  | NC_000003.11 |
| cg14762896      | 6.35E-10 | 5.12E-11 | -6.96 | 14.137401  | -9.23E-02 | 61691785  | 61691908  | NC_000020.10 |
| cg02327604      | 6.36E-10 | 5.12E-11 | -6.96 | 14.1366669 | -9.45E-02 | 808834    | 808957    | NC_000007.13 |
| cg05065926      | 6.36E-10 | 5.12E-11 | -6.96 | 14.1363189 | -4.76E-02 | 144329806 | 144329929 | NC_000008.10 |
| cg13897914      | 6.38E-10 | 5.14E-11 | -6.96 | 14.1335242 | -1.46E-01 | 41695294  | 41695417  | NC_000015.9  |
| cg04718845      | 6.38E-10 | 5.15E-11 | -6.96 | 14.132121  | -1.38E-01 | 152623094 | 152623217 | NC_000006.11 |
| cg26252077      | 6.39E-10 | 5.15E-11 | -6.96 | 14.1315837 | -1.25E-01 | 61607055  | 61607178  | NC_000001.10 |
| cg22453183      | 6.39E-10 | 5.15E-11 | -6.96 | 14.1305765 | -1.53E-01 | 89940953  | 89941076  | NC_000005.9  |
| cg13578303      | 6.40E-10 | 5.16E-11 | -6.96 | 14.1289162 | -1.36E-01 | 49838698  | 49838821  | NC_000019.9  |
| cg23050705      | 6.41E-10 | 5.17E-11 | -6.96 | 14.1282331 | -1.34E-01 | 231694386 | 231694509 | NC_000001.10 |
| cg15100947      | 6.41E-10 | 5.17E-11 | -6.96 | 14.1280663 | -1.56E-01 | 6333867   | 6333990   | NC_000001.10 |
| cg07851374      | 6.41E-10 | 5.17E-11 | -6.96 | 14.127919  | -1.28E-01 | 76723380  | 76723503  | NC_000013.10 |
| cg11253122      | 6.41E-10 | 5.17E-11 | -6.96 | 14.127186  | -1.16E-01 | 20314957  | 20315080  | NC_000001.10 |
| cg22170222      | 6.42E-10 | 5.18E-11 | -6.95 | 14.1255611 | -7.88E-02 | 43942440  | 43942563  | NC_000015.9  |

|            |          |          |       |            |           |           |           |              |
|------------|----------|----------|-------|------------|-----------|-----------|-----------|--------------|
| cg24208375 | 6.42E-10 | 5.18E-11 | -6.95 | 14.1255116 | -1.55E-02 | 31704282  | 31704405  | NC_000006.11 |
| cg17527177 | 6.42E-10 | 5.18E-11 | -6.95 | 14.1253828 | -1.86E-01 | 45796856  | 45796979  | NC_000017.10 |
| cg14294658 | 6.42E-10 | 5.18E-11 | -6.95 | 14.125253  | -1.26E-01 | 17994507  | 17994630  | NC_000011.9  |
| cg24421410 | 6.43E-10 | 5.18E-11 | -6.95 | 14.12496   | -1.83E-01 | 32920220  | 32920343  | NC_000006.11 |
| cg15840256 | 6.44E-10 | 5.20E-11 | -6.95 | 14.1227983 | -6.36E-02 | 54243739  | 54243862  | NC_000004.11 |
| cg04231772 | 6.44E-10 | 5.20E-11 | -6.95 | 14.1226219 | -4.05E-02 | 132638571 | 132638694 | NC_000012.11 |
| cg03387092 | 6.45E-10 | 5.20E-11 | -6.95 | 14.1218554 | -1.19E-01 | 123493248 | 123493371 | NC_000003.11 |
| cg19398115 | 6.45E-10 | 5.20E-11 | -6.95 | 14.1212721 | -3.21E-02 | 90750169  | 90750292  | NC_000010.10 |
| cg15007050 | 6.47E-10 | 5.22E-11 | -6.95 | 14.1183477 | -7.23E-02 | 101447374 | 101447497 | NC_000007.13 |
| cg08039701 | 6.47E-10 | 5.22E-11 | -6.95 | 14.1177705 | -6.89E-02 | 74063125  | 74063248  | NC_000005.9  |
| cg26940328 | 6.48E-10 | 5.23E-11 | -6.95 | 14.1163899 | -1.08E-01 | 11148412  | 11148535  | NC_000017.10 |
| cg00760950 | 6.48E-10 | 5.23E-11 | -6.95 | 14.1160491 | -1.50E-01 | 38066983  | 38067106  | NC_000013.10 |
| cg15799461 | 6.49E-10 | 5.24E-11 | -6.95 | 14.1146638 | -1.12E-01 | 69264259  | 69264382  | NC_000011.9  |
| cg27445709 | 6.50E-10 | 5.24E-11 | -6.95 | 14.113817  | -1.30E-01 | 47693946  | 47694069  | NC_000007.13 |
| cg24302752 | 6.50E-10 | 5.24E-11 | -6.95 | 14.1137142 | -1.58E-01 | 80853625  | 80853748  | NC_000006.11 |
| cg02259698 | 6.50E-10 | 5.25E-11 | -6.95 | 14.1133797 | -5.40E-02 | 10953349  | 10953472  | NC_000002.11 |
| cg00663183 | 6.51E-10 | 5.25E-11 | -6.95 | 14.1123019 | -1.55E-01 | 15687950  | 15688073  | NC_000003.11 |
| cg21584862 | 6.52E-10 | 5.26E-11 | -6.95 | 14.1107704 | -1.35E-01 | 15133183  | 15133306  | NC_000006.11 |
| cg03918221 | 6.52E-10 | 5.26E-11 | -6.95 | 14.109961  | -1.06E-01 | 114322874 | 114322997 | NC_000013.10 |
| cg05135156 | 6.52E-10 | 5.27E-11 | -6.95 | 14.109547  | -7.20E-02 | 184355420 | 184355543 | NC_000001.10 |
| cg05977992 | 6.52E-10 | 5.27E-11 | -6.95 | 14.109268  | -8.26E-02 | 151186411 | 151186534 | NC_000006.11 |
| cg00648955 | 6.53E-10 | 5.27E-11 | -6.95 | 14.1089003 | -1.34E-01 | 31456217  | 31456340  | NC_000002.11 |
| cg10753889 | 6.53E-10 | 5.27E-11 | -6.95 | 14.1085664 | -1.35E-01 | 116706520 | 116706643 | NC_000011.9  |
| cg24775180 | 6.54E-10 | 5.28E-11 | -6.95 | 14.1070077 | -1.40E-01 | 132423699 | 132423822 | NC_000012.11 |
| cg19030554 | 6.54E-10 | 5.28E-11 | -6.95 | 14.1066742 | -8.39E-02 | 1822289   | 1822412   | NC_000016.9  |

|            |          |          |       |            |           |           |           |              |
|------------|----------|----------|-------|------------|-----------|-----------|-----------|--------------|
| cg15270729 | 6.54E-10 | 5.28E-11 | -6.95 | 14.1062485 | -1.03E-01 | 47468898  | 47469021  | NC_000011.9  |
| cg15831598 | 6.54E-10 | 5.29E-11 | -6.95 | 14.1058893 | -1.45E-01 | 10215551  | 10215674  | NC_000019.9  |
| cg13116071 | 6.55E-10 | 5.29E-11 | -6.95 | 14.1046938 | -1.38E-01 | 243368706 | 243368829 | NC_000001.10 |
| cg22691256 | 6.55E-10 | 5.29E-11 | -6.95 | 14.1043074 | -1.53E-01 | 70937827  | 70937950  | NC_000007.13 |
| cg00258316 | 6.56E-10 | 5.30E-11 | -6.95 | 14.1039793 | -1.94E-01 | 8194341   | 8194464   | NC_000001.10 |
| cg06604102 | 6.56E-10 | 5.30E-11 | -6.95 | 14.1034225 | -2.93E-02 | 125549789 | 125549912 | NC_000012.11 |
| cg18045685 | 6.56E-10 | 5.30E-11 | -6.95 | 14.1031598 | -1.65E-01 | 22629474  | 22629597  | NC_000007.13 |
| cg11300402 | 6.56E-10 | 5.30E-11 | -6.95 | 14.1028395 | -6.92E-02 | 99680324  | 99680447  | NC_000007.13 |
| cg13731609 | 6.57E-10 | 5.31E-11 | -6.95 | 14.1019331 | -6.51E-02 | 82753739  | 82753862  | NC_000008.10 |
| cg16901862 | 6.57E-10 | 5.31E-11 | -6.95 | 14.1011178 | -1.65E-01 | 563019    | 563142    | NC_000012.11 |
| cg00975971 | 6.58E-10 | 5.32E-11 | -6.95 | 14.1003609 | -1.30E-01 | 14744206  | 14744329  | NC_000005.9  |
| cg21767135 | 6.59E-10 | 5.32E-11 | -6.95 | 14.0992352 | -4.82E-02 | 3169141   | 3169264   | NC_000003.11 |
| cg09898070 | 6.59E-10 | 5.33E-11 | -6.95 | 14.0982271 | -6.93E-02 | 48009866  | 48009989  | NC_000002.11 |
| cg07924154 | 6.60E-10 | 5.34E-11 | -6.95 | 14.096723  | -9.58E-02 | 1855209   | 1855332   | NC_000001.10 |
| cg02280132 | 6.60E-10 | 5.34E-11 | -6.95 | 14.0964453 | -9.89E-02 | 120008963 | 120009086 | NC_000011.9  |
| cg01709921 | 6.61E-10 | 5.34E-11 | -6.95 | 14.0954274 | -1.62E-01 | 15595987  | 15596110  | NC_000016.9  |
| cg14305659 | 6.62E-10 | 5.35E-11 | -6.95 | 14.0940742 | -1.29E-01 | 138696500 | 138696623 | NC_000009.11 |
| cg09343667 | 6.62E-10 | 5.35E-11 | -6.95 | 14.0940487 | -1.59E-01 | 206572056 | 206572179 | NC_000002.11 |
| cg23059700 | 6.64E-10 | 5.37E-11 | -6.95 | 14.0909405 | -1.28E-01 | 36238213  | 36238336  | NC_000006.11 |
| cg02482730 | 6.64E-10 | 5.37E-11 | -6.95 | 14.0907217 | -1.43E-01 | 75473577  | 75473700  | NC_000017.10 |
| cg10486488 | 6.64E-10 | 5.37E-11 | -6.95 | 14.0901942 | -9.04E-02 | 31695427  | 31695550  | NC_000015.9  |
| cg24859800 | 6.65E-10 | 5.38E-11 | -6.95 | 14.0886334 | -1.80E-02 | 31126731  | 31126854  | NC_000006.11 |
| cg16645344 | 6.66E-10 | 5.38E-11 | -6.95 | 14.087999  | -3.51E-02 | 71833193  | 71833316  | NC_000012.11 |
| cg08691775 | 6.66E-10 | 5.38E-11 | -6.95 | 14.0879233 | -1.31E-01 | 134310658 | 134310781 | NC_000008.10 |
| cg17611093 | 6.66E-10 | 5.39E-11 | -6.95 | 14.0876416 | -9.40E-02 | 233739114 | 233739237 | NC_000002.11 |



|                 |          |          |       |            |           |           |           |              |
|-----------------|----------|----------|-------|------------|-----------|-----------|-----------|--------------|
| cg05300440      | 6.66E-10 | 5.39E-11 | -6.95 | 14.0867277 | -6.82E-02 | 27098693  | 27098816  | NC_000001.10 |
| cg11787522      | 6.69E-10 | 5.41E-11 | -6.95 | 14.0824693 | -1.31E-01 | 74495109  | 74495232  | NC_000015.9  |
| cg24368588      | 6.69E-10 | 5.41E-11 | -6.95 | 14.0823179 | -6.44E-02 | 61903974  | 61904097  | NC_000020.10 |
| cg26544685      | 6.71E-10 | 5.42E-11 | -6.95 | 14.0804306 | -2.88E-02 | 93276720  | 93276843  | NC_000011.9  |
| cg02086195      | 6.71E-10 | 5.43E-11 | -6.95 | 14.0803706 | -1.75E-01 | 12656232  | 12656355  | NC_000001.10 |
| cg24131116      | 6.72E-10 | 5.43E-11 | -6.95 | 14.0787067 | -8.24E-02 | 219219623 | 219219746 | NC_000002.11 |
| cg12779520      | 6.72E-10 | 5.43E-11 | -6.95 | 14.0786607 | -8.43E-02 | 60774952  | 60775075  | NC_000011.9  |
| cg06328750      | 6.72E-10 | 5.44E-11 | -6.95 | 14.0781164 | -1.58E-01 | 157322599 | 157322722 | NC_000007.13 |
| cg16794579      | 6.72E-10 | 5.44E-11 | -6.95 | 14.0779504 | -1.47E-01 | 17562419  | 17562542  | NC_000016.9  |
| cg19364141      | 6.73E-10 | 5.44E-11 | -6.95 | 14.0771054 | -1.22E-01 | 63846679  | 63846802  | NC_000002.11 |
| cg19358594      | 6.73E-10 | 5.45E-11 | -6.95 | 14.0764122 | -6.35E-02 | 10532567  | 10532690  | NC_000001.10 |
| cg10782668      | 6.73E-10 | 5.45E-11 | -6.95 | 14.0761374 | -1.78E-01 | 28496082  | 28496205  | NC_000013.10 |
| cg19280776      | 6.73E-10 | 5.45E-11 | -6.95 | 14.0760741 | -7.34E-02 | 82024586  | 82024709  | NC_000008.10 |
| cg00925616      | 6.74E-10 | 5.45E-11 | -6.95 | 14.0752645 | -2.07E-01 | 32410211  | 32410334  | NC_000001.10 |
| ch.4.187742505F | 6.74E-10 | 5.45E-11 | -6.95 | 14.0751908 | -2.37E-02 | 187505511 | 187505634 | NC_000004.11 |
| cg10966187      | 6.76E-10 | 5.47E-11 | -6.95 | 14.0722122 | -6.36E-02 | 65789910  | 65790033  | NC_000011.9  |
| cg13808936      | 6.76E-10 | 5.48E-11 | -6.95 | 14.070994  | -8.59E-02 | 136371164 | 136371287 | NC_000009.11 |
| cg18689925      | 6.77E-10 | 5.48E-11 | -6.94 | 14.0705789 | -3.45E-02 | 31371254  | 31371377  | NC_000006.11 |
| cg13461178      | 6.77E-10 | 5.49E-11 | -6.94 | 14.0694993 | -1.34E-01 | 4583451   | 4583574   | NC_000019.9  |
| cg12206846      | 6.78E-10 | 5.49E-11 | -6.94 | 14.0682139 | -1.09E-01 | 19292493  | 19292616  | NC_000001.10 |
| cg20009332      | 6.79E-10 | 5.50E-11 | -6.94 | 14.0665429 | -9.73E-02 | 10489118  | 10489241  | NC_000008.10 |
| cg05075268      | 6.79E-10 | 5.50E-11 | -6.94 | 14.066289  | -5.05E-02 | 19718750  | 19718873  | NC_000022.10 |
| cg09639264      | 6.81E-10 | 5.51E-11 | -6.94 | 14.0643425 | -1.13E-01 | 1308385   | 1308508   | NC_000016.9  |
| cg00111948      | 6.81E-10 | 5.52E-11 | -6.94 | 14.0635689 | -2.44E-02 | 27691978  | 27692101  | NC_000001.10 |
| cg17998530      | 6.81E-10 | 5.52E-11 | -6.94 | 14.0634568 | -8.23E-02 | 35388865  | 35388988  | NC_000022.10 |

|              |          |          |       |            |           |           |           |              |
|--------------|----------|----------|-------|------------|-----------|-----------|-----------|--------------|
| cg09943401   | 6.81E-10 | 5.52E-11 | -6.94 | 14.0633513 | -7.78E-02 | 57276595  | 57276718  | NC_000004.11 |
| ch.8.575115F | 6.81E-10 | 5.52E-11 | -6.94 | 14.0630707 | -2.18E-02 | 23116576  | 23116699  | NC_000008.10 |
| cg13300480   | 6.82E-10 | 5.53E-11 | -6.94 | 14.0623001 | -1.62E-01 | 64485696  | 64485819  | NC_000001.10 |
| cg02390637   | 6.82E-10 | 5.53E-11 | -6.94 | 14.0615767 | -7.93E-02 | 106074440 | 106074563 | NC_000010.10 |
| cg15751090   | 6.83E-10 | 5.53E-11 | -6.94 | 14.0613039 | -1.12E-01 | 69534751  | 69534874  | NC_000002.11 |
| cg22648815   | 6.83E-10 | 5.53E-11 | -6.94 | 14.0608996 | -1.56E-01 | 113969140 | 113969263 | NC_000002.11 |
| cg04857172   | 6.84E-10 | 5.54E-11 | -6.94 | 14.0594385 | -1.01E-01 | 4283651   | 4283774   | NC_000016.9  |
| cg14993430   | 6.84E-10 | 5.54E-11 | -6.94 | 14.0591692 | -1.28E-01 | 193499482 | 193499605 | NC_000003.11 |
| cg12214673   | 6.84E-10 | 5.54E-11 | -6.94 | 14.0590675 | -3.35E-02 | 196159430 | 196159553 | NC_000003.11 |
| cg27083414   | 6.84E-10 | 5.55E-11 | -6.94 | 14.0588391 | -1.91E-02 | 49149933  | 49150056  | NC_000019.9  |
| cg23162967   | 6.84E-10 | 5.55E-11 | -6.94 | 14.0584517 | -4.90E-02 | 105587981 | 105588104 | NC_000003.11 |
| cg12493906   | 6.84E-10 | 5.55E-11 | -6.94 | 14.0584186 | -1.56E-01 | 5009311   | 5009434   | NC_000011.9  |
| cg24587601   | 6.85E-10 | 5.55E-11 | -6.94 | 14.0574956 | -2.24E-01 | 54987140  | 54987263  | NC_000020.10 |
| cg20687414   | 6.85E-10 | 5.55E-11 | -6.94 | 14.0574648 | -9.02E-02 | 44155764  | 44155887  | NC_000003.11 |
| cg05062087   | 6.85E-10 | 5.56E-11 | -6.94 | 14.0569241 | -8.49E-02 | 145806546 | 145806669 | NC_000008.10 |
| cg09160359   | 6.85E-10 | 5.56E-11 | -6.94 | 14.0566648 | -9.30E-02 | 81294865  | 81294988  | NC_000015.9  |
| cg25844590   | 6.86E-10 | 5.56E-11 | -6.94 | 14.056435  | -1.54E-01 | 7621556   | 7621679   | NC_000011.9  |
| cg27168858   | 6.86E-10 | 5.57E-11 | -6.94 | 14.0551887 | -1.32E-01 | 55351659  | 55351782  | NC_000001.10 |
| cg01389761   | 6.87E-10 | 5.57E-11 | -6.94 | 14.0542579 | -3.04E-02 | 169482968 | 169483091 | NC_000003.11 |
| cg16988810   | 6.88E-10 | 5.58E-11 | -6.94 | 14.0527627 | -6.46E-02 | 31762650  | 31762773  | NC_000006.11 |
| cg15939920   | 6.89E-10 | 5.59E-11 | -6.94 | 14.0512778 | -1.21E-01 | 35457385  | 35457508  | NC_000017.10 |
| cg18909903   | 6.89E-10 | 5.59E-11 | -6.94 | 14.0509514 | -1.16E-01 | 1634335   | 1634458   | NC_000017.10 |
| cg09914555   | 6.90E-10 | 5.59E-11 | -6.94 | 14.0505057 | -7.24E-02 | 142094789 | 142094912 | NC_000008.10 |
| cg22262753   | 6.90E-10 | 5.59E-11 | -6.94 | 14.0503561 | -7.11E-02 | 20932931  | 20933054  | NC_000006.11 |
| cg00474218   | 6.90E-10 | 5.60E-11 | -6.94 | 14.0498943 | -1.28E-01 | 67143904  | 67144027  | NC_000015.9  |

|               |          |          |       |            |           |           |           |              |
|---------------|----------|----------|-------|------------|-----------|-----------|-----------|--------------|
| cg04672650    | 6.90E-10 | 5.60E-11 | -6.94 | 14.0497771 | -6.38E-02 | 96943563  | 96943686  | NC_000010.10 |
| cg22531904    | 6.90E-10 | 5.60E-11 | -6.94 | 14.0497429 | -1.71E-01 | 99595276  | 99595399  | NC_000007.13 |
| cg07042289    | 6.91E-10 | 5.61E-11 | -6.94 | 14.0477055 | -7.45E-02 | 90692494  | 90692617  | NC_000010.10 |
| cg12632313    | 6.93E-10 | 5.62E-11 | -6.94 | 14.0452785 | -1.43E-01 | 151329752 | 151329875 | NC_000002.11 |
| cg09386054    | 6.93E-10 | 5.63E-11 | -6.94 | 14.044793  | -1.64E-01 | 98919898  | 98920021  | NC_000014.8  |
| cg10508193    | 6.93E-10 | 5.63E-11 | -6.94 | 14.0447456 | -1.62E-01 | 5211861   | 5211984   | NC_000012.11 |
| ch.20.752957R | 6.95E-10 | 5.64E-11 | -6.94 | 14.0419459 | -3.75E-02 | 35702558  | 35702681  | NC_000020.10 |
| cg06637550    | 6.95E-10 | 5.64E-11 | -6.94 | 14.0418742 | -1.20E-01 | 37585337  | 37585460  | NC_000022.10 |
| cg05303132    | 6.95E-10 | 5.64E-11 | -6.94 | 14.0418646 | -1.81E-01 | 2984631   | 2984754   | NC_000001.10 |
| cg09957504    | 6.96E-10 | 5.65E-11 | -6.94 | 14.0402837 | -1.03E-01 | 8742058   | 8742181   | NC_000008.10 |
| cg15138109    | 6.96E-10 | 5.65E-11 | -6.94 | 14.0402738 | -7.84E-02 | 24713234  | 24713357  | NC_000002.11 |
| cg06611076    | 6.96E-10 | 5.65E-11 | -6.94 | 14.0402042 | -2.69E-02 | 198364074 | 198364197 | NC_000002.11 |
| cg13873733    | 6.97E-10 | 5.65E-11 | -6.94 | 14.03968   | -4.12E-02 | 83352560  | 83352683  | NC_000004.11 |
| cg06551822    | 6.97E-10 | 5.66E-11 | -6.94 | 14.0392301 | -1.05E-01 | 29858868  | 29858991  | NC_000016.9  |
| cg13739345    | 6.97E-10 | 5.66E-11 | -6.94 | 14.0385764 | -6.01E-02 | 19102782  | 19102905  | NC_000009.11 |
| cg03008387    | 6.99E-10 | 5.68E-11 | -6.94 | 14.0361263 | -1.38E-01 | 62089152  | 62089275  | NC_000020.10 |
| cg17557160    | 7.02E-10 | 5.70E-11 | -6.94 | 14.0321038 | -5.11E-02 | 129464924 | 129465047 | NC_000007.13 |
| cg11371851    | 7.02E-10 | 5.70E-11 | -6.94 | 14.0317938 | -6.13E-02 | 47823423  | 47823546  | NC_000003.11 |
| cg08410533    | 7.02E-10 | 5.70E-11 | -6.94 | 14.0317253 | -1.21E-01 | 375830    | 375953    | NC_000010.10 |
| cg21078330    | 7.02E-10 | 5.70E-11 | -6.94 | 14.0316704 | -1.41E-01 | 134104516 | 134104639 | NC_000002.11 |
| cg07314391    | 7.03E-10 | 5.71E-11 | -6.94 | 14.0303936 | -2.67E-02 | 150602100 | 150602223 | NC_000001.10 |
| cg02470595    | 7.04E-10 | 5.72E-11 | -6.94 | 14.0292037 | -8.37E-02 | 54426736  | 54426859  | NC_000012.11 |
| cg01810267    | 7.04E-10 | 5.72E-11 | -6.94 | 14.0280211 | -9.15E-02 | 118603742 | 118603865 | NC_000005.9  |
| cg24696028    | 7.04E-10 | 5.72E-11 | -6.94 | 14.0280113 | -4.41E-02 | 47731714  | 47731837  | NC_000019.9  |
| cg12697139    | 7.05E-10 | 5.72E-11 | -6.94 | 14.0276701 | -1.73E-01 | 209571889 | 209572012 | NC_000001.10 |

|            |          |          |       |            |           |           |           |              |
|------------|----------|----------|-------|------------|-----------|-----------|-----------|--------------|
| cg19319588 | 7.05E-10 | 5.73E-11 | -6.94 | 14.0273791 | -1.32E-01 | 46010025  | 46010148  | NC_000010.10 |
| cg10878976 | 7.05E-10 | 5.73E-11 | -6.94 | 14.0272703 | -9.24E-02 | 1257084   | 1257207   | NC_000005.9  |
| cg10574863 | 7.06E-10 | 5.73E-11 | -6.94 | 14.0259919 | -1.38E-01 | 38068752  | 38068875  | NC_000014.8  |
| cg21142272 | 7.06E-10 | 5.74E-11 | -6.94 | 14.0249041 | -9.38E-02 | 67224341  | 67224464  | NC_000016.9  |
| cg14809332 | 7.09E-10 | 5.76E-11 | -6.94 | 14.0213386 | -9.09E-02 | 144654887 | 144655010 | NC_000008.10 |
| cg08051604 | 7.09E-10 | 5.76E-11 | -6.94 | 14.0212071 | -1.49E-01 | 101309386 | 101309509 | NC_000014.8  |
| cg12626968 | 7.09E-10 | 5.76E-11 | -6.94 | 14.0211348 | -6.12E-02 | 43603169  | 43603292  | NC_000005.9  |
| cg00563858 | 7.09E-10 | 5.76E-11 | -6.94 | 14.0208574 | -1.35E-01 | 153735395 | 153735518 | NC_000005.9  |
| cg17712202 | 7.10E-10 | 5.77E-11 | -6.94 | 14.0194461 | -4.06E-02 | 13261217  | 13261340  | NC_000019.9  |
| cg06246950 | 7.10E-10 | 5.77E-11 | -6.94 | 14.0194017 | -1.12E-01 | 31030853  | 31030976  | NC_000022.10 |
| cg13877974 | 7.10E-10 | 5.78E-11 | -6.94 | 14.0189271 | -6.95E-02 | 201708888 | 201709011 | NC_000001.10 |
| cg10080966 | 7.11E-10 | 5.78E-11 | -6.94 | 14.0178406 | -1.21E-01 | 112260867 | 112260990 | NC_000010.10 |
| cg15684661 | 7.11E-10 | 5.78E-11 | -6.94 | 14.0177294 | -1.43E-01 | 1795014   | 1795137   | NC_000005.9  |
| cg03044344 | 7.12E-10 | 5.79E-11 | -6.94 | 14.0163096 | -1.18E-01 | 1856307   | 1856430   | NC_000011.9  |
| cg15188182 | 7.12E-10 | 5.79E-11 | -6.94 | 14.0159199 | -5.29E-02 | 62457647  | 62457770  | NC_000015.9  |
| cg18462764 | 7.14E-10 | 5.81E-11 | -6.93 | 14.0136785 | -1.42E-01 | 76584710  | 76584833  | NC_000010.10 |
| cg26690742 | 7.14E-10 | 5.81E-11 | -6.93 | 14.0135183 | -1.84E-01 | 2889602   | 2889725   | NC_000011.9  |
| cg26339180 | 7.14E-10 | 5.81E-11 | -6.93 | 14.0131334 | -6.52E-02 | 55043319  | 55043442  | NC_000020.10 |
| cg03000844 | 7.14E-10 | 5.81E-11 | -6.93 | 14.0130735 | -3.67E-02 | 242641386 | 242641509 | NC_000002.11 |
| cg11083235 | 7.16E-10 | 5.82E-11 | -6.93 | 14.0108704 | -1.40E-01 | 128429005 | 128429128 | NC_000003.11 |
| cg05974629 | 7.18E-10 | 5.84E-11 | -6.93 | 14.0079457 | -9.54E-02 | 66742299  | 66742422  | NC_000011.9  |
| cg11258001 | 7.18E-10 | 5.84E-11 | -6.93 | 14.00785   | -3.32E-02 | 45360205  | 45360328  | NC_000010.10 |
| cg07144408 | 7.20E-10 | 5.86E-11 | -6.93 | 14.0054239 | -9.58E-02 | 54866037  | 54866160  | NC_000005.9  |
| cg03736603 | 7.20E-10 | 5.86E-11 | -6.93 | 14.0044902 | -5.69E-02 | 6346862   | 6346985   | NC_000017.10 |
| cg26831488 | 7.20E-10 | 5.86E-11 | -6.93 | 14.0040933 | -5.22E-02 | 114270881 | 114271004 | NC_000011.9  |

|                |          |          |       |            |           |           |           |              |
|----------------|----------|----------|-------|------------|-----------|-----------|-----------|--------------|
| cg05867975     | 7.21E-10 | 5.86E-11 | -6.93 | 14.0040082 | -8.85E-02 | 10131854  | 10131977  | NC_000018.9  |
| cg12018888     | 7.21E-10 | 5.87E-11 | -6.93 | 14.0033721 | -1.14E-01 | 106583218 | 106583341 | NC_000006.11 |
| cg03604774     | 7.23E-10 | 5.88E-11 | -6.93 | 14.0008947 | -1.91E-01 | 27849102  | 27849225  | NC_000001.10 |
| cg25011530     | 7.23E-10 | 5.88E-11 | -6.93 | 14.0008583 | -3.63E-02 | 105162470 | 105162593 | NC_000007.13 |
| cg14256268     | 7.23E-10 | 5.89E-11 | -6.93 | 14.0003708 | -1.13E-01 | 124985272 | 124985395 | NC_000012.11 |
| cg16775939     | 7.23E-10 | 5.89E-11 | -6.93 | 14.0000144 | -1.57E-01 | 197247220 | 197247343 | NC_000003.11 |
| cg16684817     | 7.24E-10 | 5.89E-11 | -6.93 | 13.9991413 | -1.58E-01 | 28202173  | 28202296  | NC_000001.10 |
| ch.11.1405170R | 7.26E-10 | 5.91E-11 | -6.93 | 13.9963359 | -6.42E-02 | 67951916  | 67952039  | NC_000011.9  |
| cg22587600     | 7.26E-10 | 5.91E-11 | -6.93 | 13.9960367 | -1.48E-01 | 46883368  | 46883491  | NC_000002.11 |
| cg14039909     | 7.27E-10 | 5.92E-11 | -6.93 | 13.9952692 | -7.82E-02 | 76433293  | 76433416  | NC_000011.9  |
| cg03160508     | 7.27E-10 | 5.92E-11 | -6.93 | 13.9951482 | -7.95E-02 | 66823684  | 66823807  | NC_000011.9  |
| cg16086730     | 7.28E-10 | 5.93E-11 | -6.93 | 13.9934017 | -1.52E-01 | 9782142   | 9782265   | NC_000005.9  |
| cg16732648     | 7.29E-10 | 5.94E-11 | -6.93 | 13.9917811 | -1.50E-01 | 16318668  | 16318791  | NC_000017.10 |
| cg00741946     | 7.29E-10 | 5.94E-11 | -6.93 | 13.9917247 | -5.71E-02 | 122042964 | 122043087 | NC_000002.11 |
| cg24351694     | 7.29E-10 | 5.94E-11 | -6.93 | 13.9912923 | -9.71E-02 | 144655447 | 144655570 | NC_000008.10 |
| cg10787197     | 7.29E-10 | 5.94E-11 | -6.93 | 13.9911003 | -1.56E-01 | 11779941  | 11780064  | NC_000006.11 |
| cg04116494     | 7.29E-10 | 5.94E-11 | -6.93 | 13.991024  | -2.68E-02 | 76618702  | 76618825  | NC_000014.8  |
| cg07680195     | 7.29E-10 | 5.94E-11 | -6.93 | 13.990979  | -6.91E-02 | 17622109  | 17622232  | NC_000019.9  |
| cg01069791     | 7.30E-10 | 5.95E-11 | -6.93 | 13.9898064 | -7.02E-02 | 25507395  | 25507518  | NC_000022.10 |
| cg11214555     | 7.31E-10 | 5.95E-11 | -6.93 | 13.9891145 | -5.11E-02 | 36337033  | 36337156  | NC_000019.9  |
| cg15537269     | 7.32E-10 | 5.96E-11 | -6.93 | 13.987516  | -1.87E-01 | 24507197  | 24507320  | NC_000008.10 |
| cg10407585     | 7.32E-10 | 5.97E-11 | -6.93 | 13.9867579 | -1.26E-01 | 115999916 | 116000039 | NC_000010.10 |
| cg11022944     | 7.33E-10 | 5.97E-11 | -6.93 | 13.9859084 | -7.09E-02 | 114598438 | 114598561 | NC_000005.9  |
| cg10472567     | 7.34E-10 | 5.98E-11 | -6.93 | 13.9840995 | -1.02E-01 | 46115450  | 46115573  | NC_000017.10 |
| cg01640635     | 7.35E-10 | 5.99E-11 | -6.93 | 13.9834714 | -1.33E-01 | 38864868  | 38864991  | NC_000022.10 |

|            |          |          |       |            |           |           |           |              |
|------------|----------|----------|-------|------------|-----------|-----------|-----------|--------------|
| cg17976390 | 7.35E-10 | 5.99E-11 | -6.93 | 13.9829817 | -1.17E-01 | 6130479   | 6130602   | NC_000010.10 |
| cg02909866 | 7.35E-10 | 5.99E-11 | -6.93 | 13.9828437 | -7.36E-02 | 101152469 | 101152592 | NC_000010.10 |
| cg18262260 | 7.36E-10 | 6.00E-11 | -6.93 | 13.9819948 | -5.23E-02 | 89029717  | 89029840  | NC_000014.8  |
| cg12649038 | 7.36E-10 | 6.00E-11 | -6.93 | 13.9815073 | -1.41E-01 | 116282534 | 116282657 | NC_000010.10 |
| cg15361750 | 7.36E-10 | 6.00E-11 | -6.93 | 13.9812171 | -1.57E-01 | 47839132  | 47839255  | NC_000019.9  |
| cg08140055 | 7.36E-10 | 6.00E-11 | -6.93 | 13.9810961 | -1.40E-01 | 134369339 | 134369462 | NC_000003.11 |
| cg14780845 | 7.37E-10 | 6.01E-11 | -6.93 | 13.9805312 | -5.07E-02 | 41323115  | 41323238  | NC_000017.10 |
| cg23616097 | 7.37E-10 | 6.01E-11 | -6.93 | 13.9800592 | -7.16E-02 | 5463348   | 5463471   | NC_000007.13 |
| cg01736212 | 7.37E-10 | 6.01E-11 | -6.93 | 13.9794177 | -7.29E-02 | 228189534 | 228189657 | NC_000002.11 |
| cg07237590 | 7.40E-10 | 6.03E-11 | -6.93 | 13.9762801 | -4.19E-02 | 62526788  | 62526911  | NC_000020.10 |
| cg14092536 | 7.40E-10 | 6.03E-11 | -6.93 | 13.9762607 | -6.30E-02 | 130889808 | 130889931 | NC_000009.11 |
| cg14473904 | 7.42E-10 | 6.05E-11 | -6.93 | 13.9732381 | -1.44E-01 | 93465087  | 93465210  | NC_000015.9  |
| cg12789833 | 7.42E-10 | 6.05E-11 | -6.93 | 13.9727698 | -6.47E-02 | 76195876  | 76195999  | NC_000015.9  |
| cg14967066 | 7.42E-10 | 6.05E-11 | -6.93 | 13.9727158 | -2.05E-01 | 314341    | 314464    | NC_000011.9  |
| cg17222829 | 7.43E-10 | 6.06E-11 | -6.93 | 13.9715126 | -1.36E-01 | 70433293  | 70433416  | NC_000011.9  |
| cg08330919 | 7.44E-10 | 6.06E-11 | -6.93 | 13.9709186 | -4.54E-02 | 40058921  | 40059044  | NC_000004.11 |
| cg11055926 | 7.44E-10 | 6.07E-11 | -6.93 | 13.9702342 | -6.49E-02 | 111683227 | 111683350 | NC_000010.10 |
| cg15698244 | 7.44E-10 | 6.07E-11 | -6.93 | 13.9699018 | -1.37E-01 | 76073316  | 76073439  | NC_000006.11 |
| cg22120095 | 7.46E-10 | 6.09E-11 | -6.93 | 13.9675062 | -1.60E-01 | 50488020  | 50488143  | NC_000003.11 |
| cg18762243 | 7.46E-10 | 6.09E-11 | -6.93 | 13.9672285 | -7.33E-02 | 226925704 | 226925827 | NC_000001.10 |
| cg00057667 | 7.47E-10 | 6.09E-11 | -6.93 | 13.9660944 | -1.12E-01 | 140069730 | 140069853 | NC_000006.11 |
| cg21482176 | 7.47E-10 | 6.10E-11 | -6.93 | 13.9656864 | -1.08E-01 | 64249332  | 64249455  | NC_000005.9  |
| cg03811829 | 7.47E-10 | 6.10E-11 | -6.93 | 13.965593  | -1.37E-01 | 949449    | 949572    | NC_000001.10 |
| cg24125063 | 7.48E-10 | 6.11E-11 | -6.93 | 13.9640872 | -2.92E-02 | 35374650  | 35374773  | NC_000020.10 |
| cg07072166 | 7.49E-10 | 6.11E-11 | -6.93 | 13.963159  | -4.65E-02 | 12886455  | 12886578  | NC_000019.9  |

|               |          |          |       |            |           |           |           |              |
|---------------|----------|----------|-------|------------|-----------|-----------|-----------|--------------|
| cg18422058    | 7.49E-10 | 6.12E-11 | -6.93 | 13.9627028 | -1.58E-01 | 78951762  | 78951885  | NC_000014.8  |
| cg05694563    | 7.49E-10 | 6.12E-11 | -6.93 | 13.9624848 | -1.01E-01 | 17465224  | 17465347  | NC_000017.10 |
| cg15849872    | 7.50E-10 | 6.12E-11 | -6.93 | 13.9618706 | -1.05E-01 | 1942744   | 1942867   | NC_000011.9  |
| cg09256310    | 7.51E-10 | 6.13E-11 | -6.93 | 13.9607903 | -3.46E-02 | 55657757  | 55657880  | NC_000019.9  |
| cg15430294    | 7.52E-10 | 6.14E-11 | -6.92 | 13.9584216 | -1.35E-01 | 47125648  | 47125771  | NC_000019.9  |
| cg23793599    | 7.53E-10 | 6.14E-11 | -6.92 | 13.9580446 | -1.27E-01 | 117749424 | 117749547 | NC_000011.9  |
| ch.2.4104651R | 7.53E-10 | 6.15E-11 | -6.92 | 13.9573021 | -5.03E-02 | 206156946 | 206157069 | NC_000002.11 |
| cg04593696    | 7.55E-10 | 6.16E-11 | -6.92 | 13.9551139 | -1.22E-01 | 84076900  | 84077023  | NC_000016.9  |
| cg11188031    | 7.57E-10 | 6.18E-11 | -6.92 | 13.9520539 | -1.94E-01 | 156485648 | 156485771 | NC_000005.9  |
| cg01808708    | 7.57E-10 | 6.18E-11 | -6.92 | 13.9517517 | -1.59E-01 | 183484105 | 183484228 | NC_000001.10 |
| cg10092546    | 7.58E-10 | 6.19E-11 | -6.92 | 13.9512975 | -4.67E-02 | 1099214   | 1099337   | NC_000020.10 |
| cg18886436    | 7.60E-10 | 6.21E-11 | -6.92 | 13.9483771 | -4.09E-02 | 54785171  | 54785294  | NC_000012.11 |
| cg03701779    | 7.61E-10 | 6.22E-11 | -6.92 | 13.9464137 | -5.00E-02 | 74927978  | 74928101  | NC_000010.10 |
| cg22493616    | 7.62E-10 | 6.23E-11 | -6.92 | 13.9450036 | -1.28E-01 | 100400274 | 100400397 | NC_000007.13 |
| cg03624661    | 7.63E-10 | 6.23E-11 | -6.92 | 13.9446472 | -3.16E-02 | 63569529  | 63569652  | NC_000015.9  |
| cg03012115    | 7.65E-10 | 6.25E-11 | -6.92 | 13.9418294 | -4.33E-02 | 33216271  | 33216394  | NC_000006.11 |
| cg26539232    | 7.65E-10 | 6.25E-11 | -6.92 | 13.941351  | -4.83E-02 | 924834    | 924957    | NC_000019.9  |
| cg03665970    | 7.65E-10 | 6.25E-11 | -6.92 | 13.9409951 | -1.26E-01 | 17446104  | 17446227  | NC_000019.9  |
| ch.22.78028F  | 7.66E-10 | 6.26E-11 | -6.92 | 13.9397416 | -2.65E-02 | 19362054  | 19362177  | NC_000022.10 |
| cg04500909    | 7.67E-10 | 6.27E-11 | -6.92 | 13.938724  | -1.16E-01 | 159203122 | 159203245 | NC_000005.9  |
| cg15929771    | 7.68E-10 | 6.27E-11 | -6.92 | 13.937457  | -1.34E-01 | 12466185  | 12466308  | NC_000001.10 |
| cg19708986    | 7.69E-10 | 6.28E-11 | -6.92 | 13.9360415 | -1.31E-01 | 80824318  | 80824441  | NC_000015.9  |
| cg01062786    | 7.70E-10 | 6.29E-11 | -6.92 | 13.93485   | -5.96E-02 | 20929651  | 20929774  | NC_000014.8  |
| cg21510189    | 7.70E-10 | 6.30E-11 | -6.92 | 13.934182  | -1.11E-01 | 133927987 | 133928110 | NC_000005.9  |
| cg19113603    | 7.72E-10 | 6.31E-11 | -6.92 | 13.9324374 | -3.81E-02 | 130692917 | 130693040 | NC_000009.11 |

|            |          |          |       |            |           |           |           |              |
|------------|----------|----------|-------|------------|-----------|-----------|-----------|--------------|
| cg17748242 | 7.73E-10 | 6.32E-11 | -6.92 | 13.9299904 | -9.83E-02 | 40517479  | 40517602  | NC_000017.10 |
| cg13361307 | 7.75E-10 | 6.34E-11 | -6.92 | 13.9272086 | -1.33E-01 | 100365075 | 100365198 | NC_000002.11 |
| cg16868095 | 7.76E-10 | 6.35E-11 | -6.92 | 13.9263729 | -1.36E-01 | 197090774 | 197090897 | NC_000003.11 |
| cg03788004 | 7.76E-10 | 6.35E-11 | -6.92 | 13.9260996 | -3.22E-02 | 102092168 | 102092291 | NC_000012.11 |
| cg23281711 | 7.77E-10 | 6.35E-11 | -6.92 | 13.9253899 | -4.34E-02 | 1354468   | 1354591   | NC_000019.9  |
| cg00247599 | 7.77E-10 | 6.36E-11 | -6.92 | 13.9243831 | -6.64E-02 | 27777649  | 27777772  | NC_000006.11 |
| cg09959684 | 7.78E-10 | 6.37E-11 | -6.92 | 13.9230555 | -1.47E-01 | 5632392   | 5632515   | NC_000010.10 |
| cg16615508 | 7.79E-10 | 6.37E-11 | -6.92 | 13.9223979 | -1.39E-01 | 601073    | 601196    | NC_000005.9  |
| cg26189303 | 7.79E-10 | 6.38E-11 | -6.92 | 13.9217112 | -1.04E-01 | 159897910 | 159898033 | NC_000005.9  |
| cg04837722 | 7.80E-10 | 6.38E-11 | -6.92 | 13.9206956 | -1.42E-01 | 160463767 | 160463890 | NC_000006.11 |
| cg11120865 | 7.81E-10 | 6.39E-11 | -6.92 | 13.920177  | -5.04E-02 | 21853037  | 21853160  | NC_000014.8  |
| cg11179286 | 7.81E-10 | 6.39E-11 | -6.92 | 13.9201298 | -4.86E-02 | 115047994 | 115048117 | NC_000013.10 |
| cg23003832 | 7.81E-10 | 6.39E-11 | -6.92 | 13.9192822 | -6.27E-02 | 131486918 | 131487041 | NC_000009.11 |
| cg24590075 | 7.82E-10 | 6.40E-11 | -6.92 | 13.9182358 | -5.62E-02 | 40224031  | 40224154  | NC_000017.10 |
| cg03433699 | 7.83E-10 | 6.41E-11 | -6.92 | 13.9171563 | -7.10E-02 | 6916926   | 6917049   | NC_000017.10 |
| cg23696886 | 7.83E-10 | 6.41E-11 | -6.92 | 13.9164006 | -7.53E-02 | 22437193  | 22437316  | NC_000008.10 |
| cg19399285 | 7.84E-10 | 6.41E-11 | -6.92 | 13.9159777 | -1.48E-01 | 75666847  | 75666970  | NC_000010.10 |
| cg03533091 | 7.84E-10 | 6.42E-11 | -6.92 | 13.915517  | -6.93E-02 | 3614086   | 3614209   | NC_000011.9  |
| cg17076397 | 7.85E-10 | 6.43E-11 | -6.92 | 13.9136764 | -6.46E-02 | 10353763  | 10353886  | NC_000005.9  |
| cg04382468 | 7.86E-10 | 6.43E-11 | -6.92 | 13.9135578 | -1.51E-01 | 11110746  | 11110869  | NC_000016.9  |
| cg20545458 | 7.87E-10 | 6.44E-11 | -6.92 | 13.9113293 | -1.45E-01 | 26046341  | 26046464  | NC_000006.11 |
| cg20924428 | 7.88E-10 | 6.45E-11 | -6.92 | 13.910032  | -8.04E-02 | 61927820  | 61927943  | NC_000020.10 |
| cg15881238 | 7.89E-10 | 6.46E-11 | -6.92 | 13.9088988 | -1.19E-01 | 87770744  | 87770867  | NC_000004.11 |
| cg02882530 | 7.90E-10 | 6.47E-11 | -6.92 | 13.9076761 | -1.39E-01 | 776504    | 776627    | NC_000004.11 |
| cg22330749 | 7.91E-10 | 6.47E-11 | -6.92 | 13.9067304 | -7.94E-02 | 10123764  | 10123887  | NC_000002.11 |



|                 |          |          |       |            |           |           |           |              |
|-----------------|----------|----------|-------|------------|-----------|-----------|-----------|--------------|
| cg04787675      | 7.91E-10 | 6.48E-11 | -6.92 | 13.9058089 | -7.02E-02 | 104683308 | 104683431 | NC_000012.11 |
| cg13659252      | 7.91E-10 | 6.48E-11 | -6.92 | 13.9056047 | -4.01E-02 | 139655589 | 139655712 | NC_000009.11 |
| cg06882420      | 7.92E-10 | 6.48E-11 | -6.92 | 13.9054664 | -9.78E-02 | 3605970   | 3606093   | NC_000011.9  |
| cg09495643      | 7.92E-10 | 6.49E-11 | -6.92 | 13.9050051 | -2.28E-01 | 1132313   | 1132436   | NC_000019.9  |
| ch.16.48460639F | 7.92E-10 | 6.49E-11 | -6.92 | 13.9044781 | -1.20E-01 | 49903138  | 49903261  | NC_000016.9  |
| cg04132146      | 7.93E-10 | 6.50E-11 | -6.91 | 13.9032013 | -1.33E-01 | 87862158  | 87862281  | NC_000006.11 |
| cg27032813      | 7.93E-10 | 6.50E-11 | -6.91 | 13.9031361 | -1.40E-01 | 72490517  | 72490640  | NC_000015.9  |
| cg18107072      | 7.94E-10 | 6.50E-11 | -6.91 | 13.9026291 | -8.01E-02 | 67427811  | 67427934  | NC_000016.9  |
| cg02736560      | 7.95E-10 | 6.51E-11 | -6.91 | 13.9011558 | -8.99E-02 | 68257754  | 68257877  | NC_000001.10 |
| cg13365753      | 7.96E-10 | 6.52E-11 | -6.91 | 13.8994577 | -1.41E-01 | 234390545 | 234390668 | NC_000002.11 |
| cg06267200      | 7.96E-10 | 6.52E-11 | -6.91 | 13.8994479 | -1.07E-01 | 73403921  | 73404044  | NC_000002.11 |
| cg07142523      | 7.96E-10 | 6.52E-11 | -6.91 | 13.8991705 | -7.91E-02 | 45970509  | 45970632  | NC_000019.9  |
| cg19633205      | 7.97E-10 | 6.54E-11 | -6.91 | 13.8975321 | -8.93E-02 | 35544470  | 35544593  | NC_000001.10 |
| cg01660244      | 7.98E-10 | 6.54E-11 | -6.91 | 13.89699   | -4.22E-02 | 46620406  | 46620529  | NC_000006.11 |
| ch.1.228777R    | 7.98E-10 | 6.54E-11 | -6.91 | 13.8962901 | -4.67E-02 | 6251025   | 6251148   | NC_000001.10 |
| cg07665058      | 7.99E-10 | 6.55E-11 | -6.91 | 13.895782  | -7.34E-02 | 75542084  | 75542207  | NC_000010.10 |
| cg22035959      | 8.01E-10 | 6.57E-11 | -6.91 | 13.8925662 | -1.48E-01 | 951681    | 951804    | NC_000019.9  |
| cg12310395      | 8.01E-10 | 6.57E-11 | -6.91 | 13.8923009 | -5.24E-02 | 34245042  | 34245165  | NC_000005.9  |
| cg17316718      | 8.02E-10 | 6.57E-11 | -6.91 | 13.8918473 | -1.39E-01 | 152308    | 152431    | NC_000017.10 |
| cg13975303      | 8.02E-10 | 6.58E-11 | -6.91 | 13.891194  | -9.06E-02 | 36850894  | 36851017  | NC_000022.10 |
| cg03209642      | 8.02E-10 | 6.58E-11 | -6.91 | 13.8909874 | -1.26E-01 | 91427605  | 91427728  | NC_000015.9  |
| cg03437924      | 8.03E-10 | 6.58E-11 | -6.91 | 13.8907138 | -5.26E-02 | 25123326  | 25123449  | NC_000016.9  |
| cg16523490      | 8.04E-10 | 6.59E-11 | -6.91 | 13.8891103 | -1.39E-01 | 42115829  | 42115952  | NC_000001.10 |
| cg03008741      | 8.05E-10 | 6.60E-11 | -6.91 | 13.8878258 | -3.69E-02 | 69148573  | 69148696  | NC_000016.9  |
| cg23256466      | 8.05E-10 | 6.60E-11 | -6.91 | 13.8878092 | -5.82E-02 | 104159199 | 104159322 | NC_000010.10 |

|                 |          |          |       |            |           |           |           |              |
|-----------------|----------|----------|-------|------------|-----------|-----------|-----------|--------------|
| cg03962809      | 8.05E-10 | 6.60E-11 | -6.91 | 13.8877585 | -1.55E-02 | 201983199 | 201983322 | NC_000002.11 |
| cg18473090      | 8.06E-10 | 6.61E-11 | -6.91 | 13.8867325 | -1.37E-02 | 49436786  | 49436909  | NC_000019.9  |
| cg11829608      | 8.06E-10 | 6.61E-11 | -6.91 | 13.8857374 | -9.16E-02 | 207224549 | 207224672 | NC_000001.10 |
| cg05120428      | 8.08E-10 | 6.62E-11 | -6.91 | 13.8841827 | -1.07E-01 | 116109825 | 116109948 | NC_000010.10 |
| cg11769400      | 8.09E-10 | 6.63E-11 | -6.91 | 13.8828058 | -1.38E-01 | 22773857  | 22773980  | NC_000008.10 |
| ch.11.2015773F  | 8.10E-10 | 6.65E-11 | -6.91 | 13.8808431 | -3.39E-02 | 96664361  | 96664484  | NC_000011.9  |
| cg04483701      | 8.11E-10 | 6.66E-11 | -6.91 | 13.8796569 | -1.41E-01 | 86253703  | 86253826  | NC_000016.9  |
| cg21404063      | 8.13E-10 | 6.67E-11 | -6.91 | 13.8778065 | -1.84E-01 | 72957135  | 72957258  | NC_000017.10 |
| cg01073332      | 8.13E-10 | 6.67E-11 | -6.91 | 13.8774654 | -1.46E-01 | 62574023  | 62574146  | NC_000020.10 |
| cg08832744      | 8.14E-10 | 6.67E-11 | -6.91 | 13.8767701 | -3.55E-02 | 79283095  | 79283218  | NC_000017.10 |
| ch.3.1012570R   | 8.14E-10 | 6.68E-11 | -6.91 | 13.8758859 | -4.64E-02 | 48208271  | 48208394  | NC_000003.11 |
| ch.13.26026325R | 8.14E-10 | 6.68E-11 | -6.91 | 13.8757334 | -5.32E-02 | 27128325  | 27128448  | NC_000013.10 |
| cg07026433      | 8.15E-10 | 6.69E-11 | -6.91 | 13.8752561 | -1.61E-01 | 129781152 | 129781275 | NC_000007.13 |
| cg01833923      | 8.15E-10 | 6.69E-11 | -6.91 | 13.8746718 | -8.64E-02 | 47286719  | 47286842  | NC_000017.10 |
| cg13514778      | 8.15E-10 | 6.69E-11 | -6.91 | 13.8744255 | -3.75E-02 | 34204988  | 34205111  | NC_000020.10 |
| cg02896757      | 8.16E-10 | 6.69E-11 | -6.91 | 13.8740365 | -1.10E-01 | 38508024  | 38508147  | NC_000008.10 |
| cg06180915      | 8.16E-10 | 6.70E-11 | -6.91 | 13.8736437 | -4.71E-02 | 2394179   | 2394302   | NC_000007.13 |
| cg04774229      | 8.17E-10 | 6.70E-11 | -6.91 | 13.8727505 | -6.53E-02 | 62670729  | 62670852  | NC_000020.10 |
| cg16534867      | 8.17E-10 | 6.70E-11 | -6.91 | 13.8724954 | -1.65E-01 | 42033899  | 42034022  | NC_000007.13 |
| cg02340818      | 8.17E-10 | 6.70E-11 | -6.91 | 13.8724167 | -1.50E-01 | 145808436 | 145808559 | NC_000008.10 |
| cg03994018      | 8.17E-10 | 6.71E-11 | -6.91 | 13.8720388 | -4.58E-02 | 37553339  | 37553462  | NC_000008.10 |
| cg05724997      | 8.17E-10 | 6.71E-11 | -6.91 | 13.8715374 | -5.52E-02 | 60988056  | 60988179  | NC_000018.9  |
| cg19363916      | 8.18E-10 | 6.71E-11 | -6.91 | 13.8709814 | -3.27E-02 | 67034540  | 67034663  | NC_000011.9  |
| cg26222731      | 8.18E-10 | 6.72E-11 | -6.91 | 13.8702015 | -9.35E-02 | 57695943  | 57696066  | NC_000015.9  |
| cg00421846      | 8.19E-10 | 6.73E-11 | -6.91 | 13.8689759 | -1.12E-01 | 41340293  | 41340416  | NC_000006.11 |

|                |          |          |       |            |           |           |           |              |
|----------------|----------|----------|-------|------------|-----------|-----------|-----------|--------------|
| cg21275039     | 8.20E-10 | 6.73E-11 | -6.91 | 13.8685151 | -1.14E-01 | 9632401   | 9632524   | NC_000017.10 |
| cg19061270     | 8.21E-10 | 6.74E-11 | -6.91 | 13.8673356 | -1.26E-01 | 17010645  | 17010768  | NC_000019.9  |
| cg05622441     | 8.21E-10 | 6.74E-11 | -6.91 | 13.8672446 | -3.91E-02 | 69419962  | 69420085  | NC_000016.9  |
| cg24875440     | 8.22E-10 | 6.75E-11 | -6.91 | 13.8658362 | -3.30E-02 | 27986375  | 27986498  | NC_000001.10 |
| cg02523617     | 8.22E-10 | 6.75E-11 | -6.91 | 13.8651417 | -4.44E-02 | 39699380  | 39699503  | NC_000004.11 |
| cg20160885     | 8.25E-10 | 6.78E-11 | -6.91 | 13.8620529 | -2.15E-02 | 5013524   | 5013647   | NC_000007.13 |
| cg22062554     | 8.25E-10 | 6.78E-11 | -6.91 | 13.8619995 | -5.05E-02 | 55866677  | 55866800  | NC_000019.9  |
| cg03773192     | 8.25E-10 | 6.78E-11 | -6.91 | 13.8612668 | -8.04E-02 | 120965975 | 120966098 | NC_000010.10 |
| cg17029694     | 8.26E-10 | 6.79E-11 | -6.91 | 13.860381  | -9.00E-02 | 62166255  | 62166378  | NC_000020.10 |
| cg17832212     | 8.26E-10 | 6.79E-11 | -6.91 | 13.8600906 | -4.59E-02 | 33367304  | 33367427  | NC_000001.10 |
| cg05819150     | 8.27E-10 | 6.80E-11 | -6.91 | 13.8585905 | -1.10E-01 | 101980380 | 101980503 | NC_000011.9  |
| cg05940672     | 8.28E-10 | 6.80E-11 | -6.91 | 13.8582876 | -1.63E-01 | 10438486  | 10438609  | NC_000002.11 |
| cg00665650     | 8.28E-10 | 6.81E-11 | -6.91 | 13.8576598 | -1.06E-01 | 138676787 | 138676910 | NC_000005.9  |
| cg27270962     | 8.30E-10 | 6.82E-11 | -6.91 | 13.855028  | -9.78E-02 | 134498381 | 134498504 | NC_000008.10 |
| cg08415973     | 8.32E-10 | 6.84E-11 | -6.91 | 13.8534094 | -1.28E-01 | 40346114  | 40346237  | NC_000006.11 |
| cg17755554     | 8.34E-10 | 6.85E-11 | -6.91 | 13.8510998 | -1.82E-01 | 24034017  | 24034140  | NC_000003.11 |
| ch.17.1234119R | 8.34E-10 | 6.85E-11 | -6.91 | 13.8507094 | -5.46E-02 | 45227063  | 45227186  | NC_000017.10 |
| cg19216204     | 8.34E-10 | 6.86E-11 | -6.91 | 13.8501545 | -6.26E-02 | 37274578  | 37274701  | NC_000003.11 |
| ch.9.2787281F  | 8.34E-10 | 6.86E-11 | -6.91 | 13.8500635 | -3.96E-02 | 2797281   | 2797404   | NC_000009.11 |
| cg02695219     | 8.37E-10 | 6.89E-11 | -6.9  | 13.8462357 | -2.73E-02 | 9136852   | 9136975   | NC_000018.9  |
| cg18473733     | 8.38E-10 | 6.89E-11 | -6.9  | 13.8461427 | -1.47E-01 | 16437362  | 16437485  | NC_000019.9  |
| cg02384530     | 8.38E-10 | 6.89E-11 | -6.9  | 13.8452701 | -4.46E-02 | 6961868   | 6961991   | NC_000012.11 |
| cg17800649     | 8.39E-10 | 6.90E-11 | -6.9  | 13.8440578 | -4.39E-02 | 11159423  | 11159546  | NC_000001.10 |
| cg08241401     | 8.41E-10 | 6.91E-11 | -6.9  | 13.8424702 | -6.89E-02 | 3824289   | 3824412   | NC_000020.10 |
| cg04219726     | 8.41E-10 | 6.91E-11 | -6.9  | 13.8421446 | -8.88E-02 | 110082486 | 110082609 | NC_000001.10 |

|                 |          |          |      |            |           |           |           |              |
|-----------------|----------|----------|------|------------|-----------|-----------|-----------|--------------|
| cg03699079      | 8.41E-10 | 6.92E-11 | -6.9 | 13.8419735 | -3.53E-02 | 47082129  | 47082252  | NC_000001.10 |
| cg24024661      | 8.41E-10 | 6.92E-11 | -6.9 | 13.8416895 | -1.42E-01 | 1074425   | 1074548   | NC_000019.9  |
| cg07185664      | 8.41E-10 | 6.92E-11 | -6.9 | 13.8413729 | -1.32E-01 | 1412950   | 1413073   | NC_000017.10 |
| cg02563407      | 8.41E-10 | 6.92E-11 | -6.9 | 13.841254  | -2.08E-01 | 269468    | 269591    | NC_000011.9  |
| cg00281100      | 8.43E-10 | 6.93E-11 | -6.9 | 13.83953   | -1.45E-01 | 90041434  | 90041557  | NC_000010.10 |
| cg10622911      | 8.43E-10 | 6.93E-11 | -6.9 | 13.83934   | -1.23E-01 | 47998776  | 47998899  | NC_000001.10 |
| ch.20.50133246R | 8.43E-10 | 6.93E-11 | -6.9 | 13.8392902 | -1.01E-01 | 50699839  | 50699962  | NC_000020.10 |
| cg14666473      | 8.44E-10 | 6.94E-11 | -6.9 | 13.8378325 | -3.46E-02 | 27091463  | 27091586  | NC_000012.11 |
| cg13765621      | 8.44E-10 | 6.95E-11 | -6.9 | 13.8375565 | -1.10E-01 | 158149228 | 158149351 | NC_000001.10 |
| cg25271892      | 8.45E-10 | 6.95E-11 | -6.9 | 13.8365457 | -1.22E-01 | 62690462  | 62690585  | NC_000011.9  |
| cg00575127      | 8.47E-10 | 6.97E-11 | -6.9 | 13.8341301 | -7.50E-02 | 18718742  | 18718865  | NC_000019.9  |
| cg07598522      | 8.48E-10 | 6.98E-11 | -6.9 | 13.833149  | -4.81E-02 | 13227118  | 13227241  | NC_000019.9  |
| cg24066931      | 8.48E-10 | 6.98E-11 | -6.9 | 13.8327378 | -3.98E-02 | 1568534   | 1568657   | NC_000019.9  |
| cg15231202      | 8.49E-10 | 6.98E-11 | -6.9 | 13.8323509 | -1.72E-01 | 195310936 | 195311059 | NC_000003.11 |
| cg07490151      | 8.49E-10 | 6.99E-11 | -6.9 | 13.8319342 | -5.25E-02 | 143772072 | 143772195 | NC_000006.11 |
| cg03095800      | 8.49E-10 | 6.99E-11 | -6.9 | 13.8311086 | -1.27E-01 | 67208728  | 67208851  | NC_000016.9  |
| cg26851933      | 8.49E-10 | 6.99E-11 | -6.9 | 13.8311001 | -6.77E-02 | 20620030  | 20620153  | NC_000009.11 |
| cg25758828      | 8.50E-10 | 6.99E-11 | -6.9 | 13.8309276 | -1.48E-01 | 113976143 | 113976266 | NC_000002.11 |
| cg10562114      | 8.50E-10 | 7.00E-11 | -6.9 | 13.8300527 | -1.14E-01 | 120790501 | 120790624 | NC_000010.10 |
| cg08454125      | 8.51E-10 | 7.01E-11 | -6.9 | 13.8289165 | -1.19E-01 | 46747930  | 46748053  | NC_000003.11 |
| cg08468689      | 8.52E-10 | 7.02E-11 | -6.9 | 13.8277083 | -7.46E-02 | 40346680  | 40346803  | NC_000017.10 |
| cg11783815      | 8.52E-10 | 7.02E-11 | -6.9 | 13.8276252 | -1.55E-01 | 33558433  | 33558556  | NC_000006.11 |
| cg03498402      | 8.52E-10 | 7.02E-11 | -6.9 | 13.8276173 | -3.38E-02 | 67219437  | 67219560  | NC_000016.9  |
| cg21415227      | 8.53E-10 | 7.02E-11 | -6.9 | 13.8270808 | -1.03E-01 | 13985911  | 13986034  | NC_000011.9  |
| cg22643193      | 8.53E-10 | 7.02E-11 | -6.9 | 13.8267936 | -1.18E-01 | 1326215   | 1326338   | NC_000006.11 |

|               |          |          |      |            |           |           |           |              |
|---------------|----------|----------|------|------------|-----------|-----------|-----------|--------------|
| cg05302441    | 8.54E-10 | 7.03E-11 | -6.9 | 13.8253046 | -1.16E-01 | 125157402 | 125157525 | NC_000011.9  |
| cg23059709    | 8.55E-10 | 7.04E-11 | -6.9 | 13.8248404 | -1.16E-01 | 57778278  | 57778401  | NC_000015.9  |
| cg08009669    | 8.55E-10 | 7.04E-11 | -6.9 | 13.8243604 | -1.31E-01 | 31465202  | 31465325  | NC_000006.11 |
| cg03918703    | 8.57E-10 | 7.06E-11 | -6.9 | 13.821858  | -1.29E-01 | 23888450  | 23888573  | NC_000014.8  |
| cg21574400    | 8.57E-10 | 7.06E-11 | -6.9 | 13.8215965 | -2.30E-02 | 47088309  | 47088432  | NC_000018.9  |
| cg11692181    | 8.59E-10 | 7.07E-11 | -6.9 | 13.8196138 | -6.41E-02 | 2687547   | 2687670   | NC_000004.11 |
| cg07218344    | 8.59E-10 | 7.08E-11 | -6.9 | 13.8192626 | -3.88E-02 | 50571702  | 50571825  | NC_000013.10 |
| cg12020201    | 8.59E-10 | 7.08E-11 | -6.9 | 13.8190832 | -2.44E-02 | 50017283  | 50017406  | NC_000012.11 |
| cg23959118    | 8.61E-10 | 7.09E-11 | -6.9 | 13.8174504 | -4.73E-02 | 26911451  | 26911574  | NC_000010.10 |
| cg15171911    | 8.61E-10 | 7.09E-11 | -6.9 | 13.8169868 | -1.53E-01 | 53068921  | 53069044  | NC_000018.9  |
| cg06622468    | 8.61E-10 | 7.09E-11 | -6.9 | 13.8169244 | -5.60E-02 | 10491460  | 10491583  | NC_000019.9  |
| cg07496882    | 8.62E-10 | 7.10E-11 | -6.9 | 13.8163199 | -5.87E-02 | 112631570 | 112631693 | NC_000010.10 |
| cg21571466    | 8.63E-10 | 7.11E-11 | -6.9 | 13.8142813 | -6.18E-02 | 159895591 | 159895714 | NC_000001.10 |
| cg17809353    | 8.63E-10 | 7.11E-11 | -6.9 | 13.8142136 | -1.10E-01 | 20386466  | 20386589  | NC_000002.11 |
| ch.20.234237F | 8.63E-10 | 7.12E-11 | -6.9 | 13.8140025 | -3.82E-02 | 10626720  | 10626843  | NC_000020.10 |
| cg08036553    | 8.64E-10 | 7.12E-11 | -6.9 | 13.8138162 | -1.27E-01 | 64649805  | 64649928  | NC_000001.10 |
| cg12648806    | 8.64E-10 | 7.12E-11 | -6.9 | 13.8133699 | -6.12E-02 | 8286599   | 8286722   | NC_000017.10 |
| cg26793720    | 8.66E-10 | 7.13E-11 | -6.9 | 13.8113881 | -1.45E-01 | 98532008  | 98532131  | NC_000008.10 |
| cg16326367    | 8.67E-10 | 7.14E-11 | -6.9 | 13.8100643 | -1.01E-01 | 77946110  | 77946233  | NC_000005.9  |
| cg14114377    | 8.68E-10 | 7.15E-11 | -6.9 | 13.8089037 | -1.09E-01 | 45756845  | 45756968  | NC_000019.9  |
| cg14950751    | 8.68E-10 | 7.15E-11 | -6.9 | 13.8088964 | -1.11E-01 | 6947464   | 6947587   | NC_000017.10 |
| cg17727855    | 8.68E-10 | 7.16E-11 | -6.9 | 13.8082265 | -6.16E-02 | 108007124 | 108007247 | NC_000009.11 |
| cg16020551    | 8.68E-10 | 7.16E-11 | -6.9 | 13.8080659 | -3.98E-02 | 130890638 | 130890761 | NC_000009.11 |
| cg20765441    | 8.69E-10 | 7.16E-11 | -6.9 | 13.8074242 | -1.39E-01 | 25931659  | 25931782  | NC_000006.11 |
| cg20443357    | 8.71E-10 | 7.18E-11 | -6.9 | 13.8054541 | -9.43E-02 | 134269240 | 134269363 | NC_000010.10 |

|                 |          |          |       |            |           |           |           |              |
|-----------------|----------|----------|-------|------------|-----------|-----------|-----------|--------------|
| cg10226628      | 8.72E-10 | 7.19E-11 | -6.9  | 13.8040384 | -1.48E-02 | 30968426  | 30968549  | NC_000016.9  |
| ch.1.227099949R | 8.74E-10 | 7.21E-11 | -6.9  | 13.801351  | -3.14E-02 | 229033326 | 229033449 | NC_000001.10 |
| cg19903001      | 8.75E-10 | 7.21E-11 | -6.9  | 13.8004505 | -7.35E-02 | 70939225  | 70939348  | NC_000010.10 |
| cg11755367      | 8.75E-10 | 7.22E-11 | -6.9  | 13.8001401 | -1.06E-01 | 48105707  | 48105830  | NC_000008.10 |
| cg05673892      | 8.76E-10 | 7.22E-11 | -6.9  | 13.7993483 | -1.75E-01 | 38033934  | 38034057  | NC_000003.11 |
| cg11935143      | 8.78E-10 | 7.24E-11 | -6.9  | 13.7967494 | -9.05E-02 | 38389659  | 38389782  | NC_000007.13 |
| cg26099834      | 8.78E-10 | 7.25E-11 | -6.9  | 13.7961176 | -1.82E-01 | 66947568  | 66947691  | NC_000015.9  |
| cg00913289      | 8.80E-10 | 7.26E-11 | -6.9  | 13.7943482 | -7.13E-02 | 232573281 | 232573404 | NC_000002.11 |
| cg05939149      | 8.80E-10 | 7.26E-11 | -6.9  | 13.7942476 | -1.49E-01 | 43986106  | 43986229  | NC_000002.11 |
| cg23845609      | 8.82E-10 | 7.28E-11 | -6.89 | 13.7917193 | -1.20E-01 | 47609357  | 47609480  | NC_000011.9  |
| cg19355325      | 8.82E-10 | 7.28E-11 | -6.89 | 13.791545  | -4.92E-02 | 55839524  | 55839647  | NC_000020.10 |
| cg17301311      | 8.83E-10 | 7.28E-11 | -6.89 | 13.7909653 | -8.11E-02 | 48641896  | 48642019  | NC_000017.10 |
| cg07352798      | 8.83E-10 | 7.29E-11 | -6.89 | 13.7903515 | -5.50E-02 | 141488591 | 141488714 | NC_000005.9  |
| cg00624976      | 8.84E-10 | 7.29E-11 | -6.89 | 13.790039  | -2.72E-02 | 61846766  | 61846889  | NC_000020.10 |
| cg27177839      | 8.84E-10 | 7.30E-11 | -6.89 | 13.7894181 | -1.55E-01 | 105635769 | 105635892 | NC_000014.8  |
| cg10851763      | 8.85E-10 | 7.30E-11 | -6.89 | 13.7884781 | -1.69E-01 | 43545792  | 43545915  | NC_000021.8  |
| cg06367459      | 8.85E-10 | 7.30E-11 | -6.89 | 13.7883595 | -4.81E-02 | 55898325  | 55898448  | NC_000019.9  |
| cg13601517      | 8.85E-10 | 7.30E-11 | -6.89 | 13.7882386 | -5.31E-02 | 136374564 | 136374687 | NC_000009.11 |
| cg08057037      | 8.85E-10 | 7.31E-11 | -6.89 | 13.7876761 | -9.62E-02 | 865673    | 865796    | NC_000011.9  |
| cg00326958      | 8.86E-10 | 7.32E-11 | -6.89 | 13.7865334 | -6.15E-02 | 43892075  | 43892198  | NC_000010.10 |
| cg24584161      | 8.89E-10 | 7.34E-11 | -6.89 | 13.7839064 | -1.11E-01 | 40452931  | 40453054  | NC_000015.9  |
| cg05876069      | 8.90E-10 | 7.35E-11 | -6.89 | 13.782122  | -1.02E-01 | 150020288 | 150020411 | NC_000005.9  |
| cg22878627      | 8.91E-10 | 7.36E-11 | -6.89 | 13.7806563 | -1.18E-01 | 169379010 | 169379133 | NC_000003.11 |
| cg09336922      | 8.92E-10 | 7.36E-11 | -6.89 | 13.7804232 | -1.23E-01 | 790795    | 790918    | NC_000011.9  |
| cg10153942      | 8.92E-10 | 7.36E-11 | -6.89 | 13.7802911 | -7.74E-02 | 54982500  | 54982623  | NC_000019.9  |

|            |          |          |       |            |           |           |           |              |
|------------|----------|----------|-------|------------|-----------|-----------|-----------|--------------|
| cg05335886 | 8.93E-10 | 7.37E-11 | -6.89 | 13.7790285 | -3.37E-02 | 19421979  | 19422102  | NC_000016.9  |
| cg11289100 | 8.93E-10 | 7.38E-11 | -6.89 | 13.7783876 | -1.04E-01 | 19313024  | 19313147  | NC_000017.10 |
| cg04018571 | 8.94E-10 | 7.39E-11 | -6.89 | 13.7772522 | -4.11E-02 | 96874059  | 96874182  | NC_000002.11 |
| cg13414834 | 8.96E-10 | 7.40E-11 | -6.89 | 13.775222  | -7.62E-02 | 241394123 | 241394246 | NC_000002.11 |
| cg03690162 | 8.97E-10 | 7.41E-11 | -6.89 | 13.7746529 | -1.35E-02 | 121410453 | 121410576 | NC_000010.10 |
| cg18408209 | 8.97E-10 | 7.41E-11 | -6.89 | 13.7746188 | -1.13E-01 | 193509    | 193632    | NC_000002.11 |
| cg03928887 | 8.98E-10 | 7.42E-11 | -6.89 | 13.7731448 | -1.47E-01 | 43200129  | 43200252  | NC_000017.10 |
| cg08055910 | 8.98E-10 | 7.42E-11 | -6.89 | 13.7726024 | -3.97E-02 | 187065940 | 187066063 | NC_000004.11 |
| cg00164282 | 9.01E-10 | 7.44E-11 | -6.89 | 13.7700587 | -1.97E-01 | 30830732  | 30830855  | NC_000017.10 |
| cg24476826 | 9.01E-10 | 7.44E-11 | -6.89 | 13.7697488 | -1.60E-01 | 29904571  | 29904694  | NC_000015.9  |
| cg16415939 | 9.03E-10 | 7.47E-11 | -6.89 | 13.7668968 | -1.08E-01 | 236083208 | 236083331 | NC_000001.10 |
| cg21646084 | 9.05E-10 | 7.48E-11 | -6.89 | 13.7646935 | -1.22E-01 | 16802843  | 16802966  | NC_000002.11 |
| cg14495958 | 9.10E-10 | 7.52E-11 | -6.89 | 13.7598542 | -1.26E-01 | 140301079 | 140301202 | NC_000009.11 |
| cg21863334 | 9.11E-10 | 7.53E-11 | -6.89 | 13.7580531 | -1.27E-01 | 36157405  | 36157528  | NC_000020.10 |
| cg12218099 | 9.11E-10 | 7.53E-11 | -6.89 | 13.7579311 | -1.19E-01 | 159188159 | 159188282 | NC_000006.11 |
| cg13853591 | 9.12E-10 | 7.54E-11 | -6.89 | 13.7573117 | -2.34E-02 | 65468921  | 65469044  | NC_000001.10 |
| cg11798891 | 9.12E-10 | 7.54E-11 | -6.89 | 13.7566765 | -8.38E-02 | 143485435 | 143485558 | NC_000008.10 |
| cg13319042 | 9.13E-10 | 7.55E-11 | -6.89 | 13.7556697 | -1.21E-01 | 151067848 | 151067971 | NC_000005.9  |
| cg12099472 | 9.13E-10 | 7.55E-11 | -6.89 | 13.7556531 | -1.23E-01 | 224677565 | 224677688 | NC_000001.10 |
| cg01556552 | 9.14E-10 | 7.56E-11 | -6.89 | 13.7550545 | -1.21E-01 | 10695686  | 10695809  | NC_000001.10 |
| cg01830674 | 9.14E-10 | 7.56E-11 | -6.89 | 13.7548033 | -3.13E-02 | 219433148 | 219433271 | NC_000002.11 |
| cg23170988 | 9.15E-10 | 7.57E-11 | -6.89 | 13.7534529 | -9.12E-02 | 88720216  | 88720339  | NC_000010.10 |
| cg14355581 | 9.15E-10 | 7.57E-11 | -6.89 | 13.7532542 | -1.07E-01 | 28518682  | 28518805  | NC_000013.10 |
| cg18733757 | 9.16E-10 | 7.57E-11 | -6.89 | 13.7526798 | -1.73E-01 | 114134878 | 114135001 | NC_000010.10 |
| cg12030031 | 9.16E-10 | 7.58E-11 | -6.89 | 13.7524468 | -1.35E-01 | 6614798   | 6614921   | NC_000006.11 |

|               |          |          |       |            |           |           |           |              |
|---------------|----------|----------|-------|------------|-----------|-----------|-----------|--------------|
| cg13909214    | 9.16E-10 | 7.58E-11 | -6.89 | 13.7520628 | -6.25E-02 | 95653899  | 95654022  | NC_000008.10 |
| cg23196919    | 9.16E-10 | 7.58E-11 | -6.89 | 13.7518659 | -7.92E-02 | 58257920  | 58258043  | NC_000003.11 |
| cg24150051    | 9.17E-10 | 7.58E-11 | -6.89 | 13.7513494 | -1.88E-02 | 223899998 | 223900121 | NC_000001.10 |
| ch.1.2890615F | 9.18E-10 | 7.59E-11 | -6.89 | 13.7501394 | -2.12E-02 | 150313655 | 150313778 | NC_000001.10 |
| cg20200080    | 9.18E-10 | 7.60E-11 | -6.89 | 13.7496142 | -8.86E-02 | 171830785 | 171830908 | NC_000002.11 |
| cg07431429    | 9.18E-10 | 7.60E-11 | -6.89 | 13.7495913 | -4.20E-02 | 21750645  | 21750768  | NC_000013.10 |
| cg17544584    | 9.19E-10 | 7.60E-11 | -6.89 | 13.7490238 | -1.66E-01 | 43288771  | 43288894  | NC_000007.13 |
| cg20268689    | 9.20E-10 | 7.61E-11 | -6.89 | 13.7482291 | -1.59E-01 | 20431435  | 20431558  | NC_000002.11 |
| cg06047270    | 9.20E-10 | 7.61E-11 | -6.89 | 13.7477365 | -1.15E-01 | 139740885 | 139741008 | NC_000009.11 |
| cg16452651    | 9.21E-10 | 7.62E-11 | -6.89 | 13.747054  | -1.81E-01 | 35016873  | 35016996  | NC_000021.8  |
| cg00245890    | 9.22E-10 | 7.63E-11 | -6.89 | 13.7458176 | -1.21E-01 | 58574042  | 58574165  | NC_000003.11 |
| cg18154114    | 9.23E-10 | 7.63E-11 | -6.89 | 13.7448356 | -5.04E-02 | 155948831 | 155948954 | NC_000001.10 |
| cg03953671    | 9.23E-10 | 7.64E-11 | -6.89 | 13.7444791 | -4.84E-02 | 26488355  | 26488478  | NC_000001.10 |
| cg22390433    | 9.23E-10 | 7.64E-11 | -6.89 | 13.7442189 | -3.54E-02 | 185014530 | 185014653 | NC_000001.10 |
| cg02909097    | 9.23E-10 | 7.64E-11 | -6.89 | 13.7439834 | -1.01E-01 | 2843206   | 2843329   | NC_000017.10 |
| cg12815841    | 9.24E-10 | 7.64E-11 | -6.89 | 13.7435878 | -3.68E-02 | 126150822 | 126150945 | NC_000010.10 |
| cg03876823    | 9.24E-10 | 7.65E-11 | -6.89 | 13.7430136 | -2.21E-02 | 32899771  | 32899894  | NC_000020.10 |
| cg24690692    | 9.24E-10 | 7.65E-11 | -6.89 | 13.7425708 | -1.40E-01 | 123842309 | 123842432 | NC_000007.13 |
| cg02623200    | 9.25E-10 | 7.66E-11 | -6.89 | 13.7421603 | -8.91E-02 | 118727658 | 118727781 | NC_000001.10 |
| cg10930101    | 9.25E-10 | 7.66E-11 | -6.89 | 13.7419626 | -1.21E-01 | 62085466  | 62085589  | NC_000017.10 |
| cg10075819    | 9.26E-10 | 7.66E-11 | -6.89 | 13.7410762 | -1.55E-01 | 109229337 | 109229460 | NC_000002.11 |
| cg18944582    | 9.26E-10 | 7.67E-11 | -6.89 | 13.7403212 | -5.14E-02 | 37657136  | 37657259  | NC_000022.10 |
| cg06630869    | 9.28E-10 | 7.68E-11 | -6.89 | 13.7387999 | -3.95E-02 | 55769270  | 55769393  | NC_000019.9  |
| cg16486109    | 9.28E-10 | 7.68E-11 | -6.89 | 13.738579  | -1.54E-01 | 613632    | 613755    | NC_000011.9  |
| cg21333861    | 9.28E-10 | 7.69E-11 | -6.89 | 13.7380339 | -2.31E-01 | 33244976  | 33245099  | NC_000006.11 |



|            |          |          |       |            |           |           |           |              |
|------------|----------|----------|-------|------------|-----------|-----------|-----------|--------------|
| cg22801561 | 9.29E-10 | 7.70E-11 | -6.88 | 13.7368635 | -1.37E-01 | 55562964  | 55563087  | NC_000017.10 |
| cg20699274 | 9.29E-10 | 7.70E-11 | -6.88 | 13.7367172 | -1.05E-01 | 95706927  | 95707050  | NC_000010.10 |
| cg19637113 | 9.30E-10 | 7.70E-11 | -6.88 | 13.7364247 | -8.15E-02 | 74528522  | 74528645  | NC_000015.9  |
| cg06159340 | 9.31E-10 | 7.71E-11 | -6.88 | 13.735131  | -1.57E-01 | 30907560  | 30907683  | NC_000016.9  |
| cg19478111 | 9.33E-10 | 7.73E-11 | -6.88 | 13.7326175 | -1.14E-01 | 73359987  | 73360110  | NC_000011.9  |
| cg03637179 | 9.34E-10 | 7.74E-11 | -6.88 | 13.7318938 | -2.85E-02 | 99716580  | 99716703  | NC_000007.13 |
| cg11583041 | 9.34E-10 | 7.74E-11 | -6.88 | 13.7318613 | -1.27E-01 | 169740781 | 169740904 | NC_000006.11 |
| cg00759634 | 9.34E-10 | 7.74E-11 | -6.88 | 13.7312237 | -5.07E-02 | 125853788 | 125853911 | NC_000010.10 |
| cg22231056 | 9.34E-10 | 7.74E-11 | -6.88 | 13.7311038 | -3.87E-02 | 106958645 | 106958768 | NC_000006.11 |
| cg25577367 | 9.34E-10 | 7.74E-11 | -6.88 | 13.7310978 | -1.11E-01 | 123676979 | 123677102 | NC_000011.9  |
| cg02349669 | 9.35E-10 | 7.74E-11 | -6.88 | 13.7307778 | -5.01E-02 | 115155524 | 115155647 | NC_000005.9  |
| cg09704553 | 9.35E-10 | 7.75E-11 | -6.88 | 13.7300571 | -6.70E-02 | 27167052  | 27167175  | NC_000012.11 |
| cg01732984 | 9.35E-10 | 7.75E-11 | -6.88 | 13.7299095 | -8.15E-02 | 48575859  | 48575982  | NC_000013.10 |
| cg25270574 | 9.35E-10 | 7.75E-11 | -6.88 | 13.7299075 | -8.99E-02 | 109194620 | 109194743 | NC_000012.11 |
| cg21485906 | 9.37E-10 | 7.76E-11 | -6.88 | 13.7284394 | -1.38E-01 | 29625216  | 29625339  | NC_000016.9  |
| cg09006420 | 9.37E-10 | 7.77E-11 | -6.88 | 13.7277698 | -6.32E-02 | 463599    | 463722    | NC_000017.10 |
| cg10464130 | 9.37E-10 | 7.77E-11 | -6.88 | 13.7276651 | -1.40E-01 | 123991925 | 123992048 | NC_000003.11 |
| cg18660345 | 9.38E-10 | 7.77E-11 | -6.88 | 13.7271593 | -1.73E-01 | 35169539  | 35169662  | NC_000020.10 |
| cg10339152 | 9.40E-10 | 7.79E-11 | -6.88 | 13.7247739 | -8.84E-02 | 749452    | 749575    | NC_000020.10 |
| cg02830576 | 9.41E-10 | 7.80E-11 | -6.88 | 13.7235753 | -6.78E-02 | 12706008  | 12706131  | NC_000003.11 |
| cg18882687 | 9.42E-10 | 7.81E-11 | -6.88 | 13.7227173 | -1.24E-01 | 228275828 | 228275951 | NC_000001.10 |
| cg01908338 | 9.42E-10 | 7.81E-11 | -6.88 | 13.7225224 | -1.58E-01 | 2984525   | 2984648   | NC_000001.10 |
| cg13653809 | 9.44E-10 | 7.83E-11 | -6.88 | 13.7202224 | -9.12E-02 | 1167714   | 1167837   | NC_000004.11 |
| cg27096232 | 9.45E-10 | 7.83E-11 | -6.88 | 13.719553  | -1.13E-01 | 3287777   | 3287900   | NC_000004.11 |
| cg08703808 | 9.47E-10 | 7.85E-11 | -6.88 | 13.7172815 | -1.47E-01 | 201613458 | 201613581 | NC_000001.10 |

|                 |          |          |       |            |           |           |           |              |
|-----------------|----------|----------|-------|------------|-----------|-----------|-----------|--------------|
| cg07457626      | 9.48E-10 | 7.86E-11 | -6.88 | 13.7163497 | -1.51E-01 | 155347581 | 155347704 | NC_000006.11 |
| cg13430851      | 9.48E-10 | 7.86E-11 | -6.88 | 13.7163252 | -4.88E-02 | 12237037  | 12237160  | NC_000010.10 |
| cg06655665      | 9.49E-10 | 7.87E-11 | -6.88 | 13.7151964 | -1.18E-01 | 38607629  | 38607752  | NC_000002.11 |
| ch.7.1578169F   | 9.49E-10 | 7.87E-11 | -6.88 | 13.7150056 | -3.46E-02 | 72409005  | 72409128  | NC_000007.13 |
| cg21494069      | 9.49E-10 | 7.87E-11 | -6.88 | 13.714598  | -4.83E-02 | 139045471 | 139045594 | NC_000007.13 |
| cg13679691      | 9.49E-10 | 7.87E-11 | -6.88 | 13.7145303 | -6.03E-02 | 50608033  | 50608156  | NC_000022.10 |
| ch.14.55428957F | 9.49E-10 | 7.88E-11 | -6.88 | 13.7143159 | -2.14E-02 | 56359204  | 56359327  | NC_000014.8  |
| cg04716261      | 9.50E-10 | 7.88E-11 | -6.88 | 13.7139322 | -8.45E-02 | 2937999   | 2938122   | NC_000001.10 |
| cg24311182      | 9.50E-10 | 7.88E-11 | -6.88 | 13.7139162 | -9.89E-02 | 116610397 | 116610520 | NC_000001.10 |
| cg03477252      | 9.51E-10 | 7.89E-11 | -6.88 | 13.7129729 | -1.04E-01 | 33288180  | 33288303  | NC_000006.11 |
| ch.6.952513R    | 9.51E-10 | 7.89E-11 | -6.88 | 13.712702  | -4.05E-02 | 38384073  | 38384196  | NC_000006.11 |
| cg25961136      | 9.52E-10 | 7.90E-11 | -6.88 | 13.7109544 | -1.02E-01 | 58246871  | 58246994  | NC_000012.11 |
| cg02739280      | 9.53E-10 | 7.91E-11 | -6.88 | 13.7105999 | -1.14E-01 | 20119229  | 20119352  | NC_000011.9  |
| ch.1.24684R     | 9.53E-10 | 7.91E-11 | -6.88 | 13.7102607 | -3.58E-02 | 1190026   | 1190149   | NC_000001.10 |
| cg14651650      | 9.54E-10 | 7.92E-11 | -6.88 | 13.7091216 | -1.19E-01 | 193323793 | 193323916 | NC_000003.11 |
| cg02441711      | 9.54E-10 | 7.92E-11 | -6.88 | 13.7090468 | -1.54E-01 | 80291105  | 80291228  | NC_000017.10 |
| cg07134045      | 9.56E-10 | 7.93E-11 | -6.88 | 13.7074416 | -6.89E-02 | 130690198 | 130690321 | NC_000009.11 |
| cg03343515      | 9.56E-10 | 7.94E-11 | -6.88 | 13.7063844 | -1.44E-01 | 41430189  | 41430312  | NC_000019.9  |
| cg11775488      | 9.57E-10 | 7.94E-11 | -6.88 | 13.7060416 | -2.06E-01 | 95586237  | 95586360  | NC_000010.10 |
| cg10389812      | 9.57E-10 | 7.94E-11 | -6.88 | 13.7058551 | -1.73E-01 | 99458162  | 99458285  | NC_000015.9  |
| cg00368296      | 9.57E-10 | 7.95E-11 | -6.88 | 13.705401  | -1.31E-01 | 8052183   | 8052306   | NC_000019.9  |
| ch.3.15909166F  | 9.58E-10 | 7.96E-11 | -6.88 | 13.7043252 | -1.82E-02 | 15934162  | 15934285  | NC_000003.11 |
| cg07883869      | 9.59E-10 | 7.96E-11 | -6.88 | 13.7034677 | -1.36E-01 | 49909757  | 49909880  | NC_000016.9  |
| cg16152753      | 9.59E-10 | 7.97E-11 | -6.88 | 13.7030824 | -1.43E-01 | 23732088  | 23732211  | NC_000010.10 |
| cg04013733      | 9.60E-10 | 7.97E-11 | -6.88 | 13.7025927 | -1.15E-01 | 135727318 | 135727441 | NC_000003.11 |

|            |          |          |       |            |           |           |           |              |
|------------|----------|----------|-------|------------|-----------|-----------|-----------|--------------|
| cg13334518 | 9.60E-10 | 7.97E-11 | -6.88 | 13.7022997 | -1.04E-01 | 40792399  | 40792522  | NC_000009.11 |
| cg15082824 | 9.61E-10 | 7.98E-11 | -6.88 | 13.7008292 | -1.28E-01 | 70977715  | 70977838  | NC_000011.9  |
| cg18538297 | 9.62E-10 | 7.99E-11 | -6.88 | 13.7004645 | -6.41E-02 | 58892579  | 58892702  | NC_000019.9  |
| cg19785773 | 9.62E-10 | 7.99E-11 | -6.88 | 13.7000914 | -9.99E-02 | 142398412 | 142398535 | NC_000008.10 |
| cg25410842 | 9.63E-10 | 8.00E-11 | -6.88 | 13.6991766 | -4.52E-02 | 150521647 | 150521770 | NC_000001.10 |
| cg07294870 | 9.64E-10 | 8.01E-11 | -6.88 | 13.6978925 | -3.67E-02 | 44044586  | 44044709  | NC_000020.10 |
| cg03040622 | 9.66E-10 | 8.02E-11 | -6.88 | 13.6964912 | -1.25E-01 | 5536937   | 5537060   | NC_000007.13 |
| cg20468081 | 9.67E-10 | 8.03E-11 | -6.88 | 13.6953978 | -1.02E-01 | 38657934  | 38658057  | NC_000017.10 |
| cg00281153 | 9.68E-10 | 8.04E-11 | -6.88 | 13.6936022 | -5.32E-02 | 75682798  | 75682921  | NC_000016.9  |
| cg23191380 | 9.69E-10 | 8.05E-11 | -6.88 | 13.6930134 | -2.60E-02 | 90893747  | 90893870  | NC_000007.13 |
| cg25029360 | 9.71E-10 | 8.07E-11 | -6.88 | 13.6907602 | -2.54E-02 | 141646502 | 141646625 | NC_000008.10 |
| cg22935501 | 9.72E-10 | 8.07E-11 | -6.88 | 13.6899021 | -4.19E-02 | 78234799  | 78234922  | NC_000017.10 |
| cg07408552 | 9.74E-10 | 8.09E-11 | -6.88 | 13.687775  | -8.74E-02 | 40611995  | 40612118  | NC_000017.10 |
| cg04876474 | 9.74E-10 | 8.09E-11 | -6.88 | 13.6876273 | -1.22E-01 | 2890091   | 2890214   | NC_000011.9  |
| cg11612727 | 9.74E-10 | 8.10E-11 | -6.88 | 13.6873708 | -7.40E-02 | 105110686 | 105110809 | NC_000010.10 |
| cg15890469 | 9.77E-10 | 8.12E-11 | -6.88 | 13.683827  | -1.22E-01 | 75408846  | 75408969  | NC_000014.8  |
| cg25281616 | 9.78E-10 | 8.13E-11 | -6.88 | 13.6837007 | -9.21E-02 | 2020279   | 2020402   | NC_000011.9  |
| cg03934002 | 9.79E-10 | 8.14E-11 | -6.88 | 13.6818237 | -1.27E-01 | 100096052 | 100096175 | NC_000013.10 |
| cg14675881 | 9.80E-10 | 8.14E-11 | -6.87 | 13.68145   | -1.42E-01 | 43396331  | 43396454  | NC_000002.11 |
| cg14068788 | 9.80E-10 | 8.14E-11 | -6.87 | 13.6814429 | -1.05E-01 | 133838188 | 133838311 | NC_000009.11 |
| cg04449953 | 9.80E-10 | 8.15E-11 | -6.87 | 13.6811628 | -7.35E-02 | 144486939 | 144487062 | NC_000008.10 |
| cg08996506 | 9.81E-10 | 8.16E-11 | -6.87 | 13.6799816 | -1.20E-01 | 16070868  | 16070991  | NC_000016.9  |
| cg20425384 | 9.82E-10 | 8.17E-11 | -6.87 | 13.6785833 | -9.56E-02 | 132657819 | 132657942 | NC_000012.11 |
| cg15514918 | 9.82E-10 | 8.17E-11 | -6.87 | 13.6784555 | -1.69E-01 | 236087201 | 236087324 | NC_000001.10 |
| cg07838680 | 9.85E-10 | 8.19E-11 | -6.87 | 13.6755713 | -3.63E-02 | 30821706  | 30821829  | NC_000022.10 |

|            |          |          |       |            |           |           |           |              |
|------------|----------|----------|-------|------------|-----------|-----------|-----------|--------------|
| cg01028925 | 9.86E-10 | 8.20E-11 | -6.87 | 13.6751482 | -7.94E-02 | 2122103   | 2122226   | NC_000007.13 |
| cg11599830 | 9.86E-10 | 8.20E-11 | -6.87 | 13.6748913 | -1.00E-01 | 49504967  | 49505090  | NC_000012.11 |
| cg04095776 | 9.86E-10 | 8.20E-11 | -6.87 | 13.6747941 | -1.07E-01 | 31106941  | 31107064  | NC_000006.11 |
| cg13814747 | 9.88E-10 | 8.22E-11 | -6.87 | 13.6726897 | -1.32E-01 | 31373178  | 31373301  | NC_000015.9  |
| cg06909117 | 9.90E-10 | 8.23E-11 | -6.87 | 13.6710556 | -3.06E-02 | 119205209 | 119205332 | NC_000011.9  |
| cg05713242 | 9.91E-10 | 8.24E-11 | -6.87 | 13.6699789 | -1.46E-01 | 23145039  | 23145162  | NC_000008.10 |
| cg05945943 | 9.91E-10 | 8.24E-11 | -6.87 | 13.6697192 | -1.74E-02 | 60986770  | 60986893  | NC_000018.9  |
| cg17028814 | 9.91E-10 | 8.25E-11 | -6.87 | 13.6692427 | -1.43E-01 | 161206502 | 161206625 | NC_000001.10 |
| cg09893570 | 9.92E-10 | 8.25E-11 | -6.87 | 13.6685169 | -1.83E-01 | 58248058  | 58248181  | NC_000017.10 |
| cg07631533 | 9.93E-10 | 8.26E-11 | -6.87 | 13.667166  | -1.40E-01 | 13135565  | 13135688  | NC_000016.9  |
| cg02072992 | 9.94E-10 | 8.27E-11 | -6.87 | 13.666331  | -3.02E-02 | 83960431  | 83960554  | NC_000016.9  |
| cg06732687 | 9.94E-10 | 8.27E-11 | -6.87 | 13.6660943 | -1.30E-01 | 56299289  | 56299412  | NC_000014.8  |
| cg10778836 | 9.95E-10 | 8.28E-11 | -6.87 | 13.6654127 | -1.40E-01 | 99617387  | 99617510  | NC_000009.11 |
| cg06720722 | 9.97E-10 | 8.30E-11 | -6.87 | 13.6628498 | -1.54E-01 | 189349021 | 189349144 | NC_000003.11 |
| cg15787712 | 9.97E-10 | 8.30E-11 | -6.87 | 13.6627727 | -1.15E-01 | 13948243  | 13948366  | NC_000019.9  |
| cg18547299 | 9.98E-10 | 8.31E-11 | -6.87 | 13.661751  | -1.57E-01 | 14049578  | 14049701  | NC_000019.9  |
| cg03138405 | 9.99E-10 | 8.32E-11 | -6.87 | 13.6610156 | -2.59E-02 | 17666150  | 17666273  | NC_000019.9  |
| cg22333897 | 1.00E-09 | 8.33E-11 | -6.87 | 13.6593757 | -1.29E-01 | 168925698 | 168925821 | NC_000006.11 |
| cg19603134 | 1.00E-09 | 8.33E-11 | -6.87 | 13.6593543 | -1.26E-01 | 44577240  | 44577363  | NC_000022.10 |
| cg14928452 | 1.00E-09 | 8.34E-11 | -6.87 | 13.6583104 | -1.13E-01 | 37814797  | 37814920  | NC_000003.11 |
| cg22109530 | 1.00E-09 | 8.34E-11 | -6.87 | 13.6581    | -1.03E-01 | 178310534 | 178310657 | NC_000001.10 |
| cg12081372 | 1.00E-09 | 8.35E-11 | -6.87 | 13.6567845 | -9.74E-02 | 170926055 | 170926178 | NC_000004.11 |
| cg10757188 | 1.00E-09 | 8.36E-11 | -6.87 | 13.6561819 | -2.64E-02 | 8213612   | 8213735   | NC_000019.9  |
| cg04422024 | 1.00E-09 | 8.36E-11 | -6.87 | 13.6560462 | -1.43E-01 | 73524288  | 73524411  | NC_000014.8  |
| cg21449569 | 1.00E-09 | 8.36E-11 | -6.87 | 13.655588  | -1.33E-01 | 2276322   | 2276445   | NC_000019.9  |

|               |          |          |       |            |           |           |           |              |
|---------------|----------|----------|-------|------------|-----------|-----------|-----------|--------------|
| cg19619576    | 1.00E-09 | 8.37E-11 | -6.87 | 13.6548125 | -7.74E-02 | 17718525  | 17718648  | NC_000017.10 |
| cg04184623    | 1.01E-09 | 8.38E-11 | -6.87 | 13.6539885 | -5.99E-02 | 217277352 | 217277475 | NC_000002.11 |
| cg00566164    | 1.01E-09 | 8.38E-11 | -6.87 | 13.653933  | -9.95E-02 | 228559156 | 228559279 | NC_000001.10 |
| cg16700000    | 1.01E-09 | 8.39E-11 | -6.87 | 13.652642  | -4.53E-02 | 27756844  | 27756967  | NC_000003.11 |
| cg23895096    | 1.01E-09 | 8.39E-11 | -6.87 | 13.6523027 | -1.17E-01 | 161085133 | 161085256 | NC_000001.10 |
| cg07874772    | 1.01E-09 | 8.40E-11 | -6.87 | 13.650667  | -4.83E-02 | 16582240  | 16582363  | NC_000019.9  |
| cg11713727    | 1.01E-09 | 8.42E-11 | -6.87 | 13.648271  | -9.91E-02 | 150444569 | 150444692 | NC_000002.11 |
| cg05635940    | 1.01E-09 | 8.42E-11 | -6.87 | 13.6482486 | -1.11E-01 | 35617254  | 35617377  | NC_000019.9  |
| cg19315261    | 1.01E-09 | 8.43E-11 | -6.87 | 13.6478303 | -1.26E-01 | 177225876 | 177225999 | NC_000001.10 |
| cg24032190    | 1.01E-09 | 8.44E-11 | -6.87 | 13.646879  | -6.56E-02 | 67442893  | 67443016  | NC_000015.9  |
| cg03027227    | 1.01E-09 | 8.44E-11 | -6.87 | 13.6465281 | -1.50E-01 | 80221468  | 80221591  | NC_000002.11 |
| cg06856891    | 1.01E-09 | 8.44E-11 | -6.87 | 13.6461368 | -1.28E-01 | 74903507  | 74903630  | NC_000004.11 |
| cg21515349    | 1.01E-09 | 8.44E-11 | -6.87 | 13.6458505 | -1.04E-01 | 42082028  | 42082151  | NC_000017.10 |
| cg11091914    | 1.01E-09 | 8.45E-11 | -6.87 | 13.6447051 | -1.88E-01 | 105598224 | 105598347 | NC_000008.10 |
| cg25137841    | 1.01E-09 | 8.46E-11 | -6.87 | 13.6444408 | -1.03E-01 | 31536585  | 31536708  | NC_000022.10 |
| cg18063824    | 1.02E-09 | 8.46E-11 | -6.87 | 13.6440805 | -9.34E-02 | 54075042  | 54075165  | NC_000004.11 |
| cg08534016    | 1.02E-09 | 8.46E-11 | -6.87 | 13.6439573 | -1.60E-01 | 35771584  | 35771707  | NC_000005.9  |
| cg21484956    | 1.02E-09 | 8.46E-11 | -6.87 | 13.6438822 | -1.20E-01 | 77273469  | 77273592  | NC_000012.11 |
| ch.9.2265413R | 1.02E-09 | 8.48E-11 | -6.87 | 13.6413102 | -4.43E-02 | 134358722 | 134358845 | NC_000009.11 |
| cg21184926    | 1.02E-09 | 8.50E-11 | -6.87 | 13.6399344 | -5.08E-02 | 198318139 | 198318262 | NC_000002.11 |
| cg26931475    | 1.02E-09 | 8.51E-11 | -6.87 | 13.6388347 | -1.11E-01 | 46743214  | 46743337  | NC_000012.11 |
| cg22779651    | 1.02E-09 | 8.52E-11 | -6.87 | 13.6366162 | -1.30E-01 | 164415027 | 164415150 | NC_000004.11 |
| cg21032008    | 1.02E-09 | 8.53E-11 | -6.87 | 13.6354984 | -1.14E-01 | 7724717   | 7724840   | NC_000003.11 |
| cg07298347    | 1.02E-09 | 8.54E-11 | -6.87 | 13.6348653 | -2.05E-01 | 153264085 | 153264208 | NC_000002.11 |
| cg17449018    | 1.02E-09 | 8.54E-11 | -6.87 | 13.6342693 | -3.01E-02 | 61129369  | 61129492  | NC_000011.9  |

|               |          |          |       |            |           |           |           |              |
|---------------|----------|----------|-------|------------|-----------|-----------|-----------|--------------|
| cg16569937    | 1.02E-09 | 8.55E-11 | -6.87 | 13.6340289 | -1.76E-01 | 57174377  | 57174500  | NC_000005.9  |
| cg18890112    | 1.03E-09 | 8.56E-11 | -6.87 | 13.632591  | -1.56E-01 | 18367799  | 18367922  | NC_000001.10 |
| cg19742538    | 1.03E-09 | 8.57E-11 | -6.87 | 13.6314537 | -1.76E-02 | 1568549   | 1568672   | NC_000011.9  |
| cg01487683    | 1.03E-09 | 8.59E-11 | -6.87 | 13.6294638 | -1.34E-01 | 5031084   | 5031207   | NC_000006.11 |
| ch.3.2627042R | 1.03E-09 | 8.59E-11 | -6.87 | 13.628818  | -6.44E-02 | 132360869 | 132360992 | NC_000003.11 |
| cg07161239    | 1.03E-09 | 8.59E-11 | -6.87 | 13.6287758 | -1.43E-02 | 155179117 | 155179240 | NC_000001.10 |
| cg17829984    | 1.03E-09 | 8.59E-11 | -6.87 | 13.6287035 | -4.71E-02 | 62501480  | 62501603  | NC_000017.10 |
| cg15087401    | 1.03E-09 | 8.61E-11 | -6.87 | 13.6271274 | -9.25E-02 | 50100809  | 50100932  | NC_000012.11 |
| cg23391214    | 1.03E-09 | 8.61E-11 | -6.87 | 13.626507  | -9.29E-02 | 47292160  | 47292283  | NC_000019.9  |
| cg06323521    | 1.03E-09 | 8.64E-11 | -6.86 | 13.623891  | -1.02E-01 | 27710217  | 27710340  | NC_000001.10 |
| cg23344338    | 1.04E-09 | 8.64E-11 | -6.86 | 13.6233949 | -1.02E-01 | 151231429 | 151231552 | NC_000004.11 |
| cg00411358    | 1.04E-09 | 8.67E-11 | -6.86 | 13.6204664 | -1.02E-01 | 24577142  | 24577265  | NC_000022.10 |
| cg22027399    | 1.04E-09 | 8.68E-11 | -6.86 | 13.6188906 | -1.02E-01 | 15217635  | 15217758  | NC_000019.9  |
| cg05372679    | 1.04E-09 | 8.68E-11 | -6.86 | 13.61846   | -1.28E-01 | 48064730  | 48064853  | NC_000015.9  |
| cg05903710    | 1.04E-09 | 8.69E-11 | -6.86 | 13.6176368 | -1.46E-01 | 27375732  | 27375855  | NC_000016.9  |
| cg09511906    | 1.04E-09 | 8.69E-11 | -6.86 | 13.6173398 | -2.96E-02 | 9811467   | 9811590   | NC_000003.11 |
| cg26438846    | 1.04E-09 | 8.70E-11 | -6.86 | 13.6171818 | -6.60E-02 | 2731392   | 2731515   | NC_000011.9  |
| cg13119578    | 1.04E-09 | 8.71E-11 | -6.86 | 13.616028  | -8.94E-02 | 65196696  | 65196819  | NC_000011.9  |
| cg06319579    | 1.04E-09 | 8.72E-11 | -6.86 | 13.6141763 | -6.52E-02 | 8127196   | 8127319   | NC_000017.10 |
| cg03748603    | 1.05E-09 | 8.73E-11 | -6.86 | 13.6132217 | -1.31E-01 | 2494443   | 2494566   | NC_000019.9  |
| cg21036162    | 1.05E-09 | 8.73E-11 | -6.86 | 13.6129575 | -1.36E-01 | 31649728  | 31649851  | NC_000006.11 |
| cg14160419    | 1.05E-09 | 8.74E-11 | -6.86 | 13.6121717 | -1.09E-01 | 40518065  | 40518188  | NC_000004.11 |
| cg07404223    | 1.05E-09 | 8.74E-11 | -6.86 | 13.6119622 | -1.39E-01 | 84840564  | 84840687  | NC_000016.9  |
| cg11105980    | 1.05E-09 | 8.75E-11 | -6.86 | 13.6114562 | -4.91E-02 | 37393381  | 37393504  | NC_000013.10 |
| cg04860157    | 1.05E-09 | 8.75E-11 | -6.86 | 13.6107385 | -5.89E-02 | 36842651  | 36842774  | NC_000006.11 |

|               |          |          |       |            |           |           |           |              |
|---------------|----------|----------|-------|------------|-----------|-----------|-----------|--------------|
| cg18221341    | 1.05E-09 | 8.76E-11 | -6.86 | 13.6093736 | -1.33E-01 | 30607830  | 30607953  | NC_000013.10 |
| cg03189821    | 1.05E-09 | 8.78E-11 | -6.86 | 13.6077822 | -1.61E-01 | 184908351 | 184908474 | NC_000004.11 |
| cg03030757    | 1.05E-09 | 8.78E-11 | -6.86 | 13.6073289 | -8.58E-02 | 35420754  | 35420877  | NC_000006.11 |
| cg16294363    | 1.05E-09 | 8.81E-11 | -6.86 | 13.6044024 | -1.33E-01 | 41248881  | 41249004  | NC_000001.10 |
| cg15768020    | 1.05E-09 | 8.81E-11 | -6.86 | 13.6041036 | -2.22E-02 | 20369872  | 20369995  | NC_000007.13 |
| cg08524190    | 1.06E-09 | 8.82E-11 | -6.86 | 13.6035974 | -7.69E-02 | 128825270 | 128825393 | NC_000003.11 |
| cg08001520    | 1.06E-09 | 8.82E-11 | -6.86 | 13.6031986 | -5.37E-02 | 128840660 | 128840783 | NC_000003.11 |
| cg19538115    | 1.06E-09 | 8.82E-11 | -6.86 | 13.602739  | -1.43E-01 | 48970893  | 48971016  | NC_000017.10 |
| cg12427321    | 1.06E-09 | 8.83E-11 | -6.86 | 13.6023136 | -5.82E-02 | 56943668  | 56943791  | NC_000001.10 |
| cg13284614    | 1.06E-09 | 8.83E-11 | -6.86 | 13.6023007 | -1.32E-01 | 52569169  | 52569292  | NC_000003.11 |
| cg22677556    | 1.06E-09 | 8.83E-11 | -6.86 | 13.6015076 | -1.72E-01 | 12238390  | 12238513  | NC_000001.10 |
| cg01843189    | 1.06E-09 | 8.84E-11 | -6.86 | 13.6014752 | -1.54E-01 | 100612587 | 100612710 | NC_000009.11 |
| cg14494448    | 1.06E-09 | 8.84E-11 | -6.86 | 13.6005389 | -3.49E-02 | 48701524  | 48701647  | NC_000003.11 |
| cg25737040    | 1.06E-09 | 8.85E-11 | -6.86 | 13.6000025 | -1.43E-01 | 111374205 | 111374328 | NC_000012.11 |
| cg04959298    | 1.06E-09 | 8.86E-11 | -6.86 | 13.5987781 | -1.46E-01 | 86430602  | 86430725  | NC_000016.9  |
| cg16039142    | 1.06E-09 | 8.86E-11 | -6.86 | 13.5984752 | -1.46E-01 | 38361199  | 38361322  | NC_000007.13 |
| cg00572560    | 1.06E-09 | 8.89E-11 | -6.86 | 13.595095  | -1.40E-01 | 30093517  | 30093640  | NC_000010.10 |
| cg12287936    | 1.06E-09 | 8.89E-11 | -6.86 | 13.5949555 | -1.13E-01 | 1800606   | 1800729   | NC_000005.9  |
| cg20713492    | 1.06E-09 | 8.90E-11 | -6.86 | 13.5946492 | -6.36E-02 | 154293482 | 154293605 | NC_000001.10 |
| cg19979108    | 1.07E-09 | 8.91E-11 | -6.86 | 13.5935068 | -1.40E-01 | 171870875 | 171870998 | NC_000005.9  |
| cg22399703    | 1.07E-09 | 8.95E-11 | -6.86 | 13.588553  | -1.30E-01 | 19456333  | 19456456  | NC_000002.11 |
| cg17478615    | 1.07E-09 | 8.95E-11 | -6.86 | 13.5884148 | -4.54E-02 | 185285364 | 185285487 | NC_000001.10 |
| cg22792938    | 1.07E-09 | 8.97E-11 | -6.86 | 13.586496  | -6.40E-02 | 228337242 | 228337365 | NC_000002.11 |
| ch.19.476355R | 1.07E-09 | 8.97E-11 | -6.86 | 13.5862771 | -4.63E-02 | 10599484  | 10599607  | NC_000019.9  |
| cg11342789    | 1.07E-09 | 8.98E-11 | -6.86 | 13.5859519 | -1.75E-01 | 162352023 | 162352146 | NC_000001.10 |

|            |          |          |       |            |           |           |           |              |
|------------|----------|----------|-------|------------|-----------|-----------|-----------|--------------|
| cg05727225 | 1.07E-09 | 8.98E-11 | -6.86 | 13.5858895 | -1.22E-01 | 10327870  | 10327993  | NC_000011.9  |
| cg20414098 | 1.08E-09 | 9.00E-11 | -6.86 | 13.5834641 | -4.54E-02 | 65150159  | 65150282  | NC_000011.9  |
| cg17896129 | 1.08E-09 | 9.00E-11 | -6.86 | 13.5829381 | -2.92E-02 | 54870925  | 54871048  | NC_000001.10 |
| cg12596040 | 1.08E-09 | 9.01E-11 | -6.86 | 13.5827424 | -3.30E-02 | 18973183  | 18973306  | NC_000001.10 |
| cg02688752 | 1.08E-09 | 9.02E-11 | -6.86 | 13.5813344 | -2.58E-02 | 76115309  | 76115432  | NC_000005.9  |
| cg00621646 | 1.08E-09 | 9.03E-11 | -6.86 | 13.580332  | -1.58E-01 | 123849141 | 123849264 | NC_000011.9  |
| cg08412316 | 1.08E-09 | 9.03E-11 | -6.86 | 13.5798788 | -1.55E-01 | 95658469  | 95658592  | NC_000011.9  |
| cg12039611 | 1.08E-09 | 9.04E-11 | -6.86 | 13.5788484 | -1.44E-01 | 156786653 | 156786776 | NC_000001.10 |
| cg16544989 | 1.08E-09 | 9.05E-11 | -6.86 | 13.5781578 | -1.35E-01 | 85600639  | 85600762  | NC_000016.9  |
| cg23904595 | 1.08E-09 | 9.06E-11 | -6.86 | 13.5764481 | -1.27E-01 | 2908116   | 2908239   | NC_000011.9  |
| cg14470448 | 1.08E-09 | 9.07E-11 | -6.86 | 13.5757103 | -6.41E-02 | 132099291 | 132099414 | NC_000009.11 |
| cg14235676 | 1.08E-09 | 9.07E-11 | -6.86 | 13.5755584 | -4.89E-02 | 66508939  | 66509062  | NC_000017.10 |
| cg21445764 | 1.08E-09 | 9.07E-11 | -6.86 | 13.57548   | -1.03E-01 | 99752916  | 99753039  | NC_000003.11 |
| cg21577193 | 1.08E-09 | 9.08E-11 | -6.86 | 13.5750994 | -9.98E-02 | 17410340  | 17410463  | NC_000007.13 |
| cg12209965 | 1.08E-09 | 9.08E-11 | -6.86 | 13.5742191 | -6.74E-02 | 42759231  | 42759354  | NC_000019.9  |
| cg10900550 | 1.09E-09 | 9.09E-11 | -6.86 | 13.5738004 | -4.90E-02 | 100173984 | 100174107 | NC_000009.11 |
| cg12691651 | 1.09E-09 | 9.11E-11 | -6.86 | 13.5711986 | -7.62E-02 | 73075087  | 73075210  | NC_000015.9  |
| cg11444072 | 1.09E-09 | 9.11E-11 | -6.86 | 13.5710345 | -2.28E-01 | 9427798   | 9427921   | NC_000002.11 |
| cg19154858 | 1.09E-09 | 9.13E-11 | -6.85 | 13.5697203 | -4.49E-02 | 48807339  | 48807462  | NC_000013.10 |
| cg25221919 | 1.09E-09 | 9.16E-11 | -6.85 | 13.5661273 | -1.41E-01 | 234845770 | 234845893 | NC_000001.10 |
| cg17800396 | 1.10E-09 | 9.19E-11 | -6.85 | 13.5625242 | -1.33E-01 | 33749443  | 33749566  | NC_000006.11 |
| cg08564522 | 1.10E-09 | 9.20E-11 | -6.85 | 13.5622281 | -1.45E-01 | 42440079  | 42440202  | NC_000019.9  |
| cg22614927 | 1.10E-09 | 9.20E-11 | -6.85 | 13.561376  | -7.70E-02 | 24195587  | 24195710  | NC_000001.10 |
| cg04550103 | 1.10E-09 | 9.21E-11 | -6.85 | 13.561108  | -1.18E-01 | 234762281 | 234762404 | NC_000002.11 |
| cg22713958 | 1.10E-09 | 9.21E-11 | -6.85 | 13.5604063 | -1.24E-01 | 76976245  | 76976368  | NC_000017.10 |



|            |          |          |       |            |           |           |           |              |
|------------|----------|----------|-------|------------|-----------|-----------|-----------|--------------|
| cg00057092 | 1.10E-09 | 9.22E-11 | -6.85 | 13.5594205 | -1.42E-01 | 37030160  | 37030283  | NC_000015.9  |
| cg23762487 | 1.10E-09 | 9.23E-11 | -6.85 | 13.5590148 | -6.98E-02 | 31165673  | 31165796  | NC_000006.11 |
| cg09526712 | 1.10E-09 | 9.24E-11 | -6.85 | 13.5576076 | -1.33E-01 | 1394089   | 1394212   | NC_000016.9  |
| cg24037813 | 1.10E-09 | 9.24E-11 | -6.85 | 13.5573015 | -1.13E-01 | 61528078  | 61528201  | NC_000017.10 |
| cg09882061 | 1.10E-09 | 9.24E-11 | -6.85 | 13.5572886 | -4.26E-02 | 175874675 | 175874798 | NC_000005.9  |
| cg10943249 | 1.10E-09 | 9.25E-11 | -6.85 | 13.5567753 | -1.17E-01 | 53097289  | 53097412  | NC_000015.9  |
| cg06798115 | 1.10E-09 | 9.26E-11 | -6.85 | 13.5557745 | -1.28E-01 | 45241685  | 45241808  | NC_000003.11 |
| cg05791411 | 1.10E-09 | 9.26E-11 | -6.85 | 13.5555101 | -3.97E-02 | 24165134  | 24165257  | NC_000001.10 |
| cg06247837 | 1.10E-09 | 9.26E-11 | -6.85 | 13.5551597 | -1.00E-01 | 37820135  | 37820258  | NC_000017.10 |
| cg09682796 | 1.11E-09 | 9.28E-11 | -6.85 | 13.5537157 | -1.65E-01 | 50383167  | 50383290  | NC_000003.11 |
| cg25813936 | 1.11E-09 | 9.28E-11 | -6.85 | 13.5531538 | -1.85E-01 | 36276879  | 36277002  | NC_000009.11 |
| cg25598376 | 1.11E-09 | 9.29E-11 | -6.85 | 13.5525392 | -1.15E-01 | 15084348  | 15084471  | NC_000003.11 |
| cg07056567 | 1.11E-09 | 9.30E-11 | -6.85 | 13.5512957 | -1.06E-01 | 100273943 | 100274066 | NC_000007.13 |
| cg05541460 | 1.11E-09 | 9.30E-11 | -6.85 | 13.5511245 | -1.59E-01 | 39850774  | 39850897  | NC_000022.10 |
| cg20983876 | 1.11E-09 | 9.31E-11 | -6.85 | 13.5502216 | -1.28E-01 | 119438953 | 119439076 | NC_000011.9  |
| cg13603508 | 1.11E-09 | 9.32E-11 | -6.85 | 13.5495146 | -6.81E-02 | 39299326  | 39299449  | NC_000012.11 |
| cg19126910 | 1.11E-09 | 9.32E-11 | -6.85 | 13.5489198 | -1.29E-01 | 111249659 | 111249782 | NC_000011.9  |
| cg21870784 | 1.11E-09 | 9.33E-11 | -6.85 | 13.5482722 | -5.98E-02 | 27816659  | 27816782  | NC_000001.10 |
| cg21477638 | 1.11E-09 | 9.34E-11 | -6.85 | 13.5474441 | -1.12E-01 | 113399192 | 113399315 | NC_000002.11 |
| cg10501008 | 1.11E-09 | 9.34E-11 | -6.85 | 13.5472687 | -4.88E-02 | 43903472  | 43903595  | NC_000010.10 |
| cg16744911 | 1.11E-09 | 9.34E-11 | -6.85 | 13.5472634 | -1.42E-01 | 102108974 | 102109097 | NC_000010.10 |
| cg25358853 | 1.11E-09 | 9.35E-11 | -6.85 | 13.546243  | -9.20E-02 | 46448631  | 46448754  | NC_000003.11 |
| cg02974655 | 1.11E-09 | 9.35E-11 | -6.85 | 13.545441  | -4.57E-02 | 76493876  | 76493999  | NC_000011.9  |
| cg08018572 | 1.12E-09 | 9.36E-11 | -6.85 | 13.5448254 | -1.96E-01 | 1014592   | 1014715   | NC_000016.9  |
| cg10244414 | 1.12E-09 | 9.37E-11 | -6.85 | 13.5440182 | -1.15E-01 | 88706717  | 88706840  | NC_000016.9  |

|            |          |          |       |            |           |           |           |              |
|------------|----------|----------|-------|------------|-----------|-----------|-----------|--------------|
| cg23233605 | 1.12E-09 | 9.38E-11 | -6.85 | 13.5429786 | -4.35E-02 | 130548199 | 130548322 | NC_000009.11 |
| cg22573917 | 1.12E-09 | 9.38E-11 | -6.85 | 13.5429139 | -8.42E-02 | 49371628  | 49371751  | NC_000012.11 |
| cg09136551 | 1.12E-09 | 9.39E-11 | -6.85 | 13.5419029 | -2.47E-02 | 3627688   | 3627811   | NC_000017.10 |
| cg05855733 | 1.12E-09 | 9.39E-11 | -6.85 | 13.5414951 | -1.39E-01 | 132973200 | 132973323 | NC_000012.11 |
| cg12637085 | 1.12E-09 | 9.41E-11 | -6.85 | 13.5395136 | -1.09E-01 | 114068181 | 114068304 | NC_000013.10 |
| cg23067535 | 1.12E-09 | 9.41E-11 | -6.85 | 13.5391579 | -1.15E-01 | 124195133 | 124195256 | NC_000008.10 |
| cg17200204 | 1.12E-09 | 9.42E-11 | -6.85 | 13.5388439 | -4.49E-02 | 43732323  | 43732446  | NC_000003.11 |
| cg13556663 | 1.12E-09 | 9.43E-11 | -6.85 | 13.53725   | -5.09E-02 | 1246779   | 1246902   | NC_000020.10 |
| cg18090197 | 1.12E-09 | 9.43E-11 | -6.85 | 13.5371648 | -1.04E-01 | 99769602  | 99769725  | NC_000007.13 |
| cg15565057 | 1.13E-09 | 9.46E-11 | -6.85 | 13.5348333 | -1.41E-01 | 207140871 | 207140994 | NC_000001.10 |
| cg19709585 | 1.13E-09 | 9.47E-11 | -6.85 | 13.5335647 | -1.38E-01 | 209825849 | 209825972 | NC_000001.10 |
| cg18251389 | 1.13E-09 | 9.48E-11 | -6.85 | 13.5322667 | -1.19E-01 | 144104563 | 144104686 | NC_000007.13 |
| cg26010756 | 1.13E-09 | 9.48E-11 | -6.85 | 13.5322509 | -1.32E-01 | 7731069   | 7731192   | NC_000006.11 |
| cg05586607 | 1.13E-09 | 9.49E-11 | -6.85 | 13.5317017 | -1.28E-01 | 1965447   | 1965570   | NC_000011.9  |
| cg12967093 | 1.13E-09 | 9.49E-11 | -6.85 | 13.5314947 | -1.18E-01 | 218621493 | 218621616 | NC_000002.11 |
| cg22672078 | 1.13E-09 | 9.50E-11 | -6.85 | 13.530712  | -4.44E-02 | 132628386 | 132628509 | NC_000012.11 |
| cg21381845 | 1.13E-09 | 9.50E-11 | -6.85 | 13.5303092 | -1.41E-01 | 642127    | 642250    | NC_000007.13 |
| cg02945192 | 1.13E-09 | 9.53E-11 | -6.85 | 13.5269496 | -1.33E-01 | 1038140   | 1038263   | NC_000019.9  |
| cg06996129 | 1.13E-09 | 9.54E-11 | -6.85 | 13.5265994 | -7.06E-02 | 16627962  | 16628085  | NC_000011.9  |
| cg04351903 | 1.14E-09 | 9.54E-11 | -6.85 | 13.5261676 | -4.39E-02 | 202162209 | 202162332 | NC_000001.10 |
| cg25123427 | 1.14E-09 | 9.55E-11 | -6.85 | 13.5247595 | -1.64E-01 | 39054994  | 39055117  | NC_000003.11 |
| cg06560494 | 1.14E-09 | 9.56E-11 | -6.85 | 13.5241747 | -9.18E-02 | 62510825  | 62510948  | NC_000007.13 |
| cg03237218 | 1.14E-09 | 9.56E-11 | -6.85 | 13.5239504 | -1.51E-01 | 33760527  | 33760650  | NC_000017.10 |
| cg25771113 | 1.14E-09 | 9.57E-11 | -6.85 | 13.5231105 | -1.30E-01 | 30140788  | 30140911  | NC_000003.11 |
| cg07676920 | 1.14E-09 | 9.58E-11 | -6.85 | 13.5221684 | -1.71E-01 | 12447615  | 12447738  | NC_000003.11 |

|            |          |          |       |            |           |           |           |              |
|------------|----------|----------|-------|------------|-----------|-----------|-----------|--------------|
| cg15735736 | 1.14E-09 | 9.58E-11 | -6.85 | 13.521702  | -1.52E-01 | 41854950  | 41855073  | NC_000019.9  |
| cg08406698 | 1.14E-09 | 9.59E-11 | -6.85 | 13.5211458 | -1.40E-01 | 168785320 | 168785443 | NC_000006.11 |
| cg14066993 | 1.14E-09 | 9.59E-11 | -6.85 | 13.5207323 | -1.00E-01 | 1203049   | 1203172   | NC_000004.11 |
| cg19409133 | 1.14E-09 | 9.59E-11 | -6.85 | 13.5205408 | -1.17E-01 | 28843744  | 28843867  | NC_000001.10 |
| cg22975318 | 1.14E-09 | 9.61E-11 | -6.85 | 13.5192909 | -1.18E-01 | 84524975  | 84525098  | NC_000002.11 |
| cg14770633 | 1.14E-09 | 9.62E-11 | -6.85 | 13.5183551 | -5.32E-02 | 27851514  | 27851637  | NC_000002.11 |
| cg26213458 | 1.14E-09 | 9.62E-11 | -6.85 | 13.5175648 | -1.44E-01 | 5918191   | 5918314   | NC_000012.11 |
| cg06135425 | 1.15E-09 | 9.64E-11 | -6.85 | 13.516314  | -1.55E-01 | 136316734 | 136316857 | NC_000006.11 |
| cg05409596 | 1.15E-09 | 9.64E-11 | -6.85 | 13.5155503 | -6.38E-02 | 38519841  | 38519964  | NC_000017.10 |
| cg16973520 | 1.15E-09 | 9.64E-11 | -6.85 | 13.5155044 | -9.25E-02 | 219763176 | 219763299 | NC_000002.11 |
| cg23374864 | 1.15E-09 | 9.65E-11 | -6.84 | 13.514381  | -7.25E-02 | 150338421 | 150338544 | NC_000006.11 |
| cg00054408 | 1.15E-09 | 9.66E-11 | -6.84 | 13.5142964 | -4.16E-02 | 3275609   | 3275732   | NC_000019.9  |
| cg03853134 | 1.15E-09 | 9.67E-11 | -6.84 | 13.5132892 | -8.63E-02 | 122494799 | 122494922 | NC_000002.11 |
| cg24647031 | 1.15E-09 | 9.67E-11 | -6.84 | 13.512661  | -1.46E-01 | 157644160 | 157644283 | NC_000007.13 |
| cg08095985 | 1.15E-09 | 9.68E-11 | -6.84 | 13.5118761 | -1.38E-01 | 66544325  | 66544448  | NC_000015.9  |
| cg26909602 | 1.15E-09 | 9.69E-11 | -6.84 | 13.5108511 | -6.62E-02 | 240972927 | 240973050 | NC_000002.11 |
| cg05463027 | 1.15E-09 | 9.70E-11 | -6.84 | 13.5099629 | -5.49E-02 | 17988748  | 17988871  | NC_000006.11 |
| cg02013841 | 1.15E-09 | 9.70E-11 | -6.84 | 13.509786  | -1.45E-01 | 49159767  | 49159890  | NC_000013.10 |
| cg02021180 | 1.15E-09 | 9.71E-11 | -6.84 | 13.5087259 | -1.51E-01 | 65996909  | 65997032  | NC_000003.11 |
| cg20546777 | 1.15E-09 | 9.71E-11 | -6.84 | 13.5085226 | -1.05E-01 | 13025369  | 13025492  | NC_000012.11 |
| cg03388266 | 1.16E-09 | 9.72E-11 | -6.84 | 13.507369  | -1.75E-01 | 234891489 | 234891612 | NC_000002.11 |
| cg03497652 | 1.16E-09 | 9.73E-11 | -6.84 | 13.5070766 | -1.95E-01 | 4751569   | 4751692   | NC_000016.9  |
| cg04204452 | 1.16E-09 | 9.73E-11 | -6.84 | 13.5064314 | -1.43E-01 | 1479213   | 1479336   | NC_000017.10 |
| cg02638567 | 1.16E-09 | 9.74E-11 | -6.84 | 13.5060886 | -1.51E-01 | 70793147  | 70793270  | NC_000007.13 |
| cg03672348 | 1.16E-09 | 9.74E-11 | -6.84 | 13.5056369 | -2.61E-02 | 388443    | 388566    | NC_000020.10 |

|            |          |          |       |            |           |           |           |              |
|------------|----------|----------|-------|------------|-----------|-----------|-----------|--------------|
| cg00606914 | 1.16E-09 | 9.74E-11 | -6.84 | 13.5053969 | -1.92E-02 | 90229063  | 90229186  | NC_000001.10 |
| cg04149930 | 1.16E-09 | 9.75E-11 | -6.84 | 13.5045068 | -1.25E-01 | 2340461   | 2340584   | NC_000016.9  |
| cg01785046 | 1.16E-09 | 9.76E-11 | -6.84 | 13.5041094 | -6.55E-02 | 91510447  | 91510570  | NC_000007.13 |
| cg27173819 | 1.16E-09 | 9.76E-11 | -6.84 | 13.5040981 | -1.55E-01 | 134043635 | 134043758 | NC_000010.10 |
| cg08390172 | 1.16E-09 | 9.77E-11 | -6.84 | 13.5031918 | -1.08E-01 | 192711905 | 192712028 | NC_000002.11 |
| cg21250100 | 1.16E-09 | 9.77E-11 | -6.84 | 13.5023192 | -7.20E-02 | 41956987  | 41957110  | NC_000022.10 |
| cg03445965 | 1.16E-09 | 9.78E-11 | -6.84 | 13.5021398 | -1.20E-01 | 18484373  | 18484496  | NC_000010.10 |
| cg00386586 | 1.16E-09 | 9.78E-11 | -6.84 | 13.5019265 | -2.10E-01 | 114917527 | 114917650 | NC_000013.10 |
| cg11526665 | 1.16E-09 | 9.78E-11 | -6.84 | 13.5015821 | -8.67E-02 | 224896204 | 224896327 | NC_000001.10 |
| cg11609156 | 1.16E-09 | 9.79E-11 | -6.84 | 13.5002738 | -1.52E-01 | 81441781  | 81441904  | NC_000008.10 |
| cg18918090 | 1.16E-09 | 9.80E-11 | -6.84 | 13.4998632 | -1.25E-01 | 38549412  | 38549535  | NC_000022.10 |
| cg19768898 | 1.16E-09 | 9.80E-11 | -6.84 | 13.499343  | -4.18E-02 | 56153481  | 56153604  | NC_000019.9  |
| cg16577540 | 1.17E-09 | 9.82E-11 | -6.84 | 13.4978312 | -6.56E-02 | 139682757 | 139682880 | NC_000005.9  |
| cg07364676 | 1.17E-09 | 9.83E-11 | -6.84 | 13.4970874 | -6.44E-02 | 29137974  | 29138097  | NC_000022.10 |
| cg04339860 | 1.17E-09 | 9.83E-11 | -6.84 | 13.4970641 | -5.44E-02 | 69796075  | 69796198  | NC_000016.9  |
| cg05008653 | 1.17E-09 | 9.83E-11 | -6.84 | 13.4966678 | -6.05E-02 | 18907974  | 18908097  | NC_000017.10 |
| cg24289314 | 1.17E-09 | 9.83E-11 | -6.84 | 13.4964393 | -1.53E-01 | 126106425 | 126106548 | NC_000010.10 |
| cg11702866 | 1.17E-09 | 9.86E-11 | -6.84 | 13.4938628 | -1.34E-01 | 11267098  | 11267221  | NC_000003.11 |
| cg05290737 | 1.17E-09 | 9.86E-11 | -6.84 | 13.4933439 | -1.08E-01 | 123215151 | 123215274 | NC_000012.11 |
| cg03601644 | 1.17E-09 | 9.87E-11 | -6.84 | 13.4931014 | -1.09E-01 | 54498336  | 54498459  | NC_000019.9  |
| cg14448145 | 1.17E-09 | 9.87E-11 | -6.84 | 13.4929741 | -7.25E-02 | 62525650  | 62525773  | NC_000020.10 |
| cg04886783 | 1.17E-09 | 9.87E-11 | -6.84 | 13.4927322 | -9.67E-02 | 1852216   | 1852339   | NC_000001.10 |
| cg24730307 | 1.17E-09 | 9.88E-11 | -6.84 | 13.4919496 | -1.29E-01 | 24405009  | 24405132  | NC_000022.10 |
| cg26834479 | 1.17E-09 | 9.88E-11 | -6.84 | 13.491916  | -8.58E-02 | 41327090  | 41327213  | NC_000001.10 |
| cg15697257 | 1.17E-09 | 9.88E-11 | -6.84 | 13.4917472 | -7.58E-02 | 150020212 | 150020335 | NC_000005.9  |

|            |          |          |       |            |           |           |           |              |
|------------|----------|----------|-------|------------|-----------|-----------|-----------|--------------|
| cg13105766 | 1.17E-09 | 9.89E-11 | -6.84 | 13.4907906 | -9.27E-02 | 3881390   | 3881513   | NC_000004.11 |
| cg14020320 | 1.17E-09 | 9.90E-11 | -6.84 | 13.4898831 | -1.60E-01 | 2323851   | 2323974   | NC_000011.9  |
| cg19720260 | 1.17E-09 | 9.90E-11 | -6.84 | 13.4896371 | -1.06E-01 | 114549291 | 114549414 | NC_000011.9  |
| cg09942210 | 1.18E-09 | 9.91E-11 | -6.84 | 13.4883323 | -1.12E-01 | 124965227 | 124965350 | NC_000012.11 |
| cg18649979 | 1.18E-09 | 9.92E-11 | -6.84 | 13.4880471 | -6.14E-02 | 21688263  | 21688386  | NC_000019.9  |
| cg16337566 | 1.18E-09 | 9.92E-11 | -6.84 | 13.4873089 | -1.41E-01 | 10657514  | 10657637  | NC_000008.10 |
| cg10802480 | 1.18E-09 | 9.94E-11 | -6.84 | 13.4860806 | -1.25E-01 | 2984255   | 2984378   | NC_000001.10 |
| cg09432154 | 1.18E-09 | 9.95E-11 | -6.84 | 13.4847439 | -1.22E-01 | 151034669 | 151034792 | NC_000003.11 |
| cg04607322 | 1.18E-09 | 9.97E-11 | -6.84 | 13.4830119 | -5.06E-02 | 180587716 | 180587839 | NC_000005.9  |
| cg11660684 | 1.18E-09 | 9.97E-11 | -6.84 | 13.4827508 | -5.30E-02 | 126490277 | 126490400 | NC_000010.10 |
| cg00187614 | 1.18E-09 | 9.99E-11 | -6.84 | 13.4810269 | -4.81E-02 | 42500967  | 42501090  | NC_000001.10 |
| cg18327423 | 1.19E-09 | 9.99E-11 | -6.84 | 13.4805038 | -3.84E-02 | 3186549   | 3186672   | NC_000011.9  |
| cg03595286 | 1.19E-09 | 1.00E-10 | -6.84 | 13.4792751 | -4.24E-02 | 110228216 | 110228339 | NC_000009.11 |
| cg04986591 | 1.19E-09 | 1.00E-10 | -6.84 | 13.4786413 | -9.97E-02 | 41723953  | 41724076  | NC_000017.10 |
| cg13567405 | 1.19E-09 | 1.00E-10 | -6.84 | 13.4780311 | -1.51E-01 | 94372017  | 94372140  | NC_000011.9  |
| cg26675382 | 1.19E-09 | 1.01E-10 | -6.84 | 13.474887  | -6.02E-02 | 150067846 | 150067969 | NC_000006.11 |
| cg24518943 | 1.19E-09 | 1.01E-10 | -6.84 | 13.473488  | -5.56E-02 | 71123805  | 71123928  | NC_000006.11 |
| cg03128332 | 1.19E-09 | 1.01E-10 | -6.84 | 13.4733169 | -7.62E-02 | 805338    | 805461    | NC_000001.10 |
| cg00420808 | 1.19E-09 | 1.01E-10 | -6.84 | 13.4727776 | -3.86E-02 | 33216383  | 33216506  | NC_000006.11 |
| cg04840800 | 1.19E-09 | 1.01E-10 | -6.84 | 13.4724017 | -1.28E-01 | 127846739 | 127846862 | NC_000007.13 |
| cg00392914 | 1.20E-09 | 1.01E-10 | -6.84 | 13.4716941 | -1.95E-02 | 83841513  | 83841636  | NC_000016.9  |
| cg19544434 | 1.20E-09 | 1.01E-10 | -6.84 | 13.4716529 | -1.18E-01 | 129845670 | 129845793 | NC_000010.10 |
| cg04944659 | 1.20E-09 | 1.01E-10 | -6.84 | 13.4688027 | -9.87E-02 | 10891531  | 10891654  | NC_000001.10 |
| cg12813709 | 1.20E-09 | 1.01E-10 | -6.84 | 13.4687409 | -6.18E-02 | 576467    | 576590    | NC_000011.9  |
| cg21209091 | 1.20E-09 | 1.01E-10 | -6.84 | 13.4666185 | -6.88E-02 | 42234975  | 42235098  | NC_000008.10 |

|               |          |          |       |            |           |           |           |              |
|---------------|----------|----------|-------|------------|-----------|-----------|-----------|--------------|
| cg02606058    | 1.20E-09 | 1.01E-10 | -6.84 | 13.4663155 | -1.54E-01 | 67195658  | 67195781  | NC_000016.9  |
| cg03955296    | 1.20E-09 | 1.01E-10 | -6.84 | 13.4662966 | -3.97E-02 | 157107917 | 157108040 | NC_000001.10 |
| cg22960833    | 1.20E-09 | 1.01E-10 | -6.84 | 13.4658584 | -8.87E-02 | 4988763   | 4988886   | NC_000019.9  |
| cg21593676    | 1.20E-09 | 1.02E-10 | -6.84 | 13.4652955 | -1.12E-01 | 88142277  | 88142400  | NC_000004.11 |
| cg04405332    | 1.20E-09 | 1.02E-10 | -6.84 | 13.4651726 | -4.70E-02 | 167789609 | 167789732 | NC_000001.10 |
| cg22589169    | 1.20E-09 | 1.02E-10 | -6.84 | 13.4650952 | -1.39E-01 | 111227891 | 111228014 | NC_000013.10 |
| cg23812679    | 1.21E-09 | 1.02E-10 | -6.83 | 13.4592184 | -1.35E-01 | 57985453  | 57985576  | NC_000003.11 |
| ch.10.645342R | 1.21E-09 | 1.02E-10 | -6.83 | 13.4588723 | -5.61E-02 | 24771691  | 24771814  | NC_000010.10 |
| cg24129618    | 1.21E-09 | 1.02E-10 | -6.83 | 13.4576498 | -4.36E-02 | 22102425  | 22102548  | NC_000008.10 |
| cg01143454    | 1.21E-09 | 1.02E-10 | -6.83 | 13.4575858 | -1.44E-01 | 2795601   | 2795724   | NC_000020.10 |
| cg10987882    | 1.21E-09 | 1.02E-10 | -6.83 | 13.4575223 | -6.57E-02 | 3996459   | 3996582   | NC_000020.10 |
| cg15296856    | 1.21E-09 | 1.02E-10 | -6.83 | 13.4574304 | -1.24E-01 | 80199608  | 80199731  | NC_000017.10 |
| cg07722368    | 1.21E-09 | 1.02E-10 | -6.83 | 13.4570516 | -3.60E-02 | 26554907  | 26555030  | NC_000017.10 |
| cg15172007    | 1.21E-09 | 1.02E-10 | -6.83 | 13.4566213 | -6.75E-02 | 43422090  | 43422213  | NC_000006.11 |
| cg24167314    | 1.21E-09 | 1.02E-10 | -6.83 | 13.45585   | -9.37E-02 | 103311500 | 103311623 | NC_000012.11 |
| cg04017276    | 1.22E-09 | 1.03E-10 | -6.83 | 13.4543388 | -1.71E-01 | 44577135  | 44577258  | NC_000022.10 |
| cg17449759    | 1.22E-09 | 1.03E-10 | -6.83 | 13.4542311 | -1.54E-01 | 168466986 | 168467109 | NC_000001.10 |
| cg24375399    | 1.22E-09 | 1.03E-10 | -6.83 | 13.4542019 | -1.33E-01 | 40825798  | 40825921  | NC_000017.10 |
| cg14931118    | 1.22E-09 | 1.03E-10 | -6.83 | 13.4539572 | -1.61E-01 | 213228956 | 213229079 | NC_000002.11 |
| cg15274171    | 1.22E-09 | 1.03E-10 | -6.83 | 13.4528197 | -1.21E-01 | 35755964  | 35756087  | NC_000021.8  |
| cg14370520    | 1.22E-09 | 1.03E-10 | -6.83 | 13.4526471 | -1.68E-01 | 30891837  | 30891960  | NC_000007.13 |
| cg10678427    | 1.22E-09 | 1.03E-10 | -6.83 | 13.4503197 | -9.41E-02 | 127176163 | 127176286 | NC_000003.11 |
| cg19870978    | 1.22E-09 | 1.03E-10 | -6.83 | 13.4492252 | -6.77E-02 | 137673245 | 137673368 | NC_000005.9  |
| cg16739178    | 1.22E-09 | 1.03E-10 | -6.83 | 13.4478481 | -9.39E-02 | 85470674  | 85470797  | NC_000016.9  |
| cg14398883    | 1.22E-09 | 1.03E-10 | -6.83 | 13.447202  | -8.40E-02 | 101398184 | 101398307 | NC_000007.13 |

|            |          |          |       |            |           |           |           |              |
|------------|----------|----------|-------|------------|-----------|-----------|-----------|--------------|
| cg01754756 | 1.22E-09 | 1.03E-10 | -6.83 | 13.4466415 | -1.29E-01 | 88728078  | 88728201  | NC_000010.10 |
| cg01413632 | 1.23E-09 | 1.04E-10 | -6.83 | 13.4459723 | -1.23E-01 | 76078445  | 76078568  | NC_000012.11 |
| cg08466034 | 1.23E-09 | 1.04E-10 | -6.83 | 13.4440868 | -2.05E-01 | 16318930  | 16319053  | NC_000017.10 |
| cg18776616 | 1.23E-09 | 1.04E-10 | -6.83 | 13.4438552 | -1.47E-01 | 72235645  | 72235768  | NC_000010.10 |
| cg19134665 | 1.23E-09 | 1.04E-10 | -6.83 | 13.4438145 | -4.16E-02 | 91072801  | 91072924  | NC_000015.9  |
| cg04870732 | 1.23E-09 | 1.04E-10 | -6.83 | 13.4437596 | -1.12E-01 | 123754732 | 123754855 | NC_000011.9  |
| cg25854162 | 1.23E-09 | 1.04E-10 | -6.83 | 13.4437543 | -8.33E-02 | 217497617 | 217497740 | NC_000002.11 |
| cg04844987 | 1.23E-09 | 1.04E-10 | -6.83 | 13.4434043 | -1.35E-01 | 114136053 | 114136176 | NC_000010.10 |
| cg11113931 | 1.23E-09 | 1.04E-10 | -6.83 | 13.4426419 | -9.33E-02 | 40730338  | 40730461  | NC_000015.9  |
| cg19227924 | 1.23E-09 | 1.04E-10 | -6.83 | 13.4424871 | -9.71E-02 | 28565709  | 28565832  | NC_000017.10 |
| cg02887530 | 1.23E-09 | 1.04E-10 | -6.83 | 13.4413203 | -9.49E-02 | 1609383   | 1609506   | NC_000010.10 |
| cg01787445 | 1.23E-09 | 1.04E-10 | -6.83 | 13.4405622 | -1.12E-01 | 130344243 | 130344366 | NC_000002.11 |
| cg26166595 | 1.23E-09 | 1.04E-10 | -6.83 | 13.4390222 | -9.51E-02 | 11998715  | 11998838  | NC_000011.9  |
| cg08187585 | 1.23E-09 | 1.04E-10 | -6.83 | 13.4389388 | -1.20E-01 | 105393182 | 105393305 | NC_000014.8  |
| cg08530064 | 1.24E-09 | 1.04E-10 | -6.83 | 13.4372749 | -9.23E-02 | 150598393 | 150598516 | NC_000007.13 |
| cg05520031 | 1.24E-09 | 1.04E-10 | -6.83 | 13.4369368 | -7.23E-02 | 129262012 | 129262135 | NC_000009.11 |
| cg17009836 | 1.24E-09 | 1.05E-10 | -6.83 | 13.4359394 | -9.42E-02 | 49529007  | 49529130  | NC_000019.9  |
| cg17592120 | 1.24E-09 | 1.05E-10 | -6.83 | 13.4344767 | -4.19E-02 | 43920261  | 43920384  | NC_000001.10 |
| cg08858091 | 1.24E-09 | 1.05E-10 | -6.83 | 13.4343896 | -8.44E-02 | 27173437  | 27173560  | NC_000017.10 |
| cg08181534 | 1.24E-09 | 1.05E-10 | -6.83 | 13.4331425 | -3.53E-02 | 56186883  | 56187006  | NC_000019.9  |
| cg23293329 | 1.24E-09 | 1.05E-10 | -6.83 | 13.4315461 | -2.00E-02 | 8079962   | 8080085   | NC_000017.10 |
| cg08128274 | 1.24E-09 | 1.05E-10 | -6.83 | 13.4311615 | -2.04E-01 | 206832043 | 206832166 | NC_000001.10 |
| cg01587198 | 1.24E-09 | 1.05E-10 | -6.83 | 13.4310146 | -3.86E-02 | 17193765  | 17193888  | NC_000011.9  |
| cg24088250 | 1.25E-09 | 1.05E-10 | -6.83 | 13.4282477 | -8.17E-02 | 75252179  | 75252302  | NC_000017.10 |
| cg19373099 | 1.25E-09 | 1.05E-10 | -6.83 | 13.4276849 | -1.37E-01 | 210008092 | 210008215 | NC_000002.11 |

|            |          |          |       |            |           |           |           |              |
|------------|----------|----------|-------|------------|-----------|-----------|-----------|--------------|
| cg01597172 | 1.25E-09 | 1.05E-10 | -6.83 | 13.427671  | -4.41E-02 | 130497263 | 130497386 | NC_000009.11 |
| cg02447462 | 1.25E-09 | 1.06E-10 | -6.83 | 13.4272686 | -1.43E-01 | 861071    | 861194    | NC_000019.9  |
| cg07186765 | 1.25E-09 | 1.06E-10 | -6.83 | 13.4247945 | -9.42E-02 | 30633504  | 30633627  | NC_000007.13 |
| cg24806126 | 1.25E-09 | 1.06E-10 | -6.83 | 13.4246718 | -5.26E-02 | 14581620  | 14581743  | NC_000005.9  |
| cg12026858 | 1.25E-09 | 1.06E-10 | -6.83 | 13.4243211 | -1.52E-01 | 114067446 | 114067569 | NC_000011.9  |
| cg12378001 | 1.25E-09 | 1.06E-10 | -6.83 | 13.4239947 | -8.28E-02 | 24818413  | 24818536  | NC_000007.13 |
| cg05583240 | 1.25E-09 | 1.06E-10 | -6.83 | 13.4230426 | -1.11E-01 | 105477579 | 105477702 | NC_000012.11 |
| cg00163372 | 1.25E-09 | 1.06E-10 | -6.83 | 13.4226431 | -2.10E-01 | 128752988 | 128753111 | NC_000008.10 |
| cg26404568 | 1.25E-09 | 1.06E-10 | -6.83 | 13.4219288 | -1.64E-02 | 12882848  | 12882971  | NC_000003.11 |
| cg22690558 | 1.26E-09 | 1.06E-10 | -6.83 | 13.4202068 | -1.46E-01 | 29715218  | 29715341  | NC_000012.11 |
| cg12689055 | 1.26E-09 | 1.06E-10 | -6.83 | 13.4190174 | -8.91E-02 | 53541670  | 53541793  | NC_000001.10 |
| cg09415832 | 1.26E-09 | 1.06E-10 | -6.83 | 13.4187956 | -2.96E-02 | 33422185  | 33422308  | NC_000006.11 |
| cg09474010 | 1.26E-09 | 1.06E-10 | -6.83 | 13.4185544 | -9.63E-02 | 26405517  | 26405640  | NC_000001.10 |
| cg24579422 | 1.26E-09 | 1.07E-10 | -6.83 | 13.4167655 | -1.21E-01 | 134183359 | 134183482 | NC_000008.10 |
| cg02680669 | 1.26E-09 | 1.07E-10 | -6.83 | 13.415591  | -1.21E-01 | 40181105  | 40181228  | NC_000008.10 |
| cg23785719 | 1.26E-09 | 1.07E-10 | -6.83 | 13.4149444 | -6.32E-02 | 43622659  | 43622782  | NC_000007.13 |
| cg22114840 | 1.26E-09 | 1.07E-10 | -6.83 | 13.4144585 | -7.40E-02 | 1750212   | 1750335   | NC_000019.9  |
| cg10583942 | 1.26E-09 | 1.07E-10 | -6.83 | 13.4132693 | -1.20E-01 | 1142892   | 1143015   | NC_000001.10 |
| cg09288780 | 1.26E-09 | 1.07E-10 | -6.83 | 13.4123429 | -4.61E-02 | 10413394  | 10413517  | NC_000006.11 |
| cg04536765 | 1.27E-09 | 1.07E-10 | -6.83 | 13.4100954 | -7.99E-02 | 31621761  | 31621884  | NC_000006.11 |
| cg20192997 | 1.27E-09 | 1.07E-10 | -6.83 | 13.4094536 | -8.87E-02 | 117696015 | 117696138 | NC_000011.9  |
| cg00981877 | 1.27E-09 | 1.07E-10 | -6.83 | 13.40934   | -4.38E-02 | 50366841  | 50366964  | NC_000020.10 |
| cg12936747 | 1.27E-09 | 1.08E-10 | -6.83 | 13.4087207 | -6.19E-02 | 95361386  | 95361509  | NC_000010.10 |
| cg02639435 | 1.27E-09 | 1.08E-10 | -6.83 | 13.4058908 | -1.86E-01 | 13534679  | 13534802  | NC_000010.10 |
| cg23571433 | 1.27E-09 | 1.08E-10 | -6.83 | 13.4050931 | -6.97E-02 | 85980782  | 85980905  | NC_000002.11 |



|                |          |          |       |            |           |           |           |              |
|----------------|----------|----------|-------|------------|-----------|-----------|-----------|--------------|
| cg09232555     | 1.27E-09 | 1.08E-10 | -6.82 | 13.4048517 | -2.19E-01 | 11619866  | 11619989  | NC_000008.10 |
| ch.22.734399R  | 1.27E-09 | 1.08E-10 | -6.82 | 13.4044128 | -6.49E-02 | 41522682  | 41522805  | NC_000022.10 |
| cg16254190     | 1.28E-09 | 1.08E-10 | -6.82 | 13.4038407 | -1.22E-01 | 16483694  | 16483817  | NC_000001.10 |
| cg23372216     | 1.28E-09 | 1.08E-10 | -6.82 | 13.4029266 | -9.01E-02 | 76518340  | 76518463  | NC_000011.9  |
| cg21210409     | 1.28E-09 | 1.08E-10 | -6.82 | 13.4015102 | -1.21E-01 | 140015868 | 140015991 | NC_000007.13 |
| cg17580261     | 1.28E-09 | 1.08E-10 | -6.82 | 13.4014862 | -1.09E-01 | 76998501  | 76998624  | NC_000011.9  |
| cg00327437     | 1.28E-09 | 1.08E-10 | -6.82 | 13.4010637 | -7.71E-02 | 64578227  | 64578350  | NC_000001.10 |
| cg26575914     | 1.28E-09 | 1.08E-10 | -6.82 | 13.400917  | -8.49E-02 | 228397977 | 228398100 | NC_000001.10 |
| cg03961030     | 1.28E-09 | 1.09E-10 | -6.82 | 13.3993714 | -1.47E-01 | 6333796   | 6333919   | NC_000001.10 |
| cg00907549     | 1.28E-09 | 1.09E-10 | -6.82 | 13.3984897 | -6.01E-02 | 236768366 | 236768489 | NC_000001.10 |
| ch.3.52262431R | 1.28E-09 | 1.09E-10 | -6.82 | 13.3964319 | -2.67E-02 | 52287391  | 52287514  | NC_000003.11 |
| cg06094126     | 1.28E-09 | 1.09E-10 | -6.82 | 13.3959046 | -9.28E-02 | 17025723  | 17025846  | NC_000001.10 |
| cg14278300     | 1.29E-09 | 1.09E-10 | -6.82 | 13.3957001 | -1.07E-01 | 167486978 | 167487101 | NC_000001.10 |
| cg07807695     | 1.29E-09 | 1.09E-10 | -6.82 | 13.3956516 | -1.46E-01 | 81608485  | 81608608  | NC_000005.9  |
| cg14376625     | 1.29E-09 | 1.09E-10 | -6.82 | 13.3946018 | -8.03E-02 | 111736686 | 111736809 | NC_000012.11 |
| cg24766429     | 1.29E-09 | 1.09E-10 | -6.82 | 13.3925622 | -3.85E-02 | 30043037  | 30043160  | NC_000006.11 |
| cg04897892     | 1.29E-09 | 1.10E-10 | -6.82 | 13.3905016 | -1.73E-01 | 81564314  | 81564437  | NC_000016.9  |
| cg04929355     | 1.29E-09 | 1.10E-10 | -6.82 | 13.3895171 | -1.56E-01 | 112034997 | 112035120 | NC_000011.9  |
| cg01606027     | 1.29E-09 | 1.10E-10 | -6.82 | 13.389347  | -1.52E-01 | 31607212  | 31607335  | NC_000022.10 |
| cg01934408     | 1.29E-09 | 1.10E-10 | -6.82 | 13.3888032 | -7.91E-02 | 6085799   | 6085922   | NC_000001.10 |
| cg24730705     | 1.29E-09 | 1.10E-10 | -6.82 | 13.3887269 | -1.35E-01 | 119496382 | 119496505 | NC_000010.10 |
| cg08736225     | 1.29E-09 | 1.10E-10 | -6.82 | 13.3886856 | -1.16E-01 | 18654908  | 18655031  | NC_000002.11 |
| cg21845580     | 1.29E-09 | 1.10E-10 | -6.82 | 13.3878333 | -2.95E-02 | 53472882  | 53473005  | NC_000012.11 |
| cg01320048     | 1.30E-09 | 1.10E-10 | -6.82 | 13.3858401 | -8.57E-02 | 115999405 | 115999528 | NC_000010.10 |
| cg10110376     | 1.30E-09 | 1.10E-10 | -6.82 | 13.3851564 | -8.20E-02 | 85454585  | 85454708  | NC_000016.9  |

|               |          |          |       |            |           |           |           |              |
|---------------|----------|----------|-------|------------|-----------|-----------|-----------|--------------|
| cg08159663    | 1.30E-09 | 1.10E-10 | -6.82 | 13.3836503 | -1.36E-01 | 57022486  | 57022609  | NC_000016.9  |
| cg02607319    | 1.30E-09 | 1.10E-10 | -6.82 | 13.3819913 | -1.19E-01 | 45002112  | 45002235  | NC_000007.13 |
| cg23243902    | 1.30E-09 | 1.11E-10 | -6.82 | 13.3810741 | -4.12E-02 | 117049849 | 117049972 | NC_000011.9  |
| cg24100506    | 1.30E-09 | 1.11E-10 | -6.82 | 13.3810192 | -4.07E-02 | 44903551  | 44903674  | NC_000003.11 |
| cg21959316    | 1.30E-09 | 1.11E-10 | -6.82 | 13.3803585 | -5.89E-02 | 85040158  | 85040281  | NC_000001.10 |
| cg25937577    | 1.31E-09 | 1.11E-10 | -6.82 | 13.3787776 | -1.46E-01 | 31536476  | 31536599  | NC_000022.10 |
| cg12974223    | 1.31E-09 | 1.11E-10 | -6.82 | 13.3781691 | -7.68E-02 | 51925684  | 51925807  | NC_000012.11 |
| cg05224707    | 1.31E-09 | 1.11E-10 | -6.82 | 13.3778529 | -4.75E-02 | 171881549 | 171881672 | NC_000005.9  |
| cg02560081    | 1.31E-09 | 1.11E-10 | -6.82 | 13.3772452 | -1.42E-01 | 842128    | 842251    | NC_000007.13 |
| cg05190096    | 1.31E-09 | 1.11E-10 | -6.82 | 13.377231  | -4.29E-02 | 461515    | 461638    | NC_000019.9  |
| cg21144988    | 1.31E-09 | 1.11E-10 | -6.82 | 13.3770007 | -1.45E-01 | 186086650 | 186086773 | NC_000004.11 |
| cg25853622    | 1.31E-09 | 1.11E-10 | -6.82 | 13.3767473 | -1.58E-01 | 188425256 | 188425379 | NC_000003.11 |
| cg13786666    | 1.31E-09 | 1.11E-10 | -6.82 | 13.3761319 | -4.75E-02 | 86536028  | 86536151  | NC_000009.11 |
| cg13804461    | 1.31E-09 | 1.11E-10 | -6.82 | 13.3751879 | -7.26E-02 | 93351847  | 93351970  | NC_000015.9  |
| cg13481335    | 1.31E-09 | 1.11E-10 | -6.82 | 13.374271  | -3.38E-02 | 90864902  | 90865025  | NC_000014.8  |
| cg02535674    | 1.31E-09 | 1.11E-10 | -6.82 | 13.3742622 | -2.06E-01 | 52226352  | 52226475  | NC_000020.10 |
| cg03733207    | 1.31E-09 | 1.11E-10 | -6.82 | 13.3741633 | -1.60E-01 | 36932553  | 36932676  | NC_000020.10 |
| cg00727912    | 1.31E-09 | 1.11E-10 | -6.82 | 13.3734089 | -8.10E-02 | 61583736  | 61583859  | NC_000020.10 |
| cg07170045    | 1.31E-09 | 1.12E-10 | -6.82 | 13.3728357 | -8.78E-02 | 21905960  | 21906083  | NC_000008.10 |
| cg17552116    | 1.31E-09 | 1.12E-10 | -6.82 | 13.3726366 | -1.42E-01 | 126721513 | 126721636 | NC_000003.11 |
| ch.3.2364134R | 1.31E-09 | 1.12E-10 | -6.82 | 13.3715829 | -4.82E-02 | 121191813 | 121191936 | NC_000003.11 |
| cg08806622    | 1.32E-09 | 1.12E-10 | -6.82 | 13.370951  | -5.19E-02 | 27279525  | 27279648  | NC_000017.10 |
| cg02423080    | 1.32E-09 | 1.12E-10 | -6.82 | 13.3707849 | -1.27E-01 | 149423471 | 149423594 | NC_000005.9  |
| cg06850099    | 1.32E-09 | 1.12E-10 | -6.82 | 13.3706834 | -1.42E-01 | 183070351 | 183070474 | NC_000001.10 |
| cg02149880    | 1.32E-09 | 1.12E-10 | -6.82 | 13.3692372 | -3.50E-02 | 216878419 | 216878542 | NC_000002.11 |

|                |          |          |       |            |           |           |           |              |
|----------------|----------|----------|-------|------------|-----------|-----------|-----------|--------------|
| cg24299389     | 1.32E-09 | 1.12E-10 | -6.82 | 13.3669953 | -7.82E-02 | 51670552  | 51670675  | NC_000019.9  |
| cg20836412     | 1.32E-09 | 1.12E-10 | -6.82 | 13.3659439 | -1.02E-01 | 82543285  | 82543408  | NC_000008.10 |
| ch.1.3897073R  | 1.32E-09 | 1.12E-10 | -6.82 | 13.3657529 | -1.54E-02 | 201780598 | 201780721 | NC_000001.10 |
| cg14409104     | 1.32E-09 | 1.12E-10 | -6.82 | 13.3653652 | -1.36E-01 | 129126793 | 129126916 | NC_000009.11 |
| cg04208928     | 1.32E-09 | 1.12E-10 | -6.82 | 13.3652383 | -1.58E-01 | 226498038 | 226498161 | NC_000001.10 |
| cg12931707     | 1.32E-09 | 1.13E-10 | -6.82 | 13.3633455 | -1.23E-01 | 115527443 | 115527566 | NC_000004.11 |
| cg19635188     | 1.33E-09 | 1.13E-10 | -6.82 | 13.3627941 | -8.13E-02 | 44004546  | 44004669  | NC_000014.8  |
| cg15835747     | 1.33E-09 | 1.13E-10 | -6.82 | 13.3620005 | -1.33E-01 | 143523387 | 143523510 | NC_000008.10 |
| cg07219425     | 1.33E-09 | 1.13E-10 | -6.82 | 13.3614356 | -1.12E-01 | 177482829 | 177482952 | NC_000005.9  |
| cg14712964     | 1.33E-09 | 1.13E-10 | -6.82 | 13.3609306 | -3.30E-02 | 9773672   | 9773795   | NC_000003.11 |
| cg02263999     | 1.33E-09 | 1.13E-10 | -6.82 | 13.3592709 | -5.59E-02 | 66994432  | 66994555  | NC_000015.9  |
| cg24298696     | 1.33E-09 | 1.13E-10 | -6.82 | 13.357954  | -1.33E-01 | 3210424   | 3210547   | NC_000001.10 |
| cg13724827     | 1.33E-09 | 1.13E-10 | -6.82 | 13.35747   | -5.96E-02 | 126030353 | 126030476 | NC_000009.11 |
| cg06521247     | 1.33E-09 | 1.13E-10 | -6.82 | 13.3573887 | -1.62E-01 | 3209787   | 3209910   | NC_000001.10 |
| cg16349616     | 1.33E-09 | 1.13E-10 | -6.82 | 13.3572394 | -1.49E-01 | 159195472 | 159195595 | NC_000006.11 |
| cg13273236     | 1.33E-09 | 1.13E-10 | -6.82 | 13.356603  | -9.53E-02 | 31250765  | 31250888  | NC_000006.11 |
| cg17533477     | 1.33E-09 | 1.13E-10 | -6.82 | 13.3557498 | -8.88E-02 | 97501010  | 97501133  | NC_000007.13 |
| cg00332745     | 1.33E-09 | 1.14E-10 | -6.82 | 13.3554731 | -1.13E-01 | 67208247  | 67208370  | NC_000016.9  |
| cg24813588     | 1.34E-09 | 1.14E-10 | -6.82 | 13.3528914 | -1.08E-01 | 62606499  | 62606622  | NC_000020.10 |
| cg02736280     | 1.34E-09 | 1.14E-10 | -6.82 | 13.3528668 | -8.48E-02 | 1633745   | 1633868   | NC_000017.10 |
| cg05845030     | 1.34E-09 | 1.14E-10 | -6.82 | 13.3517105 | -9.78E-02 | 91573247  | 91573370  | NC_000012.11 |
| ch.17.1009718F | 1.34E-09 | 1.14E-10 | -6.82 | 13.3513979 | -1.78E-02 | 37656220  | 37656343  | NC_000017.10 |
| cg09938664     | 1.34E-09 | 1.14E-10 | -6.82 | 13.3507409 | -1.33E-01 | 119662882 | 119663005 | NC_000011.9  |
| cg09336988     | 1.34E-09 | 1.14E-10 | -6.82 | 13.3505877 | -1.35E-01 | 42386872  | 42386995  | NC_000019.9  |
| cg26840755     | 1.34E-09 | 1.14E-10 | -6.82 | 13.3498538 | -1.51E-01 | 65197776  | 65197899  | NC_000011.9  |

|            |          |          |       |            |           |           |           |              |
|------------|----------|----------|-------|------------|-----------|-----------|-----------|--------------|
| cg24506434 | 1.34E-09 | 1.14E-10 | -6.81 | 13.3495143 | -1.05E-01 | 49656920  | 49657043  | NC_000010.10 |
| cg17146111 | 1.34E-09 | 1.14E-10 | -6.81 | 13.3487782 | -6.25E-02 | 52870497  | 52870620  | NC_000001.10 |
| cg05061804 | 1.34E-09 | 1.14E-10 | -6.81 | 13.3475512 | -7.05E-02 | 135282417 | 135282540 | NC_000009.11 |
| cg11608390 | 1.34E-09 | 1.14E-10 | -6.81 | 13.3472038 | -1.55E-01 | 2021942   | 2022065   | NC_000006.11 |
| cg26425045 | 1.35E-09 | 1.15E-10 | -6.81 | 13.3460908 | -8.31E-02 | 36813278  | 36813401  | NC_000010.10 |
| cg02329193 | 1.35E-09 | 1.15E-10 | -6.81 | 13.3439054 | -1.42E-01 | 29196472  | 29196595  | NC_000016.9  |
| cg06986263 | 1.35E-09 | 1.15E-10 | -6.81 | 13.3399103 | -1.14E-01 | 42609124  | 42609247  | NC_000001.10 |
| cg21661347 | 1.36E-09 | 1.15E-10 | -6.81 | 13.3391918 | -6.10E-02 | 8674237   | 8674360   | NC_000019.9  |
| cg03394122 | 1.36E-09 | 1.16E-10 | -6.81 | 13.3367766 | -8.09E-02 | 17307678  | 17307801  | NC_000001.10 |
| cg15319824 | 1.36E-09 | 1.16E-10 | -6.81 | 13.3367027 | -1.87E-01 | 3160974   | 3161097   | NC_000010.10 |
| cg01703329 | 1.36E-09 | 1.16E-10 | -6.81 | 13.336606  | -8.55E-02 | 3859977   | 3860100   | NC_000017.10 |
| cg15010372 | 1.36E-09 | 1.16E-10 | -6.81 | 13.33639   | -1.38E-01 | 175832735 | 175832858 | NC_000001.10 |
| cg24103018 | 1.36E-09 | 1.16E-10 | -6.81 | 13.3358479 | -1.65E-02 | 17420930  | 17421053  | NC_000019.9  |
| cg17940821 | 1.36E-09 | 1.16E-10 | -6.81 | 13.3358349 | -1.68E-01 | 20140245  | 20140368  | NC_000018.9  |
| cg12518898 | 1.36E-09 | 1.16E-10 | -6.81 | 13.3352385 | -8.58E-02 | 23384664  | 23384787  | NC_000010.10 |
| cg27569706 | 1.36E-09 | 1.16E-10 | -6.81 | 13.3351547 | -8.69E-02 | 33173163  | 33173286  | NC_000002.11 |
| cg12558347 | 1.36E-09 | 1.16E-10 | -6.81 | 13.3339139 | -1.45E-01 | 131724271 | 131724394 | NC_000005.9  |
| cg06456389 | 1.36E-09 | 1.16E-10 | -6.81 | 13.3337077 | -4.09E-02 | 99052468  | 99052591  | NC_000010.10 |
| cg21126306 | 1.36E-09 | 1.16E-10 | -6.81 | 13.3331451 | -5.64E-02 | 80342724  | 80342847  | NC_000007.13 |
| cg06800222 | 1.36E-09 | 1.16E-10 | -6.81 | 13.331726  | -1.29E-01 | 10195469  | 10195592  | NC_000017.10 |
| cg17030820 | 1.37E-09 | 1.16E-10 | -6.81 | 13.3301402 | -1.66E-01 | 51549260  | 51549383  | NC_000010.10 |
| cg18542377 | 1.37E-09 | 1.17E-10 | -6.81 | 13.3296287 | -4.34E-02 | 4172961   | 4173084   | NC_000019.9  |
| cg20697630 | 1.37E-09 | 1.17E-10 | -6.81 | 13.329553  | -4.94E-02 | 20960374  | 20960497  | NC_000001.10 |
| cg00110832 | 1.37E-09 | 1.17E-10 | -6.81 | 13.3283486 | -1.49E-01 | 32121130  | 32121253  | NC_000006.11 |
| cg11600991 | 1.37E-09 | 1.17E-10 | -6.81 | 13.3261538 | -1.17E-01 | 966196    | 966319    | NC_000007.13 |

|            |          |          |       |            |           |           |           |              |
|------------|----------|----------|-------|------------|-----------|-----------|-----------|--------------|
| cg24311373 | 1.37E-09 | 1.17E-10 | -6.81 | 13.325644  | -5.23E-02 | 51203304  | 51203427  | NC_000015.9  |
| cg21383652 | 1.37E-09 | 1.17E-10 | -6.81 | 13.3254604 | -4.15E-02 | 45401397  | 45401520  | NC_000017.10 |
| cg19455142 | 1.37E-09 | 1.17E-10 | -6.81 | 13.3251211 | -2.03E-02 | 40336161  | 40336284  | NC_000017.10 |
| cg04127455 | 1.37E-09 | 1.17E-10 | -6.81 | 13.3248593 | -1.00E-01 | 156572731 | 156572854 | NC_000001.10 |
| cg06434454 | 1.38E-09 | 1.17E-10 | -6.81 | 13.3231688 | -1.93E-01 | 5146320   | 5146443   | NC_000005.9  |
| cg04386614 | 1.38E-09 | 1.17E-10 | -6.81 | 13.3229391 | -9.79E-02 | 126364460 | 126364583 | NC_000007.13 |
| cg12409547 | 1.38E-09 | 1.18E-10 | -6.81 | 13.3209358 | -9.17E-02 | 22222815  | 22222938  | NC_000001.10 |
| cg05094429 | 1.38E-09 | 1.18E-10 | -6.81 | 13.319698  | -1.64E-01 | 167536184 | 167536307 | NC_000006.11 |
| cg09436871 | 1.38E-09 | 1.18E-10 | -6.81 | 13.3196952 | -3.85E-02 | 19321130  | 19321253  | NC_000018.9  |
| cg07880384 | 1.38E-09 | 1.18E-10 | -6.81 | 13.3195087 | -1.00E-01 | 31913323  | 31913446  | NC_000006.11 |
| cg05765734 | 1.38E-09 | 1.18E-10 | -6.81 | 13.3180762 | -1.74E-01 | 49231190  | 49231313  | NC_000008.10 |
| cg26144734 | 1.39E-09 | 1.18E-10 | -6.81 | 13.3159055 | -1.28E-01 | 31898033  | 31898156  | NC_000015.9  |
| cg02709068 | 1.39E-09 | 1.18E-10 | -6.81 | 13.3158762 | -9.25E-02 | 42016844  | 42016967  | NC_000007.13 |
| cg04077141 | 1.39E-09 | 1.18E-10 | -6.81 | 13.3152128 | -3.62E-02 | 36782143  | 36782266  | NC_000022.10 |
| cg13053992 | 1.39E-09 | 1.18E-10 | -6.81 | 13.3150585 | -1.12E-01 | 45663171  | 45663294  | NC_000021.8  |
| cg27434233 | 1.39E-09 | 1.18E-10 | -6.81 | 13.3150395 | -1.16E-01 | 89786188  | 89786311  | NC_000015.9  |
| cg27149388 | 1.39E-09 | 1.18E-10 | -6.81 | 13.314681  | -4.62E-02 | 47473796  | 47473919  | NC_000012.11 |
| cg21848084 | 1.39E-09 | 1.18E-10 | -6.81 | 13.3137884 | -1.15E-01 | 3264381   | 3264504   | NC_000001.10 |
| cg13281195 | 1.39E-09 | 1.18E-10 | -6.81 | 13.313707  | -9.80E-02 | 121529622 | 121529745 | NC_000002.11 |
| cg05701418 | 1.39E-09 | 1.19E-10 | -6.81 | 13.313138  | -9.94E-02 | 30131361  | 30131484  | NC_000006.11 |
| cg12113101 | 1.39E-09 | 1.19E-10 | -6.81 | 13.3128321 | -7.20E-02 | 175173    | 175296    | NC_000012.11 |
| cg21972382 | 1.39E-09 | 1.19E-10 | -6.81 | 13.312583  | -1.31E-01 | 29339076  | 29339199  | NC_000002.11 |
| cg01389506 | 1.39E-09 | 1.19E-10 | -6.81 | 13.311866  | -7.32E-02 | 109203581 | 109203704 | NC_000012.11 |
| cg16931068 | 1.39E-09 | 1.19E-10 | -6.81 | 13.3108166 | -9.11E-02 | 139680    | 139803    | NC_000020.10 |
| cg10727759 | 1.39E-09 | 1.19E-10 | -6.81 | 13.3106874 | -2.71E-02 | 50017361  | 50017484  | NC_000012.11 |

|                 |          |          |       |            |           |           |           |              |
|-----------------|----------|----------|-------|------------|-----------|-----------|-----------|--------------|
| cg11814087      | 1.39E-09 | 1.19E-10 | -6.81 | 13.3102241 | -1.57E-01 | 32391135  | 32391258  | NC_000005.9  |
| cg27114782      | 1.39E-09 | 1.19E-10 | -6.81 | 13.3101767 | -1.16E-01 | 109274496 | 109274619 | NC_000006.11 |
| cg22075924      | 1.39E-09 | 1.19E-10 | -6.81 | 13.3087087 | -1.25E-01 | 78005352  | 78005475  | NC_000001.10 |
| cg07893230      | 1.40E-09 | 1.19E-10 | -6.81 | 13.3085985 | -6.62E-02 | 138089096 | 138089219 | NC_000005.9  |
| cg11916758      | 1.40E-09 | 1.19E-10 | -6.81 | 13.3085113 | -3.84E-02 | 133512809 | 133512932 | NC_000005.9  |
| cg01284289      | 1.40E-09 | 1.19E-10 | -6.81 | 13.3079125 | -1.50E-01 | 66025635  | 66025758  | NC_000012.11 |
| cg03003394      | 1.40E-09 | 1.19E-10 | -6.81 | 13.3077501 | -1.39E-01 | 208026398 | 208026521 | NC_000002.11 |
| cg05246522      | 1.40E-09 | 1.19E-10 | -6.81 | 13.3076955 | -1.54E-01 | 25798973  | 25799096  | NC_000017.10 |
| cg08212479      | 1.40E-09 | 1.19E-10 | -6.81 | 13.3074827 | -6.15E-02 | 64126809  | 64126932  | NC_000007.13 |
| cg12126706      | 1.40E-09 | 1.19E-10 | -6.81 | 13.3068287 | -1.47E-01 | 156889128 | 156889251 | NC_000001.10 |
| cg00662400      | 1.40E-09 | 1.19E-10 | -6.81 | 13.3066642 | -1.02E-01 | 88510783  | 88510906  | NC_000016.9  |
| cg23677000      | 1.40E-09 | 1.19E-10 | -6.81 | 13.3053675 | -8.70E-02 | 35773317  | 35773440  | NC_000019.9  |
| cg16204524      | 1.40E-09 | 1.20E-10 | -6.81 | 13.3047607 | -1.16E-01 | 26565759  | 26565882  | NC_000002.11 |
| ch.21.27853252F | 1.40E-09 | 1.20E-10 | -6.81 | 13.3046905 | -5.59E-02 | 28931381  | 28931504  | NC_000021.8  |
| cg26724949      | 1.40E-09 | 1.20E-10 | -6.81 | 13.3045482 | -6.72E-02 | 86610230  | 86610353  | NC_000016.9  |
| cg25149396      | 1.40E-09 | 1.20E-10 | -6.81 | 13.3044013 | -6.16E-02 | 184943512 | 184943635 | NC_000001.10 |
| cg05616589      | 1.40E-09 | 1.20E-10 | -6.81 | 13.3040874 | -1.24E-01 | 55298362  | 55298485  | NC_000006.11 |
| cg08459746      | 1.40E-09 | 1.20E-10 | -6.81 | 13.3039218 | -1.34E-01 | 1347277   | 1347400   | NC_000006.11 |
| cg18922620      | 1.40E-09 | 1.20E-10 | -6.81 | 13.3017813 | -1.32E-01 | 25357368  | 25357491  | NC_000010.10 |
| cg08456130      | 1.41E-09 | 1.20E-10 | -6.81 | 13.3009659 | -6.14E-02 | 151773385 | 151773508 | NC_000006.11 |
| cg26860182      | 1.41E-09 | 1.20E-10 | -6.81 | 13.2995257 | -1.12E-01 | 133066054 | 133066177 | NC_000012.11 |
| cg12711059      | 1.41E-09 | 1.20E-10 | -6.81 | 13.2991807 | -1.41E-01 | 29415366  | 29415489  | NC_000015.9  |
| cg00306112      | 1.41E-09 | 1.20E-10 | -6.81 | 13.2987591 | -9.39E-02 | 219773416 | 219773539 | NC_000002.11 |
| cg23598010      | 1.41E-09 | 1.20E-10 | -6.81 | 13.2983716 | -1.24E-01 | 88601809  | 88601932  | NC_000012.11 |
| cg18595542      | 1.41E-09 | 1.21E-10 | -6.81 | 13.2965695 | -5.98E-02 | 77770301  | 77770424  | NC_000017.10 |

|            |          |          |       |            |           |           |           |              |
|------------|----------|----------|-------|------------|-----------|-----------|-----------|--------------|
| cg23994303 | 1.41E-09 | 1.21E-10 | -6.81 | 13.2964691 | -5.20E-02 | 37025274  | 37025397  | NC_000017.10 |
| cg12136387 | 1.41E-09 | 1.21E-10 | -6.81 | 13.2960408 | -1.47E-01 | 116820108 | 116820231 | NC_000012.11 |
| cg27340723 | 1.41E-09 | 1.21E-10 | -6.81 | 13.2959311 | -1.41E-01 | 4061608   | 4061731   | NC_000016.9  |
| cg02448597 | 1.41E-09 | 1.21E-10 | -6.81 | 13.2958502 | -1.94E-01 | 32160605  | 32160728  | NC_000006.11 |
| cg14032950 | 1.41E-09 | 1.21E-10 | -6.81 | 13.2953565 | -1.32E-01 | 63458312  | 63458435  | NC_000015.9  |
| cg20438951 | 1.41E-09 | 1.21E-10 | -6.81 | 13.2946379 | -4.29E-02 | 12035877  | 12036000  | NC_000019.9  |
| cg08234927 | 1.41E-09 | 1.21E-10 | -6.8  | 13.293826  | -2.96E-02 | 104155285 | 104155408 | NC_000010.10 |
| cg16986748 | 1.41E-09 | 1.21E-10 | -6.8  | 13.2937287 | -6.63E-02 | 154971109 | 154971232 | NC_000001.10 |
| cg19888654 | 1.42E-09 | 1.21E-10 | -6.8  | 13.2923578 | -9.37E-02 | 28929168  | 28929291  | NC_000008.10 |
| cg12565636 | 1.42E-09 | 1.21E-10 | -6.8  | 13.2922427 | -1.31E-01 | 39797497  | 39797620  | NC_000008.10 |
| cg07827008 | 1.42E-09 | 1.21E-10 | -6.8  | 13.2921385 | -5.79E-02 | 133338719 | 133338842 | NC_000012.11 |
| cg19132069 | 1.42E-09 | 1.21E-10 | -6.8  | 13.2920375 | -9.76E-02 | 124631666 | 124631789 | NC_000011.9  |
| cg02310562 | 1.42E-09 | 1.21E-10 | -6.8  | 13.290613  | -3.60E-02 | 117348663 | 117348786 | NC_000012.11 |
| cg20892919 | 1.42E-09 | 1.22E-10 | -6.8  | 13.2871317 | -1.47E-01 | 65927379  | 65927502  | NC_000012.11 |
| cg01284415 | 1.42E-09 | 1.22E-10 | -6.8  | 13.2861028 | -8.97E-02 | 49457725  | 49457848  | NC_000019.9  |
| cg01471036 | 1.43E-09 | 1.22E-10 | -6.8  | 13.2853074 | -1.22E-01 | 19648972  | 19649095  | NC_000017.10 |
| cg17810944 | 1.43E-09 | 1.22E-10 | -6.8  | 13.2845509 | -1.26E-01 | 42876091  | 42876214  | NC_000020.10 |
| cg02204205 | 1.43E-09 | 1.22E-10 | -6.8  | 13.2820572 | -5.15E-02 | 50861487  | 50861610  | NC_000007.13 |
| cg07427475 | 1.43E-09 | 1.22E-10 | -6.8  | 13.2820365 | -1.86E-01 | 145008110 | 145008233 | NC_000008.10 |
| cg15273468 | 1.43E-09 | 1.22E-10 | -6.8  | 13.2818215 | -1.34E-01 | 94459665  | 94459788  | NC_000010.10 |
| cg01820962 | 1.43E-09 | 1.22E-10 | -6.8  | 13.2812613 | -1.46E-01 | 116511817 | 116511940 | NC_000006.11 |
| cg10048961 | 1.43E-09 | 1.23E-10 | -6.8  | 13.2806863 | -5.29E-02 | 123459168 | 123459291 | NC_000012.11 |
| cg02491912 | 1.43E-09 | 1.23E-10 | -6.8  | 13.2802459 | -3.87E-02 | 74809091  | 74809214  | NC_000016.9  |
| cg16105594 | 1.43E-09 | 1.23E-10 | -6.8  | 13.2796331 | -5.75E-02 | 88180095  | 88180218  | NC_000005.9  |
| cg14284211 | 1.44E-09 | 1.23E-10 | -6.8  | 13.2778297 | -1.17E-01 | 35570224  | 35570347  | NC_000006.11 |

|            |          |          |      |            |           |           |           |              |
|------------|----------|----------|------|------------|-----------|-----------|-----------|--------------|
| cg01569709 | 1.44E-09 | 1.23E-10 | -6.8 | 13.2770104 | -1.84E-01 | 81894271  | 81894394  | NC_000014.8  |
| cg05139523 | 1.44E-09 | 1.23E-10 | -6.8 | 13.2743683 | -1.47E-01 | 43435091  | 43435214  | NC_000020.10 |
| cg10347265 | 1.44E-09 | 1.24E-10 | -6.8 | 13.2725193 | -5.76E-02 | 107237473 | 107237596 | NC_000004.11 |
| cg02589695 | 1.45E-09 | 1.24E-10 | -6.8 | 13.2709432 | -1.01E-01 | 206730999 | 206731122 | NC_000001.10 |
| cg27015057 | 1.45E-09 | 1.24E-10 | -6.8 | 13.2704136 | -3.51E-02 | 141703946 | 141704069 | NC_000005.9  |
| cg07021288 | 1.45E-09 | 1.24E-10 | -6.8 | 13.2691274 | -1.41E-01 | 13197399  | 13197522  | NC_000020.10 |
| cg20328456 | 1.45E-09 | 1.24E-10 | -6.8 | 13.2690934 | -1.08E-01 | 32121113  | 32121236  | NC_000006.11 |
| cg09287328 | 1.45E-09 | 1.24E-10 | -6.8 | 13.2687553 | -1.63E-01 | 134231487 | 134231610 | NC_000010.10 |
| cg25599924 | 1.45E-09 | 1.24E-10 | -6.8 | 13.2685368 | -1.33E-01 | 8396056   | 8396179   | NC_000004.11 |
| cg18849799 | 1.45E-09 | 1.24E-10 | -6.8 | 13.267602  | -4.68E-02 | 9929547   | 9929670   | NC_000019.9  |
| cg17121541 | 1.45E-09 | 1.24E-10 | -6.8 | 13.2674039 | -3.92E-02 | 38714738  | 38714861  | NC_000019.9  |
| cg02612971 | 1.45E-09 | 1.24E-10 | -6.8 | 13.2668146 | -9.35E-02 | 24190721  | 24190844  | NC_000022.10 |
| cg04941630 | 1.45E-09 | 1.24E-10 | -6.8 | 13.2667834 | -4.02E-02 | 54962001  | 54962124  | NC_000016.9  |
| cg07696006 | 1.45E-09 | 1.24E-10 | -6.8 | 13.2663228 | -1.08E-01 | 74528563  | 74528686  | NC_000015.9  |
| cg18909389 | 1.46E-09 | 1.25E-10 | -6.8 | 13.263711  | -1.30E-01 | 31701110  | 31701233  | NC_000006.11 |
| cg22783363 | 1.46E-09 | 1.25E-10 | -6.8 | 13.2583454 | -3.62E-02 | 23021553  | 23021676  | NC_000008.10 |
| cg14989977 | 1.47E-09 | 1.26E-10 | -6.8 | 13.2560389 | -1.04E-01 | 71555947  | 71556070  | NC_000001.10 |
| cg09180877 | 1.47E-09 | 1.26E-10 | -6.8 | 13.2527402 | -1.21E-01 | 30962306  | 30962429  | NC_000022.10 |
| cg07679322 | 1.47E-09 | 1.26E-10 | -6.8 | 13.2522035 | -1.35E-01 | 121503164 | 121503287 | NC_000010.10 |
| cg18447740 | 1.47E-09 | 1.26E-10 | -6.8 | 13.2512409 | -1.12E-01 | 54604187  | 54604310  | NC_000019.9  |
| cg04377525 | 1.48E-09 | 1.26E-10 | -6.8 | 13.2498298 | -3.82E-02 | 2977344   | 2977467   | NC_000019.9  |
| cg21789008 | 1.48E-09 | 1.27E-10 | -6.8 | 13.2490529 | -1.24E-01 | 118764818 | 118764941 | NC_000008.10 |
| cg15484899 | 1.48E-09 | 1.27E-10 | -6.8 | 13.2471935 | -4.78E-02 | 73977283  | 73977406  | NC_000015.9  |
| cg04997812 | 1.48E-09 | 1.27E-10 | -6.8 | 13.247009  | -5.10E-02 | 7041194   | 7041317   | NC_000011.9  |
| cg06949673 | 1.48E-09 | 1.27E-10 | -6.8 | 13.2465873 | -1.33E-01 | 56463319  | 56463442  | NC_000001.10 |



|            |          |          |       |            |           |           |           |              |
|------------|----------|----------|-------|------------|-----------|-----------|-----------|--------------|
| cg07695625 | 1.48E-09 | 1.27E-10 | -6.8  | 13.2464777 | -5.61E-02 | 133136339 | 133136462 | NC_000006.11 |
| cg05992368 | 1.48E-09 | 1.27E-10 | -6.8  | 13.2439854 | -7.88E-02 | 1572755   | 1572878   | NC_000017.10 |
| cg05963136 | 1.48E-09 | 1.27E-10 | -6.8  | 13.2436494 | -1.15E-01 | 46628137  | 46628260  | NC_000019.9  |
| cg26942829 | 1.49E-09 | 1.27E-10 | -6.8  | 13.2419683 | -1.61E-01 | 13408158  | 13408281  | NC_000006.11 |
| cg08617020 | 1.49E-09 | 1.27E-10 | -6.8  | 13.2415558 | -1.19E-01 | 87894491  | 87894614  | NC_000016.9  |
| cg16663033 | 1.49E-09 | 1.28E-10 | -6.8  | 13.2400781 | -1.33E-01 | 15272108  | 15272231  | NC_000001.10 |
| cg15995695 | 1.49E-09 | 1.28E-10 | -6.79 | 13.239337  | -6.23E-02 | 179334675 | 179334798 | NC_000001.10 |
| cg27472151 | 1.49E-09 | 1.28E-10 | -6.79 | 13.2389414 | -3.07E-02 | 118956135 | 118956258 | NC_000011.9  |
| cg26277730 | 1.49E-09 | 1.28E-10 | -6.79 | 13.2387978 | -3.53E-02 | 60988085  | 60988208  | NC_000018.9  |
| cg07596668 | 1.49E-09 | 1.28E-10 | -6.79 | 13.2385661 | -1.57E-01 | 151509825 | 151509948 | NC_000001.10 |
| cg20071949 | 1.49E-09 | 1.28E-10 | -6.79 | 13.2384257 | -9.23E-02 | 129691449 | 129691572 | NC_000007.13 |
| cg21100328 | 1.49E-09 | 1.28E-10 | -6.79 | 13.2375276 | -1.38E-01 | 46713446  | 46713569  | NC_000019.9  |
| cg05919456 | 1.49E-09 | 1.28E-10 | -6.79 | 13.2370059 | -1.63E-01 | 3722818   | 3722941   | NC_000006.11 |
| cg00609473 | 1.49E-09 | 1.28E-10 | -6.79 | 13.2366472 | -6.84E-02 | 23351842  | 23351965  | NC_000014.8  |
| cg05064665 | 1.50E-09 | 1.28E-10 | -6.79 | 13.2350263 | -5.47E-02 | 37824233  | 37824356  | NC_000017.10 |
| cg01182386 | 1.50E-09 | 1.28E-10 | -6.79 | 13.2344704 | -3.36E-02 | 75182373  | 75182496  | NC_000015.9  |
| cg22076757 | 1.50E-09 | 1.29E-10 | -6.79 | 13.2315804 | -6.69E-02 | 109849705 | 109849828 | NC_000001.10 |
| cg18741321 | 1.50E-09 | 1.29E-10 | -6.79 | 13.2315392 | -1.32E-01 | 76883565  | 76883688  | NC_000007.13 |
| cg03425468 | 1.50E-09 | 1.29E-10 | -6.79 | 13.2307137 | -4.75E-02 | 155164676 | 155164799 | NC_000001.10 |
| cg05118916 | 1.51E-09 | 1.29E-10 | -6.79 | 13.2280735 | -7.09E-02 | 55505063  | 55505186  | NC_000001.10 |
| cg25330264 | 1.51E-09 | 1.29E-10 | -6.79 | 13.2272097 | -9.70E-02 | 4806949   | 4807072   | NC_000007.13 |
| cg14684798 | 1.51E-09 | 1.29E-10 | -6.79 | 13.2264329 | -7.23E-02 | 691862    | 691985    | NC_000002.11 |
| cg26399778 | 1.51E-09 | 1.30E-10 | -6.79 | 13.2257342 | -3.01E-02 | 145316212 | 145316335 | NC_000005.9  |
| cg05048917 | 1.51E-09 | 1.30E-10 | -6.79 | 13.224868  | -6.83E-02 | 107077187 | 107077310 | NC_000006.11 |
| cg14511156 | 1.51E-09 | 1.30E-10 | -6.79 | 13.2237424 | -1.05E-01 | 54604124  | 54604247  | NC_000019.9  |

|            |          |          |       |            |           |           |           |              |
|------------|----------|----------|-------|------------|-----------|-----------|-----------|--------------|
| cg22160735 | 1.51E-09 | 1.30E-10 | -6.79 | 13.2233541 | -1.25E-01 | 40673466  | 40673589  | NC_000017.10 |
| cg08169311 | 1.51E-09 | 1.30E-10 | -6.79 | 13.2221636 | -1.06E-01 | 69706622  | 69706745  | NC_000011.9  |
| cg19244855 | 1.51E-09 | 1.30E-10 | -6.79 | 13.2217201 | -5.24E-02 | 3029152   | 3029275   | NC_000019.9  |
| cg11927233 | 1.52E-09 | 1.30E-10 | -6.79 | 13.2215618 | -1.16E-01 | 170816542 | 170816665 | NC_000005.9  |
| cg10731020 | 1.52E-09 | 1.30E-10 | -6.79 | 13.2213396 | -1.38E-01 | 34496374  | 34496497  | NC_000010.10 |
| cg13589318 | 1.52E-09 | 1.30E-10 | -6.79 | 13.221129  | -2.67E-02 | 132176355 | 132176478 | NC_000009.11 |
| cg04795044 | 1.52E-09 | 1.30E-10 | -6.79 | 13.220983  | -1.62E-01 | 129344706 | 129344829 | NC_000003.11 |
| cg02144516 | 1.52E-09 | 1.30E-10 | -6.79 | 13.2209366 | -1.10E-01 | 1311909   | 1312032   | NC_000001.10 |
| cg03516026 | 1.52E-09 | 1.30E-10 | -6.79 | 13.220598  | -1.06E-01 | 16564651  | 16564774  | NC_000001.10 |
| cg04452713 | 1.52E-09 | 1.30E-10 | -6.79 | 13.2205512 | -1.22E-01 | 56707687  | 56707810  | NC_000006.11 |
| cg13764116 | 1.52E-09 | 1.30E-10 | -6.79 | 13.2204578 | -1.25E-01 | 121906957 | 121907080 | NC_000003.11 |
| cg14006800 | 1.52E-09 | 1.30E-10 | -6.79 | 13.2201778 | -1.18E-01 | 11652483  | 11652606  | NC_000004.11 |
| cg18183435 | 1.52E-09 | 1.31E-10 | -6.79 | 13.2178545 | -9.92E-02 | 30458147  | 30458270  | NC_000006.11 |
| cg21172159 | 1.52E-09 | 1.31E-10 | -6.79 | 13.2163428 | -4.46E-02 | 130342381 | 130342504 | NC_000006.11 |
| cg20268054 | 1.52E-09 | 1.31E-10 | -6.79 | 13.2156257 | -1.22E-01 | 393029    | 393152    | NC_000011.9  |
| cg12924095 | 1.52E-09 | 1.31E-10 | -6.79 | 13.215161  | -1.33E-01 | 151150029 | 151150152 | NC_000005.9  |
| cg18302606 | 1.52E-09 | 1.31E-10 | -6.79 | 13.2151447 | -1.47E-01 | 39904402  | 39904525  | NC_000019.9  |
| cg25954269 | 1.52E-09 | 1.31E-10 | -6.79 | 13.2146161 | -1.38E-01 | 71092216  | 71092339  | NC_000015.9  |
| cg24707200 | 1.53E-09 | 1.31E-10 | -6.79 | 13.2144505 | -1.24E-01 | 156833163 | 156833286 | NC_000001.10 |
| cg09032010 | 1.53E-09 | 1.31E-10 | -6.79 | 13.2143651 | -1.22E-02 | 5591950   | 5592073   | NC_000020.10 |
| cg12357606 | 1.53E-09 | 1.31E-10 | -6.79 | 13.2142201 | -1.55E-01 | 47719380  | 47719503  | NC_000004.11 |
| cg07240000 | 1.53E-09 | 1.31E-10 | -6.79 | 13.2138294 | -6.91E-02 | 17878538  | 17878661  | NC_000001.10 |
| cg00812236 | 1.53E-09 | 1.31E-10 | -6.79 | 13.2130867 | -1.20E-01 | 2210434   | 2210557   | NC_000016.9  |
| cg09470732 | 1.53E-09 | 1.31E-10 | -6.79 | 13.2129277 | -3.84E-02 | 65357786  | 65357909  | NC_000002.11 |
| cg05818605 | 1.53E-09 | 1.31E-10 | -6.79 | 13.2113975 | -1.52E-01 | 30768346  | 30768469  | NC_000007.13 |

|               |          |          |       |            |           |           |           |              |
|---------------|----------|----------|-------|------------|-----------|-----------|-----------|--------------|
| cg25135322    | 1.53E-09 | 1.32E-10 | -6.79 | 13.210106  | -7.19E-02 | 67350153  | 67350276  | NC_000011.9  |
| cg09745440    | 1.53E-09 | 1.32E-10 | -6.79 | 13.2083899 | -1.50E-01 | 31481318  | 31481441  | NC_000022.10 |
| cg14944398    | 1.53E-09 | 1.32E-10 | -6.79 | 13.2078067 | -1.18E-01 | 7218709   | 7218832   | NC_000007.13 |
| cg08081778    | 1.54E-09 | 1.32E-10 | -6.79 | 13.2073872 | -8.64E-02 | 129845766 | 129845889 | NC_000010.10 |
| cg00525011    | 1.54E-09 | 1.32E-10 | -6.79 | 13.2070844 | -7.87E-02 | 122031    | 122154    | NC_000016.9  |
| cg02714666    | 1.54E-09 | 1.32E-10 | -6.79 | 13.206372  | -1.30E-01 | 16131767  | 16131890  | NC_000003.11 |
| cg06896988    | 1.54E-09 | 1.32E-10 | -6.79 | 13.2042559 | -1.17E-01 | 87952610  | 87952733  | NC_000016.9  |
| cg15605124    | 1.54E-09 | 1.32E-10 | -6.79 | 13.2041829 | -1.35E-01 | 3230250   | 3230373   | NC_000001.10 |
| cg13581362    | 1.54E-09 | 1.33E-10 | -6.79 | 13.2031758 | -8.41E-02 | 105287326 | 105287449 | NC_000014.8  |
| cg04093047    | 1.54E-09 | 1.33E-10 | -6.79 | 13.2029311 | -5.10E-02 | 32827707  | 32827830  | NC_000001.10 |
| cg22988851    | 1.54E-09 | 1.33E-10 | -6.79 | 13.2020136 | -8.81E-02 | 41752483  | 41752606  | NC_000003.11 |
| cg18301703    | 1.54E-09 | 1.33E-10 | -6.79 | 13.2012946 | -6.94E-02 | 61928727  | 61928850  | NC_000014.8  |
| cg06671706    | 1.55E-09 | 1.33E-10 | -6.79 | 13.200655  | -9.31E-02 | 8559999   | 8560122   | NC_000008.10 |
| cg25155774    | 1.55E-09 | 1.33E-10 | -6.79 | 13.2000647 | -9.56E-02 | 45932141  | 45932264  | NC_000003.11 |
| cg25613180    | 1.55E-09 | 1.33E-10 | -6.79 | 13.1986169 | -1.12E-01 | 149513303 | 149513426 | NC_000005.9  |
| cg21170682    | 1.55E-09 | 1.33E-10 | -6.79 | 13.198381  | -1.59E-01 | 122205382 | 122205505 | NC_000011.9  |
| cg25169679    | 1.55E-09 | 1.33E-10 | -6.79 | 13.1981758 | -1.47E-01 | 69197217  | 69197340  | NC_000011.9  |
| cg03704061    | 1.55E-09 | 1.33E-10 | -6.79 | 13.1968517 | -1.40E-01 | 230883300 | 230883423 | NC_000001.10 |
| ch.12.570712R | 1.55E-09 | 1.33E-10 | -6.79 | 13.1963818 | -7.38E-02 | 25389817  | 25389940  | NC_000012.11 |
| cg00508965    | 1.55E-09 | 1.34E-10 | -6.79 | 13.1953744 | -1.27E-01 | 113651326 | 113651449 | NC_000013.10 |
| cg17841615    | 1.55E-09 | 1.34E-10 | -6.79 | 13.1941616 | -3.68E-02 | 190627496 | 190627619 | NC_000002.11 |
| cg15068709    | 1.56E-09 | 1.34E-10 | -6.79 | 13.1931666 | -9.91E-02 | 57566045  | 57566168  | NC_000011.9  |
| cg13190306    | 1.56E-09 | 1.34E-10 | -6.79 | 13.1928503 | -4.46E-02 | 18415923  | 18416046  | NC_000011.9  |
| cg12312863    | 1.56E-09 | 1.34E-10 | -6.79 | 13.1923886 | -9.00E-02 | 2569967   | 2570090   | NC_000016.9  |
| cg00667938    | 1.56E-09 | 1.34E-10 | -6.79 | 13.1912716 | -7.15E-02 | 38231146  | 38231269  | NC_000001.10 |

|            |          |          |       |            |           |           |           |              |
|------------|----------|----------|-------|------------|-----------|-----------|-----------|--------------|
| cg02216951 | 1.56E-09 | 1.34E-10 | -6.79 | 13.1910601 | -1.36E-01 | 6660095   | 6660218   | NC_000007.13 |
| cg23465685 | 1.56E-09 | 1.34E-10 | -6.79 | 13.1901162 | -1.54E-01 | 155617333 | 155617456 | NC_000007.13 |
| cg18512515 | 1.56E-09 | 1.34E-10 | -6.79 | 13.1894166 | -8.07E-02 | 96897414  | 96897537  | NC_000015.9  |
| cg22063206 | 1.56E-09 | 1.35E-10 | -6.79 | 13.1885679 | -1.43E-01 | 102037097 | 102037220 | NC_000015.9  |
| cg20692268 | 1.56E-09 | 1.35E-10 | -6.79 | 13.1877057 | -1.33E-01 | 25358981  | 25359104  | NC_000001.10 |
| cg27644327 | 1.57E-09 | 1.35E-10 | -6.79 | 13.18546   | -1.41E-01 | 90845852  | 90845975  | NC_000006.11 |
| cg01418527 | 1.57E-09 | 1.35E-10 | -6.79 | 13.1854177 | -1.49E-01 | 5631189   | 5631312   | NC_000007.13 |
| cg24914313 | 1.57E-09 | 1.35E-10 | -6.79 | 13.1849315 | -4.53E-02 | 41636195  | 41636318  | NC_000013.10 |
| cg17364487 | 1.57E-09 | 1.35E-10 | -6.78 | 13.1834559 | -2.85E-02 | 30381677  | 30381800  | NC_000016.9  |
| cg15872437 | 1.57E-09 | 1.35E-10 | -6.78 | 13.1822044 | -6.97E-02 | 37804282  | 37804405  | NC_000003.11 |
| cg06506560 | 1.57E-09 | 1.35E-10 | -6.78 | 13.1819591 | -8.70E-02 | 38474741  | 38474864  | NC_000017.10 |
| cg00801568 | 1.58E-09 | 1.36E-10 | -6.78 | 13.1791609 | -5.86E-02 | 66649150  | 66649273  | NC_000015.9  |
| cg18956393 | 1.58E-09 | 1.36E-10 | -6.78 | 13.1787617 | -3.92E-02 | 54074524  | 54074647  | NC_000010.10 |
| cg09754341 | 1.58E-09 | 1.36E-10 | -6.78 | 13.1785526 | -1.50E-01 | 120294781 | 120294904 | NC_000011.9  |
| cg05579598 | 1.58E-09 | 1.36E-10 | -6.78 | 13.176796  | -1.13E-01 | 88989069  | 88989192  | NC_000016.9  |
| cg05099464 | 1.58E-09 | 1.36E-10 | -6.78 | 13.1760053 | -8.16E-02 | 120302922 | 120303045 | NC_000011.9  |
| cg08241360 | 1.58E-09 | 1.36E-10 | -6.78 | 13.175959  | -1.06E-01 | 129244738 | 129244861 | NC_000009.11 |
| cg13927251 | 1.58E-09 | 1.36E-10 | -6.78 | 13.1750837 | -7.29E-02 | 180077359 | 180077482 | NC_000005.9  |
| cg08265392 | 1.58E-09 | 1.37E-10 | -6.78 | 13.1740366 | -1.50E-01 | 151290088 | 151290211 | NC_000007.13 |
| cg00490976 | 1.59E-09 | 1.37E-10 | -6.78 | 13.1736585 | -1.69E-01 | 194034055 | 194034178 | NC_000003.11 |
| cg13617376 | 1.59E-09 | 1.37E-10 | -6.78 | 13.1718983 | -1.45E-01 | 101544999 | 101545122 | NC_000010.10 |
| cg21522254 | 1.59E-09 | 1.37E-10 | -6.78 | 13.1702528 | -1.48E-02 | 27175280  | 27175403  | NC_000012.11 |
| cg03519031 | 1.59E-09 | 1.37E-10 | -6.78 | 13.1700391 | -1.22E-01 | 74980612  | 74980735  | NC_000002.11 |
| cg18599110 | 1.59E-09 | 1.37E-10 | -6.78 | 13.1693632 | -3.83E-02 | 50337061  | 50337184  | NC_000003.11 |
| cg10096873 | 1.59E-09 | 1.37E-10 | -6.78 | 13.1682993 | -4.98E-02 | 92546470  | 92546593  | NC_000001.10 |

|                |          |          |       |            |           |           |           |              |
|----------------|----------|----------|-------|------------|-----------|-----------|-----------|--------------|
| cg00297432     | 1.60E-09 | 1.38E-10 | -6.78 | 13.1659835 | -5.90E-02 | 6484784   | 6484907   | NC_000001.10 |
| cg04212846     | 1.60E-09 | 1.38E-10 | -6.78 | 13.1656443 | -1.56E-01 | 36168008  | 36168131  | NC_000021.8  |
| cg13234544     | 1.60E-09 | 1.38E-10 | -6.78 | 13.1649532 | -5.92E-02 | 76911877  | 76912000  | NC_000007.13 |
| cg20063095     | 1.60E-09 | 1.38E-10 | -6.78 | 13.1640465 | -1.32E-01 | 134977141 | 134977264 | NC_000002.11 |
| cg25117091     | 1.60E-09 | 1.38E-10 | -6.78 | 13.1636002 | -1.07E-01 | 40518143  | 40518266  | NC_000004.11 |
| cg09141413     | 1.60E-09 | 1.38E-10 | -6.78 | 13.1624583 | -7.18E-02 | 19896246  | 19896369  | NC_000016.9  |
| cg24088438     | 1.60E-09 | 1.38E-10 | -6.78 | 13.1624505 | -1.58E-01 | 63974229  | 63974352  | NC_000011.9  |
| ch.1.2975077F  | 1.60E-09 | 1.38E-10 | -6.78 | 13.1618246 | -2.41E-02 | 153799869 | 153799992 | NC_000001.10 |
| cg27110491     | 1.60E-09 | 1.38E-10 | -6.78 | 13.1612576 | -1.40E-01 | 48132109  | 48132232  | NC_000007.13 |
| cg23771929     | 1.60E-09 | 1.38E-10 | -6.78 | 13.1610391 | -7.48E-02 | 132934195 | 132934318 | NC_000009.11 |
| cg00845862     | 1.61E-09 | 1.39E-10 | -6.78 | 13.1600882 | -2.99E-02 | 30035234  | 30035357  | NC_000006.11 |
| cg05929469     | 1.61E-09 | 1.39E-10 | -6.78 | 13.1598759 | -1.99E-02 | 75135815  | 75135938  | NC_000015.9  |
| cg05151395     | 1.61E-09 | 1.39E-10 | -6.78 | 13.1593978 | -1.86E-01 | 8192371   | 8192494   | NC_000017.10 |
| cg27610561     | 1.61E-09 | 1.39E-10 | -6.78 | 13.1583993 | -1.59E-01 | 45337784  | 45337907  | NC_000020.10 |
| cg04464357     | 1.61E-09 | 1.39E-10 | -6.78 | 13.1576995 | -6.41E-02 | 52931527  | 52931650  | NC_000003.11 |
| cg05280131     | 1.61E-09 | 1.39E-10 | -6.78 | 13.1568514 | -9.18E-02 | 132248998 | 132249121 | NC_000002.11 |
| cg07423943     | 1.61E-09 | 1.39E-10 | -6.78 | 13.1557265 | -7.90E-02 | 20175909  | 20176032  | NC_000013.10 |
| cg04892409     | 1.61E-09 | 1.39E-10 | -6.78 | 13.1553641 | -3.55E-02 | 170501224 | 170501347 | NC_000001.10 |
| cg26207309     | 1.61E-09 | 1.39E-10 | -6.78 | 13.1551472 | -3.04E-02 | 31892053  | 31892176  | NC_000022.10 |
| cg03604819     | 1.61E-09 | 1.39E-10 | -6.78 | 13.1544276 | -3.74E-02 | 17813007  | 17813130  | NC_000004.11 |
| cg00756943     | 1.61E-09 | 1.39E-10 | -6.78 | 13.1539727 | -9.51E-02 | 91208460  | 91208583  | NC_000015.9  |
| cg00305071     | 1.62E-09 | 1.39E-10 | -6.78 | 13.1533457 | -1.38E-01 | 34504017  | 34504140  | NC_000001.10 |
| ch.10.2545310R | 1.62E-09 | 1.40E-10 | -6.78 | 13.1524691 | -3.84E-02 | 120819460 | 120819583 | NC_000010.10 |
| cg20706599     | 1.62E-09 | 1.40E-10 | -6.78 | 13.1523902 | -3.96E-02 | 90777202  | 90777325  | NC_000015.9  |
| cg24524470     | 1.62E-09 | 1.40E-10 | -6.78 | 13.1522848 | -1.55E-01 | 245273257 | 245273380 | NC_000001.10 |

|            |          |          |       |            |           |           |           |              |
|------------|----------|----------|-------|------------|-----------|-----------|-----------|--------------|
| cg13605542 | 1.62E-09 | 1.40E-10 | -6.78 | 13.1503834 | -8.40E-02 | 58110814  | 58110937  | NC_000003.11 |
| cg04578935 | 1.62E-09 | 1.40E-10 | -6.78 | 13.1497827 | -8.30E-02 | 180881163 | 180881286 | NC_000001.10 |
| cg22257374 | 1.62E-09 | 1.40E-10 | -6.78 | 13.1493911 | -7.24E-02 | 15139756  | 15139879  | NC_000003.11 |
| cg19920899 | 1.63E-09 | 1.40E-10 | -6.78 | 13.1471948 | -4.29E-02 | 88969839  | 88969962  | NC_000009.11 |
| cg21749538 | 1.63E-09 | 1.41E-10 | -6.78 | 13.1458848 | -5.01E-02 | 43588937  | 43589060  | NC_000020.10 |
| cg05793020 | 1.63E-09 | 1.41E-10 | -6.78 | 13.1449275 | -5.22E-02 | 43374889  | 43375012  | NC_000020.10 |
| cg05235884 | 1.63E-09 | 1.41E-10 | -6.78 | 13.14458   | -1.14E-01 | 30131806  | 30131929  | NC_000006.11 |
| cg03447083 | 1.63E-09 | 1.41E-10 | -6.78 | 13.1436854 | -9.50E-02 | 66993711  | 66993834  | NC_000016.9  |
| cg23226134 | 1.63E-09 | 1.41E-10 | -6.78 | 13.1433951 | -1.85E-02 | 11866389  | 11866512  | NC_000001.10 |
| cg17501569 | 1.63E-09 | 1.41E-10 | -6.78 | 13.1432239 | -9.46E-02 | 811064    | 811187    | NC_000016.9  |
| cg00425792 | 1.63E-09 | 1.41E-10 | -6.78 | 13.1425155 | -2.91E-02 | 33905503  | 33905626  | NC_000017.10 |
| cg03144714 | 1.63E-09 | 1.41E-10 | -6.78 | 13.1413704 | -6.46E-02 | 54426694  | 54426817  | NC_000012.11 |
| cg27449973 | 1.63E-09 | 1.41E-10 | -6.78 | 13.1410842 | -9.88E-02 | 2111912   | 2112035   | NC_000001.10 |
| cg04911280 | 1.64E-09 | 1.41E-10 | -6.78 | 13.1409014 | -3.02E-02 | 44281184  | 44281307  | NC_000006.11 |
| cg03519967 | 1.64E-09 | 1.41E-10 | -6.78 | 13.1395019 | -9.93E-02 | 26010346  | 26010469  | NC_000001.10 |
| cg11070420 | 1.64E-09 | 1.41E-10 | -6.78 | 13.1394922 | -1.11E-01 | 133804743 | 133804866 | NC_000011.9  |
| cg24038105 | 1.64E-09 | 1.42E-10 | -6.78 | 13.138816  | -1.03E-01 | 15679299  | 15679422  | NC_000001.10 |
| cg10496690 | 1.64E-09 | 1.42E-10 | -6.78 | 13.138135  | -3.37E-02 | 31724482  | 31724605  | NC_000016.9  |
| cg08339189 | 1.64E-09 | 1.42E-10 | -6.78 | 13.1377935 | -8.23E-02 | 124260498 | 124260621 | NC_000009.11 |
| cg03277898 | 1.64E-09 | 1.42E-10 | -6.78 | 13.137782  | -1.50E-01 | 2518824   | 2518947   | NC_000007.13 |
| cg03619332 | 1.64E-09 | 1.42E-10 | -6.78 | 13.1375834 | -8.96E-02 | 585859    | 585982    | NC_000016.9  |
| cg26203383 | 1.64E-09 | 1.42E-10 | -6.78 | 13.137091  | -1.63E-01 | 40297048  | 40297171  | NC_000022.10 |
| cg24420093 | 1.64E-09 | 1.42E-10 | -6.78 | 13.1368555 | -7.49E-02 | 6947085   | 6947208   | NC_000011.9  |
| cg21371809 | 1.64E-09 | 1.42E-10 | -6.78 | 13.1362602 | -1.61E-01 | 14052028  | 14052151  | NC_000010.10 |
| cg09517873 | 1.64E-09 | 1.42E-10 | -6.78 | 13.1348116 | -2.03E-01 | 12656315  | 12656438  | NC_000001.10 |

|               |          |          |       |            |           |           |           |              |
|---------------|----------|----------|-------|------------|-----------|-----------|-----------|--------------|
| cg13242160    | 1.64E-09 | 1.42E-10 | -6.78 | 13.1343397 | -3.72E-02 | 55294610  | 55294733  | NC_000008.10 |
| cg02170478    | 1.65E-09 | 1.42E-10 | -6.78 | 13.1340718 | -1.10E-01 | 55100995  | 55101118  | NC_000004.11 |
| cg22219494    | 1.65E-09 | 1.42E-10 | -6.78 | 13.1333414 | -1.18E-01 | 25201805  | 25201928  | NC_000001.10 |
| cg03311682    | 1.65E-09 | 1.42E-10 | -6.78 | 13.1326573 | -5.57E-02 | 47127856  | 47127979  | NC_000019.9  |
| cg07691306    | 1.65E-09 | 1.42E-10 | -6.78 | 13.1326024 | -1.47E-01 | 953575    | 953698    | NC_000019.9  |
| cg22218536    | 1.65E-09 | 1.43E-10 | -6.78 | 13.1320648 | -3.61E-02 | 40518595  | 40518718  | NC_000003.11 |
| cg04239078    | 1.65E-09 | 1.43E-10 | -6.78 | 13.1315815 | -1.26E-01 | 209549585 | 209549708 | NC_000001.10 |
| cg06496222    | 1.65E-09 | 1.43E-10 | -6.78 | 13.131152  | -1.07E-01 | 57181668  | 57181791  | NC_000016.9  |
| cg00563352    | 1.65E-09 | 1.43E-10 | -6.78 | 13.1306996 | -1.72E-01 | 9765708   | 9765831   | NC_000005.9  |
| ch.6.1255267F | 1.65E-09 | 1.43E-10 | -6.78 | 13.130451  | -4.07E-02 | 53131782  | 53131905  | NC_000006.11 |
| cg06621452    | 1.65E-09 | 1.43E-10 | -6.77 | 13.1289289 | -1.54E-01 | 110872620 | 110872743 | NC_000002.11 |
| cg10517202    | 1.65E-09 | 1.43E-10 | -6.77 | 13.1289257 | -9.12E-02 | 177187243 | 177187366 | NC_000003.11 |
| cg23346134    | 1.66E-09 | 1.43E-10 | -6.77 | 13.1276475 | -1.47E-01 | 49453900  | 49454023  | NC_000003.11 |
| cg04102208    | 1.66E-09 | 1.43E-10 | -6.77 | 13.1272565 | -2.47E-02 | 16465239  | 16465362  | NC_000005.9  |
| cg24170687    | 1.66E-09 | 1.43E-10 | -6.77 | 13.1258646 | -6.98E-02 | 57598683  | 57598806  | NC_000015.9  |
| cg20465207    | 1.66E-09 | 1.43E-10 | -6.77 | 13.1258578 | -4.89E-02 | 155948698 | 155948821 | NC_000001.10 |
| cg20822990    | 1.66E-09 | 1.44E-10 | -6.77 | 13.1243946 | -5.88E-02 | 17338766  | 17338889  | NC_000001.10 |
| cg15928106    | 1.66E-09 | 1.44E-10 | -6.77 | 13.1235298 | -2.33E-01 | 130646078 | 130646201 | NC_000007.13 |
| cg05884705    | 1.66E-09 | 1.44E-10 | -6.77 | 13.1220493 | -1.66E-01 | 40600099  | 40600222  | NC_000015.9  |
| cg22999025    | 1.67E-09 | 1.44E-10 | -6.77 | 13.1208879 | -1.50E-01 | 19977025  | 19977148  | NC_000017.10 |
| cg03997398    | 1.67E-09 | 1.44E-10 | -6.77 | 13.1199288 | -6.75E-02 | 148521466 | 148521589 | NC_000005.9  |
| cg14132536    | 1.67E-09 | 1.44E-10 | -6.77 | 13.1199168 | -8.41E-02 | 130700442 | 130700565 | NC_000009.11 |
| cg14578311    | 1.67E-09 | 1.44E-10 | -6.77 | 13.1196257 | -1.35E-01 | 1019787   | 1019910   | NC_000010.10 |
| cg01275661    | 1.67E-09 | 1.44E-10 | -6.77 | 13.1188099 | -6.33E-02 | 5504438   | 5504561   | NC_000010.10 |
| cg02096790    | 1.67E-09 | 1.45E-10 | -6.77 | 13.1178724 | -1.50E-01 | 89920010  | 89920133  | NC_000016.9  |

|            |          |          |       |            |           |           |           |              |
|------------|----------|----------|-------|------------|-----------|-----------|-----------|--------------|
| cg01415562 | 1.67E-09 | 1.45E-10 | -6.77 | 13.1160159 | -1.12E-01 | 27152635  | 27152758  | NC_000022.10 |
| cg01586609 | 1.67E-09 | 1.45E-10 | -6.77 | 13.1154047 | -1.22E-01 | 113846937 | 113847060 | NC_000011.9  |
| cg18727501 | 1.67E-09 | 1.45E-10 | -6.77 | 13.1149748 | -5.10E-02 | 89513542  | 89513665  | NC_000004.11 |
| cg17532976 | 1.68E-09 | 1.45E-10 | -6.77 | 13.1137281 | -7.75E-02 | 53937515  | 53937638  | NC_000012.11 |
| cg00988247 | 1.68E-09 | 1.45E-10 | -6.77 | 13.1131812 | -1.36E-01 | 169378758 | 169378881 | NC_000003.11 |
| cg16413327 | 1.68E-09 | 1.45E-10 | -6.77 | 13.1126327 | -1.07E-01 | 31215451  | 31215574  | NC_000016.9  |
| cg22045942 | 1.68E-09 | 1.45E-10 | -6.77 | 13.1125916 | -7.51E-02 | 35490561  | 35490684  | NC_000019.9  |
| cg24427660 | 1.68E-09 | 1.46E-10 | -6.77 | 13.1111213 | -1.15E-01 | 818892    | 819015    | NC_000011.9  |
| cg27638057 | 1.68E-09 | 1.46E-10 | -6.77 | 13.1106541 | -1.12E-01 | 20882779  | 20882902  | NC_000018.9  |
| cg15830290 | 1.68E-09 | 1.46E-10 | -6.77 | 13.1099689 | -4.98E-02 | 65153757  | 65153880  | NC_000011.9  |
| cg24737761 | 1.68E-09 | 1.46E-10 | -6.77 | 13.1096226 | -1.12E-01 | 106245659 | 106245782 | NC_000006.11 |
| cg10522125 | 1.69E-09 | 1.46E-10 | -6.77 | 13.1086198 | -1.50E-01 | 30483996  | 30484119  | NC_000016.9  |
| cg26328687 | 1.69E-09 | 1.46E-10 | -6.77 | 13.1077517 | -1.05E-01 | 96076794  | 96076917  | NC_000011.9  |
| cg12270275 | 1.69E-09 | 1.46E-10 | -6.77 | 13.1072098 | -1.33E-01 | 61443868  | 61443991  | NC_000011.9  |
| cg08376089 | 1.69E-09 | 1.46E-10 | -6.77 | 13.1055372 | -1.39E-01 | 61514925  | 61515048  | NC_000011.9  |
| cg11725689 | 1.69E-09 | 1.47E-10 | -6.77 | 13.1039483 | -3.55E-02 | 6098862   | 6098985   | NC_000007.13 |
| cg21720385 | 1.69E-09 | 1.47E-10 | -6.77 | 13.1037708 | -1.28E-01 | 4455239   | 4455362   | NC_000019.9  |
| cg16410115 | 1.69E-09 | 1.47E-10 | -6.77 | 13.1036589 | -1.12E-01 | 24240000  | 24240123  | NC_000001.10 |
| cg13144783 | 1.69E-09 | 1.47E-10 | -6.77 | 13.1027693 | -1.58E-01 | 46249795  | 46249918  | NC_000003.11 |
| cg04967982 | 1.69E-09 | 1.47E-10 | -6.77 | 13.1025364 | -1.31E-01 | 31781955  | 31782078  | NC_000015.9  |
| cg07971188 | 1.70E-09 | 1.47E-10 | -6.77 | 13.1014719 | -1.28E-01 | 31431100  | 31431223  | NC_000006.11 |
| cg04039799 | 1.70E-09 | 1.47E-10 | -6.77 | 13.100837  | -1.07E-01 | 19745484  | 19745607  | NC_000011.9  |
| cg04686114 | 1.70E-09 | 1.47E-10 | -6.77 | 13.1006178 | -7.79E-02 | 57081832  | 57081955  | NC_000012.11 |
| cg01963224 | 1.70E-09 | 1.48E-10 | -6.77 | 13.0965367 | -1.66E-01 | 71791671  | 71791794  | NC_000014.8  |
| cg08438366 | 1.70E-09 | 1.48E-10 | -6.77 | 13.096389  | -9.72E-02 | 37230612  | 37230735  | NC_000020.10 |



|            |          |          |       |            |           |           |           |              |
|------------|----------|----------|-------|------------|-----------|-----------|-----------|--------------|
| cg14975318 | 1.71E-09 | 1.48E-10 | -6.77 | 13.0958247 | -4.40E-02 | 17298537  | 17298660  | NC_000011.9  |
| cg01750375 | 1.71E-09 | 1.48E-10 | -6.77 | 13.095735  | -5.84E-02 | 43343365  | 43343488  | NC_000020.10 |
| cg17424602 | 1.71E-09 | 1.48E-10 | -6.77 | 13.0956235 | -5.06E-02 | 138740101 | 138740224 | NC_000005.9  |
| cg18075287 | 1.71E-09 | 1.48E-10 | -6.77 | 13.0936734 | -6.27E-02 | 10365459  | 10365582  | NC_000012.11 |
| cg13651859 | 1.71E-09 | 1.48E-10 | -6.77 | 13.0925806 | -6.20E-02 | 91926249  | 91926372  | NC_000009.11 |
| cg27366280 | 1.71E-09 | 1.49E-10 | -6.77 | 13.091234  | -1.10E-01 | 42221102  | 42221225  | NC_000003.11 |
| cg08020922 | 1.71E-09 | 1.49E-10 | -6.77 | 13.0911326 | -3.61E-02 | 112895809 | 112895932 | NC_000002.11 |
| cg05246190 | 1.71E-09 | 1.49E-10 | -6.77 | 13.0904833 | -4.81E-02 | 50330022  | 50330145  | NC_000022.10 |
| cg00466425 | 1.72E-09 | 1.49E-10 | -6.77 | 13.0901454 | -8.86E-02 | 30856491  | 30856614  | NC_000006.11 |
| cg27455049 | 1.72E-09 | 1.49E-10 | -6.77 | 13.0899544 | -1.93E-02 | 29233411  | 29233534  | NC_000017.10 |
| cg12944146 | 1.72E-09 | 1.49E-10 | -6.77 | 13.089132  | -1.19E-01 | 50725609  | 50725732  | NC_000022.10 |
| cg15089090 | 1.72E-09 | 1.49E-10 | -6.77 | 13.0872964 | -3.68E-02 | 52089313  | 52089436  | NC_000003.11 |
| cg10495270 | 1.72E-09 | 1.49E-10 | -6.77 | 13.0872926 | -8.76E-02 | 76009633  | 76009756  | NC_000014.8  |
| cg04291221 | 1.72E-09 | 1.49E-10 | -6.77 | 13.0871527 | -5.71E-02 | 32522997  | 32523120  | NC_000005.9  |
| cg14228177 | 1.72E-09 | 1.49E-10 | -6.77 | 13.086644  | -1.79E-01 | 1606526   | 1606649   | NC_000007.13 |
| cg04922566 | 1.72E-09 | 1.49E-10 | -6.77 | 13.0866081 | -9.59E-02 | 57198244  | 57198367  | NC_000003.11 |
| cg14863489 | 1.72E-09 | 1.49E-10 | -6.77 | 13.0853509 | -5.97E-02 | 121457196 | 121457319 | NC_000008.10 |
| cg11383944 | 1.73E-09 | 1.50E-10 | -6.77 | 13.0828504 | -2.66E-02 | 62360728  | 62360851  | NC_000015.9  |
| cg20448053 | 1.73E-09 | 1.50E-10 | -6.77 | 13.0827947 | -2.15E-01 | 8192352   | 8192475   | NC_000017.10 |
| cg07033292 | 1.73E-09 | 1.50E-10 | -6.77 | 13.0827407 | -1.14E-01 | 78287690  | 78287813  | NC_000015.9  |
| cg19652483 | 1.73E-09 | 1.50E-10 | -6.77 | 13.0817751 | -1.66E-01 | 76191813  | 76191936  | NC_000006.11 |
| cg04739228 | 1.73E-09 | 1.50E-10 | -6.77 | 13.0806803 | -6.01E-02 | 42806843  | 42806966  | NC_000019.9  |
| cg06505273 | 1.73E-09 | 1.50E-10 | -6.77 | 13.0795723 | -8.92E-02 | 24850292  | 24850415  | NC_000016.9  |
| cg23538064 | 1.73E-09 | 1.50E-10 | -6.77 | 13.0789342 | -1.44E-01 | 31913275  | 31913398  | NC_000006.11 |
| cg07914856 | 1.73E-09 | 1.51E-10 | -6.77 | 13.0784126 | -8.08E-02 | 77788484  | 77788607  | NC_000017.10 |

|            |          |          |       |            |           |           |           |              |
|------------|----------|----------|-------|------------|-----------|-----------|-----------|--------------|
| cg12569119 | 1.73E-09 | 1.51E-10 | -6.77 | 13.0780494 | -1.40E-01 | 105541150 | 105541273 | NC_000010.10 |
| cg26551026 | 1.74E-09 | 1.51E-10 | -6.77 | 13.0778903 | -1.80E-01 | 20717693  | 20717816  | NC_000018.9  |
| cg03489974 | 1.74E-09 | 1.51E-10 | -6.77 | 13.0773907 | -8.66E-02 | 122846437 | 122846560 | NC_000011.9  |
| cg11360522 | 1.74E-09 | 1.51E-10 | -6.77 | 13.0759767 | -1.22E-01 | 113379828 | 113379951 | NC_000013.10 |
| cg08144172 | 1.74E-09 | 1.51E-10 | -6.77 | 13.0751567 | -1.80E-01 | 41849203  | 41849326  | NC_000001.10 |
| cg02167193 | 1.74E-09 | 1.51E-10 | -6.77 | 13.0748299 | -4.37E-02 | 30688035  | 30688158  | NC_000006.11 |
| cg16468773 | 1.74E-09 | 1.51E-10 | -6.76 | 13.0745391 | -3.49E-02 | 82644668  | 82644791  | NC_000008.10 |
| cg07994435 | 1.74E-09 | 1.52E-10 | -6.76 | 13.0721803 | -7.89E-02 | 70587467  | 70587590  | NC_000017.10 |
| cg23815828 | 1.74E-09 | 1.52E-10 | -6.76 | 13.0721122 | -1.29E-01 | 46885567  | 46885690  | NC_000012.11 |
| cg00366359 | 1.75E-09 | 1.52E-10 | -6.76 | 13.0718619 | -1.29E-01 | 79145542  | 79145665  | NC_000011.9  |
| cg11953868 | 1.75E-09 | 1.52E-10 | -6.76 | 13.0708564 | -6.92E-02 | 44258437  | 44258560  | NC_000020.10 |
| cg24852442 | 1.75E-09 | 1.52E-10 | -6.76 | 13.0704734 | -8.45E-02 | 76903134  | 76903257  | NC_000011.9  |
| cg18012556 | 1.75E-09 | 1.52E-10 | -6.76 | 13.0697993 | -1.22E-01 | 44373754  | 44373877  | NC_000015.9  |
| cg26981966 | 1.75E-09 | 1.52E-10 | -6.76 | 13.0691116 | -1.06E-01 | 152598597 | 152598720 | NC_000007.13 |
| cg19823793 | 1.75E-09 | 1.52E-10 | -6.76 | 13.0681484 | -4.77E-02 | 20227663  | 20227786  | NC_000003.11 |
| cg09809672 | 1.75E-09 | 1.52E-10 | -6.76 | 13.0663408 | -1.55E-01 | 236557682 | 236557805 | NC_000001.10 |
| cg16870215 | 1.76E-09 | 1.53E-10 | -6.76 | 13.0650445 | -1.15E-01 | 76481269  | 76481392  | NC_000004.11 |
| cg25441141 | 1.76E-09 | 1.53E-10 | -6.76 | 13.0642134 | -8.91E-02 | 113012601 | 113012724 | NC_000006.11 |
| cg11966450 | 1.76E-09 | 1.53E-10 | -6.76 | 13.0637752 | -4.17E-02 | 59992157  | 59992280  | NC_000018.9  |
| cg20580655 | 1.76E-09 | 1.53E-10 | -6.76 | 13.0635588 | -1.18E-01 | 93257624  | 93257747  | NC_000015.9  |
| cg06871213 | 1.76E-09 | 1.53E-10 | -6.76 | 13.0627219 | -1.02E-01 | 10971250  | 10971373  | NC_000016.9  |
| cg08480458 | 1.76E-09 | 1.53E-10 | -6.76 | 13.0626019 | -8.90E-02 | 53529655  | 53529778  | NC_000003.11 |
| cg08805054 | 1.76E-09 | 1.53E-10 | -6.76 | 13.062069  | -1.06E-01 | 118781728 | 118781851 | NC_000011.9  |
| cg22509422 | 1.76E-09 | 1.53E-10 | -6.76 | 13.0601495 | -1.10E-01 | 137797039 | 137797162 | NC_000005.9  |
| cg04337188 | 1.76E-09 | 1.53E-10 | -6.76 | 13.0599891 | -1.11E-01 | 219251771 | 219251894 | NC_000002.11 |

|            |          |          |       |            |           |           |           |              |
|------------|----------|----------|-------|------------|-----------|-----------|-----------|--------------|
| cg20559385 | 1.77E-09 | 1.54E-10 | -6.76 | 13.0592358 | -2.02E-01 | 106049591 | 106049714 | NC_000006.11 |
| cg09314495 | 1.77E-09 | 1.54E-10 | -6.76 | 13.0583394 | -1.54E-01 | 90454617  | 90454740  | NC_000007.13 |
| cg16009677 | 1.77E-09 | 1.54E-10 | -6.76 | 13.0565945 | -7.66E-02 | 115605921 | 115606044 | NC_000001.10 |
| cg08119452 | 1.77E-09 | 1.54E-10 | -6.76 | 13.0563566 | -1.61E-01 | 53602385  | 53602508  | NC_000013.10 |
| cg19850535 | 1.78E-09 | 1.54E-10 | -6.76 | 13.0538254 | -3.21E-02 | 31782761  | 31782884  | NC_000006.11 |
| cg11904056 | 1.78E-09 | 1.54E-10 | -6.76 | 13.0530858 | -7.40E-02 | 92918910  | 92919033  | NC_000005.9  |
| cg03117611 | 1.78E-09 | 1.55E-10 | -6.76 | 13.0518935 | -7.89E-02 | 125223679 | 125223802 | NC_000012.11 |
| cg01006193 | 1.78E-09 | 1.55E-10 | -6.76 | 13.0509073 | -3.75E-02 | 6097872   | 6097995   | NC_000012.11 |
| cg16650212 | 1.78E-09 | 1.55E-10 | -6.76 | 13.0499552 | -1.03E-01 | 1230935   | 1231058   | NC_000016.9  |
| cg13022624 | 1.78E-09 | 1.55E-10 | -6.76 | 13.0495    | -1.81E-01 | 38742789  | 38742912  | NC_000002.11 |
| cg05044414 | 1.78E-09 | 1.55E-10 | -6.76 | 13.0492809 | -1.54E-01 | 183734942 | 183735065 | NC_000003.11 |
| cg26853401 | 1.78E-09 | 1.55E-10 | -6.76 | 13.0486835 | -9.30E-02 | 84206199  | 84206322  | NC_000004.11 |
| cg07897701 | 1.78E-09 | 1.55E-10 | -6.76 | 13.0485021 | -9.27E-02 | 150549370 | 150549493 | NC_000007.13 |
| cg01532749 | 1.79E-09 | 1.55E-10 | -6.76 | 13.0476243 | -1.50E-01 | 138085169 | 138085292 | NC_000003.11 |
| cg17491560 | 1.79E-09 | 1.55E-10 | -6.76 | 13.0469473 | -1.28E-01 | 6338529   | 6338652   | NC_000005.9  |
| cg12600197 | 1.79E-09 | 1.55E-10 | -6.76 | 13.0468253 | -1.01E-01 | 75639339  | 75639462  | NC_000015.9  |
| cg06920946 | 1.79E-09 | 1.56E-10 | -6.76 | 13.0465807 | -8.92E-02 | 415489    | 415612    | NC_000010.10 |
| cg16950616 | 1.79E-09 | 1.56E-10 | -6.76 | 13.0455752 | -7.68E-02 | 53045046  | 53045169  | NC_000017.10 |
| cg12336935 | 1.79E-09 | 1.56E-10 | -6.76 | 13.0453382 | -5.77E-02 | 99358835  | 99358958  | NC_000006.11 |
| cg23697467 | 1.79E-09 | 1.56E-10 | -6.76 | 13.0439029 | -1.26E-01 | 145642018 | 145642141 | NC_000008.10 |
| cg17496921 | 1.79E-09 | 1.56E-10 | -6.76 | 13.0436553 | -1.46E-01 | 11406993  | 11407116  | NC_000019.9  |
| cg00283576 | 1.79E-09 | 1.56E-10 | -6.76 | 13.0425961 | -4.32E-02 | 2465351   | 2465474   | NC_000011.9  |
| cg21827203 | 1.80E-09 | 1.56E-10 | -6.76 | 13.0419397 | -1.14E-01 | 43016886  | 43017009  | NC_000022.10 |
| cg11110978 | 1.80E-09 | 1.56E-10 | -6.76 | 13.0418493 | -6.08E-02 | 44527518  | 44527641  | NC_000021.8  |
| cg08076044 | 1.80E-09 | 1.56E-10 | -6.76 | 13.0408274 | -8.06E-02 | 26685074  | 26685197  | NC_000017.10 |

|                 |          |          |       |            |           |           |           |              |
|-----------------|----------|----------|-------|------------|-----------|-----------|-----------|--------------|
| cg22617406      | 1.80E-09 | 1.57E-10 | -6.76 | 13.0384452 | -8.66E-02 | 58008183  | 58008306  | NC_000012.11 |
| cg23529856      | 1.81E-09 | 1.57E-10 | -6.76 | 13.0349025 | -1.24E-01 | 30498683  | 30498806  | NC_000013.10 |
| cg14024458      | 1.81E-09 | 1.57E-10 | -6.76 | 13.0343426 | -1.38E-01 | 17502610  | 17502733  | NC_000019.9  |
| cg13303313      | 1.81E-09 | 1.58E-10 | -6.76 | 13.0337033 | -1.09E-01 | 140098230 | 140098353 | NC_000005.9  |
| cg08222513      | 1.81E-09 | 1.58E-10 | -6.76 | 13.032444  | -1.42E-01 | 30079280  | 30079403  | NC_000006.11 |
| cg18167946      | 1.81E-09 | 1.58E-10 | -6.76 | 13.0323237 | -1.20E-01 | 125205034 | 125205157 | NC_000012.11 |
| cg00914963      | 1.81E-09 | 1.58E-10 | -6.76 | 13.0309853 | -6.51E-02 | 77966262  | 77966385  | NC_000017.10 |
| cg20156985      | 1.82E-09 | 1.58E-10 | -6.76 | 13.0293105 | -1.16E-01 | 33694609  | 33694732  | NC_000001.10 |
| cg18350524      | 1.82E-09 | 1.58E-10 | -6.76 | 13.0289416 | -6.11E-02 | 93835624  | 93835747  | NC_000012.11 |
| cg15085879      | 1.82E-09 | 1.58E-10 | -6.76 | 13.0282011 | -6.50E-02 | 57212130  | 57212253  | NC_000015.9  |
| cg09119494      | 1.82E-09 | 1.59E-10 | -6.76 | 13.0274868 | -8.53E-02 | 23851471  | 23851594  | NC_000001.10 |
| cg15061025      | 1.82E-09 | 1.59E-10 | -6.76 | 13.0266448 | -4.50E-02 | 45883859  | 45883982  | NC_000003.11 |
| cg09171112      | 1.82E-09 | 1.59E-10 | -6.76 | 13.0262952 | -1.73E-01 | 166711594 | 166711717 | NC_000005.9  |
| cg00949532      | 1.82E-09 | 1.59E-10 | -6.76 | 13.0249324 | -1.24E-01 | 6456854   | 6456977   | NC_000008.10 |
| cg02634027      | 1.83E-09 | 1.60E-10 | -6.76 | 13.0203052 | -2.96E-02 | 116695026 | 116695149 | NC_000001.10 |
| cg18086386      | 1.83E-09 | 1.60E-10 | -6.75 | 13.0197209 | -1.59E-01 | 162516650 | 162516773 | NC_000005.9  |
| cg11924260      | 1.83E-09 | 1.60E-10 | -6.75 | 13.0195966 | -1.36E-01 | 125036266 | 125036389 | NC_000012.11 |
| cg07173547      | 1.83E-09 | 1.60E-10 | -6.75 | 13.0195171 | -5.70E-02 | 18727949  | 18728072  | NC_000011.9  |
| cg24290286      | 1.84E-09 | 1.60E-10 | -6.75 | 13.019141  | -4.91E-02 | 17374112  | 17374235  | NC_000011.9  |
| ch.8.117193312F | 1.84E-09 | 1.60E-10 | -6.75 | 13.018765  | -4.74E-02 | 117124134 | 117124257 | NC_000008.10 |
| cg18443095      | 1.84E-09 | 1.60E-10 | -6.75 | 13.01809   | -5.88E-02 | 33378516  | 33378639  | NC_000006.11 |
| cg00804485      | 1.84E-09 | 1.60E-10 | -6.75 | 13.0156523 | -3.00E-02 | 5569135   | 5569258   | NC_000007.13 |
| cg07113006      | 1.84E-09 | 1.61E-10 | -6.75 | 13.0149483 | -8.73E-02 | 45097282  | 45097405  | NC_000001.10 |
| cg25171118      | 1.84E-09 | 1.61E-10 | -6.75 | 13.0143515 | -1.48E-01 | 134212463 | 134212586 | NC_000007.13 |
| cg19684783      | 1.84E-09 | 1.61E-10 | -6.75 | 13.013948  | -1.72E-01 | 40905255  | 40905378  | NC_000005.9  |

|               |          |          |       |            |           |           |           |              |
|---------------|----------|----------|-------|------------|-----------|-----------|-----------|--------------|
| cg23418201    | 1.84E-09 | 1.61E-10 | -6.75 | 13.013522  | -1.58E-01 | 9134057   | 9134180   | NC_000002.11 |
| cg26157756    | 1.85E-09 | 1.61E-10 | -6.75 | 13.0122441 | -1.79E-01 | 61917230  | 61917353  | NC_000008.10 |
| cg01277372    | 1.85E-09 | 1.61E-10 | -6.75 | 13.0118695 | -1.43E-01 | 169378764 | 169378887 | NC_000003.11 |
| cg25534294    | 1.85E-09 | 1.61E-10 | -6.75 | 13.0117932 | -7.49E-02 | 155554931 | 155555054 | NC_000002.11 |
| cg19168338    | 1.85E-09 | 1.61E-10 | -6.75 | 13.0117093 | -1.15E-01 | 4465731   | 4465854   | NC_000016.9  |
| ch.22.909671F | 1.85E-09 | 1.61E-10 | -6.75 | 13.0114501 | -7.35E-02 | 46114168  | 46114291  | NC_000022.10 |
| cg06727060    | 1.86E-09 | 1.62E-10 | -6.75 | 13.0069782 | -5.26E-02 | 30709711  | 30709834  | NC_000016.9  |
| cg16536610    | 1.86E-09 | 1.62E-10 | -6.75 | 13.0059598 | -1.67E-01 | 65704960  | 65705083  | NC_000014.8  |
| cg06211794    | 1.86E-09 | 1.62E-10 | -6.75 | 13.0053514 | -2.91E-02 | 48330587  | 48330710  | NC_000020.10 |
| cg27223805    | 1.86E-09 | 1.62E-10 | -6.75 | 13.0053082 | -1.34E-01 | 2889616   | 2889739   | NC_000011.9  |
| cg09895325    | 1.87E-09 | 1.63E-10 | -6.75 | 13.0008961 | -1.75E-01 | 24968182  | 24968305  | NC_000001.10 |
| cg05673731    | 1.87E-09 | 1.63E-10 | -6.75 | 12.9996408 | -1.45E-01 | 29565306  | 29565429  | NC_000001.10 |
| cg00968267    | 1.87E-09 | 1.63E-10 | -6.75 | 12.9992704 | -1.20E-01 | 73764146  | 73764269  | NC_000013.10 |
| cg14830082    | 1.87E-09 | 1.63E-10 | -6.75 | 12.9979214 | -1.16E-01 | 130067806 | 130067929 | NC_000011.9  |
| cg25887076    | 1.87E-09 | 1.64E-10 | -6.75 | 12.9972479 | -1.99E-01 | 5576256   | 5576379   | NC_000010.10 |
| cg11071912    | 1.88E-09 | 1.64E-10 | -6.75 | 12.9963681 | -1.28E-01 | 1073424   | 1073547   | NC_000001.10 |
| cg15043642    | 1.88E-09 | 1.64E-10 | -6.75 | 12.996181  | -5.92E-02 | 141061863 | 141061986 | NC_000005.9  |
| cg03411579    | 1.88E-09 | 1.64E-10 | -6.75 | 12.9950378 | -1.11E-01 | 76552736  | 76552859  | NC_000012.11 |
| cg03469869    | 1.88E-09 | 1.64E-10 | -6.75 | 12.9945904 | -1.55E-01 | 111000343 | 111000466 | NC_000013.10 |
| cg10046767    | 1.88E-09 | 1.64E-10 | -6.75 | 12.9939161 | -3.02E-02 | 53297693  | 53297816  | NC_000012.11 |
| cg07895576    | 1.88E-09 | 1.64E-10 | -6.75 | 12.9937547 | -6.02E-02 | 12442682  | 12442805  | NC_000003.11 |
| cg14042132    | 1.88E-09 | 1.64E-10 | -6.75 | 12.9930333 | -6.16E-02 | 117112752 | 117112875 | NC_000001.10 |
| cg27077773    | 1.88E-09 | 1.64E-10 | -6.75 | 12.9926533 | -8.12E-02 | 88512653  | 88512776  | NC_000016.9  |
| cg19188595    | 1.88E-09 | 1.64E-10 | -6.75 | 12.9925824 | -1.65E-02 | 45496482  | 45496605  | NC_000010.10 |
| cg13123009    | 1.88E-09 | 1.64E-10 | -6.75 | 12.9922877 | -8.62E-02 | 31681882  | 31682005  | NC_000006.11 |

|                 |          |          |       |            |           |           |           |              |
|-----------------|----------|----------|-------|------------|-----------|-----------|-----------|--------------|
| cg06986543      | 1.88E-09 | 1.64E-10 | -6.75 | 12.9919313 | -2.05E-02 | 60942666  | 60942789  | NC_000020.10 |
| cg01557792      | 1.88E-09 | 1.65E-10 | -6.75 | 12.9910611 | -1.43E-01 | 70162755  | 70162878  | NC_000014.8  |
| cg14916079      | 1.89E-09 | 1.65E-10 | -6.75 | 12.9892805 | -1.19E-01 | 120788696 | 120788819 | NC_000010.10 |
| cg24494577      | 1.89E-09 | 1.65E-10 | -6.75 | 12.988152  | -1.17E-01 | 16475112  | 16475235  | NC_000001.10 |
| cg18590618      | 1.89E-09 | 1.65E-10 | -6.75 | 12.9880056 | -3.06E-02 | 27561116  | 27561239  | NC_000001.10 |
| cg07843568      | 1.89E-09 | 1.65E-10 | -6.75 | 12.9867699 | -8.74E-02 | 1254066   | 1254189   | NC_000019.9  |
| cg08621418      | 1.89E-09 | 1.65E-10 | -6.75 | 12.9864589 | -4.65E-02 | 79944414  | 79944537  | NC_000006.11 |
| cg07882820      | 1.89E-09 | 1.65E-10 | -6.75 | 12.986347  | -7.29E-02 | 111032073 | 111032196 | NC_000005.9  |
| cg24932394      | 1.89E-09 | 1.66E-10 | -6.75 | 12.9853539 | -2.33E-02 | 120703729 | 120703852 | NC_000012.11 |
| cg01782711      | 1.90E-09 | 1.66E-10 | -6.75 | 12.984684  | -1.65E-01 | 99332500  | 99332623  | NC_000012.11 |
| cg07081477      | 1.90E-09 | 1.66E-10 | -6.75 | 12.9842235 | -1.86E-01 | 80254862  | 80254985  | NC_000017.10 |
| cg26877198      | 1.90E-09 | 1.66E-10 | -6.75 | 12.9838115 | -6.52E-02 | 9938416   | 9938539   | NC_000019.9  |
| cg21834604      | 1.90E-09 | 1.66E-10 | -6.75 | 12.9837898 | -1.39E-01 | 11610595  | 11610718  | NC_000003.11 |
| cg04899282      | 1.90E-09 | 1.66E-10 | -6.75 | 12.983488  | -3.38E-02 | 103523516 | 103523639 | NC_000014.8  |
| cg01774131      | 1.90E-09 | 1.66E-10 | -6.75 | 12.9816315 | -1.01E-01 | 8578086   | 8578209   | NC_000008.10 |
| cg06422782      | 1.90E-09 | 1.66E-10 | -6.75 | 12.9814195 | -1.01E-01 | 88268771  | 88268894  | NC_000016.9  |
| cg13708803      | 1.90E-09 | 1.66E-10 | -6.75 | 12.9811794 | -9.53E-02 | 138898243 | 138898366 | NC_000008.10 |
| cg02370858      | 1.90E-09 | 1.66E-10 | -6.75 | 12.9811063 | -3.58E-02 | 74700039  | 74700162  | NC_000002.11 |
| cg14928057      | 1.90E-09 | 1.66E-10 | -6.75 | 12.9802253 | -1.49E-01 | 4891542   | 4891665   | NC_000017.10 |
| cg03918288      | 1.90E-09 | 1.66E-10 | -6.75 | 12.98002   | -9.56E-02 | 145101324 | 145101447 | NC_000008.10 |
| cg09871285      | 1.91E-09 | 1.67E-10 | -6.75 | 12.9786633 | -1.34E-01 | 113932855 | 113932978 | NC_000003.11 |
| cg00775075      | 1.91E-09 | 1.67E-10 | -6.75 | 12.9764123 | -5.69E-02 | 11891054  | 11891177  | NC_000016.9  |
| ch.17.75722220R | 1.91E-09 | 1.67E-10 | -6.75 | 12.9760767 | -3.05E-02 | 78107625  | 78107748  | NC_000017.10 |
| cg22276685      | 1.91E-09 | 1.67E-10 | -6.75 | 12.9758388 | -1.57E-01 | 119500902 | 119501025 | NC_000003.11 |
| cg10632266      | 1.91E-09 | 1.67E-10 | -6.75 | 12.9757956 | -2.78E-02 | 167691116 | 167691239 | NC_000001.10 |

|               |          |          |       |            |           |           |           |              |
|---------------|----------|----------|-------|------------|-----------|-----------|-----------|--------------|
| cg04720283    | 1.91E-09 | 1.67E-10 | -6.75 | 12.9757148 | -1.37E-01 | 103914796 | 103914919 | NC_000011.9  |
| cg05292478    | 1.92E-09 | 1.68E-10 | -6.75 | 12.9729403 | -1.10E-01 | 98742398  | 98742521  | NC_000007.13 |
| cg04550079    | 1.92E-09 | 1.68E-10 | -6.75 | 12.9718005 | -7.49E-02 | 67212681  | 67212804  | NC_000016.9  |
| cg13909320    | 1.92E-09 | 1.68E-10 | -6.75 | 12.9712253 | -4.08E-02 | 125026858 | 125026981 | NC_000009.11 |
| cg20781241    | 1.92E-09 | 1.68E-10 | -6.75 | 12.9700556 | -4.52E-02 | 74907290  | 74907413  | NC_000015.9  |
| cg26818820    | 1.93E-09 | 1.69E-10 | -6.75 | 12.9653433 | -8.87E-02 | 135468000 | 135468123 | NC_000005.9  |
| cg08180025    | 1.93E-09 | 1.69E-10 | -6.75 | 12.9653137 | -1.66E-01 | 5682666   | 5682789   | NC_000007.13 |
| cg07497941    | 1.93E-09 | 1.69E-10 | -6.74 | 12.9648125 | -1.48E-01 | 1258546   | 1258669   | NC_000011.9  |
| cg14839558    | 1.93E-09 | 1.69E-10 | -6.74 | 12.9645256 | -1.78E-01 | 1874488   | 1874611   | NC_000001.10 |
| cg27261397    | 1.93E-09 | 1.69E-10 | -6.74 | 12.9636943 | -1.16E-01 | 625833    | 625956    | NC_000011.9  |
| cg11145399    | 1.93E-09 | 1.69E-10 | -6.74 | 12.9636242 | -8.04E-02 | 224034478 | 224034601 | NC_000001.10 |
| cg00857536    | 1.94E-09 | 1.70E-10 | -6.74 | 12.9616631 | -1.27E-01 | 50298306  | 50298429  | NC_000010.10 |
| ch.1.2740682R | 1.94E-09 | 1.70E-10 | -6.74 | 12.9611513 | -2.82E-02 | 117424854 | 117424977 | NC_000001.10 |
| cg14791639    | 1.94E-09 | 1.70E-10 | -6.74 | 12.9611365 | -8.91E-02 | 16699028  | 16699151  | NC_000006.11 |
| cg26413708    | 1.94E-09 | 1.70E-10 | -6.74 | 12.9608997 | -1.34E-01 | 42306808  | 42306931  | NC_000006.11 |
| cg00221394    | 1.94E-09 | 1.70E-10 | -6.74 | 12.9599495 | -4.76E-02 | 133707523 | 133707646 | NC_000012.11 |
| cg03447530    | 1.94E-09 | 1.70E-10 | -6.74 | 12.9599443 | -4.90E-02 | 60970210  | 60970333  | NC_000013.10 |
| cg02261543    | 1.94E-09 | 1.70E-10 | -6.74 | 12.9588441 | -9.09E-02 | 10800368  | 10800491  | NC_000011.9  |
| cg25027699    | 1.94E-09 | 1.70E-10 | -6.74 | 12.9587361 | -1.23E-01 | 101187093 | 101187216 | NC_000012.11 |
| cg22254313    | 1.94E-09 | 1.70E-10 | -6.74 | 12.95855   | -5.61E-02 | 67734916  | 67735039  | NC_000011.9  |
| cg01965636    | 1.94E-09 | 1.70E-10 | -6.74 | 12.9577938 | -1.53E-01 | 90237942  | 90238065  | NC_000014.8  |
| cg24084564    | 1.95E-09 | 1.70E-10 | -6.74 | 12.9573618 | -1.33E-01 | 39892799  | 39892922  | NC_000019.9  |
| cg27285720    | 1.95E-09 | 1.70E-10 | -6.74 | 12.9571592 | -2.14E-01 | 89664782  | 89664905  | NC_000001.10 |
| cg21025488    | 1.95E-09 | 1.71E-10 | -6.74 | 12.9556329 | -5.44E-02 | 115000149 | 115000272 | NC_000013.10 |
| cg23912171    | 1.95E-09 | 1.71E-10 | -6.74 | 12.9549249 | -7.20E-02 | 28832176  | 28832299  | NC_000001.10 |

|                |          |          |       |            |           |           |           |              |
|----------------|----------|----------|-------|------------|-----------|-----------|-----------|--------------|
| ch.6.12427391R | 1.95E-09 | 1.71E-10 | -6.74 | 12.9524335 | -1.35E-02 | 12319405  | 12319528  | NC_000006.11 |
| cg17836612     | 1.96E-09 | 1.72E-10 | -6.74 | 12.9500534 | -1.21E-01 | 76976357  | 76976480  | NC_000017.10 |
| cg18567041     | 1.96E-09 | 1.72E-10 | -6.74 | 12.9491265 | -1.29E-01 | 2654246   | 2654369   | NC_000019.9  |
| cg06120359     | 1.96E-09 | 1.72E-10 | -6.74 | 12.9488965 | -1.57E-01 | 127105723 | 127105846 | NC_000008.10 |
| cg09714607     | 1.96E-09 | 1.72E-10 | -6.74 | 12.9476413 | -1.71E-02 | 32122161  | 32122284  | NC_000006.11 |
| cg02253535     | 1.96E-09 | 1.72E-10 | -6.74 | 12.947511  | -1.04E-01 | 45147292  | 45147415  | NC_000021.8  |
| cg12049550     | 1.97E-09 | 1.72E-10 | -6.74 | 12.9461732 | -1.61E-01 | 65035261  | 65035384  | NC_000001.10 |
| cg24116380     | 1.97E-09 | 1.72E-10 | -6.74 | 12.9449375 | -1.35E-01 | 114791124 | 114791247 | NC_000005.9  |
| cg10515180     | 1.97E-09 | 1.73E-10 | -6.74 | 12.9430563 | -1.41E-01 | 40583939  | 40584062  | NC_000007.13 |
| cg14122403     | 1.98E-09 | 1.73E-10 | -6.74 | 12.9410101 | -1.50E-01 | 121499498 | 121499621 | NC_000005.9  |
| cg24438909     | 1.98E-09 | 1.73E-10 | -6.74 | 12.940424  | -6.72E-02 | 156828693 | 156828816 | NC_000001.10 |
| cg03741332     | 1.98E-09 | 1.73E-10 | -6.74 | 12.939748  | -3.29E-02 | 4403337   | 4403460   | NC_000019.9  |
| cg26668747     | 1.98E-09 | 1.73E-10 | -6.74 | 12.939228  | -6.08E-02 | 80212883  | 80213006  | NC_000005.9  |
| cg16386293     | 1.98E-09 | 1.74E-10 | -6.74 | 12.9388066 | -1.43E-01 | 150480856 | 150480979 | NC_000001.10 |
| cg09219019     | 1.98E-09 | 1.74E-10 | -6.74 | 12.9384214 | -6.48E-02 | 182400155 | 182400278 | NC_000003.11 |
| cg05165064     | 1.98E-09 | 1.74E-10 | -6.74 | 12.9375102 | -4.33E-02 | 18037039  | 18037162  | NC_000020.10 |
| cg15396800     | 1.98E-09 | 1.74E-10 | -6.74 | 12.9374326 | -1.43E-01 | 178943143 | 178943266 | NC_000001.10 |
| cg11435441     | 1.99E-09 | 1.74E-10 | -6.74 | 12.9359605 | -1.58E-01 | 25027994  | 25028117  | NC_000006.11 |
| cg08708711     | 1.99E-09 | 1.74E-10 | -6.74 | 12.9353521 | -3.47E-02 | 10157086  | 10157209  | NC_000003.11 |
| cg11062046     | 1.99E-09 | 1.74E-10 | -6.74 | 12.9337796 | -5.13E-02 | 64254701  | 64254824  | NC_000007.13 |
| cg25730564     | 1.99E-09 | 1.74E-10 | -6.74 | 12.9337689 | -1.02E-01 | 236100751 | 236100874 | NC_000002.11 |
| cg08964435     | 1.99E-09 | 1.75E-10 | -6.74 | 12.9326814 | -1.26E-01 | 32382851  | 32382974  | NC_000020.10 |
| cg14234912     | 1.99E-09 | 1.75E-10 | -6.74 | 12.93147   | -1.31E-01 | 103677503 | 103677626 | NC_000011.9  |
| cg27147174     | 2.00E-09 | 1.75E-10 | -6.74 | 12.9303    | -6.35E-02 | 100797783 | 100797906 | NC_000007.13 |
| cg13359161     | 2.00E-09 | 1.75E-10 | -6.74 | 12.9300471 | -1.01E-01 | 124552897 | 124553020 | NC_000004.11 |



|            |          |          |       |            |           |           |           |              |
|------------|----------|----------|-------|------------|-----------|-----------|-----------|--------------|
| cg02209932 | 2.00E-09 | 1.75E-10 | -6.74 | 12.9298866 | -3.38E-02 | 66662498  | 66662621  | NC_000002.11 |
| cg06363692 | 2.00E-09 | 1.76E-10 | -6.74 | 12.9271769 | -1.58E-01 | 71656425  | 71656548  | NC_000011.9  |
| cg01130092 | 2.00E-09 | 1.76E-10 | -6.74 | 12.9268962 | -1.30E-01 | 67311704  | 67311827  | NC_000016.9  |
| cg22044398 | 2.00E-09 | 1.76E-10 | -6.74 | 12.9263674 | -1.02E-01 | 106583179 | 106583302 | NC_000006.11 |
| cg24834394 | 2.00E-09 | 1.76E-10 | -6.74 | 12.9262389 | -1.50E-01 | 12620789  | 12620912  | NC_000012.11 |
| cg01383268 | 2.01E-09 | 1.76E-10 | -6.74 | 12.9248004 | -4.35E-02 | 71088868  | 71088991  | NC_000017.10 |
| cg17499041 | 2.01E-09 | 1.76E-10 | -6.74 | 12.9240661 | -3.63E-02 | 35310257  | 35310380  | NC_000006.11 |
| cg27104271 | 2.01E-09 | 1.77E-10 | -6.74 | 12.9222768 | -5.22E-02 | 74862127  | 74862250  | NC_000011.9  |
| cg09213451 | 2.01E-09 | 1.77E-10 | -6.74 | 12.9222284 | -1.41E-01 | 61569759  | 61569882  | NC_000014.8  |
| cg24527194 | 2.01E-09 | 1.77E-10 | -6.74 | 12.9213709 | -1.11E-01 | 14073463  | 14073586  | NC_000019.9  |
| cg16219266 | 2.01E-09 | 1.77E-10 | -6.74 | 12.9213275 | -1.19E-01 | 67433184  | 67433307  | NC_000016.9  |
| cg04849856 | 2.01E-09 | 1.77E-10 | -6.74 | 12.9213134 | -6.74E-02 | 73401481  | 73401604  | NC_000017.10 |
| cg07283098 | 2.01E-09 | 1.77E-10 | -6.74 | 12.9207523 | -5.22E-02 | 134514086 | 134514209 | NC_000003.11 |
| cg25422226 | 2.01E-09 | 1.77E-10 | -6.74 | 12.9206296 | -1.41E-01 | 13057352  | 13057475  | NC_000007.13 |
| cg26132612 | 2.02E-09 | 1.77E-10 | -6.74 | 12.9201507 | -3.32E-02 | 40518669  | 40518792  | NC_000003.11 |
| cg11534215 | 2.02E-09 | 1.77E-10 | -6.74 | 12.9199019 | -1.34E-01 | 240200967 | 240201090 | NC_000002.11 |
| cg14643075 | 2.02E-09 | 1.77E-10 | -6.74 | 12.9196913 | -9.15E-02 | 176755449 | 176755572 | NC_000005.9  |
| cg16039869 | 2.02E-09 | 1.77E-10 | -6.74 | 12.9195788 | -1.23E-01 | 125260943 | 125261066 | NC_000011.9  |
| cg10208821 | 2.02E-09 | 1.78E-10 | -6.74 | 12.9166804 | -7.14E-02 | 21852954  | 21853077  | NC_000014.8  |
| cg06333800 | 2.02E-09 | 1.78E-10 | -6.74 | 12.9165343 | -8.00E-02 | 151442481 | 151442604 | NC_000007.13 |
| cg21186098 | 2.03E-09 | 1.78E-10 | -6.74 | 12.9150329 | -1.62E-01 | 108208344 | 108208467 | NC_000008.10 |
| cg20783262 | 2.03E-09 | 1.78E-10 | -6.74 | 12.9148447 | -4.91E-02 | 68152310  | 68152433  | NC_000001.10 |
| cg00181327 | 2.03E-09 | 1.78E-10 | -6.74 | 12.912479  | -1.42E-01 | 31439278  | 31439401  | NC_000013.10 |
| cg05917963 | 2.03E-09 | 1.78E-10 | -6.74 | 12.9120173 | -7.24E-02 | 101988539 | 101988662 | NC_000010.10 |
| cg06358131 | 2.04E-09 | 1.79E-10 | -6.74 | 12.9102441 | -1.03E-01 | 3687922   | 3688045   | NC_000019.9  |

|              |          |          |       |            |           |           |           |              |
|--------------|----------|----------|-------|------------|-----------|-----------|-----------|--------------|
| cg25424250   | 2.04E-09 | 1.79E-10 | -6.73 | 12.9092022 | -7.98E-02 | 71421380  | 71421503  | NC_000011.9  |
| cg01961752   | 2.04E-09 | 1.79E-10 | -6.73 | 12.90897   | -1.83E-01 | 1109012   | 1109135   | NC_000001.10 |
| cg23210118   | 2.04E-09 | 1.79E-10 | -6.73 | 12.908038  | -3.87E-02 | 95653378  | 95653501  | NC_000010.10 |
| cg15732079   | 2.04E-09 | 1.79E-10 | -6.73 | 12.9077883 | -1.47E-01 | 22898516  | 22898639  | NC_000007.13 |
| cg12080882   | 2.04E-09 | 1.79E-10 | -6.73 | 12.9061799 | -8.75E-02 | 109634248 | 109634371 | NC_000001.10 |
| cg02556655   | 2.04E-09 | 1.80E-10 | -6.73 | 12.9055526 | -1.91E-01 | 63975026  | 63975149  | NC_000011.9  |
| cg19371349   | 2.05E-09 | 1.80E-10 | -6.73 | 12.9045295 | -9.68E-02 | 174254281 | 174254404 | NC_000004.11 |
| cg26158983   | 2.05E-09 | 1.80E-10 | -6.73 | 12.9040189 | -6.38E-02 | 24835040  | 24835163  | NC_000014.8  |
| cg04554272   | 2.05E-09 | 1.80E-10 | -6.73 | 12.9021539 | -2.03E-01 | 1013990   | 1014113   | NC_000016.9  |
| cg19587237   | 2.05E-09 | 1.80E-10 | -6.73 | 12.9018332 | -1.41E-01 | 54797076  | 54797199  | NC_000001.10 |
| cg03477302   | 2.05E-09 | 1.80E-10 | -6.73 | 12.9016563 | -6.53E-02 | 32598681  | 32598804  | NC_000022.10 |
| cg14157107   | 2.05E-09 | 1.80E-10 | -6.73 | 12.9015928 | -1.60E-01 | 16704404  | 16704527  | NC_000009.11 |
| ch.1.822136R | 2.05E-09 | 1.80E-10 | -6.73 | 12.9015153 | -4.19E-02 | 24746734  | 24746857  | NC_000001.10 |
| cg04500312   | 2.05E-09 | 1.80E-10 | -6.73 | 12.9014805 | -9.83E-02 | 142054663 | 142054786 | NC_000005.9  |
| cg07571202   | 2.05E-09 | 1.81E-10 | -6.73 | 12.8999512 | -8.68E-02 | 14272342  | 14272465  | NC_000019.9  |
| cg16963286   | 2.06E-09 | 1.81E-10 | -6.73 | 12.8992254 | -2.42E-02 | 33102443  | 33102566  | NC_000007.13 |
| cg16230352   | 2.06E-09 | 1.81E-10 | -6.73 | 12.8989697 | -1.34E-01 | 42123158  | 42123281  | NC_000008.10 |
| cg03555157   | 2.06E-09 | 1.81E-10 | -6.73 | 12.8965779 | -1.21E-01 | 128439171 | 128439294 | NC_000002.11 |
| cg14732248   | 2.06E-09 | 1.81E-10 | -6.73 | 12.8963341 | -4.97E-02 | 1313730   | 1313853   | NC_000006.11 |
| cg26827893   | 2.06E-09 | 1.81E-10 | -6.73 | 12.8958831 | -6.61E-02 | 21105829  | 21105952  | NC_000020.10 |
| cg05266796   | 2.06E-09 | 1.81E-10 | -6.73 | 12.8954164 | -7.49E-02 | 16723783  | 16723906  | NC_000006.11 |
| cg02927327   | 2.06E-09 | 1.81E-10 | -6.73 | 12.8954099 | -8.43E-02 | 35265759  | 35265882  | NC_000006.11 |
| cg22171607   | 2.06E-09 | 1.81E-10 | -6.73 | 12.8953566 | -1.49E-01 | 8137564   | 8137687   | NC_000001.10 |
| cg03656020   | 2.06E-09 | 1.82E-10 | -6.73 | 12.8946753 | -1.08E-01 | 100805972 | 100806095 | NC_000007.13 |
| cg08720806   | 2.07E-09 | 1.82E-10 | -6.73 | 12.8937399 | -1.60E-01 | 125142671 | 125142794 | NC_000011.9  |

|            |          |          |       |            |           |           |           |              |
|------------|----------|----------|-------|------------|-----------|-----------|-----------|--------------|
| cg04983903 | 2.07E-09 | 1.82E-10 | -6.73 | 12.8935357 | -6.27E-02 | 29974065  | 29974188  | NC_000006.11 |
| cg25749318 | 2.07E-09 | 1.82E-10 | -6.73 | 12.8934001 | -3.62E-02 | 170103058 | 170103181 | NC_000006.11 |
| cg24091195 | 2.07E-09 | 1.82E-10 | -6.73 | 12.8910313 | -1.25E-01 | 153174759 | 153174882 | NC_000001.10 |
| cg03171795 | 2.07E-09 | 1.82E-10 | -6.73 | 12.8910108 | -1.18E-01 | 70882921  | 70883044  | NC_000003.11 |
| cg00208830 | 2.07E-09 | 1.82E-10 | -6.73 | 12.889798  | -1.40E-01 | 183154778 | 183154901 | NC_000001.10 |
| cg15641062 | 2.07E-09 | 1.82E-10 | -6.73 | 12.8896549 | -6.34E-02 | 120884529 | 120884652 | NC_000012.11 |
| cg05844937 | 2.08E-09 | 1.83E-10 | -6.73 | 12.8884303 | -1.07E-01 | 1614141   | 1614264   | NC_000006.11 |
| cg01251434 | 2.08E-09 | 1.83E-10 | -6.73 | 12.888193  | -5.91E-02 | 68630898  | 68631021  | NC_000005.9  |
| cg07817097 | 2.08E-09 | 1.83E-10 | -6.73 | 12.8880611 | -4.27E-02 | 179851575 | 179851698 | NC_000001.10 |
| cg25141995 | 2.08E-09 | 1.83E-10 | -6.73 | 12.8872261 | -1.21E-01 | 133341459 | 133341582 | NC_000005.9  |
| cg16625770 | 2.08E-09 | 1.83E-10 | -6.73 | 12.8853499 | -9.34E-02 | 38300134  | 38300257  | NC_000008.10 |
| cg13180566 | 2.08E-09 | 1.83E-10 | -6.73 | 12.8851596 | -1.21E-01 | 1052158   | 1052281   | NC_000004.11 |
| cg10841248 | 2.09E-09 | 1.83E-10 | -6.73 | 12.8843449 | -1.12E-01 | 95299519  | 95299642  | NC_000005.9  |
| cg10057904 | 2.09E-09 | 1.84E-10 | -6.73 | 12.8834653 | -1.17E-01 | 102530122 | 102530245 | NC_000014.8  |
| cg18957070 | 2.09E-09 | 1.84E-10 | -6.73 | 12.8826725 | -1.37E-01 | 19648970  | 19649093  | NC_000017.10 |
| cg26979044 | 2.09E-09 | 1.84E-10 | -6.73 | 12.8819422 | -7.95E-02 | 25045552  | 25045675  | NC_000016.9  |
| cg08466051 | 2.09E-09 | 1.84E-10 | -6.73 | 12.8815343 | -6.03E-02 | 166810428 | 166810551 | NC_000002.11 |
| cg02250680 | 2.09E-09 | 1.84E-10 | -6.73 | 12.8803637 | -5.21E-02 | 58346542  | 58346665  | NC_000011.9  |
| cg24520885 | 2.10E-09 | 1.84E-10 | -6.73 | 12.879231  | -1.35E-01 | 76747956  | 76748079  | NC_000010.10 |
| cg08949735 | 2.10E-09 | 1.85E-10 | -6.73 | 12.878244  | -1.21E-01 | 89699720  | 89699843  | NC_000016.9  |
| cg11786966 | 2.10E-09 | 1.85E-10 | -6.73 | 12.877139  | -1.36E-01 | 64508232  | 64508355  | NC_000001.10 |
| cg13420075 | 2.10E-09 | 1.85E-10 | -6.73 | 12.8762145 | -1.31E-01 | 74471974  | 74472097  | NC_000015.9  |
| cg10992419 | 2.10E-09 | 1.85E-10 | -6.73 | 12.875342  | -1.41E-01 | 192597855 | 192597978 | NC_000003.11 |
| cg02553663 | 2.11E-09 | 1.86E-10 | -6.73 | 12.87332   | -1.38E-01 | 80291775  | 80291898  | NC_000017.10 |
| cg15155463 | 2.11E-09 | 1.86E-10 | -6.73 | 12.8720487 | -6.27E-02 | 71693793  | 71693916  | NC_000002.11 |

|            |          |          |       |            |           |           |           |              |
|------------|----------|----------|-------|------------|-----------|-----------|-----------|--------------|
| cg23801885 | 2.11E-09 | 1.86E-10 | -6.73 | 12.8718793 | -1.06E-01 | 34458902  | 34459025  | NC_000006.11 |
| cg08057038 | 2.11E-09 | 1.86E-10 | -6.73 | 12.8699045 | -8.84E-02 | 626128    | 626251    | NC_000011.9  |
| cg09275968 | 2.11E-09 | 1.86E-10 | -6.73 | 12.8696997 | -5.36E-02 | 49212180  | 49212303  | NC_000012.11 |
| cg00341522 | 2.11E-09 | 1.86E-10 | -6.73 | 12.8696299 | -1.37E-01 | 237981972 | 237982095 | NC_000002.11 |
| cg08851837 | 2.12E-09 | 1.86E-10 | -6.73 | 12.8694099 | -1.36E-01 | 57558820  | 57558943  | NC_000016.9  |
| cg20917077 | 2.12E-09 | 1.87E-10 | -6.73 | 12.8677769 | -1.66E-01 | 129996313 | 129996436 | NC_000007.13 |
| cg02954563 | 2.12E-09 | 1.87E-10 | -6.73 | 12.867564  | -9.16E-02 | 101213547 | 101213670 | NC_000014.8  |
| cg04685459 | 2.12E-09 | 1.87E-10 | -6.73 | 12.8652806 | -3.90E-02 | 52273525  | 52273648  | NC_000003.11 |
| cg09020213 | 2.12E-09 | 1.87E-10 | -6.73 | 12.8652138 | -1.31E-01 | 114810096 | 114810219 | NC_000013.10 |
| cg03237166 | 2.13E-09 | 1.87E-10 | -6.73 | 12.8638718 | -5.75E-02 | 38393112  | 38393235  | NC_000009.11 |
| cg15891358 | 2.13E-09 | 1.87E-10 | -6.73 | 12.8634532 | -1.38E-01 | 128210552 | 128210675 | NC_000010.10 |
| cg24768463 | 2.13E-09 | 1.87E-10 | -6.73 | 12.8633162 | -1.22E-01 | 7043676   | 7043799   | NC_000012.11 |
| cg04403474 | 2.13E-09 | 1.88E-10 | -6.73 | 12.8621696 | -9.30E-02 | 49545638  | 49545761  | NC_000019.9  |
| cg04027916 | 2.13E-09 | 1.88E-10 | -6.73 | 12.8614678 | -3.37E-02 | 65686562  | 65686685  | NC_000011.9  |
| cg17089019 | 2.13E-09 | 1.88E-10 | -6.73 | 12.8612787 | -1.24E-01 | 41343215  | 41343338  | NC_000001.10 |
| cg11152263 | 2.13E-09 | 1.88E-10 | -6.73 | 12.8599589 | -1.83E-01 | 569642    | 569765    | NC_000007.13 |
| cg26954101 | 2.14E-09 | 1.88E-10 | -6.73 | 12.8579762 | -1.25E-01 | 77526296  | 77526419  | NC_000014.8  |
| cg26418880 | 2.14E-09 | 1.88E-10 | -6.73 | 12.8579694 | -5.73E-02 | 56123972  | 56124095  | NC_000012.11 |
| cg23438945 | 2.14E-09 | 1.89E-10 | -6.73 | 12.857128  | -6.29E-02 | 99517277  | 99517400  | NC_000007.13 |
| cg05020510 | 2.14E-09 | 1.89E-10 | -6.72 | 12.8550304 | -8.98E-02 | 120428057 | 120428180 | NC_000008.10 |
| cg24107443 | 2.15E-09 | 1.89E-10 | -6.72 | 12.8543699 | -1.11E-01 | 23729011  | 23729134  | NC_000022.10 |
| cg26851141 | 2.15E-09 | 1.89E-10 | -6.72 | 12.8543657 | -5.24E-02 | 58426274  | 58426397  | NC_000016.9  |
| cg23795082 | 2.15E-09 | 1.89E-10 | -6.72 | 12.8542589 | -1.31E-01 | 843318    | 843441    | NC_000004.11 |
| cg17066531 | 2.15E-09 | 1.89E-10 | -6.72 | 12.8530713 | -1.25E-01 | 36922415  | 36922538  | NC_000006.11 |
| cg26107033 | 2.15E-09 | 1.89E-10 | -6.72 | 12.852758  | -1.58E-01 | 209825672 | 209825795 | NC_000001.10 |

|            |          |          |       |            |           |           |           |              |
|------------|----------|----------|-------|------------|-----------|-----------|-----------|--------------|
| cg26473548 | 2.15E-09 | 1.90E-10 | -6.72 | 12.8513687 | -9.54E-02 | 172868268 | 172868391 | NC_000005.9  |
| cg14480463 | 2.15E-09 | 1.90E-10 | -6.72 | 12.8510003 | -7.15E-02 | 1543435   | 1543558   | NC_000007.13 |
| cg12256311 | 2.15E-09 | 1.90E-10 | -6.72 | 12.8508848 | -6.78E-02 | 685750    | 685873    | NC_000017.10 |
| cg18570646 | 2.15E-09 | 1.90E-10 | -6.72 | 12.8502166 | -3.41E-02 | 37391424  | 37391547  | NC_000015.9  |
| cg24728180 | 2.16E-09 | 1.90E-10 | -6.72 | 12.8477358 | -2.14E-01 | 68133235  | 68133358  | NC_000011.9  |
| cg22957339 | 2.16E-09 | 1.91E-10 | -6.72 | 12.8474536 | -7.88E-02 | 31246272  | 31246395  | NC_000015.9  |
| cg08351131 | 2.16E-09 | 1.91E-10 | -6.72 | 12.8467996 | -1.22E-01 | 43242591  | 43242714  | NC_000017.10 |
| cg08641963 | 2.16E-09 | 1.91E-10 | -6.72 | 12.8464343 | -8.99E-02 | 44451973  | 44452096  | NC_000020.10 |
| cg18541042 | 2.16E-09 | 1.91E-10 | -6.72 | 12.8463809 | -1.48E-01 | 140227195 | 140227318 | NC_000007.13 |
| cg25881535 | 2.16E-09 | 1.91E-10 | -6.72 | 12.8462202 | -1.40E-01 | 52625897  | 52626020  | NC_000012.11 |
| cg27059354 | 2.16E-09 | 1.91E-10 | -6.72 | 12.8458279 | -1.72E-01 | 100346529 | 100346652 | NC_000014.8  |
| cg16807911 | 2.16E-09 | 1.91E-10 | -6.72 | 12.8454316 | -6.04E-02 | 58145918  | 58146041  | NC_000012.11 |
| cg09092525 | 2.16E-09 | 1.91E-10 | -6.72 | 12.8453844 | -1.30E-01 | 58570133  | 58570256  | NC_000020.10 |
| cg03604367 | 2.17E-09 | 1.91E-10 | -6.72 | 12.8439828 | -6.69E-02 | 12610817  | 12610940  | NC_000007.13 |
| cg20510033 | 2.17E-09 | 1.91E-10 | -6.72 | 12.8434499 | -1.18E-01 | 8960134   | 8960257   | NC_000001.10 |
| cg27425327 | 2.17E-09 | 1.92E-10 | -6.72 | 12.8415646 | -7.77E-02 | 102270723 | 102270846 | NC_000012.11 |
| cg22485372 | 2.17E-09 | 1.92E-10 | -6.72 | 12.8408632 | -5.34E-02 | 91487159  | 91487282  | NC_000001.10 |
| cg08283595 | 2.18E-09 | 1.92E-10 | -6.72 | 12.8385846 | -1.93E-01 | 1299466   | 1299589   | NC_000004.11 |
| cg17767659 | 2.18E-09 | 1.92E-10 | -6.72 | 12.8382891 | -3.79E-02 | 41888922  | 41889045  | NC_000006.11 |
| cg15584070 | 2.18E-09 | 1.92E-10 | -6.72 | 12.8381609 | -1.38E-01 | 129439854 | 129439977 | NC_000002.11 |
| cg22109795 | 2.18E-09 | 1.92E-10 | -6.72 | 12.8376105 | -1.34E-01 | 210468650 | 210468773 | NC_000001.10 |
| cg25205321 | 2.18E-09 | 1.93E-10 | -6.72 | 12.8361406 | -1.46E-01 | 111096339 | 111096462 | NC_000013.10 |
| cg21565150 | 2.18E-09 | 1.93E-10 | -6.72 | 12.8352303 | -2.50E-02 | 90751097  | 90751220  | NC_000010.10 |
| cg17392909 | 2.19E-09 | 1.93E-10 | -6.72 | 12.8324279 | -7.26E-02 | 135187035 | 135187158 | NC_000010.10 |
| cg09633881 | 2.19E-09 | 1.94E-10 | -6.72 | 12.8321225 | -8.02E-02 | 33002021  | 33002144  | NC_000009.11 |

|               |          |          |       |            |           |           |           |              |
|---------------|----------|----------|-------|------------|-----------|-----------|-----------|--------------|
| cg04007890    | 2.19E-09 | 1.94E-10 | -6.72 | 12.8320053 | -1.30E-01 | 976706    | 976829    | NC_000007.13 |
| cg25510614    | 2.19E-09 | 1.94E-10 | -6.72 | 12.831957  | -1.38E-01 | 683772    | 683895    | NC_000004.11 |
| cg16257215    | 2.19E-09 | 1.94E-10 | -6.72 | 12.8312073 | -9.39E-02 | 202092296 | 202092419 | NC_000001.10 |
| cg08474901    | 2.19E-09 | 1.94E-10 | -6.72 | 12.8308667 | -1.21E-01 | 13092035  | 13092158  | NC_000010.10 |
| cg03958883    | 2.19E-09 | 1.94E-10 | -6.72 | 12.830468  | -1.29E-01 | 73020729  | 73020852  | NC_000011.9  |
| cg15924831    | 2.20E-09 | 1.94E-10 | -6.72 | 12.8295776 | -6.52E-02 | 149529665 | 149529788 | NC_000005.9  |
| cg25124241    | 2.20E-09 | 1.94E-10 | -6.72 | 12.8292104 | -4.35E-02 | 121944931 | 121945054 | NC_000007.13 |
| cg16035633    | 2.20E-09 | 1.94E-10 | -6.72 | 12.8290315 | -1.01E-01 | 150700728 | 150700851 | NC_000007.13 |
| cg06956006    | 2.20E-09 | 1.94E-10 | -6.72 | 12.8281773 | -1.18E-01 | 40066945  | 40067068  | NC_000017.10 |
| cg06889746    | 2.20E-09 | 1.94E-10 | -6.72 | 12.8279013 | -1.98E-01 | 99395435  | 99395558  | NC_000015.9  |
| cg27631248    | 2.20E-09 | 1.95E-10 | -6.72 | 12.8267752 | -1.40E-02 | 220267790 | 220267913 | NC_000001.10 |
| cg00424354    | 2.20E-09 | 1.95E-10 | -6.72 | 12.8265745 | -1.49E-01 | 100555339 | 100555462 | NC_000011.9  |
| cg01119072    | 2.20E-09 | 1.95E-10 | -6.72 | 12.8262408 | -1.09E-01 | 84076582  | 84076705  | NC_000016.9  |
| cg13978856    | 2.20E-09 | 1.95E-10 | -6.72 | 12.8262133 | -1.04E-01 | 40918191  | 40918314  | NC_000004.11 |
| cg20077230    | 2.20E-09 | 1.95E-10 | -6.72 | 12.8258033 | -1.15E-01 | 67022852  | 67022975  | NC_000003.11 |
| cg21025113    | 2.21E-09 | 1.95E-10 | -6.72 | 12.8236483 | -8.43E-02 | 46270542  | 46270665  | NC_000011.9  |
| cg06716182    | 2.21E-09 | 1.95E-10 | -6.72 | 12.822938  | -1.31E-01 | 96074944  | 96075067  | NC_000011.9  |
| cg05880945    | 2.21E-09 | 1.95E-10 | -6.72 | 12.8228001 | -9.74E-02 | 38622480  | 38622603  | NC_000009.11 |
| cg26474124    | 2.22E-09 | 1.96E-10 | -6.72 | 12.8202716 | -1.25E-01 | 70368457  | 70368580  | NC_000002.11 |
| cg26316373    | 2.22E-09 | 1.96E-10 | -6.72 | 12.8194242 | -1.13E-01 | 48206749  | 48206872  | NC_000017.10 |
| cg03280108    | 2.22E-09 | 1.96E-10 | -6.72 | 12.8192119 | -1.64E-01 | 26298067  | 26298190  | NC_000008.10 |
| cg05753589    | 2.22E-09 | 1.96E-10 | -6.72 | 12.8189281 | -4.90E-02 | 2064765   | 2064888   | NC_000001.10 |
| ch.11.720675R | 2.22E-09 | 1.96E-10 | -6.72 | 12.8185544 | -3.65E-02 | 34135302  | 34135425  | NC_000011.9  |
| cg01981760    | 2.22E-09 | 1.96E-10 | -6.72 | 12.8183939 | -3.32E-02 | 53737576  | 53737699  | NC_000016.9  |
| cg10881225    | 2.22E-09 | 1.96E-10 | -6.72 | 12.8172169 | -2.05E-01 | 9984929   | 9985052   | NC_000002.11 |

|            |          |          |       |            |           |           |           |              |
|------------|----------|----------|-------|------------|-----------|-----------|-----------|--------------|
| cg08241082 | 2.22E-09 | 1.97E-10 | -6.72 | 12.8168354 | -1.14E-01 | 71149623  | 71149746  | NC_000012.11 |
| cg02569658 | 2.22E-09 | 1.97E-10 | -6.72 | 12.8166579 | -1.03E-01 | 113499528 | 113499651 | NC_000001.10 |
| cg18801579 | 2.22E-09 | 1.97E-10 | -6.72 | 12.8165578 | -1.69E-01 | 1003897   | 1004020   | NC_000005.9  |
| cg08903381 | 2.23E-09 | 1.97E-10 | -6.72 | 12.8158465 | -2.63E-02 | 30103528  | 30103651  | NC_000016.9  |
| cg25638993 | 2.23E-09 | 1.97E-10 | -6.72 | 12.8153629 | -1.31E-01 | 62085629  | 62085752  | NC_000020.10 |
| cg08478672 | 2.23E-09 | 1.97E-10 | -6.72 | 12.8148068 | -1.56E-01 | 129374295 | 129374418 | NC_000008.10 |
| cg20434586 | 2.23E-09 | 1.97E-10 | -6.72 | 12.814728  | -4.50E-02 | 43237511  | 43237634  | NC_000006.11 |
| cg14591195 | 2.23E-09 | 1.97E-10 | -6.72 | 12.814379  | -5.41E-02 | 7382608   | 7382731   | NC_000017.10 |
| cg20808893 | 2.23E-09 | 1.97E-10 | -6.72 | 12.8135969 | -2.51E-02 | 54965215  | 54965338  | NC_000001.10 |
| cg02332696 | 2.23E-09 | 1.97E-10 | -6.72 | 12.8121939 | -1.70E-01 | 21783091  | 21783214  | NC_000010.10 |
| cg14418609 | 2.23E-09 | 1.98E-10 | -6.72 | 12.8118043 | -1.20E-01 | 233286870 | 233286993 | NC_000002.11 |
| cg27438425 | 2.23E-09 | 1.98E-10 | -6.72 | 12.8115608 | -1.53E-01 | 41952221  | 41952344  | NC_000001.10 |
| cg00089821 | 2.24E-09 | 1.98E-10 | -6.72 | 12.8104084 | -1.02E-01 | 170807096 | 170807219 | NC_000006.11 |
| cg25818583 | 2.24E-09 | 1.98E-10 | -6.72 | 12.8100885 | -1.50E-01 | 55549801  | 55549924  | NC_000019.9  |
| cg05924212 | 2.24E-09 | 1.98E-10 | -6.72 | 12.8097517 | -5.17E-02 | 30455114  | 30455237  | NC_000002.11 |
| cg02076598 | 2.24E-09 | 1.98E-10 | -6.72 | 12.8091799 | -1.63E-01 | 25423801  | 25423924  | NC_000022.10 |
| cg13096541 | 2.24E-09 | 1.98E-10 | -6.72 | 12.8091311 | -3.69E-02 | 138482936 | 138483059 | NC_000006.11 |
| cg01116568 | 2.24E-09 | 1.98E-10 | -6.72 | 12.807166  | -1.64E-01 | 10476529  | 10476652  | NC_000011.9  |
| cg24646009 | 2.25E-09 | 1.99E-10 | -6.72 | 12.8061261 | -8.76E-02 | 107221327 | 107221450 | NC_000007.13 |
| cg10016024 | 2.25E-09 | 1.99E-10 | -6.72 | 12.8059071 | -9.48E-02 | 71315863  | 71315986  | NC_000011.9  |
| cg12326244 | 2.25E-09 | 1.99E-10 | -6.72 | 12.8057724 | -1.43E-01 | 78078995  | 78079118  | NC_000017.10 |
| cg08920628 | 2.25E-09 | 1.99E-10 | -6.72 | 12.8054702 | -3.40E-02 | 48354911  | 48355034  | NC_000010.10 |
| cg00710862 | 2.25E-09 | 1.99E-10 | -6.72 | 12.8051078 | -1.43E-01 | 85545908  | 85546031  | NC_000002.11 |
| cg12115081 | 2.25E-09 | 1.99E-10 | -6.72 | 12.8041431 | -1.01E-01 | 151038391 | 151038514 | NC_000004.11 |
| cg02066184 | 2.25E-09 | 1.99E-10 | -6.72 | 12.8036041 | -1.60E-01 | 16841504  | 16841627  | NC_000007.13 |

|            |          |          |       |            |           |           |           |              |
|------------|----------|----------|-------|------------|-----------|-----------|-----------|--------------|
| cg16048817 | 2.25E-09 | 1.99E-10 | -6.72 | 12.8034999 | -1.33E-01 | 41001944  | 41002067  | NC_000017.10 |
| cg21881184 | 2.25E-09 | 1.99E-10 | -6.72 | 12.803294  | -1.30E-01 | 1993022   | 1993145   | NC_000019.9  |
| cg12995421 | 2.25E-09 | 1.99E-10 | -6.72 | 12.8032063 | -1.11E-01 | 59999842  | 59999965  | NC_000005.9  |
| cg18942110 | 2.25E-09 | 1.99E-10 | -6.72 | 12.8028638 | -4.57E-02 | 91072797  | 91072920  | NC_000015.9  |
| cg19930116 | 2.25E-09 | 1.99E-10 | -6.72 | 12.8024566 | -1.05E-01 | 50809588  | 50809711  | NC_000014.8  |
| cg20399252 | 2.25E-09 | 2.00E-10 | -6.72 | 12.8019001 | -1.49E-01 | 50266227  | 50266350  | NC_000013.10 |
| cg06836736 | 2.26E-09 | 2.00E-10 | -6.72 | 12.8012865 | -5.17E-02 | 84140993  | 84141116  | NC_000006.11 |
| cg23240145 | 2.26E-09 | 2.00E-10 | -6.71 | 12.8007377 | -1.38E-01 | 70682771  | 70682894  | NC_000013.10 |
| cg19035232 | 2.26E-09 | 2.00E-10 | -6.71 | 12.8003119 | -1.35E-01 | 51589985  | 51590108  | NC_000020.10 |
| cg16604801 | 2.26E-09 | 2.00E-10 | -6.71 | 12.7996635 | -1.36E-01 | 2718310   | 2718433   | NC_000017.10 |
| cg17920653 | 2.26E-09 | 2.01E-10 | -6.71 | 12.7970081 | -9.57E-02 | 220115278 | 220115401 | NC_000002.11 |
| cg03461430 | 2.27E-09 | 2.01E-10 | -6.71 | 12.7965524 | -1.20E-01 | 143201610 | 143201733 | NC_000008.10 |
| cg17488500 | 2.27E-09 | 2.01E-10 | -6.71 | 12.7946593 | -1.42E-01 | 154307007 | 154307130 | NC_000001.10 |
| cg13365972 | 2.27E-09 | 2.01E-10 | -6.71 | 12.7931793 | -1.07E-01 | 1629275   | 1629398   | NC_000011.9  |
| cg21301148 | 2.28E-09 | 2.02E-10 | -6.71 | 12.7921101 | -8.59E-02 | 23878195  | 23878318  | NC_000014.8  |
| cg18486150 | 2.28E-09 | 2.02E-10 | -6.71 | 12.7910332 | -1.43E-01 | 21044874  | 21044997  | NC_000001.10 |
| cg19738774 | 2.28E-09 | 2.02E-10 | -6.71 | 12.7899461 | -6.99E-02 | 68778850  | 68778973  | NC_000011.9  |
| cg15547276 | 2.28E-09 | 2.02E-10 | -6.71 | 12.7899421 | -2.98E-02 | 41321718  | 41321841  | NC_000017.10 |
| cg22450798 | 2.28E-09 | 2.02E-10 | -6.71 | 12.7889568 | -5.74E-02 | 28705842  | 28705965  | NC_000017.10 |
| cg02181968 | 2.28E-09 | 2.02E-10 | -6.71 | 12.7887179 | -2.62E-02 | 39836347  | 39836470  | NC_000012.11 |
| cg26829098 | 2.28E-09 | 2.02E-10 | -6.71 | 12.7884452 | -8.02E-02 | 86968255  | 86968378  | NC_000001.10 |
| cg27588902 | 2.29E-09 | 2.03E-10 | -6.71 | 12.7872455 | -6.32E-02 | 42928151  | 42928274  | NC_000006.11 |
| cg25130390 | 2.29E-09 | 2.03E-10 | -6.71 | 12.7869362 | -3.98E-02 | 65810150  | 65810273  | NC_000015.9  |
| cg18337222 | 2.29E-09 | 2.03E-10 | -6.71 | 12.7854952 | -9.67E-02 | 99595254  | 99595377  | NC_000003.11 |
| cg12394426 | 2.29E-09 | 2.03E-10 | -6.71 | 12.7833578 | -5.38E-02 | 64009745  | 64009868  | NC_000011.9  |



|                 |          |          |       |            |           |           |           |              |
|-----------------|----------|----------|-------|------------|-----------|-----------|-----------|--------------|
| cg10829727      | 2.30E-09 | 2.03E-10 | -6.71 | 12.7830515 | -8.25E-02 | 73084309  | 73084432  | NC_000017.10 |
| cg21829783      | 2.30E-09 | 2.04E-10 | -6.71 | 12.7810739 | -1.89E-01 | 160493089 | 160493212 | NC_000001.10 |
| cg25485913      | 2.30E-09 | 2.04E-10 | -6.71 | 12.7800492 | -8.23E-02 | 49568962  | 49569085  | NC_000019.9  |
| cg17868445      | 2.31E-09 | 2.04E-10 | -6.71 | 12.7784872 | -6.37E-02 | 83294709  | 83294832  | NC_000004.11 |
| cg02799411      | 2.31E-09 | 2.05E-10 | -6.71 | 12.7764915 | -1.34E-01 | 4794061   | 4794184   | NC_000003.11 |
| cg08049136      | 2.31E-09 | 2.05E-10 | -6.71 | 12.7762565 | -5.85E-02 | 10765744  | 10765867  | NC_000019.9  |
| cg15103181      | 2.31E-09 | 2.05E-10 | -6.71 | 12.7760338 | -5.48E-02 | 35454479  | 35454602  | NC_000019.9  |
| cg24757778      | 2.31E-09 | 2.05E-10 | -6.71 | 12.7751527 | -1.45E-01 | 60616392  | 60616515  | NC_000010.10 |
| cg09826188      | 2.32E-09 | 2.06E-10 | -6.71 | 12.772425  | -6.64E-02 | 99979421  | 99979544  | NC_000003.11 |
| cg21223341      | 2.32E-09 | 2.06E-10 | -6.71 | 12.7721944 | -1.19E-01 | 136653337 | 136653460 | NC_000009.11 |
| cg02844502      | 2.32E-09 | 2.06E-10 | -6.71 | 12.77216   | -1.38E-01 | 140189025 | 140189148 | NC_000009.11 |
| cg06712763      | 2.32E-09 | 2.06E-10 | -6.71 | 12.7720198 | -6.65E-02 | 3070057   | 3070180   | NC_000016.9  |
| cg24238564      | 2.32E-09 | 2.06E-10 | -6.71 | 12.7716779 | -2.90E-02 | 65779343  | 65779466  | NC_000011.9  |
| cg07664183      | 2.32E-09 | 2.06E-10 | -6.71 | 12.7709129 | -1.07E-01 | 19103231  | 19103354  | NC_000009.11 |
| cg01589587      | 2.32E-09 | 2.06E-10 | -6.71 | 12.7703865 | -1.31E-01 | 76002440  | 76002563  | NC_000014.8  |
| cg03214130      | 2.32E-09 | 2.06E-10 | -6.71 | 12.7701704 | -1.50E-01 | 36088642  | 36088765  | NC_000007.13 |
| cg06527166      | 2.32E-09 | 2.06E-10 | -6.71 | 12.7698153 | -9.46E-02 | 42138658  | 42138781  | NC_000001.10 |
| cg24678319      | 2.33E-09 | 2.06E-10 | -6.71 | 12.7686769 | -5.01E-02 | 45097946  | 45098069  | NC_000022.10 |
| cg00249205      | 2.33E-09 | 2.06E-10 | -6.71 | 12.7684245 | -1.38E-01 | 31012263  | 31012386  | NC_000016.9  |
| ch.9.106041185R | 2.33E-09 | 2.07E-10 | -6.71 | 12.7680322 | -2.20E-02 | 107001364 | 107001487 | NC_000009.11 |
| cg22826239      | 2.33E-09 | 2.07E-10 | -6.71 | 12.767034  | -1.17E-01 | 23510123  | 23510246  | NC_000007.13 |
| cg17733447      | 2.33E-09 | 2.07E-10 | -6.71 | 12.7667819 | -1.27E-01 | 45929399  | 45929522  | NC_000017.10 |
| cg01635061      | 2.33E-09 | 2.07E-10 | -6.71 | 12.7662677 | -1.28E-01 | 33160234  | 33160357  | NC_000006.11 |
| cg00507945      | 2.33E-09 | 2.07E-10 | -6.71 | 12.7661731 | -8.00E-02 | 180614561 | 180614684 | NC_000005.9  |
| cg04339837      | 2.33E-09 | 2.07E-10 | -6.71 | 12.7657555 | -1.55E-01 | 12656114  | 12656237  | NC_000001.10 |

|                 |          |          |       |            |           |           |           |              |
|-----------------|----------|----------|-------|------------|-----------|-----------|-----------|--------------|
| cg10729062      | 2.34E-09 | 2.07E-10 | -6.71 | 12.7644349 | -9.90E-02 | 14049823  | 14049946  | NC_000019.9  |
| cg12835352      | 2.34E-09 | 2.07E-10 | -6.71 | 12.7644047 | -3.38E-02 | 4065539   | 4065662   | NC_000019.9  |
| ch.2.171328329F | 2.34E-09 | 2.08E-10 | -6.71 | 12.7634427 | -2.49E-02 | 171620083 | 171620206 | NC_000002.11 |
| cg00323313      | 2.34E-09 | 2.08E-10 | -6.71 | 12.7628496 | -1.19E-01 | 23054915  | 23055038  | NC_000001.10 |
| cg07977614      | 2.34E-09 | 2.08E-10 | -6.71 | 12.7618868 | -1.52E-01 | 242310145 | 242310268 | NC_000001.10 |
| cg01273802      | 2.35E-09 | 2.08E-10 | -6.71 | 12.7597322 | -9.82E-02 | 10871371  | 10871494  | NC_000008.10 |
| cg05892419      | 2.35E-09 | 2.08E-10 | -6.71 | 12.7596289 | -1.18E-01 | 29764719  | 29764842  | NC_000017.10 |
| cg07887806      | 2.35E-09 | 2.08E-10 | -6.71 | 12.7594373 | -7.68E-02 | 128840836 | 128840959 | NC_000003.11 |
| cg17259265      | 2.35E-09 | 2.08E-10 | -6.71 | 12.7590293 | -1.60E-01 | 125753373 | 125753496 | NC_000011.9  |
| cg21614201      | 2.35E-09 | 2.09E-10 | -6.71 | 12.7580328 | -1.08E-01 | 119888794 | 119888917 | NC_000004.11 |
| cg05569909      | 2.35E-09 | 2.09E-10 | -6.71 | 12.7577804 | -1.06E-01 | 102990026 | 102990149 | NC_000010.10 |
| cg27083689      | 2.35E-09 | 2.09E-10 | -6.71 | 12.757079  | -8.23E-02 | 10057059  | 10057182  | NC_000001.10 |
| cg16139006      | 2.35E-09 | 2.09E-10 | -6.71 | 12.756639  | -1.34E-01 | 113393322 | 113393445 | NC_000001.10 |
| cg26104551      | 2.35E-09 | 2.09E-10 | -6.71 | 12.756542  | -7.90E-02 | 27851776  | 27851899  | NC_000002.11 |
| cg26928972      | 2.35E-09 | 2.09E-10 | -6.71 | 12.7562076 | -1.63E-01 | 122043799 | 122043922 | NC_000003.11 |
| cg08940169      | 2.36E-09 | 2.09E-10 | -6.71 | 12.7559418 | -1.03E-01 | 88540241  | 88540364  | NC_000016.9  |
| cg00264129      | 2.36E-09 | 2.09E-10 | -6.71 | 12.7553149 | -1.47E-01 | 139725093 | 139725216 | NC_000005.9  |
| cg03357730      | 2.36E-09 | 2.09E-10 | -6.71 | 12.7543296 | -3.27E-02 | 31510130  | 31510253  | NC_000006.11 |
| cg15056105      | 2.36E-09 | 2.10E-10 | -6.71 | 12.7540294 | -1.23E-01 | 13611489  | 13611612  | NC_000018.9  |
| cg09122423      | 2.36E-09 | 2.10E-10 | -6.71 | 12.7534218 | -1.07E-01 | 107540995 | 107541118 | NC_000011.9  |
| cg14121593      | 2.36E-09 | 2.10E-10 | -6.71 | 12.7534129 | -3.83E-02 | 132084793 | 132084916 | NC_000009.11 |
| cg13578393      | 2.36E-09 | 2.10E-10 | -6.71 | 12.7528474 | -5.94E-02 | 571321    | 571444    | NC_000019.9  |
| cg20905621      | 2.36E-09 | 2.10E-10 | -6.71 | 12.7518169 | -1.21E-01 | 31892751  | 31892874  | NC_000010.10 |
| cg11888381      | 2.36E-09 | 2.10E-10 | -6.71 | 12.7515252 | -6.84E-02 | 184053532 | 184053655 | NC_000003.11 |
| cg07081245      | 2.37E-09 | 2.10E-10 | -6.71 | 12.750567  | -1.03E-01 | 120433996 | 120434119 | NC_000011.9  |

|            |          |          |       |            |           |           |           |              |
|------------|----------|----------|-------|------------|-----------|-----------|-----------|--------------|
| cg26193418 | 2.37E-09 | 2.10E-10 | -6.71 | 12.7502604 | -1.45E-01 | 33973655  | 33973778  | NC_000007.13 |
| cg15861059 | 2.37E-09 | 2.10E-10 | -6.71 | 12.7502536 | -3.71E-02 | 2972195   | 2972318   | NC_000006.11 |
| cg11019462 | 2.37E-09 | 2.11E-10 | -6.71 | 12.7488451 | -1.90E-02 | 43299789  | 43299912  | NC_000021.8  |
| cg11347316 | 2.37E-09 | 2.11E-10 | -6.71 | 12.7481719 | -4.42E-02 | 18343657  | 18343780  | NC_000011.9  |
| cg07794409 | 2.38E-09 | 2.11E-10 | -6.71 | 12.7461579 | -9.09E-02 | 156473988 | 156474111 | NC_000001.10 |
| cg15617548 | 2.38E-09 | 2.11E-10 | -6.7  | 12.7458846 | -9.10E-02 | 171785815 | 171785938 | NC_000002.11 |
| cg06900571 | 2.38E-09 | 2.12E-10 | -6.7  | 12.7446403 | -1.64E-01 | 141248582 | 141248705 | NC_000008.10 |
| cg12946690 | 2.38E-09 | 2.12E-10 | -6.7  | 12.7436597 | -5.33E-02 | 2206740   | 2206863   | NC_000017.10 |
| cg26759515 | 2.39E-09 | 2.12E-10 | -6.7  | 12.7419157 | -3.91E-02 | 67515027  | 67515150  | NC_000016.9  |
| cg24869232 | 2.39E-09 | 2.12E-10 | -6.7  | 12.741687  | -1.12E-01 | 109154811 | 109154934 | NC_000002.11 |
| cg11218330 | 2.39E-09 | 2.12E-10 | -6.7  | 12.7415979 | -8.16E-02 | 113437795 | 113437918 | NC_000013.10 |
| cg08407014 | 2.39E-09 | 2.12E-10 | -6.7  | 12.7411991 | -1.38E-01 | 2541104   | 2541227   | NC_000019.9  |
| cg13271643 | 2.39E-09 | 2.12E-10 | -6.7  | 12.7405963 | -1.10E-01 | 21036583  | 21036706  | NC_000013.10 |
| cg21912060 | 2.39E-09 | 2.13E-10 | -6.7  | 12.7392186 | -2.00E-01 | 138662875 | 138662998 | NC_000003.11 |
| cg13151664 | 2.39E-09 | 2.13E-10 | -6.7  | 12.7387028 | -1.59E-01 | 123813232 | 123813355 | NC_000003.11 |
| cg21312066 | 2.40E-09 | 2.13E-10 | -6.7  | 12.7379947 | -2.34E-02 | 45942777  | 45942900  | NC_000019.9  |
| cg02037425 | 2.40E-09 | 2.13E-10 | -6.7  | 12.7375457 | -1.21E-01 | 42662538  | 42662661  | NC_000014.8  |
| cg11619602 | 2.40E-09 | 2.13E-10 | -6.7  | 12.7375283 | -9.35E-02 | 13360707  | 13360830  | NC_000011.9  |
| cg02493905 | 2.40E-09 | 2.13E-10 | -6.7  | 12.7371043 | -1.54E-01 | 151520213 | 151520336 | NC_000001.10 |
| cg13337731 | 2.40E-09 | 2.13E-10 | -6.7  | 12.7365401 | -1.77E-01 | 73011308  | 73011431  | NC_000007.13 |
| cg26258245 | 2.40E-09 | 2.13E-10 | -6.7  | 12.7363119 | -1.11E-01 | 15695917  | 15696040  | NC_000019.9  |
| cg27296937 | 2.40E-09 | 2.14E-10 | -6.7  | 12.7336681 | -1.56E-01 | 218997192 | 218997315 | NC_000001.10 |
| cg00038857 | 2.41E-09 | 2.14E-10 | -6.7  | 12.7333581 | -1.27E-01 | 32645753  | 32645876  | NC_000017.10 |
| cg26815021 | 2.41E-09 | 2.14E-10 | -6.7  | 12.7330817 | -5.18E-02 | 74733172  | 74733295  | NC_000017.10 |
| cg03717367 | 2.41E-09 | 2.14E-10 | -6.7  | 12.7328044 | -1.30E-01 | 139980219 | 139980342 | NC_000009.11 |

|                |          |          |      |            |           |           |           |              |
|----------------|----------|----------|------|------------|-----------|-----------|-----------|--------------|
| cg04586023     | 2.41E-09 | 2.14E-10 | -6.7 | 12.7327338 | -8.52E-02 | 50690380  | 50690503  | NC_000022.10 |
| cg14769121     | 2.41E-09 | 2.14E-10 | -6.7 | 12.7320496 | -1.55E-01 | 98722470  | 98722593  | NC_000007.13 |
| cg08539965     | 2.41E-09 | 2.14E-10 | -6.7 | 12.7315333 | -1.18E-01 | 21396338  | 21396461  | NC_000001.10 |
| cg04799210     | 2.41E-09 | 2.14E-10 | -6.7 | 12.7314183 | -1.05E-01 | 1994761   | 1994884   | NC_000004.11 |
| cg11338339     | 2.41E-09 | 2.15E-10 | -6.7 | 12.7299219 | -1.35E-01 | 194823909 | 194824032 | NC_000003.11 |
| cg12346083     | 2.41E-09 | 2.15E-10 | -6.7 | 12.7297066 | -7.38E-02 | 137549537 | 137549660 | NC_000005.9  |
| cg14361654     | 2.42E-09 | 2.15E-10 | -6.7 | 12.7283907 | -1.17E-01 | 139615215 | 139615338 | NC_000009.11 |
| cg05360714     | 2.42E-09 | 2.15E-10 | -6.7 | 12.7280438 | -1.07E-01 | 75543046  | 75543169  | NC_000017.10 |
| cg18313182     | 2.42E-09 | 2.15E-10 | -6.7 | 12.7267436 | -1.10E-01 | 818903    | 819026    | NC_000011.9  |
| cg18703983     | 2.42E-09 | 2.15E-10 | -6.7 | 12.7266955 | -1.26E-01 | 18097337  | 18097460  | NC_000002.11 |
| cg08769634     | 2.42E-09 | 2.15E-10 | -6.7 | 12.7266613 | -1.17E-01 | 71657362  | 71657485  | NC_000016.9  |
| cg24222546     | 2.42E-09 | 2.15E-10 | -6.7 | 12.7265991 | -1.18E-01 | 74501771  | 74501894  | NC_000015.9  |
| cg22654626     | 2.42E-09 | 2.16E-10 | -6.7 | 12.7265554 | -6.35E-02 | 18699620  | 18699743  | NC_000019.9  |
| ch.14.1499103R | 2.42E-09 | 2.16E-10 | -6.7 | 12.725526  | -5.14E-02 | 93412334  | 93412457  | NC_000014.8  |
| cg20322832     | 2.43E-09 | 2.16E-10 | -6.7 | 12.7247109 | -7.86E-02 | 73073878  | 73074001  | NC_000017.10 |
| cg08861826     | 2.43E-09 | 2.16E-10 | -6.7 | 12.7233818 | -2.55E-02 | 18416224  | 18416347  | NC_000011.9  |
| cg04657183     | 2.43E-09 | 2.16E-10 | -6.7 | 12.7232323 | -1.30E-01 | 175636905 | 175637028 | NC_000002.11 |
| cg09853043     | 2.43E-09 | 2.16E-10 | -6.7 | 12.7224439 | -4.87E-02 | 74658628  | 74658751  | NC_000008.10 |
| cg26858152     | 2.43E-09 | 2.16E-10 | -6.7 | 12.7223531 | -1.25E-01 | 140971523 | 140971646 | NC_000008.10 |
| cg24048361     | 2.43E-09 | 2.16E-10 | -6.7 | 12.7222385 | -6.04E-02 | 224776790 | 224776913 | NC_000001.10 |
| cg27054424     | 2.43E-09 | 2.16E-10 | -6.7 | 12.722064  | -1.54E-01 | 105094993 | 105095116 | NC_000007.13 |
| cg21448513     | 2.43E-09 | 2.17E-10 | -6.7 | 12.7208737 | -7.87E-02 | 57103638  | 57103761  | NC_000008.10 |
| cg00954566     | 2.43E-09 | 2.17E-10 | -6.7 | 12.7203649 | -1.64E-02 | 102106405 | 102106528 | NC_000010.10 |
| cg06832359     | 2.44E-09 | 2.17E-10 | -6.7 | 12.7196349 | -8.82E-02 | 205633759 | 205633882 | NC_000001.10 |
| cg02902975     | 2.44E-09 | 2.17E-10 | -6.7 | 12.7194155 | -1.32E-01 | 67360129  | 67360252  | NC_000016.9  |

|                |          |          |      |            |           |           |           |              |
|----------------|----------|----------|------|------------|-----------|-----------|-----------|--------------|
| cg13295242     | 2.44E-09 | 2.17E-10 | -6.7 | 12.7192745 | -8.56E-02 | 7239718   | 7239841   | NC_000017.10 |
| ch.5.38673910R | 2.44E-09 | 2.17E-10 | -6.7 | 12.7189189 | -2.07E-02 | 38638153  | 38638276  | NC_000005.9  |
| cg21655969     | 2.44E-09 | 2.17E-10 | -6.7 | 12.7184871 | -5.64E-02 | 90792609  | 90792732  | NC_000015.9  |
| cg08454546     | 2.44E-09 | 2.17E-10 | -6.7 | 12.7178055 | -1.29E-01 | 59731340  | 59731463  | NC_000015.9  |
| cg13731605     | 2.44E-09 | 2.18E-10 | -6.7 | 12.716821  | -8.95E-02 | 21660372  | 21660495  | NC_000014.8  |
| cg19599407     | 2.44E-09 | 2.18E-10 | -6.7 | 12.7166178 | -9.90E-02 | 33360214  | 33360337  | NC_000015.9  |
| cg08011941     | 2.44E-09 | 2.18E-10 | -6.7 | 12.7162452 | -1.30E-01 | 140333139 | 140333262 | NC_000009.11 |
| cg07786355     | 2.45E-09 | 2.18E-10 | -6.7 | 12.7155655 | -1.11E-01 | 90913036  | 90913159  | NC_000010.10 |
| cg07027613     | 2.45E-09 | 2.18E-10 | -6.7 | 12.7154652 | -5.97E-02 | 7260608   | 7260731   | NC_000012.11 |
| cg09397246     | 2.45E-09 | 2.18E-10 | -6.7 | 12.7151495 | -1.47E-01 | 91427361  | 91427484  | NC_000015.9  |
| cg03835824     | 2.45E-09 | 2.18E-10 | -6.7 | 12.7151106 | -1.19E-01 | 90744010  | 90744133  | NC_000015.9  |
| cg09886009     | 2.45E-09 | 2.18E-10 | -6.7 | 12.7144804 | -1.27E-01 | 67443131  | 67443254  | NC_000011.9  |
| cg26041076     | 2.45E-09 | 2.18E-10 | -6.7 | 12.7132211 | -7.56E-02 | 236249    | 236372    | NC_000017.10 |
| cg04387059     | 2.45E-09 | 2.19E-10 | -6.7 | 12.7125928 | -1.19E-01 | 31698722  | 31698845  | NC_000006.11 |
| cg24513433     | 2.45E-09 | 2.19E-10 | -6.7 | 12.712258  | -5.05E-02 | 47088234  | 47088357  | NC_000018.9  |
| cg00634606     | 2.45E-09 | 2.19E-10 | -6.7 | 12.7118964 | -6.24E-02 | 218933345 | 218933468 | NC_000002.11 |
| cg16706749     | 2.46E-09 | 2.19E-10 | -6.7 | 12.7113352 | -9.14E-02 | 74222816  | 74222939  | NC_000015.9  |
| cg26038697     | 2.46E-09 | 2.19E-10 | -6.7 | 12.7112388 | -1.11E-01 | 74128448  | 74128571  | NC_000017.10 |
| cg04753107     | 2.46E-09 | 2.19E-10 | -6.7 | 12.7106542 | -4.97E-02 | 31172130  | 31172253  | NC_000020.10 |
| cg02795691     | 2.46E-09 | 2.19E-10 | -6.7 | 12.7104342 | -1.05E-01 | 17514397  | 17514520  | NC_000020.10 |
| cg12378878     | 2.46E-09 | 2.19E-10 | -6.7 | 12.7087962 | -6.94E-02 | 50700606  | 50700729  | NC_000013.10 |
| cg07180458     | 2.46E-09 | 2.19E-10 | -6.7 | 12.7085913 | -1.24E-01 | 19600912  | 19601035  | NC_000001.10 |
| cg19096540     | 2.46E-09 | 2.19E-10 | -6.7 | 12.7085349 | -5.53E-02 | 133748191 | 133748314 | NC_000005.9  |
| cg00535683     | 2.46E-09 | 2.20E-10 | -6.7 | 12.7083502 | -1.21E-01 | 153114002 | 153114125 | NC_000001.10 |
| cg01611626     | 2.46E-09 | 2.20E-10 | -6.7 | 12.708206  | -8.24E-02 | 2565338   | 2565461   | NC_000016.9  |

|            |          |          |       |            |           |           |           |              |
|------------|----------|----------|-------|------------|-----------|-----------|-----------|--------------|
| cg25908283 | 2.47E-09 | 2.20E-10 | -6.7  | 12.7061018 | -1.26E-01 | 107124524 | 107124647 | NC_000013.10 |
| cg14316231 | 2.47E-09 | 2.20E-10 | -6.7  | 12.7056827 | -1.34E-01 | 41895100  | 41895223  | NC_000008.10 |
| cg20562359 | 2.47E-09 | 2.20E-10 | -6.7  | 12.704983  | -1.08E-01 | 41024817  | 41024940  | NC_000017.10 |
| cg01243297 | 2.47E-09 | 2.20E-10 | -6.7  | 12.7049518 | -4.50E-02 | 33160292  | 33160415  | NC_000006.11 |
| cg05537210 | 2.47E-09 | 2.20E-10 | -6.7  | 12.7044771 | -5.40E-02 | 110650914 | 110651037 | NC_000004.11 |
| cg12206103 | 2.47E-09 | 2.21E-10 | -6.7  | 12.704     | -9.08E-02 | 90319516  | 90319639  | NC_000015.9  |
| cg01396022 | 2.48E-09 | 2.21E-10 | -6.7  | 12.700503  | -6.22E-02 | 9811990   | 9812113   | NC_000003.11 |
| cg17467525 | 2.48E-09 | 2.22E-10 | -6.7  | 12.6989566 | -1.08E-01 | 9686523   | 9686646   | NC_000001.10 |
| cg08479603 | 2.50E-09 | 2.23E-10 | -6.7  | 12.6947151 | -8.89E-02 | 19638460  | 19638583  | NC_000001.10 |
| cg03074210 | 2.50E-09 | 2.23E-10 | -6.7  | 12.6937041 | -1.19E-01 | 606568    | 606691    | NC_000011.9  |
| cg24206161 | 2.50E-09 | 2.23E-10 | -6.7  | 12.6933827 | -4.72E-02 | 1014844   | 1014967   | NC_000007.13 |
| cg13148544 | 2.50E-09 | 2.23E-10 | -6.7  | 12.6923607 | -1.24E-01 | 30196119  | 30196242  | NC_000020.10 |
| cg22733207 | 2.50E-09 | 2.23E-10 | -6.7  | 12.6920802 | -1.21E-01 | 47352461  | 47352584  | NC_000013.10 |
| cg22291359 | 2.50E-09 | 2.23E-10 | -6.69 | 12.6912956 | -6.98E-02 | 16119456  | 16119579  | NC_000017.10 |
| cg00202829 | 2.51E-09 | 2.24E-10 | -6.69 | 12.6897019 | -7.29E-02 | 74609868  | 74609991  | NC_000015.9  |
| cg06359394 | 2.51E-09 | 2.24E-10 | -6.69 | 12.6895382 | -1.03E-01 | 187559328 | 187559451 | NC_000002.11 |
| cg07807210 | 2.51E-09 | 2.24E-10 | -6.69 | 12.6892831 | -1.24E-01 | 74770431  | 74770554  | NC_000018.9  |
| cg08478623 | 2.51E-09 | 2.24E-10 | -6.69 | 12.6886974 | -1.24E-01 | 37816339  | 37816462  | NC_000002.11 |
| cg04181892 | 2.51E-09 | 2.24E-10 | -6.69 | 12.6881232 | -8.87E-02 | 54936027  | 54936150  | NC_000002.11 |
| cg19484381 | 2.51E-09 | 2.24E-10 | -6.69 | 12.6872803 | -3.51E-02 | 28890673  | 28890796  | NC_000006.11 |
| cg16097858 | 2.52E-09 | 2.25E-10 | -6.69 | 12.6852454 | -1.17E-01 | 46765700  | 46765823  | NC_000002.11 |
| cg17823376 | 2.52E-09 | 2.25E-10 | -6.69 | 12.6850279 | -9.29E-02 | 145314627 | 145314750 | NC_000005.9  |
| cg11993118 | 2.52E-09 | 2.25E-10 | -6.69 | 12.6843196 | -4.23E-02 | 50159346  | 50159469  | NC_000020.10 |
| cg16674467 | 2.52E-09 | 2.25E-10 | -6.69 | 12.6840823 | -6.45E-02 | 46854311  | 46854434  | NC_000003.11 |
| cg22443510 | 2.52E-09 | 2.25E-10 | -6.69 | 12.6836786 | -8.44E-02 | 73062083  | 73062206  | NC_000007.13 |

|            |          |          |       |            |           |           |           |              |
|------------|----------|----------|-------|------------|-----------|-----------|-----------|--------------|
| cg14143304 | 2.52E-09 | 2.25E-10 | -6.69 | 12.6836072 | -1.09E-01 | 132228647 | 132228770 | NC_000009.11 |
| cg27465858 | 2.52E-09 | 2.25E-10 | -6.69 | 12.6828143 | -3.08E-02 | 48785406  | 48785529  | NC_000017.10 |
| cg06485995 | 2.52E-09 | 2.25E-10 | -6.69 | 12.6825807 | -5.84E-02 | 27547647  | 27547770  | NC_000007.13 |
| cg26002632 | 2.52E-09 | 2.25E-10 | -6.69 | 12.6824836 | -5.90E-02 | 100625216 | 100625339 | NC_000014.8  |
| cg00013660 | 2.52E-09 | 2.25E-10 | -6.69 | 12.6824298 | -1.06E-01 | 140068770 | 140068893 | NC_000009.11 |
| cg18632527 | 2.53E-09 | 2.26E-10 | -6.69 | 12.6807904 | -4.53E-02 | 6120830   | 6120953   | NC_000007.13 |
| cg25730428 | 2.53E-09 | 2.26E-10 | -6.69 | 12.6793644 | -1.47E-01 | 29454755  | 29454878  | NC_000006.11 |
| cg26251429 | 2.53E-09 | 2.26E-10 | -6.69 | 12.6788965 | -5.23E-02 | 28113398  | 28113521  | NC_000002.11 |
| cg03344608 | 2.53E-09 | 2.26E-10 | -6.69 | 12.6787252 | -5.75E-02 | 96855476  | 96855599  | NC_000005.9  |
| cg02127589 | 2.53E-09 | 2.26E-10 | -6.69 | 12.6786571 | -6.69E-02 | 12458309  | 12458432  | NC_000008.10 |
| cg09966978 | 2.53E-09 | 2.26E-10 | -6.69 | 12.6781544 | -2.77E-02 | 33025025  | 33025148  | NC_000009.11 |
| cg07283595 | 2.54E-09 | 2.27E-10 | -6.69 | 12.6774068 | -4.70E-02 | 5372003   | 5372126   | NC_000017.10 |
| cg18767321 | 2.54E-09 | 2.27E-10 | -6.69 | 12.6763371 | -3.94E-02 | 39096505  | 39096628  | NC_000022.10 |
| cg08650639 | 2.54E-09 | 2.27E-10 | -6.69 | 12.6761006 | -9.85E-02 | 121013116 | 121013239 | NC_000010.10 |
| cg01013754 | 2.54E-09 | 2.27E-10 | -6.69 | 12.6760808 | -6.10E-02 | 224622131 | 224622254 | NC_000001.10 |
| cg18419045 | 2.54E-09 | 2.27E-10 | -6.69 | 12.6755271 | -5.70E-02 | 32076147  | 32076270  | NC_000006.11 |
| cg05146399 | 2.54E-09 | 2.27E-10 | -6.69 | 12.6753677 | -1.26E-01 | 107602260 | 107602383 | NC_000003.11 |
| cg17596531 | 2.55E-09 | 2.27E-10 | -6.69 | 12.6736895 | -9.01E-02 | 6400815   | 6400938   | NC_000008.10 |
| cg05590755 | 2.55E-09 | 2.27E-10 | -6.69 | 12.6736675 | -8.27E-02 | 23855149  | 23855272  | NC_000001.10 |
| cg07661904 | 2.55E-09 | 2.28E-10 | -6.69 | 12.6701517 | -1.91E-01 | 71930999  | 71931122  | NC_000010.10 |
| cg01153979 | 2.56E-09 | 2.28E-10 | -6.69 | 12.6693724 | -5.73E-02 | 79577195  | 79577318  | NC_000006.11 |
| cg00060484 | 2.56E-09 | 2.29E-10 | -6.69 | 12.6680973 | -1.01E-01 | 3287598   | 3287721   | NC_000004.11 |
| cg22218316 | 2.56E-09 | 2.29E-10 | -6.69 | 12.6671721 | -1.18E-01 | 3164855   | 3164978   | NC_000012.11 |
| cg27048142 | 2.56E-09 | 2.29E-10 | -6.69 | 12.6669248 | -1.41E-01 | 46544240  | 46544363  | NC_000019.9  |
| cg09944659 | 2.57E-09 | 2.29E-10 | -6.69 | 12.6651502 | -1.11E-01 | 124779228 | 124779351 | NC_000012.11 |

|            |          |          |       |            |           |           |           |              |
|------------|----------|----------|-------|------------|-----------|-----------|-----------|--------------|
| cg07011168 | 2.57E-09 | 2.30E-10 | -6.69 | 12.6643189 | -1.12E-01 | 49797259  | 49797382  | NC_000010.10 |
| cg18394120 | 2.57E-09 | 2.30E-10 | -6.69 | 12.6636401 | -9.35E-02 | 55402014  | 55402137  | NC_000020.10 |
| cg18463401 | 2.57E-09 | 2.30E-10 | -6.69 | 12.6630569 | -5.35E-02 | 3366631   | 3366754   | NC_000019.9  |
| cg14103343 | 2.57E-09 | 2.30E-10 | -6.69 | 12.6627414 | -9.15E-02 | 49220223  | 49220346  | NC_000019.9  |
| cg05644462 | 2.57E-09 | 2.30E-10 | -6.69 | 12.6626269 | -9.51E-02 | 85261785  | 85261908  | NC_000016.9  |
| cg01749651 | 2.57E-09 | 2.30E-10 | -6.69 | 12.6617911 | -1.12E-01 | 143279569 | 143279692 | NC_000008.10 |
| cg21779904 | 2.58E-09 | 2.30E-10 | -6.69 | 12.6613404 | -7.95E-02 | 57425157  | 57425280  | NC_000020.10 |
| cg17298489 | 2.58E-09 | 2.30E-10 | -6.69 | 12.6609251 | -2.29E-02 | 3109555   | 3109678   | NC_000010.10 |
| cg17278401 | 2.58E-09 | 2.31E-10 | -6.69 | 12.658897  | -1.32E-01 | 66462662  | 66462785  | NC_000005.9  |
| cg15896446 | 2.58E-09 | 2.31E-10 | -6.69 | 12.6584634 | -6.98E-02 | 122262909 | 122263032 | NC_000010.10 |
| cg25054816 | 2.58E-09 | 2.31E-10 | -6.69 | 12.6580317 | -1.36E-01 | 1267429   | 1267552   | NC_000006.11 |
| cg22335801 | 2.58E-09 | 2.31E-10 | -6.69 | 12.657994  | -9.26E-02 | 1149091   | 1149214   | NC_000001.10 |
| cg20902975 | 2.59E-09 | 2.32E-10 | -6.69 | 12.6553102 | -1.12E-01 | 11138403  | 11138526  | NC_000008.10 |
| cg16780771 | 2.59E-09 | 2.32E-10 | -6.69 | 12.6552533 | -9.83E-02 | 81643766  | 81643889  | NC_000016.9  |
| cg08729442 | 2.59E-09 | 2.32E-10 | -6.69 | 12.6550345 | -7.36E-02 | 36455639  | 36455762  | NC_000006.11 |
| cg27059225 | 2.59E-09 | 2.32E-10 | -6.69 | 12.6549753 | -1.27E-01 | 85269816  | 85269939  | NC_000016.9  |
| cg06112923 | 2.59E-09 | 2.32E-10 | -6.69 | 12.6547285 | -1.46E-01 | 89863353  | 89863476  | NC_000007.13 |
| cg09837995 | 2.59E-09 | 2.32E-10 | -6.69 | 12.6536026 | -9.52E-02 | 79256840  | 79256963  | NC_000010.10 |
| cg27657867 | 2.60E-09 | 2.32E-10 | -6.69 | 12.6532872 | -4.01E-02 | 27818018  | 27818141  | NC_000011.9  |
| cg11785183 | 2.60E-09 | 2.32E-10 | -6.69 | 12.6523636 | -1.29E-01 | 31847931  | 31848054  | NC_000006.11 |
| cg00022606 | 2.60E-09 | 2.33E-10 | -6.69 | 12.6520247 | -4.20E-02 | 442445    | 442568    | NC_000020.10 |
| cg10800280 | 2.60E-09 | 2.33E-10 | -6.69 | 12.6499658 | -4.23E-02 | 36646508  | 36646631  | NC_000006.11 |
| cg13324189 | 2.61E-09 | 2.33E-10 | -6.69 | 12.6489666 | -5.36E-02 | 10535140  | 10535263  | NC_000019.9  |
| cg22149184 | 2.61E-09 | 2.33E-10 | -6.69 | 12.6485812 | -1.21E-01 | 79372515  | 79372638  | NC_000017.10 |
| cg19098768 | 2.61E-09 | 2.33E-10 | -6.69 | 12.6484649 | -9.47E-02 | 13689411  | 13689534  | NC_000011.9  |



|            |          |          |       |            |           |           |           |              |
|------------|----------|----------|-------|------------|-----------|-----------|-----------|--------------|
| cg23551494 | 2.61E-09 | 2.34E-10 | -6.69 | 12.647038  | -1.79E-01 | 39495535  | 39495658  | NC_000017.10 |
| cg15843217 | 2.61E-09 | 2.34E-10 | -6.69 | 12.6468991 | -9.02E-02 | 699224    | 699347    | NC_000004.11 |
| cg04874782 | 2.61E-09 | 2.34E-10 | -6.69 | 12.6463243 | -1.11E-01 | 241900108 | 241900231 | NC_000002.11 |
| cg16000022 | 2.61E-09 | 2.34E-10 | -6.69 | 12.6457141 | -6.15E-02 | 68856414  | 68856537  | NC_000011.9  |
| cg10930290 | 2.61E-09 | 2.34E-10 | -6.69 | 12.6455482 | -1.32E-01 | 219840349 | 219840472 | NC_000002.11 |
| cg18132262 | 2.62E-09 | 2.34E-10 | -6.69 | 12.6447248 | -8.30E-02 | 99971238  | 99971361  | NC_000007.13 |
| cg14210681 | 2.62E-09 | 2.34E-10 | -6.69 | 12.6441505 | -5.46E-02 | 19563093  | 19563216  | NC_000002.11 |
| cg15696058 | 2.62E-09 | 2.35E-10 | -6.69 | 12.6425932 | -1.36E-01 | 15965425  | 15965548  | NC_000004.11 |
| cg21484940 | 2.62E-09 | 2.35E-10 | -6.69 | 12.6412848 | -1.28E-01 | 48129992  | 48130115  | NC_000007.13 |
| cg11214507 | 2.63E-09 | 2.35E-10 | -6.69 | 12.6404126 | -1.73E-01 | 210419938 | 210420061 | NC_000001.10 |
| cg06601993 | 2.63E-09 | 2.36E-10 | -6.69 | 12.6393928 | -1.70E-01 | 80244500  | 80244623  | NC_000007.13 |
| cg18642361 | 2.63E-09 | 2.36E-10 | -6.69 | 12.6387538 | -1.59E-01 | 58332862  | 58332985  | NC_000001.10 |
| cg18818531 | 2.64E-09 | 2.36E-10 | -6.68 | 12.6353921 | -9.30E-02 | 65668277  | 65668400  | NC_000011.9  |
| cg00187768 | 2.64E-09 | 2.37E-10 | -6.68 | 12.6342718 | -5.41E-02 | 186617977 | 186618100 | NC_000003.11 |
| cg08603706 | 2.65E-09 | 2.37E-10 | -6.68 | 12.6330994 | -3.84E-02 | 30891316  | 30891439  | NC_000008.10 |
| cg19537184 | 2.65E-09 | 2.37E-10 | -6.68 | 12.6329916 | -8.26E-02 | 54209319  | 54209442  | NC_000019.9  |
| cg01824603 | 2.65E-09 | 2.37E-10 | -6.68 | 12.6327957 | -1.59E-01 | 1878323   | 1878446   | NC_000008.10 |
| cg19087104 | 2.65E-09 | 2.37E-10 | -6.68 | 12.6317104 | -1.19E-01 | 203643746 | 203643869 | NC_000001.10 |
| cg06819373 | 2.65E-09 | 2.38E-10 | -6.68 | 12.6304921 | -1.38E-01 | 157463355 | 157463478 | NC_000007.13 |
| cg17426166 | 2.65E-09 | 2.38E-10 | -6.68 | 12.6294969 | -7.28E-02 | 81772046  | 81772169  | NC_000001.10 |
| cg13242558 | 2.66E-09 | 2.38E-10 | -6.68 | 12.6287841 | -8.33E-02 | 129062937 | 129063060 | NC_000003.11 |
| cg04028070 | 2.66E-09 | 2.38E-10 | -6.68 | 12.6274165 | -4.63E-02 | 12391599  | 12391722  | NC_000010.10 |
| cg07034563 | 2.66E-09 | 2.39E-10 | -6.68 | 12.6261485 | -1.21E-01 | 176919739 | 176919862 | NC_000005.9  |
| cg26160976 | 2.67E-09 | 2.39E-10 | -6.68 | 12.6247629 | -6.43E-02 | 130184750 | 130184873 | NC_000011.9  |
| cg02159731 | 2.67E-09 | 2.39E-10 | -6.68 | 12.6237551 | -1.80E-01 | 119613405 | 119613528 | NC_000011.9  |

|            |          |          |       |            |           |           |           |              |
|------------|----------|----------|-------|------------|-----------|-----------|-----------|--------------|
| cg12095353 | 2.67E-09 | 2.39E-10 | -6.68 | 12.6236703 | -1.35E-01 | 125369577 | 125369700 | NC_000012.11 |
| cg22623273 | 2.67E-09 | 2.40E-10 | -6.68 | 12.6225668 | -1.25E-01 | 179557712 | 179557835 | NC_000001.10 |
| cg07148167 | 2.67E-09 | 2.40E-10 | -6.68 | 12.6220825 | -1.40E-01 | 29403393  | 29403516  | NC_000015.9  |
| cg09406547 | 2.68E-09 | 2.40E-10 | -6.68 | 12.6215463 | -9.28E-02 | 22602715  | 22602838  | NC_000007.13 |
| cg01297479 | 2.68E-09 | 2.40E-10 | -6.68 | 12.621394  | -4.13E-02 | 80986965  | 80987088  | NC_000015.9  |
| cg21784134 | 2.68E-09 | 2.40E-10 | -6.68 | 12.6206592 | -3.75E-02 | 159848731 | 159848854 | NC_000005.9  |
| cg20011794 | 2.68E-09 | 2.40E-10 | -6.68 | 12.6199762 | -3.25E-02 | 37447915  | 37448038  | NC_000022.10 |
| cg17156100 | 2.68E-09 | 2.40E-10 | -6.68 | 12.619942  | -6.70E-02 | 145910685 | 145910808 | NC_000008.10 |
| cg02992118 | 2.68E-09 | 2.41E-10 | -6.68 | 12.618396  | -9.44E-02 | 88470787  | 88470910  | NC_000016.9  |
| cg16014412 | 2.68E-09 | 2.41E-10 | -6.68 | 12.6181687 | -8.84E-02 | 9687471   | 9687594   | NC_000001.10 |
| cg07189394 | 2.69E-09 | 2.41E-10 | -6.68 | 12.6176902 | -1.43E-01 | 131802515 | 131802638 | NC_000003.11 |
| cg23497678 | 2.69E-09 | 2.41E-10 | -6.68 | 12.6160438 | -5.66E-02 | 100822744 | 100822867 | NC_000007.13 |
| cg18464137 | 2.69E-09 | 2.41E-10 | -6.68 | 12.6159365 | -1.16E-01 | 83278504  | 83278627  | NC_000007.13 |
| cg08692006 | 2.69E-09 | 2.42E-10 | -6.68 | 12.6146626 | -9.34E-02 | 4639992   | 4640115   | NC_000019.9  |
| cg15716680 | 2.69E-09 | 2.42E-10 | -6.68 | 12.6141871 | -1.80E-01 | 12864037  | 12864160  | NC_000011.9  |
| cg25629442 | 2.69E-09 | 2.42E-10 | -6.68 | 12.6141678 | -7.06E-02 | 77070844  | 77070967  | NC_000017.10 |
| cg05869417 | 2.70E-09 | 2.42E-10 | -6.68 | 12.6134162 | -1.18E-01 | 27234419  | 27234542  | NC_000016.9  |
| cg06492821 | 2.70E-09 | 2.42E-10 | -6.68 | 12.613277  | -7.05E-02 | 53537101  | 53537224  | NC_000016.9  |
| cg15568914 | 2.70E-09 | 2.42E-10 | -6.68 | 12.6130629 | -7.67E-02 | 13325790  | 13325913  | NC_000004.11 |
| cg24507955 | 2.70E-09 | 2.42E-10 | -6.68 | 12.6125749 | -9.58E-02 | 49339070  | 49339193  | NC_000015.9  |
| cg08078648 | 2.70E-09 | 2.42E-10 | -6.68 | 12.611351  | -1.65E-01 | 236236591 | 236236714 | NC_000002.11 |
| cg18505939 | 2.71E-09 | 2.43E-10 | -6.68 | 12.6085706 | -3.34E-02 | 36427426  | 36427549  | NC_000019.9  |
| cg18145080 | 2.71E-09 | 2.43E-10 | -6.68 | 12.6085445 | -3.40E-02 | 144640397 | 144640520 | NC_000008.10 |
| cg07749454 | 2.72E-09 | 2.44E-10 | -6.68 | 12.6051977 | -9.66E-02 | 56028883  | 56029006  | NC_000019.9  |
| cg04481170 | 2.72E-09 | 2.44E-10 | -6.68 | 12.6040641 | -8.63E-02 | 158445995 | 158446118 | NC_000003.11 |

|               |          |          |       |            |           |           |           |              |
|---------------|----------|----------|-------|------------|-----------|-----------|-----------|--------------|
| cg08660999    | 2.72E-09 | 2.44E-10 | -6.68 | 12.6038917 | -5.71E-02 | 1592898   | 1593021   | NC_000019.9  |
| cg26394572    | 2.72E-09 | 2.44E-10 | -6.68 | 12.6034211 | -6.22E-02 | 64126094  | 64126217  | NC_000015.9  |
| cg03817794    | 2.73E-09 | 2.45E-10 | -6.68 | 12.6018403 | -9.02E-02 | 1475775   | 1475898   | NC_000011.9  |
| cg08869883    | 2.73E-09 | 2.45E-10 | -6.68 | 12.6009338 | -1.11E-01 | 56350385  | 56350508  | NC_000012.11 |
| cg08024316    | 2.73E-09 | 2.45E-10 | -6.68 | 12.6001142 | -3.58E-02 | 73401273  | 73401396  | NC_000017.10 |
| cg25130939    | 2.73E-09 | 2.45E-10 | -6.68 | 12.599443  | -1.21E-01 | 76328140  | 76328263  | NC_000015.9  |
| cg20909664    | 2.74E-09 | 2.46E-10 | -6.68 | 12.597257  | -2.49E-02 | 46390261  | 46390384  | NC_000019.9  |
| cg02625024    | 2.74E-09 | 2.46E-10 | -6.68 | 12.5971387 | -1.02E-01 | 17465361  | 17465484  | NC_000017.10 |
| ch.3.3302591F | 2.74E-09 | 2.46E-10 | -6.68 | 12.5970992 | -4.54E-02 | 169964358 | 169964481 | NC_000003.11 |
| cg04441191    | 2.74E-09 | 2.46E-10 | -6.68 | 12.5967464 | -5.29E-02 | 48130393  | 48130516  | NC_000003.11 |
| cg19913582    | 2.74E-09 | 2.46E-10 | -6.68 | 12.5958583 | -1.45E-01 | 167567540 | 167567663 | NC_000005.9  |
| cg00788375    | 2.74E-09 | 2.46E-10 | -6.68 | 12.5956666 | -3.50E-02 | 7745377   | 7745500   | NC_000019.9  |
| cg14771077    | 2.74E-09 | 2.46E-10 | -6.68 | 12.5949771 | -1.16E-01 | 1166824   | 1166947   | NC_000004.11 |
| cg12502297    | 2.75E-09 | 2.47E-10 | -6.68 | 12.5940865 | -1.22E-01 | 37618817  | 37618940  | NC_000021.8  |
| cg14336737    | 2.75E-09 | 2.47E-10 | -6.68 | 12.5930631 | -3.91E-02 | 74079845  | 74079968  | NC_000010.10 |
| cg09139144    | 2.75E-09 | 2.47E-10 | -6.68 | 12.592262  | -3.59E-02 | 36429274  | 36429397  | NC_000007.13 |
| cg13447502    | 2.75E-09 | 2.47E-10 | -6.68 | 12.5922326 | -9.61E-02 | 469777    | 469900    | NC_000009.11 |
| cg18269382    | 2.75E-09 | 2.47E-10 | -6.68 | 12.5919363 | -1.14E-01 | 77328166  | 77328289  | NC_000014.8  |
| cg03844154    | 2.75E-09 | 2.47E-10 | -6.68 | 12.5913345 | -7.08E-02 | 14031414  | 14031537  | NC_000007.13 |
| cg00385441    | 2.75E-09 | 2.47E-10 | -6.68 | 12.5910584 | -1.36E-01 | 43991402  | 43991525  | NC_000020.10 |
| cg05348324    | 2.75E-09 | 2.47E-10 | -6.68 | 12.5909372 | -1.10E-01 | 119668165 | 119668288 | NC_000011.9  |
| ch.13.63716R  | 2.76E-09 | 2.48E-10 | -6.68 | 12.590361  | -5.37E-02 | 21732504  | 21732627  | NC_000013.10 |
| cg04483101    | 2.77E-09 | 2.49E-10 | -6.68 | 12.5867631 | -1.33E-01 | 189349278 | 189349401 | NC_000003.11 |
| cg11940960    | 2.77E-09 | 2.49E-10 | -6.68 | 12.5853958 | -7.67E-02 | 34913894  | 34914017  | NC_000021.8  |
| cg25261228    | 2.77E-09 | 2.49E-10 | -6.68 | 12.5852688 | -6.61E-02 | 43566114  | 43566237  | NC_000013.10 |

|               |          |          |       |            |           |           |           |              |
|---------------|----------|----------|-------|------------|-----------|-----------|-----------|--------------|
| cg01719405    | 2.77E-09 | 2.49E-10 | -6.68 | 12.5847477 | -1.81E-01 | 62401258  | 62401381  | NC_000014.8  |
| cg27345286    | 2.77E-09 | 2.49E-10 | -6.68 | 12.5847065 | -5.29E-02 | 33796106  | 33796229  | NC_000011.9  |
| cg12170787    | 2.77E-09 | 2.49E-10 | -6.68 | 12.5844597 | -1.15E-01 | 1130965   | 1131088   | NC_000019.9  |
| cg26216891    | 2.78E-09 | 2.50E-10 | -6.67 | 12.5818366 | -2.86E-02 | 30669342  | 30669465  | NC_000017.10 |
| cg06707993    | 2.78E-09 | 2.50E-10 | -6.67 | 12.5802918 | -1.66E-01 | 78152466  | 78152589  | NC_000017.10 |
| cg09322432    | 2.78E-09 | 2.50E-10 | -6.67 | 12.5796758 | -1.01E-01 | 42527611  | 42527734  | NC_000022.10 |
| cg08062023    | 2.79E-09 | 2.50E-10 | -6.67 | 12.5793928 | -6.20E-02 | 111393015 | 111393138 | NC_000003.11 |
| cg23764603    | 2.79E-09 | 2.50E-10 | -6.67 | 12.5791111 | -1.58E-01 | 19976820  | 19976943  | NC_000017.10 |
| cg11548446    | 2.79E-09 | 2.50E-10 | -6.67 | 12.5790047 | -1.46E-01 | 28867073  | 28867196  | NC_000002.11 |
| cg05354479    | 2.79E-09 | 2.51E-10 | -6.67 | 12.5778307 | -6.44E-02 | 71276874  | 71276997  | NC_000014.8  |
| cg03328360    | 2.80E-09 | 2.51E-10 | -6.67 | 12.5756038 | -7.78E-02 | 87551805  | 87551928  | NC_000016.9  |
| cg19020103    | 2.80E-09 | 2.52E-10 | -6.67 | 12.5745931 | -6.12E-02 | 147999849 | 147999972 | NC_000001.10 |
| cg19165946    | 2.81E-09 | 2.52E-10 | -6.67 | 12.5711737 | -1.52E-01 | 138719443 | 138719566 | NC_000007.13 |
| cg20701457    | 2.81E-09 | 2.53E-10 | -6.67 | 12.5711516 | -1.39E-01 | 62084342  | 62084465  | NC_000017.10 |
| cg08599249    | 2.81E-09 | 2.53E-10 | -6.67 | 12.5701778 | -1.21E-01 | 128265902 | 128266025 | NC_000008.10 |
| cg03920003    | 2.82E-09 | 2.53E-10 | -6.67 | 12.5676785 | -1.28E-01 | 154582007 | 154582130 | NC_000001.10 |
| cg16223079    | 2.82E-09 | 2.54E-10 | -6.67 | 12.5671738 | -1.15E-01 | 75339541  | 75339664  | NC_000015.9  |
| cg07475390    | 2.82E-09 | 2.54E-10 | -6.67 | 12.5671169 | -1.29E-01 | 14440604  | 14440727  | NC_000001.10 |
| ch.3.2924837R | 2.82E-09 | 2.54E-10 | -6.67 | 12.5658535 | -5.18E-02 | 148109078 | 148109201 | NC_000003.11 |
| cg23998391    | 2.82E-09 | 2.54E-10 | -6.67 | 12.5657329 | -9.47E-02 | 57848560  | 57848683  | NC_000012.11 |
| cg27291468    | 2.82E-09 | 2.54E-10 | -6.67 | 12.5650284 | -1.69E-01 | 9878816   | 9878939   | NC_000002.11 |
| cg20744756    | 2.82E-09 | 2.54E-10 | -6.67 | 12.5648777 | -1.42E-01 | 95201495  | 95201618  | NC_000001.10 |
| cg07818563    | 2.83E-09 | 2.54E-10 | -6.67 | 12.5644062 | -3.79E-02 | 16043225  | 16043348  | NC_000016.9  |
| cg23087661    | 2.83E-09 | 2.54E-10 | -6.67 | 12.5641067 | -1.21E-01 | 2940825   | 2940948   | NC_000001.10 |
| cg12366423    | 2.83E-09 | 2.55E-10 | -6.67 | 12.5633054 | -1.36E-01 | 38403622  | 38403745  | NC_000005.9  |

|                |          |          |       |            |           |           |           |              |
|----------------|----------|----------|-------|------------|-----------|-----------|-----------|--------------|
| cg18655522     | 2.83E-09 | 2.55E-10 | -6.67 | 12.5632875 | -8.94E-02 | 69424756  | 69424879  | NC_000014.8  |
| cg22861669     | 2.83E-09 | 2.55E-10 | -6.67 | 12.5627311 | -1.13E-01 | 9904386   | 9904509   | NC_000001.10 |
| cg22512803     | 2.83E-09 | 2.55E-10 | -6.67 | 12.5612601 | -1.17E-01 | 34383032  | 34383155  | NC_000022.10 |
| cg20969896     | 2.84E-09 | 2.55E-10 | -6.67 | 12.5603966 | -1.57E-02 | 35201751  | 35201874  | NC_000020.10 |
| cg12380441     | 2.84E-09 | 2.55E-10 | -6.67 | 12.5600426 | -1.00E-01 | 1403976   | 1404099   | NC_000011.9  |
| cg06523516     | 2.84E-09 | 2.55E-10 | -6.67 | 12.559888  | -8.83E-02 | 794646    | 794769    | NC_000002.11 |
| ch.10.5571894F | 2.84E-09 | 2.56E-10 | -6.67 | 12.5586093 | -3.61E-02 | 5581896   | 5582019   | NC_000010.10 |
| cg06895913     | 2.84E-09 | 2.56E-10 | -6.67 | 12.5582971 | -1.64E-01 | 58957910  | 58958033  | NC_000005.9  |
| cg02926622     | 2.84E-09 | 2.56E-10 | -6.67 | 12.5580336 | -3.90E-02 | 144386041 | 144386164 | NC_000006.11 |
| ch.7.2667284R  | 2.84E-09 | 2.56E-10 | -6.67 | 12.5577494 | -2.14E-02 | 128843678 | 128843801 | NC_000007.13 |
| cg14177084     | 2.85E-09 | 2.56E-10 | -6.67 | 12.5566166 | -1.16E-01 | 75269642  | 75269765  | NC_000007.13 |
| cg23953309     | 2.85E-09 | 2.57E-10 | -6.67 | 12.5556229 | -3.01E-02 | 112193859 | 112193982 | NC_000006.11 |
| cg20064122     | 2.85E-09 | 2.57E-10 | -6.67 | 12.5555551 | -5.95E-02 | 18593362  | 18593485  | NC_000022.10 |
| cg07826255     | 2.86E-09 | 2.57E-10 | -6.67 | 12.5530858 | -1.02E-01 | 48243707  | 48243830  | NC_000017.10 |
| cg16988008     | 2.86E-09 | 2.57E-10 | -6.67 | 12.5530519 | -5.11E-02 | 108463728 | 108463851 | NC_000011.9  |
| cg12535402     | 2.86E-09 | 2.57E-10 | -6.67 | 12.5528727 | -1.37E-01 | 139525150 | 139525273 | NC_000005.9  |
| cg01616440     | 2.86E-09 | 2.58E-10 | -6.67 | 12.5515538 | -1.49E-01 | 84319908  | 84320031  | NC_000015.9  |
| cg07047471     | 2.86E-09 | 2.58E-10 | -6.67 | 12.5503686 | -1.29E-01 | 27353034  | 27353157  | NC_000003.11 |
| cg00940212     | 2.86E-09 | 2.58E-10 | -6.67 | 12.5497207 | -2.57E-02 | 30633751  | 30633874  | NC_000007.13 |
| cg15789106     | 2.87E-09 | 2.58E-10 | -6.67 | 12.548537  | -8.54E-02 | 563990    | 564113    | NC_000011.9  |
| cg25567674     | 2.87E-09 | 2.59E-10 | -6.67 | 12.5470353 | -8.01E-02 | 123751655 | 123751778 | NC_000003.11 |
| cg01068014     | 2.88E-09 | 2.59E-10 | -6.67 | 12.5457681 | -3.71E-02 | 92000225  | 92000348  | NC_000013.10 |
| cg04609307     | 2.88E-09 | 2.59E-10 | -6.67 | 12.5454592 | -2.05E-02 | 8378356   | 8378479   | NC_000001.10 |
| cg20777266     | 2.88E-09 | 2.59E-10 | -6.67 | 12.5451999 | -5.84E-02 | 173000377 | 173000500 | NC_000005.9  |
| cg16833264     | 2.88E-09 | 2.60E-10 | -6.67 | 12.5438448 | -2.85E-02 | 75052603  | 75052726  | NC_000017.10 |

|            |          |          |       |            |           |           |           |              |
|------------|----------|----------|-------|------------|-----------|-----------|-----------|--------------|
| cg06221470 | 2.88E-09 | 2.60E-10 | -6.67 | 12.5438106 | -2.32E-02 | 2353869   | 2353992   | NC_000007.13 |
| cg13221796 | 2.89E-09 | 2.60E-10 | -6.67 | 12.5419567 | -1.52E-01 | 48876919  | 48877042  | NC_000013.10 |
| cg16711694 | 2.89E-09 | 2.60E-10 | -6.67 | 12.5417304 | -3.29E-02 | 34656625  | 34656748  | NC_000005.9  |
| cg06654510 | 2.89E-09 | 2.61E-10 | -6.67 | 12.5402542 | -1.45E-01 | 119993914 | 119994037 | NC_000011.9  |
| cg25587223 | 2.89E-09 | 2.61E-10 | -6.67 | 12.5401103 | -1.19E-01 | 7905928   | 7906051   | NC_000017.10 |
| cg16796959 | 2.89E-09 | 2.61E-10 | -6.67 | 12.5390042 | -1.13E-01 | 145061291 | 145061414 | NC_000008.10 |
| cg05160751 | 2.90E-09 | 2.61E-10 | -6.67 | 12.5382896 | -1.52E-01 | 24192033  | 24192156  | NC_000001.10 |
| cg24774891 | 2.90E-09 | 2.61E-10 | -6.67 | 12.5370586 | -4.06E-02 | 3867847   | 3867970   | NC_000017.10 |
| cg03747456 | 2.90E-09 | 2.62E-10 | -6.67 | 12.5365648 | -6.40E-02 | 52586127  | 52586250  | NC_000012.11 |
| cg05471465 | 2.91E-09 | 2.63E-10 | -6.67 | 12.5324295 | -6.38E-02 | 146614536 | 146614659 | NC_000005.9  |
| cg20364050 | 2.91E-09 | 2.63E-10 | -6.67 | 12.5323724 | -1.63E-01 | 825240    | 825363    | NC_000020.10 |
| cg23123017 | 2.91E-09 | 2.63E-10 | -6.67 | 12.5323034 | -1.42E-01 | 1765679   | 1765802   | NC_000008.10 |
| cg09852107 | 2.91E-09 | 2.63E-10 | -6.67 | 12.531825  | -5.01E-02 | 57226342  | 57226465  | NC_000011.9  |
| cg26709234 | 2.91E-09 | 2.63E-10 | -6.67 | 12.5318085 | -9.48E-02 | 82868296  | 82868419  | NC_000016.9  |
| cg03433986 | 2.91E-09 | 2.63E-10 | -6.67 | 12.531699  | -1.68E-01 | 62477624  | 62477747  | NC_000011.9  |
| cg07594531 | 2.92E-09 | 2.63E-10 | -6.67 | 12.5314761 | -9.02E-02 | 35225326  | 35225449  | NC_000001.10 |
| cg08383938 | 2.92E-09 | 2.63E-10 | -6.67 | 12.5311985 | -1.13E-01 | 146200144 | 146200267 | NC_000004.11 |
| cg25529965 | 2.92E-09 | 2.63E-10 | -6.67 | 12.5310767 | -3.42E-02 | 56174084  | 56174207  | NC_000007.13 |
| cg18456621 | 2.92E-09 | 2.63E-10 | -6.67 | 12.5307362 | -1.06E-01 | 80297270  | 80297393  | NC_000017.10 |
| cg26125060 | 2.92E-09 | 2.63E-10 | -6.67 | 12.5302046 | -8.17E-02 | 160112854 | 160112977 | NC_000005.9  |
| cg08096702 | 2.92E-09 | 2.64E-10 | -6.67 | 12.5289481 | -1.54E-01 | 31358323  | 31358446  | NC_000015.9  |
| cg22150397 | 2.93E-09 | 2.64E-10 | -6.66 | 12.5276861 | -7.42E-02 | 82752718  | 82752841  | NC_000012.11 |
| cg25402480 | 2.93E-09 | 2.64E-10 | -6.66 | 12.5265937 | -9.02E-02 | 53719777  | 53719900  | NC_000012.11 |
| cg01736403 | 2.93E-09 | 2.64E-10 | -6.66 | 12.5261038 | -3.99E-02 | 52312682  | 52312805  | NC_000003.11 |
| cg00480356 | 2.93E-09 | 2.65E-10 | -6.66 | 12.5252915 | -5.53E-02 | 44092806  | 44092929  | NC_000015.9  |

|                 |          |          |       |            |           |           |           |              |
|-----------------|----------|----------|-------|------------|-----------|-----------|-----------|--------------|
| cg23592730      | 2.93E-09 | 2.65E-10 | -6.66 | 12.525087  | -1.72E-02 | 33570795  | 33570918  | NC_000017.10 |
| cg25138553      | 2.93E-09 | 2.65E-10 | -6.66 | 12.5247282 | -1.44E-01 | 22223841  | 22223964  | NC_000001.10 |
| cg16738984      | 2.93E-09 | 2.65E-10 | -6.66 | 12.5243743 | -1.17E-01 | 14519121  | 14519244  | NC_000019.9  |
| cg24043307      | 2.94E-09 | 2.65E-10 | -6.66 | 12.5235743 | -4.81E-02 | 51157954  | 51158077  | NC_000012.11 |
| cg19406182      | 2.94E-09 | 2.66E-10 | -6.66 | 12.5216465 | -1.09E-01 | 37721149  | 37721272  | NC_000022.10 |
| cg14939691      | 2.94E-09 | 2.66E-10 | -6.66 | 12.5215334 | -1.86E-02 | 53289981  | 53290104  | NC_000003.11 |
| cg21160610      | 2.94E-09 | 2.66E-10 | -6.66 | 12.5206799 | -5.61E-02 | 43662639  | 43662762  | NC_000015.9  |
| cg21853348      | 2.95E-09 | 2.66E-10 | -6.66 | 12.5197133 | -1.35E-01 | 197247074 | 197247197 | NC_000003.11 |
| cg23439621      | 2.95E-09 | 2.66E-10 | -6.66 | 12.5196405 | -6.69E-02 | 102228216 | 102228339 | NC_000014.8  |
| cg25318211      | 2.95E-09 | 2.66E-10 | -6.66 | 12.5189252 | -1.42E-01 | 109778433 | 109778556 | NC_000006.11 |
| cg12081645      | 2.95E-09 | 2.66E-10 | -6.66 | 12.5183926 | -1.04E-01 | 157920476 | 157920599 | NC_000004.11 |
| cg04421974      | 2.95E-09 | 2.67E-10 | -6.66 | 12.5175759 | -2.11E-01 | 134224814 | 134224937 | NC_000008.10 |
| cg00575645      | 2.96E-09 | 2.67E-10 | -6.66 | 12.5159386 | -1.14E-01 | 169548502 | 169548625 | NC_000005.9  |
| cg23965905      | 2.96E-09 | 2.67E-10 | -6.66 | 12.5156259 | -2.80E-02 | 157827874 | 157827997 | NC_000003.11 |
| ch.10.80061816F | 2.96E-09 | 2.67E-10 | -6.66 | 12.5148662 | -8.41E-02 | 80391810  | 80391933  | NC_000010.10 |
| cg22029015      | 2.96E-09 | 2.68E-10 | -6.66 | 12.5143568 | -1.75E-01 | 236674257 | 236674380 | NC_000002.11 |
| cg00830086      | 2.96E-09 | 2.68E-10 | -6.66 | 12.5140359 | -1.17E-01 | 979504    | 979627    | NC_000008.10 |
| cg21911861      | 2.96E-09 | 2.68E-10 | -6.66 | 12.5137339 | -1.48E-02 | 39832561  | 39832684  | NC_000019.9  |
| cg10647465      | 2.97E-09 | 2.68E-10 | -6.66 | 12.5119353 | -1.51E-01 | 126582242 | 126582365 | NC_000011.9  |
| cg00189366      | 2.97E-09 | 2.68E-10 | -6.66 | 12.5113706 | -9.90E-02 | 43846705  | 43846828  | NC_000010.10 |
| cg01196531      | 2.97E-09 | 2.69E-10 | -6.66 | 12.5106471 | -1.68E-01 | 53083238  | 53083361  | NC_000015.9  |
| cg02968918      | 2.97E-09 | 2.69E-10 | -6.66 | 12.5101228 | -1.15E-01 | 184908541 | 184908664 | NC_000004.11 |
| cg22205607      | 2.98E-09 | 2.69E-10 | -6.66 | 12.5097839 | -7.78E-02 | 66207656  | 66207779  | NC_000007.13 |
| cg26726589      | 2.98E-09 | 2.69E-10 | -6.66 | 12.5093092 | -5.92E-02 | 306364    | 306487    | NC_000020.10 |
| cg25614726      | 2.98E-09 | 2.69E-10 | -6.66 | 12.5085241 | -8.79E-02 | 10490058  | 10490181  | NC_000001.10 |

|            |          |          |       |            |           |           |           |              |
|------------|----------|----------|-------|------------|-----------|-----------|-----------|--------------|
| cg03781084 | 2.98E-09 | 2.69E-10 | -6.66 | 12.5080922 | -3.16E-02 | 26191726  | 26191849  | NC_000007.13 |
| cg15462411 | 2.98E-09 | 2.69E-10 | -6.66 | 12.5076648 | -6.16E-02 | 79361621  | 79361744  | NC_000017.10 |
| cg16101213 | 2.98E-09 | 2.70E-10 | -6.66 | 12.5068651 | -1.23E-01 | 127861992 | 127862115 | NC_000007.13 |
| cg10888811 | 2.99E-09 | 2.70E-10 | -6.66 | 12.5057695 | -9.80E-02 | 242620306 | 242620429 | NC_000002.11 |
| cg06934394 | 2.99E-09 | 2.70E-10 | -6.66 | 12.5039707 | -1.15E-01 | 101959848 | 101959971 | NC_000013.10 |
| cg12646385 | 2.99E-09 | 2.70E-10 | -6.66 | 12.5038005 | -6.28E-02 | 173846180 | 173846303 | NC_000005.9  |
| cg05480370 | 3.00E-09 | 2.71E-10 | -6.66 | 12.5005173 | -1.13E-01 | 136522913 | 136523036 | NC_000005.9  |
| cg10683615 | 3.01E-09 | 2.72E-10 | -6.66 | 12.4992957 | -1.22E-01 | 30790683  | 30790806  | NC_000007.13 |
| cg16079358 | 3.01E-09 | 2.72E-10 | -6.66 | 12.4992224 | -4.46E-02 | 23340577  | 23340700  | NC_000014.8  |
| cg12457270 | 3.01E-09 | 2.72E-10 | -6.66 | 12.4980428 | -1.16E-01 | 116678438 | 116678561 | NC_000010.10 |
| cg01385356 | 3.01E-09 | 2.72E-10 | -6.66 | 12.4973502 | -7.69E-02 | 76837375  | 76837498  | NC_000017.10 |
| cg21273275 | 3.01E-09 | 2.72E-10 | -6.66 | 12.4968819 | -1.58E-01 | 24648328  | 24648451  | NC_000001.10 |
| cg03826976 | 3.01E-09 | 2.72E-10 | -6.66 | 12.4967684 | -1.10E-01 | 7695433   | 7695556   | NC_000011.9  |
| cg25949961 | 3.02E-09 | 2.73E-10 | -6.66 | 12.4959721 | -1.46E-01 | 79166676  | 79166799  | NC_000017.10 |
| cg22929280 | 3.02E-09 | 2.73E-10 | -6.66 | 12.4958052 | -1.38E-01 | 81134497  | 81134620  | NC_000015.9  |
| cg06953065 | 3.02E-09 | 2.73E-10 | -6.66 | 12.4945307 | -4.19E-02 | 70159215  | 70159338  | NC_000007.13 |
| cg17612991 | 3.02E-09 | 2.73E-10 | -6.66 | 12.4936988 | -1.40E-01 | 6721016   | 6721139   | NC_000019.9  |
| cg00935119 | 3.03E-09 | 2.74E-10 | -6.66 | 12.4924911 | -4.06E-02 | 36647544  | 36647667  | NC_000006.11 |
| cg15087571 | 3.03E-09 | 2.74E-10 | -6.66 | 12.4923974 | -3.14E-02 | 5462185   | 5462308   | NC_000007.13 |
| cg14016187 | 3.03E-09 | 2.74E-10 | -6.66 | 12.4912453 | -1.39E-01 | 92806854  | 92806977  | NC_000009.11 |
| cg02246002 | 3.03E-09 | 2.74E-10 | -6.66 | 12.4911261 | -1.06E-01 | 37101457  | 37101580  | NC_000013.10 |
| cg27134730 | 3.03E-09 | 2.74E-10 | -6.66 | 12.4911211 | -1.53E-01 | 124633001 | 124633124 | NC_000007.13 |
| cg05690685 | 3.03E-09 | 2.74E-10 | -6.66 | 12.490794  | -7.44E-02 | 20293200  | 20293323  | NC_000008.10 |
| cg03763874 | 3.04E-09 | 2.75E-10 | -6.66 | 12.4890802 | -1.27E-01 | 933707    | 933830    | NC_000019.9  |
| cg10273210 | 3.04E-09 | 2.75E-10 | -6.66 | 12.4881112 | -2.34E-02 | 160167665 | 160167788 | NC_000003.11 |



|            |          |          |       |            |           |           |           |              |
|------------|----------|----------|-------|------------|-----------|-----------|-----------|--------------|
| cg01328949 | 3.04E-09 | 2.75E-10 | -6.66 | 12.4879376 | -1.41E-01 | 113499849 | 113499972 | NC_000001.10 |
| cg24937735 | 3.04E-09 | 2.75E-10 | -6.66 | 12.4860279 | -1.22E-01 | 94245226  | 94245349  | NC_000001.10 |
| cg11146884 | 3.05E-09 | 2.76E-10 | -6.66 | 12.4856705 | -4.18E-02 | 107487800 | 107487923 | NC_000012.11 |
| cg00583535 | 3.05E-09 | 2.76E-10 | -6.66 | 12.4852674 | -9.68E-02 | 201159906 | 201160029 | NC_000001.10 |
| cg03209871 | 3.05E-09 | 2.76E-10 | -6.66 | 12.4833883 | -1.70E-01 | 76438412  | 76438535  | NC_000004.11 |
| cg13524082 | 3.05E-09 | 2.76E-10 | -6.66 | 12.4833529 | -1.32E-01 | 119294283 | 119294406 | NC_000011.9  |
| cg16763885 | 3.05E-09 | 2.76E-10 | -6.66 | 12.4825755 | -1.65E-01 | 131941989 | 131942112 | NC_000011.9  |
| cg04028695 | 3.06E-09 | 2.77E-10 | -6.66 | 12.4812557 | -1.49E-01 | 80008319  | 80008442  | NC_000010.10 |
| cg07074976 | 3.06E-09 | 2.77E-10 | -6.66 | 12.4802735 | -8.79E-02 | 37924550  | 37924673  | NC_000008.10 |
| cg10372302 | 3.06E-09 | 2.77E-10 | -6.66 | 12.4802234 | -1.25E-01 | 99574466  | 99574589  | NC_000007.13 |
| cg05395852 | 3.06E-09 | 2.77E-10 | -6.66 | 12.4802229 | -9.58E-02 | 128750384 | 128750507 | NC_000007.13 |
| cg11944110 | 3.07E-09 | 2.78E-10 | -6.66 | 12.4774622 | -1.49E-01 | 117581067 | 117581190 | NC_000012.11 |
| cg01626569 | 3.07E-09 | 2.78E-10 | -6.66 | 12.4769574 | -3.98E-02 | 20911881  | 20912004  | NC_000016.9  |
| cg11233384 | 3.08E-09 | 2.79E-10 | -6.66 | 12.474148  | -5.75E-02 | 19615702  | 19615825  | NC_000001.10 |
| cg02664479 | 3.08E-09 | 2.79E-10 | -6.66 | 12.4739058 | -1.39E-01 | 62690218  | 62690341  | NC_000020.10 |
| cg13575139 | 3.08E-09 | 2.79E-10 | -6.65 | 12.4736767 | -9.34E-02 | 58456976  | 58457099  | NC_000003.11 |
| cg05049784 | 3.08E-09 | 2.79E-10 | -6.65 | 12.4736753 | -4.44E-02 | 22202424  | 22202547  | NC_000016.9  |
| cg05309454 | 3.08E-09 | 2.79E-10 | -6.65 | 12.4730911 | -3.19E-02 | 79791505  | 79791628  | NC_000017.10 |
| cg08826460 | 3.08E-09 | 2.79E-10 | -6.65 | 12.4723183 | -4.76E-02 | 11201433  | 11201556  | NC_000019.9  |
| cg12496014 | 3.08E-09 | 2.79E-10 | -6.65 | 12.4722477 | -1.14E-01 | 38619790  | 38619913  | NC_000017.10 |
| cg20286882 | 3.09E-09 | 2.79E-10 | -6.65 | 12.4720737 | -1.15E-01 | 33432514  | 33432637  | NC_000010.10 |
| cg14462015 | 3.09E-09 | 2.80E-10 | -6.65 | 12.4714084 | -5.34E-02 | 79860507  | 79860630  | NC_000004.11 |
| cg21638374 | 3.09E-09 | 2.80E-10 | -6.65 | 12.4704259 | -4.02E-02 | 147763491 | 147763614 | NC_000005.9  |
| cg08874974 | 3.09E-09 | 2.80E-10 | -6.65 | 12.4699001 | -9.46E-02 | 9049803   | 9049926   | NC_000003.11 |
| cg05986288 | 3.09E-09 | 2.80E-10 | -6.65 | 12.469513  | -1.37E-01 | 74616750  | 74616873  | NC_000005.9  |

|                 |          |          |       |            |           |           |           |              |
|-----------------|----------|----------|-------|------------|-----------|-----------|-----------|--------------|
| cg19805953      | 3.09E-09 | 2.80E-10 | -6.65 | 12.4688706 | -1.05E-01 | 48828412  | 48828535  | NC_000019.9  |
| cg23488616      | 3.10E-09 | 2.81E-10 | -6.65 | 12.4680396 | -7.62E-02 | 159065864 | 159065987 | NC_000006.11 |
| cg00366722      | 3.10E-09 | 2.81E-10 | -6.65 | 12.4666992 | -2.85E-02 | 37393576  | 37393699  | NC_000015.9  |
| cg10477854      | 3.10E-09 | 2.81E-10 | -6.65 | 12.4660192 | -8.20E-02 | 40760975  | 40761098  | NC_000021.8  |
| cg09820183      | 3.11E-09 | 2.81E-10 | -6.65 | 12.4653459 | -3.81E-02 | 222886073 | 222886196 | NC_000001.10 |
| cg20968717      | 3.11E-09 | 2.81E-10 | -6.65 | 12.4649493 | -1.03E-01 | 58758468  | 58758591  | NC_000015.9  |
| cg00825047      | 3.11E-09 | 2.82E-10 | -6.65 | 12.4634691 | -3.80E-02 | 40226572  | 40226695  | NC_000015.9  |
| cg24416660      | 3.11E-09 | 2.82E-10 | -6.65 | 12.4630511 | -1.44E-01 | 73865998  | 73866121  | NC_000017.10 |
| cg13375427      | 3.11E-09 | 2.82E-10 | -6.65 | 12.4628928 | -1.52E-01 | 39216687  | 39216810  | NC_000017.10 |
| cg22864617      | 3.11E-09 | 2.82E-10 | -6.65 | 12.4621904 | -1.09E-01 | 155338265 | 155338388 | NC_000002.11 |
| cg10623219      | 3.12E-09 | 2.82E-10 | -6.65 | 12.4617322 | -8.25E-02 | 52242807  | 52242930  | NC_000012.11 |
| cg24059741      | 3.12E-09 | 2.83E-10 | -6.65 | 12.4588777 | -4.09E-02 | 59249828  | 59249951  | NC_000001.10 |
| cg03267442      | 3.12E-09 | 2.83E-10 | -6.65 | 12.4588253 | -5.99E-02 | 82210566  | 82210689  | NC_000010.10 |
| cg08140891      | 3.13E-09 | 2.83E-10 | -6.65 | 12.4585911 | -6.66E-02 | 154955627 | 154955750 | NC_000001.10 |
| cg18960028      | 3.13E-09 | 2.83E-10 | -6.65 | 12.4583008 | -3.16E-02 | 75526075  | 75526198  | NC_000011.9  |
| cg22976120      | 3.13E-09 | 2.84E-10 | -6.65 | 12.457023  | -1.38E-01 | 48040772  | 48040895  | NC_000011.9  |
| cg25326319      | 3.13E-09 | 2.84E-10 | -6.65 | 12.4559727 | -9.59E-02 | 1733132   | 1733255   | NC_000007.13 |
| cg24374159      | 3.13E-09 | 2.84E-10 | -6.65 | 12.4559649 | -1.65E-02 | 45496476  | 45496599  | NC_000010.10 |
| cg17449465      | 3.14E-09 | 2.84E-10 | -6.65 | 12.4550564 | -1.08E-01 | 93205295  | 93205418  | NC_000007.13 |
| cg00486915      | 3.14E-09 | 2.84E-10 | -6.65 | 12.4546848 | -1.41E-01 | 152877614 | 152877737 | NC_000003.11 |
| ch.10.19309820R | 3.14E-09 | 2.84E-10 | -6.65 | 12.454584  | -4.01E-02 | 19269814  | 19269937  | NC_000010.10 |
| cg07375836      | 3.14E-09 | 2.84E-10 | -6.65 | 12.4545439 | -1.42E-01 | 35717813  | 35717936  | NC_000017.10 |
| cg18970754      | 3.14E-09 | 2.85E-10 | -6.65 | 12.453539  | -4.36E-02 | 74079533  | 74079656  | NC_000014.8  |
| cg26022064      | 3.14E-09 | 2.85E-10 | -6.65 | 12.45289   | -9.17E-02 | 98739782  | 98739905  | NC_000007.13 |
| cg26923862      | 3.14E-09 | 2.85E-10 | -6.65 | 12.4524941 | -1.80E-01 | 1041256   | 1041379   | NC_000016.9  |

|            |          |          |       |            |           |           |           |              |
|------------|----------|----------|-------|------------|-----------|-----------|-----------|--------------|
| cg07975472 | 3.15E-09 | 2.85E-10 | -6.65 | 12.45163   | -3.23E-02 | 1503610   | 1503733   | NC_000019.9  |
| cg13581507 | 3.15E-09 | 2.85E-10 | -6.65 | 12.4509441 | -4.67E-02 | 37075286  | 37075409  | NC_000020.10 |
| cg18921306 | 3.15E-09 | 2.86E-10 | -6.65 | 12.4503346 | -8.84E-02 | 75596055  | 75596178  | NC_000007.13 |
| cg09811317 | 3.16E-09 | 2.86E-10 | -6.65 | 12.447615  | -2.15E-02 | 29297826  | 29297949  | NC_000017.10 |
| cg13411784 | 3.16E-09 | 2.86E-10 | -6.65 | 12.4473034 | -9.01E-02 | 140473680 | 140473803 | NC_000009.11 |
| cg19821682 | 3.16E-09 | 2.87E-10 | -6.65 | 12.4456266 | -1.24E-01 | 4849063   | 4849186   | NC_000001.10 |
| cg00815862 | 3.17E-09 | 2.87E-10 | -6.65 | 12.4449321 | -1.46E-02 | 88851914  | 88852037  | NC_000016.9  |
| cg03232342 | 3.17E-09 | 2.87E-10 | -6.65 | 12.4449088 | -9.57E-02 | 13828356  | 13828479  | NC_000019.9  |
| cg12121965 | 3.17E-09 | 2.87E-10 | -6.65 | 12.4448819 | -5.56E-02 | 46293563  | 46293686  | NC_000021.8  |
| cg20059337 | 3.17E-09 | 2.88E-10 | -6.65 | 12.4438521 | -9.69E-02 | 100686693 | 100686816 | NC_000002.11 |
| cg15117681 | 3.18E-09 | 2.88E-10 | -6.65 | 12.4413728 | -1.13E-01 | 80202426  | 80202549  | NC_000017.10 |
| cg16568084 | 3.18E-09 | 2.88E-10 | -6.65 | 12.4411959 | -1.25E-01 | 93811563  | 93811686  | NC_000007.13 |
| cg22974915 | 3.18E-09 | 2.88E-10 | -6.65 | 12.4411909 | -9.93E-02 | 2306444   | 2306567   | NC_000019.9  |
| cg03876174 | 3.18E-09 | 2.89E-10 | -6.65 | 12.4403713 | -3.84E-02 | 33378508  | 33378631  | NC_000006.11 |
| cg16670736 | 3.18E-09 | 2.89E-10 | -6.65 | 12.4399483 | -1.17E-01 | 157777149 | 157777272 | NC_000007.13 |
| cg06895640 | 3.18E-09 | 2.89E-10 | -6.65 | 12.4395077 | -1.77E-01 | 93277191  | 93277314  | NC_000011.9  |
| cg09959112 | 3.18E-09 | 2.89E-10 | -6.65 | 12.4390714 | -3.06E-02 | 10973301  | 10973424  | NC_000016.9  |
| cg19377234 | 3.19E-09 | 2.89E-10 | -6.65 | 12.4388022 | -4.91E-02 | 125482197 | 125482320 | NC_000003.11 |
| cg03834767 | 3.19E-09 | 2.89E-10 | -6.65 | 12.4386426 | -1.49E-01 | 90794392  | 90794515  | NC_000007.13 |
| cg08946844 | 3.19E-09 | 2.90E-10 | -6.65 | 12.4367302 | -1.33E-01 | 110511112 | 110511235 | NC_000012.11 |
| cg03909504 | 3.20E-09 | 2.90E-10 | -6.65 | 12.4349825 | -7.24E-02 | 25959847  | 25959970  | NC_000017.10 |
| cg16800975 | 3.20E-09 | 2.91E-10 | -6.65 | 12.4326131 | -6.64E-02 | 17434541  | 17434664  | NC_000008.10 |
| cg23946709 | 3.21E-09 | 2.91E-10 | -6.65 | 12.4319052 | -6.59E-02 | 23527317  | 23527440  | NC_000014.8  |
| cg13531460 | 3.21E-09 | 2.92E-10 | -6.65 | 12.4300389 | -1.24E-01 | 231790813 | 231790936 | NC_000002.11 |
| cg05261349 | 3.22E-09 | 2.92E-10 | -6.65 | 12.4282326 | -1.27E-01 | 70473841  | 70473964  | NC_000016.9  |

|                 |          |          |       |            |           |           |           |              |
|-----------------|----------|----------|-------|------------|-----------|-----------|-----------|--------------|
| cg04928457      | 3.22E-09 | 2.93E-10 | -6.65 | 12.4260693 | -1.71E-01 | 186835866 | 186835989 | NC_000004.11 |
| cg21862081      | 3.23E-09 | 2.93E-10 | -6.65 | 12.4258427 | -1.08E-01 | 77769687  | 77769810  | NC_000014.8  |
| cg10259265      | 3.23E-09 | 2.93E-10 | -6.65 | 12.4255408 | -1.31E-01 | 242557379 | 242557502 | NC_000002.11 |
| cg02705474      | 3.23E-09 | 2.93E-10 | -6.65 | 12.4245683 | -1.31E-01 | 50156979  | 50157102  | NC_000012.11 |
| cg00679556      | 3.23E-09 | 2.94E-10 | -6.65 | 12.423487  | -1.41E-01 | 30080782  | 30080905  | NC_000006.11 |
| cg24495017      | 3.23E-09 | 2.94E-10 | -6.65 | 12.4233817 | -1.23E-01 | 134370530 | 134370653 | NC_000005.9  |
| cg09606421      | 3.23E-09 | 2.94E-10 | -6.65 | 12.4232333 | -9.10E-02 | 143154107 | 143154230 | NC_000006.11 |
| cg18711535      | 3.24E-09 | 2.94E-10 | -6.65 | 12.4227249 | -1.42E-01 | 64736348  | 64736471  | NC_000015.9  |
| cg24911837      | 3.24E-09 | 2.94E-10 | -6.65 | 12.422343  | -1.09E-01 | 65227864  | 65227987  | NC_000007.13 |
| cg25233569      | 3.24E-09 | 2.94E-10 | -6.65 | 12.4211776 | -4.66E-02 | 62703741  | 62703864  | NC_000010.10 |
| cg09283548      | 3.25E-09 | 2.95E-10 | -6.64 | 12.4191224 | -1.33E-01 | 233404220 | 233404343 | NC_000002.11 |
| cg13563863      | 3.25E-09 | 2.95E-10 | -6.64 | 12.4175906 | -3.40E-02 | 3506439   | 3506562   | NC_000019.9  |
| cg15282281      | 3.25E-09 | 2.95E-10 | -6.64 | 12.4171179 | -1.03E-01 | 88024557  | 88024680  | NC_000010.10 |
| cg03578548      | 3.25E-09 | 2.96E-10 | -6.64 | 12.4168239 | -1.19E-01 | 91267411  | 91267534  | NC_000009.11 |
| cg13655586      | 3.26E-09 | 2.96E-10 | -6.64 | 12.4157615 | -4.36E-02 | 111202389 | 111202512 | NC_000007.13 |
| cg01128109      | 3.26E-09 | 2.96E-10 | -6.64 | 12.4148679 | -1.19E-01 | 89989507  | 89989630  | NC_000001.10 |
| cg16753939      | 3.26E-09 | 2.96E-10 | -6.64 | 12.4141422 | -1.30E-01 | 624457    | 624580    | NC_000011.9  |
| cg08780020      | 3.26E-09 | 2.96E-10 | -6.64 | 12.4139449 | -4.16E-02 | 105892880 | 105893003 | NC_000011.9  |
| cg22795891      | 3.26E-09 | 2.97E-10 | -6.64 | 12.4136414 | -1.20E-01 | 192543908 | 192544031 | NC_000002.11 |
| cg01245423      | 3.27E-09 | 2.97E-10 | -6.64 | 12.4118691 | -4.86E-02 | 98080212  | 98080335  | NC_000009.11 |
| cg10835417      | 3.27E-09 | 2.97E-10 | -6.64 | 12.4114697 | -7.85E-02 | 94985190  | 94985313  | NC_000015.9  |
| cg00658451      | 3.27E-09 | 2.97E-10 | -6.64 | 12.4107726 | -2.17E-02 | 96336545  | 96336668  | NC_000012.11 |
| cg02097190      | 3.27E-09 | 2.97E-10 | -6.64 | 12.4103959 | -3.20E-02 | 113392116 | 113392239 | NC_000001.10 |
| ch.8.101580865F | 3.28E-09 | 2.98E-10 | -6.64 | 12.4097366 | -2.73E-02 | 101511689 | 101511812 | NC_000008.10 |
| cg14009900      | 3.28E-09 | 2.98E-10 | -6.64 | 12.4093792 | -7.37E-02 | 93983210  | 93983333  | NC_000009.11 |

|            |          |          |       |            |           |           |           |              |
|------------|----------|----------|-------|------------|-----------|-----------|-----------|--------------|
| cg11723077 | 3.28E-09 | 2.98E-10 | -6.64 | 12.4088965 | -1.24E-01 | 158508188 | 158508311 | NC_000006.11 |
| cg26924465 | 3.28E-09 | 2.98E-10 | -6.64 | 12.4087951 | -4.80E-02 | 52095961  | 52096084  | NC_000005.9  |
| cg22345428 | 3.28E-09 | 2.98E-10 | -6.64 | 12.408375  | -1.16E-01 | 129781496 | 129781619 | NC_000011.9  |
| cg00387357 | 3.28E-09 | 2.99E-10 | -6.64 | 12.4070242 | -1.63E-01 | 3484049   | 3484172   | NC_000004.11 |
| cg22333016 | 3.29E-09 | 2.99E-10 | -6.64 | 12.4053295 | -3.98E-02 | 54244258  | 54244381  | NC_000004.11 |
| cg24355048 | 3.29E-09 | 2.99E-10 | -6.64 | 12.4037797 | -1.22E-01 | 25045028  | 25045151  | NC_000014.8  |
| cg03730958 | 3.29E-09 | 3.00E-10 | -6.64 | 12.4036145 | -3.63E-02 | 1312519   | 1312642   | NC_000006.11 |
| cg22233906 | 3.30E-09 | 3.00E-10 | -6.64 | 12.4023734 | -1.20E-01 | 170340932 | 170341055 | NC_000003.11 |
| cg18567944 | 3.30E-09 | 3.00E-10 | -6.64 | 12.4021365 | -2.93E-02 | 42843864  | 42843987  | NC_000020.10 |
| cg11304968 | 3.30E-09 | 3.00E-10 | -6.64 | 12.4017495 | -1.32E-01 | 44016194  | 44016317  | NC_000021.8  |
| cg20208600 | 3.30E-09 | 3.00E-10 | -6.64 | 12.4010764 | -8.88E-02 | 61159687  | 61159810  | NC_000011.9  |
| cg04885832 | 3.30E-09 | 3.00E-10 | -6.64 | 12.4008482 | -1.32E-01 | 176560265 | 176560388 | NC_000005.9  |
| cg13424393 | 3.30E-09 | 3.01E-10 | -6.64 | 12.4003291 | -1.05E-01 | 80569923  | 80570046  | NC_000017.10 |
| cg19055803 | 3.31E-09 | 3.01E-10 | -6.64 | 12.400029  | -5.22E-02 | 12947164  | 12947287  | NC_000019.9  |
| cg26184028 | 3.31E-09 | 3.01E-10 | -6.64 | 12.3988742 | -7.22E-02 | 151814932 | 151815055 | NC_000006.11 |
| cg12546785 | 3.31E-09 | 3.01E-10 | -6.64 | 12.3988162 | -1.33E-01 | 17615189  | 17615312  | NC_000017.10 |
| cg12274898 | 3.31E-09 | 3.01E-10 | -6.64 | 12.3977721 | -1.50E-01 | 153586108 | 153586231 | NC_000001.10 |
| cg07186199 | 3.31E-09 | 3.01E-10 | -6.64 | 12.3974597 | -1.41E-01 | 95243243  | 95243366  | NC_000014.8  |
| cg27535044 | 3.32E-09 | 3.02E-10 | -6.64 | 12.3966804 | -4.08E-02 | 82633568  | 82633691  | NC_000008.10 |
| cg17372101 | 3.32E-09 | 3.02E-10 | -6.64 | 12.3951492 | -1.46E-01 | 147500722 | 147500845 | NC_000007.13 |
| cg06956500 | 3.32E-09 | 3.02E-10 | -6.64 | 12.3948458 | -3.94E-02 | 173684595 | 173684718 | NC_000001.10 |
| cg17777432 | 3.33E-09 | 3.03E-10 | -6.64 | 12.3930071 | -1.76E-01 | 172068999 | 172069122 | NC_000005.9  |
| cg19089701 | 3.33E-09 | 3.03E-10 | -6.64 | 12.3921978 | -1.01E-01 | 126398731 | 126398854 | NC_000008.10 |
| cg08607082 | 3.33E-09 | 3.03E-10 | -6.64 | 12.3914809 | -3.48E-02 | 10381924  | 10382047  | NC_000019.9  |
| cg18494018 | 3.33E-09 | 3.03E-10 | -6.64 | 12.3914435 | -3.66E-02 | 148581708 | 148581831 | NC_000007.13 |

|                 |          |          |       |            |           |           |           |              |
|-----------------|----------|----------|-------|------------|-----------|-----------|-----------|--------------|
| cg17852482      | 3.34E-09 | 3.04E-10 | -6.64 | 12.3900388 | -1.89E-01 | 80833054  | 80833177  | NC_000017.10 |
| cg01597398      | 3.34E-09 | 3.04E-10 | -6.64 | 12.3890651 | -1.00E-01 | 40250727  | 40250850  | NC_000017.10 |
| cg25254338      | 3.34E-09 | 3.04E-10 | -6.64 | 12.3886314 | -1.06E-01 | 32158616  | 32158739  | NC_000015.9  |
| cg03899229      | 3.35E-09 | 3.04E-10 | -6.64 | 12.3875656 | -1.68E-01 | 8821258   | 8821381   | NC_000008.10 |
| cg05331340      | 3.35E-09 | 3.05E-10 | -6.64 | 12.387155  | -9.49E-02 | 7083064   | 7083187   | NC_000017.10 |
| cg04312358      | 3.35E-09 | 3.05E-10 | -6.64 | 12.3868127 | -7.53E-02 | 41197166  | 41197289  | NC_000019.9  |
| cg22701032      | 3.35E-09 | 3.05E-10 | -6.64 | 12.3864034 | -1.26E-01 | 70484527  | 70484650  | NC_000002.11 |
| cg12498580      | 3.35E-09 | 3.05E-10 | -6.64 | 12.3855198 | -8.51E-02 | 7070732   | 7070855   | NC_000012.11 |
| cg14901284      | 3.35E-09 | 3.05E-10 | -6.64 | 12.384991  | -8.92E-02 | 49072348  | 49072471  | NC_000011.9  |
| cg18095506      | 3.36E-09 | 3.06E-10 | -6.64 | 12.3840931 | -4.30E-02 | 137834707 | 137834830 | NC_000003.11 |
| cg24054582      | 3.36E-09 | 3.06E-10 | -6.64 | 12.3827463 | -1.74E-01 | 193973521 | 193973644 | NC_000003.11 |
| cg27357316      | 3.37E-09 | 3.06E-10 | -6.64 | 12.3813685 | -9.77E-02 | 37365987  | 37366110  | NC_000017.10 |
| cg04468092      | 3.37E-09 | 3.07E-10 | -6.64 | 12.3807592 | -9.26E-02 | 25003537  | 25003660  | NC_000004.11 |
| cg03552103      | 3.37E-09 | 3.07E-10 | -6.64 | 12.3802812 | -1.35E-01 | 110373002 | 110373125 | NC_000002.11 |
| cg03050022      | 3.38E-09 | 3.07E-10 | -6.64 | 12.3781006 | -1.88E-01 | 55559759  | 55559882  | NC_000015.9  |
| cg12325349      | 3.38E-09 | 3.07E-10 | -6.64 | 12.3779372 | -4.68E-02 | 73143076  | 73143199  | NC_000002.11 |
| cg07997596      | 3.38E-09 | 3.08E-10 | -6.64 | 12.3757283 | -1.41E-01 | 3685319   | 3685442   | NC_000001.10 |
| ch.2.170674427F | 3.39E-09 | 3.09E-10 | -6.64 | 12.3743415 | -8.64E-02 | 170966181 | 170966304 | NC_000002.11 |
| cg06151718      | 3.39E-09 | 3.09E-10 | -6.64 | 12.3735393 | -1.57E-01 | 74753334  | 74753457  | NC_000002.11 |
| cg21843755      | 3.40E-09 | 3.09E-10 | -6.64 | 12.3722403 | -7.44E-02 | 71558577  | 71558700  | NC_000002.11 |
| ch.11.2590R     | 3.40E-09 | 3.09E-10 | -6.64 | 12.3721379 | -5.35E-02 | 245924    | 246047    | NC_000011.9  |
| cg24604417      | 3.40E-09 | 3.09E-10 | -6.64 | 12.371982  | -6.61E-02 | 49995694  | 49995817  | NC_000005.9  |
| cg26465602      | 3.40E-09 | 3.10E-10 | -6.64 | 12.3714748 | -1.13E-01 | 1098847   | 1098970   | NC_000016.9  |
| cg02100150      | 3.40E-09 | 3.10E-10 | -6.64 | 12.3713547 | -1.85E-01 | 128920485 | 128920608 | NC_000008.10 |
| cg14151317      | 3.40E-09 | 3.10E-10 | -6.64 | 12.3703693 | -1.43E-01 | 139916869 | 139916992 | NC_000009.11 |

|                 |          |          |       |            |           |           |           |              |
|-----------------|----------|----------|-------|------------|-----------|-----------|-----------|--------------|
| cg19207017      | 3.40E-09 | 3.10E-10 | -6.64 | 12.3699818 | -7.75E-02 | 104316063 | 104316186 | NC_000010.10 |
| cg14546714      | 3.41E-09 | 3.11E-10 | -6.64 | 12.3683695 | -3.54E-02 | 73179300  | 73179423  | NC_000017.10 |
| cg14218861      | 3.41E-09 | 3.11E-10 | -6.64 | 12.3669688 | -1.36E-01 | 119443973 | 119444096 | NC_000010.10 |
| cg02881158      | 3.41E-09 | 3.11E-10 | -6.64 | 12.3665765 | -1.61E-01 | 154143948 | 154144071 | NC_000004.11 |
| cg17702736      | 3.41E-09 | 3.11E-10 | -6.64 | 12.366463  | -1.70E-01 | 35941709  | 35941832  | NC_000006.11 |
| ch.20.18164830R | 3.42E-09 | 3.11E-10 | -6.64 | 12.3656159 | -3.44E-02 | 18216830  | 18216953  | NC_000020.10 |
| cg15400703      | 3.42E-09 | 3.12E-10 | -6.63 | 12.364253  | -1.16E-01 | 93391194  | 93391317  | NC_000014.8  |
| cg23594693      | 3.42E-09 | 3.12E-10 | -6.63 | 12.3640215 | -1.24E-01 | 41703970  | 41704093  | NC_000006.11 |
| cg04839259      | 3.42E-09 | 3.12E-10 | -6.63 | 12.3639544 | -1.04E-01 | 123873277 | 123873400 | NC_000010.10 |
| cg14109456      | 3.42E-09 | 3.12E-10 | -6.63 | 12.3634862 | -1.24E-01 | 127040562 | 127040685 | NC_000009.11 |
| cg08678055      | 3.43E-09 | 3.13E-10 | -6.63 | 12.361869  | -1.20E-01 | 74164800  | 74164923  | NC_000015.9  |
| cg21878385      | 3.43E-09 | 3.13E-10 | -6.63 | 12.3618238 | -8.68E-02 | 54398956  | 54399079  | NC_000004.11 |
| cg06705361      | 3.43E-09 | 3.13E-10 | -6.63 | 12.361241  | -1.18E-01 | 135889377 | 135889500 | NC_000006.11 |
| cg00379272      | 3.43E-09 | 3.13E-10 | -6.63 | 12.3599647 | -5.78E-02 | 22306534  | 22306657  | NC_000011.9  |
| cg27360567      | 3.44E-09 | 3.13E-10 | -6.63 | 12.359583  | -5.70E-02 | 49941613  | 49941736  | NC_000003.11 |
| cg15606962      | 3.44E-09 | 3.13E-10 | -6.63 | 12.3592023 | -2.18E-02 | 45909324  | 45909447  | NC_000017.10 |
| cg07894717      | 3.44E-09 | 3.14E-10 | -6.63 | 12.358089  | -7.40E-02 | 10508598  | 10508721  | NC_000001.10 |
| cg18121829      | 3.44E-09 | 3.14E-10 | -6.63 | 12.3572225 | -1.27E-01 | 107388741 | 107388864 | NC_000012.11 |
| cg15558299      | 3.45E-09 | 3.14E-10 | -6.63 | 12.356566  | -5.53E-02 | 205599988 | 205600111 | NC_000001.10 |
| cg13560058      | 3.45E-09 | 3.15E-10 | -6.63 | 12.3556182 | -1.24E-01 | 1097233   | 1097356   | NC_000001.10 |
| cg09911521      | 3.45E-09 | 3.15E-10 | -6.63 | 12.3548047 | -1.57E-01 | 5828301   | 5828424   | NC_000019.9  |
| cg03453764      | 3.45E-09 | 3.15E-10 | -6.63 | 12.3544559 | -2.75E-02 | 2918704   | 2918827   | NC_000016.9  |
| cg24392939      | 3.45E-09 | 3.15E-10 | -6.63 | 12.353889  | -1.62E-01 | 97591258  | 97591381  | NC_000003.11 |
| cg07106881      | 3.46E-09 | 3.15E-10 | -6.63 | 12.3529956 | -1.81E-02 | 1004554   | 1004677   | NC_000004.11 |
| cg08362283      | 3.46E-09 | 3.16E-10 | -6.63 | 12.3515858 | -8.53E-02 | 89119663  | 89119786  | NC_000016.9  |

|               |          |          |       |            |           |           |           |              |
|---------------|----------|----------|-------|------------|-----------|-----------|-----------|--------------|
| cg10328768    | 3.46E-09 | 3.16E-10 | -6.63 | 12.3513885 | -1.65E-01 | 3210325   | 3210448   | NC_000001.10 |
| cg18226957    | 3.46E-09 | 3.16E-10 | -6.63 | 12.3508384 | -4.43E-02 | 128604857 | 128604980 | NC_000002.11 |
| cg15558129    | 3.47E-09 | 3.16E-10 | -6.63 | 12.3502735 | -5.76E-02 | 219347279 | 219347402 | NC_000001.10 |
| cg02927074    | 3.48E-09 | 3.17E-10 | -6.63 | 12.3474807 | -1.24E-01 | 80860549  | 80860672  | NC_000015.9  |
| cg09022458    | 3.48E-09 | 3.18E-10 | -6.63 | 12.345728  | -4.07E-02 | 43538617  | 43538740  | NC_000020.10 |
| cg04936178    | 3.48E-09 | 3.18E-10 | -6.63 | 12.3446848 | -8.52E-02 | 157072649 | 157072772 | NC_000007.13 |
| cg19683073    | 3.50E-09 | 3.19E-10 | -6.63 | 12.3409229 | -1.70E-01 | 79553267  | 79553390  | NC_000005.9  |
| cg18821320    | 3.50E-09 | 3.19E-10 | -6.63 | 12.3405672 | -3.02E-02 | 31509875  | 31509998  | NC_000006.11 |
| cg21840908    | 3.50E-09 | 3.20E-10 | -6.63 | 12.3401389 | -7.61E-02 | 75596046  | 75596169  | NC_000007.13 |
| cg02001060    | 3.50E-09 | 3.20E-10 | -6.63 | 12.339997  | -1.23E-01 | 108408962 | 108409085 | NC_000011.9  |
| cg24694691    | 3.50E-09 | 3.20E-10 | -6.63 | 12.3399382 | -1.11E-01 | 111927153 | 111927276 | NC_000001.10 |
| cg20664247    | 3.50E-09 | 3.20E-10 | -6.63 | 12.3398085 | -9.40E-02 | 2345475   | 2345598   | NC_000001.10 |
| cg27664407    | 3.50E-09 | 3.20E-10 | -6.63 | 12.3391989 | -1.40E-01 | 5116674   | 5116797   | NC_000016.9  |
| cg15373950    | 3.50E-09 | 3.20E-10 | -6.63 | 12.3385992 | -4.73E-02 | 99039295  | 99039418  | NC_000012.11 |
| cg17511195    | 3.51E-09 | 3.21E-10 | -6.63 | 12.3369392 | -2.98E-02 | 95007541  | 95007664  | NC_000001.10 |
| cg07193389    | 3.51E-09 | 3.21E-10 | -6.63 | 12.3368285 | -6.34E-02 | 17290861  | 17290984  | NC_000022.10 |
| ch.20.739424F | 3.52E-09 | 3.21E-10 | -6.63 | 12.3352838 | -5.44E-02 | 35335299  | 35335422  | NC_000020.10 |
| cg25574111    | 3.52E-09 | 3.21E-10 | -6.63 | 12.3348333 | -1.14E-01 | 46544802  | 46544925  | NC_000019.9  |
| cg01542423    | 3.52E-09 | 3.21E-10 | -6.63 | 12.3346666 | -1.70E-01 | 126668119 | 126668242 | NC_000008.10 |
| cg20563759    | 3.52E-09 | 3.22E-10 | -6.63 | 12.3340456 | -2.48E-02 | 149109601 | 149109724 | NC_000005.9  |
| cg02415020    | 3.52E-09 | 3.22E-10 | -6.63 | 12.3328806 | -1.38E-01 | 246019678 | 246019801 | NC_000001.10 |
| cg00558358    | 3.53E-09 | 3.22E-10 | -6.63 | 12.331684  | -4.97E-02 | 114647918 | 114648041 | NC_000002.11 |
| cg24406344    | 3.53E-09 | 3.23E-10 | -6.63 | 12.3304765 | -1.15E-01 | 97167519  | 97167642  | NC_000002.11 |
| cg07405810    | 3.53E-09 | 3.23E-10 | -6.63 | 12.329573  | -9.66E-02 | 45649048  | 45649171  | NC_000005.9  |
| cg17992509    | 3.54E-09 | 3.23E-10 | -6.63 | 12.3292306 | -3.11E-02 | 94312380  | 94312503  | NC_000001.10 |



|            |          |          |       |            |           |           |           |              |
|------------|----------|----------|-------|------------|-----------|-----------|-----------|--------------|
| cg18289508 | 3.54E-09 | 3.24E-10 | -6.63 | 12.327948  | -1.34E-01 | 36990155  | 36990278  | NC_000003.11 |
| cg03262918 | 3.54E-09 | 3.24E-10 | -6.63 | 12.3279436 | -3.57E-02 | 107241738 | 107241861 | NC_000003.11 |
| cg08640619 | 3.54E-09 | 3.24E-10 | -6.63 | 12.3276597 | -1.54E-01 | 157989520 | 157989643 | NC_000001.10 |
| cg24268236 | 3.54E-09 | 3.24E-10 | -6.63 | 12.3265109 | -2.64E-02 | 134204538 | 134204661 | NC_000003.11 |
| cg20852302 | 3.55E-09 | 3.24E-10 | -6.63 | 12.3256155 | -1.20E-01 | 44784898  | 44785021  | NC_000020.10 |
| cg27097542 | 3.55E-09 | 3.25E-10 | -6.63 | 12.3243527 | -9.81E-02 | 11706435  | 11706558  | NC_000016.9  |
| cg02048812 | 3.55E-09 | 3.25E-10 | -6.63 | 12.3241776 | -7.05E-02 | 100448920 | 100449043 | NC_000014.8  |
| cg19396666 | 3.56E-09 | 3.25E-10 | -6.63 | 12.3228349 | -1.23E-01 | 125866280 | 125866403 | NC_000010.10 |
| cg03128133 | 3.56E-09 | 3.25E-10 | -6.63 | 12.3222605 | -2.79E-02 | 1072839   | 1072962   | NC_000001.10 |
| cg13665850 | 3.56E-09 | 3.26E-10 | -6.63 | 12.3208251 | -1.08E-01 | 32015175  | 32015298  | NC_000006.11 |
| cg00149684 | 3.57E-09 | 3.26E-10 | -6.63 | 12.3195867 | -1.46E-01 | 155097375 | 155097498 | NC_000001.10 |
| cg21799053 | 3.57E-09 | 3.26E-10 | -6.63 | 12.3195198 | -5.13E-02 | 22856801  | 22856924  | NC_000008.10 |
| cg09744448 | 3.57E-09 | 3.26E-10 | -6.63 | 12.3194334 | -1.85E-01 | 156998546 | 156998669 | NC_000005.9  |
| cg11398517 | 3.57E-09 | 3.27E-10 | -6.63 | 12.3189009 | -1.00E-01 | 42355625  | 42355748  | NC_000020.10 |
| cg11386746 | 3.58E-09 | 3.27E-10 | -6.63 | 12.3165707 | -5.00E-02 | 89237370  | 89237493  | NC_000016.9  |
| cg10399944 | 3.58E-09 | 3.27E-10 | -6.63 | 12.316342  | -5.37E-02 | 74449604  | 74449727  | NC_000017.10 |
| cg27429749 | 3.59E-09 | 3.28E-10 | -6.63 | 12.3137123 | -2.13E-01 | 57333612  | 57333735  | NC_000011.9  |
| cg21577233 | 3.60E-09 | 3.29E-10 | -6.63 | 12.3115777 | -4.29E-02 | 201507860 | 201507983 | NC_000001.10 |
| cg02483126 | 3.60E-09 | 3.30E-10 | -6.62 | 12.310006  | -4.48E-02 | 22466877  | 22467000  | NC_000019.9  |
| cg18446110 | 3.60E-09 | 3.30E-10 | -6.62 | 12.3094292 | -1.32E-01 | 138714654 | 138714777 | NC_000005.9  |
| cg00118978 | 3.60E-09 | 3.30E-10 | -6.62 | 12.3089975 | -1.14E-01 | 14597418  | 14597541  | NC_000003.11 |
| cg09941798 | 3.61E-09 | 3.30E-10 | -6.62 | 12.3080835 | -6.70E-02 | 99631109  | 99631232  | NC_000013.10 |
| cg00210204 | 3.61E-09 | 3.30E-10 | -6.62 | 12.307365  | -4.08E-02 | 10748101  | 10748224  | NC_000006.11 |
| cg07630564 | 3.61E-09 | 3.31E-10 | -6.62 | 12.3069201 | -4.44E-02 | 128445061 | 128445184 | NC_000003.11 |
| cg22162757 | 3.62E-09 | 3.31E-10 | -6.62 | 12.3058306 | -1.50E-01 | 214699233 | 214699356 | NC_000001.10 |

|            |          |          |       |            |           |           |           |              |
|------------|----------|----------|-------|------------|-----------|-----------|-----------|--------------|
| cg20614157 | 3.62E-09 | 3.31E-10 | -6.62 | 12.305347  | -8.58E-02 | 31980845  | 31980968  | NC_000006.11 |
| cg04123409 | 3.62E-09 | 3.31E-10 | -6.62 | 12.3047557 | -9.03E-02 | 113841617 | 113841740 | NC_000012.11 |
| cg03777205 | 3.62E-09 | 3.32E-10 | -6.62 | 12.3041195 | -4.79E-02 | 100182085 | 100182208 | NC_000007.13 |
| cg11090202 | 3.62E-09 | 3.32E-10 | -6.62 | 12.3033977 | -1.58E-01 | 133021713 | 133021836 | NC_000012.11 |
| cg23407475 | 3.63E-09 | 3.32E-10 | -6.62 | 12.3021695 | -5.11E-02 | 75671462  | 75671585  | NC_000010.10 |
| cg08625851 | 3.63E-09 | 3.32E-10 | -6.62 | 12.3017107 | -2.14E-02 | 21593968  | 21594091  | NC_000006.11 |
| cg07352691 | 3.63E-09 | 3.33E-10 | -6.62 | 12.300427  | -1.45E-01 | 2276371   | 2276494   | NC_000019.9  |
| cg24933605 | 3.63E-09 | 3.33E-10 | -6.62 | 12.300266  | -2.53E-02 | 216177085 | 216177208 | NC_000002.11 |
| cg00525683 | 3.64E-09 | 3.33E-10 | -6.62 | 12.2988504 | -1.44E-01 | 156948581 | 156948704 | NC_000005.9  |
| cg15742818 | 3.64E-09 | 3.33E-10 | -6.62 | 12.2986353 | -1.41E-01 | 25913455  | 25913578  | NC_000017.10 |
| cg26421140 | 3.64E-09 | 3.34E-10 | -6.62 | 12.2974525 | -8.72E-02 | 65006053  | 65006176  | NC_000014.8  |
| cg11082691 | 3.65E-09 | 3.34E-10 | -6.62 | 12.2971103 | -1.99E-01 | 24183666  | 24183789  | NC_000013.10 |
| cg24029430 | 3.66E-09 | 3.35E-10 | -6.62 | 12.2937922 | -6.59E-02 | 60028721  | 60028844  | NC_000010.10 |
| cg23123250 | 3.66E-09 | 3.35E-10 | -6.62 | 12.2928521 | -1.07E-01 | 4440116   | 4440239   | NC_000017.10 |
| cg04897931 | 3.66E-09 | 3.36E-10 | -6.62 | 12.2916131 | -1.40E-01 | 152089    | 152212    | NC_000017.10 |
| cg15526954 | 3.67E-09 | 3.36E-10 | -6.62 | 12.2909343 | -1.50E-01 | 77139085  | 77139208  | NC_000018.9  |
| cg01028142 | 3.67E-09 | 3.36E-10 | -6.62 | 12.2909105 | -1.16E-01 | 7004578   | 7004701   | NC_000002.11 |
| cg08963118 | 3.67E-09 | 3.37E-10 | -6.62 | 12.2895422 | -1.12E-01 | 89636230  | 89636353  | NC_000016.9  |
| cg11684549 | 3.68E-09 | 3.37E-10 | -6.62 | 12.2884531 | -1.55E-01 | 79122243  | 79122366  | NC_000017.10 |
| cg20212077 | 3.68E-09 | 3.37E-10 | -6.62 | 12.287759  | -1.51E-01 | 68194226  | 68194349  | NC_000013.10 |
| cg27361964 | 3.68E-09 | 3.37E-10 | -6.62 | 12.2867851 | -7.71E-02 | 57609204  | 57609327  | NC_000012.11 |
| cg27220681 | 3.69E-09 | 3.38E-10 | -6.62 | 12.2855937 | -4.20E-02 | 685915    | 686038    | NC_000017.10 |
| cg06062378 | 3.70E-09 | 3.39E-10 | -6.62 | 12.2827185 | -1.69E-01 | 112387002 | 112387125 | NC_000005.9  |
| cg15257783 | 3.70E-09 | 3.39E-10 | -6.62 | 12.2821318 | -1.07E-01 | 99277496  | 99277619  | NC_000007.13 |
| cg00564598 | 3.70E-09 | 3.40E-10 | -6.62 | 12.2807393 | -2.80E-02 | 10216860  | 10216983  | NC_000019.9  |

|            |          |          |       |            |           |           |           |              |
|------------|----------|----------|-------|------------|-----------|-----------|-----------|--------------|
| cg17083925 | 3.70E-09 | 3.40E-10 | -6.62 | 12.2806813 | -1.18E-01 | 36793373  | 36793496  | NC_000020.10 |
| cg08018731 | 3.70E-09 | 3.40E-10 | -6.62 | 12.2804702 | -9.13E-02 | 150687961 | 150688084 | NC_000007.13 |
| cg09016822 | 3.70E-09 | 3.40E-10 | -6.62 | 12.2804203 | -3.09E-02 | 30712396  | 30712519  | NC_000006.11 |
| cg22907692 | 3.70E-09 | 3.40E-10 | -6.62 | 12.2802158 | -1.02E-01 | 101455506 | 101455629 | NC_000014.8  |
| cg13423759 | 3.71E-09 | 3.40E-10 | -6.62 | 12.2798782 | -8.86E-02 | 37937403  | 37937526  | NC_000001.10 |
| cg23153745 | 3.71E-09 | 3.40E-10 | -6.62 | 12.279624  | -1.04E-01 | 33652047  | 33652170  | NC_000002.11 |
| cg19043800 | 3.71E-09 | 3.40E-10 | -6.62 | 12.2787432 | -1.31E-01 | 37702050  | 37702173  | NC_000013.10 |
| cg18684951 | 3.71E-09 | 3.41E-10 | -6.62 | 12.2778721 | -1.14E-01 | 141700490 | 141700613 | NC_000005.9  |
| cg23613429 | 3.72E-09 | 3.41E-10 | -6.62 | 12.2760567 | -1.20E-01 | 187464068 | 187464191 | NC_000002.11 |
| cg06157388 | 3.72E-09 | 3.42E-10 | -6.62 | 12.2750333 | -2.03E-02 | 50396996  | 50397119  | NC_000003.11 |
| cg06141346 | 3.72E-09 | 3.42E-10 | -6.62 | 12.2749867 | -6.26E-02 | 93517122  | 93517245  | NC_000011.9  |
| cg23949524 | 3.73E-09 | 3.42E-10 | -6.62 | 12.2722816 | -5.54E-02 | 96588205  | 96588328  | NC_000012.11 |
| cg03535253 | 3.74E-09 | 3.43E-10 | -6.62 | 12.2708434 | -1.87E-01 | 93706571  | 93706694  | NC_000014.8  |
| cg02068361 | 3.74E-09 | 3.43E-10 | -6.62 | 12.2696621 | -1.02E-01 | 52845930  | 52846053  | NC_000012.11 |
| cg19244922 | 3.74E-09 | 3.44E-10 | -6.62 | 12.2692668 | -8.28E-02 | 19380953  | 19381076  | NC_000001.10 |
| cg14077369 | 3.75E-09 | 3.44E-10 | -6.62 | 12.2684513 | -5.68E-02 | 34249001  | 34249124  | NC_000009.11 |
| cg18250651 | 3.75E-09 | 3.44E-10 | -6.62 | 12.2679584 | -3.01E-02 | 74181035  | 74181158  | NC_000014.8  |
| cg14565752 | 3.76E-09 | 3.45E-10 | -6.62 | 12.2656375 | -1.43E-01 | 47955003  | 47955126  | NC_000019.9  |
| cg10752190 | 3.76E-09 | 3.45E-10 | -6.62 | 12.265599  | -9.48E-02 | 9604414   | 9604537   | NC_000017.10 |
| cg14649449 | 3.76E-09 | 3.45E-10 | -6.62 | 12.2649684 | -1.26E-01 | 72660082  | 72660205  | NC_000009.11 |
| cg03926846 | 3.76E-09 | 3.45E-10 | -6.62 | 12.264934  | -1.37E-01 | 184678574 | 184678697 | NC_000004.11 |
| cg18022496 | 3.76E-09 | 3.45E-10 | -6.62 | 12.2642426 | -4.79E-02 | 196594351 | 196594474 | NC_000003.11 |
| cg26499663 | 3.76E-09 | 3.46E-10 | -6.62 | 12.2635558 | -1.36E-01 | 61835175  | 61835298  | NC_000008.10 |
| cg20287434 | 3.77E-09 | 3.46E-10 | -6.62 | 12.2627842 | -1.00E-01 | 79958592  | 79958715  | NC_000017.10 |
| cg08844313 | 3.78E-09 | 3.47E-10 | -6.62 | 12.2604804 | -1.72E-01 | 149240529 | 149240652 | NC_000005.9  |

|            |          |          |       |            |           |           |           |              |
|------------|----------|----------|-------|------------|-----------|-----------|-----------|--------------|
| cg18565216 | 3.78E-09 | 3.47E-10 | -6.62 | 12.2601721 | -1.24E-01 | 43347094  | 43347217  | NC_000021.8  |
| cg04108360 | 3.78E-09 | 3.47E-10 | -6.62 | 12.2591333 | -5.91E-02 | 67771791  | 67771914  | NC_000011.9  |
| cg07793808 | 3.78E-09 | 3.47E-10 | -6.62 | 12.2584311 | -1.57E-01 | 122019006 | 122019129 | NC_000012.11 |
| cg04865442 | 3.78E-09 | 3.47E-10 | -6.62 | 12.2584032 | -1.11E-01 | 120168805 | 120168928 | NC_000003.11 |
| cg15822982 | 3.78E-09 | 3.47E-10 | -6.62 | 12.2581102 | -1.26E-01 | 95517895  | 95518018  | NC_000010.10 |
| cg19324023 | 3.79E-09 | 3.48E-10 | -6.62 | 12.2575369 | -9.54E-02 | 51170003  | 51170126  | NC_000022.10 |
| cg16885779 | 3.79E-09 | 3.48E-10 | -6.62 | 12.2575294 | -1.06E-01 | 840975    | 841098    | NC_000017.10 |
| cg05815196 | 3.79E-09 | 3.48E-10 | -6.62 | 12.2571116 | -1.00E-01 | 31536540  | 31536663  | NC_000022.10 |
| cg08704154 | 3.79E-09 | 3.48E-10 | -6.62 | 12.2570566 | -8.55E-02 | 13297839  | 13297962  | NC_000017.10 |
| cg22780146 | 3.79E-09 | 3.48E-10 | -6.61 | 12.2559599 | -3.58E-02 | 7260707   | 7260830   | NC_000012.11 |
| cg20715824 | 3.79E-09 | 3.48E-10 | -6.61 | 12.2558116 | -3.65E-02 | 100752144 | 100752267 | NC_000014.8  |
| cg27388703 | 3.79E-09 | 3.48E-10 | -6.61 | 12.2556851 | -1.67E-01 | 50004281  | 50004404  | NC_000019.9  |
| cg10727432 | 3.80E-09 | 3.49E-10 | -6.61 | 12.2541307 | -1.33E-01 | 72083707  | 72083830  | NC_000014.8  |
| cg27601574 | 3.80E-09 | 3.49E-10 | -6.61 | 12.2537754 | -1.02E-01 | 31498863  | 31498986  | NC_000022.10 |
| cg08013793 | 3.80E-09 | 3.49E-10 | -6.61 | 12.2529462 | -1.04E-01 | 49905354  | 49905477  | NC_000003.11 |
| cg26616148 | 3.80E-09 | 3.49E-10 | -6.61 | 12.2528151 | -3.68E-02 | 45681407  | 45681530  | NC_000019.9  |
| cg08878352 | 3.80E-09 | 3.49E-10 | -6.61 | 12.2527136 | -3.44E-02 | 30035220  | 30035343  | NC_000006.11 |
| cg05684195 | 3.80E-09 | 3.49E-10 | -6.61 | 12.2526906 | -1.02E-01 | 9920572   | 9920695   | NC_000003.11 |
| cg04200323 | 3.80E-09 | 3.49E-10 | -6.61 | 12.2526277 | -2.45E-02 | 45907069  | 45907192  | NC_000011.9  |
| cg13670898 | 3.80E-09 | 3.50E-10 | -6.61 | 12.252363  | -1.04E-01 | 56792319  | 56792442  | NC_000014.8  |
| cg24021113 | 3.81E-09 | 3.50E-10 | -6.61 | 12.250997  | -1.83E-01 | 3752849   | 3752972   | NC_000006.11 |
| cg11384924 | 3.81E-09 | 3.50E-10 | -6.61 | 12.2507713 | -9.47E-02 | 33160224  | 33160347  | NC_000006.11 |
| cg05519181 | 3.81E-09 | 3.50E-10 | -6.61 | 12.2502881 | -5.66E-02 | 42541252  | 42541375  | NC_000022.10 |
| cg10695429 | 3.81E-09 | 3.50E-10 | -6.61 | 12.2497594 | -6.44E-02 | 185542769 | 185542892 | NC_000003.11 |
| cg05321721 | 3.82E-09 | 3.51E-10 | -6.61 | 12.2489136 | -3.88E-02 | 104094918 | 104095041 | NC_000014.8  |

|                 |          |          |       |            |           |           |           |              |
|-----------------|----------|----------|-------|------------|-----------|-----------|-----------|--------------|
| cg03784994      | 3.82E-09 | 3.51E-10 | -6.61 | 12.2488882 | -9.83E-02 | 1556050   | 1556173   | NC_000011.9  |
| cg10126324      | 3.82E-09 | 3.51E-10 | -6.61 | 12.2475114 | -8.35E-02 | 1052600   | 1052723   | NC_000001.10 |
| cg18079334      | 3.83E-09 | 3.52E-10 | -6.61 | 12.2462443 | -6.66E-02 | 98503376  | 98503499  | NC_000015.9  |
| cg17103217      | 3.83E-09 | 3.52E-10 | -6.61 | 12.2460836 | -1.17E-01 | 33245721  | 33245844  | NC_000006.11 |
| cg14534803      | 3.83E-09 | 3.52E-10 | -6.61 | 12.2457844 | -1.40E-01 | 19692446  | 19692569  | NC_000011.9  |
| cg09304803      | 3.83E-09 | 3.52E-10 | -6.61 | 12.2454984 | -9.28E-02 | 149976    | 150099    | NC_000007.13 |
| cg24511341      | 3.83E-09 | 3.52E-10 | -6.61 | 12.2452735 | -3.67E-02 | 111358516 | 111358639 | NC_000013.10 |
| cg26089007      | 3.83E-09 | 3.52E-10 | -6.61 | 12.2450381 | -1.23E-01 | 44256337  | 44256460  | NC_000018.9  |
| cg16048006      | 3.84E-09 | 3.53E-10 | -6.61 | 12.2435453 | -1.19E-01 | 2065263   | 2065386   | NC_000001.10 |
| cg13100962      | 3.84E-09 | 3.53E-10 | -6.61 | 12.2426236 | -1.11E-01 | 33921158  | 33921281  | NC_000011.9  |
| cg20804831      | 3.85E-09 | 3.54E-10 | -6.61 | 12.2410257 | -5.22E-02 | 131080579 | 131080702 | NC_000003.11 |
| cg25815298      | 3.85E-09 | 3.54E-10 | -6.61 | 12.2406462 | -7.03E-02 | 155703360 | 155703483 | NC_000006.11 |
| cg22863798      | 3.85E-09 | 3.54E-10 | -6.61 | 12.239602  | -2.77E-02 | 130889913 | 130890036 | NC_000009.11 |
| cg04804139      | 3.85E-09 | 3.54E-10 | -6.61 | 12.239595  | -9.12E-02 | 124901555 | 124901678 | NC_000012.11 |
| ch.6.2649866F   | 3.85E-09 | 3.54E-10 | -6.61 | 12.2390196 | -4.33E-02 | 138083694 | 138083817 | NC_000006.11 |
| cg24061580      | 3.86E-09 | 3.55E-10 | -6.61 | 12.2377208 | -5.07E-02 | 151573966 | 151574089 | NC_000007.13 |
| cg26689934      | 3.86E-09 | 3.55E-10 | -6.61 | 12.2372537 | -1.25E-01 | 10839502  | 10839625  | NC_000001.10 |
| cg21476940      | 3.86E-09 | 3.55E-10 | -6.61 | 12.2359371 | -1.24E-01 | 160854954 | 160855077 | NC_000001.10 |
| cg26912314      | 3.88E-09 | 3.57E-10 | -6.61 | 12.2328361 | -1.20E-01 | 56291781  | 56291904  | NC_000016.9  |
| cg04144533      | 3.88E-09 | 3.57E-10 | -6.61 | 12.2305889 | -9.89E-02 | 206681983 | 206682106 | NC_000001.10 |
| cg04205769      | 3.89E-09 | 3.58E-10 | -6.61 | 12.2300418 | -1.17E-01 | 101488098 | 101488221 | NC_000001.10 |
| cg22480490      | 3.89E-09 | 3.58E-10 | -6.61 | 12.229505  | -6.60E-02 | 88316373  | 88316496  | NC_000002.11 |
| cg09741240      | 3.89E-09 | 3.58E-10 | -6.61 | 12.2285353 | -7.48E-02 | 3000097   | 3000220   | NC_000006.11 |
| cg14528386      | 3.89E-09 | 3.58E-10 | -6.61 | 12.2280649 | -1.03E-01 | 848440    | 848563    | NC_000001.10 |
| ch.2.113772948R | 3.89E-09 | 3.58E-10 | -6.61 | 12.2277686 | -3.79E-02 | 114056478 | 114056601 | NC_000002.11 |

|              |          |          |       |            |           |           |           |              |
|--------------|----------|----------|-------|------------|-----------|-----------|-----------|--------------|
| cg00832547   | 3.89E-09 | 3.58E-10 | -6.61 | 12.227683  | -1.57E-01 | 102701390 | 102701513 | NC_000014.8  |
| cg16220294   | 3.90E-09 | 3.59E-10 | -6.61 | 12.2267226 | -1.22E-01 | 45924140  | 45924263  | NC_000015.9  |
| cg04115544   | 3.90E-09 | 3.59E-10 | -6.61 | 12.2263803 | -7.12E-02 | 55108438  | 55108561  | NC_000018.9  |
| cg07899956   | 3.90E-09 | 3.59E-10 | -6.61 | 12.2256082 | -5.23E-02 | 74261249  | 74261372  | NC_000017.10 |
| cg17078883   | 3.90E-09 | 3.59E-10 | -6.61 | 12.22519   | -1.07E-01 | 28759936  | 28760059  | NC_000010.10 |
| cg00928894   | 3.90E-09 | 3.59E-10 | -6.61 | 12.2247959 | -3.03E-02 | 188269    | 188392    | NC_000016.9  |
| cg23836542   | 3.91E-09 | 3.60E-10 | -6.61 | 12.222928  | -5.60E-02 | 29233705  | 29233828  | NC_000007.13 |
| cg07404400   | 3.92E-09 | 3.61E-10 | -6.61 | 12.2203552 | -5.03E-02 | 180649609 | 180649732 | NC_000005.9  |
| cg05491930   | 3.93E-09 | 3.62E-10 | -6.61 | 12.2185621 | -6.53E-02 | 99872786  | 99872909  | NC_000006.11 |
| cg02572713   | 3.93E-09 | 3.62E-10 | -6.61 | 12.2183737 | -1.06E-01 | 80239356  | 80239479  | NC_000008.10 |
| cg15621458   | 3.93E-09 | 3.62E-10 | -6.61 | 12.2169237 | -1.48E-01 | 97300429  | 97300552  | NC_000012.11 |
| cg17460285   | 3.93E-09 | 3.62E-10 | -6.61 | 12.2168576 | -7.43E-02 | 40985453  | 40985576  | NC_000017.10 |
| cg11159604   | 3.94E-09 | 3.63E-10 | -6.61 | 12.2146145 | -1.10E-01 | 91316223  | 91316346  | NC_000001.10 |
| ch.7.647988F | 3.94E-09 | 3.63E-10 | -6.61 | 12.2144487 | -1.62E-02 | 26052839  | 26052962  | NC_000007.13 |
| cg10155432   | 3.95E-09 | 3.64E-10 | -6.61 | 12.21272   | -8.91E-02 | 1293933   | 1294056   | NC_000007.13 |
| cg12407867   | 3.96E-09 | 3.65E-10 | -6.61 | 12.2104457 | -1.36E-01 | 1167369   | 1167492   | NC_000004.11 |
| cg22985172   | 3.96E-09 | 3.65E-10 | -6.61 | 12.2102423 | -1.18E-01 | 151258337 | 151258460 | NC_000006.11 |
| cg23257935   | 3.96E-09 | 3.65E-10 | -6.61 | 12.2102052 | -4.72E-02 | 118727834 | 118727957 | NC_000001.10 |
| cg03065107   | 3.96E-09 | 3.65E-10 | -6.61 | 12.2095006 | -1.18E-01 | 31497155  | 31497278  | NC_000002.11 |
| cg01987202   | 3.97E-09 | 3.66E-10 | -6.61 | 12.207975  | -8.48E-02 | 40633194  | 40633317  | NC_000015.9  |
| cg07596299   | 3.97E-09 | 3.66E-10 | -6.61 | 12.2068236 | -4.15E-02 | 71824057  | 71824180  | NC_000011.9  |
| cg06634460   | 3.97E-09 | 3.66E-10 | -6.61 | 12.2068195 | -7.12E-02 | 123380891 | 123381014 | NC_000012.11 |
| cg20810997   | 3.98E-09 | 3.67E-10 | -6.61 | 12.2047738 | -9.63E-02 | 29978353  | 29978476  | NC_000020.10 |
| cg04714041   | 3.98E-09 | 3.67E-10 | -6.61 | 12.2037974 | -1.33E-01 | 35068710  | 35068833  | NC_000019.9  |
| cg15440512   | 3.98E-09 | 3.67E-10 | -6.61 | 12.2034493 | -7.26E-02 | 4401718   | 4401841   | NC_000017.10 |

|                |          |          |      |            |           |           |           |              |
|----------------|----------|----------|------|------------|-----------|-----------|-----------|--------------|
| cg09335647     | 3.99E-09 | 3.68E-10 | -6.6 | 12.2020069 | -1.21E-01 | 147097440 | 147097563 | NC_000007.13 |
| cg16948053     | 3.99E-09 | 3.68E-10 | -6.6 | 12.2012085 | -3.36E-02 | 169386691 | 169386814 | NC_000003.11 |
| cg04159098     | 3.99E-09 | 3.68E-10 | -6.6 | 12.2010471 | -1.00E-01 | 33982683  | 33982806  | NC_000001.10 |
| cg05173749     | 3.99E-09 | 3.68E-10 | -6.6 | 12.2009583 | -9.69E-02 | 71452580  | 71452703  | NC_000005.9  |
| cg26559707     | 4.00E-09 | 3.69E-10 | -6.6 | 12.1987247 | -1.11E-01 | 47367816  | 47367939  | NC_000007.13 |
| cg11431346     | 4.00E-09 | 3.69E-10 | -6.6 | 12.198355  | -9.22E-02 | 45670478  | 45670601  | NC_000015.9  |
| cg10056854     | 4.01E-09 | 3.70E-10 | -6.6 | 12.1977262 | -5.23E-02 | 22019337  | 22019460  | NC_000016.9  |
| cg08411512     | 4.01E-09 | 3.70E-10 | -6.6 | 12.1969966 | -6.95E-02 | 25846519  | 25846642  | NC_000020.10 |
| cg14826683     | 4.01E-09 | 3.70E-10 | -6.6 | 12.1969004 | -1.59E-01 | 153013830 | 153013953 | NC_000001.10 |
| cg19951818     | 4.01E-09 | 3.70E-10 | -6.6 | 12.1958042 | -7.19E-02 | 45969823  | 45969946  | NC_000003.11 |
| cg14849071     | 4.02E-09 | 3.70E-10 | -6.6 | 12.1952686 | -5.26E-02 | 226070470 | 226070593 | NC_000001.10 |
| cg26426395     | 4.02E-09 | 3.71E-10 | -6.6 | 12.1952018 | -1.46E-01 | 8870227   | 8870350   | NC_000002.11 |
| ch.8.56925254R | 4.02E-09 | 3.71E-10 | -6.6 | 12.1950015 | -3.28E-02 | 56762700  | 56762823  | NC_000008.10 |
| cg09636163     | 4.03E-09 | 3.71E-10 | -6.6 | 12.1926185 | -1.53E-01 | 111829360 | 111829483 | NC_000002.11 |
| cg12741295     | 4.03E-09 | 3.71E-10 | -6.6 | 12.1926077 | -4.81E-02 | 197518711 | 197518834 | NC_000003.11 |
| cg26297808     | 4.03E-09 | 3.72E-10 | -6.6 | 12.1910867 | -1.15E-01 | 1372924   | 1373047   | NC_000007.13 |
| cg06705122     | 4.03E-09 | 3.72E-10 | -6.6 | 12.1908625 | -1.18E-01 | 49371079  | 49371202  | NC_000019.9  |
| cg20707991     | 4.03E-09 | 3.72E-10 | -6.6 | 12.1905473 | -8.51E-02 | 157333949 | 157334072 | NC_000007.13 |
| cg03033182     | 4.03E-09 | 3.72E-10 | -6.6 | 12.1904482 | -1.20E-01 | 141177619 | 141177742 | NC_000004.11 |
| cg09576223     | 4.04E-09 | 3.72E-10 | -6.6 | 12.1900406 | -9.01E-02 | 39092757  | 39092880  | NC_000022.10 |
| cg26177629     | 4.04E-09 | 3.73E-10 | -6.6 | 12.1884911 | -5.17E-02 | 27793549  | 27793672  | NC_000010.10 |
| cg11623714     | 4.04E-09 | 3.73E-10 | -6.6 | 12.1879801 | -2.87E-02 | 155601176 | 155601299 | NC_000007.13 |
| cg21723559     | 4.04E-09 | 3.73E-10 | -6.6 | 12.1876177 | -1.25E-01 | 44048174  | 44048297  | NC_000020.10 |
| cg24624624     | 4.05E-09 | 3.74E-10 | -6.6 | 12.1870565 | -7.97E-02 | 66036125  | 66036248  | NC_000011.9  |
| cg16718891     | 4.05E-09 | 3.74E-10 | -6.6 | 12.1867932 | -2.13E-02 | 54813155  | 54813278  | NC_000012.11 |

|            |          |          |      |            |           |           |           |              |
|------------|----------|----------|------|------------|-----------|-----------|-----------|--------------|
| cg14779271 | 4.05E-09 | 3.74E-10 | -6.6 | 12.1860124 | -1.24E-01 | 109838678 | 109838801 | NC_000004.11 |
| cg22600610 | 4.05E-09 | 3.74E-10 | -6.6 | 12.1851979 | -6.51E-02 | 21300625  | 21300748  | NC_000001.10 |
| cg23756173 | 4.05E-09 | 3.74E-10 | -6.6 | 12.1851728 | -1.41E-01 | 26577713  | 26577836  | NC_000017.10 |
| cg24622544 | 4.06E-09 | 3.74E-10 | -6.6 | 12.18472   | -1.10E-01 | 121021673 | 121021796 | NC_000012.11 |
| cg27572072 | 4.06E-09 | 3.75E-10 | -6.6 | 12.1842641 | -1.41E-01 | 958244    | 958367    | NC_000007.13 |
| cg11245181 | 4.06E-09 | 3.75E-10 | -6.6 | 12.1824519 | -1.64E-01 | 149772854 | 149772977 | NC_000006.11 |
| cg21451265 | 4.06E-09 | 3.75E-10 | -6.6 | 12.1824074 | -4.60E-02 | 97187319  | 97187442  | NC_000001.10 |
| cg16587707 | 4.07E-09 | 3.75E-10 | -6.6 | 12.1821017 | -1.22E-01 | 2920265   | 2920388   | NC_000011.9  |
| cg27306678 | 4.07E-09 | 3.76E-10 | -6.6 | 12.1819603 | -1.79E-01 | 9994280   | 9994403   | NC_000003.11 |
| cg16455444 | 4.07E-09 | 3.76E-10 | -6.6 | 12.1817128 | -1.57E-01 | 140676190 | 140676313 | NC_000008.10 |
| cg27294629 | 4.07E-09 | 3.76E-10 | -6.6 | 12.1816136 | -3.63E-02 | 176513704 | 176513827 | NC_000005.9  |
| cg09458420 | 4.07E-09 | 3.76E-10 | -6.6 | 12.1809193 | -1.03E-01 | 231661317 | 231661440 | NC_000002.11 |
| cg04894027 | 4.07E-09 | 3.76E-10 | -6.6 | 12.1808017 | -1.13E-01 | 17951184  | 17951307  | NC_000001.10 |
| cg16315417 | 4.08E-09 | 3.76E-10 | -6.6 | 12.1796397 | -1.78E-01 | 2187457   | 2187580   | NC_000001.10 |
| cg14746387 | 4.09E-09 | 3.78E-10 | -6.6 | 12.1768413 | -1.61E-01 | 172879299 | 172879422 | NC_000005.9  |
| cg25098478 | 4.09E-09 | 3.78E-10 | -6.6 | 12.1754748 | -1.08E-01 | 27464538  | 27464661  | NC_000001.10 |
| cg08156809 | 4.10E-09 | 3.78E-10 | -6.6 | 12.1746874 | -6.24E-02 | 74071310  | 74071433  | NC_000007.13 |
| cg04458969 | 4.11E-09 | 3.80E-10 | -6.6 | 12.171624  | -1.04E-01 | 183733105 | 183733228 | NC_000002.11 |
| cg23428143 | 4.11E-09 | 3.80E-10 | -6.6 | 12.1713549 | -1.41E-01 | 57385648  | 57385771  | NC_000014.8  |
| cg24490529 | 4.12E-09 | 3.80E-10 | -6.6 | 12.1691408 | -9.89E-02 | 4279385   | 4279508   | NC_000007.13 |
| cg11912215 | 4.12E-09 | 3.81E-10 | -6.6 | 12.1675068 | -1.04E-01 | 1377931   | 1378054   | NC_000002.11 |
| cg03178838 | 4.13E-09 | 3.81E-10 | -6.6 | 12.16657   | -2.36E-01 | 1132339   | 1132462   | NC_000019.9  |
| cg00789198 | 4.14E-09 | 3.82E-10 | -6.6 | 12.1642249 | -1.34E-01 | 42007378  | 42007501  | NC_000019.9  |
| cg21210523 | 4.14E-09 | 3.83E-10 | -6.6 | 12.1635404 | -4.55E-02 | 13940715  | 13940838  | NC_000019.9  |
| cg02070114 | 4.14E-09 | 3.83E-10 | -6.6 | 12.1626903 | -3.18E-02 | 139555300 | 139555423 | NC_000005.9  |



|            |          |          |       |            |           |           |           |              |
|------------|----------|----------|-------|------------|-----------|-----------|-----------|--------------|
| cg15664152 | 4.15E-09 | 3.83E-10 | -6.6  | 12.1615866 | -1.33E-01 | 129008407 | 129008530 | NC_000007.13 |
| cg06130072 | 4.15E-09 | 3.84E-10 | -6.6  | 12.1600584 | -6.58E-02 | 1036714   | 1036837   | NC_000011.9  |
| cg01708812 | 4.16E-09 | 3.85E-10 | -6.6  | 12.1574748 | -3.93E-02 | 71222655  | 71222778  | NC_000002.11 |
| cg09944616 | 4.17E-09 | 3.85E-10 | -6.6  | 12.1568832 | -9.26E-02 | 80275880  | 80276003  | NC_000017.10 |
| cg06720084 | 4.17E-09 | 3.85E-10 | -6.6  | 12.1564483 | -1.64E-01 | 69776369  | 69776492  | NC_000016.9  |
| cg03339956 | 4.17E-09 | 3.86E-10 | -6.6  | 12.1558074 | -1.17E-01 | 114818235 | 114818358 | NC_000010.10 |
| cg03784048 | 4.17E-09 | 3.86E-10 | -6.6  | 12.1552438 | -1.55E-01 | 9229746   | 9229869   | NC_000016.9  |
| cg17100696 | 4.17E-09 | 3.86E-10 | -6.6  | 12.1550219 | -4.09E-02 | 71088862  | 71088985  | NC_000017.10 |
| cg22905192 | 4.18E-09 | 3.86E-10 | -6.6  | 12.1541882 | -1.02E-01 | 55019140  | 55019263  | NC_000004.11 |
| cg01438829 | 4.18E-09 | 3.87E-10 | -6.6  | 12.1537158 | -1.54E-02 | 26646651  | 26646774  | NC_000017.10 |
| cg19992474 | 4.18E-09 | 3.87E-10 | -6.6  | 12.1535461 | -1.14E-01 | 154985807 | 154985930 | NC_000007.13 |
| cg06710328 | 4.18E-09 | 3.87E-10 | -6.6  | 12.1535145 | -1.47E-01 | 33217195  | 33217318  | NC_000011.9  |
| cg23023970 | 4.18E-09 | 3.87E-10 | -6.6  | 12.1527787 | -8.32E-02 | 134385698 | 134385821 | NC_000010.10 |
| cg17452249 | 4.18E-09 | 3.87E-10 | -6.6  | 12.1524781 | -1.36E-01 | 245287858 | 245287981 | NC_000001.10 |
| cg21448788 | 4.20E-09 | 3.88E-10 | -6.6  | 12.1493937 | -1.85E-02 | 10826971  | 10827094  | NC_000012.11 |
| cg02998992 | 4.21E-09 | 3.89E-10 | -6.59 | 12.1470346 | -4.21E-02 | 19265610  | 19265733  | NC_000017.10 |
| cg27442140 | 4.21E-09 | 3.90E-10 | -6.59 | 12.146049  | -5.69E-02 | 38456210  | 38456333  | NC_000001.10 |
| cg15206981 | 4.21E-09 | 3.90E-10 | -6.59 | 12.1453094 | -1.31E-01 | 124323013 | 124323136 | NC_000004.11 |
| cg27530186 | 4.22E-09 | 3.90E-10 | -6.59 | 12.1450204 | -1.86E-01 | 121688459 | 121688582 | NC_000012.11 |
| cg01823416 | 4.22E-09 | 3.90E-10 | -6.59 | 12.144025  | -3.85E-02 | 47082372  | 47082495  | NC_000001.10 |
| cg25910466 | 4.22E-09 | 3.90E-10 | -6.59 | 12.1437896 | -4.27E-02 | 21283998  | 21284121  | NC_000020.10 |
| cg01061944 | 4.22E-09 | 3.91E-10 | -6.59 | 12.1435511 | -2.54E-02 | 43129736  | 43129859  | NC_000017.10 |
| cg27061971 | 4.22E-09 | 3.91E-10 | -6.59 | 12.1430836 | -7.82E-02 | 72746990  | 72747113  | NC_000005.9  |
| cg08778148 | 4.22E-09 | 3.91E-10 | -6.59 | 12.142613  | -1.31E-01 | 188406934 | 188407057 | NC_000002.11 |
| cg02360862 | 4.23E-09 | 3.91E-10 | -6.59 | 12.1421781 | -1.31E-01 | 226411954 | 226412077 | NC_000001.10 |

|                |          |          |       |            |           |           |           |              |
|----------------|----------|----------|-------|------------|-----------|-----------|-----------|--------------|
| cg18577214     | 4.23E-09 | 3.91E-10 | -6.59 | 12.1421016 | -2.59E-02 | 3819306   | 3819429   | NC_000011.9  |
| cg12407070     | 4.23E-09 | 3.92E-10 | -6.59 | 12.1408684 | -1.37E-01 | 149034450 | 149034573 | NC_000003.11 |
| ch.12.2884971R | 4.23E-09 | 3.92E-10 | -6.59 | 12.1405969 | -4.77E-02 | 132503991 | 132504114 | NC_000012.11 |
| cg19345149     | 4.23E-09 | 3.92E-10 | -6.59 | 12.1401077 | -3.37E-02 | 116658875 | 116658998 | NC_000011.9  |
| cg11068337     | 4.24E-09 | 3.92E-10 | -6.59 | 12.1391976 | -8.38E-02 | 43224582  | 43224705  | NC_000017.10 |
| cg00618711     | 4.24E-09 | 3.92E-10 | -6.59 | 12.13885   | -8.61E-02 | 70688052  | 70688175  | NC_000016.9  |
| cg25514328     | 4.24E-09 | 3.92E-10 | -6.59 | 12.1387038 | -4.38E-02 | 78549324  | 78549447  | NC_000017.10 |
| cg27637363     | 4.24E-09 | 3.93E-10 | -6.59 | 12.1382471 | -6.05E-02 | 27945387  | 27945510  | NC_000017.10 |
| cg16872106     | 4.24E-09 | 3.93E-10 | -6.59 | 12.137653  | -5.89E-02 | 18268459  | 18268582  | NC_000020.10 |
| cg20827077     | 4.25E-09 | 3.93E-10 | -6.59 | 12.1370398 | -1.22E-01 | 33171339  | 33171462  | NC_000015.9  |
| cg24021846     | 4.25E-09 | 3.93E-10 | -6.59 | 12.1368918 | -1.11E-01 | 103556529 | 103556652 | NC_000007.13 |
| ch.8.902189R   | 4.25E-09 | 3.94E-10 | -6.59 | 12.1360582 | -2.91E-02 | 38143723  | 38143846  | NC_000008.10 |
| cg25336765     | 4.26E-09 | 3.94E-10 | -6.59 | 12.1349323 | -1.34E-01 | 131008537 | 131008660 | NC_000008.10 |
| cg16868190     | 4.26E-09 | 3.94E-10 | -6.59 | 12.1344079 | -5.12E-02 | 12377377  | 12377500  | NC_000018.9  |
| cg18120111     | 4.26E-09 | 3.95E-10 | -6.59 | 12.1331932 | -5.21E-02 | 43917047  | 43917170  | NC_000021.8  |
| cg10501036     | 4.26E-09 | 3.95E-10 | -6.59 | 12.1329975 | -3.42E-02 | 103058097 | 103058220 | NC_000014.8  |
| cg23062006     | 4.26E-09 | 3.95E-10 | -6.59 | 12.1328396 | -6.21E-02 | 46940220  | 46940343  | NC_000011.9  |
| cg08134671     | 4.26E-09 | 3.95E-10 | -6.59 | 12.1327296 | -1.34E-01 | 2542837   | 2542960   | NC_000019.9  |
| cg08346127     | 4.27E-09 | 3.96E-10 | -6.59 | 12.1308879 | -1.25E-01 | 31871019  | 31871142  | NC_000020.10 |
| cg23475112     | 4.27E-09 | 3.96E-10 | -6.59 | 12.1306676 | -1.47E-01 | 131725325 | 131725448 | NC_000005.9  |
| cg00584422     | 4.27E-09 | 3.96E-10 | -6.59 | 12.1302716 | -1.04E-01 | 23724774  | 23724897  | NC_000016.9  |
| cg08180187     | 4.28E-09 | 3.96E-10 | -6.59 | 12.1297897 | -1.03E-01 | 24796689  | 24796812  | NC_000004.11 |
| cg22119676     | 4.28E-09 | 3.96E-10 | -6.59 | 12.1292407 | -1.32E-01 | 33057712  | 33057835  | NC_000002.11 |
| ch.9.2172872F  | 4.28E-09 | 3.96E-10 | -6.59 | 12.128987  | -2.11E-02 | 131891362 | 131891485 | NC_000009.11 |
| cg20777257     | 4.28E-09 | 3.97E-10 | -6.59 | 12.1283238 | -8.91E-02 | 173841038 | 173841161 | NC_000005.9  |

|            |          |          |       |            |           |           |           |              |
|------------|----------|----------|-------|------------|-----------|-----------|-----------|--------------|
| cg24870662 | 4.28E-09 | 3.97E-10 | -6.59 | 12.1280776 | -9.79E-02 | 16179321  | 16179444  | NC_000019.9  |
| cg13286318 | 4.28E-09 | 3.97E-10 | -6.59 | 12.1279774 | -5.19E-02 | 57906058  | 57906181  | NC_000008.10 |
| cg14669515 | 4.29E-09 | 3.97E-10 | -6.59 | 12.1275583 | -1.09E-01 | 9386821   | 9386944   | NC_000001.10 |
| cg04885336 | 4.29E-09 | 3.97E-10 | -6.59 | 12.1272084 | -6.55E-02 | 195270848 | 195270971 | NC_000003.11 |
| cg05714672 | 4.29E-09 | 3.97E-10 | -6.59 | 12.1267434 | -4.84E-02 | 15469004  | 15469127  | NC_000003.11 |
| cg24254891 | 4.29E-09 | 3.97E-10 | -6.59 | 12.1263905 | -1.20E-01 | 40395315  | 40395438  | NC_000022.10 |
| cg07471203 | 4.29E-09 | 3.98E-10 | -6.59 | 12.1256486 | -1.29E-01 | 64880911  | 64881034  | NC_000011.9  |
| cg03907570 | 4.30E-09 | 3.98E-10 | -6.59 | 12.1241371 | -9.73E-02 | 731254    | 731377    | NC_000007.13 |
| cg11636714 | 4.30E-09 | 3.99E-10 | -6.59 | 12.1230163 | -2.45E-02 | 42128950  | 42129073  | NC_000008.10 |
| cg03087610 | 4.31E-09 | 3.99E-10 | -6.59 | 12.121815  | -1.64E-02 | 71892362  | 71892485  | NC_000010.10 |
| cg05655953 | 4.31E-09 | 4.00E-10 | -6.59 | 12.1205512 | -1.98E-01 | 123810032 | 123810155 | NC_000010.10 |
| cg14694038 | 4.31E-09 | 4.00E-10 | -6.59 | 12.120547  | -1.05E-01 | 5037103   | 5037226   | NC_000019.9  |
| cg25189626 | 4.31E-09 | 4.00E-10 | -6.59 | 12.1203953 | -5.66E-02 | 19411026  | 19411149  | NC_000017.10 |
| cg12417590 | 4.32E-09 | 4.00E-10 | -6.59 | 12.1200264 | -6.10E-02 | 42086612  | 42086735  | NC_000020.10 |
| cg08431873 | 4.32E-09 | 4.01E-10 | -6.59 | 12.1186419 | -2.69E-02 | 86013179  | 86013302  | NC_000011.9  |
| cg14163444 | 4.32E-09 | 4.01E-10 | -6.59 | 12.1182526 | -1.84E-01 | 99595348  | 99595471  | NC_000007.13 |
| cg07698804 | 4.33E-09 | 4.01E-10 | -6.59 | 12.1170745 | -1.49E-01 | 80829309  | 80829432  | NC_000017.10 |
| cg06983551 | 4.33E-09 | 4.01E-10 | -6.59 | 12.1167726 | -6.93E-02 | 111435583 | 111435706 | NC_000002.11 |
| cg22614142 | 4.34E-09 | 4.02E-10 | -6.59 | 12.1151668 | -1.62E-01 | 145698232 | 145698355 | NC_000008.10 |
| cg14893129 | 4.34E-09 | 4.02E-10 | -6.59 | 12.1150776 | -1.43E-01 | 78152051  | 78152174  | NC_000017.10 |
| cg13605327 | 4.34E-09 | 4.03E-10 | -6.59 | 12.1135979 | -1.10E-01 | 47057436  | 47057559  | NC_000010.10 |
| cg19272720 | 4.34E-09 | 4.03E-10 | -6.59 | 12.113152  | -1.32E-01 | 204289444 | 204289567 | NC_000001.10 |
| cg26820327 | 4.35E-09 | 4.03E-10 | -6.59 | 12.1118631 | -9.38E-02 | 232765754 | 232765877 | NC_000002.11 |
| cg16017800 | 4.35E-09 | 4.04E-10 | -6.59 | 12.1111192 | -8.64E-02 | 157184114 | 157184237 | NC_000006.11 |
| cg01541814 | 4.36E-09 | 4.05E-10 | -6.59 | 12.1091359 | -5.29E-02 | 29298591  | 29298714  | NC_000017.10 |

|               |          |          |       |            |           |           |           |              |
|---------------|----------|----------|-------|------------|-----------|-----------|-----------|--------------|
| cg16922167    | 4.37E-09 | 4.05E-10 | -6.59 | 12.1075906 | -1.22E-01 | 27961746  | 27961869  | NC_000001.10 |
| cg21237418    | 4.37E-09 | 4.05E-10 | -6.59 | 12.1070412 | -1.57E-01 | 27045043  | 27045166  | NC_000017.10 |
| cg05914242    | 4.37E-09 | 4.06E-10 | -6.59 | 12.1065803 | -3.91E-02 | 84222083  | 84222206  | NC_000006.11 |
| cg24428600    | 4.38E-09 | 4.06E-10 | -6.59 | 12.1053197 | -1.23E-01 | 37952273  | 37952396  | NC_000001.10 |
| cg03102788    | 4.38E-09 | 4.07E-10 | -6.59 | 12.1037134 | -1.20E-01 | 62738880  | 62739003  | NC_000020.10 |
| cg24227984    | 4.39E-09 | 4.07E-10 | -6.59 | 12.1035616 | -1.23E-01 | 4474970   | 4475093   | NC_000019.9  |
| cg15044453    | 4.39E-09 | 4.07E-10 | -6.59 | 12.1030689 | -1.04E-01 | 151258520 | 151258643 | NC_000006.11 |
| cg09503596    | 4.40E-09 | 4.08E-10 | -6.59 | 12.1011361 | -1.05E-01 | 94883722  | 94883845  | NC_000011.9  |
| cg05216542    | 4.40E-09 | 4.08E-10 | -6.59 | 12.1010894 | -1.40E-01 | 48109635  | 48109758  | NC_000016.9  |
| cg14023999    | 4.40E-09 | 4.08E-10 | -6.59 | 12.1010108 | -1.19E-01 | 90543224  | 90543347  | NC_000015.9  |
| cg22263591    | 4.40E-09 | 4.09E-10 | -6.59 | 12.0993188 | -1.11E-01 | 71089168  | 71089291  | NC_000017.10 |
| cg09435190    | 4.40E-09 | 4.09E-10 | -6.59 | 12.0991779 | -9.38E-02 | 50968297  | 50968420  | NC_000022.10 |
| cg19274606    | 4.40E-09 | 4.09E-10 | -6.59 | 12.0990956 | -1.39E-01 | 43968252  | 43968375  | NC_000006.11 |
| cg08579420    | 4.40E-09 | 4.09E-10 | -6.59 | 12.0989899 | -1.55E-01 | 31594469  | 31594592  | NC_000017.10 |
| cg07310406    | 4.40E-09 | 4.09E-10 | -6.59 | 12.0989307 | -1.60E-01 | 50524374  | 50524497  | NC_000022.10 |
| cg23525941    | 4.42E-09 | 4.10E-10 | -6.59 | 12.0964192 | -9.55E-02 | 128355289 | 128355412 | NC_000007.13 |
| cg16200531    | 4.43E-09 | 4.11E-10 | -6.58 | 12.0940873 | -1.61E-01 | 135532566 | 135532689 | NC_000002.11 |
| cg18449361    | 4.43E-09 | 4.11E-10 | -6.58 | 12.0934958 | -1.10E-01 | 2689154   | 2689277   | NC_000006.11 |
| cg27522780    | 4.43E-09 | 4.12E-10 | -6.58 | 12.0919285 | -2.69E-02 | 121163493 | 121163616 | NC_000012.11 |
| cg13443733    | 4.44E-09 | 4.12E-10 | -6.58 | 12.0918532 | -1.38E-01 | 2699689   | 2699812   | NC_000017.10 |
| cg03702975    | 4.44E-09 | 4.12E-10 | -6.58 | 12.0904415 | -4.63E-02 | 223316252 | 223316375 | NC_000001.10 |
| cg04822973    | 4.45E-09 | 4.13E-10 | -6.58 | 12.0889211 | -3.34E-02 | 68086311  | 68086434  | NC_000014.8  |
| ch.12.602695F | 4.45E-09 | 4.13E-10 | -6.58 | 12.0888296 | -3.56E-02 | 26932613  | 26932736  | NC_000012.11 |
| cg19269039    | 4.45E-09 | 4.13E-10 | -6.58 | 12.0880029 | -1.46E-01 | 111743200 | 111743323 | NC_000001.10 |
| cg23251746    | 4.45E-09 | 4.14E-10 | -6.58 | 12.0872377 | -1.65E-01 | 92047329  | 92047452  | NC_000014.8  |

|                 |          |          |       |            |           |           |           |              |
|-----------------|----------|----------|-------|------------|-----------|-----------|-----------|--------------|
| cg06179749      | 4.46E-09 | 4.14E-10 | -6.58 | 12.0868879 | -7.29E-02 | 33799703  | 33799826  | NC_000001.10 |
| cg04097334      | 4.46E-09 | 4.14E-10 | -6.58 | 12.0867646 | -1.51E-01 | 189599665 | 189599788 | NC_000002.11 |
| cg08479319      | 4.47E-09 | 4.15E-10 | -6.58 | 12.0834307 | -6.98E-02 | 66648941  | 66649064  | NC_000015.9  |
| cg05308970      | 4.47E-09 | 4.15E-10 | -6.58 | 12.0834192 | -1.25E-01 | 85318420  | 85318543  | NC_000016.9  |
| cg14699839      | 4.47E-09 | 4.15E-10 | -6.58 | 12.0832546 | -1.06E-01 | 74458485  | 74458608  | NC_000017.10 |
| ch.9.106992904R | 4.48E-09 | 4.16E-10 | -6.58 | 12.0817234 | -5.43E-02 | 107953083 | 107953206 | NC_000009.11 |
| cg16684691      | 4.48E-09 | 4.16E-10 | -6.58 | 12.0812235 | -1.68E-01 | 96949801  | 96949924  | NC_000013.10 |
| cg25382821      | 4.49E-09 | 4.17E-10 | -6.58 | 12.0790436 | -1.46E-01 | 23496403  | 23496526  | NC_000003.11 |
| cg18014844      | 4.49E-09 | 4.17E-10 | -6.58 | 12.0782552 | -2.78E-02 | 55230402  | 55230525  | NC_000001.10 |
| cg22867288      | 4.50E-09 | 4.18E-10 | -6.58 | 12.077816  | -3.80E-02 | 57086716  | 57086839  | NC_000006.11 |
| cg04558298      | 4.50E-09 | 4.18E-10 | -6.58 | 12.0776803 | -5.57E-02 | 17278349  | 17278472  | NC_000001.10 |
| cg08203210      | 4.50E-09 | 4.18E-10 | -6.58 | 12.0766417 | -1.17E-01 | 26153217  | 26153340  | NC_000006.11 |
| cg07537147      | 4.50E-09 | 4.18E-10 | -6.58 | 12.0758273 | -6.31E-02 | 110271031 | 110271154 | NC_000012.11 |
| cg04607334      | 4.51E-09 | 4.19E-10 | -6.58 | 12.0747686 | -9.29E-02 | 27568523  | 27568646  | NC_000017.10 |
| cg13415850      | 4.51E-09 | 4.19E-10 | -6.58 | 12.0746684 | -4.37E-02 | 73459842  | 73459965  | NC_000002.11 |
| cg13244312      | 4.51E-09 | 4.19E-10 | -6.58 | 12.0740425 | -1.21E-01 | 71109707  | 71109830  | NC_000014.8  |
| cg13063040      | 4.51E-09 | 4.19E-10 | -6.58 | 12.0735281 | -5.68E-02 | 145669623 | 145669746 | NC_000008.10 |
| cg19575813      | 4.53E-09 | 4.21E-10 | -6.58 | 12.0708906 | -3.64E-02 | 46476937  | 46477060  | NC_000018.9  |
| cg13727473      | 4.53E-09 | 4.21E-10 | -6.58 | 12.0703118 | -1.36E-01 | 137097280 | 137097403 | NC_000009.11 |
| cg06017028      | 4.53E-09 | 4.21E-10 | -6.58 | 12.0702555 | -4.29E-02 | 114598768 | 114598891 | NC_000005.9  |
| cg10627206      | 4.53E-09 | 4.21E-10 | -6.58 | 12.0692117 | -4.65E-02 | 11494058  | 11494181  | NC_000019.9  |
| cg22509138      | 4.54E-09 | 4.22E-10 | -6.58 | 12.0683208 | -1.47E-01 | 44809026  | 44809149  | NC_000020.10 |
| cg21806750      | 4.54E-09 | 4.22E-10 | -6.58 | 12.0682311 | -1.33E-01 | 86673476  | 86673599  | NC_000001.10 |
| cg22536398      | 4.54E-09 | 4.22E-10 | -6.58 | 12.0677474 | -8.29E-02 | 2521659   | 2521782   | NC_000016.9  |
| cg21012874      | 4.54E-09 | 4.22E-10 | -6.58 | 12.0674536 | -8.62E-02 | 88718393  | 88718516  | NC_000010.10 |

|                 |          |          |       |            |           |           |           |              |
|-----------------|----------|----------|-------|------------|-----------|-----------|-----------|--------------|
| cg26100130      | 4.55E-09 | 4.23E-10 | -6.58 | 12.0660829 | -3.11E-02 | 100150602 | 100150725 | NC_000014.8  |
| cg04489856      | 4.55E-09 | 4.23E-10 | -6.58 | 12.0649595 | -4.01E-02 | 36861700  | 36861823  | NC_000017.10 |
| cg16671682      | 4.56E-09 | 4.24E-10 | -6.58 | 12.063242  | -8.36E-02 | 13249201  | 13249324  | NC_000019.9  |
| cg14252502      | 4.56E-09 | 4.24E-10 | -6.58 | 12.0628921 | -1.05E-01 | 8676388   | 8676511   | NC_000019.9  |
| cg16168406      | 4.57E-09 | 4.25E-10 | -6.58 | 12.061614  | -1.09E-01 | 72414453  | 72414576  | NC_000011.9  |
| cg08809408      | 4.57E-09 | 4.25E-10 | -6.58 | 12.0608031 | -1.28E-01 | 2820942   | 2821065   | NC_000016.9  |
| cg08284713      | 4.57E-09 | 4.25E-10 | -6.58 | 12.0598824 | -3.63E-02 | 69419481  | 69419604  | NC_000016.9  |
| cg01429039      | 4.58E-09 | 4.26E-10 | -6.58 | 12.0586795 | -7.01E-02 | 52918065  | 52918188  | NC_000004.11 |
| cg11021222      | 4.58E-09 | 4.26E-10 | -6.58 | 12.0581879 | -1.38E-01 | 97300417  | 97300540  | NC_000012.11 |
| cg06512350      | 4.59E-09 | 4.27E-10 | -6.58 | 12.0569126 | -8.39E-02 | 151121097 | 151121220 | NC_000003.11 |
| cg06623017      | 4.59E-09 | 4.27E-10 | -6.58 | 12.0564285 | -7.47E-02 | 54124220  | 54124343  | NC_000015.9  |
| cg10043760      | 4.59E-09 | 4.27E-10 | -6.58 | 12.0562615 | -4.50E-02 | 66563838  | 66563961  | NC_000012.11 |
| cg03190769      | 4.59E-09 | 4.27E-10 | -6.58 | 12.0561826 | -1.25E-01 | 238382720 | 238382843 | NC_000002.11 |
| cg09684264      | 4.59E-09 | 4.27E-10 | -6.58 | 12.0558053 | -1.55E-01 | 85925699  | 85925822  | NC_000016.9  |
| cg19246761      | 4.60E-09 | 4.27E-10 | -6.58 | 12.0550194 | -5.71E-02 | 1549799   | 1549922   | NC_000001.10 |
| cg09701700      | 4.60E-09 | 4.28E-10 | -6.58 | 12.0536936 | -9.42E-02 | 104194843 | 104194966 | NC_000010.10 |
| cg05620288      | 4.60E-09 | 4.28E-10 | -6.58 | 12.0536771 | -9.86E-02 | 129076914 | 129077037 | NC_000002.11 |
| cg06797525      | 4.60E-09 | 4.28E-10 | -6.58 | 12.0535547 | -1.73E-02 | 27861009  | 27861132  | NC_000006.11 |
| cg17386689      | 4.61E-09 | 4.28E-10 | -6.58 | 12.0528012 | -1.36E-01 | 66755196  | 66755319  | NC_000015.9  |
| cg06454380      | 4.61E-09 | 4.29E-10 | -6.58 | 12.0524958 | -5.89E-02 | 50067053  | 50067176  | NC_000022.10 |
| cg12685539      | 4.61E-09 | 4.29E-10 | -6.58 | 12.0511434 | -9.61E-02 | 10472001  | 10472124  | NC_000011.9  |
| cg26814100      | 4.63E-09 | 4.30E-10 | -6.58 | 12.0482035 | -1.34E-01 | 136724451 | 136724574 | NC_000006.11 |
| cg14661234      | 4.63E-09 | 4.31E-10 | -6.58 | 12.0475978 | -8.76E-02 | 1149192   | 1149315   | NC_000001.10 |
| cg23276120      | 4.63E-09 | 4.31E-10 | -6.58 | 12.047568  | -1.42E-01 | 66331911  | 66332034  | NC_000015.9  |
| ch.4.104561249F | 4.63E-09 | 4.31E-10 | -6.58 | 12.0472152 | -4.04E-02 | 104341800 | 104341923 | NC_000004.11 |

|            |          |          |       |            |           |           |           |              |
|------------|----------|----------|-------|------------|-----------|-----------|-----------|--------------|
| cg15913671 | 4.63E-09 | 4.31E-10 | -6.58 | 12.0472018 | -1.16E-01 | 79304420  | 79304543  | NC_000017.10 |
| cg16938363 | 4.64E-09 | 4.31E-10 | -6.58 | 12.0458719 | -9.41E-02 | 1614285   | 1614408   | NC_000006.11 |
| cg00696567 | 4.64E-09 | 4.32E-10 | -6.58 | 12.0457187 | -8.59E-02 | 25042924  | 25043047  | NC_000016.9  |
| cg18109033 | 4.64E-09 | 4.32E-10 | -6.58 | 12.0453596 | -1.04E-01 | 99377018  | 99377141  | NC_000008.10 |
| cg08035694 | 4.64E-09 | 4.32E-10 | -6.58 | 12.0451212 | -1.15E-01 | 192921988 | 192922111 | NC_000001.10 |
| cg06111140 | 4.64E-09 | 4.32E-10 | -6.58 | 12.0449691 | -1.54E-01 | 158575756 | 158575879 | NC_000007.13 |
| cg09662920 | 4.64E-09 | 4.32E-10 | -6.58 | 12.0448463 | -7.64E-02 | 78511433  | 78511556  | NC_000001.10 |
| cg21833837 | 4.65E-09 | 4.33E-10 | -6.58 | 12.043273  | -8.22E-02 | 15250388  | 15250511  | NC_000001.10 |
| cg27288047 | 4.65E-09 | 4.33E-10 | -6.58 | 12.0425492 | -3.86E-02 | 49568106  | 49568229  | NC_000019.9  |
| cg12822286 | 4.65E-09 | 4.33E-10 | -6.58 | 12.0419094 | -6.44E-02 | 101394951 | 101395074 | NC_000003.11 |
| cg27152312 | 4.66E-09 | 4.34E-10 | -6.57 | 12.0394767 | -1.27E-01 | 96221849  | 96221972  | NC_000007.13 |
| cg12930392 | 4.67E-09 | 4.35E-10 | -6.57 | 12.0384128 | -1.15E-01 | 196481615 | 196481738 | NC_000003.11 |
| cg01700683 | 4.67E-09 | 4.35E-10 | -6.57 | 12.0382376 | -1.45E-01 | 63510942  | 63511065  | NC_000015.9  |
| cg04889221 | 4.67E-09 | 4.35E-10 | -6.57 | 12.0376198 | -6.71E-02 | 126137216 | 126137339 | NC_000003.11 |
| cg08579540 | 4.68E-09 | 4.35E-10 | -6.57 | 12.0369767 | -1.29E-01 | 175652652 | 175652775 | NC_000002.11 |
| cg25192619 | 4.68E-09 | 4.36E-10 | -6.57 | 12.0367643 | -6.70E-02 | 37467404  | 37467527  | NC_000006.11 |
| cg00426822 | 4.68E-09 | 4.36E-10 | -6.57 | 12.0366989 | -1.54E-01 | 39546536  | 39546659  | NC_000001.10 |
| cg03540329 | 4.68E-09 | 4.36E-10 | -6.57 | 12.0356848 | -1.23E-01 | 141928789 | 141928912 | NC_000003.11 |
| cg04479212 | 4.68E-09 | 4.36E-10 | -6.57 | 12.0350251 | -1.12E-01 | 37495166  | 37495289  | NC_000003.11 |
| cg08526319 | 4.69E-09 | 4.37E-10 | -6.57 | 12.03347   | -4.44E-02 | 74888271  | 74888394  | NC_000008.10 |
| cg13678641 | 4.69E-09 | 4.37E-10 | -6.57 | 12.0329864 | -1.28E-02 | 8113909   | 8114032   | NC_000017.10 |
| cg06091804 | 4.70E-09 | 4.38E-10 | -6.57 | 12.0320934 | -1.00E-01 | 1158069   | 1158192   | NC_000004.11 |
| cg21617762 | 4.70E-09 | 4.38E-10 | -6.57 | 12.0318529 | -7.77E-02 | 156811517 | 156811640 | NC_000007.13 |
| cg21245372 | 4.71E-09 | 4.38E-10 | -6.57 | 12.0302603 | -1.00E-01 | 3819539   | 3819662   | NC_000011.9  |
| cg04631804 | 4.71E-09 | 4.38E-10 | -6.57 | 12.0301615 | -2.69E-02 | 110624697 | 110624820 | NC_000004.11 |

|                 |          |          |       |            |           |           |           |              |
|-----------------|----------|----------|-------|------------|-----------|-----------|-----------|--------------|
| cg13700939      | 4.71E-09 | 4.39E-10 | -6.57 | 12.0290178 | -8.26E-02 | 128166166 | 128166289 | NC_000002.11 |
| cg08542016      | 4.71E-09 | 4.39E-10 | -6.57 | 12.0283548 | -9.02E-02 | 28912084  | 28912207  | NC_000006.11 |
| cg22048922      | 4.72E-09 | 4.40E-10 | -6.57 | 12.0274365 | -1.15E-01 | 3938802   | 3938925   | NC_000019.9  |
| cg10534439      | 4.72E-09 | 4.40E-10 | -6.57 | 12.026547  | -3.09E-02 | 69969029  | 69969152  | NC_000002.11 |
| cg17380244      | 4.73E-09 | 4.40E-10 | -6.57 | 12.0256718 | -1.54E-01 | 183458286 | 183458409 | NC_000002.11 |
| cg27389562      | 4.73E-09 | 4.41E-10 | -6.57 | 12.025524  | -6.32E-02 | 43099124  | 43099247  | NC_000019.9  |
| cg26937038      | 4.73E-09 | 4.41E-10 | -6.57 | 12.0249469 | -1.26E-01 | 153330072 | 153330195 | NC_000001.10 |
| cg16238419      | 4.73E-09 | 4.41E-10 | -6.57 | 12.024442  | -1.08E-01 | 50451414  | 50451537  | NC_000022.10 |
| cg07228441      | 4.74E-09 | 4.41E-10 | -6.57 | 12.0234388 | -2.34E-02 | 681215    | 681338    | NC_000008.10 |
| cg25514148      | 4.74E-09 | 4.42E-10 | -6.57 | 12.0227653 | -7.93E-02 | 46294375  | 46294498  | NC_000011.9  |
| cg26186545      | 4.75E-09 | 4.42E-10 | -6.57 | 12.0213931 | -7.56E-02 | 161520972 | 161521095 | NC_000001.10 |
| cg25276521      | 4.75E-09 | 4.43E-10 | -6.57 | 12.0211356 | -1.44E-01 | 105333067 | 105333190 | NC_000010.10 |
| cg21648391      | 4.75E-09 | 4.43E-10 | -6.57 | 12.0205968 | -1.27E-01 | 220563631 | 220563754 | NC_000002.11 |
| cg23057232      | 4.75E-09 | 4.43E-10 | -6.57 | 12.0199455 | -1.25E-01 | 97737509  | 97737632  | NC_000001.10 |
| cg24343273      | 4.75E-09 | 4.43E-10 | -6.57 | 12.0199079 | -2.83E-02 | 112812951 | 112813074 | NC_000002.11 |
| ch.8.132836635R | 4.76E-09 | 4.43E-10 | -6.57 | 12.0190659 | -3.88E-02 | 132767453 | 132767576 | NC_000008.10 |
| cg16900102      | 4.76E-09 | 4.44E-10 | -6.57 | 12.0188102 | -1.31E-01 | 98283412  | 98283535  | NC_000007.13 |
| cg02417480      | 4.76E-09 | 4.44E-10 | -6.57 | 12.018636  | -6.56E-02 | 152247150 | 152247273 | NC_000004.11 |
| cg01515444      | 4.77E-09 | 4.45E-10 | -6.57 | 12.0159027 | -1.18E-01 | 56292914  | 56293037  | NC_000020.10 |
| cg05504045      | 4.77E-09 | 4.45E-10 | -6.57 | 12.0158931 | -1.50E-01 | 86618836  | 86618959  | NC_000016.9  |
| cg04055086      | 4.77E-09 | 4.45E-10 | -6.57 | 12.0154559 | -1.17E-01 | 110365472 | 110365595 | NC_000002.11 |
| cg02023043      | 4.77E-09 | 4.45E-10 | -6.57 | 12.0151528 | -5.53E-02 | 45129337  | 45129460  | NC_000007.13 |
| cg24048338      | 4.78E-09 | 4.45E-10 | -6.57 | 12.0146436 | -1.42E-01 | 43046482  | 43046605  | NC_000008.10 |
| cg19760410      | 4.78E-09 | 4.46E-10 | -6.57 | 12.0138378 | -8.44E-02 | 154300117 | 154300240 | NC_000001.10 |
| cg02744705      | 4.78E-09 | 4.46E-10 | -6.57 | 12.0126081 | -1.59E-01 | 151178090 | 151178213 | NC_000004.11 |



|            |          |          |       |            |           |           |           |              |
|------------|----------|----------|-------|------------|-----------|-----------|-----------|--------------|
| cg18204833 | 4.79E-09 | 4.47E-10 | -6.57 | 12.0122467 | -4.65E-02 | 28864787  | 28864910  | NC_000006.11 |
| cg04321608 | 4.79E-09 | 4.47E-10 | -6.57 | 12.0112061 | -2.69E-02 | 50689962  | 50690085  | NC_000022.10 |
| cg11378979 | 4.79E-09 | 4.47E-10 | -6.57 | 12.0111849 | -1.18E-01 | 219249918 | 219250041 | NC_000002.11 |
| cg18060199 | 4.79E-09 | 4.47E-10 | -6.57 | 12.0111734 | -6.01E-02 | 94146495  | 94146618  | NC_000001.10 |
| cg09578319 | 4.80E-09 | 4.48E-10 | -6.57 | 12.010036  | -8.26E-02 | 4900256   | 4900379   | NC_000017.10 |
| cg25194470 | 4.80E-09 | 4.48E-10 | -6.57 | 12.0099558 | -1.03E-01 | 66316425  | 66316548  | NC_000015.9  |
| cg27655706 | 4.80E-09 | 4.48E-10 | -6.57 | 12.0099227 | -1.09E-01 | 96044476  | 96044599  | NC_000007.13 |
| cg16709384 | 4.80E-09 | 4.48E-10 | -6.57 | 12.0094528 | -6.80E-02 | 113615408 | 113615531 | NC_000001.10 |
| cg06878311 | 4.80E-09 | 4.48E-10 | -6.57 | 12.0089954 | -8.61E-02 | 32043191  | 32043314  | NC_000006.11 |
| cg00086809 | 4.81E-09 | 4.49E-10 | -6.57 | 12.0064691 | -3.99E-02 | 640354    | 640477    | NC_000016.9  |
| cg04340918 | 4.81E-09 | 4.49E-10 | -6.57 | 12.0059737 | -1.05E-01 | 19577028  | 19577151  | NC_000008.10 |
| cg18801806 | 4.82E-09 | 4.50E-10 | -6.57 | 12.0048303 | -6.21E-02 | 118869385 | 118869508 | NC_000011.9  |
| cg03929743 | 4.82E-09 | 4.50E-10 | -6.57 | 12.0037758 | -1.03E-01 | 15265252  | 15265375  | NC_000010.10 |
| cg14189583 | 4.83E-09 | 4.51E-10 | -6.57 | 12.0031678 | -1.52E-01 | 42703852  | 42703975  | NC_000019.9  |
| cg04525476 | 4.83E-09 | 4.51E-10 | -6.57 | 12.0028327 | -2.28E-02 | 172198714 | 172198837 | NC_000005.9  |
| cg27514624 | 4.83E-09 | 4.51E-10 | -6.57 | 12.0028318 | -4.37E-02 | 69706456  | 69706579  | NC_000015.9  |
| cg00899400 | 4.83E-09 | 4.51E-10 | -6.57 | 12.0024908 | -1.59E-01 | 27154537  | 27154660  | NC_000007.13 |
| cg10503992 | 4.83E-09 | 4.51E-10 | -6.57 | 12.0023643 | -1.02E-01 | 33644276  | 33644399  | NC_000001.10 |
| cg07091500 | 4.83E-09 | 4.51E-10 | -6.57 | 12.0019022 | -1.43E-01 | 185678074 | 185678197 | NC_000003.11 |
| cg19862769 | 4.84E-09 | 4.52E-10 | -6.57 | 11.999443  | -1.27E-01 | 6162118   | 6162241   | NC_000010.10 |
| cg10937593 | 4.85E-09 | 4.53E-10 | -6.57 | 11.9980655 | -4.73E-02 | 65290063  | 65290186  | NC_000014.8  |
| cg21459921 | 4.86E-09 | 4.54E-10 | -6.57 | 11.9967378 | -2.73E-02 | 60878267  | 60878390  | NC_000020.10 |
| cg18834029 | 4.86E-09 | 4.54E-10 | -6.57 | 11.9964527 | -1.59E-01 | 103349097 | 103349220 | NC_000010.10 |
| cg02930687 | 4.86E-09 | 4.54E-10 | -6.57 | 11.9958459 | -1.09E-01 | 32253206  | 32253329  | NC_000021.8  |
| cg19440115 | 4.86E-09 | 4.54E-10 | -6.57 | 11.9958198 | -1.34E-01 | 67342010  | 67342133  | NC_000015.9  |

|               |          |          |       |            |           |           |           |              |
|---------------|----------|----------|-------|------------|-----------|-----------|-----------|--------------|
| cg08337959    | 4.86E-09 | 4.54E-10 | -6.57 | 11.9956422 | -9.78E-02 | 1948933   | 1949056   | NC_000011.9  |
| cg03512248    | 4.87E-09 | 4.55E-10 | -6.57 | 11.9945775 | -1.11E-01 | 28517610  | 28517733  | NC_000001.10 |
| cg04886221    | 4.87E-09 | 4.55E-10 | -6.57 | 11.9938161 | -6.96E-02 | 27669729  | 27669852  | NC_000001.10 |
| cg04041960    | 4.87E-09 | 4.55E-10 | -6.57 | 11.9931729 | -1.58E-01 | 121301765 | 121301888 | NC_000010.10 |
| cg02914379    | 4.87E-09 | 4.55E-10 | -6.57 | 11.992775  | -9.72E-02 | 41605784  | 41605907  | NC_000006.11 |
| cg12726120    | 4.88E-09 | 4.56E-10 | -6.57 | 11.9921186 | -1.42E-01 | 244892984 | 244893107 | NC_000001.10 |
| cg07974833    | 4.88E-09 | 4.56E-10 | -6.57 | 11.9919233 | -1.33E-01 | 73430160  | 73430283  | NC_000004.11 |
| cg00044665    | 4.88E-09 | 4.56E-10 | -6.57 | 11.9917287 | -1.28E-01 | 66400411  | 66400534  | NC_000016.9  |
| cg23313126    | 4.88E-09 | 4.56E-10 | -6.57 | 11.9916267 | -8.33E-02 | 162270889 | 162271012 | NC_000002.11 |
| cg10455940    | 4.88E-09 | 4.56E-10 | -6.57 | 11.9911907 | -1.56E-01 | 103213706 | 103213829 | NC_000010.10 |
| cg16713321    | 4.88E-09 | 4.56E-10 | -6.57 | 11.9906885 | -1.20E-01 | 73577813  | 73577936  | NC_000011.9  |
| cg08528327    | 4.89E-09 | 4.57E-10 | -6.57 | 11.9902143 | -4.73E-02 | 74700062  | 74700185  | NC_000002.11 |
| cg23637791    | 4.89E-09 | 4.57E-10 | -6.57 | 11.9900072 | -4.09E-02 | 76016262  | 76016385  | NC_000015.9  |
| cg06430753    | 4.89E-09 | 4.57E-10 | -6.57 | 11.9893127 | -1.38E-01 | 958808    | 958931    | NC_000005.9  |
| cg01931222    | 4.89E-09 | 4.58E-10 | -6.57 | 11.9883541 | -1.25E-01 | 54623795  | 54623918  | NC_000012.11 |
| cg10201923    | 4.90E-09 | 4.58E-10 | -6.57 | 11.987233  | -1.50E-01 | 17308303  | 17308426  | NC_000001.10 |
| cg12118371    | 4.90E-09 | 4.58E-10 | -6.56 | 11.9867165 | -1.30E-01 | 96713122  | 96713245  | NC_000014.8  |
| cg08853571    | 4.90E-09 | 4.58E-10 | -6.56 | 11.9866345 | -1.06E-01 | 121305621 | 121305744 | NC_000005.9  |
| cg14166209    | 4.91E-09 | 4.59E-10 | -6.56 | 11.984971  | -1.42E-01 | 117047015 | 117047138 | NC_000001.10 |
| cg21668880    | 4.92E-09 | 4.60E-10 | -6.56 | 11.9839761 | -3.94E-02 | 34759629  | 34759752  | NC_000006.11 |
| cg16463558    | 4.92E-09 | 4.60E-10 | -6.56 | 11.9829189 | -1.29E-01 | 101918710 | 101918833 | NC_000011.9  |
| cg17866650    | 4.92E-09 | 4.60E-10 | -6.56 | 11.9824522 | -1.27E-01 | 37798344  | 37798467  | NC_000002.11 |
| cg13338207    | 4.93E-09 | 4.61E-10 | -6.56 | 11.9819609 | -6.60E-02 | 98452879  | 98453002  | NC_000003.11 |
| cg20430434    | 4.93E-09 | 4.61E-10 | -6.56 | 11.9811247 | -6.21E-02 | 56642433  | 56642556  | NC_000016.9  |
| ch.6.2134092F | 4.93E-09 | 4.61E-10 | -6.56 | 11.9807833 | -3.17E-02 | 109191345 | 109191468 | NC_000006.11 |

|            |          |          |       |            |           |           |           |              |
|------------|----------|----------|-------|------------|-----------|-----------|-----------|--------------|
| cg13223043 | 4.93E-09 | 4.61E-10 | -6.56 | 11.9806785 | -1.22E-01 | 26492308  | 26492431  | NC_000001.10 |
| cg09646173 | 4.94E-09 | 4.62E-10 | -6.56 | 11.979684  | -1.30E-01 | 149317669 | 149317792 | NC_000005.9  |
| cg16535018 | 4.94E-09 | 4.62E-10 | -6.56 | 11.9791489 | -1.14E-01 | 36829606  | 36829729  | NC_000017.10 |
| cg25579180 | 4.94E-09 | 4.62E-10 | -6.56 | 11.9785584 | -2.08E-01 | 71098623  | 71098746  | NC_000007.13 |
| cg13871400 | 4.94E-09 | 4.62E-10 | -6.56 | 11.9782789 | -7.35E-02 | 61616492  | 61616615  | NC_000018.9  |
| cg24145481 | 4.95E-09 | 4.63E-10 | -6.56 | 11.9777106 | -1.26E-01 | 31661998  | 31662121  | NC_000021.8  |
| cg04442407 | 4.95E-09 | 4.63E-10 | -6.56 | 11.9774037 | -5.39E-02 | 69633209  | 69633332  | NC_000012.11 |
| cg25094149 | 4.95E-09 | 4.63E-10 | -6.56 | 11.9770356 | -3.08E-02 | 32253906  | 32254029  | NC_000001.10 |
| cg04862679 | 4.95E-09 | 4.63E-10 | -6.56 | 11.9759361 | -1.11E-01 | 59578540  | 59578663  | NC_000011.9  |
| cg01936220 | 4.96E-09 | 4.64E-10 | -6.56 | 11.9746514 | -1.19E-01 | 114906016 | 114906139 | NC_000013.10 |
| cg01211097 | 4.96E-09 | 4.64E-10 | -6.56 | 11.9742692 | -7.94E-02 | 84732969  | 84733092  | NC_000016.9  |
| cg00025991 | 4.96E-09 | 4.64E-10 | -6.56 | 11.9740363 | -9.18E-02 | 736625    | 736748    | NC_000010.10 |
| cg20025970 | 4.96E-09 | 4.64E-10 | -6.56 | 11.9740117 | -1.36E-01 | 22089560  | 22089683  | NC_000012.11 |
| cg14378925 | 4.96E-09 | 4.65E-10 | -6.56 | 11.9732831 | -1.39E-01 | 64635728  | 64635851  | NC_000011.9  |
| cg19853565 | 4.97E-09 | 4.65E-10 | -6.56 | 11.9723705 | -1.27E-01 | 2540907   | 2541030   | NC_000019.9  |
| cg08228672 | 4.97E-09 | 4.65E-10 | -6.56 | 11.9719094 | -1.29E-01 | 228337626 | 228337749 | NC_000001.10 |
| cg07338782 | 4.98E-09 | 4.66E-10 | -6.56 | 11.9698727 | -1.95E-01 | 101480470 | 101480593 | NC_000012.11 |
| cg08443717 | 4.99E-09 | 4.67E-10 | -6.56 | 11.9684992 | -9.84E-02 | 45585347  | 45585470  | NC_000021.8  |
| cg17279410 | 4.99E-09 | 4.67E-10 | -6.56 | 11.9678786 | -1.30E-01 | 59998729  | 59998852  | NC_000018.9  |
| cg25345746 | 4.99E-09 | 4.67E-10 | -6.56 | 11.9674013 | -1.34E-01 | 172032402 | 172032525 | NC_000004.11 |
| cg00734931 | 5.00E-09 | 4.68E-10 | -6.56 | 11.9667797 | -1.55E-01 | 9116428   | 9116551   | NC_000006.11 |
| cg27381488 | 5.00E-09 | 4.68E-10 | -6.56 | 11.9667763 | -1.48E-01 | 66300611  | 66300734  | NC_000016.9  |
| cg10624786 | 5.00E-09 | 4.68E-10 | -6.56 | 11.9661551 | -2.39E-02 | 2016608   | 2016731   | NC_000009.11 |
| cg00377681 | 5.00E-09 | 4.68E-10 | -6.56 | 11.9659785 | -8.20E-02 | 37102603  | 37102726  | NC_000006.11 |
| cg10513480 | 5.00E-09 | 4.68E-10 | -6.56 | 11.9655987 | -5.35E-02 | 21852135  | 21852258  | NC_000014.8  |

|                |          |          |       |            |           |           |           |              |
|----------------|----------|----------|-------|------------|-----------|-----------|-----------|--------------|
| cg03536289     | 5.01E-09 | 4.69E-10 | -6.56 | 11.9639345 | -1.28E-01 | 94443120  | 94443243  | NC_000014.8  |
| cg24502192     | 5.01E-09 | 4.69E-10 | -6.56 | 11.9633569 | -8.56E-02 | 58138329  | 58138452  | NC_000012.11 |
| cg07695771     | 5.02E-09 | 4.71E-10 | -6.56 | 11.9607901 | -1.78E-01 | 126029702 | 126029825 | NC_000010.10 |
| cg23507953     | 5.03E-09 | 4.71E-10 | -6.56 | 11.9602798 | -1.31E-01 | 46638127  | 46638250  | NC_000017.10 |
| cg18397882     | 5.03E-09 | 4.71E-10 | -6.56 | 11.9597262 | -5.20E-02 | 19050971  | 19051094  | NC_000019.9  |
| cg24589564     | 5.03E-09 | 4.72E-10 | -6.56 | 11.9589107 | -2.90E-02 | 27357686  | 27357809  | NC_000002.11 |
| cg05358175     | 5.04E-09 | 4.72E-10 | -6.56 | 11.958025  | -5.14E-02 | 156693748 | 156693871 | NC_000005.9  |
| cg26871885     | 5.04E-09 | 4.73E-10 | -6.56 | 11.9566367 | -3.63E-02 | 207525    | 207648    | NC_000011.9  |
| cg14966613     | 5.04E-09 | 4.73E-10 | -6.56 | 11.9564604 | -1.49E-01 | 25423700  | 25423823  | NC_000022.10 |
| cg24303814     | 5.05E-09 | 4.73E-10 | -6.56 | 11.9559252 | -2.28E-02 | 10443689  | 10443812  | NC_000019.9  |
| cg20589096     | 5.06E-09 | 4.74E-10 | -6.56 | 11.9541108 | -8.53E-02 | 71824669  | 71824792  | NC_000004.11 |
| ch.12.1981639F | 5.06E-09 | 4.75E-10 | -6.56 | 11.9524369 | -3.70E-02 | 100732545 | 100732668 | NC_000012.11 |
| cg25587662     | 5.07E-09 | 4.76E-10 | -6.56 | 11.9505801 | -1.51E-01 | 10525447  | 10525570  | NC_000018.9  |
| cg19045239     | 5.07E-09 | 4.76E-10 | -6.56 | 11.95038   | -9.37E-02 | 46799505  | 46799628  | NC_000019.9  |
| cg10957254     | 5.08E-09 | 4.76E-10 | -6.56 | 11.9500389 | -3.73E-02 | 54411942  | 54412065  | NC_000001.10 |
| cg22330471     | 5.08E-09 | 4.76E-10 | -6.56 | 11.9499471 | -2.61E-02 | 46269788  | 46269911  | NC_000001.10 |
| cg17740327     | 5.09E-09 | 4.77E-10 | -6.56 | 11.9473308 | -1.54E-02 | 45250638  | 45250761  | NC_000019.9  |
| cg26518861     | 5.10E-09 | 4.78E-10 | -6.56 | 11.9458346 | -1.54E-01 | 122708898 | 122709021 | NC_000010.10 |
| cg16612995     | 5.11E-09 | 4.79E-10 | -6.56 | 11.9439119 | -8.18E-02 | 150529842 | 150529965 | NC_000001.10 |
| cg24187253     | 5.11E-09 | 4.79E-10 | -6.56 | 11.9433152 | -4.57E-02 | 1032865   | 1032988   | NC_000007.13 |
| cg13467950     | 5.11E-09 | 4.79E-10 | -6.56 | 11.9429486 | -4.71E-02 | 74033549  | 74033672  | NC_000010.10 |
| cg03002526     | 5.11E-09 | 4.79E-10 | -6.56 | 11.9424759 | -1.52E-01 | 105237721 | 105237844 | NC_000006.11 |
| cg15849648     | 5.11E-09 | 4.80E-10 | -6.56 | 11.9420733 | -1.31E-01 | 41007485  | 41007608  | NC_000006.11 |
| cg06749819     | 5.12E-09 | 4.80E-10 | -6.56 | 11.9416553 | -7.67E-02 | 24811770  | 24811893  | NC_000004.11 |
| cg25580018     | 5.12E-09 | 4.80E-10 | -6.56 | 11.9413853 | -5.91E-02 | 136399808 | 136399931 | NC_000009.11 |

|            |          |          |       |            |           |           |           |              |
|------------|----------|----------|-------|------------|-----------|-----------|-----------|--------------|
| cg01562813 | 5.12E-09 | 4.80E-10 | -6.56 | 11.94044   | -1.27E-01 | 13420826  | 13420949  | NC_000003.11 |
| cg18874902 | 5.14E-09 | 4.82E-10 | -6.56 | 11.9377781 | -3.79E-02 | 122848255 | 122848378 | NC_000005.9  |
| cg24796627 | 5.14E-09 | 4.82E-10 | -6.56 | 11.9370143 | -2.41E-02 | 81071708  | 81071831  | NC_000015.9  |
| cg00155622 | 5.15E-09 | 4.83E-10 | -6.56 | 11.9347278 | -5.99E-02 | 41710064  | 41710187  | NC_000015.9  |
| cg14352119 | 5.15E-09 | 4.84E-10 | -6.56 | 11.9341673 | -2.43E-02 | 61447914  | 61448037  | NC_000014.8  |
| cg12686414 | 5.16E-09 | 4.84E-10 | -6.56 | 11.9334124 | -2.84E-02 | 35684217  | 35684340  | NC_000011.9  |
| cg22515589 | 5.16E-09 | 4.84E-10 | -6.56 | 11.9333901 | -1.22E-01 | 79426432  | 79426555  | NC_000017.10 |
| cg27278668 | 5.16E-09 | 4.84E-10 | -6.56 | 11.933317  | -1.12E-01 | 6452060   | 6452183   | NC_000010.10 |
| cg09858811 | 5.17E-09 | 4.85E-10 | -6.55 | 11.9309892 | -1.14E-01 | 52867597  | 52867720  | NC_000012.11 |
| cg11424665 | 5.17E-09 | 4.85E-10 | -6.55 | 11.9305695 | -5.61E-02 | 129158811 | 129158934 | NC_000003.11 |
| cg13314694 | 5.18E-09 | 4.86E-10 | -6.55 | 11.9294475 | -1.17E-01 | 4734661   | 4734784   | NC_000006.11 |
| cg06528150 | 5.18E-09 | 4.86E-10 | -6.55 | 11.929312  | -3.95E-02 | 61293470  | 61293593  | NC_000002.11 |
| cg04419025 | 5.18E-09 | 4.86E-10 | -6.55 | 11.9284384 | -3.11E-02 | 70243945  | 70244068  | NC_000011.9  |
| cg09357979 | 5.19E-09 | 4.87E-10 | -6.55 | 11.9271919 | -2.82E-02 | 25915643  | 25915766  | NC_000004.11 |
| cg10080250 | 5.20E-09 | 4.88E-10 | -6.55 | 11.9248251 | -5.73E-02 | 65426671  | 65426794  | NC_000015.9  |
| cg11046836 | 5.20E-09 | 4.88E-10 | -6.55 | 11.9245414 | -4.30E-02 | 72088434  | 72088557  | NC_000014.8  |
| cg11873311 | 5.20E-09 | 4.88E-10 | -6.55 | 11.9244227 | -1.39E-01 | 128953231 | 128953354 | NC_000002.11 |
| cg06537257 | 5.20E-09 | 4.88E-10 | -6.55 | 11.9242416 | -4.43E-02 | 41768693  | 41768816  | NC_000013.10 |
| cg14731422 | 5.20E-09 | 4.89E-10 | -6.55 | 11.9241944 | -1.24E-01 | 213561757 | 213561880 | NC_000001.10 |
| cg04848452 | 5.21E-09 | 4.89E-10 | -6.55 | 11.9225353 | -2.02E-02 | 40350801  | 40350924  | NC_000003.11 |
| cg25179758 | 5.21E-09 | 4.89E-10 | -6.55 | 11.9224487 | -1.41E-01 | 36918614  | 36918737  | NC_000013.10 |
| cg12095167 | 5.21E-09 | 4.89E-10 | -6.55 | 11.9223053 | -4.44E-02 | 61428991  | 61429114  | NC_000008.10 |
| cg18739537 | 5.22E-09 | 4.90E-10 | -6.55 | 11.9211312 | -1.36E-01 | 44232189  | 44232312  | NC_000006.11 |
| cg17443080 | 5.23E-09 | 4.91E-10 | -6.55 | 11.9194591 | -1.05E-01 | 139557460 | 139557583 | NC_000009.11 |
| cg07312051 | 5.23E-09 | 4.91E-10 | -6.55 | 11.91887   | -1.30E-01 | 15656086  | 15656209  | NC_000001.10 |

|                |          |          |       |            |           |           |           |              |
|----------------|----------|----------|-------|------------|-----------|-----------|-----------|--------------|
| cg03342113     | 5.24E-09 | 4.92E-10 | -6.55 | 11.917722  | -6.24E-02 | 61197477  | 61197600  | NC_000011.9  |
| cg18146927     | 5.24E-09 | 4.92E-10 | -6.55 | 11.9174446 | -1.14E-01 | 200835888 | 200836011 | NC_000001.10 |
| cg07592361     | 5.24E-09 | 4.92E-10 | -6.55 | 11.9166041 | -1.50E-01 | 241496830 | 241496953 | NC_000002.11 |
| cg16650630     | 5.24E-09 | 4.92E-10 | -6.55 | 11.9164301 | -1.39E-01 | 40364862  | 40364985  | NC_000015.9  |
| cg12410939     | 5.24E-09 | 4.92E-10 | -6.55 | 11.9162801 | -1.59E-01 | 230882809 | 230882932 | NC_000001.10 |
| cg22597040     | 5.24E-09 | 4.93E-10 | -6.55 | 11.915909  | -4.31E-02 | 80693216  | 80693339  | NC_000017.10 |
| cg07564188     | 5.24E-09 | 4.93E-10 | -6.55 | 11.9157717 | -3.19E-02 | 165667906 | 165668029 | NC_000001.10 |
| cg07571734     | 5.25E-09 | 4.93E-10 | -6.55 | 11.915522  | -1.68E-01 | 151479894 | 151480017 | NC_000007.13 |
| cg02901136     | 5.26E-09 | 4.94E-10 | -6.55 | 11.9133609 | -1.79E-01 | 153348305 | 153348428 | NC_000001.10 |
| cg23866412     | 5.26E-09 | 4.94E-10 | -6.55 | 11.912984  | -5.58E-02 | 18337365  | 18337488  | NC_000019.9  |
| cg26060255     | 5.26E-09 | 4.94E-10 | -6.55 | 11.9123789 | -8.78E-02 | 3025968   | 3026091   | NC_000020.10 |
| cg23893997     | 5.26E-09 | 4.95E-10 | -6.55 | 11.9121458 | -1.78E-02 | 26904682  | 26904805  | NC_000007.13 |
| cg00292662     | 5.27E-09 | 4.95E-10 | -6.55 | 11.9106084 | -7.44E-02 | 38071168  | 38071291  | NC_000022.10 |
| cg00533496     | 5.28E-09 | 4.96E-10 | -6.55 | 11.9093666 | -5.08E-02 | 114048211 | 114048334 | NC_000013.10 |
| cg19376664     | 5.28E-09 | 4.96E-10 | -6.55 | 11.908819  | -1.25E-01 | 32153575  | 32153698  | NC_000006.11 |
| cg07080231     | 5.28E-09 | 4.97E-10 | -6.55 | 11.9081921 | -9.02E-02 | 101300217 | 101300340 | NC_000015.9  |
| ch.12.1171804F | 5.29E-09 | 4.97E-10 | -6.55 | 11.9075711 | -1.78E-02 | 56495766  | 56495889  | NC_000012.11 |
| cg02328793     | 5.29E-09 | 4.97E-10 | -6.55 | 11.9074243 | -1.35E-01 | 6446234   | 6446357   | NC_000001.10 |
| cg19430473     | 5.29E-09 | 4.97E-10 | -6.55 | 11.9064097 | -9.67E-02 | 156468708 | 156468831 | NC_000003.11 |
| cg07991586     | 5.29E-09 | 4.98E-10 | -6.55 | 11.9061412 | -1.14E-01 | 50279175  | 50279298  | NC_000016.9  |
| cg07458170     | 5.30E-09 | 4.98E-10 | -6.55 | 11.9051048 | -5.65E-02 | 130184747 | 130184870 | NC_000011.9  |
| cg09110292     | 5.30E-09 | 4.98E-10 | -6.55 | 11.9044682 | -3.76E-02 | 32217076  | 32217199  | NC_000010.10 |
| cg00527825     | 5.30E-09 | 4.99E-10 | -6.55 | 11.9038564 | -1.33E-01 | 74218418  | 74218541  | NC_000015.9  |
| cg12048331     | 5.32E-09 | 5.00E-10 | -6.55 | 11.901508  | -1.17E-01 | 52302150  | 52302273  | NC_000003.11 |
| cg16179748     | 5.32E-09 | 5.00E-10 | -6.55 | 11.9014612 | -1.53E-02 | 223254706 | 223254829 | NC_000001.10 |

|            |          |          |       |            |           |           |           |              |
|------------|----------|----------|-------|------------|-----------|-----------|-----------|--------------|
| cg21905229 | 5.32E-09 | 5.00E-10 | -6.55 | 11.9009067 | -1.93E-02 | 32031732  | 32031855  | NC_000020.10 |
| cg13225750 | 5.32E-09 | 5.01E-10 | -6.55 | 11.9003203 | -1.29E-01 | 31744033  | 31744156  | NC_000006.11 |
| cg13369981 | 5.33E-09 | 5.01E-10 | -6.55 | 11.8996621 | -6.20E-02 | 100027501 | 100027624 | NC_000007.13 |
| cg26826325 | 5.33E-09 | 5.01E-10 | -6.55 | 11.8993691 | -9.97E-02 | 70459053  | 70459176  | NC_000011.9  |
| cg24939838 | 5.33E-09 | 5.01E-10 | -6.55 | 11.8987113 | -1.32E-01 | 3164390   | 3164513   | NC_000001.10 |
| cg19034084 | 5.35E-09 | 5.04E-10 | -6.55 | 11.8944896 | -8.57E-02 | 55472069  | 55472192  | NC_000005.9  |
| cg02325880 | 5.35E-09 | 5.04E-10 | -6.55 | 11.8942937 | -5.36E-02 | 84971750  | 84971873  | NC_000001.10 |
| cg03280299 | 5.36E-09 | 5.04E-10 | -6.55 | 11.8936503 | -1.39E-01 | 116659609 | 116659732 | NC_000007.13 |
| cg00453202 | 5.36E-09 | 5.04E-10 | -6.55 | 11.8931464 | -7.57E-02 | 85482380  | 85482503  | NC_000016.9  |
| cg23476401 | 5.36E-09 | 5.05E-10 | -6.55 | 11.8925277 | -1.13E-01 | 2020296   | 2020419   | NC_000011.9  |
| cg23740652 | 5.36E-09 | 5.05E-10 | -6.55 | 11.8922118 | -1.35E-01 | 157561925 | 157562048 | NC_000007.13 |
| cg25139596 | 5.37E-09 | 5.05E-10 | -6.55 | 11.8918191 | -5.48E-02 | 24270239  | 24270362  | NC_000002.11 |
| cg01968759 | 5.37E-09 | 5.05E-10 | -6.55 | 11.8917246 | -6.70E-02 | 146101151 | 146101274 | NC_000004.11 |
| cg19024575 | 5.37E-09 | 5.05E-10 | -6.55 | 11.8916772 | -7.17E-02 | 76794560  | 76794683  | NC_000017.10 |
| cg09026539 | 5.37E-09 | 5.05E-10 | -6.55 | 11.8913306 | -8.29E-02 | 39237940  | 39238063  | NC_000003.11 |
| cg17934894 | 5.37E-09 | 5.05E-10 | -6.55 | 11.8913059 | -6.87E-02 | 27050410  | 27050533  | NC_000004.11 |
| cg19861427 | 5.37E-09 | 5.05E-10 | -6.55 | 11.8908506 | -7.90E-02 | 18830612  | 18830735  | NC_000019.9  |
| cg07021447 | 5.37E-09 | 5.06E-10 | -6.55 | 11.8905546 | -9.83E-02 | 69418951  | 69419074  | NC_000014.8  |
| cg08822360 | 5.38E-09 | 5.07E-10 | -6.55 | 11.8887198 | -1.49E-01 | 94459553  | 94459676  | NC_000010.10 |
| cg06189038 | 5.39E-09 | 5.07E-10 | -6.55 | 11.8876935 | -8.07E-02 | 99767134  | 99767257  | NC_000007.13 |
| cg18581777 | 5.39E-09 | 5.07E-10 | -6.55 | 11.8873864 | -8.87E-02 | 75105186  | 75105309  | NC_000015.9  |
| cg02554274 | 5.39E-09 | 5.07E-10 | -6.55 | 11.8873099 | -1.13E-01 | 788180    | 788303    | NC_000011.9  |
| cg26967305 | 5.39E-09 | 5.08E-10 | -6.55 | 11.8864042 | -1.30E-01 | 29563734  | 29563857  | NC_000022.10 |
| cg08869547 | 5.40E-09 | 5.09E-10 | -6.55 | 11.88441   | -9.46E-02 | 90199883  | 90200006  | NC_000015.9  |
| cg11600078 | 5.41E-09 | 5.09E-10 | -6.55 | 11.8834455 | -7.36E-02 | 79100124  | 79100247  | NC_000017.10 |

|            |          |          |       |            |           |           |           |              |
|------------|----------|----------|-------|------------|-----------|-----------|-----------|--------------|
| cg01667702 | 5.41E-09 | 5.09E-10 | -6.55 | 11.8833885 | -7.22E-02 | 7836604   | 7836727   | NC_000017.10 |
| cg18404281 | 5.41E-09 | 5.10E-10 | -6.55 | 11.8826443 | -4.82E-02 | 80263384  | 80263507  | NC_000009.11 |
| cg19202886 | 5.42E-09 | 5.10E-10 | -6.55 | 11.8822979 | -1.24E-01 | 50288819  | 50288942  | NC_000012.11 |
| cg14181940 | 5.42E-09 | 5.10E-10 | -6.55 | 11.8816831 | -1.09E-01 | 72463080  | 72463203  | NC_000017.10 |
| cg00533891 | 5.42E-09 | 5.10E-10 | -6.55 | 11.8815697 | -1.31E-01 | 80919242  | 80919365  | NC_000010.10 |
| cg13844662 | 5.42E-09 | 5.10E-10 | -6.55 | 11.8814936 | -7.70E-02 | 152646533 | 152646656 | NC_000001.10 |
| cg10517281 | 5.42E-09 | 5.10E-10 | -6.55 | 11.881196  | -1.07E-01 | 393038    | 393161    | NC_000011.9  |
| cg23386659 | 5.43E-09 | 5.11E-10 | -6.55 | 11.8801884 | -8.71E-02 | 840950    | 841073    | NC_000019.9  |
| cg06705862 | 5.43E-09 | 5.12E-10 | -6.54 | 11.8791136 | -1.63E-01 | 128151236 | 128151359 | NC_000003.11 |
| cg14011971 | 5.43E-09 | 5.12E-10 | -6.54 | 11.8783493 | -1.81E-01 | 61997974  | 61998097  | NC_000010.10 |
| cg04073061 | 5.44E-09 | 5.12E-10 | -6.54 | 11.8781774 | -8.84E-02 | 65447384  | 65447507  | NC_000007.13 |
| cg07891971 | 5.45E-09 | 5.13E-10 | -6.54 | 11.876169  | -4.42E-02 | 41245016  | 41245139  | NC_000015.9  |
| cg01412762 | 5.45E-09 | 5.13E-10 | -6.54 | 11.875803  | -2.01E-01 | 29751968  | 29752091  | NC_000002.11 |
| cg07615364 | 5.45E-09 | 5.13E-10 | -6.54 | 11.8755983 | -1.43E-01 | 52088726  | 52088849  | NC_000003.11 |
| cg12858693 | 5.45E-09 | 5.13E-10 | -6.54 | 11.8753848 | -3.38E-02 | 150346886 | 150347009 | NC_000006.11 |
| cg15696408 | 5.46E-09 | 5.14E-10 | -6.54 | 11.874502  | -7.31E-02 | 94287211  | 94287334  | NC_000007.13 |
| cg04929612 | 5.46E-09 | 5.14E-10 | -6.54 | 11.8743275 | -1.36E-01 | 38512125  | 38512248  | NC_000008.10 |
| cg10992465 | 5.46E-09 | 5.14E-10 | -6.54 | 11.8740128 | -8.76E-02 | 9504049   | 9504172   | NC_000001.10 |
| cg22542139 | 5.47E-09 | 5.15E-10 | -6.54 | 11.8717184 | -1.16E-01 | 17465476  | 17465599  | NC_000017.10 |
| cg14824732 | 5.47E-09 | 5.15E-10 | -6.54 | 11.8715523 | -6.25E-02 | 153856547 | 153856670 | NC_000004.11 |
| cg06471596 | 5.49E-09 | 5.17E-10 | -6.54 | 11.8681474 | -1.73E-01 | 101579936 | 101580059 | NC_000007.13 |
| cg14592798 | 5.49E-09 | 5.18E-10 | -6.54 | 11.8671929 | -1.20E-01 | 87257941  | 87258064  | NC_000009.11 |
| cg05545454 | 5.50E-09 | 5.18E-10 | -6.54 | 11.8669425 | -1.69E-01 | 167284353 | 167284476 | NC_000006.11 |
| cg04903159 | 5.50E-09 | 5.18E-10 | -6.54 | 11.8667279 | -1.20E-01 | 44202699  | 44202822  | NC_000006.11 |
| cg04001071 | 5.50E-09 | 5.18E-10 | -6.54 | 11.8662969 | -1.51E-01 | 47613485  | 47613608  | NC_000013.10 |



|            |          |          |       |            |           |           |           |              |
|------------|----------|----------|-------|------------|-----------|-----------|-----------|--------------|
| cg22478919 | 5.50E-09 | 5.18E-10 | -6.54 | 11.8659726 | -2.72E-02 | 74582458  | 74582581  | NC_000017.10 |
| cg00870279 | 5.51E-09 | 5.19E-10 | -6.54 | 11.8648011 | -7.85E-02 | 33256222  | 33256345  | NC_000006.11 |
| cg19987256 | 5.51E-09 | 5.19E-10 | -6.54 | 11.8647837 | -1.16E-01 | 42916332  | 42916455  | NC_000022.10 |
| cg15619439 | 5.51E-09 | 5.19E-10 | -6.54 | 11.8641236 | -1.61E-01 | 102700944 | 102701067 | NC_000011.9  |
| cg11467639 | 5.52E-09 | 5.21E-10 | -6.54 | 11.8617999 | -1.89E-02 | 16494499  | 16494622  | NC_000001.10 |
| cg08701609 | 5.53E-09 | 5.21E-10 | -6.54 | 11.860842  | -3.20E-02 | 34961305  | 34961428  | NC_000021.8  |
| cg23568192 | 5.54E-09 | 5.22E-10 | -6.54 | 11.8590929 | -1.24E-01 | 44289380  | 44289503  | NC_000010.10 |
| cg10268711 | 5.54E-09 | 5.22E-10 | -6.54 | 11.8590721 | -9.56E-02 | 37678489  | 37678612  | NC_000022.10 |
| cg17018349 | 5.54E-09 | 5.22E-10 | -6.54 | 11.8589238 | -9.00E-02 | 68136196  | 68136319  | NC_000015.9  |
| cg02163266 | 5.54E-09 | 5.22E-10 | -6.54 | 11.8588584 | -6.48E-02 | 19015061  | 19015184  | NC_000022.10 |
| cg04338119 | 5.54E-09 | 5.23E-10 | -6.54 | 11.8582366 | -1.07E-01 | 88048341  | 88048464  | NC_000016.9  |
| cg11989330 | 5.55E-09 | 5.23E-10 | -6.54 | 11.8564541 | -3.77E-02 | 65468827  | 65468950  | NC_000001.10 |
| cg22173131 | 5.55E-09 | 5.24E-10 | -6.54 | 11.8557687 | -9.76E-02 | 75480171  | 75480294  | NC_000011.9  |
| cg26548293 | 5.56E-09 | 5.24E-10 | -6.54 | 11.8552529 | -8.65E-02 | 153606178 | 153606301 | NC_000001.10 |
| cg14391622 | 5.56E-09 | 5.24E-10 | -6.54 | 11.8548313 | -7.47E-02 | 124931956 | 124932079 | NC_000003.11 |
| cg18659153 | 5.56E-09 | 5.25E-10 | -6.54 | 11.854514  | -3.71E-02 | 29710531  | 29710654  | NC_000022.10 |
| cg26433208 | 5.56E-09 | 5.25E-10 | -6.54 | 11.8542894 | -3.10E-02 | 41445556  | 41445679  | NC_000001.10 |
| cg06367311 | 5.56E-09 | 5.25E-10 | -6.54 | 11.8538447 | -7.78E-02 | 57318013  | 57318136  | NC_000016.9  |
| cg26323752 | 5.57E-09 | 5.25E-10 | -6.54 | 11.8532657 | -1.06E-01 | 112247638 | 112247761 | NC_000010.10 |
| cg19370689 | 5.57E-09 | 5.25E-10 | -6.54 | 11.8529408 | -1.19E-01 | 102558323 | 102558446 | NC_000007.13 |
| cg03416645 | 5.57E-09 | 5.26E-10 | -6.54 | 11.8525528 | -4.65E-02 | 105087206 | 105087329 | NC_000003.11 |
| cg00458016 | 5.57E-09 | 5.26E-10 | -6.54 | 11.8521002 | -1.06E-01 | 50096876  | 50096999  | NC_000019.9  |
| cg07086564 | 5.57E-09 | 5.26E-10 | -6.54 | 11.8520374 | -6.56E-02 | 59371804  | 59371927  | NC_000017.10 |
| cg00797152 | 5.58E-09 | 5.26E-10 | -6.54 | 11.8513599 | -1.09E-01 | 5541568   | 5541691   | NC_000010.10 |
| cg03594044 | 5.59E-09 | 5.28E-10 | -6.54 | 11.8488737 | -2.23E-02 | 33330726  | 33330849  | NC_000008.10 |

|               |          |          |       |            |           |           |           |              |
|---------------|----------|----------|-------|------------|-----------|-----------|-----------|--------------|
| cg07336987    | 5.60E-09 | 5.29E-10 | -6.54 | 11.8469902 | -1.15E-01 | 625147    | 625270    | NC_000011.9  |
| cg00328219    | 5.61E-09 | 5.29E-10 | -6.54 | 11.8460843 | -1.31E-01 | 29033680  | 29033803  | NC_000008.10 |
| cg09788352    | 5.61E-09 | 5.29E-10 | -6.54 | 11.845368  | -5.30E-02 | 68522666  | 68522789  | NC_000015.9  |
| ch.5.2564734R | 5.61E-09 | 5.30E-10 | -6.54 | 11.845191  | -4.97E-02 | 138313101 | 138313224 | NC_000005.9  |
| cg17749735    | 5.62E-09 | 5.30E-10 | -6.54 | 11.8439174 | -3.42E-02 | 155051360 | 155051483 | NC_000001.10 |
| cg11106264    | 5.62E-09 | 5.30E-10 | -6.54 | 11.8438415 | -1.18E-01 | 22331872  | 22331995  | NC_000010.10 |
| cg21300895    | 5.62E-09 | 5.31E-10 | -6.54 | 11.8426959 | -9.27E-02 | 241076441 | 241076564 | NC_000002.11 |
| cg04265261    | 5.63E-09 | 5.32E-10 | -6.54 | 11.8415216 | -9.56E-02 | 133815865 | 133815988 | NC_000009.11 |
| cg10587741    | 5.63E-09 | 5.32E-10 | -6.54 | 11.84145   | -8.99E-02 | 38071170  | 38071293  | NC_000022.10 |
| cg22776856    | 5.63E-09 | 5.32E-10 | -6.54 | 11.8406477 | -1.18E-01 | 3072572   | 3072695   | NC_000016.9  |
| cg15233131    | 5.65E-09 | 5.33E-10 | -6.54 | 11.838426  | -1.03E-01 | 817832    | 817955    | NC_000019.9  |
| cg14516287    | 5.65E-09 | 5.33E-10 | -6.54 | 11.8382281 | -1.25E-01 | 119987070 | 119987193 | NC_000009.11 |
| cg05728019    | 5.65E-09 | 5.33E-10 | -6.54 | 11.8381153 | -1.81E-01 | 3024023   | 3024146   | NC_000006.11 |
| cg15454385    | 5.66E-09 | 5.34E-10 | -6.54 | 11.8361707 | -1.06E-01 | 556429    | 556552    | NC_000007.13 |
| cg03468541    | 5.66E-09 | 5.35E-10 | -6.54 | 11.8358509 | -7.70E-02 | 89029199  | 89029322  | NC_000014.8  |
| cg09230350    | 5.66E-09 | 5.35E-10 | -6.54 | 11.8349176 | -7.89E-02 | 31937582  | 31937705  | NC_000006.11 |
| cg21026022    | 5.67E-09 | 5.35E-10 | -6.54 | 11.834525  | -8.41E-02 | 21719568  | 21719691  | NC_000018.9  |
| cg01017895    | 5.67E-09 | 5.35E-10 | -6.54 | 11.8344994 | -4.37E-02 | 388559    | 388682    | NC_000020.10 |
| cg14244577    | 5.68E-09 | 5.37E-10 | -6.54 | 11.8323643 | -1.04E-01 | 70332878  | 70333001  | NC_000016.9  |
| cg00375235    | 5.69E-09 | 5.37E-10 | -6.54 | 11.8311367 | -7.03E-02 | 20646251  | 20646374  | NC_000002.11 |
| cg22349332    | 5.69E-09 | 5.37E-10 | -6.54 | 11.8309134 | -8.93E-02 | 2252794   | 2252917   | NC_000001.10 |
| cg15951466    | 5.69E-09 | 5.37E-10 | -6.54 | 11.830669  | -1.23E-01 | 30079192  | 30079315  | NC_000006.11 |
| cg02898915    | 5.69E-09 | 5.38E-10 | -6.54 | 11.8302414 | -3.46E-02 | 56677510  | 56677633  | NC_000016.9  |
| cg20091297    | 5.70E-09 | 5.38E-10 | -6.54 | 11.8292279 | -9.63E-02 | 37572423  | 37572546  | NC_000002.11 |
| cg01612443    | 5.70E-09 | 5.38E-10 | -6.54 | 11.8292257 | -5.20E-02 | 94749535  | 94749658  | NC_000004.11 |

|               |          |          |       |            |           |           |           |              |
|---------------|----------|----------|-------|------------|-----------|-----------|-----------|--------------|
| cg09359103    | 5.70E-09 | 5.38E-10 | -6.54 | 11.8291018 | -1.41E-01 | 154839909 | 154840032 | NC_000001.10 |
| cg02605258    | 5.70E-09 | 5.39E-10 | -6.54 | 11.8286043 | -1.16E-01 | 60940772  | 60940895  | NC_000020.10 |
| cg19241279    | 5.70E-09 | 5.39E-10 | -6.54 | 11.8276467 | -1.03E-01 | 176175002 | 176175125 | NC_000002.11 |
| cg04053959    | 5.72E-09 | 5.41E-10 | -6.53 | 11.8242292 | -1.23E-01 | 22447106  | 22447229  | NC_000013.10 |
| cg23120243    | 5.73E-09 | 5.42E-10 | -6.53 | 11.8226821 | -9.90E-02 | 1663171   | 1663294   | NC_000006.11 |
| cg01782668    | 5.74E-09 | 5.42E-10 | -6.53 | 11.8217817 | -9.22E-02 | 148947436 | 148947559 | NC_000004.11 |
| cg19684795    | 5.74E-09 | 5.42E-10 | -6.53 | 11.8215995 | -3.36E-02 | 45307974  | 45308097  | NC_000011.9  |
| cg00891995    | 5.74E-09 | 5.42E-10 | -6.53 | 11.8215082 | -8.45E-02 | 153113262 | 153113385 | NC_000001.10 |
| cg16530881    | 5.74E-09 | 5.43E-10 | -6.53 | 11.8209077 | -1.10E-01 | 38708399  | 38708522  | NC_000017.10 |
| cg21960110    | 5.74E-09 | 5.43E-10 | -6.53 | 11.8205497 | -9.33E-02 | 202482    | 202605    | NC_000016.9  |
| cg21510194    | 5.74E-09 | 5.43E-10 | -6.53 | 11.8203953 | -8.25E-02 | 236172370 | 236172493 | NC_000002.11 |
| cg11772804    | 5.75E-09 | 5.43E-10 | -6.53 | 11.8199716 | -1.14E-01 | 30131971  | 30132094  | NC_000006.11 |
| cg14520913    | 5.75E-09 | 5.44E-10 | -6.53 | 11.8191976 | -1.51E-01 | 114166440 | 114166563 | NC_000011.9  |
| cg02263932    | 5.76E-09 | 5.44E-10 | -6.53 | 11.8183161 | -1.08E-01 | 50109099  | 50109222  | NC_000020.10 |
| cg24029426    | 5.76E-09 | 5.44E-10 | -6.53 | 11.8181257 | -7.29E-02 | 25995496  | 25995619  | NC_000004.11 |
| cg03328804    | 5.76E-09 | 5.45E-10 | -6.53 | 11.8167307 | -3.61E-02 | 75526289  | 75526412  | NC_000011.9  |
| cg27135113    | 5.77E-09 | 5.45E-10 | -6.53 | 11.8166502 | -9.84E-02 | 12307450  | 12307573  | NC_000011.9  |
| cg21137244    | 5.77E-09 | 5.45E-10 | -6.53 | 11.8161645 | -1.74E-01 | 43398234  | 43398357  | NC_000017.10 |
| cg27604944    | 5.77E-09 | 5.46E-10 | -6.53 | 11.8159996 | -3.81E-02 | 72440409  | 72440532  | NC_000013.10 |
| ch.7.1264585R | 5.77E-09 | 5.46E-10 | -6.53 | 11.8152252 | -4.05E-02 | 55212640  | 55212763  | NC_000007.13 |
| cg08369079    | 5.78E-09 | 5.46E-10 | -6.53 | 11.8147505 | -1.28E-01 | 106551623 | 106551746 | NC_000006.11 |
| cg06239478    | 5.78E-09 | 5.47E-10 | -6.53 | 11.8142489 | -4.12E-02 | 11606277  | 11606400  | NC_000002.11 |
| cg02246725    | 5.78E-09 | 5.47E-10 | -6.53 | 11.814205  | -9.98E-02 | 2014127   | 2014250   | NC_000011.9  |
| cg14192542    | 5.78E-09 | 5.47E-10 | -6.53 | 11.8140934 | -1.15E-01 | 64187581  | 64187704  | NC_000017.10 |
| cg15863826    | 5.78E-09 | 5.47E-10 | -6.53 | 11.8133567 | -3.91E-02 | 16925708  | 16925831  | NC_000003.11 |

|                 |          |          |       |            |           |           |           |              |
|-----------------|----------|----------|-------|------------|-----------|-----------|-----------|--------------|
| cg24328944      | 5.78E-09 | 5.47E-10 | -6.53 | 11.8132312 | -8.53E-02 | 96256596  | 96256719  | NC_000013.10 |
| cg22874652      | 5.79E-09 | 5.47E-10 | -6.53 | 11.8127793 | -1.45E-01 | 1107439   | 1107562   | NC_000001.10 |
| cg13974313      | 5.79E-09 | 5.48E-10 | -6.53 | 11.812389  | -1.16E-01 | 48129869  | 48129992  | NC_000004.11 |
| cg27585376      | 5.79E-09 | 5.48E-10 | -6.53 | 11.8112741 | -9.38E-02 | 74021333  | 74021456  | NC_000007.13 |
| cg15519508      | 5.80E-09 | 5.49E-10 | -6.53 | 11.8100176 | -9.56E-02 | 23862194  | 23862317  | NC_000014.8  |
| cg16637458      | 5.80E-09 | 5.49E-10 | -6.53 | 11.8093903 | -1.46E-01 | 113585948 | 113586071 | NC_000013.10 |
| cg17107691      | 5.81E-09 | 5.50E-10 | -6.53 | 11.8081521 | -1.20E-01 | 11289376  | 11289499  | NC_000019.9  |
| cg13147013      | 5.81E-09 | 5.50E-10 | -6.53 | 11.8075043 | -4.37E-02 | 99852409  | 99852532  | NC_000013.10 |
| cg05580603      | 5.81E-09 | 5.50E-10 | -6.53 | 11.8073282 | -5.67E-02 | 170606266 | 170606389 | NC_000006.11 |
| cg14360139      | 5.82E-09 | 5.51E-10 | -6.53 | 11.8066215 | -1.17E-01 | 242143538 | 242143661 | NC_000002.11 |
| cg03731828      | 5.82E-09 | 5.51E-10 | -6.53 | 11.8056336 | -6.59E-02 | 33129106  | 33129229  | NC_000006.11 |
| cg13431373      | 5.83E-09 | 5.52E-10 | -6.53 | 11.8039794 | -7.51E-02 | 5956002   | 5956125   | NC_000018.9  |
| cg10003443      | 5.83E-09 | 5.52E-10 | -6.53 | 11.8038024 | -8.51E-02 | 22567170  | 22567293  | NC_000020.10 |
| cg07894391      | 5.84E-09 | 5.53E-10 | -6.53 | 11.803317  | -9.89E-02 | 131085769 | 131085892 | NC_000002.11 |
| cg13089369      | 5.84E-09 | 5.53E-10 | -6.53 | 11.8031203 | -9.61E-02 | 87374944  | 87375067  | NC_000004.11 |
| cg08882099      | 5.85E-09 | 5.54E-10 | -6.53 | 11.8012091 | -1.27E-01 | 107612007 | 107612130 | NC_000006.11 |
| cg13663303      | 5.86E-09 | 5.55E-10 | -6.53 | 11.7996093 | -1.47E-01 | 35046992  | 35047115  | NC_000005.9  |
| cg06580884      | 5.86E-09 | 5.55E-10 | -6.53 | 11.799523  | -7.85E-02 | 47365911  | 47366034  | NC_000003.11 |
| cg18661379      | 5.86E-09 | 5.55E-10 | -6.53 | 11.7988856 | -1.88E-01 | 104393081 | 104393204 | NC_000010.10 |
| cg06380725      | 5.87E-09 | 5.56E-10 | -6.53 | 11.7982376 | -1.24E-01 | 111894647 | 111894770 | NC_000006.11 |
| cg11940177      | 5.87E-09 | 5.56E-10 | -6.53 | 11.7981292 | -1.47E-01 | 99188478  | 99188601  | NC_000010.10 |
| ch.15.97746216F | 5.87E-09 | 5.56E-10 | -6.53 | 11.798032  | -7.82E-02 | 99928693  | 99928816  | NC_000015.9  |
| cg00913521      | 5.87E-09 | 5.56E-10 | -6.53 | 11.7978672 | -6.89E-02 | 89893799  | 89893922  | NC_000012.11 |
| cg25023684      | 5.87E-09 | 5.56E-10 | -6.53 | 11.7977805 | -9.61E-02 | 155714868 | 155714991 | NC_000007.13 |
| ch.5.2533981R   | 5.87E-09 | 5.56E-10 | -6.53 | 11.7977713 | -2.44E-02 | 137298291 | 137298414 | NC_000005.9  |

|            |          |          |       |            |           |           |           |              |
|------------|----------|----------|-------|------------|-----------|-----------|-----------|--------------|
| cg05090170 | 5.87E-09 | 5.56E-10 | -6.53 | 11.7973706 | -5.97E-02 | 100105369 | 100105492 | NC_000015.9  |
| cg17755610 | 5.88E-09 | 5.57E-10 | -6.53 | 11.7962904 | -7.43E-02 | 231688740 | 231688863 | NC_000002.11 |
| cg13415434 | 5.88E-09 | 5.57E-10 | -6.53 | 11.79532   | -2.93E-02 | 49044522  | 49044645  | NC_000003.11 |
| cg27003951 | 5.88E-09 | 5.57E-10 | -6.53 | 11.7952719 | -3.92E-02 | 11350045  | 11350168  | NC_000016.9  |
| cg19532617 | 5.88E-09 | 5.57E-10 | -6.53 | 11.7951406 | -5.80E-02 | 76373607  | 76373730  | NC_000004.11 |
| cg01022012 | 5.89E-09 | 5.58E-10 | -6.53 | 11.7942036 | -1.18E-01 | 232765174 | 232765297 | NC_000002.11 |
| cg02268013 | 5.89E-09 | 5.58E-10 | -6.53 | 11.7940927 | -9.54E-02 | 71650331  | 71650454  | NC_000009.11 |
| cg05961792 | 5.89E-09 | 5.58E-10 | -6.53 | 11.7933799 | -4.05E-02 | 172929351 | 172929474 | NC_000001.10 |
| cg24092914 | 5.89E-09 | 5.58E-10 | -6.53 | 11.7933296 | -1.46E-01 | 10184877  | 10185000  | NC_000003.11 |
| cg18560366 | 5.90E-09 | 5.59E-10 | -6.53 | 11.7920799 | -1.01E-01 | 109057564 | 109057687 | NC_000003.11 |
| cg01866427 | 5.91E-09 | 5.60E-10 | -6.53 | 11.7900361 | -3.32E-02 | 113598068 | 113598191 | NC_000013.10 |
| cg01456571 | 5.91E-09 | 5.60E-10 | -6.53 | 11.7897236 | -1.17E-02 | 23021325  | 23021448  | NC_000008.10 |
| cg24847154 | 5.91E-09 | 5.61E-10 | -6.53 | 11.7891246 | -6.52E-02 | 151118794 | 151118917 | NC_000001.10 |
| cg03719070 | 5.92E-09 | 5.61E-10 | -6.53 | 11.7885878 | -6.59E-02 | 74668976  | 74669099  | NC_000002.11 |
| cg01827717 | 5.92E-09 | 5.61E-10 | -6.53 | 11.788489  | -3.22E-02 | 90287312  | 90287435  | NC_000001.10 |
| cg00674995 | 5.92E-09 | 5.61E-10 | -6.53 | 11.7884053 | -1.44E-01 | 42708444  | 42708567  | NC_000013.10 |
| cg12423584 | 5.93E-09 | 5.62E-10 | -6.53 | 11.7869995 | -7.13E-02 | 12609932  | 12610055  | NC_000007.13 |
| cg13393204 | 5.93E-09 | 5.62E-10 | -6.53 | 11.7867981 | -4.82E-02 | 86748738  | 86748861  | NC_000011.9  |
| cg23068797 | 5.93E-09 | 5.63E-10 | -6.53 | 11.7856399 | -9.37E-02 | 10928549  | 10928672  | NC_000019.9  |
| cg02435252 | 5.93E-09 | 5.63E-10 | -6.53 | 11.7855606 | -3.17E-02 | 31232764  | 31232887  | NC_000007.13 |
| cg01917626 | 5.94E-09 | 5.63E-10 | -6.53 | 11.7845606 | -6.62E-02 | 102586371 | 102586494 | NC_000009.11 |
| cg06412669 | 5.94E-09 | 5.63E-10 | -6.53 | 11.7845068 | -1.81E-01 | 78735550  | 78735673  | NC_000017.10 |
| cg14189534 | 5.95E-09 | 5.64E-10 | -6.53 | 11.7831487 | -8.21E-02 | 77436852  | 77436975  | NC_000015.9  |
| cg14483244 | 5.95E-09 | 5.64E-10 | -6.53 | 11.7830543 | -1.74E-01 | 42173343  | 42173466  | NC_000017.10 |
| cg17182270 | 5.95E-09 | 5.65E-10 | -6.53 | 11.7825248 | -1.29E-01 | 17349027  | 17349150  | NC_000017.10 |

|                 |          |          |       |            |           |           |           |              |
|-----------------|----------|----------|-------|------------|-----------|-----------|-----------|--------------|
| cg17552029      | 5.95E-09 | 5.65E-10 | -6.53 | 11.7824872 | -1.46E-01 | 41985222  | 41985345  | NC_000017.10 |
| cg03955589      | 5.95E-09 | 5.65E-10 | -6.53 | 11.7823284 | -1.25E-01 | 351064    | 351187    | NC_000011.9  |
| cg01744217      | 5.95E-09 | 5.65E-10 | -6.53 | 11.7821488 | -1.05E-01 | 54933713  | 54933836  | NC_000020.10 |
| cg21114177      | 5.96E-09 | 5.65E-10 | -6.53 | 11.7817745 | -7.68E-02 | 46105073  | 46105196  | NC_000019.9  |
| cg00215896      | 5.96E-09 | 5.66E-10 | -6.53 | 11.7803022 | -1.01E-01 | 12291754  | 12291877  | NC_000017.10 |
| cg13969788      | 5.97E-09 | 5.66E-10 | -6.53 | 11.7796765 | -1.44E-01 | 35689475  | 35689598  | NC_000009.11 |
| cg03703887      | 5.97E-09 | 5.67E-10 | -6.53 | 11.779069  | -1.13E-01 | 34273111  | 34273234  | NC_000011.9  |
| cg03675739      | 5.99E-09 | 5.68E-10 | -6.53 | 11.7765004 | -1.01E-01 | 52702559  | 52702682  | NC_000012.11 |
| cg00762662      | 5.99E-09 | 5.68E-10 | -6.53 | 11.7756355 | -3.79E-02 | 23727572  | 23727695  | NC_000010.10 |
| cg19570574      | 5.99E-09 | 5.69E-10 | -6.53 | 11.7750181 | -7.08E-02 | 39872824  | 39872947  | NC_000015.9  |
| cg01057945      | 6.00E-09 | 5.69E-10 | -6.53 | 11.7747563 | -1.22E-01 | 50303785  | 50303908  | NC_000012.11 |
| cg23882164      | 6.01E-09 | 5.70E-10 | -6.53 | 11.7730192 | -1.06E-01 | 9919440   | 9919563   | NC_000002.11 |
| cg15241074      | 6.01E-09 | 5.70E-10 | -6.53 | 11.7725015 | -1.53E-01 | 12860614  | 12860737  | NC_000002.11 |
| cg03489712      | 6.01E-09 | 5.71E-10 | -6.53 | 11.7721369 | -1.19E-01 | 143076881 | 143077004 | NC_000007.13 |
| cg20742389      | 6.02E-09 | 5.71E-10 | -6.52 | 11.7713189 | -1.59E-01 | 14591033  | 14591156  | NC_000019.9  |
| cg10747529      | 6.02E-09 | 5.71E-10 | -6.52 | 11.7707261 | -6.22E-02 | 34135888  | 34136011  | NC_000017.10 |
| cg07800959      | 6.02E-09 | 5.71E-10 | -6.52 | 11.7706894 | -1.33E-01 | 224839964 | 224840087 | NC_000001.10 |
| cg06790581      | 6.02E-09 | 5.72E-10 | -6.52 | 11.7699068 | -5.36E-02 | 94077144  | 94077267  | NC_000012.11 |
| cg20337305      | 6.03E-09 | 5.72E-10 | -6.52 | 11.7694795 | -3.78E-02 | 58711896  | 58712019  | NC_000014.8  |
| cg26428136      | 6.03E-09 | 5.73E-10 | -6.52 | 11.7679123 | -6.73E-02 | 64880767  | 64880890  | NC_000011.9  |
| cg19855573      | 6.04E-09 | 5.73E-10 | -6.52 | 11.7672128 | -1.47E-01 | 152297873 | 152297996 | NC_000001.10 |
| ch.14.35531994F | 6.04E-09 | 5.74E-10 | -6.52 | 11.7668375 | -5.05E-02 | 36462243  | 36462366  | NC_000014.8  |
| cg07250916      | 6.05E-09 | 5.74E-10 | -6.52 | 11.7659852 | -1.64E-01 | 168939666 | 168939789 | NC_000006.11 |
| cg08899667      | 6.05E-09 | 5.74E-10 | -6.52 | 11.7655047 | -1.22E-01 | 31761055  | 31761178  | NC_000006.11 |
| cg14811551      | 6.05E-09 | 5.75E-10 | -6.52 | 11.7643803 | -1.04E-01 | 10152901  | 10153024  | NC_000002.11 |

|            |          |          |       |            |           |           |           |              |
|------------|----------|----------|-------|------------|-----------|-----------|-----------|--------------|
| cg12611897 | 6.06E-09 | 5.76E-10 | -6.52 | 11.7634695 | -1.59E-01 | 155349216 | 155349339 | NC_000003.11 |
| cg12325507 | 6.06E-09 | 5.76E-10 | -6.52 | 11.7627877 | -2.67E-02 | 74764263  | 74764386  | NC_000009.11 |
| cg04956790 | 6.07E-09 | 5.76E-10 | -6.52 | 11.7625828 | -4.37E-02 | 67663226  | 67663349  | NC_000012.11 |
| cg27475923 | 6.08E-09 | 5.77E-10 | -6.52 | 11.7607684 | -1.04E-01 | 63530997  | 63531120  | NC_000011.9  |
| cg00809399 | 6.08E-09 | 5.77E-10 | -6.52 | 11.7604693 | -9.53E-02 | 249153756 | 249153879 | NC_000001.10 |
| cg16752652 | 6.08E-09 | 5.78E-10 | -6.52 | 11.7601663 | -3.95E-02 | 127420219 | 127420342 | NC_000005.9  |
| cg14437634 | 6.08E-09 | 5.78E-10 | -6.52 | 11.7598426 | -1.56E-01 | 67879385  | 67879508  | NC_000014.8  |
| cg06059032 | 6.08E-09 | 5.78E-10 | -6.52 | 11.7594972 | -5.93E-02 | 236402544 | 236402667 | NC_000002.11 |
| cg24795748 | 6.09E-09 | 5.78E-10 | -6.52 | 11.7588864 | -1.20E-01 | 47404165  | 47404288  | NC_000021.8  |
| cg26974880 | 6.10E-09 | 5.80E-10 | -6.52 | 11.7566789 | -1.15E-01 | 50308058  | 50308181  | NC_000016.9  |
| cg27018309 | 6.10E-09 | 5.80E-10 | -6.52 | 11.7560002 | -1.04E-01 | 8943122   | 8943245   | NC_000016.9  |
| cg03240628 | 6.10E-09 | 5.80E-10 | -6.52 | 11.7558595 | -3.57E-02 | 65153403  | 65153526  | NC_000012.11 |
| cg13187188 | 6.12E-09 | 5.82E-10 | -6.52 | 11.7528603 | -7.43E-02 | 67219859  | 67219982  | NC_000011.9  |
| cg15590007 | 6.12E-09 | 5.82E-10 | -6.52 | 11.7526654 | -1.25E-01 | 45870220  | 45870343  | NC_000010.10 |
| cg06875754 | 6.13E-09 | 5.82E-10 | -6.52 | 11.7522841 | -7.78E-02 | 10328428  | 10328551  | NC_000011.9  |
| cg18211447 | 6.13E-09 | 5.82E-10 | -6.52 | 11.7522507 | -2.54E-02 | 102771717 | 102771840 | NC_000014.8  |
| cg26579892 | 6.13E-09 | 5.82E-10 | -6.52 | 11.7519831 | -4.12E-02 | 63381077  | 63381200  | NC_000011.9  |
| cg18635110 | 6.13E-09 | 5.82E-10 | -6.52 | 11.751805  | -6.64E-02 | 3185384   | 3185507   | NC_000020.10 |
| cg22211672 | 6.14E-09 | 5.84E-10 | -6.52 | 11.7495107 | -1.15E-01 | 74610366  | 74610489  | NC_000015.9  |
| cg21454485 | 6.14E-09 | 5.84E-10 | -6.52 | 11.7492789 | -1.58E-01 | 160546243 | 160546366 | NC_000001.10 |
| cg05083033 | 6.15E-09 | 5.84E-10 | -6.52 | 11.748716  | -8.37E-02 | 28726216  | 28726339  | NC_000007.13 |
| cg05400079 | 6.15E-09 | 5.85E-10 | -6.52 | 11.7474658 | -5.63E-02 | 88344185  | 88344308  | NC_000004.11 |
| cg14497348 | 6.16E-09 | 5.86E-10 | -6.52 | 11.7466524 | -3.34E-02 | 6757781   | 6757904   | NC_000009.11 |
| cg16416987 | 6.16E-09 | 5.86E-10 | -6.52 | 11.7457645 | -1.19E-01 | 155177561 | 155177684 | NC_000001.10 |
| cg22089361 | 6.17E-09 | 5.87E-10 | -6.52 | 11.744709  | -1.49E-01 | 52600604  | 52600727  | NC_000017.10 |

|            |          |          |       |            |           |           |           |              |
|------------|----------|----------|-------|------------|-----------|-----------|-----------|--------------|
| cg20315257 | 6.18E-09 | 5.87E-10 | -6.52 | 11.7439699 | -1.18E-01 | 85665172  | 85665295  | NC_000002.11 |
| cg09106999 | 6.18E-09 | 5.87E-10 | -6.52 | 11.7439468 | -7.65E-02 | 56360065  | 56360188  | NC_000012.11 |
| cg04066396 | 6.18E-09 | 5.88E-10 | -6.52 | 11.7433181 | -4.05E-02 | 159314911 | 159315034 | NC_000002.11 |
| cg02579377 | 6.19E-09 | 5.88E-10 | -6.52 | 11.7422788 | -1.06E-01 | 85047901  | 85048024  | NC_000016.9  |
| cg07372450 | 6.19E-09 | 5.88E-10 | -6.52 | 11.7420124 | -1.28E-01 | 18679429  | 18679552  | NC_000010.10 |
| cg23080733 | 6.19E-09 | 5.88E-10 | -6.52 | 11.741796  | -2.75E-02 | 86042934  | 86043057  | NC_000001.10 |
| cg09060090 | 6.20E-09 | 5.89E-10 | -6.52 | 11.7405002 | -4.81E-02 | 15510150  | 15510273  | NC_000009.11 |
| cg23537193 | 6.20E-09 | 5.89E-10 | -6.52 | 11.7402499 | -2.96E-02 | 39300744  | 39300867  | NC_000012.11 |
| cg25249286 | 6.20E-09 | 5.90E-10 | -6.52 | 11.7398383 | -1.13E-01 | 242713790 | 242713913 | NC_000002.11 |
| cg10322876 | 6.20E-09 | 5.90E-10 | -6.52 | 11.7396126 | -1.42E-01 | 41496749  | 41496872  | NC_000019.9  |
| cg10654546 | 6.21E-09 | 5.90E-10 | -6.52 | 11.7387045 | -1.26E-01 | 56617576  | 56617699  | NC_000012.11 |
| cg08782481 | 6.21E-09 | 5.91E-10 | -6.52 | 11.7378966 | -8.87E-02 | 27839916  | 27840039  | NC_000006.11 |
| cg25426285 | 6.21E-09 | 5.91E-10 | -6.52 | 11.7374056 | -3.10E-02 | 65564395  | 65564518  | NC_000012.11 |
| cg01307359 | 6.21E-09 | 5.91E-10 | -6.52 | 11.7373992 | -3.95E-02 | 44214729  | 44214852  | NC_000006.11 |
| cg25084525 | 6.22E-09 | 5.92E-10 | -6.52 | 11.7356949 | -2.12E-02 | 48019347  | 48019470  | NC_000004.11 |
| cg16711011 | 6.23E-09 | 5.93E-10 | -6.52 | 11.734578  | -1.17E-01 | 568198    | 568321    | NC_000002.11 |
| cg03164805 | 6.23E-09 | 5.93E-10 | -6.52 | 11.7343721 | -8.70E-02 | 1024326   | 1024449   | NC_000016.9  |
| cg14189808 | 6.23E-09 | 5.93E-10 | -6.52 | 11.7341716 | -1.38E-01 | 47611440  | 47611563  | NC_000019.9  |
| cg25763760 | 6.23E-09 | 5.93E-10 | -6.52 | 11.734032  | -2.95E-02 | 48213040  | 48213163  | NC_000012.11 |
| cg26094122 | 6.23E-09 | 5.93E-10 | -6.52 | 11.7339584 | -8.39E-02 | 28705364  | 28705487  | NC_000017.10 |
| cg05681148 | 6.23E-09 | 5.93E-10 | -6.52 | 11.7337951 | -3.21E-02 | 28195812  | 28195935  | NC_000013.10 |
| cg11855156 | 6.25E-09 | 5.95E-10 | -6.52 | 11.7313999 | -1.34E-01 | 51446953  | 51447076  | NC_000019.9  |
| cg01242196 | 6.25E-09 | 5.95E-10 | -6.52 | 11.7313483 | -9.25E-02 | 33990181  | 33990304  | NC_000006.11 |
| cg24150153 | 6.25E-09 | 5.95E-10 | -6.52 | 11.7310286 | -6.81E-02 | 94703463  | 94703586  | NC_000001.10 |
| cg07950397 | 6.26E-09 | 5.95E-10 | -6.52 | 11.7302416 | -9.05E-02 | 10022659  | 10022782  | NC_000019.9  |



|                 |          |          |       |            |           |           |           |              |
|-----------------|----------|----------|-------|------------|-----------|-----------|-----------|--------------|
| cg26270411      | 6.26E-09 | 5.96E-10 | -6.52 | 11.7301182 | -4.80E-02 | 43514327  | 43514450  | NC_000020.10 |
| cg23261171      | 6.26E-09 | 5.96E-10 | -6.52 | 11.7299824 | -1.32E-01 | 42848367  | 42848490  | NC_000013.10 |
| cg01658502      | 6.26E-09 | 5.96E-10 | -6.52 | 11.7295748 | -6.02E-02 | 218933508 | 218933631 | NC_000002.11 |
| ch.12.46508471F | 6.26E-09 | 5.96E-10 | -6.52 | 11.7294846 | -1.74E-02 | 48222204  | 48222327  | NC_000012.11 |
| cg07653289      | 6.28E-09 | 5.97E-10 | -6.52 | 11.7268836 | -8.05E-02 | 30325734  | 30325857  | NC_000006.11 |
| cg21946195      | 6.28E-09 | 5.98E-10 | -6.52 | 11.7257239 | -1.02E-01 | 86012225  | 86012348  | NC_000002.11 |
| cg22614532      | 6.29E-09 | 5.99E-10 | -6.52 | 11.7238993 | -1.44E-01 | 57443357  | 57443480  | NC_000012.11 |
| cg25343227      | 6.30E-09 | 5.99E-10 | -6.52 | 11.7237847 | -1.04E-01 | 42353589  | 42353712  | NC_000022.10 |
| cg10775231      | 6.30E-09 | 6.00E-10 | -6.52 | 11.7234306 | -1.19E-01 | 81967666  | 81967789  | NC_000010.10 |
| cg04321126      | 6.30E-09 | 6.00E-10 | -6.52 | 11.7226845 | -1.15E-01 | 39393690  | 39393813  | NC_000006.11 |
| cg23940655      | 6.30E-09 | 6.00E-10 | -6.52 | 11.7222557 | -2.96E-02 | 74227020  | 74227143  | NC_000014.8  |
| cg00739471      | 6.31E-09 | 6.01E-10 | -6.52 | 11.7214611 | -1.33E-01 | 69415588  | 69415711  | NC_000014.8  |
| cg23063440      | 6.31E-09 | 6.01E-10 | -6.52 | 11.7209196 | -1.05E-01 | 107446472 | 107446595 | NC_000006.11 |
| cg08713098      | 6.33E-09 | 6.03E-10 | -6.52 | 11.718518  | -9.83E-02 | 100005500 | 100005623 | NC_000007.13 |
| cg05479618      | 6.33E-09 | 6.03E-10 | -6.52 | 11.7182076 | -1.41E-01 | 351125    | 351248    | NC_000011.9  |
| cg10796899      | 6.33E-09 | 6.03E-10 | -6.51 | 11.718111  | -5.25E-02 | 735041    | 735164    | NC_000010.10 |
| cg18618206      | 6.34E-09 | 6.04E-10 | -6.51 | 11.7161375 | -1.01E-01 | 754296    | 754419    | NC_000017.10 |
| cg19625116      | 6.35E-09 | 6.05E-10 | -6.51 | 11.7145119 | -2.40E-02 | 94276903  | 94277026  | NC_000011.9  |
| cg17368808      | 6.36E-09 | 6.06E-10 | -6.51 | 11.7133869 | -9.77E-02 | 9496892   | 9497015   | NC_000020.10 |
| cg04738379      | 6.36E-09 | 6.06E-10 | -6.51 | 11.7133868 | -2.81E-02 | 81282102  | 81282225  | NC_000015.9  |
| cg25836326      | 6.37E-09 | 6.07E-10 | -6.51 | 11.7113649 | -8.38E-02 | 113898609 | 113898732 | NC_000003.11 |
| cg15462970      | 6.37E-09 | 6.07E-10 | -6.51 | 11.7109211 | -1.31E-01 | 1444586   | 1444709   | NC_000010.10 |
| cg00261832      | 6.37E-09 | 6.07E-10 | -6.51 | 11.7107214 | -1.37E-01 | 132270033 | 132270156 | NC_000006.11 |
| cg04173864      | 6.38E-09 | 6.08E-10 | -6.51 | 11.71055   | -1.47E-01 | 142241069 | 142241192 | NC_000008.10 |
| cg26504263      | 6.38E-09 | 6.08E-10 | -6.51 | 11.7100774 | -8.25E-02 | 90192032  | 90192155  | NC_000006.11 |

|            |          |          |       |            |           |           |           |              |
|------------|----------|----------|-------|------------|-----------|-----------|-----------|--------------|
| cg26603264 | 6.39E-09 | 6.09E-10 | -6.51 | 11.7079534 | -4.71E-02 | 6500346   | 6500469   | NC_000001.10 |
| cg02071712 | 6.39E-09 | 6.09E-10 | -6.51 | 11.707891  | -1.10E-01 | 104235554 | 104235677 | NC_000012.11 |
| cg13329217 | 6.41E-09 | 6.11E-10 | -6.51 | 11.7044766 | -1.85E-01 | 63975481  | 63975604  | NC_000011.9  |
| cg16078938 | 6.42E-09 | 6.12E-10 | -6.51 | 11.7039901 | -7.04E-02 | 6769406   | 6769529   | NC_000007.13 |
| cg03303857 | 6.42E-09 | 6.12E-10 | -6.51 | 11.7026915 | -1.10E-01 | 120619307 | 120619430 | NC_000011.9  |
| cg08551088 | 6.43E-09 | 6.13E-10 | -6.51 | 11.7024225 | -6.14E-02 | 121631655 | 121631778 | NC_000010.10 |
| cg17620425 | 6.43E-09 | 6.13E-10 | -6.51 | 11.7016504 | -8.71E-02 | 37403552  | 37403675  | NC_000013.10 |
| cg08600765 | 6.43E-09 | 6.13E-10 | -6.51 | 11.7010739 | -7.35E-02 | 34638493  | 34638616  | NC_000020.10 |
| cg00568910 | 6.44E-09 | 6.14E-10 | -6.51 | 11.7006025 | -1.47E-01 | 43429380  | 43429503  | NC_000001.10 |
| cg00693884 | 6.45E-09 | 6.15E-10 | -6.51 | 11.6987791 | -1.86E-02 | 144923083 | 144923206 | NC_000008.10 |
| cg01094309 | 6.45E-09 | 6.15E-10 | -6.51 | 11.6986735 | -1.65E-01 | 166901854 | 166901977 | NC_000006.11 |
| cg25885280 | 6.45E-09 | 6.15E-10 | -6.51 | 11.6986653 | -1.44E-01 | 70760166  | 70760289  | NC_000011.9  |
| cg05139152 | 6.46E-09 | 6.16E-10 | -6.51 | 11.6976826 | -6.52E-02 | 113572930 | 113573053 | NC_000012.11 |
| cg21580456 | 6.46E-09 | 6.16E-10 | -6.51 | 11.6974038 | -1.42E-01 | 125775613 | 125775736 | NC_000003.11 |
| cg23321524 | 6.46E-09 | 6.16E-10 | -6.51 | 11.6971888 | -9.46E-02 | 2875654   | 2875777   | NC_000006.11 |
| cg01225565 | 6.46E-09 | 6.16E-10 | -6.51 | 11.6970729 | -8.24E-02 | 67982143  | 67982266  | NC_000011.9  |
| cg07422042 | 6.46E-09 | 6.16E-10 | -6.51 | 11.6962352 | -1.08E-01 | 20194554  | 20194677  | NC_000022.10 |
| cg22626675 | 6.47E-09 | 6.17E-10 | -6.51 | 11.6954643 | -1.30E-01 | 44009775  | 44009898  | NC_000011.9  |
| cg19630951 | 6.47E-09 | 6.17E-10 | -6.51 | 11.6950387 | -1.14E-01 | 146771456 | 146771579 | NC_000005.9  |
| cg10342447 | 6.47E-09 | 6.17E-10 | -6.51 | 11.6947544 | -6.43E-02 | 26645325  | 26645448  | NC_000017.10 |
| cg07387813 | 6.47E-09 | 6.18E-10 | -6.51 | 11.6944214 | -6.41E-02 | 40499408  | 40499531  | NC_000003.11 |
| cg26091247 | 6.48E-09 | 6.18E-10 | -6.51 | 11.6935197 | -8.39E-02 | 118784336 | 118784459 | NC_000011.9  |
| cg14624950 | 6.48E-09 | 6.18E-10 | -6.51 | 11.6934297 | -1.07E-01 | 62577106  | 62577229  | NC_000017.10 |
| cg06289824 | 6.48E-09 | 6.19E-10 | -6.51 | 11.692911  | -1.16E-01 | 1076283   | 1076406   | NC_000016.9  |
| cg21934552 | 6.49E-09 | 6.19E-10 | -6.51 | 11.6914964 | -3.83E-02 | 27936559  | 27936682  | NC_000013.10 |

|            |          |          |       |            |           |           |           |              |
|------------|----------|----------|-------|------------|-----------|-----------|-----------|--------------|
| cg23696864 | 6.50E-09 | 6.20E-10 | -6.51 | 11.690968  | -1.42E-01 | 67449345  | 67449468  | NC_000017.10 |
| cg21632964 | 6.50E-09 | 6.20E-10 | -6.51 | 11.6909577 | -1.13E-01 | 33129033  | 33129156  | NC_000006.11 |
| cg13758780 | 6.50E-09 | 6.20E-10 | -6.51 | 11.6903256 | -9.52E-02 | 124329514 | 124329637 | NC_000009.11 |
| cg13311549 | 6.51E-09 | 6.21E-10 | -6.51 | 11.6894323 | -1.44E-01 | 24988669  | 24988792  | NC_000007.13 |
| cg11977443 | 6.51E-09 | 6.21E-10 | -6.51 | 11.6893506 | -9.23E-02 | 77721007  | 77721130  | NC_000017.10 |
| cg17809365 | 6.51E-09 | 6.21E-10 | -6.51 | 11.6889548 | -7.40E-02 | 22833172  | 22833295  | NC_000015.9  |
| cg10129938 | 6.51E-09 | 6.21E-10 | -6.51 | 11.6885214 | -1.00E-01 | 59243881  | 59244004  | NC_000015.9  |
| cg21828233 | 6.52E-09 | 6.22E-10 | -6.51 | 11.6875425 | -1.38E-01 | 113164672 | 113164795 | NC_000001.10 |
| cg12747657 | 6.52E-09 | 6.22E-10 | -6.51 | 11.6870575 | -7.63E-02 | 240027059 | 240027182 | NC_000002.11 |
| cg25353142 | 6.53E-09 | 6.23E-10 | -6.51 | 11.6860838 | -7.79E-02 | 43729869  | 43729992  | NC_000020.10 |
| cg16597169 | 6.53E-09 | 6.23E-10 | -6.51 | 11.6859536 | -3.96E-02 | 60095403  | 60095526  | NC_000010.10 |
| cg11177980 | 6.54E-09 | 6.24E-10 | -6.51 | 11.6838772 | -8.83E-02 | 41982115  | 41982238  | NC_000001.10 |
| cg05251814 | 6.54E-09 | 6.24E-10 | -6.51 | 11.6836831 | -1.16E-01 | 585386    | 585509    | NC_000016.9  |
| cg16616769 | 6.55E-09 | 6.25E-10 | -6.51 | 11.6829388 | -1.50E-01 | 19727142  | 19727265  | NC_000016.9  |
| cg07392101 | 6.55E-09 | 6.25E-10 | -6.51 | 11.6828596 | -3.24E-02 | 4909263   | 4909386   | NC_000019.9  |
| cg25597366 | 6.55E-09 | 6.25E-10 | -6.51 | 11.6825971 | -9.69E-02 | 51313361  | 51313484  | NC_000014.8  |
| cg00474723 | 6.55E-09 | 6.25E-10 | -6.51 | 11.6825347 | -5.08E-02 | 86383430  | 86383553  | NC_000011.9  |
| cg16985288 | 6.55E-09 | 6.25E-10 | -6.51 | 11.6825346 | -1.79E-01 | 227015456 | 227015579 | NC_000001.10 |
| cg14209854 | 6.55E-09 | 6.26E-10 | -6.51 | 11.681523  | -1.04E-01 | 11370349  | 11370472  | NC_000016.9  |
| cg12019109 | 6.56E-09 | 6.26E-10 | -6.51 | 11.6810048 | -1.51E-01 | 99574383  | 99574506  | NC_000007.13 |
| cg19687230 | 6.57E-09 | 6.27E-10 | -6.51 | 11.6796225 | -9.73E-02 | 72490380  | 72490503  | NC_000015.9  |
| cg14410557 | 6.57E-09 | 6.27E-10 | -6.51 | 11.6793798 | -1.07E-01 | 138221097 | 138221220 | NC_000009.11 |
| cg25226226 | 6.57E-09 | 6.28E-10 | -6.51 | 11.6784613 | -8.54E-02 | 47591494  | 47591617  | NC_000017.10 |
| cg17918875 | 6.58E-09 | 6.28E-10 | -6.51 | 11.67785   | -3.38E-02 | 17780190  | 17780313  | NC_000008.10 |
| cg17841440 | 6.58E-09 | 6.29E-10 | -6.51 | 11.6770951 | -9.09E-02 | 1861356   | 1861479   | NC_000019.9  |

|                 |          |          |       |            |           |           |           |              |
|-----------------|----------|----------|-------|------------|-----------|-----------|-----------|--------------|
| cg01647936      | 6.58E-09 | 6.29E-10 | -6.51 | 11.676805  | -1.51E-01 | 63974772  | 63974895  | NC_000011.9  |
| cg24595580      | 6.59E-09 | 6.30E-10 | -6.51 | 11.6752125 | -1.04E-01 | 100890996 | 100891119 | NC_000015.9  |
| cg16117513      | 6.60E-09 | 6.30E-10 | -6.51 | 11.6748541 | -1.08E-01 | 2139657   | 2139780   | NC_000001.10 |
| cg08710911      | 6.60E-09 | 6.30E-10 | -6.51 | 11.6747075 | -1.20E-01 | 37574795  | 37574918  | NC_000022.10 |
| cg13558971      | 6.60E-09 | 6.30E-10 | -6.51 | 11.6745895 | -8.63E-02 | 203597085 | 203597208 | NC_000001.10 |
| cg21968169      | 6.60E-09 | 6.30E-10 | -6.51 | 11.674541  | -3.26E-02 | 122241952 | 122242075 | NC_000012.11 |
| cg12845975      | 6.61E-09 | 6.32E-10 | -6.51 | 11.6726177 | -9.22E-02 | 62305226  | 62305349  | NC_000003.11 |
| ch.7.143447326F | 6.61E-09 | 6.32E-10 | -6.51 | 11.6722807 | -7.01E-02 | 143816393 | 143816516 | NC_000007.13 |
| cg07761822      | 6.62E-09 | 6.32E-10 | -6.51 | 11.6712194 | -6.95E-02 | 26323722  | 26323845  | NC_000004.11 |
| cg27563968      | 6.62E-09 | 6.33E-10 | -6.51 | 11.6708298 | -1.20E-01 | 13037811  | 13037934  | NC_000012.11 |
| cg26062476      | 6.62E-09 | 6.33E-10 | -6.51 | 11.6705916 | -2.36E-01 | 103583177 | 103583300 | NC_000014.8  |
| cg11283427      | 6.62E-09 | 6.33E-10 | -6.51 | 11.6705773 | -1.16E-01 | 102986306 | 102986429 | NC_000010.10 |
| cg18891127      | 6.63E-09 | 6.33E-10 | -6.51 | 11.669934  | -1.17E-01 | 65637714  | 65637837  | NC_000014.8  |
| cg08289567      | 6.63E-09 | 6.33E-10 | -6.51 | 11.6698636 | -1.40E-01 | 129307231 | 129307354 | NC_000004.11 |
| ch.20.230983F   | 6.63E-09 | 6.33E-10 | -6.51 | 11.669816  | -2.89E-02 | 10500546  | 10500669  | NC_000020.10 |
| cg16194234      | 6.63E-09 | 6.34E-10 | -6.51 | 11.6689237 | -1.08E-01 | 138413709 | 138413832 | NC_000003.11 |
| cg23926866      | 6.64E-09 | 6.34E-10 | -6.51 | 11.6684484 | -9.00E-02 | 1058658   | 1058781   | NC_000001.10 |
| cg02153528      | 6.64E-09 | 6.35E-10 | -6.51 | 11.667638  | -5.40E-02 | 56618648  | 56618771  | NC_000012.11 |
| cg20755408      | 6.65E-09 | 6.36E-10 | -6.51 | 11.6658075 | -2.16E-02 | 498145    | 498268    | NC_000012.11 |
| cg01295034      | 6.66E-09 | 6.36E-10 | -6.51 | 11.6653448 | -1.39E-01 | 48576092  | 48576215  | NC_000016.9  |
| cg19916409      | 6.66E-09 | 6.37E-10 | -6.5  | 11.66406   | -5.64E-02 | 103266691 | 103266814 | NC_000004.11 |
| cg14156381      | 6.66E-09 | 6.37E-10 | -6.5  | 11.6639841 | -8.70E-02 | 8212675   | 8212798   | NC_000019.9  |
| cg10483393      | 6.68E-09 | 6.38E-10 | -6.5  | 11.6621034 | -3.54E-02 | 18573498  | 18573621  | NC_000016.9  |
| cg05800014      | 6.70E-09 | 6.40E-10 | -6.5  | 11.6591493 | -1.76E-02 | 28845292  | 28845415  | NC_000001.10 |
| cg15114607      | 6.70E-09 | 6.41E-10 | -6.5  | 11.6584596 | -1.11E-01 | 137854552 | 137854675 | NC_000007.13 |

|               |          |          |      |            |           |           |           |              |
|---------------|----------|----------|------|------------|-----------|-----------|-----------|--------------|
| cg04191297    | 6.70E-09 | 6.41E-10 | -6.5 | 11.6581275 | -2.57E-02 | 33359192  | 33359315  | NC_000006.11 |
| cg09501717    | 6.71E-09 | 6.42E-10 | -6.5 | 11.656534  | -1.26E-01 | 225968528 | 225968651 | NC_000002.11 |
| cg16605187    | 6.71E-09 | 6.42E-10 | -6.5 | 11.6561816 | -3.56E-02 | 156252484 | 156252607 | NC_000001.10 |
| cg05454446    | 6.72E-09 | 6.42E-10 | -6.5 | 11.6560132 | -1.01E-01 | 43277757  | 43277880  | NC_000010.10 |
| cg13942283    | 6.72E-09 | 6.43E-10 | -6.5 | 11.6555283 | -1.27E-01 | 112562640 | 112562763 | NC_000010.10 |
| cg19020666    | 6.72E-09 | 6.43E-10 | -6.5 | 11.6554915 | -9.52E-02 | 178452552 | 178452675 | NC_000001.10 |
| cg06580196    | 6.72E-09 | 6.43E-10 | -6.5 | 11.655378  | -3.63E-02 | 50366021  | 50366144  | NC_000003.11 |
| cg10122877    | 6.72E-09 | 6.43E-10 | -6.5 | 11.6544951 | -1.33E-01 | 37585361  | 37585484  | NC_000004.11 |
| cg24800063    | 6.73E-09 | 6.44E-10 | -6.5 | 11.65316   | -1.26E-01 | 6481729   | 6481852   | NC_000019.9  |
| cg09586924    | 6.74E-09 | 6.45E-10 | -6.5 | 11.6520049 | -1.27E-01 | 130032815 | 130032938 | NC_000011.9  |
| cg19579160    | 6.75E-09 | 6.46E-10 | -6.5 | 11.6501119 | -5.84E-02 | 173940277 | 173940400 | NC_000002.11 |
| cg16742703    | 6.75E-09 | 6.46E-10 | -6.5 | 11.6500264 | -1.47E-01 | 51357857  | 51357980  | NC_000019.9  |
| cg06720949    | 6.76E-09 | 6.47E-10 | -6.5 | 11.6490843 | -1.03E-01 | 45381937  | 45382060  | NC_000019.9  |
| cg04697635    | 6.76E-09 | 6.47E-10 | -6.5 | 11.6489589 | -8.92E-02 | 80181030  | 80181153  | NC_000005.9  |
| cg26672573    | 6.76E-09 | 6.47E-10 | -6.5 | 11.6488575 | -1.22E-01 | 19991691  | 19991814  | NC_000016.9  |
| cg23950756    | 6.77E-09 | 6.48E-10 | -6.5 | 11.6476821 | -1.02E-01 | 90989532  | 90989655  | NC_000014.8  |
| cg14190128    | 6.78E-09 | 6.49E-10 | -6.5 | 11.6461354 | -2.76E-02 | 90342638  | 90342761  | NC_000009.11 |
| cg11802013    | 6.80E-09 | 6.51E-10 | -6.5 | 11.6423593 | -1.35E-01 | 69469175  | 69469298  | NC_000011.9  |
| cg15816267    | 6.81E-09 | 6.51E-10 | -6.5 | 11.6421451 | -3.03E-02 | 30458048  | 30458171  | NC_000006.11 |
| ch.9.1395144F | 6.81E-09 | 6.52E-10 | -6.5 | 11.641345  | -8.09E-02 | 97953133  | 97953256  | NC_000009.11 |
| cg13978100    | 6.81E-09 | 6.52E-10 | -6.5 | 11.6412182 | -3.02E-02 | 103361058 | 103361181 | NC_000009.11 |
| cg12862611    | 6.81E-09 | 6.52E-10 | -6.5 | 11.6410228 | -3.16E-02 | 147443109 | 147443232 | NC_000004.11 |
| cg13120875    | 6.81E-09 | 6.52E-10 | -6.5 | 11.6409474 | -1.68E-02 | 144533471 | 144533594 | NC_000007.13 |
| cg23505970    | 6.82E-09 | 6.53E-10 | -6.5 | 11.6402083 | -4.22E-02 | 90529759  | 90529882  | NC_000006.11 |
| cg09527615    | 6.83E-09 | 6.54E-10 | -6.5 | 11.6385463 | -1.34E-01 | 94883350  | 94883473  | NC_000011.9  |

|            |          |          |      |            |           |           |           |              |
|------------|----------|----------|------|------------|-----------|-----------|-----------|--------------|
| cg08484506 | 6.83E-09 | 6.54E-10 | -6.5 | 11.6384586 | -1.15E-01 | 71156927  | 71157050  | NC_000017.10 |
| cg22268256 | 6.83E-09 | 6.54E-10 | -6.5 | 11.6383491 | -2.09E-02 | 31671229  | 31671352  | NC_000006.11 |
| cg14237903 | 6.83E-09 | 6.54E-10 | -6.5 | 11.6376352 | -1.76E-01 | 60729448  | 60729571  | NC_000017.10 |
| cg15942979 | 6.84E-09 | 6.55E-10 | -6.5 | 11.6370488 | -1.62E-01 | 22497061  | 22497184  | NC_000008.10 |
| cg19205909 | 6.85E-09 | 6.56E-10 | -6.5 | 11.6355978 | -7.63E-02 | 42353671  | 42353794  | NC_000022.10 |
| cg24350202 | 6.85E-09 | 6.56E-10 | -6.5 | 11.6354605 | -2.94E-02 | 58287827  | 58287950  | NC_000006.11 |
| cg14839440 | 6.85E-09 | 6.56E-10 | -6.5 | 11.6354079 | -3.04E-02 | 43213257  | 43213380  | NC_000015.9  |
| cg06926300 | 6.85E-09 | 6.56E-10 | -6.5 | 11.6353293 | -7.25E-02 | 102397718 | 102397841 | NC_000010.10 |
| cg26339162 | 6.85E-09 | 6.57E-10 | -6.5 | 11.6344887 | -1.20E-01 | 68509470  | 68509593  | NC_000014.8  |
| cg00605362 | 6.85E-09 | 6.57E-10 | -6.5 | 11.634366  | -8.59E-02 | 4793770   | 4793893   | NC_000016.9  |
| cg23806261 | 6.86E-09 | 6.57E-10 | -6.5 | 11.6332227 | -6.86E-02 | 219219666 | 219219789 | NC_000002.11 |
| cg24671886 | 6.87E-09 | 6.58E-10 | -6.5 | 11.6325553 | -1.70E-01 | 19756839  | 19756962  | NC_000001.10 |
| cg01467417 | 6.87E-09 | 6.58E-10 | -6.5 | 11.6320095 | -1.64E-01 | 113874068 | 113874191 | NC_000002.11 |
| cg08434171 | 6.87E-09 | 6.58E-10 | -6.5 | 11.6318579 | -4.93E-02 | 16284988  | 16285111  | NC_000017.10 |
| cg15419054 | 6.88E-09 | 6.59E-10 | -6.5 | 11.6310011 | -4.30E-02 | 45609121  | 45609244  | NC_000017.10 |
| cg21460606 | 6.88E-09 | 6.59E-10 | -6.5 | 11.6305134 | -5.64E-02 | 32055402  | 32055525  | NC_000006.11 |
| cg02175033 | 6.88E-09 | 6.59E-10 | -6.5 | 11.6304632 | -1.28E-01 | 70098523  | 70098646  | NC_000014.8  |
| cg26437845 | 6.88E-09 | 6.60E-10 | -6.5 | 11.6297554 | -1.09E-01 | 11779326  | 11779449  | NC_000001.10 |
| cg04505023 | 6.89E-09 | 6.61E-10 | -6.5 | 11.6283659 | -1.30E-01 | 152956186 | 152956309 | NC_000001.10 |
| cg07717559 | 6.91E-09 | 6.62E-10 | -6.5 | 11.6265488 | -1.53E-01 | 2699021   | 2699144   | NC_000017.10 |
| cg04976154 | 6.91E-09 | 6.62E-10 | -6.5 | 11.6261642 | -1.24E-01 | 1532411   | 1532534   | NC_000016.9  |
| cg15030789 | 6.91E-09 | 6.62E-10 | -6.5 | 11.6260517 | -1.33E-01 | 27438378  | 27438501  | NC_000001.10 |
| cg22015966 | 6.91E-09 | 6.62E-10 | -6.5 | 11.6259897 | -5.22E-02 | 47198573  | 47198696  | NC_000011.9  |
| cg09093931 | 6.91E-09 | 6.62E-10 | -6.5 | 11.6258131 | -8.67E-02 | 98880926  | 98881049  | NC_000008.10 |
| cg12250883 | 6.92E-09 | 6.63E-10 | -6.5 | 11.6244723 | -6.01E-02 | 63328707  | 63328830  | NC_000012.11 |

|                 |          |          |       |            |           |           |           |              |
|-----------------|----------|----------|-------|------------|-----------|-----------|-----------|--------------|
| cg02028540      | 6.93E-09 | 6.64E-10 | -6.5  | 11.6236121 | -2.67E-02 | 67193883  | 67194006  | NC_000016.9  |
| cg07394914      | 6.93E-09 | 6.64E-10 | -6.5  | 11.6235824 | -1.53E-01 | 185371335 | 185371458 | NC_000004.11 |
| cg11674448      | 6.94E-09 | 6.65E-10 | -6.5  | 11.6214333 | -1.50E-01 | 41711766  | 41711889  | NC_000001.10 |
| cg06090383      | 6.94E-09 | 6.66E-10 | -6.5  | 11.6212705 | -4.96E-02 | 174292579 | 174292702 | NC_000004.11 |
| cg09693811      | 6.94E-09 | 6.66E-10 | -6.5  | 11.6210981 | -6.68E-02 | 73553751  | 73553874  | NC_000005.9  |
| cg16731016      | 6.96E-09 | 6.68E-10 | -6.5  | 11.6179333 | -1.55E-01 | 39303506  | 39303629  | NC_000019.9  |
| cg14137939      | 6.97E-09 | 6.68E-10 | -6.5  | 11.6171048 | -1.15E-01 | 85397109  | 85397232  | NC_000011.9  |
| cg03613662      | 6.97E-09 | 6.69E-10 | -6.5  | 11.6163878 | -1.02E-01 | 70404585  | 70404708  | NC_000008.10 |
| cg17500686      | 6.98E-09 | 6.70E-10 | -6.5  | 11.6153932 | -8.23E-02 | 79621783  | 79621906  | NC_000015.9  |
| cg19015086      | 6.98E-09 | 6.70E-10 | -6.5  | 11.61495   | -9.89E-02 | 30817820  | 30817943  | NC_000022.10 |
| cg06524668      | 6.99E-09 | 6.70E-10 | -6.5  | 11.6144347 | -7.11E-02 | 85298355  | 85298478  | NC_000016.9  |
| cg18234973      | 6.99E-09 | 6.71E-10 | -6.5  | 11.6136314 | -8.59E-02 | 60031255  | 60031378  | NC_000001.10 |
| cg06203102      | 6.99E-09 | 6.71E-10 | -6.5  | 11.6135401 | -1.24E-01 | 155148157 | 155148280 | NC_000001.10 |
| cg09080173      | 7.00E-09 | 6.71E-10 | -6.5  | 11.6128414 | -1.36E-01 | 22605334  | 22605457  | NC_000008.10 |
| cg01715842      | 7.00E-09 | 6.71E-10 | -6.5  | 11.6125817 | -7.27E-02 | 85045600  | 85045723  | NC_000016.9  |
| cg02953144      | 7.01E-09 | 6.72E-10 | -6.5  | 11.6112928 | -1.40E-01 | 21138859  | 21138982  | NC_000022.10 |
| cg10496030      | 7.01E-09 | 6.73E-10 | -6.49 | 11.610258  | -1.12E-01 | 76510466  | 76510589  | NC_000011.9  |
| ch.2.238980020F | 7.02E-09 | 6.74E-10 | -6.49 | 11.6088863 | -3.15E-02 | 239315281 | 239315404 | NC_000002.11 |
| cg06346362      | 7.03E-09 | 6.74E-10 | -6.49 | 11.6083873 | -8.62E-02 | 3400412   | 3400535   | NC_000001.10 |
| cg13297120      | 7.03E-09 | 6.75E-10 | -6.49 | 11.6072254 | -7.28E-02 | 115545869 | 115545992 | NC_000011.9  |
| cg23975810      | 7.04E-09 | 6.75E-10 | -6.49 | 11.6071039 | -1.18E-01 | 23966201  | 23966324  | NC_000013.10 |
| cg11915641      | 7.04E-09 | 6.75E-10 | -6.49 | 11.6067337 | -4.32E-02 | 103236553 | 103236676 | NC_000002.11 |
| cg14515812      | 7.04E-09 | 6.76E-10 | -6.49 | 11.6062863 | -1.52E-01 | 21978863  | 21978986  | NC_000001.10 |
| cg27150412      | 7.05E-09 | 6.77E-10 | -6.49 | 11.6051321 | -9.41E-02 | 31161431  | 31161554  | NC_000016.9  |
| cg18864674      | 7.06E-09 | 6.78E-10 | -6.49 | 11.603548  | -9.02E-02 | 21058007  | 21058130  | NC_000001.10 |

|            |          |          |       |            |           |           |           |              |
|------------|----------|----------|-------|------------|-----------|-----------|-----------|--------------|
| cg27178407 | 7.06E-09 | 6.78E-10 | -6.49 | 11.6027399 | -4.22E-02 | 9189213   | 9189336   | NC_000001.10 |
| cg06492744 | 7.07E-09 | 6.78E-10 | -6.49 | 11.6026255 | -1.79E-01 | 65406254  | 65406377  | NC_000011.9  |
| cg15315773 | 7.07E-09 | 6.79E-10 | -6.49 | 11.6023044 | -9.87E-02 | 59997484  | 59997607  | NC_000018.9  |
| cg01220651 | 7.07E-09 | 6.79E-10 | -6.49 | 11.6021312 | -3.03E-02 | 245026640 | 245026763 | NC_000001.10 |
| cg16085568 | 7.08E-09 | 6.80E-10 | -6.49 | 11.6002898 | -1.06E-01 | 103311088 | 103311211 | NC_000012.11 |
| cg18072871 | 7.09E-09 | 6.81E-10 | -6.49 | 11.5993176 | -4.63E-02 | 50919961  | 50920084  | NC_000022.10 |
| cg21211213 | 7.09E-09 | 6.81E-10 | -6.49 | 11.5988057 | -1.40E-01 | 158127763 | 158127886 | NC_000005.9  |
| cg10272520 | 7.09E-09 | 6.81E-10 | -6.49 | 11.5985137 | -1.79E-01 | 151178205 | 151178328 | NC_000004.11 |
| cg24901474 | 7.11E-09 | 6.83E-10 | -6.49 | 11.5962266 | -1.27E-01 | 163173040 | 163173163 | NC_000001.10 |
| cg05310240 | 7.11E-09 | 6.83E-10 | -6.49 | 11.5962217 | -1.16E-01 | 47979069  | 47979192  | NC_000017.10 |
| cg21159473 | 7.12E-09 | 6.84E-10 | -6.49 | 11.5950551 | -5.58E-02 | 15510228  | 15510351  | NC_000009.11 |
| cg15457481 | 7.12E-09 | 6.84E-10 | -6.49 | 11.5941621 | -1.43E-01 | 100326030 | 100326153 | NC_000004.11 |
| cg17910478 | 7.12E-09 | 6.84E-10 | -6.49 | 11.5940945 | -1.09E-01 | 228581288 | 228581411 | NC_000001.10 |
| cg02705758 | 7.12E-09 | 6.84E-10 | -6.49 | 11.5940081 | -7.95E-02 | 14449498  | 14449621  | NC_000005.9  |
| cg12531953 | 7.13E-09 | 6.85E-10 | -6.49 | 11.5928812 | -4.11E-02 | 56793075  | 56793198  | NC_000008.10 |
| cg19231082 | 7.14E-09 | 6.86E-10 | -6.49 | 11.5911659 | -6.65E-02 | 119217133 | 119217256 | NC_000003.11 |
| cg03731797 | 7.14E-09 | 6.86E-10 | -6.49 | 11.5910054 | -1.05E-01 | 42900540  | 42900663  | NC_000019.9  |
| cg13886636 | 7.15E-09 | 6.87E-10 | -6.49 | 11.5906444 | -3.75E-02 | 130679606 | 130679729 | NC_000009.11 |
| cg19086858 | 7.15E-09 | 6.87E-10 | -6.49 | 11.5897217 | -6.73E-02 | 31743367  | 31743490  | NC_000012.11 |
| cg02120621 | 7.16E-09 | 6.88E-10 | -6.49 | 11.5884554 | -1.15E-01 | 53617701  | 53617824  | NC_000006.11 |
| cg07834418 | 7.17E-09 | 6.89E-10 | -6.49 | 11.5875208 | -1.30E-01 | 107409739 | 107409862 | NC_000010.10 |
| cg18788725 | 7.18E-09 | 6.91E-10 | -6.49 | 11.5850944 | -1.79E-01 | 45512122  | 45512245  | NC_000019.9  |
| cg22981296 | 7.19E-09 | 6.91E-10 | -6.49 | 11.5847351 | -6.30E-02 | 17400632  | 17400755  | NC_000017.10 |
| cg24695972 | 7.19E-09 | 6.91E-10 | -6.49 | 11.5839491 | -4.17E-02 | 117113752 | 117113875 | NC_000001.10 |
| cg17893775 | 7.19E-09 | 6.91E-10 | -6.49 | 11.5837452 | -1.11E-01 | 60662488  | 60662611  | NC_000015.9  |



|                |          |          |       |            |           |           |           |              |
|----------------|----------|----------|-------|------------|-----------|-----------|-----------|--------------|
| cg06619282     | 7.20E-09 | 6.92E-10 | -6.49 | 11.5829869 | -1.09E-01 | 131182093 | 131182216 | NC_000009.11 |
| cg09084462     | 7.20E-09 | 6.92E-10 | -6.49 | 11.5829203 | -6.29E-02 | 27220234  | 27220357  | NC_000010.10 |
| cg06272895     | 7.20E-09 | 6.93E-10 | -6.49 | 11.5823104 | -2.98E-02 | 132176249 | 132176372 | NC_000009.11 |
| cg22780193     | 7.20E-09 | 6.93E-10 | -6.49 | 11.5822726 | -1.40E-01 | 74825252  | 74825375  | NC_000013.10 |
| cg03398002     | 7.21E-09 | 6.93E-10 | -6.49 | 11.5816637 | -1.32E-01 | 15272082  | 15272205  | NC_000001.10 |
| cg02694884     | 7.21E-09 | 6.93E-10 | -6.49 | 11.5813131 | -8.39E-02 | 99411691  | 99411814  | NC_000008.10 |
| cg03927131     | 7.22E-09 | 6.94E-10 | -6.49 | 11.5797226 | -1.47E-01 | 33866726  | 33866849  | NC_000020.10 |
| cg01614764     | 7.22E-09 | 6.95E-10 | -6.49 | 11.5793243 | -1.06E-01 | 76023325  | 76023448  | NC_000007.13 |
| cg20597569     | 7.23E-09 | 6.95E-10 | -6.49 | 11.5784501 | -1.11E-01 | 66399085  | 66399208  | NC_000015.9  |
| cg12163823     | 7.23E-09 | 6.95E-10 | -6.49 | 11.5782953 | -6.42E-02 | 242673721 | 242673844 | NC_000002.11 |
| cg15428453     | 7.23E-09 | 6.95E-10 | -6.49 | 11.5782017 | -1.04E-01 | 92038766  | 92038889  | NC_000008.10 |
| cg17508816     | 7.25E-09 | 6.97E-10 | -6.49 | 11.5759067 | -1.24E-01 | 38423639  | 38423762  | NC_000008.10 |
| cg21809927     | 7.25E-09 | 6.98E-10 | -6.49 | 11.5751011 | -1.37E-01 | 30079265  | 30079388  | NC_000006.11 |
| cg08609578     | 7.25E-09 | 6.98E-10 | -6.49 | 11.5750596 | -1.57E-01 | 169828158 | 169828281 | NC_000006.11 |
| cg23661183     | 7.25E-09 | 6.98E-10 | -6.49 | 11.5748464 | -3.47E-02 | 116286593 | 116286716 | NC_000010.10 |
| cg05132999     | 7.28E-09 | 7.00E-10 | -6.49 | 11.5712204 | -1.38E-01 | 51796987  | 51797110  | NC_000001.10 |
| ch.5.61135040R | 7.28E-09 | 7.01E-10 | -6.49 | 11.5707905 | -3.96E-02 | 61099283  | 61099406  | NC_000005.9  |
| cg17475467     | 7.28E-09 | 7.01E-10 | -6.49 | 11.5706261 | -9.43E-02 | 55316769  | 55316892  | NC_000001.10 |
| cg18675146     | 7.28E-09 | 7.01E-10 | -6.49 | 11.5705689 | -1.81E-01 | 40429823  | 40429946  | NC_000003.11 |
| cg24242593     | 7.29E-09 | 7.01E-10 | -6.49 | 11.569818  | -1.92E-02 | 75497181  | 75497304  | NC_000015.9  |
| ch.1.4511733R  | 7.29E-09 | 7.02E-10 | -6.49 | 11.5693836 | -3.56E-02 | 229778196 | 229778319 | NC_000001.10 |
| cg17128256     | 7.29E-09 | 7.02E-10 | -6.49 | 11.5692393 | -9.51E-02 | 5342540   | 5342663   | NC_000007.13 |
| cg14538532     | 7.30E-09 | 7.02E-10 | -6.49 | 11.5687888 | -9.47E-02 | 32153657  | 32153780  | NC_000006.11 |
| cg08525345     | 7.30E-09 | 7.02E-10 | -6.49 | 11.5684326 | -7.13E-02 | 177581310 | 177581433 | NC_000005.9  |
| cg14847162     | 7.30E-09 | 7.03E-10 | -6.49 | 11.5680988 | -6.53E-02 | 31940782  | 31940905  | NC_000006.11 |

|            |          |          |       |            |           |           |           |              |
|------------|----------|----------|-------|------------|-----------|-----------|-----------|--------------|
| cg26608305 | 7.30E-09 | 7.03E-10 | -6.49 | 11.567669  | -1.17E-01 | 925416    | 925539    | NC_000011.9  |
| cg00814476 | 7.31E-09 | 7.03E-10 | -6.49 | 11.5672344 | -2.39E-02 | 70099968  | 70100091  | NC_000016.9  |
| cg13832441 | 7.31E-09 | 7.03E-10 | -6.49 | 11.5669366 | -1.06E-01 | 45585210  | 45585333  | NC_000012.11 |
| cg09340403 | 7.31E-09 | 7.04E-10 | -6.49 | 11.5664774 | -1.15E-01 | 138247491 | 138247614 | NC_000006.11 |
| cg20424973 | 7.31E-09 | 7.04E-10 | -6.49 | 11.5664409 | -1.14E-01 | 3045241   | 3045364   | NC_000002.11 |
| cg26193555 | 7.33E-09 | 7.05E-10 | -6.49 | 11.5646826 | -3.47E-02 | 125933258 | 125933381 | NC_000011.9  |
| cg13668129 | 7.33E-09 | 7.05E-10 | -6.49 | 11.5641414 | -7.44E-02 | 41768075  | 41768198  | NC_000019.9  |
| cg24635971 | 7.33E-09 | 7.06E-10 | -6.49 | 11.5638356 | -1.69E-01 | 67446084  | 67446207  | NC_000008.10 |
| cg00501622 | 7.34E-09 | 7.06E-10 | -6.49 | 11.5629541 | -7.88E-02 | 139563832 | 139563955 | NC_000009.11 |
| cg19252328 | 7.34E-09 | 7.07E-10 | -6.49 | 11.5624718 | -1.26E-01 | 99624413  | 99624536  | NC_000013.10 |
| cg05322916 | 7.35E-09 | 7.08E-10 | -6.49 | 11.5610786 | -1.24E-01 | 36880416  | 36880539  | NC_000006.11 |
| cg12845756 | 7.35E-09 | 7.08E-10 | -6.49 | 11.5609554 | -9.19E-02 | 36007854  | 36007977  | NC_000022.10 |
| cg13858394 | 7.35E-09 | 7.08E-10 | -6.49 | 11.5607191 | -9.08E-02 | 52476073  | 52476196  | NC_000012.11 |
| cg20117626 | 7.35E-09 | 7.08E-10 | -6.49 | 11.560559  | -5.73E-02 | 32150034  | 32150157  | NC_000022.10 |
| cg09849688 | 7.37E-09 | 7.09E-10 | -6.49 | 11.5585708 | -1.35E-01 | 27060511  | 27060634  | NC_000001.10 |
| cg23290456 | 7.37E-09 | 7.10E-10 | -6.49 | 11.558432  | -7.74E-02 | 1859341   | 1859464   | NC_000019.9  |
| cg25708069 | 7.37E-09 | 7.10E-10 | -6.49 | 11.558223  | -3.81E-02 | 8476730   | 8476853   | NC_000007.13 |
| cg06089086 | 7.37E-09 | 7.10E-10 | -6.49 | 11.5579308 | -2.61E-02 | 52210841  | 52210964  | NC_000020.10 |
| cg27638913 | 7.37E-09 | 7.10E-10 | -6.49 | 11.557805  | -1.39E-01 | 21849412  | 21849535  | NC_000018.9  |
| cg11808699 | 7.38E-09 | 7.10E-10 | -6.48 | 11.5575491 | -1.46E-01 | 81528661  | 81528784  | NC_000015.9  |
| cg12210770 | 7.39E-09 | 7.12E-10 | -6.48 | 11.5556646 | -1.57E-02 | 8022010   | 8022133   | NC_000017.10 |
| cg16743289 | 7.39E-09 | 7.12E-10 | -6.48 | 11.5548627 | -1.00E-01 | 174968144 | 174968267 | NC_000001.10 |
| cg23855989 | 7.40E-09 | 7.13E-10 | -6.48 | 11.5534275 | -1.39E-01 | 50355821  | 50355944  | NC_000012.11 |
| cg13316736 | 7.41E-09 | 7.13E-10 | -6.48 | 11.5531299 | -2.86E-02 | 21589687  | 21589810  | NC_000006.11 |
| cg00010654 | 7.41E-09 | 7.14E-10 | -6.48 | 11.5526793 | -6.80E-02 | 45476118  | 45476241  | NC_000001.10 |

|            |          |          |       |            |           |           |           |              |
|------------|----------|----------|-------|------------|-----------|-----------|-----------|--------------|
| cg23655651 | 7.41E-09 | 7.14E-10 | -6.48 | 11.5524068 | -1.37E-01 | 20365720  | 20365843  | NC_000012.11 |
| cg18175880 | 7.41E-09 | 7.14E-10 | -6.48 | 11.5521638 | -1.41E-02 | 2951046   | 2951169   | NC_000011.9  |
| cg25230571 | 7.42E-09 | 7.15E-10 | -6.48 | 11.5515656 | -1.79E-02 | 33424894  | 33425017  | NC_000008.10 |
| cg06589161 | 7.42E-09 | 7.15E-10 | -6.48 | 11.5505499 | -5.62E-02 | 180618230 | 180618353 | NC_000005.9  |
| cg26187031 | 7.43E-09 | 7.16E-10 | -6.48 | 11.5492668 | -1.10E-01 | 26457789  | 26457912  | NC_000008.10 |
| cg08670181 | 7.44E-09 | 7.16E-10 | -6.48 | 11.549033  | -1.11E-01 | 48846942  | 48847065  | NC_000016.9  |
| cg14752965 | 7.44E-09 | 7.17E-10 | -6.48 | 11.5489304 | -1.28E-01 | 17579346  | 17579469  | NC_000017.10 |
| cg08817540 | 7.44E-09 | 7.17E-10 | -6.48 | 11.5488012 | -1.25E-01 | 108020727 | 108020850 | NC_000003.11 |
| cg05847519 | 7.44E-09 | 7.17E-10 | -6.48 | 11.5487085 | -1.39E-01 | 83829911  | 83830034  | NC_000016.9  |
| cg08117110 | 7.44E-09 | 7.17E-10 | -6.48 | 11.5483604 | -9.84E-02 | 81605232  | 81605355  | NC_000015.9  |
| cg19735804 | 7.44E-09 | 7.17E-10 | -6.48 | 11.5483137 | -1.58E-01 | 142421812 | 142421935 | NC_000007.13 |
| cg06821919 | 7.46E-09 | 7.19E-10 | -6.48 | 11.5458747 | -4.89E-02 | 16710653  | 16710776  | NC_000020.10 |
| cg11887733 | 7.46E-09 | 7.19E-10 | -6.48 | 11.5456102 | -1.15E-01 | 71648377  | 71648500  | NC_000003.11 |
| cg20745381 | 7.47E-09 | 7.20E-10 | -6.48 | 11.5437204 | -7.08E-02 | 37139265  | 37139388  | NC_000001.10 |
| cg24056751 | 7.47E-09 | 7.20E-10 | -6.48 | 11.5435408 | -1.08E-01 | 4606418   | 4606541   | NC_000016.9  |
| cg18331098 | 7.47E-09 | 7.20E-10 | -6.48 | 11.5435032 | -2.01E-02 | 120081749 | 120081872 | NC_000011.9  |
| cg21707089 | 7.47E-09 | 7.21E-10 | -6.48 | 11.543477  | -1.08E-01 | 1969769   | 1969892   | NC_000008.10 |
| cg00809863 | 7.48E-09 | 7.21E-10 | -6.48 | 11.5422742 | -1.06E-01 | 15251881  | 15252004  | NC_000001.10 |
| cg08619932 | 7.48E-09 | 7.22E-10 | -6.48 | 11.5421334 | -4.56E-02 | 49200058  | 49200181  | NC_000019.9  |
| cg04259358 | 7.49E-09 | 7.22E-10 | -6.48 | 11.5418867 | -1.64E-01 | 119590450 | 119590573 | NC_000010.10 |
| cg18537482 | 7.49E-09 | 7.23E-10 | -6.48 | 11.5406237 | -1.02E-01 | 1911588   | 1911711   | NC_000008.10 |
| cg03732007 | 7.50E-09 | 7.23E-10 | -6.48 | 11.5404111 | -9.75E-02 | 2071316   | 2071439   | NC_000001.10 |
| cg16276982 | 7.50E-09 | 7.23E-10 | -6.48 | 11.5400685 | -1.61E-01 | 29968032  | 29968155  | NC_000015.9  |
| cg10414829 | 7.50E-09 | 7.23E-10 | -6.48 | 11.5398585 | -9.41E-02 | 88719259  | 88719382  | NC_000010.10 |
| cg01895612 | 7.50E-09 | 7.24E-10 | -6.48 | 11.5392393 | -8.30E-02 | 2020286   | 2020409   | NC_000011.9  |

|            |          |          |       |            |           |           |           |              |
|------------|----------|----------|-------|------------|-----------|-----------|-----------|--------------|
| cg09681043 | 7.51E-09 | 7.24E-10 | -6.48 | 11.5388141 | -8.42E-02 | 128293239 | 128293362 | NC_000002.11 |
| cg12667792 | 7.51E-09 | 7.24E-10 | -6.48 | 11.5387164 | -1.23E-01 | 71774656  | 71774779  | NC_000005.9  |
| cg13204435 | 7.51E-09 | 7.24E-10 | -6.48 | 11.5381003 | -6.35E-02 | 95731830  | 95731953  | NC_000008.10 |
| cg13357821 | 7.52E-09 | 7.25E-10 | -6.48 | 11.5371801 | -1.11E-01 | 101707668 | 101707791 | NC_000007.13 |
| cg08483980 | 7.52E-09 | 7.25E-10 | -6.48 | 11.5371165 | -7.14E-02 | 2434990   | 2435113   | NC_000019.9  |
| cg00071950 | 7.52E-09 | 7.25E-10 | -6.48 | 11.5370769 | -8.38E-02 | 10020882  | 10021005  | NC_000004.11 |
| cg20716932 | 7.52E-09 | 7.26E-10 | -6.48 | 11.5363144 | -6.52E-02 | 31331814  | 31331937  | NC_000020.10 |
| cg15144453 | 7.52E-09 | 7.26E-10 | -6.48 | 11.536216  | -1.21E-01 | 241395755 | 241395878 | NC_000002.11 |
| cg23718418 | 7.52E-09 | 7.26E-10 | -6.48 | 11.5361632 | -6.31E-02 | 33377739  | 33377862  | NC_000006.11 |
| cg26547359 | 7.54E-09 | 7.27E-10 | -6.48 | 11.5346729 | -5.10E-02 | 16859530  | 16859653  | NC_000010.10 |
| cg03329714 | 7.55E-09 | 7.28E-10 | -6.48 | 11.5334059 | -1.86E-01 | 7525578   | 7525701   | NC_000019.9  |
| cg19448269 | 7.55E-09 | 7.29E-10 | -6.48 | 11.5326366 | -3.84E-02 | 89790246  | 89790369  | NC_000006.11 |
| cg25202390 | 7.55E-09 | 7.29E-10 | -6.48 | 11.5326161 | -5.61E-02 | 99797622  | 99797745  | NC_000002.11 |
| cg02843503 | 7.56E-09 | 7.29E-10 | -6.48 | 11.5318864 | -4.44E-02 | 6865989   | 6866112   | NC_000007.13 |
| cg19991079 | 7.57E-09 | 7.30E-10 | -6.48 | 11.5301663 | -2.02E-02 | 74162458  | 74162581  | NC_000005.9  |
| cg20157095 | 7.58E-09 | 7.31E-10 | -6.48 | 11.5287284 | -1.17E-01 | 67780637  | 67780760  | NC_000011.9  |
| cg14571710 | 7.58E-09 | 7.32E-10 | -6.48 | 11.5285314 | -9.79E-02 | 30655896  | 30656019  | NC_000006.11 |
| cg24334335 | 7.58E-09 | 7.32E-10 | -6.48 | 11.5283677 | -4.64E-02 | 113050814 | 113050937 | NC_000001.10 |
| cg17389427 | 7.58E-09 | 7.32E-10 | -6.48 | 11.5282393 | -1.45E-01 | 129330986 | 129331109 | NC_000003.11 |
| cg01741836 | 7.58E-09 | 7.32E-10 | -6.48 | 11.5279173 | -1.20E-01 | 95996644  | 95996767  | NC_000005.9  |
| cg07264050 | 7.59E-09 | 7.33E-10 | -6.48 | 11.5272048 | -3.25E-02 | 48920858  | 48920981  | NC_000008.10 |
| cg09974566 | 7.59E-09 | 7.33E-10 | -6.48 | 11.5269779 | -3.65E-02 | 32150118  | 32150241  | NC_000022.10 |
| cg00580022 | 7.61E-09 | 7.35E-10 | -6.48 | 11.5239311 | -4.36E-02 | 17639482  | 17639605  | NC_000022.10 |
| cg01244015 | 7.62E-09 | 7.36E-10 | -6.48 | 11.522472  | -2.12E-01 | 225266843 | 225266966 | NC_000002.11 |
| cg10918171 | 7.65E-09 | 7.39E-10 | -6.48 | 11.5191837 | -1.41E-01 | 170601120 | 170601243 | NC_000006.11 |

|            |          |          |       |            |           |           |           |              |
|------------|----------|----------|-------|------------|-----------|-----------|-----------|--------------|
| cg00930306 | 7.65E-09 | 7.39E-10 | -6.48 | 11.518852  | -1.21E-01 | 155161221 | 155161344 | NC_000001.10 |
| cg02953529 | 7.65E-09 | 7.39E-10 | -6.48 | 11.5188417 | -1.15E-01 | 85406352  | 85406475  | NC_000016.9  |
| cg00892792 | 7.65E-09 | 7.39E-10 | -6.48 | 11.5185676 | -1.60E-01 | 142297584 | 142297707 | NC_000008.10 |
| cg02517372 | 7.66E-09 | 7.39E-10 | -6.48 | 11.518019  | -9.34E-02 | 6143736   | 6143859   | NC_000007.13 |
| cg05602356 | 7.66E-09 | 7.40E-10 | -6.48 | 11.5176781 | -1.62E-01 | 58334856  | 58334979  | NC_000005.9  |
| cg01862897 | 7.67E-09 | 7.41E-10 | -6.48 | 11.5163679 | -1.32E-01 | 70548168  | 70548291  | NC_000014.8  |
| cg17018661 | 7.67E-09 | 7.41E-10 | -6.48 | 11.5162151 | -7.49E-02 | 1480166   | 1480289   | NC_000011.9  |
| cg17069396 | 7.67E-09 | 7.41E-10 | -6.48 | 11.5158893 | -1.00E-01 | 2731102   | 2731225   | NC_000020.10 |
| cg16814416 | 7.68E-09 | 7.42E-10 | -6.48 | 11.5153382 | -1.22E-01 | 45272261  | 45272384  | NC_000001.10 |
| cg06987053 | 7.68E-09 | 7.42E-10 | -6.48 | 11.5149365 | -1.05E-01 | 87947779  | 87947902  | NC_000016.9  |
| cg13648344 | 7.68E-09 | 7.42E-10 | -6.48 | 11.5144046 | -1.20E-01 | 36328161  | 36328284  | NC_000009.11 |
| cg22902478 | 7.69E-09 | 7.43E-10 | -6.48 | 11.5130244 | -1.32E-02 | 67085251  | 67085374  | NC_000011.9  |
| cg08893817 | 7.73E-09 | 7.47E-10 | -6.48 | 11.508649  | -1.35E-01 | 114515500 | 114515623 | NC_000006.11 |
| cg04755561 | 7.73E-09 | 7.47E-10 | -6.48 | 11.508467  | -1.17E-01 | 3029641   | 3029764   | NC_000016.9  |
| cg01473602 | 7.73E-09 | 7.47E-10 | -6.48 | 11.5084447 | -1.15E-01 | 77257301  | 77257424  | NC_000012.11 |
| cg10997335 | 7.73E-09 | 7.47E-10 | -6.48 | 11.508297  | -1.24E-01 | 47009028  | 47009151  | NC_000010.10 |
| cg11721464 | 7.73E-09 | 7.47E-10 | -6.48 | 11.5076622 | -1.73E-01 | 42703763  | 42703886  | NC_000019.9  |
| cg13205516 | 7.74E-09 | 7.48E-10 | -6.48 | 11.507215  | -2.91E-02 | 56032364  | 56032487  | NC_000007.13 |
| cg23285573 | 7.74E-09 | 7.48E-10 | -6.48 | 11.5070246 | -2.76E-02 | 95064174  | 95064297  | NC_000007.13 |
| cg25074458 | 7.74E-09 | 7.48E-10 | -6.48 | 11.5066788 | -7.68E-02 | 9946388   | 9946511   | NC_000019.9  |
| cg10717480 | 7.75E-09 | 7.49E-10 | -6.48 | 11.5057452 | -3.66E-02 | 150336524 | 150336647 | NC_000006.11 |
| cg04764597 | 7.76E-09 | 7.50E-10 | -6.48 | 11.5042774 | -9.70E-02 | 63510947  | 63511070  | NC_000010.10 |
| cg12854186 | 7.76E-09 | 7.50E-10 | -6.47 | 11.5036145 | -1.16E-01 | 32805398  | 32805521  | NC_000006.11 |
| cg01958203 | 7.77E-09 | 7.51E-10 | -6.47 | 11.5031528 | -4.88E-02 | 99098094  | 99098217  | NC_000007.13 |
| cg18802567 | 7.77E-09 | 7.51E-10 | -6.47 | 11.5026518 | -4.11E-02 | 171433913 | 171434036 | NC_000005.9  |

|                 |          |          |       |            |           |           |           |              |
|-----------------|----------|----------|-------|------------|-----------|-----------|-----------|--------------|
| cg02770546      | 7.77E-09 | 7.51E-10 | -6.47 | 11.5023432 | -5.38E-02 | 99013242  | 99013365  | NC_000007.13 |
| cg22550229      | 7.77E-09 | 7.52E-10 | -6.47 | 11.5022099 | -1.98E-01 | 13138034  | 13138157  | NC_000018.9  |
| cg12589308      | 7.78E-09 | 7.52E-10 | -6.47 | 11.5016208 | -1.31E-01 | 1811438   | 1811561   | NC_000019.9  |
| cg02202411      | 7.78E-09 | 7.52E-10 | -6.47 | 11.5013924 | -1.39E-01 | 6338418   | 6338541   | NC_000005.9  |
| cg27485921      | 7.79E-09 | 7.53E-10 | -6.47 | 11.5004222 | -1.10E-01 | 46747379  | 46747502  | NC_000002.11 |
| cg17466946      | 7.79E-09 | 7.53E-10 | -6.47 | 11.5003888 | -1.18E-01 | 176739371 | 176739494 | NC_000005.9  |
| cg26244616      | 7.79E-09 | 7.53E-10 | -6.47 | 11.5001929 | -1.59E-01 | 27955722  | 27955845  | NC_000011.9  |
| cg26727231      | 7.80E-09 | 7.54E-10 | -6.47 | 11.4983375 | -1.01E-01 | 20153445  | 20153568  | NC_000008.10 |
| cg26937500      | 7.81E-09 | 7.55E-10 | -6.47 | 11.4974899 | -3.85E-02 | 3083338   | 3083461   | NC_000007.13 |
| ch.6.113866684R | 7.82E-09 | 7.57E-10 | -6.47 | 11.4955211 | -1.07E-01 | 113759991 | 113760114 | NC_000006.11 |
| cg21459816      | 7.82E-09 | 7.57E-10 | -6.47 | 11.4954235 | -1.26E-01 | 157588756 | 157588879 | NC_000007.13 |
| cg13396318      | 7.82E-09 | 7.57E-10 | -6.47 | 11.4952784 | -1.07E-01 | 19866974  | 19867097  | NC_000020.10 |
| cg23516824      | 7.83E-09 | 7.58E-10 | -6.47 | 11.4940934 | -8.90E-02 | 76134399  | 76134522  | NC_000005.9  |
| cg19459804      | 7.83E-09 | 7.58E-10 | -6.47 | 11.4939806 | -4.10E-02 | 32032443  | 32032566  | NC_000020.10 |
| cg10202994      | 7.83E-09 | 7.58E-10 | -6.47 | 11.4937605 | -3.82E-02 | 220071050 | 220071173 | NC_000002.11 |
| ch.2.16090152F  | 7.84E-09 | 7.58E-10 | -6.47 | 11.4932979 | -9.04E-02 | 16172701  | 16172824  | NC_000002.11 |
| cg02525989      | 7.85E-09 | 7.60E-10 | -6.47 | 11.4913616 | -1.20E-01 | 186211511 | 186211634 | NC_000003.11 |
| cg16371956      | 7.85E-09 | 7.60E-10 | -6.47 | 11.4912549 | -3.12E-02 | 77494124  | 77494247  | NC_000014.8  |
| cg08066417      | 7.87E-09 | 7.62E-10 | -6.47 | 11.4890854 | -8.02E-02 | 66413098  | 66413221  | NC_000016.9  |
| cg19002857      | 7.87E-09 | 7.62E-10 | -6.47 | 11.488778  | -3.84E-02 | 62389476  | 62389599  | NC_000011.9  |
| cg27612744      | 7.88E-09 | 7.63E-10 | -6.47 | 11.4873005 | -6.07E-02 | 16465883  | 16466006  | NC_000005.9  |
| cg27342781      | 7.88E-09 | 7.63E-10 | -6.47 | 11.4871084 | -1.70E-01 | 84566279  | 84566402  | NC_000016.9  |
| cg03503942      | 7.89E-09 | 7.64E-10 | -6.47 | 11.4857446 | -1.42E-01 | 1715296   | 1715419   | NC_000020.10 |
| cg00379713      | 7.91E-09 | 7.66E-10 | -6.47 | 11.4836371 | -1.44E-01 | 124940631 | 124940754 | NC_000011.9  |
| cg10149582      | 7.91E-09 | 7.66E-10 | -6.47 | 11.4831672 | -9.93E-02 | 23846456  | 23846579  | NC_000014.8  |

|               |          |          |       |            |           |           |           |              |
|---------------|----------|----------|-------|------------|-----------|-----------|-----------|--------------|
| cg19526685    | 7.92E-09 | 7.66E-10 | -6.47 | 11.4828861 | -1.85E-01 | 126963507 | 126963630 | NC_000008.10 |
| cg22017309    | 7.92E-09 | 7.67E-10 | -6.47 | 11.4827821 | -4.91E-02 | 61685499  | 61685622  | NC_000011.9  |
| cg09814633    | 7.92E-09 | 7.67E-10 | -6.47 | 11.4826936 | -1.40E-01 | 5969517   | 5969640   | NC_000006.11 |
| cg26916410    | 7.93E-09 | 7.68E-10 | -6.47 | 11.4812769 | -3.39E-02 | 89642016  | 89642139  | NC_000016.9  |
| cg11987534    | 7.94E-09 | 7.68E-10 | -6.47 | 11.4803261 | -3.40E-02 | 172960124 | 172960247 | NC_000002.11 |
| cg03528118    | 7.94E-09 | 7.69E-10 | -6.47 | 11.4799853 | -8.67E-02 | 133252013 | 133252136 | NC_000003.11 |
| cg26647332    | 7.95E-09 | 7.70E-10 | -6.47 | 11.4786608 | -1.40E-01 | 31073467  | 31073590  | NC_000010.10 |
| cg08368934    | 7.95E-09 | 7.70E-10 | -6.47 | 11.4783749 | -9.59E-02 | 57701455  | 57701578  | NC_000016.9  |
| cg20042338    | 7.96E-09 | 7.71E-10 | -6.47 | 11.4774823 | -1.63E-01 | 17444421  | 17444544  | NC_000019.9  |
| cg06497752    | 7.96E-09 | 7.71E-10 | -6.47 | 11.4770375 | -5.73E-02 | 61448534  | 61448657  | NC_000020.10 |
| cg21289015    | 7.97E-09 | 7.72E-10 | -6.47 | 11.4757787 | -4.40E-02 | 17566048  | 17566171  | NC_000011.9  |
| cg02265619    | 7.98E-09 | 7.73E-10 | -6.47 | 11.4745455 | -6.61E-02 | 84963674  | 84963797  | NC_000016.9  |
| cg07496457    | 7.99E-09 | 7.74E-10 | -6.47 | 11.4730253 | -1.15E-01 | 184929183 | 184929306 | NC_000004.11 |
| cg26588045    | 8.00E-09 | 7.75E-10 | -6.47 | 11.4716176 | -1.53E-01 | 41283090  | 41283213  | NC_000019.9  |
| cg05808815    | 8.00E-09 | 7.75E-10 | -6.47 | 11.4714545 | -5.45E-02 | 54666250  | 54666373  | NC_000001.10 |
| cg23819027    | 8.01E-09 | 7.77E-10 | -6.47 | 11.470001  | -1.21E-01 | 95799256  | 95799379  | NC_000004.11 |
| cg08583277    | 8.03E-09 | 7.78E-10 | -6.47 | 11.4682177 | -1.01E-01 | 89439933  | 89440056  | NC_000016.9  |
| cg04314652    | 8.03E-09 | 7.78E-10 | -6.47 | 11.4681579 | -1.12E-01 | 69597925  | 69598048  | NC_000016.9  |
| cg05168062    | 8.03E-09 | 7.78E-10 | -6.47 | 11.4678864 | -7.62E-02 | 170190029 | 170190152 | NC_000006.11 |
| ch.10.345533F | 8.04E-09 | 7.79E-10 | -6.47 | 11.4672557 | -6.14E-02 | 12228308  | 12228431  | NC_000010.10 |
| cg14337526    | 8.04E-09 | 7.79E-10 | -6.47 | 11.4669953 | -5.79E-02 | 98086635  | 98086758  | NC_000013.10 |
| cg09564361    | 8.04E-09 | 7.79E-10 | -6.47 | 11.4667492 | -1.78E-01 | 93537362  | 93537485  | NC_000008.10 |
| cg17221226    | 8.05E-09 | 7.80E-10 | -6.47 | 11.4655121 | -1.26E-01 | 64414192  | 64414315  | NC_000011.9  |
| cg00128654    | 8.05E-09 | 7.81E-10 | -6.47 | 11.4649893 | -2.32E-02 | 90798063  | 90798186  | NC_000014.8  |
| cg15208832    | 8.06E-09 | 7.82E-10 | -6.47 | 11.4635784 | -1.27E-01 | 65467997  | 65468120  | NC_000001.10 |

|              |          |          |       |            |           |           |           |              |
|--------------|----------|----------|-------|------------|-----------|-----------|-----------|--------------|
| ch.1.250064R | 8.07E-09 | 7.82E-10 | -6.47 | 11.4628401 | -1.91E-02 | 6704940   | 6705063   | NC_000001.10 |
| cg19193826   | 8.07E-09 | 7.82E-10 | -6.47 | 11.4627542 | -1.41E-01 | 82180611  | 82180734  | NC_000015.9  |
| cg20978937   | 8.07E-09 | 7.82E-10 | -6.47 | 11.4627206 | -6.40E-02 | 105399321 | 105399444 | NC_000014.8  |
| cg24339704   | 8.07E-09 | 7.83E-10 | -6.47 | 11.4622475 | -1.44E-01 | 2529022   | 2529145   | NC_000019.9  |
| cg08569678   | 8.08E-09 | 7.83E-10 | -6.47 | 11.4617792 | -2.14E-01 | 143781397 | 143781520 | NC_000008.10 |
| cg20113619   | 8.11E-09 | 7.87E-10 | -6.47 | 11.457173  | -1.22E-02 | 59489332  | 59489455  | NC_000017.10 |
| cg05226932   | 8.12E-09 | 7.88E-10 | -6.47 | 11.4558403 | -4.35E-02 | 37720696  | 37720819  | NC_000022.10 |
| cg03463994   | 8.13E-09 | 7.88E-10 | -6.47 | 11.4554786 | -1.58E-01 | 189046152 | 189046275 | NC_000002.11 |
| cg01629749   | 8.14E-09 | 7.90E-10 | -6.47 | 11.4534866 | -1.66E-01 | 959866    | 959989    | NC_000007.13 |
| cg17419299   | 8.15E-09 | 7.90E-10 | -6.47 | 11.4528213 | -1.62E-01 | 48876950  | 48877073  | NC_000013.10 |
| cg11810998   | 8.16E-09 | 7.91E-10 | -6.47 | 11.451702  | -9.70E-02 | 212819593 | 212819716 | NC_000001.10 |
| cg07735220   | 8.16E-09 | 7.91E-10 | -6.47 | 11.4515583 | -1.02E-01 | 65280591  | 65280714  | NC_000002.11 |
| cg17583844   | 8.17E-09 | 7.93E-10 | -6.46 | 11.4500264 | -1.63E-01 | 11519208  | 11519331  | NC_000008.10 |
| cg24714606   | 8.18E-09 | 7.93E-10 | -6.46 | 11.4490158 | -1.13E-01 | 98019621  | 98019744  | NC_000013.10 |
| cg05961145   | 8.18E-09 | 7.94E-10 | -6.46 | 11.4484457 | -2.55E-02 | 72158979  | 72159102  | NC_000016.9  |
| cg18944752   | 8.20E-09 | 7.96E-10 | -6.46 | 11.4464319 | -1.39E-01 | 3404372   | 3404495   | NC_000004.11 |
| cg16459276   | 8.21E-09 | 7.97E-10 | -6.46 | 11.4446441 | -1.49E-01 | 30433423  | 30433546  | NC_000006.11 |
| cg12426802   | 8.21E-09 | 7.97E-10 | -6.46 | 11.4444049 | -2.77E-02 | 25175293  | 25175416  | NC_000001.10 |
| cg17885481   | 8.22E-09 | 7.98E-10 | -6.46 | 11.4437802 | -1.20E-01 | 48906863  | 48906986  | NC_000004.11 |
| cg16175906   | 8.22E-09 | 7.98E-10 | -6.46 | 11.4434815 | -6.58E-02 | 31607374  | 31607497  | NC_000006.11 |
| cg21442419   | 8.23E-09 | 7.99E-10 | -6.46 | 11.4426433 | -1.79E-01 | 2182373   | 2182496   | NC_000001.10 |
| cg26771998   | 8.25E-09 | 8.01E-10 | -6.46 | 11.4395797 | -6.91E-02 | 75490334  | 75490457  | NC_000010.10 |
| cg02025737   | 8.27E-09 | 8.03E-10 | -6.46 | 11.4374545 | -1.79E-01 | 33384751  | 33384874  | NC_000015.9  |
| cg25536300   | 8.27E-09 | 8.03E-10 | -6.46 | 11.4369749 | -3.71E-02 | 797459    | 797582    | NC_000019.9  |
| cg16997314   | 8.28E-09 | 8.04E-10 | -6.46 | 11.436517  | -1.22E-01 | 35835030  | 35835153  | NC_000010.10 |



|            |          |          |       |            |           |           |           |              |
|------------|----------|----------|-------|------------|-----------|-----------|-----------|--------------|
| cg05364179 | 8.28E-09 | 8.04E-10 | -6.46 | 11.4364974 | -1.32E-01 | 760039    | 760162    | NC_000004.11 |
| cg15892280 | 8.28E-09 | 8.04E-10 | -6.46 | 11.4357087 | -1.34E-01 | 40180000  | 40180123  | NC_000021.8  |
| cg22209105 | 8.29E-09 | 8.05E-10 | -6.46 | 11.4349799 | -4.48E-02 | 16710841  | 16710964  | NC_000020.10 |
| cg21210690 | 8.29E-09 | 8.05E-10 | -6.46 | 11.4345069 | -7.30E-02 | 117314243 | 117314366 | NC_000011.9  |
| cg06510410 | 8.30E-09 | 8.06E-10 | -6.46 | 11.4334351 | -6.98E-02 | 196594695 | 196594818 | NC_000003.11 |
| cg03159409 | 8.31E-09 | 8.08E-10 | -6.46 | 11.4316914 | -1.30E-01 | 124779144 | 124779267 | NC_000012.11 |
| cg03971484 | 8.31E-09 | 8.08E-10 | -6.46 | 11.4316368 | -4.71E-02 | 148851764 | 148851887 | NC_000001.10 |
| cg08997445 | 8.32E-09 | 8.08E-10 | -6.46 | 11.431261  | -6.37E-02 | 57947026  | 57947149  | NC_000019.9  |
| cg01476739 | 8.32E-09 | 8.08E-10 | -6.46 | 11.4310907 | -6.29E-02 | 241853884 | 241854007 | NC_000002.11 |
| cg24555071 | 8.32E-09 | 8.09E-10 | -6.46 | 11.4305367 | -1.09E-01 | 1358016   | 1358139   | NC_000001.10 |
| cg21735068 | 8.32E-09 | 8.09E-10 | -6.46 | 11.4302783 | -1.67E-01 | 97975467  | 97975590  | NC_000008.10 |
| cg16389709 | 8.33E-09 | 8.09E-10 | -6.46 | 11.4295988 | -1.80E-02 | 47018180  | 47018303  | NC_000018.9  |
| cg10759936 | 8.33E-09 | 8.09E-10 | -6.46 | 11.4295291 | -1.55E-01 | 147011226 | 147011349 | NC_000001.10 |
| cg16514255 | 8.34E-09 | 8.10E-10 | -6.46 | 11.4287191 | -1.09E-01 | 85515594  | 85515717  | NC_000016.9  |
| cg05155704 | 8.34E-09 | 8.10E-10 | -6.46 | 11.4284981 | -6.35E-02 | 54711276  | 54711399  | NC_000006.11 |
| cg18483487 | 8.35E-09 | 8.11E-10 | -6.46 | 11.427173  | -8.05E-02 | 45208900  | 45209023  | NC_000003.11 |
| cg04729730 | 8.35E-09 | 8.12E-10 | -6.46 | 11.4267632 | -9.56E-02 | 69258477  | 69258600  | NC_000011.9  |
| cg25198656 | 8.36E-09 | 8.12E-10 | -6.46 | 11.4261635 | -3.15E-02 | 5013641   | 5013764   | NC_000007.13 |
| cg11327809 | 8.37E-09 | 8.13E-10 | -6.46 | 11.4250121 | -3.48E-02 | 101965577 | 101965700 | NC_000008.10 |
| cg20077343 | 8.37E-09 | 8.13E-10 | -6.46 | 11.4249516 | -9.08E-02 | 1036307   | 1036430   | NC_000011.9  |
| cg02739850 | 8.37E-09 | 8.13E-10 | -6.46 | 11.4246099 | -1.35E-01 | 86380880  | 86381003  | NC_000015.9  |
| cg16987552 | 8.37E-09 | 8.14E-10 | -6.46 | 11.4243468 | -1.23E-01 | 231015123 | 231015246 | NC_000001.10 |
| cg27351675 | 8.38E-09 | 8.15E-10 | -6.46 | 11.4229988 | -9.00E-02 | 16284307  | 16284430  | NC_000017.10 |
| cg11518454 | 8.39E-09 | 8.15E-10 | -6.46 | 11.4226249 | -1.43E-01 | 5286091   | 5286214   | NC_000001.10 |
| cg03678062 | 8.39E-09 | 8.15E-10 | -6.46 | 11.4224037 | -1.20E-01 | 149772716 | 149772839 | NC_000006.11 |

|            |          |          |       |            |           |           |           |              |
|------------|----------|----------|-------|------------|-----------|-----------|-----------|--------------|
| cg26162147 | 8.39E-09 | 8.15E-10 | -6.46 | 11.4222132 | -1.87E-01 | 113499731 | 113499854 | NC_000001.10 |
| cg02333706 | 8.40E-09 | 8.16E-10 | -6.46 | 11.4210484 | -1.13E-01 | 108478494 | 108478617 | NC_000006.11 |
| cg07696099 | 8.40E-09 | 8.17E-10 | -6.46 | 11.4207674 | -1.58E-01 | 133573809 | 133573932 | NC_000008.10 |
| cg07609780 | 8.41E-09 | 8.18E-10 | -6.46 | 11.4196012 | -9.87E-02 | 85343650  | 85343773  | NC_000016.9  |
| cg18787420 | 8.41E-09 | 8.18E-10 | -6.46 | 11.4194792 | -1.32E-01 | 30309466  | 30309589  | NC_000020.10 |
| cg00390484 | 8.43E-09 | 8.20E-10 | -6.46 | 11.4171759 | -1.39E-01 | 20019695  | 20019818  | NC_000022.10 |
| cg14997942 | 8.44E-09 | 8.21E-10 | -6.46 | 11.4161542 | -1.49E-01 | 22040307  | 22040430  | NC_000010.10 |
| cg08641935 | 8.45E-09 | 8.22E-10 | -6.46 | 11.4146939 | -6.59E-02 | 173575577 | 173575700 | NC_000002.11 |
| cg26390598 | 8.45E-09 | 8.22E-10 | -6.46 | 11.4146451 | -6.79E-02 | 41032396  | 41032519  | NC_000021.8  |
| cg20907471 | 8.45E-09 | 8.22E-10 | -6.46 | 11.4142764 | -1.22E-01 | 21679525  | 21679648  | NC_000020.10 |
| cg03224812 | 8.46E-09 | 8.23E-10 | -6.46 | 11.4127593 | -1.78E-01 | 3807404   | 3807527   | NC_000012.11 |
| cg14288326 | 8.47E-09 | 8.24E-10 | -6.46 | 11.4123089 | -1.31E-01 | 77042644  | 77042767  | NC_000007.13 |
| cg04083553 | 8.47E-09 | 8.24E-10 | -6.46 | 11.4118271 | -8.27E-02 | 128778575 | 128778698 | NC_000003.11 |
| cg08529269 | 8.48E-09 | 8.25E-10 | -6.46 | 11.4104582 | -6.79E-02 | 43514755  | 43514878  | NC_000001.10 |
| cg08102294 | 8.49E-09 | 8.26E-10 | -6.46 | 11.4092554 | -1.29E-01 | 13063918  | 13064041  | NC_000003.11 |
| cg15001056 | 8.50E-09 | 8.27E-10 | -6.46 | 11.4084801 | -9.18E-02 | 151143464 | 151143587 | NC_000003.11 |
| cg18885372 | 8.50E-09 | 8.27E-10 | -6.46 | 11.4081795 | -1.21E-01 | 95107019  | 95107142  | NC_000014.8  |
| cg08623535 | 8.50E-09 | 8.27E-10 | -6.46 | 11.4079821 | -1.16E-01 | 121414267 | 121414390 | NC_000005.9  |
| cg16735986 | 8.51E-09 | 8.28E-10 | -6.46 | 11.406821  | -1.05E-01 | 23765927  | 23766050  | NC_000016.9  |
| cg19303748 | 8.52E-09 | 8.29E-10 | -6.46 | 11.4061188 | -9.00E-02 | 844085    | 844208    | NC_000011.9  |
| cg25082487 | 8.52E-09 | 8.29E-10 | -6.46 | 11.4060645 | -5.32E-02 | 74091975  | 74092098  | NC_000010.10 |
| cg19717326 | 8.53E-09 | 8.30E-10 | -6.46 | 11.4047688 | -1.51E-01 | 54370016  | 54370139  | NC_000019.9  |
| cg10978034 | 8.53E-09 | 8.31E-10 | -6.46 | 11.4040349 | -1.30E-01 | 33129988  | 33130111  | NC_000006.11 |
| cg10361281 | 8.54E-09 | 8.31E-10 | -6.46 | 11.4034827 | -1.55E-01 | 24811256  | 24811379  | NC_000022.10 |
| cg08043998 | 8.54E-09 | 8.32E-10 | -6.46 | 11.4030535 | -1.19E-01 | 121890503 | 121890626 | NC_000012.11 |

|            |          |          |       |            |           |           |           |              |
|------------|----------|----------|-------|------------|-----------|-----------|-----------|--------------|
| cg22898783 | 8.55E-09 | 8.32E-10 | -6.46 | 11.4027018 | -1.14E-01 | 26204699  | 26204822  | NC_000002.11 |
| cg17566541 | 8.55E-09 | 8.32E-10 | -6.46 | 11.4026873 | -8.33E-02 | 1912287   | 1912410   | NC_000011.9  |
| cg10787919 | 8.55E-09 | 8.32E-10 | -6.46 | 11.402666  | -1.67E-01 | 83027658  | 83027781  | NC_000003.11 |
| cg15078838 | 8.55E-09 | 8.32E-10 | -6.46 | 11.4025907 | -1.18E-01 | 28114349  | 28114472  | NC_000002.11 |
| cg14968378 | 8.55E-09 | 8.32E-10 | -6.46 | 11.4025312 | -9.58E-02 | 176245283 | 176245406 | NC_000005.9  |
| cg22221831 | 8.55E-09 | 8.33E-10 | -6.46 | 11.4016866 | -1.24E-01 | 15039397  | 15039520  | NC_000012.11 |
| cg13882377 | 8.55E-09 | 8.33E-10 | -6.46 | 11.4016669 | -1.17E-01 | 126211811 | 126211934 | NC_000010.10 |
| cg23348723 | 8.58E-09 | 8.36E-10 | -6.46 | 11.39834   | -1.41E-01 | 31725748  | 31725871  | NC_000007.13 |
| cg21007342 | 8.59E-09 | 8.36E-10 | -6.45 | 11.3973052 | -1.04E-01 | 94917627  | 94917750  | NC_000014.8  |
| cg07156182 | 8.59E-09 | 8.37E-10 | -6.45 | 11.3970422 | -4.42E-02 | 122513738 | 122513861 | NC_000003.11 |
| cg20361540 | 8.60E-09 | 8.38E-10 | -6.45 | 11.3956566 | -3.20E-02 | 123380447 | 123380570 | NC_000012.11 |
| cg05998503 | 8.60E-09 | 8.38E-10 | -6.45 | 11.3955677 | -6.11E-02 | 4359947   | 4360070   | NC_000016.9  |
| cg14438453 | 8.61E-09 | 8.38E-10 | -6.45 | 11.3952033 | -1.28E-01 | 39786566  | 39786689  | NC_000006.11 |
| cg13508904 | 8.61E-09 | 8.39E-10 | -6.45 | 11.3947594 | -1.44E-01 | 131317330 | 131317453 | NC_000009.11 |
| cg26174398 | 8.61E-09 | 8.39E-10 | -6.45 | 11.3942074 | -9.93E-02 | 55590040  | 55590163  | NC_000014.8  |
| cg15693898 | 8.61E-09 | 8.39E-10 | -6.45 | 11.3941095 | -7.00E-02 | 183602556 | 183602679 | NC_000003.11 |
| cg15591803 | 8.62E-09 | 8.40E-10 | -6.45 | 11.3931316 | -1.31E-01 | 111733668 | 111733791 | NC_000001.10 |
| cg06191571 | 8.62E-09 | 8.40E-10 | -6.45 | 11.3930944 | -1.22E-01 | 54854019  | 54854142  | NC_000004.11 |
| cg15718222 | 8.63E-09 | 8.41E-10 | -6.45 | 11.3923453 | -8.87E-02 | 6483926   | 6484049   | NC_000001.10 |
| cg02744252 | 8.63E-09 | 8.41E-10 | -6.45 | 11.3921137 | -5.93E-02 | 20504155  | 20504278  | NC_000015.9  |
| cg27546012 | 8.63E-09 | 8.41E-10 | -6.45 | 11.3920365 | -1.48E-01 | 74684504  | 74684627  | NC_000017.10 |
| cg24688577 | 8.64E-09 | 8.42E-10 | -6.45 | 11.3912884 | -2.97E-02 | 48807332  | 48807455  | NC_000020.10 |
| cg23917009 | 8.64E-09 | 8.42E-10 | -6.45 | 11.3907337 | -1.22E-01 | 96813193  | 96813316  | NC_000008.10 |
| cg26945392 | 8.65E-09 | 8.43E-10 | -6.45 | 11.3896922 | -7.63E-02 | 71087092  | 71087215  | NC_000015.9  |
| cg18152809 | 8.65E-09 | 8.43E-10 | -6.45 | 11.3891431 | -3.17E-02 | 42249056  | 42249179  | NC_000008.10 |

|               |          |          |       |            |           |           |           |              |
|---------------|----------|----------|-------|------------|-----------|-----------|-----------|--------------|
| cg12875205    | 8.66E-09 | 8.45E-10 | -6.45 | 11.3878393 | -1.16E-01 | 157660296 | 157660419 | NC_000007.13 |
| cg02330500    | 8.67E-09 | 8.45E-10 | -6.45 | 11.3874934 | -5.31E-02 | 95731916  | 95732039  | NC_000014.8  |
| cg15679978    | 8.67E-09 | 8.45E-10 | -6.45 | 11.3872785 | -3.35E-02 | 119255801 | 119255924 | NC_000006.11 |
| cg15313325    | 8.68E-09 | 8.47E-10 | -6.45 | 11.3856205 | -5.58E-02 | 58869663  | 58869786  | NC_000011.9  |
| cg06516820    | 8.69E-09 | 8.47E-10 | -6.45 | 11.3851299 | -1.09E-01 | 139877292 | 139877415 | NC_000009.11 |
| cg23606925    | 8.69E-09 | 8.47E-10 | -6.45 | 11.3850547 | -1.15E-01 | 102471597 | 102471720 | NC_000010.10 |
| cg07044708    | 8.70E-09 | 8.48E-10 | -6.45 | 11.3837562 | -9.63E-02 | 75471034  | 75471157  | NC_000015.9  |
| cg00387156    | 8.71E-09 | 8.49E-10 | -6.45 | 11.3827421 | -3.79E-02 | 54975017  | 54975140  | NC_000019.9  |
| cg01763636    | 8.72E-09 | 8.50E-10 | -6.45 | 11.3816972 | -4.51E-02 | 132568565 | 132568688 | NC_000012.11 |
| cg10342908    | 8.72E-09 | 8.51E-10 | -6.45 | 11.3809723 | -1.58E-02 | 43415239  | 43415362  | NC_000015.9  |
| cg10074498    | 8.72E-09 | 8.51E-10 | -6.45 | 11.3807549 | -7.25E-02 | 85353838  | 85353961  | NC_000016.9  |
| cg10985430    | 8.73E-09 | 8.51E-10 | -6.45 | 11.3800909 | -1.26E-01 | 24607688  | 24607811  | NC_000013.10 |
| cg06522456    | 8.73E-09 | 8.52E-10 | -6.45 | 11.379765  | -4.83E-02 | 45311781  | 45311904  | NC_000019.9  |
| cg27447874    | 8.75E-09 | 8.53E-10 | -6.45 | 11.3780243 | -9.46E-02 | 165346015 | 165346138 | NC_000001.10 |
| cg06030190    | 8.75E-09 | 8.53E-10 | -6.45 | 11.3777221 | -2.96E-02 | 43029558  | 43029681  | NC_000015.9  |
| cg19133618    | 8.75E-09 | 8.54E-10 | -6.45 | 11.3770247 | -3.80E-02 | 22008970  | 22009093  | NC_000009.11 |
| cg06633978    | 8.76E-09 | 8.55E-10 | -6.45 | 11.376199  | -2.11E-01 | 75353806  | 75353929  | NC_000016.9  |
| cg07058377    | 8.76E-09 | 8.55E-10 | -6.45 | 11.376127  | -1.16E-01 | 2041773   | 2041896   | NC_000017.10 |
| cg26705930    | 8.77E-09 | 8.56E-10 | -6.45 | 11.3752764 | -7.71E-02 | 74833631  | 74833754  | NC_000015.9  |
| cg08266177    | 8.79E-09 | 8.58E-10 | -6.45 | 11.3722518 | -1.30E-01 | 94432162  | 94432285  | NC_000014.8  |
| cg03666350    | 8.80E-09 | 8.59E-10 | -6.45 | 11.3717285 | -9.49E-02 | 46662132  | 46662255  | NC_000002.11 |
| cg14830485    | 8.80E-09 | 8.59E-10 | -6.45 | 11.3712548 | -1.36E-01 | 21070832  | 21070955  | NC_000020.10 |
| ch.1.3947147F | 8.82E-09 | 8.61E-10 | -6.45 | 11.3687043 | -2.83E-02 | 203693763 | 203693886 | NC_000001.10 |
| cg10082841    | 8.84E-09 | 8.63E-10 | -6.45 | 11.3672784 | -1.27E-01 | 130689321 | 130689444 | NC_000009.11 |
| cg21646032    | 8.87E-09 | 8.66E-10 | -6.45 | 11.3638156 | -1.16E-01 | 25623905  | 25624028  | NC_000003.11 |

|                 |          |          |       |            |           |           |           |              |
|-----------------|----------|----------|-------|------------|-----------|-----------|-----------|--------------|
| cg12331932      | 8.87E-09 | 8.66E-10 | -6.45 | 11.3637073 | -1.60E-01 | 72462635  | 72462758  | NC_000017.10 |
| cg19235490      | 8.87E-09 | 8.66E-10 | -6.45 | 11.3634894 | -2.98E-02 | 201391216 | 201391339 | NC_000002.11 |
| ch.4.2115405R   | 8.87E-09 | 8.66E-10 | -6.45 | 11.3634537 | -4.88E-02 | 113531039 | 113531162 | NC_000004.11 |
| cg04107003      | 8.89E-09 | 8.68E-10 | -6.45 | 11.3605528 | -8.59E-02 | 1397297   | 1397420   | NC_000001.10 |
| ch.15.73674797F | 8.91E-09 | 8.70E-10 | -6.45 | 11.3592779 | -1.76E-02 | 75887742  | 75887865  | NC_000015.9  |
| cg22560317      | 8.91E-09 | 8.70E-10 | -6.45 | 11.3588671 | -2.24E-02 | 48730083  | 48730206  | NC_000020.10 |
| cg11310341      | 8.91E-09 | 8.70E-10 | -6.45 | 11.3587305 | -8.16E-02 | 38532129  | 38532252  | NC_000012.11 |
| cg16975959      | 8.91E-09 | 8.70E-10 | -6.45 | 11.3586866 | -3.55E-02 | 223184510 | 223184633 | NC_000002.11 |
| cg08439109      | 8.92E-09 | 8.71E-10 | -6.45 | 11.3572612 | -1.42E-01 | 46089344  | 46089467  | NC_000017.10 |
| cg03803818      | 8.92E-09 | 8.72E-10 | -6.45 | 11.357025  | -8.85E-02 | 110637414 | 110637537 | NC_000012.11 |
| cg21445398      | 8.93E-09 | 8.72E-10 | -6.45 | 11.3568671 | -1.25E-01 | 125425654 | 125425777 | NC_000002.11 |
| cg26001287      | 8.93E-09 | 8.72E-10 | -6.45 | 11.3567145 | -6.63E-02 | 111877753 | 111877876 | NC_000002.11 |
| cg06644669      | 8.94E-09 | 8.73E-10 | -6.45 | 11.3558019 | -1.69E-01 | 30653799  | 30653922  | NC_000006.11 |
| cg24319167      | 8.94E-09 | 8.73E-10 | -6.45 | 11.3557925 | -1.13E-01 | 10588483  | 10588606  | NC_000012.11 |
| cg23762465      | 8.94E-09 | 8.73E-10 | -6.45 | 11.3555924 | -1.10E-01 | 50360628  | 50360751  | NC_000022.10 |
| cg07714476      | 8.94E-09 | 8.73E-10 | -6.45 | 11.3555636 | -4.39E-02 | 6516817   | 6516940   | NC_000019.9  |
| cg14341034      | 8.94E-09 | 8.73E-10 | -6.45 | 11.3550499 | -8.41E-02 | 65709117  | 65709240  | NC_000011.9  |
| cg10902139      | 8.95E-09 | 8.74E-10 | -6.45 | 11.3543301 | -1.15E-01 | 75573071  | 75573194  | NC_000007.13 |
| cg19864130      | 8.95E-09 | 8.74E-10 | -6.45 | 11.3541005 | -2.70E-01 | 1132420   | 1132543   | NC_000019.9  |
| cg24099813      | 8.95E-09 | 8.74E-10 | -6.45 | 11.3540565 | -5.29E-02 | 39190279  | 39190402  | NC_000022.10 |
| cg20485144      | 8.95E-09 | 8.74E-10 | -6.45 | 11.3537922 | -7.42E-02 | 23886472  | 23886595  | NC_000001.10 |
| cg16685586      | 8.96E-09 | 8.75E-10 | -6.45 | 11.3531266 | -1.19E-01 | 23945686  | 23945809  | NC_000001.10 |
| cg04458094      | 8.96E-09 | 8.75E-10 | -6.45 | 11.3526975 | -3.09E-02 | 52831562  | 52831685  | NC_000001.10 |
| cg23209976      | 8.96E-09 | 8.76E-10 | -6.45 | 11.3523781 | -1.04E-01 | 138872772 | 138872895 | NC_000005.9  |
| cg04295297      | 8.96E-09 | 8.76E-10 | -6.45 | 11.352363  | -5.70E-02 | 135502378 | 135502501 | NC_000006.11 |

|            |          |          |       |            |           |           |           |              |
|------------|----------|----------|-------|------------|-----------|-----------|-----------|--------------|
| cg10193711 | 8.97E-09 | 8.76E-10 | -6.45 | 11.3518302 | -1.70E-01 | 22917797  | 22917920  | NC_000014.8  |
| cg13844011 | 8.97E-09 | 8.76E-10 | -6.45 | 11.3517303 | -2.18E-02 | 126242864 | 126242987 | NC_000003.11 |
| cg12221621 | 8.97E-09 | 8.77E-10 | -6.45 | 11.3515413 | -9.71E-02 | 9381317   | 9381440   | NC_000001.10 |
| cg04341324 | 8.99E-09 | 8.78E-10 | -6.45 | 11.3495104 | -7.54E-02 | 10590177  | 10590300  | NC_000008.10 |
| cg21620078 | 8.99E-09 | 8.79E-10 | -6.45 | 11.349165  | -8.45E-02 | 55307817  | 55307940  | NC_000005.9  |
| cg19697239 | 9.00E-09 | 8.80E-10 | -6.45 | 11.3479369 | -1.08E-01 | 752646    | 752769    | NC_000012.11 |
| cg04364764 | 9.00E-09 | 8.80E-10 | -6.45 | 11.3477043 | -1.72E-01 | 236106938 | 236107061 | NC_000001.10 |
| cg08324090 | 9.01E-09 | 8.81E-10 | -6.45 | 11.3468501 | -1.26E-01 | 7253189   | 7253312   | NC_000017.10 |
| cg02097616 | 9.01E-09 | 8.81E-10 | -6.45 | 11.3466069 | -1.34E-01 | 62675921  | 62676044  | NC_000017.10 |
| cg27207756 | 9.02E-09 | 8.81E-10 | -6.45 | 11.3462549 | -1.07E-01 | 1607291   | 1607414   | NC_000004.11 |
| cg00649606 | 9.03E-09 | 8.82E-10 | -6.45 | 11.3449924 | -6.08E-02 | 169455416 | 169455539 | NC_000001.10 |
| cg02400009 | 9.03E-09 | 8.82E-10 | -6.45 | 11.3449922 | -8.01E-02 | 151409709 | 151409832 | NC_000006.11 |
| cg03289602 | 9.04E-09 | 8.83E-10 | -6.44 | 11.3439272 | -2.63E-02 | 11708437  | 11708560  | NC_000019.9  |
| cg07098502 | 9.04E-09 | 8.84E-10 | -6.44 | 11.3431356 | -1.50E-01 | 85654157  | 85654280  | NC_000016.9  |
| cg07110860 | 9.05E-09 | 8.85E-10 | -6.44 | 11.3423652 | -7.17E-02 | 156811655 | 156811778 | NC_000007.13 |
| cg19660720 | 9.07E-09 | 8.86E-10 | -6.44 | 11.3404819 | -6.91E-02 | 25960296  | 25960419  | NC_000022.10 |
| cg17431952 | 9.07E-09 | 8.87E-10 | -6.44 | 11.3400199 | -1.38E-01 | 113806337 | 113806460 | NC_000005.9  |
| cg22052143 | 9.07E-09 | 8.87E-10 | -6.44 | 11.3394664 | -1.67E-01 | 78067856  | 78067979  | NC_000005.9  |
| cg02839306 | 9.09E-09 | 8.89E-10 | -6.44 | 11.3372721 | -5.29E-02 | 33165564  | 33165687  | NC_000019.9  |
| cg13609694 | 9.10E-09 | 8.90E-10 | -6.44 | 11.3368934 | -1.05E-01 | 131058235 | 131058358 | NC_000009.11 |
| cg05457684 | 9.10E-09 | 8.90E-10 | -6.44 | 11.3365744 | -1.35E-01 | 2919808   | 2919931   | NC_000011.9  |
| cg24749089 | 9.13E-09 | 8.93E-10 | -6.44 | 11.3333944 | -1.45E-01 | 153322823 | 153322946 | NC_000002.11 |
| cg05115862 | 9.13E-09 | 8.93E-10 | -6.44 | 11.3331473 | -1.14E-01 | 79439144  | 79439267  | NC_000017.10 |
| cg27287944 | 9.13E-09 | 8.93E-10 | -6.44 | 11.3330447 | -1.15E-01 | 1254435   | 1254558   | NC_000019.9  |
| cg26395382 | 9.14E-09 | 8.94E-10 | -6.44 | 11.3325451 | -1.38E-01 | 88728235  | 88728358  | NC_000010.10 |

|                |          |          |       |            |           |           |           |              |
|----------------|----------|----------|-------|------------|-----------|-----------|-----------|--------------|
| cg10582858     | 9.15E-09 | 8.95E-10 | -6.44 | 11.3305958 | -1.13E-01 | 121069511 | 121069634 | NC_000011.9  |
| cg09032314     | 9.17E-09 | 8.97E-10 | -6.44 | 11.3292149 | -1.07E-01 | 69426081  | 69426204  | NC_000008.10 |
| cg08240571     | 9.18E-09 | 8.99E-10 | -6.44 | 11.3271218 | -6.05E-02 | 87970654  | 87970777  | NC_000016.9  |
| cg27284120     | 9.19E-09 | 8.99E-10 | -6.44 | 11.3266673 | -1.62E-01 | 52302551  | 52302674  | NC_000019.9  |
| cg12609785     | 9.20E-09 | 9.00E-10 | -6.44 | 11.325682  | -1.32E-01 | 43660871  | 43660994  | NC_000017.10 |
| cg19718359     | 9.20E-09 | 9.00E-10 | -6.44 | 11.3255276 | -5.39E-02 | 111035897 | 111036020 | NC_000001.10 |
| cg07896832     | 9.20E-09 | 9.00E-10 | -6.44 | 11.3254934 | -1.80E-01 | 67975874  | 67975997  | NC_000008.10 |
| cg26865127     | 9.20E-09 | 9.01E-10 | -6.44 | 11.3248303 | -1.34E-02 | 51785378  | 51785501  | NC_000012.11 |
| cg02009311     | 9.22E-09 | 9.02E-10 | -6.44 | 11.3234939 | -8.42E-02 | 79886614  | 79886737  | NC_000017.10 |
| cg04757410     | 9.22E-09 | 9.03E-10 | -6.44 | 11.3228209 | -5.70E-02 | 51195437  | 51195560  | NC_000022.10 |
| cg24212268     | 9.22E-09 | 9.03E-10 | -6.44 | 11.322803  | -1.49E-01 | 29936149  | 29936272  | NC_000010.10 |
| cg20108693     | 9.22E-09 | 9.03E-10 | -6.44 | 11.3226324 | -9.93E-02 | 143823809 | 143823932 | NC_000008.10 |
| cg14788334     | 9.22E-09 | 9.03E-10 | -6.44 | 11.3225159 | -9.86E-02 | 26606110  | 26606233  | NC_000001.10 |
| cg25214914     | 9.22E-09 | 9.03E-10 | -6.44 | 11.32247   | -9.51E-02 | 155910523 | 155910646 | NC_000001.10 |
| cg11681219     | 9.23E-09 | 9.04E-10 | -6.44 | 11.3216449 | -5.38E-02 | 235291909 | 235292032 | NC_000001.10 |
| cg24256991     | 9.23E-09 | 9.04E-10 | -6.44 | 11.321318  | -2.98E-02 | 220267933 | 220268056 | NC_000001.10 |
| cg18311633     | 9.24E-09 | 9.05E-10 | -6.44 | 11.3204546 | -9.65E-02 | 155309539 | 155309662 | NC_000002.11 |
| cg05329317     | 9.25E-09 | 9.06E-10 | -6.44 | 11.3192037 | -1.06E-01 | 30126595  | 30126718  | NC_000016.9  |
| cg10952663     | 9.25E-09 | 9.06E-10 | -6.44 | 11.3191845 | -3.97E-02 | 38073334  | 38073457  | NC_000022.10 |
| cg07187855     | 9.25E-09 | 9.06E-10 | -6.44 | 11.3189542 | -9.95E-02 | 30854161  | 30854284  | NC_000006.11 |
| cg12973479     | 9.26E-09 | 9.06E-10 | -6.44 | 11.3188455 | -8.13E-02 | 33372401  | 33372524  | NC_000008.10 |
| ch.1.32283278R | 9.27E-09 | 9.07E-10 | -6.44 | 11.3176543 | -5.33E-02 | 32510691  | 32510814  | NC_000001.10 |
| cg20628942     | 9.27E-09 | 9.08E-10 | -6.44 | 11.3173417 | -1.05E-01 | 114171501 | 114171624 | NC_000013.10 |
| cg01540203     | 9.27E-09 | 9.08E-10 | -6.44 | 11.3172492 | -1.20E-01 | 80662407  | 80662530  | NC_000017.10 |
| cg27581493     | 9.27E-09 | 9.08E-10 | -6.44 | 11.3170955 | -1.34E-01 | 139178598 | 139178721 | NC_000005.9  |

|            |          |          |       |            |           |           |           |              |
|------------|----------|----------|-------|------------|-----------|-----------|-----------|--------------|
| cg09672452 | 9.29E-09 | 9.09E-10 | -6.44 | 11.3154399 | -1.66E-01 | 55665236  | 55665359  | NC_000015.9  |
| cg03367679 | 9.29E-09 | 9.10E-10 | -6.44 | 11.3152934 | -5.69E-02 | 38183553  | 38183676  | NC_000017.10 |
| cg10018862 | 9.29E-09 | 9.10E-10 | -6.44 | 11.3145585 | -9.25E-02 | 100633029 | 100633152 | NC_000014.8  |
| cg03217460 | 9.30E-09 | 9.11E-10 | -6.44 | 11.3134272 | -2.54E-02 | 70117060  | 70117183  | NC_000011.9  |
| cg18121420 | 9.31E-09 | 9.12E-10 | -6.44 | 11.3131568 | -1.96E-02 | 172199013 | 172199136 | NC_000005.9  |
| cg19710326 | 9.31E-09 | 9.12E-10 | -6.44 | 11.3129763 | -1.22E-01 | 25609973  | 25610096  | NC_000002.11 |
| cg16987876 | 9.31E-09 | 9.13E-10 | -6.44 | 11.3121246 | -9.51E-02 | 543909    | 544032    | NC_000019.9  |
| cg00112314 | 9.32E-09 | 9.13E-10 | -6.44 | 11.3119106 | -1.19E-01 | 134607427 | 134607550 | NC_000010.10 |
| cg19358608 | 9.32E-09 | 9.13E-10 | -6.44 | 11.3117336 | -1.28E-01 | 1924565   | 1924688   | NC_000020.10 |
| cg04140754 | 9.32E-09 | 9.13E-10 | -6.44 | 11.3113444 | -6.51E-02 | 124196328 | 124196451 | NC_000012.11 |
| cg21790314 | 9.32E-09 | 9.13E-10 | -6.44 | 11.3111945 | -1.37E-01 | 955469    | 955592    | NC_000004.11 |
| cg06908458 | 9.33E-09 | 9.14E-10 | -6.44 | 11.3108502 | -1.22E-01 | 51818350  | 51818473  | NC_000012.11 |
| cg27603366 | 9.33E-09 | 9.14E-10 | -6.44 | 11.310595  | -3.61E-02 | 173037734 | 173037857 | NC_000002.11 |
| cg17590003 | 9.33E-09 | 9.15E-10 | -6.44 | 11.3099244 | -1.14E-01 | 25676574  | 25676697  | NC_000017.10 |
| cg18519694 | 9.33E-09 | 9.15E-10 | -6.44 | 11.3098747 | -3.83E-02 | 118307647 | 118307770 | NC_000011.9  |
| cg02047803 | 9.34E-09 | 9.15E-10 | -6.44 | 11.3096453 | -1.09E-01 | 141018369 | 141018492 | NC_000005.9  |
| cg27512018 | 9.34E-09 | 9.15E-10 | -6.44 | 11.3093746 | -6.30E-02 | 11039304  | 11039427  | NC_000019.9  |
| cg10490795 | 9.36E-09 | 9.17E-10 | -6.44 | 11.3073096 | -8.61E-02 | 150035893 | 150036016 | NC_000005.9  |
| cg04236540 | 9.36E-09 | 9.18E-10 | -6.44 | 11.3067587 | -9.35E-02 | 107148807 | 107148930 | NC_000003.11 |
| cg23642833 | 9.38E-09 | 9.20E-10 | -6.44 | 11.304385  | -6.54E-02 | 37262611  | 37262734  | NC_000019.9  |
| cg23792978 | 9.41E-09 | 9.22E-10 | -6.44 | 11.3020709 | -1.03E-01 | 72385698  | 72385821  | NC_000011.9  |
| cg22546151 | 9.41E-09 | 9.22E-10 | -6.44 | 11.3018038 | -7.60E-02 | 34958412  | 34958535  | NC_000005.9  |
| cg02463844 | 9.41E-09 | 9.22E-10 | -6.44 | 11.3016598 | -1.07E-01 | 88152170  | 88152293  | NC_000016.9  |
| cg26480675 | 9.41E-09 | 9.23E-10 | -6.44 | 11.3013316 | -5.35E-02 | 66461075  | 66461198  | NC_000016.9  |
| cg00547445 | 9.41E-09 | 9.23E-10 | -6.44 | 11.3011255 | -4.67E-02 | 95326291  | 95326414  | NC_000010.10 |



|            |          |          |       |            |           |           |           |              |
|------------|----------|----------|-------|------------|-----------|-----------|-----------|--------------|
| cg20751398 | 9.41E-09 | 9.23E-10 | -6.44 | 11.3010813 | -1.30E-01 | 126660703 | 126660826 | NC_000011.9  |
| cg03362840 | 9.42E-09 | 9.24E-10 | -6.44 | 11.2999694 | -7.38E-02 | 134464295 | 134464418 | NC_000007.13 |
| cg05187508 | 9.44E-09 | 9.25E-10 | -6.44 | 11.2983216 | -7.82E-02 | 29974306  | 29974429  | NC_000006.11 |
| cg17597419 | 9.45E-09 | 9.27E-10 | -6.44 | 11.2971942 | -2.55E-02 | 204380949 | 204381072 | NC_000001.10 |
| cg05968270 | 9.46E-09 | 9.28E-10 | -6.44 | 11.2955212 | -4.34E-02 | 65533502  | 65533625  | NC_000001.10 |
| cg27577993 | 9.48E-09 | 9.29E-10 | -6.44 | 11.2943608 | -8.19E-02 | 151454795 | 151454918 | NC_000007.13 |
| cg01011943 | 9.48E-09 | 9.29E-10 | -6.44 | 11.2940923 | -5.41E-02 | 43690622  | 43690745  | NC_000019.9  |
| cg10507121 | 9.48E-09 | 9.30E-10 | -6.44 | 11.2937533 | -2.69E-02 | 118324332 | 118324455 | NC_000005.9  |
| cg00500729 | 9.49E-09 | 9.30E-10 | -6.44 | 11.2930855 | -3.67E-02 | 46708178  | 46708301  | NC_000021.8  |
| cg21792983 | 9.49E-09 | 9.31E-10 | -6.44 | 11.2929866 | -9.61E-02 | 25818940  | 25819063  | NC_000004.11 |
| cg03357952 | 9.49E-09 | 9.31E-10 | -6.44 | 11.292692  | -9.90E-02 | 1027974   | 1028097   | NC_000004.11 |
| cg06538426 | 9.50E-09 | 9.31E-10 | -6.44 | 11.292114  | -9.32E-02 | 16491125  | 16491248  | NC_000001.10 |
| cg20155035 | 9.51E-09 | 9.32E-10 | -6.44 | 11.2910361 | -1.91E-01 | 235091106 | 235091229 | NC_000001.10 |
| cg23447569 | 9.51E-09 | 9.32E-10 | -6.43 | 11.2909782 | -1.37E-01 | 62315320  | 62315443  | NC_000011.9  |
| cg27180974 | 9.52E-09 | 9.34E-10 | -6.43 | 11.2892886 | -1.35E-01 | 4932189   | 4932312   | NC_000006.11 |
| cg04978471 | 9.54E-09 | 9.36E-10 | -6.43 | 11.2868435 | -8.46E-02 | 43460569  | 43460692  | NC_000006.11 |
| cg02992639 | 9.55E-09 | 9.37E-10 | -6.43 | 11.2862835 | -8.78E-02 | 155098827 | 155098950 | NC_000001.10 |
| cg16304656 | 9.57E-09 | 9.39E-10 | -6.43 | 11.2843444 | -2.05E-01 | 641337    | 641460    | NC_000007.13 |
| cg02404377 | 9.58E-09 | 9.40E-10 | -6.43 | 11.2830703 | -1.09E-01 | 20043971  | 20044094  | NC_000011.9  |
| cg19874145 | 9.58E-09 | 9.40E-10 | -6.43 | 11.2829551 | -6.55E-02 | 89029076  | 89029199  | NC_000014.8  |
| cg20060632 | 9.58E-09 | 9.40E-10 | -6.43 | 11.2826618 | -1.33E-01 | 21467375  | 21467498  | NC_000014.8  |
| cg00248454 | 9.60E-09 | 9.43E-10 | -6.43 | 11.2803908 | -7.80E-02 | 6505421   | 6505544   | NC_000001.10 |
| cg02423534 | 9.61E-09 | 9.43E-10 | -6.43 | 11.2795838 | -8.45E-02 | 49160180  | 49160303  | NC_000012.11 |
| cg13901134 | 9.63E-09 | 9.45E-10 | -6.43 | 11.2779974 | -1.70E-02 | 130923133 | 130923256 | NC_000009.11 |
| cg19157329 | 9.63E-09 | 9.45E-10 | -6.43 | 11.2776631 | -1.25E-01 | 247524592 | 247524715 | NC_000001.10 |

|               |          |          |       |            |           |           |           |              |
|---------------|----------|----------|-------|------------|-----------|-----------|-----------|--------------|
| cg19392379    | 9.63E-09 | 9.46E-10 | -6.43 | 11.2770469 | -8.88E-02 | 123909426 | 123909549 | NC_000010.10 |
| cg06572563    | 9.64E-09 | 9.46E-10 | -6.43 | 11.2767961 | -1.29E-01 | 1132966   | 1133089   | NC_000019.9  |
| cg15133734    | 9.64E-09 | 9.46E-10 | -6.43 | 11.2765572 | -7.97E-02 | 48728113  | 48728236  | NC_000020.10 |
| cg23411065    | 9.67E-09 | 9.50E-10 | -6.43 | 11.2729679 | -1.92E-02 | 39705458  | 39705581  | NC_000017.10 |
| cg06355652    | 9.68E-09 | 9.51E-10 | -6.43 | 11.2721114 | -1.14E-01 | 33725105  | 33725228  | NC_000011.9  |
| cg06649044    | 9.69E-09 | 9.51E-10 | -6.43 | 11.2715387 | -5.69E-02 | 62680970  | 62681093  | NC_000020.10 |
| cg04993276    | 9.69E-09 | 9.52E-10 | -6.43 | 11.2707918 | -1.24E-01 | 65730339  | 65730462  | NC_000001.10 |
| cg07205203    | 9.70E-09 | 9.52E-10 | -6.43 | 11.2703122 | -1.58E-01 | 28940400  | 28940523  | NC_000002.11 |
| cg14761514    | 9.70E-09 | 9.53E-10 | -6.43 | 11.2698391 | -1.40E-01 | 114714301 | 114714424 | NC_000012.11 |
| cg15371732    | 9.72E-09 | 9.55E-10 | -6.43 | 11.2680451 | -5.92E-02 | 78194151  | 78194274  | NC_000017.10 |
| cg24513480    | 9.72E-09 | 9.55E-10 | -6.43 | 11.2674813 | -1.13E-01 | 181428046 | 181428169 | NC_000003.11 |
| cg11765205    | 9.72E-09 | 9.55E-10 | -6.43 | 11.2674689 | -1.24E-01 | 50202547  | 50202670  | NC_000013.10 |
| cg07694975    | 9.73E-09 | 9.55E-10 | -6.43 | 11.2673551 | -8.94E-02 | 6756671   | 6756794   | NC_000012.11 |
| cg03622263    | 9.73E-09 | 9.55E-10 | -6.43 | 11.2670787 | -1.40E-01 | 126101308 | 126101431 | NC_000009.11 |
| cg00816609    | 9.74E-09 | 9.57E-10 | -6.43 | 11.2658041 | -1.07E-01 | 13679471  | 13679594  | NC_000003.11 |
| cg01697163    | 9.74E-09 | 9.57E-10 | -6.43 | 11.2653177 | -1.17E-01 | 38035301  | 38035424  | NC_000022.10 |
| cg10154122    | 9.76E-09 | 9.59E-10 | -6.43 | 11.2635024 | -3.72E-02 | 38754855  | 38754978  | NC_000019.9  |
| cg26180843    | 9.77E-09 | 9.60E-10 | -6.43 | 11.2624166 | -8.08E-02 | 170557102 | 170557225 | NC_000006.11 |
| cg14037141    | 9.78E-09 | 9.61E-10 | -6.43 | 11.2616225 | -5.48E-02 | 134277574 | 134277697 | NC_000010.10 |
| cg21088488    | 9.78E-09 | 9.61E-10 | -6.43 | 11.2615724 | -9.72E-02 | 44105721  | 44105844  | NC_000007.13 |
| cg17372841    | 9.81E-09 | 9.64E-10 | -6.43 | 11.2583461 | -5.71E-02 | 99013357  | 99013480  | NC_000007.13 |
| cg17748167    | 9.82E-09 | 9.65E-10 | -6.43 | 11.2575086 | -5.08E-02 | 31769917  | 31770040  | NC_000001.10 |
| ch.3.2967002F | 9.82E-09 | 9.65E-10 | -6.43 | 11.2574633 | -3.97E-02 | 150304457 | 150304580 | NC_000003.11 |
| cg26875135    | 9.82E-09 | 9.66E-10 | -6.43 | 11.2568041 | -9.18E-02 | 1221192   | 1221315   | NC_000007.13 |
| cg23305408    | 9.86E-09 | 9.69E-10 | -6.43 | 11.2529251 | -1.04E-01 | 32169701  | 32169824  | NC_000001.10 |

|            |          |          |       |            |           |           |           |              |
|------------|----------|----------|-------|------------|-----------|-----------|-----------|--------------|
| cg00313094 | 9.87E-09 | 9.70E-10 | -6.43 | 11.2523015 | -1.43E-01 | 65603587  | 65603710  | NC_000008.10 |
| cg17644557 | 9.87E-09 | 9.70E-10 | -6.43 | 11.2521618 | -1.22E-01 | 86159103  | 86159226  | NC_000006.11 |
| cg16990557 | 9.88E-09 | 9.71E-10 | -6.43 | 11.2512709 | -1.27E-01 | 17725431  | 17725554  | NC_000006.11 |
| cg22789769 | 9.88E-09 | 9.71E-10 | -6.43 | 11.2512282 | -1.12E-01 | 44789589  | 44789712  | NC_000010.10 |
| cg24881834 | 9.88E-09 | 9.72E-10 | -6.43 | 11.250619  | -5.30E-02 | 84140997  | 84141120  | NC_000006.11 |
| cg14396066 | 9.88E-09 | 9.72E-10 | -6.43 | 11.2505518 | -5.39E-02 | 142010253 | 142010376 | NC_000008.10 |
| cg13583272 | 9.89E-09 | 9.72E-10 | -6.43 | 11.2498254 | -1.22E-01 | 739376    | 739499    | NC_000017.10 |
| cg13389652 | 9.89E-09 | 9.73E-10 | -6.43 | 11.249733  | -8.74E-02 | 3481985   | 3482108   | NC_000019.9  |
| cg03452174 | 9.90E-09 | 9.74E-10 | -6.43 | 11.248574  | -1.63E-01 | 27045113  | 27045236  | NC_000017.10 |
| cg17373345 | 9.91E-09 | 9.74E-10 | -6.43 | 11.2479167 | -1.08E-01 | 66946188  | 66946311  | NC_000008.10 |
| cg27454316 | 9.91E-09 | 9.75E-10 | -6.43 | 11.2476225 | -9.90E-02 | 4482158   | 4482281   | NC_000004.11 |
| cg09976157 | 9.91E-09 | 9.75E-10 | -6.43 | 11.247385  | -1.49E-01 | 27816164  | 27816287  | NC_000006.11 |
| cg05940122 | 9.93E-09 | 9.76E-10 | -6.43 | 11.2461212 | -1.31E-01 | 231770489 | 231770612 | NC_000002.11 |
| cg14175438 | 9.93E-09 | 9.76E-10 | -6.43 | 11.2459436 | -7.29E-02 | 121036729 | 121036852 | NC_000007.13 |
| cg26596719 | 9.93E-09 | 9.77E-10 | -6.43 | 11.2456452 | -1.57E-01 | 142986429 | 142986552 | NC_000007.13 |
| cg03065459 | 9.95E-09 | 9.79E-10 | -6.43 | 11.2434251 | -1.03E-01 | 3059773   | 3059896   | NC_000016.9  |
| cg05202804 | 9.95E-09 | 9.79E-10 | -6.43 | 11.2432217 | -9.90E-02 | 11484815  | 11484938  | NC_000019.9  |
| cg10343364 | 9.96E-09 | 9.79E-10 | -6.43 | 11.2428667 | -1.19E-01 | 3559568   | 3559691   | NC_000016.9  |
| cg08613122 | 9.97E-09 | 9.81E-10 | -6.43 | 11.2416962 | -8.92E-02 | 597568    | 597691    | NC_000007.13 |
| cg08540118 | 9.97E-09 | 9.81E-10 | -6.43 | 11.2416517 | -2.43E-02 | 13001935  | 13002058  | NC_000019.9  |
| cg20953257 | 9.99E-09 | 9.82E-10 | -6.43 | 11.239753  | -8.16E-02 | 11289349  | 11289472  | NC_000019.9  |
| cg21493483 | 9.99E-09 | 9.83E-10 | -6.43 | 11.2391201 | -7.31E-02 | 236044744 | 236044867 | NC_000002.11 |
| cg26749518 | 1.00E-08 | 9.84E-10 | -6.43 | 11.238405  | -1.55E-01 | 51506165  | 51506288  | NC_000019.9  |
| cg18013792 | 1.00E-08 | 9.85E-10 | -6.42 | 11.2377234 | -1.51E-01 | 2103069   | 2103192   | NC_000007.13 |
| cg25837984 | 1.00E-08 | 9.87E-10 | -6.42 | 11.235372  | -6.44E-02 | 167372481 | 167372604 | NC_000003.11 |

|            |          |          |       |            |           |           |           |              |
|------------|----------|----------|-------|------------|-----------|-----------|-----------|--------------|
| cg12570246 | 1.00E-08 | 9.88E-10 | -6.42 | 11.2342373 | -1.41E-01 | 36959356  | 36959479  | NC_000007.13 |
| cg19408207 | 1.00E-08 | 9.88E-10 | -6.42 | 11.2340938 | -1.46E-01 | 178755197 | 178755320 | NC_000003.11 |
| cg26269653 | 1.00E-08 | 9.88E-10 | -6.42 | 11.2338838 | -2.99E-02 | 154794018 | 154794141 | NC_000007.13 |
| cg26809043 | 1.00E-08 | 9.89E-10 | -6.42 | 11.2333296 | -1.07E-01 | 34285529  | 34285652  | NC_000011.9  |
| cg02074763 | 1.01E-08 | 9.90E-10 | -6.42 | 11.2326153 | -1.15E-01 | 11825795  | 11825918  | NC_000010.10 |
| cg01623261 | 1.01E-08 | 9.90E-10 | -6.42 | 11.2323581 | -1.53E-01 | 79377850  | 79377973  | NC_000017.10 |
| cg25239704 | 1.01E-08 | 9.91E-10 | -6.42 | 11.231445  | -3.62E-02 | 72195968  | 72196091  | NC_000017.10 |
| cg26427115 | 1.01E-08 | 9.91E-10 | -6.42 | 11.2313884 | -4.83E-02 | 26785891  | 26786014  | NC_000002.11 |
| cg21962603 | 1.01E-08 | 9.93E-10 | -6.42 | 11.2291157 | -7.64E-02 | 49583112  | 49583235  | NC_000012.11 |
| cg13430053 | 1.01E-08 | 9.94E-10 | -6.42 | 11.228696  | -1.20E-01 | 150932623 | 150932746 | NC_000002.11 |
| cg24889021 | 1.01E-08 | 9.94E-10 | -6.42 | 11.2283517 | -2.34E-02 | 36355343  | 36355466  | NC_000006.11 |
| cg25751172 | 1.01E-08 | 9.94E-10 | -6.42 | 11.2283407 | -9.05E-02 | 54074967  | 54075090  | NC_000010.10 |
| cg05777061 | 1.01E-08 | 9.95E-10 | -6.42 | 11.2277842 | -7.82E-02 | 51505001  | 51505124  | NC_000019.9  |
| cg05437648 | 1.01E-08 | 9.95E-10 | -6.42 | 11.227272  | -1.34E-01 | 43778670  | 43778793  | NC_000003.11 |
| cg12007596 | 1.01E-08 | 9.96E-10 | -6.42 | 11.2266886 | -1.02E-01 | 6756678   | 6756801   | NC_000012.11 |
| cg18546384 | 1.01E-08 | 9.99E-10 | -6.42 | 11.2232886 | -1.27E-01 | 2077057   | 2077180   | NC_000007.13 |
| cg27287254 | 1.02E-08 | 1.00E-09 | -6.42 | 11.2227021 | -8.85E-02 | 33160067  | 33160190  | NC_000006.11 |
| cg03798915 | 1.02E-08 | 1.00E-09 | -6.42 | 11.2220281 | -7.10E-02 | 61447110  | 61447233  | NC_000020.10 |
| cg21919820 | 1.02E-08 | 1.00E-09 | -6.42 | 11.2216585 | -1.07E-01 | 28081543  | 28081666  | NC_000007.13 |
| cg24251218 | 1.02E-08 | 1.00E-09 | -6.42 | 11.2214447 | -1.27E-01 | 10347429  | 10347552  | NC_000011.9  |
| cg13180005 | 1.02E-08 | 1.00E-09 | -6.42 | 11.2212884 | -3.70E-02 | 182360683 | 182360806 | NC_000001.10 |
| cg22442895 | 1.02E-08 | 1.00E-09 | -6.42 | 11.220905  | -6.15E-02 | 30069213  | 30069336  | NC_000006.11 |
| cg02921697 | 1.02E-08 | 1.00E-09 | -6.42 | 11.2206884 | -6.01E-02 | 104629413 | 104629536 | NC_000010.10 |
| cg04878851 | 1.02E-08 | 1.00E-09 | -6.42 | 11.2206615 | -6.12E-02 | 76778451  | 76778574  | NC_000017.10 |
| cg26529645 | 1.02E-08 | 1.00E-09 | -6.42 | 11.2206028 | -6.57E-02 | 22612262  | 22612385  | NC_000001.10 |

|            |          |          |       |            |           |           |           |              |
|------------|----------|----------|-------|------------|-----------|-----------|-----------|--------------|
| cg10324158 | 1.02E-08 | 1.00E-09 | -6.42 | 11.2201997 | -8.26E-02 | 45067713  | 45067836  | NC_000003.11 |
| cg08409225 | 1.02E-08 | 1.00E-09 | -6.42 | 11.2192021 | -8.94E-02 | 56617737  | 56617860  | NC_000012.11 |
| cg19615059 | 1.02E-08 | 1.00E-09 | -6.42 | 11.2189191 | -4.43E-02 | 110270919 | 110271042 | NC_000012.11 |
| cg21992501 | 1.02E-08 | 1.00E-09 | -6.42 | 11.2186395 | -6.40E-02 | 32872637  | 32872760  | NC_000002.11 |
| cg17984007 | 1.02E-08 | 1.01E-09 | -6.42 | 11.2166629 | -1.30E-01 | 201998638 | 201998761 | NC_000001.10 |
| cg05931551 | 1.02E-08 | 1.01E-09 | -6.42 | 11.2155009 | -1.03E-01 | 52892210  | 52892333  | NC_000001.10 |
| cg07006564 | 1.02E-08 | 1.01E-09 | -6.42 | 11.2151859 | -3.74E-02 | 62360790  | 62360913  | NC_000015.9  |
| cg09703323 | 1.02E-08 | 1.01E-09 | -6.42 | 11.2143015 | -1.11E-01 | 65197876  | 65197999  | NC_000011.9  |
| cg15947007 | 1.02E-08 | 1.01E-09 | -6.42 | 11.2139423 | -5.13E-02 | 64023509  | 64023632  | NC_000007.13 |
| cg21023001 | 1.02E-08 | 1.01E-09 | -6.42 | 11.2133373 | -1.16E-01 | 23067088  | 23067211  | NC_000020.10 |
| cg14848555 | 1.02E-08 | 1.01E-09 | -6.42 | 11.2132638 | -3.36E-02 | 171750797 | 171750920 | NC_000001.10 |
| cg26204448 | 1.02E-08 | 1.01E-09 | -6.42 | 11.2132131 | -1.75E-01 | 1962212   | 1962335   | NC_000007.13 |
| cg06802565 | 1.02E-08 | 1.01E-09 | -6.42 | 11.2128643 | -1.04E-01 | 68788961  | 68789084  | NC_000001.10 |
| cg08317058 | 1.03E-08 | 1.01E-09 | -6.42 | 11.2116351 | -2.35E-02 | 187648358 | 187648481 | NC_000004.11 |
| cg01832549 | 1.03E-08 | 1.01E-09 | -6.42 | 11.2113113 | -1.24E-01 | 19774989  | 19775112  | NC_000001.10 |
| cg19483007 | 1.03E-08 | 1.01E-09 | -6.42 | 11.2110512 | -1.14E-01 | 149327651 | 149327774 | NC_000003.11 |
| cg08470180 | 1.03E-08 | 1.01E-09 | -6.42 | 11.2108973 | -6.82E-02 | 134181226 | 134181349 | NC_000005.9  |
| cg25686905 | 1.03E-08 | 1.01E-09 | -6.42 | 11.2107503 | -1.33E-01 | 183603175 | 183603298 | NC_000003.11 |
| cg15152595 | 1.03E-08 | 1.02E-09 | -6.42 | 11.2070777 | -1.42E-01 | 204972818 | 204972941 | NC_000001.10 |
| cg16594468 | 1.03E-08 | 1.02E-09 | -6.42 | 11.2069863 | -1.25E-01 | 102039579 | 102039702 | NC_000008.10 |
| cg13314614 | 1.03E-08 | 1.02E-09 | -6.42 | 11.2060046 | -1.43E-01 | 12655992  | 12656115  | NC_000001.10 |
| cg11948328 | 1.03E-08 | 1.02E-09 | -6.42 | 11.2032357 | -5.82E-02 | 43702395  | 43702518  | NC_000011.9  |
| cg06731730 | 1.03E-08 | 1.02E-09 | -6.42 | 11.2030599 | -6.81E-02 | 69788837  | 69788960  | NC_000016.9  |
| cg03111039 | 1.03E-08 | 1.02E-09 | -6.42 | 11.2025702 | -8.73E-02 | 90751583  | 90751706  | NC_000010.10 |
| cg16492510 | 1.04E-08 | 1.02E-09 | -6.42 | 11.2020284 | -1.39E-01 | 157561684 | 157561807 | NC_000007.13 |

|                 |          |          |       |            |           |           |           |              |
|-----------------|----------|----------|-------|------------|-----------|-----------|-----------|--------------|
| cg07318398      | 1.04E-08 | 1.02E-09 | -6.42 | 11.201504  | -9.31E-02 | 39993101  | 39993224  | NC_000017.10 |
| cg04247720      | 1.04E-08 | 1.02E-09 | -6.42 | 11.2009595 | -4.74E-02 | 172261327 | 172261450 | NC_000005.9  |
| cg20976019      | 1.04E-08 | 1.02E-09 | -6.42 | 11.2000258 | -1.50E-01 | 25931360  | 25931483  | NC_000017.10 |
| cg25985347      | 1.04E-08 | 1.03E-09 | -6.42 | 11.1974673 | -1.06E-01 | 169418105 | 169418228 | NC_000004.11 |
| cg18941085      | 1.04E-08 | 1.03E-09 | -6.42 | 11.1969169 | -4.14E-02 | 94547962  | 94548085  | NC_000014.8  |
| cg09379935      | 1.04E-08 | 1.03E-09 | -6.42 | 11.1964852 | -1.13E-01 | 72974155  | 72974278  | NC_000011.9  |
| cg08120389      | 1.04E-08 | 1.03E-09 | -6.42 | 11.1964207 | -4.44E-02 | 19881268  | 19881391  | NC_000017.10 |
| cg21153839      | 1.04E-08 | 1.03E-09 | -6.42 | 11.1954012 | -1.16E-01 | 27190789  | 27190912  | NC_000002.11 |
| cg11863717      | 1.04E-08 | 1.03E-09 | -6.42 | 11.1950523 | -1.23E-01 | 73725041  | 73725164  | NC_000010.10 |
| cg04569233      | 1.04E-08 | 1.03E-09 | -6.42 | 11.1945748 | -9.69E-02 | 39321449  | 39321572  | NC_000003.11 |
| cg26364911      | 1.04E-08 | 1.03E-09 | -6.42 | 11.1938764 | -2.52E-02 | 99775893  | 99776016  | NC_000009.11 |
| cg08836619      | 1.04E-08 | 1.03E-09 | -6.42 | 11.1938526 | -3.34E-02 | 139555389 | 139555512 | NC_000005.9  |
| cg01133262      | 1.04E-08 | 1.03E-09 | -6.42 | 11.1935037 | -3.79E-02 | 38863905  | 38864028  | NC_000022.10 |
| cg19574017      | 1.04E-08 | 1.03E-09 | -6.42 | 11.1934139 | -5.52E-02 | 63569834  | 63569957  | NC_000015.9  |
| cg13637321      | 1.04E-08 | 1.03E-09 | -6.42 | 11.1932263 | -3.41E-02 | 111985220 | 111985343 | NC_000010.10 |
| cg17860962      | 1.04E-08 | 1.03E-09 | -6.42 | 11.1926917 | -5.24E-02 | 44214684  | 44214807  | NC_000006.11 |
| cg12054698      | 1.04E-08 | 1.03E-09 | -6.42 | 11.1926657 | -4.80E-02 | 89530930  | 89531053  | NC_000001.10 |
| cg27137280      | 1.04E-08 | 1.03E-09 | -6.42 | 11.1922877 | -4.11E-02 | 31634141  | 31634264  | NC_000006.11 |
| cg02454890      | 1.04E-08 | 1.03E-09 | -6.42 | 11.1920831 | -2.77E-02 | 90544015  | 90544138  | NC_000015.9  |
| cg07969622      | 1.05E-08 | 1.03E-09 | -6.42 | 11.1913309 | -9.28E-02 | 22901569  | 22901692  | NC_000022.10 |
| cg13943355      | 1.05E-08 | 1.03E-09 | -6.42 | 11.1913293 | -1.28E-01 | 67470870  | 67470993  | NC_000015.9  |
| ch.13.29539842F | 1.05E-08 | 1.03E-09 | -6.42 | 11.1912295 | -2.88E-02 | 30641842  | 30641965  | NC_000013.10 |
| cg06352483      | 1.05E-08 | 1.03E-09 | -6.42 | 11.1908947 | -4.39E-02 | 28052575  | 28052698  | NC_000001.10 |
| cg01733570      | 1.05E-08 | 1.03E-09 | -6.42 | 11.1905504 | -1.59E-01 | 24797656  | 24797779  | NC_000007.13 |
| cg04105923      | 1.05E-08 | 1.03E-09 | -6.42 | 11.1893885 | -7.41E-02 | 106451610 | 106451733 | NC_000006.11 |

|            |          |          |       |            |           |           |           |              |
|------------|----------|----------|-------|------------|-----------|-----------|-----------|--------------|
| cg10220544 | 1.05E-08 | 1.03E-09 | -6.42 | 11.189198  | -1.37E-01 | 60171660  | 60171783  | NC_000001.10 |
| cg26838449 | 1.05E-08 | 1.04E-09 | -6.42 | 11.1882376 | -5.58E-02 | 15210830  | 15210953  | NC_000010.10 |
| cg14230378 | 1.05E-08 | 1.04E-09 | -6.42 | 11.1881846 | -6.09E-02 | 131080483 | 131080606 | NC_000003.11 |
| cg08201604 | 1.05E-08 | 1.04E-09 | -6.42 | 11.1878977 | -1.35E-01 | 26171697  | 26171820  | NC_000008.10 |
| cg16087101 | 1.05E-08 | 1.04E-09 | -6.42 | 11.1873917 | -4.41E-02 | 46266030  | 46266153  | NC_000021.8  |
| cg02704907 | 1.05E-08 | 1.04E-09 | -6.42 | 11.1869766 | -9.30E-02 | 27116113  | 27116236  | NC_000006.11 |
| cg22345647 | 1.05E-08 | 1.04E-09 | -6.42 | 11.1868229 | -2.44E-02 | 68609526  | 68609649  | NC_000011.9  |
| cg18923221 | 1.05E-08 | 1.04E-09 | -6.42 | 11.1863404 | -1.88E-02 | 48650727  | 48650850  | NC_000008.10 |
| cg11025793 | 1.05E-08 | 1.04E-09 | -6.42 | 11.1862839 | -7.96E-02 | 13262015  | 13262138  | NC_000019.9  |
| cg25119946 | 1.05E-08 | 1.04E-09 | -6.42 | 11.1853257 | -9.60E-02 | 39558556  | 39558679  | NC_000017.10 |
| cg10077144 | 1.05E-08 | 1.04E-09 | -6.41 | 11.1841284 | -4.12E-02 | 3199858   | 3199981   | NC_000016.9  |
| cg17197051 | 1.05E-08 | 1.04E-09 | -6.41 | 11.1837341 | -7.88E-02 | 32870183  | 32870306  | NC_000022.10 |
| cg09140966 | 1.05E-08 | 1.04E-09 | -6.41 | 11.1833583 | -2.79E-02 | 155608175 | 155608298 | NC_000007.13 |
| cg23216745 | 1.06E-08 | 1.04E-09 | -6.41 | 11.180682  | -1.16E-01 | 154929762 | 154929885 | NC_000001.10 |
| cg24338833 | 1.06E-08 | 1.05E-09 | -6.41 | 11.1791125 | -8.69E-02 | 10592227  | 10592350  | NC_000008.10 |
| cg16101962 | 1.06E-08 | 1.05E-09 | -6.41 | 11.1785739 | -1.02E-01 | 3064937   | 3065060   | NC_000006.11 |
| cg00012238 | 1.06E-08 | 1.05E-09 | -6.41 | 11.1781264 | -1.04E-01 | 21718458  | 21718581  | NC_000018.9  |
| cg07296256 | 1.06E-08 | 1.05E-09 | -6.41 | 11.1770401 | -1.14E-01 | 113438010 | 113438133 | NC_000013.10 |
| cg18139174 | 1.06E-08 | 1.05E-09 | -6.41 | 11.1768188 | -5.41E-02 | 24605759  | 24605882  | NC_000014.8  |
| cg24898753 | 1.06E-08 | 1.05E-09 | -6.41 | 11.1753038 | -5.09E-02 | 61735917  | 61736040  | NC_000011.9  |
| cg07473175 | 1.06E-08 | 1.05E-09 | -6.41 | 11.1740874 | -2.97E-02 | 47474262  | 47474385  | NC_000012.11 |
| cg17809895 | 1.06E-08 | 1.05E-09 | -6.41 | 11.1736562 | -6.47E-02 | 51589197  | 51589320  | NC_000020.10 |
| cg08979686 | 1.06E-08 | 1.05E-09 | -6.41 | 11.1735874 | -2.02E-02 | 44600644  | 44600767  | NC_000020.10 |
| cg15151052 | 1.06E-08 | 1.05E-09 | -6.41 | 11.1731599 | -9.59E-02 | 29617359  | 29617482  | NC_000001.10 |
| cg05249479 | 1.06E-08 | 1.05E-09 | -6.41 | 11.1719576 | -1.38E-01 | 100542584 | 100542707 | NC_000014.8  |

|                 |          |          |       |            |           |           |           |              |
|-----------------|----------|----------|-------|------------|-----------|-----------|-----------|--------------|
| cg21109167      | 1.06E-08 | 1.05E-09 | -6.41 | 11.1717671 | -1.38E-01 | 37034084  | 37034207  | NC_000003.11 |
| cg20247048      | 1.07E-08 | 1.05E-09 | -6.41 | 11.1715631 | -7.01E-02 | 62972358  | 62972481  | NC_000017.10 |
| ch.17.72493169F | 1.07E-08 | 1.05E-09 | -6.41 | 11.1713702 | -3.29E-02 | 74981574  | 74981697  | NC_000017.10 |
| cg21774736      | 1.07E-08 | 1.05E-09 | -6.41 | 11.1711284 | -4.00E-02 | 42846470  | 42846593  | NC_000001.10 |
| cg08556541      | 1.07E-08 | 1.06E-09 | -6.41 | 11.1696958 | -1.29E-01 | 54861563  | 54861686  | NC_000002.11 |
| cg06205432      | 1.07E-08 | 1.06E-09 | -6.41 | 11.16967   | -2.88E-02 | 33160869  | 33160992  | NC_000006.11 |
| cg07986199      | 1.07E-08 | 1.06E-09 | -6.41 | 11.1694824 | -1.11E-01 | 2743038   | 2743161   | NC_000012.11 |
| cg11905324      | 1.07E-08 | 1.06E-09 | -6.41 | 11.1691396 | -7.61E-02 | 49817266  | 49817389  | NC_000008.10 |
| cg06815704      | 1.07E-08 | 1.06E-09 | -6.41 | 11.1677897 | -4.30E-02 | 51460793  | 51460916  | NC_000007.13 |
| ch.11.691621F   | 1.07E-08 | 1.06E-09 | -6.41 | 11.1664311 | -4.57E-02 | 32947349  | 32947472  | NC_000011.9  |
| cg13503564      | 1.07E-08 | 1.06E-09 | -6.41 | 11.1664181 | -1.09E-01 | 45539374  | 45539497  | NC_000002.11 |
| cg05833158      | 1.07E-08 | 1.06E-09 | -6.41 | 11.1661276 | -1.42E-01 | 9993731   | 9993854   | NC_000003.11 |
| cg23922724      | 1.07E-08 | 1.06E-09 | -6.41 | 11.1645734 | -1.31E-01 | 76474735  | 76474858  | NC_000011.9  |
| cg24108579      | 1.07E-08 | 1.06E-09 | -6.41 | 11.1639484 | -1.31E-01 | 32475172  | 32475295  | NC_000014.8  |
| cg07087130      | 1.07E-08 | 1.06E-09 | -6.41 | 11.1634383 | -1.38E-01 | 48129797  | 48129920  | NC_000007.13 |
| cg11902543      | 1.07E-08 | 1.06E-09 | -6.41 | 11.1632629 | -1.38E-01 | 127901882 | 127902005 | NC_000002.11 |
| cg08968107      | 1.07E-08 | 1.06E-09 | -6.41 | 11.162562  | -1.25E-01 | 71012806  | 71012929  | NC_000006.11 |
| cg19823504      | 1.07E-08 | 1.06E-09 | -6.41 | 11.1623908 | -1.22E-01 | 4556982   | 4557105   | NC_000019.9  |
| cg02965290      | 1.07E-08 | 1.06E-09 | -6.41 | 11.1621438 | -8.24E-02 | 38108850  | 38108973  | NC_000017.10 |
| cg22870295      | 1.07E-08 | 1.06E-09 | -6.41 | 11.1618153 | -4.17E-02 | 105332311 | 105332434 | NC_000007.13 |
| cg04963082      | 1.08E-08 | 1.06E-09 | -6.41 | 11.1616575 | -5.23E-02 | 30043105  | 30043228  | NC_000016.9  |
| cg05885462      | 1.08E-08 | 1.06E-09 | -6.41 | 11.1612205 | -1.18E-01 | 108672936 | 108673059 | NC_000004.11 |
| cg05775862      | 1.08E-08 | 1.07E-09 | -6.41 | 11.1587159 | -1.62E-01 | 31026101  | 31026224  | NC_000010.10 |
| cg03859282      | 1.08E-08 | 1.07E-09 | -6.41 | 11.1585116 | -6.44E-02 | 4783755   | 4783878   | NC_000016.9  |
| cg11859922      | 1.08E-08 | 1.07E-09 | -6.41 | 11.1576629 | -1.12E-01 | 240776316 | 240776439 | NC_000001.10 |



|            |          |          |       |            |           |           |           |              |
|------------|----------|----------|-------|------------|-----------|-----------|-----------|--------------|
| cg01567509 | 1.08E-08 | 1.07E-09 | -6.41 | 11.1576036 | -1.39E-01 | 15104223  | 15104346  | NC_000001.10 |
| cg04687517 | 1.08E-08 | 1.07E-09 | -6.41 | 11.1570953 | -8.63E-02 | 138660387 | 138660510 | NC_000003.11 |
| cg15777323 | 1.08E-08 | 1.07E-09 | -6.41 | 11.1566057 | -4.82E-02 | 48543165  | 48543288  | NC_000002.11 |
| cg18390959 | 1.08E-08 | 1.07E-09 | -6.41 | 11.1561394 | -9.37E-02 | 51872257  | 51872380  | NC_000019.9  |
| cg03535933 | 1.08E-08 | 1.07E-09 | -6.41 | 11.1556139 | -3.27E-02 | 67974296  | 67974419  | NC_000008.10 |
| cg06697094 | 1.08E-08 | 1.07E-09 | -6.41 | 11.1554873 | -6.01E-02 | 54911185  | 54911308  | NC_000017.10 |
| cg16397638 | 1.08E-08 | 1.07E-09 | -6.41 | 11.1526548 | -1.27E-01 | 228559083 | 228559206 | NC_000001.10 |
| cg05819371 | 1.08E-08 | 1.07E-09 | -6.41 | 11.1525231 | -1.04E-01 | 92540484  | 92540607  | NC_000012.11 |
| cg24593464 | 1.09E-08 | 1.08E-09 | -6.41 | 11.1513418 | -1.21E-01 | 120008998 | 120009121 | NC_000011.9  |
| cg23723486 | 1.09E-08 | 1.08E-09 | -6.41 | 11.1510218 | -8.69E-02 | 101361745 | 101361868 | NC_000007.13 |
| cg04787602 | 1.09E-08 | 1.08E-09 | -6.41 | 11.1505941 | -3.96E-02 | 112282986 | 112283109 | NC_000001.10 |
| cg26475911 | 1.09E-08 | 1.08E-09 | -6.41 | 11.1497166 | -1.43E-01 | 73056187  | 73056310  | NC_000017.10 |
| cg19792802 | 1.09E-08 | 1.08E-09 | -6.41 | 11.1496589 | -1.25E-01 | 65647270  | 65647393  | NC_000011.9  |
| cg06052888 | 1.09E-08 | 1.08E-09 | -6.41 | 11.1493418 | -1.15E-01 | 52225658  | 52225781  | NC_000006.11 |
| cg08292572 | 1.09E-08 | 1.08E-09 | -6.41 | 11.1472982 | -3.24E-02 | 42846188  | 42846311  | NC_000003.11 |
| cg06708255 | 1.09E-08 | 1.08E-09 | -6.41 | 11.1461246 | -6.49E-02 | 54570293  | 54570416  | NC_000008.10 |
| cg17888979 | 1.09E-08 | 1.08E-09 | -6.41 | 11.1460482 | -6.93E-02 | 1609341   | 1609464   | NC_000007.13 |
| cg15608892 | 1.09E-08 | 1.08E-09 | -6.41 | 11.1456797 | -1.22E-01 | 126721586 | 126721709 | NC_000003.11 |
| cg08570639 | 1.09E-08 | 1.08E-09 | -6.41 | 11.145399  | -1.36E-01 | 113371757 | 113371880 | NC_000006.11 |
| cg12965426 | 1.09E-08 | 1.08E-09 | -6.41 | 11.1444098 | -5.65E-02 | 131863715 | 131863838 | NC_000002.11 |
| cg18419358 | 1.09E-08 | 1.08E-09 | -6.41 | 11.1437742 | -1.17E-01 | 158384009 | 158384132 | NC_000006.11 |
| cg16211507 | 1.10E-08 | 1.09E-09 | -6.41 | 11.1389968 | -4.85E-02 | 139135961 | 139136084 | NC_000005.9  |
| cg27095527 | 1.10E-08 | 1.09E-09 | -6.41 | 11.1370738 | -2.45E-02 | 12329080  | 12329203  | NC_000003.11 |
| cg04373106 | 1.10E-08 | 1.09E-09 | -6.41 | 11.1366507 | -6.71E-02 | 72932992  | 72933115  | NC_000017.10 |
| cg19921917 | 1.10E-08 | 1.09E-09 | -6.41 | 11.1363385 | -1.26E-01 | 169418224 | 169418347 | NC_000004.11 |

|               |          |          |       |            |           |           |           |              |
|---------------|----------|----------|-------|------------|-----------|-----------|-----------|--------------|
| cg26467949    | 1.10E-08 | 1.10E-09 | -6.41 | 11.1327703 | -8.21E-02 | 73441162  | 73441285  | NC_000002.11 |
| cg00563495    | 1.11E-08 | 1.10E-09 | -6.41 | 11.1324571 | -1.14E-01 | 74489089  | 74489212  | NC_000015.9  |
| cg04727356    | 1.11E-08 | 1.10E-09 | -6.4  | 11.1303319 | -1.07E-02 | 46125312  | 46125435  | NC_000017.10 |
| cg16602846    | 1.11E-08 | 1.10E-09 | -6.4  | 11.129918  | -6.43E-02 | 78114278  | 78114401  | NC_000015.9  |
| cg06679494    | 1.11E-08 | 1.10E-09 | -6.4  | 11.1292554 | -1.35E-01 | 6921295   | 6921418   | NC_000017.10 |
| cg07957491    | 1.11E-08 | 1.10E-09 | -6.4  | 11.1290685 | -1.02E-01 | 134407190 | 134407313 | NC_000009.11 |
| cg25908973    | 1.11E-08 | 1.10E-09 | -6.4  | 11.128174  | -1.02E-01 | 45670865  | 45670988  | NC_000015.9  |
| cg15265785    | 1.11E-08 | 1.10E-09 | -6.4  | 11.1275754 | -4.22E-02 | 156877897 | 156878020 | NC_000003.11 |
| cg09739904    | 1.11E-08 | 1.10E-09 | -6.4  | 11.1269966 | -8.67E-02 | 103310839 | 103310962 | NC_000012.11 |
| cg04130356    | 1.11E-08 | 1.10E-09 | -6.4  | 11.1269048 | -9.51E-02 | 810643    | 810766    | NC_000016.9  |
| cg14176450    | 1.11E-08 | 1.10E-09 | -6.4  | 11.126448  | -9.92E-02 | 11054229  | 11054352  | NC_000002.11 |
| cg07233343    | 1.11E-08 | 1.10E-09 | -6.4  | 11.1257608 | -1.29E-01 | 17944660  | 17944783  | NC_000001.10 |
| ch.2.3935902R | 1.11E-08 | 1.10E-09 | -6.4  | 11.1247138 | -2.84E-02 | 198281115 | 198281238 | NC_000002.11 |
| cg19433037    | 1.11E-08 | 1.11E-09 | -6.4  | 11.1245212 | -3.73E-02 | 198128165 | 198128288 | NC_000001.10 |
| cg04765195    | 1.11E-08 | 1.11E-09 | -6.4  | 11.1239189 | -1.79E-01 | 36209753  | 36209876  | NC_000006.11 |
| cg14221644    | 1.11E-08 | 1.11E-09 | -6.4  | 11.1235051 | -8.05E-02 | 139146602 | 139146725 | NC_000009.11 |
| cg25078649    | 1.12E-08 | 1.11E-09 | -6.4  | 11.122039  | -1.66E-01 | 43478829  | 43478952  | NC_000006.11 |
| cg06873401    | 1.12E-08 | 1.11E-09 | -6.4  | 11.1210804 | -1.57E-01 | 77792105  | 77792228  | NC_000005.9  |
| cg06627043    | 1.12E-08 | 1.11E-09 | -6.4  | 11.120969  | -1.01E-01 | 147838662 | 147838785 | NC_000001.10 |
| cg06636685    | 1.12E-08 | 1.11E-09 | -6.4  | 11.1203635 | -6.26E-02 | 76211051  | 76211174  | NC_000013.10 |
| cg10416861    | 1.12E-08 | 1.11E-09 | -6.4  | 11.1195985 | -7.99E-02 | 65201834  | 65201957  | NC_000011.9  |
| cg08628911    | 1.12E-08 | 1.11E-09 | -6.4  | 11.119539  | -1.15E-01 | 1199592   | 1199715   | NC_000016.9  |
| cg03591676    | 1.12E-08 | 1.11E-09 | -6.4  | 11.116941  | -3.11E-02 | 96281769  | 96281892  | NC_000008.10 |
| cg22372439    | 1.12E-08 | 1.11E-09 | -6.4  | 11.1161216 | -4.42E-02 | 60929245  | 60929368  | NC_000011.9  |
| cg03719083    | 1.12E-08 | 1.12E-09 | -6.4  | 11.1142145 | -9.82E-02 | 10415290  | 10415413  | NC_000006.11 |

|            |          |          |      |            |           |           |           |              |
|------------|----------|----------|------|------------|-----------|-----------|-----------|--------------|
| cg04958055 | 1.12E-08 | 1.12E-09 | -6.4 | 11.1141497 | -1.28E-01 | 69404437  | 69404560  | NC_000014.8  |
| cg25571957 | 1.12E-08 | 1.12E-09 | -6.4 | 11.1140289 | -1.44E-01 | 39902693  | 39902816  | NC_000006.11 |
| cg23305768 | 1.12E-08 | 1.12E-09 | -6.4 | 11.113974  | -5.45E-02 | 148521464 | 148521587 | NC_000005.9  |
| cg11164860 | 1.13E-08 | 1.12E-09 | -6.4 | 11.1136742 | -6.28E-02 | 1994871   | 1994994   | NC_000004.11 |
| cg07457213 | 1.13E-08 | 1.12E-09 | -6.4 | 11.1136548 | -1.14E-01 | 105498968 | 105499091 | NC_000010.10 |
| cg20041624 | 1.13E-08 | 1.12E-09 | -6.4 | 11.113045  | -9.97E-02 | 40559580  | 40559703  | NC_000015.9  |
| cg14781967 | 1.13E-08 | 1.12E-09 | -6.4 | 11.1114037 | -7.12E-02 | 180101440 | 180101563 | NC_000005.9  |
| cg12832228 | 1.13E-08 | 1.12E-09 | -6.4 | 11.1112394 | -3.31E-02 | 28244096  | 28244219  | NC_000008.10 |
| cg09351258 | 1.13E-08 | 1.12E-09 | -6.4 | 11.1109842 | -4.91E-02 | 191208999 | 191209122 | NC_000002.11 |
| cg08128361 | 1.13E-08 | 1.12E-09 | -6.4 | 11.1108498 | -1.07E-01 | 67336052  | 67336175  | NC_000016.9  |
| cg12416929 | 1.13E-08 | 1.12E-09 | -6.4 | 11.1107787 | -7.51E-02 | 108882205 | 108882328 | NC_000006.11 |
| cg02950892 | 1.13E-08 | 1.12E-09 | -6.4 | 11.1106923 | -1.28E-01 | 99331344  | 99331467  | NC_000010.10 |
| cg05351750 | 1.13E-08 | 1.12E-09 | -6.4 | 11.1099824 | -8.69E-02 | 680335    | 680458    | NC_000016.9  |
| cg21700780 | 1.13E-08 | 1.12E-09 | -6.4 | 11.1096224 | -9.17E-02 | 2004050   | 2004173   | NC_000008.10 |
| cg25730717 | 1.13E-08 | 1.12E-09 | -6.4 | 11.1096001 | -4.22E-02 | 148726076 | 148726199 | NC_000007.13 |
| cg10096052 | 1.13E-08 | 1.12E-09 | -6.4 | 11.1073541 | -1.19E-01 | 615709    | 615832    | NC_000016.9  |
| cg17978103 | 1.13E-08 | 1.12E-09 | -6.4 | 11.1073463 | -1.59E-01 | 56272305  | 56272428  | NC_000020.10 |
| cg10932874 | 1.13E-08 | 1.12E-09 | -6.4 | 11.1073098 | -1.48E-01 | 58135981  | 58136104  | NC_000012.11 |
| cg27442478 | 1.13E-08 | 1.12E-09 | -6.4 | 11.1072745 | -6.13E-02 | 155635788 | 155635911 | NC_000006.11 |
| cg04554652 | 1.13E-08 | 1.13E-09 | -6.4 | 11.1069435 | -9.59E-02 | 103880979 | 103881102 | NC_000010.10 |
| cg16331632 | 1.13E-08 | 1.13E-09 | -6.4 | 11.1052738 | -1.19E-01 | 60783238  | 60783361  | NC_000014.8  |
| cg24736734 | 1.13E-08 | 1.13E-09 | -6.4 | 11.1051254 | -1.41E-01 | 102114455 | 102114578 | NC_000005.9  |
| cg02416013 | 1.14E-08 | 1.13E-09 | -6.4 | 11.104212  | -3.70E-02 | 11891051  | 11891174  | NC_000016.9  |
| cg27003165 | 1.14E-08 | 1.13E-09 | -6.4 | 11.1041448 | -1.01E-01 | 162381929 | 162382052 | NC_000001.10 |
| cg07047601 | 1.14E-08 | 1.13E-09 | -6.4 | 11.1035223 | -4.73E-02 | 21337040  | 21337163  | NC_000022.10 |

|               |          |          |      |            |           |           |           |              |
|---------------|----------|----------|------|------------|-----------|-----------|-----------|--------------|
| cg04293353    | 1.14E-08 | 1.13E-09 | -6.4 | 11.1034253 | -6.20E-02 | 2205396   | 2205519   | NC_000001.10 |
| cg05007375    | 1.14E-08 | 1.13E-09 | -6.4 | 11.1029447 | -2.26E-02 | 92588364  | 92588487  | NC_000014.8  |
| ch.9.1518492F | 1.14E-08 | 1.13E-09 | -6.4 | 11.1022658 | -4.75E-02 | 103025307 | 103025430 | NC_000009.11 |
| cg16681157    | 1.14E-08 | 1.13E-09 | -6.4 | 11.1008152 | -1.22E-01 | 49594482  | 49594605  | NC_000016.9  |
| cg13106430    | 1.14E-08 | 1.13E-09 | -6.4 | 11.1006969 | -8.57E-02 | 9604352   | 9604475   | NC_000017.10 |
| cg15807143    | 1.14E-08 | 1.14E-09 | -6.4 | 11.0974812 | -1.08E-01 | 3452624   | 3452747   | NC_000002.11 |
| cg08185808    | 1.14E-08 | 1.14E-09 | -6.4 | 11.0968692 | -1.50E-01 | 809910    | 810033    | NC_000016.9  |
| cg10809872    | 1.14E-08 | 1.14E-09 | -6.4 | 11.0965626 | -4.63E-02 | 202936725 | 202936848 | NC_000001.10 |
| cg12324144    | 1.14E-08 | 1.14E-09 | -6.4 | 11.0965247 | -9.72E-02 | 169531663 | 169531786 | NC_000003.11 |
| cg13995006    | 1.15E-08 | 1.14E-09 | -6.4 | 11.0946932 | -5.06E-02 | 118532813 | 118532936 | NC_000008.10 |
| cg06552368    | 1.15E-08 | 1.14E-09 | -6.4 | 11.0945832 | -4.05E-02 | 118972898 | 118973021 | NC_000011.9  |
| cg17473673    | 1.15E-08 | 1.14E-09 | -6.4 | 11.0944974 | -7.94E-02 | 15590570  | 15590693  | NC_000019.9  |
| cg16103712    | 1.15E-08 | 1.14E-09 | -6.4 | 11.0938014 | -1.43E-01 | 99023869  | 99023992  | NC_000008.10 |
| cg03387353    | 1.15E-08 | 1.14E-09 | -6.4 | 11.0928738 | -4.94E-02 | 61429246  | 61429369  | NC_000008.10 |
| cg24851100    | 1.15E-08 | 1.14E-09 | -6.4 | 11.0924669 | -9.40E-02 | 41748833  | 41748956  | NC_000005.9  |
| cg24972816    | 1.15E-08 | 1.14E-09 | -6.4 | 11.0922193 | -1.02E-01 | 106940889 | 106941012 | NC_000003.11 |
| cg15893360    | 1.15E-08 | 1.14E-09 | -6.4 | 11.0916611 | -1.27E-01 | 120700361 | 120700484 | NC_000012.11 |
| cg26978611    | 1.15E-08 | 1.14E-09 | -6.4 | 11.0915704 | -8.93E-02 | 90271866  | 90271989  | NC_000006.11 |
| cg02663137    | 1.15E-08 | 1.14E-09 | -6.4 | 11.0910633 | -8.72E-02 | 6745717   | 6745840   | NC_000019.9  |
| cg12051819    | 1.15E-08 | 1.14E-09 | -6.4 | 11.0910549 | -1.52E-01 | 114717638 | 114717761 | NC_000001.10 |
| cg05557266    | 1.15E-08 | 1.15E-09 | -6.4 | 11.0892095 | -1.28E-01 | 49057259  | 49057382  | NC_000003.11 |
| cg16141600    | 1.15E-08 | 1.15E-09 | -6.4 | 11.0872456 | -1.99E-02 | 124169984 | 124170107 | NC_000008.10 |
| cg20683809    | 1.15E-08 | 1.15E-09 | -6.4 | 11.0870362 | -4.74E-02 | 41601892  | 41602015  | NC_000019.9  |
| cg08982381    | 1.15E-08 | 1.15E-09 | -6.4 | 11.086835  | -2.25E-02 | 80647290  | 80647413  | NC_000009.11 |
| cg06173663    | 1.15E-08 | 1.15E-09 | -6.4 | 11.0861586 | -1.76E-01 | 101579929 | 101580052 | NC_000007.13 |

|               |          |          |       |            |           |           |           |              |
|---------------|----------|----------|-------|------------|-----------|-----------|-----------|--------------|
| cg01963134    | 1.16E-08 | 1.15E-09 | -6.4  | 11.0845113 | -8.34E-02 | 39299364  | 39299487  | NC_000012.11 |
| cg08370718    | 1.16E-08 | 1.15E-09 | -6.4  | 11.0843016 | -4.08E-02 | 49913307  | 49913430  | NC_000015.9  |
| cg08118649    | 1.16E-08 | 1.15E-09 | -6.4  | 11.0835047 | -4.32E-02 | 99038419  | 99038542  | NC_000012.11 |
| cg05322222    | 1.16E-08 | 1.15E-09 | -6.4  | 11.0833442 | -7.62E-02 | 66059064  | 66059187  | NC_000011.9  |
| cg22111705    | 1.16E-08 | 1.15E-09 | -6.4  | 11.0827838 | -4.61E-02 | 8430496   | 8430619   | NC_000004.11 |
| cg17471836    | 1.16E-08 | 1.15E-09 | -6.4  | 11.0824155 | -1.40E-01 | 118691007 | 118691130 | NC_000005.9  |
| ch.2.1420302F | 1.16E-08 | 1.15E-09 | -6.4  | 11.0819171 | -3.52E-02 | 62093097  | 62093220  | NC_000002.11 |
| cg16671674    | 1.16E-08 | 1.15E-09 | -6.4  | 11.0815198 | -9.84E-02 | 142150452 | 142150575 | NC_000002.11 |
| cg20759281    | 1.16E-08 | 1.16E-09 | -6.4  | 11.0811218 | -1.25E-01 | 21796914  | 21797037  | NC_000012.11 |
| cg18949044    | 1.16E-08 | 1.16E-09 | -6.4  | 11.0804313 | -1.06E-01 | 156443804 | 156443927 | NC_000004.11 |
| cg17960629    | 1.16E-08 | 1.16E-09 | -6.4  | 11.0803911 | -1.07E-01 | 36877454  | 36877577  | NC_000002.11 |
| cg15413566    | 1.16E-08 | 1.16E-09 | -6.4  | 11.0794973 | -3.08E-02 | 8301971   | 8302094   | NC_000007.13 |
| cg08905399    | 1.16E-08 | 1.16E-09 | -6.39 | 11.0770312 | -1.24E-01 | 35347479  | 35347602  | NC_000010.10 |
| cg04049240    | 1.17E-08 | 1.16E-09 | -6.39 | 11.0765066 | -1.37E-01 | 61335377  | 61335500  | NC_000020.10 |
| cg19099736    | 1.17E-08 | 1.16E-09 | -6.39 | 11.0760805 | -6.04E-02 | 29702810  | 29702933  | NC_000022.10 |
| cg00428179    | 1.17E-08 | 1.16E-09 | -6.39 | 11.0754203 | -1.47E-01 | 31322131  | 31322254  | NC_000010.10 |
| cg12104266    | 1.17E-08 | 1.16E-09 | -6.39 | 11.075114  | -4.96E-02 | 44601447  | 44601570  | NC_000020.10 |
| cg22329555    | 1.17E-08 | 1.16E-09 | -6.39 | 11.0746316 | -7.69E-02 | 30777558  | 30777681  | NC_000020.10 |
| cg21858516    | 1.17E-08 | 1.16E-09 | -6.39 | 11.0741104 | -9.48E-02 | 59103353  | 59103476  | NC_000014.8  |
| cg25380464    | 1.17E-08 | 1.16E-09 | -6.39 | 11.0740382 | -1.19E-01 | 52923340  | 52923463  | NC_000006.11 |
| cg05936667    | 1.17E-08 | 1.16E-09 | -6.39 | 11.0739742 | -1.92E-02 | 89992136  | 89992259  | NC_000016.9  |
| cg11388866    | 1.17E-08 | 1.16E-09 | -6.39 | 11.073543  | -5.38E-02 | 40752116  | 40752239  | NC_000021.8  |
| cg22267234    | 1.17E-08 | 1.16E-09 | -6.39 | 11.0735164 | -6.26E-02 | 9087524   | 9087647   | NC_000011.9  |
| cg27148952    | 1.17E-08 | 1.16E-09 | -6.39 | 11.0734538 | -1.79E-02 | 49518347  | 49518470  | NC_000006.11 |
| cg21363706    | 1.17E-08 | 1.17E-09 | -6.39 | 11.0722733 | -1.26E-01 | 18066485  | 18066608  | NC_000008.10 |

|                |          |          |       |            |           |           |           |              |
|----------------|----------|----------|-------|------------|-----------|-----------|-----------|--------------|
| cg19894728     | 1.17E-08 | 1.17E-09 | -6.39 | 11.0713541 | -1.12E-01 | 105423113 | 105423236 | NC_000007.13 |
| cg20854539     | 1.17E-08 | 1.17E-09 | -6.39 | 11.0702391 | -1.09E-01 | 135475426 | 135475549 | NC_000002.11 |
| cg02404843     | 1.17E-08 | 1.17E-09 | -6.39 | 11.0696619 | -2.47E-02 | 176037404 | 176037527 | NC_000005.9  |
| cg19290504     | 1.18E-08 | 1.17E-09 | -6.39 | 11.0674634 | -4.82E-02 | 3867060   | 3867183   | NC_000017.10 |
| cg18612956     | 1.18E-08 | 1.17E-09 | -6.39 | 11.0671932 | -8.85E-02 | 26848344  | 26848467  | NC_000017.10 |
| cg14790107     | 1.18E-08 | 1.17E-09 | -6.39 | 11.0665779 | -1.09E-01 | 204047878 | 204048001 | NC_000001.10 |
| cg12807237     | 1.18E-08 | 1.17E-09 | -6.39 | 11.0646684 | -1.11E-01 | 134729045 | 134729168 | NC_000010.10 |
| cg11180624     | 1.18E-08 | 1.18E-09 | -6.39 | 11.0625774 | -2.79E-02 | 95705445  | 95705568  | NC_000007.13 |
| ch.8.2527088R  | 1.18E-08 | 1.18E-09 | -6.39 | 11.0621884 | -1.80E-02 | 127629477 | 127629600 | NC_000008.10 |
| cg06700234     | 1.18E-08 | 1.18E-09 | -6.39 | 11.0611294 | -1.69E-01 | 145642243 | 145642366 | NC_000008.10 |
| cg17481703     | 1.18E-08 | 1.18E-09 | -6.39 | 11.0605109 | -1.63E-01 | 76444831  | 76444954  | NC_000013.10 |
| cg08498942     | 1.18E-08 | 1.18E-09 | -6.39 | 11.0597185 | -4.50E-02 | 42110188  | 42110311  | NC_000006.11 |
| cg26748028     | 1.18E-08 | 1.18E-09 | -6.39 | 11.0596477 | -2.61E-02 | 40697398  | 40697521  | NC_000019.9  |
| ch.17.1457304R | 1.18E-08 | 1.18E-09 | -6.39 | 11.058954  | -2.62E-02 | 55195361  | 55195484  | NC_000017.10 |
| cg06331700     | 1.19E-08 | 1.18E-09 | -6.39 | 11.0584097 | -1.33E-01 | 22661121  | 22661244  | NC_000013.10 |
| cg11747081     | 1.19E-08 | 1.18E-09 | -6.39 | 11.0582821 | -1.69E-01 | 76444823  | 76444946  | NC_000013.10 |
| cg01012560     | 1.19E-08 | 1.18E-09 | -6.39 | 11.0573102 | -2.93E-02 | 235324573 | 235324696 | NC_000001.10 |
| cg18880646     | 1.19E-08 | 1.18E-09 | -6.39 | 11.0570462 | -1.28E-01 | 97375699  | 97375822  | NC_000006.11 |
| cg17798857     | 1.19E-08 | 1.19E-09 | -6.39 | 11.0555498 | -1.44E-01 | 70994632  | 70994755  | NC_000015.9  |
| cg15177211     | 1.19E-08 | 1.19E-09 | -6.39 | 11.0547249 | -1.34E-01 | 75567469  | 75567592  | NC_000007.13 |
| cg16022876     | 1.19E-08 | 1.19E-09 | -6.39 | 11.05389   | -1.18E-01 | 1471939   | 1472062   | NC_000011.9  |
| cg11151251     | 1.19E-08 | 1.19E-09 | -6.39 | 11.0531405 | -8.93E-02 | 69522003  | 69522126  | NC_000014.8  |
| cg16882373     | 1.19E-08 | 1.19E-09 | -6.39 | 11.0528814 | -1.33E-01 | 26191458  | 26191581  | NC_000007.13 |
| cg12117660     | 1.19E-08 | 1.19E-09 | -6.39 | 11.0523371 | -3.79E-02 | 16555778  | 16555901  | NC_000020.10 |
| cg04174226     | 1.19E-08 | 1.19E-09 | -6.39 | 11.0518176 | -4.92E-02 | 162164773 | 162164896 | NC_000002.11 |

|            |          |          |       |            |           |           |           |              |
|------------|----------|----------|-------|------------|-----------|-----------|-----------|--------------|
| cg23571857 | 1.19E-08 | 1.19E-09 | -6.39 | 11.0506954 | -1.08E-01 | 6658898   | 6659021   | NC_000017.10 |
| cg24461524 | 1.20E-08 | 1.19E-09 | -6.39 | 11.0490778 | -1.19E-01 | 4207451   | 4207574   | NC_000019.9  |
| cg10370262 | 1.20E-08 | 1.19E-09 | -6.39 | 11.0485173 | -8.58E-02 | 151396512 | 151396635 | NC_000007.13 |
| cg04207142 | 1.20E-08 | 1.20E-09 | -6.39 | 11.0476126 | -6.39E-02 | 86089106  | 86089229  | NC_000008.10 |
| cg20118306 | 1.20E-08 | 1.20E-09 | -6.39 | 11.0475735 | -3.62E-02 | 30688860  | 30688983  | NC_000006.11 |
| cg04874343 | 1.20E-08 | 1.20E-09 | -6.39 | 11.0474462 | -1.08E-01 | 113718405 | 113718528 | NC_000013.10 |
| cg24056365 | 1.20E-08 | 1.20E-09 | -6.39 | 11.0474361 | -1.33E-01 | 110834615 | 110834738 | NC_000001.10 |
| cg09508289 | 1.20E-08 | 1.20E-09 | -6.39 | 11.0472714 | -1.40E-01 | 3978604   | 3978727   | NC_000006.11 |
| cg23553576 | 1.20E-08 | 1.20E-09 | -6.39 | 11.0469841 | -9.13E-02 | 85451557  | 85451680  | NC_000011.9  |
| cg01831166 | 1.20E-08 | 1.20E-09 | -6.39 | 11.043145  | -3.83E-02 | 198570100 | 198570223 | NC_000002.11 |
| cg09164168 | 1.20E-08 | 1.20E-09 | -6.39 | 11.0423946 | -1.10E-01 | 89384721  | 89384844  | NC_000016.9  |
| cg05789711 | 1.20E-08 | 1.20E-09 | -6.39 | 11.0420569 | -5.56E-02 | 23724428  | 23724551  | NC_000016.9  |
| cg09792378 | 1.20E-08 | 1.20E-09 | -6.39 | 11.0410553 | -9.40E-02 | 60021987  | 60022110  | NC_000013.10 |
| cg22001807 | 1.20E-08 | 1.20E-09 | -6.39 | 11.0410111 | -8.95E-02 | 30690355  | 30690478  | NC_000006.11 |
| cg03421236 | 1.21E-08 | 1.20E-09 | -6.39 | 11.0406055 | -1.27E-01 | 49486155  | 49486278  | NC_000016.9  |
| cg12070351 | 1.21E-08 | 1.21E-09 | -6.39 | 11.0385582 | -7.89E-02 | 202613601 | 202613724 | NC_000001.10 |
| cg26231732 | 1.21E-08 | 1.21E-09 | -6.39 | 11.0377949 | -4.45E-02 | 100069542 | 100069665 | NC_000010.10 |
| cg08125125 | 1.21E-08 | 1.21E-09 | -6.39 | 11.0374699 | -9.94E-02 | 149980486 | 149980609 | NC_000005.9  |
| cg01263716 | 1.21E-08 | 1.21E-09 | -6.39 | 11.0370672 | -1.40E-02 | 2951590   | 2951713   | NC_000011.9  |
| cg16590792 | 1.21E-08 | 1.21E-09 | -6.39 | 11.0362214 | -1.40E-01 | 144888877 | 144889000 | NC_000002.11 |
| cg09905511 | 1.21E-08 | 1.21E-09 | -6.39 | 11.0360009 | -1.46E-01 | 77621916  | 77622039  | NC_000002.11 |
| cg16733136 | 1.21E-08 | 1.21E-09 | -6.39 | 11.0352544 | -8.03E-02 | 6404058   | 6404181   | NC_000001.10 |
| cg08148891 | 1.21E-08 | 1.21E-09 | -6.39 | 11.0342996 | -1.68E-01 | 13030309  | 13030432  | NC_000011.9  |
| cg16260355 | 1.21E-08 | 1.21E-09 | -6.39 | 11.0342448 | -5.41E-02 | 72575844  | 72575967  | NC_000010.10 |
| cg10011083 | 1.21E-08 | 1.21E-09 | -6.39 | 11.0342204 | -1.86E-02 | 55639278  | 55639401  | NC_000007.13 |

|            |          |          |       |            |           |           |           |              |
|------------|----------|----------|-------|------------|-----------|-----------|-----------|--------------|
| cg15099418 | 1.21E-08 | 1.21E-09 | -6.39 | 11.0339694 | -1.56E-01 | 117593637 | 117593760 | NC_000003.11 |
| cg02202742 | 1.21E-08 | 1.21E-09 | -6.39 | 11.0328067 | -9.75E-02 | 3695595   | 3695718   | NC_000016.9  |
| cg08715862 | 1.21E-08 | 1.21E-09 | -6.39 | 11.0321924 | -1.28E-01 | 67275028  | 67275151  | NC_000016.9  |
| cg01832218 | 1.22E-08 | 1.22E-09 | -6.39 | 11.0302354 | -1.37E-01 | 136201061 | 136201184 | NC_000009.11 |
| cg19244553 | 1.22E-08 | 1.22E-09 | -6.39 | 11.0300353 | -1.51E-01 | 2476987   | 2477110   | NC_000007.13 |
| cg24381155 | 1.22E-08 | 1.22E-09 | -6.39 | 11.0299551 | -1.16E-01 | 103289745 | 103289868 | NC_000010.10 |
| cg24851181 | 1.22E-08 | 1.22E-09 | -6.39 | 11.0290786 | -1.25E-01 | 138668187 | 138668310 | NC_000003.11 |
| cg20847292 | 1.22E-08 | 1.22E-09 | -6.39 | 11.0286339 | -1.15E-01 | 155931629 | 155931752 | NC_000001.10 |
| cg20215290 | 1.22E-08 | 1.22E-09 | -6.39 | 11.0284163 | -1.26E-01 | 32831428  | 32831551  | NC_000012.11 |
| cg01546047 | 1.22E-08 | 1.22E-09 | -6.39 | 11.0278117 | -1.32E-01 | 1167409   | 1167532   | NC_000004.11 |
| cg07719604 | 1.22E-08 | 1.22E-09 | -6.39 | 11.0266161 | -8.82E-02 | 67232460  | 67232583  | NC_000016.9  |
| cg00536718 | 1.22E-08 | 1.22E-09 | -6.39 | 11.0263096 | -1.17E-01 | 2478297   | 2478420   | NC_000007.13 |
| cg27240158 | 1.22E-08 | 1.22E-09 | -6.38 | 11.0252883 | -1.48E-01 | 12698019  | 12698142  | NC_000011.9  |
| cg00543443 | 1.22E-08 | 1.22E-09 | -6.38 | 11.0246347 | -6.51E-02 | 34638744  | 34638867  | NC_000020.10 |
| cg15306012 | 1.22E-08 | 1.22E-09 | -6.38 | 11.0241499 | -1.12E-01 | 67224199  | 67224322  | NC_000016.9  |
| cg11443523 | 1.23E-08 | 1.23E-09 | -6.38 | 11.0226332 | -4.92E-02 | 133815639 | 133815762 | NC_000009.11 |
| cg02417408 | 1.23E-08 | 1.23E-09 | -6.38 | 11.0224404 | -1.01E-01 | 52280688  | 52280811  | NC_000003.11 |
| cg23642001 | 1.23E-08 | 1.23E-09 | -6.38 | 11.0224039 | -4.20E-02 | 67025419  | 67025542  | NC_000008.10 |
| cg03239386 | 1.23E-08 | 1.23E-09 | -6.38 | 11.0214901 | -6.29E-02 | 45999978  | 46000101  | NC_000019.9  |
| cg03449389 | 1.23E-08 | 1.23E-09 | -6.38 | 11.0205646 | -2.82E-02 | 41889537  | 41889660  | NC_000006.11 |
| cg25567805 | 1.23E-08 | 1.23E-09 | -6.38 | 11.0191209 | -1.56E-01 | 112572766 | 112572889 | NC_000006.11 |
| cg27306787 | 1.23E-08 | 1.23E-09 | -6.38 | 11.0189089 | -1.32E-01 | 19879176  | 19879299  | NC_000022.10 |
| cg01960016 | 1.23E-08 | 1.23E-09 | -6.38 | 11.0181221 | -8.82E-02 | 174152363 | 174152486 | NC_000005.9  |
| cg24366564 | 1.23E-08 | 1.23E-09 | -6.38 | 11.0170759 | -9.16E-02 | 2843149   | 2843272   | NC_000017.10 |
| cg25729466 | 1.23E-08 | 1.23E-09 | -6.38 | 11.0166904 | -1.47E-01 | 195972365 | 195972488 | NC_000001.10 |



|            |          |          |       |            |           |           |           |              |
|------------|----------|----------|-------|------------|-----------|-----------|-----------|--------------|
| cg00914562 | 1.23E-08 | 1.23E-09 | -6.38 | 11.0162673 | -2.78E-02 | 23857269  | 23857392  | NC_000001.10 |
| cg15271054 | 1.24E-08 | 1.24E-09 | -6.38 | 11.0149208 | -9.81E-02 | 62077647  | 62077770  | NC_000020.10 |
| cg23889093 | 1.24E-08 | 1.24E-09 | -6.38 | 11.0142545 | -6.11E-02 | 39844656  | 39844779  | NC_000017.10 |
| cg02458188 | 1.24E-08 | 1.24E-09 | -6.38 | 11.0140302 | -1.37E-01 | 60966344  | 60966467  | NC_000015.9  |
| cg10267724 | 1.24E-08 | 1.24E-09 | -6.38 | 11.0131787 | -1.33E-01 | 24615715  | 24615838  | NC_000020.10 |
| cg04286030 | 1.24E-08 | 1.24E-09 | -6.38 | 11.0126459 | -8.16E-02 | 2313373   | 2313496   | NC_000001.10 |
| cg17560832 | 1.24E-08 | 1.24E-09 | -6.38 | 11.0111947 | -1.05E-01 | 130757336 | 130757459 | NC_000010.10 |
| cg04803798 | 1.24E-08 | 1.24E-09 | -6.38 | 11.0111433 | -1.41E-01 | 145642295 | 145642418 | NC_000008.10 |
| cg03874358 | 1.24E-08 | 1.24E-09 | -6.38 | 11.0108837 | -1.04E-01 | 17392384  | 17392507  | NC_000019.9  |
| cg22939709 | 1.24E-08 | 1.24E-09 | -6.38 | 11.0095719 | -1.02E-01 | 31498218  | 31498341  | NC_000022.10 |
| cg08251131 | 1.24E-08 | 1.24E-09 | -6.38 | 11.0094132 | -2.60E-02 | 227915846 | 227915969 | NC_000001.10 |
| cg24631450 | 1.24E-08 | 1.24E-09 | -6.38 | 11.0089908 | -1.84E-02 | 234262952 | 234263075 | NC_000002.11 |
| cg09230938 | 1.24E-08 | 1.24E-09 | -6.38 | 11.0086482 | -1.01E-01 | 183722448 | 183722571 | NC_000003.11 |
| cg14026602 | 1.24E-08 | 1.25E-09 | -6.38 | 11.0068459 | -4.26E-02 | 9056723   | 9056846   | NC_000016.9  |
| cg14381255 | 1.25E-08 | 1.25E-09 | -6.38 | 11.0048746 | -8.46E-02 | 113437214 | 113437337 | NC_000013.10 |
| cg09147710 | 1.25E-08 | 1.25E-09 | -6.38 | 11.0044264 | -3.63E-02 | 57607335  | 57607458  | NC_000020.10 |
| cg20969675 | 1.25E-08 | 1.25E-09 | -6.38 | 11.0030475 | -6.73E-02 | 62222808  | 62222931  | NC_000017.10 |
| cg05644602 | 1.25E-08 | 1.25E-09 | -6.38 | 11.0029762 | -1.19E-01 | 74795186  | 74795309  | NC_000002.11 |
| cg08839210 | 1.25E-08 | 1.25E-09 | -6.38 | 11.0023208 | -1.34E-01 | 27045048  | 27045171  | NC_000017.10 |
| cg18733690 | 1.25E-08 | 1.25E-09 | -6.38 | 11.0017532 | -1.21E-01 | 112896872 | 112896995 | NC_000010.10 |
| cg01936565 | 1.25E-08 | 1.25E-09 | -6.38 | 11.0015574 | -4.00E-02 | 1785618   | 1785741   | NC_000011.9  |
| cg00700596 | 1.25E-08 | 1.25E-09 | -6.38 | 11.00088   | -5.38E-02 | 47277029  | 47277152  | NC_000006.11 |
| cg01973456 | 1.25E-08 | 1.25E-09 | -6.38 | 11.0002854 | -1.66E-01 | 114918702 | 114918825 | NC_000013.10 |
| cg00407901 | 1.25E-08 | 1.26E-09 | -6.38 | 10.9997008 | -5.61E-02 | 7917212   | 7917335   | NC_000020.10 |
| cg18360755 | 1.25E-08 | 1.26E-09 | -6.38 | 10.9990874 | -7.74E-02 | 65251475  | 65251598  | NC_000002.11 |

|            |          |          |       |            |           |           |           |              |
|------------|----------|----------|-------|------------|-----------|-----------|-----------|--------------|
| cg00338749 | 1.25E-08 | 1.26E-09 | -6.38 | 10.9990163 | -7.92E-02 | 1036677   | 1036800   | NC_000011.9  |
| cg16107285 | 1.26E-08 | 1.26E-09 | -6.38 | 10.9976397 | -8.50E-02 | 99645031  | 99645154  | NC_000015.9  |
| cg22257056 | 1.26E-08 | 1.26E-09 | -6.38 | 10.9976005 | -1.11E-01 | 32462766  | 32462889  | NC_000003.11 |
| cg00816240 | 1.26E-08 | 1.26E-09 | -6.38 | 10.9964738 | -9.60E-02 | 232477075 | 232477198 | NC_000002.11 |
| cg08835221 | 1.26E-08 | 1.26E-09 | -6.38 | 10.9945101 | -6.83E-02 | 38071607  | 38071730  | NC_000022.10 |
| cg26184741 | 1.26E-08 | 1.26E-09 | -6.38 | 10.9933003 | -7.57E-02 | 9291739   | 9291862   | NC_000003.11 |
| cg00814597 | 1.26E-08 | 1.26E-09 | -6.38 | 10.9929992 | -6.40E-02 | 144386148 | 144386271 | NC_000006.11 |
| cg24587080 | 1.26E-08 | 1.26E-09 | -6.38 | 10.9924092 | -1.16E-01 | 160016373 | 160016496 | NC_000006.11 |
| cg00075967 | 1.26E-08 | 1.26E-09 | -6.38 | 10.9923689 | -1.31E-01 | 74495354  | 74495477  | NC_000015.9  |
| cg25951288 | 1.26E-08 | 1.27E-09 | -6.38 | 10.9919493 | -1.10E-01 | 77218480  | 77218603  | NC_000018.9  |
| cg10481740 | 1.27E-08 | 1.27E-09 | -6.38 | 10.9890559 | -4.06E-02 | 1857103   | 1857226   | NC_000004.11 |
| cg09243576 | 1.27E-08 | 1.27E-09 | -6.38 | 10.9889624 | -1.10E-01 | 46850588  | 46850711  | NC_000003.11 |
| cg14946515 | 1.27E-08 | 1.27E-09 | -6.38 | 10.9887463 | -2.56E-02 | 25989916  | 25990039  | NC_000004.11 |
| cg12758485 | 1.27E-08 | 1.27E-09 | -6.38 | 10.9877902 | -1.19E-01 | 168785396 | 168785519 | NC_000006.11 |
| cg12661343 | 1.27E-08 | 1.27E-09 | -6.38 | 10.9875066 | -4.92E-02 | 52312684  | 52312807  | NC_000003.11 |
| cg09596131 | 1.27E-08 | 1.27E-09 | -6.38 | 10.9871039 | -1.32E-01 | 19986567  | 19986690  | NC_000002.11 |
| cg00078221 | 1.27E-08 | 1.27E-09 | -6.38 | 10.9850606 | -8.55E-02 | 139927754 | 139927877 | NC_000005.9  |
| cg11800672 | 1.27E-08 | 1.27E-09 | -6.38 | 10.984936  | -1.61E-01 | 145642291 | 145642414 | NC_000008.10 |
| cg08162476 | 1.27E-08 | 1.27E-09 | -6.38 | 10.9847369 | -8.41E-02 | 13064001  | 13064124  | NC_000003.11 |
| cg15677364 | 1.27E-08 | 1.28E-09 | -6.38 | 10.9840582 | -1.56E-01 | 30687221  | 30687344  | NC_000006.11 |
| cg12198830 | 1.27E-08 | 1.28E-09 | -6.38 | 10.982747  | -6.45E-02 | 106645490 | 106645613 | NC_000012.11 |
| cg13488501 | 1.27E-08 | 1.28E-09 | -6.38 | 10.9824886 | -1.23E-01 | 46805584  | 46805707  | NC_000001.10 |
| cg00641679 | 1.27E-08 | 1.28E-09 | -6.38 | 10.9823207 | -1.36E-01 | 94230311  | 94230434  | NC_000008.10 |
| cg06263395 | 1.28E-08 | 1.28E-09 | -6.38 | 10.9815575 | -8.64E-02 | 46195640  | 46195763  | NC_000010.10 |
| cg23635728 | 1.28E-08 | 1.28E-09 | -6.38 | 10.9811005 | -1.23E-01 | 33765409  | 33765532  | NC_000007.13 |

|                  |          |          |       |            |           |           |           |              |
|------------------|----------|----------|-------|------------|-----------|-----------|-----------|--------------|
| cg07871636       | 1.28E-08 | 1.28E-09 | -6.38 | 10.9798145 | -3.59E-02 | 14017192  | 14017315  | NC_000019.9  |
| cg27646965       | 1.28E-08 | 1.28E-09 | -6.38 | 10.9794005 | -1.08E-01 | 238814032 | 238814155 | NC_000002.11 |
| cg04060366       | 1.28E-08 | 1.28E-09 | -6.38 | 10.9793718 | -1.14E-01 | 168079025 | 168079148 | NC_000006.11 |
| cg00688840       | 1.28E-08 | 1.28E-09 | -6.38 | 10.9793373 | -9.45E-02 | 106363051 | 106363174 | NC_000014.8  |
| cg01806261       | 1.28E-08 | 1.28E-09 | -6.38 | 10.9792713 | -6.77E-02 | 110722380 | 110722503 | NC_000007.13 |
| cg07955887       | 1.28E-08 | 1.28E-09 | -6.38 | 10.9786237 | -1.85E-01 | 8717926   | 8718049   | NC_000018.9  |
| cg06924873       | 1.28E-08 | 1.28E-09 | -6.38 | 10.9781939 | -1.05E-01 | 172943770 | 172943893 | NC_000002.11 |
| cg04579800       | 1.28E-08 | 1.28E-09 | -6.38 | 10.977835  | -3.86E-02 | 18451220  | 18451343  | NC_000019.9  |
| cg26390512       | 1.28E-08 | 1.29E-09 | -6.38 | 10.9765233 | -7.41E-02 | 6714166   | 6714289   | NC_000006.11 |
| cg13725958       | 1.28E-08 | 1.29E-09 | -6.38 | 10.9755218 | -4.82E-02 | 48712219  | 48712342  | NC_000017.10 |
| cg16571642       | 1.28E-08 | 1.29E-09 | -6.38 | 10.9754032 | -1.05E-01 | 158045996 | 158046119 | NC_000007.13 |
| cg26814835       | 1.28E-08 | 1.29E-09 | -6.38 | 10.9745884 | -1.36E-01 | 30195969  | 30196092  | NC_000020.10 |
| cg16631417       | 1.28E-08 | 1.29E-09 | -6.38 | 10.9744982 | -1.27E-01 | 41993127  | 41993250  | NC_000017.10 |
| ch.11.130657691R | 1.28E-08 | 1.29E-09 | -6.38 | 10.973771  | -6.69E-02 | 131152481 | 131152604 | NC_000011.9  |
| cg21176130       | 1.28E-08 | 1.29E-09 | -6.38 | 10.9736414 | -1.51E-01 | 30458158  | 30458281  | NC_000006.11 |
| cg21531604       | 1.28E-08 | 1.29E-09 | -6.38 | 10.9735175 | -1.08E-01 | 2551598   | 2551721   | NC_000007.13 |
| cg13745832       | 1.29E-08 | 1.29E-09 | -6.37 | 10.9723976 | -7.99E-02 | 15405942  | 15406065  | NC_000017.10 |
| cg04016485       | 1.29E-08 | 1.29E-09 | -6.37 | 10.9717692 | -1.09E-01 | 26244324  | 26244447  | NC_000012.11 |
| cg11628739       | 1.29E-08 | 1.29E-09 | -6.37 | 10.9713437 | -1.13E-01 | 60731254  | 60731377  | NC_000017.10 |
| ch.1.117057666F  | 1.29E-08 | 1.29E-09 | -6.37 | 10.9701887 | -3.97E-02 | 117256143 | 117256266 | NC_000001.10 |
| cg06204229       | 1.29E-08 | 1.30E-09 | -6.37 | 10.9687269 | -1.07E-01 | 52865917  | 52866040  | NC_000003.11 |
| cg00486113       | 1.29E-08 | 1.30E-09 | -6.37 | 10.9683887 | -6.17E-02 | 31105711  | 31105834  | NC_000006.11 |
| cg05098551       | 1.29E-08 | 1.30E-09 | -6.37 | 10.967601  | -1.15E-01 | 179344725 | 179344848 | NC_000002.11 |
| cg19584674       | 1.29E-08 | 1.30E-09 | -6.37 | 10.9670034 | -6.90E-02 | 24898818  | 24898941  | NC_000014.8  |
| cg24375218       | 1.30E-08 | 1.30E-09 | -6.37 | 10.9653618 | -1.82E-01 | 46461399  | 46461522  | NC_000018.9  |

|            |          |          |       |            |           |           |           |              |
|------------|----------|----------|-------|------------|-----------|-----------|-----------|--------------|
| cg24709511 | 1.30E-08 | 1.30E-09 | -6.37 | 10.9652795 | -6.95E-02 | 2251570   | 2251693   | NC_000001.10 |
| cg13531509 | 1.30E-08 | 1.30E-09 | -6.37 | 10.9640384 | -5.88E-02 | 79793353  | 79793476  | NC_000010.10 |
| cg01538021 | 1.30E-08 | 1.30E-09 | -6.37 | 10.9637405 | -2.50E-02 | 38296400  | 38296523  | NC_000017.10 |
| cg22675956 | 1.30E-08 | 1.30E-09 | -6.37 | 10.9634134 | -6.51E-02 | 171882060 | 171882183 | NC_000005.9  |
| cg20023102 | 1.30E-08 | 1.30E-09 | -6.37 | 10.9632643 | -7.23E-02 | 80055049  | 80055172  | NC_000013.10 |
| cg14248680 | 1.30E-08 | 1.30E-09 | -6.37 | 10.9626406 | -4.45E-02 | 2972186   | 2972309   | NC_000006.11 |
| cg08074084 | 1.30E-08 | 1.30E-09 | -6.37 | 10.9623575 | -2.78E-02 | 65880369  | 65880492  | NC_000014.8  |
| cg07624915 | 1.30E-08 | 1.30E-09 | -6.37 | 10.9621888 | -4.21E-02 | 3689151   | 3689274   | NC_000001.10 |
| cg07903860 | 1.30E-08 | 1.30E-09 | -6.37 | 10.9619487 | -4.04E-02 | 14995957  | 14996080  | NC_000010.10 |
| cg10345522 | 1.30E-08 | 1.31E-09 | -6.37 | 10.9607759 | -7.91E-02 | 105169673 | 105169796 | NC_000014.8  |
| cg13345558 | 1.30E-08 | 1.31E-09 | -6.37 | 10.960553  | -1.11E-01 | 40796738  | 40796861  | NC_000005.9  |
| cg07142009 | 1.30E-08 | 1.31E-09 | -6.37 | 10.9603705 | -1.95E-01 | 6656315   | 6656438   | NC_000017.10 |
| cg05945230 | 1.30E-08 | 1.31E-09 | -6.37 | 10.9595901 | -1.26E-01 | 12425767  | 12425890  | NC_000017.10 |
| cg15540623 | 1.30E-08 | 1.31E-09 | -6.37 | 10.9584162 | -9.88E-02 | 52388221  | 52388344  | NC_000012.11 |
| cg01161055 | 1.31E-08 | 1.31E-09 | -6.37 | 10.9573404 | -7.86E-02 | 32437813  | 32437936  | NC_000012.11 |
| cg06240896 | 1.31E-08 | 1.31E-09 | -6.37 | 10.956435  | -2.85E-02 | 100136768 | 100136891 | NC_000007.13 |
| cg03855656 | 1.31E-08 | 1.31E-09 | -6.37 | 10.9557272 | -6.73E-02 | 42896105  | 42896228  | NC_000022.10 |
| cg14951488 | 1.31E-08 | 1.32E-09 | -6.37 | 10.9542256 | -4.40E-02 | 95256188  | 95256311  | NC_000010.10 |
| cg02589949 | 1.31E-08 | 1.32E-09 | -6.37 | 10.9520637 | -1.08E-01 | 13027685  | 13027808  | NC_000012.11 |
| cg23018117 | 1.31E-08 | 1.32E-09 | -6.37 | 10.9520086 | -1.65E-01 | 150413687 | 150413810 | NC_000007.13 |
| cg14663177 | 1.31E-08 | 1.32E-09 | -6.37 | 10.951894  | -1.63E-01 | 38373737  | 38373860  | NC_000002.11 |
| cg07823935 | 1.31E-08 | 1.32E-09 | -6.37 | 10.9518795 | -3.38E-02 | 183902842 | 183902965 | NC_000002.11 |
| cg26015040 | 1.31E-08 | 1.32E-09 | -6.37 | 10.9517344 | -4.27E-02 | 7764362   | 7764485   | NC_000019.9  |
| cg17006281 | 1.31E-08 | 1.32E-09 | -6.37 | 10.9516262 | -1.32E-01 | 154589595 | 154589718 | NC_000007.13 |
| cg16092390 | 1.31E-08 | 1.32E-09 | -6.37 | 10.9513737 | -9.54E-02 | 36720207  | 36720330  | NC_000022.10 |

|            |          |          |       |            |           |           |           |              |
|------------|----------|----------|-------|------------|-----------|-----------|-----------|--------------|
| cg22344841 | 1.31E-08 | 1.32E-09 | -6.37 | 10.9504434 | -1.44E-01 | 20421656  | 20421779  | NC_000002.11 |
| cg11574001 | 1.31E-08 | 1.32E-09 | -6.37 | 10.9503762 | -3.41E-02 | 706070    | 706193    | NC_000011.9  |
| cg08595782 | 1.31E-08 | 1.32E-09 | -6.37 | 10.9502208 | -7.21E-02 | 88096995  | 88097118  | NC_000016.9  |
| cg00469015 | 1.31E-08 | 1.32E-09 | -6.37 | 10.9497371 | -1.26E-01 | 69744684  | 69744807  | NC_000015.9  |
| cg04415270 | 1.31E-08 | 1.32E-09 | -6.37 | 10.9496533 | -1.33E-01 | 102091202 | 102091325 | NC_000002.11 |
| cg04524040 | 1.31E-08 | 1.32E-09 | -6.37 | 10.9495711 | -9.53E-02 | 4153364   | 4153487   | NC_000019.9  |
| cg23050996 | 1.32E-08 | 1.32E-09 | -6.37 | 10.9492461 | -5.01E-02 | 114514230 | 114514353 | NC_000002.11 |
| cg24279744 | 1.32E-08 | 1.32E-09 | -6.37 | 10.9491134 | -1.04E-01 | 10408402  | 10408525  | NC_000003.11 |
| cg26504110 | 1.32E-08 | 1.32E-09 | -6.37 | 10.9489106 | -1.33E-01 | 41130041  | 41130164  | NC_000019.9  |
| cg23774016 | 1.32E-08 | 1.32E-09 | -6.37 | 10.9488632 | -1.22E-01 | 159284082 | 159284205 | NC_000001.10 |
| cg27321079 | 1.32E-08 | 1.32E-09 | -6.37 | 10.9488326 | -3.99E-02 | 100034454 | 100034577 | NC_000007.13 |
| cg05556202 | 1.32E-08 | 1.32E-09 | -6.37 | 10.9484857 | -1.09E-01 | 196065106 | 196065229 | NC_000003.11 |
| cg06390079 | 1.32E-08 | 1.33E-09 | -6.37 | 10.9469039 | -8.89E-02 | 19648855  | 19648978  | NC_000017.10 |
| cg08906263 | 1.32E-08 | 1.33E-09 | -6.37 | 10.9464793 | -2.67E-02 | 57261572  | 57261695  | NC_000003.11 |
| cg13010797 | 1.32E-08 | 1.33E-09 | -6.37 | 10.9451223 | -5.69E-02 | 42725643  | 42725766  | NC_000003.11 |
| cg10231067 | 1.32E-08 | 1.33E-09 | -6.37 | 10.9449962 | -1.46E-01 | 19254731  | 19254854  | NC_000001.10 |
| cg02501746 | 1.32E-08 | 1.33E-09 | -6.37 | 10.9448725 | -1.36E-01 | 30209513  | 30209636  | NC_000007.13 |
| cg12703371 | 1.32E-08 | 1.33E-09 | -6.37 | 10.9424028 | -2.91E-02 | 103266563 | 103266686 | NC_000004.11 |
| cg14431165 | 1.33E-08 | 1.34E-09 | -6.37 | 10.9393189 | -1.24E-01 | 44160222  | 44160345  | NC_000006.11 |
| cg00161556 | 1.33E-08 | 1.34E-09 | -6.37 | 10.939078  | -1.27E-01 | 19138045  | 19138168  | NC_000011.9  |
| cg03025061 | 1.33E-08 | 1.34E-09 | -6.37 | 10.9369208 | -2.08E-02 | 109261275 | 109261398 | NC_000008.10 |
| cg25907138 | 1.33E-08 | 1.34E-09 | -6.37 | 10.9360806 | -1.08E-01 | 206730974 | 206731097 | NC_000002.11 |
| cg20306511 | 1.33E-08 | 1.34E-09 | -6.37 | 10.9359995 | -4.42E-02 | 19718791  | 19718914  | NC_000022.10 |
| cg16689634 | 1.34E-08 | 1.34E-09 | -6.37 | 10.9334661 | -3.17E-02 | 47489539  | 47489662  | NC_000001.10 |
| cg01128574 | 1.34E-08 | 1.34E-09 | -6.37 | 10.9326909 | -1.55E-01 | 2058865   | 2058988   | NC_000007.13 |

|            |          |          |       |            |           |           |           |              |
|------------|----------|----------|-------|------------|-----------|-----------|-----------|--------------|
| cg10407598 | 1.34E-08 | 1.34E-09 | -6.37 | 10.9326748 | -1.44E-01 | 73629365  | 73629488  | NC_000017.10 |
| cg03139228 | 1.34E-08 | 1.34E-09 | -6.37 | 10.9323941 | -6.49E-02 | 77082448  | 77082571  | NC_000018.9  |
| cg01154445 | 1.34E-08 | 1.35E-09 | -6.37 | 10.9309669 | -1.55E-01 | 206548171 | 206548294 | NC_000002.11 |
| cg25114183 | 1.34E-08 | 1.35E-09 | -6.37 | 10.9299437 | -1.16E-01 | 152147803 | 152147926 | NC_000004.11 |
| cg22730459 | 1.34E-08 | 1.35E-09 | -6.37 | 10.9297346 | -8.73E-02 | 83548035  | 83548158  | NC_000011.9  |
| cg17804999 | 1.34E-08 | 1.35E-09 | -6.37 | 10.9293222 | -1.60E-02 | 105753126 | 105753249 | NC_000007.13 |
| cg22476504 | 1.34E-08 | 1.35E-09 | -6.37 | 10.9291567 | -1.49E-01 | 42277840  | 42277963  | NC_000002.11 |
| cg19433118 | 1.34E-08 | 1.35E-09 | -6.37 | 10.9288555 | -7.18E-02 | 43977423  | 43977546  | NC_000020.10 |
| cg14398731 | 1.34E-08 | 1.35E-09 | -6.37 | 10.9284954 | -1.16E-01 | 119993732 | 119993855 | NC_000011.9  |
| cg25753010 | 1.34E-08 | 1.35E-09 | -6.37 | 10.9268359 | -4.17E-02 | 32889434  | 32889557  | NC_000013.10 |
| cg26259865 | 1.34E-08 | 1.35E-09 | -6.37 | 10.9265422 | -1.01E-01 | 2880359   | 2880482   | NC_000016.9  |
| cg13295878 | 1.34E-08 | 1.35E-09 | -6.37 | 10.9264742 | -1.64E-01 | 19649293  | 19649416  | NC_000017.10 |
| cg15358752 | 1.34E-08 | 1.35E-09 | -6.37 | 10.9264734 | -4.48E-02 | 228566333 | 228566456 | NC_000001.10 |
| cg08974852 | 1.34E-08 | 1.35E-09 | -6.37 | 10.9261771 | -1.22E-01 | 104252828 | 104252951 | NC_000012.11 |
| cg20721320 | 1.34E-08 | 1.35E-09 | -6.37 | 10.9259455 | -9.72E-02 | 177660036 | 177660159 | NC_000005.9  |
| cg07554966 | 1.34E-08 | 1.35E-09 | -6.37 | 10.925902  | -2.43E-02 | 75483803  | 75483926  | NC_000003.11 |
| cg14819242 | 1.35E-08 | 1.35E-09 | -6.37 | 10.925109  | -1.71E-01 | 125782749 | 125782872 | NC_000005.9  |
| cg18456803 | 1.35E-08 | 1.36E-09 | -6.37 | 10.9230463 | -8.75E-02 | 41593519  | 41593642  | NC_000013.10 |
| cg15921587 | 1.35E-08 | 1.36E-09 | -6.36 | 10.9189301 | -6.76E-02 | 73144353  | 73144476  | NC_000002.11 |
| cg07690768 | 1.35E-08 | 1.36E-09 | -6.36 | 10.9184089 | -1.00E-01 | 32370933  | 32371056  | NC_000012.11 |
| cg17825156 | 1.35E-08 | 1.36E-09 | -6.36 | 10.9181384 | -4.79E-02 | 67391082  | 67391205  | NC_000001.10 |
| cg10175719 | 1.35E-08 | 1.36E-09 | -6.36 | 10.9180714 | -4.59E-02 | 28592238  | 28592361  | NC_000010.10 |
| cg04794690 | 1.36E-08 | 1.37E-09 | -6.36 | 10.9165912 | -1.11E-01 | 17768059  | 17768182  | NC_000001.10 |
| cg03662648 | 1.36E-08 | 1.37E-09 | -6.36 | 10.91648   | -1.06E-01 | 6481826   | 6481949   | NC_000019.9  |
| cg22510037 | 1.36E-08 | 1.37E-09 | -6.36 | 10.9159191 | -4.75E-02 | 113772128 | 113772251 | NC_000012.11 |

|                  |          |          |       |            |           |           |           |              |
|------------------|----------|----------|-------|------------|-----------|-----------|-----------|--------------|
| cg23227726       | 1.36E-08 | 1.37E-09 | -6.36 | 10.9158678 | -7.64E-02 | 72143885  | 72144008  | NC_000011.9  |
| cg25287482       | 1.36E-08 | 1.37E-09 | -6.36 | 10.9155781 | -8.16E-02 | 23884847  | 23884970  | NC_000001.10 |
| cg00478435       | 1.36E-08 | 1.37E-09 | -6.36 | 10.9155565 | -7.24E-02 | 32254706  | 32254829  | NC_000020.10 |
| cg04156940       | 1.36E-08 | 1.37E-09 | -6.36 | 10.9143876 | -1.43E-01 | 55197704  | 55197827  | NC_000007.13 |
| cg10767008       | 1.36E-08 | 1.37E-09 | -6.36 | 10.9140957 | -1.39E-01 | 157794688 | 157794811 | NC_000007.13 |
| cg12754671       | 1.36E-08 | 1.37E-09 | -6.36 | 10.9133305 | -6.14E-02 | 161171876 | 161171999 | NC_000001.10 |
| cg01033299       | 1.36E-08 | 1.37E-09 | -6.36 | 10.9128888 | -1.39E-01 | 53601015  | 53601138  | NC_000012.11 |
| cg13518968       | 1.36E-08 | 1.37E-09 | -6.36 | 10.9120781 | -1.18E-01 | 20138378  | 20138501  | NC_000008.10 |
| cg09717516       | 1.36E-08 | 1.37E-09 | -6.36 | 10.9112908 | -9.07E-02 | 1949480   | 1949603   | NC_000005.9  |
| cg05867134       | 1.36E-08 | 1.37E-09 | -6.36 | 10.91078   | -8.41E-02 | 31009035  | 31009158  | NC_000016.9  |
| cg05580671       | 1.36E-08 | 1.38E-09 | -6.36 | 10.910609  | -1.22E-01 | 38006196  | 38006319  | NC_000008.10 |
| cg26405020       | 1.37E-08 | 1.38E-09 | -6.36 | 10.9102067 | -1.33E-01 | 91427363  | 91427486  | NC_000015.9  |
| cg20545721       | 1.37E-08 | 1.38E-09 | -6.36 | 10.9098658 | -8.71E-02 | 144925333 | 144925456 | NC_000008.10 |
| cg22258976       | 1.37E-08 | 1.38E-09 | -6.36 | 10.9089991 | -2.56E-02 | 65628542  | 65628665  | NC_000011.9  |
| ch.10.132220714F | 1.37E-08 | 1.38E-09 | -6.36 | 10.9089428 | -1.52E-02 | 132330724 | 132330847 | NC_000010.10 |
| cg05416753       | 1.37E-08 | 1.38E-09 | -6.36 | 10.908923  | -1.32E-01 | 98681235  | 98681358  | NC_000003.11 |
| cg24203542       | 1.37E-08 | 1.38E-09 | -6.36 | 10.9085198 | -1.20E-01 | 19462284  | 19462407  | NC_000011.9  |
| cg19024296       | 1.37E-08 | 1.38E-09 | -6.36 | 10.9076831 | -3.26E-02 | 1324834   | 1324957   | NC_000019.9  |
| cg20450318       | 1.37E-08 | 1.38E-09 | -6.36 | 10.9072785 | -1.48E-01 | 65415260  | 65415383  | NC_000011.9  |
| cg08611402       | 1.37E-08 | 1.38E-09 | -6.36 | 10.9072218 | -1.09E-01 | 80933006  | 80933129  | NC_000004.11 |
| cg24661184       | 1.37E-08 | 1.38E-09 | -6.36 | 10.9071677 | -1.13E-01 | 47416959  | 47417082  | NC_000007.13 |
| cg11631579       | 1.37E-08 | 1.38E-09 | -6.36 | 10.9071382 | -6.54E-02 | 118309902 | 118310025 | NC_000005.9  |
| cg04409048       | 1.37E-08 | 1.38E-09 | -6.36 | 10.9069803 | -6.44E-02 | 146203625 | 146203748 | NC_000006.11 |
| cg06038342       | 1.37E-08 | 1.38E-09 | -6.36 | 10.9066912 | -1.38E-01 | 114864808 | 114864931 | NC_000013.10 |
| cg18443571       | 1.37E-08 | 1.38E-09 | -6.36 | 10.9066676 | -1.25E-01 | 90547692  | 90547815  | NC_000015.9  |

|            |          |          |       |            |           |           |           |              |
|------------|----------|----------|-------|------------|-----------|-----------|-----------|--------------|
| cg15700776 | 1.37E-08 | 1.38E-09 | -6.36 | 10.9057164 | -8.22E-02 | 108852048 | 108852171 | NC_000004.11 |
| cg20471045 | 1.37E-08 | 1.38E-09 | -6.36 | 10.9055771 | -4.13E-02 | 49568214  | 49568337  | NC_000019.9  |
| cg16820186 | 1.37E-08 | 1.38E-09 | -6.36 | 10.9047286 | -1.27E-01 | 17373103  | 17373226  | NC_000011.9  |
| cg04303590 | 1.37E-08 | 1.38E-09 | -6.36 | 10.9044143 | -1.37E-01 | 116890539 | 116890662 | NC_000006.11 |
| cg03981596 | 1.37E-08 | 1.39E-09 | -6.36 | 10.9032313 | -7.81E-02 | 21695771  | 21695894  | NC_000016.9  |
| cg10882522 | 1.38E-08 | 1.39E-09 | -6.36 | 10.9008647 | -1.09E-01 | 57199792  | 57199915  | NC_000003.11 |
| cg08962767 | 1.38E-08 | 1.39E-09 | -6.36 | 10.9005023 | -2.28E-02 | 53773782  | 53773905  | NC_000012.11 |
| cg24433341 | 1.38E-08 | 1.39E-09 | -6.36 | 10.8997651 | -7.31E-02 | 72272568  | 72272691  | NC_000017.10 |
| cg15414828 | 1.38E-08 | 1.39E-09 | -6.36 | 10.899031  | -3.67E-02 | 71791511  | 71791634  | NC_000011.9  |
| cg13716880 | 1.38E-08 | 1.39E-09 | -6.36 | 10.8973794 | -8.03E-02 | 10148773  | 10148896  | NC_000002.11 |
| cg25730441 | 1.38E-08 | 1.40E-09 | -6.36 | 10.8961242 | -3.36E-02 | 90167783  | 90167906  | NC_000014.8  |
| cg10589539 | 1.38E-08 | 1.40E-09 | -6.36 | 10.8959531 | -9.63E-02 | 119514395 | 119514518 | NC_000003.11 |
| cg22461615 | 1.38E-08 | 1.40E-09 | -6.36 | 10.8949232 | -4.51E-02 | 83821917  | 83822040  | NC_000004.11 |
| cg17818792 | 1.39E-08 | 1.40E-09 | -6.36 | 10.8943315 | -1.48E-01 | 14115538  | 14115661  | NC_000017.10 |
| cg02922817 | 1.39E-08 | 1.40E-09 | -6.36 | 10.8940738 | -1.24E-01 | 104623613 | 104623736 | NC_000014.8  |
| cg14909545 | 1.39E-08 | 1.40E-09 | -6.36 | 10.8933476 | -2.88E-02 | 56521953  | 56522076  | NC_000012.11 |
| cg21376090 | 1.39E-08 | 1.40E-09 | -6.36 | 10.8929431 | -1.47E-01 | 106201547 | 106201670 | NC_000006.11 |
| cg19581790 | 1.39E-08 | 1.40E-09 | -6.36 | 10.8924711 | -1.37E-01 | 222644621 | 222644744 | NC_000002.11 |
| cg03341641 | 1.39E-08 | 1.40E-09 | -6.36 | 10.8921781 | -8.73E-02 | 49810606  | 49810729  | NC_000010.10 |
| cg27228712 | 1.39E-08 | 1.40E-09 | -6.36 | 10.8914985 | -1.74E-01 | 570041    | 570164    | NC_000007.13 |
| cg02469457 | 1.39E-08 | 1.40E-09 | -6.36 | 10.890715  | -2.82E-02 | 242254758 | 242254881 | NC_000002.11 |
| cg24072331 | 1.39E-08 | 1.41E-09 | -6.36 | 10.8878785 | -6.87E-02 | 125584119 | 125584242 | NC_000006.11 |
| cg09392819 | 1.40E-08 | 1.41E-09 | -6.36 | 10.8867487 | -3.36E-02 | 26568944  | 26569067  | NC_000002.11 |
| cg02763032 | 1.40E-08 | 1.41E-09 | -6.36 | 10.886372  | -6.00E-02 | 74425761  | 74425884  | NC_000002.11 |
| cg26484108 | 1.40E-08 | 1.41E-09 | -6.36 | 10.8862309 | -1.37E-01 | 117580995 | 117581118 | NC_000012.11 |



|                |          |          |       |            |           |           |           |              |
|----------------|----------|----------|-------|------------|-----------|-----------|-----------|--------------|
| cg13030790     | 1.40E-08 | 1.41E-09 | -6.36 | 10.8847418 | -1.74E-01 | 36421503  | 36421626  | NC_000021.8  |
| cg00206779     | 1.40E-08 | 1.41E-09 | -6.36 | 10.8831745 | -1.36E-01 | 105341338 | 105341461 | NC_000008.10 |
| cg05658793     | 1.40E-08 | 1.41E-09 | -6.36 | 10.8827647 | -8.88E-02 | 18893382  | 18893505  | NC_000022.10 |
| cg00370106     | 1.40E-08 | 1.42E-09 | -6.36 | 10.8821267 | -1.80E-01 | 159071106 | 159071229 | NC_000006.11 |
| cg12492027     | 1.40E-08 | 1.42E-09 | -6.36 | 10.8819315 | -8.96E-02 | 35089174  | 35089297  | NC_000020.10 |
| cg06775361     | 1.41E-08 | 1.42E-09 | -6.36 | 10.8776464 | -1.35E-01 | 141188341 | 141188464 | NC_000004.11 |
| cg01576275     | 1.41E-08 | 1.42E-09 | -6.36 | 10.8766014 | -9.40E-02 | 43409880  | 43410003  | NC_000022.10 |
| cg02907064     | 1.41E-08 | 1.42E-09 | -6.36 | 10.8763787 | -8.79E-02 | 10928327  | 10928450  | NC_000019.9  |
| cg05617452     | 1.41E-08 | 1.43E-09 | -6.36 | 10.8752605 | -4.67E-02 | 1877333   | 1877456   | NC_000016.9  |
| cg01639898     | 1.41E-08 | 1.43E-09 | -6.36 | 10.8733042 | -1.20E-01 | 32083012  | 32083135  | NC_000001.10 |
| cg15961993     | 1.41E-08 | 1.43E-09 | -6.36 | 10.8724977 | -1.78E-01 | 132930478 | 132930601 | NC_000003.11 |
| cg04753786     | 1.41E-08 | 1.43E-09 | -6.36 | 10.8724711 | -4.16E-02 | 48281744  | 48281867  | NC_000019.9  |
| ch.21.366880F  | 1.42E-08 | 1.43E-09 | -6.36 | 10.8720784 | -3.79E-02 | 33747404  | 33747527  | NC_000021.8  |
| cg21477717     | 1.42E-08 | 1.43E-09 | -6.36 | 10.8716843 | -5.45E-02 | 17982682  | 17982805  | NC_000019.9  |
| cg10288437     | 1.42E-08 | 1.43E-09 | -6.36 | 10.8705927 | -9.76E-02 | 158432894 | 158433017 | NC_000006.11 |
| ch.20.1534602F | 1.42E-08 | 1.44E-09 | -6.36 | 10.8686506 | -3.53E-02 | 62645068  | 62645191  | NC_000020.10 |
| cg16272777     | 1.42E-08 | 1.44E-09 | -6.36 | 10.8684954 | -5.34E-02 | 23694780  | 23694903  | NC_000001.10 |
| cg25091829     | 1.42E-08 | 1.44E-09 | -6.36 | 10.868312  | -3.94E-02 | 116601170 | 116601293 | NC_000006.11 |
| cg22065124     | 1.42E-08 | 1.44E-09 | -6.36 | 10.868188  | -1.28E-01 | 73649955  | 73650078  | NC_000013.10 |
| cg04653776     | 1.42E-08 | 1.44E-09 | -6.36 | 10.8679419 | -5.97E-02 | 32399093  | 32399216  | NC_000020.10 |
| cg26684511     | 1.42E-08 | 1.44E-09 | -6.36 | 10.8676939 | -3.74E-02 | 185827275 | 185827398 | NC_000003.11 |
| cg14528881     | 1.42E-08 | 1.44E-09 | -6.35 | 10.866692  | -3.30E-02 | 113864354 | 113864477 | NC_000013.10 |
| cg13018639     | 1.42E-08 | 1.44E-09 | -6.35 | 10.8657167 | -1.36E-01 | 30027969  | 30028092  | NC_000014.8  |
| cg23642827     | 1.42E-08 | 1.44E-09 | -6.35 | 10.8653891 | -1.24E-01 | 98751284  | 98751407  | NC_000010.10 |
| cg23004043     | 1.42E-08 | 1.44E-09 | -6.35 | 10.8651763 | -3.64E-02 | 23387995  | 23388118  | NC_000014.8  |

|                |          |          |       |            |           |           |           |              |
|----------------|----------|----------|-------|------------|-----------|-----------|-----------|--------------|
| cg26734350     | 1.43E-08 | 1.44E-09 | -6.35 | 10.8647089 | -9.92E-02 | 57662008  | 57662131  | NC_000016.9  |
| cg04834097     | 1.43E-08 | 1.44E-09 | -6.35 | 10.8644374 | -7.85E-02 | 63774078  | 63774201  | NC_000007.13 |
| cg24175777     | 1.43E-08 | 1.44E-09 | -6.35 | 10.864028  | -2.93E-02 | 149119846 | 149119969 | NC_000007.13 |
| cg06427502     | 1.43E-08 | 1.44E-09 | -6.35 | 10.8637049 | -6.67E-02 | 3012800   | 3012923   | NC_000011.9  |
| cg06511678     | 1.43E-08 | 1.44E-09 | -6.35 | 10.8628143 | -1.15E-01 | 7038746   | 7038869   | NC_000018.9  |
| cg15042150     | 1.43E-08 | 1.44E-09 | -6.35 | 10.8626587 | -9.87E-02 | 18654681  | 18654804  | NC_000019.9  |
| cg03948207     | 1.43E-08 | 1.44E-09 | -6.35 | 10.8626482 | -5.34E-02 | 114302014 | 114302137 | NC_000001.10 |
| ch.1.59074111F | 1.43E-08 | 1.45E-09 | -6.35 | 10.8609128 | -3.88E-02 | 59301523  | 59301646  | NC_000001.10 |
| cg23731991     | 1.43E-08 | 1.45E-09 | -6.35 | 10.8606079 | -3.10E-02 | 130795031 | 130795154 | NC_000007.13 |
| cg14372171     | 1.43E-08 | 1.45E-09 | -6.35 | 10.8602349 | -6.85E-02 | 44093010  | 44093133  | NC_000015.9  |
| cg13725826     | 1.43E-08 | 1.45E-09 | -6.35 | 10.8597426 | -1.45E-01 | 100211213 | 100211336 | NC_000014.8  |
| cg00003287     | 1.43E-08 | 1.45E-09 | -6.35 | 10.8597171 | -6.63E-02 | 201346149 | 201346272 | NC_000001.10 |
| cg24911283     | 1.43E-08 | 1.45E-09 | -6.35 | 10.8590632 | -7.88E-02 | 24780369  | 24780492  | NC_000004.11 |
| cg02788230     | 1.43E-08 | 1.45E-09 | -6.35 | 10.8589931 | -5.64E-02 | 4167479   | 4167602   | NC_000004.11 |
| cg06285439     | 1.43E-08 | 1.45E-09 | -6.35 | 10.8589327 | -1.16E-01 | 206613589 | 206613712 | NC_000002.11 |
| cg10982275     | 1.43E-08 | 1.45E-09 | -6.35 | 10.8578444 | -1.05E-01 | 41059627  | 41059750  | NC_000015.9  |
| cg16856722     | 1.44E-08 | 1.45E-09 | -6.35 | 10.8574823 | -1.60E-01 | 9920535   | 9920658   | NC_000003.11 |
| cg06839900     | 1.44E-08 | 1.45E-09 | -6.35 | 10.8572396 | -8.31E-02 | 2461900   | 2462023   | NC_000001.10 |
| cg01821113     | 1.44E-08 | 1.45E-09 | -6.35 | 10.8571717 | -1.33E-01 | 218277531 | 218277654 | NC_000002.11 |
| cg07095347     | 1.44E-08 | 1.45E-09 | -6.35 | 10.8571282 | -1.29E-01 | 133253256 | 133253379 | NC_000006.11 |
| cg01994190     | 1.44E-08 | 1.45E-09 | -6.35 | 10.8570093 | -9.21E-02 | 119768574 | 119768697 | NC_000002.11 |
| cg19618897     | 1.44E-08 | 1.45E-09 | -6.35 | 10.8555611 | -8.97E-02 | 65242892  | 65243015  | NC_000017.10 |
| cg03228132     | 1.44E-08 | 1.46E-09 | -6.35 | 10.8550268 | -1.63E-01 | 129781429 | 129781552 | NC_000007.13 |
| cg02331673     | 1.44E-08 | 1.46E-09 | -6.35 | 10.8549082 | -1.10E-01 | 1102389   | 1102512   | NC_000001.10 |
| cg01200051     | 1.44E-08 | 1.46E-09 | -6.35 | 10.8545462 | -8.40E-02 | 55954647  | 55954770  | NC_000007.13 |

|            |          |          |       |            |           |           |           |              |
|------------|----------|----------|-------|------------|-----------|-----------|-----------|--------------|
| cg17415859 | 1.44E-08 | 1.46E-09 | -6.35 | 10.8518121 | -1.34E-01 | 4218990   | 4219113   | NC_000007.13 |
| cg07793807 | 1.44E-08 | 1.46E-09 | -6.35 | 10.850779  | -1.29E-01 | 226823363 | 226823486 | NC_000001.10 |
| cg05970660 | 1.44E-08 | 1.46E-09 | -6.35 | 10.8506584 | -4.47E-02 | 32820218  | 32820341  | NC_000016.9  |
| cg09774842 | 1.45E-08 | 1.46E-09 | -6.35 | 10.8502109 | -9.73E-02 | 3052483   | 3052606   | NC_000020.10 |
| cg10914292 | 1.45E-08 | 1.46E-09 | -6.35 | 10.8493186 | -1.24E-01 | 67746210  | 67746333  | NC_000005.9  |
| cg08413402 | 1.45E-08 | 1.46E-09 | -6.35 | 10.8487224 | -3.03E-02 | 32313017  | 32313140  | NC_000005.9  |
| cg16734845 | 1.45E-08 | 1.47E-09 | -6.35 | 10.8485006 | -1.29E-01 | 44781962  | 44782085  | NC_000015.9  |
| cg09489757 | 1.45E-08 | 1.47E-09 | -6.35 | 10.8472899 | -1.26E-01 | 41006345  | 41006468  | NC_000006.11 |
| cg25032321 | 1.45E-08 | 1.47E-09 | -6.35 | 10.8461915 | -1.18E-01 | 99227533  | 99227656  | NC_000013.10 |
| cg26115228 | 1.45E-08 | 1.47E-09 | -6.35 | 10.8458987 | -1.26E-01 | 85116113  | 85116236  | NC_000002.11 |
| cg00823095 | 1.45E-08 | 1.47E-09 | -6.35 | 10.8446847 | -4.95E-02 | 208416449 | 208416572 | NC_000001.10 |
| cg18967180 | 1.45E-08 | 1.47E-09 | -6.35 | 10.8440403 | -4.11E-02 | 140241567 | 140241690 | NC_000007.13 |
| cg12422154 | 1.45E-08 | 1.47E-09 | -6.35 | 10.8436932 | -1.23E-01 | 30130819  | 30130942  | NC_000006.11 |
| cg04052570 | 1.45E-08 | 1.47E-09 | -6.35 | 10.843623  | -4.20E-02 | 88459528  | 88459651  | NC_000014.8  |
| cg01498641 | 1.46E-08 | 1.47E-09 | -6.35 | 10.842806  | -1.67E-01 | 85365443  | 85365566  | NC_000016.9  |
| cg08374799 | 1.46E-08 | 1.48E-09 | -6.35 | 10.8418696 | -1.52E-01 | 53601050  | 53601173  | NC_000012.11 |
| cg20459543 | 1.46E-08 | 1.48E-09 | -6.35 | 10.8395786 | -4.66E-02 | 148627789 | 148627912 | NC_000006.11 |
| cg00498211 | 1.46E-08 | 1.48E-09 | -6.35 | 10.8391056 | -1.08E-01 | 65217568  | 65217691  | NC_000002.11 |
| cg15001131 | 1.46E-08 | 1.48E-09 | -6.35 | 10.83909   | -1.88E-01 | 42329652  | 42329775  | NC_000002.11 |
| cg25797454 | 1.46E-08 | 1.48E-09 | -6.35 | 10.8388514 | -1.19E-01 | 150327115 | 150327238 | NC_000006.11 |
| cg04173396 | 1.46E-08 | 1.48E-09 | -6.35 | 10.8361566 | -9.75E-02 | 61821400  | 61821523  | NC_000008.10 |
| cg15302296 | 1.47E-08 | 1.48E-09 | -6.35 | 10.8357032 | -9.82E-02 | 22960251  | 22960374  | NC_000008.10 |
| cg19641625 | 1.47E-08 | 1.49E-09 | -6.35 | 10.8319217 | -9.99E-02 | 168925633 | 168925756 | NC_000006.11 |
| cg05539265 | 1.47E-08 | 1.49E-09 | -6.35 | 10.8314227 | -1.25E-01 | 102717438 | 102717561 | NC_000002.11 |
| cg16155081 | 1.47E-08 | 1.49E-09 | -6.35 | 10.8301105 | -1.20E-01 | 9983211   | 9983334   | NC_000002.11 |

|               |          |          |       |            |           |           |           |              |
|---------------|----------|----------|-------|------------|-----------|-----------|-----------|--------------|
| cg10759286    | 1.47E-08 | 1.49E-09 | -6.35 | 10.829724  | -1.32E-01 | 1927864   | 1927987   | NC_000001.10 |
| cg15556090    | 1.47E-08 | 1.49E-09 | -6.35 | 10.8291702 | -5.38E-02 | 149195153 | 149195276 | NC_000007.13 |
| cg21930889    | 1.48E-08 | 1.50E-09 | -6.35 | 10.8286616 | -5.18E-02 | 3444479   | 3444602   | NC_000011.9  |
| cg16264966    | 1.48E-08 | 1.50E-09 | -6.35 | 10.8285114 | -1.87E-01 | 41613790  | 41613913  | NC_000022.10 |
| cg24995503    | 1.48E-08 | 1.50E-09 | -6.35 | 10.8282548 | -1.05E-01 | 103046300 | 103046423 | NC_000014.8  |
| ch.3.1112796R | 1.48E-08 | 1.50E-09 | -6.35 | 10.8281243 | -1.87E-02 | 51452653  | 51452776  | NC_000003.11 |
| cg27273033    | 1.48E-08 | 1.50E-09 | -6.35 | 10.8278646 | -9.59E-02 | 35773718  | 35773841  | NC_000019.9  |
| cg25240478    | 1.48E-08 | 1.50E-09 | -6.35 | 10.8272031 | -6.23E-02 | 2395772   | 2395895   | NC_000004.11 |
| cg23130957    | 1.48E-08 | 1.50E-09 | -6.35 | 10.8269459 | -8.10E-02 | 1657346   | 1657469   | NC_000005.9  |
| cg04402122    | 1.48E-08 | 1.50E-09 | -6.35 | 10.8269199 | -1.18E-01 | 1544648   | 1544771   | NC_000016.9  |
| cg04566512    | 1.48E-08 | 1.50E-09 | -6.35 | 10.8268117 | -1.74E-01 | 46457588  | 46457711  | NC_000022.10 |
| cg04474085    | 1.48E-08 | 1.50E-09 | -6.35 | 10.8264122 | -5.71E-02 | 77342550  | 77342673  | NC_000004.11 |
| cg11239575    | 1.48E-08 | 1.50E-09 | -6.35 | 10.8262494 | -1.29E-01 | 3705765   | 3705888   | NC_000017.10 |
| cg11607742    | 1.48E-08 | 1.50E-09 | -6.35 | 10.824755  | -7.43E-02 | 38869646  | 38869769  | NC_000019.9  |
| cg10619644    | 1.48E-08 | 1.50E-09 | -6.35 | 10.824657  | -1.42E-01 | 69149951  | 69150074  | NC_000007.13 |
| cg20808693    | 1.48E-08 | 1.50E-09 | -6.35 | 10.8241847 | -1.01E-01 | 150951482 | 150951605 | NC_000007.13 |
| cg07430967    | 1.48E-08 | 1.50E-09 | -6.35 | 10.8240188 | -1.39E-01 | 72954350  | 72954473  | NC_000017.10 |
| cg16226300    | 1.48E-08 | 1.50E-09 | -6.35 | 10.8238771 | -5.68E-02 | 133136135 | 133136258 | NC_000006.11 |
| cg01710865    | 1.48E-08 | 1.50E-09 | -6.35 | 10.8234288 | -4.39E-02 | 48937404  | 48937527  | NC_000001.10 |
| cg05192293    | 1.48E-08 | 1.50E-09 | -6.35 | 10.8224601 | -1.26E-01 | 71934086  | 71934209  | NC_000010.10 |
| cg22300566    | 1.49E-08 | 1.51E-09 | -6.35 | 10.8214478 | -1.04E-01 | 1598558   | 1598681   | NC_000006.11 |
| cg06215939    | 1.49E-08 | 1.51E-09 | -6.35 | 10.821404  | -7.25E-02 | 1755402   | 1755525   | NC_000016.9  |
| cg23660866    | 1.49E-08 | 1.51E-09 | -6.35 | 10.8211682 | -1.16E-01 | 95009914  | 95010037  | NC_000014.8  |
| cg13863668    | 1.49E-08 | 1.51E-09 | -6.35 | 10.82058   | -1.45E-01 | 28996561  | 28996684  | NC_000001.10 |
| cg27418564    | 1.49E-08 | 1.51E-09 | -6.35 | 10.8203739 | -3.50E-02 | 44581614  | 44581737  | NC_000015.9  |

|            |          |          |       |            |           |           |           |              |
|------------|----------|----------|-------|------------|-----------|-----------|-----------|--------------|
| cg26154860 | 1.49E-08 | 1.51E-09 | -6.35 | 10.8201219 | -1.07E-01 | 129721259 | 129721382 | NC_000003.11 |
| cg18719170 | 1.49E-08 | 1.51E-09 | -6.35 | 10.8181613 | -6.09E-02 | 240969975 | 240970098 | NC_000002.11 |
| cg03495688 | 1.49E-08 | 1.51E-09 | -6.35 | 10.8176714 | -2.85E-02 | 6007586   | 6007709   | NC_000009.11 |
| cg06597861 | 1.49E-08 | 1.51E-09 | -6.35 | 10.8172783 | -2.98E-02 | 144100572 | 144100695 | NC_000008.10 |
| cg11332505 | 1.49E-08 | 1.51E-09 | -6.35 | 10.8165709 | -8.93E-02 | 3294322   | 3294445   | NC_000001.10 |
| cg20602843 | 1.49E-08 | 1.51E-09 | -6.35 | 10.8165626 | -1.30E-01 | 95351603  | 95351726  | NC_000010.10 |
| cg13683534 | 1.49E-08 | 1.52E-09 | -6.35 | 10.8149466 | -1.15E-01 | 139221076 | 139221199 | NC_000009.11 |
| cg21364231 | 1.50E-08 | 1.52E-09 | -6.34 | 10.813752  | -5.27E-02 | 152161058 | 152161181 | NC_000007.13 |
| cg20109233 | 1.50E-08 | 1.52E-09 | -6.34 | 10.8127756 | -9.75E-02 | 114313136 | 114313259 | NC_000012.11 |
| cg19701531 | 1.50E-08 | 1.52E-09 | -6.34 | 10.8121063 | -1.10E-01 | 76026560  | 76026683  | NC_000007.13 |
| cg02804920 | 1.50E-08 | 1.52E-09 | -6.34 | 10.8113604 | -3.16E-02 | 5833275   | 5833398   | NC_000007.13 |
| cg22451100 | 1.50E-08 | 1.52E-09 | -6.34 | 10.8100664 | -1.09E-01 | 178107899 | 178108022 | NC_000002.11 |
| cg26299174 | 1.50E-08 | 1.52E-09 | -6.34 | 10.8098609 | -3.00E-02 | 23751369  | 23751492  | NC_000001.10 |
| cg06078990 | 1.51E-08 | 1.53E-09 | -6.34 | 10.8052472 | -1.43E-02 | 62205560  | 62205683  | NC_000020.10 |
| cg24221742 | 1.51E-08 | 1.53E-09 | -6.34 | 10.8046036 | -1.16E-01 | 74868220  | 74868343  | NC_000017.10 |
| cg05894801 | 1.51E-08 | 1.53E-09 | -6.34 | 10.8044377 | -1.56E-01 | 155850469 | 155850592 | NC_000006.11 |
| cg04727357 | 1.51E-08 | 1.53E-09 | -6.34 | 10.8044309 | -1.01E-01 | 7137270   | 7137393   | NC_000004.11 |
| cg01935436 | 1.51E-08 | 1.53E-09 | -6.34 | 10.8038007 | -7.33E-02 | 129793013 | 129793136 | NC_000007.13 |
| cg09848080 | 1.51E-08 | 1.54E-09 | -6.34 | 10.802824  | -1.00E-01 | 41642064  | 41642187  | NC_000019.9  |
| cg26859841 | 1.51E-08 | 1.54E-09 | -6.34 | 10.8009905 | -6.57E-02 | 228784104 | 228784227 | NC_000001.10 |
| cg18002126 | 1.51E-08 | 1.54E-09 | -6.34 | 10.8003652 | -1.75E-01 | 3221373   | 3221496   | NC_000007.13 |
| cg25769852 | 1.52E-08 | 1.54E-09 | -6.34 | 10.8002635 | -1.32E-01 | 9914057   | 9914180   | NC_000012.11 |
| cg14622857 | 1.52E-08 | 1.54E-09 | -6.34 | 10.7999506 | -6.72E-02 | 21941432  | 21941555  | NC_000015.9  |
| cg02838499 | 1.52E-08 | 1.54E-09 | -6.34 | 10.7995431 | -2.15E-02 | 4342461   | 4342584   | NC_000019.9  |
| cg11856810 | 1.52E-08 | 1.54E-09 | -6.34 | 10.798214  | -4.82E-02 | 155554961 | 155555084 | NC_000002.11 |

|            |          |          |       |            |           |           |           |              |
|------------|----------|----------|-------|------------|-----------|-----------|-----------|--------------|
| cg11209001 | 1.52E-08 | 1.54E-09 | -6.34 | 10.7981243 | -5.72E-02 | 121647654 | 121647777 | NC_000012.11 |
| cg20636249 | 1.52E-08 | 1.54E-09 | -6.34 | 10.7973456 | -3.50E-02 | 26624039  | 26624162  | NC_000013.10 |
| cg22108680 | 1.52E-08 | 1.54E-09 | -6.34 | 10.7966407 | -7.43E-02 | 4108220   | 4108343   | NC_000004.11 |
| cg14349231 | 1.52E-08 | 1.55E-09 | -6.34 | 10.7966237 | -1.37E-01 | 103340474 | 103340597 | NC_000009.11 |
| cg12346491 | 1.52E-08 | 1.55E-09 | -6.34 | 10.7957742 | -1.66E-01 | 145277815 | 145277938 | NC_000004.11 |
| cg21680449 | 1.52E-08 | 1.55E-09 | -6.34 | 10.7955448 | -6.33E-02 | 34206330  | 34206453  | NC_000020.10 |
| cg08818207 | 1.52E-08 | 1.55E-09 | -6.34 | 10.7955195 | -1.08E-01 | 32820355  | 32820478  | NC_000006.11 |
| cg13922121 | 1.52E-08 | 1.55E-09 | -6.34 | 10.7951566 | -1.21E-01 | 19575262  | 19575385  | NC_000011.9  |
| cg17241937 | 1.52E-08 | 1.55E-09 | -6.34 | 10.7943001 | -1.29E-01 | 99664011  | 99664134  | NC_000003.11 |
| cg09530650 | 1.52E-08 | 1.55E-09 | -6.34 | 10.7940663 | -6.69E-02 | 137024163 | 137024286 | NC_000005.9  |
| cg21071748 | 1.53E-08 | 1.55E-09 | -6.34 | 10.7933378 | -2.06E-02 | 121790349 | 121790472 | NC_000012.11 |
| cg13664579 | 1.53E-08 | 1.55E-09 | -6.34 | 10.7931308 | -4.66E-02 | 136020089 | 136020212 | NC_000009.11 |
| cg24526433 | 1.53E-08 | 1.55E-09 | -6.34 | 10.7926805 | -1.50E-01 | 37794080  | 37794203  | NC_000017.10 |
| cg01412886 | 1.53E-08 | 1.55E-09 | -6.34 | 10.7923753 | -1.35E-01 | 105445253 | 105445376 | NC_000014.8  |
| cg17752270 | 1.53E-08 | 1.55E-09 | -6.34 | 10.7918856 | -9.40E-02 | 169706238 | 169706361 | NC_000005.9  |
| cg03025880 | 1.53E-08 | 1.56E-09 | -6.34 | 10.7893029 | -1.22E-01 | 100572172 | 100572295 | NC_000004.11 |
| cg27437304 | 1.53E-08 | 1.56E-09 | -6.34 | 10.7883888 | -1.55E-01 | 129992368 | 129992491 | NC_000011.9  |
| cg21878650 | 1.53E-08 | 1.56E-09 | -6.34 | 10.7878642 | -1.52E-01 | 64558623  | 64558746  | NC_000005.9  |
| cg02775846 | 1.53E-08 | 1.56E-09 | -6.34 | 10.7872628 | -2.08E-02 | 83775730  | 83775853  | NC_000006.11 |
| cg11427039 | 1.54E-08 | 1.56E-09 | -6.34 | 10.784758  | -5.24E-02 | 26438888  | 26439011  | NC_000001.10 |
| cg14766620 | 1.54E-08 | 1.56E-09 | -6.34 | 10.7843718 | -9.10E-02 | 5018860   | 5018983   | NC_000003.11 |
| cg14626725 | 1.54E-08 | 1.56E-09 | -6.34 | 10.7842214 | -1.33E-01 | 238080231 | 238080354 | NC_000002.11 |
| cg10651583 | 1.54E-08 | 1.57E-09 | -6.34 | 10.7835029 | -7.06E-02 | 57941069  | 57941192  | NC_000012.11 |
| cg03591753 | 1.54E-08 | 1.57E-09 | -6.34 | 10.7821925 | -8.55E-02 | 35659141  | 35659264  | NC_000006.11 |
| cg25675800 | 1.54E-08 | 1.57E-09 | -6.34 | 10.7818378 | -9.57E-02 | 39360961  | 39361084  | NC_000019.9  |

|            |          |          |       |            |           |           |           |              |
|------------|----------|----------|-------|------------|-----------|-----------|-----------|--------------|
| cg27164770 | 1.54E-08 | 1.57E-09 | -6.34 | 10.7810724 | -1.42E-01 | 94891445  | 94891568  | NC_000013.10 |
| cg11855555 | 1.54E-08 | 1.57E-09 | -6.34 | 10.780922  | -9.00E-02 | 68232134  | 68232257  | NC_000001.10 |
| cg17550708 | 1.54E-08 | 1.57E-09 | -6.34 | 10.7807378 | -9.37E-02 | 570261    | 570384    | NC_000005.9  |
| cg21914526 | 1.54E-08 | 1.57E-09 | -6.34 | 10.7800311 | -1.33E-01 | 157638226 | 157638349 | NC_000007.13 |
| cg25908504 | 1.55E-08 | 1.58E-09 | -6.34 | 10.7770911 | -2.52E-02 | 74722769  | 74722892  | NC_000017.10 |
| cg02784696 | 1.55E-08 | 1.58E-09 | -6.34 | 10.7768424 | -6.35E-02 | 24270586  | 24270709  | NC_000002.11 |
| cg11859845 | 1.55E-08 | 1.58E-09 | -6.34 | 10.7750498 | -3.07E-02 | 52703348  | 52703471  | NC_000013.10 |
| cg11601663 | 1.55E-08 | 1.58E-09 | -6.34 | 10.7739423 | -1.18E-01 | 15666820  | 15666943  | NC_000010.10 |
| cg24519108 | 1.55E-08 | 1.58E-09 | -6.34 | 10.7733248 | -1.44E-01 | 6421063   | 6421186   | NC_000008.10 |
| cg26030974 | 1.56E-08 | 1.58E-09 | -6.34 | 10.7726762 | -2.63E-02 | 45266791  | 45266914  | NC_000017.10 |
| cg08135787 | 1.56E-08 | 1.59E-09 | -6.34 | 10.7701154 | -1.62E-02 | 26538969  | 26539092  | NC_000006.11 |
| cg14831539 | 1.56E-08 | 1.59E-09 | -6.34 | 10.7684975 | -6.35E-02 | 18988324  | 18988447  | NC_000001.10 |
| cg14196507 | 1.56E-08 | 1.59E-09 | -6.34 | 10.7674644 | -1.33E-01 | 96443383  | 96443506  | NC_000010.10 |
| cg02683307 | 1.56E-08 | 1.59E-09 | -6.34 | 10.7671213 | -1.31E-01 | 54903329  | 54903452  | NC_000019.9  |
| cg02483128 | 1.56E-08 | 1.59E-09 | -6.34 | 10.7670675 | -1.95E-02 | 17598503  | 17598626  | NC_000017.10 |
| cg16013349 | 1.56E-08 | 1.59E-09 | -6.34 | 10.7667083 | -1.39E-02 | 205512521 | 205512644 | NC_000001.10 |
| cg00036408 | 1.57E-08 | 1.59E-09 | -6.34 | 10.7658764 | -1.44E-01 | 79316841  | 79316964  | NC_000017.10 |
| cg22107147 | 1.57E-08 | 1.59E-09 | -6.34 | 10.7655229 | -1.27E-01 | 11513527  | 11513650  | NC_000002.11 |
| cg20054420 | 1.57E-08 | 1.60E-09 | -6.34 | 10.7643066 | -1.16E-01 | 22590199  | 22590322  | NC_000012.11 |
| cg14999726 | 1.57E-08 | 1.60E-09 | -6.34 | 10.7642534 | -6.53E-02 | 31251090  | 31251213  | NC_000017.10 |
| cg15464363 | 1.57E-08 | 1.60E-09 | -6.34 | 10.7640422 | -6.35E-02 | 32149800  | 32149923  | NC_000022.10 |
| cg06211724 | 1.57E-08 | 1.60E-09 | -6.34 | 10.7639242 | -6.07E-02 | 183155437 | 183155560 | NC_000001.10 |
| cg06839388 | 1.57E-08 | 1.60E-09 | -6.34 | 10.7634966 | -7.97E-02 | 71152915  | 71153038  | NC_000014.8  |
| cg13511231 | 1.57E-08 | 1.60E-09 | -6.34 | 10.7632578 | -1.17E-01 | 1060679   | 1060802   | NC_000011.9  |
| cg11969108 | 1.57E-08 | 1.60E-09 | -6.34 | 10.7632153 | -1.13E-01 | 154582418 | 154582541 | NC_000007.13 |

|               |          |          |       |            |           |           |           |              |
|---------------|----------|----------|-------|------------|-----------|-----------|-----------|--------------|
| cg16300556    | 1.57E-08 | 1.60E-09 | -6.34 | 10.7625334 | -1.39E-01 | 758981    | 759104    | NC_000005.9  |
| cg10681811    | 1.57E-08 | 1.60E-09 | -6.33 | 10.7603057 | -4.49E-02 | 76904661  | 76904784  | NC_000005.9  |
| cg00691948    | 1.58E-08 | 1.60E-09 | -6.33 | 10.759474  | -1.35E-01 | 78958651  | 78958774  | NC_000017.10 |
| cg13179915    | 1.58E-08 | 1.60E-09 | -6.33 | 10.7593509 | -9.45E-02 | 65362949  | 65363072  | NC_000011.9  |
| cg05072951    | 1.58E-08 | 1.61E-09 | -6.33 | 10.7593036 | -5.15E-02 | 64949398  | 64949521  | NC_000011.9  |
| cg00638514    | 1.58E-08 | 1.61E-09 | -6.33 | 10.7587757 | -6.30E-02 | 72932048  | 72932171  | NC_000017.10 |
| cg05649009    | 1.58E-08 | 1.61E-09 | -6.33 | 10.7584354 | -1.40E-01 | 175629850 | 175629973 | NC_000002.11 |
| cg07586285    | 1.58E-08 | 1.61E-09 | -6.33 | 10.7580285 | -1.06E-01 | 200994978 | 200995101 | NC_000001.10 |
| cg20974885    | 1.58E-08 | 1.61E-09 | -6.33 | 10.7578692 | -6.20E-02 | 183966734 | 183966857 | NC_000003.11 |
| cg05316694    | 1.58E-08 | 1.61E-09 | -6.33 | 10.7555991 | -8.11E-02 | 99786833  | 99786956  | NC_000014.8  |
| cg06201393    | 1.58E-08 | 1.61E-09 | -6.33 | 10.7555892 | -1.23E-01 | 169378835 | 169378958 | NC_000003.11 |
| cg23069847    | 1.58E-08 | 1.61E-09 | -6.33 | 10.7549129 | -4.27E-02 | 64067868  | 64067991  | NC_000011.9  |
| cg23125249    | 1.58E-08 | 1.62E-09 | -6.33 | 10.7530911 | -1.07E-01 | 7481826   | 7481949   | NC_000006.11 |
| cg00648686    | 1.59E-08 | 1.62E-09 | -6.33 | 10.7528698 | -6.85E-02 | 79152624  | 79152747  | NC_000015.9  |
| cg22124136    | 1.59E-08 | 1.62E-09 | -6.33 | 10.7526781 | -6.87E-02 | 34391985  | 34392108  | NC_000013.10 |
| ch.2.1149235F | 1.59E-08 | 1.62E-09 | -6.33 | 10.7514467 | -4.04E-02 | 47979809  | 47979932  | NC_000002.11 |
| cg17713010    | 1.59E-08 | 1.62E-09 | -6.33 | 10.7512851 | -1.16E-01 | 54876598  | 54876721  | NC_000019.9  |
| cg11162104    | 1.59E-08 | 1.62E-09 | -6.33 | 10.7508876 | -1.24E-01 | 204677873 | 204677996 | NC_000001.10 |
| cg12339920    | 1.59E-08 | 1.62E-09 | -6.33 | 10.7500876 | -1.29E-01 | 135370288 | 135370411 | NC_000005.9  |
| cg04628014    | 1.59E-08 | 1.62E-09 | -6.33 | 10.7500452 | -8.27E-02 | 158816392 | 158816515 | NC_000007.13 |
| cg20303033    | 1.59E-08 | 1.62E-09 | -6.33 | 10.7496524 | -7.79E-02 | 132043874 | 132043997 | NC_000002.11 |
| cg06931356    | 1.59E-08 | 1.62E-09 | -6.33 | 10.748948  | -1.25E-01 | 43575891  | 43576014  | NC_000007.13 |
| cg01943694    | 1.59E-08 | 1.62E-09 | -6.33 | 10.7485712 | -1.04E-01 | 20498055  | 20498178  | NC_000006.11 |
| cg08891229    | 1.59E-08 | 1.62E-09 | -6.33 | 10.7478276 | -5.88E-02 | 78245618  | 78245741  | NC_000001.10 |
| cg15408889    | 1.59E-08 | 1.62E-09 | -6.33 | 10.7473022 | -1.10E-01 | 118623661 | 118623784 | NC_000005.9  |



|            |          |          |       |            |           |           |           |              |
|------------|----------|----------|-------|------------|-----------|-----------|-----------|--------------|
| cg13954548 | 1.59E-08 | 1.63E-09 | -6.33 | 10.7466032 | -1.35E-01 | 47334060  | 47334183  | NC_000019.9  |
| cg05129477 | 1.59E-08 | 1.63E-09 | -6.33 | 10.7463501 | -1.35E-01 | 21044945  | 21045068  | NC_000001.10 |
| cg04630748 | 1.60E-08 | 1.63E-09 | -6.33 | 10.7460178 | -6.31E-02 | 100964998 | 100965121 | NC_000007.13 |
| cg04604946 | 1.60E-08 | 1.63E-09 | -6.33 | 10.7455122 | -8.42E-02 | 7023352   | 7023475   | NC_000012.11 |
| cg08486903 | 1.60E-08 | 1.63E-09 | -6.33 | 10.7451304 | -1.06E-01 | 98739496  | 98739619  | NC_000007.13 |
| cg07091958 | 1.60E-08 | 1.63E-09 | -6.33 | 10.7448463 | -4.61E-02 | 41709524  | 41709647  | NC_000015.9  |
| cg07181257 | 1.60E-08 | 1.63E-09 | -6.33 | 10.7436316 | -1.29E-01 | 27876033  | 27876156  | NC_000001.10 |
| cg10824582 | 1.60E-08 | 1.63E-09 | -6.33 | 10.7425301 | -7.65E-02 | 116855630 | 116855753 | NC_000011.9  |
| cg21557087 | 1.60E-08 | 1.63E-09 | -6.33 | 10.7423432 | -8.92E-02 | 106103691 | 106103814 | NC_000002.11 |
| cg05730215 | 1.60E-08 | 1.63E-09 | -6.33 | 10.7421714 | -3.92E-02 | 27435253  | 27435376  | NC_000002.11 |
| cg16757984 | 1.60E-08 | 1.64E-09 | -6.33 | 10.7412128 | -1.21E-01 | 38257936  | 38258059  | NC_000017.10 |
| cg09936190 | 1.61E-08 | 1.64E-09 | -6.33 | 10.7394073 | -2.46E-02 | 43892956  | 43893079  | NC_000010.10 |
| cg13222036 | 1.61E-08 | 1.64E-09 | -6.33 | 10.739399  | -1.44E-01 | 187897629 | 187897752 | NC_000001.10 |
| cg26097391 | 1.61E-08 | 1.64E-09 | -6.33 | 10.738479  | -6.28E-02 | 54893211  | 54893334  | NC_000002.11 |
| cg09300114 | 1.61E-08 | 1.64E-09 | -6.33 | 10.7383346 | -1.59E-01 | 73084329  | 73084452  | NC_000017.10 |
| cg11637695 | 1.61E-08 | 1.64E-09 | -6.33 | 10.7375507 | -1.03E-01 | 78808060  | 78808183  | NC_000017.10 |
| cg17843125 | 1.61E-08 | 1.64E-09 | -6.33 | 10.7373841 | -2.63E-02 | 100598159 | 100598282 | NC_000001.10 |
| cg22586603 | 1.61E-08 | 1.64E-09 | -6.33 | 10.7371441 | -1.39E-01 | 129985596 | 129985719 | NC_000008.10 |
| cg21743867 | 1.61E-08 | 1.64E-09 | -6.33 | 10.7368256 | -9.86E-02 | 11215999  | 11216122  | NC_000019.9  |
| cg00400221 | 1.61E-08 | 1.65E-09 | -6.33 | 10.7333911 | -1.08E-01 | 38323291  | 38323414  | NC_000008.10 |
| cg15386877 | 1.62E-08 | 1.65E-09 | -6.33 | 10.7328887 | -5.91E-02 | 161258456 | 161258579 | NC_000006.11 |
| cg02202858 | 1.62E-08 | 1.65E-09 | -6.33 | 10.7325861 | -5.71E-02 | 12079252  | 12079375  | NC_000001.10 |
| cg16805068 | 1.62E-08 | 1.65E-09 | -6.33 | 10.7323937 | -9.59E-02 | 31410931  | 31411054  | NC_000020.10 |
| cg18147048 | 1.62E-08 | 1.65E-09 | -6.33 | 10.732152  | -1.65E-01 | 2428677   | 2428800   | NC_000019.9  |
| cg05192452 | 1.62E-08 | 1.65E-09 | -6.33 | 10.7320625 | -7.36E-02 | 71852759  | 71852882  | NC_000005.9  |

|               |          |          |       |            |           |           |           |              |
|---------------|----------|----------|-------|------------|-----------|-----------|-----------|--------------|
| cg03506656    | 1.62E-08 | 1.65E-09 | -6.33 | 10.7310537 | -1.41E-01 | 163097510 | 163097633 | NC_000002.11 |
| ch.16.612655R | 1.62E-08 | 1.66E-09 | -6.33 | 10.7285643 | -1.76E-02 | 18879798  | 18879921  | NC_000016.9  |
| ch.2.747167F  | 1.62E-08 | 1.66E-09 | -6.33 | 10.7284737 | -3.40E-02 | 30383352  | 30383475  | NC_000002.11 |
| cg00164941    | 1.62E-08 | 1.66E-09 | -6.33 | 10.7282114 | -9.78E-02 | 73523056  | 73523179  | NC_000002.11 |
| cg02051981    | 1.62E-08 | 1.66E-09 | -6.33 | 10.7279534 | -8.27E-02 | 176432162 | 176432285 | NC_000001.10 |
| cg21643916    | 1.62E-08 | 1.66E-09 | -6.33 | 10.7276133 | -3.73E-02 | 616051    | 616174    | NC_000007.13 |
| cg01412379    | 1.62E-08 | 1.66E-09 | -6.33 | 10.7268121 | -1.06E-01 | 38742665  | 38742788  | NC_000002.11 |
| cg24358781    | 1.63E-08 | 1.66E-09 | -6.33 | 10.7262006 | -1.54E-01 | 178067721 | 178067844 | NC_000001.10 |
| cg12829141    | 1.63E-08 | 1.66E-09 | -6.33 | 10.7261924 | -1.31E-01 | 128000780 | 128000903 | NC_000007.13 |
| cg21160105    | 1.63E-08 | 1.66E-09 | -6.33 | 10.725628  | -1.17E-01 | 62384326  | 62384449  | NC_000020.10 |
| cg04215564    | 1.63E-08 | 1.66E-09 | -6.33 | 10.7250324 | -1.05E-01 | 109081851 | 109081974 | NC_000006.11 |
| cg23167906    | 1.63E-08 | 1.66E-09 | -6.33 | 10.7249176 | -5.67E-02 | 69517299  | 69517422  | NC_000011.9  |
| cg22221131    | 1.63E-08 | 1.67E-09 | -6.33 | 10.7228528 | -2.96E-02 | 51484590  | 51484713  | NC_000013.10 |
| cg09421562    | 1.63E-08 | 1.67E-09 | -6.33 | 10.7222405 | -1.14E-01 | 56357994  | 56358117  | NC_000017.10 |
| cg23170346    | 1.63E-08 | 1.67E-09 | -6.33 | 10.7210607 | -1.28E-01 | 134863880 | 134864003 | NC_000008.10 |
| cg25558617    | 1.63E-08 | 1.67E-09 | -6.33 | 10.7206156 | -1.00E-01 | 128857923 | 128858046 | NC_000008.10 |
| cg27468976    | 1.63E-08 | 1.67E-09 | -6.33 | 10.7204034 | -2.01E-01 | 89410322  | 89410445  | NC_000016.9  |
| cg18139641    | 1.64E-08 | 1.67E-09 | -6.33 | 10.7199084 | -1.01E-01 | 201470467 | 201470590 | NC_000001.10 |
| cg22730004    | 1.64E-08 | 1.67E-09 | -6.33 | 10.7198663 | -1.37E-01 | 158656718 | 158656841 | NC_000001.10 |
| cg09828761    | 1.64E-08 | 1.67E-09 | -6.33 | 10.7192822 | -5.98E-02 | 14450568  | 14450691  | NC_000005.9  |
| cg21786873    | 1.64E-08 | 1.68E-09 | -6.33 | 10.7175678 | -3.15E-02 | 4250096   | 4250219   | NC_000004.11 |
| cg07106766    | 1.64E-08 | 1.68E-09 | -6.33 | 10.7169387 | -1.53E-01 | 137014230 | 137014353 | NC_000003.11 |
| cg13697715    | 1.64E-08 | 1.68E-09 | -6.33 | 10.7168792 | -9.65E-02 | 177099644 | 177099767 | NC_000005.9  |
| cg22674248    | 1.64E-08 | 1.68E-09 | -6.33 | 10.716648  | -1.02E-01 | 74275085  | 74275208  | NC_000017.10 |
| cg06957310    | 1.64E-08 | 1.68E-09 | -6.33 | 10.7148605 | -1.21E-01 | 29283870  | 29283993  | NC_000017.10 |

|            |          |          |       |            |           |           |           |              |
|------------|----------|----------|-------|------------|-----------|-----------|-----------|--------------|
| cg04078732 | 1.64E-08 | 1.68E-09 | -6.33 | 10.7144374 | -5.69E-02 | 31439111  | 31439234  | NC_000001.10 |
| cg25330232 | 1.64E-08 | 1.68E-09 | -6.33 | 10.7141204 | -2.49E-02 | 82193704  | 82193827  | NC_000008.10 |
| cg03592824 | 1.64E-08 | 1.68E-09 | -6.33 | 10.7137378 | -1.02E-01 | 75666768  | 75666891  | NC_000007.13 |
| cg24185443 | 1.65E-08 | 1.68E-09 | -6.33 | 10.7129426 | -6.65E-02 | 11533199  | 11533322  | NC_000019.9  |
| cg02097792 | 1.65E-08 | 1.68E-09 | -6.33 | 10.7121071 | -6.30E-02 | 2058046   | 2058169   | NC_000011.9  |
| cg19098932 | 1.65E-08 | 1.69E-09 | -6.33 | 10.7115165 | -8.36E-02 | 2345152   | 2345275   | NC_000001.10 |
| cg15642933 | 1.65E-08 | 1.69E-09 | -6.33 | 10.7105554 | -1.31E-01 | 179557780 | 179557903 | NC_000001.10 |
| cg08577517 | 1.65E-08 | 1.69E-09 | -6.33 | 10.7098946 | -5.88E-02 | 32098344  | 32098467  | NC_000006.11 |
| cg26816438 | 1.65E-08 | 1.69E-09 | -6.32 | 10.7089178 | -4.58E-02 | 45139524  | 45139647  | NC_000001.10 |
| cg21073459 | 1.65E-08 | 1.69E-09 | -6.32 | 10.7088075 | -1.09E-01 | 54604098  | 54604221  | NC_000019.9  |
| cg02836764 | 1.65E-08 | 1.69E-09 | -6.32 | 10.7079862 | -1.33E-01 | 134499364 | 134499487 | NC_000010.10 |
| cg07739851 | 1.66E-08 | 1.69E-09 | -6.32 | 10.7071792 | -1.14E-01 | 72231448  | 72231571  | NC_000017.10 |
| cg21189224 | 1.66E-08 | 1.69E-09 | -6.32 | 10.7064485 | -9.40E-02 | 92277515  | 92277638  | NC_000009.11 |
| cg10468738 | 1.66E-08 | 1.70E-09 | -6.32 | 10.7049449 | -5.28E-02 | 134201930 | 134202053 | NC_000010.10 |
| cg01876612 | 1.66E-08 | 1.70E-09 | -6.32 | 10.7034879 | -2.18E-02 | 85045424  | 85045547  | NC_000016.9  |
| cg15166583 | 1.66E-08 | 1.70E-09 | -6.32 | 10.7033029 | -7.32E-02 | 86208322  | 86208445  | NC_000011.9  |
| cg00792107 | 1.66E-08 | 1.70E-09 | -6.32 | 10.7032435 | -1.06E-01 | 133181600 | 133181723 | NC_000012.11 |
| cg06387141 | 1.66E-08 | 1.70E-09 | -6.32 | 10.7031746 | -6.13E-02 | 49724291  | 49724414  | NC_000003.11 |
| cg01853632 | 1.66E-08 | 1.70E-09 | -6.32 | 10.7030804 | -3.50E-02 | 43147395  | 43147518  | NC_000003.11 |
| cg22967016 | 1.66E-08 | 1.70E-09 | -6.32 | 10.7028837 | -3.40E-02 | 12131739  | 12131862  | NC_000011.9  |
| cg25951430 | 1.66E-08 | 1.70E-09 | -6.32 | 10.7028184 | -1.62E-01 | 57192432  | 57192555  | NC_000011.9  |
| cg22146357 | 1.66E-08 | 1.70E-09 | -6.32 | 10.7025547 | -1.93E-01 | 143781406 | 143781529 | NC_000008.10 |
| cg25626012 | 1.66E-08 | 1.70E-09 | -6.32 | 10.7020405 | -6.83E-02 | 95721252  | 95721375  | NC_000010.10 |
| cg03287658 | 1.67E-08 | 1.70E-09 | -6.32 | 10.7006202 | -9.47E-02 | 41410918  | 41411041  | NC_000006.11 |
| cg15006681 | 1.67E-08 | 1.70E-09 | -6.32 | 10.7004059 | -1.05E-01 | 38199759  | 38199882  | NC_000022.10 |

|            |          |          |       |            |           |           |           |              |
|------------|----------|----------|-------|------------|-----------|-----------|-----------|--------------|
| cg07903316 | 1.67E-08 | 1.71E-09 | -6.32 | 10.6998487 | -4.11E-02 | 99205749  | 99205872  | NC_000010.10 |
| cg00786406 | 1.67E-08 | 1.71E-09 | -6.32 | 10.6983471 | -7.94E-02 | 114474389 | 114474512 | NC_000001.10 |
| cg01269514 | 1.67E-08 | 1.71E-09 | -6.32 | 10.6976515 | -1.18E-01 | 3394013   | 3394136   | NC_000001.10 |
| cg13051263 | 1.67E-08 | 1.71E-09 | -6.32 | 10.6967973 | -1.50E-01 | 16883899  | 16884022  | NC_000003.11 |
| cg13201461 | 1.67E-08 | 1.71E-09 | -6.32 | 10.6964455 | -8.29E-02 | 109288968 | 109289091 | NC_000001.10 |
| cg17247190 | 1.67E-08 | 1.71E-09 | -6.32 | 10.6959901 | -1.22E-01 | 141883437 | 141883560 | NC_000006.11 |
| cg04723679 | 1.67E-08 | 1.71E-09 | -6.32 | 10.695857  | -6.75E-02 | 62548919  | 62549042  | NC_000015.9  |
| cg27593593 | 1.68E-08 | 1.72E-09 | -6.32 | 10.6941034 | -7.50E-02 | 4344248   | 4344371   | NC_000016.9  |
| cg24144883 | 1.68E-08 | 1.72E-09 | -6.32 | 10.6939351 | -9.91E-02 | 21986985  | 21987108  | NC_000022.10 |
| cg24454932 | 1.68E-08 | 1.72E-09 | -6.32 | 10.6934815 | -1.56E-01 | 170532633 | 170532756 | NC_000006.11 |
| cg15388107 | 1.68E-08 | 1.72E-09 | -6.32 | 10.693451  | -1.21E-01 | 36700916  | 36701039  | NC_000007.13 |
| cg25475026 | 1.68E-08 | 1.72E-09 | -6.32 | 10.6929328 | -1.57E-02 | 49961902  | 49962025  | NC_000012.11 |
| cg16944941 | 1.68E-08 | 1.72E-09 | -6.32 | 10.6924125 | -1.04E-01 | 70391346  | 70391469  | NC_000011.9  |
| cg06899844 | 1.68E-08 | 1.72E-09 | -6.32 | 10.6919448 | -2.70E-02 | 30662123  | 30662246  | NC_000016.9  |
| cg08081036 | 1.68E-08 | 1.72E-09 | -6.32 | 10.6911485 | -4.54E-02 | 60690219  | 60690342  | NC_000015.9  |
| cg25214310 | 1.68E-08 | 1.72E-09 | -6.32 | 10.6910827 | -1.19E-01 | 149934218 | 149934341 | NC_000003.11 |
| cg03216043 | 1.68E-08 | 1.72E-09 | -6.32 | 10.6904472 | -1.22E-01 | 10928639  | 10928762  | NC_000019.9  |
| cg04753836 | 1.68E-08 | 1.72E-09 | -6.32 | 10.6901969 | -1.33E-01 | 65308247  | 65308370  | NC_000014.8  |
| cg18245316 | 1.68E-08 | 1.72E-09 | -6.32 | 10.689658  | -1.10E-01 | 144962981 | 144963104 | NC_000008.10 |
| cg22183626 | 1.69E-08 | 1.73E-09 | -6.32 | 10.6872787 | -2.72E-02 | 45150990  | 45151113  | NC_000013.10 |
| cg13538006 | 1.69E-08 | 1.73E-09 | -6.32 | 10.6868356 | -8.35E-02 | 95897313  | 95897436  | NC_000009.11 |
| cg00620628 | 1.69E-08 | 1.73E-09 | -6.32 | 10.6859043 | -9.24E-02 | 238165917 | 238166040 | NC_000002.11 |
| cg25424194 | 1.69E-08 | 1.73E-09 | -6.32 | 10.6858157 | -9.75E-02 | 41388232  | 41388355  | NC_000019.9  |
| cg04344000 | 1.69E-08 | 1.73E-09 | -6.32 | 10.6854265 | -1.34E-01 | 117869857 | 117869980 | NC_000006.11 |
| cg00715290 | 1.69E-08 | 1.73E-09 | -6.32 | 10.6852955 | -1.20E-01 | 2221807   | 2221930   | NC_000001.10 |

|            |          |          |       |            |           |           |           |              |
|------------|----------|----------|-------|------------|-----------|-----------|-----------|--------------|
| cg07398558 | 1.69E-08 | 1.73E-09 | -6.32 | 10.6851351 | -2.49E-02 | 28879201  | 28879324  | NC_000001.10 |
| cg26487562 | 1.69E-08 | 1.73E-09 | -6.32 | 10.6850391 | -1.10E-01 | 14225959  | 14226082  | NC_000019.9  |
| cg23551720 | 1.69E-08 | 1.73E-09 | -6.32 | 10.683544  | -1.71E-01 | 46633726  | 46633849  | NC_000017.10 |
| cg16116973 | 1.69E-08 | 1.73E-09 | -6.32 | 10.6831863 | -7.02E-02 | 33759608  | 33759731  | NC_000020.10 |
| cg01651915 | 1.70E-08 | 1.74E-09 | -6.32 | 10.6818121 | -1.26E-01 | 55795551  | 55795674  | NC_000008.10 |
| cg11896795 | 1.70E-08 | 1.74E-09 | -6.32 | 10.6816484 | -2.03E-02 | 5465465   | 5465588   | NC_000007.13 |
| cg11228005 | 1.70E-08 | 1.74E-09 | -6.32 | 10.6796875 | -3.30E-02 | 197477097 | 197477220 | NC_000003.11 |
| cg22940152 | 1.70E-08 | 1.74E-09 | -6.32 | 10.679237  | -6.43E-02 | 62669102  | 62669225  | NC_000020.10 |
| cg08719380 | 1.70E-08 | 1.74E-09 | -6.32 | 10.6782643 | -1.21E-01 | 152830505 | 152830628 | NC_000002.11 |
| cg04307508 | 1.71E-08 | 1.75E-09 | -6.32 | 10.6758216 | -1.31E-01 | 10959101  | 10959224  | NC_000019.9  |
| cg23909173 | 1.71E-08 | 1.75E-09 | -6.32 | 10.6742694 | -8.46E-02 | 94451389  | 94451512  | NC_000014.8  |
| cg03890167 | 1.71E-08 | 1.75E-09 | -6.32 | 10.6737027 | -6.82E-02 | 203242638 | 203242761 | NC_000001.10 |
| cg01510990 | 1.71E-08 | 1.75E-09 | -6.32 | 10.6730598 | -1.48E-01 | 4914643   | 4914766   | NC_000006.11 |
| cg05581878 | 1.71E-08 | 1.75E-09 | -6.32 | 10.6723355 | -1.22E-01 | 159886981 | 159887104 | NC_000003.11 |
| cg26804944 | 1.71E-08 | 1.76E-09 | -6.32 | 10.6707889 | -4.39E-02 | 56660921  | 56661044  | NC_000012.11 |
| cg15612947 | 1.72E-08 | 1.76E-09 | -6.32 | 10.6697681 | -1.74E-01 | 14464064  | 14464187  | NC_000005.9  |
| cg05393023 | 1.72E-08 | 1.76E-09 | -6.32 | 10.6693381 | -1.49E-01 | 168194826 | 168194949 | NC_000001.10 |
| cg04435807 | 1.72E-08 | 1.76E-09 | -6.32 | 10.6685587 | -1.43E-01 | 90610522  | 90610645  | NC_000010.10 |
| cg18666379 | 1.72E-08 | 1.76E-09 | -6.32 | 10.6679154 | -1.06E-01 | 44503867  | 44503990  | NC_000010.10 |
| cg03880841 | 1.72E-08 | 1.76E-09 | -6.32 | 10.6664879 | -5.39E-02 | 568178    | 568301    | NC_000011.9  |
| cg27049094 | 1.72E-08 | 1.77E-09 | -6.32 | 10.665637  | -1.49E-01 | 75067716  | 75067839  | NC_000002.11 |
| cg06641593 | 1.72E-08 | 1.77E-09 | -6.32 | 10.6655517 | -1.56E-01 | 38034235  | 38034358  | NC_000003.11 |
| cg20650545 | 1.72E-08 | 1.77E-09 | -6.32 | 10.6655082 | -1.26E-01 | 39826677  | 39826800  | NC_000019.9  |
| cg24159723 | 1.73E-08 | 1.77E-09 | -6.32 | 10.6635864 | -3.98E-02 | 132387639 | 132387762 | NC_000005.9  |
| cg14737484 | 1.73E-08 | 1.77E-09 | -6.32 | 10.6625794 | -1.13E-01 | 32054561  | 32054684  | NC_000006.11 |

|            |          |          |       |            |           |           |           |              |
|------------|----------|----------|-------|------------|-----------|-----------|-----------|--------------|
| cg07674459 | 1.73E-08 | 1.77E-09 | -6.32 | 10.6624601 | -9.41E-02 | 100892205 | 100892328 | NC_000015.9  |
| cg13726633 | 1.73E-08 | 1.77E-09 | -6.32 | 10.6620866 | -6.78E-02 | 179064405 | 179064528 | NC_000003.11 |
| cg23768117 | 1.73E-08 | 1.77E-09 | -6.32 | 10.6619878 | -1.09E-01 | 79134486  | 79134609  | NC_000017.10 |
| cg09772299 | 1.73E-08 | 1.77E-09 | -6.32 | 10.6610135 | -9.64E-02 | 136783103 | 136783226 | NC_000002.11 |
| cg24897126 | 1.73E-08 | 1.77E-09 | -6.32 | 10.6609026 | -8.97E-02 | 6474383   | 6474506   | NC_000001.10 |
| cg19653161 | 1.73E-08 | 1.78E-09 | -6.32 | 10.6582551 | -2.04E-02 | 121302492 | 121302615 | NC_000010.10 |
| cg21048700 | 1.73E-08 | 1.78E-09 | -6.32 | 10.6580236 | -1.47E-01 | 189762162 | 189762285 | NC_000002.11 |
| cg11768167 | 1.74E-08 | 1.78E-09 | -6.31 | 10.6565011 | -1.16E-01 | 29690889  | 29691012  | NC_000006.11 |
| cg05267118 | 1.74E-08 | 1.78E-09 | -6.31 | 10.6560759 | -8.85E-02 | 2907884   | 2908007   | NC_000011.9  |
| cg15910685 | 1.74E-08 | 1.79E-09 | -6.31 | 10.6549502 | -2.07E-02 | 79980098  | 79980221  | NC_000013.10 |
| cg01953591 | 1.74E-08 | 1.79E-09 | -6.31 | 10.6545755 | -3.30E-02 | 169555805 | 169555928 | NC_000001.10 |
| cg26912078 | 1.74E-08 | 1.79E-09 | -6.31 | 10.6542088 | -4.56E-02 | 97523308  | 97523431  | NC_000002.11 |
| cg12256080 | 1.74E-08 | 1.79E-09 | -6.31 | 10.6533018 | -3.07E-02 | 26597000  | 26597123  | NC_000006.11 |
| cg22853542 | 1.74E-08 | 1.79E-09 | -6.31 | 10.6520171 | -1.34E-01 | 128812713 | 128812836 | NC_000008.10 |
| cg18932526 | 1.75E-08 | 1.79E-09 | -6.31 | 10.651559  | -1.10E-01 | 49608557  | 49608680  | NC_000010.10 |
| cg22380322 | 1.75E-08 | 1.79E-09 | -6.31 | 10.6514879 | -1.12E-01 | 36566160  | 36566283  | NC_000001.10 |
| cg03406626 | 1.75E-08 | 1.79E-09 | -6.31 | 10.6510207 | -1.33E-01 | 96036104  | 96036227  | NC_000011.9  |
| cg03728806 | 1.75E-08 | 1.80E-09 | -6.31 | 10.6491572 | -1.11E-01 | 147361831 | 147361954 | NC_000006.11 |
| cg23858706 | 1.75E-08 | 1.80E-09 | -6.31 | 10.6486306 | -7.02E-02 | 62122039  | 62122162  | NC_000020.10 |
| cg14717666 | 1.75E-08 | 1.80E-09 | -6.31 | 10.6482798 | -1.15E-01 | 119862992 | 119863115 | NC_000004.11 |
| cg15993762 | 1.75E-08 | 1.80E-09 | -6.31 | 10.6470191 | -6.57E-02 | 170440699 | 170440822 | NC_000002.11 |
| cg10787981 | 1.75E-08 | 1.80E-09 | -6.31 | 10.6468221 | -7.61E-02 | 15148999  | 15149122  | NC_000011.9  |
| cg15488794 | 1.76E-08 | 1.80E-09 | -6.31 | 10.6444652 | -1.46E-01 | 30262899  | 30263022  | NC_000020.10 |
| cg07263981 | 1.76E-08 | 1.81E-09 | -6.31 | 10.6441296 | -4.04E-02 | 26726691  | 26726814  | NC_000002.11 |
| cg23324101 | 1.76E-08 | 1.81E-09 | -6.31 | 10.6437013 | -1.41E-01 | 17444399  | 17444522  | NC_000019.9  |

|              |          |          |       |            |           |           |           |              |
|--------------|----------|----------|-------|------------|-----------|-----------|-----------|--------------|
| ch.7.901673F | 1.76E-08 | 1.81E-09 | -6.31 | 10.6424491 | -5.44E-02 | 38262698  | 38262821  | NC_000007.13 |
| cg12271332   | 1.76E-08 | 1.81E-09 | -6.31 | 10.6418652 | -2.25E-02 | 67579608  | 67579731  | NC_000008.10 |
| cg13365543   | 1.76E-08 | 1.81E-09 | -6.31 | 10.6412508 | -4.15E-02 | 9596475   | 9596598   | NC_000011.9  |
| cg09185990   | 1.76E-08 | 1.81E-09 | -6.31 | 10.6408429 | -1.11E-01 | 22090231  | 22090354  | NC_000012.11 |
| cg05106785   | 1.76E-08 | 1.81E-09 | -6.31 | 10.6404406 | -1.23E-01 | 190303960 | 190304083 | NC_000003.11 |
| cg12401918   | 1.76E-08 | 1.81E-09 | -6.31 | 10.6404387 | -7.56E-02 | 32164723  | 32164846  | NC_000006.11 |
| cg18933685   | 1.76E-08 | 1.81E-09 | -6.31 | 10.640378  | -1.61E-01 | 4255780   | 4255903   | NC_000007.13 |
| cg02977524   | 1.76E-08 | 1.81E-09 | -6.31 | 10.6401993 | -7.96E-02 | 234747788 | 234747911 | NC_000001.10 |
| cg06920434   | 1.77E-08 | 1.81E-09 | -6.31 | 10.6393122 | -4.43E-02 | 63607473  | 63607596  | NC_000011.9  |
| cg22736354   | 1.77E-08 | 1.82E-09 | -6.31 | 10.6370073 | -7.33E-02 | 18122719  | 18122842  | NC_000006.11 |
| cg01034251   | 1.77E-08 | 1.82E-09 | -6.31 | 10.6363194 | -1.50E-01 | 88748522  | 88748645  | NC_000016.9  |
| cg17385448   | 1.77E-08 | 1.82E-09 | -6.31 | 10.6362132 | -6.53E-02 | 15911702  | 15911825  | NC_000001.10 |
| cg00994896   | 1.77E-08 | 1.82E-09 | -6.31 | 10.6353003 | -3.39E-02 | 38519807  | 38519930  | NC_000017.10 |
| cg14099685   | 1.78E-08 | 1.83E-09 | -6.31 | 10.6332276 | -8.25E-02 | 47546068  | 47546191  | NC_000011.9  |
| cg13071185   | 1.78E-08 | 1.83E-09 | -6.31 | 10.6319251 | -1.23E-01 | 860134    | 860257    | NC_000011.9  |
| cg02791973   | 1.78E-08 | 1.83E-09 | -6.31 | 10.6314128 | -2.37E-01 | 1132256   | 1132379   | NC_000019.9  |
| cg18976869   | 1.78E-08 | 1.83E-09 | -6.31 | 10.6296025 | -2.83E-02 | 146102046 | 146102169 | NC_000004.11 |
| cg19107692   | 1.78E-08 | 1.83E-09 | -6.31 | 10.6288628 | -3.63E-02 | 147829408 | 147829531 | NC_000006.11 |
| cg03826618   | 1.78E-08 | 1.83E-09 | -6.31 | 10.6288596 | -9.21E-02 | 117297328 | 117297451 | NC_000011.9  |
| cg01798149   | 1.78E-08 | 1.83E-09 | -6.31 | 10.6286637 | -6.88E-02 | 28751111  | 28751234  | NC_000016.9  |
| cg09185884   | 1.78E-08 | 1.83E-09 | -6.31 | 10.6286156 | -1.66E-01 | 73056145  | 73056268  | NC_000017.10 |
| cg04089246   | 1.78E-08 | 1.83E-09 | -6.31 | 10.6285308 | -7.91E-02 | 47579217  | 47579340  | NC_000007.13 |
| cg10334127   | 1.79E-08 | 1.84E-09 | -6.31 | 10.628087  | -9.68E-02 | 33656146  | 33656269  | NC_000011.9  |
| cg07378762   | 1.79E-08 | 1.84E-09 | -6.31 | 10.6280417 | -7.01E-02 | 169376470 | 169376593 | NC_000003.11 |
| cg14647880   | 1.79E-08 | 1.84E-09 | -6.31 | 10.6278724 | -1.11E-01 | 86946141  | 86946264  | NC_000007.13 |

|            |          |          |       |            |           |           |           |              |
|------------|----------|----------|-------|------------|-----------|-----------|-----------|--------------|
| cg00771084 | 1.79E-08 | 1.84E-09 | -6.31 | 10.6276447 | -7.74E-02 | 242598843 | 242598966 | NC_000002.11 |
| cg11891256 | 1.79E-08 | 1.84E-09 | -6.31 | 10.6275692 | -1.20E-01 | 101349035 | 101349158 | NC_000012.11 |
| cg19360930 | 1.79E-08 | 1.84E-09 | -6.31 | 10.6273593 | -1.47E-01 | 20111778  | 20111901  | NC_000002.11 |
| cg10420527 | 1.79E-08 | 1.84E-09 | -6.31 | 10.6271851 | -1.38E-01 | 68138505  | 68138628  | NC_000011.9  |
| cg09490880 | 1.79E-08 | 1.84E-09 | -6.31 | 10.6268891 | -1.06E-01 | 24914970  | 24915093  | NC_000004.11 |
| cg17625891 | 1.79E-08 | 1.84E-09 | -6.31 | 10.6261999 | -6.86E-02 | 41218583  | 41218706  | NC_000004.11 |
| cg24371534 | 1.79E-08 | 1.84E-09 | -6.31 | 10.6257073 | -1.34E-01 | 3384929   | 3385052   | NC_000001.10 |
| cg13727629 | 1.79E-08 | 1.84E-09 | -6.31 | 10.6238053 | -1.40E-01 | 2232469   | 2232592   | NC_000001.10 |
| cg20954533 | 1.79E-08 | 1.84E-09 | -6.31 | 10.6236026 | -1.50E-01 | 71462729  | 71462852  | NC_000005.9  |
| cg08598296 | 1.79E-08 | 1.84E-09 | -6.31 | 10.6234793 | -3.01E-02 | 62704199  | 62704322  | NC_000010.10 |
| cg14741153 | 1.79E-08 | 1.84E-09 | -6.31 | 10.623208  | -7.95E-02 | 95753348  | 95753471  | NC_000010.10 |
| cg07613930 | 1.79E-08 | 1.85E-09 | -6.31 | 10.6229229 | -5.69E-02 | 117316665 | 117316788 | NC_000012.11 |
| cg14210311 | 1.79E-08 | 1.85E-09 | -6.31 | 10.6222692 | -1.89E-01 | 44726943  | 44727066  | NC_000001.10 |
| cg09308847 | 1.80E-08 | 1.85E-09 | -6.31 | 10.6203714 | -7.39E-02 | 29242602  | 29242725  | NC_000016.9  |
| cg24423806 | 1.80E-08 | 1.85E-09 | -6.31 | 10.6201833 | -5.48E-02 | 66310467  | 66310590  | NC_000011.9  |
| cg14933468 | 1.80E-08 | 1.85E-09 | -6.31 | 10.6194652 | -1.10E-01 | 62138599  | 62138722  | NC_000011.9  |
| cg05057534 | 1.80E-08 | 1.85E-09 | -6.31 | 10.6177467 | -1.12E-01 | 28497669  | 28497792  | NC_000002.11 |
| cg12390237 | 1.80E-08 | 1.86E-09 | -6.31 | 10.6169639 | -9.14E-02 | 34634263  | 34634386  | NC_000015.9  |
| cg07015079 | 1.81E-08 | 1.86E-09 | -6.31 | 10.6161877 | -6.85E-02 | 145549441 | 145549564 | NC_000001.10 |
| cg08493590 | 1.81E-08 | 1.86E-09 | -6.31 | 10.6146738 | -1.10E-01 | 44796705  | 44796828  | NC_000006.11 |
| cg23860337 | 1.81E-08 | 1.86E-09 | -6.31 | 10.6143732 | -1.61E-01 | 42434572  | 42434695  | NC_000019.9  |
| cg07155478 | 1.81E-08 | 1.86E-09 | -6.31 | 10.6139588 | -3.82E-02 | 197283151 | 197283274 | NC_000003.11 |
| cg08410996 | 1.81E-08 | 1.87E-09 | -6.31 | 10.611027  | -2.12E-01 | 76373022  | 76373145  | NC_000005.9  |
| cg26101183 | 1.82E-08 | 1.87E-09 | -6.31 | 10.6100682 | -6.96E-02 | 65930786  | 65930909  | NC_000010.10 |
| cg09253581 | 1.82E-08 | 1.87E-09 | -6.31 | 10.6094291 | -5.82E-02 | 44302822  | 44302945  | NC_000019.9  |



|                |          |          |       |            |           |           |           |              |
|----------------|----------|----------|-------|------------|-----------|-----------|-----------|--------------|
| cg05133853     | 1.82E-08 | 1.87E-09 | -6.31 | 10.6092986 | -1.20E-01 | 5265008   | 5265131   | NC_000011.9  |
| cg01233518     | 1.82E-08 | 1.87E-09 | -6.31 | 10.6088873 | -1.41E-01 | 44837158  | 44837281  | NC_000021.8  |
| cg04476865     | 1.82E-08 | 1.87E-09 | -6.31 | 10.6084274 | -1.14E-01 | 36223476  | 36223599  | NC_000013.10 |
| ch.15.292390F  | 1.82E-08 | 1.87E-09 | -6.31 | 10.6082792 | -4.14E-02 | 35241472  | 35241595  | NC_000015.9  |
| cg23515651     | 1.82E-08 | 1.87E-09 | -6.31 | 10.6082631 | -7.69E-02 | 77988841  | 77988964  | NC_000015.9  |
| cg21114840     | 1.82E-08 | 1.88E-09 | -6.31 | 10.6063805 | -7.53E-02 | 40752097  | 40752220  | NC_000021.8  |
| ch.1.30340112R | 1.82E-08 | 1.88E-09 | -6.31 | 10.6063735 | -4.40E-02 | 30567525  | 30567648  | NC_000001.10 |
| cg11982525     | 1.82E-08 | 1.88E-09 | -6.31 | 10.6061372 | -1.76E-01 | 106505688 | 106505811 | NC_000007.13 |
| cg26123763     | 1.82E-08 | 1.88E-09 | -6.31 | 10.60612   | -9.06E-02 | 150516043 | 150516166 | NC_000003.11 |
| cg24985331     | 1.82E-08 | 1.88E-09 | -6.31 | 10.6060451 | -2.70E-02 | 38210911  | 38211034  | NC_000017.10 |
| cg11651538     | 1.83E-08 | 1.88E-09 | -6.31 | 10.6048311 | -1.03E-01 | 56320950  | 56321073  | NC_000001.10 |
| cg23101680     | 1.83E-08 | 1.88E-09 | -6.31 | 10.6047531 | -1.23E-01 | 46277286  | 46277409  | NC_000013.10 |
| cg14280181     | 1.83E-08 | 1.88E-09 | -6.31 | 10.6043825 | -1.35E-01 | 223291007 | 223291130 | NC_000002.11 |
| cg23978161     | 1.83E-08 | 1.88E-09 | -6.31 | 10.6042752 | -3.22E-02 | 77870897  | 77871020  | NC_000004.11 |
| cg13322582     | 1.83E-08 | 1.88E-09 | -6.3  | 10.6025874 | -9.41E-02 | 38720689  | 38720812  | NC_000019.9  |
| cg09642525     | 1.83E-08 | 1.88E-09 | -6.3  | 10.6020584 | -7.72E-02 | 85320701  | 85320824  | NC_000016.9  |
| cg10708588     | 1.83E-08 | 1.89E-09 | -6.3  | 10.601455  | -3.54E-02 | 23810816  | 23810939  | NC_000001.10 |
| cg12995370     | 1.83E-08 | 1.89E-09 | -6.3  | 10.5997805 | -1.52E-02 | 52904697  | 52904820  | NC_000004.11 |
| cg05481579     | 1.83E-08 | 1.89E-09 | -6.3  | 10.5996074 | -1.18E-01 | 79030796  | 79030919  | NC_000017.10 |
| cg10125119     | 1.83E-08 | 1.89E-09 | -6.3  | 10.5994056 | -5.35E-02 | 115300850 | 115300973 | NC_000001.10 |
| cg19716073     | 1.84E-08 | 1.89E-09 | -6.3  | 10.5984144 | -1.22E-01 | 65039817  | 65039940  | NC_000017.10 |
| cg16371082     | 1.84E-08 | 1.89E-09 | -6.3  | 10.598063  | -2.11E-02 | 134083158 | 134083281 | NC_000003.11 |
| cg10626391     | 1.84E-08 | 1.89E-09 | -6.3  | 10.5974939 | -3.61E-02 | 883112    | 883235    | NC_000017.10 |
| cg09284772     | 1.84E-08 | 1.90E-09 | -6.3  | 10.5960874 | -4.57E-02 | 30709924  | 30710047  | NC_000006.11 |
| cg26133217     | 1.84E-08 | 1.90E-09 | -6.3  | 10.5953194 | -1.04E-01 | 233157602 | 233157725 | NC_000002.11 |

|                |          |          |      |            |           |           |           |              |
|----------------|----------|----------|------|------------|-----------|-----------|-----------|--------------|
| cg05885410     | 1.84E-08 | 1.90E-09 | -6.3 | 10.5953082 | -8.98E-02 | 88459516  | 88459639  | NC_000016.9  |
| cg05734973     | 1.84E-08 | 1.90E-09 | -6.3 | 10.5942939 | -7.30E-02 | 15139826  | 15139949  | NC_000003.11 |
| cg05308645     | 1.84E-08 | 1.90E-09 | -6.3 | 10.5940501 | -9.76E-02 | 184107534 | 184107657 | NC_000003.11 |
| cg03951374     | 1.84E-08 | 1.90E-09 | -6.3 | 10.5937104 | -1.43E-01 | 37390176  | 37390299  | NC_000015.9  |
| cg17835455     | 1.84E-08 | 1.90E-09 | -6.3 | 10.5935464 | -1.40E-01 | 84464130  | 84464253  | NC_000012.11 |
| cg02435083     | 1.85E-08 | 1.90E-09 | -6.3 | 10.5917277 | -1.07E-01 | 8943436   | 8943559   | NC_000016.9  |
| ch.11.1810631R | 1.85E-08 | 1.91E-09 | -6.3 | 10.5915259 | -1.35E-02 | 84371458  | 84371581  | NC_000011.9  |
| cg07875786     | 1.85E-08 | 1.91E-09 | -6.3 | 10.5915203 | -7.76E-02 | 92918927  | 92919050  | NC_000005.9  |
| cg07737802     | 1.85E-08 | 1.91E-09 | -6.3 | 10.5913312 | -1.31E-01 | 95537812  | 95537935  | NC_000012.11 |
| cg08084675     | 1.85E-08 | 1.91E-09 | -6.3 | 10.5910035 | -7.28E-02 | 32915497  | 32915620  | NC_000011.9  |
| cg14118175     | 1.85E-08 | 1.91E-09 | -6.3 | 10.5889979 | -9.35E-02 | 94152384  | 94152507  | NC_000013.10 |
| cg02989257     | 1.85E-08 | 1.91E-09 | -6.3 | 10.5879476 | -1.01E-01 | 32169274  | 32169397  | NC_000001.10 |
| cg18786374     | 1.86E-08 | 1.91E-09 | -6.3 | 10.5871093 | -1.18E-01 | 202313532 | 202313655 | NC_000002.11 |
| cg17988524     | 1.86E-08 | 1.91E-09 | -6.3 | 10.5869312 | -5.34E-02 | 74681873  | 74681996  | NC_000002.11 |
| cg09581049     | 1.86E-08 | 1.91E-09 | -6.3 | 10.5868227 | -1.04E-01 | 42998320  | 42998443  | NC_000017.10 |
| cg00470341     | 1.86E-08 | 1.92E-09 | -6.3 | 10.5830503 | -1.51E-01 | 183237787 | 183237910 | NC_000002.11 |
| cg05037488     | 1.86E-08 | 1.92E-09 | -6.3 | 10.5824454 | -4.10E-02 | 33395495  | 33395618  | NC_000006.11 |
| cg03840259     | 1.87E-08 | 1.93E-09 | -6.3 | 10.5799675 | -1.66E-01 | 40297036  | 40297159  | NC_000022.10 |
| cg07624742     | 1.87E-08 | 1.93E-09 | -6.3 | 10.5799633 | -8.72E-02 | 5892048   | 5892171   | NC_000019.9  |
| cg10267925     | 1.87E-08 | 1.93E-09 | -6.3 | 10.5786718 | -3.13E-02 | 111170595 | 111170718 | NC_000011.9  |
| cg01346718     | 1.87E-08 | 1.93E-09 | -6.3 | 10.5786093 | -8.67E-02 | 38713874  | 38713997  | NC_000022.10 |
| cg21398996     | 1.88E-08 | 1.94E-09 | -6.3 | 10.5760268 | -1.20E-01 | 33923778  | 33923901  | NC_000013.10 |
| cg14431850     | 1.88E-08 | 1.94E-09 | -6.3 | 10.5748356 | -8.21E-02 | 107666012 | 107666135 | NC_000009.11 |
| cg17213946     | 1.88E-08 | 1.94E-09 | -6.3 | 10.5744474 | -6.20E-02 | 43997516  | 43997639  | NC_000001.10 |
| cg20544372     | 1.88E-08 | 1.94E-09 | -6.3 | 10.5741925 | -3.22E-02 | 74064549  | 74064672  | NC_000007.13 |

|            |          |          |      |            |           |           |           |              |
|------------|----------|----------|------|------------|-----------|-----------|-----------|--------------|
| cg26535158 | 1.88E-08 | 1.94E-09 | -6.3 | 10.5741836 | -1.19E-01 | 40175841  | 40175964  | NC_000017.10 |
| cg05521150 | 1.88E-08 | 1.94E-09 | -6.3 | 10.5735664 | -1.22E-01 | 11550611  | 11550734  | NC_000004.11 |
| cg09335911 | 1.88E-08 | 1.94E-09 | -6.3 | 10.5734831 | -4.57E-02 | 100027962 | 100028085 | NC_000010.10 |
| cg24807294 | 1.88E-08 | 1.94E-09 | -6.3 | 10.5733432 | -1.24E-01 | 85397563  | 85397686  | NC_000011.9  |
| cg25545598 | 1.88E-08 | 1.94E-09 | -6.3 | 10.5725214 | -6.94E-02 | 107937633 | 107937756 | NC_000008.10 |
| cg11330108 | 1.88E-08 | 1.94E-09 | -6.3 | 10.5722615 | -8.60E-02 | 60986115  | 60986238  | NC_000018.9  |
| cg04873169 | 1.88E-08 | 1.95E-09 | -6.3 | 10.5712738 | -7.74E-02 | 47021767  | 47021890  | NC_000022.10 |
| cg13718141 | 1.88E-08 | 1.95E-09 | -6.3 | 10.5712707 | -9.05E-02 | 37926346  | 37926469  | NC_000009.11 |
| cg19909623 | 1.88E-08 | 1.95E-09 | -6.3 | 10.5711655 | -3.86E-02 | 70158761  | 70158884  | NC_000007.13 |
| cg17680902 | 1.89E-08 | 1.95E-09 | -6.3 | 10.5707393 | -2.34E-02 | 31927069  | 31927192  | NC_000006.11 |
| cg00668559 | 1.89E-08 | 1.95E-09 | -6.3 | 10.5680301 | -9.93E-02 | 44230977  | 44231100  | NC_000006.11 |
| cg24969820 | 1.89E-08 | 1.95E-09 | -6.3 | 10.567618  | -9.23E-02 | 98497864  | 98497987  | NC_000003.11 |
| cg14243817 | 1.89E-08 | 1.95E-09 | -6.3 | 10.5674752 | -9.74E-02 | 138876879 | 138877002 | NC_000009.11 |
| cg05730099 | 1.89E-08 | 1.95E-09 | -6.3 | 10.5669111 | -3.86E-02 | 73964708  | 73964831  | NC_000002.11 |
| cg13956452 | 1.89E-08 | 1.95E-09 | -6.3 | 10.5668218 | -1.16E-01 | 140333362 | 140333485 | NC_000009.11 |
| cg05977109 | 1.89E-08 | 1.96E-09 | -6.3 | 10.5656133 | -1.42E-01 | 52178181  | 52178304  | NC_000010.10 |
| cg12931591 | 1.90E-08 | 1.96E-09 | -6.3 | 10.5650206 | -1.49E-01 | 3411821   | 3411944   | NC_000018.9  |
| cg00066270 | 1.90E-08 | 1.96E-09 | -6.3 | 10.5647944 | -1.27E-01 | 186265270 | 186265393 | NC_000001.10 |
| cg13916080 | 1.90E-08 | 1.96E-09 | -6.3 | 10.5640487 | -1.07E-01 | 129624994 | 129625117 | NC_000009.11 |
| cg00032852 | 1.90E-08 | 1.96E-09 | -6.3 | 10.5638628 | -2.20E-02 | 132767132 | 132767255 | NC_000007.13 |
| cg04425624 | 1.90E-08 | 1.96E-09 | -6.3 | 10.5631738 | -9.78E-02 | 31543565  | 31543688  | NC_000006.11 |
| cg00769775 | 1.90E-08 | 1.96E-09 | -6.3 | 10.5627612 | -2.27E-02 | 125412987 | 125413110 | NC_000012.11 |
| cg27204544 | 1.90E-08 | 1.96E-09 | -6.3 | 10.5622967 | -6.73E-02 | 134896097 | 134896220 | NC_000007.13 |
| cg01185640 | 1.90E-08 | 1.96E-09 | -6.3 | 10.562059  | -5.64E-02 | 158053980 | 158054103 | NC_000006.11 |
| cg02451853 | 1.90E-08 | 1.96E-09 | -6.3 | 10.5619308 | -8.66E-02 | 67185429  | 67185552  | NC_000016.9  |

|            |          |          |       |            |           |           |           |              |
|------------|----------|----------|-------|------------|-----------|-----------|-----------|--------------|
| cg26569002 | 1.90E-08 | 1.96E-09 | -6.3  | 10.5616804 | -6.53E-02 | 148747323 | 148747446 | NC_000005.9  |
| cg08866633 | 1.91E-08 | 1.97E-09 | -6.3  | 10.5597357 | -1.10E-01 | 113968514 | 113968637 | NC_000013.10 |
| cg03792876 | 1.91E-08 | 1.97E-09 | -6.3  | 10.5589745 | -9.97E-02 | 73243     | 73366     | NC_000016.9  |
| cg26312191 | 1.91E-08 | 1.97E-09 | -6.3  | 10.5588762 | -1.08E-01 | 80279310  | 80279433  | NC_000017.10 |
| cg02046226 | 1.91E-08 | 1.97E-09 | -6.3  | 10.5583399 | -2.85E-02 | 121410475 | 121410598 | NC_000010.10 |
| cg05779675 | 1.91E-08 | 1.97E-09 | -6.3  | 10.5581981 | -8.82E-02 | 50637092  | 50637215  | NC_000016.9  |
| cg14611745 | 1.91E-08 | 1.98E-09 | -6.3  | 10.5562601 | -4.38E-02 | 227916287 | 227916410 | NC_000001.10 |
| cg07242414 | 1.92E-08 | 1.98E-09 | -6.3  | 10.5532638 | -4.57E-02 | 22021845  | 22021968  | NC_000008.10 |
| cg05738715 | 1.92E-08 | 1.98E-09 | -6.3  | 10.5532501 | -1.62E-01 | 118018768 | 118018891 | NC_000012.11 |
| cg26833602 | 1.92E-08 | 1.98E-09 | -6.3  | 10.5528712 | -8.75E-02 | 95821549  | 95821672  | NC_000009.11 |
| cg14249120 | 1.92E-08 | 1.98E-09 | -6.3  | 10.5522236 | -4.11E-02 | 67579493  | 67579616  | NC_000008.10 |
| cg17008052 | 1.92E-08 | 1.99E-09 | -6.29 | 10.5505818 | -2.91E-02 | 66112445  | 66112568  | NC_000011.9  |
| cg26684574 | 1.92E-08 | 1.99E-09 | -6.29 | 10.5501137 | -2.92E-02 | 48532295  | 48532418  | NC_000020.10 |
| cg14955151 | 1.92E-08 | 1.99E-09 | -6.29 | 10.5497377 | -3.37E-02 | 73874635  | 73874758  | NC_000017.10 |
| cg12996913 | 1.92E-08 | 1.99E-09 | -6.29 | 10.5493767 | -1.19E-01 | 72338454  | 72338577  | NC_000003.11 |
| cg04522694 | 1.92E-08 | 1.99E-09 | -6.29 | 10.5491802 | -5.51E-02 | 7598942   | 7599065   | NC_000019.9  |
| cg26833169 | 1.93E-08 | 1.99E-09 | -6.29 | 10.5478633 | -9.72E-02 | 14994045  | 14994168  | NC_000011.9  |
| cg23924222 | 1.93E-08 | 1.99E-09 | -6.29 | 10.5473312 | -7.46E-02 | 24658294  | 24658417  | NC_000002.11 |
| cg04486940 | 1.93E-08 | 1.99E-09 | -6.29 | 10.5473002 | -2.02E-01 | 44727010  | 44727133  | NC_000001.10 |
| cg20049273 | 1.93E-08 | 2.00E-09 | -6.29 | 10.546319  | -9.49E-02 | 125293010 | 125293133 | NC_000008.10 |
| cg05287314 | 1.93E-08 | 2.00E-09 | -6.29 | 10.5463105 | -5.09E-02 | 822198    | 822321    | NC_000020.10 |
| cg18675600 | 1.93E-08 | 2.00E-09 | -6.29 | 10.5459988 | -1.31E-01 | 142432241 | 142432364 | NC_000008.10 |
| cg19003733 | 1.93E-08 | 2.00E-09 | -6.29 | 10.5459115 | -6.00E-02 | 40575462  | 40575585  | NC_000017.10 |
| cg07254066 | 1.94E-08 | 2.00E-09 | -6.29 | 10.5436486 | -7.91E-02 | 54965895  | 54966018  | NC_000016.9  |
| cg06121226 | 1.94E-08 | 2.00E-09 | -6.29 | 10.5431657 | -1.31E-01 | 72134060  | 72134183  | NC_000004.11 |

|                |          |          |       |            |           |           |           |              |
|----------------|----------|----------|-------|------------|-----------|-----------|-----------|--------------|
| ch.17.1945262F | 1.94E-08 | 2.00E-09 | -6.29 | 10.5430113 | -3.26E-02 | 73220966  | 73221089  | NC_000017.10 |
| cg14173185     | 1.94E-08 | 2.00E-09 | -6.29 | 10.5418285 | -3.99E-02 | 48894973  | 48895096  | NC_000019.9  |
| cg17928286     | 1.94E-08 | 2.00E-09 | -6.29 | 10.5416591 | -1.20E-01 | 205414220 | 205414343 | NC_000001.10 |
| cg17430967     | 1.94E-08 | 2.01E-09 | -6.29 | 10.5416159 | -3.79E-02 | 155948550 | 155948673 | NC_000001.10 |
| cg04876978     | 1.94E-08 | 2.01E-09 | -6.29 | 10.5409006 | -1.80E-01 | 112431576 | 112431699 | NC_000007.13 |
| cg27130240     | 1.94E-08 | 2.01E-09 | -6.29 | 10.5408729 | -1.22E-01 | 88943533  | 88943656  | NC_000016.9  |
| cg12513616     | 1.94E-08 | 2.01E-09 | -6.29 | 10.5402777 | -7.25E-02 | 177370977 | 177371100 | NC_000005.9  |
| cg20927724     | 1.94E-08 | 2.01E-09 | -6.29 | 10.5401897 | -1.13E-01 | 90209326  | 90209449  | NC_000015.9  |
| cg01234760     | 1.94E-08 | 2.01E-09 | -6.29 | 10.5394403 | -5.21E-02 | 10694545  | 10694668  | NC_000006.11 |
| cg19621460     | 1.94E-08 | 2.01E-09 | -6.29 | 10.5393115 | -1.39E-01 | 14225945  | 14226068  | NC_000019.9  |
| cg05196905     | 1.94E-08 | 2.01E-09 | -6.29 | 10.5392301 | -1.33E-01 | 47877665  | 47877788  | NC_000021.8  |
| cg04118950     | 1.94E-08 | 2.01E-09 | -6.29 | 10.5386321 | -1.20E-01 | 53897039  | 53897162  | NC_000001.10 |
| cg25344964     | 1.94E-08 | 2.01E-09 | -6.29 | 10.5385603 | -7.19E-02 | 202897387 | 202897510 | NC_000002.11 |
| cg14330119     | 1.94E-08 | 2.01E-09 | -6.29 | 10.5381056 | -3.52E-02 | 73668867  | 73668990  | NC_000007.13 |
| cg16903269     | 1.95E-08 | 2.01E-09 | -6.29 | 10.5379332 | -9.50E-02 | 134250389 | 134250512 | NC_000007.13 |
| cg01462546     | 1.95E-08 | 2.02E-09 | -6.29 | 10.5366672 | -1.47E-01 | 20864312  | 20864435  | NC_000022.10 |
| cg27288614     | 1.95E-08 | 2.02E-09 | -6.29 | 10.5351867 | -4.59E-02 | 35635774  | 35635897  | NC_000019.9  |
| ch.10.6019805R | 1.95E-08 | 2.02E-09 | -6.29 | 10.5339253 | -1.44E-02 | 5979799   | 5979922   | NC_000010.10 |
| cg01071440     | 1.95E-08 | 2.02E-09 | -6.29 | 10.5335812 | -1.45E-01 | 19711707  | 19711830  | NC_000001.10 |
| cg00944431     | 1.95E-08 | 2.02E-09 | -6.29 | 10.5334065 | -1.06E-01 | 10896004  | 10896127  | NC_000001.10 |
| cg03825158     | 1.95E-08 | 2.02E-09 | -6.29 | 10.5332991 | -1.24E-01 | 49612801  | 49612924  | NC_000016.9  |
| cg10631373     | 1.96E-08 | 2.03E-09 | -6.29 | 10.5312906 | -1.06E-01 | 89457642  | 89457765  | NC_000001.10 |
| cg18607411     | 1.96E-08 | 2.03E-09 | -6.29 | 10.5311671 | -1.37E-01 | 80911808  | 80911931  | NC_000013.10 |
| cg17826594     | 1.96E-08 | 2.03E-09 | -6.29 | 10.5311412 | -4.94E-02 | 55506014  | 55506137  | NC_000001.10 |
| cg12328660     | 1.96E-08 | 2.03E-09 | -6.29 | 10.5288026 | -1.36E-01 | 119896128 | 119896251 | NC_000003.11 |

|            |          |          |       |            |           |           |           |              |
|------------|----------|----------|-------|------------|-----------|-----------|-----------|--------------|
| cg09516537 | 1.96E-08 | 2.03E-09 | -6.29 | 10.5286697 | -2.67E-02 | 46065292  | 46065415  | NC_000018.9  |
| cg17298925 | 1.96E-08 | 2.03E-09 | -6.29 | 10.5281493 | -1.87E-01 | 6828054   | 6828177   | NC_000005.9  |
| cg01163071 | 1.97E-08 | 2.04E-09 | -6.29 | 10.525919  | -7.93E-02 | 46881511  | 46881634  | NC_000016.9  |
| cg17124700 | 1.97E-08 | 2.04E-09 | -6.29 | 10.5255877 | -1.12E-01 | 182642748 | 182642871 | NC_000001.10 |
| cg24222580 | 1.97E-08 | 2.04E-09 | -6.29 | 10.5254969 | -1.16E-01 | 113639509 | 113639632 | NC_000013.10 |
| cg02096552 | 1.97E-08 | 2.04E-09 | -6.29 | 10.5253938 | -1.49E-01 | 223168232 | 223168355 | NC_000001.10 |
| cg04285652 | 1.97E-08 | 2.04E-09 | -6.29 | 10.525257  | -8.41E-02 | 23584042  | 23584165  | NC_000008.10 |
| cg07468956 | 1.97E-08 | 2.04E-09 | -6.29 | 10.5251739 | -1.39E-01 | 80289701  | 80289824  | NC_000017.10 |
| cg20785336 | 1.97E-08 | 2.04E-09 | -6.29 | 10.524352  | -1.50E-01 | 28064505  | 28064628  | NC_000013.10 |
| cg20549620 | 1.97E-08 | 2.04E-09 | -6.29 | 10.523854  | -1.24E-01 | 220970010 | 220970133 | NC_000002.11 |
| cg01187997 | 1.97E-08 | 2.04E-09 | -6.29 | 10.5227054 | -7.56E-02 | 1594830   | 1594953   | NC_000011.9  |
| cg22777668 | 1.97E-08 | 2.04E-09 | -6.29 | 10.5225324 | -8.18E-02 | 6881303   | 6881426   | NC_000012.11 |
| cg10604333 | 1.98E-08 | 2.05E-09 | -6.29 | 10.5218037 | -7.45E-02 | 44529262  | 44529385  | NC_000019.9  |
| cg12046168 | 1.98E-08 | 2.05E-09 | -6.29 | 10.5213002 | -7.99E-02 | 23384686  | 23384809  | NC_000010.10 |
| cg07203320 | 1.98E-08 | 2.05E-09 | -6.29 | 10.5204668 | -1.67E-02 | 139108984 | 139109107 | NC_000003.11 |
| cg27151629 | 1.98E-08 | 2.05E-09 | -6.29 | 10.5193406 | -6.65E-02 | 19411125  | 19411248  | NC_000017.10 |
| cg27553890 | 1.98E-08 | 2.05E-09 | -6.29 | 10.5180706 | -9.82E-02 | 109221424 | 109221547 | NC_000012.11 |
| cg27186519 | 1.99E-08 | 2.06E-09 | -6.29 | 10.5161409 | -1.12E-01 | 46732376  | 46732499  | NC_000011.9  |
| cg06097423 | 1.99E-08 | 2.06E-09 | -6.29 | 10.5149989 | -1.13E-01 | 15955024  | 15955147  | NC_000012.11 |
| cg15673731 | 1.99E-08 | 2.06E-09 | -6.29 | 10.51477   | -2.57E-02 | 156084691 | 156084814 | NC_000001.10 |
| cg02075324 | 1.99E-08 | 2.06E-09 | -6.29 | 10.5136359 | -9.10E-02 | 55029302  | 55029425  | NC_000014.8  |
| cg13405782 | 1.99E-08 | 2.06E-09 | -6.29 | 10.513369  | -1.31E-01 | 30060868  | 30060991  | NC_000020.10 |
| cg20707668 | 1.99E-08 | 2.07E-09 | -6.29 | 10.5123589 | -1.30E-01 | 3671697   | 3671820   | NC_000004.11 |
| cg15981475 | 1.99E-08 | 2.07E-09 | -6.29 | 10.5121479 | -9.22E-02 | 76921948  | 76922071  | NC_000017.10 |
| cg00784105 | 1.99E-08 | 2.07E-09 | -6.29 | 10.5119484 | -9.09E-02 | 19636065  | 19636188  | NC_000001.10 |

|            |          |          |       |            |           |           |           |              |
|------------|----------|----------|-------|------------|-----------|-----------|-----------|--------------|
| cg12318408 | 2.00E-08 | 2.07E-09 | -6.29 | 10.5107708 | -7.36E-02 | 2699802   | 2699925   | NC_000017.10 |
| cg05641535 | 2.00E-08 | 2.07E-09 | -6.29 | 10.5107273 | -9.11E-02 | 3026154   | 3026277   | NC_000001.10 |
| cg19245758 | 2.00E-08 | 2.07E-09 | -6.29 | 10.5105502 | -1.12E-01 | 101497779 | 101497902 | NC_000003.11 |
| cg05732646 | 2.00E-08 | 2.07E-09 | -6.29 | 10.5098685 | -5.58E-02 | 41706942  | 41707065  | NC_000013.10 |
| cg04133572 | 2.00E-08 | 2.07E-09 | -6.29 | 10.5091092 | -4.76E-02 | 161195810 | 161195933 | NC_000001.10 |
| cg02002258 | 2.00E-08 | 2.07E-09 | -6.29 | 10.5086154 | -9.84E-02 | 26700976  | 26701099  | NC_000002.11 |
| cg10311048 | 2.00E-08 | 2.08E-09 | -6.29 | 10.5078189 | -1.56E-01 | 27996771  | 27996894  | NC_000012.11 |
| cg22595711 | 2.00E-08 | 2.08E-09 | -6.29 | 10.5076909 | -3.25E-02 | 83351836  | 83351959  | NC_000004.11 |
| cg00763594 | 2.00E-08 | 2.08E-09 | -6.29 | 10.5076789 | -1.31E-01 | 15256054  | 15256177  | NC_000001.10 |
| cg13134448 | 2.00E-08 | 2.08E-09 | -6.29 | 10.5068487 | -5.16E-02 | 36689477  | 36689600  | NC_000001.10 |
| cg27664689 | 2.00E-08 | 2.08E-09 | -6.29 | 10.5066941 | -1.46E-01 | 152830665 | 152830788 | NC_000002.11 |
| cg06916446 | 2.00E-08 | 2.08E-09 | -6.29 | 10.5064794 | -7.70E-02 | 179105010 | 179105133 | NC_000005.9  |
| cg14494421 | 2.00E-08 | 2.08E-09 | -6.29 | 10.5063441 | -7.33E-02 | 139636616 | 139636739 | NC_000009.11 |
| cg26818165 | 2.01E-08 | 2.08E-09 | -6.29 | 10.504709  | -1.06E-01 | 6481857   | 6481980   | NC_000019.9  |
| cg11132469 | 2.01E-08 | 2.08E-09 | -6.29 | 10.503683  | -1.41E-01 | 142432283 | 142432406 | NC_000008.10 |
| cg02205391 | 2.01E-08 | 2.09E-09 | -6.29 | 10.5029254 | -6.15E-02 | 31762409  | 31762532  | NC_000006.11 |
| cg11361691 | 2.01E-08 | 2.09E-09 | -6.29 | 10.5028962 | -3.05E-02 | 57993876  | 57993999  | NC_000003.11 |
| cg22077361 | 2.01E-08 | 2.09E-09 | -6.29 | 10.5014102 | -1.40E-01 | 24195347  | 24195470  | NC_000001.10 |
| cg16672659 | 2.02E-08 | 2.09E-09 | -6.28 | 10.4986862 | -1.21E-01 | 36098223  | 36098346  | NC_000017.10 |
| cg00033304 | 2.02E-08 | 2.10E-09 | -6.28 | 10.4984724 | -1.33E-01 | 185302692 | 185302815 | NC_000003.11 |
| cg03167763 | 2.02E-08 | 2.10E-09 | -6.28 | 10.4978148 | -9.33E-02 | 20512397  | 20512520  | NC_000001.10 |
| cg10780318 | 2.02E-08 | 2.10E-09 | -6.28 | 10.4973458 | -5.93E-02 | 35704149  | 35704272  | NC_000006.11 |
| cg01494890 | 2.02E-08 | 2.10E-09 | -6.28 | 10.4964338 | -2.77E-02 | 150672267 | 150672390 | NC_000007.13 |
| cg13921204 | 2.02E-08 | 2.10E-09 | -6.28 | 10.4963063 | -3.56E-02 | 12171454  | 12171577  | NC_000010.10 |
| cg07138070 | 2.03E-08 | 2.10E-09 | -6.28 | 10.4950613 | -1.30E-01 | 41137309  | 41137432  | NC_000007.13 |

|            |          |          |       |            |           |           |           |              |
|------------|----------|----------|-------|------------|-----------|-----------|-----------|--------------|
| cg19391697 | 2.03E-08 | 2.10E-09 | -6.28 | 10.4947927 | -1.09E-01 | 239008943 | 239009066 | NC_000002.11 |
| cg27646848 | 2.03E-08 | 2.10E-09 | -6.28 | 10.4946958 | -2.71E-02 | 62389601  | 62389724  | NC_000011.9  |
| cg16650717 | 2.03E-08 | 2.11E-09 | -6.28 | 10.4938777 | -2.31E-02 | 19970334  | 19970457  | NC_000001.10 |
| cg24951263 | 2.03E-08 | 2.11E-09 | -6.28 | 10.4936388 | -6.41E-02 | 43772975  | 43773098  | NC_000005.9  |
| cg21166985 | 2.03E-08 | 2.11E-09 | -6.28 | 10.4934538 | -1.37E-01 | 121882267 | 121882390 | NC_000012.11 |
| cg00524169 | 2.03E-08 | 2.11E-09 | -6.28 | 10.4928539 | -2.65E-02 | 39138063  | 39138186  | NC_000019.9  |
| cg11310639 | 2.03E-08 | 2.11E-09 | -6.28 | 10.4926499 | -1.15E-01 | 48623215  | 48623338  | NC_000010.10 |
| cg27330830 | 2.03E-08 | 2.11E-09 | -6.28 | 10.4909774 | -6.15E-02 | 14598341  | 14598464  | NC_000019.9  |
| cg14769589 | 2.04E-08 | 2.11E-09 | -6.28 | 10.4899444 | -9.35E-02 | 47957813  | 47957936  | NC_000017.10 |
| cg11614585 | 2.04E-08 | 2.12E-09 | -6.28 | 10.4891489 | -8.26E-02 | 897050    | 897173    | NC_000020.10 |
| cg25491905 | 2.04E-08 | 2.12E-09 | -6.28 | 10.4883376 | -1.07E-01 | 119288752 | 119288875 | NC_000011.9  |
| cg02392882 | 2.04E-08 | 2.12E-09 | -6.28 | 10.4880475 | -1.68E-01 | 29031879  | 29032002  | NC_000015.9  |
| cg07599659 | 2.04E-08 | 2.12E-09 | -6.28 | 10.4876607 | -9.01E-02 | 6660373   | 6660496   | NC_000004.11 |
| cg00374747 | 2.04E-08 | 2.12E-09 | -6.28 | 10.4869464 | -1.18E-01 | 2907930   | 2908053   | NC_000011.9  |
| cg22932427 | 2.04E-08 | 2.12E-09 | -6.28 | 10.4864153 | -1.12E-01 | 155615664 | 155615787 | NC_000001.10 |
| cg01273580 | 2.04E-08 | 2.12E-09 | -6.28 | 10.4859505 | -5.24E-02 | 49946108  | 49946231  | NC_000019.9  |
| cg03201166 | 2.04E-08 | 2.12E-09 | -6.28 | 10.4858949 | -1.41E-01 | 24170261  | 24170384  | NC_000003.11 |
| cg17619020 | 2.04E-08 | 2.12E-09 | -6.28 | 10.4856759 | -1.41E-01 | 3248098   | 3248221   | NC_000006.11 |
| cg02304945 | 2.05E-08 | 2.12E-09 | -6.28 | 10.4853759 | -2.39E-02 | 89992524  | 89992647  | NC_000016.9  |
| cg07052513 | 2.05E-08 | 2.13E-09 | -6.28 | 10.4844327 | -6.09E-02 | 86668451  | 86668574  | NC_000002.11 |
| cg09312564 | 2.05E-08 | 2.13E-09 | -6.28 | 10.4842773 | -2.35E-02 | 21093138  | 21093261  | NC_000014.8  |
| cg03237324 | 2.05E-08 | 2.13E-09 | -6.28 | 10.484193  | -6.13E-02 | 6420052   | 6420175   | NC_000012.11 |
| cg15901722 | 2.05E-08 | 2.13E-09 | -6.28 | 10.4830381 | -8.25E-02 | 175974973 | 175975096 | NC_000005.9  |
| cg25609393 | 2.05E-08 | 2.13E-09 | -6.28 | 10.4827105 | -1.87E-01 | 45569042  | 45569165  | NC_000005.9  |
| cg01090482 | 2.05E-08 | 2.13E-09 | -6.28 | 10.4822781 | -1.34E-01 | 139365336 | 139365459 | NC_000005.9  |



|            |          |          |       |            |           |           |           |              |
|------------|----------|----------|-------|------------|-----------|-----------|-----------|--------------|
| cg10200820 | 2.05E-08 | 2.13E-09 | -6.28 | 10.4819013 | -3.10E-02 | 102090930 | 102091053 | NC_000005.9  |
| cg03935807 | 2.05E-08 | 2.13E-09 | -6.28 | 10.4817194 | -3.20E-02 | 39833601  | 39833724  | NC_000019.9  |
| cg12751693 | 2.05E-08 | 2.13E-09 | -6.28 | 10.4815202 | -1.09E-01 | 62629162  | 62629285  | NC_000012.11 |
| cg26620356 | 2.05E-08 | 2.13E-09 | -6.28 | 10.4807024 | -1.51E-01 | 175789238 | 175789361 | NC_000005.9  |
| cg24824703 | 2.05E-08 | 2.13E-09 | -6.28 | 10.4806565 | -7.01E-02 | 2801248   | 2801371   | NC_000007.13 |
| cg10842008 | 2.06E-08 | 2.14E-09 | -6.28 | 10.4797034 | -5.40E-02 | 24477838  | 24477961  | NC_000001.10 |
| cg00231966 | 2.06E-08 | 2.14E-09 | -6.28 | 10.4795171 | -1.38E-01 | 80377299  | 80377422  | NC_000017.10 |
| cg19956836 | 2.06E-08 | 2.14E-09 | -6.28 | 10.4791699 | -1.32E-01 | 57241448  | 57241571  | NC_000011.9  |
| cg04509221 | 2.06E-08 | 2.14E-09 | -6.28 | 10.4787066 | -1.37E-01 | 3155312   | 3155435   | NC_000001.10 |
| cg12432846 | 2.06E-08 | 2.14E-09 | -6.28 | 10.4786323 | -5.30E-02 | 85741899  | 85742022  | NC_000001.10 |
| cg21157234 | 2.06E-08 | 2.14E-09 | -6.28 | 10.4786291 | -3.91E-02 | 101984918 | 101985041 | NC_000009.11 |
| cg02813710 | 2.06E-08 | 2.14E-09 | -6.28 | 10.4784115 | -1.33E-01 | 105079663 | 105079786 | NC_000007.13 |
| cg26927232 | 2.06E-08 | 2.14E-09 | -6.28 | 10.4773523 | -1.62E-01 | 2135631   | 2135754   | NC_000017.10 |
| cg02377915 | 2.07E-08 | 2.15E-09 | -6.28 | 10.4747704 | -1.21E-01 | 22307573  | 22307696  | NC_000022.10 |
| cg25136124 | 2.07E-08 | 2.15E-09 | -6.28 | 10.4742228 | -1.15E-01 | 228336717 | 228336840 | NC_000001.10 |
| cg09926783 | 2.07E-08 | 2.15E-09 | -6.28 | 10.4727386 | -8.14E-02 | 49716645  | 49716768  | NC_000015.9  |
| cg06431681 | 2.07E-08 | 2.15E-09 | -6.28 | 10.4724893 | -1.56E-01 | 202330990 | 202331113 | NC_000002.11 |
| cg18438345 | 2.07E-08 | 2.15E-09 | -6.28 | 10.4720264 | -8.80E-02 | 41009313  | 41009436  | NC_000006.11 |
| cg18347630 | 2.07E-08 | 2.15E-09 | -6.28 | 10.4715079 | -8.36E-02 | 39765163  | 39765286  | NC_000020.10 |
| cg11638399 | 2.07E-08 | 2.15E-09 | -6.28 | 10.4711329 | -1.56E-01 | 29441416  | 29441539  | NC_000008.10 |
| cg01291336 | 2.07E-08 | 2.16E-09 | -6.28 | 10.4709424 | -1.36E-01 | 150949495 | 150949618 | NC_000007.13 |
| cg12709669 | 2.08E-08 | 2.16E-09 | -6.28 | 10.4694567 | -8.93E-02 | 12287173  | 12287296  | NC_000018.9  |
| cg02018802 | 2.08E-08 | 2.16E-09 | -6.28 | 10.4691647 | -5.85E-02 | 220362948 | 220363071 | NC_000002.11 |
| cg08565632 | 2.08E-08 | 2.16E-09 | -6.28 | 10.4688309 | -6.39E-02 | 89650991  | 89651114  | NC_000016.9  |
| cg11362604 | 2.08E-08 | 2.16E-09 | -6.28 | 10.4685056 | -1.45E-01 | 37389585  | 37389708  | NC_000015.9  |

|                |          |          |       |            |           |           |           |              |
|----------------|----------|----------|-------|------------|-----------|-----------|-----------|--------------|
| cg12765567     | 2.08E-08 | 2.16E-09 | -6.28 | 10.4682725 | -8.19E-02 | 33918728  | 33918851  | NC_000006.11 |
| cg24163563     | 2.08E-08 | 2.16E-09 | -6.28 | 10.4678498 | -4.02E-02 | 101458615 | 101458738 | NC_000015.9  |
| cg16707506     | 2.08E-08 | 2.16E-09 | -6.28 | 10.4677448 | -1.35E-01 | 45067057  | 45067180  | NC_000007.13 |
| cg25342397     | 2.08E-08 | 2.17E-09 | -6.28 | 10.4661288 | -4.78E-02 | 41222833  | 41222956  | NC_000019.9  |
| cg11366934     | 2.08E-08 | 2.17E-09 | -6.28 | 10.4652605 | -7.75E-02 | 97912641  | 97912764  | NC_000007.13 |
| cg14644523     | 2.08E-08 | 2.17E-09 | -6.28 | 10.4651379 | -6.63E-02 | 54426673  | 54426796  | NC_000012.11 |
| cg17006413     | 2.09E-08 | 2.17E-09 | -6.28 | 10.4642987 | -1.61E-01 | 942451    | 942574    | NC_000001.10 |
| cg03277049     | 2.09E-08 | 2.17E-09 | -6.28 | 10.4637061 | -8.55E-02 | 156534076 | 156534199 | NC_000003.11 |
| cg25759517     | 2.09E-08 | 2.17E-09 | -6.28 | 10.4635219 | -1.44E-02 | 79895006  | 79895129  | NC_000017.10 |
| cg15388570     | 2.09E-08 | 2.17E-09 | -6.28 | 10.4635014 | -4.45E-02 | 78328609  | 78328732  | NC_000014.8  |
| ch.10.2374052F | 2.09E-08 | 2.17E-09 | -6.28 | 10.4631411 | -5.82E-02 | 113047439 | 113047562 | NC_000010.10 |
| cg10334703     | 2.09E-08 | 2.17E-09 | -6.28 | 10.4630491 | -1.59E-01 | 20213110  | 20213233  | NC_000002.11 |
| cg19578161     | 2.09E-08 | 2.17E-09 | -6.28 | 10.4622839 | -1.12E-01 | 68482919  | 68483042  | NC_000014.8  |
| cg14905577     | 2.09E-08 | 2.18E-09 | -6.28 | 10.4618999 | -1.12E-01 | 29558460  | 29558583  | NC_000002.11 |
| cg17115172     | 2.09E-08 | 2.18E-09 | -6.28 | 10.4605229 | -5.47E-02 | 32016172  | 32016295  | NC_000006.11 |
| cg21547624     | 2.09E-08 | 2.18E-09 | -6.28 | 10.460515  | -6.08E-02 | 1993157   | 1993280   | NC_000008.10 |
| cg14984257     | 2.09E-08 | 2.18E-09 | -6.28 | 10.460375  | -8.37E-02 | 8822600   | 8822723   | NC_000002.11 |
| cg19701828     | 2.10E-08 | 2.18E-09 | -6.28 | 10.4596703 | -9.88E-02 | 219235515 | 219235638 | NC_000002.11 |
| cg00062282     | 2.10E-08 | 2.18E-09 | -6.28 | 10.4595945 | -1.09E-01 | 50747369  | 50747492  | NC_000022.10 |
| cg22289115     | 2.10E-08 | 2.18E-09 | -6.28 | 10.458737  | -8.83E-02 | 625796    | 625919    | NC_000011.9  |
| cg27201301     | 2.10E-08 | 2.18E-09 | -6.28 | 10.4582981 | -5.62E-02 | 47039149  | 47039272  | NC_000017.10 |
| ch.11.1197632F | 2.10E-08 | 2.18E-09 | -6.28 | 10.4579776 | -1.27E-02 | 61918451  | 61918574  | NC_000011.9  |
| cg15147479     | 2.10E-08 | 2.19E-09 | -6.28 | 10.4571959 | -4.53E-02 | 32164569  | 32164692  | NC_000006.11 |
| cg06221861     | 2.10E-08 | 2.19E-09 | -6.28 | 10.4563198 | -3.62E-02 | 100425075 | 100425198 | NC_000007.13 |
| cg04240950     | 2.11E-08 | 2.19E-09 | -6.28 | 10.454569  | -6.64E-02 | 27482609  | 27482732  | NC_000016.9  |

|                 |          |          |       |            |           |           |           |              |
|-----------------|----------|----------|-------|------------|-----------|-----------|-----------|--------------|
| ch.22.28920330F | 2.11E-08 | 2.19E-09 | -6.28 | 10.4541834 | -4.50E-02 | 30590330  | 30590453  | NC_000022.10 |
| cg04346806      | 2.11E-08 | 2.19E-09 | -6.28 | 10.4540359 | -1.92E-02 | 100660545 | 100660668 | NC_000007.13 |
| cg23686908      | 2.11E-08 | 2.19E-09 | -6.28 | 10.4538662 | -6.42E-02 | 918196    | 918319    | NC_000019.9  |
| cg00830283      | 2.11E-08 | 2.20E-09 | -6.28 | 10.4527551 | -1.28E-01 | 145743676 | 145743799 | NC_000001.10 |
| cg10091265      | 2.11E-08 | 2.20E-09 | -6.28 | 10.452632  | -1.08E-01 | 223288331 | 223288454 | NC_000002.11 |
| cg07734975      | 2.11E-08 | 2.20E-09 | -6.28 | 10.4523482 | -1.78E-01 | 9780844   | 9780967   | NC_000011.9  |
| cg19856845      | 2.11E-08 | 2.20E-09 | -6.28 | 10.4514712 | -1.33E-01 | 93116513  | 93116636  | NC_000014.8  |
| cg00876141      | 2.11E-08 | 2.20E-09 | -6.28 | 10.4507565 | -1.33E-01 | 47837775  | 47837898  | NC_000004.11 |
| cg10100437      | 2.11E-08 | 2.20E-09 | -6.28 | 10.4501056 | -1.07E-01 | 223903862 | 223903985 | NC_000001.10 |
| cg12900931      | 2.11E-08 | 2.20E-09 | -6.28 | 10.4500043 | -5.81E-02 | 3400491   | 3400614   | NC_000011.9  |
| cg08651573      | 2.12E-08 | 2.20E-09 | -6.28 | 10.4496582 | -7.61E-02 | 31675073  | 31675196  | NC_000013.10 |
| cg05115182      | 2.12E-08 | 2.20E-09 | -6.28 | 10.4495903 | -3.11E-02 | 99496889  | 99497012  | NC_000010.10 |
| cg17200337      | 2.12E-08 | 2.20E-09 | -6.28 | 10.449496  | -2.97E-02 | 2936724   | 2936847   | NC_000004.11 |
| cg17383024      | 2.12E-08 | 2.20E-09 | -6.28 | 10.4494126 | -7.28E-02 | 87797556  | 87797679  | NC_000004.11 |
| cg04348305      | 2.12E-08 | 2.20E-09 | -6.28 | 10.4490182 | -1.71E-01 | 25230959  | 25231082  | NC_000020.10 |
| cg18597220      | 2.12E-08 | 2.21E-09 | -6.28 | 10.4484892 | -1.05E-01 | 80010617  | 80010740  | NC_000014.8  |
| cg03604417      | 2.12E-08 | 2.21E-09 | -6.28 | 10.4483788 | -3.40E-02 | 135116708 | 135116831 | NC_000009.11 |
| cg07293188      | 2.12E-08 | 2.21E-09 | -6.27 | 10.4456321 | -6.36E-02 | 38209834  | 38209957  | NC_000003.11 |
| cg02220008      | 2.12E-08 | 2.21E-09 | -6.27 | 10.445438  | -1.15E-01 | 13192742  | 13192865  | NC_000006.11 |
| cg15690542      | 2.13E-08 | 2.21E-09 | -6.27 | 10.4448883 | -1.10E-01 | 151172905 | 151173028 | NC_000001.10 |
| cg03854071      | 2.13E-08 | 2.21E-09 | -6.27 | 10.4445835 | -9.73E-02 | 19626428  | 19626551  | NC_000019.9  |
| cg02297063      | 2.13E-08 | 2.22E-09 | -6.27 | 10.4435093 | -2.39E-01 | 1132389   | 1132512   | NC_000019.9  |
| cg09372755      | 2.13E-08 | 2.22E-09 | -6.27 | 10.4432747 | -2.64E-02 | 43919584  | 43919707  | NC_000001.10 |
| cg11914650      | 2.13E-08 | 2.22E-09 | -6.27 | 10.4416314 | -1.42E-01 | 1477711   | 1477834   | NC_000011.9  |
| cg14929208      | 2.13E-08 | 2.22E-09 | -6.27 | 10.4409637 | -1.24E-01 | 156273297 | 156273420 | NC_000003.11 |

|                |          |          |       |            |           |           |           |              |
|----------------|----------|----------|-------|------------|-----------|-----------|-----------|--------------|
| cg05229802     | 2.13E-08 | 2.22E-09 | -6.27 | 10.4401304 | -1.15E-01 | 75282362  | 75282485  | NC_000016.9  |
| cg27222274     | 2.13E-08 | 2.22E-09 | -6.27 | 10.4401285 | -5.73E-02 | 6962378   | 6962501   | NC_000010.10 |
| cg03689904     | 2.14E-08 | 2.23E-09 | -6.27 | 10.4395971 | -8.62E-02 | 135530548 | 135530671 | NC_000002.11 |
| cg05935311     | 2.14E-08 | 2.23E-09 | -6.27 | 10.4388555 | -1.23E-01 | 102711702 | 102711825 | NC_000004.11 |
| cg23093090     | 2.14E-08 | 2.23E-09 | -6.27 | 10.4361719 | -1.60E-01 | 104574429 | 104574552 | NC_000010.10 |
| cg02967056     | 2.14E-08 | 2.23E-09 | -6.27 | 10.4358267 | -1.38E-01 | 111853315 | 111853438 | NC_000003.11 |
| cg05881135     | 2.14E-08 | 2.23E-09 | -6.27 | 10.4355877 | -1.09E-01 | 99644973  | 99645096  | NC_000015.9  |
| ch.4.2387433R  | 2.14E-08 | 2.23E-09 | -6.27 | 10.4355501 | -3.74E-02 | 129608123 | 129608246 | NC_000004.11 |
| cg00772091     | 2.15E-08 | 2.24E-09 | -6.27 | 10.4335102 | -7.47E-02 | 124914911 | 124915034 | NC_000010.10 |
| ch.7.3114411F  | 2.15E-08 | 2.24E-09 | -6.27 | 10.4332931 | -4.46E-02 | 148859697 | 148859820 | NC_000007.13 |
| cg08767838     | 2.15E-08 | 2.24E-09 | -6.27 | 10.432805  | -1.67E-01 | 62209642  | 62209765  | NC_000020.10 |
| cg06352803     | 2.15E-08 | 2.24E-09 | -6.27 | 10.4324074 | -1.31E-01 | 155277373 | 155277496 | NC_000001.10 |
| ch.3.13151741F | 2.15E-08 | 2.24E-09 | -6.27 | 10.4323865 | -2.96E-02 | 13176741  | 13176864  | NC_000003.11 |
| cg02618550     | 2.15E-08 | 2.24E-09 | -6.27 | 10.43191   | -1.04E-01 | 726214    | 726337    | NC_000016.9  |
| cg06460983     | 2.15E-08 | 2.25E-09 | -6.27 | 10.4308909 | -7.14E-02 | 91092340  | 91092463  | NC_000010.10 |
| cg16526673     | 2.15E-08 | 2.25E-09 | -6.27 | 10.4305623 | -1.21E-01 | 115510718 | 115510841 | NC_000010.10 |
| cg20949223     | 2.16E-08 | 2.25E-09 | -6.27 | 10.4301567 | -1.25E-01 | 155161679 | 155161802 | NC_000001.10 |
| cg24664305     | 2.16E-08 | 2.25E-09 | -6.27 | 10.4296334 | -4.86E-02 | 39943028  | 39943151  | NC_000017.10 |
| cg01267709     | 2.16E-08 | 2.25E-09 | -6.27 | 10.428113  | -1.06E-01 | 23623756  | 23623879  | NC_000014.8  |
| cg03131092     | 2.16E-08 | 2.25E-09 | -6.27 | 10.4275311 | -6.89E-02 | 7682983   | 7683106   | NC_000019.9  |
| cg27579501     | 2.16E-08 | 2.25E-09 | -6.27 | 10.4270309 | -1.50E-01 | 41729657  | 41729780  | NC_000019.9  |
| cg16581017     | 2.16E-08 | 2.26E-09 | -6.27 | 10.4263416 | -9.74E-02 | 101256647 | 101256770 | NC_000007.13 |
| cg14115346     | 2.17E-08 | 2.26E-09 | -6.27 | 10.4251482 | -8.65E-02 | 3118207   | 3118330   | NC_000006.11 |
| cg01992590     | 2.17E-08 | 2.26E-09 | -6.27 | 10.4243746 | -8.93E-02 | 48277042  | 48277165  | NC_000017.10 |
| cg00466301     | 2.17E-08 | 2.27E-09 | -6.27 | 10.4219986 | -3.81E-02 | 56285388  | 56285511  | NC_000020.10 |

|                |          |          |       |            |           |           |           |              |
|----------------|----------|----------|-------|------------|-----------|-----------|-----------|--------------|
| cg18236982     | 2.17E-08 | 2.27E-09 | -6.27 | 10.4219553 | -7.07E-02 | 236065291 | 236065414 | NC_000001.10 |
| cg24544298     | 2.17E-08 | 2.27E-09 | -6.27 | 10.4212078 | -4.73E-02 | 30636602  | 30636725  | NC_000006.11 |
| cg18268220     | 2.17E-08 | 2.27E-09 | -6.27 | 10.4210414 | -5.83E-02 | 61492123  | 61492246  | NC_000014.8  |
| cg09205945     | 2.17E-08 | 2.27E-09 | -6.27 | 10.4207371 | -1.61E-01 | 137662133 | 137662256 | NC_000007.13 |
| cg00480331     | 2.17E-08 | 2.27E-09 | -6.27 | 10.4206783 | -1.88E-01 | 187455371 | 187455494 | NC_000003.11 |
| cg22862003     | 2.17E-08 | 2.27E-09 | -6.27 | 10.4206165 | -1.25E-01 | 42797588  | 42797711  | NC_000021.8  |
| ch.2.3682233F  | 2.18E-08 | 2.27E-09 | -6.27 | 10.4195696 | -5.25E-02 | 182626389 | 182626512 | NC_000002.11 |
| cg05991685     | 2.18E-08 | 2.27E-09 | -6.27 | 10.4189216 | -1.09E-01 | 2818793   | 2818916   | NC_000016.9  |
| cg26303613     | 2.18E-08 | 2.27E-09 | -6.27 | 10.4185465 | -9.87E-02 | 4224577   | 4224700   | NC_000019.9  |
| ch.7.87722890F | 2.18E-08 | 2.27E-09 | -6.27 | 10.4185097 | -3.82E-02 | 87884954  | 87885077  | NC_000007.13 |
| cg21509040     | 2.18E-08 | 2.28E-09 | -6.27 | 10.4179458 | -4.18E-02 | 61814830  | 61814953  | NC_000020.10 |
| cg04895225     | 2.18E-08 | 2.28E-09 | -6.27 | 10.4177407 | -9.85E-02 | 85862822  | 85862945  | NC_000011.9  |
| cg14469684     | 2.18E-08 | 2.28E-09 | -6.27 | 10.4175265 | -8.35E-02 | 138997380 | 138997503 | NC_000009.11 |
| cg07307975     | 2.18E-08 | 2.28E-09 | -6.27 | 10.4172835 | -5.90E-02 | 46260618  | 46260741  | NC_000011.9  |
| cg10385390     | 2.19E-08 | 2.28E-09 | -6.27 | 10.414997  | -9.16E-02 | 8022505   | 8022628   | NC_000001.10 |
| cg23768894     | 2.19E-08 | 2.28E-09 | -6.27 | 10.414873  | -1.33E-01 | 157140029 | 157140152 | NC_000007.13 |
| cg02478828     | 2.19E-08 | 2.28E-09 | -6.27 | 10.4146952 | -1.45E-01 | 74153195  | 74153318  | NC_000002.11 |
| cg11833938     | 2.19E-08 | 2.28E-09 | -6.27 | 10.414001  | -1.28E-01 | 555251    | 555374    | NC_000005.9  |
| cg01013566     | 2.19E-08 | 2.29E-09 | -6.27 | 10.4114753 | -3.51E-02 | 7000250   | 7000373   | NC_000012.11 |
| cg15195097     | 2.19E-08 | 2.29E-09 | -6.27 | 10.4114686 | -1.08E-01 | 98868006  | 98868129  | NC_000008.10 |
| cg23051123     | 2.19E-08 | 2.29E-09 | -6.27 | 10.4114232 | -1.31E-01 | 226132841 | 226132964 | NC_000001.10 |
| cg13178361     | 2.19E-08 | 2.29E-09 | -6.27 | 10.4110395 | -1.20E-01 | 162532502 | 162532625 | NC_000001.10 |
| cg01743835     | 2.20E-08 | 2.29E-09 | -6.27 | 10.4095546 | -1.01E-01 | 112131509 | 112131632 | NC_000011.9  |
| cg20156353     | 2.20E-08 | 2.30E-09 | -6.27 | 10.4090365 | -1.34E-01 | 30947686  | 30947809  | NC_000011.9  |
| cg04123507     | 2.20E-08 | 2.30E-09 | -6.27 | 10.4090223 | -9.26E-02 | 52695270  | 52695393  | NC_000012.11 |

|                 |          |          |       |            |           |           |           |              |
|-----------------|----------|----------|-------|------------|-----------|-----------|-----------|--------------|
| cg15935965      | 2.20E-08 | 2.30E-09 | -6.27 | 10.4084272 | -1.02E-01 | 59550124  | 59550247  | NC_000001.10 |
| cg08188886      | 2.20E-08 | 2.30E-09 | -6.27 | 10.4077849 | -1.00E-01 | 105633697 | 105633820 | NC_000014.8  |
| cg11662638      | 2.20E-08 | 2.30E-09 | -6.27 | 10.4077357 | -5.30E-02 | 45878864  | 45878987  | NC_000002.11 |
| cg24192505      | 2.20E-08 | 2.30E-09 | -6.27 | 10.4074626 | -1.38E-01 | 163776782 | 163776905 | NC_000006.11 |
| cg13429675      | 2.20E-08 | 2.30E-09 | -6.27 | 10.4073119 | -4.69E-02 | 75628126  | 75628249  | NC_000015.9  |
| cg00085122      | 2.20E-08 | 2.30E-09 | -6.27 | 10.4072692 | -7.52E-02 | 11709018  | 11709141  | NC_000001.10 |
| cg10985914      | 2.20E-08 | 2.30E-09 | -6.27 | 10.4065001 | -7.15E-02 | 212769641 | 212769764 | NC_000001.10 |
| cg24707573      | 2.21E-08 | 2.30E-09 | -6.27 | 10.4061612 | -9.62E-02 | 101961796 | 101961919 | NC_000007.13 |
| cg21340821      | 2.21E-08 | 2.31E-09 | -6.27 | 10.4045047 | -1.15E-01 | 134855457 | 134855580 | NC_000002.11 |
| cg06984848      | 2.21E-08 | 2.31E-09 | -6.27 | 10.4034298 | -1.15E-01 | 85320722  | 85320845  | NC_000016.9  |
| cg21519202      | 2.21E-08 | 2.31E-09 | -6.27 | 10.402522  | -3.29E-02 | 44399534  | 44399657  | NC_000001.10 |
| cg10550506      | 2.21E-08 | 2.31E-09 | -6.27 | 10.4023731 | -1.23E-01 | 76548907  | 76549030  | NC_000011.9  |
| cg10790778      | 2.21E-08 | 2.31E-09 | -6.27 | 10.4022911 | -3.54E-02 | 48701553  | 48701676  | NC_000003.11 |
| cg01885839      | 2.21E-08 | 2.31E-09 | -6.27 | 10.4015448 | -7.14E-02 | 111017556 | 111017679 | NC_000005.9  |
| cg21138501      | 2.21E-08 | 2.31E-09 | -6.27 | 10.4014961 | -2.65E-02 | 137800068 | 137800191 | NC_000005.9  |
| cg05973028      | 2.22E-08 | 2.32E-09 | -6.27 | 10.4009158 | -7.69E-02 | 56805707  | 56805830  | NC_000008.10 |
| cg22347642      | 2.22E-08 | 2.32E-09 | -6.27 | 10.4007971 | -1.09E-01 | 41382951  | 41383074  | NC_000008.10 |
| cg02837128      | 2.22E-08 | 2.32E-09 | -6.27 | 10.3998707 | -1.13E-01 | 30241167  | 30241290  | NC_000008.10 |
| cg27026695      | 2.22E-08 | 2.32E-09 | -6.27 | 10.3997231 | -1.34E-01 | 65006016  | 65006139  | NC_000014.8  |
| cg16785213      | 2.22E-08 | 2.32E-09 | -6.27 | 10.39925   | -4.39E-02 | 75599104  | 75599227  | NC_000016.9  |
| cg00452252      | 2.22E-08 | 2.32E-09 | -6.27 | 10.3985339 | -1.21E-01 | 23227394  | 23227517  | NC_000016.9  |
| ch.16.13300564R | 2.22E-08 | 2.32E-09 | -6.27 | 10.3975855 | -3.08E-02 | 13393063  | 13393186  | NC_000016.9  |
| cg23404476      | 2.22E-08 | 2.32E-09 | -6.27 | 10.3971146 | -1.07E-01 | 171190112 | 171190235 | NC_000005.9  |
| cg00796793      | 2.23E-08 | 2.33E-09 | -6.27 | 10.3963504 | -7.11E-02 | 180644590 | 180644713 | NC_000005.9  |
| cg02434314      | 2.23E-08 | 2.33E-09 | -6.27 | 10.3962798 | -1.33E-01 | 26577760  | 26577883  | NC_000017.10 |

|               |          |          |       |            |           |           |           |              |
|---------------|----------|----------|-------|------------|-----------|-----------|-----------|--------------|
| cg17031787    | 2.23E-08 | 2.33E-09 | -6.26 | 10.3946232 | -1.07E-01 | 32049235  | 32049358  | NC_000006.11 |
| cg15945016    | 2.23E-08 | 2.33E-09 | -6.26 | 10.3945929 | -4.65E-02 | 26020698  | 26020821  | NC_000006.11 |
| cg07059784    | 2.23E-08 | 2.33E-09 | -6.26 | 10.3945272 | -9.38E-02 | 233416233 | 233416356 | NC_000002.11 |
| ch.7.1699359R | 2.23E-08 | 2.33E-09 | -6.26 | 10.3943913 | -3.15E-02 | 77227740  | 77227863  | NC_000007.13 |
| cg13133835    | 2.23E-08 | 2.33E-09 | -6.26 | 10.394166  | -1.33E-01 | 125239803 | 125239926 | NC_000012.11 |
| cg00699901    | 2.23E-08 | 2.33E-09 | -6.26 | 10.3936548 | -5.78E-02 | 2908157   | 2908280   | NC_000016.9  |
| cg07318073    | 2.23E-08 | 2.33E-09 | -6.26 | 10.3930388 | -3.66E-02 | 74904359  | 74904482  | NC_000004.11 |
| cg25147604    | 2.23E-08 | 2.34E-09 | -6.26 | 10.3925632 | -1.38E-01 | 7540971   | 7541094   | NC_000006.11 |
| cg14523238    | 2.23E-08 | 2.34E-09 | -6.26 | 10.3919777 | -1.26E-01 | 101192792 | 101192915 | NC_000009.11 |
| cg19998654    | 2.23E-08 | 2.34E-09 | -6.26 | 10.3918824 | -4.17E-02 | 37458983  | 37459106  | NC_000002.11 |
| cg09337544    | 2.23E-08 | 2.34E-09 | -6.26 | 10.3918526 | -4.55E-02 | 38857452  | 38857575  | NC_000022.10 |
| cg06967784    | 2.24E-08 | 2.34E-09 | -6.26 | 10.3916183 | -1.29E-02 | 129809827 | 129809950 | NC_000010.10 |
| cg06974143    | 2.24E-08 | 2.34E-09 | -6.26 | 10.3904199 | -7.69E-02 | 159907515 | 159907638 | NC_000001.10 |
| cg05654289    | 2.24E-08 | 2.34E-09 | -6.26 | 10.3893782 | -3.91E-02 | 66201647  | 66201770  | NC_000017.10 |
| cg10889999    | 2.24E-08 | 2.34E-09 | -6.26 | 10.3887293 | -5.83E-02 | 104688092 | 104688215 | NC_000012.11 |
| cg18011760    | 2.24E-08 | 2.34E-09 | -6.26 | 10.3886318 | -1.44E-01 | 19320928  | 19321051  | NC_000002.11 |
| cg16517838    | 2.25E-08 | 2.35E-09 | -6.26 | 10.3869344 | -7.79E-02 | 106154914 | 106155037 | NC_000014.8  |
| ch.13.116017F | 2.25E-08 | 2.35E-09 | -6.26 | 10.3864842 | -5.69E-02 | 23913631  | 23913754  | NC_000013.10 |
| cg03841541    | 2.25E-08 | 2.35E-09 | -6.26 | 10.3863577 | -1.11E-02 | 15188318  | 15188441  | NC_000016.9  |
| cg02423452    | 2.25E-08 | 2.35E-09 | -6.26 | 10.3863426 | -3.78E-02 | 19179456  | 19179579  | NC_000016.9  |
| cg08956226    | 2.25E-08 | 2.35E-09 | -6.26 | 10.3861887 | -9.55E-02 | 31913995  | 31914118  | NC_000006.11 |
| cg19422340    | 2.25E-08 | 2.35E-09 | -6.26 | 10.3860807 | -2.57E-02 | 179335022 | 179335145 | NC_000001.10 |
| cg07980777    | 2.25E-08 | 2.35E-09 | -6.26 | 10.385657  | -6.66E-02 | 21303077  | 21303200  | NC_000013.10 |
| cg06430061    | 2.25E-08 | 2.35E-09 | -6.26 | 10.3849038 | -8.73E-02 | 75013592  | 75013715  | NC_000005.9  |
| cg05834805    | 2.25E-08 | 2.35E-09 | -6.26 | 10.3843509 | -6.13E-02 | 123631524 | 123631647 | NC_000009.11 |

|            |          |          |       |            |           |           |           |              |
|------------|----------|----------|-------|------------|-----------|-----------|-----------|--------------|
| cg18531146 | 2.25E-08 | 2.36E-09 | -6.26 | 10.3842189 | -5.16E-02 | 12715649  | 12715772  | NC_000011.9  |
| cg02739013 | 2.25E-08 | 2.36E-09 | -6.26 | 10.3841767 | -5.20E-02 | 114681314 | 114681437 | NC_000004.11 |
| cg14744160 | 2.25E-08 | 2.36E-09 | -6.26 | 10.383896  | -3.19E-02 | 28129753  | 28129876  | NC_000011.9  |
| cg01568244 | 2.25E-08 | 2.36E-09 | -6.26 | 10.3835738 | -4.33E-02 | 67218584  | 67218707  | NC_000016.9  |
| cg07442657 | 2.25E-08 | 2.36E-09 | -6.26 | 10.3824668 | -3.40E-02 | 85198334  | 85198457  | NC_000002.11 |
| cg23609982 | 2.26E-08 | 2.36E-09 | -6.26 | 10.3821975 | -1.09E-01 | 154377403 | 154377526 | NC_000001.10 |
| cg00447682 | 2.26E-08 | 2.36E-09 | -6.26 | 10.3815697 | -1.87E-02 | 20813064  | 20813187  | NC_000001.10 |
| cg19464780 | 2.26E-08 | 2.36E-09 | -6.26 | 10.3808211 | -5.59E-02 | 67047539  | 67047662  | NC_000017.10 |
| cg15230273 | 2.26E-08 | 2.36E-09 | -6.26 | 10.3807673 | -2.72E-02 | 107006413 | 107006536 | NC_000005.9  |
| cg02733994 | 2.26E-08 | 2.36E-09 | -6.26 | 10.3802028 | -1.15E-01 | 141600191 | 141600314 | NC_000008.10 |
| cg16702014 | 2.26E-08 | 2.37E-09 | -6.26 | 10.3798494 | -1.94E-01 | 16168399  | 16168522  | NC_000016.9  |
| cg00541303 | 2.26E-08 | 2.37E-09 | -6.26 | 10.3787618 | -1.36E-01 | 208962374 | 208962497 | NC_000001.10 |
| cg14708940 | 2.26E-08 | 2.37E-09 | -6.26 | 10.3786514 | -1.01E-01 | 3805441   | 3805564   | NC_000010.10 |
| cg06855485 | 2.26E-08 | 2.37E-09 | -6.26 | 10.3779725 | -1.19E-01 | 144303008 | 144303131 | NC_000004.11 |
| cg05414613 | 2.26E-08 | 2.37E-09 | -6.26 | 10.3779175 | -1.03E-01 | 53558470  | 53558593  | NC_000001.10 |
| cg19825589 | 2.26E-08 | 2.37E-09 | -6.26 | 10.3779102 | -9.66E-02 | 42379710  | 42379833  | NC_000019.9  |
| cg17186750 | 2.27E-08 | 2.37E-09 | -6.26 | 10.3772822 | -1.28E-01 | 38529336  | 38529459  | NC_000008.10 |
| cg19861165 | 2.27E-08 | 2.37E-09 | -6.26 | 10.3766596 | -2.71E-02 | 211872042 | 211872165 | NC_000001.10 |
| cg13419869 | 2.27E-08 | 2.37E-09 | -6.26 | 10.376326  | -1.39E-01 | 200863686 | 200863809 | NC_000001.10 |
| cg14010805 | 2.27E-08 | 2.37E-09 | -6.26 | 10.3761148 | -8.46E-02 | 103361518 | 103361641 | NC_000009.11 |
| cg02397073 | 2.27E-08 | 2.38E-09 | -6.26 | 10.3750845 | -2.51E-02 | 107349626 | 107349749 | NC_000006.11 |
| cg22304705 | 2.27E-08 | 2.38E-09 | -6.26 | 10.3747191 | -1.29E-01 | 238173584 | 238173707 | NC_000002.11 |
| cg25772221 | 2.27E-08 | 2.38E-09 | -6.26 | 10.3745034 | -1.24E-01 | 1079622   | 1079745   | NC_000001.10 |
| cg17491185 | 2.27E-08 | 2.38E-09 | -6.26 | 10.3733373 | -3.65E-02 | 23811274  | 23811397  | NC_000001.10 |
| cg26053771 | 2.28E-08 | 2.39E-09 | -6.26 | 10.3711468 | -1.53E-01 | 8192194   | 8192317   | NC_000017.10 |



|            |          |          |       |            |           |           |           |              |
|------------|----------|----------|-------|------------|-----------|-----------|-----------|--------------|
| cg27019019 | 2.28E-08 | 2.39E-09 | -6.26 | 10.3687242 | -1.08E-01 | 34891725  | 34891848  | NC_000017.10 |
| cg13798289 | 2.29E-08 | 2.39E-09 | -6.26 | 10.3683875 | -1.06E-01 | 67875619  | 67875742  | NC_000016.9  |
| cg17172331 | 2.29E-08 | 2.39E-09 | -6.26 | 10.3682642 | -1.59E-01 | 76081215  | 76081338  | NC_000017.10 |
| cg22954978 | 2.29E-08 | 2.40E-09 | -6.26 | 10.3669535 | -9.18E-02 | 151228677 | 151228800 | NC_000006.11 |
| cg06597413 | 2.29E-08 | 2.40E-09 | -6.26 | 10.3666226 | -1.25E-01 | 69251883  | 69252006  | NC_000011.9  |
| cg12618270 | 2.29E-08 | 2.40E-09 | -6.26 | 10.3663151 | -1.15E-01 | 8667411   | 8667534   | NC_000008.10 |
| cg05390555 | 2.29E-08 | 2.40E-09 | -6.26 | 10.3648632 | -5.24E-02 | 74881012  | 74881135  | NC_000002.11 |
| cg05705335 | 2.29E-08 | 2.40E-09 | -6.26 | 10.3646804 | -9.38E-02 | 81520589  | 81520712  | NC_000016.9  |
| cg24000859 | 2.29E-08 | 2.40E-09 | -6.26 | 10.3639072 | -1.18E-01 | 71023890  | 71024013  | NC_000007.13 |
| cg00182273 | 2.30E-08 | 2.41E-09 | -6.26 | 10.3636003 | -1.06E-01 | 66876847  | 66876970  | NC_000016.9  |
| cg21487856 | 2.30E-08 | 2.41E-09 | -6.26 | 10.3625536 | -1.30E-01 | 54828502  | 54828625  | NC_000002.11 |
| cg10183150 | 2.30E-08 | 2.41E-09 | -6.26 | 10.3623602 | -5.90E-02 | 120222239 | 120222362 | NC_000004.11 |
| cg23043779 | 2.30E-08 | 2.41E-09 | -6.26 | 10.3621106 | -1.10E-01 | 22061235  | 22061358  | NC_000008.10 |
| cg27058077 | 2.30E-08 | 2.41E-09 | -6.26 | 10.3620196 | -1.05E-01 | 200337470 | 200337593 | NC_000001.10 |
| cg06092178 | 2.30E-08 | 2.41E-09 | -6.26 | 10.3610808 | -1.24E-01 | 50708855  | 50708978  | NC_000003.11 |
| cg17271585 | 2.30E-08 | 2.41E-09 | -6.26 | 10.361049  | -9.16E-02 | 36153947  | 36154070  | NC_000020.10 |
| cg00113096 | 2.30E-08 | 2.41E-09 | -6.26 | 10.3610409 | -7.34E-02 | 134119805 | 134119928 | NC_000002.11 |
| cg19197523 | 2.30E-08 | 2.42E-09 | -6.26 | 10.3595002 | -4.05E-02 | 124428674 | 124428797 | NC_000008.10 |
| cg24524451 | 2.31E-08 | 2.42E-09 | -6.26 | 10.3589579 | -5.26E-02 | 140372725 | 140372848 | NC_000007.13 |
| cg26942250 | 2.31E-08 | 2.42E-09 | -6.26 | 10.3587827 | -2.30E-02 | 101835945 | 101836068 | NC_000015.9  |
| cg09492074 | 2.31E-08 | 2.42E-09 | -6.26 | 10.358607  | -1.41E-01 | 66263624  | 66263747  | NC_000015.9  |
| cg27596649 | 2.31E-08 | 2.42E-09 | -6.26 | 10.3567707 | -9.56E-02 | 17172345  | 17172468  | NC_000008.10 |
| cg06835744 | 2.31E-08 | 2.42E-09 | -6.26 | 10.3557827 | -2.89E-02 | 32180666  | 32180789  | NC_000001.10 |
| cg15900444 | 2.31E-08 | 2.43E-09 | -6.26 | 10.3555368 | -4.99E-02 | 139154848 | 139154971 | NC_000005.9  |
| cg14030359 | 2.32E-08 | 2.43E-09 | -6.26 | 10.3542346 | -5.01E-02 | 21493406  | 21493529  | NC_000014.8  |

|                |          |          |       |            |           |           |           |              |
|----------------|----------|----------|-------|------------|-----------|-----------|-----------|--------------|
| cg22081096     | 2.32E-08 | 2.43E-09 | -6.26 | 10.354024  | -1.27E-01 | 67137953  | 67138076  | NC_000017.10 |
| cg23475955     | 2.32E-08 | 2.43E-09 | -6.26 | 10.3529971 | -9.03E-02 | 1985762   | 1985885   | NC_000011.9  |
| cg16858898     | 2.32E-08 | 2.43E-09 | -6.26 | 10.3529016 | -2.99E-02 | 15479872  | 15479995  | NC_000001.10 |
| cg24718015     | 2.32E-08 | 2.43E-09 | -6.26 | 10.3523703 | -1.49E-01 | 40489721  | 40489844  | NC_000017.10 |
| cg03216884     | 2.32E-08 | 2.44E-09 | -6.26 | 10.3514008 | -1.38E-01 | 56514787  | 56514910  | NC_000006.11 |
| cg01055129     | 2.32E-08 | 2.44E-09 | -6.26 | 10.3508258 | -9.64E-02 | 11996358  | 11996481  | NC_000008.10 |
| cg02870950     | 2.32E-08 | 2.44E-09 | -6.26 | 10.3501053 | -5.97E-02 | 46168231  | 46168354  | NC_000010.10 |
| cg23052776     | 2.33E-08 | 2.44E-09 | -6.26 | 10.349709  | -1.78E-01 | 71609158  | 71609281  | NC_000014.8  |
| cg05732876     | 2.33E-08 | 2.44E-09 | -6.26 | 10.3488674 | -5.65E-02 | 22337374  | 22337497  | NC_000022.10 |
| cg03731473     | 2.33E-08 | 2.44E-09 | -6.26 | 10.3487575 | -1.08E-01 | 130901674 | 130901797 | NC_000002.11 |
| cg25439632     | 2.33E-08 | 2.44E-09 | -6.26 | 10.3479843 | -1.48E-01 | 49892209  | 49892332  | NC_000008.10 |
| cg23174148     | 2.33E-08 | 2.45E-09 | -6.26 | 10.3471485 | -1.21E-01 | 141174337 | 141174460 | NC_000003.11 |
| cg23332732     | 2.33E-08 | 2.45E-09 | -6.26 | 10.3459951 | -4.28E-02 | 26986274  | 26986397  | NC_000012.11 |
| cg24825974     | 2.33E-08 | 2.45E-09 | -6.26 | 10.3458135 | -1.14E-01 | 140369854 | 140369977 | NC_000007.13 |
| cg26989646     | 2.34E-08 | 2.45E-09 | -6.26 | 10.345366  | -1.01E-01 | 28630576  | 28630699  | NC_000002.11 |
| cg19831403     | 2.34E-08 | 2.45E-09 | -6.26 | 10.3448939 | -1.06E-01 | 88453678  | 88453801  | NC_000010.10 |
| cg12339133     | 2.34E-08 | 2.46E-09 | -6.26 | 10.3426656 | -8.66E-02 | 1031174   | 1031297   | NC_000007.13 |
| cg00138641     | 2.34E-08 | 2.46E-09 | -6.25 | 10.3423854 | -9.07E-02 | 14397074  | 14397197  | NC_000016.9  |
| cg13383971     | 2.34E-08 | 2.46E-09 | -6.25 | 10.3422659 | -4.44E-02 | 6912197   | 6912320   | NC_000017.10 |
| cg12620342     | 2.34E-08 | 2.46E-09 | -6.25 | 10.341618  | -4.32E-02 | 56522011  | 56522134  | NC_000012.11 |
| cg27108984     | 2.34E-08 | 2.46E-09 | -6.25 | 10.3415631 | -7.02E-02 | 71194075  | 71194198  | NC_000014.8  |
| cg01388757     | 2.35E-08 | 2.47E-09 | -6.25 | 10.3393168 | -1.08E-01 | 102091195 | 102091318 | NC_000002.11 |
| cg04771248     | 2.35E-08 | 2.47E-09 | -6.25 | 10.338519  | -3.66E-02 | 157072050 | 157072173 | NC_000007.13 |
| ch.10.2006653F | 2.35E-08 | 2.47E-09 | -6.25 | 10.3368665 | -4.42E-02 | 96321017  | 96321140  | NC_000010.10 |
| cg24853765     | 2.36E-08 | 2.48E-09 | -6.25 | 10.3351129 | -4.49E-02 | 109584962 | 109585085 | NC_000001.10 |

|            |          |          |       |            |           |           |           |              |
|------------|----------|----------|-------|------------|-----------|-----------|-----------|--------------|
| cg24351003 | 2.36E-08 | 2.48E-09 | -6.25 | 10.3349551 | -1.44E-01 | 88013210  | 88013333  | NC_000010.10 |
| cg08224212 | 2.36E-08 | 2.48E-09 | -6.25 | 10.3348415 | -2.10E-02 | 34196093  | 34196216  | NC_000011.9  |
| cg23857976 | 2.36E-08 | 2.48E-09 | -6.25 | 10.3342511 | -6.64E-02 | 56065481  | 56065604  | NC_000017.10 |
| cg11498165 | 2.36E-08 | 2.48E-09 | -6.25 | 10.3340778 | -7.42E-02 | 59503645  | 59503768  | NC_000017.10 |
| cg20487932 | 2.36E-08 | 2.48E-09 | -6.25 | 10.333975  | -6.52E-02 | 109234959 | 109235082 | NC_000012.11 |
| cg02543636 | 2.36E-08 | 2.48E-09 | -6.25 | 10.3339327 | -1.50E-01 | 30810183  | 30810306  | NC_000007.13 |
| cg24000829 | 2.36E-08 | 2.48E-09 | -6.25 | 10.3333996 | -4.13E-02 | 38827749  | 38827872  | NC_000019.9  |
| cg02379052 | 2.36E-08 | 2.48E-09 | -6.25 | 10.3329723 | -1.43E-02 | 105486781 | 105486904 | NC_000014.8  |
| cg00239660 | 2.37E-08 | 2.49E-09 | -6.25 | 10.3307467 | -9.44E-02 | 130182620 | 130182743 | NC_000006.11 |
| cg12869058 | 2.37E-08 | 2.49E-09 | -6.25 | 10.33059   | -1.18E-01 | 94587872  | 94587995  | NC_000001.10 |
| cg16010827 | 2.37E-08 | 2.49E-09 | -6.25 | 10.3304798 | -2.06E-02 | 200708413 | 200708536 | NC_000001.10 |
| cg22445712 | 2.37E-08 | 2.49E-09 | -6.25 | 10.3298671 | -1.31E-01 | 50738550  | 50738673  | NC_000022.10 |
| cg17929273 | 2.37E-08 | 2.49E-09 | -6.25 | 10.3293772 | -1.18E-01 | 37967569  | 37967692  | NC_000022.10 |
| cg05408094 | 2.37E-08 | 2.49E-09 | -6.25 | 10.3286655 | -6.54E-02 | 113097633 | 113097756 | NC_000013.10 |
| cg05566965 | 2.37E-08 | 2.49E-09 | -6.25 | 10.327963  | -1.84E-02 | 18256588  | 18256711  | NC_000022.10 |
| cg04721828 | 2.38E-08 | 2.50E-09 | -6.25 | 10.3276308 | -8.22E-02 | 48285200  | 48285323  | NC_000011.9  |
| cg19509663 | 2.38E-08 | 2.50E-09 | -6.25 | 10.3275258 | -1.01E-01 | 7863560   | 7863683   | NC_000004.11 |
| cg14589466 | 2.38E-08 | 2.50E-09 | -6.25 | 10.3264433 | -2.39E-02 | 9548894   | 9549017   | NC_000017.10 |
| cg16424683 | 2.38E-08 | 2.50E-09 | -6.25 | 10.3257933 | -5.95E-02 | 177541051 | 177541174 | NC_000005.9  |
| cg11596902 | 2.38E-08 | 2.50E-09 | -6.25 | 10.3247763 | -1.20E-01 | 123324834 | 123324957 | NC_000011.9  |
| cg03905718 | 2.38E-08 | 2.51E-09 | -6.25 | 10.3237263 | -1.04E-01 | 4289417   | 4289540   | NC_000016.9  |
| cg00135888 | 2.38E-08 | 2.51E-09 | -6.25 | 10.3235736 | -1.20E-01 | 57407543  | 57407666  | NC_000011.9  |
| cg19550533 | 2.39E-08 | 2.51E-09 | -6.25 | 10.3228015 | -4.98E-02 | 1901437   | 1901560   | NC_000017.10 |
| cg20868898 | 2.39E-08 | 2.51E-09 | -6.25 | 10.3214272 | -3.94E-02 | 38678545  | 38678668  | NC_000014.8  |
| cg20033082 | 2.39E-08 | 2.51E-09 | -6.25 | 10.3204259 | -2.34E-02 | 18111902  | 18112025  | NC_000022.10 |

|                 |          |          |       |            |           |           |           |              |
|-----------------|----------|----------|-------|------------|-----------|-----------|-----------|--------------|
| cg26169632      | 2.39E-08 | 2.51E-09 | -6.25 | 10.3202524 | -1.08E-01 | 134768258 | 134768381 | NC_000002.11 |
| ch.17.35528401F | 2.40E-08 | 2.52E-09 | -6.25 | 10.3173436 | -1.89E-02 | 38274875  | 38274998  | NC_000017.10 |
| cg26076236      | 2.40E-08 | 2.52E-09 | -6.25 | 10.317314  | -8.43E-02 | 56650375  | 56650498  | NC_000006.11 |
| cg01425967      | 2.40E-08 | 2.52E-09 | -6.25 | 10.3169079 | -9.21E-02 | 161228203 | 161228326 | NC_000001.10 |
| cg08161323      | 2.40E-08 | 2.53E-09 | -6.25 | 10.3159487 | -5.02E-02 | 74734762  | 74734885  | NC_000004.11 |
| cg13834567      | 2.40E-08 | 2.53E-09 | -6.25 | 10.3151953 | -6.44E-02 | 42817981  | 42818104  | NC_000019.9  |
| cg16124981      | 2.41E-08 | 2.53E-09 | -6.25 | 10.3130446 | -9.52E-02 | 9896993   | 9897116   | NC_000019.9  |
| cg16384170      | 2.41E-08 | 2.53E-09 | -6.25 | 10.312815  | -3.15E-02 | 5085745   | 5085868   | NC_000007.13 |
| cg14601550      | 2.41E-08 | 2.53E-09 | -6.25 | 10.3122621 | -2.33E-02 | 40346443  | 40346566  | NC_000017.10 |
| cg08436738      | 2.41E-08 | 2.53E-09 | -6.25 | 10.3122581 | -1.84E-01 | 235528865 | 235528988 | NC_000002.11 |
| cg09692396      | 2.41E-08 | 2.54E-09 | -6.25 | 10.3114435 | -8.55E-02 | 7023346   | 7023469   | NC_000012.11 |
| cg14395885      | 2.42E-08 | 2.55E-09 | -6.25 | 10.306647  | -1.57E-01 | 130700923 | 130701046 | NC_000009.11 |
| cg04619882      | 2.43E-08 | 2.55E-09 | -6.25 | 10.3057103 | -1.09E-01 | 109741037 | 109741160 | NC_000001.10 |
| cg26177311      | 2.43E-08 | 2.55E-09 | -6.25 | 10.3055145 | -8.04E-02 | 17449166  | 17449289  | NC_000017.10 |
| cg04134096      | 2.43E-08 | 2.55E-09 | -6.25 | 10.3054123 | -1.38E-01 | 151643511 | 151643634 | NC_000003.11 |
| cg10358194      | 2.43E-08 | 2.55E-09 | -6.25 | 10.3052386 | -2.43E-02 | 510688    | 510811    | NC_000012.11 |
| cg10768318      | 2.43E-08 | 2.55E-09 | -6.25 | 10.3051243 | -4.44E-02 | 25604462  | 25604585  | NC_000020.10 |
| cg13131501      | 2.43E-08 | 2.55E-09 | -6.25 | 10.3047831 | -6.82E-02 | 145508262 | 145508385 | NC_000001.10 |
| cg04164744      | 2.43E-08 | 2.56E-09 | -6.25 | 10.3042466 | -1.04E-01 | 170100656 | 170100779 | NC_000006.11 |
| cg26859690      | 2.43E-08 | 2.56E-09 | -6.25 | 10.3036531 | -3.03E-02 | 3869672   | 3869795   | NC_000020.10 |
| cg18731055      | 2.43E-08 | 2.56E-09 | -6.25 | 10.3028822 | -1.26E-01 | 49108131  | 49108254  | NC_000013.10 |
| cg18325841      | 2.43E-08 | 2.56E-09 | -6.25 | 10.3018728 | -9.90E-02 | 25006183  | 25006306  | NC_000010.10 |
| cg07458516      | 2.44E-08 | 2.56E-09 | -6.25 | 10.3011309 | -5.90E-02 | 43854839  | 43854962  | NC_000001.10 |
| cg07092135      | 2.44E-08 | 2.56E-09 | -6.25 | 10.3008271 | -1.46E-01 | 124753863 | 124753986 | NC_000004.11 |
| cg23048656      | 2.44E-08 | 2.57E-09 | -6.25 | 10.3000867 | -1.10E-01 | 91227147  | 91227270  | NC_000014.8  |

|               |          |          |       |            |           |           |           |              |
|---------------|----------|----------|-------|------------|-----------|-----------|-----------|--------------|
| cg18765405    | 2.44E-08 | 2.57E-09 | -6.25 | 10.2997284 | -7.68E-02 | 134644263 | 134644386 | NC_000005.9  |
| cg20337103    | 2.44E-08 | 2.57E-09 | -6.25 | 10.2997215 | -9.18E-02 | 118781778 | 118781901 | NC_000011.9  |
| cg20454887    | 2.44E-08 | 2.57E-09 | -6.25 | 10.2997069 | -8.31E-02 | 54935920  | 54936043  | NC_000002.11 |
| cg04158046    | 2.44E-08 | 2.57E-09 | -6.25 | 10.2988511 | -4.88E-02 | 63833953  | 63834076  | NC_000001.10 |
| cg11435466    | 2.44E-08 | 2.57E-09 | -6.25 | 10.298002  | -6.45E-02 | 60738032  | 60738155  | NC_000011.9  |
| cg24720717    | 2.45E-08 | 2.57E-09 | -6.25 | 10.2972507 | -5.24E-02 | 90309410  | 90309533  | NC_000001.10 |
| cg20095237    | 2.45E-08 | 2.58E-09 | -6.25 | 10.2965658 | -9.70E-02 | 615919    | 616042    | NC_000007.13 |
| ch.2.2729437F | 2.45E-08 | 2.58E-09 | -6.25 | 10.2961303 | -2.16E-02 | 130523152 | 130523275 | NC_000002.11 |
| cg21272843    | 2.45E-08 | 2.58E-09 | -6.25 | 10.2957522 | -1.57E-01 | 85914525  | 85914648  | NC_000002.11 |
| cg20457147    | 2.45E-08 | 2.58E-09 | -6.25 | 10.2955989 | -8.25E-02 | 61787823  | 61787946  | NC_000014.8  |
| cg02843755    | 2.45E-08 | 2.58E-09 | -6.25 | 10.2955906 | -1.95E-02 | 37902570  | 37902693  | NC_000003.11 |
| cg26982695    | 2.45E-08 | 2.58E-09 | -6.25 | 10.295573  | -6.50E-02 | 34591618  | 34591741  | NC_000009.11 |
| cg25316305    | 2.45E-08 | 2.58E-09 | -6.25 | 10.2951906 | -1.43E-01 | 4361135   | 4361258   | NC_000012.11 |
| cg10343327    | 2.45E-08 | 2.58E-09 | -6.25 | 10.293705  | -1.26E-01 | 99331808  | 99331931  | NC_000010.10 |
| cg11255208    | 2.46E-08 | 2.59E-09 | -6.25 | 10.2930739 | -7.47E-02 | 42275334  | 42275457  | NC_000017.10 |
| cg05168404    | 2.46E-08 | 2.59E-09 | -6.25 | 10.2929602 | -1.01E-01 | 5321726   | 5321849   | NC_000007.13 |
| cg12718502    | 2.46E-08 | 2.59E-09 | -6.25 | 10.2921161 | -5.36E-02 | 2999424   | 2999547   | NC_000012.11 |
| cg01214847    | 2.46E-08 | 2.59E-09 | -6.25 | 10.2920034 | -1.37E-01 | 43816086  | 43816209  | NC_000021.8  |
| cg04508951    | 2.46E-08 | 2.59E-09 | -6.25 | 10.2919395 | -1.09E-01 | 193456140 | 193456263 | NC_000001.10 |
| cg18631798    | 2.46E-08 | 2.59E-09 | -6.24 | 10.2900949 | -1.22E-01 | 8396163   | 8396286   | NC_000004.11 |
| cg19170991    | 2.46E-08 | 2.59E-09 | -6.24 | 10.2896103 | -8.77E-02 | 71088038  | 71088161  | NC_000010.10 |
| cg08042055    | 2.47E-08 | 2.60E-09 | -6.24 | 10.2880074 | -7.44E-02 | 811031    | 811154    | NC_000016.9  |
| cg07813254    | 2.47E-08 | 2.60E-09 | -6.24 | 10.2875325 | -1.08E-01 | 20877673  | 20877796  | NC_000001.10 |
| cg18461347    | 2.47E-08 | 2.60E-09 | -6.24 | 10.2873095 | -1.22E-01 | 78947094  | 78947217  | NC_000007.13 |
| cg23287661    | 2.47E-08 | 2.60E-09 | -6.24 | 10.2867506 | -6.87E-02 | 153395100 | 153395223 | NC_000001.10 |

|            |          |          |       |            |           |           |           |              |
|------------|----------|----------|-------|------------|-----------|-----------|-----------|--------------|
| cg03281572 | 2.47E-08 | 2.61E-09 | -6.24 | 10.2854806 | -1.25E-01 | 114502318 | 114502441 | NC_000010.10 |
| cg00248242 | 2.47E-08 | 2.61E-09 | -6.24 | 10.2850954 | -1.42E-01 | 240867059 | 240867182 | NC_000002.11 |
| cg01065828 | 2.48E-08 | 2.61E-09 | -6.24 | 10.2845515 | -5.93E-02 | 86089846  | 86089969  | NC_000008.10 |
| cg15158859 | 2.48E-08 | 2.61E-09 | -6.24 | 10.2844815 | -8.26E-02 | 133978304 | 133978427 | NC_000010.10 |
| cg17168172 | 2.48E-08 | 2.61E-09 | -6.24 | 10.2841336 | -4.22E-02 | 42018038  | 42018161  | NC_000022.10 |
| cg15601071 | 2.48E-08 | 2.61E-09 | -6.24 | 10.2839753 | -1.19E-01 | 30078080  | 30078203  | NC_000006.11 |
| cg10065736 | 2.48E-08 | 2.61E-09 | -6.24 | 10.2839414 | -8.55E-02 | 117440120 | 117440243 | NC_000012.11 |
| cg14153876 | 2.48E-08 | 2.61E-09 | -6.24 | 10.2834947 | -3.22E-02 | 157292773 | 157292896 | NC_000002.11 |
| cg07037509 | 2.48E-08 | 2.61E-09 | -6.24 | 10.2834826 | -1.14E-01 | 112285979 | 112286102 | NC_000001.10 |
| cg13665184 | 2.48E-08 | 2.61E-09 | -6.24 | 10.283245  | -4.50E-02 | 68057062  | 68057185  | NC_000016.9  |
| cg00893488 | 2.48E-08 | 2.61E-09 | -6.24 | 10.2828702 | -9.60E-02 | 170555108 | 170555231 | NC_000006.11 |
| cg06910125 | 2.48E-08 | 2.61E-09 | -6.24 | 10.2825673 | -4.76E-02 | 177034441 | 177034564 | NC_000005.9  |
| cg27000831 | 2.49E-08 | 2.62E-09 | -6.24 | 10.2796679 | -1.28E-01 | 32645748  | 32645871  | NC_000017.10 |
| cg18340445 | 2.49E-08 | 2.63E-09 | -6.24 | 10.277137  | -1.00E-01 | 6661709   | 6661832   | NC_000019.9  |
| cg10130088 | 2.50E-08 | 2.63E-09 | -6.24 | 10.2763241 | -1.16E-01 | 122138618 | 122138741 | NC_000011.9  |
| cg08154187 | 2.50E-08 | 2.63E-09 | -6.24 | 10.2760387 | -4.11E-02 | 113404016 | 113404139 | NC_000013.10 |
| cg07350163 | 2.50E-08 | 2.63E-09 | -6.24 | 10.2759038 | -1.62E-02 | 62833479  | 62833602  | NC_000017.10 |
| cg06960514 | 2.50E-08 | 2.64E-09 | -6.24 | 10.274138  | -5.65E-02 | 71519778  | 71519901  | NC_000008.10 |
| cg07460665 | 2.50E-08 | 2.64E-09 | -6.24 | 10.273166  | -3.47E-02 | 46908912  | 46909035  | NC_000017.10 |
| cg08069043 | 2.50E-08 | 2.64E-09 | -6.24 | 10.2730056 | -2.12E-02 | 175816344 | 175816467 | NC_000005.9  |
| cg00987699 | 2.51E-08 | 2.65E-09 | -6.24 | 10.2700347 | -6.94E-02 | 5229947   | 5230070   | NC_000007.13 |
| cg05060440 | 2.51E-08 | 2.65E-09 | -6.24 | 10.2698988 | -1.26E-01 | 184395412 | 184395535 | NC_000002.11 |
| cg18428006 | 2.51E-08 | 2.65E-09 | -6.24 | 10.2696893 | -1.20E-01 | 177633449 | 177633572 | NC_000005.9  |
| cg16118592 | 2.51E-08 | 2.65E-09 | -6.24 | 10.2694439 | -9.63E-02 | 1148569   | 1148692   | NC_000004.11 |
| cg09248007 | 2.51E-08 | 2.65E-09 | -6.24 | 10.2682951 | -3.15E-02 | 14164860  | 14164983  | NC_000016.9  |

|                 |          |          |       |            |           |           |           |              |
|-----------------|----------|----------|-------|------------|-----------|-----------|-----------|--------------|
| cg14565781      | 2.52E-08 | 2.65E-09 | -6.24 | 10.2671305 | -1.34E-01 | 45274513  | 45274636  | NC_000001.10 |
| cg00792184      | 2.52E-08 | 2.66E-09 | -6.24 | 10.2668706 | -1.12E-01 | 73355148  | 73355271  | NC_000014.8  |
| cg21918595      | 2.52E-08 | 2.66E-09 | -6.24 | 10.2665117 | -6.38E-02 | 44784097  | 44784220  | NC_000001.10 |
| cg05643964      | 2.52E-08 | 2.66E-09 | -6.24 | 10.2661181 | -6.20E-02 | 62369504  | 62369627  | NC_000020.10 |
| cg21885638      | 2.52E-08 | 2.66E-09 | -6.24 | 10.2658319 | -8.45E-02 | 129306552 | 129306675 | NC_000003.11 |
| cg09996298      | 2.52E-08 | 2.66E-09 | -6.24 | 10.2653789 | -1.18E-01 | 241386947 | 241387070 | NC_000002.11 |
| cg24316255      | 2.53E-08 | 2.67E-09 | -6.24 | 10.2632506 | -4.43E-02 | 45753677  | 45753800  | NC_000021.8  |
| cg02816367      | 2.53E-08 | 2.67E-09 | -6.24 | 10.2627087 | -1.50E-01 | 112081490 | 112081613 | NC_000006.11 |
| cg07350718      | 2.53E-08 | 2.67E-09 | -6.24 | 10.2616143 | -2.17E-02 | 86045841  | 86045964  | NC_000001.10 |
| cg11664544      | 2.54E-08 | 2.68E-09 | -6.24 | 10.2588855 | -1.05E-01 | 30721636  | 30721759  | NC_000022.10 |
| cg06363417      | 2.54E-08 | 2.68E-09 | -6.24 | 10.2585426 | -1.81E-01 | 48351958  | 48352081  | NC_000016.9  |
| cg15813095      | 2.54E-08 | 2.68E-09 | -6.24 | 10.2579777 | -4.70E-02 | 47491068  | 47491191  | NC_000011.9  |
| cg21002542      | 2.54E-08 | 2.68E-09 | -6.24 | 10.2579214 | -1.08E-01 | 168785632 | 168785755 | NC_000006.11 |
| cg26069973      | 2.54E-08 | 2.68E-09 | -6.24 | 10.2574039 | -1.17E-01 | 80080213  | 80080336  | NC_000007.13 |
| ch.19.17835377R | 2.54E-08 | 2.68E-09 | -6.24 | 10.2568986 | -1.25E-02 | 17974377  | 17974500  | NC_000019.9  |
| cg15974062      | 2.54E-08 | 2.68E-09 | -6.24 | 10.2567327 | -2.58E-02 | 6833012   | 6833135   | NC_000012.11 |
| cg01460557      | 2.54E-08 | 2.69E-09 | -6.24 | 10.2559506 | -5.64E-02 | 133561498 | 133561621 | NC_000005.9  |
| cg06589507      | 2.55E-08 | 2.69E-09 | -6.24 | 10.2545987 | -2.99E-02 | 179234594 | 179234717 | NC_000005.9  |
| cg15393925      | 2.55E-08 | 2.69E-09 | -6.24 | 10.2525149 | -8.39E-02 | 30081299  | 30081422  | NC_000007.13 |
| cg25916044      | 2.55E-08 | 2.69E-09 | -6.24 | 10.2524132 | -9.69E-02 | 39648696  | 39648819  | NC_000007.13 |
| cg00404177      | 2.55E-08 | 2.69E-09 | -6.24 | 10.2523935 | -3.08E-02 | 51425685  | 51425808  | NC_000001.10 |
| cg15609321      | 2.55E-08 | 2.69E-09 | -6.24 | 10.2523798 | -5.82E-02 | 27805893  | 27806016  | NC_000002.11 |
| cg20312132      | 2.55E-08 | 2.70E-09 | -6.24 | 10.2519141 | -1.17E-01 | 16495441  | 16495564  | NC_000001.10 |
| cg02458384      | 2.55E-08 | 2.70E-09 | -6.24 | 10.2516825 | -3.88E-02 | 2021763   | 2021886   | NC_000016.9  |
| cg22384904      | 2.56E-08 | 2.70E-09 | -6.24 | 10.2513387 | -5.48E-02 | 227975220 | 227975343 | NC_000001.10 |

|                 |          |          |       |            |           |           |           |              |
|-----------------|----------|----------|-------|------------|-----------|-----------|-----------|--------------|
| cg03511957      | 2.56E-08 | 2.70E-09 | -6.24 | 10.2510262 | -1.05E-01 | 167765211 | 167765334 | NC_000001.10 |
| cg18309129      | 2.56E-08 | 2.70E-09 | -6.24 | 10.2509769 | -3.54E-02 | 47852304  | 47852427  | NC_000019.9  |
| cg10204999      | 2.56E-08 | 2.70E-09 | -6.24 | 10.2507845 | -6.11E-02 | 103057895 | 103058018 | NC_000014.8  |
| cg01109464      | 2.56E-08 | 2.70E-09 | -6.24 | 10.2499768 | -6.46E-02 | 60292819  | 60292942  | NC_000015.9  |
| cg07373798      | 2.56E-08 | 2.70E-09 | -6.24 | 10.2492968 | -1.10E-01 | 131032074 | 131032197 | NC_000004.11 |
| cg12175753      | 2.56E-08 | 2.70E-09 | -6.24 | 10.2492083 | -2.40E-02 | 40030677  | 40030800  | NC_000019.9  |
| cg05024961      | 2.56E-08 | 2.71E-09 | -6.24 | 10.2480244 | -1.27E-01 | 88498528  | 88498651  | NC_000016.9  |
| cg11751808      | 2.57E-08 | 2.71E-09 | -6.24 | 10.246405  | -1.05E-01 | 75079753  | 75079876  | NC_000006.11 |
| ch.14.92683308R | 2.57E-08 | 2.72E-09 | -6.24 | 10.2445285 | -2.22E-02 | 93613555  | 93613678  | NC_000014.8  |
| cg24733450      | 2.57E-08 | 2.72E-09 | -6.24 | 10.2440514 | -4.77E-02 | 150246821 | 150246944 | NC_000006.11 |
| cg07724643      | 2.58E-08 | 2.72E-09 | -6.24 | 10.2435416 | -6.58E-02 | 157163711 | 157163834 | NC_000001.10 |
| cg24915511      | 2.58E-08 | 2.72E-09 | -6.24 | 10.2422826 | -4.73E-02 | 181057458 | 181057581 | NC_000001.10 |
| cg22973468      | 2.58E-08 | 2.72E-09 | -6.24 | 10.2422213 | -1.13E-01 | 54569817  | 54569940  | NC_000008.10 |
| cg11276280      | 2.58E-08 | 2.72E-09 | -6.24 | 10.242181  | -2.04E-02 | 42713551  | 42713674  | NC_000006.11 |
| cg09146459      | 2.58E-08 | 2.72E-09 | -6.24 | 10.2421378 | -1.10E-01 | 32921200  | 32921323  | NC_000006.11 |
| cg13690407      | 2.58E-08 | 2.73E-09 | -6.24 | 10.2412055 | -1.42E-01 | 33473178  | 33473301  | NC_000001.10 |
| cg17069828      | 2.58E-08 | 2.73E-09 | -6.24 | 10.2411139 | -7.86E-02 | 119476471 | 119476594 | NC_000008.10 |
| cg19900821      | 2.58E-08 | 2.73E-09 | -6.24 | 10.2408009 | -7.18E-02 | 162359133 | 162359256 | NC_000001.10 |
| cg21262502      | 2.58E-08 | 2.73E-09 | -6.24 | 10.2407322 | -2.74E-02 | 46432208  | 46432331  | NC_000022.10 |
| cg18128437      | 2.59E-08 | 2.73E-09 | -6.24 | 10.2388346 | -4.94E-02 | 167453397 | 167453520 | NC_000003.11 |
| cg08822737      | 2.59E-08 | 2.73E-09 | -6.24 | 10.2387073 | -5.79E-02 | 71088851  | 71088974  | NC_000017.10 |
| cg21130113      | 2.59E-08 | 2.73E-09 | -6.24 | 10.2385038 | -1.91E-01 | 193973396 | 193973519 | NC_000003.11 |
| cg12040370      | 2.59E-08 | 2.74E-09 | -6.23 | 10.2376357 | -2.95E-02 | 93107744  | 93107867  | NC_000008.10 |
| cg24664957      | 2.59E-08 | 2.74E-09 | -6.23 | 10.2376353 | -9.98E-02 | 123381003 | 123381126 | NC_000012.11 |
| cg12247247      | 2.59E-08 | 2.74E-09 | -6.23 | 10.2362822 | -4.35E-02 | 37009861  | 37009984  | NC_000017.10 |



|                |          |          |       |            |           |           |           |              |
|----------------|----------|----------|-------|------------|-----------|-----------|-----------|--------------|
| cg02220837     | 2.59E-08 | 2.74E-09 | -6.23 | 10.235848  | -1.45E-01 | 5024773   | 5024896   | NC_000003.11 |
| cg07285481     | 2.59E-08 | 2.74E-09 | -6.23 | 10.2357674 | -1.03E-01 | 81667167  | 81667290  | NC_000016.9  |
| cg05302489     | 2.59E-08 | 2.74E-09 | -6.23 | 10.2356238 | -1.35E-01 | 31760426  | 31760549  | NC_000006.11 |
| cg21193888     | 2.60E-08 | 2.74E-09 | -6.23 | 10.2350797 | -1.37E-01 | 97671404  | 97671527  | NC_000009.11 |
| cg27419217     | 2.60E-08 | 2.74E-09 | -6.23 | 10.2347751 | -2.08E-02 | 49717280  | 49717403  | NC_000012.11 |
| cg10034642     | 2.60E-08 | 2.75E-09 | -6.23 | 10.2337389 | -2.31E-02 | 791241    | 791364    | NC_000016.9  |
| cg18885365     | 2.60E-08 | 2.75E-09 | -6.23 | 10.2333311 | -4.56E-02 | 40420800  | 40420923  | NC_000001.10 |
| cg25748136     | 2.60E-08 | 2.75E-09 | -6.23 | 10.2329648 | -1.27E-01 | 63555464  | 63555587  | NC_000017.10 |
| cg01859191     | 2.60E-08 | 2.75E-09 | -6.23 | 10.2320825 | -7.05E-02 | 2250274   | 2250397   | NC_000007.13 |
| cg04031134     | 2.61E-08 | 2.75E-09 | -6.23 | 10.2313187 | -5.62E-02 | 98630788  | 98630911  | NC_000007.13 |
| cg03085549     | 2.61E-08 | 2.76E-09 | -6.23 | 10.2303601 | -1.30E-01 | 75150819  | 75150942  | NC_000016.9  |
| ch.5.56229788F | 2.61E-08 | 2.76E-09 | -6.23 | 10.230255  | -2.15E-02 | 56194031  | 56194154  | NC_000005.9  |
| cg19915361     | 2.61E-08 | 2.76E-09 | -6.23 | 10.2302532 | -7.76E-02 | 66171222  | 66171345  | NC_000014.8  |
| cg08309013     | 2.61E-08 | 2.76E-09 | -6.23 | 10.2302156 | -1.52E-01 | 63921966  | 63922089  | NC_000008.10 |
| cg03340408     | 2.61E-08 | 2.76E-09 | -6.23 | 10.2294999 | -1.17E-01 | 201656308 | 201656431 | NC_000001.10 |
| cg08674093     | 2.61E-08 | 2.76E-09 | -6.23 | 10.2293297 | -4.33E-02 | 182697846 | 182697969 | NC_000003.11 |
| cg14647877     | 2.61E-08 | 2.76E-09 | -6.23 | 10.2292029 | -8.14E-02 | 31698698  | 31698821  | NC_000006.11 |
| cg05301818     | 2.61E-08 | 2.76E-09 | -6.23 | 10.227601  | -4.45E-02 | 125385252 | 125385375 | NC_000008.10 |
| cg19702703     | 2.62E-08 | 2.77E-09 | -6.23 | 10.2266698 | -1.11E-01 | 7942020   | 7942143   | NC_000004.11 |
| cg11617975     | 2.62E-08 | 2.77E-09 | -6.23 | 10.2263711 | -1.58E-02 | 80916774  | 80916897  | NC_000013.10 |
| cg13633756     | 2.62E-08 | 2.77E-09 | -6.23 | 10.226169  | -1.34E-01 | 48828393  | 48828516  | NC_000019.9  |
| cg18965980     | 2.62E-08 | 2.77E-09 | -6.23 | 10.2253808 | -6.76E-02 | 78699048  | 78699171  | NC_000017.10 |
| cg03796381     | 2.62E-08 | 2.77E-09 | -6.23 | 10.2252881 | -1.44E-01 | 36650033  | 36650156  | NC_000015.9  |
| cg17085688     | 2.62E-08 | 2.77E-09 | -6.23 | 10.2249895 | -1.08E-01 | 93540134  | 93540257  | NC_000007.13 |
| cg15114431     | 2.62E-08 | 2.77E-09 | -6.23 | 10.2249859 | -1.26E-01 | 102775941 | 102776064 | NC_000003.11 |

|            |          |          |       |            |           |           |           |              |
|------------|----------|----------|-------|------------|-----------|-----------|-----------|--------------|
| cg06118338 | 2.62E-08 | 2.77E-09 | -6.23 | 10.2246954 | -1.42E-01 | 18544818  | 18544941  | NC_000011.9  |
| cg03449631 | 2.62E-08 | 2.77E-09 | -6.23 | 10.2243711 | -3.47E-02 | 1714019   | 1714142   | NC_000004.11 |
| cg13248574 | 2.62E-08 | 2.77E-09 | -6.23 | 10.2239006 | -1.44E-01 | 77504561  | 77504684  | NC_000014.8  |
| cg14340131 | 2.62E-08 | 2.78E-09 | -6.23 | 10.2237107 | -9.23E-02 | 533457    | 533580    | NC_000011.9  |
| cg06927305 | 2.63E-08 | 2.78E-09 | -6.23 | 10.2219175 | -6.68E-02 | 1617447   | 1617570   | NC_000017.10 |
| cg11544420 | 2.63E-08 | 2.78E-09 | -6.23 | 10.2216532 | -1.28E-01 | 99409957  | 99410080  | NC_000015.9  |
| cg12785993 | 2.63E-08 | 2.78E-09 | -6.23 | 10.2202464 | -1.35E-01 | 30401636  | 30401759  | NC_000002.11 |
| cg15849060 | 2.63E-08 | 2.79E-09 | -6.23 | 10.2193433 | -1.62E-01 | 19649004  | 19649127  | NC_000017.10 |
| cg12110333 | 2.63E-08 | 2.79E-09 | -6.23 | 10.2193156 | -7.05E-02 | 1635186   | 1635309   | NC_000005.9  |
| cg07635017 | 2.63E-08 | 2.79E-09 | -6.23 | 10.2192775 | -8.95E-02 | 1341808   | 1341931   | NC_000016.9  |
| cg19861110 | 2.64E-08 | 2.80E-09 | -6.23 | 10.2158019 | -3.47E-02 | 100967307 | 100967430 | NC_000012.11 |
| cg11956930 | 2.65E-08 | 2.80E-09 | -6.23 | 10.2141871 | -3.36E-02 | 99182490  | 99182613  | NC_000008.10 |
| cg17566325 | 2.65E-08 | 2.80E-09 | -6.23 | 10.2138267 | -1.33E-01 | 133022423 | 133022546 | NC_000012.11 |
| cg05593726 | 2.65E-08 | 2.81E-09 | -6.23 | 10.2127046 | -5.40E-02 | 9282670   | 9282793   | NC_000018.9  |
| cg26586164 | 2.65E-08 | 2.81E-09 | -6.23 | 10.2123597 | -2.78E-02 | 25895850  | 25895973  | NC_000002.11 |
| cg07740306 | 2.66E-08 | 2.81E-09 | -6.23 | 10.2109153 | -1.71E-01 | 77246369  | 77246492  | NC_000018.9  |
| cg09715545 | 2.66E-08 | 2.81E-09 | -6.23 | 10.2105026 | -1.22E-01 | 85196350  | 85196473  | NC_000016.9  |
| cg05254511 | 2.66E-08 | 2.81E-09 | -6.23 | 10.2102928 | -3.76E-02 | 39077689  | 39077812  | NC_000022.10 |
| cg03199366 | 2.66E-08 | 2.81E-09 | -6.23 | 10.2101814 | -1.27E-01 | 187740664 | 187740787 | NC_000004.11 |
| cg25821304 | 2.66E-08 | 2.81E-09 | -6.23 | 10.2100206 | -2.29E-02 | 29297824  | 29297947  | NC_000017.10 |
| cg27447286 | 2.66E-08 | 2.81E-09 | -6.23 | 10.2098397 | -1.79E-02 | 95705527  | 95705650  | NC_000007.13 |
| cg18391127 | 2.66E-08 | 2.82E-09 | -6.23 | 10.2095472 | -1.32E-01 | 89462418  | 89462541  | NC_000015.9  |
| cg03071245 | 2.66E-08 | 2.82E-09 | -6.23 | 10.2093878 | -1.37E-01 | 37463034  | 37463157  | NC_000013.10 |
| cg15889106 | 2.66E-08 | 2.82E-09 | -6.23 | 10.2087742 | -6.63E-02 | 21567164  | 21567287  | NC_000014.8  |
| cg14533390 | 2.67E-08 | 2.82E-09 | -6.23 | 10.2070842 | -1.38E-01 | 65342843  | 65342966  | NC_000003.11 |

|            |          |          |       |            |           |           |           |              |
|------------|----------|----------|-------|------------|-----------|-----------|-----------|--------------|
| cg10106965 | 2.67E-08 | 2.82E-09 | -6.23 | 10.2063578 | -6.77E-02 | 10206258  | 10206381  | NC_000003.11 |
| cg21227325 | 2.67E-08 | 2.83E-09 | -6.23 | 10.2061458 | -1.02E-01 | 78776599  | 78776722  | NC_000009.11 |
| cg11363168 | 2.67E-08 | 2.83E-09 | -6.23 | 10.2057032 | -9.39E-02 | 38470662  | 38470785  | NC_000008.10 |
| cg18129296 | 2.67E-08 | 2.83E-09 | -6.23 | 10.2055629 | -1.44E-01 | 74003742  | 74003865  | NC_000003.11 |
| cg18070504 | 2.67E-08 | 2.83E-09 | -6.23 | 10.2049065 | -1.17E-01 | 11187858  | 11187981  | NC_000003.11 |
| cg14841011 | 2.67E-08 | 2.83E-09 | -6.23 | 10.2033268 | -1.03E-01 | 3332125   | 3332248   | NC_000001.10 |
| cg23252387 | 2.68E-08 | 2.84E-09 | -6.23 | 10.2023969 | -3.14E-02 | 160822661 | 160822784 | NC_000003.11 |
| cg19865472 | 2.68E-08 | 2.84E-09 | -6.23 | 10.2022498 | -1.68E-01 | 617133    | 617256    | NC_000019.9  |
| cg16004390 | 2.68E-08 | 2.84E-09 | -6.23 | 10.201801  | -1.17E-01 | 47918542  | 47918665  | NC_000021.8  |
| cg07793889 | 2.68E-08 | 2.84E-09 | -6.23 | 10.2012983 | -2.56E-02 | 48357314  | 48357437  | NC_000012.11 |
| cg06760305 | 2.68E-08 | 2.84E-09 | -6.23 | 10.2011381 | -5.70E-02 | 228566548 | 228566671 | NC_000001.10 |
| cg19136371 | 2.69E-08 | 2.85E-09 | -6.23 | 10.1992168 | -1.22E-01 | 40357140  | 40357263  | NC_000006.11 |
| cg07480798 | 2.69E-08 | 2.85E-09 | -6.23 | 10.1985662 | -4.66E-02 | 80674520  | 80674643  | NC_000017.10 |
| cg08402107 | 2.69E-08 | 2.85E-09 | -6.23 | 10.1964852 | -9.18E-02 | 106028939 | 106029062 | NC_000010.10 |
| cg11569869 | 2.69E-08 | 2.85E-09 | -6.23 | 10.1959613 | -1.88E-01 | 987242    | 987365    | NC_000007.13 |
| cg02412803 | 2.70E-08 | 2.86E-09 | -6.23 | 10.1951534 | -9.30E-02 | 1099138   | 1099261   | NC_000016.9  |
| cg21242009 | 2.70E-08 | 2.86E-09 | -6.23 | 10.1942161 | -8.82E-02 | 6894182   | 6894305   | NC_000006.11 |
| cg10322504 | 2.70E-08 | 2.86E-09 | -6.23 | 10.1939239 | -1.43E-01 | 3229239   | 3229362   | NC_000020.10 |
| cg20426709 | 2.70E-08 | 2.86E-09 | -6.23 | 10.1935922 | -4.36E-02 | 43920264  | 43920387  | NC_000001.10 |
| cg21881859 | 2.70E-08 | 2.86E-09 | -6.23 | 10.1934182 | -5.03E-02 | 3749224   | 3749347   | NC_000017.10 |
| cg16306078 | 2.70E-08 | 2.87E-09 | -6.23 | 10.1922235 | -1.25E-01 | 126000798 | 126000921 | NC_000006.11 |
| cg18910534 | 2.70E-08 | 2.87E-09 | -6.23 | 10.1921815 | -6.26E-02 | 201729768 | 201729891 | NC_000002.11 |
| cg24082121 | 2.70E-08 | 2.87E-09 | -6.23 | 10.1914799 | -1.12E-01 | 672872    | 672995    | NC_000005.9  |
| cg13198342 | 2.71E-08 | 2.87E-09 | -6.23 | 10.1911323 | -1.22E-01 | 10687583  | 10687706  | NC_000002.11 |
| cg12782654 | 2.71E-08 | 2.88E-09 | -6.23 | 10.1890672 | -1.24E-01 | 66085299  | 66085422  | NC_000011.9  |

|            |          |          |       |            |           |           |           |              |
|------------|----------|----------|-------|------------|-----------|-----------|-----------|--------------|
| cg04778194 | 2.71E-08 | 2.88E-09 | -6.23 | 10.1887835 | -2.35E-02 | 48637408  | 48637531  | NC_000017.10 |
| cg25883348 | 2.72E-08 | 2.88E-09 | -6.23 | 10.1870173 | -1.18E-01 | 234883862 | 234883985 | NC_000002.11 |
| cg20329047 | 2.72E-08 | 2.88E-09 | -6.23 | 10.1869078 | -9.38E-02 | 145514383 | 145514506 | NC_000008.10 |
| cg17253981 | 2.72E-08 | 2.88E-09 | -6.23 | 10.186358  | -1.08E-01 | 114366508 | 114366631 | NC_000004.11 |
| cg00516030 | 2.72E-08 | 2.89E-09 | -6.22 | 10.185157  | -1.09E-01 | 132273126 | 132273249 | NC_000006.11 |
| cg04454259 | 2.72E-08 | 2.89E-09 | -6.22 | 10.1847009 | -2.31E-02 | 37507390  | 37507513  | NC_000021.8  |
| cg25353287 | 2.73E-08 | 2.89E-09 | -6.22 | 10.1836662 | -1.44E-01 | 42277667  | 42277790  | NC_000002.11 |
| cg06012748 | 2.73E-08 | 2.90E-09 | -6.22 | 10.1817923 | -1.04E-01 | 28039531  | 28039654  | NC_000011.9  |
| cg06124110 | 2.73E-08 | 2.90E-09 | -6.22 | 10.1817572 | -5.11E-02 | 119683694 | 119683817 | NC_000001.10 |
| cg07189401 | 2.73E-08 | 2.90E-09 | -6.22 | 10.1812988 | -1.20E-01 | 19736333  | 19736456  | NC_000011.9  |
| cg10621597 | 2.73E-08 | 2.90E-09 | -6.22 | 10.1804879 | -1.01E-01 | 140481801 | 140481924 | NC_000004.11 |
| cg21449646 | 2.73E-08 | 2.90E-09 | -6.22 | 10.1804807 | -7.05E-02 | 19465636  | 19465759  | NC_000008.10 |
| cg23545049 | 2.74E-08 | 2.90E-09 | -6.22 | 10.1799408 | -1.11E-01 | 2569474   | 2569597   | NC_000011.9  |
| cg10621441 | 2.74E-08 | 2.90E-09 | -6.22 | 10.1799132 | -9.13E-02 | 45354409  | 45354532  | NC_000011.9  |
| cg08530036 | 2.74E-08 | 2.90E-09 | -6.22 | 10.1792767 | -1.26E-01 | 19496406  | 19496529  | NC_000001.10 |
| cg06349754 | 2.74E-08 | 2.90E-09 | -6.22 | 10.1790156 | -1.11E-01 | 67311653  | 67311776  | NC_000016.9  |
| cg19764489 | 2.74E-08 | 2.91E-09 | -6.22 | 10.1787222 | -9.65E-02 | 2730616   | 2730739   | NC_000011.9  |
| cg08251761 | 2.74E-08 | 2.91E-09 | -6.22 | 10.1781455 | -1.57E-01 | 470197    | 470320    | NC_000011.9  |
| cg14426167 | 2.74E-08 | 2.91E-09 | -6.22 | 10.1780318 | -1.07E-01 | 27972099  | 27972222  | NC_000017.10 |
| cg12597472 | 2.74E-08 | 2.91E-09 | -6.22 | 10.1773196 | -1.23E-01 | 69339188  | 69339311  | NC_000011.9  |
| cg09326440 | 2.75E-08 | 2.92E-09 | -6.22 | 10.1750134 | -1.46E-01 | 30458161  | 30458284  | NC_000006.11 |
| cg15160746 | 2.75E-08 | 2.92E-09 | -6.22 | 10.1733395 | -1.91E-01 | 2743239   | 2743362   | NC_000012.11 |
| cg24578853 | 2.75E-08 | 2.92E-09 | -6.22 | 10.1733142 | -4.03E-02 | 30710755  | 30710878  | NC_000006.11 |
| cg23354224 | 2.75E-08 | 2.92E-09 | -6.22 | 10.1730644 | -2.39E-02 | 41697229  | 41697352  | NC_000022.10 |
| cg24157598 | 2.75E-08 | 2.92E-09 | -6.22 | 10.1727913 | -9.72E-02 | 164254508 | 164254631 | NC_000004.11 |

|            |          |          |       |            |           |           |           |              |
|------------|----------|----------|-------|------------|-----------|-----------|-----------|--------------|
| cg18159184 | 2.75E-08 | 2.92E-09 | -6.22 | 10.1726576 | -6.92E-02 | 153548101 | 153548224 | NC_000005.9  |
| cg12395843 | 2.75E-08 | 2.92E-09 | -6.22 | 10.1724719 | -2.77E-02 | 65812734  | 65812857  | NC_000011.9  |
| cg18994377 | 2.76E-08 | 2.93E-09 | -6.22 | 10.1715124 | -5.70E-02 | 125634060 | 125634183 | NC_000003.11 |
| cg14975547 | 2.76E-08 | 2.93E-09 | -6.22 | 10.1711231 | -1.16E-01 | 75827618  | 75827741  | NC_000002.11 |
| cg01209635 | 2.76E-08 | 2.93E-09 | -6.22 | 10.1709371 | -1.09E-01 | 3607269   | 3607392   | NC_000019.9  |
| cg00680003 | 2.76E-08 | 2.93E-09 | -6.22 | 10.1702289 | -2.11E-02 | 30523449  | 30523572  | NC_000006.11 |
| cg13027404 | 2.76E-08 | 2.93E-09 | -6.22 | 10.1694045 | -7.78E-02 | 53095984  | 53096107  | NC_000015.9  |
| cg07182163 | 2.77E-08 | 2.94E-09 | -6.22 | 10.1674669 | -1.58E-01 | 79511907  | 79512030  | NC_000014.8  |
| cg11692070 | 2.77E-08 | 2.94E-09 | -6.22 | 10.1664053 | -1.29E-01 | 102790406 | 102790529 | NC_000007.13 |
| cg22907165 | 2.77E-08 | 2.94E-09 | -6.22 | 10.1657605 | -1.35E-02 | 13328662  | 13328785  | NC_000006.11 |
| cg05336051 | 2.77E-08 | 2.95E-09 | -6.22 | 10.1648317 | -1.82E-01 | 2813724   | 2813847   | NC_000004.11 |
| cg22153745 | 2.78E-08 | 2.95E-09 | -6.22 | 10.1641828 | -3.92E-02 | 153894579 | 153894702 | NC_000001.10 |
| cg02079584 | 2.78E-08 | 2.95E-09 | -6.22 | 10.1634209 | -1.05E-01 | 74528719  | 74528842  | NC_000015.9  |
| cg23834919 | 2.78E-08 | 2.95E-09 | -6.22 | 10.1634183 | -1.40E-01 | 122078745 | 122078868 | NC_000011.9  |
| cg02996291 | 2.78E-08 | 2.95E-09 | -6.22 | 10.1631514 | -2.26E-02 | 66035083  | 66035206  | NC_000011.9  |
| cg23021168 | 2.78E-08 | 2.95E-09 | -6.22 | 10.1629538 | -9.48E-02 | 102201137 | 102201260 | NC_000005.9  |
| cg25172145 | 2.78E-08 | 2.96E-09 | -6.22 | 10.1616742 | -3.81E-02 | 22296625  | 22296748  | NC_000022.10 |
| cg12515517 | 2.78E-08 | 2.96E-09 | -6.22 | 10.1610419 | -9.04E-02 | 68804378  | 68804501  | NC_000015.9  |
| cg16241033 | 2.79E-08 | 2.96E-09 | -6.22 | 10.159827  | -1.79E-01 | 14050455  | 14050578  | NC_000010.10 |
| cg13330005 | 2.79E-08 | 2.97E-09 | -6.22 | 10.1589665 | -8.05E-02 | 516966    | 517089    | NC_000007.13 |
| cg23006519 | 2.79E-08 | 2.97E-09 | -6.22 | 10.1573251 | -9.80E-02 | 121223740 | 121223863 | NC_000002.11 |
| cg18496262 | 2.80E-08 | 2.97E-09 | -6.22 | 10.1559889 | -2.95E-02 | 8977857   | 8977980   | NC_000002.11 |
| cg07537417 | 2.80E-08 | 2.98E-09 | -6.22 | 10.1547651 | -1.94E-01 | 74332553  | 74332676  | NC_000018.9  |
| cg11867016 | 2.80E-08 | 2.98E-09 | -6.22 | 10.1542982 | -9.21E-02 | 129522733 | 129522856 | NC_000004.11 |
| cg11959387 | 2.80E-08 | 2.98E-09 | -6.22 | 10.1537081 | -1.38E-01 | 6721027   | 6721150   | NC_000019.9  |

|            |          |          |       |            |           |           |           |              |
|------------|----------|----------|-------|------------|-----------|-----------|-----------|--------------|
| cg20924136 | 2.81E-08 | 2.99E-09 | -6.22 | 10.1520449 | -8.90E-02 | 230808359 | 230808482 | NC_000002.11 |
| cg26923410 | 2.81E-08 | 2.99E-09 | -6.22 | 10.1519496 | -1.28E-01 | 30951432  | 30951555  | NC_000007.13 |
| cg11461808 | 2.81E-08 | 2.99E-09 | -6.22 | 10.1501909 | -9.71E-02 | 1126579   | 1126702   | NC_000007.13 |
| cg27576694 | 2.82E-08 | 2.99E-09 | -6.22 | 10.1493964 | -1.67E-01 | 106372161 | 106372284 | NC_000007.13 |
| cg10490227 | 2.82E-08 | 3.00E-09 | -6.22 | 10.1487461 | -4.48E-02 | 40348903  | 40349026  | NC_000001.10 |
| cg12552944 | 2.82E-08 | 3.00E-09 | -6.22 | 10.1487295 | -2.75E-02 | 2353682   | 2353805   | NC_000007.13 |
| cg19080233 | 2.82E-08 | 3.00E-09 | -6.22 | 10.1483648 | -1.04E-01 | 67089012  | 67089135  | NC_000005.9  |
| cg10576132 | 2.82E-08 | 3.00E-09 | -6.22 | 10.147768  | -1.24E-01 | 37899045  | 37899168  | NC_000007.13 |
| cg00025211 | 2.82E-08 | 3.00E-09 | -6.22 | 10.147555  | -1.09E-01 | 145588627 | 145588750 | NC_000001.10 |
| cg07217691 | 2.82E-08 | 3.00E-09 | -6.22 | 10.1474804 | -4.45E-02 | 134117257 | 134117380 | NC_000007.13 |
| cg06212213 | 2.82E-08 | 3.00E-09 | -6.22 | 10.1469234 | -8.94E-02 | 596202    | 596325    | NC_000007.13 |
| cg00932156 | 2.82E-08 | 3.00E-09 | -6.22 | 10.1468958 | -6.78E-02 | 69618982  | 69619105  | NC_000014.8  |
| cg01113988 | 2.83E-08 | 3.01E-09 | -6.22 | 10.1449649 | -1.40E-01 | 106035528 | 106035651 | NC_000006.11 |
| cg10631289 | 2.83E-08 | 3.01E-09 | -6.22 | 10.144613  | -1.61E-01 | 39006617  | 39006740  | NC_000015.9  |
| cg23316923 | 2.83E-08 | 3.01E-09 | -6.22 | 10.1432204 | -3.92E-02 | 52210825  | 52210948  | NC_000020.10 |
| cg20956738 | 2.83E-08 | 3.02E-09 | -6.22 | 10.1424906 | -1.45E-01 | 55108537  | 55108660  | NC_000018.9  |
| cg09797463 | 2.84E-08 | 3.02E-09 | -6.22 | 10.1419894 | -8.37E-02 | 90995297  | 90995420  | NC_000010.10 |
| cg08155050 | 2.84E-08 | 3.02E-09 | -6.22 | 10.1419064 | -7.53E-02 | 2972435   | 2972558   | NC_000006.11 |
| cg05678976 | 2.84E-08 | 3.02E-09 | -6.22 | 10.1414222 | -7.61E-02 | 21660828  | 21660951  | NC_000022.10 |
| cg10244503 | 2.84E-08 | 3.02E-09 | -6.22 | 10.141183  | -1.30E-01 | 87691781  | 87691904  | NC_000001.10 |
| cg17861863 | 2.84E-08 | 3.02E-09 | -6.22 | 10.1410681 | -1.61E-01 | 1454387   | 1454510   | NC_000010.10 |
| cg09689633 | 2.84E-08 | 3.02E-09 | -6.22 | 10.1406641 | -7.44E-02 | 14458509  | 14458632  | NC_000016.9  |
| cg13496041 | 2.84E-08 | 3.02E-09 | -6.22 | 10.1398769 | -1.04E-01 | 14494726  | 14494849  | NC_000003.11 |
| cg01906055 | 2.84E-08 | 3.03E-09 | -6.22 | 10.1393639 | -1.16E-01 | 97000811  | 97000934  | NC_000002.11 |
| cg09260951 | 2.84E-08 | 3.03E-09 | -6.22 | 10.1391275 | -3.19E-02 | 39096513  | 39096636  | NC_000022.10 |

|            |          |          |       |            |           |           |           |              |
|------------|----------|----------|-------|------------|-----------|-----------|-----------|--------------|
| cg27423177 | 2.85E-08 | 3.03E-09 | -6.22 | 10.1383337 | -1.23E-01 | 8219358   | 8219481   | NC_000012.11 |
| cg10361765 | 2.85E-08 | 3.03E-09 | -6.22 | 10.1378678 | -1.17E-01 | 19440976  | 19441099  | NC_000011.9  |
| cg03706086 | 2.85E-08 | 3.03E-09 | -6.22 | 10.137743  | -1.09E-01 | 71381216  | 71381339  | NC_000008.10 |
| cg01246254 | 2.85E-08 | 3.03E-09 | -6.22 | 10.1375142 | -6.59E-02 | 124134882 | 124135005 | NC_000010.10 |
| cg14490552 | 2.85E-08 | 3.03E-09 | -6.22 | 10.136795  | -4.14E-02 | 101965602 | 101965725 | NC_000008.10 |
| cg26034313 | 2.85E-08 | 3.03E-09 | -6.22 | 10.1362841 | -1.26E-01 | 117110208 | 117110331 | NC_000011.9  |
| cg05472059 | 2.85E-08 | 3.04E-09 | -6.22 | 10.1361164 | -1.41E-01 | 1054787   | 1054910   | NC_000002.11 |
| cg02574734 | 2.85E-08 | 3.04E-09 | -6.22 | 10.1354898 | -1.03E-01 | 116369351 | 116369474 | NC_000001.10 |
| cg26818935 | 2.86E-08 | 3.04E-09 | -6.22 | 10.1345627 | -2.74E-02 | 740532    | 740655    | NC_000016.9  |
| cg23195687 | 2.86E-08 | 3.04E-09 | -6.21 | 10.1340455 | -1.21E-01 | 90847168  | 90847291  | NC_000010.10 |
| cg24951989 | 2.86E-08 | 3.04E-09 | -6.21 | 10.1337283 | -1.06E-01 | 1129117   | 1129240   | NC_000008.10 |
| cg03917952 | 2.86E-08 | 3.04E-09 | -6.21 | 10.1333824 | -9.40E-02 | 115770664 | 115770787 | NC_000001.10 |
| cg19170881 | 2.86E-08 | 3.04E-09 | -6.21 | 10.1331448 | -1.21E-01 | 101129980 | 101130103 | NC_000007.13 |
| cg09051904 | 2.86E-08 | 3.04E-09 | -6.21 | 10.133112  | -4.30E-02 | 36635583  | 36635706  | NC_000022.10 |
| cg21439896 | 2.86E-08 | 3.05E-09 | -6.21 | 10.132743  | -9.50E-02 | 36108233  | 36108356  | NC_000001.10 |
| cg27122614 | 2.86E-08 | 3.05E-09 | -6.21 | 10.1323941 | -1.05E-01 | 157913741 | 157913864 | NC_000007.13 |
| cg19807685 | 2.86E-08 | 3.05E-09 | -6.21 | 10.1322322 | -1.17E-01 | 82068980  | 82069103  | NC_000016.9  |
| cg18694313 | 2.86E-08 | 3.05E-09 | -6.21 | 10.1319756 | -8.03E-02 | 33224942  | 33225065  | NC_000013.10 |
| cg17940902 | 2.87E-08 | 3.05E-09 | -6.21 | 10.1298322 | -8.52E-02 | 32921233  | 32921356  | NC_000006.11 |
| cg08551633 | 2.87E-08 | 3.05E-09 | -6.21 | 10.1297683 | -4.94E-02 | 43099046  | 43099169  | NC_000019.9  |
| cg05577434 | 2.87E-08 | 3.06E-09 | -6.21 | 10.1285783 | -8.65E-02 | 25003527  | 25003650  | NC_000022.10 |
| cg21740177 | 2.88E-08 | 3.06E-09 | -6.21 | 10.1273322 | -1.02E-01 | 119381682 | 119381805 | NC_000003.11 |
| cg01257194 | 2.88E-08 | 3.06E-09 | -6.21 | 10.1271613 | -1.20E-01 | 116161247 | 116161370 | NC_000009.11 |
| cg05534175 | 2.88E-08 | 3.07E-09 | -6.21 | 10.1264108 | -3.70E-02 | 32869897  | 32870020  | NC_000018.9  |
| cg07979757 | 2.88E-08 | 3.07E-09 | -6.21 | 10.1250971 | -7.49E-02 | 2828652   | 2828775   | NC_000011.9  |

|            |          |          |       |            |           |           |           |              |
|------------|----------|----------|-------|------------|-----------|-----------|-----------|--------------|
| cg20536364 | 2.88E-08 | 3.07E-09 | -6.21 | 10.1243903 | -8.52E-02 | 55790102  | 55790225  | NC_000005.9  |
| cg24009881 | 2.89E-08 | 3.08E-09 | -6.21 | 10.1224273 | -1.15E-01 | 29719552  | 29719675  | NC_000008.10 |
| cg14407179 | 2.89E-08 | 3.08E-09 | -6.21 | 10.1221073 | -1.61E-01 | 963768    | 963891    | NC_000007.13 |
| cg15357934 | 2.89E-08 | 3.08E-09 | -6.21 | 10.1216591 | -7.77E-02 | 58138320  | 58138443  | NC_000012.11 |
| cg04342594 | 2.89E-08 | 3.08E-09 | -6.21 | 10.1213408 | -1.54E-01 | 138662870 | 138662993 | NC_000003.11 |
| cg15260365 | 2.89E-08 | 3.08E-09 | -6.21 | 10.1209921 | -3.72E-02 | 67771606  | 67771729  | NC_000011.9  |
| cg03859929 | 2.90E-08 | 3.09E-09 | -6.21 | 10.1201477 | -8.45E-02 | 67291247  | 67291370  | NC_000011.9  |
| cg13031167 | 2.90E-08 | 3.09E-09 | -6.21 | 10.1199785 | -1.19E-01 | 33041406  | 33041529  | NC_000006.11 |
| cg07957069 | 2.90E-08 | 3.09E-09 | -6.21 | 10.1199174 | -1.03E-01 | 101159472 | 101159595 | NC_000014.8  |
| cg27292977 | 2.90E-08 | 3.09E-09 | -6.21 | 10.1195848 | -1.45E-01 | 92305602  | 92305725  | NC_000014.8  |
| cg27591349 | 2.90E-08 | 3.09E-09 | -6.21 | 10.1187097 | -5.17E-02 | 54074250  | 54074373  | NC_000010.10 |
| cg18119085 | 2.90E-08 | 3.09E-09 | -6.21 | 10.1176647 | -2.72E-02 | 6121093   | 6121216   | NC_000007.13 |
| cg07402800 | 2.90E-08 | 3.09E-09 | -6.21 | 10.1171148 | -6.25E-02 | 145582003 | 145582126 | NC_000008.10 |
| cg04528720 | 2.91E-08 | 3.10E-09 | -6.21 | 10.1163037 | -1.07E-01 | 83962037  | 83962160  | NC_000016.9  |
| cg10187927 | 2.91E-08 | 3.10E-09 | -6.21 | 10.115908  | -1.12E-01 | 135364060 | 135364183 | NC_000005.9  |
| cg27634991 | 2.91E-08 | 3.10E-09 | -6.21 | 10.1153265 | -6.28E-02 | 137536245 | 137536368 | NC_000006.11 |
| cg11979846 | 2.91E-08 | 3.11E-09 | -6.21 | 10.113656  | -9.78E-02 | 247335702 | 247335825 | NC_000001.10 |
| cg12989498 | 2.91E-08 | 3.11E-09 | -6.21 | 10.1133793 | -1.35E-01 | 22236465  | 22236588  | NC_000022.10 |
| cg11944219 | 2.91E-08 | 3.11E-09 | -6.21 | 10.1132178 | -2.49E-02 | 112408507 | 112408630 | NC_000006.11 |
| cg26263675 | 2.92E-08 | 3.11E-09 | -6.21 | 10.1126021 | -1.07E-01 | 72743191  | 72743314  | NC_000017.10 |
| cg17541142 | 2.92E-08 | 3.11E-09 | -6.21 | 10.1124332 | -4.39E-02 | 1546826   | 1546949   | NC_000007.13 |
| cg15523177 | 2.92E-08 | 3.11E-09 | -6.21 | 10.1110218 | -4.26E-02 | 79269242  | 79269365  | NC_000017.10 |
| cg01397912 | 2.92E-08 | 3.12E-09 | -6.21 | 10.1102714 | -1.31E-01 | 55670288  | 55670411  | NC_000019.9  |
| cg04547002 | 2.92E-08 | 3.12E-09 | -6.21 | 10.1101114 | -1.13E-01 | 122551801 | 122551924 | NC_000005.9  |
| cg12723011 | 2.92E-08 | 3.12E-09 | -6.21 | 10.1096365 | -7.52E-02 | 15965102  | 15965225  | NC_000004.11 |



|            |          |          |       |            |           |           |           |              |
|------------|----------|----------|-------|------------|-----------|-----------|-----------|--------------|
| cg14064335 | 2.93E-08 | 3.12E-09 | -6.21 | 10.1086313 | -1.53E-01 | 139540822 | 139540945 | NC_000009.11 |
| cg19726343 | 2.93E-08 | 3.12E-09 | -6.21 | 10.108422  | -1.08E-01 | 7515595   | 7515718   | NC_000001.10 |
| cg15703221 | 2.93E-08 | 3.12E-09 | -6.21 | 10.1080275 | -2.58E-02 | 160919268 | 160919391 | NC_000002.11 |
| cg14500718 | 2.93E-08 | 3.12E-09 | -6.21 | 10.1079355 | -8.21E-02 | 156251456 | 156251579 | NC_000001.10 |
| cg27657525 | 2.93E-08 | 3.12E-09 | -6.21 | 10.1078884 | -4.23E-02 | 30432971  | 30433094  | NC_000019.9  |
| cg05616355 | 2.93E-08 | 3.13E-09 | -6.21 | 10.1073563 | -1.17E-01 | 124480990 | 124481113 | NC_000011.9  |
| cg12123019 | 2.93E-08 | 3.13E-09 | -6.21 | 10.1059777 | -1.59E-01 | 18197853  | 18197976  | NC_000019.9  |
| cg16672562 | 2.94E-08 | 3.13E-09 | -6.21 | 10.1056578 | -1.91E-01 | 46801672  | 46801795  | NC_000019.9  |
| cg16604566 | 2.94E-08 | 3.13E-09 | -6.21 | 10.1054357 | -1.23E-01 | 74845829  | 74845952  | NC_000018.9  |
| cg17152465 | 2.94E-08 | 3.13E-09 | -6.21 | 10.104735  | -2.60E-02 | 30390102  | 30390225  | NC_000016.9  |
| cg23232299 | 2.94E-08 | 3.14E-09 | -6.21 | 10.1042685 | -9.85E-02 | 68212170  | 68212293  | NC_000001.10 |
| cg13713010 | 2.94E-08 | 3.14E-09 | -6.21 | 10.1027469 | -9.42E-02 | 54475409  | 54475532  | NC_000012.11 |
| cg09336589 | 2.95E-08 | 3.14E-09 | -6.21 | 10.1018002 | -1.05E-01 | 7107939   | 7108062   | NC_000017.10 |
| cg03531326 | 2.95E-08 | 3.14E-09 | -6.21 | 10.1015352 | -7.57E-02 | 39443344  | 39443467  | NC_000019.9  |
| cg21887023 | 2.95E-08 | 3.15E-09 | -6.21 | 10.1004012 | -1.25E-01 | 33534982  | 33535105  | NC_000015.9  |
| cg01717246 | 2.95E-08 | 3.15E-09 | -6.21 | 10.1000057 | -5.98E-02 | 224044718 | 224044841 | NC_000001.10 |
| cg19699088 | 2.95E-08 | 3.15E-09 | -6.21 | 10.0997643 | -3.47E-02 | 15930386  | 15930509  | NC_000001.10 |
| cg09264065 | 2.95E-08 | 3.15E-09 | -6.21 | 10.0993642 | -8.55E-02 | 29460936  | 29461059  | NC_000001.10 |
| cg20110633 | 2.96E-08 | 3.16E-09 | -6.21 | 10.0981867 | -1.36E-02 | 44302906  | 44303029  | NC_000019.9  |
| cg08265915 | 2.96E-08 | 3.16E-09 | -6.21 | 10.0980511 | -1.11E-01 | 45211116  | 45211239  | NC_000010.10 |
| cg07940793 | 2.96E-08 | 3.16E-09 | -6.21 | 10.0974905 | -1.95E-02 | 79603854  | 79603977  | NC_000017.10 |
| cg03560586 | 2.96E-08 | 3.16E-09 | -6.21 | 10.0972576 | -5.22E-02 | 239334908 | 239335031 | NC_000002.11 |
| cg17786206 | 2.96E-08 | 3.16E-09 | -6.21 | 10.0966686 | -1.06E-01 | 29142254  | 29142377  | NC_000001.10 |
| cg15512851 | 2.96E-08 | 3.16E-09 | -6.21 | 10.096576  | -1.29E-01 | 36973518  | 36973641  | NC_000006.11 |
| cg14993712 | 2.96E-08 | 3.16E-09 | -6.21 | 10.0955936 | -7.46E-02 | 138720786 | 138720909 | NC_000007.13 |

|                 |          |          |       |            |           |           |           |              |
|-----------------|----------|----------|-------|------------|-----------|-----------|-----------|--------------|
| cg21295838      | 2.97E-08 | 3.17E-09 | -6.21 | 10.0947883 | -8.26E-02 | 17634713  | 17634836  | NC_000001.10 |
| cg25260865      | 2.97E-08 | 3.17E-09 | -6.21 | 10.0934293 | -6.58E-02 | 124932002 | 124932125 | NC_000003.11 |
| cg25232795      | 2.97E-08 | 3.17E-09 | -6.21 | 10.093222  | -1.02E-01 | 150860100 | 150860223 | NC_000005.9  |
| cg14590214      | 2.97E-08 | 3.17E-09 | -6.21 | 10.0924193 | -1.26E-01 | 101586790 | 101586913 | NC_000015.9  |
| cg02957620      | 2.97E-08 | 3.17E-09 | -6.21 | 10.092326  | -2.74E-02 | 15903290  | 15903413  | NC_000017.10 |
| ch.2.4543734F   | 2.97E-08 | 3.17E-09 | -6.21 | 10.0920825 | -5.39E-02 | 227865079 | 227865202 | NC_000002.11 |
| cg26458617      | 2.98E-08 | 3.18E-09 | -6.21 | 10.0912686 | -1.58E-01 | 32889213  | 32889336  | NC_000013.10 |
| cg05262634      | 2.98E-08 | 3.18E-09 | -6.21 | 10.0908807 | -3.73E-02 | 38157968  | 38158091  | NC_000001.10 |
| cg25002294      | 2.98E-08 | 3.18E-09 | -6.21 | 10.0901948 | -1.42E-01 | 228559321 | 228559444 | NC_000001.10 |
| cg14116056      | 2.98E-08 | 3.18E-09 | -6.21 | 10.0893743 | -1.37E-01 | 35043782  | 35043905  | NC_000007.13 |
| cg17921363      | 2.98E-08 | 3.18E-09 | -6.21 | 10.0893263 | -6.11E-02 | 46696742  | 46696865  | NC_000021.8  |
| cg27425314      | 2.99E-08 | 3.19E-09 | -6.21 | 10.0878288 | -6.74E-02 | 26797619  | 26797742  | NC_000001.10 |
| cg03725115      | 2.99E-08 | 3.19E-09 | -6.21 | 10.0878011 | -1.10E-01 | 30458102  | 30458225  | NC_000006.11 |
| cg22230538      | 2.99E-08 | 3.19E-09 | -6.21 | 10.0874214 | -5.61E-02 | 28258841  | 28258964  | NC_000008.10 |
| cg27648270      | 2.99E-08 | 3.19E-09 | -6.21 | 10.0865365 | -8.51E-02 | 10928172  | 10928295  | NC_000019.9  |
| cg16614500      | 2.99E-08 | 3.20E-09 | -6.21 | 10.0848852 | -5.28E-02 | 694704    | 694827    | NC_000011.9  |
| cg24504432      | 3.00E-08 | 3.20E-09 | -6.21 | 10.0841883 | -1.29E-01 | 145808810 | 145808933 | NC_000008.10 |
| cg00130778      | 3.00E-08 | 3.20E-09 | -6.21 | 10.0838902 | -1.05E-01 | 18956389  | 18956512  | NC_000022.10 |
| cg13659542      | 3.00E-08 | 3.20E-09 | -6.21 | 10.0838888 | -1.01E-01 | 31044986  | 31045109  | NC_000002.11 |
| cg00199059      | 3.00E-08 | 3.20E-09 | -6.21 | 10.0835322 | -9.57E-02 | 45317219  | 45317342  | NC_000020.10 |
| cg09664550      | 3.00E-08 | 3.20E-09 | -6.21 | 10.0829555 | -3.74E-02 | 33294358  | 33294481  | NC_000010.10 |
| cg01349901      | 3.00E-08 | 3.21E-09 | -6.21 | 10.0824806 | -9.92E-02 | 140119930 | 140120053 | NC_000009.11 |
| cg01066046      | 3.01E-08 | 3.21E-09 | -6.2  | 10.0811108 | -7.78E-02 | 33105288  | 33105411  | NC_000021.8  |
| cg13110461      | 3.01E-08 | 3.21E-09 | -6.2  | 10.0809371 | -1.20E-01 | 16475451  | 16475574  | NC_000001.10 |
| ch.16.85700017R | 3.01E-08 | 3.21E-09 | -6.2  | 10.0800936 | -1.41E-02 | 87142516  | 87142639  | NC_000016.9  |

|               |          |          |      |            |           |           |           |              |
|---------------|----------|----------|------|------------|-----------|-----------|-----------|--------------|
| cg11214532    | 3.01E-08 | 3.22E-09 | -6.2 | 10.0797841 | -1.21E-01 | 79412137  | 79412260  | NC_000017.10 |
| cg24768078    | 3.01E-08 | 3.22E-09 | -6.2 | 10.0797279 | -4.72E-02 | 12353078  | 12353201  | NC_000011.9  |
| cg24287175    | 3.01E-08 | 3.22E-09 | -6.2 | 10.0786847 | -9.69E-02 | 17713671  | 17713794  | NC_000017.10 |
| cg18403852    | 3.01E-08 | 3.22E-09 | -6.2 | 10.0784656 | -1.22E-01 | 44016328  | 44016451  | NC_000021.8  |
| cg18926021    | 3.01E-08 | 3.22E-09 | -6.2 | 10.0783754 | -2.97E-02 | 89787293  | 89787416  | NC_000015.9  |
| cg13393601    | 3.01E-08 | 3.22E-09 | -6.2 | 10.0781826 | -8.45E-02 | 69534855  | 69534978  | NC_000002.11 |
| cg26440261    | 3.01E-08 | 3.22E-09 | -6.2 | 10.0776055 | -1.31E-01 | 229594    | 229717    | NC_000007.13 |
| cg04276536    | 3.02E-08 | 3.22E-09 | -6.2 | 10.0770975 | -9.37E-02 | 57567813  | 57567936  | NC_000016.9  |
| cg12011299    | 3.02E-08 | 3.22E-09 | -6.2 | 10.0768032 | -1.77E-01 | 100065546 | 100065669 | NC_000004.11 |
| cg13234062    | 3.02E-08 | 3.23E-09 | -6.2 | 10.0765888 | -6.18E-02 | 65668299  | 65668422  | NC_000011.9  |
| cg09368075    | 3.02E-08 | 3.23E-09 | -6.2 | 10.0762552 | -1.73E-01 | 210011147 | 210011270 | NC_000002.11 |
| cg04836987    | 3.02E-08 | 3.23E-09 | -6.2 | 10.0759549 | -8.09E-02 | 95964334  | 95964457  | NC_000005.9  |
| cg19522644    | 3.02E-08 | 3.23E-09 | -6.2 | 10.0751432 | -1.65E-01 | 8717905   | 8718028   | NC_000018.9  |
| cg20683445    | 3.02E-08 | 3.23E-09 | -6.2 | 10.0747937 | -1.04E-01 | 12853879  | 12854002  | NC_000010.10 |
| cg17272843    | 3.02E-08 | 3.23E-09 | -6.2 | 10.0745067 | -5.15E-02 | 77734280  | 77734403  | NC_000011.9  |
| cg02725556    | 3.02E-08 | 3.24E-09 | -6.2 | 10.0737481 | -6.26E-02 | 42820550  | 42820673  | NC_000003.11 |
| cg02984009    | 3.03E-08 | 3.24E-09 | -6.2 | 10.0724805 | -7.96E-02 | 86850498  | 86850621  | NC_000007.13 |
| cg26645509    | 3.03E-08 | 3.24E-09 | -6.2 | 10.0722879 | -6.10E-02 | 118944144 | 118944267 | NC_000002.11 |
| cg01380194    | 3.03E-08 | 3.25E-09 | -6.2 | 10.0705763 | -1.02E-01 | 72452482  | 72452605  | NC_000011.9  |
| cg03721293    | 3.04E-08 | 3.25E-09 | -6.2 | 10.0699219 | -5.42E-02 | 90014378  | 90014501  | NC_000016.9  |
| ch.16.192535R | 3.04E-08 | 3.25E-09 | -6.2 | 10.0699125 | -1.73E-02 | 3828668   | 3828791   | NC_000016.9  |
| cg12720921    | 3.04E-08 | 3.25E-09 | -6.2 | 10.0698364 | -1.42E-01 | 40310457  | 40310580  | NC_000004.11 |
| cg04467803    | 3.04E-08 | 3.25E-09 | -6.2 | 10.0695714 | -5.20E-02 | 187457588 | 187457711 | NC_000003.11 |
| cg16577947    | 3.04E-08 | 3.25E-09 | -6.2 | 10.0692809 | -1.19E-01 | 168977235 | 168977358 | NC_000006.11 |
| cg24655706    | 3.04E-08 | 3.25E-09 | -6.2 | 10.0690601 | -1.33E-01 | 127078268 | 127078391 | NC_000007.13 |

|            |          |          |      |            |           |           |           |              |
|------------|----------|----------|------|------------|-----------|-----------|-----------|--------------|
| cg24333206 | 3.04E-08 | 3.25E-09 | -6.2 | 10.0689554 | -3.60E-02 | 140660642 | 140660765 | NC_000003.11 |
| cg07274523 | 3.04E-08 | 3.25E-09 | -6.2 | 10.0685664 | -9.68E-02 | 49395745  | 49395868  | NC_000003.11 |
| cg18565510 | 3.04E-08 | 3.25E-09 | -6.2 | 10.0683238 | -1.00E-01 | 1238702   | 1238825   | NC_000001.10 |
| cg20768342 | 3.04E-08 | 3.26E-09 | -6.2 | 10.0673616 | -6.14E-02 | 85483948  | 85484071  | NC_000001.10 |
| cg21290814 | 3.04E-08 | 3.26E-09 | -6.2 | 10.0672586 | -1.31E-01 | 18793853  | 18793976  | NC_000019.9  |
| cg15010854 | 3.04E-08 | 3.26E-09 | -6.2 | 10.0672223 | -4.44E-02 | 79008585  | 79008708  | NC_000017.10 |
| cg19511817 | 3.05E-08 | 3.26E-09 | -6.2 | 10.0666462 | -4.41E-02 | 14918783  | 14918906  | NC_000016.9  |
| cg08410227 | 3.05E-08 | 3.26E-09 | -6.2 | 10.0664474 | -9.81E-02 | 125753823 | 125753946 | NC_000010.10 |
| cg26615853 | 3.05E-08 | 3.26E-09 | -6.2 | 10.0651201 | -1.08E-01 | 79347104  | 79347227  | NC_000010.10 |
| cg17667773 | 3.05E-08 | 3.27E-09 | -6.2 | 10.0642734 | -1.72E-01 | 955700    | 955823    | NC_000007.13 |
| cg23334729 | 3.05E-08 | 3.27E-09 | -6.2 | 10.0638408 | -5.03E-02 | 2489047   | 2489170   | NC_000020.10 |
| cg20591745 | 3.05E-08 | 3.27E-09 | -6.2 | 10.0637336 | -1.49E-01 | 30079524  | 30079647  | NC_000006.11 |
| cg06485101 | 3.05E-08 | 3.27E-09 | -6.2 | 10.063533  | -1.16E-01 | 78073693  | 78073816  | NC_000017.10 |
| cg03312532 | 3.06E-08 | 3.27E-09 | -6.2 | 10.0619778 | -9.68E-02 | 90166033  | 90166156  | NC_000015.9  |
| cg12483466 | 3.06E-08 | 3.27E-09 | -6.2 | 10.0617973 | -4.01E-02 | 56546139  | 56546262  | NC_000012.11 |
| cg02962630 | 3.06E-08 | 3.27E-09 | -6.2 | 10.0617921 | -7.22E-02 | 41222776  | 41222899  | NC_000015.9  |
| cg18734472 | 3.06E-08 | 3.27E-09 | -6.2 | 10.0617842 | -1.01E-01 | 67326225  | 67326348  | NC_000011.9  |
| cg25068347 | 3.06E-08 | 3.28E-09 | -6.2 | 10.0615811 | -1.60E-01 | 128343784 | 128343907 | NC_000011.9  |
| cg05226292 | 3.06E-08 | 3.28E-09 | -6.2 | 10.0615173 | -2.67E-02 | 71520850  | 71520973  | NC_000008.10 |
| cg27539060 | 3.06E-08 | 3.28E-09 | -6.2 | 10.0615154 | -5.11E-02 | 137112464 | 137112587 | NC_000006.11 |
| cg22289662 | 3.06E-08 | 3.28E-09 | -6.2 | 10.0600857 | -5.85E-02 | 33386397  | 33386520  | NC_000006.11 |
| cg15009352 | 3.06E-08 | 3.28E-09 | -6.2 | 10.0600025 | -3.54E-02 | 22263925  | 22264048  | NC_000001.10 |
| cg07449450 | 3.06E-08 | 3.28E-09 | -6.2 | 10.0599781 | -3.80E-02 | 17566051  | 17566174  | NC_000011.9  |
| cg00359421 | 3.07E-08 | 3.28E-09 | -6.2 | 10.0596716 | -7.23E-02 | 159423044 | 159423167 | NC_000001.10 |
| cg24015081 | 3.07E-08 | 3.28E-09 | -6.2 | 10.0593603 | -1.54E-02 | 105144033 | 105144156 | NC_000014.8  |

|            |          |          |      |            |           |           |           |              |
|------------|----------|----------|------|------------|-----------|-----------|-----------|--------------|
| cg08813925 | 3.07E-08 | 3.29E-09 | -6.2 | 10.0584479 | -1.88E-01 | 31996740  | 31996863  | NC_000010.10 |
| cg09501372 | 3.07E-08 | 3.29E-09 | -6.2 | 10.0576402 | -5.10E-02 | 35463894  | 35464017  | NC_000020.10 |
| cg15696309 | 3.07E-08 | 3.29E-09 | -6.2 | 10.0574579 | -6.95E-02 | 58395628  | 58395751  | NC_000011.9  |
| cg08925066 | 3.08E-08 | 3.29E-09 | -6.2 | 10.0558387 | -3.14E-02 | 39572669  | 39572792  | NC_000014.8  |
| cg07578410 | 3.08E-08 | 3.30E-09 | -6.2 | 10.0543894 | -3.10E-02 | 171710114 | 171710237 | NC_000005.9  |
| cg25664034 | 3.08E-08 | 3.30E-09 | -6.2 | 10.0540061 | -7.79E-02 | 128469891 | 128470014 | NC_000007.13 |
| cg11660879 | 3.08E-08 | 3.30E-09 | -6.2 | 10.0537939 | -2.04E-01 | 13319417  | 13319540  | NC_000019.9  |
| cg14472062 | 3.08E-08 | 3.30E-09 | -6.2 | 10.0533531 | -8.64E-02 | 120310684 | 120310807 | NC_000009.11 |
| cg09170207 | 3.09E-08 | 3.31E-09 | -6.2 | 10.0520186 | -1.36E-01 | 71071082  | 71071205  | NC_000015.9  |
| cg22697825 | 3.09E-08 | 3.31E-09 | -6.2 | 10.051245  | -7.89E-02 | 223899853 | 223899976 | NC_000001.10 |
| cg17005273 | 3.09E-08 | 3.31E-09 | -6.2 | 10.0511269 | -1.18E-01 | 74524238  | 74524361  | NC_000017.10 |
| cg00789423 | 3.10E-08 | 3.32E-09 | -6.2 | 10.0487084 | -6.29E-02 | 45241714  | 45241837  | NC_000001.10 |
| cg16824301 | 3.10E-08 | 3.32E-09 | -6.2 | 10.0486376 | -4.54E-02 | 182573155 | 182573278 | NC_000001.10 |
| cg22548790 | 3.10E-08 | 3.32E-09 | -6.2 | 10.0484203 | -9.08E-02 | 87511439  | 87511562  | NC_000004.11 |
| cg24158844 | 3.11E-08 | 3.33E-09 | -6.2 | 10.0456022 | -1.08E-01 | 1079561   | 1079684   | NC_000001.10 |
| cg18551353 | 3.11E-08 | 3.33E-09 | -6.2 | 10.0455422 | -1.20E-01 | 49454326  | 49454449  | NC_000020.10 |
| cg14235568 | 3.11E-08 | 3.33E-09 | -6.2 | 10.0450245 | -6.35E-02 | 73774897  | 73775020  | NC_000017.10 |
| cg22199115 | 3.11E-08 | 3.33E-09 | -6.2 | 10.0449204 | -5.48E-02 | 90102575  | 90102698  | NC_000012.11 |
| cg00996315 | 3.11E-08 | 3.33E-09 | -6.2 | 10.0440383 | -5.36E-02 | 42977550  | 42977673  | NC_000017.10 |
| cg18623355 | 3.11E-08 | 3.34E-09 | -6.2 | 10.043725  | -7.17E-02 | 116808922 | 116809045 | NC_000012.11 |
| cg23880533 | 3.11E-08 | 3.34E-09 | -6.2 | 10.0434377 | -9.48E-02 | 124896079 | 124896202 | NC_000012.11 |
| cg13856812 | 3.12E-08 | 3.34E-09 | -6.2 | 10.0422498 | -1.16E-01 | 9551644   | 9551767   | NC_000017.10 |
| cg23351289 | 3.12E-08 | 3.34E-09 | -6.2 | 10.042191  | -9.75E-02 | 34849945  | 34850068  | NC_000019.9  |
| cg04999352 | 3.12E-08 | 3.34E-09 | -6.2 | 10.0414611 | -1.37E-01 | 63304614  | 63304737  | NC_000011.9  |
| cg11763800 | 3.12E-08 | 3.35E-09 | -6.2 | 10.040745  | -9.53E-02 | 105955745 | 105955868 | NC_000014.8  |

|            |          |          |       |            |           |           |           |              |
|------------|----------|----------|-------|------------|-----------|-----------|-----------|--------------|
| cg04891053 | 3.12E-08 | 3.35E-09 | -6.2  | 10.0402048 | -8.86E-02 | 161053558 | 161053681 | NC_000001.10 |
| cg19323059 | 3.13E-08 | 3.35E-09 | -6.2  | 10.0388816 | -1.30E-01 | 41749344  | 41749467  | NC_000007.13 |
| cg17321668 | 3.13E-08 | 3.35E-09 | -6.2  | 10.0386896 | -1.72E-02 | 40174330  | 40174453  | NC_000007.13 |
| cg18732869 | 3.13E-08 | 3.35E-09 | -6.2  | 10.0384955 | -4.00E-02 | 6739680   | 6739803   | NC_000019.9  |
| cg25205801 | 3.13E-08 | 3.35E-09 | -6.2  | 10.0381931 | -1.11E-01 | 179710133 | 179710256 | NC_000002.11 |
| cg05037680 | 3.13E-08 | 3.36E-09 | -6.2  | 10.0381494 | -1.84E-02 | 155579817 | 155579940 | NC_000001.10 |
| cg15615968 | 3.13E-08 | 3.36E-09 | -6.2  | 10.0365713 | -9.68E-02 | 31364468  | 31364591  | NC_000002.11 |
| cg26558287 | 3.13E-08 | 3.36E-09 | -6.2  | 10.0364294 | -1.09E-01 | 67428155  | 67428278  | NC_000016.9  |
| cg06779113 | 3.13E-08 | 3.36E-09 | -6.2  | 10.0363478 | -1.13E-01 | 228273674 | 228273797 | NC_000001.10 |
| cg09553839 | 3.13E-08 | 3.36E-09 | -6.2  | 10.0363432 | -8.89E-02 | 74358778  | 74358901  | NC_000010.10 |
| cg01076704 | 3.14E-08 | 3.36E-09 | -6.2  | 10.0356335 | -1.14E-01 | 31127744  | 31127867  | NC_000020.10 |
| cg21483906 | 3.14E-08 | 3.36E-09 | -6.2  | 10.0353159 | -6.47E-02 | 33758870  | 33758993  | NC_000003.11 |
| cg08069383 | 3.14E-08 | 3.37E-09 | -6.2  | 10.0349562 | -1.59E-01 | 126897376 | 126897499 | NC_000007.13 |
| cg14997132 | 3.14E-08 | 3.37E-09 | -6.2  | 10.0346057 | -1.64E-01 | 82771274  | 82771397  | NC_000005.9  |
| cg02958167 | 3.14E-08 | 3.37E-09 | -6.2  | 10.034431  | -3.41E-02 | 170151846 | 170151969 | NC_000006.11 |
| cg22182287 | 3.14E-08 | 3.37E-09 | -6.2  | 10.033968  | -1.21E-01 | 3452347   | 3452470   | NC_000002.11 |
| cg27282761 | 3.14E-08 | 3.37E-09 | -6.2  | 10.0333871 | -3.53E-02 | 74806951  | 74807074  | NC_000005.9  |
| cg19266578 | 3.14E-08 | 3.37E-09 | -6.2  | 10.0330669 | -1.54E-01 | 62711729  | 62711852  | NC_000020.10 |
| cg22677723 | 3.15E-08 | 3.38E-09 | -6.2  | 10.0316502 | -9.73E-02 | 20229013  | 20229136  | NC_000022.10 |
| cg07022554 | 3.15E-08 | 3.38E-09 | -6.2  | 10.0310916 | -3.71E-02 | 1993481   | 1993604   | NC_000016.9  |
| cg04340502 | 3.15E-08 | 3.38E-09 | -6.2  | 10.0304077 | -1.29E-01 | 52775209  | 52775332  | NC_000006.11 |
| cg20663376 | 3.15E-08 | 3.38E-09 | -6.2  | 10.0303958 | -1.26E-01 | 31372997  | 31373120  | NC_000015.9  |
| cg20975478 | 3.15E-08 | 3.38E-09 | -6.19 | 10.0302162 | -2.73E-02 | 44457319  | 44457442  | NC_000001.10 |
| cg23047804 | 3.15E-08 | 3.38E-09 | -6.19 | 10.0300129 | -3.68E-02 | 132073375 | 132073498 | NC_000005.9  |
| cg14798919 | 3.15E-08 | 3.38E-09 | -6.19 | 10.0298604 | -4.83E-02 | 39340631  | 39340754  | NC_000019.9  |

|            |          |          |       |            |           |           |           |              |
|------------|----------|----------|-------|------------|-----------|-----------|-----------|--------------|
| cg07006718 | 3.15E-08 | 3.38E-09 | -6.19 | 10.0295866 | -9.29E-02 | 74770589  | 74770712  | NC_000018.9  |
| cg00660009 | 3.16E-08 | 3.39E-09 | -6.19 | 10.0286548 | -8.03E-02 | 3054884   | 3055007   | NC_000006.11 |
| cg20566286 | 3.16E-08 | 3.39E-09 | -6.19 | 10.028581  | -9.10E-02 | 168785923 | 168786046 | NC_000006.11 |
| cg24399529 | 3.16E-08 | 3.39E-09 | -6.19 | 10.0280657 | -9.45E-02 | 69373153  | 69373276  | NC_000015.9  |
| cg00521428 | 3.16E-08 | 3.39E-09 | -6.19 | 10.0274101 | -9.88E-02 | 16534579  | 16534702  | NC_000001.10 |
| cg27529555 | 3.16E-08 | 3.39E-09 | -6.19 | 10.0273183 | -9.65E-02 | 205325859 | 205325982 | NC_000001.10 |
| cg09971940 | 3.16E-08 | 3.40E-09 | -6.19 | 10.0265616 | -3.77E-02 | 133372606 | 133372729 | NC_000012.11 |
| cg14694342 | 3.16E-08 | 3.40E-09 | -6.19 | 10.0262808 | -1.56E-01 | 5828172   | 5828295   | NC_000019.9  |
| cg08956463 | 3.17E-08 | 3.40E-09 | -6.19 | 10.0253211 | -1.13E-01 | 41168911  | 41169034  | NC_000006.11 |
| cg14521987 | 3.17E-08 | 3.40E-09 | -6.19 | 10.0243851 | -7.79E-02 | 129236500 | 129236623 | NC_000009.11 |
| cg17304467 | 3.17E-08 | 3.41E-09 | -6.19 | 10.0233103 | -7.86E-02 | 61110297  | 61110420  | NC_000011.9  |
| cg15504677 | 3.17E-08 | 3.41E-09 | -6.19 | 10.0229503 | -7.97E-02 | 49521513  | 49521636  | NC_000019.9  |
| cg17415451 | 3.18E-08 | 3.41E-09 | -6.19 | 10.0226823 | -1.40E-01 | 11589049  | 11589172  | NC_000005.9  |
| cg04355439 | 3.18E-08 | 3.41E-09 | -6.19 | 10.0225155 | -1.01E-01 | 2065251   | 2065374   | NC_000019.9  |
| cg21823425 | 3.18E-08 | 3.41E-09 | -6.19 | 10.0219271 | -1.42E-01 | 123757331 | 123757454 | NC_000011.9  |
| cg17186087 | 3.18E-08 | 3.41E-09 | -6.19 | 10.0209553 | -8.27E-02 | 232765416 | 232765539 | NC_000002.11 |
| cg25755191 | 3.18E-08 | 3.42E-09 | -6.19 | 10.0197631 | -9.45E-02 | 167013332 | 167013455 | NC_000001.10 |
| cg08548559 | 3.18E-08 | 3.42E-09 | -6.19 | 10.019572  | -1.45E-01 | 31686097  | 31686220  | NC_000022.10 |
| cg15923350 | 3.19E-08 | 3.42E-09 | -6.19 | 10.019406  | -9.72E-02 | 163038703 | 163038826 | NC_000001.10 |
| cg05365532 | 3.19E-08 | 3.42E-09 | -6.19 | 10.0193917 | -1.04E-01 | 55128350  | 55128473  | NC_000019.9  |
| cg00252696 | 3.19E-08 | 3.42E-09 | -6.19 | 10.018384  | -5.98E-02 | 31769601  | 31769724  | NC_000001.10 |
| cg26478107 | 3.19E-08 | 3.43E-09 | -6.19 | 10.0171275 | -1.15E-01 | 26595280  | 26595403  | NC_000006.11 |
| cg17674604 | 3.19E-08 | 3.43E-09 | -6.19 | 10.0169961 | -8.18E-02 | 22084959  | 22085082  | NC_000008.10 |
| cg04174410 | 3.19E-08 | 3.43E-09 | -6.19 | 10.0163536 | -8.52E-02 | 57832339  | 57832462  | NC_000019.9  |
| cg26904169 | 3.20E-08 | 3.43E-09 | -6.19 | 10.0159826 | -1.45E-01 | 89839865  | 89839988  | NC_000007.13 |

|                |          |          |       |            |           |           |           |              |
|----------------|----------|----------|-------|------------|-----------|-----------|-----------|--------------|
| cg05793299     | 3.20E-08 | 3.43E-09 | -6.19 | 10.0154721 | -1.65E-02 | 16481635  | 16481758  | NC_000001.10 |
| cg16763401     | 3.20E-08 | 3.44E-09 | -6.19 | 10.0146776 | -7.58E-02 | 190258603 | 190258726 | NC_000002.11 |
| cg22901337     | 3.20E-08 | 3.44E-09 | -6.19 | 10.0144179 | -2.92E-02 | 23790498  | 23790621  | NC_000014.8  |
| cg20768717     | 3.21E-08 | 3.45E-09 | -6.19 | 10.0114894 | -4.29E-02 | 65480045  | 65480168  | NC_000011.9  |
| cg01307507     | 3.21E-08 | 3.45E-09 | -6.19 | 10.0107106 | -2.17E-02 | 77751480  | 77751603  | NC_000017.10 |
| cg05091135     | 3.22E-08 | 3.46E-09 | -6.19 | 10.0093744 | -1.15E-01 | 51103373  | 51103496  | NC_000013.10 |
| cg12882103     | 3.22E-08 | 3.46E-09 | -6.19 | 10.0091543 | -5.49E-02 | 119672375 | 119672498 | NC_000006.11 |
| cg27650678     | 3.22E-08 | 3.46E-09 | -6.19 | 10.0080064 | -7.63E-02 | 66636318  | 66636441  | NC_000011.9  |
| cg23126152     | 3.22E-08 | 3.46E-09 | -6.19 | 10.0078367 | -1.02E-01 | 109221407 | 109221530 | NC_000012.11 |
| cg10456705     | 3.22E-08 | 3.46E-09 | -6.19 | 10.0073225 | -3.54E-02 | 19102203  | 19102326  | NC_000009.11 |
| cg05848175     | 3.22E-08 | 3.46E-09 | -6.19 | 10.0072543 | -1.09E-01 | 153330257 | 153330380 | NC_000001.10 |
| cg04525773     | 3.22E-08 | 3.46E-09 | -6.19 | 10.0071482 | -5.51E-02 | 87506040  | 87506163  | NC_000007.13 |
| cg14701122     | 3.23E-08 | 3.47E-09 | -6.19 | 10.0051246 | -1.61E-01 | 121890446 | 121890569 | NC_000002.11 |
| cg05483776     | 3.23E-08 | 3.47E-09 | -6.19 | 10.0050888 | -7.47E-02 | 174890487 | 174890610 | NC_000002.11 |
| cg20197130     | 3.23E-08 | 3.47E-09 | -6.19 | 10.0050362 | -1.69E-01 | 127256717 | 127256840 | NC_000012.11 |
| cg09273119     | 3.23E-08 | 3.47E-09 | -6.19 | 10.0045337 | -4.16E-02 | 35324774  | 35324897  | NC_000001.10 |
| cg05904338     | 3.23E-08 | 3.48E-09 | -6.19 | 10.0033216 | -1.50E-01 | 23546218  | 23546341  | NC_000002.11 |
| cg11050612     | 3.24E-08 | 3.48E-09 | -6.19 | 10.0030045 | -1.50E-01 | 149374066 | 149374189 | NC_000003.11 |
| cg06083412     | 3.24E-08 | 3.48E-09 | -6.19 | 10.0025291 | -1.27E-01 | 71228213  | 71228336  | NC_000008.10 |
| cg00716254     | 3.24E-08 | 3.48E-09 | -6.19 | 10.0022471 | -2.75E-02 | 122406912 | 122407035 | NC_000002.11 |
| cg14441964     | 3.24E-08 | 3.48E-09 | -6.19 | 10.0014703 | -3.62E-02 | 75910358  | 75910481  | NC_000010.10 |
| ch.3.30723819R | 3.24E-08 | 3.48E-09 | -6.19 | 10.0010058 | -3.80E-02 | 30748815  | 30748938  | NC_000003.11 |
| cg15521790     | 3.24E-08 | 3.49E-09 | -6.19 | 10.0000466 | -1.86E-01 | 95889454  | 95889577  | NC_000011.9  |
| cg03602360     | 3.25E-08 | 3.49E-09 | -6.19 | 9.9997682  | -9.92E-02 | 79664699  | 79664822  | NC_000002.11 |
| cg20826671     | 3.25E-08 | 3.49E-09 | -6.19 | 9.9992098  | -1.04E-01 | 155547491 | 155547614 | NC_000004.11 |



|            |          |          |       |           |           |           |           |              |
|------------|----------|----------|-------|-----------|-----------|-----------|-----------|--------------|
| cg20043066 | 3.25E-08 | 3.49E-09 | -6.19 | 9.9987278 | -6.44E-02 | 52467264  | 52467387  | NC_000008.10 |
| cg15034393 | 3.25E-08 | 3.50E-09 | -6.19 | 9.9981568 | -9.33E-02 | 152856773 | 152856896 | NC_000003.11 |
| cg21755457 | 3.25E-08 | 3.50E-09 | -6.19 | 9.9980097 | -4.00E-02 | 54020320  | 54020443  | NC_000012.11 |
| cg07025471 | 3.25E-08 | 3.50E-09 | -6.19 | 9.9973367 | -5.18E-02 | 56468858  | 56468981  | NC_000005.9  |
| cg09180262 | 3.25E-08 | 3.50E-09 | -6.19 | 9.9967522 | -3.11E-02 | 876870    | 876993    | NC_000001.10 |
| cg06110802 | 3.26E-08 | 3.50E-09 | -6.19 | 9.9956553 | -1.29E-01 | 152020177 | 152020300 | NC_000004.11 |
| cg24889694 | 3.26E-08 | 3.51E-09 | -6.19 | 9.9952804 | -1.55E-01 | 101522535 | 101522658 | NC_000008.10 |
| cg06668829 | 3.26E-08 | 3.51E-09 | -6.19 | 9.9951417 | -1.36E-01 | 144948781 | 144948904 | NC_000008.10 |
| cg01436424 | 3.26E-08 | 3.51E-09 | -6.19 | 9.9949073 | -9.75E-02 | 7669070   | 7669193   | NC_000001.10 |
| cg26193694 | 3.26E-08 | 3.51E-09 | -6.19 | 9.9941658 | -3.28E-02 | 6543354   | 6543477   | NC_000007.13 |
| cg10721942 | 3.26E-08 | 3.51E-09 | -6.19 | 9.9941522 | -1.22E-01 | 48474184  | 48474307  | NC_000003.11 |
| cg17165759 | 3.26E-08 | 3.51E-09 | -6.19 | 9.9938615 | -1.44E-01 | 229577027 | 229577150 | NC_000001.10 |
| cg19245120 | 3.27E-08 | 3.51E-09 | -6.19 | 9.9932731 | -1.12E-01 | 222411535 | 222411658 | NC_000002.11 |
| cg10961484 | 3.27E-08 | 3.52E-09 | -6.19 | 9.9919656 | -1.21E-01 | 120530860 | 120530983 | NC_000011.9  |
| cg05657096 | 3.27E-08 | 3.52E-09 | -6.19 | 9.9913529 | -1.14E-01 | 281424    | 281547    | NC_000016.9  |
| cg00124488 | 3.28E-08 | 3.52E-09 | -6.19 | 9.9899262 | -5.75E-02 | 31509762  | 31509885  | NC_000006.11 |
| cg07412254 | 3.28E-08 | 3.53E-09 | -6.19 | 9.9895526 | -1.42E-01 | 121223534 | 121223657 | NC_000002.11 |
| cg09614479 | 3.28E-08 | 3.53E-09 | -6.19 | 9.9888267 | -1.22E-01 | 81967536  | 81967659  | NC_000010.10 |
| cg07837433 | 3.28E-08 | 3.53E-09 | -6.19 | 9.9887785 | -9.65E-02 | 51473087  | 51473210  | NC_000019.9  |
| cg20395892 | 3.28E-08 | 3.53E-09 | -6.19 | 9.9887522 | -1.42E-01 | 66582780  | 66582903  | NC_000012.11 |
| cg14251964 | 3.28E-08 | 3.53E-09 | -6.19 | 9.9887244 | -1.09E-01 | 18396499  | 18396622  | NC_000008.10 |
| cg18109369 | 3.28E-08 | 3.53E-09 | -6.19 | 9.9885784 | -1.26E-01 | 57051243  | 57051366  | NC_000003.11 |
| cg16733866 | 3.28E-08 | 3.53E-09 | -6.19 | 9.9883527 | -5.85E-02 | 42792609  | 42792732  | NC_000021.8  |
| cg10204695 | 3.29E-08 | 3.54E-09 | -6.19 | 9.9864119 | -2.56E-02 | 111991555 | 111991678 | NC_000001.10 |
| cg08142172 | 3.29E-08 | 3.54E-09 | -6.19 | 9.9853872 | -6.26E-02 | 39695011  | 39695134  | NC_000019.9  |

|             |          |          |       |           |           |           |           |              |
|-------------|----------|----------|-------|-----------|-----------|-----------|-----------|--------------|
| cg26942392  | 3.30E-08 | 3.55E-09 | -6.19 | 9.9838631 | -6.74E-02 | 5591638   | 5591761   | NC_000020.10 |
| cg18708252  | 3.30E-08 | 3.55E-09 | -6.19 | 9.9838221 | -1.03E-01 | 39545030  | 39545153  | NC_000022.10 |
| cg22465123  | 3.30E-08 | 3.55E-09 | -6.19 | 9.9836949 | -2.63E-02 | 29598437  | 29598560  | NC_000018.9  |
| cg25284492  | 3.30E-08 | 3.55E-09 | -6.19 | 9.9834266 | -2.05E-02 | 9295432   | 9295555   | NC_000001.10 |
| cg16788391  | 3.30E-08 | 3.55E-09 | -6.19 | 9.9833042 | -1.03E-02 | 35201809  | 35201932  | NC_000020.10 |
| cg08417338  | 3.30E-08 | 3.55E-09 | -6.19 | 9.9829999 | -2.71E-02 | 43663582  | 43663705  | NC_000015.9  |
| cg14418857  | 3.30E-08 | 3.55E-09 | -6.19 | 9.9821322 | -1.35E-01 | 121120431 | 121120554 | NC_000007.13 |
| cg07236001  | 3.31E-08 | 3.56E-09 | -6.19 | 9.9788621 | -1.27E-01 | 1392360   | 1392483   | NC_000011.9  |
| cg19275220  | 3.31E-08 | 3.57E-09 | -6.19 | 9.9786764 | -1.50E-01 | 108168721 | 108168844 | NC_000007.13 |
| ch.7.84780R | 3.32E-08 | 3.57E-09 | -6.18 | 9.9772942 | -2.78E-02 | 1851537   | 1851660   | NC_000007.13 |
| cg14120896  | 3.32E-08 | 3.57E-09 | -6.18 | 9.9764371 | -1.02E-01 | 56086441  | 56086564  | NC_000019.9  |
| cg02616405  | 3.32E-08 | 3.57E-09 | -6.18 | 9.9764077 | -1.07E-01 | 1250756   | 1250879   | NC_000007.13 |
| cg02861082  | 3.32E-08 | 3.58E-09 | -6.18 | 9.9756218 | -3.76E-02 | 136633712 | 136633835 | NC_000002.11 |
| cg07669776  | 3.33E-08 | 3.59E-09 | -6.18 | 9.9718353 | -9.80E-02 | 110975691 | 110975814 | NC_000013.10 |
| cg23257461  | 3.34E-08 | 3.59E-09 | -6.18 | 9.9706697 | -9.12E-02 | 39407851  | 39407974  | NC_000001.10 |
| cg18191248  | 3.34E-08 | 3.59E-09 | -6.18 | 9.9706465 | -4.33E-02 | 90808575  | 90808698  | NC_000015.9  |
| cg23313755  | 3.34E-08 | 3.60E-09 | -6.18 | 9.9699823 | -1.13E-01 | 112180280 | 112180403 | NC_000010.10 |
| cg11511777  | 3.35E-08 | 3.61E-09 | -6.18 | 9.9677041 | -1.38E-01 | 219725959 | 219726082 | NC_000002.11 |
| cg03723730  | 3.35E-08 | 3.61E-09 | -6.18 | 9.9673093 | -8.69E-02 | 34031694  | 34031817  | NC_000006.11 |
| cg23954193  | 3.35E-08 | 3.61E-09 | -6.18 | 9.9660622 | -3.47E-02 | 180991269 | 180991392 | NC_000001.10 |
| cg27072212  | 3.35E-08 | 3.61E-09 | -6.18 | 9.966008  | -9.62E-02 | 89901087  | 89901210  | NC_000016.9  |
| cg00872170  | 3.35E-08 | 3.61E-09 | -6.18 | 9.9659197 | -8.09E-02 | 157567443 | 157567566 | NC_000007.13 |
| cg19946631  | 3.36E-08 | 3.62E-09 | -6.18 | 9.9644358 | -4.05E-02 | 120933318 | 120933441 | NC_000012.11 |
| cg03625911  | 3.36E-08 | 3.62E-09 | -6.18 | 9.9642891 | -8.72E-02 | 203155737 | 203155860 | NC_000001.10 |
| cg15026743  | 3.36E-08 | 3.62E-09 | -6.18 | 9.9635158 | -1.48E-01 | 95003968  | 95004091  | NC_000001.10 |

|            |          |          |       |           |           |           |           |              |
|------------|----------|----------|-------|-----------|-----------|-----------|-----------|--------------|
| cg05452391 | 3.36E-08 | 3.62E-09 | -6.18 | 9.9631722 | -1.23E-01 | 131781406 | 131781529 | NC_000005.9  |
| cg03243450 | 3.36E-08 | 3.62E-09 | -6.18 | 9.9627777 | -5.60E-02 | 1800782   | 1800905   | NC_000005.9  |
| cg10479629 | 3.36E-08 | 3.62E-09 | -6.18 | 9.962663  | -1.06E-01 | 36499845  | 36499968  | NC_000017.10 |
| cg03895221 | 3.37E-08 | 3.63E-09 | -6.18 | 9.9606497 | -1.11E-01 | 31717101  | 31717224  | NC_000001.10 |
| cg26940178 | 3.37E-08 | 3.63E-09 | -6.18 | 9.9606351 | -1.16E-01 | 76082888  | 76083011  | NC_000001.10 |
| cg01870619 | 3.37E-08 | 3.63E-09 | -6.18 | 9.9598519 | -2.84E-02 | 32444265  | 32444388  | NC_000005.9  |
| cg23699463 | 3.37E-08 | 3.64E-09 | -6.18 | 9.9593954 | -1.33E-01 | 127559126 | 127559249 | NC_000008.10 |
| cg05705549 | 3.38E-08 | 3.64E-09 | -6.18 | 9.9585536 | -1.07E-01 | 5094341   | 5094464   | NC_000016.9  |
| cg23847017 | 3.38E-08 | 3.64E-09 | -6.18 | 9.9583141 | -9.20E-02 | 28764854  | 28764977  | NC_000001.10 |
| cg02385728 | 3.38E-08 | 3.64E-09 | -6.18 | 9.9582615 | -1.23E-01 | 133803377 | 133803500 | NC_000009.11 |
| cg02332491 | 3.38E-08 | 3.64E-09 | -6.18 | 9.9571806 | -1.15E-01 | 47180824  | 47180947  | NC_000012.11 |
| cg24481882 | 3.38E-08 | 3.65E-09 | -6.18 | 9.9570085 | -1.19E-01 | 136450701 | 136450824 | NC_000006.11 |
| cg24902842 | 3.38E-08 | 3.65E-09 | -6.18 | 9.9565388 | -1.10E-01 | 49850507  | 49850630  | NC_000003.11 |
| cg01285435 | 3.39E-08 | 3.65E-09 | -6.18 | 9.954655  | -5.70E-02 | 145654565 | 145654688 | NC_000008.10 |
| cg02034720 | 3.39E-08 | 3.66E-09 | -6.18 | 9.953893  | -2.02E-02 | 41925147  | 41925270  | NC_000005.9  |
| cg04303509 | 3.39E-08 | 3.66E-09 | -6.18 | 9.9536012 | -1.52E-01 | 35453690  | 35453813  | NC_000019.9  |
| cg25651608 | 3.39E-08 | 3.66E-09 | -6.18 | 9.9526883 | -7.62E-02 | 42073868  | 42073991  | NC_000003.11 |
| cg08906309 | 3.40E-08 | 3.66E-09 | -6.18 | 9.9523649 | -1.33E-01 | 8263420   | 8263543   | NC_000017.10 |
| cg08969922 | 3.40E-08 | 3.66E-09 | -6.18 | 9.9520599 | -1.06E-01 | 145642114 | 145642237 | NC_000008.10 |
| cg01331461 | 3.40E-08 | 3.66E-09 | -6.18 | 9.95198   | -1.22E-01 | 45345152  | 45345275  | NC_000021.8  |
| cg06747831 | 3.40E-08 | 3.66E-09 | -6.18 | 9.9519447 | -4.37E-02 | 58825870  | 58825993  | NC_000011.9  |
| cg26234644 | 3.40E-08 | 3.67E-09 | -6.18 | 9.9512101 | -1.33E-01 | 10634427  | 10634550  | NC_000017.10 |
| cg07793033 | 3.40E-08 | 3.67E-09 | -6.18 | 9.9511181 | -1.31E-01 | 85256423  | 85256546  | NC_000016.9  |
| cg21040094 | 3.40E-08 | 3.67E-09 | -6.18 | 9.9508471 | -1.51E-01 | 78475995  | 78476118  | NC_000017.10 |
| cg15233074 | 3.40E-08 | 3.67E-09 | -6.18 | 9.9505686 | -1.31E-01 | 3288101   | 3288224   | NC_000004.11 |

|            |          |          |       |           |           |           |           |              |
|------------|----------|----------|-------|-----------|-----------|-----------|-----------|--------------|
| cg27092704 | 3.40E-08 | 3.67E-09 | -6.18 | 9.9496353 | -1.30E-01 | 153066830 | 153066953 | NC_000003.11 |
| cg07747553 | 3.41E-08 | 3.67E-09 | -6.18 | 9.9493576 | -7.44E-02 | 35935982  | 35936105  | NC_000022.10 |
| cg03520342 | 3.41E-08 | 3.68E-09 | -6.18 | 9.9487479 | -1.11E-01 | 32920784  | 32920907  | NC_000006.11 |
| cg19622714 | 3.41E-08 | 3.68E-09 | -6.18 | 9.9480816 | -9.78E-02 | 30572912  | 30573035  | NC_000016.9  |
| cg24620463 | 3.41E-08 | 3.68E-09 | -6.18 | 9.9476841 | -5.12E-02 | 95917902  | 95918025  | NC_000007.13 |
| cg04424119 | 3.41E-08 | 3.68E-09 | -6.18 | 9.947358  | -1.17E-01 | 8403680   | 8403803   | NC_000001.10 |
| cg15984516 | 3.41E-08 | 3.68E-09 | -6.18 | 9.9472105 | -9.46E-02 | 100680261 | 100680384 | NC_000014.8  |
| cg22310062 | 3.41E-08 | 3.68E-09 | -6.18 | 9.9467927 | -1.97E-02 | 19181025  | 19181148  | NC_000018.9  |
| cg21136005 | 3.41E-08 | 3.68E-09 | -6.18 | 9.9466182 | -1.74E-02 | 31494527  | 31494650  | NC_000014.8  |
| cg17341955 | 3.41E-08 | 3.68E-09 | -6.18 | 9.9465653 | -5.99E-02 | 43662933  | 43663056  | NC_000003.11 |
| cg00719626 | 3.42E-08 | 3.69E-09 | -6.18 | 9.946033  | -1.02E-01 | 15575685  | 15575808  | NC_000019.9  |
| cg25106635 | 3.42E-08 | 3.69E-09 | -6.18 | 9.9447812 | -2.52E-02 | 2510001   | 2510124   | NC_000016.9  |
| cg05368910 | 3.42E-08 | 3.69E-09 | -6.18 | 9.9444045 | -6.60E-02 | 134911061 | 134911184 | NC_000006.11 |
| cg06588028 | 3.42E-08 | 3.70E-09 | -6.18 | 9.9432835 | -9.29E-02 | 6745568   | 6745691   | NC_000012.11 |
| cg24415278 | 3.43E-08 | 3.70E-09 | -6.18 | 9.9431582 | -5.98E-02 | 108786955 | 108787078 | NC_000011.9  |
| cg23969554 | 3.43E-08 | 3.70E-09 | -6.18 | 9.9421831 | -1.01E-01 | 2979311   | 2979434   | NC_000001.10 |
| cg21686812 | 3.43E-08 | 3.70E-09 | -6.18 | 9.9421321 | -1.35E-01 | 168078911 | 168079034 | NC_000006.11 |
| cg10282807 | 3.43E-08 | 3.70E-09 | -6.18 | 9.9415951 | -1.05E-01 | 6756551   | 6756674   | NC_000012.11 |
| cg15645888 | 3.43E-08 | 3.70E-09 | -6.18 | 9.9413512 | -7.68E-02 | 28285957  | 28286080  | NC_000008.10 |
| cg00957686 | 3.43E-08 | 3.71E-09 | -6.18 | 9.9411012 | -5.15E-02 | 15161139  | 15161262  | NC_000018.9  |
| cg19183542 | 3.43E-08 | 3.71E-09 | -6.18 | 9.9406876 | -5.45E-02 | 49448572  | 49448695  | NC_000015.9  |
| cg08525430 | 3.44E-08 | 3.71E-09 | -6.18 | 9.9397277 | -6.54E-02 | 52900882  | 52901005  | NC_000019.9  |
| cg17337807 | 3.44E-08 | 3.71E-09 | -6.18 | 9.9394489 | -5.15E-02 | 52546246  | 52546369  | NC_000012.11 |
| cg26325497 | 3.44E-08 | 3.71E-09 | -6.18 | 9.9392474 | -7.27E-02 | 54199538  | 54199661  | NC_000019.9  |
| cg25272143 | 3.44E-08 | 3.71E-09 | -6.18 | 9.938894  | -1.70E-01 | 62211990  | 62212113  | NC_000011.9  |

|            |          |          |       |           |           |           |           |              |
|------------|----------|----------|-------|-----------|-----------|-----------|-----------|--------------|
| cg03535079 | 3.44E-08 | 3.72E-09 | -6.18 | 9.9379988 | -1.07E-01 | 48523498  | 48523621  | NC_000008.10 |
| cg23024047 | 3.44E-08 | 3.72E-09 | -6.18 | 9.9378512 | -1.39E-01 | 5505983   | 5506106   | NC_000003.11 |
| cg18336435 | 3.44E-08 | 3.72E-09 | -6.18 | 9.9374592 | -4.81E-02 | 60884637  | 60884760  | NC_000015.9  |
| cg21266845 | 3.44E-08 | 3.72E-09 | -6.18 | 9.9374198 | -7.05E-02 | 168698479 | 168698602 | NC_000001.10 |
| cg11045524 | 3.45E-08 | 3.72E-09 | -6.18 | 9.9364996 | -4.10E-02 | 133320781 | 133320904 | NC_000009.11 |
| cg24146288 | 3.45E-08 | 3.73E-09 | -6.18 | 9.935791  | -1.17E-01 | 42302342  | 42302465  | NC_000015.9  |
| cg06468347 | 3.45E-08 | 3.73E-09 | -6.18 | 9.9353693 | -1.46E-01 | 3705875   | 3705998   | NC_000017.10 |
| cg18163699 | 3.45E-08 | 3.73E-09 | -6.18 | 9.9349821 | -3.93E-02 | 61659072  | 61659195  | NC_000011.9  |
| cg16869108 | 3.45E-08 | 3.73E-09 | -6.18 | 9.9349704 | -1.10E-01 | 10184319  | 10184442  | NC_000003.11 |
| cg20837557 | 3.45E-08 | 3.73E-09 | -6.18 | 9.9342808 | -1.26E-01 | 146864278 | 146864401 | NC_000006.11 |
| cg24969222 | 3.46E-08 | 3.74E-09 | -6.18 | 9.9332689 | -1.28E-01 | 143861209 | 143861332 | NC_000003.11 |
| cg21736592 | 3.46E-08 | 3.74E-09 | -6.18 | 9.9326253 | -6.91E-02 | 37678450  | 37678573  | NC_000022.10 |
| cg06840930 | 3.46E-08 | 3.74E-09 | -6.18 | 9.9319072 | -1.17E-01 | 38642659  | 38642782  | NC_000017.10 |
| cg13877005 | 3.46E-08 | 3.74E-09 | -6.18 | 9.9312611 | -6.48E-02 | 44866637  | 44866760  | NC_000009.11 |
| cg23646337 | 3.47E-08 | 3.75E-09 | -6.18 | 9.9293542 | -6.28E-02 | 42817556  | 42817679  | NC_000019.9  |
| cg04618386 | 3.47E-08 | 3.75E-09 | -6.18 | 9.9288642 | -1.34E-01 | 8768440   | 8768563   | NC_000002.11 |
| cg23930083 | 3.47E-08 | 3.75E-09 | -6.18 | 9.9281808 | -3.25E-02 | 100816912 | 100817035 | NC_000007.13 |
| cg24875595 | 3.48E-08 | 3.76E-09 | -6.18 | 9.9278974 | -1.24E-01 | 79363761  | 79363884  | NC_000002.11 |
| cg12149777 | 3.48E-08 | 3.76E-09 | -6.18 | 9.927637  | -3.95E-02 | 139937459 | 139937582 | NC_000004.11 |
| cg01168339 | 3.48E-08 | 3.76E-09 | -6.18 | 9.9272769 | -1.23E-01 | 120935726 | 120935849 | NC_000012.11 |
| cg10821925 | 3.48E-08 | 3.76E-09 | -6.18 | 9.9269215 | -1.50E-02 | 29533733  | 29533856  | NC_000012.11 |
| cg11705167 | 3.48E-08 | 3.76E-09 | -6.18 | 9.9269007 | -1.04E-01 | 86001364  | 86001487  | NC_000010.10 |
| cg11229399 | 3.48E-08 | 3.76E-09 | -6.17 | 9.9264327 | -8.90E-02 | 228689056 | 228689179 | NC_000001.10 |
| cg09155025 | 3.48E-08 | 3.76E-09 | -6.17 | 9.9262653 | -1.22E-01 | 145642024 | 145642147 | NC_000008.10 |
| cg15743358 | 3.48E-08 | 3.76E-09 | -6.17 | 9.9259122 | -4.99E-02 | 28303923  | 28304046  | NC_000006.11 |

|            |          |          |       |           |           |           |           |              |
|------------|----------|----------|-------|-----------|-----------|-----------|-----------|--------------|
| cg01126095 | 3.48E-08 | 3.76E-09 | -6.17 | 9.9258469 | -1.21E-01 | 153665707 | 153665830 | NC_000005.9  |
| cg08321942 | 3.48E-08 | 3.77E-09 | -6.17 | 9.9251441 | -1.28E-01 | 34310625  | 34310748  | NC_000019.9  |
| cg02557269 | 3.48E-08 | 3.77E-09 | -6.17 | 9.9249801 | -3.05E-02 | 54826467  | 54826590  | NC_000007.13 |
| cg01437571 | 3.49E-08 | 3.77E-09 | -6.17 | 9.9246647 | -4.45E-02 | 33792148  | 33792271  | NC_000019.9  |
| cg12598340 | 3.49E-08 | 3.77E-09 | -6.17 | 9.9245592 | -6.66E-02 | 33367416  | 33367539  | NC_000001.10 |
| cg09766628 | 3.49E-08 | 3.77E-09 | -6.17 | 9.9243478 | -3.16E-02 | 4634728   | 4634851   | NC_000017.10 |
| cg02400092 | 3.49E-08 | 3.77E-09 | -6.17 | 9.9232722 | -1.17E-01 | 130185384 | 130185507 | NC_000011.9  |
| cg09077966 | 3.49E-08 | 3.77E-09 | -6.17 | 9.9231537 | -3.15E-02 | 89724782  | 89724905  | NC_000016.9  |
| cg09363068 | 3.50E-08 | 3.78E-09 | -6.17 | 9.9213048 | -1.44E-01 | 1004748   | 1004871   | NC_000007.13 |
| cg18919225 | 3.50E-08 | 3.78E-09 | -6.17 | 9.9210907 | -6.69E-02 | 103311494 | 103311617 | NC_000012.11 |
| cg21878902 | 3.50E-08 | 3.78E-09 | -6.17 | 9.9210363 | -5.72E-02 | 13068309  | 13068432  | NC_000019.9  |
| cg16086588 | 3.50E-08 | 3.79E-09 | -6.17 | 9.9200557 | -3.48E-02 | 96651424  | 96651547  | NC_000014.8  |
| cg00418735 | 3.50E-08 | 3.79E-09 | -6.17 | 9.9190744 | -1.06E-01 | 60791033  | 60791156  | NC_000020.10 |
| cg12315011 | 3.51E-08 | 3.79E-09 | -6.17 | 9.9184571 | -8.91E-02 | 161047106 | 161047229 | NC_000004.11 |
| cg17929169 | 3.51E-08 | 3.79E-09 | -6.17 | 9.9182698 | -1.66E-01 | 112195522 | 112195645 | NC_000006.11 |
| cg02589685 | 3.51E-08 | 3.79E-09 | -6.17 | 9.9181309 | -1.44E-01 | 2889629   | 2889752   | NC_000011.9  |
| cg09444637 | 3.51E-08 | 3.79E-09 | -6.17 | 9.917984  | -3.54E-02 | 98503725  | 98503848  | NC_000015.9  |
| cg11307417 | 3.51E-08 | 3.80E-09 | -6.17 | 9.9169234 | -1.14E-01 | 48310616  | 48310739  | NC_000003.11 |
| cg04034517 | 3.51E-08 | 3.80E-09 | -6.17 | 9.9165682 | -9.53E-02 | 76262877  | 76263000  | NC_000010.10 |
| cg00677272 | 3.51E-08 | 3.80E-09 | -6.17 | 9.9159934 | -1.50E-01 | 59213434  | 59213557  | NC_000014.8  |
| cg14538785 | 3.52E-08 | 3.80E-09 | -6.17 | 9.9156517 | -1.42E-01 | 112112130 | 112112253 | NC_000009.11 |
| cg01790464 | 3.52E-08 | 3.80E-09 | -6.17 | 9.9156293 | -9.73E-02 | 23623935  | 23624058  | NC_000014.8  |
| cg16144447 | 3.52E-08 | 3.81E-09 | -6.17 | 9.9136818 | -3.82E-02 | 36184773  | 36184896  | NC_000001.10 |
| cg11411705 | 3.53E-08 | 3.82E-09 | -6.17 | 9.9121853 | -1.18E-01 | 82246287  | 82246410  | NC_000010.10 |
| cg02607779 | 3.53E-08 | 3.82E-09 | -6.17 | 9.9119627 | -6.46E-02 | 208030673 | 208030796 | NC_000002.11 |

|            |          |          |       |           |           |           |           |              |
|------------|----------|----------|-------|-----------|-----------|-----------|-----------|--------------|
| cg12196294 | 3.53E-08 | 3.82E-09 | -6.17 | 9.9111244 | -1.25E-01 | 129575053 | 129575176 | NC_000003.11 |
| cg08631427 | 3.53E-08 | 3.82E-09 | -6.17 | 9.910931  | -3.64E-02 | 150346858 | 150346981 | NC_000006.11 |
| cg15689795 | 3.53E-08 | 3.82E-09 | -6.17 | 9.9108155 | -1.05E-01 | 2439478   | 2439601   | NC_000004.11 |
| cg17840178 | 3.53E-08 | 3.82E-09 | -6.17 | 9.9104899 | -5.79E-02 | 30709803  | 30709926  | NC_000006.11 |
| cg01326048 | 3.53E-08 | 3.82E-09 | -6.17 | 9.9101378 | -1.25E-01 | 84560751  | 84560874  | NC_000016.9  |
| cg09962952 | 3.54E-08 | 3.83E-09 | -6.17 | 9.9095961 | -1.46E-01 | 6753024   | 6753147   | NC_000019.9  |
| cg04303920 | 3.54E-08 | 3.83E-09 | -6.17 | 9.9093103 | -8.11E-02 | 73951939  | 73952062  | NC_000006.11 |
| cg11647108 | 3.54E-08 | 3.83E-09 | -6.17 | 9.9076422 | -1.34E-01 | 81967516  | 81967639  | NC_000010.10 |
| cg24674635 | 3.54E-08 | 3.84E-09 | -6.17 | 9.9071043 | -6.82E-02 | 6750696   | 6750819   | NC_000020.10 |
| cg24427243 | 3.55E-08 | 3.84E-09 | -6.17 | 9.9064783 | -1.20E-01 | 12128100  | 12128223  | NC_000001.10 |
| cg13978325 | 3.55E-08 | 3.84E-09 | -6.17 | 9.906116  | -3.53E-02 | 137218288 | 137218411 | NC_000009.11 |
| cg22892110 | 3.55E-08 | 3.84E-09 | -6.17 | 9.9053444 | -8.95E-02 | 144798631 | 144798754 | NC_000008.10 |
| cg13930468 | 3.55E-08 | 3.84E-09 | -6.17 | 9.9051262 | -2.33E-02 | 18022372  | 18022495  | NC_000004.11 |
| cg03245218 | 3.56E-08 | 3.86E-09 | -6.17 | 9.9022721 | -1.12E-01 | 3666271   | 3666394   | NC_000011.9  |
| cg08241307 | 3.56E-08 | 3.86E-09 | -6.17 | 9.9016411 | -1.17E-01 | 2212225   | 2212348   | NC_000011.9  |
| cg22583147 | 3.57E-08 | 3.86E-09 | -6.17 | 9.9005791 | -1.23E-01 | 44331824  | 44331947  | NC_000003.11 |
| cg25756398 | 3.57E-08 | 3.86E-09 | -6.17 | 9.9005058 | -3.82E-02 | 93474621  | 93474744  | NC_000011.9  |
| cg21026086 | 3.57E-08 | 3.87E-09 | -6.17 | 9.8993768 | -1.83E-02 | 42939820  | 42939943  | NC_000020.10 |
| cg02271139 | 3.57E-08 | 3.87E-09 | -6.17 | 9.8992264 | -1.26E-01 | 79110023  | 79110146  | NC_000017.10 |
| cg21927177 | 3.58E-08 | 3.88E-09 | -6.17 | 9.8964419 | -6.59E-02 | 65172436  | 65172559  | NC_000014.8  |
| cg14688588 | 3.58E-08 | 3.88E-09 | -6.17 | 9.8956283 | -8.22E-02 | 184870705 | 184870828 | NC_000003.11 |
| cg16358099 | 3.59E-08 | 3.89E-09 | -6.17 | 9.8945758 | -7.98E-02 | 95136834  | 95136957  | NC_000010.10 |
| cg24798047 | 3.59E-08 | 3.89E-09 | -6.17 | 9.8944657 | -1.41E-01 | 204183655 | 204183778 | NC_000001.10 |
| cg12603531 | 3.59E-08 | 3.89E-09 | -6.17 | 9.8943178 | -4.64E-02 | 139258402 | 139258525 | NC_000009.11 |
| cg09515568 | 3.59E-08 | 3.89E-09 | -6.17 | 9.8942935 | -3.12E-02 | 120101875 | 120101998 | NC_000010.10 |

|            |          |          |       |           |           |           |           |              |
|------------|----------|----------|-------|-----------|-----------|-----------|-----------|--------------|
| cg23636802 | 3.59E-08 | 3.89E-09 | -6.17 | 9.8939944 | -1.25E-01 | 32054441  | 32054564  | NC_000006.11 |
| cg13597564 | 3.59E-08 | 3.89E-09 | -6.17 | 9.8938587 | -5.93E-02 | 49851942  | 49852065  | NC_000003.11 |
| cg25215298 | 3.59E-08 | 3.89E-09 | -6.17 | 9.8937797 | -5.92E-02 | 860022    | 860145    | NC_000001.10 |
| cg15374518 | 3.59E-08 | 3.89E-09 | -6.17 | 9.8932729 | -1.27E-01 | 159067684 | 159067807 | NC_000006.11 |
| cg24867501 | 3.59E-08 | 3.89E-09 | -6.17 | 9.8928064 | -1.09E-01 | 50925337  | 50925460  | NC_000022.10 |
| cg01927373 | 3.60E-08 | 3.90E-09 | -6.17 | 9.8921043 | -1.17E-01 | 82407884  | 82408007  | NC_000004.11 |
| cg17096807 | 3.60E-08 | 3.90E-09 | -6.17 | 9.891933  | -1.63E-01 | 6667374   | 6667497   | NC_000012.11 |
| cg19560656 | 3.60E-08 | 3.90E-09 | -6.17 | 9.8918606 | -7.59E-02 | 14444267  | 14444390  | NC_000019.9  |
| cg05647567 | 3.60E-08 | 3.90E-09 | -6.17 | 9.8916167 | -1.09E-01 | 172222550 | 172222673 | NC_000005.9  |
| cg05362669 | 3.60E-08 | 3.90E-09 | -6.17 | 9.8915219 | -2.37E-02 | 61547285  | 61547408  | NC_000003.11 |
| cg04835091 | 3.60E-08 | 3.90E-09 | -6.17 | 9.8912183 | -1.24E-01 | 35406     | 35529     | NC_000017.10 |
| cg08165083 | 3.60E-08 | 3.90E-09 | -6.17 | 9.8906638 | -1.39E-01 | 10589400  | 10589523  | NC_000001.10 |
| cg07231132 | 3.60E-08 | 3.90E-09 | -6.17 | 9.8902213 | -1.65E-02 | 48350498  | 48350621  | NC_000017.10 |
| cg05953598 | 3.60E-08 | 3.90E-09 | -6.17 | 9.8901195 | -2.46E-02 | 184433249 | 184433372 | NC_000003.11 |
| cg06200244 | 3.61E-08 | 3.91E-09 | -6.17 | 9.8874557 | -1.61E-01 | 12862337  | 12862460  | NC_000002.11 |
| cg00106744 | 3.61E-08 | 3.92E-09 | -6.17 | 9.8869262 | -5.59E-02 | 27106928  | 27107051  | NC_000021.8  |
| cg05210886 | 3.61E-08 | 3.92E-09 | -6.17 | 9.8869256 | -3.59E-02 | 245133216 | 245133339 | NC_000001.10 |
| cg09211429 | 3.62E-08 | 3.92E-09 | -6.17 | 9.8859036 | -3.07E-02 | 6748710   | 6748833   | NC_000020.10 |
| cg07138024 | 3.62E-08 | 3.92E-09 | -6.17 | 9.8855944 | -1.54E-01 | 25608323  | 25608446  | NC_000007.13 |
| cg08834573 | 3.62E-08 | 3.93E-09 | -6.17 | 9.8846776 | -1.02E-01 | 77005666  | 77005789  | NC_000010.10 |
| cg24516901 | 3.62E-08 | 3.93E-09 | -6.17 | 9.8836021 | -1.50E-01 | 225266801 | 225266924 | NC_000002.11 |
| cg04550823 | 3.62E-08 | 3.93E-09 | -6.17 | 9.8835672 | -1.09E-01 | 87617916  | 87618039  | NC_000001.10 |
| cg26813458 | 3.63E-08 | 3.93E-09 | -6.17 | 9.8831869 | -1.19E-01 | 42260485  | 42260608  | NC_000019.9  |
| cg01739965 | 3.63E-08 | 3.93E-09 | -6.17 | 9.8825672 | -3.95E-02 | 64246297  | 64246420  | NC_000002.11 |
| cg08821656 | 3.63E-08 | 3.94E-09 | -6.17 | 9.8812554 | -1.71E-01 | 76373091  | 76373214  | NC_000005.9  |



|            |          |          |       |           |           |           |           |              |
|------------|----------|----------|-------|-----------|-----------|-----------|-----------|--------------|
| cg10109215 | 3.64E-08 | 3.95E-09 | -6.17 | 9.8797542 | -5.78E-02 | 30605810  | 30605933  | NC_000020.10 |
| cg04680535 | 3.64E-08 | 3.95E-09 | -6.17 | 9.8795796 | -9.18E-02 | 4066091   | 4066214   | NC_000007.13 |
| cg23920246 | 3.64E-08 | 3.95E-09 | -6.17 | 9.8783847 | -1.16E-01 | 113398727 | 113398850 | NC_000002.11 |
| cg17656763 | 3.64E-08 | 3.95E-09 | -6.17 | 9.8782404 | -1.37E-01 | 65927079  | 65927202  | NC_000012.11 |
| cg22724765 | 3.65E-08 | 3.96E-09 | -6.17 | 9.8769053 | -1.31E-01 | 43397572  | 43397695  | NC_000005.9  |
| cg15933729 | 3.65E-08 | 3.96E-09 | -6.17 | 9.8766806 | -7.87E-02 | 27504612  | 27504735  | NC_000011.9  |
| cg02044895 | 3.65E-08 | 3.96E-09 | -6.17 | 9.8766205 | -1.61E-01 | 58343318  | 58343441  | NC_000011.9  |
| cg19658829 | 3.65E-08 | 3.96E-09 | -6.17 | 9.8763354 | -2.21E-02 | 125399894 | 125400017 | NC_000012.11 |
| cg17263053 | 3.65E-08 | 3.96E-09 | -6.17 | 9.8755333 | -6.65E-02 | 26785187  | 26785310  | NC_000002.11 |
| cg09918747 | 3.65E-08 | 3.96E-09 | -6.17 | 9.8753119 | -2.37E-02 | 179105170 | 179105293 | NC_000005.9  |
| cg12298241 | 3.66E-08 | 3.97E-09 | -6.16 | 9.8730015 | -1.18E-01 | 30638129  | 30638252  | NC_000020.10 |
| cg02164153 | 3.66E-08 | 3.97E-09 | -6.16 | 9.872922  | -3.83E-02 | 172068145 | 172068268 | NC_000005.9  |
| cg05059451 | 3.66E-08 | 3.97E-09 | -6.16 | 9.8727259 | -1.04E-01 | 13011156  | 13011279  | NC_000011.9  |
| cg03161309 | 3.67E-08 | 3.98E-09 | -6.16 | 9.8714331 | -1.28E-01 | 6563585   | 6563708   | NC_000017.10 |
| cg07241908 | 3.67E-08 | 3.98E-09 | -6.16 | 9.8710186 | -1.02E-01 | 56284622  | 56284745  | NC_000008.10 |
| cg25343204 | 3.67E-08 | 3.98E-09 | -6.16 | 9.8710142 | -1.47E-01 | 16841311  | 16841434  | NC_000007.13 |
| cg20769856 | 3.67E-08 | 3.98E-09 | -6.16 | 9.8708956 | -1.62E-01 | 31422123  | 31422246  | NC_000013.10 |
| cg21595543 | 3.67E-08 | 3.98E-09 | -6.16 | 9.870589  | -2.11E-02 | 196295373 | 196295496 | NC_000003.11 |
| cg11638320 | 3.67E-08 | 3.98E-09 | -6.16 | 9.8705448 | -9.55E-02 | 150638295 | 150638418 | NC_000003.11 |
| cg16516556 | 3.67E-08 | 3.98E-09 | -6.16 | 9.8700842 | -1.79E-02 | 55008180  | 55008303  | NC_000001.10 |
| cg17501828 | 3.68E-08 | 3.99E-09 | -6.16 | 9.8684921 | -5.52E-02 | 567358    | 567481    | NC_000001.10 |
| cg04742977 | 3.69E-08 | 4.01E-09 | -6.16 | 9.8647693 | -1.21E-01 | 91127460  | 91127583  | NC_000014.8  |
| cg13940218 | 3.69E-08 | 4.01E-09 | -6.16 | 9.8647389 | -5.98E-02 | 22207207  | 22207330  | NC_000001.10 |
| cg26804595 | 3.69E-08 | 4.01E-09 | -6.16 | 9.8639366 | -8.86E-02 | 749581    | 749704    | NC_000016.9  |
| cg03506193 | 3.70E-08 | 4.01E-09 | -6.16 | 9.8634773 | -8.01E-02 | 104033864 | 104033987 | NC_000008.10 |

|            |          |          |       |           |           |           |           |              |
|------------|----------|----------|-------|-----------|-----------|-----------|-----------|--------------|
| cg22275321 | 3.70E-08 | 4.01E-09 | -6.16 | 9.8633726 | -6.79E-02 | 9732290   | 9732413   | NC_000019.9  |
| cg24544047 | 3.70E-08 | 4.01E-09 | -6.16 | 9.8633127 | -1.23E-01 | 101927904 | 101928027 | NC_000007.13 |
| cg12719510 | 3.70E-08 | 4.01E-09 | -6.16 | 9.8630981 | -2.76E-02 | 155024394 | 155024517 | NC_000001.10 |
| cg10811945 | 3.70E-08 | 4.01E-09 | -6.16 | 9.8628499 | -9.96E-02 | 156784913 | 156785036 | NC_000001.10 |
| cg20629923 | 3.70E-08 | 4.02E-09 | -6.16 | 9.8625856 | -3.00E-02 | 30594955  | 30595078  | NC_000006.11 |
| cg16488580 | 3.70E-08 | 4.02E-09 | -6.16 | 9.8622313 | -8.29E-02 | 173097570 | 173097693 | NC_000005.9  |
| cg24659201 | 3.71E-08 | 4.02E-09 | -6.16 | 9.8604786 | -3.56E-02 | 133173718 | 133173841 | NC_000002.11 |
| cg11377213 | 3.71E-08 | 4.02E-09 | -6.16 | 9.8602277 | -1.37E-01 | 69370218  | 69370341  | NC_000003.11 |
| cg23606079 | 3.71E-08 | 4.03E-09 | -6.16 | 9.8600531 | -1.11E-01 | 84853871  | 84853994  | NC_000016.9  |
| cg15982419 | 3.71E-08 | 4.03E-09 | -6.16 | 9.8596944 | -1.04E-01 | 9474707   | 9474830   | NC_000018.9  |
| cg22261866 | 3.71E-08 | 4.03E-09 | -6.16 | 9.8596377 | -4.04E-02 | 187475891 | 187476014 | NC_000004.11 |
| cg17489312 | 3.71E-08 | 4.03E-09 | -6.16 | 9.8590974 | -1.09E-01 | 9376039   | 9376162   | NC_000001.10 |
| cg24960799 | 3.71E-08 | 4.03E-09 | -6.16 | 9.8588331 | -1.61E-01 | 24908812  | 24908935  | NC_000006.11 |
| cg14407437 | 3.71E-08 | 4.03E-09 | -6.16 | 9.8581402 | -1.72E-01 | 31845923  | 31846046  | NC_000001.10 |
| cg14646613 | 3.71E-08 | 4.03E-09 | -6.16 | 9.8581244 | -7.77E-02 | 110412708 | 110412831 | NC_000009.11 |
| cg09569432 | 3.72E-08 | 4.04E-09 | -6.16 | 9.85736   | -1.04E-01 | 39826668  | 39826791  | NC_000019.9  |
| cg25214561 | 3.72E-08 | 4.04E-09 | -6.16 | 9.8572759 | -1.03E-01 | 11494984  | 11495107  | NC_000003.11 |
| cg00087425 | 3.72E-08 | 4.04E-09 | -6.16 | 9.8566785 | -1.45E-01 | 22766829  | 22766952  | NC_000007.13 |
| cg02045948 | 3.73E-08 | 4.05E-09 | -6.16 | 9.8541939 | -8.78E-02 | 32857317  | 32857440  | NC_000003.11 |
| cg23894948 | 3.73E-08 | 4.05E-09 | -6.16 | 9.8541839 | -9.91E-02 | 21387055  | 21387178  | NC_000022.10 |
| cg26862286 | 3.73E-08 | 4.05E-09 | -6.16 | 9.8541264 | -1.22E-01 | 232330307 | 232330430 | NC_000002.11 |
| cg13026729 | 3.73E-08 | 4.05E-09 | -6.16 | 9.8539935 | -8.16E-02 | 159240774 | 159240897 | NC_000006.11 |
| cg24598495 | 3.73E-08 | 4.05E-09 | -6.16 | 9.8538423 | -1.16E-01 | 37064804  | 37064927  | NC_000013.10 |
| cg08519643 | 3.73E-08 | 4.05E-09 | -6.16 | 9.8538156 | -7.64E-02 | 84030854  | 84030977  | NC_000004.11 |
| cg19809791 | 3.73E-08 | 4.05E-09 | -6.16 | 9.8537649 | -9.77E-02 | 17027832  | 17027955  | NC_000001.10 |

|               |          |          |       |           |           |           |           |              |
|---------------|----------|----------|-------|-----------|-----------|-----------|-----------|--------------|
| cg18448426    | 3.73E-08 | 4.06E-09 | -6.16 | 9.8528254 | -1.26E-01 | 36648832  | 36648955  | NC_000022.10 |
| cg18430895    | 3.74E-08 | 4.06E-09 | -6.16 | 9.851837  | -8.29E-02 | 10485607  | 10485730  | NC_000005.9  |
| ch.5.2173511R | 3.74E-08 | 4.06E-09 | -6.16 | 9.8515459 | -5.10E-02 | 118874673 | 118874796 | NC_000005.9  |
| cg27061366    | 3.74E-08 | 4.06E-09 | -6.16 | 9.8512538 | -4.28E-02 | 13044373  | 13044496  | NC_000019.9  |
| cg06186790    | 3.74E-08 | 4.06E-09 | -6.16 | 9.8512308 | -9.91E-02 | 2902921   | 2903044   | NC_000016.9  |
| cg02672737    | 3.74E-08 | 4.06E-09 | -6.16 | 9.8508005 | -6.81E-02 | 72476759  | 72476882  | NC_000015.9  |
| cg08665810    | 3.75E-08 | 4.07E-09 | -6.16 | 9.849191  | -4.26E-02 | 242498021 | 242498144 | NC_000002.11 |
| ch.1.3642016F | 3.75E-08 | 4.07E-09 | -6.16 | 9.848718  | -2.91E-02 | 186326454 | 186326577 | NC_000001.10 |
| cg18313694    | 3.75E-08 | 4.08E-09 | -6.16 | 9.8478423 | -7.46E-02 | 45480185  | 45480308  | NC_000015.9  |
| cg13415078    | 3.75E-08 | 4.08E-09 | -6.16 | 9.8470943 | -9.98E-02 | 111287117 | 111287240 | NC_000013.10 |
| cg10581241    | 3.75E-08 | 4.08E-09 | -6.16 | 9.8467668 | -3.25E-02 | 46403617  | 46403740  | NC_000011.9  |
| cg10587621    | 3.77E-08 | 4.10E-09 | -6.16 | 9.8430914 | -7.04E-02 | 7482003   | 7482126   | NC_000017.10 |
| cg01214459    | 3.77E-08 | 4.10E-09 | -6.16 | 9.8428015 | -9.16E-02 | 1938156   | 1938279   | NC_000012.11 |
| cg11523456    | 3.77E-08 | 4.10E-09 | -6.16 | 9.842658  | -1.03E-01 | 65258811  | 65258934  | NC_000011.9  |
| cg11907102    | 3.77E-08 | 4.10E-09 | -6.16 | 9.8425084 | -2.59E-02 | 201936469 | 201936592 | NC_000002.11 |
| cg07172334    | 3.77E-08 | 4.10E-09 | -6.16 | 9.8424979 | -1.42E-01 | 31655261  | 31655384  | NC_000021.8  |
| cg11348293    | 3.77E-08 | 4.10E-09 | -6.16 | 9.8416898 | -1.01E-01 | 219926334 | 219926457 | NC_000002.11 |
| cg16417258    | 3.77E-08 | 4.10E-09 | -6.16 | 9.8415655 | -2.71E-02 | 919731    | 919854    | NC_000001.10 |
| cg07479001    | 3.77E-08 | 4.10E-09 | -6.16 | 9.8414133 | -1.39E-01 | 25017635  | 25017758  | NC_000012.11 |
| cg25444667    | 3.77E-08 | 4.10E-09 | -6.16 | 9.8410278 | -8.95E-02 | 238610221 | 238610344 | NC_000002.11 |
| cg06633162    | 3.78E-08 | 4.11E-09 | -6.16 | 9.8407779 | -1.12E-01 | 158481402 | 158481525 | NC_000006.11 |
| cg25423174    | 3.78E-08 | 4.11E-09 | -6.16 | 9.8406903 | -1.08E-01 | 12236303  | 12236426  | NC_000003.11 |
| cg04987071    | 3.78E-08 | 4.11E-09 | -6.16 | 9.8405653 | -1.68E-01 | 4000839   | 4000962   | NC_000016.9  |
| cg05721773    | 3.78E-08 | 4.11E-09 | -6.16 | 9.8404789 | -7.82E-02 | 207083336 | 207083459 | NC_000001.10 |
| cg26328589    | 3.78E-08 | 4.11E-09 | -6.16 | 9.8398589 | -1.44E-01 | 27036568  | 27036691  | NC_000017.10 |

|                |          |          |       |           |           |           |           |              |
|----------------|----------|----------|-------|-----------|-----------|-----------|-----------|--------------|
| cg03935729     | 3.78E-08 | 4.11E-09 | -6.16 | 9.8393987 | -1.08E-01 | 104405198 | 104405321 | NC_000011.9  |
| cg10660903     | 3.78E-08 | 4.11E-09 | -6.16 | 9.8388294 | -6.72E-02 | 45307606  | 45307729  | NC_000017.10 |
| cg08158805     | 3.78E-08 | 4.11E-09 | -6.16 | 9.8385757 | -9.04E-02 | 123485052 | 123485175 | NC_000007.13 |
| cg18677603     | 3.79E-08 | 4.12E-09 | -6.16 | 9.8378857 | -1.33E-01 | 194030679 | 194030802 | NC_000003.11 |
| cg00479463     | 3.79E-08 | 4.12E-09 | -6.16 | 9.8374523 | -1.35E-01 | 33726786  | 33726909  | NC_000019.9  |
| cg17074431     | 3.79E-08 | 4.12E-09 | -6.16 | 9.8371564 | -1.29E-01 | 99409948  | 99410071  | NC_000015.9  |
| cg25752272     | 3.79E-08 | 4.12E-09 | -6.16 | 9.8365979 | -6.99E-02 | 61110107  | 61110230  | NC_000011.9  |
| cg26572896     | 3.79E-08 | 4.12E-09 | -6.16 | 9.8362875 | -1.25E-01 | 151386104 | 151386227 | NC_000002.11 |
| cg07594954     | 3.79E-08 | 4.13E-09 | -6.16 | 9.8352706 | -1.25E-01 | 132990608 | 132990731 | NC_000003.11 |
| cg00139681     | 3.81E-08 | 4.14E-09 | -6.16 | 9.8319883 | -9.40E-02 | 106125168 | 106125291 | NC_000007.13 |
| cg16760587     | 3.81E-08 | 4.14E-09 | -6.16 | 9.8318042 | -9.39E-02 | 17517594  | 17517717  | NC_000004.11 |
| cg19371652     | 3.81E-08 | 4.15E-09 | -6.16 | 9.8304247 | -1.33E-01 | 113415883 | 113416006 | NC_000012.11 |
| cg09645818     | 3.81E-08 | 4.15E-09 | -6.16 | 9.8303727 | -1.24E-01 | 10764592  | 10764715  | NC_000011.9  |
| cg09218250     | 3.81E-08 | 4.15E-09 | -6.16 | 9.8300677 | -9.76E-02 | 9943848   | 9943971   | NC_000003.11 |
| cg10251594     | 3.82E-08 | 4.15E-09 | -6.16 | 9.8293967 | -1.19E-01 | 106433444 | 106433567 | NC_000006.11 |
| cg17136630     | 3.82E-08 | 4.16E-09 | -6.16 | 9.829115  | -2.03E-02 | 56884682  | 56884805  | NC_000020.10 |
| cg03453890     | 3.82E-08 | 4.16E-09 | -6.16 | 9.8281696 | -1.09E-01 | 145643535 | 145643658 | NC_000008.10 |
| cg16108887     | 3.82E-08 | 4.16E-09 | -6.16 | 9.8278919 | -1.42E-01 | 25608305  | 25608428  | NC_000007.13 |
| cg09538676     | 3.82E-08 | 4.16E-09 | -6.16 | 9.8276199 | -1.10E-01 | 105400982 | 105401105 | NC_000007.13 |
| cg22341788     | 3.83E-08 | 4.16E-09 | -6.16 | 9.8268333 | -1.26E-01 | 28975690  | 28975813  | NC_000013.10 |
| ch.6.34361150R | 3.83E-08 | 4.17E-09 | -6.16 | 9.8259151 | -2.59E-02 | 34253172  | 34253295  | NC_000006.11 |
| cg21503392     | 3.83E-08 | 4.17E-09 | -6.16 | 9.8255478 | -1.13E-01 | 168479852 | 168479975 | NC_000006.11 |
| cg06706894     | 3.84E-08 | 4.18E-09 | -6.15 | 9.8228103 | -7.86E-02 | 80167002  | 80167125  | NC_000010.10 |
| cg08535171     | 3.84E-08 | 4.18E-09 | -6.15 | 9.8226114 | -6.23E-02 | 44458022  | 44458145  | NC_000013.10 |
| cg27051453     | 3.84E-08 | 4.18E-09 | -6.15 | 9.8225382 | -4.00E-02 | 63335020  | 63335143  | NC_000007.13 |

|                |          |          |       |           |           |           |           |              |
|----------------|----------|----------|-------|-----------|-----------|-----------|-----------|--------------|
| cg08428545     | 3.84E-08 | 4.18E-09 | -6.15 | 9.8223364 | -1.29E-01 | 111507452 | 111507575 | NC_000004.11 |
| cg26662324     | 3.85E-08 | 4.19E-09 | -6.15 | 9.821213  | -1.38E-01 | 126745862 | 126745985 | NC_000010.10 |
| cg12225854     | 3.85E-08 | 4.19E-09 | -6.15 | 9.8203184 | -6.03E-02 | 95619884  | 95620007  | NC_000013.10 |
| cg19038540     | 3.85E-08 | 4.19E-09 | -6.15 | 9.8199306 | -7.72E-02 | 101701364 | 101701487 | NC_000001.10 |
| cg07487572     | 3.86E-08 | 4.20E-09 | -6.15 | 9.8175641 | -8.83E-02 | 185018391 | 185018514 | NC_000004.11 |
| cg22982093     | 3.86E-08 | 4.21E-09 | -6.15 | 9.8169468 | -1.50E-01 | 41669401  | 41669524  | NC_000017.10 |
| cg26580869     | 3.87E-08 | 4.21E-09 | -6.15 | 9.8151084 | -1.12E-01 | 611506    | 611629    | NC_000019.9  |
| cg26110281     | 3.87E-08 | 4.22E-09 | -6.15 | 9.8146728 | -1.35E-01 | 123885695 | 123885818 | NC_000011.9  |
| cg08298827     | 3.88E-08 | 4.22E-09 | -6.15 | 9.8131277 | -7.51E-02 | 62009585  | 62009708  | NC_000011.9  |
| ch.12.1441382R | 3.88E-08 | 4.23E-09 | -6.15 | 9.8118726 | -4.52E-02 | 69985999  | 69986122  | NC_000012.11 |
| cg10190035     | 3.88E-08 | 4.23E-09 | -6.15 | 9.8111327 | -3.68E-02 | 99437860  | 99437983  | NC_000015.9  |
| cg16460860     | 3.89E-08 | 4.24E-09 | -6.15 | 9.809673  | -9.06E-02 | 17744282  | 17744405  | NC_000017.10 |
| cg11936341     | 3.89E-08 | 4.24E-09 | -6.15 | 9.8091679 | -1.37E-01 | 1604140   | 1604263   | NC_000006.11 |
| cg22491629     | 3.89E-08 | 4.24E-09 | -6.15 | 9.8084472 | -6.16E-02 | 157744540 | 157744663 | NC_000006.11 |
| cg23322223     | 3.89E-08 | 4.24E-09 | -6.15 | 9.8082567 | -1.57E-01 | 108423292 | 108423415 | NC_000011.9  |
| cg26697334     | 3.90E-08 | 4.25E-09 | -6.15 | 9.8078653 | -7.90E-02 | 279990    | 280113    | NC_000016.9  |
| cg06800962     | 3.90E-08 | 4.25E-09 | -6.15 | 9.807516  | -1.08E-01 | 149096029 | 149096152 | NC_000003.11 |
| cg14806752     | 3.90E-08 | 4.25E-09 | -6.15 | 9.807447  | -1.04E-01 | 998808    | 998931    | NC_000007.13 |
| cg24962827     | 3.90E-08 | 4.25E-09 | -6.15 | 9.8071406 | -1.06E-01 | 24262634  | 24262757  | NC_000003.11 |
| cg27194586     | 3.91E-08 | 4.26E-09 | -6.15 | 9.8046768 | -4.06E-02 | 52431306  | 52431429  | NC_000012.11 |
| cg00238283     | 3.91E-08 | 4.26E-09 | -6.15 | 9.8045469 | -1.16E-01 | 158059790 | 158059913 | NC_000007.13 |
| cg11692369     | 3.91E-08 | 4.27E-09 | -6.15 | 9.8035409 | -6.21E-02 | 54755880  | 54756003  | NC_000008.10 |
| cg20647467     | 3.91E-08 | 4.27E-09 | -6.15 | 9.8032796 | -4.82E-02 | 121944705 | 121944828 | NC_000007.13 |
| cg00856336     | 3.92E-08 | 4.27E-09 | -6.15 | 9.8024056 | -1.41E-01 | 169399760 | 169399883 | NC_000006.11 |
| cg27049201     | 3.92E-08 | 4.27E-09 | -6.15 | 9.8018463 | -3.22E-02 | 128695169 | 128695292 | NC_000007.13 |

|            |          |          |       |           |           |           |           |              |
|------------|----------|----------|-------|-----------|-----------|-----------|-----------|--------------|
| cg06952715 | 3.92E-08 | 4.27E-09 | -6.15 | 9.8017861 | -1.01E-01 | 206804680 | 206804803 | NC_000001.10 |
| cg02306946 | 3.92E-08 | 4.28E-09 | -6.15 | 9.8012753 | -3.89E-02 | 105630036 | 105630159 | NC_000012.11 |
| cg03834116 | 3.92E-08 | 4.28E-09 | -6.15 | 9.8007936 | -1.27E-01 | 27403477  | 27403600  | NC_000002.11 |
| cg15888741 | 3.92E-08 | 4.28E-09 | -6.15 | 9.8007791 | -3.24E-02 | 15139207  | 15139330  | NC_000010.10 |
| cg13690280 | 3.92E-08 | 4.28E-09 | -6.15 | 9.8003893 | -1.45E-01 | 112562314 | 112562437 | NC_000009.11 |
| cg01767270 | 3.93E-08 | 4.28E-09 | -6.15 | 9.7997931 | -1.30E-01 | 121116386 | 121116509 | NC_000002.11 |
| cg02666105 | 3.93E-08 | 4.29E-09 | -6.15 | 9.7987617 | -2.82E-02 | 31724574  | 31724697  | NC_000016.9  |
| cg22532155 | 3.94E-08 | 4.29E-09 | -6.15 | 9.7971415 | -1.13E-01 | 79304683  | 79304806  | NC_000017.10 |
| cg08091707 | 3.94E-08 | 4.30E-09 | -6.15 | 9.7963199 | -1.27E-01 | 859554    | 859677    | NC_000019.9  |
| cg02453779 | 3.94E-08 | 4.30E-09 | -6.15 | 9.7960929 | -3.52E-02 | 105948520 | 105948643 | NC_000011.9  |
| cg16378003 | 3.94E-08 | 4.30E-09 | -6.15 | 9.7947644 | -1.01E-01 | 69776100  | 69776223  | NC_000016.9  |
| cg06719487 | 3.95E-08 | 4.31E-09 | -6.15 | 9.7930741 | -7.39E-02 | 10489962  | 10490085  | NC_000001.10 |
| cg17675199 | 3.96E-08 | 4.32E-09 | -6.15 | 9.7919108 | -6.06E-02 | 35436792  | 35436915  | NC_000006.11 |
| cg09892262 | 3.96E-08 | 4.32E-09 | -6.15 | 9.7899905 | -1.18E-01 | 31655654  | 31655777  | NC_000021.8  |
| cg10145640 | 3.96E-08 | 4.33E-09 | -6.15 | 9.7898524 | -6.05E-02 | 96656936  | 96657059  | NC_000007.13 |
| cg04867652 | 3.96E-08 | 4.33E-09 | -6.15 | 9.7897428 | -1.46E-01 | 75178514  | 75178637  | NC_000017.10 |
| cg17677848 | 3.97E-08 | 4.33E-09 | -6.15 | 9.7878618 | -7.40E-02 | 46166409  | 46166532  | NC_000011.9  |
| cg24013589 | 3.97E-08 | 4.34E-09 | -6.15 | 9.7869908 | -9.78E-02 | 65196222  | 65196345  | NC_000011.9  |
| cg20235871 | 3.97E-08 | 4.34E-09 | -6.15 | 9.7869522 | -9.78E-02 | 158047359 | 158047482 | NC_000007.13 |
| cg25310097 | 3.98E-08 | 4.34E-09 | -6.15 | 9.7867338 | -8.65E-02 | 86874205  | 86874328  | NC_000004.11 |
| cg26184687 | 3.98E-08 | 4.35E-09 | -6.15 | 9.7850521 | -6.03E-02 | 2042592   | 2042715   | NC_000019.9  |
| cg08761208 | 3.98E-08 | 4.35E-09 | -6.15 | 9.7846023 | -8.02E-02 | 65693289  | 65693412  | NC_000015.9  |
| cg14507845 | 3.99E-08 | 4.35E-09 | -6.15 | 9.7838023 | -8.20E-02 | 137418069 | 137418192 | NC_000009.11 |
| cg16700163 | 3.99E-08 | 4.35E-09 | -6.15 | 9.7833286 | -1.34E-01 | 85169956  | 85170079  | NC_000016.9  |
| cg11884546 | 4.00E-08 | 4.37E-09 | -6.15 | 9.7803046 | -4.02E-02 | 31366377  | 31366500  | NC_000016.9  |

|            |          |          |       |           |           |           |           |              |
|------------|----------|----------|-------|-----------|-----------|-----------|-----------|--------------|
| cg03580292 | 4.00E-08 | 4.37E-09 | -6.15 | 9.7793575 | -1.28E-01 | 174411723 | 174411846 | NC_000004.11 |
| cg05121182 | 4.00E-08 | 4.37E-09 | -6.15 | 9.7793274 | -1.31E-01 | 123812381 | 123812504 | NC_000003.11 |
| cg12700283 | 4.01E-08 | 4.38E-09 | -6.15 | 9.7767542 | -9.37E-02 | 76037035  | 76037158  | NC_000017.10 |
| cg24357503 | 4.02E-08 | 4.39E-09 | -6.15 | 9.7762502 | -1.32E-02 | 73975484  | 73975607  | NC_000017.10 |
| cg11075745 | 4.03E-08 | 4.40E-09 | -6.15 | 9.7728781 | -8.41E-02 | 43205976  | 43206099  | NC_000001.10 |
| cg18467133 | 4.03E-08 | 4.40E-09 | -6.15 | 9.7724096 | -3.26E-02 | 100661475 | 100661598 | NC_000012.11 |
| cg21163128 | 4.03E-08 | 4.40E-09 | -6.15 | 9.7722691 | -1.06E-01 | 62477362  | 62477485  | NC_000011.9  |
| cg09670128 | 4.03E-08 | 4.41E-09 | -6.14 | 9.7716599 | -8.26E-02 | 52627047  | 52627170  | NC_000012.11 |
| cg20943084 | 4.03E-08 | 4.41E-09 | -6.14 | 9.7714869 | -7.44E-02 | 140012769 | 140012892 | NC_000005.9  |
| cg02261541 | 4.04E-08 | 4.41E-09 | -6.14 | 9.7709855 | -5.34E-02 | 4050315   | 4050438   | NC_000016.9  |
| cg09230442 | 4.04E-08 | 4.41E-09 | -6.14 | 9.770749  | -6.18E-02 | 65809997  | 65810120  | NC_000015.9  |
| cg12243858 | 4.04E-08 | 4.41E-09 | -6.14 | 9.7705101 | -8.47E-02 | 149473178 | 149473301 | NC_000007.13 |
| cg15745817 | 4.04E-08 | 4.41E-09 | -6.14 | 9.7704867 | -9.93E-02 | 67799979  | 67800102  | NC_000002.11 |
| cg00727310 | 4.04E-08 | 4.41E-09 | -6.14 | 9.7700112 | -1.68E-01 | 227662704 | 227662827 | NC_000002.11 |
| cg01516737 | 4.04E-08 | 4.42E-09 | -6.14 | 9.7694609 | -1.14E-01 | 26209773  | 26209896  | NC_000008.10 |
| cg08717896 | 4.04E-08 | 4.42E-09 | -6.14 | 9.7688883 | -7.59E-02 | 27541913  | 27542036  | NC_000010.10 |
| cg09331986 | 4.05E-08 | 4.42E-09 | -6.14 | 9.7687546 | -1.55E-01 | 15411400  | 15411523  | NC_000006.11 |
| cg23007087 | 4.05E-08 | 4.42E-09 | -6.14 | 9.768411  | -1.12E-01 | 90380258  | 90380381  | NC_000015.9  |
| cg02620307 | 4.05E-08 | 4.42E-09 | -6.14 | 9.7681912 | -1.98E-02 | 161283965 | 161284088 | NC_000001.10 |
| cg14418633 | 4.05E-08 | 4.43E-09 | -6.14 | 9.7669614 | -1.12E-01 | 2005489   | 2005612   | NC_000001.10 |
| cg04473405 | 4.05E-08 | 4.43E-09 | -6.14 | 9.7668553 | -9.13E-02 | 52762005  | 52762128  | NC_000012.11 |
| cg18082112 | 4.06E-08 | 4.43E-09 | -6.14 | 9.7656103 | -9.53E-02 | 184870137 | 184870260 | NC_000003.11 |
| cg07113322 | 4.06E-08 | 4.44E-09 | -6.14 | 9.764369  | -2.49E-02 | 58034858  | 58034981  | NC_000016.9  |
| cg26636244 | 4.06E-08 | 4.44E-09 | -6.14 | 9.7640676 | -5.88E-02 | 102119729 | 102119852 | NC_000007.13 |
| cg06541857 | 4.07E-08 | 4.44E-09 | -6.14 | 9.7633822 | -5.98E-02 | 134203789 | 134203912 | NC_000003.11 |

|                |          |          |       |           |           |           |           |              |
|----------------|----------|----------|-------|-----------|-----------|-----------|-----------|--------------|
| cg00651016     | 4.07E-08 | 4.45E-09 | -6.14 | 9.7630579 | -1.57E-01 | 552754    | 552877    | NC_000016.9  |
| cg18170784     | 4.07E-08 | 4.45E-09 | -6.14 | 9.7627985 | -3.13E-02 | 71114262  | 71114385  | NC_000003.11 |
| cg17740140     | 4.07E-08 | 4.45E-09 | -6.14 | 9.7624574 | -1.41E-01 | 39659249  | 39659372  | NC_000020.10 |
| cg08658981     | 4.07E-08 | 4.45E-09 | -6.14 | 9.7614991 | -1.03E-01 | 134578481 | 134578604 | NC_000010.10 |
| cg11848173     | 4.07E-08 | 4.45E-09 | -6.14 | 9.7613497 | -1.24E-01 | 56121015  | 56121138  | NC_000012.11 |
| cg14030055     | 4.07E-08 | 4.45E-09 | -6.14 | 9.7610794 | -1.56E-01 | 22006851  | 22006974  | NC_000022.10 |
| cg04189591     | 4.09E-08 | 4.47E-09 | -6.14 | 9.7575006 | -9.06E-02 | 42309398  | 42309521  | NC_000022.10 |
| cg01338634     | 4.09E-08 | 4.47E-09 | -6.14 | 9.7570191 | -4.35E-02 | 73748364  | 73748487  | NC_000007.13 |
| cg05482413     | 4.09E-08 | 4.47E-09 | -6.14 | 9.7569673 | -1.32E-01 | 141940591 | 141940714 | NC_000007.13 |
| cg02809611     | 4.09E-08 | 4.48E-09 | -6.14 | 9.7561357 | -9.69E-02 | 3253368   | 3253491   | NC_000016.9  |
| cg12927753     | 4.10E-08 | 4.48E-09 | -6.14 | 9.7551847 | -9.95E-02 | 160823392 | 160823515 | NC_000003.11 |
| cg21804372     | 4.10E-08 | 4.48E-09 | -6.14 | 9.7547609 | -6.23E-02 | 91570221  | 91570344  | NC_000007.13 |
| cg09073059     | 4.10E-08 | 4.48E-09 | -6.14 | 9.7546655 | -1.57E-01 | 1490216   | 1490339   | NC_000001.10 |
| cg17414431     | 4.10E-08 | 4.49E-09 | -6.14 | 9.754298  | -3.94E-02 | 49622715  | 49622838  | NC_000019.9  |
| ch.15.1538350R | 4.11E-08 | 4.49E-09 | -6.14 | 9.7528246 | -2.12E-02 | 90174190  | 90174313  | NC_000015.9  |
| cg25660390     | 4.11E-08 | 4.49E-09 | -6.14 | 9.7522589 | -9.23E-02 | 73073700  | 73073823  | NC_000017.10 |
| cg03615240     | 4.11E-08 | 4.50E-09 | -6.14 | 9.7521234 | -6.00E-02 | 28832056  | 28832179  | NC_000006.11 |
| cg23373640     | 4.12E-08 | 4.50E-09 | -6.14 | 9.7503604 | -1.02E-01 | 65696480  | 65696603  | NC_000014.8  |
| cg10589235     | 4.12E-08 | 4.50E-09 | -6.14 | 9.7502313 | -7.55E-02 | 107569888 | 107570011 | NC_000013.10 |
| cg00300750     | 4.12E-08 | 4.51E-09 | -6.14 | 9.7497574 | -2.41E-02 | 99956467  | 99956590  | NC_000008.10 |
| cg08402572     | 4.12E-08 | 4.51E-09 | -6.14 | 9.7493718 | -5.20E-02 | 97510201  | 97510324  | NC_000002.11 |
| cg24023487     | 4.12E-08 | 4.51E-09 | -6.14 | 9.7482289 | -1.20E-01 | 12988727  | 12988850  | NC_000020.10 |
| cg07869667     | 4.12E-08 | 4.51E-09 | -6.14 | 9.7481357 | -1.21E-02 | 145133475 | 145133598 | NC_000008.10 |
| cg12585923     | 4.13E-08 | 4.52E-09 | -6.14 | 9.7477032 | -9.89E-02 | 42756876  | 42756999  | NC_000005.9  |
| cg12865381     | 4.13E-08 | 4.52E-09 | -6.14 | 9.7462774 | -1.50E-01 | 94459447  | 94459570  | NC_000010.10 |



|            |          |          |       |           |           |           |           |              |
|------------|----------|----------|-------|-----------|-----------|-----------|-----------|--------------|
| cg20012885 | 4.14E-08 | 4.53E-09 | -6.14 | 9.7450549 | -5.62E-02 | 12377404  | 12377527  | NC_000018.9  |
| cg02632200 | 4.14E-08 | 4.53E-09 | -6.14 | 9.744859  | -7.34E-02 | 46971658  | 46971781  | NC_000010.10 |
| cg00975876 | 4.14E-08 | 4.53E-09 | -6.14 | 9.7445433 | -1.10E-01 | 41752769  | 41752892  | NC_000006.11 |
| cg02346282 | 4.15E-08 | 4.54E-09 | -6.14 | 9.7429013 | -1.16E-01 | 72793476  | 72793599  | NC_000005.9  |
| cg27562948 | 4.15E-08 | 4.54E-09 | -6.14 | 9.7419569 | -1.28E-01 | 155283424 | 155283547 | NC_000007.13 |
| cg10175753 | 4.15E-08 | 4.55E-09 | -6.14 | 9.7414016 | -8.81E-02 | 50219606  | 50219729  | NC_000019.9  |
| cg13930682 | 4.16E-08 | 4.55E-09 | -6.14 | 9.7397081 | -6.74E-02 | 26393253  | 26393376  | NC_000006.11 |
| cg07347092 | 4.16E-08 | 4.55E-09 | -6.14 | 9.7396317 | -7.85E-02 | 124246927 | 124247050 | NC_000012.11 |
| cg13420934 | 4.16E-08 | 4.55E-09 | -6.14 | 9.7395566 | -7.64E-02 | 3088823   | 3088946   | NC_000006.11 |
| cg10103000 | 4.16E-08 | 4.55E-09 | -6.14 | 9.7394167 | -1.22E-01 | 187609278 | 187609401 | NC_000001.10 |
| cg10686304 | 4.16E-08 | 4.56E-09 | -6.14 | 9.738761  | -7.68E-02 | 22561205  | 22561328  | NC_000008.10 |
| cg10461088 | 4.16E-08 | 4.56E-09 | -6.14 | 9.7385868 | -2.54E-02 | 47198846  | 47198969  | NC_000011.9  |
| cg02100305 | 4.17E-08 | 4.56E-09 | -6.14 | 9.7379182 | -2.94E-02 | 73308991  | 73309114  | NC_000011.9  |
| cg25893560 | 4.17E-08 | 4.56E-09 | -6.14 | 9.7378056 | -1.51E-01 | 128710122 | 128710245 | NC_000011.9  |
| cg14880788 | 4.17E-08 | 4.57E-09 | -6.14 | 9.7370602 | -6.08E-02 | 227633016 | 227633139 | NC_000002.11 |
| cg09407650 | 4.17E-08 | 4.57E-09 | -6.14 | 9.7367406 | -1.22E-01 | 85320156  | 85320279  | NC_000016.9  |
| cg13534791 | 4.17E-08 | 4.57E-09 | -6.14 | 9.735894  | -9.42E-02 | 35042344  | 35042467  | NC_000009.11 |
| cg10825315 | 4.18E-08 | 4.58E-09 | -6.14 | 9.7344667 | -1.30E-01 | 81425912  | 81426035  | NC_000014.8  |
| cg04349420 | 4.18E-08 | 4.58E-09 | -6.14 | 9.7337095 | -6.48E-02 | 49414279  | 49414402  | NC_000008.10 |
| cg08365687 | 4.18E-08 | 4.58E-09 | -6.14 | 9.7334167 | -9.22E-02 | 52569147  | 52569270  | NC_000003.11 |
| cg00458681 | 4.19E-08 | 4.59E-09 | -6.14 | 9.7322919 | -1.38E-01 | 19010419  | 19010542  | NC_000022.10 |
| cg25087049 | 4.19E-08 | 4.59E-09 | -6.14 | 9.7322486 | -4.76E-02 | 186130781 | 186130904 | NC_000004.11 |
| cg08097086 | 4.19E-08 | 4.59E-09 | -6.14 | 9.7318662 | -1.13E-01 | 75868279  | 75868402  | NC_000007.13 |
| cg05912212 | 4.19E-08 | 4.59E-09 | -6.14 | 9.7316845 | -1.24E-01 | 119622531 | 119622654 | NC_000011.9  |
| cg07709155 | 4.19E-08 | 4.59E-09 | -6.14 | 9.7315964 | -9.08E-02 | 2186975   | 2187098   | NC_000008.10 |

|            |          |          |       |           |           |           |           |              |
|------------|----------|----------|-------|-----------|-----------|-----------|-----------|--------------|
| cg09909069 | 4.19E-08 | 4.59E-09 | -6.14 | 9.7314566 | -9.81E-02 | 41860793  | 41860916  | NC_000013.10 |
| cg26666029 | 4.20E-08 | 4.60E-09 | -6.14 | 9.729759  | -3.36E-02 | 145027741 | 145027864 | NC_000008.10 |
| cg17141902 | 4.20E-08 | 4.60E-09 | -6.14 | 9.7290525 | -9.71E-02 | 95897216  | 95897339  | NC_000009.11 |
| cg13484467 | 4.20E-08 | 4.61E-09 | -6.14 | 9.7279355 | -1.02E-01 | 81047784  | 81047907  | NC_000017.10 |
| cg02452732 | 4.20E-08 | 4.61E-09 | -6.14 | 9.7278978 | -1.23E-01 | 41158611  | 41158734  | NC_000017.10 |
| cg13303229 | 4.20E-08 | 4.61E-09 | -6.14 | 9.7278022 | -2.68E-02 | 154136254 | 154136377 | NC_000005.9  |
| cg26797722 | 4.21E-08 | 4.61E-09 | -6.14 | 9.7276094 | -1.19E-01 | 15432551  | 15432674  | NC_000006.11 |
| cg08841425 | 4.21E-08 | 4.61E-09 | -6.14 | 9.7274966 | -5.10E-02 | 112679110 | 112679233 | NC_000010.10 |
| cg07689032 | 4.21E-08 | 4.61E-09 | -6.14 | 9.7274875 | -5.60E-02 | 57881586  | 57881709  | NC_000012.11 |
| cg08448833 | 4.21E-08 | 4.62E-09 | -6.14 | 9.7263738 | -1.64E-02 | 5068731   | 5068854   | NC_000003.11 |
| cg24326267 | 4.21E-08 | 4.62E-09 | -6.14 | 9.7253483 | -1.62E-02 | 61435985  | 61436108  | NC_000020.10 |
| cg02062230 | 4.22E-08 | 4.63E-09 | -6.14 | 9.7241477 | -2.01E-02 | 3464998   | 3465121   | NC_000004.11 |
| cg14611750 | 4.22E-08 | 4.63E-09 | -6.14 | 9.7241357 | -3.73E-02 | 30102125  | 30102248  | NC_000020.10 |
| cg05827346 | 4.23E-08 | 4.64E-09 | -6.14 | 9.7222736 | -2.08E-02 | 48732560  | 48732683  | NC_000020.10 |
| cg13499300 | 4.23E-08 | 4.64E-09 | -6.14 | 9.722096  | -2.07E-01 | 54369556  | 54369679  | NC_000019.9  |
| cg17396305 | 4.23E-08 | 4.64E-09 | -6.14 | 9.7215224 | -1.07E-01 | 1594275   | 1594398   | NC_000006.11 |
| cg21211321 | 4.23E-08 | 4.64E-09 | -6.14 | 9.7213779 | -1.34E-01 | 133816242 | 133816365 | NC_000011.9  |
| cg24714709 | 4.23E-08 | 4.64E-09 | -6.14 | 9.7212746 | -5.13E-02 | 95064397  | 95064520  | NC_000007.13 |
| cg01374729 | 4.23E-08 | 4.64E-09 | -6.14 | 9.7210315 | -3.08E-02 | 159420963 | 159421086 | NC_000006.11 |
| cg27264345 | 4.23E-08 | 4.64E-09 | -6.14 | 9.7207435 | -5.51E-02 | 137775041 | 137775164 | NC_000005.9  |
| cg21103074 | 4.24E-08 | 4.65E-09 | -6.13 | 9.7198286 | -1.21E-01 | 31105777  | 31105900  | NC_000006.11 |
| cg02852529 | 4.24E-08 | 4.65E-09 | -6.13 | 9.7194159 | -1.24E-01 | 20057511  | 20057634  | NC_000011.9  |
| cg22077313 | 4.25E-08 | 4.66E-09 | -6.13 | 9.7173447 | -7.74E-02 | 6691093   | 6691216   | NC_000004.11 |
| cg09897737 | 4.25E-08 | 4.66E-09 | -6.13 | 9.7171205 | -1.21E-01 | 227509309 | 227509432 | NC_000002.11 |
| cg08773226 | 4.25E-08 | 4.66E-09 | -6.13 | 9.7169254 | -1.28E-01 | 135061398 | 135061521 | NC_000006.11 |

|                |          |          |       |           |           |           |           |              |
|----------------|----------|----------|-------|-----------|-----------|-----------|-----------|--------------|
| cg04871726     | 4.25E-08 | 4.66E-09 | -6.13 | 9.7164694 | -1.21E-01 | 25348828  | 25348951  | NC_000001.10 |
| cg08075719     | 4.25E-08 | 4.66E-09 | -6.13 | 9.7160914 | -1.02E-01 | 103021372 | 103021495 | NC_000014.8  |
| cg01076970     | 4.26E-08 | 4.67E-09 | -6.13 | 9.7142808 | -9.06E-02 | 180455248 | 180455371 | NC_000005.9  |
| cg13578652     | 4.26E-08 | 4.67E-09 | -6.13 | 9.7140024 | -1.19E-01 | 43823863  | 43823986  | NC_000021.8  |
| cg03874568     | 4.26E-08 | 4.68E-09 | -6.13 | 9.713304  | -4.23E-02 | 74667923  | 74668046  | NC_000017.10 |
| cg02639294     | 4.27E-08 | 4.68E-09 | -6.13 | 9.7127708 | -3.60E-02 | 30406318  | 30406441  | NC_000016.9  |
| cg02084811     | 4.27E-08 | 4.68E-09 | -6.13 | 9.7124028 | -2.40E-02 | 49524778  | 49524901  | NC_000012.11 |
| cg01357116     | 4.27E-08 | 4.68E-09 | -6.13 | 9.7120893 | -4.32E-02 | 94749496  | 94749619  | NC_000004.11 |
| cg19774782     | 4.28E-08 | 4.70E-09 | -6.13 | 9.7089224 | -9.03E-02 | 123909356 | 123909479 | NC_000010.10 |
| cg11012584     | 4.28E-08 | 4.70E-09 | -6.13 | 9.7088219 | -7.63E-02 | 242549943 | 242550066 | NC_000002.11 |
| cg21829420     | 4.28E-08 | 4.70E-09 | -6.13 | 9.7083881 | -5.38E-02 | 10277058  | 10277181  | NC_000017.10 |
| cg03839382     | 4.29E-08 | 4.70E-09 | -6.13 | 9.7077562 | -8.89E-02 | 22540090  | 22540213  | NC_000007.13 |
| cg11781421     | 4.29E-08 | 4.71E-09 | -6.13 | 9.7061243 | -1.20E-01 | 19367084  | 19367207  | NC_000019.9  |
| cg12805374     | 4.29E-08 | 4.71E-09 | -6.13 | 9.7055738 | -1.22E-01 | 43306622  | 43306745  | NC_000017.10 |
| ch.9.98959675F | 4.30E-08 | 4.72E-09 | -6.13 | 9.7047    | -8.41E-02 | 99919854  | 99919977  | NC_000009.11 |
| cg18718657     | 4.30E-08 | 4.73E-09 | -6.13 | 9.703472  | -6.28E-02 | 64009699  | 64009822  | NC_000011.9  |
| cg19902593     | 4.31E-08 | 4.74E-09 | -6.13 | 9.7007462 | -1.24E-01 | 56038708  | 56038831  | NC_000001.10 |
| cg14120703     | 4.32E-08 | 4.74E-09 | -6.13 | 9.6995464 | -1.53E-01 | 139416102 | 139416225 | NC_000009.11 |
| cg07894162     | 4.32E-08 | 4.75E-09 | -6.13 | 9.6989261 | -3.01E-02 | 31364948  | 31365071  | NC_000022.10 |
| cg27652459     | 4.33E-08 | 4.75E-09 | -6.13 | 9.6979115 | -1.12E-01 | 46709238  | 46709361  | NC_000011.9  |
| cg18151030     | 4.33E-08 | 4.75E-09 | -6.13 | 9.6978529 | -9.50E-02 | 43222961  | 43223084  | NC_000021.8  |
| cg01149264     | 4.33E-08 | 4.76E-09 | -6.13 | 9.6970992 | -1.07E-01 | 644081    | 644204    | NC_000016.9  |
| cg24537986     | 4.33E-08 | 4.76E-09 | -6.13 | 9.696143  | -5.91E-02 | 103114734 | 103114857 | NC_000010.10 |
| cg01980222     | 4.33E-08 | 4.76E-09 | -6.13 | 9.695822  | -1.37E-01 | 41130917  | 41131040  | NC_000006.11 |
| cg11898431     | 4.33E-08 | 4.76E-09 | -6.13 | 9.6957253 | -1.42E-01 | 159331893 | 159332016 | NC_000006.11 |

|            |          |          |       |           |           |           |           |              |
|------------|----------|----------|-------|-----------|-----------|-----------|-----------|--------------|
| cg05744888 | 4.34E-08 | 4.76E-09 | -6.13 | 9.6954211 | -1.06E-01 | 141588118 | 141588241 | NC_000008.10 |
| cg20488756 | 4.35E-08 | 4.78E-09 | -6.13 | 9.6929909 | -1.07E-01 | 30131586  | 30131709  | NC_000006.11 |
| cg13428516 | 4.35E-08 | 4.78E-09 | -6.13 | 9.6920737 | -8.48E-02 | 49224033  | 49224156  | NC_000019.9  |
| cg18663513 | 4.35E-08 | 4.78E-09 | -6.13 | 9.6916311 | -2.77E-02 | 53793486  | 53793609  | NC_000001.10 |
| cg11772193 | 4.36E-08 | 4.79E-09 | -6.13 | 9.6899309 | -1.08E-01 | 1471691   | 1471814   | NC_000011.9  |
| cg17843066 | 4.36E-08 | 4.80E-09 | -6.13 | 9.6890943 | -1.18E-01 | 84761826  | 84761949  | NC_000001.10 |
| cg05902503 | 4.36E-08 | 4.80E-09 | -6.13 | 9.6886033 | -1.24E-01 | 30133175  | 30133298  | NC_000016.9  |
| cg13911697 | 4.36E-08 | 4.80E-09 | -6.13 | 9.6885203 | -9.28E-02 | 15911614  | 15911737  | NC_000011.9  |
| cg14120215 | 4.37E-08 | 4.81E-09 | -6.13 | 9.6870618 | -1.07E-01 | 113841668 | 113841791 | NC_000012.11 |
| cg03138091 | 4.37E-08 | 4.81E-09 | -6.13 | 9.6869466 | -7.61E-02 | 38846540  | 38846663  | NC_000005.9  |
| cg13391607 | 4.37E-08 | 4.81E-09 | -6.13 | 9.6864432 | -6.14E-02 | 81718493  | 81718616  | NC_000009.11 |
| cg10327067 | 4.37E-08 | 4.81E-09 | -6.13 | 9.6863861 | -1.07E-01 | 37549202  | 37549325  | NC_000008.10 |
| cg19358520 | 4.37E-08 | 4.81E-09 | -6.13 | 9.6863556 | -1.29E-01 | 62744209  | 62744332  | NC_000011.9  |
| cg15156712 | 4.38E-08 | 4.81E-09 | -6.13 | 9.685955  | -8.36E-02 | 54362886  | 54363009  | NC_000001.10 |
| cg03098782 | 4.38E-08 | 4.81E-09 | -6.13 | 9.6857833 | -1.22E-01 | 130067861 | 130067984 | NC_000011.9  |
| cg04151062 | 4.38E-08 | 4.81E-09 | -6.13 | 9.6854866 | -4.75E-02 | 116710943 | 116711066 | NC_000001.10 |
| cg20895785 | 4.38E-08 | 4.82E-09 | -6.13 | 9.6846636 | -2.57E-02 | 89840850  | 89840973  | NC_000007.13 |
| cg12243453 | 4.38E-08 | 4.82E-09 | -6.13 | 9.6846156 | -1.23E-01 | 113775400 | 113775523 | NC_000011.9  |
| cg11426157 | 4.39E-08 | 4.82E-09 | -6.13 | 9.683464  | -9.60E-02 | 149979610 | 149979733 | NC_000005.9  |
| cg26793648 | 4.39E-08 | 4.83E-09 | -6.13 | 9.6823531 | -5.28E-02 | 67313014  | 67313137  | NC_000016.9  |
| cg07202320 | 4.39E-08 | 4.83E-09 | -6.13 | 9.6823351 | -7.12E-02 | 181149323 | 181149446 | NC_000001.10 |
| cg10334489 | 4.39E-08 | 4.83E-09 | -6.13 | 9.6820369 | -1.05E-01 | 25798878  | 25799001  | NC_000017.10 |
| cg23411876 | 4.39E-08 | 4.83E-09 | -6.13 | 9.6817094 | -2.13E-02 | 140396886 | 140397009 | NC_000007.13 |
| cg05971592 | 4.39E-08 | 4.83E-09 | -6.13 | 9.6813771 | -1.46E-01 | 64895105  | 64895228  | NC_000003.11 |
| cg10591064 | 4.39E-08 | 4.83E-09 | -6.13 | 9.6812338 | -2.04E-02 | 203296928 | 203297051 | NC_000001.10 |

|                |          |          |       |           |           |           |           |              |
|----------------|----------|----------|-------|-----------|-----------|-----------|-----------|--------------|
| cg13442820     | 4.40E-08 | 4.84E-09 | -6.13 | 9.680765  | -1.78E-02 | 1672531   | 1672654   | NC_000019.9  |
| cg27113440     | 4.40E-08 | 4.84E-09 | -6.13 | 9.6806184 | -5.02E-02 | 22214386  | 22214509  | NC_000011.9  |
| cg05241157     | 4.40E-08 | 4.84E-09 | -6.13 | 9.6803232 | -6.67E-02 | 17354674  | 17354797  | NC_000005.9  |
| cg01647204     | 4.40E-08 | 4.84E-09 | -6.13 | 9.6802715 | -1.24E-01 | 100883459 | 100883582 | NC_000014.8  |
| cg17463698     | 4.40E-08 | 4.84E-09 | -6.13 | 9.6798565 | -1.30E-01 | 83477712  | 83477835  | NC_000015.9  |
| cg05902884     | 4.40E-08 | 4.84E-09 | -6.13 | 9.6791891 | -6.94E-02 | 183543862 | 183543985 | NC_000003.11 |
| cg22941178     | 4.41E-08 | 4.85E-09 | -6.13 | 9.678601  | -1.00E-01 | 45233585  | 45233708  | NC_000021.8  |
| cg04129548     | 4.41E-08 | 4.85E-09 | -6.13 | 9.6785171 | -1.79E-01 | 227662083 | 227662206 | NC_000002.11 |
| cg06411479     | 4.41E-08 | 4.85E-09 | -6.13 | 9.6771049 | -4.01E-02 | 6272229   | 6272352   | NC_000004.11 |
| cg26505663     | 4.41E-08 | 4.86E-09 | -6.13 | 9.676716  | -6.90E-02 | 57999151  | 57999274  | NC_000015.9  |
| cg12449931     | 4.41E-08 | 4.86E-09 | -6.13 | 9.676296  | -5.40E-02 | 30688637  | 30688760  | NC_000006.11 |
| cg09103291     | 4.43E-08 | 4.87E-09 | -6.13 | 9.6729839 | -1.17E-01 | 90035514  | 90035637  | NC_000015.9  |
| cg13329242     | 4.43E-08 | 4.88E-09 | -6.13 | 9.6724339 | -1.19E-01 | 117382759 | 117382882 | NC_000011.9  |
| cg23047544     | 4.43E-08 | 4.88E-09 | -6.13 | 9.6723501 | -8.91E-02 | 10928211  | 10928334  | NC_000019.9  |
| cg00917471     | 4.43E-08 | 4.88E-09 | -6.13 | 9.6721412 | -1.35E-01 | 43228316  | 43228439  | NC_000001.10 |
| cg09567048     | 4.43E-08 | 4.88E-09 | -6.13 | 9.6720545 | -1.24E-01 | 46456880  | 46457003  | NC_000002.11 |
| ch.16.9041202R | 4.44E-08 | 4.88E-09 | -6.13 | 9.6713578 | -5.48E-02 | 9133701   | 9133824   | NC_000016.9  |
| cg03677492     | 4.44E-08 | 4.88E-09 | -6.13 | 9.6712356 | -1.13E-01 | 80273969  | 80274092  | NC_000017.10 |
| cg05346256     | 4.44E-08 | 4.89E-09 | -6.13 | 9.670683  | -1.71E-01 | 25959372  | 25959495  | NC_000012.11 |
| cg14044426     | 4.44E-08 | 4.89E-09 | -6.13 | 9.6703416 | -1.13E-01 | 32160798  | 32160921  | NC_000006.11 |
| cg02481256     | 4.44E-08 | 4.89E-09 | -6.13 | 9.6701097 | -7.30E-02 | 11465868  | 11465991  | NC_000019.9  |
| ch.9.93373462R | 4.44E-08 | 4.89E-09 | -6.13 | 9.6695985 | -8.45E-03 | 94333641  | 94333764  | NC_000009.11 |
| cg21985132     | 4.44E-08 | 4.89E-09 | -6.13 | 9.669355  | -5.77E-02 | 42086626  | 42086749  | NC_000020.10 |
| cg12590521     | 4.44E-08 | 4.89E-09 | -6.13 | 9.6690808 | -1.11E-01 | 121678474 | 121678597 | NC_000012.11 |
| cg05087309     | 4.45E-08 | 4.90E-09 | -6.12 | 9.6683489 | -7.81E-02 | 53088738  | 53088861  | NC_000016.9  |

|            |          |          |       |           |           |           |           |              |
|------------|----------|----------|-------|-----------|-----------|-----------|-----------|--------------|
| cg20024403 | 4.45E-08 | 4.90E-09 | -6.12 | 9.6676312 | -6.75E-02 | 81039326  | 81039449  | NC_000017.10 |
| cg13670615 | 4.45E-08 | 4.90E-09 | -6.12 | 9.6676068 | -3.72E-02 | 49140625  | 49140748  | NC_000019.9  |
| cg24867665 | 4.45E-08 | 4.91E-09 | -6.12 | 9.666804  | -1.14E-01 | 13546094  | 13546217  | NC_000010.10 |
| cg23357789 | 4.46E-08 | 4.91E-09 | -6.12 | 9.6666081 | -9.74E-02 | 848026    | 848149    | NC_000019.9  |
| cg03589557 | 4.46E-08 | 4.91E-09 | -6.12 | 9.6664717 | -3.46E-02 | 71164283  | 71164406  | NC_000011.9  |
| cg19430423 | 4.46E-08 | 4.91E-09 | -6.12 | 9.6652635 | -1.04E-01 | 41702153  | 41702276  | NC_000019.9  |
| cg02872623 | 4.46E-08 | 4.91E-09 | -6.12 | 9.6649738 | -3.35E-02 | 185304179 | 185304302 | NC_000003.11 |
| cg05418495 | 4.46E-08 | 4.92E-09 | -6.12 | 9.6648705 | -1.09E-01 | 32636305  | 32636428  | NC_000015.9  |
| cg12857638 | 4.46E-08 | 4.92E-09 | -6.12 | 9.66456   | -1.35E-01 | 62212169  | 62212292  | NC_000011.9  |
| cg18187200 | 4.46E-08 | 4.92E-09 | -6.12 | 9.6643844 | -1.45E-01 | 47479939  | 47480062  | NC_000012.11 |
| cg16801954 | 4.47E-08 | 4.92E-09 | -6.12 | 9.664163  | -1.16E-01 | 36916123  | 36916246  | NC_000006.11 |
| cg04231166 | 4.47E-08 | 4.92E-09 | -6.12 | 9.6641351 | -1.36E-02 | 185655124 | 185655247 | NC_000003.11 |
| cg23493751 | 4.47E-08 | 4.93E-09 | -6.12 | 9.6626349 | -7.29E-02 | 46204787  | 46204910  | NC_000003.11 |
| cg13647382 | 4.47E-08 | 4.93E-09 | -6.12 | 9.6625416 | -1.29E-01 | 75912547  | 75912670  | NC_000006.11 |
| cg19275834 | 4.48E-08 | 4.94E-09 | -6.12 | 9.6603067 | -4.41E-02 | 124855809 | 124855932 | NC_000009.11 |
| cg04230403 | 4.49E-08 | 4.95E-09 | -6.12 | 9.6588203 | -1.73E-02 | 90750176  | 90750299  | NC_000010.10 |
| cg09718071 | 4.49E-08 | 4.95E-09 | -6.12 | 9.658457  | -1.05E-01 | 50568845  | 50568968  | NC_000003.11 |
| cg16584392 | 4.50E-08 | 4.96E-09 | -6.12 | 9.6563583 | -1.05E-01 | 17090970  | 17091093  | NC_000001.10 |
| cg25961221 | 4.50E-08 | 4.96E-09 | -6.12 | 9.6560111 | -6.82E-02 | 3775979   | 3776102   | NC_000020.10 |
| cg19502700 | 4.50E-08 | 4.96E-09 | -6.12 | 9.6557611 | -4.24E-02 | 113558183 | 113558306 | NC_000004.11 |
| cg09929879 | 4.51E-08 | 4.97E-09 | -6.12 | 9.6544495 | -9.87E-02 | 343794    | 343917    | NC_000010.10 |
| cg22041610 | 4.51E-08 | 4.97E-09 | -6.12 | 9.654334  | -1.09E-01 | 636122    | 636245    | NC_000002.11 |
| cg11981599 | 4.51E-08 | 4.97E-09 | -6.12 | 9.6540678 | -9.59E-02 | 11566526  | 11566649  | NC_000008.10 |
| cg26227592 | 4.52E-08 | 4.98E-09 | -6.12 | 9.6525477 | -9.30E-02 | 41313786  | 41313909  | NC_000019.9  |
| cg21215811 | 4.52E-08 | 4.98E-09 | -6.12 | 9.6516825 | -4.13E-02 | 40925428  | 40925551  | NC_000017.10 |

|            |          |          |       |           |           |           |           |              |
|------------|----------|----------|-------|-----------|-----------|-----------|-----------|--------------|
| cg13121938 | 4.52E-08 | 4.99E-09 | -6.12 | 9.6510917 | -7.21E-02 | 114871497 | 114871620 | NC_000013.10 |
| cg04318602 | 4.52E-08 | 4.99E-09 | -6.12 | 9.6510702 | -2.09E-02 | 53162623  | 53162746  | NC_000014.8  |
| cg05986067 | 4.52E-08 | 4.99E-09 | -6.12 | 9.650931  | -1.20E-01 | 184908573 | 184908696 | NC_000004.11 |
| cg24565274 | 4.52E-08 | 4.99E-09 | -6.12 | 9.6508923 | -1.56E-01 | 19736253  | 19736376  | NC_000011.9  |
| cg12961926 | 4.52E-08 | 4.99E-09 | -6.12 | 9.6508875 | -9.13E-02 | 80839300  | 80839423  | NC_000017.10 |
| cg12207450 | 4.52E-08 | 4.99E-09 | -6.12 | 9.6507437 | -5.57E-02 | 92919335  | 92919458  | NC_000005.9  |
| cg01725872 | 4.52E-08 | 4.99E-09 | -6.12 | 9.6503619 | -7.51E-02 | 45635600  | 45635723  | NC_000022.10 |
| cg04848972 | 4.52E-08 | 4.99E-09 | -6.12 | 9.650219  | -7.33E-02 | 47236123  | 47236246  | NC_000011.9  |
| cg24938761 | 4.53E-08 | 4.99E-09 | -6.12 | 9.6501111 | -1.23E-01 | 2091406   | 2091529   | NC_000019.9  |
| cg14250274 | 4.53E-08 | 4.99E-09 | -6.12 | 9.6499877 | -3.99E-02 | 66206258  | 66206381  | NC_000007.13 |
| cg26399201 | 4.53E-08 | 4.99E-09 | -6.12 | 9.6498755 | -2.98E-02 | 132149404 | 132149527 | NC_000005.9  |
| cg02351082 | 4.53E-08 | 4.99E-09 | -6.12 | 9.6497438 | -6.55E-02 | 179069308 | 179069431 | NC_000005.9  |
| cg04758387 | 4.53E-08 | 5.00E-09 | -6.12 | 9.6483258 | -7.87E-02 | 1851384   | 1851507   | NC_000001.10 |
| cg02654449 | 4.53E-08 | 5.00E-09 | -6.12 | 9.6478762 | -1.24E-01 | 27254785  | 27254908  | NC_000016.9  |
| cg24303076 | 4.54E-08 | 5.00E-09 | -6.12 | 9.6476182 | -6.26E-02 | 45827260  | 45827383  | NC_000011.9  |
| cg26579601 | 4.54E-08 | 5.01E-09 | -6.12 | 9.6467913 | -7.46E-02 | 30724020  | 30724143  | NC_000010.10 |
| cg00228735 | 4.54E-08 | 5.01E-09 | -6.12 | 9.6460054 | -1.15E-01 | 131304505 | 131304628 | NC_000007.13 |
| cg27621513 | 4.54E-08 | 5.01E-09 | -6.12 | 9.6458561 | -1.10E-01 | 118658343 | 118658466 | NC_000005.9  |
| cg14233838 | 4.55E-08 | 5.02E-09 | -6.12 | 9.6450428 | -1.54E-01 | 139548425 | 139548548 | NC_000009.11 |
| cg21288861 | 4.55E-08 | 5.02E-09 | -6.12 | 9.6444099 | -7.35E-02 | 45331061  | 45331184  | NC_000017.10 |
| cg04759114 | 4.55E-08 | 5.02E-09 | -6.12 | 9.6441403 | -9.68E-02 | 2828274   | 2828397   | NC_000011.9  |
| cg16017889 | 4.55E-08 | 5.02E-09 | -6.12 | 9.6439514 | -1.23E-01 | 144303111 | 144303234 | NC_000008.10 |
| cg14121845 | 4.55E-08 | 5.02E-09 | -6.12 | 9.6439128 | -8.90E-02 | 25566513  | 25566636  | NC_000020.10 |
| cg22936253 | 4.56E-08 | 5.03E-09 | -6.12 | 9.6429363 | -1.57E-01 | 90752569  | 90752692  | NC_000010.10 |
| cg21756647 | 4.56E-08 | 5.03E-09 | -6.12 | 9.64269   | -1.37E-01 | 75024611  | 75024734  | NC_000011.9  |

|            |          |          |       |           |           |           |           |              |
|------------|----------|----------|-------|-----------|-----------|-----------|-----------|--------------|
| cg14153654 | 4.56E-08 | 5.03E-09 | -6.12 | 9.6425623 | -6.35E-02 | 8001027   | 8001150   | NC_000001.10 |
| cg00834379 | 4.56E-08 | 5.03E-09 | -6.12 | 9.6418789 | -2.75E-02 | 41827384  | 41827507  | NC_000001.10 |
| cg03578458 | 4.56E-08 | 5.03E-09 | -6.12 | 9.6417634 | -2.17E-02 | 70389891  | 70390014  | NC_000015.9  |
| cg13921324 | 4.56E-08 | 5.03E-09 | -6.12 | 9.6414507 | -5.67E-02 | 99769118  | 99769241  | NC_000007.13 |
| cg06633739 | 4.57E-08 | 5.04E-09 | -6.12 | 9.6406269 | -6.62E-02 | 71570947  | 71571070  | NC_000010.10 |
| cg24294857 | 4.57E-08 | 5.04E-09 | -6.12 | 9.6404034 | -4.78E-02 | 20812821  | 20812944  | NC_000001.10 |
| cg12269394 | 4.57E-08 | 5.04E-09 | -6.12 | 9.6402441 | -8.14E-02 | 205011999 | 205012122 | NC_000001.10 |
| cg09688579 | 4.57E-08 | 5.04E-09 | -6.12 | 9.640186  | -1.53E-01 | 67035965  | 67036088  | NC_000011.9  |
| cg13976219 | 4.57E-08 | 5.05E-09 | -6.12 | 9.6390003 | -4.01E-02 | 7197166   | 7197289   | NC_000019.9  |
| cg19632005 | 4.57E-08 | 5.05E-09 | -6.12 | 9.6387817 | -8.55E-02 | 55092556  | 55092679  | NC_000004.11 |
| cg26257210 | 4.58E-08 | 5.05E-09 | -6.12 | 9.638347  | -1.89E-02 | 6305348   | 6305471   | NC_000001.10 |
| cg14821327 | 4.58E-08 | 5.05E-09 | -6.12 | 9.6383045 | -6.63E-02 | 74699701  | 74699824  | NC_000011.9  |
| cg02749511 | 4.58E-08 | 5.05E-09 | -6.12 | 9.6381013 | -9.09E-02 | 174696522 | 174696645 | NC_000002.11 |
| cg12614789 | 4.58E-08 | 5.05E-09 | -6.12 | 9.6378795 | -7.81E-02 | 76638473  | 76638596  | NC_000015.9  |
| cg16306706 | 4.58E-08 | 5.05E-09 | -6.12 | 9.6376769 | -8.64E-02 | 42643274  | 42643397  | NC_000001.10 |
| cg22014194 | 4.58E-08 | 5.06E-09 | -6.12 | 9.6372342 | -1.04E-01 | 151804306 | 151804429 | NC_000007.13 |
| cg13785883 | 4.58E-08 | 5.06E-09 | -6.12 | 9.6369201 | -2.88E-02 | 71407670  | 71407793  | NC_000015.9  |
| cg14584448 | 4.58E-08 | 5.06E-09 | -6.12 | 9.636855  | -4.39E-02 | 160918900 | 160919023 | NC_000002.11 |
| cg04093381 | 4.58E-08 | 5.06E-09 | -6.12 | 9.6362927 | -1.18E-01 | 9292094   | 9292217   | NC_000001.10 |
| cg00504599 | 4.59E-08 | 5.07E-09 | -6.12 | 9.6353887 | -1.42E-01 | 79428036  | 79428159  | NC_000017.10 |
| cg26821681 | 4.59E-08 | 5.07E-09 | -6.12 | 9.6340065 | -1.46E-01 | 125827396 | 125827519 | NC_000008.10 |
| cg24475598 | 4.60E-08 | 5.08E-09 | -6.12 | 9.633561  | -1.09E-01 | 221712289 | 221712412 | NC_000002.11 |
| cg08656816 | 4.61E-08 | 5.09E-09 | -6.12 | 9.6299345 | -1.52E-01 | 34207454  | 34207577  | NC_000017.10 |
| cg17083685 | 4.62E-08 | 5.10E-09 | -6.12 | 9.6292155 | -8.75E-02 | 90053523  | 90053646  | NC_000013.10 |
| cg17888985 | 4.62E-08 | 5.10E-09 | -6.12 | 9.6281804 | -1.48E-01 | 126898290 | 126898413 | NC_000010.10 |



|            |          |          |       |           |           |           |           |              |
|------------|----------|----------|-------|-----------|-----------|-----------|-----------|--------------|
| cg21341435 | 4.62E-08 | 5.10E-09 | -6.12 | 9.6280883 | -1.27E-01 | 157638259 | 157638382 | NC_000007.13 |
| cg19177722 | 4.62E-08 | 5.10E-09 | -6.12 | 9.6280044 | -4.97E-02 | 10414485  | 10414608  | NC_000006.11 |
| cg13204236 | 4.62E-08 | 5.11E-09 | -6.12 | 9.6275462 | -1.28E-01 | 47476732  | 47476855  | NC_000002.11 |
| cg20918219 | 4.62E-08 | 5.11E-09 | -6.12 | 9.6273773 | -1.04E-01 | 27493854  | 27493977  | NC_000008.10 |
| cg19672694 | 4.63E-08 | 5.11E-09 | -6.12 | 9.6267255 | -4.64E-02 | 40688524  | 40688647  | NC_000005.9  |
| cg07380095 | 4.63E-08 | 5.11E-09 | -6.12 | 9.6266003 | -9.56E-02 | 150920533 | 150920656 | NC_000006.11 |
| cg18444544 | 4.64E-08 | 5.12E-09 | -6.12 | 9.6244021 | -1.26E-01 | 22852741  | 22852864  | NC_000008.10 |
| cg26008464 | 4.64E-08 | 5.12E-09 | -6.12 | 9.6241529 | -1.52E-02 | 134373624 | 134373747 | NC_000006.11 |
| cg00607755 | 4.65E-08 | 5.13E-09 | -6.12 | 9.6223919 | -1.14E-01 | 42274082  | 42274205  | NC_000002.11 |
| cg05359853 | 4.65E-08 | 5.14E-09 | -6.12 | 9.6216443 | -4.71E-02 | 63327142  | 63327265  | NC_000012.11 |
| cg20945738 | 4.65E-08 | 5.14E-09 | -6.12 | 9.6207511 | -9.33E-02 | 108922032 | 108922155 | NC_000013.10 |
| cg03474926 | 4.66E-08 | 5.15E-09 | -6.12 | 9.6202496 | -6.53E-02 | 136023407 | 136023530 | NC_000009.11 |
| cg13227105 | 4.66E-08 | 5.15E-09 | -6.12 | 9.6197897 | -3.87E-02 | 59489041  | 59489164  | NC_000017.10 |
| cg23418510 | 4.66E-08 | 5.15E-09 | -6.12 | 9.6196878 | -1.23E-01 | 25240660  | 25240783  | NC_000010.10 |
| cg00674265 | 4.66E-08 | 5.15E-09 | -6.12 | 9.6195735 | -3.10E-02 | 11350746  | 11350869  | NC_000016.9  |
| cg10922232 | 4.66E-08 | 5.15E-09 | -6.12 | 9.6194867 | -1.01E-01 | 73238491  | 73238614  | NC_000017.10 |
| cg14769570 | 4.66E-08 | 5.15E-09 | -6.12 | 9.6194437 | -5.13E-02 | 101546814 | 101546937 | NC_000003.11 |
| cg18973101 | 4.66E-08 | 5.15E-09 | -6.12 | 9.6187698 | -1.01E-01 | 156251280 | 156251403 | NC_000001.10 |
| cg21743914 | 4.66E-08 | 5.15E-09 | -6.12 | 9.6184418 | -6.81E-02 | 6401045   | 6401168   | NC_000008.10 |
| cg00110695 | 4.67E-08 | 5.16E-09 | -6.12 | 9.6178923 | -5.25E-02 | 99358736  | 99358859  | NC_000006.11 |
| cg08476843 | 4.67E-08 | 5.16E-09 | -6.12 | 9.6178233 | -7.62E-02 | 33760215  | 33760338  | NC_000013.10 |
| cg04843461 | 4.67E-08 | 5.16E-09 | -6.12 | 9.6176618 | -1.36E-01 | 1974661   | 1974784   | NC_000001.10 |
| cg05812171 | 4.67E-08 | 5.16E-09 | -6.12 | 9.6174564 | -3.55E-02 | 100557958 | 100558081 | NC_000011.9  |
| cg17993027 | 4.67E-08 | 5.16E-09 | -6.11 | 9.6167707 | -1.04E-01 | 82543125  | 82543248  | NC_000008.10 |
| cg20080878 | 4.67E-08 | 5.17E-09 | -6.11 | 9.616245  | -1.42E-01 | 126479070 | 126479193 | NC_000008.10 |

|               |          |          |       |           |           |           |           |              |
|---------------|----------|----------|-------|-----------|-----------|-----------|-----------|--------------|
| cg17925829    | 4.67E-08 | 5.17E-09 | -6.11 | 9.6162186 | -9.13E-02 | 36399328  | 36399451  | NC_000019.9  |
| cg01598371    | 4.67E-08 | 5.17E-09 | -6.11 | 9.616069  | -1.07E-01 | 37423428  | 37423551  | NC_000002.11 |
| cg27085488    | 4.68E-08 | 5.17E-09 | -6.11 | 9.6153773 | -1.40E-01 | 60541865  | 60541988  | NC_000005.9  |
| cg15153264    | 4.68E-08 | 5.17E-09 | -6.11 | 9.6151714 | -6.23E-02 | 65169511  | 65169634  | NC_000010.10 |
| cg15163040    | 4.68E-08 | 5.18E-09 | -6.11 | 9.6145426 | -2.20E-02 | 167813423 | 167813546 | NC_000003.11 |
| cg06837799    | 4.68E-08 | 5.18E-09 | -6.11 | 9.6139174 | -1.34E-01 | 27160960  | 27161083  | NC_000007.13 |
| cg05911100    | 4.68E-08 | 5.18E-09 | -6.11 | 9.6136565 | -9.65E-02 | 8333192   | 8333315   | NC_000012.11 |
| cg24396566    | 4.69E-08 | 5.18E-09 | -6.11 | 9.6132084 | -5.00E-02 | 52904500  | 52904623  | NC_000004.11 |
| cg10700459    | 4.69E-08 | 5.19E-09 | -6.11 | 9.611962  | -9.89E-02 | 30231675  | 30231798  | NC_000006.11 |
| cg07755760    | 4.69E-08 | 5.19E-09 | -6.11 | 9.6117216 | -1.01E-01 | 196943586 | 196943709 | NC_000003.11 |
| cg00286214    | 4.69E-08 | 5.19E-09 | -6.11 | 9.6114986 | -3.22E-02 | 2771425   | 2771548   | NC_000016.9  |
| cg00256374    | 4.69E-08 | 5.19E-09 | -6.11 | 9.6112616 | -2.82E-02 | 1383699   | 1383822   | NC_000019.9  |
| cg02828016    | 4.70E-08 | 5.20E-09 | -6.11 | 9.6107092 | -2.45E-02 | 24646676  | 24646799  | NC_000006.11 |
| cg19541916    | 4.70E-08 | 5.20E-09 | -6.11 | 9.6100031 | -1.69E-01 | 19674105  | 19674228  | NC_000002.11 |
| cg20954708    | 4.70E-08 | 5.20E-09 | -6.11 | 9.6097829 | -2.23E-02 | 147525710 | 147525833 | NC_000006.11 |
| cg02000275    | 4.70E-08 | 5.20E-09 | -6.11 | 9.6096541 | -1.79E-01 | 34488059  | 34488182  | NC_000014.8  |
| cg07707817    | 4.71E-08 | 5.21E-09 | -6.11 | 9.6086477 | -9.64E-02 | 121285706 | 121285829 | NC_000003.11 |
| cg03479657    | 4.71E-08 | 5.21E-09 | -6.11 | 9.6085425 | -2.38E-02 | 85108429  | 85108552  | NC_000002.11 |
| cg21415060    | 4.71E-08 | 5.21E-09 | -6.11 | 9.608071  | -1.01E-01 | 159277295 | 159277418 | NC_000001.10 |
| ch.14.564806R | 4.71E-08 | 5.21E-09 | -6.11 | 9.6075761 | -4.03E-02 | 50890364  | 50890487  | NC_000014.8  |
| cg10521767    | 4.71E-08 | 5.21E-09 | -6.11 | 9.6075277 | -8.47E-02 | 237116052 | 237116175 | NC_000001.10 |
| cg16297530    | 4.71E-08 | 5.21E-09 | -6.11 | 9.6071796 | -7.75E-02 | 93509658  | 93509781  | NC_000010.10 |
| cg24593138    | 4.72E-08 | 5.22E-09 | -6.11 | 9.6064803 | -1.41E-01 | 19687988  | 19688111  | NC_000001.10 |
| cg24955895    | 4.72E-08 | 5.22E-09 | -6.11 | 9.6057199 | -1.01E-01 | 25425923  | 25426046  | NC_000001.10 |
| cg08818716    | 4.72E-08 | 5.22E-09 | -6.11 | 9.6053289 | -8.50E-02 | 4876909   | 4877032   | NC_000007.13 |

|            |          |          |       |           |           |           |           |              |
|------------|----------|----------|-------|-----------|-----------|-----------|-----------|--------------|
| cg04275506 | 4.72E-08 | 5.22E-09 | -6.11 | 9.6052495 | -1.21E-01 | 12445337  | 12445460  | NC_000001.10 |
| cg06631222 | 4.73E-08 | 5.23E-09 | -6.11 | 9.6039467 | -8.17E-02 | 809476    | 809599    | NC_000016.9  |
| cg05209515 | 4.73E-08 | 5.23E-09 | -6.11 | 9.6038624 | -1.03E-01 | 37585549  | 37585672  | NC_000022.10 |
| cg20156116 | 4.73E-08 | 5.24E-09 | -6.11 | 9.6031028 | -1.02E-01 | 156699437 | 156699560 | NC_000001.10 |
| cg18145189 | 4.73E-08 | 5.24E-09 | -6.11 | 9.6030382 | -4.18E-02 | 66137134  | 66137257  | NC_000011.9  |
| cg13378865 | 4.73E-08 | 5.24E-09 | -6.11 | 9.6030218 | -1.68E-02 | 26660005  | 26660128  | NC_000006.11 |
| cg05890550 | 4.73E-08 | 5.24E-09 | -6.11 | 9.6024489 | -1.03E-01 | 2699706   | 2699829   | NC_000017.10 |
| cg13512859 | 4.74E-08 | 5.24E-09 | -6.11 | 9.6017166 | -9.00E-02 | 140127379 | 140127502 | NC_000009.11 |
| cg10339593 | 4.74E-08 | 5.25E-09 | -6.11 | 9.6004169 | -4.92E-02 | 48442688  | 48442811  | NC_000019.9  |
| cg04509526 | 4.75E-08 | 5.25E-09 | -6.11 | 9.5998655 | -1.22E-01 | 87679579  | 87679702  | NC_000016.9  |
| cg02598335 | 4.75E-08 | 5.26E-09 | -6.11 | 9.5980529 | -1.14E-01 | 86337918  | 86338041  | NC_000007.13 |
| cg03330168 | 4.75E-08 | 5.26E-09 | -6.11 | 9.5978595 | -7.33E-02 | 9382066   | 9382189   | NC_000004.11 |
| cg24747122 | 4.76E-08 | 5.27E-09 | -6.11 | 9.5970548 | -1.32E-01 | 63053929  | 63054052  | NC_000017.10 |
| cg01076217 | 4.76E-08 | 5.27E-09 | -6.11 | 9.5968383 | -1.22E-01 | 137364811 | 137364934 | NC_000006.11 |
| cg01099220 | 4.76E-08 | 5.27E-09 | -6.11 | 9.5966866 | -1.18E-01 | 145747659 | 145747782 | NC_000008.10 |
| cg09115607 | 4.76E-08 | 5.27E-09 | -6.11 | 9.5963851 | -1.09E-01 | 2442958   | 2443081   | NC_000005.9  |
| cg15977002 | 4.76E-08 | 5.27E-09 | -6.11 | 9.5963103 | -1.18E-01 | 1418294   | 1418417   | NC_000002.11 |
| cg10461261 | 4.76E-08 | 5.27E-09 | -6.11 | 9.5962103 | -1.13E-01 | 78109450  | 78109573  | NC_000015.9  |
| cg09371693 | 4.77E-08 | 5.28E-09 | -6.11 | 9.5943136 | -3.37E-02 | 57855541  | 57855664  | NC_000012.11 |
| cg04111054 | 4.77E-08 | 5.29E-09 | -6.11 | 9.5936013 | -1.17E-01 | 131400334 | 131400457 | NC_000004.11 |
| cg09688127 | 4.78E-08 | 5.29E-09 | -6.11 | 9.5928536 | -1.68E-01 | 93770794  | 93770917  | NC_000012.11 |
| cg09716613 | 4.78E-08 | 5.29E-09 | -6.11 | 9.5927145 | -1.50E-01 | 33000534  | 33000657  | NC_000013.10 |
| cg11398451 | 4.79E-08 | 5.30E-09 | -6.11 | 9.5906897 | -6.26E-02 | 91136069  | 91136192  | NC_000015.9  |
| cg04833713 | 4.79E-08 | 5.31E-09 | -6.11 | 9.5890151 | -1.34E-01 | 74871078  | 74871201  | NC_000010.10 |
| cg18865445 | 4.80E-08 | 5.31E-09 | -6.11 | 9.588937  | -1.26E-01 | 110522265 | 110522388 | NC_000013.10 |

|            |          |          |       |           |           |           |           |              |
|------------|----------|----------|-------|-----------|-----------|-----------|-----------|--------------|
| cg05076755 | 4.80E-08 | 5.31E-09 | -6.11 | 9.5886672 | -1.19E-01 | 76381148  | 76381271  | NC_000011.9  |
| cg02975505 | 4.80E-08 | 5.32E-09 | -6.11 | 9.5878212 | -6.40E-02 | 36625168  | 36625291  | NC_000001.10 |
| cg14576319 | 4.81E-08 | 5.33E-09 | -6.11 | 9.5860996 | -9.19E-02 | 171175713 | 171175836 | NC_000003.11 |
| cg24321774 | 4.81E-08 | 5.33E-09 | -6.11 | 9.5858866 | -4.69E-02 | 27193835  | 27193958  | NC_000002.11 |
| cg00401972 | 4.81E-08 | 5.33E-09 | -6.11 | 9.5852602 | -1.08E-01 | 66400404  | 66400527  | NC_000016.9  |
| cg07516712 | 4.81E-08 | 5.33E-09 | -6.11 | 9.5852163 | -1.07E-01 | 107798547 | 107798670 | NC_000007.13 |
| cg09249800 | 4.81E-08 | 5.33E-09 | -6.11 | 9.5851407 | -1.02E-01 | 6341287   | 6341410   | NC_000001.10 |
| cg01173978 | 4.82E-08 | 5.34E-09 | -6.11 | 9.5844805 | -1.33E-01 | 14097192  | 14097315  | NC_000016.9  |
| cg07363330 | 4.82E-08 | 5.34E-09 | -6.11 | 9.5842013 | -1.19E-01 | 55148493  | 55148616  | NC_000005.9  |
| cg04199354 | 4.82E-08 | 5.34E-09 | -6.11 | 9.5837393 | -1.30E-01 | 94655935  | 94656058  | NC_000012.11 |
| cg25951811 | 4.82E-08 | 5.34E-09 | -6.11 | 9.5835919 | -3.96E-02 | 96858416  | 96858539  | NC_000014.8  |
| cg21963318 | 4.82E-08 | 5.35E-09 | -6.11 | 9.5826054 | -5.90E-02 | 85832920  | 85833043  | NC_000016.9  |
| cg27317017 | 4.83E-08 | 5.35E-09 | -6.11 | 9.5818997 | -7.59E-02 | 573146    | 573269    | NC_000007.13 |
| cg16619193 | 4.83E-08 | 5.36E-09 | -6.11 | 9.5811732 | -6.69E-02 | 206643301 | 206643424 | NC_000001.10 |
| cg17193961 | 4.83E-08 | 5.36E-09 | -6.11 | 9.5807224 | -1.33E-01 | 152350    | 152473    | NC_000017.10 |
| cg27649653 | 4.83E-08 | 5.36E-09 | -6.11 | 9.5806404 | -6.92E-02 | 58789751  | 58789874  | NC_000019.9  |
| cg12071073 | 4.83E-08 | 5.36E-09 | -6.11 | 9.5805912 | -7.62E-02 | 52436281  | 52436404  | NC_000013.10 |
| cg23420005 | 4.83E-08 | 5.36E-09 | -6.11 | 9.5804122 | -3.13E-02 | 34957718  | 34957841  | NC_000009.11 |
| cg14753355 | 4.83E-08 | 5.36E-09 | -6.11 | 9.5804103 | -1.58E-01 | 16999668  | 16999791  | NC_000019.9  |
| cg02501984 | 4.83E-08 | 5.36E-09 | -6.11 | 9.5801984 | -3.22E-02 | 133263946 | 133264069 | NC_000012.11 |
| cg09503566 | 4.84E-08 | 5.37E-09 | -6.11 | 9.5786668 | -1.16E-01 | 15907489  | 15907612  | NC_000004.11 |
| cg01245356 | 4.85E-08 | 5.38E-09 | -6.11 | 9.5775145 | -5.62E-02 | 28559620  | 28559743  | NC_000001.10 |
| cg06781563 | 4.85E-08 | 5.38E-09 | -6.11 | 9.5771348 | -3.35E-02 | 85646914  | 85647037  | NC_000016.9  |
| cg06613203 | 4.85E-08 | 5.38E-09 | -6.11 | 9.5768895 | -1.64E-02 | 50143480  | 50143603  | NC_000019.9  |
| cg14793844 | 4.85E-08 | 5.38E-09 | -6.11 | 9.5766223 | -1.42E-01 | 100516880 | 100517003 | NC_000002.11 |

|               |          |          |       |           |           |           |           |              |
|---------------|----------|----------|-------|-----------|-----------|-----------|-----------|--------------|
| cg10486610    | 4.86E-08 | 5.39E-09 | -6.11 | 9.575003  | -7.47E-02 | 61298677  | 61298800  | NC_000020.10 |
| cg25640892    | 4.86E-08 | 5.39E-09 | -6.11 | 9.5749788 | -2.85E-02 | 84743294  | 84743417  | NC_000006.11 |
| cg07712243    | 4.87E-08 | 5.40E-09 | -6.11 | 9.5737008 | -2.97E-02 | 6279561   | 6279684   | NC_000019.9  |
| cg25137372    | 4.87E-08 | 5.40E-09 | -6.11 | 9.5729956 | -8.05E-02 | 96390059  | 96390182  | NC_000012.11 |
| cg27509306    | 4.88E-08 | 5.41E-09 | -6.11 | 9.5705969 | -1.95E-02 | 510604    | 510727    | NC_000012.11 |
| cg19054708    | 4.89E-08 | 5.42E-09 | -6.11 | 9.569526  | -1.48E-02 | 133405370 | 133405493 | NC_000012.11 |
| cg18949409    | 4.89E-08 | 5.43E-09 | -6.11 | 9.5683834 | -2.55E-02 | 197036502 | 197036625 | NC_000002.11 |
| cg08313168    | 4.89E-08 | 5.43E-09 | -6.11 | 9.5683382 | -6.45E-02 | 7315531   | 7315654   | NC_000012.11 |
| cg20450058    | 4.89E-08 | 5.43E-09 | -6.11 | 9.5680166 | -1.30E-01 | 111152708 | 111152831 | NC_000013.10 |
| cg04396112    | 4.89E-08 | 5.43E-09 | -6.11 | 9.5675754 | -1.61E-01 | 2151007   | 2151130   | NC_000007.13 |
| cg09501282    | 4.90E-08 | 5.43E-09 | -6.11 | 9.5671638 | -1.18E-01 | 88267863  | 88267986  | NC_000016.9  |
| cg01845356    | 4.90E-08 | 5.44E-09 | -6.11 | 9.5665932 | -1.00E-01 | 113898568 | 113898691 | NC_000003.11 |
| cg16588073    | 4.90E-08 | 5.44E-09 | -6.11 | 9.5661788 | -5.23E-02 | 156647247 | 156647370 | NC_000001.10 |
| ch.4.1478851R | 4.91E-08 | 5.44E-09 | -6.1  | 9.5650238 | -1.47E-02 | 76739356  | 76739479  | NC_000004.11 |
| cg13580749    | 4.91E-08 | 5.45E-09 | -6.1  | 9.5645962 | -1.48E-01 | 102181570 | 102181693 | NC_000009.11 |
| cg17452615    | 4.91E-08 | 5.45E-09 | -6.1  | 9.5634907 | -1.52E-01 | 122019080 | 122019203 | NC_000012.11 |
| cg26743024    | 4.92E-08 | 5.46E-09 | -6.1  | 9.5628599 | -8.69E-02 | 64960282  | 64960405  | NC_000017.10 |
| cg12210527    | 4.92E-08 | 5.46E-09 | -6.1  | 9.5622843 | -6.22E-02 | 121790694 | 121790817 | NC_000012.11 |
| cg03600516    | 4.92E-08 | 5.46E-09 | -6.1  | 9.5622313 | -3.34E-02 | 14581651  | 14581774  | NC_000005.9  |
| ch.18.807506F | 4.92E-08 | 5.46E-09 | -6.1  | 9.5617672 | -4.42E-02 | 42170111  | 42170234  | NC_000018.9  |
| cg19257979    | 4.92E-08 | 5.46E-09 | -6.1  | 9.5616025 | -2.53E-02 | 37101387  | 37101510  | NC_000020.10 |
| cg00325920    | 4.92E-08 | 5.46E-09 | -6.1  | 9.5615769 | -7.53E-02 | 61776005  | 61776128  | NC_000003.11 |
| cg00364457    | 4.92E-08 | 5.46E-09 | -6.1  | 9.5614739 | -8.50E-02 | 38608738  | 38608861  | NC_000006.11 |
| cg04314555    | 4.93E-08 | 5.47E-09 | -6.1  | 9.5606688 | -4.28E-02 | 84652472  | 84652595  | NC_000016.9  |
| cg21583565    | 4.93E-08 | 5.47E-09 | -6.1  | 9.5597586 | -6.26E-02 | 174219336 | 174219459 | NC_000002.11 |

|                |          |          |      |           |           |           |           |              |
|----------------|----------|----------|------|-----------|-----------|-----------|-----------|--------------|
| cg06675531     | 4.93E-08 | 5.47E-09 | -6.1 | 9.5596073 | -1.10E-01 | 150019123 | 150019246 | NC_000005.9  |
| cg00183639     | 4.94E-08 | 5.48E-09 | -6.1 | 9.5581986 | -1.29E-01 | 47834055  | 47834178  | NC_000020.10 |
| cg05980111     | 4.94E-08 | 5.48E-09 | -6.1 | 9.5581616 | -9.21E-02 | 124395277 | 124395400 | NC_000003.11 |
| cg01737507     | 4.94E-08 | 5.48E-09 | -6.1 | 9.5578319 | -5.82E-02 | 122372093 | 122372216 | NC_000005.9  |
| cg04612198     | 4.95E-08 | 5.49E-09 | -6.1 | 9.5562451 | -6.18E-02 | 61880024  | 61880147  | NC_000011.9  |
| cg00068810     | 4.95E-08 | 5.50E-09 | -6.1 | 9.5551158 | -6.15E-02 | 75857963  | 75858086  | NC_000004.11 |
| cg24532669     | 4.96E-08 | 5.50E-09 | -6.1 | 9.5544602 | -1.85E-02 | 66112147  | 66112270  | NC_000011.9  |
| cg00169897     | 4.97E-08 | 5.52E-09 | -6.1 | 9.5512554 | -1.26E-01 | 89098782  | 89098905  | NC_000016.9  |
| cg04308589     | 4.97E-08 | 5.52E-09 | -6.1 | 9.5511416 | -1.50E-01 | 79110881  | 79111004  | NC_000010.10 |
| cg07580831     | 4.97E-08 | 5.52E-09 | -6.1 | 9.5507715 | -1.18E-01 | 79385573  | 79385696  | NC_000002.11 |
| cg14002950     | 4.98E-08 | 5.53E-09 | -6.1 | 9.5496928 | -3.19E-02 | 65245129  | 65245252  | NC_000011.9  |
| cg22691336     | 4.98E-08 | 5.53E-09 | -6.1 | 9.5496511 | -7.86E-02 | 1292638   | 1292761   | NC_000001.10 |
| cg10088041     | 4.98E-08 | 5.54E-09 | -6.1 | 9.5486059 | -9.45E-02 | 45670872  | 45670995  | NC_000015.9  |
| cg12715285     | 4.99E-08 | 5.54E-09 | -6.1 | 9.5477319 | -1.61E-01 | 3504125   | 3504248   | NC_000001.10 |
| cg15624624     | 4.99E-08 | 5.54E-09 | -6.1 | 9.5474475 | -1.03E-01 | 114819357 | 114819480 | NC_000010.10 |
| ch.14.1783623F | 4.99E-08 | 5.55E-09 | -6.1 | 9.5467485 | -4.98E-02 | 103166835 | 103166958 | NC_000014.8  |
| cg17974515     | 4.99E-08 | 5.55E-09 | -6.1 | 9.546583  | -1.05E-01 | 2252516   | 2252639   | NC_000001.10 |
| cg17266431     | 4.99E-08 | 5.55E-09 | -6.1 | 9.5464101 | -1.06E-01 | 1711069   | 1711192   | NC_000001.10 |
| cg11135108     | 5.00E-08 | 5.55E-09 | -6.1 | 9.5460755 | -1.18E-01 | 154929791 | 154929914 | NC_000001.10 |
| cg24496614     | 5.00E-08 | 5.55E-09 | -6.1 | 9.5459147 | -6.05E-02 | 61735970  | 61736093  | NC_000011.9  |
| cg25735922     | 5.00E-08 | 5.55E-09 | -6.1 | 9.5458414 | -5.24E-02 | 76432800  | 76432923  | NC_000011.9  |
| cg22262704     | 5.00E-08 | 5.55E-09 | -6.1 | 9.5453902 | -9.44E-02 | 23861280  | 23861403  | NC_000020.10 |
| cg12163545     | 5.00E-08 | 5.56E-09 | -6.1 | 9.5447084 | -4.67E-02 | 1755338   | 1755461   | NC_000019.9  |
| cg26618058     | 5.01E-08 | 5.57E-09 | -6.1 | 9.5432921 | -1.69E-01 | 118022239 | 118022362 | NC_000012.11 |
| cg06329143     | 5.01E-08 | 5.57E-09 | -6.1 | 9.5428857 | -5.49E-02 | 48556512  | 48556635  | NC_000018.9  |

|            |          |          |      |           |           |           |           |              |
|------------|----------|----------|------|-----------|-----------|-----------|-----------|--------------|
| cg11680855 | 5.02E-08 | 5.58E-09 | -6.1 | 9.5412651 | -3.47E-02 | 54694179  | 54694302  | NC_000019.9  |
| cg25591451 | 5.02E-08 | 5.58E-09 | -6.1 | 9.5405397 | -1.12E-01 | 99517509  | 99517632  | NC_000007.13 |
| cg03549739 | 5.03E-08 | 5.59E-09 | -6.1 | 9.5387154 | -1.25E-01 | 86163631  | 86163754  | NC_000002.11 |
| cg00637688 | 5.04E-08 | 5.61E-09 | -6.1 | 9.5365038 | -5.23E-02 | 135170000 | 135170123 | NC_000005.9  |
| cg24514773 | 5.05E-08 | 5.61E-09 | -6.1 | 9.5358949 | -8.38E-02 | 119421604 | 119421727 | NC_000003.11 |
| cg18291422 | 5.06E-08 | 5.62E-09 | -6.1 | 9.5337283 | -9.58E-02 | 147171560 | 147171683 | NC_000006.11 |
| cg11251378 | 5.06E-08 | 5.63E-09 | -6.1 | 9.5331328 | -4.30E-02 | 179344870 | 179344993 | NC_000002.11 |
| cg13090671 | 5.07E-08 | 5.63E-09 | -6.1 | 9.5317513 | -4.42E-02 | 31431002  | 31431125  | NC_000006.11 |
| cg16847428 | 5.07E-08 | 5.64E-09 | -6.1 | 9.53004   | -1.13E-01 | 26095438  | 26095561  | NC_000004.11 |
| cg22341848 | 5.08E-08 | 5.65E-09 | -6.1 | 9.5289962 | -9.51E-02 | 24106359  | 24106482  | NC_000001.10 |
| cg23449122 | 5.08E-08 | 5.65E-09 | -6.1 | 9.528791  | -9.61E-02 | 2337492   | 2337615   | NC_000008.10 |
| cg15000071 | 5.08E-08 | 5.65E-09 | -6.1 | 9.5285794 | -8.91E-02 | 134889493 | 134889616 | NC_000003.11 |
| cg03172717 | 5.09E-08 | 5.66E-09 | -6.1 | 9.5273874 | -4.94E-02 | 51565268  | 51565391  | NC_000010.10 |
| cg20333067 | 5.09E-08 | 5.66E-09 | -6.1 | 9.5267489 | -6.05E-02 | 30676942  | 30677065  | NC_000017.10 |
| cg14515791 | 5.09E-08 | 5.66E-09 | -6.1 | 9.5264048 | -1.21E-01 | 178310545 | 178310668 | NC_000001.10 |
| cg01375285 | 5.10E-08 | 5.67E-09 | -6.1 | 9.5248199 | -6.05E-02 | 85843044  | 85843167  | NC_000002.11 |
| cg21818807 | 5.10E-08 | 5.67E-09 | -6.1 | 9.524768  | -8.97E-02 | 78894477  | 78894600  | NC_000017.10 |
| cg00007426 | 5.10E-08 | 5.68E-09 | -6.1 | 9.5239572 | -1.18E-01 | 240404782 | 240404905 | NC_000002.11 |
| cg06964027 | 5.11E-08 | 5.69E-09 | -6.1 | 9.5227613 | -6.74E-02 | 1073496   | 1073619   | NC_000011.9  |
| cg01882150 | 5.11E-08 | 5.69E-09 | -6.1 | 9.5222517 | -3.09E-02 | 63933998  | 63934121  | NC_000011.9  |
| cg11353064 | 5.11E-08 | 5.69E-09 | -6.1 | 9.5219004 | -2.91E-02 | 57472281  | 57472404  | NC_000012.11 |
| cg21515113 | 5.11E-08 | 5.69E-09 | -6.1 | 9.5216826 | -1.26E-01 | 185676537 | 185676660 | NC_000003.11 |
| cg10378348 | 5.12E-08 | 5.70E-09 | -6.1 | 9.5209747 | -1.24E-01 | 6244619   | 6244742   | NC_000001.10 |
| cg17651095 | 5.12E-08 | 5.70E-09 | -6.1 | 9.5200248 | -3.84E-02 | 93220812  | 93220935  | NC_000007.13 |
| cg16574065 | 5.13E-08 | 5.71E-09 | -6.1 | 9.519243  | -3.87E-02 | 34257726  | 34257849  | NC_000017.10 |

|            |          |          |       |           |           |           |           |              |
|------------|----------|----------|-------|-----------|-----------|-----------|-----------|--------------|
| cg01992990 | 5.13E-08 | 5.71E-09 | -6.1  | 9.5180533 | -2.09E-02 | 202780680 | 202780803 | NC_000001.10 |
| cg13464990 | 5.13E-08 | 5.71E-09 | -6.1  | 9.5177635 | -1.80E-02 | 135421719 | 135421842 | NC_000009.11 |
| cg21577036 | 5.13E-08 | 5.71E-09 | -6.1  | 9.5177344 | -9.86E-02 | 90844799  | 90844922  | NC_000015.9  |
| cg15617699 | 5.14E-08 | 5.72E-09 | -6.1  | 9.5173816 | -4.18E-02 | 38538063  | 38538186  | NC_000003.11 |
| cg09011732 | 5.14E-08 | 5.72E-09 | -6.1  | 9.5173012 | -6.71E-02 | 74730507  | 74730630  | NC_000002.11 |
| cg26901111 | 5.14E-08 | 5.72E-09 | -6.1  | 9.5163436 | -7.05E-02 | 12251917  | 12252040  | NC_000019.9  |
| cg08074162 | 5.14E-08 | 5.72E-09 | -6.1  | 9.5160821 | -7.68E-02 | 98423431  | 98423554  | NC_000002.11 |
| cg00857998 | 5.15E-08 | 5.73E-09 | -6.1  | 9.5153392 | -4.08E-02 | 205179979 | 205180102 | NC_000001.10 |
| cg27113015 | 5.15E-08 | 5.73E-09 | -6.1  | 9.5150382 | -1.11E-01 | 148829044 | 148829167 | NC_000006.11 |
| cg03168249 | 5.15E-08 | 5.73E-09 | -6.1  | 9.5149738 | -3.51E-02 | 102822423 | 102822546 | NC_000010.10 |
| cg17590710 | 5.15E-08 | 5.73E-09 | -6.1  | 9.5148116 | -9.92E-02 | 177740069 | 177740192 | NC_000005.9  |
| cg04737185 | 5.16E-08 | 5.74E-09 | -6.09 | 9.5132107 | -1.07E-01 | 1445041   | 1445164   | NC_000011.9  |
| cg22464548 | 5.16E-08 | 5.75E-09 | -6.09 | 9.512237  | -4.88E-02 | 185000648 | 185000771 | NC_000003.11 |
| cg08507571 | 5.16E-08 | 5.75E-09 | -6.09 | 9.5117854 | -1.05E-01 | 7575543   | 7575666   | NC_000007.13 |
| cg00152838 | 5.17E-08 | 5.76E-09 | -6.09 | 9.5097939 | -5.66E-02 | 24741724  | 24741847  | NC_000016.9  |
| cg10832714 | 5.17E-08 | 5.76E-09 | -6.09 | 9.5097186 | -1.18E-01 | 70901437  | 70901560  | NC_000012.11 |
| cg13019844 | 5.17E-08 | 5.76E-09 | -6.09 | 9.5096076 | -7.52E-02 | 170589897 | 170590020 | NC_000006.11 |
| cg23834228 | 5.18E-08 | 5.77E-09 | -6.09 | 9.5086712 | -2.62E-02 | 73358657  | 73358780  | NC_000011.9  |
| cg12108146 | 5.18E-08 | 5.77E-09 | -6.09 | 9.5080726 | -1.01E-01 | 144329866 | 144329989 | NC_000008.10 |
| cg18555073 | 5.18E-08 | 5.77E-09 | -6.09 | 9.5074486 | -1.15E-01 | 45002662  | 45002785  | NC_000015.9  |
| cg07411798 | 5.19E-08 | 5.78E-09 | -6.09 | 9.5070264 | -3.18E-02 | 33168516  | 33168639  | NC_000006.11 |
| cg04915618 | 5.19E-08 | 5.78E-09 | -6.09 | 9.5070231 | -1.35E-01 | 124304960 | 124305083 | NC_000003.11 |
| cg21216828 | 5.19E-08 | 5.78E-09 | -6.09 | 9.5060807 | -7.50E-02 | 15560076  | 15560199  | NC_000019.9  |
| cg26365847 | 5.19E-08 | 5.79E-09 | -6.09 | 9.5054828 | -1.01E-01 | 90921585  | 90921708  | NC_000014.8  |
| cg01642901 | 5.20E-08 | 5.79E-09 | -6.09 | 9.5052423 | -1.13E-01 | 170190012 | 170190135 | NC_000004.11 |



|            |          |          |       |           |           |           |           |              |
|------------|----------|----------|-------|-----------|-----------|-----------|-----------|--------------|
| cg05445490 | 5.20E-08 | 5.79E-09 | -6.09 | 9.5051121 | -1.08E-01 | 131893019 | 131893142 | NC_000011.9  |
| cg13582435 | 5.20E-08 | 5.79E-09 | -6.09 | 9.5051027 | -1.07E-01 | 53096481  | 53096604  | NC_000015.9  |
| cg05513583 | 5.20E-08 | 5.79E-09 | -6.09 | 9.5050892 | -1.07E-01 | 3829456   | 3829579   | NC_000010.10 |
| cg02364970 | 5.20E-08 | 5.80E-09 | -6.09 | 9.5035962 | -1.60E-01 | 77921375  | 77921498  | NC_000017.10 |
| cg06503573 | 5.20E-08 | 5.80E-09 | -6.09 | 9.5035616 | -8.36E-02 | 1949039   | 1949162   | NC_000011.9  |
| cg07820280 | 5.20E-08 | 5.80E-09 | -6.09 | 9.5034671 | -1.22E-01 | 6532571   | 6532694   | NC_000001.10 |
| cg01962105 | 5.20E-08 | 5.80E-09 | -6.09 | 9.5034477 | -2.74E-02 | 30181212  | 30181335  | NC_000006.11 |
| cg22676516 | 5.21E-08 | 5.80E-09 | -6.09 | 9.5028005 | -1.05E-01 | 157808983 | 157809106 | NC_000007.13 |
| cg09129563 | 5.21E-08 | 5.81E-09 | -6.09 | 9.5020155 | -3.13E-02 | 179198950 | 179199073 | NC_000001.10 |
| cg10085326 | 5.21E-08 | 5.81E-09 | -6.09 | 9.5018244 | -1.34E-01 | 102826680 | 102826803 | NC_000011.9  |
| cg08004073 | 5.21E-08 | 5.81E-09 | -6.09 | 9.5015151 | -1.82E-01 | 169377725 | 169377848 | NC_000003.11 |
| cg15554087 | 5.21E-08 | 5.81E-09 | -6.09 | 9.5014172 | -1.28E-01 | 8404216   | 8404339   | NC_000001.10 |
| cg23172057 | 5.22E-08 | 5.81E-09 | -6.09 | 9.500772  | -1.01E-01 | 113800351 | 113800474 | NC_000013.10 |
| cg23382741 | 5.22E-08 | 5.82E-09 | -6.09 | 9.5005345 | -1.36E-01 | 41121320  | 41121443  | NC_000015.9  |
| cg03807883 | 5.22E-08 | 5.82E-09 | -6.09 | 9.5001714 | -9.24E-02 | 36535685  | 36535808  | NC_000011.9  |
| cg18079948 | 5.23E-08 | 5.83E-09 | -6.09 | 9.4984551 | -1.13E-01 | 20009221  | 20009344  | NC_000010.10 |
| cg13584882 | 5.23E-08 | 5.83E-09 | -6.09 | 9.4983277 | -1.28E-01 | 74836656  | 74836779  | NC_000010.10 |
| cg16600432 | 5.23E-08 | 5.83E-09 | -6.09 | 9.4975847 | -6.00E-02 | 64970085  | 64970208  | NC_000014.8  |
| cg13353879 | 5.24E-08 | 5.84E-09 | -6.09 | 9.4965254 | -4.95E-02 | 1012098   | 1012221   | NC_000019.9  |
| cg08740063 | 5.24E-08 | 5.84E-09 | -6.09 | 9.4963051 | -9.69E-02 | 51180192  | 51180315  | NC_000012.11 |
| cg04495299 | 5.24E-08 | 5.85E-09 | -6.09 | 9.4954894 | -8.13E-02 | 5370601   | 5370724   | NC_000007.13 |
| cg00462202 | 5.25E-08 | 5.85E-09 | -6.09 | 9.494684  | -2.71E-02 | 67374668  | 67374791  | NC_000011.9  |
| cg22889914 | 5.25E-08 | 5.85E-09 | -6.09 | 9.4946675 | -1.25E-01 | 99331332  | 99331455  | NC_000010.10 |
| cg02845997 | 5.25E-08 | 5.85E-09 | -6.09 | 9.4945961 | -5.49E-02 | 96631473  | 96631596  | NC_000012.11 |
| cg12957265 | 5.25E-08 | 5.85E-09 | -6.09 | 9.4944814 | -7.72E-02 | 57026014  | 57026137  | NC_000015.9  |

|            |          |          |       |           |           |           |           |              |
|------------|----------|----------|-------|-----------|-----------|-----------|-----------|--------------|
| cg26907472 | 5.25E-08 | 5.85E-09 | -6.09 | 9.4940245 | -1.05E-01 | 69006828  | 69006951  | NC_000016.9  |
| cg15030449 | 5.25E-08 | 5.86E-09 | -6.09 | 9.4938694 | -8.96E-02 | 2780395   | 2780518   | NC_000001.10 |
| cg02907402 | 5.25E-08 | 5.86E-09 | -6.09 | 9.4935894 | -1.31E-01 | 30079425  | 30079548  | NC_000006.11 |
| cg11739297 | 5.25E-08 | 5.86E-09 | -6.09 | 9.4934666 | -1.46E-01 | 100644502 | 100644625 | NC_000014.8  |
| cg01710147 | 5.25E-08 | 5.86E-09 | -6.09 | 9.4933987 | -1.00E-01 | 207233419 | 207233542 | NC_000001.10 |
| cg06793728 | 5.25E-08 | 5.86E-09 | -6.09 | 9.4932814 | -7.68E-02 | 54942853  | 54942976  | NC_000012.11 |
| cg23658014 | 5.25E-08 | 5.86E-09 | -6.09 | 9.4932687 | -3.82E-02 | 185827776 | 185827899 | NC_000003.11 |
| cg07817967 | 5.26E-08 | 5.87E-09 | -6.09 | 9.4919329 | -2.00E-01 | 184721222 | 184721345 | NC_000001.10 |
| cg25890936 | 5.26E-08 | 5.87E-09 | -6.09 | 9.4917406 | -1.08E-01 | 68179006  | 68179129  | NC_000011.9  |
| cg21101222 | 5.26E-08 | 5.87E-09 | -6.09 | 9.4911232 | -2.89E-02 | 151138161 | 151138284 | NC_000005.9  |
| cg00189101 | 5.26E-08 | 5.87E-09 | -6.09 | 9.4910086 | -4.33E-02 | 242088304 | 242088427 | NC_000002.11 |
| cg15609373 | 5.27E-08 | 5.88E-09 | -6.09 | 9.4906241 | -1.22E-01 | 41087721  | 41087844  | NC_000005.9  |
| cg15189233 | 5.27E-08 | 5.88E-09 | -6.09 | 9.4906157 | -6.58E-02 | 35939766  | 35939889  | NC_000019.9  |
| cg04478428 | 5.27E-08 | 5.88E-09 | -6.09 | 9.4902808 | -7.38E-02 | 61584072  | 61584195  | NC_000020.10 |
| cg24336718 | 5.27E-08 | 5.88E-09 | -6.09 | 9.4901817 | -3.53E-02 | 28283093  | 28283216  | NC_000003.11 |
| cg16122716 | 5.27E-08 | 5.88E-09 | -6.09 | 9.4901367 | -1.18E-01 | 206679959 | 206680082 | NC_000001.10 |
| cg01014486 | 5.27E-08 | 5.88E-09 | -6.09 | 9.4899174 | -3.31E-02 | 2598706   | 2598829   | NC_000007.13 |
| cg18542458 | 5.27E-08 | 5.88E-09 | -6.09 | 9.4896951 | -5.10E-02 | 82555552  | 82555675  | NC_000015.9  |
| cg18808466 | 5.27E-08 | 5.88E-09 | -6.09 | 9.4891332 | -1.58E-01 | 95293954  | 95294077  | NC_000013.10 |
| cg05444541 | 5.27E-08 | 5.88E-09 | -6.09 | 9.4890496 | -1.18E-01 | 17804740  | 17804863  | NC_000017.10 |
| cg16238993 | 5.27E-08 | 5.88E-09 | -6.09 | 9.4890154 | -2.19E-01 | 1132372   | 1132495   | NC_000019.9  |
| cg18022893 | 5.27E-08 | 5.89E-09 | -6.09 | 9.4889243 | -1.42E-01 | 44951225  | 44951348  | NC_000001.10 |
| cg05535113 | 5.28E-08 | 5.89E-09 | -6.09 | 9.4881232 | -1.45E-01 | 71559579  | 71559702  | NC_000016.9  |
| cg18810691 | 5.28E-08 | 5.89E-09 | -6.09 | 9.4876716 | -1.16E-01 | 151130479 | 151130602 | NC_000007.13 |
| cg16700620 | 5.28E-08 | 5.90E-09 | -6.09 | 9.4873113 | -1.40E-02 | 54963754  | 54963877  | NC_000016.9  |

|            |          |          |       |           |           |           |           |              |
|------------|----------|----------|-------|-----------|-----------|-----------|-----------|--------------|
| cg17429870 | 5.29E-08 | 5.91E-09 | -6.09 | 9.4855989 | -1.25E-01 | 1463662   | 1463785   | NC_000011.9  |
| cg26944052 | 5.29E-08 | 5.91E-09 | -6.09 | 9.4850078 | -2.11E-02 | 100425154 | 100425277 | NC_000007.13 |
| cg21208107 | 5.30E-08 | 5.91E-09 | -6.09 | 9.4844485 | -1.21E-01 | 157073270 | 157073393 | NC_000007.13 |
| cg27508021 | 5.30E-08 | 5.91E-09 | -6.09 | 9.4844391 | -6.00E-02 | 104846094 | 104846217 | NC_000010.10 |
| cg09990852 | 5.30E-08 | 5.92E-09 | -6.09 | 9.4839694 | -7.47E-02 | 71587726  | 71587849  | NC_000004.11 |
| cg26821540 | 5.30E-08 | 5.92E-09 | -6.09 | 9.4839679 | -1.12E-01 | 45115390  | 45115513  | NC_000011.9  |
| cg13321688 | 5.30E-08 | 5.92E-09 | -6.09 | 9.4830504 | -1.13E-01 | 125120406 | 125120529 | NC_000003.11 |
| cg12771187 | 5.31E-08 | 5.92E-09 | -6.09 | 9.4825355 | -1.61E-01 | 116152010 | 116152133 | NC_000007.13 |
| cg07699300 | 5.31E-08 | 5.92E-09 | -6.09 | 9.4825074 | -9.13E-02 | 29392964  | 29393087  | NC_000015.9  |
| cg24480515 | 5.31E-08 | 5.93E-09 | -6.09 | 9.4820415 | -1.32E-01 | 6418440   | 6418563   | NC_000007.13 |
| cg24449091 | 5.31E-08 | 5.93E-09 | -6.09 | 9.4818973 | -8.52E-02 | 167773027 | 167773150 | NC_000001.10 |
| cg14546197 | 5.31E-08 | 5.93E-09 | -6.09 | 9.4814037 | -3.61E-02 | 38137043  | 38137166  | NC_000017.10 |
| cg12337053 | 5.31E-08 | 5.93E-09 | -6.09 | 9.4808276 | -9.20E-02 | 142350647 | 142350770 | NC_000008.10 |
| cg12103802 | 5.32E-08 | 5.94E-09 | -6.09 | 9.4804973 | -6.77E-02 | 91902937  | 91903060  | NC_000014.8  |
| cg07285673 | 5.32E-08 | 5.94E-09 | -6.09 | 9.4804768 | -1.31E-01 | 29337984  | 29338107  | NC_000002.11 |
| cg02102889 | 5.32E-08 | 5.94E-09 | -6.09 | 9.4799858 | -1.13E-01 | 139164723 | 139164846 | NC_000004.11 |
| cg16383910 | 5.32E-08 | 5.94E-09 | -6.09 | 9.4796778 | -1.03E-01 | 78287672  | 78287795  | NC_000015.9  |
| cg27475126 | 5.32E-08 | 5.94E-09 | -6.09 | 9.4795672 | -7.92E-02 | 30303651  | 30303774  | NC_000019.9  |
| cg09298971 | 5.32E-08 | 5.94E-09 | -6.09 | 9.4795372 | -1.20E-01 | 31846249  | 31846372  | NC_000006.11 |
| cg25006823 | 5.32E-08 | 5.95E-09 | -6.09 | 9.4790655 | -8.40E-02 | 67982456  | 67982579  | NC_000014.8  |
| cg14424111 | 5.32E-08 | 5.95E-09 | -6.09 | 9.4790544 | -1.90E-02 | 36662310  | 36662433  | NC_000020.10 |
| cg19936194 | 5.33E-08 | 5.95E-09 | -6.09 | 9.4785623 | -2.91E-02 | 141595256 | 141595379 | NC_000003.11 |
| cg27244120 | 5.33E-08 | 5.95E-09 | -6.09 | 9.4781235 | -1.30E-01 | 70610434  | 70610557  | NC_000016.9  |
| cg20886049 | 5.33E-08 | 5.96E-09 | -6.09 | 9.4770505 | -1.15E-01 | 76493545  | 76493668  | NC_000011.9  |
| cg06369407 | 5.34E-08 | 5.97E-09 | -6.09 | 9.4756293 | -1.07E-01 | 234045196 | 234045319 | NC_000001.10 |

|            |          |          |       |           |           |           |           |              |
|------------|----------|----------|-------|-----------|-----------|-----------|-----------|--------------|
| cg21164723 | 5.34E-08 | 5.97E-09 | -6.09 | 9.474905  | -4.30E-02 | 214776304 | 214776427 | NC_000001.10 |
| cg16879115 | 5.35E-08 | 5.98E-09 | -6.09 | 9.4741644 | -1.31E-01 | 7819180   | 7819303   | NC_000012.11 |
| cg05941376 | 5.35E-08 | 5.98E-09 | -6.09 | 9.4730717 | -1.76E-01 | 167836834 | 167836957 | NC_000005.9  |
| cg12072972 | 5.36E-08 | 5.98E-09 | -6.09 | 9.4728414 | -8.90E-02 | 405958    | 406081    | NC_000011.9  |
| cg10572659 | 5.36E-08 | 5.98E-09 | -6.09 | 9.4727135 | -8.78E-02 | 65565292  | 65565415  | NC_000011.9  |
| cg04857231 | 5.36E-08 | 5.99E-09 | -6.09 | 9.4725027 | -1.14E-01 | 42782520  | 42782643  | NC_000015.9  |
| cg07589968 | 5.36E-08 | 5.99E-09 | -6.09 | 9.4723669 | -7.50E-02 | 43729910  | 43730033  | NC_000020.10 |
| cg26154268 | 5.36E-08 | 5.99E-09 | -6.09 | 9.4723312 | -6.67E-02 | 22538783  | 22538906  | NC_000014.8  |
| cg03974204 | 5.36E-08 | 5.99E-09 | -6.09 | 9.4722325 | -9.75E-02 | 124252811 | 124252934 | NC_000010.10 |
| cg25582669 | 5.37E-08 | 6.00E-09 | -6.09 | 9.4707699 | -6.52E-02 | 95248888  | 95249011  | NC_000013.10 |
| cg06096901 | 5.37E-08 | 6.00E-09 | -6.09 | 9.4699846 | -9.12E-02 | 78894393  | 78894516  | NC_000017.10 |
| cg03888592 | 5.37E-08 | 6.01E-09 | -6.09 | 9.469113  | -1.08E-01 | 48210934  | 48211057  | NC_000012.11 |
| cg04968426 | 5.38E-08 | 6.01E-09 | -6.09 | 9.4688137 | -1.22E-01 | 41120711  | 41120834  | NC_000015.9  |
| cg12877354 | 5.39E-08 | 6.02E-09 | -6.09 | 9.4670516 | -6.75E-02 | 45873196  | 45873319  | NC_000010.10 |
| cg14884828 | 5.39E-08 | 6.02E-09 | -6.09 | 9.4669256 | -1.62E-01 | 14603607  | 14603730  | NC_000010.10 |
| cg19290938 | 5.40E-08 | 6.03E-09 | -6.09 | 9.4649003 | -9.61E-02 | 1988758   | 1988881   | NC_000011.9  |
| cg16291069 | 5.40E-08 | 6.03E-09 | -6.09 | 9.4647314 | -1.26E-01 | 27317394  | 27317517  | NC_000008.10 |
| cg05948654 | 5.40E-08 | 6.03E-09 | -6.09 | 9.4645978 | -8.21E-02 | 25930507  | 25930630  | NC_000006.11 |
| cg01049775 | 5.40E-08 | 6.04E-09 | -6.09 | 9.4639779 | -4.90E-02 | 39915367  | 39915490  | NC_000022.10 |
| cg20284218 | 5.41E-08 | 6.05E-09 | -6.08 | 9.4626796 | -2.52E-02 | 62648405  | 62648528  | NC_000011.9  |
| cg05376469 | 5.41E-08 | 6.05E-09 | -6.08 | 9.4624496 | -6.71E-02 | 102649931 | 102650054 | NC_000002.11 |
| cg11945292 | 5.41E-08 | 6.05E-09 | -6.08 | 9.4620704 | -6.63E-02 | 24981801  | 24981924  | NC_000004.11 |
| cg06511330 | 5.42E-08 | 6.06E-09 | -6.08 | 9.4604125 | -1.72E-01 | 234635574 | 234635697 | NC_000001.10 |
| cg02871891 | 5.43E-08 | 6.07E-09 | -6.08 | 9.4593891 | -1.24E-01 | 27228679  | 27228802  | NC_000016.9  |
| cg26949796 | 5.43E-08 | 6.07E-09 | -6.08 | 9.4592868 | -4.57E-02 | 35183363  | 35183486  | NC_000014.8  |

|               |          |          |       |           |           |           |           |              |
|---------------|----------|----------|-------|-----------|-----------|-----------|-----------|--------------|
| cg19914238    | 5.43E-08 | 6.07E-09 | -6.08 | 9.459248  | -1.33E-01 | 113483728 | 113483851 | NC_000002.11 |
| cg03744842    | 5.43E-08 | 6.07E-09 | -6.08 | 9.4588166 | -1.45E-01 | 45067319  | 45067442  | NC_000007.13 |
| cg09174162    | 5.43E-08 | 6.07E-09 | -6.08 | 9.4588057 | -1.33E-01 | 2150845   | 2150968   | NC_000007.13 |
| cg10196696    | 5.43E-08 | 6.07E-09 | -6.08 | 9.4582004 | -6.90E-02 | 157247843 | 157247966 | NC_000005.9  |
| cg26870936    | 5.43E-08 | 6.07E-09 | -6.08 | 9.4580395 | -9.46E-02 | 73631785  | 73631908  | NC_000017.10 |
| cg25619707    | 5.44E-08 | 6.09E-09 | -6.08 | 9.4557184 | -5.45E-02 | 23377763  | 23377886  | NC_000015.9  |
| cg03241461    | 5.45E-08 | 6.09E-09 | -6.08 | 9.4554063 | -1.30E-01 | 29924258  | 29924381  | NC_000010.10 |
| cg26926904    | 5.45E-08 | 6.09E-09 | -6.08 | 9.4548348 | -2.45E-02 | 186317539 | 186317662 | NC_000004.11 |
| cg21775570    | 5.45E-08 | 6.10E-09 | -6.08 | 9.4543948 | -1.01E-01 | 2171834   | 2171957   | NC_000001.10 |
| cg06360703    | 5.45E-08 | 6.10E-09 | -6.08 | 9.4542103 | -1.11E-01 | 169482790 | 169482913 | NC_000002.11 |
| cg02995664    | 5.46E-08 | 6.11E-09 | -6.08 | 9.4524791 | -7.35E-02 | 98613076  | 98613199  | NC_000002.11 |
| cg01182863    | 5.46E-08 | 6.11E-09 | -6.08 | 9.4520151 | -1.64E-01 | 1464792   | 1464915   | NC_000011.9  |
| cg13936383    | 5.47E-08 | 6.12E-09 | -6.08 | 9.4512814 | -1.05E-01 | 139528170 | 139528293 | NC_000009.11 |
| cg06497408    | 5.47E-08 | 6.12E-09 | -6.08 | 9.4503306 | -9.81E-02 | 158046838 | 158046961 | NC_000007.13 |
| cg27414481    | 5.48E-08 | 6.13E-09 | -6.08 | 9.4498218 | -1.35E-01 | 6342510   | 6342633   | NC_000011.9  |
| cg13588355    | 5.48E-08 | 6.13E-09 | -6.08 | 9.449161  | -1.02E-01 | 126998388 | 126998511 | NC_000005.9  |
| cg02775243    | 5.49E-08 | 6.15E-09 | -6.08 | 9.446703  | -1.35E-01 | 102831287 | 102831410 | NC_000010.10 |
| cg00127781    | 5.50E-08 | 6.16E-09 | -6.08 | 9.4449206 | -9.58E-02 | 50409882  | 50410005  | NC_000003.11 |
| cg04203298    | 5.50E-08 | 6.16E-09 | -6.08 | 9.4445893 | -6.30E-02 | 59521722  | 59521845  | NC_000011.9  |
| cg01067604    | 5.52E-08 | 6.18E-09 | -6.08 | 9.4419605 | -2.58E-02 | 7831845   | 7831968   | NC_000001.10 |
| cg14043509    | 5.52E-08 | 6.18E-09 | -6.08 | 9.441144  | -8.42E-02 | 4141051   | 4141174   | NC_000012.11 |
| cg09381917    | 5.52E-08 | 6.18E-09 | -6.08 | 9.4411146 | -2.83E-02 | 110094833 | 110094956 | NC_000006.11 |
| cg21215409    | 5.52E-08 | 6.18E-09 | -6.08 | 9.4405205 | -9.34E-02 | 145514316 | 145514439 | NC_000008.10 |
| cg01816748    | 5.53E-08 | 6.19E-09 | -6.08 | 9.4400821 | -9.52E-02 | 149512117 | 149512240 | NC_000005.9  |
| ch.13.268523R | 5.53E-08 | 6.19E-09 | -6.08 | 9.4397358 | -2.17E-02 | 30087543  | 30087666  | NC_000013.10 |

|            |          |          |       |           |           |           |           |              |
|------------|----------|----------|-------|-----------|-----------|-----------|-----------|--------------|
| cg12885832 | 5.53E-08 | 6.19E-09 | -6.08 | 9.4396523 | -4.53E-02 | 111843885 | 111844008 | NC_000012.11 |
| cg17004653 | 5.53E-08 | 6.20E-09 | -6.08 | 9.4388064 | -1.61E-01 | 132925393 | 132925516 | NC_000010.10 |
| cg10441379 | 5.53E-08 | 6.20E-09 | -6.08 | 9.4386528 | -1.12E-01 | 72793693  | 72793816  | NC_000005.9  |
| cg09446136 | 5.54E-08 | 6.20E-09 | -6.08 | 9.4383542 | -3.89E-02 | 88974429  | 88974552  | NC_000012.11 |
| cg19330592 | 5.54E-08 | 6.20E-09 | -6.08 | 9.4380359 | -6.10E-02 | 91580380  | 91580503  | NC_000014.8  |
| cg12418043 | 5.54E-08 | 6.20E-09 | -6.08 | 9.4379834 | -9.07E-02 | 141900671 | 141900794 | NC_000005.9  |
| cg16345720 | 5.54E-08 | 6.20E-09 | -6.08 | 9.4379813 | -1.13E-01 | 64727184  | 64727307  | NC_000011.9  |
| cg14360405 | 5.54E-08 | 6.21E-09 | -6.08 | 9.4365211 | -9.30E-02 | 87912414  | 87912537  | NC_000011.9  |
| cg09499262 | 5.55E-08 | 6.21E-09 | -6.08 | 9.4361512 | -4.40E-02 | 22054781  | 22054904  | NC_000013.10 |
| cg07669969 | 5.55E-08 | 6.21E-09 | -6.08 | 9.4357494 | -1.19E-01 | 60608527  | 60608650  | NC_000005.9  |
| cg21829328 | 5.55E-08 | 6.22E-09 | -6.08 | 9.4355089 | -1.13E-01 | 24188134  | 24188257  | NC_000022.10 |
| cg26302614 | 5.55E-08 | 6.22E-09 | -6.08 | 9.4347426 | -3.57E-02 | 16465130  | 16465253  | NC_000005.9  |
| cg14858551 | 5.56E-08 | 6.22E-09 | -6.08 | 9.4344666 | -2.73E-02 | 18269244  | 18269367  | NC_000020.10 |
| cg17001194 | 5.56E-08 | 6.22E-09 | -6.08 | 9.4343025 | -1.17E-01 | 116216209 | 116216332 | NC_000011.9  |
| cg20807111 | 5.56E-08 | 6.23E-09 | -6.08 | 9.4336897 | -1.81E-02 | 100660595 | 100660718 | NC_000007.13 |
| cg05722427 | 5.56E-08 | 6.23E-09 | -6.08 | 9.4334776 | -9.75E-02 | 137688090 | 137688213 | NC_000005.9  |
| cg09308553 | 5.56E-08 | 6.23E-09 | -6.08 | 9.4333508 | -7.47E-02 | 56763573  | 56763696  | NC_000016.9  |
| cg11284329 | 5.56E-08 | 6.23E-09 | -6.08 | 9.4327581 | -3.23E-02 | 77870605  | 77870728  | NC_000004.11 |
| cg05335186 | 5.57E-08 | 6.24E-09 | -6.08 | 9.4322129 | -7.64E-02 | 53173507  | 53173630  | NC_000013.10 |
| cg23632656 | 5.57E-08 | 6.24E-09 | -6.08 | 9.4310058 | -1.66E-01 | 56362296  | 56362419  | NC_000017.10 |
| cg01908462 | 5.57E-08 | 6.25E-09 | -6.08 | 9.430832  | -1.26E-01 | 184718215 | 184718338 | NC_000004.11 |
| cg01471232 | 5.58E-08 | 6.25E-09 | -6.08 | 9.430382  | -1.38E-01 | 415430    | 415553    | NC_000011.9  |
| cg23256951 | 5.58E-08 | 6.25E-09 | -6.08 | 9.4299475 | -8.21E-02 | 155163205 | 155163328 | NC_000001.10 |
| cg26598918 | 5.58E-08 | 6.26E-09 | -6.08 | 9.4289649 | -1.06E-01 | 89761195  | 89761318  | NC_000016.9  |
| cg25792473 | 5.59E-08 | 6.27E-09 | -6.08 | 9.4271763 | -8.04E-02 | 1029484   | 1029607   | NC_000004.11 |

|            |          |          |       |           |           |           |           |              |
|------------|----------|----------|-------|-----------|-----------|-----------|-----------|--------------|
| cg21678388 | 5.59E-08 | 6.27E-09 | -6.08 | 9.4271591 | -6.15E-02 | 178286735 | 178286858 | NC_000005.9  |
| cg18132852 | 5.61E-08 | 6.28E-09 | -6.08 | 9.4248381 | -2.09E-02 | 102792581 | 102792704 | NC_000010.10 |
| cg03951488 | 5.61E-08 | 6.28E-09 | -6.08 | 9.4248011 | -2.23E-02 | 129691356 | 129691479 | NC_000007.13 |
| cg13410000 | 5.61E-08 | 6.29E-09 | -6.08 | 9.4236421 | -1.25E-01 | 91357521  | 91357644  | NC_000015.9  |
| cg04515608 | 5.62E-08 | 6.30E-09 | -6.08 | 9.4230322 | -1.24E-01 | 48129067  | 48129190  | NC_000011.9  |
| cg06621132 | 5.62E-08 | 6.30E-09 | -6.08 | 9.422693  | -6.97E-02 | 25623424  | 25623547  | NC_000004.11 |
| cg11881003 | 5.62E-08 | 6.30E-09 | -6.08 | 9.422364  | -6.14E-02 | 28740533  | 28740656  | NC_000006.11 |
| cg24810917 | 5.62E-08 | 6.30E-09 | -6.08 | 9.4218269 | -1.25E-01 | 79130675  | 79130798  | NC_000011.9  |
| cg16255156 | 5.62E-08 | 6.31E-09 | -6.08 | 9.4214174 | -1.19E-01 | 113265709 | 113265832 | NC_000001.10 |
| cg16474701 | 5.63E-08 | 6.31E-09 | -6.08 | 9.4208416 | -9.04E-02 | 27321661  | 27321784  | NC_000008.10 |
| cg26008509 | 5.63E-08 | 6.31E-09 | -6.08 | 9.4204174 | -9.30E-02 | 45735303  | 45735426  | NC_000019.9  |
| cg02157755 | 5.64E-08 | 6.32E-09 | -6.08 | 9.419467  | -5.58E-02 | 2422654   | 2422777   | NC_000011.9  |
| cg19536781 | 5.64E-08 | 6.32E-09 | -6.08 | 9.4193682 | -7.50E-02 | 112876728 | 112876851 | NC_000003.11 |
| cg00626466 | 5.65E-08 | 6.33E-09 | -6.08 | 9.4175005 | -1.24E-01 | 65153982  | 65154105  | NC_000012.11 |
| cg10420398 | 5.65E-08 | 6.33E-09 | -6.08 | 9.417435  | -5.38E-02 | 39639367  | 39639490  | NC_000014.8  |
| cg14222574 | 5.65E-08 | 6.34E-09 | -6.08 | 9.4168442 | -1.11E-01 | 27894470  | 27894593  | NC_000013.10 |
| cg14747086 | 5.65E-08 | 6.34E-09 | -6.08 | 9.4162764 | -7.33E-02 | 30070087  | 30070210  | NC_000006.11 |
| cg02556381 | 5.66E-08 | 6.35E-09 | -6.08 | 9.4154259 | -7.64E-02 | 247463421 | 247463544 | NC_000001.10 |
| cg19460713 | 5.66E-08 | 6.35E-09 | -6.08 | 9.4141746 | -2.74E-02 | 201170819 | 201170942 | NC_000002.11 |
| cg00182994 | 5.67E-08 | 6.36E-09 | -6.08 | 9.4136635 | -1.08E-01 | 2234571   | 2234694   | NC_000016.9  |
| cg07276338 | 5.68E-08 | 6.37E-09 | -6.07 | 9.4120103 | -1.11E-01 | 57295758  | 57295881  | NC_000015.9  |
| cg15837913 | 5.68E-08 | 6.37E-09 | -6.07 | 9.4115393 | -1.24E-01 | 5449890   | 5450013   | NC_000009.11 |
| cg17431922 | 5.68E-08 | 6.37E-09 | -6.07 | 9.4110983 | -1.72E-01 | 19599516  | 19599639  | NC_000001.10 |
| cg16274376 | 5.68E-08 | 6.38E-09 | -6.07 | 9.4107919 | -1.12E-01 | 21634314  | 21634437  | NC_000013.10 |
| cg13823511 | 5.69E-08 | 6.38E-09 | -6.07 | 9.4103343 | -5.84E-02 | 150920147 | 150920270 | NC_000002.11 |

|            |          |          |       |           |           |           |           |              |
|------------|----------|----------|-------|-----------|-----------|-----------|-----------|--------------|
| cg20608895 | 5.69E-08 | 6.38E-09 | -6.07 | 9.4103029 | -1.32E-01 | 109896380 | 109896503 | NC_000013.10 |
| cg11640756 | 5.69E-08 | 6.39E-09 | -6.07 | 9.409225  | -2.15E-02 | 143247810 | 143247933 | NC_000006.11 |
| cg17507897 | 5.70E-08 | 6.39E-09 | -6.07 | 9.4085292 | -1.06E-01 | 17943694  | 17943817  | NC_000020.10 |
| cg06374794 | 5.70E-08 | 6.39E-09 | -6.07 | 9.4079425 | -7.15E-02 | 88002281  | 88002404  | NC_000016.9  |
| cg22360016 | 5.70E-08 | 6.40E-09 | -6.07 | 9.4074917 | -1.06E-01 | 105276153 | 105276276 | NC_000002.11 |
| cg25962218 | 5.70E-08 | 6.40E-09 | -6.07 | 9.4066767 | -9.70E-02 | 133826103 | 133826226 | NC_000007.13 |
| cg06253072 | 5.71E-08 | 6.41E-09 | -6.07 | 9.4060897 | -5.37E-02 | 33679850  | 33679973  | NC_000006.11 |
| cg11375547 | 5.71E-08 | 6.41E-09 | -6.07 | 9.4057204 | -1.15E-01 | 55670466  | 55670589  | NC_000019.9  |
| cg03381047 | 5.72E-08 | 6.41E-09 | -6.07 | 9.4047947 | -1.20E-01 | 168078772 | 168078895 | NC_000006.11 |
| cg21602882 | 5.72E-08 | 6.41E-09 | -6.07 | 9.4047741 | -8.31E-02 | 140937410 | 140937533 | NC_000008.10 |
| cg17331199 | 5.72E-08 | 6.42E-09 | -6.07 | 9.4038927 | -9.46E-02 | 56414882  | 56415005  | NC_000012.11 |
| cg06740897 | 5.73E-08 | 6.43E-09 | -6.07 | 9.4023572 | -7.60E-02 | 46124821  | 46124944  | NC_000017.10 |
| cg07222243 | 5.73E-08 | 6.44E-09 | -6.07 | 9.4014221 | -8.95E-02 | 9920615   | 9920738   | NC_000003.11 |
| cg20698862 | 5.73E-08 | 6.44E-09 | -6.07 | 9.4014103 | -8.48E-02 | 112290112 | 112290235 | NC_000010.10 |
| cg23713156 | 5.73E-08 | 6.44E-09 | -6.07 | 9.4013938 | -6.72E-02 | 80606235  | 80606358  | NC_000017.10 |
| cg11893323 | 5.74E-08 | 6.44E-09 | -6.07 | 9.4009856 | -2.97E-02 | 131133119 | 131133242 | NC_000009.11 |
| cg26496628 | 5.74E-08 | 6.44E-09 | -6.07 | 9.4007681 | -1.38E-01 | 82864340  | 82864463  | NC_000005.9  |
| cg01295782 | 5.74E-08 | 6.44E-09 | -6.07 | 9.4005604 | -1.34E-01 | 71739283  | 71739406  | NC_000003.11 |
| cg13182522 | 5.74E-08 | 6.44E-09 | -6.07 | 9.4004161 | -1.42E-01 | 94529152  | 94529275  | NC_000014.8  |
| cg14884160 | 5.74E-08 | 6.45E-09 | -6.07 | 9.4000205 | -6.35E-02 | 89840396  | 89840519  | NC_000007.13 |
| cg21220731 | 5.74E-08 | 6.45E-09 | -6.07 | 9.3999214 | -5.86E-02 | 37455492  | 37455615  | NC_000004.11 |
| cg17820022 | 5.75E-08 | 6.46E-09 | -6.07 | 9.3985952 | -1.23E-01 | 2425860   | 2425983   | NC_000001.10 |
| cg26253500 | 5.76E-08 | 6.47E-09 | -6.07 | 9.3966444 | -1.15E-01 | 136641740 | 136641863 | NC_000007.13 |
| cg04748673 | 5.76E-08 | 6.47E-09 | -6.07 | 9.3963177 | -2.36E-02 | 41082663  | 41082786  | NC_000019.9  |
| cg09650180 | 5.76E-08 | 6.47E-09 | -6.07 | 9.3961325 | -7.31E-02 | 62225654  | 62225777  | NC_000020.10 |



|            |          |          |       |           |           |           |           |              |
|------------|----------|----------|-------|-----------|-----------|-----------|-----------|--------------|
| cg17816637 | 5.76E-08 | 6.47E-09 | -6.07 | 9.3960908 | -9.40E-02 | 21387058  | 21387181  | NC_000022.10 |
| cg05481452 | 5.76E-08 | 6.47E-09 | -6.07 | 9.3958581 | -8.45E-02 | 61717684  | 61717807  | NC_000011.9  |
| cg05357861 | 5.76E-08 | 6.47E-09 | -6.07 | 9.3957023 | -5.01E-02 | 51460827  | 51460950  | NC_000007.13 |
| cg21255356 | 5.77E-08 | 6.48E-09 | -6.07 | 9.395208  | -1.05E-01 | 169446912 | 169447035 | NC_000006.11 |
| cg10610428 | 5.77E-08 | 6.49E-09 | -6.07 | 9.3939578 | -1.01E-01 | 5884295   | 5884418   | NC_000012.11 |
| cg00661564 | 5.77E-08 | 6.49E-09 | -6.07 | 9.3939466 | -2.06E-02 | 185286520 | 185286643 | NC_000001.10 |
| cg24262469 | 5.78E-08 | 6.49E-09 | -6.07 | 9.393698  | -6.49E-02 | 156391694 | 156391817 | NC_000003.11 |
| cg00912746 | 5.78E-08 | 6.49E-09 | -6.07 | 9.3928873 | -1.48E-01 | 33350709  | 33350832  | NC_000001.10 |
| cg00117237 | 5.78E-08 | 6.50E-09 | -6.07 | 9.3922273 | -1.32E-01 | 67318804  | 67318927  | NC_000008.10 |
| cg13235098 | 5.78E-08 | 6.50E-09 | -6.07 | 9.3921307 | -4.76E-02 | 123090679 | 123090802 | NC_000004.11 |
| cg02646073 | 5.79E-08 | 6.50E-09 | -6.07 | 9.391547  | -1.17E-01 | 139619584 | 139619707 | NC_000005.9  |
| cg01914455 | 5.79E-08 | 6.50E-09 | -6.07 | 9.3915228 | -2.03E-02 | 77649564  | 77649687  | NC_000007.13 |
| cg18705808 | 5.79E-08 | 6.50E-09 | -6.07 | 9.3913689 | -7.88E-02 | 1588284   | 1588407   | NC_000007.13 |
| cg24772267 | 5.79E-08 | 6.50E-09 | -6.07 | 9.3913403 | -4.86E-02 | 72130742  | 72130865  | NC_000006.11 |
| cg02483058 | 5.80E-08 | 6.52E-09 | -6.07 | 9.3895206 | -7.81E-02 | 54951562  | 54951685  | NC_000002.11 |
| cg02224795 | 5.80E-08 | 6.52E-09 | -6.07 | 9.3891292 | -9.21E-02 | 143363873 | 143363996 | NC_000008.10 |
| cg07793207 | 5.80E-08 | 6.52E-09 | -6.07 | 9.3889224 | -1.23E-01 | 95517529  | 95517652  | NC_000010.10 |
| cg22688566 | 5.81E-08 | 6.52E-09 | -6.07 | 9.3882037 | -8.00E-02 | 27459835  | 27459958  | NC_000017.10 |
| cg01847206 | 5.81E-08 | 6.53E-09 | -6.07 | 9.3879571 | -1.11E-01 | 14165995  | 14166118  | NC_000005.9  |
| cg09019002 | 5.81E-08 | 6.53E-09 | -6.07 | 9.3879251 | -2.66E-02 | 102715232 | 102715355 | NC_000007.13 |
| cg00831931 | 5.81E-08 | 6.53E-09 | -6.07 | 9.3877535 | -1.10E-01 | 114823094 | 114823217 | NC_000010.10 |
| cg25575349 | 5.81E-08 | 6.53E-09 | -6.07 | 9.3869269 | -8.96E-02 | 106703262 | 106703385 | NC_000012.11 |
| cg06228542 | 5.81E-08 | 6.53E-09 | -6.07 | 9.3866695 | -5.89E-02 | 56123961  | 56124084  | NC_000012.11 |
| cg11859398 | 5.81E-08 | 6.54E-09 | -6.07 | 9.3865559 | -1.81E-01 | 3411503   | 3411626   | NC_000007.13 |
| cg07749597 | 5.82E-08 | 6.54E-09 | -6.07 | 9.3858665 | -1.57E-01 | 42840698  | 42840821  | NC_000005.9  |

|                 |          |          |       |           |           |           |           |              |
|-----------------|----------|----------|-------|-----------|-----------|-----------|-----------|--------------|
| cg09298289      | 5.82E-08 | 6.54E-09 | -6.07 | 9.3855498 | -1.57E-02 | 68485754  | 68485877  | NC_000005.9  |
| cg15409004      | 5.82E-08 | 6.54E-09 | -6.07 | 9.3855146 | -2.47E-02 | 126850362 | 126850485 | NC_000010.10 |
| cg17455261      | 5.83E-08 | 6.56E-09 | -6.07 | 9.3835569 | -1.73E-01 | 87882899  | 87883022  | NC_000004.11 |
| cg05522288      | 5.83E-08 | 6.56E-09 | -6.07 | 9.3835542 | -1.93E-02 | 117824098 | 117824221 | NC_000007.13 |
| cg14176626      | 5.83E-08 | 6.56E-09 | -6.07 | 9.3834612 | -1.05E-01 | 99617320  | 99617443  | NC_000009.11 |
| ch.2.224872986R | 5.83E-08 | 6.56E-09 | -6.07 | 9.3828004 | -2.91E-02 | 225164742 | 225164865 | NC_000002.11 |
| cg11820605      | 5.84E-08 | 6.57E-09 | -6.07 | 9.3810966 | -3.48E-02 | 68519066  | 68519189  | NC_000011.9  |
| cg14789175      | 5.85E-08 | 6.58E-09 | -6.07 | 9.3803406 | -1.18E-01 | 11534690  | 11534813  | NC_000001.10 |
| cg09363564      | 5.85E-08 | 6.58E-09 | -6.07 | 9.379238  | -3.71E-02 | 169337483 | 169337606 | NC_000001.10 |
| cg09682727      | 5.87E-08 | 6.61E-09 | -6.07 | 9.3762349 | -8.07E-02 | 139953966 | 139954089 | NC_000005.9  |
| cg26001410      | 5.87E-08 | 6.61E-09 | -6.07 | 9.3760817 | -4.74E-02 | 102120464 | 102120587 | NC_000007.13 |
| cg13897416      | 5.87E-08 | 6.61E-09 | -6.07 | 9.3759218 | -4.98E-02 | 38093079  | 38093202  | NC_000022.10 |
| cg13598881      | 5.88E-08 | 6.61E-09 | -6.07 | 9.3749691 | -1.21E-01 | 2783665   | 2783788   | NC_000006.11 |
| cg21123656      | 5.88E-08 | 6.62E-09 | -6.07 | 9.3743175 | -2.94E-02 | 99775134  | 99775257  | NC_000007.13 |
| cg25169706      | 5.89E-08 | 6.63E-09 | -6.07 | 9.3732751 | -8.27E-02 | 8749064   | 8749187   | NC_000011.9  |
| cg03475182      | 5.89E-08 | 6.63E-09 | -6.07 | 9.3732502 | -7.80E-02 | 110581454 | 110581577 | NC_000011.9  |
| cg10143731      | 5.89E-08 | 6.63E-09 | -6.07 | 9.3729785 | -1.52E-01 | 171453943 | 171454066 | NC_000001.10 |
| cg18487343      | 5.89E-08 | 6.63E-09 | -6.07 | 9.3724776 | -7.91E-02 | 60864465  | 60864588  | NC_000014.8  |
| cg11885098      | 5.90E-08 | 6.63E-09 | -6.07 | 9.3720291 | -1.21E-01 | 1285397   | 1285520   | NC_000019.9  |
| cg05897465      | 5.90E-08 | 6.65E-09 | -6.07 | 9.3703582 | -8.44E-02 | 106583161 | 106583284 | NC_000006.11 |
| cg16757658      | 5.92E-08 | 6.66E-09 | -6.07 | 9.3676427 | -3.52E-02 | 126138769 | 126138892 | NC_000011.9  |
| cg04080625      | 5.92E-08 | 6.66E-09 | -6.07 | 9.3676327 | -6.57E-02 | 15426634  | 15426757  | NC_000001.10 |
| cg27314422      | 5.92E-08 | 6.67E-09 | -6.07 | 9.3673665 | -1.22E-01 | 31105927  | 31106050  | NC_000006.11 |
| cg26615188      | 5.92E-08 | 6.67E-09 | -6.07 | 9.367224  | -1.28E-01 | 31699304  | 31699427  | NC_000020.10 |
| cg13613044      | 5.92E-08 | 6.67E-09 | -6.07 | 9.3671825 | -9.94E-02 | 137122886 | 137123009 | NC_000009.11 |

|               |          |          |       |           |           |           |           |              |
|---------------|----------|----------|-------|-----------|-----------|-----------|-----------|--------------|
| cg08028037    | 5.92E-08 | 6.67E-09 | -6.07 | 9.3669825 | -3.87E-02 | 52027479  | 52027602  | NC_000013.10 |
| cg25638443    | 5.92E-08 | 6.67E-09 | -6.07 | 9.3669225 | -1.42E-01 | 22435475  | 22435598  | NC_000012.11 |
| cg00852051    | 5.93E-08 | 6.67E-09 | -6.07 | 9.3662868 | -1.61E-01 | 214006138 | 214006261 | NC_000001.10 |
| cg24685109    | 5.94E-08 | 6.69E-09 | -6.07 | 9.364488  | -9.68E-02 | 43477090  | 43477213  | NC_000015.9  |
| cg11301670    | 5.94E-08 | 6.69E-09 | -6.07 | 9.3637756 | -1.18E-01 | 167363345 | 167363468 | NC_000006.11 |
| cg16721359    | 5.94E-08 | 6.69E-09 | -6.07 | 9.3637534 | -1.25E-01 | 98610787  | 98610910  | NC_000008.10 |
| cg09676630    | 5.94E-08 | 6.69E-09 | -6.07 | 9.363653  | -8.68E-02 | 133101224 | 133101347 | NC_000012.11 |
| cg22672790    | 5.94E-08 | 6.69E-09 | -6.07 | 9.3635823 | -1.01E-01 | 161112787 | 161112910 | NC_000005.9  |
| cg23556715    | 5.95E-08 | 6.70E-09 | -6.07 | 9.3627423 | -1.15E-01 | 62084359  | 62084482  | NC_000017.10 |
| cg14063566    | 5.95E-08 | 6.70E-09 | -6.07 | 9.3621435 | -8.66E-02 | 73642773  | 73642896  | NC_000017.10 |
| cg20531781    | 5.95E-08 | 6.70E-09 | -6.07 | 9.3621332 | -2.83E-02 | 99775012  | 99775135  | NC_000007.13 |
| cg01719998    | 5.95E-08 | 6.70E-09 | -6.07 | 9.3619806 | -2.52E-02 | 89642051  | 89642174  | NC_000016.9  |
| cg26838345    | 5.95E-08 | 6.70E-09 | -6.07 | 9.3618996 | -8.00E-02 | 6276831   | 6276954   | NC_000019.9  |
| cg04831490    | 5.96E-08 | 6.71E-09 | -6.07 | 9.3611849 | -3.32E-02 | 132515501 | 132515624 | NC_000009.11 |
| cg03919779    | 5.96E-08 | 6.71E-09 | -6.07 | 9.3611476 | -8.29E-02 | 16284127  | 16284250  | NC_000017.10 |
| cg20521198    | 5.96E-08 | 6.71E-09 | -6.06 | 9.3601823 | -1.01E-01 | 27102907  | 27103030  | NC_000004.11 |
| ch.2.2207852R | 5.96E-08 | 6.72E-09 | -6.06 | 9.3598635 | -6.63E-02 | 105686129 | 105686252 | NC_000002.11 |
| cg09318283    | 5.97E-08 | 6.72E-09 | -6.06 | 9.3587353 | -1.28E-01 | 82146728  | 82146851  | NC_000008.10 |
| cg06995624    | 5.97E-08 | 6.73E-09 | -6.06 | 9.3586543 | -3.22E-02 | 73043174  | 73043297  | NC_000017.10 |
| cg08747717    | 5.97E-08 | 6.73E-09 | -6.06 | 9.358288  | -5.60E-02 | 50186775  | 50186898  | NC_000016.9  |
| cg19106478    | 5.97E-08 | 6.73E-09 | -6.06 | 9.3581157 | -9.22E-02 | 40800053  | 40800176  | NC_000017.10 |
| cg11770815    | 5.97E-08 | 6.73E-09 | -6.06 | 9.3580512 | -6.74E-02 | 85410792  | 85410915  | NC_000002.11 |
| cg07275979    | 5.98E-08 | 6.73E-09 | -6.06 | 9.3573609 | -1.69E-01 | 124084365 | 124084488 | NC_000008.10 |
| cg18233746    | 5.98E-08 | 6.74E-09 | -6.06 | 9.3571848 | -7.13E-02 | 16500403  | 16500526  | NC_000012.11 |
| cg02053920    | 5.98E-08 | 6.74E-09 | -6.06 | 9.3569494 | -7.46E-02 | 31093846  | 31093969  | NC_000006.11 |

|            |          |          |       |           |           |           |           |              |
|------------|----------|----------|-------|-----------|-----------|-----------|-----------|--------------|
| cg11212237 | 5.98E-08 | 6.74E-09 | -6.06 | 9.3568502 | -9.92E-02 | 116358814 | 116358937 | NC_000006.11 |
| cg10622536 | 5.98E-08 | 6.74E-09 | -6.06 | 9.3567678 | -1.51E-01 | 36771021  | 36771144  | NC_000001.10 |
| cg09110274 | 5.98E-08 | 6.74E-09 | -6.06 | 9.3567151 | -1.14E-01 | 2028254   | 2028377   | NC_000012.11 |
| cg02626388 | 5.98E-08 | 6.74E-09 | -6.06 | 9.3563761 | -7.15E-02 | 13954572  | 13954695  | NC_000019.9  |
| cg16403299 | 5.99E-08 | 6.75E-09 | -6.06 | 9.3553054 | -5.15E-02 | 211589678 | 211589801 | NC_000001.10 |
| cg21084284 | 5.99E-08 | 6.75E-09 | -6.06 | 9.3552406 | -1.24E-01 | 99645231  | 99645354  | NC_000015.9  |
| cg14225665 | 5.99E-08 | 6.75E-09 | -6.06 | 9.3544437 | -8.99E-02 | 102394448 | 102394571 | NC_000014.8  |
| cg19927836 | 6.00E-08 | 6.76E-09 | -6.06 | 9.3533765 | -3.34E-02 | 43992413  | 43992536  | NC_000020.10 |
| cg02654940 | 6.00E-08 | 6.76E-09 | -6.06 | 9.3531603 | -1.44E-01 | 34206400  | 34206523  | NC_000006.11 |
| cg10471574 | 6.00E-08 | 6.76E-09 | -6.06 | 9.3530188 | -1.27E-01 | 70120318  | 70120441  | NC_000017.10 |
| cg06786600 | 6.01E-08 | 6.77E-09 | -6.06 | 9.3519727 | -1.22E-01 | 38666816  | 38666939  | NC_000017.10 |
| cg12976582 | 6.01E-08 | 6.77E-09 | -6.06 | 9.3514865 | -1.20E-01 | 50359583  | 50359706  | NC_000003.11 |
| cg17974424 | 6.01E-08 | 6.78E-09 | -6.06 | 9.3508186 | -8.84E-02 | 1145589   | 1145712   | NC_000006.11 |
| cg01561861 | 6.01E-08 | 6.78E-09 | -6.06 | 9.3508145 | -1.29E-01 | 50886992  | 50887115  | NC_000022.10 |
| cg11622162 | 6.01E-08 | 6.78E-09 | -6.06 | 9.3507138 | -1.49E-01 | 78237543  | 78237666  | NC_000017.10 |
| cg00796187 | 6.02E-08 | 6.79E-09 | -6.06 | 9.349834  | -5.75E-02 | 21341871  | 21341994  | NC_000014.8  |
| cg12422351 | 6.02E-08 | 6.79E-09 | -6.06 | 9.3495796 | -1.36E-01 | 95201226  | 95201349  | NC_000001.10 |
| cg13527631 | 6.02E-08 | 6.79E-09 | -6.06 | 9.349209  | -1.39E-01 | 183990182 | 183990305 | NC_000003.11 |
| cg22814884 | 6.03E-08 | 6.80E-09 | -6.06 | 9.3480418 | -2.60E-02 | 66360803  | 66360926  | NC_000011.9  |
| cg13766687 | 6.04E-08 | 6.81E-09 | -6.06 | 9.3465992 | -7.21E-02 | 57200331  | 57200454  | NC_000003.11 |
| cg15512289 | 6.04E-08 | 6.81E-09 | -6.06 | 9.3464116 | -1.22E-01 | 97026071  | 97026194  | NC_000001.10 |
| cg12997187 | 6.04E-08 | 6.81E-09 | -6.06 | 9.3460381 | -1.01E-01 | 116382890 | 116383013 | NC_000012.11 |
| cg25387593 | 6.04E-08 | 6.81E-09 | -6.06 | 9.3459334 | -3.20E-02 | 118927868 | 118927991 | NC_000011.9  |
| cg17546822 | 6.04E-08 | 6.82E-09 | -6.06 | 9.3456715 | -4.15E-02 | 41865178  | 41865301  | NC_000022.10 |
| cg04756594 | 6.04E-08 | 6.82E-09 | -6.06 | 9.3456349 | -1.44E-01 | 24857601  | 24857724  | NC_000016.9  |

|            |          |          |       |           |           |           |           |              |
|------------|----------|----------|-------|-----------|-----------|-----------|-----------|--------------|
| cg00672638 | 6.04E-08 | 6.82E-09 | -6.06 | 9.3453601 | -2.80E-02 | 142149399 | 142149522 | NC_000005.9  |
| cg03719908 | 6.04E-08 | 6.82E-09 | -6.06 | 9.3452258 | -5.43E-02 | 105168128 | 105168251 | NC_000014.8  |
| cg16600991 | 6.05E-08 | 6.82E-09 | -6.06 | 9.3445029 | -4.31E-02 | 54389477  | 54389600  | NC_000012.11 |
| cg05261411 | 6.05E-08 | 6.82E-09 | -6.06 | 9.3444985 | -8.93E-02 | 1238398   | 1238521   | NC_000019.9  |
| cg04138378 | 6.05E-08 | 6.83E-09 | -6.06 | 9.3437193 | -9.94E-02 | 95849192  | 95849315  | NC_000007.13 |
| cg18184769 | 6.06E-08 | 6.83E-09 | -6.06 | 9.3433778 | -9.20E-02 | 12039714  | 12039837  | NC_000001.10 |
| cg00343127 | 6.06E-08 | 6.84E-09 | -6.06 | 9.3424533 | -7.12E-02 | 129299088 | 129299211 | NC_000012.11 |
| cg04406863 | 6.07E-08 | 6.85E-09 | -6.06 | 9.3411495 | -8.78E-02 | 62177351  | 62177474  | NC_000020.10 |
| cg24769924 | 6.07E-08 | 6.85E-09 | -6.06 | 9.3407472 | -6.30E-02 | 32553033  | 32553156  | NC_000012.11 |
| cg16685257 | 6.08E-08 | 6.86E-09 | -6.06 | 9.3388908 | -1.40E-01 | 48991098  | 48991221  | NC_000019.9  |
| cg01584103 | 6.08E-08 | 6.87E-09 | -6.06 | 9.33855   | -1.08E-01 | 71578347  | 71578470  | NC_000007.13 |
| cg24432245 | 6.09E-08 | 6.87E-09 | -6.06 | 9.3378732 | -8.14E-02 | 72350581  | 72350704  | NC_000017.10 |
| cg23402305 | 6.09E-08 | 6.87E-09 | -6.06 | 9.3378057 | -1.16E-01 | 178178939 | 178179062 | NC_000002.11 |
| cg08089518 | 6.09E-08 | 6.88E-09 | -6.06 | 9.3370507 | -5.88E-02 | 39941714  | 39941837  | NC_000017.10 |
| cg13375828 | 6.09E-08 | 6.88E-09 | -6.06 | 9.3369477 | -6.74E-02 | 3598755   | 3598878   | NC_000017.10 |
| cg15556591 | 6.10E-08 | 6.88E-09 | -6.06 | 9.3362298 | -9.89E-02 | 1027967   | 1028090   | NC_000004.11 |
| cg20042798 | 6.10E-08 | 6.88E-09 | -6.06 | 9.3359096 | -4.89E-02 | 13036713  | 13036836  | NC_000003.11 |
| cg17164016 | 6.10E-08 | 6.88E-09 | -6.06 | 9.335851  | -1.40E-01 | 110990365 | 110990488 | NC_000008.10 |
| cg03521358 | 6.11E-08 | 6.89E-09 | -6.06 | 9.3348524 | -3.16E-02 | 9242937   | 9243060   | NC_000001.10 |
| cg09212000 | 6.11E-08 | 6.90E-09 | -6.06 | 9.333453  | -2.41E-02 | 47168038  | 47168161  | NC_000002.11 |
| cg06626168 | 6.12E-08 | 6.90E-09 | -6.06 | 9.3330168 | -8.24E-02 | 61834373  | 61834496  | NC_000008.10 |
| cg09282201 | 6.12E-08 | 6.91E-09 | -6.06 | 9.3326953 | -1.08E-01 | 3155161   | 3155284   | NC_000001.10 |
| cg21932293 | 6.12E-08 | 6.91E-09 | -6.06 | 9.3316787 | -1.94E-02 | 64645999  | 64646122  | NC_000011.9  |
| cg14386946 | 6.12E-08 | 6.92E-09 | -6.06 | 9.3314499 | -3.09E-02 | 179315284 | 179315407 | NC_000002.11 |
| cg26296957 | 6.13E-08 | 6.92E-09 | -6.06 | 9.330342  | -1.52E-01 | 16230109  | 16230232  | NC_000004.11 |

|               |          |          |       |           |           |           |           |              |
|---------------|----------|----------|-------|-----------|-----------|-----------|-----------|--------------|
| cg05062489    | 6.14E-08 | 6.93E-09 | -6.06 | 9.3294685 | -7.67E-02 | 109404367 | 109404490 | NC_000003.11 |
| cg06638023    | 6.14E-08 | 6.93E-09 | -6.06 | 9.3293799 | -8.91E-02 | 59030102  | 59030225  | NC_000019.9  |
| cg01912298    | 6.14E-08 | 6.94E-09 | -6.06 | 9.3281494 | -9.79E-02 | 4872499   | 4872622   | NC_000017.10 |
| cg25968437    | 6.17E-08 | 6.97E-09 | -6.06 | 9.3244093 | -6.59E-02 | 33819738  | 33819861  | NC_000006.11 |
| cg02506053    | 6.17E-08 | 6.97E-09 | -6.06 | 9.3242594 | -2.22E-02 | 30104042  | 30104165  | NC_000016.9  |
| cg07490142    | 6.17E-08 | 6.97E-09 | -6.06 | 9.3240946 | -2.13E-02 | 21357269  | 21357392  | NC_000022.10 |
| cg01290136    | 6.17E-08 | 6.97E-09 | -6.06 | 9.324052  | -1.27E-01 | 53792016  | 53792139  | NC_000004.11 |
| cg27498434    | 6.17E-08 | 6.97E-09 | -6.06 | 9.3234133 | -1.25E-01 | 30556362  | 30556485  | NC_000008.10 |
| cg03605761    | 6.17E-08 | 6.97E-09 | -6.06 | 9.3232082 | -1.26E-01 | 663973    | 664096    | NC_000019.9  |
| cg07248377    | 6.17E-08 | 6.97E-09 | -6.06 | 9.3232077 | -7.96E-02 | 4732406   | 4732529   | NC_000016.9  |
| cg24997986    | 6.17E-08 | 6.97E-09 | -6.06 | 9.3230284 | -5.96E-02 | 67098906  | 67099029  | NC_000008.10 |
| cg18107893    | 6.18E-08 | 6.98E-09 | -6.06 | 9.3228539 | -6.03E-02 | 33166844  | 33166967  | NC_000019.9  |
| cg15322963    | 6.18E-08 | 6.98E-09 | -6.06 | 9.3216283 | -3.66E-02 | 94334193  | 94334316  | NC_000010.10 |
| ch.7.1637031F | 6.19E-08 | 6.99E-09 | -6.06 | 9.3212662 | -4.35E-02 | 74117341  | 74117464  | NC_000007.13 |
| cg20353935    | 6.19E-08 | 6.99E-09 | -6.06 | 9.3208732 | -9.05E-02 | 55098450  | 55098573  | NC_000018.9  |
| cg13978929    | 6.19E-08 | 6.99E-09 | -6.06 | 9.3205094 | -7.72E-02 | 21580086  | 21580209  | NC_000019.9  |
| cg01045132    | 6.20E-08 | 7.00E-09 | -6.06 | 9.3195218 | -1.22E-01 | 11649571  | 11649694  | NC_000019.9  |
| cg26484631    | 6.20E-08 | 7.00E-09 | -6.06 | 9.3192311 | -8.98E-02 | 150284518 | 150284641 | NC_000006.11 |
| cg14789272    | 6.20E-08 | 7.01E-09 | -6.06 | 9.3182023 | -6.60E-02 | 54456056  | 54456179  | NC_000005.9  |
| cg23728060    | 6.21E-08 | 7.01E-09 | -6.06 | 9.3178163 | -9.33E-02 | 158113471 | 158113594 | NC_000002.11 |
| cg22491440    | 6.21E-08 | 7.02E-09 | -6.06 | 9.3165545 | -1.32E-01 | 18311356  | 18311479  | NC_000001.10 |
| cg19145858    | 6.21E-08 | 7.02E-09 | -6.06 | 9.3165376 | -1.37E-01 | 129781681 | 129781804 | NC_000007.13 |
| cg21201572    | 6.22E-08 | 7.02E-09 | -6.06 | 9.3160826 | -1.46E-01 | 16844606  | 16844729  | NC_000007.13 |
| cg23869158    | 6.22E-08 | 7.03E-09 | -6.06 | 9.3158302 | -1.30E-01 | 47126023  | 47126146  | NC_000013.10 |
| cg26275110    | 6.22E-08 | 7.03E-09 | -6.06 | 9.3157302 | -9.01E-02 | 64329426  | 64329549  | NC_000011.9  |

|                 |          |          |       |           |           |           |           |              |
|-----------------|----------|----------|-------|-----------|-----------|-----------|-----------|--------------|
| cg03162721      | 6.22E-08 | 7.03E-09 | -6.06 | 9.3153171 | -1.20E-01 | 62660876  | 62660999  | NC_000017.10 |
| cg26971042      | 6.23E-08 | 7.04E-09 | -6.06 | 9.3146152 | -1.04E-01 | 70387217  | 70387340  | NC_000015.9  |
| ch.22.30020508R | 6.23E-08 | 7.04E-09 | -6.06 | 9.3141224 | -1.74E-02 | 31690508  | 31690631  | NC_000022.10 |
| cg19038804      | 6.24E-08 | 7.05E-09 | -6.06 | 9.3129877 | -1.00E-01 | 39868359  | 39868482  | NC_000017.10 |
| cg16438525      | 6.24E-08 | 7.05E-09 | -6.06 | 9.3125066 | -8.53E-02 | 52517742  | 52517865  | NC_000003.11 |
| cg15736994      | 6.24E-08 | 7.05E-09 | -6.06 | 9.3120696 | -1.07E-01 | 156775941 | 156776064 | NC_000004.11 |
| cg02084467      | 6.25E-08 | 7.06E-09 | -6.06 | 9.3112377 | -1.08E-01 | 632478    | 632601    | NC_000017.10 |
| cg08824961      | 6.25E-08 | 7.06E-09 | -6.06 | 9.3106182 | -9.21E-02 | 133902371 | 133902494 | NC_000011.9  |
| cg03291396      | 6.25E-08 | 7.07E-09 | -6.06 | 9.3102644 | -6.49E-02 | 219252533 | 219252656 | NC_000002.11 |
| cg06905970      | 6.25E-08 | 7.07E-09 | -6.06 | 9.3098795 | -3.20E-02 | 41222748  | 41222871  | NC_000019.9  |
| cg05360958      | 6.25E-08 | 7.07E-09 | -6.05 | 9.3097085 | -1.39E-01 | 15038440  | 15038563  | NC_000012.11 |
| cg21497082      | 6.26E-08 | 7.07E-09 | -6.05 | 9.3093988 | -1.35E-01 | 31111270  | 31111393  | NC_000006.11 |
| cg03375833      | 6.26E-08 | 7.07E-09 | -6.05 | 9.3093236 | -9.77E-02 | 9859360   | 9859483   | NC_000003.11 |
| cg03045620      | 6.27E-08 | 7.08E-09 | -6.05 | 9.3078869 | -6.93E-02 | 31846970  | 31847093  | NC_000006.11 |
| cg03249011      | 6.27E-08 | 7.09E-09 | -6.05 | 9.3075401 | -1.24E-01 | 65195995  | 65196118  | NC_000011.9  |
| cg21094405      | 6.27E-08 | 7.09E-09 | -6.05 | 9.30744   | -7.35E-02 | 113656117 | 113656240 | NC_000013.10 |
| cg19250213      | 6.27E-08 | 7.09E-09 | -6.05 | 9.3073391 | -6.69E-02 | 13406582  | 13406705  | NC_000003.11 |
| cg26652484      | 6.27E-08 | 7.09E-09 | -6.05 | 9.3066116 | -5.15E-02 | 57582327  | 57582450  | NC_000003.11 |
| cg05518130      | 6.27E-08 | 7.09E-09 | -6.05 | 9.3063728 | -1.31E-01 | 70666259  | 70666382  | NC_000007.13 |
| cg07790085      | 6.28E-08 | 7.11E-09 | -6.05 | 9.3048544 | -1.33E-01 | 29597447  | 29597570  | NC_000013.10 |
| cg19110982      | 6.29E-08 | 7.11E-09 | -6.05 | 9.3044067 | -6.21E-02 | 32662344  | 32662467  | NC_000020.10 |
| cg09266087      | 6.29E-08 | 7.12E-09 | -6.05 | 9.3035624 | -7.59E-02 | 76214697  | 76214820  | NC_000012.11 |
| cg16734795      | 6.30E-08 | 7.12E-09 | -6.05 | 9.3028224 | -1.36E-01 | 47839187  | 47839310  | NC_000019.9  |
| cg17907567      | 6.30E-08 | 7.12E-09 | -6.05 | 9.3025804 | -5.90E-02 | 35773474  | 35773597  | NC_000019.9  |
| cg02532293      | 6.30E-08 | 7.12E-09 | -6.05 | 9.3023588 | -7.19E-02 | 1994816   | 1994939   | NC_000004.11 |

|            |          |          |       |           |           |           |           |              |
|------------|----------|----------|-------|-----------|-----------|-----------|-----------|--------------|
| cg19857407 | 6.30E-08 | 7.13E-09 | -6.05 | 9.3014918 | -1.33E-01 | 110272993 | 110273116 | NC_000007.13 |
| cg08942191 | 6.31E-08 | 7.14E-09 | -6.05 | 9.3003074 | -1.23E-01 | 80729093  | 80729216  | NC_000015.9  |
| cg14586546 | 6.32E-08 | 7.15E-09 | -6.05 | 9.2990711 | -1.23E-01 | 136003252 | 136003375 | NC_000009.11 |
| cg17071855 | 6.32E-08 | 7.15E-09 | -6.05 | 9.2984017 | -1.10E-01 | 3819880   | 3820003   | NC_000017.10 |
| cg05210612 | 6.32E-08 | 7.15E-09 | -6.05 | 9.2981554 | -8.66E-02 | 42081656  | 42081779  | NC_000002.11 |
| cg08917117 | 6.33E-08 | 7.16E-09 | -6.05 | 9.2978188 | -1.35E-01 | 115059021 | 115059144 | NC_000010.10 |
| cg01461718 | 6.33E-08 | 7.16E-09 | -6.05 | 9.2972406 | -6.57E-02 | 49711095  | 49711218  | NC_000003.11 |
| cg04992191 | 6.33E-08 | 7.16E-09 | -6.05 | 9.2971677 | -1.24E-01 | 238341559 | 238341682 | NC_000001.10 |
| cg21290290 | 6.33E-08 | 7.16E-09 | -6.05 | 9.2968859 | -7.70E-02 | 2518275   | 2518398   | NC_000001.10 |
| cg17504306 | 6.34E-08 | 7.17E-09 | -6.05 | 9.296009  | -1.97E-02 | 2951538   | 2951661   | NC_000011.9  |
| cg15438951 | 6.34E-08 | 7.17E-09 | -6.05 | 9.2955424 | -1.13E-01 | 96389694  | 96389817  | NC_000012.11 |
| cg23185751 | 6.35E-08 | 7.19E-09 | -6.05 | 9.2931822 | -1.18E-01 | 30720163  | 30720286  | NC_000007.13 |
| cg23434998 | 6.35E-08 | 7.19E-09 | -6.05 | 9.293133  | -9.02E-02 | 41870910  | 41871033  | NC_000005.9  |
| cg00499707 | 6.35E-08 | 7.19E-09 | -6.05 | 9.2930407 | -1.19E-01 | 34679665  | 34679788  | NC_000020.10 |
| cg20706315 | 6.36E-08 | 7.20E-09 | -6.05 | 9.2926054 | -1.37E-01 | 74366578  | 74366701  | NC_000017.10 |
| cg03766174 | 6.36E-08 | 7.20E-09 | -6.05 | 9.2926032 | -1.23E-01 | 81547907  | 81548030  | NC_000016.9  |
| cg10839385 | 6.36E-08 | 7.20E-09 | -6.05 | 9.2917032 | -1.05E-01 | 159825049 | 159825172 | NC_000001.10 |
| cg10631854 | 6.37E-08 | 7.21E-09 | -6.05 | 9.2904901 | -9.06E-02 | 197383170 | 197383293 | NC_000003.11 |
| cg18690712 | 6.37E-08 | 7.21E-09 | -6.05 | 9.2902233 | -7.41E-02 | 57463150  | 57463273  | NC_000003.11 |
| cg10336925 | 6.37E-08 | 7.21E-09 | -6.05 | 9.2900942 | -1.23E-01 | 77647482  | 77647605  | NC_000014.8  |
| cg26679231 | 6.37E-08 | 7.22E-09 | -6.05 | 9.2898767 | -2.49E-02 | 80247134  | 80247257  | NC_000006.11 |
| cg21248989 | 6.37E-08 | 7.22E-09 | -6.05 | 9.2895822 | -1.06E-01 | 140813541 | 140813664 | NC_000009.11 |
| cg13099847 | 6.38E-08 | 7.22E-09 | -6.05 | 9.2894319 | -5.31E-02 | 33546750  | 33546873  | NC_000001.10 |
| cg26991199 | 6.38E-08 | 7.22E-09 | -6.05 | 9.2890372 | -4.56E-02 | 24307153  | 24307276  | NC_000001.10 |
| cg00890145 | 6.38E-08 | 7.23E-09 | -6.05 | 9.2885871 | -1.10E-01 | 145028465 | 145028588 | NC_000001.10 |



|                 |          |          |       |           |           |           |           |              |
|-----------------|----------|----------|-------|-----------|-----------|-----------|-----------|--------------|
| cg01216607      | 6.38E-08 | 7.23E-09 | -6.05 | 9.2884359 | -3.39E-02 | 100860773 | 100860896 | NC_000007.13 |
| cg04229928      | 6.39E-08 | 7.23E-09 | -6.05 | 9.2878166 | -1.17E-01 | 119303807 | 119303930 | NC_000011.9  |
| cg20394609      | 6.39E-08 | 7.23E-09 | -6.05 | 9.2877521 | -1.01E-01 | 49736085  | 49736208  | NC_000005.9  |
| cg06185452      | 6.39E-08 | 7.23E-09 | -6.05 | 9.2877055 | -1.11E-01 | 16065144  | 16065267  | NC_000006.11 |
| cg21805731      | 6.39E-08 | 7.24E-09 | -6.05 | 9.2871132 | -1.22E-01 | 204560985 | 204561108 | NC_000001.10 |
| cg25133762      | 6.39E-08 | 7.24E-09 | -6.05 | 9.2865346 | -8.34E-02 | 3562645   | 3562768   | NC_000017.10 |
| cg14118583      | 6.40E-08 | 7.25E-09 | -6.05 | 9.2858569 | -1.06E-01 | 139885129 | 139885252 | NC_000009.11 |
| cg11445634      | 6.41E-08 | 7.26E-09 | -6.05 | 9.283974  | -1.01E-01 | 61821004  | 61821127  | NC_000015.9  |
| cg09612786      | 6.42E-08 | 7.27E-09 | -6.05 | 9.2826995 | -1.05E-01 | 150715214 | 150715337 | NC_000007.13 |
| cg15746719      | 6.43E-08 | 7.28E-09 | -6.05 | 9.2812727 | -4.75E-02 | 90113813  | 90113936  | NC_000009.11 |
| cg18613421      | 6.43E-08 | 7.28E-09 | -6.05 | 9.2812112 | -1.56E-01 | 54051543  | 54051666  | NC_000015.9  |
| cg20995564      | 6.43E-08 | 7.28E-09 | -6.05 | 9.2808397 | -1.43E-01 | 145172035 | 145172158 | NC_000002.11 |
| cg26446449      | 6.43E-08 | 7.28E-09 | -6.05 | 9.280743  | -3.15E-02 | 46661718  | 46661841  | NC_000012.11 |
| cg27296308      | 6.43E-08 | 7.29E-09 | -6.05 | 9.2803143 | -6.23E-02 | 9556116   | 9556239   | NC_000002.11 |
| cg23415489      | 6.44E-08 | 7.29E-09 | -6.05 | 9.2796532 | -3.71E-02 | 47324472  | 47324595  | NC_000003.11 |
| cg08221741      | 6.44E-08 | 7.29E-09 | -6.05 | 9.2795486 | -1.38E-01 | 70931770  | 70931893  | NC_000007.13 |
| cg08368169      | 6.44E-08 | 7.30E-09 | -6.05 | 9.2786457 | -6.28E-02 | 25949998  | 25950121  | NC_000013.10 |
| cg19063856      | 6.45E-08 | 7.30E-09 | -6.05 | 9.2779949 | -7.98E-02 | 38350695  | 38350818  | NC_000017.10 |
| cg03545133      | 6.46E-08 | 7.32E-09 | -6.05 | 9.275688  | -3.01E-02 | 70473447  | 70473570  | NC_000016.9  |
| cg24588745      | 6.47E-08 | 7.33E-09 | -6.05 | 9.2744798 | -2.57E-02 | 28559529  | 28559652  | NC_000001.10 |
| ch.1.231737468F | 6.47E-08 | 7.33E-09 | -6.05 | 9.2743178 | -3.28E-02 | 233670845 | 233670968 | NC_000001.10 |
| cg06181069      | 6.47E-08 | 7.33E-09 | -6.05 | 9.2738944 | -6.54E-02 | 154293494 | 154293617 | NC_000001.10 |
| cg25940728      | 6.47E-08 | 7.34E-09 | -6.05 | 9.2738511 | -2.67E-02 | 48429179  | 48429302  | NC_000020.10 |
| cg09732145      | 6.48E-08 | 7.34E-09 | -6.05 | 9.2732576 | -6.93E-02 | 197066980 | 197067103 | NC_000003.11 |
| cg05593325      | 6.48E-08 | 7.34E-09 | -6.05 | 9.2730299 | -7.61E-02 | 101569696 | 101569819 | NC_000009.11 |

|            |          |          |       |           |           |           |           |              |
|------------|----------|----------|-------|-----------|-----------|-----------|-----------|--------------|
| cg12314335 | 6.48E-08 | 7.34E-09 | -6.05 | 9.273     | -3.27E-02 | 113699016 | 113699139 | NC_000013.10 |
| cg21834001 | 6.48E-08 | 7.34E-09 | -6.05 | 9.2726637 | -1.46E-01 | 126755865 | 126755988 | NC_000003.11 |
| cg22249291 | 6.48E-08 | 7.35E-09 | -6.05 | 9.2720911 | -1.09E-01 | 168777717 | 168777840 | NC_000006.11 |
| cg04723534 | 6.49E-08 | 7.36E-09 | -6.05 | 9.271113  | -1.20E-01 | 43373136  | 43373259  | NC_000021.8  |
| cg08923355 | 6.49E-08 | 7.36E-09 | -6.05 | 9.2709169 | -5.03E-02 | 227517    | 227640    | NC_000016.9  |
| cg01849970 | 6.50E-08 | 7.37E-09 | -6.05 | 9.2697416 | -9.87E-03 | 141031209 | 141031332 | NC_000005.9  |
| cg20376421 | 6.50E-08 | 7.37E-09 | -6.05 | 9.2694231 | -3.83E-02 | 56546193  | 56546316  | NC_000012.11 |
| cg06905679 | 6.51E-08 | 7.38E-09 | -6.05 | 9.2680822 | -1.11E-01 | 54008126  | 54008249  | NC_000001.10 |
| cg17753789 | 6.51E-08 | 7.38E-09 | -6.05 | 9.2680019 | -1.29E-01 | 81026766  | 81026889  | NC_000010.10 |
| cg01380658 | 6.51E-08 | 7.38E-09 | -6.05 | 9.267309  | -1.79E-02 | 27095028  | 27095151  | NC_000006.11 |
| cg06017697 | 6.51E-08 | 7.39E-09 | -6.05 | 9.2670795 | -8.73E-02 | 89976667  | 89976790  | NC_000016.9  |
| cg01969403 | 6.52E-08 | 7.39E-09 | -6.05 | 9.2664327 | -8.70E-02 | 12480395  | 12480518  | NC_000002.11 |
| cg00657529 | 6.52E-08 | 7.39E-09 | -6.05 | 9.2659386 | -1.59E-01 | 31698687  | 31698810  | NC_000006.11 |
| cg18033333 | 6.52E-08 | 7.40E-09 | -6.05 | 9.2651612 | -1.10E-01 | 85604328  | 85604451  | NC_000004.11 |
| cg04785900 | 6.53E-08 | 7.41E-09 | -6.05 | 9.2645737 | -1.07E-01 | 1950120   | 1950243   | NC_000008.10 |
| cg15601371 | 6.53E-08 | 7.41E-09 | -6.05 | 9.2641334 | -1.08E-01 | 578938    | 579061    | NC_000007.13 |
| cg19984911 | 6.53E-08 | 7.41E-09 | -6.05 | 9.2640167 | -1.39E-01 | 150020338 | 150020461 | NC_000005.9  |
| cg18544365 | 6.53E-08 | 7.41E-09 | -6.05 | 9.2635152 | -7.62E-02 | 10928178  | 10928301  | NC_000019.9  |
| cg15865150 | 6.54E-08 | 7.42E-09 | -6.05 | 9.2632442 | -6.53E-02 | 49757134  | 49757257  | NC_000003.11 |
| cg19554457 | 6.54E-08 | 7.42E-09 | -6.05 | 9.2626792 | -1.16E-01 | 93774772  | 93774895  | NC_000012.11 |
| cg22744480 | 6.54E-08 | 7.42E-09 | -6.05 | 9.2619913 | -5.71E-02 | 6897617   | 6897740   | NC_000007.13 |
| cg05002837 | 6.55E-08 | 7.43E-09 | -6.05 | 9.2616679 | -1.22E-01 | 47057371  | 47057494  | NC_000022.10 |
| cg26735886 | 6.55E-08 | 7.43E-09 | -6.05 | 9.2613498 | -5.54E-02 | 48351608  | 48351731  | NC_000017.10 |
| cg04691277 | 6.55E-08 | 7.44E-09 | -6.05 | 9.2605377 | -5.38E-02 | 6479352   | 6479475   | NC_000001.10 |
| cg04198042 | 6.55E-08 | 7.44E-09 | -6.05 | 9.2602696 | -9.36E-02 | 48169370  | 48169493  | NC_000017.10 |

|            |          |          |       |           |           |           |           |              |
|------------|----------|----------|-------|-----------|-----------|-----------|-----------|--------------|
| cg16992787 | 6.56E-08 | 7.44E-09 | -6.05 | 9.2595622 | -9.70E-02 | 5914669   | 5914792   | NC_000019.9  |
| cg18685330 | 6.56E-08 | 7.45E-09 | -6.05 | 9.2591034 | -1.31E-01 | 70746877  | 70747000  | NC_000007.13 |
| cg00591660 | 6.57E-08 | 7.46E-09 | -6.04 | 9.25757   | -9.75E-02 | 2478353   | 2478476   | NC_000016.9  |
| cg24953633 | 6.57E-08 | 7.46E-09 | -6.04 | 9.2574727 | -1.33E-01 | 201107102 | 201107225 | NC_000001.10 |
| cg10692140 | 6.57E-08 | 7.46E-09 | -6.04 | 9.2573252 | -6.69E-02 | 30496072  | 30496195  | NC_000006.11 |
| cg01614883 | 6.58E-08 | 7.47E-09 | -6.04 | 9.2557819 | -8.94E-02 | 38070934  | 38071057  | NC_000003.11 |
| cg14801418 | 6.59E-08 | 7.48E-09 | -6.04 | 9.2554082 | -3.71E-02 | 31588053  | 31588176  | NC_000006.11 |
| cg14728310 | 6.59E-08 | 7.48E-09 | -6.04 | 9.2550808 | -3.07E-02 | 9879317   | 9879440   | NC_000019.9  |
| cg02040921 | 6.59E-08 | 7.48E-09 | -6.04 | 9.2549896 | -3.15E-02 | 61554411  | 61554534  | NC_000017.10 |
| cg17338299 | 6.59E-08 | 7.48E-09 | -6.04 | 9.2547942 | -9.53E-02 | 155141719 | 155141842 | NC_000007.13 |
| cg02011054 | 6.59E-08 | 7.48E-09 | -6.04 | 9.2543829 | -3.81E-02 | 2950754   | 2950877   | NC_000011.9  |
| cg27241845 | 6.60E-08 | 7.49E-09 | -6.04 | 9.2535193 | -1.22E-01 | 233250370 | 233250493 | NC_000002.11 |
| cg08480461 | 6.60E-08 | 7.49E-09 | -6.04 | 9.2534822 | -9.62E-02 | 39553001  | 39553124  | NC_000001.10 |
| cg15967278 | 6.60E-08 | 7.50E-09 | -6.04 | 9.2524622 | -1.23E-01 | 29886272  | 29886395  | NC_000008.10 |
| cg06249486 | 6.61E-08 | 7.51E-09 | -6.04 | 9.2507638 | -7.37E-02 | 56553361  | 56553484  | NC_000016.9  |
| cg11367159 | 6.61E-08 | 7.51E-09 | -6.04 | 9.2507356 | -1.24E-01 | 110044531 | 110044654 | NC_000012.11 |
| cg02017323 | 6.62E-08 | 7.51E-09 | -6.04 | 9.2506053 | -7.22E-02 | 30411471  | 30411594  | NC_000016.9  |
| cg05114898 | 6.62E-08 | 7.51E-09 | -6.04 | 9.2504257 | -9.92E-02 | 56294175  | 56294298  | NC_000020.10 |
| cg15393585 | 6.62E-08 | 7.52E-09 | -6.04 | 9.2500065 | -9.62E-02 | 79275309  | 79275432  | NC_000017.10 |
| cg09789536 | 6.62E-08 | 7.52E-09 | -6.04 | 9.2497073 | -5.66E-02 | 896226    | 896349    | NC_000001.10 |
| cg12543918 | 6.62E-08 | 7.52E-09 | -6.04 | 9.2493509 | -1.32E-01 | 38403957  | 38404080  | NC_000005.9  |
| cg00112341 | 6.63E-08 | 7.53E-09 | -6.04 | 9.2487892 | -1.35E-01 | 55991024  | 55991147  | NC_000003.11 |
| cg25697881 | 6.63E-08 | 7.53E-09 | -6.04 | 9.2483928 | -1.21E-01 | 142517341 | 142517464 | NC_000008.10 |
| cg02005771 | 6.64E-08 | 7.54E-09 | -6.04 | 9.2472663 | -1.34E-01 | 79386576  | 79386699  | NC_000002.11 |
| cg20819617 | 6.64E-08 | 7.54E-09 | -6.04 | 9.2467669 | -8.25E-02 | 43045052  | 43045175  | NC_000006.11 |

|            |          |          |       |           |           |           |           |              |
|------------|----------|----------|-------|-----------|-----------|-----------|-----------|--------------|
| cg03583734 | 6.64E-08 | 7.55E-09 | -6.04 | 9.2462923 | -3.30E-02 | 46390327  | 46390450  | NC_000019.9  |
| cg15683970 | 6.65E-08 | 7.55E-09 | -6.04 | 9.245709  | -1.35E-01 | 35747081  | 35747204  | NC_000021.8  |
| cg06412523 | 6.65E-08 | 7.55E-09 | -6.04 | 9.2454642 | -3.22E-02 | 22551655  | 22551778  | NC_000008.10 |
| cg00423453 | 6.65E-08 | 7.55E-09 | -6.04 | 9.2452972 | -1.29E-01 | 5372944   | 5373067   | NC_000011.9  |
| cg23255141 | 6.65E-08 | 7.56E-09 | -6.04 | 9.2444668 | -1.15E-01 | 51199395  | 51199518  | NC_000015.9  |
| cg17271974 | 6.65E-08 | 7.56E-09 | -6.04 | 9.2442972 | -1.03E-01 | 204462540 | 204462663 | NC_000001.10 |
| cg08804892 | 6.65E-08 | 7.56E-09 | -6.04 | 9.2442918 | -8.27E-02 | 42201374  | 42201497  | NC_000003.11 |
| cg06360527 | 6.65E-08 | 7.56E-09 | -6.04 | 9.244262  | -8.26E-02 | 7491548   | 7491671   | NC_000017.10 |
| cg19190269 | 6.67E-08 | 7.57E-09 | -6.04 | 9.2424877 | -8.89E-02 | 64444820  | 64444943  | NC_000015.9  |
| cg23036947 | 6.67E-08 | 7.58E-09 | -6.04 | 9.2420268 | -9.76E-02 | 1294018   | 1294141   | NC_000001.10 |
| cg21386088 | 6.67E-08 | 7.58E-09 | -6.04 | 9.2414864 | -3.28E-02 | 26924767  | 26924890  | NC_000006.11 |
| cg18546437 | 6.68E-08 | 7.59E-09 | -6.04 | 9.2398911 | -9.34E-02 | 37308423  | 37308546  | NC_000022.10 |
| cg10040116 | 6.68E-08 | 7.60E-09 | -6.04 | 9.2396725 | -1.05E-01 | 13332667  | 13332790  | NC_000017.10 |
| cg16626480 | 6.68E-08 | 7.60E-09 | -6.04 | 9.2395678 | -6.39E-02 | 25575426  | 25575549  | NC_000022.10 |
| cg27140633 | 6.69E-08 | 7.60E-09 | -6.04 | 9.2390931 | -9.34E-02 | 63685905  | 63686028  | NC_000011.9  |
| cg06810011 | 6.69E-08 | 7.60E-09 | -6.04 | 9.2389026 | -1.08E-01 | 110562986 | 110563109 | NC_000007.13 |
| cg13916421 | 6.69E-08 | 7.60E-09 | -6.04 | 9.2386422 | -1.09E-01 | 215287668 | 215287791 | NC_000001.10 |
| cg26069837 | 6.69E-08 | 7.61E-09 | -6.04 | 9.2384923 | -2.57E-02 | 32345445  | 32345568  | NC_000010.10 |
| cg15864571 | 6.69E-08 | 7.61E-09 | -6.04 | 9.2382322 | -9.26E-02 | 149966904 | 149967027 | NC_000003.11 |
| cg04282788 | 6.70E-08 | 7.62E-09 | -6.04 | 9.2370873 | -4.83E-02 | 210407473 | 210407596 | NC_000001.10 |
| cg16171137 | 6.70E-08 | 7.62E-09 | -6.04 | 9.2366844 | -1.25E-01 | 31607634  | 31607757  | NC_000006.11 |
| cg12121660 | 6.70E-08 | 7.62E-09 | -6.04 | 9.2363593 | -1.67E-01 | 46621709  | 46621832  | NC_000017.10 |
| cg10616902 | 6.71E-08 | 7.63E-09 | -6.04 | 9.2357395 | -1.39E-01 | 189554990 | 189555113 | NC_000004.11 |
| cg00521239 | 6.71E-08 | 7.63E-09 | -6.04 | 9.2348273 | -7.43E-02 | 145015964 | 145016087 | NC_000008.10 |
| cg15160801 | 6.72E-08 | 7.64E-09 | -6.04 | 9.2339278 | -1.10E-01 | 153330399 | 153330522 | NC_000001.10 |

|            |          |          |       |           |           |           |           |              |
|------------|----------|----------|-------|-----------|-----------|-----------|-----------|--------------|
| cg01462856 | 6.72E-08 | 7.64E-09 | -6.04 | 9.2335754 | -1.01E-01 | 108922745 | 108922868 | NC_000013.10 |
| cg13018402 | 6.72E-08 | 7.65E-09 | -6.04 | 9.2330573 | -9.72E-02 | 148443366 | 148443489 | NC_000005.9  |
| cg27581031 | 6.73E-08 | 7.66E-09 | -6.04 | 9.2320131 | -7.68E-02 | 48348565  | 48348688  | NC_000017.10 |
| cg06352912 | 6.73E-08 | 7.66E-09 | -6.04 | 9.2317382 | -8.91E-02 | 96054661  | 96054784  | NC_000002.11 |
| cg10191581 | 6.74E-08 | 7.66E-09 | -6.04 | 9.2314675 | -1.10E-01 | 32255112  | 32255235  | NC_000021.8  |
| cg09658066 | 6.74E-08 | 7.66E-09 | -6.04 | 9.2313678 | -3.75E-02 | 35995354  | 35995477  | NC_000006.11 |
| cg08599448 | 6.74E-08 | 7.67E-09 | -6.04 | 9.2306563 | -1.16E-01 | 11689614  | 11689737  | NC_000019.9  |
| cg19570723 | 6.74E-08 | 7.67E-09 | -6.04 | 9.2300837 | -2.76E-02 | 47220176  | 47220299  | NC_000019.9  |
| cg24397318 | 6.75E-08 | 7.68E-09 | -6.04 | 9.2292324 | -6.83E-02 | 17420802  | 17420925  | NC_000019.9  |
| cg26963367 | 6.75E-08 | 7.68E-09 | -6.04 | 9.229229  | -1.18E-01 | 89157841  | 89157964  | NC_000015.9  |
| cg07858745 | 6.75E-08 | 7.68E-09 | -6.04 | 9.2291176 | -1.64E-02 | 74072514  | 74072637  | NC_000007.13 |
| cg15540821 | 6.76E-08 | 7.69E-09 | -6.04 | 9.2281039 | -5.45E-02 | 6911249   | 6911372   | NC_000004.11 |
| cg26151675 | 6.76E-08 | 7.69E-09 | -6.04 | 9.2279293 | -1.17E-01 | 24240069  | 24240192  | NC_000001.10 |
| cg20445283 | 6.76E-08 | 7.69E-09 | -6.04 | 9.2275476 | -1.36E-01 | 33360599  | 33360722  | NC_000019.9  |
| cg18418242 | 6.76E-08 | 7.69E-09 | -6.04 | 9.2274281 | -1.35E-01 | 42760642  | 42760765  | NC_000007.13 |
| cg25414605 | 6.77E-08 | 7.70E-09 | -6.04 | 9.22668   | -8.61E-02 | 67182672  | 67182795  | NC_000011.9  |
| cg04933530 | 6.77E-08 | 7.70E-09 | -6.04 | 9.2265876 | -1.31E-01 | 77419754  | 77419877  | NC_000014.8  |
| cg11749902 | 6.77E-08 | 7.70E-09 | -6.04 | 9.2262924 | -1.05E-01 | 41093619  | 41093742  | NC_000008.10 |
| cg13882090 | 6.77E-08 | 7.70E-09 | -6.04 | 9.2259981 | -8.00E-02 | 33246094  | 33246217  | NC_000006.11 |
| cg08244028 | 6.77E-08 | 7.71E-09 | -6.04 | 9.225634  | -1.19E-01 | 79949339  | 79949462  | NC_000005.9  |
| cg16640599 | 6.77E-08 | 7.71E-09 | -6.04 | 9.2254273 | -9.90E-02 | 119732131 | 119732254 | NC_000004.11 |
| cg25130728 | 6.78E-08 | 7.72E-09 | -6.04 | 9.2241857 | -1.41E-01 | 73483053  | 73483176  | NC_000007.13 |
| cg05092932 | 6.78E-08 | 7.72E-09 | -6.04 | 9.224061  | -4.60E-02 | 73137351  | 73137474  | NC_000010.10 |
| cg24349610 | 6.79E-08 | 7.73E-09 | -6.04 | 9.2232097 | -7.55E-02 | 119644968 | 119645091 | NC_000010.10 |
| cg21177463 | 6.79E-08 | 7.73E-09 | -6.04 | 9.2231078 | -8.23E-02 | 48732781  | 48732904  | NC_000003.11 |

|            |          |          |       |           |           |           |           |              |
|------------|----------|----------|-------|-----------|-----------|-----------|-----------|--------------|
| cg14176475 | 6.79E-08 | 7.73E-09 | -6.04 | 9.2222699 | -3.73E-02 | 135282081 | 135282204 | NC_000009.11 |
| cg06375292 | 6.80E-08 | 7.74E-09 | -6.04 | 9.2215957 | -1.21E-01 | 47786311  | 47786434  | NC_000017.10 |
| cg08508338 | 6.80E-08 | 7.74E-09 | -6.04 | 9.2215368 | -1.23E-01 | 58721060  | 58721183  | NC_000016.9  |
| cg12131828 | 6.80E-08 | 7.75E-09 | -6.04 | 9.2205416 | -1.41E-01 | 46663648  | 46663771  | NC_000017.10 |
| cg24787138 | 6.81E-08 | 7.75E-09 | -6.04 | 9.2195676 | -8.32E-02 | 43214590  | 43214713  | NC_000006.11 |
| cg05897210 | 6.82E-08 | 7.77E-09 | -6.04 | 9.2174318 | -9.81E-02 | 36282339  | 36282462  | NC_000004.11 |
| cg14545763 | 6.83E-08 | 7.77E-09 | -6.04 | 9.2173029 | -3.45E-02 | 58920002  | 58920125  | NC_000019.9  |
| cg20114103 | 6.83E-08 | 7.78E-09 | -6.04 | 9.2165449 | -8.09E-02 | 2397671   | 2397794   | NC_000006.11 |
| cg00940280 | 6.84E-08 | 7.78E-09 | -6.04 | 9.2157521 | -8.32E-02 | 131456284 | 131456407 | NC_000008.10 |
| cg22598840 | 6.84E-08 | 7.79E-09 | -6.04 | 9.215125  | -1.10E-01 | 58427707  | 58427830  | NC_000019.9  |
| cg03830680 | 6.84E-08 | 7.80E-09 | -6.04 | 9.2144537 | -3.57E-02 | 158636697 | 158636820 | NC_000005.9  |
| cg08734988 | 6.85E-08 | 7.80E-09 | -6.04 | 9.2140726 | -1.68E-02 | 132767095 | 132767218 | NC_000007.13 |
| cg00736104 | 6.85E-08 | 7.80E-09 | -6.04 | 9.2137299 | -1.12E-01 | 118974383 | 118974506 | NC_000012.11 |
| cg27259731 | 6.85E-08 | 7.80E-09 | -6.04 | 9.2133812 | -1.56E-01 | 142241208 | 142241331 | NC_000008.10 |
| cg09841124 | 6.86E-08 | 7.81E-09 | -6.04 | 9.2122088 | -2.22E-02 | 27807322  | 27807445  | NC_000006.11 |
| cg10969412 | 6.86E-08 | 7.82E-09 | -6.04 | 9.2115718 | -7.67E-02 | 121411269 | 121411392 | NC_000012.11 |
| cg07479303 | 6.87E-08 | 7.82E-09 | -6.04 | 9.2112736 | -5.89E-02 | 216988411 | 216988534 | NC_000001.10 |
| cg01866098 | 6.87E-08 | 7.82E-09 | -6.04 | 9.2110474 | -2.08E-02 | 24059229  | 24059352  | NC_000022.10 |
| cg00090147 | 6.87E-08 | 7.83E-09 | -6.04 | 9.2105507 | -5.21E-02 | 11562367  | 11562490  | NC_000008.10 |
| cg04413644 | 6.87E-08 | 7.83E-09 | -6.04 | 9.2104957 | -1.70E-02 | 9242184   | 9242307   | NC_000001.10 |
| cg22660447 | 6.88E-08 | 7.83E-09 | -6.04 | 9.2096123 | -1.03E-01 | 89778660  | 89778783  | NC_000016.9  |
| cg20272604 | 6.88E-08 | 7.83E-09 | -6.04 | 9.209599  | -2.41E-02 | 231004631 | 231004754 | NC_000001.10 |
| cg04620506 | 6.88E-08 | 7.84E-09 | -6.04 | 9.2094311 | -5.49E-02 | 25507318  | 25507441  | NC_000022.10 |
| cg12749787 | 6.88E-08 | 7.84E-09 | -6.04 | 9.2083701 | -2.81E-02 | 12878379  | 12878502  | NC_000012.11 |
| cg03180191 | 6.89E-08 | 7.85E-09 | -6.03 | 9.2077625 | -2.24E-02 | 59437231  | 59437354  | NC_000011.9  |

|            |          |          |       |           |           |           |           |              |
|------------|----------|----------|-------|-----------|-----------|-----------|-----------|--------------|
| cg18958584 | 6.89E-08 | 7.85E-09 | -6.03 | 9.2076816 | -3.62E-02 | 18266764  | 18266887  | NC_000017.10 |
| cg00845765 | 6.89E-08 | 7.85E-09 | -6.03 | 9.2075367 | -7.98E-02 | 145700821 | 145700944 | NC_000008.10 |
| cg15115413 | 6.89E-08 | 7.85E-09 | -6.03 | 9.2072003 | -5.04E-02 | 42931123  | 42931246  | NC_000010.10 |
| cg04407400 | 6.89E-08 | 7.85E-09 | -6.03 | 9.207065  | -7.08E-02 | 145731095 | 145731218 | NC_000004.11 |
| cg21502250 | 6.90E-08 | 7.86E-09 | -6.03 | 9.2063359 | -1.23E-01 | 122297313 | 122297436 | NC_000012.11 |
| cg24517325 | 6.90E-08 | 7.86E-09 | -6.03 | 9.2060321 | -4.73E-02 | 18884428  | 18884551  | NC_000001.10 |
| cg20951825 | 6.90E-08 | 7.87E-09 | -6.03 | 9.2055578 | -1.10E-01 | 122461157 | 122461280 | NC_000005.9  |
| cg16533373 | 6.90E-08 | 7.87E-09 | -6.03 | 9.2051869 | -3.32E-02 | 30457889  | 30458012  | NC_000020.10 |
| cg07407736 | 6.91E-08 | 7.87E-09 | -6.03 | 9.2047383 | -1.07E-01 | 141391254 | 141391377 | NC_000004.11 |
| cg13319197 | 6.92E-08 | 7.88E-09 | -6.03 | 9.2035344 | -3.27E-02 | 46142000  | 46142123  | NC_000011.9  |
| cg16905586 | 6.92E-08 | 7.89E-09 | -6.03 | 9.2032434 | -1.22E-02 | 49761211  | 49761334  | NC_000003.11 |
| cg04905201 | 6.92E-08 | 7.89E-09 | -6.03 | 9.2032334 | -6.35E-02 | 89119709  | 89119832  | NC_000016.9  |
| cg22895601 | 6.92E-08 | 7.89E-09 | -6.03 | 9.2030894 | -1.10E-01 | 21131621  | 21131744  | NC_000014.8  |
| cg09180894 | 6.92E-08 | 7.89E-09 | -6.03 | 9.2029503 | -8.76E-02 | 3395053   | 3395176   | NC_000001.10 |
| cg20091689 | 6.93E-08 | 7.90E-09 | -6.03 | 9.2009184 | -1.06E-01 | 97524862  | 97524985  | NC_000002.11 |
| cg05789250 | 6.93E-08 | 7.91E-09 | -6.03 | 9.2007821 | -1.14E-01 | 31804306  | 31804429  | NC_000006.11 |
| cg21487894 | 6.94E-08 | 7.91E-09 | -6.03 | 9.1997572 | -6.78E-02 | 55038404  | 55038527  | NC_000017.10 |
| cg05908691 | 6.94E-08 | 7.92E-09 | -6.03 | 9.199311  | -8.13E-02 | 78870221  | 78870344  | NC_000010.10 |
| cg11887376 | 6.95E-08 | 7.93E-09 | -6.03 | 9.1976049 | -8.54E-02 | 1118670   | 1118793   | NC_000005.9  |
| cg03708694 | 6.95E-08 | 7.93E-09 | -6.03 | 9.1975381 | -7.59E-02 | 44489577  | 44489700  | NC_000011.9  |
| cg00639286 | 6.96E-08 | 7.93E-09 | -6.03 | 9.197272  | -2.56E-02 | 151138064 | 151138187 | NC_000005.9  |
| cg05820435 | 6.96E-08 | 7.94E-09 | -6.03 | 9.1967563 | -9.19E-02 | 19701756  | 19701879  | NC_000001.10 |
| cg16563151 | 6.96E-08 | 7.94E-09 | -6.03 | 9.1965777 | -1.69E-02 | 144640403 | 144640526 | NC_000008.10 |
| cg04093208 | 6.97E-08 | 7.95E-09 | -6.03 | 9.1951768 | -1.16E-01 | 39891557  | 39891680  | NC_000013.10 |
| cg08774280 | 6.97E-08 | 7.95E-09 | -6.03 | 9.1948746 | -1.09E-01 | 119826303 | 119826426 | NC_000004.11 |

|               |          |          |       |           |           |           |           |              |
|---------------|----------|----------|-------|-----------|-----------|-----------|-----------|--------------|
| cg01664382    | 6.97E-08 | 7.95E-09 | -6.03 | 9.1948046 | -1.00E-01 | 170490375 | 170490498 | NC_000006.11 |
| cg12257341    | 6.97E-08 | 7.95E-09 | -6.03 | 9.1947882 | -1.12E-02 | 26467734  | 26467857  | NC_000002.11 |
| cg22967717    | 6.98E-08 | 7.97E-09 | -6.03 | 9.1933694 | -7.57E-02 | 92695561  | 92695684  | NC_000005.9  |
| cg02500075    | 6.98E-08 | 7.97E-09 | -6.03 | 9.1930652 | -6.71E-02 | 179263203 | 179263326 | NC_000003.11 |
| cg10667895    | 6.98E-08 | 7.97E-09 | -6.03 | 9.1929951 | -1.11E-01 | 102577876 | 102577999 | NC_000002.11 |
| cg16498391    | 6.99E-08 | 7.97E-09 | -6.03 | 9.1922635 | -1.19E-01 | 12421072  | 12421195  | NC_000018.9  |
| cg24055178    | 6.99E-08 | 7.98E-09 | -6.03 | 9.1919629 | -7.64E-02 | 134263487 | 134263610 | NC_000010.10 |
| cg13491139    | 7.00E-08 | 7.98E-09 | -6.03 | 9.1912219 | -1.21E-01 | 139627019 | 139627142 | NC_000009.11 |
| cg14646653    | 7.00E-08 | 7.99E-09 | -6.03 | 9.1908179 | -1.47E-01 | 42233161  | 42233284  | NC_000007.13 |
| cg24570042    | 7.01E-08 | 8.00E-09 | -6.03 | 9.1892144 | -1.19E-01 | 51634583  | 51634706  | NC_000015.9  |
| cg24205914    | 7.01E-08 | 8.00E-09 | -6.03 | 9.1889012 | -1.42E-01 | 62761575  | 62761698  | NC_000010.10 |
| cg01654560    | 7.01E-08 | 8.00E-09 | -6.03 | 9.1888814 | -9.96E-02 | 131780046 | 131780169 | NC_000011.9  |
| ch.7.2194789F | 7.01E-08 | 8.00E-09 | -6.03 | 9.188769  | -1.28E-02 | 102039835 | 102039958 | NC_000007.13 |
| cg14283978    | 7.01E-08 | 8.00E-09 | -6.03 | 9.1885395 | -1.22E-01 | 45809570  | 45809693  | NC_000019.9  |
| cg13565866    | 7.02E-08 | 8.02E-09 | -6.03 | 9.1872196 | -6.34E-02 | 24837564  | 24837687  | NC_000014.8  |
| cg05382480    | 7.03E-08 | 8.02E-09 | -6.03 | 9.1861065 | -1.83E-01 | 19606588  | 19606711  | NC_000016.9  |
| cg03742705    | 7.04E-08 | 8.03E-09 | -6.03 | 9.1853985 | -5.84E-02 | 1406266   | 1406389   | NC_000001.10 |
| cg06008435    | 7.04E-08 | 8.04E-09 | -6.03 | 9.1848201 | -1.13E-01 | 25027714  | 25027837  | NC_000006.11 |
| cg09980626    | 7.04E-08 | 8.04E-09 | -6.03 | 9.1846104 | -6.70E-02 | 30125305  | 30125428  | NC_000016.9  |
| cg10752753    | 7.04E-08 | 8.04E-09 | -6.03 | 9.1845268 | -8.89E-02 | 33984930  | 33985053  | NC_000005.9  |
| cg11436767    | 7.04E-08 | 8.04E-09 | -6.03 | 9.1843498 | -5.28E-02 | 46401422  | 46401545  | NC_000011.9  |
| cg20724405    | 7.05E-08 | 8.05E-09 | -6.03 | 9.1833436 | -1.32E-02 | 32805960  | 32806083  | NC_000006.11 |
| cg05746256    | 7.05E-08 | 8.05E-09 | -6.03 | 9.1825788 | -4.73E-02 | 89237789  | 89237912  | NC_000016.9  |
| cg18842310    | 7.06E-08 | 8.06E-09 | -6.03 | 9.1819231 | -1.09E-01 | 113627484 | 113627607 | NC_000013.10 |
| cg10107725    | 7.06E-08 | 8.06E-09 | -6.03 | 9.1816103 | -6.81E-02 | 160761556 | 160761679 | NC_000002.11 |



|            |          |          |       |           |           |           |           |              |
|------------|----------|----------|-------|-----------|-----------|-----------|-----------|--------------|
| cg09493621 | 7.06E-08 | 8.06E-09 | -6.03 | 9.1813722 | -1.02E-01 | 74823581  | 74823704  | NC_000015.9  |
| cg00841090 | 7.07E-08 | 8.07E-09 | -6.03 | 9.1806457 | -8.80E-02 | 2651101   | 2651224   | NC_000017.10 |
| cg24097460 | 7.08E-08 | 8.09E-09 | -6.03 | 9.1787411 | -6.02E-02 | 134671024 | 134671147 | NC_000007.13 |
| cg00892742 | 7.08E-08 | 8.09E-09 | -6.03 | 9.1787001 | -1.73E-01 | 195648562 | 195648685 | NC_000003.11 |
| cg03851159 | 7.08E-08 | 8.09E-09 | -6.03 | 9.1786156 | -1.04E-01 | 118891090 | 118891213 | NC_000010.10 |
| cg12659381 | 7.08E-08 | 8.09E-09 | -6.03 | 9.1780967 | -3.18E-02 | 24646254  | 24646377  | NC_000006.11 |
| cg23221504 | 7.09E-08 | 8.09E-09 | -6.03 | 9.1777459 | -2.18E-02 | 171673110 | 171673233 | NC_000002.11 |
| cg02565999 | 7.09E-08 | 8.10E-09 | -6.03 | 9.1772302 | -1.45E-01 | 95003984  | 95004107  | NC_000013.10 |
| cg13620921 | 7.09E-08 | 8.10E-09 | -6.03 | 9.1771878 | -3.97E-02 | 3400587   | 3400710   | NC_000011.9  |
| cg12736501 | 7.09E-08 | 8.10E-09 | -6.03 | 9.1765195 | -8.49E-02 | 121433170 | 121433293 | NC_000002.11 |
| cg18028711 | 7.11E-08 | 8.12E-09 | -6.03 | 9.1750166 | -3.07E-02 | 45150028  | 45150151  | NC_000013.10 |
| cg06143012 | 7.11E-08 | 8.12E-09 | -6.03 | 9.1747274 | -9.12E-02 | 34258076  | 34258199  | NC_000017.10 |
| cg23826582 | 7.12E-08 | 8.13E-09 | -6.03 | 9.1730826 | -5.20E-02 | 31548612  | 31548735  | NC_000006.11 |
| cg01991934 | 7.12E-08 | 8.14E-09 | -6.03 | 9.1725599 | -8.15E-02 | 93412768  | 93412891  | NC_000014.8  |
| cg00672333 | 7.12E-08 | 8.14E-09 | -6.03 | 9.1724052 | -1.62E-01 | 36728456  | 36728579  | NC_000017.10 |
| cg21904489 | 7.14E-08 | 8.15E-09 | -6.03 | 9.1704818 | -1.16E-01 | 119071213 | 119071336 | NC_000003.11 |
| cg27461196 | 7.14E-08 | 8.15E-09 | -6.03 | 9.1704772 | -1.17E-01 | 35630106  | 35630229  | NC_000019.9  |
| cg14760355 | 7.14E-08 | 8.16E-09 | -6.03 | 9.1700724 | -3.16E-02 | 176046503 | 176046626 | NC_000002.11 |
| cg00849642 | 7.14E-08 | 8.16E-09 | -6.03 | 9.1699711 | -9.62E-02 | 109106495 | 109106618 | NC_000012.11 |
| cg00401552 | 7.14E-08 | 8.16E-09 | -6.03 | 9.1693869 | -3.71E-02 | 2835710   | 2835833   | NC_000016.9  |
| cg21288207 | 7.15E-08 | 8.17E-09 | -6.03 | 9.1681475 | -3.50E-02 | 6048673   | 6048796   | NC_000007.13 |
| cg26908611 | 7.15E-08 | 8.18E-09 | -6.03 | 9.1679102 | -2.77E-02 | 40421002  | 40421125  | NC_000001.10 |
| cg19893664 | 7.16E-08 | 8.18E-09 | -6.03 | 9.1671323 | -1.13E-01 | 105619634 | 105619757 | NC_000014.8  |
| cg25268100 | 7.16E-08 | 8.18E-09 | -6.03 | 9.1668727 | -8.11E-02 | 134457731 | 134457854 | NC_000010.10 |
| cg17177699 | 7.17E-08 | 8.19E-09 | -6.03 | 9.1661762 | -6.87E-02 | 10120594  | 10120717  | NC_000019.9  |

|            |          |          |       |           |           |           |           |              |
|------------|----------|----------|-------|-----------|-----------|-----------|-----------|--------------|
| cg04678315 | 7.17E-08 | 8.19E-09 | -6.03 | 9.1658139 | -8.80E-02 | 125212010 | 125212133 | NC_000012.11 |
| cg12424383 | 7.17E-08 | 8.20E-09 | -6.03 | 9.1652791 | -1.02E-01 | 27990967  | 27991090  | NC_000001.10 |
| cg26166688 | 7.17E-08 | 8.20E-09 | -6.03 | 9.1649552 | -6.77E-02 | 119396640 | 119396763 | NC_000003.11 |
| cg03065329 | 7.18E-08 | 8.20E-09 | -6.03 | 9.1647587 | -4.35E-02 | 113240306 | 113240429 | NC_000002.11 |
| cg02602010 | 7.18E-08 | 8.20E-09 | -6.03 | 9.1645063 | -7.51E-02 | 27372132  | 27372255  | NC_000002.11 |
| cg06568454 | 7.18E-08 | 8.21E-09 | -6.03 | 9.1636842 | -1.20E-01 | 89940886  | 89941009  | NC_000016.9  |
| cg21451816 | 7.19E-08 | 8.22E-09 | -6.03 | 9.1629637 | -7.18E-02 | 1468848   | 1468971   | NC_000007.13 |
| cg00868131 | 7.19E-08 | 8.22E-09 | -6.03 | 9.1629496 | -1.19E-01 | 54952901  | 54953024  | NC_000001.10 |
| cg20162696 | 7.19E-08 | 8.22E-09 | -6.03 | 9.1621653 | -1.23E-01 | 102167694 | 102167817 | NC_000008.10 |
| cg15348274 | 7.19E-08 | 8.22E-09 | -6.03 | 9.1621603 | -5.90E-02 | 123451191 | 123451314 | NC_000012.11 |
| cg24897392 | 7.19E-08 | 8.22E-09 | -6.03 | 9.1621235 | -1.36E-01 | 169072106 | 169072229 | NC_000001.10 |
| cg13505608 | 7.19E-08 | 8.23E-09 | -6.03 | 9.1617999 | -7.43E-02 | 140127061 | 140127184 | NC_000009.11 |
| cg21240441 | 7.20E-08 | 8.23E-09 | -6.03 | 9.1612498 | -5.53E-02 | 139872871 | 139872994 | NC_000009.11 |
| cg15669088 | 7.21E-08 | 8.24E-09 | -6.03 | 9.1602748 | -9.93E-02 | 134775772 | 134775895 | NC_000010.10 |
| cg11373356 | 7.21E-08 | 8.25E-09 | -6.03 | 9.1589998 | -9.14E-02 | 3439095   | 3439218   | NC_000004.11 |
| cg04425701 | 7.22E-08 | 8.26E-09 | -6.03 | 9.1582009 | -9.46E-02 | 35630474  | 35630597  | NC_000019.9  |
| cg11882377 | 7.22E-08 | 8.26E-09 | -6.03 | 9.158159  | -5.43E-02 | 145654780 | 145654903 | NC_000008.10 |
| cg14696926 | 7.23E-08 | 8.27E-09 | -6.03 | 9.1568726 | -1.03E-01 | 2093220   | 2093343   | NC_000008.10 |
| cg03877492 | 7.23E-08 | 8.27E-09 | -6.03 | 9.1568708 | -2.43E-02 | 1567421   | 1567544   | NC_000019.9  |
| cg07149459 | 7.23E-08 | 8.27E-09 | -6.02 | 9.1562861 | -1.89E-02 | 134144864 | 134144987 | NC_000010.10 |
| cg13640414 | 7.23E-08 | 8.27E-09 | -6.02 | 9.1562342 | -7.98E-02 | 15530870  | 15530993  | NC_000019.9  |
| cg00890010 | 7.23E-08 | 8.28E-09 | -6.02 | 9.1560675 | -4.63E-02 | 182817389 | 182817512 | NC_000003.11 |
| cg26150981 | 7.25E-08 | 8.29E-09 | -6.02 | 9.1543809 | -9.48E-02 | 135608687 | 135608810 | NC_000007.13 |
| cg10102037 | 7.25E-08 | 8.29E-09 | -6.02 | 9.1542087 | -5.31E-02 | 34323943  | 34324066  | NC_000012.11 |
| cg03807888 | 7.25E-08 | 8.29E-09 | -6.02 | 9.1539819 | -3.58E-02 | 8580619   | 8580742   | NC_000003.11 |

|            |          |          |       |           |           |           |           |              |
|------------|----------|----------|-------|-----------|-----------|-----------|-----------|--------------|
| cg21157107 | 7.26E-08 | 8.30E-09 | -6.02 | 9.1531663 | -9.06E-02 | 110399894 | 110400017 | NC_000009.11 |
| cg26628795 | 7.26E-08 | 8.30E-09 | -6.02 | 9.1530338 | -3.03E-02 | 111435723 | 111435846 | NC_000002.11 |
| cg05906777 | 7.26E-08 | 8.31E-09 | -6.02 | 9.152276  | -8.27E-02 | 73268160  | 73268283  | NC_000017.10 |
| cg23106115 | 7.26E-08 | 8.31E-09 | -6.02 | 9.1518507 | -9.76E-02 | 96036568  | 96036691  | NC_000008.10 |
| cg16506970 | 7.27E-08 | 8.32E-09 | -6.02 | 9.1512736 | -1.20E-01 | 6809109   | 6809232   | NC_000004.11 |
| cg20935945 | 7.27E-08 | 8.32E-09 | -6.02 | 9.1508116 | -1.90E-02 | 72969046  | 72969169  | NC_000017.10 |
| cg00063828 | 7.28E-08 | 8.32E-09 | -6.02 | 9.1503348 | -1.51E-01 | 85749496  | 85749619  | NC_000016.9  |
| cg25969107 | 7.28E-08 | 8.33E-09 | -6.02 | 9.150142  | -1.89E-01 | 95128247  | 95128370  | NC_000015.9  |
| cg06970370 | 7.29E-08 | 8.34E-09 | -6.02 | 9.1485004 | -8.60E-02 | 121261077 | 121261200 | NC_000001.10 |
| cg24026549 | 7.30E-08 | 8.35E-09 | -6.02 | 9.1468322 | -1.16E-02 | 3534156   | 3534279   | NC_000004.11 |
| cg24200083 | 7.31E-08 | 8.36E-09 | -6.02 | 9.1459872 | -7.97E-02 | 19279245  | 19279368  | NC_000022.10 |
| cg07472373 | 7.31E-08 | 8.36E-09 | -6.02 | 9.1459767 | -1.25E-01 | 50595181  | 50595304  | NC_000010.10 |
| cg02703032 | 7.31E-08 | 8.36E-09 | -6.02 | 9.1457406 | -6.57E-02 | 32938830  | 32938953  | NC_000006.11 |
| cg18380808 | 7.31E-08 | 8.37E-09 | -6.02 | 9.1454372 | -1.32E-01 | 73343027  | 73343150  | NC_000014.8  |
| cg14609721 | 7.31E-08 | 8.37E-09 | -6.02 | 9.1453792 | -1.73E-02 | 68962124  | 68962247  | NC_000001.10 |
| cg07528974 | 7.31E-08 | 8.37E-09 | -6.02 | 9.1450703 | -5.66E-02 | 74332777  | 74332900  | NC_000015.9  |
| cg11815762 | 7.31E-08 | 8.37E-09 | -6.02 | 9.1447594 | -3.78E-02 | 1610673   | 1610796   | NC_000006.11 |
| cg03665259 | 7.32E-08 | 8.37E-09 | -6.02 | 9.1445437 | -1.02E-01 | 31021826  | 31021949  | NC_000006.11 |
| cg04066634 | 7.32E-08 | 8.37E-09 | -6.02 | 9.1444657 | -6.60E-02 | 131174253 | 131174376 | NC_000006.11 |
| cg02895319 | 7.32E-08 | 8.37E-09 | -6.02 | 9.1444211 | -3.78E-02 | 50222810  | 50222933  | NC_000012.11 |
| cg13946500 | 7.32E-08 | 8.38E-09 | -6.02 | 9.1438322 | -2.40E-02 | 10217312  | 10217435  | NC_000019.9  |
| cg17915961 | 7.32E-08 | 8.38E-09 | -6.02 | 9.1433726 | -1.18E-01 | 103881480 | 103881603 | NC_000010.10 |
| cg22434506 | 7.32E-08 | 8.38E-09 | -6.02 | 9.1433353 | -8.51E-02 | 6657818   | 6657941   | NC_000012.11 |
| cg06007323 | 7.33E-08 | 8.39E-09 | -6.02 | 9.1430955 | -2.87E-02 | 6784769   | 6784892   | NC_000004.11 |
| cg24697460 | 7.33E-08 | 8.40E-09 | -6.02 | 9.1418581 | -6.16E-02 | 124908653 | 124908776 | NC_000012.11 |

|            |          |          |       |           |           |           |           |              |
|------------|----------|----------|-------|-----------|-----------|-----------|-----------|--------------|
| cg08290013 | 7.34E-08 | 8.40E-09 | -6.02 | 9.1415708 | -1.15E-01 | 27334164  | 27334287  | NC_000017.10 |
| cg03172060 | 7.35E-08 | 8.41E-09 | -6.02 | 9.1402073 | -2.44E-02 | 78518613  | 78518736  | NC_000017.10 |
| cg14580747 | 7.35E-08 | 8.41E-09 | -6.02 | 9.1397648 | -1.17E-01 | 169384519 | 169384642 | NC_000003.11 |
| cg03607415 | 7.37E-08 | 8.44E-09 | -6.02 | 9.137243  | -1.35E-01 | 89881642  | 89881765  | NC_000005.9  |
| cg08111922 | 7.37E-08 | 8.45E-09 | -6.02 | 9.1362422 | -1.07E-01 | 105287408 | 105287531 | NC_000014.8  |
| cg17173451 | 7.37E-08 | 8.45E-09 | -6.02 | 9.1362115 | -1.32E-01 | 138310864 | 138310987 | NC_000007.13 |
| cg27542341 | 7.38E-08 | 8.45E-09 | -6.02 | 9.135826  | -1.49E-01 | 75248086  | 75248209  | NC_000015.9  |
| cg27358154 | 7.39E-08 | 8.46E-09 | -6.02 | 9.1344247 | -9.67E-02 | 72453975  | 72454098  | NC_000010.10 |
| cg11333436 | 7.40E-08 | 8.47E-09 | -6.02 | 9.1332613 | -4.14E-02 | 11533781  | 11533904  | NC_000003.11 |
| cg25170995 | 7.40E-08 | 8.47E-09 | -6.02 | 9.1331869 | -8.59E-02 | 168818564 | 168818687 | NC_000004.11 |
| cg26823762 | 7.40E-08 | 8.48E-09 | -6.02 | 9.1328185 | -8.90E-02 | 42369093  | 42369216  | NC_000002.11 |
| cg24002003 | 7.40E-08 | 8.48E-09 | -6.02 | 9.1324544 | -1.52E-01 | 101668143 | 101668266 | NC_000015.9  |
| cg12969595 | 7.40E-08 | 8.48E-09 | -6.02 | 9.1323817 | -3.70E-02 | 31254878  | 31255001  | NC_000017.10 |
| cg24520862 | 7.41E-08 | 8.48E-09 | -6.02 | 9.1316989 | -1.50E-01 | 75943228  | 75943351  | NC_000011.9  |
| cg14199150 | 7.41E-08 | 8.49E-09 | -6.02 | 9.1313829 | -9.53E-02 | 136930919 | 136931042 | NC_000009.11 |
| cg20482145 | 7.42E-08 | 8.50E-09 | -6.02 | 9.1303171 | -1.05E-01 | 8525165   | 8525288   | NC_000017.10 |
| cg19514613 | 7.42E-08 | 8.51E-09 | -6.02 | 9.1293259 | -4.76E-02 | 45409713  | 45409836  | NC_000019.9  |
| cg22552457 | 7.42E-08 | 8.51E-09 | -6.02 | 9.1291052 | -6.23E-02 | 10792615  | 10792738  | NC_000019.9  |
| cg04364517 | 7.43E-08 | 8.51E-09 | -6.02 | 9.1289424 | -1.43E-02 | 2478362   | 2478485   | NC_000001.10 |
| cg10577585 | 7.43E-08 | 8.51E-09 | -6.02 | 9.1289297 | -5.99E-02 | 103347909 | 103348032 | NC_000010.10 |
| cg21191088 | 7.43E-08 | 8.51E-09 | -6.02 | 9.128898  | -8.20E-02 | 140115301 | 140115424 | NC_000009.11 |
| cg07166546 | 7.43E-08 | 8.51E-09 | -6.02 | 9.128864  | -9.42E-02 | 35805898  | 35806021  | NC_000014.8  |
| cg17655415 | 7.43E-08 | 8.52E-09 | -6.02 | 9.1280304 | -1.65E-01 | 89802559  | 89802682  | NC_000010.10 |
| cg11150191 | 7.44E-08 | 8.52E-09 | -6.02 | 9.1272185 | -8.38E-02 | 94391285  | 94391408  | NC_000014.8  |
| cg06027057 | 7.44E-08 | 8.53E-09 | -6.02 | 9.1269165 | -2.03E-02 | 90849959  | 90850082  | NC_000014.8  |

|                |          |          |       |           |           |           |           |              |
|----------------|----------|----------|-------|-----------|-----------|-----------|-----------|--------------|
| cg11872300     | 7.44E-08 | 8.53E-09 | -6.02 | 9.1267599 | -1.34E-02 | 42785225  | 42785348  | NC_000019.9  |
| cg05668853     | 7.44E-08 | 8.53E-09 | -6.02 | 9.1263894 | -1.12E-01 | 27044169  | 27044292  | NC_000017.10 |
| cg17837192     | 7.44E-08 | 8.53E-09 | -6.02 | 9.1263674 | -1.38E-01 | 239068941 | 239069064 | NC_000002.11 |
| cg09133422     | 7.46E-08 | 8.55E-09 | -6.02 | 9.1241434 | -3.71E-02 | 155292660 | 155292783 | NC_000001.10 |
| cg18954339     | 7.47E-08 | 8.56E-09 | -6.02 | 9.122673  | -1.76E-02 | 105780420 | 105780543 | NC_000014.8  |
| cg06397510     | 7.47E-08 | 8.57E-09 | -6.02 | 9.1224868 | -5.70E-02 | 32403634  | 32403757  | NC_000001.10 |
| cg02956255     | 7.47E-08 | 8.57E-09 | -6.02 | 9.1222404 | -7.99E-02 | 31430641  | 31430764  | NC_000006.11 |
| cg13605674     | 7.49E-08 | 8.59E-09 | -6.02 | 9.1193628 | -1.12E-01 | 196065328 | 196065451 | NC_000003.11 |
| cg04365568     | 7.50E-08 | 8.60E-09 | -6.02 | 9.1187231 | -1.10E-01 | 45809373  | 45809496  | NC_000019.9  |
| cg03363653     | 7.50E-08 | 8.60E-09 | -6.02 | 9.1182893 | -3.50E-02 | 16394677  | 16394800  | NC_000017.10 |
| cg09365645     | 7.52E-08 | 8.62E-09 | -6.02 | 9.1163199 | -8.89E-02 | 79442037  | 79442160  | NC_000017.10 |
| cg14163802     | 7.52E-08 | 8.62E-09 | -6.02 | 9.1160127 | -2.06E-02 | 206547479 | 206547602 | NC_000002.11 |
| cg19184348     | 7.52E-08 | 8.62E-09 | -6.02 | 9.1159296 | -5.11E-02 | 33386504  | 33386627  | NC_000006.11 |
| cg05128656     | 7.53E-08 | 8.64E-09 | -6.02 | 9.1145491 | -6.47E-02 | 29210592  | 29210715  | NC_000008.10 |
| cg05999255     | 7.53E-08 | 8.64E-09 | -6.02 | 9.1144009 | -2.81E-02 | 106641134 | 106641257 | NC_000012.11 |
| cg02800711     | 7.53E-08 | 8.64E-09 | -6.02 | 9.114233  | -1.17E-01 | 17564425  | 17564548  | NC_000011.9  |
| cg04084786     | 7.54E-08 | 8.65E-09 | -6.02 | 9.1129861 | -1.29E-01 | 27609163  | 27609286  | NC_000010.10 |
| cg14981432     | 7.55E-08 | 8.66E-09 | -6.02 | 9.1120327 | -7.83E-02 | 61555930  | 61556053  | NC_000011.9  |
| cg26610167     | 7.55E-08 | 8.66E-09 | -6.02 | 9.1117507 | -1.17E-01 | 55720817  | 55720940  | NC_000019.9  |
| ch.4.11419765R | 7.55E-08 | 8.66E-09 | -6.02 | 9.1114248 | -3.51E-02 | 11810667  | 11810790  | NC_000004.11 |
| cg07015749     | 7.56E-08 | 8.67E-09 | -6.02 | 9.110512  | -9.52E-02 | 6085995   | 6086118   | NC_000001.10 |
| ch.7.2435427F  | 7.57E-08 | 8.68E-09 | -6.02 | 9.1092187 | -4.67E-02 | 115583891 | 115584014 | NC_000007.13 |
| cg19380793     | 7.57E-08 | 8.69E-09 | -6.02 | 9.1087564 | -1.34E-01 | 111079100 | 111079223 | NC_000007.13 |
| cg21041514     | 7.57E-08 | 8.69E-09 | -6.02 | 9.1084309 | -1.50E-02 | 40333411  | 40333534  | NC_000017.10 |
| cg16044595     | 7.58E-08 | 8.70E-09 | -6.02 | 9.1069296 | -7.21E-02 | 236304396 | 236304519 | NC_000001.10 |

|               |          |          |       |           |           |           |           |              |
|---------------|----------|----------|-------|-----------|-----------|-----------|-----------|--------------|
| cg16361876    | 7.59E-08 | 8.71E-09 | -6.02 | 9.1061571 | -6.07E-02 | 152635878 | 152636001 | NC_000001.10 |
| cg07148594    | 7.60E-08 | 8.72E-09 | -6.01 | 9.1053832 | -8.45E-02 | 52565909  | 52566032  | NC_000003.11 |
| cg20373432    | 7.60E-08 | 8.72E-09 | -6.01 | 9.1051204 | -1.11E-01 | 74135572  | 74135695  | NC_000017.10 |
| cg11026867    | 7.60E-08 | 8.72E-09 | -6.01 | 9.1050492 | -1.29E-01 | 6473643   | 6473766   | NC_000012.11 |
| ch.4.1680698F | 7.60E-08 | 8.73E-09 | -6.01 | 9.1042555 | -4.79E-02 | 87737075  | 87737198  | NC_000004.11 |
| cg26152017    | 7.61E-08 | 8.74E-09 | -6.01 | 9.1033115 | -1.36E-01 | 73004558  | 73004681  | NC_000010.10 |
| cg25032745    | 7.62E-08 | 8.74E-09 | -6.01 | 9.1025201 | -5.21E-02 | 15481695  | 15481818  | NC_000010.10 |
| cg24111008    | 7.64E-08 | 8.77E-09 | -6.01 | 9.0998124 | -4.23E-02 | 7599072   | 7599195   | NC_000019.9  |
| cg17003212    | 7.64E-08 | 8.77E-09 | -6.01 | 9.0996722 | -7.94E-02 | 97054967  | 97055090  | NC_000010.10 |
| cg19722698    | 7.66E-08 | 8.80E-09 | -6.01 | 9.0966339 | -8.98E-02 | 104693930 | 104694053 | NC_000012.11 |
| cg23407151    | 7.66E-08 | 8.80E-09 | -6.01 | 9.096253  | -1.23E-01 | 53579798  | 53579921  | NC_000006.11 |
| cg04685645    | 7.66E-08 | 8.80E-09 | -6.01 | 9.0962274 | -1.49E-01 | 1404499   | 1404622   | NC_000019.9  |
| cg24447890    | 7.67E-08 | 8.81E-09 | -6.01 | 9.0949691 | -8.89E-02 | 75105144  | 75105267  | NC_000015.9  |
| cg16975985    | 7.68E-08 | 8.82E-09 | -6.01 | 9.0935896 | -3.84E-02 | 49524048  | 49524171  | NC_000012.11 |
| cg17181325    | 7.68E-08 | 8.82E-09 | -6.01 | 9.0935613 | -2.18E-02 | 1613831   | 1613954   | NC_000017.10 |
| cg24036039    | 7.69E-08 | 8.83E-09 | -6.01 | 9.0926852 | -1.20E-01 | 3397125   | 3397248   | NC_000001.10 |
| cg23265096    | 7.69E-08 | 8.84E-09 | -6.01 | 9.0921037 | -8.31E-02 | 57582594  | 57582717  | NC_000020.10 |
| cg01588464    | 7.70E-08 | 8.84E-09 | -6.01 | 9.09171   | -3.94E-02 | 182360063 | 182360186 | NC_000001.10 |
| cg15060346    | 7.70E-08 | 8.84E-09 | -6.01 | 9.0912408 | -9.29E-02 | 73868736  | 73868859  | NC_000002.11 |
| cg05122957    | 7.70E-08 | 8.85E-09 | -6.01 | 9.0908986 | -9.62E-02 | 112973542 | 112973665 | NC_000003.11 |
| cg18605729    | 7.70E-08 | 8.85E-09 | -6.01 | 9.0905528 | -6.72E-02 | 81742245  | 81742368  | NC_000010.10 |
| cg07518532    | 7.71E-08 | 8.85E-09 | -6.01 | 9.0900542 | -1.10E-01 | 1989507   | 1989630   | NC_000011.9  |
| cg02830714    | 7.72E-08 | 8.87E-09 | -6.01 | 9.0882451 | -1.23E-01 | 1232545   | 1232668   | NC_000005.9  |
| cg01573306    | 7.72E-08 | 8.87E-09 | -6.01 | 9.0878655 | -1.43E-01 | 172330400 | 172330523 | NC_000001.10 |
| cg11452455    | 7.73E-08 | 8.88E-09 | -6.01 | 9.087198  | -6.89E-02 | 132439990 | 132440113 | NC_000002.11 |

|            |          |          |       |           |           |           |           |              |
|------------|----------|----------|-------|-----------|-----------|-----------|-----------|--------------|
| cg18574403 | 7.73E-08 | 8.88E-09 | -6.01 | 9.0871231 | -3.63E-02 | 77070839  | 77070962  | NC_000017.10 |
| cg26910384 | 7.73E-08 | 8.89E-09 | -6.01 | 9.0864835 | -1.07E-01 | 1103312   | 1103435   | NC_000001.10 |
| cg13944870 | 7.74E-08 | 8.89E-09 | -6.01 | 9.0857325 | -6.91E-02 | 36938402  | 36938525  | NC_000001.10 |
| cg01239666 | 7.74E-08 | 8.90E-09 | -6.01 | 9.0855491 | -1.52E-01 | 195601381 | 195601504 | NC_000003.11 |
| cg09578829 | 7.75E-08 | 8.90E-09 | -6.01 | 9.0847149 | -9.32E-02 | 37910251  | 37910374  | NC_000004.11 |
| cg04661436 | 7.75E-08 | 8.91E-09 | -6.01 | 9.0843166 | -1.33E-01 | 79169207  | 79169330  | NC_000015.9  |
| cg15471815 | 7.75E-08 | 8.91E-09 | -6.01 | 9.0841555 | -1.20E-01 | 228645486 | 228645609 | NC_000001.10 |
| cg19168578 | 7.76E-08 | 8.92E-09 | -6.01 | 9.0824153 | -2.26E-02 | 80828650  | 80828773  | NC_000010.10 |
| cg07497569 | 7.77E-08 | 8.93E-09 | -6.01 | 9.0815364 | -7.79E-02 | 2930361   | 2930484   | NC_000004.11 |
| cg02319067 | 7.77E-08 | 8.94E-09 | -6.01 | 9.0811682 | -1.47E-01 | 29757461  | 29757584  | NC_000016.9  |
| cg01736164 | 7.78E-08 | 8.94E-09 | -6.01 | 9.0809645 | -1.15E-01 | 97924317  | 97924440  | NC_000014.8  |
| cg15726025 | 7.78E-08 | 8.94E-09 | -6.01 | 9.0809133 | -1.24E-01 | 32681995  | 32682118  | NC_000001.10 |
| cg26111757 | 7.78E-08 | 8.94E-09 | -6.01 | 9.0801991 | -1.29E-01 | 31642120  | 31642243  | NC_000020.10 |
| cg22489931 | 7.78E-08 | 8.94E-09 | -6.01 | 9.08019   | -1.21E-01 | 93595923  | 93596046  | NC_000015.9  |
| cg03179542 | 7.78E-08 | 8.95E-09 | -6.01 | 9.0797504 | -1.16E-01 | 2647333   | 2647456   | NC_000007.13 |
| cg17387577 | 7.79E-08 | 8.96E-09 | -6.01 | 9.0789362 | -1.44E-01 | 124864657 | 124864780 | NC_000012.11 |
| cg12445832 | 7.79E-08 | 8.96E-09 | -6.01 | 9.0786645 | -1.28E-01 | 834295    | 834418    | NC_000001.10 |
| cg18877862 | 7.79E-08 | 8.96E-09 | -6.01 | 9.0784089 | -6.37E-02 | 43116932  | 43117055  | NC_000022.10 |
| cg03147907 | 7.80E-08 | 8.97E-09 | -6.01 | 9.0773876 | -1.12E-01 | 62926690  | 62926813  | NC_000003.11 |
| cg25486143 | 7.81E-08 | 8.97E-09 | -6.01 | 9.0768732 | -1.72E-01 | 50378527  | 50378650  | NC_000003.11 |
| cg18405262 | 7.81E-08 | 8.98E-09 | -6.01 | 9.0768315 | -6.87E-02 | 48270042  | 48270165  | NC_000017.10 |
| cg03074244 | 7.81E-08 | 8.98E-09 | -6.01 | 9.0767999 | -9.28E-02 | 118213414 | 118213537 | NC_000011.9  |
| cg03768007 | 7.81E-08 | 8.98E-09 | -6.01 | 9.0763616 | -1.63E-02 | 55851064  | 55851187  | NC_000019.9  |
| cg06294416 | 7.81E-08 | 8.98E-09 | -6.01 | 9.0759591 | -1.56E-01 | 66628232  | 66628355  | NC_000012.11 |
| cg03512098 | 7.81E-08 | 8.98E-09 | -6.01 | 9.0759332 | -1.05E-01 | 2730129   | 2730252   | NC_000011.9  |

|              |          |          |       |           |           |           |           |              |
|--------------|----------|----------|-------|-----------|-----------|-----------|-----------|--------------|
| cg06484123   | 7.81E-08 | 8.99E-09 | -6.01 | 9.0757522 | -9.52E-02 | 53107200  | 53107323  | NC_000019.9  |
| cg27303654   | 7.81E-08 | 8.99E-09 | -6.01 | 9.0754739 | -1.03E-01 | 3933046   | 3933169   | NC_000019.9  |
| cg12442236   | 7.82E-08 | 8.99E-09 | -6.01 | 9.0747497 | -4.68E-02 | 37823644  | 37823767  | NC_000022.10 |
| cg15769279   | 7.82E-08 | 9.00E-09 | -6.01 | 9.0746546 | -9.49E-02 | 117151966 | 117152089 | NC_000011.9  |
| cg03614916   | 7.82E-08 | 9.00E-09 | -6.01 | 9.0741749 | -1.20E-01 | 22007271  | 22007394  | NC_000018.9  |
| cg23889086   | 7.83E-08 | 9.00E-09 | -6.01 | 9.0738652 | -5.15E-02 | 47731562  | 47731685  | NC_000019.9  |
| cg01481000   | 7.83E-08 | 9.01E-09 | -6.01 | 9.0732345 | -1.33E-01 | 33514858  | 33514981  | NC_000001.10 |
| cg07577824   | 7.84E-08 | 9.01E-09 | -6.01 | 9.0727153 | -1.28E-01 | 17943403  | 17943526  | NC_000020.10 |
| cg21091766   | 7.84E-08 | 9.02E-09 | -6.01 | 9.0722253 | -1.19E-01 | 176898673 | 176898796 | NC_000005.9  |
| cg11542402   | 7.85E-08 | 9.03E-09 | -6.01 | 9.0713728 | -1.97E-02 | 13141466  | 13141589  | NC_000010.10 |
| cg15255537   | 7.85E-08 | 9.03E-09 | -6.01 | 9.0710244 | -6.13E-02 | 24999192  | 24999315  | NC_000022.10 |
| cg07149785   | 7.86E-08 | 9.04E-09 | -6.01 | 9.0698012 | -4.38E-02 | 69455028  | 69455151  | NC_000011.9  |
| cg08411435   | 7.86E-08 | 9.04E-09 | -6.01 | 9.0695794 | -6.62E-02 | 37784024  | 37784147  | NC_000017.10 |
| cg20823695   | 7.86E-08 | 9.05E-09 | -6.01 | 9.0691117 | -6.96E-02 | 2345410   | 2345533   | NC_000001.10 |
| cg20850984   | 7.87E-08 | 9.05E-09 | -6.01 | 9.0685005 | -1.17E-01 | 2569120   | 2569243   | NC_000011.9  |
| cg20518497   | 7.87E-08 | 9.05E-09 | -6.01 | 9.0682064 | -1.17E-01 | 1046821   | 1046944   | NC_000004.11 |
| cg05206120   | 7.87E-08 | 9.06E-09 | -6.01 | 9.0679959 | -6.62E-02 | 69730129  | 69730252  | NC_000014.8  |
| ch.3.574787R | 7.87E-08 | 9.06E-09 | -6.01 | 9.0678088 | -7.10E-02 | 27578816  | 27578939  | NC_000003.11 |
| cg14150774   | 7.88E-08 | 9.06E-09 | -6.01 | 9.0672235 | -1.02E-01 | 139138057 | 139138180 | NC_000009.11 |
| cg02619001   | 7.88E-08 | 9.07E-09 | -6.01 | 9.0666969 | -1.11E-01 | 47592333  | 47592456  | NC_000017.10 |
| cg25137204   | 7.90E-08 | 9.10E-09 | -6.01 | 9.0637889 | -8.89E-02 | 72975404  | 72975527  | NC_000011.9  |
| cg26060817   | 7.91E-08 | 9.10E-09 | -6.01 | 9.0631592 | -1.42E-01 | 14406676  | 14406799  | NC_000005.9  |
| cg14039368   | 7.91E-08 | 9.10E-09 | -6.01 | 9.0630586 | -9.30E-02 | 7543466   | 7543589   | NC_000019.9  |
| cg15816712   | 7.91E-08 | 9.10E-09 | -6.01 | 9.0628985 | -1.30E-01 | 72630628  | 72630751  | NC_000008.10 |
| cg12785689   | 7.91E-08 | 9.11E-09 | -6.01 | 9.0628077 | -1.83E-02 | 33872408  | 33872531  | NC_000020.10 |



|            |          |          |       |           |           |           |           |              |
|------------|----------|----------|-------|-----------|-----------|-----------|-----------|--------------|
| cg16944958 | 7.93E-08 | 9.12E-09 | -6.01 | 9.0607386 | -1.15E-01 | 170403962 | 170404085 | NC_000006.11 |
| cg05031325 | 7.93E-08 | 9.12E-09 | -6.01 | 9.0607204 | -2.69E-02 | 102984544 | 102984667 | NC_000007.13 |
| cg14656153 | 7.93E-08 | 9.14E-09 | -6.01 | 9.059578  | -1.27E-01 | 37505970  | 37506093  | NC_000006.11 |
| cg01044637 | 7.94E-08 | 9.14E-09 | -6.01 | 9.0593697 | -1.10E-01 | 13082751  | 13082874  | NC_000003.11 |
| cg20368301 | 7.94E-08 | 9.15E-09 | -6.01 | 9.0582115 | -8.41E-02 | 113985700 | 113985823 | NC_000012.11 |
| cg24381587 | 7.97E-08 | 9.18E-09 | -6    | 9.055154  | -1.16E-01 | 158736312 | 158736435 | NC_000001.10 |
| cg14252488 | 7.98E-08 | 9.18E-09 | -6    | 9.0543538 | -8.76E-02 | 245361403 | 245361526 | NC_000001.10 |
| cg01992765 | 7.98E-08 | 9.19E-09 | -6    | 9.0541225 | -7.44E-02 | 45622493  | 45622616  | NC_000021.8  |
| cg01550828 | 7.98E-08 | 9.20E-09 | -6    | 9.0531307 | -1.57E-01 | 196227453 | 196227576 | NC_000003.11 |
| cg02613964 | 7.99E-08 | 9.21E-09 | -6    | 9.0519979 | -5.91E-02 | 44690321  | 44690444  | NC_000003.11 |
| cg07470639 | 7.99E-08 | 9.21E-09 | -6    | 9.0519945 | -1.17E-01 | 20839291  | 20839414  | NC_000017.10 |
| cg17220545 | 8.00E-08 | 9.21E-09 | -6    | 9.0515774 | -9.25E-02 | 157085556 | 157085679 | NC_000007.13 |
| cg26386402 | 8.00E-08 | 9.22E-09 | -6    | 9.0510092 | -5.76E-02 | 115512612 | 115512735 | NC_000009.11 |
| cg01072609 | 8.01E-08 | 9.22E-09 | -6    | 9.0503215 | -1.06E-01 | 140338624 | 140338747 | NC_000007.13 |
| cg14994247 | 8.01E-08 | 9.23E-09 | -6    | 9.0499714 | -9.70E-02 | 1407005   | 1407128   | NC_000005.9  |
| cg17740722 | 8.01E-08 | 9.23E-09 | -6    | 9.0497233 | -1.10E-01 | 57337294  | 57337417  | NC_000019.9  |
| cg17591741 | 8.02E-08 | 9.24E-09 | -6    | 9.0489235 | -1.05E-01 | 206316396 | 206316519 | NC_000001.10 |
| cg05036153 | 8.03E-08 | 9.25E-09 | -6    | 9.0471338 | -9.77E-02 | 140128254 | 140128377 | NC_000009.11 |
| cg18390991 | 8.03E-08 | 9.25E-09 | -6    | 9.0470799 | -1.21E-01 | 217672659 | 217672782 | NC_000002.11 |
| cg11314292 | 8.04E-08 | 9.26E-09 | -6    | 9.0461814 | -2.19E-02 | 29598433  | 29598556  | NC_000018.9  |
| cg06646708 | 8.04E-08 | 9.26E-09 | -6    | 9.046164  | -1.37E-01 | 18123224  | 18123347  | NC_000006.11 |
| cg03227570 | 8.04E-08 | 9.26E-09 | -6    | 9.0461488 | -4.55E-02 | 17766306  | 17766429  | NC_000001.10 |
| cg01764438 | 8.04E-08 | 9.26E-09 | -6    | 9.0460824 | -8.06E-02 | 9170298   | 9170421   | NC_000016.9  |
| cg24525480 | 8.04E-08 | 9.27E-09 | -6    | 9.0452557 | -1.36E-01 | 44801378  | 44801501  | NC_000007.13 |
| cg10058920 | 8.05E-08 | 9.27E-09 | -6    | 9.0448966 | -1.01E-01 | 1974738   | 1974861   | NC_000020.10 |

|            |          |          |    |           |           |           |           |              |
|------------|----------|----------|----|-----------|-----------|-----------|-----------|--------------|
| cg04037707 | 8.05E-08 | 9.27E-09 | -6 | 9.04488   | -8.78E-02 | 154704915 | 154705038 | NC_000007.13 |
| cg18444519 | 8.05E-08 | 9.28E-09 | -6 | 9.0443292 | -1.81E-02 | 134210458 | 134210581 | NC_000005.9  |
| cg08065733 | 8.06E-08 | 9.29E-09 | -6 | 9.0431594 | -1.02E-01 | 121106721 | 121106844 | NC_000002.11 |
| cg17375396 | 8.07E-08 | 9.30E-09 | -6 | 9.0422151 | -1.29E-01 | 67202808  | 67202931  | NC_000011.9  |
| cg17282910 | 8.08E-08 | 9.32E-09 | -6 | 9.0403222 | -3.40E-02 | 89825494  | 89825617  | NC_000005.9  |
| cg19783626 | 8.09E-08 | 9.33E-09 | -6 | 9.0391712 | -1.32E-01 | 98311436  | 98311559  | NC_000007.13 |
| cg13625205 | 8.09E-08 | 9.33E-09 | -6 | 9.0388023 | -2.69E-02 | 151584902 | 151585025 | NC_000001.10 |
| cg09213964 | 8.10E-08 | 9.33E-09 | -6 | 9.038481  | -1.73E-01 | 122668037 | 122668160 | NC_000012.11 |
| cg00214056 | 8.10E-08 | 9.34E-09 | -6 | 9.0383959 | -4.56E-02 | 46478384  | 46478507  | NC_000018.9  |
| cg16094954 | 8.10E-08 | 9.34E-09 | -6 | 9.0380102 | -2.63E-02 | 45251180  | 45251303  | NC_000019.9  |
| cg17106073 | 8.10E-08 | 9.34E-09 | -6 | 9.0376964 | -6.12E-02 | 41769254  | 41769377  | NC_000019.9  |
| cg05554543 | 8.11E-08 | 9.35E-09 | -6 | 9.0369256 | -7.51E-02 | 167771886 | 167772009 | NC_000004.11 |
| cg11784626 | 8.11E-08 | 9.35E-09 | -6 | 9.0367452 | -6.28E-02 | 126782538 | 126782661 | NC_000010.10 |
| cg01352294 | 8.11E-08 | 9.35E-09 | -6 | 9.0366195 | -9.99E-02 | 109614626 | 109614749 | NC_000006.11 |
| cg00966255 | 8.11E-08 | 9.36E-09 | -6 | 9.0362337 | -9.85E-02 | 10479562  | 10479685  | NC_000016.9  |
| cg21446343 | 8.12E-08 | 9.36E-09 | -6 | 9.0357349 | -5.71E-02 | 19974866  | 19974989  | NC_000022.10 |
| cg04442328 | 8.12E-08 | 9.36E-09 | -6 | 9.0356091 | -4.67E-02 | 185304136 | 185304259 | NC_000003.11 |
| cg06023039 | 8.12E-08 | 9.37E-09 | -6 | 9.0351379 | -2.78E-02 | 66790240  | 66790363  | NC_000015.9  |
| cg18388972 | 8.12E-08 | 9.37E-09 | -6 | 9.0348676 | -3.18E-02 | 156308174 | 156308297 | NC_000001.10 |
| cg10654948 | 8.12E-08 | 9.37E-09 | -6 | 9.0346219 | -1.45E-01 | 33788229  | 33788352  | NC_000013.10 |
| cg04078896 | 8.12E-08 | 9.37E-09 | -6 | 9.0346174 | -5.95E-02 | 62338273  | 62338396  | NC_000020.10 |
| cg00783104 | 8.12E-08 | 9.37E-09 | -6 | 9.0346075 | -6.37E-02 | 41655894  | 41656017  | NC_000008.10 |
| cg03293308 | 8.13E-08 | 9.37E-09 | -6 | 9.034384  | -8.80E-02 | 223065390 | 223065513 | NC_000002.11 |
| cg18391427 | 8.13E-08 | 9.38E-09 | -6 | 9.0336894 | -2.18E-02 | 34122800  | 34122923  | NC_000017.10 |
| cg22660370 | 8.14E-08 | 9.39E-09 | -6 | 9.0327743 | -1.22E-01 | 64132778  | 64132901  | NC_000008.10 |

|               |          |          |    |           |           |           |           |              |
|---------------|----------|----------|----|-----------|-----------|-----------|-----------|--------------|
| cg18732546    | 8.14E-08 | 9.39E-09 | -6 | 9.0327085 | -7.88E-02 | 105309812 | 105309935 | NC_000014.8  |
| cg19282443    | 8.14E-08 | 9.39E-09 | -6 | 9.0324616 | -1.06E-01 | 60541935  | 60542058  | NC_000003.11 |
| cg07326413    | 8.14E-08 | 9.40E-09 | -6 | 9.0321558 | -9.10E-02 | 78060295  | 78060418  | NC_000015.9  |
| cg19716433    | 8.15E-08 | 9.40E-09 | -6 | 9.0314281 | -7.13E-02 | 103589780 | 103589903 | NC_000014.8  |
| cg04582672    | 8.17E-08 | 9.43E-09 | -6 | 9.0290105 | -1.06E-01 | 97127338  | 97127461  | NC_000014.8  |
| cg20558612    | 8.17E-08 | 9.43E-09 | -6 | 9.0286361 | -1.13E-01 | 19050135  | 19050258  | NC_000007.13 |
| ch.7.3333777R | 8.17E-08 | 9.43E-09 | -6 | 9.0283955 | -1.39E-02 | 156646977 | 156647100 | NC_000007.13 |
| cg01400822    | 8.18E-08 | 9.44E-09 | -6 | 9.0279155 | -8.53E-02 | 53067365  | 53067488  | NC_000001.10 |
| cg10929299    | 8.18E-08 | 9.44E-09 | -6 | 9.0275883 | -3.90E-02 | 50334860  | 50334983  | NC_000014.8  |
| cg02039712    | 8.18E-08 | 9.44E-09 | -6 | 9.0275721 | -3.72E-02 | 65425874  | 65425997  | NC_000015.9  |
| cg26165660    | 8.18E-08 | 9.44E-09 | -6 | 9.0273847 | -5.78E-02 | 76363767  | 76363890  | NC_000012.11 |
| cg13921220    | 8.18E-08 | 9.44E-09 | -6 | 9.0271365 | -8.55E-02 | 18610522  | 18610645  | NC_000001.10 |
| cg21919809    | 8.19E-08 | 9.45E-09 | -6 | 9.0267717 | -1.50E-01 | 36132842  | 36132965  | NC_000019.9  |
| cg15659093    | 8.19E-08 | 9.45E-09 | -6 | 9.02675   | -1.09E-02 | 66278037  | 66278160  | NC_000011.9  |
| cg10374402    | 8.19E-08 | 9.45E-09 | -6 | 9.0264044 | -1.42E-01 | 82300600  | 82300723  | NC_000010.10 |
| cg16592378    | 8.19E-08 | 9.45E-09 | -6 | 9.0261636 | -1.25E-01 | 126498687 | 126498810 | NC_000011.9  |
| cg01690119    | 8.21E-08 | 9.48E-09 | -6 | 9.0237328 | -6.93E-02 | 88511822  | 88511945  | NC_000016.9  |
| cg00252418    | 8.22E-08 | 9.49E-09 | -6 | 9.0221839 | -9.47E-02 | 154540325 | 154540448 | NC_000007.13 |
| cg27118968    | 8.22E-08 | 9.50E-09 | -6 | 9.0218682 | -2.09E-02 | 161090472 | 161090595 | NC_000003.11 |
| cg26434548    | 8.23E-08 | 9.50E-09 | -6 | 9.0214772 | -2.85E-02 | 129074607 | 129074730 | NC_000007.13 |
| cg08354751    | 8.23E-08 | 9.50E-09 | -6 | 9.0213594 | -6.35E-02 | 11450712  | 11450835  | NC_000016.9  |
| cg19771626    | 8.23E-08 | 9.51E-09 | -6 | 9.020697  | -1.03E-01 | 133127043 | 133127166 | NC_000012.11 |
| cg15227231    | 8.23E-08 | 9.51E-09 | -6 | 9.0205808 | -1.04E-01 | 170467425 | 170467548 | NC_000006.11 |
| cg13781498    | 8.24E-08 | 9.51E-09 | -6 | 9.0201685 | -6.63E-02 | 85491153  | 85491276  | NC_000015.9  |
| cg09718987    | 8.24E-08 | 9.52E-09 | -6 | 9.0197394 | -6.00E-02 | 75275351  | 75275474  | NC_000002.11 |

|            |          |          |    |           |           |           |           |              |
|------------|----------|----------|----|-----------|-----------|-----------|-----------|--------------|
| cg06156768 | 8.24E-08 | 9.52E-09 | -6 | 9.019621  | -2.29E-02 | 128983279 | 128983402 | NC_000004.11 |
| cg18076767 | 8.24E-08 | 9.52E-09 | -6 | 9.0192273 | -1.07E-01 | 86453358  | 86453481  | NC_000011.9  |
| cg08007378 | 8.25E-08 | 9.52E-09 | -6 | 9.0189046 | -8.57E-02 | 83477915  | 83478038  | NC_000015.9  |
| cg27470303 | 8.25E-08 | 9.52E-09 | -6 | 9.0188136 | -1.49E-02 | 21823447  | 21823570  | NC_000010.10 |
| cg00495476 | 8.25E-08 | 9.53E-09 | -6 | 9.0187438 | -8.65E-02 | 168061660 | 168061783 | NC_000006.11 |
| cg25471987 | 8.25E-08 | 9.53E-09 | -6 | 9.0184182 | -1.06E-01 | 45123607  | 45123730  | NC_000010.10 |
| cg04881903 | 8.25E-08 | 9.53E-09 | -6 | 9.0183844 | -9.86E-02 | 85637116  | 85637239  | NC_000002.11 |
| cg24740818 | 8.25E-08 | 9.53E-09 | -6 | 9.0180441 | -5.66E-02 | 76440405  | 76440528  | NC_000015.9  |
| cg10028038 | 8.26E-08 | 9.54E-09 | -6 | 9.0170691 | -3.21E-02 | 31510382  | 31510505  | NC_000006.11 |
| cg20107668 | 8.27E-08 | 9.55E-09 | -6 | 9.0160984 | -9.34E-02 | 113624471 | 113624594 | NC_000013.10 |
| cg04939749 | 8.28E-08 | 9.56E-09 | -6 | 9.0151422 | -1.60E-02 | 178417898 | 178418021 | NC_000002.11 |
| cg01155190 | 8.28E-08 | 9.57E-09 | -6 | 9.0143329 | -2.51E-02 | 9347973   | 9348096   | NC_000002.11 |
| cg23982617 | 8.28E-08 | 9.57E-09 | -6 | 9.0142518 | -2.86E-02 | 43509267  | 43509390  | NC_000017.10 |
| cg13165753 | 8.29E-08 | 9.57E-09 | -6 | 9.0140049 | -7.53E-02 | 216301341 | 216301464 | NC_000002.11 |
| cg07590638 | 8.29E-08 | 9.57E-09 | -6 | 9.0139322 | -5.17E-02 | 38631548  | 38631671  | NC_000005.9  |
| cg21426218 | 8.29E-08 | 9.58E-09 | -6 | 9.0133441 | -8.02E-02 | 42350667  | 42350790  | NC_000020.10 |
| cg12107431 | 8.29E-08 | 9.58E-09 | -6 | 9.0130757 | -1.86E-02 | 50913116  | 50913239  | NC_000022.10 |
| cg12236845 | 8.30E-08 | 9.59E-09 | -6 | 9.0125471 | -1.03E-01 | 76105953  | 76106076  | NC_000012.11 |
| cg00790020 | 8.30E-08 | 9.59E-09 | -6 | 9.0117768 | -9.41E-02 | 1765477   | 1765600   | NC_000008.10 |
| cg10208649 | 8.31E-08 | 9.60E-09 | -6 | 9.0113409 | -3.47E-02 | 96858368  | 96858491  | NC_000014.8  |
| cg19363546 | 8.31E-08 | 9.60E-09 | -6 | 9.0109127 | -4.31E-02 | 120110701 | 120110824 | NC_000011.9  |
| cg26565120 | 8.31E-08 | 9.60E-09 | -6 | 9.0107711 | -1.04E-01 | 29635776  | 29635899  | NC_000008.10 |
| cg15048902 | 8.31E-08 | 9.61E-09 | -6 | 9.0104901 | -5.20E-02 | 112097877 | 112098000 | NC_000011.9  |
| cg05839767 | 8.31E-08 | 9.61E-09 | -6 | 9.0103935 | -3.35E-02 | 119914248 | 119914371 | NC_000002.11 |
| cg08767708 | 8.32E-08 | 9.61E-09 | -6 | 9.009962  | -1.88E-02 | 73082503  | 73082626  | NC_000016.9  |

|            |          |          |       |           |           |           |           |              |
|------------|----------|----------|-------|-----------|-----------|-----------|-----------|--------------|
| cg10932289 | 8.32E-08 | 9.61E-09 | -6    | 9.0097974 | -4.31E-02 | 55038442  | 55038565  | NC_000017.10 |
| cg03860400 | 8.33E-08 | 9.62E-09 | -6    | 9.0089525 | -7.00E-02 | 13485289  | 13485412  | NC_000011.9  |
| cg12145564 | 8.33E-08 | 9.63E-09 | -6    | 9.0079412 | -1.23E-01 | 67220263  | 67220386  | NC_000011.9  |
| cg27239243 | 8.34E-08 | 9.64E-09 | -6    | 9.006879  | -1.22E-01 | 101945867 | 101945990 | NC_000002.11 |
| cg15266205 | 8.34E-08 | 9.64E-09 | -6    | 9.0067845 | -1.01E-01 | 15749418  | 15749541  | NC_000012.11 |
| cg06325540 | 8.34E-08 | 9.64E-09 | -6    | 9.0066995 | -1.01E-01 | 1183618   | 1183741   | NC_000016.9  |
| cg23183069 | 8.35E-08 | 9.65E-09 | -6    | 9.0060065 | -1.18E-01 | 168778242 | 168778365 | NC_000006.11 |
| cg03123136 | 8.36E-08 | 9.66E-09 | -6    | 9.0050288 | -1.19E-01 | 131132828 | 131132951 | NC_000002.11 |
| cg13740834 | 8.36E-08 | 9.67E-09 | -5.99 | 9.0042276 | -8.69E-02 | 93926617  | 93926740  | NC_000007.13 |
| cg20199738 | 8.36E-08 | 9.67E-09 | -5.99 | 9.0040718 | -3.89E-02 | 103251433 | 103251556 | NC_000008.10 |
| cg26226167 | 8.37E-08 | 9.68E-09 | -5.99 | 9.0031083 | -9.60E-02 | 114737002 | 114737125 | NC_000007.13 |
| cg27460531 | 8.38E-08 | 9.69E-09 | -5.99 | 9.0022557 | -1.11E-01 | 78791723  | 78791846  | NC_000017.10 |
| cg20946991 | 8.38E-08 | 9.69E-09 | -5.99 | 9.002031  | -1.29E-01 | 56213304  | 56213427  | NC_000001.10 |
| cg07274253 | 8.38E-08 | 9.69E-09 | -5.99 | 9.0016328 | -1.24E-01 | 10330984  | 10331107  | NC_000005.9  |
| cg08393788 | 8.39E-08 | 9.70E-09 | -5.99 | 9.0013123 | -1.19E-01 | 53357721  | 53357844  | NC_000002.11 |
| cg13880303 | 8.39E-08 | 9.71E-09 | -5.99 | 9.0004054 | -1.14E-01 | 45417814  | 45417937  | NC_000019.9  |
| cg10908953 | 8.40E-08 | 9.71E-09 | -5.99 | 8.9996002 | -6.79E-02 | 121322456 | 121322579 | NC_000011.9  |
| cg25936876 | 8.40E-08 | 9.72E-09 | -5.99 | 8.9993453 | -7.67E-02 | 6484687   | 6484810   | NC_000008.10 |
| cg15931850 | 8.41E-08 | 9.72E-09 | -5.99 | 8.9986389 | -8.83E-02 | 1550089   | 1550212   | NC_000004.11 |
| cg14618635 | 8.41E-08 | 9.72E-09 | -5.99 | 8.9986217 | -6.11E-02 | 114836121 | 114836244 | NC_000009.11 |
| cg00302160 | 8.41E-08 | 9.73E-09 | -5.99 | 8.9978613 | -7.79E-02 | 10030945  | 10031068  | NC_000008.10 |
| cg06285575 | 8.41E-08 | 9.73E-09 | -5.99 | 8.9977115 | -6.66E-02 | 31888794  | 31888917  | NC_000016.9  |
| cg07381000 | 8.42E-08 | 9.74E-09 | -5.99 | 8.9973962 | -4.22E-02 | 53190613  | 53190736  | NC_000003.11 |
| cg21773633 | 8.43E-08 | 9.75E-09 | -5.99 | 8.9958907 | -1.17E-01 | 112375324 | 112375447 | NC_000006.11 |
| cg24715767 | 8.44E-08 | 9.77E-09 | -5.99 | 8.9943466 | -7.06E-02 | 14136518  | 14136641  | NC_000001.10 |

|            |          |          |       |           |           |           |           |              |
|------------|----------|----------|-------|-----------|-----------|-----------|-----------|--------------|
| cg25520440 | 8.45E-08 | 9.77E-09 | -5.99 | 8.9938846 | -1.19E-01 | 1734190   | 1734313   | NC_000007.13 |
| cg18901895 | 8.45E-08 | 9.78E-09 | -5.99 | 8.9932689 | -3.16E-02 | 90168351  | 90168474  | NC_000014.8  |
| cg19415364 | 8.45E-08 | 9.78E-09 | -5.99 | 8.9929269 | -6.09E-02 | 79479885  | 79480008  | NC_000017.10 |
| cg22755932 | 8.45E-08 | 9.78E-09 | -5.99 | 8.9928573 | -4.12E-02 | 98504668  | 98504791  | NC_000015.9  |
| cg18226096 | 8.46E-08 | 9.78E-09 | -5.99 | 8.9925514 | -7.36E-02 | 76818207  | 76818330  | NC_000010.10 |
| cg21107889 | 8.47E-08 | 9.80E-09 | -5.99 | 8.9906414 | -7.99E-02 | 34802732  | 34802855  | NC_000018.9  |
| cg24703717 | 8.48E-08 | 9.81E-09 | -5.99 | 8.9900999 | -3.17E-02 | 29691168  | 29691291  | NC_000006.11 |
| cg25408901 | 8.48E-08 | 9.81E-09 | -5.99 | 8.9899064 | -7.23E-02 | 50679743  | 50679866  | NC_000005.9  |
| cg25104233 | 8.48E-08 | 9.81E-09 | -5.99 | 8.9896838 | -1.42E-01 | 18158708  | 18158831  | NC_000002.11 |
| cg05712125 | 8.48E-08 | 9.81E-09 | -5.99 | 8.9896459 | -7.43E-02 | 9513980   | 9514103   | NC_000001.10 |
| cg17920789 | 8.48E-08 | 9.82E-09 | -5.99 | 8.9893919 | -1.40E-01 | 47152525  | 47152648  | NC_000013.10 |
| cg07054804 | 8.48E-08 | 9.82E-09 | -5.99 | 8.9890849 | -9.74E-02 | 10621492  | 10621615  | NC_000011.9  |
| cg03527802 | 8.50E-08 | 9.83E-09 | -5.99 | 8.9875635 | -1.13E-01 | 29819931  | 29820054  | NC_000016.9  |
| cg20734219 | 8.50E-08 | 9.84E-09 | -5.99 | 8.9872444 | -1.23E-01 | 146453021 | 146453144 | NC_000005.9  |
| cg27068996 | 8.50E-08 | 9.84E-09 | -5.99 | 8.9871861 | -1.08E-01 | 51513883  | 51514006  | NC_000019.9  |
| cg20710824 | 8.50E-08 | 9.84E-09 | -5.99 | 8.9871591 | -9.36E-02 | 80560593  | 80560716  | NC_000017.10 |
| cg09631175 | 8.50E-08 | 9.84E-09 | -5.99 | 8.9868955 | -1.18E-01 | 130472165 | 130472288 | NC_000008.10 |
| cg06024411 | 8.51E-08 | 9.85E-09 | -5.99 | 8.9857857 | -7.14E-02 | 112895681 | 112895804 | NC_000002.11 |
| cg01890836 | 8.51E-08 | 9.85E-09 | -5.99 | 8.9856277 | -1.09E-01 | 17055584  | 17055707  | NC_000017.10 |
| cg13598409 | 8.51E-08 | 9.86E-09 | -5.99 | 8.9854718 | -7.68E-02 | 43374239  | 43374362  | NC_000020.10 |
| cg09260603 | 8.52E-08 | 9.86E-09 | -5.99 | 8.9853379 | -1.62E-02 | 206809102 | 206809225 | NC_000001.10 |
| cg04754916 | 8.52E-08 | 9.86E-09 | -5.99 | 8.9853338 | -1.74E-02 | 10381498  | 10381621  | NC_000019.9  |
| cg17906803 | 8.52E-08 | 9.86E-09 | -5.99 | 8.9852204 | -1.13E-01 | 19587393  | 19587516  | NC_000001.10 |
| cg11067179 | 8.52E-08 | 9.86E-09 | -5.99 | 8.9851433 | -1.03E-01 | 66083541  | 66083664  | NC_000011.9  |
| cg05407490 | 8.54E-08 | 9.88E-09 | -5.99 | 8.9828885 | -1.54E-01 | 23749667  | 23749790  | NC_000007.13 |

|            |          |          |       |           |           |           |           |              |
|------------|----------|----------|-------|-----------|-----------|-----------|-----------|--------------|
| cg17289734 | 8.54E-08 | 9.89E-09 | -5.99 | 8.9819563 | -3.69E-02 | 50310641  | 50310764  | NC_000003.11 |
| cg10918927 | 8.54E-08 | 9.89E-09 | -5.99 | 8.9819055 | -5.43E-02 | 54411193  | 54411316  | NC_000012.11 |
| cg04565255 | 8.55E-08 | 9.90E-09 | -5.99 | 8.9814001 | -1.08E-01 | 77565759  | 77565882  | NC_000013.10 |
| cg08675743 | 8.55E-08 | 9.90E-09 | -5.99 | 8.9812911 | -8.24E-02 | 114938439 | 114938562 | NC_000005.9  |
| cg26291818 | 8.55E-08 | 9.90E-09 | -5.99 | 8.9811831 | -2.70E-02 | 61429582  | 61429705  | NC_000008.10 |
| cg27106643 | 8.55E-08 | 9.90E-09 | -5.99 | 8.9811493 | -1.16E-01 | 77257352  | 77257475  | NC_000018.9  |
| cg16466899 | 8.55E-08 | 9.90E-09 | -5.99 | 8.9810567 | -7.47E-02 | 23510693  | 23510816  | NC_000007.13 |
| cg00801465 | 8.55E-08 | 9.90E-09 | -5.99 | 8.980991  | -1.90E-02 | 193852989 | 193853112 | NC_000003.11 |
| cg10182355 | 8.55E-08 | 9.90E-09 | -5.99 | 8.9809103 | -1.97E-02 | 101768491 | 101768614 | NC_000002.11 |
| cg21890820 | 8.55E-08 | 9.90E-09 | -5.99 | 8.9808926 | -9.94E-02 | 65308645  | 65308768  | NC_000011.9  |
| cg09355820 | 8.55E-08 | 9.90E-09 | -5.99 | 8.9808093 | -1.16E-01 | 10092237  | 10092360  | NC_000001.10 |
| cg04391800 | 8.57E-08 | 9.93E-09 | -5.99 | 8.9785934 | -1.45E-01 | 65779802  | 65779925  | NC_000003.11 |
| cg05670193 | 8.57E-08 | 9.93E-09 | -5.99 | 8.9783291 | -1.11E-01 | 45324246  | 45324369  | NC_000019.9  |
| cg20931134 | 8.58E-08 | 9.94E-09 | -5.99 | 8.977509  | -8.04E-02 | 69045498  | 69045621  | NC_000014.8  |
| cg25408314 | 8.59E-08 | 9.95E-09 | -5.99 | 8.9764701 | -1.87E-01 | 33350043  | 33350166  | NC_000017.10 |
| cg01763821 | 8.60E-08 | 9.96E-09 | -5.99 | 8.9748461 | -1.68E-02 | 59397510  | 59397633  | NC_000015.9  |
| cg00504410 | 8.61E-08 | 9.97E-09 | -5.99 | 8.973996  | -6.95E-02 | 4732262   | 4732385   | NC_000016.9  |
| cg07824483 | 8.61E-08 | 9.98E-09 | -5.99 | 8.9735986 | -8.07E-02 | 79882042  | 79882165  | NC_000017.10 |
| cg04757350 | 8.61E-08 | 9.98E-09 | -5.99 | 8.9734845 | -1.02E-01 | 71529128  | 71529251  | NC_000010.10 |
| cg14487111 | 8.61E-08 | 9.98E-09 | -5.99 | 8.973225  | -1.03E-01 | 137032976 | 137033099 | NC_000009.11 |
| cg15997484 | 8.62E-08 | 9.99E-09 | -5.99 | 8.9726054 | -3.68E-02 | 62859461  | 62859584  | NC_000003.11 |
| cg10016348 | 8.63E-08 | 1.00E-08 | -5.99 | 8.9712869 | -6.55E-02 | 39436183  | 39436306  | NC_000022.10 |
| cg21422770 | 8.63E-08 | 1.00E-08 | -5.99 | 8.9711297 | -3.26E-02 | 38362632  | 38362755  | NC_000021.8  |
| cg20710667 | 8.63E-08 | 1.00E-08 | -5.99 | 8.9709735 | -9.38E-02 | 6736922   | 6737045   | NC_000008.10 |
| cg12178904 | 8.63E-08 | 1.00E-08 | -5.99 | 8.9706726 | -1.55E-01 | 205632052 | 205632175 | NC_000001.10 |

|               |          |          |       |           |           |           |           |              |
|---------------|----------|----------|-------|-----------|-----------|-----------|-----------|--------------|
| cg18965055    | 8.63E-08 | 1.00E-08 | -5.99 | 8.9706194 | -2.47E-02 | 174291932 | 174292055 | NC_000004.11 |
| cg08762247    | 8.64E-08 | 1.00E-08 | -5.99 | 8.9694586 | -1.22E-01 | 53800372  | 53800495  | NC_000017.10 |
| cg18259253    | 8.64E-08 | 1.00E-08 | -5.99 | 8.9693701 | -1.03E-01 | 60745986  | 60746109  | NC_000005.9  |
| cg22508615    | 8.65E-08 | 1.00E-08 | -5.99 | 8.9690178 | -4.35E-02 | 94351955  | 94352078  | NC_000010.10 |
| cg18861917    | 8.66E-08 | 1.00E-08 | -5.99 | 8.9670607 | -8.24E-02 | 69148624  | 69148747  | NC_000009.11 |
| cg03108296    | 8.66E-08 | 1.00E-08 | -5.99 | 8.9670422 | -8.27E-02 | 56185096  | 56185219  | NC_000001.10 |
| cg04107082    | 8.66E-08 | 1.00E-08 | -5.99 | 8.9669935 | -6.63E-02 | 61245442  | 61245565  | NC_000002.11 |
| cg08660562    | 8.67E-08 | 1.01E-08 | -5.99 | 8.9662125 | -1.53E-01 | 66627900  | 66628023  | NC_000012.11 |
| cg16456596    | 8.67E-08 | 1.01E-08 | -5.99 | 8.9661168 | -7.95E-02 | 8313504   | 8313627   | NC_000008.10 |
| cg10168434    | 8.67E-08 | 1.01E-08 | -5.99 | 8.9659085 | -3.85E-02 | 71295172  | 71295295  | NC_000002.11 |
| cg01026233    | 8.68E-08 | 1.01E-08 | -5.99 | 8.9647982 | -1.06E-01 | 206713941 | 206714064 | NC_000002.11 |
| cg04697624    | 8.68E-08 | 1.01E-08 | -5.99 | 8.9647563 | -1.26E-01 | 69002178  | 69002301  | NC_000012.11 |
| cg00862588    | 8.68E-08 | 1.01E-08 | -5.99 | 8.9647048 | -1.04E-01 | 32909397  | 32909520  | NC_000006.11 |
| cg15249164    | 8.68E-08 | 1.01E-08 | -5.99 | 8.9646237 | -3.91E-02 | 35288186  | 35288309  | NC_000021.8  |
| cg11426224    | 8.68E-08 | 1.01E-08 | -5.99 | 8.9644443 | -4.11E-02 | 54567248  | 54567371  | NC_000012.11 |
| cg24108508    | 8.69E-08 | 1.01E-08 | -5.99 | 8.9639312 | -5.34E-02 | 179016233 | 179016356 | NC_000001.10 |
| cg27381194    | 8.69E-08 | 1.01E-08 | -5.99 | 8.9638847 | -3.08E-02 | 96932018  | 96932141  | NC_000002.11 |
| cg27469152    | 8.69E-08 | 1.01E-08 | -5.99 | 8.9633786 | -6.58E-02 | 56282313  | 56282436  | NC_000017.10 |
| cg08058191    | 8.70E-08 | 1.01E-08 | -5.99 | 8.963003  | -9.83E-02 | 39781130  | 39781253  | NC_000017.10 |
| cg16966139    | 8.70E-08 | 1.01E-08 | -5.99 | 8.9627409 | -9.94E-02 | 111933757 | 111933880 | NC_000001.10 |
| ch.8.1293020R | 8.72E-08 | 1.01E-08 | -5.99 | 8.9603112 | -7.31E-02 | 59333349  | 59333472  | NC_000008.10 |
| cg07180125    | 8.72E-08 | 1.01E-08 | -5.99 | 8.9602905 | -1.09E-01 | 114039492 | 114039615 | NC_000010.10 |
| cg24746938    | 8.72E-08 | 1.01E-08 | -5.99 | 8.9601913 | -1.25E-01 | 225543274 | 225543397 | NC_000002.11 |
| cg15827285    | 8.73E-08 | 1.01E-08 | -5.99 | 8.9594453 | -1.21E-01 | 31408578  | 31408701  | NC_000005.9  |
| cg05092861    | 8.73E-08 | 1.01E-08 | -5.99 | 8.9590903 | -6.78E-02 | 27220034  | 27220157  | NC_000007.13 |



|                 |          |          |       |           |           |           |           |              |
|-----------------|----------|----------|-------|-----------|-----------|-----------|-----------|--------------|
| cg11848496      | 8.73E-08 | 1.01E-08 | -5.99 | 8.9589116 | -5.23E-02 | 66571782  | 66571905  | NC_000009.11 |
| cg20215112      | 8.73E-08 | 1.01E-08 | -5.99 | 8.9587766 | -1.05E-01 | 43065055  | 43065178  | NC_000017.10 |
| cg18795232      | 8.73E-08 | 1.01E-08 | -5.99 | 8.9587212 | -1.26E-01 | 121890163 | 121890286 | NC_000012.11 |
| cg00814909      | 8.73E-08 | 1.01E-08 | -5.99 | 8.9586362 | -7.58E-02 | 1225599   | 1225722   | NC_000004.11 |
| cg11956866      | 8.73E-08 | 1.01E-08 | -5.99 | 8.9585607 | -9.33E-02 | 31998253  | 31998376  | NC_000022.10 |
| cg03104561      | 8.73E-08 | 1.01E-08 | -5.99 | 8.9582686 | -4.91E-02 | 150780086 | 150780209 | NC_000007.13 |
| ch.21.39866785R | 8.74E-08 | 1.01E-08 | -5.99 | 8.9580623 | -1.60E-02 | 40944915  | 40945038  | NC_000021.8  |
| cg23653343      | 8.74E-08 | 1.01E-08 | -5.99 | 8.9579727 | -1.45E-02 | 10443541  | 10443664  | NC_000019.9  |
| cg25403488      | 8.75E-08 | 1.02E-08 | -5.99 | 8.9564064 | -1.48E-01 | 3221228   | 3221351   | NC_000007.13 |
| cg25987452      | 8.76E-08 | 1.02E-08 | -5.99 | 8.9557926 | -8.81E-02 | 20531342  | 20531465  | NC_000013.10 |
| cg18499941      | 8.76E-08 | 1.02E-08 | -5.99 | 8.9554735 | -1.14E-01 | 169049825 | 169049948 | NC_000006.11 |
| cg05461503      | 8.76E-08 | 1.02E-08 | -5.99 | 8.9553588 | -1.20E-01 | 45837170  | 45837293  | NC_000003.11 |
| cg01912455      | 8.76E-08 | 1.02E-08 | -5.99 | 8.9548826 | -8.39E-02 | 24128528  | 24128651  | NC_000022.10 |
| cg17825294      | 8.77E-08 | 1.02E-08 | -5.99 | 8.9543217 | -7.14E-02 | 36400340  | 36400463  | NC_000006.11 |
| cg16669339      | 8.77E-08 | 1.02E-08 | -5.99 | 8.9542681 | -1.18E-01 | 105428621 | 105428744 | NC_000010.10 |
| cg20706192      | 8.78E-08 | 1.02E-08 | -5.98 | 8.953215  | -1.52E-02 | 26241055  | 26241178  | NC_000007.13 |
| cg10490577      | 8.78E-08 | 1.02E-08 | -5.98 | 8.9523515 | -1.03E-01 | 30009956  | 30010079  | NC_000013.10 |
| cg19303125      | 8.79E-08 | 1.02E-08 | -5.98 | 8.951642  | -5.09E-02 | 108437116 | 108437239 | NC_000006.11 |
| cg10851715      | 8.79E-08 | 1.02E-08 | -5.98 | 8.9515695 | -1.17E-01 | 49984830  | 49984953  | NC_000008.10 |
| cg07962043      | 8.79E-08 | 1.02E-08 | -5.98 | 8.9511642 | -3.70E-02 | 60691582  | 60691705  | NC_000011.9  |
| cg24054272      | 8.80E-08 | 1.02E-08 | -5.98 | 8.9508571 | -5.89E-02 | 155243076 | 155243199 | NC_000001.10 |
| cg19364538      | 8.80E-08 | 1.02E-08 | -5.98 | 8.9507705 | -1.01E-01 | 36042394  | 36042517  | NC_000013.10 |
| cg16108823      | 8.80E-08 | 1.02E-08 | -5.98 | 8.9506723 | -1.02E-01 | 50925284  | 50925407  | NC_000022.10 |
| cg07354253      | 8.80E-08 | 1.02E-08 | -5.98 | 8.9502825 | -2.59E-02 | 131629923 | 131630046 | NC_000005.9  |
| cg27368068      | 8.80E-08 | 1.02E-08 | -5.98 | 8.950108  | -1.28E-01 | 13515754  | 13515877  | NC_000003.11 |

|                |          |          |       |           |           |           |           |              |
|----------------|----------|----------|-------|-----------|-----------|-----------|-----------|--------------|
| cg01097406     | 8.81E-08 | 1.02E-08 | -5.98 | 8.9498437 | -1.31E-01 | 89675127  | 89675250  | NC_000016.9  |
| cg13975062     | 8.81E-08 | 1.02E-08 | -5.98 | 8.9488336 | -3.45E-02 | 108308228 | 108308351 | NC_000003.11 |
| cg04320476     | 8.83E-08 | 1.03E-08 | -5.98 | 8.9466805 | -6.72E-02 | 1492206   | 1492329   | NC_000017.10 |
| cg02902770     | 8.84E-08 | 1.03E-08 | -5.98 | 8.9460231 | -8.86E-02 | 150039406 | 150039529 | NC_000007.13 |
| ch.10.181390F  | 8.85E-08 | 1.03E-08 | -5.98 | 8.9451826 | -1.29E-02 | 5940801   | 5940924   | NC_000010.10 |
| ch.20.577701F  | 8.87E-08 | 1.03E-08 | -5.98 | 8.941873  | -3.06E-02 | 30139029  | 30139152  | NC_000020.10 |
| cg11277090     | 8.88E-08 | 1.03E-08 | -5.98 | 8.9417847 | -8.58E-02 | 72848048  | 72848171  | NC_000017.10 |
| cg18319984     | 8.88E-08 | 1.03E-08 | -5.98 | 8.9416929 | -1.32E-01 | 30374748  | 30374871  | NC_000021.8  |
| cg09248944     | 8.88E-08 | 1.03E-08 | -5.98 | 8.9416185 | -5.91E-02 | 160654499 | 160654622 | NC_000002.11 |
| cg26581729     | 8.88E-08 | 1.03E-08 | -5.98 | 8.941083  | -1.04E-01 | 139939792 | 139939915 | NC_000009.11 |
| cg25320388     | 8.88E-08 | 1.03E-08 | -5.98 | 8.9408765 | -1.85E-01 | 6767766   | 6767889   | NC_000011.9  |
| cg05226283     | 8.88E-08 | 1.03E-08 | -5.98 | 8.9404978 | -7.84E-02 | 21560355  | 21560478  | NC_000009.11 |
| cg11808639     | 8.89E-08 | 1.03E-08 | -5.98 | 8.9401978 | -5.39E-02 | 132439921 | 132440044 | NC_000002.11 |
| cg02899870     | 8.90E-08 | 1.03E-08 | -5.98 | 8.9390838 | -1.44E-01 | 32263104  | 32263227  | NC_000020.10 |
| ch.16.1297358F | 8.91E-08 | 1.03E-08 | -5.98 | 8.9380269 | -5.44E-02 | 58601671  | 58601794  | NC_000016.9  |
| cg04187185     | 8.91E-08 | 1.03E-08 | -5.98 | 8.9378201 | -1.59E-01 | 43396953  | 43397076  | NC_000005.9  |
| cg23002097     | 8.91E-08 | 1.04E-08 | -5.98 | 8.9373268 | -3.05E-02 | 58898625  | 58898748  | NC_000019.9  |
| cg23324259     | 8.92E-08 | 1.04E-08 | -5.98 | 8.9369301 | -1.81E-02 | 82754387  | 82754510  | NC_000008.10 |
| cg23873996     | 8.96E-08 | 1.04E-08 | -5.98 | 8.9320248 | -1.04E-01 | 170467487 | 170467610 | NC_000006.11 |
| cg13838969     | 8.96E-08 | 1.04E-08 | -5.98 | 8.9318787 | -9.87E-02 | 56283964  | 56284087  | NC_000020.10 |
| cg00660817     | 8.96E-08 | 1.04E-08 | -5.98 | 8.9314182 | -8.12E-02 | 132073706 | 132073829 | NC_000005.9  |
| cg06193766     | 8.97E-08 | 1.04E-08 | -5.98 | 8.9307478 | -9.80E-02 | 375391    | 375514    | NC_000010.10 |
| cg09012091     | 8.98E-08 | 1.04E-08 | -5.98 | 8.9300305 | -1.26E-01 | 24431322  | 24431445  | NC_000006.11 |
| cg05543443     | 8.98E-08 | 1.04E-08 | -5.98 | 8.9296981 | -6.47E-02 | 35574064  | 35574187  | NC_000005.9  |
| cg23202949     | 8.99E-08 | 1.05E-08 | -5.98 | 8.9282117 | -4.33E-02 | 124519807 | 124519930 | NC_000008.10 |

|            |          |          |       |           |           |           |           |              |
|------------|----------|----------|-------|-----------|-----------|-----------|-----------|--------------|
| cg24951100 | 9.00E-08 | 1.05E-08 | -5.98 | 8.9272301 | -7.56E-02 | 13760075  | 13760198  | NC_000010.10 |
| cg16159491 | 9.00E-08 | 1.05E-08 | -5.98 | 8.9271647 | -2.12E-02 | 24115290  | 24115413  | NC_000022.10 |
| cg03943826 | 9.00E-08 | 1.05E-08 | -5.98 | 8.9270867 | -3.28E-02 | 72612556  | 72612679  | NC_000015.9  |
| cg14266156 | 9.01E-08 | 1.05E-08 | -5.98 | 8.925834  | -1.05E-01 | 54829018  | 54829141  | NC_000017.10 |
| cg04388863 | 9.01E-08 | 1.05E-08 | -5.98 | 8.9257917 | -1.13E-01 | 48269349  | 48269472  | NC_000016.9  |
| cg05169499 | 9.01E-08 | 1.05E-08 | -5.98 | 8.9256587 | -7.75E-02 | 52673946  | 52674069  | NC_000012.11 |
| cg04898719 | 9.02E-08 | 1.05E-08 | -5.98 | 8.9250414 | -7.35E-02 | 52456918  | 52457041  | NC_000001.10 |
| cg10762570 | 9.02E-08 | 1.05E-08 | -5.98 | 8.924511  | -1.25E-01 | 34906118  | 34906241  | NC_000014.8  |
| cg23546512 | 9.03E-08 | 1.05E-08 | -5.98 | 8.924116  | -1.25E-01 | 125160999 | 125161122 | NC_000012.11 |
| cg15407213 | 9.03E-08 | 1.05E-08 | -5.98 | 8.9238105 | -9.89E-02 | 33145550  | 33145673  | NC_000006.11 |
| cg22996170 | 9.04E-08 | 1.05E-08 | -5.98 | 8.9224801 | -1.30E-01 | 12895529  | 12895652  | NC_000019.9  |
| cg15898536 | 9.04E-08 | 1.05E-08 | -5.98 | 8.9219069 | -1.09E-01 | 1753301   | 1753424   | NC_000005.9  |
| cg24698211 | 9.05E-08 | 1.05E-08 | -5.98 | 8.9214732 | -1.26E-01 | 170877540 | 170877663 | NC_000005.9  |
| cg15616888 | 9.05E-08 | 1.05E-08 | -5.98 | 8.9214532 | -2.59E-02 | 140397014 | 140397137 | NC_000007.13 |
| cg15622352 | 9.05E-08 | 1.05E-08 | -5.98 | 8.9210727 | -9.33E-02 | 2334949   | 2335072   | NC_000011.9  |
| cg19220825 | 9.06E-08 | 1.05E-08 | -5.98 | 8.9195473 | -9.70E-02 | 50353951  | 50354074  | NC_000012.11 |
| cg12984254 | 9.07E-08 | 1.05E-08 | -5.98 | 8.9194351 | -9.85E-02 | 5825437   | 5825560   | NC_000007.13 |
| cg09299086 | 9.07E-08 | 1.05E-08 | -5.98 | 8.9194074 | -9.67E-02 | 17746438  | 17746561  | NC_000001.10 |
| cg27376024 | 9.07E-08 | 1.05E-08 | -5.98 | 8.9192862 | -1.44E-01 | 63273565  | 63273688  | NC_000011.9  |
| cg04900893 | 9.07E-08 | 1.06E-08 | -5.98 | 8.9185898 | -1.16E-01 | 11996327  | 11996450  | NC_000008.10 |
| cg27297441 | 9.09E-08 | 1.06E-08 | -5.98 | 8.9170237 | -1.29E-01 | 134918671 | 134918794 | NC_000010.10 |
| cg26581484 | 9.09E-08 | 1.06E-08 | -5.98 | 8.9165059 | -1.86E-02 | 56223915  | 56224038  | NC_000012.11 |
| cg01123729 | 9.10E-08 | 1.06E-08 | -5.98 | 8.9152262 | -1.92E-02 | 40169510  | 40169633  | NC_000017.10 |
| cg23081488 | 9.11E-08 | 1.06E-08 | -5.98 | 8.9147369 | -5.16E-02 | 210616647 | 210616770 | NC_000002.11 |
| cg24950336 | 9.11E-08 | 1.06E-08 | -5.98 | 8.9139108 | -3.36E-02 | 113464879 | 113465002 | NC_000003.11 |

|            |          |          |       |           |           |           |           |              |
|------------|----------|----------|-------|-----------|-----------|-----------|-----------|--------------|
| cg27120488 | 9.12E-08 | 1.06E-08 | -5.98 | 8.9128966 | -5.05E-02 | 208047873 | 208047996 | NC_000002.11 |
| cg14245135 | 9.13E-08 | 1.06E-08 | -5.98 | 8.9124091 | -4.96E-02 | 47755742  | 47755865  | NC_000017.10 |
| cg08099136 | 9.14E-08 | 1.06E-08 | -5.98 | 8.9114569 | -1.43E-01 | 32811251  | 32811374  | NC_000006.11 |
| cg07836831 | 9.14E-08 | 1.06E-08 | -5.98 | 8.9113257 | -3.92E-02 | 2460865   | 2460988   | NC_000001.10 |
| cg07570055 | 9.16E-08 | 1.07E-08 | -5.98 | 8.9087553 | -6.62E-02 | 233387088 | 233387211 | NC_000002.11 |
| cg23098621 | 9.16E-08 | 1.07E-08 | -5.98 | 8.9081911 | -8.66E-02 | 111807941 | 111808064 | NC_000012.11 |
| cg17258195 | 9.17E-08 | 1.07E-08 | -5.98 | 8.9080256 | -7.06E-02 | 74466337  | 74466460  | NC_000015.9  |
| cg12199376 | 9.17E-08 | 1.07E-08 | -5.98 | 8.9079693 | -8.81E-02 | 67881521  | 67881644  | NC_000014.8  |
| cg16771652 | 9.17E-08 | 1.07E-08 | -5.98 | 8.9076516 | -1.10E-01 | 50730385  | 50730508  | NC_000016.9  |
| cg15384717 | 9.17E-08 | 1.07E-08 | -5.98 | 8.9074669 | -3.57E-02 | 150294084 | 150294207 | NC_000001.10 |
| cg18730511 | 9.18E-08 | 1.07E-08 | -5.98 | 8.9063374 | -7.62E-02 | 50435413  | 50435536  | NC_000022.10 |
| cg00087274 | 9.18E-08 | 1.07E-08 | -5.98 | 8.9060444 | -6.00E-02 | 124856760 | 124856883 | NC_000003.11 |
| cg20618842 | 9.19E-08 | 1.07E-08 | -5.98 | 8.9049559 | -2.73E-02 | 114521572 | 114521695 | NC_000001.10 |
| cg24046927 | 9.19E-08 | 1.07E-08 | -5.98 | 8.904926  | -1.35E-02 | 87794131  | 87794254  | NC_000001.10 |
| cg06192289 | 9.20E-08 | 1.07E-08 | -5.98 | 8.90452   | -1.96E-02 | 102513805 | 102513928 | NC_000012.11 |
| cg05438378 | 9.20E-08 | 1.07E-08 | -5.98 | 8.9036691 | -7.63E-02 | 67383736  | 67383859  | NC_000015.9  |
| cg26940122 | 9.21E-08 | 1.07E-08 | -5.97 | 8.9028215 | -1.41E-01 | 3397061   | 3397184   | NC_000001.10 |
| cg02786012 | 9.21E-08 | 1.07E-08 | -5.97 | 8.902581  | -6.36E-02 | 57371589  | 57371712  | NC_000004.11 |
| cg15239579 | 9.23E-08 | 1.07E-08 | -5.97 | 8.9008413 | -9.63E-02 | 3767978   | 3768101   | NC_000016.9  |
| cg10848724 | 9.23E-08 | 1.08E-08 | -5.97 | 8.9006738 | -5.98E-02 | 123380878 | 123381001 | NC_000012.11 |
| cg18027683 | 9.23E-08 | 1.08E-08 | -5.97 | 8.900184  | -1.24E-01 | 86047660  | 86047783  | NC_000001.10 |
| cg02551604 | 9.25E-08 | 1.08E-08 | -5.97 | 8.8983625 | -7.40E-02 | 131831745 | 131831868 | NC_000005.9  |
| cg01470535 | 9.25E-08 | 1.08E-08 | -5.97 | 8.8983278 | -1.14E-01 | 74963112  | 74963235  | NC_000004.11 |
| cg02866761 | 9.26E-08 | 1.08E-08 | -5.97 | 8.8976739 | -4.58E-02 | 17565664  | 17565787  | NC_000022.10 |
| cg26761744 | 9.26E-08 | 1.08E-08 | -5.97 | 8.8972857 | -1.47E-01 | 11779039  | 11779162  | NC_000006.11 |

|                 |          |          |       |           |           |           |           |              |
|-----------------|----------|----------|-------|-----------|-----------|-----------|-----------|--------------|
| cg17397159      | 9.26E-08 | 1.08E-08 | -5.97 | 8.8970925 | -6.85E-02 | 720144    | 720267    | NC_000004.11 |
| cg11541486      | 9.26E-08 | 1.08E-08 | -5.97 | 8.8969833 | -9.17E-02 | 72358055  | 72358178  | NC_000017.10 |
| cg22487391      | 9.26E-08 | 1.08E-08 | -5.97 | 8.8969515 | -9.42E-02 | 95437072  | 95437195  | NC_000001.10 |
| cg00093080      | 9.26E-08 | 1.08E-08 | -5.97 | 8.8968326 | -5.99E-02 | 117421224 | 117421347 | NC_000012.11 |
| cg14630382      | 9.29E-08 | 1.08E-08 | -5.97 | 8.8941918 | -3.51E-02 | 13824396  | 13824519  | NC_000018.9  |
| cg24938956      | 9.29E-08 | 1.08E-08 | -5.97 | 8.8939761 | -1.76E-02 | 4670603   | 4670726   | NC_000019.9  |
| ch.14.44741640R | 9.29E-08 | 1.08E-08 | -5.97 | 8.8936495 | -6.05E-02 | 45671890  | 45672013  | NC_000014.8  |
| cg18031661      | 9.30E-08 | 1.08E-08 | -5.97 | 8.8932553 | -1.26E-01 | 163133751 | 163133874 | NC_000005.9  |
| cg24828746      | 9.30E-08 | 1.08E-08 | -5.97 | 8.8926079 | -1.55E-01 | 4051723   | 4051846   | NC_000019.9  |
| cg10481560      | 9.31E-08 | 1.09E-08 | -5.97 | 8.8915395 | -1.08E-01 | 1597444   | 1597567   | NC_000011.9  |
| cg01731360      | 9.31E-08 | 1.09E-08 | -5.97 | 8.8914985 | -6.94E-02 | 49736671  | 49736794  | NC_000005.9  |
| cg08957484      | 9.33E-08 | 1.09E-08 | -5.97 | 8.8894245 | -8.08E-02 | 132083532 | 132083655 | NC_000005.9  |
| cg01174276      | 9.33E-08 | 1.09E-08 | -5.97 | 8.8892967 | -8.96E-02 | 39805850  | 39805973  | NC_000019.9  |
| cg04872399      | 9.33E-08 | 1.09E-08 | -5.97 | 8.8887964 | -1.01E-01 | 201346784 | 201346907 | NC_000001.10 |
| cg00495442      | 9.34E-08 | 1.09E-08 | -5.97 | 8.8885267 | -1.96E-02 | 37101172  | 37101295  | NC_000020.10 |
| cg14651896      | 9.34E-08 | 1.09E-08 | -5.97 | 8.8879106 | -4.35E-02 | 124094730 | 124094853 | NC_000009.11 |
| ch.15.811911R   | 9.36E-08 | 1.09E-08 | -5.97 | 8.8864569 | -3.02E-02 | 59455505  | 59455628  | NC_000015.9  |
| cg18808777      | 9.37E-08 | 1.09E-08 | -5.97 | 8.8845485 | -1.51E-01 | 31431503  | 31431626  | NC_000006.11 |
| cg06089684      | 9.39E-08 | 1.09E-08 | -5.97 | 8.8828926 | -3.84E-02 | 63783375  | 63783498  | NC_000001.10 |
| cg06828505      | 9.40E-08 | 1.10E-08 | -5.97 | 8.8817296 | -8.81E-02 | 111577981 | 111578104 | NC_000003.11 |
| cg27504738      | 9.41E-08 | 1.10E-08 | -5.97 | 8.8807543 | -1.29E-01 | 66564266  | 66564389  | NC_000012.11 |
| cg04389328      | 9.41E-08 | 1.10E-08 | -5.97 | 8.8807051 | -6.49E-02 | 20104991  | 20105114  | NC_000022.10 |
| cg13874739      | 9.41E-08 | 1.10E-08 | -5.97 | 8.8802593 | -1.39E-01 | 129244236 | 129244359 | NC_000011.9  |
| cg19088141      | 9.42E-08 | 1.10E-08 | -5.97 | 8.8799243 | -1.09E-01 | 113056151 | 113056274 | NC_000001.10 |
| cg02927747      | 9.42E-08 | 1.10E-08 | -5.97 | 8.8796828 | -8.42E-02 | 60381593  | 60381716  | NC_000018.9  |

|            |          |          |       |           |           |           |           |              |
|------------|----------|----------|-------|-----------|-----------|-----------|-----------|--------------|
| cg11183156 | 9.42E-08 | 1.10E-08 | -5.97 | 8.8795846 | -1.16E-01 | 63273543  | 63273666  | NC_000011.9  |
| cg15831875 | 9.42E-08 | 1.10E-08 | -5.97 | 8.8795143 | -1.04E-01 | 245986694 | 245986817 | NC_000001.10 |
| cg18400281 | 9.43E-08 | 1.10E-08 | -5.97 | 8.8786178 | -1.33E-01 | 24633303  | 24633426  | NC_000010.10 |
| cg17354880 | 9.43E-08 | 1.10E-08 | -5.97 | 8.8780454 | -9.32E-02 | 112658759 | 112658882 | NC_000002.11 |
| cg18692507 | 9.43E-08 | 1.10E-08 | -5.97 | 8.8780119 | -1.22E-01 | 36726031  | 36726154  | NC_000013.10 |
| cg14373210 | 9.44E-08 | 1.10E-08 | -5.97 | 8.8773296 | -9.25E-02 | 75913786  | 75913909  | NC_000006.11 |
| cg12799790 | 9.44E-08 | 1.10E-08 | -5.97 | 8.8772745 | -1.07E-01 | 54071134  | 54071257  | NC_000010.10 |
| cg04519622 | 9.45E-08 | 1.10E-08 | -5.97 | 8.8761442 | -7.31E-02 | 82651186  | 82651309  | NC_000013.10 |
| cg16756854 | 9.46E-08 | 1.10E-08 | -5.97 | 8.875255  | -1.56E-01 | 66116455  | 66116578  | NC_000011.9  |
| cg06241812 | 9.46E-08 | 1.10E-08 | -5.97 | 8.8750194 | -9.19E-02 | 71293694  | 71293817  | NC_000003.11 |
| cg12350762 | 9.46E-08 | 1.10E-08 | -5.97 | 8.8745436 | -1.15E-01 | 55106285  | 55106408  | NC_000018.9  |
| cg03291099 | 9.47E-08 | 1.10E-08 | -5.97 | 8.8740461 | -8.11E-02 | 50498209  | 50498332  | NC_000022.10 |
| cg06834712 | 9.48E-08 | 1.11E-08 | -5.97 | 8.8730275 | -1.15E-01 | 133100405 | 133100528 | NC_000012.11 |
| cg01025720 | 9.48E-08 | 1.11E-08 | -5.97 | 8.8729689 | -1.45E-01 | 113346439 | 113346562 | NC_000013.10 |
| cg01197302 | 9.48E-08 | 1.11E-08 | -5.97 | 8.8728429 | -6.37E-02 | 4859667   | 4859790   | NC_000007.13 |
| cg00492574 | 9.48E-08 | 1.11E-08 | -5.97 | 8.8722024 | -1.27E-01 | 110248385 | 110248508 | NC_000009.11 |
| cg05193430 | 9.48E-08 | 1.11E-08 | -5.97 | 8.872088  | -3.27E-02 | 68086242  | 68086365  | NC_000014.8  |
| cg21579578 | 9.50E-08 | 1.11E-08 | -5.97 | 8.8704018 | -9.96E-02 | 55262757  | 55262880  | NC_000001.10 |
| cg08526705 | 9.50E-08 | 1.11E-08 | -5.97 | 8.8700214 | -1.40E-01 | 128753029 | 128753152 | NC_000008.10 |
| cg00221650 | 9.51E-08 | 1.11E-08 | -5.97 | 8.8693367 | -1.31E-01 | 6819650   | 6819773   | NC_000002.11 |
| cg12513221 | 9.51E-08 | 1.11E-08 | -5.97 | 8.8692314 | -5.71E-02 | 150744599 | 150744722 | NC_000007.13 |
| cg26528311 | 9.51E-08 | 1.11E-08 | -5.97 | 8.8687382 | -1.02E-01 | 38462546  | 38462669  | NC_000001.10 |
| cg06529643 | 9.52E-08 | 1.11E-08 | -5.97 | 8.8682788 | -8.43E-02 | 73652288  | 73652411  | NC_000010.10 |
| cg16779295 | 9.52E-08 | 1.11E-08 | -5.97 | 8.8681644 | -7.09E-02 | 24438909  | 24439032  | NC_000014.8  |
| cg06207961 | 9.52E-08 | 1.11E-08 | -5.97 | 8.8680386 | -1.52E-01 | 108661230 | 108661353 | NC_000001.10 |

|            |          |          |       |           |           |           |           |              |
|------------|----------|----------|-------|-----------|-----------|-----------|-----------|--------------|
| cg08940378 | 9.53E-08 | 1.11E-08 | -5.97 | 8.8674163 | -7.42E-02 | 38418343  | 38418466  | NC_000002.11 |
| cg17803993 | 9.53E-08 | 1.11E-08 | -5.97 | 8.867371  | -1.33E-01 | 71276214  | 71276337  | NC_000003.11 |
| cg14232108 | 9.55E-08 | 1.12E-08 | -5.97 | 8.8649203 | -1.30E-01 | 33202784  | 33202907  | NC_000009.11 |
| cg06885641 | 9.55E-08 | 1.12E-08 | -5.97 | 8.8644153 | -6.21E-02 | 67390768  | 67390891  | NC_000001.10 |
| cg26366091 | 9.56E-08 | 1.12E-08 | -5.97 | 8.8639299 | -1.47E-01 | 111770274 | 111770397 | NC_000001.10 |
| cg04564000 | 9.56E-08 | 1.12E-08 | -5.97 | 8.8634153 | -1.61E-01 | 114343068 | 114343191 | NC_000003.11 |
| cg26100303 | 9.56E-08 | 1.12E-08 | -5.97 | 8.8633852 | -8.97E-02 | 114099712 | 114099835 | NC_000003.11 |
| cg13979182 | 9.57E-08 | 1.12E-08 | -5.97 | 8.8627408 | -2.61E-02 | 2845120   | 2845243   | NC_000004.11 |
| cg26345142 | 9.58E-08 | 1.12E-08 | -5.97 | 8.8615279 | -9.57E-02 | 109305794 | 109305917 | NC_000012.11 |
| cg27024196 | 9.58E-08 | 1.12E-08 | -5.97 | 8.8613182 | -1.38E-01 | 181568620 | 181568743 | NC_000003.11 |
| cg01038940 | 9.58E-08 | 1.12E-08 | -5.97 | 8.8613059 | -7.44E-02 | 94652135  | 94652258  | NC_000010.10 |
| cg12055940 | 9.59E-08 | 1.12E-08 | -5.97 | 8.8601857 | -5.75E-02 | 71421279  | 71421402  | NC_000011.9  |
| cg18678121 | 9.60E-08 | 1.12E-08 | -5.97 | 8.8593028 | -1.26E-01 | 12170807  | 12170930  | NC_000010.10 |
| cg00205658 | 9.62E-08 | 1.12E-08 | -5.97 | 8.8566737 | -2.02E-02 | 120628002 | 120628125 | NC_000007.13 |
| cg09056039 | 9.63E-08 | 1.13E-08 | -5.97 | 8.8559913 | -5.55E-02 | 15231470  | 15231593  | NC_000016.9  |
| cg06552549 | 9.64E-08 | 1.13E-08 | -5.97 | 8.8555624 | -6.11E-02 | 2051251   | 2051374   | NC_000019.9  |
| cg12504415 | 9.64E-08 | 1.13E-08 | -5.97 | 8.855495  | -5.73E-02 | 74722752  | 74722875  | NC_000017.10 |
| cg08795948 | 9.64E-08 | 1.13E-08 | -5.97 | 8.855436  | -1.43E-01 | 128337044 | 128337167 | NC_000003.11 |
| cg02647990 | 9.64E-08 | 1.13E-08 | -5.97 | 8.8551466 | -1.85E-02 | 196230837 | 196230960 | NC_000003.11 |
| cg16807577 | 9.64E-08 | 1.13E-08 | -5.97 | 8.8545108 | -3.93E-02 | 22019998  | 22020121  | NC_000016.9  |
| cg02963119 | 9.65E-08 | 1.13E-08 | -5.97 | 8.8543814 | -1.00E-01 | 450970    | 451093    | NC_000016.9  |
| cg02345613 | 9.65E-08 | 1.13E-08 | -5.97 | 8.8543258 | -9.40E-02 | 141619483 | 141619606 | NC_000008.10 |
| cg10608948 | 9.66E-08 | 1.13E-08 | -5.97 | 8.8527101 | -1.37E-01 | 6478486   | 6478609   | NC_000017.10 |
| cg24560920 | 9.66E-08 | 1.13E-08 | -5.97 | 8.8526579 | -1.19E-01 | 179344387 | 179344510 | NC_000002.11 |
| cg19940077 | 9.67E-08 | 1.13E-08 | -5.96 | 8.8517628 | -1.20E-01 | 200842282 | 200842405 | NC_000001.10 |

|            |          |          |       |           |           |           |           |              |
|------------|----------|----------|-------|-----------|-----------|-----------|-----------|--------------|
| cg21638533 | 9.67E-08 | 1.13E-08 | -5.96 | 8.8516607 | -9.23E-02 | 6658625   | 6658748   | NC_000012.11 |
| cg07278624 | 9.68E-08 | 1.13E-08 | -5.96 | 8.850902  | -5.68E-02 | 106696673 | 106696796 | NC_000012.11 |
| cg23712970 | 9.68E-08 | 1.13E-08 | -5.96 | 8.8501649 | -5.14E-02 | 23540735  | 23540858  | NC_000014.8  |
| cg25661397 | 9.69E-08 | 1.13E-08 | -5.96 | 8.8499276 | -8.89E-02 | 37521150  | 37521273  | NC_000017.10 |
| cg17878501 | 9.69E-08 | 1.13E-08 | -5.96 | 8.8498086 | -1.14E-01 | 152215049 | 152215172 | NC_000003.11 |
| cg08463231 | 9.70E-08 | 1.13E-08 | -5.96 | 8.8488073 | -9.90E-02 | 78103228  | 78103351  | NC_000015.9  |
| cg11619961 | 9.70E-08 | 1.13E-08 | -5.96 | 8.8480215 | -1.29E-01 | 149792840 | 149792963 | NC_000005.9  |
| cg18587499 | 9.70E-08 | 1.13E-08 | -5.96 | 8.8479799 | -8.94E-02 | 94121146  | 94121269  | NC_000014.8  |
| cg17463564 | 9.71E-08 | 1.14E-08 | -5.96 | 8.8470045 | -9.88E-02 | 384587    | 384710    | NC_000010.10 |
| cg04084157 | 9.72E-08 | 1.14E-08 | -5.96 | 8.8457514 | -6.74E-02 | 100809049 | 100809172 | NC_000007.13 |
| cg04976330 | 9.73E-08 | 1.14E-08 | -5.96 | 8.8455223 | -1.01E-01 | 31480640  | 31480763  | NC_000001.10 |
| cg14628604 | 9.73E-08 | 1.14E-08 | -5.96 | 8.8453942 | -6.43E-02 | 157646701 | 157646824 | NC_000007.13 |
| cg09166091 | 9.73E-08 | 1.14E-08 | -5.96 | 8.8447975 | -1.03E-01 | 216484055 | 216484178 | NC_000002.11 |
| cg04206637 | 9.74E-08 | 1.14E-08 | -5.96 | 8.8437138 | -1.19E-01 | 63202277  | 63202400  | NC_000005.9  |
| cg03070095 | 9.75E-08 | 1.14E-08 | -5.96 | 8.843076  | -2.28E-02 | 80656113  | 80656236  | NC_000017.10 |
| cg01197891 | 9.75E-08 | 1.14E-08 | -5.96 | 8.8427562 | -3.68E-02 | 57843787  | 57843910  | NC_000004.11 |
| cg16324633 | 9.75E-08 | 1.14E-08 | -5.96 | 8.842521  | -1.47E-01 | 43397167  | 43397290  | NC_000005.9  |
| cg21926077 | 9.76E-08 | 1.14E-08 | -5.96 | 8.8418767 | -6.58E-02 | 1503812   | 1503935   | NC_000019.9  |
| cg04722620 | 9.77E-08 | 1.14E-08 | -5.96 | 8.8412242 | -4.23E-02 | 54982598  | 54982721  | NC_000019.9  |
| cg03795574 | 9.78E-08 | 1.14E-08 | -5.96 | 8.8401581 | -1.51E-01 | 99256874  | 99256997  | NC_000015.9  |
| cg24859986 | 9.78E-08 | 1.14E-08 | -5.96 | 8.8398712 | -1.07E-01 | 84084182  | 84084305  | NC_000001.10 |
| cg00658449 | 9.78E-08 | 1.14E-08 | -5.96 | 8.8393152 | -1.07E-01 | 47751953  | 47752076  | NC_000008.10 |
| cg13520520 | 9.81E-08 | 1.15E-08 | -5.96 | 8.8367438 | -6.36E-02 | 11616957  | 11617080  | NC_000019.9  |
| cg12655112 | 9.81E-08 | 1.15E-08 | -5.96 | 8.8365917 | -1.00E-01 | 42261154  | 42261277  | NC_000015.9  |
| cg03636532 | 9.81E-08 | 1.15E-08 | -5.96 | 8.8365418 | -1.22E-01 | 55107236  | 55107359  | NC_000018.9  |



|               |          |          |       |           |           |           |           |              |
|---------------|----------|----------|-------|-----------|-----------|-----------|-----------|--------------|
| cg12283482    | 9.81E-08 | 1.15E-08 | -5.96 | 8.8362687 | -1.08E-01 | 57254754  | 57254877  | NC_000004.11 |
| cg19954234    | 9.82E-08 | 1.15E-08 | -5.96 | 8.8350551 | -1.01E-01 | 108408969 | 108409092 | NC_000011.9  |
| cg15096465    | 9.82E-08 | 1.15E-08 | -5.96 | 8.8349262 | -1.66E-01 | 396979    | 397102    | NC_000010.10 |
| cg08959039    | 9.83E-08 | 1.15E-08 | -5.96 | 8.8348797 | -1.32E-01 | 111062266 | 111062389 | NC_000013.10 |
| cg27278729    | 9.83E-08 | 1.15E-08 | -5.96 | 8.8348388 | -1.04E-01 | 61666595  | 61666718  | NC_000011.9  |
| cg17462962    | 9.83E-08 | 1.15E-08 | -5.96 | 8.8346378 | -1.01E-01 | 154347281 | 154347404 | NC_000005.9  |
| cg08674885    | 9.83E-08 | 1.15E-08 | -5.96 | 8.8344216 | -1.10E-01 | 49832881  | 49833004  | NC_000008.10 |
| cg11077171    | 9.84E-08 | 1.15E-08 | -5.96 | 8.8331817 | -8.82E-02 | 74881051  | 74881174  | NC_000015.9  |
| cg09028008    | 9.84E-08 | 1.15E-08 | -5.96 | 8.8328643 | -9.07E-02 | 19615080  | 19615203  | NC_000001.10 |
| cg02940362    | 9.86E-08 | 1.15E-08 | -5.96 | 8.8308446 | -1.29E-01 | 5009201   | 5009324   | NC_000011.9  |
| cg11729934    | 9.86E-08 | 1.16E-08 | -5.96 | 8.830535  | -1.05E-01 | 1601693   | 1601816   | NC_000006.11 |
| cg03985360    | 9.87E-08 | 1.16E-08 | -5.96 | 8.8302961 | -1.32E-01 | 13960140  | 13960263  | NC_000007.13 |
| cg07978738    | 9.87E-08 | 1.16E-08 | -5.96 | 8.8300914 | -1.13E-01 | 116298339 | 116298462 | NC_000010.10 |
| cg07575166    | 9.87E-08 | 1.16E-08 | -5.96 | 8.829881  | -6.67E-02 | 32599433  | 32599556  | NC_000016.9  |
| cg19595170    | 9.87E-08 | 1.16E-08 | -5.96 | 8.8298536 | -3.81E-02 | 43139150  | 43139273  | NC_000006.11 |
| cg23092788    | 9.88E-08 | 1.16E-08 | -5.96 | 8.8288431 | -6.88E-02 | 949558    | 949681    | NC_000004.11 |
| cg08625568    | 9.89E-08 | 1.16E-08 | -5.96 | 8.8278997 | -1.10E-01 | 113142201 | 113142324 | NC_000005.9  |
| ch.8.2842146R | 9.89E-08 | 1.16E-08 | -5.96 | 8.8275649 | -1.31E-02 | 142203859 | 142203982 | NC_000008.10 |
| cg03508390    | 9.90E-08 | 1.16E-08 | -5.96 | 8.8270364 | -1.13E-01 | 124120796 | 124120919 | NC_000003.11 |
| cg04702538    | 9.91E-08 | 1.16E-08 | -5.96 | 8.825941  | -1.53E-01 | 16318972  | 16319095  | NC_000017.10 |
| cg07357716    | 9.91E-08 | 1.16E-08 | -5.96 | 8.8253927 | -1.07E-01 | 31764211  | 31764334  | NC_000015.9  |
| cg17322667    | 9.92E-08 | 1.16E-08 | -5.96 | 8.8250642 | -2.26E-02 | 61159837  | 61159960  | NC_000011.9  |
| cg19751098    | 9.92E-08 | 1.16E-08 | -5.96 | 8.8248688 | -2.80E-02 | 4831974   | 4832097   | NC_000019.9  |
| cg12190322    | 9.94E-08 | 1.16E-08 | -5.96 | 8.8226985 | -1.23E-01 | 122395107 | 122395230 | NC_000011.9  |
| cg10641258    | 9.94E-08 | 1.16E-08 | -5.96 | 8.8225799 | -8.00E-02 | 43484279  | 43484402  | NC_000021.8  |

|            |          |          |       |           |           |           |           |              |
|------------|----------|----------|-------|-----------|-----------|-----------|-----------|--------------|
| cg12629515 | 9.94E-08 | 1.17E-08 | -5.96 | 8.8222207 | -1.33E-01 | 27859811  | 27859934  | NC_000006.11 |
| cg14037769 | 9.94E-08 | 1.17E-08 | -5.96 | 8.8220755 | -1.14E-01 | 9895799   | 9895922   | NC_000001.10 |
| cg01435137 | 9.95E-08 | 1.17E-08 | -5.96 | 8.8219459 | -6.11E-02 | 27255443  | 27255566  | NC_000002.11 |
| cg24121168 | 9.96E-08 | 1.17E-08 | -5.96 | 8.8202635 | -1.05E-01 | 58652503  | 58652626  | NC_000003.11 |
| cg03056341 | 9.97E-08 | 1.17E-08 | -5.96 | 8.8196039 | -2.48E-02 | 64546100  | 64546223  | NC_000011.9  |
| cg16293835 | 9.98E-08 | 1.17E-08 | -5.96 | 8.8184868 | -1.36E-01 | 127314989 | 127315112 | NC_000008.10 |
| cg21618017 | 9.98E-08 | 1.17E-08 | -5.96 | 8.8182568 | -1.21E-01 | 124016861 | 124016984 | NC_000012.11 |
| cg24276035 | 9.99E-08 | 1.17E-08 | -5.96 | 8.817219  | -1.26E-01 | 42927286  | 42927409  | NC_000019.9  |
| cg09128050 | 9.99E-08 | 1.17E-08 | -5.96 | 8.8171349 | -1.88E-02 | 35580168  | 35580291  | NC_000020.10 |
| cg26767897 | 1.00E-07 | 1.17E-08 | -5.96 | 8.8162005 | -1.33E-01 | 31637348  | 31637471  | NC_000002.11 |
| cg04623371 | 1.00E-07 | 1.17E-08 | -5.96 | 8.8159527 | -1.49E-01 | 168768113 | 168768236 | NC_000006.11 |
| cg27083040 | 1.00E-07 | 1.17E-08 | -5.96 | 8.8153825 | -1.44E-01 | 148810061 | 148810184 | NC_000005.9  |
| cg21316772 | 1.00E-07 | 1.17E-08 | -5.96 | 8.8153687 | -1.06E-01 | 33167933  | 33168056  | NC_000009.11 |
| cg22247664 | 1.00E-07 | 1.17E-08 | -5.96 | 8.8146197 | -8.58E-02 | 110199126 | 110199249 | NC_000001.10 |
| cg20783722 | 1.00E-07 | 1.17E-08 | -5.96 | 8.8144278 | -7.96E-02 | 77349090  | 77349213  | NC_000011.9  |
| cg24093139 | 1.00E-07 | 1.18E-08 | -5.96 | 8.8133867 | -2.83E-02 | 74582379  | 74582502  | NC_000017.10 |
| cg04917197 | 1.00E-07 | 1.18E-08 | -5.96 | 8.8132885 | -6.08E-02 | 112290331 | 112290454 | NC_000010.10 |
| cg21537187 | 1.00E-07 | 1.18E-08 | -5.96 | 8.8131888 | -1.49E-01 | 135662562 | 135662685 | NC_000007.13 |
| cg00482020 | 1.00E-07 | 1.18E-08 | -5.96 | 8.8131528 | -2.73E-02 | 25026850  | 25026973  | NC_000016.9  |
| cg12057946 | 1.00E-07 | 1.18E-08 | -5.96 | 8.8131276 | -4.63E-02 | 120195905 | 120196028 | NC_000011.9  |
| cg26605046 | 1.00E-07 | 1.18E-08 | -5.96 | 8.8130137 | -1.35E-01 | 2439731   | 2439854   | NC_000004.11 |
| cg06699286 | 1.00E-07 | 1.18E-08 | -5.96 | 8.8125965 | -2.01E-02 | 78980101  | 78980224  | NC_000004.11 |
| cg02239258 | 1.00E-07 | 1.18E-08 | -5.96 | 8.8124232 | -1.35E-01 | 8241752   | 8241875   | NC_000008.10 |
| cg23905556 | 1.00E-07 | 1.18E-08 | -5.96 | 8.8120196 | -8.63E-02 | 92976846  | 92976969  | NC_000012.11 |
| cg07271757 | 1.00E-07 | 1.18E-08 | -5.96 | 8.8116651 | -6.68E-02 | 135127558 | 135127681 | NC_000010.10 |

|            |          |          |       |           |           |           |           |              |
|------------|----------|----------|-------|-----------|-----------|-----------|-----------|--------------|
| cg25542337 | 1.00E-07 | 1.18E-08 | -5.96 | 8.8113444 | -6.18E-02 | 2598521   | 2598644   | NC_000007.13 |
| cg07047589 | 1.00E-07 | 1.18E-08 | -5.96 | 8.8113304 | -1.20E-01 | 40642998  | 40643121  | NC_000015.9  |
| cg23252902 | 1.00E-07 | 1.18E-08 | -5.96 | 8.811038  | -1.79E-01 | 711405    | 711528    | NC_000006.11 |
| cg10495683 | 1.01E-07 | 1.18E-08 | -5.96 | 8.8104219 | -8.06E-02 | 94054019  | 94054142  | NC_000001.10 |
| cg17144547 | 1.01E-07 | 1.18E-08 | -5.96 | 8.809835  | -6.73E-02 | 46260234  | 46260357  | NC_000011.9  |
| cg05686503 | 1.01E-07 | 1.18E-08 | -5.96 | 8.8092208 | -4.48E-02 | 42896426  | 42896549  | NC_000022.10 |
| cg26846592 | 1.01E-07 | 1.18E-08 | -5.96 | 8.8090712 | -3.55E-02 | 112195163 | 112195286 | NC_000006.11 |
| cg00381179 | 1.01E-07 | 1.18E-08 | -5.96 | 8.8080845 | -2.06E-02 | 134093562 | 134093685 | NC_000003.11 |
| cg13558061 | 1.01E-07 | 1.18E-08 | -5.96 | 8.8064933 | -3.57E-02 | 22090124  | 22090247  | NC_000022.10 |
| cg00082285 | 1.01E-07 | 1.19E-08 | -5.96 | 8.8045135 | -1.03E-01 | 1097270   | 1097393   | NC_000001.10 |
| cg16232674 | 1.01E-07 | 1.19E-08 | -5.96 | 8.8030967 | -1.47E-01 | 37309658  | 37309781  | NC_000022.10 |
| cg05548402 | 1.01E-07 | 1.19E-08 | -5.96 | 8.8030839 | -1.29E-01 | 66115853  | 66115976  | NC_000016.9  |
| cg01136183 | 1.01E-07 | 1.19E-08 | -5.96 | 8.8026127 | -1.14E-01 | 105351092 | 105351215 | NC_000008.10 |
| cg15215077 | 1.01E-07 | 1.19E-08 | -5.96 | 8.8025499 | -7.53E-02 | 119561839 | 119561962 | NC_000006.11 |
| cg15617545 | 1.02E-07 | 1.19E-08 | -5.95 | 8.7995738 | -1.14E-01 | 57365018  | 57365141  | NC_000011.9  |
| cg21100638 | 1.02E-07 | 1.19E-08 | -5.95 | 8.7992602 | -1.19E-01 | 4337082   | 4337205   | NC_000017.10 |
| cg18112681 | 1.02E-07 | 1.19E-08 | -5.95 | 8.798774  | -1.25E-01 | 63303399  | 63303522  | NC_000011.9  |
| cg08460435 | 1.02E-07 | 1.19E-08 | -5.95 | 8.7986513 | -6.36E-02 | 109203610 | 109203733 | NC_000001.10 |
| cg02073839 | 1.02E-07 | 1.19E-08 | -5.95 | 8.7978822 | -6.36E-02 | 168417743 | 168417866 | NC_000006.11 |
| cg17512989 | 1.02E-07 | 1.20E-08 | -5.95 | 8.7973828 | -1.12E-01 | 76344333  | 76344456  | NC_000013.10 |
| cg15651928 | 1.02E-07 | 1.20E-08 | -5.95 | 8.7959438 | -1.13E-01 | 32290811  | 32290934  | NC_000020.10 |
| cg17628867 | 1.02E-07 | 1.20E-08 | -5.95 | 8.7956346 | -4.70E-02 | 15555115  | 15555238  | NC_000017.10 |
| cg23922134 | 1.02E-07 | 1.20E-08 | -5.95 | 8.7954526 | -5.44E-02 | 109403538 | 109403661 | NC_000002.11 |
| cg07481886 | 1.02E-07 | 1.20E-08 | -5.95 | 8.7951061 | -6.98E-02 | 32014510  | 32014633  | NC_000006.11 |
| cg00262446 | 1.02E-07 | 1.20E-08 | -5.95 | 8.7950954 | -1.58E-01 | 101439228 | 101439351 | NC_000004.11 |

|            |          |          |       |           |           |           |           |              |
|------------|----------|----------|-------|-----------|-----------|-----------|-----------|--------------|
| cg10932868 | 1.02E-07 | 1.20E-08 | -5.95 | 8.7949137 | -1.01E-01 | 921992    | 922115    | NC_000011.9  |
| cg07156669 | 1.02E-07 | 1.20E-08 | -5.95 | 8.7946779 | -1.25E-01 | 28705245  | 28705368  | NC_000017.10 |
| cg11147886 | 1.02E-07 | 1.20E-08 | -5.95 | 8.7945575 | -1.54E-01 | 69598170  | 69598293  | NC_000016.9  |
| cg02981443 | 1.02E-07 | 1.20E-08 | -5.95 | 8.7944486 | -3.93E-02 | 31254875  | 31254998  | NC_000017.10 |
| cg03117577 | 1.02E-07 | 1.20E-08 | -5.95 | 8.7936015 | -8.30E-02 | 20187457  | 20187580  | NC_000017.10 |
| cg22026150 | 1.02E-07 | 1.20E-08 | -5.95 | 8.7935681 | -1.12E-01 | 50653870  | 50653993  | NC_000008.10 |
| cg02749789 | 1.02E-07 | 1.20E-08 | -5.95 | 8.7935151 | -5.24E-02 | 1303531   | 1303654   | NC_000017.10 |
| cg00549561 | 1.02E-07 | 1.20E-08 | -5.95 | 8.7933045 | -5.96E-02 | 22296110  | 22296233  | NC_000016.9  |
| cg06212498 | 1.02E-07 | 1.20E-08 | -5.95 | 8.7925543 | -1.58E-02 | 49045151  | 49045274  | NC_000003.11 |
| cg03521736 | 1.02E-07 | 1.20E-08 | -5.95 | 8.7918461 | -2.22E-02 | 291022    | 291145    | NC_000019.9  |
| cg02047547 | 1.02E-07 | 1.20E-08 | -5.95 | 8.7913859 | -9.07E-02 | 19126242  | 19126365  | NC_000016.9  |
| cg01799856 | 1.02E-07 | 1.20E-08 | -5.95 | 8.7913423 | -7.63E-02 | 37794335  | 37794458  | NC_000017.10 |
| cg14491362 | 1.02E-07 | 1.20E-08 | -5.95 | 8.7905691 | -1.19E-01 | 69286344  | 69286467  | NC_000014.8  |
| cg16629179 | 1.03E-07 | 1.20E-08 | -5.95 | 8.7903475 | -3.65E-02 | 48278852  | 48278975  | NC_000017.10 |
| cg19653589 | 1.03E-07 | 1.21E-08 | -5.95 | 8.7886761 | -1.31E-01 | 2614177   | 2614300   | NC_000019.9  |
| cg10152097 | 1.03E-07 | 1.21E-08 | -5.95 | 8.7878492 | -1.17E-01 | 106200350 | 106200473 | NC_000002.11 |
| cg26194090 | 1.03E-07 | 1.21E-08 | -5.95 | 8.7860286 | -6.58E-02 | 7269433   | 7269556   | NC_000006.11 |
| cg12720839 | 1.03E-07 | 1.21E-08 | -5.95 | 8.7855544 | -2.18E-02 | 55008150  | 55008273  | NC_000001.10 |
| cg02335376 | 1.03E-07 | 1.21E-08 | -5.95 | 8.7847813 | -8.18E-02 | 30124880  | 30125003  | NC_000016.9  |
| cg09892671 | 1.03E-07 | 1.21E-08 | -5.95 | 8.7845031 | -1.25E-01 | 82951578  | 82951701  | NC_000001.10 |
| cg00007076 | 1.03E-07 | 1.21E-08 | -5.95 | 8.7836939 | -9.74E-02 | 67342600  | 67342723  | NC_000008.10 |
| cg10318148 | 1.03E-07 | 1.21E-08 | -5.95 | 8.7836121 | -9.43E-02 | 1024673   | 1024796   | NC_000007.13 |
| cg27030336 | 1.03E-07 | 1.21E-08 | -5.95 | 8.7827893 | -2.21E-02 | 43798661  | 43798784  | NC_000007.13 |
| cg12812489 | 1.03E-07 | 1.21E-08 | -5.95 | 8.7812696 | -5.65E-02 | 40896724  | 40896847  | NC_000017.10 |
| cg15306209 | 1.03E-07 | 1.22E-08 | -5.95 | 8.7811349 | -1.84E-02 | 61616451  | 61616574  | NC_000018.9  |

|                 |          |          |       |           |           |           |           |              |
|-----------------|----------|----------|-------|-----------|-----------|-----------|-----------|--------------|
| cg24359926      | 1.04E-07 | 1.22E-08 | -5.95 | 8.7790401 | -8.08E-02 | 47138673  | 47138796  | NC_000003.11 |
| cg22669060      | 1.04E-07 | 1.22E-08 | -5.95 | 8.7786806 | -1.48E-01 | 34774882  | 34775005  | NC_000021.8  |
| cg19040702      | 1.04E-07 | 1.22E-08 | -5.95 | 8.7784813 | -6.02E-02 | 22023833  | 22023956  | NC_000017.10 |
| cg16555466      | 1.04E-07 | 1.22E-08 | -5.95 | 8.777194  | -1.24E-01 | 92042333  | 92042456  | NC_000014.8  |
| cg02270689      | 1.04E-07 | 1.22E-08 | -5.95 | 8.7768972 | -1.20E-01 | 64836235  | 64836358  | NC_000002.11 |
| cg27453857      | 1.04E-07 | 1.22E-08 | -5.95 | 8.7755033 | -1.90E-01 | 4689640   | 4689763   | NC_000017.10 |
| cg22956060      | 1.04E-07 | 1.22E-08 | -5.95 | 8.7754102 | -1.04E-01 | 9289747   | 9289870   | NC_000003.11 |
| cg06296169      | 1.04E-07 | 1.22E-08 | -5.95 | 8.7748349 | -1.10E-01 | 132230612 | 132230735 | NC_000007.13 |
| cg20430104      | 1.04E-07 | 1.22E-08 | -5.95 | 8.7737946 | -1.18E-01 | 47764246  | 47764369  | NC_000007.13 |
| cg27479634      | 1.04E-07 | 1.22E-08 | -5.95 | 8.7736431 | -8.70E-02 | 54070545  | 54070668  | NC_000012.11 |
| ch.2.3376566R   | 1.04E-07 | 1.22E-08 | -5.95 | 8.7734802 | -3.01E-02 | 166772260 | 166772383 | NC_000002.11 |
| cg05483125      | 1.04E-07 | 1.23E-08 | -5.95 | 8.7732359 | -9.28E-02 | 75554060  | 75554183  | NC_000016.9  |
| cg17064870      | 1.04E-07 | 1.23E-08 | -5.95 | 8.7729198 | -7.42E-02 | 102394773 | 102394896 | NC_000014.8  |
| cg03259292      | 1.04E-07 | 1.23E-08 | -5.95 | 8.7728462 | -1.11E-01 | 88162925  | 88163048  | NC_000010.10 |
| cg25738301      | 1.04E-07 | 1.23E-08 | -5.95 | 8.7725092 | -6.67E-02 | 104532524 | 104532647 | NC_000012.11 |
| cg02091341      | 1.04E-07 | 1.23E-08 | -5.95 | 8.772354  | -3.53E-02 | 75497728  | 75497851  | NC_000016.9  |
| cg06779253      | 1.04E-07 | 1.23E-08 | -5.95 | 8.7714752 | -8.95E-02 | 9375627   | 9375750   | NC_000001.10 |
| cg19725098      | 1.04E-07 | 1.23E-08 | -5.95 | 8.7712459 | -9.48E-02 | 35749200  | 35749323  | NC_000017.10 |
| cg26828599      | 1.04E-07 | 1.23E-08 | -5.95 | 8.7711683 | -1.01E-01 | 68842998  | 68843121  | NC_000011.9  |
| cg07587746      | 1.04E-07 | 1.23E-08 | -5.95 | 8.7709233 | -8.03E-02 | 129180151 | 129180274 | NC_000003.11 |
| cg24500487      | 1.04E-07 | 1.23E-08 | -5.95 | 8.7707572 | -9.26E-02 | 89420794  | 89420917  | NC_000010.10 |
| cg09936933      | 1.04E-07 | 1.23E-08 | -5.95 | 8.7706705 | -7.98E-02 | 72469551  | 72469674  | NC_000011.9  |
| ch.1.156669547F | 1.05E-07 | 1.23E-08 | -5.95 | 8.7701584 | -3.71E-02 | 158402923 | 158403046 | NC_000001.10 |
| cg16284684      | 1.05E-07 | 1.23E-08 | -5.95 | 8.7699923 | -7.87E-02 | 1164063   | 1164186   | NC_000007.13 |
| cg23638849      | 1.05E-07 | 1.23E-08 | -5.95 | 8.7688141 | -6.38E-02 | 70477184  | 70477307  | NC_000011.9  |

|            |          |          |       |           |           |           |           |              |
|------------|----------|----------|-------|-----------|-----------|-----------|-----------|--------------|
| cg20102673 | 1.05E-07 | 1.23E-08 | -5.95 | 8.768065  | -8.37E-02 | 49933539  | 49933662  | NC_000012.11 |
| cg17466346 | 1.05E-07 | 1.23E-08 | -5.95 | 8.7662004 | -6.56E-02 | 24516464  | 24516587  | NC_000007.13 |
| cg13705014 | 1.05E-07 | 1.23E-08 | -5.95 | 8.7658285 | -1.35E-01 | 139250888 | 139251011 | NC_000009.11 |
| cg25246084 | 1.05E-07 | 1.24E-08 | -5.95 | 8.765109  | -7.33E-02 | 4971487   | 4971610   | NC_000019.9  |
| cg17335001 | 1.05E-07 | 1.24E-08 | -5.95 | 8.7650145 | -4.82E-02 | 128846231 | 128846354 | NC_000010.10 |
| cg21791252 | 1.05E-07 | 1.24E-08 | -5.95 | 8.7644762 | -8.15E-02 | 33864756  | 33864879  | NC_000006.11 |
| cg17767484 | 1.05E-07 | 1.24E-08 | -5.95 | 8.7642669 | -1.14E-01 | 36238230  | 36238353  | NC_000006.11 |
| cg11411107 | 1.05E-07 | 1.24E-08 | -5.95 | 8.7639523 | -2.83E-02 | 160473611 | 160473734 | NC_000003.11 |
| cg19698273 | 1.05E-07 | 1.24E-08 | -5.95 | 8.7635594 | -8.07E-02 | 3908397   | 3908520   | NC_000019.9  |
| cg01719123 | 1.05E-07 | 1.24E-08 | -5.95 | 8.7625886 | -3.95E-02 | 28244050  | 28244173  | NC_000008.10 |
| cg18088242 | 1.05E-07 | 1.24E-08 | -5.95 | 8.7618477 | -1.45E-01 | 45422325  | 45422448  | NC_000015.9  |
| cg25080465 | 1.05E-07 | 1.24E-08 | -5.95 | 8.7614419 | -7.84E-02 | 104404115 | 104404238 | NC_000010.10 |
| cg06874399 | 1.05E-07 | 1.24E-08 | -5.95 | 8.7607926 | -2.93E-02 | 79704109  | 79704232  | NC_000005.9  |
| cg15782984 | 1.05E-07 | 1.24E-08 | -5.95 | 8.7606977 | -8.73E-02 | 35993792  | 35993915  | NC_000006.11 |
| cg23060709 | 1.05E-07 | 1.24E-08 | -5.95 | 8.7603707 | -5.64E-02 | 16440291  | 16440414  | NC_000017.10 |
| cg01727105 | 1.06E-07 | 1.24E-08 | -5.95 | 8.7596945 | -1.19E-01 | 85596697  | 85596820  | NC_000002.11 |
| cg14202825 | 1.06E-07 | 1.24E-08 | -5.95 | 8.7577674 | -1.96E-02 | 42622333  | 42622456  | NC_000013.10 |
| cg17250770 | 1.06E-07 | 1.25E-08 | -5.95 | 8.7571169 | -1.34E-01 | 22500401  | 22500524  | NC_000008.10 |
| cg25207721 | 1.06E-07 | 1.25E-08 | -5.95 | 8.7565663 | -2.21E-02 | 227751555 | 227751678 | NC_000001.10 |
| cg04489243 | 1.06E-07 | 1.25E-08 | -5.95 | 8.7565213 | -1.37E-01 | 189349129 | 189349252 | NC_000003.11 |
| cg23172664 | 1.06E-07 | 1.25E-08 | -5.95 | 8.7561134 | -1.42E-01 | 86169204  | 86169327  | NC_000006.11 |
| cg15456144 | 1.06E-07 | 1.25E-08 | -5.95 | 8.7560229 | -1.48E-01 | 93277178  | 93277301  | NC_000011.9  |
| cg15899410 | 1.06E-07 | 1.25E-08 | -5.95 | 8.7538597 | -4.85E-02 | 76136386  | 76136509  | NC_000015.9  |
| cg22138529 | 1.06E-07 | 1.25E-08 | -5.95 | 8.753416  | -7.04E-02 | 89438128  | 89438251  | NC_000015.9  |
| cg10810804 | 1.06E-07 | 1.25E-08 | -5.95 | 8.7528061 | -8.67E-02 | 1200097   | 1200220   | NC_000016.9  |

|               |          |          |       |           |           |           |           |              |
|---------------|----------|----------|-------|-----------|-----------|-----------|-----------|--------------|
| cg13247922    | 1.06E-07 | 1.25E-08 | -5.95 | 8.7521183 | -1.06E-01 | 68334960  | 68335083  | NC_000014.8  |
| cg19230443    | 1.06E-07 | 1.25E-08 | -5.95 | 8.7520907 | -4.10E-02 | 49950584  | 49950707  | NC_000019.9  |
| cg12015615    | 1.06E-07 | 1.25E-08 | -5.94 | 8.7511833 | -1.14E-01 | 55540725  | 55540848  | NC_000007.13 |
| cg05651511    | 1.07E-07 | 1.26E-08 | -5.94 | 8.7495356 | -1.57E-01 | 78754090  | 78754213  | NC_000017.10 |
| cg11007423    | 1.07E-07 | 1.26E-08 | -5.94 | 8.7492216 | -2.41E-02 | 51058114  | 51058237  | NC_000015.9  |
| cg18091385    | 1.07E-07 | 1.26E-08 | -5.94 | 8.7490486 | -9.80E-02 | 99502466  | 99502589  | NC_000014.8  |
| cg07778315    | 1.07E-07 | 1.26E-08 | -5.94 | 8.749031  | -8.71E-02 | 133380627 | 133380750 | NC_000012.11 |
| cg06876053    | 1.07E-07 | 1.26E-08 | -5.94 | 8.7490026 | -1.34E-01 | 9810051   | 9810174   | NC_000011.9  |
| cg18355337    | 1.07E-07 | 1.26E-08 | -5.94 | 8.7485407 | -1.74E-01 | 55549722  | 55549845  | NC_000019.9  |
| cg14720274    | 1.07E-07 | 1.26E-08 | -5.94 | 8.7483434 | -1.10E-01 | 61014131  | 61014254  | NC_000015.9  |
| cg09987889    | 1.07E-07 | 1.26E-08 | -5.94 | 8.7477434 | -1.20E-02 | 100660909 | 100661032 | NC_000007.13 |
| cg01016800    | 1.07E-07 | 1.26E-08 | -5.94 | 8.746669  | -6.50E-02 | 97802959  | 97803082  | NC_000010.10 |
| cg00119986    | 1.07E-07 | 1.26E-08 | -5.94 | 8.7446638 | -6.15E-02 | 37774457  | 37774580  | NC_000017.10 |
| cg14571194    | 1.07E-07 | 1.26E-08 | -5.94 | 8.7442031 | -5.42E-02 | 46385304  | 46385427  | NC_000018.9  |
| cg04701628    | 1.07E-07 | 1.26E-08 | -5.94 | 8.7441597 | -9.28E-02 | 31492263  | 31492386  | NC_000016.9  |
| cg26669410    | 1.07E-07 | 1.26E-08 | -5.94 | 8.7437246 | -2.50E-02 | 36023134  | 36023257  | NC_000001.10 |
| cg13284007    | 1.07E-07 | 1.26E-08 | -5.94 | 8.7426479 | -3.23E-02 | 53381865  | 53381988  | NC_000003.11 |
| cg19788308    | 1.07E-07 | 1.26E-08 | -5.94 | 8.7423137 | -3.94E-02 | 32443454  | 32443577  | NC_000003.11 |
| cg25344194    | 1.07E-07 | 1.26E-08 | -5.94 | 8.7420877 | -1.15E-01 | 76948389  | 76948512  | NC_000017.10 |
| cg02726883    | 1.07E-07 | 1.27E-08 | -5.94 | 8.7414131 | -3.84E-02 | 29421732  | 29421855  | NC_000017.10 |
| ch.7.1714607F | 1.08E-07 | 1.27E-08 | -5.94 | 8.7405331 | -5.11E-02 | 77818337  | 77818460  | NC_000007.13 |
| cg20989553    | 1.08E-07 | 1.27E-08 | -5.94 | 8.7401433 | -5.24E-02 | 185458775 | 185458898 | NC_000004.11 |
| cg26785823    | 1.08E-07 | 1.27E-08 | -5.94 | 8.7394734 | -8.59E-02 | 2482001   | 2482124   | NC_000001.10 |
| cg02684562    | 1.08E-07 | 1.27E-08 | -5.94 | 8.7392001 | -7.70E-02 | 26064950  | 26065073  | NC_000010.10 |
| cg05332483    | 1.08E-07 | 1.27E-08 | -5.94 | 8.7387827 | -8.74E-02 | 130959684 | 130959807 | NC_000010.10 |

|            |          |          |       |           |           |           |           |              |
|------------|----------|----------|-------|-----------|-----------|-----------|-----------|--------------|
| cg15203597 | 1.08E-07 | 1.27E-08 | -5.94 | 8.7380488 | -4.47E-02 | 91976656  | 91976779  | NC_000014.8  |
| cg16858125 | 1.08E-07 | 1.27E-08 | -5.94 | 8.7379994 | -1.31E-01 | 43834757  | 43834880  | NC_000001.10 |
| cg06812225 | 1.08E-07 | 1.27E-08 | -5.94 | 8.7376124 | -5.66E-02 | 204485782 | 204485905 | NC_000001.10 |
| cg06573096 | 1.08E-07 | 1.27E-08 | -5.94 | 8.7374363 | -1.82E-01 | 44811779  | 44811902  | NC_000013.10 |
| cg23979923 | 1.08E-07 | 1.27E-08 | -5.94 | 8.7372239 | -2.90E-02 | 90777592  | 90777715  | NC_000015.9  |
| cg05581469 | 1.08E-07 | 1.27E-08 | -5.94 | 8.7358192 | -1.11E-01 | 49413435  | 49413558  | NC_000012.11 |
| cg09494546 | 1.08E-07 | 1.27E-08 | -5.94 | 8.7348352 | -1.46E-01 | 110933248 | 110933371 | NC_000001.10 |
| cg00185413 | 1.08E-07 | 1.28E-08 | -5.94 | 8.7341967 | -1.24E-01 | 125927866 | 125927989 | NC_000003.11 |
| cg27126743 | 1.08E-07 | 1.28E-08 | -5.94 | 8.7328212 | -8.50E-02 | 74880654  | 74880777  | NC_000014.8  |
| cg06124876 | 1.08E-07 | 1.28E-08 | -5.94 | 8.7324395 | -1.14E-01 | 22721151  | 22721274  | NC_000001.10 |
| cg15488963 | 1.09E-07 | 1.28E-08 | -5.94 | 8.7307622 | -1.19E-01 | 106262226 | 106262349 | NC_000002.11 |
| cg19596273 | 1.09E-07 | 1.28E-08 | -5.94 | 8.7304041 | -6.60E-02 | 30724086  | 30724209  | NC_000010.10 |
| cg13551074 | 1.09E-07 | 1.28E-08 | -5.94 | 8.7298303 | -1.22E-01 | 243017952 | 243018075 | NC_000002.11 |
| cg15100630 | 1.09E-07 | 1.28E-08 | -5.94 | 8.7290551 | -2.79E-02 | 30524468  | 30524591  | NC_000006.11 |
| cg12595401 | 1.09E-07 | 1.28E-08 | -5.94 | 8.7284323 | -1.11E-01 | 27298344  | 27298467  | NC_000001.10 |
| cg00491404 | 1.09E-07 | 1.28E-08 | -5.94 | 8.7283757 | -1.23E-01 | 110306591 | 110306714 | NC_000001.10 |
| cg23084309 | 1.09E-07 | 1.28E-08 | -5.94 | 8.7279856 | -6.09E-02 | 6280164   | 6280287   | NC_000019.9  |
| cg13996426 | 1.09E-07 | 1.28E-08 | -5.94 | 8.7279388 | -3.83E-02 | 49756904  | 49757027  | NC_000003.11 |
| cg07824710 | 1.09E-07 | 1.28E-08 | -5.94 | 8.7269125 | -6.54E-02 | 150923535 | 150923658 | NC_000007.13 |
| cg27300804 | 1.09E-07 | 1.29E-08 | -5.94 | 8.7260364 | -6.09E-02 | 113976054 | 113976177 | NC_000013.10 |
| cg14619443 | 1.09E-07 | 1.29E-08 | -5.94 | 8.7254865 | -5.44E-02 | 6681415   | 6681538   | NC_000009.11 |
| cg16716189 | 1.09E-07 | 1.29E-08 | -5.94 | 8.7239813 | -8.42E-02 | 113261711 | 113261834 | NC_000001.10 |
| cg18449345 | 1.09E-07 | 1.29E-08 | -5.94 | 8.7239407 | -5.49E-02 | 30068347  | 30068470  | NC_000007.13 |
| cg06952297 | 1.09E-07 | 1.29E-08 | -5.94 | 8.7228235 | -9.32E-02 | 84730742  | 84730865  | NC_000016.9  |
| cg09301232 | 1.09E-07 | 1.29E-08 | -5.94 | 8.7225662 | -5.01E-02 | 100681129 | 100681252 | NC_000014.8  |



|            |          |          |       |           |           |           |           |              |
|------------|----------|----------|-------|-----------|-----------|-----------|-----------|--------------|
| cg17759093 | 1.09E-07 | 1.29E-08 | -5.94 | 8.7222729 | -1.41E-02 | 23402258  | 23402381  | NC_000020.10 |
| cg07291639 | 1.09E-07 | 1.29E-08 | -5.94 | 8.7215498 | -4.57E-02 | 105426001 | 105426124 | NC_000010.10 |
| cg02931753 | 1.09E-07 | 1.29E-08 | -5.94 | 8.7213805 | -3.60E-02 | 154074737 | 154074860 | NC_000004.11 |
| cg16572910 | 1.10E-07 | 1.29E-08 | -5.94 | 8.7205934 | -6.99E-02 | 43880657  | 43880780  | NC_000001.10 |
| cg13389460 | 1.10E-07 | 1.29E-08 | -5.94 | 8.7199851 | -3.35E-02 | 12080011  | 12080134  | NC_000001.10 |
| cg14244439 | 1.10E-07 | 1.29E-08 | -5.94 | 8.7194445 | -1.11E-01 | 94561075  | 94561198  | NC_000009.11 |
| cg24830730 | 1.10E-07 | 1.29E-08 | -5.94 | 8.7190832 | -1.54E-01 | 150653195 | 150653318 | NC_000007.13 |
| cg20406482 | 1.10E-07 | 1.30E-08 | -5.94 | 8.7186109 | -1.06E-01 | 40333521  | 40333644  | NC_000017.10 |
| cg11344352 | 1.10E-07 | 1.30E-08 | -5.94 | 8.7184568 | -1.40E-02 | 45927696  | 45927819  | NC_000019.9  |
| cg13878775 | 1.10E-07 | 1.30E-08 | -5.94 | 8.7182148 | -2.13E-02 | 242041740 | 242041863 | NC_000002.11 |
| cg10129154 | 1.10E-07 | 1.30E-08 | -5.94 | 8.7179832 | -8.78E-02 | 1093823   | 1093946   | NC_000016.9  |
| cg26912222 | 1.10E-07 | 1.30E-08 | -5.94 | 8.717339  | -7.59E-02 | 68000829  | 68000952  | NC_000016.9  |
| cg12589387 | 1.10E-07 | 1.30E-08 | -5.94 | 8.7171289 | -5.76E-02 | 61848140  | 61848263  | NC_000020.10 |
| cg04101117 | 1.10E-07 | 1.30E-08 | -5.94 | 8.7164389 | -5.84E-02 | 42719598  | 42719721  | NC_000012.11 |
| cg03367519 | 1.10E-07 | 1.30E-08 | -5.94 | 8.7164254 | -1.01E-01 | 58334910  | 58335033  | NC_000005.9  |
| cg15680557 | 1.10E-07 | 1.30E-08 | -5.94 | 8.7163819 | -3.37E-02 | 54704426  | 54704549  | NC_000019.9  |
| cg23274123 | 1.10E-07 | 1.30E-08 | -5.94 | 8.715687  | -6.35E-02 | 229478617 | 229478740 | NC_000001.10 |
| cg21078654 | 1.10E-07 | 1.30E-08 | -5.94 | 8.7145785 | -1.64E-01 | 52130305  | 52130428  | NC_000015.9  |
| cg07167594 | 1.10E-07 | 1.30E-08 | -5.94 | 8.7144806 | -1.21E-01 | 19010468  | 19010591  | NC_000022.10 |
| cg05841809 | 1.10E-07 | 1.30E-08 | -5.94 | 8.7139342 | -1.79E-02 | 90119362  | 90119485  | NC_000015.9  |
| cg04871472 | 1.10E-07 | 1.30E-08 | -5.94 | 8.7139282 | -9.52E-02 | 70268913  | 70269036  | NC_000002.11 |
| cg18106925 | 1.10E-07 | 1.30E-08 | -5.94 | 8.7137269 | -6.73E-02 | 145092485 | 145092608 | NC_000001.10 |
| cg20630605 | 1.10E-07 | 1.30E-08 | -5.94 | 8.7135145 | -5.86E-02 | 89010209  | 89010332  | NC_000015.9  |
| cg25182621 | 1.10E-07 | 1.30E-08 | -5.94 | 8.71207   | -1.07E-01 | 184097440 | 184097563 | NC_000003.11 |
| cg05683445 | 1.11E-07 | 1.31E-08 | -5.94 | 8.711119  | -4.85E-02 | 28303182  | 28303305  | NC_000016.9  |

|            |          |          |       |           |           |           |           |              |
|------------|----------|----------|-------|-----------|-----------|-----------|-----------|--------------|
| cg16205490 | 1.11E-07 | 1.31E-08 | -5.94 | 8.7107479 | -1.14E-01 | 119077241 | 119077364 | NC_000002.11 |
| cg20435594 | 1.11E-07 | 1.31E-08 | -5.94 | 8.7102706 | -9.70E-02 | 733141    | 733264    | NC_000011.9  |
| cg08684477 | 1.11E-07 | 1.31E-08 | -5.94 | 8.7100996 | -7.52E-02 | 87521410  | 87521533  | NC_000016.9  |
| cg05941631 | 1.11E-07 | 1.31E-08 | -5.94 | 8.7097618 | -7.27E-02 | 46521469  | 46521592  | NC_000002.11 |
| cg06447614 | 1.11E-07 | 1.31E-08 | -5.94 | 8.7095896 | -6.77E-02 | 1195491   | 1195614   | NC_000016.9  |
| cg15942368 | 1.11E-07 | 1.31E-08 | -5.94 | 8.7087875 | -5.53E-02 | 139118969 | 139119092 | NC_000007.13 |
| cg04766377 | 1.11E-07 | 1.31E-08 | -5.94 | 8.7084786 | -7.12E-02 | 38713606  | 38713729  | NC_000022.10 |
| cg18000638 | 1.11E-07 | 1.31E-08 | -5.94 | 8.7083154 | -2.56E-02 | 6502926   | 6503049   | NC_000011.9  |
| cg20895669 | 1.11E-07 | 1.31E-08 | -5.94 | 8.7071846 | -8.59E-02 | 113622539 | 113622662 | NC_000013.10 |
| cg16433860 | 1.11E-07 | 1.31E-08 | -5.94 | 8.706051  | -6.23E-02 | 50402640  | 50402763  | NC_000016.9  |
| cg09595356 | 1.11E-07 | 1.31E-08 | -5.94 | 8.7045787 | -6.75E-02 | 26659966  | 26660089  | NC_000006.11 |
| cg26222229 | 1.11E-07 | 1.31E-08 | -5.94 | 8.7045013 | -3.64E-02 | 36842844  | 36842967  | NC_000006.11 |
| cg26399411 | 1.11E-07 | 1.32E-08 | -5.94 | 8.7040658 | -1.00E-02 | 56174390  | 56174513  | NC_000007.13 |
| cg22807822 | 1.11E-07 | 1.32E-08 | -5.94 | 8.7031608 | -7.96E-02 | 11289365  | 11289488  | NC_000019.9  |
| cg13325666 | 1.11E-07 | 1.32E-08 | -5.94 | 8.7031555 | -2.08E-02 | 168227843 | 168227966 | NC_000006.11 |
| cg26627129 | 1.11E-07 | 1.32E-08 | -5.94 | 8.7031331 | -5.89E-02 | 49552470  | 49552593  | NC_000019.9  |
| cg19809039 | 1.12E-07 | 1.32E-08 | -5.94 | 8.7021199 | -6.50E-02 | 101918575 | 101918698 | NC_000011.9  |
| cg00630761 | 1.12E-07 | 1.32E-08 | -5.94 | 8.7019428 | -1.30E-01 | 94898169  | 94898292  | NC_000008.10 |
| cg10249703 | 1.12E-07 | 1.32E-08 | -5.94 | 8.7017164 | -9.90E-02 | 155025301 | 155025424 | NC_000001.10 |
| cg12072973 | 1.12E-07 | 1.32E-08 | -5.94 | 8.7016216 | -1.14E-01 | 150121727 | 150121850 | NC_000001.10 |
| cg05830842 | 1.12E-07 | 1.32E-08 | -5.94 | 8.701293  | -1.29E-01 | 121208681 | 121208804 | NC_000008.10 |
| cg11856215 | 1.12E-07 | 1.32E-08 | -5.93 | 8.7011053 | -3.04E-02 | 63535358  | 63535481  | NC_000011.9  |
| cg13363823 | 1.12E-07 | 1.32E-08 | -5.93 | 8.7008836 | -1.01E-01 | 40362907  | 40363030  | NC_000001.10 |
| cg06381123 | 1.12E-07 | 1.32E-08 | -5.93 | 8.7005555 | -2.48E-02 | 121302009 | 121302132 | NC_000010.10 |
| cg21904329 | 1.12E-07 | 1.32E-08 | -5.93 | 8.6986    | -9.27E-02 | 66549307  | 66549430  | NC_000015.9  |

|            |          |          |       |           |           |           |           |              |
|------------|----------|----------|-------|-----------|-----------|-----------|-----------|--------------|
| cg02573091 | 1.12E-07 | 1.32E-08 | -5.93 | 8.6984526 | -1.11E-01 | 74908125  | 74908248  | NC_000005.9  |
| cg17046776 | 1.12E-07 | 1.32E-08 | -5.93 | 8.698349  | -6.21E-02 | 8832283   | 8832406   | NC_000011.9  |
| cg06670612 | 1.12E-07 | 1.32E-08 | -5.93 | 8.6982144 | -2.43E-02 | 42082485  | 42082608  | NC_000019.9  |
| cg18980373 | 1.12E-07 | 1.32E-08 | -5.93 | 8.6972083 | -2.56E-02 | 67145803  | 67145926  | NC_000015.9  |
| cg27281191 | 1.12E-07 | 1.32E-08 | -5.93 | 8.697208  | -1.26E-01 | 226202912 | 226203035 | NC_000002.11 |
| cg27016307 | 1.12E-07 | 1.32E-08 | -5.93 | 8.6971489 | -1.21E-01 | 49658913  | 49659036  | NC_000019.9  |
| cg15850739 | 1.12E-07 | 1.32E-08 | -5.93 | 8.697052  | -8.39E-02 | 23692512  | 23692635  | NC_000015.9  |
| cg00628477 | 1.12E-07 | 1.32E-08 | -5.93 | 8.6967596 | -7.76E-02 | 30131821  | 30131944  | NC_000006.11 |
| cg08635395 | 1.12E-07 | 1.33E-08 | -5.93 | 8.6961273 | -1.27E-01 | 15747286  | 15747409  | NC_000016.9  |
| cg05970721 | 1.12E-07 | 1.33E-08 | -5.93 | 8.6958155 | -1.76E-01 | 22926625  | 22926748  | NC_000016.9  |
| cg03519451 | 1.12E-07 | 1.33E-08 | -5.93 | 8.6957831 | -3.29E-02 | 150780317 | 150780440 | NC_000007.13 |
| cg13832679 | 1.12E-07 | 1.33E-08 | -5.93 | 8.6955147 | -1.93E-02 | 111775862 | 111775985 | NC_000009.11 |
| cg02184338 | 1.12E-07 | 1.33E-08 | -5.93 | 8.694686  | -3.88E-02 | 101331866 | 101331989 | NC_000007.13 |
| cg14675200 | 1.12E-07 | 1.33E-08 | -5.93 | 8.6946166 | -5.48E-02 | 43328403  | 43328526  | NC_000013.10 |
| cg09856153 | 1.12E-07 | 1.33E-08 | -5.93 | 8.6945424 | -1.12E-01 | 1330936   | 1331059   | NC_000004.11 |
| cg03321813 | 1.12E-07 | 1.33E-08 | -5.93 | 8.6938249 | -9.47E-02 | 84257153  | 84257276  | NC_000004.11 |
| cg11185549 | 1.12E-07 | 1.33E-08 | -5.93 | 8.693233  | -1.28E-01 | 116996871 | 116996994 | NC_000012.11 |
| cg04273573 | 1.12E-07 | 1.33E-08 | -5.93 | 8.6932256 | -8.65E-02 | 2197265   | 2197388   | NC_000005.9  |
| cg16379311 | 1.13E-07 | 1.33E-08 | -5.93 | 8.6914632 | -1.79E-02 | 59665233  | 59665356  | NC_000015.9  |
| cg18302933 | 1.13E-07 | 1.33E-08 | -5.93 | 8.6912963 | -9.05E-02 | 88491318  | 88491441  | NC_000002.11 |
| cg00863318 | 1.13E-07 | 1.33E-08 | -5.93 | 8.6902332 | -7.44E-02 | 1143738   | 1143861   | NC_000004.11 |
| cg11087503 | 1.13E-07 | 1.33E-08 | -5.93 | 8.6899754 | -7.59E-02 | 52499897  | 52500020  | NC_000014.8  |
| cg19457823 | 1.13E-07 | 1.34E-08 | -5.93 | 8.6889466 | -1.02E-01 | 142692961 | 142693084 | NC_000005.9  |
| cg15090036 | 1.13E-07 | 1.34E-08 | -5.93 | 8.6889429 | -9.15E-02 | 48706075  | 48706198  | NC_000017.10 |
| cg09559373 | 1.13E-07 | 1.34E-08 | -5.93 | 8.6880999 | -4.99E-02 | 1626649   | 1626772   | NC_000019.9  |

|            |          |          |       |           |           |           |           |              |
|------------|----------|----------|-------|-----------|-----------|-----------|-----------|--------------|
| cg02426324 | 1.13E-07 | 1.34E-08 | -5.93 | 8.6876549 | -1.08E-01 | 40680454  | 40680577  | NC_000007.13 |
| cg02500691 | 1.13E-07 | 1.34E-08 | -5.93 | 8.6865914 | -1.07E-01 | 79476186  | 79476309  | NC_000017.10 |
| cg19913626 | 1.13E-07 | 1.34E-08 | -5.93 | 8.6863784 | -1.01E-01 | 49533357  | 49533480  | NC_000008.10 |
| cg02045285 | 1.13E-07 | 1.34E-08 | -5.93 | 8.6856332 | -3.66E-02 | 36861674  | 36861797  | NC_000017.10 |
| cg14241323 | 1.13E-07 | 1.34E-08 | -5.93 | 8.6854746 | -4.03E-02 | 13824002  | 13824125  | NC_000018.9  |
| cg12462720 | 1.13E-07 | 1.34E-08 | -5.93 | 8.6852439 | -9.68E-02 | 62739073  | 62739196  | NC_000020.10 |
| cg24718819 | 1.13E-07 | 1.34E-08 | -5.93 | 8.6845785 | -1.48E-02 | 194033680 | 194033803 | NC_000003.11 |
| cg13782884 | 1.13E-07 | 1.34E-08 | -5.93 | 8.6839734 | -8.62E-02 | 27339287  | 27339410  | NC_000001.10 |
| cg13201342 | 1.13E-07 | 1.34E-08 | -5.93 | 8.6839502 | -1.05E-01 | 150782303 | 150782426 | NC_000001.10 |
| cg14253899 | 1.13E-07 | 1.34E-08 | -5.93 | 8.6834152 | -1.89E-02 | 55878235  | 55878358  | NC_000014.8  |
| cg02448805 | 1.14E-07 | 1.35E-08 | -5.93 | 8.6818056 | -8.65E-02 | 168916275 | 168916398 | NC_000006.11 |
| cg18986335 | 1.14E-07 | 1.35E-08 | -5.93 | 8.6815165 | -1.20E-01 | 156846983 | 156847106 | NC_000003.11 |
| cg20318748 | 1.14E-07 | 1.35E-08 | -5.93 | 8.6810221 | -6.85E-02 | 25605178  | 25605301  | NC_000020.10 |
| cg03478444 | 1.14E-07 | 1.35E-08 | -5.93 | 8.6809349 | -1.24E-01 | 49407465  | 49407588  | NC_000016.9  |
| cg27025758 | 1.14E-07 | 1.35E-08 | -5.93 | 8.680463  | -6.59E-02 | 112408447 | 112408570 | NC_000006.11 |
| cg06621126 | 1.14E-07 | 1.35E-08 | -5.93 | 8.6802867 | -1.15E-01 | 67198243  | 67198366  | NC_000016.9  |
| cg12431891 | 1.14E-07 | 1.35E-08 | -5.93 | 8.6793627 | -1.26E-01 | 114958699 | 114958822 | NC_000003.11 |
| cg15089806 | 1.14E-07 | 1.35E-08 | -5.93 | 8.6791255 | -1.10E-01 | 43418199  | 43418322  | NC_000001.10 |
| cg04469731 | 1.14E-07 | 1.35E-08 | -5.93 | 8.678311  | -1.38E-01 | 129992359 | 129992482 | NC_000011.9  |
| cg07691200 | 1.14E-07 | 1.35E-08 | -5.93 | 8.6781415 | -2.50E-02 | 34916224  | 34916347  | NC_000005.9  |
| cg15152912 | 1.14E-07 | 1.35E-08 | -5.93 | 8.6780993 | -1.05E-01 | 154585539 | 154585662 | NC_000007.13 |
| cg09844976 | 1.14E-07 | 1.35E-08 | -5.93 | 8.6777085 | -1.19E-01 | 148188454 | 148188577 | NC_000005.9  |
| cg10515414 | 1.14E-07 | 1.35E-08 | -5.93 | 8.6774654 | -2.99E-02 | 15650268  | 15650391  | NC_000001.10 |
| cg07643942 | 1.14E-07 | 1.35E-08 | -5.93 | 8.6768303 | -1.18E-01 | 55029147  | 55029270  | NC_000012.11 |
| cg18618815 | 1.14E-07 | 1.35E-08 | -5.93 | 8.6766482 | -1.17E-01 | 48275324  | 48275447  | NC_000017.10 |

|            |          |          |       |           |           |           |           |              |
|------------|----------|----------|-------|-----------|-----------|-----------|-----------|--------------|
| cg23274984 | 1.14E-07 | 1.35E-08 | -5.93 | 8.6758549 | -1.31E-01 | 129636330 | 129636453 | NC_000002.11 |
| cg05568454 | 1.14E-07 | 1.36E-08 | -5.93 | 8.6747335 | -1.30E-01 | 30567189  | 30567312  | NC_000011.9  |
| cg14319451 | 1.15E-07 | 1.36E-08 | -5.93 | 8.6736933 | -7.02E-02 | 63685777  | 63685900  | NC_000011.9  |
| cg27023075 | 1.15E-07 | 1.36E-08 | -5.93 | 8.6734263 | -2.96E-02 | 18720484  | 18720607  | NC_000011.9  |
| cg23026543 | 1.15E-07 | 1.36E-08 | -5.93 | 8.6730418 | -1.21E-01 | 70203221  | 70203344  | NC_000007.13 |
| cg02479296 | 1.15E-07 | 1.36E-08 | -5.93 | 8.6729409 | -4.68E-02 | 26301927  | 26302050  | NC_000015.9  |
| cg05055001 | 1.15E-07 | 1.36E-08 | -5.93 | 8.6728439 | -1.13E-01 | 30649039  | 30649162  | NC_000014.8  |
| cg06437740 | 1.15E-07 | 1.36E-08 | -5.93 | 8.6727613 | -1.10E-01 | 48575927  | 48576050  | NC_000013.10 |
| cg02873263 | 1.15E-07 | 1.36E-08 | -5.93 | 8.6725837 | -6.70E-02 | 70476756  | 70476879  | NC_000014.8  |
| cg05928849 | 1.15E-07 | 1.36E-08 | -5.93 | 8.672281  | -1.12E-01 | 122993208 | 122993331 | NC_000011.9  |
| cg16517021 | 1.15E-07 | 1.36E-08 | -5.93 | 8.6711851 | -2.20E-02 | 11945358  | 11945481  | NC_000016.9  |
| cg23254184 | 1.15E-07 | 1.36E-08 | -5.93 | 8.6711287 | -4.61E-02 | 53620237  | 53620360  | NC_000014.8  |
| cg02656594 | 1.15E-07 | 1.36E-08 | -5.93 | 8.670983  | -1.29E-01 | 27412496  | 27412619  | NC_000016.9  |
| cg01289561 | 1.15E-07 | 1.36E-08 | -5.93 | 8.6701925 | -5.86E-02 | 138066559 | 138066682 | NC_000003.11 |
| cg10099364 | 1.15E-07 | 1.36E-08 | -5.93 | 8.670002  | -4.56E-02 | 32899426  | 32899549  | NC_000020.10 |
| cg01675953 | 1.15E-07 | 1.36E-08 | -5.93 | 8.6694223 | -6.59E-02 | 113698931 | 113699054 | NC_000013.10 |
| cg09491944 | 1.15E-07 | 1.36E-08 | -5.93 | 8.6688537 | -1.17E-01 | 180881175 | 180881298 | NC_000002.11 |
| cg12893361 | 1.15E-07 | 1.36E-08 | -5.93 | 8.6688026 | -2.05E-02 | 122124854 | 122124977 | NC_000012.11 |
| cg14456143 | 1.15E-07 | 1.36E-08 | -5.93 | 8.6680026 | -1.26E-01 | 17938848  | 17938971  | NC_000002.11 |
| cg13277380 | 1.15E-07 | 1.37E-08 | -5.93 | 8.6676015 | -8.29E-02 | 101662021 | 101662144 | NC_000008.10 |
| cg21369988 | 1.15E-07 | 1.37E-08 | -5.93 | 8.6669659 | -2.51E-02 | 30907191  | 30907314  | NC_000012.11 |
| cg03364015 | 1.15E-07 | 1.37E-08 | -5.93 | 8.665232  | -5.28E-02 | 69454423  | 69454546  | NC_000011.9  |
| cg11754314 | 1.16E-07 | 1.37E-08 | -5.93 | 8.6650422 | -2.41E-02 | 67121010  | 67121133  | NC_000011.9  |
| cg04071118 | 1.16E-07 | 1.37E-08 | -5.93 | 8.6647208 | -4.70E-02 | 37555933  | 37556056  | NC_000020.10 |
| cg06193988 | 1.16E-07 | 1.37E-08 | -5.93 | 8.6639718 | -2.42E-02 | 10442521  | 10442644  | NC_000002.11 |

|            |          |          |       |           |           |           |           |              |
|------------|----------|----------|-------|-----------|-----------|-----------|-----------|--------------|
| cg12187567 | 1.16E-07 | 1.37E-08 | -5.93 | 8.6636558 | -2.15E-02 | 95907389  | 95907512  | NC_000008.10 |
| cg10938556 | 1.16E-07 | 1.37E-08 | -5.93 | 8.6636429 | -1.11E-01 | 105126275 | 105126398 | NC_000014.8  |
| cg21029631 | 1.16E-07 | 1.37E-08 | -5.93 | 8.6635851 | -1.03E-01 | 240752524 | 240752647 | NC_000002.11 |
| cg17201651 | 1.16E-07 | 1.37E-08 | -5.93 | 8.6631406 | -1.05E-01 | 111683631 | 111683754 | NC_000010.10 |
| cg01395499 | 1.16E-07 | 1.37E-08 | -5.93 | 8.6631073 | -1.09E-01 | 204982603 | 204982726 | NC_000001.10 |
| cg20865151 | 1.16E-07 | 1.37E-08 | -5.93 | 8.6623899 | -3.04E-02 | 6724842   | 6724965   | NC_000006.11 |
| cg26870536 | 1.16E-07 | 1.37E-08 | -5.93 | 8.6618046 | -6.36E-02 | 22988442  | 22988565  | NC_000019.9  |
| cg09578113 | 1.16E-07 | 1.37E-08 | -5.93 | 8.6616238 | -8.97E-02 | 47420152  | 47420275  | NC_000007.13 |
| cg08541497 | 1.16E-07 | 1.37E-08 | -5.93 | 8.6613332 | -1.14E-01 | 124253829 | 124253952 | NC_000008.10 |
| cg07178379 | 1.16E-07 | 1.37E-08 | -5.93 | 8.6610818 | -6.54E-02 | 76506902  | 76507025  | NC_000011.9  |
| cg11676325 | 1.16E-07 | 1.38E-08 | -5.93 | 8.6604567 | -7.93E-02 | 10621091  | 10621214  | NC_000019.9  |
| cg03301240 | 1.16E-07 | 1.38E-08 | -5.93 | 8.6601579 | -9.00E-02 | 47400330  | 47400453  | NC_000011.9  |
| cg26939721 | 1.16E-07 | 1.38E-08 | -5.93 | 8.6594797 | -7.22E-02 | 25108042  | 25108165  | NC_000015.9  |
| cg25096745 | 1.16E-07 | 1.38E-08 | -5.93 | 8.6594565 | -1.24E-01 | 35195513  | 35195636  | NC_000011.9  |
| cg01381829 | 1.16E-07 | 1.38E-08 | -5.93 | 8.6592725 | -1.24E-01 | 40573054  | 40573177  | NC_000022.10 |
| cg01988827 | 1.16E-07 | 1.38E-08 | -5.93 | 8.6591735 | -3.40E-02 | 69864077  | 69864200  | NC_000012.11 |
| cg07651906 | 1.16E-07 | 1.38E-08 | -5.93 | 8.6589709 | -3.06E-02 | 15848828  | 15848951  | NC_000017.10 |
| cg00210856 | 1.16E-07 | 1.38E-08 | -5.93 | 8.6589564 | -1.35E-01 | 158466226 | 158466349 | NC_000005.9  |
| cg27265307 | 1.16E-07 | 1.38E-08 | -5.93 | 8.6585962 | -1.22E-01 | 67220318  | 67220441  | NC_000011.9  |
| cg14222630 | 1.16E-07 | 1.38E-08 | -5.93 | 8.6579536 | -1.39E-01 | 127961717 | 127961840 | NC_000009.11 |
| cg17396797 | 1.16E-07 | 1.38E-08 | -5.93 | 8.6578992 | -1.28E-01 | 241851501 | 241851624 | NC_000002.11 |
| cg01349370 | 1.16E-07 | 1.38E-08 | -5.93 | 8.6577578 | -3.76E-02 | 31587814  | 31587937  | NC_000006.11 |
| cg24187645 | 1.16E-07 | 1.38E-08 | -5.93 | 8.6577338 | -9.94E-02 | 140959388 | 140959511 | NC_000003.11 |
| cg23863157 | 1.16E-07 | 1.38E-08 | -5.93 | 8.6572675 | -1.41E-01 | 166678822 | 166678945 | NC_000004.11 |
| cg13055278 | 1.16E-07 | 1.38E-08 | -5.93 | 8.6570874 | -5.58E-02 | 8822288   | 8822411   | NC_000002.11 |

|               |          |          |       |           |           |           |           |              |
|---------------|----------|----------|-------|-----------|-----------|-----------|-----------|--------------|
| cg04260633    | 1.16E-07 | 1.38E-08 | -5.93 | 8.6568714 | -8.10E-02 | 2687305   | 2687428   | NC_000007.13 |
| cg20310759    | 1.16E-07 | 1.38E-08 | -5.93 | 8.6567024 | -6.95E-02 | 87618313  | 87618436  | NC_000001.10 |
| cg25320499    | 1.16E-07 | 1.38E-08 | -5.93 | 8.6566143 | -8.54E-02 | 113052563 | 113052686 | NC_000001.10 |
| cg12063218    | 1.16E-07 | 1.38E-08 | -5.93 | 8.6561043 | -6.23E-02 | 34638859  | 34638982  | NC_000020.10 |
| cg08913410    | 1.16E-07 | 1.38E-08 | -5.93 | 8.6559715 | -1.07E-01 | 30726859  | 30726982  | NC_000007.13 |
| cg21919819    | 1.16E-07 | 1.38E-08 | -5.93 | 8.6558466 | -7.94E-02 | 100275737 | 100275860 | NC_000014.8  |
| cg00968038    | 1.17E-07 | 1.38E-08 | -5.93 | 8.6537557 | -1.47E-02 | 21151021  | 21151144  | NC_000014.8  |
| cg24542714    | 1.17E-07 | 1.39E-08 | -5.93 | 8.6524072 | -1.26E-01 | 46669345  | 46669468  | NC_000001.10 |
| cg11564483    | 1.17E-07 | 1.39E-08 | -5.93 | 8.6523291 | -3.25E-02 | 37401398  | 37401521  | NC_000006.11 |
| cg13995427    | 1.17E-07 | 1.39E-08 | -5.93 | 8.6514485 | -1.59E-01 | 117134861 | 117134984 | NC_000009.11 |
| cg00050692    | 1.17E-07 | 1.39E-08 | -5.93 | 8.6510343 | -1.35E-01 | 25524877  | 25525000  | NC_000002.11 |
| cg02923021    | 1.17E-07 | 1.39E-08 | -5.93 | 8.6510184 | -6.27E-02 | 854974    | 855097    | NC_000008.10 |
| cg00177127    | 1.17E-07 | 1.39E-08 | -5.92 | 8.6496253 | -9.21E-02 | 22927146  | 22927269  | NC_000001.10 |
| cg21369466    | 1.17E-07 | 1.39E-08 | -5.92 | 8.6488874 | -9.97E-02 | 55437329  | 55437452  | NC_000007.13 |
| cg07235652    | 1.17E-07 | 1.39E-08 | -5.92 | 8.6480516 | -2.52E-02 | 109531354 | 109531477 | NC_000012.11 |
| cg10347474    | 1.17E-07 | 1.39E-08 | -5.92 | 8.6479257 | -6.06E-02 | 45209045  | 45209168  | NC_000021.8  |
| cg17157894    | 1.17E-07 | 1.39E-08 | -5.92 | 8.6476698 | -1.60E-01 | 47187343  | 47187466  | NC_000022.10 |
| cg07875121    | 1.17E-07 | 1.39E-08 | -5.92 | 8.6473795 | -1.05E-01 | 139641530 | 139641653 | NC_000005.9  |
| cg20602628    | 1.17E-07 | 1.39E-08 | -5.92 | 8.6469769 | -4.99E-02 | 138156475 | 138156598 | NC_000002.11 |
| cg22202264    | 1.17E-07 | 1.39E-08 | -5.92 | 8.6469589 | -1.13E-01 | 133816022 | 133816145 | NC_000011.9  |
| cg14063331    | 1.17E-07 | 1.39E-08 | -5.92 | 8.6469416 | -7.59E-02 | 17717790  | 17717913  | NC_000019.9  |
| ch.1.3533065R | 1.17E-07 | 1.39E-08 | -5.92 | 8.6468883 | -2.29E-02 | 180941111 | 180941234 | NC_000001.10 |
| cg09555706    | 1.18E-07 | 1.39E-08 | -5.92 | 8.6465136 | -1.22E-01 | 1160897   | 1161020   | NC_000004.11 |
| cg15832311    | 1.18E-07 | 1.39E-08 | -5.92 | 8.6464564 | -3.07E-02 | 242675047 | 242675170 | NC_000002.11 |
| cg00238994    | 1.18E-07 | 1.40E-08 | -5.92 | 8.6460976 | -2.64E-02 | 2977310   | 2977433   | NC_000019.9  |

|               |          |          |       |           |           |           |           |              |
|---------------|----------|----------|-------|-----------|-----------|-----------|-----------|--------------|
| cg10959999    | 1.18E-07 | 1.40E-08 | -5.92 | 8.6458447 | -8.30E-02 | 133647103 | 133647226 | NC_000003.11 |
| cg12675571    | 1.18E-07 | 1.40E-08 | -5.92 | 8.6440473 | -1.40E-01 | 148808721 | 148808844 | NC_000005.9  |
| cg16726869    | 1.18E-07 | 1.40E-08 | -5.92 | 8.6439643 | -1.20E-01 | 127454704 | 127454827 | NC_000004.11 |
| cg08655953    | 1.18E-07 | 1.40E-08 | -5.92 | 8.641988  | -1.26E-01 | 2425888   | 2426011   | NC_000001.10 |
| cg07081054    | 1.18E-07 | 1.40E-08 | -5.92 | 8.6402654 | -5.37E-02 | 52978409  | 52978532  | NC_000017.10 |
| cg17046586    | 1.18E-07 | 1.40E-08 | -5.92 | 8.6402189 | -1.29E-01 | 50665774  | 50665897  | NC_000012.11 |
| cg15124109    | 1.18E-07 | 1.40E-08 | -5.92 | 8.640047  | -3.48E-02 | 156711332 | 156711455 | NC_000001.10 |
| cg00500100    | 1.18E-07 | 1.41E-08 | -5.92 | 8.6393256 | -7.93E-02 | 140098250 | 140098373 | NC_000005.9  |
| cg21689613    | 1.18E-07 | 1.41E-08 | -5.92 | 8.6391495 | -5.54E-02 | 40950290  | 40950413  | NC_000017.10 |
| cg03282295    | 1.18E-07 | 1.41E-08 | -5.92 | 8.6388882 | -8.07E-02 | 17418420  | 17418543  | NC_000006.11 |
| cg00610360    | 1.18E-07 | 1.41E-08 | -5.92 | 8.6387279 | -1.21E-01 | 99186904  | 99187027  | NC_000015.9  |
| cg05973317    | 1.19E-07 | 1.41E-08 | -5.92 | 8.637613  | -9.31E-02 | 142437236 | 142437359 | NC_000008.10 |
| cg08317252    | 1.19E-07 | 1.41E-08 | -5.92 | 8.6376087 | -8.37E-02 | 1223163   | 1223286   | NC_000019.9  |
| cg10631356    | 1.19E-07 | 1.41E-08 | -5.92 | 8.6376012 | -1.23E-01 | 34517541  | 34517664  | NC_000011.9  |
| cg11941630    | 1.19E-07 | 1.41E-08 | -5.92 | 8.6374284 | -1.14E-01 | 1283388   | 1283511   | NC_000020.10 |
| cg05614267    | 1.19E-07 | 1.41E-08 | -5.92 | 8.6373446 | -3.92E-02 | 69373129  | 69373252  | NC_000016.9  |
| cg01518398    | 1.19E-07 | 1.41E-08 | -5.92 | 8.6365446 | -7.04E-02 | 74406523  | 74406646  | NC_000002.11 |
| cg18167829    | 1.19E-07 | 1.41E-08 | -5.92 | 8.6363567 | -5.64E-02 | 49561318  | 49561441  | NC_000019.9  |
| cg09990194    | 1.19E-07 | 1.41E-08 | -5.92 | 8.6352573 | -1.49E-01 | 76289228  | 76289351  | NC_000014.8  |
| cg24793052    | 1.19E-07 | 1.41E-08 | -5.92 | 8.6348364 | -2.56E-02 | 58331460  | 58331583  | NC_000019.9  |
| cg04100595    | 1.19E-07 | 1.41E-08 | -5.92 | 8.6347706 | -1.82E-01 | 27615138  | 27615261  | NC_000012.11 |
| ch.3.3564705F | 1.19E-07 | 1.41E-08 | -5.92 | 8.6347519 | -5.56E-02 | 183104543 | 183104666 | NC_000003.11 |
| cg27478863    | 1.19E-07 | 1.41E-08 | -5.92 | 8.6335342 | -1.43E-01 | 50783080  | 50783203  | NC_000013.10 |
| cg00961640    | 1.19E-07 | 1.42E-08 | -5.92 | 8.6316475 | -1.47E-01 | 110933767 | 110933890 | NC_000001.10 |
| cg17257944    | 1.19E-07 | 1.42E-08 | -5.92 | 8.63133   | -3.95E-02 | 11836937  | 11837060  | NC_000016.9  |



|                 |          |          |       |           |           |           |           |              |
|-----------------|----------|----------|-------|-----------|-----------|-----------|-----------|--------------|
| cg14080940      | 1.19E-07 | 1.42E-08 | -5.92 | 8.6310877 | -5.31E-02 | 79944542  | 79944665  | NC_000006.11 |
| cg15442419      | 1.19E-07 | 1.42E-08 | -5.92 | 8.6298238 | -3.42E-02 | 10412797  | 10412920  | NC_000006.11 |
| cg10102736      | 1.19E-07 | 1.42E-08 | -5.92 | 8.6292062 | -9.32E-02 | 23661899  | 23662022  | NC_000015.9  |
| cg08458487      | 1.20E-07 | 1.42E-08 | -5.92 | 8.6283816 | -1.33E-01 | 81709191  | 81709314  | NC_000010.10 |
| cg02927042      | 1.20E-07 | 1.42E-08 | -5.92 | 8.6280384 | -1.44E-01 | 21476669  | 21476792  | NC_000001.10 |
| cg23178322      | 1.20E-07 | 1.42E-08 | -5.92 | 8.6278929 | -4.40E-02 | 7518094   | 7518217   | NC_000017.10 |
| cg22796363      | 1.20E-07 | 1.42E-08 | -5.92 | 8.6275708 | -1.06E-01 | 214477063 | 214477186 | NC_000001.10 |
| cg09624525      | 1.20E-07 | 1.42E-08 | -5.92 | 8.6275589 | -5.57E-02 | 49549887  | 49550010  | NC_000013.10 |
| cg03060986      | 1.20E-07 | 1.42E-08 | -5.92 | 8.6275191 | -1.12E-01 | 60309590  | 60309713  | NC_000003.11 |
| ch.15.67797584R | 1.20E-07 | 1.42E-08 | -5.92 | 8.6271992 | -8.48E-02 | 70010530  | 70010653  | NC_000015.9  |
| cg06856720      | 1.20E-07 | 1.42E-08 | -5.92 | 8.6264271 | -1.39E-01 | 19870217  | 19870340  | NC_000020.10 |
| cg13299324      | 1.20E-07 | 1.43E-08 | -5.92 | 8.6247327 | -9.56E-02 | 40145949  | 40146072  | NC_000021.8  |
| cg07684796      | 1.20E-07 | 1.43E-08 | -5.92 | 8.6235745 | -6.28E-02 | 54074209  | 54074332  | NC_000010.10 |
| cg15169286      | 1.20E-07 | 1.43E-08 | -5.92 | 8.6235303 | -1.16E-01 | 36417932  | 36418055  | NC_000005.9  |
| cg15460348      | 1.20E-07 | 1.43E-08 | -5.92 | 8.6231874 | -1.67E-01 | 88896909  | 88897032  | NC_000004.11 |
| cg10040355      | 1.20E-07 | 1.43E-08 | -5.92 | 8.6230864 | -1.34E-01 | 12990366  | 12990489  | NC_000012.11 |
| cg25306006      | 1.20E-07 | 1.43E-08 | -5.92 | 8.6224535 | -9.41E-02 | 71932630  | 71932753  | NC_000011.9  |
| cg14235030      | 1.20E-07 | 1.43E-08 | -5.92 | 8.6209374 | -4.56E-02 | 37121269  | 37121392  | NC_000009.11 |
| cg22430700      | 1.20E-07 | 1.43E-08 | -5.92 | 8.6202266 | -9.91E-02 | 180511495 | 180511618 | NC_000001.10 |
| cg05517964      | 1.21E-07 | 1.43E-08 | -5.92 | 8.6200061 | -7.89E-02 | 65790280  | 65790403  | NC_000011.9  |
| cg00754027      | 1.21E-07 | 1.43E-08 | -5.92 | 8.6198941 | -4.66E-02 | 200590459 | 200590582 | NC_000001.10 |
| cg17864730      | 1.21E-07 | 1.43E-08 | -5.92 | 8.6195473 | -1.70E-02 | 20370899  | 20371022  | NC_000007.13 |
| cg15583517      | 1.21E-07 | 1.43E-08 | -5.92 | 8.6194971 | -1.09E-01 | 52051142  | 52051265  | NC_000015.9  |
| cg10696351      | 1.21E-07 | 1.43E-08 | -5.92 | 8.6193889 | -1.30E-01 | 41227982  | 41228105  | NC_000013.10 |
| cg07928378      | 1.21E-07 | 1.43E-08 | -5.92 | 8.6188791 | -1.22E-01 | 124989278 | 124989401 | NC_000012.11 |

|                |          |          |       |           |           |           |           |              |
|----------------|----------|----------|-------|-----------|-----------|-----------|-----------|--------------|
| cg23832497     | 1.21E-07 | 1.44E-08 | -5.92 | 8.6182447 | -7.31E-02 | 121655383 | 121655506 | NC_000006.11 |
| cg22369786     | 1.21E-07 | 1.44E-08 | -5.92 | 8.6175606 | -1.45E-01 | 80911626  | 80911749  | NC_000013.10 |
| cg24159435     | 1.21E-07 | 1.44E-08 | -5.92 | 8.6161234 | -5.11E-02 | 128840686 | 128840809 | NC_000003.11 |
| cg03158772     | 1.21E-07 | 1.44E-08 | -5.92 | 8.6158562 | -8.76E-02 | 14768188  | 14768311  | NC_000003.11 |
| cg08143133     | 1.21E-07 | 1.44E-08 | -5.92 | 8.6155482 | -6.33E-02 | 32598570  | 32598693  | NC_000022.10 |
| cg24153003     | 1.21E-07 | 1.44E-08 | -5.92 | 8.6147755 | -7.93E-02 | 151736681 | 151736804 | NC_000001.10 |
| cg03329603     | 1.21E-07 | 1.44E-08 | -5.92 | 8.6129848 | -9.21E-02 | 31698657  | 31698780  | NC_000006.11 |
| cg13030634     | 1.21E-07 | 1.45E-08 | -5.92 | 8.611886  | -5.38E-02 | 130954073 | 130954196 | NC_000011.9  |
| cg24524850     | 1.21E-07 | 1.45E-08 | -5.92 | 8.611572  | -3.20E-02 | 44496039  | 44496162  | NC_000001.10 |
| cg06320175     | 1.21E-07 | 1.45E-08 | -5.92 | 8.6114333 | -4.64E-02 | 172255540 | 172255663 | NC_000001.10 |
| cg03218192     | 1.22E-07 | 1.45E-08 | -5.92 | 8.6113117 | -7.88E-02 | 33914403  | 33914526  | NC_000017.10 |
| cg12610972     | 1.22E-07 | 1.45E-08 | -5.92 | 8.6111945 | -2.59E-02 | 94138947  | 94139070  | NC_000007.13 |
| cg00736283     | 1.22E-07 | 1.45E-08 | -5.92 | 8.6110336 | -3.47E-02 | 14247601  | 14247724  | NC_000019.9  |
| ch.1.93237475F | 1.22E-07 | 1.45E-08 | -5.92 | 8.6106194 | -2.29E-02 | 93464887  | 93465010  | NC_000001.10 |
| cg11718135     | 1.22E-07 | 1.45E-08 | -5.92 | 8.6105728 | -3.59E-02 | 192110830 | 192110953 | NC_000002.11 |
| cg21618521     | 1.22E-07 | 1.45E-08 | -5.92 | 8.6095538 | -1.22E-01 | 33245770  | 33245893  | NC_000006.11 |
| cg23525243     | 1.22E-07 | 1.45E-08 | -5.92 | 8.6091657 | -1.60E-01 | 11385735  | 11385858  | NC_000005.9  |
| cg13398470     | 1.22E-07 | 1.45E-08 | -5.92 | 8.6081707 | -1.08E-01 | 27862840  | 27862963  | NC_000008.10 |
| cg17218041     | 1.22E-07 | 1.45E-08 | -5.92 | 8.6078675 | -9.23E-02 | 113365319 | 113365442 | NC_000013.10 |
| cg07522403     | 1.22E-07 | 1.45E-08 | -5.92 | 8.6072138 | -1.43E-01 | 66105984  | 66106107  | NC_000007.13 |
| cg02664162     | 1.22E-07 | 1.45E-08 | -5.92 | 8.6070786 | -2.13E-02 | 49469375  | 49469498  | NC_000019.9  |
| cg26174807     | 1.22E-07 | 1.45E-08 | -5.92 | 8.606742  | -8.46E-02 | 159992037 | 159992160 | NC_000004.11 |
| cg06989074     | 1.22E-07 | 1.45E-08 | -5.92 | 8.6063265 | -1.41E-01 | 68133177  | 68133300  | NC_000011.9  |
| cg17446956     | 1.22E-07 | 1.45E-08 | -5.92 | 8.6059893 | -6.82E-02 | 109235032 | 109235155 | NC_000012.11 |
| cg04875062     | 1.22E-07 | 1.45E-08 | -5.92 | 8.6053845 | -8.35E-02 | 17305562  | 17305685  | NC_000001.10 |

|            |          |          |       |           |           |           |           |              |
|------------|----------|----------|-------|-----------|-----------|-----------|-----------|--------------|
| cg10246531 | 1.22E-07 | 1.46E-08 | -5.92 | 8.6047216 | -8.73E-02 | 88717628  | 88717751  | NC_000016.9  |
| cg00043599 | 1.22E-07 | 1.46E-08 | -5.92 | 8.6038909 | -8.89E-02 | 45274600  | 45274723  | NC_000001.10 |
| cg14778437 | 1.22E-07 | 1.46E-08 | -5.92 | 8.6035559 | -1.08E-01 | 100148404 | 100148527 | NC_000013.10 |
| cg12132029 | 1.22E-07 | 1.46E-08 | -5.92 | 8.6029817 | -5.31E-02 | 11616515  | 11616638  | NC_000019.9  |
| cg00413250 | 1.23E-07 | 1.46E-08 | -5.92 | 8.6024941 | -9.30E-02 | 13155767  | 13155890  | NC_000016.9  |
| cg21284370 | 1.23E-07 | 1.46E-08 | -5.92 | 8.6023806 | -4.20E-02 | 42621865  | 42621988  | NC_000013.10 |
| cg14706200 | 1.23E-07 | 1.46E-08 | -5.92 | 8.6016267 | -1.03E-01 | 2472062   | 2472185   | NC_000019.9  |
| cg23156742 | 1.23E-07 | 1.46E-08 | -5.92 | 8.6010956 | -3.50E-02 | 80490949  | 80491072  | NC_000005.9  |
| cg10206331 | 1.23E-07 | 1.46E-08 | -5.92 | 8.6009345 | -9.48E-02 | 1200083   | 1200206   | NC_000016.9  |
| cg27359629 | 1.23E-07 | 1.46E-08 | -5.91 | 8.6004798 | -1.10E-01 | 74101601  | 74101724  | NC_000006.11 |
| cg27569935 | 1.23E-07 | 1.46E-08 | -5.91 | 8.5999756 | -1.23E-01 | 138683375 | 138683498 | NC_000003.11 |
| cg14676702 | 1.23E-07 | 1.46E-08 | -5.91 | 8.5998178 | -6.17E-02 | 170550423 | 170550546 | NC_000002.11 |
| cg20219172 | 1.23E-07 | 1.47E-08 | -5.91 | 8.5982342 | -8.70E-02 | 79701478  | 79701601  | NC_000017.10 |
| cg11619797 | 1.23E-07 | 1.47E-08 | -5.91 | 8.5978562 | -1.21E-01 | 90228764  | 90228887  | NC_000007.13 |
| cg17501485 | 1.23E-07 | 1.47E-08 | -5.91 | 8.597314  | -2.14E-02 | 24191984  | 24192107  | NC_000022.10 |
| cg05076631 | 1.23E-07 | 1.47E-08 | -5.91 | 8.5971813 | -1.65E-02 | 75422152  | 75422275  | NC_000014.8  |
| cg21396630 | 1.23E-07 | 1.47E-08 | -5.91 | 8.5967252 | -7.08E-02 | 42886004  | 42886127  | NC_000001.10 |
| cg04231905 | 1.23E-07 | 1.47E-08 | -5.91 | 8.5965372 | -1.62E-01 | 94840793  | 94840916  | NC_000015.9  |
| cg22734236 | 1.23E-07 | 1.47E-08 | -5.91 | 8.5963528 | -1.20E-01 | 152462020 | 152462143 | NC_000004.11 |
| cg23985447 | 1.23E-07 | 1.47E-08 | -5.91 | 8.5955999 | -1.35E-01 | 118691066 | 118691189 | NC_000005.9  |
| cg23130369 | 1.23E-07 | 1.47E-08 | -5.91 | 8.5954645 | -1.23E-01 | 129245177 | 129245300 | NC_000002.11 |
| cg21464115 | 1.23E-07 | 1.47E-08 | -5.91 | 8.5947193 | -1.03E-01 | 138157982 | 138158105 | NC_000003.11 |
| cg00267142 | 1.23E-07 | 1.47E-08 | -5.91 | 8.5941572 | -9.61E-02 | 167104601 | 167104724 | NC_000006.11 |
| cg08305799 | 1.24E-07 | 1.47E-08 | -5.91 | 8.5939514 | -7.57E-02 | 30580804  | 30580927  | NC_000008.10 |
| cg21549577 | 1.24E-07 | 1.47E-08 | -5.91 | 8.5938267 | -4.51E-02 | 102151720 | 102151843 | NC_000005.9  |

|            |          |          |       |           |           |           |           |              |
|------------|----------|----------|-------|-----------|-----------|-----------|-----------|--------------|
| cg02560642 | 1.24E-07 | 1.47E-08 | -5.91 | 8.5932365 | -9.27E-02 | 110664301 | 110664424 | NC_000013.10 |
| cg05834036 | 1.24E-07 | 1.47E-08 | -5.91 | 8.5931841 | -6.48E-02 | 55063893  | 55064016  | NC_000004.11 |
| cg23401912 | 1.24E-07 | 1.48E-08 | -5.91 | 8.5912303 | -2.52E-02 | 16256974  | 16257097  | NC_000017.10 |
| cg14409029 | 1.24E-07 | 1.48E-08 | -5.91 | 8.591004  | -1.09E-01 | 19138243  | 19138366  | NC_000011.9  |
| cg11189107 | 1.24E-07 | 1.48E-08 | -5.91 | 8.5894022 | -8.61E-02 | 25042782  | 25042905  | NC_000014.8  |
| cg07330288 | 1.24E-07 | 1.48E-08 | -5.91 | 8.5888499 | -1.71E-01 | 19977156  | 19977279  | NC_000017.10 |
| cg03922381 | 1.24E-07 | 1.48E-08 | -5.91 | 8.5874139 | -1.32E-01 | 70977210  | 70977333  | NC_000010.10 |
| cg05309934 | 1.24E-07 | 1.48E-08 | -5.91 | 8.5870499 | -2.18E-02 | 5855475   | 5855598   | NC_000010.10 |
| cg19850931 | 1.24E-07 | 1.48E-08 | -5.91 | 8.5867452 | -1.08E-01 | 105993347 | 105993470 | NC_000002.11 |
| cg24281697 | 1.24E-07 | 1.48E-08 | -5.91 | 8.5866923 | -6.33E-02 | 42213546  | 42213669  | NC_000013.10 |
| cg17580614 | 1.25E-07 | 1.49E-08 | -5.91 | 8.5841475 | -1.23E-01 | 15849512  | 15849635  | NC_000017.10 |
| cg08387270 | 1.25E-07 | 1.49E-08 | -5.91 | 8.5829088 | -1.45E-01 | 145649036 | 145649159 | NC_000008.10 |
| cg03620123 | 1.25E-07 | 1.49E-08 | -5.91 | 8.5822639 | -1.15E-01 | 111869581 | 111869704 | NC_000005.9  |
| cg01604946 | 1.25E-07 | 1.49E-08 | -5.91 | 8.5806569 | -1.13E-01 | 148398804 | 148398927 | NC_000005.9  |
| cg09560533 | 1.25E-07 | 1.49E-08 | -5.91 | 8.5797108 | -1.08E-01 | 241776193 | 241776316 | NC_000002.11 |
| cg07565701 | 1.25E-07 | 1.49E-08 | -5.91 | 8.5793609 | -1.10E-01 | 71043770  | 71043893  | NC_000016.9  |
| cg13915843 | 1.25E-07 | 1.49E-08 | -5.91 | 8.5791491 | -7.06E-02 | 28907176  | 28907299  | NC_000017.10 |
| cg01555151 | 1.25E-07 | 1.50E-08 | -5.91 | 8.5785681 | -1.07E-01 | 80679979  | 80680102  | NC_000014.8  |
| cg00105640 | 1.25E-07 | 1.50E-08 | -5.91 | 8.5785627 | -1.13E-01 | 3691994   | 3692117   | NC_000001.10 |
| cg18481087 | 1.25E-07 | 1.50E-08 | -5.91 | 8.5783899 | -3.24E-02 | 160474064 | 160474187 | NC_000003.11 |
| cg05257291 | 1.25E-07 | 1.50E-08 | -5.91 | 8.5776654 | -1.43E-01 | 1161247   | 1161370   | NC_000004.11 |
| cg00974149 | 1.26E-07 | 1.50E-08 | -5.91 | 8.577237  | -1.53E-02 | 56296512  | 56296635  | NC_000017.10 |
| cg22529396 | 1.26E-07 | 1.50E-08 | -5.91 | 8.5765493 | -7.70E-02 | 128293186 | 128293309 | NC_000002.11 |
| cg06499778 | 1.26E-07 | 1.50E-08 | -5.91 | 8.5763968 | -1.13E-01 | 130505164 | 130505287 | NC_000011.9  |
| cg22498057 | 1.26E-07 | 1.50E-08 | -5.91 | 8.5761048 | -5.07E-02 | 93954358  | 93954481  | NC_000005.9  |

|              |          |          |       |           |           |           |           |              |
|--------------|----------|----------|-------|-----------|-----------|-----------|-----------|--------------|
| cg06635150   | 1.26E-07 | 1.50E-08 | -5.91 | 8.5759729 | -1.25E-01 | 171094937 | 171095060 | NC_000005.9  |
| cg14652131   | 1.26E-07 | 1.50E-08 | -5.91 | 8.5758075 | -1.53E-01 | 1166531   | 1166654   | NC_000004.11 |
| cg20379239   | 1.26E-07 | 1.50E-08 | -5.91 | 8.5755409 | -6.62E-02 | 11207015  | 11207138  | NC_000010.10 |
| cg13817037   | 1.26E-07 | 1.50E-08 | -5.91 | 8.5751842 | -9.78E-02 | 36100589  | 36100712  | NC_000009.11 |
| cg26595893   | 1.26E-07 | 1.50E-08 | -5.91 | 8.5751342 | -1.34E-01 | 2946474   | 2946597   | NC_000011.9  |
| cg14242958   | 1.26E-07 | 1.50E-08 | -5.91 | 8.5747806 | -2.88E-02 | 101785693 | 101785816 | NC_000011.9  |
| cg11157816   | 1.26E-07 | 1.50E-08 | -5.91 | 8.5743148 | -7.03E-02 | 114522185 | 114522308 | NC_000001.10 |
| cg10369688   | 1.26E-07 | 1.50E-08 | -5.91 | 8.5739439 | -3.02E-02 | 39898283  | 39898406  | NC_000019.9  |
| cg19934366   | 1.26E-07 | 1.50E-08 | -5.91 | 8.5732356 | -4.21E-02 | 8151011   | 8151134   | NC_000017.10 |
| ch.6.698823R | 1.26E-07 | 1.50E-08 | -5.91 | 8.5731426 | -2.18E-02 | 28887514  | 28887637  | NC_000006.11 |
| cg00731691   | 1.26E-07 | 1.51E-08 | -5.91 | 8.5713611 | -1.05E-01 | 79145983  | 79146106  | NC_000017.10 |
| cg04970158   | 1.26E-07 | 1.51E-08 | -5.91 | 8.570989  | -1.28E-01 | 43208740  | 43208863  | NC_000017.10 |
| cg06761076   | 1.26E-07 | 1.51E-08 | -5.91 | 8.5708065 | -2.32E-02 | 21056301  | 21056424  | NC_000022.10 |
| cg03352655   | 1.26E-07 | 1.51E-08 | -5.91 | 8.5705883 | -4.58E-02 | 115439283 | 115439406 | NC_000010.10 |
| cg01563663   | 1.26E-07 | 1.51E-08 | -5.91 | 8.569605  | -2.21E-02 | 12612233  | 12612356  | NC_000008.10 |
| cg20845858   | 1.26E-07 | 1.51E-08 | -5.91 | 8.5695094 | -6.67E-02 | 129945688 | 129945811 | NC_000007.13 |
| cg01073178   | 1.26E-07 | 1.51E-08 | -5.91 | 8.569413  | -8.91E-02 | 117537710 | 117537833 | NC_000012.11 |
| cg02737507   | 1.26E-07 | 1.51E-08 | -5.91 | 8.5692529 | -1.34E-01 | 43145309  | 43145432  | NC_000002.11 |
| cg01283343   | 1.26E-07 | 1.51E-08 | -5.91 | 8.5691512 | -8.87E-02 | 42211160  | 42211283  | NC_000019.9  |
| cg19503963   | 1.27E-07 | 1.51E-08 | -5.91 | 8.5688991 | -9.36E-02 | 2085005   | 2085128   | NC_000017.10 |
| cg17104202   | 1.27E-07 | 1.51E-08 | -5.91 | 8.568812  | -8.97E-02 | 3162404   | 3162527   | NC_000001.10 |
| cg12212706   | 1.27E-07 | 1.51E-08 | -5.91 | 8.5686574 | -6.16E-02 | 42817984  | 42818107  | NC_000019.9  |
| cg00687714   | 1.27E-07 | 1.51E-08 | -5.91 | 8.5685224 | -1.27E-01 | 21272887  | 21273010  | NC_000016.9  |
| cg16425554   | 1.27E-07 | 1.51E-08 | -5.91 | 8.568063  | -2.50E-02 | 64994995  | 64995118  | NC_000002.11 |
| cg21044968   | 1.27E-07 | 1.51E-08 | -5.91 | 8.5672057 | -6.61E-02 | 111895086 | 111895209 | NC_000006.11 |

|            |          |          |       |           |           |           |           |              |
|------------|----------|----------|-------|-----------|-----------|-----------|-----------|--------------|
| cg26142380 | 1.27E-07 | 1.51E-08 | -5.91 | 8.5665113 | -3.61E-02 | 27276017  | 27276140  | NC_000017.10 |
| cg14116908 | 1.27E-07 | 1.52E-08 | -5.91 | 8.5653561 | -7.17E-02 | 95859189  | 95859312  | NC_000009.11 |
| cg15141853 | 1.27E-07 | 1.52E-08 | -5.91 | 8.5652172 | -7.73E-02 | 79544771  | 79544894  | NC_000010.10 |
| cg06833203 | 1.27E-07 | 1.52E-08 | -5.91 | 8.5648224 | -9.09E-02 | 15218579  | 15218702  | NC_000019.9  |
| cg11888738 | 1.27E-07 | 1.52E-08 | -5.91 | 8.5641581 | -8.91E-02 | 1202911   | 1203034   | NC_000004.11 |
| cg27664085 | 1.27E-07 | 1.52E-08 | -5.91 | 8.5611799 | -1.12E-01 | 89157815  | 89157938  | NC_000015.9  |
| cg02767068 | 1.28E-07 | 1.52E-08 | -5.91 | 8.5606957 | -5.89E-02 | 30198517  | 30198640  | NC_000016.9  |
| cg11556416 | 1.28E-07 | 1.52E-08 | -5.91 | 8.5603326 | -3.35E-02 | 191879252 | 191879375 | NC_000002.11 |
| cg24021649 | 1.28E-07 | 1.52E-08 | -5.91 | 8.5601818 | -6.70E-02 | 46102063  | 46102186  | NC_000019.9  |
| cg12237269 | 1.28E-07 | 1.52E-08 | -5.91 | 8.5601595 | -1.24E-01 | 107582734 | 107582857 | NC_000011.9  |
| cg16819743 | 1.28E-07 | 1.52E-08 | -5.91 | 8.5599336 | -6.49E-02 | 177833288 | 177833411 | NC_000001.10 |
| cg00202568 | 1.28E-07 | 1.52E-08 | -5.91 | 8.5598236 | -1.23E-01 | 55528166  | 55528289  | NC_000008.10 |
| cg07056299 | 1.28E-07 | 1.53E-08 | -5.91 | 8.5588247 | -1.49E-01 | 73393148  | 73393271  | NC_000007.13 |
| cg14210971 | 1.28E-07 | 1.53E-08 | -5.91 | 8.558731  | -1.62E-02 | 3014102   | 3014225   | NC_000011.9  |
| cg18173263 | 1.28E-07 | 1.53E-08 | -5.91 | 8.5586593 | -1.07E-01 | 17465242  | 17465365  | NC_000017.10 |
| cg06767701 | 1.28E-07 | 1.53E-08 | -5.91 | 8.5580448 | -1.85E-02 | 152008878 | 152009001 | NC_000001.10 |
| cg19270739 | 1.28E-07 | 1.53E-08 | -5.91 | 8.557378  | -8.63E-02 | 1368846   | 1368969   | NC_000001.10 |
| cg24913168 | 1.28E-07 | 1.53E-08 | -5.91 | 8.5570098 | -8.40E-02 | 44971694  | 44971817  | NC_000013.10 |
| cg11282650 | 1.28E-07 | 1.53E-08 | -5.91 | 8.5567369 | -9.22E-02 | 102990191 | 102990314 | NC_000010.10 |
| cg05492964 | 1.28E-07 | 1.53E-08 | -5.91 | 8.5554975 | -4.40E-02 | 53835262  | 53835385  | NC_000012.11 |
| cg13153865 | 1.29E-07 | 1.54E-08 | -5.91 | 8.5524605 | -3.92E-02 | 90914101  | 90914224  | NC_000008.10 |
| cg14474520 | 1.29E-07 | 1.54E-08 | -5.91 | 8.5521216 | -8.94E-02 | 124781038 | 124781161 | NC_000012.11 |
| cg05798429 | 1.29E-07 | 1.54E-08 | -5.91 | 8.5517729 | -7.77E-02 | 31743928  | 31744051  | NC_000006.11 |
| cg10049535 | 1.29E-07 | 1.54E-08 | -5.91 | 8.5504565 | -3.78E-02 | 68299128  | 68299251  | NC_000016.9  |
| cg25794147 | 1.29E-07 | 1.54E-08 | -5.91 | 8.5503493 | -1.08E-01 | 2548991   | 2549114   | NC_000007.13 |

|               |          |          |      |           |           |           |           |              |
|---------------|----------|----------|------|-----------|-----------|-----------|-----------|--------------|
| cg22378237    | 1.29E-07 | 1.54E-08 | -5.9 | 8.550237  | -7.84E-02 | 94867583  | 94867706  | NC_000015.9  |
| cg03709475    | 1.29E-07 | 1.54E-08 | -5.9 | 8.5497804 | -1.55E-01 | 55219492  | 55219615  | NC_000005.9  |
| cg01442565    | 1.29E-07 | 1.54E-08 | -5.9 | 8.5486813 | -1.28E-01 | 43787747  | 43787870  | NC_000021.8  |
| cg21974996    | 1.29E-07 | 1.54E-08 | -5.9 | 8.5485559 | -2.66E-02 | 78174491  | 78174614  | NC_000014.8  |
| cg22209624    | 1.29E-07 | 1.54E-08 | -5.9 | 8.5482128 | -1.98E-02 | 210406738 | 210406861 | NC_000001.10 |
| cg05657488    | 1.29E-07 | 1.54E-08 | -5.9 | 8.5475629 | -4.05E-02 | 23689988  | 23690111  | NC_000016.9  |
| cg03820282    | 1.29E-07 | 1.54E-08 | -5.9 | 8.5474715 | -2.75E-02 | 106809305 | 106809428 | NC_000007.13 |
| cg04414459    | 1.29E-07 | 1.54E-08 | -5.9 | 8.5474308 | -1.12E-01 | 27541213  | 27541336  | NC_000010.10 |
| cg06657888    | 1.29E-07 | 1.54E-08 | -5.9 | 8.5469417 | -7.99E-02 | 62531318  | 62531441  | NC_000007.13 |
| cg17408686    | 1.29E-07 | 1.55E-08 | -5.9 | 8.5466745 | -6.53E-02 | 126422575 | 126422698 | NC_000003.11 |
| cg15160748    | 1.29E-07 | 1.55E-08 | -5.9 | 8.5463473 | -1.20E-01 | 44076586  | 44076709  | NC_000019.9  |
| cg04112126    | 1.29E-07 | 1.55E-08 | -5.9 | 8.5445152 | -7.78E-02 | 134980924 | 134981047 | NC_000010.10 |
| cg15214605    | 1.30E-07 | 1.55E-08 | -5.9 | 8.5434872 | -2.07E-02 | 50699773  | 50699896  | NC_000013.10 |
| cg06979020    | 1.30E-07 | 1.55E-08 | -5.9 | 8.5433402 | -8.81E-02 | 69660388  | 69660511  | NC_000016.9  |
| cg24537973    | 1.30E-07 | 1.55E-08 | -5.9 | 8.5424951 | -8.68E-02 | 8661976   | 8662099   | NC_000012.11 |
| cg22078710    | 1.30E-07 | 1.55E-08 | -5.9 | 8.5420815 | -1.46E-01 | 53087599  | 53087722  | NC_000015.9  |
| cg05445187    | 1.30E-07 | 1.55E-08 | -5.9 | 8.5419803 | -5.30E-02 | 80890588  | 80890711  | NC_000017.10 |
| cg16060189    | 1.30E-07 | 1.55E-08 | -5.9 | 8.5415926 | -1.24E-01 | 94350577  | 94350700  | NC_000010.10 |
| cg09588020    | 1.30E-07 | 1.55E-08 | -5.9 | 8.5406223 | -1.07E-01 | 27755803  | 27755926  | NC_000001.10 |
| cg15689121    | 1.30E-07 | 1.56E-08 | -5.9 | 8.5399557 | -1.16E-01 | 38618977  | 38619100  | NC_000001.10 |
| ch.4.1172045R | 1.30E-07 | 1.56E-08 | -5.9 | 8.5394474 | -7.00E-02 | 57343548  | 57343671  | NC_000004.11 |
| cg01952537    | 1.30E-07 | 1.56E-08 | -5.9 | 8.5389873 | -9.03E-02 | 105051261 | 105051384 | NC_000014.8  |
| cg09845205    | 1.30E-07 | 1.56E-08 | -5.9 | 8.5377511 | -1.27E-01 | 81591792  | 81591915  | NC_000016.9  |
| cg25212571    | 1.30E-07 | 1.56E-08 | -5.9 | 8.5371087 | -1.01E-01 | 153114115 | 153114238 | NC_000001.10 |
| cg24479014    | 1.30E-07 | 1.56E-08 | -5.9 | 8.5366974 | -1.50E-01 | 102702656 | 102702779 | NC_000011.9  |

|                  |          |          |      |           |           |           |           |              |
|------------------|----------|----------|------|-----------|-----------|-----------|-----------|--------------|
| cg18713316       | 1.30E-07 | 1.56E-08 | -5.9 | 8.5365077 | -9.48E-02 | 154732860 | 154732983 | NC_000001.10 |
| cg16188209       | 1.30E-07 | 1.56E-08 | -5.9 | 8.5364947 | -7.06E-02 | 103311596 | 103311719 | NC_000012.11 |
| cg07300610       | 1.31E-07 | 1.56E-08 | -5.9 | 8.535996  | -9.68E-02 | 30584674  | 30584797  | NC_000016.9  |
| cg20892743       | 1.31E-07 | 1.56E-08 | -5.9 | 8.5359071 | -1.29E-01 | 68133159  | 68133282  | NC_000011.9  |
| cg21498490       | 1.31E-07 | 1.56E-08 | -5.9 | 8.5357916 | -1.37E-01 | 143182559 | 143182682 | NC_000008.10 |
| cg19240569       | 1.31E-07 | 1.56E-08 | -5.9 | 8.5355891 | -1.29E-01 | 63331821  | 63331944  | NC_000011.9  |
| cg00591868       | 1.31E-07 | 1.56E-08 | -5.9 | 8.5355722 | -7.39E-02 | 19729048  | 19729171  | NC_000019.9  |
| cg18262201       | 1.31E-07 | 1.56E-08 | -5.9 | 8.5354833 | -1.14E-01 | 6187854   | 6187977   | NC_000010.10 |
| cg04560213       | 1.31E-07 | 1.56E-08 | -5.9 | 8.5352609 | -1.21E-01 | 13149464  | 13149587  | NC_000016.9  |
| cg26198898       | 1.31E-07 | 1.56E-08 | -5.9 | 8.5348096 | -3.31E-02 | 93363666  | 93363789  | NC_000015.9  |
| cg16527794       | 1.31E-07 | 1.57E-08 | -5.9 | 8.5339459 | -2.78E-02 | 47600580  | 47600703  | NC_000011.9  |
| cg13514718       | 1.31E-07 | 1.57E-08 | -5.9 | 8.5333493 | -1.34E-01 | 23749722  | 23749845  | NC_000007.13 |
| cg13011961       | 1.31E-07 | 1.57E-08 | -5.9 | 8.5329255 | -1.29E-01 | 67291183  | 67291306  | NC_000003.11 |
| cg12126344       | 1.31E-07 | 1.57E-08 | -5.9 | 8.5325105 | -7.19E-02 | 12207564  | 12207687  | NC_000001.10 |
| cg20237610       | 1.31E-07 | 1.57E-08 | -5.9 | 8.5324719 | -1.23E-01 | 129203887 | 129204010 | NC_000006.11 |
| cg10303698       | 1.31E-07 | 1.57E-08 | -5.9 | 8.5315923 | -7.17E-02 | 55969998  | 55970121  | NC_000017.10 |
| ch.12.121680993R | 1.31E-07 | 1.57E-08 | -5.9 | 8.5315179 | -2.43E-02 | 123115040 | 123115163 | NC_000012.11 |
| cg23101464       | 1.31E-07 | 1.57E-08 | -5.9 | 8.5306707 | -3.65E-02 | 144640755 | 144640878 | NC_000008.10 |
| cg13050953       | 1.31E-07 | 1.57E-08 | -5.9 | 8.5306588 | -8.83E-02 | 41392664  | 41392787  | NC_000017.10 |
| cg17746130       | 1.31E-07 | 1.57E-08 | -5.9 | 8.5303089 | -9.30E-02 | 40253314  | 40253437  | NC_000001.10 |
| cg04536575       | 1.31E-07 | 1.57E-08 | -5.9 | 8.5298704 | -4.22E-02 | 65016802  | 65016925  | NC_000014.8  |
| cg12441694       | 1.31E-07 | 1.57E-08 | -5.9 | 8.529511  | -1.19E-01 | 106572969 | 106573092 | NC_000013.10 |
| cg04798984       | 1.31E-07 | 1.57E-08 | -5.9 | 8.5293161 | -3.40E-02 | 86547801  | 86547924  | NC_000006.11 |
| cg03833948       | 1.31E-07 | 1.57E-08 | -5.9 | 8.5292619 | -1.34E-01 | 21678044  | 21678167  | NC_000012.11 |
| cg22592475       | 1.32E-07 | 1.58E-08 | -5.9 | 8.5276985 | -1.41E-01 | 67547334  | 67547457  | NC_000005.9  |



|                |          |          |      |           |           |           |           |              |
|----------------|----------|----------|------|-----------|-----------|-----------|-----------|--------------|
| cg25460262     | 1.32E-07 | 1.58E-08 | -5.9 | 8.5255007 | -1.49E-01 | 18499688  | 18499811  | NC_000019.9  |
| cg26853415     | 1.32E-07 | 1.58E-08 | -5.9 | 8.5249863 | -1.26E-01 | 26127438  | 26127561  | NC_000017.10 |
| ch.19.1271107R | 1.32E-07 | 1.58E-08 | -5.9 | 8.5247097 | -2.16E-02 | 39332532  | 39332655  | NC_000019.9  |
| ch.13.1448446R | 1.32E-07 | 1.58E-08 | -5.9 | 8.5246006 | -2.22E-02 | 96274458  | 96274581  | NC_000013.10 |
| cg08305378     | 1.32E-07 | 1.58E-08 | -5.9 | 8.5242331 | -1.60E-01 | 118953376 | 118953499 | NC_000008.10 |
| cg07183637     | 1.32E-07 | 1.58E-08 | -5.9 | 8.5241974 | -5.10E-02 | 31940692  | 31940815  | NC_000006.11 |
| cg27428633     | 1.32E-07 | 1.58E-08 | -5.9 | 8.5236352 | -1.11E-01 | 47657926  | 47658049  | NC_000001.10 |
| cg00058644     | 1.32E-07 | 1.58E-08 | -5.9 | 8.5226827 | -1.12E-01 | 79844023  | 79844146  | NC_000017.10 |
| cg03138124     | 1.32E-07 | 1.59E-08 | -5.9 | 8.521605  | -1.25E-01 | 68290812  | 68290935  | NC_000002.11 |
| cg14042912     | 1.32E-07 | 1.59E-08 | -5.9 | 8.5208759 | -3.95E-02 | 118016803 | 118016926 | NC_000011.9  |
| cg08522065     | 1.32E-07 | 1.59E-08 | -5.9 | 8.5203578 | -3.26E-02 | 46384600  | 46384723  | NC_000012.11 |
| cg10921334     | 1.33E-07 | 1.59E-08 | -5.9 | 8.5197933 | -5.96E-02 | 119529888 | 119530011 | NC_000006.11 |
| cg25396690     | 1.33E-07 | 1.59E-08 | -5.9 | 8.5195376 | -4.82E-02 | 7006004   | 7006127   | NC_000002.11 |
| cg14774086     | 1.33E-07 | 1.59E-08 | -5.9 | 8.5194031 | -3.23E-02 | 24181270  | 24181393  | NC_000022.10 |
| cg25276640     | 1.33E-07 | 1.59E-08 | -5.9 | 8.5172261 | -7.88E-02 | 6124631   | 6124754   | NC_000007.13 |
| cg26139559     | 1.33E-07 | 1.59E-08 | -5.9 | 8.5169979 | -1.18E-01 | 37069791  | 37069914  | NC_000014.8  |
| cg08620789     | 1.33E-07 | 1.59E-08 | -5.9 | 8.5158075 | -2.66E-02 | 157129638 | 157129761 | NC_000007.13 |
| cg24595152     | 1.33E-07 | 1.60E-08 | -5.9 | 8.5156175 | -9.69E-02 | 43733831  | 43733954  | NC_000003.11 |
| cg14539394     | 1.33E-07 | 1.60E-08 | -5.9 | 8.5151601 | -1.63E-02 | 45496315  | 45496438  | NC_000010.10 |
| cg12423733     | 1.33E-07 | 1.60E-08 | -5.9 | 8.5149464 | -1.42E-01 | 29454623  | 29454746  | NC_000006.11 |
| cg07845392     | 1.33E-07 | 1.60E-08 | -5.9 | 8.5144593 | -1.26E-01 | 79678158  | 79678281  | NC_000017.10 |
| cg17632214     | 1.33E-07 | 1.60E-08 | -5.9 | 8.514199  | -2.41E-02 | 31556050  | 31556173  | NC_000022.10 |
| cg17946713     | 1.34E-07 | 1.60E-08 | -5.9 | 8.5106828 | -5.53E-02 | 14108721  | 14108844  | NC_000005.9  |
| cg05655647     | 1.34E-07 | 1.60E-08 | -5.9 | 8.5102666 | -9.33E-02 | 51157023  | 51157146  | NC_000012.11 |
| cg25520249     | 1.34E-07 | 1.60E-08 | -5.9 | 8.510219  | -1.22E-01 | 41700269  | 41700392  | NC_000019.9  |

|                 |          |          |       |           |           |           |           |              |
|-----------------|----------|----------|-------|-----------|-----------|-----------|-----------|--------------|
| cg25078908      | 1.34E-07 | 1.61E-08 | -5.9  | 8.5093489 | -5.97E-02 | 30434661  | 30434784  | NC_000015.9  |
| cg01283887      | 1.34E-07 | 1.61E-08 | -5.9  | 8.5093483 | -1.13E-01 | 69366755  | 69366878  | NC_000010.10 |
| cg02286008      | 1.34E-07 | 1.61E-08 | -5.9  | 8.5091545 | -1.13E-01 | 30133247  | 30133370  | NC_000016.9  |
| cg19659125      | 1.34E-07 | 1.61E-08 | -5.9  | 8.50808   | -3.01E-02 | 18794596  | 18794719  | NC_000019.9  |
| cg18108683      | 1.34E-07 | 1.61E-08 | -5.9  | 8.5065542 | -1.50E-01 | 102477205 | 102477328 | NC_000007.13 |
| cg27469606      | 1.34E-07 | 1.61E-08 | -5.9  | 8.5053751 | -1.06E-01 | 1154485   | 1154608   | NC_000019.9  |
| cg02915739      | 1.35E-07 | 1.61E-08 | -5.9  | 8.5045242 | -1.00E-01 | 17910374  | 17910497  | NC_000017.10 |
| cg15197745      | 1.35E-07 | 1.62E-08 | -5.9  | 8.5035098 | -1.00E-01 | 124474980 | 124475103 | NC_000010.10 |
| cg12911952      | 1.35E-07 | 1.62E-08 | -5.9  | 8.5033583 | -1.20E-01 | 2924523   | 2924646   | NC_000011.9  |
| cg03875347      | 1.35E-07 | 1.62E-08 | -5.9  | 8.5026727 | -1.90E-02 | 1102609   | 1102732   | NC_000010.10 |
| cg00645339      | 1.35E-07 | 1.62E-08 | -5.9  | 8.5021086 | -9.18E-02 | 45670875  | 45670998  | NC_000015.9  |
| cg07693931      | 1.35E-07 | 1.62E-08 | -5.9  | 8.5015326 | -4.78E-02 | 158449734 | 158449857 | NC_000003.11 |
| cg18328334      | 1.35E-07 | 1.62E-08 | -5.9  | 8.501499  | -9.69E-02 | 218808652 | 218808775 | NC_000002.11 |
| cg26234543      | 1.35E-07 | 1.62E-08 | -5.9  | 8.5009956 | -7.91E-02 | 62732450  | 62732573  | NC_000002.11 |
| cg12929040      | 1.35E-07 | 1.62E-08 | -5.9  | 8.5005841 | -2.91E-02 | 56792373  | 56792496  | NC_000008.10 |
| cg11778714      | 1.35E-07 | 1.62E-08 | -5.9  | 8.5004515 | -1.38E-01 | 79605162  | 79605285  | NC_000010.10 |
| cg27404824      | 1.35E-07 | 1.62E-08 | -5.89 | 8.4998633 | -9.98E-02 | 1454848   | 1454971   | NC_000010.10 |
| cg09223687      | 1.35E-07 | 1.62E-08 | -5.89 | 8.499805  | -9.71E-02 | 1027885   | 1028008   | NC_000004.11 |
| cg13848905      | 1.35E-07 | 1.62E-08 | -5.89 | 8.4997608 | -8.76E-02 | 179560700 | 179560823 | NC_000001.10 |
| cg23356831      | 1.35E-07 | 1.62E-08 | -5.89 | 8.4996064 | -9.00E-02 | 105996513 | 105996636 | NC_000014.8  |
| cg01761236      | 1.35E-07 | 1.62E-08 | -5.89 | 8.4992777 | -1.04E-01 | 102990251 | 102990374 | NC_000014.8  |
| ch.22.22597277R | 1.36E-07 | 1.63E-08 | -5.89 | 8.4959937 | -2.27E-02 | 24267277  | 24267400  | NC_000022.10 |
| cg16564710      | 1.36E-07 | 1.63E-08 | -5.89 | 8.4957651 | -1.62E-02 | 153508839 | 153508962 | NC_000001.10 |
| cg20784823      | 1.36E-07 | 1.63E-08 | -5.89 | 8.4957333 | -6.32E-02 | 112213418 | 112213541 | NC_000007.13 |
| cg07863354      | 1.36E-07 | 1.63E-08 | -5.89 | 8.495431  | -1.36E-01 | 80832611  | 80832734  | NC_000017.10 |

|                |          |          |       |           |           |           |           |              |
|----------------|----------|----------|-------|-----------|-----------|-----------|-----------|--------------|
| cg24708674     | 1.36E-07 | 1.63E-08 | -5.89 | 8.4951514 | -8.47E-02 | 73875284  | 73875407  | NC_000017.10 |
| cg07818830     | 1.36E-07 | 1.63E-08 | -5.89 | 8.4947761 | -2.68E-02 | 76953439  | 76953562  | NC_000012.11 |
| cg15902864     | 1.36E-07 | 1.63E-08 | -5.89 | 8.4942988 | -1.08E-01 | 33504903  | 33505026  | NC_000005.9  |
| cg01103812     | 1.36E-07 | 1.63E-08 | -5.89 | 8.4939535 | -3.88E-02 | 26986269  | 26986392  | NC_000012.11 |
| cg08747277     | 1.36E-07 | 1.63E-08 | -5.89 | 8.4938058 | -5.30E-02 | 96048126  | 96048249  | NC_000006.11 |
| cg03500164     | 1.36E-07 | 1.63E-08 | -5.89 | 8.4929099 | -1.08E-01 | 58160046  | 58160169  | NC_000017.10 |
| cg02519286     | 1.36E-07 | 1.63E-08 | -5.89 | 8.4925717 | -4.56E-02 | 6642354   | 6642477   | NC_000012.11 |
| cg20737812     | 1.36E-07 | 1.63E-08 | -5.89 | 8.4920369 | -1.22E-01 | 86336631  | 86336754  | NC_000015.9  |
| cg18983132     | 1.36E-07 | 1.64E-08 | -5.89 | 8.4913211 | -1.26E-01 | 78024305  | 78024428  | NC_000007.13 |
| cg06497921     | 1.36E-07 | 1.64E-08 | -5.89 | 8.4909034 | -1.31E-01 | 11796786  | 11796909  | NC_000002.11 |
| cg22734315     | 1.36E-07 | 1.64E-08 | -5.89 | 8.4904095 | -3.59E-02 | 81069742  | 81069865  | NC_000016.9  |
| ch.8.34134444F | 1.36E-07 | 1.64E-08 | -5.89 | 8.489875  | -2.99E-02 | 34014902  | 34015025  | NC_000008.10 |
| cg12651014     | 1.36E-07 | 1.64E-08 | -5.89 | 8.4894216 | -3.37E-02 | 32735292  | 32735415  | NC_000010.10 |
| cg05492735     | 1.36E-07 | 1.64E-08 | -5.89 | 8.489417  | -1.16E-01 | 104445402 | 104445525 | NC_000007.13 |
| cg06178299     | 1.37E-07 | 1.64E-08 | -5.89 | 8.4888058 | -6.34E-02 | 18967508  | 18967631  | NC_000001.10 |
| cg01602730     | 1.37E-07 | 1.64E-08 | -5.89 | 8.4877753 | -1.46E-01 | 153671011 | 153671134 | NC_000001.10 |
| cg21799270     | 1.37E-07 | 1.64E-08 | -5.89 | 8.4876093 | -4.56E-02 | 133985246 | 133985369 | NC_000005.9  |
| cg13977323     | 1.37E-07 | 1.64E-08 | -5.89 | 8.4873409 | -1.16E-02 | 1704065   | 1704188   | NC_000012.11 |
| cg11733294     | 1.37E-07 | 1.64E-08 | -5.89 | 8.4873004 | -3.09E-02 | 118123053 | 118123176 | NC_000011.9  |
| cg07442105     | 1.37E-07 | 1.64E-08 | -5.89 | 8.4864792 | -8.21E-02 | 66962501  | 66962624  | NC_000016.9  |
| cg19340296     | 1.37E-07 | 1.64E-08 | -5.89 | 8.485932  | -1.24E-01 | 52288804  | 52288927  | NC_000006.11 |
| cg07742374     | 1.37E-07 | 1.65E-08 | -5.89 | 8.4830946 | -3.99E-02 | 68933067  | 68933190  | NC_000012.11 |
| cg25965355     | 1.37E-07 | 1.65E-08 | -5.89 | 8.4827177 | -4.96E-02 | 79151966  | 79152089  | NC_000011.9  |
| cg01166892     | 1.37E-07 | 1.65E-08 | -5.89 | 8.4826799 | -1.07E-01 | 85320882  | 85321005  | NC_000016.9  |
| cg05346193     | 1.37E-07 | 1.65E-08 | -5.89 | 8.4826227 | -3.63E-02 | 73087168  | 73087291  | NC_000011.9  |

|            |          |          |       |           |           |           |           |              |
|------------|----------|----------|-------|-----------|-----------|-----------|-----------|--------------|
| cg03092607 | 1.37E-07 | 1.65E-08 | -5.89 | 8.4825605 | -2.20E-02 | 96068514  | 96068637  | NC_000002.11 |
| cg22059438 | 1.37E-07 | 1.65E-08 | -5.89 | 8.4822743 | -1.39E-01 | 145641882 | 145642005 | NC_000008.10 |
| cg23457901 | 1.38E-07 | 1.65E-08 | -5.89 | 8.4804702 | -1.27E-01 | 52402140  | 52402263  | NC_000006.11 |
| cg12149609 | 1.38E-07 | 1.66E-08 | -5.89 | 8.4787043 | -1.16E-01 | 42816600  | 42816723  | NC_000020.10 |
| cg15996647 | 1.38E-07 | 1.66E-08 | -5.89 | 8.4775367 | -1.05E-01 | 118900302 | 118900425 | NC_000002.11 |
| cg21439481 | 1.38E-07 | 1.66E-08 | -5.89 | 8.4770415 | -1.34E-01 | 143201145 | 143201268 | NC_000008.10 |
| cg14899563 | 1.38E-07 | 1.66E-08 | -5.89 | 8.4766767 | -3.39E-02 | 80656473  | 80656596  | NC_000017.10 |
| cg02455706 | 1.38E-07 | 1.66E-08 | -5.89 | 8.476532  | -1.25E-01 | 84918851  | 84918974  | NC_000016.9  |
| cg12833720 | 1.38E-07 | 1.66E-08 | -5.89 | 8.4760807 | -3.02E-02 | 45251551  | 45251674  | NC_000019.9  |
| cg26651122 | 1.38E-07 | 1.66E-08 | -5.89 | 8.4746119 | -9.97E-02 | 56641777  | 56641900  | NC_000016.9  |
| cg10613224 | 1.39E-07 | 1.67E-08 | -5.89 | 8.4738169 | -1.17E-01 | 202671583 | 202671706 | NC_000002.11 |
| cg07624948 | 1.39E-07 | 1.67E-08 | -5.89 | 8.4737719 | -4.62E-02 | 28962847  | 28962970  | NC_000016.9  |
| cg25582403 | 1.39E-07 | 1.67E-08 | -5.89 | 8.4731592 | -3.94E-02 | 37844421  | 37844544  | NC_000017.10 |
| cg20755353 | 1.39E-07 | 1.67E-08 | -5.89 | 8.4730508 | -2.48E-02 | 1510883   | 1511006   | NC_000001.10 |
| cg14009632 | 1.39E-07 | 1.67E-08 | -5.89 | 8.4722835 | -6.21E-02 | 43445012  | 43445135  | NC_000006.11 |
| cg24759919 | 1.39E-07 | 1.67E-08 | -5.89 | 8.4722478 | -5.87E-02 | 7702494   | 7702617   | NC_000019.9  |
| cg16739544 | 1.39E-07 | 1.67E-08 | -5.89 | 8.4718082 | -1.07E-01 | 85518792  | 85518915  | NC_000016.9  |
| cg19375028 | 1.39E-07 | 1.67E-08 | -5.89 | 8.4713724 | -4.28E-02 | 41744830  | 41744953  | NC_000022.10 |
| cg12352399 | 1.39E-07 | 1.67E-08 | -5.89 | 8.4708324 | -1.03E-01 | 25689774  | 25689897  | NC_000003.11 |
| cg10914667 | 1.39E-07 | 1.67E-08 | -5.89 | 8.4703024 | -1.11E-01 | 59191352  | 59191475  | NC_000011.9  |
| cg23962746 | 1.39E-07 | 1.67E-08 | -5.89 | 8.4702483 | -1.32E-01 | 209105888 | 209106011 | NC_000001.10 |
| cg22843395 | 1.39E-07 | 1.67E-08 | -5.89 | 8.4700559 | -6.58E-02 | 39639820  | 39639943  | NC_000014.8  |
| cg04892766 | 1.39E-07 | 1.67E-08 | -5.89 | 8.4682133 | -1.14E-01 | 72570318  | 72570441  | NC_000003.11 |
| cg27217194 | 1.39E-07 | 1.68E-08 | -5.89 | 8.4679771 | -3.62E-02 | 29600139  | 29600262  | NC_000006.11 |
| cg16011480 | 1.39E-07 | 1.68E-08 | -5.89 | 8.4676926 | -3.78E-02 | 97667594  | 97667717  | NC_000010.10 |

|               |          |          |       |           |           |           |           |              |
|---------------|----------|----------|-------|-----------|-----------|-----------|-----------|--------------|
| cg24881569    | 1.39E-07 | 1.68E-08 | -5.89 | 8.4673955 | -8.68E-02 | 59400820  | 59400943  | NC_000017.10 |
| cg00268019    | 1.39E-07 | 1.68E-08 | -5.89 | 8.4669823 | -3.20E-02 | 160761302 | 160761425 | NC_000002.11 |
| cg14947955    | 1.39E-07 | 1.68E-08 | -5.89 | 8.4668891 | -7.30E-02 | 50877341  | 50877464  | NC_000014.8  |
| cg23239052    | 1.39E-07 | 1.68E-08 | -5.89 | 8.4666137 | -2.75E-02 | 79008930  | 79009053  | NC_000017.10 |
| cg16493238    | 1.40E-07 | 1.68E-08 | -5.89 | 8.4659075 | -1.24E-01 | 7928236   | 7928359   | NC_000011.9  |
| cg01144019    | 1.40E-07 | 1.68E-08 | -5.89 | 8.4657278 | -1.21E-01 | 63188741  | 63188864  | NC_000015.9  |
| cg12424624    | 1.40E-07 | 1.68E-08 | -5.89 | 8.4655341 | -8.59E-02 | 46718941  | 46719064  | NC_000003.11 |
| cg06612088    | 1.40E-07 | 1.68E-08 | -5.89 | 8.4651712 | -1.60E-01 | 11589016  | 11589139  | NC_000005.9  |
| cg22207900    | 1.40E-07 | 1.68E-08 | -5.89 | 8.4644499 | -2.56E-02 | 64072031  | 64072154  | NC_000011.9  |
| cg20640432    | 1.40E-07 | 1.68E-08 | -5.89 | 8.4641752 | -2.86E-02 | 4153445   | 4153568   | NC_000019.9  |
| cg24407596    | 1.40E-07 | 1.68E-08 | -5.89 | 8.4634148 | -1.17E-01 | 98718683  | 98718806  | NC_000007.13 |
| cg19262315    | 1.40E-07 | 1.68E-08 | -5.89 | 8.46278   | -1.00E-01 | 67325980  | 67326103  | NC_000011.9  |
| cg24524366    | 1.40E-07 | 1.68E-08 | -5.89 | 8.4622553 | -1.31E-02 | 211689016 | 211689139 | NC_000001.10 |
| cg26003056    | 1.40E-07 | 1.69E-08 | -5.89 | 8.4621174 | -1.30E-01 | 89908195  | 89908318  | NC_000005.9  |
| cg11799735    | 1.40E-07 | 1.69E-08 | -5.89 | 8.4618413 | -3.26E-02 | 75111455  | 75111578  | NC_000011.9  |
| cg07291100    | 1.40E-07 | 1.69E-08 | -5.89 | 8.4606988 | -1.25E-01 | 139812907 | 139813030 | NC_000003.11 |
| cg27144368    | 1.41E-07 | 1.69E-08 | -5.89 | 8.4586484 | -1.35E-01 | 100286635 | 100286758 | NC_000014.8  |
| cg06291428    | 1.41E-07 | 1.69E-08 | -5.89 | 8.4565022 | -1.64E-01 | 57559063  | 57559186  | NC_000011.9  |
| cg20971407    | 1.41E-07 | 1.70E-08 | -5.89 | 8.4557244 | -1.01E-01 | 5022392   | 5022515   | NC_000003.11 |
| cg04843615    | 1.41E-07 | 1.70E-08 | -5.89 | 8.4551736 | -7.04E-02 | 113613229 | 113613352 | NC_000013.10 |
| cg15168892    | 1.41E-07 | 1.70E-08 | -5.89 | 8.4549454 | -7.08E-02 | 15220709  | 15220832  | NC_000021.8  |
| cg11179180    | 1.41E-07 | 1.70E-08 | -5.89 | 8.4541345 | -9.69E-02 | 78986371  | 78986494  | NC_000011.9  |
| cg24549639    | 1.41E-07 | 1.70E-08 | -5.89 | 8.4531179 | -3.09E-02 | 69201477  | 69201600  | NC_000012.11 |
| cg10325497    | 1.41E-07 | 1.70E-08 | -5.89 | 8.4531111 | -1.01E-01 | 32739049  | 32739172  | NC_000001.10 |
| ch.1.3042365R | 1.41E-07 | 1.70E-08 | -5.89 | 8.4530626 | -1.47E-02 | 155888432 | 155888555 | NC_000001.10 |

|            |          |          |       |           |           |           |           |              |
|------------|----------|----------|-------|-----------|-----------|-----------|-----------|--------------|
| cg06364319 | 1.41E-07 | 1.70E-08 | -5.89 | 8.4528613 | -3.28E-02 | 196730303 | 196730426 | NC_000003.11 |
| cg26669397 | 1.41E-07 | 1.70E-08 | -5.89 | 8.4524151 | -1.21E-01 | 228889628 | 228889751 | NC_000001.10 |
| cg21807034 | 1.42E-07 | 1.70E-08 | -5.89 | 8.4512517 | -1.43E-01 | 61144150  | 61144273  | NC_000018.9  |
| cg25344639 | 1.42E-07 | 1.70E-08 | -5.89 | 8.4512197 | -2.04E-02 | 75137144  | 75137267  | NC_000017.10 |
| cg00939353 | 1.42E-07 | 1.70E-08 | -5.89 | 8.4507502 | -1.32E-01 | 58162955  | 58163078  | NC_000003.11 |
| cg11765003 | 1.42E-07 | 1.70E-08 | -5.89 | 8.4507358 | -8.31E-02 | 220024730 | 220024853 | NC_000002.11 |
| cg13916990 | 1.42E-07 | 1.71E-08 | -5.89 | 8.4505981 | -5.63E-02 | 34048851  | 34048974  | NC_000009.11 |
| cg19204958 | 1.42E-07 | 1.71E-08 | -5.88 | 8.4488975 | -9.75E-02 | 415937    | 416060    | NC_000010.10 |
| cg26963632 | 1.42E-07 | 1.71E-08 | -5.88 | 8.448706  | -7.28E-02 | 85558148  | 85558271  | NC_000016.9  |
| cg01601658 | 1.42E-07 | 1.71E-08 | -5.88 | 8.4486716 | -1.25E-01 | 168785524 | 168785647 | NC_000006.11 |
| cg04488822 | 1.42E-07 | 1.71E-08 | -5.88 | 8.4484645 | -4.26E-02 | 103558134 | 103558257 | NC_000014.8  |
| cg06281648 | 1.42E-07 | 1.71E-08 | -5.88 | 8.4477582 | -4.73E-02 | 58039281  | 58039404  | NC_000016.9  |
| cg05206559 | 1.42E-07 | 1.71E-08 | -5.88 | 8.4477488 | -9.40E-02 | 46417255  | 46417378  | NC_000019.9  |
| cg14193156 | 1.42E-07 | 1.71E-08 | -5.88 | 8.4475787 | -1.29E-01 | 73056104  | 73056227  | NC_000017.10 |
| cg16964809 | 1.42E-07 | 1.71E-08 | -5.88 | 8.4472392 | -3.90E-02 | 233463318 | 233463441 | NC_000001.10 |
| cg17467557 | 1.42E-07 | 1.71E-08 | -5.88 | 8.4464405 | -1.34E-02 | 32319681  | 32319804  | NC_000020.10 |
| cg12663811 | 1.42E-07 | 1.71E-08 | -5.88 | 8.4462815 | -7.98E-02 | 901685    | 901808    | NC_000001.10 |
| cg02031597 | 1.42E-07 | 1.71E-08 | -5.88 | 8.4461086 | -2.01E-02 | 50683365  | 50683488  | NC_000022.10 |
| cg25829488 | 1.42E-07 | 1.72E-08 | -5.88 | 8.4447451 | -8.33E-02 | 39457521  | 39457644  | NC_000015.9  |
| cg19450302 | 1.42E-07 | 1.72E-08 | -5.88 | 8.4445371 | -1.10E-01 | 9160869   | 9160992   | NC_000011.9  |
| cg07523470 | 1.43E-07 | 1.72E-08 | -5.88 | 8.4417072 | -9.08E-02 | 23974496  | 23974619  | NC_000022.10 |
| cg18142906 | 1.43E-07 | 1.72E-08 | -5.88 | 8.4413376 | -1.20E-01 | 167293814 | 167293937 | NC_000003.11 |
| cg14985076 | 1.43E-07 | 1.72E-08 | -5.88 | 8.4407916 | -6.94E-02 | 86042149  | 86042272  | NC_000001.10 |
| cg05911928 | 1.43E-07 | 1.72E-08 | -5.88 | 8.4405475 | -2.14E-02 | 233415245 | 233415368 | NC_000002.11 |
| cg03458344 | 1.43E-07 | 1.72E-08 | -5.88 | 8.4397537 | -1.19E-01 | 170964477 | 170964600 | NC_000001.10 |

|               |          |          |       |           |           |           |           |              |
|---------------|----------|----------|-------|-----------|-----------|-----------|-----------|--------------|
| cg01652476    | 1.43E-07 | 1.73E-08 | -5.88 | 8.4391705 | -1.22E-01 | 809048    | 809171    | NC_000007.13 |
| cg24873508    | 1.43E-07 | 1.73E-08 | -5.88 | 8.4371414 | -2.00E-02 | 219271892 | 219272015 | NC_000002.11 |
| cg04210544    | 1.44E-07 | 1.73E-08 | -5.88 | 8.4367878 | -2.68E-02 | 111806530 | 111806653 | NC_000013.10 |
| cg17591573    | 1.44E-07 | 1.73E-08 | -5.88 | 8.4366942 | -9.37E-02 | 33156206  | 33156329  | NC_000006.11 |
| cg25003047    | 1.44E-07 | 1.73E-08 | -5.88 | 8.4365433 | -6.58E-02 | 134882702 | 134882825 | NC_000005.9  |
| cg24393055    | 1.44E-07 | 1.73E-08 | -5.88 | 8.436539  | -2.04E-02 | 141705521 | 141705644 | NC_000005.9  |
| cg02153041    | 1.44E-07 | 1.73E-08 | -5.88 | 8.4362962 | -1.23E-01 | 131502934 | 131503057 | NC_000012.11 |
| cg05308819    | 1.44E-07 | 1.73E-08 | -5.88 | 8.4357304 | -1.10E-01 | 155959156 | 155959279 | NC_000001.10 |
| cg10521480    | 1.44E-07 | 1.73E-08 | -5.88 | 8.4357183 | -1.59E-01 | 182721424 | 182721547 | NC_000001.10 |
| cg05899741    | 1.44E-07 | 1.73E-08 | -5.88 | 8.434972  | -6.80E-02 | 43901084  | 43901207  | NC_000004.11 |
| cg16296902    | 1.44E-07 | 1.73E-08 | -5.88 | 8.4348562 | -1.09E-01 | 43396802  | 43396925  | NC_000005.9  |
| cg04671462    | 1.44E-07 | 1.74E-08 | -5.88 | 8.4336331 | -1.02E-01 | 156647602 | 156647725 | NC_000001.10 |
| cg24997659    | 1.44E-07 | 1.74E-08 | -5.88 | 8.4311934 | -6.89E-02 | 177015777 | 177015900 | NC_000005.9  |
| cg18285722    | 1.44E-07 | 1.74E-08 | -5.88 | 8.431049  | -8.15E-02 | 95507615  | 95507738  | NC_000014.8  |
| cg03697881    | 1.44E-07 | 1.74E-08 | -5.88 | 8.4308832 | -1.09E-01 | 40803287  | 40803410  | NC_000007.13 |
| cg05943563    | 1.44E-07 | 1.74E-08 | -5.88 | 8.4304131 | -2.94E-02 | 88636557  | 88636680  | NC_000016.9  |
| cg22762951    | 1.45E-07 | 1.74E-08 | -5.88 | 8.4286927 | -2.79E-02 | 224518104 | 224518227 | NC_000001.10 |
| cg15763984    | 1.45E-07 | 1.74E-08 | -5.88 | 8.42859   | -1.36E-01 | 1342303   | 1342426   | NC_000004.11 |
| cg01579629    | 1.45E-07 | 1.75E-08 | -5.88 | 8.4278247 | -4.66E-02 | 233771125 | 233771248 | NC_000002.11 |
| cg17075459    | 1.45E-07 | 1.75E-08 | -5.88 | 8.4275972 | -1.17E-01 | 70931257  | 70931380  | NC_000002.11 |
| ch.2.4478726F | 1.45E-07 | 1.75E-08 | -5.88 | 8.4273573 | -2.97E-02 | 224602942 | 224603065 | NC_000002.11 |
| cg16265859    | 1.45E-07 | 1.75E-08 | -5.88 | 8.4269148 | -1.28E-01 | 19401069  | 19401192  | NC_000001.10 |
| cg03147592    | 1.45E-07 | 1.75E-08 | -5.88 | 8.4266229 | -1.15E-01 | 133022955 | 133023078 | NC_000012.11 |
| cg11580790    | 1.45E-07 | 1.75E-08 | -5.88 | 8.4259895 | -9.98E-02 | 99356163  | 99356286  | NC_000010.10 |
| cg21655444    | 1.45E-07 | 1.75E-08 | -5.88 | 8.42562   | -1.05E-01 | 74770402  | 74770525  | NC_000018.9  |

|            |          |          |       |           |           |           |           |              |
|------------|----------|----------|-------|-----------|-----------|-----------|-----------|--------------|
| cg14855292 | 1.45E-07 | 1.75E-08 | -5.88 | 8.4253137 | -1.57E-01 | 825415    | 825538    | NC_000020.10 |
| cg02624129 | 1.45E-07 | 1.75E-08 | -5.88 | 8.4244025 | -7.27E-02 | 130786230 | 130786353 | NC_000011.9  |
| cg19877741 | 1.45E-07 | 1.75E-08 | -5.88 | 8.4229999 | -1.77E-01 | 644219    | 644342    | NC_000007.13 |
| cg27034836 | 1.45E-07 | 1.75E-08 | -5.88 | 8.422574  | -4.77E-02 | 33139098  | 33139221  | NC_000003.11 |
| cg02584187 | 1.46E-07 | 1.76E-08 | -5.88 | 8.4213025 | -5.56E-02 | 48575128  | 48575251  | NC_000013.10 |
| cg06330621 | 1.46E-07 | 1.76E-08 | -5.88 | 8.4209609 | -7.34E-02 | 87525461  | 87525584  | NC_000016.9  |
| cg26274929 | 1.46E-07 | 1.76E-08 | -5.88 | 8.4209406 | -1.10E-01 | 203965350 | 203965473 | NC_000001.10 |
| cg10600964 | 1.46E-07 | 1.76E-08 | -5.88 | 8.4202036 | -6.94E-02 | 114492301 | 114492424 | NC_000010.10 |
| cg02062816 | 1.46E-07 | 1.76E-08 | -5.88 | 8.4199964 | -1.06E-01 | 163166949 | 163167072 | NC_000001.10 |
| cg13392029 | 1.46E-07 | 1.76E-08 | -5.88 | 8.419951  | -1.26E-01 | 44400749  | 44400872  | NC_000001.10 |
| cg07889337 | 1.46E-07 | 1.76E-08 | -5.88 | 8.4198901 | -1.39E-02 | 38257022  | 38257145  | NC_000017.10 |
| cg05751159 | 1.46E-07 | 1.76E-08 | -5.88 | 8.4188713 | -1.38E-02 | 130081017 | 130081140 | NC_000007.13 |
| cg16177556 | 1.46E-07 | 1.76E-08 | -5.88 | 8.4177611 | -9.98E-02 | 186876457 | 186876580 | NC_000004.11 |
| cg24046474 | 1.46E-07 | 1.76E-08 | -5.88 | 8.4172319 | -1.02E-01 | 130212550 | 130212673 | NC_000009.11 |
| cg12593608 | 1.46E-07 | 1.76E-08 | -5.88 | 8.4171837 | -1.55E-02 | 72668042  | 72668165  | NC_000015.9  |
| cg15914828 | 1.46E-07 | 1.77E-08 | -5.88 | 8.4155483 | -1.22E-01 | 38068755  | 38068878  | NC_000014.8  |
| cg04813911 | 1.46E-07 | 1.77E-08 | -5.88 | 8.4153831 | -8.95E-02 | 65503889  | 65504012  | NC_000015.9  |
| cg09973986 | 1.47E-07 | 1.77E-08 | -5.88 | 8.4141101 | -1.38E-01 | 58135973  | 58136096  | NC_000012.11 |
| cg17403520 | 1.47E-07 | 1.77E-08 | -5.88 | 8.4140664 | -6.04E-02 | 33359638  | 33359761  | NC_000006.11 |
| cg17407908 | 1.47E-07 | 1.77E-08 | -5.88 | 8.4135549 | -5.37E-02 | 32153115  | 32153238  | NC_000006.11 |
| cg00983899 | 1.47E-07 | 1.77E-08 | -5.88 | 8.4134343 | -8.42E-02 | 67290853  | 67290976  | NC_000011.9  |
| cg01277763 | 1.47E-07 | 1.77E-08 | -5.88 | 8.413353  | -3.22E-02 | 123011700 | 123011823 | NC_000012.11 |
| cg16364675 | 1.47E-07 | 1.77E-08 | -5.88 | 8.4133478 | -1.15E-01 | 103096221 | 103096344 | NC_000014.8  |
| cg03223580 | 1.47E-07 | 1.77E-08 | -5.88 | 8.4131784 | -7.36E-02 | 76742630  | 76742753  | NC_000012.11 |
| cg23078194 | 1.47E-07 | 1.77E-08 | -5.88 | 8.4118431 | -9.23E-02 | 27661566  | 27661689  | NC_000006.11 |



|               |          |          |       |           |           |           |           |              |
|---------------|----------|----------|-------|-----------|-----------|-----------|-----------|--------------|
| cg14910265    | 1.47E-07 | 1.77E-08 | -5.88 | 8.4116779 | -3.72E-02 | 45670406  | 45670529  | NC_000015.9  |
| cg22662233    | 1.47E-07 | 1.78E-08 | -5.88 | 8.411075  | -4.31E-02 | 21512258  | 21512381  | NC_000019.9  |
| cg05514903    | 1.47E-07 | 1.78E-08 | -5.88 | 8.4109494 | -9.12E-02 | 49494173  | 49494296  | NC_000008.10 |
| cg26085197    | 1.47E-07 | 1.78E-08 | -5.88 | 8.4109344 | -2.82E-02 | 178789612 | 178789735 | NC_000003.11 |
| cg01429256    | 1.47E-07 | 1.78E-08 | -5.88 | 8.4104923 | -7.29E-02 | 17687834  | 17687957  | NC_000017.10 |
| cg03977174    | 1.47E-07 | 1.78E-08 | -5.88 | 8.4103117 | -1.22E-01 | 148942547 | 148942670 | NC_000005.9  |
| cg02675859    | 1.47E-07 | 1.78E-08 | -5.88 | 8.40912   | -5.52E-02 | 76227227  | 76227350  | NC_000017.10 |
| cg01580568    | 1.47E-07 | 1.78E-08 | -5.88 | 8.4088488 | -1.12E-01 | 209825856 | 209825979 | NC_000001.10 |
| cg01101354    | 1.48E-07 | 1.78E-08 | -5.88 | 8.4081802 | -5.51E-02 | 33219335  | 33219458  | NC_000006.11 |
| cg11428546    | 1.48E-07 | 1.78E-08 | -5.88 | 8.4078764 | -1.25E-01 | 100723110 | 100723233 | NC_000002.11 |
| cg21077578    | 1.48E-07 | 1.78E-08 | -5.88 | 8.4066846 | -7.82E-02 | 1022970   | 1023093   | NC_000007.13 |
| cg23646360    | 1.48E-07 | 1.78E-08 | -5.88 | 8.4064911 | -7.88E-02 | 10886130  | 10886253  | NC_000006.11 |
| cg27152299    | 1.48E-07 | 1.78E-08 | -5.88 | 8.4061626 | -1.19E-01 | 71238225  | 71238348  | NC_000011.9  |
| ch.19.228877F | 1.48E-07 | 1.79E-08 | -5.88 | 8.4059374 | -2.65E-02 | 4219909   | 4220032   | NC_000019.9  |
| cg01036148    | 1.48E-07 | 1.79E-08 | -5.88 | 8.4056253 | -2.13E-02 | 201951866 | 201951989 | NC_000001.10 |
| cg15815206    | 1.48E-07 | 1.79E-08 | -5.88 | 8.4055637 | -2.33E-02 | 13227474  | 13227597  | NC_000019.9  |
| cg04743654    | 1.48E-07 | 1.79E-08 | -5.88 | 8.4047216 | -1.56E-01 | 50378292  | 50378415  | NC_000003.11 |
| cg15316334    | 1.48E-07 | 1.79E-08 | -5.88 | 8.404681  | -7.70E-02 | 42211252  | 42211375  | NC_000019.9  |
| cg08376310    | 1.48E-07 | 1.79E-08 | -5.88 | 8.403947  | -1.26E-01 | 2858621   | 2858744   | NC_000011.9  |
| cg11747349    | 1.48E-07 | 1.79E-08 | -5.88 | 8.4032462 | -5.14E-02 | 32164553  | 32164676  | NC_000006.11 |
| cg00934037    | 1.48E-07 | 1.79E-08 | -5.88 | 8.4028733 | -1.35E-01 | 100889672 | 100889795 | NC_000001.10 |
| cg12564097    | 1.48E-07 | 1.79E-08 | -5.88 | 8.4023822 | -6.81E-02 | 40732762  | 40732885  | NC_000019.9  |
| cg24797508    | 1.48E-07 | 1.79E-08 | -5.88 | 8.4021278 | -1.15E-01 | 67583609  | 67583732  | NC_000005.9  |
| cg19778455    | 1.49E-07 | 1.79E-08 | -5.88 | 8.400692  | -7.07E-02 | 42924913  | 42925036  | NC_000003.11 |
| cg00168694    | 1.49E-07 | 1.80E-08 | -5.87 | 8.3998728 | -1.39E-01 | 40193056  | 40193179  | NC_000021.8  |

|            |          |          |       |           |           |           |           |              |
|------------|----------|----------|-------|-----------|-----------|-----------|-----------|--------------|
| cg10258385 | 1.49E-07 | 1.80E-08 | -5.87 | 8.3997879 | -5.72E-02 | 17410380  | 17410503  | NC_000011.9  |
| cg23295886 | 1.49E-07 | 1.80E-08 | -5.87 | 8.3976525 | -7.44E-02 | 8367314   | 8367437   | NC_000018.9  |
| cg15799267 | 1.49E-07 | 1.80E-08 | -5.87 | 8.3970853 | -9.34E-02 | 7942406   | 7942529   | NC_000017.10 |
| cg00318013 | 1.49E-07 | 1.80E-08 | -5.87 | 8.3967146 | -1.19E-01 | 55119388  | 55119511  | NC_000017.10 |
| cg04122568 | 1.49E-07 | 1.80E-08 | -5.87 | 8.3967139 | -3.26E-02 | 90675774  | 90675897  | NC_000005.9  |
| cg11237426 | 1.49E-07 | 1.80E-08 | -5.87 | 8.3962975 | -4.88E-02 | 179545166 | 179545289 | NC_000001.10 |
| cg22272492 | 1.49E-07 | 1.80E-08 | -5.87 | 8.3962712 | -1.08E-01 | 2925996   | 2926119   | NC_000011.9  |
| cg27066295 | 1.49E-07 | 1.80E-08 | -5.87 | 8.3955186 | -1.20E-01 | 87778903  | 87779026  | NC_000016.9  |
| cg24152976 | 1.49E-07 | 1.81E-08 | -5.87 | 8.3951041 | -9.12E-02 | 236100696 | 236100819 | NC_000002.11 |
| cg23424400 | 1.49E-07 | 1.81E-08 | -5.87 | 8.3941938 | -5.49E-02 | 122985803 | 122985926 | NC_000012.11 |
| cg06743037 | 1.49E-07 | 1.81E-08 | -5.87 | 8.3940115 | -1.35E-01 | 80550531  | 80550654  | NC_000007.13 |
| cg22221074 | 1.50E-07 | 1.81E-08 | -5.87 | 8.3937622 | -8.02E-02 | 3862810   | 3862933   | NC_000012.11 |
| cg11658054 | 1.50E-07 | 1.81E-08 | -5.87 | 8.3935342 | -6.28E-02 | 61988717  | 61988840  | NC_000017.10 |
| cg08323299 | 1.50E-07 | 1.81E-08 | -5.87 | 8.3931295 | -1.24E-01 | 80563028  | 80563151  | NC_000013.10 |
| cg14132167 | 1.50E-07 | 1.81E-08 | -5.87 | 8.3930777 | -1.04E-01 | 90661052  | 90661175  | NC_000006.11 |
| cg07078452 | 1.50E-07 | 1.81E-08 | -5.87 | 8.3927341 | -1.16E-01 | 151093041 | 151093164 | NC_000007.13 |
| cg03511735 | 1.50E-07 | 1.81E-08 | -5.87 | 8.3927138 | -1.70E-01 | 142405227 | 142405350 | NC_000008.10 |
| cg04114537 | 1.50E-07 | 1.81E-08 | -5.87 | 8.3925759 | -4.43E-02 | 155259883 | 155260006 | NC_000003.11 |
| cg11061422 | 1.50E-07 | 1.81E-08 | -5.87 | 8.3925212 | -7.62E-02 | 73136913  | 73137036  | NC_000010.10 |
| cg09174674 | 1.50E-07 | 1.81E-08 | -5.87 | 8.3910167 | -1.44E-02 | 9884042   | 9884165   | NC_000001.10 |
| cg14512870 | 1.50E-07 | 1.81E-08 | -5.87 | 8.3906162 | -8.90E-02 | 173330342 | 173330465 | NC_000002.11 |
| cg14950321 | 1.50E-07 | 1.82E-08 | -5.87 | 8.388196  | -1.25E-01 | 4530233   | 4530356   | NC_000019.9  |
| cg17181653 | 1.50E-07 | 1.82E-08 | -5.87 | 8.3875559 | -1.29E-01 | 144417537 | 144417660 | NC_000006.11 |
| cg00054639 | 1.50E-07 | 1.82E-08 | -5.87 | 8.3868569 | -6.99E-02 | 211698619 | 211698742 | NC_000002.11 |
| cg20293725 | 1.51E-07 | 1.82E-08 | -5.87 | 8.3866911 | -1.30E-01 | 1121899   | 1122022   | NC_000007.13 |

|               |          |          |       |           |           |           |           |              |
|---------------|----------|----------|-------|-----------|-----------|-----------|-----------|--------------|
| cg09153895    | 1.51E-07 | 1.82E-08 | -5.87 | 8.3858704 | -1.66E-01 | 58179869  | 58179992  | NC_000017.10 |
| cg27233566    | 1.51E-07 | 1.82E-08 | -5.87 | 8.3854464 | -4.20E-02 | 49894142  | 49894265  | NC_000003.11 |
| cg02744632    | 1.51E-07 | 1.82E-08 | -5.87 | 8.3849946 | -8.52E-02 | 224441764 | 224441887 | NC_000002.11 |
| cg01267076    | 1.51E-07 | 1.82E-08 | -5.87 | 8.3848803 | -1.28E-01 | 115593787 | 115593910 | NC_000012.11 |
| cg10220068    | 1.51E-07 | 1.82E-08 | -5.87 | 8.3847061 | -1.25E-01 | 179770007 | 179770130 | NC_000005.9  |
| cg11742909    | 1.51E-07 | 1.82E-08 | -5.87 | 8.3844285 | -2.80E-02 | 155601876 | 155601999 | NC_000007.13 |
| cg16724720    | 1.51E-07 | 1.83E-08 | -5.87 | 8.3842097 | -8.98E-02 | 222544693 | 222544816 | NC_000001.10 |
| cg25705266    | 1.51E-07 | 1.83E-08 | -5.87 | 8.3833047 | -1.17E-01 | 30049574  | 30049697  | NC_000017.10 |
| cg14295611    | 1.51E-07 | 1.83E-08 | -5.87 | 8.3824003 | -1.32E-01 | 136876366 | 136876489 | NC_000009.11 |
| cg16910767    | 1.51E-07 | 1.83E-08 | -5.87 | 8.3814219 | -2.32E-02 | 33166529  | 33166652  | NC_000019.9  |
| cg18594562    | 1.51E-07 | 1.83E-08 | -5.87 | 8.3813136 | -2.85E-02 | 57797677  | 57797800  | NC_000020.10 |
| cg09182455    | 1.51E-07 | 1.83E-08 | -5.87 | 8.3809173 | -1.41E-01 | 109116994 | 109117117 | NC_000012.11 |
| cg00690710    | 1.52E-07 | 1.83E-08 | -5.87 | 8.3796846 | -9.75E-02 | 19615438  | 19615561  | NC_000001.10 |
| ch.5.3304132F | 1.52E-07 | 1.83E-08 | -5.87 | 8.3796364 | -1.75E-02 | 172749891 | 172750014 | NC_000005.9  |
| cg06287775    | 1.52E-07 | 1.83E-08 | -5.87 | 8.379567  | -1.42E-01 | 4784174   | 4784297   | NC_000007.13 |
| cg09844687    | 1.52E-07 | 1.84E-08 | -5.87 | 8.378418  | -4.91E-02 | 154597547 | 154597670 | NC_000001.10 |
| cg05337806    | 1.52E-07 | 1.84E-08 | -5.87 | 8.3779855 | -9.88E-02 | 1775904   | 1776027   | NC_000007.13 |
| cg08363042    | 1.52E-07 | 1.84E-08 | -5.87 | 8.3779509 | -8.63E-02 | 36043140  | 36043263  | NC_000021.8  |
| cg01195196    | 1.52E-07 | 1.84E-08 | -5.87 | 8.3776441 | -1.57E-01 | 2770211   | 2770334   | NC_000016.9  |
| cg25295726    | 1.52E-07 | 1.84E-08 | -5.87 | 8.3771845 | -4.19E-02 | 75531989  | 75532112  | NC_000010.10 |
| cg02616710    | 1.52E-07 | 1.84E-08 | -5.87 | 8.3770792 | -6.72E-02 | 19408584  | 19408707  | NC_000009.11 |
| cg13267368    | 1.52E-07 | 1.84E-08 | -5.87 | 8.3754548 | -5.43E-02 | 50234727  | 50234850  | NC_000014.8  |
| cg19873536    | 1.52E-07 | 1.84E-08 | -5.87 | 8.3745891 | -1.34E-01 | 116475283 | 116475406 | NC_000010.10 |
| cg08793208    | 1.52E-07 | 1.84E-08 | -5.87 | 8.3743345 | -8.06E-02 | 66585449  | 66585572  | NC_000016.9  |
| cg03504042    | 1.52E-07 | 1.84E-08 | -5.87 | 8.3742628 | -1.05E-01 | 24108151  | 24108274  | NC_000014.8  |

|            |          |          |       |           |           |           |           |              |
|------------|----------|----------|-------|-----------|-----------|-----------|-----------|--------------|
| cg07756477 | 1.52E-07 | 1.85E-08 | -5.87 | 8.3736409 | -8.39E-02 | 75105012  | 75105135  | NC_000015.9  |
| cg09391066 | 1.52E-07 | 1.85E-08 | -5.87 | 8.373578  | -7.77E-02 | 3163814   | 3163937   | NC_000006.11 |
| cg25923207 | 1.52E-07 | 1.85E-08 | -5.87 | 8.3734766 | -3.79E-02 | 62192276  | 62192399  | NC_000011.9  |
| cg02357046 | 1.53E-07 | 1.85E-08 | -5.87 | 8.3725342 | -1.12E-01 | 1686926   | 1687049   | NC_000004.11 |
| cg04720865 | 1.53E-07 | 1.85E-08 | -5.87 | 8.3724104 | -1.16E-01 | 27948927  | 27949050  | NC_000008.10 |
| cg04643397 | 1.53E-07 | 1.85E-08 | -5.87 | 8.3719648 | -1.35E-01 | 120118807 | 120118930 | NC_000012.11 |
| cg10643489 | 1.53E-07 | 1.85E-08 | -5.87 | 8.3718827 | -9.14E-02 | 219434658 | 219434781 | NC_000002.11 |
| cg23166740 | 1.53E-07 | 1.85E-08 | -5.87 | 8.3715424 | -9.28E-02 | 45440540  | 45440663  | NC_000015.9  |
| cg16643422 | 1.53E-07 | 1.85E-08 | -5.87 | 8.3714276 | -1.06E-01 | 13111435  | 13111558  | NC_000008.10 |
| cg12552165 | 1.53E-07 | 1.85E-08 | -5.87 | 8.3713874 | -1.00E-01 | 183154981 | 183155104 | NC_000001.10 |
| cg15583058 | 1.53E-07 | 1.85E-08 | -5.87 | 8.3708914 | -5.17E-02 | 139305771 | 139305894 | NC_000009.11 |
| cg20847496 | 1.53E-07 | 1.85E-08 | -5.87 | 8.369951  | -3.16E-02 | 31620262  | 31620385  | NC_000006.11 |
| cg23016472 | 1.53E-07 | 1.85E-08 | -5.87 | 8.3691291 | -1.88E-02 | 49217901  | 49218024  | NC_000019.9  |
| cg00691586 | 1.53E-07 | 1.85E-08 | -5.87 | 8.3686916 | -9.02E-02 | 86160762  | 86160885  | NC_000015.9  |
| cg15068863 | 1.53E-07 | 1.86E-08 | -5.87 | 8.3684739 | -3.04E-02 | 36103878  | 36104001  | NC_000019.9  |
| cg06824467 | 1.53E-07 | 1.86E-08 | -5.87 | 8.3681618 | -4.88E-02 | 149223316 | 149223439 | NC_000001.10 |
| cg12714757 | 1.53E-07 | 1.86E-08 | -5.87 | 8.3670581 | -3.19E-02 | 73874637  | 73874760  | NC_000017.10 |
| cg23118151 | 1.53E-07 | 1.86E-08 | -5.87 | 8.3664563 | -2.55E-02 | 24269866  | 24269989  | NC_000002.11 |
| cg26601559 | 1.53E-07 | 1.86E-08 | -5.87 | 8.3663624 | -3.71E-02 | 77837019  | 77837142  | NC_000005.9  |
| cg18178836 | 1.53E-07 | 1.86E-08 | -5.87 | 8.3662911 | -7.04E-02 | 3179821   | 3179944   | NC_000010.10 |
| cg26969179 | 1.54E-07 | 1.86E-08 | -5.87 | 8.3657285 | -1.10E-01 | 127738328 | 127738451 | NC_000010.10 |
| cg07037944 | 1.54E-07 | 1.86E-08 | -5.87 | 8.3656553 | -1.00E-01 | 64290807  | 64290930  | NC_000015.9  |
| cg09916692 | 1.54E-07 | 1.86E-08 | -5.87 | 8.3653603 | -1.19E-01 | 103549622 | 103549745 | NC_000008.10 |
| cg22960347 | 1.54E-07 | 1.86E-08 | -5.87 | 8.3650589 | -7.74E-02 | 155276653 | 155276776 | NC_000007.13 |
| cg14094333 | 1.54E-07 | 1.86E-08 | -5.87 | 8.3643211 | -5.43E-02 | 38666051  | 38666174  | NC_000004.11 |

|            |          |          |       |           |           |           |           |              |
|------------|----------|----------|-------|-----------|-----------|-----------|-----------|--------------|
| cg03556021 | 1.54E-07 | 1.86E-08 | -5.87 | 8.3640663 | -1.37E-01 | 112258649 | 112258772 | NC_000005.9  |
| cg14097440 | 1.54E-07 | 1.86E-08 | -5.87 | 8.3640468 | -1.03E-01 | 74251018  | 74251141  | NC_000014.8  |
| cg16259904 | 1.54E-07 | 1.86E-08 | -5.87 | 8.3634527 | -7.86E-02 | 134146220 | 134146343 | NC_000010.10 |
| cg01647560 | 1.54E-07 | 1.87E-08 | -5.87 | 8.3631199 | -1.21E-01 | 83404491  | 83404614  | NC_000011.9  |
| cg02813298 | 1.54E-07 | 1.87E-08 | -5.87 | 8.3630847 | -6.23E-02 | 863136    | 863259    | NC_000019.9  |
| cg16807961 | 1.54E-07 | 1.87E-08 | -5.87 | 8.3626175 | -1.08E-01 | 2699860   | 2699983   | NC_000017.10 |
| cg02346342 | 1.54E-07 | 1.87E-08 | -5.87 | 8.3621634 | -1.18E-01 | 74332435  | 74332558  | NC_000008.10 |
| cg11453400 | 1.54E-07 | 1.87E-08 | -5.87 | 8.3608702 | -1.18E-01 | 116165190 | 116165313 | NC_000010.10 |
| cg04785213 | 1.54E-07 | 1.87E-08 | -5.87 | 8.3607846 | -1.32E-01 | 69743616  | 69743739  | NC_000012.11 |
| cg15438314 | 1.54E-07 | 1.87E-08 | -5.87 | 8.3604717 | -8.91E-02 | 17190397  | 17190520  | NC_000019.9  |
| cg23412091 | 1.54E-07 | 1.87E-08 | -5.87 | 8.3600227 | -3.94E-02 | 185217061 | 185217184 | NC_000003.11 |
| cg09026875 | 1.54E-07 | 1.87E-08 | -5.87 | 8.3596169 | -2.75E-02 | 60501189  | 60501312  | NC_000017.10 |
| cg13423274 | 1.55E-07 | 1.87E-08 | -5.87 | 8.3588029 | -1.17E-01 | 28695679  | 28695802  | NC_000011.9  |
| cg13260148 | 1.55E-07 | 1.87E-08 | -5.87 | 8.3586949 | -1.14E-01 | 72227294  | 72227417  | NC_000003.11 |
| cg22325186 | 1.55E-07 | 1.87E-08 | -5.87 | 8.3582738 | -7.18E-02 | 133158791 | 133158914 | NC_000012.11 |
| cg11421255 | 1.55E-07 | 1.88E-08 | -5.87 | 8.3579611 | -3.49E-02 | 60690974  | 60691097  | NC_000015.9  |
| cg03885646 | 1.55E-07 | 1.88E-08 | -5.87 | 8.3578265 | -1.09E-01 | 156273458 | 156273581 | NC_000003.11 |
| cg10082088 | 1.55E-07 | 1.88E-08 | -5.87 | 8.3575794 | -7.75E-02 | 124856376 | 124856499 | NC_000012.11 |
| cg13646480 | 1.55E-07 | 1.88E-08 | -5.87 | 8.3569845 | -1.11E-01 | 125110034 | 125110157 | NC_000009.11 |
| cg09431318 | 1.55E-07 | 1.88E-08 | -5.87 | 8.3569826 | -1.19E-01 | 1652082   | 1652205   | NC_000011.9  |
| cg12678667 | 1.55E-07 | 1.88E-08 | -5.87 | 8.3551194 | -3.48E-02 | 223536123 | 223536246 | NC_000002.11 |
| cg07019638 | 1.55E-07 | 1.88E-08 | -5.87 | 8.3539339 | -1.39E-01 | 64635774  | 64635897  | NC_000011.9  |
| cg20831777 | 1.56E-07 | 1.89E-08 | -5.87 | 8.3509702 | -4.49E-02 | 55100918  | 55101041  | NC_000004.11 |
| cg27664343 | 1.56E-07 | 1.89E-08 | -5.87 | 8.3509198 | -6.70E-02 | 133296224 | 133296347 | NC_000012.11 |
| cg08774694 | 1.56E-07 | 1.89E-08 | -5.87 | 8.3508831 | -9.93E-02 | 75287019  | 75287142  | NC_000016.9  |

|            |          |          |       |           |           |           |           |              |
|------------|----------|----------|-------|-----------|-----------|-----------|-----------|--------------|
| cg23684507 | 1.56E-07 | 1.89E-08 | -5.86 | 8.35001   | -2.84E-02 | 6271878   | 6272001   | NC_000004.11 |
| cg04295632 | 1.56E-07 | 1.89E-08 | -5.86 | 8.34873   | -1.11E-01 | 101927304 | 101927427 | NC_000014.8  |
| cg19468534 | 1.56E-07 | 1.89E-08 | -5.86 | 8.3479766 | -1.11E-01 | 41623761  | 41623884  | NC_000015.9  |
| cg01806808 | 1.56E-07 | 1.90E-08 | -5.86 | 8.3471433 | -2.97E-02 | 142011144 | 142011267 | NC_000008.10 |
| cg23856536 | 1.56E-07 | 1.90E-08 | -5.86 | 8.3468487 | -1.24E-01 | 101384349 | 101384472 | NC_000007.13 |
| cg20460166 | 1.57E-07 | 1.90E-08 | -5.86 | 8.3456698 | -1.06E-01 | 54423202  | 54423325  | NC_000001.10 |
| cg22226680 | 1.57E-07 | 1.90E-08 | -5.86 | 8.3450418 | -9.96E-02 | 1841885   | 1842008   | NC_000011.9  |
| cg10658516 | 1.57E-07 | 1.90E-08 | -5.86 | 8.344924  | -2.72E-02 | 98612531  | 98612654  | NC_000002.11 |
| cg10508317 | 1.57E-07 | 1.90E-08 | -5.86 | 8.3445231 | -1.37E-01 | 76355146  | 76355269  | NC_000017.10 |
| cg11408656 | 1.57E-07 | 1.90E-08 | -5.86 | 8.3432424 | -3.70E-02 | 226497275 | 226497398 | NC_000001.10 |
| cg08729600 | 1.57E-07 | 1.90E-08 | -5.86 | 8.3429151 | -1.32E-01 | 9360986   | 9361109   | NC_000012.11 |
| cg17920186 | 1.57E-07 | 1.90E-08 | -5.86 | 8.3427503 | -9.25E-02 | 72323154  | 72323277  | NC_000003.11 |
| cg03513388 | 1.57E-07 | 1.91E-08 | -5.86 | 8.3424766 | -8.87E-02 | 17599362  | 17599485  | NC_000001.10 |
| cg10702418 | 1.57E-07 | 1.91E-08 | -5.86 | 8.3424347 | -1.15E-01 | 157090031 | 157090154 | NC_000007.13 |
| cg04848660 | 1.57E-07 | 1.91E-08 | -5.86 | 8.3423293 | -1.72E-01 | 41174125  | 41174248  | NC_000007.13 |
| cg24467337 | 1.57E-07 | 1.91E-08 | -5.86 | 8.341552  | -9.35E-02 | 31262314  | 31262437  | NC_000020.10 |
| cg03041510 | 1.57E-07 | 1.91E-08 | -5.86 | 8.3413495 | -1.33E-01 | 107636217 | 107636340 | NC_000007.13 |
| cg11862001 | 1.57E-07 | 1.91E-08 | -5.86 | 8.3397903 | -1.06E-01 | 6764048   | 6764171   | NC_000010.10 |
| cg17166812 | 1.57E-07 | 1.91E-08 | -5.86 | 8.3396254 | -5.65E-02 | 161169574 | 161169697 | NC_000001.10 |
| cg14782883 | 1.57E-07 | 1.91E-08 | -5.86 | 8.3395713 | -8.60E-02 | 49522683  | 49522806  | NC_000019.9  |
| cg16117781 | 1.58E-07 | 1.91E-08 | -5.86 | 8.3386863 | -1.47E-01 | 7991159   | 7991282   | NC_000001.10 |
| cg05157272 | 1.58E-07 | 1.92E-08 | -5.86 | 8.3373154 | -7.51E-02 | 246862256 | 246862379 | NC_000001.10 |
| cg17340729 | 1.58E-07 | 1.92E-08 | -5.86 | 8.3371904 | -1.24E-01 | 16850308  | 16850431  | NC_000006.11 |
| cg01932459 | 1.58E-07 | 1.92E-08 | -5.86 | 8.3368043 | -4.27E-02 | 109703513 | 109703636 | NC_000006.11 |
| cg23640231 | 1.58E-07 | 1.92E-08 | -5.86 | 8.3360449 | -1.20E-01 | 2844871   | 2844994   | NC_000001.10 |

|            |          |          |       |           |           |           |           |              |
|------------|----------|----------|-------|-----------|-----------|-----------|-----------|--------------|
| cg01435196 | 1.58E-07 | 1.92E-08 | -5.86 | 8.3360399 | -3.98E-02 | 46009946  | 46010069  | NC_000019.9  |
| cg05487207 | 1.58E-07 | 1.92E-08 | -5.86 | 8.3356271 | -7.32E-02 | 22224126  | 22224249  | NC_000008.10 |
| cg11300098 | 1.58E-07 | 1.92E-08 | -5.86 | 8.3355528 | -6.99E-02 | 38801506  | 38801629  | NC_000019.9  |
| cg14992108 | 1.58E-07 | 1.92E-08 | -5.86 | 8.3352915 | -1.41E-01 | 121825470 | 121825593 | NC_000008.10 |
| cg27055685 | 1.58E-07 | 1.92E-08 | -5.86 | 8.3346605 | -7.50E-02 | 33258248  | 33258371  | NC_000006.11 |
| cg10444530 | 1.58E-07 | 1.92E-08 | -5.86 | 8.3343066 | -4.00E-02 | 52811374  | 52811497  | NC_000008.10 |
| cg08431882 | 1.58E-07 | 1.92E-08 | -5.86 | 8.3339884 | -9.94E-02 | 103110998 | 103111121 | NC_000010.10 |
| cg26631477 | 1.58E-07 | 1.92E-08 | -5.86 | 8.3330384 | -8.06E-02 | 22517195  | 22517318  | NC_000004.11 |
| cg05167392 | 1.58E-07 | 1.92E-08 | -5.86 | 8.3325832 | -2.25E-02 | 103874593 | 103874716 | NC_000010.10 |
| cg15048832 | 1.59E-07 | 1.93E-08 | -5.86 | 8.3316367 | -3.88E-02 | 150130775 | 150130898 | NC_000003.11 |
| cg19238325 | 1.59E-07 | 1.93E-08 | -5.86 | 8.33141   | -1.34E-01 | 51988425  | 51988548  | NC_000003.11 |
| cg26111184 | 1.59E-07 | 1.93E-08 | -5.86 | 8.3313512 | -2.80E-02 | 27255694  | 27255817  | NC_000002.11 |
| cg09060316 | 1.59E-07 | 1.93E-08 | -5.86 | 8.3310391 | -3.14E-02 | 26467451  | 26467574  | NC_000002.11 |
| cg07134316 | 1.59E-07 | 1.93E-08 | -5.86 | 8.3308606 | -8.84E-02 | 57488112  | 57488235  | NC_000012.11 |
| cg01720033 | 1.59E-07 | 1.93E-08 | -5.86 | 8.3307963 | -1.05E-01 | 62777744  | 62777867  | NC_000017.10 |
| cg10132348 | 1.59E-07 | 1.93E-08 | -5.86 | 8.3307249 | -2.36E-02 | 6784379   | 6784502   | NC_000004.11 |
| cg00834319 | 1.59E-07 | 1.93E-08 | -5.86 | 8.330331  | -2.14E-02 | 64970752  | 64970875  | NC_000014.8  |
| cg23730617 | 1.59E-07 | 1.93E-08 | -5.86 | 8.3302805 | -9.12E-02 | 160823505 | 160823628 | NC_000003.11 |
| cg07260739 | 1.59E-07 | 1.93E-08 | -5.86 | 8.3296292 | -8.65E-02 | 70285978  | 70286101  | NC_000016.9  |
| cg12205669 | 1.59E-07 | 1.93E-08 | -5.86 | 8.3288077 | -1.12E-01 | 82086140  | 82086263  | NC_000014.8  |
| cg12212956 | 1.59E-07 | 1.93E-08 | -5.86 | 8.3283459 | -8.08E-02 | 151893845 | 151893968 | NC_000003.11 |
| cg00451054 | 1.59E-07 | 1.93E-08 | -5.86 | 8.3281835 | -1.31E-01 | 77913321  | 77913444  | NC_000008.10 |
| cg07560662 | 1.59E-07 | 1.93E-08 | -5.86 | 8.3280058 | -4.24E-02 | 117113232 | 117113355 | NC_000001.10 |
| cg09962458 | 1.59E-07 | 1.93E-08 | -5.86 | 8.3279419 | -6.22E-02 | 72178358  | 72178481  | NC_000014.8  |
| cg09761224 | 1.59E-07 | 1.93E-08 | -5.86 | 8.3278825 | -1.95E-01 | 10687042  | 10687165  | NC_000002.11 |

|            |          |          |       |           |           |           |           |              |
|------------|----------|----------|-------|-----------|-----------|-----------|-----------|--------------|
| cg08587313 | 1.59E-07 | 1.94E-08 | -5.86 | 8.3269523 | -1.42E-01 | 130215373 | 130215496 | NC_000008.10 |
| cg07408148 | 1.59E-07 | 1.94E-08 | -5.86 | 8.3266291 | -1.33E-01 | 15021403  | 15021526  | NC_000005.9  |
| cg25685983 | 1.59E-07 | 1.94E-08 | -5.86 | 8.3266046 | -7.26E-02 | 10677491  | 10677614  | NC_000019.9  |
| cg14054283 | 1.59E-07 | 1.94E-08 | -5.86 | 8.3265248 | -7.74E-02 | 75292272  | 75292395  | NC_000002.11 |
| cg13397314 | 1.59E-07 | 1.94E-08 | -5.86 | 8.3264521 | -1.85E-02 | 20256052  | 20256175  | NC_000022.10 |
| cg14087413 | 1.59E-07 | 1.94E-08 | -5.86 | 8.3258571 | -1.43E-01 | 35848330  | 35848453  | NC_000009.11 |
| cg07185038 | 1.60E-07 | 1.94E-08 | -5.86 | 8.3247234 | -2.47E-02 | 58165658  | 58165781  | NC_000012.11 |
| cg07855465 | 1.60E-07 | 1.94E-08 | -5.86 | 8.3245475 | -1.26E-01 | 79377665  | 79377788  | NC_000017.10 |
| cg20266910 | 1.60E-07 | 1.94E-08 | -5.86 | 8.3237671 | -8.93E-02 | 26577678  | 26577801  | NC_000006.11 |
| cg17134890 | 1.60E-07 | 1.94E-08 | -5.86 | 8.3236425 | -6.31E-02 | 122753390 | 122753513 | NC_000011.9  |
| cg04329382 | 1.60E-07 | 1.94E-08 | -5.86 | 8.3233027 | -1.30E-01 | 46480891  | 46481014  | NC_000022.10 |
| cg06633081 | 1.60E-07 | 1.94E-08 | -5.86 | 8.3229506 | -1.09E-01 | 55120781  | 55120904  | NC_000014.8  |
| cg19015537 | 1.60E-07 | 1.94E-08 | -5.86 | 8.3224827 | -1.05E-01 | 147341375 | 147341498 | NC_000002.11 |
| cg03679456 | 1.60E-07 | 1.94E-08 | -5.86 | 8.3224645 | -1.35E-01 | 169377946 | 169378069 | NC_000003.11 |
| cg04447890 | 1.60E-07 | 1.95E-08 | -5.86 | 8.3212638 | -3.73E-02 | 68697988  | 68698111  | NC_000001.10 |
| cg07105478 | 1.60E-07 | 1.95E-08 | -5.86 | 8.3208475 | -9.39E-02 | 77767485  | 77767608  | NC_000017.10 |
| cg00563678 | 1.60E-07 | 1.95E-08 | -5.86 | 8.3199395 | -1.15E-01 | 141968563 | 141968686 | NC_000004.11 |
| cg17484976 | 1.61E-07 | 1.95E-08 | -5.86 | 8.3189807 | -3.36E-02 | 60982411  | 60982534  | NC_000020.10 |
| cg07260541 | 1.61E-07 | 1.95E-08 | -5.86 | 8.3188872 | -1.09E-01 | 51117848  | 51117971  | NC_000016.9  |
| cg01846046 | 1.61E-07 | 1.95E-08 | -5.86 | 8.3185573 | -1.32E-01 | 64034019  | 64034142  | NC_000011.9  |
| cg17336139 | 1.61E-07 | 1.96E-08 | -5.86 | 8.3162293 | -9.98E-02 | 22901648  | 22901771  | NC_000022.10 |
| cg16116663 | 1.61E-07 | 1.96E-08 | -5.86 | 8.3138954 | -7.52E-02 | 71421775  | 71421898  | NC_000002.11 |
| cg02968301 | 1.61E-07 | 1.96E-08 | -5.86 | 8.3138545 | -9.34E-02 | 5108664   | 5108787   | NC_000016.9  |
| cg01083380 | 1.61E-07 | 1.96E-08 | -5.86 | 8.3134527 | -6.82E-02 | 168863860 | 168863983 | NC_000003.11 |
| cg09940311 | 1.61E-07 | 1.96E-08 | -5.86 | 8.3129376 | -1.06E-01 | 183901666 | 183901789 | NC_000001.10 |



|               |          |          |       |           |           |           |           |              |
|---------------|----------|----------|-------|-----------|-----------|-----------|-----------|--------------|
| cg08196842    | 1.61E-07 | 1.96E-08 | -5.86 | 8.3127879 | -5.76E-02 | 65016517  | 65016640  | NC_000014.8  |
| cg26889437    | 1.62E-07 | 1.97E-08 | -5.86 | 8.312256  | -2.38E-01 | 460914    | 461037    | NC_000011.9  |
| cg06547034    | 1.62E-07 | 1.97E-08 | -5.86 | 8.3120304 | -1.14E-01 | 87403729  | 87403852  | NC_000010.10 |
| cg00945507    | 1.62E-07 | 1.97E-08 | -5.86 | 8.3115286 | -8.58E-02 | 54827677  | 54827800  | NC_000007.13 |
| cg21533897    | 1.62E-07 | 1.97E-08 | -5.86 | 8.3097848 | -1.16E-01 | 64377229  | 64377352  | NC_000011.9  |
| cg14053001    | 1.62E-07 | 1.97E-08 | -5.86 | 8.3094034 | -7.65E-02 | 24338244  | 24338367  | NC_000002.11 |
| ch.8.2465681F | 1.62E-07 | 1.97E-08 | -5.86 | 8.3091911 | -3.62E-02 | 124800139 | 124800262 | NC_000008.10 |
| cg20863393    | 1.62E-07 | 1.97E-08 | -5.86 | 8.3090163 | -4.14E-02 | 100259188 | 100259311 | NC_000013.10 |
| cg09171931    | 1.62E-07 | 1.97E-08 | -5.86 | 8.3088766 | -1.34E-01 | 34876740  | 34876863  | NC_000011.9  |
| cg09808196    | 1.62E-07 | 1.97E-08 | -5.86 | 8.308224  | -3.99E-02 | 49354696  | 49354819  | NC_000006.11 |
| cg10270430    | 1.62E-07 | 1.97E-08 | -5.86 | 8.3080762 | -1.02E-01 | 34024362  | 34024485  | NC_000006.11 |
| cg07814974    | 1.62E-07 | 1.98E-08 | -5.86 | 8.3069921 | -4.03E-02 | 1544179   | 1544302   | NC_000016.9  |
| cg24935409    | 1.62E-07 | 1.98E-08 | -5.86 | 8.3067714 | -1.28E-01 | 157667762 | 157667885 | NC_000007.13 |
| cg03669282    | 1.62E-07 | 1.98E-08 | -5.86 | 8.3064366 | -7.14E-02 | 228566718 | 228566841 | NC_000001.10 |
| cg18670092    | 1.62E-07 | 1.98E-08 | -5.86 | 8.3062314 | -1.05E-02 | 42841167  | 42841290  | NC_000015.9  |
| cg02007288    | 1.63E-07 | 1.98E-08 | -5.86 | 8.3060094 | -1.35E-01 | 30513708  | 30513831  | NC_000008.10 |
| cg19009372    | 1.63E-07 | 1.98E-08 | -5.86 | 8.3054111 | -1.01E-01 | 225748136 | 225748259 | NC_000002.11 |
| cg00187981    | 1.63E-07 | 1.98E-08 | -5.86 | 8.304826  | -1.63E-01 | 142984613 | 142984736 | NC_000008.10 |
| cg11962201    | 1.63E-07 | 1.98E-08 | -5.86 | 8.3041147 | -1.91E-02 | 33680799  | 33680922  | NC_000020.10 |
| cg22495191    | 1.63E-07 | 1.98E-08 | -5.86 | 8.3036703 | -4.83E-02 | 154834293 | 154834416 | NC_000001.10 |
| cg26907438    | 1.63E-07 | 1.98E-08 | -5.86 | 8.3027622 | -8.29E-02 | 233114000 | 233114123 | NC_000001.10 |
| cg27520502    | 1.63E-07 | 1.99E-08 | -5.86 | 8.3018579 | -3.90E-02 | 26684562  | 26684685  | NC_000017.10 |
| cg14665028    | 1.63E-07 | 1.99E-08 | -5.86 | 8.300915  | -3.03E-02 | 220024924 | 220025047 | NC_000002.11 |
| cg07249919    | 1.63E-07 | 1.99E-08 | -5.86 | 8.3005679 | -3.15E-02 | 53813391  | 53813514  | NC_000005.9  |
| cg20623868    | 1.63E-07 | 1.99E-08 | -5.86 | 8.3001914 | -4.18E-02 | 15666885  | 15667008  | NC_000019.9  |

|            |          |          |       |           |           |           |           |              |
|------------|----------|----------|-------|-----------|-----------|-----------|-----------|--------------|
| cg16241867 | 1.63E-07 | 1.99E-08 | -5.85 | 8.2998725 | -8.28E-02 | 14074162  | 14074285  | NC_000019.9  |
| cg12759215 | 1.64E-07 | 1.99E-08 | -5.85 | 8.2988616 | -2.29E-02 | 14183018  | 14183141  | NC_000019.9  |
| cg15012864 | 1.64E-07 | 1.99E-08 | -5.85 | 8.2987825 | -2.80E-02 | 226891415 | 226891538 | NC_000001.10 |
| cg16588302 | 1.64E-07 | 1.99E-08 | -5.85 | 8.2985548 | -2.51E-02 | 103668499 | 103668622 | NC_000008.10 |
| cg00153942 | 1.64E-07 | 1.99E-08 | -5.85 | 8.2979105 | -9.58E-02 | 71249212  | 71249335  | NC_000011.9  |
| cg16164356 | 1.64E-07 | 2.00E-08 | -5.85 | 8.2975208 | -6.76E-02 | 111683801 | 111683924 | NC_000001.10 |
| cg20095338 | 1.64E-07 | 2.00E-08 | -5.85 | 8.297186  | -5.80E-02 | 76478402  | 76478525  | NC_000012.11 |
| cg14961031 | 1.64E-07 | 2.00E-08 | -5.85 | 8.296965  | -5.43E-02 | 4344921   | 4345044   | NC_000003.11 |
| cg02663821 | 1.64E-07 | 2.00E-08 | -5.85 | 8.2955254 | -5.59E-02 | 82463911  | 82464034  | NC_000006.11 |
| cg05651657 | 1.64E-07 | 2.00E-08 | -5.85 | 8.2953681 | -5.29E-02 | 32509331  | 32509454  | NC_000003.11 |
| cg05366923 | 1.64E-07 | 2.00E-08 | -5.85 | 8.2948743 | -9.70E-02 | 183155056 | 183155179 | NC_000001.10 |
| cg04431002 | 1.64E-07 | 2.00E-08 | -5.85 | 8.2944317 | -9.35E-02 | 84766438  | 84766561  | NC_000016.9  |
| cg26035105 | 1.64E-07 | 2.00E-08 | -5.85 | 8.2934536 | -1.46E-01 | 121105464 | 121105587 | NC_000002.11 |
| cg10639411 | 1.64E-07 | 2.00E-08 | -5.85 | 8.2933513 | -8.17E-02 | 73150125  | 73150248  | NC_000003.11 |
| cg18864399 | 1.64E-07 | 2.00E-08 | -5.85 | 8.2932842 | -5.42E-02 | 73345368  | 73345491  | NC_000015.9  |
| cg25574672 | 1.65E-07 | 2.00E-08 | -5.85 | 8.2931325 | -2.88E-02 | 133562092 | 133562215 | NC_000005.9  |
| cg17093267 | 1.65E-07 | 2.01E-08 | -5.85 | 8.2909609 | -1.09E-01 | 111683654 | 111683777 | NC_000010.10 |
| cg20276232 | 1.65E-07 | 2.01E-08 | -5.85 | 8.2902916 | -5.60E-02 | 28567004  | 28567127  | NC_000015.9  |
| cg04241305 | 1.65E-07 | 2.01E-08 | -5.85 | 8.289501  | -1.58E-02 | 137689053 | 137689176 | NC_000005.9  |
| cg19966212 | 1.65E-07 | 2.01E-08 | -5.85 | 8.289442  | -1.15E-01 | 149792783 | 149792906 | NC_000005.9  |
| cg17940234 | 1.65E-07 | 2.01E-08 | -5.85 | 8.2887995 | -7.14E-02 | 150070697 | 150070820 | NC_000006.11 |
| cg02101338 | 1.65E-07 | 2.01E-08 | -5.85 | 8.2886358 | -8.04E-02 | 124095512 | 124095635 | NC_000011.9  |
| cg05001044 | 1.65E-07 | 2.01E-08 | -5.85 | 8.288496  | -3.71E-02 | 567312    | 567435    | NC_000001.10 |
| cg09319706 | 1.65E-07 | 2.02E-08 | -5.85 | 8.2877192 | -3.95E-02 | 75024153  | 75024276  | NC_000004.11 |
| cg17508500 | 1.65E-07 | 2.02E-08 | -5.85 | 8.2876308 | -1.06E-01 | 72945331  | 72945454  | NC_000006.11 |

|                 |          |          |       |           |           |           |           |              |
|-----------------|----------|----------|-------|-----------|-----------|-----------|-----------|--------------|
| cg02097152      | 1.66E-07 | 2.02E-08 | -5.85 | 8.2865795 | -1.06E-01 | 29291701  | 29291824  | NC_000013.10 |
| cg20433906      | 1.66E-07 | 2.02E-08 | -5.85 | 8.2856148 | -1.06E-01 | 62076318  | 62076441  | NC_000017.10 |
| cg15412446      | 1.66E-07 | 2.02E-08 | -5.85 | 8.2840933 | -9.11E-02 | 106886593 | 106886716 | NC_000002.11 |
| cg23036508      | 1.66E-07 | 2.02E-08 | -5.85 | 8.283667  | -2.94E-02 | 169483025 | 169483148 | NC_000003.11 |
| cg23341567      | 1.66E-07 | 2.02E-08 | -5.85 | 8.2836462 | -4.76E-02 | 38278395  | 38278518  | NC_000017.10 |
| cg16811988      | 1.66E-07 | 2.02E-08 | -5.85 | 8.2831607 | -1.07E-01 | 42103138  | 42103261  | NC_000003.11 |
| cg22606873      | 1.66E-07 | 2.03E-08 | -5.85 | 8.2829428 | -5.22E-02 | 3144679   | 3144802   | NC_000001.10 |
| cg19874640      | 1.66E-07 | 2.03E-08 | -5.85 | 8.2823372 | -1.06E-01 | 134527449 | 134527572 | NC_000005.9  |
| cg25940946      | 1.66E-07 | 2.03E-08 | -5.85 | 8.2822268 | -4.97E-02 | 24181263  | 24181386  | NC_000022.10 |
| cg00055555      | 1.66E-07 | 2.03E-08 | -5.85 | 8.2814651 | -7.18E-02 | 29011001  | 29011124  | NC_000010.10 |
| ch.17.49953103R | 1.66E-07 | 2.03E-08 | -5.85 | 8.2809304 | -1.81E-02 | 52598104  | 52598227  | NC_000017.10 |
| cg18189409      | 1.66E-07 | 2.03E-08 | -5.85 | 8.2806083 | -6.74E-02 | 21399795  | 21399918  | NC_000022.10 |
| cg19162333      | 1.67E-07 | 2.03E-08 | -5.85 | 8.2796691 | -2.91E-02 | 16084676  | 16084799  | NC_000004.11 |
| cg22273231      | 1.67E-07 | 2.03E-08 | -5.85 | 8.2783487 | -9.26E-02 | 17910351  | 17910474  | NC_000017.10 |
| cg03937290      | 1.67E-07 | 2.04E-08 | -5.85 | 8.2781809 | -1.15E-01 | 27852711  | 27852834  | NC_000001.10 |
| cg12800122      | 1.67E-07 | 2.04E-08 | -5.85 | 8.2781281 | -8.65E-02 | 3162454   | 3162577   | NC_000001.10 |
| cg06758539      | 1.67E-07 | 2.04E-08 | -5.85 | 8.2778626 | -8.18E-02 | 75975285  | 75975408  | NC_000005.9  |
| cg26450149      | 1.67E-07 | 2.04E-08 | -5.85 | 8.2776196 | -1.07E-01 | 47375903  | 47376026  | NC_000007.13 |
| cg21285383      | 1.67E-07 | 2.04E-08 | -5.85 | 8.2775895 | -4.95E-02 | 89894308  | 89894431  | NC_000016.9  |
| cg18170545      | 1.67E-07 | 2.04E-08 | -5.85 | 8.2771169 | -9.38E-02 | 131080137 | 131080260 | NC_000008.10 |
| cg05507459      | 1.67E-07 | 2.04E-08 | -5.85 | 8.2767535 | -8.47E-02 | 91148748  | 91148871  | NC_000009.11 |
| cg12283302      | 1.67E-07 | 2.04E-08 | -5.85 | 8.2760928 | -7.16E-02 | 62113045  | 62113168  | NC_000020.10 |
| cg06424894      | 1.67E-07 | 2.04E-08 | -5.85 | 8.2759764 | -1.16E-01 | 45314789  | 45314912  | NC_000015.9  |
| cg20620147      | 1.67E-07 | 2.04E-08 | -5.85 | 8.2756625 | -2.84E-02 | 43374879  | 43375002  | NC_000020.10 |
| cg05405389      | 1.67E-07 | 2.04E-08 | -5.85 | 8.2753044 | -1.24E-01 | 84386472  | 84386595  | NC_000011.9  |

|            |          |          |       |           |           |           |           |              |
|------------|----------|----------|-------|-----------|-----------|-----------|-----------|--------------|
| cg05953751 | 1.67E-07 | 2.04E-08 | -5.85 | 8.2749423 | -9.84E-02 | 80054291  | 80054414  | NC_000017.10 |
| cg24699021 | 1.67E-07 | 2.04E-08 | -5.85 | 8.2748253 | -1.26E-01 | 172305986 | 172306109 | NC_000005.9  |
| cg17643624 | 1.68E-07 | 2.04E-08 | -5.85 | 8.2740722 | -9.95E-02 | 111281037 | 111281160 | NC_000013.10 |
| cg15315056 | 1.68E-07 | 2.04E-08 | -5.85 | 8.2739474 | -1.45E-01 | 184504579 | 184504702 | NC_000003.11 |
| cg17906339 | 1.68E-07 | 2.04E-08 | -5.85 | 8.2735139 | -1.19E-01 | 204183529 | 204183652 | NC_000001.10 |
| cg16617141 | 1.68E-07 | 2.04E-08 | -5.85 | 8.2734485 | -7.84E-02 | 72408186  | 72408309  | NC_000011.9  |
| cg09648454 | 1.68E-07 | 2.05E-08 | -5.85 | 8.2725052 | -1.33E-01 | 48157560  | 48157683  | NC_000016.9  |
| cg23817981 | 1.68E-07 | 2.05E-08 | -5.85 | 8.2717425 | -1.66E-01 | 32993063  | 32993186  | NC_000003.11 |
| cg20478264 | 1.68E-07 | 2.05E-08 | -5.85 | 8.2717305 | -7.87E-02 | 27782176  | 27782299  | NC_000006.11 |
| cg25504749 | 1.68E-07 | 2.05E-08 | -5.85 | 8.2711794 | -8.71E-02 | 135159539 | 135159662 | NC_000010.10 |
| cg18347602 | 1.68E-07 | 2.05E-08 | -5.85 | 8.2709882 | -1.22E-01 | 26063314  | 26063437  | NC_000001.10 |
| cg27552857 | 1.68E-07 | 2.05E-08 | -5.85 | 8.270663  | -8.26E-02 | 4542866   | 4542989   | NC_000019.9  |
| cg20541505 | 1.68E-07 | 2.05E-08 | -5.85 | 8.2703318 | -1.03E-01 | 28395518  | 28395641  | NC_000002.11 |
| cg09174829 | 1.68E-07 | 2.05E-08 | -5.85 | 8.2703178 | -8.50E-02 | 42631405  | 42631528  | NC_000001.10 |
| cg07921759 | 1.68E-07 | 2.05E-08 | -5.85 | 8.2702401 | -9.82E-02 | 55203969  | 55204092  | NC_000014.8  |
| cg23704627 | 1.68E-07 | 2.05E-08 | -5.85 | 8.2701927 | -6.02E-02 | 39152758  | 39152881  | NC_000022.10 |
| cg14222307 | 1.68E-07 | 2.05E-08 | -5.85 | 8.2699382 | -1.05E-01 | 61097246  | 61097369  | NC_000015.9  |
| cg08916340 | 1.68E-07 | 2.05E-08 | -5.85 | 8.2695291 | -6.22E-02 | 112631462 | 112631585 | NC_000010.10 |
| cg11277834 | 1.68E-07 | 2.05E-08 | -5.85 | 8.2692771 | -5.81E-02 | 11323560  | 11323683  | NC_000003.11 |
| cg12946225 | 1.68E-07 | 2.05E-08 | -5.85 | 8.2688427 | -9.74E-02 | 3573751   | 3573874   | NC_000019.9  |
| cg11420192 | 1.68E-07 | 2.06E-08 | -5.85 | 8.2686228 | -8.34E-02 | 239495208 | 239495331 | NC_000002.11 |
| cg23792952 | 1.68E-07 | 2.06E-08 | -5.85 | 8.2681759 | -7.15E-02 | 25451326  | 25451449  | NC_000015.9  |
| cg27009812 | 1.69E-07 | 2.06E-08 | -5.85 | 8.2670717 | -9.14E-02 | 3062597   | 3062720   | NC_000016.9  |
| cg07086380 | 1.69E-07 | 2.06E-08 | -5.85 | 8.2663218 | -1.40E-01 | 118691033 | 118691156 | NC_000005.9  |
| cg08519233 | 1.69E-07 | 2.06E-08 | -5.85 | 8.264956  | -4.17E-02 | 105085521 | 105085644 | NC_000003.11 |

|            |          |          |       |           |           |           |           |              |
|------------|----------|----------|-------|-----------|-----------|-----------|-----------|--------------|
| cg16689962 | 1.69E-07 | 2.07E-08 | -5.85 | 8.2639043 | -2.39E-02 | 32144119  | 32144242  | NC_000006.11 |
| cg16489547 | 1.69E-07 | 2.07E-08 | -5.85 | 8.2638869 | -3.16E-02 | 30597449  | 30597572  | NC_000016.9  |
| cg26724248 | 1.69E-07 | 2.07E-08 | -5.85 | 8.2637496 | -4.86E-02 | 46645903  | 46646026  | NC_000022.10 |
| cg20604317 | 1.69E-07 | 2.07E-08 | -5.85 | 8.2629209 | -2.99E-02 | 4129314   | 4129437   | NC_000020.10 |
| cg06589239 | 1.70E-07 | 2.07E-08 | -5.85 | 8.2606374 | -1.23E-01 | 961457    | 961580    | NC_000007.13 |
| cg15036284 | 1.70E-07 | 2.07E-08 | -5.85 | 8.2600476 | -5.29E-02 | 42972593  | 42972716  | NC_000007.13 |
| cg15891850 | 1.70E-07 | 2.07E-08 | -5.85 | 8.259526  | -7.55E-02 | 74526920  | 74527043  | NC_000013.10 |
| cg21582695 | 1.70E-07 | 2.07E-08 | -5.85 | 8.2593905 | -6.41E-02 | 149299381 | 149299504 | NC_000001.10 |
| cg22086566 | 1.70E-07 | 2.07E-08 | -5.85 | 8.2593519 | -9.33E-02 | 3989097   | 3989220   | NC_000007.13 |
| cg03872745 | 1.70E-07 | 2.08E-08 | -5.85 | 8.2585921 | -5.66E-02 | 109125505 | 109125628 | NC_000012.11 |
| cg08242070 | 1.70E-07 | 2.08E-08 | -5.85 | 8.257356  | -9.03E-02 | 29247612  | 29247735  | NC_000017.10 |
| cg05683999 | 1.70E-07 | 2.08E-08 | -5.85 | 8.2571696 | -7.51E-02 | 88779135  | 88779258  | NC_000010.10 |
| cg14074476 | 1.70E-07 | 2.08E-08 | -5.85 | 8.2571463 | -8.34E-02 | 96865777  | 96865900  | NC_000015.9  |
| cg00697916 | 1.70E-07 | 2.08E-08 | -5.85 | 8.2570013 | -1.34E-01 | 65342644  | 65342767  | NC_000003.11 |
| cg04400047 | 1.71E-07 | 2.08E-08 | -5.85 | 8.255084  | -4.94E-02 | 11332843  | 11332966  | NC_000001.10 |
| cg27042091 | 1.71E-07 | 2.08E-08 | -5.85 | 8.2546575 | -7.88E-02 | 66461337  | 66461460  | NC_000007.13 |
| cg16758970 | 1.71E-07 | 2.09E-08 | -5.85 | 8.2538689 | -3.55E-02 | 28527699  | 28527822  | NC_000013.10 |
| cg00155167 | 1.71E-07 | 2.09E-08 | -5.85 | 8.2534976 | -3.59E-02 | 100025831 | 100025954 | NC_000008.10 |
| cg19812283 | 1.71E-07 | 2.09E-08 | -5.85 | 8.2524078 | -9.11E-02 | 173021074 | 173021197 | NC_000005.9  |
| cg02779429 | 1.71E-07 | 2.09E-08 | -5.85 | 8.2518046 | -1.38E-02 | 88753010  | 88753133  | NC_000016.9  |
| cg20345446 | 1.71E-07 | 2.09E-08 | -5.84 | 8.2501851 | -7.37E-02 | 3186804   | 3186927   | NC_000011.9  |
| cg00048178 | 1.71E-07 | 2.09E-08 | -5.84 | 8.2498581 | -3.68E-02 | 13488257  | 13488380  | NC_000006.11 |
| cg10811961 | 1.72E-07 | 2.10E-08 | -5.84 | 8.2496367 | -7.00E-02 | 54090346  | 54090469  | NC_000012.11 |
| cg22902289 | 1.72E-07 | 2.10E-08 | -5.84 | 8.2487391 | -7.96E-02 | 2557466   | 2557589   | NC_000007.13 |
| cg04458776 | 1.72E-07 | 2.10E-08 | -5.84 | 8.2485241 | -1.26E-01 | 62753944  | 62754067  | NC_000011.9  |

|               |          |          |       |           |           |           |           |              |
|---------------|----------|----------|-------|-----------|-----------|-----------|-----------|--------------|
| cg26450106    | 1.72E-07 | 2.10E-08 | -5.84 | 8.2481102 | -1.60E-01 | 24929607  | 24929730  | NC_000020.10 |
| cg04163595    | 1.72E-07 | 2.10E-08 | -5.84 | 8.2478882 | -6.24E-02 | 53511232  | 53511355  | NC_000014.8  |
| cg21784036    | 1.72E-07 | 2.10E-08 | -5.84 | 8.2477753 | -6.88E-02 | 39299726  | 39299849  | NC_000012.11 |
| cg06667222    | 1.72E-07 | 2.10E-08 | -5.84 | 8.2472698 | -1.55E-02 | 31648994  | 31649117  | NC_000006.11 |
| cg23519671    | 1.72E-07 | 2.10E-08 | -5.84 | 8.2471157 | -1.20E-01 | 39011484  | 39011607  | NC_000019.9  |
| cg06632098    | 1.72E-07 | 2.10E-08 | -5.84 | 8.2469272 | -1.01E-01 | 43605906  | 43606029  | NC_000010.10 |
| cg10703331    | 1.72E-07 | 2.10E-08 | -5.84 | 8.2464677 | -2.52E-02 | 138144619 | 138144742 | NC_000007.13 |
| cg22603982    | 1.72E-07 | 2.10E-08 | -5.84 | 8.2455507 | -4.48E-02 | 49092366  | 49092489  | NC_000019.9  |
| cg24072451    | 1.72E-07 | 2.10E-08 | -5.84 | 8.2454723 | -1.17E-01 | 133888263 | 133888386 | NC_000002.11 |
| cg15183991    | 1.72E-07 | 2.10E-08 | -5.84 | 8.2452594 | -7.11E-02 | 145047566 | 145047689 | NC_000008.10 |
| cg11256956    | 1.72E-07 | 2.11E-08 | -5.84 | 8.2448087 | -1.29E-01 | 3446067   | 3446190   | NC_000012.11 |
| cg05944840    | 1.72E-07 | 2.11E-08 | -5.84 | 8.2444924 | -7.31E-02 | 89401621  | 89401744  | NC_000016.9  |
| cg02436414    | 1.72E-07 | 2.11E-08 | -5.84 | 8.2440139 | -1.21E-01 | 89379491  | 89379614  | NC_000010.10 |
| cg01637011    | 1.72E-07 | 2.11E-08 | -5.84 | 8.2438351 | -2.76E-02 | 200992964 | 200993087 | NC_000001.10 |
| cg24357619    | 1.73E-07 | 2.11E-08 | -5.84 | 8.2417475 | -1.61E-01 | 37389384  | 37389507  | NC_000015.9  |
| ch.9.2042397F | 1.73E-07 | 2.11E-08 | -5.84 | 8.2415597 | -1.59E-02 | 128074940 | 128075063 | NC_000009.11 |
| cg17830754    | 1.73E-07 | 2.11E-08 | -5.84 | 8.240893  | -5.32E-02 | 5679875   | 5679998   | NC_000019.9  |
| cg24830241    | 1.73E-07 | 2.12E-08 | -5.84 | 8.2393168 | -8.51E-02 | 101257675 | 101257798 | NC_000007.13 |
| cg08017248    | 1.73E-07 | 2.12E-08 | -5.84 | 8.2380739 | -4.00E-02 | 49447575  | 49447698  | NC_000015.9  |
| cg02360002    | 1.74E-07 | 2.12E-08 | -5.84 | 8.2374195 | -1.05E-01 | 170585777 | 170585900 | NC_000006.11 |
| cg20944379    | 1.74E-07 | 2.12E-08 | -5.84 | 8.2371065 | -1.11E-01 | 207069392 | 207069515 | NC_000001.10 |
| cg08017409    | 1.74E-07 | 2.12E-08 | -5.84 | 8.2369638 | -9.04E-02 | 86185121  | 86185244  | NC_000016.9  |
| cg03571445    | 1.74E-07 | 2.12E-08 | -5.84 | 8.236722  | -6.93E-02 | 87946173  | 87946296  | NC_000016.9  |
| cg06350345    | 1.74E-07 | 2.12E-08 | -5.84 | 8.2363344 | -5.06E-02 | 27239739  | 27239862  | NC_000002.11 |
| cg11708118    | 1.74E-07 | 2.13E-08 | -5.84 | 8.2352028 | -4.01E-02 | 6862968   | 6863091   | NC_000012.11 |

|            |          |          |       |           |           |           |           |              |
|------------|----------|----------|-------|-----------|-----------|-----------|-----------|--------------|
| cg13880458 | 1.74E-07 | 2.13E-08 | -5.84 | 8.2349948 | -7.37E-02 | 1474456   | 1474579   | NC_000011.9  |
| cg17338212 | 1.74E-07 | 2.13E-08 | -5.84 | 8.234991  | -1.33E-01 | 138662940 | 138663063 | NC_000003.11 |
| cg25466154 | 1.74E-07 | 2.13E-08 | -5.84 | 8.2336804 | -1.03E-01 | 44708908  | 44709031  | NC_000022.10 |
| cg01206944 | 1.74E-07 | 2.13E-08 | -5.84 | 8.2330708 | -1.09E-01 | 26076321  | 26076444  | NC_000015.9  |
| cg20459022 | 1.75E-07 | 2.14E-08 | -5.84 | 8.2305364 | -1.16E-01 | 46651087  | 46651210  | NC_000019.9  |
| cg04053776 | 1.75E-07 | 2.14E-08 | -5.84 | 8.2301405 | -9.72E-02 | 6947353   | 6947476   | NC_000011.9  |
| cg11437231 | 1.75E-07 | 2.14E-08 | -5.84 | 8.2296579 | -2.24E-02 | 47291487  | 47291610  | NC_000011.9  |
| cg05543864 | 1.75E-07 | 2.14E-08 | -5.84 | 8.2292138 | -8.87E-02 | 24979755  | 24979878  | NC_000022.10 |
| cg21937128 | 1.75E-07 | 2.14E-08 | -5.84 | 8.2291905 | -1.31E-01 | 150971889 | 150972012 | NC_000001.10 |
| cg00770372 | 1.75E-07 | 2.14E-08 | -5.84 | 8.2289716 | -9.20E-02 | 37237473  | 37237596  | NC_000008.10 |
| cg04975846 | 1.75E-07 | 2.14E-08 | -5.84 | 8.2284569 | -3.38E-02 | 88923880  | 88924003  | NC_000016.9  |
| cg20724690 | 1.75E-07 | 2.14E-08 | -5.84 | 8.2283003 | -4.66E-02 | 231584368 | 231584491 | NC_000002.11 |
| cg27132732 | 1.75E-07 | 2.14E-08 | -5.84 | 8.2276439 | -1.22E-01 | 32202752  | 32202875  | NC_000015.9  |
| cg16087826 | 1.75E-07 | 2.14E-08 | -5.84 | 8.2275792 | -1.18E-01 | 131654574 | 131654697 | NC_000005.9  |
| cg27297043 | 1.75E-07 | 2.14E-08 | -5.84 | 8.2274339 | -5.26E-02 | 154035092 | 154035215 | NC_000003.11 |
| cg13965144 | 1.75E-07 | 2.14E-08 | -5.84 | 8.227349  | -1.86E-02 | 16222683  | 16222806  | NC_000019.9  |
| cg14349144 | 1.75E-07 | 2.14E-08 | -5.84 | 8.2272197 | -1.08E-01 | 7755220   | 7755343   | NC_000004.11 |
| cg26712428 | 1.75E-07 | 2.14E-08 | -5.84 | 8.2270416 | -8.91E-02 | 105218771 | 105218894 | NC_000010.10 |
| cg16004738 | 1.75E-07 | 2.15E-08 | -5.84 | 8.2267475 | -7.52E-02 | 105155327 | 105155450 | NC_000014.8  |
| cg27063540 | 1.76E-07 | 2.15E-08 | -5.84 | 8.2252739 | -5.94E-02 | 5116142   | 5116265   | NC_000016.9  |
| cg04321303 | 1.76E-07 | 2.15E-08 | -5.84 | 8.2247762 | -1.35E-01 | 44107504  | 44107627  | NC_000007.13 |
| cg18343292 | 1.76E-07 | 2.15E-08 | -5.84 | 8.2247724 | -1.53E-01 | 60146078  | 60146201  | NC_000011.9  |
| cg01639775 | 1.76E-07 | 2.15E-08 | -5.84 | 8.2243473 | -2.17E-02 | 134331301 | 134331424 | NC_000007.13 |
| cg12615982 | 1.76E-07 | 2.15E-08 | -5.84 | 8.2241284 | -1.14E-01 | 169483122 | 169483245 | NC_000003.11 |
| cg21230450 | 1.76E-07 | 2.15E-08 | -5.84 | 8.2236811 | -5.02E-02 | 22320326  | 22320449  | NC_000014.8  |

|            |          |          |       |           |           |           |           |              |
|------------|----------|----------|-------|-----------|-----------|-----------|-----------|--------------|
| cg08513681 | 1.76E-07 | 2.15E-08 | -5.84 | 8.223447  | -3.74E-02 | 59665080  | 59665203  | NC_000015.9  |
| cg17866373 | 1.76E-07 | 2.15E-08 | -5.84 | 8.223103  | -9.58E-02 | 228651353 | 228651476 | NC_000001.10 |
| cg11611244 | 1.76E-07 | 2.15E-08 | -5.84 | 8.2229216 | -9.27E-02 | 1507263   | 1507386   | NC_000011.9  |
| cg01070272 | 1.76E-07 | 2.16E-08 | -5.84 | 8.2221223 | -1.09E-01 | 3672087   | 3672210   | NC_000019.9  |
| cg02159996 | 1.76E-07 | 2.16E-08 | -5.84 | 8.2214517 | -1.02E-01 | 89927233  | 89927356  | NC_000006.11 |
| cg10200608 | 1.76E-07 | 2.16E-08 | -5.84 | 8.2214104 | -5.22E-02 | 141302906 | 141303029 | NC_000005.9  |
| cg07465899 | 1.76E-07 | 2.16E-08 | -5.84 | 8.2213837 | -8.25E-02 | 696400    | 696523    | NC_000004.11 |
| cg04215179 | 1.76E-07 | 2.16E-08 | -5.84 | 8.2208845 | -6.22E-02 | 23719682  | 23719805  | NC_000007.13 |
| cg07910724 | 1.76E-07 | 2.16E-08 | -5.84 | 8.2194107 | -1.15E-01 | 117604411 | 117604534 | NC_000003.11 |
| cg09455881 | 1.77E-07 | 2.16E-08 | -5.84 | 8.2190663 | -1.26E-01 | 47388736  | 47388859  | NC_000003.11 |
| cg22748698 | 1.77E-07 | 2.16E-08 | -5.84 | 8.2187995 | -3.73E-02 | 7146447   | 7146570   | NC_000017.10 |
| cg11945130 | 1.77E-07 | 2.16E-08 | -5.84 | 8.2180095 | -5.89E-02 | 64219963  | 64220086  | NC_000012.11 |
| cg27104117 | 1.77E-07 | 2.16E-08 | -5.84 | 8.2178194 | -3.85E-02 | 27276789  | 27276912  | NC_000017.10 |
| cg26738040 | 1.77E-07 | 2.17E-08 | -5.84 | 8.2165472 | -3.28E-02 | 62433033  | 62433156  | NC_000011.9  |
| cg14950134 | 1.77E-07 | 2.17E-08 | -5.84 | 8.2163462 | -1.03E-01 | 3261155   | 3261278   | NC_000002.11 |
| cg20069688 | 1.77E-07 | 2.17E-08 | -5.84 | 8.2155813 | -6.90E-02 | 31941049  | 31941172  | NC_000006.11 |
| cg08603083 | 1.77E-07 | 2.17E-08 | -5.84 | 8.2150755 | -5.41E-02 | 73867927  | 73868050  | NC_000007.13 |
| cg11550865 | 1.77E-07 | 2.17E-08 | -5.84 | 8.2149114 | -4.65E-02 | 59501408  | 59501531  | NC_000015.9  |
| cg01329151 | 1.77E-07 | 2.17E-08 | -5.84 | 8.2137308 | -1.04E-01 | 61559756  | 61559879  | NC_000020.10 |
| cg09871057 | 1.77E-07 | 2.17E-08 | -5.84 | 8.2136699 | -1.46E-01 | 73118748  | 73118871  | NC_000007.13 |
| cg17000714 | 1.78E-07 | 2.18E-08 | -5.84 | 8.2133205 | -2.00E-02 | 77185354  | 77185477  | NC_000011.9  |
| cg10516683 | 1.78E-07 | 2.18E-08 | -5.84 | 8.2130293 | -4.32E-02 | 50102006  | 50102129  | NC_000014.8  |
| cg15914863 | 1.78E-07 | 2.18E-08 | -5.84 | 8.2128171 | -1.31E-01 | 1022675   | 1022798   | NC_000007.13 |
| cg03553358 | 1.78E-07 | 2.18E-08 | -5.84 | 8.2126016 | -5.94E-02 | 11350115  | 11350238  | NC_000016.9  |
| cg07355157 | 1.78E-07 | 2.18E-08 | -5.84 | 8.2120032 | -1.34E-01 | 23385780  | 23385903  | NC_000010.10 |



|                |          |          |       |           |           |           |           |              |
|----------------|----------|----------|-------|-----------|-----------|-----------|-----------|--------------|
| cg18788940     | 1.78E-07 | 2.18E-08 | -5.84 | 8.2118274 | -1.10E-01 | 20385085  | 20385208  | NC_000011.9  |
| cg24929538     | 1.78E-07 | 2.18E-08 | -5.84 | 8.2117627 | -1.08E-01 | 73164119  | 73164242  | NC_000003.11 |
| cg09993699     | 1.78E-07 | 2.18E-08 | -5.84 | 8.2115417 | -1.57E-01 | 17517008  | 17517131  | NC_000019.9  |
| cg14092997     | 1.78E-07 | 2.18E-08 | -5.84 | 8.2108962 | -1.41E-01 | 6425737   | 6425860   | NC_000019.9  |
| cg09803002     | 1.78E-07 | 2.18E-08 | -5.84 | 8.2108324 | -8.26E-02 | 119039103 | 119039226 | NC_000011.9  |
| cg14971320     | 1.78E-07 | 2.18E-08 | -5.84 | 8.210577  | -9.25E-02 | 43699070  | 43699193  | NC_000010.10 |
| cg15103195     | 1.78E-07 | 2.18E-08 | -5.84 | 8.2104762 | -4.11E-02 | 100797603 | 100797726 | NC_000007.13 |
| cg14353649     | 1.78E-07 | 2.18E-08 | -5.84 | 8.2096932 | -6.64E-02 | 135191496 | 135191619 | NC_000010.10 |
| cg18362496     | 1.78E-07 | 2.19E-08 | -5.84 | 8.2088345 | -7.46E-02 | 2019930   | 2020053   | NC_000011.9  |
| cg04194001     | 1.78E-07 | 2.19E-08 | -5.84 | 8.2079972 | -3.08E-02 | 43823104  | 43823227  | NC_000002.11 |
| cg18825076     | 1.78E-07 | 2.19E-08 | -5.84 | 8.2079816 | -9.67E-02 | 78729989  | 78730112  | NC_000015.9  |
| cg04799664     | 1.78E-07 | 2.19E-08 | -5.84 | 8.2079383 | -5.18E-02 | 57053850  | 57053973  | NC_000016.9  |
| cg07380200     | 1.78E-07 | 2.19E-08 | -5.84 | 8.2077553 | -1.25E-01 | 48874903  | 48875026  | NC_000015.9  |
| cg05573809     | 1.79E-07 | 2.19E-08 | -5.84 | 8.2068157 | -1.15E-01 | 14036481  | 14036604  | NC_000005.9  |
| cg26723847     | 1.79E-07 | 2.19E-08 | -5.84 | 8.2061099 | -5.98E-02 | 134095652 | 134095775 | NC_000011.9  |
| cg05583087     | 1.79E-07 | 2.19E-08 | -5.84 | 8.2059426 | -8.01E-02 | 12894947  | 12895070  | NC_000003.11 |
| cg24430578     | 1.79E-07 | 2.19E-08 | -5.84 | 8.2053687 | -7.95E-02 | 231761688 | 231761811 | NC_000001.10 |
| cg09106556     | 1.79E-07 | 2.19E-08 | -5.84 | 8.20457   | -2.64E-02 | 35168274  | 35168397  | NC_000019.9  |
| cg11497870     | 1.79E-07 | 2.20E-08 | -5.84 | 8.203905  | -3.21E-02 | 176037262 | 176037385 | NC_000005.9  |
| cg23029506     | 1.79E-07 | 2.20E-08 | -5.84 | 8.2035489 | -4.05E-02 | 74834163  | 74834286  | NC_000015.9  |
| cg23042540     | 1.79E-07 | 2.20E-08 | -5.84 | 8.2032116 | -8.36E-02 | 1653566   | 1653689   | NC_000008.10 |
| cg03947632     | 1.79E-07 | 2.20E-08 | -5.84 | 8.2028823 | -4.71E-02 | 28404089  | 28404212  | NC_000013.10 |
| cg05521538     | 1.79E-07 | 2.20E-08 | -5.84 | 8.2025888 | -9.70E-02 | 1258994   | 1259117   | NC_000005.9  |
| cg14947846     | 1.79E-07 | 2.20E-08 | -5.84 | 8.2023948 | -1.35E-01 | 129227604 | 129227727 | NC_000002.11 |
| ch.6.20150281F | 1.79E-07 | 2.20E-08 | -5.84 | 8.2017954 | -3.52E-02 | 20042302  | 20042425  | NC_000006.11 |

|            |          |          |       |           |           |           |           |              |
|------------|----------|----------|-------|-----------|-----------|-----------|-----------|--------------|
| cg07062658 | 1.80E-07 | 2.20E-08 | -5.84 | 8.2011119 | -7.48E-02 | 62290499  | 62290622  | NC_000020.10 |
| cg17609731 | 1.80E-07 | 2.21E-08 | -5.83 | 8.1995847 | -6.27E-02 | 77325533  | 77325656  | NC_000007.13 |
| cg02835423 | 1.80E-07 | 2.21E-08 | -5.83 | 8.198905  | -5.87E-02 | 7099230   | 7099353   | NC_000019.9  |
| cg06706068 | 1.80E-07 | 2.21E-08 | -5.83 | 8.1987548 | -9.82E-02 | 835857    | 835980    | NC_000016.9  |
| cg03290610 | 1.80E-07 | 2.21E-08 | -5.83 | 8.1982262 | -7.06E-02 | 67035041  | 67035164  | NC_000016.9  |
| cg06099048 | 1.80E-07 | 2.21E-08 | -5.83 | 8.1969343 | -1.51E-02 | 32164151  | 32164274  | NC_000006.11 |
| cg22495848 | 1.80E-07 | 2.21E-08 | -5.83 | 8.1968173 | -6.35E-02 | 2425173   | 2425296   | NC_000001.10 |
| cg16299576 | 1.80E-07 | 2.21E-08 | -5.83 | 8.1966464 | -9.71E-02 | 10872819  | 10872942  | NC_000008.10 |
| cg10000825 | 1.80E-07 | 2.21E-08 | -5.83 | 8.1959964 | -1.33E-02 | 131012516 | 131012639 | NC_000007.13 |
| cg02807964 | 1.81E-07 | 2.22E-08 | -5.83 | 8.1953047 | -2.42E-02 | 10814144  | 10814267  | NC_000011.9  |
| cg11093872 | 1.81E-07 | 2.22E-08 | -5.83 | 8.1942653 | -1.07E-01 | 70829968  | 70830091  | NC_000011.9  |
| cg06782493 | 1.81E-07 | 2.22E-08 | -5.83 | 8.1942152 | -2.65E-02 | 1876874   | 1876997   | NC_000016.9  |
| cg21646471 | 1.81E-07 | 2.22E-08 | -5.83 | 8.1941332 | -1.34E-01 | 242523971 | 242524094 | NC_000002.11 |
| cg21619224 | 1.81E-07 | 2.22E-08 | -5.83 | 8.1937604 | -7.20E-02 | 159205696 | 159205819 | NC_000006.11 |
| cg02620533 | 1.81E-07 | 2.22E-08 | -5.83 | 8.1933806 | -1.04E-01 | 57719013  | 57719136  | NC_000001.10 |
| cg04393227 | 1.81E-07 | 2.22E-08 | -5.83 | 8.1928698 | -4.52E-02 | 193760780 | 193760903 | NC_000003.11 |
| cg22611120 | 1.81E-07 | 2.22E-08 | -5.83 | 8.1927646 | -1.29E-01 | 20307906  | 20308029  | NC_000001.10 |
| cg03368399 | 1.81E-07 | 2.22E-08 | -5.83 | 8.1922526 | -3.26E-02 | 22102556  | 22102679  | NC_000008.10 |
| cg05721365 | 1.81E-07 | 2.22E-08 | -5.83 | 8.1911969 | -8.77E-02 | 62777693  | 62777816  | NC_000017.10 |
| cg15832314 | 1.81E-07 | 2.23E-08 | -5.83 | 8.1902529 | -2.57E-02 | 40401289  | 40401412  | NC_000015.9  |
| cg20511832 | 1.82E-07 | 2.23E-08 | -5.83 | 8.1872838 | -8.33E-02 | 78934280  | 78934403  | NC_000015.9  |
| cg09321403 | 1.82E-07 | 2.24E-08 | -5.83 | 8.1866211 | -1.19E-01 | 13555624  | 13555747  | NC_000006.11 |
| cg07658646 | 1.82E-07 | 2.24E-08 | -5.83 | 8.1865756 | -1.37E-01 | 11002197  | 11002320  | NC_000012.11 |
| cg15100135 | 1.82E-07 | 2.24E-08 | -5.83 | 8.1865461 | -1.05E-01 | 4891775   | 4891898   | NC_000017.10 |
| cg05609160 | 1.82E-07 | 2.24E-08 | -5.83 | 8.1863562 | -7.97E-02 | 91208370  | 91208493  | NC_000015.9  |

|               |          |          |       |           |           |           |           |              |
|---------------|----------|----------|-------|-----------|-----------|-----------|-----------|--------------|
| cg15014679    | 1.82E-07 | 2.24E-08 | -5.83 | 8.1862947 | -8.49E-02 | 27695210  | 27695333  | NC_000011.9  |
| cg00004608    | 1.82E-07 | 2.24E-08 | -5.83 | 8.1861616 | -9.78E-02 | 134272463 | 134272586 | NC_000006.11 |
| cg18520925    | 1.82E-07 | 2.24E-08 | -5.83 | 8.1848653 | -1.25E-01 | 36305155  | 36305278  | NC_000006.11 |
| cg15364537    | 1.83E-07 | 2.24E-08 | -5.83 | 8.1839869 | -2.67E-02 | 205538310 | 205538433 | NC_000001.10 |
| cg16353254    | 1.83E-07 | 2.24E-08 | -5.83 | 8.1838695 | -3.41E-02 | 48532923  | 48533046  | NC_000016.9  |
| cg08781365    | 1.83E-07 | 2.24E-08 | -5.83 | 8.1825633 | -1.22E-01 | 85320072  | 85320195  | NC_000016.9  |
| cg00221794    | 1.83E-07 | 2.25E-08 | -5.83 | 8.1822848 | -1.62E-01 | 20776620  | 20776743  | NC_000002.11 |
| cg13461622    | 1.83E-07 | 2.25E-08 | -5.83 | 8.1821133 | -1.19E-01 | 25291385  | 25291508  | NC_000001.10 |
| cg24914185    | 1.83E-07 | 2.25E-08 | -5.83 | 8.1814169 | -1.31E-01 | 200663789 | 200663912 | NC_000002.11 |
| cg09630706    | 1.83E-07 | 2.25E-08 | -5.83 | 8.1799354 | -1.02E-01 | 229695    | 229818    | NC_000007.13 |
| cg07805967    | 1.83E-07 | 2.25E-08 | -5.83 | 8.1793066 | -6.05E-02 | 53459337  | 53459460  | NC_000010.10 |
| cg01549570    | 1.83E-07 | 2.25E-08 | -5.83 | 8.1786754 | -1.16E-01 | 104622128 | 104622251 | NC_000014.8  |
| cg10598551    | 1.84E-07 | 2.26E-08 | -5.83 | 8.1780878 | -1.13E-01 | 133680429 | 133680552 | NC_000011.9  |
| cg12439423    | 1.84E-07 | 2.26E-08 | -5.83 | 8.1780567 | -1.28E-01 | 41522721  | 41522844  | NC_000008.10 |
| cg01407861    | 1.84E-07 | 2.26E-08 | -5.83 | 8.1779821 | -6.44E-02 | 12307496  | 12307619  | NC_000011.9  |
| cg14637470    | 1.84E-07 | 2.26E-08 | -5.83 | 8.176929  | -9.86E-02 | 131798317 | 131798440 | NC_000009.11 |
| cg25481157    | 1.84E-07 | 2.26E-08 | -5.83 | 8.175641  | -1.33E-01 | 66947564  | 66947687  | NC_000015.9  |
| cg01266707    | 1.84E-07 | 2.26E-08 | -5.83 | 8.1755099 | -6.12E-02 | 37824461  | 37824584  | NC_000017.10 |
| cg27247723    | 1.84E-07 | 2.26E-08 | -5.83 | 8.1750801 | -5.84E-02 | 57302454  | 57302577  | NC_000004.11 |
| ch.1.1021960F | 1.84E-07 | 2.26E-08 | -5.83 | 8.1744417 | -5.12E-02 | 31518261  | 31518384  | NC_000001.10 |
| cg01932076    | 1.84E-07 | 2.26E-08 | -5.83 | 8.1742102 | -1.01E-01 | 47394659  | 47394782  | NC_000021.8  |
| cg11310125    | 1.84E-07 | 2.27E-08 | -5.83 | 8.1737807 | -3.16E-02 | 113239311 | 113239434 | NC_000002.11 |
| cg08708209    | 1.84E-07 | 2.27E-08 | -5.83 | 8.1731752 | -3.02E-02 | 221915487 | 221915610 | NC_000001.10 |
| cg21037265    | 1.84E-07 | 2.27E-08 | -5.83 | 8.1730214 | -9.88E-02 | 6481819   | 6481942   | NC_000019.9  |
| cg22233890    | 1.85E-07 | 2.27E-08 | -5.83 | 8.1722984 | -1.25E-01 | 36477229  | 36477352  | NC_000011.9  |

|            |          |          |       |           |           |           |           |              |
|------------|----------|----------|-------|-----------|-----------|-----------|-----------|--------------|
| cg23830037 | 1.85E-07 | 2.27E-08 | -5.83 | 8.171322  | -2.47E-02 | 17991318  | 17991441  | NC_000017.10 |
| cg20958753 | 1.85E-07 | 2.27E-08 | -5.83 | 8.1706864 | -6.18E-02 | 38810162  | 38810285  | NC_000019.9  |
| cg06861572 | 1.85E-07 | 2.27E-08 | -5.83 | 8.1704243 | -5.38E-02 | 241760829 | 241760952 | NC_000002.11 |
| cg09237302 | 1.85E-07 | 2.27E-08 | -5.83 | 8.1703461 | -9.15E-02 | 906077    | 906200    | NC_000004.11 |
| cg22511633 | 1.85E-07 | 2.27E-08 | -5.83 | 8.169693  | -4.40E-02 | 72993507  | 72993630  | NC_000007.13 |
| cg03516318 | 1.85E-07 | 2.28E-08 | -5.83 | 8.1693288 | -8.12E-02 | 36790242  | 36790365  | NC_000014.8  |
| cg02010185 | 1.85E-07 | 2.28E-08 | -5.83 | 8.1686623 | -4.52E-02 | 76452815  | 76452938  | NC_000014.8  |
| cg05593510 | 1.85E-07 | 2.28E-08 | -5.83 | 8.1673295 | -1.18E-01 | 176249224 | 176249347 | NC_000005.9  |
| cg22117825 | 1.86E-07 | 2.28E-08 | -5.83 | 8.1667987 | -1.10E-01 | 174439478 | 174439601 | NC_000004.11 |
| cg01485548 | 1.86E-07 | 2.29E-08 | -5.83 | 8.1648163 | -1.16E-01 | 18284321  | 18284444  | NC_000019.9  |
| cg06452642 | 1.86E-07 | 2.29E-08 | -5.83 | 8.1647349 | -4.29E-02 | 13875641  | 13875764  | NC_000019.9  |
| cg27646469 | 1.86E-07 | 2.29E-08 | -5.83 | 8.164665  | -3.27E-02 | 54567063  | 54567186  | NC_000012.11 |
| cg04157658 | 1.86E-07 | 2.29E-08 | -5.83 | 8.164499  | -1.14E-01 | 110243994 | 110244117 | NC_000011.9  |
| cg15548859 | 1.86E-07 | 2.29E-08 | -5.83 | 8.1636165 | -7.58E-02 | 2381299   | 2381422   | NC_000001.10 |
| cg12062545 | 1.86E-07 | 2.29E-08 | -5.83 | 8.1627716 | -2.99E-02 | 104532339 | 104532462 | NC_000012.11 |
| cg14540461 | 1.86E-07 | 2.29E-08 | -5.83 | 8.1623863 | -7.28E-02 | 15990183  | 15990306  | NC_000012.11 |
| cg20748397 | 1.86E-07 | 2.29E-08 | -5.83 | 8.1623152 | -8.99E-02 | 18062972  | 18063095  | NC_000017.10 |
| cg05753328 | 1.86E-07 | 2.29E-08 | -5.83 | 8.1621519 | -8.65E-02 | 124171421 | 124171544 | NC_000008.10 |
| cg06889755 | 1.86E-07 | 2.29E-08 | -5.83 | 8.161972  | -2.26E-02 | 150326021 | 150326144 | NC_000006.11 |
| cg26162295 | 1.86E-07 | 2.29E-08 | -5.83 | 8.1619094 | -9.35E-02 | 38119207  | 38119330  | NC_000017.10 |
| cg02235497 | 1.87E-07 | 2.29E-08 | -5.83 | 8.1610368 | -1.55E-01 | 127941989 | 127942112 | NC_000010.10 |
| cg24322131 | 1.87E-07 | 2.30E-08 | -5.83 | 8.1605496 | -8.64E-02 | 45971503  | 45971626  | NC_000021.8  |
| cg02832357 | 1.87E-07 | 2.30E-08 | -5.83 | 8.1603603 | -6.61E-02 | 40429406  | 40429529  | NC_000017.10 |
| cg00328376 | 1.87E-07 | 2.30E-08 | -5.83 | 8.1597949 | -1.32E-01 | 26902685  | 26902808  | NC_000007.13 |
| cg04213338 | 1.87E-07 | 2.30E-08 | -5.83 | 8.1584412 | -3.21E-02 | 6144367   | 6144490   | NC_000007.13 |

|            |          |          |       |           |           |           |           |              |
|------------|----------|----------|-------|-----------|-----------|-----------|-----------|--------------|
| cg04078115 | 1.87E-07 | 2.30E-08 | -5.83 | 8.1584405 | -8.86E-02 | 33278114  | 33278237  | NC_000022.10 |
| cg18548879 | 1.87E-07 | 2.30E-08 | -5.83 | 8.1581469 | -9.87E-02 | 41914454  | 41914577  | NC_000015.9  |
| cg09126636 | 1.87E-07 | 2.30E-08 | -5.83 | 8.1579814 | -1.17E-01 | 113265753 | 113265876 | NC_000001.10 |
| cg09528111 | 1.87E-07 | 2.30E-08 | -5.83 | 8.1579616 | -2.52E-02 | 31495531  | 31495654  | NC_000014.8  |
| cg04220482 | 1.87E-07 | 2.30E-08 | -5.83 | 8.1572202 | -9.70E-02 | 63952370  | 63952493  | NC_000008.10 |
| cg22931642 | 1.87E-07 | 2.30E-08 | -5.83 | 8.1571847 | -7.65E-02 | 23135043  | 23135166  | NC_000001.10 |
| cg20391365 | 1.87E-07 | 2.31E-08 | -5.83 | 8.1564518 | -5.44E-02 | 8059223   | 8059346   | NC_000017.10 |
| cg25995133 | 1.87E-07 | 2.31E-08 | -5.83 | 8.1564021 | -6.11E-02 | 407183    | 407306    | NC_000011.9  |
| cg18304501 | 1.87E-07 | 2.31E-08 | -5.83 | 8.1563991 | -3.50E-02 | 29604436  | 29604559  | NC_000007.13 |
| cg14170787 | 1.87E-07 | 2.31E-08 | -5.83 | 8.1561115 | -1.26E-01 | 112889386 | 112889509 | NC_000009.11 |
| cg07188863 | 1.88E-07 | 2.31E-08 | -5.83 | 8.1545811 | -1.08E-01 | 110055425 | 110055548 | NC_000011.9  |
| cg09258553 | 1.88E-07 | 2.31E-08 | -5.83 | 8.1544978 | -1.21E-01 | 241564827 | 241564950 | NC_000002.11 |
| cg05099952 | 1.88E-07 | 2.31E-08 | -5.83 | 8.1537356 | -9.98E-02 | 30367546  | 30367669  | NC_000016.9  |
| cg03184776 | 1.88E-07 | 2.31E-08 | -5.83 | 8.1531394 | -1.14E-01 | 41522069  | 41522192  | NC_000017.10 |
| cg18775149 | 1.88E-07 | 2.31E-08 | -5.83 | 8.1529345 | -1.21E-01 | 52288062  | 52288185  | NC_000005.9  |
| cg17361641 | 1.88E-07 | 2.31E-08 | -5.83 | 8.1527746 | -1.74E-02 | 18391832  | 18391955  | NC_000019.9  |
| cg03702990 | 1.88E-07 | 2.31E-08 | -5.83 | 8.1526818 | -7.16E-02 | 137828196 | 137828319 | NC_000005.9  |
| cg05097696 | 1.88E-07 | 2.32E-08 | -5.83 | 8.1523198 | -3.40E-02 | 71499117  | 71499240  | NC_000011.9  |
| cg08643824 | 1.88E-07 | 2.32E-08 | -5.83 | 8.1516288 | -9.78E-02 | 58294523  | 58294646  | NC_000011.9  |
| cg11788010 | 1.88E-07 | 2.32E-08 | -5.82 | 8.1504965 | -6.45E-02 | 40255321  | 40255444  | NC_000001.10 |
| cg13457890 | 1.88E-07 | 2.32E-08 | -5.82 | 8.1502117 | -2.77E-02 | 804976    | 805099    | NC_000011.9  |
| cg12419863 | 1.89E-07 | 2.32E-08 | -5.82 | 8.1491588 | -8.21E-02 | 144263450 | 144263573 | NC_000006.11 |
| cg05823493 | 1.89E-07 | 2.32E-08 | -5.82 | 8.1484388 | -3.06E-02 | 49518103  | 49518226  | NC_000006.11 |
| cg22404242 | 1.89E-07 | 2.32E-08 | -5.82 | 8.148427  | -2.60E-02 | 86668131  | 86668254  | NC_000002.11 |
| cg23827488 | 1.89E-07 | 2.33E-08 | -5.82 | 8.1469316 | -1.46E-01 | 24908452  | 24908575  | NC_000006.11 |

|               |          |          |       |           |           |           |           |              |
|---------------|----------|----------|-------|-----------|-----------|-----------|-----------|--------------|
| cg16363586    | 1.89E-07 | 2.33E-08 | -5.82 | 8.1461599 | -1.91E-01 | 17516329  | 17516452  | NC_000019.9  |
| cg16089416    | 1.89E-07 | 2.33E-08 | -5.82 | 8.1460172 | -2.46E-02 | 126114228 | 126114351 | NC_000005.9  |
| ch.12.973812R | 1.89E-07 | 2.33E-08 | -5.82 | 8.1459281 | -7.22E-02 | 49046495  | 49046618  | NC_000012.11 |
| cg17470227    | 1.89E-07 | 2.33E-08 | -5.82 | 8.1457264 | -3.15E-02 | 111579551 | 111579674 | NC_000003.11 |
| cg19099281    | 1.89E-07 | 2.33E-08 | -5.82 | 8.1456045 | -5.73E-02 | 83621006  | 83621129  | NC_000015.9  |
| cg01753263    | 1.89E-07 | 2.33E-08 | -5.82 | 8.1446025 | -9.05E-02 | 171879957 | 171880080 | NC_000005.9  |
| cg05660005    | 1.89E-07 | 2.33E-08 | -5.82 | 8.1445743 | -7.47E-02 | 145507663 | 145507786 | NC_000001.10 |
| cg13922021    | 1.89E-07 | 2.33E-08 | -5.82 | 8.1445306 | -7.22E-02 | 76115974  | 76116097  | NC_000005.9  |
| cg14010513    | 1.90E-07 | 2.34E-08 | -5.82 | 8.1440077 | -1.20E-01 | 64146871  | 64146994  | NC_000011.9  |
| cg25875537    | 1.90E-07 | 2.34E-08 | -5.82 | 8.1434936 | -6.89E-02 | 21909033  | 21909156  | NC_000008.10 |
| cg13998945    | 1.90E-07 | 2.34E-08 | -5.82 | 8.1434098 | -1.28E-01 | 45035665  | 45035788  | NC_000007.13 |
| cg18844900    | 1.90E-07 | 2.34E-08 | -5.82 | 8.1425541 | -1.25E-01 | 165184866 | 165184989 | NC_000005.9  |
| cg06298729    | 1.90E-07 | 2.34E-08 | -5.82 | 8.142483  | -7.67E-02 | 48118041  | 48118164  | NC_000011.9  |
| cg11302533    | 1.90E-07 | 2.34E-08 | -5.82 | 8.1423148 | -1.19E-02 | 197183662 | 197183785 | NC_000003.11 |
| cg12613240    | 1.90E-07 | 2.34E-08 | -5.82 | 8.1422619 | -1.09E-01 | 6493555   | 6493678   | NC_000007.13 |
| cg00344411    | 1.90E-07 | 2.34E-08 | -5.82 | 8.1419739 | -7.86E-02 | 64547108  | 64547231  | NC_000003.11 |
| cg15416440    | 1.90E-07 | 2.34E-08 | -5.82 | 8.1406686 | -8.41E-02 | 110899996 | 110900119 | NC_000013.10 |
| cg10980921    | 1.90E-07 | 2.34E-08 | -5.82 | 8.1406394 | -7.64E-02 | 103705294 | 103705417 | NC_000008.10 |
| cg03066081    | 1.90E-07 | 2.34E-08 | -5.82 | 8.140243  | -4.04E-02 | 77784036  | 77784159  | NC_000017.10 |
| cg19401867    | 1.90E-07 | 2.34E-08 | -5.82 | 8.1401401 | -2.38E-02 | 35071839  | 35071962  | NC_000009.11 |
| cg09685250    | 1.90E-07 | 2.35E-08 | -5.82 | 8.1395327 | -9.45E-02 | 114305121 | 114305244 | NC_000013.10 |
| cg18431813    | 1.90E-07 | 2.35E-08 | -5.82 | 8.1392599 | -2.94E-02 | 77786981  | 77787104  | NC_000014.8  |
| cg14413177    | 1.90E-07 | 2.35E-08 | -5.82 | 8.1391969 | -9.28E-02 | 205760781 | 205760904 | NC_000001.10 |
| cg13615963    | 1.90E-07 | 2.35E-08 | -5.82 | 8.1389692 | -1.19E-01 | 167536521 | 167536644 | NC_000006.11 |
| cg00160583    | 1.90E-07 | 2.35E-08 | -5.82 | 8.1386709 | -8.15E-02 | 32167512  | 32167635  | NC_000001.10 |

|            |          |          |       |           |           |           |           |              |
|------------|----------|----------|-------|-----------|-----------|-----------|-----------|--------------|
| cg26114100 | 1.90E-07 | 2.35E-08 | -5.82 | 8.1385384 | -6.43E-02 | 101418483 | 101418606 | NC_000010.10 |
| cg04151012 | 1.91E-07 | 2.35E-08 | -5.82 | 8.1380944 | -7.57E-02 | 27806529  | 27806652  | NC_000002.11 |
| cg27227598 | 1.91E-07 | 2.35E-08 | -5.82 | 8.1377994 | -7.85E-02 | 10374415  | 10374538  | NC_000003.11 |
| cg03918614 | 1.91E-07 | 2.35E-08 | -5.82 | 8.1368783 | -5.37E-02 | 87096418  | 87096541  | NC_000016.9  |
| cg26140749 | 1.91E-07 | 2.35E-08 | -5.82 | 8.1365794 | -7.29E-02 | 143821266 | 143821389 | NC_000008.10 |
| cg27519411 | 1.91E-07 | 2.35E-08 | -5.82 | 8.1359964 | -2.42E-02 | 67390349  | 67390472  | NC_000001.10 |
| cg05573699 | 1.91E-07 | 2.35E-08 | -5.82 | 8.1358867 | -2.40E-02 | 52720067  | 52720190  | NC_000003.11 |
| cg21086878 | 1.91E-07 | 2.36E-08 | -5.82 | 8.1357559 | -2.91E-02 | 90862960  | 90863083  | NC_000014.8  |
| cg19383974 | 1.91E-07 | 2.36E-08 | -5.82 | 8.1357393 | -1.05E-01 | 33463643  | 33463766  | NC_000001.10 |
| cg06540636 | 1.91E-07 | 2.36E-08 | -5.82 | 8.1348895 | -2.43E-02 | 44174071  | 44174194  | NC_000019.9  |
| cg08715725 | 1.91E-07 | 2.36E-08 | -5.82 | 8.133764  | -1.18E-01 | 184922433 | 184922556 | NC_000004.11 |
| cg14588606 | 1.91E-07 | 2.36E-08 | -5.82 | 8.1336322 | -1.19E-01 | 39183560  | 39183683  | NC_000017.10 |
| cg07903153 | 1.92E-07 | 2.36E-08 | -5.82 | 8.1320136 | -6.04E-02 | 30456827  | 30456950  | NC_000016.9  |
| cg01994902 | 1.92E-07 | 2.37E-08 | -5.82 | 8.1315857 | -9.19E-02 | 1576069   | 1576192   | NC_000016.9  |
| cg05875176 | 1.92E-07 | 2.37E-08 | -5.82 | 8.1307678 | -5.39E-02 | 66594586  | 66594709  | NC_000017.10 |
| cg09555073 | 1.92E-07 | 2.37E-08 | -5.82 | 8.1301251 | -3.32E-02 | 122747539 | 122747662 | NC_000003.11 |
| cg03330058 | 1.92E-07 | 2.37E-08 | -5.82 | 8.1300478 | -6.86E-02 | 127392403 | 127392526 | NC_000003.11 |
| cg19311055 | 1.92E-07 | 2.37E-08 | -5.82 | 8.1296193 | -1.02E-01 | 38459149  | 38459272  | NC_000008.10 |
| cg15771416 | 1.92E-07 | 2.37E-08 | -5.82 | 8.1285205 | -1.09E-01 | 65473753  | 65473876  | NC_000010.10 |
| cg00859655 | 1.92E-07 | 2.37E-08 | -5.82 | 8.1285103 | -8.92E-02 | 7694524   | 7694647   | NC_000011.9  |
| cg18151262 | 1.92E-07 | 2.37E-08 | -5.82 | 8.1284089 | -9.23E-02 | 1254251   | 1254374   | NC_000019.9  |
| cg16651768 | 1.92E-07 | 2.37E-08 | -5.82 | 8.1278406 | -1.24E-01 | 222340714 | 222340837 | NC_000001.10 |
| cg00196827 | 1.92E-07 | 2.37E-08 | -5.82 | 8.1278285 | -1.16E-01 | 55108068  | 55108191  | NC_000018.9  |
| cg10003961 | 1.93E-07 | 2.38E-08 | -5.82 | 8.1271507 | -9.49E-02 | 168293749 | 168293872 | NC_000006.11 |
| cg16998564 | 1.93E-07 | 2.38E-08 | -5.82 | 8.1264473 | -1.17E-01 | 88271572  | 88271695  | NC_000001.10 |

|            |          |          |       |           |           |           |           |              |
|------------|----------|----------|-------|-----------|-----------|-----------|-----------|--------------|
| cg02273392 | 1.93E-07 | 2.38E-08 | -5.82 | 8.1259656 | -8.64E-02 | 100770414 | 100770537 | NC_000007.13 |
| cg18234352 | 1.93E-07 | 2.38E-08 | -5.82 | 8.1256532 | -1.14E-01 | 18977405  | 18977528  | NC_000019.9  |
| cg08610968 | 1.93E-07 | 2.38E-08 | -5.82 | 8.1255098 | -1.27E-01 | 133797327 | 133797450 | NC_000010.10 |
| cg10703692 | 1.93E-07 | 2.38E-08 | -5.82 | 8.1253133 | -9.95E-02 | 132086847 | 132086970 | NC_000006.11 |
| cg06872185 | 1.93E-07 | 2.38E-08 | -5.82 | 8.1243069 | -6.25E-02 | 151831144 | 151831267 | NC_000001.10 |
| cg09883745 | 1.93E-07 | 2.39E-08 | -5.82 | 8.1227746 | -9.79E-02 | 40086528  | 40086651  | NC_000003.11 |
| cg16705929 | 1.94E-07 | 2.39E-08 | -5.82 | 8.1215648 | -1.26E-01 | 238539204 | 238539327 | NC_000002.11 |
| cg18303608 | 1.94E-07 | 2.39E-08 | -5.82 | 8.1208268 | -1.11E-01 | 213777611 | 213777734 | NC_000002.11 |
| cg12599700 | 1.94E-07 | 2.39E-08 | -5.82 | 8.1205932 | -3.41E-02 | 54962423  | 54962546  | NC_000016.9  |
| cg20677058 | 1.94E-07 | 2.39E-08 | -5.82 | 8.1201091 | -9.66E-02 | 19600471  | 19600594  | NC_000001.10 |
| cg04986413 | 1.94E-07 | 2.40E-08 | -5.82 | 8.118144  | -7.91E-02 | 99161311  | 99161434  | NC_000010.10 |
| cg01276497 | 1.94E-07 | 2.40E-08 | -5.82 | 8.1180662 | -1.23E-01 | 33723723  | 33723846  | NC_000011.9  |
| cg19265913 | 1.94E-07 | 2.40E-08 | -5.82 | 8.118051  | -1.34E-01 | 81154181  | 81154304  | NC_000010.10 |
| cg06937939 | 1.94E-07 | 2.40E-08 | -5.82 | 8.1172835 | -5.63E-02 | 6128602   | 6128725   | NC_000010.10 |
| cg16831185 | 1.95E-07 | 2.40E-08 | -5.82 | 8.1165458 | -1.08E-01 | 29158530  | 29158653  | NC_000017.10 |
| cg18187726 | 1.95E-07 | 2.40E-08 | -5.82 | 8.1163252 | -3.71E-02 | 69080414  | 69080537  | NC_000012.11 |
| cg15611150 | 1.95E-07 | 2.41E-08 | -5.82 | 8.1152153 | -6.75E-02 | 133524362 | 133524485 | NC_000003.11 |
| cg00499726 | 1.95E-07 | 2.41E-08 | -5.82 | 8.1151825 | -3.49E-02 | 42402049  | 42402172  | NC_000017.10 |
| cg07555102 | 1.95E-07 | 2.41E-08 | -5.82 | 8.1150963 | -1.25E-01 | 10696066  | 10696189  | NC_000001.10 |
| cg20679082 | 1.95E-07 | 2.41E-08 | -5.82 | 8.1145826 | -4.15E-02 | 1090548   | 1090671   | NC_000017.10 |
| cg01204655 | 1.95E-07 | 2.41E-08 | -5.82 | 8.1144782 | -3.82E-02 | 156692969 | 156693092 | NC_000005.9  |
| cg15199326 | 1.95E-07 | 2.41E-08 | -5.82 | 8.1141441 | -3.69E-02 | 2842005   | 2842128   | NC_000006.11 |
| cg05980782 | 1.95E-07 | 2.41E-08 | -5.82 | 8.1140954 | -5.65E-02 | 101567801 | 101567924 | NC_000003.11 |
| cg27217748 | 1.95E-07 | 2.41E-08 | -5.82 | 8.1124905 | -2.22E-02 | 132569568 | 132569691 | NC_000012.11 |
| cg25586410 | 1.95E-07 | 2.41E-08 | -5.82 | 8.1124259 | -1.37E-01 | 175350621 | 175350744 | NC_000002.11 |



|            |          |          |       |           |           |           |           |              |
|------------|----------|----------|-------|-----------|-----------|-----------|-----------|--------------|
| cg11074549 | 1.95E-07 | 2.41E-08 | -5.82 | 8.1121416 | -1.73E-02 | 75642944  | 75643067  | NC_000014.8  |
| cg08989921 | 1.95E-07 | 2.41E-08 | -5.82 | 8.1120504 | -2.64E-02 | 76836740  | 76836863  | NC_000017.10 |
| cg15889594 | 1.95E-07 | 2.41E-08 | -5.82 | 8.1116246 | -1.23E-01 | 36605927  | 36606050  | NC_000017.10 |
| cg14608903 | 1.96E-07 | 2.42E-08 | -5.82 | 8.1105781 | -1.11E-01 | 116287249 | 116287372 | NC_000010.10 |
| cg03335938 | 1.96E-07 | 2.42E-08 | -5.82 | 8.1103691 | -1.23E-01 | 17955976  | 17956099  | NC_000022.10 |
| cg14888579 | 1.96E-07 | 2.42E-08 | -5.82 | 8.1101045 | -4.54E-02 | 46426289  | 46426412  | NC_000011.9  |
| cg13978777 | 1.96E-07 | 2.42E-08 | -5.82 | 8.1089614 | -1.02E-01 | 2491825   | 2491948   | NC_000019.9  |
| cg04254028 | 1.96E-07 | 2.42E-08 | -5.82 | 8.1085411 | -4.14E-02 | 6927697   | 6927820   | NC_000004.11 |
| cg24174307 | 1.96E-07 | 2.42E-08 | -5.82 | 8.1080791 | -5.83E-02 | 73043075  | 73043198  | NC_000017.10 |
| cg17185710 | 1.96E-07 | 2.42E-08 | -5.82 | 8.1075275 | -8.52E-02 | 151984822 | 151984945 | NC_000003.11 |
| cg23164054 | 1.96E-07 | 2.42E-08 | -5.82 | 8.1075163 | -9.08E-02 | 38591593  | 38591716  | NC_000015.9  |
| cg17344099 | 1.97E-07 | 2.43E-08 | -5.82 | 8.1051145 | -1.24E-01 | 22488445  | 22488568  | NC_000011.9  |
| cg08836954 | 1.97E-07 | 2.43E-08 | -5.82 | 8.1049649 | -1.16E-01 | 179235209 | 179235332 | NC_000005.9  |
| cg13179130 | 1.97E-07 | 2.43E-08 | -5.82 | 8.104657  | -1.94E-02 | 24070416  | 24070539  | NC_000001.10 |
| cg11276093 | 1.97E-07 | 2.43E-08 | -5.82 | 8.1040802 | -1.18E-01 | 95123774  | 95123897  | NC_000010.10 |
| cg08567142 | 1.97E-07 | 2.43E-08 | -5.82 | 8.1036888 | -7.25E-02 | 71087924  | 71088047  | NC_000010.10 |
| cg25958716 | 1.97E-07 | 2.44E-08 | -5.82 | 8.1024129 | -6.48E-02 | 191079856 | 191079979 | NC_000002.11 |
| cg01383881 | 1.97E-07 | 2.44E-08 | -5.82 | 8.1015271 | -1.07E-01 | 47292384  | 47292507  | NC_000007.13 |
| cg20931972 | 1.97E-07 | 2.44E-08 | -5.82 | 8.1012024 | -9.05E-02 | 15850232  | 15850355  | NC_000004.11 |
| cg04526365 | 1.97E-07 | 2.44E-08 | -5.82 | 8.1011312 | -4.41E-02 | 34858220  | 34858343  | NC_000006.11 |
| cg07388493 | 1.97E-07 | 2.44E-08 | -5.81 | 8.1008524 | -1.21E-01 | 39491459  | 39491582  | NC_000001.10 |
| cg03369965 | 1.98E-07 | 2.44E-08 | -5.81 | 8.1003342 | -9.38E-02 | 169531731 | 169531854 | NC_000003.11 |
| cg14061230 | 1.98E-07 | 2.44E-08 | -5.81 | 8.1001841 | -6.93E-02 | 130829320 | 130829443 | NC_000009.11 |
| cg26137931 | 1.98E-07 | 2.44E-08 | -5.81 | 8.100044  | -3.64E-02 | 67048568  | 67048691  | NC_000003.11 |
| cg10610648 | 1.98E-07 | 2.44E-08 | -5.81 | 8.0998855 | -6.70E-02 | 5969457   | 5969580   | NC_000010.10 |

|              |          |          |       |           |           |           |           |              |
|--------------|----------|----------|-------|-----------|-----------|-----------|-----------|--------------|
| cg24861866   | 1.98E-07 | 2.44E-08 | -5.81 | 8.0996666 | -9.02E-02 | 135106684 | 135106807 | NC_000010.10 |
| cg25708364   | 1.98E-07 | 2.45E-08 | -5.81 | 8.0989141 | -1.10E-01 | 18905779  | 18905902  | NC_000017.10 |
| cg14418756   | 1.98E-07 | 2.45E-08 | -5.81 | 8.0988504 | -1.23E-01 | 134043618 | 134043741 | NC_000010.10 |
| ch.4.427739F | 1.98E-07 | 2.45E-08 | -5.81 | 8.0985808 | -2.36E-02 | 14816445  | 14816568  | NC_000004.11 |
| cg26052885   | 1.98E-07 | 2.45E-08 | -5.81 | 8.0982808 | -9.60E-02 | 57176315  | 57176438  | NC_000001.10 |
| cg06708133   | 1.98E-07 | 2.45E-08 | -5.81 | 8.097243  | -1.18E-01 | 50667801  | 50667924  | NC_000019.9  |
| cg13564020   | 1.98E-07 | 2.45E-08 | -5.81 | 8.096572  | -1.34E-01 | 79939536  | 79939659  | NC_000014.8  |
| cg24986840   | 1.99E-07 | 2.46E-08 | -5.81 | 8.0940638 | -7.80E-02 | 112693829 | 112693952 | NC_000011.9  |
| cg02632227   | 1.99E-07 | 2.46E-08 | -5.81 | 8.0938542 | -1.18E-01 | 1404914   | 1405037   | NC_000016.9  |
| cg14002578   | 1.99E-07 | 2.46E-08 | -5.81 | 8.0937497 | -1.25E-01 | 101569103 | 101569226 | NC_000009.11 |
| cg23519637   | 1.99E-07 | 2.46E-08 | -5.81 | 8.0937128 | -1.78E-01 | 1121738   | 1121861   | NC_000007.13 |
| cg04663564   | 1.99E-07 | 2.46E-08 | -5.81 | 8.0930365 | -1.15E-01 | 134144288 | 134144411 | NC_000007.13 |
| cg07586489   | 1.99E-07 | 2.46E-08 | -5.81 | 8.0926467 | -6.81E-02 | 3013227   | 3013350   | NC_000016.9  |
| cg03984120   | 1.99E-07 | 2.46E-08 | -5.81 | 8.0917283 | -2.17E-02 | 126082000 | 126082123 | NC_000011.9  |
| cg10551016   | 1.99E-07 | 2.47E-08 | -5.81 | 8.0912555 | -6.01E-02 | 41252963  | 41253086  | NC_000022.10 |
| cg02567751   | 2.00E-07 | 2.47E-08 | -5.81 | 8.0899478 | -8.27E-02 | 39521911  | 39522034  | NC_000006.11 |
| cg25309588   | 2.00E-07 | 2.47E-08 | -5.81 | 8.0897889 | -2.77E-02 | 42659645  | 42659768  | NC_000004.11 |
| cg19595850   | 2.00E-07 | 2.47E-08 | -5.81 | 8.0895672 | -1.56E-02 | 3712909   | 3713032   | NC_000001.10 |
| cg14204559   | 2.00E-07 | 2.47E-08 | -5.81 | 8.0888453 | -7.61E-02 | 75596021  | 75596144  | NC_000007.13 |
| cg07760722   | 2.00E-07 | 2.47E-08 | -5.81 | 8.0886746 | -9.68E-02 | 149033953 | 149034076 | NC_000004.11 |
| cg23045373   | 2.00E-07 | 2.47E-08 | -5.81 | 8.0878824 | -3.60E-02 | 11324048  | 11324171  | NC_000008.10 |
| cg08716684   | 2.00E-07 | 2.47E-08 | -5.81 | 8.0873818 | -9.99E-02 | 133337116 | 133337239 | NC_000012.11 |
| cg03802486   | 2.00E-07 | 2.48E-08 | -5.81 | 8.0865642 | -5.24E-02 | 7254577   | 7254700   | NC_000012.11 |
| cg26772894   | 2.00E-07 | 2.48E-08 | -5.81 | 8.0862793 | -7.09E-02 | 85122558  | 85122681  | NC_000016.9  |
| cg16860392   | 2.00E-07 | 2.48E-08 | -5.81 | 8.0859066 | -8.53E-02 | 112005207 | 112005330 | NC_000006.11 |

|               |          |          |       |           |           |           |           |              |
|---------------|----------|----------|-------|-----------|-----------|-----------|-----------|--------------|
| cg05006449    | 2.00E-07 | 2.48E-08 | -5.81 | 8.0852719 | -1.15E-01 | 54600295  | 54600418  | NC_000019.9  |
| cg00406211    | 2.01E-07 | 2.48E-08 | -5.81 | 8.0844894 | -1.30E-01 | 121077022 | 121077145 | NC_000010.10 |
| cg00196167    | 2.01E-07 | 2.48E-08 | -5.81 | 8.0841414 | -3.62E-02 | 139026058 | 139026181 | NC_000007.13 |
| cg26784957    | 2.01E-07 | 2.48E-08 | -5.81 | 8.0839831 | -1.11E-01 | 154042762 | 154042885 | NC_000003.11 |
| cg09760422    | 2.01E-07 | 2.48E-08 | -5.81 | 8.0837235 | -8.51E-02 | 128146352 | 128146475 | NC_000002.11 |
| cg01409343    | 2.01E-07 | 2.49E-08 | -5.81 | 8.082263  | -9.72E-02 | 57915740  | 57915863  | NC_000017.10 |
| cg15404785    | 2.01E-07 | 2.49E-08 | -5.81 | 8.0803704 | -9.57E-02 | 61727792  | 61727915  | NC_000014.8  |
| cg00237904    | 2.02E-07 | 2.50E-08 | -5.81 | 8.078712  | -1.05E-01 | 2020314   | 2020437   | NC_000011.9  |
| cg18345219    | 2.02E-07 | 2.50E-08 | -5.81 | 8.0780225 | -5.18E-02 | 43919084  | 43919207  | NC_000001.10 |
| cg00251270    | 2.02E-07 | 2.50E-08 | -5.81 | 8.0767927 | -6.66E-02 | 3536362   | 3536485   | NC_000010.10 |
| cg00781604    | 2.02E-07 | 2.50E-08 | -5.81 | 8.075885  | -4.91E-02 | 203499802 | 203499925 | NC_000002.11 |
| cg17784503    | 2.02E-07 | 2.51E-08 | -5.81 | 8.0749054 | -1.36E-01 | 174917275 | 174917398 | NC_000002.11 |
| cg07891271    | 2.03E-07 | 2.51E-08 | -5.81 | 8.0743741 | -1.58E-01 | 101783037 | 101783160 | NC_000015.9  |
| cg22686718    | 2.03E-07 | 2.51E-08 | -5.81 | 8.0739662 | -1.08E-01 | 127209925 | 127210048 | NC_000012.11 |
| cg14311134    | 2.03E-07 | 2.51E-08 | -5.81 | 8.0736576 | -1.05E-01 | 7414062   | 7414185   | NC_000019.9  |
| cg04195831    | 2.03E-07 | 2.51E-08 | -5.81 | 8.073622  | -6.89E-02 | 17090834  | 17090957  | NC_000001.10 |
| cg13210239    | 2.03E-07 | 2.51E-08 | -5.81 | 8.0727092 | -9.12E-02 | 2019090   | 2019213   | NC_000011.9  |
| cg10373676    | 2.03E-07 | 2.51E-08 | -5.81 | 8.0719952 | -1.36E-02 | 1993355   | 1993478   | NC_000016.9  |
| ch.17.839409R | 2.03E-07 | 2.52E-08 | -5.81 | 8.071503  | -4.44E-02 | 30701662  | 30701785  | NC_000017.10 |
| cg07993112    | 2.03E-07 | 2.52E-08 | -5.81 | 8.071266  | -1.12E-01 | 44363533  | 44363656  | NC_000002.11 |
| cg21780326    | 2.04E-07 | 2.52E-08 | -5.81 | 8.0687954 | -2.38E-02 | 100558100 | 100558223 | NC_000011.9  |
| cg05881521    | 2.04E-07 | 2.52E-08 | -5.81 | 8.0684427 | -7.31E-02 | 73160126  | 73160249  | NC_000016.9  |
| cg23318538    | 2.04E-07 | 2.52E-08 | -5.81 | 8.0682959 | -7.92E-02 | 26883079  | 26883202  | NC_000010.10 |
| cg19909658    | 2.04E-07 | 2.53E-08 | -5.81 | 8.0674794 | -1.18E-01 | 38447008  | 38447131  | NC_000017.10 |
| cg06813862    | 2.04E-07 | 2.53E-08 | -5.81 | 8.0674708 | -7.94E-02 | 89346059  | 89346182  | NC_000012.11 |

|            |          |          |       |           |           |           |           |              |
|------------|----------|----------|-------|-----------|-----------|-----------|-----------|--------------|
| cg18161670 | 2.04E-07 | 2.53E-08 | -5.81 | 8.0674534 | -1.01E-01 | 229225    | 229348    | NC_000007.13 |
| cg13522462 | 2.04E-07 | 2.53E-08 | -5.81 | 8.0672379 | -7.92E-02 | 44576874  | 44576997  | NC_000019.9  |
| cg01060471 | 2.04E-07 | 2.53E-08 | -5.81 | 8.0659226 | -7.06E-02 | 103911733 | 103911856 | NC_000010.10 |
| cg18181496 | 2.04E-07 | 2.53E-08 | -5.81 | 8.0653509 | -7.53E-02 | 107642539 | 107642662 | NC_000007.13 |
| cg12990591 | 2.04E-07 | 2.53E-08 | -5.81 | 8.0651211 | -2.31E-02 | 2757781   | 2757904   | NC_000004.11 |
| cg09880665 | 2.04E-07 | 2.53E-08 | -5.81 | 8.0644621 | -1.07E-01 | 35991490  | 35991613  | NC_000011.9  |
| cg26915799 | 2.05E-07 | 2.53E-08 | -5.81 | 8.064052  | -1.31E-01 | 201852272 | 201852395 | NC_000001.10 |
| cg17724054 | 2.05E-07 | 2.54E-08 | -5.81 | 8.0638849 | -1.37E-02 | 81574408  | 81574531  | NC_000005.9  |
| cg02552489 | 2.05E-07 | 2.54E-08 | -5.81 | 8.0633345 | -7.33E-02 | 96069055  | 96069178  | NC_000002.11 |
| cg08903389 | 2.05E-07 | 2.54E-08 | -5.81 | 8.0630197 | -1.38E-01 | 69104289  | 69104412  | NC_000007.13 |
| cg07451859 | 2.05E-07 | 2.54E-08 | -5.81 | 8.06171   | -4.16E-02 | 54469144  | 54469267  | NC_000005.9  |
| cg07004925 | 2.05E-07 | 2.54E-08 | -5.81 | 8.061268  | -8.03E-02 | 2072049   | 2072172   | NC_000004.11 |
| cg06985664 | 2.06E-07 | 2.55E-08 | -5.81 | 8.0589001 | -1.15E-01 | 116367599 | 116367722 | NC_000007.13 |
| cg15781794 | 2.06E-07 | 2.55E-08 | -5.81 | 8.0584819 | -2.35E-02 | 75541867  | 75541990  | NC_000010.10 |
| cg00706282 | 2.06E-07 | 2.55E-08 | -5.81 | 8.0580357 | -3.36E-02 | 160471856 | 160471979 | NC_000002.11 |
| cg09620840 | 2.06E-07 | 2.55E-08 | -5.81 | 8.057185  | -9.92E-02 | 30458149  | 30458272  | NC_000006.11 |
| cg15483758 | 2.06E-07 | 2.55E-08 | -5.81 | 8.0567062 | -1.11E-01 | 3672228   | 3672351   | NC_000019.9  |
| cg13990947 | 2.06E-07 | 2.56E-08 | -5.81 | 8.056297  | -1.31E-01 | 19128801  | 19128924  | NC_000009.11 |
| cg12513249 | 2.06E-07 | 2.56E-08 | -5.81 | 8.056223  | -2.51E-02 | 65656489  | 65656612  | NC_000011.9  |
| cg23632849 | 2.06E-07 | 2.56E-08 | -5.81 | 8.056151  | -9.41E-02 | 72208322  | 72208445  | NC_000017.10 |
| cg23850277 | 2.06E-07 | 2.56E-08 | -5.81 | 8.0561072 | -5.85E-02 | 24114770  | 24114893  | NC_000022.10 |
| cg17762035 | 2.06E-07 | 2.56E-08 | -5.81 | 8.054972  | -4.04E-02 | 113666894 | 113667017 | NC_000003.11 |
| cg25322720 | 2.06E-07 | 2.56E-08 | -5.81 | 8.054708  | -1.22E-01 | 19628292  | 19628415  | NC_000017.10 |
| cg21539842 | 2.06E-07 | 2.56E-08 | -5.81 | 8.0540509 | -6.20E-02 | 162641005 | 162641128 | NC_000001.10 |
| cg12060713 | 2.07E-07 | 2.56E-08 | -5.81 | 8.053321  | -2.13E-02 | 121945148 | 121945271 | NC_000007.13 |

|              |          |          |       |           |           |           |           |              |
|--------------|----------|----------|-------|-----------|-----------|-----------|-----------|--------------|
| cg22334879   | 2.07E-07 | 2.56E-08 | -5.81 | 8.0530783 | -6.07E-02 | 8642370   | 8642493   | NC_000019.9  |
| cg06419748   | 2.07E-07 | 2.56E-08 | -5.81 | 8.0529317 | -8.76E-02 | 77587324  | 77587447  | NC_000004.11 |
| cg22070156   | 2.07E-07 | 2.57E-08 | -5.81 | 8.052154  | -1.50E-01 | 102104991 | 102105114 | NC_000013.10 |
| cg15825501   | 2.07E-07 | 2.57E-08 | -5.81 | 8.0519458 | -5.69E-02 | 936610    | 936733    | NC_000001.10 |
| cg19940482   | 2.07E-07 | 2.57E-08 | -5.81 | 8.0518431 | -1.03E-01 | 125190793 | 125190916 | NC_000011.9  |
| cg08393660   | 2.07E-07 | 2.57E-08 | -5.8  | 8.0489655 | -5.39E-02 | 37322641  | 37322764  | NC_000006.11 |
| cg14462067   | 2.07E-07 | 2.57E-08 | -5.8  | 8.0489144 | -3.55E-02 | 3158207   | 3158330   | NC_000006.11 |
| cg00130707   | 2.08E-07 | 2.58E-08 | -5.8  | 8.0469773 | -1.13E-01 | 20303127  | 20303250  | NC_000016.9  |
| cg00808492   | 2.08E-07 | 2.58E-08 | -5.8  | 8.0469463 | -1.52E-01 | 120354159 | 120354282 | NC_000001.10 |
| cg10668041   | 2.08E-07 | 2.58E-08 | -5.8  | 8.0467597 | -1.55E-02 | 15412970  | 15413093  | NC_000010.10 |
| cg10874111   | 2.08E-07 | 2.58E-08 | -5.8  | 8.046373  | -1.20E-01 | 158799748 | 158799871 | NC_000007.13 |
| cg12616923   | 2.08E-07 | 2.58E-08 | -5.8  | 8.0462698 | -1.11E-01 | 128228107 | 128228230 | NC_000008.10 |
| cg18142353   | 2.08E-07 | 2.58E-08 | -5.8  | 8.0459061 | -5.47E-02 | 12420574  | 12420697  | NC_000012.11 |
| cg02933962   | 2.08E-07 | 2.58E-08 | -5.8  | 8.0453515 | -1.01E-01 | 66827615  | 66827738  | NC_000011.9  |
| cg11525834   | 2.08E-07 | 2.59E-08 | -5.8  | 8.0445095 | -4.62E-02 | 73153318  | 73153441  | NC_000007.13 |
| cg16941302   | 2.08E-07 | 2.59E-08 | -5.8  | 8.0443101 | -1.17E-01 | 55108947  | 55109070  | NC_000018.9  |
| cg06045576   | 2.08E-07 | 2.59E-08 | -5.8  | 8.0442522 | -7.27E-02 | 19948957  | 19949080  | NC_000022.10 |
| cg15644764   | 2.08E-07 | 2.59E-08 | -5.8  | 8.0438675 | -1.03E-01 | 202592914 | 202593037 | NC_000001.10 |
| ch.7.398127F | 2.09E-07 | 2.59E-08 | -5.8  | 8.0437269 | -2.62E-02 | 12890234  | 12890357  | NC_000007.13 |
| cg07628084   | 2.09E-07 | 2.59E-08 | -5.8  | 8.043715  | -1.16E-01 | 112576119 | 112576242 | NC_000006.11 |
| cg24243265   | 2.09E-07 | 2.59E-08 | -5.8  | 8.0424343 | -1.11E-01 | 130799851 | 130799974 | NC_000008.10 |
| cg17081027   | 2.09E-07 | 2.59E-08 | -5.8  | 8.0423723 | -1.23E-01 | 223566447 | 223566570 | NC_000001.10 |
| cg03968911   | 2.09E-07 | 2.59E-08 | -5.8  | 8.0414429 | -9.51E-02 | 118734132 | 118734255 | NC_000010.10 |
| cg19057830   | 2.09E-07 | 2.60E-08 | -5.8  | 8.0394435 | -1.04E-01 | 77165673  | 77165796  | NC_000010.10 |
| cg18898336   | 2.09E-07 | 2.60E-08 | -5.8  | 8.0394336 | -1.02E-01 | 3392103   | 3392226   | NC_000004.11 |

|            |          |          |      |           |           |           |           |              |
|------------|----------|----------|------|-----------|-----------|-----------|-----------|--------------|
| cg14483831 | 2.09E-07 | 2.60E-08 | -5.8 | 8.0392098 | -7.31E-02 | 133032572 | 133032695 | NC_000011.9  |
| cg07216436 | 2.10E-07 | 2.60E-08 | -5.8 | 8.0387112 | -1.21E-01 | 154951034 | 154951157 | NC_000003.11 |
| cg14845609 | 2.10E-07 | 2.61E-08 | -5.8 | 8.0372344 | -1.07E-01 | 113376010 | 113376133 | NC_000013.10 |
| cg04731384 | 2.10E-07 | 2.61E-08 | -5.8 | 8.036541  | -8.06E-02 | 90076766  | 90076889  | NC_000016.9  |
| cg09712234 | 2.10E-07 | 2.61E-08 | -5.8 | 8.0363997 | -1.08E-01 | 30614413  | 30614536  | NC_000016.9  |
| cg06484340 | 2.10E-07 | 2.61E-08 | -5.8 | 8.0359906 | -4.39E-02 | 15543369  | 15543492  | NC_000019.9  |
| cg11650648 | 2.10E-07 | 2.61E-08 | -5.8 | 8.0350524 | -9.12E-02 | 9741522   | 9741645   | NC_000017.10 |
| cg01961153 | 2.10E-07 | 2.61E-08 | -5.8 | 8.0342635 | -1.04E-01 | 41826446  | 41826569  | NC_000001.10 |
| cg02272280 | 2.10E-07 | 2.61E-08 | -5.8 | 8.03422   | -7.92E-02 | 12076435  | 12076558  | NC_000018.9  |
| cg07885191 | 2.10E-07 | 2.62E-08 | -5.8 | 8.0337207 | -6.93E-02 | 80848209  | 80848332  | NC_000017.10 |
| cg22948808 | 2.11E-07 | 2.62E-08 | -5.8 | 8.0327551 | -8.83E-02 | 46360763  | 46360886  | NC_000011.9  |
| cg13533061 | 2.11E-07 | 2.62E-08 | -5.8 | 8.0326098 | -1.35E-01 | 74712429  | 74712552  | NC_000017.10 |
| cg09739887 | 2.11E-07 | 2.62E-08 | -5.8 | 8.032247  | -3.70E-02 | 7105262   | 7105385   | NC_000004.11 |
| cg04622454 | 2.11E-07 | 2.62E-08 | -5.8 | 8.0317241 | -1.12E-01 | 140349128 | 140349251 | NC_000009.11 |
| cg11096515 | 2.11E-07 | 2.62E-08 | -5.8 | 8.0316638 | -1.34E-01 | 111062287 | 111062410 | NC_000013.10 |
| cg24094897 | 2.11E-07 | 2.62E-08 | -5.8 | 8.0316144 | -9.35E-02 | 112426203 | 112426326 | NC_000005.9  |
| cg08215318 | 2.11E-07 | 2.62E-08 | -5.8 | 8.0306704 | -1.09E-01 | 86016387  | 86016510  | NC_000016.9  |
| cg10988561 | 2.11E-07 | 2.62E-08 | -5.8 | 8.0301231 | -4.35E-02 | 271254    | 271377    | NC_000005.9  |
| cg09742465 | 2.11E-07 | 2.63E-08 | -5.8 | 8.029451  | -1.36E-01 | 8618154   | 8618277   | NC_000002.11 |
| cg07459525 | 2.11E-07 | 2.63E-08 | -5.8 | 8.0293616 | -2.12E-02 | 22409131  | 22409254  | NC_000008.10 |
| cg05183487 | 2.11E-07 | 2.63E-08 | -5.8 | 8.0293567 | -4.79E-02 | 89992959  | 89993082  | NC_000016.9  |
| cg07132492 | 2.11E-07 | 2.63E-08 | -5.8 | 8.0290102 | -8.50E-02 | 113492042 | 113492165 | NC_000013.10 |
| cg02096718 | 2.12E-07 | 2.63E-08 | -5.8 | 8.0285896 | -2.75E-02 | 32174744  | 32174867  | NC_000005.9  |
| cg22157099 | 2.12E-07 | 2.63E-08 | -5.8 | 8.0283617 | -1.20E-01 | 15830172  | 15830295  | NC_000002.11 |
| cg00259834 | 2.12E-07 | 2.63E-08 | -5.8 | 8.0278752 | -1.56E-01 | 16553499  | 16553622  | NC_000003.11 |

|            |          |          |      |           |           |           |           |              |
|------------|----------|----------|------|-----------|-----------|-----------|-----------|--------------|
| cg09703910 | 2.12E-07 | 2.63E-08 | -5.8 | 8.0269875 | -1.67E-01 | 56236435  | 56236558  | NC_000002.11 |
| cg26810281 | 2.12E-07 | 2.63E-08 | -5.8 | 8.0267376 | -7.92E-02 | 31465714  | 31465837  | NC_000006.11 |
| cg10655236 | 2.12E-07 | 2.63E-08 | -5.8 | 8.0263823 | -1.21E-01 | 753974    | 754097    | NC_000017.10 |
| cg00264799 | 2.12E-07 | 2.64E-08 | -5.8 | 8.0256757 | -1.11E-01 | 102848839 | 102848962 | NC_000012.11 |
| cg08877624 | 2.12E-07 | 2.64E-08 | -5.8 | 8.0253341 | -4.99E-02 | 141521446 | 141521569 | NC_000008.10 |
| cg19745314 | 2.12E-07 | 2.64E-08 | -5.8 | 8.0242997 | -5.39E-02 | 170814913 | 170815036 | NC_000005.9  |
| cg22218543 | 2.13E-07 | 2.64E-08 | -5.8 | 8.023241  | -7.98E-02 | 47393136  | 47393259  | NC_000017.10 |
| cg03318469 | 2.13E-07 | 2.64E-08 | -5.8 | 8.0232278 | -1.04E-01 | 3710303   | 3710426   | NC_000001.10 |
| cg20253350 | 2.13E-07 | 2.64E-08 | -5.8 | 8.022911  | -6.08E-02 | 19615659  | 19615782  | NC_000001.10 |
| cg18806378 | 2.13E-07 | 2.65E-08 | -5.8 | 8.0225319 | -2.43E-02 | 61655862  | 61655985  | NC_000014.8  |
| cg18284875 | 2.13E-07 | 2.65E-08 | -5.8 | 8.0225308 | -1.06E-01 | 157777033 | 157777156 | NC_000007.13 |
| cg07700393 | 2.13E-07 | 2.65E-08 | -5.8 | 8.0215809 | -1.22E-01 | 33788976  | 33789099  | NC_000005.9  |
| cg06655190 | 2.13E-07 | 2.65E-08 | -5.8 | 8.0208572 | -8.86E-02 | 75551627  | 75551750  | NC_000016.9  |
| cg26123824 | 2.14E-07 | 2.66E-08 | -5.8 | 8.0185096 | -1.23E-01 | 120783201 | 120783324 | NC_000010.10 |
| cg22499297 | 2.14E-07 | 2.66E-08 | -5.8 | 8.0174234 | -8.17E-02 | 49789369  | 49789492  | NC_000013.10 |
| cg08890043 | 2.14E-07 | 2.66E-08 | -5.8 | 8.0171965 | -2.51E-02 | 51021165  | 51021288  | NC_000022.10 |
| cg15997611 | 2.14E-07 | 2.66E-08 | -5.8 | 8.0171837 | -6.87E-02 | 47901145  | 47901268  | NC_000017.10 |
| cg03371986 | 2.14E-07 | 2.66E-08 | -5.8 | 8.0170747 | -3.47E-02 | 138089103 | 138089226 | NC_000005.9  |
| cg15810815 | 2.14E-07 | 2.66E-08 | -5.8 | 8.0164682 | -7.53E-02 | 114663139 | 114663262 | NC_000006.11 |
| cg18595780 | 2.14E-07 | 2.66E-08 | -5.8 | 8.0164595 | -1.05E-01 | 31010742  | 31010865  | NC_000006.11 |
| cg13325233 | 2.14E-07 | 2.66E-08 | -5.8 | 8.0164388 | -5.52E-02 | 86167398  | 86167521  | NC_000004.11 |
| cg15812469 | 2.14E-07 | 2.66E-08 | -5.8 | 8.0163444 | -4.87E-02 | 25041320  | 25041443  | NC_000008.10 |
| cg13830636 | 2.14E-07 | 2.66E-08 | -5.8 | 8.0154198 | -1.65E-02 | 75503731  | 75503854  | NC_000010.10 |
| cg08791922 | 2.14E-07 | 2.67E-08 | -5.8 | 8.0147223 | -8.38E-02 | 32964265  | 32964388  | NC_000017.10 |
| cg01766699 | 2.14E-07 | 2.67E-08 | -5.8 | 8.0143656 | -1.16E-01 | 196602679 | 196602802 | NC_000002.11 |

|            |          |          |      |           |           |           |           |              |
|------------|----------|----------|------|-----------|-----------|-----------|-----------|--------------|
| cg00803638 | 2.15E-07 | 2.67E-08 | -5.8 | 8.0133292 | -5.27E-02 | 35464304  | 35464427  | NC_000006.11 |
| cg24883586 | 2.15E-07 | 2.67E-08 | -5.8 | 8.0131376 | -4.89E-02 | 37757094  | 37757217  | NC_000008.10 |
| cg04189187 | 2.15E-07 | 2.67E-08 | -5.8 | 8.0128455 | -1.31E-01 | 6183528   | 6183651   | NC_000010.10 |
| cg25466805 | 2.15E-07 | 2.67E-08 | -5.8 | 8.0127814 | -4.38E-02 | 72463704  | 72463827  | NC_000011.9  |
| cg21724798 | 2.15E-07 | 2.67E-08 | -5.8 | 8.0120952 | -4.54E-02 | 11667650  | 11667773  | NC_000020.10 |
| cg08028651 | 2.15E-07 | 2.67E-08 | -5.8 | 8.0118793 | -1.35E-02 | 116164836 | 116164959 | NC_000007.13 |
| cg07318609 | 2.15E-07 | 2.68E-08 | -5.8 | 8.0108542 | -1.53E-01 | 128585354 | 128585477 | NC_000010.10 |
| cg06072717 | 2.15E-07 | 2.68E-08 | -5.8 | 8.0105489 | -1.18E-01 | 120066282 | 120066405 | NC_000008.10 |
| cg08711281 | 2.15E-07 | 2.68E-08 | -5.8 | 8.0103843 | -1.14E-01 | 30908302  | 30908425  | NC_000006.11 |
| cg07812848 | 2.15E-07 | 2.68E-08 | -5.8 | 8.0098186 | -1.12E-01 | 1214622   | 1214745   | NC_000001.10 |
| cg25356504 | 2.15E-07 | 2.68E-08 | -5.8 | 8.009453  | -1.22E-01 | 26707476  | 26707599  | NC_000017.10 |
| cg20032370 | 2.15E-07 | 2.68E-08 | -5.8 | 8.0094515 | -6.29E-02 | 80251467  | 80251590  | NC_000017.10 |
| cg24412662 | 2.16E-07 | 2.68E-08 | -5.8 | 8.0088385 | -1.48E-01 | 2866667   | 2866790   | NC_000001.10 |
| cg18636739 | 2.16E-07 | 2.68E-08 | -5.8 | 8.0087824 | -1.15E-01 | 10870175  | 10870298  | NC_000012.11 |
| cg06294319 | 2.16E-07 | 2.69E-08 | -5.8 | 8.0078326 | -1.12E-01 | 127387971 | 127388094 | NC_000008.10 |
| cg05032934 | 2.16E-07 | 2.69E-08 | -5.8 | 8.0076114 | -3.78E-02 | 31789161  | 31789284  | NC_000006.11 |
| cg05817758 | 2.16E-07 | 2.69E-08 | -5.8 | 8.0075228 | -1.63E-01 | 13030567  | 13030690  | NC_000011.9  |
| cg16572224 | 2.16E-07 | 2.69E-08 | -5.8 | 8.0072751 | -1.16E-01 | 171788937 | 171789060 | NC_000005.9  |
| cg24733934 | 2.16E-07 | 2.69E-08 | -5.8 | 8.0052381 | -7.66E-02 | 40152179  | 40152302  | NC_000001.10 |
| cg26667287 | 2.16E-07 | 2.69E-08 | -5.8 | 8.0050544 | -6.27E-02 | 46419365  | 46419488  | NC_000022.10 |
| cg04478875 | 2.16E-07 | 2.69E-08 | -5.8 | 8.0050543 | -1.10E-01 | 142023774 | 142023897 | NC_000005.9  |
| cg20468883 | 2.16E-07 | 2.69E-08 | -5.8 | 8.0048967 | -8.91E-02 | 59982396  | 59982519  | NC_000015.9  |
| cg16418183 | 2.16E-07 | 2.70E-08 | -5.8 | 8.0042868 | -1.07E-01 | 51360402  | 51360525  | NC_000016.9  |
| cg12464148 | 2.16E-07 | 2.70E-08 | -5.8 | 8.0041908 | -1.03E-01 | 4173497   | 4173620   | NC_000004.11 |
| cg14607904 | 2.17E-07 | 2.70E-08 | -5.8 | 8.004036  | -2.59E-02 | 170862125 | 170862248 | NC_000006.11 |



|            |          |          |       |           |           |           |           |              |
|------------|----------|----------|-------|-----------|-----------|-----------|-----------|--------------|
| cg00997411 | 2.17E-07 | 2.70E-08 | -5.8  | 8.0036185 | -2.13E-02 | 205290916 | 205291039 | NC_000001.10 |
| cg13555050 | 2.17E-07 | 2.70E-08 | -5.8  | 8.0030026 | -1.09E-01 | 111985640 | 111985763 | NC_000004.11 |
| cg04310074 | 2.17E-07 | 2.70E-08 | -5.8  | 8.0023757 | -5.52E-02 | 11211495  | 11211618  | NC_000001.10 |
| cg20815778 | 2.17E-07 | 2.70E-08 | -5.8  | 8.0020752 | -1.11E-01 | 72113416  | 72113539  | NC_000006.11 |
| cg02582940 | 2.17E-07 | 2.70E-08 | -5.79 | 8.0017527 | -1.14E-01 | 97308417  | 97308540  | NC_000002.11 |
| cg18817654 | 2.18E-07 | 2.71E-08 | -5.79 | 7.9984095 | -1.23E-01 | 39485138  | 39485261  | NC_000015.9  |
| cg18087256 | 2.18E-07 | 2.71E-08 | -5.79 | 7.9983185 | -1.35E-01 | 45495954  | 45496077  | NC_000013.10 |
| cg11007850 | 2.18E-07 | 2.71E-08 | -5.79 | 7.9972192 | -1.03E-01 | 129216138 | 129216261 | NC_000002.11 |
| cg00958451 | 2.18E-07 | 2.72E-08 | -5.79 | 7.996587  | -5.17E-02 | 65204391  | 65204514  | NC_000015.9  |
| cg23533419 | 2.18E-07 | 2.72E-08 | -5.79 | 7.9963982 | -1.17E-01 | 54090519  | 54090642  | NC_000012.11 |
| cg04339947 | 2.18E-07 | 2.72E-08 | -5.79 | 7.9956569 | -9.46E-02 | 61443052  | 61443175  | NC_000011.9  |
| cg02675946 | 2.18E-07 | 2.72E-08 | -5.79 | 7.994555  | -8.46E-02 | 64993239  | 64993362  | NC_000011.9  |
| cg08845722 | 2.19E-07 | 2.72E-08 | -5.79 | 7.9944625 | -7.74E-02 | 46041801  | 46041924  | NC_000002.11 |
| cg13618604 | 2.19E-07 | 2.72E-08 | -5.79 | 7.9940139 | -7.52E-02 | 187646929 | 187647052 | NC_000004.11 |
| cg23985077 | 2.19E-07 | 2.73E-08 | -5.79 | 7.993381  | -1.03E-01 | 17512652  | 17512775  | NC_000020.10 |
| cg26471390 | 2.19E-07 | 2.73E-08 | -5.79 | 7.9931382 | -5.02E-02 | 43511301  | 43511424  | NC_000017.10 |
| cg01853828 | 2.19E-07 | 2.73E-08 | -5.79 | 7.9925711 | -1.07E-01 | 30684633  | 30684756  | NC_000016.9  |
| cg11992992 | 2.19E-07 | 2.73E-08 | -5.79 | 7.9923419 | -1.70E-02 | 71633216  | 71633339  | NC_000003.11 |
| cg08113562 | 2.19E-07 | 2.73E-08 | -5.79 | 7.9919441 | -4.52E-02 | 43508428  | 43508551  | NC_000017.10 |
| cg05005073 | 2.19E-07 | 2.73E-08 | -5.79 | 7.9919335 | -7.61E-02 | 39513326  | 39513449  | NC_000001.10 |
| cg25410310 | 2.19E-07 | 2.73E-08 | -5.79 | 7.9915194 | -1.24E-01 | 48902803  | 48902926  | NC_000019.9  |
| cg23041295 | 2.19E-07 | 2.73E-08 | -5.79 | 7.9908933 | -1.37E-01 | 15502456  | 15502579  | NC_000005.9  |
| cg25996077 | 2.19E-07 | 2.73E-08 | -5.79 | 7.9907849 | -1.04E-01 | 228331319 | 228331442 | NC_000002.11 |
| cg17461003 | 2.19E-07 | 2.73E-08 | -5.79 | 7.9903669 | -6.69E-02 | 101768816 | 101768939 | NC_000002.11 |
| cg10227393 | 2.19E-07 | 2.74E-08 | -5.79 | 7.9898212 | -2.88E-02 | 3721525   | 3721648   | NC_000019.9  |

|            |          |          |       |           |           |           |           |              |
|------------|----------|----------|-------|-----------|-----------|-----------|-----------|--------------|
| cg12923585 | 2.19E-07 | 2.74E-08 | -5.79 | 7.989657  | -2.48E-02 | 132149015 | 132149138 | NC_000005.9  |
| cg26802951 | 2.20E-07 | 2.74E-08 | -5.79 | 7.9894239 | -5.57E-02 | 178977641 | 178977764 | NC_000005.9  |
| cg20666186 | 2.20E-07 | 2.74E-08 | -5.79 | 7.9893769 | -9.69E-02 | 4038956   | 4039079   | NC_000019.9  |
| cg01579086 | 2.20E-07 | 2.74E-08 | -5.79 | 7.9892649 | -3.89E-02 | 40719412  | 40719535  | NC_000017.10 |
| cg23627145 | 2.20E-07 | 2.74E-08 | -5.79 | 7.9890871 | -6.15E-02 | 146445284 | 146445407 | NC_000002.11 |
| cg04246138 | 2.20E-07 | 2.74E-08 | -5.79 | 7.988903  | -1.01E-01 | 46777343  | 46777466  | NC_000016.9  |
| cg15639581 | 2.20E-07 | 2.74E-08 | -5.79 | 7.9886523 | -1.42E-01 | 13318873  | 13318996  | NC_000019.9  |
| cg20482223 | 2.20E-07 | 2.74E-08 | -5.79 | 7.9884423 | -7.34E-02 | 138347826 | 138347949 | NC_000007.13 |
| cg19356232 | 2.20E-07 | 2.74E-08 | -5.79 | 7.9872951 | -4.26E-02 | 200589415 | 200589538 | NC_000001.10 |
| cg01470323 | 2.20E-07 | 2.75E-08 | -5.79 | 7.9857886 | -4.96E-02 | 66139715  | 66139838  | NC_000011.9  |
| cg27641801 | 2.20E-07 | 2.75E-08 | -5.79 | 7.9851886 | -9.79E-02 | 4429265   | 4429388   | NC_000004.11 |
| cg01262337 | 2.21E-07 | 2.75E-08 | -5.79 | 7.9844825 | -3.95E-02 | 53290205  | 53290328  | NC_000003.11 |
| cg18046311 | 2.21E-07 | 2.75E-08 | -5.79 | 7.9841206 | -1.21E-01 | 49222623  | 49222746  | NC_000012.11 |
| cg03059247 | 2.21E-07 | 2.75E-08 | -5.79 | 7.9834527 | -7.88E-02 | 11287657  | 11287780  | NC_000008.10 |
| cg24804765 | 2.21E-07 | 2.75E-08 | -5.79 | 7.9830606 | -1.04E-01 | 51524658  | 51524781  | NC_000019.9  |
| cg08244052 | 2.21E-07 | 2.76E-08 | -5.79 | 7.9823918 | -1.60E-02 | 114631987 | 114632110 | NC_000005.9  |
| cg26168249 | 2.21E-07 | 2.76E-08 | -5.79 | 7.9811893 | -1.79E-02 | 15140507  | 15140630  | NC_000003.11 |
| cg18766468 | 2.21E-07 | 2.76E-08 | -5.79 | 7.9810689 | -6.86E-02 | 194090477 | 194090600 | NC_000003.11 |
| cg25234359 | 2.21E-07 | 2.76E-08 | -5.79 | 7.9807689 | -1.17E-01 | 18699219  | 18699342  | NC_000019.9  |
| cg19303187 | 2.21E-07 | 2.76E-08 | -5.79 | 7.9804746 | -1.13E-01 | 172968881 | 172969004 | NC_000002.11 |
| cg09603919 | 2.22E-07 | 2.76E-08 | -5.79 | 7.9800129 | -7.48E-02 | 64725835  | 64725958  | NC_000003.11 |
| cg23664186 | 2.22E-07 | 2.77E-08 | -5.79 | 7.9792299 | -8.95E-02 | 38065582  | 38065705  | NC_000014.8  |
| cg04848426 | 2.22E-07 | 2.77E-08 | -5.79 | 7.9787331 | -1.28E-01 | 106735003 | 106735126 | NC_000002.11 |
| cg27624229 | 2.22E-07 | 2.77E-08 | -5.79 | 7.9785203 | -7.89E-02 | 32049053  | 32049176  | NC_000006.11 |
| cg09893068 | 2.22E-07 | 2.77E-08 | -5.79 | 7.9782739 | -2.89E-02 | 46089593  | 46089716  | NC_000001.10 |

|                |          |          |       |           |           |           |           |              |
|----------------|----------|----------|-------|-----------|-----------|-----------|-----------|--------------|
| cg04492769     | 2.22E-07 | 2.77E-08 | -5.79 | 7.9781469 | -1.14E-01 | 157314300 | 157314423 | NC_000007.13 |
| cg18762849     | 2.22E-07 | 2.77E-08 | -5.79 | 7.9771965 | -1.67E-02 | 81741832  | 81741955  | NC_000010.10 |
| cg22448292     | 2.22E-07 | 2.77E-08 | -5.79 | 7.9771532 | -3.64E-02 | 90234075  | 90234198  | NC_000015.9  |
| cg13876135     | 2.22E-07 | 2.77E-08 | -5.79 | 7.9769659 | -7.77E-02 | 211872318 | 211872441 | NC_000001.10 |
| cg10653926     | 2.22E-07 | 2.77E-08 | -5.79 | 7.9769213 | -1.08E-01 | 1069320   | 1069443   | NC_000019.9  |
| cg13433937     | 2.22E-07 | 2.77E-08 | -5.79 | 7.9768746 | -3.24E-02 | 30865319  | 30865442  | NC_000020.10 |
| cg04928670     | 2.22E-07 | 2.77E-08 | -5.79 | 7.9767664 | -1.14E-01 | 89128459  | 89128582  | NC_000002.11 |
| cg14165909     | 2.22E-07 | 2.77E-08 | -5.79 | 7.9764788 | -1.03E-01 | 44203699  | 44203822  | NC_000018.9  |
| cg06541222     | 2.22E-07 | 2.77E-08 | -5.79 | 7.9764594 | -1.45E-01 | 74019754  | 74019877  | NC_000008.10 |
| cg24110768     | 2.22E-07 | 2.78E-08 | -5.79 | 7.9754433 | -2.81E-02 | 58159478  | 58159601  | NC_000012.11 |
| ch.5.42356207R | 2.23E-07 | 2.78E-08 | -5.79 | 7.9750476 | -1.58E-02 | 42320450  | 42320573  | NC_000005.9  |
| cg17230773     | 2.23E-07 | 2.78E-08 | -5.79 | 7.9740389 | -1.30E-01 | 142494148 | 142494271 | NC_000007.13 |
| cg13651986     | 2.23E-07 | 2.78E-08 | -5.79 | 7.9737019 | -1.24E-01 | 175548447 | 175548570 | NC_000002.11 |
| cg13150632     | 2.23E-07 | 2.78E-08 | -5.79 | 7.97305   | -5.07E-02 | 31549222  | 31549345  | NC_000006.11 |
| cg18861140     | 2.23E-07 | 2.78E-08 | -5.79 | 7.9727876 | -3.72E-02 | 3449789   | 3449912   | NC_000018.9  |
| cg15895925     | 2.23E-07 | 2.79E-08 | -5.79 | 7.9723421 | -1.19E-01 | 33810859  | 33810982  | NC_000001.10 |
| cg04337270     | 2.23E-07 | 2.79E-08 | -5.79 | 7.9716795 | -1.04E-01 | 24559830  | 24559953  | NC_000004.11 |
| cg09556351     | 2.23E-07 | 2.79E-08 | -5.79 | 7.9712924 | -1.05E-01 | 70087066  | 70087189  | NC_000010.10 |
| cg04203508     | 2.24E-07 | 2.79E-08 | -5.79 | 7.970535  | -5.31E-02 | 212779532 | 212779655 | NC_000001.10 |
| cg24645679     | 2.24E-07 | 2.79E-08 | -5.79 | 7.9704306 | -1.20E-01 | 2611236   | 2611359   | NC_000007.13 |
| cg23632528     | 2.24E-07 | 2.79E-08 | -5.79 | 7.9701674 | -5.89E-02 | 24901434  | 24901557  | NC_000014.8  |
| cg10502118     | 2.24E-07 | 2.79E-08 | -5.79 | 7.9700069 | -1.56E-01 | 16553697  | 16553820  | NC_000003.11 |
| cg01195545     | 2.24E-07 | 2.79E-08 | -5.79 | 7.9697539 | -1.21E-01 | 150253908 | 150254031 | NC_000007.13 |
| cg27128761     | 2.24E-07 | 2.79E-08 | -5.79 | 7.9696263 | -1.10E-01 | 151055650 | 151055773 | NC_000005.9  |
| cg21456320     | 2.24E-07 | 2.79E-08 | -5.79 | 7.9696192 | -6.08E-02 | 121264201 | 121264324 | NC_000003.11 |

|              |          |          |       |           |           |           |           |              |
|--------------|----------|----------|-------|-----------|-----------|-----------|-----------|--------------|
| cg26105015   | 2.24E-07 | 2.79E-08 | -5.79 | 7.9693103 | -7.06E-02 | 122745099 | 122745222 | NC_000003.11 |
| cg27300045   | 2.24E-07 | 2.79E-08 | -5.79 | 7.9689827 | -6.72E-02 | 47610813  | 47610936  | NC_000019.9  |
| cg11093760   | 2.24E-07 | 2.80E-08 | -5.79 | 7.9669413 | -7.52E-02 | 65503807  | 65503930  | NC_000015.9  |
| cg09440866   | 2.24E-07 | 2.80E-08 | -5.79 | 7.9668854 | -8.32E-02 | 114014510 | 114014633 | NC_000012.11 |
| cg10509014   | 2.24E-07 | 2.80E-08 | -5.79 | 7.9668135 | -8.48E-02 | 89234354  | 89234477  | NC_000001.10 |
| cg26823630   | 2.24E-07 | 2.80E-08 | -5.79 | 7.9667357 | -1.19E-02 | 110354443 | 110354566 | NC_000004.11 |
| cg12308346   | 2.24E-07 | 2.80E-08 | -5.79 | 7.9659226 | -6.72E-02 | 141014313 | 141014436 | NC_000004.11 |
| cg04954757   | 2.25E-07 | 2.80E-08 | -5.79 | 7.9657971 | -6.51E-02 | 807121    | 807244    | NC_000017.10 |
| cg16580759   | 2.25E-07 | 2.80E-08 | -5.79 | 7.9654525 | -1.00E-01 | 6693379   | 6693502   | NC_000008.10 |
| ch.1.572291F | 2.25E-07 | 2.81E-08 | -5.79 | 7.9653305 | -5.00E-02 | 16715418  | 16715541  | NC_000001.10 |
| cg02990598   | 2.25E-07 | 2.81E-08 | -5.79 | 7.9644278 | -8.53E-02 | 1955419   | 1955542   | NC_000019.9  |
| cg21141034   | 2.25E-07 | 2.81E-08 | -5.79 | 7.962191  | -3.99E-02 | 20101612  | 20101735  | NC_000015.9  |
| cg06998422   | 2.26E-07 | 2.82E-08 | -5.79 | 7.9605213 | -9.67E-02 | 64328158  | 64328281  | NC_000011.9  |
| cg13945880   | 2.26E-07 | 2.82E-08 | -5.79 | 7.959869  | -9.84E-02 | 171008055 | 171008178 | NC_000005.9  |
| cg01789150   | 2.26E-07 | 2.82E-08 | -5.79 | 7.9588286 | -5.98E-02 | 28241495  | 28241618  | NC_000001.10 |
| cg18395632   | 2.26E-07 | 2.82E-08 | -5.79 | 7.958771  | -1.19E-01 | 165345040 | 165345163 | NC_000001.10 |
| cg02279082   | 2.26E-07 | 2.82E-08 | -5.79 | 7.958769  | -1.61E-01 | 236417590 | 236417713 | NC_000002.11 |
| cg11313780   | 2.26E-07 | 2.82E-08 | -5.79 | 7.9587306 | -1.34E-01 | 103817950 | 103818073 | NC_000008.10 |
| cg19554257   | 2.26E-07 | 2.83E-08 | -5.79 | 7.9578009 | -1.37E-01 | 116996931 | 116997054 | NC_000012.11 |
| cg01000188   | 2.27E-07 | 2.83E-08 | -5.79 | 7.955388  | -1.24E-01 | 133769184 | 133769307 | NC_000009.11 |
| cg13824500   | 2.27E-07 | 2.84E-08 | -5.79 | 7.9547601 | -1.10E-01 | 114394236 | 114394359 | NC_000010.10 |
| cg25350097   | 2.27E-07 | 2.84E-08 | -5.79 | 7.9542966 | -1.25E-01 | 110963774 | 110963897 | NC_000002.11 |
| cg24631735   | 2.27E-07 | 2.84E-08 | -5.79 | 7.9538409 | -1.35E-01 | 137808241 | 137808364 | NC_000003.11 |
| cg07029277   | 2.27E-07 | 2.84E-08 | -5.79 | 7.9532641 | -2.51E-02 | 45150537  | 45150660  | NC_000013.10 |
| cg16707227   | 2.27E-07 | 2.84E-08 | -5.79 | 7.9530868 | -8.59E-02 | 19157847  | 19157970  | NC_000002.11 |

|            |          |          |       |           |           |           |           |              |
|------------|----------|----------|-------|-----------|-----------|-----------|-----------|--------------|
| cg21058987 | 2.27E-07 | 2.84E-08 | -5.79 | 7.953041  | -4.10E-02 | 50778937  | 50779060  | NC_000014.8  |
| cg05480883 | 2.27E-07 | 2.84E-08 | -5.79 | 7.9529023 | -1.24E-01 | 7614570   | 7614693   | NC_000010.10 |
| cg23931323 | 2.27E-07 | 2.84E-08 | -5.79 | 7.9528991 | -1.15E-01 | 73372278  | 73372401  | NC_000011.9  |
| cg19642402 | 2.27E-07 | 2.84E-08 | -5.79 | 7.9526099 | -1.22E-01 | 77287762  | 77287885  | NC_000015.9  |
| cg00747184 | 2.28E-07 | 2.84E-08 | -5.78 | 7.9518288 | -3.19E-02 | 55878680  | 55878803  | NC_000014.8  |
| cg03539735 | 2.28E-07 | 2.85E-08 | -5.78 | 7.9507434 | -1.03E-01 | 100402658 | 100402781 | NC_000014.8  |
| cg08757037 | 2.28E-07 | 2.85E-08 | -5.78 | 7.9505735 | -2.67E-02 | 75933294  | 75933417  | NC_000007.13 |
| cg06006512 | 2.28E-07 | 2.85E-08 | -5.78 | 7.9502963 | -8.90E-02 | 89221147  | 89221270  | NC_000003.11 |
| cg16467811 | 2.28E-07 | 2.85E-08 | -5.78 | 7.9502762 | -8.11E-02 | 139832064 | 139832187 | NC_000004.11 |
| cg27094376 | 2.28E-07 | 2.85E-08 | -5.78 | 7.9499721 | -1.02E-01 | 3639688   | 3639811   | NC_000016.9  |
| cg20989729 | 2.28E-07 | 2.85E-08 | -5.78 | 7.9491412 | -3.12E-02 | 101981056 | 101981179 | NC_000011.9  |
| cg05151228 | 2.28E-07 | 2.86E-08 | -5.78 | 7.9481295 | -2.69E-02 | 110752952 | 110753075 | NC_000001.10 |
| cg05915004 | 2.28E-07 | 2.86E-08 | -5.78 | 7.9478523 | -1.39E-01 | 15959602  | 15959725  | NC_000011.9  |
| cg10313417 | 2.28E-07 | 2.86E-08 | -5.78 | 7.9476759 | -2.64E-02 | 40420809  | 40420932  | NC_000001.10 |
| cg14084826 | 2.29E-07 | 2.86E-08 | -5.78 | 7.945797  | -1.09E-01 | 205632101 | 205632224 | NC_000001.10 |
| cg09703727 | 2.29E-07 | 2.86E-08 | -5.78 | 7.945588  | -8.21E-02 | 69447465  | 69447588  | NC_000007.13 |
| cg11266682 | 2.29E-07 | 2.86E-08 | -5.78 | 7.9454132 | -9.95E-02 | 10021025  | 10021148  | NC_000004.11 |
| cg21137823 | 2.29E-07 | 2.86E-08 | -5.78 | 7.9448229 | -5.25E-02 | 1981270   | 1981393   | NC_000001.10 |
| cg15577126 | 2.29E-07 | 2.87E-08 | -5.78 | 7.9447099 | -6.93E-02 | 218932178 | 218932301 | NC_000002.11 |
| cg03737691 | 2.29E-07 | 2.87E-08 | -5.78 | 7.9444616 | -5.88E-02 | 62681064  | 62681187  | NC_000020.10 |
| cg00876501 | 2.29E-07 | 2.87E-08 | -5.78 | 7.9430542 | -3.91E-02 | 99850885  | 99851008  | NC_000004.11 |
| cg19806933 | 2.30E-07 | 2.87E-08 | -5.78 | 7.9421376 | -1.81E-02 | 63742453  | 63742576  | NC_000011.9  |
| cg01581222 | 2.30E-07 | 2.88E-08 | -5.78 | 7.9402662 | -1.09E-01 | 10958952  | 10959075  | NC_000019.9  |
| cg04556519 | 2.30E-07 | 2.88E-08 | -5.78 | 7.9398145 | -6.14E-02 | 45675633  | 45675756  | NC_000010.10 |
| cg13127574 | 2.31E-07 | 2.88E-08 | -5.78 | 7.9383609 | -8.66E-02 | 105196523 | 105196646 | NC_000014.8  |

|            |          |          |       |           |           |           |           |              |
|------------|----------|----------|-------|-----------|-----------|-----------|-----------|--------------|
| cg10180697 | 2.31E-07 | 2.89E-08 | -5.78 | 7.9375851 | -1.11E-01 | 79948941  | 79949064  | NC_000005.9  |
| cg05333844 | 2.31E-07 | 2.89E-08 | -5.78 | 7.936839  | -1.04E-01 | 46184403  | 46184526  | NC_000019.9  |
| cg07493760 | 2.31E-07 | 2.89E-08 | -5.78 | 7.935191  | -6.89E-02 | 139739683 | 139739806 | NC_000005.9  |
| cg26925717 | 2.32E-07 | 2.90E-08 | -5.78 | 7.9338319 | -1.06E-01 | 21467316  | 21467439  | NC_000014.8  |
| cg05238713 | 2.32E-07 | 2.90E-08 | -5.78 | 7.9326562 | -9.35E-02 | 31800946  | 31801069  | NC_000011.9  |
| cg05248655 | 2.32E-07 | 2.90E-08 | -5.78 | 7.932293  | -1.31E-01 | 1454265   | 1454388   | NC_000010.10 |
| cg14227911 | 2.32E-07 | 2.90E-08 | -5.78 | 7.9322802 | -1.31E-01 | 113292824 | 113292947 | NC_000013.10 |
| cg00853964 | 2.32E-07 | 2.90E-08 | -5.78 | 7.9320849 | -2.16E-02 | 33814536  | 33814659  | NC_000001.10 |
| cg12583184 | 2.32E-07 | 2.90E-08 | -5.78 | 7.9319793 | -7.46E-02 | 113773298 | 113773421 | NC_000012.11 |
| cg13934625 | 2.32E-07 | 2.90E-08 | -5.78 | 7.9319583 | -1.49E-01 | 52472770  | 52472893  | NC_000015.9  |
| cg02627657 | 2.32E-07 | 2.90E-08 | -5.78 | 7.931854  | -8.64E-02 | 16257165  | 16257288  | NC_000017.10 |
| cg06330587 | 2.32E-07 | 2.90E-08 | -5.78 | 7.9313512 | -8.37E-02 | 149488213 | 149488336 | NC_000007.13 |
| cg13318121 | 2.32E-07 | 2.91E-08 | -5.78 | 7.930764  | -7.04E-02 | 82192777  | 82192900  | NC_000008.10 |
| cg22360765 | 2.32E-07 | 2.91E-08 | -5.78 | 7.929765  | -8.53E-02 | 47298563  | 47298686  | NC_000002.11 |
| cg20907614 | 2.32E-07 | 2.91E-08 | -5.78 | 7.9297571 | -6.74E-02 | 29914963  | 29915086  | NC_000008.10 |
| cg24156905 | 2.32E-07 | 2.91E-08 | -5.78 | 7.9296509 | -4.84E-02 | 6440470   | 6440593   | NC_000011.9  |
| cg26393983 | 2.32E-07 | 2.91E-08 | -5.78 | 7.9295451 | -1.74E-02 | 2571747   | 2571870   | NC_000018.9  |
| cg12360373 | 2.33E-07 | 2.91E-08 | -5.78 | 7.9288527 | -2.17E-02 | 28834065  | 28834188  | NC_000016.9  |
| cg13553455 | 2.33E-07 | 2.91E-08 | -5.78 | 7.9287964 | -1.28E-01 | 105846002 | 105846125 | NC_000010.10 |
| cg10511249 | 2.33E-07 | 2.91E-08 | -5.78 | 7.9286706 | -4.50E-02 | 43533955  | 43534078  | NC_000001.10 |
| cg26045434 | 2.33E-07 | 2.92E-08 | -5.78 | 7.9278514 | -4.23E-02 | 21987861  | 21987984  | NC_000008.10 |
| cg10778736 | 2.33E-07 | 2.92E-08 | -5.78 | 7.9272258 | -4.11E-02 | 45406362  | 45406485  | NC_000015.9  |
| cg15050865 | 2.33E-07 | 2.92E-08 | -5.78 | 7.9268727 | -1.40E-01 | 19886600  | 19886723  | NC_000005.9  |
| cg10596361 | 2.33E-07 | 2.92E-08 | -5.78 | 7.9267514 | -7.10E-02 | 10907750  | 10907873  | NC_000008.10 |
| cg00187414 | 2.33E-07 | 2.92E-08 | -5.78 | 7.9262663 | -4.31E-02 | 37892193  | 37892316  | NC_000004.11 |

|              |          |          |       |           |           |           |           |              |
|--------------|----------|----------|-------|-----------|-----------|-----------|-----------|--------------|
| cg19655704   | 2.33E-07 | 2.92E-08 | -5.78 | 7.9251008 | -4.09E-02 | 178295152 | 178295275 | NC_000002.11 |
| cg02945056   | 2.34E-07 | 2.92E-08 | -5.78 | 7.9247402 | -9.00E-02 | 127225891 | 127226014 | NC_000007.13 |
| cg01185080   | 2.34E-07 | 2.93E-08 | -5.78 | 7.9233818 | -9.82E-02 | 90543813  | 90543936  | NC_000015.9  |
| cg02499967   | 2.34E-07 | 2.93E-08 | -5.78 | 7.923309  | -1.24E-01 | 79188211  | 79188334  | NC_000010.10 |
| cg22618337   | 2.34E-07 | 2.93E-08 | -5.78 | 7.9233007 | -1.24E-01 | 115510928 | 115511051 | NC_000010.10 |
| cg20332503   | 2.34E-07 | 2.93E-08 | -5.78 | 7.923143  | -1.16E-01 | 143081287 | 143081410 | NC_000007.13 |
| cg05212098   | 2.34E-07 | 2.93E-08 | -5.78 | 7.9225638 | -7.97E-02 | 106177398 | 106177521 | NC_000014.8  |
| cg01312167   | 2.34E-07 | 2.93E-08 | -5.78 | 7.9219276 | -6.65E-02 | 54292798  | 54292921  | NC_000002.11 |
| cg02096396   | 2.34E-07 | 2.93E-08 | -5.78 | 7.9216886 | -2.18E-02 | 26395556  | 26395679  | NC_000002.11 |
| cg26044171   | 2.34E-07 | 2.94E-08 | -5.78 | 7.9210117 | -1.81E-02 | 57985301  | 57985424  | NC_000012.11 |
| cg27178045   | 2.34E-07 | 2.94E-08 | -5.78 | 7.9209421 | -1.16E-01 | 23753823  | 23753946  | NC_000007.13 |
| cg05813616   | 2.34E-07 | 2.94E-08 | -5.78 | 7.9206731 | -8.85E-02 | 46781713  | 46781836  | NC_000016.9  |
| cg17941202   | 2.34E-07 | 2.94E-08 | -5.78 | 7.9205875 | -1.81E-02 | 72163695  | 72163818  | NC_000018.9  |
| ch.3.397026R | 2.34E-07 | 2.94E-08 | -5.78 | 7.920565  | -4.98E-02 | 17583522  | 17583645  | NC_000003.11 |
| cg12005412   | 2.35E-07 | 2.94E-08 | -5.78 | 7.9203254 | -1.25E-01 | 204674074 | 204674197 | NC_000002.11 |
| cg11687679   | 2.35E-07 | 2.94E-08 | -5.78 | 7.9200699 | -4.45E-02 | 37573611  | 37573734  | NC_000013.10 |
| cg24479752   | 2.35E-07 | 2.94E-08 | -5.78 | 7.9200533 | -9.67E-02 | 30005173  | 30005296  | NC_000006.11 |
| cg24699895   | 2.35E-07 | 2.94E-08 | -5.78 | 7.9198024 | -1.12E-01 | 71094286  | 71094409  | NC_000010.10 |
| cg17824465   | 2.35E-07 | 2.94E-08 | -5.78 | 7.919772  | -2.91E-02 | 51001806  | 51001929  | NC_000022.10 |
| cg00317020   | 2.35E-07 | 2.94E-08 | -5.78 | 7.9194563 | -1.11E-01 | 60933578  | 60933701  | NC_000010.10 |
| cg06827038   | 2.35E-07 | 2.94E-08 | -5.78 | 7.9194228 | -9.51E-02 | 48912952  | 48913075  | NC_000017.10 |
| cg07300451   | 2.35E-07 | 2.94E-08 | -5.78 | 7.9180716 | -5.24E-02 | 39299511  | 39299634  | NC_000012.11 |
| cg05484393   | 2.35E-07 | 2.94E-08 | -5.78 | 7.9180069 | -2.27E-02 | 170587694 | 170587817 | NC_000003.11 |
| cg01012669   | 2.35E-07 | 2.95E-08 | -5.78 | 7.9178259 | -4.58E-02 | 231822092 | 231822215 | NC_000002.11 |
| cg18754370   | 2.35E-07 | 2.95E-08 | -5.78 | 7.9165393 | -2.54E-02 | 19497405  | 19497528  | NC_000019.9  |

|            |          |          |       |           |           |           |           |              |
|------------|----------|----------|-------|-----------|-----------|-----------|-----------|--------------|
| cg22364262 | 2.35E-07 | 2.95E-08 | -5.78 | 7.91638   | -1.48E-02 | 142558129 | 142558252 | NC_000004.11 |
| cg25586069 | 2.36E-07 | 2.95E-08 | -5.78 | 7.9156673 | -6.78E-02 | 118765145 | 118765268 | NC_000010.10 |
| cg24489972 | 2.36E-07 | 2.95E-08 | -5.78 | 7.9155421 | -2.58E-02 | 105817320 | 105817443 | NC_000007.13 |
| cg02693688 | 2.36E-07 | 2.95E-08 | -5.78 | 7.9150142 | -3.40E-02 | 3818083   | 3818206   | NC_000001.10 |
| cg09478591 | 2.36E-07 | 2.95E-08 | -5.78 | 7.9149627 | -6.77E-02 | 42989096  | 42989219  | NC_000006.11 |
| cg24579589 | 2.36E-07 | 2.96E-08 | -5.78 | 7.914157  | -1.14E-01 | 235256910 | 235257033 | NC_000001.10 |
| cg08728167 | 2.36E-07 | 2.96E-08 | -5.78 | 7.9140495 | -1.84E-02 | 148892434 | 148892557 | NC_000007.13 |
| cg27519942 | 2.36E-07 | 2.96E-08 | -5.78 | 7.9140093 | -1.49E-02 | 245318232 | 245318355 | NC_000001.10 |
| cg19559537 | 2.36E-07 | 2.96E-08 | -5.78 | 7.9139145 | -8.04E-02 | 36204489  | 36204612  | NC_000017.10 |
| cg13824156 | 2.36E-07 | 2.96E-08 | -5.78 | 7.9137516 | -9.98E-02 | 24199059  | 24199182  | NC_000022.10 |
| cg24270031 | 2.36E-07 | 2.96E-08 | -5.78 | 7.9137303 | -2.05E-02 | 32308343  | 32308466  | NC_000020.10 |
| cg06913508 | 2.36E-07 | 2.96E-08 | -5.78 | 7.9135445 | -3.83E-02 | 207630136 | 207630259 | NC_000002.11 |
| cg04239548 | 2.36E-07 | 2.96E-08 | -5.78 | 7.9132298 | -6.55E-02 | 92117004  | 92117127  | NC_000001.10 |
| cg10057252 | 2.36E-07 | 2.96E-08 | -5.78 | 7.9130026 | -3.05E-02 | 110036897 | 110037020 | NC_000001.10 |
| cg02505177 | 2.36E-07 | 2.97E-08 | -5.78 | 7.9112851 | -1.16E-01 | 103574626 | 103574749 | NC_000010.10 |
| cg13622355 | 2.37E-07 | 2.97E-08 | -5.78 | 7.9110379 | -7.35E-02 | 37495279  | 37495402  | NC_000008.10 |
| cg02233414 | 2.37E-07 | 2.97E-08 | -5.78 | 7.9108126 | -1.40E-02 | 36391117  | 36391240  | NC_000019.9  |
| cg08626653 | 2.37E-07 | 2.97E-08 | -5.78 | 7.9104589 | -9.22E-02 | 100082322 | 100082445 | NC_000007.13 |
| cg02038418 | 2.37E-07 | 2.97E-08 | -5.78 | 7.9104514 | -6.90E-02 | 39958882  | 39959005  | NC_000015.9  |
| cg19413417 | 2.37E-07 | 2.97E-08 | -5.78 | 7.9090875 | -4.03E-02 | 55294536  | 55294659  | NC_000008.10 |
| cg17647904 | 2.37E-07 | 2.97E-08 | -5.78 | 7.9087527 | -5.83E-02 | 124908601 | 124908724 | NC_000012.11 |
| cg05241308 | 2.37E-07 | 2.97E-08 | -5.78 | 7.9087401 | -5.97E-02 | 21970348  | 21970471  | NC_000015.9  |
| cg02680909 | 2.37E-07 | 2.97E-08 | -5.78 | 7.908163  | -1.21E-01 | 39899321  | 39899444  | NC_000006.11 |
| cg26387848 | 2.37E-07 | 2.98E-08 | -5.78 | 7.9072979 | -1.32E-01 | 17808724  | 17808847  | NC_000011.9  |
| cg06750579 | 2.37E-07 | 2.98E-08 | -5.78 | 7.9072717 | -2.72E-02 | 14191988  | 14192111  | NC_000019.9  |



|            |          |          |       |           |           |           |           |              |
|------------|----------|----------|-------|-----------|-----------|-----------|-----------|--------------|
| cg11781389 | 2.38E-07 | 2.98E-08 | -5.78 | 7.9062716 | -2.73E-02 | 134201462 | 134201585 | NC_000011.9  |
| cg06236206 | 2.38E-07 | 2.98E-08 | -5.78 | 7.9049987 | -4.01E-02 | 66120395  | 66120518  | NC_000007.13 |
| cg03901462 | 2.38E-07 | 2.99E-08 | -5.78 | 7.9047441 | -3.37E-02 | 62572874  | 62572997  | NC_000011.9  |
| cg04381712 | 2.38E-07 | 2.99E-08 | -5.78 | 7.9047438 | -1.54E-02 | 53024905  | 53025028  | NC_000013.10 |
| cg11448270 | 2.38E-07 | 2.99E-08 | -5.78 | 7.9042589 | -1.09E-01 | 116358457 | 116358580 | NC_000006.11 |
| cg22349387 | 2.38E-07 | 2.99E-08 | -5.78 | 7.9041977 | -9.68E-02 | 9600060   | 9600183   | NC_000012.11 |
| cg13534999 | 2.38E-07 | 2.99E-08 | -5.78 | 7.9037619 | -1.53E-01 | 1506936   | 1507059   | NC_000011.9  |
| cg26848957 | 2.38E-07 | 2.99E-08 | -5.78 | 7.9036638 | -1.15E-01 | 70507711  | 70507834  | NC_000017.10 |
| cg02339937 | 2.38E-07 | 2.99E-08 | -5.78 | 7.903658  | -3.02E-02 | 57824242  | 57824365  | NC_000012.11 |
| cg23718606 | 2.38E-07 | 2.99E-08 | -5.78 | 7.9033532 | -4.10E-02 | 27219812  | 27219935  | NC_000006.11 |
| cg12407526 | 2.38E-07 | 2.99E-08 | -5.78 | 7.9028959 | -1.03E-01 | 60059120  | 60059243  | NC_000005.9  |
| cg18109665 | 2.38E-07 | 2.99E-08 | -5.78 | 7.9028855 | -7.31E-02 | 9062474   | 9062597   | NC_000003.11 |
| cg01824138 | 2.39E-07 | 3.00E-08 | -5.77 | 7.9013057 | -8.56E-02 | 10699604  | 10699727  | NC_000001.10 |
| cg07287463 | 2.39E-07 | 3.00E-08 | -5.77 | 7.8993814 | -5.15E-02 | 47903450  | 47903573  | NC_000001.10 |
| cg13820776 | 2.40E-07 | 3.01E-08 | -5.77 | 7.8975386 | -9.17E-02 | 139859096 | 139859219 | NC_000009.11 |
| cg07495314 | 2.40E-07 | 3.01E-08 | -5.77 | 7.8974858 | -2.94E-02 | 27845355  | 27845478  | NC_000013.10 |
| cg01464067 | 2.40E-07 | 3.01E-08 | -5.77 | 7.8960986 | -6.86E-02 | 24745718  | 24745841  | NC_000004.11 |
| cg16875864 | 2.40E-07 | 3.01E-08 | -5.77 | 7.8959906 | -1.30E-01 | 16441008  | 16441131  | NC_000003.11 |
| cg12755477 | 2.40E-07 | 3.01E-08 | -5.77 | 7.8954824 | -3.35E-02 | 36156813  | 36156936  | NC_000020.10 |
| cg11251135 | 2.40E-07 | 3.01E-08 | -5.77 | 7.8952322 | -8.64E-02 | 1863911   | 1864034   | NC_000017.10 |
| cg15752436 | 2.40E-07 | 3.02E-08 | -5.77 | 7.8947127 | -1.26E-01 | 20937757  | 20937880  | NC_000017.10 |
| cg24027931 | 2.40E-07 | 3.02E-08 | -5.77 | 7.8946661 | -6.80E-02 | 64067687  | 64067810  | NC_000011.9  |
| cg00200298 | 2.40E-07 | 3.02E-08 | -5.77 | 7.8942188 | -2.32E-02 | 89790339  | 89790462  | NC_000006.11 |
| cg23514340 | 2.41E-07 | 3.03E-08 | -5.77 | 7.8914426 | -6.55E-02 | 94948185  | 94948308  | NC_000008.10 |
| cg18979802 | 2.41E-07 | 3.03E-08 | -5.77 | 7.8913264 | -3.99E-02 | 128775513 | 128775636 | NC_000011.9  |

|                |          |          |       |           |           |           |           |              |
|----------------|----------|----------|-------|-----------|-----------|-----------|-----------|--------------|
| cg03388712     | 2.41E-07 | 3.03E-08 | -5.77 | 7.8911567 | -8.14E-02 | 168271061 | 168271184 | NC_000001.10 |
| cg03046325     | 2.41E-07 | 3.03E-08 | -5.77 | 7.890721  | -3.39E-02 | 93558661  | 93558784  | NC_000010.10 |
| cg26450228     | 2.41E-07 | 3.03E-08 | -5.77 | 7.8907204 | -7.31E-02 | 64575581  | 64575704  | NC_000017.10 |
| cg00878605     | 2.41E-07 | 3.03E-08 | -5.77 | 7.8900711 | -7.03E-02 | 17716645  | 17716768  | NC_000019.9  |
| cg00237391     | 2.41E-07 | 3.03E-08 | -5.77 | 7.8896246 | -1.04E-01 | 35265643  | 35265766  | NC_000006.11 |
| cg10568634     | 2.42E-07 | 3.03E-08 | -5.77 | 7.8889701 | -7.50E-02 | 5005562   | 5005685   | NC_000010.10 |
| cg09925014     | 2.42E-07 | 3.04E-08 | -5.77 | 7.8879771 | -3.14E-02 | 121495233 | 121495356 | NC_000002.11 |
| cg01074767     | 2.42E-07 | 3.04E-08 | -5.77 | 7.8872518 | -1.37E-01 | 7262137   | 7262260   | NC_000012.11 |
| cg27021056     | 2.42E-07 | 3.04E-08 | -5.77 | 7.8872273 | -2.49E-02 | 76837047  | 76837170  | NC_000017.10 |
| cg14425863     | 2.42E-07 | 3.04E-08 | -5.77 | 7.8871936 | -3.58E-02 | 17566034  | 17566157  | NC_000011.9  |
| ch.2.38819824R | 2.42E-07 | 3.04E-08 | -5.77 | 7.8869027 | -3.07E-02 | 38966320  | 38966443  | NC_000002.11 |
| cg20426710     | 2.42E-07 | 3.04E-08 | -5.77 | 7.886705  | -9.10E-02 | 50248907  | 50249030  | NC_000022.10 |
| cg08421910     | 2.42E-07 | 3.04E-08 | -5.77 | 7.8865041 | -1.21E-01 | 11771840  | 11771963  | NC_000006.11 |
| cg08257003     | 2.42E-07 | 3.04E-08 | -5.77 | 7.8864894 | -5.48E-02 | 84140564  | 84140687  | NC_000006.11 |
| cg14018690     | 2.42E-07 | 3.04E-08 | -5.77 | 7.8861552 | -7.07E-02 | 111804832 | 111804955 | NC_000003.11 |
| cg20097593     | 2.42E-07 | 3.04E-08 | -5.77 | 7.8854834 | -6.31E-02 | 70781679  | 70781802  | NC_000002.11 |
| cg01961018     | 2.43E-07 | 3.05E-08 | -5.77 | 7.8844542 | -3.90E-02 | 67999752  | 67999875  | NC_000014.8  |
| cg10900641     | 2.43E-07 | 3.05E-08 | -5.77 | 7.8829222 | -1.18E-01 | 1767793   | 1767916   | NC_000011.9  |
| cg27614445     | 2.43E-07 | 3.05E-08 | -5.77 | 7.8827607 | -5.05E-02 | 179041226 | 179041349 | NC_000003.11 |
| cg19254691     | 2.43E-07 | 3.05E-08 | -5.77 | 7.8826436 | -1.02E-01 | 33375765  | 33375888  | NC_000015.9  |
| cg19878479     | 2.43E-07 | 3.05E-08 | -5.77 | 7.8823516 | -8.48E-02 | 49015582  | 49015705  | NC_000019.9  |
| cg08209163     | 2.43E-07 | 3.05E-08 | -5.77 | 7.8823445 | -3.40E-02 | 28024472  | 28024595  | NC_000013.10 |
| cg12164955     | 2.43E-07 | 3.06E-08 | -5.77 | 7.8818972 | -1.23E-01 | 106752261 | 106752384 | NC_000013.10 |
| cg06981716     | 2.43E-07 | 3.06E-08 | -5.77 | 7.8818062 | -7.84E-02 | 98030795  | 98030918  | NC_000007.13 |
| cg23515853     | 2.43E-07 | 3.06E-08 | -5.77 | 7.8816443 | -1.27E-01 | 79372528  | 79372651  | NC_000017.10 |

|            |          |          |       |           |           |           |           |              |
|------------|----------|----------|-------|-----------|-----------|-----------|-----------|--------------|
| cg04906886 | 2.44E-07 | 3.06E-08 | -5.77 | 7.8800937 | -1.18E-01 | 100755611 | 100755734 | NC_000003.11 |
| cg14871628 | 2.44E-07 | 3.06E-08 | -5.77 | 7.8796805 | -2.53E-02 | 18228604  | 18228727  | NC_000019.9  |
| cg23776186 | 2.44E-07 | 3.06E-08 | -5.77 | 7.8796665 | -4.31E-02 | 57599066  | 57599189  | NC_000015.9  |
| cg23000950 | 2.44E-07 | 3.06E-08 | -5.77 | 7.8792454 | -8.71E-02 | 48785738  | 48785861  | NC_000015.9  |
| cg11334070 | 2.44E-07 | 3.06E-08 | -5.77 | 7.8791901 | -7.50E-02 | 128840773 | 128840896 | NC_000003.11 |
| cg08264848 | 2.44E-07 | 3.07E-08 | -5.77 | 7.8779205 | -4.68E-02 | 120740020 | 120740143 | NC_000012.11 |
| cg16251016 | 2.44E-07 | 3.07E-08 | -5.77 | 7.8778974 | -1.01E-01 | 11643100  | 11643223  | NC_000019.9  |
| cg00622105 | 2.44E-07 | 3.07E-08 | -5.77 | 7.8773988 | -6.84E-02 | 65594478  | 65594601  | NC_000002.11 |
| cg15616358 | 2.45E-07 | 3.08E-08 | -5.77 | 7.8754303 | -1.79E-01 | 68610296  | 68610419  | NC_000011.9  |
| cg12643378 | 2.45E-07 | 3.08E-08 | -5.77 | 7.8752547 | -4.39E-02 | 57634855  | 57634978  | NC_000012.11 |
| cg11648522 | 2.45E-07 | 3.08E-08 | -5.77 | 7.874467  | -1.06E-01 | 15272238  | 15272361  | NC_000001.10 |
| cg02641941 | 2.45E-07 | 3.08E-08 | -5.77 | 7.8741193 | -1.35E-01 | 40410965  | 40411088  | NC_000012.11 |
| cg03847435 | 2.45E-07 | 3.08E-08 | -5.77 | 7.87405   | -9.37E-02 | 134420910 | 134421033 | NC_000005.9  |
| cg13670531 | 2.46E-07 | 3.09E-08 | -5.77 | 7.8719153 | -1.29E-01 | 116066521 | 116066644 | NC_000010.10 |
| cg07236342 | 2.46E-07 | 3.09E-08 | -5.77 | 7.8703926 | -2.35E-02 | 73133398  | 73133521  | NC_000007.13 |
| cg24265969 | 2.46E-07 | 3.09E-08 | -5.77 | 7.8695445 | -1.54E-01 | 55654481  | 55654604  | NC_000003.11 |
| cg09699193 | 2.47E-07 | 3.10E-08 | -5.77 | 7.8676371 | -1.12E-01 | 9457024   | 9457147   | NC_000005.9  |
| cg09218524 | 2.47E-07 | 3.10E-08 | -5.77 | 7.867057  | -3.10E-02 | 57598511  | 57598634  | NC_000015.9  |
| cg14369780 | 2.47E-07 | 3.11E-08 | -5.77 | 7.8655223 | -6.40E-02 | 155010956 | 155011079 | NC_000007.13 |
| cg26848071 | 2.47E-07 | 3.11E-08 | -5.77 | 7.86523   | -8.76E-02 | 4927715   | 4927838   | NC_000017.10 |
| cg20638045 | 2.47E-07 | 3.11E-08 | -5.77 | 7.8647132 | -2.62E-02 | 100107064 | 100107187 | NC_000015.9  |
| cg26851984 | 2.47E-07 | 3.11E-08 | -5.77 | 7.8644697 | -1.05E-01 | 126016153 | 126016276 | NC_000005.9  |
| cg01840575 | 2.47E-07 | 3.11E-08 | -5.77 | 7.8640433 | -2.38E-02 | 38977957  | 38978080  | NC_000002.11 |
| cg26872907 | 2.47E-07 | 3.11E-08 | -5.77 | 7.8640266 | -1.44E-01 | 161796854 | 161796977 | NC_000006.11 |
| cg02902102 | 2.47E-07 | 3.11E-08 | -5.77 | 7.8638501 | -1.45E-01 | 48902290  | 48902413  | NC_000019.9  |

|            |          |          |       |           |           |           |           |              |
|------------|----------|----------|-------|-----------|-----------|-----------|-----------|--------------|
| cg20677267 | 2.48E-07 | 3.11E-08 | -5.77 | 7.8634266 | -7.94E-02 | 148834863 | 148834986 | NC_000006.11 |
| cg14766198 | 2.48E-07 | 3.12E-08 | -5.77 | 7.863142  | -1.72E-02 | 100818374 | 100818497 | NC_000001.10 |
| cg21334510 | 2.48E-07 | 3.12E-08 | -5.77 | 7.8622093 | -9.75E-02 | 1093580   | 1093703   | NC_000005.9  |
| cg09345153 | 2.48E-07 | 3.12E-08 | -5.77 | 7.8618819 | -6.32E-02 | 29231505  | 29231628  | NC_000016.9  |
| cg08582840 | 2.48E-07 | 3.12E-08 | -5.77 | 7.8617339 | -1.04E-01 | 932700    | 932823    | NC_000017.10 |
| cg05033401 | 2.48E-07 | 3.12E-08 | -5.77 | 7.8614543 | -1.04E-01 | 64972403  | 64972526  | NC_000011.9  |
| cg14956593 | 2.48E-07 | 3.12E-08 | -5.77 | 7.8613843 | -2.16E-02 | 24685421  | 24685544  | NC_000014.8  |
| cg14094646 | 2.48E-07 | 3.12E-08 | -5.77 | 7.8613014 | -8.69E-02 | 37030262  | 37030385  | NC_000009.11 |
| cg08597839 | 2.48E-07 | 3.12E-08 | -5.77 | 7.8610862 | -9.76E-02 | 29461008  | 29461131  | NC_000001.10 |
| cg11343713 | 2.48E-07 | 3.12E-08 | -5.77 | 7.86073   | -9.54E-02 | 45749313  | 45749436  | NC_000007.13 |
| cg18382947 | 2.48E-07 | 3.13E-08 | -5.77 | 7.8597079 | -3.91E-02 | 51308364  | 51308487  | NC_000019.9  |
| cg00670111 | 2.49E-07 | 3.13E-08 | -5.77 | 7.8590054 | -8.28E-02 | 128500474 | 128500597 | NC_000007.13 |
| cg16503611 | 2.49E-07 | 3.13E-08 | -5.77 | 7.8576491 | -1.03E-01 | 114679761 | 114679884 | NC_000004.11 |
| cg15461880 | 2.49E-07 | 3.13E-08 | -5.77 | 7.8571564 | -1.63E-02 | 8179781   | 8179904   | NC_000012.11 |
| cg03554174 | 2.49E-07 | 3.14E-08 | -5.77 | 7.8568816 | -8.31E-02 | 119948388 | 119948511 | NC_000004.11 |
| cg14485901 | 2.49E-07 | 3.14E-08 | -5.77 | 7.8557569 | -1.23E-01 | 139913752 | 139913875 | NC_000009.11 |
| cg05127221 | 2.50E-07 | 3.14E-08 | -5.77 | 7.8547814 | -1.09E-01 | 29706381  | 29706504  | NC_000016.9  |
| cg26313349 | 2.50E-07 | 3.14E-08 | -5.77 | 7.8544802 | -1.63E-02 | 145589328 | 145589451 | NC_000001.10 |
| cg16895672 | 2.50E-07 | 3.14E-08 | -5.77 | 7.8541008 | -1.31E-01 | 34470745  | 34470868  | NC_000010.10 |
| cg19457506 | 2.50E-07 | 3.15E-08 | -5.76 | 7.8534191 | -2.64E-02 | 43099559  | 43099682  | NC_000017.10 |
| cg00387170 | 2.50E-07 | 3.15E-08 | -5.76 | 7.8530427 | -5.22E-02 | 41514002  | 41514125  | NC_000006.11 |
| cg06493166 | 2.50E-07 | 3.15E-08 | -5.76 | 7.8527966 | -7.97E-02 | 144386146 | 144386269 | NC_000006.11 |
| cg06760169 | 2.50E-07 | 3.15E-08 | -5.76 | 7.8527484 | -4.34E-02 | 73081893  | 73082016  | NC_000007.13 |
| cg01907426 | 2.50E-07 | 3.15E-08 | -5.76 | 7.8518857 | -1.25E-01 | 177817086 | 177817209 | NC_000001.10 |
| cg05888872 | 2.50E-07 | 3.15E-08 | -5.76 | 7.8512941 | -1.63E-01 | 14050479  | 14050602  | NC_000010.10 |

|            |          |          |       |           |           |           |           |              |
|------------|----------|----------|-------|-----------|-----------|-----------|-----------|--------------|
| cg01736252 | 2.50E-07 | 3.15E-08 | -5.76 | 7.850954  | -2.21E-02 | 55181557  | 55181680  | NC_000001.10 |
| cg24539573 | 2.51E-07 | 3.16E-08 | -5.76 | 7.8506823 | -5.40E-02 | 31846542  | 31846665  | NC_000001.10 |
| cg10156905 | 2.51E-07 | 3.16E-08 | -5.76 | 7.8501311 | -9.56E-02 | 42965753  | 42965876  | NC_000020.10 |
| cg04930596 | 2.51E-07 | 3.16E-08 | -5.76 | 7.8491229 | -1.32E-01 | 124864528 | 124864651 | NC_000012.11 |
| cg20196910 | 2.51E-07 | 3.16E-08 | -5.76 | 7.8488481 | -1.18E-02 | 172291295 | 172291418 | NC_000002.11 |
| cg24118715 | 2.51E-07 | 3.16E-08 | -5.76 | 7.8486339 | -6.07E-02 | 70232072  | 70232195  | NC_000010.10 |
| cg06768670 | 2.51E-07 | 3.16E-08 | -5.76 | 7.8484353 | -1.04E-01 | 143182662 | 143182785 | NC_000008.10 |
| cg04347867 | 2.51E-07 | 3.17E-08 | -5.76 | 7.8472764 | -2.24E-02 | 56965804  | 56965927  | NC_000016.9  |
| cg12709009 | 2.51E-07 | 3.17E-08 | -5.76 | 7.8469507 | -1.16E-01 | 170557582 | 170557705 | NC_000006.11 |
| cg27297318 | 2.52E-07 | 3.17E-08 | -5.76 | 7.8456483 | -9.81E-02 | 85320035  | 85320158  | NC_000016.9  |
| cg25863369 | 2.52E-07 | 3.17E-08 | -5.76 | 7.8448693 | -2.44E-02 | 78194236  | 78194359  | NC_000017.10 |
| cg24296397 | 2.52E-07 | 3.18E-08 | -5.76 | 7.8441061 | -1.17E-01 | 49692537  | 49692660  | NC_000003.11 |
| cg10195687 | 2.52E-07 | 3.18E-08 | -5.76 | 7.8440696 | -7.80E-02 | 74926396  | 74926519  | NC_000014.8  |
| cg14654468 | 2.52E-07 | 3.18E-08 | -5.76 | 7.8434951 | -1.14E-01 | 80186336  | 80186459  | NC_000017.10 |
| cg21506059 | 2.53E-07 | 3.18E-08 | -5.76 | 7.842363  | -1.28E-02 | 65242309  | 65242432  | NC_000017.10 |
| cg23373626 | 2.53E-07 | 3.18E-08 | -5.76 | 7.8421878 | -4.51E-02 | 141031295 | 141031418 | NC_000005.9  |
| cg23850750 | 2.53E-07 | 3.18E-08 | -5.76 | 7.8420687 | -9.16E-02 | 1612589   | 1612712   | NC_000006.11 |
| cg04810377 | 2.53E-07 | 3.18E-08 | -5.76 | 7.8419949 | -2.79E-02 | 11761964  | 11762087  | NC_000016.9  |
| cg21908488 | 2.53E-07 | 3.18E-08 | -5.76 | 7.8418971 | -4.29E-02 | 17991580  | 17991703  | NC_000017.10 |
| cg20435125 | 2.53E-07 | 3.18E-08 | -5.76 | 7.8417919 | -9.60E-02 | 3563778   | 3563901   | NC_000017.10 |
| cg09297903 | 2.53E-07 | 3.19E-08 | -5.76 | 7.8415163 | -8.42E-02 | 42234798  | 42234921  | NC_000008.10 |
| cg14520901 | 2.53E-07 | 3.19E-08 | -5.76 | 7.8407995 | -2.55E-02 | 30228897  | 30229020  | NC_000017.10 |
| cg11888447 | 2.53E-07 | 3.19E-08 | -5.76 | 7.8406748 | -1.32E-01 | 55705596  | 55705719  | NC_000005.9  |
| cg22571065 | 2.53E-07 | 3.19E-08 | -5.76 | 7.8395126 | -9.27E-02 | 1949503   | 1949626   | NC_000012.11 |
| cg17117160 | 2.54E-07 | 3.20E-08 | -5.76 | 7.8373034 | -5.17E-02 | 26148737  | 26148860  | NC_000008.10 |

|            |          |          |       |           |           |           |           |              |
|------------|----------|----------|-------|-----------|-----------|-----------|-----------|--------------|
| cg07367469 | 2.54E-07 | 3.20E-08 | -5.76 | 7.8371913 | -7.31E-02 | 115988245 | 115988368 | NC_000005.9  |
| cg05198969 | 2.54E-07 | 3.20E-08 | -5.76 | 7.8370846 | -1.26E-01 | 142066128 | 142066251 | NC_000005.9  |
| cg03520938 | 2.54E-07 | 3.20E-08 | -5.76 | 7.836449  | -1.33E-01 | 21961713  | 21961836  | NC_000008.10 |
| cg03330558 | 2.54E-07 | 3.20E-08 | -5.76 | 7.8358815 | -1.13E-01 | 31516127  | 31516250  | NC_000015.9  |
| cg12568633 | 2.54E-07 | 3.20E-08 | -5.76 | 7.835849  | -4.29E-02 | 73533407  | 73533530  | NC_000010.10 |
| cg26137915 | 2.54E-07 | 3.20E-08 | -5.76 | 7.8358348 | -1.25E-01 | 69247337  | 69247460  | NC_000014.8  |
| cg13729043 | 2.54E-07 | 3.20E-08 | -5.76 | 7.8356572 | -5.42E-02 | 7141683   | 7141806   | NC_000017.10 |
| cg02679012 | 2.54E-07 | 3.21E-08 | -5.76 | 7.8352188 | -1.03E-01 | 773283    | 773406    | NC_000017.10 |
| cg04406020 | 2.54E-07 | 3.21E-08 | -5.76 | 7.8348327 | -3.42E-02 | 50270326  | 50270449  | NC_000019.9  |
| cg16012111 | 2.54E-07 | 3.21E-08 | -5.76 | 7.8347243 | -3.83E-02 | 35656758  | 35656881  | NC_000006.11 |
| cg11324999 | 2.55E-07 | 3.21E-08 | -5.76 | 7.8341547 | -5.88E-02 | 36582398  | 36582521  | NC_000002.11 |
| cg10651007 | 2.55E-07 | 3.21E-08 | -5.76 | 7.8330912 | -6.25E-02 | 7298519   | 7298642   | NC_000017.10 |
| cg24428232 | 2.55E-07 | 3.21E-08 | -5.76 | 7.8330005 | -1.09E-01 | 166124419 | 166124542 | NC_000001.10 |
| cg04075726 | 2.55E-07 | 3.21E-08 | -5.76 | 7.8329438 | -1.54E-01 | 69499425  | 69499548  | NC_000002.11 |
| cg22986084 | 2.55E-07 | 3.21E-08 | -5.76 | 7.8327308 | -3.37E-02 | 39901328  | 39901451  | NC_000014.8  |
| cg20203210 | 2.55E-07 | 3.22E-08 | -5.76 | 7.8318929 | -8.82E-02 | 56741047  | 56741170  | NC_000013.10 |
| cg05345876 | 2.55E-07 | 3.22E-08 | -5.76 | 7.8308875 | -1.02E-01 | 49733377  | 49733500  | NC_000016.9  |
| cg20895511 | 2.55E-07 | 3.22E-08 | -5.76 | 7.8302697 | -4.72E-02 | 2160055   | 2160178   | NC_000011.9  |
| cg13648088 | 2.56E-07 | 3.22E-08 | -5.76 | 7.8299837 | -1.80E-02 | 124768538 | 124768661 | NC_000010.10 |
| cg27393652 | 2.56E-07 | 3.23E-08 | -5.76 | 7.8291765 | -5.98E-02 | 33290620  | 33290743  | NC_000006.11 |
| cg10287113 | 2.56E-07 | 3.23E-08 | -5.76 | 7.8277928 | -9.30E-02 | 1733976   | 1734099   | NC_000007.13 |
| cg07049552 | 2.56E-07 | 3.23E-08 | -5.76 | 7.8273908 | -8.69E-02 | 30206076  | 30206199  | NC_000016.9  |
| cg00684283 | 2.56E-07 | 3.23E-08 | -5.76 | 7.8272808 | -7.84E-02 | 105943425 | 105943548 | NC_000014.8  |
| cg08828594 | 2.56E-07 | 3.23E-08 | -5.76 | 7.8266881 | -4.47E-02 | 99558786  | 99558909  | NC_000015.9  |
| cg18013408 | 2.56E-07 | 3.24E-08 | -5.76 | 7.826428  | -1.98E-02 | 100487659 | 100487782 | NC_000007.13 |

|                |          |          |       |           |           |           |           |              |
|----------------|----------|----------|-------|-----------|-----------|-----------|-----------|--------------|
| cg19823490     | 2.57E-07 | 3.24E-08 | -5.76 | 7.8249128 | -2.69E-02 | 1310815   | 1310938   | NC_000001.10 |
| cg13716585     | 2.57E-07 | 3.24E-08 | -5.76 | 7.8241811 | -1.65E-01 | 22917809  | 22917932  | NC_000014.8  |
| cg10239410     | 2.57E-07 | 3.25E-08 | -5.76 | 7.8233507 | -4.78E-02 | 235292449 | 235292572 | NC_000001.10 |
| cg05413451     | 2.57E-07 | 3.25E-08 | -5.76 | 7.823159  | -2.44E-02 | 57045111  | 57045234  | NC_000001.10 |
| cg08392591     | 2.57E-07 | 3.25E-08 | -5.76 | 7.8231283 | -1.49E-02 | 89556376  | 89556499  | NC_000016.9  |
| cg07134930     | 2.57E-07 | 3.25E-08 | -5.76 | 7.8226829 | -7.17E-02 | 240176050 | 240176173 | NC_000002.11 |
| cg22366350     | 2.58E-07 | 3.25E-08 | -5.76 | 7.8219796 | -1.22E-02 | 57082604  | 57082727  | NC_000012.11 |
| cg21214467     | 2.58E-07 | 3.25E-08 | -5.76 | 7.8217547 | -7.01E-02 | 55894758  | 55894881  | NC_000019.9  |
| cg18947276     | 2.58E-07 | 3.25E-08 | -5.76 | 7.8214844 | -9.32E-02 | 48795067  | 48795190  | NC_000002.11 |
| cg22266001     | 2.58E-07 | 3.25E-08 | -5.76 | 7.8213284 | -1.42E-01 | 35786932  | 35787055  | NC_000019.9  |
| cg22498453     | 2.58E-07 | 3.25E-08 | -5.76 | 7.8210063 | -1.09E-01 | 98805084  | 98805207  | NC_000007.13 |
| cg23634459     | 2.58E-07 | 3.25E-08 | -5.76 | 7.8208934 | -1.31E-02 | 73078858  | 73078981  | NC_000010.10 |
| cg20222911     | 2.58E-07 | 3.25E-08 | -5.76 | 7.8207731 | -4.52E-02 | 105886024 | 105886147 | NC_000014.8  |
| cg01663295     | 2.58E-07 | 3.25E-08 | -5.76 | 7.8207385 | -3.21E-02 | 65837194  | 65837317  | NC_000011.9  |
| cg12575313     | 2.58E-07 | 3.25E-08 | -5.76 | 7.8207082 | -1.54E-02 | 33765297  | 33765420  | NC_000021.8  |
| cg27618939     | 2.58E-07 | 3.26E-08 | -5.76 | 7.8201498 | -6.93E-02 | 71581788  | 71581911  | NC_000008.10 |
| cg09408902     | 2.58E-07 | 3.26E-08 | -5.76 | 7.8199883 | -1.04E-01 | 121338544 | 121338667 | NC_000002.11 |
| cg11594811     | 2.58E-07 | 3.26E-08 | -5.76 | 7.8192623 | -1.15E-01 | 115088660 | 115088783 | NC_000011.9  |
| cg02532488     | 2.58E-07 | 3.26E-08 | -5.76 | 7.8187529 | -3.27E-02 | 65343341  | 65343464  | NC_000011.9  |
| ch.12.2105166R | 2.58E-07 | 3.26E-08 | -5.76 | 7.8185395 | -1.95E-02 | 106634130 | 106634253 | NC_000012.11 |
| cg19712813     | 2.59E-07 | 3.27E-08 | -5.76 | 7.8169735 | -1.30E-01 | 27322021  | 27322144  | NC_000001.10 |
| cg07510175     | 2.59E-07 | 3.27E-08 | -5.76 | 7.8168476 | -1.38E-01 | 1030700   | 1030823   | NC_000007.13 |
| cg00646216     | 2.59E-07 | 3.27E-08 | -5.76 | 7.8160414 | -1.17E-01 | 73210822  | 73210945  | NC_000016.9  |
| cg17159187     | 2.59E-07 | 3.27E-08 | -5.76 | 7.8159719 | -8.75E-02 | 144420118 | 144420241 | NC_000008.10 |
| cg11231958     | 2.59E-07 | 3.27E-08 | -5.76 | 7.8159097 | -7.90E-02 | 9509421   | 9509544   | NC_000001.10 |

|            |          |          |       |           |           |           |           |              |
|------------|----------|----------|-------|-----------|-----------|-----------|-----------|--------------|
| cg24518098 | 2.59E-07 | 3.27E-08 | -5.76 | 7.815545  | -1.00E-01 | 2146288   | 2146411   | NC_000001.10 |
| cg24415793 | 2.59E-07 | 3.27E-08 | -5.76 | 7.8150535 | -1.14E-01 | 51818433  | 51818556  | NC_000012.11 |
| cg12587954 | 2.59E-07 | 3.27E-08 | -5.76 | 7.814821  | -9.19E-02 | 200993200 | 200993323 | NC_000001.10 |
| cg00699947 | 2.59E-07 | 3.28E-08 | -5.76 | 7.8144455 | -4.42E-02 | 4592560   | 4592683   | NC_000004.11 |
| cg13186710 | 2.59E-07 | 3.28E-08 | -5.76 | 7.8140695 | -6.37E-02 | 96001627  | 96001750  | NC_000014.8  |
| cg04886157 | 2.60E-07 | 3.28E-08 | -5.76 | 7.8137665 | -5.77E-02 | 30380006  | 30380129  | NC_000016.9  |
| cg26713109 | 2.60E-07 | 3.28E-08 | -5.76 | 7.8128667 | -9.79E-02 | 754463    | 754586    | NC_000017.10 |
| cg02854288 | 2.60E-07 | 3.28E-08 | -5.76 | 7.811773  | -2.41E-02 | 61236911  | 61237034  | NC_000003.11 |
| cg15410528 | 2.60E-07 | 3.28E-08 | -5.76 | 7.8116222 | -6.21E-02 | 35617470  | 35617593  | NC_000019.9  |
| cg03929796 | 2.60E-07 | 3.29E-08 | -5.76 | 7.8102333 | -8.21E-02 | 52231840  | 52231963  | NC_000003.11 |
| cg09385972 | 2.61E-07 | 3.29E-08 | -5.76 | 7.8090056 | -8.51E-02 | 772568    | 772691    | NC_000016.9  |
| cg25036886 | 2.61E-07 | 3.29E-08 | -5.76 | 7.8089935 | -5.79E-02 | 10782863  | 10782986  | NC_000004.11 |
| cg18105612 | 2.61E-07 | 3.29E-08 | -5.76 | 7.8088944 | -5.39E-02 | 71289522  | 71289645  | NC_000014.8  |
| cg01651250 | 2.61E-07 | 3.30E-08 | -5.76 | 7.80802   | -1.16E-01 | 32060681  | 32060804  | NC_000006.11 |
| cg06099703 | 2.61E-07 | 3.30E-08 | -5.76 | 7.8076423 | -9.13E-02 | 2569920   | 2570043   | NC_000016.9  |
| cg16714273 | 2.61E-07 | 3.30E-08 | -5.76 | 7.8075959 | -1.07E-01 | 30455386  | 30455509  | NC_000020.10 |
| cg00433081 | 2.61E-07 | 3.30E-08 | -5.76 | 7.8066022 | -3.64E-02 | 179719502 | 179719625 | NC_000005.9  |
| cg17793059 | 2.61E-07 | 3.30E-08 | -5.76 | 7.8065875 | -7.18E-02 | 8428850   | 8428973   | NC_000019.9  |
| cg05346286 | 2.61E-07 | 3.30E-08 | -5.76 | 7.8064612 | -1.12E-01 | 2980598   | 2980721   | NC_000001.10 |
| cg23837253 | 2.61E-07 | 3.30E-08 | -5.76 | 7.8061446 | -2.53E-02 | 47759802  | 47759925  | NC_000019.9  |
| cg00331343 | 2.62E-07 | 3.30E-08 | -5.76 | 7.8057499 | -2.72E-02 | 136581031 | 136581154 | NC_000003.11 |
| cg15210526 | 2.62E-07 | 3.31E-08 | -5.76 | 7.8052629 | -1.04E-01 | 167733310 | 167733433 | NC_000001.10 |
| cg21849552 | 2.62E-07 | 3.31E-08 | -5.76 | 7.8048354 | -7.56E-02 | 14597650  | 14597773  | NC_000003.11 |
| cg05237436 | 2.62E-07 | 3.31E-08 | -5.76 | 7.8047008 | -7.02E-02 | 138533428 | 138533551 | NC_000005.9  |
| cg04940695 | 2.62E-07 | 3.31E-08 | -5.75 | 7.8033478 | -4.68E-02 | 110059611 | 110059734 | NC_000006.11 |



|               |          |          |       |           |           |           |           |              |
|---------------|----------|----------|-------|-----------|-----------|-----------|-----------|--------------|
| cg18229107    | 2.62E-07 | 3.32E-08 | -5.75 | 7.8023095 | -3.08E-02 | 64854676  | 64854799  | NC_000014.8  |
| cg07202479    | 2.63E-07 | 3.32E-08 | -5.75 | 7.8002152 | -6.97E-02 | 159174162 | 159174285 | NC_000001.10 |
| cg04085447    | 2.63E-07 | 3.32E-08 | -5.75 | 7.7998038 | -7.80E-02 | 35773328  | 35773451  | NC_000019.9  |
| cg16581097    | 2.63E-07 | 3.33E-08 | -5.75 | 7.799641  | -6.08E-02 | 31204643  | 31204766  | NC_000017.10 |
| cg15927357    | 2.63E-07 | 3.33E-08 | -5.75 | 7.7994354 | -5.45E-02 | 47013900  | 47014023  | NC_000018.9  |
| cg01333788    | 2.63E-07 | 3.33E-08 | -5.75 | 7.7984222 | -1.17E-01 | 35220814  | 35220937  | NC_000001.10 |
| cg14706739    | 2.63E-07 | 3.33E-08 | -5.75 | 7.7984212 | -9.25E-02 | 21916355  | 21916478  | NC_000008.10 |
| cg06857094    | 2.63E-07 | 3.33E-08 | -5.75 | 7.7981686 | -7.73E-02 | 31762442  | 31762565  | NC_000006.11 |
| cg27406150    | 2.64E-07 | 3.34E-08 | -5.75 | 7.7966722 | -5.81E-02 | 6657167   | 6657290   | NC_000012.11 |
| cg24153044    | 2.64E-07 | 3.34E-08 | -5.75 | 7.795753  | -7.61E-02 | 6485201   | 6485324   | NC_000001.10 |
| ch.9.1470405F | 2.64E-07 | 3.34E-08 | -5.75 | 7.7950487 | -1.97E-02 | 100842913 | 100843036 | NC_000009.11 |
| cg09565806    | 2.64E-07 | 3.34E-08 | -5.75 | 7.7950291 | -8.34E-02 | 198492976 | 198493099 | NC_000002.11 |
| cg26904212    | 2.65E-07 | 3.35E-08 | -5.75 | 7.7934745 | -1.76E-02 | 7517697   | 7517820   | NC_000017.10 |
| cg13587725    | 2.65E-07 | 3.35E-08 | -5.75 | 7.7931471 | -1.11E-01 | 63320399  | 63320522  | NC_000011.9  |
| cg13654276    | 2.65E-07 | 3.35E-08 | -5.75 | 7.7918481 | -3.41E-02 | 113666360 | 113666483 | NC_000003.11 |
| cg09932439    | 2.65E-07 | 3.35E-08 | -5.75 | 7.7917177 | -2.24E-02 | 44645532  | 44645655  | NC_000019.9  |
| cg05385623    | 2.65E-07 | 3.35E-08 | -5.75 | 7.7914142 | -1.59E-02 | 57994101  | 57994224  | NC_000003.11 |
| cg17740822    | 2.65E-07 | 3.35E-08 | -5.75 | 7.7910978 | -8.93E-02 | 89744609  | 89744732  | NC_000012.11 |
| cg05024715    | 2.65E-07 | 3.35E-08 | -5.75 | 7.791013  | -1.27E-01 | 123849197 | 123849320 | NC_000011.9  |
| cg03675083    | 2.65E-07 | 3.35E-08 | -5.75 | 7.7909729 | -6.17E-02 | 194064806 | 194064929 | NC_000003.11 |
| cg12654519    | 2.65E-07 | 3.36E-08 | -5.75 | 7.7904525 | -9.49E-02 | 148715234 | 148715357 | NC_000004.11 |
| cg19238380    | 2.66E-07 | 3.36E-08 | -5.75 | 7.7890731 | -8.85E-02 | 156093948 | 156094071 | NC_000001.10 |
| cg04878973    | 2.66E-07 | 3.36E-08 | -5.75 | 7.7889947 | -5.20E-02 | 49057761  | 49057884  | NC_000003.11 |
| cg11069470    | 2.66E-07 | 3.37E-08 | -5.75 | 7.7880276 | -9.63E-02 | 149388394 | 149388517 | NC_000007.13 |
| cg14485643    | 2.66E-07 | 3.37E-08 | -5.75 | 7.7877648 | -1.16E-01 | 134484581 | 134484704 | NC_000009.11 |

|            |          |          |       |           |           |           |           |              |
|------------|----------|----------|-------|-----------|-----------|-----------|-----------|--------------|
| cg00034039 | 2.66E-07 | 3.37E-08 | -5.75 | 7.7875986 | -1.90E-02 | 74526266  | 74526389  | NC_000009.11 |
| cg24513684 | 2.66E-07 | 3.37E-08 | -5.75 | 7.7869843 | -4.83E-02 | 227922309 | 227922432 | NC_000001.10 |
| cg16162391 | 2.66E-07 | 3.37E-08 | -5.75 | 7.7869774 | -8.37E-02 | 29698368  | 29698491  | NC_000010.10 |
| cg15840949 | 2.66E-07 | 3.37E-08 | -5.75 | 7.7868681 | -7.27E-02 | 99443666  | 99443789  | NC_000015.9  |
| cg25813290 | 2.66E-07 | 3.37E-08 | -5.75 | 7.7865222 | -1.25E-01 | 108767676 | 108767799 | NC_000007.13 |
| cg27547053 | 2.67E-07 | 3.37E-08 | -5.75 | 7.7853653 | -5.67E-02 | 56531471  | 56531594  | NC_000001.10 |
| cg26083045 | 2.67E-07 | 3.38E-08 | -5.75 | 7.7850491 | -6.95E-02 | 8560168   | 8560291   | NC_000003.11 |
| cg08215115 | 2.67E-07 | 3.38E-08 | -5.75 | 7.7847322 | -1.10E-01 | 51039609  | 51039732  | NC_000010.10 |
| cg09285683 | 2.67E-07 | 3.38E-08 | -5.75 | 7.7843877 | -1.14E-01 | 216691985 | 216692108 | NC_000002.11 |
| cg02022488 | 2.67E-07 | 3.38E-08 | -5.75 | 7.7840879 | -9.03E-02 | 102702045 | 102702168 | NC_000014.8  |
| cg25076325 | 2.67E-07 | 3.38E-08 | -5.75 | 7.7838754 | -1.18E-01 | 118135407 | 118135530 | NC_000011.9  |
| cg12128340 | 2.67E-07 | 3.38E-08 | -5.75 | 7.7833496 | -1.36E-01 | 165203646 | 165203769 | NC_000001.10 |
| cg08270053 | 2.67E-07 | 3.38E-08 | -5.75 | 7.7831148 | -2.59E-02 | 150336619 | 150336742 | NC_000001.10 |
| cg21769093 | 2.67E-07 | 3.39E-08 | -5.75 | 7.782182  | -1.39E-01 | 49819689  | 49819812  | NC_000007.13 |
| cg20445197 | 2.67E-07 | 3.39E-08 | -5.75 | 7.7821761 | -1.08E-01 | 72057817  | 72057940  | NC_000002.11 |
| cg21763482 | 2.68E-07 | 3.39E-08 | -5.75 | 7.781994  | -9.82E-02 | 573298    | 573421    | NC_000005.9  |
| cg16604086 | 2.68E-07 | 3.39E-08 | -5.75 | 7.7817725 | -5.22E-02 | 113860443 | 113860566 | NC_000012.11 |
| cg19934686 | 2.68E-07 | 3.39E-08 | -5.75 | 7.7816645 | -1.14E-02 | 99588657  | 99588780  | NC_000007.13 |
| cg15635728 | 2.68E-07 | 3.39E-08 | -5.75 | 7.7814911 | -3.03E-02 | 56152354  | 56152477  | NC_000019.9  |
| cg05702851 | 2.68E-07 | 3.39E-08 | -5.75 | 7.7809357 | -8.12E-03 | 110481083 | 110481206 | NC_000004.11 |
| cg04612488 | 2.68E-07 | 3.39E-08 | -5.75 | 7.7806777 | -1.29E-02 | 8113907   | 8114030   | NC_000017.10 |
| cg15685922 | 2.68E-07 | 3.39E-08 | -5.75 | 7.7800203 | -7.64E-02 | 156045208 | 156045331 | NC_000001.10 |
| cg00388287 | 2.68E-07 | 3.39E-08 | -5.75 | 7.7799852 | -1.34E-01 | 23358444  | 23358567  | NC_000002.11 |
| cg02865595 | 2.68E-07 | 3.39E-08 | -5.75 | 7.7798174 | -9.86E-02 | 36771714  | 36771837  | NC_000001.10 |
| cg11450671 | 2.68E-07 | 3.40E-08 | -5.75 | 7.7792269 | -7.85E-02 | 595812    | 595935    | NC_000019.9  |

|                 |          |          |       |           |           |           |           |              |
|-----------------|----------|----------|-------|-----------|-----------|-----------|-----------|--------------|
| cg01618530      | 2.68E-07 | 3.40E-08 | -5.75 | 7.7786793 | -2.34E-02 | 54755981  | 54756104  | NC_000008.10 |
| cg04758026      | 2.69E-07 | 3.40E-08 | -5.75 | 7.7777758 | -1.04E-01 | 152159591 | 152159714 | NC_000002.11 |
| cg01768328      | 2.69E-07 | 3.40E-08 | -5.75 | 7.7776001 | -7.20E-02 | 1634018   | 1634141   | NC_000017.10 |
| ch.13.33087556F | 2.69E-07 | 3.40E-08 | -5.75 | 7.7766255 | -1.24E-02 | 34189558  | 34189681  | NC_000013.10 |
| cg26995244      | 2.69E-07 | 3.41E-08 | -5.75 | 7.7758705 | -1.05E-01 | 45125395  | 45125518  | NC_000022.10 |
| cg19460095      | 2.69E-07 | 3.41E-08 | -5.75 | 7.7758596 | -1.21E-01 | 34672025  | 34672148  | NC_000011.9  |
| cg00686046      | 2.69E-07 | 3.41E-08 | -5.75 | 7.7756693 | -1.13E-02 | 31126799  | 31126922  | NC_000006.11 |
| cg21281799      | 2.69E-07 | 3.41E-08 | -5.75 | 7.7754041 | -1.38E-01 | 68041322  | 68041445  | NC_000012.11 |
| cg07665115      | 2.69E-07 | 3.41E-08 | -5.75 | 7.7751813 | -1.10E-01 | 133062851 | 133062974 | NC_000008.10 |
| cg13963315      | 2.70E-07 | 3.42E-08 | -5.75 | 7.7729766 | -4.42E-02 | 4208278   | 4208401   | NC_000011.9  |
| cg24348107      | 2.70E-07 | 3.42E-08 | -5.75 | 7.7728391 | -3.25E-02 | 52082575  | 52082698  | NC_000001.10 |
| cg02371119      | 2.70E-07 | 3.42E-08 | -5.75 | 7.7720974 | -4.31E-02 | 171527346 | 171527469 | NC_000003.11 |
| cg03372205      | 2.70E-07 | 3.42E-08 | -5.75 | 7.7716012 | -1.05E-01 | 119619765 | 119619888 | NC_000002.11 |
| cg07554053      | 2.70E-07 | 3.42E-08 | -5.75 | 7.7709853 | -1.18E-01 | 44885910  | 44886033  | NC_000010.10 |
| cg22130673      | 2.71E-07 | 3.43E-08 | -5.75 | 7.7699129 | -1.05E-01 | 114031817 | 114031940 | NC_000011.9  |
| cg04877287      | 2.71E-07 | 3.43E-08 | -5.75 | 7.769912  | -1.16E-01 | 132278166 | 132278289 | NC_000011.9  |
| cg07425824      | 2.71E-07 | 3.43E-08 | -5.75 | 7.7697753 | -1.12E-01 | 69451547  | 69451670  | NC_000016.9  |
| cg26710371      | 2.71E-07 | 3.43E-08 | -5.75 | 7.7695177 | -1.06E-01 | 36234215  | 36234338  | NC_000011.9  |
| cg26781482      | 2.71E-07 | 3.43E-08 | -5.75 | 7.7691999 | -5.46E-02 | 45353344  | 45353467  | NC_000010.10 |
| cg27319971      | 2.71E-07 | 3.43E-08 | -5.75 | 7.7685926 | -1.29E-01 | 3255056   | 3255179   | NC_000004.11 |
| cg16239218      | 2.71E-07 | 3.44E-08 | -5.75 | 7.7679238 | -1.17E-01 | 117715809 | 117715932 | NC_000010.10 |
| cg08528000      | 2.72E-07 | 3.44E-08 | -5.75 | 7.7652527 | -5.69E-02 | 198224330 | 198224453 | NC_000001.10 |
| cg19530551      | 2.72E-07 | 3.44E-08 | -5.75 | 7.7652356 | -1.57E-02 | 19051190  | 19051313  | NC_000019.9  |
| cg12593511      | 2.72E-07 | 3.45E-08 | -5.75 | 7.765163  | -1.52E-01 | 3276753   | 3276876   | NC_000001.10 |
| cg04215126      | 2.72E-07 | 3.45E-08 | -5.75 | 7.7650461 | -8.86E-02 | 105621846 | 105621969 | NC_000007.13 |

|            |          |          |       |           |           |           |           |              |
|------------|----------|----------|-------|-----------|-----------|-----------|-----------|--------------|
| cg01373691 | 2.72E-07 | 3.45E-08 | -5.75 | 7.7649789 | -4.32E-02 | 71917765  | 71917888  | NC_000016.9  |
| cg10096040 | 2.72E-07 | 3.45E-08 | -5.75 | 7.7635466 | -7.94E-02 | 100504533 | 100504656 | NC_000014.8  |
| cg08345082 | 2.73E-07 | 3.45E-08 | -5.75 | 7.7624155 | -5.94E-02 | 99160200  | 99160323  | NC_000010.10 |
| cg09307468 | 2.73E-07 | 3.46E-08 | -5.75 | 7.7616507 | -7.53E-02 | 144386093 | 144386216 | NC_000006.11 |
| cg21562750 | 2.73E-07 | 3.46E-08 | -5.75 | 7.7602225 | -8.49E-02 | 92689433  | 92689556  | NC_000012.11 |
| cg24944395 | 2.73E-07 | 3.46E-08 | -5.75 | 7.7600825 | -4.34E-02 | 7166718   | 7166841   | NC_000017.10 |
| cg04882727 | 2.73E-07 | 3.47E-08 | -5.75 | 7.7589612 | -2.76E-02 | 126442299 | 126442422 | NC_000008.10 |
| cg10222701 | 2.74E-07 | 3.47E-08 | -5.75 | 7.7584519 | -5.79E-02 | 53466355  | 53466478  | NC_000019.9  |
| cg17546721 | 2.74E-07 | 3.47E-08 | -5.75 | 7.7580426 | -9.26E-02 | 30646532  | 30646655  | NC_000003.11 |
| cg26372612 | 2.74E-07 | 3.47E-08 | -5.75 | 7.7579313 | -2.17E-02 | 50330167  | 50330290  | NC_000003.11 |
| cg00153101 | 2.74E-07 | 3.47E-08 | -5.75 | 7.7575667 | -9.86E-02 | 2431753   | 2431876   | NC_000001.10 |
| cg17488985 | 2.74E-07 | 3.47E-08 | -5.75 | 7.7572566 | -1.88E-02 | 86159426  | 86159549  | NC_000006.11 |
| cg18975130 | 2.74E-07 | 3.47E-08 | -5.75 | 7.7568198 | -1.29E-01 | 94238749  | 94238872  | NC_000008.10 |
| cg26118643 | 2.74E-07 | 3.48E-08 | -5.75 | 7.7564139 | -1.08E-01 | 8009079   | 8009202   | NC_000001.10 |
| cg25525379 | 2.74E-07 | 3.48E-08 | -5.75 | 7.7560259 | -8.58E-02 | 40550473  | 40550596  | NC_000015.9  |
| cg01176363 | 2.74E-07 | 3.48E-08 | -5.75 | 7.7550898 | -1.00E-01 | 62369445  | 62369568  | NC_000020.10 |
| cg23439458 | 2.74E-07 | 3.48E-08 | -5.74 | 7.7548889 | -2.72E-02 | 40174327  | 40174450  | NC_000007.13 |
| cg13739485 | 2.75E-07 | 3.49E-08 | -5.74 | 7.7538961 | -6.91E-02 | 136392285 | 136392408 | NC_000009.11 |
| cg03216867 | 2.75E-07 | 3.49E-08 | -5.74 | 7.7536284 | -7.85E-02 | 8275039   | 8275162   | NC_000004.11 |
| cg16553500 | 2.75E-07 | 3.49E-08 | -5.74 | 7.7521513 | -6.74E-02 | 32169868  | 32169991  | NC_000001.10 |
| cg27559870 | 2.75E-07 | 3.49E-08 | -5.74 | 7.7519923 | -3.78E-02 | 31380976  | 31381099  | NC_000001.10 |
| cg00395063 | 2.75E-07 | 3.49E-08 | -5.74 | 7.7516031 | -6.63E-02 | 120210293 | 120210416 | NC_000011.9  |
| cg12438430 | 2.75E-07 | 3.49E-08 | -5.74 | 7.7514192 | -9.40E-02 | 1507896   | 1508019   | NC_000010.10 |
| cg27109912 | 2.76E-07 | 3.50E-08 | -5.74 | 7.750132  | -9.66E-02 | 38707719  | 38707842  | NC_000017.10 |
| cg27553708 | 2.76E-07 | 3.50E-08 | -5.74 | 7.7494435 | -3.08E-02 | 102036326 | 102036449 | NC_000007.13 |

|               |          |          |       |           |           |           |           |              |
|---------------|----------|----------|-------|-----------|-----------|-----------|-----------|--------------|
| cg15395345    | 2.76E-07 | 3.51E-08 | -5.74 | 7.747472  | -7.21E-02 | 6946366   | 6946489   | NC_000008.10 |
| cg13656025    | 2.77E-07 | 3.51E-08 | -5.74 | 7.7468996 | -2.63E-02 | 7744978   | 7745101   | NC_000017.10 |
| cg11740103    | 2.77E-07 | 3.51E-08 | -5.74 | 7.7465786 | -5.93E-02 | 150020945 | 150021068 | NC_000007.13 |
| ch.7.1100907F | 2.77E-07 | 3.51E-08 | -5.74 | 7.7464033 | -2.88E-02 | 47388000  | 47388123  | NC_000007.13 |
| cg04013090    | 2.77E-07 | 3.51E-08 | -5.74 | 7.7463436 | -3.49E-02 | 67342485  | 67342608  | NC_000008.10 |
| cg07716249    | 2.77E-07 | 3.51E-08 | -5.74 | 7.7459507 | -4.90E-02 | 133428422 | 133428545 | NC_000002.11 |
| cg10653339    | 2.77E-07 | 3.51E-08 | -5.74 | 7.7458872 | -9.28E-02 | 43463490  | 43463613  | NC_000006.11 |
| cg00352349    | 2.77E-07 | 3.51E-08 | -5.74 | 7.7458309 | -1.62E-02 | 179316347 | 179316470 | NC_000002.11 |
| cg20973743    | 2.77E-07 | 3.51E-08 | -5.74 | 7.7457338 | -3.89E-02 | 49447782  | 49447905  | NC_000015.9  |
| cg27077143    | 2.77E-07 | 3.52E-08 | -5.74 | 7.7451241 | -5.97E-02 | 68666458  | 68666581  | NC_000005.9  |
| cg03625953    | 2.77E-07 | 3.52E-08 | -5.74 | 7.7447326 | -9.13E-02 | 1975218   | 1975341   | NC_000017.10 |
| cg15637191    | 2.77E-07 | 3.52E-08 | -5.74 | 7.7444334 | -4.24E-02 | 38020667  | 38020790  | NC_000017.10 |
| cg25350635    | 2.78E-07 | 3.52E-08 | -5.74 | 7.743338  | -3.58E-02 | 49182847  | 49182970  | NC_000012.11 |
| cg08737116    | 2.78E-07 | 3.52E-08 | -5.74 | 7.7432762 | -8.15E-02 | 116563487 | 116563610 | NC_000001.10 |
| cg15923947    | 2.78E-07 | 3.53E-08 | -5.74 | 7.7427788 | -8.18E-02 | 2461929   | 2462052   | NC_000001.10 |
| cg09132619    | 2.78E-07 | 3.53E-08 | -5.74 | 7.7423527 | -1.11E-01 | 16576166  | 16576289  | NC_000006.11 |
| cg15108060    | 2.78E-07 | 3.53E-08 | -5.74 | 7.741822  | -9.61E-02 | 48974707  | 48974830  | NC_000013.10 |
| cg22367678    | 2.78E-07 | 3.53E-08 | -5.74 | 7.7417926 | -4.87E-02 | 33077705  | 33077828  | NC_000001.10 |
| cg09845093    | 2.78E-07 | 3.53E-08 | -5.74 | 7.7417429 | -1.00E-01 | 56424393  | 56424516  | NC_000001.10 |
| cg02983911    | 2.78E-07 | 3.53E-08 | -5.74 | 7.7416282 | -1.69E-01 | 36932397  | 36932520  | NC_000020.10 |
| cg12871463    | 2.78E-07 | 3.53E-08 | -5.74 | 7.7409683 | -7.80E-02 | 39680662  | 39680785  | NC_000017.10 |
| cg06814792    | 2.78E-07 | 3.53E-08 | -5.74 | 7.7407919 | -9.20E-02 | 120174570 | 120174693 | NC_000001.10 |
| cg01329005    | 2.79E-07 | 3.54E-08 | -5.74 | 7.73918   | -1.78E-01 | 17516712  | 17516835  | NC_000019.9  |
| cg01142721    | 2.79E-07 | 3.55E-08 | -5.74 | 7.7365564 | -8.83E-02 | 85985448  | 85985571  | NC_000010.10 |
| cg20765267    | 2.79E-07 | 3.55E-08 | -5.74 | 7.7363067 | -3.36E-02 | 104428676 | 104428799 | NC_000008.10 |

|                 |          |          |       |           |           |           |           |              |
|-----------------|----------|----------|-------|-----------|-----------|-----------|-----------|--------------|
| cg24994755      | 2.79E-07 | 3.55E-08 | -5.74 | 7.7360779 | -7.92E-02 | 44878479  | 44878602  | NC_000021.8  |
| cg22051146      | 2.79E-07 | 3.55E-08 | -5.74 | 7.7359967 | -1.44E-01 | 177895047 | 177895170 | NC_000005.9  |
| cg22892373      | 2.80E-07 | 3.56E-08 | -5.74 | 7.7344427 | -5.08E-02 | 45262260  | 45262383  | NC_000017.10 |
| cg20734154      | 2.80E-07 | 3.56E-08 | -5.74 | 7.7344362 | -2.51E-02 | 128865266 | 128865389 | NC_000007.13 |
| cg05780543      | 2.80E-07 | 3.56E-08 | -5.74 | 7.7341931 | -5.60E-02 | 46963764  | 46963887  | NC_000016.9  |
| cg08657886      | 2.80E-07 | 3.56E-08 | -5.74 | 7.7334101 | -7.07E-02 | 16295868  | 16295991  | NC_000019.9  |
| cg10071035      | 2.80E-07 | 3.56E-08 | -5.74 | 7.7333536 | -1.47E-01 | 58132287  | 58132410  | NC_000008.10 |
| cg08152263      | 2.80E-07 | 3.56E-08 | -5.74 | 7.7327902 | -1.17E-01 | 35795274  | 35795397  | NC_000022.10 |
| ch.22.38010425R | 2.80E-07 | 3.56E-08 | -5.74 | 7.7327682 | -1.72E-02 | 39680479  | 39680602  | NC_000022.10 |
| cg14133064      | 2.80E-07 | 3.56E-08 | -5.74 | 7.7323941 | -9.86E-02 | 5530115   | 5530238   | NC_000009.11 |
| cg04543901      | 2.81E-07 | 3.57E-08 | -5.74 | 7.7316783 | -1.43E-01 | 63519783  | 63519906  | NC_000017.10 |
| cg14219124      | 2.81E-07 | 3.57E-08 | -5.74 | 7.7315984 | -1.67E-01 | 129992297 | 129992420 | NC_000011.9  |
| cg19681842      | 2.81E-07 | 3.57E-08 | -5.74 | 7.7313595 | -8.81E-02 | 93672832  | 93672955  | NC_000014.8  |
| cg08069287      | 2.81E-07 | 3.57E-08 | -5.74 | 7.7299975 | -1.32E-01 | 72868833  | 72868956  | NC_000011.9  |
| cg06540458      | 2.81E-07 | 3.57E-08 | -5.74 | 7.7296842 | -1.21E-01 | 226951747 | 226951870 | NC_000001.10 |
| cg24950222      | 2.81E-07 | 3.57E-08 | -5.74 | 7.7295632 | -7.31E-02 | 43969886  | 43970009  | NC_000019.9  |
| cg21182322      | 2.81E-07 | 3.57E-08 | -5.74 | 7.7295139 | -1.32E-02 | 167189623 | 167189746 | NC_000001.10 |
| cg20887396      | 2.81E-07 | 3.57E-08 | -5.74 | 7.7294799 | -9.35E-02 | 79131943  | 79132066  | NC_000017.10 |
| cg25303336      | 2.81E-07 | 3.57E-08 | -5.74 | 7.7291091 | -2.11E-02 | 33756862  | 33756985  | NC_000006.11 |
| cg15033140      | 2.81E-07 | 3.57E-08 | -5.74 | 7.7291006 | -9.63E-02 | 170411909 | 170412032 | NC_000006.11 |
| cg12100791      | 2.82E-07 | 3.58E-08 | -5.74 | 7.7281951 | -1.72E-01 | 31214417  | 31214540  | NC_000016.9  |
| cg03420580      | 2.82E-07 | 3.58E-08 | -5.74 | 7.7281276 | -1.03E-01 | 30730226  | 30730349  | NC_000003.11 |
| cg13965612      | 2.82E-07 | 3.58E-08 | -5.74 | 7.7280799 | -8.54E-02 | 10928696  | 10928819  | NC_000019.9  |
| cg16745616      | 2.82E-07 | 3.58E-08 | -5.74 | 7.7279512 | -1.19E-01 | 8428856   | 8428979   | NC_000019.9  |
| cg12223997      | 2.82E-07 | 3.58E-08 | -5.74 | 7.727922  | -7.40E-02 | 9159596   | 9159719   | NC_000011.9  |

|                 |          |          |       |           |           |           |           |              |
|-----------------|----------|----------|-------|-----------|-----------|-----------|-----------|--------------|
| cg21818252      | 2.82E-07 | 3.58E-08 | -5.74 | 7.7272297 | -5.15E-02 | 110354354 | 110354477 | NC_000004.11 |
| cg22603450      | 2.82E-07 | 3.58E-08 | -5.74 | 7.7271014 | -9.93E-02 | 551536    | 551659    | NC_000019.9  |
| cg26017408      | 2.82E-07 | 3.58E-08 | -5.74 | 7.7269817 | -7.52E-02 | 116161327 | 116161450 | NC_000010.10 |
| cg13167431      | 2.82E-07 | 3.59E-08 | -5.74 | 7.7261582 | -1.05E-01 | 26988419  | 26988542  | NC_000022.10 |
| cg15070507      | 2.82E-07 | 3.59E-08 | -5.74 | 7.7250955 | -2.55E-02 | 45663129  | 45663252  | NC_000018.9  |
| cg13521229      | 2.83E-07 | 3.59E-08 | -5.74 | 7.7242037 | -9.64E-02 | 51013630  | 51013753  | NC_000019.9  |
| ch.21.17404405R | 2.83E-07 | 3.60E-08 | -5.74 | 7.7233429 | -3.15E-02 | 18482534  | 18482657  | NC_000021.8  |
| cg22686066      | 2.83E-07 | 3.60E-08 | -5.74 | 7.7232363 | -1.94E-02 | 60641183  | 60641306  | NC_000020.10 |
| cg19685205      | 2.83E-07 | 3.60E-08 | -5.74 | 7.72198   | -1.10E-01 | 8672038   | 8672161   | NC_000012.11 |
| cg03135127      | 2.83E-07 | 3.60E-08 | -5.74 | 7.7213166 | -2.92E-02 | 13227421  | 13227544  | NC_000019.9  |
| cg24863152      | 2.83E-07 | 3.60E-08 | -5.74 | 7.7211049 | -7.31E-02 | 151134876 | 151134999 | NC_000006.11 |
| cg18528640      | 2.84E-07 | 3.61E-08 | -5.74 | 7.7202745 | -8.76E-02 | 155579964 | 155580087 | NC_000001.10 |
| cg20376082      | 2.84E-07 | 3.61E-08 | -5.74 | 7.7199569 | -8.98E-02 | 1229932   | 1230055   | NC_000011.9  |
| cg01213599      | 2.84E-07 | 3.61E-08 | -5.74 | 7.7197871 | -9.03E-02 | 126704259 | 126704382 | NC_000010.10 |
| cg27659622      | 2.84E-07 | 3.61E-08 | -5.74 | 7.7193114 | -1.34E-01 | 108145539 | 108145662 | NC_000006.11 |
| cg12454161      | 2.84E-07 | 3.62E-08 | -5.74 | 7.7180699 | -8.66E-02 | 876551    | 876674    | NC_000001.10 |
| cg08397927      | 2.84E-07 | 3.62E-08 | -5.74 | 7.7180317 | -8.70E-02 | 41104408  | 41104531  | NC_000019.9  |
| cg14164816      | 2.84E-07 | 3.62E-08 | -5.74 | 7.717653  | -1.08E-01 | 91483823  | 91483946  | NC_000001.10 |
| cg27161463      | 2.85E-07 | 3.62E-08 | -5.74 | 7.7165034 | -3.24E-02 | 118123074 | 118123197 | NC_000011.9  |
| cg12949461      | 2.85E-07 | 3.62E-08 | -5.74 | 7.7162301 | -5.01E-02 | 33872364  | 33872487  | NC_000006.11 |
| cg20386586      | 2.85E-07 | 3.62E-08 | -5.74 | 7.7156171 | -5.13E-02 | 3449692   | 3449815   | NC_000018.9  |
| cg14039237      | 2.85E-07 | 3.63E-08 | -5.74 | 7.7154772 | -1.23E-01 | 130833354 | 130833477 | NC_000009.11 |
| cg25283121      | 2.85E-07 | 3.63E-08 | -5.74 | 7.7151261 | -1.50E-01 | 132904540 | 132904663 | NC_000012.11 |
| cg24879560      | 2.85E-07 | 3.63E-08 | -5.74 | 7.7144722 | -1.16E-01 | 65342971  | 65343094  | NC_000003.11 |
| cg13263483      | 2.85E-07 | 3.63E-08 | -5.74 | 7.7143242 | -1.71E-02 | 35247084  | 35247207  | NC_000001.10 |

|              |          |          |       |           |           |           |           |              |
|--------------|----------|----------|-------|-----------|-----------|-----------|-----------|--------------|
| cg20378002   | 2.85E-07 | 3.63E-08 | -5.74 | 7.7142667 | -5.32E-02 | 8477029   | 8477152   | NC_000007.13 |
| ch.1.131529R | 2.85E-07 | 3.63E-08 | -5.74 | 7.7142631 | -3.73E-02 | 3283394   | 3283517   | NC_000001.10 |
| cg03742642   | 2.86E-07 | 3.64E-08 | -5.74 | 7.7122547 | -5.45E-02 | 133354143 | 133354266 | NC_000012.11 |
| cg02183903   | 2.86E-07 | 3.64E-08 | -5.74 | 7.7113651 | -2.76E-02 | 37557857  | 37557980  | NC_000008.10 |
| cg06351965   | 2.86E-07 | 3.64E-08 | -5.74 | 7.7103121 | -1.14E-02 | 23690351  | 23690474  | NC_000016.9  |
| cg17849542   | 2.86E-07 | 3.65E-08 | -5.74 | 7.7100128 | -8.96E-02 | 2266228   | 2266351   | NC_000001.10 |
| cg20156793   | 2.86E-07 | 3.65E-08 | -5.74 | 7.7099507 | -8.22E-02 | 89768575  | 89768698  | NC_000012.11 |
| cg04287375   | 2.87E-07 | 3.65E-08 | -5.74 | 7.7093609 | -3.31E-02 | 102490920 | 102491043 | NC_000010.10 |
| cg01816186   | 2.87E-07 | 3.66E-08 | -5.74 | 7.7073036 | -1.10E-01 | 15310191  | 15310314  | NC_000002.11 |
| cg26599274   | 2.87E-07 | 3.66E-08 | -5.74 | 7.7069186 | -1.18E-02 | 66205733  | 66205856  | NC_000007.13 |
| cg09533293   | 2.87E-07 | 3.66E-08 | -5.74 | 7.7067981 | -4.00E-02 | 60689670  | 60689793  | NC_000015.9  |
| cg17786598   | 2.87E-07 | 3.66E-08 | -5.74 | 7.7066884 | -2.97E-02 | 134957547 | 134957670 | NC_000010.10 |
| cg01728507   | 2.87E-07 | 3.66E-08 | -5.74 | 7.7065838 | -8.11E-02 | 3563357   | 3563480   | NC_000004.11 |
| cg08942342   | 2.87E-07 | 3.66E-08 | -5.74 | 7.7060927 | -8.24E-02 | 177580211 | 177580334 | NC_000005.9  |
| cg08603829   | 2.88E-07 | 3.66E-08 | -5.73 | 7.7056274 | -1.03E-01 | 111409769 | 111409892 | NC_000011.9  |
| cg04731624   | 2.88E-07 | 3.66E-08 | -5.73 | 7.7055227 | -1.08E-01 | 171067585 | 171067708 | NC_000005.9  |
| cg06807915   | 2.88E-07 | 3.67E-08 | -5.73 | 7.7047561 | -1.07E-01 | 103040379 | 103040502 | NC_000010.10 |
| cg14787880   | 2.88E-07 | 3.67E-08 | -5.73 | 7.7046412 | -1.40E-01 | 203244123 | 203244246 | NC_000002.11 |
| cg15015426   | 2.88E-07 | 3.67E-08 | -5.73 | 7.7038365 | -1.09E-01 | 159506559 | 159506682 | NC_000001.10 |
| cg11056766   | 2.88E-07 | 3.67E-08 | -5.73 | 7.703359  | -9.55E-02 | 1230072   | 1230195   | NC_000011.9  |
| cg05120944   | 2.88E-07 | 3.67E-08 | -5.73 | 7.7033152 | -7.79E-02 | 54090254  | 54090377  | NC_000012.11 |
| cg14283802   | 2.89E-07 | 3.68E-08 | -5.73 | 7.7013871 | -1.27E-01 | 87684132  | 87684255  | NC_000008.10 |
| cg14417896   | 2.89E-07 | 3.68E-08 | -5.73 | 7.7012633 | -1.12E-01 | 70087153  | 70087276  | NC_000015.9  |
| cg23089425   | 2.89E-07 | 3.68E-08 | -5.73 | 7.7012565 | -8.30E-02 | 19034837  | 19034960  | NC_000008.10 |
| cg07562458   | 2.89E-07 | 3.68E-08 | -5.73 | 7.7011652 | -4.60E-02 | 224622430 | 224622553 | NC_000001.10 |



|            |          |          |       |           |           |           |           |              |
|------------|----------|----------|-------|-----------|-----------|-----------|-----------|--------------|
| cg04245374 | 2.89E-07 | 3.68E-08 | -5.73 | 7.700361  | -7.41E-02 | 168150977 | 168151100 | NC_000001.10 |
| cg16755220 | 2.89E-07 | 3.68E-08 | -5.73 | 7.699817  | -4.12E-02 | 12070685  | 12070808  | NC_000016.9  |
| cg24827726 | 2.90E-07 | 3.69E-08 | -5.73 | 7.6986415 | -9.69E-02 | 14581937  | 14582060  | NC_000003.11 |
| cg24071057 | 2.90E-07 | 3.69E-08 | -5.73 | 7.6971389 | -6.59E-02 | 40873344  | 40873467  | NC_000017.10 |
| cg15448726 | 2.90E-07 | 3.70E-08 | -5.73 | 7.6968724 | -4.87E-02 | 53273497  | 53273620  | NC_000012.11 |
| cg04808985 | 2.91E-07 | 3.71E-08 | -5.73 | 7.6939452 | -1.02E-01 | 72301924  | 72302047  | NC_000011.9  |
| cg10364881 | 2.91E-07 | 3.71E-08 | -5.73 | 7.6939043 | -7.11E-02 | 12010020  | 12010143  | NC_000011.9  |
| cg20775109 | 2.91E-07 | 3.71E-08 | -5.73 | 7.6937672 | -1.00E-01 | 168358086 | 168358209 | NC_000006.11 |
| cg24262715 | 2.91E-07 | 3.71E-08 | -5.73 | 7.6936009 | -6.35E-02 | 44038991  | 44039114  | NC_000015.9  |
| cg20994227 | 2.91E-07 | 3.71E-08 | -5.73 | 7.6928397 | -4.51E-02 | 106807175 | 106807298 | NC_000008.10 |
| cg25720264 | 2.91E-07 | 3.71E-08 | -5.73 | 7.692436  | -8.72E-02 | 19389751  | 19389874  | NC_000012.11 |
| cg00730857 | 2.91E-07 | 3.72E-08 | -5.73 | 7.6916427 | -1.20E-01 | 1994281   | 1994404   | NC_000004.11 |
| cg09533845 | 2.91E-07 | 3.72E-08 | -5.73 | 7.6915859 | -1.30E-01 | 81290007  | 81290130  | NC_000008.10 |
| cg22449745 | 2.92E-07 | 3.72E-08 | -5.73 | 7.6911891 | -7.74E-02 | 38156939  | 38157062  | NC_000001.10 |
| cg08340482 | 2.92E-07 | 3.72E-08 | -5.73 | 7.6909941 | -1.08E-01 | 49927244  | 49927367  | NC_000019.9  |
| cg03407184 | 2.92E-07 | 3.72E-08 | -5.73 | 7.6909764 | -6.62E-02 | 70881475  | 70881598  | NC_000003.11 |
| cg07423540 | 2.92E-07 | 3.72E-08 | -5.73 | 7.6901538 | -4.85E-02 | 8442223   | 8442346   | NC_000004.11 |
| cg21503377 | 2.92E-07 | 3.72E-08 | -5.73 | 7.6899648 | -3.52E-02 | 228871665 | 228871788 | NC_000001.10 |
| cg17504641 | 2.92E-07 | 3.72E-08 | -5.73 | 7.6892385 | -8.74E-02 | 44458167  | 44458290  | NC_000010.10 |
| cg20834966 | 2.93E-07 | 3.73E-08 | -5.73 | 7.6873677 | -5.96E-02 | 82811301  | 82811424  | NC_000006.11 |
| cg01761968 | 2.93E-07 | 3.73E-08 | -5.73 | 7.6871288 | -8.01E-02 | 130824831 | 130824954 | NC_000012.11 |
| cg26039954 | 2.93E-07 | 3.73E-08 | -5.73 | 7.6869801 | -5.79E-02 | 16220025  | 16220148  | NC_000001.10 |
| cg22544673 | 2.93E-07 | 3.73E-08 | -5.73 | 7.686682  | -5.10E-02 | 48088150  | 48088273  | NC_000021.8  |
| cg14453145 | 2.93E-07 | 3.74E-08 | -5.73 | 7.6860216 | -1.29E-01 | 242801896 | 242802019 | NC_000002.11 |
| cg05459971 | 2.93E-07 | 3.74E-08 | -5.73 | 7.6858053 | -1.15E-01 | 148520894 | 148521017 | NC_000005.9  |

|                 |          |          |       |           |           |           |           |              |
|-----------------|----------|----------|-------|-----------|-----------|-----------|-----------|--------------|
| cg08977790      | 2.93E-07 | 3.74E-08 | -5.73 | 7.6846705 | -1.05E-01 | 48633441  | 48633564  | NC_000003.11 |
| cg20385001      | 2.93E-07 | 3.74E-08 | -5.73 | 7.6845107 | -8.47E-02 | 102077114 | 102077237 | NC_000015.9  |
| cg09915232      | 2.94E-07 | 3.74E-08 | -5.73 | 7.684312  | -1.14E-01 | 1879280   | 1879403   | NC_000008.10 |
| cg02157052      | 2.94E-07 | 3.74E-08 | -5.73 | 7.684258  | -4.00E-02 | 101326091 | 101326214 | NC_000013.10 |
| cg15241236      | 2.94E-07 | 3.75E-08 | -5.73 | 7.6821253 | -9.69E-02 | 69355417  | 69355540  | NC_000008.10 |
| cg24294950      | 2.94E-07 | 3.75E-08 | -5.73 | 7.6817908 | -8.09E-02 | 126752911 | 126753034 | NC_000007.13 |
| cg08837676      | 2.94E-07 | 3.75E-08 | -5.73 | 7.6816501 | -7.76E-02 | 191625074 | 191625197 | NC_000002.11 |
| cg03020208      | 2.94E-07 | 3.75E-08 | -5.73 | 7.6816284 | -7.26E-02 | 50354962  | 50355085  | NC_000012.11 |
| cg25456144      | 2.95E-07 | 3.76E-08 | -5.73 | 7.6800871 | -1.21E-01 | 44629374  | 44629497  | NC_000011.9  |
| cg25326378      | 2.95E-07 | 3.76E-08 | -5.73 | 7.6792597 | -1.00E-01 | 137910553 | 137910676 | NC_000006.11 |
| cg04484075      | 2.95E-07 | 3.76E-08 | -5.73 | 7.6789871 | -8.90E-02 | 139159559 | 139159682 | NC_000009.11 |
| cg12867156      | 2.95E-07 | 3.77E-08 | -5.73 | 7.6786036 | -1.05E-01 | 4218211   | 4218334   | NC_000007.13 |
| cg07561552      | 2.95E-07 | 3.77E-08 | -5.73 | 7.6777304 | -6.72E-02 | 45884065  | 45884188  | NC_000003.11 |
| cg02061229      | 2.96E-07 | 3.77E-08 | -5.73 | 7.6771815 | -1.05E-01 | 102651208 | 102651331 | NC_000011.9  |
| cg12356873      | 2.96E-07 | 3.77E-08 | -5.73 | 7.6770304 | -4.32E-02 | 67835423  | 67835546  | NC_000015.9  |
| cg15293759      | 2.96E-07 | 3.77E-08 | -5.73 | 7.6769512 | -9.42E-02 | 86040024  | 86040147  | NC_000010.10 |
| cg16597172      | 2.96E-07 | 3.77E-08 | -5.73 | 7.6769249 | -1.44E-02 | 16080669  | 16080792  | NC_000002.11 |
| cg00086710      | 2.96E-07 | 3.78E-08 | -5.73 | 7.6745819 | -9.54E-02 | 89204074  | 89204197  | NC_000004.11 |
| cg16045390      | 2.96E-07 | 3.78E-08 | -5.73 | 7.6744417 | -6.06E-02 | 37896620  | 37896743  | NC_000017.10 |
| cg04658679      | 2.96E-07 | 3.78E-08 | -5.73 | 7.6741103 | -1.10E-01 | 125185923 | 125186046 | NC_000012.11 |
| cg18073357      | 2.96E-07 | 3.78E-08 | -5.73 | 7.6739045 | -1.81E-02 | 185458522 | 185458645 | NC_000004.11 |
| ch.15.64945366R | 2.97E-07 | 3.79E-08 | -5.73 | 7.6726041 | -5.41E-02 | 67158312  | 67158435  | NC_000015.9  |
| cg15835542      | 2.97E-07 | 3.79E-08 | -5.73 | 7.6719139 | -1.31E-01 | 45709808  | 45709931  | NC_000006.11 |
| cg13963210      | 2.97E-07 | 3.80E-08 | -5.73 | 7.6706954 | -1.14E-01 | 100510201 | 100510324 | NC_000009.11 |
| cg10983056      | 2.97E-07 | 3.80E-08 | -5.73 | 7.6703984 | -2.68E-02 | 113344077 | 113344200 | NC_000013.10 |

|                |          |          |       |           |           |           |           |              |
|----------------|----------|----------|-------|-----------|-----------|-----------|-----------|--------------|
| cg07601967     | 2.98E-07 | 3.80E-08 | -5.73 | 7.6700968 | -7.25E-02 | 9590805   | 9590928   | NC_000020.10 |
| cg22352186     | 2.98E-07 | 3.80E-08 | -5.73 | 7.6698462 | -2.91E-02 | 1722180   | 1722303   | NC_000004.11 |
| cg24403804     | 2.98E-07 | 3.80E-08 | -5.73 | 7.6692067 | -9.64E-02 | 16805426  | 16805549  | NC_000006.11 |
| cg11373252     | 2.98E-07 | 3.80E-08 | -5.73 | 7.6688099 | -7.97E-02 | 219938304 | 219938427 | NC_000002.11 |
| cg24174988     | 2.98E-07 | 3.81E-08 | -5.73 | 7.667789  | -5.09E-02 | 92545662  | 92545785  | NC_000001.10 |
| cg06744057     | 2.98E-07 | 3.81E-08 | -5.73 | 7.6674786 | -4.79E-02 | 73493715  | 73493838  | NC_000014.8  |
| ch.14.1755952R | 2.98E-07 | 3.81E-08 | -5.73 | 7.6673874 | -1.38E-02 | 102483986 | 102484109 | NC_000014.8  |
| cg26932693     | 2.98E-07 | 3.81E-08 | -5.73 | 7.666733  | -3.60E-02 | 46152449  | 46152572  | NC_000017.10 |
| cg26161104     | 2.99E-07 | 3.81E-08 | -5.73 | 7.6666587 | -7.12E-02 | 131959253 | 131959376 | NC_000012.11 |
| cg23562023     | 2.99E-07 | 3.81E-08 | -5.73 | 7.6664145 | -7.47E-02 | 24429162  | 24429285  | NC_000006.11 |
| cg23387220     | 2.99E-07 | 3.81E-08 | -5.73 | 7.6663781 | -3.65E-02 | 53578496  | 53578619  | NC_000004.11 |
| cg19318218     | 2.99E-07 | 3.82E-08 | -5.73 | 7.6650983 | -8.40E-02 | 1317608   | 1317731   | NC_000004.11 |
| cg02388999     | 2.99E-07 | 3.82E-08 | -5.73 | 7.6644439 | -3.82E-02 | 131384671 | 131384794 | NC_000006.11 |
| cg09178384     | 2.99E-07 | 3.82E-08 | -5.73 | 7.6640974 | -1.10E-01 | 170193375 | 170193498 | NC_000004.11 |
| cg14777161     | 2.99E-07 | 3.82E-08 | -5.73 | 7.6636887 | -6.03E-02 | 180689277 | 180689400 | NC_000005.9  |
| cg18199554     | 2.99E-07 | 3.82E-08 | -5.73 | 7.6632731 | -1.35E-01 | 43397288  | 43397411  | NC_000005.9  |
| cg02971581     | 3.00E-07 | 3.83E-08 | -5.73 | 7.6627653 | -1.43E-01 | 10895950  | 10896073  | NC_000001.10 |
| cg22225685     | 3.00E-07 | 3.83E-08 | -5.73 | 7.6620364 | -6.41E-02 | 38203998  | 38204121  | NC_000022.10 |
| cg20380768     | 3.00E-07 | 3.84E-08 | -5.73 | 7.660695  | -1.32E-01 | 130125511 | 130125634 | NC_000007.13 |
| ch.6.66830957F | 3.00E-07 | 3.84E-08 | -5.73 | 7.6606644 | -2.58E-02 | 66774236  | 66774359  | NC_000006.11 |
| cg01356463     | 3.00E-07 | 3.84E-08 | -5.73 | 7.6606339 | -2.97E-02 | 112280204 | 112280327 | NC_000012.11 |
| cg12656272     | 3.00E-07 | 3.84E-08 | -5.73 | 7.6599953 | -1.48E-01 | 100328186 | 100328309 | NC_000003.11 |
| cg21554013     | 3.00E-07 | 3.84E-08 | -5.73 | 7.6597744 | -2.94E-02 | 43138521  | 43138644  | NC_000017.10 |
| cg11404058     | 3.01E-07 | 3.84E-08 | -5.73 | 7.659513  | -2.28E-02 | 14011843  | 14011966  | NC_000005.9  |
| cg16697620     | 3.01E-07 | 3.84E-08 | -5.73 | 7.6582997 | -8.32E-02 | 32092196  | 32092319  | NC_000001.10 |

|            |          |          |       |           |           |           |           |              |
|------------|----------|----------|-------|-----------|-----------|-----------|-----------|--------------|
| cg09549240 | 3.01E-07 | 3.85E-08 | -5.73 | 7.6581278 | -3.35E-02 | 75250560  | 75250683  | NC_000015.9  |
| cg02196655 | 3.01E-07 | 3.85E-08 | -5.73 | 7.6579972 | -1.04E-01 | 10830764  | 10830887  | NC_000002.11 |
| cg04132983 | 3.01E-07 | 3.85E-08 | -5.73 | 7.6579811 | -6.48E-02 | 79632620  | 79632743  | NC_000016.9  |
| cg09701062 | 3.01E-07 | 3.85E-08 | -5.73 | 7.6579063 | -9.69E-02 | 133446318 | 133446441 | NC_000005.9  |
| cg01018864 | 3.01E-07 | 3.85E-08 | -5.73 | 7.6572469 | -9.38E-02 | 96158915  | 96159038  | NC_000014.8  |
| cg09558281 | 3.01E-07 | 3.85E-08 | -5.73 | 7.6572261 | -7.20E-02 | 27102927  | 27103050  | NC_000004.11 |
| cg01759672 | 3.02E-07 | 3.85E-08 | -5.72 | 7.6561738 | -5.64E-02 | 137593418 | 137593541 | NC_000005.9  |
| cg20404336 | 3.02E-07 | 3.85E-08 | -5.72 | 7.6557532 | -7.49E-02 | 133757909 | 133758032 | NC_000012.11 |
| cg00550955 | 3.02E-07 | 3.86E-08 | -5.72 | 7.6551801 | -1.07E-01 | 22012657  | 22012780  | NC_000022.10 |
| cg03185752 | 3.02E-07 | 3.86E-08 | -5.72 | 7.6545611 | -3.99E-02 | 954631    | 954754    | NC_000001.10 |
| cg20227763 | 3.02E-07 | 3.86E-08 | -5.72 | 7.6543771 | -3.17E-02 | 151763931 | 151764054 | NC_000001.10 |
| cg05798972 | 3.02E-07 | 3.86E-08 | -5.72 | 7.653815  | -1.95E-02 | 37607105  | 37607228  | NC_000017.10 |
| cg04752812 | 3.03E-07 | 3.87E-08 | -5.72 | 7.6510888 | -7.43E-02 | 90014316  | 90014439  | NC_000016.9  |
| cg20886263 | 3.03E-07 | 3.87E-08 | -5.72 | 7.650951  | -3.94E-02 | 53196104  | 53196227  | NC_000003.11 |
| cg07372034 | 3.03E-07 | 3.87E-08 | -5.72 | 7.6506478 | -1.16E-01 | 48486164  | 48486287  | NC_000022.10 |
| cg03677924 | 3.03E-07 | 3.88E-08 | -5.72 | 7.6504389 | -8.61E-02 | 56849618  | 56849741  | NC_000012.11 |
| cg17471102 | 3.03E-07 | 3.88E-08 | -5.72 | 7.6499816 | -7.91E-02 | 5851255   | 5851378   | NC_000019.9  |
| cg03564754 | 3.03E-07 | 3.88E-08 | -5.72 | 7.6496325 | -1.15E-01 | 131580109 | 131580232 | NC_000009.11 |
| cg01811559 | 3.04E-07 | 3.88E-08 | -5.72 | 7.649182  | -8.14E-02 | 42051120  | 42051243  | NC_000003.11 |
| cg07119168 | 3.04E-07 | 3.88E-08 | -5.72 | 7.6488912 | -8.98E-02 | 65225253  | 65225376  | NC_000014.8  |
| cg09857149 | 3.04E-07 | 3.88E-08 | -5.72 | 7.6487553 | -3.89E-02 | 37178105  | 37178228  | NC_000019.9  |
| cg24506394 | 3.04E-07 | 3.88E-08 | -5.72 | 7.6487406 | -6.45E-02 | 246135274 | 246135397 | NC_000001.10 |
| cg04120686 | 3.04E-07 | 3.88E-08 | -5.72 | 7.6483493 | -1.08E-01 | 169384410 | 169384533 | NC_000003.11 |
| cg20023578 | 3.04E-07 | 3.89E-08 | -5.72 | 7.6476228 | -4.50E-02 | 114709626 | 114709749 | NC_000010.10 |
| cg06102153 | 3.04E-07 | 3.89E-08 | -5.72 | 7.6472675 | -2.15E-02 | 4674926   | 4675049   | NC_000016.9  |

|               |          |          |       |           |           |           |           |              |
|---------------|----------|----------|-------|-----------|-----------|-----------|-----------|--------------|
| cg04177244    | 3.04E-07 | 3.89E-08 | -5.72 | 7.646521  | -5.86E-02 | 72973894  | 72974017  | NC_000010.10 |
| cg07866476    | 3.04E-07 | 3.89E-08 | -5.72 | 7.6463635 | -6.55E-02 | 67064157  | 67064280  | NC_000016.9  |
| cg00114478    | 3.04E-07 | 3.89E-08 | -5.72 | 7.6463528 | -8.17E-02 | 73658110  | 73658233  | NC_000008.10 |
| cg04010248    | 3.04E-07 | 3.89E-08 | -5.72 | 7.6459263 | -8.87E-02 | 242814898 | 242815021 | NC_000002.11 |
| cg13412283    | 3.04E-07 | 3.89E-08 | -5.72 | 7.645702  | -1.02E-01 | 65280     | 65403     | NC_000007.13 |
| cg22904096    | 3.04E-07 | 3.89E-08 | -5.72 | 7.6456334 | -1.32E-01 | 211180386 | 211180509 | NC_000002.11 |
| cg00031896    | 3.05E-07 | 3.90E-08 | -5.72 | 7.6454134 | -5.92E-02 | 122020205 | 122020328 | NC_000012.11 |
| cg07518576    | 3.05E-07 | 3.90E-08 | -5.72 | 7.6453429 | -4.46E-02 | 27806426  | 27806549  | NC_000002.11 |
| cg02990302    | 3.05E-07 | 3.90E-08 | -5.72 | 7.6444183 | -8.32E-02 | 58155189  | 58155312  | NC_000016.9  |
| cg01141721    | 3.05E-07 | 3.90E-08 | -5.72 | 7.6443806 | -1.16E-01 | 36010619  | 36010742  | NC_000020.10 |
| cg05403316    | 3.05E-07 | 3.90E-08 | -5.72 | 7.6438961 | -1.15E-01 | 55339939  | 55340062  | NC_000002.11 |
| cg17265788    | 3.05E-07 | 3.90E-08 | -5.72 | 7.6433349 | -3.19E-02 | 26785834  | 26785957  | NC_000002.11 |
| cg22101141    | 3.05E-07 | 3.91E-08 | -5.72 | 7.6421143 | -2.83E-02 | 39425191  | 39425314  | NC_000005.9  |
| cg23269663    | 3.06E-07 | 3.91E-08 | -5.72 | 7.6419343 | -2.44E-02 | 45250480  | 45250603  | NC_000019.9  |
| cg02333555    | 3.06E-07 | 3.91E-08 | -5.72 | 7.6415477 | -8.70E-02 | 35099662  | 35099785  | NC_000014.8  |
| ch.8.2087691R | 3.06E-07 | 3.91E-08 | -5.72 | 7.6414696 | -3.50E-02 | 103313232 | 103313355 | NC_000008.10 |
| cg23360967    | 3.06E-07 | 3.91E-08 | -5.72 | 7.6408457 | -6.72E-02 | 11210562  | 11210685  | NC_000006.11 |
| cg21870321    | 3.06E-07 | 3.91E-08 | -5.72 | 7.6406505 | -4.03E-02 | 4701482   | 4701605   | NC_000020.10 |
| cg13185188    | 3.06E-07 | 3.92E-08 | -5.72 | 7.6403904 | -8.10E-02 | 100680334 | 100680457 | NC_000014.8  |
| cg27246744    | 3.06E-07 | 3.92E-08 | -5.72 | 7.6390036 | -5.38E-02 | 31746590  | 31746713  | NC_000003.11 |
| cg17825194    | 3.07E-07 | 3.93E-08 | -5.72 | 7.6371474 | -1.07E-01 | 124864681 | 124864804 | NC_000012.11 |
| cg22833292    | 3.07E-07 | 3.93E-08 | -5.72 | 7.6366249 | -1.68E-02 | 64126806  | 64126929  | NC_000011.9  |
| cg24139169    | 3.07E-07 | 3.93E-08 | -5.72 | 7.6359536 | -3.33E-02 | 111807696 | 111807819 | NC_000011.9  |
| cg26516710    | 3.07E-07 | 3.94E-08 | -5.72 | 7.6354146 | -1.05E-01 | 2569911   | 2570034   | NC_000016.9  |
| cg09100593    | 3.07E-07 | 3.94E-08 | -5.72 | 7.6352014 | -1.18E-01 | 160122503 | 160122626 | NC_000003.11 |

|               |          |          |       |           |           |           |           |              |
|---------------|----------|----------|-------|-----------|-----------|-----------|-----------|--------------|
| cg08682036    | 3.08E-07 | 3.94E-08 | -5.72 | 7.6345823 | -1.26E-01 | 43898033  | 43898156  | NC_000010.10 |
| cg16841748    | 3.08E-07 | 3.94E-08 | -5.72 | 7.6341186 | -1.04E-01 | 142710298 | 142710421 | NC_000008.10 |
| ch.2.1580620R | 3.08E-07 | 3.94E-08 | -5.72 | 7.6334922 | -4.55E-02 | 69966976  | 69967099  | NC_000002.11 |
| cg03514977    | 3.08E-07 | 3.94E-08 | -5.72 | 7.6332606 | -7.88E-02 | 4313709   | 4313832   | NC_000016.9  |
| cg05223441    | 3.08E-07 | 3.95E-08 | -5.72 | 7.633087  | -1.22E-01 | 43818920  | 43819043  | NC_000006.11 |
| cg06161375    | 3.08E-07 | 3.95E-08 | -5.72 | 7.632628  | -1.06E-01 | 26394593  | 26394716  | NC_000001.10 |
| cg12556608    | 3.09E-07 | 3.95E-08 | -5.72 | 7.6310785 | -5.06E-02 | 66057450  | 66057573  | NC_000007.13 |
| cg11185904    | 3.09E-07 | 3.96E-08 | -5.72 | 7.6286897 | -1.00E-01 | 115756754 | 115756877 | NC_000011.9  |
| cg10959672    | 3.10E-07 | 3.97E-08 | -5.72 | 7.628132  | -1.16E-01 | 35972127  | 35972250  | NC_000001.10 |
| cg12909921    | 3.10E-07 | 3.97E-08 | -5.72 | 7.6276659 | -3.99E-02 | 37558512  | 37558635  | NC_000017.10 |
| cg20289609    | 3.10E-07 | 3.97E-08 | -5.72 | 7.6271879 | -7.44E-02 | 156051792 | 156051915 | NC_000001.10 |
| cg25306875    | 3.10E-07 | 3.97E-08 | -5.72 | 7.627185  | -4.15E-02 | 121372101 | 121372224 | NC_000002.11 |
| cg11754778    | 3.10E-07 | 3.98E-08 | -5.72 | 7.6257248 | -1.54E-01 | 85516568  | 85516691  | NC_000001.10 |
| cg21206770    | 3.10E-07 | 3.98E-08 | -5.72 | 7.625619  | -7.19E-02 | 40203334  | 40203457  | NC_000001.10 |
| cg16971128    | 3.10E-07 | 3.98E-08 | -5.72 | 7.6255528 | -1.24E-01 | 37499859  | 37499982  | NC_000022.10 |
| cg15660498    | 3.10E-07 | 3.98E-08 | -5.72 | 7.6252763 | -8.12E-02 | 36249933  | 36250056  | NC_000019.9  |
| cg06480496    | 3.11E-07 | 3.98E-08 | -5.72 | 7.6248051 | -5.41E-02 | 31430675  | 31430798  | NC_000006.11 |
| cg08738280    | 3.11E-07 | 3.98E-08 | -5.72 | 7.6247911 | -9.98E-02 | 168197198 | 168197321 | NC_000001.10 |
| cg18332838    | 3.11E-07 | 3.99E-08 | -5.72 | 7.6224932 | -1.60E-01 | 126698738 | 126698861 | NC_000008.10 |
| cg05369942    | 3.11E-07 | 3.99E-08 | -5.72 | 7.6222694 | -1.25E-01 | 142228617 | 142228740 | NC_000004.11 |
| cg04992282    | 3.11E-07 | 3.99E-08 | -5.72 | 7.622087  | -5.18E-02 | 154580118 | 154580241 | NC_000001.10 |
| cg02061553    | 3.11E-07 | 3.99E-08 | -5.72 | 7.6219096 | -6.55E-02 | 3370110   | 3370233   | NC_000001.10 |
| cg06014092    | 3.12E-07 | 3.99E-08 | -5.72 | 7.6209411 | -1.08E-01 | 77924281  | 77924404  | NC_000015.9  |
| cg00003345    | 3.12E-07 | 4.00E-08 | -5.72 | 7.6207828 | -6.74E-02 | 10816499  | 10816622  | NC_000001.10 |
| cg09848114    | 3.12E-07 | 4.00E-08 | -5.72 | 7.6197593 | -1.26E-01 | 30130698  | 30130821  | NC_000006.11 |

|               |          |          |       |           |           |           |           |              |
|---------------|----------|----------|-------|-----------|-----------|-----------|-----------|--------------|
| cg04395006    | 3.12E-07 | 4.00E-08 | -5.72 | 7.6196608 | -4.25E-02 | 4436902   | 4437025   | NC_000016.9  |
| cg21348173    | 3.12E-07 | 4.00E-08 | -5.72 | 7.6195759 | -1.04E-01 | 42059636  | 42059759  | NC_000017.10 |
| cg02835343    | 3.12E-07 | 4.00E-08 | -5.72 | 7.6193014 | -6.87E-02 | 26436718  | 26436841  | NC_000008.10 |
| cg14093792    | 3.13E-07 | 4.01E-08 | -5.72 | 7.6180988 | -8.58E-02 | 322888    | 323011    | NC_000012.11 |
| cg16597717    | 3.13E-07 | 4.01E-08 | -5.72 | 7.6180582 | -1.34E-02 | 89770685  | 89770808  | NC_000005.9  |
| cg22862208    | 3.13E-07 | 4.01E-08 | -5.72 | 7.6179402 | -1.08E-01 | 121857749 | 121857872 | NC_000010.10 |
| cg08880153    | 3.13E-07 | 4.01E-08 | -5.72 | 7.6162073 | -7.16E-02 | 43808806  | 43808929  | NC_000015.9  |
| ch.7.1269058F | 3.13E-07 | 4.01E-08 | -5.72 | 7.616155  | -4.86E-02 | 55368888  | 55369011  | NC_000007.13 |
| cg16054502    | 3.14E-07 | 4.02E-08 | -5.72 | 7.6147786 | -1.28E-01 | 22224163  | 22224286  | NC_000001.10 |
| cg22695084    | 3.14E-07 | 4.02E-08 | -5.72 | 7.6147243 | -9.15E-02 | 155971174 | 155971297 | NC_000007.13 |
| ch.14.561430R | 3.14E-07 | 4.02E-08 | -5.72 | 7.614689  | -3.22E-02 | 50760071  | 50760194  | NC_000014.8  |
| cg01148741    | 3.14E-07 | 4.02E-08 | -5.72 | 7.6139667 | -9.59E-02 | 96811453  | 96811576  | NC_000002.11 |
| cg01843367    | 3.14E-07 | 4.03E-08 | -5.72 | 7.6130372 | -2.82E-02 | 155589075 | 155589198 | NC_000003.11 |
| cg18055230    | 3.15E-07 | 4.04E-08 | -5.72 | 7.6107938 | -3.78E-02 | 16296654  | 16296777  | NC_000019.9  |
| cg00731458    | 3.15E-07 | 4.04E-08 | -5.72 | 7.6103372 | -1.19E-01 | 71463001  | 71463124  | NC_000016.9  |
| cg22697657    | 3.15E-07 | 4.04E-08 | -5.72 | 7.6098581 | -2.69E-02 | 3542188   | 3542311   | NC_000001.10 |
| cg01160394    | 3.15E-07 | 4.04E-08 | -5.72 | 7.6092508 | -5.05E-02 | 69951720  | 69951843  | NC_000014.8  |
| cg13348574    | 3.15E-07 | 4.04E-08 | -5.72 | 7.6091437 | -1.12E-01 | 207478    | 207601    | NC_000017.10 |
| cg05476231    | 3.15E-07 | 4.04E-08 | -5.72 | 7.6089471 | -1.81E-02 | 26055835  | 26055958  | NC_000006.11 |
| cg16441919    | 3.15E-07 | 4.05E-08 | -5.72 | 7.6086683 | -1.13E-01 | 1094029   | 1094152   | NC_000017.10 |
| cg15444597    | 3.15E-07 | 4.05E-08 | -5.72 | 7.6085692 | -1.14E-01 | 103881107 | 103881230 | NC_000010.10 |
| cg19463193    | 3.15E-07 | 4.05E-08 | -5.72 | 7.6083525 | -1.54E-01 | 68564546  | 68564669  | NC_000015.9  |
| cg01854491    | 3.16E-07 | 4.06E-08 | -5.71 | 7.6051179 | -9.42E-02 | 144815021 | 144815144 | NC_000008.10 |
| cg07005242    | 3.17E-07 | 4.06E-08 | -5.71 | 7.604836  | -9.00E-02 | 30431577  | 30431700  | NC_000006.11 |
| cg04261607    | 3.17E-07 | 4.06E-08 | -5.71 | 7.6040873 | -7.17E-02 | 65150871  | 65150994  | NC_000011.9  |

|            |          |          |       |           |           |           |           |              |
|------------|----------|----------|-------|-----------|-----------|-----------|-----------|--------------|
| cg20039048 | 3.17E-07 | 4.07E-08 | -5.71 | 7.6038998 | -8.65E-02 | 8305302   | 8305425   | NC_000011.9  |
| cg22107476 | 3.17E-07 | 4.07E-08 | -5.71 | 7.6037962 | -6.32E-02 | 2442660   | 2442783   | NC_000007.13 |
| cg12458039 | 3.17E-07 | 4.07E-08 | -5.71 | 7.6022195 | -8.23E-02 | 210075    | 210198    | NC_000007.13 |
| cg16427321 | 3.18E-07 | 4.08E-08 | -5.71 | 7.6013619 | -5.22E-02 | 10917344  | 10917467  | NC_000001.10 |
| cg07540652 | 3.18E-07 | 4.08E-08 | -5.71 | 7.6012935 | -1.00E-01 | 81805956  | 81806079  | NC_000008.10 |
| cg11747499 | 3.18E-07 | 4.08E-08 | -5.71 | 7.6008903 | -9.21E-02 | 109252653 | 109252776 | NC_000012.11 |
| cg04529538 | 3.18E-07 | 4.08E-08 | -5.71 | 7.6002698 | -5.66E-02 | 5871276   | 5871399   | NC_000019.9  |
| cg22813622 | 3.18E-07 | 4.08E-08 | -5.71 | 7.6000213 | -6.88E-02 | 89786761  | 89786884  | NC_000015.9  |
| cg14496346 | 3.18E-07 | 4.08E-08 | -5.71 | 7.5994402 | -2.71E-02 | 134422108 | 134422231 | NC_000009.11 |
| cg26543150 | 3.18E-07 | 4.08E-08 | -5.71 | 7.5993211 | -1.38E-01 | 91043813  | 91043936  | NC_000010.10 |
| cg13463208 | 3.19E-07 | 4.09E-08 | -5.71 | 7.5983495 | -1.41E-02 | 39872401  | 39872524  | NC_000015.9  |
| cg25445707 | 3.19E-07 | 4.09E-08 | -5.71 | 7.5983259 | -8.63E-02 | 46719086  | 46719209  | NC_000003.11 |
| cg04552921 | 3.19E-07 | 4.09E-08 | -5.71 | 7.5978845 | -7.73E-02 | 80262264  | 80262387  | NC_000010.10 |
| cg22705228 | 3.19E-07 | 4.09E-08 | -5.71 | 7.5977598 | -1.75E-02 | 37400926  | 37401049  | NC_000006.11 |
| cg07291005 | 3.19E-07 | 4.09E-08 | -5.71 | 7.5976685 | -2.51E-02 | 24126194  | 24126317  | NC_000001.10 |
| cg02342092 | 3.19E-07 | 4.10E-08 | -5.71 | 7.5968127 | -2.23E-02 | 44314396  | 44314519  | NC_000002.11 |
| cg05424782 | 3.19E-07 | 4.10E-08 | -5.71 | 7.5967875 | -2.97E-02 | 42017079  | 42017202  | NC_000022.10 |
| cg19577080 | 3.19E-07 | 4.10E-08 | -5.71 | 7.5967179 | -1.10E-01 | 143470771 | 143470894 | NC_000004.11 |
| cg03265490 | 3.19E-07 | 4.10E-08 | -5.71 | 7.596446  | -6.41E-02 | 27371840  | 27371963  | NC_000002.11 |
| cg15038241 | 3.19E-07 | 4.10E-08 | -5.71 | 7.5950388 | -2.38E-02 | 48113684  | 48113807  | NC_000019.9  |
| cg05351785 | 3.20E-07 | 4.10E-08 | -5.71 | 7.5949461 | -8.82E-02 | 24733733  | 24733856  | NC_000014.8  |
| cg00439733 | 3.20E-07 | 4.10E-08 | -5.71 | 7.5948824 | -6.30E-02 | 240970175 | 240970298 | NC_000002.11 |
| cg15133201 | 3.20E-07 | 4.11E-08 | -5.71 | 7.5943611 | -1.25E-01 | 248852044 | 248852167 | NC_000001.10 |
| cg24298578 | 3.20E-07 | 4.11E-08 | -5.71 | 7.5930163 | -1.11E-01 | 121843956 | 121844079 | NC_000006.11 |
| cg13290476 | 3.20E-07 | 4.11E-08 | -5.71 | 7.5929343 | -1.02E-01 | 94010601  | 94010724  | NC_000015.9  |



|            |          |          |       |           |           |           |           |              |
|------------|----------|----------|-------|-----------|-----------|-----------|-----------|--------------|
| cg06086316 | 3.20E-07 | 4.11E-08 | -5.71 | 7.5926852 | -1.36E-01 | 48207862  | 48207985  | NC_000012.11 |
| cg12240637 | 3.20E-07 | 4.11E-08 | -5.71 | 7.5922518 | -1.15E-01 | 42146261  | 42146384  | NC_000017.10 |
| cg23107161 | 3.21E-07 | 4.12E-08 | -5.71 | 7.5915017 | -1.03E-01 | 27938371  | 27938494  | NC_000002.11 |
| cg10409919 | 3.21E-07 | 4.12E-08 | -5.71 | 7.5914919 | -8.90E-02 | 53530016  | 53530139  | NC_000003.11 |
| cg10167233 | 3.21E-07 | 4.12E-08 | -5.71 | 7.5910263 | -1.22E-01 | 72004311  | 72004434  | NC_000006.11 |
| cg00726615 | 3.21E-07 | 4.12E-08 | -5.71 | 7.5901372 | -1.61E-01 | 113252640 | 113252763 | NC_000003.11 |
| cg12655416 | 3.21E-07 | 4.12E-08 | -5.71 | 7.5899481 | -9.77E-02 | 38077870  | 38077993  | NC_000017.10 |
| cg09002774 | 3.21E-07 | 4.12E-08 | -5.71 | 7.5899254 | -2.13E-02 | 47785225  | 47785348  | NC_000017.10 |
| cg08288703 | 3.21E-07 | 4.13E-08 | -5.71 | 7.5885355 | -9.61E-02 | 62783482  | 62783605  | NC_000011.9  |
| cg23422170 | 3.21E-07 | 4.13E-08 | -5.71 | 7.5884419 | -1.06E-01 | 10345003  | 10345126  | NC_000002.11 |
| cg06897860 | 3.22E-07 | 4.13E-08 | -5.71 | 7.5877689 | -5.59E-02 | 54965458  | 54965581  | NC_000001.10 |
| cg11932387 | 3.22E-07 | 4.14E-08 | -5.71 | 7.586874  | -2.23E-02 | 99057538  | 99057661  | NC_000008.10 |
| cg03884572 | 3.22E-07 | 4.14E-08 | -5.71 | 7.5866129 | -1.19E-01 | 111521899 | 111522022 | NC_000012.11 |
| cg04026926 | 3.23E-07 | 4.14E-08 | -5.71 | 7.5850963 | -5.31E-02 | 2323395   | 2323518   | NC_000011.9  |
| cg19893494 | 3.23E-07 | 4.15E-08 | -5.71 | 7.5827493 | -1.27E-01 | 126162903 | 126163026 | NC_000008.10 |
| cg15680518 | 3.23E-07 | 4.16E-08 | -5.71 | 7.5824528 | -3.03E-02 | 132414800 | 132414923 | NC_000012.11 |
| cg11194994 | 3.24E-07 | 4.16E-08 | -5.71 | 7.5812699 | -4.52E-02 | 160175974 | 160176097 | NC_000001.10 |
| cg02994288 | 3.24E-07 | 4.16E-08 | -5.71 | 7.5807611 | -3.73E-02 | 128801935 | 128802058 | NC_000004.11 |
| cg25683268 | 3.24E-07 | 4.16E-08 | -5.71 | 7.5806193 | -1.03E-01 | 53809564  | 53809687  | NC_000017.10 |
| cg12729160 | 3.24E-07 | 4.17E-08 | -5.71 | 7.5801485 | -8.11E-02 | 37875985  | 37876108  | NC_000001.10 |
| cg03582286 | 3.24E-07 | 4.17E-08 | -5.71 | 7.5800041 | -3.48E-02 | 71571171  | 71571294  | NC_000004.11 |
| cg26403608 | 3.25E-07 | 4.17E-08 | -5.71 | 7.5783262 | -8.13E-02 | 2319719   | 2319842   | NC_000017.10 |
| cg24387542 | 3.25E-07 | 4.17E-08 | -5.71 | 7.5779948 | -7.59E-02 | 20370597  | 20370720  | NC_000017.10 |
| cg21733013 | 3.25E-07 | 4.18E-08 | -5.71 | 7.5772377 | -8.75E-02 | 22359568  | 22359691  | NC_000007.13 |
| cg13228642 | 3.25E-07 | 4.18E-08 | -5.71 | 7.5765304 | -8.96E-02 | 181057360 | 181057483 | NC_000001.10 |

|            |          |          |       |           |           |           |           |              |
|------------|----------|----------|-------|-----------|-----------|-----------|-----------|--------------|
| cg02631199 | 3.25E-07 | 4.18E-08 | -5.71 | 7.5763899 | -4.99E-02 | 50502411  | 50502534  | NC_000016.9  |
| cg06437747 | 3.25E-07 | 4.18E-08 | -5.71 | 7.5762664 | -1.03E-01 | 2890836   | 2890959   | NC_000001.10 |
| cg01023672 | 3.25E-07 | 4.18E-08 | -5.71 | 7.5758095 | -1.05E-01 | 47477223  | 47477346  | NC_000012.11 |
| cg13292777 | 3.25E-07 | 4.18E-08 | -5.71 | 7.5757049 | -6.81E-02 | 34196220  | 34196343  | NC_000011.9  |
| cg04002486 | 3.25E-07 | 4.18E-08 | -5.71 | 7.575697  | -6.91E-02 | 1162736   | 1162859   | NC_000016.9  |
| cg20874811 | 3.25E-07 | 4.19E-08 | -5.71 | 7.5755773 | -1.81E-02 | 54991629  | 54991752  | NC_000017.10 |
| cg09671951 | 3.26E-07 | 4.19E-08 | -5.71 | 7.5748901 | -1.41E-01 | 104556332 | 104556455 | NC_000010.10 |
| cg14463304 | 3.26E-07 | 4.19E-08 | -5.71 | 7.5745218 | -7.89E-02 | 12965884  | 12966007  | NC_000012.11 |
| cg15131258 | 3.26E-07 | 4.19E-08 | -5.71 | 7.5739641 | -1.06E-01 | 31805182  | 31805305  | NC_000020.10 |
| cg03193299 | 3.26E-07 | 4.20E-08 | -5.71 | 7.5730918 | -7.26E-02 | 1167239   | 1167362   | NC_000004.11 |
| cg10070101 | 3.26E-07 | 4.20E-08 | -5.71 | 7.5730035 | -9.60E-02 | 78963290  | 78963413  | NC_000017.10 |
| cg19932515 | 3.26E-07 | 4.20E-08 | -5.71 | 7.5727984 | -1.02E-01 | 98326480  | 98326603  | NC_000002.11 |
| cg13849253 | 3.26E-07 | 4.20E-08 | -5.71 | 7.5724332 | -1.22E-01 | 35676166  | 35676289  | NC_000009.11 |
| cg11893552 | 3.26E-07 | 4.20E-08 | -5.71 | 7.5723429 | -8.84E-02 | 168045268 | 168045391 | NC_000006.11 |
| cg19399885 | 3.27E-07 | 4.20E-08 | -5.71 | 7.5715568 | -1.06E-01 | 110373776 | 110373899 | NC_000002.11 |
| cg07848310 | 3.27E-07 | 4.20E-08 | -5.71 | 7.5715017 | -3.91E-02 | 43603786  | 43603909  | NC_000005.9  |
| cg08940762 | 3.27E-07 | 4.20E-08 | -5.71 | 7.5710364 | -2.61E-02 | 233415810 | 233415933 | NC_000002.11 |
| cg10573553 | 3.27E-07 | 4.21E-08 | -5.71 | 7.5704768 | -8.80E-02 | 47918580  | 47918703  | NC_000021.8  |
| cg00817189 | 3.27E-07 | 4.21E-08 | -5.71 | 7.5699786 | -6.91E-02 | 4250606   | 4250729   | NC_000004.11 |
| cg01993552 | 3.27E-07 | 4.21E-08 | -5.71 | 7.5697407 | -1.37E-01 | 46584209  | 46584332  | NC_000019.9  |
| cg23649140 | 3.27E-07 | 4.21E-08 | -5.71 | 7.5693807 | -8.65E-02 | 37661612  | 37661735  | NC_000008.10 |
| cg12774429 | 3.28E-07 | 4.22E-08 | -5.71 | 7.5685634 | -1.14E-01 | 21853470  | 21853593  | NC_000014.8  |
| cg23360101 | 3.28E-07 | 4.22E-08 | -5.71 | 7.5684762 | -1.05E-01 | 858591    | 858714    | NC_000008.10 |
| cg27050229 | 3.28E-07 | 4.22E-08 | -5.71 | 7.5674404 | -1.74E-02 | 856693    | 856816    | NC_000001.10 |
| cg02301019 | 3.28E-07 | 4.22E-08 | -5.71 | 7.567084  | -9.76E-02 | 85465191  | 85465314  | NC_000016.9  |

|               |          |          |       |           |           |           |           |              |
|---------------|----------|----------|-------|-----------|-----------|-----------|-----------|--------------|
| cg18928221    | 3.28E-07 | 4.23E-08 | -5.71 | 7.5663565 | -1.25E-01 | 93759099  | 93759222  | NC_000007.13 |
| ch.1.4544771F | 3.29E-07 | 4.23E-08 | -5.71 | 7.5656694 | -3.09E-02 | 230992415 | 230992538 | NC_000001.10 |
| cg11179625    | 3.29E-07 | 4.23E-08 | -5.71 | 7.5651611 | -1.13E-01 | 61522741  | 61522864  | NC_000011.9  |
| cg02008544    | 3.29E-07 | 4.23E-08 | -5.71 | 7.564341  | -4.67E-02 | 22926600  | 22926723  | NC_000008.10 |
| cg16723716    | 3.29E-07 | 4.24E-08 | -5.71 | 7.5638229 | -1.07E-01 | 125149524 | 125149647 | NC_000012.11 |
| cg02365539    | 3.29E-07 | 4.24E-08 | -5.71 | 7.5638221 | -8.37E-02 | 2136919   | 2137042   | NC_000007.13 |
| cg21870662    | 3.30E-07 | 4.24E-08 | -5.71 | 7.5624828 | -6.30E-02 | 2241570   | 2241693   | NC_000017.10 |
| cg16831461    | 3.30E-07 | 4.25E-08 | -5.71 | 7.5607716 | -1.75E-02 | 50470026  | 50470149  | NC_000014.8  |
| cg11595454    | 3.30E-07 | 4.25E-08 | -5.71 | 7.5602725 | -8.00E-02 | 99995398  | 99995521  | NC_000007.13 |
| cg24550933    | 3.31E-07 | 4.26E-08 | -5.71 | 7.5593855 | -9.81E-02 | 111932556 | 111932679 | NC_000001.10 |
| cg08155741    | 3.31E-07 | 4.26E-08 | -5.71 | 7.5592419 | -6.00E-02 | 63994308  | 63994431  | NC_000011.9  |
| cg24688854    | 3.31E-07 | 4.26E-08 | -5.71 | 7.5590726 | -8.17E-02 | 32376815  | 32376938  | NC_000020.10 |
| cg11879577    | 3.31E-07 | 4.26E-08 | -5.7  | 7.5582228 | -6.28E-02 | 18813519  | 18813642  | NC_000016.9  |
| cg17783031    | 3.31E-07 | 4.26E-08 | -5.7  | 7.5572893 | -1.86E-02 | 48673137  | 48673260  | NC_000003.11 |
| cg18410685    | 3.31E-07 | 4.27E-08 | -5.7  | 7.5570435 | -1.26E-01 | 34838703  | 34838826  | NC_000014.8  |
| cg22848779    | 3.31E-07 | 4.27E-08 | -5.7  | 7.5567762 | -3.58E-02 | 103997452 | 103997575 | NC_000004.11 |
| cg22692964    | 3.31E-07 | 4.27E-08 | -5.7  | 7.556551  | -3.07E-02 | 19262062  | 19262185  | NC_000011.9  |
| cg10775991    | 3.31E-07 | 4.27E-08 | -5.7  | 7.5564789 | -7.88E-02 | 21905945  | 21906068  | NC_000014.8  |
| cg07267294    | 3.31E-07 | 4.27E-08 | -5.7  | 7.5563639 | -1.04E-01 | 58893722  | 58893845  | NC_000005.9  |
| ch.1.3307476R | 3.31E-07 | 4.27E-08 | -5.7  | 7.5563347 | -1.38E-02 | 169082848 | 169082971 | NC_000001.10 |
| cg16263848    | 3.32E-07 | 4.27E-08 | -5.7  | 7.5553018 | -1.00E-01 | 9018806   | 9018929   | NC_000017.10 |
| cg08872742    | 3.32E-07 | 4.28E-08 | -5.7  | 7.5541556 | -1.01E-01 | 66400320  | 66400443  | NC_000016.9  |
| cg16809806    | 3.32E-07 | 4.28E-08 | -5.7  | 7.5532537 | -4.25E-02 | 86708298  | 86708421  | NC_000004.11 |
| cg04461802    | 3.33E-07 | 4.29E-08 | -5.7  | 7.5526038 | -5.40E-02 | 142623433 | 142623556 | NC_000006.11 |
| cg17511741    | 3.33E-07 | 4.29E-08 | -5.7  | 7.5521365 | -6.53E-02 | 51039434  | 51039557  | NC_000022.10 |

|            |          |          |      |           |           |           |           |              |
|------------|----------|----------|------|-----------|-----------|-----------|-----------|--------------|
| cg25235068 | 3.33E-07 | 4.29E-08 | -5.7 | 7.5513752 | -9.81E-02 | 21642319  | 21642442  | NC_000008.10 |
| cg11867012 | 3.33E-07 | 4.29E-08 | -5.7 | 7.5513517 | -5.66E-02 | 42364667  | 42364790  | NC_000019.9  |
| cg24126941 | 3.33E-07 | 4.29E-08 | -5.7 | 7.5506408 | -1.11E-01 | 38068553  | 38068676  | NC_000014.8  |
| cg16075951 | 3.33E-07 | 4.29E-08 | -5.7 | 7.5504248 | -2.85E-02 | 24899050  | 24899173  | NC_000014.8  |
| cg00067824 | 3.33E-07 | 4.30E-08 | -5.7 | 7.5501808 | -1.19E-01 | 23492914  | 23493037  | NC_000010.10 |
| cg26338757 | 3.34E-07 | 4.30E-08 | -5.7 | 7.5491197 | -6.38E-02 | 88428295  | 88428418  | NC_000010.10 |
| cg10447615 | 3.34E-07 | 4.30E-08 | -5.7 | 7.5490497 | -7.88E-02 | 109506805 | 109506928 | NC_000001.10 |
| cg15544650 | 3.34E-07 | 4.30E-08 | -5.7 | 7.5486445 | -2.76E-02 | 224544612 | 224544735 | NC_000001.10 |
| cg16974832 | 3.34E-07 | 4.30E-08 | -5.7 | 7.5485713 | -1.38E-01 | 238188707 | 238188830 | NC_000002.11 |
| cg21201924 | 3.34E-07 | 4.30E-08 | -5.7 | 7.548271  | -9.09E-02 | 137251825 | 137251948 | NC_000009.11 |
| cg12345593 | 3.34E-07 | 4.31E-08 | -5.7 | 7.5481326 | -1.57E-02 | 51975989  | 51976112  | NC_000003.11 |
| cg24757978 | 3.34E-07 | 4.31E-08 | -5.7 | 7.5470629 | -1.17E-01 | 69003455  | 69003578  | NC_000003.11 |
| cg05202136 | 3.35E-07 | 4.31E-08 | -5.7 | 7.546422  | -9.04E-02 | 3250845   | 3250968   | NC_000004.11 |
| cg13896748 | 3.35E-07 | 4.32E-08 | -5.7 | 7.545501  | -5.56E-02 | 30872987  | 30873110  | NC_000010.10 |
| cg07890553 | 3.35E-07 | 4.32E-08 | -5.7 | 7.5444422 | -1.19E-01 | 119182858 | 119182981 | NC_000003.11 |
| cg00084094 | 3.35E-07 | 4.32E-08 | -5.7 | 7.5442365 | -1.02E-01 | 109096204 | 109096327 | NC_000012.11 |
| cg00061520 | 3.35E-07 | 4.32E-08 | -5.7 | 7.5440376 | -1.31E-01 | 4070371   | 4070494   | NC_000016.9  |
| cg20805475 | 3.36E-07 | 4.33E-08 | -5.7 | 7.541527  | -1.11E-01 | 42763815  | 42763938  | NC_000022.10 |
| cg23720929 | 3.36E-07 | 4.33E-08 | -5.7 | 7.5414624 | -1.29E-01 | 195310887 | 195311010 | NC_000003.11 |
| cg08198228 | 3.36E-07 | 4.33E-08 | -5.7 | 7.5414021 | -1.08E-01 | 109788583 | 109788706 | NC_000002.11 |
| cg16141378 | 3.36E-07 | 4.34E-08 | -5.7 | 7.541315  | -2.28E-02 | 129829833 | 129829956 | NC_000003.11 |
| cg12391048 | 3.36E-07 | 4.34E-08 | -5.7 | 7.5407563 | -1.04E-01 | 2770336   | 2770459   | NC_000016.9  |
| cg05708544 | 3.36E-07 | 4.34E-08 | -5.7 | 7.5407008 | -2.19E-02 | 23745076  | 23745199  | NC_000022.10 |
| cg18006328 | 3.37E-07 | 4.34E-08 | -5.7 | 7.540434  | -5.58E-02 | 121499577 | 121499700 | NC_000002.11 |
| cg10135178 | 3.37E-07 | 4.34E-08 | -5.7 | 7.540349  | -6.45E-02 | 28834933  | 28835056  | NC_000015.9  |

|                |          |          |      |           |           |           |           |              |
|----------------|----------|----------|------|-----------|-----------|-----------|-----------|--------------|
| cg12169927     | 3.37E-07 | 4.34E-08 | -5.7 | 7.5403384 | -4.88E-02 | 124120882 | 124121005 | NC_000007.13 |
| cg06178669     | 3.37E-07 | 4.34E-08 | -5.7 | 7.5400566 | -1.01E-01 | 63334608  | 63334731  | NC_000011.9  |
| cg04211309     | 3.37E-07 | 4.34E-08 | -5.7 | 7.54002   | -1.02E-01 | 58056296  | 58056419  | NC_000016.9  |
| cg04104789     | 3.37E-07 | 4.34E-08 | -5.7 | 7.5398018 | -1.09E-01 | 24778439  | 24778562  | NC_000015.9  |
| cg15924259     | 3.37E-07 | 4.34E-08 | -5.7 | 7.5392122 | -2.01E-02 | 9687259   | 9687382   | NC_000001.10 |
| cg20467658     | 3.37E-07 | 4.34E-08 | -5.7 | 7.5391649 | -9.92E-02 | 89933347  | 89933470  | NC_000015.9  |
| cg17051704     | 3.37E-07 | 4.35E-08 | -5.7 | 7.5391146 | -1.46E-01 | 29424197  | 29424320  | NC_000015.9  |
| cg07548791     | 3.37E-07 | 4.35E-08 | -5.7 | 7.5383264 | -9.14E-02 | 86012053  | 86012176  | NC_000016.9  |
| cg09766710     | 3.37E-07 | 4.35E-08 | -5.7 | 7.5380202 | -1.13E-01 | 247767976 | 247768099 | NC_000001.10 |
| cg14750367     | 3.37E-07 | 4.35E-08 | -5.7 | 7.5377771 | -1.25E-01 | 105257227 | 105257350 | NC_000008.10 |
| cg10021749     | 3.38E-07 | 4.36E-08 | -5.7 | 7.5355784 | -8.60E-02 | 2557358   | 2557481   | NC_000007.13 |
| cg21674010     | 3.38E-07 | 4.36E-08 | -5.7 | 7.5351182 | -1.04E-01 | 58844583  | 58844706  | NC_000015.9  |
| cg03449406     | 3.39E-07 | 4.37E-08 | -5.7 | 7.5344196 | -2.82E-02 | 35183687  | 35183810  | NC_000014.8  |
| cg27001534     | 3.39E-07 | 4.38E-08 | -5.7 | 7.5322913 | -4.36E-02 | 443220    | 443343    | NC_000005.9  |
| cg11411220     | 3.39E-07 | 4.38E-08 | -5.7 | 7.5319674 | -9.52E-02 | 35630062  | 35630185  | NC_000010.10 |
| cg13021192     | 3.39E-07 | 4.38E-08 | -5.7 | 7.5318306 | -8.11E-02 | 57582213  | 57582336  | NC_000020.10 |
| cg17279789     | 3.40E-07 | 4.38E-08 | -5.7 | 7.5303564 | -3.14E-02 | 53828267  | 53828390  | NC_000017.10 |
| cg06402590     | 3.40E-07 | 4.39E-08 | -5.7 | 7.5291756 | -1.06E-01 | 2820155   | 2820278   | NC_000016.9  |
| cg04149179     | 3.40E-07 | 4.39E-08 | -5.7 | 7.5290021 | -8.09E-02 | 97149537  | 97149660  | NC_000010.10 |
| cg27651070     | 3.40E-07 | 4.39E-08 | -5.7 | 7.5287824 | -9.00E-02 | 46391669  | 46391792  | NC_000011.9  |
| ch.8.72742858R | 3.40E-07 | 4.39E-08 | -5.7 | 7.5285687 | -3.47E-02 | 72580304  | 72580427  | NC_000008.10 |
| cg11155687     | 3.41E-07 | 4.39E-08 | -5.7 | 7.5281286 | -1.02E-01 | 63025589  | 63025712  | NC_000012.11 |
| cg26561631     | 3.41E-07 | 4.40E-08 | -5.7 | 7.5278573 | -1.29E-01 | 99966833  | 99966956  | NC_000015.9  |
| cg00029831     | 3.41E-07 | 4.40E-08 | -5.7 | 7.5271674 | -1.80E-02 | 145653349 | 145653472 | NC_000008.10 |
| cg21318380     | 3.41E-07 | 4.40E-08 | -5.7 | 7.5269662 | -1.02E-01 | 49620366  | 49620489  | NC_000020.10 |

|            |          |          |      |           |           |           |           |              |
|------------|----------|----------|------|-----------|-----------|-----------|-----------|--------------|
| cg27194164 | 3.41E-07 | 4.40E-08 | -5.7 | 7.5268802 | -2.17E-02 | 17666205  | 17666328  | NC_000019.9  |
| cg14824670 | 3.41E-07 | 4.40E-08 | -5.7 | 7.526272  | -5.77E-02 | 100492175 | 100492298 | NC_000007.13 |
| cg03702919 | 3.41E-07 | 4.41E-08 | -5.7 | 7.5254698 | -7.49E-02 | 21832208  | 21832331  | NC_000016.9  |
| cg01141645 | 3.42E-07 | 4.41E-08 | -5.7 | 7.5248876 | -1.14E-01 | 62627837  | 62627960  | NC_000008.10 |
| cg14943722 | 3.42E-07 | 4.41E-08 | -5.7 | 7.5246048 | -1.14E-01 | 50341009  | 50341132  | NC_000003.11 |
| cg12664770 | 3.42E-07 | 4.41E-08 | -5.7 | 7.5239504 | -1.03E-01 | 14642025  | 14642148  | NC_000003.11 |
| cg09998189 | 3.42E-07 | 4.41E-08 | -5.7 | 7.5237381 | -1.02E-01 | 70348104  | 70348227  | NC_000014.8  |
| cg09158826 | 3.42E-07 | 4.42E-08 | -5.7 | 7.5235566 | -4.22E-02 | 67194232  | 67194355  | NC_000016.9  |
| cg15962547 | 3.42E-07 | 4.42E-08 | -5.7 | 7.5232293 | -7.84E-02 | 204183337 | 204183460 | NC_000001.10 |
| cg20386580 | 3.42E-07 | 4.42E-08 | -5.7 | 7.522906  | -7.31E-02 | 105344807 | 105344930 | NC_000010.10 |
| cg18427856 | 3.42E-07 | 4.42E-08 | -5.7 | 7.5227706 | -1.82E-01 | 30652647  | 30652770  | NC_000006.11 |
| cg08621441 | 3.42E-07 | 4.42E-08 | -5.7 | 7.5223445 | -6.16E-02 | 1267745   | 1267868   | NC_000001.10 |
| cg27185504 | 3.43E-07 | 4.43E-08 | -5.7 | 7.521167  | -5.57E-02 | 210466211 | 210466334 | NC_000001.10 |
| cg23523129 | 3.43E-07 | 4.43E-08 | -5.7 | 7.5207975 | -1.93E-02 | 11457176  | 11457299  | NC_000019.9  |
| cg21724796 | 3.43E-07 | 4.43E-08 | -5.7 | 7.520508  | -1.33E-02 | 8113904   | 8114027   | NC_000017.10 |
| cg07835270 | 3.43E-07 | 4.43E-08 | -5.7 | 7.5203569 | -9.51E-02 | 56676694  | 56676817  | NC_000016.9  |
| cg25244356 | 3.43E-07 | 4.43E-08 | -5.7 | 7.5203149 | -1.41E-01 | 90042240  | 90042363  | NC_000007.13 |
| cg21593030 | 3.43E-07 | 4.43E-08 | -5.7 | 7.5199627 | -1.98E-01 | 70952175  | 70952298  | NC_000011.9  |
| cg20464368 | 3.43E-07 | 4.43E-08 | -5.7 | 7.5196369 | -5.31E-02 | 236767266 | 236767389 | NC_000001.10 |
| cg24770408 | 3.43E-07 | 4.43E-08 | -5.7 | 7.5193302 | -1.23E-01 | 19777808  | 19777931  | NC_000004.11 |
| cg14959506 | 3.44E-07 | 4.44E-08 | -5.7 | 7.5189393 | -3.21E-02 | 1525533   | 1525656   | NC_000016.9  |
| cg08924374 | 3.44E-07 | 4.44E-08 | -5.7 | 7.5184845 | -2.18E-02 | 133557400 | 133557523 | NC_000009.11 |
| cg06688916 | 3.44E-07 | 4.44E-08 | -5.7 | 7.5183818 | -9.00E-02 | 99595095  | 99595218  | NC_000007.13 |
| cg22235072 | 3.44E-07 | 4.44E-08 | -5.7 | 7.5178263 | -7.95E-02 | 238708555 | 238708678 | NC_000002.11 |
| cg14984341 | 3.44E-07 | 4.44E-08 | -5.7 | 7.5177239 | -8.51E-02 | 97136729  | 97136852  | NC_000002.11 |

|            |          |          |       |           |           |           |           |              |
|------------|----------|----------|-------|-----------|-----------|-----------|-----------|--------------|
| cg05563110 | 3.44E-07 | 4.44E-08 | -5.7  | 7.5169889 | -7.30E-02 | 112838078 | 112838201 | NC_000010.10 |
| cg05952643 | 3.44E-07 | 4.45E-08 | -5.7  | 7.5168311 | -3.71E-02 | 132597404 | 132597527 | NC_000009.11 |
| cg02747901 | 3.45E-07 | 4.45E-08 | -5.7  | 7.5151359 | -9.56E-02 | 157005623 | 157005746 | NC_000005.9  |
| cg17357548 | 3.45E-07 | 4.46E-08 | -5.7  | 7.5142453 | -1.26E-01 | 50429829  | 50429952  | NC_000015.9  |
| cg02059927 | 3.45E-07 | 4.46E-08 | -5.7  | 7.513779  | -1.31E-01 | 74936232  | 74936355  | NC_000002.11 |
| cg07855221 | 3.45E-07 | 4.46E-08 | -5.7  | 7.5135661 | -1.05E-01 | 79877314  | 79877437  | NC_000017.10 |
| cg17757000 | 3.46E-07 | 4.46E-08 | -5.7  | 7.5127812 | -6.80E-02 | 40476423  | 40476546  | NC_000019.9  |
| cg18844118 | 3.46E-07 | 4.47E-08 | -5.7  | 7.5124845 | -8.52E-02 | 26191489  | 26191612  | NC_000007.13 |
| cg13884115 | 3.46E-07 | 4.47E-08 | -5.7  | 7.5124036 | -3.52E-02 | 127534127 | 127534250 | NC_000009.11 |
| cg15459695 | 3.46E-07 | 4.47E-08 | -5.7  | 7.5112734 | -2.82E-02 | 236403016 | 236403139 | NC_000002.11 |
| cg03979024 | 3.46E-07 | 4.47E-08 | -5.7  | 7.5107437 | -9.10E-02 | 419189    | 419312    | NC_000010.10 |
| cg01538392 | 3.46E-07 | 4.48E-08 | -5.7  | 7.5102222 | -5.05E-02 | 33291225  | 33291348  | NC_000020.10 |
| cg05064398 | 3.47E-07 | 4.48E-08 | -5.7  | 7.510103  | -2.18E-02 | 10052817  | 10052940  | NC_000003.11 |
| cg00782925 | 3.47E-07 | 4.48E-08 | -5.7  | 7.5100834 | -3.15E-02 | 38398389  | 38398512  | NC_000019.9  |
| cg06965803 | 3.47E-07 | 4.48E-08 | -5.7  | 7.509588  | -7.61E-02 | 6531717   | 6531840   | NC_000001.10 |
| cg26929261 | 3.47E-07 | 4.48E-08 | -5.7  | 7.5095779 | -8.06E-02 | 175792123 | 175792246 | NC_000005.9  |
| cg17450446 | 3.47E-07 | 4.48E-08 | -5.69 | 7.5092409 | -2.23E-02 | 160002111 | 160002234 | NC_000001.10 |
| cg18718692 | 3.47E-07 | 4.49E-08 | -5.69 | 7.5081562 | -9.59E-02 | 133121913 | 133122036 | NC_000003.11 |
| cg01930518 | 3.47E-07 | 4.49E-08 | -5.69 | 7.5076303 | -3.89E-02 | 91414850  | 91414973  | NC_000015.9  |
| cg05515034 | 3.47E-07 | 4.49E-08 | -5.69 | 7.5071948 | -2.45E-02 | 2955283   | 2955406   | NC_000016.9  |
| cg23615572 | 3.48E-07 | 4.49E-08 | -5.69 | 7.5069306 | -4.16E-02 | 64086020  | 64086143  | NC_000011.9  |
| cg25586329 | 3.48E-07 | 4.49E-08 | -5.69 | 7.5063931 | -1.21E-01 | 132800564 | 132800687 | NC_000010.10 |
| cg11878712 | 3.48E-07 | 4.50E-08 | -5.69 | 7.5053498 | -1.05E-01 | 135018453 | 135018576 | NC_000002.11 |
| cg06577005 | 3.48E-07 | 4.50E-08 | -5.69 | 7.5050144 | -1.05E-01 | 26758228  | 26758351  | NC_000001.10 |
| cg21023126 | 3.48E-07 | 4.50E-08 | -5.69 | 7.50437   | -8.19E-02 | 32870150  | 32870273  | NC_000022.10 |

|            |          |          |       |           |           |           |           |              |
|------------|----------|----------|-------|-----------|-----------|-----------|-----------|--------------|
| cg19752861 | 3.49E-07 | 4.51E-08 | -5.69 | 7.5034178 | -1.43E-01 | 74153213  | 74153336  | NC_000002.11 |
| cg24791965 | 3.49E-07 | 4.51E-08 | -5.69 | 7.502098  | -6.69E-02 | 102132302 | 102132425 | NC_000004.11 |
| cg20140452 | 3.49E-07 | 4.51E-08 | -5.69 | 7.5019491 | -3.19E-02 | 149363715 | 149363838 | NC_000004.11 |
| cg00023154 | 3.49E-07 | 4.51E-08 | -5.69 | 7.5018048 | -7.13E-02 | 44872463  | 44872586  | NC_000001.10 |
| cg07284190 | 3.49E-07 | 4.52E-08 | -5.69 | 7.5017614 | -1.23E-01 | 78588454  | 78588577  | NC_000012.11 |
| cg13120986 | 3.49E-07 | 4.52E-08 | -5.69 | 7.5017165 | -6.19E-02 | 7168012   | 7168135   | NC_000012.11 |
| cg19804071 | 3.49E-07 | 4.52E-08 | -5.69 | 7.5012984 | -9.99E-02 | 112375186 | 112375309 | NC_000006.11 |
| cg07213181 | 3.49E-07 | 4.52E-08 | -5.69 | 7.5011971 | -8.97E-02 | 238794837 | 238794960 | NC_000002.11 |
| cg22547540 | 3.49E-07 | 4.52E-08 | -5.69 | 7.5010628 | -9.73E-02 | 32055007  | 32055130  | NC_000006.11 |
| cg23728359 | 3.50E-07 | 4.52E-08 | -5.69 | 7.5009168 | -1.12E-01 | 6290148   | 6290271   | NC_000007.13 |
| cg13009927 | 3.50E-07 | 4.52E-08 | -5.69 | 7.5002507 | -4.06E-02 | 242254519 | 242254642 | NC_000002.11 |
| cg08017606 | 3.50E-07 | 4.52E-08 | -5.69 | 7.5001587 | -3.87E-02 | 145316274 | 145316397 | NC_000005.9  |
| cg13617204 | 3.50E-07 | 4.52E-08 | -5.69 | 7.4997226 | -1.67E-02 | 27832869  | 27832992  | NC_000006.11 |
| cg11369706 | 3.50E-07 | 4.53E-08 | -5.69 | 7.4992581 | -4.59E-02 | 32122111  | 32122234  | NC_000011.9  |
| cg08130630 | 3.50E-07 | 4.53E-08 | -5.69 | 7.4990752 | -7.33E-02 | 2312475   | 2312598   | NC_000001.10 |
| cg04652522 | 3.50E-07 | 4.53E-08 | -5.69 | 7.4989495 | -7.82E-02 | 179124978 | 179125101 | NC_000005.9  |
| cg14287443 | 3.50E-07 | 4.53E-08 | -5.69 | 7.4987567 | -7.73E-02 | 3497093   | 3497216   | NC_000002.11 |
| cg05065507 | 3.50E-07 | 4.53E-08 | -5.69 | 7.4981757 | -6.00E-02 | 59042931  | 59043054  | NC_000001.10 |
| cg13392258 | 3.51E-07 | 4.53E-08 | -5.69 | 7.4978602 | -8.47E-02 | 77806190  | 77806313  | NC_000017.10 |
| cg08403064 | 3.51E-07 | 4.54E-08 | -5.69 | 7.4970219 | -1.06E-01 | 44068709  | 44068832  | NC_000011.9  |
| cg02868222 | 3.51E-07 | 4.54E-08 | -5.69 | 7.4967681 | -7.21E-02 | 155572952 | 155573075 | NC_000003.11 |
| cg14014879 | 3.51E-07 | 4.54E-08 | -5.69 | 7.4966391 | -8.39E-02 | 94561088  | 94561211  | NC_000001.10 |
| cg09359810 | 3.51E-07 | 4.54E-08 | -5.69 | 7.4963286 | -1.41E-01 | 52048421  | 52048544  | NC_000014.8  |
| cg00832457 | 3.51E-07 | 4.54E-08 | -5.69 | 7.496313  | -9.17E-02 | 32287236  | 32287359  | NC_000012.11 |
| cg09094804 | 3.52E-07 | 4.55E-08 | -5.69 | 7.4946373 | -3.18E-02 | 56485438  | 56485561  | NC_000016.9  |



|                 |          |          |       |           |           |           |           |              |
|-----------------|----------|----------|-------|-----------|-----------|-----------|-----------|--------------|
| cg14117874      | 3.52E-07 | 4.55E-08 | -5.69 | 7.4946227 | -6.85E-02 | 81684364  | 81684487  | NC_000005.9  |
| cg07988713      | 3.52E-07 | 4.55E-08 | -5.69 | 7.494282  | -3.22E-02 | 28388196  | 28388319  | NC_000016.9  |
| cg03335386      | 3.52E-07 | 4.55E-08 | -5.69 | 7.4942197 | -7.53E-02 | 134469021 | 134469144 | NC_000008.10 |
| cg04200938      | 3.52E-07 | 4.55E-08 | -5.69 | 7.4939818 | -4.92E-02 | 45665536  | 45665659  | NC_000022.10 |
| cg01612366      | 3.52E-07 | 4.56E-08 | -5.69 | 7.4929309 | -7.77E-02 | 14113465  | 14113588  | NC_000004.11 |
| cg02459543      | 3.52E-07 | 4.56E-08 | -5.69 | 7.4927536 | -1.02E-01 | 94924611  | 94924734  | NC_000008.10 |
| cg24422797      | 3.52E-07 | 4.56E-08 | -5.69 | 7.4923156 | -1.15E-01 | 80633179  | 80633302  | NC_000017.10 |
| cg24416609      | 3.52E-07 | 4.56E-08 | -5.69 | 7.4922255 | -7.80E-02 | 231773530 | 231773653 | NC_000002.11 |
| cg06777522      | 3.53E-07 | 4.56E-08 | -5.69 | 7.4919    | -5.13E-02 | 145969007 | 145969130 | NC_000003.11 |
| cg09893947      | 3.53E-07 | 4.56E-08 | -5.69 | 7.4917256 | -9.40E-02 | 43827897  | 43828020  | NC_000022.10 |
| cg17937570      | 3.53E-07 | 4.57E-08 | -5.69 | 7.4909841 | -2.56E-02 | 33941863  | 33941986  | NC_000021.8  |
| cg09624870      | 3.53E-07 | 4.57E-08 | -5.69 | 7.4909102 | -8.86E-02 | 123871988 | 123872111 | NC_000010.10 |
| cg13368983      | 3.53E-07 | 4.57E-08 | -5.69 | 7.4905851 | -1.51E-01 | 201995729 | 201995852 | NC_000002.11 |
| cg14353508      | 3.53E-07 | 4.57E-08 | -5.69 | 7.4901208 | -1.34E-01 | 34207754  | 34207877  | NC_000020.10 |
| cg19006211      | 3.53E-07 | 4.57E-08 | -5.69 | 7.4898982 | -1.06E-01 | 116183919 | 116184042 | NC_000002.11 |
| cg03160342      | 3.53E-07 | 4.57E-08 | -5.69 | 7.4897144 | -1.34E-02 | 12807165  | 12807288  | NC_000019.9  |
| ch.21.43554353R | 3.53E-07 | 4.57E-08 | -5.69 | 7.4895581 | -1.82E-02 | 44729925  | 44730048  | NC_000021.8  |
| cg08822891      | 3.53E-07 | 4.57E-08 | -5.69 | 7.4892675 | -6.04E-02 | 12625807  | 12625930  | NC_000016.9  |
| cg06204101      | 3.53E-07 | 4.57E-08 | -5.69 | 7.4891445 | -8.09E-02 | 2039671   | 2039794   | NC_000001.10 |
| cg03754708      | 3.53E-07 | 4.57E-08 | -5.69 | 7.4890813 | -6.98E-02 | 134604989 | 134605112 | NC_000010.10 |
| cg21171320      | 3.54E-07 | 4.58E-08 | -5.69 | 7.4887272 | -1.21E-01 | 73178360  | 73178483  | NC_000009.11 |
| cg22042382      | 3.54E-07 | 4.58E-08 | -5.69 | 7.4887123 | -8.12E-02 | 131211547 | 131211670 | NC_000006.11 |
| cg07155453      | 3.54E-07 | 4.58E-08 | -5.69 | 7.4883634 | -1.45E-02 | 65004289  | 65004412  | NC_000012.11 |
| cg07468327      | 3.54E-07 | 4.58E-08 | -5.69 | 7.4872942 | -8.44E-02 | 54170217  | 54170340  | NC_000016.9  |
| cg12748491      | 3.54E-07 | 4.58E-08 | -5.69 | 7.4871162 | -9.96E-02 | 169801641 | 169801764 | NC_000004.11 |

|                |          |          |       |           |           |           |           |              |
|----------------|----------|----------|-------|-----------|-----------|-----------|-----------|--------------|
| cg06495060     | 3.54E-07 | 4.58E-08 | -5.69 | 7.4869544 | -3.12E-02 | 182993363 | 182993486 | NC_000001.10 |
| cg07687131     | 3.54E-07 | 4.58E-08 | -5.69 | 7.4868077 | -1.93E-01 | 93967580  | 93967703  | NC_000012.11 |
| cg15002250     | 3.54E-07 | 4.59E-08 | -5.69 | 7.4866207 | -1.51E-01 | 236619445 | 236619568 | NC_000002.11 |
| cg04874103     | 3.54E-07 | 4.59E-08 | -5.69 | 7.4865323 | -6.92E-02 | 33872383  | 33872506  | NC_000006.11 |
| cg11242907     | 3.55E-07 | 4.59E-08 | -5.69 | 7.4857675 | -1.34E-01 | 45919419  | 45919542  | NC_000017.10 |
| cg21284028     | 3.55E-07 | 4.59E-08 | -5.69 | 7.4848055 | -1.30E-01 | 58571569  | 58571692  | NC_000020.10 |
| cg23282441     | 3.55E-07 | 4.59E-08 | -5.69 | 7.4847728 | -1.20E-01 | 73533927  | 73534050  | NC_000010.10 |
| cg10329418     | 3.55E-07 | 4.60E-08 | -5.69 | 7.484611  | -7.45E-02 | 95026181  | 95026304  | NC_000007.13 |
| cg25373595     | 3.55E-07 | 4.60E-08 | -5.69 | 7.4839348 | -1.01E-01 | 2699718   | 2699841   | NC_000017.10 |
| cg09305478     | 3.55E-07 | 4.60E-08 | -5.69 | 7.4833487 | -5.96E-02 | 691988    | 692111    | NC_000016.9  |
| cg10211626     | 3.55E-07 | 4.60E-08 | -5.69 | 7.4828902 | -6.26E-02 | 42085361  | 42085484  | NC_000022.10 |
| cg01620785     | 3.56E-07 | 4.61E-08 | -5.69 | 7.4815896 | -5.90E-02 | 27436111  | 27436234  | NC_000002.11 |
| cg23255950     | 3.56E-07 | 4.61E-08 | -5.69 | 7.4813411 | -4.49E-02 | 84971011  | 84971134  | NC_000001.10 |
| cg07388132     | 3.56E-07 | 4.61E-08 | -5.69 | 7.481289  | -1.81E-02 | 96306137  | 96306260  | NC_000010.10 |
| cg09711028     | 3.56E-07 | 4.61E-08 | -5.69 | 7.4812148 | -6.87E-02 | 21976788  | 21976911  | NC_000012.11 |
| cg02174203     | 3.56E-07 | 4.61E-08 | -5.69 | 7.4811134 | -8.08E-02 | 76848054  | 76848177  | NC_000011.9  |
| cg16527491     | 3.56E-07 | 4.61E-08 | -5.69 | 7.4806495 | -2.56E-02 | 38065127  | 38065250  | NC_000014.8  |
| ch.2.42579310F | 3.56E-07 | 4.61E-08 | -5.69 | 7.4804475 | -2.86E-02 | 42725806  | 42725929  | NC_000002.11 |
| cg01030404     | 3.57E-07 | 4.62E-08 | -5.69 | 7.4792152 | -1.14E-01 | 84560950  | 84561073  | NC_000016.9  |
| cg12574576     | 3.57E-07 | 4.62E-08 | -5.69 | 7.478981  | -1.09E-01 | 44363776  | 44363899  | NC_000010.10 |
| cg03120116     | 3.57E-07 | 4.62E-08 | -5.69 | 7.4788752 | -9.09E-02 | 167276567 | 167276690 | NC_000006.11 |
| cg23244022     | 3.57E-07 | 4.62E-08 | -5.69 | 7.4787083 | -1.29E-01 | 144437350 | 144437473 | NC_000008.10 |
| cg07845873     | 3.57E-07 | 4.63E-08 | -5.69 | 7.478277  | -1.13E-01 | 67022802  | 67022925  | NC_000003.11 |
| cg09088834     | 3.57E-07 | 4.63E-08 | -5.69 | 7.4781381 | -8.02E-02 | 25565460  | 25565583  | NC_000020.10 |
| cg12036017     | 3.57E-07 | 4.63E-08 | -5.69 | 7.4774705 | -1.31E-02 | 3956448   | 3956571   | NC_000004.11 |

|            |          |          |       |           |           |           |           |              |
|------------|----------|----------|-------|-----------|-----------|-----------|-----------|--------------|
| cg20840069 | 3.57E-07 | 4.63E-08 | -5.69 | 7.4772277 | -9.04E-02 | 58147905  | 58148028  | NC_000003.11 |
| cg16989117 | 3.58E-07 | 4.64E-08 | -5.69 | 7.4758334 | -1.06E-01 | 40781907  | 40782030  | NC_000001.10 |
| cg11902777 | 3.58E-07 | 4.64E-08 | -5.69 | 7.4755618 | -1.09E-01 | 368843    | 368966    | NC_000005.9  |
| cg04592144 | 3.58E-07 | 4.64E-08 | -5.69 | 7.4751112 | -1.07E-01 | 172899456 | 172899579 | NC_000005.9  |
| cg12033273 | 3.59E-07 | 4.65E-08 | -5.69 | 7.4739073 | -3.29E-02 | 155247785 | 155247908 | NC_000001.10 |
| cg10063512 | 3.59E-07 | 4.65E-08 | -5.69 | 7.4730063 | -2.98E-02 | 37594142  | 37594265  | NC_000008.10 |
| cg20809737 | 3.59E-07 | 4.65E-08 | -5.69 | 7.4729154 | -8.72E-02 | 68574649  | 68574772  | NC_000011.9  |
| cg07734358 | 3.59E-07 | 4.65E-08 | -5.69 | 7.4728204 | -7.02E-02 | 47370132  | 47370255  | NC_000022.10 |
| cg26663796 | 3.59E-07 | 4.66E-08 | -5.69 | 7.4712614 | -5.82E-02 | 80255734  | 80255857  | NC_000017.10 |
| cg23003315 | 3.59E-07 | 4.66E-08 | -5.69 | 7.4711976 | -4.76E-02 | 30070109  | 30070232  | NC_000006.11 |
| cg06944758 | 3.60E-07 | 4.66E-08 | -5.69 | 7.470768  | -8.30E-02 | 74064408  | 74064531  | NC_000016.9  |
| cg01123518 | 3.60E-07 | 4.66E-08 | -5.69 | 7.4704036 | -3.51E-02 | 10837605  | 10837728  | NC_000016.9  |
| cg00779304 | 3.61E-07 | 4.68E-08 | -5.69 | 7.4676642 | -7.12E-02 | 26044841  | 26044964  | NC_000006.11 |
| cg01663570 | 3.61E-07 | 4.68E-08 | -5.69 | 7.4676471 | -2.60E-02 | 183873429 | 183873552 | NC_000003.11 |
| cg13743231 | 3.61E-07 | 4.68E-08 | -5.69 | 7.4674997 | -1.10E-01 | 94958683  | 94958806  | NC_000010.10 |
| cg08648041 | 3.61E-07 | 4.68E-08 | -5.69 | 7.4658322 | -3.64E-02 | 2633689   | 2633812   | NC_000020.10 |
| cg01477933 | 3.62E-07 | 4.69E-08 | -5.69 | 7.4642941 | -9.34E-02 | 122922107 | 122922230 | NC_000012.11 |
| cg04251872 | 3.62E-07 | 4.69E-08 | -5.69 | 7.4640576 | -3.88E-02 | 93964403  | 93964526  | NC_000012.11 |
| cg26159990 | 3.62E-07 | 4.70E-08 | -5.69 | 7.4635727 | -1.13E-01 | 44760607  | 44760730  | NC_000001.10 |
| cg01250603 | 3.62E-07 | 4.70E-08 | -5.69 | 7.4635552 | -1.28E-01 | 122709029 | 122709152 | NC_000010.10 |
| cg19985056 | 3.62E-07 | 4.70E-08 | -5.69 | 7.4631484 | -1.52E-01 | 56595244  | 56595367  | NC_000005.9  |
| cg22996004 | 3.62E-07 | 4.70E-08 | -5.69 | 7.4630595 | -4.11E-02 | 46018654  | 46018777  | NC_000017.10 |
| cg15336243 | 3.63E-07 | 4.70E-08 | -5.69 | 7.4623363 | -1.07E-01 | 15386981  | 15387104  | NC_000010.10 |
| cg04439696 | 3.63E-07 | 4.70E-08 | -5.69 | 7.461646  | -2.23E-02 | 36954195  | 36954318  | NC_000006.11 |
| cg06533042 | 3.63E-07 | 4.71E-08 | -5.69 | 7.4610446 | -1.02E-01 | 184385917 | 184386040 | NC_000001.10 |

|            |          |          |       |           |           |           |           |              |
|------------|----------|----------|-------|-----------|-----------|-----------|-----------|--------------|
| cg07531663 | 3.63E-07 | 4.71E-08 | -5.69 | 7.4606484 | -8.73E-02 | 47751494  | 47751617  | NC_000008.10 |
| cg09404733 | 3.63E-07 | 4.71E-08 | -5.68 | 7.4599619 | -5.73E-02 | 8511432   | 8511555   | NC_000017.10 |
| cg01237807 | 3.63E-07 | 4.71E-08 | -5.68 | 7.4598039 | -1.12E-02 | 46215957  | 46216080  | NC_000001.10 |
| cg11652360 | 3.64E-07 | 4.72E-08 | -5.68 | 7.4585336 | -8.95E-02 | 33160120  | 33160243  | NC_000006.11 |
| cg21542842 | 3.65E-07 | 4.74E-08 | -5.68 | 7.4552117 | -9.83E-02 | 77899442  | 77899565  | NC_000004.11 |
| cg21343919 | 3.65E-07 | 4.74E-08 | -5.68 | 7.4550106 | -4.26E-02 | 46413743  | 46413866  | NC_000020.10 |
| cg03221539 | 3.65E-07 | 4.74E-08 | -5.68 | 7.4545147 | -7.19E-02 | 146008887 | 146009010 | NC_000001.10 |
| cg26500773 | 3.65E-07 | 4.74E-08 | -5.68 | 7.4541594 | -2.29E-02 | 232646331 | 232646454 | NC_000002.11 |
| cg09130043 | 3.65E-07 | 4.74E-08 | -5.68 | 7.4539449 | -5.91E-02 | 11561283  | 11561406  | NC_000008.10 |
| cg03644238 | 3.65E-07 | 4.74E-08 | -5.68 | 7.4536898 | -1.19E-01 | 148400542 | 148400665 | NC_000007.13 |
| cg21828716 | 3.65E-07 | 4.74E-08 | -5.68 | 7.4536419 | -7.76E-02 | 23857953  | 23858076  | NC_000014.8  |
| cg13105234 | 3.66E-07 | 4.75E-08 | -5.68 | 7.4518572 | -8.42E-02 | 1550473   | 1550596   | NC_000004.11 |
| cg14983698 | 3.66E-07 | 4.76E-08 | -5.68 | 7.4512017 | -2.22E-02 | 138153270 | 138153393 | NC_000003.11 |
| cg10795646 | 3.67E-07 | 4.76E-08 | -5.68 | 7.4506137 | -9.57E-02 | 151975566 | 151975689 | NC_000001.10 |
| cg24881229 | 3.67E-07 | 4.76E-08 | -5.68 | 7.4501581 | -4.47E-02 | 93474015  | 93474138  | NC_000011.9  |
| cg23159165 | 3.67E-07 | 4.76E-08 | -5.68 | 7.4493092 | -1.12E-01 | 107567020 | 107567143 | NC_000011.9  |
| cg05399434 | 3.67E-07 | 4.77E-08 | -5.68 | 7.4486652 | -5.40E-02 | 123368681 | 123368804 | NC_000010.10 |
| cg20662523 | 3.67E-07 | 4.77E-08 | -5.68 | 7.4478986 | -2.17E-02 | 18742662  | 18742785  | NC_000011.9  |
| cg08993267 | 3.68E-07 | 4.77E-08 | -5.68 | 7.4477583 | -1.33E-02 | 41277322  | 41277445  | NC_000017.10 |
| cg09592244 | 3.68E-07 | 4.78E-08 | -5.68 | 7.4466178 | -1.09E-01 | 37024020  | 37024143  | NC_000017.10 |
| cg18070621 | 3.68E-07 | 4.78E-08 | -5.68 | 7.4462187 | -4.08E-02 | 79869449  | 79869572  | NC_000017.10 |
| cg19820919 | 3.68E-07 | 4.78E-08 | -5.68 | 7.4460466 | -1.02E-01 | 9380800   | 9380923   | NC_000001.10 |
| cg00496462 | 3.68E-07 | 4.78E-08 | -5.68 | 7.4457844 | -1.15E-01 | 93577610  | 93577733  | NC_000007.13 |
| cg23153730 | 3.68E-07 | 4.78E-08 | -5.68 | 7.4455191 | -1.92E-02 | 73612707  | 73612830  | NC_000002.11 |
| cg14994513 | 3.69E-07 | 4.79E-08 | -5.68 | 7.444481  | -8.14E-02 | 146919932 | 146920055 | NC_000006.11 |

|            |          |          |       |           |           |           |           |              |
|------------|----------|----------|-------|-----------|-----------|-----------|-----------|--------------|
| cg07608033 | 3.69E-07 | 4.79E-08 | -5.68 | 7.4444553 | -8.84E-02 | 36056930  | 36057053  | NC_000010.10 |
| cg04460931 | 3.69E-07 | 4.79E-08 | -5.68 | 7.4433273 | -5.43E-02 | 47788044  | 47788167  | NC_000011.9  |
| cg09462806 | 3.69E-07 | 4.80E-08 | -5.68 | 7.4430462 | -1.43E-01 | 150084    | 150207    | NC_000007.13 |
| cg19787891 | 3.70E-07 | 4.80E-08 | -5.68 | 7.4420153 | -9.35E-02 | 147691248 | 147691371 | NC_000005.9  |
| cg10665616 | 3.70E-07 | 4.81E-08 | -5.68 | 7.4402889 | -1.27E-01 | 69326361  | 69326484  | NC_000007.13 |
| cg05813297 | 3.70E-07 | 4.81E-08 | -5.68 | 7.4402148 | -7.35E-02 | 82543035  | 82543158  | NC_000008.10 |
| cg17873451 | 3.70E-07 | 4.81E-08 | -5.68 | 7.4400774 | -1.52E-02 | 171571851 | 171571974 | NC_000002.11 |
| cg08627847 | 3.70E-07 | 4.81E-08 | -5.68 | 7.4394302 | -9.27E-02 | 6833830   | 6833953   | NC_000012.11 |
| cg11789992 | 3.71E-07 | 4.81E-08 | -5.68 | 7.439336  | -4.79E-02 | 13625442  | 13625565  | NC_000008.10 |
| cg20135002 | 3.71E-07 | 4.82E-08 | -5.68 | 7.4387231 | -8.59E-02 | 47629003  | 47629126  | NC_000011.9  |
| cg01819568 | 3.71E-07 | 4.82E-08 | -5.68 | 7.4378821 | -1.01E-01 | 55528138  | 55528261  | NC_000004.11 |
| cg01955025 | 3.71E-07 | 4.82E-08 | -5.68 | 7.4372344 | -1.11E-01 | 91091782  | 91091905  | NC_000014.8  |
| cg00491963 | 3.71E-07 | 4.82E-08 | -5.68 | 7.437181  | -5.50E-02 | 57335356  | 57335479  | NC_000011.9  |
| cg09405635 | 3.72E-07 | 4.83E-08 | -5.68 | 7.4352194 | -8.10E-02 | 49533444  | 49533567  | NC_000008.10 |
| cg12305074 | 3.72E-07 | 4.84E-08 | -5.68 | 7.4350514 | -1.33E-01 | 78368756  | 78368879  | NC_000007.13 |
| cg03551807 | 3.72E-07 | 4.84E-08 | -5.68 | 7.4350282 | -1.21E-01 | 51323496  | 51323619  | NC_000007.13 |
| cg14698352 | 3.72E-07 | 4.84E-08 | -5.68 | 7.4348002 | -3.82E-02 | 87505675  | 87505798  | NC_000007.13 |
| cg01278654 | 3.72E-07 | 4.84E-08 | -5.68 | 7.4345197 | -9.53E-02 | 48845563  | 48845686  | NC_000017.10 |
| cg24859316 | 3.72E-07 | 4.84E-08 | -5.68 | 7.434214  | -2.17E-02 | 201450362 | 201450485 | NC_000001.10 |
| cg18810542 | 3.72E-07 | 4.84E-08 | -5.68 | 7.4337381 | -8.49E-02 | 17379795  | 17379918  | NC_000007.13 |
| cg12158136 | 3.73E-07 | 4.85E-08 | -5.68 | 7.433026  | -4.84E-02 | 14783352  | 14783475  | NC_000012.11 |
| cg24756865 | 3.73E-07 | 4.85E-08 | -5.68 | 7.4328965 | -4.92E-02 | 103652182 | 103652305 | NC_000014.8  |
| cg12096325 | 3.73E-07 | 4.85E-08 | -5.68 | 7.4326518 | -5.95E-02 | 202996541 | 202996664 | NC_000001.10 |
| cg12867763 | 3.73E-07 | 4.85E-08 | -5.68 | 7.4326413 | -1.13E-01 | 106681666 | 106681789 | NC_000007.13 |
| cg08263507 | 3.73E-07 | 4.85E-08 | -5.68 | 7.4318847 | -4.32E-02 | 238480950 | 238481073 | NC_000002.11 |

|            |          |          |       |           |           |           |           |              |
|------------|----------|----------|-------|-----------|-----------|-----------|-----------|--------------|
| cg19805943 | 3.73E-07 | 4.85E-08 | -5.68 | 7.4312562 | -9.10E-02 | 85933069  | 85933192  | NC_000002.11 |
| cg09951201 | 3.73E-07 | 4.86E-08 | -5.68 | 7.4309275 | -1.12E-01 | 1100096   | 1100219   | NC_000005.9  |
| cg02938429 | 3.74E-07 | 4.86E-08 | -5.68 | 7.4307975 | -6.59E-02 | 20646248  | 20646371  | NC_000002.11 |
| cg12597558 | 3.74E-07 | 4.86E-08 | -5.68 | 7.4301595 | -7.39E-02 | 9226944   | 9227067   | NC_000001.10 |
| cg05373251 | 3.74E-07 | 4.86E-08 | -5.68 | 7.429705  | -1.33E-01 | 79451985  | 79452108  | NC_000017.10 |
| cg00868252 | 3.74E-07 | 4.86E-08 | -5.68 | 7.4295903 | -4.48E-02 | 31708260  | 31708383  | NC_000006.11 |
| cg01172082 | 3.74E-07 | 4.86E-08 | -5.68 | 7.4295841 | -8.71E-02 | 104645732 | 104645855 | NC_000014.8  |
| cg23688479 | 3.74E-07 | 4.86E-08 | -5.68 | 7.429452  | -1.22E-01 | 42756851  | 42756974  | NC_000005.9  |
| cg07113562 | 3.74E-07 | 4.86E-08 | -5.68 | 7.429373  | -2.78E-02 | 52834093  | 52834216  | NC_000010.10 |
| cg04266474 | 3.74E-07 | 4.86E-08 | -5.68 | 7.4293028 | -1.28E-01 | 36318491  | 36318614  | NC_000007.13 |
| cg18831371 | 3.74E-07 | 4.87E-08 | -5.68 | 7.4289738 | -2.17E-02 | 176037325 | 176037448 | NC_000005.9  |
| cg10519709 | 3.74E-07 | 4.87E-08 | -5.68 | 7.428532  | -2.55E-02 | 204347359 | 204347482 | NC_000001.10 |
| cg05242244 | 3.75E-07 | 4.88E-08 | -5.68 | 7.4263108 | -7.83E-02 | 53553086  | 53553209  | NC_000012.11 |
| cg09509221 | 3.75E-07 | 4.88E-08 | -5.68 | 7.4260357 | -3.59E-02 | 47492396  | 47492519  | NC_000017.10 |
| cg24541550 | 3.76E-07 | 4.89E-08 | -5.68 | 7.4249007 | -8.20E-02 | 10715360  | 10715483  | NC_000011.9  |
| cg27587033 | 3.76E-07 | 4.89E-08 | -5.68 | 7.4247574 | -4.08E-02 | 2006032   | 2006155   | NC_000001.10 |
| cg14833024 | 3.76E-07 | 4.89E-08 | -5.68 | 7.4247406 | -6.28E-02 | 106913460 | 106913583 | NC_000012.11 |
| cg10648960 | 3.76E-07 | 4.89E-08 | -5.68 | 7.4241067 | -8.71E-02 | 2677986   | 2678109   | NC_000007.13 |
| cg14741870 | 3.76E-07 | 4.89E-08 | -5.68 | 7.4241007 | -1.05E-01 | 30174091  | 30174214  | NC_000006.11 |
| cg07156115 | 3.76E-07 | 4.89E-08 | -5.68 | 7.423335  | -9.98E-02 | 17379753  | 17379876  | NC_000007.13 |
| cg16322581 | 3.77E-07 | 4.90E-08 | -5.68 | 7.4219228 | -3.32E-02 | 70636648  | 70636771  | NC_000012.11 |
| cg18387343 | 3.77E-07 | 4.90E-08 | -5.68 | 7.4213408 | -1.99E-02 | 27248345  | 27248468  | NC_000001.10 |
| cg25060172 | 3.77E-07 | 4.91E-08 | -5.68 | 7.4210079 | -1.22E-01 | 76555980  | 76556103  | NC_000004.11 |
| cg15695435 | 3.77E-07 | 4.91E-08 | -5.68 | 7.4208853 | -6.09E-02 | 121909465 | 121909588 | NC_000012.11 |
| cg06204126 | 3.77E-07 | 4.91E-08 | -5.68 | 7.4207823 | -9.22E-02 | 139890188 | 139890311 | NC_000009.11 |

|            |          |          |       |           |           |           |           |              |
|------------|----------|----------|-------|-----------|-----------|-----------|-----------|--------------|
| cg10042437 | 3.77E-07 | 4.91E-08 | -5.68 | 7.420168  | -7.72E-02 | 45406931  | 45407054  | NC_000015.9  |
| cg02963866 | 3.78E-07 | 4.91E-08 | -5.68 | 7.419508  | -1.30E-01 | 29612015  | 29612138  | NC_000015.9  |
| cg15699386 | 3.78E-07 | 4.91E-08 | -5.68 | 7.4191714 | -1.19E-01 | 155161211 | 155161334 | NC_000001.10 |
| cg20705065 | 3.78E-07 | 4.92E-08 | -5.68 | 7.4190999 | -2.64E-02 | 48074613  | 48074736  | NC_000017.10 |
| cg07431106 | 3.78E-07 | 4.92E-08 | -5.68 | 7.419013  | -1.14E-01 | 32561989  | 32562112  | NC_000017.10 |
| cg11196333 | 3.78E-07 | 4.92E-08 | -5.68 | 7.4188189 | -1.20E-01 | 203154370 | 203154493 | NC_000001.10 |
| cg19017581 | 3.78E-07 | 4.92E-08 | -5.68 | 7.4175039 | -2.73E-02 | 171181391 | 171181514 | NC_000002.11 |
| cg19305545 | 3.78E-07 | 4.93E-08 | -5.68 | 7.4170367 | -1.61E-01 | 3548894   | 3549017   | NC_000001.10 |
| cg18114294 | 3.78E-07 | 4.93E-08 | -5.68 | 7.4168905 | -1.14E-01 | 180923847 | 180923970 | NC_000001.10 |
| cg26895931 | 3.79E-07 | 4.93E-08 | -5.68 | 7.4156205 | -1.07E-01 | 85398190  | 85398313  | NC_000016.9  |
| cg23465967 | 3.79E-07 | 4.94E-08 | -5.68 | 7.414503  | -5.39E-02 | 111435611 | 111435734 | NC_000002.11 |
| cg26645401 | 3.79E-07 | 4.94E-08 | -5.68 | 7.4142861 | -1.17E-01 | 9686514   | 9686637   | NC_000011.9  |
| cg03850986 | 3.79E-07 | 4.94E-08 | -5.68 | 7.4141606 | -1.04E-01 | 116408382 | 116408505 | NC_000010.10 |
| cg14794655 | 3.79E-07 | 4.94E-08 | -5.68 | 7.414083  | -9.26E-02 | 54558352  | 54558475  | NC_000002.11 |
| cg07446740 | 3.80E-07 | 4.95E-08 | -5.68 | 7.4125508 | -4.19E-02 | 27279784  | 27279907  | NC_000016.9  |
| cg01421615 | 3.80E-07 | 4.95E-08 | -5.68 | 7.4122967 | -5.88E-02 | 126782592 | 126782715 | NC_000010.10 |
| cg08597319 | 3.80E-07 | 4.95E-08 | -5.67 | 7.4115224 | -1.14E-02 | 103876573 | 103876696 | NC_000008.10 |
| cg10073091 | 3.80E-07 | 4.95E-08 | -5.67 | 7.4115045 | -3.48E-02 | 55352301  | 55352424  | NC_000001.10 |
| cg24502391 | 3.81E-07 | 4.96E-08 | -5.67 | 7.411151  | -6.84E-02 | 70404780  | 70404903  | NC_000008.10 |
| cg26940261 | 3.81E-07 | 4.96E-08 | -5.67 | 7.409293  | -2.46E-02 | 105725112 | 105725235 | NC_000012.11 |
| cg16120415 | 3.81E-07 | 4.97E-08 | -5.67 | 7.408664  | -9.35E-02 | 156399787 | 156399910 | NC_000001.10 |
| cg23997263 | 3.82E-07 | 4.97E-08 | -5.67 | 7.4082277 | -1.10E-01 | 96462814  | 96462937  | NC_000006.11 |
| cg08496387 | 3.82E-07 | 4.97E-08 | -5.67 | 7.4076715 | -8.88E-02 | 11862730  | 11862853  | NC_000011.9  |
| cg06248061 | 3.82E-07 | 4.98E-08 | -5.67 | 7.4070462 | -1.96E-02 | 135372380 | 135372503 | NC_000010.10 |
| cg13447820 | 3.82E-07 | 4.98E-08 | -5.67 | 7.4068473 | -7.93E-02 | 111906503 | 111906626 | NC_000008.10 |

|            |          |          |       |           |           |           |           |              |
|------------|----------|----------|-------|-----------|-----------|-----------|-----------|--------------|
| cg16894974 | 3.82E-07 | 4.98E-08 | -5.67 | 7.4064846 | -4.08E-02 | 55700780  | 55700903  | NC_000015.9  |
| cg20388062 | 3.82E-07 | 4.98E-08 | -5.67 | 7.406445  | -3.59E-02 | 46713403  | 46713526  | NC_000001.10 |
| cg14330868 | 3.83E-07 | 4.99E-08 | -5.67 | 7.4050977 | -7.91E-02 | 12631363  | 12631486  | NC_000017.10 |
| cg11012543 | 3.83E-07 | 4.99E-08 | -5.67 | 7.4049667 | -1.09E-01 | 52231691  | 52231814  | NC_000003.11 |
| cg02901644 | 3.83E-07 | 4.99E-08 | -5.67 | 7.4045148 | -1.12E-01 | 234369787 | 234369910 | NC_000002.11 |
| cg11564042 | 3.83E-07 | 5.00E-08 | -5.67 | 7.4031921 | -3.04E-02 | 150479915 | 150480038 | NC_000003.11 |
| cg08895633 | 3.84E-07 | 5.00E-08 | -5.67 | 7.4027196 | -8.53E-02 | 1079220   | 1079343   | NC_000016.9  |
| cg05720733 | 3.84E-07 | 5.00E-08 | -5.67 | 7.40233   | -1.08E-01 | 84829007  | 84829130  | NC_000016.9  |
| cg21786114 | 3.84E-07 | 5.00E-08 | -5.67 | 7.4021246 | -1.00E-01 | 31866072  | 31866195  | NC_000006.11 |
| cg04522931 | 3.84E-07 | 5.00E-08 | -5.67 | 7.4021068 | -3.43E-02 | 30324582  | 30324705  | NC_000007.13 |
| cg18047607 | 3.84E-07 | 5.00E-08 | -5.67 | 7.4019778 | -2.60E-02 | 15701435  | 15701558  | NC_000002.11 |
| cg19980912 | 3.84E-07 | 5.00E-08 | -5.67 | 7.4015959 | -3.03E-02 | 133304180 | 133304303 | NC_000005.9  |
| cg23865994 | 3.84E-07 | 5.01E-08 | -5.67 | 7.4008372 | -5.68E-02 | 3758499   | 3758622   | NC_000020.10 |
| cg23463700 | 3.84E-07 | 5.01E-08 | -5.67 | 7.4007599 | -7.10E-02 | 32153540  | 32153663  | NC_000006.11 |
| cg26864526 | 3.84E-07 | 5.01E-08 | -5.67 | 7.4004367 | -1.06E-01 | 11178064  | 11178187  | NC_000003.11 |
| cg12297501 | 3.84E-07 | 5.01E-08 | -5.67 | 7.4003667 | -9.84E-02 | 28364357  | 28364480  | NC_000006.11 |
| cg14824848 | 3.84E-07 | 5.01E-08 | -5.67 | 7.4003431 | -2.57E-02 | 145214744 | 145214867 | NC_000005.9  |
| cg13027727 | 3.85E-07 | 5.01E-08 | -5.67 | 7.3999886 | -7.40E-02 | 61302112  | 61302235  | NC_000011.9  |
| cg07816873 | 3.85E-07 | 5.02E-08 | -5.67 | 7.3991865 | -5.94E-02 | 1100472   | 1100595   | NC_000012.11 |
| cg24713343 | 3.85E-07 | 5.02E-08 | -5.67 | 7.3986932 | -3.40E-02 | 52082692  | 52082815  | NC_000001.10 |
| cg06802599 | 3.85E-07 | 5.02E-08 | -5.67 | 7.3983011 | -1.49E-02 | 42981650  | 42981773  | NC_000006.11 |
| cg04765098 | 3.85E-07 | 5.02E-08 | -5.67 | 7.3978793 | -4.93E-02 | 184644154 | 184644277 | NC_000004.11 |
| cg06889086 | 3.85E-07 | 5.02E-08 | -5.67 | 7.3977501 | -1.24E-01 | 55638230  | 55638353  | NC_000007.13 |
| cg17274064 | 3.85E-07 | 5.02E-08 | -5.67 | 7.3977489 | -7.76E-02 | 40033892  | 40034015  | NC_000021.8  |
| cg02265758 | 3.85E-07 | 5.03E-08 | -5.67 | 7.3975353 | -8.17E-02 | 767440    | 767563    | NC_000005.9  |



|            |          |          |       |           |           |           |           |              |
|------------|----------|----------|-------|-----------|-----------|-----------|-----------|--------------|
| cg27124512 | 3.85E-07 | 5.03E-08 | -5.67 | 7.3975    | -1.00E-01 | 31225350  | 31225473  | NC_000016.9  |
| cg23689428 | 3.86E-07 | 5.03E-08 | -5.67 | 7.3971657 | -1.35E-01 | 121223964 | 121224087 | NC_000002.11 |
| cg21869055 | 3.86E-07 | 5.03E-08 | -5.67 | 7.3966407 | -7.03E-02 | 51522454  | 51522577  | NC_000019.9  |
| cg01316109 | 3.86E-07 | 5.03E-08 | -5.67 | 7.3965706 | -2.08E-02 | 31232748  | 31232871  | NC_000007.13 |
| cg10542362 | 3.86E-07 | 5.04E-08 | -5.67 | 7.3953683 | -4.25E-02 | 195636894 | 195637017 | NC_000003.11 |
| cg04459545 | 3.86E-07 | 5.04E-08 | -5.67 | 7.3951858 | -9.70E-02 | 17375685  | 17375808  | NC_000019.9  |
| cg07681739 | 3.87E-07 | 5.04E-08 | -5.67 | 7.3945253 | -1.07E-01 | 49897407  | 49897530  | NC_000003.11 |
| cg17566735 | 3.87E-07 | 5.04E-08 | -5.67 | 7.3944732 | -6.86E-02 | 171527257 | 171527380 | NC_000003.11 |
| cg01076454 | 3.87E-07 | 5.05E-08 | -5.67 | 7.3927291 | -4.08E-02 | 17742212  | 17742335  | NC_000003.11 |
| cg21501096 | 3.87E-07 | 5.05E-08 | -5.67 | 7.3925171 | -4.69E-02 | 24454443  | 24454566  | NC_000014.8  |
| cg05574324 | 3.87E-07 | 5.05E-08 | -5.67 | 7.3920747 | -1.27E-01 | 145642456 | 145642579 | NC_000008.10 |
| cg14422488 | 3.88E-07 | 5.05E-08 | -5.67 | 7.3918878 | -5.68E-02 | 32538997  | 32539120  | NC_000001.10 |
| cg02255609 | 3.88E-07 | 5.06E-08 | -5.67 | 7.3914148 | -7.26E-02 | 55181269  | 55181392  | NC_000001.10 |
| cg13104938 | 3.88E-07 | 5.06E-08 | -5.67 | 7.3911924 | -1.02E-01 | 843956    | 844079    | NC_000011.9  |
| cg05256304 | 3.88E-07 | 5.06E-08 | -5.67 | 7.390682  | -1.06E-01 | 116969870 | 116969993 | NC_000011.9  |
| cg05999993 | 3.88E-07 | 5.06E-08 | -5.67 | 7.3906776 | -1.40E-01 | 36764205  | 36764328  | NC_000007.13 |
| cg02410245 | 3.88E-07 | 5.06E-08 | -5.67 | 7.3900297 | -8.43E-02 | 6649349   | 6649472   | NC_000012.11 |
| cg12651761 | 3.88E-07 | 5.06E-08 | -5.67 | 7.3899804 | -6.24E-02 | 18128022  | 18128145  | NC_000017.10 |
| cg26581200 | 3.88E-07 | 5.07E-08 | -5.67 | 7.3896721 | -7.92E-02 | 30637461  | 30637584  | NC_000022.10 |
| cg03720617 | 3.88E-07 | 5.07E-08 | -5.67 | 7.3893573 | -1.38E-01 | 47527034  | 47527157  | NC_000016.9  |
| cg05030077 | 3.89E-07 | 5.08E-08 | -5.67 | 7.3879201 | -3.24E-02 | 2255199   | 2255322   | NC_000016.9  |
| cg08601192 | 3.89E-07 | 5.08E-08 | -5.67 | 7.3878778 | -6.85E-02 | 131812878 | 131813001 | NC_000010.10 |
| cg01531701 | 3.89E-07 | 5.08E-08 | -5.67 | 7.3875765 | -4.02E-02 | 65675516  | 65675639  | NC_000012.11 |
| cg13791183 | 3.89E-07 | 5.08E-08 | -5.67 | 7.3873559 | -1.27E-01 | 41316697  | 41316820  | NC_000019.9  |
| cg22360678 | 3.90E-07 | 5.08E-08 | -5.67 | 7.3864383 | -7.62E-02 | 46412175  | 46412298  | NC_000011.9  |

|            |          |          |       |           |           |           |           |              |
|------------|----------|----------|-------|-----------|-----------|-----------|-----------|--------------|
| cg11575912 | 3.90E-07 | 5.09E-08 | -5.67 | 7.385769  | -1.76E-01 | 5828299   | 5828422   | NC_000019.9  |
| cg14242460 | 3.90E-07 | 5.09E-08 | -5.67 | 7.3851126 | -1.69E-02 | 5261506   | 5261629   | NC_000006.11 |
| cg22881141 | 3.90E-07 | 5.09E-08 | -5.67 | 7.384695  | -9.96E-02 | 46730765  | 46730888  | NC_000022.10 |
| cg02321885 | 3.90E-07 | 5.09E-08 | -5.67 | 7.3844456 | -4.18E-02 | 11032537  | 11032660  | NC_000019.9  |
| cg16907766 | 3.90E-07 | 5.10E-08 | -5.67 | 7.383848  | -9.31E-02 | 13143470  | 13143593  | NC_000010.10 |
| cg09484019 | 3.91E-07 | 5.10E-08 | -5.67 | 7.3836574 | -8.88E-02 | 90744132  | 90744255  | NC_000015.9  |
| cg04542977 | 3.91E-07 | 5.10E-08 | -5.67 | 7.3822143 | -1.22E-01 | 51982669  | 51982792  | NC_000001.10 |
| cg11797222 | 3.92E-07 | 5.11E-08 | -5.67 | 7.3809702 | -6.09E-02 | 66679417  | 66679540  | NC_000015.9  |
| cg18517266 | 3.92E-07 | 5.11E-08 | -5.67 | 7.3807902 | -1.76E-01 | 5827811   | 5827934   | NC_000019.9  |
| cg20379593 | 3.92E-07 | 5.11E-08 | -5.67 | 7.3805823 | -1.28E-01 | 65198023  | 65198146  | NC_000011.9  |
| cg07616791 | 3.93E-07 | 5.13E-08 | -5.67 | 7.3777135 | -1.01E-01 | 101661720 | 101661843 | NC_000015.9  |
| cg24319143 | 3.93E-07 | 5.13E-08 | -5.67 | 7.3774835 | -8.91E-02 | 312026    | 312149    | NC_000006.11 |
| cg04609439 | 3.93E-07 | 5.13E-08 | -5.67 | 7.3772638 | -7.25E-02 | 32599417  | 32599540  | NC_000016.9  |
| cg12153373 | 3.93E-07 | 5.14E-08 | -5.67 | 7.376445  | -1.01E-01 | 113058725 | 113058848 | NC_000002.11 |
| cg12584520 | 3.94E-07 | 5.14E-08 | -5.67 | 7.3756203 | -1.48E-01 | 70637288  | 70637411  | NC_000017.10 |
| cg19680332 | 3.94E-07 | 5.14E-08 | -5.67 | 7.3750746 | -4.84E-02 | 112046088 | 112046211 | NC_000011.9  |
| cg23032316 | 3.94E-07 | 5.15E-08 | -5.67 | 7.3738597 | -3.87E-02 | 53715148  | 53715271  | NC_000012.11 |
| cg09615056 | 3.94E-07 | 5.15E-08 | -5.67 | 7.3735663 | -1.11E-01 | 1478718   | 1478841   | NC_000016.9  |
| cg16628205 | 3.94E-07 | 5.15E-08 | -5.67 | 7.3735387 | -1.29E-01 | 100240094 | 100240217 | NC_000007.13 |
| cg25594980 | 3.94E-07 | 5.15E-08 | -5.67 | 7.3733963 | -2.29E-02 | 179198508 | 179198631 | NC_000001.10 |
| cg18118490 | 3.94E-07 | 5.15E-08 | -5.67 | 7.3733593 | -4.45E-02 | 55240252  | 55240375  | NC_000014.8  |
| cg12596273 | 3.94E-07 | 5.15E-08 | -5.67 | 7.373187  | -1.07E-01 | 29080595  | 29080718  | NC_000018.9  |
| cg07988171 | 3.95E-07 | 5.15E-08 | -5.67 | 7.3727942 | -1.26E-01 | 16199419  | 16199542  | NC_000019.9  |
| cg01154241 | 3.95E-07 | 5.16E-08 | -5.67 | 7.3710969 | -2.04E-02 | 42996634  | 42996757  | NC_000008.10 |
| cg09985802 | 3.96E-07 | 5.17E-08 | -5.67 | 7.3701566 | -1.01E-01 | 126234119 | 126234242 | NC_000010.10 |

|            |          |          |       |           |           |           |           |              |
|------------|----------|----------|-------|-----------|-----------|-----------|-----------|--------------|
| cg27143664 | 3.96E-07 | 5.17E-08 | -5.67 | 7.3697514 | -1.11E-01 | 60032511  | 60032634  | NC_000014.8  |
| cg16280098 | 3.96E-07 | 5.17E-08 | -5.67 | 7.3697235 | -5.34E-02 | 23790882  | 23791005  | NC_000014.8  |
| cg09017941 | 3.96E-07 | 5.17E-08 | -5.67 | 7.3691164 | -1.55E-01 | 229163577 | 229163700 | NC_000001.10 |
| cg05836943 | 3.96E-07 | 5.17E-08 | -5.67 | 7.368962  | -6.76E-02 | 28888925  | 28889048  | NC_000016.9  |
| cg14535274 | 3.96E-07 | 5.18E-08 | -5.67 | 7.3686839 | -1.11E-01 | 121151186 | 121151309 | NC_000003.11 |
| cg06793600 | 3.97E-07 | 5.19E-08 | -5.67 | 7.3665441 | -2.12E-02 | 42127247  | 42127370  | NC_000001.10 |
| cg16992713 | 3.98E-07 | 5.19E-08 | -5.67 | 7.3653306 | -1.10E-01 | 22540646  | 22540769  | NC_000010.10 |
| cg06526020 | 3.98E-07 | 5.20E-08 | -5.67 | 7.3645588 | -9.65E-02 | 34308880  | 34309003  | NC_000006.11 |
| cg05968822 | 3.98E-07 | 5.20E-08 | -5.67 | 7.3642076 | -1.00E-01 | 226071684 | 226071807 | NC_000001.10 |
| cg26566660 | 3.98E-07 | 5.20E-08 | -5.67 | 7.3639668 | -3.53E-02 | 12610833  | 12610956  | NC_000007.13 |
| cg06441001 | 3.98E-07 | 5.20E-08 | -5.67 | 7.3639464 | -3.04E-02 | 89307764  | 89307887  | NC_000016.9  |
| cg14777341 | 3.98E-07 | 5.20E-08 | -5.67 | 7.3637576 | -1.09E-01 | 78992323  | 78992446  | NC_000017.10 |
| cg19307406 | 3.98E-07 | 5.20E-08 | -5.67 | 7.363471  | -9.93E-02 | 167874258 | 167874381 | NC_000001.10 |
| cg07145398 | 3.98E-07 | 5.21E-08 | -5.67 | 7.3630202 | -3.21E-02 | 61523374  | 61523497  | NC_000017.10 |
| cg16723982 | 3.98E-07 | 5.21E-08 | -5.67 | 7.3630091 | -1.20E-01 | 40225618  | 40225741  | NC_000015.9  |
| cg07833397 | 3.99E-07 | 5.21E-08 | -5.66 | 7.3618893 | -6.25E-02 | 77811499  | 77811622  | NC_000017.10 |
| cg11645306 | 3.99E-07 | 5.21E-08 | -5.66 | 7.36165   | -1.20E-01 | 46474064  | 46474187  | NC_000018.9  |
| cg00748432 | 3.99E-07 | 5.22E-08 | -5.66 | 7.360705  | -9.49E-02 | 18042722  | 18042845  | NC_000022.10 |
| cg08301779 | 4.00E-07 | 5.22E-08 | -5.66 | 7.3599458 | -5.92E-02 | 79442206  | 79442329  | NC_000017.10 |
| cg12214451 | 4.00E-07 | 5.23E-08 | -5.66 | 7.3586856 | -1.09E-01 | 114900175 | 114900298 | NC_000004.11 |
| cg13844237 | 4.00E-07 | 5.23E-08 | -5.66 | 7.3577826 | -1.07E-01 | 128284824 | 128284947 | NC_000009.11 |
| cg26800237 | 4.00E-07 | 5.24E-08 | -5.66 | 7.3576617 | -6.10E-02 | 16593426  | 16593549  | NC_000017.10 |
| cg06178383 | 4.01E-07 | 5.24E-08 | -5.66 | 7.3559661 | -1.13E-01 | 23213204  | 23213327  | NC_000016.9  |
| cg22321671 | 4.01E-07 | 5.25E-08 | -5.66 | 7.3558523 | -8.30E-02 | 32015226  | 32015349  | NC_000006.11 |
| cg21481966 | 4.01E-07 | 5.25E-08 | -5.66 | 7.3554135 | -8.15E-02 | 233280609 | 233280732 | NC_000002.11 |

|            |          |          |       |           |           |           |           |              |
|------------|----------|----------|-------|-----------|-----------|-----------|-----------|--------------|
| cg10960675 | 4.01E-07 | 5.25E-08 | -5.66 | 7.354835  | -4.73E-02 | 53994559  | 53994682  | NC_000002.11 |
| cg13823003 | 4.01E-07 | 5.25E-08 | -5.66 | 7.3547661 | -5.89E-02 | 72856049  | 72856172  | NC_000017.10 |
| cg14470594 | 4.02E-07 | 5.25E-08 | -5.66 | 7.3546457 | -2.61E-02 | 196014778 | 196014901 | NC_000003.11 |
| cg14530382 | 4.02E-07 | 5.26E-08 | -5.66 | 7.3538586 | -1.43E-01 | 6753525   | 6753648   | NC_000019.9  |
| cg02748419 | 4.02E-07 | 5.26E-08 | -5.66 | 7.3535879 | -1.24E-01 | 141868612 | 141868735 | NC_000003.11 |
| cg02053006 | 4.02E-07 | 5.26E-08 | -5.66 | 7.3534822 | -3.74E-02 | 238330319 | 238330442 | NC_000002.11 |
| cg25447461 | 4.02E-07 | 5.26E-08 | -5.66 | 7.3530056 | -3.61E-02 | 27920715  | 27920838  | NC_000017.10 |
| cg07238699 | 4.02E-07 | 5.26E-08 | -5.66 | 7.3528051 | -6.30E-02 | 71929673  | 71929796  | NC_000005.9  |
| cg13470735 | 4.02E-07 | 5.26E-08 | -5.66 | 7.3522378 | -7.62E-02 | 156678548 | 156678671 | NC_000001.10 |
| cg18725681 | 4.03E-07 | 5.28E-08 | -5.66 | 7.3497344 | -9.72E-02 | 42940213  | 42940336  | NC_000020.10 |
| cg19899972 | 4.04E-07 | 5.28E-08 | -5.66 | 7.3495565 | -1.30E-01 | 61624321  | 61624444  | NC_000001.10 |
| cg07136035 | 4.04E-07 | 5.28E-08 | -5.66 | 7.3492758 | -4.98E-02 | 8081484   | 8081607   | NC_000004.11 |
| cg15058557 | 4.04E-07 | 5.28E-08 | -5.66 | 7.3491141 | -8.76E-02 | 33169666  | 33169789  | NC_000001.10 |
| cg14533068 | 4.04E-07 | 5.28E-08 | -5.66 | 7.3487048 | -8.63E-02 | 158507953 | 158508076 | NC_000006.11 |
| cg03953069 | 4.04E-07 | 5.29E-08 | -5.66 | 7.3476545 | -9.07E-02 | 41948998  | 41949121  | NC_000019.9  |
| cg20338276 | 4.04E-07 | 5.29E-08 | -5.66 | 7.3474677 | -8.55E-02 | 73246585  | 73246708  | NC_000017.10 |
| cg24492140 | 4.04E-07 | 5.29E-08 | -5.66 | 7.3471938 | -8.49E-02 | 34392781  | 34392904  | NC_000013.10 |
| cg17477806 | 4.05E-07 | 5.30E-08 | -5.66 | 7.346566  | -8.41E-02 | 4543865   | 4543988   | NC_000019.9  |
| cg21587650 | 4.05E-07 | 5.30E-08 | -5.66 | 7.34655   | -5.11E-02 | 95044711  | 95044834  | NC_000012.11 |
| cg22902964 | 4.05E-07 | 5.30E-08 | -5.66 | 7.3454085 | -8.50E-02 | 40746370  | 40746493  | NC_000013.10 |
| cg02927448 | 4.05E-07 | 5.30E-08 | -5.66 | 7.3453823 | -9.77E-02 | 100532162 | 100532285 | NC_000012.11 |
| cg18335681 | 4.05E-07 | 5.30E-08 | -5.66 | 7.3449545 | -9.73E-02 | 1354361   | 1354484   | NC_000019.9  |
| cg09253762 | 4.06E-07 | 5.31E-08 | -5.66 | 7.3437646 | -5.52E-02 | 58165392  | 58165515  | NC_000012.11 |
| cg06391046 | 4.06E-07 | 5.31E-08 | -5.66 | 7.343188  | -4.82E-02 | 81478765  | 81478888  | NC_000016.9  |
| cg19128723 | 4.06E-07 | 5.32E-08 | -5.66 | 7.3421734 | -1.32E-02 | 105668237 | 105668360 | NC_000010.10 |

|            |          |          |       |           |           |           |           |              |
|------------|----------|----------|-------|-----------|-----------|-----------|-----------|--------------|
| cg03722525 | 4.07E-07 | 5.32E-08 | -5.66 | 7.3417896 | -5.00E-02 | 67381554  | 67381677  | NC_000011.9  |
| cg19724344 | 4.07E-07 | 5.32E-08 | -5.66 | 7.3416675 | -4.23E-02 | 877647    | 877770    | NC_000001.10 |
| cg25373430 | 4.07E-07 | 5.32E-08 | -5.66 | 7.3416297 | -1.13E-01 | 35220531  | 35220654  | NC_000001.10 |
| cg24038794 | 4.07E-07 | 5.32E-08 | -5.66 | 7.3413367 | -9.60E-02 | 74980569  | 74980692  | NC_000002.11 |
| cg23197862 | 4.07E-07 | 5.32E-08 | -5.66 | 7.3411574 | -1.44E-01 | 135732917 | 135733040 | NC_000008.10 |
| cg07906724 | 4.07E-07 | 5.33E-08 | -5.66 | 7.3406804 | -1.41E-01 | 42623946  | 42624069  | NC_000008.10 |
| cg18115693 | 4.07E-07 | 5.33E-08 | -5.66 | 7.3405998 | -6.10E-02 | 4968519   | 4968642   | NC_000019.9  |
| cg24356321 | 4.07E-07 | 5.33E-08 | -5.66 | 7.3404685 | -3.26E-02 | 186344702 | 186344825 | NC_000001.10 |
| cg00039505 | 4.07E-07 | 5.33E-08 | -5.66 | 7.3403626 | -4.00E-02 | 85855180  | 85855303  | NC_000016.9  |
| cg09274562 | 4.07E-07 | 5.33E-08 | -5.66 | 7.3398567 | -5.57E-02 | 88943375  | 88943498  | NC_000014.8  |
| cg21192698 | 4.07E-07 | 5.33E-08 | -5.66 | 7.3398253 | -9.96E-02 | 77256905  | 77257028  | NC_000018.9  |
| cg13593479 | 4.07E-07 | 5.34E-08 | -5.66 | 7.3392273 | -2.38E-02 | 149111749 | 149111872 | NC_000005.9  |
| cg19911494 | 4.08E-07 | 5.34E-08 | -5.66 | 7.3386488 | -1.26E-01 | 9169758   | 9169881   | NC_000005.9  |
| cg15512715 | 4.08E-07 | 5.34E-08 | -5.66 | 7.33796   | -1.14E-01 | 101539455 | 101539578 | NC_000014.8  |
| cg26681687 | 4.08E-07 | 5.34E-08 | -5.66 | 7.3378564 | -6.16E-02 | 77874155  | 77874278  | NC_000004.11 |
| cg20327862 | 4.08E-07 | 5.35E-08 | -5.66 | 7.3369787 | -5.45E-02 | 99076531  | 99076654  | NC_000008.10 |
| cg00527307 | 4.09E-07 | 5.35E-08 | -5.66 | 7.3365971 | -7.11E-02 | 34208894  | 34209017  | NC_000013.10 |
| cg07711556 | 4.09E-07 | 5.35E-08 | -5.66 | 7.336592  | -4.73E-02 | 111767584 | 111767707 | NC_000010.10 |
| cg24642523 | 4.09E-07 | 5.36E-08 | -5.66 | 7.3354458 | -7.87E-02 | 65009265  | 65009388  | NC_000014.8  |
| cg17104766 | 4.09E-07 | 5.36E-08 | -5.66 | 7.3348957 | -1.10E-01 | 66617333  | 66617456  | NC_000002.11 |
| cg10485411 | 4.10E-07 | 5.36E-08 | -5.66 | 7.3338756 | -4.75E-02 | 2328797   | 2328920   | NC_000007.13 |
| cg03040848 | 4.10E-07 | 5.37E-08 | -5.66 | 7.333776  | -9.77E-02 | 88993053  | 88993176  | NC_000016.9  |
| cg19035966 | 4.10E-07 | 5.37E-08 | -5.66 | 7.3324946 | -1.08E-01 | 143254408 | 143254531 | NC_000008.10 |
| cg17517390 | 4.10E-07 | 5.37E-08 | -5.66 | 7.3322855 | -5.61E-02 | 79108224  | 79108347  | NC_000017.10 |
| cg02345399 | 4.10E-07 | 5.38E-08 | -5.66 | 7.3319387 | -9.78E-02 | 65195039  | 65195162  | NC_000011.9  |

|            |          |          |       |           |           |           |           |              |
|------------|----------|----------|-------|-----------|-----------|-----------|-----------|--------------|
| cg22047013 | 4.11E-07 | 5.38E-08 | -5.66 | 7.3311099 | -1.00E-01 | 169593    | 169716    | NC_000005.9  |
| cg26631144 | 4.11E-07 | 5.39E-08 | -5.66 | 7.3290136 | -6.15E-02 | 30670260  | 30670383  | NC_000008.10 |
| cg23913350 | 4.11E-07 | 5.39E-08 | -5.66 | 7.3289922 | -6.84E-02 | 121414270 | 121414393 | NC_000005.9  |
| cg01667493 | 4.13E-07 | 5.41E-08 | -5.66 | 7.3253387 | -1.01E-01 | 101466750 | 101466873 | NC_000007.13 |
| cg20430841 | 4.13E-07 | 5.42E-08 | -5.66 | 7.3244821 | -1.60E-01 | 48998701  | 48998824  | NC_000020.10 |
| cg23389651 | 4.14E-07 | 5.42E-08 | -5.66 | 7.3233018 | -3.66E-02 | 95327390  | 95327513  | NC_000013.10 |
| cg10351829 | 4.14E-07 | 5.42E-08 | -5.66 | 7.3232168 | -8.30E-02 | 134661550 | 134661673 | NC_000010.10 |
| cg01646610 | 4.14E-07 | 5.43E-08 | -5.66 | 7.3217363 | -3.27E-02 | 19976784  | 19976907  | NC_000019.9  |
| cg20519665 | 4.14E-07 | 5.43E-08 | -5.66 | 7.3216169 | -6.38E-02 | 136497758 | 136497881 | NC_000003.11 |
| cg21388543 | 4.15E-07 | 5.44E-08 | -5.66 | 7.3208724 | -6.30E-02 | 129793080 | 129793203 | NC_000007.13 |
| cg15107884 | 4.15E-07 | 5.44E-08 | -5.66 | 7.3204208 | -2.84E-02 | 38180343  | 38180466  | NC_000003.11 |
| cg02088470 | 4.15E-07 | 5.44E-08 | -5.66 | 7.3199886 | -8.89E-02 | 1551251   | 1551374   | NC_000010.10 |
| cg03282600 | 4.16E-07 | 5.45E-08 | -5.66 | 7.3187498 | -9.44E-02 | 129744870 | 129744993 | NC_000003.11 |
| cg21885995 | 4.16E-07 | 5.45E-08 | -5.66 | 7.3179877 | -1.02E-01 | 74069256  | 74069379  | NC_000017.10 |
| cg21725265 | 4.16E-07 | 5.45E-08 | -5.66 | 7.3176654 | -1.68E-02 | 19051201  | 19051324  | NC_000019.9  |
| cg02121104 | 4.16E-07 | 5.46E-08 | -5.66 | 7.3173049 | -4.94E-02 | 75470314  | 75470437  | NC_000014.8  |
| cg13643774 | 4.17E-07 | 5.47E-08 | -5.66 | 7.3154292 | -2.20E-02 | 132176807 | 132176930 | NC_000009.11 |
| cg13940160 | 4.17E-07 | 5.47E-08 | -5.66 | 7.3146465 | -5.42E-02 | 49548413  | 49548536  | NC_000020.10 |
| cg23197460 | 4.17E-07 | 5.47E-08 | -5.65 | 7.314277  | -4.77E-02 | 144436129 | 144436252 | NC_000004.11 |
| cg20575915 | 4.18E-07 | 5.47E-08 | -5.65 | 7.3141327 | -2.31E-02 | 204399975 | 204400098 | NC_000002.11 |
| cg23151014 | 4.18E-07 | 5.48E-08 | -5.65 | 7.313553  | -1.45E-01 | 2418311   | 2418434   | NC_000004.11 |
| cg20297566 | 4.19E-07 | 5.49E-08 | -5.65 | 7.3116452 | -3.38E-02 | 99979976  | 99980099  | NC_000003.11 |
| cg02645135 | 4.19E-07 | 5.49E-08 | -5.65 | 7.3115526 | -1.30E-01 | 69516238  | 69516361  | NC_000016.9  |
| cg23192899 | 4.19E-07 | 5.49E-08 | -5.65 | 7.3115399 | -3.38E-02 | 55746287  | 55746410  | NC_000002.11 |
| cg12265878 | 4.19E-07 | 5.49E-08 | -5.65 | 7.3108275 | -1.70E-01 | 41995442  | 41995565  | NC_000007.13 |

|            |          |          |       |           |           |           |           |              |
|------------|----------|----------|-------|-----------|-----------|-----------|-----------|--------------|
| cg18067096 | 4.19E-07 | 5.50E-08 | -5.65 | 7.3104139 | -1.18E-01 | 223598699 | 223598822 | NC_000002.11 |
| cg20634127 | 4.19E-07 | 5.50E-08 | -5.65 | 7.3101722 | -2.02E-02 | 70964082  | 70964205  | NC_000011.9  |
| cg01188235 | 4.19E-07 | 5.50E-08 | -5.65 | 7.3098832 | -7.92E-02 | 62535090  | 62535213  | NC_000015.9  |
| cg09556700 | 4.20E-07 | 5.50E-08 | -5.65 | 7.3090682 | -1.13E-01 | 2230668   | 2230791   | NC_000001.10 |
| cg14326991 | 4.20E-07 | 5.51E-08 | -5.65 | 7.3087645 | -1.14E-01 | 46889760  | 46889883  | NC_000006.11 |
| cg01112899 | 4.20E-07 | 5.51E-08 | -5.65 | 7.3081391 | -9.36E-02 | 44278309  | 44278432  | NC_000007.13 |
| cg06946838 | 4.20E-07 | 5.51E-08 | -5.65 | 7.3079417 | -1.37E-01 | 114563609 | 114563732 | NC_000007.13 |
| cg06886827 | 4.20E-07 | 5.51E-08 | -5.65 | 7.3076611 | -6.75E-02 | 242954224 | 242954347 | NC_000002.11 |
| cg09971591 | 4.20E-07 | 5.51E-08 | -5.65 | 7.3074513 | -1.01E-01 | 131525196 | 131525319 | NC_000002.11 |
| cg23530619 | 4.20E-07 | 5.51E-08 | -5.65 | 7.3074407 | -9.04E-02 | 87441563  | 87441686  | NC_000005.9  |
| cg05715751 | 4.20E-07 | 5.52E-08 | -5.65 | 7.306988  | -1.09E-01 | 79391071  | 79391194  | NC_000017.10 |
| cg11874426 | 4.20E-07 | 5.52E-08 | -5.65 | 7.306653  | -8.97E-02 | 118781731 | 118781854 | NC_000011.9  |
| cg12762449 | 4.21E-07 | 5.52E-08 | -5.65 | 7.3064522 | -5.86E-02 | 113672808 | 113672931 | NC_000013.10 |
| cg07513768 | 4.21E-07 | 5.52E-08 | -5.65 | 7.3062778 | -1.15E-01 | 69744528  | 69744651  | NC_000015.9  |
| cg07243762 | 4.21E-07 | 5.52E-08 | -5.65 | 7.3062299 | -1.23E-01 | 125030744 | 125030867 | NC_000012.11 |
| cg13077745 | 4.21E-07 | 5.52E-08 | -5.65 | 7.3061538 | -9.20E-02 | 60623592  | 60623715  | NC_000011.9  |
| cg08996748 | 4.21E-07 | 5.52E-08 | -5.65 | 7.305627  | -1.05E-01 | 40651036  | 40651159  | NC_000015.9  |
| cg20466045 | 4.21E-07 | 5.53E-08 | -5.65 | 7.3047956 | -5.24E-02 | 30445936  | 30446059  | NC_000021.8  |
| cg22230229 | 4.22E-07 | 5.53E-08 | -5.65 | 7.3038326 | -1.05E-01 | 79372254  | 79372377  | NC_000017.10 |
| cg04448477 | 4.22E-07 | 5.53E-08 | -5.65 | 7.3034996 | -1.17E-01 | 55095148  | 55095271  | NC_000004.11 |
| cg05416643 | 4.22E-07 | 5.54E-08 | -5.65 | 7.3025967 | -1.17E-02 | 48557332  | 48557455  | NC_000018.9  |
| cg27278980 | 4.22E-07 | 5.54E-08 | -5.65 | 7.3023894 | -7.45E-02 | 54475673  | 54475796  | NC_000012.11 |
| cg25315252 | 4.22E-07 | 5.54E-08 | -5.65 | 7.3017952 | -4.05E-02 | 81839033  | 81839156  | NC_000010.10 |
| cg14758812 | 4.22E-07 | 5.54E-08 | -5.65 | 7.3017787 | -9.39E-02 | 103090818 | 103090941 | NC_000010.10 |
| cg11939346 | 4.23E-07 | 5.55E-08 | -5.65 | 7.3007195 | -6.81E-02 | 123813454 | 123813577 | NC_000003.11 |

|            |          |          |       |           |           |           |           |              |
|------------|----------|----------|-------|-----------|-----------|-----------|-----------|--------------|
| cg18086594 | 4.23E-07 | 5.56E-08 | -5.65 | 7.2997333 | -3.48E-02 | 44803244  | 44803367  | NC_000003.11 |
| cg18174075 | 4.24E-07 | 5.56E-08 | -5.65 | 7.2988273 | -9.66E-02 | 96443165  | 96443288  | NC_000010.10 |
| cg07783491 | 4.24E-07 | 5.57E-08 | -5.65 | 7.2980172 | -8.27E-02 | 23029611  | 23029734  | NC_000013.10 |
| cg08183490 | 4.24E-07 | 5.57E-08 | -5.65 | 7.2978316 | -2.80E-02 | 212004261 | 212004384 | NC_000001.10 |
| cg14145667 | 4.25E-07 | 5.58E-08 | -5.65 | 7.296197  | -1.04E-01 | 909533    | 909656    | NC_000019.9  |
| cg11001780 | 4.25E-07 | 5.58E-08 | -5.65 | 7.2961711 | -8.32E-02 | 623056    | 623179    | NC_000010.10 |
| cg04196516 | 4.25E-07 | 5.58E-08 | -5.65 | 7.2954811 | -1.03E-01 | 50667955  | 50668078  | NC_000016.9  |
| cg16652790 | 4.25E-07 | 5.58E-08 | -5.65 | 7.2951713 | -9.32E-03 | 776895    | 777018    | NC_000016.9  |
| cg24334803 | 4.25E-07 | 5.59E-08 | -5.65 | 7.2942634 | -3.79E-02 | 249132834 | 249132957 | NC_000001.10 |
| cg15260921 | 4.26E-07 | 5.59E-08 | -5.65 | 7.2938916 | -1.04E-01 | 226308960 | 226309083 | NC_000001.10 |
| cg05772155 | 4.26E-07 | 5.59E-08 | -5.65 | 7.2937549 | -9.71E-02 | 65801432  | 65801555  | NC_000010.10 |
| cg25110511 | 4.26E-07 | 5.59E-08 | -5.65 | 7.2934584 | -3.00E-02 | 32821376  | 32821499  | NC_000006.11 |
| cg05967340 | 4.26E-07 | 5.60E-08 | -5.65 | 7.2929171 | -9.85E-02 | 54146616  | 54146739  | NC_000016.9  |
| cg19537645 | 4.26E-07 | 5.60E-08 | -5.65 | 7.292499  | -1.51E-02 | 172199418 | 172199541 | NC_000005.9  |
| cg09086442 | 4.26E-07 | 5.60E-08 | -5.65 | 7.2924124 | -1.10E-01 | 168079212 | 168079335 | NC_000006.11 |
| cg20674701 | 4.26E-07 | 5.60E-08 | -5.65 | 7.2922544 | -8.91E-02 | 10591081  | 10591204  | NC_000008.10 |
| cg02956542 | 4.26E-07 | 5.60E-08 | -5.65 | 7.2920912 | -8.31E-02 | 153321421 | 153321544 | NC_000001.10 |
| cg05203213 | 4.26E-07 | 5.60E-08 | -5.65 | 7.2918    | -9.14E-02 | 73419551  | 73419674  | NC_000002.11 |
| cg18866792 | 4.27E-07 | 5.61E-08 | -5.65 | 7.2910447 | -1.23E-01 | 217152056 | 217152179 | NC_000002.11 |
| cg11014582 | 4.27E-07 | 5.61E-08 | -5.65 | 7.2907464 | -1.11E-01 | 76333727  | 76333850  | NC_000013.10 |
| cg06496454 | 4.27E-07 | 5.61E-08 | -5.65 | 7.2907269 | -8.30E-02 | 4807062   | 4807185   | NC_000007.13 |
| cg23201830 | 4.27E-07 | 5.61E-08 | -5.65 | 7.2902876 | -1.08E-01 | 228735790 | 228735913 | NC_000002.11 |
| cg08655662 | 4.27E-07 | 5.61E-08 | -5.65 | 7.290171  | -1.37E-01 | 41438590  | 41438713  | NC_000006.11 |
| cg02936468 | 4.27E-07 | 5.61E-08 | -5.65 | 7.2899001 | -1.13E-02 | 77642970  | 77643093  | NC_000009.11 |
| cg06777902 | 4.27E-07 | 5.61E-08 | -5.65 | 7.2896499 | -8.12E-02 | 127622996 | 127623119 | NC_000010.10 |



|            |          |          |       |           |           |           |           |              |
|------------|----------|----------|-------|-----------|-----------|-----------|-----------|--------------|
| cg00951869 | 4.27E-07 | 5.62E-08 | -5.65 | 7.2893668 | -9.05E-02 | 24805349  | 24805472  | NC_000014.8  |
| cg07415373 | 4.27E-07 | 5.62E-08 | -5.65 | 7.2892933 | -9.64E-02 | 27153015  | 27153138  | NC_000022.10 |
| cg22663995 | 4.28E-07 | 5.62E-08 | -5.65 | 7.2887645 | -2.19E-02 | 24921616  | 24921739  | NC_000022.10 |
| cg17392047 | 4.28E-07 | 5.62E-08 | -5.65 | 7.2886592 | -9.92E-02 | 65247138  | 65247261  | NC_000011.9  |
| cg14345882 | 4.28E-07 | 5.62E-08 | -5.65 | 7.288377  | -1.36E-01 | 26364793  | 26364916  | NC_000006.11 |
| cg17657737 | 4.28E-07 | 5.63E-08 | -5.65 | 7.2877675 | -6.14E-02 | 45224950  | 45225073  | NC_000003.11 |
| cg01422243 | 4.28E-07 | 5.63E-08 | -5.65 | 7.286912  | -8.98E-02 | 22725309  | 22725432  | NC_000010.10 |
| cg20012366 | 4.28E-07 | 5.63E-08 | -5.65 | 7.2865735 | -8.25E-02 | 76813828  | 76813951  | NC_000011.9  |
| cg25934495 | 4.29E-07 | 5.64E-08 | -5.65 | 7.2858556 | -6.45E-02 | 138200136 | 138200259 | NC_000006.11 |
| cg26857378 | 4.29E-07 | 5.64E-08 | -5.65 | 7.2858042 | -2.18E-02 | 1102112   | 1102235   | NC_000010.10 |
| cg03752330 | 4.29E-07 | 5.64E-08 | -5.65 | 7.2847506 | -2.63E-02 | 45004907  | 45005030  | NC_000019.9  |
| cg13655303 | 4.29E-07 | 5.64E-08 | -5.65 | 7.2847061 | -1.38E-01 | 56134648  | 56134771  | NC_000020.10 |
| cg12311644 | 4.30E-07 | 5.65E-08 | -5.65 | 7.2840692 | -3.45E-02 | 31687046  | 31687169  | NC_000022.10 |
| cg26585100 | 4.30E-07 | 5.65E-08 | -5.65 | 7.2836331 | -9.93E-02 | 84078960  | 84079083  | NC_000016.9  |
| cg07788061 | 4.30E-07 | 5.66E-08 | -5.65 | 7.2820448 | -7.36E-02 | 13207239  | 13207362  | NC_000019.9  |
| cg10048349 | 4.30E-07 | 5.66E-08 | -5.65 | 7.282003  | -1.19E-01 | 111783267 | 111783390 | NC_000011.9  |
| cg04416734 | 4.31E-07 | 5.66E-08 | -5.65 | 7.2814287 | -1.02E-01 | 30075192  | 30075315  | NC_000016.9  |
| cg24298684 | 4.31E-07 | 5.66E-08 | -5.65 | 7.2811812 | -8.84E-02 | 54823878  | 54824001  | NC_000020.10 |
| cg03078520 | 4.31E-07 | 5.67E-08 | -5.65 | 7.2808513 | -9.64E-02 | 18463400  | 18463523  | NC_000022.10 |
| cg14792904 | 4.31E-07 | 5.67E-08 | -5.65 | 7.2807615 | -2.52E-02 | 88299623  | 88299746  | NC_000006.11 |
| cg26984593 | 4.31E-07 | 5.67E-08 | -5.65 | 7.2804588 | -8.94E-02 | 14051636  | 14051759  | NC_000010.10 |
| cg14261863 | 4.31E-07 | 5.67E-08 | -5.65 | 7.2798782 | -3.36E-02 | 45035638  | 45035761  | NC_000020.10 |
| cg07457785 | 4.32E-07 | 5.68E-08 | -5.65 | 7.2791071 | -3.86E-02 | 29760096  | 29760219  | NC_000006.11 |
| cg11237792 | 4.32E-07 | 5.68E-08 | -5.65 | 7.2786666 | -1.10E-01 | 178484058 | 178484181 | NC_000002.11 |
| cg24119674 | 4.32E-07 | 5.68E-08 | -5.65 | 7.2776908 | -1.19E-01 | 79648146  | 79648269  | NC_000010.10 |

|            |          |          |       |           |           |           |           |              |
|------------|----------|----------|-------|-----------|-----------|-----------|-----------|--------------|
| cg13446863 | 4.32E-07 | 5.69E-08 | -5.65 | 7.2774587 | -8.54E-02 | 139259726 | 139259849 | NC_000009.11 |
| cg01152374 | 4.32E-07 | 5.69E-08 | -5.65 | 7.2771173 | -1.32E-01 | 69817071  | 69817194  | NC_000015.9  |
| cg24382249 | 4.33E-07 | 5.69E-08 | -5.65 | 7.276806  | -9.86E-02 | 66947171  | 66947294  | NC_000015.9  |
| cg17189494 | 4.33E-07 | 5.69E-08 | -5.65 | 7.2764738 | -5.36E-02 | 11740665  | 11740788  | NC_000001.10 |
| cg24874612 | 4.33E-07 | 5.69E-08 | -5.65 | 7.2763271 | -1.20E-01 | 4689765   | 4689888   | NC_000017.10 |
| cg08423507 | 4.33E-07 | 5.70E-08 | -5.65 | 7.2756038 | -8.45E-02 | 51177982  | 51178105  | NC_000022.10 |
| cg04630848 | 4.33E-07 | 5.70E-08 | -5.65 | 7.2754477 | -4.22E-02 | 62886664  | 62886787  | NC_000020.10 |
| cg01468309 | 4.33E-07 | 5.70E-08 | -5.65 | 7.2745095 | -4.53E-02 | 12398904  | 12399027  | NC_000011.9  |
| cg18574813 | 4.35E-07 | 5.72E-08 | -5.65 | 7.2719982 | -9.54E-02 | 72381308  | 72381431  | NC_000011.9  |
| cg03160935 | 4.35E-07 | 5.72E-08 | -5.65 | 7.2712085 | -1.00E-01 | 132242593 | 132242716 | NC_000009.11 |
| cg06285727 | 4.35E-07 | 5.72E-08 | -5.65 | 7.2709967 | -9.84E-02 | 72524028  | 72524151  | NC_000011.9  |
| cg21838952 | 4.35E-07 | 5.72E-08 | -5.65 | 7.2709242 | -3.87E-02 | 64197566  | 64197689  | NC_000015.9  |
| cg13173567 | 4.35E-07 | 5.73E-08 | -5.65 | 7.2705615 | -1.03E-01 | 9172290   | 9172413   | NC_000011.9  |
| cg10994639 | 4.35E-07 | 5.73E-08 | -5.65 | 7.2702814 | -8.46E-02 | 167789455 | 167789578 | NC_000001.10 |
| cg08899471 | 4.36E-07 | 5.73E-08 | -5.65 | 7.2695223 | -1.02E-01 | 1058439   | 1058562   | NC_000001.10 |
| cg00491021 | 4.36E-07 | 5.73E-08 | -5.65 | 7.2689541 | -1.38E-01 | 42064880  | 42065003  | NC_000008.10 |
| cg13063704 | 4.36E-07 | 5.74E-08 | -5.65 | 7.2684385 | -4.10E-02 | 48885665  | 48885788  | NC_000003.11 |
| cg01504447 | 4.36E-07 | 5.74E-08 | -5.65 | 7.2684236 | -1.36E-01 | 31041221  | 31041344  | NC_000013.10 |
| cg07041428 | 4.36E-07 | 5.74E-08 | -5.65 | 7.2680124 | -1.22E-01 | 1763019   | 1763142   | NC_000004.11 |
| cg13807386 | 4.36E-07 | 5.74E-08 | -5.65 | 7.267307  | -6.59E-02 | 139098502 | 139098625 | NC_000009.11 |
| cg14905466 | 4.37E-07 | 5.75E-08 | -5.65 | 7.2666881 | -9.19E-02 | 134499143 | 134499266 | NC_000006.11 |
| cg13597417 | 4.37E-07 | 5.75E-08 | -5.65 | 7.2657424 | -7.52E-02 | 18380354  | 18380477  | NC_000017.10 |
| cg25961816 | 4.37E-07 | 5.75E-08 | -5.65 | 7.2656665 | -1.32E-01 | 121972775 | 121972898 | NC_000006.11 |
| cg22219450 | 4.38E-07 | 5.76E-08 | -5.64 | 7.2642326 | -9.75E-02 | 34244798  | 34244921  | NC_000011.9  |
| cg12960305 | 4.38E-07 | 5.77E-08 | -5.64 | 7.2634286 | -1.36E-02 | 2794616   | 2794739   | NC_000004.11 |

|                |          |          |       |           |           |           |           |              |
|----------------|----------|----------|-------|-----------|-----------|-----------|-----------|--------------|
| cg02160738     | 4.38E-07 | 5.77E-08 | -5.64 | 7.2631813 | -9.04E-02 | 60961816  | 60961939  | NC_000011.9  |
| cg11674763     | 4.38E-07 | 5.77E-08 | -5.64 | 7.2627165 | -9.34E-02 | 8833332   | 8833455   | NC_000002.11 |
| cg14485377     | 4.38E-07 | 5.77E-08 | -5.64 | 7.2624462 | -3.61E-02 | 52931826  | 52931949  | NC_000003.11 |
| cg02325160     | 4.39E-07 | 5.78E-08 | -5.64 | 7.2619045 | -1.06E-01 | 187621836 | 187621959 | NC_000004.11 |
| cg27645858     | 4.39E-07 | 5.78E-08 | -5.64 | 7.26134   | -6.60E-02 | 238005812 | 238005935 | NC_000002.11 |
| cg13655082     | 4.39E-07 | 5.78E-08 | -5.64 | 7.2612547 | -1.00E-01 | 125109046 | 125109169 | NC_000009.11 |
| cg23627948     | 4.39E-07 | 5.78E-08 | -5.64 | 7.2608935 | -1.45E-01 | 2760692   | 2760815   | NC_000007.13 |
| cg06569121     | 4.39E-07 | 5.78E-08 | -5.64 | 7.2607715 | -7.78E-02 | 38459667  | 38459790  | NC_000008.10 |
| cg11254847     | 4.39E-07 | 5.78E-08 | -5.64 | 7.2607368 | -9.68E-02 | 1435489   | 1435612   | NC_000011.9  |
| ch.2.71774667F | 4.39E-07 | 5.78E-08 | -5.64 | 7.2606448 | -7.37E-02 | 71921159  | 71921282  | NC_000002.11 |
| cg23976981     | 4.39E-07 | 5.79E-08 | -5.64 | 7.2600803 | -1.20E-01 | 22560659  | 22560782  | NC_000013.10 |
| cg23620622     | 4.39E-07 | 5.79E-08 | -5.64 | 7.2599948 | -1.14E-02 | 202508287 | 202508410 | NC_000002.11 |
| cg26490758     | 4.40E-07 | 5.79E-08 | -5.64 | 7.2592743 | -1.48E-01 | 3372937   | 3373060   | NC_000010.10 |
| ch.20.661824R  | 4.40E-07 | 5.80E-08 | -5.64 | 7.2577952 | -2.08E-02 | 32868459  | 32868582  | NC_000020.10 |
| cg11786833     | 4.41E-07 | 5.80E-08 | -5.64 | 7.2572172 | -8.04E-02 | 41884697  | 41884820  | NC_000001.10 |
| cg15402619     | 4.41E-07 | 5.81E-08 | -5.64 | 7.2565742 | -1.99E-02 | 62205886  | 62206009  | NC_000020.10 |
| cg01193769     | 4.41E-07 | 5.82E-08 | -5.64 | 7.2554537 | -9.81E-02 | 55107097  | 55107220  | NC_000018.9  |
| cg11363229     | 4.42E-07 | 5.82E-08 | -5.64 | 7.2552847 | -1.03E-01 | 196065320 | 196065443 | NC_000003.11 |
| cg04932840     | 4.42E-07 | 5.82E-08 | -5.64 | 7.2547683 | -8.83E-02 | 34077141  | 34077264  | NC_000017.10 |
| cg06873916     | 4.42E-07 | 5.82E-08 | -5.64 | 7.2543443 | -1.89E-01 | 89410196  | 89410319  | NC_000016.9  |
| cg05129572     | 4.42E-07 | 5.82E-08 | -5.64 | 7.2542451 | -9.68E-02 | 56138634  | 56138757  | NC_000015.9  |
| cg04946561     | 4.42E-07 | 5.82E-08 | -5.64 | 7.2541942 | -9.24E-02 | 4902899   | 4903022   | NC_000019.9  |
| cg03249917     | 4.42E-07 | 5.82E-08 | -5.64 | 7.2539422 | -1.10E-01 | 1733988   | 1734111   | NC_000007.13 |
| cg15612186     | 4.42E-07 | 5.82E-08 | -5.64 | 7.2539103 | -3.82E-02 | 167523069 | 167523192 | NC_000001.10 |
| cg26419621     | 4.42E-07 | 5.83E-08 | -5.64 | 7.2536271 | -1.03E-02 | 28833787  | 28833910  | NC_000001.10 |

|               |          |          |       |           |           |           |           |              |
|---------------|----------|----------|-------|-----------|-----------|-----------|-----------|--------------|
| cg19005830    | 4.42E-07 | 5.83E-08 | -5.64 | 7.2533805 | -6.84E-02 | 55467175  | 55467298  | NC_000008.10 |
| cg20975733    | 4.42E-07 | 5.83E-08 | -5.64 | 7.2532493 | -1.20E-01 | 87155056  | 87155179  | NC_000015.9  |
| cg19492423    | 4.42E-07 | 5.83E-08 | -5.64 | 7.253037  | -1.25E-01 | 18700933  | 18701056  | NC_000019.9  |
| cg21453758    | 4.42E-07 | 5.83E-08 | -5.64 | 7.2529449 | -8.82E-02 | 80185943  | 80186066  | NC_000017.10 |
| cg03224650    | 4.42E-07 | 5.83E-08 | -5.64 | 7.2529429 | -1.17E-01 | 228559090 | 228559213 | NC_000001.10 |
| cg21485120    | 4.43E-07 | 5.83E-08 | -5.64 | 7.252738  | -5.70E-02 | 31707746  | 31707869  | NC_000006.11 |
| cg05293897    | 4.43E-07 | 5.83E-08 | -5.64 | 7.252605  | -1.11E-01 | 226913713 | 226913836 | NC_000002.11 |
| cg15856626    | 4.43E-07 | 5.84E-08 | -5.64 | 7.2517976 | -1.39E-01 | 140796013 | 140796136 | NC_000003.11 |
| cg03857553    | 4.43E-07 | 5.84E-08 | -5.64 | 7.2517154 | -8.28E-02 | 29976613  | 29976736  | NC_000022.10 |
| cg15058645    | 4.43E-07 | 5.84E-08 | -5.64 | 7.250762  | -1.25E-01 | 175528343 | 175528466 | NC_000002.11 |
| cg26371771    | 4.44E-07 | 5.85E-08 | -5.64 | 7.2493855 | -1.56E-02 | 49518360  | 49518483  | NC_000006.11 |
| cg05164406    | 4.44E-07 | 5.85E-08 | -5.64 | 7.2493624 | -1.19E-01 | 29830908  | 29831031  | NC_000016.9  |
| cg19015847    | 4.44E-07 | 5.85E-08 | -5.64 | 7.2488636 | -8.57E-02 | 40447561  | 40447684  | NC_000002.11 |
| cg27127272    | 4.44E-07 | 5.86E-08 | -5.64 | 7.2484373 | -9.83E-02 | 31377624  | 31377747  | NC_000013.10 |
| cg24856456    | 4.45E-07 | 5.86E-08 | -5.64 | 7.247753  | -3.52E-02 | 56923352  | 56923475  | NC_000008.10 |
| cg02131862    | 4.45E-07 | 5.86E-08 | -5.64 | 7.2476345 | -8.45E-02 | 31654844  | 31654967  | NC_000021.8  |
| cg16205850    | 4.45E-07 | 5.87E-08 | -5.64 | 7.2468095 | -4.44E-02 | 75118021  | 75118144  | NC_000015.9  |
| cg17787502    | 4.45E-07 | 5.87E-08 | -5.64 | 7.2458087 | -1.27E-01 | 123452994 | 123453117 | NC_000003.11 |
| cg00449189    | 4.46E-07 | 5.88E-08 | -5.64 | 7.2440964 | -6.50E-02 | 22011008  | 22011131  | NC_000022.10 |
| cg20100545    | 4.46E-07 | 5.88E-08 | -5.64 | 7.2440834 | -9.18E-02 | 19361158  | 19361281  | NC_000019.9  |
| cg16371477    | 4.46E-07 | 5.89E-08 | -5.64 | 7.243814  | -6.46E-02 | 24838828  | 24838951  | NC_000014.8  |
| cg03004985    | 4.46E-07 | 5.89E-08 | -5.64 | 7.2437349 | -7.16E-02 | 46735695  | 46735818  | NC_000003.11 |
| ch.7.2864275F | 4.47E-07 | 5.89E-08 | -5.64 | 7.2433357 | -3.01E-02 | 137653600 | 137653723 | NC_000007.13 |
| cg05774464    | 4.47E-07 | 5.89E-08 | -5.64 | 7.242838  | -4.58E-02 | 72738350  | 72738473  | NC_000007.13 |
| cg16808455    | 4.47E-07 | 5.90E-08 | -5.64 | 7.2418253 | -3.59E-02 | 12309071  | 12309194  | NC_000018.9  |

|                 |          |          |       |           |           |           |           |              |
|-----------------|----------|----------|-------|-----------|-----------|-----------|-----------|--------------|
| cg01794799      | 4.47E-07 | 5.90E-08 | -5.64 | 7.2415478 | -1.21E-01 | 69931877  | 69932000  | NC_000014.8  |
| cg02138756      | 4.48E-07 | 5.90E-08 | -5.64 | 7.2406551 | -2.33E-02 | 685505    | 685628    | NC_000012.11 |
| cg06234624      | 4.48E-07 | 5.91E-08 | -5.64 | 7.2404484 | -3.51E-02 | 27181559  | 27181682  | NC_000017.10 |
| cg10416593      | 4.48E-07 | 5.91E-08 | -5.64 | 7.2393464 | -7.17E-02 | 50966123  | 50966246  | NC_000022.10 |
| cg06024079      | 4.48E-07 | 5.91E-08 | -5.64 | 7.239154  | -5.93E-02 | 61905527  | 61905650  | NC_000017.10 |
| cg06815361      | 4.49E-07 | 5.92E-08 | -5.64 | 7.2378886 | -3.38E-02 | 42659977  | 42660100  | NC_000008.10 |
| cg08253704      | 4.49E-07 | 5.92E-08 | -5.64 | 7.2378675 | -1.35E-01 | 30653242  | 30653365  | NC_000006.11 |
| cg15771763      | 4.49E-07 | 5.92E-08 | -5.64 | 7.2373736 | -4.05E-02 | 83350584  | 83350707  | NC_000004.11 |
| cg01035190      | 4.49E-07 | 5.93E-08 | -5.64 | 7.2370615 | -9.14E-02 | 49560930  | 49561053  | NC_000019.9  |
| cg19502932      | 4.49E-07 | 5.93E-08 | -5.64 | 7.2363528 | -2.50E-02 | 6640663   | 6640786   | NC_000011.9  |
| cg02454464      | 4.50E-07 | 5.93E-08 | -5.64 | 7.2361304 | -3.61E-02 | 49957206  | 49957329  | NC_000019.9  |
| cg13596773      | 4.51E-07 | 5.94E-08 | -5.64 | 7.2339505 | -5.88E-02 | 123465968 | 123466091 | NC_000012.11 |
| cg03162506      | 4.51E-07 | 5.95E-08 | -5.64 | 7.2337369 | -8.55E-02 | 38580953  | 38581076  | NC_000022.10 |
| cg00777445      | 4.51E-07 | 5.95E-08 | -5.64 | 7.2330386 | -1.30E-01 | 48970357  | 48970480  | NC_000017.10 |
| cg07284379      | 4.51E-07 | 5.95E-08 | -5.64 | 7.2329529 | -8.36E-02 | 100681386 | 100681509 | NC_000015.9  |
| cg13977280      | 4.51E-07 | 5.95E-08 | -5.64 | 7.2329311 | -1.35E-01 | 3387765   | 3387888   | NC_000004.11 |
| ch.15.75593923F | 4.51E-07 | 5.95E-08 | -5.64 | 7.2324415 | -4.94E-02 | 77806868  | 77806991  | NC_000015.9  |
| cg07963147      | 4.52E-07 | 5.96E-08 | -5.64 | 7.2308301 | -1.03E-01 | 141086820 | 141086943 | NC_000003.11 |
| cg26247880      | 4.52E-07 | 5.97E-08 | -5.64 | 7.23051   | -8.69E-02 | 1131424   | 1131547   | NC_000017.10 |
| cg20478261      | 4.52E-07 | 5.97E-08 | -5.64 | 7.2302852 | -9.41E-02 | 79017421  | 79017544  | NC_000017.10 |
| cg03701805      | 4.53E-07 | 5.97E-08 | -5.64 | 7.2291028 | -6.84E-02 | 122452418 | 122452541 | NC_000005.9  |
| cg11963755      | 4.53E-07 | 5.98E-08 | -5.64 | 7.2287611 | -6.15E-02 | 214477205 | 214477328 | NC_000001.10 |
| cg00325139      | 4.54E-07 | 5.99E-08 | -5.64 | 7.2270278 | -1.30E-01 | 57178623  | 57178746  | NC_000006.11 |
| cg22808351      | 4.54E-07 | 5.99E-08 | -5.64 | 7.2262285 | -5.71E-02 | 156783633 | 156783756 | NC_000001.10 |
| cg18110822      | 4.54E-07 | 5.99E-08 | -5.64 | 7.2259748 | -6.24E-02 | 4459358   | 4459481   | NC_000003.11 |

|                |          |          |       |           |           |           |           |              |
|----------------|----------|----------|-------|-----------|-----------|-----------|-----------|--------------|
| cg10784110     | 4.54E-07 | 5.99E-08 | -5.64 | 7.2259272 | -6.34E-02 | 1173356   | 1173479   | NC_000001.10 |
| cg06829366     | 4.54E-07 | 6.00E-08 | -5.64 | 7.2250485 | -6.33E-02 | 65677377  | 65677500  | NC_000015.9  |
| cg13838843     | 4.55E-07 | 6.00E-08 | -5.64 | 7.2244454 | -1.36E-01 | 140419935 | 140420058 | NC_000009.11 |
| cg04497752     | 4.55E-07 | 6.01E-08 | -5.64 | 7.2234733 | -9.40E-02 | 1228946   | 1229069   | NC_000011.9  |
| cg22193385     | 4.55E-07 | 6.01E-08 | -5.64 | 7.2228506 | -8.18E-02 | 52638005  | 52638128  | NC_000012.11 |
| cg02876341     | 4.56E-07 | 6.02E-08 | -5.64 | 7.2222399 | -4.16E-02 | 140783585 | 140783708 | NC_000004.11 |
| cg00575769     | 4.56E-07 | 6.02E-08 | -5.64 | 7.2220347 | -7.15E-02 | 22079255  | 22079378  | NC_000008.10 |
| cg09659400     | 4.56E-07 | 6.02E-08 | -5.64 | 7.2215619 | -1.13E-01 | 43744673  | 43744796  | NC_000020.10 |
| cg05603367     | 4.56E-07 | 6.03E-08 | -5.64 | 7.2209011 | -5.89E-02 | 73511020  | 73511143  | NC_000002.11 |
| cg09829263     | 4.56E-07 | 6.03E-08 | -5.64 | 7.2208313 | -1.32E-01 | 49066969  | 49067092  | NC_000013.10 |
| cg02152985     | 4.57E-07 | 6.04E-08 | -5.64 | 7.2190094 | -1.19E-01 | 3064023   | 3064146   | NC_000002.11 |
| cg01180831     | 4.57E-07 | 6.04E-08 | -5.64 | 7.2187853 | -1.07E-01 | 89361469  | 89361592  | NC_000014.8  |
| cg23489403     | 4.57E-07 | 6.04E-08 | -5.64 | 7.2183206 | -3.59E-02 | 150247256 | 150247379 | NC_000006.11 |
| cg00220243     | 4.58E-07 | 6.04E-08 | -5.64 | 7.2178575 | -7.48E-02 | 132330135 | 132330258 | NC_000009.11 |
| cg14152948     | 4.58E-07 | 6.05E-08 | -5.64 | 7.2172633 | -2.98E-02 | 60382305  | 60382428  | NC_000018.9  |
| cg13921420     | 4.58E-07 | 6.06E-08 | -5.63 | 7.2157903 | -1.07E-01 | 27551747  | 27551870  | NC_000013.10 |
| cg25748524     | 4.59E-07 | 6.06E-08 | -5.63 | 7.2153523 | -7.60E-02 | 71969834  | 71969957  | NC_000017.10 |
| cg15597405     | 4.59E-07 | 6.06E-08 | -5.63 | 7.2152915 | -1.95E-02 | 4607312   | 4607435   | NC_000017.10 |
| cg20391556     | 4.59E-07 | 6.06E-08 | -5.63 | 7.2145849 | -2.67E-02 | 21357028  | 21357151  | NC_000022.10 |
| cg26925463     | 4.59E-07 | 6.06E-08 | -5.63 | 7.2145128 | -1.40E-01 | 134139309 | 134139432 | NC_000007.13 |
| cg07896735     | 4.60E-07 | 6.07E-08 | -5.63 | 7.2130356 | -1.75E-02 | 124030508 | 124030631 | NC_000009.11 |
| cg04554131     | 4.60E-07 | 6.08E-08 | -5.63 | 7.2123583 | -1.30E-01 | 25291540  | 25291663  | NC_000001.10 |
| ch.17.1132965F | 4.60E-07 | 6.08E-08 | -5.63 | 7.2115581 | -3.12E-02 | 41613916  | 41614039  | NC_000017.10 |
| cg21129006     | 4.60E-07 | 6.08E-08 | -5.63 | 7.2114772 | -1.36E-01 | 4023078   | 4023201   | NC_000012.11 |
| cg19653701     | 4.60E-07 | 6.08E-08 | -5.63 | 7.2114589 | -8.34E-02 | 24161085  | 24161208  | NC_000002.11 |

|            |          |          |       |           |           |           |           |              |
|------------|----------|----------|-------|-----------|-----------|-----------|-----------|--------------|
| cg15485440 | 4.60E-07 | 6.09E-08 | -5.63 | 7.2111575 | -1.88E-02 | 31632968  | 31633091  | NC_000006.11 |
| cg10785311 | 4.61E-07 | 6.09E-08 | -5.63 | 7.2097475 | -4.70E-02 | 50135515  | 50135638  | NC_000012.11 |
| cg07703783 | 4.62E-07 | 6.10E-08 | -5.63 | 7.2083749 | -5.33E-02 | 89070719  | 89070842  | NC_000016.9  |
| cg25806558 | 4.62E-07 | 6.10E-08 | -5.63 | 7.208343  | -1.28E-02 | 40058716  | 40058839  | NC_000004.11 |
| cg09225449 | 4.62E-07 | 6.10E-08 | -5.63 | 7.2083274 | -4.56E-02 | 138728367 | 138728490 | NC_000005.9  |
| cg16456337 | 4.62E-07 | 6.11E-08 | -5.63 | 7.2079874 | -2.30E-02 | 112312164 | 112312287 | NC_000005.9  |
| cg05587756 | 4.62E-07 | 6.11E-08 | -5.63 | 7.2078869 | -1.61E-02 | 10874734  | 10874857  | NC_000012.11 |
| cg18170080 | 4.62E-07 | 6.11E-08 | -5.63 | 7.2077764 | -2.20E-02 | 124631981 | 124632104 | NC_000011.9  |
| cg16054590 | 4.62E-07 | 6.11E-08 | -5.63 | 7.2072259 | -3.43E-02 | 179846986 | 179847109 | NC_000001.10 |
| cg14199423 | 4.62E-07 | 6.11E-08 | -5.63 | 7.206793  | -9.11E-02 | 6721892   | 6722015   | NC_000012.11 |
| cg08776014 | 4.63E-07 | 6.12E-08 | -5.63 | 7.2063664 | -1.18E-01 | 43183039  | 43183162  | NC_000021.8  |
| cg14540150 | 4.63E-07 | 6.12E-08 | -5.63 | 7.205535  | -1.28E-02 | 126849760 | 126849883 | NC_000010.10 |
| cg01785339 | 4.63E-07 | 6.12E-08 | -5.63 | 7.2052729 | -3.16E-02 | 224544456 | 224544579 | NC_000001.10 |
| cg25889581 | 4.63E-07 | 6.13E-08 | -5.63 | 7.2049023 | -1.08E-01 | 16708336  | 16708459  | NC_000004.11 |
| cg00571809 | 4.63E-07 | 6.13E-08 | -5.63 | 7.2048354 | -1.07E-01 | 3397113   | 3397236   | NC_000001.10 |
| cg19231632 | 4.63E-07 | 6.13E-08 | -5.63 | 7.2043208 | -1.40E-02 | 49661071  | 49661194  | NC_000019.9  |
| cg12852187 | 4.64E-07 | 6.13E-08 | -5.63 | 7.2037577 | -1.50E-01 | 231903372 | 231903495 | NC_000002.11 |
| cg18614510 | 4.64E-07 | 6.13E-08 | -5.63 | 7.2035731 | -1.18E-01 | 47081903  | 47082026  | NC_000022.10 |
| cg04973995 | 4.64E-07 | 6.14E-08 | -5.63 | 7.2029658 | -4.80E-02 | 74057977  | 74058100  | NC_000010.10 |
| cg24051057 | 4.65E-07 | 6.15E-08 | -5.63 | 7.2015186 | -6.96E-02 | 112358409 | 112358532 | NC_000003.11 |
| cg23106940 | 4.65E-07 | 6.15E-08 | -5.63 | 7.2015065 | -9.54E-02 | 25223659  | 25223782  | NC_000002.11 |
| cg01586116 | 4.65E-07 | 6.15E-08 | -5.63 | 7.2009328 | -6.58E-02 | 134326017 | 134326140 | NC_000002.11 |
| cg11113363 | 4.65E-07 | 6.15E-08 | -5.63 | 7.2006469 | -6.09E-02 | 3184547   | 3184670   | NC_000001.10 |
| cg18247436 | 4.65E-07 | 6.15E-08 | -5.63 | 7.2005234 | -5.78E-02 | 120856646 | 120856769 | NC_000011.9  |
| cg00632466 | 4.66E-07 | 6.16E-08 | -5.63 | 7.1996981 | -7.02E-02 | 98610888  | 98611011  | NC_000008.10 |

|            |          |          |       |           |           |           |           |              |
|------------|----------|----------|-------|-----------|-----------|-----------|-----------|--------------|
| cg11225751 | 4.66E-07 | 6.17E-08 | -5.63 | 7.1983306 | -9.84E-02 | 22901661  | 22901784  | NC_000022.10 |
| cg19741173 | 4.66E-07 | 6.17E-08 | -5.63 | 7.1983241 | -5.66E-02 | 1448419   | 1448542   | NC_000020.10 |
| cg17087499 | 4.66E-07 | 6.17E-08 | -5.63 | 7.1982001 | -1.08E-01 | 237706764 | 237706887 | NC_000001.10 |
| cg14489199 | 4.66E-07 | 6.17E-08 | -5.63 | 7.19817   | -1.11E-01 | 101453431 | 101453554 | NC_000014.8  |
| cg09303645 | 4.66E-07 | 6.17E-08 | -5.63 | 7.1979094 | -6.86E-02 | 31138958  | 31139081  | NC_000012.11 |
| cg22242539 | 4.66E-07 | 6.17E-08 | -5.63 | 7.1976604 | -7.41E-02 | 1665220   | 1665343   | NC_000017.10 |
| cg02671333 | 4.66E-07 | 6.17E-08 | -5.63 | 7.1975148 | -7.52E-02 | 39806102  | 39806225  | NC_000019.9  |
| cg00188547 | 4.67E-07 | 6.18E-08 | -5.63 | 7.1967223 | -2.96E-02 | 101162809 | 101162932 | NC_000008.10 |
| cg05170515 | 4.67E-07 | 6.18E-08 | -5.63 | 7.1964771 | -2.91E-02 | 24899109  | 24899232  | NC_000014.8  |
| cg20836669 | 4.67E-07 | 6.18E-08 | -5.63 | 7.1957299 | -2.69E-02 | 14165521  | 14165644  | NC_000016.9  |
| cg25847024 | 4.68E-07 | 6.19E-08 | -5.63 | 7.1950786 | -3.01E-02 | 111991376 | 111991499 | NC_000001.10 |
| cg12967370 | 4.68E-07 | 6.19E-08 | -5.63 | 7.1949479 | -1.99E-02 | 94983049  | 94983172  | NC_000005.9  |
| cg12428447 | 4.68E-07 | 6.19E-08 | -5.63 | 7.1942293 | -9.89E-02 | 62753072  | 62753195  | NC_000011.9  |
| cg06748470 | 4.68E-07 | 6.19E-08 | -5.63 | 7.1942098 | -1.45E-01 | 65467980  | 65468103  | NC_000001.10 |
| cg03353971 | 4.68E-07 | 6.19E-08 | -5.63 | 7.1940978 | -7.72E-02 | 31254616  | 31254739  | NC_000017.10 |
| cg16404784 | 4.68E-07 | 6.20E-08 | -5.63 | 7.1935046 | -1.10E-01 | 38087605  | 38087728  | NC_000014.8  |
| cg19261810 | 4.68E-07 | 6.20E-08 | -5.63 | 7.1934732 | -1.10E-01 | 38754529  | 38754652  | NC_000019.9  |
| cg25565479 | 4.68E-07 | 6.20E-08 | -5.63 | 7.1929231 | -4.13E-02 | 93861779  | 93861902  | NC_000011.9  |
| cg14443077 | 4.69E-07 | 6.20E-08 | -5.63 | 7.1927211 | -4.04E-02 | 68606701  | 68606824  | NC_000011.9  |
| cg19617213 | 4.69E-07 | 6.21E-08 | -5.63 | 7.1917368 | -8.18E-02 | 1074926   | 1075049   | NC_000019.9  |
| cg03681834 | 4.69E-07 | 6.21E-08 | -5.63 | 7.1907295 | -7.72E-02 | 41481358  | 41481481  | NC_000011.9  |
| cg25709789 | 4.70E-07 | 6.22E-08 | -5.63 | 7.1903298 | -7.57E-02 | 27739916  | 27740039  | NC_000017.10 |
| cg12084235 | 4.70E-07 | 6.22E-08 | -5.63 | 7.1901499 | -5.25E-02 | 1986896   | 1987019   | NC_000011.9  |
| cg06034336 | 4.70E-07 | 6.22E-08 | -5.63 | 7.1898354 | -1.22E-01 | 177365023 | 177365146 | NC_000004.11 |
| cg20366258 | 4.70E-07 | 6.22E-08 | -5.63 | 7.189805  | -4.19E-02 | 113404078 | 113404201 | NC_000002.11 |



|            |          |          |       |           |           |           |           |              |
|------------|----------|----------|-------|-----------|-----------|-----------|-----------|--------------|
| cg14112569 | 4.70E-07 | 6.22E-08 | -5.63 | 7.1892457 | -1.40E-01 | 124604450 | 124604573 | NC_000003.11 |
| cg02077216 | 4.70E-07 | 6.23E-08 | -5.63 | 7.1890577 | -1.32E-01 | 57753951  | 57754074  | NC_000005.9  |
| cg22396498 | 4.70E-07 | 6.23E-08 | -5.63 | 7.1886162 | -1.01E-01 | 91141539  | 91141662  | NC_000015.9  |
| cg21889116 | 4.71E-07 | 6.24E-08 | -5.63 | 7.1875671 | -1.99E-02 | 56685548  | 56685671  | NC_000008.10 |
| cg14131824 | 4.71E-07 | 6.24E-08 | -5.63 | 7.1868423 | -9.41E-02 | 1490487   | 1490610   | NC_000017.10 |
| cg18836689 | 4.72E-07 | 6.25E-08 | -5.63 | 7.1858062 | -1.33E-01 | 69708392  | 69708515  | NC_000014.8  |
| cg09163998 | 4.72E-07 | 6.25E-08 | -5.63 | 7.1853612 | -2.57E-02 | 48103707  | 48103830  | NC_000019.9  |
| cg14788749 | 4.72E-07 | 6.25E-08 | -5.63 | 7.1853267 | -3.46E-02 | 35937309  | 35937432  | NC_000022.10 |
| cg06755309 | 4.72E-07 | 6.26E-08 | -5.63 | 7.1841937 | -2.94E-02 | 141704660 | 141704783 | NC_000005.9  |
| cg02312706 | 4.72E-07 | 6.26E-08 | -5.63 | 7.1840891 | -7.19E-02 | 87384599  | 87384722  | NC_000016.9  |
| cg14429427 | 4.72E-07 | 6.26E-08 | -5.63 | 7.183864  | -1.14E-01 | 113785563 | 113785686 | NC_000009.11 |
| cg03577591 | 4.73E-07 | 6.26E-08 | -5.63 | 7.1836271 | -4.27E-02 | 90893390  | 90893513  | NC_000007.13 |
| cg03635073 | 4.73E-07 | 6.26E-08 | -5.63 | 7.1835238 | -1.03E-01 | 20499293  | 20499416  | NC_000011.9  |
| cg02525705 | 4.74E-07 | 6.28E-08 | -5.63 | 7.180735  | -4.41E-02 | 32145146  | 32145269  | NC_000006.11 |
| cg25605174 | 4.74E-07 | 6.29E-08 | -5.63 | 7.1797172 | -9.26E-02 | 1106175   | 1106298   | NC_000001.10 |
| cg11095122 | 4.74E-07 | 6.29E-08 | -5.63 | 7.1795166 | -9.94E-02 | 19540734  | 19540857  | NC_000008.10 |
| cg07709618 | 4.75E-07 | 6.29E-08 | -5.63 | 7.1790662 | -5.53E-02 | 99590854  | 99590977  | NC_000013.10 |
| cg08705285 | 4.75E-07 | 6.29E-08 | -5.63 | 7.1788454 | -8.38E-02 | 72431919  | 72432042  | NC_000010.10 |
| cg15012662 | 4.75E-07 | 6.29E-08 | -5.63 | 7.1785637 | -1.39E-01 | 122443513 | 122443636 | NC_000007.13 |
| cg09368875 | 4.75E-07 | 6.30E-08 | -5.63 | 7.1781901 | -6.51E-02 | 110949563 | 110949686 | NC_000001.10 |
| cg03517073 | 4.75E-07 | 6.30E-08 | -5.63 | 7.1781689 | -6.55E-02 | 239957283 | 239957406 | NC_000002.11 |
| cg03296370 | 4.75E-07 | 6.30E-08 | -5.63 | 7.1781416 | -7.34E-02 | 39323216  | 39323339  | NC_000003.11 |
| cg25100604 | 4.75E-07 | 6.30E-08 | -5.63 | 7.1777159 | -2.34E-02 | 70314404  | 70314527  | NC_000002.11 |
| cg24629972 | 4.76E-07 | 6.31E-08 | -5.63 | 7.1760101 | -8.81E-02 | 43147439  | 43147562  | NC_000008.10 |
| cg07163475 | 4.77E-07 | 6.32E-08 | -5.63 | 7.1749001 | -2.67E-02 | 70716862  | 70716985  | NC_000010.10 |

|            |          |          |       |           |           |           |           |              |
|------------|----------|----------|-------|-----------|-----------|-----------|-----------|--------------|
| cg01440489 | 4.77E-07 | 6.32E-08 | -5.63 | 7.1747172 | -7.90E-02 | 41593385  | 41593508  | NC_000013.10 |
| cg23733394 | 4.77E-07 | 6.32E-08 | -5.63 | 7.1743867 | -1.15E-01 | 839752    | 839875    | NC_000001.10 |
| cg15978014 | 4.77E-07 | 6.32E-08 | -5.63 | 7.173869  | -1.05E-02 | 40420635  | 40420758  | NC_000001.10 |
| cg01053241 | 4.77E-07 | 6.33E-08 | -5.63 | 7.1731696 | -1.28E-01 | 17352834  | 17352957  | NC_000008.10 |
| cg13775856 | 4.78E-07 | 6.33E-08 | -5.63 | 7.1722851 | -2.97E-02 | 36486874  | 36486997  | NC_000019.9  |
| cg00015024 | 4.78E-07 | 6.34E-08 | -5.63 | 7.1713252 | -1.89E-02 | 97803045  | 97803168  | NC_000010.10 |
| cg24491704 | 4.78E-07 | 6.34E-08 | -5.63 | 7.1712287 | -7.38E-02 | 38693552  | 38693675  | NC_000004.11 |
| cg24332767 | 4.79E-07 | 6.35E-08 | -5.63 | 7.1702688 | -7.64E-02 | 184871524 | 184871647 | NC_000003.11 |
| cg16488098 | 4.79E-07 | 6.35E-08 | -5.63 | 7.1701696 | -7.28E-02 | 131240440 | 131240563 | NC_000007.13 |
| cg19777001 | 4.79E-07 | 6.36E-08 | -5.63 | 7.1689905 | -1.03E-01 | 103150180 | 103150303 | NC_000014.8  |
| cg21041888 | 4.79E-07 | 6.36E-08 | -5.63 | 7.1687666 | -1.29E-01 | 187622164 | 187622287 | NC_000004.11 |
| cg09781054 | 4.79E-07 | 6.36E-08 | -5.62 | 7.1684994 | -1.27E-02 | 44509606  | 44509729  | NC_000020.10 |
| cg07958093 | 4.80E-07 | 6.36E-08 | -5.62 | 7.1680117 | -2.69E-02 | 76871156  | 76871279  | NC_000010.10 |
| cg03435901 | 4.80E-07 | 6.36E-08 | -5.62 | 7.1676161 | -8.98E-02 | 57125501  | 57125624  | NC_000003.11 |
| cg02870820 | 4.80E-07 | 6.37E-08 | -5.62 | 7.1675228 | -6.75E-02 | 56003211  | 56003334  | NC_000019.9  |
| cg02082642 | 4.80E-07 | 6.37E-08 | -5.62 | 7.1668305 | -9.79E-02 | 78522609  | 78522732  | NC_000017.10 |
| cg20822579 | 4.80E-07 | 6.37E-08 | -5.62 | 7.166337  | -4.60E-02 | 24809073  | 24809196  | NC_000014.8  |
| cg04731988 | 4.81E-07 | 6.38E-08 | -5.62 | 7.1656449 | -9.84E-02 | 3051954   | 3052077   | NC_000020.10 |
| cg13254286 | 4.81E-07 | 6.38E-08 | -5.62 | 7.1651884 | -4.43E-02 | 3658044   | 3658167   | NC_000017.10 |
| cg04926193 | 4.81E-07 | 6.39E-08 | -5.62 | 7.1642392 | -1.31E-01 | 497316    | 497439    | NC_000010.10 |
| cg19190593 | 4.82E-07 | 6.39E-08 | -5.62 | 7.1630617 | -1.11E-01 | 6588737   | 6588860   | NC_000006.11 |
| cg20376249 | 4.82E-07 | 6.40E-08 | -5.62 | 7.1621222 | -3.93E-02 | 81904401  | 81904524  | NC_000008.10 |
| cg02964602 | 4.83E-07 | 6.40E-08 | -5.62 | 7.1614526 | -7.02E-02 | 203130213 | 203130336 | NC_000002.11 |
| cg05462570 | 4.83E-07 | 6.41E-08 | -5.62 | 7.1602598 | -1.04E-01 | 64814948  | 64815071  | NC_000011.9  |
| cg04098479 | 4.84E-07 | 6.42E-08 | -5.62 | 7.1595398 | -4.99E-02 | 1994849   | 1994972   | NC_000004.11 |

|            |          |          |       |           |           |           |           |              |
|------------|----------|----------|-------|-----------|-----------|-----------|-----------|--------------|
| cg06823512 | 4.84E-07 | 6.42E-08 | -5.62 | 7.1595006 | -5.63E-02 | 97055282  | 97055405  | NC_000010.10 |
| cg09203382 | 4.84E-07 | 6.43E-08 | -5.62 | 7.1583215 | -4.98E-02 | 99151099  | 99151222  | NC_000006.11 |
| cg23915527 | 4.84E-07 | 6.43E-08 | -5.62 | 7.1581392 | -8.40E-02 | 161368787 | 161368910 | NC_000001.10 |
| cg20436037 | 4.84E-07 | 6.43E-08 | -5.62 | 7.1581263 | -1.18E-01 | 33879989  | 33880112  | NC_000020.10 |
| cg22784047 | 4.84E-07 | 6.43E-08 | -5.62 | 7.1576541 | -6.78E-02 | 29824542  | 29824665  | NC_000016.9  |
| cg09245698 | 4.85E-07 | 6.43E-08 | -5.62 | 7.1569664 | -9.42E-02 | 159084370 | 159084493 | NC_000006.11 |
| cg01587064 | 4.85E-07 | 6.44E-08 | -5.62 | 7.1565374 | -9.24E-02 | 75878127  | 75878250  | NC_000011.9  |
| cg05982345 | 4.85E-07 | 6.44E-08 | -5.62 | 7.1564046 | -5.73E-02 | 48191068  | 48191191  | NC_000011.9  |
| cg16253790 | 4.85E-07 | 6.44E-08 | -5.62 | 7.1563836 | -2.60E-02 | 238876124 | 238876247 | NC_000002.11 |
| cg08992972 | 4.85E-07 | 6.44E-08 | -5.62 | 7.156152  | -1.04E-01 | 148271271 | 148271394 | NC_000006.11 |
| cg23137807 | 4.85E-07 | 6.44E-08 | -5.62 | 7.1558293 | -2.56E-02 | 37393578  | 37393701  | NC_000015.9  |
| cg09729182 | 4.85E-07 | 6.44E-08 | -5.62 | 7.1553816 | -6.83E-02 | 121964928 | 121965051 | NC_000003.11 |
| cg07590609 | 4.86E-07 | 6.45E-08 | -5.62 | 7.1546839 | -2.44E-02 | 219845021 | 219845144 | NC_000002.11 |
| cg04930921 | 4.86E-07 | 6.46E-08 | -5.62 | 7.153637  | -9.99E-02 | 3447796   | 3447919   | NC_000004.11 |
| cg07953935 | 4.86E-07 | 6.46E-08 | -5.62 | 7.1534217 | -9.51E-02 | 3482933   | 3483056   | NC_000019.9  |
| cg03382121 | 4.87E-07 | 6.46E-08 | -5.62 | 7.1529448 | -6.73E-02 | 33291921  | 33292044  | NC_000006.11 |
| cg19048403 | 4.87E-07 | 6.46E-08 | -5.62 | 7.1527487 | -1.14E-01 | 7942488   | 7942611   | NC_000019.9  |
| cg21293933 | 4.87E-07 | 6.46E-08 | -5.62 | 7.1525952 | -9.41E-02 | 42539946  | 42540069  | NC_000020.10 |
| cg10054398 | 4.87E-07 | 6.47E-08 | -5.62 | 7.1520515 | -8.33E-02 | 42208040  | 42208163  | NC_000001.10 |
| cg15208480 | 4.87E-07 | 6.47E-08 | -5.62 | 7.1518662 | -5.29E-02 | 1905312   | 1905435   | NC_000019.9  |
| cg05547778 | 4.87E-07 | 6.47E-08 | -5.62 | 7.1517381 | -1.37E-01 | 40600279  | 40600402  | NC_000015.9  |
| cg26512925 | 4.87E-07 | 6.47E-08 | -5.62 | 7.1513776 | -9.98E-02 | 85519061  | 85519184  | NC_000016.9  |
| cg12167489 | 4.88E-07 | 6.48E-08 | -5.62 | 7.1502244 | -1.09E-01 | 30290489  | 30290612  | NC_000008.10 |
| cg26729913 | 4.88E-07 | 6.48E-08 | -5.62 | 7.1497539 | -7.00E-02 | 79135071  | 79135194  | NC_000017.10 |
| cg15058266 | 4.88E-07 | 6.49E-08 | -5.62 | 7.1493257 | -4.56E-02 | 228246263 | 228246386 | NC_000001.10 |

|                |          |          |       |           |           |           |           |              |
|----------------|----------|----------|-------|-----------|-----------|-----------|-----------|--------------|
| cg10068989     | 4.88E-07 | 6.49E-08 | -5.62 | 7.1492088 | -9.43E-02 | 129244122 | 129244245 | NC_000011.9  |
| cg14373988     | 4.89E-07 | 6.49E-08 | -5.62 | 7.1479483 | -1.17E-01 | 2345333   | 2345456   | NC_000001.10 |
| cg21770145     | 4.89E-07 | 6.49E-08 | -5.62 | 7.1479034 | -1.20E-01 | 79869997  | 79870120  | NC_000017.10 |
| cg09351859     | 4.89E-07 | 6.50E-08 | -5.62 | 7.1475127 | -2.73E-02 | 49962613  | 49962736  | NC_000005.9  |
| cg26974214     | 4.89E-07 | 6.50E-08 | -5.62 | 7.1475036 | -1.30E-01 | 91151885  | 91152008  | NC_000010.10 |
| cg01353073     | 4.89E-07 | 6.50E-08 | -5.62 | 7.1468154 | -1.13E-01 | 1965080   | 1965203   | NC_000016.9  |
| cg14661385     | 4.90E-07 | 6.51E-08 | -5.62 | 7.1460081 | -3.47E-02 | 173846308 | 173846431 | NC_000005.9  |
| cg06341100     | 4.90E-07 | 6.51E-08 | -5.62 | 7.1456947 | -1.23E-01 | 68138908  | 68139031  | NC_000011.9  |
| ch.15.1166704F | 4.90E-07 | 6.51E-08 | -5.62 | 7.145386  | -5.60E-02 | 73663757  | 73663880  | NC_000015.9  |
| cg16617628     | 4.90E-07 | 6.51E-08 | -5.62 | 7.1450889 | -2.02E-02 | 19733794  | 19733917  | NC_000011.9  |
| cg10362335     | 4.90E-07 | 6.52E-08 | -5.62 | 7.1448541 | -1.24E-01 | 6670109   | 6670232   | NC_000019.9  |
| cg20074340     | 4.90E-07 | 6.52E-08 | -5.62 | 7.1446288 | -1.07E-01 | 113651420 | 113651543 | NC_000013.10 |
| cg25746903     | 4.91E-07 | 6.52E-08 | -5.62 | 7.1438319 | -5.81E-02 | 117811278 | 117811401 | NC_000001.10 |
| cg19671694     | 4.91E-07 | 6.52E-08 | -5.62 | 7.1436626 | -7.92E-02 | 60971696  | 60971819  | NC_000020.10 |
| cg14972814     | 4.91E-07 | 6.52E-08 | -5.62 | 7.1436371 | -1.05E-01 | 95582409  | 95582532  | NC_000011.9  |
| cg27057022     | 4.91E-07 | 6.52E-08 | -5.62 | 7.1434271 | -8.84E-02 | 54227790  | 54227913  | NC_000016.9  |
| cg13599051     | 4.92E-07 | 6.53E-08 | -5.62 | 7.1423284 | -4.19E-02 | 96387677  | 96387800  | NC_000008.10 |
| cg22152438     | 4.92E-07 | 6.53E-08 | -5.62 | 7.1419584 | -8.23E-02 | 86120442  | 86120565  | NC_000001.10 |
| ch.5.2255319R  | 4.92E-07 | 6.54E-08 | -5.62 | 7.1411288 | -2.01E-02 | 123799603 | 123799726 | NC_000005.9  |
| cg27121538     | 4.92E-07 | 6.54E-08 | -5.62 | 7.140792  | -8.30E-02 | 91646263  | 91646386  | NC_000015.9  |
| cg01194712     | 4.92E-07 | 6.54E-08 | -5.62 | 7.1405185 | -2.96E-02 | 91643885  | 91644008  | NC_000014.8  |
| cg13381679     | 4.93E-07 | 6.55E-08 | -5.62 | 7.1399493 | -1.13E-01 | 90746138  | 90746261  | NC_000015.9  |
| cg01496185     | 4.93E-07 | 6.55E-08 | -5.62 | 7.1394798 | -1.87E-02 | 122513349 | 122513472 | NC_000002.11 |
| cg25244238     | 4.93E-07 | 6.55E-08 | -5.62 | 7.1394228 | -1.42E-01 | 6730713   | 6730836   | NC_000019.9  |
| cg06841846     | 4.93E-07 | 6.56E-08 | -5.62 | 7.1386062 | -6.77E-02 | 28564094  | 28564217  | NC_000017.10 |

|                |          |          |       |           |           |           |           |              |
|----------------|----------|----------|-------|-----------|-----------|-----------|-----------|--------------|
| cg12341757     | 4.94E-07 | 6.56E-08 | -5.62 | 7.1380795 | -3.72E-02 | 134582241 | 134582364 | NC_000008.10 |
| cg25885684     | 4.94E-07 | 6.57E-08 | -5.62 | 7.1373991 | -1.16E-01 | 100048426 | 100048549 | NC_000015.9  |
| ch.10.2027377R | 4.94E-07 | 6.57E-08 | -5.62 | 7.1369258 | -1.63E-02 | 97373679  | 97373802  | NC_000010.10 |
| cg03653855     | 4.94E-07 | 6.57E-08 | -5.62 | 7.136362  | -9.81E-02 | 146436093 | 146436216 | NC_000005.9  |
| cg17965698     | 4.95E-07 | 6.57E-08 | -5.62 | 7.1360236 | -6.43E-02 | 42927384  | 42927507  | NC_000006.11 |
| cg08202287     | 4.95E-07 | 6.58E-08 | -5.62 | 7.1358903 | -1.19E-01 | 232259281 | 232259404 | NC_000002.11 |
| cg20320905     | 4.95E-07 | 6.58E-08 | -5.62 | 7.1357395 | -5.19E-02 | 91848150  | 91848273  | NC_000002.11 |
| cg08107354     | 4.95E-07 | 6.58E-08 | -5.62 | 7.135274  | -7.83E-02 | 174890570 | 174890693 | NC_000002.11 |
| cg12004276     | 4.95E-07 | 6.58E-08 | -5.62 | 7.135194  | -1.20E-01 | 33913586  | 33913709  | NC_000011.9  |
| cg07270851     | 4.95E-07 | 6.58E-08 | -5.62 | 7.1351435 | -2.10E-02 | 65779332  | 65779455  | NC_000011.9  |
| cg08066917     | 4.95E-07 | 6.58E-08 | -5.62 | 7.1351378 | -6.17E-02 | 167764146 | 167764269 | NC_000006.11 |
| ch.15.1454355R | 4.95E-07 | 6.58E-08 | -5.62 | 7.1348795 | -1.28E-02 | 86300571  | 86300694  | NC_000015.9  |
| cg20392616     | 4.95E-07 | 6.59E-08 | -5.62 | 7.1340545 | -9.15E-02 | 135392013 | 135392136 | NC_000007.13 |
| cg23072981     | 4.95E-07 | 6.59E-08 | -5.62 | 7.1340074 | -5.04E-02 | 112812751 | 112812874 | NC_000002.11 |
| cg09683562     | 4.96E-07 | 6.60E-08 | -5.62 | 7.1320598 | -9.01E-02 | 29297516  | 29297639  | NC_000017.10 |
| cg00593404     | 4.96E-07 | 6.60E-08 | -5.62 | 7.1320157 | -6.88E-02 | 52377740  | 52377863  | NC_000006.11 |
| cg14673904     | 4.97E-07 | 6.61E-08 | -5.62 | 7.1314257 | -1.21E-01 | 46609063  | 46609186  | NC_000012.11 |
| cg00002224     | 4.97E-07 | 6.61E-08 | -5.62 | 7.1308618 | -6.68E-02 | 144120399 | 144120522 | NC_000008.10 |
| cg00702638     | 4.97E-07 | 6.61E-08 | -5.62 | 7.1303146 | -3.08E-02 | 44803293  | 44803416  | NC_000003.11 |
| cg01042640     | 4.97E-07 | 6.62E-08 | -5.62 | 7.1298329 | -6.08E-02 | 74446218  | 74446341  | NC_000016.9  |
| cg21903817     | 4.98E-07 | 6.62E-08 | -5.62 | 7.12977   | -6.81E-02 | 56406118  | 56406241  | NC_000017.10 |
| cg11184569     | 4.98E-07 | 6.62E-08 | -5.62 | 7.129225  | -1.14E-01 | 38004268  | 38004391  | NC_000013.10 |
| cg01845583     | 4.98E-07 | 6.62E-08 | -5.62 | 7.1292119 | -3.87E-02 | 133066520 | 133066643 | NC_000012.11 |
| cg04488647     | 4.98E-07 | 6.63E-08 | -5.62 | 7.1283761 | -8.64E-02 | 3389969   | 3390092   | NC_000001.10 |
| cg01307555     | 4.98E-07 | 6.63E-08 | -5.62 | 7.1281385 | -9.88E-02 | 73871915  | 73872038  | NC_000002.11 |

|            |          |          |       |           |           |           |           |              |
|------------|----------|----------|-------|-----------|-----------|-----------|-----------|--------------|
| cg02543202 | 4.98E-07 | 6.63E-08 | -5.62 | 7.1281179 | -5.67E-02 | 120516858 | 120516981 | NC_000002.11 |
| cg24635109 | 4.98E-07 | 6.63E-08 | -5.62 | 7.1279181 | -1.22E-01 | 154640892 | 154641015 | NC_000006.11 |
| cg13627258 | 4.99E-07 | 6.64E-08 | -5.62 | 7.1267914 | -8.16E-02 | 3770608   | 3770731   | NC_000004.11 |
| cg11376339 | 4.99E-07 | 6.64E-08 | -5.62 | 7.126618  | -1.04E-01 | 42570056  | 42570179  | NC_000002.11 |
| cg25123866 | 4.99E-07 | 6.64E-08 | -5.62 | 7.1264652 | -7.29E-02 | 64528328  | 64528451  | NC_000011.9  |
| cg09167117 | 4.99E-07 | 6.65E-08 | -5.62 | 7.125594  | -7.21E-02 | 39641536  | 39641659  | NC_000022.10 |
| cg17896097 | 5.00E-07 | 6.65E-08 | -5.62 | 7.1253086 | -2.65E-02 | 125693949 | 125694072 | NC_000009.11 |
| cg10974980 | 5.00E-07 | 6.65E-08 | -5.62 | 7.1245693 | -1.15E-01 | 74243781  | 74243904  | NC_000015.9  |
| cg26948823 | 5.00E-07 | 6.66E-08 | -5.62 | 7.1240888 | -8.51E-02 | 1255116   | 1255239   | NC_000016.9  |
| cg06793062 | 5.00E-07 | 6.66E-08 | -5.62 | 7.1239724 | -1.01E-01 | 76343868  | 76343991  | NC_000016.9  |
| cg08190298 | 5.00E-07 | 6.66E-08 | -5.62 | 7.123771  | -1.16E-01 | 35088160  | 35088283  | NC_000015.9  |
| cg07108443 | 5.00E-07 | 6.66E-08 | -5.62 | 7.1237573 | -1.29E-01 | 74968350  | 74968473  | NC_000004.11 |
| cg16793525 | 5.00E-07 | 6.66E-08 | -5.62 | 7.1236833 | -8.76E-02 | 1422319   | 1422442   | NC_000011.9  |
| cg08628580 | 5.00E-07 | 6.66E-08 | -5.62 | 7.1234784 | -1.17E-01 | 58954091  | 58954214  | NC_000011.9  |
| cg04249769 | 5.01E-07 | 6.66E-08 | -5.62 | 7.1233279 | -4.36E-02 | 80680899  | 80681022  | NC_000008.10 |
| cg00240378 | 5.01E-07 | 6.66E-08 | -5.62 | 7.1232262 | -1.78E-01 | 8850020   | 8850143   | NC_000002.11 |
| cg02915920 | 5.01E-07 | 6.66E-08 | -5.62 | 7.1228706 | -1.49E-01 | 133736469 | 133736592 | NC_000009.11 |
| cg27549619 | 5.01E-07 | 6.67E-08 | -5.62 | 7.1225675 | -1.68E-01 | 374924    | 375047    | NC_000016.9  |
| cg23409587 | 5.01E-07 | 6.67E-08 | -5.62 | 7.1222913 | -4.65E-02 | 128840680 | 128840803 | NC_000003.11 |
| cg22259932 | 5.01E-07 | 6.67E-08 | -5.62 | 7.1220544 | -2.03E-02 | 30162890  | 30163013  | NC_000022.10 |
| cg26666107 | 5.01E-07 | 6.67E-08 | -5.62 | 7.1216214 | -4.28E-02 | 55505073  | 55505196  | NC_000001.10 |
| cg20678835 | 5.01E-07 | 6.67E-08 | -5.62 | 7.1215998 | -9.36E-02 | 23521332  | 23521455  | NC_000001.10 |
| cg13917273 | 5.02E-07 | 6.68E-08 | -5.62 | 7.1206722 | -9.28E-02 | 132099943 | 132100066 | NC_000009.11 |
| cg26440467 | 5.02E-07 | 6.68E-08 | -5.62 | 7.120459  | -4.97E-02 | 145654605 | 145654728 | NC_000008.10 |
| cg02110141 | 5.02E-07 | 6.68E-08 | -5.62 | 7.1203122 | -3.91E-02 | 99530944  | 99531067  | NC_000010.10 |

|            |          |          |       |           |           |           |           |              |
|------------|----------|----------|-------|-----------|-----------|-----------|-----------|--------------|
| cg21643547 | 5.02E-07 | 6.68E-08 | -5.61 | 7.1199387 | -1.17E-01 | 205240462 | 205240585 | NC_000001.10 |
| cg00376910 | 5.03E-07 | 6.69E-08 | -5.61 | 7.1191178 | -1.04E-01 | 89765061  | 89765184  | NC_000015.9  |
| cg09728392 | 5.03E-07 | 6.70E-08 | -5.61 | 7.118341  | -9.92E-02 | 66585799  | 66585922  | NC_000016.9  |
| cg18107727 | 5.03E-07 | 6.70E-08 | -5.61 | 7.1181796 | -2.72E-02 | 225615856 | 225615979 | NC_000001.10 |
| cg10290200 | 5.04E-07 | 6.70E-08 | -5.61 | 7.1170903 | -1.33E-01 | 128481295 | 128481418 | NC_000007.13 |
| cg02471028 | 5.04E-07 | 6.70E-08 | -5.61 | 7.117058  | -7.57E-02 | 1203653   | 1203776   | NC_000004.11 |
| cg20852226 | 5.04E-07 | 6.71E-08 | -5.61 | 7.1165219 | -1.36E-01 | 76859010  | 76859133  | NC_000011.9  |
| cg17600661 | 5.04E-07 | 6.71E-08 | -5.61 | 7.1162601 | -4.56E-02 | 94752611  | 94752734  | NC_000008.10 |
| cg20720553 | 5.04E-07 | 6.71E-08 | -5.61 | 7.1157395 | -2.63E-02 | 101792477 | 101792600 | NC_000015.9  |
| cg23538718 | 5.04E-07 | 6.72E-08 | -5.61 | 7.1152812 | -1.44E-01 | 143567031 | 143567154 | NC_000003.11 |
| cg09190188 | 5.05E-07 | 6.72E-08 | -5.61 | 7.1150165 | -6.17E-02 | 59324899  | 59325022  | NC_000011.9  |
| cg06416760 | 5.05E-07 | 6.73E-08 | -5.61 | 7.1135697 | -2.74E-02 | 4323067   | 4323190   | NC_000016.9  |
| cg19136868 | 5.05E-07 | 6.73E-08 | -5.61 | 7.1131581 | -1.88E-02 | 560685    | 560808    | NC_000011.9  |
| cg14345676 | 5.06E-07 | 6.73E-08 | -5.61 | 7.1129326 | -8.49E-02 | 175109098 | 175109221 | NC_000005.9  |
| cg16501235 | 5.06E-07 | 6.74E-08 | -5.61 | 7.1125163 | -8.04E-02 | 150245988 | 150246111 | NC_000001.10 |
| cg01068808 | 5.06E-07 | 6.74E-08 | -5.61 | 7.1120733 | -1.15E-01 | 184007101 | 184007224 | NC_000001.10 |
| cg14547240 | 5.06E-07 | 6.74E-08 | -5.61 | 7.1119157 | -1.23E-01 | 15428750  | 15428873  | NC_000004.11 |
| cg04833050 | 5.06E-07 | 6.74E-08 | -5.61 | 7.1112639 | -1.05E-01 | 77806051  | 77806174  | NC_000005.9  |
| cg15948916 | 5.06E-07 | 6.74E-08 | -5.61 | 7.1111082 | -4.30E-02 | 31803378  | 31803501  | NC_000006.11 |
| cg09654116 | 5.06E-07 | 6.75E-08 | -5.61 | 7.1109762 | -1.16E-01 | 158816213 | 158816336 | NC_000007.13 |
| cg15924566 | 5.07E-07 | 6.76E-08 | -5.61 | 7.1091278 | -7.31E-02 | 57969541  | 57969664  | NC_000004.11 |
| cg12304113 | 5.07E-07 | 6.76E-08 | -5.61 | 7.1089061 | -8.87E-02 | 139926188 | 139926311 | NC_000008.10 |
| cg07417745 | 5.08E-07 | 6.77E-08 | -5.61 | 7.1076982 | -7.40E-02 | 228582488 | 228582611 | NC_000002.11 |
| cg07635369 | 5.08E-07 | 6.77E-08 | -5.61 | 7.1076953 | -3.43E-02 | 48216813  | 48216936  | NC_000019.9  |
| cg27173148 | 5.08E-07 | 6.77E-08 | -5.61 | 7.1075681 | -7.57E-02 | 1203001   | 1203124   | NC_000004.11 |

|            |          |          |       |           |           |           |           |              |
|------------|----------|----------|-------|-----------|-----------|-----------|-----------|--------------|
| cg18514358 | 5.08E-07 | 6.77E-08 | -5.61 | 7.1071369 | -1.65E-02 | 99129291  | 99129414  | NC_000008.10 |
| cg23836365 | 5.09E-07 | 6.78E-08 | -5.61 | 7.1065856 | -5.98E-02 | 4829464   | 4829587   | NC_000012.11 |
| cg26550874 | 5.09E-07 | 6.78E-08 | -5.61 | 7.1064035 | -1.16E-01 | 4183528   | 4183651   | NC_000007.13 |
| cg07455504 | 5.09E-07 | 6.78E-08 | -5.61 | 7.1062637 | -5.50E-02 | 1080144   | 1080267   | NC_000016.9  |
| cg02176725 | 5.09E-07 | 6.78E-08 | -5.61 | 7.106174  | -1.01E-01 | 45824652  | 45824775  | NC_000011.9  |
| cg03123759 | 5.09E-07 | 6.78E-08 | -5.61 | 7.1061647 | -8.77E-02 | 54763387  | 54763510  | NC_000012.11 |
| cg14937695 | 5.09E-07 | 6.78E-08 | -5.61 | 7.1061001 | -2.48E-02 | 24950917  | 24951040  | NC_000022.10 |
| cg00754426 | 5.09E-07 | 6.78E-08 | -5.61 | 7.105664  | -1.12E-01 | 37100437  | 37100560  | NC_000020.10 |
| cg27652490 | 5.09E-07 | 6.78E-08 | -5.61 | 7.1056338 | -7.38E-02 | 18761402  | 18761525  | NC_000019.9  |
| cg03435384 | 5.09E-07 | 6.78E-08 | -5.61 | 7.1055732 | -9.30E-02 | 53681873  | 53681996  | NC_000015.9  |
| cg09964873 | 5.09E-07 | 6.78E-08 | -5.61 | 7.1055693 | -9.16E-02 | 143868136 | 143868259 | NC_000008.10 |
| cg26550162 | 5.09E-07 | 6.79E-08 | -5.61 | 7.1052377 | -7.58E-02 | 105344798 | 105344921 | NC_000010.10 |
| cg27609721 | 5.10E-07 | 6.80E-08 | -5.61 | 7.1039033 | -6.02E-02 | 69271235  | 69271358  | NC_000016.9  |
| cg19698340 | 5.10E-07 | 6.80E-08 | -5.61 | 7.1037658 | -1.27E-01 | 17846718  | 17846841  | NC_000017.10 |
| cg17400905 | 5.10E-07 | 6.80E-08 | -5.61 | 7.1037414 | -7.43E-02 | 43545157  | 43545280  | NC_000013.10 |
| cg25025181 | 5.10E-07 | 6.80E-08 | -5.61 | 7.1037167 | -1.54E-01 | 246378510 | 246378633 | NC_000001.10 |
| cg07977689 | 5.10E-07 | 6.80E-08 | -5.61 | 7.1033277 | -6.43E-02 | 28834730  | 28834853  | NC_000006.11 |
| cg03276399 | 5.10E-07 | 6.80E-08 | -5.61 | 7.1029887 | -1.87E-02 | 99870040  | 99870163  | NC_000007.13 |
| cg00101260 | 5.10E-07 | 6.80E-08 | -5.61 | 7.1029489 | -7.61E-02 | 53426657  | 53426780  | NC_000017.10 |
| cg00221658 | 5.10E-07 | 6.80E-08 | -5.61 | 7.1029277 | -1.00E-01 | 43912425  | 43912548  | NC_000007.13 |
| cg22130205 | 5.11E-07 | 6.81E-08 | -5.61 | 7.1023777 | -1.22E-01 | 77139296  | 77139419  | NC_000018.9  |
| cg08222913 | 5.11E-07 | 6.81E-08 | -5.61 | 7.1023375 | -1.02E-01 | 52553049  | 52553172  | NC_000003.11 |
| cg03443762 | 5.11E-07 | 6.81E-08 | -5.61 | 7.1021282 | -1.18E-01 | 25676827  | 25676950  | NC_000017.10 |
| cg23655939 | 5.11E-07 | 6.82E-08 | -5.61 | 7.1008302 | -8.83E-02 | 187454477 | 187454600 | NC_000003.11 |
| cg10822172 | 5.12E-07 | 6.82E-08 | -5.61 | 7.1001936 | -8.28E-02 | 28338757  | 28338880  | NC_000007.13 |



|            |          |          |       |           |           |           |           |              |
|------------|----------|----------|-------|-----------|-----------|-----------|-----------|--------------|
| cg06984255 | 5.12E-07 | 6.82E-08 | -5.61 | 7.0999146 | -1.28E-01 | 104991193 | 104991316 | NC_000010.10 |
| cg06200697 | 5.12E-07 | 6.83E-08 | -5.61 | 7.0991889 | -9.96E-02 | 57528838  | 57528961  | NC_000011.9  |
| cg12244647 | 5.13E-07 | 6.84E-08 | -5.61 | 7.0981072 | -1.20E-01 | 50737978  | 50738101  | NC_000022.10 |
| cg22195220 | 5.13E-07 | 6.84E-08 | -5.61 | 7.097823  | -5.12E-02 | 45937072  | 45937195  | NC_000018.9  |
| cg12210036 | 5.13E-07 | 6.84E-08 | -5.61 | 7.09778   | -9.55E-02 | 204183581 | 204183704 | NC_000001.10 |
| cg18473686 | 5.13E-07 | 6.84E-08 | -5.61 | 7.0972522 | -7.41E-02 | 33427086  | 33427209  | NC_000022.10 |
| cg14312860 | 5.13E-07 | 6.85E-08 | -5.61 | 7.0965504 | -1.29E-01 | 79105559  | 79105682  | NC_000017.10 |
| cg21776813 | 5.13E-07 | 6.85E-08 | -5.61 | 7.0965261 | -1.15E-01 | 13314980  | 13315103  | NC_000003.11 |
| cg19551485 | 5.14E-07 | 6.85E-08 | -5.61 | 7.0958054 | -1.33E-01 | 55693182  | 55693305  | NC_000003.11 |
| cg19944876 | 5.14E-07 | 6.86E-08 | -5.61 | 7.0952767 | -1.40E-01 | 8905866   | 8905989   | NC_000017.10 |
| cg10898182 | 5.15E-07 | 6.87E-08 | -5.61 | 7.0937911 | -1.18E-01 | 5979803   | 5979926   | NC_000005.9  |
| cg17329534 | 5.15E-07 | 6.87E-08 | -5.61 | 7.0933132 | -9.93E-02 | 154980743 | 154980866 | NC_000001.10 |
| cg22101045 | 5.15E-07 | 6.87E-08 | -5.61 | 7.0932339 | -9.33E-02 | 47927509  | 47927632  | NC_000011.9  |
| cg17673205 | 5.15E-07 | 6.87E-08 | -5.61 | 7.0931916 | -5.36E-02 | 61245365  | 61245488  | NC_000002.11 |
| cg25206071 | 5.15E-07 | 6.87E-08 | -5.61 | 7.0931501 | -1.22E-01 | 207007273 | 207007396 | NC_000001.10 |
| cg13929065 | 5.15E-07 | 6.87E-08 | -5.61 | 7.0929856 | -7.09E-02 | 91711047  | 91711170  | NC_000009.11 |
| cg07359215 | 5.15E-07 | 6.87E-08 | -5.61 | 7.0929249 | -1.68E-02 | 66907117  | 66907240  | NC_000016.9  |
| cg20287790 | 5.16E-07 | 6.88E-08 | -5.61 | 7.0917227 | -9.90E-02 | 53359982  | 53360105  | NC_000001.10 |
| cg06027807 | 5.16E-07 | 6.88E-08 | -5.61 | 7.0914862 | -7.08E-02 | 61325312  | 61325435  | NC_000008.10 |
| cg20607318 | 5.16E-07 | 6.88E-08 | -5.61 | 7.0913116 | -1.65E-02 | 36391512  | 36391635  | NC_000019.9  |
| cg21849932 | 5.17E-07 | 6.89E-08 | -5.61 | 7.0903197 | -1.06E-01 | 62369462  | 62369585  | NC_000020.10 |
| cg17848496 | 5.17E-07 | 6.89E-08 | -5.61 | 7.0902976 | -1.75E-01 | 227661213 | 227661336 | NC_000002.11 |
| cg19209385 | 5.17E-07 | 6.89E-08 | -5.61 | 7.0902608 | -3.03E-02 | 53659379  | 53659502  | NC_000006.11 |
| cg16118089 | 5.17E-07 | 6.90E-08 | -5.61 | 7.0896753 | -5.21E-02 | 125550542 | 125550665 | NC_000012.11 |
| cg01950958 | 5.17E-07 | 6.90E-08 | -5.61 | 7.089534  | -5.41E-02 | 145589783 | 145589906 | NC_000001.10 |

|               |          |          |       |           |           |           |           |              |
|---------------|----------|----------|-------|-----------|-----------|-----------|-----------|--------------|
| cg22801949    | 5.17E-07 | 6.90E-08 | -5.61 | 7.0893954 | -9.78E-02 | 181057279 | 181057402 | NC_000001.10 |
| cg15408734    | 5.17E-07 | 6.90E-08 | -5.61 | 7.0890462 | -3.76E-02 | 70369140  | 70369263  | NC_000002.11 |
| cg03014427    | 5.17E-07 | 6.90E-08 | -5.61 | 7.0888785 | -9.77E-02 | 45552678  | 45552801  | NC_000014.8  |
| cg25667511    | 5.18E-07 | 6.91E-08 | -5.61 | 7.0879641 | -5.54E-02 | 111686098 | 111686221 | NC_000010.10 |
| cg25746923    | 5.18E-07 | 6.91E-08 | -5.61 | 7.0876706 | -6.97E-02 | 47988546  | 47988669  | NC_000017.10 |
| cg07833068    | 5.18E-07 | 6.91E-08 | -5.61 | 7.0874575 | -8.26E-02 | 4195937   | 4196060   | NC_000019.9  |
| cg25894551    | 5.19E-07 | 6.92E-08 | -5.61 | 7.0861831 | -9.41E-02 | 117699851 | 117699974 | NC_000011.9  |
| cg03859561    | 5.19E-07 | 6.92E-08 | -5.61 | 7.0860742 | -5.89E-02 | 32767555  | 32767678  | NC_000007.13 |
| cg07475654    | 5.19E-07 | 6.92E-08 | -5.61 | 7.0858956 | -6.26E-02 | 219151444 | 219151567 | NC_000002.11 |
| cg25521400    | 5.19E-07 | 6.92E-08 | -5.61 | 7.0855462 | -9.91E-02 | 62445279  | 62445402  | NC_000002.11 |
| cg07004357    | 5.19E-07 | 6.93E-08 | -5.61 | 7.0852758 | -3.99E-02 | 18893614  | 18893737  | NC_000022.10 |
| ch.1.3571010R | 5.19E-07 | 6.93E-08 | -5.61 | 7.0848206 | -2.77E-02 | 182824678 | 182824801 | NC_000001.10 |
| cg09813341    | 5.19E-07 | 6.93E-08 | -5.61 | 7.0846588 | -7.82E-02 | 122665500 | 122665623 | NC_000012.11 |
| cg20845639    | 5.19E-07 | 6.93E-08 | -5.61 | 7.0844613 | -7.78E-02 | 23430886  | 23431009  | NC_000008.10 |
| cg09033641    | 5.20E-07 | 6.93E-08 | -5.61 | 7.0840907 | -1.06E-01 | 89436838  | 89436961  | NC_000016.9  |
| cg04343927    | 5.20E-07 | 6.94E-08 | -5.61 | 7.0840086 | -1.32E-01 | 1167423   | 1167546   | NC_000004.11 |
| cg05829046    | 5.20E-07 | 6.94E-08 | -5.61 | 7.0839536 | -6.16E-02 | 2557446   | 2557569   | NC_000007.13 |
| cg07503059    | 5.20E-07 | 6.94E-08 | -5.61 | 7.0838619 | -4.33E-02 | 111753938 | 111754061 | NC_000005.9  |
| cg11707031    | 5.20E-07 | 6.94E-08 | -5.61 | 7.0837637 | -1.05E-01 | 22602401  | 22602524  | NC_000008.10 |
| cg11808099    | 5.20E-07 | 6.94E-08 | -5.61 | 7.0837465 | -6.18E-02 | 120387083 | 120387206 | NC_000001.10 |
| cg22485059    | 5.20E-07 | 6.94E-08 | -5.61 | 7.083421  | -3.40E-02 | 12764594  | 12764717  | NC_000012.11 |
| cg27039312    | 5.20E-07 | 6.94E-08 | -5.61 | 7.0831771 | -1.11E-01 | 143625791 | 143625914 | NC_000008.10 |
| cg20090551    | 5.20E-07 | 6.94E-08 | -5.61 | 7.0827591 | -2.20E-02 | 2421291   | 2421414   | NC_000011.9  |
| cg16072754    | 5.20E-07 | 6.95E-08 | -5.61 | 7.0825055 | -1.13E-01 | 150723904 | 150724027 | NC_000007.13 |
| cg19590140    | 5.21E-07 | 6.95E-08 | -5.61 | 7.081647  | -7.51E-02 | 101012492 | 101012615 | NC_000014.8  |

|               |          |          |       |           |           |           |           |              |
|---------------|----------|----------|-------|-----------|-----------|-----------|-----------|--------------|
| cg25011257    | 5.21E-07 | 6.95E-08 | -5.61 | 7.0814023 | -7.70E-02 | 2193187   | 2193310   | NC_000011.9  |
| ch.3.541014R  | 5.21E-07 | 6.96E-08 | -5.61 | 7.0811412 | -4.55E-02 | 25654052  | 25654175  | NC_000003.11 |
| cg27295434    | 5.21E-07 | 6.96E-08 | -5.61 | 7.0807823 | -9.51E-02 | 95009677  | 95009800  | NC_000001.10 |
| cg22496559    | 5.21E-07 | 6.96E-08 | -5.61 | 7.0806632 | -1.41E-01 | 196065318 | 196065441 | NC_000003.11 |
| cg16692892    | 5.21E-07 | 6.96E-08 | -5.61 | 7.0805085 | -3.15E-02 | 179160673 | 179160796 | NC_000005.9  |
| cg19997245    | 5.21E-07 | 6.96E-08 | -5.61 | 7.0803769 | -1.21E-01 | 85200399  | 85200522  | NC_000015.9  |
| cg00639635    | 5.21E-07 | 6.96E-08 | -5.61 | 7.0803222 | -8.33E-02 | 143837891 | 143838014 | NC_000006.11 |
| cg07917836    | 5.22E-07 | 6.97E-08 | -5.61 | 7.0794538 | -3.05E-02 | 72869660  | 72869783  | NC_000017.10 |
| cg26708940    | 5.22E-07 | 6.97E-08 | -5.61 | 7.0790793 | -1.61E-02 | 102003884 | 102004007 | NC_000002.11 |
| cg21535156    | 5.22E-07 | 6.98E-08 | -5.61 | 7.0782108 | -5.18E-02 | 1499152   | 1499275   | NC_000007.13 |
| cg25251459    | 5.22E-07 | 6.98E-08 | -5.61 | 7.0780103 | -1.50E-01 | 74731371  | 74731494  | NC_000002.11 |
| cg04962005    | 5.22E-07 | 6.98E-08 | -5.61 | 7.0778818 | -9.88E-02 | 64979111  | 64979234  | NC_000011.9  |
| cg10103850    | 5.23E-07 | 6.99E-08 | -5.61 | 7.0770761 | -1.37E-01 | 40658891  | 40659014  | NC_000002.11 |
| cg17516185    | 5.23E-07 | 6.99E-08 | -5.61 | 7.0769954 | -1.39E-02 | 108746651 | 108746774 | NC_000004.11 |
| cg22495636    | 5.23E-07 | 6.99E-08 | -5.61 | 7.0769948 | -5.36E-02 | 113698951 | 113699074 | NC_000013.10 |
| cg20683565    | 5.23E-07 | 6.99E-08 | -5.61 | 7.0769138 | -4.83E-02 | 104179492 | 104179615 | NC_000010.10 |
| cg01835474    | 5.23E-07 | 6.99E-08 | -5.61 | 7.0768646 | -1.05E-01 | 106679299 | 106679422 | NC_000002.11 |
| cg19697109    | 5.23E-07 | 6.99E-08 | -5.61 | 7.0764773 | -9.40E-02 | 4869088   | 4869211   | NC_000010.10 |
| cg12080831    | 5.23E-07 | 6.99E-08 | -5.61 | 7.0763696 | -1.21E-01 | 121697428 | 121697551 | NC_000002.11 |
| ch.12.206169F | 5.23E-07 | 6.99E-08 | -5.61 | 7.0763251 | -8.44E-03 | 7044838   | 7044961   | NC_000012.11 |
| cg03845852    | 5.23E-07 | 6.99E-08 | -5.61 | 7.0760047 | -1.04E-01 | 19886414  | 19886537  | NC_000005.9  |
| cg11319300    | 5.23E-07 | 6.99E-08 | -5.61 | 7.0757679 | -8.60E-02 | 131779920 | 131780043 | NC_000011.9  |
| cg25280938    | 5.23E-07 | 7.00E-08 | -5.61 | 7.0756309 | -4.25E-02 | 6543803   | 6543926   | NC_000007.13 |
| cg00314000    | 5.24E-07 | 7.00E-08 | -5.61 | 7.0750565 | -5.33E-02 | 61977683  | 61977806  | NC_000002.11 |
| cg04591018    | 5.24E-07 | 7.00E-08 | -5.61 | 7.0745396 | -8.96E-02 | 77997302  | 77997425  | NC_000016.9  |

|            |          |          |       |           |           |           |           |              |
|------------|----------|----------|-------|-----------|-----------|-----------|-----------|--------------|
| cg05300939 | 5.24E-07 | 7.00E-08 | -5.61 | 7.0744059 | -4.88E-02 | 44587523  | 44587646  | NC_000011.9  |
| cg08137040 | 5.24E-07 | 7.01E-08 | -5.61 | 7.0741254 | -1.24E-01 | 127033695 | 127033818 | NC_000007.13 |
| cg04017769 | 5.24E-07 | 7.01E-08 | -5.61 | 7.0739227 | -1.06E-01 | 38644939  | 38645062  | NC_000008.10 |
| cg01570589 | 5.24E-07 | 7.01E-08 | -5.61 | 7.073878  | -1.28E-01 | 150121725 | 150121848 | NC_000001.10 |
| cg21216944 | 5.24E-07 | 7.01E-08 | -5.61 | 7.0738731 | -8.31E-02 | 99107799  | 99107922  | NC_000009.11 |
| cg17513943 | 5.25E-07 | 7.01E-08 | -5.61 | 7.0732864 | -1.16E-02 | 27444487  | 27444610  | NC_000010.10 |
| cg06508062 | 5.25E-07 | 7.02E-08 | -5.61 | 7.0724905 | -1.38E-01 | 38063872  | 38063995  | NC_000021.8  |
| cg01368068 | 5.25E-07 | 7.02E-08 | -5.61 | 7.0724374 | -1.16E-01 | 78368660  | 78368783  | NC_000007.13 |
| cg21579854 | 5.25E-07 | 7.02E-08 | -5.61 | 7.0722376 | -6.10E-02 | 70970629  | 70970752  | NC_000009.11 |
| cg10140957 | 5.26E-07 | 7.03E-08 | -5.6  | 7.0711101 | -5.45E-02 | 58768477  | 58768600  | NC_000016.9  |
| cg16780688 | 5.26E-07 | 7.04E-08 | -5.6  | 7.0700125 | -7.63E-02 | 120220073 | 120220196 | NC_000008.10 |
| cg22478258 | 5.26E-07 | 7.04E-08 | -5.6  | 7.0698734 | -1.17E-01 | 36237982  | 36238105  | NC_000006.11 |
| cg12489547 | 5.27E-07 | 7.04E-08 | -5.6  | 7.0690816 | -9.86E-02 | 15959637  | 15959760  | NC_000011.9  |
| cg11114757 | 5.27E-07 | 7.04E-08 | -5.6  | 7.0689462 | -8.88E-02 | 102216909 | 102217032 | NC_000011.9  |
| cg14164839 | 5.27E-07 | 7.04E-08 | -5.6  | 7.0687907 | -9.06E-02 | 26823481  | 26823604  | NC_000001.10 |
| cg00836101 | 5.27E-07 | 7.05E-08 | -5.6  | 7.0681072 | -6.83E-02 | 39876248  | 39876371  | NC_000015.9  |
| cg25369015 | 5.27E-07 | 7.05E-08 | -5.6  | 7.0678263 | -2.64E-02 | 9599256   | 9599379   | NC_000001.10 |
| cg16964946 | 5.27E-07 | 7.05E-08 | -5.6  | 7.0676968 | -1.10E-01 | 27442973  | 27443096  | NC_000011.9  |
| cg24039393 | 5.28E-07 | 7.06E-08 | -5.6  | 7.0671743 | -3.35E-02 | 149195094 | 149195217 | NC_000007.13 |
| cg01044731 | 5.28E-07 | 7.06E-08 | -5.6  | 7.0667222 | -2.71E-02 | 24554006  | 24554129  | NC_000013.10 |
| cg17794241 | 5.28E-07 | 7.06E-08 | -5.6  | 7.0665981 | -5.54E-02 | 74658653  | 74658776  | NC_000015.9  |
| cg15381475 | 5.28E-07 | 7.06E-08 | -5.6  | 7.066361  | -1.26E-01 | 6436101   | 6436224   | NC_000007.13 |
| cg26549174 | 5.28E-07 | 7.07E-08 | -5.6  | 7.0660108 | -1.40E-01 | 10381355  | 10381478  | NC_000019.9  |
| cg26369418 | 5.28E-07 | 7.07E-08 | -5.6  | 7.0659049 | -6.14E-02 | 131409352 | 131409475 | NC_000005.9  |
| cg16239278 | 5.29E-07 | 7.08E-08 | -5.6  | 7.0645579 | -1.32E-01 | 170200291 | 170200414 | NC_000005.9  |

|                |          |          |      |           |           |           |           |              |
|----------------|----------|----------|------|-----------|-----------|-----------|-----------|--------------|
| cg07132686     | 5.29E-07 | 7.08E-08 | -5.6 | 7.0642595 | -5.85E-02 | 243603467 | 243603590 | NC_000001.10 |
| cg19738980     | 5.29E-07 | 7.08E-08 | -5.6 | 7.0640654 | -1.10E-01 | 7011463   | 7011586   | NC_000018.9  |
| cg21972990     | 5.29E-07 | 7.08E-08 | -5.6 | 7.0640212 | -2.41E-02 | 41473063  | 41473186  | NC_000006.11 |
| cg21877281     | 5.29E-07 | 7.08E-08 | -5.6 | 7.0639529 | -2.33E-02 | 122751255 | 122751378 | NC_000012.11 |
| cg06214220     | 5.29E-07 | 7.08E-08 | -5.6 | 7.0637211 | -1.71E-02 | 36400252  | 36400375  | NC_000009.11 |
| ch.2.47286786F | 5.29E-07 | 7.08E-08 | -5.6 | 7.0635701 | -5.36E-02 | 47433282  | 47433405  | NC_000002.11 |
| cg11698035     | 5.30E-07 | 7.09E-08 | -5.6 | 7.0631655 | -4.14E-02 | 73105356  | 73105479  | NC_000017.10 |
| cg08281371     | 5.30E-07 | 7.09E-08 | -5.6 | 7.0627986 | -7.89E-02 | 76662056  | 76662179  | NC_000017.10 |
| cg07197230     | 5.30E-07 | 7.09E-08 | -5.6 | 7.0626325 | -1.15E-01 | 17956641  | 17956764  | NC_000022.10 |
| cg19479935     | 5.30E-07 | 7.09E-08 | -5.6 | 7.062516  | -1.04E-01 | 155895608 | 155895731 | NC_000007.13 |
| cg24141663     | 5.30E-07 | 7.09E-08 | -5.6 | 7.0623558 | -8.12E-02 | 203095747 | 203095870 | NC_000001.10 |
| cg12109797     | 5.30E-07 | 7.10E-08 | -5.6 | 7.0615433 | -1.58E-01 | 86414553  | 86414676  | NC_000008.10 |
| cg18498263     | 5.30E-07 | 7.10E-08 | -5.6 | 7.061512  | -9.36E-02 | 91034963  | 91035086  | NC_000014.8  |
| cg27508180     | 5.31E-07 | 7.11E-08 | -5.6 | 7.0604275 | -5.39E-02 | 94039079  | 94039202  | NC_000007.13 |
| cg25881591     | 5.31E-07 | 7.11E-08 | -5.6 | 7.0599586 | -8.32E-02 | 131779935 | 131780058 | NC_000011.9  |
| cg14886850     | 5.32E-07 | 7.11E-08 | -5.6 | 7.0592273 | -7.10E-02 | 75122289  | 75122412  | NC_000014.8  |
| cg03503297     | 5.32E-07 | 7.12E-08 | -5.6 | 7.0590363 | -3.33E-02 | 30441811  | 30441934  | NC_000016.9  |
| cg15602677     | 5.32E-07 | 7.12E-08 | -5.6 | 7.0581116 | -1.03E-01 | 1166067   | 1166190   | NC_000002.11 |
| cg06197769     | 5.33E-07 | 7.13E-08 | -5.6 | 7.0573178 | -1.59E-01 | 12868983  | 12869106  | NC_000012.11 |
| cg06057569     | 5.33E-07 | 7.14E-08 | -5.6 | 7.0558308 | -8.51E-02 | 50219754  | 50219877  | NC_000022.10 |
| cg17275551     | 5.33E-07 | 7.14E-08 | -5.6 | 7.0555524 | -8.74E-02 | 39462994  | 39463117  | NC_000006.11 |
| cg04854089     | 5.34E-07 | 7.14E-08 | -5.6 | 7.0552351 | -1.08E-01 | 46355137  | 46355260  | NC_000011.9  |
| cg25149251     | 5.34E-07 | 7.15E-08 | -5.6 | 7.0548961 | -9.05E-02 | 100488527 | 100488650 | NC_000007.13 |
| cg20321265     | 5.34E-07 | 7.15E-08 | -5.6 | 7.0546177 | -1.04E-01 | 17542027  | 17542150  | NC_000001.10 |
| cg24848787     | 5.34E-07 | 7.15E-08 | -5.6 | 7.0545874 | -1.51E-01 | 58844359  | 58844482  | NC_000015.9  |

|            |          |          |      |           |           |           |           |              |
|------------|----------|----------|------|-----------|-----------|-----------|-----------|--------------|
| cg27150460 | 5.34E-07 | 7.15E-08 | -5.6 | 7.0543636 | -6.54E-02 | 67515916  | 67516039  | NC_000016.9  |
| cg16462006 | 5.35E-07 | 7.16E-08 | -5.6 | 7.0533802 | -1.38E-01 | 95155784  | 95155907  | NC_000014.8  |
| cg03523426 | 5.35E-07 | 7.16E-08 | -5.6 | 7.0532568 | -3.98E-02 | 75147006  | 75147129  | NC_000002.11 |
| cg06372654 | 5.35E-07 | 7.17E-08 | -5.6 | 7.0522592 | -1.09E-01 | 128044655 | 128044778 | NC_000007.13 |
| cg22677858 | 5.36E-07 | 7.17E-08 | -5.6 | 7.0514664 | -1.03E-01 | 201797722 | 201797845 | NC_000001.10 |
| cg04784316 | 5.36E-07 | 7.17E-08 | -5.6 | 7.0513031 | -8.58E-02 | 212609384 | 212609507 | NC_000002.11 |
| cg18790382 | 5.36E-07 | 7.18E-08 | -5.6 | 7.0499371 | -8.87E-02 | 68748584  | 68748707  | NC_000011.9  |
| cg23566447 | 5.37E-07 | 7.19E-08 | -5.6 | 7.0488021 | -6.52E-02 | 143890458 | 143890581 | NC_000006.11 |
| cg21752660 | 5.37E-07 | 7.19E-08 | -5.6 | 7.0483359 | -1.14E-01 | 52824726  | 52824849  | NC_000015.9  |
| cg02687417 | 5.38E-07 | 7.20E-08 | -5.6 | 7.0470557 | -9.83E-03 | 43977232  | 43977355  | NC_000020.10 |
| cg17315844 | 5.38E-07 | 7.21E-08 | -5.6 | 7.0468974 | -1.51E-01 | 10249113  | 10249236  | NC_000005.9  |
| cg12627948 | 5.38E-07 | 7.21E-08 | -5.6 | 7.0463226 | -6.97E-02 | 49892292  | 49892415  | NC_000007.13 |
| cg07645299 | 5.39E-07 | 7.21E-08 | -5.6 | 7.0457635 | -9.12E-02 | 63991864  | 63991987  | NC_000002.11 |
| cg16293118 | 5.39E-07 | 7.22E-08 | -5.6 | 7.0452691 | -1.07E-01 | 102105006 | 102105129 | NC_000013.10 |
| cg03894990 | 5.39E-07 | 7.22E-08 | -5.6 | 7.0447709 | -1.28E-01 | 44309765  | 44309888  | NC_000006.11 |
| cg09051775 | 5.39E-07 | 7.22E-08 | -5.6 | 7.0443644 | -3.42E-02 | 52580266  | 52580389  | NC_000016.9  |
| cg11891591 | 5.40E-07 | 7.23E-08 | -5.6 | 7.0436887 | -1.04E-01 | 2302474   | 2302597   | NC_000019.9  |
| cg13002189 | 5.40E-07 | 7.23E-08 | -5.6 | 7.0435624 | -8.10E-02 | 66846049  | 66846172  | NC_000003.11 |
| cg00712181 | 5.40E-07 | 7.23E-08 | -5.6 | 7.0429214 | -6.47E-02 | 71577188  | 71577311  | NC_000010.10 |
| cg07122794 | 5.40E-07 | 7.24E-08 | -5.6 | 7.0420357 | -2.33E-02 | 113299370 | 113299493 | NC_000002.11 |
| cg00758881 | 5.41E-07 | 7.25E-08 | -5.6 | 7.0412338 | -1.72E-01 | 58534681  | 58534804  | NC_000016.9  |
| cg13255190 | 5.41E-07 | 7.25E-08 | -5.6 | 7.0412322 | -5.63E-02 | 4829286   | 4829409   | NC_000012.11 |
| cg02348876 | 5.41E-07 | 7.25E-08 | -5.6 | 7.0405937 | -4.67E-02 | 21683513  | 21683636  | NC_000008.10 |
| cg18094961 | 5.41E-07 | 7.25E-08 | -5.6 | 7.040456  | -9.03E-02 | 45155744  | 45155867  | NC_000010.10 |
| cg19640263 | 5.42E-07 | 7.26E-08 | -5.6 | 7.0399519 | -2.80E-02 | 62414186  | 62414309  | NC_000011.9  |

|            |          |          |      |           |           |           |           |              |
|------------|----------|----------|------|-----------|-----------|-----------|-----------|--------------|
| cg16553574 | 5.42E-07 | 7.26E-08 | -5.6 | 7.039836  | -4.57E-02 | 64839175  | 64839298  | NC_000007.13 |
| cg03176993 | 5.43E-07 | 7.27E-08 | -5.6 | 7.0381427 | -1.24E-01 | 188664887 | 188665010 | NC_000003.11 |
| cg15487725 | 5.44E-07 | 7.28E-08 | -5.6 | 7.0362628 | -1.08E-01 | 21524938  | 21525061  | NC_000014.8  |
| cg04944393 | 5.44E-07 | 7.29E-08 | -5.6 | 7.0361655 | -6.29E-02 | 46748208  | 46748331  | NC_000002.11 |
| cg02365900 | 5.44E-07 | 7.29E-08 | -5.6 | 7.035751  | -1.28E-01 | 81050089  | 81050212  | NC_000017.10 |
| cg15373767 | 5.44E-07 | 7.29E-08 | -5.6 | 7.0354505 | -9.76E-02 | 30951328  | 30951451  | NC_000007.13 |
| cg01779903 | 5.44E-07 | 7.29E-08 | -5.6 | 7.0353939 | -5.97E-02 | 148205646 | 148205769 | NC_000005.9  |
| cg01334831 | 5.44E-07 | 7.29E-08 | -5.6 | 7.0349552 | -1.30E-01 | 114832833 | 114832956 | NC_000013.10 |
| cg25065535 | 5.44E-07 | 7.29E-08 | -5.6 | 7.0349091 | -7.34E-02 | 123374885 | 123375008 | NC_000004.11 |
| cg01475577 | 5.44E-07 | 7.29E-08 | -5.6 | 7.0348989 | -7.11E-02 | 128829615 | 128829738 | NC_000007.13 |
| cg06586265 | 5.45E-07 | 7.30E-08 | -5.6 | 7.0343594 | -1.15E-01 | 170040557 | 170040680 | NC_000003.11 |
| cg07148318 | 5.45E-07 | 7.30E-08 | -5.6 | 7.0337239 | -8.66E-02 | 145115260 | 145115383 | NC_000008.10 |
| cg10322124 | 5.45E-07 | 7.31E-08 | -5.6 | 7.0333184 | -1.19E-01 | 74331865  | 74331988  | NC_000008.10 |
| cg07663571 | 5.45E-07 | 7.31E-08 | -5.6 | 7.0328061 | -1.38E-02 | 69455493  | 69455616  | NC_000011.9  |
| cg26133909 | 5.46E-07 | 7.31E-08 | -5.6 | 7.0323975 | -1.10E-01 | 79762963  | 79763086  | NC_000005.9  |
| cg24523403 | 5.46E-07 | 7.32E-08 | -5.6 | 7.0317412 | -2.46E-02 | 27525514  | 27525637  | NC_000003.11 |
| cg12688265 | 5.46E-07 | 7.32E-08 | -5.6 | 7.031373  | -4.47E-02 | 155197843 | 155197966 | NC_000001.10 |
| cg17870569 | 5.46E-07 | 7.32E-08 | -5.6 | 7.0313552 | -8.95E-02 | 84513930  | 84514053  | NC_000002.11 |
| cg08345575 | 5.46E-07 | 7.32E-08 | -5.6 | 7.0311823 | -2.47E-02 | 4524283   | 4524406   | NC_000016.9  |
| cg00594191 | 5.47E-07 | 7.33E-08 | -5.6 | 7.0302843 | -1.05E-01 | 11755103  | 11755226  | NC_000010.10 |
| cg06618764 | 5.47E-07 | 7.33E-08 | -5.6 | 7.0300441 | -5.72E-02 | 2719090   | 2719213   | NC_000007.13 |
| cg11348257 | 5.47E-07 | 7.33E-08 | -5.6 | 7.0300065 | -1.22E-01 | 76556226  | 76556349  | NC_000001.10 |
| cg19736397 | 5.47E-07 | 7.34E-08 | -5.6 | 7.0291144 | -1.79E-02 | 75947899  | 75948022  | NC_000007.13 |
| cg25488160 | 5.47E-07 | 7.34E-08 | -5.6 | 7.0290912 | -1.10E-01 | 133097868 | 133097991 | NC_000003.11 |
| cg20534702 | 5.47E-07 | 7.34E-08 | -5.6 | 7.0290143 | -1.27E-01 | 4752170   | 4752293   | NC_000007.13 |

|                 |          |          |       |           |           |           |           |              |
|-----------------|----------|----------|-------|-----------|-----------|-----------|-----------|--------------|
| cg22516975      | 5.48E-07 | 7.35E-08 | -5.6  | 7.0281655 | -7.42E-02 | 1617465   | 1617588   | NC_000017.10 |
| cg09309024      | 5.48E-07 | 7.35E-08 | -5.6  | 7.0279967 | -7.69E-02 | 29837267  | 29837390  | NC_000016.9  |
| cg09076650      | 5.48E-07 | 7.35E-08 | -5.6  | 7.0273516 | -8.87E-02 | 73424891  | 73425014  | NC_000007.13 |
| ch.2.235177505R | 5.48E-07 | 7.35E-08 | -5.6  | 7.0270706 | -2.72E-02 | 235512766 | 235512889 | NC_000002.11 |
| cg20598768      | 5.49E-07 | 7.36E-08 | -5.6  | 7.0263998 | -3.20E-02 | 154193039 | 154193162 | NC_000001.10 |
| cg21403759      | 5.49E-07 | 7.36E-08 | -5.6  | 7.025748  | -1.22E-01 | 38739258  | 38739381  | NC_000007.13 |
| cg24277817      | 5.50E-07 | 7.37E-08 | -5.6  | 7.0248236 | -1.62E-01 | 13135662  | 13135785  | NC_000019.9  |
| cg15469802      | 5.50E-07 | 7.38E-08 | -5.6  | 7.023884  | -1.04E-01 | 11293699  | 11293822  | NC_000003.11 |
| cg25649655      | 5.50E-07 | 7.38E-08 | -5.6  | 7.0234454 | -3.89E-02 | 145692504 | 145692627 | NC_000008.10 |
| cg02237755      | 5.51E-07 | 7.39E-08 | -5.59 | 7.0227679 | -9.71E-02 | 102107925 | 102108048 | NC_000010.10 |
| cg15204119      | 5.52E-07 | 7.40E-08 | -5.59 | 7.0209171 | -3.31E-02 | 10613180  | 10613303  | NC_000019.9  |
| cg07669260      | 5.52E-07 | 7.40E-08 | -5.59 | 7.0207989 | -4.43E-02 | 88316847  | 88316970  | NC_000002.11 |
| cg18373855      | 5.52E-07 | 7.40E-08 | -5.59 | 7.0206459 | -1.31E-01 | 159360209 | 159360332 | NC_000006.11 |
| cg05422352      | 5.53E-07 | 7.42E-08 | -5.59 | 7.0182504 | -6.25E-02 | 232650747 | 232650870 | NC_000002.11 |
| cg07832203      | 5.53E-07 | 7.43E-08 | -5.59 | 7.0174058 | -6.35E-02 | 161050227 | 161050350 | NC_000001.10 |
| cg15539901      | 5.54E-07 | 7.44E-08 | -5.59 | 7.0157138 | -4.02E-02 | 124084814 | 124084937 | NC_000008.10 |
| cg22614327      | 5.54E-07 | 7.44E-08 | -5.59 | 7.0156302 | -8.29E-02 | 17750198  | 17750321  | NC_000001.10 |
| cg26055446      | 5.55E-07 | 7.44E-08 | -5.59 | 7.0151863 | -8.65E-02 | 33245990  | 33246113  | NC_000006.11 |
| cg00772868      | 5.55E-07 | 7.45E-08 | -5.59 | 7.014364  | -5.47E-02 | 151814981 | 151815104 | NC_000006.11 |
| cg18883807      | 5.56E-07 | 7.46E-08 | -5.59 | 7.0134937 | -8.76E-02 | 96493999  | 96494122  | NC_000014.8  |
| cg09035838      | 5.56E-07 | 7.46E-08 | -5.59 | 7.0128628 | -5.01E-02 | 82400683  | 82400806  | NC_000011.9  |
| cg21007089      | 5.56E-07 | 7.46E-08 | -5.59 | 7.012503  | -2.51E-02 | 41408316  | 41408439  | NC_000015.9  |
| cg00722097      | 5.56E-07 | 7.46E-08 | -5.59 | 7.012484  | -2.75E-02 | 111195976 | 111196099 | NC_000006.11 |
| cg17526887      | 5.57E-07 | 7.47E-08 | -5.59 | 7.0116164 | -1.18E-01 | 223918000 | 223918123 | NC_000002.11 |
| cg01233487      | 5.57E-07 | 7.47E-08 | -5.59 | 7.01119   | -8.02E-02 | 114312686 | 114312809 | NC_000013.10 |



|                 |          |          |       |           |           |           |           |              |
|-----------------|----------|----------|-------|-----------|-----------|-----------|-----------|--------------|
| cg16520712      | 5.57E-07 | 7.48E-08 | -5.59 | 7.01079   | -1.02E-01 | 1616450   | 1616573   | NC_000008.10 |
| cg05098566      | 5.57E-07 | 7.48E-08 | -5.59 | 7.0104356 | -2.22E-01 | 30652282  | 30652405  | NC_000006.11 |
| cg06358970      | 5.57E-07 | 7.48E-08 | -5.59 | 7.0104269 | -1.19E-01 | 85664826  | 85664949  | NC_000002.11 |
| cg13963793      | 5.57E-07 | 7.48E-08 | -5.59 | 7.0103674 | -1.02E-01 | 223567173 | 223567296 | NC_000001.10 |
| cg02981620      | 5.58E-07 | 7.49E-08 | -5.59 | 7.0097006 | -2.12E-02 | 82632974  | 82633097  | NC_000008.10 |
| cg18394496      | 5.58E-07 | 7.49E-08 | -5.59 | 7.0095138 | -2.31E-02 | 62554881  | 62555004  | NC_000011.9  |
| cg11277143      | 5.58E-07 | 7.49E-08 | -5.59 | 7.0093719 | -8.70E-02 | 10334372  | 10334495  | NC_000002.11 |
| cg22316451      | 5.58E-07 | 7.49E-08 | -5.59 | 7.0093408 | -1.15E-01 | 60645197  | 60645320  | NC_000020.10 |
| cg18054725      | 5.58E-07 | 7.49E-08 | -5.59 | 7.0092237 | -9.80E-02 | 10450472  | 10450595  | NC_000019.9  |
| cg26010191      | 5.58E-07 | 7.49E-08 | -5.59 | 7.0089674 | -1.12E-02 | 15701432  | 15701555  | NC_000002.11 |
| cg15300837      | 5.58E-07 | 7.50E-08 | -5.59 | 7.0083156 | -9.34E-02 | 38803955  | 38804078  | NC_000006.11 |
| ch.14.25380199R | 5.59E-07 | 7.50E-08 | -5.59 | 7.0078813 | -2.63E-02 | 26310359  | 26310482  | NC_000014.8  |
| cg21999991      | 5.59E-07 | 7.50E-08 | -5.59 | 7.0077733 | -6.09E-02 | 4202764   | 4202887   | NC_000020.10 |
| cg04215968      | 5.59E-07 | 7.51E-08 | -5.59 | 7.0069903 | -3.24E-02 | 220253068 | 220253191 | NC_000002.11 |
| cg03353000      | 5.59E-07 | 7.51E-08 | -5.59 | 7.0067282 | -4.16E-02 | 41252913  | 41253036  | NC_000022.10 |
| cg13900770      | 5.60E-07 | 7.52E-08 | -5.59 | 7.0058021 | -9.26E-02 | 74663636  | 74663759  | NC_000001.10 |
| cg07739604      | 5.60E-07 | 7.53E-08 | -5.59 | 7.0044288 | -1.21E-01 | 124950990 | 124951113 | NC_000012.11 |
| cg16137564      | 5.61E-07 | 7.53E-08 | -5.59 | 7.0038339 | -1.11E-01 | 89024217  | 89024340  | NC_000014.8  |
| cg11941507      | 5.61E-07 | 7.54E-08 | -5.59 | 7.0028619 | -4.85E-02 | 133524510 | 133524633 | NC_000003.11 |
| cg19160555      | 5.62E-07 | 7.55E-08 | -5.59 | 7.001972  | -1.81E-02 | 143267454 | 143267577 | NC_000006.11 |
| cg05355411      | 5.62E-07 | 7.55E-08 | -5.59 | 7.0012299 | -1.35E-01 | 70449272  | 70449395  | NC_000008.10 |
| cg17131183      | 5.62E-07 | 7.55E-08 | -5.59 | 7.0012271 | -1.05E-01 | 36771362  | 36771485  | NC_000001.10 |
| cg07012484      | 5.62E-07 | 7.55E-08 | -5.59 | 7.0011142 | -1.39E-01 | 167619748 | 167619871 | NC_000001.10 |
| cg04813876      | 5.62E-07 | 7.56E-08 | -5.59 | 7.0007798 | -1.00E-01 | 103964219 | 103964342 | NC_000011.9  |
| cg06526179      | 5.63E-07 | 7.56E-08 | -5.59 | 7.0002675 | -3.38E-02 | 4665054   | 4665177   | NC_000016.9  |

|            |          |          |       |           |           |           |           |              |
|------------|----------|----------|-------|-----------|-----------|-----------|-----------|--------------|
| cg14402562 | 5.63E-07 | 7.56E-08 | -5.59 | 6.9997287 | -6.45E-02 | 8945810   | 8945933   | NC_000011.9  |
| cg12676500 | 5.63E-07 | 7.56E-08 | -5.59 | 6.9996354 | -1.11E-01 | 145643083 | 145643206 | NC_000008.10 |
| cg05908442 | 5.63E-07 | 7.57E-08 | -5.59 | 6.9989413 | -1.02E-01 | 77800637  | 77800760  | NC_000015.9  |
| cg10219995 | 5.64E-07 | 7.57E-08 | -5.59 | 6.9985425 | -1.15E-01 | 51359431  | 51359554  | NC_000006.11 |
| cg22118297 | 5.64E-07 | 7.58E-08 | -5.59 | 6.997136  | -6.22E-02 | 64547310  | 64547433  | NC_000003.11 |
| cg03819227 | 5.64E-07 | 7.59E-08 | -5.59 | 6.9969315 | -1.07E-01 | 110252994 | 110253117 | NC_000005.9  |
| cg15277311 | 5.65E-07 | 7.59E-08 | -5.59 | 6.9965552 | -7.52E-02 | 93517137  | 93517260  | NC_000011.9  |
| cg19175193 | 5.65E-07 | 7.59E-08 | -5.59 | 6.9959374 | -1.25E-01 | 41007450  | 41007573  | NC_000006.11 |
| cg18730174 | 5.65E-07 | 7.60E-08 | -5.59 | 6.9953091 | -9.48E-02 | 122073211 | 122073334 | NC_000011.9  |
| cg07153826 | 5.65E-07 | 7.60E-08 | -5.59 | 6.99527   | -5.15E-02 | 60962721  | 60962844  | NC_000020.10 |
| cg01638188 | 5.65E-07 | 7.60E-08 | -5.59 | 6.9950295 | -3.52E-02 | 30720323  | 30720446  | NC_000004.11 |
| cg06916011 | 5.66E-07 | 7.61E-08 | -5.59 | 6.9933524 | -7.14E-02 | 55594963  | 55595086  | NC_000019.9  |
| cg13679772 | 5.66E-07 | 7.61E-08 | -5.59 | 6.9932228 | -8.15E-02 | 89933549  | 89933672  | NC_000014.8  |
| cg03019000 | 5.67E-07 | 7.62E-08 | -5.59 | 6.9926494 | -1.04E-01 | 51704351  | 51704474  | NC_000003.11 |
| cg21514857 | 5.67E-07 | 7.63E-08 | -5.59 | 6.9916705 | -5.19E-02 | 52721802  | 52721925  | NC_000008.10 |
| cg18114173 | 5.68E-07 | 7.63E-08 | -5.59 | 6.9912011 | -1.80E-02 | 99149806  | 99149929  | NC_000007.13 |
| cg08285934 | 5.68E-07 | 7.64E-08 | -5.59 | 6.9899225 | -5.17E-02 | 25026600  | 25026723  | NC_000016.9  |
| cg00907204 | 5.69E-07 | 7.65E-08 | -5.59 | 6.9885595 | -3.92E-02 | 92461971  | 92462094  | NC_000007.13 |
| cg22235727 | 5.69E-07 | 7.65E-08 | -5.59 | 6.9881709 | -6.39E-02 | 89043281  | 89043404  | NC_000016.9  |
| cg11860203 | 5.69E-07 | 7.65E-08 | -5.59 | 6.98815   | -6.52E-02 | 32582516  | 32582639  | NC_000017.10 |
| cg10799791 | 5.69E-07 | 7.65E-08 | -5.59 | 6.9880594 | -9.73E-02 | 55908365  | 55908488  | NC_000014.8  |
| cg20213269 | 5.70E-07 | 7.66E-08 | -5.59 | 6.987629  | -2.43E-02 | 64808357  | 64808480  | NC_000011.9  |
| cg11934771 | 5.70E-07 | 7.66E-08 | -5.59 | 6.9868883 | -1.11E-01 | 31021796  | 31021919  | NC_000006.11 |
| cg11412036 | 5.70E-07 | 7.66E-08 | -5.59 | 6.9867907 | -6.15E-02 | 43941871  | 43941994  | NC_000015.9  |
| cg08872722 | 5.70E-07 | 7.67E-08 | -5.59 | 6.9867175 | -3.44E-02 | 201252360 | 201252483 | NC_000001.10 |

|            |          |          |       |           |           |           |           |              |
|------------|----------|----------|-------|-----------|-----------|-----------|-----------|--------------|
| cg27005118 | 5.70E-07 | 7.67E-08 | -5.59 | 6.986636  | -1.33E-01 | 13972210  | 13972333  | NC_000017.10 |
| cg09717979 | 5.71E-07 | 7.67E-08 | -5.59 | 6.9857878 | -2.95E-02 | 103790325 | 103790448 | NC_000004.11 |
| cg10144493 | 5.71E-07 | 7.67E-08 | -5.59 | 6.9857806 | -8.56E-02 | 33395133  | 33395256  | NC_000006.11 |
| cg21732383 | 5.71E-07 | 7.68E-08 | -5.59 | 6.9852541 | -9.85E-02 | 169654692 | 169654815 | NC_000006.11 |
| cg12163415 | 5.71E-07 | 7.68E-08 | -5.59 | 6.9848077 | -6.22E-02 | 27906671  | 27906794  | NC_000002.11 |
| cg12803433 | 5.71E-07 | 7.68E-08 | -5.59 | 6.9847561 | -8.87E-02 | 15466085  | 15466208  | NC_000017.10 |
| cg26806924 | 5.71E-07 | 7.68E-08 | -5.59 | 6.984487  | -4.92E-02 | 33760017  | 33760140  | NC_000020.10 |
| cg08792976 | 5.72E-07 | 7.69E-08 | -5.59 | 6.9833179 | -7.94E-02 | 760528    | 760651    | NC_000016.9  |
| cg02827132 | 5.72E-07 | 7.69E-08 | -5.59 | 6.983008  | -1.42E-01 | 1052529   | 1052652   | NC_000016.9  |
| cg21721825 | 5.72E-07 | 7.70E-08 | -5.59 | 6.9825283 | -1.22E-01 | 97300410  | 97300533  | NC_000012.11 |
| cg20434926 | 5.73E-07 | 7.70E-08 | -5.59 | 6.9817078 | -5.54E-02 | 46181274  | 46181397  | NC_000019.9  |
| cg25463742 | 5.73E-07 | 7.71E-08 | -5.59 | 6.9816318 | -1.18E-01 | 10839574  | 10839697  | NC_000001.10 |
| cg05923914 | 5.73E-07 | 7.71E-08 | -5.59 | 6.9812413 | -6.21E-02 | 45792610  | 45792733  | NC_000011.9  |
| cg13361910 | 5.73E-07 | 7.71E-08 | -5.59 | 6.9811667 | -8.48E-02 | 232750286 | 232750409 | NC_000001.10 |
| cg15525489 | 5.73E-07 | 7.71E-08 | -5.59 | 6.9810639 | -4.21E-02 | 114374589 | 114374712 | NC_000004.11 |
| cg26378073 | 5.73E-07 | 7.71E-08 | -5.59 | 6.9804167 | -1.18E-01 | 105213818 | 105213941 | NC_000010.10 |
| cg00897404 | 5.74E-07 | 7.72E-08 | -5.59 | 6.9799289 | -6.23E-02 | 75182368  | 75182491  | NC_000016.9  |
| cg17004212 | 5.74E-07 | 7.72E-08 | -5.59 | 6.9795258 | -6.72E-02 | 50656130  | 50656253  | NC_000013.10 |
| cg01779076 | 5.74E-07 | 7.73E-08 | -5.59 | 6.9787526 | -4.52E-02 | 201980642 | 201980765 | NC_000002.11 |
| cg23493132 | 5.75E-07 | 7.73E-08 | -5.59 | 6.9783682 | -9.77E-02 | 54370796  | 54370919  | NC_000019.9  |
| cg26097549 | 5.75E-07 | 7.73E-08 | -5.59 | 6.9782663 | -1.92E-02 | 36582467  | 36582590  | NC_000002.11 |
| cg12325286 | 5.75E-07 | 7.74E-08 | -5.59 | 6.9777173 | -9.87E-02 | 55332820  | 55332943  | NC_000017.10 |
| cg16230559 | 5.75E-07 | 7.74E-08 | -5.59 | 6.9772359 | -2.49E-02 | 21771551  | 21771674  | NC_000022.10 |
| cg15747933 | 5.75E-07 | 7.74E-08 | -5.59 | 6.9767681 | -4.21E-02 | 152146478 | 152146601 | NC_000002.11 |
| cg19400926 | 5.75E-07 | 7.75E-08 | -5.59 | 6.9766286 | -6.83E-02 | 28889996  | 28890119  | NC_000006.11 |

|               |          |          |       |           |           |           |           |              |
|---------------|----------|----------|-------|-----------|-----------|-----------|-----------|--------------|
| cg17008978    | 5.76E-07 | 7.75E-08 | -5.59 | 6.9765791 | -5.58E-02 | 151542804 | 151542927 | NC_000007.13 |
| cg09248148    | 5.76E-07 | 7.75E-08 | -5.59 | 6.9764879 | -3.21E-02 | 15755608  | 15755731  | NC_000021.8  |
| cg00831633    | 5.76E-07 | 7.76E-08 | -5.59 | 6.9750385 | -5.24E-02 | 34174976  | 34175099  | NC_000012.11 |
| cg14930242    | 5.78E-07 | 7.77E-08 | -5.58 | 6.9729207 | -6.57E-02 | 139020892 | 139021015 | NC_000003.11 |
| cg13468624    | 5.78E-07 | 7.78E-08 | -5.58 | 6.9719769 | -1.06E-01 | 31146889  | 31147012  | NC_000006.11 |
| cg00530564    | 5.79E-07 | 7.79E-08 | -5.58 | 6.9706967 | -1.10E-01 | 125036429 | 125036552 | NC_000012.11 |
| cg08070476    | 5.79E-07 | 7.80E-08 | -5.58 | 6.9698517 | -1.44E-01 | 16887412  | 16887535  | NC_000007.13 |
| cg09643340    | 5.79E-07 | 7.80E-08 | -5.58 | 6.9697078 | -8.55E-02 | 129244105 | 129244228 | NC_000011.9  |
| cg01497154    | 5.80E-07 | 7.80E-08 | -5.58 | 6.9694186 | -7.68E-02 | 3661910   | 3662033   | NC_000020.10 |
| cg00358220    | 5.80E-07 | 7.80E-08 | -5.58 | 6.9693107 | -3.42E-02 | 3247473   | 3247596   | NC_000018.9  |
| ch.3.2661134R | 5.80E-07 | 7.81E-08 | -5.58 | 6.9684133 | -2.25E-02 | 134020605 | 134020728 | NC_000003.11 |
| cg18479656    | 5.80E-07 | 7.81E-08 | -5.58 | 6.968207  | -2.63E-02 | 25348087  | 25348210  | NC_000012.11 |
| cg11651961    | 5.80E-07 | 7.81E-08 | -5.58 | 6.9681891 | -2.73E-02 | 54197711  | 54197834  | NC_000002.11 |
| cg16348003    | 5.80E-07 | 7.81E-08 | -5.58 | 6.9679134 | -1.06E-01 | 153589781 | 153589904 | NC_000001.10 |
| cg25124402    | 5.81E-07 | 7.82E-08 | -5.58 | 6.967364  | -6.75E-02 | 219125749 | 219125872 | NC_000002.11 |
| cg00828583    | 5.81E-07 | 7.82E-08 | -5.58 | 6.9672664 | -7.52E-02 | 117836331 | 117836454 | NC_000003.11 |
| cg21422024    | 5.81E-07 | 7.82E-08 | -5.58 | 6.967215  | -3.19E-02 | 64080841  | 64080964  | NC_000008.10 |
| cg04066453    | 5.81E-07 | 7.82E-08 | -5.58 | 6.9671078 | -1.09E-01 | 39943545  | 39943668  | NC_000017.10 |
| cg10540754    | 5.81E-07 | 7.82E-08 | -5.58 | 6.9668249 | -1.24E-02 | 16790370  | 16790493  | NC_000002.11 |
| cg25044817    | 5.82E-07 | 7.83E-08 | -5.58 | 6.9656512 | -8.80E-02 | 24233259  | 24233382  | NC_000002.11 |
| cg18768338    | 5.82E-07 | 7.84E-08 | -5.58 | 6.9650125 | -8.20E-02 | 17575440  | 17575563  | NC_000001.10 |
| cg02816425    | 5.82E-07 | 7.85E-08 | -5.58 | 6.9641041 | -1.03E-01 | 16809233  | 16809356  | NC_000011.9  |
| cg05206762    | 5.83E-07 | 7.85E-08 | -5.58 | 6.9632492 | -1.56E-02 | 8160379   | 8160502   | NC_000004.11 |
| cg03448396    | 5.83E-07 | 7.85E-08 | -5.58 | 6.9631347 | -2.39E-02 | 38495949  | 38496072  | NC_000003.11 |
| cg01050423    | 5.83E-07 | 7.86E-08 | -5.58 | 6.9625524 | -2.53E-02 | 103236078 | 103236201 | NC_000002.11 |

|            |          |          |       |           |           |           |           |              |
|------------|----------|----------|-------|-----------|-----------|-----------|-----------|--------------|
| cg15719025 | 5.83E-07 | 7.86E-08 | -5.58 | 6.962253  | -3.99E-02 | 28879147  | 28879270  | NC_000001.10 |
| cg16697850 | 5.84E-07 | 7.86E-08 | -5.58 | 6.9621236 | -1.03E-01 | 141946928 | 141947051 | NC_000007.13 |
| cg20826792 | 5.84E-07 | 7.86E-08 | -5.58 | 6.9617676 | -5.08E-02 | 29425     | 29548     | NC_000001.10 |
| cg11901034 | 5.84E-07 | 7.86E-08 | -5.58 | 6.9617384 | -1.94E-02 | 128598214 | 128598337 | NC_000003.11 |
| cg21714809 | 5.84E-07 | 7.87E-08 | -5.58 | 6.9605035 | -2.06E-02 | 72463184  | 72463307  | NC_000011.9  |
| cg04015433 | 5.85E-07 | 7.88E-08 | -5.58 | 6.9597266 | -1.23E-01 | 8820844   | 8820967   | NC_000008.10 |
| cg01871427 | 5.85E-07 | 7.88E-08 | -5.58 | 6.9594655 | -9.88E-02 | 90341955  | 90342078  | NC_000012.11 |
| cg09812376 | 5.85E-07 | 7.89E-08 | -5.58 | 6.9589376 | -7.24E-02 | 74270190  | 74270313  | NC_000017.10 |
| cg12138063 | 5.86E-07 | 7.90E-08 | -5.58 | 6.9575316 | -2.26E-02 | 16607096  | 16607219  | NC_000019.9  |
| cg10410910 | 5.86E-07 | 7.90E-08 | -5.58 | 6.9573973 | -6.31E-02 | 53684225  | 53684348  | NC_000014.8  |
| cg26946769 | 5.86E-07 | 7.90E-08 | -5.58 | 6.9571039 | -7.49E-02 | 48189538  | 48189661  | NC_000018.9  |
| cg14192259 | 5.87E-07 | 7.91E-08 | -5.58 | 6.9565856 | -1.22E-01 | 133014881 | 133015004 | NC_000012.11 |
| cg05803296 | 5.87E-07 | 7.91E-08 | -5.58 | 6.95593   | -1.03E-01 | 105319615 | 105319738 | NC_000007.13 |
| cg26352401 | 5.87E-07 | 7.91E-08 | -5.58 | 6.9558235 | -4.27E-02 | 150040160 | 150040283 | NC_000001.10 |
| cg00420347 | 5.87E-07 | 7.91E-08 | -5.58 | 6.9557585 | -9.55E-02 | 65362428  | 65362551  | NC_000001.10 |
| cg12854483 | 5.88E-07 | 7.92E-08 | -5.58 | 6.9550485 | -9.49E-02 | 11649671  | 11649794  | NC_000019.9  |
| cg15407058 | 5.88E-07 | 7.93E-08 | -5.58 | 6.9542682 | -8.68E-02 | 80175989  | 80176112  | NC_000017.10 |
| cg22177227 | 5.88E-07 | 7.93E-08 | -5.58 | 6.9541793 | -4.50E-02 | 59125919  | 59126042  | NC_000015.9  |
| cg23205886 | 5.88E-07 | 7.93E-08 | -5.58 | 6.953499  | -9.63E-02 | 138611766 | 138611889 | NC_000005.9  |
| cg03857198 | 5.89E-07 | 7.94E-08 | -5.58 | 6.9529501 | -1.27E-01 | 152927597 | 152927720 | NC_000003.11 |
| cg13424422 | 5.89E-07 | 7.94E-08 | -5.58 | 6.9528635 | -9.71E-02 | 110838288 | 110838411 | NC_000013.10 |
| cg18825703 | 5.89E-07 | 7.94E-08 | -5.58 | 6.9524631 | -9.55E-02 | 103675748 | 103675871 | NC_000014.8  |
| cg18963763 | 5.90E-07 | 7.95E-08 | -5.58 | 6.9510298 | -8.03E-02 | 99612150  | 99612273  | NC_000010.10 |
| cg23081353 | 5.90E-07 | 7.96E-08 | -5.58 | 6.9505479 | -3.27E-02 | 93323494  | 93323617  | NC_000012.11 |
| cg16019273 | 5.91E-07 | 7.96E-08 | -5.58 | 6.9498698 | -9.88E-02 | 36273185  | 36273308  | NC_000001.10 |

|            |          |          |       |           |           |           |           |              |
|------------|----------|----------|-------|-----------|-----------|-----------|-----------|--------------|
| cg14557227 | 5.91E-07 | 7.96E-08 | -5.58 | 6.9496393 | -1.63E-02 | 205649791 | 205649914 | NC_000001.10 |
| cg11737676 | 5.91E-07 | 7.97E-08 | -5.58 | 6.9487485 | -4.03E-02 | 86042230  | 86042353  | NC_000001.10 |
| cg05767561 | 5.91E-07 | 7.97E-08 | -5.58 | 6.9483683 | -2.21E-02 | 70820607  | 70820730  | NC_000001.10 |
| cg19752602 | 5.92E-07 | 7.98E-08 | -5.58 | 6.9480144 | -9.85E-02 | 153039227 | 153039350 | NC_000005.9  |
| cg23394480 | 5.92E-07 | 7.98E-08 | -5.58 | 6.9476466 | -4.27E-02 | 105487615 | 105487738 | NC_000014.8  |
| cg03750587 | 5.92E-07 | 7.98E-08 | -5.58 | 6.9471888 | -1.29E-01 | 24239979  | 24240102  | NC_000001.10 |
| cg26261298 | 5.92E-07 | 7.98E-08 | -5.58 | 6.9471315 | -9.21E-02 | 144263435 | 144263558 | NC_000006.11 |
| cg27206976 | 5.92E-07 | 7.98E-08 | -5.58 | 6.9469575 | -7.18E-02 | 50738315  | 50738438  | NC_000022.10 |
| cg10654618 | 5.92E-07 | 7.99E-08 | -5.58 | 6.946938  | -3.82E-02 | 62682503  | 62682626  | NC_000015.9  |
| cg00521993 | 5.92E-07 | 7.99E-08 | -5.58 | 6.9463499 | -5.39E-02 | 75199411  | 75199534  | NC_000010.10 |
| cg27090029 | 5.93E-07 | 7.99E-08 | -5.58 | 6.9459516 | -8.33E-02 | 72408394  | 72408517  | NC_000011.9  |
| cg27464065 | 5.93E-07 | 8.00E-08 | -5.58 | 6.9454296 | -1.03E-01 | 12940610  | 12940733  | NC_000012.11 |
| cg01023751 | 5.93E-07 | 8.00E-08 | -5.58 | 6.945292  | -4.16E-02 | 36427010  | 36427133  | NC_000019.9  |
| cg25412387 | 5.94E-07 | 8.01E-08 | -5.58 | 6.9437076 | -1.17E-01 | 30061634  | 30061757  | NC_000020.10 |
| cg12478066 | 5.94E-07 | 8.01E-08 | -5.58 | 6.9433622 | -6.73E-02 | 1294006   | 1294129   | NC_000001.10 |
| cg23006204 | 5.94E-07 | 8.02E-08 | -5.58 | 6.943296  | -8.51E-02 | 130700866 | 130700989 | NC_000009.11 |
| cg14254480 | 5.95E-07 | 8.02E-08 | -5.58 | 6.9425613 | -6.16E-02 | 26927693  | 26927816  | NC_000002.11 |
| cg26672071 | 5.95E-07 | 8.02E-08 | -5.58 | 6.9421066 | -2.85E-02 | 153606943 | 153607066 | NC_000001.10 |
| cg21208157 | 5.95E-07 | 8.03E-08 | -5.58 | 6.9417001 | -6.05E-02 | 49120043  | 49120166  | NC_000019.9  |
| cg25763788 | 5.96E-07 | 8.03E-08 | -5.58 | 6.9409309 | -8.62E-02 | 78172950  | 78173073  | NC_000006.11 |
| cg06733608 | 5.96E-07 | 8.04E-08 | -5.58 | 6.9407779 | -4.01E-02 | 10692764  | 10692887  | NC_000005.9  |
| cg13542022 | 5.96E-07 | 8.04E-08 | -5.58 | 6.9406895 | -2.33E-02 | 40932276  | 40932399  | NC_000019.9  |
| cg04734286 | 5.96E-07 | 8.04E-08 | -5.58 | 6.9405129 | -3.71E-02 | 74079535  | 74079658  | NC_000010.10 |
| cg26328951 | 5.96E-07 | 8.04E-08 | -5.58 | 6.9400635 | -1.22E-01 | 28906514  | 28906637  | NC_000001.10 |
| cg05620710 | 5.96E-07 | 8.04E-08 | -5.58 | 6.9399764 | -1.19E-01 | 140010064 | 140010187 | NC_000005.9  |

|            |          |          |       |           |           |           |           |              |
|------------|----------|----------|-------|-----------|-----------|-----------|-----------|--------------|
| cg13867248 | 5.96E-07 | 8.05E-08 | -5.58 | 6.9395518 | -4.37E-02 | 33285584  | 33285707  | NC_000006.11 |
| cg01749142 | 5.96E-07 | 8.05E-08 | -5.58 | 6.9392841 | -4.96E-02 | 105262305 | 105262428 | NC_000014.8  |
| cg06392589 | 5.97E-07 | 8.06E-08 | -5.58 | 6.938266  | -1.07E-01 | 136676846 | 136676969 | NC_000003.11 |
| cg03879180 | 5.98E-07 | 8.06E-08 | -5.58 | 6.9374527 | -9.01E-02 | 24713283  | 24713406  | NC_000002.11 |
| cg08889114 | 5.98E-07 | 8.07E-08 | -5.58 | 6.9371654 | -7.40E-02 | 8631797   | 8631920   | NC_000003.11 |
| cg06318274 | 5.98E-07 | 8.07E-08 | -5.58 | 6.9369559 | -6.72E-02 | 86150813  | 86150936  | NC_000015.9  |
| cg03227611 | 5.98E-07 | 8.07E-08 | -5.58 | 6.9365914 | -4.39E-02 | 159676034 | 159676157 | NC_000004.11 |
| cg05867925 | 5.98E-07 | 8.07E-08 | -5.58 | 6.9365207 | -1.20E-02 | 26033854  | 26033977  | NC_000006.11 |
| cg17646499 | 5.98E-07 | 8.08E-08 | -5.58 | 6.9358193 | -1.00E-01 | 124601778 | 124601901 | NC_000003.11 |
| cg26555023 | 5.98E-07 | 8.08E-08 | -5.58 | 6.9358085 | -2.44E-02 | 7070401   | 7070524   | NC_000004.11 |
| cg10394757 | 5.99E-07 | 8.08E-08 | -5.58 | 6.9355093 | -8.65E-02 | 66879807  | 66879930  | NC_000016.9  |
| cg25518400 | 5.99E-07 | 8.08E-08 | -5.58 | 6.9354657 | -7.31E-02 | 49517153  | 49517276  | NC_000006.11 |
| cg17540545 | 5.99E-07 | 8.09E-08 | -5.58 | 6.9341971 | -1.11E-01 | 35630355  | 35630478  | NC_000019.9  |
| cg05412410 | 6.00E-07 | 8.09E-08 | -5.58 | 6.9338573 | -1.14E-01 | 3033173   | 3033296   | NC_000007.13 |
| cg08094571 | 6.00E-07 | 8.10E-08 | -5.58 | 6.9327875 | -5.86E-02 | 16682354  | 16682477  | NC_000019.9  |
| cg07340423 | 6.01E-07 | 8.11E-08 | -5.58 | 6.9316688 | -2.14E-02 | 52472383  | 52472506  | NC_000015.9  |
| cg05384123 | 6.01E-07 | 8.12E-08 | -5.58 | 6.9311828 | -1.21E-01 | 71294341  | 71294464  | NC_000003.11 |
| cg27043786 | 6.01E-07 | 8.12E-08 | -5.58 | 6.9311553 | -7.86E-02 | 88928647  | 88928770  | NC_000001.10 |
| cg07389276 | 6.02E-07 | 8.12E-08 | -5.58 | 6.9304389 | -3.28E-02 | 35715686  | 35715809  | NC_000017.10 |
| cg13071569 | 6.02E-07 | 8.12E-08 | -5.58 | 6.9303526 | -1.14E-01 | 107296946 | 107297069 | NC_000012.11 |
| cg25212025 | 6.02E-07 | 8.13E-08 | -5.58 | 6.9297134 | -1.02E-01 | 34602937  | 34603060  | NC_000010.10 |
| cg26092367 | 6.02E-07 | 8.13E-08 | -5.58 | 6.9292082 | -1.11E-01 | 145431290 | 145431413 | NC_000006.11 |
| cg02426912 | 6.03E-07 | 8.14E-08 | -5.58 | 6.9284974 | -4.69E-02 | 18812920  | 18813043  | NC_000016.9  |
| cg26545519 | 6.03E-07 | 8.14E-08 | -5.58 | 6.9283129 | -1.04E-01 | 418075    | 418198    | NC_000002.11 |
| cg13576991 | 6.03E-07 | 8.14E-08 | -5.58 | 6.9279744 | -8.02E-02 | 223257466 | 223257589 | NC_000001.10 |

|               |          |          |       |           |           |           |           |              |
|---------------|----------|----------|-------|-----------|-----------|-----------|-----------|--------------|
| ch.2.4853641F | 6.03E-07 | 8.15E-08 | -5.58 | 6.927583  | -4.20E-02 | 239102266 | 239102389 | NC_000002.11 |
| cg19445097    | 6.04E-07 | 8.15E-08 | -5.58 | 6.9268326 | -8.15E-02 | 114075643 | 114075766 | NC_000013.10 |
| cg08278648    | 6.04E-07 | 8.15E-08 | -5.58 | 6.9268275 | -1.43E-02 | 27503704  | 27503827  | NC_000017.10 |
| cg24407086    | 6.04E-07 | 8.15E-08 | -5.57 | 6.9267903 | -8.23E-02 | 202820266 | 202820389 | NC_000002.11 |
| cg26108416    | 6.04E-07 | 8.15E-08 | -5.57 | 6.9266764 | -8.80E-02 | 49226683  | 49226806  | NC_000001.10 |
| cg19873496    | 6.04E-07 | 8.17E-08 | -5.57 | 6.9252335 | -7.38E-02 | 197105397 | 197105520 | NC_000003.11 |
| cg19616230    | 6.04E-07 | 8.17E-08 | -5.57 | 6.9251585 | -5.83E-02 | 25657429  | 25657552  | NC_000004.11 |
| cg17942618    | 6.05E-07 | 8.17E-08 | -5.57 | 6.924927  | -1.48E-01 | 32409867  | 32409990  | NC_000001.10 |
| cg06058618    | 6.05E-07 | 8.17E-08 | -5.57 | 6.9247231 | -2.23E-02 | 155057452 | 155057575 | NC_000001.10 |
| cg23288337    | 6.05E-07 | 8.17E-08 | -5.57 | 6.9246432 | -6.95E-02 | 233250701 | 233250824 | NC_000002.11 |
| cg21005438    | 6.05E-07 | 8.17E-08 | -5.57 | 6.9246024 | -1.03E-01 | 15541182  | 15541305  | NC_000001.10 |
| cg27314760    | 6.05E-07 | 8.18E-08 | -5.57 | 6.9234804 | -6.93E-02 | 38395079  | 38395202  | NC_000001.10 |
| cg09187413    | 6.06E-07 | 8.18E-08 | -5.57 | 6.9233673 | -9.26E-02 | 32800591  | 32800714  | NC_000006.11 |
| cg02375313    | 6.06E-07 | 8.18E-08 | -5.57 | 6.923188  | -8.15E-02 | 658301    | 658424    | NC_000006.11 |
| cg09152259    | 6.06E-07 | 8.18E-08 | -5.57 | 6.9231747 | -6.05E-02 | 128156114 | 128156237 | NC_000002.11 |
| cg19399326    | 6.06E-07 | 8.18E-08 | -5.57 | 6.9231204 | -1.78E-02 | 142720039 | 142720162 | NC_000003.11 |
| cg06002947    | 6.06E-07 | 8.18E-08 | -5.57 | 6.9229555 | -2.33E-02 | 28936713  | 28936836  | NC_000016.9  |
| cg05226180    | 6.06E-07 | 8.19E-08 | -5.57 | 6.9221103 | -8.34E-02 | 79362117  | 79362240  | NC_000010.10 |
| cg24493649    | 6.06E-07 | 8.19E-08 | -5.57 | 6.9219679 | -1.10E-01 | 31847922  | 31848045  | NC_000006.11 |
| cg18121245    | 6.06E-07 | 8.19E-08 | -5.57 | 6.9218598 | -4.52E-02 | 21512378  | 21512501  | NC_000019.9  |
| cg20837735    | 6.07E-07 | 8.20E-08 | -5.57 | 6.9210208 | -1.37E-01 | 61144177  | 61144300  | NC_000018.9  |
| cg01512589    | 6.07E-07 | 8.21E-08 | -5.57 | 6.9202254 | -4.75E-02 | 98279517  | 98279640  | NC_000009.11 |
| cg12061886    | 6.08E-07 | 8.22E-08 | -5.57 | 6.9187891 | -9.13E-02 | 75746793  | 75746916  | NC_000014.8  |
| cg00224929    | 6.09E-07 | 8.23E-08 | -5.57 | 6.9175319 | -5.32E-02 | 171705463 | 171705586 | NC_000002.11 |
| cg02888894    | 6.09E-07 | 8.24E-08 | -5.57 | 6.9168536 | -5.39E-02 | 62660605  | 62660728  | NC_000020.10 |



|            |          |          |       |           |           |           |           |              |
|------------|----------|----------|-------|-----------|-----------|-----------|-----------|--------------|
| cg08675176 | 6.09E-07 | 8.24E-08 | -5.57 | 6.9166764 | -1.52E-02 | 50312165  | 50312288  | NC_000022.10 |
| cg25027167 | 6.10E-07 | 8.24E-08 | -5.57 | 6.9164329 | -9.81E-02 | 145551031 | 145551154 | NC_000008.10 |
| cg00848594 | 6.10E-07 | 8.24E-08 | -5.57 | 6.9159223 | -1.49E-01 | 45495782  | 45495905  | NC_000010.10 |
| cg16989784 | 6.10E-07 | 8.25E-08 | -5.57 | 6.9155297 | -8.24E-02 | 52205894  | 52206017  | NC_000003.11 |
| cg17578322 | 6.10E-07 | 8.25E-08 | -5.57 | 6.915099  | -1.15E-01 | 55546118  | 55546241  | NC_000003.11 |
| cg04332927 | 6.11E-07 | 8.25E-08 | -5.57 | 6.9147364 | -9.74E-02 | 44039484  | 44039607  | NC_000006.11 |
| cg21681643 | 6.11E-07 | 8.26E-08 | -5.57 | 6.9142837 | -1.26E-01 | 114039512 | 114039635 | NC_000002.11 |
| cg07602841 | 6.11E-07 | 8.26E-08 | -5.57 | 6.9136517 | -7.12E-02 | 56702144  | 56702267  | NC_000016.9  |
| cg22142913 | 6.12E-07 | 8.28E-08 | -5.57 | 6.9122423 | -2.76E-02 | 33552384  | 33552507  | NC_000018.9  |
| cg04663916 | 6.12E-07 | 8.28E-08 | -5.57 | 6.9121966 | -9.57E-02 | 50265991  | 50266114  | NC_000013.10 |
| cg14310162 | 6.12E-07 | 8.28E-08 | -5.57 | 6.9121289 | -2.43E-02 | 32146344  | 32146467  | NC_000022.10 |
| cg20524271 | 6.12E-07 | 8.28E-08 | -5.57 | 6.9119914 | -2.85E-02 | 20153750  | 20153873  | NC_000011.9  |
| cg00439089 | 6.12E-07 | 8.28E-08 | -5.57 | 6.9117523 | -7.19E-02 | 48263150  | 48263273  | NC_000017.10 |
| cg26334428 | 6.13E-07 | 8.29E-08 | -5.57 | 6.9108127 | -2.88E-02 | 156308728 | 156308851 | NC_000001.10 |
| cg24089935 | 6.13E-07 | 8.29E-08 | -5.57 | 6.9105784 | -1.00E-02 | 2554295   | 2554418   | NC_000011.9  |
| cg09934892 | 6.13E-07 | 8.29E-08 | -5.57 | 6.9100912 | -1.11E-01 | 3559551   | 3559674   | NC_000016.9  |
| cg22396279 | 6.13E-07 | 8.30E-08 | -5.57 | 6.9098332 | -2.98E-02 | 154580739 | 154580862 | NC_000001.10 |
| cg03469233 | 6.14E-07 | 8.30E-08 | -5.57 | 6.9094465 | -9.83E-02 | 230527641 | 230527764 | NC_000001.10 |
| cg20541370 | 6.14E-07 | 8.30E-08 | -5.57 | 6.9092301 | -4.46E-02 | 44549075  | 44549198  | NC_000006.11 |
| cg23251858 | 6.14E-07 | 8.30E-08 | -5.57 | 6.908999  | -6.32E-02 | 5510010   | 5510133   | NC_000007.13 |
| cg27056425 | 6.14E-07 | 8.30E-08 | -5.57 | 6.9088604 | -5.02E-02 | 27776039  | 27776162  | NC_000006.11 |
| cg18413449 | 6.14E-07 | 8.31E-08 | -5.57 | 6.9086481 | -3.90E-02 | 155605350 | 155605473 | NC_000007.13 |
| cg09913813 | 6.14E-07 | 8.31E-08 | -5.57 | 6.9082507 | -1.02E-01 | 126573785 | 126573908 | NC_000011.9  |
| cg17730764 | 6.15E-07 | 8.32E-08 | -5.57 | 6.9074398 | -1.19E-01 | 151334267 | 151334390 | NC_000002.11 |
| cg12637920 | 6.16E-07 | 8.33E-08 | -5.57 | 6.905811  | -1.52E-02 | 71408366  | 71408489  | NC_000015.9  |

|            |          |          |       |           |           |           |           |              |
|------------|----------|----------|-------|-----------|-----------|-----------|-----------|--------------|
| cg14059464 | 6.16E-07 | 8.33E-08 | -5.57 | 6.9055825 | -8.11E-02 | 241901988 | 241902111 | NC_000002.11 |
| cg25430506 | 6.16E-07 | 8.34E-08 | -5.57 | 6.9050957 | -1.60E-02 | 90348385  | 90348508  | NC_000006.11 |
| cg09685527 | 6.16E-07 | 8.34E-08 | -5.57 | 6.9050401 | -1.27E-02 | 63753438  | 63753561  | NC_000011.9  |
| cg23684711 | 6.16E-07 | 8.34E-08 | -5.57 | 6.9048063 | -2.53E-02 | 948879    | 949002    | NC_000001.10 |
| cg23591298 | 6.17E-07 | 8.34E-08 | -5.57 | 6.904345  | -2.47E-02 | 31628935  | 31629058  | NC_000006.11 |
| cg01948202 | 6.17E-07 | 8.35E-08 | -5.57 | 6.9036801 | -1.11E-01 | 122400474 | 122400597 | NC_000003.11 |
| cg21519900 | 6.17E-07 | 8.35E-08 | -5.57 | 6.9035816 | -1.08E-01 | 31670612  | 31670735  | NC_000020.10 |
| cg01628737 | 6.17E-07 | 8.35E-08 | -5.57 | 6.9034748 | -8.80E-02 | 201559140 | 201559263 | NC_000002.11 |
| cg07571928 | 6.17E-07 | 8.35E-08 | -5.57 | 6.9030941 | -8.60E-02 | 22020630  | 22020753  | NC_000016.9  |
| cg02737379 | 6.17E-07 | 8.36E-08 | -5.57 | 6.9028517 | -7.72E-02 | 119379530 | 119379653 | NC_000003.11 |
| cg03011941 | 6.17E-07 | 8.36E-08 | -5.57 | 6.9027343 | -5.29E-02 | 75468318  | 75468441  | NC_000016.9  |
| cg05570258 | 6.18E-07 | 8.36E-08 | -5.57 | 6.90214   | -1.09E-01 | 105662884 | 105663007 | NC_000007.13 |
| cg08408668 | 6.19E-07 | 8.37E-08 | -5.57 | 6.9006019 | -6.96E-02 | 1173241   | 1173364   | NC_000019.9  |
| cg05768620 | 6.19E-07 | 8.38E-08 | -5.57 | 6.9005671 | -4.74E-02 | 71752971  | 71753094  | NC_000011.9  |
| cg00458337 | 6.19E-07 | 8.38E-08 | -5.57 | 6.9003184 | -7.08E-02 | 45972499  | 45972622  | NC_000017.10 |
| cg02951526 | 6.19E-07 | 8.38E-08 | -5.57 | 6.8998932 | -6.53E-02 | 12191276  | 12191399  | NC_000016.9  |
| cg06726207 | 6.19E-07 | 8.38E-08 | -5.57 | 6.899514  | -3.30E-02 | 61190550  | 61190673  | NC_000014.8  |
| cg15649857 | 6.19E-07 | 8.38E-08 | -5.57 | 6.899495  | -8.62E-02 | 25051716  | 25051839  | NC_000001.10 |
| cg00050375 | 6.19E-07 | 8.39E-08 | -5.57 | 6.8993308 | -1.07E-01 | 43404828  | 43404951  | NC_000006.11 |
| cg22415591 | 6.20E-07 | 8.39E-08 | -5.57 | 6.8990414 | -3.79E-02 | 2282346   | 2282469   | NC_000007.13 |
| cg00592695 | 6.20E-07 | 8.39E-08 | -5.57 | 6.8989094 | -1.47E-01 | 134545685 | 134545808 | NC_000008.10 |
| cg13789015 | 6.20E-07 | 8.40E-08 | -5.57 | 6.8982179 | -1.47E-01 | 136890014 | 136890137 | NC_000009.11 |
| cg09798435 | 6.21E-07 | 8.40E-08 | -5.57 | 6.8973985 | -3.77E-02 | 3566304   | 3566427   | NC_000001.10 |
| cg19923326 | 6.21E-07 | 8.40E-08 | -5.57 | 6.8972096 | -8.51E-02 | 2828778   | 2828901   | NC_000011.9  |
| cg13435795 | 6.21E-07 | 8.41E-08 | -5.57 | 6.8970954 | -5.32E-02 | 139523709 | 139523832 | NC_000009.11 |

|                |          |          |       |           |           |           |           |              |
|----------------|----------|----------|-------|-----------|-----------|-----------|-----------|--------------|
| cg00518623     | 6.21E-07 | 8.41E-08 | -5.57 | 6.8969642 | -6.12E-02 | 54933797  | 54933920  | NC_000020.10 |
| cg10758306     | 6.21E-07 | 8.41E-08 | -5.57 | 6.8962853 | -1.77E-02 | 18038771  | 18038894  | NC_000020.10 |
| cg19185339     | 6.22E-07 | 8.42E-08 | -5.57 | 6.8954496 | -7.81E-02 | 44971649  | 44971772  | NC_000013.10 |
| ch.13.1524792R | 6.22E-07 | 8.42E-08 | -5.57 | 6.8952708 | -2.40E-02 | 99552827  | 99552950  | NC_000013.10 |
| cg23801272     | 6.23E-07 | 8.43E-08 | -5.57 | 6.8938072 | -6.92E-02 | 158824201 | 158824324 | NC_000007.13 |
| cg26261342     | 6.23E-07 | 8.44E-08 | -5.57 | 6.8928541 | -2.06E-02 | 56512029  | 56512152  | NC_000012.11 |
| cg07958689     | 6.23E-07 | 8.44E-08 | -5.57 | 6.8927917 | -1.23E-01 | 39010551  | 39010674  | NC_000017.10 |
| cg07911905     | 6.23E-07 | 8.45E-08 | -5.57 | 6.8924648 | -9.52E-02 | 105096644 | 105096767 | NC_000012.11 |
| cg17501754     | 6.24E-07 | 8.45E-08 | -5.57 | 6.8923144 | -1.02E-01 | 1891699   | 1891822   | NC_000011.9  |
| cg11887214     | 6.24E-07 | 8.45E-08 | -5.57 | 6.8922818 | -8.17E-02 | 64527417  | 64527540  | NC_000011.9  |
| cg10866062     | 6.24E-07 | 8.45E-08 | -5.57 | 6.8921804 | -9.49E-02 | 72358370  | 72358493  | NC_000017.10 |
| cg05296619     | 6.24E-07 | 8.45E-08 | -5.57 | 6.8918367 | -1.16E-01 | 114834683 | 114834806 | NC_000013.10 |
| cg02060465     | 6.24E-07 | 8.45E-08 | -5.57 | 6.8916294 | -8.91E-02 | 152941727 | 152941850 | NC_000001.10 |
| cg21625146     | 6.24E-07 | 8.45E-08 | -5.57 | 6.8915505 | -9.19E-02 | 486483    | 486606    | NC_000005.9  |
| cg17165766     | 6.24E-07 | 8.45E-08 | -5.57 | 6.8915125 | -2.21E-02 | 117767944 | 117768067 | NC_000008.10 |
| cg04097610     | 6.24E-07 | 8.46E-08 | -5.57 | 6.8910124 | -3.89E-02 | 57023835  | 57023958  | NC_000016.9  |
| cg05707788     | 6.24E-07 | 8.46E-08 | -5.57 | 6.8909752 | -9.22E-02 | 47165437  | 47165560  | NC_000021.8  |
| cg27313933     | 6.24E-07 | 8.46E-08 | -5.57 | 6.8908057 | -1.06E-01 | 89704682  | 89704805  | NC_000016.9  |
| cg22218058     | 6.25E-07 | 8.46E-08 | -5.57 | 6.89045   | -3.37E-02 | 32021831  | 32021954  | NC_000003.11 |
| cg12095505     | 6.25E-07 | 8.46E-08 | -5.57 | 6.8903253 | -9.63E-02 | 14849394  | 14849517  | NC_000012.11 |
| cg01112643     | 6.25E-07 | 8.46E-08 | -5.57 | 6.8903022 | -2.70E-02 | 157802216 | 157802339 | NC_000006.11 |
| cg16906765     | 6.26E-07 | 8.48E-08 | -5.57 | 6.8888122 | -1.05E-01 | 75475038  | 75475161  | NC_000015.9  |
| cg22797644     | 6.26E-07 | 8.48E-08 | -5.57 | 6.888482  | -1.06E-01 | 34206491  | 34206614  | NC_000006.11 |
| cg05483623     | 6.26E-07 | 8.48E-08 | -5.57 | 6.8884769 | -3.06E-02 | 42666165  | 42666288  | NC_000022.10 |
| cg03038685     | 6.26E-07 | 8.49E-08 | -5.57 | 6.8877149 | -3.02E-02 | 197281468 | 197281591 | NC_000003.11 |

|            |          |          |       |           |           |           |           |              |
|------------|----------|----------|-------|-----------|-----------|-----------|-----------|--------------|
| cg01220469 | 6.27E-07 | 8.49E-08 | -5.57 | 6.8869885 | -4.17E-02 | 119205034 | 119205157 | NC_000011.9  |
| cg10082398 | 6.27E-07 | 8.49E-08 | -5.57 | 6.8867824 | -9.34E-02 | 155595675 | 155595798 | NC_000006.11 |
| cg12196367 | 6.27E-07 | 8.50E-08 | -5.57 | 6.8858369 | -5.87E-02 | 183892577 | 183892700 | NC_000003.11 |
| cg20565833 | 6.28E-07 | 8.51E-08 | -5.57 | 6.8850147 | -6.10E-02 | 91137297  | 91137420  | NC_000004.11 |
| cg13016308 | 6.28E-07 | 8.51E-08 | -5.57 | 6.8850139 | -8.09E-02 | 3253581   | 3253704   | NC_000011.9  |
| cg27502066 | 6.28E-07 | 8.52E-08 | -5.57 | 6.8843906 | -3.10E-02 | 74380231  | 74380354  | NC_000017.10 |
| cg01704698 | 6.29E-07 | 8.52E-08 | -5.57 | 6.883633  | -1.25E-01 | 84941294  | 84941417  | NC_000016.9  |
| cg24743301 | 6.29E-07 | 8.52E-08 | -5.57 | 6.8834806 | -1.10E-01 | 112945506 | 112945629 | NC_000002.11 |
| cg02486268 | 6.29E-07 | 8.52E-08 | -5.57 | 6.8833699 | -1.05E-01 | 69682825  | 69682948  | NC_000011.9  |
| cg00517855 | 6.29E-07 | 8.52E-08 | -5.57 | 6.8833659 | -7.34E-02 | 146016408 | 146016531 | NC_000008.10 |
| cg07027305 | 6.29E-07 | 8.53E-08 | -5.57 | 6.8832807 | -9.99E-02 | 2059796   | 2059919   | NC_000007.13 |
| cg13980266 | 6.29E-07 | 8.53E-08 | -5.57 | 6.8830464 | -1.52E-01 | 97022269  | 97022392  | NC_000009.11 |
| cg26310429 | 6.29E-07 | 8.53E-08 | -5.57 | 6.882824  | -7.23E-02 | 71024449  | 71024572  | NC_000017.10 |
| cg10013003 | 6.29E-07 | 8.53E-08 | -5.57 | 6.8827951 | -8.81E-02 | 26025568  | 26025691  | NC_000006.11 |
| cg12129117 | 6.29E-07 | 8.53E-08 | -5.57 | 6.8824616 | -7.28E-02 | 223940656 | 223940779 | NC_000001.10 |
| cg13881619 | 6.29E-07 | 8.53E-08 | -5.57 | 6.882411  | -6.01E-02 | 130323725 | 130323848 | NC_000009.11 |
| cg06745001 | 6.30E-07 | 8.54E-08 | -5.57 | 6.8820093 | -7.56E-02 | 49471563  | 49471686  | NC_000019.9  |
| cg09925621 | 6.30E-07 | 8.54E-08 | -5.57 | 6.8818788 | -3.24E-02 | 84178555  | 84178678  | NC_000016.9  |
| cg06352750 | 6.30E-07 | 8.54E-08 | -5.57 | 6.8815666 | -7.81E-02 | 192711926 | 192712049 | NC_000002.11 |
| cg15811902 | 6.30E-07 | 8.54E-08 | -5.57 | 6.8814455 | -4.19E-02 | 75918385  | 75918508  | NC_000015.9  |
| cg16269716 | 6.30E-07 | 8.54E-08 | -5.57 | 6.881294  | -2.59E-02 | 150241781 | 150241904 | NC_000001.10 |
| cg14675241 | 6.31E-07 | 8.55E-08 | -5.57 | 6.8802067 | -1.30E-01 | 111154375 | 111154498 | NC_000011.9  |
| cg09507386 | 6.31E-07 | 8.56E-08 | -5.57 | 6.8793661 | -1.16E-01 | 1399338   | 1399461   | NC_000019.9  |
| cg18467978 | 6.32E-07 | 8.57E-08 | -5.56 | 6.8784888 | -8.59E-02 | 47134906  | 47135029  | NC_000019.9  |
| cg24894318 | 6.33E-07 | 8.58E-08 | -5.56 | 6.877293  | -1.07E-01 | 104914755 | 104914878 | NC_000003.11 |

|              |          |          |       |           |           |           |           |              |
|--------------|----------|----------|-------|-----------|-----------|-----------|-----------|--------------|
| cg21566348   | 6.33E-07 | 8.59E-08 | -5.56 | 6.8759818 | -3.17E-02 | 182510892 | 182511015 | NC_000003.11 |
| cg00184235   | 6.34E-07 | 8.59E-08 | -5.56 | 6.8753849 | -2.41E-02 | 126442434 | 126442557 | NC_000008.10 |
| cg14993614   | 6.34E-07 | 8.60E-08 | -5.56 | 6.8749723 | -2.45E-02 | 32023069  | 32023192  | NC_000003.11 |
| cg18627816   | 6.34E-07 | 8.60E-08 | -5.56 | 6.8745732 | -8.33E-02 | 39686695  | 39686818  | NC_000019.9  |
| cg18935516   | 6.34E-07 | 8.60E-08 | -5.56 | 6.8743296 | -1.33E-01 | 77245922  | 77246045  | NC_000018.9  |
| cg26057616   | 6.34E-07 | 8.61E-08 | -5.56 | 6.8740564 | -5.79E-02 | 222234397 | 222234520 | NC_000001.10 |
| cg25146100   | 6.35E-07 | 8.61E-08 | -5.56 | 6.8733176 | -8.54E-02 | 50158060  | 50158183  | NC_000022.10 |
| cg25481680   | 6.35E-07 | 8.62E-08 | -5.56 | 6.8730725 | -3.93E-02 | 105110878 | 105111001 | NC_000010.10 |
| cg17171539   | 6.35E-07 | 8.62E-08 | -5.56 | 6.8730057 | -9.74E-02 | 59398690  | 59398813  | NC_000001.10 |
| ch.6.180632F | 6.35E-07 | 8.62E-08 | -5.56 | 6.8729966 | -1.31E-02 | 6768917   | 6769040   | NC_000006.11 |
| cg00636508   | 6.35E-07 | 8.62E-08 | -5.56 | 6.8726845 | -1.09E-01 | 70624430  | 70624553  | NC_000016.9  |
| cg08198071   | 6.36E-07 | 8.63E-08 | -5.56 | 6.8716966 | -1.22E-01 | 109742356 | 109742479 | NC_000002.11 |
| cg25325932   | 6.36E-07 | 8.63E-08 | -5.56 | 6.8713285 | -1.16E-01 | 76783470  | 76783593  | NC_000006.11 |
| cg10584209   | 6.36E-07 | 8.63E-08 | -5.56 | 6.8710164 | -4.50E-02 | 54528200  | 54528323  | NC_000005.9  |
| cg01781529   | 6.37E-07 | 8.64E-08 | -5.56 | 6.8705922 | -7.29E-02 | 22444030  | 22444153  | NC_000001.10 |
| cg22971029   | 6.37E-07 | 8.64E-08 | -5.56 | 6.8699812 | -1.24E-01 | 91818497  | 91818620  | NC_000014.8  |
| cg11693508   | 6.37E-07 | 8.64E-08 | -5.56 | 6.8698589 | -6.95E-02 | 37793320  | 37793443  | NC_000017.10 |
| cg13168924   | 6.37E-07 | 8.64E-08 | -5.56 | 6.8697462 | -5.08E-02 | 8386583   | 8386706   | NC_000019.9  |
| cg15643000   | 6.38E-07 | 8.66E-08 | -5.56 | 6.8676959 | -9.01E-02 | 168453216 | 168453339 | NC_000006.11 |
| cg18934496   | 6.38E-07 | 8.66E-08 | -5.56 | 6.8675923 | -7.05E-02 | 27792502  | 27792625  | NC_000006.11 |
| cg20600850   | 6.39E-07 | 8.67E-08 | -5.56 | 6.8671941 | -9.20E-02 | 6712515   | 6712638   | NC_000012.11 |
| cg16976310   | 6.39E-07 | 8.67E-08 | -5.56 | 6.8664025 | -1.24E-02 | 27862785  | 27862908  | NC_000006.11 |
| cg01977079   | 6.39E-07 | 8.68E-08 | -5.56 | 6.8662511 | -6.24E-02 | 17036644  | 17036767  | NC_000011.9  |
| cg21161173   | 6.39E-07 | 8.68E-08 | -5.56 | 6.8661837 | -8.78E-02 | 140098174 | 140098297 | NC_000005.9  |
| cg18064706   | 6.39E-07 | 8.68E-08 | -5.56 | 6.8657574 | -5.81E-02 | 157646656 | 157646779 | NC_000007.13 |

|            |          |          |       |           |           |           |           |              |
|------------|----------|----------|-------|-----------|-----------|-----------|-----------|--------------|
| cg07886914 | 6.40E-07 | 8.69E-08 | -5.56 | 6.8649156 | -1.02E-01 | 28198639  | 28198762  | NC_000008.10 |
| cg22040301 | 6.41E-07 | 8.69E-08 | -5.56 | 6.8641285 | -1.17E-01 | 2919798   | 2919921   | NC_000011.9  |
| cg05389024 | 6.42E-07 | 8.71E-08 | -5.56 | 6.8619968 | -1.23E-01 | 170366131 | 170366254 | NC_000002.11 |
| cg06651054 | 6.42E-07 | 8.72E-08 | -5.56 | 6.8617295 | -2.74E-02 | 83680015  | 83680138  | NC_000015.9  |
| cg03797705 | 6.42E-07 | 8.72E-08 | -5.56 | 6.8610583 | -3.47E-02 | 79604227  | 79604350  | NC_000017.10 |
| cg21100596 | 6.43E-07 | 8.73E-08 | -5.56 | 6.8606518 | -4.66E-02 | 4456803   | 4456926   | NC_000019.9  |
| cg09965419 | 6.43E-07 | 8.73E-08 | -5.56 | 6.8606258 | -9.12E-02 | 30854186  | 30854309  | NC_000006.11 |
| cg22758471 | 6.43E-07 | 8.73E-08 | -5.56 | 6.8601552 | -8.88E-02 | 90639197  | 90639320  | NC_000006.11 |
| cg00887153 | 6.44E-07 | 8.75E-08 | -5.56 | 6.8582781 | -1.34E-01 | 71559593  | 71559716  | NC_000016.9  |
| cg01154336 | 6.44E-07 | 8.75E-08 | -5.56 | 6.8578922 | -1.10E-01 | 101539195 | 101539318 | NC_000014.8  |
| cg03233332 | 6.46E-07 | 8.77E-08 | -5.56 | 6.8559406 | -1.15E-01 | 66118400  | 66118523  | NC_000007.13 |
| cg13857382 | 6.46E-07 | 8.77E-08 | -5.56 | 6.855683  | -1.90E-02 | 175162153 | 175162276 | NC_000001.10 |
| cg02733795 | 6.47E-07 | 8.79E-08 | -5.56 | 6.8538896 | -2.91E-02 | 33422526  | 33422649  | NC_000006.11 |
| cg19245686 | 6.48E-07 | 8.80E-08 | -5.56 | 6.8527395 | -1.94E-02 | 34541603  | 34541726  | NC_000020.10 |
| cg18589526 | 6.48E-07 | 8.80E-08 | -5.56 | 6.8527225 | -1.21E-01 | 138575872 | 138575995 | NC_000007.13 |
| cg06801252 | 6.48E-07 | 8.80E-08 | -5.56 | 6.8526367 | -9.14E-02 | 25570529  | 25570652  | NC_000020.10 |
| cg06283052 | 6.48E-07 | 8.80E-08 | -5.56 | 6.8524385 | -9.94E-02 | 44774998  | 44775121  | NC_000010.10 |
| cg06215691 | 6.48E-07 | 8.80E-08 | -5.56 | 6.8522752 | -9.75E-02 | 26624487  | 26624610  | NC_000013.10 |
| cg24688837 | 6.48E-07 | 8.80E-08 | -5.56 | 6.8522142 | -1.09E-01 | 79107197  | 79107320  | NC_000017.10 |
| cg25594165 | 6.48E-07 | 8.81E-08 | -5.56 | 6.8512971 | -8.62E-02 | 83637420  | 83637543  | NC_000010.10 |
| cg05346878 | 6.49E-07 | 8.81E-08 | -5.56 | 6.8509799 | -6.52E-02 | 59043576  | 59043699  | NC_000001.10 |
| cg17742559 | 6.49E-07 | 8.82E-08 | -5.56 | 6.8505058 | -1.13E-01 | 27068495  | 27068618  | NC_000017.10 |
| cg10925991 | 6.49E-07 | 8.82E-08 | -5.56 | 6.8501252 | -1.04E-01 | 40324096  | 40324219  | NC_000004.11 |
| cg05123845 | 6.49E-07 | 8.83E-08 | -5.56 | 6.8496477 | -9.18E-02 | 104918078 | 104918201 | NC_000004.11 |
| cg18513551 | 6.50E-07 | 8.83E-08 | -5.56 | 6.8493626 | -3.06E-02 | 21538329  | 21538452  | NC_000014.8  |

|            |          |          |       |           |           |           |           |              |
|------------|----------|----------|-------|-----------|-----------|-----------|-----------|--------------|
| cg00035326 | 6.50E-07 | 8.83E-08 | -5.56 | 6.8491752 | -2.75E-02 | 135208356 | 135208479 | NC_000010.10 |
| cg14314643 | 6.50E-07 | 8.83E-08 | -5.56 | 6.8487313 | -2.66E-02 | 76742180  | 76742303  | NC_000012.11 |
| cg11282676 | 6.50E-07 | 8.84E-08 | -5.56 | 6.8482624 | -1.51E-01 | 26018003  | 26018126  | NC_000006.11 |
| cg13707894 | 6.50E-07 | 8.84E-08 | -5.56 | 6.848168  | -1.41E-01 | 27674461  | 27674584  | NC_000003.11 |
| cg15843818 | 6.50E-07 | 8.84E-08 | -5.56 | 6.8481234 | -2.20E-02 | 165477582 | 165477705 | NC_000002.11 |
| cg25288155 | 6.51E-07 | 8.84E-08 | -5.56 | 6.8478002 | -1.06E-01 | 73357396  | 73357519  | NC_000011.9  |
| cg21376136 | 6.51E-07 | 8.85E-08 | -5.56 | 6.8474384 | -1.43E-01 | 152830572 | 152830695 | NC_000002.11 |
| cg05859845 | 6.51E-07 | 8.85E-08 | -5.56 | 6.8469116 | -5.28E-02 | 31795668  | 31795791  | NC_000022.10 |
| cg17771652 | 6.52E-07 | 8.87E-08 | -5.56 | 6.8451039 | -1.51E-01 | 82767968  | 82768091  | NC_000005.9  |
| cg07268332 | 6.52E-07 | 8.87E-08 | -5.56 | 6.8450715 | -1.44E-01 | 10476494  | 10476617  | NC_000011.9  |
| cg14067066 | 6.53E-07 | 8.87E-08 | -5.56 | 6.8445456 | -7.82E-02 | 29717475  | 29717598  | NC_000006.11 |
| cg10151737 | 6.53E-07 | 8.87E-08 | -5.56 | 6.8444955 | -6.12E-02 | 170615854 | 170615977 | NC_000006.11 |
| cg07270423 | 6.53E-07 | 8.87E-08 | -5.56 | 6.844477  | -1.07E-01 | 123242457 | 123242580 | NC_000011.9  |
| cg10835584 | 6.53E-07 | 8.88E-08 | -5.56 | 6.8436547 | -1.24E-01 | 55108852  | 55108975  | NC_000018.9  |
| cg06749213 | 6.54E-07 | 8.89E-08 | -5.56 | 6.8423926 | -1.09E-01 | 20387292  | 20387415  | NC_000014.8  |
| cg17316784 | 6.54E-07 | 8.89E-08 | -5.56 | 6.8420537 | -1.01E-01 | 22005602  | 22005725  | NC_000008.10 |
| cg18447972 | 6.54E-07 | 8.90E-08 | -5.56 | 6.8417076 | -1.21E-01 | 7036934   | 7037057   | NC_000017.10 |
| cg09669835 | 6.55E-07 | 8.91E-08 | -5.56 | 6.8407909 | -7.94E-02 | 91510500  | 91510623  | NC_000007.13 |
| cg09845015 | 6.55E-07 | 8.91E-08 | -5.56 | 6.8407642 | -5.86E-02 | 70458994  | 70459117  | NC_000011.9  |
| cg15966610 | 6.55E-07 | 8.91E-08 | -5.56 | 6.8407292 | -8.00E-02 | 79718206  | 79718329  | NC_000008.10 |
| cg07730270 | 6.55E-07 | 8.91E-08 | -5.56 | 6.8406399 | -2.73E-02 | 16465981  | 16466104  | NC_000005.9  |
| cg05022301 | 6.55E-07 | 8.91E-08 | -5.56 | 6.8403834 | -4.65E-02 | 93650515  | 93650638  | NC_000014.8  |
| cg06177974 | 6.56E-07 | 8.92E-08 | -5.56 | 6.8394487 | -5.84E-02 | 85522300  | 85522423  | NC_000011.9  |
| cg11153485 | 6.56E-07 | 8.92E-08 | -5.56 | 6.8392287 | -1.46E-01 | 110431612 | 110431735 | NC_000013.10 |
| cg08548888 | 6.56E-07 | 8.93E-08 | -5.56 | 6.8384388 | -5.19E-02 | 38180840  | 38180963  | NC_000003.11 |

|                |          |          |       |           |           |           |           |              |
|----------------|----------|----------|-------|-----------|-----------|-----------|-----------|--------------|
| cg03544335     | 6.56E-07 | 8.93E-08 | -5.56 | 6.8382757 | -2.84E-02 | 41134801  | 41134924  | NC_000001.10 |
| cg13752885     | 6.57E-07 | 8.94E-08 | -5.56 | 6.8371245 | -9.03E-02 | 37905779  | 37905902  | NC_000009.11 |
| cg02833116     | 6.58E-07 | 8.95E-08 | -5.56 | 6.8364509 | -1.27E-02 | 108210556 | 108210679 | NC_000007.13 |
| cg23679982     | 6.58E-07 | 8.95E-08 | -5.56 | 6.8363074 | -7.82E-02 | 1686737   | 1686860   | NC_000017.10 |
| cg18706879     | 6.59E-07 | 8.96E-08 | -5.56 | 6.8349268 | -3.04E-02 | 74353254  | 74353377  | NC_000014.8  |
| cg27359308     | 6.59E-07 | 8.96E-08 | -5.56 | 6.8347495 | -1.42E-02 | 122043034 | 122043157 | NC_000002.11 |
| cg27042983     | 6.59E-07 | 8.96E-08 | -5.56 | 6.8346157 | -1.01E-01 | 44063147  | 44063270  | NC_000006.11 |
| cg10165585     | 6.59E-07 | 8.97E-08 | -5.56 | 6.8342806 | -9.98E-02 | 29449042  | 29449165  | NC_000001.10 |
| cg00301795     | 6.59E-07 | 8.97E-08 | -5.56 | 6.8342787 | -1.65E-01 | 200195818 | 200195941 | NC_000001.10 |
| cg01533082     | 6.59E-07 | 8.97E-08 | -5.56 | 6.8341006 | -1.03E-01 | 58567637  | 58567760  | NC_000014.8  |
| cg25602536     | 6.59E-07 | 8.97E-08 | -5.56 | 6.8335887 | -1.17E-01 | 8816608   | 8816731   | NC_000002.11 |
| cg17301506     | 6.60E-07 | 8.98E-08 | -5.56 | 6.8330567 | -3.72E-02 | 32700554  | 32700677  | NC_000020.10 |
| cg18285188     | 6.60E-07 | 8.99E-08 | -5.56 | 6.8320567 | -5.22E-02 | 179558954 | 179559077 | NC_000001.10 |
| cg13171679     | 6.61E-07 | 9.00E-08 | -5.56 | 6.8311133 | -1.15E-01 | 41258634  | 41258757  | NC_000008.10 |
| cg00526576     | 6.61E-07 | 9.00E-08 | -5.55 | 6.8305121 | -2.77E-02 | 30545772  | 30545895  | NC_000016.9  |
| cg26242687     | 6.61E-07 | 9.00E-08 | -5.55 | 6.8302557 | -1.21E-01 | 41471014  | 41471137  | NC_000006.11 |
| cg24493375     | 6.62E-07 | 9.01E-08 | -5.55 | 6.8299508 | -2.40E-02 | 144328914 | 144329037 | NC_000008.10 |
| cg00152041     | 6.62E-07 | 9.01E-08 | -5.55 | 6.829763  | -4.86E-02 | 61274867  | 61274990  | NC_000020.10 |
| cg16087527     | 6.63E-07 | 9.03E-08 | -5.55 | 6.8276612 | -3.21E-02 | 978019    | 978142    | NC_000010.10 |
| cg14070039     | 6.63E-07 | 9.03E-08 | -5.55 | 6.8275998 | -9.13E-02 | 32013710  | 32013833  | NC_000006.11 |
| cg05364884     | 6.63E-07 | 9.03E-08 | -5.55 | 6.8275202 | -1.59E-01 | 17107768  | 17107891  | NC_000016.9  |
| cg01692674     | 6.64E-07 | 9.04E-08 | -5.55 | 6.8266072 | -1.71E-02 | 32822043  | 32822166  | NC_000006.11 |
| ch.1.95579934F | 6.64E-07 | 9.04E-08 | -5.55 | 6.8259904 | -3.50E-02 | 95807346  | 95807469  | NC_000001.10 |
| cg13498778     | 6.65E-07 | 9.06E-08 | -5.55 | 6.8244167 | -1.00E-01 | 5483364   | 5483487   | NC_000001.10 |
| cg04208734     | 6.65E-07 | 9.06E-08 | -5.55 | 6.8243181 | -2.64E-02 | 73270063  | 73270186  | NC_000007.13 |



|            |          |          |       |           |           |           |           |              |
|------------|----------|----------|-------|-----------|-----------|-----------|-----------|--------------|
| cg04723137 | 6.65E-07 | 9.06E-08 | -5.55 | 6.8242815 | -1.09E-01 | 31744015  | 31744138  | NC_000006.11 |
| cg03007571 | 6.65E-07 | 9.06E-08 | -5.55 | 6.8242427 | -2.20E-02 | 26157673  | 26157796  | NC_000006.11 |
| cg00085619 | 6.66E-07 | 9.06E-08 | -5.55 | 6.8239126 | -1.17E-01 | 155252748 | 155252871 | NC_000007.13 |
| cg24839533 | 6.66E-07 | 9.07E-08 | -5.55 | 6.823568  | -3.40E-02 | 32226222  | 32226345  | NC_000001.10 |
| cg08122051 | 6.66E-07 | 9.07E-08 | -5.55 | 6.8235602 | -9.99E-02 | 79047955  | 79048078  | NC_000016.9  |
| cg24919522 | 6.66E-07 | 9.07E-08 | -5.55 | 6.8226942 | -8.18E-02 | 33313260  | 33313383  | NC_000006.11 |
| cg04632724 | 6.67E-07 | 9.08E-08 | -5.55 | 6.8220124 | -2.59E-02 | 102192393 | 102192516 | NC_000015.9  |
| cg20913831 | 6.67E-07 | 9.08E-08 | -5.55 | 6.8218152 | -4.16E-02 | 75063436  | 75063559  | NC_000002.11 |
| cg05193470 | 6.67E-07 | 9.09E-08 | -5.55 | 6.8212441 | -1.06E-01 | 135469552 | 135469675 | NC_000008.10 |
| cg19767215 | 6.67E-07 | 9.09E-08 | -5.55 | 6.82087   | -9.36E-03 | 38755103  | 38755226  | NC_000019.9  |
| cg02462353 | 6.68E-07 | 9.09E-08 | -5.55 | 6.8205016 | -1.04E-01 | 55549799  | 55549922  | NC_000019.9  |
| cg18741908 | 6.68E-07 | 9.10E-08 | -5.55 | 6.8203416 | -8.32E-02 | 169756818 | 169756941 | NC_000003.11 |
| cg04784101 | 6.68E-07 | 9.10E-08 | -5.55 | 6.8202546 | -4.66E-02 | 66824465  | 66824588  | NC_000011.9  |
| cg14174232 | 6.68E-07 | 9.10E-08 | -5.55 | 6.8202474 | -8.61E-02 | 18909891  | 18910014  | NC_000009.11 |
| cg14591386 | 6.68E-07 | 9.10E-08 | -5.55 | 6.8195212 | -1.84E-02 | 97345725  | 97345848  | NC_000006.11 |
| cg20789595 | 6.69E-07 | 9.11E-08 | -5.55 | 6.8190651 | -9.19E-02 | 123063477 | 123063600 | NC_000003.11 |
| cg04226276 | 6.69E-07 | 9.11E-08 | -5.55 | 6.8186907 | -8.77E-02 | 194406284 | 194406407 | NC_000003.11 |
| cg25414370 | 6.69E-07 | 9.11E-08 | -5.55 | 6.8186501 | -1.32E-01 | 50483351  | 50483474  | NC_000022.10 |
| cg13365436 | 6.69E-07 | 9.12E-08 | -5.55 | 6.818027  | -8.24E-02 | 968650    | 968773    | NC_000011.9  |
| cg22354175 | 6.70E-07 | 9.12E-08 | -5.55 | 6.8171911 | -1.16E-01 | 113305901 | 113306024 | NC_000013.10 |
| cg16536330 | 6.70E-07 | 9.13E-08 | -5.55 | 6.8166312 | -6.75E-02 | 29957344  | 29957467  | NC_000008.10 |
| cg06508445 | 6.70E-07 | 9.13E-08 | -5.55 | 6.816189  | -4.20E-02 | 121414088 | 121414211 | NC_000005.9  |
| cg14741143 | 6.71E-07 | 9.14E-08 | -5.55 | 6.815916  | -1.17E-01 | 156273315 | 156273438 | NC_000003.11 |
| cg06625640 | 6.71E-07 | 9.14E-08 | -5.55 | 6.8158848 | -9.96E-02 | 119765927 | 119766050 | NC_000002.11 |
| cg05569203 | 6.71E-07 | 9.14E-08 | -5.55 | 6.8151978 | -3.58E-02 | 41510742  | 41510865  | NC_000005.9  |

|               |          |          |       |           |           |           |           |              |
|---------------|----------|----------|-------|-----------|-----------|-----------|-----------|--------------|
| cg24613043    | 6.72E-07 | 9.15E-08 | -5.55 | 6.8143941 | -4.78E-02 | 86521516  | 86521639  | NC_000011.9  |
| cg09090791    | 6.72E-07 | 9.16E-08 | -5.55 | 6.8133063 | -7.27E-02 | 5621096   | 5621219   | NC_000012.11 |
| cg11965365    | 6.73E-07 | 9.17E-08 | -5.55 | 6.812775  | -7.68E-02 | 104388185 | 104388308 | NC_000014.8  |
| cg26102475    | 6.73E-07 | 9.17E-08 | -5.55 | 6.8126574 | -1.58E-01 | 39826821  | 39826944  | NC_000019.9  |
| cg10179045    | 6.73E-07 | 9.17E-08 | -5.55 | 6.812403  | -7.52E-02 | 178077512 | 178077635 | NC_000002.11 |
| cg15526825    | 6.73E-07 | 9.17E-08 | -5.55 | 6.812333  | -1.13E-01 | 75237636  | 75237759  | NC_000011.9  |
| cg18485720    | 6.74E-07 | 9.19E-08 | -5.55 | 6.8106184 | -5.68E-02 | 720740    | 720863    | NC_000019.9  |
| cg11195363    | 6.75E-07 | 9.20E-08 | -5.55 | 6.8095744 | -1.21E-01 | 61915276  | 61915399  | NC_000012.11 |
| ch.17.795614F | 6.75E-07 | 9.20E-08 | -5.55 | 6.8086902 | -2.36E-02 | 29212339  | 29212462  | NC_000017.10 |
| cg07702548    | 6.76E-07 | 9.21E-08 | -5.55 | 6.8077707 | -3.52E-02 | 88636912  | 88637035  | NC_000016.9  |
| cg19974128    | 6.76E-07 | 9.21E-08 | -5.55 | 6.8077528 | -1.76E-02 | 19110040  | 19110163  | NC_000022.10 |
| cg24793124    | 6.76E-07 | 9.21E-08 | -5.55 | 6.8076701 | -1.12E-01 | 106546074 | 106546197 | NC_000006.11 |
| cg07378472    | 6.77E-07 | 9.23E-08 | -5.55 | 6.8062188 | -1.95E-02 | 11013375  | 11013498  | NC_000007.13 |
| cg21524155    | 6.77E-07 | 9.24E-08 | -5.55 | 6.8053229 | -1.22E-02 | 51762608  | 51762731  | NC_000001.10 |
| cg00900735    | 6.77E-07 | 9.24E-08 | -5.55 | 6.8052997 | -9.31E-02 | 73316505  | 73316628  | NC_000017.10 |
| cg23484912    | 6.78E-07 | 9.24E-08 | -5.55 | 6.8049682 | -7.96E-02 | 273055    | 273178    | NC_000005.9  |
| cg10892950    | 6.78E-07 | 9.24E-08 | -5.55 | 6.8046261 | -9.39E-02 | 45626938  | 45627061  | NC_000012.11 |
| cg22406518    | 6.78E-07 | 9.24E-08 | -5.55 | 6.8044855 | -2.38E-02 | 134093627 | 134093750 | NC_000003.11 |
| cg18890876    | 6.78E-07 | 9.24E-08 | -5.55 | 6.8044785 | -5.48E-02 | 159742670 | 159742793 | NC_000002.11 |
| cg18914258    | 6.79E-07 | 9.26E-08 | -5.55 | 6.8032195 | -1.08E-01 | 12903886  | 12904009  | NC_000004.11 |
| cg00017970    | 6.79E-07 | 9.26E-08 | -5.55 | 6.8031256 | -7.17E-02 | 26487737  | 26487860  | NC_000001.10 |
| cg20979307    | 6.79E-07 | 9.26E-08 | -5.55 | 6.8030013 | -6.24E-02 | 135303866 | 135303989 | NC_000003.11 |
| cg17042996    | 6.80E-07 | 9.28E-08 | -5.55 | 6.8011612 | -8.79E-02 | 195590056 | 195590179 | NC_000003.11 |
| cg12234455    | 6.80E-07 | 9.28E-08 | -5.55 | 6.8011446 | -7.93E-02 | 49220235  | 49220358  | NC_000019.9  |
| cg21853948    | 6.80E-07 | 9.28E-08 | -5.55 | 6.8007846 | -1.86E-02 | 100867292 | 100867415 | NC_000004.11 |

|            |          |          |       |           |           |           |           |              |
|------------|----------|----------|-------|-----------|-----------|-----------|-----------|--------------|
| cg10021043 | 6.80E-07 | 9.28E-08 | -5.55 | 6.8007551 | -5.04E-02 | 68547349  | 68547472  | NC_000002.11 |
| cg26293512 | 6.80E-07 | 9.28E-08 | -5.55 | 6.8004939 | -9.57E-02 | 58010433  | 58010556  | NC_000016.9  |
| cg10491993 | 6.81E-07 | 9.28E-08 | -5.55 | 6.8003695 | -8.48E-03 | 21964412  | 21964535  | NC_000016.9  |
| cg11570367 | 6.81E-07 | 9.28E-08 | -5.55 | 6.8003096 | -1.88E-01 | 114896683 | 114896806 | NC_000013.10 |
| cg19588016 | 6.81E-07 | 9.30E-08 | -5.55 | 6.7991271 | -8.70E-02 | 9511523   | 9511646   | NC_000002.11 |
| cg00381076 | 6.82E-07 | 9.31E-08 | -5.55 | 6.79755   | -1.21E-02 | 51884797  | 51884920  | NC_000018.9  |
| cg07483523 | 6.83E-07 | 9.31E-08 | -5.55 | 6.7972203 | -6.52E-02 | 14626843  | 14626966  | NC_000019.9  |
| cg12486710 | 6.83E-07 | 9.32E-08 | -5.55 | 6.7970499 | -7.02E-02 | 178512616 | 178512739 | NC_000001.10 |
| cg05811247 | 6.83E-07 | 9.32E-08 | -5.55 | 6.7967536 | -2.92E-02 | 8113477   | 8113600   | NC_000017.10 |
| cg06873024 | 6.84E-07 | 9.33E-08 | -5.55 | 6.7954638 | -1.38E-01 | 215130954 | 215131077 | NC_000001.10 |
| cg07721852 | 6.84E-07 | 9.34E-08 | -5.55 | 6.7949141 | -1.30E-01 | 118576628 | 118576751 | NC_000011.9  |
| cg19356022 | 6.84E-07 | 9.34E-08 | -5.55 | 6.7943823 | -1.14E-01 | 154943932 | 154944055 | NC_000001.10 |
| cg02725885 | 6.85E-07 | 9.34E-08 | -5.55 | 6.7942535 | -2.65E-02 | 291239    | 291362    | NC_000019.9  |
| cg13312094 | 6.85E-07 | 9.35E-08 | -5.55 | 6.7939065 | -8.53E-02 | 19321359  | 19321482  | NC_000019.9  |
| cg20767977 | 6.85E-07 | 9.35E-08 | -5.55 | 6.7935788 | -1.01E-01 | 56743059  | 56743182  | NC_000017.10 |
| cg03538934 | 6.85E-07 | 9.35E-08 | -5.55 | 6.7935303 | -5.46E-02 | 2069683   | 2069806   | NC_000004.11 |
| cg12216180 | 6.85E-07 | 9.35E-08 | -5.55 | 6.7930999 | -8.92E-02 | 31698702  | 31698825  | NC_000006.11 |
| cg24503003 | 6.85E-07 | 9.35E-08 | -5.55 | 6.7930222 | -9.19E-02 | 110682837 | 110682960 | NC_000012.11 |
| cg22839180 | 6.86E-07 | 9.37E-08 | -5.55 | 6.7918676 | -9.92E-02 | 175117697 | 175117820 | NC_000005.9  |
| cg16576255 | 6.86E-07 | 9.37E-08 | -5.55 | 6.79186   | -8.42E-02 | 21400640  | 21400763  | NC_000022.10 |
| cg21860285 | 6.86E-07 | 9.37E-08 | -5.55 | 6.7916772 | -1.02E-01 | 68658943  | 68659066  | NC_000008.10 |
| cg04689720 | 6.86E-07 | 9.37E-08 | -5.55 | 6.7915384 | -2.22E-02 | 2622584   | 2622707   | NC_000009.11 |
| cg26815802 | 6.87E-07 | 9.38E-08 | -5.55 | 6.790784  | -3.09E-02 | 44613874  | 44613997  | NC_000007.13 |
| cg03284102 | 6.87E-07 | 9.38E-08 | -5.55 | 6.7907494 | -1.39E-01 | 10980944  | 10981067  | NC_000007.13 |
| cg00283535 | 6.87E-07 | 9.38E-08 | -5.55 | 6.7903406 | -1.37E-01 | 124749564 | 124749687 | NC_000008.10 |

|            |          |          |       |           |           |           |           |              |
|------------|----------|----------|-------|-----------|-----------|-----------|-----------|--------------|
| cg22549086 | 6.87E-07 | 9.38E-08 | -5.55 | 6.7901053 | -1.23E-01 | 46406516  | 46406639  | NC_000002.11 |
| cg03309308 | 6.89E-07 | 9.40E-08 | -5.55 | 6.7879845 | -6.79E-02 | 68525329  | 68525452  | NC_000016.9  |
| cg19563270 | 6.89E-07 | 9.41E-08 | -5.55 | 6.7875432 | -3.48E-02 | 11546999  | 11547122  | NC_000019.9  |
| cg01638025 | 6.89E-07 | 9.41E-08 | -5.55 | 6.7874279 | -2.01E-02 | 25041768  | 25041891  | NC_000008.10 |
| cg09379340 | 6.90E-07 | 9.43E-08 | -5.55 | 6.7853793 | -8.77E-02 | 155507793 | 155507916 | NC_000006.11 |
| cg10193763 | 6.91E-07 | 9.43E-08 | -5.55 | 6.7851234 | -7.41E-02 | 225306901 | 225307024 | NC_000002.11 |
| cg24654028 | 6.91E-07 | 9.43E-08 | -5.55 | 6.7848652 | -1.07E-01 | 8854482   | 8854605   | NC_000011.9  |
| cg24799710 | 6.91E-07 | 9.43E-08 | -5.55 | 6.7847554 | -6.29E-02 | 42469007  | 42469130  | NC_000005.9  |
| cg16264722 | 6.91E-07 | 9.44E-08 | -5.55 | 6.7837917 | -6.78E-02 | 108647479 | 108647602 | NC_000012.11 |
| cg07888040 | 6.91E-07 | 9.44E-08 | -5.55 | 6.7836918 | -2.52E-02 | 51669526  | 51669649  | NC_000015.9  |
| cg13270404 | 6.92E-07 | 9.45E-08 | -5.55 | 6.7832974 | -8.75E-03 | 99129495  | 99129618  | NC_000008.10 |
| cg09594696 | 6.92E-07 | 9.46E-08 | -5.54 | 6.782423  | -1.70E-02 | 150777854 | 150777977 | NC_000007.13 |
| cg07348845 | 6.94E-07 | 9.48E-08 | -5.54 | 6.7804727 | -1.06E-01 | 227544540 | 227544663 | NC_000001.10 |
| cg02815835 | 6.94E-07 | 9.48E-08 | -5.54 | 6.7801308 | -9.27E-02 | 25710694  | 25710817  | NC_000006.11 |
| cg24041822 | 6.94E-07 | 9.48E-08 | -5.54 | 6.7796658 | -4.83E-02 | 55493335  | 55493458  | NC_000014.8  |
| cg23411013 | 6.95E-07 | 9.50E-08 | -5.54 | 6.7781603 | -9.20E-02 | 60868149  | 60868272  | NC_000015.9  |
| cg25852472 | 6.95E-07 | 9.50E-08 | -5.54 | 6.7778728 | -7.83E-02 | 2017664   | 2017787   | NC_000011.9  |
| cg18615431 | 6.96E-07 | 9.51E-08 | -5.54 | 6.7774275 | -5.33E-02 | 19250617  | 19250740  | NC_000019.9  |
| cg20272648 | 6.96E-07 | 9.51E-08 | -5.54 | 6.7771408 | -7.15E-02 | 37660108  | 37660231  | NC_000008.10 |
| cg24358603 | 6.96E-07 | 9.51E-08 | -5.54 | 6.7768114 | -6.44E-02 | 40984553  | 40984676  | NC_000021.8  |
| cg18638763 | 6.96E-07 | 9.51E-08 | -5.54 | 6.776551  | -5.11E-02 | 168968529 | 168968652 | NC_000006.11 |
| cg18545076 | 6.96E-07 | 9.52E-08 | -5.54 | 6.7762573 | -7.77E-02 | 22960177  | 22960300  | NC_000008.10 |
| cg06240173 | 6.97E-07 | 9.53E-08 | -5.54 | 6.7750479 | -5.18E-02 | 63449105  | 63449228  | NC_000015.9  |
| cg07150145 | 6.98E-07 | 9.53E-08 | -5.54 | 6.7745675 | -6.90E-02 | 47656137  | 47656260  | NC_000001.10 |
| cg20118577 | 6.98E-07 | 9.54E-08 | -5.54 | 6.7744117 | -9.49E-02 | 72839832  | 72839955  | NC_000018.9  |

|               |          |          |       |           |           |           |           |              |
|---------------|----------|----------|-------|-----------|-----------|-----------|-----------|--------------|
| cg07364433    | 6.98E-07 | 9.54E-08 | -5.54 | 6.7738428 | -9.75E-02 | 218872657 | 218872780 | NC_000002.11 |
| cg09909671    | 6.98E-07 | 9.54E-08 | -5.54 | 6.773482  | -1.46E-02 | 13689641  | 13689764  | NC_000011.9  |
| cg08334153    | 6.98E-07 | 9.55E-08 | -5.54 | 6.7733487 | -3.32E-02 | 128806872 | 128806995 | NC_000008.10 |
| cg03923285    | 6.99E-07 | 9.55E-08 | -5.54 | 6.7729472 | -8.45E-02 | 412168    | 412291    | NC_000016.9  |
| cg18872604    | 6.99E-07 | 9.55E-08 | -5.54 | 6.7727906 | -4.06E-02 | 64002754  | 64002877  | NC_000011.9  |
| cg24544105    | 6.99E-07 | 9.56E-08 | -5.54 | 6.7718274 | -1.43E-01 | 74753312  | 74753435  | NC_000002.11 |
| cg09436562    | 6.99E-07 | 9.56E-08 | -5.54 | 6.7718091 | -1.66E-02 | 18415874  | 18415997  | NC_000011.9  |
| cg19895380    | 7.00E-07 | 9.56E-08 | -5.54 | 6.7714351 | -3.83E-02 | 143913569 | 143913692 | NC_000001.10 |
| cg23065732    | 7.00E-07 | 9.57E-08 | -5.54 | 6.7711705 | -8.26E-02 | 31701808  | 31701931  | NC_000006.11 |
| cg10804363    | 7.00E-07 | 9.57E-08 | -5.54 | 6.7711657 | -3.44E-02 | 35580365  | 35580488  | NC_000020.10 |
| cg25913882    | 7.00E-07 | 9.57E-08 | -5.54 | 6.771025  | -1.09E-01 | 17067842  | 17067965  | NC_000010.10 |
| cg17657594    | 7.00E-07 | 9.57E-08 | -5.54 | 6.7704753 | -3.39E-02 | 28892012  | 28892135  | NC_000006.11 |
| cg01027976    | 7.00E-07 | 9.58E-08 | -5.54 | 6.7702118 | -8.91E-02 | 42734612  | 42734735  | NC_000022.10 |
| ch.16.589030R | 7.01E-07 | 9.58E-08 | -5.54 | 6.7701221 | -2.05E-02 | 17542328  | 17542451  | NC_000016.9  |
| cg09043511    | 7.01E-07 | 9.58E-08 | -5.54 | 6.76959   | -9.82E-02 | 52305945  | 52306068  | NC_000012.11 |
| cg03934150    | 7.01E-07 | 9.59E-08 | -5.54 | 6.7691952 | -3.03E-02 | 244212074 | 244212197 | NC_000001.10 |
| cg01982533    | 7.02E-07 | 9.59E-08 | -5.54 | 6.7683777 | -4.18E-02 | 63532630  | 63532753  | NC_000017.10 |
| cg11631334    | 7.02E-07 | 9.60E-08 | -5.54 | 6.7675791 | -6.50E-02 | 196730272 | 196730395 | NC_000003.11 |
| cg18881776    | 7.03E-07 | 9.61E-08 | -5.54 | 6.767056  | -1.46E-02 | 28052146  | 28052269  | NC_000001.10 |
| cg17662953    | 7.03E-07 | 9.62E-08 | -5.54 | 6.7663066 | -1.36E-02 | 48173280  | 48173403  | NC_000008.10 |
| cg04332914    | 7.03E-07 | 9.62E-08 | -5.54 | 6.7661161 | -2.31E-02 | 53381587  | 53381710  | NC_000003.11 |
| cg01041239    | 7.03E-07 | 9.62E-08 | -5.54 | 6.7658606 | -1.11E-01 | 13222581  | 13222704  | NC_000018.9  |
| cg19439123    | 7.04E-07 | 9.63E-08 | -5.54 | 6.7651572 | -1.20E-01 | 17687621  | 17687744  | NC_000017.10 |
| cg16389474    | 7.04E-07 | 9.63E-08 | -5.54 | 6.7643315 | -1.43E-02 | 60878197  | 60878320  | NC_000020.10 |
| cg12340381    | 7.05E-07 | 9.64E-08 | -5.54 | 6.7635918 | -3.66E-02 | 37824788  | 37824911  | NC_000013.10 |

|            |          |          |       |           |           |           |           |              |
|------------|----------|----------|-------|-----------|-----------|-----------|-----------|--------------|
| cg15483084 | 7.05E-07 | 9.64E-08 | -5.54 | 6.7634452 | -1.02E-01 | 956502    | 956625    | NC_000007.13 |
| cg05878073 | 7.06E-07 | 9.65E-08 | -5.54 | 6.7626864 | -1.47E-01 | 74766220  | 74766343  | NC_000014.8  |
| cg12701088 | 7.06E-07 | 9.65E-08 | -5.54 | 6.762509  | -5.95E-02 | 113639718 | 113639841 | NC_000013.10 |
| cg25426723 | 7.06E-07 | 9.66E-08 | -5.54 | 6.7620858 | -4.62E-02 | 6750836   | 6750959   | NC_000005.9  |
| cg07193504 | 7.06E-07 | 9.66E-08 | -5.54 | 6.7617544 | -9.69E-02 | 225964856 | 225964979 | NC_000001.10 |
| cg24435866 | 7.08E-07 | 9.68E-08 | -5.54 | 6.7597171 | -2.86E-02 | 154976595 | 154976718 | NC_000001.10 |
| cg18428489 | 7.08E-07 | 9.68E-08 | -5.54 | 6.759528  | -6.59E-02 | 52546408  | 52546531  | NC_000012.11 |
| cg07060117 | 7.08E-07 | 9.68E-08 | -5.54 | 6.7593594 | -1.54E-02 | 75467772  | 75467895  | NC_000016.9  |
| cg14170609 | 7.08E-07 | 9.69E-08 | -5.54 | 6.7591162 | -5.17E-02 | 59060978  | 59061101  | NC_000015.9  |
| cg12670477 | 7.08E-07 | 9.69E-08 | -5.54 | 6.7586661 | -6.99E-02 | 18727774  | 18727897  | NC_000011.9  |
| cg16576033 | 7.08E-07 | 9.69E-08 | -5.54 | 6.7583788 | -1.37E-01 | 235268621 | 235268744 | NC_000001.10 |
| cg04618331 | 7.09E-07 | 9.70E-08 | -5.54 | 6.7576416 | -4.19E-02 | 64136263  | 64136386  | NC_000011.9  |
| cg12074493 | 7.10E-07 | 9.72E-08 | -5.54 | 6.7560155 | -4.53E-02 | 28564117  | 28564240  | NC_000017.10 |
| cg07052524 | 7.10E-07 | 9.72E-08 | -5.54 | 6.7557161 | -1.45E-01 | 40009835  | 40009958  | NC_000019.9  |
| cg27645955 | 7.10E-07 | 9.72E-08 | -5.54 | 6.7556305 | -5.24E-02 | 21386885  | 21387008  | NC_000022.10 |
| cg14150186 | 7.11E-07 | 9.73E-08 | -5.54 | 6.7548645 | -1.14E-01 | 105764606 | 105764729 | NC_000009.11 |
| cg22777433 | 7.11E-07 | 9.73E-08 | -5.54 | 6.7546985 | -1.53E-01 | 100784665 | 100784788 | NC_000014.8  |
| cg09813986 | 7.11E-07 | 9.73E-08 | -5.54 | 6.7545989 | -1.28E-01 | 32445429  | 32445552  | NC_000005.9  |
| cg05359207 | 7.12E-07 | 9.74E-08 | -5.54 | 6.753312  | -7.93E-02 | 52196506  | 52196629  | NC_000020.10 |
| cg14006309 | 7.12E-07 | 9.75E-08 | -5.54 | 6.7528791 | -1.32E-02 | 33281552  | 33281675  | NC_000006.11 |
| cg25433648 | 7.13E-07 | 9.75E-08 | -5.54 | 6.7524594 | -1.15E-01 | 153588782 | 153588905 | NC_000001.10 |
| cg07841232 | 7.13E-07 | 9.75E-08 | -5.54 | 6.7524533 | -1.02E-01 | 75593825  | 75593948  | NC_000016.9  |
| cg13736131 | 7.13E-07 | 9.76E-08 | -5.54 | 6.7520076 | -9.03E-02 | 8832907   | 8833030   | NC_000011.9  |
| cg11037477 | 7.13E-07 | 9.76E-08 | -5.54 | 6.7518301 | -6.08E-02 | 99851008  | 99851131  | NC_000004.11 |
| cg08654091 | 7.13E-07 | 9.76E-08 | -5.54 | 6.7517386 | -1.16E-01 | 227015418 | 227015541 | NC_000001.10 |

|            |          |          |       |           |           |           |           |              |
|------------|----------|----------|-------|-----------|-----------|-----------|-----------|--------------|
| cg09875444 | 7.13E-07 | 9.76E-08 | -5.54 | 6.7513908 | -8.88E-02 | 52317302  | 52317425  | NC_000012.11 |
| cg22325145 | 7.14E-07 | 9.77E-08 | -5.54 | 6.7509447 | -7.42E-02 | 38825918  | 38826041  | NC_000022.10 |
| cg04554576 | 7.14E-07 | 9.77E-08 | -5.54 | 6.7507744 | -1.00E-01 | 200168577 | 200168700 | NC_000002.11 |
| cg06812574 | 7.14E-07 | 9.77E-08 | -5.54 | 6.7505597 | -1.05E-01 | 18331664  | 18331787  | NC_000010.10 |
| cg07244202 | 7.14E-07 | 9.77E-08 | -5.54 | 6.7504139 | -9.00E-02 | 127750970 | 127751093 | NC_000010.10 |
| cg00360230 | 7.15E-07 | 9.78E-08 | -5.54 | 6.7495199 | -3.66E-02 | 135229656 | 135229779 | NC_000009.11 |
| cg19997196 | 7.15E-07 | 9.78E-08 | -5.54 | 6.7494504 | -1.28E-01 | 127769491 | 127769614 | NC_000010.10 |
| cg09373786 | 7.15E-07 | 9.79E-08 | -5.54 | 6.7491418 | -6.57E-02 | 93156639  | 93156762  | NC_000008.10 |
| cg01503516 | 7.15E-07 | 9.79E-08 | -5.54 | 6.7487854 | -9.22E-02 | 85202406  | 85202529  | NC_000015.9  |
| cg23873525 | 7.15E-07 | 9.79E-08 | -5.54 | 6.7484488 | -8.33E-02 | 103070221 | 103070344 | NC_000010.10 |
| cg15550618 | 7.15E-07 | 9.80E-08 | -5.54 | 6.7480205 | -6.04E-02 | 43576101  | 43576224  | NC_000006.11 |
| cg04827020 | 7.16E-07 | 9.80E-08 | -5.54 | 6.7478909 | -9.86E-02 | 39875655  | 39875778  | NC_000015.9  |
| cg06300469 | 7.17E-07 | 9.81E-08 | -5.54 | 6.7463248 | -9.28E-02 | 125383138 | 125383261 | NC_000012.11 |
| cg08744726 | 7.17E-07 | 9.81E-08 | -5.54 | 6.7463154 | -7.62E-02 | 149323101 | 149323224 | NC_000007.13 |
| cg14180343 | 7.17E-07 | 9.82E-08 | -5.54 | 6.7461433 | -5.06E-02 | 40363827  | 40363950  | NC_000013.10 |
| cg07923588 | 7.17E-07 | 9.82E-08 | -5.54 | 6.746092  | -5.76E-02 | 150312704 | 150312827 | NC_000006.11 |
| cg26970042 | 7.17E-07 | 9.82E-08 | -5.54 | 6.7460591 | -7.06E-02 | 111815419 | 111815542 | NC_000011.9  |
| cg26532393 | 7.17E-07 | 9.82E-08 | -5.54 | 6.7454234 | -3.41E-02 | 129939253 | 129939376 | NC_000011.9  |
| cg21528927 | 7.18E-07 | 9.83E-08 | -5.54 | 6.7448147 | -1.24E-01 | 308821    | 308944    | NC_000012.11 |
| cg06093379 | 7.18E-07 | 9.83E-08 | -5.54 | 6.7444455 | -8.13E-02 | 44896080  | 44896203  | NC_000017.10 |
| cg16448058 | 7.18E-07 | 9.84E-08 | -5.54 | 6.744174  | -4.65E-02 | 102880841 | 102880964 | NC_000010.10 |
| cg09198200 | 7.19E-07 | 9.84E-08 | -5.54 | 6.7436438 | -9.52E-02 | 208123481 | 208123604 | NC_000002.11 |
| cg06074146 | 7.19E-07 | 9.85E-08 | -5.54 | 6.7433044 | -1.66E-01 | 21298449  | 21298572  | NC_000013.10 |
| cg17076485 | 7.19E-07 | 9.85E-08 | -5.54 | 6.742817  | -9.61E-02 | 116580712 | 116580835 | NC_000011.9  |
| cg08728129 | 7.19E-07 | 9.85E-08 | -5.54 | 6.7425793 | -1.69E-02 | 46894191  | 46894314  | NC_000017.10 |

|            |          |          |       |           |           |           |           |              |
|------------|----------|----------|-------|-----------|-----------|-----------|-----------|--------------|
| cg18750756 | 7.20E-07 | 9.86E-08 | -5.54 | 6.741625  | -1.15E-01 | 4337231   | 4337354   | NC_000017.10 |
| cg03864215 | 7.20E-07 | 9.87E-08 | -5.54 | 6.7411856 | -5.73E-02 | 17408437  | 17408560  | NC_000011.9  |
| cg18954047 | 7.21E-07 | 9.87E-08 | -5.54 | 6.7408175 | -1.13E-01 | 28889682  | 28889805  | NC_000006.11 |
| cg15555995 | 7.21E-07 | 9.87E-08 | -5.54 | 6.7407208 | -1.83E-02 | 141258138 | 141258261 | NC_000005.9  |
| cg11180288 | 7.21E-07 | 9.87E-08 | -5.54 | 6.7404035 | -2.67E-02 | 7143098   | 7143221   | NC_000017.10 |
| cg05543593 | 7.21E-07 | 9.88E-08 | -5.54 | 6.7400592 | -1.31E-01 | 21511899  | 21512022  | NC_000002.11 |
| cg06803706 | 7.21E-07 | 9.88E-08 | -5.54 | 6.739771  | -8.84E-02 | 1709413   | 1709536   | NC_000005.9  |
| cg01889306 | 7.21E-07 | 9.88E-08 | -5.54 | 6.7396152 | -7.80E-02 | 91738961  | 91739084  | NC_000014.8  |
| cg00067768 | 7.21E-07 | 9.88E-08 | -5.54 | 6.739398  | -8.29E-02 | 183886674 | 183886797 | NC_000003.11 |
| cg00978910 | 7.22E-07 | 9.89E-08 | -5.54 | 6.7387454 | -1.81E-02 | 172502140 | 172502263 | NC_000001.10 |
| cg13303573 | 7.22E-07 | 9.89E-08 | -5.54 | 6.7384632 | -3.78E-02 | 21278287  | 21278410  | NC_000013.10 |
| cg06653052 | 7.24E-07 | 9.92E-08 | -5.54 | 6.7360455 | -4.89E-02 | 1275167   | 1275290   | NC_000019.9  |
| cg05916545 | 7.24E-07 | 9.92E-08 | -5.54 | 6.7356249 | -1.05E-01 | 74901513  | 74901636  | NC_000004.11 |
| cg02576395 | 7.25E-07 | 9.93E-08 | -5.54 | 6.7348507 | -4.60E-02 | 27884179  | 27884302  | NC_000001.10 |
| cg05037168 | 7.25E-07 | 9.93E-08 | -5.54 | 6.7347903 | -2.25E-02 | 46259470  | 46259593  | NC_000011.9  |
| cg12485386 | 7.25E-07 | 9.94E-08 | -5.53 | 6.734312  | -9.49E-02 | 55607746  | 55607869  | NC_000019.9  |
| cg08056629 | 7.25E-07 | 9.94E-08 | -5.53 | 6.7342913 | -1.01E-01 | 154359587 | 154359710 | NC_000001.10 |
| cg22736267 | 7.25E-07 | 9.94E-08 | -5.53 | 6.7338863 | -9.33E-02 | 148841524 | 148841647 | NC_000007.13 |
| cg00804433 | 7.25E-07 | 9.94E-08 | -5.53 | 6.733635  | -6.34E-02 | 7940052   | 7940175   | NC_000019.9  |
| cg27299526 | 7.26E-07 | 9.95E-08 | -5.53 | 6.7325554 | -4.90E-02 | 6657744   | 6657867   | NC_000012.11 |
| cg03239638 | 7.26E-07 | 9.96E-08 | -5.53 | 6.7325235 | -8.74E-02 | 37529510  | 37529633  | NC_000021.8  |
| cg03900072 | 7.27E-07 | 9.96E-08 | -5.53 | 6.7319828 | -1.16E-01 | 30060822  | 30060945  | NC_000020.10 |
| cg25080322 | 7.27E-07 | 9.96E-08 | -5.53 | 6.7316308 | -2.74E-02 | 205410435 | 205410558 | NC_000002.11 |
| cg12361987 | 7.27E-07 | 9.97E-08 | -5.53 | 6.7310907 | -6.62E-02 | 50109467  | 50109590  | NC_000007.13 |
| cg05207465 | 7.28E-07 | 9.98E-08 | -5.53 | 6.7296187 | -7.81E-02 | 154318039 | 154318162 | NC_000005.9  |



|                 |          |          |       |           |           |           |           |              |
|-----------------|----------|----------|-------|-----------|-----------|-----------|-----------|--------------|
| cg25455811      | 7.29E-07 | 9.99E-08 | -5.53 | 6.7292531 | -1.01E-01 | 77072789  | 77072912  | NC_000005.9  |
| cg03706154      | 7.29E-07 | 9.99E-08 | -5.53 | 6.7292003 | -3.56E-02 | 80789586  | 80789709  | NC_000008.10 |
| cg16147529      | 7.29E-07 | 9.99E-08 | -5.53 | 6.7288141 | -8.11E-02 | 23182961  | 23183084  | NC_000014.8  |
| ch.14.37665462F | 7.29E-07 | 1.00E-07 | -5.53 | 6.7284179 | -3.70E-02 | 38595711  | 38595834  | NC_000014.8  |
| cg02867079      | 7.30E-07 | 1.00E-07 | -5.53 | 6.7273878 | -1.13E-01 | 100111269 | 100111392 | NC_000014.8  |
| cg08244078      | 7.30E-07 | 1.00E-07 | -5.53 | 6.7271717 | -1.90E-02 | 62654024  | 62654147  | NC_000012.11 |
| cg24718197      | 7.30E-07 | 1.00E-07 | -5.53 | 6.7269386 | -5.70E-02 | 79485709  | 79485832  | NC_000017.10 |
| cg22504024      | 7.30E-07 | 1.00E-07 | -5.53 | 6.7267473 | -1.03E-01 | 111710593 | 111710716 | NC_000012.11 |
| cg00926926      | 7.30E-07 | 1.00E-07 | -5.53 | 6.7265594 | -6.52E-02 | 89445433  | 89445556  | NC_000016.9  |
| cg26006440      | 7.31E-07 | 1.00E-07 | -5.53 | 6.7263407 | -1.38E-02 | 4868007   | 4868130   | NC_000019.9  |
| cg03207265      | 7.31E-07 | 1.00E-07 | -5.53 | 6.7251228 | -8.67E-02 | 43164543  | 43164666  | NC_000022.10 |
| cg01006102      | 7.32E-07 | 1.00E-07 | -5.53 | 6.7247768 | -5.42E-02 | 195590998 | 195591121 | NC_000003.11 |
| cg04835615      | 7.32E-07 | 1.00E-07 | -5.53 | 6.7247192 | -2.64E-02 | 3773828   | 3773951   | NC_000001.10 |
| cg18933331      | 7.32E-07 | 1.00E-07 | -5.53 | 6.724653  | -5.77E-02 | 110186418 | 110186541 | NC_000001.10 |
| cg10398905      | 7.32E-07 | 1.00E-07 | -5.53 | 6.7240737 | -8.69E-02 | 97406466  | 97406589  | NC_000002.11 |
| cg11614536      | 7.32E-07 | 1.00E-07 | -5.53 | 6.7235285 | -4.39E-02 | 30348709  | 30348832  | NC_000010.10 |
| cg10165222      | 7.32E-07 | 1.00E-07 | -5.53 | 6.723439  | -1.57E-02 | 119134612 | 119134735 | NC_000010.10 |
| cg15571231      | 7.33E-07 | 1.01E-07 | -5.53 | 6.7228975 | -5.93E-02 | 153277513 | 153277636 | NC_000002.11 |
| cg01870113      | 7.34E-07 | 1.01E-07 | -5.53 | 6.7218234 | -8.31E-02 | 140106010 | 140106133 | NC_000009.11 |
| cg00209328      | 7.34E-07 | 1.01E-07 | -5.53 | 6.7214434 | -1.47E-02 | 27397486  | 27397609  | NC_000012.11 |
| cg01594949      | 7.34E-07 | 1.01E-07 | -5.53 | 6.7214084 | -1.01E-01 | 140197890 | 140198013 | NC_000009.11 |
| cg02893429      | 7.34E-07 | 1.01E-07 | -5.53 | 6.7213812 | -1.22E-01 | 38404263  | 38404386  | NC_000002.11 |
| cg02149773      | 7.34E-07 | 1.01E-07 | -5.53 | 6.7212179 | -7.25E-02 | 39759335  | 39759458  | NC_000019.9  |
| cg12217971      | 7.35E-07 | 1.01E-07 | -5.53 | 6.7200179 | -8.89E-02 | 30216986  | 30217109  | NC_000015.9  |
| cg26787020      | 7.35E-07 | 1.01E-07 | -5.53 | 6.7194555 | -8.67E-02 | 174968089 | 174968212 | NC_000001.10 |

|            |          |          |       |           |           |           |           |              |
|------------|----------|----------|-------|-----------|-----------|-----------|-----------|--------------|
| cg24372558 | 7.35E-07 | 1.01E-07 | -5.53 | 6.7192584 | -3.42E-02 | 105412467 | 105412590 | NC_000004.11 |
| cg00040590 | 7.36E-07 | 1.01E-07 | -5.53 | 6.7186702 | -8.67E-02 | 17897985  | 17898108  | NC_000022.10 |
| cg26553501 | 7.36E-07 | 1.01E-07 | -5.53 | 6.7184937 | -1.04E-01 | 2145276   | 2145399   | NC_000001.10 |
| cg18919642 | 7.36E-07 | 1.01E-07 | -5.53 | 6.718332  | -3.92E-02 | 69139827  | 69139950  | NC_000012.11 |
| cg20768043 | 7.36E-07 | 1.01E-07 | -5.53 | 6.7181736 | -6.98E-02 | 50679681  | 50679804  | NC_000005.9  |
| cg11902180 | 7.37E-07 | 1.01E-07 | -5.53 | 6.7168633 | -9.34E-02 | 1780242   | 1780365   | NC_000008.10 |
| cg11400333 | 7.37E-07 | 1.01E-07 | -5.53 | 6.716359  | -3.03E-02 | 66059695  | 66059818  | NC_000011.9  |
| cg27381979 | 7.38E-07 | 1.01E-07 | -5.53 | 6.7157455 | -6.54E-02 | 13537787  | 13537910  | NC_000003.11 |
| cg02936035 | 7.38E-07 | 1.01E-07 | -5.53 | 6.7152909 | -1.07E-01 | 47631791  | 47631914  | NC_000006.11 |
| cg16070740 | 7.39E-07 | 1.01E-07 | -5.53 | 6.7143747 | -1.13E-01 | 169569703 | 169569826 | NC_000006.11 |
| cg19861260 | 7.39E-07 | 1.01E-07 | -5.53 | 6.7138553 | -1.41E-01 | 87228749  | 87228872  | NC_000007.13 |
| cg22843670 | 7.39E-07 | 1.01E-07 | -5.53 | 6.7137798 | -3.06E-02 | 149902022 | 149902145 | NC_000003.11 |
| cg14594459 | 7.40E-07 | 1.02E-07 | -5.53 | 6.7132014 | -2.62E-02 | 110374675 | 110374798 | NC_000008.10 |
| cg10653240 | 7.40E-07 | 1.02E-07 | -5.53 | 6.7131389 | -5.37E-02 | 51810892  | 51811015  | NC_000001.10 |
| cg22909609 | 7.40E-07 | 1.02E-07 | -5.53 | 6.7124452 | -1.20E-01 | 102105440 | 102105563 | NC_000013.10 |
| cg24530074 | 7.40E-07 | 1.02E-07 | -5.53 | 6.7122557 | -7.33E-02 | 173327921 | 173328044 | NC_000002.11 |
| cg04136113 | 7.41E-07 | 1.02E-07 | -5.53 | 6.7112655 | -7.14E-02 | 78668022  | 78668145  | NC_000017.10 |
| cg25218793 | 7.41E-07 | 1.02E-07 | -5.53 | 6.7111303 | -7.16E-02 | 3387341   | 3387464   | NC_000004.11 |
| cg16558695 | 7.41E-07 | 1.02E-07 | -5.53 | 6.7109724 | -9.94E-02 | 44847999  | 44848122  | NC_000010.10 |
| cg03393445 | 7.42E-07 | 1.02E-07 | -5.53 | 6.7104627 | -7.00E-02 | 19249545  | 19249668  | NC_000008.10 |
| cg15368544 | 7.42E-07 | 1.02E-07 | -5.53 | 6.710216  | -9.84E-02 | 39110451  | 39110574  | NC_000017.10 |
| cg21634993 | 7.42E-07 | 1.02E-07 | -5.53 | 6.7097037 | -3.68E-02 | 140619779 | 140619902 | NC_000004.11 |
| cg17409920 | 7.43E-07 | 1.02E-07 | -5.53 | 6.7087759 | -7.89E-02 | 176755805 | 176755928 | NC_000005.9  |
| cg07103714 | 7.43E-07 | 1.02E-07 | -5.53 | 6.7082231 | -3.01E-02 | 2954750   | 2954873   | NC_000016.9  |
| cg21818891 | 7.43E-07 | 1.02E-07 | -5.53 | 6.707885  | -1.15E-01 | 35310917  | 35311040  | NC_000011.9  |

|                 |          |          |       |           |           |           |           |              |
|-----------------|----------|----------|-------|-----------|-----------|-----------|-----------|--------------|
| cg20018782      | 7.43E-07 | 1.02E-07 | -5.53 | 6.707768  | -1.00E-01 | 23317496  | 23317619  | NC_000014.8  |
| cg27571351      | 7.44E-07 | 1.02E-07 | -5.53 | 6.707516  | -6.20E-02 | 17619364  | 17619487  | NC_000010.10 |
| cg22068044      | 7.44E-07 | 1.02E-07 | -5.53 | 6.7071398 | -3.35E-02 | 140095070 | 140095193 | NC_000009.11 |
| cg25439951      | 7.45E-07 | 1.02E-07 | -5.53 | 6.7063346 | -7.26E-02 | 176245309 | 176245432 | NC_000005.9  |
| cg22346461      | 7.45E-07 | 1.02E-07 | -5.53 | 6.7059978 | -5.56E-02 | 183155573 | 183155696 | NC_000001.10 |
| cg00620452      | 7.46E-07 | 1.02E-07 | -5.53 | 6.7043053 | -6.47E-02 | 32147645  | 32147768  | NC_000003.11 |
| ch.1.176851855F | 7.46E-07 | 1.03E-07 | -5.53 | 6.7038554 | -5.49E-02 | 178585232 | 178585355 | NC_000001.10 |
| cg03261725      | 7.47E-07 | 1.03E-07 | -5.53 | 6.7035085 | -8.35E-02 | 70367843  | 70367966  | NC_000017.10 |
| cg18129628      | 7.47E-07 | 1.03E-07 | -5.53 | 6.7032841 | -9.76E-02 | 47113489  | 47113612  | NC_000017.10 |
| cg07154958      | 7.47E-07 | 1.03E-07 | -5.53 | 6.7032651 | -1.54E-02 | 95582416  | 95582539  | NC_000001.10 |
| cg11525409      | 7.47E-07 | 1.03E-07 | -5.53 | 6.7027684 | -1.01E-01 | 74236068  | 74236191  | NC_000002.11 |
| cg08354406      | 7.47E-07 | 1.03E-07 | -5.53 | 6.7023471 | -1.37E-01 | 115370978 | 115371101 | NC_000010.10 |
| cg10030791      | 7.48E-07 | 1.03E-07 | -5.53 | 6.7015203 | -1.11E-01 | 57364888  | 57365011  | NC_000011.9  |
| cg11948766      | 7.48E-07 | 1.03E-07 | -5.53 | 6.7015058 | -1.02E-01 | 49494499  | 49494622  | NC_000008.10 |
| cg10656674      | 7.48E-07 | 1.03E-07 | -5.53 | 6.7012812 | -3.98E-02 | 101801826 | 101801949 | NC_000012.11 |
| cg27539247      | 7.48E-07 | 1.03E-07 | -5.53 | 6.7012414 | -1.58E-02 | 173793289 | 173793412 | NC_000001.10 |
| cg00352576      | 7.49E-07 | 1.03E-07 | -5.53 | 6.6999638 | -9.83E-02 | 135454197 | 135454320 | NC_000009.11 |
| cg01548463      | 7.49E-07 | 1.03E-07 | -5.53 | 6.6997171 | -1.22E-01 | 135433715 | 135433838 | NC_000007.13 |
| cg09634019      | 7.49E-07 | 1.03E-07 | -5.53 | 6.6994181 | -1.23E-01 | 62952542  | 62952665  | NC_000002.11 |
| cg27020260      | 7.50E-07 | 1.03E-07 | -5.53 | 6.6992497 | -4.45E-02 | 25175711  | 25175834  | NC_000004.11 |
| cg22508569      | 7.50E-07 | 1.03E-07 | -5.53 | 6.6983901 | -2.12E-02 | 127771381 | 127771504 | NC_000003.11 |
| cg01117339      | 7.51E-07 | 1.03E-07 | -5.53 | 6.6968257 | -1.06E-01 | 73737124  | 73737247  | NC_000011.9  |
| cg24171337      | 7.52E-07 | 1.03E-07 | -5.53 | 6.6959294 | -4.89E-02 | 105946028 | 105946151 | NC_000002.11 |
| cg05049335      | 7.52E-07 | 1.03E-07 | -5.53 | 6.6956483 | -5.81E-02 | 66103889  | 66104012  | NC_000011.9  |
| cg27341866      | 7.53E-07 | 1.03E-07 | -5.53 | 6.6950916 | -2.47E-01 | 2278618   | 2278741   | NC_000019.9  |

|            |          |          |       |           |           |           |           |              |
|------------|----------|----------|-------|-----------|-----------|-----------|-----------|--------------|
| cg25313204 | 7.53E-07 | 1.03E-07 | -5.53 | 6.6949865 | -1.02E-01 | 160768801 | 160768924 | NC_000006.11 |
| cg10675515 | 7.54E-07 | 1.04E-07 | -5.53 | 6.6938968 | -7.92E-02 | 51978789  | 51978912  | NC_000019.9  |
| cg08715226 | 7.54E-07 | 1.04E-07 | -5.53 | 6.6935031 | -9.31E-02 | 62327732  | 62327855  | NC_000020.10 |
| cg26530485 | 7.55E-07 | 1.04E-07 | -5.53 | 6.6924214 | -1.35E-01 | 23496304  | 23496427  | NC_000001.10 |
| cg21932297 | 7.55E-07 | 1.04E-07 | -5.53 | 6.6919105 | -2.73E-02 | 97910808  | 97910931  | NC_000007.13 |
| cg00142150 | 7.55E-07 | 1.04E-07 | -5.53 | 6.6911843 | -5.57E-02 | 38071001  | 38071124  | NC_000022.10 |
| cg08127916 | 7.56E-07 | 1.04E-07 | -5.53 | 6.6905991 | -1.04E-01 | 122643989 | 122644112 | NC_000011.9  |
| cg09213929 | 7.56E-07 | 1.04E-07 | -5.53 | 6.690579  | -5.15E-02 | 111170578 | 111170701 | NC_000011.9  |
| cg12830299 | 7.56E-07 | 1.04E-07 | -5.53 | 6.6901189 | -2.58E-02 | 139334128 | 139334251 | NC_000009.11 |
| cg02542218 | 7.56E-07 | 1.04E-07 | -5.53 | 6.6899505 | -6.81E-02 | 131630566 | 131630689 | NC_000007.13 |
| cg20841134 | 7.57E-07 | 1.04E-07 | -5.53 | 6.689154  | -5.63E-02 | 64247030  | 64247153  | NC_000002.11 |
| cg01954585 | 7.58E-07 | 1.04E-07 | -5.53 | 6.6882443 | -1.14E-01 | 86270435  | 86270558  | NC_000015.9  |
| cg19014623 | 7.58E-07 | 1.04E-07 | -5.53 | 6.687617  | -7.23E-02 | 100244946 | 100245069 | NC_000007.13 |
| cg12791245 | 7.58E-07 | 1.04E-07 | -5.53 | 6.687361  | -9.91E-02 | 78085644  | 78085767  | NC_000017.10 |
| cg19887750 | 7.58E-07 | 1.04E-07 | -5.53 | 6.6871182 | -8.68E-02 | 47813174  | 47813297  | NC_000018.9  |
| cg21911100 | 7.59E-07 | 1.04E-07 | -5.53 | 6.6869258 | -6.82E-02 | 4361555   | 4361678   | NC_000019.9  |
| cg10315945 | 7.59E-07 | 1.04E-07 | -5.52 | 6.6862747 | -8.85E-02 | 17236551  | 17236674  | NC_000001.10 |
| cg13601740 | 7.59E-07 | 1.04E-07 | -5.52 | 6.6858933 | -7.62E-02 | 66627194  | 66627317  | NC_000011.9  |
| cg07909359 | 7.59E-07 | 1.04E-07 | -5.52 | 6.6857247 | -7.18E-02 | 67208405  | 67208528  | NC_000016.9  |
| cg15927878 | 7.60E-07 | 1.05E-07 | -5.52 | 6.684947  | -1.28E-02 | 21151904  | 21152027  | NC_000014.8  |
| cg01670714 | 7.60E-07 | 1.05E-07 | -5.52 | 6.684784  | -7.09E-02 | 33111318  | 33111441  | NC_000020.10 |
| cg08488915 | 7.60E-07 | 1.05E-07 | -5.52 | 6.6844336 | -1.04E-01 | 1494272   | 1494395   | NC_000017.10 |
| cg21900928 | 7.60E-07 | 1.05E-07 | -5.52 | 6.684365  | -1.12E-01 | 29294897  | 29295020  | NC_000007.13 |
| cg26438325 | 7.60E-07 | 1.05E-07 | -5.52 | 6.6841554 | -8.40E-02 | 28176718  | 28176841  | NC_000007.13 |
| cg08759309 | 7.61E-07 | 1.05E-07 | -5.52 | 6.6840273 | -8.01E-02 | 1950271   | 1950394   | NC_000005.9  |

|            |          |          |       |           |           |           |           |              |
|------------|----------|----------|-------|-----------|-----------|-----------|-----------|--------------|
| cg04079176 | 7.61E-07 | 1.05E-07 | -5.52 | 6.683915  | -3.83E-02 | 110962342 | 110962465 | NC_000002.11 |
| cg00000029 | 7.61E-07 | 1.05E-07 | -5.52 | 6.6838332 | -8.41E-02 | 53468112  | 53468235  | NC_000016.9  |
| cg07772781 | 7.61E-07 | 1.05E-07 | -5.52 | 6.6832845 | -1.31E-01 | 101798142 | 101798265 | NC_000003.11 |
| cg15748271 | 7.61E-07 | 1.05E-07 | -5.52 | 6.6829805 | -1.07E-01 | 104416925 | 104417048 | NC_000010.10 |
| cg01706263 | 7.61E-07 | 1.05E-07 | -5.52 | 6.6827902 | -1.08E-01 | 10893100  | 10893223  | NC_000008.10 |
| cg14569209 | 7.61E-07 | 1.05E-07 | -5.52 | 6.6827177 | -1.25E-01 | 62726223  | 62726346  | NC_000011.9  |
| cg25914270 | 7.62E-07 | 1.05E-07 | -5.52 | 6.6823098 | -5.76E-02 | 85913777  | 85913900  | NC_000005.9  |
| cg25875049 | 7.62E-07 | 1.05E-07 | -5.52 | 6.6822871 | -1.08E-01 | 43531947  | 43532070  | NC_000015.9  |
| cg17450546 | 7.62E-07 | 1.05E-07 | -5.52 | 6.681413  | -2.55E-02 | 44439266  | 44439389  | NC_000019.9  |
| cg00994411 | 7.63E-07 | 1.05E-07 | -5.52 | 6.6810767 | -2.62E-02 | 52812171  | 52812294  | NC_000008.10 |
| cg08198609 | 7.63E-07 | 1.05E-07 | -5.52 | 6.6800655 | -6.61E-02 | 75458056  | 75458179  | NC_000010.10 |
| cg19998151 | 7.63E-07 | 1.05E-07 | -5.52 | 6.6799344 | -8.94E-02 | 267613    | 267736    | NC_000011.9  |
| cg22543026 | 7.64E-07 | 1.05E-07 | -5.52 | 6.6797797 | -1.56E-01 | 208338079 | 208338202 | NC_000002.11 |
| cg02169185 | 7.64E-07 | 1.05E-07 | -5.52 | 6.6791198 | -4.20E-02 | 101899429 | 101899552 | NC_000007.13 |
| cg11524400 | 7.64E-07 | 1.05E-07 | -5.52 | 6.6789398 | -1.12E-01 | 1778524   | 1778647   | NC_000011.9  |
| cg09194364 | 7.64E-07 | 1.05E-07 | -5.52 | 6.6785887 | -1.43E-01 | 119612475 | 119612598 | NC_000011.9  |
| cg18030372 | 7.65E-07 | 1.05E-07 | -5.52 | 6.6781771 | -6.03E-02 | 2069750   | 2069873   | NC_000004.11 |
| cg24290948 | 7.65E-07 | 1.05E-07 | -5.52 | 6.6773007 | -1.09E-01 | 12800802  | 12800925  | NC_000003.11 |
| cg00782854 | 7.65E-07 | 1.05E-07 | -5.52 | 6.677111  | -2.59E-02 | 30310858  | 30310981  | NC_000020.10 |
| cg20677365 | 7.66E-07 | 1.05E-07 | -5.52 | 6.6768507 | -5.68E-02 | 18155916  | 18156039  | NC_000006.11 |
| cg14152268 | 7.66E-07 | 1.05E-07 | -5.52 | 6.6763604 | -9.33E-02 | 105287427 | 105287550 | NC_000014.8  |
| cg08762653 | 7.67E-07 | 1.06E-07 | -5.52 | 6.6754183 | -3.67E-02 | 56293564  | 56293687  | NC_000020.10 |
| cg16102063 | 7.67E-07 | 1.06E-07 | -5.52 | 6.6745257 | -6.47E-02 | 22298240  | 22298363  | NC_000008.10 |
| cg08438690 | 7.68E-07 | 1.06E-07 | -5.52 | 6.6743856 | -1.40E-01 | 52279403  | 52279526  | NC_000003.11 |
| cg26672426 | 7.68E-07 | 1.06E-07 | -5.52 | 6.6739892 | -8.46E-02 | 132514582 | 132514705 | NC_000009.11 |

|                |          |          |       |           |           |           |           |              |
|----------------|----------|----------|-------|-----------|-----------|-----------|-----------|--------------|
| cg20707633     | 7.68E-07 | 1.06E-07 | -5.52 | 6.6736904 | -1.41E-02 | 46987095  | 46987218  | NC_000018.9  |
| cg08918811     | 7.68E-07 | 1.06E-07 | -5.52 | 6.6732112 | -6.47E-03 | 19262251  | 19262374  | NC_000011.9  |
| cg02873991     | 7.69E-07 | 1.06E-07 | -5.52 | 6.67288   | -1.47E-01 | 25151263  | 25151386  | NC_000012.11 |
| cg11358199     | 7.69E-07 | 1.06E-07 | -5.52 | 6.6727663 | -1.09E-01 | 8453529   | 8453652   | NC_000002.11 |
| cg13490422     | 7.69E-07 | 1.06E-07 | -5.52 | 6.6727574 | -1.06E-01 | 50377731  | 50377854  | NC_000012.11 |
| cg06539921     | 7.69E-07 | 1.06E-07 | -5.52 | 6.6718387 | -5.75E-02 | 26973309  | 26973432  | NC_000011.9  |
| cg00908631     | 7.70E-07 | 1.06E-07 | -5.52 | 6.6713592 | -1.20E-01 | 51433616  | 51433739  | NC_000001.10 |
| cg24299913     | 7.70E-07 | 1.06E-07 | -5.52 | 6.6712428 | -1.18E-01 | 42408316  | 42408439  | NC_000019.9  |
| cg08536417     | 7.70E-07 | 1.06E-07 | -5.52 | 6.6709707 | -1.96E-02 | 23728250  | 23728373  | NC_000010.10 |
| cg14484792     | 7.70E-07 | 1.06E-07 | -5.52 | 6.670334  | -1.18E-01 | 38511543  | 38511666  | NC_000014.8  |
| cg12177922     | 7.71E-07 | 1.06E-07 | -5.52 | 6.6702725 | -7.14E-02 | 154245232 | 154245355 | NC_000001.10 |
| cg06726262     | 7.71E-07 | 1.06E-07 | -5.52 | 6.669568  | -1.00E-02 | 15602873  | 15602996  | NC_000017.10 |
| cg01142096     | 7.71E-07 | 1.06E-07 | -5.52 | 6.6695049 | -8.11E-02 | 682091    | 682214    | NC_000008.10 |
| cg20856161     | 7.71E-07 | 1.06E-07 | -5.52 | 6.6690236 | -2.04E-02 | 1853713   | 1853836   | NC_000011.9  |
| cg20095398     | 7.72E-07 | 1.06E-07 | -5.52 | 6.6687863 | -1.02E-01 | 1571649   | 1571772   | NC_000004.11 |
| cg23666180     | 7.72E-07 | 1.06E-07 | -5.52 | 6.6684328 | -1.02E-02 | 27100115  | 27100238  | NC_000006.11 |
| cg02847897     | 7.72E-07 | 1.06E-07 | -5.52 | 6.6678412 | -8.24E-02 | 88142275  | 88142398  | NC_000004.11 |
| cg16913233     | 7.73E-07 | 1.06E-07 | -5.52 | 6.6671449 | -1.01E-01 | 157073403 | 157073526 | NC_000007.13 |
| cg21214521     | 7.73E-07 | 1.07E-07 | -5.52 | 6.66651   | -1.53E-01 | 569979    | 570102    | NC_000007.13 |
| cg11535839     | 7.73E-07 | 1.07E-07 | -5.52 | 6.6663417 | -1.10E-01 | 28582676  | 28582799  | NC_000002.11 |
| ch.18.1546242R | 7.74E-07 | 1.07E-07 | -5.52 | 6.6660313 | -3.60E-02 | 76891500  | 76891623  | NC_000018.9  |
| cg11758345     | 7.74E-07 | 1.07E-07 | -5.52 | 6.6653461 | -9.55E-02 | 79304498  | 79304621  | NC_000017.10 |
| cg27277439     | 7.74E-07 | 1.07E-07 | -5.52 | 6.6650596 | -5.54E-02 | 52433577  | 52433700  | NC_000010.10 |
| cg14624381     | 7.75E-07 | 1.07E-07 | -5.52 | 6.6645377 | -4.08E-02 | 132222201 | 132222324 | NC_000009.11 |
| cg07456681     | 7.75E-07 | 1.07E-07 | -5.52 | 6.664079  | -1.01E-01 | 15146876  | 15146999  | NC_000016.9  |

|            |          |          |       |           |           |           |           |              |
|------------|----------|----------|-------|-----------|-----------|-----------|-----------|--------------|
| cg05148093 | 7.75E-07 | 1.07E-07 | -5.52 | 6.6638437 | -3.01E-02 | 140027274 | 140027397 | NC_000005.9  |
| cg02493771 | 7.75E-07 | 1.07E-07 | -5.52 | 6.6637001 | -5.47E-02 | 31744328  | 31744451  | NC_000021.8  |
| cg09364426 | 7.75E-07 | 1.07E-07 | -5.52 | 6.6636198 | -5.37E-02 | 163201346 | 163201469 | NC_000001.10 |
| cg09145139 | 7.76E-07 | 1.07E-07 | -5.52 | 6.662919  | -2.23E-02 | 95256412  | 95256535  | NC_000010.10 |
| cg21545548 | 7.77E-07 | 1.07E-07 | -5.52 | 6.6612964 | -1.47E-01 | 26296575  | 26296698  | NC_000006.11 |
| cg11686792 | 7.77E-07 | 1.07E-07 | -5.52 | 6.6612809 | -1.14E-01 | 114876061 | 114876184 | NC_000013.10 |
| cg02872930 | 7.78E-07 | 1.07E-07 | -5.52 | 6.6604725 | -6.95E-02 | 45649752  | 45649875  | NC_000019.9  |
| cg03536664 | 7.78E-07 | 1.07E-07 | -5.52 | 6.6597659 | -8.68E-02 | 48636487  | 48636610  | NC_000003.11 |
| cg25953012 | 7.80E-07 | 1.08E-07 | -5.52 | 6.6576868 | -3.31E-02 | 50052901  | 50053024  | NC_000014.8  |
| cg13650504 | 7.80E-07 | 1.08E-07 | -5.52 | 6.6576427 | -7.37E-02 | 692026    | 692149    | NC_000002.11 |
| cg18109798 | 7.80E-07 | 1.08E-07 | -5.52 | 6.6575881 | -1.08E-01 | 20848473  | 20848596  | NC_000012.11 |
| cg04172000 | 7.80E-07 | 1.08E-07 | -5.52 | 6.6574702 | -3.87E-02 | 16771088  | 16771211  | NC_000019.9  |
| cg06872313 | 7.83E-07 | 1.08E-07 | -5.52 | 6.653619  | -7.74E-02 | 14413185  | 14413308  | NC_000012.11 |
| cg20253561 | 7.83E-07 | 1.08E-07 | -5.52 | 6.6535212 | -1.08E-01 | 237916368 | 237916491 | NC_000001.10 |
| cg13911594 | 7.83E-07 | 1.08E-07 | -5.52 | 6.653489  | -9.25E-02 | 1074757   | 1074880   | NC_000011.9  |
| cg02806156 | 7.84E-07 | 1.08E-07 | -5.52 | 6.6527897 | -8.17E-02 | 89728752  | 89728875  | NC_000012.11 |
| cg03491087 | 7.84E-07 | 1.08E-07 | -5.52 | 6.6518154 | -1.02E-01 | 75073928  | 75074051  | NC_000014.8  |
| cg05278335 | 7.86E-07 | 1.08E-07 | -5.52 | 6.6503013 | -1.38E-02 | 13329023  | 13329146  | NC_000006.11 |
| cg03022263 | 7.86E-07 | 1.08E-07 | -5.52 | 6.6496542 | -7.77E-02 | 104356172 | 104356295 | NC_000014.8  |
| cg22123542 | 7.86E-07 | 1.08E-07 | -5.52 | 6.6495221 | -7.15E-02 | 120905163 | 120905286 | NC_000001.10 |
| cg14302489 | 7.86E-07 | 1.08E-07 | -5.52 | 6.6490576 | -2.50E-02 | 66556779  | 66556902  | NC_000008.10 |
| cg00898274 | 7.87E-07 | 1.09E-07 | -5.52 | 6.6484554 | -1.02E-01 | 88448035  | 88448158  | NC_000010.10 |
| cg13053608 | 7.87E-07 | 1.09E-07 | -5.52 | 6.6478436 | -9.50E-02 | 40345673  | 40345796  | NC_000017.10 |
| cg17092985 | 7.87E-07 | 1.09E-07 | -5.52 | 6.6477498 | -9.90E-02 | 20119213  | 20119336  | NC_000008.10 |
| cg05681977 | 7.88E-07 | 1.09E-07 | -5.52 | 6.6476556 | -7.06E-02 | 145638934 | 145639057 | NC_000008.10 |

|              |          |          |       |           |           |           |           |              |
|--------------|----------|----------|-------|-----------|-----------|-----------|-----------|--------------|
| cg01948201   | 7.88E-07 | 1.09E-07 | -5.52 | 6.6476187 | -5.01E-02 | 64682236  | 64682359  | NC_000002.11 |
| cg15108641   | 7.88E-07 | 1.09E-07 | -5.52 | 6.6475729 | -1.11E-01 | 99263320  | 99263443  | NC_000010.10 |
| cg11715092   | 7.88E-07 | 1.09E-07 | -5.52 | 6.6474123 | -7.71E-02 | 47705294  | 47705417  | NC_000021.8  |
| cg08221136   | 7.89E-07 | 1.09E-07 | -5.52 | 6.6461203 | -7.36E-02 | 102422608 | 102422731 | NC_000014.8  |
| cg01925393   | 7.89E-07 | 1.09E-07 | -5.52 | 6.645864  | -3.68E-02 | 24194307  | 24194430  | NC_000001.10 |
| cg01524091   | 7.89E-07 | 1.09E-07 | -5.52 | 6.6450653 | -3.11E-02 | 44281032  | 44281155  | NC_000006.11 |
| cg24054774   | 7.90E-07 | 1.09E-07 | -5.52 | 6.6446948 | -4.79E-02 | 19750334  | 19750457  | NC_000012.11 |
| cg00437124   | 7.90E-07 | 1.09E-07 | -5.52 | 6.6441395 | -1.22E-01 | 114475951 | 114476074 | NC_000006.11 |
| cg14195117   | 7.91E-07 | 1.09E-07 | -5.52 | 6.6435637 | -9.25E-02 | 114936583 | 114936706 | NC_000009.11 |
| cg06937595   | 7.91E-07 | 1.09E-07 | -5.52 | 6.643526  | -9.42E-02 | 1868501   | 1868624   | NC_000001.10 |
| cg04041679   | 7.91E-07 | 1.09E-07 | -5.52 | 6.6433533 | -1.17E-01 | 118537229 | 118537352 | NC_000012.11 |
| cg26147845   | 7.91E-07 | 1.09E-07 | -5.52 | 6.6433466 | -1.10E-01 | 132433838 | 132433961 | NC_000012.11 |
| cg07656391   | 7.91E-07 | 1.09E-07 | -5.52 | 6.6431023 | -3.33E-02 | 32264720  | 32264843  | NC_000002.11 |
| cg13586696   | 7.91E-07 | 1.09E-07 | -5.52 | 6.6425471 | -5.65E-02 | 29458723  | 29458846  | NC_000022.10 |
| cg02016065   | 7.91E-07 | 1.09E-07 | -5.52 | 6.6424897 | -9.86E-02 | 157290927 | 157291050 | NC_000003.11 |
| cg14510374   | 7.91E-07 | 1.09E-07 | -5.52 | 6.6424067 | -2.93E-02 | 50365322  | 50365445  | NC_000003.11 |
| cg20702295   | 7.92E-07 | 1.09E-07 | -5.52 | 6.6422631 | -2.01E-02 | 20307583  | 20307706  | NC_000022.10 |
| cg00538370   | 7.92E-07 | 1.09E-07 | -5.52 | 6.6420598 | -5.32E-02 | 8823090   | 8823213   | NC_000002.11 |
| ch.14.43986R | 7.92E-07 | 1.09E-07 | -5.52 | 6.6411578 | -2.84E-02 | 21869499  | 21869622  | NC_000014.8  |
| cg27644254   | 7.93E-07 | 1.09E-07 | -5.52 | 6.6403861 | -1.77E-02 | 48556578  | 48556701  | NC_000018.9  |
| cg04594378   | 7.94E-07 | 1.10E-07 | -5.52 | 6.6397377 | -6.87E-02 | 85181102  | 85181225  | NC_000016.9  |
| cg14780255   | 7.94E-07 | 1.10E-07 | -5.52 | 6.6396452 | -1.13E-01 | 201720358 | 201720481 | NC_000001.10 |
| cg18634848   | 7.95E-07 | 1.10E-07 | -5.51 | 6.6382599 | -1.95E-02 | 13056459  | 13056582  | NC_000019.9  |
| cg02362848   | 7.95E-07 | 1.10E-07 | -5.51 | 6.6374296 | -4.76E-02 | 33848786  | 33848909  | NC_000001.10 |
| cg27643360   | 7.97E-07 | 1.10E-07 | -5.51 | 6.6359449 | -1.07E-01 | 32623819  | 32623942  | NC_000008.10 |



|            |          |          |       |           |           |           |           |              |
|------------|----------|----------|-------|-----------|-----------|-----------|-----------|--------------|
| cg10206440 | 7.97E-07 | 1.10E-07 | -5.51 | 6.6358584 | -6.37E-02 | 16353594  | 16353717  | NC_000001.10 |
| cg02407266 | 7.97E-07 | 1.10E-07 | -5.51 | 6.6355789 | -1.47E-01 | 79637979  | 79638102  | NC_000010.10 |
| cg18069356 | 7.97E-07 | 1.10E-07 | -5.51 | 6.6355753 | -1.06E-01 | 66594875  | 66594998  | NC_000017.10 |
| cg01021488 | 7.97E-07 | 1.10E-07 | -5.51 | 6.635062  | -7.65E-02 | 99395581  | 99395704  | NC_000015.9  |
| cg10976772 | 7.97E-07 | 1.10E-07 | -5.51 | 6.6347809 | -8.54E-02 | 6390595   | 6390718   | NC_000001.10 |
| cg15594471 | 7.98E-07 | 1.10E-07 | -5.51 | 6.6342114 | -9.20E-02 | 94883474  | 94883597  | NC_000011.9  |
| cg01189072 | 7.98E-07 | 1.10E-07 | -5.51 | 6.6338832 | -1.90E-01 | 1610660   | 1610783   | NC_000001.10 |
| cg05270381 | 7.99E-07 | 1.10E-07 | -5.51 | 6.6329697 | -3.93E-02 | 202976926 | 202977049 | NC_000001.10 |
| cg06837242 | 7.99E-07 | 1.10E-07 | -5.51 | 6.6325253 | -2.28E-02 | 19578761  | 19578884  | NC_000001.10 |
| cg05343159 | 7.99E-07 | 1.10E-07 | -5.51 | 6.6322198 | -1.03E-01 | 129347529 | 129347652 | NC_000010.10 |
| cg14320593 | 8.00E-07 | 1.10E-07 | -5.51 | 6.6317114 | -1.61E-02 | 47088343  | 47088466  | NC_000018.9  |
| cg04573276 | 8.00E-07 | 1.10E-07 | -5.51 | 6.6312896 | -1.50E-01 | 35639632  | 35639755  | NC_000011.9  |
| cg16300681 | 8.00E-07 | 1.11E-07 | -5.51 | 6.6310962 | -7.24E-02 | 180166492 | 180166615 | NC_000005.9  |
| cg09253473 | 8.01E-07 | 1.11E-07 | -5.51 | 6.6303153 | -1.00E-01 | 79877389  | 79877512  | NC_000017.10 |
| cg02512596 | 8.01E-07 | 1.11E-07 | -5.51 | 6.6295479 | -6.77E-02 | 48054563  | 48054686  | NC_000021.8  |
| cg27004640 | 8.02E-07 | 1.11E-07 | -5.51 | 6.6283674 | -6.05E-02 | 34663929  | 34664052  | NC_000016.9  |
| cg14816748 | 8.03E-07 | 1.11E-07 | -5.51 | 6.6281269 | -2.18E-02 | 74349897  | 74350020  | NC_000017.10 |
| cg04468568 | 8.03E-07 | 1.11E-07 | -5.51 | 6.6277785 | -6.66E-02 | 128776059 | 128776182 | NC_000011.9  |
| cg07700925 | 8.03E-07 | 1.11E-07 | -5.51 | 6.6272887 | -1.08E-01 | 129540267 | 129540390 | NC_000010.10 |
| cg17465827 | 8.04E-07 | 1.11E-07 | -5.51 | 6.6262162 | -6.04E-02 | 148538229 | 148538352 | NC_000004.11 |
| cg27438152 | 8.04E-07 | 1.11E-07 | -5.51 | 6.6260661 | -1.50E-01 | 31515761  | 31515884  | NC_000015.9  |
| cg12496156 | 8.05E-07 | 1.11E-07 | -5.51 | 6.6250072 | -7.33E-02 | 218666048 | 218666171 | NC_000002.11 |
| cg19801868 | 8.05E-07 | 1.11E-07 | -5.51 | 6.6248884 | -3.01E-02 | 6186542   | 6186665   | NC_000010.10 |
| cg24147343 | 8.05E-07 | 1.11E-07 | -5.51 | 6.6243773 | -6.86E-02 | 174221117 | 174221240 | NC_000005.9  |
| cg27131821 | 8.06E-07 | 1.11E-07 | -5.51 | 6.624166  | -9.10E-02 | 6104546   | 6104669   | NC_000010.10 |

|            |          |          |       |           |           |           |           |              |
|------------|----------|----------|-------|-----------|-----------|-----------|-----------|--------------|
| cg08062469 | 8.07E-07 | 1.11E-07 | -5.51 | 6.6229229 | -2.08E-02 | 26926627  | 26926750  | NC_000017.10 |
| cg27587645 | 8.08E-07 | 1.12E-07 | -5.51 | 6.6209153 | -1.82E-02 | 2015311   | 2015434   | NC_000019.9  |
| cg09122442 | 8.08E-07 | 1.12E-07 | -5.51 | 6.6205368 | -1.13E-01 | 6894410   | 6894533   | NC_000004.11 |
| cg18720803 | 8.09E-07 | 1.12E-07 | -5.51 | 6.6202949 | -8.76E-02 | 75608133  | 75608256  | NC_000004.11 |
| cg00285314 | 8.10E-07 | 1.12E-07 | -5.51 | 6.6186788 | -4.06E-02 | 68119255  | 68119378  | NC_000016.9  |
| cg13018099 | 8.10E-07 | 1.12E-07 | -5.51 | 6.6186505 | -2.95E-02 | 104350833 | 104350956 | NC_000012.11 |
| cg15858747 | 8.10E-07 | 1.12E-07 | -5.51 | 6.6183283 | -5.21E-02 | 155562314 | 155562437 | NC_000007.13 |
| cg13641690 | 8.10E-07 | 1.12E-07 | -5.51 | 6.6182329 | -8.45E-02 | 78114888  | 78115011  | NC_000015.9  |
| cg01781446 | 8.11E-07 | 1.12E-07 | -5.51 | 6.6176454 | -8.22E-02 | 7383488   | 7383611   | NC_000017.10 |
| cg24043192 | 8.11E-07 | 1.12E-07 | -5.51 | 6.6174118 | -4.03E-02 | 43515527  | 43515650  | NC_000005.9  |
| cg13508283 | 8.11E-07 | 1.12E-07 | -5.51 | 6.6171949 | -3.44E-02 | 55881893  | 55882016  | NC_000019.9  |
| cg17755495 | 8.12E-07 | 1.12E-07 | -5.51 | 6.615358  | -5.97E-02 | 240800311 | 240800434 | NC_000001.10 |
| cg13959241 | 8.12E-07 | 1.12E-07 | -5.51 | 6.6152784 | -8.37E-02 | 138904715 | 138904838 | NC_000009.11 |
| cg13605690 | 8.13E-07 | 1.12E-07 | -5.51 | 6.6148003 | -3.21E-02 | 169746671 | 169746794 | NC_000002.11 |
| cg25013269 | 8.13E-07 | 1.12E-07 | -5.51 | 6.6145072 | -9.91E-02 | 176766954 | 176767077 | NC_000005.9  |
| cg10798764 | 8.13E-07 | 1.12E-07 | -5.51 | 6.6144563 | -7.02E-02 | 31514352  | 31514475  | NC_000006.11 |
| cg08142347 | 8.13E-07 | 1.12E-07 | -5.51 | 6.6143846 | -5.86E-02 | 42440001  | 42440124  | NC_000019.9  |
| cg19612191 | 8.13E-07 | 1.12E-07 | -5.51 | 6.6139753 | -1.11E-01 | 96884949  | 96885072  | NC_000015.9  |
| cg12506597 | 8.14E-07 | 1.13E-07 | -5.51 | 6.6134296 | -8.06E-02 | 31699709  | 31699832  | NC_000006.11 |
| cg18007641 | 8.14E-07 | 1.13E-07 | -5.51 | 6.6133108 | -1.07E-01 | 74641828  | 74641951  | NC_000004.11 |
| cg24996263 | 8.15E-07 | 1.13E-07 | -5.51 | 6.6121667 | -2.02E-02 | 31297444  | 31297567  | NC_000001.10 |
| cg23702644 | 8.16E-07 | 1.13E-07 | -5.51 | 6.6112845 | -1.14E-01 | 3254875   | 3254998   | NC_000008.10 |
| cg11997536 | 8.16E-07 | 1.13E-07 | -5.51 | 6.610848  | -8.83E-02 | 16176297  | 16176420  | NC_000019.9  |
| cg24124703 | 8.16E-07 | 1.13E-07 | -5.51 | 6.6107543 | -1.35E-01 | 88122944  | 88123067  | NC_000005.9  |
| cg16645705 | 8.18E-07 | 1.13E-07 | -5.51 | 6.608581  | -6.32E-02 | 111881218 | 111881341 | NC_000013.10 |

|            |          |          |       |           |           |           |           |              |
|------------|----------|----------|-------|-----------|-----------|-----------|-----------|--------------|
| cg09522018 | 8.18E-07 | 1.13E-07 | -5.51 | 6.6082786 | -1.70E-01 | 139644871 | 139644994 | NC_000006.11 |
| cg24134056 | 8.18E-07 | 1.13E-07 | -5.51 | 6.6075519 | -8.88E-02 | 54494546  | 54494669  | NC_000012.11 |
| cg00658411 | 8.18E-07 | 1.13E-07 | -5.51 | 6.6074663 | -1.01E-01 | 4467558   | 4467681   | NC_000016.9  |
| cg26386449 | 8.19E-07 | 1.13E-07 | -5.51 | 6.6068668 | -1.27E-01 | 112430654 | 112430777 | NC_000007.13 |
| cg05141026 | 8.19E-07 | 1.13E-07 | -5.51 | 6.6061785 | -2.22E-02 | 145064874 | 145064997 | NC_000008.10 |
| cg16540391 | 8.20E-07 | 1.13E-07 | -5.51 | 6.6058381 | -5.53E-02 | 151042035 | 151042158 | NC_000006.11 |
| cg05348973 | 8.20E-07 | 1.13E-07 | -5.51 | 6.6056882 | -9.37E-02 | 110697298 | 110697421 | NC_000001.10 |
| cg10781828 | 8.20E-07 | 1.13E-07 | -5.51 | 6.6052063 | -3.36E-02 | 198570936 | 198571059 | NC_000002.11 |
| cg15604357 | 8.21E-07 | 1.14E-07 | -5.51 | 6.6043487 | -1.04E-01 | 160386408 | 160386531 | NC_000001.10 |
| cg25658010 | 8.21E-07 | 1.14E-07 | -5.51 | 6.6043148 | -1.06E-01 | 112455412 | 112455535 | NC_000010.10 |
| cg25368728 | 8.21E-07 | 1.14E-07 | -5.51 | 6.6040188 | -8.36E-02 | 31833007  | 31833130  | NC_000006.11 |
| cg04002325 | 8.21E-07 | 1.14E-07 | -5.51 | 6.6036623 | -3.90E-02 | 30891687  | 30891810  | NC_000008.10 |
| cg02598564 | 8.21E-07 | 1.14E-07 | -5.51 | 6.6035726 | -1.14E-01 | 72822634  | 72822757  | NC_000010.10 |
| cg12338137 | 8.22E-07 | 1.14E-07 | -5.51 | 6.6030654 | -1.17E-01 | 218701429 | 218701552 | NC_000002.11 |
| cg22919115 | 8.22E-07 | 1.14E-07 | -5.51 | 6.6030195 | -7.81E-02 | 48936584  | 48936707  | NC_000003.11 |
| cg04712435 | 8.22E-07 | 1.14E-07 | -5.51 | 6.6029487 | -3.35E-02 | 90863145  | 90863268  | NC_000014.8  |
| cg20406267 | 8.22E-07 | 1.14E-07 | -5.51 | 6.6027859 | -1.10E-01 | 34377921  | 34378044  | NC_000011.9  |
| cg01207473 | 8.22E-07 | 1.14E-07 | -5.51 | 6.6026248 | -1.27E-01 | 159359940 | 159360063 | NC_000006.11 |
| cg03287469 | 8.23E-07 | 1.14E-07 | -5.51 | 6.601889  | -1.44E-01 | 9006242   | 9006365   | NC_000003.11 |
| cg08698835 | 8.23E-07 | 1.14E-07 | -5.51 | 6.6013543 | -8.57E-02 | 56279276  | 56279399  | NC_000016.9  |
| cg05901451 | 8.23E-07 | 1.14E-07 | -5.51 | 6.6013447 | -6.32E-02 | 126070800 | 126070923 | NC_000006.11 |
| cg12432980 | 8.23E-07 | 1.14E-07 | -5.51 | 6.60104   | -5.31E-02 | 5987794   | 5987917   | NC_000020.10 |
| cg17695537 | 8.24E-07 | 1.14E-07 | -5.51 | 6.6006251 | -5.76E-02 | 121274655 | 121274778 | NC_000002.11 |
| cg04434147 | 8.24E-07 | 1.14E-07 | -5.51 | 6.6003535 | -4.73E-02 | 45281287  | 45281410  | NC_000019.9  |
| cg13200575 | 8.25E-07 | 1.14E-07 | -5.51 | 6.5994592 | -7.96E-02 | 38096571  | 38096694  | NC_000017.10 |

|            |          |          |       |           |           |           |           |              |
|------------|----------|----------|-------|-----------|-----------|-----------|-----------|--------------|
| cg00156964 | 8.25E-07 | 1.14E-07 | -5.51 | 6.5992797 | -2.20E-02 | 94853892  | 94854015  | NC_000012.11 |
| cg14042504 | 8.25E-07 | 1.14E-07 | -5.51 | 6.5991084 | -2.65E-02 | 22564325  | 22564448  | NC_000020.10 |
| cg14276580 | 8.25E-07 | 1.14E-07 | -5.51 | 6.5989931 | -9.92E-02 | 40527020  | 40527143  | NC_000013.10 |
| cg17984956 | 8.26E-07 | 1.14E-07 | -5.51 | 6.5979613 | -7.70E-02 | 155711813 | 155711936 | NC_000007.13 |
| cg22677637 | 8.26E-07 | 1.14E-07 | -5.51 | 6.5975864 | -1.49E-01 | 242636898 | 242637021 | NC_000002.11 |
| cg11035304 | 8.26E-07 | 1.14E-07 | -5.51 | 6.5974178 | -7.92E-02 | 112096355 | 112096478 | NC_000010.10 |
| cg20058937 | 8.27E-07 | 1.14E-07 | -5.51 | 6.5970496 | -1.62E-01 | 5336543   | 5336666   | NC_000007.13 |
| cg16500605 | 8.27E-07 | 1.14E-07 | -5.51 | 6.5969534 | -8.54E-02 | 31620861  | 31620984  | NC_000006.11 |
| cg06172859 | 8.27E-07 | 1.14E-07 | -5.51 | 6.59695   | -1.21E-01 | 117866589 | 117866712 | NC_000006.11 |
| cg09606015 | 8.27E-07 | 1.15E-07 | -5.51 | 6.5963215 | -3.72E-02 | 182511586 | 182511709 | NC_000003.11 |
| cg27539546 | 8.28E-07 | 1.15E-07 | -5.51 | 6.5951888 | -1.99E-02 | 29911634  | 29911757  | NC_000016.9  |
| cg00794400 | 8.28E-07 | 1.15E-07 | -5.51 | 6.5951375 | -1.15E-01 | 17746510  | 17746633  | NC_000001.10 |
| cg00340382 | 8.29E-07 | 1.15E-07 | -5.51 | 6.5945102 | -6.77E-02 | 47662406  | 47662529  | NC_000020.10 |
| cg15164871 | 8.29E-07 | 1.15E-07 | -5.51 | 6.5944243 | -3.08E-02 | 123380523 | 123380646 | NC_000012.11 |
| cg11735311 | 8.29E-07 | 1.15E-07 | -5.51 | 6.5942536 | -7.84E-02 | 41832649  | 41832772  | NC_000001.10 |
| cg13109106 | 8.29E-07 | 1.15E-07 | -5.51 | 6.5939053 | -6.02E-02 | 89333529  | 89333652  | NC_000001.10 |
| cg08105951 | 8.29E-07 | 1.15E-07 | -5.51 | 6.5938021 | -2.01E-02 | 5229733   | 5229856   | NC_000007.13 |
| cg11624479 | 8.29E-07 | 1.15E-07 | -5.51 | 6.5937759 | -1.58E-01 | 9285586   | 9285709   | NC_000011.9  |
| cg15257469 | 8.29E-07 | 1.15E-07 | -5.51 | 6.5933827 | -2.77E-02 | 7069202   | 7069325   | NC_000019.9  |
| cg11631592 | 8.30E-07 | 1.15E-07 | -5.51 | 6.5925796 | -6.31E-02 | 148869535 | 148869658 | NC_000006.11 |
| cg17664269 | 8.30E-07 | 1.15E-07 | -5.51 | 6.5921498 | -1.65E-01 | 3080621   | 3080744   | NC_000003.11 |
| cg03456755 | 8.32E-07 | 1.15E-07 | -5.5  | 6.5905541 | -3.00E-02 | 75084957  | 75085080  | NC_000017.10 |
| cg14600885 | 8.32E-07 | 1.15E-07 | -5.5  | 6.5904867 | -7.92E-02 | 150040280 | 150040403 | NC_000005.9  |
| cg14883961 | 8.32E-07 | 1.15E-07 | -5.5  | 6.5902    | -1.12E-01 | 127846077 | 127846200 | NC_000008.10 |
| cg23519155 | 8.32E-07 | 1.15E-07 | -5.5  | 6.5898987 | -1.09E-01 | 37815128  | 37815251  | NC_000002.11 |

|                |          |          |      |           |           |           |           |              |
|----------------|----------|----------|------|-----------|-----------|-----------|-----------|--------------|
| ch.1.55181547R | 8.32E-07 | 1.15E-07 | -5.5 | 6.5896629 | -6.94E-02 | 55408959  | 55409082  | NC_000001.10 |
| cg23303188     | 8.33E-07 | 1.15E-07 | -5.5 | 6.5894035 | -9.91E-02 | 72570711  | 72570834  | NC_000005.9  |
| cg13242199     | 8.34E-07 | 1.16E-07 | -5.5 | 6.5880909 | -6.53E-02 | 203410080 | 203410203 | NC_000001.10 |
| ch.15.1614682R | 8.34E-07 | 1.16E-07 | -5.5 | 6.5878037 | -3.46E-02 | 92856301  | 92856424  | NC_000015.9  |
| cg21833076     | 8.34E-07 | 1.16E-07 | -5.5 | 6.5874976 | -1.48E-01 | 104643591 | 104643714 | NC_000011.9  |
| cg09860935     | 8.34E-07 | 1.16E-07 | -5.5 | 6.587328  | -4.40E-02 | 21572311  | 21572434  | NC_000012.11 |
| cg15499560     | 8.35E-07 | 1.16E-07 | -5.5 | 6.5863822 | -7.94E-02 | 74192381  | 74192504  | NC_000014.8  |
| cg12159689     | 8.35E-07 | 1.16E-07 | -5.5 | 6.5859718 | -7.39E-02 | 156297493 | 156297616 | NC_000007.13 |
| cg08882650     | 8.36E-07 | 1.16E-07 | -5.5 | 6.5855994 | -5.42E-02 | 167691462 | 167691585 | NC_000001.10 |
| cg20005057     | 8.36E-07 | 1.16E-07 | -5.5 | 6.5855673 | -6.97E-02 | 10364834  | 10364957  | NC_000012.11 |
| cg07596482     | 8.37E-07 | 1.16E-07 | -5.5 | 6.5839758 | -3.42E-02 | 42633968  | 42634091  | NC_000017.10 |
| cg24066677     | 8.37E-07 | 1.16E-07 | -5.5 | 6.5836374 | -1.32E-02 | 42298870  | 42298993  | NC_000017.10 |
| cg27183791     | 8.37E-07 | 1.16E-07 | -5.5 | 6.5836102 | -1.22E-01 | 89381904  | 89382027  | NC_000016.9  |
| cg15776653     | 8.38E-07 | 1.16E-07 | -5.5 | 6.5827589 | -4.20E-02 | 26538476  | 26538599  | NC_000006.11 |
| cg20384732     | 8.38E-07 | 1.16E-07 | -5.5 | 6.5827324 | -2.09E-01 | 195601375 | 195601498 | NC_000003.11 |
| ch.19.746747R  | 8.38E-07 | 1.16E-07 | -5.5 | 6.5824093 | -3.77E-02 | 17726035  | 17726158  | NC_000019.9  |
| cg10334916     | 8.39E-07 | 1.16E-07 | -5.5 | 6.5812481 | -2.44E-02 | 241508098 | 241508221 | NC_000002.11 |
| cg17091020     | 8.40E-07 | 1.16E-07 | -5.5 | 6.5798254 | -1.20E-01 | 91986716  | 91986839  | NC_000008.10 |
| cg20798872     | 8.40E-07 | 1.16E-07 | -5.5 | 6.5798143 | -2.89E-02 | 15850838  | 15850961  | NC_000001.10 |
| cg25037461     | 8.40E-07 | 1.16E-07 | -5.5 | 6.5797788 | -3.83E-02 | 24181268  | 24181391  | NC_000022.10 |
| cg24349400     | 8.41E-07 | 1.17E-07 | -5.5 | 6.5795143 | -1.42E-02 | 19132419  | 19132542  | NC_000022.10 |
| cg26548122     | 8.41E-07 | 1.17E-07 | -5.5 | 6.5793595 | -8.85E-02 | 69061244  | 69061367  | NC_000011.9  |
| cg18461649     | 8.41E-07 | 1.17E-07 | -5.5 | 6.5792186 | -2.59E-02 | 56585102  | 56585225  | NC_000014.8  |
| cg18388084     | 8.41E-07 | 1.17E-07 | -5.5 | 6.578596  | -1.12E-01 | 241664439 | 241664562 | NC_000002.11 |
| cg25372085     | 8.41E-07 | 1.17E-07 | -5.5 | 6.5783893 | -1.31E-01 | 80528720  | 80528843  | NC_000010.10 |

|              |          |          |      |           |           |           |           |              |
|--------------|----------|----------|------|-----------|-----------|-----------|-----------|--------------|
| cg02264288   | 8.41E-07 | 1.17E-07 | -5.5 | 6.5783107 | -6.08E-02 | 18990796  | 18990919  | NC_000006.11 |
| cg07439056   | 8.42E-07 | 1.17E-07 | -5.5 | 6.5775153 | -5.25E-02 | 97912653  | 97912776  | NC_000005.9  |
| cg24704082   | 8.42E-07 | 1.17E-07 | -5.5 | 6.5774248 | -4.51E-02 | 75976809  | 75976932  | NC_000010.10 |
| cg23280720   | 8.42E-07 | 1.17E-07 | -5.5 | 6.5772906 | -1.18E-01 | 139483193 | 139483316 | NC_000006.11 |
| cg25609480   | 8.43E-07 | 1.17E-07 | -5.5 | 6.576937  | -1.31E-01 | 13534652  | 13534775  | NC_000010.10 |
| cg22476960   | 8.43E-07 | 1.17E-07 | -5.5 | 6.576579  | -8.59E-02 | 124134914 | 124135037 | NC_000011.9  |
| cg09472211   | 8.43E-07 | 1.17E-07 | -5.5 | 6.5764242 | -3.06E-02 | 89622126  | 89622249  | NC_000010.10 |
| cg08074321   | 8.44E-07 | 1.17E-07 | -5.5 | 6.5756028 | -9.38E-02 | 138605857 | 138605980 | NC_000002.11 |
| cg11721194   | 8.45E-07 | 1.17E-07 | -5.5 | 6.573537  | -1.08E-01 | 160709239 | 160709362 | NC_000001.10 |
| cg03173367   | 8.46E-07 | 1.17E-07 | -5.5 | 6.5730761 | -6.98E-02 | 97524995  | 97525118  | NC_000002.11 |
| cg08011645   | 8.46E-07 | 1.17E-07 | -5.5 | 6.5730409 | -1.22E-01 | 64488701  | 64488824  | NC_000011.9  |
| cg23661676   | 8.46E-07 | 1.17E-07 | -5.5 | 6.5728887 | -8.15E-02 | 35861862  | 35861985  | NC_000019.9  |
| cg06595154   | 8.47E-07 | 1.17E-07 | -5.5 | 6.5718744 | -1.05E-01 | 10716164  | 10716287  | NC_000011.9  |
| cg26003023   | 8.47E-07 | 1.17E-07 | -5.5 | 6.571841  | -5.69E-02 | 90298269  | 90298392  | NC_000010.10 |
| cg08149546   | 8.47E-07 | 1.17E-07 | -5.5 | 6.5716003 | -8.47E-02 | 49120127  | 49120250  | NC_000011.9  |
| cg04103315   | 8.47E-07 | 1.18E-07 | -5.5 | 6.571067  | -1.41E-02 | 42642047  | 42642170  | NC_000003.11 |
| cg18207742   | 8.47E-07 | 1.18E-07 | -5.5 | 6.5710141 | -5.07E-02 | 16229123  | 16229246  | NC_000004.11 |
| cg08328535   | 8.48E-07 | 1.18E-07 | -5.5 | 6.5705729 | -2.31E-02 | 22222169  | 22222292  | NC_000022.10 |
| cg09245901   | 8.48E-07 | 1.18E-07 | -5.5 | 6.5696802 | -9.23E-02 | 132075947 | 132076070 | NC_000006.11 |
| ch.5.762713R | 8.49E-07 | 1.18E-07 | -5.5 | 6.5691304 | -3.32E-02 | 35221274  | 35221397  | NC_000005.9  |
| cg24061542   | 8.49E-07 | 1.18E-07 | -5.5 | 6.5689894 | -2.64E-02 | 44971593  | 44971716  | NC_000011.9  |
| cg15122966   | 8.49E-07 | 1.18E-07 | -5.5 | 6.5687215 | -1.10E-01 | 102135168 | 102135291 | NC_000002.11 |
| cg20612875   | 8.49E-07 | 1.18E-07 | -5.5 | 6.5685934 | -8.52E-02 | 1094308   | 1094431   | NC_000017.10 |
| cg17817532   | 8.49E-07 | 1.18E-07 | -5.5 | 6.5682622 | -1.39E-01 | 70322874  | 70322997  | NC_000010.10 |
| cg03094905   | 8.49E-07 | 1.18E-07 | -5.5 | 6.568251  | -5.70E-02 | 52710562  | 52710685  | NC_000004.11 |

|            |          |          |      |           |           |           |           |              |
|------------|----------|----------|------|-----------|-----------|-----------|-----------|--------------|
| cg14059221 | 8.50E-07 | 1.18E-07 | -5.5 | 6.5679308 | -6.26E-02 | 28803808  | 28803931  | NC_000017.10 |
| cg10038907 | 8.50E-07 | 1.18E-07 | -5.5 | 6.5673217 | -6.51E-02 | 50154240  | 50154363  | NC_000014.8  |
| cg16474118 | 8.50E-07 | 1.18E-07 | -5.5 | 6.5670651 | -1.07E-01 | 12760191  | 12760314  | NC_000002.11 |
| cg09118017 | 8.50E-07 | 1.18E-07 | -5.5 | 6.5670618 | -9.97E-02 | 10704886  | 10705009  | NC_000001.10 |
| cg10801102 | 8.51E-07 | 1.18E-07 | -5.5 | 6.566853  | -7.24E-02 | 80023921  | 80024044  | NC_000017.10 |
| cg08288223 | 8.51E-07 | 1.18E-07 | -5.5 | 6.5666304 | -8.87E-02 | 70563131  | 70563254  | NC_000011.9  |
| cg12428160 | 8.51E-07 | 1.18E-07 | -5.5 | 6.565828  | -1.29E-01 | 44500693  | 44500816  | NC_000010.10 |
| cg03811260 | 8.51E-07 | 1.18E-07 | -5.5 | 6.5658245 | -1.36E-01 | 67198215  | 67198338  | NC_000016.9  |
| cg18578578 | 8.52E-07 | 1.18E-07 | -5.5 | 6.5651574 | -7.13E-02 | 50262245  | 50262368  | NC_000003.11 |
| cg00355673 | 8.52E-07 | 1.18E-07 | -5.5 | 6.5644939 | -2.21E-02 | 92573075  | 92573198  | NC_000014.8  |
| cg15459780 | 8.53E-07 | 1.18E-07 | -5.5 | 6.564157  | -1.35E-01 | 104609980 | 104610103 | NC_000012.11 |
| cg25552843 | 8.53E-07 | 1.18E-07 | -5.5 | 6.5637858 | -1.52E-01 | 106088702 | 106088825 | NC_000010.10 |
| cg25471253 | 8.53E-07 | 1.18E-07 | -5.5 | 6.5635142 | -1.64E-02 | 5602751   | 5602874   | NC_000007.13 |
| cg08721324 | 8.53E-07 | 1.18E-07 | -5.5 | 6.5631741 | -8.53E-02 | 89384602  | 89384725  | NC_000016.9  |
| cg05269451 | 8.54E-07 | 1.19E-07 | -5.5 | 6.5623909 | -7.56E-02 | 172962700 | 172962823 | NC_000002.11 |
| cg12042787 | 8.54E-07 | 1.19E-07 | -5.5 | 6.5623003 | -7.15E-02 | 39976671  | 39976794  | NC_000001.10 |
| cg26452989 | 8.55E-07 | 1.19E-07 | -5.5 | 6.5618582 | -5.98E-02 | 11581379  | 11581502  | NC_000010.10 |
| cg25785303 | 8.55E-07 | 1.19E-07 | -5.5 | 6.5614453 | -1.05E-01 | 11681908  | 11682031  | NC_000002.11 |
| cg04273422 | 8.55E-07 | 1.19E-07 | -5.5 | 6.5614096 | -9.19E-02 | 6498787   | 6498910   | NC_000019.9  |
| cg26882419 | 8.56E-07 | 1.19E-07 | -5.5 | 6.5604227 | -1.97E-02 | 227751228 | 227751351 | NC_000001.10 |
| cg16500230 | 8.56E-07 | 1.19E-07 | -5.5 | 6.5602543 | -9.35E-02 | 22854061  | 22854184  | NC_000011.9  |
| cg00716991 | 8.56E-07 | 1.19E-07 | -5.5 | 6.5596985 | -8.56E-02 | 36166159  | 36166282  | NC_000009.11 |
| cg19249874 | 8.56E-07 | 1.19E-07 | -5.5 | 6.5596324 | -1.18E-01 | 28895537  | 28895660  | NC_000007.13 |
| cg11880646 | 8.57E-07 | 1.19E-07 | -5.5 | 6.5591725 | -4.21E-02 | 61638900  | 61639023  | NC_000011.9  |
| cg15447512 | 8.57E-07 | 1.19E-07 | -5.5 | 6.5589473 | -6.24E-02 | 110163209 | 110163332 | NC_000001.10 |

|                 |          |          |      |           |           |           |           |              |
|-----------------|----------|----------|------|-----------|-----------|-----------|-----------|--------------|
| cg00961450      | 8.57E-07 | 1.19E-07 | -5.5 | 6.5588589 | -6.43E-02 | 26343960  | 26344083  | NC_000004.11 |
| cg16791210      | 8.57E-07 | 1.19E-07 | -5.5 | 6.558261  | -5.70E-02 | 85581378  | 85581501  | NC_000002.11 |
| cg09386050      | 8.58E-07 | 1.19E-07 | -5.5 | 6.5573298 | -1.07E-01 | 809078    | 809201    | NC_000007.13 |
| cg25104512      | 8.59E-07 | 1.19E-07 | -5.5 | 6.5570076 | -1.51E-02 | 46735454  | 46735577  | NC_000003.11 |
| cg04006133      | 8.59E-07 | 1.19E-07 | -5.5 | 6.5568585 | -1.17E-01 | 84172431  | 84172554  | NC_000016.9  |
| cg26138144      | 8.59E-07 | 1.19E-07 | -5.5 | 6.5567899 | -1.03E-01 | 38071188  | 38071311  | NC_000022.10 |
| cg25113360      | 8.59E-07 | 1.19E-07 | -5.5 | 6.5567592 | -8.54E-02 | 120530355 | 120530478 | NC_000011.9  |
| cg07124956      | 8.59E-07 | 1.19E-07 | -5.5 | 6.5566633 | -2.98E-02 | 236273335 | 236273458 | NC_000001.10 |
| ch.2.116599701R | 8.59E-07 | 1.19E-07 | -5.5 | 6.5560949 | -5.91E-02 | 116883231 | 116883354 | NC_000002.11 |
| cg23150604      | 8.60E-07 | 1.19E-07 | -5.5 | 6.5554679 | -1.21E-01 | 85732147  | 85732270  | NC_000002.11 |
| cg22119580      | 8.60E-07 | 1.19E-07 | -5.5 | 6.5550946 | -1.07E-02 | 140951301 | 140951424 | NC_000003.11 |
| cg14916288      | 8.61E-07 | 1.20E-07 | -5.5 | 6.5543067 | -1.12E-01 | 34345136  | 34345259  | NC_000017.10 |
| cg12374732      | 8.61E-07 | 1.20E-07 | -5.5 | 6.5539558 | -3.54E-02 | 103251909 | 103252032 | NC_000008.10 |
| cg07931844      | 8.62E-07 | 1.20E-07 | -5.5 | 6.5532432 | -6.67E-02 | 72102213  | 72102336  | NC_000015.9  |
| cg04402633      | 8.62E-07 | 1.20E-07 | -5.5 | 6.5530968 | -4.31E-02 | 2907113   | 2907236   | NC_000011.9  |
| cg09026379      | 8.62E-07 | 1.20E-07 | -5.5 | 6.5527473 | -3.31E-02 | 64067248  | 64067371  | NC_000011.9  |
| cg15613991      | 8.62E-07 | 1.20E-07 | -5.5 | 6.5525126 | -1.00E-01 | 5277080   | 5277203   | NC_000007.13 |
| cg01203651      | 8.63E-07 | 1.20E-07 | -5.5 | 6.5519891 | -1.29E-01 | 187762256 | 187762379 | NC_000004.11 |
| cg01384319      | 8.63E-07 | 1.20E-07 | -5.5 | 6.5516978 | -9.88E-02 | 134766697 | 134766820 | NC_000002.11 |
| cg12734688      | 8.63E-07 | 1.20E-07 | -5.5 | 6.5509026 | -8.82E-02 | 48308390  | 48308513  | NC_000001.10 |
| cg21038291      | 8.64E-07 | 1.20E-07 | -5.5 | 6.5508143 | -1.41E-01 | 70332630  | 70332753  | NC_000017.10 |
| cg02267698      | 8.64E-07 | 1.20E-07 | -5.5 | 6.5500543 | -5.70E-02 | 7991119   | 7991242   | NC_000019.9  |
| cg01478482      | 8.64E-07 | 1.20E-07 | -5.5 | 6.5496384 | -8.30E-02 | 21168523  | 21168646  | NC_000016.9  |
| cg00887547      | 8.65E-07 | 1.20E-07 | -5.5 | 6.5494241 | -3.53E-02 | 118811020 | 118811143 | NC_000012.11 |
| cg16376036      | 8.65E-07 | 1.20E-07 | -5.5 | 6.5484639 | -5.70E-02 | 117015095 | 117015218 | NC_000011.9  |



|            |          |          |       |           |           |           |           |              |
|------------|----------|----------|-------|-----------|-----------|-----------|-----------|--------------|
| cg01309328 | 8.66E-07 | 1.20E-07 | -5.5  | 6.5482687 | -1.37E-01 | 32811253  | 32811376  | NC_000006.11 |
| cg19230575 | 8.66E-07 | 1.20E-07 | -5.5  | 6.5476913 | -2.96E-02 | 179041494 | 179041617 | NC_000003.11 |
| cg27250037 | 8.66E-07 | 1.20E-07 | -5.5  | 6.5476603 | -1.12E-01 | 35471692  | 35471815  | NC_000020.10 |
| cg17759224 | 8.66E-07 | 1.20E-07 | -5.5  | 6.5475621 | -7.46E-02 | 235098018 | 235098141 | NC_000001.10 |
| cg23285732 | 8.66E-07 | 1.20E-07 | -5.5  | 6.5474914 | -4.72E-02 | 145138351 | 145138474 | NC_000008.10 |
| cg15535363 | 8.67E-07 | 1.20E-07 | -5.5  | 6.547162  | -1.19E-01 | 121688416 | 121688539 | NC_000012.11 |
| cg02466602 | 8.67E-07 | 1.20E-07 | -5.5  | 6.546929  | -5.31E-02 | 16290349  | 16290472  | NC_000017.10 |
| cg10884544 | 8.67E-07 | 1.21E-07 | -5.5  | 6.5460803 | -8.77E-02 | 104302786 | 104302909 | NC_000012.11 |
| cg06132862 | 8.68E-07 | 1.21E-07 | -5.5  | 6.5456264 | -7.23E-02 | 128152075 | 128152198 | NC_000010.10 |
| cg10954740 | 8.68E-07 | 1.21E-07 | -5.5  | 6.5455317 | -1.31E-01 | 110982709 | 110982832 | NC_000008.10 |
| cg02035961 | 8.68E-07 | 1.21E-07 | -5.5  | 6.5454536 | -6.57E-02 | 6288071   | 6288194   | NC_000007.13 |
| cg10097906 | 8.68E-07 | 1.21E-07 | -5.5  | 6.5452057 | -1.09E-01 | 164235612 | 164235735 | NC_000006.11 |
| cg26826631 | 8.68E-07 | 1.21E-07 | -5.5  | 6.544872  | -1.13E-01 | 207497486 | 207497609 | NC_000001.10 |
| cg05726935 | 8.69E-07 | 1.21E-07 | -5.5  | 6.5443812 | -8.75E-02 | 105263522 | 105263645 | NC_000014.8  |
| cg06150897 | 8.69E-07 | 1.21E-07 | -5.5  | 6.543874  | -4.88E-02 | 101386608 | 101386731 | NC_000007.13 |
| cg01450736 | 8.69E-07 | 1.21E-07 | -5.5  | 6.5436552 | -9.40E-02 | 162838743 | 162838866 | NC_000001.10 |
| cg18402034 | 8.70E-07 | 1.21E-07 | -5.49 | 6.5428477 | -7.55E-02 | 31698651  | 31698774  | NC_000006.11 |
| cg24908708 | 8.71E-07 | 1.21E-07 | -5.49 | 6.5421148 | -1.06E-02 | 95835570  | 95835693  | NC_000008.10 |
| cg23070380 | 8.71E-07 | 1.21E-07 | -5.49 | 6.5413867 | -8.68E-02 | 169351075 | 169351198 | NC_000006.11 |
| cg19723805 | 8.71E-07 | 1.21E-07 | -5.49 | 6.5413477 | -1.12E-01 | 33147539  | 33147662  | NC_000005.9  |
| cg26676034 | 8.72E-07 | 1.21E-07 | -5.49 | 6.5411019 | -5.68E-02 | 74669048  | 74669171  | NC_000002.11 |
| cg24497897 | 8.73E-07 | 1.21E-07 | -5.49 | 6.5393742 | -2.13E-02 | 65658826  | 65658949  | NC_000011.9  |
| cg02789394 | 8.73E-07 | 1.21E-07 | -5.49 | 6.5393214 | -1.06E-01 | 112191479 | 112191602 | NC_000006.11 |
| cg02659338 | 8.74E-07 | 1.22E-07 | -5.49 | 6.5383948 | -3.96E-02 | 2390610   | 2390733   | NC_000007.13 |
| cg02037503 | 8.74E-07 | 1.22E-07 | -5.49 | 6.5383722 | -5.38E-02 | 23540729  | 23540852  | NC_000014.8  |

|                 |          |          |       |           |           |           |           |              |
|-----------------|----------|----------|-------|-----------|-----------|-----------|-----------|--------------|
| cg09184467      | 8.74E-07 | 1.22E-07 | -5.49 | 6.5376182 | -8.57E-02 | 14995699  | 14995822  | NC_000010.10 |
| cg20110765      | 8.75E-07 | 1.22E-07 | -5.49 | 6.5371796 | -2.90E-02 | 66079292  | 66079415  | NC_000011.9  |
| cg15472210      | 8.76E-07 | 1.22E-07 | -5.49 | 6.5361779 | -1.75E-02 | 232766496 | 232766619 | NC_000001.10 |
| cg26079666      | 8.77E-07 | 1.22E-07 | -5.49 | 6.5349899 | -6.26E-02 | 35067009  | 35067132  | NC_000018.9  |
| cg17848959      | 8.77E-07 | 1.22E-07 | -5.49 | 6.5349636 | -3.97E-02 | 220252827 | 220252950 | NC_000002.11 |
| cg06485706      | 8.77E-07 | 1.22E-07 | -5.49 | 6.5347077 | -1.14E-01 | 28996270  | 28996393  | NC_000016.9  |
| cg12389545      | 8.77E-07 | 1.22E-07 | -5.49 | 6.5341    | -4.50E-02 | 72353604  | 72353727  | NC_000011.9  |
| cg25140571      | 8.78E-07 | 1.22E-07 | -5.49 | 6.5340352 | -1.02E-01 | 8811437   | 8811560   | NC_000003.11 |
| cg18898209      | 8.78E-07 | 1.22E-07 | -5.49 | 6.5338629 | -9.66E-02 | 86600250  | 86600373  | NC_000011.9  |
| cg05678462      | 8.78E-07 | 1.22E-07 | -5.49 | 6.533536  | -8.32E-02 | 2634100   | 2634223   | NC_000006.11 |
| cg18352616      | 8.79E-07 | 1.22E-07 | -5.49 | 6.5322853 | -1.12E-01 | 3374830   | 3374953   | NC_000004.11 |
| ch.2.128865249F | 8.79E-07 | 1.22E-07 | -5.49 | 6.5322836 | -6.51E-02 | 129148779 | 129148902 | NC_000002.11 |
| cg14251777      | 8.79E-07 | 1.22E-07 | -5.49 | 6.5321535 | -1.02E-01 | 150147655 | 150147778 | NC_000007.13 |
| cg00816880      | 8.79E-07 | 1.22E-07 | -5.49 | 6.5320066 | -2.61E-02 | 54676994  | 54677117  | NC_000019.9  |
| cg17025275      | 8.80E-07 | 1.23E-07 | -5.49 | 6.5307022 | -2.99E-02 | 132112923 | 132113046 | NC_000005.9  |
| cg07161062      | 8.80E-07 | 1.23E-07 | -5.49 | 6.5304797 | -6.81E-02 | 142204334 | 142204457 | NC_000008.10 |
| cg14661383      | 8.81E-07 | 1.23E-07 | -5.49 | 6.5303261 | -9.87E-02 | 228463720 | 228463843 | NC_000001.10 |
| cg17755794      | 8.81E-07 | 1.23E-07 | -5.49 | 6.5300298 | -3.53E-02 | 150601493 | 150601616 | NC_000001.10 |
| cg23666844      | 8.81E-07 | 1.23E-07 | -5.49 | 6.5299184 | -9.06E-02 | 151137882 | 151138005 | NC_000007.13 |
| cg12895370      | 8.81E-07 | 1.23E-07 | -5.49 | 6.5295243 | -1.23E-01 | 6755816   | 6755939   | NC_000012.11 |
| cg16266669      | 8.81E-07 | 1.23E-07 | -5.49 | 6.5294811 | -1.03E-01 | 1144558   | 1144681   | NC_000001.10 |
| cg23698269      | 8.82E-07 | 1.23E-07 | -5.49 | 6.529215  | -1.52E-01 | 10316851  | 10316974  | NC_000011.9  |
| cg05376904      | 8.82E-07 | 1.23E-07 | -5.49 | 6.528995  | -3.14E-02 | 76920464  | 76920587  | NC_000017.10 |
| cg15907944      | 8.82E-07 | 1.23E-07 | -5.49 | 6.528768  | -1.20E-01 | 27152698  | 27152821  | NC_000022.10 |
| cg20661303      | 8.82E-07 | 1.23E-07 | -5.49 | 6.528748  | -8.41E-02 | 226129561 | 226129684 | NC_000001.10 |

|                |          |          |       |           |           |           |           |              |
|----------------|----------|----------|-------|-----------|-----------|-----------|-----------|--------------|
| ch.2.88490217F | 8.82E-07 | 1.23E-07 | -5.49 | 6.528477  | -4.04E-02 | 88709102  | 88709225  | NC_000002.11 |
| cg01772192     | 8.82E-07 | 1.23E-07 | -5.49 | 6.5283731 | -1.03E-01 | 81270102  | 81270225  | NC_000015.9  |
| cg14987564     | 8.82E-07 | 1.23E-07 | -5.49 | 6.5283244 | -3.57E-02 | 60557946  | 60558069  | NC_000014.8  |
| cg14116799     | 8.82E-07 | 1.23E-07 | -5.49 | 6.5282978 | -7.59E-02 | 43800154  | 43800277  | NC_000010.10 |
| cg22611419     | 8.83E-07 | 1.23E-07 | -5.49 | 6.5275468 | -2.64E-02 | 77070824  | 77070947  | NC_000017.10 |
| cg22926686     | 8.83E-07 | 1.23E-07 | -5.49 | 6.5270998 | -6.04E-02 | 114799776 | 114799899 | NC_000013.10 |
| cg18794809     | 8.83E-07 | 1.23E-07 | -5.49 | 6.5269741 | -6.25E-02 | 156480627 | 156480750 | NC_000003.11 |
| cg13075295     | 8.83E-07 | 1.23E-07 | -5.49 | 6.5267911 | -8.06E-02 | 42262356  | 42262479  | NC_000015.9  |
| cg19253809     | 8.84E-07 | 1.23E-07 | -5.49 | 6.5257576 | -8.69E-02 | 74689005  | 74689128  | NC_000015.9  |
| cg14515049     | 8.85E-07 | 1.23E-07 | -5.49 | 6.5253388 | -5.05E-02 | 3075893   | 3076016   | NC_000004.11 |
| cg13721989     | 8.85E-07 | 1.23E-07 | -5.49 | 6.5249704 | -7.48E-02 | 130689253 | 130689376 | NC_000009.11 |
| cg03989610     | 8.85E-07 | 1.23E-07 | -5.49 | 6.5248069 | -1.85E-02 | 38156359  | 38156482  | NC_000001.10 |
| cg05982460     | 8.85E-07 | 1.23E-07 | -5.49 | 6.5245831 | -1.72E-01 | 3211519   | 3211642   | NC_000016.9  |
| cg08641990     | 8.86E-07 | 1.23E-07 | -5.49 | 6.5242361 | -1.39E-01 | 54822503  | 54822626  | NC_000001.10 |
| cg14776016     | 8.86E-07 | 1.23E-07 | -5.49 | 6.5241712 | -5.37E-02 | 61034565  | 61034688  | NC_000018.9  |
| cg22078179     | 8.86E-07 | 1.23E-07 | -5.49 | 6.5240282 | -8.02E-02 | 39063989  | 39064112  | NC_000004.11 |
| cg04931493     | 8.86E-07 | 1.23E-07 | -5.49 | 6.5238735 | -7.30E-02 | 3246099   | 3246222   | NC_000016.9  |
| cg09586198     | 8.86E-07 | 1.23E-07 | -5.49 | 6.5237411 | -9.92E-02 | 175190584 | 175190707 | NC_000001.10 |
| cg00997917     | 8.86E-07 | 1.23E-07 | -5.49 | 6.5233997 | -1.03E-01 | 116445691 | 116445814 | NC_000010.10 |
| cg17866732     | 8.87E-07 | 1.24E-07 | -5.49 | 6.52239   | -1.11E-01 | 110372875 | 110372998 | NC_000002.11 |
| cg19238398     | 8.88E-07 | 1.24E-07 | -5.49 | 6.5218653 | -2.16E-02 | 138775248 | 138775371 | NC_000005.9  |
| cg13784792     | 8.88E-07 | 1.24E-07 | -5.49 | 6.521018  | -3.61E-02 | 39942930  | 39943053  | NC_000017.10 |
| cg24308082     | 8.88E-07 | 1.24E-07 | -5.49 | 6.5210054 | -1.20E-01 | 102703383 | 102703506 | NC_000011.9  |
| cg26103845     | 8.89E-07 | 1.24E-07 | -5.49 | 6.5205448 | -1.26E-01 | 49283175  | 49283298  | NC_000008.10 |
| cg13987042     | 8.90E-07 | 1.24E-07 | -5.49 | 6.5195248 | -4.66E-02 | 74660265  | 74660388  | NC_000011.9  |

|                 |          |          |       |           |           |           |           |              |
|-----------------|----------|----------|-------|-----------|-----------|-----------|-----------|--------------|
| cg20559216      | 8.91E-07 | 1.24E-07 | -5.49 | 6.5176832 | -3.79E-02 | 52703417  | 52703540  | NC_000013.10 |
| cg14183602      | 8.91E-07 | 1.24E-07 | -5.49 | 6.5174744 | -7.80E-02 | 23367828  | 23367951  | NC_000014.8  |
| cg24259688      | 8.91E-07 | 1.24E-07 | -5.49 | 6.5173889 | -3.28E-02 | 91414844  | 91414967  | NC_000015.9  |
| cg26475085      | 8.92E-07 | 1.24E-07 | -5.49 | 6.5171434 | -6.48E-02 | 38845600  | 38845723  | NC_000005.9  |
| cg26096752      | 8.92E-07 | 1.24E-07 | -5.49 | 6.5170376 | -9.95E-02 | 66530611  | 66530734  | NC_000005.9  |
| cg10208034      | 8.92E-07 | 1.24E-07 | -5.49 | 6.5168272 | -5.56E-02 | 47739740  | 47739863  | NC_000002.11 |
| cg07753241      | 8.93E-07 | 1.24E-07 | -5.49 | 6.5156313 | -3.33E-02 | 63849527  | 63849650  | NC_000003.11 |
| cg16658737      | 8.93E-07 | 1.25E-07 | -5.49 | 6.5148776 | -6.26E-02 | 37064572  | 37064695  | NC_000019.9  |
| cg26990380      | 8.94E-07 | 1.25E-07 | -5.49 | 6.5145695 | -7.93E-02 | 95469305  | 95469428  | NC_000004.11 |
| cg20208990      | 8.94E-07 | 1.25E-07 | -5.49 | 6.5144164 | -1.21E-01 | 56286567  | 56286690  | NC_000020.10 |
| cg08572565      | 8.95E-07 | 1.25E-07 | -5.49 | 6.5136521 | -8.31E-02 | 51298737  | 51298860  | NC_000014.8  |
| cg04774103      | 8.95E-07 | 1.25E-07 | -5.49 | 6.5132836 | -1.17E-01 | 230517179 | 230517302 | NC_000002.11 |
| cg25148733      | 8.95E-07 | 1.25E-07 | -5.49 | 6.5126318 | -2.14E-02 | 49716596  | 49716719  | NC_000012.11 |
| cg14556677      | 8.96E-07 | 1.25E-07 | -5.49 | 6.5124653 | -1.01E-01 | 127054428 | 127054551 | NC_000009.11 |
| cg05883128      | 8.96E-07 | 1.25E-07 | -5.49 | 6.5123373 | -8.94E-02 | 169239131 | 169239254 | NC_000004.11 |
| cg05654103      | 8.96E-07 | 1.25E-07 | -5.49 | 6.5117329 | -4.89E-02 | 24586381  | 24586504  | NC_000002.11 |
| cg23511118      | 8.97E-07 | 1.25E-07 | -5.49 | 6.5112586 | -1.31E-01 | 67840535  | 67840658  | NC_000003.11 |
| ch.1.196733536R | 8.97E-07 | 1.25E-07 | -5.49 | 6.5107338 | -1.33E-02 | 198466913 | 198467036 | NC_000001.10 |
| cg13199589      | 8.97E-07 | 1.25E-07 | -5.49 | 6.5106543 | -3.32E-02 | 42845990  | 42846113  | NC_000001.10 |
| cg13958199      | 8.98E-07 | 1.25E-07 | -5.49 | 6.5097794 | -1.04E-01 | 127018815 | 127018938 | NC_000009.11 |
| cg21726037      | 8.98E-07 | 1.25E-07 | -5.49 | 6.5097774 | -5.40E-02 | 75273205  | 75273328  | NC_000011.9  |
| cg07017153      | 8.98E-07 | 1.25E-07 | -5.49 | 6.5095767 | -8.76E-02 | 47100007  | 47100130  | NC_000017.10 |
| cg03570994      | 8.98E-07 | 1.25E-07 | -5.49 | 6.5093705 | -1.08E-01 | 32121143  | 32121266  | NC_000006.11 |
| cg18983818      | 8.98E-07 | 1.25E-07 | -5.49 | 6.5093008 | -6.48E-02 | 21176176  | 21176299  | NC_000017.10 |
| cg00831735      | 8.98E-07 | 1.25E-07 | -5.49 | 6.5090203 | -1.10E-01 | 124215033 | 124215156 | NC_000008.10 |

|              |          |          |       |           |           |           |           |              |
|--------------|----------|----------|-------|-----------|-----------|-----------|-----------|--------------|
| cg07737236   | 8.99E-07 | 1.25E-07 | -5.49 | 6.5084414 | -7.06E-02 | 161089327 | 161089450 | NC_000003.11 |
| cg04102894   | 8.99E-07 | 1.25E-07 | -5.49 | 6.5083543 | -8.69E-02 | 1000210   | 1000333   | NC_000007.13 |
| cg02151301   | 8.99E-07 | 1.25E-07 | -5.49 | 6.5083312 | -5.29E-02 | 30101785  | 30101908  | NC_000020.10 |
| cg01900965   | 8.99E-07 | 1.25E-07 | -5.49 | 6.5081334 | -3.82E-02 | 2471727   | 2471850   | NC_000004.11 |
| cg24105068   | 9.00E-07 | 1.26E-07 | -5.49 | 6.507164  | -9.51E-02 | 185658366 | 185658489 | NC_000003.11 |
| cg19628164   | 9.00E-07 | 1.26E-07 | -5.49 | 6.5070189 | -1.45E-02 | 143689916 | 143690039 | NC_000003.11 |
| cg23214464   | 9.00E-07 | 1.26E-07 | -5.49 | 6.5067213 | -6.53E-02 | 140373596 | 140373719 | NC_000007.13 |
| cg03899643   | 9.00E-07 | 1.26E-07 | -5.49 | 6.5066691 | -1.21E-01 | 90205170  | 90205293  | NC_000001.10 |
| cg26606064   | 9.01E-07 | 1.26E-07 | -5.49 | 6.5054917 | -1.90E-02 | 125439070 | 125439193 | NC_000011.9  |
| cg05135942   | 9.02E-07 | 1.26E-07 | -5.49 | 6.5050766 | -5.49E-02 | 94854469  | 94854592  | NC_000012.11 |
| cg16521040   | 9.02E-07 | 1.26E-07 | -5.49 | 6.5049425 | -5.90E-02 | 17417442  | 17417565  | NC_000019.9  |
| cg13987674   | 9.02E-07 | 1.26E-07 | -5.49 | 6.504492  | -8.47E-02 | 24649494  | 24649617  | NC_000001.10 |
| cg16525281   | 9.02E-07 | 1.26E-07 | -5.49 | 6.5041922 | -3.36E-02 | 38810227  | 38810350  | NC_000019.9  |
| cg26307266   | 9.05E-07 | 1.26E-07 | -5.49 | 6.5017657 | -2.06E-02 | 44837140  | 44837263  | NC_000007.13 |
| ch.4.586044R | 9.09E-07 | 1.27E-07 | -5.49 | 6.4972687 | -1.95E-02 | 23467652  | 23467775  | NC_000004.11 |
| cg16351441   | 9.09E-07 | 1.27E-07 | -5.49 | 6.4971536 | -1.21E-01 | 63057592  | 63057715  | NC_000011.9  |
| cg10605963   | 9.09E-07 | 1.27E-07 | -5.49 | 6.4970309 | -3.12E-02 | 633983    | 634106    | NC_000005.9  |
| cg08865695   | 9.09E-07 | 1.27E-07 | -5.49 | 6.4968461 | -9.26E-02 | 209917237 | 209917360 | NC_000001.10 |
| cg07134367   | 9.10E-07 | 1.27E-07 | -5.49 | 6.4959594 | -4.12E-02 | 91404689  | 91404812  | NC_000010.10 |
| cg00636809   | 9.10E-07 | 1.27E-07 | -5.48 | 6.4951962 | -2.73E-02 | 64577607  | 64577730  | NC_000010.10 |
| cg27596890   | 9.11E-07 | 1.27E-07 | -5.48 | 6.4943081 | -1.09E-01 | 49621173  | 49621296  | NC_000016.9  |
| cg27023871   | 9.11E-07 | 1.27E-07 | -5.48 | 6.4941822 | -1.14E-01 | 80848259  | 80848382  | NC_000017.10 |
| cg08160871   | 9.12E-07 | 1.27E-07 | -5.48 | 6.4938924 | -6.33E-02 | 58175453  | 58175576  | NC_000019.9  |
| cg20911986   | 9.12E-07 | 1.27E-07 | -5.48 | 6.4937051 | -1.18E-01 | 11947968  | 11948091  | NC_000012.11 |
| cg07939231   | 9.12E-07 | 1.27E-07 | -5.48 | 6.4933525 | -6.93E-02 | 30079403  | 30079526  | NC_000006.11 |

|            |          |          |       |           |           |           |           |              |
|------------|----------|----------|-------|-----------|-----------|-----------|-----------|--------------|
| cg01046507 | 9.12E-07 | 1.27E-07 | -5.48 | 6.4929695 | -6.34E-02 | 239064292 | 239064415 | NC_000002.11 |
| cg19791630 | 9.12E-07 | 1.27E-07 | -5.48 | 6.492942  | -8.55E-02 | 6772811   | 6772934   | NC_000019.9  |
| cg02083676 | 9.13E-07 | 1.27E-07 | -5.48 | 6.4926641 | -5.64E-02 | 127311156 | 127311279 | NC_000003.11 |
| cg19696329 | 9.13E-07 | 1.27E-07 | -5.48 | 6.492655  | -3.49E-02 | 144164803 | 144164926 | NC_000006.11 |
| cg02585483 | 9.13E-07 | 1.27E-07 | -5.48 | 6.4925597 | -2.57E-02 | 61602105  | 61602228  | NC_000005.9  |
| cg00598985 | 9.13E-07 | 1.27E-07 | -5.48 | 6.4923741 | -2.59E-02 | 242088379 | 242088502 | NC_000002.11 |
| cg13778208 | 9.13E-07 | 1.28E-07 | -5.48 | 6.4917167 | -9.38E-02 | 46072223  | 46072346  | NC_000017.10 |
| cg04048796 | 9.14E-07 | 1.28E-07 | -5.48 | 6.4904901 | -1.48E-02 | 57301372  | 57301495  | NC_000004.11 |
| cg00363737 | 9.15E-07 | 1.28E-07 | -5.48 | 6.4902207 | -1.06E-01 | 116031419 | 116031542 | NC_000010.10 |
| cg20622410 | 9.16E-07 | 1.28E-07 | -5.48 | 6.4892692 | -5.04E-02 | 39930302  | 39930425  | NC_000017.10 |
| cg15022387 | 9.16E-07 | 1.28E-07 | -5.48 | 6.4885369 | -9.93E-02 | 50096791  | 50096914  | NC_000019.9  |
| cg20927395 | 9.17E-07 | 1.28E-07 | -5.48 | 6.4880407 | -1.06E-01 | 115120356 | 115120479 | NC_000003.11 |
| cg06781948 | 9.17E-07 | 1.28E-07 | -5.48 | 6.4874469 | -9.41E-02 | 72941472  | 72941595  | NC_000003.11 |
| cg04676561 | 9.18E-07 | 1.28E-07 | -5.48 | 6.4869326 | -9.78E-02 | 27835191  | 27835314  | NC_000006.11 |
| cg06479057 | 9.18E-07 | 1.28E-07 | -5.48 | 6.4866002 | -7.79E-02 | 112358468 | 112358591 | NC_000003.11 |
| cg07712444 | 9.18E-07 | 1.28E-07 | -5.48 | 6.4859568 | -2.16E-02 | 73882115  | 73882238  | NC_000011.9  |
| cg18988560 | 9.20E-07 | 1.28E-07 | -5.48 | 6.4847667 | -5.81E-02 | 83636072  | 83636195  | NC_000010.10 |
| cg16067453 | 9.20E-07 | 1.28E-07 | -5.48 | 6.4846446 | -4.21E-02 | 46053951  | 46054074  | NC_000006.11 |
| cg22943115 | 9.20E-07 | 1.28E-07 | -5.48 | 6.4844696 | -1.30E-01 | 149522468 | 149522591 | NC_000005.9  |
| cg13906098 | 9.20E-07 | 1.29E-07 | -5.48 | 6.4836863 | -1.15E-01 | 100663185 | 100663308 | NC_000007.13 |
| cg18403361 | 9.21E-07 | 1.29E-07 | -5.48 | 6.4832407 | -1.53E-01 | 38725750  | 38725873  | NC_000014.8  |
| cg13660622 | 9.21E-07 | 1.29E-07 | -5.48 | 6.4831584 | -4.92E-02 | 104885375 | 104885498 | NC_000007.13 |
| cg08719467 | 9.21E-07 | 1.29E-07 | -5.48 | 6.4827886 | -1.64E-02 | 146714230 | 146714353 | NC_000001.10 |
| cg25578410 | 9.21E-07 | 1.29E-07 | -5.48 | 6.482716  | -1.44E-02 | 34122762  | 34122885  | NC_000006.11 |
| cg15833596 | 9.22E-07 | 1.29E-07 | -5.48 | 6.4823868 | -2.14E-02 | 207226419 | 207226542 | NC_000001.10 |

|                |          |          |       |           |           |           |           |              |
|----------------|----------|----------|-------|-----------|-----------|-----------|-----------|--------------|
| cg20566885     | 9.22E-07 | 1.29E-07 | -5.48 | 6.4819201 | -1.01E-01 | 70995014  | 70995137  | NC_000015.9  |
| cg26348226     | 9.22E-07 | 1.29E-07 | -5.48 | 6.4817658 | -8.21E-02 | 21617442  | 21617565  | NC_000001.10 |
| cg20149956     | 9.23E-07 | 1.29E-07 | -5.48 | 6.4804795 | -1.93E-02 | 249132233 | 249132356 | NC_000001.10 |
| cg14668981     | 9.24E-07 | 1.29E-07 | -5.48 | 6.4797541 | -9.34E-02 | 133112774 | 133112897 | NC_000003.11 |
| cg12885203     | 9.25E-07 | 1.29E-07 | -5.48 | 6.479071  | -6.58E-02 | 207656782 | 207656905 | NC_000002.11 |
| cg00927503     | 9.25E-07 | 1.29E-07 | -5.48 | 6.4788546 | -9.12E-02 | 150983033 | 150983156 | NC_000002.11 |
| cg14417676     | 9.25E-07 | 1.29E-07 | -5.48 | 6.4786918 | -7.10E-02 | 202316517 | 202316640 | NC_000002.11 |
| cg10533282     | 9.25E-07 | 1.29E-07 | -5.48 | 6.478033  | -2.92E-02 | 99602454  | 99602577  | NC_000015.9  |
| cg01628067     | 9.25E-07 | 1.29E-07 | -5.48 | 6.4780262 | -1.24E-01 | 2222419   | 2222542   | NC_000001.10 |
| cg19888787     | 9.25E-07 | 1.29E-07 | -5.48 | 6.4780209 | -1.78E-02 | 125399898 | 125400021 | NC_000012.11 |
| cg04935521     | 9.25E-07 | 1.29E-07 | -5.48 | 6.4778798 | -8.55E-02 | 79098772  | 79098895  | NC_000017.10 |
| cg25198784     | 9.26E-07 | 1.29E-07 | -5.48 | 6.4774098 | -2.09E-02 | 99963468  | 99963591  | NC_000006.11 |
| cg23387401     | 9.26E-07 | 1.29E-07 | -5.48 | 6.4773017 | -8.44E-02 | 4582204   | 4582327   | NC_000017.10 |
| cg06161814     | 9.26E-07 | 1.29E-07 | -5.48 | 6.4772723 | -3.18E-02 | 37956963  | 37957086  | NC_000007.13 |
| cg04774194     | 9.26E-07 | 1.29E-07 | -5.48 | 6.4771255 | -3.86E-02 | 127664674 | 127664797 | NC_000006.11 |
| cg15403758     | 9.26E-07 | 1.29E-07 | -5.48 | 6.4769569 | -8.51E-02 | 166428151 | 166428274 | NC_000004.11 |
| cg20238978     | 9.27E-07 | 1.30E-07 | -5.48 | 6.476164  | -1.64E-02 | 15469317  | 15469440  | NC_000003.11 |
| cg11710123     | 9.27E-07 | 1.30E-07 | -5.48 | 6.4757734 | -6.16E-02 | 3141992   | 3142115   | NC_000001.10 |
| cg05931497     | 9.27E-07 | 1.30E-07 | -5.48 | 6.475738  | -1.37E-01 | 867221    | 867344    | NC_000010.10 |
| cg02766482     | 9.27E-07 | 1.30E-07 | -5.48 | 6.4755976 | -7.93E-02 | 93466826  | 93466949  | NC_000011.9  |
| cg13082351     | 9.27E-07 | 1.30E-07 | -5.48 | 6.4754912 | -6.12E-02 | 149399930 | 149400053 | NC_000001.10 |
| cg07622766     | 9.29E-07 | 1.30E-07 | -5.48 | 6.4738616 | -6.68E-02 | 46547809  | 46547932  | NC_000003.11 |
| cg06100684     | 9.29E-07 | 1.30E-07 | -5.48 | 6.4737449 | -1.06E-01 | 23383753  | 23383876  | NC_000010.10 |
| ch.11.2720214F | 9.30E-07 | 1.30E-07 | -5.48 | 6.4726056 | -3.01E-02 | 129835266 | 129835389 | NC_000011.9  |
| cg04879387     | 9.30E-07 | 1.30E-07 | -5.48 | 6.472354  | -2.51E-02 | 16043101  | 16043224  | NC_000016.9  |

|                |          |          |       |           |           |           |           |              |
|----------------|----------|----------|-------|-----------|-----------|-----------|-----------|--------------|
| cg10976478     | 9.31E-07 | 1.30E-07 | -5.48 | 6.4720596 | -9.42E-02 | 241263838 | 241263961 | NC_000002.11 |
| cg09808864     | 9.31E-07 | 1.30E-07 | -5.48 | 6.4718979 | -8.63E-02 | 138482336 | 138482459 | NC_000006.11 |
| cg08596532     | 9.31E-07 | 1.30E-07 | -5.48 | 6.4714663 | -1.01E-01 | 5033993   | 5034116   | NC_000005.9  |
| cg04569429     | 9.31E-07 | 1.30E-07 | -5.48 | 6.4713342 | -5.53E-02 | 37024625  | 37024748  | NC_000017.10 |
| cg13554818     | 9.31E-07 | 1.30E-07 | -5.48 | 6.4712826 | -6.75E-02 | 43979316  | 43979439  | NC_000019.9  |
| cg12472597     | 9.31E-07 | 1.30E-07 | -5.48 | 6.4712464 | -6.13E-02 | 67141742  | 67141865  | NC_000011.9  |
| cg08457421     | 9.31E-07 | 1.30E-07 | -5.48 | 6.4711967 | -1.20E-01 | 31536431  | 31536554  | NC_000022.10 |
| cg27142530     | 9.32E-07 | 1.30E-07 | -5.48 | 6.47009   | -1.19E-01 | 187266705 | 187266828 | NC_000004.11 |
| cg04089739     | 9.33E-07 | 1.30E-07 | -5.48 | 6.4695313 | -7.98E-02 | 6719980   | 6720103   | NC_000019.9  |
| cg14107561     | 9.34E-07 | 1.31E-07 | -5.48 | 6.4686237 | -2.25E-02 | 31789941  | 31790064  | NC_000006.11 |
| cg12341365     | 9.34E-07 | 1.31E-07 | -5.48 | 6.468298  | -1.22E-02 | 46816779  | 46816902  | NC_000006.11 |
| cg25246876     | 9.34E-07 | 1.31E-07 | -5.48 | 6.4679444 | -1.04E-01 | 70678609  | 70678732  | NC_000013.10 |
| cg01426921     | 9.35E-07 | 1.31E-07 | -5.48 | 6.4672224 | -8.25E-02 | 35658776  | 35658899  | NC_000009.11 |
| ch.4.79753186F | 9.35E-07 | 1.31E-07 | -5.48 | 6.4665132 | -6.19E-02 | 79534162  | 79534285  | NC_000004.11 |
| cg09995507     | 9.36E-07 | 1.31E-07 | -5.48 | 6.4660686 | -1.06E-01 | 21988494  | 21988617  | NC_000001.10 |
| cg10919176     | 9.36E-07 | 1.31E-07 | -5.48 | 6.4659583 | -2.15E-02 | 110346552 | 110346675 | NC_000008.10 |
| cg14840429     | 9.36E-07 | 1.31E-07 | -5.48 | 6.4658535 | -9.97E-02 | 115312213 | 115312336 | NC_000010.10 |
| cg22465281     | 9.36E-07 | 1.31E-07 | -5.48 | 6.4655828 | -4.22E-02 | 65017296  | 65017419  | NC_000005.9  |
| cg09512575     | 9.37E-07 | 1.31E-07 | -5.48 | 6.4652151 | -2.14E-02 | 107008490 | 107008613 | NC_000005.9  |
| cg02279224     | 9.37E-07 | 1.31E-07 | -5.48 | 6.4650287 | -7.02E-02 | 144386160 | 144386283 | NC_000006.11 |
| cg18011230     | 9.37E-07 | 1.31E-07 | -5.48 | 6.4642352 | -6.78E-02 | 149312483 | 149312606 | NC_000005.9  |
| cg03913000     | 9.38E-07 | 1.31E-07 | -5.48 | 6.4640856 | -3.91E-02 | 70269352  | 70269475  | NC_000008.10 |
| cg26392277     | 9.38E-07 | 1.31E-07 | -5.48 | 6.4632131 | -1.04E-01 | 5775318   | 5775441   | NC_000004.11 |
| cg15571730     | 9.39E-07 | 1.31E-07 | -5.48 | 6.4628568 | -2.45E-02 | 99680278  | 99680401  | NC_000007.13 |
| cg21520537     | 9.39E-07 | 1.31E-07 | -5.48 | 6.4624543 | -3.11E-02 | 10326774  | 10326897  | NC_000003.11 |



|            |          |          |       |           |           |           |           |              |
|------------|----------|----------|-------|-----------|-----------|-----------|-----------|--------------|
| cg10996932 | 9.39E-07 | 1.31E-07 | -5.48 | 6.4623379 | -8.82E-02 | 40234536  | 40234659  | NC_000003.11 |
| cg05112986 | 9.39E-07 | 1.32E-07 | -5.48 | 6.4619999 | -4.78E-02 | 45346247  | 45346370  | NC_000006.11 |
| cg14570006 | 9.40E-07 | 1.32E-07 | -5.48 | 6.4616218 | -5.99E-02 | 139760593 | 139760716 | NC_000009.11 |
| cg10765909 | 9.40E-07 | 1.32E-07 | -5.48 | 6.4615799 | -6.19E-02 | 53715428  | 53715551  | NC_000012.11 |
| cg05162858 | 9.41E-07 | 1.32E-07 | -5.48 | 6.4602832 | -1.28E-01 | 80697460  | 80697583  | NC_000010.10 |
| cg07613752 | 9.43E-07 | 1.32E-07 | -5.48 | 6.4583343 | -1.06E-01 | 27756421  | 27756544  | NC_000003.11 |
| cg16634971 | 9.43E-07 | 1.32E-07 | -5.48 | 6.4581126 | -6.36E-02 | 12455615  | 12455738  | NC_000011.9  |
| cg02872263 | 9.43E-07 | 1.32E-07 | -5.48 | 6.4575361 | -1.04E-01 | 150724678 | 150724801 | NC_000006.11 |
| cg26053073 | 9.44E-07 | 1.32E-07 | -5.48 | 6.4565954 | -6.71E-02 | 131455383 | 131455506 | NC_000008.10 |
| cg14951598 | 9.44E-07 | 1.32E-07 | -5.48 | 6.4564625 | -4.67E-02 | 41472931  | 41473054  | NC_000006.11 |
| cg01590787 | 9.45E-07 | 1.32E-07 | -5.48 | 6.4563267 | -8.81E-02 | 175813861 | 175813984 | NC_000005.9  |
| cg24094450 | 9.46E-07 | 1.32E-07 | -5.48 | 6.4553308 | -1.02E-01 | 76429151  | 76429274  | NC_000015.9  |
| cg02698600 | 9.46E-07 | 1.32E-07 | -5.48 | 6.4552328 | -4.63E-02 | 201450009 | 201450132 | NC_000001.10 |
| cg06010356 | 9.46E-07 | 1.33E-07 | -5.48 | 6.4546422 | -3.21E-02 | 74847234  | 74847357  | NC_000016.9  |
| cg18817318 | 9.46E-07 | 1.33E-07 | -5.48 | 6.4543581 | -5.96E-02 | 77565875  | 77565998  | NC_000013.10 |
| cg26860855 | 9.47E-07 | 1.33E-07 | -5.48 | 6.4541615 | -9.52E-02 | 152618527 | 152618650 | NC_000007.13 |
| cg18088494 | 9.47E-07 | 1.33E-07 | -5.48 | 6.4537823 | -1.66E-02 | 16494143  | 16494266  | NC_000001.10 |
| cg05710142 | 9.47E-07 | 1.33E-07 | -5.48 | 6.4533087 | -7.51E-02 | 33223592  | 33223715  | NC_000001.10 |
| cg21546155 | 9.48E-07 | 1.33E-07 | -5.48 | 6.452824  | -5.12E-02 | 159894937 | 159895060 | NC_000005.9  |
| cg26590003 | 9.48E-07 | 1.33E-07 | -5.48 | 6.4528003 | -3.82E-02 | 72512115  | 72512238  | NC_000005.9  |
| cg17689799 | 9.48E-07 | 1.33E-07 | -5.48 | 6.4525809 | -4.57E-02 | 27529540  | 27529663  | NC_000002.11 |
| cg08356637 | 9.49E-07 | 1.33E-07 | -5.48 | 6.4519484 | -1.17E-01 | 8385767   | 8385890   | NC_000011.9  |
| cg15656834 | 9.49E-07 | 1.33E-07 | -5.48 | 6.4516031 | -8.11E-02 | 116578399 | 116578522 | NC_000011.9  |
| cg14638147 | 9.49E-07 | 1.33E-07 | -5.48 | 6.4509632 | -4.87E-02 | 138830878 | 138831001 | NC_000003.11 |
| cg05245515 | 9.50E-07 | 1.33E-07 | -5.48 | 6.4507436 | -1.20E-01 | 21467273  | 21467396  | NC_000014.8  |

|            |          |          |       |           |           |           |           |              |
|------------|----------|----------|-------|-----------|-----------|-----------|-----------|--------------|
| cg13300670 | 9.50E-07 | 1.33E-07 | -5.48 | 6.4499838 | -1.02E-01 | 2896834   | 2896957   | NC_000001.10 |
| cg22027725 | 9.50E-07 | 1.33E-07 | -5.48 | 6.4497773 | -1.13E-01 | 124961633 | 124961756 | NC_000011.9  |
| cg09933836 | 9.51E-07 | 1.33E-07 | -5.48 | 6.4495596 | -7.37E-02 | 29595133  | 29595256  | NC_000008.10 |
| cg12108798 | 9.52E-07 | 1.33E-07 | -5.48 | 6.4482768 | -7.54E-02 | 1173916   | 1174039   | NC_000001.10 |
| cg17483792 | 9.53E-07 | 1.33E-07 | -5.47 | 6.4473993 | -1.06E-01 | 129015799 | 129015922 | NC_000007.13 |
| cg10098787 | 9.53E-07 | 1.34E-07 | -5.47 | 6.4473348 | -7.51E-02 | 104550915 | 104551038 | NC_000014.8  |
| cg26332926 | 9.53E-07 | 1.34E-07 | -5.47 | 6.4471274 | -1.10E-01 | 52835078  | 52835201  | NC_000010.10 |
| cg13593548 | 9.53E-07 | 1.34E-07 | -5.47 | 6.4469626 | -7.88E-02 | 101745309 | 101745432 | NC_000009.11 |
| cg17091577 | 9.53E-07 | 1.34E-07 | -5.47 | 6.4467018 | -7.18E-02 | 30854233  | 30854356  | NC_000006.11 |
| cg10174585 | 9.54E-07 | 1.34E-07 | -5.47 | 6.4461512 | -2.61E-02 | 38243596  | 38243719  | NC_000008.10 |
| cg00157962 | 9.54E-07 | 1.34E-07 | -5.47 | 6.4456347 | -1.17E-01 | 109102212 | 109102335 | NC_000001.10 |
| cg05405094 | 9.54E-07 | 1.34E-07 | -5.47 | 6.4456338 | -1.15E-01 | 20141722  | 20141845  | NC_000012.11 |
| cg04566677 | 9.55E-07 | 1.34E-07 | -5.47 | 6.4447555 | -1.23E-01 | 54779175  | 54779298  | NC_000012.11 |
| cg23927983 | 9.55E-07 | 1.34E-07 | -5.47 | 6.4446311 | -2.42E-02 | 179315956 | 179316079 | NC_000002.11 |
| cg00039326 | 9.56E-07 | 1.34E-07 | -5.47 | 6.4439686 | -1.16E-01 | 36615845  | 36615968  | NC_000001.10 |
| cg22853797 | 9.56E-07 | 1.34E-07 | -5.47 | 6.4439668 | -2.66E-02 | 19172126  | 19172249  | NC_000008.10 |
| cg16646354 | 9.58E-07 | 1.34E-07 | -5.47 | 6.4419193 | -2.05E-02 | 62310490  | 62310613  | NC_000011.9  |
| cg19888017 | 9.58E-07 | 1.34E-07 | -5.47 | 6.4416859 | -8.13E-02 | 170589483 | 170589606 | NC_000006.11 |
| cg19459434 | 9.58E-07 | 1.34E-07 | -5.47 | 6.4410872 | -1.18E-01 | 71900783  | 71900906  | NC_000017.10 |
| cg03179291 | 9.59E-07 | 1.34E-07 | -5.47 | 6.4407254 | -1.35E-01 | 3791902   | 3792025   | NC_000017.10 |
| cg06706813 | 9.61E-07 | 1.35E-07 | -5.47 | 6.4378913 | -1.34E-01 | 194826411 | 194826534 | NC_000003.11 |
| cg22518769 | 9.62E-07 | 1.35E-07 | -5.47 | 6.4369052 | -7.08E-02 | 5321662   | 5321785   | NC_000007.13 |
| cg04233201 | 9.63E-07 | 1.35E-07 | -5.47 | 6.4363273 | -8.35E-02 | 33937768  | 33937891  | NC_000008.10 |
| cg26266098 | 9.64E-07 | 1.35E-07 | -5.47 | 6.4356389 | -3.83E-02 | 102756795 | 102756918 | NC_000010.10 |
| cg04177684 | 9.64E-07 | 1.35E-07 | -5.47 | 6.4350769 | -7.77E-02 | 49118165  | 49118288  | NC_000019.9  |

|               |          |          |       |           |           |           |           |              |
|---------------|----------|----------|-------|-----------|-----------|-----------|-----------|--------------|
| cg10857774    | 9.64E-07 | 1.35E-07 | -5.47 | 6.4347983 | -6.95E-02 | 46286683  | 46286806  | NC_000019.9  |
| cg02011124    | 9.67E-07 | 1.36E-07 | -5.47 | 6.4319682 | -7.04E-02 | 5770367   | 5770490   | NC_000001.10 |
| cg01267797    | 9.68E-07 | 1.36E-07 | -5.47 | 6.431034  | -1.06E-01 | 79542470  | 79542593  | NC_000005.9  |
| cg02751064    | 9.68E-07 | 1.36E-07 | -5.47 | 6.430607  | -8.78E-02 | 72244242  | 72244365  | NC_000017.10 |
| cg19951297    | 9.68E-07 | 1.36E-07 | -5.47 | 6.4305092 | -7.62E-02 | 138441071 | 138441194 | NC_000005.9  |
| cg07290522    | 9.69E-07 | 1.36E-07 | -5.47 | 6.4300345 | -1.01E-01 | 86185338  | 86185461  | NC_000016.9  |
| cg00976692    | 9.69E-07 | 1.36E-07 | -5.47 | 6.4295335 | -7.06E-02 | 64578131  | 64578254  | NC_000011.9  |
| cg16347155    | 9.70E-07 | 1.36E-07 | -5.47 | 6.4290182 | -1.04E-01 | 40687830  | 40687953  | NC_000017.10 |
| cg16829998    | 9.70E-07 | 1.36E-07 | -5.47 | 6.428851  | -6.98E-02 | 49944964  | 49945087  | NC_000019.9  |
| ch.19.714487R | 9.70E-07 | 1.36E-07 | -5.47 | 6.4284694 | -1.80E-02 | 16978952  | 16979075  | NC_000019.9  |
| cg01269456    | 9.70E-07 | 1.36E-07 | -5.47 | 6.4283598 | -4.41E-02 | 74154221  | 74154344  | NC_000002.11 |
| cg00847221    | 9.71E-07 | 1.36E-07 | -5.47 | 6.4274507 | -1.30E-01 | 64948442  | 64948565  | NC_000017.10 |
| cg10332003    | 9.71E-07 | 1.36E-07 | -5.47 | 6.427338  | -8.28E-02 | 185070366 | 185070489 | NC_000004.11 |
| cg07855319    | 9.72E-07 | 1.36E-07 | -5.47 | 6.4270149 | -6.38E-02 | 69123283  | 69123406  | NC_000016.9  |
| cg13407464    | 9.72E-07 | 1.36E-07 | -5.47 | 6.426561  | -5.25E-02 | 93351779  | 93351902  | NC_000015.9  |
| cg02717570    | 9.73E-07 | 1.36E-07 | -5.47 | 6.4259273 | -2.26E-02 | 27920934  | 27921057  | NC_000017.10 |
| cg26405545    | 9.74E-07 | 1.37E-07 | -5.47 | 6.4245768 | -7.86E-02 | 1045506   | 1045629   | NC_000001.10 |
| cg25705508    | 9.74E-07 | 1.37E-07 | -5.47 | 6.4243534 | -1.20E-01 | 203199023 | 203199146 | NC_000001.10 |
| cg22164009    | 9.74E-07 | 1.37E-07 | -5.47 | 6.4242172 | -8.98E-02 | 14729030  | 14729153  | NC_000006.11 |
| cg22236894    | 9.75E-07 | 1.37E-07 | -5.47 | 6.4235834 | -2.19E-02 | 64081383  | 64081506  | NC_000008.10 |
| cg24963307    | 9.75E-07 | 1.37E-07 | -5.47 | 6.4233281 | -2.14E-02 | 21979594  | 21979717  | NC_000014.8  |
| cg19744906    | 9.75E-07 | 1.37E-07 | -5.47 | 6.4232471 | -3.02E-02 | 94547946  | 94548069  | NC_000014.8  |
| cg23631842    | 9.75E-07 | 1.37E-07 | -5.47 | 6.4228981 | -2.69E-02 | 38259884  | 38260007  | NC_000001.10 |
| cg14909376    | 9.76E-07 | 1.37E-07 | -5.47 | 6.422745  | -1.54E-02 | 43588988  | 43589111  | NC_000020.10 |
| cg17308840    | 9.76E-07 | 1.37E-07 | -5.47 | 6.4225488 | -5.85E-02 | 542758    | 542881    | NC_000001.10 |

|            |          |          |       |           |           |           |           |              |
|------------|----------|----------|-------|-----------|-----------|-----------|-----------|--------------|
| cg04707603 | 9.76E-07 | 1.37E-07 | -5.47 | 6.4221232 | -1.10E-01 | 33735888  | 33736011  | NC_000002.11 |
| cg17223866 | 9.77E-07 | 1.37E-07 | -5.47 | 6.4210555 | -1.15E-01 | 44794158  | 44794281  | NC_000001.10 |
| cg15920669 | 9.78E-07 | 1.37E-07 | -5.47 | 6.4205256 | -6.48E-02 | 142037502 | 142037625 | NC_000008.10 |
| cg08159271 | 9.78E-07 | 1.37E-07 | -5.47 | 6.4200856 | -1.06E-01 | 145009241 | 145009364 | NC_000008.10 |
| cg06557580 | 9.79E-07 | 1.37E-07 | -5.47 | 6.4195606 | -1.06E-01 | 1041216   | 1041339   | NC_000016.9  |
| cg13976253 | 9.79E-07 | 1.37E-07 | -5.47 | 6.4194107 | -3.34E-02 | 202317780 | 202317903 | NC_000001.10 |
| cg02967428 | 9.80E-07 | 1.38E-07 | -5.47 | 6.4183292 | -4.57E-02 | 104510754 | 104510877 | NC_000008.10 |
| cg24123355 | 9.80E-07 | 1.38E-07 | -5.47 | 6.4179341 | -3.16E-02 | 102904584 | 102904707 | NC_000014.8  |
| cg21556309 | 9.80E-07 | 1.38E-07 | -5.47 | 6.4175605 | -1.33E-01 | 9993818   | 9993941   | NC_000003.11 |
| cg15339164 | 9.81E-07 | 1.38E-07 | -5.47 | 6.417332  | -1.13E-01 | 3589869   | 3589992   | NC_000012.11 |
| cg24571110 | 9.81E-07 | 1.38E-07 | -5.47 | 6.4165555 | -1.39E-01 | 80921117  | 80921240  | NC_000017.10 |
| cg24865210 | 9.82E-07 | 1.38E-07 | -5.47 | 6.4161434 | -1.19E-01 | 158689727 | 158689850 | NC_000005.9  |
| cg06606199 | 9.82E-07 | 1.38E-07 | -5.47 | 6.4160713 | -8.83E-02 | 115174773 | 115174896 | NC_000012.11 |
| cg18256429 | 9.82E-07 | 1.38E-07 | -5.47 | 6.4158825 | -3.03E-02 | 31632881  | 31633004  | NC_000006.11 |
| cg21823502 | 9.83E-07 | 1.38E-07 | -5.47 | 6.414842  | -1.20E-01 | 79856430  | 79856553  | NC_000017.10 |
| cg12833407 | 9.84E-07 | 1.38E-07 | -5.47 | 6.4138084 | -6.78E-02 | 130469175 | 130469298 | NC_000009.11 |
| cg02675308 | 9.84E-07 | 1.38E-07 | -5.47 | 6.413636  | -8.08E-02 | 76556042  | 76556165  | NC_000004.11 |
| cg24922022 | 9.84E-07 | 1.38E-07 | -5.47 | 6.4133418 | -8.70E-02 | 827675    | 827798    | NC_000004.11 |
| cg22340067 | 9.85E-07 | 1.38E-07 | -5.47 | 6.4123616 | -5.98E-02 | 11967826  | 11967949  | NC_000001.10 |
| cg01580888 | 9.86E-07 | 1.38E-07 | -5.47 | 6.4118202 | -2.89E-02 | 33556060  | 33556183  | NC_000019.9  |
| cg24957657 | 9.86E-07 | 1.38E-07 | -5.47 | 6.4116673 | -2.26E-02 | 38497631  | 38497754  | NC_000017.10 |
| cg12159166 | 9.86E-07 | 1.39E-07 | -5.47 | 6.4115516 | -5.21E-02 | 75649913  | 75650036  | NC_000011.9  |
| cg13311803 | 9.88E-07 | 1.39E-07 | -5.47 | 6.409791  | -2.79E-02 | 101930366 | 101930489 | NC_000007.13 |
| cg20699549 | 9.88E-07 | 1.39E-07 | -5.47 | 6.4092932 | -1.06E-01 | 42567973  | 42568096  | NC_000015.9  |
| cg16134607 | 9.89E-07 | 1.39E-07 | -5.47 | 6.4079493 | -4.36E-02 | 56512091  | 56512214  | NC_000012.11 |

|            |          |          |       |           |           |           |           |              |
|------------|----------|----------|-------|-----------|-----------|-----------|-----------|--------------|
| cg23145493 | 9.90E-07 | 1.39E-07 | -5.47 | 6.407759  | -7.27E-02 | 168813125 | 168813248 | NC_000006.11 |
| cg02164442 | 9.91E-07 | 1.39E-07 | -5.47 | 6.4065766 | -9.48E-02 | 31405101  | 31405224  | NC_000016.9  |
| cg11323828 | 9.91E-07 | 1.39E-07 | -5.47 | 6.4061373 | -8.29E-02 | 41230578  | 41230701  | NC_000015.9  |
| cg08421478 | 9.92E-07 | 1.39E-07 | -5.47 | 6.4054217 | -6.19E-02 | 22666424  | 22666547  | NC_000013.10 |
| cg14851460 | 9.92E-07 | 1.39E-07 | -5.47 | 6.40488   | -4.23E-02 | 20235923  | 20236046  | NC_000001.10 |
| cg17683067 | 9.93E-07 | 1.40E-07 | -5.47 | 6.4045242 | -1.35E-02 | 145703841 | 145703964 | NC_000008.10 |
| cg08333616 | 9.93E-07 | 1.40E-07 | -5.47 | 6.4044561 | -7.70E-02 | 156369336 | 156369459 | NC_000005.9  |
| cg19304507 | 9.93E-07 | 1.40E-07 | -5.47 | 6.4043595 | -6.05E-02 | 30278992  | 30279115  | NC_000022.10 |
| cg16561256 | 9.93E-07 | 1.40E-07 | -5.47 | 6.4041518 | -1.05E-01 | 1103266   | 1103389   | NC_000001.10 |
| cg14704270 | 9.93E-07 | 1.40E-07 | -5.47 | 6.4037683 | -2.31E-02 | 50639024  | 50639147  | NC_000022.10 |
| cg03471106 | 9.94E-07 | 1.40E-07 | -5.47 | 6.4034498 | -3.65E-02 | 30294972  | 30295095  | NC_000006.11 |
| cg17631184 | 9.94E-07 | 1.40E-07 | -5.47 | 6.4031358 | -8.65E-02 | 70266172  | 70266295  | NC_000011.9  |
| cg21647035 | 9.94E-07 | 1.40E-07 | -5.47 | 6.4030922 | -1.50E-01 | 16473479  | 16473602  | NC_000001.10 |
| cg15436123 | 9.94E-07 | 1.40E-07 | -5.47 | 6.4027036 | -1.11E-01 | 3390332   | 3390455   | NC_000004.11 |
| cg25936902 | 9.94E-07 | 1.40E-07 | -5.47 | 6.4025181 | -1.01E-01 | 30982971  | 30983094  | NC_000013.10 |
| cg11612470 | 9.95E-07 | 1.40E-07 | -5.47 | 6.4023888 | -3.05E-02 | 3068051   | 3068174   | NC_000012.11 |
| cg08018143 | 9.95E-07 | 1.40E-07 | -5.47 | 6.4015856 | -1.01E-01 | 162110754 | 162110877 | NC_000004.11 |
| cg18351858 | 9.96E-07 | 1.40E-07 | -5.47 | 6.4013734 | -6.87E-02 | 184053569 | 184053692 | NC_000003.11 |
| cg17153426 | 9.96E-07 | 1.40E-07 | -5.47 | 6.4009134 | -6.16E-02 | 24640743  | 24640866  | NC_000022.10 |
| cg18986925 | 9.96E-07 | 1.40E-07 | -5.47 | 6.4006444 | -1.30E-01 | 26635591  | 26635714  | NC_000002.11 |
| cg16861031 | 9.97E-07 | 1.40E-07 | -5.46 | 6.3998972 | -1.13E-01 | 105477526 | 105477649 | NC_000012.11 |
| cg23646820 | 9.97E-07 | 1.40E-07 | -5.46 | 6.3994317 | -7.51E-02 | 236304503 | 236304626 | NC_000001.10 |
| cg25638602 | 9.97E-07 | 1.40E-07 | -5.46 | 6.3993972 | -4.32E-02 | 68723743  | 68723866  | NC_000011.9  |
| cg08973675 | 9.97E-07 | 1.40E-07 | -5.46 | 6.3993365 | -4.46E-02 | 101380289 | 101380412 | NC_000010.10 |
| cg10855276 | 9.98E-07 | 1.40E-07 | -5.46 | 6.3991746 | -8.24E-02 | 113698688 | 113698811 | NC_000013.10 |

|            |          |          |       |           |           |           |           |              |
|------------|----------|----------|-------|-----------|-----------|-----------|-----------|--------------|
| cg15308295 | 9.98E-07 | 1.40E-07 | -5.46 | 6.3991595 | -3.06E-02 | 89378052  | 89378175  | NC_000004.11 |
| cg26767443 | 9.98E-07 | 1.40E-07 | -5.46 | 6.3991319 | -1.21E-01 | 41316244  | 41316367  | NC_000019.9  |
| cg23433370 | 9.98E-07 | 1.40E-07 | -5.46 | 6.3986828 | -1.16E-01 | 27396894  | 27397017  | NC_000012.11 |
| cg20774413 | 9.98E-07 | 1.40E-07 | -5.46 | 6.398555  | -6.62E-02 | 42350482  | 42350605  | NC_000020.10 |
| cg19634693 | 9.98E-07 | 1.40E-07 | -5.46 | 6.3985336 | -6.85E-02 | 68961717  | 68961840  | NC_000001.10 |
| cg16093876 | 9.98E-07 | 1.40E-07 | -5.46 | 6.3984086 | -4.51E-02 | 97021966  | 97022089  | NC_000009.11 |
| cg26986180 | 9.99E-07 | 1.40E-07 | -5.46 | 6.3980896 | -5.16E-02 | 124246525 | 124246648 | NC_000012.11 |
| cg11584519 | 9.99E-07 | 1.40E-07 | -5.46 | 6.397975  | -1.15E-01 | 16175867  | 16175990  | NC_000005.9  |
| cg11215015 | 9.99E-07 | 1.40E-07 | -5.46 | 6.3978427 | -4.36E-02 | 197116161 | 197116284 | NC_000001.10 |
| cg20537992 | 9.99E-07 | 1.41E-07 | -5.46 | 6.3975513 | -8.35E-02 | 64852354  | 64852477  | NC_000011.9  |
| cg19940312 | 1.00E-06 | 1.41E-07 | -5.46 | 6.3967452 | -1.42E-01 | 20257590  | 20257713  | NC_000004.11 |
| cg12776756 | 1.00E-06 | 1.41E-07 | -5.46 | 6.396291  | -8.92E-02 | 45953055  | 45953178  | NC_000017.10 |
| cg12850379 | 1.00E-06 | 1.41E-07 | -5.46 | 6.3962492 | -1.06E-01 | 54935605  | 54935728  | NC_000008.10 |
| cg04985251 | 1.00E-06 | 1.41E-07 | -5.46 | 6.3959586 | -5.36E-02 | 119188494 | 119188617 | NC_000003.11 |
| cg06834758 | 1.00E-06 | 1.41E-07 | -5.46 | 6.3957402 | -8.63E-02 | 70410637  | 70410760  | NC_000008.10 |
| cg11128944 | 1.00E-06 | 1.41E-07 | -5.46 | 6.3955685 | -4.15E-02 | 114215021 | 114215144 | NC_000006.11 |
| cg04993130 | 1.00E-06 | 1.41E-07 | -5.46 | 6.3949609 | -1.06E-01 | 726759    | 726882    | NC_000011.9  |
| cg06643567 | 1.00E-06 | 1.41E-07 | -5.46 | 6.3945317 | -7.33E-02 | 54068019  | 54068142  | NC_000003.11 |
| cg27356115 | 1.00E-06 | 1.41E-07 | -5.46 | 6.3945069 | -1.18E-01 | 53422311  | 53422434  | NC_000015.9  |
| cg12679192 | 1.00E-06 | 1.41E-07 | -5.46 | 6.393947  | -8.30E-02 | 68969455  | 68969578  | NC_000008.10 |
| cg22644320 | 1.00E-06 | 1.41E-07 | -5.46 | 6.39285   | -8.45E-02 | 78808187  | 78808310  | NC_000017.10 |
| cg17747551 | 1.00E-06 | 1.41E-07 | -5.46 | 6.3927366 | -1.18E-01 | 174944792 | 174944915 | NC_000005.9  |
| cg16326073 | 1.00E-06 | 1.41E-07 | -5.46 | 6.3916925 | -9.01E-02 | 45125218  | 45125341  | NC_000022.10 |
| cg24109860 | 1.01E-06 | 1.41E-07 | -5.46 | 6.3911596 | -1.62E-02 | 76136520  | 76136643  | NC_000017.10 |
| cg11614065 | 1.01E-06 | 1.41E-07 | -5.46 | 6.3909926 | -2.74E-02 | 167719478 | 167719601 | NC_000005.9  |

|            |          |          |       |           |           |           |           |              |
|------------|----------|----------|-------|-----------|-----------|-----------|-----------|--------------|
| cg26601289 | 1.01E-06 | 1.41E-07 | -5.46 | 6.3908403 | -3.62E-02 | 247267644 | 247267767 | NC_000001.10 |
| cg20630207 | 1.01E-06 | 1.42E-07 | -5.46 | 6.3908085 | -4.24E-02 | 14640235  | 14640358  | NC_000019.9  |
| cg01861377 | 1.01E-06 | 1.42E-07 | -5.46 | 6.3903149 | -6.98E-02 | 281445    | 281568    | NC_000019.9  |
| cg22298860 | 1.01E-06 | 1.42E-07 | -5.46 | 6.3898588 | -9.85E-02 | 29690822  | 29690945  | NC_000006.11 |
| cg00521130 | 1.01E-06 | 1.42E-07 | -5.46 | 6.387858  | -2.65E-02 | 3073893   | 3074016   | NC_000016.9  |
| cg13333107 | 1.01E-06 | 1.42E-07 | -5.46 | 6.3873576 | -8.89E-02 | 15931214  | 15931337  | NC_000012.11 |
| cg04579415 | 1.01E-06 | 1.42E-07 | -5.46 | 6.3867448 | -5.28E-02 | 44252530  | 44252653  | NC_000006.11 |
| cg10414208 | 1.01E-06 | 1.42E-07 | -5.46 | 6.3864603 | -8.50E-02 | 74669923  | 74670046  | NC_000017.10 |
| cg24814257 | 1.01E-06 | 1.42E-07 | -5.46 | 6.3854678 | -6.69E-02 | 42212501  | 42212624  | NC_000019.9  |
| cg00007226 | 1.01E-06 | 1.42E-07 | -5.46 | 6.3847637 | -1.83E-02 | 105781366 | 105781489 | NC_000014.8  |
| cg07575624 | 1.01E-06 | 1.42E-07 | -5.46 | 6.3847554 | -8.17E-02 | 192778623 | 192778746 | NC_000001.10 |
| cg12407057 | 1.01E-06 | 1.42E-07 | -5.46 | 6.3846285 | -8.51E-02 | 1366206   | 1366329   | NC_000001.10 |
| cg18121914 | 1.01E-06 | 1.42E-07 | -5.46 | 6.3841431 | -6.16E-02 | 156337523 | 156337646 | NC_000001.10 |
| cg18991165 | 1.01E-06 | 1.43E-07 | -5.46 | 6.3837973 | -1.09E-01 | 143847362 | 143847485 | NC_000005.9  |
| cg15496871 | 1.01E-06 | 1.43E-07 | -5.46 | 6.3837357 | -2.68E-02 | 36208495  | 36208618  | NC_000019.9  |
| cg25980489 | 1.01E-06 | 1.43E-07 | -5.46 | 6.3832696 | -8.99E-02 | 75050864  | 75050987  | NC_000014.8  |
| cg15919816 | 1.01E-06 | 1.43E-07 | -5.46 | 6.3829971 | -8.59E-02 | 2431872   | 2431995   | NC_000004.11 |
| cg09470376 | 1.01E-06 | 1.43E-07 | -5.46 | 6.3829603 | -2.27E-02 | 39991217  | 39991340  | NC_000007.13 |
| cg24928546 | 1.01E-06 | 1.43E-07 | -5.46 | 6.3824612 | -6.98E-02 | 79392689  | 79392812  | NC_000017.10 |
| cg08604596 | 1.02E-06 | 1.43E-07 | -5.46 | 6.3803368 | -9.30E-02 | 28565976  | 28566099  | NC_000016.9  |
| cg25952096 | 1.02E-06 | 1.43E-07 | -5.46 | 6.3794758 | -8.46E-02 | 77732468  | 77732591  | NC_000014.8  |
| cg26965639 | 1.02E-06 | 1.43E-07 | -5.46 | 6.3790174 | -1.09E-01 | 142606734 | 142606857 | NC_000007.13 |
| cg13000219 | 1.02E-06 | 1.43E-07 | -5.46 | 6.3785094 | -5.73E-02 | 21590632  | 21590755  | NC_000012.11 |
| cg21911326 | 1.02E-06 | 1.43E-07 | -5.46 | 6.3773724 | -2.34E-02 | 16826140  | 16826263  | NC_000001.10 |
| cg27018424 | 1.02E-06 | 1.44E-07 | -5.46 | 6.3769174 | -6.62E-02 | 33173425  | 33173548  | NC_000006.11 |

|            |          |          |       |           |           |           |           |              |
|------------|----------|----------|-------|-----------|-----------|-----------|-----------|--------------|
| cg15022049 | 1.02E-06 | 1.44E-07 | -5.46 | 6.3767416 | -4.11E-02 | 66137145  | 66137268  | NC_000011.9  |
| cg01883046 | 1.02E-06 | 1.44E-07 | -5.46 | 6.3764778 | -7.16E-02 | 174890420 | 174890543 | NC_000002.11 |
| cg04349839 | 1.02E-06 | 1.44E-07 | -5.46 | 6.3759874 | -1.31E-01 | 25789390  | 25789513  | NC_000004.11 |
| cg12637409 | 1.02E-06 | 1.44E-07 | -5.46 | 6.3754983 | -1.45E-02 | 7156125   | 7156248   | NC_000017.10 |
| cg13533070 | 1.02E-06 | 1.44E-07 | -5.46 | 6.3754674 | -7.75E-02 | 152032584 | 152032707 | NC_000002.11 |
| cg08764162 | 1.02E-06 | 1.44E-07 | -5.46 | 6.3751711 | -8.33E-02 | 31147088  | 31147211  | NC_000010.10 |
| cg17497560 | 1.02E-06 | 1.44E-07 | -5.46 | 6.3749098 | -3.10E-02 | 107007776 | 107007899 | NC_000005.9  |
| cg19214594 | 1.02E-06 | 1.44E-07 | -5.46 | 6.3745165 | -9.40E-02 | 50629038  | 50629161  | NC_000022.10 |
| cg02298094 | 1.02E-06 | 1.44E-07 | -5.46 | 6.374187  | -9.91E-02 | 111844676 | 111844799 | NC_000012.11 |
| cg06168319 | 1.02E-06 | 1.44E-07 | -5.46 | 6.3733294 | -2.34E-02 | 84205972  | 84206095  | NC_000004.11 |
| cg00047532 | 1.02E-06 | 1.44E-07 | -5.46 | 6.3732539 | -9.71E-02 | 42882406  | 42882529  | NC_000006.11 |
| cg25656096 | 1.02E-06 | 1.44E-07 | -5.46 | 6.3726263 | -3.80E-02 | 237990400 | 237990523 | NC_000002.11 |
| cg04385818 | 1.02E-06 | 1.44E-07 | -5.46 | 6.3724757 | -6.92E-02 | 49468626  | 49468749  | NC_000019.9  |
| cg19507256 | 1.02E-06 | 1.44E-07 | -5.46 | 6.3722681 | -9.20E-02 | 149552478 | 149552601 | NC_000007.13 |
| cg24244747 | 1.02E-06 | 1.44E-07 | -5.46 | 6.3718102 | -1.06E-01 | 80885001  | 80885124  | NC_000006.11 |
| cg17919667 | 1.02E-06 | 1.44E-07 | -5.46 | 6.3716653 | -7.55E-02 | 176513163 | 176513286 | NC_000005.9  |
| cg21208744 | 1.02E-06 | 1.44E-07 | -5.46 | 6.3713872 | -1.01E-01 | 149909548 | 149909671 | NC_000001.10 |
| cg05389236 | 1.02E-06 | 1.44E-07 | -5.46 | 6.3712561 | -1.15E-01 | 36635087  | 36635210  | NC_000006.11 |
| cg15906794 | 1.02E-06 | 1.44E-07 | -5.46 | 6.3709941 | -4.77E-02 | 7197963   | 7198086   | NC_000017.10 |
| cg26003140 | 1.02E-06 | 1.44E-07 | -5.46 | 6.370493  | -1.15E-01 | 8611612   | 8611735   | NC_000017.10 |
| cg06940127 | 1.03E-06 | 1.45E-07 | -5.46 | 6.3696947 | -6.08E-02 | 1665303   | 1665426   | NC_000017.10 |
| cg17383272 | 1.03E-06 | 1.45E-07 | -5.46 | 6.3695851 | -1.04E-01 | 50710013  | 50710136  | NC_000019.9  |
| cg04059988 | 1.03E-06 | 1.45E-07 | -5.46 | 6.3695827 | -4.96E-02 | 27413649  | 27413772  | NC_000016.9  |
| cg16695597 | 1.03E-06 | 1.45E-07 | -5.46 | 6.3689623 | -2.19E-02 | 142557614 | 142557737 | NC_000004.11 |
| cg21500247 | 1.03E-06 | 1.45E-07 | -5.46 | 6.3685873 | -7.17E-02 | 1730306   | 1730429   | NC_000006.11 |



|            |          |          |       |           |           |           |           |              |
|------------|----------|----------|-------|-----------|-----------|-----------|-----------|--------------|
| cg04072597 | 1.03E-06 | 1.45E-07 | -5.46 | 6.3683898 | -6.22E-02 | 18716499  | 18716622  | NC_000019.9  |
| cg08763705 | 1.03E-06 | 1.45E-07 | -5.46 | 6.36756   | -1.24E-01 | 139525657 | 139525780 | NC_000005.9  |
| cg17976191 | 1.03E-06 | 1.45E-07 | -5.46 | 6.3665228 | -1.30E-01 | 13135527  | 13135650  | NC_000019.9  |
| cg11454606 | 1.03E-06 | 1.45E-07 | -5.46 | 6.3661826 | -3.03E-02 | 67888949  | 67889072  | NC_000011.9  |
| cg27531571 | 1.03E-06 | 1.45E-07 | -5.46 | 6.3657565 | -1.14E-01 | 77905160  | 77905283  | NC_000017.10 |
| cg04149916 | 1.03E-06 | 1.45E-07 | -5.46 | 6.3654805 | -6.78E-02 | 31939319  | 31939442  | NC_000006.11 |
| cg23858537 | 1.03E-06 | 1.45E-07 | -5.46 | 6.3654332 | -1.23E-01 | 72039838  | 72039961  | NC_000015.9  |
| cg02853731 | 1.03E-06 | 1.45E-07 | -5.46 | 6.3648537 | -4.56E-02 | 85218481  | 85218604  | NC_000010.10 |
| cg18735089 | 1.03E-06 | 1.45E-07 | -5.46 | 6.3646342 | -1.22E-01 | 98738998  | 98739121  | NC_000007.13 |
| cg06961086 | 1.03E-06 | 1.45E-07 | -5.46 | 6.3639672 | -4.25E-02 | 239343317 | 239343440 | NC_000002.11 |
| cg07164125 | 1.03E-06 | 1.46E-07 | -5.46 | 6.3632087 | -1.19E-01 | 21604831  | 21604954  | NC_000008.10 |
| cg24032414 | 1.03E-06 | 1.46E-07 | -5.46 | 6.3625107 | -8.23E-02 | 48674136  | 48674259  | NC_000017.10 |
| cg08760493 | 1.03E-06 | 1.46E-07 | -5.46 | 6.3614334 | -1.09E-01 | 109994039 | 109994162 | NC_000004.11 |
| cg16253634 | 1.03E-06 | 1.46E-07 | -5.46 | 6.3612154 | -7.25E-02 | 134464123 | 134464246 | NC_000007.13 |
| cg14282612 | 1.03E-06 | 1.46E-07 | -5.46 | 6.3611015 | -1.56E-02 | 102046509 | 102046632 | NC_000010.10 |
| cg17309464 | 1.03E-06 | 1.46E-07 | -5.46 | 6.3607407 | -3.68E-02 | 36705192  | 36705315  | NC_000019.9  |
| cg00543840 | 1.03E-06 | 1.46E-07 | -5.46 | 6.3604494 | -1.15E-01 | 22213376  | 22213499  | NC_000001.10 |
| cg12580445 | 1.04E-06 | 1.46E-07 | -5.46 | 6.3598144 | -1.39E-01 | 121414634 | 121414757 | NC_000005.9  |
| cg22366698 | 1.04E-06 | 1.46E-07 | -5.46 | 6.3590247 | -2.99E-02 | 3400543   | 3400666   | NC_000011.9  |
| cg02063165 | 1.04E-06 | 1.46E-07 | -5.46 | 6.3589114 | -7.21E-02 | 149294388 | 149294511 | NC_000001.10 |
| cg00456086 | 1.04E-06 | 1.46E-07 | -5.46 | 6.3585497 | -2.59E-02 | 197283111 | 197283234 | NC_000003.11 |
| cg24606594 | 1.04E-06 | 1.46E-07 | -5.46 | 6.3579554 | -1.28E-01 | 51795291  | 51795414  | NC_000012.11 |
| cg10118167 | 1.04E-06 | 1.46E-07 | -5.46 | 6.3578347 | -9.57E-02 | 94676545  | 94676668  | NC_000012.11 |
| cg07563765 | 1.04E-06 | 1.46E-07 | -5.46 | 6.3576229 | -6.81E-02 | 28929242  | 28929365  | NC_000008.10 |
| cg26255314 | 1.04E-06 | 1.46E-07 | -5.46 | 6.3576164 | -1.44E-01 | 60869910  | 60870033  | NC_000011.9  |

|            |          |          |       |           |           |           |           |              |
|------------|----------|----------|-------|-----------|-----------|-----------|-----------|--------------|
| cg10595344 | 1.04E-06 | 1.46E-07 | -5.46 | 6.3574735 | -1.71E-02 | 109585022 | 109585145 | NC_000001.10 |
| cg25027273 | 1.04E-06 | 1.46E-07 | -5.46 | 6.357377  | -7.73E-02 | 101720914 | 101721037 | NC_000015.9  |
| cg03907390 | 1.04E-06 | 1.46E-07 | -5.46 | 6.3571711 | -1.22E-01 | 121066392 | 121066515 | NC_000010.10 |
| cg11628021 | 1.04E-06 | 1.47E-07 | -5.46 | 6.3554714 | -2.99E-02 | 17491382  | 17491505  | NC_000019.9  |
| cg02524863 | 1.04E-06 | 1.47E-07 | -5.46 | 6.3547471 | -7.33E-02 | 193858041 | 193858164 | NC_000003.11 |
| cg13239646 | 1.04E-06 | 1.47E-07 | -5.46 | 6.3538219 | -6.36E-02 | 65348394  | 65348517  | NC_000011.9  |
| cg06814287 | 1.04E-06 | 1.47E-07 | -5.46 | 6.3535584 | -1.05E-01 | 32120584  | 32120707  | NC_000006.11 |
| cg27123423 | 1.04E-06 | 1.47E-07 | -5.46 | 6.3535569 | -6.44E-02 | 62971335  | 62971458  | NC_000017.10 |
| cg21685808 | 1.04E-06 | 1.47E-07 | -5.45 | 6.3530728 | -8.60E-02 | 45982421  | 45982544  | NC_000006.11 |
| cg09940188 | 1.04E-06 | 1.47E-07 | -5.45 | 6.3527367 | -9.93E-02 | 1686671   | 1686794   | NC_000017.10 |
| cg04073204 | 1.04E-06 | 1.47E-07 | -5.45 | 6.3526143 | -1.03E-01 | 179158569 | 179158692 | NC_000005.9  |
| cg22673972 | 1.04E-06 | 1.47E-07 | -5.45 | 6.3526059 | -1.00E-01 | 14415346  | 14415469  | NC_000003.11 |
| cg03610867 | 1.04E-06 | 1.47E-07 | -5.45 | 6.3505639 | -2.93E-02 | 155602060 | 155602183 | NC_000007.13 |
| cg03853945 | 1.04E-06 | 1.48E-07 | -5.45 | 6.3502501 | -8.13E-02 | 84024017  | 84024140  | NC_000013.10 |
| cg20460101 | 1.05E-06 | 1.48E-07 | -5.45 | 6.3499821 | -2.58E-02 | 92465103  | 92465226  | NC_000007.13 |
| cg14097619 | 1.05E-06 | 1.48E-07 | -5.45 | 6.3491839 | -8.01E-02 | 183945054 | 183945177 | NC_000003.11 |
| cg07780517 | 1.05E-06 | 1.48E-07 | -5.45 | 6.348989  | -9.38E-02 | 30077489  | 30077612  | NC_000013.10 |
| cg22026918 | 1.05E-06 | 1.48E-07 | -5.45 | 6.3489245 | -1.05E-01 | 70552251  | 70552374  | NC_000015.9  |
| cg07798694 | 1.05E-06 | 1.48E-07 | -5.45 | 6.3486529 | -1.34E-02 | 142141972 | 142142095 | NC_000004.11 |
| cg16612806 | 1.05E-06 | 1.48E-07 | -5.45 | 6.348468  | -1.08E-01 | 124592229 | 124592352 | NC_000011.9  |
| cg20264543 | 1.05E-06 | 1.48E-07 | -5.45 | 6.3484112 | -9.40E-02 | 128787213 | 128787336 | NC_000003.11 |
| cg07549120 | 1.05E-06 | 1.48E-07 | -5.45 | 6.3483091 | -1.01E-01 | 145758650 | 145758773 | NC_000008.10 |
| cg10630028 | 1.05E-06 | 1.48E-07 | -5.45 | 6.3478229 | -2.32E-02 | 77785640  | 77785763  | NC_000017.10 |
| cg14010379 | 1.05E-06 | 1.48E-07 | -5.45 | 6.3478015 | -5.93E-02 | 19844368  | 19844491  | NC_000019.9  |
| cg13298466 | 1.05E-06 | 1.48E-07 | -5.45 | 6.3470076 | -7.40E-02 | 6658164   | 6658287   | NC_000012.11 |

|            |          |          |       |           |           |           |           |              |
|------------|----------|----------|-------|-----------|-----------|-----------|-----------|--------------|
| cg24978058 | 1.05E-06 | 1.48E-07 | -5.45 | 6.3460669 | -6.46E-02 | 86152227  | 86152350  | NC_000011.9  |
| cg15935113 | 1.05E-06 | 1.48E-07 | -5.45 | 6.345797  | -2.70E-02 | 40118557  | 40118680  | NC_000017.10 |
| cg09051342 | 1.05E-06 | 1.48E-07 | -5.45 | 6.345211  | -9.66E-02 | 95113521  | 95113644  | NC_000008.10 |
| cg08256027 | 1.05E-06 | 1.48E-07 | -5.45 | 6.3441662 | -4.50E-02 | 144334733 | 144334856 | NC_000006.11 |
| cg26228558 | 1.05E-06 | 1.49E-07 | -5.45 | 6.3437144 | -1.08E-01 | 71527496  | 71527619  | NC_000008.10 |
| cg09165678 | 1.05E-06 | 1.49E-07 | -5.45 | 6.3429969 | -2.27E-02 | 219536837 | 219536960 | NC_000002.11 |
| cg01231165 | 1.05E-06 | 1.49E-07 | -5.45 | 6.3425661 | -2.68E-02 | 9695142   | 9695265   | NC_000002.11 |
| cg00516597 | 1.05E-06 | 1.49E-07 | -5.45 | 6.3425225 | -1.53E-02 | 25824837  | 25824960  | NC_000003.11 |
| cg27464657 | 1.05E-06 | 1.49E-07 | -5.45 | 6.3413601 | -6.69E-02 | 50560469  | 50560592  | NC_000012.11 |
| cg06753281 | 1.05E-06 | 1.49E-07 | -5.45 | 6.3405224 | -1.02E-01 | 6086652   | 6086775   | NC_000001.10 |
| cg12079115 | 1.06E-06 | 1.49E-07 | -5.45 | 6.3402612 | -9.63E-02 | 241851444 | 241851567 | NC_000002.11 |
| cg25236791 | 1.06E-06 | 1.49E-07 | -5.45 | 6.340091  | -8.02E-02 | 52302252  | 52302375  | NC_000003.11 |
| cg16341266 | 1.06E-06 | 1.49E-07 | -5.45 | 6.3392315 | -1.21E-01 | 147256367 | 147256490 | NC_000007.13 |
| cg08894066 | 1.06E-06 | 1.49E-07 | -5.45 | 6.3387602 | -9.66E-02 | 145849535 | 145849658 | NC_000008.10 |
| cg19614321 | 1.06E-06 | 1.50E-07 | -5.45 | 6.3373965 | -1.07E-01 | 4804581   | 4804704   | NC_000020.10 |
| cg12031740 | 1.06E-06 | 1.50E-07 | -5.45 | 6.337286  | -6.62E-02 | 76936927  | 76937050  | NC_000017.10 |
| cg04446992 | 1.06E-06 | 1.50E-07 | -5.45 | 6.3367583 | -4.84E-02 | 11550094  | 11550217  | NC_000008.10 |
| cg03698393 | 1.06E-06 | 1.50E-07 | -5.45 | 6.3367252 | -3.08E-02 | 89438795  | 89438918  | NC_000015.9  |
| cg25000900 | 1.06E-06 | 1.50E-07 | -5.45 | 6.3360511 | -1.08E-01 | 73197088  | 73197211  | NC_000005.9  |
| cg06706867 | 1.06E-06 | 1.50E-07 | -5.45 | 6.3350852 | -1.46E-02 | 17949623  | 17949746  | NC_000020.10 |
| cg21746275 | 1.06E-06 | 1.50E-07 | -5.45 | 6.3347039 | -1.20E-01 | 179758307 | 179758430 | NC_000003.11 |
| cg10110604 | 1.06E-06 | 1.50E-07 | -5.45 | 6.3346881 | -1.20E-01 | 93956122  | 93956245  | NC_000015.9  |
| cg26529687 | 1.06E-06 | 1.50E-07 | -5.45 | 6.3343201 | -1.02E-01 | 133514793 | 133514916 | NC_000002.11 |
| cg16351184 | 1.06E-06 | 1.50E-07 | -5.45 | 6.3339378 | -1.63E-02 | 140473184 | 140473307 | NC_000009.11 |
| cg05895453 | 1.06E-06 | 1.50E-07 | -5.45 | 6.333447  | -7.99E-02 | 41768968  | 41769091  | NC_000013.10 |

|            |          |          |       |           |           |           |           |              |
|------------|----------|----------|-------|-----------|-----------|-----------|-----------|--------------|
| cg00677479 | 1.06E-06 | 1.50E-07 | -5.45 | 6.3328748 | -4.57E-02 | 171830637 | 171830760 | NC_000002.11 |
| cg15371566 | 1.06E-06 | 1.50E-07 | -5.45 | 6.3328669 | -1.07E-01 | 170187722 | 170187845 | NC_000003.11 |
| cg08466082 | 1.06E-06 | 1.50E-07 | -5.45 | 6.3328606 | -1.21E-01 | 88551422  | 88551545  | NC_000016.9  |
| cg09605111 | 1.06E-06 | 1.50E-07 | -5.45 | 6.3323552 | -6.00E-02 | 45560051  | 45560174  | NC_000022.10 |
| cg09507120 | 1.06E-06 | 1.50E-07 | -5.45 | 6.332038  | -4.00E-02 | 138853424 | 138853547 | NC_000009.11 |
| cg23679992 | 1.06E-06 | 1.50E-07 | -5.45 | 6.3317959 | -1.03E-01 | 6421513   | 6421636   | NC_000012.11 |
| cg06657050 | 1.06E-06 | 1.50E-07 | -5.45 | 6.3313542 | -1.48E-01 | 53083587  | 53083710  | NC_000015.9  |
| cg12840024 | 1.06E-06 | 1.51E-07 | -5.45 | 6.3308453 | -9.79E-02 | 21916256  | 21916379  | NC_000008.10 |
| cg25274503 | 1.06E-06 | 1.51E-07 | -5.45 | 6.3308428 | -4.95E-02 | 116140128 | 116140251 | NC_000007.13 |
| cg16839921 | 1.06E-06 | 1.51E-07 | -5.45 | 6.3308162 | -9.71E-02 | 74178883  | 74179006  | NC_000011.9  |
| cg00117005 | 1.06E-06 | 1.51E-07 | -5.45 | 6.3306763 | -6.77E-02 | 33288995  | 33289118  | NC_000006.11 |
| cg09667289 | 1.07E-06 | 1.51E-07 | -5.45 | 6.3300344 | -9.58E-02 | 33165563  | 33165686  | NC_000015.9  |
| cg07320595 | 1.07E-06 | 1.51E-07 | -5.45 | 6.329955  | -1.37E-01 | 156485233 | 156485356 | NC_000005.9  |
| cg19406161 | 1.07E-06 | 1.51E-07 | -5.45 | 6.3291951 | -9.18E-02 | 80550908  | 80551031  | NC_000007.13 |
| cg14288091 | 1.07E-06 | 1.51E-07 | -5.45 | 6.3291925 | -2.21E-02 | 99305661  | 99305784  | NC_000008.10 |
| cg00575744 | 1.07E-06 | 1.51E-07 | -5.45 | 6.3291626 | -4.21E-02 | 32908642  | 32908765  | NC_000006.11 |
| cg23927970 | 1.07E-06 | 1.51E-07 | -5.45 | 6.3281056 | -1.17E-01 | 504933    | 505056    | NC_000011.9  |
| cg07286341 | 1.07E-06 | 1.51E-07 | -5.45 | 6.3275129 | -5.65E-02 | 176923805 | 176923928 | NC_000005.9  |
| cg19662708 | 1.07E-06 | 1.51E-07 | -5.45 | 6.3270021 | -5.02E-02 | 12785573  | 12785696  | NC_000011.9  |
| cg08330690 | 1.07E-06 | 1.51E-07 | -5.45 | 6.3269268 | -1.28E-01 | 33760293  | 33760416  | NC_000017.10 |
| cg12158488 | 1.07E-06 | 1.51E-07 | -5.45 | 6.3264255 | -1.36E-01 | 31336998  | 31337121  | NC_000008.10 |
| cg01741038 | 1.07E-06 | 1.51E-07 | -5.45 | 6.3249823 | -1.21E-01 | 18414933  | 18415056  | NC_000012.11 |
| cg00678539 | 1.07E-06 | 1.51E-07 | -5.45 | 6.3245694 | -6.39E-02 | 56757625  | 56757748  | NC_000015.9  |
| cg15852320 | 1.07E-06 | 1.52E-07 | -5.45 | 6.3243857 | -1.02E-01 | 3232207   | 3232330   | NC_000012.11 |
| cg04893792 | 1.07E-06 | 1.52E-07 | -5.45 | 6.3234854 | -5.11E-02 | 114114504 | 114114627 | NC_000013.10 |

|                |          |          |       |           |           |           |           |              |
|----------------|----------|----------|-------|-----------|-----------|-----------|-----------|--------------|
| cg00401463     | 1.07E-06 | 1.52E-07 | -5.45 | 6.3230809 | -7.20E-02 | 133978450 | 133978573 | NC_000010.10 |
| cg05231706     | 1.07E-06 | 1.52E-07 | -5.45 | 6.3221245 | -4.40E-02 | 6441810   | 6441933   | NC_000007.13 |
| cg18622494     | 1.07E-06 | 1.52E-07 | -5.45 | 6.3209069 | -1.42E-02 | 128049976 | 128050099 | NC_000007.13 |
| cg15356966     | 1.08E-06 | 1.52E-07 | -5.45 | 6.3204126 | -1.17E-01 | 33913187  | 33913310  | NC_000011.9  |
| cg09475757     | 1.08E-06 | 1.52E-07 | -5.45 | 6.3198829 | -4.10E-02 | 178230851 | 178230974 | NC_000004.11 |
| cg23384027     | 1.08E-06 | 1.52E-07 | -5.45 | 6.3192116 | -1.08E-01 | 54688344  | 54688467  | NC_000012.11 |
| cg10045881     | 1.08E-06 | 1.52E-07 | -5.45 | 6.3190545 | -1.05E-01 | 111770291 | 111770414 | NC_000001.10 |
| cg16348638     | 1.08E-06 | 1.52E-07 | -5.45 | 6.3183316 | -5.80E-02 | 107198772 | 107198895 | NC_000002.11 |
| cg17020635     | 1.08E-06 | 1.52E-07 | -5.45 | 6.3182126 | -7.60E-02 | 67373639  | 67373762  | NC_000011.9  |
| cg12738008     | 1.08E-06 | 1.53E-07 | -5.45 | 6.3179738 | -1.49E-01 | 2037954   | 2038077   | NC_000008.10 |
| ch.14.1558261F | 1.08E-06 | 1.53E-07 | -5.45 | 6.3179638 | -2.62E-02 | 95593869  | 95593992  | NC_000014.8  |
| cg12792264     | 1.08E-06 | 1.53E-07 | -5.45 | 6.3173326 | -1.34E-01 | 183971636 | 183971759 | NC_000001.10 |
| cg14187860     | 1.08E-06 | 1.53E-07 | -5.45 | 6.3171778 | -1.02E-01 | 31261784  | 31261907  | NC_000020.10 |
| cg25632883     | 1.08E-06 | 1.53E-07 | -5.45 | 6.3169926 | -5.72E-02 | 109250438 | 109250561 | NC_000012.11 |
| cg23530596     | 1.08E-06 | 1.53E-07 | -5.45 | 6.3154405 | -9.62E-02 | 48515109  | 48515232  | NC_000015.9  |
| cg22299191     | 1.08E-06 | 1.53E-07 | -5.45 | 6.3150531 | -7.85E-02 | 7991169   | 7991292   | NC_000017.10 |
| cg04899753     | 1.08E-06 | 1.53E-07 | -5.45 | 6.3143275 | -9.39E-02 | 100843331 | 100843454 | NC_000014.8  |
| cg21598389     | 1.08E-06 | 1.53E-07 | -5.45 | 6.3138965 | -1.08E-01 | 59584281  | 59584404  | NC_000015.9  |
| cg12360123     | 1.08E-06 | 1.53E-07 | -5.45 | 6.3133398 | -7.79E-02 | 79984532  | 79984655  | NC_000010.10 |
| cg18105767     | 1.08E-06 | 1.53E-07 | -5.45 | 6.3131324 | -5.85E-02 | 41698548  | 41698671  | NC_000019.9  |
| cg14163484     | 1.08E-06 | 1.53E-07 | -5.45 | 6.3126524 | -6.83E-02 | 97359926  | 97360049  | NC_000002.11 |
| cg01182620     | 1.08E-06 | 1.53E-07 | -5.45 | 6.3124415 | -1.20E-01 | 2031167   | 2031290   | NC_000016.9  |
| cg18241337     | 1.08E-06 | 1.53E-07 | -5.45 | 6.3122751 | -6.12E-02 | 156271892 | 156272015 | NC_000003.11 |
| cg12005811     | 1.08E-06 | 1.53E-07 | -5.45 | 6.3121387 | -9.69E-02 | 22503787  | 22503910  | NC_000004.11 |
| cg26221410     | 1.08E-06 | 1.53E-07 | -5.45 | 6.3120907 | -3.12E-02 | 51785820  | 51785943  | NC_000012.11 |

|            |          |          |       |           |           |           |           |              |
|------------|----------|----------|-------|-----------|-----------|-----------|-----------|--------------|
| cg27090409 | 1.08E-06 | 1.53E-07 | -5.45 | 6.3120654 | -1.01E-01 | 46589259  | 46589382  | NC_000015.9  |
| cg14210447 | 1.08E-06 | 1.54E-07 | -5.45 | 6.3115322 | -5.89E-02 | 35688002  | 35688125  | NC_000001.10 |
| cg06494421 | 1.08E-06 | 1.54E-07 | -5.45 | 6.3113611 | -6.15E-02 | 130356164 | 130356287 | NC_000011.9  |
| cg03874868 | 1.09E-06 | 1.54E-07 | -5.45 | 6.3108032 | -9.63E-02 | 1551941   | 1552064   | NC_000017.10 |
| cg06916012 | 1.09E-06 | 1.54E-07 | -5.45 | 6.3103007 | -2.11E-02 | 220363862 | 220363985 | NC_000002.11 |
| cg11964810 | 1.09E-06 | 1.54E-07 | -5.45 | 6.310043  | -5.39E-02 | 1478170   | 1478293   | NC_000001.10 |
| cg18793215 | 1.09E-06 | 1.54E-07 | -5.45 | 6.309731  | -9.22E-02 | 156674685 | 156674808 | NC_000001.10 |
| cg00402074 | 1.09E-06 | 1.54E-07 | -5.45 | 6.3096305 | -9.12E-02 | 46889742  | 46889865  | NC_000006.11 |
| cg24942416 | 1.09E-06 | 1.54E-07 | -5.45 | 6.3095153 | -8.01E-02 | 124621829 | 124621952 | NC_000011.9  |
| cg16616370 | 1.09E-06 | 1.54E-07 | -5.45 | 6.3089666 | -8.19E-02 | 93009742  | 93009865  | NC_000012.11 |
| cg02165330 | 1.09E-06 | 1.54E-07 | -5.45 | 6.3075484 | -1.11E-01 | 124542984 | 124543107 | NC_000011.9  |
| cg00994323 | 1.09E-06 | 1.54E-07 | -5.45 | 6.3070693 | -1.18E-01 | 145721560 | 145721683 | NC_000008.10 |
| cg23877008 | 1.09E-06 | 1.54E-07 | -5.45 | 6.3068164 | -5.47E-02 | 109896967 | 109897090 | NC_000012.11 |
| cg22185879 | 1.09E-06 | 1.54E-07 | -5.44 | 6.3054819 | -1.09E-01 | 62153193  | 62153316  | NC_000020.10 |
| cg26025505 | 1.09E-06 | 1.55E-07 | -5.44 | 6.3051876 | -7.91E-02 | 35138084  | 35138207  | NC_000011.9  |
| cg10669833 | 1.09E-06 | 1.55E-07 | -5.44 | 6.3047921 | -4.76E-02 | 124085669 | 124085792 | NC_000008.10 |
| cg00668927 | 1.09E-06 | 1.55E-07 | -5.44 | 6.3045875 | -7.92E-02 | 74202486  | 74202609  | NC_000007.13 |
| cg16852767 | 1.09E-06 | 1.55E-07 | -5.44 | 6.3044413 | -5.06E-02 | 82868931  | 82869054  | NC_000011.9  |
| cg08368094 | 1.09E-06 | 1.55E-07 | -5.44 | 6.3037134 | -8.26E-02 | 74286665  | 74286788  | NC_000004.11 |
| cg03882071 | 1.09E-06 | 1.55E-07 | -5.44 | 6.3032846 | -9.57E-02 | 43922210  | 43922333  | NC_000017.10 |
| cg08457514 | 1.09E-06 | 1.55E-07 | -5.44 | 6.3025763 | -9.41E-02 | 61803736  | 61803859  | NC_000001.10 |
| cg16256615 | 1.10E-06 | 1.55E-07 | -5.44 | 6.3013452 | -1.08E-01 | 113393179 | 113393302 | NC_000001.10 |
| cg11247304 | 1.10E-06 | 1.55E-07 | -5.44 | 6.3009844 | -1.15E-01 | 51523933  | 51524056  | NC_000019.9  |
| cg05040235 | 1.10E-06 | 1.55E-07 | -5.44 | 6.3003224 | -1.05E-01 | 93412760  | 93412883  | NC_000015.9  |
| cg03544375 | 1.10E-06 | 1.55E-07 | -5.44 | 6.2996848 | -6.61E-02 | 31090725  | 31090848  | NC_000022.10 |

|            |          |          |       |           |           |           |           |              |
|------------|----------|----------|-------|-----------|-----------|-----------|-----------|--------------|
| cg01709265 | 1.10E-06 | 1.55E-07 | -5.44 | 6.2996439 | -2.31E-02 | 48350468  | 48350591  | NC_000017.10 |
| cg02118652 | 1.10E-06 | 1.55E-07 | -5.44 | 6.2992093 | -1.80E-02 | 215741258 | 215741381 | NC_000001.10 |
| cg02319094 | 1.10E-06 | 1.56E-07 | -5.44 | 6.2984445 | -9.96E-02 | 72980866  | 72980989  | NC_000011.9  |
| cg23835453 | 1.10E-06 | 1.56E-07 | -5.44 | 6.2982797 | -1.01E-01 | 53646929  | 53647052  | NC_000012.11 |
| cg04080270 | 1.10E-06 | 1.56E-07 | -5.44 | 6.2981689 | -1.75E-02 | 52456551  | 52456674  | NC_000001.10 |
| cg16165120 | 1.10E-06 | 1.56E-07 | -5.44 | 6.2975268 | -6.56E-02 | 85566439  | 85566562  | NC_000011.9  |
| cg00997720 | 1.10E-06 | 1.56E-07 | -5.44 | 6.2967914 | -1.83E-02 | 39616233  | 39616356  | NC_000019.9  |
| cg24331722 | 1.10E-06 | 1.56E-07 | -5.44 | 6.2964762 | -1.12E-01 | 62633628  | 62633751  | NC_000008.10 |
| cg15761233 | 1.10E-06 | 1.56E-07 | -5.44 | 6.2963564 | -1.09E-01 | 200819070 | 200819193 | NC_000002.11 |
| cg08368148 | 1.10E-06 | 1.56E-07 | -5.44 | 6.295779  | -4.11E-02 | 80917381  | 80917504  | NC_000013.10 |
| cg13200188 | 1.10E-06 | 1.56E-07 | -5.44 | 6.2954961 | -5.68E-02 | 3173907   | 3174030   | NC_000011.9  |
| cg06680511 | 1.10E-06 | 1.56E-07 | -5.44 | 6.2954518 | -6.09E-02 | 15672258  | 15672381  | NC_000011.9  |
| cg13002493 | 1.10E-06 | 1.56E-07 | -5.44 | 6.2948371 | -2.93E-02 | 39683800  | 39683923  | NC_000017.10 |
| cg01729089 | 1.10E-06 | 1.56E-07 | -5.44 | 6.2941662 | -1.58E-02 | 3174639   | 3174762   | NC_000016.9  |
| cg19464320 | 1.10E-06 | 1.56E-07 | -5.44 | 6.2937519 | -3.30E-02 | 121148158 | 121148281 | NC_000012.11 |
| cg01636591 | 1.10E-06 | 1.56E-07 | -5.44 | 6.2935502 | -1.07E-01 | 32646156  | 32646279  | NC_000017.10 |
| cg01378677 | 1.10E-06 | 1.56E-07 | -5.44 | 6.2935418 | -6.55E-02 | 53237862  | 53237985  | NC_000019.9  |
| cg08240778 | 1.10E-06 | 1.57E-07 | -5.44 | 6.2925408 | -9.72E-02 | 1643787   | 1643910   | NC_000011.9  |
| cg17177816 | 1.10E-06 | 1.57E-07 | -5.44 | 6.2924301 | -1.27E-01 | 96304193  | 96304316  | NC_000010.10 |
| cg05242915 | 1.11E-06 | 1.57E-07 | -5.44 | 6.2911957 | -9.42E-02 | 1263080   | 1263203   | NC_000019.9  |
| cg24467387 | 1.11E-06 | 1.57E-07 | -5.44 | 6.2910083 | -1.14E-01 | 1168354   | 1168477   | NC_000019.9  |
| cg20407483 | 1.11E-06 | 1.57E-07 | -5.44 | 6.2898839 | -1.20E-01 | 5647920   | 5648043   | NC_000007.13 |
| cg13609505 | 1.11E-06 | 1.57E-07 | -5.44 | 6.2885971 | -4.66E-02 | 100206860 | 100206983 | NC_000010.10 |
| cg05587926 | 1.11E-06 | 1.57E-07 | -5.44 | 6.2880213 | -1.42E-01 | 122387899 | 122388022 | NC_000011.9  |
| cg24593688 | 1.11E-06 | 1.58E-07 | -5.44 | 6.2864735 | -1.70E-01 | 45885599  | 45885722  | NC_000013.10 |

|               |          |          |       |           |           |           |           |              |
|---------------|----------|----------|-------|-----------|-----------|-----------|-----------|--------------|
| cg21284400    | 1.11E-06 | 1.58E-07 | -5.44 | 6.2852879 | -6.62E-02 | 149981654 | 149981777 | NC_000001.10 |
| cg05503433    | 1.11E-06 | 1.58E-07 | -5.44 | 6.2852332 | -1.24E-01 | 42409117  | 42409240  | NC_000019.9  |
| cg08198430    | 1.11E-06 | 1.58E-07 | -5.44 | 6.2847098 | -6.95E-02 | 24733757  | 24733880  | NC_000014.8  |
| cg17518550    | 1.11E-06 | 1.58E-07 | -5.44 | 6.2843979 | -1.18E-01 | 247712383 | 247712506 | NC_000001.10 |
| cg15789095    | 1.11E-06 | 1.58E-07 | -5.44 | 6.2839502 | -9.76E-02 | 32281466  | 32281589  | NC_000001.10 |
| cg04195527    | 1.11E-06 | 1.58E-07 | -5.44 | 6.2836043 | -2.65E-02 | 118846289 | 118846412 | NC_000002.11 |
| cg14431547    | 1.11E-06 | 1.58E-07 | -5.44 | 6.2823646 | -1.21E-01 | 36572421  | 36572544  | NC_000009.11 |
| cg12447928    | 1.12E-06 | 1.58E-07 | -5.44 | 6.2821617 | -1.07E-01 | 25193435  | 25193558  | NC_000006.11 |
| cg18468176    | 1.12E-06 | 1.58E-07 | -5.44 | 6.2817639 | -3.93E-02 | 95623969  | 95624092  | NC_000014.8  |
| cg26904179    | 1.12E-06 | 1.58E-07 | -5.44 | 6.2814607 | -9.55E-02 | 43888938  | 43889061  | NC_000001.10 |
| cg10932048    | 1.12E-06 | 1.58E-07 | -5.44 | 6.2813736 | -5.43E-02 | 28879381  | 28879504  | NC_000001.10 |
| cg05419581    | 1.12E-06 | 1.59E-07 | -5.44 | 6.2794225 | -7.72E-02 | 155464121 | 155464244 | NC_000006.11 |
| cg21368143    | 1.12E-06 | 1.59E-07 | -5.44 | 6.2786928 | -8.39E-02 | 25150626  | 25150749  | NC_000012.11 |
| cg11702942    | 1.12E-06 | 1.59E-07 | -5.44 | 6.278326  | -8.40E-02 | 144102584 | 144102707 | NC_000008.10 |
| cg05911003    | 1.12E-06 | 1.59E-07 | -5.44 | 6.2758575 | -5.10E-02 | 187065516 | 187065639 | NC_000004.11 |
| cg06871772    | 1.12E-06 | 1.59E-07 | -5.44 | 6.2757047 | -2.99E-02 | 67313024  | 67313147  | NC_000016.9  |
| cg15175162    | 1.12E-06 | 1.59E-07 | -5.44 | 6.2755673 | -1.00E-01 | 15657657  | 15657780  | NC_000004.11 |
| cg11526455    | 1.12E-06 | 1.59E-07 | -5.44 | 6.2753987 | -5.51E-02 | 71273308  | 71273431  | NC_000002.11 |
| cg12430302    | 1.12E-06 | 1.59E-07 | -5.44 | 6.2753347 | -6.51E-02 | 9424575   | 9424698   | NC_000001.10 |
| cg14042143    | 1.12E-06 | 1.59E-07 | -5.44 | 6.2752376 | -1.31E-01 | 2646782   | 2646905   | NC_000007.13 |
| cg13316472    | 1.12E-06 | 1.59E-07 | -5.44 | 6.2751167 | -9.11E-02 | 1482428   | 1482551   | NC_000011.9  |
| cg02598441    | 1.12E-06 | 1.60E-07 | -5.44 | 6.2742246 | -5.74E-02 | 62777298  | 62777421  | NC_000017.10 |
| cg26518100    | 1.12E-06 | 1.60E-07 | -5.44 | 6.2740521 | -1.22E-01 | 18823509  | 18823632  | NC_000018.9  |
| ch.8.1852347F | 1.12E-06 | 1.60E-07 | -5.44 | 6.2734201 | -1.63E-02 | 91642798  | 91642921  | NC_000008.10 |
| cg14307605    | 1.12E-06 | 1.60E-07 | -5.44 | 6.2732764 | -1.36E-01 | 226029766 | 226029889 | NC_000002.11 |



|               |          |          |       |           |           |           |           |              |
|---------------|----------|----------|-------|-----------|-----------|-----------|-----------|--------------|
| cg12293340    | 1.13E-06 | 1.60E-07 | -5.44 | 6.2729774 | -7.82E-02 | 1750442   | 1750565   | NC_000004.11 |
| cg13227806    | 1.13E-06 | 1.60E-07 | -5.44 | 6.2727138 | -1.05E-01 | 113811946 | 113812069 | NC_000003.11 |
| cg12277122    | 1.13E-06 | 1.60E-07 | -5.44 | 6.2724936 | -1.60E-02 | 12902277  | 12902400  | NC_000019.9  |
| cg27291602    | 1.13E-06 | 1.60E-07 | -5.44 | 6.2723006 | -6.07E-02 | 644977    | 645100    | NC_000010.10 |
| cg08903604    | 1.13E-06 | 1.60E-07 | -5.44 | 6.2722341 | -2.29E-02 | 2305559   | 2305682   | NC_000017.10 |
| cg19229702    | 1.13E-06 | 1.60E-07 | -5.44 | 6.272225  | -3.60E-02 | 11762011  | 11762134  | NC_000003.11 |
| cg20734569    | 1.13E-06 | 1.60E-07 | -5.44 | 6.2712609 | -9.94E-02 | 48348370  | 48348493  | NC_000003.11 |
| cg06358322    | 1.13E-06 | 1.60E-07 | -5.44 | 6.2709214 | -7.70E-02 | 15253798  | 15253921  | NC_000010.10 |
| ch.1.3532527F | 1.13E-06 | 1.60E-07 | -5.44 | 6.2709022 | -1.65E-02 | 180926373 | 180926496 | NC_000001.10 |
| cg13385881    | 1.13E-06 | 1.60E-07 | -5.44 | 6.270502  | -3.11E-02 | 224810212 | 224810335 | NC_000002.11 |
| cg10240148    | 1.13E-06 | 1.60E-07 | -5.44 | 6.2700733 | -1.06E-01 | 105663019 | 105663142 | NC_000014.8  |
| cg05228244    | 1.13E-06 | 1.60E-07 | -5.44 | 6.2688732 | -2.53E-02 | 1102351   | 1102474   | NC_000010.10 |
| cg09554856    | 1.13E-06 | 1.60E-07 | -5.44 | 6.2687346 | -9.44E-02 | 33914646  | 33914769  | NC_000011.9  |
| ch.20.741059R | 1.13E-06 | 1.60E-07 | -5.44 | 6.2685496 | -1.46E-02 | 35381238  | 35381361  | NC_000020.10 |
| cg23525853    | 1.13E-06 | 1.60E-07 | -5.44 | 6.2685044 | -2.20E-02 | 843541    | 843664    | NC_000019.9  |
| cg26982386    | 1.13E-06 | 1.61E-07 | -5.44 | 6.2684462 | -1.45E-02 | 75947745  | 75947868  | NC_000007.13 |
| cg05357695    | 1.13E-06 | 1.61E-07 | -5.44 | 6.2683728 | -8.75E-02 | 23623480  | 23623603  | NC_000014.8  |
| cg23152667    | 1.13E-06 | 1.61E-07 | -5.44 | 6.2683633 | -6.17E-02 | 77072348  | 77072471  | NC_000005.9  |
| cg10603156    | 1.13E-06 | 1.61E-07 | -5.44 | 6.2674631 | -9.32E-02 | 13732625  | 13732748  | NC_000010.10 |
| cg24233194    | 1.13E-06 | 1.61E-07 | -5.44 | 6.2668796 | -1.06E-01 | 113526840 | 113526963 | NC_000010.10 |
| cg20240154    | 1.13E-06 | 1.61E-07 | -5.44 | 6.265619  | -9.83E-02 | 31464980  | 31465103  | NC_000006.11 |
| cg23016632    | 1.13E-06 | 1.61E-07 | -5.44 | 6.265071  | -1.06E-01 | 1396169   | 1396292   | NC_000001.10 |
| cg07889505    | 1.13E-06 | 1.61E-07 | -5.44 | 6.2644781 | -7.36E-02 | 42349787  | 42349910  | NC_000015.9  |
| cg13871900    | 1.13E-06 | 1.61E-07 | -5.44 | 6.2642429 | -5.85E-02 | 79235968  | 79236091  | NC_000017.10 |
| cg00354542    | 1.13E-06 | 1.61E-07 | -5.44 | 6.2641075 | -1.06E-01 | 434356    | 434479    | NC_000016.9  |

|                 |          |          |       |           |           |           |           |              |
|-----------------|----------|----------|-------|-----------|-----------|-----------|-----------|--------------|
| cg17691988      | 1.13E-06 | 1.61E-07 | -5.44 | 6.263959  | -6.74E-02 | 108586594 | 108586717 | NC_000004.11 |
| cg26668129      | 1.13E-06 | 1.61E-07 | -5.44 | 6.2637883 | -1.72E-01 | 114326408 | 114326531 | NC_000001.10 |
| cg12402318      | 1.14E-06 | 1.61E-07 | -5.44 | 6.2629863 | -1.24E-01 | 52135487  | 52135610  | NC_000015.9  |
| cg13950290      | 1.14E-06 | 1.61E-07 | -5.44 | 6.2626935 | -5.86E-02 | 183947069 | 183947192 | NC_000003.11 |
| cg07781247      | 1.14E-06 | 1.61E-07 | -5.44 | 6.2626209 | -2.35E-02 | 93954443  | 93954566  | NC_000005.9  |
| cg23960538      | 1.14E-06 | 1.62E-07 | -5.44 | 6.2622514 | -7.38E-02 | 121372013 | 121372136 | NC_000002.11 |
| cg03220734      | 1.14E-06 | 1.62E-07 | -5.44 | 6.2619183 | -7.79E-02 | 832841    | 832964    | NC_000016.9  |
| cg02881374      | 1.14E-06 | 1.62E-07 | -5.44 | 6.2618939 | -1.32E-01 | 3581191   | 3581314   | NC_000010.10 |
| cg01595746      | 1.14E-06 | 1.62E-07 | -5.44 | 6.2616202 | -9.36E-02 | 1190953   | 1191076   | NC_000006.11 |
| cg09074856      | 1.14E-06 | 1.62E-07 | -5.44 | 6.2612054 | -7.61E-02 | 2979817   | 2979940   | NC_000001.10 |
| cg07148896      | 1.14E-06 | 1.62E-07 | -5.44 | 6.2605776 | -5.94E-02 | 11119225  | 11119348  | NC_000001.10 |
| cg18444097      | 1.14E-06 | 1.62E-07 | -5.44 | 6.2602961 | -9.09E-02 | 17272520  | 17272643  | NC_000008.10 |
| cg03125217      | 1.14E-06 | 1.62E-07 | -5.44 | 6.2599892 | -1.45E-02 | 40797790  | 40797913  | NC_000005.9  |
| cg17429631      | 1.14E-06 | 1.62E-07 | -5.44 | 6.2592358 | -1.16E-02 | 55230368  | 55230491  | NC_000001.10 |
| cg25412384      | 1.14E-06 | 1.62E-07 | -5.43 | 6.2584014 | -2.68E-02 | 23341283  | 23341406  | NC_000014.8  |
| cg05002041      | 1.14E-06 | 1.62E-07 | -5.43 | 6.2583302 | -6.11E-02 | 23652837  | 23652960  | NC_000016.9  |
| cg03732295      | 1.14E-06 | 1.62E-07 | -5.43 | 6.2568825 | -4.55E-02 | 57906837  | 57906960  | NC_000008.10 |
| cg03665761      | 1.14E-06 | 1.62E-07 | -5.43 | 6.256813  | -8.67E-02 | 54965929  | 54966052  | NC_000016.9  |
| cg02817421      | 1.14E-06 | 1.62E-07 | -5.43 | 6.2567307 | -9.18E-02 | 88414271  | 88414394  | NC_000010.10 |
| ch.10.73329320R | 1.14E-06 | 1.63E-07 | -5.43 | 6.256166  | -2.69E-02 | 73659314  | 73659437  | NC_000010.10 |
| cg08571304      | 1.14E-06 | 1.63E-07 | -5.43 | 6.2558076 | -1.21E-01 | 79669928  | 79670051  | NC_000010.10 |
| cg07673979      | 1.14E-06 | 1.63E-07 | -5.43 | 6.255726  | -1.55E-01 | 45270216  | 45270339  | NC_000017.10 |
| cg06015036      | 1.14E-06 | 1.63E-07 | -5.43 | 6.2557231 | -1.81E-02 | 32914618  | 32914741  | NC_000011.9  |
| cg27534772      | 1.14E-06 | 1.63E-07 | -5.43 | 6.2555591 | -7.97E-02 | 16042836  | 16042959  | NC_000001.10 |
| cg02000328      | 1.14E-06 | 1.63E-07 | -5.43 | 6.2554358 | -1.24E-01 | 15901917  | 15902040  | NC_000016.9  |

|            |          |          |       |           |           |           |           |              |
|------------|----------|----------|-------|-----------|-----------|-----------|-----------|--------------|
| cg15246719 | 1.14E-06 | 1.63E-07 | -5.43 | 6.254987  | -2.16E-02 | 36102254  | 36102377  | NC_000017.10 |
| cg04734784 | 1.15E-06 | 1.63E-07 | -5.43 | 6.254129  | -8.84E-02 | 75251087  | 75251210  | NC_000017.10 |
| cg27138002 | 1.15E-06 | 1.63E-07 | -5.43 | 6.254091  | -1.06E-01 | 46925381  | 46925504  | NC_000002.11 |
| cg24382527 | 1.15E-06 | 1.63E-07 | -5.43 | 6.2537288 | -1.04E-01 | 135090367 | 135090490 | NC_000010.10 |
| cg24531638 | 1.15E-06 | 1.63E-07 | -5.43 | 6.2533088 | -2.19E-02 | 36916323  | 36916446  | NC_000001.10 |
| cg22792862 | 1.15E-06 | 1.63E-07 | -5.43 | 6.2529018 | -6.90E-02 | 67827087  | 67827210  | NC_000014.8  |
| cg01342692 | 1.15E-06 | 1.63E-07 | -5.43 | 6.252784  | -1.94E-02 | 32832968  | 32833091  | NC_000012.11 |
| cg16459103 | 1.15E-06 | 1.63E-07 | -5.43 | 6.2520351 | -4.52E-02 | 75141846  | 75141969  | NC_000011.9  |
| cg19407023 | 1.15E-06 | 1.63E-07 | -5.43 | 6.2520069 | -1.10E-01 | 134610861 | 134610984 | NC_000010.10 |
| cg24182470 | 1.15E-06 | 1.63E-07 | -5.43 | 6.2515055 | -2.34E-02 | 39299844  | 39299967  | NC_000012.11 |
| cg22305258 | 1.15E-06 | 1.63E-07 | -5.43 | 6.251278  | -3.63E-02 | 4643367   | 4643490   | NC_000017.10 |
| cg14532344 | 1.15E-06 | 1.63E-07 | -5.43 | 6.2512528 | -1.11E-01 | 186211530 | 186211653 | NC_000003.11 |
| cg03920729 | 1.15E-06 | 1.63E-07 | -5.43 | 6.2510014 | -7.91E-02 | 16768195  | 16768318  | NC_000001.10 |
| cg14679230 | 1.15E-06 | 1.63E-07 | -5.43 | 6.2508931 | -6.04E-02 | 42931679  | 42931802  | NC_000019.9  |
| cg07199337 | 1.15E-06 | 1.63E-07 | -5.43 | 6.2505477 | -5.24E-02 | 20408536  | 20408659  | NC_000011.9  |
| cg09827761 | 1.15E-06 | 1.64E-07 | -5.43 | 6.2504156 | -1.81E-01 | 66947392  | 66947515  | NC_000015.9  |
| cg24760647 | 1.15E-06 | 1.64E-07 | -5.43 | 6.2503934 | -2.38E-02 | 220408209 | 220408332 | NC_000002.11 |
| cg27297033 | 1.15E-06 | 1.64E-07 | -5.43 | 6.2499834 | -1.07E-01 | 2031217   | 2031340   | NC_000016.9  |
| cg09174555 | 1.15E-06 | 1.64E-07 | -5.43 | 6.2499283 | -8.48E-02 | 153364020 | 153364143 | NC_000001.10 |
| cg21969795 | 1.15E-06 | 1.64E-07 | -5.43 | 6.2497387 | -8.98E-02 | 7759140   | 7759263   | NC_000017.10 |
| cg13571479 | 1.15E-06 | 1.64E-07 | -5.43 | 6.2495932 | -1.46E-01 | 2077345   | 2077468   | NC_000007.13 |
| cg17801864 | 1.15E-06 | 1.64E-07 | -5.43 | 6.2495072 | -1.16E-01 | 45179345  | 45179468  | NC_000020.10 |
| cg14355428 | 1.15E-06 | 1.64E-07 | -5.43 | 6.2491101 | -3.86E-02 | 91762876  | 91762999  | NC_000007.13 |
| cg26968025 | 1.15E-06 | 1.64E-07 | -5.43 | 6.2490761 | -1.38E-01 | 64519943  | 64520066  | NC_000017.10 |
| cg06861841 | 1.15E-06 | 1.64E-07 | -5.43 | 6.2487877 | -1.41E-01 | 62212114  | 62212237  | NC_000011.9  |

|            |          |          |       |           |           |           |           |              |
|------------|----------|----------|-------|-----------|-----------|-----------|-----------|--------------|
| cg02775617 | 1.15E-06 | 1.64E-07 | -5.43 | 6.2485339 | -4.11E-02 | 32217281  | 32217404  | NC_000010.10 |
| cg22162010 | 1.15E-06 | 1.64E-07 | -5.43 | 6.2481679 | -3.51E-02 | 113249994 | 113250117 | NC_000001.10 |
| cg19412663 | 1.15E-06 | 1.64E-07 | -5.43 | 6.2477923 | -1.22E-01 | 184679386 | 184679509 | NC_000004.11 |
| cg13883696 | 1.15E-06 | 1.64E-07 | -5.43 | 6.2475649 | -7.91E-02 | 61519888  | 61520011  | NC_000001.10 |
| cg19549171 | 1.15E-06 | 1.64E-07 | -5.43 | 6.2470154 | -9.20E-02 | 13515777  | 13515900  | NC_000003.11 |
| cg17191715 | 1.15E-06 | 1.64E-07 | -5.43 | 6.246611  | -8.16E-02 | 86290878  | 86291001  | NC_000008.10 |
| cg02858402 | 1.15E-06 | 1.64E-07 | -5.43 | 6.2463855 | -1.36E-01 | 204183519 | 204183642 | NC_000001.10 |
| cg24756966 | 1.15E-06 | 1.64E-07 | -5.43 | 6.245921  | -1.19E-01 | 43478692  | 43478815  | NC_000006.11 |
| cg23395341 | 1.15E-06 | 1.64E-07 | -5.43 | 6.2458055 | -1.32E-01 | 141175075 | 141175198 | NC_000007.13 |
| cg24364967 | 1.15E-06 | 1.64E-07 | -5.43 | 6.2455469 | -5.07E-02 | 55450577  | 55450700  | NC_000002.11 |
| cg14810329 | 1.15E-06 | 1.64E-07 | -5.43 | 6.245418  | -1.04E-01 | 35086653  | 35086776  | NC_000019.9  |
| cg17329287 | 1.15E-06 | 1.64E-07 | -5.43 | 6.2451943 | -8.77E-02 | 44870688  | 44870811  | NC_000001.10 |
| cg13196550 | 1.16E-06 | 1.65E-07 | -5.43 | 6.2444863 | -7.39E-02 | 2290105   | 2290228   | NC_000011.9  |
| cg19191357 | 1.16E-06 | 1.65E-07 | -5.43 | 6.2439932 | -1.61E-02 | 42196520  | 42196643  | NC_000022.10 |
| cg19765451 | 1.16E-06 | 1.65E-07 | -5.43 | 6.2429281 | -5.75E-02 | 94702724  | 94702847  | NC_000001.10 |
| cg02192281 | 1.16E-06 | 1.65E-07 | -5.43 | 6.2423533 | -1.14E-01 | 48478591  | 48478714  | NC_000013.10 |
| cg12532653 | 1.16E-06 | 1.65E-07 | -5.43 | 6.2421047 | -3.61E-02 | 140090559 | 140090682 | NC_000005.9  |
| cg26330133 | 1.16E-06 | 1.65E-07 | -5.43 | 6.2419015 | -2.93E-02 | 35089838  | 35089961  | NC_000020.10 |
| cg08001592 | 1.16E-06 | 1.65E-07 | -5.43 | 6.2415792 | -1.82E-02 | 48350867  | 48350990  | NC_000017.10 |
| cg12908894 | 1.16E-06 | 1.65E-07 | -5.43 | 6.2415788 | -4.23E-02 | 21059481  | 21059604  | NC_000001.10 |
| cg16955499 | 1.16E-06 | 1.65E-07 | -5.43 | 6.2415186 | -3.45E-02 | 46766294  | 46766417  | NC_000012.11 |
| cg08768421 | 1.16E-06 | 1.65E-07 | -5.43 | 6.2398126 | -4.75E-02 | 74764504  | 74764627  | NC_000009.11 |
| cg18151012 | 1.16E-06 | 1.65E-07 | -5.43 | 6.2393282 | -1.43E-01 | 19600909  | 19601032  | NC_000001.10 |
| cg02243437 | 1.16E-06 | 1.65E-07 | -5.43 | 6.2391382 | -3.75E-02 | 61469599  | 61469722  | NC_000010.10 |
| cg10796099 | 1.16E-06 | 1.65E-07 | -5.43 | 6.2388742 | -3.30E-02 | 102594140 | 102594263 | NC_000005.9  |

|            |          |          |       |           |           |           |           |              |
|------------|----------|----------|-------|-----------|-----------|-----------|-----------|--------------|
| cg06149159 | 1.16E-06 | 1.66E-07 | -5.43 | 6.2385826 | -6.51E-02 | 7975374   | 7975497   | NC_000006.11 |
| cg19684668 | 1.16E-06 | 1.66E-07 | -5.43 | 6.2380023 | -9.34E-02 | 76290361  | 76290484  | NC_000011.9  |
| cg17340492 | 1.16E-06 | 1.66E-07 | -5.43 | 6.2376775 | -8.29E-02 | 3932951   | 3933074   | NC_000019.9  |
| cg23039660 | 1.16E-06 | 1.66E-07 | -5.43 | 6.2375745 | -2.06E-02 | 1005884   | 1006007   | NC_000004.11 |
| cg27051171 | 1.16E-06 | 1.66E-07 | -5.43 | 6.2370921 | -2.44E-02 | 7005923   | 7006046   | NC_000002.11 |
| cg08528778 | 1.16E-06 | 1.66E-07 | -5.43 | 6.2369752 | -1.08E-01 | 17634071  | 17634194  | NC_000019.9  |
| cg01096199 | 1.16E-06 | 1.66E-07 | -5.43 | 6.2367656 | -1.44E-01 | 90191045  | 90191168  | NC_000014.8  |
| cg15371509 | 1.16E-06 | 1.66E-07 | -5.43 | 6.2362431 | -1.12E-02 | 153700650 | 153700773 | NC_000001.10 |
| cg25196348 | 1.16E-06 | 1.66E-07 | -5.43 | 6.235888  | -6.59E-02 | 26985910  | 26986033  | NC_000010.10 |
| cg20281375 | 1.17E-06 | 1.66E-07 | -5.43 | 6.235596  | -9.50E-02 | 13946770  | 13946893  | NC_000019.9  |
| cg06829266 | 1.17E-06 | 1.66E-07 | -5.43 | 6.2354551 | -1.11E-01 | 446668    | 446791    | NC_000016.9  |
| cg13957558 | 1.17E-06 | 1.66E-07 | -5.43 | 6.2354099 | -1.73E-01 | 11435095  | 11435218  | NC_000019.9  |
| cg03466932 | 1.17E-06 | 1.66E-07 | -5.43 | 6.2349439 | -8.00E-03 | 26027575  | 26027698  | NC_000006.11 |
| cg16864139 | 1.17E-06 | 1.66E-07 | -5.43 | 6.2348297 | -1.47E-02 | 43864212  | 43864335  | NC_000002.11 |
| cg21217846 | 1.17E-06 | 1.66E-07 | -5.43 | 6.2346775 | -1.18E-01 | 153515539 | 153515662 | NC_000001.10 |
| cg27367526 | 1.17E-06 | 1.66E-07 | -5.43 | 6.2343517 | -7.94E-02 | 89841692  | 89841815  | NC_000007.13 |
| cg18434354 | 1.17E-06 | 1.66E-07 | -5.43 | 6.2331815 | -1.00E-01 | 121224009 | 121224132 | NC_000002.11 |
| cg22502001 | 1.17E-06 | 1.67E-07 | -5.43 | 6.2325225 | -8.56E-02 | 2360018   | 2360141   | NC_000001.10 |
| cg05349159 | 1.17E-06 | 1.67E-07 | -5.43 | 6.2322988 | -1.00E-01 | 247695328 | 247695451 | NC_000001.10 |
| cg15753593 | 1.17E-06 | 1.67E-07 | -5.43 | 6.2320821 | -5.09E-02 | 159726728 | 159726851 | NC_000002.11 |
| cg23661466 | 1.17E-06 | 1.67E-07 | -5.43 | 6.2318886 | -8.55E-02 | 63657173  | 63657296  | NC_000010.10 |
| cg08515989 | 1.17E-06 | 1.67E-07 | -5.43 | 6.2296566 | -1.28E-01 | 29912904  | 29913027  | NC_000016.9  |
| cg17868538 | 1.17E-06 | 1.67E-07 | -5.43 | 6.2287277 | -6.80E-02 | 25232874  | 25232997  | NC_000006.11 |
| cg12255818 | 1.17E-06 | 1.67E-07 | -5.43 | 6.2280834 | -5.52E-02 | 190628473 | 190628596 | NC_000002.11 |
| cg09800519 | 1.17E-06 | 1.67E-07 | -5.43 | 6.2280137 | -3.52E-02 | 137218286 | 137218409 | NC_000009.11 |

|            |          |          |       |           |           |           |           |              |
|------------|----------|----------|-------|-----------|-----------|-----------|-----------|--------------|
| cg16877339 | 1.17E-06 | 1.67E-07 | -5.43 | 6.2274384 | -7.57E-02 | 112151247 | 112151370 | NC_000011.9  |
| cg04755857 | 1.17E-06 | 1.67E-07 | -5.43 | 6.2274075 | -1.16E-01 | 5748162   | 5748285   | NC_000004.11 |
| cg16891968 | 1.18E-06 | 1.68E-07 | -5.43 | 6.2257213 | -9.59E-02 | 29698284  | 29698407  | NC_000006.11 |
| cg25162533 | 1.18E-06 | 1.68E-07 | -5.43 | 6.2251562 | -8.81E-02 | 81032067  | 81032190  | NC_000017.10 |
| cg25974617 | 1.18E-06 | 1.68E-07 | -5.43 | 6.2240755 | -7.51E-02 | 71520962  | 71521085  | NC_000008.10 |
| cg27242911 | 1.18E-06 | 1.68E-07 | -5.43 | 6.2240476 | -3.86E-02 | 74262420  | 74262543  | NC_000010.10 |
| cg20918243 | 1.18E-06 | 1.68E-07 | -5.43 | 6.2233789 | -1.32E-01 | 13030512  | 13030635  | NC_000011.9  |
| cg11201654 | 1.18E-06 | 1.68E-07 | -5.43 | 6.223273  | -1.26E-01 | 29690766  | 29690889  | NC_000006.11 |
| cg23258678 | 1.18E-06 | 1.68E-07 | -5.43 | 6.2232228 | -1.00E-01 | 200004095 | 200004218 | NC_000001.10 |
| cg00333193 | 1.18E-06 | 1.68E-07 | -5.43 | 6.2230249 | -6.54E-02 | 180673604 | 180673727 | NC_000005.9  |
| cg09956047 | 1.18E-06 | 1.68E-07 | -5.43 | 6.2224507 | -9.18E-02 | 1404834   | 1404957   | NC_000016.9  |
| cg17071181 | 1.18E-06 | 1.68E-07 | -5.43 | 6.2222977 | -4.42E-02 | 171757786 | 171757909 | NC_000003.11 |
| cg25483907 | 1.18E-06 | 1.68E-07 | -5.43 | 6.2222042 | -1.05E-01 | 41723017  | 41723140  | NC_000003.11 |
| cg11249902 | 1.18E-06 | 1.69E-07 | -5.43 | 6.2209658 | -6.17E-02 | 77783207  | 77783330  | NC_000017.10 |
| cg11736739 | 1.18E-06 | 1.69E-07 | -5.43 | 6.2205057 | -8.37E-02 | 143541867 | 143541990 | NC_000008.10 |
| cg08173915 | 1.18E-06 | 1.69E-07 | -5.43 | 6.2204245 | -8.21E-02 | 34774164  | 34774287  | NC_000021.8  |
| cg10030250 | 1.18E-06 | 1.69E-07 | -5.43 | 6.220397  | -9.91E-02 | 55540152  | 55540275  | NC_000016.9  |
| cg19337324 | 1.18E-06 | 1.69E-07 | -5.43 | 6.2202052 | -6.33E-02 | 62535704  | 62535827  | NC_000015.9  |
| cg09526343 | 1.18E-06 | 1.69E-07 | -5.43 | 6.2200698 | -4.02E-02 | 189485260 | 189485383 | NC_000004.11 |
| cg02386822 | 1.18E-06 | 1.69E-07 | -5.43 | 6.2200377 | -6.07E-02 | 155162871 | 155162994 | NC_000001.10 |
| cg16638769 | 1.18E-06 | 1.69E-07 | -5.43 | 6.2193014 | -8.64E-02 | 86185202  | 86185325  | NC_000016.9  |
| cg26487582 | 1.18E-06 | 1.69E-07 | -5.43 | 6.2192708 | -1.18E-01 | 25322200  | 25322323  | NC_000004.11 |
| cg07015424 | 1.18E-06 | 1.69E-07 | -5.43 | 6.2187375 | -1.10E-01 | 124360326 | 124360449 | NC_000007.13 |
| cg24109894 | 1.18E-06 | 1.69E-07 | -5.43 | 6.2182368 | -9.06E-02 | 36108212  | 36108335  | NC_000001.10 |
| cg03763077 | 1.18E-06 | 1.69E-07 | -5.43 | 6.2182072 | -3.74E-02 | 74231297  | 74231420  | NC_000002.11 |

|               |          |          |       |           |           |           |           |              |
|---------------|----------|----------|-------|-----------|-----------|-----------|-----------|--------------|
| cg01129238    | 1.19E-06 | 1.69E-07 | -5.43 | 6.217445  | -1.36E-01 | 11779817  | 11779940  | NC_000006.11 |
| cg14553504    | 1.19E-06 | 1.69E-07 | -5.43 | 6.2172436 | -6.36E-02 | 169898657 | 169898780 | NC_000003.11 |
| ch.3.3371471R | 1.19E-06 | 1.69E-07 | -5.43 | 6.2160236 | -6.45E-02 | 173127198 | 173127321 | NC_000003.11 |
| cg02550950    | 1.19E-06 | 1.69E-07 | -5.43 | 6.2157705 | -1.00E-01 | 197122104 | 197122227 | NC_000002.11 |
| cg11582017    | 1.19E-06 | 1.69E-07 | -5.43 | 6.2156753 | -4.10E-02 | 91414499  | 91414622  | NC_000015.9  |
| cg13303520    | 1.19E-06 | 1.70E-07 | -5.43 | 6.214819  | -8.43E-02 | 32856704  | 32856827  | NC_000001.10 |
| cg01049782    | 1.19E-06 | 1.70E-07 | -5.43 | 6.2147323 | -1.18E-01 | 30717954  | 30718077  | NC_000007.13 |
| cg05038209    | 1.19E-06 | 1.70E-07 | -5.43 | 6.2146187 | -1.90E-02 | 87426147  | 87426270  | NC_000016.9  |
| cg18369680    | 1.19E-06 | 1.70E-07 | -5.43 | 6.2143308 | -9.62E-02 | 41984014  | 41984137  | NC_000020.10 |
| cg27476482    | 1.19E-06 | 1.70E-07 | -5.43 | 6.2141957 | -9.79E-02 | 65150453  | 65150576  | NC_000012.11 |
| cg16080121    | 1.19E-06 | 1.70E-07 | -5.43 | 6.2141185 | -1.45E-02 | 37455366  | 37455489  | NC_000004.11 |
| cg05371711    | 1.19E-06 | 1.70E-07 | -5.43 | 6.2130545 | -2.03E-02 | 241506007 | 241506130 | NC_000002.11 |
| cg05839741    | 1.19E-06 | 1.70E-07 | -5.43 | 6.2130062 | -6.53E-02 | 42695625  | 42695748  | NC_000006.11 |
| cg13485889    | 1.19E-06 | 1.70E-07 | -5.43 | 6.2129225 | -2.01E-02 | 52188943  | 52189066  | NC_000003.11 |
| cg03909800    | 1.19E-06 | 1.70E-07 | -5.43 | 6.212222  | -9.63E-02 | 76458005  | 76458128  | NC_000006.11 |
| cg24091474    | 1.19E-06 | 1.70E-07 | -5.43 | 6.2121979 | -8.40E-02 | 36399185  | 36399308  | NC_000019.9  |
| cg25416149    | 1.19E-06 | 1.70E-07 | -5.43 | 6.2115769 | -7.58E-02 | 149488    | 149611    | NC_000017.10 |
| cg07876289    | 1.19E-06 | 1.71E-07 | -5.42 | 6.2097516 | -3.13E-02 | 43048696  | 43048819  | NC_000010.10 |
| cg27438128    | 1.19E-06 | 1.71E-07 | -5.42 | 6.20954   | -9.18E-02 | 43951555  | 43951678  | NC_000010.10 |
| ch.19.683370F | 1.20E-06 | 1.71E-07 | -5.42 | 6.2086413 | -2.11E-02 | 16239180  | 16239303  | NC_000019.9  |
| cg05465916    | 1.20E-06 | 1.71E-07 | -5.42 | 6.2070067 | -7.69E-02 | 7819762   | 7819885   | NC_000017.10 |
| cg00564190    | 1.20E-06 | 1.71E-07 | -5.42 | 6.2068909 | -5.88E-02 | 16759509  | 16759632  | NC_000012.11 |
| cg10863145    | 1.20E-06 | 1.71E-07 | -5.42 | 6.2067271 | -8.67E-02 | 1217260   | 1217383   | NC_000016.9  |
| cg23786152    | 1.20E-06 | 1.71E-07 | -5.42 | 6.2062261 | -9.33E-02 | 105610562 | 105610685 | NC_000010.10 |
| cg05650680    | 1.20E-06 | 1.71E-07 | -5.42 | 6.205745  | -5.52E-02 | 1765217   | 1765340   | NC_000008.10 |

|            |          |          |       |           |           |           |           |              |
|------------|----------|----------|-------|-----------|-----------|-----------|-----------|--------------|
| cg15258416 | 1.20E-06 | 1.71E-07 | -5.42 | 6.2052512 | -1.44E-02 | 29297842  | 29297965  | NC_000017.10 |
| cg22825979 | 1.20E-06 | 1.71E-07 | -5.42 | 6.205211  | -2.46E-02 | 50571203  | 50571326  | NC_000013.10 |
| cg25104133 | 1.20E-06 | 1.71E-07 | -5.42 | 6.2047628 | -1.64E-02 | 178501588 | 178501711 | NC_000001.10 |
| cg07858728 | 1.20E-06 | 1.71E-07 | -5.42 | 6.2046552 | -7.35E-02 | 124319791 | 124319914 | NC_000010.10 |
| cg02062003 | 1.20E-06 | 1.71E-07 | -5.42 | 6.2046076 | -1.70E-02 | 117187060 | 117187183 | NC_000011.9  |
| cg07960084 | 1.20E-06 | 1.71E-07 | -5.42 | 6.2043772 | -1.20E-02 | 21117671  | 21117794  | NC_000017.10 |
| cg23484358 | 1.20E-06 | 1.72E-07 | -5.42 | 6.2039418 | -6.45E-02 | 196695320 | 196695443 | NC_000003.11 |
| cg00995284 | 1.20E-06 | 1.72E-07 | -5.42 | 6.20373   | -2.65E-02 | 231712865 | 231712988 | NC_000002.11 |
| cg14451791 | 1.20E-06 | 1.72E-07 | -5.42 | 6.2035145 | -9.20E-02 | 16040625  | 16040748  | NC_000009.11 |
| cg18003231 | 1.20E-06 | 1.72E-07 | -5.42 | 6.2028575 | -6.39E-02 | 18043745  | 18043868  | NC_000022.10 |
| cg27172893 | 1.20E-06 | 1.72E-07 | -5.42 | 6.2024068 | -2.68E-02 | 30882255  | 30882378  | NC_000006.11 |
| cg24484339 | 1.20E-06 | 1.72E-07 | -5.42 | 6.202072  | -3.35E-02 | 86157525  | 86157648  | NC_000008.10 |
| cg03337575 | 1.20E-06 | 1.72E-07 | -5.42 | 6.201359  | -1.13E-01 | 80716846  | 80716969  | NC_000015.9  |
| cg20272733 | 1.21E-06 | 1.72E-07 | -5.42 | 6.2000693 | -4.05E-02 | 47888144  | 47888267  | NC_000003.11 |
| cg24887387 | 1.21E-06 | 1.72E-07 | -5.42 | 6.1985786 | -9.55E-02 | 40443548  | 40443671  | NC_000008.10 |
| cg24077265 | 1.21E-06 | 1.73E-07 | -5.42 | 6.1972354 | -2.46E-02 | 78448548  | 78448671  | NC_000017.10 |
| cg03193322 | 1.21E-06 | 1.73E-07 | -5.42 | 6.1963647 | -1.28E-01 | 96610720  | 96610843  | NC_000006.11 |
| cg09582200 | 1.21E-06 | 1.73E-07 | -5.42 | 6.1961524 | -9.24E-02 | 117748236 | 117748359 | NC_000011.9  |
| cg05261702 | 1.21E-06 | 1.73E-07 | -5.42 | 6.1959026 | -6.77E-02 | 3574300   | 3574423   | NC_000019.9  |
| cg22757101 | 1.21E-06 | 1.73E-07 | -5.42 | 6.1958127 | -6.31E-02 | 3607136   | 3607259   | NC_000019.9  |
| cg14257676 | 1.21E-06 | 1.73E-07 | -5.42 | 6.1951274 | -3.77E-02 | 10192642  | 10192765  | NC_000008.10 |
| cg19169154 | 1.21E-06 | 1.73E-07 | -5.42 | 6.1946193 | -7.03E-02 | 19287978  | 19288101  | NC_000017.10 |
| cg11872478 | 1.21E-06 | 1.73E-07 | -5.42 | 6.1944683 | -8.21E-02 | 96196596  | 96196719  | NC_000002.11 |
| cg04958411 | 1.21E-06 | 1.73E-07 | -5.42 | 6.1944589 | -7.81E-02 | 77816711  | 77816834  | NC_000017.10 |
| cg26572165 | 1.21E-06 | 1.73E-07 | -5.42 | 6.1937523 | -1.16E-01 | 160807694 | 160807817 | NC_000001.10 |



|               |          |          |       |           |           |           |           |              |
|---------------|----------|----------|-------|-----------|-----------|-----------|-----------|--------------|
| cg25215890    | 1.21E-06 | 1.74E-07 | -5.42 | 6.1927372 | -1.28E-01 | 160651452 | 160651575 | NC_000001.10 |
| cg04477079    | 1.22E-06 | 1.74E-07 | -5.42 | 6.1914631 | -4.27E-02 | 86267202  | 86267325  | NC_000016.9  |
| cg26424147    | 1.22E-06 | 1.74E-07 | -5.42 | 6.191043  | -7.36E-02 | 43055984  | 43056107  | NC_000002.11 |
| cg00507234    | 1.22E-06 | 1.74E-07 | -5.42 | 6.1906846 | -2.44E-02 | 5986979   | 5987102   | NC_000020.10 |
| cg15529542    | 1.22E-06 | 1.74E-07 | -5.42 | 6.1903347 | -9.42E-02 | 86338692  | 86338815  | NC_000015.9  |
| cg19926902    | 1.22E-06 | 1.74E-07 | -5.42 | 6.1898494 | -8.35E-02 | 118015584 | 118015707 | NC_000011.9  |
| cg07945221    | 1.22E-06 | 1.74E-07 | -5.42 | 6.1898058 | -7.60E-02 | 810247    | 810370    | NC_000016.9  |
| cg09253316    | 1.22E-06 | 1.74E-07 | -5.42 | 6.1896117 | -1.50E-02 | 55007705  | 55007828  | NC_000001.10 |
| cg14399863    | 1.22E-06 | 1.74E-07 | -5.42 | 6.1895183 | -7.40E-02 | 707166    | 707289    | NC_000009.11 |
| cg15191795    | 1.22E-06 | 1.74E-07 | -5.42 | 6.189119  | -8.32E-02 | 8727474   | 8727597   | NC_000004.11 |
| cg22797169    | 1.22E-06 | 1.74E-07 | -5.42 | 6.1885673 | -1.16E-01 | 102803407 | 102803530 | NC_000002.11 |
| ch.3.2059622R | 1.22E-06 | 1.74E-07 | -5.42 | 6.1880398 | -1.48E-02 | 103848004 | 103848127 | NC_000003.11 |
| cg00776917    | 1.22E-06 | 1.75E-07 | -5.42 | 6.1871228 | -1.20E-01 | 30691759  | 30691882  | NC_000014.8  |
| cg24828422    | 1.22E-06 | 1.75E-07 | -5.42 | 6.1871111 | -7.49E-02 | 99646755  | 99646878  | NC_000003.11 |
| cg16319142    | 1.22E-06 | 1.75E-07 | -5.42 | 6.1868667 | -1.49E-01 | 118629000 | 118629123 | NC_000008.10 |
| cg03912614    | 1.22E-06 | 1.75E-07 | -5.42 | 6.1863472 | -3.89E-02 | 33734751  | 33734874  | NC_000020.10 |
| cg00093095    | 1.22E-06 | 1.75E-07 | -5.42 | 6.1861791 | -9.48E-02 | 76481380  | 76481503  | NC_000017.10 |
| cg18971647    | 1.22E-06 | 1.75E-07 | -5.42 | 6.1859423 | -3.66E-02 | 83956927  | 83957050  | NC_000004.11 |
| cg13552736    | 1.22E-06 | 1.75E-07 | -5.42 | 6.1857659 | -2.24E-02 | 87354545  | 87354668  | NC_000008.10 |
| cg22123459    | 1.22E-06 | 1.75E-07 | -5.42 | 6.1850596 | -7.33E-02 | 25003499  | 25003622  | NC_000022.10 |
| cg23202388    | 1.22E-06 | 1.75E-07 | -5.42 | 6.1845959 | -7.94E-02 | 914849    | 914972    | NC_000011.9  |
| cg14548777    | 1.22E-06 | 1.75E-07 | -5.42 | 6.1837722 | -9.41E-02 | 62495003  | 62495126  | NC_000017.10 |
| cg11282156    | 1.23E-06 | 1.75E-07 | -5.42 | 6.1827416 | -1.42E-01 | 63428840  | 63428963  | NC_000003.11 |
| cg25080829    | 1.23E-06 | 1.75E-07 | -5.42 | 6.1825865 | -2.35E-02 | 70043844  | 70043967  | NC_000010.10 |
| cg10632000    | 1.23E-06 | 1.75E-07 | -5.42 | 6.1822857 | -2.72E-02 | 42806201  | 42806324  | NC_000019.9  |

|            |          |          |       |           |           |           |           |              |
|------------|----------|----------|-------|-----------|-----------|-----------|-----------|--------------|
| cg10883266 | 1.23E-06 | 1.75E-07 | -5.42 | 6.1819758 | -3.66E-02 | 100741297 | 100741420 | NC_000013.10 |
| cg19051416 | 1.23E-06 | 1.76E-07 | -5.42 | 6.1814456 | -1.90E-02 | 74064585  | 74064708  | NC_000007.13 |
| cg17506061 | 1.23E-06 | 1.76E-07 | -5.42 | 6.1813086 | -7.65E-02 | 79243526  | 79243649  | NC_000015.9  |
| cg17824240 | 1.23E-06 | 1.76E-07 | -5.42 | 6.1800153 | -1.49E-02 | 43892819  | 43892942  | NC_000010.10 |
| cg13606720 | 1.23E-06 | 1.76E-07 | -5.42 | 6.1800114 | -5.75E-02 | 70490853  | 70490976  | NC_000009.11 |
| cg06703222 | 1.23E-06 | 1.76E-07 | -5.42 | 6.1797893 | -1.42E-01 | 69598327  | 69598450  | NC_000016.9  |
| cg12494603 | 1.23E-06 | 1.76E-07 | -5.42 | 6.1796598 | -1.11E-01 | 40755270  | 40755393  | NC_000007.13 |
| cg02688927 | 1.23E-06 | 1.76E-07 | -5.42 | 6.1794668 | -4.38E-02 | 132283812 | 132283935 | NC_000012.11 |
| cg25346720 | 1.23E-06 | 1.76E-07 | -5.42 | 6.1794584 | -1.96E-02 | 73184981  | 73185104  | NC_000007.13 |
| cg01337940 | 1.23E-06 | 1.76E-07 | -5.42 | 6.1778784 | -6.81E-02 | 187597586 | 187597709 | NC_000004.11 |
| cg15240733 | 1.23E-06 | 1.76E-07 | -5.42 | 6.1772826 | -8.51E-02 | 52258691  | 52258814  | NC_000012.11 |
| cg00201670 | 1.23E-06 | 1.76E-07 | -5.42 | 6.1769605 | -1.73E-02 | 46221900  | 46222023  | NC_000021.8  |
| cg05523500 | 1.23E-06 | 1.77E-07 | -5.42 | 6.1758524 | -5.92E-02 | 73046033  | 73046156  | NC_000003.11 |
| cg06175578 | 1.23E-06 | 1.77E-07 | -5.42 | 6.1754779 | -2.76E-02 | 42249154  | 42249277  | NC_000008.10 |
| cg23428922 | 1.23E-06 | 1.77E-07 | -5.42 | 6.1753137 | -6.81E-02 | 56040601  | 56040724  | NC_000012.11 |
| cg03001484 | 1.23E-06 | 1.77E-07 | -5.42 | 6.1750079 | -6.31E-02 | 70507230  | 70507353  | NC_000006.11 |
| cg23873683 | 1.23E-06 | 1.77E-07 | -5.42 | 6.1747776 | -8.25E-02 | 37664088  | 37664211  | NC_000014.8  |
| cg12184221 | 1.24E-06 | 1.77E-07 | -5.42 | 6.1743427 | -1.15E-01 | 119182840 | 119182963 | NC_000003.11 |
| cg01561807 | 1.24E-06 | 1.77E-07 | -5.42 | 6.1742144 | -1.03E-01 | 114307602 | 114307725 | NC_000013.10 |
| cg26035323 | 1.24E-06 | 1.77E-07 | -5.42 | 6.1737688 | -2.19E-02 | 44871156  | 44871279  | NC_000001.10 |
| cg09893504 | 1.24E-06 | 1.77E-07 | -5.42 | 6.1733806 | -9.37E-02 | 11273901  | 11274024  | NC_000002.11 |
| cg05616995 | 1.24E-06 | 1.77E-07 | -5.42 | 6.17336   | -1.10E-01 | 141393361 | 141393484 | NC_000005.9  |
| cg10671066 | 1.24E-06 | 1.77E-07 | -5.42 | 6.1712267 | -7.09E-02 | 160492861 | 160492984 | NC_000001.10 |
| cg01080483 | 1.24E-06 | 1.77E-07 | -5.42 | 6.1707879 | -5.39E-02 | 112807736 | 112807859 | NC_000005.9  |
| cg22376661 | 1.24E-06 | 1.77E-07 | -5.42 | 6.1707342 | -5.09E-02 | 100449647 | 100449770 | NC_000007.13 |

|            |          |          |       |           |           |           |           |              |
|------------|----------|----------|-------|-----------|-----------|-----------|-----------|--------------|
| cg02411950 | 1.24E-06 | 1.78E-07 | -5.42 | 6.1701978 | -1.45E-02 | 127889025 | 127889148 | NC_000008.10 |
| cg12054453 | 1.24E-06 | 1.78E-07 | -5.42 | 6.1697023 | -5.53E-02 | 57915717  | 57915840  | NC_000017.10 |
| cg13456960 | 1.24E-06 | 1.78E-07 | -5.42 | 6.169684  | -1.52E-01 | 5139479   | 5139602   | NC_000019.9  |
| cg19906672 | 1.24E-06 | 1.78E-07 | -5.42 | 6.1694973 | -1.20E-01 | 6918868   | 6918991   | NC_000004.11 |
| cg07961715 | 1.24E-06 | 1.78E-07 | -5.42 | 6.1688713 | -8.27E-02 | 90456686  | 90456809  | NC_000015.9  |
| cg06610368 | 1.24E-06 | 1.78E-07 | -5.42 | 6.1684414 | -1.88E-02 | 86564371  | 86564494  | NC_000005.9  |
| cg16734981 | 1.24E-06 | 1.78E-07 | -5.42 | 6.1673756 | -1.52E-01 | 109259766 | 109259889 | NC_000011.9  |
| cg06285911 | 1.25E-06 | 1.78E-07 | -5.42 | 6.1655816 | -8.34E-02 | 14179364  | 14179487  | NC_000018.9  |
| cg00306905 | 1.25E-06 | 1.78E-07 | -5.42 | 6.1653092 | -3.39E-02 | 121356070 | 121356193 | NC_000010.10 |
| cg15772223 | 1.25E-06 | 1.79E-07 | -5.42 | 6.1648191 | -3.71E-02 | 159943466 | 159943589 | NC_000003.11 |
| cg00832555 | 1.25E-06 | 1.79E-07 | -5.42 | 6.1647829 | -9.08E-02 | 169529716 | 169529839 | NC_000003.11 |
| cg26738080 | 1.25E-06 | 1.79E-07 | -5.42 | 6.1641176 | -5.16E-02 | 52487733  | 52487856  | NC_000003.11 |
| cg27013848 | 1.25E-06 | 1.79E-07 | -5.41 | 6.1636741 | -3.04E-02 | 118572668 | 118572791 | NC_000002.11 |
| cg26187342 | 1.25E-06 | 1.79E-07 | -5.41 | 6.1632936 | -6.31E-02 | 65713858  | 65713981  | NC_000017.10 |
| cg08579070 | 1.25E-06 | 1.79E-07 | -5.41 | 6.1628894 | -1.78E-02 | 76210054  | 76210177  | NC_000013.10 |
| cg02588309 | 1.25E-06 | 1.79E-07 | -5.41 | 6.1618393 | -8.07E-02 | 40756462  | 40756585  | NC_000005.9  |
| cg13852093 | 1.25E-06 | 1.79E-07 | -5.41 | 6.1616822 | -7.91E-02 | 74770815  | 74770938  | NC_000018.9  |
| cg08905662 | 1.25E-06 | 1.79E-07 | -5.41 | 6.1616656 | -2.59E-02 | 102789948 | 102790071 | NC_000007.13 |
| cg24634009 | 1.25E-06 | 1.79E-07 | -5.41 | 6.1616654 | -1.28E-01 | 140554458 | 140554581 | NC_000004.11 |
| cg04113258 | 1.25E-06 | 1.79E-07 | -5.41 | 6.161026  | -9.86E-02 | 17527041  | 17527164  | NC_000016.9  |
| cg26059822 | 1.25E-06 | 1.79E-07 | -5.41 | 6.1610047 | -1.77E-02 | 51976165  | 51976288  | NC_000003.11 |
| cg16334795 | 1.25E-06 | 1.79E-07 | -5.41 | 6.1603235 | -1.03E-01 | 42538894  | 42539017  | NC_000021.8  |
| cg07588128 | 1.25E-06 | 1.79E-07 | -5.41 | 6.1598605 | -3.00E-02 | 23451327  | 23451450  | NC_000014.8  |
| cg08108868 | 1.25E-06 | 1.80E-07 | -5.41 | 6.1591248 | -7.43E-02 | 90920921  | 90921044  | NC_000014.8  |
| cg05815436 | 1.25E-06 | 1.80E-07 | -5.41 | 6.1590617 | -9.37E-02 | 20781165  | 20781288  | NC_000013.10 |

|            |          |          |       |           |           |           |           |              |
|------------|----------|----------|-------|-----------|-----------|-----------|-----------|--------------|
| cg07944445 | 1.25E-06 | 1.80E-07 | -5.41 | 6.1589222 | -7.43E-02 | 155006275 | 155006398 | NC_000007.13 |
| cg17140191 | 1.25E-06 | 1.80E-07 | -5.41 | 6.1585227 | -9.98E-02 | 98971627  | 98971750  | NC_000007.13 |
| cg18841653 | 1.25E-06 | 1.80E-07 | -5.41 | 6.1584256 | -7.34E-02 | 5046097   | 5046220   | NC_000010.10 |
| cg02673636 | 1.25E-06 | 1.80E-07 | -5.41 | 6.1579722 | -5.54E-02 | 109647056 | 109647179 | NC_000001.10 |
| cg00514684 | 1.26E-06 | 1.80E-07 | -5.41 | 6.157742  | -1.66E-02 | 195635643 | 195635766 | NC_000003.11 |
| cg17961535 | 1.26E-06 | 1.80E-07 | -5.41 | 6.1575792 | -9.21E-02 | 172761367 | 172761490 | NC_000005.9  |
| cg06325889 | 1.26E-06 | 1.80E-07 | -5.41 | 6.1569162 | -6.27E-02 | 5042589   | 5042712   | NC_000017.10 |
| cg03958757 | 1.26E-06 | 1.80E-07 | -5.41 | 6.1568537 | -7.55E-02 | 222917998 | 222918121 | NC_000002.11 |
| cg12038298 | 1.26E-06 | 1.80E-07 | -5.41 | 6.1562236 | -9.99E-02 | 1951814   | 1951937   | NC_000011.9  |
| cg14734903 | 1.26E-06 | 1.80E-07 | -5.41 | 6.1560511 | -9.11E-02 | 123617366 | 123617489 | NC_000011.9  |
| cg17652424 | 1.26E-06 | 1.80E-07 | -5.41 | 6.1551302 | -8.94E-02 | 38574118  | 38574241  | NC_000022.10 |
| cg19530831 | 1.26E-06 | 1.80E-07 | -5.41 | 6.1546453 | -8.22E-02 | 76461805  | 76461928  | NC_000014.8  |
| cg01313358 | 1.26E-06 | 1.80E-07 | -5.41 | 6.1546345 | -7.08E-02 | 128841722 | 128841845 | NC_000003.11 |
| cg16493416 | 1.26E-06 | 1.80E-07 | -5.41 | 6.1544658 | -1.95E-02 | 100660494 | 100660617 | NC_000007.13 |
| cg24304318 | 1.26E-06 | 1.81E-07 | -5.41 | 6.1541759 | -9.39E-02 | 25827440  | 25827563  | NC_000007.13 |
| cg24156149 | 1.26E-06 | 1.81E-07 | -5.41 | 6.1540216 | -9.90E-02 | 197033988 | 197034111 | NC_000002.11 |
| cg00533835 | 1.26E-06 | 1.81E-07 | -5.41 | 6.1536731 | -1.27E-01 | 157659434 | 157659557 | NC_000007.13 |
| cg24721964 | 1.26E-06 | 1.81E-07 | -5.41 | 6.1536032 | -1.31E-01 | 150662697 | 150662820 | NC_000003.11 |
| cg01425405 | 1.26E-06 | 1.81E-07 | -5.41 | 6.1535075 | -2.65E-02 | 48072705  | 48072828  | NC_000017.10 |
| cg04891761 | 1.26E-06 | 1.81E-07 | -5.41 | 6.1534274 | -6.85E-02 | 1001973   | 1002096   | NC_000001.10 |
| cg00370227 | 1.26E-06 | 1.81E-07 | -5.41 | 6.1531683 | -7.72E-02 | 46947009  | 46947132  | NC_000002.11 |
| cg07817881 | 1.26E-06 | 1.81E-07 | -5.41 | 6.1527461 | -2.00E-02 | 57039556  | 57039679  | NC_000012.11 |
| cg27478579 | 1.26E-06 | 1.81E-07 | -5.41 | 6.1516952 | -9.55E-02 | 55497012  | 55497135  | NC_000002.11 |
| cg12806892 | 1.26E-06 | 1.81E-07 | -5.41 | 6.1512906 | -1.41E-01 | 113340341 | 113340464 | NC_000012.11 |
| cg06598753 | 1.26E-06 | 1.81E-07 | -5.41 | 6.1500005 | -5.89E-02 | 29139295  | 29139418  | NC_000016.9  |

|            |          |          |       |           |           |           |           |              |
|------------|----------|----------|-------|-----------|-----------|-----------|-----------|--------------|
| cg13868084 | 1.26E-06 | 1.81E-07 | -5.41 | 6.1499726 | -1.16E-01 | 86755504  | 86755627  | NC_000009.11 |
| cg13867039 | 1.27E-06 | 1.81E-07 | -5.41 | 6.1492332 | -8.34E-02 | 3159645   | 3159768   | NC_000001.10 |
| cg01723934 | 1.27E-06 | 1.82E-07 | -5.41 | 6.1477143 | -5.42E-02 | 46680461  | 46680584  | NC_000017.10 |
| cg12785643 | 1.27E-06 | 1.82E-07 | -5.41 | 6.1466125 | -2.38E-02 | 30523313  | 30523436  | NC_000006.11 |
| cg23598604 | 1.27E-06 | 1.82E-07 | -5.41 | 6.1461251 | -9.54E-02 | 99732472  | 99732595  | NC_000001.10 |
| cg19081759 | 1.27E-06 | 1.82E-07 | -5.41 | 6.1457618 | -2.44E-02 | 9771089   | 9771212   | NC_000002.11 |
| cg11847992 | 1.27E-06 | 1.82E-07 | -5.41 | 6.1456833 | -1.06E-01 | 95590917  | 95591040  | NC_000005.9  |
| cg13207333 | 1.27E-06 | 1.82E-07 | -5.41 | 6.1454087 | -4.56E-02 | 29974798  | 29974921  | NC_000006.11 |
| cg19158553 | 1.27E-06 | 1.82E-07 | -5.41 | 6.1447074 | -7.63E-02 | 5356471   | 5356594   | NC_000001.10 |
| cg24296484 | 1.27E-06 | 1.82E-07 | -5.41 | 6.1444373 | -4.20E-02 | 154298543 | 154298666 | NC_000001.10 |
| cg19251656 | 1.27E-06 | 1.82E-07 | -5.41 | 6.1440868 | -9.13E-02 | 100000372 | 100000495 | NC_000001.10 |
| cg27576683 | 1.27E-06 | 1.83E-07 | -5.41 | 6.1429442 | -3.98E-02 | 129948776 | 129948899 | NC_000010.10 |
| cg19549731 | 1.27E-06 | 1.83E-07 | -5.41 | 6.1424844 | -4.33E-02 | 53173497  | 53173620  | NC_000014.8  |
| cg05278204 | 1.27E-06 | 1.83E-07 | -5.41 | 6.1418291 | -5.76E-02 | 93476916  | 93477039  | NC_000004.11 |
| cg24863544 | 1.28E-06 | 1.83E-07 | -5.41 | 6.1413229 | -1.17E-01 | 67278779  | 67278902  | NC_000011.9  |
| cg05962106 | 1.28E-06 | 1.83E-07 | -5.41 | 6.1410832 | -8.49E-02 | 64329383  | 64329506  | NC_000011.9  |
| cg10367330 | 1.28E-06 | 1.83E-07 | -5.41 | 6.1402184 | -4.40E-02 | 29856194  | 29856317  | NC_000016.9  |
| cg14503636 | 1.28E-06 | 1.83E-07 | -5.41 | 6.140133  | -5.36E-02 | 113611556 | 113611679 | NC_000013.10 |
| cg04228553 | 1.28E-06 | 1.83E-07 | -5.41 | 6.1400391 | -2.19E-02 | 15247818  | 15247941  | NC_000003.11 |
| cg14941073 | 1.28E-06 | 1.83E-07 | -5.41 | 6.139588  | -4.58E-02 | 47654312  | 47654435  | NC_000010.10 |
| cg00982214 | 1.28E-06 | 1.84E-07 | -5.41 | 6.1367759 | -6.43E-02 | 202614080 | 202614203 | NC_000001.10 |
| cg18678185 | 1.28E-06 | 1.84E-07 | -5.41 | 6.1366457 | -5.60E-02 | 48895030  | 48895153  | NC_000019.9  |
| cg03926640 | 1.28E-06 | 1.84E-07 | -5.41 | 6.1358994 | -1.09E-01 | 79031376  | 79031499  | NC_000017.10 |
| cg17020337 | 1.28E-06 | 1.84E-07 | -5.41 | 6.1358983 | -3.75E-02 | 150076495 | 150076618 | NC_000007.13 |
| cg02492835 | 1.28E-06 | 1.84E-07 | -5.41 | 6.1348484 | -1.59E-01 | 245508613 | 245508736 | NC_000001.10 |

|            |          |          |       |           |           |           |           |              |
|------------|----------|----------|-------|-----------|-----------|-----------|-----------|--------------|
| cg13331936 | 1.28E-06 | 1.84E-07 | -5.41 | 6.1344995 | -2.94E-02 | 52417019  | 52417142  | NC_000012.11 |
| cg04313733 | 1.28E-06 | 1.84E-07 | -5.41 | 6.1343328 | -9.56E-02 | 22935344  | 22935467  | NC_000007.13 |
| cg26171469 | 1.28E-06 | 1.84E-07 | -5.41 | 6.1342855 | -4.58E-02 | 51307074  | 51307197  | NC_000019.9  |
| cg27621997 | 1.29E-06 | 1.85E-07 | -5.41 | 6.1322909 | -8.78E-02 | 60608634  | 60608757  | NC_000011.9  |
| cg26441372 | 1.29E-06 | 1.85E-07 | -5.41 | 6.1317106 | -1.15E-01 | 41120906  | 41121029  | NC_000019.9  |
| cg13054119 | 1.29E-06 | 1.85E-07 | -5.41 | 6.1315504 | -6.12E-02 | 38098935  | 38099058  | NC_000001.10 |
| cg03992168 | 1.29E-06 | 1.85E-07 | -5.41 | 6.1308247 | -8.38E-02 | 574244    | 574367    | NC_000005.9  |
| cg14818277 | 1.29E-06 | 1.85E-07 | -5.41 | 6.1296546 | -1.43E-01 | 41956427  | 41956550  | NC_000007.13 |
| cg15635480 | 1.29E-06 | 1.85E-07 | -5.41 | 6.1291199 | -5.90E-02 | 35090169  | 35090292  | NC_000020.10 |
| cg06595162 | 1.29E-06 | 1.85E-07 | -5.41 | 6.1287925 | -8.32E-02 | 40141040  | 40141163  | NC_000021.8  |
| cg02750065 | 1.29E-06 | 1.85E-07 | -5.41 | 6.1285859 | -6.87E-02 | 117155382 | 117155505 | NC_000012.11 |
| cg24640182 | 1.29E-06 | 1.85E-07 | -5.41 | 6.1283524 | -7.04E-02 | 32305068  | 32305191  | NC_000006.11 |
| cg00509249 | 1.29E-06 | 1.85E-07 | -5.41 | 6.1279457 | -8.45E-02 | 109615579 | 109615702 | NC_000006.11 |
| cg23055217 | 1.29E-06 | 1.86E-07 | -5.41 | 6.1278416 | -8.28E-02 | 49493865  | 49493988  | NC_000008.10 |
| cg20850016 | 1.29E-06 | 1.86E-07 | -5.41 | 6.1270913 | -4.39E-02 | 5165254   | 5165377   | NC_000003.11 |
| cg18116600 | 1.29E-06 | 1.86E-07 | -5.41 | 6.1260956 | -3.52E-02 | 160210817 | 160210940 | NC_000006.11 |
| cg09044981 | 1.29E-06 | 1.86E-07 | -5.41 | 6.1256705 | -1.20E-01 | 82827677  | 82827800  | NC_000016.9  |
| cg06460328 | 1.29E-06 | 1.86E-07 | -5.41 | 6.1255415 | -1.18E-01 | 89003037  | 89003160  | NC_000016.9  |
| cg24853975 | 1.29E-06 | 1.86E-07 | -5.41 | 6.1254475 | -9.90E-02 | 112666914 | 112667037 | NC_000005.9  |
| cg03188064 | 1.30E-06 | 1.86E-07 | -5.41 | 6.1246903 | -1.52E-01 | 122096667 | 122096790 | NC_000012.11 |
| cg18562121 | 1.30E-06 | 1.86E-07 | -5.41 | 6.1245599 | -1.35E-01 | 27076093  | 27076216  | NC_000002.11 |
| cg22758697 | 1.30E-06 | 1.86E-07 | -5.41 | 6.1245316 | -4.00E-02 | 51572216  | 51572339  | NC_000010.10 |
| cg06603851 | 1.30E-06 | 1.86E-07 | -5.41 | 6.123918  | -7.12E-02 | 1813772   | 1813895   | NC_000005.9  |
| cg17046756 | 1.30E-06 | 1.86E-07 | -5.41 | 6.123098  | -9.30E-02 | 1855851   | 1855974   | NC_000011.9  |
| cg00915858 | 1.30E-06 | 1.87E-07 | -5.41 | 6.1225711 | -6.42E-02 | 31154636  | 31154759  | NC_000016.9  |

|            |          |          |       |           |           |           |           |              |
|------------|----------|----------|-------|-----------|-----------|-----------|-----------|--------------|
| cg21846009 | 1.30E-06 | 1.87E-07 | -5.41 | 6.122486  | -8.78E-02 | 105053550 | 105053673 | NC_000014.8  |
| cg02385848 | 1.30E-06 | 1.87E-07 | -5.41 | 6.1222967 | -8.35E-02 | 166440066 | 166440189 | NC_000006.11 |
| cg06991974 | 1.30E-06 | 1.87E-07 | -5.41 | 6.1218105 | -1.09E-01 | 2984218   | 2984341   | NC_000001.10 |
| cg24884543 | 1.30E-06 | 1.87E-07 | -5.41 | 6.1213125 | -1.41E-01 | 77139072  | 77139195  | NC_000018.9  |
| cg18026235 | 1.30E-06 | 1.87E-07 | -5.41 | 6.1212392 | -9.73E-02 | 38549430  | 38549553  | NC_000001.10 |
| cg06658625 | 1.30E-06 | 1.87E-07 | -5.41 | 6.1212161 | -9.72E-02 | 21133553  | 21133676  | NC_000022.10 |
| cg15310278 | 1.30E-06 | 1.87E-07 | -5.41 | 6.1210281 | -2.12E-02 | 121148690 | 121148813 | NC_000012.11 |
| cg26232247 | 1.30E-06 | 1.87E-07 | -5.41 | 6.1209536 | -1.13E-01 | 19915716  | 19915839  | NC_000020.10 |
| cg19048371 | 1.30E-06 | 1.87E-07 | -5.41 | 6.1203081 | -4.30E-02 | 1137517   | 1137640   | NC_000007.13 |
| cg06380123 | 1.30E-06 | 1.87E-07 | -5.41 | 6.1203064 | -9.37E-02 | 51717978  | 51718101  | NC_000012.11 |
| cg16903217 | 1.30E-06 | 1.87E-07 | -5.41 | 6.1197954 | -6.03E-02 | 201915950 | 201916073 | NC_000001.10 |
| cg18551892 | 1.30E-06 | 1.87E-07 | -5.41 | 6.1196967 | -2.44E-02 | 86667149  | 86667272  | NC_000011.9  |
| cg17707493 | 1.30E-06 | 1.87E-07 | -5.41 | 6.1195246 | -8.37E-02 | 42222405  | 42222528  | NC_000017.10 |
| cg01108243 | 1.30E-06 | 1.87E-07 | -5.41 | 6.1191752 | -8.88E-02 | 57594267  | 57594390  | NC_000020.10 |
| cg23519812 | 1.30E-06 | 1.87E-07 | -5.41 | 6.1190891 | -3.68E-02 | 74036744  | 74036867  | NC_000014.8  |
| cg01977863 | 1.30E-06 | 1.87E-07 | -5.41 | 6.118433  | -7.24E-02 | 79167836  | 79167959  | NC_000017.10 |
| cg08498485 | 1.30E-06 | 1.87E-07 | -5.41 | 6.1180938 | -3.14E-02 | 49711383  | 49711506  | NC_000003.11 |
| cg12232388 | 1.30E-06 | 1.87E-07 | -5.41 | 6.117604  | -1.23E-01 | 125027851 | 125027974 | NC_000012.11 |
| cg26697117 | 1.31E-06 | 1.88E-07 | -5.4  | 6.1141631 | -1.06E-01 | 3820518   | 3820641   | NC_000017.10 |
| cg14741236 | 1.31E-06 | 1.88E-07 | -5.4  | 6.1134725 | -1.12E-01 | 171985354 | 171985477 | NC_000005.9  |
| cg24766104 | 1.31E-06 | 1.88E-07 | -5.4  | 6.1129469 | -2.60E-02 | 16309072  | 16309195  | NC_000019.9  |
| cg06497051 | 1.31E-06 | 1.88E-07 | -5.4  | 6.11287   | -7.57E-02 | 156261200 | 156261323 | NC_000001.10 |
| cg04592204 | 1.31E-06 | 1.89E-07 | -5.4  | 6.112132  | -1.50E-02 | 43965870  | 43965993  | NC_000007.13 |
| cg24119607 | 1.31E-06 | 1.89E-07 | -5.4  | 6.1119301 | -1.22E-01 | 139047739 | 139047862 | NC_000005.9  |
| cg07317843 | 1.31E-06 | 1.89E-07 | -5.4  | 6.1116602 | -1.43E-01 | 116307714 | 116307837 | NC_000010.10 |

|               |          |          |      |           |           |           |           |              |
|---------------|----------|----------|------|-----------|-----------|-----------|-----------|--------------|
| cg25091678    | 1.31E-06 | 1.89E-07 | -5.4 | 6.1115997 | -2.66E-02 | 150481409 | 150481532 | NC_000003.11 |
| cg00815177    | 1.31E-06 | 1.89E-07 | -5.4 | 6.1113416 | -3.90E-02 | 24791193  | 24791316  | NC_000001.10 |
| ch.1.422303F  | 1.31E-06 | 1.89E-07 | -5.4 | 6.1112379 | -4.03E-02 | 11358290  | 11358413  | NC_000001.10 |
| cg01373896    | 1.31E-06 | 1.89E-07 | -5.4 | 6.1106133 | -1.01E-01 | 1854724   | 1854847   | NC_000019.9  |
| cg21163444    | 1.31E-06 | 1.89E-07 | -5.4 | 6.1099735 | -9.14E-02 | 54765670  | 54765793  | NC_000012.11 |
| cg02447122    | 1.31E-06 | 1.89E-07 | -5.4 | 6.1097794 | -1.21E-02 | 25142523  | 25142646  | NC_000002.11 |
| cg07715395    | 1.31E-06 | 1.89E-07 | -5.4 | 6.1096467 | -9.17E-02 | 113512006 | 113512129 | NC_000005.9  |
| cg27250427    | 1.31E-06 | 1.89E-07 | -5.4 | 6.1093776 | -8.46E-02 | 1027695   | 1027818   | NC_000006.11 |
| cg06198069    | 1.31E-06 | 1.89E-07 | -5.4 | 6.1089377 | -1.27E-01 | 36151184  | 36151307  | NC_000020.10 |
| cg13054674    | 1.32E-06 | 1.89E-07 | -5.4 | 6.1084374 | -6.86E-02 | 147809658 | 147809781 | NC_000001.10 |
| cg10433390    | 1.32E-06 | 1.89E-07 | -5.4 | 6.1072193 | -8.85E-02 | 41434430  | 41434553  | NC_000017.10 |
| ch.1.4385290F | 1.32E-06 | 1.90E-07 | -5.4 | 6.1071345 | -2.19E-02 | 224974190 | 224974313 | NC_000001.10 |
| cg24113950    | 1.32E-06 | 1.90E-07 | -5.4 | 6.1067811 | -8.66E-02 | 36577900  | 36578023  | NC_000017.10 |
| cg26353448    | 1.32E-06 | 1.90E-07 | -5.4 | 6.1055813 | -9.88E-02 | 248524236 | 248524359 | NC_000001.10 |
| cg06858263    | 1.32E-06 | 1.90E-07 | -5.4 | 6.1055221 | -7.94E-02 | 157148509 | 157148632 | NC_000007.13 |
| cg15656310    | 1.32E-06 | 1.90E-07 | -5.4 | 6.1044623 | -5.56E-02 | 85843042  | 85843165  | NC_000002.11 |
| cg00067126    | 1.32E-06 | 1.90E-07 | -5.4 | 6.1041037 | -1.79E-02 | 122493570 | 122493693 | NC_000002.11 |
| cg08196307    | 1.32E-06 | 1.90E-07 | -5.4 | 6.1038792 | -8.72E-02 | 73110457  | 73110580  | NC_000014.8  |
| cg23313031    | 1.32E-06 | 1.90E-07 | -5.4 | 6.1038566 | -4.30E-02 | 29974745  | 29974868  | NC_000006.11 |
| ch.6.2680060R | 1.32E-06 | 1.90E-07 | -5.4 | 6.1037515 | -4.29E-02 | 139357863 | 139357986 | NC_000006.11 |
| cg16967434    | 1.32E-06 | 1.90E-07 | -5.4 | 6.1023042 | -1.15E-01 | 142240604 | 142240727 | NC_000008.10 |
| cg13981132    | 1.32E-06 | 1.91E-07 | -5.4 | 6.1020634 | -1.07E-01 | 76734493  | 76734616  | NC_000014.8  |
| cg21863207    | 1.32E-06 | 1.91E-07 | -5.4 | 6.1018678 | -2.47E-02 | 104234989 | 104235112 | NC_000012.11 |
| cg08129310    | 1.32E-06 | 1.91E-07 | -5.4 | 6.1017859 | -1.36E-01 | 95010029  | 95010152  | NC_000012.11 |
| cg15575700    | 1.32E-06 | 1.91E-07 | -5.4 | 6.1017139 | -5.33E-02 | 42072622  | 42072745  | NC_000017.10 |



|               |          |          |      |           |           |           |           |              |
|---------------|----------|----------|------|-----------|-----------|-----------|-----------|--------------|
| cg15882591    | 1.32E-06 | 1.91E-07 | -5.4 | 6.1009663 | -1.22E-01 | 21608557  | 21608680  | NC_000013.10 |
| cg14404318    | 1.32E-06 | 1.91E-07 | -5.4 | 6.1009477 | -6.49E-02 | 74538788  | 74538911  | NC_000017.10 |
| cg00737264    | 1.32E-06 | 1.91E-07 | -5.4 | 6.1009339 | -1.10E-01 | 169049498 | 169049621 | NC_000006.11 |
| cg03309938    | 1.32E-06 | 1.91E-07 | -5.4 | 6.1009013 | -6.64E-02 | 122930448 | 122930571 | NC_000011.9  |
| cg18325160    | 1.33E-06 | 1.91E-07 | -5.4 | 6.1006517 | -1.83E-02 | 193311041 | 193311164 | NC_000003.11 |
| cg16401465    | 1.33E-06 | 1.91E-07 | -5.4 | 6.1006422 | -8.07E-02 | 63809170  | 63809293  | NC_000010.10 |
| cg01377200    | 1.33E-06 | 1.91E-07 | -5.4 | 6.1005118 | -8.13E-02 | 184938316 | 184938439 | NC_000004.11 |
| cg10960354    | 1.33E-06 | 1.91E-07 | -5.4 | 6.0995012 | -1.17E-01 | 195536834 | 195536957 | NC_000003.11 |
| cg05395156    | 1.33E-06 | 1.91E-07 | -5.4 | 6.0990241 | -8.92E-02 | 75631701  | 75631824  | NC_000010.10 |
| cg03946034    | 1.33E-06 | 1.91E-07 | -5.4 | 6.098987  | -1.15E-02 | 91885274  | 91885397  | NC_000014.8  |
| cg18944786    | 1.33E-06 | 1.91E-07 | -5.4 | 6.0986553 | -3.88E-02 | 54813119  | 54813242  | NC_000012.11 |
| cg23120601    | 1.33E-06 | 1.91E-07 | -5.4 | 6.0981973 | -7.84E-02 | 40583227  | 40583350  | NC_000015.9  |
| cg24281422    | 1.33E-06 | 1.92E-07 | -5.4 | 6.0964    | -1.24E-02 | 67976473  | 67976596  | NC_000008.10 |
| cg11479419    | 1.33E-06 | 1.92E-07 | -5.4 | 6.0962929 | -1.40E-01 | 129979292 | 129979415 | NC_000010.10 |
| cg07596819    | 1.33E-06 | 1.92E-07 | -5.4 | 6.0959898 | -9.92E-02 | 184922382 | 184922505 | NC_000004.11 |
| cg23826980    | 1.33E-06 | 1.92E-07 | -5.4 | 6.0957235 | -1.12E-01 | 562848    | 562971    | NC_000012.11 |
| cg23846712    | 1.33E-06 | 1.92E-07 | -5.4 | 6.0954084 | -1.04E-01 | 3607608   | 3607731   | NC_000019.9  |
| ch.16.779861F | 1.33E-06 | 1.92E-07 | -5.4 | 6.0936817 | -4.78E-02 | 25550771  | 25550894  | NC_000016.9  |
| cg20662858    | 1.33E-06 | 1.92E-07 | -5.4 | 6.0931225 | -5.17E-02 | 235166931 | 235167054 | NC_000002.11 |
| cg10712476    | 1.34E-06 | 1.92E-07 | -5.4 | 6.0924036 | -1.10E-01 | 95163986  | 95164109  | NC_000001.10 |
| cg17594004    | 1.34E-06 | 1.93E-07 | -5.4 | 6.0915652 | -6.90E-02 | 183247132 | 183247255 | NC_000004.11 |
| cg23375783    | 1.34E-06 | 1.93E-07 | -5.4 | 6.0911634 | -2.17E-02 | 73008576  | 73008699  | NC_000017.10 |
| cg22761551    | 1.34E-06 | 1.93E-07 | -5.4 | 6.0908419 | -2.83E-02 | 175875380 | 175875503 | NC_000005.9  |
| cg08790004    | 1.34E-06 | 1.93E-07 | -5.4 | 6.0903856 | -2.16E-02 | 28962265  | 28962388  | NC_000016.9  |
| cg14322403    | 1.34E-06 | 1.93E-07 | -5.4 | 6.0902555 | -3.59E-02 | 57123418  | 57123541  | NC_000008.10 |

|            |          |          |      |           |           |           |           |              |
|------------|----------|----------|------|-----------|-----------|-----------|-----------|--------------|
| cg18548362 | 1.34E-06 | 1.93E-07 | -5.4 | 6.0893604 | -2.11E-02 | 1857197   | 1857320   | NC_000004.11 |
| cg03245590 | 1.34E-06 | 1.93E-07 | -5.4 | 6.0888923 | -1.13E-01 | 15329459  | 15329582  | NC_000011.9  |
| cg03018163 | 1.34E-06 | 1.93E-07 | -5.4 | 6.088229  | -7.08E-02 | 49016627  | 49016750  | NC_000019.9  |
| cg01246520 | 1.34E-06 | 1.93E-07 | -5.4 | 6.0881137 | -1.77E-01 | 17644344  | 17644467  | NC_000017.10 |
| cg02826233 | 1.34E-06 | 1.93E-07 | -5.4 | 6.0877276 | -8.78E-02 | 56365894  | 56366017  | NC_000012.11 |
| cg01982835 | 1.34E-06 | 1.93E-07 | -5.4 | 6.0873763 | -1.08E-01 | 34995278  | 34995401  | NC_000020.10 |
| cg00717080 | 1.34E-06 | 1.93E-07 | -5.4 | 6.0873289 | -1.32E-01 | 44483604  | 44483727  | NC_000021.8  |
| cg00686926 | 1.34E-06 | 1.93E-07 | -5.4 | 6.0871711 | -6.52E-02 | 141514782 | 141514905 | NC_000003.11 |
| cg05399115 | 1.34E-06 | 1.94E-07 | -5.4 | 6.0860964 | -3.15E-02 | 46607760  | 46607883  | NC_000003.11 |
| cg10095801 | 1.34E-06 | 1.94E-07 | -5.4 | 6.0851683 | -1.04E-01 | 33785988  | 33786111  | NC_000021.8  |
| cg24049468 | 1.35E-06 | 1.94E-07 | -5.4 | 6.0848935 | -1.30E-01 | 65615281  | 65615404  | NC_000001.10 |
| cg02896515 | 1.35E-06 | 1.94E-07 | -5.4 | 6.0846169 | -1.29E-01 | 46645968  | 46646091  | NC_000001.10 |
| cg11184109 | 1.35E-06 | 1.94E-07 | -5.4 | 6.0845735 | -1.23E-01 | 53164962  | 53165085  | NC_000003.11 |
| cg09421020 | 1.35E-06 | 1.94E-07 | -5.4 | 6.0842906 | -2.05E-02 | 19303389  | 19303512  | NC_000019.9  |
| cg15357075 | 1.35E-06 | 1.94E-07 | -5.4 | 6.0839619 | -1.08E-01 | 123325095 | 123325218 | NC_000011.9  |
| cg02486145 | 1.35E-06 | 1.94E-07 | -5.4 | 6.0824532 | -9.93E-02 | 38334178  | 38334301  | NC_000002.11 |
| cg13983182 | 1.35E-06 | 1.94E-07 | -5.4 | 6.0822446 | -8.78E-02 | 130853333 | 130853456 | NC_000009.11 |
| cg04484126 | 1.35E-06 | 1.95E-07 | -5.4 | 6.08078   | -7.44E-02 | 65839403  | 65839526  | NC_000007.13 |
| cg23369364 | 1.35E-06 | 1.95E-07 | -5.4 | 6.0798686 | -8.67E-02 | 238406478 | 238406601 | NC_000002.11 |
| cg19609242 | 1.35E-06 | 1.95E-07 | -5.4 | 6.0796257 | -8.08E-02 | 38845762  | 38845885  | NC_000005.9  |
| cg10229594 | 1.35E-06 | 1.95E-07 | -5.4 | 6.0792469 | -1.59E-01 | 5277188   | 5277311   | NC_000007.13 |
| cg23279691 | 1.35E-06 | 1.95E-07 | -5.4 | 6.0783377 | -1.24E-02 | 12848510  | 12848633  | NC_000019.9  |
| cg26651810 | 1.35E-06 | 1.95E-07 | -5.4 | 6.0780896 | -1.08E-01 | 53851122  | 53851245  | NC_000016.9  |
| cg02861733 | 1.35E-06 | 1.95E-07 | -5.4 | 6.0776528 | -4.50E-02 | 153930593 | 153930716 | NC_000001.10 |
| cg26023748 | 1.35E-06 | 1.95E-07 | -5.4 | 6.0775632 | -1.17E-01 | 54515151  | 54515274  | NC_000010.10 |

|                |          |          |       |           |           |           |           |              |
|----------------|----------|----------|-------|-----------|-----------|-----------|-----------|--------------|
| cg10422709     | 1.36E-06 | 1.95E-07 | -5.4  | 6.0771703 | -9.65E-02 | 53083978  | 53084101  | NC_000015.9  |
| ch.7.88141140F | 1.36E-06 | 1.95E-07 | -5.4  | 6.0770477 | -2.43E-02 | 88303204  | 88303327  | NC_000007.13 |
| cg15123499     | 1.36E-06 | 1.95E-07 | -5.4  | 6.0770383 | -7.91E-02 | 636241    | 636364    | NC_000010.10 |
| cg20059881     | 1.36E-06 | 1.96E-07 | -5.4  | 6.0762153 | -8.58E-02 | 56655821  | 56655944  | NC_000012.11 |
| cg05657709     | 1.36E-06 | 1.96E-07 | -5.4  | 6.0753797 | -8.49E-02 | 121742496 | 121742619 | NC_000003.11 |
| cg17851657     | 1.36E-06 | 1.96E-07 | -5.4  | 6.074853  | -5.81E-02 | 99680296  | 99680419  | NC_000007.13 |
| cg22030684     | 1.36E-06 | 1.96E-07 | -5.4  | 6.073174  | -3.76E-02 | 40781708  | 40781831  | NC_000001.10 |
| cg01720616     | 1.36E-06 | 1.96E-07 | -5.4  | 6.0724918 | -1.26E-01 | 16101713  | 16101836  | NC_000007.13 |
| ch.2.4679874R  | 1.36E-06 | 1.96E-07 | -5.4  | 6.0724722 | -2.47E-02 | 233430461 | 233430584 | NC_000002.11 |
| cg15980707     | 1.36E-06 | 1.97E-07 | -5.4  | 6.0719381 | -1.21E-01 | 113348722 | 113348845 | NC_000013.10 |
| cg21820394     | 1.36E-06 | 1.97E-07 | -5.4  | 6.0712187 | -1.32E-01 | 77444372  | 77444495  | NC_000014.8  |
| cg01813334     | 1.36E-06 | 1.97E-07 | -5.4  | 6.0709023 | -3.18E-02 | 2394150   | 2394273   | NC_000007.13 |
| cg09584650     | 1.36E-06 | 1.97E-07 | -5.4  | 6.0703588 | -1.31E-01 | 2002012   | 2002135   | NC_000008.10 |
| cg06620117     | 1.37E-06 | 1.97E-07 | -5.39 | 6.0697674 | -1.05E-01 | 23818150  | 23818273  | NC_000003.11 |
| cg26274946     | 1.37E-06 | 1.97E-07 | -5.39 | 6.0686345 | -5.21E-02 | 124220856 | 124220979 | NC_000010.10 |
| cg00380930     | 1.37E-06 | 1.97E-07 | -5.39 | 6.0685725 | -1.06E-01 | 182443989 | 182444112 | NC_000003.11 |
| cg19152518     | 1.37E-06 | 1.97E-07 | -5.39 | 6.0684466 | -2.76E-02 | 31743857  | 31743980  | NC_000012.11 |
| cg11744767     | 1.37E-06 | 1.97E-07 | -5.39 | 6.0682054 | -1.04E-01 | 2907672   | 2907795   | NC_000011.9  |
| cg26218982     | 1.37E-06 | 1.97E-07 | -5.39 | 6.0678587 | -8.56E-02 | 55028756  | 55028879  | NC_000012.11 |
| cg01361361     | 1.37E-06 | 1.97E-07 | -5.39 | 6.0676121 | -1.00E-01 | 188618380 | 188618503 | NC_000003.11 |
| cg23889021     | 1.37E-06 | 1.97E-07 | -5.39 | 6.0675216 | -3.96E-02 | 219264573 | 219264696 | NC_000002.11 |
| cg27402634     | 1.37E-06 | 1.97E-07 | -5.39 | 6.0673963 | -1.17E-01 | 156536860 | 156536983 | NC_000003.11 |
| cg08467643     | 1.37E-06 | 1.98E-07 | -5.39 | 6.0670044 | -6.20E-02 | 183890761 | 183890884 | NC_000003.11 |
| cg13946806     | 1.37E-06 | 1.98E-07 | -5.39 | 6.0669907 | -8.41E-02 | 41969562  | 41969685  | NC_000001.10 |
| cg01942863     | 1.37E-06 | 1.98E-07 | -5.39 | 6.0666225 | -6.07E-02 | 99769432  | 99769555  | NC_000007.13 |

|            |          |          |       |           |           |           |           |              |
|------------|----------|----------|-------|-----------|-----------|-----------|-----------|--------------|
| cg06577708 | 1.37E-06 | 1.98E-07 | -5.39 | 6.0665727 | -2.36E-02 | 64008893  | 64009016  | NC_000003.11 |
| cg18541581 | 1.37E-06 | 1.98E-07 | -5.39 | 6.0662617 | -6.39E-02 | 21905982  | 21906105  | NC_000014.8  |
| cg05468843 | 1.37E-06 | 1.98E-07 | -5.39 | 6.0659344 | -1.20E-01 | 117857990 | 117858113 | NC_000011.9  |
| cg16403912 | 1.37E-06 | 1.98E-07 | -5.39 | 6.0656437 | -2.53E-02 | 23104730  | 23104853  | NC_000008.10 |
| cg07008591 | 1.37E-06 | 1.98E-07 | -5.39 | 6.0652761 | -1.11E-01 | 12809661  | 12809784  | NC_000011.9  |
| cg11335436 | 1.37E-06 | 1.98E-07 | -5.39 | 6.0641418 | -1.53E-02 | 66360554  | 66360677  | NC_000011.9  |
| cg24025538 | 1.37E-06 | 1.98E-07 | -5.39 | 6.0636513 | -1.02E-01 | 50364499  | 50364622  | NC_000019.9  |
| cg04530460 | 1.37E-06 | 1.98E-07 | -5.39 | 6.0626496 | -1.36E-02 | 42858550  | 42858673  | NC_000006.11 |
| cg26334558 | 1.38E-06 | 1.99E-07 | -5.39 | 6.0618357 | -1.39E-01 | 51794933  | 51795056  | NC_000012.11 |
| cg10042178 | 1.38E-06 | 1.99E-07 | -5.39 | 6.0599506 | -2.10E-02 | 87794589  | 87794712  | NC_000001.10 |
| cg00099091 | 1.38E-06 | 1.99E-07 | -5.39 | 6.0598307 | -2.86E-02 | 776809    | 776932    | NC_000016.9  |
| cg06866400 | 1.38E-06 | 1.99E-07 | -5.39 | 6.0591359 | -1.57E-02 | 143771904 | 143772027 | NC_000006.11 |
| cg27641628 | 1.38E-06 | 1.99E-07 | -5.39 | 6.0586011 | -2.46E-02 | 134833031 | 134833154 | NC_000007.13 |
| cg21405705 | 1.38E-06 | 1.99E-07 | -5.39 | 6.057969  | -2.91E-02 | 69260653  | 69260776  | NC_000014.8  |
| cg08836861 | 1.38E-06 | 1.99E-07 | -5.39 | 6.0575263 | -1.29E-01 | 69757867  | 69757990  | NC_000016.9  |
| cg07573020 | 1.38E-06 | 1.99E-07 | -5.39 | 6.0573292 | -9.46E-02 | 14707001  | 14707124  | NC_000005.9  |
| cg00864474 | 1.38E-06 | 2.00E-07 | -5.39 | 6.0566935 | -1.14E-01 | 9143838   | 9143961   | NC_000017.10 |
| cg23588384 | 1.38E-06 | 2.00E-07 | -5.39 | 6.0562274 | -1.20E-01 | 144684634 | 144684757 | NC_000008.10 |
| cg24802835 | 1.38E-06 | 2.00E-07 | -5.39 | 6.0556217 | -1.08E-01 | 184922406 | 184922529 | NC_000004.11 |
| cg18564053 | 1.39E-06 | 2.00E-07 | -5.39 | 6.0544674 | -5.88E-02 | 6303793   | 6303916   | NC_000001.10 |
| cg04639905 | 1.39E-06 | 2.00E-07 | -5.39 | 6.0539485 | -1.08E-01 | 95772721  | 95772844  | NC_000005.9  |
| cg27350307 | 1.39E-06 | 2.00E-07 | -5.39 | 6.0537227 | -1.05E-01 | 8567502   | 8567625   | NC_000019.9  |
| cg24382178 | 1.39E-06 | 2.00E-07 | -5.39 | 6.0537076 | -8.34E-02 | 2066397   | 2066520   | NC_000004.11 |
| cg00411411 | 1.39E-06 | 2.00E-07 | -5.39 | 6.0536879 | -9.18E-02 | 103455165 | 103455288 | NC_000010.10 |
| cg01300852 | 1.39E-06 | 2.00E-07 | -5.39 | 6.0533547 | -1.16E-01 | 166955885 | 166956008 | NC_000006.11 |

|                 |          |          |       |           |           |           |           |              |
|-----------------|----------|----------|-------|-----------|-----------|-----------|-----------|--------------|
| cg18739367      | 1.39E-06 | 2.00E-07 | -5.39 | 6.0529951 | -8.65E-02 | 38330740  | 38330863  | NC_000008.10 |
| cg13038685      | 1.39E-06 | 2.00E-07 | -5.39 | 6.0527389 | -1.12E-01 | 77504478  | 77504601  | NC_000014.8  |
| cg01996714      | 1.39E-06 | 2.01E-07 | -5.39 | 6.0523389 | -7.17E-02 | 3220839   | 3220962   | NC_000020.10 |
| ch.4.132387F    | 1.39E-06 | 2.01E-07 | -5.39 | 6.0516464 | -1.12E-02 | 3219399   | 3219522   | NC_000004.11 |
| cg04794183      | 1.39E-06 | 2.01E-07 | -5.39 | 6.051558  | -8.56E-02 | 54410510  | 54410633  | NC_000012.11 |
| cg17524151      | 1.39E-06 | 2.01E-07 | -5.39 | 6.0515082 | -7.23E-02 | 475494    | 475617    | NC_000016.9  |
| cg01942023      | 1.39E-06 | 2.01E-07 | -5.39 | 6.0514146 | -7.58E-02 | 189837928 | 189838051 | NC_000002.11 |
| cg12899889      | 1.39E-06 | 2.01E-07 | -5.39 | 6.0513594 | -5.05E-02 | 83352362  | 83352485  | NC_000004.11 |
| cg13326581      | 1.39E-06 | 2.01E-07 | -5.39 | 6.0512975 | -2.33E-02 | 154265534 | 154265657 | NC_000004.11 |
| cg09296742      | 1.39E-06 | 2.01E-07 | -5.39 | 6.0509117 | -5.86E-02 | 85779929  | 85780052  | NC_000014.8  |
| cg14768519      | 1.39E-06 | 2.01E-07 | -5.39 | 6.0508339 | -1.41E-01 | 79870056  | 79870179  | NC_000017.10 |
| cg05208812      | 1.39E-06 | 2.01E-07 | -5.39 | 6.0508086 | -2.11E-02 | 48785326  | 48785449  | NC_000017.10 |
| cg04474277      | 1.39E-06 | 2.01E-07 | -5.39 | 6.0507752 | -9.49E-02 | 134376946 | 134377069 | NC_000007.13 |
| cg05059605      | 1.39E-06 | 2.01E-07 | -5.39 | 6.0507267 | -2.35E-02 | 129245568 | 129245691 | NC_000011.9  |
| cg05628625      | 1.39E-06 | 2.01E-07 | -5.39 | 6.0504941 | -6.26E-02 | 3148810   | 3148933   | NC_000001.10 |
| cg02331450      | 1.39E-06 | 2.01E-07 | -5.39 | 6.0496152 | -1.28E-02 | 33155354  | 33155477  | NC_000003.11 |
| cg16136840      | 1.39E-06 | 2.01E-07 | -5.39 | 6.0484121 | -1.93E-02 | 95997740  | 95997863  | NC_000005.9  |
| cg11075561      | 1.39E-06 | 2.01E-07 | -5.39 | 6.0482008 | -1.16E-01 | 36088380  | 36088503  | NC_000006.11 |
| cg11570347      | 1.39E-06 | 2.01E-07 | -5.39 | 6.0480522 | -3.29E-02 | 99850390  | 99850513  | NC_000004.11 |
| cg20483719      | 1.39E-06 | 2.02E-07 | -5.39 | 6.0472298 | -6.22E-02 | 114799652 | 114799775 | NC_000013.10 |
| cg13937817      | 1.39E-06 | 2.02E-07 | -5.39 | 6.0472197 | -8.87E-02 | 72134749  | 72134872  | NC_000009.11 |
| cg11409205      | 1.39E-06 | 2.02E-07 | -5.39 | 6.0471343 | -5.23E-02 | 48357772  | 48357895  | NC_000012.11 |
| cg03687650      | 1.40E-06 | 2.02E-07 | -5.39 | 6.0468498 | -9.28E-02 | 3144685   | 3144808   | NC_000011.9  |
| cg09010904      | 1.40E-06 | 2.02E-07 | -5.39 | 6.0467814 | -2.62E-02 | 51573036  | 51573159  | NC_000003.11 |
| ch.12.19627204F | 1.40E-06 | 2.02E-07 | -5.39 | 6.046657  | -3.04E-02 | 19735937  | 19736060  | NC_000012.11 |

|            |          |          |       |           |           |           |           |              |
|------------|----------|----------|-------|-----------|-----------|-----------|-----------|--------------|
| cg04174986 | 1.40E-06 | 2.02E-07 | -5.39 | 6.0465292 | -3.66E-02 | 30468155  | 30468278  | NC_000020.10 |
| cg04233521 | 1.40E-06 | 2.02E-07 | -5.39 | 6.0463431 | -1.22E-01 | 27743080  | 27743203  | NC_000001.10 |
| cg20592075 | 1.40E-06 | 2.02E-07 | -5.39 | 6.0457986 | -1.04E-01 | 45921668  | 45921791  | NC_000007.13 |
| cg15385623 | 1.40E-06 | 2.02E-07 | -5.39 | 6.0456311 | -3.06E-02 | 24536309  | 24536432  | NC_000003.11 |
| cg20201639 | 1.40E-06 | 2.02E-07 | -5.39 | 6.0450729 | -8.93E-03 | 86388914  | 86389037  | NC_000006.11 |
| cg20689054 | 1.40E-06 | 2.02E-07 | -5.39 | 6.0449466 | -2.64E-02 | 153457152 | 153457275 | NC_000004.11 |
| cg02660440 | 1.40E-06 | 2.02E-07 | -5.39 | 6.0438463 | -7.78E-02 | 10928233  | 10928356  | NC_000019.9  |
| cg15280188 | 1.40E-06 | 2.03E-07 | -5.39 | 6.0417737 | -1.57E-02 | 79934854  | 79934977  | NC_000017.10 |
| cg13978902 | 1.40E-06 | 2.03E-07 | -5.39 | 6.0415905 | -1.03E-01 | 26120728  | 26120851  | NC_000006.11 |
| cg16622651 | 1.40E-06 | 2.03E-07 | -5.39 | 6.0415601 | -1.14E-01 | 76724431  | 76724554  | NC_000006.11 |
| cg13255216 | 1.40E-06 | 2.03E-07 | -5.39 | 6.0406883 | -5.89E-02 | 26625047  | 26625170  | NC_000002.11 |
| cg19715167 | 1.40E-06 | 2.03E-07 | -5.39 | 6.0405476 | -8.07E-02 | 97785444  | 97785567  | NC_000010.10 |
| cg04011470 | 1.40E-06 | 2.03E-07 | -5.39 | 6.040188  | -8.67E-02 | 22079330  | 22079453  | NC_000008.10 |
| cg04851352 | 1.40E-06 | 2.03E-07 | -5.39 | 6.0398765 | -5.12E-02 | 124169118 | 124169241 | NC_000008.10 |
| cg25216704 | 1.40E-06 | 2.03E-07 | -5.39 | 6.039838  | -1.24E-01 | 3485393   | 3485516   | NC_000004.11 |
| cg04670913 | 1.41E-06 | 2.03E-07 | -5.39 | 6.0393264 | -3.16E-02 | 69139822  | 69139945  | NC_000012.11 |
| cg11361262 | 1.41E-06 | 2.03E-07 | -5.39 | 6.0390515 | -6.34E-02 | 86116777  | 86116900  | NC_000002.11 |
| cg00486280 | 1.41E-06 | 2.04E-07 | -5.39 | 6.0372637 | -8.18E-02 | 34988869  | 34988992  | NC_000015.9  |
| cg13756273 | 1.41E-06 | 2.04E-07 | -5.39 | 6.0366178 | -5.90E-02 | 57594513  | 57594636  | NC_000020.10 |
| cg26120756 | 1.41E-06 | 2.04E-07 | -5.39 | 6.0359692 | -2.74E-02 | 125551131 | 125551254 | NC_000008.10 |
| cg10405333 | 1.41E-06 | 2.04E-07 | -5.39 | 6.0357612 | -5.84E-02 | 28516138  | 28516261  | NC_000021.8  |
| cg15135773 | 1.41E-06 | 2.04E-07 | -5.39 | 6.0340532 | -9.98E-02 | 4308372   | 4308495   | NC_000007.13 |
| cg10367724 | 1.41E-06 | 2.04E-07 | -5.39 | 6.0338954 | -7.30E-02 | 2537209   | 2537332   | NC_000004.11 |
| cg14433217 | 1.41E-06 | 2.04E-07 | -5.39 | 6.0335899 | -2.16E-02 | 89419725  | 89419848  | NC_000010.10 |
| cg22811818 | 1.41E-06 | 2.04E-07 | -5.39 | 6.0334569 | -4.73E-02 | 9439389   | 9439512   | NC_000003.11 |

|            |          |          |       |           |           |           |           |              |
|------------|----------|----------|-------|-----------|-----------|-----------|-----------|--------------|
| cg06179485 | 1.42E-06 | 2.05E-07 | -5.39 | 6.0322766 | -5.97E-02 | 33367401  | 33367524  | NC_000001.10 |
| cg26697605 | 1.42E-06 | 2.05E-07 | -5.39 | 6.0313207 | -1.11E-01 | 1850801   | 1850924   | NC_000007.13 |
| cg00387117 | 1.42E-06 | 2.05E-07 | -5.39 | 6.0308027 | -8.43E-02 | 105105844 | 105105967 | NC_000003.11 |
| cg25103895 | 1.42E-06 | 2.05E-07 | -5.39 | 6.0298783 | -5.87E-02 | 64565642  | 64565765  | NC_000010.10 |
| cg02879081 | 1.42E-06 | 2.05E-07 | -5.39 | 6.0293    | -1.09E-01 | 102500684 | 102500807 | NC_000014.8  |
| cg27579805 | 1.42E-06 | 2.05E-07 | -5.39 | 6.0288244 | -1.03E-01 | 76101307  | 76101430  | NC_000017.10 |
| cg06312813 | 1.42E-06 | 2.06E-07 | -5.39 | 6.028373  | -5.40E-02 | 74964493  | 74964616  | NC_000004.11 |
| cg00652942 | 1.42E-06 | 2.06E-07 | -5.39 | 6.0281826 | -4.05E-02 | 170847313 | 170847436 | NC_000005.9  |
| cg24998981 | 1.42E-06 | 2.06E-07 | -5.39 | 6.0278004 | -9.14E-02 | 77441810  | 77441933  | NC_000018.9  |
| cg22629853 | 1.42E-06 | 2.06E-07 | -5.39 | 6.0277784 | -7.55E-02 | 30638455  | 30638578  | NC_000010.10 |
| cg24028634 | 1.42E-06 | 2.06E-07 | -5.39 | 6.0273367 | -1.88E-01 | 113584107 | 113584230 | NC_000013.10 |
| cg07990843 | 1.42E-06 | 2.06E-07 | -5.39 | 6.025622  | -9.11E-02 | 25676201  | 25676324  | NC_000017.10 |
| cg13748577 | 1.42E-06 | 2.06E-07 | -5.39 | 6.0250728 | -2.15E-02 | 148787770 | 148787893 | NC_000007.13 |
| cg11228480 | 1.42E-06 | 2.06E-07 | -5.39 | 6.0250531 | -3.85E-02 | 133066511 | 133066634 | NC_000012.11 |
| cg11690983 | 1.43E-06 | 2.06E-07 | -5.39 | 6.0248706 | -9.19E-02 | 29211119  | 29211242  | NC_000001.10 |
| cg19350469 | 1.43E-06 | 2.06E-07 | -5.39 | 6.0245718 | -9.74E-02 | 15704453  | 15704576  | NC_000004.11 |
| cg17489562 | 1.43E-06 | 2.06E-07 | -5.39 | 6.0240571 | -1.02E-01 | 68038953  | 68039076  | NC_000014.8  |
| cg27379109 | 1.43E-06 | 2.07E-07 | -5.39 | 6.0232188 | -5.78E-02 | 74907287  | 74907410  | NC_000005.9  |
| cg15470102 | 1.43E-06 | 2.07E-07 | -5.38 | 6.0208744 | -1.19E-01 | 1507119   | 1507242   | NC_000011.9  |
| cg13230386 | 1.43E-06 | 2.07E-07 | -5.38 | 6.0206047 | -1.21E-02 | 131241653 | 131241776 | NC_000007.13 |
| cg19444690 | 1.43E-06 | 2.07E-07 | -5.38 | 6.0199992 | -1.68E-02 | 31620253  | 31620376  | NC_000006.11 |
| cg02445395 | 1.43E-06 | 2.07E-07 | -5.38 | 6.0198717 | -1.52E-01 | 157659455 | 157659578 | NC_000007.13 |
| cg00718261 | 1.43E-06 | 2.08E-07 | -5.38 | 6.0188843 | -1.07E-01 | 1787944   | 1788067   | NC_000007.13 |
| cg03682117 | 1.43E-06 | 2.08E-07 | -5.38 | 6.0184104 | -2.33E-02 | 116581829 | 116581952 | NC_000010.10 |
| cg19155007 | 1.43E-06 | 2.08E-07 | -5.38 | 6.0180394 | -2.37E-02 | 183543564 | 183543687 | NC_000003.11 |

|                 |          |          |       |           |           |           |           |              |
|-----------------|----------|----------|-------|-----------|-----------|-----------|-----------|--------------|
| cg06875660      | 1.43E-06 | 2.08E-07 | -5.38 | 6.0177249 | -1.95E-02 | 85040134  | 85040257  | NC_000001.10 |
| cg23281369      | 1.44E-06 | 2.08E-07 | -5.38 | 6.017241  | -1.62E-02 | 91933285  | 91933408  | NC_000009.11 |
| cg16636468      | 1.44E-06 | 2.08E-07 | -5.38 | 6.0168656 | -9.06E-02 | 78800574  | 78800697  | NC_000017.10 |
| cg08331960      | 1.44E-06 | 2.08E-07 | -5.38 | 6.0167218 | -5.11E-02 | 2076597   | 2076720   | NC_000016.9  |
| cg11443888      | 1.44E-06 | 2.08E-07 | -5.38 | 6.0164674 | -8.78E-02 | 44244590  | 44244713  | NC_000006.11 |
| cg25329844      | 1.44E-06 | 2.09E-07 | -5.38 | 6.0141185 | -4.82E-02 | 118015865 | 118015988 | NC_000011.9  |
| cg22804000      | 1.44E-06 | 2.09E-07 | -5.38 | 6.012501  | -1.28E-01 | 24797691  | 24797814  | NC_000007.13 |
| cg17285883      | 1.44E-06 | 2.09E-07 | -5.38 | 6.0120445 | -7.53E-02 | 17896290  | 17896413  | NC_000001.10 |
| cg14466709      | 1.44E-06 | 2.09E-07 | -5.38 | 6.0110654 | -5.62E-02 | 95087590  | 95087713  | NC_000009.11 |
| ch.10.2774258R  | 1.44E-06 | 2.09E-07 | -5.38 | 6.0108019 | -1.45E-02 | 129113226 | 129113349 | NC_000010.10 |
| cg20796999      | 1.44E-06 | 2.09E-07 | -5.38 | 6.0105798 | -1.10E-01 | 75390097  | 75390220  | NC_000017.10 |
| cg15716373      | 1.45E-06 | 2.09E-07 | -5.38 | 6.0101059 | -8.16E-02 | 36655542  | 36655665  | NC_000022.10 |
| cg02349578      | 1.45E-06 | 2.10E-07 | -5.38 | 6.0096732 | -5.89E-02 | 41877870  | 41877993  | NC_000015.9  |
| cg07937803      | 1.45E-06 | 2.10E-07 | -5.38 | 6.0096448 | -1.20E-01 | 3569036   | 3569159   | NC_000019.9  |
| cg21102709      | 1.45E-06 | 2.10E-07 | -5.38 | 6.0092607 | -2.08E-02 | 74723400  | 74723523  | NC_000017.10 |
| cg02255801      | 1.45E-06 | 2.10E-07 | -5.38 | 6.0091125 | -5.58E-02 | 3665189   | 3665312   | NC_000001.10 |
| ch.2.119267486F | 1.45E-06 | 2.10E-07 | -5.38 | 6.0081418 | -1.93E-02 | 119551016 | 119551139 | NC_000002.11 |
| cg13011104      | 1.45E-06 | 2.10E-07 | -5.38 | 6.0077517 | -3.74E-02 | 47151589  | 47151712  | NC_000010.10 |
| cg23045371      | 1.45E-06 | 2.10E-07 | -5.38 | 6.0075304 | -4.57E-02 | 105155760 | 105155883 | NC_000014.8  |
| cg14266999      | 1.45E-06 | 2.10E-07 | -5.38 | 6.0073306 | -4.17E-02 | 33240388  | 33240511  | NC_000006.11 |
| cg23365135      | 1.45E-06 | 2.10E-07 | -5.38 | 6.0069072 | -9.73E-02 | 525684    | 525807    | NC_000007.13 |
| cg03404742      | 1.45E-06 | 2.10E-07 | -5.38 | 6.0068105 | -1.02E-01 | 58314575  | 58314698  | NC_000016.9  |
| cg10091408      | 1.45E-06 | 2.10E-07 | -5.38 | 6.0066488 | -1.16E-01 | 35183637  | 35183760  | NC_000017.10 |
| cg09633240      | 1.45E-06 | 2.10E-07 | -5.38 | 6.0056797 | -9.15E-02 | 18135667  | 18135790  | NC_000016.9  |
| cg01627594      | 1.45E-06 | 2.10E-07 | -5.38 | 6.0056047 | -8.54E-02 | 159241461 | 159241584 | NC_000006.11 |



|              |          |          |       |           |           |           |           |              |
|--------------|----------|----------|-------|-----------|-----------|-----------|-----------|--------------|
| ch.3.994724R | 1.45E-06 | 2.10E-07 | -5.38 | 6.0055994 | -2.77E-02 | 47736700  | 47736823  | NC_000003.11 |
| cg20037470   | 1.45E-06 | 2.11E-07 | -5.38 | 6.0047911 | -2.25E-02 | 30185765  | 30185888  | NC_000017.10 |
| cg17958798   | 1.45E-06 | 2.11E-07 | -5.38 | 6.0043629 | -4.80E-02 | 7200008   | 7200131   | NC_000017.10 |
| cg14247325   | 1.45E-06 | 2.11E-07 | -5.38 | 6.004225  | -1.23E-01 | 36501687  | 36501810  | NC_000013.10 |
| cg18426477   | 1.45E-06 | 2.11E-07 | -5.38 | 6.0037187 | -8.21E-02 | 48764504  | 48764627  | NC_000017.10 |
| cg05762769   | 1.45E-06 | 2.11E-07 | -5.38 | 6.0035366 | -7.31E-02 | 18985610  | 18985733  | NC_000021.8  |
| cg27365701   | 1.46E-06 | 2.11E-07 | -5.38 | 6.002655  | -1.21E-01 | 89744150  | 89744273  | NC_000012.11 |
| cg09179084   | 1.46E-06 | 2.11E-07 | -5.38 | 6.0023491 | -1.09E-01 | 114516368 | 114516491 | NC_000005.9  |
| cg09644562   | 1.46E-06 | 2.11E-07 | -5.38 | 6.0012805 | -8.16E-02 | 140141165 | 140141288 | NC_000006.11 |
| cg09919982   | 1.46E-06 | 2.11E-07 | -5.38 | 6.0011753 | -4.83E-02 | 3451216   | 3451339   | NC_000004.11 |
| cg26538140   | 1.46E-06 | 2.11E-07 | -5.38 | 6.0008681 | -1.06E-01 | 6996791   | 6996914   | NC_000012.11 |
| cg06622199   | 1.46E-06 | 2.11E-07 | -5.38 | 6.0006849 | -7.68E-02 | 75422925  | 75423048  | NC_000017.10 |
| cg22014491   | 1.46E-06 | 2.12E-07 | -5.38 | 6.0005583 | -1.06E-01 | 160777888 | 160778011 | NC_000004.11 |
| cg02790691   | 1.46E-06 | 2.12E-07 | -5.38 | 6.0003395 | -1.16E-01 | 32289550  | 32289673  | NC_000018.9  |
| cg12157440   | 1.46E-06 | 2.12E-07 | -5.38 | 6.0003213 | -7.40E-02 | 46173208  | 46173331  | NC_000021.8  |
| cg13346872   | 1.46E-06 | 2.12E-07 | -5.38 | 5.9997119 | -8.94E-02 | 29395076  | 29395199  | NC_000010.10 |
| cg20758492   | 1.46E-06 | 2.12E-07 | -5.38 | 5.9983973 | -8.49E-02 | 78520239  | 78520362  | NC_000017.10 |
| cg13164675   | 1.46E-06 | 2.12E-07 | -5.38 | 5.9972772 | -7.35E-02 | 74735479  | 74735602  | NC_000015.9  |
| cg03380406   | 1.46E-06 | 2.12E-07 | -5.38 | 5.9968465 | -2.41E-02 | 114393978 | 114394101 | NC_000009.11 |
| cg23033158   | 1.46E-06 | 2.12E-07 | -5.38 | 5.996439  | -1.20E-01 | 117573066 | 117573189 | NC_000003.11 |
| cg02256546   | 1.46E-06 | 2.12E-07 | -5.38 | 5.9963758 | -6.81E-02 | 26582380  | 26582503  | NC_000017.10 |
| cg14970340   | 1.47E-06 | 2.12E-07 | -5.38 | 5.9960885 | -3.06E-02 | 27677001  | 27677124  | NC_000012.11 |
| cg20787903   | 1.47E-06 | 2.13E-07 | -5.38 | 5.9958244 | -3.74E-02 | 30278994  | 30279117  | NC_000022.10 |
| cg00017842   | 1.47E-06 | 2.13E-07 | -5.38 | 5.9946197 | -1.15E-01 | 119528421 | 119528544 | NC_000002.11 |
| cg08426733   | 1.47E-06 | 2.13E-07 | -5.38 | 5.9943393 | -5.39E-02 | 1376740   | 1376863   | NC_000001.10 |

|            |          |          |       |           |           |           |           |              |
|------------|----------|----------|-------|-----------|-----------|-----------|-----------|--------------|
| cg17366378 | 1.47E-06 | 2.13E-07 | -5.38 | 5.9942413 | -2.24E-02 | 45458906  | 45459029  | NC_000015.9  |
| cg24054898 | 1.47E-06 | 2.13E-07 | -5.38 | 5.9938404 | -1.06E-01 | 148721868 | 148721991 | NC_000003.11 |
| cg02269083 | 1.47E-06 | 2.13E-07 | -5.38 | 5.9932982 | -7.44E-02 | 56296607  | 56296730  | NC_000018.9  |
| cg07715909 | 1.47E-06 | 2.13E-07 | -5.38 | 5.9930994 | -5.53E-02 | 1750738   | 1750861   | NC_000011.9  |
| cg20306180 | 1.47E-06 | 2.13E-07 | -5.38 | 5.9930365 | -2.56E-02 | 32340197  | 32340320  | NC_000022.10 |
| cg08856920 | 1.47E-06 | 2.14E-07 | -5.38 | 5.9903166 | -2.07E-02 | 143771642 | 143771765 | NC_000006.11 |
| cg06630241 | 1.47E-06 | 2.14E-07 | -5.38 | 5.9902928 | -1.64E-01 | 93967711  | 93967834  | NC_000012.11 |
| cg01458683 | 1.47E-06 | 2.14E-07 | -5.38 | 5.990278  | -3.35E-02 | 76112187  | 76112310  | NC_000013.10 |
| cg22150661 | 1.47E-06 | 2.14E-07 | -5.38 | 5.9897242 | -1.14E-01 | 104032860 | 104032983 | NC_000008.10 |
| cg14844130 | 1.47E-06 | 2.14E-07 | -5.38 | 5.9896572 | -1.01E-01 | 22598937  | 22599060  | NC_000022.10 |
| cg19886951 | 1.47E-06 | 2.14E-07 | -5.38 | 5.9895604 | -2.64E-02 | 41522854  | 41522977  | NC_000015.9  |
| cg23741759 | 1.48E-06 | 2.14E-07 | -5.38 | 5.9889889 | -8.31E-02 | 86959046  | 86959169  | NC_000010.10 |
| cg23013931 | 1.48E-06 | 2.14E-07 | -5.38 | 5.9881478 | -1.50E-02 | 41214857  | 41214980  | NC_000022.10 |
| cg05280133 | 1.48E-06 | 2.14E-07 | -5.38 | 5.9877985 | -7.08E-02 | 45670068  | 45670191  | NC_000015.9  |
| cg25044876 | 1.48E-06 | 2.14E-07 | -5.38 | 5.9869166 | -1.14E-01 | 43041146  | 43041269  | NC_000022.10 |
| cg09233156 | 1.48E-06 | 2.14E-07 | -5.38 | 5.9869136 | -1.41E-01 | 96531769  | 96531892  | NC_000015.9  |
| cg17890298 | 1.48E-06 | 2.15E-07 | -5.38 | 5.9867964 | -9.93E-02 | 44330621  | 44330744  | NC_000020.10 |
| cg12222588 | 1.48E-06 | 2.15E-07 | -5.38 | 5.9867808 | -1.39E-01 | 34823808  | 34823931  | NC_000018.9  |
| cg22654949 | 1.48E-06 | 2.15E-07 | -5.38 | 5.9862452 | -1.08E-01 | 49198516  | 49198639  | NC_000019.9  |
| cg20630740 | 1.48E-06 | 2.15E-07 | -5.38 | 5.9856379 | -8.67E-02 | 107354612 | 107354735 | NC_000013.10 |
| cg24715412 | 1.48E-06 | 2.15E-07 | -5.38 | 5.9854972 | -1.38E-01 | 184922571 | 184922694 | NC_000004.11 |
| cg23493412 | 1.48E-06 | 2.15E-07 | -5.38 | 5.9851495 | -1.12E-01 | 63491688  | 63491811  | NC_000017.10 |
| cg21989399 | 1.48E-06 | 2.15E-07 | -5.38 | 5.9844597 | -3.26E-02 | 52535730  | 52535853  | NC_000006.11 |
| cg27226949 | 1.48E-06 | 2.15E-07 | -5.38 | 5.9840291 | -3.62E-02 | 107187177 | 107187300 | NC_000013.10 |
| cg25321854 | 1.48E-06 | 2.15E-07 | -5.38 | 5.9838759 | -1.05E-01 | 6916835   | 6916958   | NC_000018.9  |

|            |          |          |       |           |           |           |           |              |
|------------|----------|----------|-------|-----------|-----------|-----------|-----------|--------------|
| cg05689582 | 1.48E-06 | 2.15E-07 | -5.38 | 5.9837566 | -7.96E-02 | 232457587 | 232457710 | NC_000002.11 |
| cg25680916 | 1.48E-06 | 2.15E-07 | -5.38 | 5.9825286 | -2.61E-02 | 53916015  | 53916138  | NC_000003.11 |
| cg25265126 | 1.48E-06 | 2.15E-07 | -5.38 | 5.9824642 | -9.55E-02 | 113891507 | 113891630 | NC_000002.11 |
| cg00819788 | 1.49E-06 | 2.16E-07 | -5.38 | 5.9817662 | -1.10E-01 | 7308579   | 7308702   | NC_000017.10 |
| cg15335525 | 1.49E-06 | 2.16E-07 | -5.38 | 5.9815075 | -2.26E-02 | 68816274  | 68816397  | NC_000011.9  |
| cg12221864 | 1.49E-06 | 2.16E-07 | -5.38 | 5.981438  | -2.94E-02 | 29127558  | 29127681  | NC_000002.11 |
| cg04560689 | 1.49E-06 | 2.16E-07 | -5.38 | 5.9811333 | -3.96E-02 | 75165732  | 75165855  | NC_000011.9  |
| cg00044354 | 1.49E-06 | 2.16E-07 | -5.38 | 5.9804259 | -7.93E-02 | 67389884  | 67390007  | NC_000001.10 |
| cg18747742 | 1.49E-06 | 2.16E-07 | -5.38 | 5.9792766 | -1.39E-01 | 19180751  | 19180874  | NC_000006.11 |
| cg00465319 | 1.49E-06 | 2.16E-07 | -5.38 | 5.9790843 | -8.43E-02 | 123339568 | 123339691 | NC_000003.11 |
| cg14089512 | 1.49E-06 | 2.16E-07 | -5.38 | 5.9781533 | -2.31E-02 | 102106757 | 102106880 | NC_000010.10 |
| cg04026699 | 1.49E-06 | 2.17E-07 | -5.38 | 5.9776551 | -6.62E-02 | 28834513  | 28834636  | NC_000006.11 |
| cg22665089 | 1.49E-06 | 2.17E-07 | -5.38 | 5.9772382 | -3.07E-02 | 97320867  | 97320990  | NC_000010.10 |
| cg19904905 | 1.49E-06 | 2.17E-07 | -5.38 | 5.9763996 | -1.18E-01 | 49469667  | 49469790  | NC_000019.9  |
| cg20175760 | 1.49E-06 | 2.17E-07 | -5.38 | 5.9763671 | -1.61E-02 | 125486985 | 125487108 | NC_000008.10 |
| cg16722001 | 1.49E-06 | 2.17E-07 | -5.38 | 5.9763023 | -1.13E-01 | 75771490  | 75771613  | NC_000010.10 |
| cg14945182 | 1.49E-06 | 2.17E-07 | -5.37 | 5.975374  | -5.69E-02 | 3012879   | 3013002   | NC_000011.9  |
| cg12302830 | 1.49E-06 | 2.17E-07 | -5.37 | 5.9750407 | -3.54E-02 | 33297742  | 33297865  | NC_000020.10 |
| cg01861096 | 1.50E-06 | 2.17E-07 | -5.37 | 5.9734866 | -4.14E-02 | 19279212  | 19279335  | NC_000022.10 |
| cg06812278 | 1.50E-06 | 2.18E-07 | -5.37 | 5.9730428 | -3.05E-02 | 200992475 | 200992598 | NC_000001.10 |
| cg26477221 | 1.50E-06 | 2.18E-07 | -5.37 | 5.9730256 | -1.40E-02 | 13702163  | 13702286  | NC_000010.10 |
| cg06213626 | 1.50E-06 | 2.18E-07 | -5.37 | 5.9726907 | -8.82E-02 | 153586168 | 153586291 | NC_000001.10 |
| cg10477989 | 1.50E-06 | 2.18E-07 | -5.37 | 5.9723233 | -2.21E-02 | 68039601  | 68039724  | NC_000011.9  |
| cg01885859 | 1.50E-06 | 2.18E-07 | -5.37 | 5.9722207 | -1.89E-02 | 153569823 | 153569946 | NC_000005.9  |
| cg05756178 | 1.50E-06 | 2.18E-07 | -5.37 | 5.9717985 | -1.76E-02 | 111805385 | 111805508 | NC_000003.11 |

|            |          |          |       |           |           |           |           |              |
|------------|----------|----------|-------|-----------|-----------|-----------|-----------|--------------|
| cg01838317 | 1.50E-06 | 2.18E-07 | -5.37 | 5.9707203 | -1.41E-02 | 55369861  | 55369984  | NC_000014.8  |
| cg19587280 | 1.50E-06 | 2.18E-07 | -5.37 | 5.9706088 | -8.43E-02 | 18770726  | 18770849  | NC_000019.9  |
| cg21416706 | 1.50E-06 | 2.18E-07 | -5.37 | 5.9700405 | -8.94E-02 | 22609324  | 22609447  | NC_000001.10 |
| cg21234471 | 1.50E-06 | 2.19E-07 | -5.37 | 5.9687991 | -1.27E-01 | 92023797  | 92023920  | NC_000009.11 |
| cg07171527 | 1.51E-06 | 2.19E-07 | -5.37 | 5.9677577 | -1.31E-01 | 8377844   | 8377967   | NC_000001.10 |
| cg25446191 | 1.51E-06 | 2.19E-07 | -5.37 | 5.9676561 | -1.53E-01 | 170077545 | 170077668 | NC_000003.11 |
| cg12061021 | 1.51E-06 | 2.19E-07 | -5.37 | 5.9670451 | -2.57E-02 | 95699574  | 95699697  | NC_000001.10 |
| cg00059652 | 1.51E-06 | 2.19E-07 | -5.37 | 5.9670046 | -1.03E-01 | 67605498  | 67605621  | NC_000017.10 |
| cg12127149 | 1.51E-06 | 2.19E-07 | -5.37 | 5.9669305 | -9.49E-02 | 102487020 | 102487143 | NC_000014.8  |
| cg07161061 | 1.51E-06 | 2.19E-07 | -5.37 | 5.9668173 | -1.00E-01 | 133057193 | 133057316 | NC_000012.11 |
| cg04025675 | 1.51E-06 | 2.19E-07 | -5.37 | 5.966282  | -6.32E-02 | 45671028  | 45671151  | NC_000015.9  |
| cg07821496 | 1.51E-06 | 2.19E-07 | -5.37 | 5.9656462 | -2.08E-02 | 151762942 | 151763065 | NC_000001.10 |
| cg14036069 | 1.51E-06 | 2.19E-07 | -5.37 | 5.9653708 | -8.52E-02 | 127047671 | 127047794 | NC_000009.11 |
| cg04517258 | 1.51E-06 | 2.19E-07 | -5.37 | 5.9653563 | -1.08E-01 | 144094955 | 144095078 | NC_000008.10 |
| cg07787666 | 1.51E-06 | 2.19E-07 | -5.37 | 5.9650236 | -8.79E-02 | 135059289 | 135059412 | NC_000010.10 |
| cg09859596 | 1.51E-06 | 2.19E-07 | -5.37 | 5.9650163 | -8.77E-02 | 21868624  | 21868747  | NC_000001.10 |
| cg01572891 | 1.51E-06 | 2.19E-07 | -5.37 | 5.9647836 | -1.08E-01 | 4184354   | 4184477   | NC_000007.13 |
| cg14437534 | 1.51E-06 | 2.20E-07 | -5.37 | 5.9633388 | -7.41E-02 | 64065031  | 64065154  | NC_000011.9  |
| cg09830866 | 1.51E-06 | 2.20E-07 | -5.37 | 5.9628657 | -8.54E-02 | 771714    | 771837    | NC_000016.9  |
| cg01773692 | 1.51E-06 | 2.20E-07 | -5.37 | 5.961246  | -1.33E-02 | 46693348  | 46693471  | NC_000022.10 |
| cg05595691 | 1.52E-06 | 2.20E-07 | -5.37 | 5.9604373 | -2.91E-02 | 224821967 | 224822090 | NC_000002.11 |
| cg00559845 | 1.52E-06 | 2.21E-07 | -5.37 | 5.9595903 | -5.07E-02 | 134213821 | 134213944 | NC_000011.9  |
| cg18850929 | 1.52E-06 | 2.21E-07 | -5.37 | 5.9593399 | -7.64E-02 | 1828978   | 1829101   | NC_000019.9  |
| cg02622032 | 1.52E-06 | 2.21E-07 | -5.37 | 5.9590573 | -4.89E-02 | 133702899 | 133703022 | NC_000005.9  |
| cg19184963 | 1.52E-06 | 2.21E-07 | -5.37 | 5.958813  | -1.53E-02 | 50708639  | 50708762  | NC_000022.10 |

|                 |          |          |       |           |           |           |           |              |
|-----------------|----------|----------|-------|-----------|-----------|-----------|-----------|--------------|
| cg05469934      | 1.52E-06 | 2.21E-07 | -5.37 | 5.9580128 | -7.43E-02 | 566467    | 566590    | NC_000007.13 |
| cg19091291      | 1.52E-06 | 2.21E-07 | -5.37 | 5.9577144 | -1.28E-01 | 219444794 | 219444917 | NC_000001.10 |
| cg21053323      | 1.52E-06 | 2.21E-07 | -5.37 | 5.9572532 | -1.05E-01 | 46237385  | 46237508  | NC_000021.8  |
| cg04545963      | 1.52E-06 | 2.21E-07 | -5.37 | 5.9572099 | -6.66E-02 | 35872393  | 35872516  | NC_000014.8  |
| cg27058763      | 1.52E-06 | 2.21E-07 | -5.37 | 5.9571014 | -6.42E-02 | 72411400  | 72411523  | NC_000011.9  |
| cg05514072      | 1.52E-06 | 2.21E-07 | -5.37 | 5.9570926 | -5.61E-02 | 32021276  | 32021399  | NC_000006.11 |
| cg05260886      | 1.52E-06 | 2.21E-07 | -5.37 | 5.9568928 | -6.27E-02 | 91854239  | 91854362  | NC_000014.8  |
| cg07218647      | 1.52E-06 | 2.21E-07 | -5.37 | 5.9563944 | -9.07E-02 | 121338498 | 121338621 | NC_000002.11 |
| cg14839087      | 1.52E-06 | 2.21E-07 | -5.37 | 5.9561412 | -1.24E-01 | 73928348  | 73928471  | NC_000002.11 |
| cg18369654      | 1.52E-06 | 2.22E-07 | -5.37 | 5.9555589 | -1.05E-01 | 145417038 | 145417161 | NC_000001.10 |
| cg00459898      | 1.52E-06 | 2.22E-07 | -5.37 | 5.9552349 | -9.85E-02 | 241912309 | 241912432 | NC_000002.11 |
| cg26263477      | 1.52E-06 | 2.22E-07 | -5.37 | 5.9550825 | -2.29E-02 | 1039863   | 1039986   | NC_000019.9  |
| cg06660522      | 1.52E-06 | 2.22E-07 | -5.37 | 5.9549622 | -1.30E-01 | 211725112 | 211725235 | NC_000001.10 |
| cg25484319      | 1.52E-06 | 2.22E-07 | -5.37 | 5.9546912 | -4.52E-02 | 68162304  | 68162427  | NC_000014.8  |
| cg24674304      | 1.52E-06 | 2.22E-07 | -5.37 | 5.9542151 | -5.39E-02 | 44903063  | 44903186  | NC_000003.11 |
| cg16392865      | 1.53E-06 | 2.22E-07 | -5.37 | 5.9540994 | -4.42E-02 | 42893443  | 42893566  | NC_000006.11 |
| cg03627880      | 1.53E-06 | 2.22E-07 | -5.37 | 5.9531943 | -4.69E-02 | 151815985 | 151816108 | NC_000006.11 |
| cg10485752      | 1.53E-06 | 2.22E-07 | -5.37 | 5.952521  | -1.37E-01 | 26021655  | 26021778  | NC_000001.10 |
| cg18142940      | 1.53E-06 | 2.22E-07 | -5.37 | 5.9525079 | -8.21E-02 | 156594108 | 156594231 | NC_000001.10 |
| cg23244761      | 1.53E-06 | 2.22E-07 | -5.37 | 5.952475  | -1.51E-01 | 161796850 | 161796973 | NC_000006.11 |
| cg20201177      | 1.53E-06 | 2.22E-07 | -5.37 | 5.9516048 | -1.07E-01 | 6162780   | 6162903   | NC_000010.10 |
| cg04003615      | 1.53E-06 | 2.23E-07 | -5.37 | 5.9512732 | -6.72E-02 | 179486382 | 179486505 | NC_000005.9  |
| ch.10.47925130F | 1.53E-06 | 2.23E-07 | -5.37 | 5.9508779 | -2.04E-02 | 48305124  | 48305247  | NC_000010.10 |
| cg06443973      | 1.53E-06 | 2.23E-07 | -5.37 | 5.9508391 | -3.38E-02 | 105501904 | 105502027 | NC_000012.11 |
| cg09422291      | 1.53E-06 | 2.23E-07 | -5.37 | 5.950435  | -5.86E-02 | 7586940   | 7587063   | NC_000019.9  |

|            |          |          |       |           |           |           |           |              |
|------------|----------|----------|-------|-----------|-----------|-----------|-----------|--------------|
| cg20824939 | 1.53E-06 | 2.23E-07 | -5.37 | 5.9487755 | -1.57E-01 | 205255082 | 205255205 | NC_000001.10 |
| cg00479718 | 1.53E-06 | 2.23E-07 | -5.37 | 5.948743  | -1.27E-01 | 691761    | 691884    | NC_000007.13 |
| cg07057670 | 1.54E-06 | 2.23E-07 | -5.37 | 5.9473581 | -3.26E-02 | 185000824 | 185000947 | NC_000003.11 |
| cg13917151 | 1.54E-06 | 2.23E-07 | -5.37 | 5.9471748 | -1.05E-01 | 27730185  | 27730308  | NC_000001.10 |
| cg23634401 | 1.54E-06 | 2.24E-07 | -5.37 | 5.9462678 | -9.89E-02 | 58521438  | 58521561  | NC_000015.9  |
| cg02189738 | 1.54E-06 | 2.24E-07 | -5.37 | 5.9459417 | -8.25E-02 | 104639890 | 104640013 | NC_000014.8  |
| cg10643271 | 1.54E-06 | 2.24E-07 | -5.37 | 5.9458014 | -1.07E-01 | 129309330 | 129309453 | NC_000012.11 |
| cg21776403 | 1.54E-06 | 2.24E-07 | -5.37 | 5.945255  | -3.48E-02 | 174961197 | 174961320 | NC_000005.9  |
| cg16822035 | 1.54E-06 | 2.24E-07 | -5.37 | 5.9445888 | -1.01E-01 | 113633379 | 113633502 | NC_000013.10 |
| cg06385449 | 1.54E-06 | 2.24E-07 | -5.37 | 5.944544  | -1.28E-01 | 63974123  | 63974246  | NC_000011.9  |
| cg22803285 | 1.54E-06 | 2.24E-07 | -5.37 | 5.9441064 | -9.23E-02 | 25335583  | 25335706  | NC_000022.10 |
| cg23259289 | 1.54E-06 | 2.24E-07 | -5.37 | 5.9434483 | -8.32E-02 | 12888154  | 12888277  | NC_000017.10 |
| cg00387090 | 1.54E-06 | 2.24E-07 | -5.37 | 5.9434082 | -1.08E-01 | 201615401 | 201615524 | NC_000001.10 |
| cg15252948 | 1.54E-06 | 2.24E-07 | -5.37 | 5.9432341 | -2.17E-02 | 42698594  | 42698717  | NC_000008.10 |
| cg22708112 | 1.54E-06 | 2.24E-07 | -5.37 | 5.9431816 | -1.02E-01 | 57883392  | 57883515  | NC_000015.9  |
| cg00561775 | 1.54E-06 | 2.24E-07 | -5.37 | 5.9431724 | -1.14E-01 | 1159805   | 1159928   | NC_000016.9  |
| cg08373187 | 1.54E-06 | 2.24E-07 | -5.37 | 5.9429844 | -8.22E-02 | 134912048 | 134912171 | NC_000005.9  |
| cg02122525 | 1.54E-06 | 2.24E-07 | -5.37 | 5.9427817 | -6.62E-02 | 242801252 | 242801375 | NC_000002.11 |
| cg10442549 | 1.54E-06 | 2.24E-07 | -5.37 | 5.9427301 | -1.07E-01 | 230818260 | 230818383 | NC_000001.10 |
| cg00946491 | 1.54E-06 | 2.25E-07 | -5.37 | 5.9424575 | -6.55E-02 | 33760517  | 33760640  | NC_000013.10 |
| cg20621200 | 1.54E-06 | 2.25E-07 | -5.37 | 5.9416929 | -8.92E-02 | 94883516  | 94883639  | NC_000011.9  |
| cg06358191 | 1.54E-06 | 2.25E-07 | -5.37 | 5.9416239 | -9.35E-02 | 1227138   | 1227261   | NC_000001.10 |
| cg13817265 | 1.54E-06 | 2.25E-07 | -5.37 | 5.941114  | -8.57E-02 | 24104357  | 24104480  | NC_000012.11 |
| cg10257521 | 1.54E-06 | 2.25E-07 | -5.37 | 5.9409749 | -4.86E-02 | 1903828   | 1903951   | NC_000011.9  |
| cg09145690 | 1.54E-06 | 2.25E-07 | -5.37 | 5.9407378 | -9.94E-02 | 142053957 | 142054080 | NC_000008.10 |

|            |          |          |       |           |           |           |           |              |
|------------|----------|----------|-------|-----------|-----------|-----------|-----------|--------------|
| cg20136738 | 1.54E-06 | 2.25E-07 | -5.37 | 5.9405761 | -2.16E-02 | 231114860 | 231114983 | NC_000001.10 |
| cg14431361 | 1.55E-06 | 2.25E-07 | -5.37 | 5.9403534 | -7.62E-02 | 70611386  | 70611509  | NC_000017.10 |
| cg19128113 | 1.55E-06 | 2.25E-07 | -5.37 | 5.9400517 | -1.34E-01 | 174439300 | 174439423 | NC_000004.11 |
| cg04724720 | 1.55E-06 | 2.25E-07 | -5.37 | 5.9398411 | -1.60E-02 | 65640939  | 65641062  | NC_000011.9  |
| cg20946037 | 1.55E-06 | 2.25E-07 | -5.37 | 5.9393625 | -8.44E-02 | 150582344 | 150582467 | NC_000001.10 |
| cg21126183 | 1.55E-06 | 2.25E-07 | -5.37 | 5.9388404 | -4.50E-02 | 34371529  | 34371652  | NC_000012.11 |
| cg20282814 | 1.55E-06 | 2.25E-07 | -5.37 | 5.9387886 | -1.12E-01 | 43423072  | 43423195  | NC_000001.10 |
| cg07372500 | 1.55E-06 | 2.26E-07 | -5.37 | 5.9381291 | -5.08E-02 | 177367013 | 177367136 | NC_000005.9  |
| cg26528298 | 1.55E-06 | 2.26E-07 | -5.37 | 5.9378321 | -1.06E-01 | 112375206 | 112375329 | NC_000006.11 |
| cg00294550 | 1.55E-06 | 2.26E-07 | -5.37 | 5.9375677 | -1.23E-01 | 62144786  | 62144909  | NC_000010.10 |
| cg22264436 | 1.55E-06 | 2.26E-07 | -5.37 | 5.9372429 | -9.00E-02 | 41836423  | 41836546  | NC_000017.10 |
| cg07857404 | 1.55E-06 | 2.26E-07 | -5.37 | 5.9367573 | -2.66E-02 | 33378502  | 33378625  | NC_000006.11 |
| cg14402224 | 1.55E-06 | 2.26E-07 | -5.37 | 5.936675  | -6.13E-02 | 50570049  | 50570172  | NC_000007.13 |
| cg16361867 | 1.55E-06 | 2.26E-07 | -5.37 | 5.9356263 | -9.78E-02 | 120581355 | 120581478 | NC_000011.9  |
| cg10061235 | 1.55E-06 | 2.26E-07 | -5.37 | 5.9347438 | -2.76E-02 | 4768697   | 4768820   | NC_000007.13 |
| cg04190037 | 1.55E-06 | 2.26E-07 | -5.37 | 5.934114  | -1.30E-01 | 113105962 | 113106085 | NC_000013.10 |
| cg05093836 | 1.55E-06 | 2.27E-07 | -5.37 | 5.9340508 | -3.26E-02 | 30594590  | 30594713  | NC_000006.11 |
| cg19738281 | 1.55E-06 | 2.27E-07 | -5.37 | 5.9340208 | -1.16E-01 | 30939684  | 30939807  | NC_000019.9  |
| cg08265418 | 1.55E-06 | 2.27E-07 | -5.37 | 5.9336944 | -2.06E-02 | 134123803 | 134123926 | NC_000011.9  |
| cg07231005 | 1.56E-06 | 2.27E-07 | -5.37 | 5.9332872 | -3.75E-02 | 58668634  | 58668757  | NC_000011.9  |
| cg09225162 | 1.56E-06 | 2.27E-07 | -5.37 | 5.9328097 | -9.23E-02 | 56757806  | 56757929  | NC_000015.9  |
| cg17987982 | 1.56E-06 | 2.27E-07 | -5.37 | 5.9327898 | -1.07E-01 | 158820591 | 158820714 | NC_000007.13 |
| cg21760363 | 1.56E-06 | 2.27E-07 | -5.37 | 5.9327469 | -9.91E-02 | 167835467 | 167835590 | NC_000003.11 |
| cg10469659 | 1.56E-06 | 2.27E-07 | -5.37 | 5.9326282 | -8.18E-02 | 51057714  | 51057837  | NC_000015.9  |
| cg03688058 | 1.56E-06 | 2.27E-07 | -5.37 | 5.9321349 | -3.57E-02 | 89840708  | 89840831  | NC_000007.13 |

|                |          |          |       |           |           |           |           |              |
|----------------|----------|----------|-------|-----------|-----------|-----------|-----------|--------------|
| cg10122050     | 1.56E-06 | 2.27E-07 | -5.37 | 5.9318515 | -7.27E-02 | 106059062 | 106059185 | NC_000010.10 |
| cg10015830     | 1.56E-06 | 2.27E-07 | -5.37 | 5.9314045 | -6.86E-02 | 228727869 | 228727992 | NC_000002.11 |
| cg06868098     | 1.56E-06 | 2.27E-07 | -5.37 | 5.9308943 | -7.57E-02 | 58773623  | 58773746  | NC_000001.10 |
| ch.12.2571969F | 1.56E-06 | 2.27E-07 | -5.37 | 5.9303004 | -4.19E-02 | 122873956 | 122874079 | NC_000012.11 |
| cg07274522     | 1.56E-06 | 2.27E-07 | -5.37 | 5.930279  | -5.09E-02 | 124019284 | 124019407 | NC_000012.11 |
| cg13536107     | 1.56E-06 | 2.27E-07 | -5.37 | 5.9302789 | -7.69E-02 | 153437193 | 153437316 | NC_000004.11 |
| cg26378179     | 1.56E-06 | 2.27E-07 | -5.37 | 5.9297967 | -1.28E-01 | 87477349  | 87477472  | NC_000014.8  |
| cg13977583     | 1.56E-06 | 2.28E-07 | -5.37 | 5.9289685 | -6.23E-02 | 129567043 | 129567166 | NC_000009.11 |
| cg04114197     | 1.56E-06 | 2.28E-07 | -5.36 | 5.9278624 | -2.21E-02 | 129765616 | 129765739 | NC_000011.9  |
| cg15150550     | 1.56E-06 | 2.28E-07 | -5.36 | 5.9276794 | -9.19E-02 | 223174905 | 223175028 | NC_000001.10 |
| cg13625403     | 1.56E-06 | 2.28E-07 | -5.36 | 5.9275051 | -1.09E-01 | 120008510 | 120008633 | NC_000011.9  |
| cg03734402     | 1.56E-06 | 2.28E-07 | -5.36 | 5.926901  | -3.23E-02 | 6265417   | 6265540   | NC_000001.10 |
| cg21037314     | 1.57E-06 | 2.28E-07 | -5.36 | 5.926193  | -1.69E-02 | 23487440  | 23487563  | NC_000022.10 |
| cg24163263     | 1.57E-06 | 2.29E-07 | -5.36 | 5.92548   | -1.25E-01 | 107335632 | 107335755 | NC_000013.10 |
| cg00292087     | 1.57E-06 | 2.29E-07 | -5.36 | 5.9253741 | -1.78E-02 | 142138611 | 142138734 | NC_000008.10 |
| cg22667358     | 1.57E-06 | 2.29E-07 | -5.36 | 5.9252235 | -9.54E-02 | 3171146   | 3171269   | NC_000010.10 |
| cg01897944     | 1.57E-06 | 2.29E-07 | -5.36 | 5.9251428 | -1.22E-01 | 67633729  | 67633852  | NC_000017.10 |
| cg20522104     | 1.57E-06 | 2.29E-07 | -5.36 | 5.9249995 | -8.51E-02 | 83251615  | 83251738  | NC_000011.9  |
| cg07451886     | 1.57E-06 | 2.29E-07 | -5.36 | 5.9249113 | -8.17E-02 | 3097405   | 3097528   | NC_000016.9  |
| ch.20.437154R  | 1.57E-06 | 2.29E-07 | -5.36 | 5.9244794 | -7.95E-03 | 20495441  | 20495564  | NC_000020.10 |
| cg23009327     | 1.57E-06 | 2.29E-07 | -5.36 | 5.9242938 | -7.72E-02 | 1630248   | 1630371   | NC_000019.9  |
| cg09366145     | 1.57E-06 | 2.29E-07 | -5.36 | 5.9235038 | -1.60E-02 | 31763873  | 31763996  | NC_000006.11 |
| cg22987011     | 1.57E-06 | 2.29E-07 | -5.36 | 5.9233049 | -1.11E-01 | 75753776  | 75753899  | NC_000005.9  |
| cg19963856     | 1.57E-06 | 2.29E-07 | -5.36 | 5.9221776 | -1.64E-01 | 33759573  | 33759696  | NC_000017.10 |
| cg23561979     | 1.57E-06 | 2.29E-07 | -5.36 | 5.9217372 | -1.50E-01 | 42329535  | 42329658  | NC_000002.11 |



|            |          |          |       |           |           |           |           |              |
|------------|----------|----------|-------|-----------|-----------|-----------|-----------|--------------|
| cg02390801 | 1.57E-06 | 2.29E-07 | -5.36 | 5.9213589 | -8.07E-02 | 74528565  | 74528688  | NC_000015.9  |
| cg23079702 | 1.57E-06 | 2.30E-07 | -5.36 | 5.9207049 | -9.65E-02 | 1394909   | 1395032   | NC_000011.9  |
| cg21544931 | 1.57E-06 | 2.30E-07 | -5.36 | 5.9201592 | -7.23E-02 | 36474744  | 36474867  | NC_000011.9  |
| cg25886382 | 1.58E-06 | 2.30E-07 | -5.36 | 5.9198114 | -4.12E-02 | 26760664  | 26760787  | NC_000013.10 |
| cg20870752 | 1.58E-06 | 2.30E-07 | -5.36 | 5.9197138 | -7.30E-02 | 11016942  | 11017065  | NC_000007.13 |
| cg22691746 | 1.58E-06 | 2.30E-07 | -5.36 | 5.9195625 | -7.80E-02 | 76381450  | 76381573  | NC_000011.9  |
| cg14472251 | 1.58E-06 | 2.30E-07 | -5.36 | 5.9194607 | -3.99E-02 | 55493991  | 55494114  | NC_000014.8  |
| cg03313364 | 1.58E-06 | 2.30E-07 | -5.36 | 5.9190882 | -1.01E-01 | 40440904  | 40441027  | NC_000017.10 |
| cg26307820 | 1.58E-06 | 2.30E-07 | -5.36 | 5.9187991 | -8.06E-03 | 180617633 | 180617756 | NC_000005.9  |
| cg05403817 | 1.58E-06 | 2.30E-07 | -5.36 | 5.9176721 | -5.84E-02 | 3228616   | 3228739   | NC_000020.10 |
| cg25840210 | 1.58E-06 | 2.30E-07 | -5.36 | 5.9171688 | -2.79E-02 | 45152287  | 45152410  | NC_000013.10 |
| cg06408053 | 1.58E-06 | 2.31E-07 | -5.36 | 5.9170167 | -1.06E-01 | 100680681 | 100680804 | NC_000010.10 |
| cg09914444 | 1.58E-06 | 2.31E-07 | -5.36 | 5.9168559 | -9.35E-02 | 46972183  | 46972306  | NC_000001.10 |
| cg22489519 | 1.58E-06 | 2.31E-07 | -5.36 | 5.9162681 | -2.97E-02 | 73269952  | 73270075  | NC_000007.13 |
| cg20494553 | 1.58E-06 | 2.31E-07 | -5.36 | 5.916214  | -3.28E-02 | 71554112  | 71554235  | NC_000004.11 |
| cg22118655 | 1.58E-06 | 2.31E-07 | -5.36 | 5.9158304 | -4.05E-02 | 37823656  | 37823779  | NC_000022.10 |
| cg21797718 | 1.58E-06 | 2.31E-07 | -5.36 | 5.915727  | -7.88E-02 | 34024416  | 34024539  | NC_000006.11 |
| cg06102602 | 1.58E-06 | 2.31E-07 | -5.36 | 5.9156277 | -1.42E-01 | 96895446  | 96895569  | NC_000012.11 |
| cg01106303 | 1.58E-06 | 2.31E-07 | -5.36 | 5.9154595 | -4.73E-02 | 67899264  | 67899387  | NC_000016.9  |
| cg06506598 | 1.58E-06 | 2.31E-07 | -5.36 | 5.9137927 | -2.75E-02 | 79783889  | 79784012  | NC_000005.9  |
| cg18413025 | 1.59E-06 | 2.31E-07 | -5.36 | 5.9132788 | -1.03E-01 | 169418081 | 169418204 | NC_000004.11 |
| cg00503866 | 1.59E-06 | 2.32E-07 | -5.36 | 5.9127454 | -1.04E-01 | 39546656  | 39546779  | NC_000001.10 |
| cg24012925 | 1.59E-06 | 2.32E-07 | -5.36 | 5.9120103 | -4.98E-02 | 633418    | 633541    | NC_000020.10 |
| cg08838779 | 1.59E-06 | 2.32E-07 | -5.36 | 5.9119373 | -8.87E-02 | 94411006  | 94411129  | NC_000008.10 |
| cg18437839 | 1.59E-06 | 2.32E-07 | -5.36 | 5.9117117 | -7.56E-02 | 201445713 | 201445836 | NC_000001.10 |

|            |          |          |       |           |           |           |           |              |
|------------|----------|----------|-------|-----------|-----------|-----------|-----------|--------------|
| cg20112500 | 1.59E-06 | 2.32E-07 | -5.36 | 5.9109773 | -1.11E-01 | 31021744  | 31021867  | NC_000006.11 |
| cg07907564 | 1.59E-06 | 2.32E-07 | -5.36 | 5.910773  | -3.56E-02 | 73589340  | 73589463  | NC_000007.13 |
| cg22391718 | 1.59E-06 | 2.32E-07 | -5.36 | 5.9097524 | -1.00E-01 | 110326285 | 110326408 | NC_000001.10 |
| cg04886703 | 1.59E-06 | 2.32E-07 | -5.36 | 5.9097075 | -1.18E-01 | 45250266  | 45250389  | NC_000001.10 |
| cg21752270 | 1.59E-06 | 2.32E-07 | -5.36 | 5.9095336 | -7.54E-02 | 2813528   | 2813651   | NC_000011.9  |
| cg14823389 | 1.59E-06 | 2.32E-07 | -5.36 | 5.9091744 | -5.19E-02 | 101398152 | 101398275 | NC_000007.13 |
| cg20806264 | 1.59E-06 | 2.33E-07 | -5.36 | 5.9078086 | -6.11E-02 | 47005728  | 47005851  | NC_000001.10 |
| cg08133496 | 1.59E-06 | 2.33E-07 | -5.36 | 5.9076273 | -6.25E-02 | 44116911  | 44117034  | NC_000011.9  |
| cg09425611 | 1.59E-06 | 2.33E-07 | -5.36 | 5.9072232 | -8.40E-02 | 55868370  | 55868493  | NC_000016.9  |
| cg16881960 | 1.59E-06 | 2.33E-07 | -5.36 | 5.9071918 | -9.88E-02 | 17338842  | 17338965  | NC_000017.10 |
| cg07089783 | 1.60E-06 | 2.33E-07 | -5.36 | 5.9064442 | -5.33E-02 | 31607955  | 31608078  | NC_000010.10 |
| cg14552010 | 1.60E-06 | 2.33E-07 | -5.36 | 5.9062316 | -1.14E-01 | 100327369 | 100327492 | NC_000002.11 |
| cg22857141 | 1.60E-06 | 2.33E-07 | -5.36 | 5.9060265 | -7.05E-02 | 123707481 | 123707604 | NC_000005.9  |
| cg10359235 | 1.60E-06 | 2.33E-07 | -5.36 | 5.9059749 | -5.79E-02 | 12135470  | 12135593  | NC_000016.9  |
| cg25808892 | 1.60E-06 | 2.33E-07 | -5.36 | 5.9057775 | -1.91E-02 | 6459352   | 6459475   | NC_000017.10 |
| cg02491717 | 1.60E-06 | 2.33E-07 | -5.36 | 5.9057507 | -2.18E-02 | 151171662 | 151171785 | NC_000001.10 |
| cg14623917 | 1.60E-06 | 2.33E-07 | -5.36 | 5.9053859 | -6.69E-02 | 132271548 | 132271671 | NC_000006.11 |
| cg13947513 | 1.60E-06 | 2.33E-07 | -5.36 | 5.9048213 | -3.22E-02 | 172824551 | 172824674 | NC_000004.11 |
| cg04108127 | 1.60E-06 | 2.33E-07 | -5.36 | 5.9046306 | -4.74E-02 | 222885781 | 222885904 | NC_000001.10 |
| cg16914035 | 1.60E-06 | 2.34E-07 | -5.36 | 5.9043113 | -7.75E-02 | 76018489  | 76018612  | NC_000006.11 |
| cg14428628 | 1.60E-06 | 2.34E-07 | -5.36 | 5.9042073 | -9.05E-02 | 77806922  | 77807045  | NC_000017.10 |
| cg00563892 | 1.60E-06 | 2.34E-07 | -5.36 | 5.9031725 | -2.78E-02 | 42588392  | 42588515  | NC_000002.11 |
| cg25858983 | 1.60E-06 | 2.34E-07 | -5.36 | 5.9028602 | -5.39E-02 | 42295711  | 42295834  | NC_000017.10 |
| cg03736099 | 1.60E-06 | 2.34E-07 | -5.36 | 5.9024249 | -7.99E-02 | 78430511  | 78430634  | NC_000017.10 |
| cg03262690 | 1.60E-06 | 2.34E-07 | -5.36 | 5.9017613 | -8.28E-02 | 11196659  | 11196782  | NC_000002.11 |

|                |          |          |       |           |           |           |           |              |
|----------------|----------|----------|-------|-----------|-----------|-----------|-----------|--------------|
| cg20250722     | 1.60E-06 | 2.34E-07 | -5.36 | 5.9012273 | -1.02E-01 | 26522136  | 26522259  | NC_000006.11 |
| cg04784263     | 1.60E-06 | 2.34E-07 | -5.36 | 5.9008315 | -1.15E-02 | 57318624  | 57318747  | NC_000016.9  |
| cg21484573     | 1.60E-06 | 2.34E-07 | -5.36 | 5.9003907 | -1.12E-01 | 163730853 | 163730976 | NC_000006.11 |
| cg02531924     | 1.60E-06 | 2.35E-07 | -5.36 | 5.9002853 | -9.53E-02 | 1522816   | 1522939   | NC_000005.9  |
| cg01564322     | 1.60E-06 | 2.35E-07 | -5.36 | 5.900216  | -4.53E-02 | 110251095 | 110251218 | NC_000009.11 |
| cg08395365     | 1.60E-06 | 2.35E-07 | -5.36 | 5.9002036 | -3.67E-02 | 182817479 | 182817602 | NC_000003.11 |
| cg18045152     | 1.61E-06 | 2.35E-07 | -5.36 | 5.8992311 | -9.53E-02 | 35992984  | 35993107  | NC_000019.9  |
| cg18566555     | 1.61E-06 | 2.35E-07 | -5.36 | 5.8982659 | -1.12E-01 | 154155288 | 154155411 | NC_000004.11 |
| cg11414821     | 1.61E-06 | 2.35E-07 | -5.36 | 5.8976537 | -1.50E-01 | 30652771  | 30652894  | NC_000006.11 |
| ch.7.2691555F  | 1.61E-06 | 2.35E-07 | -5.36 | 5.897287  | -1.57E-02 | 129667665 | 129667788 | NC_000007.13 |
| cg13205578     | 1.61E-06 | 2.35E-07 | -5.36 | 5.8965804 | -5.23E-02 | 52382136  | 52382259  | NC_000010.10 |
| cg03548857     | 1.61E-06 | 2.35E-07 | -5.36 | 5.8964494 | -1.31E-01 | 35940174  | 35940297  | NC_000019.9  |
| cg21041512     | 1.61E-06 | 2.36E-07 | -5.36 | 5.8959229 | -1.87E-02 | 79196677  | 79196800  | NC_000017.10 |
| cg03553897     | 1.61E-06 | 2.36E-07 | -5.36 | 5.8955103 | -9.39E-02 | 72969503  | 72969626  | NC_000017.10 |
| cg03310874     | 1.61E-06 | 2.36E-07 | -5.36 | 5.8948703 | -9.81E-02 | 4850260   | 4850383   | NC_000007.13 |
| cg03085932     | 1.61E-06 | 2.36E-07 | -5.36 | 5.8945017 | -7.57E-02 | 123484534 | 123484657 | NC_000007.13 |
| cg16621633     | 1.61E-06 | 2.36E-07 | -5.36 | 5.8944921 | -8.36E-02 | 19296418  | 19296541  | NC_000016.9  |
| cg26545425     | 1.62E-06 | 2.36E-07 | -5.36 | 5.8934261 | -7.48E-02 | 73022110  | 73022233  | NC_000007.13 |
| cg22459052     | 1.62E-06 | 2.36E-07 | -5.36 | 5.8928643 | -9.47E-02 | 149588987 | 149589110 | NC_000005.9  |
| cg08242194     | 1.62E-06 | 2.36E-07 | -5.36 | 5.8927043 | -1.11E-01 | 4157691   | 4157814   | NC_000007.13 |
| cg11699334     | 1.62E-06 | 2.37E-07 | -5.36 | 5.8914743 | -7.59E-02 | 109195889 | 109196012 | NC_000012.11 |
| cg23995917     | 1.62E-06 | 2.37E-07 | -5.36 | 5.891398  | -1.52E-02 | 145575294 | 145575417 | NC_000001.10 |
| cg00213745     | 1.62E-06 | 2.37E-07 | -5.36 | 5.8899269 | -5.19E-02 | 124730836 | 124730959 | NC_000003.11 |
| cg08313757     | 1.62E-06 | 2.37E-07 | -5.36 | 5.8888997 | -6.14E-02 | 97428708  | 97428831  | NC_000002.11 |
| ch.11.1147402R | 1.62E-06 | 2.37E-07 | -5.36 | 5.8888513 | -1.20E-02 | 60358641  | 60358764  | NC_000011.9  |

|                 |          |          |       |           |           |           |           |              |
|-----------------|----------|----------|-------|-----------|-----------|-----------|-----------|--------------|
| cg10778931      | 1.62E-06 | 2.38E-07 | -5.36 | 5.8876071 | -4.59E-02 | 76901065  | 76901188  | NC_000015.9  |
| cg06130371      | 1.63E-06 | 2.38E-07 | -5.36 | 5.8854404 | -1.36E-02 | 65578830  | 65578953  | NC_000015.9  |
| cg08022543      | 1.63E-06 | 2.38E-07 | -5.36 | 5.88492   | -7.11E-02 | 195929544 | 195929667 | NC_000003.11 |
| cg21716693      | 1.63E-06 | 2.38E-07 | -5.36 | 5.8848447 | -9.84E-02 | 36806882  | 36807005  | NC_000006.11 |
| cg11911689      | 1.63E-06 | 2.38E-07 | -5.36 | 5.8846676 | -6.83E-02 | 19381324  | 19381447  | NC_000019.9  |
| cg11422851      | 1.63E-06 | 2.38E-07 | -5.36 | 5.8846521 | -8.08E-02 | 38508140  | 38508263  | NC_000008.10 |
| cg14948434      | 1.63E-06 | 2.38E-07 | -5.36 | 5.8843839 | -3.92E-02 | 56132159  | 56132282  | NC_000007.13 |
| cg25968394      | 1.63E-06 | 2.38E-07 | -5.36 | 5.8843078 | -1.05E-01 | 104604511 | 104604634 | NC_000007.13 |
| cg08944723      | 1.63E-06 | 2.39E-07 | -5.36 | 5.8839314 | -7.96E-02 | 72915238  | 72915361  | NC_000012.11 |
| cg13942016      | 1.63E-06 | 2.39E-07 | -5.36 | 5.882631  | -4.57E-02 | 47447463  | 47447586  | NC_000011.9  |
| cg06864443      | 1.63E-06 | 2.39E-07 | -5.36 | 5.8824459 | -5.30E-02 | 45929860  | 45929983  | NC_000015.9  |
| cg06482716      | 1.63E-06 | 2.39E-07 | -5.35 | 5.8814974 | -1.28E-01 | 47794995  | 47795118  | NC_000018.9  |
| cg09083736      | 1.64E-06 | 2.39E-07 | -5.35 | 5.8804735 | -7.50E-02 | 100049849 | 100049972 | NC_000006.11 |
| cg27115788      | 1.64E-06 | 2.39E-07 | -5.35 | 5.8801523 | -3.97E-02 | 39106258  | 39106381  | NC_000003.11 |
| cg04865113      | 1.64E-06 | 2.40E-07 | -5.35 | 5.8796715 | -1.12E-01 | 48960137  | 48960260  | NC_000001.10 |
| cg06093152      | 1.64E-06 | 2.40E-07 | -5.35 | 5.8792614 | -7.42E-02 | 212662017 | 212662140 | NC_000001.10 |
| ch.13.22912778R | 1.64E-06 | 2.40E-07 | -5.35 | 5.8789092 | -5.40E-02 | 24014778  | 24014901  | NC_000013.10 |
| ch.10.15292952R | 1.64E-06 | 2.40E-07 | -5.35 | 5.8786061 | -2.64E-02 | 15252946  | 15253069  | NC_000010.10 |
| cg23146741      | 1.64E-06 | 2.40E-07 | -5.35 | 5.8784372 | -9.73E-02 | 42712312  | 42712435  | NC_000008.10 |
| cg19628988      | 1.64E-06 | 2.40E-07 | -5.35 | 5.8764008 | -1.19E-01 | 139040928 | 139041051 | NC_000005.9  |
| cg16411445      | 1.64E-06 | 2.41E-07 | -5.35 | 5.8758244 | -1.02E-01 | 40145923  | 40146046  | NC_000021.8  |
| cg21258259      | 1.64E-06 | 2.41E-07 | -5.35 | 5.8757874 | -3.57E-02 | 114281006 | 114281129 | NC_000013.10 |
| cg20884776      | 1.64E-06 | 2.41E-07 | -5.35 | 5.8752717 | -2.75E-02 | 49209044  | 49209167  | NC_000012.11 |
| cg16390380      | 1.64E-06 | 2.41E-07 | -5.35 | 5.8750465 | -8.26E-02 | 3461140   | 3461263   | NC_000017.10 |
| cg05716726      | 1.64E-06 | 2.41E-07 | -5.35 | 5.8746129 | -1.32E-01 | 27343671  | 27343794  | NC_000006.11 |

|                |          |          |       |           |           |           |           |              |
|----------------|----------|----------|-------|-----------|-----------|-----------|-----------|--------------|
| cg02712294     | 1.64E-06 | 2.41E-07 | -5.35 | 5.8745732 | -2.03E-02 | 41559393  | 41559516  | NC_000008.10 |
| cg16174121     | 1.65E-06 | 2.41E-07 | -5.35 | 5.8741627 | -5.69E-02 | 47736254  | 47736377  | NC_000011.9  |
| cg24003866     | 1.65E-06 | 2.41E-07 | -5.35 | 5.8730719 | -8.20E-02 | 184938470 | 184938593 | NC_000004.11 |
| cg06936779     | 1.65E-06 | 2.42E-07 | -5.35 | 5.8718317 | -7.56E-02 | 151171405 | 151171528 | NC_000001.10 |
| cg19195327     | 1.65E-06 | 2.42E-07 | -5.35 | 5.871614  | -3.45E-02 | 6479725   | 6479848   | NC_000001.10 |
| cg09294660     | 1.65E-06 | 2.42E-07 | -5.35 | 5.870669  | -4.48E-02 | 63422159  | 63422282  | NC_000016.9  |
| cg21690489     | 1.65E-06 | 2.42E-07 | -5.35 | 5.8698896 | -8.42E-02 | 46330260  | 46330383  | NC_000011.9  |
| cg18186349     | 1.65E-06 | 2.42E-07 | -5.35 | 5.8696173 | -4.31E-02 | 57146150  | 57146273  | NC_000012.11 |
| cg20420249     | 1.65E-06 | 2.42E-07 | -5.35 | 5.8693067 | -6.66E-02 | 172378938 | 172379061 | NC_000001.10 |
| cg02314308     | 1.65E-06 | 2.42E-07 | -5.35 | 5.8688443 | -3.89E-02 | 184006972 | 184007095 | NC_000001.10 |
| cg22536770     | 1.65E-06 | 2.42E-07 | -5.35 | 5.868229  | -1.10E-01 | 18870922  | 18871045  | NC_000019.9  |
| cg06198758     | 1.66E-06 | 2.42E-07 | -5.35 | 5.8680112 | -7.33E-02 | 36181297  | 36181420  | NC_000001.10 |
| cg13955572     | 1.66E-06 | 2.42E-07 | -5.35 | 5.8679249 | -2.41E-02 | 15422376  | 15422499  | NC_000009.11 |
| cg08404354     | 1.66E-06 | 2.43E-07 | -5.35 | 5.8676472 | -9.30E-02 | 115311837 | 115311960 | NC_000010.10 |
| cg17288471     | 1.66E-06 | 2.43E-07 | -5.35 | 5.8675144 | -7.45E-02 | 20804947  | 20805070  | NC_000002.11 |
| cg05206633     | 1.66E-06 | 2.43E-07 | -5.35 | 5.8667248 | -7.45E-02 | 177913434 | 177913557 | NC_000005.9  |
| cg09677741     | 1.66E-06 | 2.43E-07 | -5.35 | 5.8666883 | -4.74E-02 | 137071648 | 137071771 | NC_000005.9  |
| ch.10.1947223F | 1.66E-06 | 2.43E-07 | -5.35 | 5.8656619 | -4.31E-02 | 93768670  | 93768793  | NC_000010.10 |
| cg05297105     | 1.66E-06 | 2.43E-07 | -5.35 | 5.8655543 | -2.21E-02 | 56123171  | 56123294  | NC_000012.11 |
| cg01286935     | 1.66E-06 | 2.43E-07 | -5.35 | 5.8655174 | -6.32E-02 | 89778247  | 89778370  | NC_000016.9  |
| cg18509719     | 1.66E-06 | 2.43E-07 | -5.35 | 5.8653742 | -9.22E-02 | 1469746   | 1469869   | NC_000011.9  |
| cg12244325     | 1.66E-06 | 2.43E-07 | -5.35 | 5.865332  | -7.28E-02 | 45883864  | 45883987  | NC_000021.8  |
| cg18323589     | 1.66E-06 | 2.43E-07 | -5.35 | 5.8649567 | -1.32E-01 | 175893092 | 175893215 | NC_000002.11 |
| cg12233833     | 1.66E-06 | 2.43E-07 | -5.35 | 5.8647175 | -3.19E-02 | 830825    | 830948    | NC_000010.10 |
| cg25746134     | 1.66E-06 | 2.43E-07 | -5.35 | 5.8641384 | -1.27E-01 | 202129865 | 202129988 | NC_000001.10 |

|                |          |          |       |           |           |           |           |              |
|----------------|----------|----------|-------|-----------|-----------|-----------|-----------|--------------|
| cg10239163     | 1.66E-06 | 2.44E-07 | -5.35 | 5.8637893 | -6.47E-02 | 25527366  | 25527489  | NC_000002.11 |
| cg10498083     | 1.66E-06 | 2.44E-07 | -5.35 | 5.8631704 | -9.92E-02 | 30428323  | 30428446  | NC_000006.11 |
| cg26562462     | 1.66E-06 | 2.44E-07 | -5.35 | 5.8628239 | -8.87E-02 | 6929045   | 6929168   | NC_000004.11 |
| cg16034168     | 1.66E-06 | 2.44E-07 | -5.35 | 5.8624127 | -1.12E-01 | 6336711   | 6336834   | NC_000001.10 |
| cg05872485     | 1.66E-06 | 2.44E-07 | -5.35 | 5.862203  | -1.21E-02 | 57081186  | 57081309  | NC_000012.11 |
| cg12090942     | 1.66E-06 | 2.44E-07 | -5.35 | 5.8618145 | -9.05E-02 | 77279508  | 77279631  | NC_000014.8  |
| ch.1.58573617F | 1.66E-06 | 2.44E-07 | -5.35 | 5.8617693 | -2.01E-02 | 58801029  | 58801152  | NC_000001.10 |
| cg14497202     | 1.67E-06 | 2.44E-07 | -5.35 | 5.8612473 | -1.81E-02 | 3534424   | 3534547   | NC_000004.11 |
| cg04343394     | 1.67E-06 | 2.44E-07 | -5.35 | 5.8606638 | -2.80E-02 | 10695072  | 10695195  | NC_000006.11 |
| cg16146288     | 1.67E-06 | 2.45E-07 | -5.35 | 5.8590663 | -7.66E-02 | 33148913  | 33149036  | NC_000015.9  |
| cg06859463     | 1.67E-06 | 2.45E-07 | -5.35 | 5.8587021 | -5.44E-02 | 46300215  | 46300338  | NC_000011.9  |
| cg06163593     | 1.67E-06 | 2.45E-07 | -5.35 | 5.858605  | -4.84E-02 | 120718790 | 120718913 | NC_000010.10 |
| cg02626646     | 1.67E-06 | 2.45E-07 | -5.35 | 5.8581687 | -9.64E-02 | 102037293 | 102037416 | NC_000015.9  |
| cg17567602     | 1.67E-06 | 2.45E-07 | -5.35 | 5.8581005 | -8.11E-02 | 106732112 | 106732235 | NC_000002.11 |
| cg23435730     | 1.67E-06 | 2.45E-07 | -5.35 | 5.8576558 | -2.07E-02 | 127770634 | 127770757 | NC_000003.11 |
| cg16345114     | 1.67E-06 | 2.45E-07 | -5.35 | 5.8573696 | -9.75E-02 | 172306112 | 172306235 | NC_000005.9  |
| cg24523591     | 1.67E-06 | 2.45E-07 | -5.35 | 5.8573577 | -6.34E-02 | 178893304 | 178893427 | NC_000003.11 |
| cg18795022     | 1.67E-06 | 2.45E-07 | -5.35 | 5.8568973 | -9.10E-02 | 7587410   | 7587533   | NC_000001.10 |
| cg19241679     | 1.67E-06 | 2.45E-07 | -5.35 | 5.8564017 | -1.00E-01 | 2302401   | 2302524   | NC_000019.9  |
| cg16755833     | 1.67E-06 | 2.45E-07 | -5.35 | 5.8560757 | -7.27E-02 | 80866063  | 80866186  | NC_000017.10 |
| cg15190445     | 1.67E-06 | 2.46E-07 | -5.35 | 5.8557691 | -9.86E-02 | 108442528 | 108442651 | NC_000006.11 |
| cg13200556     | 1.68E-06 | 2.46E-07 | -5.35 | 5.8549365 | -1.17E-01 | 337303    | 337426    | NC_000008.10 |
| cg13761949     | 1.68E-06 | 2.46E-07 | -5.35 | 5.8537261 | -1.05E-01 | 35098359  | 35098482  | NC_000010.10 |
| cg08756594     | 1.68E-06 | 2.46E-07 | -5.35 | 5.85372   | -8.15E-02 | 1892392   | 1892515   | NC_000011.9  |
| cg18214436     | 1.68E-06 | 2.46E-07 | -5.35 | 5.8535929 | -4.96E-02 | 120565257 | 120565380 | NC_000012.11 |

|            |          |          |       |           |           |           |           |              |
|------------|----------|----------|-------|-----------|-----------|-----------|-----------|--------------|
| cg24517323 | 1.68E-06 | 2.46E-07 | -5.35 | 5.8535262 | -1.25E-01 | 7227564   | 7227687   | NC_000017.10 |
| cg00891599 | 1.68E-06 | 2.46E-07 | -5.35 | 5.8530481 | -4.10E-02 | 119067892 | 119068015 | NC_000011.9  |
| cg04575144 | 1.68E-06 | 2.46E-07 | -5.35 | 5.8528505 | -2.12E-02 | 4067379   | 4067502   | NC_000019.9  |
| cg17057086 | 1.68E-06 | 2.46E-07 | -5.35 | 5.8523978 | -1.17E-01 | 133456013 | 133456136 | NC_000008.10 |
| cg12808565 | 1.68E-06 | 2.47E-07 | -5.35 | 5.8512994 | -1.40E-01 | 729259    | 729382    | NC_000010.10 |
| cg25754673 | 1.68E-06 | 2.47E-07 | -5.35 | 5.8512887 | -9.14E-02 | 124880260 | 124880383 | NC_000012.11 |
| cg23484392 | 1.68E-06 | 2.47E-07 | -5.35 | 5.8496695 | -9.03E-02 | 66465334  | 66465457  | NC_000018.9  |
| cg18889393 | 1.68E-06 | 2.47E-07 | -5.35 | 5.8494369 | -7.31E-02 | 6282970   | 6283093   | NC_000019.9  |
| cg14571539 | 1.69E-06 | 2.47E-07 | -5.35 | 5.8490725 | -1.16E-01 | 128746622 | 128746745 | NC_000005.9  |
| cg04232972 | 1.69E-06 | 2.47E-07 | -5.35 | 5.8487162 | -1.08E-01 | 30671644  | 30671767  | NC_000016.9  |
| cg00277342 | 1.69E-06 | 2.48E-07 | -5.35 | 5.8472744 | -6.34E-02 | 72976090  | 72976213  | NC_000011.9  |
| cg23136738 | 1.69E-06 | 2.48E-07 | -5.35 | 5.8461425 | -8.50E-02 | 925521    | 925644    | NC_000011.9  |
| cg05865011 | 1.69E-06 | 2.48E-07 | -5.35 | 5.84608   | -1.30E-01 | 72969374  | 72969497  | NC_000017.10 |
| cg27381216 | 1.69E-06 | 2.48E-07 | -5.35 | 5.8457058 | -2.47E-02 | 7869428   | 7869551   | NC_000005.9  |
| cg13698865 | 1.69E-06 | 2.48E-07 | -5.35 | 5.8455784 | -9.28E-02 | 137553680 | 137553803 | NC_000009.11 |
| cg06923616 | 1.69E-06 | 2.48E-07 | -5.35 | 5.8445336 | -8.69E-02 | 66381343  | 66381466  | NC_000018.9  |
| cg18396811 | 1.69E-06 | 2.48E-07 | -5.35 | 5.8443547 | -8.07E-02 | 3332264   | 3332387   | NC_000001.10 |
| cg18052123 | 1.69E-06 | 2.48E-07 | -5.35 | 5.8442788 | -3.64E-02 | 42724001  | 42724124  | NC_000019.9  |
| cg03931027 | 1.69E-06 | 2.49E-07 | -5.35 | 5.8434647 | -2.21E-02 | 138609848 | 138609971 | NC_000005.9  |
| cg16323609 | 1.69E-06 | 2.49E-07 | -5.35 | 5.8432856 | -6.82E-02 | 48885591  | 48885714  | NC_000003.11 |
| cg27039218 | 1.70E-06 | 2.49E-07 | -5.35 | 5.8421218 | -1.03E-01 | 33485389  | 33485512  | NC_000010.10 |
| cg22040631 | 1.70E-06 | 2.49E-07 | -5.35 | 5.841316  | -9.84E-02 | 129153820 | 129153943 | NC_000002.11 |
| cg22830895 | 1.70E-06 | 2.49E-07 | -5.35 | 5.8407118 | -7.76E-02 | 151137476 | 151137599 | NC_000007.13 |
| cg23551120 | 1.70E-06 | 2.49E-07 | -5.35 | 5.8407104 | -1.18E-01 | 113375848 | 113375971 | NC_000013.10 |
| cg11426170 | 1.70E-06 | 2.50E-07 | -5.35 | 5.8401982 | -1.20E-01 | 186961160 | 186961283 | NC_000004.11 |

|                |          |          |       |           |           |           |           |              |
|----------------|----------|----------|-------|-----------|-----------|-----------|-----------|--------------|
| cg10504000     | 1.70E-06 | 2.50E-07 | -5.35 | 5.8400207 | -1.24E-01 | 2402391   | 2402514   | NC_000011.9  |
| cg09991633     | 1.70E-06 | 2.50E-07 | -5.35 | 5.8397587 | -9.01E-02 | 134759376 | 134759499 | NC_000008.10 |
| cg26679756     | 1.70E-06 | 2.50E-07 | -5.35 | 5.8390152 | -5.58E-02 | 172262169 | 172262292 | NC_000001.10 |
| cg06181784     | 1.70E-06 | 2.50E-07 | -5.35 | 5.8388999 | -1.49E-01 | 9993934   | 9994057   | NC_000003.11 |
| cg01916632     | 1.70E-06 | 2.50E-07 | -5.35 | 5.8383619 | -9.56E-02 | 107781506 | 107781629 | NC_000006.11 |
| cg01936430     | 1.70E-06 | 2.50E-07 | -5.35 | 5.8382591 | -1.65E-02 | 204380496 | 204380619 | NC_000001.10 |
| cg11325127     | 1.70E-06 | 2.50E-07 | -5.35 | 5.8381558 | -3.61E-02 | 79407954  | 79408077  | NC_000005.9  |
| cg03607648     | 1.70E-06 | 2.50E-07 | -5.35 | 5.8374291 | -1.28E-01 | 234668930 | 234669053 | NC_000002.11 |
| cg01488300     | 1.71E-06 | 2.51E-07 | -5.35 | 5.8361773 | -8.37E-02 | 3527126   | 3527249   | NC_000001.10 |
| cg13160251     | 1.71E-06 | 2.51E-07 | -5.35 | 5.83613   | -8.46E-02 | 56286575  | 56286698  | NC_000015.9  |
| cg01196336     | 1.71E-06 | 2.51E-07 | -5.35 | 5.8360817 | -1.06E-01 | 1186469   | 1186592   | NC_000004.11 |
| cg16447680     | 1.71E-06 | 2.51E-07 | -5.35 | 5.8357718 | -1.21E-01 | 55379100  | 55379223  | NC_000012.11 |
| cg24296187     | 1.71E-06 | 2.51E-07 | -5.34 | 5.8349222 | -1.34E-01 | 212434331 | 212434454 | NC_000001.10 |
| cg16262201     | 1.71E-06 | 2.51E-07 | -5.34 | 5.8340779 | -6.98E-02 | 3157480   | 3157603   | NC_000001.10 |
| cg18159740     | 1.71E-06 | 2.51E-07 | -5.34 | 5.8332087 | -2.97E-02 | 30881703  | 30881826  | NC_000013.10 |
| cg04857149     | 1.71E-06 | 2.51E-07 | -5.34 | 5.8330541 | -3.80E-02 | 24237060  | 24237183  | NC_000018.9  |
| cg03905463     | 1.71E-06 | 2.51E-07 | -5.34 | 5.8325923 | -2.60E-02 | 92980256  | 92980379  | NC_000010.10 |
| cg05938423     | 1.71E-06 | 2.52E-07 | -5.34 | 5.8320942 | -5.99E-02 | 85085313  | 85085436  | NC_000001.10 |
| cg18133076     | 1.71E-06 | 2.52E-07 | -5.34 | 5.8319509 | -8.43E-02 | 47623751  | 47623874  | NC_000006.11 |
| cg05317605     | 1.71E-06 | 2.52E-07 | -5.34 | 5.8319119 | -2.42E-02 | 4558499   | 4558622   | NC_000019.9  |
| cg15311460     | 1.71E-06 | 2.52E-07 | -5.34 | 5.8317514 | -8.67E-02 | 406997    | 407120    | NC_000011.9  |
| cg26753302     | 1.71E-06 | 2.52E-07 | -5.34 | 5.8316469 | -1.29E-01 | 61143993  | 61144116  | NC_000018.9  |
| cg09327911     | 1.71E-06 | 2.52E-07 | -5.34 | 5.8315777 | -2.07E-02 | 6617264   | 6617387   | NC_000007.13 |
| cg00664054     | 1.72E-06 | 2.52E-07 | -5.34 | 5.830836  | -7.45E-02 | 21998309  | 21998432  | NC_000008.10 |
| ch.16.1630026F | 1.72E-06 | 2.52E-07 | -5.34 | 5.830714  | -7.20E-02 | 72492804  | 72492927  | NC_000016.9  |



|            |          |          |       |           |           |           |           |              |
|------------|----------|----------|-------|-----------|-----------|-----------|-----------|--------------|
| cg13800209 | 1.72E-06 | 2.52E-07 | -5.34 | 5.8301017 | -1.39E-01 | 37390284  | 37390407  | NC_000015.9  |
| cg01522425 | 1.72E-06 | 2.53E-07 | -5.34 | 5.8285921 | -5.29E-02 | 16525848  | 16525971  | NC_000003.11 |
| cg02206807 | 1.72E-06 | 2.53E-07 | -5.34 | 5.8278027 | -5.38E-02 | 3961397   | 3961520   | NC_000011.9  |
| cg04848686 | 1.72E-06 | 2.53E-07 | -5.34 | 5.8276779 | -1.14E-01 | 88747591  | 88747714  | NC_000016.9  |
| cg01847380 | 1.72E-06 | 2.53E-07 | -5.34 | 5.8272407 | -4.62E-02 | 40366596  | 40366719  | NC_000001.10 |
| cg05555515 | 1.72E-06 | 2.53E-07 | -5.34 | 5.8270457 | -6.58E-02 | 14170785  | 14170908  | NC_000019.9  |
| cg11592677 | 1.72E-06 | 2.53E-07 | -5.34 | 5.8267725 | -9.83E-02 | 119110466 | 119110589 | NC_000008.10 |
| cg16442587 | 1.72E-06 | 2.53E-07 | -5.34 | 5.8266085 | -9.42E-02 | 56514573  | 56514696  | NC_000018.9  |
| cg10028434 | 1.72E-06 | 2.53E-07 | -5.34 | 5.8263029 | -9.54E-02 | 104160076 | 104160199 | NC_000014.8  |
| cg05142373 | 1.72E-06 | 2.53E-07 | -5.34 | 5.8261899 | -2.92E-02 | 90894714  | 90894837  | NC_000007.13 |
| cg05033749 | 1.72E-06 | 2.53E-07 | -5.34 | 5.8259353 | -1.16E-01 | 142439489 | 142439612 | NC_000008.10 |
| cg18680860 | 1.72E-06 | 2.53E-07 | -5.34 | 5.8255651 | -5.16E-02 | 175625991 | 175626114 | NC_000005.9  |
| cg14763096 | 1.72E-06 | 2.53E-07 | -5.34 | 5.8255105 | -1.00E-01 | 95954251  | 95954374  | NC_000010.10 |
| cg15317628 | 1.72E-06 | 2.53E-07 | -5.34 | 5.8254965 | -4.71E-02 | 8653329   | 8653452   | NC_000011.9  |
| cg22466620 | 1.72E-06 | 2.53E-07 | -5.34 | 5.8253102 | -3.08E-02 | 138187852 | 138187975 | NC_000006.11 |
| cg23701776 | 1.72E-06 | 2.53E-07 | -5.34 | 5.8250207 | -3.21E-02 | 5680879   | 5681002   | NC_000019.9  |
| cg18135132 | 1.73E-06 | 2.54E-07 | -5.34 | 5.8244677 | -3.81E-02 | 10814092  | 10814215  | NC_000011.9  |
| cg24361761 | 1.73E-06 | 2.54E-07 | -5.34 | 5.8241712 | -1.10E-01 | 25782377  | 25782500  | NC_000010.10 |
| cg10396171 | 1.73E-06 | 2.54E-07 | -5.34 | 5.8241636 | -1.43E-01 | 605214    | 605337    | NC_000016.9  |
| cg27495444 | 1.73E-06 | 2.54E-07 | -5.34 | 5.8233779 | -6.27E-02 | 2819863   | 2819986   | NC_000019.9  |
| cg26209676 | 1.73E-06 | 2.54E-07 | -5.34 | 5.823329  | -9.39E-02 | 56154382  | 56154505  | NC_000019.9  |
| cg14790772 | 1.73E-06 | 2.54E-07 | -5.34 | 5.8229907 | -3.30E-02 | 193090742 | 193090865 | NC_000001.10 |
| cg12466599 | 1.73E-06 | 2.54E-07 | -5.34 | 5.8228227 | -9.07E-02 | 21894532  | 21894655  | NC_000001.10 |
| cg26980996 | 1.73E-06 | 2.54E-07 | -5.34 | 5.8227666 | -9.92E-02 | 98026481  | 98026604  | NC_000007.13 |
| cg18037578 | 1.73E-06 | 2.54E-07 | -5.34 | 5.8212454 | -2.48E-02 | 30313418  | 30313541  | NC_000006.11 |

|            |          |          |       |           |           |           |           |              |
|------------|----------|----------|-------|-----------|-----------|-----------|-----------|--------------|
| cg13357752 | 1.73E-06 | 2.55E-07 | -5.34 | 5.8206962 | -2.03E-02 | 4639397   | 4639520   | NC_000019.9  |
| cg24110635 | 1.73E-06 | 2.55E-07 | -5.34 | 5.8201823 | -1.12E-01 | 27472736  | 27472859  | NC_000012.11 |
| cg03141069 | 1.73E-06 | 2.55E-07 | -5.34 | 5.8198937 | -9.83E-02 | 228463734 | 228463857 | NC_000001.10 |
| cg21313830 | 1.73E-06 | 2.55E-07 | -5.34 | 5.8197668 | -6.16E-02 | 45983303  | 45983426  | NC_000015.9  |
| cg22564433 | 1.73E-06 | 2.55E-07 | -5.34 | 5.8197067 | -1.25E-01 | 49612450  | 49612573  | NC_000008.10 |
| cg15095922 | 1.73E-06 | 2.55E-07 | -5.34 | 5.8193437 | -8.30E-02 | 1800542   | 1800665   | NC_000005.9  |
| cg23205936 | 1.73E-06 | 2.55E-07 | -5.34 | 5.8189004 | -1.17E-01 | 170560006 | 170560129 | NC_000006.11 |
| cg23562473 | 1.73E-06 | 2.55E-07 | -5.34 | 5.8188319 | -7.89E-02 | 51334972  | 51335095  | NC_000019.9  |
| cg04929543 | 1.74E-06 | 2.55E-07 | -5.34 | 5.8182936 | -1.25E-01 | 179183500 | 179183623 | NC_000002.11 |
| cg21750887 | 1.74E-06 | 2.55E-07 | -5.34 | 5.8178956 | -1.19E-01 | 68658237  | 68658360  | NC_000008.10 |
| cg08592890 | 1.74E-06 | 2.55E-07 | -5.34 | 5.8176456 | -1.47E-01 | 30907246  | 30907369  | NC_000016.9  |
| cg17616205 | 1.74E-06 | 2.55E-07 | -5.34 | 5.8173473 | -6.67E-02 | 39448961  | 39449084  | NC_000003.11 |
| cg19693446 | 1.74E-06 | 2.55E-07 | -5.34 | 5.8171667 | -6.18E-02 | 102144192 | 102144315 | NC_000014.8  |
| cg19412743 | 1.74E-06 | 2.56E-07 | -5.34 | 5.8165209 | -9.83E-02 | 190747919 | 190748042 | NC_000004.11 |
| cg19499674 | 1.74E-06 | 2.56E-07 | -5.34 | 5.8161966 | -1.34E-01 | 100436724 | 100436847 | NC_000001.10 |
| cg01382105 | 1.74E-06 | 2.56E-07 | -5.34 | 5.8160699 | -8.50E-02 | 113406866 | 113406989 | NC_000013.10 |
| cg27641076 | 1.74E-06 | 2.56E-07 | -5.34 | 5.815548  | -1.08E-01 | 62211788  | 62211911  | NC_000011.9  |
| cg04306106 | 1.74E-06 | 2.56E-07 | -5.34 | 5.8153528 | -6.78E-02 | 84681729  | 84681852  | NC_000016.9  |
| cg00542402 | 1.74E-06 | 2.56E-07 | -5.34 | 5.8146609 | -3.04E-02 | 10562851  | 10562974  | NC_000011.9  |
| cg07700369 | 1.74E-06 | 2.56E-07 | -5.34 | 5.8138374 | -2.23E-02 | 46299268  | 46299391  | NC_000011.9  |
| cg02934600 | 1.74E-06 | 2.56E-07 | -5.34 | 5.8137399 | -3.08E-02 | 107600376 | 107600499 | NC_000001.10 |
| cg14844466 | 1.74E-06 | 2.57E-07 | -5.34 | 5.8132196 | -1.01E-01 | 54908674  | 54908797  | NC_000014.8  |
| cg23713520 | 1.75E-06 | 2.57E-07 | -5.34 | 5.8116612 | -6.44E-02 | 57318087  | 57318210  | NC_000016.9  |
| cg01277331 | 1.75E-06 | 2.57E-07 | -5.34 | 5.8108073 | -7.26E-02 | 219748759 | 219748882 | NC_000002.11 |
| cg20330333 | 1.75E-06 | 2.57E-07 | -5.34 | 5.8107847 | -1.01E-01 | 58337741  | 58337864  | NC_000014.8  |

|            |          |          |       |           |           |           |           |              |
|------------|----------|----------|-------|-----------|-----------|-----------|-----------|--------------|
| cg05374025 | 1.75E-06 | 2.57E-07 | -5.34 | 5.8107618 | -1.29E-01 | 55549746  | 55549869  | NC_000019.9  |
| cg15335768 | 1.75E-06 | 2.57E-07 | -5.34 | 5.8100796 | -7.34E-02 | 218268053 | 218268176 | NC_000002.11 |
| cg24147596 | 1.75E-06 | 2.57E-07 | -5.34 | 5.8096835 | -1.11E-01 | 160395420 | 160395543 | NC_000003.11 |
| cg24151267 | 1.75E-06 | 2.58E-07 | -5.34 | 5.8091272 | -2.44E-02 | 48556017  | 48556140  | NC_000017.10 |
| cg00753747 | 1.75E-06 | 2.58E-07 | -5.34 | 5.8085016 | -2.16E-02 | 22201766  | 22201889  | NC_000016.9  |
| cg21218561 | 1.75E-06 | 2.58E-07 | -5.34 | 5.8082438 | -1.18E-01 | 34434147  | 34434270  | NC_000014.8  |
| cg22798214 | 1.75E-06 | 2.58E-07 | -5.34 | 5.807765  | -7.92E-02 | 212692190 | 212692313 | NC_000001.10 |
| cg19272468 | 1.75E-06 | 2.58E-07 | -5.34 | 5.8071694 | -7.24E-02 | 10405694  | 10405817  | NC_000004.11 |
| cg07412079 | 1.75E-06 | 2.58E-07 | -5.34 | 5.8070238 | -4.45E-02 | 33766607  | 33766730  | NC_000018.9  |
| cg10021668 | 1.75E-06 | 2.58E-07 | -5.34 | 5.8069626 | -1.87E-02 | 159751259 | 159751382 | NC_000001.10 |
| cg06201030 | 1.75E-06 | 2.58E-07 | -5.34 | 5.806763  | -2.74E-02 | 31774253  | 31774376  | NC_000006.11 |
| cg17445987 | 1.75E-06 | 2.58E-07 | -5.34 | 5.8067424 | -2.79E-02 | 10305305  | 10305428  | NC_000019.9  |
| cg24067813 | 1.75E-06 | 2.58E-07 | -5.34 | 5.8066385 | -1.59E-02 | 152009629 | 152009752 | NC_000001.10 |
| cg13501446 | 1.76E-06 | 2.58E-07 | -5.34 | 5.8060104 | -9.17E-02 | 138900624 | 138900747 | NC_000009.11 |
| cg21494379 | 1.76E-06 | 2.59E-07 | -5.34 | 5.8057218 | -1.28E-01 | 88275243  | 88275366  | NC_000005.9  |
| cg09205751 | 1.76E-06 | 2.59E-07 | -5.34 | 5.8048526 | -1.14E-01 | 278394    | 278517    | NC_000011.9  |
| cg10608858 | 1.76E-06 | 2.59E-07 | -5.34 | 5.8044648 | -8.00E-02 | 151491913 | 151492036 | NC_000007.13 |
| cg02853703 | 1.76E-06 | 2.59E-07 | -5.34 | 5.8044532 | -1.11E-01 | 25889298  | 25889421  | NC_000015.9  |
| cg09882550 | 1.76E-06 | 2.59E-07 | -5.34 | 5.8036904 | -4.63E-02 | 179920971 | 179921094 | NC_000005.9  |
| cg20390673 | 1.76E-06 | 2.59E-07 | -5.34 | 5.8035251 | -8.67E-02 | 61602293  | 61602416  | NC_000020.10 |
| cg08485649 | 1.76E-06 | 2.59E-07 | -5.34 | 5.8027622 | -1.23E-01 | 134043654 | 134043777 | NC_000010.10 |
| cg24526899 | 1.76E-06 | 2.59E-07 | -5.34 | 5.8022157 | -1.13E-01 | 54424149  | 54424272  | NC_000014.8  |
| cg13374432 | 1.76E-06 | 2.59E-07 | -5.34 | 5.8021124 | -1.21E-01 | 86192745  | 86192868  | NC_000015.9  |
| cg09439054 | 1.76E-06 | 2.60E-07 | -5.34 | 5.8018906 | -6.13E-02 | 10691954  | 10692077  | NC_000019.9  |
| cg22654142 | 1.76E-06 | 2.60E-07 | -5.34 | 5.801559  | -8.54E-02 | 22056517  | 22056640  | NC_000022.10 |

|               |          |          |       |           |           |           |           |              |
|---------------|----------|----------|-------|-----------|-----------|-----------|-----------|--------------|
| cg21518056    | 1.76E-06 | 2.60E-07 | -5.34 | 5.8011697 | -1.80E-02 | 33183187  | 33183310  | NC_000019.9  |
| ch.7.1466734R | 1.76E-06 | 2.60E-07 | -5.34 | 5.801004  | -2.34E-02 | 68211517  | 68211640  | NC_000007.13 |
| cg05662090    | 1.76E-06 | 2.60E-07 | -5.34 | 5.8006266 | -2.46E-02 | 83933514  | 83933637  | NC_000004.11 |
| cg10009207    | 1.76E-06 | 2.60E-07 | -5.34 | 5.8005819 | -8.04E-02 | 70365800  | 70365923  | NC_000016.9  |
| ch.1.4690234F | 1.77E-06 | 2.60E-07 | -5.34 | 5.7995897 | -1.17E-02 | 236708881 | 236709004 | NC_000001.10 |
| cg07867517    | 1.77E-06 | 2.60E-07 | -5.34 | 5.7988689 | -1.20E-01 | 75520165  | 75520288  | NC_000016.9  |
| cg22322679    | 1.77E-06 | 2.60E-07 | -5.34 | 5.7986399 | -9.95E-02 | 33244178  | 33244301  | NC_000006.11 |
| cg07926178    | 1.77E-06 | 2.60E-07 | -5.34 | 5.7984753 | -4.44E-02 | 158130463 | 158130586 | NC_000007.13 |
| cg25059541    | 1.77E-06 | 2.60E-07 | -5.34 | 5.7984457 | -6.70E-02 | 103411459 | 103411582 | NC_000014.8  |
| cg01155522    | 1.77E-06 | 2.61E-07 | -5.34 | 5.7981519 | -2.08E-02 | 24740939  | 24741062  | NC_000016.9  |
| cg17415721    | 1.77E-06 | 2.61E-07 | -5.34 | 5.7979296 | -1.09E-02 | 66140101  | 66140224  | NC_000011.9  |
| cg08657449    | 1.77E-06 | 2.61E-07 | -5.34 | 5.7975352 | -6.29E-02 | 105351661 | 105351784 | NC_000008.10 |
| cg07821574    | 1.77E-06 | 2.61E-07 | -5.34 | 5.7968689 | -2.46E-02 | 18208505  | 18208628  | NC_000019.9  |
| cg11758861    | 1.77E-06 | 2.61E-07 | -5.34 | 5.7968368 | -9.69E-02 | 13135514  | 13135637  | NC_000019.9  |
| cg11233228    | 1.77E-06 | 2.61E-07 | -5.34 | 5.796744  | -2.29E-02 | 116037401 | 116037524 | NC_000009.11 |
| cg05705366    | 1.77E-06 | 2.61E-07 | -5.34 | 5.7957744 | -2.42E-02 | 53813915  | 53814038  | NC_000005.9  |
| cg09569869    | 1.77E-06 | 2.61E-07 | -5.34 | 5.7948586 | -7.49E-02 | 42469756  | 42469879  | NC_000022.10 |
| cg17480554    | 1.77E-06 | 2.61E-07 | -5.34 | 5.794711  | -9.46E-02 | 52334107  | 52334230  | NC_000005.9  |
| cg04144151    | 1.78E-06 | 2.62E-07 | -5.34 | 5.7945233 | -8.56E-02 | 242715019 | 242715142 | NC_000002.11 |
| cg11382477    | 1.78E-06 | 2.62E-07 | -5.34 | 5.7940532 | -4.90E-02 | 155264170 | 155264293 | NC_000007.13 |
| cg13400969    | 1.78E-06 | 2.62E-07 | -5.34 | 5.7937099 | -1.43E-01 | 44087762  | 44087885  | NC_000017.10 |
| cg01546046    | 1.78E-06 | 2.62E-07 | -5.34 | 5.7933834 | -7.13E-02 | 31494849  | 31494972  | NC_000014.8  |
| cg11087819    | 1.78E-06 | 2.62E-07 | -5.34 | 5.7929922 | -1.28E-01 | 142838482 | 142838605 | NC_000008.10 |
| cg03419151    | 1.78E-06 | 2.62E-07 | -5.34 | 5.792905  | -7.40E-02 | 6658728   | 6658851   | NC_000017.10 |
| cg22878489    | 1.78E-06 | 2.62E-07 | -5.34 | 5.7919581 | -1.18E-01 | 33245701  | 33245824  | NC_000006.11 |

|            |          |          |       |           |           |           |           |              |
|------------|----------|----------|-------|-----------|-----------|-----------|-----------|--------------|
| cg01492170 | 1.78E-06 | 2.62E-07 | -5.34 | 5.7913548 | -1.18E-01 | 27781295  | 27781418  | NC_000016.9  |
| cg26529044 | 1.78E-06 | 2.62E-07 | -5.34 | 5.7912251 | -9.19E-02 | 43354767  | 43354890  | NC_000013.10 |
| cg00188298 | 1.78E-06 | 2.62E-07 | -5.34 | 5.7910441 | -2.28E-02 | 97667731  | 97667854  | NC_000010.10 |
| cg25066772 | 1.78E-06 | 2.63E-07 | -5.34 | 5.790829  | -9.86E-02 | 93136682  | 93136805  | NC_000014.8  |
| cg00359395 | 1.78E-06 | 2.63E-07 | -5.34 | 5.7902308 | -8.44E-02 | 22228153  | 22228276  | NC_000001.10 |
| cg12492653 | 1.78E-06 | 2.63E-07 | -5.34 | 5.789737  | -1.04E-01 | 11862867  | 11862990  | NC_000011.9  |
| cg02082887 | 1.78E-06 | 2.63E-07 | -5.34 | 5.7897203 | -8.33E-02 | 37820361  | 37820484  | NC_000017.10 |
| cg12054341 | 1.78E-06 | 2.63E-07 | -5.34 | 5.7890065 | -7.64E-02 | 19007074  | 19007197  | NC_000019.9  |
| cg09253696 | 1.79E-06 | 2.63E-07 | -5.33 | 5.7884897 | -5.16E-02 | 73873529  | 73873652  | NC_000017.10 |
| cg24103475 | 1.79E-06 | 2.63E-07 | -5.33 | 5.7883196 | -7.76E-02 | 126149274 | 126149397 | NC_000011.9  |
| cg09893465 | 1.79E-06 | 2.63E-07 | -5.33 | 5.7881246 | -1.86E-01 | 134588040 | 134588163 | NC_000010.10 |
| cg17804886 | 1.79E-06 | 2.64E-07 | -5.33 | 5.7867169 | -5.84E-02 | 114871422 | 114871545 | NC_000013.10 |
| cg13593192 | 1.79E-06 | 2.64E-07 | -5.33 | 5.7864207 | -1.27E-01 | 77511003  | 77511126  | NC_000004.11 |
| cg13042918 | 1.79E-06 | 2.64E-07 | -5.33 | 5.7863836 | -7.67E-02 | 119948542 | 119948665 | NC_000004.11 |
| cg19720914 | 1.79E-06 | 2.64E-07 | -5.33 | 5.7846924 | -2.15E-02 | 234746494 | 234746617 | NC_000001.10 |
| cg26427534 | 1.79E-06 | 2.64E-07 | -5.33 | 5.7846623 | -9.60E-02 | 7659067   | 7659190   | NC_000011.9  |
| cg14200127 | 1.79E-06 | 2.64E-07 | -5.33 | 5.783628  | -1.01E-01 | 97604182  | 97604305  | NC_000001.10 |
| cg18029039 | 1.79E-06 | 2.65E-07 | -5.33 | 5.7834011 | -6.29E-02 | 86710     | 86833     | NC_000017.10 |
| cg21406402 | 1.79E-06 | 2.65E-07 | -5.33 | 5.7830587 | -7.92E-02 | 121223847 | 121223970 | NC_000002.11 |
| cg09243811 | 1.79E-06 | 2.65E-07 | -5.33 | 5.7826396 | -1.04E-01 | 66694586  | 66694709  | NC_000017.10 |
| cg08123339 | 1.80E-06 | 2.65E-07 | -5.33 | 5.7824961 | -1.46E-01 | 153463458 | 153463581 | NC_000001.10 |
| cg13611989 | 1.80E-06 | 2.65E-07 | -5.33 | 5.781902  | -2.21E-02 | 133710064 | 133710187 | NC_000009.11 |
| cg16996281 | 1.80E-06 | 2.65E-07 | -5.33 | 5.781825  | -1.11E-01 | 119217884 | 119218007 | NC_000011.9  |
| cg21624165 | 1.80E-06 | 2.65E-07 | -5.33 | 5.7815392 | -9.90E-02 | 178411451 | 178411574 | NC_000005.9  |
| cg24352878 | 1.80E-06 | 2.65E-07 | -5.33 | 5.7799454 | -6.09E-02 | 8772712   | 8772835   | NC_000001.10 |

|               |          |          |       |           |           |           |           |              |
|---------------|----------|----------|-------|-----------|-----------|-----------|-----------|--------------|
| cg10014293    | 1.80E-06 | 2.66E-07 | -5.33 | 5.779061  | -8.08E-02 | 56703833  | 56703956  | NC_000016.9  |
| cg09339818    | 1.80E-06 | 2.66E-07 | -5.33 | 5.7788142 | -1.49E-01 | 100914480 | 100914603 | NC_000006.11 |
| cg09719594    | 1.80E-06 | 2.66E-07 | -5.33 | 5.7785545 | -3.10E-02 | 21412588  | 21412711  | NC_000016.9  |
| cg25255429    | 1.80E-06 | 2.66E-07 | -5.33 | 5.7773393 | -6.26E-02 | 74023633  | 74023756  | NC_000017.10 |
| cg02759002    | 1.81E-06 | 2.66E-07 | -5.33 | 5.7768533 | -2.66E-02 | 80256046  | 80256169  | NC_000017.10 |
| cg27122888    | 1.81E-06 | 2.66E-07 | -5.33 | 5.776644  | -1.22E-01 | 64379586  | 64379709  | NC_000011.9  |
| cg27583010    | 1.81E-06 | 2.67E-07 | -5.33 | 5.7758353 | -9.96E-02 | 30198505  | 30198628  | NC_000016.9  |
| cg04357830    | 1.81E-06 | 2.67E-07 | -5.33 | 5.7745085 | -2.53E-02 | 36261693  | 36261816  | NC_000021.8  |
| cg12531542    | 1.81E-06 | 2.67E-07 | -5.33 | 5.7744576 | -1.19E-01 | 75429059  | 75429182  | NC_000011.9  |
| cg06551476    | 1.81E-06 | 2.67E-07 | -5.33 | 5.7739724 | -9.77E-02 | 35045764  | 35045887  | NC_000019.9  |
| cg10305797    | 1.81E-06 | 2.67E-07 | -5.33 | 5.7739434 | -1.07E-01 | 35981677  | 35981800  | NC_000019.9  |
| cg16932472    | 1.81E-06 | 2.67E-07 | -5.33 | 5.7730941 | -9.53E-02 | 98605951  | 98606074  | NC_000013.10 |
| cg12491115    | 1.81E-06 | 2.68E-07 | -5.33 | 5.7723106 | -1.18E-01 | 129992365 | 129992488 | NC_000011.9  |
| cg01933318    | 1.81E-06 | 2.68E-07 | -5.33 | 5.7722317 | -8.33E-02 | 14864128  | 14864251  | NC_000004.11 |
| ch.3.1245645R | 1.81E-06 | 2.68E-07 | -5.33 | 5.7718563 | -3.23E-02 | 56681254  | 56681377  | NC_000003.11 |
| cg02592403    | 1.81E-06 | 2.68E-07 | -5.33 | 5.7715773 | -7.64E-02 | 51614910  | 51615033  | NC_000019.9  |
| cg22040867    | 1.82E-06 | 2.68E-07 | -5.33 | 5.7709132 | -1.10E-01 | 202081933 | 202082056 | NC_000001.10 |
| cg04872947    | 1.82E-06 | 2.68E-07 | -5.33 | 5.7698674 | -5.33E-02 | 17846815  | 17846938  | NC_000001.10 |
| cg01071534    | 1.82E-06 | 2.68E-07 | -5.33 | 5.7694614 | -4.99E-02 | 46385572  | 46385695  | NC_000021.8  |
| cg01084990    | 1.82E-06 | 2.68E-07 | -5.33 | 5.76928   | -8.92E-02 | 65105581  | 65105704  | NC_000016.9  |
| ch.3.2560679R | 1.82E-06 | 2.69E-07 | -5.33 | 5.7683711 | -2.77E-02 | 128985782 | 128985905 | NC_000003.11 |
| cg11029475    | 1.82E-06 | 2.69E-07 | -5.33 | 5.7683576 | -4.14E-02 | 38202626  | 38202749  | NC_000022.10 |
| cg27592523    | 1.82E-06 | 2.69E-07 | -5.33 | 5.7682738 | -4.38E-02 | 8024253   | 8024376   | NC_000017.10 |
| cg06100238    | 1.82E-06 | 2.69E-07 | -5.33 | 5.7681355 | -3.15E-02 | 648157    | 648280    | NC_000020.10 |
| cg09267113    | 1.82E-06 | 2.69E-07 | -5.33 | 5.7677491 | -1.46E-02 | 98030324  | 98030447  | NC_000007.13 |

|            |          |          |       |           |           |           |           |              |
|------------|----------|----------|-------|-----------|-----------|-----------|-----------|--------------|
| cg21446725 | 1.82E-06 | 2.69E-07 | -5.33 | 5.7670996 | -1.17E-02 | 49740996  | 49741119  | NC_000012.11 |
| cg03442712 | 1.82E-06 | 2.69E-07 | -5.33 | 5.7670552 | -1.11E-01 | 86292964  | 86293087  | NC_000015.9  |
| cg11229543 | 1.82E-06 | 2.69E-07 | -5.33 | 5.7665703 | -1.56E-01 | 2984445   | 2984568   | NC_000001.10 |
| cg27009448 | 1.82E-06 | 2.69E-07 | -5.33 | 5.7660614 | -1.29E-01 | 120492138 | 120492261 | NC_000010.10 |
| cg24418941 | 1.82E-06 | 2.69E-07 | -5.33 | 5.76552   | -5.82E-02 | 2062522   | 2062645   | NC_000019.9  |
| cg09040752 | 1.82E-06 | 2.69E-07 | -5.33 | 5.7654295 | -7.98E-02 | 41003155  | 41003278  | NC_000017.10 |
| cg02284273 | 1.83E-06 | 2.70E-07 | -5.33 | 5.7649296 | -1.24E-01 | 14051679  | 14051802  | NC_000010.10 |
| cg23815853 | 1.83E-06 | 2.70E-07 | -5.33 | 5.7646949 | -1.02E-01 | 48147034  | 48147157  | NC_000012.11 |
| cg07472750 | 1.83E-06 | 2.70E-07 | -5.33 | 5.7645593 | -7.26E-02 | 31039592  | 31039715  | NC_000013.10 |
| cg06142946 | 1.83E-06 | 2.70E-07 | -5.33 | 5.7645407 | -9.27E-02 | 17373124  | 17373247  | NC_000011.9  |
| cg26159860 | 1.83E-06 | 2.70E-07 | -5.33 | 5.764425  | -1.13E-01 | 133469193 | 133469316 | NC_000011.9  |
| cg08461586 | 1.83E-06 | 2.70E-07 | -5.33 | 5.7638941 | -4.79E-02 | 97802977  | 97803100  | NC_000010.10 |
| cg11597332 | 1.83E-06 | 2.70E-07 | -5.33 | 5.7638141 | -4.62E-02 | 49395923  | 49396046  | NC_000003.11 |
| cg22054793 | 1.83E-06 | 2.70E-07 | -5.33 | 5.7635666 | -1.17E-01 | 107305824 | 107305947 | NC_000007.13 |
| cg15936318 | 1.83E-06 | 2.70E-07 | -5.33 | 5.7626662 | -4.91E-02 | 10722562  | 10722685  | NC_000006.11 |
| cg24180402 | 1.83E-06 | 2.71E-07 | -5.33 | 5.7615542 | -1.40E-01 | 43221464  | 43221587  | NC_000017.10 |
| cg05349089 | 1.83E-06 | 2.71E-07 | -5.33 | 5.7614095 | -1.14E-01 | 209008498 | 209008621 | NC_000001.10 |
| cg18328168 | 1.83E-06 | 2.71E-07 | -5.33 | 5.7610842 | -1.20E-01 | 54435048  | 54435171  | NC_000008.10 |
| cg05877661 | 1.83E-06 | 2.71E-07 | -5.33 | 5.7608746 | -1.28E-01 | 1095156   | 1095279   | NC_000011.9  |
| cg08678154 | 1.83E-06 | 2.71E-07 | -5.33 | 5.7606488 | -8.87E-02 | 7036834   | 7036957   | NC_000017.10 |
| cg01137047 | 1.83E-06 | 2.71E-07 | -5.33 | 5.760533  | -8.56E-02 | 2970877   | 2971000   | NC_000006.11 |
| cg16538728 | 1.83E-06 | 2.71E-07 | -5.33 | 5.760221  | -7.99E-02 | 57334448  | 57334571  | NC_000016.9  |
| cg04165933 | 1.83E-06 | 2.71E-07 | -5.33 | 5.7597958 | -1.08E-01 | 49833847  | 49833970  | NC_000016.9  |
| cg08464177 | 1.84E-06 | 2.71E-07 | -5.33 | 5.7594682 | -9.56E-02 | 143625597 | 143625720 | NC_000008.10 |
| cg11496569 | 1.84E-06 | 2.71E-07 | -5.33 | 5.7593478 | -9.66E-02 | 244006397 | 244006520 | NC_000001.10 |

|            |          |          |       |           |           |           |           |              |
|------------|----------|----------|-------|-----------|-----------|-----------|-----------|--------------|
| cg20840706 | 1.84E-06 | 2.71E-07 | -5.33 | 5.7589798 | -4.12E-02 | 52027481  | 52027604  | NC_000013.10 |
| cg11314119 | 1.84E-06 | 2.72E-07 | -5.33 | 5.7576738 | -3.56E-02 | 1200356   | 1200479   | NC_000007.13 |
| cg24201941 | 1.84E-06 | 2.72E-07 | -5.33 | 5.7576271 | -1.00E-01 | 99697034  | 99697157  | NC_000010.10 |
| cg01888601 | 1.84E-06 | 2.72E-07 | -5.33 | 5.756174  | -1.05E-01 | 47736182  | 47736305  | NC_000011.9  |
| cg25522894 | 1.84E-06 | 2.72E-07 | -5.33 | 5.7561413 | -3.81E-02 | 28789456  | 28789579  | NC_000002.11 |
| cg27548752 | 1.84E-06 | 2.72E-07 | -5.33 | 5.756048  | -7.22E-02 | 47263614  | 47263737  | NC_000019.9  |
| cg27411220 | 1.84E-06 | 2.72E-07 | -5.33 | 5.7560144 | -2.63E-02 | 54073642  | 54073765  | NC_000010.10 |
| cg08506743 | 1.84E-06 | 2.72E-07 | -5.33 | 5.7556614 | -1.02E-01 | 131779750 | 131779873 | NC_000011.9  |
| cg24714913 | 1.84E-06 | 2.72E-07 | -5.33 | 5.7552109 | -4.10E-02 | 113932701 | 113932824 | NC_000001.10 |
| cg12473036 | 1.84E-06 | 2.72E-07 | -5.33 | 5.7551822 | -2.30E-02 | 62611207  | 62611330  | NC_000020.10 |
| cg23241878 | 1.84E-06 | 2.73E-07 | -5.33 | 5.7544032 | -1.08E-01 | 42082350  | 42082473  | NC_000019.9  |
| cg08378932 | 1.84E-06 | 2.73E-07 | -5.33 | 5.7543779 | -9.88E-02 | 149191167 | 149191290 | NC_000003.11 |
| cg09143318 | 1.84E-06 | 2.73E-07 | -5.33 | 5.754357  | -1.06E-01 | 32255976  | 32256099  | NC_000017.10 |
| cg24594504 | 1.85E-06 | 2.73E-07 | -5.33 | 5.7536994 | -1.09E-01 | 13455261  | 13455384  | NC_000006.11 |
| cg23796525 | 1.85E-06 | 2.73E-07 | -5.33 | 5.7535863 | -1.01E-01 | 39978853  | 39978976  | NC_000017.10 |
| cg17079757 | 1.85E-06 | 2.73E-07 | -5.33 | 5.7530077 | -6.90E-02 | 33291947  | 33292070  | NC_000006.11 |
| cg02494572 | 1.85E-06 | 2.73E-07 | -5.33 | 5.7522271 | -9.39E-02 | 46624268  | 46624391  | NC_000017.10 |
| cg01139059 | 1.85E-06 | 2.73E-07 | -5.33 | 5.7521064 | -2.61E-02 | 122512988 | 122513111 | NC_000002.11 |
| cg21185320 | 1.85E-06 | 2.73E-07 | -5.33 | 5.7517384 | -3.73E-02 | 37466646  | 37466769  | NC_000009.11 |
| cg27464846 | 1.85E-06 | 2.73E-07 | -5.33 | 5.7515286 | -9.15E-02 | 88268600  | 88268723  | NC_000016.9  |
| cg13604462 | 1.85E-06 | 2.74E-07 | -5.33 | 5.7510253 | -4.77E-02 | 88163667  | 88163790  | NC_000010.10 |
| cg03699074 | 1.85E-06 | 2.74E-07 | -5.33 | 5.7504803 | -1.27E-01 | 88849875  | 88849998  | NC_000016.9  |
| cg16903025 | 1.85E-06 | 2.74E-07 | -5.33 | 5.7504675 | -1.25E-01 | 124549553 | 124549676 | NC_000008.10 |
| cg15824291 | 1.85E-06 | 2.74E-07 | -5.33 | 5.7494651 | -7.33E-02 | 182521222 | 182521345 | NC_000002.11 |
| cg08335254 | 1.85E-06 | 2.74E-07 | -5.33 | 5.7494317 | -8.72E-02 | 123430575 | 123430698 | NC_000011.9  |



|               |          |          |       |           |           |           |           |              |
|---------------|----------|----------|-------|-----------|-----------|-----------|-----------|--------------|
| cg05896714    | 1.85E-06 | 2.74E-07 | -5.33 | 5.749273  | -1.35E-01 | 19247837  | 19247960  | NC_000017.10 |
| cg13466128    | 1.85E-06 | 2.74E-07 | -5.33 | 5.7487966 | -4.42E-02 | 132648438 | 132648561 | NC_000009.11 |
| cg24667510    | 1.85E-06 | 2.74E-07 | -5.33 | 5.7484656 | -8.96E-02 | 3705631   | 3705754   | NC_000017.10 |
| cg26442107    | 1.86E-06 | 2.75E-07 | -5.33 | 5.7473712 | -9.45E-02 | 11276460  | 11276583  | NC_000016.9  |
| cg10273135    | 1.86E-06 | 2.75E-07 | -5.33 | 5.7468766 | -1.15E-01 | 78986111  | 78986234  | NC_000005.9  |
| cg26683636    | 1.86E-06 | 2.75E-07 | -5.33 | 5.7467538 | -4.61E-02 | 93037234  | 93037357  | NC_000008.10 |
| cg17306740    | 1.86E-06 | 2.75E-07 | -5.33 | 5.7467172 | -7.66E-02 | 56195434  | 56195557  | NC_000020.10 |
| cg05415549    | 1.86E-06 | 2.75E-07 | -5.33 | 5.7462053 | -5.23E-02 | 73242574  | 73242697  | NC_000007.13 |
| cg05230567    | 1.86E-06 | 2.75E-07 | -5.33 | 5.7455969 | -1.06E-01 | 49575079  | 49575202  | NC_000019.9  |
| ch.6.2132867R | 1.86E-06 | 2.75E-07 | -5.33 | 5.7451588 | -1.55E-02 | 109139160 | 109139283 | NC_000006.11 |
| cg13436725    | 1.86E-06 | 2.75E-07 | -5.33 | 5.7447976 | -4.40E-02 | 88241337  | 88241460  | NC_000008.10 |
| cg18447587    | 1.86E-06 | 2.75E-07 | -5.33 | 5.7445497 | -1.13E-01 | 64627858  | 64627981  | NC_000002.11 |
| cg08427717    | 1.86E-06 | 2.75E-07 | -5.33 | 5.7445115 | -1.11E-01 | 10381383  | 10381506  | NC_000019.9  |
| cg11351958    | 1.86E-06 | 2.75E-07 | -5.33 | 5.7442268 | -3.56E-02 | 75277791  | 75277914  | NC_000011.9  |
| cg23868809    | 1.86E-06 | 2.76E-07 | -5.33 | 5.7440509 | -7.94E-02 | 94766196  | 94766319  | NC_000008.10 |
| cg11642681    | 1.86E-06 | 2.76E-07 | -5.33 | 5.7432066 | -7.01E-02 | 29210373  | 29210496  | NC_000008.10 |
| cg25647583    | 1.86E-06 | 2.76E-07 | -5.33 | 5.7431532 | -9.77E-02 | 91427184  | 91427307  | NC_000015.9  |
| cg20045040    | 1.87E-06 | 2.76E-07 | -5.32 | 5.7420221 | -8.45E-02 | 22052942  | 22053065  | NC_000022.10 |
| cg04474049    | 1.87E-06 | 2.76E-07 | -5.32 | 5.741611  | -1.24E-01 | 116164533 | 116164656 | NC_000007.13 |
| cg18527241    | 1.87E-06 | 2.76E-07 | -5.32 | 5.740964  | -1.13E-01 | 105319558 | 105319681 | NC_000007.13 |
| cg23922867    | 1.87E-06 | 2.76E-07 | -5.32 | 5.7408034 | -2.21E-02 | 54318612  | 54318735  | NC_000018.9  |
| cg07498421    | 1.87E-06 | 2.76E-07 | -5.32 | 5.7407322 | -4.05E-02 | 94071223  | 94071346  | NC_000012.11 |
| cg19003183    | 1.87E-06 | 2.77E-07 | -5.32 | 5.7396738 | -5.69E-02 | 205994737 | 205994860 | NC_000002.11 |
| cg12066583    | 1.87E-06 | 2.77E-07 | -5.32 | 5.7394944 | -2.15E-02 | 74114963  | 74115086  | NC_000010.10 |
| cg15712304    | 1.87E-06 | 2.77E-07 | -5.32 | 5.7393895 | -1.20E-01 | 125227489 | 125227612 | NC_000011.9  |

|            |          |          |       |           |           |           |           |              |
|------------|----------|----------|-------|-----------|-----------|-----------|-----------|--------------|
| cg06849501 | 1.87E-06 | 2.77E-07 | -5.32 | 5.7388892 | -6.19E-02 | 70458964  | 70459087  | NC_000011.9  |
| cg10019392 | 1.87E-06 | 2.77E-07 | -5.32 | 5.7386229 | -1.39E-01 | 87934324  | 87934447  | NC_000016.9  |
| cg22941294 | 1.87E-06 | 2.77E-07 | -5.32 | 5.7381118 | -1.18E-01 | 110156110 | 110156233 | NC_000001.10 |
| cg23127323 | 1.87E-06 | 2.77E-07 | -5.32 | 5.7378392 | -9.03E-02 | 1196179   | 1196302   | NC_000004.11 |
| cg04173252 | 1.87E-06 | 2.77E-07 | -5.32 | 5.7372585 | -5.23E-02 | 131100487 | 131100610 | NC_000002.11 |
| cg02727363 | 1.88E-06 | 2.78E-07 | -5.32 | 5.7370013 | -1.12E-01 | 70284928  | 70285051  | NC_000016.9  |
| cg22305574 | 1.88E-06 | 2.78E-07 | -5.32 | 5.7369451 | -1.11E-01 | 123797483 | 123797606 | NC_000003.11 |
| cg08647039 | 1.88E-06 | 2.78E-07 | -5.32 | 5.7362524 | -7.62E-02 | 13120987  | 13121110  | NC_000019.9  |
| cg19656486 | 1.88E-06 | 2.78E-07 | -5.32 | 5.7360835 | -7.81E-02 | 143648647 | 143648770 | NC_000008.10 |
| cg25417529 | 1.88E-06 | 2.78E-07 | -5.32 | 5.7357307 | -7.66E-02 | 11289356  | 11289479  | NC_000019.9  |
| cg14378057 | 1.88E-06 | 2.78E-07 | -5.32 | 5.7356904 | -4.83E-02 | 42788563  | 42788686  | NC_000006.11 |
| cg19501909 | 1.88E-06 | 2.78E-07 | -5.32 | 5.735038  | -1.39E-01 | 38001083  | 38001206  | NC_000022.10 |
| cg27494254 | 1.88E-06 | 2.78E-07 | -5.32 | 5.7350029 | -7.22E-02 | 40566897  | 40567020  | NC_000017.10 |
| cg24232869 | 1.88E-06 | 2.78E-07 | -5.32 | 5.7347552 | -7.45E-02 | 48478849  | 48478972  | NC_000012.11 |
| cg19886853 | 1.88E-06 | 2.78E-07 | -5.32 | 5.7339667 | -1.15E-01 | 8277746   | 8277869   | NC_000001.10 |
| cg23715045 | 1.88E-06 | 2.79E-07 | -5.32 | 5.7333821 | -7.19E-02 | 124621944 | 124622067 | NC_000011.9  |
| cg04338652 | 1.88E-06 | 2.79E-07 | -5.32 | 5.7328489 | -1.65E-01 | 13136597  | 13136720  | NC_000018.9  |
| cg10335543 | 1.88E-06 | 2.79E-07 | -5.32 | 5.731565  | -2.65E-02 | 102829157 | 102829280 | NC_000014.8  |
| cg13991953 | 1.88E-06 | 2.79E-07 | -5.32 | 5.7314736 | -2.49E-02 | 20757076  | 20757199  | NC_000001.10 |
| cg20240091 | 1.89E-06 | 2.79E-07 | -5.32 | 5.7307639 | -8.69E-02 | 175044916 | 175045039 | NC_000001.10 |
| cg15025379 | 1.89E-06 | 2.79E-07 | -5.32 | 5.7304048 | -1.19E-01 | 32159104  | 32159227  | NC_000011.9  |
| cg20550154 | 1.89E-06 | 2.79E-07 | -5.32 | 5.7300729 | -1.41E-01 | 52487779  | 52487902  | NC_000014.8  |
| cg18620396 | 1.89E-06 | 2.80E-07 | -5.32 | 5.7296494 | -1.54E-02 | 12703241  | 12703364  | NC_000018.9  |
| cg06169590 | 1.89E-06 | 2.80E-07 | -5.32 | 5.7293301 | -2.79E-02 | 43455088  | 43455211  | NC_000002.11 |
| cg03942871 | 1.89E-06 | 2.80E-07 | -5.32 | 5.7285372 | -7.59E-02 | 102574105 | 102574228 | NC_000007.13 |

|               |          |          |       |           |           |           |           |              |
|---------------|----------|----------|-------|-----------|-----------|-----------|-----------|--------------|
| cg17737314    | 1.89E-06 | 2.80E-07 | -5.32 | 5.7283177 | -1.30E-01 | 44114355  | 44114478  | NC_000001.10 |
| cg14293614    | 1.89E-06 | 2.80E-07 | -5.32 | 5.7283172 | -6.35E-02 | 37593003  | 37593126  | NC_000009.11 |
| cg18818834    | 1.89E-06 | 2.80E-07 | -5.32 | 5.7281548 | -9.34E-03 | 52226764  | 52226887  | NC_000006.11 |
| cg00952789    | 1.89E-06 | 2.80E-07 | -5.32 | 5.7279287 | -9.30E-02 | 28215206  | 28215329  | NC_000021.8  |
| cg16332631    | 1.89E-06 | 2.80E-07 | -5.32 | 5.7275408 | -6.33E-02 | 64126102  | 64126225  | NC_000011.9  |
| cg14309501    | 1.89E-06 | 2.80E-07 | -5.32 | 5.7275366 | -2.40E-02 | 17445715  | 17445838  | NC_000019.9  |
| cg25099087    | 1.89E-06 | 2.80E-07 | -5.32 | 5.7274684 | -2.01E-02 | 201172481 | 201172604 | NC_000002.11 |
| cg06357305    | 1.89E-06 | 2.80E-07 | -5.32 | 5.7270518 | -1.21E-01 | 48183673  | 48183796  | NC_000020.10 |
| cg00364644    | 1.89E-06 | 2.80E-07 | -5.32 | 5.7270193 | -5.11E-02 | 88234627  | 88234750  | NC_000016.9  |
| cg18798099    | 1.89E-06 | 2.80E-07 | -5.32 | 5.7269425 | -1.25E-01 | 140189618 | 140189741 | NC_000009.11 |
| cg25061289    | 1.89E-06 | 2.80E-07 | -5.32 | 5.726891  | -8.68E-02 | 23933620  | 23933743  | NC_000015.9  |
| cg11859594    | 1.89E-06 | 2.81E-07 | -5.32 | 5.7259311 | -1.38E-01 | 76755745  | 76755868  | NC_000017.10 |
| cg11949175    | 1.90E-06 | 2.81E-07 | -5.32 | 5.7257919 | -5.62E-02 | 135970350 | 135970473 | NC_000002.11 |
| ch.18.400468R | 1.90E-06 | 2.81E-07 | -5.32 | 5.7244378 | -1.76E-02 | 20395250  | 20395373  | NC_000018.9  |
| cg06862150    | 1.90E-06 | 2.81E-07 | -5.32 | 5.7232442 | -3.67E-02 | 151150984 | 151151107 | NC_000005.9  |
| cg18926786    | 1.90E-06 | 2.81E-07 | -5.32 | 5.7232093 | -2.19E-02 | 150244388 | 150244511 | NC_000006.11 |
| cg02366931    | 1.90E-06 | 2.82E-07 | -5.32 | 5.722731  | -1.15E-01 | 78986160  | 78986283  | NC_000005.9  |
| cg18278694    | 1.90E-06 | 2.82E-07 | -5.32 | 5.7224991 | -8.02E-02 | 179945973 | 179946096 | NC_000001.10 |
| cg23216685    | 1.90E-06 | 2.82E-07 | -5.32 | 5.7222191 | -1.22E-01 | 86174607  | 86174730  | NC_000001.10 |
| cg06495233    | 1.90E-06 | 2.82E-07 | -5.32 | 5.7218817 | -1.09E-01 | 38671111  | 38671234  | NC_000005.9  |
| cg08909806    | 1.90E-06 | 2.82E-07 | -5.32 | 5.7213101 | -5.49E-02 | 43548696  | 43548819  | NC_000022.10 |
| cg15572396    | 1.90E-06 | 2.82E-07 | -5.32 | 5.7212699 | -1.17E-01 | 58321349  | 58321472  | NC_000003.11 |
| cg02573873    | 1.90E-06 | 2.82E-07 | -5.32 | 5.7212361 | -6.61E-02 | 81520244  | 81520367  | NC_000016.9  |
| cg13327846    | 1.90E-06 | 2.82E-07 | -5.32 | 5.7204085 | -1.07E-02 | 52472389  | 52472512  | NC_000015.9  |
| cg19426731    | 1.90E-06 | 2.82E-07 | -5.32 | 5.7202654 | -6.03E-02 | 49992527  | 49992650  | NC_000019.9  |

|            |          |          |       |           |           |           |           |              |
|------------|----------|----------|-------|-----------|-----------|-----------|-----------|--------------|
| cg03665287 | 1.90E-06 | 2.82E-07 | -5.32 | 5.7202463 | -6.12E-02 | 15311886  | 15312009  | NC_000019.9  |
| cg12691229 | 1.91E-06 | 2.82E-07 | -5.32 | 5.7200195 | -6.02E-02 | 149569946 | 149570069 | NC_000007.13 |
| cg04496895 | 1.91E-06 | 2.82E-07 | -5.32 | 5.7199019 | -1.01E-01 | 30020140  | 30020263  | NC_000010.10 |
| cg07310916 | 1.91E-06 | 2.83E-07 | -5.32 | 5.7180144 | -7.42E-02 | 232330273 | 232330396 | NC_000002.11 |
| cg16549809 | 1.91E-06 | 2.83E-07 | -5.32 | 5.7178063 | -7.27E-02 | 149821291 | 149821414 | NC_000005.9  |
| cg27187555 | 1.91E-06 | 2.83E-07 | -5.32 | 5.7175216 | -9.67E-02 | 3269252   | 3269375   | NC_000001.10 |
| cg11150383 | 1.91E-06 | 2.83E-07 | -5.32 | 5.7175189 | -1.08E-01 | 108168682 | 108168805 | NC_000007.13 |
| cg22304555 | 1.91E-06 | 2.83E-07 | -5.32 | 5.7173939 | -6.20E-02 | 110962034 | 110962157 | NC_000002.11 |
| cg27081745 | 1.91E-06 | 2.84E-07 | -5.32 | 5.7160505 | -8.65E-02 | 67627382  | 67627505  | NC_000005.9  |
| cg08842441 | 1.91E-06 | 2.84E-07 | -5.32 | 5.7157539 | -5.83E-02 | 33211598  | 33211721  | NC_000008.10 |
| cg08644511 | 1.91E-06 | 2.84E-07 | -5.32 | 5.7156191 | -6.60E-02 | 9171147   | 9171270   | NC_000001.10 |
| cg15526153 | 1.91E-06 | 2.84E-07 | -5.32 | 5.7155415 | -4.45E-02 | 53559001  | 53559124  | NC_000001.10 |
| cg26673784 | 1.91E-06 | 2.84E-07 | -5.32 | 5.7155245 | -8.41E-02 | 80787497  | 80787620  | NC_000010.10 |
| cg15685811 | 1.91E-06 | 2.84E-07 | -5.32 | 5.7148672 | -5.63E-02 | 128998585 | 128998708 | NC_000003.11 |
| cg25047618 | 1.91E-06 | 2.84E-07 | -5.32 | 5.7147852 | -1.01E-01 | 126591842 | 126591965 | NC_000012.11 |
| cg03038262 | 1.92E-06 | 2.84E-07 | -5.32 | 5.7140519 | -1.27E-01 | 315262    | 315385    | NC_000011.9  |
| cg18557891 | 1.92E-06 | 2.84E-07 | -5.32 | 5.7135834 | -6.82E-02 | 60119099  | 60119222  | NC_000020.10 |
| cg09178385 | 1.92E-06 | 2.84E-07 | -5.32 | 5.7129975 | -7.88E-02 | 35246759  | 35246882  | NC_000001.10 |
| cg04774581 | 1.92E-06 | 2.85E-07 | -5.32 | 5.7128471 | -6.68E-02 | 133835822 | 133835945 | NC_000010.10 |
| cg14490025 | 1.92E-06 | 2.85E-07 | -5.32 | 5.7127484 | -1.16E-01 | 41703872  | 41703995  | NC_000006.11 |
| cg00902153 | 1.92E-06 | 2.85E-07 | -5.32 | 5.7122639 | -1.35E-01 | 188506715 | 188506838 | NC_000003.11 |
| cg04521409 | 1.92E-06 | 2.85E-07 | -5.32 | 5.7119352 | -1.18E-02 | 34287082  | 34287205  | NC_000020.10 |
| cg02296916 | 1.92E-06 | 2.85E-07 | -5.32 | 5.7118973 | -4.38E-02 | 82372944  | 82373067  | NC_000005.9  |
| cg12252759 | 1.92E-06 | 2.85E-07 | -5.32 | 5.7118821 | -1.20E-01 | 44581050  | 44581173  | NC_000007.13 |
| cg00911326 | 1.92E-06 | 2.85E-07 | -5.32 | 5.7117864 | -6.96E-02 | 45723587  | 45723710  | NC_000017.10 |

|                 |          |          |       |           |           |           |           |              |
|-----------------|----------|----------|-------|-----------|-----------|-----------|-----------|--------------|
| cg21697667      | 1.92E-06 | 2.85E-07 | -5.32 | 5.7117759 | -8.39E-02 | 121298039 | 121298162 | NC_000002.11 |
| cg06844930      | 1.92E-06 | 2.85E-07 | -5.32 | 5.7106494 | -3.65E-02 | 125633631 | 125633754 | NC_000004.11 |
| cg18414429      | 1.92E-06 | 2.85E-07 | -5.32 | 5.7105767 | -4.10E-02 | 3505367   | 3505490   | NC_000019.9  |
| cg03293765      | 1.93E-06 | 2.86E-07 | -5.32 | 5.7083258 | -3.43E-02 | 59391280  | 59391403  | NC_000003.11 |
| cg08380284      | 1.93E-06 | 2.86E-07 | -5.32 | 5.7072112 | -2.48E-02 | 21852549  | 21852672  | NC_000014.8  |
| cg07124903      | 1.93E-06 | 2.86E-07 | -5.32 | 5.7069305 | -2.41E-02 | 245316477 | 245316600 | NC_000001.10 |
| cg16509239      | 1.93E-06 | 2.86E-07 | -5.32 | 5.7067661 | -9.31E-02 | 62212431  | 62212554  | NC_000011.9  |
| cg24516061      | 1.93E-06 | 2.86E-07 | -5.32 | 5.7063379 | -1.63E-02 | 62710773  | 62710896  | NC_000020.10 |
| cg00432953      | 1.93E-06 | 2.86E-07 | -5.32 | 5.706141  | -1.22E-01 | 184318884 | 184319007 | NC_000003.11 |
| cg16636204      | 1.93E-06 | 2.87E-07 | -5.32 | 5.7048931 | -7.10E-02 | 79701561  | 79701684  | NC_000017.10 |
| cg09580147      | 1.93E-06 | 2.87E-07 | -5.32 | 5.7047635 | -4.86E-02 | 22431764  | 22431887  | NC_000016.9  |
| cg15312943      | 1.93E-06 | 2.87E-07 | -5.32 | 5.7047198 | -1.03E-01 | 17843855  | 17843978  | NC_000011.9  |
| cg24237576      | 1.93E-06 | 2.87E-07 | -5.32 | 5.7042869 | -1.03E-01 | 2285775   | 2285898   | NC_000016.9  |
| cg13902210      | 1.94E-06 | 2.87E-07 | -5.32 | 5.7039122 | -1.45E-01 | 110754436 | 110754559 | NC_000001.10 |
| cg25447717      | 1.94E-06 | 2.88E-07 | -5.32 | 5.7024805 | -5.39E-02 | 183952205 | 183952328 | NC_000003.11 |
| cg14022501      | 1.94E-06 | 2.88E-07 | -5.32 | 5.7013368 | -6.83E-02 | 137335080 | 137335203 | NC_000009.11 |
| ch.2.147019764F | 1.94E-06 | 2.88E-07 | -5.32 | 5.7003053 | -3.15E-02 | 147303294 | 147303417 | NC_000002.11 |
| cg01022345      | 1.94E-06 | 2.88E-07 | -5.32 | 5.7000436 | -7.97E-02 | 101317819 | 101317942 | NC_000014.8  |
| cg04087207      | 1.94E-06 | 2.88E-07 | -5.32 | 5.6999764 | -9.92E-02 | 31669392  | 31669515  | NC_000020.10 |
| cg01409597      | 1.94E-06 | 2.88E-07 | -5.32 | 5.6999051 | -5.24E-02 | 62586826  | 62586949  | NC_000012.11 |
| cg19634252      | 1.94E-06 | 2.89E-07 | -5.32 | 5.6989441 | -6.26E-02 | 38155144  | 38155267  | NC_000004.11 |
| cg22135685      | 1.95E-06 | 2.89E-07 | -5.32 | 5.6982114 | -7.25E-02 | 107205065 | 107205188 | NC_000005.9  |
| cg16724696      | 1.95E-06 | 2.89E-07 | -5.32 | 5.6974468 | -2.63E-02 | 118992527 | 118992650 | NC_000011.9  |
| cg03525467      | 1.95E-06 | 2.89E-07 | -5.32 | 5.6973465 | -7.77E-02 | 160098048 | 160098171 | NC_000001.10 |
| cg09525973      | 1.95E-06 | 2.89E-07 | -5.32 | 5.6973105 | -8.84E-02 | 133148746 | 133148869 | NC_000012.11 |

|               |          |          |       |           |           |           |           |              |
|---------------|----------|----------|-------|-----------|-----------|-----------|-----------|--------------|
| cg10674793    | 1.95E-06 | 2.89E-07 | -5.32 | 5.6972084 | -1.08E-01 | 183872704 | 183872827 | NC_000003.11 |
| cg14210632    | 1.95E-06 | 2.89E-07 | -5.32 | 5.6970814 | -1.23E-01 | 93155030  | 93155153  | NC_000014.8  |
| cg10457005    | 1.95E-06 | 2.89E-07 | -5.32 | 5.6964916 | -1.55E-02 | 30457876  | 30457999  | NC_000006.11 |
| cg14171882    | 1.95E-06 | 2.89E-07 | -5.32 | 5.6962469 | -5.87E-02 | 48019441  | 48019564  | NC_000007.13 |
| cg17981028    | 1.95E-06 | 2.90E-07 | -5.32 | 5.6958666 | -3.93E-02 | 80288880  | 80289003  | NC_000008.10 |
| cg09985397    | 1.95E-06 | 2.90E-07 | -5.32 | 5.6956679 | -2.63E-02 | 57215915  | 57216038  | NC_000016.9  |
| cg16377679    | 1.95E-06 | 2.90E-07 | -5.32 | 5.6956293 | -1.20E-01 | 58388744  | 58388867  | NC_000005.9  |
| cg26524541    | 1.95E-06 | 2.90E-07 | -5.31 | 5.6940352 | -2.48E-02 | 41177097  | 41177220  | NC_000017.10 |
| cg27299712    | 1.95E-06 | 2.90E-07 | -5.31 | 5.6936257 | -5.26E-02 | 6550532   | 6550655   | NC_000001.10 |
| cg23837191    | 1.95E-06 | 2.90E-07 | -5.31 | 5.6934558 | -1.11E-01 | 77335239  | 77335362  | NC_000018.9  |
| cg03657549    | 1.96E-06 | 2.90E-07 | -5.31 | 5.6930052 | -2.29E-02 | 128116813 | 128116936 | NC_000007.13 |
| cg12474983    | 1.96E-06 | 2.90E-07 | -5.31 | 5.6929439 | -1.41E-02 | 43903196  | 43903319  | NC_000010.10 |
| cg01694331    | 1.96E-06 | 2.91E-07 | -5.31 | 5.6925168 | -8.47E-02 | 109273766 | 109273889 | NC_000012.11 |
| cg26787199    | 1.96E-06 | 2.91E-07 | -5.31 | 5.691358  | -5.28E-02 | 2044042   | 2044165   | NC_000016.9  |
| cg20640862    | 1.96E-06 | 2.91E-07 | -5.31 | 5.6910046 | -9.27E-02 | 77481302  | 77481425  | NC_000012.11 |
| cg00796728    | 1.96E-06 | 2.91E-07 | -5.31 | 5.6908246 | -1.72E-02 | 94276898  | 94277021  | NC_000011.9  |
| cg16519772    | 1.96E-06 | 2.91E-07 | -5.31 | 5.6902422 | -1.32E-01 | 31112957  | 31113080  | NC_000006.11 |
| cg08294136    | 1.96E-06 | 2.91E-07 | -5.31 | 5.6900602 | -1.21E-01 | 39760800  | 39760923  | NC_000005.9  |
| cg10225325    | 1.96E-06 | 2.91E-07 | -5.31 | 5.6895985 | -1.83E-02 | 167683897 | 167684020 | NC_000001.10 |
| ch.16.723175R | 1.96E-06 | 2.91E-07 | -5.31 | 5.6893885 | -1.64E-02 | 23482588  | 23482711  | NC_000016.9  |
| cg05554494    | 1.96E-06 | 2.92E-07 | -5.31 | 5.6889281 | -7.89E-02 | 3306685   | 3306808   | NC_000016.9  |
| cg16966520    | 1.96E-06 | 2.92E-07 | -5.31 | 5.6885442 | -6.91E-02 | 206786174 | 206786297 | NC_000001.10 |
| cg11123440    | 1.96E-06 | 2.92E-07 | -5.31 | 5.6883983 | -1.38E-01 | 11619852  | 11619975  | NC_000008.10 |
| cg14473062    | 1.96E-06 | 2.92E-07 | -5.31 | 5.6883833 | -8.78E-02 | 97202887  | 97203010  | NC_000014.8  |
| cg12404181    | 1.96E-06 | 2.92E-07 | -5.31 | 5.688365  | -1.28E-01 | 5688515   | 5688638   | NC_000010.10 |

|            |          |          |       |           |           |           |           |              |
|------------|----------|----------|-------|-----------|-----------|-----------|-----------|--------------|
| cg22089942 | 1.97E-06 | 2.92E-07 | -5.31 | 5.6878713 | -7.46E-02 | 84050283  | 84050406  | NC_000004.11 |
| cg13316619 | 1.97E-06 | 2.92E-07 | -5.31 | 5.6870431 | -1.01E-01 | 73314754  | 73314877  | NC_000015.9  |
| cg02784780 | 1.97E-06 | 2.92E-07 | -5.31 | 5.6869783 | -7.84E-02 | 66119234  | 66119357  | NC_000003.11 |
| cg00579105 | 1.97E-06 | 2.92E-07 | -5.31 | 5.6869688 | -2.17E-02 | 31704587  | 31704710  | NC_000006.11 |
| cg21386586 | 1.97E-06 | 2.92E-07 | -5.31 | 5.6868447 | -7.79E-02 | 114321641 | 114321764 | NC_000013.10 |
| cg17398851 | 1.97E-06 | 2.92E-07 | -5.31 | 5.6864866 | -3.14E-02 | 47777507  | 47777630  | NC_000019.9  |
| cg25377475 | 1.97E-06 | 2.92E-07 | -5.31 | 5.6864653 | -2.84E-02 | 236030556 | 236030679 | NC_000001.10 |
| cg13754621 | 1.97E-06 | 2.93E-07 | -5.31 | 5.6854186 | -5.05E-02 | 85372582  | 85372705  | NC_000009.11 |
| cg13865610 | 1.97E-06 | 2.93E-07 | -5.31 | 5.6852894 | -1.23E-01 | 17598458  | 17598581  | NC_000007.13 |
| cg11150559 | 1.97E-06 | 2.93E-07 | -5.31 | 5.6851152 | -4.45E-02 | 156589031 | 156589154 | NC_000001.10 |
| cg10040922 | 1.97E-06 | 2.93E-07 | -5.31 | 5.6849983 | -4.05E-02 | 124778506 | 124778629 | NC_000008.10 |
| cg00365680 | 1.97E-06 | 2.93E-07 | -5.31 | 5.6847125 | -3.96E-02 | 42972339  | 42972462  | NC_000007.13 |
| cg18041006 | 1.97E-06 | 2.93E-07 | -5.31 | 5.6842279 | -4.25E-02 | 47364695  | 47364818  | NC_000019.9  |
| cg16365842 | 1.97E-06 | 2.93E-07 | -5.31 | 5.6840389 | -8.32E-02 | 170191057 | 170191180 | NC_000006.11 |
| cg22801134 | 1.97E-06 | 2.93E-07 | -5.31 | 5.6839692 | -9.81E-02 | 64210439  | 64210562  | NC_000003.11 |
| cg06607866 | 1.97E-06 | 2.93E-07 | -5.31 | 5.6838759 | -5.23E-02 | 67250809  | 67250932  | NC_000011.9  |
| cg05153781 | 1.97E-06 | 2.93E-07 | -5.31 | 5.6832746 | -1.02E-01 | 105132479 | 105132602 | NC_000014.8  |
| cg04078921 | 1.97E-06 | 2.93E-07 | -5.31 | 5.6832562 | -2.25E-02 | 26285441  | 26285564  | NC_000006.11 |
| cg21162938 | 1.97E-06 | 2.93E-07 | -5.31 | 5.6828074 | -1.04E-01 | 95115604  | 95115727  | NC_000005.9  |
| cg03334072 | 1.97E-06 | 2.93E-07 | -5.31 | 5.6827407 | -8.34E-02 | 150435779 | 150435902 | NC_000007.13 |
| cg06943316 | 1.97E-06 | 2.94E-07 | -5.31 | 5.6825102 | -1.02E-01 | 53025587  | 53025710  | NC_000017.10 |
| cg27000449 | 1.97E-06 | 2.94E-07 | -5.31 | 5.6824426 | -2.42E-02 | 2354192   | 2354315   | NC_000007.13 |
| cg11313765 | 1.98E-06 | 2.94E-07 | -5.31 | 5.6818393 | -4.83E-02 | 42896459  | 42896582  | NC_000022.10 |
| cg13038560 | 1.98E-06 | 2.94E-07 | -5.31 | 5.6813716 | -1.12E-01 | 200819113 | 200819236 | NC_000002.11 |
| cg03466007 | 1.98E-06 | 2.94E-07 | -5.31 | 5.6811994 | -7.80E-02 | 71716385  | 71716508  | NC_000016.9  |

|                |          |          |       |           |           |           |           |              |
|----------------|----------|----------|-------|-----------|-----------|-----------|-----------|--------------|
| cg13035052     | 1.98E-06 | 2.94E-07 | -5.31 | 5.6801534 | -1.94E-02 | 4323854   | 4323977   | NC_000016.9  |
| cg13413384     | 1.98E-06 | 2.94E-07 | -5.31 | 5.6798583 | -1.04E-01 | 137302231 | 137302354 | NC_000009.11 |
| cg06683080     | 1.98E-06 | 2.94E-07 | -5.31 | 5.6797818 | -9.95E-02 | 40646549  | 40646672  | NC_000015.9  |
| cg22067839     | 1.98E-06 | 2.95E-07 | -5.31 | 5.6793609 | -6.85E-02 | 47889960  | 47890083  | NC_000003.11 |
| cg00748492     | 1.98E-06 | 2.95E-07 | -5.31 | 5.6792567 | -4.08E-02 | 22216446  | 22216569  | NC_000010.10 |
| cg12994591     | 1.98E-06 | 2.95E-07 | -5.31 | 5.6791242 | -1.13E-01 | 96975932  | 96976055  | NC_000008.10 |
| cg03235661     | 1.98E-06 | 2.95E-07 | -5.31 | 5.6787954 | -1.23E-01 | 60525775  | 60525898  | NC_000020.10 |
| cg21875532     | 1.98E-06 | 2.95E-07 | -5.31 | 5.6784125 | -2.67E-02 | 42109999  | 42110122  | NC_000006.11 |
| cg07945582     | 1.98E-06 | 2.95E-07 | -5.31 | 5.6779054 | -1.14E-01 | 26206579  | 26206702  | NC_000007.13 |
| cg06349851     | 1.99E-06 | 2.95E-07 | -5.31 | 5.6766408 | -1.11E-01 | 64193180  | 64193303  | NC_000003.11 |
| cg21877464     | 1.99E-06 | 2.95E-07 | -5.31 | 5.6763037 | -1.03E-01 | 151056339 | 151056462 | NC_000005.9  |
| cg21351543     | 1.99E-06 | 2.95E-07 | -5.31 | 5.6761149 | -1.98E-02 | 191399470 | 191399593 | NC_000002.11 |
| cg25363564     | 1.99E-06 | 2.96E-07 | -5.31 | 5.6757917 | -1.12E-01 | 111540348 | 111540471 | NC_000010.10 |
| cg05208878     | 1.99E-06 | 2.96E-07 | -5.31 | 5.6757011 | -6.36E-02 | 22901596  | 22901719  | NC_000022.10 |
| cg16494477     | 1.99E-06 | 2.96E-07 | -5.31 | 5.6750023 | -2.54E-02 | 170847251 | 170847374 | NC_000005.9  |
| cg17633681     | 1.99E-06 | 2.96E-07 | -5.31 | 5.6748986 | -1.16E-01 | 88106987  | 88107110  | NC_000016.9  |
| cg13487284     | 1.99E-06 | 2.96E-07 | -5.31 | 5.6742842 | -4.52E-02 | 26794878  | 26795001  | NC_000017.10 |
| cg13927782     | 1.99E-06 | 2.96E-07 | -5.31 | 5.6738965 | -2.23E-02 | 18061155  | 18061278  | NC_000019.9  |
| cg18407136     | 1.99E-06 | 2.96E-07 | -5.31 | 5.6734326 | -1.23E-01 | 83681092  | 83681215  | NC_000015.9  |
| cg19589396     | 1.99E-06 | 2.97E-07 | -5.31 | 5.6727638 | -8.89E-02 | 103937374 | 103937497 | NC_000008.10 |
| cg13053825     | 1.99E-06 | 2.97E-07 | -5.31 | 5.67247   | -6.80E-02 | 65537964  | 65538087  | NC_000015.9  |
| cg14329673     | 2.00E-06 | 2.97E-07 | -5.31 | 5.6717552 | -4.87E-02 | 95732141  | 95732264  | NC_000008.10 |
| cg07046436     | 2.00E-06 | 2.97E-07 | -5.31 | 5.671586  | -5.16E-02 | 30663252  | 30663375  | NC_000016.9  |
| ch.8.31582255R | 2.00E-06 | 2.97E-07 | -5.31 | 5.6715767 | -4.17E-02 | 31462713  | 31462836  | NC_000008.10 |
| cg17067544     | 2.00E-06 | 2.97E-07 | -5.31 | 5.6712157 | -1.25E-01 | 22765321  | 22765444  | NC_000007.13 |



|            |          |          |       |           |           |           |           |              |
|------------|----------|----------|-------|-----------|-----------|-----------|-----------|--------------|
| cg07319459 | 2.00E-06 | 2.97E-07 | -5.31 | 5.6711797 | -9.03E-02 | 17448608  | 17448731  | NC_000001.10 |
| cg01181009 | 2.00E-06 | 2.97E-07 | -5.31 | 5.6711621 | -8.49E-02 | 62305213  | 62305336  | NC_000003.11 |
| cg23634318 | 2.00E-06 | 2.97E-07 | -5.31 | 5.6708836 | -2.10E-02 | 46097671  | 46097794  | NC_000006.11 |
| cg08662074 | 2.00E-06 | 2.97E-07 | -5.31 | 5.6708003 | -7.47E-02 | 118915867 | 118915990 | NC_000009.11 |
| cg17695543 | 2.00E-06 | 2.98E-07 | -5.31 | 5.6693525 | -6.83E-02 | 8429614   | 8429737   | NC_000019.9  |
| cg10529470 | 2.00E-06 | 2.98E-07 | -5.31 | 5.6693106 | -5.83E-02 | 171766423 | 171766546 | NC_000005.9  |
| cg20987283 | 2.00E-06 | 2.98E-07 | -5.31 | 5.6687879 | -1.15E-01 | 135863314 | 135863437 | NC_000008.10 |
| cg15820868 | 2.00E-06 | 2.98E-07 | -5.31 | 5.6675424 | -6.37E-02 | 133105045 | 133105168 | NC_000002.11 |
| cg25620430 | 2.00E-06 | 2.98E-07 | -5.31 | 5.6668233 | -1.27E-01 | 53093405  | 53093528  | NC_000015.9  |
| cg09323395 | 2.01E-06 | 2.99E-07 | -5.31 | 5.6661893 | -6.58E-02 | 134980671 | 134980794 | NC_000010.10 |
| cg07196069 | 2.01E-06 | 2.99E-07 | -5.31 | 5.665689  | -2.85E-02 | 4491175   | 4491298   | NC_000009.11 |
| cg09123615 | 2.01E-06 | 2.99E-07 | -5.31 | 5.6652283 | -1.09E-01 | 7986477   | 7986600   | NC_000004.11 |
| cg15837382 | 2.01E-06 | 2.99E-07 | -5.31 | 5.6648827 | -2.49E-02 | 35332106  | 35332229  | NC_000001.10 |
| cg04952324 | 2.01E-06 | 2.99E-07 | -5.31 | 5.664588  | -1.10E-01 | 73727108  | 73727231  | NC_000007.13 |
| cg17283889 | 2.01E-06 | 2.99E-07 | -5.31 | 5.6641212 | -9.66E-02 | 1573743   | 1573866   | NC_000005.9  |
| cg14536784 | 2.01E-06 | 2.99E-07 | -5.31 | 5.6633672 | -2.72E-02 | 10542623  | 10542746  | NC_000019.9  |
| cg08843850 | 2.01E-06 | 2.99E-07 | -5.31 | 5.6633302 | -8.99E-02 | 199092823 | 199092946 | NC_000001.10 |
| cg01878839 | 2.01E-06 | 3.00E-07 | -5.31 | 5.663008  | -2.80E-02 | 8126381   | 8126504   | NC_000017.10 |
| cg03775991 | 2.01E-06 | 3.00E-07 | -5.31 | 5.6628239 | -8.54E-02 | 170589530 | 170589653 | NC_000006.11 |
| cg08236022 | 2.01E-06 | 3.00E-07 | -5.31 | 5.6624414 | -1.22E-01 | 93551014  | 93551137  | NC_000007.13 |
| cg07241154 | 2.01E-06 | 3.00E-07 | -5.31 | 5.6620981 | -1.82E-02 | 122517184 | 122517307 | NC_000012.11 |
| cg16396933 | 2.01E-06 | 3.00E-07 | -5.31 | 5.6619832 | -1.18E-01 | 104954103 | 104954226 | NC_000010.10 |
| cg13747275 | 2.01E-06 | 3.00E-07 | -5.31 | 5.6619677 | -9.58E-02 | 1992952   | 1993075   | NC_000019.9  |
| cg08535978 | 2.01E-06 | 3.00E-07 | -5.31 | 5.6619393 | -7.28E-02 | 152092595 | 152092718 | NC_000003.11 |
| cg07173049 | 2.01E-06 | 3.00E-07 | -5.31 | 5.6619233 | -8.58E-02 | 7289937   | 7290060   | NC_000001.10 |

|            |          |          |       |           |           |           |           |              |
|------------|----------|----------|-------|-----------|-----------|-----------|-----------|--------------|
| cg12779575 | 2.02E-06 | 3.00E-07 | -5.31 | 5.6613058 | -8.30E-02 | 62208434  | 62208557  | NC_000017.10 |
| cg01028287 | 2.02E-06 | 3.00E-07 | -5.31 | 5.6612343 | -8.87E-02 | 44275556  | 44275679  | NC_000007.13 |
| cg02941859 | 2.02E-06 | 3.00E-07 | -5.31 | 5.6605508 | -3.01E-02 | 99869835  | 99869958  | NC_000007.13 |
| cg03000419 | 2.02E-06 | 3.01E-07 | -5.31 | 5.658904  | -1.19E-01 | 82997694  | 82997817  | NC_000011.9  |
| cg08592234 | 2.02E-06 | 3.01E-07 | -5.31 | 5.6588523 | -9.50E-02 | 112895794 | 112895917 | NC_000013.10 |
| cg07913153 | 2.02E-06 | 3.01E-07 | -5.31 | 5.6579817 | -1.17E-01 | 236680761 | 236680884 | NC_000001.10 |
| cg26809868 | 2.02E-06 | 3.01E-07 | -5.31 | 5.6578759 | -6.23E-02 | 2886233   | 2886356   | NC_000016.9  |
| cg13367219 | 2.02E-06 | 3.01E-07 | -5.31 | 5.6578044 | -7.09E-02 | 28764033  | 28764156  | NC_000012.11 |
| cg04353769 | 2.02E-06 | 3.01E-07 | -5.31 | 5.6570253 | -8.40E-02 | 59951557  | 59951680  | NC_000011.9  |
| cg22522920 | 2.02E-06 | 3.01E-07 | -5.31 | 5.6568006 | -6.88E-02 | 50276512  | 50276635  | NC_000012.11 |
| cg24701772 | 2.02E-06 | 3.01E-07 | -5.31 | 5.6566376 | -6.82E-02 | 51888961  | 51889084  | NC_000001.10 |
| cg21109013 | 2.02E-06 | 3.02E-07 | -5.31 | 5.6565333 | -1.36E-02 | 27806393  | 27806516  | NC_000006.11 |
| cg08759960 | 2.02E-06 | 3.02E-07 | -5.31 | 5.6562998 | -1.46E-02 | 31649335  | 31649458  | NC_000006.11 |
| cg05931231 | 2.03E-06 | 3.02E-07 | -5.31 | 5.6552581 | -1.01E-01 | 11733759  | 11733882  | NC_000012.11 |
| cg21965995 | 2.03E-06 | 3.02E-07 | -5.31 | 5.6551929 | -8.30E-02 | 151771856 | 151771979 | NC_000001.10 |
| cg01388847 | 2.03E-06 | 3.02E-07 | -5.31 | 5.6543136 | -7.50E-02 | 412428    | 412551    | NC_000016.9  |
| cg24557048 | 2.03E-06 | 3.02E-07 | -5.31 | 5.6540259 | -1.20E-01 | 2063799   | 2063922   | NC_000001.10 |
| cg17064520 | 2.03E-06 | 3.02E-07 | -5.31 | 5.6536295 | -3.91E-02 | 98591758  | 98591881  | NC_000010.10 |
| cg15416233 | 2.03E-06 | 3.03E-07 | -5.31 | 5.6522656 | -3.20E-02 | 102505266 | 102505389 | NC_000010.10 |
| cg23008718 | 2.03E-06 | 3.03E-07 | -5.31 | 5.6521946 | -1.00E-01 | 43188851  | 43188974  | NC_000002.11 |
| cg05530317 | 2.03E-06 | 3.03E-07 | -5.31 | 5.6516894 | -8.47E-02 | 38445774  | 38445897  | NC_000005.9  |
| cg21713424 | 2.03E-06 | 3.03E-07 | -5.31 | 5.651656  | -2.04E-02 | 50535952  | 50536075  | NC_000007.13 |
| cg15310872 | 2.04E-06 | 3.03E-07 | -5.31 | 5.6509289 | -7.16E-02 | 100089398 | 100089521 | NC_000014.8  |
| cg02154268 | 2.04E-06 | 3.03E-07 | -5.31 | 5.6509279 | -3.93E-02 | 130648331 | 130648454 | NC_000005.9  |
| cg21243608 | 2.04E-06 | 3.03E-07 | -5.31 | 5.6506286 | -2.02E-02 | 74205946  | 74206069  | NC_000008.10 |

|            |          |          |       |           |           |           |           |              |
|------------|----------|----------|-------|-----------|-----------|-----------|-----------|--------------|
| cg17273588 | 2.04E-06 | 3.03E-07 | -5.31 | 5.6502724 | -7.65E-02 | 100760351 | 100760474 | NC_000002.11 |
| cg06484274 | 2.04E-06 | 3.04E-07 | -5.31 | 5.6498887 | -1.18E-01 | 142164840 | 142164963 | NC_000003.11 |
| cg13244592 | 2.04E-06 | 3.04E-07 | -5.31 | 5.6498432 | -3.17E-02 | 101158264 | 101158387 | NC_000008.10 |
| cg09979641 | 2.04E-06 | 3.04E-07 | -5.31 | 5.6497187 | -1.30E-01 | 135021100 | 135021223 | NC_000010.10 |
| cg20559634 | 2.04E-06 | 3.04E-07 | -5.31 | 5.6494285 | -1.09E-01 | 45609400  | 45609523  | NC_000003.11 |
| cg03220671 | 2.04E-06 | 3.04E-07 | -5.3  | 5.6481227 | -8.64E-02 | 201363221 | 201363344 | NC_000001.10 |
| cg15257539 | 2.04E-06 | 3.04E-07 | -5.3  | 5.6474882 | -6.40E-02 | 56855954  | 56856077  | NC_000007.13 |
| cg00879163 | 2.04E-06 | 3.04E-07 | -5.3  | 5.647372  | -2.47E-02 | 66386079  | 66386202  | NC_000007.13 |
| cg21071311 | 2.04E-06 | 3.05E-07 | -5.3  | 5.6467544 | -1.51E-02 | 57046473  | 57046596  | NC_000014.8  |
| cg26300461 | 2.04E-06 | 3.05E-07 | -5.3  | 5.6465254 | -1.28E-01 | 32401032  | 32401155  | NC_000010.10 |
| cg13938963 | 2.05E-06 | 3.05E-07 | -5.3  | 5.6447587 | -2.85E-02 | 68411314  | 68411437  | NC_000004.11 |
| cg08017202 | 2.05E-06 | 3.05E-07 | -5.3  | 5.6447538 | -8.23E-02 | 25575541  | 25575664  | NC_000022.10 |
| cg09539720 | 2.05E-06 | 3.06E-07 | -5.3  | 5.6436814 | -6.42E-02 | 150885458 | 150885581 | NC_000007.13 |
| cg11347708 | 2.05E-06 | 3.06E-07 | -5.3  | 5.6435839 | -8.42E-02 | 24475833  | 24475956  | NC_000013.10 |
| cg00791418 | 2.05E-06 | 3.06E-07 | -5.3  | 5.6431998 | -1.05E-02 | 84937337  | 84937460  | NC_000006.11 |
| cg22682162 | 2.05E-06 | 3.06E-07 | -5.3  | 5.6422293 | -1.40E-02 | 97731065  | 97731188  | NC_000006.11 |
| cg24142464 | 2.05E-06 | 3.06E-07 | -5.3  | 5.6418636 | -4.21E-02 | 40040489  | 40040612  | NC_000001.10 |
| cg13766096 | 2.05E-06 | 3.06E-07 | -5.3  | 5.6417854 | -1.92E-02 | 111365492 | 111365615 | NC_000013.10 |
| cg01121978 | 2.05E-06 | 3.06E-07 | -5.3  | 5.6415695 | -1.19E-01 | 5342326   | 5342449   | NC_000007.13 |
| cg21332426 | 2.06E-06 | 3.07E-07 | -5.3  | 5.6399331 | -5.08E-02 | 1373655   | 1373778   | NC_000020.10 |
| cg23053407 | 2.06E-06 | 3.07E-07 | -5.3  | 5.6395507 | -5.57E-02 | 104068312 | 104068435 | NC_000001.10 |
| cg18003659 | 2.06E-06 | 3.07E-07 | -5.3  | 5.6393093 | -9.97E-02 | 175629267 | 175629390 | NC_000002.11 |
| cg03001305 | 2.06E-06 | 3.07E-07 | -5.3  | 5.638747  | -1.38E-01 | 40439492  | 40439615  | NC_000017.10 |
| cg15835852 | 2.06E-06 | 3.07E-07 | -5.3  | 5.6385275 | -5.00E-02 | 38299584  | 38299707  | NC_000022.10 |
| cg07212747 | 2.06E-06 | 3.07E-07 | -5.3  | 5.6379743 | -1.20E-01 | 4539233   | 4539356   | NC_000016.9  |

|            |          |          |      |           |           |           |           |              |
|------------|----------|----------|------|-----------|-----------|-----------|-----------|--------------|
| cg09234161 | 2.06E-06 | 3.07E-07 | -5.3 | 5.6375478 | -8.26E-02 | 57565147  | 57565270  | NC_000016.9  |
| cg04041159 | 2.06E-06 | 3.08E-07 | -5.3 | 5.6363005 | -7.56E-02 | 88152486  | 88152609  | NC_000016.9  |
| cg18500177 | 2.06E-06 | 3.08E-07 | -5.3 | 5.6359523 | -1.17E-01 | 69387218  | 69387341  | NC_000008.10 |
| cg20895028 | 2.07E-06 | 3.08E-07 | -5.3 | 5.6349793 | -1.00E-01 | 58533443  | 58533566  | NC_000020.10 |
| cg23193616 | 2.07E-06 | 3.08E-07 | -5.3 | 5.6345507 | -8.66E-02 | 104177530 | 104177653 | NC_000014.8  |
| cg07026882 | 2.07E-06 | 3.08E-07 | -5.3 | 5.6345426 | -7.39E-02 | 113417167 | 113417290 | NC_000013.10 |
| cg09214243 | 2.07E-06 | 3.09E-07 | -5.3 | 5.6342405 | -1.41E-01 | 29968124  | 29968247  | NC_000015.9  |
| cg00956964 | 2.07E-06 | 3.09E-07 | -5.3 | 5.6333068 | -1.19E-01 | 12420862  | 12420985  | NC_000018.9  |
| cg10716356 | 2.07E-06 | 3.09E-07 | -5.3 | 5.6331468 | -1.04E-01 | 214785523 | 214785646 | NC_000001.10 |
| cg01105356 | 2.07E-06 | 3.09E-07 | -5.3 | 5.6327433 | -7.15E-02 | 11016097  | 11016220  | NC_000016.9  |
| cg13518670 | 2.07E-06 | 3.09E-07 | -5.3 | 5.6325374 | -1.14E-01 | 30433838  | 30433961  | NC_000006.11 |
| cg07262168 | 2.08E-06 | 3.10E-07 | -5.3 | 5.6306678 | -1.22E-01 | 141865108 | 141865231 | NC_000004.11 |
| cg11680590 | 2.08E-06 | 3.10E-07 | -5.3 | 5.6300484 | -1.24E-01 | 92701885  | 92702008  | NC_000015.9  |
| cg16024530 | 2.08E-06 | 3.10E-07 | -5.3 | 5.629816  | -7.47E-02 | 128673534 | 128673657 | NC_000011.9  |
| cg07599389 | 2.08E-06 | 3.10E-07 | -5.3 | 5.6296794 | -8.61E-02 | 4890278   | 4890401   | NC_000006.11 |
| cg00354125 | 2.08E-06 | 3.10E-07 | -5.3 | 5.6295554 | -7.55E-02 | 156889675 | 156889798 | NC_000007.13 |
| cg11270917 | 2.08E-06 | 3.10E-07 | -5.3 | 5.629357  | -2.51E-02 | 10975686  | 10975809  | NC_000002.11 |
| cg16530970 | 2.08E-06 | 3.10E-07 | -5.3 | 5.6293409 | -1.09E-01 | 81134479  | 81134602  | NC_000015.9  |
| cg26833120 | 2.08E-06 | 3.10E-07 | -5.3 | 5.629107  | -9.82E-02 | 32169568  | 32169691  | NC_000001.10 |
| cg22349126 | 2.08E-06 | 3.10E-07 | -5.3 | 5.6288589 | -5.44E-02 | 25348261  | 25348384  | NC_000012.11 |
| cg16510460 | 2.08E-06 | 3.11E-07 | -5.3 | 5.6262076 | -6.56E-02 | 184434972 | 184435095 | NC_000003.11 |
| cg16775971 | 2.08E-06 | 3.11E-07 | -5.3 | 5.6260708 | -1.49E-02 | 105412117 | 105412240 | NC_000004.11 |
| cg17918700 | 2.08E-06 | 3.11E-07 | -5.3 | 5.6260083 | -6.94E-02 | 65363503  | 65363626  | NC_000011.9  |
| cg15393197 | 2.09E-06 | 3.11E-07 | -5.3 | 5.6254434 | -3.76E-02 | 37213172  | 37213295  | NC_000017.10 |
| cg08313382 | 2.09E-06 | 3.11E-07 | -5.3 | 5.6250893 | -8.93E-02 | 6822830   | 6822953   | NC_000005.9  |

|            |          |          |      |           |           |           |           |              |
|------------|----------|----------|------|-----------|-----------|-----------|-----------|--------------|
| cg14863667 | 2.09E-06 | 3.11E-07 | -5.3 | 5.6249943 | -3.31E-02 | 104489185 | 104489308 | NC_000010.10 |
| cg27073142 | 2.09E-06 | 3.11E-07 | -5.3 | 5.6249742 | -9.93E-02 | 45314933  | 45315056  | NC_000015.9  |
| cg21220336 | 2.09E-06 | 3.11E-07 | -5.3 | 5.6249502 | -3.20E-02 | 79008793  | 79008916  | NC_000009.11 |
| cg26797073 | 2.09E-06 | 3.12E-07 | -5.3 | 5.6248146 | -1.30E-02 | 131129811 | 131129934 | NC_000002.11 |
| cg20091523 | 2.09E-06 | 3.12E-07 | -5.3 | 5.6243229 | -4.60E-02 | 58909996  | 58910119  | NC_000011.9  |
| cg18448570 | 2.09E-06 | 3.12E-07 | -5.3 | 5.6239905 | -5.19E-02 | 98031337  | 98031460  | NC_000010.10 |
| cg00096447 | 2.09E-06 | 3.12E-07 | -5.3 | 5.6236583 | -1.23E-01 | 137576708 | 137576831 | NC_000005.9  |
| cg22004443 | 2.09E-06 | 3.12E-07 | -5.3 | 5.6231079 | -2.97E-02 | 10953237  | 10953360  | NC_000002.11 |
| cg15924693 | 2.09E-06 | 3.12E-07 | -5.3 | 5.6223797 | -1.01E-01 | 33359001  | 33359124  | NC_000006.11 |
| cg00152942 | 2.09E-06 | 3.12E-07 | -5.3 | 5.621934  | -1.25E-01 | 57125755  | 57125878  | NC_000016.9  |
| cg04731091 | 2.09E-06 | 3.12E-07 | -5.3 | 5.6219134 | -2.11E-02 | 1102917   | 1103040   | NC_000010.10 |
| cg26857192 | 2.09E-06 | 3.13E-07 | -5.3 | 5.6216224 | -8.75E-02 | 2017939   | 2018062   | NC_000011.9  |
| cg21233517 | 2.09E-06 | 3.13E-07 | -5.3 | 5.6209988 | -2.68E-02 | 74058401  | 74058524  | NC_000014.8  |
| cg04596071 | 2.09E-06 | 3.13E-07 | -5.3 | 5.6209593 | -1.00E-01 | 2155899   | 2156022   | NC_000007.13 |
| cg18735015 | 2.10E-06 | 3.13E-07 | -5.3 | 5.6201351 | -1.33E-01 | 105428506 | 105428629 | NC_000010.10 |
| cg13229078 | 2.10E-06 | 3.13E-07 | -5.3 | 5.6196488 | -1.22E-01 | 234998769 | 234998892 | NC_000001.10 |
| cg21339533 | 2.10E-06 | 3.13E-07 | -5.3 | 5.619144  | -3.43E-02 | 23221367  | 23221490  | NC_000007.13 |
| cg02468417 | 2.10E-06 | 3.14E-07 | -5.3 | 5.6184353 | -1.18E-02 | 36239455  | 36239578  | NC_000019.9  |
| cg23656755 | 2.10E-06 | 3.14E-07 | -5.3 | 5.6181763 | -3.30E-02 | 230203043 | 230203166 | NC_000001.10 |
| cg02981183 | 2.10E-06 | 3.14E-07 | -5.3 | 5.6178242 | -1.03E-01 | 102582487 | 102582610 | NC_000010.10 |
| cg24898863 | 2.10E-06 | 3.14E-07 | -5.3 | 5.6174613 | -1.09E-01 | 153363580 | 153363703 | NC_000001.10 |
| cg11412129 | 2.10E-06 | 3.14E-07 | -5.3 | 5.617026  | -1.10E-01 | 88928839  | 88928962  | NC_000001.10 |
| cg04108939 | 2.10E-06 | 3.14E-07 | -5.3 | 5.6163243 | -1.24E-01 | 45250181  | 45250304  | NC_000001.10 |
| cg08154612 | 2.10E-06 | 3.14E-07 | -5.3 | 5.6162797 | -8.74E-02 | 7037098   | 7037221   | NC_000017.10 |
| cg04988187 | 2.10E-06 | 3.14E-07 | -5.3 | 5.6161084 | -5.73E-02 | 80445147  | 80445270  | NC_000015.9  |

|            |          |          |      |           |           |           |           |              |
|------------|----------|----------|------|-----------|-----------|-----------|-----------|--------------|
| cg09581581 | 2.10E-06 | 3.14E-07 | -5.3 | 5.6158094 | -9.40E-02 | 35943580  | 35943703  | NC_000020.10 |
| cg18306456 | 2.10E-06 | 3.15E-07 | -5.3 | 5.6155677 | -5.71E-02 | 110271024 | 110271147 | NC_000012.11 |
| cg21962760 | 2.10E-06 | 3.15E-07 | -5.3 | 5.6155507 | -8.21E-02 | 144803661 | 144803784 | NC_000008.10 |
| cg14888176 | 2.11E-06 | 3.15E-07 | -5.3 | 5.614975  | -1.82E-02 | 48669363  | 48669486  | NC_000013.10 |
| cg01899542 | 2.11E-06 | 3.15E-07 | -5.3 | 5.6149411 | -1.36E-01 | 49732224  | 49732347  | NC_000016.9  |
| cg03901431 | 2.11E-06 | 3.15E-07 | -5.3 | 5.6146998 | -1.00E-01 | 85517684  | 85517807  | NC_000016.9  |
| cg19550755 | 2.11E-06 | 3.15E-07 | -5.3 | 5.6142346 | -6.61E-02 | 18794896  | 18795019  | NC_000011.9  |
| cg08329473 | 2.11E-06 | 3.15E-07 | -5.3 | 5.6140441 | -7.68E-02 | 116133852 | 116133975 | NC_000010.10 |
| cg08346632 | 2.11E-06 | 3.15E-07 | -5.3 | 5.6133364 | -8.01E-02 | 161836595 | 161836718 | NC_000006.11 |
| cg21159893 | 2.11E-06 | 3.15E-07 | -5.3 | 5.6129454 | -2.94E-02 | 65292492  | 65292615  | NC_000011.9  |
| cg21230425 | 2.11E-06 | 3.15E-07 | -5.3 | 5.6127634 | -1.04E-01 | 64533826  | 64533949  | NC_000007.13 |
| cg21535462 | 2.11E-06 | 3.16E-07 | -5.3 | 5.6121988 | -5.75E-02 | 75905660  | 75905783  | NC_000012.11 |
| cg03101664 | 2.11E-06 | 3.16E-07 | -5.3 | 5.6114496 | -8.49E-02 | 64794610  | 64794733  | NC_000011.9  |
| cg03208902 | 2.11E-06 | 3.16E-07 | -5.3 | 5.6111101 | -1.01E-01 | 3265467   | 3265590   | NC_000016.9  |
| cg21210630 | 2.11E-06 | 3.16E-07 | -5.3 | 5.6109916 | -1.13E-01 | 38035098  | 38035221  | NC_000003.11 |
| cg01045337 | 2.12E-06 | 3.16E-07 | -5.3 | 5.6099326 | -1.59E-01 | 374988    | 375111    | NC_000016.9  |
| cg15604682 | 2.12E-06 | 3.17E-07 | -5.3 | 5.609389  | -2.12E-02 | 102105781 | 102105904 | NC_000007.13 |
| cg17259656 | 2.12E-06 | 3.17E-07 | -5.3 | 5.6091369 | -2.72E-02 | 148521112 | 148521235 | NC_000005.9  |
| cg11190890 | 2.12E-06 | 3.17E-07 | -5.3 | 5.6091292 | -5.87E-02 | 73870956  | 73871079  | NC_000017.10 |
| cg22104103 | 2.12E-06 | 3.17E-07 | -5.3 | 5.6090995 | -9.39E-02 | 17565450  | 17565573  | NC_000021.8  |
| cg09897970 | 2.12E-06 | 3.17E-07 | -5.3 | 5.6089568 | -1.13E-01 | 29757344  | 29757467  | NC_000016.9  |
| cg04075428 | 2.12E-06 | 3.17E-07 | -5.3 | 5.60876   | -1.84E-02 | 204042338 | 204042461 | NC_000001.10 |
| cg06620390 | 2.12E-06 | 3.17E-07 | -5.3 | 5.6081386 | -8.58E-02 | 10192943  | 10193066  | NC_000008.10 |
| cg00681566 | 2.12E-06 | 3.17E-07 | -5.3 | 5.6080206 | -5.44E-02 | 54170928  | 54171051  | NC_000010.10 |
| cg23413494 | 2.12E-06 | 3.17E-07 | -5.3 | 5.6070429 | -6.29E-02 | 17104280  | 17104403  | NC_000008.10 |

|            |          |          |       |           |           |           |           |              |
|------------|----------|----------|-------|-----------|-----------|-----------|-----------|--------------|
| cg05748691 | 2.12E-06 | 3.17E-07 | -5.3  | 5.6069113 | -3.54E-02 | 23053549  | 23053672  | NC_000007.13 |
| cg04544908 | 2.12E-06 | 3.18E-07 | -5.3  | 5.6060921 | -8.58E-02 | 178833490 | 178833613 | NC_000005.9  |
| cg12996305 | 2.12E-06 | 3.18E-07 | -5.3  | 5.6060424 | -2.42E-02 | 2295923   | 2296046   | NC_000017.10 |
| cg21522159 | 2.12E-06 | 3.18E-07 | -5.3  | 5.6059687 | -8.68E-02 | 7252415   | 7252538   | NC_000004.11 |
| cg12082793 | 2.13E-06 | 3.18E-07 | -5.3  | 5.6042606 | -8.72E-02 | 20218923  | 20219046  | NC_000001.10 |
| cg25123225 | 2.13E-06 | 3.18E-07 | -5.3  | 5.6035723 | -3.65E-02 | 39063859  | 39063982  | NC_000004.11 |
| cg19091719 | 2.13E-06 | 3.19E-07 | -5.3  | 5.6032933 | -1.36E-01 | 149997515 | 149997638 | NC_000005.9  |
| cg19123966 | 2.13E-06 | 3.19E-07 | -5.3  | 5.6027189 | -5.57E-02 | 119192620 | 119192743 | NC_000011.9  |
| cg05051464 | 2.13E-06 | 3.19E-07 | -5.29 | 5.6019804 | -5.21E-02 | 19811322  | 19811445  | NC_000001.10 |
| cg27362439 | 2.13E-06 | 3.19E-07 | -5.29 | 5.6018759 | -1.66E-02 | 66234280  | 66234403  | NC_000011.9  |
| cg02643668 | 2.13E-06 | 3.19E-07 | -5.29 | 5.6013521 | -8.54E-02 | 2876182   | 2876305   | NC_000002.11 |
| cg17655614 | 2.14E-06 | 3.20E-07 | -5.29 | 5.5997985 | -6.26E-02 | 68770944  | 68771067  | NC_000016.9  |
| cg20990359 | 2.14E-06 | 3.20E-07 | -5.29 | 5.5992014 | -1.20E-01 | 99096365  | 99096488  | NC_000013.10 |
| cg06489615 | 2.14E-06 | 3.20E-07 | -5.29 | 5.5985647 | -3.48E-02 | 1518592   | 1518715   | NC_000016.9  |
| cg21300187 | 2.14E-06 | 3.20E-07 | -5.29 | 5.5980228 | -1.21E-01 | 38073560  | 38073683  | NC_000017.10 |
| cg15542880 | 2.14E-06 | 3.20E-07 | -5.29 | 5.5976686 | -4.66E-02 | 205114634 | 205114757 | NC_000001.10 |
| cg23818978 | 2.14E-06 | 3.20E-07 | -5.29 | 5.5975875 | -9.46E-02 | 118083239 | 118083362 | NC_000011.9  |
| cg10815165 | 2.14E-06 | 3.21E-07 | -5.29 | 5.5962707 | -3.33E-02 | 105212270 | 105212393 | NC_000010.10 |
| cg10886747 | 2.14E-06 | 3.21E-07 | -5.29 | 5.5961404 | -1.18E-01 | 81154142  | 81154265  | NC_000010.10 |
| cg22032626 | 2.14E-06 | 3.21E-07 | -5.29 | 5.5959439 | -8.53E-02 | 50203811  | 50203934  | NC_000012.11 |
| cg19086497 | 2.15E-06 | 3.21E-07 | -5.29 | 5.5951124 | -8.89E-02 | 74954620  | 74954743  | NC_000011.9  |
| cg08575249 | 2.15E-06 | 3.21E-07 | -5.29 | 5.5949713 | -5.57E-02 | 702123    | 702246    | NC_000016.9  |
| cg03029255 | 2.15E-06 | 3.21E-07 | -5.29 | 5.5946664 | -8.63E-02 | 144120681 | 144120804 | NC_000008.10 |
| cg11307134 | 2.15E-06 | 3.21E-07 | -5.29 | 5.5945473 | -6.64E-02 | 44079584  | 44079707  | NC_000007.13 |
| cg14846965 | 2.15E-06 | 3.21E-07 | -5.29 | 5.5944713 | -1.12E-01 | 13611481  | 13611604  | NC_000018.9  |

|               |          |          |       |           |           |           |           |              |
|---------------|----------|----------|-------|-----------|-----------|-----------|-----------|--------------|
| cg16318882    | 2.15E-06 | 3.22E-07 | -5.29 | 5.5942646 | -7.37E-02 | 129912602 | 129912725 | NC_000008.10 |
| cg07327435    | 2.15E-06 | 3.22E-07 | -5.29 | 5.5939634 | -1.05E-01 | 40072031  | 40072154  | NC_000008.10 |
| cg03520282    | 2.15E-06 | 3.22E-07 | -5.29 | 5.5938716 | -9.03E-02 | 16856591  | 16856714  | NC_000008.10 |
| cg23240479    | 2.15E-06 | 3.22E-07 | -5.29 | 5.5937469 | -1.24E-01 | 126083901 | 126084024 | NC_000011.9  |
| cg07457967    | 2.15E-06 | 3.22E-07 | -5.29 | 5.5936237 | -1.04E-01 | 35069613  | 35069736  | NC_000019.9  |
| cg11093373    | 2.15E-06 | 3.22E-07 | -5.29 | 5.5932809 | -9.63E-02 | 31698899  | 31699022  | NC_000006.11 |
| cg14451560    | 2.15E-06 | 3.22E-07 | -5.29 | 5.5931297 | -3.19E-02 | 140499397 | 140499520 | NC_000009.11 |
| cg16583598    | 2.15E-06 | 3.22E-07 | -5.29 | 5.5928555 | -1.14E-01 | 4552496   | 4552619   | NC_000019.9  |
| cg04152921    | 2.15E-06 | 3.22E-07 | -5.29 | 5.5923151 | -2.57E-02 | 47495445  | 47495568  | NC_000016.9  |
| cg12157387    | 2.15E-06 | 3.22E-07 | -5.29 | 5.5922418 | -1.07E-01 | 206347777 | 206347900 | NC_000002.11 |
| cg21810793    | 2.15E-06 | 3.22E-07 | -5.29 | 5.5922142 | -9.48E-02 | 1103225   | 1103348   | NC_000001.10 |
| cg24407859    | 2.15E-06 | 3.22E-07 | -5.29 | 5.592088  | -2.73E-02 | 43411083  | 43411206  | NC_000022.10 |
| cg24535130    | 2.15E-06 | 3.23E-07 | -5.29 | 5.5911249 | -7.93E-02 | 79917287  | 79917410  | NC_000017.10 |
| cg09476092    | 2.15E-06 | 3.23E-07 | -5.29 | 5.5911093 | -1.10E-01 | 46787125  | 46787248  | NC_000021.8  |
| cg27302373    | 2.16E-06 | 3.23E-07 | -5.29 | 5.5902334 | -1.17E-01 | 220552108 | 220552231 | NC_000001.10 |
| cg06024215    | 2.16E-06 | 3.23E-07 | -5.29 | 5.5897449 | -8.56E-02 | 75210996  | 75211119  | NC_000017.10 |
| ch.8.1702176R | 2.16E-06 | 3.23E-07 | -5.29 | 5.5887681 | -2.80E-02 | 81916823  | 81916946  | NC_000008.10 |
| cg05559445    | 2.16E-06 | 3.23E-07 | -5.29 | 5.5883891 | -1.06E-01 | 2907674   | 2907797   | NC_000011.9  |
| cg09552892    | 2.16E-06 | 3.24E-07 | -5.29 | 5.5882016 | -7.11E-02 | 88718274  | 88718397  | NC_000010.10 |
| cg24436022    | 2.16E-06 | 3.24E-07 | -5.29 | 5.5880768 | -9.17E-02 | 45691661  | 45691784  | NC_000022.10 |
| cg12464869    | 2.16E-06 | 3.24E-07 | -5.29 | 5.5880658 | -1.29E-02 | 155108011 | 155108134 | NC_000001.10 |
| cg10534658    | 2.16E-06 | 3.24E-07 | -5.29 | 5.5880228 | -1.07E-02 | 52904692  | 52904815  | NC_000004.11 |
| cg15829423    | 2.16E-06 | 3.24E-07 | -5.29 | 5.5876197 | -1.21E-01 | 68138862  | 68138985  | NC_000011.9  |
| cg16788250    | 2.16E-06 | 3.24E-07 | -5.29 | 5.5873445 | -2.11E-02 | 38538168  | 38538291  | NC_000003.11 |
| cg07788865    | 2.16E-06 | 3.24E-07 | -5.29 | 5.5862388 | -6.12E-02 | 30101042  | 30101165  | NC_000010.10 |



|            |          |          |       |           |           |           |           |              |
|------------|----------|----------|-------|-----------|-----------|-----------|-----------|--------------|
| cg05070265 | 2.17E-06 | 3.24E-07 | -5.29 | 5.585797  | -1.07E-01 | 55777041  | 55777164  | NC_000003.11 |
| cg08668676 | 2.17E-06 | 3.24E-07 | -5.29 | 5.5856556 | -2.26E-02 | 104614207 | 104614330 | NC_000010.10 |
| cg26677995 | 2.17E-06 | 3.24E-07 | -5.29 | 5.5854596 | -5.28E-02 | 1422907   | 1423030   | NC_000011.9  |
| cg02756915 | 2.17E-06 | 3.25E-07 | -5.29 | 5.5846182 | -3.58E-02 | 242824714 | 242824837 | NC_000002.11 |
| cg01716224 | 2.17E-06 | 3.25E-07 | -5.29 | 5.5843817 | -4.86E-02 | 40391434  | 40391557  | NC_000022.10 |
| cg06462874 | 2.17E-06 | 3.25E-07 | -5.29 | 5.5832427 | -8.78E-02 | 7342585   | 7342708   | NC_000017.10 |
| cg22199118 | 2.17E-06 | 3.25E-07 | -5.29 | 5.5829116 | -1.01E-01 | 69350927  | 69351050  | NC_000008.10 |
| cg06419846 | 2.17E-06 | 3.25E-07 | -5.29 | 5.5828261 | -7.71E-02 | 66083697  | 66083820  | NC_000011.9  |
| cg05671385 | 2.17E-06 | 3.25E-07 | -5.29 | 5.5824164 | -1.63E-01 | 104915759 | 104915882 | NC_000011.9  |
| cg01483653 | 2.17E-06 | 3.26E-07 | -5.29 | 5.5822489 | -4.58E-02 | 50015511  | 50015634  | NC_000019.9  |
| cg11932891 | 2.17E-06 | 3.26E-07 | -5.29 | 5.5819413 | -8.15E-02 | 105354444 | 105354567 | NC_000007.13 |
| cg17787710 | 2.17E-06 | 3.26E-07 | -5.29 | 5.5814655 | -5.26E-02 | 79989039  | 79989162  | NC_000017.10 |
| cg26561254 | 2.17E-06 | 3.26E-07 | -5.29 | 5.5812576 | -9.46E-02 | 89164044  | 89164167  | NC_000015.9  |
| cg27604101 | 2.18E-06 | 3.26E-07 | -5.29 | 5.5807973 | -5.07E-02 | 60630659  | 60630782  | NC_000017.10 |
| cg18027946 | 2.18E-06 | 3.26E-07 | -5.29 | 5.5807901 | -1.81E-02 | 45758982  | 45759105  | NC_000021.8  |
| cg01577001 | 2.18E-06 | 3.26E-07 | -5.29 | 5.5802485 | -2.43E-02 | 982767    | 982890    | NC_000019.9  |
| cg21692516 | 2.18E-06 | 3.26E-07 | -5.29 | 5.5799294 | -7.34E-02 | 48938264  | 48938387  | NC_000001.10 |
| cg10233454 | 2.18E-06 | 3.26E-07 | -5.29 | 5.5799107 | -9.73E-02 | 57529389  | 57529512  | NC_000012.11 |
| cg26090849 | 2.18E-06 | 3.26E-07 | -5.29 | 5.5795987 | -1.34E-01 | 1375330   | 1375453   | NC_000011.9  |
| cg22043381 | 2.18E-06 | 3.26E-07 | -5.29 | 5.5794156 | -5.26E-02 | 123850540 | 123850663 | NC_000008.10 |
| cg27017993 | 2.18E-06 | 3.27E-07 | -5.29 | 5.579295  | -8.01E-02 | 74814040  | 74814163  | NC_000014.8  |
| cg02648441 | 2.18E-06 | 3.27E-07 | -5.29 | 5.5789704 | -6.09E-02 | 89242827  | 89242950  | NC_000016.9  |
| cg17276002 | 2.18E-06 | 3.27E-07 | -5.29 | 5.5782881 | -3.90E-02 | 75172806  | 75172929  | NC_000010.10 |
| cg21241410 | 2.18E-06 | 3.27E-07 | -5.29 | 5.5777759 | -1.33E-01 | 43267816  | 43267939  | NC_000002.11 |
| cg04617606 | 2.18E-06 | 3.27E-07 | -5.29 | 5.5773229 | -9.46E-02 | 167770232 | 167770355 | NC_000005.9  |

|            |          |          |       |           |           |           |           |              |
|------------|----------|----------|-------|-----------|-----------|-----------|-----------|--------------|
| cg26229043 | 2.18E-06 | 3.27E-07 | -5.29 | 5.5772938 | -1.17E-01 | 24407477  | 24407600  | NC_000010.10 |
| cg06707236 | 2.18E-06 | 3.27E-07 | -5.29 | 5.5772504 | -1.01E-01 | 911965    | 912088    | NC_000019.9  |
| cg24049880 | 2.18E-06 | 3.27E-07 | -5.29 | 5.5769293 | -1.26E-01 | 161171211 | 161171334 | NC_000001.10 |
| cg11590932 | 2.18E-06 | 3.27E-07 | -5.29 | 5.5766254 | -1.13E-01 | 141251615 | 141251738 | NC_000005.9  |
| cg10987347 | 2.18E-06 | 3.27E-07 | -5.29 | 5.5766162 | -5.97E-02 | 12559783  | 12559906  | NC_000001.10 |
| cg06639267 | 2.18E-06 | 3.27E-07 | -5.29 | 5.5764152 | -1.04E-01 | 743338    | 743461    | NC_000016.9  |
| cg22424903 | 2.19E-06 | 3.28E-07 | -5.29 | 5.5758484 | -1.11E-01 | 35454434  | 35454557  | NC_000006.11 |
| cg09256930 | 2.19E-06 | 3.28E-07 | -5.29 | 5.5749661 | -6.11E-02 | 26575633  | 26575756  | NC_000017.10 |
| cg25704036 | 2.19E-06 | 3.28E-07 | -5.29 | 5.5745593 | -1.27E-01 | 3221150   | 3221273   | NC_000007.13 |
| cg22226527 | 2.19E-06 | 3.28E-07 | -5.29 | 5.5740791 | -5.39E-02 | 48823408  | 48823531  | NC_000019.9  |
| cg05614176 | 2.19E-06 | 3.28E-07 | -5.29 | 5.5739791 | -1.63E-02 | 113242512 | 113242635 | NC_000013.10 |
| cg19514721 | 2.19E-06 | 3.28E-07 | -5.29 | 5.5734267 | -1.23E-01 | 141813298 | 141813421 | NC_000005.9  |
| cg01088546 | 2.19E-06 | 3.29E-07 | -5.29 | 5.5733837 | -7.56E-02 | 26527858  | 26527981  | NC_000012.11 |
| cg06843240 | 2.19E-06 | 3.29E-07 | -5.29 | 5.5731207 | -1.71E-02 | 9488961   | 9489084   | NC_000001.10 |
| cg10765857 | 2.19E-06 | 3.29E-07 | -5.29 | 5.5729945 | -6.06E-02 | 6948101   | 6948224   | NC_000011.9  |
| cg22369787 | 2.19E-06 | 3.29E-07 | -5.29 | 5.572992  | -5.92E-02 | 37180443  | 37180566  | NC_000015.9  |
| cg19697559 | 2.19E-06 | 3.29E-07 | -5.29 | 5.5728792 | -6.61E-02 | 5510675   | 5510798   | NC_000007.13 |
| cg01251118 | 2.19E-06 | 3.29E-07 | -5.29 | 5.5725014 | -8.15E-02 | 98050646  | 98050769  | NC_000012.11 |
| cg05747424 | 2.19E-06 | 3.29E-07 | -5.29 | 5.5716052 | -1.72E-02 | 64108561  | 64108684  | NC_000014.8  |
| cg18875453 | 2.19E-06 | 3.29E-07 | -5.29 | 5.5715806 | -8.18E-02 | 50517795  | 50517918  | NC_000022.10 |
| cg20961642 | 2.20E-06 | 3.29E-07 | -5.29 | 5.5711523 | -1.86E-02 | 30690567  | 30690690  | NC_000006.11 |
| cg09804496 | 2.20E-06 | 3.29E-07 | -5.29 | 5.5710625 | -1.18E-01 | 72850442  | 72850565  | NC_000007.13 |
| cg23735214 | 2.20E-06 | 3.29E-07 | -5.29 | 5.5709906 | -4.76E-02 | 77595033  | 77595156  | NC_000011.9  |
| cg13261938 | 2.20E-06 | 3.30E-07 | -5.29 | 5.5703815 | -8.88E-02 | 34956742  | 34956865  | NC_000017.10 |
| cg27200006 | 2.20E-06 | 3.30E-07 | -5.29 | 5.5700646 | -1.16E-01 | 25003854  | 25003977  | NC_000022.10 |

|            |          |          |       |           |           |           |           |              |
|------------|----------|----------|-------|-----------|-----------|-----------|-----------|--------------|
| cg14989815 | 2.20E-06 | 3.30E-07 | -5.29 | 5.569885  | -8.32E-02 | 23939645  | 23939768  | NC_000001.10 |
| cg17855016 | 2.20E-06 | 3.30E-07 | -5.29 | 5.5691783 | -2.66E-02 | 113242518 | 113242641 | NC_000013.10 |
| cg00023233 | 2.20E-06 | 3.30E-07 | -5.29 | 5.5688656 | -2.64E-02 | 126077698 | 126077821 | NC_000010.10 |
| cg19880608 | 2.20E-06 | 3.30E-07 | -5.29 | 5.5688134 | -9.82E-02 | 112568208 | 112568331 | NC_000005.9  |
| cg05392364 | 2.20E-06 | 3.30E-07 | -5.29 | 5.5685547 | -7.90E-02 | 78556860  | 78556983  | NC_000015.9  |
| cg02493217 | 2.20E-06 | 3.31E-07 | -5.29 | 5.5672466 | -8.57E-02 | 42806405  | 42806528  | NC_000001.10 |
| cg26061593 | 2.20E-06 | 3.31E-07 | -5.29 | 5.5670264 | -8.70E-02 | 8643968   | 8644091   | NC_000004.11 |
| cg09049982 | 2.21E-06 | 3.31E-07 | -5.29 | 5.5665193 | -1.01E-01 | 32950073  | 32950196  | NC_000020.10 |
| cg12228061 | 2.21E-06 | 3.31E-07 | -5.29 | 5.5657245 | -5.30E-02 | 116382677 | 116382800 | NC_000012.11 |
| cg12566780 | 2.21E-06 | 3.31E-07 | -5.29 | 5.5655954 | -2.19E-02 | 92157604  | 92157727  | NC_000007.13 |
| cg00921350 | 2.21E-06 | 3.31E-07 | -5.29 | 5.5653451 | -8.53E-02 | 50701499  | 50701622  | NC_000016.9  |
| cg02016130 | 2.21E-06 | 3.31E-07 | -5.29 | 5.5650523 | -2.72E-02 | 53578359  | 53578482  | NC_000004.11 |
| cg15352431 | 2.21E-06 | 3.31E-07 | -5.29 | 5.5648672 | -2.56E-02 | 226896008 | 226896131 | NC_000002.11 |
| cg09271097 | 2.21E-06 | 3.32E-07 | -5.29 | 5.5637958 | -1.33E-01 | 137620868 | 137620991 | NC_000007.13 |
| cg00141925 | 2.21E-06 | 3.32E-07 | -5.29 | 5.5636507 | -8.84E-02 | 9231867   | 9231990   | NC_000012.11 |
| cg02054542 | 2.21E-06 | 3.32E-07 | -5.29 | 5.563318  | -1.04E-01 | 129658241 | 129658364 | NC_000002.11 |
| cg03492827 | 2.21E-06 | 3.32E-07 | -5.29 | 5.5632314 | -9.92E-02 | 72838601  | 72838724  | NC_000007.13 |
| cg22380139 | 2.21E-06 | 3.32E-07 | -5.29 | 5.5627559 | -1.06E-01 | 37373894  | 37374017  | NC_000008.10 |
| cg09147843 | 2.22E-06 | 3.32E-07 | -5.29 | 5.5617936 | -1.18E-01 | 53467612  | 53467735  | NC_000016.9  |
| cg00698906 | 2.22E-06 | 3.32E-07 | -5.29 | 5.5617207 | -3.01E-02 | 48619308  | 48619431  | NC_000017.10 |
| cg22663489 | 2.22E-06 | 3.33E-07 | -5.29 | 5.5616683 | -1.28E-01 | 64107720  | 64107843  | NC_000011.9  |
| cg19722371 | 2.22E-06 | 3.33E-07 | -5.29 | 5.5616141 | -3.08E-02 | 102271755 | 102271878 | NC_000012.11 |
| cg00813162 | 2.22E-06 | 3.33E-07 | -5.29 | 5.5613124 | -7.05E-02 | 69443362  | 69443485  | NC_000014.8  |
| cg17610333 | 2.22E-06 | 3.33E-07 | -5.29 | 5.5612524 | -1.14E-01 | 168107313 | 168107436 | NC_000006.11 |
| cg20212364 | 2.22E-06 | 3.33E-07 | -5.29 | 5.5609308 | -1.02E-01 | 101745102 | 101745225 | NC_000004.11 |

|            |          |          |       |           |           |           |           |              |
|------------|----------|----------|-------|-----------|-----------|-----------|-----------|--------------|
| cg26992028 | 2.22E-06 | 3.33E-07 | -5.29 | 5.5603906 | -1.00E-01 | 1030287   | 1030410   | NC_000007.13 |
| cg01708458 | 2.22E-06 | 3.33E-07 | -5.29 | 5.5593519 | -9.18E-02 | 49097906  | 49098029  | NC_000002.11 |
| cg09417640 | 2.22E-06 | 3.33E-07 | -5.29 | 5.5590718 | -9.83E-02 | 99723162  | 99723285  | NC_000007.13 |
| cg20311065 | 2.22E-06 | 3.33E-07 | -5.29 | 5.5589724 | -1.41E-01 | 85886364  | 85886487  | NC_000015.9  |
| cg09035101 | 2.22E-06 | 3.34E-07 | -5.29 | 5.5579972 | -3.20E-02 | 155881569 | 155881692 | NC_000001.10 |
| cg01060952 | 2.22E-06 | 3.34E-07 | -5.29 | 5.5575466 | -2.15E-02 | 48424106  | 48424229  | NC_000017.10 |
| cg18406700 | 2.23E-06 | 3.35E-07 | -5.28 | 5.5556384 | -1.11E-01 | 116833441 | 116833564 | NC_000006.11 |
| cg02716218 | 2.23E-06 | 3.35E-07 | -5.28 | 5.5548147 | -9.48E-02 | 17813208  | 17813331  | NC_000007.13 |
| cg18466498 | 2.23E-06 | 3.35E-07 | -5.28 | 5.5546644 | -6.06E-02 | 27498473  | 27498596  | NC_000007.13 |
| cg23087153 | 2.23E-06 | 3.35E-07 | -5.28 | 5.5542944 | -8.36E-02 | 101831067 | 101831190 | NC_000014.8  |
| cg09444685 | 2.23E-06 | 3.35E-07 | -5.28 | 5.5536023 | -9.14E-02 | 159355481 | 159355604 | NC_000005.9  |
| cg26791148 | 2.23E-06 | 3.35E-07 | -5.28 | 5.553237  | -8.82E-02 | 82374456  | 82374579  | NC_000015.9  |
| cg27243686 | 2.23E-06 | 3.36E-07 | -5.28 | 5.5529001 | -5.14E-02 | 9478612   | 9478735   | NC_000012.11 |
| cg22881680 | 2.24E-06 | 3.36E-07 | -5.28 | 5.5524714 | -7.23E-02 | 72975428  | 72975551  | NC_000011.9  |
| cg05753993 | 2.24E-06 | 3.36E-07 | -5.28 | 5.552376  | -6.85E-02 | 77199432  | 77199555  | NC_000018.9  |
| cg01579019 | 2.24E-06 | 3.36E-07 | -5.28 | 5.5521657 | -2.81E-02 | 27695516  | 27695639  | NC_000008.10 |
| cg03553765 | 2.24E-06 | 3.36E-07 | -5.28 | 5.5521003 | -5.30E-02 | 85485741  | 85485864  | NC_000002.11 |
| cg08758352 | 2.24E-06 | 3.36E-07 | -5.28 | 5.5507849 | -8.56E-02 | 46205147  | 46205270  | NC_000017.10 |
| cg15089567 | 2.24E-06 | 3.36E-07 | -5.28 | 5.5503059 | -9.79E-02 | 1957317   | 1957440   | NC_000007.13 |
| cg13617812 | 2.24E-06 | 3.36E-07 | -5.28 | 5.5502835 | -9.98E-02 | 63694990  | 63695113  | NC_000015.9  |
| cg20028291 | 2.24E-06 | 3.37E-07 | -5.28 | 5.5500071 | -1.57E-02 | 49411856  | 49411979  | NC_000020.10 |
| cg08363925 | 2.24E-06 | 3.37E-07 | -5.28 | 5.549709  | -2.67E-02 | 86511378  | 86511501  | NC_000011.9  |
| cg16594958 | 2.24E-06 | 3.37E-07 | -5.28 | 5.5495127 | -7.92E-02 | 3208793   | 3208916   | NC_000007.13 |
| cg04061873 | 2.24E-06 | 3.37E-07 | -5.28 | 5.549472  | -4.55E-02 | 67237179  | 67237302  | NC_000011.9  |
| cg23844174 | 2.24E-06 | 3.37E-07 | -5.28 | 5.5492754 | -5.37E-02 | 2064819   | 2064942   | NC_000001.10 |

|                |          |          |       |           |           |           |           |              |
|----------------|----------|----------|-------|-----------|-----------|-----------|-----------|--------------|
| cg27499105     | 2.24E-06 | 3.37E-07 | -5.28 | 5.5490879 | -9.03E-02 | 86337823  | 86337946  | NC_000016.9  |
| cg21252725     | 2.25E-06 | 3.37E-07 | -5.28 | 5.547681  | -3.03E-02 | 37800822  | 37800945  | NC_000009.11 |
| cg14530006     | 2.25E-06 | 3.37E-07 | -5.28 | 5.5476171 | -6.58E-02 | 75472168  | 75472291  | NC_000017.10 |
| ch.14.1402140F | 2.25E-06 | 3.37E-07 | -5.28 | 5.5476123 | -4.04E-02 | 89981678  | 89981801  | NC_000014.8  |
| cg07785726     | 2.25E-06 | 3.37E-07 | -5.28 | 5.5474296 | -3.57E-02 | 50159788  | 50159911  | NC_000013.10 |
| cg05422394     | 2.25E-06 | 3.38E-07 | -5.28 | 5.5465213 | -7.94E-02 | 139482902 | 139483025 | NC_000004.11 |
| cg06151505     | 2.25E-06 | 3.38E-07 | -5.28 | 5.5463493 | -3.33E-02 | 138866874 | 138866997 | NC_000003.11 |
| cg06415087     | 2.25E-06 | 3.38E-07 | -5.28 | 5.5459307 | -6.84E-02 | 12726571  | 12726694  | NC_000007.13 |
| cg16316755     | 2.25E-06 | 3.38E-07 | -5.28 | 5.5453938 | -9.85E-02 | 20091056  | 20091179  | NC_000012.11 |
| cg01827195     | 2.25E-06 | 3.38E-07 | -5.28 | 5.5451219 | -1.02E-01 | 226265799 | 226265922 | NC_000002.11 |
| cg18401108     | 2.25E-06 | 3.38E-07 | -5.28 | 5.5449127 | -6.39E-02 | 238116756 | 238116879 | NC_000002.11 |
| cg01507342     | 2.25E-06 | 3.38E-07 | -5.28 | 5.5446674 | -8.68E-02 | 65387096  | 65387219  | NC_000017.10 |
| cg23599973     | 2.25E-06 | 3.38E-07 | -5.28 | 5.5445675 | -5.87E-02 | 5956586   | 5956709   | NC_000011.9  |
| cg11781339     | 2.26E-06 | 3.39E-07 | -5.28 | 5.542974  | -1.58E-02 | 56092040  | 56092163  | NC_000019.9  |
| cg15404971     | 2.26E-06 | 3.39E-07 | -5.28 | 5.5427353 | -9.89E-02 | 7392579   | 7392702   | NC_000005.9  |
| cg21842199     | 2.26E-06 | 3.39E-07 | -5.28 | 5.5425421 | -8.71E-02 | 16282410  | 16282533  | NC_000017.10 |
| cg07903023     | 2.26E-06 | 3.40E-07 | -5.28 | 5.5414279 | -1.04E-01 | 239048072 | 239048195 | NC_000002.11 |
| cg10770230     | 2.26E-06 | 3.40E-07 | -5.28 | 5.541272  | -1.08E-01 | 872735    | 872858    | NC_000007.13 |
| cg23731908     | 2.26E-06 | 3.40E-07 | -5.28 | 5.5404995 | -7.41E-02 | 48687756  | 48687879  | NC_000015.9  |
| cg12341179     | 2.26E-06 | 3.40E-07 | -5.28 | 5.5404461 | -3.61E-02 | 176981644 | 176981767 | NC_000005.9  |
| cg22929506     | 2.26E-06 | 3.40E-07 | -5.28 | 5.5396817 | -5.23E-02 | 219137490 | 219137613 | NC_000002.11 |
| cg17640322     | 2.26E-06 | 3.40E-07 | -5.28 | 5.5392276 | -1.55E-02 | 35160462  | 35160585  | NC_000011.9  |
| cg09209669     | 2.26E-06 | 3.40E-07 | -5.28 | 5.539044  | -9.21E-02 | 8770954   | 8771077   | NC_000017.10 |
| cg13986503     | 2.26E-06 | 3.40E-07 | -5.28 | 5.5387052 | -2.04E-02 | 126152983 | 126153106 | NC_000011.9  |
| cg14036684     | 2.26E-06 | 3.41E-07 | -5.28 | 5.5386268 | -2.18E-02 | 107436483 | 107436606 | NC_000011.9  |

|            |          |          |       |           |           |           |           |              |
|------------|----------|----------|-------|-----------|-----------|-----------|-----------|--------------|
| cg22357390 | 2.27E-06 | 3.41E-07 | -5.28 | 5.5380675 | -1.12E-01 | 11871736  | 11871859  | NC_000012.11 |
| cg03162492 | 2.27E-06 | 3.41E-07 | -5.28 | 5.5378955 | -5.91E-02 | 134010471 | 134010594 | NC_000003.11 |
| cg03160378 | 2.27E-06 | 3.41E-07 | -5.28 | 5.5376662 | -7.66E-02 | 44880700  | 44880823  | NC_000021.8  |
| cg13729392 | 2.27E-06 | 3.41E-07 | -5.28 | 5.537333  | -9.50E-03 | 70826495  | 70826618  | NC_000014.8  |
| cg23856257 | 2.27E-06 | 3.42E-07 | -5.28 | 5.5352239 | -7.57E-02 | 719828    | 719951    | NC_000011.9  |
| cg24504518 | 2.27E-06 | 3.42E-07 | -5.28 | 5.5351588 | -2.40E-02 | 3026553   | 3026676   | NC_000020.10 |
| cg20878095 | 2.27E-06 | 3.42E-07 | -5.28 | 5.5350832 | -1.83E-02 | 49298744  | 49298867  | NC_000019.9  |
| cg23136799 | 2.27E-06 | 3.42E-07 | -5.28 | 5.534209  | -1.17E-01 | 167763819 | 167763942 | NC_000006.11 |
| cg04319882 | 2.27E-06 | 3.42E-07 | -5.28 | 5.5338297 | -2.16E-02 | 19535207  | 19535330  | NC_000016.9  |
| cg02297616 | 2.28E-06 | 3.42E-07 | -5.28 | 5.533706  | -5.45E-02 | 40255140  | 40255263  | NC_000001.10 |
| cg07566833 | 2.28E-06 | 3.42E-07 | -5.28 | 5.5331743 | -3.69E-02 | 41851969  | 41852092  | NC_000015.9  |
| cg23164993 | 2.28E-06 | 3.42E-07 | -5.28 | 5.5330224 | -1.23E-02 | 65613294  | 65613417  | NC_000001.10 |
| cg07667115 | 2.28E-06 | 3.43E-07 | -5.28 | 5.5324528 | -3.62E-02 | 12947942  | 12948065  | NC_000018.9  |
| cg18166959 | 2.28E-06 | 3.43E-07 | -5.28 | 5.5316852 | -1.02E-01 | 230880084 | 230880207 | NC_000001.10 |
| cg15965815 | 2.28E-06 | 3.43E-07 | -5.28 | 5.5310354 | -4.47E-02 | 29840083  | 29840206  | NC_000010.10 |
| cg01048372 | 2.28E-06 | 3.43E-07 | -5.28 | 5.5306976 | -1.16E-01 | 144655484 | 144655607 | NC_000008.10 |
| cg03760387 | 2.28E-06 | 3.43E-07 | -5.28 | 5.5301375 | -5.58E-02 | 19566823  | 19566946  | NC_000016.9  |
| cg01643563 | 2.28E-06 | 3.44E-07 | -5.28 | 5.5299544 | -7.07E-02 | 1206750   | 1206873   | NC_000016.9  |
| cg04652282 | 2.29E-06 | 3.44E-07 | -5.28 | 5.5283686 | -1.11E-01 | 68944366  | 68944489  | NC_000008.10 |
| cg05195017 | 2.29E-06 | 3.44E-07 | -5.28 | 5.5282855 | -1.30E-01 | 242758725 | 242758848 | NC_000002.11 |
| cg16808156 | 2.29E-06 | 3.44E-07 | -5.28 | 5.5279839 | -1.02E-01 | 3835875   | 3835998   | NC_000020.10 |
| cg10838757 | 2.29E-06 | 3.44E-07 | -5.28 | 5.5278364 | -2.25E-02 | 130507273 | 130507396 | NC_000005.9  |
| cg00728585 | 2.29E-06 | 3.44E-07 | -5.28 | 5.5278004 | -7.97E-02 | 81020380  | 81020503  | NC_000015.9  |
| cg03467001 | 2.29E-06 | 3.44E-07 | -5.28 | 5.527533  | -1.41E-01 | 183857649 | 183857772 | NC_000001.10 |
| cg06717615 | 2.29E-06 | 3.45E-07 | -5.28 | 5.5261697 | -6.77E-02 | 32786764  | 32786887  | NC_000013.10 |

|               |          |          |       |           |           |           |           |              |
|---------------|----------|----------|-------|-----------|-----------|-----------|-----------|--------------|
| cg13834670    | 2.29E-06 | 3.45E-07 | -5.28 | 5.5252517 | -5.16E-02 | 129677390 | 129677513 | NC_000009.11 |
| cg10276869    | 2.29E-06 | 3.45E-07 | -5.28 | 5.5248255 | -1.02E-01 | 85336004  | 85336127  | NC_000016.9  |
| cg11429271    | 2.30E-06 | 3.45E-07 | -5.28 | 5.5246487 | -4.70E-02 | 45722346  | 45722469  | NC_000015.9  |
| cg14185201    | 2.30E-06 | 3.46E-07 | -5.28 | 5.5243001 | -7.98E-02 | 79162188  | 79162311  | NC_000014.8  |
| cg09539256    | 2.30E-06 | 3.46E-07 | -5.28 | 5.5237505 | -2.04E-02 | 65626522  | 65626645  | NC_000011.9  |
| cg13288621    | 2.30E-06 | 3.46E-07 | -5.28 | 5.5233524 | -1.24E-01 | 131662148 | 131662271 | NC_000008.10 |
| cg19327375    | 2.30E-06 | 3.46E-07 | -5.28 | 5.5230244 | -6.45E-02 | 4186439   | 4186562   | NC_000019.9  |
| cg13329789    | 2.30E-06 | 3.47E-07 | -5.28 | 5.5208637 | -9.27E-02 | 45757644  | 45757767  | NC_000007.13 |
| cg08029299    | 2.30E-06 | 3.47E-07 | -5.28 | 5.5208173 | -6.82E-02 | 201531514 | 201531637 | NC_000001.10 |
| cg04621944    | 2.31E-06 | 3.47E-07 | -5.28 | 5.5201369 | -1.06E-01 | 5080448   | 5080571   | NC_000001.10 |
| cg11383427    | 2.31E-06 | 3.47E-07 | -5.28 | 5.5199904 | -6.25E-02 | 126754952 | 126755075 | NC_000003.11 |
| cg05689208    | 2.31E-06 | 3.47E-07 | -5.28 | 5.5199236 | -7.57E-02 | 49496391  | 49496514  | NC_000008.10 |
| cg11738299    | 2.31E-06 | 3.48E-07 | -5.28 | 5.518618  | -1.72E-02 | 112282125 | 112282248 | NC_000001.10 |
| cg03304299    | 2.31E-06 | 3.48E-07 | -5.28 | 5.5181363 | -1.44E-02 | 17565742  | 17565865  | NC_000022.10 |
| ch.16.725323R | 2.31E-06 | 3.48E-07 | -5.28 | 5.5169872 | -1.81E-02 | 23535908  | 23536031  | NC_000016.9  |
| cg04151612    | 2.31E-06 | 3.48E-07 | -5.28 | 5.5165511 | -3.86E-02 | 9932217   | 9932340   | NC_000003.11 |
| cg10172783    | 2.31E-06 | 3.48E-07 | -5.28 | 5.5163911 | -9.63E-02 | 42082036  | 42082159  | NC_000017.10 |
| cg04381957    | 2.31E-06 | 3.49E-07 | -5.28 | 5.5157883 | -1.21E-01 | 16550461  | 16550584  | NC_000003.11 |
| cg14949630    | 2.32E-06 | 3.49E-07 | -5.28 | 5.5155615 | -3.99E-02 | 151258879 | 151259002 | NC_000006.11 |
| cg09309979    | 2.32E-06 | 3.49E-07 | -5.28 | 5.5137139 | -5.82E-02 | 13818133  | 13818256  | NC_000010.10 |
| cg10255535    | 2.32E-06 | 3.49E-07 | -5.28 | 5.513687  | -6.76E-02 | 114309283 | 114309406 | NC_000002.11 |
| cg22511408    | 2.32E-06 | 3.49E-07 | -5.28 | 5.5134757 | -3.34E-02 | 6378790   | 6378913   | NC_000005.9  |
| cg21585512    | 2.32E-06 | 3.50E-07 | -5.28 | 5.5132387 | -1.13E-01 | 122030076 | 122030199 | NC_000011.9  |
| cg26597982    | 2.32E-06 | 3.50E-07 | -5.28 | 5.5127455 | -2.73E-02 | 143484414 | 143484537 | NC_000008.10 |
| cg02152650    | 2.32E-06 | 3.50E-07 | -5.28 | 5.5117862 | -7.89E-02 | 54968922  | 54969045  | NC_000001.10 |

|            |          |          |       |           |           |           |           |              |
|------------|----------|----------|-------|-----------|-----------|-----------|-----------|--------------|
| cg02910281 | 2.32E-06 | 3.50E-07 | -5.28 | 5.5113358 | -6.46E-02 | 39407451  | 39407574  | NC_000001.10 |
| cg23068989 | 2.33E-06 | 3.50E-07 | -5.28 | 5.5111544 | -8.57E-02 | 64689428  | 64689551  | NC_000001.10 |
| cg10534904 | 2.33E-06 | 3.50E-07 | -5.28 | 5.5110617 | -9.23E-02 | 65438215  | 65438338  | NC_000014.8  |
| cg17706173 | 2.33E-06 | 3.50E-07 | -5.28 | 5.5110179 | -8.60E-02 | 1582581   | 1582704   | NC_000016.9  |
| cg09953710 | 2.33E-06 | 3.51E-07 | -5.28 | 5.5105681 | -5.43E-02 | 1199524   | 1199647   | NC_000016.9  |
| cg00750555 | 2.33E-06 | 3.51E-07 | -5.27 | 5.5099132 | -9.78E-02 | 22204290  | 22204413  | NC_000016.9  |
| cg16236679 | 2.33E-06 | 3.51E-07 | -5.27 | 5.5098235 | -6.87E-02 | 96123321  | 96123444  | NC_000011.9  |
| cg24345551 | 2.33E-06 | 3.51E-07 | -5.27 | 5.5095225 | -6.45E-02 | 33360652  | 33360775  | NC_000006.11 |
| cg06844545 | 2.33E-06 | 3.51E-07 | -5.27 | 5.5093973 | -5.83E-02 | 163836348 | 163836471 | NC_000006.11 |
| cg10164987 | 2.33E-06 | 3.51E-07 | -5.27 | 5.5093163 | -2.86E-02 | 63816052  | 63816175  | NC_000002.11 |
| cg09721595 | 2.33E-06 | 3.51E-07 | -5.27 | 5.5091072 | -1.27E-01 | 77773924  | 77774047  | NC_000011.9  |
| cg26004221 | 2.33E-06 | 3.51E-07 | -5.27 | 5.5084408 | -6.31E-02 | 45718464  | 45718587  | NC_000011.9  |
| cg05247341 | 2.33E-06 | 3.51E-07 | -5.27 | 5.5078427 | -2.23E-02 | 74666916  | 74667039  | NC_000015.9  |
| cg11210880 | 2.33E-06 | 3.52E-07 | -5.27 | 5.5076169 | -9.01E-02 | 11779911  | 11780034  | NC_000006.11 |
| cg09363128 | 2.33E-06 | 3.52E-07 | -5.27 | 5.5069523 | -7.71E-02 | 85478932  | 85479055  | NC_000016.9  |
| cg09507215 | 2.33E-06 | 3.52E-07 | -5.27 | 5.5066943 | -9.04E-02 | 113348391 | 113348514 | NC_000013.10 |
| cg04978831 | 2.34E-06 | 3.52E-07 | -5.27 | 5.5058436 | -1.09E-01 | 163730368 | 163730491 | NC_000006.11 |
| cg11870100 | 2.34E-06 | 3.52E-07 | -5.27 | 5.5058307 | -6.53E-02 | 34534542  | 34534665  | NC_000011.9  |
| cg08697665 | 2.34E-06 | 3.52E-07 | -5.27 | 5.5054229 | -7.46E-02 | 158450590 | 158450713 | NC_000003.11 |
| cg18229196 | 2.34E-06 | 3.53E-07 | -5.27 | 5.5043811 | -7.67E-02 | 134827324 | 134827447 | NC_000010.10 |
| cg18089519 | 2.34E-06 | 3.53E-07 | -5.27 | 5.5043587 | -1.05E-01 | 763339    | 763462    | NC_000011.9  |
| cg03550075 | 2.34E-06 | 3.53E-07 | -5.27 | 5.5042852 | -5.31E-02 | 132278448 | 132278571 | NC_000012.11 |
| cg21920167 | 2.34E-06 | 3.53E-07 | -5.27 | 5.504234  | -4.00E-02 | 77451623  | 77451746  | NC_000014.8  |
| cg17338816 | 2.34E-06 | 3.53E-07 | -5.27 | 5.5042214 | -1.36E-01 | 2607424   | 2607547   | NC_000007.13 |
| cg00255099 | 2.34E-06 | 3.53E-07 | -5.27 | 5.5041543 | -8.16E-02 | 1225525   | 1225648   | NC_000005.9  |



|                 |          |          |       |           |           |           |           |              |
|-----------------|----------|----------|-------|-----------|-----------|-----------|-----------|--------------|
| ch.2.105901354F | 2.34E-06 | 3.53E-07 | -5.27 | 5.5023676 | -4.84E-02 | 106534922 | 106535045 | NC_000002.11 |
| cg00459944      | 2.34E-06 | 3.54E-07 | -5.27 | 5.5022927 | -2.55E-02 | 39148298  | 39148421  | NC_000003.11 |
| cg22884732      | 2.34E-06 | 3.54E-07 | -5.27 | 5.5021944 | -1.87E-02 | 79925999  | 79926122  | NC_000017.10 |
| cg23402467      | 2.34E-06 | 3.54E-07 | -5.27 | 5.5021467 | -7.68E-02 | 49533485  | 49533608  | NC_000008.10 |
| cg21747005      | 2.35E-06 | 3.54E-07 | -5.27 | 5.5017831 | -5.84E-02 | 116598981 | 116599104 | NC_000012.11 |
| cg27136344      | 2.35E-06 | 3.54E-07 | -5.27 | 5.5017204 | -9.69E-02 | 80606911  | 80607034  | NC_000017.10 |
| cg14612133      | 2.35E-06 | 3.54E-07 | -5.27 | 5.5011284 | -1.26E-01 | 14406585  | 14406708  | NC_000005.9  |
| cg15088679      | 2.35E-06 | 3.54E-07 | -5.27 | 5.5008676 | -2.46E-02 | 182573748 | 182573871 | NC_000001.10 |
| cg15897368      | 2.35E-06 | 3.54E-07 | -5.27 | 5.5008389 | -9.90E-02 | 70466122  | 70466245  | NC_000014.8  |
| cg23599640      | 2.35E-06 | 3.54E-07 | -5.27 | 5.5008251 | -1.23E-02 | 127864941 | 127865064 | NC_000002.11 |
| cg24698488      | 2.35E-06 | 3.54E-07 | -5.27 | 5.5007437 | -6.12E-02 | 23315866  | 23315989  | NC_000014.8  |
| cg14027288      | 2.35E-06 | 3.54E-07 | -5.27 | 5.5002748 | -1.07E-01 | 180923683 | 180923806 | NC_000001.10 |
| cg05055760      | 2.35E-06 | 3.54E-07 | -5.27 | 5.500033  | -6.68E-02 | 20711985  | 20712108  | NC_000018.9  |
| cg21074766      | 2.35E-06 | 3.54E-07 | -5.27 | 5.4997154 | -1.04E-01 | 99069077  | 99069200  | NC_000015.9  |
| cg03507119      | 2.35E-06 | 3.55E-07 | -5.27 | 5.4988406 | -6.43E-02 | 49588245  | 49588368  | NC_000003.11 |
| cg20792256      | 2.35E-06 | 3.55E-07 | -5.27 | 5.4988104 | -6.72E-02 | 14992047  | 14992170  | NC_000019.9  |
| cg22187733      | 2.35E-06 | 3.55E-07 | -5.27 | 5.4980749 | -9.16E-02 | 50464781  | 50464904  | NC_000019.9  |
| cg26872706      | 2.35E-06 | 3.55E-07 | -5.27 | 5.4976663 | -2.61E-02 | 12551931  | 12552054  | NC_000019.9  |
| cg18259342      | 2.36E-06 | 3.55E-07 | -5.27 | 5.4973054 | -6.37E-02 | 219184859 | 219184982 | NC_000002.11 |
| cg20597117      | 2.36E-06 | 3.55E-07 | -5.27 | 5.4972914 | -1.87E-02 | 117824011 | 117824134 | NC_000007.13 |
| cg21243750      | 2.36E-06 | 3.56E-07 | -5.27 | 5.4966494 | -5.55E-02 | 14883945  | 14884068  | NC_000009.11 |
| ch.22.707968R   | 2.36E-06 | 3.56E-07 | -5.27 | 5.4966038 | -1.15E-02 | 40756033  | 40756156  | NC_000022.10 |
| cg06638012      | 2.36E-06 | 3.56E-07 | -5.27 | 5.496593  | -4.36E-02 | 132299861 | 132299984 | NC_000005.9  |
| cg03322234      | 2.36E-06 | 3.56E-07 | -5.27 | 5.4963344 | -1.15E-01 | 1022643   | 1022766   | NC_000007.13 |
| ch.15.825727F   | 2.36E-06 | 3.57E-07 | -5.27 | 5.4939507 | -4.00E-02 | 59940044  | 59940167  | NC_000015.9  |

|            |          |          |       |           |           |           |           |              |
|------------|----------|----------|-------|-----------|-----------|-----------|-----------|--------------|
| cg13285004 | 2.36E-06 | 3.57E-07 | -5.27 | 5.4932253 | -1.49E-01 | 120008484 | 120008607 | NC_000011.9  |
| cg27538026 | 2.37E-06 | 3.57E-07 | -5.27 | 5.4930291 | -1.94E-02 | 155164351 | 155164474 | NC_000001.10 |
| cg01323212 | 2.37E-06 | 3.57E-07 | -5.27 | 5.4929678 | -7.72E-02 | 42719001  | 42719124  | NC_000006.11 |
| cg02057716 | 2.37E-06 | 3.57E-07 | -5.27 | 5.4928903 | -6.64E-02 | 218807759 | 218807882 | NC_000002.11 |
| cg05775451 | 2.37E-06 | 3.57E-07 | -5.27 | 5.4926995 | -2.36E-02 | 228353712 | 228353835 | NC_000001.10 |
| cg21602160 | 2.37E-06 | 3.57E-07 | -5.27 | 5.4925088 | -6.82E-02 | 41003272  | 41003395  | NC_000017.10 |
| cg26645655 | 2.37E-06 | 3.57E-07 | -5.27 | 5.4922864 | -8.81E-02 | 84851738  | 84851861  | NC_000003.11 |
| cg14769703 | 2.37E-06 | 3.57E-07 | -5.27 | 5.4920714 | -7.60E-02 | 43818695  | 43818818  | NC_000010.10 |
| cg01481646 | 2.37E-06 | 3.58E-07 | -5.27 | 5.4907317 | -9.24E-02 | 82217548  | 82217671  | NC_000010.10 |
| cg14671809 | 2.37E-06 | 3.58E-07 | -5.27 | 5.4905661 | -1.18E-01 | 55558213  | 55558336  | NC_000003.11 |
| cg09123307 | 2.37E-06 | 3.58E-07 | -5.27 | 5.4903104 | -2.57E-02 | 6746650   | 6746773   | NC_000007.13 |
| cg10111816 | 2.37E-06 | 3.58E-07 | -5.27 | 5.4901619 | -9.92E-02 | 22384715  | 22384838  | NC_000016.9  |
| cg02363593 | 2.37E-06 | 3.58E-07 | -5.27 | 5.4900177 | -1.19E-01 | 169123192 | 169123315 | NC_000005.9  |
| cg09063787 | 2.37E-06 | 3.58E-07 | -5.27 | 5.4899891 | -3.64E-02 | 2921766   | 2921889   | NC_000012.11 |
| cg03228555 | 2.37E-06 | 3.58E-07 | -5.27 | 5.4890593 | -1.08E-01 | 45174912  | 45175035  | NC_000019.9  |
| cg16655661 | 2.38E-06 | 3.58E-07 | -5.27 | 5.4887035 | -3.57E-02 | 75213778  | 75213901  | NC_000008.10 |
| cg13777502 | 2.38E-06 | 3.59E-07 | -5.27 | 5.4885647 | -2.80E-02 | 66031814  | 66031937  | NC_000017.10 |
| cg09514174 | 2.38E-06 | 3.59E-07 | -5.27 | 5.4884983 | -1.01E-01 | 36916681  | 36916804  | NC_000001.10 |
| cg06306519 | 2.38E-06 | 3.59E-07 | -5.27 | 5.4884388 | -9.91E-02 | 87304894  | 87305017  | NC_000002.11 |
| cg12565635 | 2.38E-06 | 3.59E-07 | -5.27 | 5.4884068 | -1.21E-01 | 16845331  | 16845454  | NC_000007.13 |
| cg05861512 | 2.38E-06 | 3.59E-07 | -5.27 | 5.4880462 | -1.45E-01 | 94442960  | 94443083  | NC_000014.8  |
| cg17095489 | 2.38E-06 | 3.59E-07 | -5.27 | 5.4877483 | -1.00E-01 | 128264282 | 128264405 | NC_000008.10 |
| cg17165158 | 2.38E-06 | 3.59E-07 | -5.27 | 5.4876671 | -1.42E-01 | 2182612   | 2182735   | NC_000001.10 |
| cg25025966 | 2.38E-06 | 3.59E-07 | -5.27 | 5.4863378 | -7.09E-02 | 159581121 | 159581244 | NC_000002.11 |
| cg19627538 | 2.38E-06 | 3.59E-07 | -5.27 | 5.4861794 | -2.10E-02 | 1090557   | 1090680   | NC_000017.10 |

|                 |          |          |       |           |           |           |           |              |
|-----------------|----------|----------|-------|-----------|-----------|-----------|-----------|--------------|
| cg16329014      | 2.39E-06 | 3.60E-07 | -5.27 | 5.4840678 | -6.68E-02 | 77478813  | 77478936  | NC_000017.10 |
| cg00864183      | 2.39E-06 | 3.60E-07 | -5.27 | 5.4839919 | -3.24E-02 | 48045973  | 48046096  | NC_000017.10 |
| cg23917638      | 2.39E-06 | 3.60E-07 | -5.27 | 5.4839218 | -6.42E-02 | 567501    | 567624    | NC_000001.10 |
| cg14216672      | 2.39E-06 | 3.61E-07 | -5.27 | 5.4830881 | -6.17E-02 | 3265923   | 3266046   | NC_000001.10 |
| cg19726408      | 2.39E-06 | 3.61E-07 | -5.27 | 5.4828991 | -1.04E-01 | 105428651 | 105428774 | NC_000010.10 |
| cg02527919      | 2.39E-06 | 3.61E-07 | -5.27 | 5.4828131 | -2.22E-02 | 67547538  | 67547661  | NC_000015.9  |
| ch.1.180325684F | 2.39E-06 | 3.61E-07 | -5.27 | 5.4811373 | -3.48E-02 | 182059061 | 182059184 | NC_000001.10 |
| cg18505670      | 2.39E-06 | 3.62E-07 | -5.27 | 5.4806158 | -6.41E-02 | 168771259 | 168771382 | NC_000006.11 |
| cg02880315      | 2.39E-06 | 3.62E-07 | -5.27 | 5.4805028 | -5.76E-02 | 49724254  | 49724377  | NC_000003.11 |
| cg27221193      | 2.39E-06 | 3.62E-07 | -5.27 | 5.4804609 | -1.20E-01 | 62466924  | 62467047  | NC_000020.10 |
| cg11299980      | 2.39E-06 | 3.62E-07 | -5.27 | 5.4799967 | -9.61E-02 | 2185495   | 2185618   | NC_000020.10 |
| cg17251379      | 2.40E-06 | 3.62E-07 | -5.27 | 5.4798338 | -2.96E-02 | 55966551  | 55966674  | NC_000020.10 |
| cg09884419      | 2.40E-06 | 3.62E-07 | -5.27 | 5.4794402 | -1.02E-01 | 89595811  | 89595934  | NC_000015.9  |
| cg01844154      | 2.40E-06 | 3.62E-07 | -5.27 | 5.4789621 | -2.18E-02 | 31670874  | 31670997  | NC_000006.11 |
| cg12564012      | 2.40E-06 | 3.62E-07 | -5.27 | 5.4788565 | -8.48E-02 | 3989045   | 3989168   | NC_000007.13 |
| cg09491104      | 2.40E-06 | 3.62E-07 | -5.27 | 5.4784762 | -5.81E-02 | 46646882  | 46647005  | NC_000022.10 |
| cg09654261      | 2.40E-06 | 3.62E-07 | -5.27 | 5.4783607 | -6.85E-02 | 26971995  | 26972118  | NC_000011.9  |
| cg19471433      | 2.40E-06 | 3.63E-07 | -5.27 | 5.477928  | -1.13E-01 | 961384    | 961507    | NC_000007.13 |
| cg12934320      | 2.40E-06 | 3.63E-07 | -5.27 | 5.4770838 | -6.59E-02 | 7472645   | 7472768   | NC_000011.9  |
| cg13141289      | 2.40E-06 | 3.63E-07 | -5.27 | 5.4769043 | -2.80E-02 | 49339044  | 49339167  | NC_000015.9  |
| cg20595457      | 2.40E-06 | 3.63E-07 | -5.27 | 5.4762055 | -1.38E-01 | 206753308 | 206753431 | NC_000001.10 |
| cg10033433      | 2.40E-06 | 3.63E-07 | -5.27 | 5.4757872 | -9.96E-02 | 155714979 | 155715102 | NC_000007.13 |
| cg26140911      | 2.40E-06 | 3.63E-07 | -5.27 | 5.4755771 | -9.13E-02 | 33399151  | 33399274  | NC_000006.11 |
| cg05504354      | 2.41E-06 | 3.63E-07 | -5.27 | 5.475476  | -9.89E-02 | 88974893  | 88975016  | NC_000012.11 |
| cg03117079      | 2.41E-06 | 3.64E-07 | -5.27 | 5.4747103 | -4.15E-02 | 91488015  | 91488138  | NC_000001.10 |

|                |          |          |       |           |           |           |           |              |
|----------------|----------|----------|-------|-----------|-----------|-----------|-----------|--------------|
| cg13830791     | 2.41E-06 | 3.64E-07 | -5.27 | 5.4745318 | -1.03E-01 | 132936706 | 132936829 | NC_000010.10 |
| cg05052888     | 2.41E-06 | 3.64E-07 | -5.27 | 5.4743904 | -1.44E-02 | 4298452   | 4298575   | NC_000009.11 |
| cg09233395     | 2.41E-06 | 3.64E-07 | -5.27 | 5.4741014 | -1.45E-01 | 116678582 | 116678705 | NC_000008.10 |
| cg04471507     | 2.41E-06 | 3.64E-07 | -5.27 | 5.4740432 | -6.34E-02 | 26233376  | 26233499  | NC_000001.10 |
| cg08348387     | 2.41E-06 | 3.64E-07 | -5.27 | 5.474008  | -5.98E-02 | 242158123 | 242158246 | NC_000002.11 |
| cg00174421     | 2.41E-06 | 3.64E-07 | -5.27 | 5.4738645 | -4.17E-02 | 26372472  | 26372595  | NC_000008.10 |
| cg01391299     | 2.41E-06 | 3.64E-07 | -5.27 | 5.4736598 | -9.54E-02 | 147648312 | 147648435 | NC_000005.9  |
| cg18637232     | 2.41E-06 | 3.64E-07 | -5.27 | 5.4736268 | -7.94E-02 | 84321570  | 84321693  | NC_000015.9  |
| cg26143719     | 2.41E-06 | 3.64E-07 | -5.27 | 5.4728897 | -9.06E-02 | 37584227  | 37584350  | NC_000022.10 |
| cg18719198     | 2.41E-06 | 3.65E-07 | -5.27 | 5.4724006 | -3.08E-02 | 55369460  | 55369583  | NC_000014.8  |
| cg06739525     | 2.41E-06 | 3.65E-07 | -5.27 | 5.4723765 | -5.89E-02 | 45417905  | 45418028  | NC_000002.11 |
| cg06922635     | 2.41E-06 | 3.65E-07 | -5.27 | 5.4723246 | -8.01E-02 | 57371607  | 57371730  | NC_000004.11 |
| cg25341313     | 2.41E-06 | 3.65E-07 | -5.27 | 5.4722502 | -1.20E-01 | 235069288 | 235069411 | NC_000001.10 |
| cg00864768     | 2.41E-06 | 3.65E-07 | -5.27 | 5.4720113 | -7.81E-02 | 54692102  | 54692225  | NC_000019.9  |
| cg20957553     | 2.41E-06 | 3.65E-07 | -5.27 | 5.4719457 | -5.87E-02 | 87791719  | 87791842  | NC_000001.10 |
| cg23493020     | 2.41E-06 | 3.65E-07 | -5.27 | 5.4716962 | -8.99E-02 | 65112169  | 65112292  | NC_000014.8  |
| ch.7.44221780F | 2.41E-06 | 3.65E-07 | -5.27 | 5.4716087 | -1.48E-02 | 44255255  | 44255378  | NC_000007.13 |
| cg21131343     | 2.41E-06 | 3.65E-07 | -5.27 | 5.4715704 | -5.50E-02 | 42686019  | 42686142  | NC_000022.10 |
| cg24759821     | 2.42E-06 | 3.65E-07 | -5.27 | 5.4706339 | -7.37E-02 | 103311462 | 103311585 | NC_000012.11 |
| cg01011614     | 2.42E-06 | 3.65E-07 | -5.27 | 5.4701025 | -1.73E-02 | 44600351  | 44600474  | NC_000020.10 |
| cg03780271     | 2.42E-06 | 3.66E-07 | -5.27 | 5.4695643 | -5.61E-02 | 33280052  | 33280175  | NC_000006.11 |
| cg14012233     | 2.42E-06 | 3.66E-07 | -5.27 | 5.4694406 | -1.33E-02 | 27276799  | 27276922  | NC_000017.10 |
| cg00307501     | 2.42E-06 | 3.66E-07 | -5.27 | 5.4692062 | -4.56E-02 | 59017133  | 59017256  | NC_000016.9  |
| cg10993517     | 2.42E-06 | 3.66E-07 | -5.27 | 5.4690381 | -7.47E-02 | 4810234   | 4810357   | NC_000012.11 |
| cg18789261     | 2.42E-06 | 3.66E-07 | -5.27 | 5.4683543 | -2.30E-02 | 82752393  | 82752516  | NC_000012.11 |

|                 |          |          |       |           |           |           |           |              |
|-----------------|----------|----------|-------|-----------|-----------|-----------|-----------|--------------|
| cg00094858      | 2.42E-06 | 3.66E-07 | -5.27 | 5.4675058 | -1.48E-02 | 49623089  | 49623212  | NC_000019.9  |
| cg06557644      | 2.42E-06 | 3.67E-07 | -5.27 | 5.4671447 | -1.30E-01 | 30510463  | 30510586  | NC_000007.13 |
| cg05371791      | 2.43E-06 | 3.67E-07 | -5.27 | 5.466174  | -9.44E-02 | 241458886 | 241459009 | NC_000002.11 |
| cg24159721      | 2.43E-06 | 3.67E-07 | -5.27 | 5.4659969 | -3.56E-02 | 565170    | 565293    | NC_000001.10 |
| cg07420720      | 2.43E-06 | 3.67E-07 | -5.27 | 5.4659889 | -3.37E-02 | 178113740 | 178113863 | NC_000004.11 |
| cg23908488      | 2.43E-06 | 3.67E-07 | -5.27 | 5.4659277 | -2.63E-02 | 206943    | 207066    | NC_000011.9  |
| cg09871079      | 2.43E-06 | 3.67E-07 | -5.27 | 5.4657219 | -1.94E-02 | 33359180  | 33359303  | NC_000001.10 |
| cg23042676      | 2.43E-06 | 3.67E-07 | -5.27 | 5.4652931 | -1.09E-01 | 67855787  | 67855910  | NC_000001.10 |
| cg21844038      | 2.43E-06 | 3.68E-07 | -5.26 | 5.4633183 | -5.95E-02 | 4665248   | 4665371   | NC_000016.9  |
| cg12096707      | 2.43E-06 | 3.68E-07 | -5.26 | 5.4627377 | -5.24E-02 | 3073714   | 3073837   | NC_000001.10 |
| cg14781521      | 2.44E-06 | 3.68E-07 | -5.26 | 5.4620483 | -3.39E-02 | 129063090 | 129063213 | NC_000003.11 |
| cg27462398      | 2.44E-06 | 3.69E-07 | -5.26 | 5.4615987 | -1.02E-01 | 86174642  | 86174765  | NC_000001.10 |
| cg11875500      | 2.44E-06 | 3.69E-07 | -5.26 | 5.4615861 | -3.24E-02 | 36391588  | 36391711  | NC_000019.9  |
| cg04344917      | 2.44E-06 | 3.69E-07 | -5.26 | 5.4609178 | -1.81E-02 | 94351686  | 94351809  | NC_000010.10 |
| cg17467898      | 2.44E-06 | 3.69E-07 | -5.26 | 5.4608707 | -8.69E-02 | 2289054   | 2289177   | NC_000007.13 |
| cg25601086      | 2.44E-06 | 3.69E-07 | -5.26 | 5.4608004 | -3.74E-02 | 110656394 | 110656517 | NC_000008.10 |
| cg10241341      | 2.44E-06 | 3.69E-07 | -5.26 | 5.460575  | -1.81E-02 | 233415653 | 233415776 | NC_000002.11 |
| ch.1.155481287R | 2.44E-06 | 3.69E-07 | -5.26 | 5.4602351 | -2.50E-02 | 157214663 | 157214786 | NC_000001.10 |
| cg13689066      | 2.44E-06 | 3.69E-07 | -5.26 | 5.4600952 | -1.03E-01 | 12167071  | 12167194  | NC_000001.10 |
| cg04370730      | 2.44E-06 | 3.70E-07 | -5.26 | 5.4585345 | -6.88E-02 | 35247966  | 35248089  | NC_000001.10 |
| cg10023838      | 2.44E-06 | 3.70E-07 | -5.26 | 5.4585189 | -7.37E-02 | 11866199  | 11866322  | NC_000010.10 |
| cg19728223      | 2.44E-06 | 3.70E-07 | -5.26 | 5.4583152 | -1.30E-01 | 2813121   | 2813244   | NC_000011.9  |
| cg21080921      | 2.45E-06 | 3.70E-07 | -5.26 | 5.4571699 | -8.85E-02 | 64981316  | 64981439  | NC_000011.9  |
| cg14329989      | 2.45E-06 | 3.70E-07 | -5.26 | 5.456897  | -4.85E-02 | 119192155 | 119192278 | NC_000011.9  |
| cg09948192      | 2.45E-06 | 3.71E-07 | -5.26 | 5.456445  | -6.22E-02 | 7069943   | 7070066   | NC_000004.11 |

|            |          |          |       |           |           |           |           |              |
|------------|----------|----------|-------|-----------|-----------|-----------|-----------|--------------|
| cg22523050 | 2.45E-06 | 3.71E-07 | -5.26 | 5.4559427 | -1.04E-01 | 137564212 | 137564335 | NC_000007.13 |
| cg26527457 | 2.45E-06 | 3.71E-07 | -5.26 | 5.4556451 | -9.13E-02 | 7562425   | 7562548   | NC_000019.9  |
| cg20315150 | 2.45E-06 | 3.71E-07 | -5.26 | 5.4556362 | -1.24E-01 | 28647577  | 28647700  | NC_000007.13 |
| cg22283058 | 2.45E-06 | 3.71E-07 | -5.26 | 5.4554718 | -1.01E-01 | 202091175 | 202091298 | NC_000001.10 |
| cg25541209 | 2.45E-06 | 3.71E-07 | -5.26 | 5.455041  | -8.34E-02 | 45947892  | 45948015  | NC_000020.10 |
| cg23274030 | 2.45E-06 | 3.72E-07 | -5.26 | 5.4538986 | -8.53E-02 | 120925632 | 120925755 | NC_000010.10 |
| cg13319278 | 2.46E-06 | 3.72E-07 | -5.26 | 5.4533576 | -1.63E-02 | 633649    | 633772    | NC_000019.9  |
| cg12439006 | 2.46E-06 | 3.72E-07 | -5.26 | 5.4530864 | -6.52E-02 | 119461149 | 119461272 | NC_000011.9  |
| cg21844291 | 2.46E-06 | 3.72E-07 | -5.26 | 5.4530694 | -1.04E-01 | 11097873  | 11097996  | NC_000002.11 |
| cg14920061 | 2.46E-06 | 3.72E-07 | -5.26 | 5.4530361 | -1.18E-01 | 129326392 | 129326515 | NC_000008.10 |
| cg24330514 | 2.46E-06 | 3.72E-07 | -5.26 | 5.4526873 | -9.70E-02 | 115396406 | 115396529 | NC_000001.10 |
| cg25733613 | 2.46E-06 | 3.72E-07 | -5.26 | 5.4526411 | -3.15E-02 | 111637437 | 111637560 | NC_000011.9  |
| cg14915316 | 2.46E-06 | 3.72E-07 | -5.26 | 5.452347  | -1.30E-01 | 3149852   | 3149975   | NC_000010.10 |
| cg22467216 | 2.46E-06 | 3.72E-07 | -5.26 | 5.4516832 | -2.11E-02 | 12308812  | 12308935  | NC_000018.9  |
| cg00795812 | 2.46E-06 | 3.72E-07 | -5.26 | 5.4515888 | -1.03E-01 | 242802009 | 242802132 | NC_000002.11 |
| cg02272851 | 2.46E-06 | 3.73E-07 | -5.26 | 5.451474  | -1.15E-01 | 3797471   | 3797594   | NC_000010.10 |
| cg05137146 | 2.46E-06 | 3.73E-07 | -5.26 | 5.451404  | -1.14E-02 | 30103511  | 30103634  | NC_000016.9  |
| cg16170157 | 2.46E-06 | 3.73E-07 | -5.26 | 5.4513578 | -2.43E-02 | 98480746  | 98480869  | NC_000010.10 |
| cg11303749 | 2.46E-06 | 3.73E-07 | -5.26 | 5.4508386 | -2.96E-02 | 26027410  | 26027533  | NC_000006.11 |
| cg11593656 | 2.46E-06 | 3.73E-07 | -5.26 | 5.4507716 | -3.65E-02 | 76112039  | 76112162  | NC_000013.10 |
| cg04642165 | 2.46E-06 | 3.73E-07 | -5.26 | 5.4506159 | -1.08E-01 | 150063431 | 150063554 | NC_000007.13 |
| cg11328127 | 2.46E-06 | 3.73E-07 | -5.26 | 5.4503221 | -1.20E-01 | 415441    | 415564    | NC_000011.9  |
| cg05976652 | 2.47E-06 | 3.73E-07 | -5.26 | 5.4493077 | -3.56E-02 | 63661316  | 63661439  | NC_000010.10 |
| cg14610217 | 2.47E-06 | 3.74E-07 | -5.26 | 5.4484182 | -8.00E-02 | 27334888  | 27335011  | NC_000001.10 |
| cg03244036 | 2.47E-06 | 3.74E-07 | -5.26 | 5.4484105 | -4.28E-02 | 1958034   | 1958157   | NC_000017.10 |

|            |          |          |       |           |           |           |           |              |
|------------|----------|----------|-------|-----------|-----------|-----------|-----------|--------------|
| cg02634544 | 2.47E-06 | 3.74E-07 | -5.26 | 5.4480588 | -1.40E-02 | 53689602  | 53689725  | NC_000012.11 |
| cg16629158 | 2.47E-06 | 3.74E-07 | -5.26 | 5.4473449 | -3.12E-02 | 122042988 | 122043111 | NC_000002.11 |
| cg13614036 | 2.47E-06 | 3.74E-07 | -5.26 | 5.446965  | -7.89E-02 | 139096080 | 139096203 | NC_000009.11 |
| cg18840567 | 2.47E-06 | 3.74E-07 | -5.26 | 5.4466808 | -3.67E-02 | 71906755  | 71906878  | NC_000010.10 |
| cg13320138 | 2.47E-06 | 3.75E-07 | -5.26 | 5.4462574 | -5.78E-02 | 6419575   | 6419698   | NC_000012.11 |
| cg01674036 | 2.47E-06 | 3.75E-07 | -5.26 | 5.4458444 | -2.58E-02 | 74058002  | 74058125  | NC_000010.10 |
| cg11817993 | 2.47E-06 | 3.75E-07 | -5.26 | 5.4454646 | -4.10E-02 | 92572978  | 92573101  | NC_000014.8  |
| cg07780782 | 2.47E-06 | 3.75E-07 | -5.26 | 5.4452454 | -5.48E-02 | 40465546  | 40465669  | NC_000017.10 |
| cg15807288 | 2.48E-06 | 3.75E-07 | -5.26 | 5.4441026 | -8.22E-02 | 1725325   | 1725448   | NC_000019.9  |
| cg13683424 | 2.48E-06 | 3.75E-07 | -5.26 | 5.4440008 | -4.98E-02 | 121298154 | 121298277 | NC_000011.9  |
| cg04329845 | 2.48E-06 | 3.76E-07 | -5.26 | 5.4432316 | -5.01E-02 | 14640100  | 14640223  | NC_000019.9  |
| cg21416022 | 2.48E-06 | 3.76E-07 | -5.26 | 5.4431295 | -6.54E-02 | 99789661  | 99789784  | NC_000015.9  |
| cg00356811 | 2.48E-06 | 3.76E-07 | -5.26 | 5.4425126 | -4.00E-02 | 4639239   | 4639362   | NC_000019.9  |
| cg06520521 | 2.48E-06 | 3.76E-07 | -5.26 | 5.4423634 | -1.22E-01 | 62323216  | 62323339  | NC_000011.9  |
| cg08185255 | 2.48E-06 | 3.76E-07 | -5.26 | 5.4416301 | -9.33E-02 | 80063568  | 80063691  | NC_000010.10 |
| cg17416644 | 2.48E-06 | 3.76E-07 | -5.26 | 5.4414813 | -1.19E-01 | 1474841   | 1474964   | NC_000011.9  |
| cg00658427 | 2.48E-06 | 3.76E-07 | -5.26 | 5.4413157 | -1.72E-02 | 102431823 | 102431946 | NC_000014.8  |
| cg01461856 | 2.49E-06 | 3.77E-07 | -5.26 | 5.4410043 | -9.77E-02 | 19628012  | 19628135  | NC_000017.10 |
| cg15952370 | 2.49E-06 | 3.77E-07 | -5.26 | 5.440474  | -1.16E-01 | 124190997 | 124191120 | NC_000011.9  |
| cg24314549 | 2.49E-06 | 3.77E-07 | -5.26 | 5.4403725 | -4.48E-02 | 1533570   | 1533693   | NC_000017.10 |
| cg26517730 | 2.49E-06 | 3.77E-07 | -5.26 | 5.439889  | -2.06E-02 | 132149076 | 132149199 | NC_000005.9  |
| cg21199852 | 2.49E-06 | 3.77E-07 | -5.26 | 5.439505  | -1.02E-01 | 190583783 | 190583906 | NC_000003.11 |
| cg07196637 | 2.49E-06 | 3.77E-07 | -5.26 | 5.43904   | -5.03E-02 | 187185716 | 187185839 | NC_000004.11 |
| cg25314315 | 2.49E-06 | 3.78E-07 | -5.26 | 5.4374073 | -9.13E-02 | 39407387  | 39407510  | NC_000001.10 |
| cg16939187 | 2.49E-06 | 3.78E-07 | -5.26 | 5.4371237 | -9.47E-02 | 2611971   | 2612094   | NC_000007.13 |

|               |          |          |       |           |           |           |           |              |
|---------------|----------|----------|-------|-----------|-----------|-----------|-----------|--------------|
| cg18297338    | 2.49E-06 | 3.78E-07 | -5.26 | 5.4369704 | -1.22E-02 | 119255812 | 119255935 | NC_000006.11 |
| cg06638568    | 2.50E-06 | 3.79E-07 | -5.26 | 5.4358816 | -1.08E-01 | 163730822 | 163730945 | NC_000006.11 |
| cg05826245    | 2.50E-06 | 3.79E-07 | -5.26 | 5.4356944 | -7.80E-02 | 10827400  | 10827523  | NC_000012.11 |
| cg11304682    | 2.50E-06 | 3.79E-07 | -5.26 | 5.4354027 | -1.05E-01 | 73451011  | 73451134  | NC_000003.11 |
| cg04768998    | 2.50E-06 | 3.79E-07 | -5.26 | 5.4352961 | -6.05E-02 | 175500583 | 175500706 | NC_000002.11 |
| cg20489946    | 2.50E-06 | 3.79E-07 | -5.26 | 5.4352336 | -1.05E-01 | 52731078  | 52731201  | NC_000013.10 |
| cg03177025    | 2.50E-06 | 3.79E-07 | -5.26 | 5.4345484 | -3.85E-02 | 28112917  | 28113040  | NC_000002.11 |
| cg26532826    | 2.50E-06 | 3.79E-07 | -5.26 | 5.4344654 | -3.73E-02 | 31003127  | 31003250  | NC_000022.10 |
| cg16063018    | 2.50E-06 | 3.79E-07 | -5.26 | 5.4344552 | -1.06E-01 | 3446079   | 3446202   | NC_000012.11 |
| cg00611495    | 2.50E-06 | 3.80E-07 | -5.26 | 5.433168  | -7.73E-02 | 1120275   | 1120398   | NC_000016.9  |
| cg22619759    | 2.51E-06 | 3.80E-07 | -5.26 | 5.4326706 | -1.18E-02 | 5601811   | 5601934   | NC_000007.13 |
| cg00167670    | 2.51E-06 | 3.80E-07 | -5.26 | 5.4320182 | -1.04E-01 | 13922944  | 13923067  | NC_000004.11 |
| cg13720472    | 2.51E-06 | 3.81E-07 | -5.26 | 5.4306934 | -3.28E-02 | 10381063  | 10381186  | NC_000019.9  |
| ch.2.7246174F | 2.51E-06 | 3.81E-07 | -5.26 | 5.4296866 | -2.66E-02 | 7328723   | 7328846   | NC_000002.11 |
| cg01501135    | 2.51E-06 | 3.81E-07 | -5.26 | 5.4295803 | -1.53E-02 | 16342235  | 16342358  | NC_000017.10 |
| cg10540110    | 2.51E-06 | 3.81E-07 | -5.26 | 5.4294802 | -1.06E-01 | 202775609 | 202775732 | NC_000001.10 |
| cg08941669    | 2.51E-06 | 3.81E-07 | -5.26 | 5.4292311 | -8.00E-02 | 7778234   | 7778357   | NC_000001.10 |
| cg20710266    | 2.52E-06 | 3.82E-07 | -5.26 | 5.4283584 | -7.39E-02 | 96877855  | 96877978  | NC_000015.9  |
| cg25583128    | 2.52E-06 | 3.82E-07 | -5.26 | 5.4277304 | -1.83E-02 | 61616453  | 61616576  | NC_000018.9  |
| cg01145396    | 2.52E-06 | 3.82E-07 | -5.26 | 5.426278  | -5.31E-02 | 233403063 | 233403186 | NC_000002.11 |
| cg06874144    | 2.52E-06 | 3.83E-07 | -5.26 | 5.4257724 | -1.17E-01 | 231576873 | 231576996 | NC_000002.11 |
| cg09608533    | 2.52E-06 | 3.83E-07 | -5.26 | 5.4257034 | -9.62E-02 | 125618188 | 125618311 | NC_000010.10 |
| cg10625758    | 2.52E-06 | 3.83E-07 | -5.26 | 5.4256968 | -1.98E-02 | 73851514  | 73851637  | NC_000017.10 |
| cg21361343    | 2.52E-06 | 3.83E-07 | -5.26 | 5.4251603 | -1.11E-02 | 37554915  | 37555038  | NC_000020.10 |
| cg27544759    | 2.52E-06 | 3.83E-07 | -5.26 | 5.4249222 | -1.62E-02 | 37617532  | 37617655  | NC_000017.10 |



|            |          |          |       |           |           |           |           |              |
|------------|----------|----------|-------|-----------|-----------|-----------|-----------|--------------|
| cg22023664 | 2.53E-06 | 3.83E-07 | -5.26 | 5.4240388 | -5.51E-02 | 2619608   | 2619731   | NC_000019.9  |
| cg10827434 | 2.53E-06 | 3.83E-07 | -5.26 | 5.4239441 | -7.11E-02 | 84944976  | 84945099  | NC_000001.10 |
| cg19900896 | 2.53E-06 | 3.83E-07 | -5.26 | 5.4237693 | -5.98E-02 | 49737492  | 49737615  | NC_000005.9  |
| cg19542841 | 2.53E-06 | 3.84E-07 | -5.26 | 5.4229168 | -5.17E-02 | 64073530  | 64073653  | NC_000011.9  |
| cg05310557 | 2.53E-06 | 3.84E-07 | -5.26 | 5.4221407 | -3.48E-02 | 46477250  | 46477373  | NC_000018.9  |
| cg00419604 | 2.53E-06 | 3.84E-07 | -5.26 | 5.4218355 | -1.19E-01 | 45239247  | 45239370  | NC_000002.11 |
| cg21638323 | 2.53E-06 | 3.84E-07 | -5.26 | 5.4215131 | -2.17E-02 | 47600536  | 47600659  | NC_000011.9  |
| cg07938763 | 2.54E-06 | 3.85E-07 | -5.26 | 5.4200365 | -8.99E-02 | 2516966   | 2517089   | NC_000019.9  |
| cg00052561 | 2.54E-06 | 3.85E-07 | -5.26 | 5.4199124 | -3.07E-02 | 11708537  | 11708660  | NC_000019.9  |
| cg00019377 | 2.54E-06 | 3.85E-07 | -5.26 | 5.4191293 | -3.05E-02 | 41035024  | 41035147  | NC_000019.9  |
| cg18306747 | 2.54E-06 | 3.85E-07 | -5.26 | 5.4189175 | -3.94E-02 | 74284008  | 74284131  | NC_000015.9  |
| cg04997124 | 2.54E-06 | 3.85E-07 | -5.26 | 5.4185864 | -1.08E-01 | 101393397 | 101393520 | NC_000014.8  |
| cg08270031 | 2.54E-06 | 3.85E-07 | -5.26 | 5.4183589 | -1.90E-02 | 180472207 | 180472330 | NC_000001.10 |
| cg04905421 | 2.54E-06 | 3.86E-07 | -5.26 | 5.4180995 | -6.75E-02 | 1581129   | 1581252   | NC_000016.9  |
| cg07242783 | 2.54E-06 | 3.86E-07 | -5.26 | 5.4178078 | -3.27E-02 | 28052377  | 28052500  | NC_000001.10 |
| cg03432338 | 2.54E-06 | 3.86E-07 | -5.25 | 5.417516  | -6.19E-02 | 231176985 | 231177108 | NC_000001.10 |
| cg01435493 | 2.54E-06 | 3.86E-07 | -5.25 | 5.4174359 | -3.47E-02 | 73602980  | 73603103  | NC_000014.8  |
| cg07330075 | 2.54E-06 | 3.86E-07 | -5.25 | 5.417259  | -7.42E-02 | 34125200  | 34125323  | NC_000017.10 |
| cg13375624 | 2.54E-06 | 3.86E-07 | -5.25 | 5.4172231 | -7.96E-02 | 96829126  | 96829249  | NC_000015.9  |
| cg09431544 | 2.54E-06 | 3.86E-07 | -5.25 | 5.4170237 | -4.29E-02 | 14629187  | 14629310  | NC_000019.9  |
| cg00909395 | 2.55E-06 | 3.86E-07 | -5.25 | 5.4160334 | -4.14E-02 | 47445672  | 47445795  | NC_000006.11 |
| cg25409554 | 2.55E-06 | 3.87E-07 | -5.25 | 5.4150834 | -5.11E-02 | 234871422 | 234871545 | NC_000001.10 |
| cg02078525 | 2.55E-06 | 3.87E-07 | -5.25 | 5.4148949 | -8.91E-02 | 66400395  | 66400518  | NC_000016.9  |
| cg09950920 | 2.55E-06 | 3.87E-07 | -5.25 | 5.4144119 | -9.32E-02 | 208734940 | 208735063 | NC_000002.11 |
| cg13132121 | 2.55E-06 | 3.87E-07 | -5.25 | 5.4143454 | -9.96E-02 | 218653561 | 218653684 | NC_000001.10 |

|            |          |          |       |           |           |           |           |              |
|------------|----------|----------|-------|-----------|-----------|-----------|-----------|--------------|
| cg21086551 | 2.55E-06 | 3.87E-07 | -5.25 | 5.4140722 | -1.21E-01 | 171241974 | 171242097 | NC_000003.11 |
| cg26873705 | 2.55E-06 | 3.87E-07 | -5.25 | 5.4137585 | -1.98E-02 | 160919162 | 160919285 | NC_000002.11 |
| cg12793502 | 2.55E-06 | 3.87E-07 | -5.25 | 5.4137505 | -1.10E-02 | 173794210 | 173794333 | NC_000001.10 |
| cg15115522 | 2.55E-06 | 3.87E-07 | -5.25 | 5.4134462 | -9.11E-02 | 125115327 | 125115450 | NC_000011.9  |
| cg10537193 | 2.55E-06 | 3.88E-07 | -5.25 | 5.4123934 | -3.63E-02 | 32026975  | 32027098  | NC_000022.10 |
| cg16309260 | 2.56E-06 | 3.88E-07 | -5.25 | 5.4119658 | -3.81E-02 | 45838338  | 45838461  | NC_000003.11 |
| cg24848452 | 2.56E-06 | 3.88E-07 | -5.25 | 5.4118226 | -1.06E-01 | 37015311  | 37015434  | NC_000008.10 |
| cg12255774 | 2.56E-06 | 3.88E-07 | -5.25 | 5.4114924 | -7.79E-02 | 61689144  | 61689267  | NC_000011.9  |
| cg02723904 | 2.56E-06 | 3.88E-07 | -5.25 | 5.4113795 | -3.46E-02 | 160167768 | 160167891 | NC_000003.11 |
| cg20426729 | 2.56E-06 | 3.88E-07 | -5.25 | 5.411074  | -3.46E-02 | 64580908  | 64581031  | NC_000007.13 |
| cg27304754 | 2.56E-06 | 3.89E-07 | -5.25 | 5.4105881 | -5.75E-02 | 71392088  | 71392211  | NC_000016.9  |
| cg05907649 | 2.56E-06 | 3.89E-07 | -5.25 | 5.4083527 | -9.63E-02 | 56519080  | 56519203  | NC_000015.9  |
| cg15239627 | 2.56E-06 | 3.90E-07 | -5.25 | 5.408255  | -8.15E-02 | 120918492 | 120918615 | NC_000007.13 |
| cg10840277 | 2.57E-06 | 3.90E-07 | -5.25 | 5.4080358 | -1.45E-01 | 124829410 | 124829533 | NC_000008.10 |
| cg02922913 | 2.57E-06 | 3.90E-07 | -5.25 | 5.4078359 | -6.08E-02 | 1009764   | 1009887   | NC_000019.9  |
| cg04872707 | 2.57E-06 | 3.90E-07 | -5.25 | 5.407609  | -3.23E-02 | 73029991  | 73030114  | NC_000017.10 |
| cg20465333 | 2.57E-06 | 3.90E-07 | -5.25 | 5.4075111 | -6.49E-02 | 32061711  | 32061834  | NC_000022.10 |
| cg04094846 | 2.57E-06 | 3.90E-07 | -5.25 | 5.4065691 | -6.60E-02 | 691952    | 692075    | NC_000002.11 |
| cg14584215 | 2.57E-06 | 3.90E-07 | -5.25 | 5.4061626 | -1.04E-01 | 153991033 | 153991156 | NC_000005.9  |
| cg11194398 | 2.57E-06 | 3.90E-07 | -5.25 | 5.4058564 | -7.98E-02 | 66675437  | 66675560  | NC_000011.9  |
| cg04811621 | 2.57E-06 | 3.91E-07 | -5.25 | 5.4054484 | -2.10E-02 | 40058985  | 40059108  | NC_000004.11 |
| cg13828871 | 2.57E-06 | 3.91E-07 | -5.25 | 5.4053992 | -2.00E-02 | 31128860  | 31128983  | NC_000016.9  |
| cg16171526 | 2.57E-06 | 3.91E-07 | -5.25 | 5.4051556 | -1.36E-02 | 155043744 | 155043867 | NC_000001.10 |
| cg04681845 | 2.57E-06 | 3.91E-07 | -5.25 | 5.4051194 | -8.46E-02 | 153283485 | 153283608 | NC_000002.11 |
| cg08862818 | 2.57E-06 | 3.91E-07 | -5.25 | 5.4045242 | -1.73E-02 | 31470574  | 31470697  | NC_000016.9  |

|            |          |          |       |           |           |           |           |              |
|------------|----------|----------|-------|-----------|-----------|-----------|-----------|--------------|
| cg19941230 | 2.58E-06 | 3.91E-07 | -5.25 | 5.4039372 | -1.71E-02 | 63051872  | 63051995  | NC_000017.10 |
| cg03520966 | 2.58E-06 | 3.92E-07 | -5.25 | 5.402998  | -5.89E-02 | 90751269  | 90751392  | NC_000010.10 |
| cg08768621 | 2.58E-06 | 3.92E-07 | -5.25 | 5.4021551 | -4.59E-02 | 55102916  | 55103039  | NC_000018.9  |
| cg18459339 | 2.58E-06 | 3.92E-07 | -5.25 | 5.4018573 | -9.65E-02 | 79782326  | 79782449  | NC_000014.8  |
| cg25101291 | 2.58E-06 | 3.92E-07 | -5.25 | 5.4016322 | -8.94E-02 | 1103235   | 1103358   | NC_000001.10 |
| cg10241823 | 2.58E-06 | 3.92E-07 | -5.25 | 5.401627  | -7.27E-02 | 841205    | 841328    | NC_000017.10 |
| cg00989315 | 2.58E-06 | 3.92E-07 | -5.25 | 5.4014381 | -1.11E-01 | 21982818  | 21982941  | NC_000007.13 |
| cg09266144 | 2.58E-06 | 3.92E-07 | -5.25 | 5.4012562 | -8.54E-02 | 73075591  | 73075714  | NC_000014.8  |
| cg24609530 | 2.58E-06 | 3.92E-07 | -5.25 | 5.4011709 | -1.55E-02 | 18610297  | 18610420  | NC_000011.9  |
| cg01915951 | 2.58E-06 | 3.93E-07 | -5.25 | 5.4006795 | -3.72E-02 | 62130500  | 62130623  | NC_000020.10 |
| cg23037537 | 2.59E-06 | 3.93E-07 | -5.25 | 5.3996438 | -6.93E-02 | 195354597 | 195354720 | NC_000003.11 |
| cg24168221 | 2.59E-06 | 3.93E-07 | -5.25 | 5.3996392 | -8.03E-02 | 23587099  | 23587222  | NC_000020.10 |
| cg18794854 | 2.59E-06 | 3.93E-07 | -5.25 | 5.3994319 | -2.34E-02 | 39300668  | 39300791  | NC_000012.11 |
| cg01902939 | 2.59E-06 | 3.93E-07 | -5.25 | 5.3992256 | -1.76E-02 | 54304230  | 54304353  | NC_000001.10 |
| cg11550971 | 2.59E-06 | 3.93E-07 | -5.25 | 5.3986677 | -4.83E-02 | 11981317  | 11981440  | NC_000018.9  |
| cg24455405 | 2.59E-06 | 3.93E-07 | -5.25 | 5.3985434 | -4.80E-02 | 33172353  | 33172476  | NC_000006.11 |
| cg14990643 | 2.59E-06 | 3.93E-07 | -5.25 | 5.3984281 | -8.87E-02 | 85956936  | 85957059  | NC_000010.10 |
| cg15680902 | 2.59E-06 | 3.94E-07 | -5.25 | 5.3978681 | -2.50E-02 | 190231354 | 190231477 | NC_000003.11 |
| cg15770728 | 2.59E-06 | 3.94E-07 | -5.25 | 5.3966529 | -2.42E-02 | 20513120  | 20513243  | NC_000018.9  |
| cg21223094 | 2.59E-06 | 3.94E-07 | -5.25 | 5.3966441 | -1.13E-01 | 11975515  | 11975638  | NC_000012.11 |
| cg18566672 | 2.59E-06 | 3.94E-07 | -5.25 | 5.395992  | -7.97E-02 | 39831825  | 39831948  | NC_000019.9  |
| cg17261804 | 2.59E-06 | 3.95E-07 | -5.25 | 5.3959315 | -4.31E-02 | 2422607   | 2422730   | NC_000011.9  |
| cg17007574 | 2.60E-06 | 3.95E-07 | -5.25 | 5.3956939 | -5.12E-02 | 238571511 | 238571634 | NC_000002.11 |
| cg01158527 | 2.60E-06 | 3.95E-07 | -5.25 | 5.3950517 | -1.10E-01 | 134864216 | 134864339 | NC_000011.9  |
| cg15024955 | 2.60E-06 | 3.95E-07 | -5.25 | 5.3950374 | -8.81E-02 | 102552895 | 102553018 | NC_000010.10 |

|            |          |          |       |           |           |           |           |              |
|------------|----------|----------|-------|-----------|-----------|-----------|-----------|--------------|
| cg10842080 | 2.60E-06 | 3.95E-07 | -5.25 | 5.3943935 | -1.07E-01 | 55123900  | 55124023  | NC_000017.10 |
| cg27603000 | 2.60E-06 | 3.95E-07 | -5.25 | 5.3943686 | -7.94E-02 | 1834527   | 1834650   | NC_000005.9  |
| cg17427615 | 2.60E-06 | 3.95E-07 | -5.25 | 5.3939776 | -6.62E-02 | 3539097   | 3539220   | NC_000019.9  |
| cg19762427 | 2.60E-06 | 3.96E-07 | -5.25 | 5.3930729 | -1.21E-01 | 23132186  | 23132309  | NC_000012.11 |
| cg16232698 | 2.60E-06 | 3.96E-07 | -5.25 | 5.3924757 | -8.05E-02 | 57233635  | 57233758  | NC_000008.10 |
| cg22916646 | 2.60E-06 | 3.96E-07 | -5.25 | 5.3923522 | -9.83E-02 | 162672583 | 162672706 | NC_000005.9  |
| cg00356208 | 2.60E-06 | 3.96E-07 | -5.25 | 5.3920524 | -9.05E-02 | 55167581  | 55167704  | NC_000016.9  |
| cg21527616 | 2.61E-06 | 3.96E-07 | -5.25 | 5.3917252 | -5.25E-02 | 64547373  | 64547496  | NC_000003.11 |
| cg19374089 | 2.61E-06 | 3.96E-07 | -5.25 | 5.3915623 | -6.02E-02 | 41970954  | 41971077  | NC_000022.10 |
| cg26241460 | 2.61E-06 | 3.96E-07 | -5.25 | 5.3911198 | -9.06E-02 | 1767775   | 1767898   | NC_000011.9  |
| cg24844815 | 2.61E-06 | 3.97E-07 | -5.25 | 5.3908733 | -3.85E-02 | 157130686 | 157130809 | NC_000007.13 |
| cg24595208 | 2.61E-06 | 3.97E-07 | -5.25 | 5.3898993 | -5.68E-02 | 34496537  | 34496660  | NC_000005.9  |
| cg24663419 | 2.61E-06 | 3.97E-07 | -5.25 | 5.3897025 | -9.09E-02 | 58862141  | 58862264  | NC_000002.11 |
| cg18226169 | 2.61E-06 | 3.97E-07 | -5.25 | 5.3895432 | -8.39E-02 | 12998764  | 12998887  | NC_000019.9  |
| cg10958452 | 2.61E-06 | 3.97E-07 | -5.25 | 5.3894231 | -1.20E-01 | 44114346  | 44114469  | NC_000001.10 |
| cg24450312 | 2.61E-06 | 3.97E-07 | -5.25 | 5.3892128 | -1.64E-02 | 206681158 | 206681281 | NC_000001.10 |
| cg03438216 | 2.61E-06 | 3.97E-07 | -5.25 | 5.3890715 | -9.78E-02 | 230517965 | 230518088 | NC_000001.10 |
| cg04174309 | 2.61E-06 | 3.97E-07 | -5.25 | 5.3889846 | -3.10E-02 | 117102980 | 117103103 | NC_000011.9  |
| cg20269554 | 2.61E-06 | 3.97E-07 | -5.25 | 5.3888727 | -7.99E-02 | 55181235  | 55181358  | NC_000001.10 |
| cg15017982 | 2.61E-06 | 3.98E-07 | -5.25 | 5.3879087 | -6.73E-02 | 1785723   | 1785846   | NC_000011.9  |
| cg02223351 | 2.62E-06 | 3.98E-07 | -5.25 | 5.3875356 | -6.74E-02 | 66402367  | 66402490  | NC_000016.9  |
| cg08919846 | 2.62E-06 | 3.98E-07 | -5.25 | 5.3874451 | -1.20E-01 | 3664586   | 3664709   | NC_000001.10 |
| cg22797114 | 2.62E-06 | 3.98E-07 | -5.25 | 5.387261  | -8.48E-02 | 150660317 | 150660440 | NC_000007.13 |
| cg12829360 | 2.62E-06 | 3.99E-07 | -5.25 | 5.3858767 | -7.66E-02 | 89006335  | 89006458  | NC_000016.9  |
| cg08532569 | 2.62E-06 | 3.99E-07 | -5.25 | 5.3852497 | -5.26E-02 | 36424620  | 36424743  | NC_000022.10 |

|            |          |          |       |           |           |           |           |              |
|------------|----------|----------|-------|-----------|-----------|-----------|-----------|--------------|
| cg07376834 | 2.62E-06 | 3.99E-07 | -5.25 | 5.3849493 | -7.74E-02 | 118603880 | 118604003 | NC_000005.9  |
| cg01515516 | 2.62E-06 | 3.99E-07 | -5.25 | 5.3848507 | -3.63E-02 | 14544032  | 14544155  | NC_000019.9  |
| cg21291431 | 2.62E-06 | 3.99E-07 | -5.25 | 5.384729  | -7.34E-02 | 22423994  | 22424117  | NC_000008.10 |
| cg02823783 | 2.62E-06 | 3.99E-07 | -5.25 | 5.3844808 | -5.48E-02 | 124246919 | 124247042 | NC_000012.11 |
| cg03151540 | 2.62E-06 | 3.99E-07 | -5.25 | 5.3842304 | -5.28E-02 | 16228885  | 16229008  | NC_000004.11 |
| cg10225149 | 2.63E-06 | 4.00E-07 | -5.25 | 5.383556  | -8.97E-02 | 15491808  | 15491931  | NC_000019.9  |
| cg14302612 | 2.63E-06 | 4.00E-07 | -5.25 | 5.3834328 | -8.26E-02 | 128317170 | 128317293 | NC_000002.11 |
| cg21583694 | 2.63E-06 | 4.00E-07 | -5.25 | 5.3834002 | -1.08E-01 | 135365401 | 135365524 | NC_000005.9  |
| cg14869141 | 2.63E-06 | 4.00E-07 | -5.25 | 5.3823393 | -1.89E-02 | 53410056  | 53410179  | NC_000006.11 |
| cg17549513 | 2.63E-06 | 4.00E-07 | -5.25 | 5.382203  | -5.49E-02 | 9694789   | 9694912   | NC_000017.10 |
| cg16189596 | 2.63E-06 | 4.00E-07 | -5.25 | 5.3821872 | -1.28E-02 | 4867972   | 4868095   | NC_000019.9  |
| cg26792080 | 2.63E-06 | 4.00E-07 | -5.25 | 5.3821041 | -3.33E-02 | 200324879 | 200325002 | NC_000002.11 |
| cg01699524 | 2.63E-06 | 4.00E-07 | -5.25 | 5.3816729 | -4.69E-02 | 7869638   | 7869761   | NC_000005.9  |
| cg04544858 | 2.63E-06 | 4.00E-07 | -5.25 | 5.3815667 | -1.17E-01 | 67489737  | 67489860  | NC_000005.9  |
| cg10855746 | 2.63E-06 | 4.00E-07 | -5.25 | 5.3814952 | -7.07E-02 | 61938004  | 61938127  | NC_000014.8  |
| cg16337273 | 2.63E-06 | 4.01E-07 | -5.25 | 5.3812058 | -4.19E-02 | 126160920 | 126161043 | NC_000011.9  |
| cg00259249 | 2.63E-06 | 4.01E-07 | -5.25 | 5.3803759 | -6.16E-02 | 35246726  | 35246849  | NC_000001.10 |
| cg06870986 | 2.63E-06 | 4.01E-07 | -5.25 | 5.3800078 | -6.54E-02 | 70588173  | 70588296  | NC_000017.10 |
| cg23371208 | 2.64E-06 | 4.01E-07 | -5.25 | 5.3795186 | -9.16E-02 | 57408514  | 57408637  | NC_000011.9  |
| cg06949778 | 2.64E-06 | 4.01E-07 | -5.25 | 5.3794601 | -1.09E-01 | 180892623 | 180892746 | NC_000001.10 |
| cg18322589 | 2.64E-06 | 4.01E-07 | -5.25 | 5.379146  | -7.50E-02 | 123909456 | 123909579 | NC_000010.10 |
| cg01410453 | 2.64E-06 | 4.02E-07 | -5.25 | 5.3785383 | -1.23E-01 | 74753358  | 74753481  | NC_000002.11 |
| cg06534568 | 2.64E-06 | 4.02E-07 | -5.25 | 5.3779564 | -1.04E-01 | 134662594 | 134662717 | NC_000010.10 |
| cg06685724 | 2.64E-06 | 4.02E-07 | -5.25 | 5.3777194 | -2.42E-02 | 23720386  | 23720509  | NC_000007.13 |
| cg19220507 | 2.64E-06 | 4.02E-07 | -5.25 | 5.3776829 | -6.99E-02 | 36778954  | 36779077  | NC_000010.10 |

|               |          |          |       |           |           |           |           |              |
|---------------|----------|----------|-------|-----------|-----------|-----------|-----------|--------------|
| cg12743970    | 2.64E-06 | 4.02E-07 | -5.25 | 5.3768131 | -1.15E-01 | 64536520  | 64536643  | NC_000017.10 |
| cg01597629    | 2.64E-06 | 4.02E-07 | -5.25 | 5.3767624 | -8.34E-02 | 6953997   | 6954120   | NC_000016.9  |
| cg19921279    | 2.64E-06 | 4.02E-07 | -5.25 | 5.376673  | -3.43E-02 | 32827389  | 32827512  | NC_000001.10 |
| cg08058672    | 2.64E-06 | 4.02E-07 | -5.25 | 5.3766357 | -4.92E-02 | 51423212  | 51423335  | NC_000003.11 |
| cg26503153    | 2.64E-06 | 4.03E-07 | -5.25 | 5.3761601 | -2.96E-02 | 108870610 | 108870733 | NC_000013.10 |
| cg25384423    | 2.64E-06 | 4.03E-07 | -5.25 | 5.376088  | -7.51E-02 | 19208697  | 19208820  | NC_000001.10 |
| cg04374006    | 2.64E-06 | 4.03E-07 | -5.25 | 5.3758645 | -7.60E-02 | 33556395  | 33556518  | NC_000019.9  |
| cg09650495    | 2.65E-06 | 4.03E-07 | -5.25 | 5.375304  | -8.89E-02 | 32463798  | 32463921  | NC_000007.13 |
| cg06945845    | 2.65E-06 | 4.03E-07 | -5.25 | 5.3752515 | -1.07E-01 | 84681510  | 84681633  | NC_000016.9  |
| cg16396978    | 2.65E-06 | 4.03E-07 | -5.25 | 5.3749425 | -1.17E-01 | 25936677  | 25936800  | NC_000001.10 |
| cg08504468    | 2.65E-06 | 4.03E-07 | -5.25 | 5.3743211 | -1.90E-02 | 22468982  | 22469105  | NC_000001.10 |
| cg01840803    | 2.65E-06 | 4.03E-07 | -5.25 | 5.3741233 | -3.03E-02 | 95624345  | 95624468  | NC_000014.8  |
| cg11377047    | 2.65E-06 | 4.04E-07 | -5.25 | 5.373867  | -7.87E-02 | 26881009  | 26881132  | NC_000001.10 |
| cg01510218    | 2.65E-06 | 4.04E-07 | -5.25 | 5.3732205 | -6.68E-02 | 27299994  | 27300117  | NC_000022.10 |
| cg06837040    | 2.65E-06 | 4.04E-07 | -5.25 | 5.3730326 | -9.58E-02 | 180530353 | 180530476 | NC_000001.10 |
| cg00885788    | 2.65E-06 | 4.04E-07 | -5.25 | 5.3721702 | -1.14E-01 | 19750829  | 19750952  | NC_000004.11 |
| cg06658615    | 2.65E-06 | 4.04E-07 | -5.25 | 5.3721419 | -1.06E-01 | 139334561 | 139334684 | NC_000005.9  |
| ch.2.2460911F | 2.65E-06 | 4.04E-07 | -5.25 | 5.3718267 | -1.80E-02 | 118758328 | 118758451 | NC_000002.11 |
| cg13465631    | 2.65E-06 | 4.05E-07 | -5.25 | 5.3716026 | -3.76E-02 | 170680977 | 170681100 | NC_000002.11 |
| cg05478314    | 2.66E-06 | 4.05E-07 | -5.24 | 5.371161  | -3.18E-02 | 121175674 | 121175797 | NC_000012.11 |
| cg26249852    | 2.66E-06 | 4.05E-07 | -5.24 | 5.3710787 | -9.64E-02 | 17392298  | 17392421  | NC_000019.9  |
| cg09914933    | 2.66E-06 | 4.05E-07 | -5.24 | 5.3707078 | -3.95E-02 | 27936777  | 27936900  | NC_000013.10 |
| cg27066829    | 2.66E-06 | 4.05E-07 | -5.24 | 5.3697776 | -1.64E-02 | 6737003   | 6737126   | NC_000019.9  |
| cg17121205    | 2.66E-06 | 4.06E-07 | -5.24 | 5.3685749 | -1.06E-01 | 44009353  | 44009476  | NC_000019.9  |
| cg08358964    | 2.66E-06 | 4.06E-07 | -5.24 | 5.3679564 | -8.53E-02 | 11367783  | 11367906  | NC_000016.9  |

|            |          |          |       |           |           |           |           |              |
|------------|----------|----------|-------|-----------|-----------|-----------|-----------|--------------|
| cg20725261 | 2.66E-06 | 4.06E-07 | -5.24 | 5.3678366 | -4.83E-02 | 47803425  | 47803548  | NC_000020.10 |
| cg12978253 | 2.66E-06 | 4.06E-07 | -5.24 | 5.3677943 | -6.74E-02 | 134258602 | 134258725 | NC_000010.10 |
| cg04433306 | 2.67E-06 | 4.06E-07 | -5.24 | 5.3676925 | -4.84E-02 | 129592730 | 129592853 | NC_000007.13 |
| cg09408143 | 2.67E-06 | 4.06E-07 | -5.24 | 5.3672594 | -9.29E-02 | 524778    | 524901    | NC_000016.9  |
| cg04681489 | 2.67E-06 | 4.06E-07 | -5.24 | 5.3671867 | -1.06E-01 | 123325084 | 123325207 | NC_000011.9  |
| cg08856033 | 2.67E-06 | 4.07E-07 | -5.24 | 5.3666499 | -9.93E-02 | 121280078 | 121280201 | NC_000002.11 |
| cg25718438 | 2.67E-06 | 4.07E-07 | -5.24 | 5.3662246 | -6.87E-02 | 43743921  | 43744044  | NC_000020.10 |
| cg07901253 | 2.67E-06 | 4.07E-07 | -5.24 | 5.3652252 | -9.91E-02 | 15402504  | 15402627  | NC_000001.10 |
| cg02304095 | 2.67E-06 | 4.08E-07 | -5.24 | 5.3639389 | -9.07E-02 | 2328709   | 2328832   | NC_000002.11 |
| cg24277007 | 2.67E-06 | 4.08E-07 | -5.24 | 5.3638062 | -1.33E-01 | 78509647  | 78509770  | NC_000011.9  |
| cg14255562 | 2.68E-06 | 4.08E-07 | -5.24 | 5.3627474 | -7.08E-02 | 6370619   | 6370742   | NC_000019.9  |
| cg08645278 | 2.68E-06 | 4.08E-07 | -5.24 | 5.3625821 | -9.71E-02 | 50925232  | 50925355  | NC_000022.10 |
| cg24691453 | 2.68E-06 | 4.08E-07 | -5.24 | 5.3625069 | -1.13E-01 | 153518384 | 153518507 | NC_000001.10 |
| cg06852243 | 2.68E-06 | 4.08E-07 | -5.24 | 5.3624165 | -9.19E-02 | 11505169  | 11505292  | NC_000017.10 |
| cg08477768 | 2.68E-06 | 4.08E-07 | -5.24 | 5.3623264 | -5.20E-02 | 57925482  | 57925605  | NC_000005.9  |
| cg22006208 | 2.68E-06 | 4.09E-07 | -5.24 | 5.3620746 | -9.65E-02 | 27309169  | 27309292  | NC_000017.10 |
| cg18052222 | 2.68E-06 | 4.09E-07 | -5.24 | 5.3620328 | -9.12E-02 | 72923878  | 72924001  | NC_000017.10 |
| cg27579711 | 2.68E-06 | 4.09E-07 | -5.24 | 5.3619369 | -1.43E-01 | 26172931  | 26173054  | NC_000006.11 |
| cg21168902 | 2.68E-06 | 4.09E-07 | -5.24 | 5.3612352 | -1.55E-01 | 198626733 | 198626856 | NC_000001.10 |
| cg00993205 | 2.68E-06 | 4.09E-07 | -5.24 | 5.3609354 | -7.18E-02 | 73413390  | 73413513  | NC_000014.8  |
| cg19658487 | 2.68E-06 | 4.09E-07 | -5.24 | 5.3607941 | -6.77E-02 | 68154400  | 68154523  | NC_000011.9  |
| cg19737972 | 2.68E-06 | 4.09E-07 | -5.24 | 5.3604587 | -1.28E-02 | 13044162  | 13044285  | NC_000012.11 |
| cg03059073 | 2.69E-06 | 4.10E-07 | -5.24 | 5.3596592 | -1.04E-01 | 150130708 | 150130831 | NC_000007.13 |
| cg02509985 | 2.69E-06 | 4.10E-07 | -5.24 | 5.3595069 | -2.72E-02 | 9483081   | 9483204   | NC_000011.9  |
| cg01259702 | 2.69E-06 | 4.10E-07 | -5.24 | 5.3594799 | -3.23E-02 | 662807    | 662930    | NC_000019.9  |

|               |          |          |       |           |           |           |           |              |
|---------------|----------|----------|-------|-----------|-----------|-----------|-----------|--------------|
| cg14170358    | 2.69E-06 | 4.10E-07 | -5.24 | 5.3587898 | -8.49E-02 | 88527345  | 88527468  | NC_000002.11 |
| cg24934011    | 2.69E-06 | 4.10E-07 | -5.24 | 5.3586507 | -1.04E-01 | 72382835  | 72382958  | NC_000001.10 |
| cg06366189    | 2.69E-06 | 4.10E-07 | -5.24 | 5.3579023 | -1.04E-02 | 167684427 | 167684550 | NC_000001.10 |
| cg07633317    | 2.69E-06 | 4.10E-07 | -5.24 | 5.3577098 | -1.22E-01 | 49732623  | 49732746  | NC_000016.9  |
| cg08918797    | 2.69E-06 | 4.10E-07 | -5.24 | 5.3576819 | -4.02E-02 | 141566221 | 141566344 | NC_000008.10 |
| cg26072173    | 2.69E-06 | 4.11E-07 | -5.24 | 5.3565743 | -6.95E-02 | 1860224   | 1860347   | NC_000011.9  |
| cg14913946    | 2.69E-06 | 4.11E-07 | -5.24 | 5.3565472 | -1.83E-02 | 27107025  | 27107148  | NC_000021.8  |
| cg13475484    | 2.70E-06 | 4.12E-07 | -5.24 | 5.3541125 | -8.16E-02 | 6399562   | 6399685   | NC_000017.10 |
| cg23032229    | 2.70E-06 | 4.12E-07 | -5.24 | 5.3534018 | -1.51E-02 | 42720167  | 42720290  | NC_000012.11 |
| ch.2.2578847R | 2.70E-06 | 4.13E-07 | -5.24 | 5.3524105 | -2.52E-02 | 123587590 | 123587713 | NC_000002.11 |
| cg00558813    | 2.71E-06 | 4.13E-07 | -5.24 | 5.3520357 | -3.02E-02 | 14063372  | 14063495  | NC_000019.9  |
| cg09553448    | 2.71E-06 | 4.13E-07 | -5.24 | 5.35133   | -5.91E-02 | 134000424 | 134000547 | NC_000009.11 |
| cg01283300    | 2.71E-06 | 4.13E-07 | -5.24 | 5.3510289 | -1.04E-01 | 31644282  | 31644405  | NC_000022.10 |
| cg02824523    | 2.71E-06 | 4.13E-07 | -5.24 | 5.351012  | -4.24E-02 | 187608279 | 187608402 | NC_000003.11 |
| cg26371512    | 2.71E-06 | 4.13E-07 | -5.24 | 5.3509451 | -1.45E-01 | 112430779 | 112430902 | NC_000007.13 |
| cg23323891    | 2.71E-06 | 4.13E-07 | -5.24 | 5.3508945 | -1.22E-01 | 57200519  | 57200642  | NC_000014.8  |
| cg08374890    | 2.71E-06 | 4.13E-07 | -5.24 | 5.3505127 | -2.26E-02 | 31117067  | 31117190  | NC_000016.9  |
| cg09002769    | 2.71E-06 | 4.14E-07 | -5.24 | 5.3503523 | -5.59E-02 | 8022155   | 8022278   | NC_000017.10 |
| cg06664433    | 2.71E-06 | 4.14E-07 | -5.24 | 5.3497348 | -3.13E-02 | 139077178 | 139077301 | NC_000005.9  |
| cg21610999    | 2.71E-06 | 4.14E-07 | -5.24 | 5.3489662 | -5.89E-02 | 8661909   | 8662032   | NC_000017.10 |
| cg19582256    | 2.72E-06 | 4.14E-07 | -5.24 | 5.3481196 | -2.40E-02 | 37137824  | 37137947  | NC_000006.11 |
| cg06699848    | 2.72E-06 | 4.15E-07 | -5.24 | 5.3476269 | -1.06E-01 | 8847662   | 8847785   | NC_000011.9  |
| cg15980656    | 2.72E-06 | 4.15E-07 | -5.24 | 5.3469569 | -1.20E-01 | 97583236  | 97583359  | NC_000008.10 |
| cg12720191    | 2.72E-06 | 4.15E-07 | -5.24 | 5.3468768 | -1.78E-02 | 154387984 | 154388107 | NC_000004.11 |
| cg02806675    | 2.72E-06 | 4.15E-07 | -5.24 | 5.3460488 | -9.92E-02 | 59627287  | 59627410  | NC_000003.11 |



|               |          |          |       |           |           |           |           |              |
|---------------|----------|----------|-------|-----------|-----------|-----------|-----------|--------------|
| cg11143796    | 2.72E-06 | 4.15E-07 | -5.24 | 5.3460319 | -3.68E-02 | 178363279 | 178363402 | NC_000004.11 |
| cg06247172    | 2.72E-06 | 4.15E-07 | -5.24 | 5.3459408 | -1.57E-02 | 34216481  | 34216604  | NC_000006.11 |
| cg06297642    | 2.72E-06 | 4.16E-07 | -5.24 | 5.3452209 | -5.66E-02 | 6311412   | 6311535   | NC_000007.13 |
| cg16671160    | 2.72E-06 | 4.16E-07 | -5.24 | 5.3448335 | -5.96E-02 | 21386922  | 21387045  | NC_000016.9  |
| cg15993048    | 2.72E-06 | 4.16E-07 | -5.24 | 5.3446328 | -4.82E-02 | 66753089  | 66753212  | NC_000008.10 |
| cg22109787    | 2.73E-06 | 4.16E-07 | -5.24 | 5.3441307 | -4.87E-02 | 152108040 | 152108163 | NC_000002.11 |
| cg24686322    | 2.73E-06 | 4.16E-07 | -5.24 | 5.3440825 | -6.74E-02 | 47633560  | 47633683  | NC_000017.10 |
| cg07192961    | 2.73E-06 | 4.16E-07 | -5.24 | 5.3439345 | -1.38E-01 | 672468    | 672591    | NC_000016.9  |
| cg23491391    | 2.73E-06 | 4.16E-07 | -5.24 | 5.3437064 | -4.11E-02 | 179121385 | 179121508 | NC_000005.9  |
| cg24757926    | 2.73E-06 | 4.17E-07 | -5.24 | 5.3428945 | -9.33E-02 | 66643528  | 66643651  | NC_000003.11 |
| cg02632314    | 2.73E-06 | 4.17E-07 | -5.24 | 5.3426866 | -7.19E-02 | 41593416  | 41593539  | NC_000013.10 |
| cg06094707    | 2.73E-06 | 4.17E-07 | -5.24 | 5.3421473 | -7.80E-02 | 78445867  | 78445990  | NC_000017.10 |
| cg06266097    | 2.73E-06 | 4.17E-07 | -5.24 | 5.3418693 | -5.75E-02 | 46401702  | 46401825  | NC_000011.9  |
| cg03474219    | 2.73E-06 | 4.17E-07 | -5.24 | 5.3418212 | -3.09E-02 | 64072691  | 64072814  | NC_000011.9  |
| cg06405792    | 2.73E-06 | 4.17E-07 | -5.24 | 5.3415229 | -2.08E-02 | 36483062  | 36483185  | NC_000019.9  |
| cg07233933    | 2.73E-06 | 4.17E-07 | -5.24 | 5.3414466 | -1.06E-01 | 173352671 | 173352794 | NC_000005.9  |
| cg13477780    | 2.74E-06 | 4.18E-07 | -5.24 | 5.3401204 | -8.99E-02 | 75897549  | 75897672  | NC_000007.13 |
| cg26541027    | 2.74E-06 | 4.18E-07 | -5.24 | 5.339478  | -1.89E-02 | 110163313 | 110163436 | NC_000001.10 |
| cg11841450    | 2.74E-06 | 4.18E-07 | -5.24 | 5.3392817 | -2.86E-02 | 133406986 | 133407109 | NC_000005.9  |
| cg10084513    | 2.74E-06 | 4.18E-07 | -5.24 | 5.3390954 | -3.99E-02 | 122745685 | 122745808 | NC_000003.11 |
| cg11693364    | 2.74E-06 | 4.18E-07 | -5.24 | 5.3389765 | -4.93E-02 | 11998457  | 11998580  | NC_000019.9  |
| cg15487600    | 2.74E-06 | 4.19E-07 | -5.24 | 5.3386621 | -1.36E-02 | 155113158 | 155113281 | NC_000001.10 |
| cg23024102    | 2.74E-06 | 4.19E-07 | -5.24 | 5.3383145 | -9.95E-02 | 45149706  | 45149829  | NC_000013.10 |
| cg24632480    | 2.74E-06 | 4.19E-07 | -5.24 | 5.3381433 | -8.44E-02 | 81864082  | 81864205  | NC_000010.10 |
| ch.2.4251330R | 2.74E-06 | 4.19E-07 | -5.24 | 5.3380346 | -2.23E-02 | 213799789 | 213799912 | NC_000002.11 |

|              |          |          |       |           |           |           |           |              |
|--------------|----------|----------|-------|-----------|-----------|-----------|-----------|--------------|
| cg18220816   | 2.74E-06 | 4.19E-07 | -5.24 | 5.3369275 | -1.14E-01 | 102411665 | 102411788 | NC_000014.8  |
| cg20669641   | 2.74E-06 | 4.19E-07 | -5.24 | 5.3367089 | -1.01E-01 | 105428818 | 105428941 | NC_000010.10 |
| cg06390363   | 2.74E-06 | 4.19E-07 | -5.24 | 5.3366    | -1.14E-01 | 150360829 | 150360952 | NC_000006.11 |
| cg02470871   | 2.75E-06 | 4.19E-07 | -5.24 | 5.3364386 | -5.26E-02 | 119278637 | 119278760 | NC_000003.11 |
| cg07964539   | 2.75E-06 | 4.20E-07 | -5.24 | 5.3355051 | -2.75E-02 | 41890080  | 41890203  | NC_000006.11 |
| cg03512414   | 2.75E-06 | 4.20E-07 | -5.24 | 5.3353232 | -1.14E-01 | 19915874  | 19915997  | NC_000020.10 |
| cg04998634   | 2.75E-06 | 4.20E-07 | -5.24 | 5.3351614 | -1.58E-01 | 1857004   | 1857127   | NC_000019.9  |
| cg03856470   | 2.75E-06 | 4.20E-07 | -5.24 | 5.3351569 | -5.91E-02 | 1309414   | 1309537   | NC_000016.9  |
| cg07601148   | 2.75E-06 | 4.20E-07 | -5.24 | 5.3351569 | -8.03E-02 | 20975917  | 20976040  | NC_000013.10 |
| cg07196571   | 2.75E-06 | 4.20E-07 | -5.24 | 5.3345332 | -8.11E-02 | 64442578  | 64442701  | NC_000015.9  |
| cg07841477   | 2.75E-06 | 4.20E-07 | -5.24 | 5.3344212 | -7.99E-02 | 23724901  | 23725024  | NC_000016.9  |
| cg00777121   | 2.75E-06 | 4.20E-07 | -5.24 | 5.3343923 | -1.51E-01 | 50378191  | 50378314  | NC_000003.11 |
| cg04304216   | 2.75E-06 | 4.20E-07 | -5.24 | 5.3342604 | -3.41E-02 | 191769833 | 191769956 | NC_000002.11 |
| cg25506386   | 2.75E-06 | 4.20E-07 | -5.24 | 5.3341703 | -4.75E-02 | 63849756  | 63849879  | NC_000003.11 |
| cg20668952   | 2.75E-06 | 4.21E-07 | -5.24 | 5.3333581 | -1.11E-01 | 75082885  | 75083008  | NC_000015.9  |
| cg06101789   | 2.75E-06 | 4.21E-07 | -5.24 | 5.3330473 | -6.69E-02 | 949483    | 949606    | NC_000004.11 |
| cg07466433   | 2.76E-06 | 4.21E-07 | -5.24 | 5.331913  | -2.55E-02 | 7005728   | 7005851   | NC_000002.11 |
| cg20784591   | 2.76E-06 | 4.22E-07 | -5.24 | 5.3316685 | -7.43E-02 | 99972461  | 99972584  | NC_000007.13 |
| cg26190363   | 2.76E-06 | 4.22E-07 | -5.24 | 5.3316402 | -7.25E-02 | 195390    | 195513    | NC_000011.9  |
| cg10156714   | 2.76E-06 | 4.22E-07 | -5.24 | 5.3316268 | -6.55E-02 | 45342466  | 45342589  | NC_000020.10 |
| cg04328562   | 2.76E-06 | 4.22E-07 | -5.24 | 5.3313801 | -9.34E-02 | 11649701  | 11649824  | NC_000019.9  |
| ch.2.729349R | 2.76E-06 | 4.22E-07 | -5.24 | 5.3305455 | -1.49E-02 | 29496277  | 29496400  | NC_000002.11 |
| cg00236576   | 2.76E-06 | 4.22E-07 | -5.24 | 5.3304294 | -6.38E-02 | 81039406  | 81039529  | NC_000017.10 |
| cg17264609   | 2.76E-06 | 4.22E-07 | -5.24 | 5.330411  | -6.53E-02 | 105051018 | 105051141 | NC_000002.11 |
| cg22197830   | 2.76E-06 | 4.22E-07 | -5.24 | 5.3300295 | -8.86E-02 | 134209784 | 134209907 | NC_000005.9  |

|            |          |          |       |           |           |           |           |              |
|------------|----------|----------|-------|-----------|-----------|-----------|-----------|--------------|
| cg21617357 | 2.76E-06 | 4.23E-07 | -5.24 | 5.3293282 | -1.20E-01 | 20389052  | 20389175  | NC_000011.9  |
| cg05367967 | 2.76E-06 | 4.23E-07 | -5.24 | 5.3289977 | -1.10E-01 | 106035490 | 106035613 | NC_000006.11 |
| cg04633676 | 2.76E-06 | 4.23E-07 | -5.24 | 5.3289836 | -1.26E-01 | 32581220  | 32581343  | NC_000017.10 |
| cg04804543 | 2.77E-06 | 4.23E-07 | -5.24 | 5.3288134 | -9.34E-02 | 142233427 | 142233550 | NC_000008.10 |
| cg27293107 | 2.77E-06 | 4.23E-07 | -5.24 | 5.3284461 | -3.63E-02 | 30844060  | 30844183  | NC_000015.9  |
| cg07622001 | 2.77E-06 | 4.23E-07 | -5.24 | 5.3278786 | -6.02E-02 | 158758903 | 158759026 | NC_000005.9  |
| cg17184165 | 2.77E-06 | 4.23E-07 | -5.24 | 5.3276903 | -1.07E-01 | 53855929  | 53856052  | NC_000003.11 |
| cg27299588 | 2.77E-06 | 4.24E-07 | -5.24 | 5.3269972 | -1.02E-01 | 5286082   | 5286205   | NC_000019.9  |
| cg05839636 | 2.77E-06 | 4.24E-07 | -5.24 | 5.3256704 | -1.67E-02 | 137878905 | 137879028 | NC_000005.9  |
| cg19598514 | 2.78E-06 | 4.24E-07 | -5.23 | 5.3249958 | -5.13E-02 | 442149    | 442272    | NC_000011.9  |
| cg04674201 | 2.78E-06 | 4.25E-07 | -5.23 | 5.3245502 | -1.24E-01 | 96133842  | 96133965  | NC_000006.11 |
| cg23781467 | 2.78E-06 | 4.25E-07 | -5.23 | 5.3244669 | -8.19E-02 | 31760233  | 31760356  | NC_000006.11 |
| cg00234046 | 2.78E-06 | 4.25E-07 | -5.23 | 5.3241387 | -7.18E-02 | 73169245  | 73169368  | NC_000010.10 |
| cg20059377 | 2.78E-06 | 4.25E-07 | -5.23 | 5.3228092 | -8.35E-02 | 78369232  | 78369355  | NC_000015.9  |
| cg25471715 | 2.78E-06 | 4.26E-07 | -5.23 | 5.3219909 | -6.57E-02 | 144129543 | 144129666 | NC_000008.10 |
| cg08342886 | 2.78E-06 | 4.26E-07 | -5.23 | 5.3219777 | -1.73E-02 | 33240066  | 33240189  | NC_000006.11 |
| cg12916742 | 2.78E-06 | 4.26E-07 | -5.23 | 5.3219537 | -1.29E-02 | 99396000  | 99396123  | NC_000006.11 |
| cg14356330 | 2.78E-06 | 4.26E-07 | -5.23 | 5.3218441 | -1.08E-01 | 110115053 | 110115176 | NC_000006.11 |
| cg02399464 | 2.78E-06 | 4.26E-07 | -5.23 | 5.3215301 | -5.18E-02 | 50482541  | 50482664  | NC_000012.11 |
| cg20047677 | 2.78E-06 | 4.26E-07 | -5.23 | 5.3214063 | -7.20E-02 | 113865876 | 113865999 | NC_000012.11 |
| cg02787989 | 2.79E-06 | 4.26E-07 | -5.23 | 5.3204446 | -6.39E-02 | 11713968  | 11714091  | NC_000002.11 |
| cg25134134 | 2.79E-06 | 4.27E-07 | -5.23 | 5.3199887 | -3.33E-02 | 51271666  | 51271789  | NC_000014.8  |
| cg18353345 | 2.79E-06 | 4.27E-07 | -5.23 | 5.3198978 | -4.04E-02 | 46961669  | 46961792  | NC_000021.8  |
| cg06174407 | 2.79E-06 | 4.27E-07 | -5.23 | 5.3195835 | -7.86E-02 | 29470232  | 29470355  | NC_000022.10 |
| cg26431313 | 2.79E-06 | 4.27E-07 | -5.23 | 5.319583  | -1.73E-02 | 151987306 | 151987429 | NC_000003.11 |

|            |          |          |       |           |           |           |           |              |
|------------|----------|----------|-------|-----------|-----------|-----------|-----------|--------------|
| cg19502359 | 2.79E-06 | 4.27E-07 | -5.23 | 5.3195807 | -1.05E-01 | 72912441  | 72912564  | NC_000011.9  |
| cg00367463 | 2.79E-06 | 4.27E-07 | -5.23 | 5.319514  | -6.72E-02 | 45249899  | 45250022  | NC_000001.10 |
| cg09950423 | 2.79E-06 | 4.27E-07 | -5.23 | 5.3186953 | -1.11E-01 | 49856768  | 49856891  | NC_000016.9  |
| cg25515758 | 2.79E-06 | 4.27E-07 | -5.23 | 5.3184804 | -1.04E-01 | 35045565  | 35045688  | NC_000019.9  |
| cg02351425 | 2.79E-06 | 4.27E-07 | -5.23 | 5.3181412 | -8.93E-02 | 142735186 | 142735309 | NC_000003.11 |
| cg13611499 | 2.79E-06 | 4.28E-07 | -5.23 | 5.3180013 | -3.02E-02 | 19547417  | 19547540  | NC_000002.11 |
| cg03829542 | 2.80E-06 | 4.28E-07 | -5.23 | 5.3175473 | -8.59E-02 | 67029374  | 67029497  | NC_000011.9  |
| cg07175191 | 2.80E-06 | 4.28E-07 | -5.23 | 5.3174056 | -1.74E-02 | 26988607  | 26988730  | NC_000017.10 |
| cg23226631 | 2.80E-06 | 4.28E-07 | -5.23 | 5.316361  | -1.13E-01 | 135174920 | 135175043 | NC_000006.11 |
| cg02642178 | 2.80E-06 | 4.28E-07 | -5.23 | 5.3163067 | -9.00E-02 | 50899694  | 50899817  | NC_000022.10 |
| cg20678353 | 2.80E-06 | 4.29E-07 | -5.23 | 5.3156142 | -1.04E-01 | 38988560  | 38988683  | NC_000015.9  |
| cg03356689 | 2.80E-06 | 4.29E-07 | -5.23 | 5.3153349 | -1.41E-01 | 128586365 | 128586488 | NC_000011.9  |
| cg21320567 | 2.80E-06 | 4.29E-07 | -5.23 | 5.3147441 | -1.48E-01 | 67975880  | 67976003  | NC_000008.10 |
| cg22610645 | 2.80E-06 | 4.29E-07 | -5.23 | 5.3139968 | -8.83E-02 | 58003898  | 58004021  | NC_000012.11 |
| cg16726435 | 2.80E-06 | 4.29E-07 | -5.23 | 5.3139519 | -1.21E-01 | 219128715 | 219128838 | NC_000002.11 |
| cg09809474 | 2.81E-06 | 4.29E-07 | -5.23 | 5.3137118 | -1.77E-02 | 1840100   | 1840223   | NC_000001.10 |
| cg02875869 | 2.81E-06 | 4.30E-07 | -5.23 | 5.3134524 | -8.70E-02 | 89901417  | 89901540  | NC_000016.9  |
| cg21504064 | 2.81E-06 | 4.30E-07 | -5.23 | 5.3132687 | -5.50E-02 | 41363502  | 41363625  | NC_000017.10 |
| cg11199036 | 2.81E-06 | 4.30E-07 | -5.23 | 5.3131654 | -2.32E-02 | 129325693 | 129325816 | NC_000003.11 |
| cg10726660 | 2.81E-06 | 4.30E-07 | -5.23 | 5.3125973 | -9.78E-02 | 118153200 | 118153323 | NC_000010.10 |
| cg18815957 | 2.81E-06 | 4.30E-07 | -5.23 | 5.3124339 | -6.06E-02 | 85666533  | 85666656  | NC_000011.9  |
| cg21103992 | 2.81E-06 | 4.30E-07 | -5.23 | 5.3120571 | -1.40E-01 | 18325505  | 18325628  | NC_000022.10 |
| cg04303879 | 2.81E-06 | 4.30E-07 | -5.23 | 5.3116693 | -5.36E-02 | 56899081  | 56899204  | NC_000016.9  |
| cg00800436 | 2.81E-06 | 4.31E-07 | -5.23 | 5.3112879 | -1.49E-02 | 46502501  | 46502624  | NC_000018.9  |
| cg14366742 | 2.81E-06 | 4.31E-07 | -5.23 | 5.311269  | -7.81E-02 | 8546989   | 8547112   | NC_000004.11 |

|            |          |          |       |           |           |           |           |              |
|------------|----------|----------|-------|-----------|-----------|-----------|-----------|--------------|
| cg04601510 | 2.81E-06 | 4.31E-07 | -5.23 | 5.3111151 | -7.52E-02 | 79307043  | 79307166  | NC_000001.10 |
| cg26899591 | 2.81E-06 | 4.31E-07 | -5.23 | 5.3107583 | -3.33E-02 | 10194996  | 10195119  | NC_000011.9  |
| cg22730967 | 2.81E-06 | 4.31E-07 | -5.23 | 5.3104512 | -2.29E-02 | 203097454 | 203097577 | NC_000001.10 |
| cg26550214 | 2.81E-06 | 4.31E-07 | -5.23 | 5.3104126 | -9.30E-02 | 34609493  | 34609616  | NC_000005.9  |
| cg13067350 | 2.81E-06 | 4.31E-07 | -5.23 | 5.3103835 | -5.63E-02 | 221274025 | 221274148 | NC_000001.10 |
| cg13452386 | 2.81E-06 | 4.31E-07 | -5.23 | 5.310203  | -8.38E-02 | 67398435  | 67398558  | NC_000011.9  |
| cg02370551 | 2.82E-06 | 4.31E-07 | -5.23 | 5.309775  | -4.05E-02 | 893230    | 893353    | NC_000019.9  |
| cg17480669 | 2.82E-06 | 4.31E-07 | -5.23 | 5.3096035 | -6.54E-02 | 40835317  | 40835440  | NC_000005.9  |
| cg16374656 | 2.82E-06 | 4.31E-07 | -5.23 | 5.3093086 | -1.06E-01 | 119124790 | 119124913 | NC_000008.10 |
| cg18371976 | 2.82E-06 | 4.31E-07 | -5.23 | 5.3092452 | -4.76E-02 | 42227082  | 42227205  | NC_000006.11 |
| cg05435390 | 2.82E-06 | 4.31E-07 | -5.23 | 5.3091769 | -7.27E-02 | 77863526  | 77863649  | NC_000010.10 |
| cg12501818 | 2.82E-06 | 4.32E-07 | -5.23 | 5.3083419 | -9.00E-02 | 45224505  | 45224628  | NC_000002.11 |
| cg06935184 | 2.82E-06 | 4.32E-07 | -5.23 | 5.3079941 | -2.40E-02 | 113775436 | 113775559 | NC_000003.11 |
| cg15611336 | 2.82E-06 | 4.32E-07 | -5.23 | 5.3079919 | -7.75E-02 | 75248496  | 75248619  | NC_000015.9  |
| cg15078329 | 2.83E-06 | 4.33E-07 | -5.23 | 5.3060818 | -8.45E-02 | 222628324 | 222628447 | NC_000001.10 |
| cg00818693 | 2.83E-06 | 4.33E-07 | -5.23 | 5.3060332 | -1.53E-02 | 180319964 | 180320087 | NC_000003.11 |
| cg11791155 | 2.83E-06 | 4.33E-07 | -5.23 | 5.3057702 | -7.75E-02 | 4247760   | 4247883   | NC_000007.13 |
| cg01959123 | 2.83E-06 | 4.33E-07 | -5.23 | 5.3054345 | -1.05E-01 | 65197576  | 65197699  | NC_000015.9  |
| cg00510507 | 2.83E-06 | 4.33E-07 | -5.23 | 5.3052584 | -1.32E-01 | 61900413  | 61900536  | NC_000010.10 |
| cg22381955 | 2.83E-06 | 4.34E-07 | -5.23 | 5.3039161 | -4.80E-02 | 133429949 | 133430072 | NC_000012.11 |
| cg01826025 | 2.83E-06 | 4.34E-07 | -5.23 | 5.3038241 | -6.11E-02 | 115656186 | 115656309 | NC_000001.10 |
| cg00080081 | 2.83E-06 | 4.34E-07 | -5.23 | 5.3037436 | -1.70E-01 | 33701776  | 33701899  | NC_000017.10 |
| cg00781875 | 2.83E-06 | 4.34E-07 | -5.23 | 5.3031042 | -1.95E-02 | 156252398 | 156252521 | NC_000001.10 |
| cg19035457 | 2.83E-06 | 4.34E-07 | -5.23 | 5.3025546 | -3.92E-02 | 56262833  | 56262956  | NC_000004.11 |
| cg11201751 | 2.84E-06 | 4.34E-07 | -5.23 | 5.3024356 | -7.89E-02 | 85158047  | 85158170  | NC_000016.9  |

|            |          |          |       |           |           |           |           |              |
|------------|----------|----------|-------|-----------|-----------|-----------|-----------|--------------|
| cg16098955 | 2.84E-06 | 4.34E-07 | -5.23 | 5.3023669 | -8.28E-02 | 55172992  | 55173115  | NC_000002.11 |
| cg14826417 | 2.84E-06 | 4.35E-07 | -5.23 | 5.302161  | -6.78E-02 | 73244073  | 73244196  | NC_000007.13 |
| cg23125898 | 2.84E-06 | 4.35E-07 | -5.23 | 5.3021444 | -3.84E-02 | 42539633  | 42539756  | NC_000021.8  |
| cg11540055 | 2.84E-06 | 4.35E-07 | -5.23 | 5.3015319 | -2.79E-02 | 64684823  | 64684946  | NC_000011.9  |
| cg01846824 | 2.84E-06 | 4.35E-07 | -5.23 | 5.3014136 | -2.52E-02 | 12939416  | 12939539  | NC_000019.9  |
| cg13944111 | 2.84E-06 | 4.35E-07 | -5.23 | 5.3012289 | -1.18E-01 | 107296891 | 107297014 | NC_000012.11 |
| cg23903470 | 2.84E-06 | 4.35E-07 | -5.23 | 5.3011266 | -2.04E-02 | 30876145  | 30876268  | NC_000006.11 |
| cg01916400 | 2.84E-06 | 4.35E-07 | -5.23 | 5.300956  | -1.11E-01 | 155548458 | 155548581 | NC_000005.9  |
| cg16656979 | 2.84E-06 | 4.35E-07 | -5.23 | 5.300781  | -3.17E-02 | 37403242  | 37403365  | NC_000015.9  |
| cg20372666 | 2.84E-06 | 4.35E-07 | -5.23 | 5.3003498 | -8.85E-02 | 71149910  | 71150033  | NC_000010.10 |
| cg27654611 | 2.84E-06 | 4.35E-07 | -5.23 | 5.3002889 | -2.08E-02 | 6255984   | 6256107   | NC_000011.9  |
| cg04004437 | 2.84E-06 | 4.35E-07 | -5.23 | 5.3001718 | -3.35E-02 | 21242479  | 21242602  | NC_000018.9  |
| cg14614917 | 2.84E-06 | 4.36E-07 | -5.23 | 5.2999095 | -1.23E-01 | 55984778  | 55984901  | NC_000003.11 |
| cg21833776 | 2.84E-06 | 4.36E-07 | -5.23 | 5.2998051 | -1.10E-01 | 114466093 | 114466216 | NC_000011.9  |
| cg04806421 | 2.84E-06 | 4.36E-07 | -5.23 | 5.2995347 | -2.17E-02 | 15069894  | 15070017  | NC_000016.9  |
| cg10012595 | 2.84E-06 | 4.36E-07 | -5.23 | 5.2993587 | -5.53E-02 | 25174504  | 25174627  | NC_000001.10 |
| cg20772590 | 2.84E-06 | 4.36E-07 | -5.23 | 5.2992892 | -1.03E-01 | 75446431  | 75446554  | NC_000017.10 |
| cg10234506 | 2.84E-06 | 4.36E-07 | -5.23 | 5.298854  | -4.56E-02 | 235291124 | 235291247 | NC_000001.10 |
| cg17224401 | 2.84E-06 | 4.36E-07 | -5.23 | 5.2987968 | -1.14E-01 | 46149996  | 46150119  | NC_000003.11 |
| cg02100410 | 2.85E-06 | 4.36E-07 | -5.23 | 5.2985119 | -1.09E-01 | 74731354  | 74731477  | NC_000002.11 |
| cg22973319 | 2.85E-06 | 4.36E-07 | -5.23 | 5.2983695 | -5.55E-02 | 50310839  | 50310962  | NC_000003.11 |
| cg26955287 | 2.85E-06 | 4.36E-07 | -5.23 | 5.2981366 | -8.17E-02 | 79958912  | 79959035  | NC_000017.10 |
| cg10603800 | 2.85E-06 | 4.36E-07 | -5.23 | 5.2980343 | -3.44E-02 | 80408909  | 80409032  | NC_000017.10 |
| cg04981737 | 2.85E-06 | 4.36E-07 | -5.23 | 5.2980004 | -7.79E-02 | 54383434  | 54383557  | NC_000012.11 |
| cg18098089 | 2.85E-06 | 4.37E-07 | -5.23 | 5.2971407 | -4.25E-02 | 146487    | 146610    | NC_000017.10 |

|            |          |          |       |           |           |           |           |              |
|------------|----------|----------|-------|-----------|-----------|-----------|-----------|--------------|
| cg22610194 | 2.85E-06 | 4.37E-07 | -5.23 | 5.2968488 | -1.49E-02 | 77045539  | 77045662  | NC_000007.13 |
| cg14814195 | 2.85E-06 | 4.37E-07 | -5.23 | 5.296104  | -2.11E-02 | 1313485   | 1313608   | NC_000006.11 |
| cg26647771 | 2.85E-06 | 4.37E-07 | -5.23 | 5.2958958 | -9.55E-02 | 32768395  | 32768518  | NC_000005.9  |
| cg23810463 | 2.85E-06 | 4.37E-07 | -5.23 | 5.2958492 | -9.43E-02 | 127208447 | 127208570 | NC_000011.9  |
| cg04951822 | 2.85E-06 | 4.37E-07 | -5.23 | 5.295785  | -1.02E-01 | 113345598 | 113345721 | NC_000012.11 |
| cg05556717 | 2.85E-06 | 4.38E-07 | -5.23 | 5.2956928 | -8.78E-02 | 75419304  | 75419427  | NC_000007.13 |
| cg13026072 | 2.85E-06 | 4.38E-07 | -5.23 | 5.2956027 | -8.74E-02 | 65380126  | 65380249  | NC_000011.9  |
| cg23064060 | 2.85E-06 | 4.38E-07 | -5.23 | 5.2950329 | -1.01E-02 | 129159190 | 129159313 | NC_000003.11 |
| cg27091422 | 2.86E-06 | 4.38E-07 | -5.23 | 5.294704  | -6.51E-02 | 30716343  | 30716466  | NC_000004.11 |
| cg07703130 | 2.86E-06 | 4.38E-07 | -5.23 | 5.2946804 | -2.14E-02 | 33342929  | 33343052  | NC_000008.10 |
| cg03046424 | 2.86E-06 | 4.38E-07 | -5.23 | 5.2944813 | -1.20E-01 | 220420867 | 220420990 | NC_000002.11 |
| cg08711064 | 2.86E-06 | 4.38E-07 | -5.23 | 5.2944433 | -2.89E-02 | 86564577  | 86564700  | NC_000005.9  |
| cg09534872 | 2.86E-06 | 4.39E-07 | -5.23 | 5.2928054 | -5.06E-02 | 33156837  | 33156960  | NC_000011.9  |
| cg14339466 | 2.86E-06 | 4.39E-07 | -5.23 | 5.2922622 | -1.37E-01 | 27927490  | 27927613  | NC_000013.10 |
| cg20126106 | 2.86E-06 | 4.39E-07 | -5.23 | 5.2917439 | -4.68E-02 | 111718135 | 111718258 | NC_000003.11 |
| cg11099375 | 2.86E-06 | 4.39E-07 | -5.23 | 5.2915471 | -1.22E-01 | 62141556  | 62141679  | NC_000017.10 |
| cg27121529 | 2.87E-06 | 4.40E-07 | -5.23 | 5.29106   | -7.32E-03 | 99102251  | 99102374  | NC_000007.13 |
| cg07801569 | 2.87E-06 | 4.40E-07 | -5.23 | 5.2909844 | -5.20E-02 | 31707151  | 31707274  | NC_000006.11 |
| cg00356916 | 2.87E-06 | 4.40E-07 | -5.23 | 5.2908586 | -8.14E-02 | 116256618 | 116256741 | NC_000001.10 |
| cg22706629 | 2.87E-06 | 4.40E-07 | -5.23 | 5.2906671 | -1.54E-02 | 65823539  | 65823662  | NC_000015.9  |
| cg01594514 | 2.87E-06 | 4.40E-07 | -5.23 | 5.2905238 | -1.74E-02 | 67374213  | 67374336  | NC_000011.9  |
| cg15518400 | 2.87E-06 | 4.40E-07 | -5.23 | 5.2904556 | -4.16E-02 | 47401883  | 47402006  | NC_000002.11 |
| cg20806175 | 2.87E-06 | 4.40E-07 | -5.23 | 5.2901822 | -1.04E-01 | 161186839 | 161186962 | NC_000001.10 |
| cg22850304 | 2.87E-06 | 4.41E-07 | -5.23 | 5.288878  | -1.79E-02 | 39325639  | 39325762  | NC_000001.10 |
| cg04788390 | 2.87E-06 | 4.41E-07 | -5.23 | 5.2882459 | -9.67E-02 | 17933642  | 17933765  | NC_000001.10 |

|            |          |          |       |           |           |           |           |              |
|------------|----------|----------|-------|-----------|-----------|-----------|-----------|--------------|
| cg17890940 | 2.87E-06 | 4.41E-07 | -5.23 | 5.2880939 | -1.60E-01 | 1782346   | 1782469   | NC_000007.13 |
| cg02647929 | 2.87E-06 | 4.41E-07 | -5.23 | 5.2879935 | -9.07E-02 | 4714080   | 4714203   | NC_000016.9  |
| cg09146872 | 2.87E-06 | 4.41E-07 | -5.23 | 5.2878569 | -5.44E-02 | 820881    | 821004    | NC_000017.10 |
| cg15989926 | 2.87E-06 | 4.41E-07 | -5.23 | 5.2875564 | -6.43E-02 | 124607875 | 124607998 | NC_000012.11 |
| cg17780207 | 2.88E-06 | 4.41E-07 | -5.23 | 5.2873258 | -7.88E-02 | 171565123 | 171565246 | NC_000002.11 |
| cg01729403 | 2.88E-06 | 4.41E-07 | -5.23 | 5.2871423 | -2.35E-02 | 124084822 | 124084945 | NC_000008.10 |
| cg13439596 | 2.88E-06 | 4.41E-07 | -5.23 | 5.2869695 | -9.42E-02 | 17746491  | 17746614  | NC_000001.10 |
| cg19360562 | 2.88E-06 | 4.41E-07 | -5.23 | 5.2869299 | -5.04E-02 | 116706626 | 116706749 | NC_000011.9  |
| cg15503098 | 2.88E-06 | 4.42E-07 | -5.23 | 5.2867447 | -1.50E-02 | 184723524 | 184723647 | NC_000001.10 |
| cg03174013 | 2.88E-06 | 4.42E-07 | -5.23 | 5.2864441 | -1.88E-02 | 176882548 | 176882671 | NC_000005.9  |
| cg21680979 | 2.88E-06 | 4.43E-07 | -5.23 | 5.2843979 | -1.90E-02 | 204485559 | 204485682 | NC_000001.10 |
| cg05441039 | 2.88E-06 | 4.43E-07 | -5.23 | 5.2840163 | -6.15E-02 | 89723364  | 89723487  | NC_000016.9  |
| cg26501599 | 2.89E-06 | 4.43E-07 | -5.23 | 5.2837395 | -3.63E-02 | 127310131 | 127310254 | NC_000003.11 |
| cg14089307 | 2.89E-06 | 4.43E-07 | -5.23 | 5.2836355 | -1.45E-02 | 69446181  | 69446304  | NC_000014.8  |
| cg27397757 | 2.89E-06 | 4.43E-07 | -5.23 | 5.2833267 | -1.10E-01 | 54199825  | 54199948  | NC_000001.10 |
| cg02275622 | 2.89E-06 | 4.43E-07 | -5.23 | 5.283118  | -4.45E-02 | 207773017 | 207773140 | NC_000002.11 |
| cg16218204 | 2.89E-06 | 4.43E-07 | -5.23 | 5.2827821 | -1.61E-02 | 150755571 | 150755694 | NC_000007.13 |
| cg14918927 | 2.89E-06 | 4.44E-07 | -5.23 | 5.2818078 | -8.11E-02 | 105477694 | 105477817 | NC_000012.11 |
| cg21357247 | 2.89E-06 | 4.44E-07 | -5.23 | 5.2811267 | -5.30E-02 | 235996646 | 235996769 | NC_000002.11 |
| cg09395427 | 2.89E-06 | 4.44E-07 | -5.23 | 5.2807789 | -1.07E-01 | 97487067  | 97487190  | NC_000009.11 |
| cg24768999 | 2.89E-06 | 4.44E-07 | -5.23 | 5.2804339 | -1.18E-01 | 127394912 | 127395035 | NC_000003.11 |
| cg24428389 | 2.89E-06 | 4.44E-07 | -5.23 | 5.2803521 | -7.85E-02 | 22438310  | 22438433  | NC_000001.10 |
| cg12624721 | 2.90E-06 | 4.45E-07 | -5.23 | 5.2799786 | -8.51E-02 | 143511575 | 143511698 | NC_000008.10 |
| cg18762104 | 2.90E-06 | 4.45E-07 | -5.22 | 5.2793566 | -5.02E-02 | 97535692  | 97535815  | NC_000002.11 |
| cg08885306 | 2.90E-06 | 4.45E-07 | -5.22 | 5.278751  | -5.05E-02 | 37216789  | 37216912  | NC_000017.10 |



|            |          |          |       |           |           |           |           |              |
|------------|----------|----------|-------|-----------|-----------|-----------|-----------|--------------|
| cg25554036 | 2.90E-06 | 4.45E-07 | -5.22 | 5.2786262 | -5.23E-02 | 6271136   | 6271259   | NC_000004.11 |
| cg14601357 | 2.90E-06 | 4.45E-07 | -5.22 | 5.2783991 | -5.72E-02 | 62168764  | 62168887  | NC_000020.10 |
| cg20533957 | 2.90E-06 | 4.45E-07 | -5.22 | 5.2782865 | -7.06E-02 | 94278538  | 94278661  | NC_000011.9  |
| cg07133445 | 2.90E-06 | 4.45E-07 | -5.22 | 5.2782141 | -1.54E-02 | 578352    | 578475    | NC_000016.9  |
| cg20769356 | 2.90E-06 | 4.46E-07 | -5.22 | 5.2778686 | -4.62E-02 | 93633172  | 93633295  | NC_000007.13 |
| cg02727674 | 2.90E-06 | 4.46E-07 | -5.22 | 5.2772303 | -1.65E-02 | 95611371  | 95611494  | NC_000012.11 |
| cg19980593 | 2.90E-06 | 4.46E-07 | -5.22 | 5.2769506 | -3.60E-02 | 128760909 | 128761032 | NC_000011.9  |
| cg10556036 | 2.91E-06 | 4.46E-07 | -5.22 | 5.2761876 | -8.19E-02 | 248856577 | 248856700 | NC_000001.10 |
| cg08065565 | 2.91E-06 | 4.47E-07 | -5.22 | 5.2753611 | -2.26E-02 | 8008274   | 8008397   | NC_000019.9  |
| cg14497203 | 2.91E-06 | 4.47E-07 | -5.22 | 5.2750966 | -1.05E-01 | 23487048  | 23487171  | NC_000022.10 |
| cg21858320 | 2.91E-06 | 4.47E-07 | -5.22 | 5.2749557 | -5.55E-02 | 3483007   | 3483130   | NC_000002.11 |
| cg26750789 | 2.91E-06 | 4.47E-07 | -5.22 | 5.2738337 | -4.88E-02 | 61987386  | 61987509  | NC_000017.10 |
| cg26632776 | 2.91E-06 | 4.48E-07 | -5.22 | 5.2736468 | -3.11E-02 | 45875534  | 45875657  | NC_000021.8  |
| cg04008056 | 2.91E-06 | 4.48E-07 | -5.22 | 5.273272  | -6.98E-02 | 52254842  | 52254965  | NC_000003.11 |
| cg24956866 | 2.91E-06 | 4.48E-07 | -5.22 | 5.2731834 | -6.40E-02 | 134464129 | 134464252 | NC_000007.13 |
| cg21411008 | 2.91E-06 | 4.48E-07 | -5.22 | 5.2730906 | -4.66E-02 | 25216506  | 25216629  | NC_000007.13 |
| cg06871344 | 2.92E-06 | 4.48E-07 | -5.22 | 5.2718558 | -7.28E-02 | 452707    | 452830    | NC_000017.10 |
| cg03868770 | 2.92E-06 | 4.49E-07 | -5.22 | 5.2715478 | -9.37E-02 | 30783737  | 30783860  | NC_000022.10 |
| cg06193004 | 2.92E-06 | 4.49E-07 | -5.22 | 5.271461  | -5.40E-02 | 43729874  | 43729997  | NC_000020.10 |
| cg03449125 | 2.92E-06 | 4.49E-07 | -5.22 | 5.2713017 | -1.12E-01 | 76779064  | 76779187  | NC_000011.9  |
| cg09998451 | 2.92E-06 | 4.49E-07 | -5.22 | 5.2712385 | -2.27E-02 | 18313429  | 18313552  | NC_000019.9  |
| cg00776405 | 2.92E-06 | 4.49E-07 | -5.22 | 5.2712057 | -1.21E-01 | 133967862 | 133967985 | NC_000008.10 |
| cg18293437 | 2.92E-06 | 4.49E-07 | -5.22 | 5.2700961 | -9.74E-02 | 3055544   | 3055667   | NC_000020.10 |
| cg05025427 | 2.92E-06 | 4.49E-07 | -5.22 | 5.2698134 | -1.12E-01 | 3804092   | 3804215   | NC_000010.10 |
| cg12227411 | 2.92E-06 | 4.49E-07 | -5.22 | 5.2695979 | -8.97E-02 | 25469014  | 25469137  | NC_000015.9  |

|               |          |          |       |           |           |           |           |              |
|---------------|----------|----------|-------|-----------|-----------|-----------|-----------|--------------|
| cg22947965    | 2.93E-06 | 4.50E-07 | -5.22 | 5.2689629 | -1.07E-01 | 123775188 | 123775311 | NC_000011.9  |
| cg22652782    | 2.93E-06 | 4.50E-07 | -5.22 | 5.2684091 | -2.36E-02 | 50934765  | 50934888  | NC_000019.9  |
| cg05304729    | 2.93E-06 | 4.50E-07 | -5.22 | 5.2682784 | -9.00E-02 | 158800024 | 158800147 | NC_000001.10 |
| cg12183875    | 2.93E-06 | 4.50E-07 | -5.22 | 5.2681401 | -1.16E-01 | 169587454 | 169587577 | NC_000003.11 |
| cg07385257    | 2.93E-06 | 4.50E-07 | -5.22 | 5.2676927 | -9.48E-02 | 35803167  | 35803290  | NC_000008.10 |
| cg05752118    | 2.94E-06 | 4.51E-07 | -5.22 | 5.2658255 | -9.99E-02 | 2920564   | 2920687   | NC_000011.9  |
| cg19529675    | 2.94E-06 | 4.51E-07 | -5.22 | 5.2654769 | -1.93E-02 | 36429805  | 36429928  | NC_000007.13 |
| cg14186944    | 2.94E-06 | 4.51E-07 | -5.22 | 5.2654494 | -7.10E-02 | 98335074  | 98335197  | NC_000009.11 |
| cg05038881    | 2.94E-06 | 4.52E-07 | -5.22 | 5.2651735 | -8.38E-02 | 10490043  | 10490166  | NC_000001.10 |
| cg00371570    | 2.94E-06 | 4.52E-07 | -5.22 | 5.2649949 | -5.39E-02 | 43452360  | 43452483  | NC_000002.11 |
| cg26721803    | 2.94E-06 | 4.52E-07 | -5.22 | 5.2647415 | -6.57E-02 | 30690844  | 30690967  | NC_000006.11 |
| cg17651317    | 2.94E-06 | 4.52E-07 | -5.22 | 5.2646555 | -2.48E-02 | 68080928  | 68081051  | NC_000011.9  |
| cg00363845    | 2.94E-06 | 4.52E-07 | -5.22 | 5.2646506 | -9.21E-02 | 17446137  | 17446260  | NC_000019.9  |
| cg26642667    | 2.94E-06 | 4.52E-07 | -5.22 | 5.2641933 | -6.73E-02 | 127292389 | 127292512 | NC_000007.13 |
| cg16555537    | 2.94E-06 | 4.52E-07 | -5.22 | 5.2637097 | -3.34E-02 | 100464771 | 100464894 | NC_000007.13 |
| cg06637001    | 2.94E-06 | 4.52E-07 | -5.22 | 5.2636336 | -1.57E-01 | 228463634 | 228463757 | NC_000001.10 |
| cg04122068    | 2.94E-06 | 4.52E-07 | -5.22 | 5.2635609 | -2.86E-02 | 160068504 | 160068627 | NC_000001.10 |
| cg10967990    | 2.94E-06 | 4.52E-07 | -5.22 | 5.2634709 | -3.96E-02 | 17738370  | 17738493  | NC_000001.10 |
| cg06015997    | 2.94E-06 | 4.52E-07 | -5.22 | 5.2633925 | -6.59E-02 | 11370372  | 11370495  | NC_000016.9  |
| cg25984249    | 2.94E-06 | 4.52E-07 | -5.22 | 5.2631386 | -3.09E-02 | 31509765  | 31509888  | NC_000006.11 |
| cg00449608    | 2.94E-06 | 4.53E-07 | -5.22 | 5.2628836 | -6.12E-02 | 105856709 | 105856832 | NC_000002.11 |
| ch.13.504751F | 2.95E-06 | 4.53E-07 | -5.22 | 5.2619185 | -1.15E-02 | 41646676  | 41646799  | NC_000013.10 |
| cg26304147    | 2.95E-06 | 4.53E-07 | -5.22 | 5.2619087 | -4.76E-02 | 69924046  | 69924169  | NC_000011.9  |
| cg02468728    | 2.95E-06 | 4.53E-07 | -5.22 | 5.2617638 | -9.98E-02 | 611107    | 611230    | NC_000019.9  |
| cg12017102    | 2.95E-06 | 4.53E-07 | -5.22 | 5.2617041 | -1.98E-02 | 208416636 | 208416759 | NC_000001.10 |

|            |          |          |       |           |           |           |           |              |
|------------|----------|----------|-------|-----------|-----------|-----------|-----------|--------------|
| cg03852551 | 2.95E-06 | 4.53E-07 | -5.22 | 5.2613694 | -5.84E-02 | 167596239 | 167596362 | NC_000006.11 |
| cg03552937 | 2.95E-06 | 4.53E-07 | -5.22 | 5.2610737 | -1.03E-01 | 44795713  | 44795836  | NC_000007.13 |
| cg06529134 | 2.95E-06 | 4.54E-07 | -5.22 | 5.260784  | -2.67E-02 | 57226134  | 57226257  | NC_000020.10 |
| cg19611441 | 2.95E-06 | 4.54E-07 | -5.22 | 5.259889  | -1.29E-01 | 105126372 | 105126495 | NC_000014.8  |
| cg05433911 | 2.95E-06 | 4.54E-07 | -5.22 | 5.2594317 | -1.96E-02 | 140116869 | 140116992 | NC_000009.11 |
| cg21176137 | 2.95E-06 | 4.54E-07 | -5.22 | 5.2591956 | -4.27E-02 | 96725397  | 96725520  | NC_000009.11 |
| cg12126859 | 2.96E-06 | 4.55E-07 | -5.22 | 5.2579668 | -1.18E-01 | 335281    | 335404    | NC_000008.10 |
| cg10134156 | 2.96E-06 | 4.56E-07 | -5.22 | 5.2561358 | -7.36E-02 | 77732494  | 77732617  | NC_000014.8  |
| cg10012920 | 2.96E-06 | 4.56E-07 | -5.22 | 5.2557494 | -7.94E-02 | 123222531 | 123222654 | NC_000011.9  |
| cg19148281 | 2.96E-06 | 4.56E-07 | -5.22 | 5.2552904 | -7.74E-02 | 111577973 | 111578096 | NC_000003.11 |
| cg12851514 | 2.97E-06 | 4.57E-07 | -5.22 | 5.2544322 | -6.90E-02 | 18775065  | 18775188  | NC_000020.10 |
| cg22917286 | 2.97E-06 | 4.57E-07 | -5.22 | 5.2539996 | -3.98E-02 | 25539889  | 25540012  | NC_000012.11 |
| cg06235429 | 2.97E-06 | 4.57E-07 | -5.22 | 5.2528415 | -3.05E-02 | 67373114  | 67373237  | NC_000011.9  |
| cg27498669 | 2.97E-06 | 4.57E-07 | -5.22 | 5.2527138 | -2.11E-02 | 32262017  | 32262140  | NC_000020.10 |
| cg06231724 | 2.97E-06 | 4.57E-07 | -5.22 | 5.2524576 | -6.14E-02 | 127911923 | 127912046 | NC_000002.11 |
| cg23338408 | 2.97E-06 | 4.57E-07 | -5.22 | 5.2524217 | -7.96E-02 | 31289523  | 31289646  | NC_000014.8  |
| cg15153684 | 2.97E-06 | 4.57E-07 | -5.22 | 5.2524177 | -1.83E-01 | 10686963  | 10687086  | NC_000002.11 |
| cg26904260 | 2.98E-06 | 4.58E-07 | -5.22 | 5.2515072 | -8.70E-02 | 45714651  | 45714774  | NC_000011.9  |
| cg14939446 | 2.98E-06 | 4.58E-07 | -5.22 | 5.2509807 | -6.63E-02 | 2571015   | 2571138   | NC_000016.9  |
| cg08220084 | 2.98E-06 | 4.58E-07 | -5.22 | 5.2508633 | -3.11E-02 | 23426592  | 23426715  | NC_000014.8  |
| cg11036656 | 2.98E-06 | 4.58E-07 | -5.22 | 5.2506842 | -8.82E-02 | 81887543  | 81887666  | NC_000003.11 |
| cg01442334 | 2.98E-06 | 4.59E-07 | -5.22 | 5.249794  | -3.73E-02 | 110481823 | 110481946 | NC_000004.11 |
| cg03071876 | 2.98E-06 | 4.59E-07 | -5.22 | 5.2495658 | -1.11E-01 | 45929434  | 45929557  | NC_000017.10 |
| cg13718827 | 2.98E-06 | 4.59E-07 | -5.22 | 5.2490945 | -6.59E-02 | 131008520 | 131008643 | NC_000009.11 |
| cg03865041 | 2.98E-06 | 4.59E-07 | -5.22 | 5.248865  | -2.85E-02 | 71842666  | 71842789  | NC_000016.9  |

|               |          |          |       |           |           |           |           |              |
|---------------|----------|----------|-------|-----------|-----------|-----------|-----------|--------------|
| cg24229662    | 2.98E-06 | 4.59E-07 | -5.22 | 5.2487698 | -9.92E-02 | 121499644 | 121499767 | NC_000002.11 |
| cg15041662    | 2.98E-06 | 4.59E-07 | -5.22 | 5.2486668 | -9.46E-02 | 14115369  | 14115492  | NC_000017.10 |
| cg11117945    | 2.98E-06 | 4.59E-07 | -5.22 | 5.2484266 | -8.05E-02 | 45524714  | 45524837  | NC_000020.10 |
| cg18158438    | 2.99E-06 | 4.60E-07 | -5.22 | 5.2479773 | -8.34E-02 | 64322994  | 64323117  | NC_000011.9  |
| cg21898046    | 2.99E-06 | 4.60E-07 | -5.22 | 5.2475783 | -1.05E-01 | 180231026 | 180231149 | NC_000005.9  |
| cg22383472    | 2.99E-06 | 4.60E-07 | -5.22 | 5.2471639 | -2.09E-02 | 44009067  | 44009190  | NC_000019.9  |
| cg18908419    | 2.99E-06 | 4.60E-07 | -5.22 | 5.2470223 | -6.12E-02 | 75800004  | 75800127  | NC_000010.10 |
| cg06876354    | 2.99E-06 | 4.60E-07 | -5.22 | 5.2462645 | -8.32E-02 | 121020189 | 121020312 | NC_000002.11 |
| cg17477273    | 2.99E-06 | 4.60E-07 | -5.22 | 5.2462506 | -4.91E-02 | 36198473  | 36198596  | NC_000006.11 |
| cg08205865    | 2.99E-06 | 4.60E-07 | -5.22 | 5.2460938 | -1.13E-01 | 167883379 | 167883502 | NC_000001.10 |
| cg03996020    | 2.99E-06 | 4.61E-07 | -5.22 | 5.2455278 | -1.29E-01 | 157180124 | 157180247 | NC_000007.13 |
| cg22315903    | 2.99E-06 | 4.61E-07 | -5.22 | 5.2453506 | -8.40E-02 | 45754009  | 45754132  | NC_000021.8  |
| cg01936090    | 2.99E-06 | 4.61E-07 | -5.22 | 5.2453184 | -3.64E-02 | 179923733 | 179923856 | NC_000001.10 |
| cg21771528    | 2.99E-06 | 4.61E-07 | -5.22 | 5.2450984 | -9.01E-02 | 18745861  | 18745984  | NC_000005.9  |
| cg21092021    | 2.99E-06 | 4.61E-07 | -5.22 | 5.2450982 | -9.17E-02 | 31914223  | 31914346  | NC_000006.11 |
| cg18573204    | 2.99E-06 | 4.61E-07 | -5.22 | 5.2444748 | -3.09E-02 | 798458    | 798581    | NC_000011.9  |
| cg18758900    | 2.99E-06 | 4.61E-07 | -5.22 | 5.2444484 | -8.72E-02 | 66119400  | 66119523  | NC_000012.11 |
| ch.9.1104901R | 3.00E-06 | 4.62E-07 | -5.22 | 5.2437593 | -4.21E-02 | 85992603  | 85992726  | NC_000009.11 |
| cg19272382    | 3.00E-06 | 4.62E-07 | -5.22 | 5.2436527 | -1.91E-02 | 211848938 | 211849061 | NC_000001.10 |
| cg11372934    | 3.00E-06 | 4.62E-07 | -5.22 | 5.2435861 | -9.37E-02 | 1195318   | 1195441   | NC_000004.11 |
| cg06833709    | 3.00E-06 | 4.62E-07 | -5.22 | 5.2432675 | -1.17E-01 | 95517498  | 95517621  | NC_000010.10 |
| cg10319709    | 3.00E-06 | 4.62E-07 | -5.22 | 5.242764  | -1.17E-01 | 45155097  | 45155220  | NC_000001.10 |
| cg21318521    | 3.00E-06 | 4.62E-07 | -5.22 | 5.2426654 | -1.43E-02 | 107349259 | 107349382 | NC_000006.11 |
| cg15742751    | 3.00E-06 | 4.62E-07 | -5.22 | 5.2422227 | -6.70E-02 | 155213747 | 155213870 | NC_000001.10 |
| cg08733250    | 3.00E-06 | 4.62E-07 | -5.22 | 5.2421531 | -5.54E-02 | 604141    | 604264    | NC_000007.13 |

|            |          |          |       |           |           |           |           |              |
|------------|----------|----------|-------|-----------|-----------|-----------|-----------|--------------|
| cg09874752 | 3.00E-06 | 4.62E-07 | -5.22 | 5.2421017 | -6.10E-02 | 99531309  | 99531432  | NC_000010.10 |
| cg17882374 | 3.00E-06 | 4.63E-07 | -5.22 | 5.2412011 | -2.12E-01 | 78041429  | 78041552  | NC_000017.10 |
| cg15626665 | 3.00E-06 | 4.63E-07 | -5.22 | 5.2410459 | -2.12E-02 | 33366803  | 33366926  | NC_000001.10 |
| cg00964055 | 3.00E-06 | 4.63E-07 | -5.22 | 5.2408042 | -2.29E-02 | 150070705 | 150070828 | NC_000006.11 |
| cg17524624 | 3.01E-06 | 4.63E-07 | -5.22 | 5.2406192 | -2.83E-02 | 142960387 | 142960510 | NC_000007.13 |
| cg04153890 | 3.01E-06 | 4.63E-07 | -5.22 | 5.240525  | -2.22E-02 | 47633892  | 47634015  | NC_000017.10 |
| cg10877430 | 3.01E-06 | 4.64E-07 | -5.22 | 5.2394331 | -7.38E-02 | 113527336 | 113527459 | NC_000012.11 |
| cg05221455 | 3.01E-06 | 4.64E-07 | -5.22 | 5.2390849 | -1.25E-01 | 829616    | 829739    | NC_000011.9  |
| cg02873098 | 3.01E-06 | 4.64E-07 | -5.22 | 5.2387515 | -8.10E-02 | 4524103   | 4524226   | NC_000016.9  |
| cg03074188 | 3.01E-06 | 4.64E-07 | -5.22 | 5.2379203 | -1.40E-01 | 37557348  | 37557471  | NC_000008.10 |
| cg22110770 | 3.01E-06 | 4.64E-07 | -5.22 | 5.2378321 | -1.55E-02 | 66360551  | 66360674  | NC_000011.9  |
| cg10861807 | 3.02E-06 | 4.65E-07 | -5.22 | 5.2369705 | -2.10E-02 | 40575499  | 40575622  | NC_000017.10 |
| cg09317128 | 3.02E-06 | 4.65E-07 | -5.22 | 5.2361403 | -7.99E-02 | 56265301  | 56265424  | NC_000004.11 |
| cg06634750 | 3.02E-06 | 4.65E-07 | -5.22 | 5.2359165 | -5.25E-02 | 50186413  | 50186536  | NC_000016.9  |
| cg09634707 | 3.02E-06 | 4.66E-07 | -5.22 | 5.2349376 | -1.15E-01 | 72219713  | 72219836  | NC_000010.10 |
| cg23318893 | 3.02E-06 | 4.66E-07 | -5.22 | 5.2348777 | -9.78E-02 | 29974083  | 29974206  | NC_000006.11 |
| cg04685636 | 3.02E-06 | 4.66E-07 | -5.22 | 5.2347498 | -1.14E-02 | 175351922 | 175352045 | NC_000002.11 |
| cg09662694 | 3.03E-06 | 4.66E-07 | -5.22 | 5.2337574 | -3.44E-02 | 85980803  | 85980926  | NC_000002.11 |
| cg25653141 | 3.03E-06 | 4.67E-07 | -5.21 | 5.2332491 | -7.83E-03 | 91260518  | 91260641  | NC_000015.9  |
| cg07273376 | 3.03E-06 | 4.67E-07 | -5.21 | 5.2326731 | -1.19E-01 | 23919652  | 23919775  | NC_000011.9  |
| cg27607126 | 3.03E-06 | 4.67E-07 | -5.21 | 5.2323655 | -9.75E-02 | 51548895  | 51549018  | NC_000010.10 |
| cg10791884 | 3.03E-06 | 4.67E-07 | -5.21 | 5.2319254 | -1.18E-01 | 69879951  | 69880074  | NC_000008.10 |
| cg00794227 | 3.03E-06 | 4.68E-07 | -5.21 | 5.2313871 | -2.21E-02 | 28696966  | 28697089  | NC_000001.10 |
| cg02389634 | 3.04E-06 | 4.68E-07 | -5.21 | 5.2299667 | -9.55E-02 | 41521655  | 41521778  | NC_000017.10 |
| cg13576483 | 3.04E-06 | 4.68E-07 | -5.21 | 5.2299598 | -7.21E-02 | 67290850  | 67290973  | NC_000011.9  |

|            |          |          |       |           |           |           |           |              |
|------------|----------|----------|-------|-----------|-----------|-----------|-----------|--------------|
| cg27607898 | 3.04E-06 | 4.68E-07 | -5.21 | 5.2298057 | -3.21E-02 | 4136202   | 4136325   | NC_000006.11 |
| cg13821490 | 3.04E-06 | 4.68E-07 | -5.21 | 5.2293833 | -2.32E-02 | 100798061 | 100798184 | NC_000007.13 |
| cg02117489 | 3.04E-06 | 4.69E-07 | -5.21 | 5.2293667 | -1.38E-01 | 167284462 | 167284585 | NC_000006.11 |
| cg24983014 | 3.04E-06 | 4.69E-07 | -5.21 | 5.2289335 | -4.56E-02 | 27486780  | 27486903  | NC_000012.11 |
| cg18174542 | 3.04E-06 | 4.69E-07 | -5.21 | 5.2285408 | -7.13E-02 | 41956861  | 41956984  | NC_000022.10 |
| cg10676309 | 3.04E-06 | 4.69E-07 | -5.21 | 5.228127  | -5.65E-02 | 137685565 | 137685688 | NC_000005.9  |
| cg08042647 | 3.04E-06 | 4.69E-07 | -5.21 | 5.2279142 | -1.44E-02 | 47127740  | 47127863  | NC_000013.10 |
| cg20631180 | 3.04E-06 | 4.69E-07 | -5.21 | 5.2278947 | -5.77E-02 | 18208374  | 18208497  | NC_000019.9  |
| cg03565081 | 3.04E-06 | 4.69E-07 | -5.21 | 5.2276591 | -1.18E-01 | 23478970  | 23479093  | NC_000014.8  |
| cg24118052 | 3.04E-06 | 4.69E-07 | -5.21 | 5.22761   | -6.74E-02 | 28919387  | 28919510  | NC_000001.10 |
| cg07657776 | 3.04E-06 | 4.69E-07 | -5.21 | 5.2273886 | -4.77E-02 | 109914065 | 109914188 | NC_000012.11 |
| cg21582785 | 3.04E-06 | 4.70E-07 | -5.21 | 5.2270446 | -1.16E-01 | 3982778   | 3982901   | NC_000007.13 |
| cg21600346 | 3.05E-06 | 4.70E-07 | -5.21 | 5.2262625 | -9.50E-02 | 75905364  | 75905487  | NC_000017.10 |
| cg25469234 | 3.05E-06 | 4.70E-07 | -5.21 | 5.2261583 | -2.64E-02 | 160822711 | 160822834 | NC_000003.11 |
| cg13644646 | 3.05E-06 | 4.70E-07 | -5.21 | 5.2258426 | -5.04E-02 | 4836018   | 4836141   | NC_000006.11 |
| cg22730412 | 3.05E-06 | 4.70E-07 | -5.21 | 5.2257054 | -1.24E-01 | 51700609  | 51700732  | NC_000001.10 |
| cg11484413 | 3.05E-06 | 4.70E-07 | -5.21 | 5.2254489 | -9.74E-02 | 127645018 | 127645141 | NC_000011.9  |
| cg02004165 | 3.05E-06 | 4.71E-07 | -5.21 | 5.2250612 | -4.71E-02 | 39811600  | 39811723  | NC_000002.11 |
| cg17947225 | 3.05E-06 | 4.71E-07 | -5.21 | 5.2248384 | -5.39E-02 | 115516524 | 115516647 | NC_000008.10 |
| cg14930690 | 3.05E-06 | 4.71E-07 | -5.21 | 5.2245564 | -1.02E-01 | 28973828  | 28973951  | NC_000006.11 |
| cg25829226 | 3.05E-06 | 4.71E-07 | -5.21 | 5.2240033 | -3.45E-02 | 65134451  | 65134574  | NC_000015.9  |
| cg13868001 | 3.05E-06 | 4.71E-07 | -5.21 | 5.2236087 | -1.26E-01 | 65297897  | 65298020  | NC_000013.10 |
| cg23651812 | 3.06E-06 | 4.72E-07 | -5.21 | 5.2228961 | -1.04E-01 | 1104366   | 1104489   | NC_000001.10 |
| cg05790989 | 3.06E-06 | 4.72E-07 | -5.21 | 5.2228375 | -1.03E-01 | 167197743 | 167197866 | NC_000001.10 |
| cg18086592 | 3.06E-06 | 4.72E-07 | -5.21 | 5.2227699 | -2.27E-02 | 13153464  | 13153587  | NC_000012.11 |

|            |          |          |       |           |           |           |           |              |
|------------|----------|----------|-------|-----------|-----------|-----------|-----------|--------------|
| cg27277212 | 3.06E-06 | 4.72E-07 | -5.21 | 5.2225887 | -5.43E-02 | 31230936  | 31231059  | NC_000012.11 |
| cg12789279 | 3.06E-06 | 4.72E-07 | -5.21 | 5.2224749 | -1.11E-01 | 140339594 | 140339717 | NC_000007.13 |
| cg20191959 | 3.06E-06 | 4.72E-07 | -5.21 | 5.2222501 | -4.60E-02 | 132430691 | 132430814 | NC_000002.11 |
| cg08557929 | 3.06E-06 | 4.72E-07 | -5.21 | 5.2219153 | -4.88E-02 | 113487737 | 113487860 | NC_000013.10 |
| cg27181079 | 3.06E-06 | 4.72E-07 | -5.21 | 5.2218667 | -5.08E-02 | 10766103  | 10766226  | NC_000012.11 |
| cg22569154 | 3.06E-06 | 4.72E-07 | -5.21 | 5.2216695 | -9.94E-02 | 147088445 | 147088568 | NC_000005.9  |
| cg20191858 | 3.06E-06 | 4.73E-07 | -5.21 | 5.2208323 | -6.04E-02 | 82693054  | 82693177  | NC_000011.9  |
| cg10326287 | 3.06E-06 | 4.73E-07 | -5.21 | 5.220718  | -4.73E-02 | 84853821  | 84853944  | NC_000016.9  |
| cg08468995 | 3.06E-06 | 4.73E-07 | -5.21 | 5.2206813 | -1.43E-02 | 18812428  | 18812551  | NC_000016.9  |
| cg06532163 | 3.07E-06 | 4.73E-07 | -5.21 | 5.2198495 | -1.17E-01 | 45867833  | 45867956  | NC_000017.10 |
| cg07468777 | 3.07E-06 | 4.73E-07 | -5.21 | 5.2190981 | -2.13E-02 | 92573175  | 92573298  | NC_000014.8  |
| cg07378067 | 3.07E-06 | 4.74E-07 | -5.21 | 5.2187002 | -8.87E-02 | 103388859 | 103388982 | NC_000014.8  |
| cg27310092 | 3.07E-06 | 4.74E-07 | -5.21 | 5.2184028 | -6.23E-02 | 151945663 | 151945786 | NC_000001.10 |
| cg03946297 | 3.07E-06 | 4.74E-07 | -5.21 | 5.2183871 | -1.22E-01 | 71140689  | 71140812  | NC_000001.10 |
| cg22501604 | 3.07E-06 | 4.74E-07 | -5.21 | 5.2181949 | -4.08E-02 | 187647344 | 187647467 | NC_000004.11 |
| cg15000232 | 3.07E-06 | 4.74E-07 | -5.21 | 5.2178666 | -3.62E-02 | 44319424  | 44319547  | NC_000022.10 |
| cg22480783 | 3.07E-06 | 4.74E-07 | -5.21 | 5.2171031 | -1.31E-01 | 25149622  | 25149745  | NC_000002.11 |
| cg26186665 | 3.07E-06 | 4.75E-07 | -5.21 | 5.2168588 | -3.45E-02 | 65153760  | 65153883  | NC_000011.9  |
| cg21186263 | 3.08E-06 | 4.75E-07 | -5.21 | 5.2164369 | -9.20E-02 | 102517094 | 102517217 | NC_000014.8  |
| cg27420590 | 3.08E-06 | 4.75E-07 | -5.21 | 5.2163811 | -6.48E-02 | 5206640   | 5206763   | NC_000019.9  |
| cg24241057 | 3.08E-06 | 4.75E-07 | -5.21 | 5.2163254 | -4.06E-02 | 4982241   | 4982364   | NC_000020.10 |
| cg01604404 | 3.08E-06 | 4.75E-07 | -5.21 | 5.2162282 | -8.84E-02 | 237460590 | 237460713 | NC_000002.11 |
| cg08273750 | 3.08E-06 | 4.75E-07 | -5.21 | 5.2160879 | -6.76E-02 | 2011282   | 2011405   | NC_000011.9  |
| cg08944961 | 3.08E-06 | 4.75E-07 | -5.21 | 5.2157346 | -1.38E-01 | 111537195 | 111537318 | NC_000012.11 |
| cg15929276 | 3.08E-06 | 4.75E-07 | -5.21 | 5.2156331 | -1.15E-01 | 35687457  | 35687580  | NC_000006.11 |

|            |          |          |       |           |           |           |           |              |
|------------|----------|----------|-------|-----------|-----------|-----------|-----------|--------------|
| cg22809856 | 3.08E-06 | 4.75E-07 | -5.21 | 5.2151855 | -6.24E-02 | 123479554 | 123479677 | NC_000008.10 |
| cg08746138 | 3.08E-06 | 4.76E-07 | -5.21 | 5.2149372 | -1.56E-02 | 218519552 | 218519675 | NC_000001.10 |
| cg15958289 | 3.08E-06 | 4.76E-07 | -5.21 | 5.2148649 | -1.22E-01 | 126188994 | 126189117 | NC_000011.9  |
| cg01177235 | 3.08E-06 | 4.76E-07 | -5.21 | 5.2148386 | -3.32E-02 | 33265011  | 33265134  | NC_000009.11 |
| cg13757735 | 3.08E-06 | 4.76E-07 | -5.21 | 5.2144597 | -5.58E-02 | 57081572  | 57081695  | NC_000012.11 |
| cg23779331 | 3.08E-06 | 4.76E-07 | -5.21 | 5.2137905 | -2.36E-02 | 4614312   | 4614435   | NC_000017.10 |
| cg16018124 | 3.08E-06 | 4.76E-07 | -5.21 | 5.2135453 | -8.74E-02 | 94627566  | 94627689  | NC_000008.10 |
| cg23350446 | 3.09E-06 | 4.77E-07 | -5.21 | 5.2116449 | -2.89E-02 | 170893182 | 170893305 | NC_000006.11 |
| cg18265147 | 3.09E-06 | 4.77E-07 | -5.21 | 5.2113051 | -4.58E-02 | 9256671   | 9256794   | NC_000001.10 |
| cg26149658 | 3.09E-06 | 4.78E-07 | -5.21 | 5.2105794 | -7.85E-02 | 2439423   | 2439546   | NC_000004.11 |
| cg10276016 | 3.09E-06 | 4.78E-07 | -5.21 | 5.2099056 | -1.20E-01 | 16639517  | 16639640  | NC_000007.13 |
| cg24419164 | 3.09E-06 | 4.78E-07 | -5.21 | 5.2098169 | -1.44E-02 | 69455962  | 69456085  | NC_000011.9  |
| cg13026772 | 3.10E-06 | 4.78E-07 | -5.21 | 5.2095825 | -9.43E-02 | 125098532 | 125098655 | NC_000011.9  |
| cg11936560 | 3.10E-06 | 4.79E-07 | -5.21 | 5.2086247 | -9.01E-02 | 21688798  | 21688921  | NC_000010.10 |
| cg17825384 | 3.10E-06 | 4.79E-07 | -5.21 | 5.2085827 | -2.33E-02 | 31380853  | 31380976  | NC_000001.10 |
| cg22459078 | 3.10E-06 | 4.79E-07 | -5.21 | 5.2083884 | -3.83E-02 | 67185735  | 67185858  | NC_000005.9  |
| cg19005033 | 3.10E-06 | 4.79E-07 | -5.21 | 5.2080587 | -1.19E-01 | 140265895 | 140266018 | NC_000009.11 |
| cg24116687 | 3.10E-06 | 4.79E-07 | -5.21 | 5.2077827 | -1.27E-01 | 106537991 | 106538114 | NC_000006.11 |
| cg16725948 | 3.10E-06 | 4.79E-07 | -5.21 | 5.2077478 | -1.00E-01 | 90167635  | 90167758  | NC_000014.8  |
| cg16902973 | 3.10E-06 | 4.79E-07 | -5.21 | 5.2075312 | -8.40E-02 | 15288310  | 15288433  | NC_000019.9  |
| cg19098437 | 3.10E-06 | 4.79E-07 | -5.21 | 5.2074213 | -1.01E-01 | 72113322  | 72113445  | NC_000006.11 |
| cg03159329 | 3.10E-06 | 4.79E-07 | -5.21 | 5.207269  | -2.93E-02 | 169103514 | 169103637 | NC_000002.11 |
| cg02692052 | 3.10E-06 | 4.79E-07 | -5.21 | 5.2072424 | -4.31E-02 | 23082876  | 23082999  | NC_000008.10 |
| cg10949413 | 3.10E-06 | 4.80E-07 | -5.21 | 5.2068017 | -6.08E-02 | 26158832  | 26158955  | NC_000006.11 |
| cg00033490 | 3.10E-06 | 4.80E-07 | -5.21 | 5.2063808 | -7.07E-02 | 87027887  | 87028010  | NC_000007.13 |



|                 |          |          |       |           |           |           |           |              |
|-----------------|----------|----------|-------|-----------|-----------|-----------|-----------|--------------|
| cg23075611      | 3.11E-06 | 4.80E-07 | -5.21 | 5.2060113 | -7.08E-02 | 25145254  | 25145377  | NC_000015.9  |
| cg20824989      | 3.11E-06 | 4.80E-07 | -5.21 | 5.2050008 | -1.63E-01 | 208491939 | 208492062 | NC_000002.11 |
| cg22254606      | 3.11E-06 | 4.81E-07 | -5.21 | 5.2044464 | -8.62E-02 | 119479475 | 119479598 | NC_000006.11 |
| cg01458961      | 3.11E-06 | 4.81E-07 | -5.21 | 5.2042164 | -1.88E-02 | 102269425 | 102269548 | NC_000004.11 |
| cg02106180      | 3.11E-06 | 4.81E-07 | -5.21 | 5.2030187 | -1.19E-01 | 845767    | 845890    | NC_000016.9  |
| cg01918604      | 3.11E-06 | 4.81E-07 | -5.21 | 5.2030179 | -8.49E-02 | 112107941 | 112108064 | NC_000001.10 |
| cg19190762      | 3.12E-06 | 4.82E-07 | -5.21 | 5.2023441 | -1.16E-01 | 44806055  | 44806178  | NC_000013.10 |
| ch.1.228006015R | 3.12E-06 | 4.82E-07 | -5.21 | 5.2021513 | -2.31E-02 | 229939392 | 229939515 | NC_000001.10 |
| cg04305673      | 3.12E-06 | 4.82E-07 | -5.21 | 5.2015734 | -7.99E-02 | 379581    | 379704    | NC_000006.11 |
| cg10526841      | 3.12E-06 | 4.82E-07 | -5.21 | 5.2015207 | -6.38E-02 | 30182507  | 30182630  | NC_000006.11 |
| cg08588414      | 3.12E-06 | 4.83E-07 | -5.21 | 5.2005933 | -4.30E-02 | 169226697 | 169226820 | NC_000006.11 |
| cg13240385      | 3.12E-06 | 4.83E-07 | -5.21 | 5.2002228 | -2.67E-02 | 54982590  | 54982713  | NC_000012.11 |
| cg13879411      | 3.12E-06 | 4.83E-07 | -5.21 | 5.1998381 | -8.13E-02 | 7474236   | 7474359   | NC_000007.13 |
| cg13223682      | 3.13E-06 | 4.83E-07 | -5.21 | 5.1990623 | -1.02E-01 | 174889929 | 174890052 | NC_000002.11 |
| cg02773889      | 3.13E-06 | 4.84E-07 | -5.21 | 5.1987492 | -1.98E-02 | 42615649  | 42615772  | NC_000013.10 |
| cg05486551      | 3.13E-06 | 4.84E-07 | -5.21 | 5.1987173 | -4.70E-02 | 5731259   | 5731382   | NC_000020.10 |
| cg06015142      | 3.13E-06 | 4.84E-07 | -5.21 | 5.1985918 | -8.28E-02 | 76924364  | 76924487  | NC_000007.13 |
| cg01732469      | 3.13E-06 | 4.84E-07 | -5.21 | 5.1974085 | -6.29E-02 | 72788024  | 72788147  | NC_000007.13 |
| cg09518906      | 3.13E-06 | 4.84E-07 | -5.21 | 5.1972532 | -1.16E-01 | 35595403  | 35595526  | NC_000002.11 |
| cg19234736      | 3.13E-06 | 4.84E-07 | -5.21 | 5.1972371 | -6.15E-02 | 51996834  | 51996957  | NC_000003.11 |
| cg24924051      | 3.14E-06 | 4.85E-07 | -5.21 | 5.1960446 | -6.61E-02 | 32408427  | 32408550  | NC_000003.11 |
| cg22390040      | 3.14E-06 | 4.85E-07 | -5.21 | 5.195856  | -1.13E-01 | 17220621  | 17220744  | NC_000008.10 |
| cg09070415      | 3.14E-06 | 4.85E-07 | -5.21 | 5.1951913 | -8.84E-02 | 32041052  | 32041175  | NC_000001.10 |
| cg15830441      | 3.14E-06 | 4.86E-07 | -5.21 | 5.1946913 | -2.98E-02 | 21348144  | 21348267  | NC_000013.10 |
| cg26161057      | 3.14E-06 | 4.86E-07 | -5.21 | 5.1937474 | -6.59E-02 | 27881600  | 27881723  | NC_000001.10 |

|            |          |          |       |           |           |           |           |              |
|------------|----------|----------|-------|-----------|-----------|-----------|-----------|--------------|
| cg11507178 | 3.14E-06 | 4.86E-07 | -5.21 | 5.193715  | -4.16E-02 | 118781515 | 118781638 | NC_000011.9  |
| cg12924430 | 3.14E-06 | 4.86E-07 | -5.21 | 5.1934268 | -1.11E-01 | 104644895 | 104645018 | NC_000014.8  |
| cg05921834 | 3.15E-06 | 4.86E-07 | -5.21 | 5.1929163 | -2.25E-02 | 80709563  | 80709686  | NC_000017.10 |
| cg04089111 | 3.15E-06 | 4.87E-07 | -5.21 | 5.1921747 | -2.25E-02 | 74942655  | 74942778  | NC_000002.11 |
| cg07163480 | 3.15E-06 | 4.87E-07 | -5.21 | 5.1920598 | -9.74E-02 | 236007482 | 236007605 | NC_000002.11 |
| cg06177627 | 3.15E-06 | 4.87E-07 | -5.21 | 5.1916581 | -2.50E-02 | 23751208  | 23751331  | NC_000001.10 |
| cg18630644 | 3.15E-06 | 4.87E-07 | -5.21 | 5.1915181 | -4.94E-02 | 4079528   | 4079651   | NC_000006.11 |
| cg24673801 | 3.15E-06 | 4.87E-07 | -5.21 | 5.1912303 | -8.29E-02 | 126297454 | 126297577 | NC_000005.9  |
| cg16618789 | 3.15E-06 | 4.88E-07 | -5.21 | 5.1903267 | -9.56E-02 | 10116380  | 10116503  | NC_000007.13 |
| cg20790648 | 3.15E-06 | 4.88E-07 | -5.21 | 5.1901991 | -1.11E-01 | 151619923 | 151620046 | NC_000003.11 |
| cg09603584 | 3.16E-06 | 4.88E-07 | -5.21 | 5.1895064 | -3.15E-02 | 3443969   | 3444092   | NC_000011.9  |
| cg23918047 | 3.16E-06 | 4.88E-07 | -5.21 | 5.1890451 | -4.23E-02 | 79828356  | 79828479  | NC_000017.10 |
| cg16894211 | 3.16E-06 | 4.89E-07 | -5.21 | 5.1881111 | -8.35E-02 | 33403542  | 33403665  | NC_000022.10 |
| cg25260420 | 3.16E-06 | 4.89E-07 | -5.2  | 5.1877212 | -7.65E-02 | 5823816   | 5823939   | NC_000019.9  |
| cg17503629 | 3.16E-06 | 4.89E-07 | -5.2  | 5.1874027 | -5.11E-02 | 31381718  | 31381841  | NC_000001.10 |
| cg11020333 | 3.16E-06 | 4.89E-07 | -5.2  | 5.1870134 | -8.50E-02 | 2861855   | 2861978   | NC_000007.13 |
| cg09970967 | 3.16E-06 | 4.90E-07 | -5.2  | 5.1865724 | -7.89E-02 | 73602752  | 73602875  | NC_000014.8  |
| cg21820517 | 3.16E-06 | 4.90E-07 | -5.2  | 5.1863844 | -1.77E-02 | 21672497  | 21672620  | NC_000001.10 |
| cg24034412 | 3.17E-06 | 4.90E-07 | -5.2  | 5.1862779 | -1.94E-02 | 49122294  | 49122417  | NC_000019.9  |
| cg09104050 | 3.17E-06 | 4.90E-07 | -5.2  | 5.185702  | -3.55E-02 | 68563912  | 68564035  | NC_000016.9  |
| cg23403099 | 3.17E-06 | 4.91E-07 | -5.2  | 5.1842353 | -9.33E-02 | 32942254  | 32942377  | NC_000017.10 |
| cg11620328 | 3.17E-06 | 4.91E-07 | -5.2  | 5.1840492 | -8.29E-02 | 31760521  | 31760644  | NC_000006.11 |
| cg08136190 | 3.17E-06 | 4.91E-07 | -5.2  | 5.183331  | -4.76E-02 | 30301942  | 30302065  | NC_000006.11 |
| cg26406924 | 3.17E-06 | 4.91E-07 | -5.2  | 5.183204  | -1.21E-01 | 176811378 | 176811501 | NC_000001.10 |
| cg01217204 | 3.17E-06 | 4.91E-07 | -5.2  | 5.1830708 | -1.74E-02 | 113239325 | 113239448 | NC_000002.11 |

|            |          |          |      |           |           |           |           |              |
|------------|----------|----------|------|-----------|-----------|-----------|-----------|--------------|
| cg13770461 | 3.18E-06 | 4.92E-07 | -5.2 | 5.1813998 | -7.22E-02 | 46016312  | 46016435  | NC_000011.9  |
| cg24732062 | 3.18E-06 | 4.93E-07 | -5.2 | 5.1807295 | -4.29E-02 | 95365212  | 95365335  | NC_000011.9  |
| cg11839355 | 3.18E-06 | 4.93E-07 | -5.2 | 5.1800793 | -2.13E-02 | 101963358 | 101963481 | NC_000008.10 |
| cg08742313 | 3.19E-06 | 4.93E-07 | -5.2 | 5.1796661 | -2.34E-02 | 104404887 | 104405010 | NC_000010.10 |
| cg20926679 | 3.19E-06 | 4.93E-07 | -5.2 | 5.1796661 | -1.03E-01 | 126188582 | 126188705 | NC_000004.11 |
| cg09287359 | 3.19E-06 | 4.94E-07 | -5.2 | 5.1782915 | -8.02E-02 | 39279408  | 39279531  | NC_000019.9  |
| cg20659941 | 3.19E-06 | 4.94E-07 | -5.2 | 5.1781173 | -8.92E-02 | 55888395  | 55888518  | NC_000018.9  |
| cg20732304 | 3.19E-06 | 4.94E-07 | -5.2 | 5.1781053 | -7.83E-02 | 113752657 | 113752780 | NC_000013.10 |
| cg25338577 | 3.20E-06 | 4.95E-07 | -5.2 | 5.1764621 | -1.46E-02 | 201391149 | 201391272 | NC_000002.11 |
| cg06292532 | 3.20E-06 | 4.95E-07 | -5.2 | 5.1764277 | -1.92E-02 | 202936584 | 202936707 | NC_000001.10 |
| cg18206867 | 3.20E-06 | 4.95E-07 | -5.2 | 5.1759101 | -8.31E-02 | 62422351  | 62422474  | NC_000002.11 |
| cg09120809 | 3.20E-06 | 4.95E-07 | -5.2 | 5.1756205 | -3.62E-02 | 64081332  | 64081455  | NC_000008.10 |
| cg02650512 | 3.20E-06 | 4.96E-07 | -5.2 | 5.1750903 | -1.23E-01 | 27048975  | 27049098  | NC_000017.10 |
| cg08552043 | 3.20E-06 | 4.96E-07 | -5.2 | 5.1748247 | -7.71E-02 | 2810570   | 2810693   | NC_000011.9  |
| cg21664866 | 3.20E-06 | 4.96E-07 | -5.2 | 5.1740403 | -7.53E-02 | 24537140  | 24537263  | NC_000002.11 |
| cg01599189 | 3.20E-06 | 4.96E-07 | -5.2 | 5.1739001 | -2.53E-02 | 16939520  | 16939643  | NC_000001.10 |
| cg05857825 | 3.20E-06 | 4.96E-07 | -5.2 | 5.173899  | -1.67E-02 | 31408213  | 31408336  | NC_000020.10 |
| cg13500354 | 3.21E-06 | 4.97E-07 | -5.2 | 5.1726065 | -6.12E-02 | 168617491 | 168617614 | NC_000006.11 |
| cg02101571 | 3.21E-06 | 4.97E-07 | -5.2 | 5.172319  | -9.48E-02 | 11853878  | 11854001  | NC_000008.10 |
| cg07639476 | 3.21E-06 | 4.98E-07 | -5.2 | 5.1710023 | -5.94E-02 | 150004345 | 150004468 | NC_000007.13 |
| cg11792786 | 3.21E-06 | 4.98E-07 | -5.2 | 5.170932  | -8.92E-02 | 14870083  | 14870206  | NC_000005.9  |
| cg12270129 | 3.21E-06 | 4.98E-07 | -5.2 | 5.1708163 | -2.41E-02 | 121734046 | 121734169 | NC_000012.11 |
| cg00588297 | 3.22E-06 | 4.98E-07 | -5.2 | 5.1693583 | -1.14E-01 | 74753691  | 74753814  | NC_000002.11 |
| cg01203153 | 3.22E-06 | 4.98E-07 | -5.2 | 5.169289  | -1.06E-01 | 180643432 | 180643555 | NC_000005.9  |
| cg11637076 | 3.22E-06 | 4.99E-07 | -5.2 | 5.1691827 | -5.15E-02 | 49575188  | 49575311  | NC_000019.9  |

|                |          |          |      |           |           |           |           |              |
|----------------|----------|----------|------|-----------|-----------|-----------|-----------|--------------|
| cg13595415     | 3.22E-06 | 4.99E-07 | -5.2 | 5.1690329 | -6.71E-02 | 96780753  | 96780876  | NC_000009.11 |
| cg00037013     | 3.22E-06 | 4.99E-07 | -5.2 | 5.1689435 | -4.76E-02 | 219722536 | 219722659 | NC_000002.11 |
| cg00195561     | 3.22E-06 | 4.99E-07 | -5.2 | 5.1684018 | -8.39E-02 | 46408584  | 46408707  | NC_000011.9  |
| cg10489463     | 3.22E-06 | 4.99E-07 | -5.2 | 5.1683533 | -1.33E-01 | 33546572  | 33546695  | NC_000002.11 |
| cg05254518     | 3.22E-06 | 4.99E-07 | -5.2 | 5.1682565 | -1.31E-01 | 86245702  | 86245825  | NC_000015.9  |
| cg24914483     | 3.22E-06 | 4.99E-07 | -5.2 | 5.1677728 | -1.11E-01 | 2653997   | 2654120   | NC_000018.9  |
| cg01080924     | 3.22E-06 | 4.99E-07 | -5.2 | 5.1673593 | -5.49E-02 | 46449550  | 46449673  | NC_000022.10 |
| cg00244111     | 3.22E-06 | 5.00E-07 | -5.2 | 5.1668487 | -8.35E-02 | 149086884 | 149087007 | NC_000003.11 |
| cg21772776     | 3.23E-06 | 5.00E-07 | -5.2 | 5.166103  | -4.53E-02 | 36156216  | 36156339  | NC_000020.10 |
| cg04915058     | 3.23E-06 | 5.00E-07 | -5.2 | 5.1659808 | -1.04E-01 | 55693741  | 55693864  | NC_000003.11 |
| cg24776142     | 3.23E-06 | 5.00E-07 | -5.2 | 5.1657595 | -1.21E-01 | 16513829  | 16513952  | NC_000006.11 |
| cg11393453     | 3.23E-06 | 5.01E-07 | -5.2 | 5.1652696 | -2.62E-02 | 30050326  | 30050449  | NC_000018.9  |
| ch.8.81283154R | 3.23E-06 | 5.01E-07 | -5.2 | 5.1649411 | -1.86E-02 | 81120599  | 81120722  | NC_000008.10 |
| cg25980418     | 3.23E-06 | 5.01E-07 | -5.2 | 5.1639821 | -1.00E-01 | 112848467 | 112848590 | NC_000005.9  |
| cg00687674     | 3.24E-06 | 5.02E-07 | -5.2 | 5.1631446 | -9.07E-02 | 69373260  | 69373383  | NC_000015.9  |
| cg00531789     | 3.24E-06 | 5.02E-07 | -5.2 | 5.1626121 | -6.37E-02 | 36927248  | 36927371  | NC_000006.11 |
| cg19606431     | 3.24E-06 | 5.02E-07 | -5.2 | 5.1621833 | -1.34E-02 | 131949205 | 131949328 | NC_000006.11 |
| cg06367135     | 3.24E-06 | 5.02E-07 | -5.2 | 5.161879  | -1.12E-01 | 3077835   | 3077958   | NC_000001.10 |
| cg14406224     | 3.24E-06 | 5.02E-07 | -5.2 | 5.1617633 | -6.47E-02 | 10150780  | 10150903  | NC_000002.11 |
| cg10080004     | 3.24E-06 | 5.02E-07 | -5.2 | 5.1616238 | -4.64E-02 | 55691827  | 55691950  | NC_000019.9  |
| cg17618808     | 3.24E-06 | 5.03E-07 | -5.2 | 5.1609136 | -1.02E-01 | 135118810 | 135118933 | NC_000010.10 |
| cg24091995     | 3.24E-06 | 5.03E-07 | -5.2 | 5.1605133 | -5.42E-02 | 30948636  | 30948759  | NC_000012.11 |
| cg09523228     | 3.24E-06 | 5.03E-07 | -5.2 | 5.1603622 | -4.90E-02 | 11643582  | 11643705  | NC_000011.9  |
| cg10144598     | 3.25E-06 | 5.03E-07 | -5.2 | 5.1601429 | -5.33E-02 | 203619607 | 203619730 | NC_000001.10 |
| cg10621374     | 3.25E-06 | 5.04E-07 | -5.2 | 5.1591925 | -1.01E-01 | 36505899  | 36506022  | NC_000019.9  |

|            |          |          |      |           |           |           |           |              |
|------------|----------|----------|------|-----------|-----------|-----------|-----------|--------------|
| cg24207616 | 3.25E-06 | 5.04E-07 | -5.2 | 5.1590461 | -6.48E-02 | 44718623  | 44718746  | NC_000007.13 |
| cg17868840 | 3.25E-06 | 5.04E-07 | -5.2 | 5.1589137 | -4.45E-02 | 224133090 | 224133213 | NC_000001.10 |
| cg25307332 | 3.25E-06 | 5.04E-07 | -5.2 | 5.158576  | -1.06E-01 | 38578802  | 38578925  | NC_000008.10 |
| cg25929589 | 3.25E-06 | 5.04E-07 | -5.2 | 5.1582576 | -7.94E-02 | 24238867  | 24238990  | NC_000002.11 |
| cg05296818 | 3.25E-06 | 5.04E-07 | -5.2 | 5.1577809 | -8.77E-02 | 61117162  | 61117285  | NC_000014.8  |
| cg00636072 | 3.26E-06 | 5.05E-07 | -5.2 | 5.15681   | -5.28E-02 | 56410382  | 56410505  | NC_000002.11 |
| cg00678236 | 3.26E-06 | 5.05E-07 | -5.2 | 5.156381  | -7.19E-02 | 46785423  | 46785546  | NC_000013.10 |
| cg03847279 | 3.26E-06 | 5.05E-07 | -5.2 | 5.1562659 | -3.48E-02 | 1004213   | 1004336   | NC_000004.11 |
| cg00927294 | 3.26E-06 | 5.05E-07 | -5.2 | 5.1560296 | -2.57E-02 | 122526408 | 122526531 | NC_000007.13 |
| cg01883408 | 3.26E-06 | 5.05E-07 | -5.2 | 5.1558343 | -6.39E-02 | 132083691 | 132083814 | NC_000005.9  |
| cg01465596 | 3.26E-06 | 5.06E-07 | -5.2 | 5.1554389 | -8.19E-02 | 42381916  | 42382039  | NC_000001.10 |
| cg18085660 | 3.26E-06 | 5.06E-07 | -5.2 | 5.1554105 | -8.29E-02 | 1202898   | 1203021   | NC_000004.11 |
| cg01935722 | 3.26E-06 | 5.06E-07 | -5.2 | 5.1549508 | -5.67E-02 | 45683155  | 45683278  | NC_000019.9  |
| cg01712686 | 3.26E-06 | 5.06E-07 | -5.2 | 5.1548929 | -6.25E-02 | 235814419 | 235814542 | NC_000001.10 |
| cg14480789 | 3.26E-06 | 5.06E-07 | -5.2 | 5.1539016 | -5.66E-02 | 42642589  | 42642712  | NC_000003.11 |
| cg09480446 | 3.27E-06 | 5.07E-07 | -5.2 | 5.1535072 | -1.16E-01 | 107640935 | 107641058 | NC_000007.13 |
| cg26501154 | 3.27E-06 | 5.07E-07 | -5.2 | 5.1532925 | -1.17E-01 | 113966694 | 113966817 | NC_000006.11 |
| cg14078100 | 3.27E-06 | 5.07E-07 | -5.2 | 5.1532924 | -1.12E-01 | 29303808  | 29303931  | NC_000011.9  |
| cg09250146 | 3.27E-06 | 5.07E-07 | -5.2 | 5.1532816 | -9.57E-02 | 109791946 | 109792069 | NC_000001.10 |
| cg15456476 | 3.27E-06 | 5.07E-07 | -5.2 | 5.1532151 | -5.72E-02 | 85146180  | 85146303  | NC_000016.9  |
| cg11600807 | 3.27E-06 | 5.07E-07 | -5.2 | 5.1531334 | -6.39E-02 | 17373180  | 17373303  | NC_000011.9  |
| cg26672098 | 3.27E-06 | 5.07E-07 | -5.2 | 5.1530024 | -7.49E-02 | 42326070  | 42326193  | NC_000002.11 |
| cg12788855 | 3.27E-06 | 5.08E-07 | -5.2 | 5.1514525 | -2.45E-02 | 29977253  | 29977376  | NC_000022.10 |
| cg24152080 | 3.27E-06 | 5.08E-07 | -5.2 | 5.1513226 | -7.32E-02 | 53491206  | 53491329  | NC_000001.10 |
| cg25206562 | 3.27E-06 | 5.08E-07 | -5.2 | 5.1512982 | -1.17E-01 | 152593044 | 152593167 | NC_000006.11 |

|            |          |          |       |           |           |           |           |              |
|------------|----------|----------|-------|-----------|-----------|-----------|-----------|--------------|
| cg00012199 | 3.27E-06 | 5.08E-07 | -5.2  | 5.151256  | -1.30E-02 | 21151024  | 21151147  | NC_000014.8  |
| cg21583440 | 3.27E-06 | 5.08E-07 | -5.2  | 5.1510721 | -1.07E-01 | 75186707  | 75186830  | NC_000011.9  |
| cg13717446 | 3.27E-06 | 5.08E-07 | -5.2  | 5.150984  | -8.09E-02 | 62777761  | 62777884  | NC_000017.10 |
| cg07087156 | 3.28E-06 | 5.08E-07 | -5.2  | 5.1503291 | -1.94E-02 | 228190257 | 228190380 | NC_000002.11 |
| cg03573187 | 3.28E-06 | 5.09E-07 | -5.2  | 5.1499621 | -2.29E-02 | 62439866  | 62439989  | NC_000011.9  |
| cg25202141 | 3.28E-06 | 5.09E-07 | -5.2  | 5.1497695 | -7.90E-02 | 113735404 | 113735527 | NC_000002.11 |
| cg03468023 | 3.28E-06 | 5.09E-07 | -5.2  | 5.1482853 | -4.71E-02 | 42419163  | 42419286  | NC_000006.11 |
| cg04053969 | 3.28E-06 | 5.09E-07 | -5.2  | 5.1481955 | -1.68E-02 | 4067284   | 4067407   | NC_000019.9  |
| cg26405835 | 3.28E-06 | 5.10E-07 | -5.2  | 5.1474643 | -9.08E-02 | 36095538  | 36095661  | NC_000021.8  |
| cg04027328 | 3.28E-06 | 5.10E-07 | -5.2  | 5.1474135 | -7.91E-02 | 11372138  | 11372261  | NC_000001.10 |
| cg16811650 | 3.29E-06 | 5.10E-07 | -5.2  | 5.1472845 | -5.47E-02 | 22364357  | 22364480  | NC_000006.11 |
| cg26498574 | 3.29E-06 | 5.10E-07 | -5.2  | 5.147264  | -7.15E-02 | 88425627  | 88425750  | NC_000010.10 |
| cg10600534 | 3.29E-06 | 5.10E-07 | -5.2  | 5.1468683 | -7.72E-02 | 60971920  | 60972043  | NC_000015.9  |
| cg07115519 | 3.29E-06 | 5.11E-07 | -5.2  | 5.1459344 | -6.28E-02 | 75904184  | 75904307  | NC_000011.9  |
| cg21645826 | 3.29E-06 | 5.11E-07 | -5.2  | 5.1456584 | -3.52E-02 | 19313533  | 19313656  | NC_000019.9  |
| cg03005055 | 3.29E-06 | 5.11E-07 | -5.2  | 5.1452397 | -1.33E-02 | 65006951  | 65007074  | NC_000014.8  |
| cg02034222 | 3.29E-06 | 5.11E-07 | -5.2  | 5.1445148 | -1.39E-01 | 74753281  | 74753404  | NC_000002.11 |
| cg02722637 | 3.30E-06 | 5.12E-07 | -5.2  | 5.1438124 | -1.22E-01 | 4922070   | 4922193   | NC_000012.11 |
| cg18855621 | 3.30E-06 | 5.12E-07 | -5.2  | 5.1436218 | -1.02E-01 | 38404322  | 38404445  | NC_000005.9  |
| cg07187103 | 3.30E-06 | 5.12E-07 | -5.2  | 5.143182  | -1.35E-02 | 18415850  | 18415973  | NC_000011.9  |
| cg03220945 | 3.30E-06 | 5.13E-07 | -5.2  | 5.1422329 | -6.70E-02 | 205537877 | 205538000 | NC_000001.10 |
| cg12233463 | 3.30E-06 | 5.13E-07 | -5.19 | 5.1420204 | -7.45E-02 | 81679567  | 81679690  | NC_000015.9  |
| cg13104185 | 3.30E-06 | 5.13E-07 | -5.19 | 5.1418307 | -1.24E-01 | 8509372   | 8509495   | NC_000001.10 |
| cg24136314 | 3.30E-06 | 5.13E-07 | -5.19 | 5.1417158 | -7.58E-02 | 41694736  | 41694859  | NC_000004.11 |
| cg00778807 | 3.30E-06 | 5.13E-07 | -5.19 | 5.1413927 | -1.53E-01 | 43524347  | 43524470  | NC_000001.10 |

|            |          |          |       |           |           |           |           |              |
|------------|----------|----------|-------|-----------|-----------|-----------|-----------|--------------|
| cg13849422 | 3.30E-06 | 5.13E-07 | -5.19 | 5.1411326 | -1.41E-02 | 37554927  | 37555050  | NC_000020.10 |
| cg07714600 | 3.31E-06 | 5.13E-07 | -5.19 | 5.1410169 | -2.34E-02 | 18699631  | 18699754  | NC_000019.9  |
| cg12386061 | 3.31E-06 | 5.14E-07 | -5.19 | 5.1405296 | -7.79E-02 | 37906586  | 37906709  | NC_000003.11 |
| cg18419175 | 3.31E-06 | 5.14E-07 | -5.19 | 5.1405099 | -9.47E-02 | 6199980   | 6200103   | NC_000007.13 |
| cg24168641 | 3.31E-06 | 5.14E-07 | -5.19 | 5.1400155 | -2.66E-02 | 74219645  | 74219768  | NC_000015.9  |
| cg00072369 | 3.31E-06 | 5.14E-07 | -5.19 | 5.1399841 | -6.29E-03 | 52405845  | 52405968  | NC_000005.9  |
| cg23902076 | 3.31E-06 | 5.14E-07 | -5.19 | 5.1397451 | -1.04E-01 | 9428726   | 9428849   | NC_000002.11 |
| cg08467595 | 3.31E-06 | 5.14E-07 | -5.19 | 5.1389429 | -3.00E-02 | 13009117  | 13009240  | NC_000003.11 |
| cg07756434 | 3.31E-06 | 5.14E-07 | -5.19 | 5.1388964 | -1.00E-01 | 179372454 | 179372577 | NC_000003.11 |
| cg07525817 | 3.31E-06 | 5.15E-07 | -5.19 | 5.1379631 | -2.39E-02 | 47164451  | 47164574  | NC_000019.9  |
| cg23755074 | 3.31E-06 | 5.15E-07 | -5.19 | 5.1379388 | -1.13E-01 | 108423325 | 108423448 | NC_000011.9  |
| cg05562828 | 3.31E-06 | 5.15E-07 | -5.19 | 5.1378968 | -7.90E-02 | 3906858   | 3906981   | NC_000017.10 |
| cg20283670 | 3.32E-06 | 5.15E-07 | -5.19 | 5.1367784 | -1.13E-01 | 116162728 | 116162851 | NC_000010.10 |
| cg14781190 | 3.32E-06 | 5.16E-07 | -5.19 | 5.1365141 | -2.55E-02 | 31885823  | 31885946  | NC_000001.10 |
| cg10247798 | 3.32E-06 | 5.16E-07 | -5.19 | 5.1362994 | -2.66E-02 | 52008826  | 52008949  | NC_000003.11 |
| cg09400332 | 3.32E-06 | 5.16E-07 | -5.19 | 5.1358134 | -2.80E-02 | 777898    | 778021    | NC_000011.9  |
| cg13372766 | 3.32E-06 | 5.17E-07 | -5.19 | 5.1348792 | -1.32E-01 | 228464049 | 228464172 | NC_000001.10 |
| cg14913181 | 3.33E-06 | 5.17E-07 | -5.19 | 5.1341352 | -1.31E-02 | 6845123   | 6845246   | NC_000001.10 |
| cg13092355 | 3.33E-06 | 5.17E-07 | -5.19 | 5.1336897 | -2.46E-02 | 39992602  | 39992725  | NC_000017.10 |
| cg21567649 | 3.33E-06 | 5.17E-07 | -5.19 | 5.1334703 | -8.16E-02 | 43245642  | 43245765  | NC_000002.11 |
| cg21299491 | 3.33E-06 | 5.17E-07 | -5.19 | 5.1333747 | -6.17E-02 | 3057366   | 3057489   | NC_000001.10 |
| cg00083790 | 3.33E-06 | 5.18E-07 | -5.19 | 5.1329664 | -8.19E-02 | 132944010 | 132944133 | NC_000012.11 |
| cg03494429 | 3.33E-06 | 5.18E-07 | -5.19 | 5.132717  | -1.06E-01 | 4417093   | 4417216   | NC_000012.11 |
| cg17414718 | 3.33E-06 | 5.18E-07 | -5.19 | 5.1325683 | -1.17E-01 | 1444836   | 1444959   | NC_000011.9  |
| cg26019258 | 3.33E-06 | 5.18E-07 | -5.19 | 5.1316128 | -2.69E-02 | 108880989 | 108881112 | NC_000006.11 |

|                 |          |          |       |           |           |           |           |              |
|-----------------|----------|----------|-------|-----------|-----------|-----------|-----------|--------------|
| cg05086021      | 3.34E-06 | 5.18E-07 | -5.19 | 5.1313799 | -5.24E-02 | 28829253  | 28829376  | NC_000006.11 |
| cg14774160      | 3.34E-06 | 5.19E-07 | -5.19 | 5.1307449 | -4.05E-02 | 4901081   | 4901204   | NC_000017.10 |
| cg26407100      | 3.34E-06 | 5.19E-07 | -5.19 | 5.1299202 | -2.78E-02 | 11726043  | 11726166  | NC_000008.10 |
| cg23153707      | 3.34E-06 | 5.19E-07 | -5.19 | 5.1296784 | -4.61E-02 | 7121040   | 7121163   | NC_000017.10 |
| cg21144009      | 3.34E-06 | 5.20E-07 | -5.19 | 5.1288407 | -1.17E-01 | 208281523 | 208281646 | NC_000001.10 |
| cg02803037      | 3.34E-06 | 5.20E-07 | -5.19 | 5.1288179 | -7.12E-02 | 56702158  | 56702281  | NC_000016.9  |
| cg23875391      | 3.35E-06 | 5.20E-07 | -5.19 | 5.1282176 | -7.69E-02 | 72120615  | 72120738  | NC_000018.9  |
| cg24464502      | 3.35E-06 | 5.20E-07 | -5.19 | 5.1277595 | -6.72E-02 | 60441952  | 60442075  | NC_000020.10 |
| cg15067376      | 3.35E-06 | 5.20E-07 | -5.19 | 5.1277317 | -2.94E-02 | 139257843 | 139257966 | NC_000009.11 |
| cg03422749      | 3.35E-06 | 5.20E-07 | -5.19 | 5.1274563 | -6.34E-02 | 185677549 | 185677672 | NC_000004.11 |
| ch.2.165639268R | 3.35E-06 | 5.20E-07 | -5.19 | 5.1274223 | -2.26E-02 | 165931022 | 165931145 | NC_000002.11 |
| cg17740632      | 3.35E-06 | 5.21E-07 | -5.19 | 5.1270816 | -3.47E-02 | 58892104  | 58892227  | NC_000019.9  |
| cg01386883      | 3.35E-06 | 5.21E-07 | -5.19 | 5.1270306 | -1.83E-02 | 53529144  | 53529267  | NC_000003.11 |
| cg05115375      | 3.35E-06 | 5.21E-07 | -5.19 | 5.1264087 | -8.21E-02 | 33360485  | 33360608  | NC_000015.9  |
| cg24618244      | 3.35E-06 | 5.21E-07 | -5.19 | 5.1262782 | -3.14E-02 | 121485763 | 121485886 | NC_000010.10 |
| cg25712005      | 3.35E-06 | 5.22E-07 | -5.19 | 5.125317  | -8.86E-02 | 73443113  | 73443236  | NC_000007.13 |
| cg21618784      | 3.35E-06 | 5.22E-07 | -5.19 | 5.1252668 | -2.96E-02 | 27863205  | 27863328  | NC_000003.11 |
| cg00842095      | 3.36E-06 | 5.22E-07 | -5.19 | 5.1250339 | -8.68E-02 | 70116951  | 70117074  | NC_000014.8  |
| cg06421614      | 3.36E-06 | 5.22E-07 | -5.19 | 5.1241922 | -8.09E-02 | 7121116   | 7121239   | NC_000017.10 |
| cg25983317      | 3.36E-06 | 5.22E-07 | -5.19 | 5.124138  | -2.88E-02 | 32340208  | 32340331  | NC_000022.10 |
| cg09866366      | 3.36E-06 | 5.22E-07 | -5.19 | 5.1237528 | -1.09E-01 | 183903315 | 183903438 | NC_000003.11 |
| cg14450238      | 3.36E-06 | 5.22E-07 | -5.19 | 5.1237479 | -1.96E-02 | 219262134 | 219262257 | NC_000002.11 |
| cg18594724      | 3.36E-06 | 5.23E-07 | -5.19 | 5.1233754 | -8.11E-02 | 53442973  | 53443096  | NC_000010.10 |
| cg01228271      | 3.36E-06 | 5.23E-07 | -5.19 | 5.1232121 | -1.22E-01 | 142663294 | 142663417 | NC_000003.11 |
| cg18612126      | 3.36E-06 | 5.23E-07 | -5.19 | 5.1232016 | -6.03E-02 | 2273779   | 2273902   | NC_000019.9  |



|            |          |          |       |           |           |           |           |              |
|------------|----------|----------|-------|-----------|-----------|-----------|-----------|--------------|
| cg23172545 | 3.36E-06 | 5.23E-07 | -5.19 | 5.1231444 | -7.86E-02 | 2875602   | 2875725   | NC_000006.11 |
| cg04033732 | 3.36E-06 | 5.23E-07 | -5.19 | 5.122897  | -8.10E-02 | 67707096  | 67707219  | NC_000016.9  |
| cg27656754 | 3.36E-06 | 5.23E-07 | -5.19 | 5.1224628 | -1.12E-01 | 137366492 | 137366615 | NC_000006.11 |
| cg01919701 | 3.37E-06 | 5.23E-07 | -5.19 | 5.1220258 | -6.67E-02 | 112996346 | 112996469 | NC_000013.10 |
| cg25060339 | 3.37E-06 | 5.24E-07 | -5.19 | 5.1217963 | -8.84E-02 | 104586593 | 104586716 | NC_000014.8  |
| cg14104172 | 3.37E-06 | 5.24E-07 | -5.19 | 5.1215337 | -1.99E-02 | 79074807  | 79074930  | NC_000009.11 |
| cg06089988 | 3.37E-06 | 5.24E-07 | -5.19 | 5.1213426 | -2.29E-02 | 153748485 | 153748608 | NC_000001.10 |
| cg27628552 | 3.37E-06 | 5.24E-07 | -5.19 | 5.1210103 | -2.37E-02 | 37064504  | 37064627  | NC_000020.10 |
| cg25470758 | 3.37E-06 | 5.24E-07 | -5.19 | 5.1207044 | -9.44E-02 | 31280143  | 31280266  | NC_000001.10 |
| cg12616487 | 3.37E-06 | 5.24E-07 | -5.19 | 5.1203658 | -8.10E-02 | 62379063  | 62379186  | NC_000011.9  |
| cg25291404 | 3.37E-06 | 5.25E-07 | -5.19 | 5.1192267 | -9.86E-02 | 30252580  | 30252703  | NC_000020.10 |
| cg26720404 | 3.38E-06 | 5.25E-07 | -5.19 | 5.1185368 | -4.59E-02 | 143584869 | 143584992 | NC_000005.9  |
| cg21592463 | 3.38E-06 | 5.26E-07 | -5.19 | 5.1180898 | -8.58E-02 | 85756447  | 85756570  | NC_000005.9  |
| cg24785067 | 3.38E-06 | 5.26E-07 | -5.19 | 5.1179431 | -3.86E-02 | 19929052  | 19929175  | NC_000018.9  |
| cg05159438 | 3.38E-06 | 5.26E-07 | -5.19 | 5.1177141 | -6.59E-02 | 69515681  | 69515804  | NC_000011.9  |
| cg09712464 | 3.38E-06 | 5.26E-07 | -5.19 | 5.1167095 | -1.12E-01 | 2627328   | 2627451   | NC_000017.10 |
| cg05626927 | 3.38E-06 | 5.26E-07 | -5.19 | 5.116531  | -1.16E-01 | 14362239  | 14362362  | NC_000004.11 |
| cg20010873 | 3.38E-06 | 5.26E-07 | -5.19 | 5.1163291 | -2.94E-02 | 37376864  | 37376987  | NC_000020.10 |
| cg10772185 | 3.39E-06 | 5.27E-07 | -5.19 | 5.1154266 | -1.07E-01 | 34320548  | 34320671  | NC_000010.10 |
| cg16152136 | 3.39E-06 | 5.27E-07 | -5.19 | 5.1149685 | -1.17E-01 | 102015912 | 102016035 | NC_000008.10 |
| cg20916262 | 3.39E-06 | 5.27E-07 | -5.19 | 5.1147452 | -4.60E-02 | 44545539  | 44545662  | NC_000013.10 |
| cg13751113 | 3.39E-06 | 5.27E-07 | -5.19 | 5.1146436 | -1.20E-01 | 118085214 | 118085337 | NC_000011.9  |
| cg18645316 | 3.39E-06 | 5.27E-07 | -5.19 | 5.1146104 | -8.12E-02 | 73381995  | 73382118  | NC_000010.10 |
| cg03376719 | 3.39E-06 | 5.28E-07 | -5.19 | 5.1141882 | -2.73E-02 | 105086940 | 105087063 | NC_000003.11 |
| cg14530445 | 3.39E-06 | 5.28E-07 | -5.19 | 5.1141667 | -2.17E-02 | 145507324 | 145507447 | NC_000001.10 |

|               |          |          |       |           |           |           |           |              |
|---------------|----------|----------|-------|-----------|-----------|-----------|-----------|--------------|
| cg01975858    | 3.39E-06 | 5.28E-07 | -5.19 | 5.113188  | -6.38E-02 | 15907517  | 15907640  | NC_000012.11 |
| cg24084606    | 3.39E-06 | 5.28E-07 | -5.19 | 5.1129976 | -8.99E-02 | 45430113  | 45430236  | NC_000019.9  |
| cg20979737    | 3.40E-06 | 5.29E-07 | -5.19 | 5.1124278 | -1.03E-01 | 244964768 | 244964891 | NC_000001.10 |
| cg14254396    | 3.40E-06 | 5.29E-07 | -5.19 | 5.1116523 | -1.17E-01 | 5294252   | 5294375   | NC_000019.9  |
| cg00099441    | 3.40E-06 | 5.29E-07 | -5.19 | 5.1110157 | -2.18E-02 | 11264766  | 11264889  | NC_000002.11 |
| cg10692693    | 3.40E-06 | 5.29E-07 | -5.19 | 5.1108966 | -1.38E-01 | 101688648 | 101688771 | NC_000007.13 |
| ch.4.2595101F | 3.40E-06 | 5.30E-07 | -5.19 | 5.1106393 | -1.39E-02 | 2625303   | 2625426   | NC_000004.11 |
| cg17959943    | 3.40E-06 | 5.30E-07 | -5.19 | 5.1103716 | -2.31E-02 | 135194977 | 135195100 | NC_000007.13 |
| cg17280299    | 3.41E-06 | 5.30E-07 | -5.19 | 5.109625  | -7.36E-02 | 132082690 | 132082813 | NC_000005.9  |
| cg12168066    | 3.41E-06 | 5.30E-07 | -5.19 | 5.1091253 | -8.01E-02 | 53464814  | 53464937  | NC_000014.8  |
| cg17382841    | 3.41E-06 | 5.31E-07 | -5.19 | 5.1083241 | -9.00E-02 | 38445614  | 38445737  | NC_000005.9  |
| cg22396691    | 3.41E-06 | 5.31E-07 | -5.19 | 5.1080073 | -1.20E-02 | 15106968  | 15107091  | NC_000003.11 |
| cg18808692    | 3.41E-06 | 5.31E-07 | -5.19 | 5.1079454 | -8.40E-02 | 177399722 | 177399845 | NC_000005.9  |
| cg17940190    | 3.41E-06 | 5.31E-07 | -5.19 | 5.1075715 | -2.52E-02 | 49547700  | 49547823  | NC_000020.10 |
| cg11539351    | 3.42E-06 | 5.32E-07 | -5.19 | 5.1067079 | -9.77E-02 | 65925     | 66048     | NC_000002.11 |
| cg17579753    | 3.42E-06 | 5.32E-07 | -5.19 | 5.1066534 | -1.06E-01 | 34079998  | 34080121  | NC_000017.10 |
| cg13339454    | 3.42E-06 | 5.32E-07 | -5.19 | 5.1065971 | -9.29E-02 | 242127690 | 242127813 | NC_000002.11 |
| cg10016175    | 3.42E-06 | 5.32E-07 | -5.19 | 5.106109  | -7.32E-02 | 88747919  | 88748042  | NC_000016.9  |
| cg07966717    | 3.42E-06 | 5.32E-07 | -5.19 | 5.1056901 | -1.13E-02 | 156675485 | 156675608 | NC_000001.10 |
| cg26503644    | 3.42E-06 | 5.32E-07 | -5.19 | 5.1055568 | -2.58E-02 | 25673513  | 25673636  | NC_000017.10 |
| cg13649658    | 3.42E-06 | 5.33E-07 | -5.19 | 5.1047883 | -9.94E-02 | 140680393 | 140680516 | NC_000009.11 |
| cg21041181    | 3.43E-06 | 5.33E-07 | -5.19 | 5.1036744 | -3.11E-02 | 42721947  | 42722070  | NC_000002.11 |
| cg07457252    | 3.43E-06 | 5.34E-07 | -5.19 | 5.1032842 | -8.64E-02 | 172044302 | 172044425 | NC_000005.9  |
| cg05386977    | 3.43E-06 | 5.34E-07 | -5.19 | 5.1026712 | -5.93E-02 | 4300182   | 4300305   | NC_000007.13 |
| cg14072126    | 3.43E-06 | 5.34E-07 | -5.19 | 5.1022135 | -4.60E-02 | 48132074  | 48132197  | NC_000002.11 |

|            |          |          |       |           |           |           |           |              |
|------------|----------|----------|-------|-----------|-----------|-----------|-----------|--------------|
| cg05149537 | 3.43E-06 | 5.34E-07 | -5.19 | 5.1021469 | -4.85E-02 | 45709699  | 45709822  | NC_000022.10 |
| cg00321614 | 3.43E-06 | 5.34E-07 | -5.19 | 5.1021053 | -8.92E-02 | 172856932 | 172857055 | NC_000005.9  |
| cg26973714 | 3.43E-06 | 5.34E-07 | -5.19 | 5.1017638 | -3.55E-02 | 104609524 | 104609647 | NC_000012.11 |
| cg23109721 | 3.44E-06 | 5.35E-07 | -5.19 | 5.1003302 | -5.73E-02 | 106886537 | 106886660 | NC_000002.11 |
| cg14529474 | 3.44E-06 | 5.35E-07 | -5.19 | 5.0999574 | -4.54E-02 | 82269526  | 82269649  | NC_000001.10 |
| cg01923523 | 3.44E-06 | 5.36E-07 | -5.19 | 5.099597  | -2.63E-02 | 3712654   | 3712777   | NC_000001.10 |
| cg19733833 | 3.44E-06 | 5.36E-07 | -5.19 | 5.0993976 | -2.49E-02 | 79791331  | 79791454  | NC_000017.10 |
| cg25633067 | 3.44E-06 | 5.36E-07 | -5.19 | 5.0992917 | -9.20E-02 | 68037299  | 68037422  | NC_000011.9  |
| cg06914509 | 3.44E-06 | 5.36E-07 | -5.19 | 5.0991742 | -4.33E-02 | 3626080   | 3626203   | NC_000019.9  |
| cg20253442 | 3.44E-06 | 5.37E-07 | -5.19 | 5.0979743 | -9.38E-02 | 93152750  | 93152873  | NC_000015.9  |
| cg19097880 | 3.44E-06 | 5.37E-07 | -5.19 | 5.0977421 | -1.14E-01 | 128160637 | 128160760 | NC_000011.9  |
| cg04368843 | 3.45E-06 | 5.37E-07 | -5.19 | 5.0975799 | -8.65E-02 | 3660815   | 3660938   | NC_000020.10 |
| cg09337254 | 3.45E-06 | 5.37E-07 | -5.19 | 5.0973694 | -7.53E-02 | 85640762  | 85640885  | NC_000002.11 |
| cg05925497 | 3.45E-06 | 5.37E-07 | -5.19 | 5.0973684 | -1.26E-01 | 100734094 | 100734217 | NC_000011.9  |
| cg17687962 | 3.45E-06 | 5.38E-07 | -5.18 | 5.095911  | -7.49E-02 | 51358244  | 51358367  | NC_000019.9  |
| cg08081156 | 3.45E-06 | 5.38E-07 | -5.18 | 5.094748  | -5.15E-02 | 101661976 | 101662099 | NC_000008.10 |
| cg12107018 | 3.45E-06 | 5.38E-07 | -5.18 | 5.0946025 | -1.27E-01 | 155276169 | 155276292 | NC_000007.13 |
| cg07740599 | 3.46E-06 | 5.38E-07 | -5.18 | 5.0945078 | -1.17E-01 | 524857    | 524980    | NC_000016.9  |
| cg23522508 | 3.46E-06 | 5.39E-07 | -5.18 | 5.0939164 | -3.19E-02 | 11287505  | 11287628  | NC_000019.9  |
| cg23476065 | 3.46E-06 | 5.39E-07 | -5.18 | 5.093841  | -8.58E-02 | 151106043 | 151106166 | NC_000007.13 |
| cg05260877 | 3.46E-06 | 5.39E-07 | -5.18 | 5.0935326 | -8.38E-02 | 102068599 | 102068722 | NC_000011.9  |
| cg13694664 | 3.46E-06 | 5.39E-07 | -5.18 | 5.0934863 | -7.83E-02 | 117039406 | 117039529 | NC_000009.11 |
| cg03209684 | 3.46E-06 | 5.39E-07 | -5.18 | 5.0934555 | -9.55E-02 | 70473648  | 70473771  | NC_000016.9  |
| cg00036110 | 3.46E-06 | 5.39E-07 | -5.18 | 5.0932876 | -1.16E-01 | 40146660  | 40146783  | NC_000001.10 |
| cg17911021 | 3.46E-06 | 5.39E-07 | -5.18 | 5.0929061 | -4.22E-02 | 45493416  | 45493539  | NC_000015.9  |

|            |          |          |       |           |           |           |           |              |
|------------|----------|----------|-------|-----------|-----------|-----------|-----------|--------------|
| cg09740468 | 3.46E-06 | 5.39E-07 | -5.18 | 5.0927008 | -9.03E-02 | 3025325   | 3025448   | NC_000006.11 |
| cg26872482 | 3.46E-06 | 5.40E-07 | -5.18 | 5.0926742 | -1.13E-01 | 32051108  | 32051231  | NC_000006.11 |
| cg05361489 | 3.46E-06 | 5.40E-07 | -5.18 | 5.0921982 | -5.95E-02 | 86610434  | 86610557  | NC_000016.9  |
| cg23183469 | 3.46E-06 | 5.40E-07 | -5.18 | 5.0916548 | -2.46E-02 | 1686288   | 1686411   | NC_000004.11 |
| cg18155853 | 3.47E-06 | 5.40E-07 | -5.18 | 5.0912357 | -1.41E-01 | 169540504 | 169540627 | NC_000003.11 |
| cg18492804 | 3.47E-06 | 5.41E-07 | -5.18 | 5.0905762 | -4.49E-02 | 54976994  | 54977117  | NC_000014.8  |
| cg05479166 | 3.47E-06 | 5.41E-07 | -5.18 | 5.0897934 | -8.66E-02 | 79609346  | 79609469  | NC_000017.10 |
| cg16779839 | 3.47E-06 | 5.41E-07 | -5.18 | 5.0896744 | -1.48E-01 | 79374327  | 79374450  | NC_000017.10 |
| cg16936421 | 3.47E-06 | 5.41E-07 | -5.18 | 5.0894342 | -1.50E-01 | 729226    | 729349    | NC_000010.10 |
| cg26711333 | 3.47E-06 | 5.41E-07 | -5.18 | 5.0893753 | -1.18E-01 | 8821019   | 8821142   | NC_000008.10 |
| cg19769982 | 3.47E-06 | 5.41E-07 | -5.18 | 5.0892414 | -8.96E-02 | 26934197  | 26934320  | NC_000021.8  |
| cg06722353 | 3.47E-06 | 5.41E-07 | -5.18 | 5.0891228 | -5.09E-02 | 99236244  | 99236367  | NC_000007.13 |
| cg09120320 | 3.47E-06 | 5.42E-07 | -5.18 | 5.0884949 | -6.15E-02 | 61926383  | 61926506  | NC_000017.10 |
| cg07041323 | 3.47E-06 | 5.42E-07 | -5.18 | 5.0884209 | -1.11E-01 | 28996044  | 28996167  | NC_000016.9  |
| cg14316629 | 3.48E-06 | 5.42E-07 | -5.18 | 5.0882733 | -1.17E-01 | 168436353 | 168436476 | NC_000006.11 |
| cg16029760 | 3.48E-06 | 5.43E-07 | -5.18 | 5.0871914 | -3.72E-02 | 65341902  | 65342025  | NC_000015.9  |
| cg05304531 | 3.48E-06 | 5.43E-07 | -5.18 | 5.0869777 | -9.74E-02 | 26797576  | 26797699  | NC_000001.10 |
| cg18896967 | 3.48E-06 | 5.43E-07 | -5.18 | 5.0868279 | -7.47E-02 | 129685428 | 129685551 | NC_000011.9  |
| cg07416975 | 3.48E-06 | 5.43E-07 | -5.18 | 5.0868112 | -1.59E-02 | 699435    | 699558    | NC_000004.11 |
| cg16610804 | 3.48E-06 | 5.43E-07 | -5.18 | 5.086744  | -7.08E-02 | 43685563  | 43685686  | NC_000012.11 |
| cg25209017 | 3.48E-06 | 5.43E-07 | -5.18 | 5.08638   | -5.78E-02 | 105170241 | 105170364 | NC_000007.13 |
| cg05509787 | 3.48E-06 | 5.43E-07 | -5.18 | 5.0860222 | -2.74E-02 | 220042852 | 220042975 | NC_000002.11 |
| cg09299924 | 3.48E-06 | 5.43E-07 | -5.18 | 5.085743  | -9.41E-02 | 73647575  | 73647698  | NC_000013.10 |
| cg05910443 | 3.48E-06 | 5.44E-07 | -5.18 | 5.0854039 | -1.31E-01 | 101688675 | 101688798 | NC_000007.13 |
| cg00770316 | 3.49E-06 | 5.44E-07 | -5.18 | 5.0841338 | -8.52E-02 | 146509846 | 146509969 | NC_000002.11 |

|                 |          |          |       |           |           |           |           |              |
|-----------------|----------|----------|-------|-----------|-----------|-----------|-----------|--------------|
| cg13573513      | 3.49E-06 | 5.44E-07 | -5.18 | 5.0840166 | -6.24E-02 | 14996143  | 14996266  | NC_000012.11 |
| cg17077288      | 3.49E-06 | 5.45E-07 | -5.18 | 5.0826015 | -8.77E-02 | 2516516   | 2516639   | NC_000001.10 |
| cg11143674      | 3.49E-06 | 5.45E-07 | -5.18 | 5.0825655 | -1.15E-01 | 99069100  | 99069223  | NC_000015.9  |
| cg17616547      | 3.50E-06 | 5.46E-07 | -5.18 | 5.0818856 | -7.18E-02 | 26688923  | 26689046  | NC_000006.11 |
| cg05604486      | 3.50E-06 | 5.46E-07 | -5.18 | 5.0818725 | -1.46E-01 | 38173002  | 38173125  | NC_000013.10 |
| cg01716296      | 3.50E-06 | 5.46E-07 | -5.18 | 5.0815651 | -7.06E-02 | 151133530 | 151133653 | NC_000004.11 |
| cg27484582      | 3.50E-06 | 5.46E-07 | -5.18 | 5.0813429 | -9.87E-02 | 2518723   | 2518846   | NC_000007.13 |
| cg23261491      | 3.50E-06 | 5.46E-07 | -5.18 | 5.0811676 | -1.00E-02 | 76953750  | 76953873  | NC_000012.11 |
| cg11287443      | 3.50E-06 | 5.46E-07 | -5.18 | 5.0811661 | -6.79E-02 | 19220710  | 19220833  | NC_000019.9  |
| cg19515518      | 3.50E-06 | 5.46E-07 | -5.18 | 5.0810255 | -2.27E-02 | 694717    | 694840    | NC_000011.9  |
| cg01052699      | 3.50E-06 | 5.47E-07 | -5.18 | 5.0797149 | -8.80E-02 | 171030995 | 171031118 | NC_000004.11 |
| cg02203380      | 3.51E-06 | 5.47E-07 | -5.18 | 5.0791438 | -7.90E-02 | 30173809  | 30173932  | NC_000007.13 |
| ch.4.165600943F | 3.51E-06 | 5.47E-07 | -5.18 | 5.0788292 | -2.44E-02 | 165381493 | 165381616 | NC_000004.11 |
| cg06937617      | 3.51E-06 | 5.47E-07 | -5.18 | 5.0787509 | -9.41E-02 | 134043362 | 134043485 | NC_000010.10 |
| cg24340898      | 3.51E-06 | 5.47E-07 | -5.18 | 5.0786756 | -9.52E-02 | 67782729  | 67782852  | NC_000008.10 |
| cg13729887      | 3.51E-06 | 5.48E-07 | -5.18 | 5.0783957 | -1.60E-02 | 48808906  | 48809029  | NC_000020.10 |
| cg24346776      | 3.51E-06 | 5.48E-07 | -5.18 | 5.0780985 | -1.18E-01 | 147737024 | 147737147 | NC_000001.10 |
| cg04718447      | 3.51E-06 | 5.48E-07 | -5.18 | 5.0779812 | -7.47E-02 | 85518989  | 85519112  | NC_000016.9  |
| cg20630887      | 3.51E-06 | 5.49E-07 | -5.18 | 5.0765776 | -9.27E-02 | 6417823   | 6417946   | NC_000001.10 |
| cg20108855      | 3.52E-06 | 5.49E-07 | -5.18 | 5.0759596 | -1.26E-01 | 2477278   | 2477401   | NC_000007.13 |
| cg25375186      | 3.52E-06 | 5.49E-07 | -5.18 | 5.0755127 | -9.27E-02 | 40149381  | 40149504  | NC_000001.10 |
| cg14067770      | 3.52E-06 | 5.49E-07 | -5.18 | 5.0751156 | -1.05E-01 | 615950    | 616073    | NC_000011.9  |
| cg19508957      | 3.52E-06 | 5.49E-07 | -5.18 | 5.0750495 | -1.68E-02 | 32908905  | 32909028  | NC_000012.11 |
| cg20136100      | 3.52E-06 | 5.50E-07 | -5.18 | 5.0745087 | -1.46E-01 | 63974860  | 63974983  | NC_000011.9  |
| cg24703339      | 3.53E-06 | 5.51E-07 | -5.18 | 5.0730003 | -9.12E-02 | 12600744  | 12600867  | NC_000001.10 |

|                 |          |          |       |           |           |           |           |              |
|-----------------|----------|----------|-------|-----------|-----------|-----------|-----------|--------------|
| cg16548911      | 3.53E-06 | 5.51E-07 | -5.18 | 5.072182  | -1.07E-01 | 50347766  | 50347889  | NC_000016.9  |
| cg04025431      | 3.53E-06 | 5.52E-07 | -5.18 | 5.0713535 | -7.06E-02 | 29093354  | 29093477  | NC_000008.10 |
| cg21189438      | 3.53E-06 | 5.52E-07 | -5.18 | 5.0711426 | -1.58E-01 | 38622559  | 38622682  | NC_000009.11 |
| cg20538707      | 3.53E-06 | 5.52E-07 | -5.18 | 5.0708214 | -6.84E-02 | 10707450  | 10707573  | NC_000017.10 |
| cg16565154      | 3.54E-06 | 5.52E-07 | -5.18 | 5.070522  | -1.37E-01 | 151129062 | 151129185 | NC_000001.10 |
| cg10630197      | 3.54E-06 | 5.52E-07 | -5.18 | 5.0703231 | -5.40E-02 | 201391350 | 201391473 | NC_000002.11 |
| cg18010617      | 3.54E-06 | 5.52E-07 | -5.18 | 5.0697015 | -1.18E-02 | 27632687  | 27632810  | NC_000002.11 |
| cg17129554      | 3.54E-06 | 5.53E-07 | -5.18 | 5.0686079 | -1.12E-01 | 76993272  | 76993395  | NC_000017.10 |
| cg22996129      | 3.54E-06 | 5.54E-07 | -5.18 | 5.0678886 | -2.09E-02 | 43226092  | 43226215  | NC_000017.10 |
| cg15153394      | 3.54E-06 | 5.54E-07 | -5.18 | 5.067852  | -7.73E-02 | 51504823  | 51504946  | NC_000019.9  |
| cg08466881      | 3.54E-06 | 5.54E-07 | -5.18 | 5.0677626 | -7.52E-03 | 49230871  | 49230994  | NC_000017.10 |
| cg12436738      | 3.55E-06 | 5.54E-07 | -5.18 | 5.0675091 | -1.52E-01 | 236579780 | 236579903 | NC_000002.11 |
| cg01530803      | 3.55E-06 | 5.54E-07 | -5.18 | 5.0674041 | -9.78E-02 | 30877800  | 30877923  | NC_000022.10 |
| cg07127957      | 3.55E-06 | 5.54E-07 | -5.18 | 5.0667955 | -5.30E-02 | 75411571  | 75411694  | NC_000010.10 |
| cg12070987      | 3.55E-06 | 5.54E-07 | -5.18 | 5.0667386 | -7.61E-02 | 67804055  | 67804178  | NC_000011.9  |
| cg26744859      | 3.55E-06 | 5.54E-07 | -5.18 | 5.0666214 | -2.64E-02 | 72396091  | 72396214  | NC_000007.13 |
| cg18048071      | 3.55E-06 | 5.54E-07 | -5.18 | 5.0664286 | -1.16E-01 | 158830035 | 158830158 | NC_000007.13 |
| cg07742989      | 3.55E-06 | 5.54E-07 | -5.18 | 5.0664258 | -2.78E-02 | 76311636  | 76311759  | NC_000006.11 |
| cg16207673      | 3.55E-06 | 5.55E-07 | -5.18 | 5.0656116 | -9.88E-02 | 108167730 | 108167853 | NC_000012.11 |
| cg18758405      | 3.55E-06 | 5.55E-07 | -5.18 | 5.0652265 | -8.87E-02 | 107451306 | 107451429 | NC_000010.10 |
| cg08855630      | 3.56E-06 | 5.56E-07 | -5.18 | 5.0632217 | -1.17E-01 | 68978377  | 68978500  | NC_000003.11 |
| cg01320780      | 3.56E-06 | 5.56E-07 | -5.18 | 5.0630943 | -3.30E-02 | 22298453  | 22298576  | NC_000008.10 |
| cg09843331      | 3.56E-06 | 5.56E-07 | -5.18 | 5.0626663 | -3.65E-02 | 169931117 | 169931240 | NC_000004.11 |
| ch.1.173201084F | 3.56E-06 | 5.57E-07 | -5.18 | 5.0626154 | -1.00E-02 | 174934461 | 174934584 | NC_000001.10 |
| cg13731106      | 3.56E-06 | 5.57E-07 | -5.18 | 5.0624281 | -5.55E-02 | 41936495  | 41936618  | NC_000009.11 |

|            |          |          |       |           |           |           |           |              |
|------------|----------|----------|-------|-----------|-----------|-----------|-----------|--------------|
| cg26687567 | 3.56E-06 | 5.57E-07 | -5.18 | 5.0617559 | -1.75E-02 | 186501284 | 186501407 | NC_000003.11 |
| cg10194295 | 3.57E-06 | 5.57E-07 | -5.18 | 5.0610497 | -9.92E-02 | 39216457  | 39216580  | NC_000017.10 |
| cg27662539 | 3.57E-06 | 5.58E-07 | -5.18 | 5.0605601 | -7.15E-02 | 149532221 | 149532344 | NC_000007.13 |
| cg23616524 | 3.57E-06 | 5.58E-07 | -5.18 | 5.0602832 | -7.11E-02 | 129466143 | 129466266 | NC_000007.13 |
| cg01059398 | 3.57E-06 | 5.58E-07 | -5.18 | 5.0600495 | -9.79E-02 | 172235808 | 172235931 | NC_000003.11 |
| cg17518286 | 3.57E-06 | 5.58E-07 | -5.18 | 5.0596602 | -7.33E-02 | 52546043  | 52546166  | NC_000015.9  |
| cg06913287 | 3.57E-06 | 5.58E-07 | -5.18 | 5.0596367 | -3.72E-02 | 18742029  | 18742152  | NC_000002.11 |
| cg03164309 | 3.57E-06 | 5.58E-07 | -5.18 | 5.0596022 | -6.97E-02 | 5336093   | 5336216   | NC_000007.13 |
| cg25164226 | 3.57E-06 | 5.58E-07 | -5.18 | 5.0595688 | -2.65E-02 | 47158357  | 47158480  | NC_000022.10 |
| cg23068665 | 3.57E-06 | 5.58E-07 | -5.18 | 5.0594293 | -2.87E-02 | 125475016 | 125475139 | NC_000006.11 |
| cg22012577 | 3.57E-06 | 5.59E-07 | -5.18 | 5.0588101 | -6.86E-02 | 29972884  | 29973007  | NC_000006.11 |
| cg22876908 | 3.58E-06 | 5.59E-07 | -5.18 | 5.0574984 | -5.67E-02 | 56325149  | 56325272  | NC_000012.11 |
| cg04018474 | 3.58E-06 | 5.60E-07 | -5.18 | 5.0563984 | -6.07E-02 | 31008003  | 31008126  | NC_000016.9  |
| cg09792696 | 3.59E-06 | 5.60E-07 | -5.18 | 5.0557809 | -7.85E-02 | 27633479  | 27633602  | NC_000001.10 |
| cg00481227 | 3.59E-06 | 5.61E-07 | -5.18 | 5.0557097 | -6.25E-02 | 36322069  | 36322192  | NC_000020.10 |
| cg09549015 | 3.59E-06 | 5.61E-07 | -5.18 | 5.055696  | -1.76E-02 | 95008041  | 95008164  | NC_000001.10 |
| cg23700278 | 3.59E-06 | 5.61E-07 | -5.18 | 5.0551018 | -8.54E-02 | 3746874   | 3746997   | NC_000004.11 |
| cg04753163 | 3.59E-06 | 5.61E-07 | -5.18 | 5.0550079 | -1.13E-01 | 42249488  | 42249611  | NC_000006.11 |
| cg23924647 | 3.59E-06 | 5.61E-07 | -5.18 | 5.0549827 | -1.50E-01 | 122227872 | 122227995 | NC_000012.11 |
| cg03940064 | 3.59E-06 | 5.61E-07 | -5.18 | 5.0544686 | -3.25E-02 | 52917389  | 52917512  | NC_000004.11 |
| cg17468267 | 3.59E-06 | 5.62E-07 | -5.18 | 5.0538758 | -1.06E-01 | 50161123  | 50161246  | NC_000022.10 |
| cg03924551 | 3.59E-06 | 5.62E-07 | -5.18 | 5.0534081 | -1.21E-01 | 25930203  | 25930326  | NC_000015.9  |
| cg01225788 | 3.59E-06 | 5.62E-07 | -5.18 | 5.0532528 | -7.33E-02 | 70404514  | 70404637  | NC_000008.10 |
| cg26024880 | 3.61E-06 | 5.64E-07 | -5.17 | 5.0497272 | -6.11E-02 | 24514417  | 24514540  | NC_000001.10 |
| cg17861791 | 3.61E-06 | 5.64E-07 | -5.17 | 5.049546  | -3.09E-02 | 113162073 | 113162196 | NC_000001.10 |

|            |          |          |       |           |           |           |           |              |
|------------|----------|----------|-------|-----------|-----------|-----------|-----------|--------------|
| cg07047815 | 3.61E-06 | 5.64E-07 | -5.17 | 5.0492239 | -1.04E-01 | 1909656   | 1909779   | NC_000011.9  |
| cg03176550 | 3.61E-06 | 5.64E-07 | -5.17 | 5.049151  | -9.53E-02 | 28996329  | 28996452  | NC_000016.9  |
| cg23104436 | 3.61E-06 | 5.64E-07 | -5.17 | 5.0489689 | -7.68E-02 | 15838747  | 15838870  | NC_000011.9  |
| cg25449283 | 3.61E-06 | 5.64E-07 | -5.17 | 5.0489373 | -1.07E-01 | 142836700 | 142836823 | NC_000007.13 |
| cg25335333 | 3.61E-06 | 5.64E-07 | -5.17 | 5.0488863 | -1.22E-01 | 104268041 | 104268164 | NC_000003.11 |
| cg08098964 | 3.61E-06 | 5.65E-07 | -5.17 | 5.0486687 | -4.81E-02 | 7680443   | 7680566   | NC_000019.9  |
| cg12121765 | 3.61E-06 | 5.65E-07 | -5.17 | 5.0478193 | -4.36E-02 | 13365657  | 13365780  | NC_000008.10 |
| cg23539633 | 3.61E-06 | 5.65E-07 | -5.17 | 5.047718  | -9.38E-02 | 116228309 | 116228432 | NC_000011.9  |
| cg01490283 | 3.61E-06 | 5.65E-07 | -5.17 | 5.0476183 | -1.73E-02 | 4066033   | 4066156   | NC_000019.9  |
| cg13522835 | 3.61E-06 | 5.65E-07 | -5.17 | 5.0475067 | -8.37E-03 | 61905166  | 61905289  | NC_000017.10 |
| cg01877879 | 3.61E-06 | 5.65E-07 | -5.17 | 5.0472082 | -1.88E-02 | 4871376   | 4871499   | NC_000017.10 |
| cg17082568 | 3.61E-06 | 5.65E-07 | -5.17 | 5.0471533 | -9.84E-02 | 42027295  | 42027418  | NC_000017.10 |
| cg07802362 | 3.62E-06 | 5.66E-07 | -5.17 | 5.0465527 | -5.22E-02 | 172313798 | 172313921 | NC_000001.10 |
| cg26504019 | 3.62E-06 | 5.66E-07 | -5.17 | 5.0464334 | -3.48E-02 | 37528663  | 37528786  | NC_000021.8  |
| cg20469689 | 3.62E-06 | 5.66E-07 | -5.17 | 5.0456938 | -6.82E-02 | 57117666  | 57117789  | NC_000011.9  |
| cg25309343 | 3.62E-06 | 5.67E-07 | -5.17 | 5.0447631 | -7.62E-02 | 51226207  | 51226330  | NC_000019.9  |
| cg04777644 | 3.63E-06 | 5.67E-07 | -5.17 | 5.0440133 | -5.42E-02 | 28752301  | 28752424  | NC_000016.9  |
| cg07069636 | 3.63E-06 | 5.67E-07 | -5.17 | 5.0439889 | -9.39E-02 | 30671749  | 30671872  | NC_000016.9  |
| cg08277548 | 3.63E-06 | 5.67E-07 | -5.17 | 5.0438976 | -7.15E-02 | 17600880  | 17601003  | NC_000001.10 |
| cg16046444 | 3.63E-06 | 5.68E-07 | -5.17 | 5.0428595 | -1.12E-01 | 200004265 | 200004388 | NC_000001.10 |
| cg12103951 | 3.63E-06 | 5.68E-07 | -5.17 | 5.042543  | -1.14E-01 | 88162314  | 88162437  | NC_000010.10 |
| cg14582193 | 3.63E-06 | 5.68E-07 | -5.17 | 5.0425079 | -1.48E-02 | 79152553  | 79152676  | NC_000015.9  |
| cg08677347 | 3.63E-06 | 5.68E-07 | -5.17 | 5.0424762 | -7.40E-02 | 19615514  | 19615637  | NC_000008.10 |
| cg06722639 | 3.63E-06 | 5.68E-07 | -5.17 | 5.0424105 | -1.18E-01 | 23624377  | 23624500  | NC_000014.8  |
| cg07993468 | 3.63E-06 | 5.69E-07 | -5.17 | 5.0417381 | -5.21E-02 | 73389632  | 73389755  | NC_000007.13 |



|               |          |          |       |           |           |           |           |              |
|---------------|----------|----------|-------|-----------|-----------|-----------|-----------|--------------|
| cg09642408    | 3.63E-06 | 5.69E-07 | -5.17 | 5.0414675 | -8.96E-02 | 101208028 | 101208151 | NC_000015.9  |
| cg11204987    | 3.64E-06 | 5.70E-07 | -5.17 | 5.0397885 | -4.90E-02 | 49723190  | 49723313  | NC_000001.10 |
| cg10868030    | 3.64E-06 | 5.70E-07 | -5.17 | 5.0393562 | -7.06E-02 | 192650    | 192773    | NC_000005.9  |
| cg14656180    | 3.65E-06 | 5.71E-07 | -5.17 | 5.0382442 | -9.56E-02 | 137701344 | 137701467 | NC_000009.11 |
| cg22669872    | 3.65E-06 | 5.71E-07 | -5.17 | 5.0381273 | -2.93E-02 | 107009064 | 107009187 | NC_000005.9  |
| cg17794524    | 3.65E-06 | 5.71E-07 | -5.17 | 5.037639  | -5.81E-02 | 101787472 | 101787595 | NC_000015.9  |
| cg14706455    | 3.65E-06 | 5.71E-07 | -5.17 | 5.0375708 | -7.11E-02 | 124776038 | 124776161 | NC_000003.11 |
| cg03201337    | 3.65E-06 | 5.71E-07 | -5.17 | 5.0373524 | -9.15E-02 | 69609995  | 69610118  | NC_000010.10 |
| ch.6.2600249F | 3.65E-06 | 5.72E-07 | -5.17 | 5.0368254 | -3.09E-02 | 135589814 | 135589937 | NC_000006.11 |
| cg16298152    | 3.65E-06 | 5.72E-07 | -5.17 | 5.0363982 | -1.84E-02 | 70234662  | 70234785  | NC_000014.8  |
| cg24446932    | 3.65E-06 | 5.72E-07 | -5.17 | 5.0360716 | -6.63E-02 | 46976264  | 46976387  | NC_000010.10 |
| cg01611777    | 3.65E-06 | 5.72E-07 | -5.17 | 5.0360278 | -1.19E-01 | 102359027 | 102359150 | NC_000002.11 |
| cg13604154    | 3.66E-06 | 5.72E-07 | -5.17 | 5.0355336 | -4.09E-02 | 129349764 | 129349887 | NC_000009.11 |
| cg09259797    | 3.66E-06 | 5.72E-07 | -5.17 | 5.0353703 | -6.76E-02 | 106650225 | 106650348 | NC_000013.10 |
| cg03115379    | 3.66E-06 | 5.73E-07 | -5.17 | 5.0348168 | -4.63E-02 | 28921288  | 28921411  | NC_000006.11 |
| cg17156767    | 3.66E-06 | 5.73E-07 | -5.17 | 5.0344086 | -3.13E-02 | 30364462  | 30364585  | NC_000019.9  |
| cg17428950    | 3.66E-06 | 5.73E-07 | -5.17 | 5.0343523 | -1.76E-02 | 45927554  | 45927677  | NC_000015.9  |
| cg10525432    | 3.66E-06 | 5.73E-07 | -5.17 | 5.0341004 | -1.02E-01 | 9540960   | 9541083   | NC_000005.9  |
| cg01447854    | 3.67E-06 | 5.74E-07 | -5.17 | 5.0325015 | -1.02E-01 | 228556332 | 228556455 | NC_000001.10 |
| cg23017002    | 3.67E-06 | 5.74E-07 | -5.17 | 5.0324501 | -1.07E-01 | 139976849 | 139976972 | NC_000006.11 |
| cg10994870    | 3.67E-06 | 5.75E-07 | -5.17 | 5.0318293 | -8.88E-02 | 242799553 | 242799676 | NC_000002.11 |
| cg06925855    | 3.67E-06 | 5.75E-07 | -5.17 | 5.0313033 | -6.98E-02 | 63792239  | 63792362  | NC_000001.10 |
| cg22821677    | 3.67E-06 | 5.75E-07 | -5.17 | 5.0312559 | -6.84E-02 | 21941178  | 21941301  | NC_000015.9  |
| cg18443210    | 3.67E-06 | 5.75E-07 | -5.17 | 5.0312369 | -3.73E-02 | 129809684 | 129809807 | NC_000010.10 |
| cg11018604    | 3.67E-06 | 5.75E-07 | -5.17 | 5.031149  | -1.30E-01 | 71507163  | 71507286  | NC_000005.9  |

|               |          |          |       |           |           |           |           |              |
|---------------|----------|----------|-------|-----------|-----------|-----------|-----------|--------------|
| cg02320980    | 3.67E-06 | 5.75E-07 | -5.17 | 5.0310457 | -6.29E-02 | 118926615 | 118926738 | NC_000010.10 |
| cg04615865    | 3.67E-06 | 5.75E-07 | -5.17 | 5.0309748 | -1.33E-01 | 121678720 | 121678843 | NC_000012.11 |
| cg23101649    | 3.67E-06 | 5.76E-07 | -5.17 | 5.0301406 | -1.04E-01 | 107354601 | 107354724 | NC_000013.10 |
| cg17050724    | 3.67E-06 | 5.76E-07 | -5.17 | 5.0301333 | -1.85E-02 | 79008885  | 79009008  | NC_000017.10 |
| cg12897370    | 3.68E-06 | 5.76E-07 | -5.17 | 5.0299071 | -1.91E-02 | 155055079 | 155055202 | NC_000006.11 |
| cg01892727    | 3.68E-06 | 5.76E-07 | -5.17 | 5.0296858 | -6.46E-02 | 3221728   | 3221851   | NC_000003.11 |
| cg17966619    | 3.68E-06 | 5.76E-07 | -5.17 | 5.0290038 | -3.87E-02 | 86160162  | 86160285  | NC_000006.11 |
| ch.10.907315R | 3.68E-06 | 5.76E-07 | -5.17 | 5.0289206 | -3.84E-02 | 35851693  | 35851816  | NC_000010.10 |
| cg27288971    | 3.68E-06 | 5.77E-07 | -5.17 | 5.0284439 | -5.80E-02 | 219081940 | 219082063 | NC_000002.11 |
| cg12907632    | 3.68E-06 | 5.77E-07 | -5.17 | 5.0281302 | -4.28E-02 | 28864748  | 28864871  | NC_000006.11 |
| cg14411527    | 3.69E-06 | 5.77E-07 | -5.17 | 5.0270046 | -4.97E-02 | 55640598  | 55640721  | NC_000007.13 |
| cg02269049    | 3.69E-06 | 5.77E-07 | -5.17 | 5.0269548 | -1.97E-02 | 104680606 | 104680729 | NC_000012.11 |
| cg10279487    | 3.69E-06 | 5.77E-07 | -5.17 | 5.0268837 | -1.63E-01 | 76355288  | 76355411  | NC_000017.10 |
| cg08258539    | 3.69E-06 | 5.77E-07 | -5.17 | 5.0268002 | -2.21E-02 | 144450491 | 144450614 | NC_000008.10 |
| cg16651347    | 3.69E-06 | 5.78E-07 | -5.17 | 5.0263516 | -9.41E-02 | 175042297 | 175042420 | NC_000001.10 |
| cg16470423    | 3.69E-06 | 5.78E-07 | -5.17 | 5.0254728 | -9.28E-02 | 178213543 | 178213666 | NC_000005.9  |
| cg01535630    | 3.69E-06 | 5.79E-07 | -5.17 | 5.0246048 | -4.24E-02 | 3689683   | 3689806   | NC_000001.10 |
| cg13134634    | 3.69E-06 | 5.79E-07 | -5.17 | 5.0244725 | -8.62E-02 | 76207486  | 76207609  | NC_000013.10 |
| cg24530616    | 3.69E-06 | 5.79E-07 | -5.17 | 5.0243592 | -1.23E-02 | 25229376  | 25229499  | NC_000020.10 |
| cg00563487    | 3.69E-06 | 5.79E-07 | -5.17 | 5.0242593 | -1.89E-02 | 39239602  | 39239725  | NC_000022.10 |
| cg16509045    | 3.70E-06 | 5.79E-07 | -5.17 | 5.0240466 | -9.83E-02 | 77502963  | 77503086  | NC_000009.11 |
| cg06341054    | 3.70E-06 | 5.79E-07 | -5.17 | 5.0238707 | -1.96E-02 | 52917543  | 52917666  | NC_000004.11 |
| cg00240178    | 3.70E-06 | 5.80E-07 | -5.17 | 5.023295  | -1.19E-01 | 74232108  | 74232231  | NC_000006.11 |
| cg12485727    | 3.70E-06 | 5.80E-07 | -5.17 | 5.0226893 | -1.20E-01 | 39762753  | 39762876  | NC_000020.10 |
| cg00952292    | 3.70E-06 | 5.80E-07 | -5.17 | 5.0222314 | -5.99E-02 | 23696496  | 23696619  | NC_000007.13 |

|            |          |          |       |           |           |           |           |              |
|------------|----------|----------|-------|-----------|-----------|-----------|-----------|--------------|
| cg26334888 | 3.70E-06 | 5.80E-07 | -5.17 | 5.0221125 | -1.12E-01 | 58653196  | 58653319  | NC_000003.11 |
| cg27101633 | 3.70E-06 | 5.80E-07 | -5.17 | 5.0218013 | -5.92E-02 | 48427018  | 48427141  | NC_000008.10 |
| cg19532742 | 3.70E-06 | 5.81E-07 | -5.17 | 5.0214547 | -8.24E-02 | 76859323  | 76859446  | NC_000010.10 |
| cg24251193 | 3.71E-06 | 5.81E-07 | -5.17 | 5.0212295 | -4.17E-02 | 156676542 | 156676665 | NC_000001.10 |
| cg25730804 | 3.71E-06 | 5.81E-07 | -5.17 | 5.0212029 | -4.51E-02 | 89747682  | 89747805  | NC_000007.13 |
| cg24291087 | 3.71E-06 | 5.81E-07 | -5.17 | 5.021147  | -6.92E-02 | 30722781  | 30722904  | NC_000004.11 |
| cg10037894 | 3.71E-06 | 5.81E-07 | -5.17 | 5.0210843 | -1.10E-01 | 172312301 | 172312424 | NC_000001.10 |
| cg16663142 | 3.71E-06 | 5.81E-07 | -5.17 | 5.0203219 | -7.54E-02 | 46683727  | 46683850  | NC_000016.9  |
| cg04493432 | 3.71E-06 | 5.82E-07 | -5.17 | 5.0197321 | -5.78E-02 | 8202280   | 8202403   | NC_000004.11 |
| cg05745142 | 3.71E-06 | 5.82E-07 | -5.17 | 5.0194651 | -1.47E-02 | 37687247  | 37687370  | NC_000004.11 |
| cg13521124 | 3.72E-06 | 5.83E-07 | -5.17 | 5.0175588 | -8.09E-02 | 66064082  | 66064205  | NC_000011.9  |
| cg18525312 | 3.72E-06 | 5.83E-07 | -5.17 | 5.0171222 | -6.26E-02 | 35312638  | 35312761  | NC_000014.8  |
| cg16905506 | 3.72E-06 | 5.84E-07 | -5.17 | 5.0161977 | -4.61E-02 | 155035748 | 155035871 | NC_000001.10 |
| cg26766373 | 3.73E-06 | 5.84E-07 | -5.17 | 5.0153329 | -7.93E-02 | 75063913  | 75064036  | NC_000011.9  |
| cg12423473 | 3.73E-06 | 5.85E-07 | -5.17 | 5.0150612 | -5.03E-02 | 45962135  | 45962258  | NC_000015.9  |
| cg04573510 | 3.73E-06 | 5.85E-07 | -5.17 | 5.0149211 | -3.23E-02 | 31707458  | 31707581  | NC_000006.11 |
| cg26536354 | 3.73E-06 | 5.85E-07 | -5.17 | 5.0148699 | -5.28E-02 | 144654954 | 144655077 | NC_000008.10 |
| cg04289880 | 3.73E-06 | 5.85E-07 | -5.17 | 5.014776  | -9.09E-02 | 45937406  | 45937529  | NC_000021.8  |
| cg05972185 | 3.73E-06 | 5.85E-07 | -5.17 | 5.0145847 | -7.71E-02 | 72972644  | 72972767  | NC_000016.9  |
| cg15950761 | 3.73E-06 | 5.85E-07 | -5.17 | 5.0145632 | -6.21E-02 | 90739926  | 90740049  | NC_000010.10 |
| cg11378484 | 3.73E-06 | 5.85E-07 | -5.17 | 5.0140333 | -3.85E-02 | 63848695  | 63848818  | NC_000003.11 |
| cg22026450 | 3.73E-06 | 5.85E-07 | -5.17 | 5.0140252 | -5.89E-02 | 145476687 | 145476810 | NC_000001.10 |
| cg01646461 | 3.73E-06 | 5.85E-07 | -5.17 | 5.0140037 | -1.13E-01 | 167536086 | 167536209 | NC_000006.11 |
| cg03850878 | 3.73E-06 | 5.85E-07 | -5.17 | 5.0137756 | -8.52E-02 | 77724563  | 77724686  | NC_000004.11 |
| cg24652679 | 3.73E-06 | 5.86E-07 | -5.17 | 5.0132929 | -2.58E-02 | 95302411  | 95302534  | NC_000010.10 |

|            |          |          |       |           |           |           |           |              |
|------------|----------|----------|-------|-----------|-----------|-----------|-----------|--------------|
| cg26907429 | 3.73E-06 | 5.86E-07 | -5.17 | 5.0130188 | -1.38E-02 | 165667743 | 165667866 | NC_000001.10 |
| cg11287647 | 3.74E-06 | 5.86E-07 | -5.17 | 5.0124344 | -1.29E-01 | 12725352  | 12725475  | NC_000007.13 |
| cg07608370 | 3.74E-06 | 5.86E-07 | -5.17 | 5.0120606 | -7.01E-02 | 1036865   | 1036988   | NC_000011.9  |
| cg01678833 | 3.74E-06 | 5.86E-07 | -5.17 | 5.0119445 | -6.50E-02 | 43547171  | 43547294  | NC_000022.10 |
| cg26994859 | 3.74E-06 | 5.86E-07 | -5.17 | 5.011836  | -7.06E-02 | 40948697  | 40948820  | NC_000019.9  |
| cg13306338 | 3.74E-06 | 5.87E-07 | -5.17 | 5.0114811 | -1.11E-01 | 4167607   | 4167730   | NC_000007.13 |
| cg14081226 | 3.74E-06 | 5.87E-07 | -5.17 | 5.0112195 | -4.01E-02 | 5563419   | 5563542   | NC_000010.10 |
| cg23338668 | 3.74E-06 | 5.87E-07 | -5.17 | 5.0107735 | -6.32E-02 | 74240259  | 74240382  | NC_000008.10 |
| cg01420369 | 3.74E-06 | 5.87E-07 | -5.17 | 5.0105405 | -6.86E-02 | 6304565   | 6304688   | NC_000012.11 |
| cg13951797 | 3.74E-06 | 5.88E-07 | -5.17 | 5.0098745 | -7.40E-02 | 2204381   | 2204504   | NC_000016.9  |
| cg24376214 | 3.75E-06 | 5.88E-07 | -5.17 | 5.0095726 | -1.14E-01 | 38918135  | 38918258  | NC_000019.9  |
| cg01377916 | 3.75E-06 | 5.88E-07 | -5.17 | 5.0094017 | -1.32E-02 | 46654868  | 46654991  | NC_000016.9  |
| cg04751035 | 3.75E-06 | 5.88E-07 | -5.17 | 5.00917   | -1.07E-01 | 79317102  | 79317225  | NC_000017.10 |
| cg14711997 | 3.75E-06 | 5.88E-07 | -5.17 | 5.0088929 | -1.42E-01 | 150652864 | 150652987 | NC_000007.13 |
| cg18500368 | 3.75E-06 | 5.89E-07 | -5.17 | 5.0082878 | -4.20E-02 | 56509603  | 56509726  | NC_000012.11 |
| cg22541400 | 3.75E-06 | 5.89E-07 | -5.17 | 5.0080809 | -8.82E-02 | 9840728   | 9840851   | NC_000017.10 |
| cg11660018 | 3.75E-06 | 5.89E-07 | -5.17 | 5.0075344 | -9.88E-02 | 86510915  | 86511038  | NC_000011.9  |
| cg10173831 | 3.75E-06 | 5.89E-07 | -5.17 | 5.007393  | -9.00E-02 | 1796058   | 1796181   | NC_000016.9  |
| cg22147898 | 3.75E-06 | 5.89E-07 | -5.17 | 5.0070257 | -5.56E-02 | 144824078 | 144824201 | NC_000008.10 |
| cg09977969 | 3.75E-06 | 5.89E-07 | -5.17 | 5.0070011 | -8.53E-02 | 1503778   | 1503901   | NC_000019.9  |
| cg11914812 | 3.76E-06 | 5.90E-07 | -5.17 | 5.006728  | -4.63E-02 | 56904792  | 56904915  | NC_000012.11 |
| cg15863552 | 3.76E-06 | 5.90E-07 | -5.17 | 5.0066876 | -1.34E-01 | 130059678 | 130059801 | NC_000011.9  |
| cg08525429 | 3.76E-06 | 5.90E-07 | -5.17 | 5.0066366 | -9.90E-02 | 1553444   | 1553567   | NC_000007.13 |
| cg08046411 | 3.76E-06 | 5.90E-07 | -5.17 | 5.0058983 | -7.17E-02 | 1979572   | 1979695   | NC_000011.9  |
| cg06209035 | 3.76E-06 | 5.90E-07 | -5.17 | 5.0058693 | -9.26E-02 | 78152169  | 78152292  | NC_000017.10 |

|                |          |          |       |           |           |           |           |              |
|----------------|----------|----------|-------|-----------|-----------|-----------|-----------|--------------|
| cg12078933     | 3.76E-06 | 5.90E-07 | -5.17 | 5.005275  | -5.47E-02 | 12781150  | 12781273  | NC_000019.9  |
| cg23629183     | 3.76E-06 | 5.91E-07 | -5.16 | 5.0048698 | -4.64E-02 | 97691400  | 97691523  | NC_000003.11 |
| cg01210113     | 3.77E-06 | 5.91E-07 | -5.16 | 5.0038924 | -1.19E-01 | 11352835  | 11352958  | NC_000016.9  |
| cg20068274     | 3.77E-06 | 5.91E-07 | -5.16 | 5.0037232 | -9.31E-02 | 142252688 | 142252811 | NC_000008.10 |
| cg03932904     | 3.77E-06 | 5.92E-07 | -5.16 | 5.0027655 | -7.67E-02 | 4707887   | 4708010   | NC_000007.13 |
| ch.17.1212751R | 3.77E-06 | 5.92E-07 | -5.16 | 5.0022248 | -1.27E-02 | 44111654  | 44111777  | NC_000017.10 |
| cg06235246     | 3.77E-06 | 5.93E-07 | -5.16 | 5.0019215 | -8.04E-02 | 195380764 | 195380887 | NC_000003.11 |
| cg07023803     | 3.77E-06 | 5.93E-07 | -5.16 | 5.0017798 | -5.83E-02 | 3389329   | 3389452   | NC_000020.10 |
| cg22300282     | 3.78E-06 | 5.93E-07 | -5.16 | 5.0014575 | -7.18E-02 | 72130553  | 72130676  | NC_000006.11 |
| cg06012483     | 3.78E-06 | 5.93E-07 | -5.16 | 5.0013395 | -1.15E-01 | 86388853  | 86388976  | NC_000016.9  |
| cg21873885     | 3.78E-06 | 5.93E-07 | -5.16 | 5.0011779 | -2.67E-02 | 33267214  | 33267337  | NC_000006.11 |
| cg04098458     | 3.78E-06 | 5.93E-07 | -5.16 | 5.000599  | -3.90E-02 | 149402448 | 149402571 | NC_000002.11 |
| cg03551963     | 3.78E-06 | 5.93E-07 | -5.16 | 5.0005335 | -4.97E-02 | 39502320  | 39502443  | NC_000005.9  |
| cg08860143     | 3.78E-06 | 5.94E-07 | -5.16 | 5.0002951 | -9.17E-02 | 30385767  | 30385890  | NC_000016.9  |
| cg16045223     | 3.78E-06 | 5.94E-07 | -5.16 | 5.0000751 | -8.31E-02 | 1206372   | 1206495   | NC_000001.10 |
| cg14199187     | 3.78E-06 | 5.94E-07 | -5.16 | 5.0000027 | -9.28E-02 | 3667620   | 3667743   | NC_000020.10 |
| cg07914962     | 3.79E-06 | 5.95E-07 | -5.16 | 4.9982685 | -6.47E-02 | 68992377  | 68992500  | NC_000002.11 |
| cg07197831     | 3.79E-06 | 5.95E-07 | -5.16 | 4.9976414 | -7.96E-02 | 27503157  | 27503280  | NC_000002.11 |
| cg10722636     | 3.79E-06 | 5.95E-07 | -5.16 | 4.9975873 | -3.37E-02 | 41252884  | 41253007  | NC_000022.10 |
| cg05285917     | 3.79E-06 | 5.95E-07 | -5.16 | 4.9974134 | -3.23E-02 | 1073525   | 1073648   | NC_000011.9  |
| cg21222888     | 3.79E-06 | 5.96E-07 | -5.16 | 4.9968957 | -1.03E-01 | 94493055  | 94493178  | NC_000013.10 |
| cg04016606     | 3.79E-06 | 5.96E-07 | -5.16 | 4.9967143 | -3.14E-02 | 167041530 | 167041653 | NC_000006.11 |
| cg13496862     | 3.79E-06 | 5.96E-07 | -5.16 | 4.9965373 | -8.97E-02 | 99069041  | 99069164  | NC_000015.9  |
| cg03265190     | 3.79E-06 | 5.96E-07 | -5.16 | 4.9963338 | -2.02E-02 | 151255250 | 151255373 | NC_000001.10 |
| cg13822911     | 3.80E-06 | 5.96E-07 | -5.16 | 4.995887  | -1.25E-01 | 107029273 | 107029396 | NC_000013.10 |

|               |          |          |       |           |           |           |           |              |
|---------------|----------|----------|-------|-----------|-----------|-----------|-----------|--------------|
| cg25752514    | 3.80E-06 | 5.97E-07 | -5.16 | 4.995188  | -1.10E-01 | 233320760 | 233320883 | NC_000002.11 |
| cg05460965    | 3.80E-06 | 5.97E-07 | -5.16 | 4.9951729 | -8.66E-02 | 36645100  | 36645223  | NC_000006.11 |
| cg12034869    | 3.80E-06 | 5.97E-07 | -5.16 | 4.9950145 | -9.44E-02 | 92555243  | 92555366  | NC_000015.9  |
| cg20008101    | 3.80E-06 | 5.97E-07 | -5.16 | 4.99467   | -1.16E-01 | 55595227  | 55595350  | NC_000014.8  |
| cg27127492    | 3.80E-06 | 5.97E-07 | -5.16 | 4.9943918 | -5.08E-02 | 96036905  | 96037028  | NC_000008.10 |
| cg13242944    | 3.80E-06 | 5.98E-07 | -5.16 | 4.9931769 | -1.20E-01 | 78524048  | 78524171  | NC_000011.9  |
| cg16636756    | 3.81E-06 | 5.98E-07 | -5.16 | 4.9927316 | -1.28E-01 | 106088755 | 106088878 | NC_000010.10 |
| cg23162396    | 3.81E-06 | 5.98E-07 | -5.16 | 4.9926814 | -1.60E-02 | 195808345 | 195808468 | NC_000003.11 |
| cg05346166    | 3.81E-06 | 5.99E-07 | -5.16 | 4.99184   | -1.64E-02 | 50779543  | 50779666  | NC_000014.8  |
| cg22075146    | 3.81E-06 | 5.99E-07 | -5.16 | 4.9914157 | -7.98E-02 | 50408111  | 50408234  | NC_000003.11 |
| cg15712267    | 3.81E-06 | 5.99E-07 | -5.16 | 4.9913805 | -8.26E-02 | 14629905  | 14630028  | NC_000019.9  |
| cg00545573    | 3.81E-06 | 5.99E-07 | -5.16 | 4.9913198 | -1.74E-02 | 118810436 | 118810559 | NC_000012.11 |
| cg23489038    | 3.81E-06 | 5.99E-07 | -5.16 | 4.991309  | -1.01E-01 | 111619190 | 111619313 | NC_000012.11 |
| cg15371711    | 3.82E-06 | 6.00E-07 | -5.16 | 4.9902851 | -5.60E-02 | 35169846  | 35169969  | NC_000020.10 |
| cg14047339    | 3.82E-06 | 6.00E-07 | -5.16 | 4.9892059 | -9.18E-02 | 45345544  | 45345667  | NC_000006.11 |
| cg25136310    | 3.82E-06 | 6.00E-07 | -5.16 | 4.9890262 | -5.14E-02 | 5690528   | 5690651   | NC_000019.9  |
| cg20618433    | 3.82E-06 | 6.01E-07 | -5.16 | 4.9883492 | -8.84E-02 | 11266919  | 11267042  | NC_000019.9  |
| cg26220725    | 3.82E-06 | 6.01E-07 | -5.16 | 4.9882657 | -7.00E-02 | 296538    | 296661    | NC_000006.11 |
| cg18843856    | 3.82E-06 | 6.01E-07 | -5.16 | 4.9877074 | -7.84E-02 | 121651050 | 121651173 | NC_000002.11 |
| ch.13.24413F  | 3.82E-06 | 6.01E-07 | -5.16 | 4.9876538 | -3.61E-02 | 20410512  | 20410635  | NC_000013.10 |
| cg15606819    | 3.83E-06 | 6.01E-07 | -5.16 | 4.987401  | -4.19E-02 | 49661083  | 49661206  | NC_000019.9  |
| ch.16.440507F | 3.83E-06 | 6.02E-07 | -5.16 | 4.9872951 | -4.13E-02 | 11940403  | 11940526  | NC_000016.9  |
| cg09326079    | 3.83E-06 | 6.02E-07 | -5.16 | 4.9864243 | -9.14E-02 | 238107402 | 238107525 | NC_000002.11 |
| cg27405010    | 3.83E-06 | 6.02E-07 | -5.16 | 4.9860996 | -7.93E-02 | 83841105  | 83841228  | NC_000016.9  |
| cg15469184    | 3.83E-06 | 6.02E-07 | -5.16 | 4.9859    | -1.05E-01 | 337539    | 337662    | NC_000008.10 |

|            |          |          |       |           |           |           |           |              |
|------------|----------|----------|-------|-----------|-----------|-----------|-----------|--------------|
| cg17107540 | 3.83E-06 | 6.02E-07 | -5.16 | 4.9858469 | -9.70E-02 | 72197470  | 72197593  | NC_000010.10 |
| cg02105002 | 3.83E-06 | 6.02E-07 | -5.16 | 4.9858371 | -9.30E-02 | 106028928 | 106029051 | NC_000010.10 |
| cg00998813 | 3.83E-06 | 6.03E-07 | -5.16 | 4.9856858 | -2.78E-02 | 49894005  | 49894128  | NC_000003.11 |
| cg02770745 | 3.83E-06 | 6.03E-07 | -5.16 | 4.9851369 | -1.33E-01 | 3926837   | 3926960   | NC_000011.9  |
| cg05386903 | 3.84E-06 | 6.03E-07 | -5.16 | 4.9845479 | -7.51E-02 | 30906810  | 30906933  | NC_000016.9  |
| cg11392885 | 3.84E-06 | 6.03E-07 | -5.16 | 4.9845371 | -4.84E-02 | 153601123 | 153601246 | NC_000004.11 |
| cg06291983 | 3.84E-06 | 6.03E-07 | -5.16 | 4.9843652 | -4.05E-02 | 102438026 | 102438149 | NC_000002.11 |
| cg24480577 | 3.84E-06 | 6.03E-07 | -5.16 | 4.9842793 | -2.18E-02 | 62169334  | 62169457  | NC_000020.10 |
| cg10665490 | 3.84E-06 | 6.04E-07 | -5.16 | 4.9836259 | -1.00E-01 | 86946078  | 86946201  | NC_000002.11 |
| cg00256074 | 3.84E-06 | 6.04E-07 | -5.16 | 4.9833941 | -4.27E-02 | 30386150  | 30386273  | NC_000016.9  |
| cg11342437 | 3.84E-06 | 6.04E-07 | -5.16 | 4.9830613 | -9.44E-02 | 47126328  | 47126451  | NC_000013.10 |
| cg09506675 | 3.84E-06 | 6.04E-07 | -5.16 | 4.9829371 | -9.87E-02 | 112727914 | 112728037 | NC_000007.13 |
| cg14897238 | 3.84E-06 | 6.04E-07 | -5.16 | 4.9827629 | -7.27E-02 | 43198283  | 43198406  | NC_000021.8  |
| cg22676843 | 3.84E-06 | 6.05E-07 | -5.16 | 4.9821107 | -2.35E-02 | 68274083  | 68274206  | NC_000016.9  |
| cg11987986 | 3.85E-06 | 6.05E-07 | -5.16 | 4.982002  | -1.93E-02 | 89874480  | 89874603  | NC_000007.13 |
| cg17358530 | 3.85E-06 | 6.05E-07 | -5.16 | 4.9817068 | -6.46E-02 | 18774589  | 18774712  | NC_000020.10 |
| cg11063811 | 3.85E-06 | 6.05E-07 | -5.16 | 4.9815237 | -4.70E-02 | 135233752 | 135233875 | NC_000010.10 |
| cg18279751 | 3.85E-06 | 6.05E-07 | -5.16 | 4.981034  | -1.92E-02 | 142490932 | 142491055 | NC_000007.13 |
| cg00784161 | 3.85E-06 | 6.06E-07 | -5.16 | 4.9808211 | -7.95E-02 | 238406432 | 238406555 | NC_000002.11 |
| cg16821558 | 3.85E-06 | 6.06E-07 | -5.16 | 4.9804948 | -1.02E-01 | 40201703  | 40201826  | NC_000001.10 |
| cg06366585 | 3.85E-06 | 6.06E-07 | -5.16 | 4.980453  | -5.43E-02 | 150338087 | 150338210 | NC_000001.10 |
| cg10390536 | 3.85E-06 | 6.06E-07 | -5.16 | 4.980444  | -1.12E-01 | 14926377  | 14926500  | NC_000011.9  |
| cg04040861 | 3.85E-06 | 6.06E-07 | -5.16 | 4.9804388 | -8.81E-02 | 144610554 | 144610677 | NC_000008.10 |
| cg04377289 | 3.85E-06 | 6.06E-07 | -5.16 | 4.9799124 | -1.30E-01 | 78991965  | 78992088  | NC_000017.10 |
| cg07901138 | 3.85E-06 | 6.06E-07 | -5.16 | 4.9794585 | -9.89E-02 | 179560752 | 179560875 | NC_000001.10 |

|            |          |          |       |           |           |           |           |              |
|------------|----------|----------|-------|-----------|-----------|-----------|-----------|--------------|
| cg00611429 | 3.86E-06 | 6.07E-07 | -5.16 | 4.9788169 | -2.17E-02 | 64072922  | 64073045  | NC_000011.9  |
| cg15931943 | 3.86E-06 | 6.07E-07 | -5.16 | 4.9787034 | -2.10E-02 | 61236909  | 61237032  | NC_000003.11 |
| cg23423329 | 3.86E-06 | 6.08E-07 | -5.16 | 4.9775542 | -6.62E-02 | 30709428  | 30709551  | NC_000006.11 |
| cg02410754 | 3.86E-06 | 6.08E-07 | -5.16 | 4.977364  | -9.56E-02 | 32410520  | 32410643  | NC_000001.10 |
| cg16419124 | 3.86E-06 | 6.08E-07 | -5.16 | 4.9773141 | -7.86E-02 | 2167270   | 2167393   | NC_000016.9  |
| cg04904468 | 3.87E-06 | 6.09E-07 | -5.16 | 4.9755164 | -6.58E-02 | 81202867  | 81202990  | NC_000010.10 |
| cg01423389 | 3.87E-06 | 6.09E-07 | -5.16 | 4.9753106 | -1.35E-01 | 170746586 | 170746709 | NC_000003.11 |
| cg21075829 | 3.88E-06 | 6.10E-07 | -5.16 | 4.9733613 | -4.63E-02 | 138153170 | 138153293 | NC_000003.11 |
| cg14367344 | 3.88E-06 | 6.10E-07 | -5.16 | 4.9732626 | -2.10E-02 | 146644336 | 146644459 | NC_000001.10 |
| cg22820921 | 3.88E-06 | 6.10E-07 | -5.16 | 4.9732331 | -6.40E-02 | 94287242  | 94287365  | NC_000007.13 |
| cg22022379 | 3.88E-06 | 6.10E-07 | -5.16 | 4.9730152 | -1.05E-01 | 50762277  | 50762400  | NC_000019.9  |
| cg18714469 | 3.88E-06 | 6.11E-07 | -5.16 | 4.9728444 | -4.92E-02 | 80146065  | 80146188  | NC_000015.9  |
| cg06861736 | 3.88E-06 | 6.11E-07 | -5.16 | 4.9723087 | -7.79E-02 | 20918809  | 20918932  | NC_000022.10 |
| cg21777602 | 3.88E-06 | 6.11E-07 | -5.16 | 4.9721321 | -4.01E-02 | 87246221  | 87246344  | NC_000002.11 |
| cg23759826 | 3.88E-06 | 6.11E-07 | -5.16 | 4.9720651 | -3.28E-02 | 35735287  | 35735410  | NC_000007.13 |
| cg05654404 | 3.88E-06 | 6.11E-07 | -5.16 | 4.9720361 | -3.18E-02 | 45452166  | 45452289  | NC_000001.10 |
| cg14633139 | 3.88E-06 | 6.11E-07 | -5.16 | 4.9717287 | -2.13E-02 | 44645728  | 44645851  | NC_000007.13 |
| cg04060163 | 3.88E-06 | 6.12E-07 | -5.16 | 4.9712224 | -3.79E-02 | 75136271  | 75136394  | NC_000017.10 |
| cg14330713 | 3.89E-06 | 6.12E-07 | -5.16 | 4.9701516 | -9.98E-02 | 36856244  | 36856367  | NC_000017.10 |
| cg05460050 | 3.89E-06 | 6.13E-07 | -5.16 | 4.969461  | -6.34E-02 | 38403507  | 38403630  | NC_000007.13 |
| cg02966404 | 3.90E-06 | 6.13E-07 | -5.16 | 4.9683912 | -1.10E-01 | 47631325  | 47631448  | NC_000007.13 |
| cg22963777 | 3.90E-06 | 6.14E-07 | -5.16 | 4.9679742 | -6.74E-02 | 34115350  | 34115473  | NC_000020.10 |
| cg14497869 | 3.90E-06 | 6.14E-07 | -5.16 | 4.9672024 | -2.97E-02 | 73297631  | 73297754  | NC_000002.11 |
| cg03554552 | 3.90E-06 | 6.15E-07 | -5.16 | 4.9665896 | -5.16E-02 | 45908146  | 45908269  | NC_000019.9  |
| cg12523403 | 3.90E-06 | 6.15E-07 | -5.16 | 4.9663824 | -1.45E-02 | 12779890  | 12780013  | NC_000019.9  |



|            |          |          |       |           |           |           |           |              |
|------------|----------|----------|-------|-----------|-----------|-----------|-----------|--------------|
| cg23103367 | 3.91E-06 | 6.16E-07 | -5.16 | 4.9650367 | -2.92E-02 | 60970259  | 60970382  | NC_000013.10 |
| cg25459301 | 3.91E-06 | 6.16E-07 | -5.16 | 4.9650311 | -3.36E-02 | 10941183  | 10941306  | NC_000008.10 |
| cg15143037 | 3.91E-06 | 6.16E-07 | -5.16 | 4.9647431 | -9.29E-02 | 75639754  | 75639877  | NC_000007.13 |
| cg16743048 | 3.91E-06 | 6.16E-07 | -5.16 | 4.9641936 | -6.71E-02 | 77457099  | 77457222  | NC_000012.11 |
| cg07926482 | 3.91E-06 | 6.16E-07 | -5.16 | 4.964082  | -2.44E-02 | 84651521  | 84651644  | NC_000016.9  |
| cg06774445 | 3.91E-06 | 6.16E-07 | -5.16 | 4.9639449 | -7.17E-02 | 36793290  | 36793413  | NC_000001.10 |
| cg19687985 | 3.91E-06 | 6.17E-07 | -5.16 | 4.9634493 | -5.05E-02 | 43478500  | 43478623  | NC_000006.11 |
| cg20609883 | 3.92E-06 | 6.17E-07 | -5.16 | 4.9622218 | -9.09E-02 | 49863421  | 49863544  | NC_000010.10 |
| cg13727946 | 3.92E-06 | 6.18E-07 | -5.16 | 4.9615586 | -6.91E-02 | 8953473   | 8953596   | NC_000019.9  |
| cg16329896 | 3.92E-06 | 6.18E-07 | -5.16 | 4.9611808 | -8.52E-02 | 47515060  | 47515183  | NC_000007.13 |
| cg04787916 | 3.92E-06 | 6.18E-07 | -5.16 | 4.9607435 | -9.11E-02 | 237755762 | 237755885 | NC_000002.11 |
| cg22827524 | 3.92E-06 | 6.18E-07 | -5.16 | 4.9606019 | -1.38E-01 | 222910746 | 222910869 | NC_000001.10 |
| cg07457944 | 3.92E-06 | 6.18E-07 | -5.16 | 4.9604562 | -2.05E-02 | 67957061  | 67957184  | NC_000018.9  |
| cg16778211 | 3.93E-06 | 6.19E-07 | -5.16 | 4.9600549 | -1.01E-01 | 64364050  | 64364173  | NC_000014.8  |
| cg08448751 | 3.93E-06 | 6.19E-07 | -5.16 | 4.9598062 | -4.95E-02 | 52479601  | 52479724  | NC_000003.11 |
| cg07364906 | 3.93E-06 | 6.19E-07 | -5.16 | 4.9596546 | -6.37E-02 | 16710288  | 16710411  | NC_000020.10 |
| cg04370174 | 3.93E-06 | 6.19E-07 | -5.15 | 4.9595163 | -8.55E-02 | 8207250   | 8207373   | NC_000004.11 |
| cg05104283 | 3.93E-06 | 6.19E-07 | -5.15 | 4.9591946 | -5.88E-02 | 75463860  | 75463983  | NC_000017.10 |
| cg13555047 | 3.94E-06 | 6.20E-07 | -5.15 | 4.9576087 | -5.00E-02 | 115610683 | 115610806 | NC_000012.11 |
| cg23234674 | 3.94E-06 | 6.20E-07 | -5.15 | 4.9574609 | -6.90E-02 | 172447822 | 172447945 | NC_000005.9  |
| cg01370805 | 3.94E-06 | 6.20E-07 | -5.15 | 4.9574503 | -1.04E-01 | 51111217  | 51111340  | NC_000022.10 |
| cg04961445 | 3.94E-06 | 6.21E-07 | -5.15 | 4.9566047 | -1.55E-02 | 23652859  | 23652982  | NC_000016.9  |
| cg19751406 | 3.94E-06 | 6.21E-07 | -5.15 | 4.9559773 | -1.22E-02 | 203764676 | 203764799 | NC_000001.10 |
| cg12145085 | 3.95E-06 | 6.22E-07 | -5.15 | 4.9551477 | -1.02E-01 | 73289895  | 73290018  | NC_000014.8  |
| cg03717201 | 3.95E-06 | 6.22E-07 | -5.15 | 4.9545965 | -5.24E-02 | 60780764  | 60780887  | NC_000002.11 |

|            |          |          |       |           |           |           |           |              |
|------------|----------|----------|-------|-----------|-----------|-----------|-----------|--------------|
| cg14885762 | 3.95E-06 | 6.22E-07 | -5.15 | 4.9541691 | -1.03E-01 | 75446450  | 75446573  | NC_000017.10 |
| cg16974516 | 3.95E-06 | 6.23E-07 | -5.15 | 4.9537692 | -9.81E-02 | 237640723 | 237640846 | NC_000002.11 |
| cg06532544 | 3.95E-06 | 6.23E-07 | -5.15 | 4.9532816 | -2.36E-02 | 19734717  | 19734840  | NC_000011.9  |
| cg07258627 | 3.95E-06 | 6.23E-07 | -5.15 | 4.952722  | -4.34E-02 | 4721683   | 4721806   | NC_000020.10 |
| cg12592321 | 3.96E-06 | 6.24E-07 | -5.15 | 4.952485  | -9.13E-02 | 109273999 | 109274122 | NC_000012.11 |
| cg18886719 | 3.96E-06 | 6.24E-07 | -5.15 | 4.9518    | -2.40E-02 | 13885707  | 13885830  | NC_000019.9  |
| cg13720022 | 3.96E-06 | 6.24E-07 | -5.15 | 4.9517956 | -7.09E-02 | 95264477  | 95264600  | NC_000009.11 |
| cg11297423 | 3.96E-06 | 6.25E-07 | -5.15 | 4.9506144 | -8.62E-02 | 2885797   | 2885920   | NC_000012.11 |
| cg14582154 | 3.96E-06 | 6.25E-07 | -5.15 | 4.9500192 | -1.16E-01 | 170531367 | 170531490 | NC_000006.11 |
| cg11292332 | 3.97E-06 | 6.25E-07 | -5.15 | 4.949587  | -1.07E-01 | 45801988  | 45802111  | NC_000007.13 |
| cg02930419 | 3.97E-06 | 6.26E-07 | -5.15 | 4.9494508 | -9.05E-02 | 19628087  | 19628210  | NC_000017.10 |
| cg04216597 | 3.97E-06 | 6.26E-07 | -5.15 | 4.9492099 | -8.63E-02 | 48639836  | 48639959  | NC_000017.10 |
| cg17574577 | 3.97E-06 | 6.26E-07 | -5.15 | 4.949158  | -3.30E-02 | 140098218 | 140098341 | NC_000004.11 |
| cg18317531 | 3.97E-06 | 6.26E-07 | -5.15 | 4.9489428 | -1.41E-01 | 225688425 | 225688548 | NC_000001.10 |
| cg12753787 | 3.97E-06 | 6.26E-07 | -5.15 | 4.9482242 | -5.68E-02 | 3239712   | 3239835   | NC_000001.10 |
| cg17731065 | 3.97E-06 | 6.26E-07 | -5.15 | 4.9480487 | -9.02E-02 | 597584    | 597707    | NC_000017.10 |
| cg26702670 | 3.97E-06 | 6.26E-07 | -5.15 | 4.9479872 | -1.17E-01 | 90456619  | 90456742  | NC_000015.9  |
| cg02475377 | 3.97E-06 | 6.27E-07 | -5.15 | 4.9477515 | -1.36E-02 | 362711    | 362834    | NC_000020.10 |
| cg14048797 | 3.97E-06 | 6.27E-07 | -5.15 | 4.9475617 | -3.17E-02 | 104186172 | 104186295 | NC_000009.11 |
| cg26731781 | 3.97E-06 | 6.27E-07 | -5.15 | 4.9475486 | -3.26E-02 | 28494031  | 28494154  | NC_000013.10 |
| cg08227926 | 3.97E-06 | 6.27E-07 | -5.15 | 4.9474266 | -4.11E-02 | 46731261  | 46731384  | NC_000022.10 |
| cg12991093 | 3.97E-06 | 6.27E-07 | -5.15 | 4.947371  | -6.73E-02 | 43649349  | 43649472  | NC_000005.9  |
| cg06799496 | 3.97E-06 | 6.27E-07 | -5.15 | 4.9473693 | -4.68E-02 | 34441774  | 34441897  | NC_000012.11 |
| cg25101225 | 3.98E-06 | 6.27E-07 | -5.15 | 4.9467708 | -8.46E-02 | 113705742 | 113705865 | NC_000013.10 |
| cg08237138 | 3.98E-06 | 6.28E-07 | -5.15 | 4.9461112 | -5.36E-02 | 35754796  | 35754919  | NC_000006.11 |

|              |          |          |       |           |           |           |           |              |
|--------------|----------|----------|-------|-----------|-----------|-----------|-----------|--------------|
| cg01497487   | 3.98E-06 | 6.28E-07 | -5.15 | 4.9456997 | -3.14E-02 | 38141814  | 38141937  | NC_000022.10 |
| cg17425590   | 3.98E-06 | 6.28E-07 | -5.15 | 4.9456289 | -8.56E-02 | 229830303 | 229830426 | NC_000001.10 |
| cg08212266   | 3.98E-06 | 6.28E-07 | -5.15 | 4.9452493 | -9.64E-02 | 101513100 | 101513223 | NC_000007.13 |
| cg03015942   | 3.99E-06 | 6.29E-07 | -5.15 | 4.9445405 | -8.16E-02 | 49229380  | 49229503  | NC_000008.10 |
| cg04689178   | 3.99E-06 | 6.29E-07 | -5.15 | 4.9443985 | -1.11E-01 | 76895722  | 76895845  | NC_000017.10 |
| cg01117269   | 3.99E-06 | 6.29E-07 | -5.15 | 4.9443339 | -6.43E-02 | 416315    | 416438    | NC_000010.10 |
| cg21792150   | 3.99E-06 | 6.29E-07 | -5.15 | 4.9442213 | -3.61E-02 | 101567884 | 101568007 | NC_000003.11 |
| cg04343794   | 3.99E-06 | 6.29E-07 | -5.15 | 4.9434773 | -4.97E-02 | 1142132   | 1142255   | NC_000001.10 |
| cg14350544   | 3.99E-06 | 6.30E-07 | -5.15 | 4.9430136 | -4.11E-02 | 97349564  | 97349687  | NC_000009.11 |
| cg21620606   | 3.99E-06 | 6.30E-07 | -5.15 | 4.9429362 | -1.22E-01 | 1342894   | 1343017   | NC_000004.11 |
| cg23525200   | 3.99E-06 | 6.30E-07 | -5.15 | 4.9429158 | -4.56E-02 | 49581783  | 49581906  | NC_000011.9  |
| cg06673910   | 3.99E-06 | 6.30E-07 | -5.15 | 4.9427552 | -2.58E-02 | 43904777  | 43904900  | NC_000010.10 |
| cg12335447   | 3.99E-06 | 6.30E-07 | -5.15 | 4.9426556 | -9.64E-02 | 37546115  | 37546238  | NC_000022.10 |
| cg09948879   | 3.99E-06 | 6.30E-07 | -5.15 | 4.9425366 | -4.51E-02 | 114321390 | 114321513 | NC_000013.10 |
| cg11702368   | 3.99E-06 | 6.30E-07 | -5.15 | 4.942352  | -8.41E-02 | 50798572  | 50798695  | NC_000001.10 |
| ch.9.941347R | 3.99E-06 | 6.30E-07 | -5.15 | 4.9421696 | -1.27E-02 | 77851250  | 77851373  | NC_000009.11 |
| cg14074626   | 4.00E-06 | 6.31E-07 | -5.15 | 4.9407826 | -1.07E-01 | 63571356  | 63571479  | NC_000001.10 |
| cg26548883   | 4.00E-06 | 6.31E-07 | -5.15 | 4.9404018 | -1.00E-01 | 34329899  | 34330022  | NC_000017.10 |
| cg09746391   | 4.00E-06 | 6.32E-07 | -5.15 | 4.9399838 | -7.97E-02 | 20224414  | 20224537  | NC_000017.10 |
| cg26196162   | 4.00E-06 | 6.32E-07 | -5.15 | 4.9395994 | -8.96E-02 | 830036    | 830159    | NC_000006.11 |
| cg23861541   | 4.00E-06 | 6.32E-07 | -5.15 | 4.9395402 | -1.16E-01 | 62934207  | 62934330  | NC_000002.11 |
| cg05498905   | 4.00E-06 | 6.32E-07 | -5.15 | 4.9394668 | -9.04E-02 | 6955698   | 6955821   | NC_000004.11 |
| cg09997546   | 4.01E-06 | 6.32E-07 | -5.15 | 4.9392061 | -1.06E-01 | 8931473   | 8931596   | NC_000011.9  |
| cg27658030   | 4.01E-06 | 6.32E-07 | -5.15 | 4.9390306 | -3.55E-02 | 2144198   | 2144321   | NC_000012.11 |
| cg02263377   | 4.01E-06 | 6.33E-07 | -5.15 | 4.9385718 | -1.82E-01 | 105195816 | 105195939 | NC_000014.8  |

|            |          |          |       |           |           |           |           |              |
|------------|----------|----------|-------|-----------|-----------|-----------|-----------|--------------|
| cg09418673 | 4.01E-06 | 6.33E-07 | -5.15 | 4.937385  | -6.04E-02 | 76372128  | 76372251  | NC_000011.9  |
| cg14753599 | 4.01E-06 | 6.33E-07 | -5.15 | 4.9373285 | -9.74E-02 | 88728361  | 88728484  | NC_000010.10 |
| cg22160883 | 4.01E-06 | 6.34E-07 | -5.15 | 4.9369281 | -4.26E-02 | 138609222 | 138609345 | NC_000005.9  |
| cg13551243 | 4.02E-06 | 6.34E-07 | -5.15 | 4.9363129 | -1.52E-02 | 146052742 | 146052865 | NC_000008.10 |
| cg14857380 | 4.02E-06 | 6.34E-07 | -5.15 | 4.9357336 | -6.46E-02 | 111577968 | 111578091 | NC_000003.11 |
| cg00239835 | 4.02E-06 | 6.35E-07 | -5.15 | 4.9356307 | -9.87E-02 | 72379867  | 72379990  | NC_000011.9  |
| cg23332610 | 4.02E-06 | 6.35E-07 | -5.15 | 4.9356029 | -7.14E-02 | 5984258   | 5984381   | NC_000017.10 |
| cg26147480 | 4.02E-06 | 6.35E-07 | -5.15 | 4.9355144 | -7.79E-02 | 126490099 | 126490222 | NC_000010.10 |
| cg08856601 | 4.02E-06 | 6.35E-07 | -5.15 | 4.9354051 | -1.08E-01 | 65730351  | 65730474  | NC_000001.10 |
| cg21194911 | 4.02E-06 | 6.35E-07 | -5.15 | 4.9353228 | -2.26E-02 | 44716733  | 44716856  | NC_000019.9  |
| cg00794673 | 4.02E-06 | 6.35E-07 | -5.15 | 4.9347818 | -1.17E-01 | 35016449  | 35016572  | NC_000006.11 |
| cg09618893 | 4.02E-06 | 6.35E-07 | -5.15 | 4.9342588 | -9.74E-02 | 31856773  | 31856896  | NC_000006.11 |
| cg07575344 | 4.03E-06 | 6.36E-07 | -5.15 | 4.9336986 | -5.44E-02 | 64055717  | 64055840  | NC_000001.10 |
| cg00065048 | 4.03E-06 | 6.36E-07 | -5.15 | 4.9336744 | -7.92E-02 | 27962037  | 27962160  | NC_000001.10 |
| cg04903509 | 4.03E-06 | 6.36E-07 | -5.15 | 4.9332355 | -8.89E-02 | 132855060 | 132855183 | NC_000012.11 |
| cg01420426 | 4.03E-06 | 6.36E-07 | -5.15 | 4.9327207 | -1.86E-02 | 41832032  | 41832155  | NC_000001.10 |
| cg05543547 | 4.03E-06 | 6.37E-07 | -5.15 | 4.9325602 | -2.23E-02 | 119135213 | 119135336 | NC_000010.10 |
| cg13316054 | 4.03E-06 | 6.37E-07 | -5.15 | 4.9319091 | -1.08E-01 | 63388439  | 63388562  | NC_000010.10 |
| cg21609034 | 4.03E-06 | 6.37E-07 | -5.15 | 4.9317001 | -1.81E-02 | 3869759   | 3869882   | NC_000020.10 |
| cg01542719 | 4.04E-06 | 6.37E-07 | -5.15 | 4.9312664 | -9.69E-02 | 154042778 | 154042901 | NC_000003.11 |
| cg09685934 | 4.04E-06 | 6.38E-07 | -5.15 | 4.9310326 | -5.87E-02 | 133827520 | 133827643 | NC_000011.9  |
| cg18941151 | 4.04E-06 | 6.38E-07 | -5.15 | 4.9305505 | -1.02E-01 | 114431234 | 114431357 | NC_000001.10 |
| cg01366454 | 4.04E-06 | 6.38E-07 | -5.15 | 4.9302832 | -3.30E-02 | 142317721 | 142317844 | NC_000008.10 |
| cg16697896 | 4.04E-06 | 6.38E-07 | -5.15 | 4.9298826 | -4.90E-02 | 71050832  | 71050955  | NC_000003.11 |
| cg19529645 | 4.04E-06 | 6.39E-07 | -5.15 | 4.9292375 | -2.79E-02 | 79196743  | 79196866  | NC_000017.10 |

|                |          |          |       |           |           |           |           |              |
|----------------|----------|----------|-------|-----------|-----------|-----------|-----------|--------------|
| cg01277983     | 4.04E-06 | 6.39E-07 | -5.15 | 4.9291363 | -9.31E-02 | 43835600  | 43835723  | NC_000022.10 |
| cg26804336     | 4.05E-06 | 6.39E-07 | -5.15 | 4.9287339 | -1.05E-01 | 67521733  | 67521856  | NC_000005.9  |
| cg05697785     | 4.05E-06 | 6.39E-07 | -5.15 | 4.9281747 | -6.68E-02 | 75416760  | 75416883  | NC_000010.10 |
| cg26394221     | 4.05E-06 | 6.39E-07 | -5.15 | 4.9281737 | -2.08E-02 | 187455488 | 187455611 | NC_000002.11 |
| cg06584224     | 4.05E-06 | 6.39E-07 | -5.15 | 4.9281095 | -9.15E-02 | 25573765  | 25573888  | NC_000022.10 |
| cg12074981     | 4.05E-06 | 6.40E-07 | -5.15 | 4.9277161 | -1.46E-02 | 43547177  | 43547300  | NC_000018.9  |
| cg18838436     | 4.05E-06 | 6.40E-07 | -5.15 | 4.9274372 | -2.12E-02 | 126565346 | 126565469 | NC_000005.9  |
| cg04112567     | 4.05E-06 | 6.40E-07 | -5.15 | 4.9274321 | -1.53E-02 | 9242340   | 9242463   | NC_000001.10 |
| cg09918674     | 4.05E-06 | 6.40E-07 | -5.15 | 4.9272901 | -1.06E-01 | 4638933   | 4639056   | NC_000019.9  |
| cg26735294     | 4.05E-06 | 6.40E-07 | -5.15 | 4.9267829 | -5.36E-02 | 47813364  | 47813487  | NC_000021.8  |
| cg07984168     | 4.05E-06 | 6.41E-07 | -5.15 | 4.9263857 | -1.05E-01 | 26626663  | 26626786  | NC_000013.10 |
| ch.5.78058155R | 4.06E-06 | 6.41E-07 | -5.15 | 4.9253898 | -2.28E-02 | 78022399  | 78022522  | NC_000005.9  |
| cg10977320     | 4.06E-06 | 6.42E-07 | -5.15 | 4.9246181 | -1.55E-02 | 96192699  | 96192822  | NC_000002.11 |
| cg05165689     | 4.06E-06 | 6.42E-07 | -5.15 | 4.9245968 | -6.35E-02 | 69534554  | 69534677  | NC_000002.11 |
| cg25391562     | 4.06E-06 | 6.42E-07 | -5.15 | 4.9244354 | -8.90E-02 | 89806996  | 89807119  | NC_000005.9  |
| cg02890365     | 4.07E-06 | 6.43E-07 | -5.15 | 4.9232236 | -8.57E-02 | 151518189 | 151518312 | NC_000001.10 |
| cg25217636     | 4.07E-06 | 6.43E-07 | -5.15 | 4.9230916 | -2.86E-02 | 37963452  | 37963575  | NC_000008.10 |
| cg02938601     | 4.07E-06 | 6.43E-07 | -5.15 | 4.9227021 | -1.73E-01 | 22961088  | 22961211  | NC_000008.10 |
| cg12320968     | 4.07E-06 | 6.43E-07 | -5.15 | 4.9220992 | -1.44E-02 | 22337153  | 22337276  | NC_000022.10 |
| cg24887211     | 4.07E-06 | 6.44E-07 | -5.15 | 4.9217218 | -9.22E-02 | 77292625  | 77292748  | NC_000014.8  |
| cg21634842     | 4.07E-06 | 6.44E-07 | -5.15 | 4.9216534 | -2.84E-02 | 82203649  | 82203772  | NC_000016.9  |
| cg26915343     | 4.08E-06 | 6.44E-07 | -5.15 | 4.9211309 | -6.68E-02 | 18902839  | 18902962  | NC_000002.11 |
| cg19947233     | 4.08E-06 | 6.44E-07 | -5.15 | 4.9208239 | -2.78E-02 | 90032727  | 90032850  | NC_000004.11 |
| cg04030848     | 4.08E-06 | 6.44E-07 | -5.15 | 4.9208014 | -8.57E-02 | 30960881  | 30961004  | NC_000022.10 |
| cg18316256     | 4.08E-06 | 6.44E-07 | -5.15 | 4.92077   | -9.57E-02 | 149491333 | 149491456 | NC_000006.11 |

|              |          |          |       |           |           |           |           |              |
|--------------|----------|----------|-------|-----------|-----------|-----------|-----------|--------------|
| cg07513814   | 4.08E-06 | 6.45E-07 | -5.15 | 4.9198556 | -6.29E-02 | 232758224 | 232758347 | NC_000002.11 |
| cg27053542   | 4.08E-06 | 6.45E-07 | -5.15 | 4.9192837 | -8.64E-02 | 34716303  | 34716426  | NC_000010.10 |
| cg04211581   | 4.08E-06 | 6.45E-07 | -5.15 | 4.9190952 | -1.33E-01 | 152011656 | 152011779 | NC_000006.11 |
| cg14400179   | 4.08E-06 | 6.46E-07 | -5.15 | 4.9190127 | -4.57E-02 | 125437078 | 125437201 | NC_000009.11 |
| cg06849723   | 4.08E-06 | 6.46E-07 | -5.15 | 4.9190074 | -8.11E-02 | 3144755   | 3144878   | NC_000011.9  |
| cg07936430   | 4.08E-06 | 6.46E-07 | -5.15 | 4.9187711 | -1.86E-02 | 30538244  | 30538367  | NC_000016.9  |
| cg12608507   | 4.09E-06 | 6.46E-07 | -5.15 | 4.9183114 | -7.28E-02 | 207025477 | 207025600 | NC_000002.11 |
| cg22626825   | 4.09E-06 | 6.46E-07 | -5.15 | 4.9176809 | -8.27E-02 | 16766180  | 16766303  | NC_000003.11 |
| cg01434562   | 4.10E-06 | 6.48E-07 | -5.15 | 4.9156959 | -1.38E-01 | 106201507 | 106201630 | NC_000010.10 |
| cg13733266   | 4.10E-06 | 6.48E-07 | -5.15 | 4.9150014 | -9.97E-02 | 85397216  | 85397339  | NC_000011.9  |
| cg19988204   | 4.10E-06 | 6.49E-07 | -5.15 | 4.9143685 | -5.04E-02 | 144798331 | 144798454 | NC_000008.10 |
| cg19979405   | 4.10E-06 | 6.49E-07 | -5.14 | 4.9138575 | -2.86E-02 | 30640621  | 30640744  | NC_000006.11 |
| cg22584335   | 4.10E-06 | 6.49E-07 | -5.14 | 4.9137357 | -3.21E-02 | 27806067  | 27806190  | NC_000002.11 |
| cg10354926   | 4.11E-06 | 6.49E-07 | -5.14 | 4.9131902 | -1.02E-01 | 104905791 | 104905914 | NC_000013.10 |
| cg26285698   | 4.11E-06 | 6.50E-07 | -5.14 | 4.9129528 | -1.07E-01 | 29757334  | 29757457  | NC_000016.9  |
| cg24605090   | 4.11E-06 | 6.50E-07 | -5.14 | 4.9126496 | -6.26E-02 | 2019943   | 2020066   | NC_000011.9  |
| cg16045459   | 4.11E-06 | 6.50E-07 | -5.14 | 4.9121052 | -8.18E-02 | 4872488   | 4872611   | NC_000017.10 |
| cg21923317   | 4.11E-06 | 6.50E-07 | -5.14 | 4.9117012 | -9.14E-02 | 3387678   | 3387801   | NC_000004.11 |
| cg12377113   | 4.12E-06 | 6.51E-07 | -5.14 | 4.9111081 | -9.70E-02 | 12775955  | 12776078  | NC_000001.10 |
| ch.7.558423R | 4.12E-06 | 6.51E-07 | -5.14 | 4.9108724 | -4.89E-02 | 21952937  | 21953060  | NC_000007.13 |
| cg07554478   | 4.12E-06 | 6.51E-07 | -5.14 | 4.910516  | -5.27E-02 | 113492074 | 113492197 | NC_000003.11 |
| cg20722458   | 4.12E-06 | 6.52E-07 | -5.14 | 4.9098085 | -1.13E-01 | 8715811   | 8715934   | NC_000002.11 |
| cg06522915   | 4.12E-06 | 6.52E-07 | -5.14 | 4.9095825 | -4.88E-02 | 73758449  | 73758572  | NC_000007.13 |
| cg27168632   | 4.12E-06 | 6.52E-07 | -5.14 | 4.9090428 | -6.07E-02 | 240212763 | 240212886 | NC_000002.11 |
| cg11118440   | 4.12E-06 | 6.52E-07 | -5.14 | 4.9089253 | -1.02E-01 | 125249923 | 125250046 | NC_000012.11 |

|            |          |          |       |           |           |           |           |              |
|------------|----------|----------|-------|-----------|-----------|-----------|-----------|--------------|
| cg14891195 | 4.13E-06 | 6.53E-07 | -5.14 | 4.9082362 | -1.39E-01 | 30353000  | 30353123  | NC_000018.9  |
| cg04037218 | 4.13E-06 | 6.53E-07 | -5.14 | 4.9081899 | -2.42E-02 | 4079534   | 4079657   | NC_000006.11 |
| cg25295329 | 4.13E-06 | 6.53E-07 | -5.14 | 4.908164  | -1.21E-01 | 106348603 | 106348726 | NC_000006.11 |
| cg03604827 | 4.13E-06 | 6.53E-07 | -5.14 | 4.9072783 | -3.85E-02 | 2076730   | 2076853   | NC_000016.9  |
| cg14474561 | 4.13E-06 | 6.54E-07 | -5.14 | 4.9066276 | -7.88E-02 | 48096466  | 48096589  | NC_000020.10 |
| cg22877452 | 4.13E-06 | 6.54E-07 | -5.14 | 4.9062275 | -6.03E-02 | 61517876  | 61517999  | NC_000001.10 |
| cg09208540 | 4.13E-06 | 6.54E-07 | -5.14 | 4.9062259 | -1.13E-01 | 135340467 | 135340590 | NC_000010.10 |
| cg18349298 | 4.14E-06 | 6.55E-07 | -5.14 | 4.9053833 | -8.82E-02 | 158450550 | 158450673 | NC_000003.11 |
| cg10289912 | 4.14E-06 | 6.55E-07 | -5.14 | 4.9047738 | -2.01E-02 | 30324033  | 30324156  | NC_000007.13 |
| cg26501657 | 4.14E-06 | 6.55E-07 | -5.14 | 4.9043555 | -1.07E-01 | 111873555 | 111873678 | NC_000012.11 |
| cg00114383 | 4.14E-06 | 6.56E-07 | -5.14 | 4.9039834 | -2.40E-02 | 28962172  | 28962295  | NC_000016.9  |
| cg17668728 | 4.15E-06 | 6.56E-07 | -5.14 | 4.9034028 | -7.28E-02 | 92747455  | 92747578  | NC_000007.13 |
| cg18352882 | 4.15E-06 | 6.56E-07 | -5.14 | 4.902866  | -9.43E-02 | 22725345  | 22725468  | NC_000010.10 |
| cg12050497 | 4.15E-06 | 6.57E-07 | -5.14 | 4.9024005 | -7.65E-02 | 14773274  | 14773397  | NC_000002.11 |
| cg03989020 | 4.15E-06 | 6.57E-07 | -5.14 | 4.9021206 | -8.66E-02 | 30002334  | 30002457  | NC_000013.10 |
| cg05654329 | 4.15E-06 | 6.57E-07 | -5.14 | 4.9018721 | -1.13E-01 | 177581506 | 177581629 | NC_000005.9  |
| cg23435082 | 4.15E-06 | 6.57E-07 | -5.14 | 4.901787  | -2.83E-02 | 117186472 | 117186595 | NC_000011.9  |
| cg13276428 | 4.15E-06 | 6.57E-07 | -5.14 | 4.9015344 | -6.71E-02 | 105048531 | 105048654 | NC_000014.8  |
| cg06939852 | 4.16E-06 | 6.58E-07 | -5.14 | 4.9008344 | -1.10E-01 | 51068651  | 51068774  | NC_000016.9  |
| cg05713486 | 4.16E-06 | 6.58E-07 | -5.14 | 4.9000771 | -8.45E-02 | 2441896   | 2442019   | NC_000011.9  |
| cg14614643 | 4.16E-06 | 6.59E-07 | -5.14 | 4.8996797 | -1.34E-01 | 56646507  | 56646630  | NC_000001.10 |
| cg12981272 | 4.16E-06 | 6.59E-07 | -5.14 | 4.8987643 | -7.98E-02 | 37281848  | 37281971  | NC_000003.11 |
| cg15353533 | 4.17E-06 | 6.60E-07 | -5.14 | 4.8979989 | -9.73E-02 | 1023291   | 1023414   | NC_000004.11 |
| cg09629657 | 4.17E-06 | 6.60E-07 | -5.14 | 4.8975153 | -1.11E-01 | 179220795 | 179220918 | NC_000005.9  |
| cg10624784 | 4.17E-06 | 6.61E-07 | -5.14 | 4.8967436 | -3.56E-02 | 77427913  | 77428036  | NC_000007.13 |

|            |          |          |       |           |           |           |           |              |
|------------|----------|----------|-------|-----------|-----------|-----------|-----------|--------------|
| cg14783891 | 4.18E-06 | 6.61E-07 | -5.14 | 4.896001  | -7.47E-02 | 27730060  | 27730183  | NC_000001.10 |
| cg12451852 | 4.18E-06 | 6.61E-07 | -5.14 | 4.895754  | -4.92E-02 | 149468989 | 149469112 | NC_000007.13 |
| cg07844518 | 4.18E-06 | 6.61E-07 | -5.14 | 4.8956628 | -8.26E-02 | 85387556  | 85387679  | NC_000016.9  |
| cg21143446 | 4.18E-06 | 6.62E-07 | -5.14 | 4.8951819 | -3.45E-02 | 108922340 | 108922463 | NC_000013.10 |
| cg19520115 | 4.18E-06 | 6.62E-07 | -5.14 | 4.8949749 | -1.73E-02 | 19811759  | 19811882  | NC_000001.10 |
| cg20362242 | 4.18E-06 | 6.63E-07 | -5.14 | 4.8938176 | -3.47E-02 | 692897    | 693020    | NC_000005.9  |
| cg16535352 | 4.19E-06 | 6.63E-07 | -5.14 | 4.8932947 | -5.19E-02 | 129945684 | 129945807 | NC_000007.13 |
| cg16261398 | 4.19E-06 | 6.63E-07 | -5.14 | 4.8924525 | -2.57E-02 | 1410750   | 1410873   | NC_000011.9  |
| cg09004566 | 4.19E-06 | 6.64E-07 | -5.14 | 4.8923056 | -9.95E-03 | 16296301  | 16296424  | NC_000019.9  |
| cg06463708 | 4.20E-06 | 6.64E-07 | -5.14 | 4.8910252 | -5.13E-02 | 33181870  | 33181993  | NC_000006.11 |
| cg11326793 | 4.20E-06 | 6.64E-07 | -5.14 | 4.8909612 | -6.92E-02 | 53499096  | 53499219  | NC_000013.10 |
| cg04538800 | 4.20E-06 | 6.65E-07 | -5.14 | 4.890837  | -9.18E-02 | 46089331  | 46089454  | NC_000017.10 |
| cg14827502 | 4.20E-06 | 6.65E-07 | -5.14 | 4.8903577 | -1.05E-01 | 150148025 | 150148148 | NC_000007.13 |
| cg22842854 | 4.20E-06 | 6.65E-07 | -5.14 | 4.8901117 | -3.05E-02 | 123319900 | 123320023 | NC_000012.11 |
| cg18081349 | 4.20E-06 | 6.65E-07 | -5.14 | 4.889958  | -4.46E-02 | 149266549 | 149266672 | NC_000005.9  |
| cg03138970 | 4.20E-06 | 6.65E-07 | -5.14 | 4.8897787 | -8.66E-02 | 177539698 | 177539821 | NC_000005.9  |
| cg07161369 | 4.20E-06 | 6.66E-07 | -5.14 | 4.8894041 | -1.06E-01 | 38350464  | 38350587  | NC_000007.13 |
| cg17143972 | 4.20E-06 | 6.66E-07 | -5.14 | 4.8890209 | -6.77E-02 | 27903338  | 27903461  | NC_000017.10 |
| cg16570455 | 4.20E-06 | 6.66E-07 | -5.14 | 4.8889455 | -9.96E-02 | 75147288  | 75147411  | NC_000002.11 |
| cg14058100 | 4.21E-06 | 6.66E-07 | -5.14 | 4.8885404 | -9.44E-02 | 104622028 | 104622151 | NC_000014.8  |
| cg12970937 | 4.21E-06 | 6.67E-07 | -5.14 | 4.8871055 | -1.17E-01 | 93188125  | 93188248  | NC_000007.13 |
| cg13439241 | 4.21E-06 | 6.68E-07 | -5.14 | 4.8865618 | -1.09E-01 | 63273507  | 63273630  | NC_000011.9  |
| cg14462402 | 4.22E-06 | 6.68E-07 | -5.14 | 4.8861214 | -7.90E-02 | 120678447 | 120678570 | NC_000011.9  |
| cg03794617 | 4.22E-06 | 6.68E-07 | -5.14 | 4.885498  | -6.10E-02 | 78796999  | 78797122  | NC_000017.10 |
| cg20211088 | 4.22E-06 | 6.68E-07 | -5.14 | 4.8853549 | -4.43E-02 | 13712555  | 13712678  | NC_000006.11 |



|                |          |          |       |           |           |           |           |              |
|----------------|----------|----------|-------|-----------|-----------|-----------|-----------|--------------|
| cg03390416     | 4.22E-06 | 6.69E-07 | -5.14 | 4.8848498 | -8.90E-02 | 47666241  | 47666364  | NC_000017.10 |
| cg00630020     | 4.22E-06 | 6.69E-07 | -5.14 | 4.8843491 | -2.60E-02 | 1306618   | 1306741   | NC_000020.10 |
| cg02667103     | 4.22E-06 | 6.69E-07 | -5.14 | 4.8842082 | -6.05E-02 | 83125178  | 83125301  | NC_000012.11 |
| cg14560571     | 4.22E-06 | 6.69E-07 | -5.14 | 4.8841766 | -7.71E-02 | 131395967 | 131396090 | NC_000009.11 |
| cg15129183     | 4.22E-06 | 6.69E-07 | -5.14 | 4.8841523 | -1.17E-01 | 169760269 | 169760392 | NC_000005.9  |
| cg01125366     | 4.22E-06 | 6.69E-07 | -5.14 | 4.8840215 | -1.21E-02 | 72218306  | 72218429  | NC_000010.10 |
| cg06441398     | 4.23E-06 | 6.70E-07 | -5.14 | 4.8835873 | -1.05E-01 | 70317455  | 70317578  | NC_000011.9  |
| cg04640971     | 4.23E-06 | 6.70E-07 | -5.14 | 4.8834523 | -6.63E-02 | 45165318  | 45165441  | NC_000002.11 |
| ch.14.1168716F | 4.23E-06 | 6.70E-07 | -5.14 | 4.8834414 | -3.17E-02 | 77543787  | 77543910  | NC_000014.8  |
| cg06992486     | 4.23E-06 | 6.70E-07 | -5.14 | 4.8833261 | -4.09E-02 | 96855353  | 96855476  | NC_000015.9  |
| cg10060191     | 4.23E-06 | 6.70E-07 | -5.14 | 4.8831994 | -1.00E-01 | 66282209  | 66282332  | NC_000016.9  |
| cg14376170     | 4.23E-06 | 6.70E-07 | -5.14 | 4.8828484 | -3.82E-02 | 156647971 | 156648094 | NC_000001.10 |
| cg05329578     | 4.23E-06 | 6.70E-07 | -5.14 | 4.8828216 | -7.18E-02 | 2241688   | 2241811   | NC_000009.11 |
| cg07663765     | 4.23E-06 | 6.71E-07 | -5.14 | 4.8815346 | -7.84E-02 | 84539641  | 84539764  | NC_000016.9  |
| cg25384157     | 4.23E-06 | 6.71E-07 | -5.14 | 4.8814007 | -6.28E-02 | 140499132 | 140499255 | NC_000009.11 |
| cg13828068     | 4.24E-06 | 6.71E-07 | -5.14 | 4.8809837 | -3.81E-02 | 86615267  | 86615390  | NC_000009.11 |
| cg24510494     | 4.24E-06 | 6.71E-07 | -5.14 | 4.8808751 | -1.74E-01 | 154144462 | 154144585 | NC_000004.11 |
| cg03221590     | 4.24E-06 | 6.72E-07 | -5.14 | 4.8807552 | -9.41E-02 | 123756314 | 123756437 | NC_000011.9  |
| cg12634932     | 4.24E-06 | 6.72E-07 | -5.14 | 4.88045   | -1.38E-01 | 43397230  | 43397353  | NC_000005.9  |
| cg26843750     | 4.24E-06 | 6.72E-07 | -5.14 | 4.8800795 | -1.18E-01 | 51426906  | 51427029  | NC_000016.9  |
| cg24613083     | 4.24E-06 | 6.72E-07 | -5.14 | 4.8797553 | -4.03E-02 | 59539715  | 59539838  | NC_000017.10 |
| cg17873910     | 4.24E-06 | 6.73E-07 | -5.14 | 4.879029  | -2.13E-02 | 153191822 | 153191945 | NC_000002.11 |
| ch.20.1437006F | 4.24E-06 | 6.73E-07 | -5.14 | 4.8788151 | -8.81E-03 | 60748300  | 60748423  | NC_000020.10 |
| cg10133908     | 4.24E-06 | 6.73E-07 | -5.14 | 4.8787628 | -5.37E-02 | 93168991  | 93169114  | NC_000010.10 |
| cg04932230     | 4.25E-06 | 6.73E-07 | -5.14 | 4.8780775 | -2.43E-02 | 54073878  | 54074001  | NC_000010.10 |

|                |          |          |       |           |           |           |           |              |
|----------------|----------|----------|-------|-----------|-----------|-----------|-----------|--------------|
| cg07896108     | 4.25E-06 | 6.73E-07 | -5.14 | 4.8780468 | -3.55E-02 | 99037846  | 99037969  | NC_000012.11 |
| cg02002391     | 4.25E-06 | 6.73E-07 | -5.14 | 4.8780227 | -1.66E-02 | 122758961 | 122759084 | NC_000005.9  |
| cg06765022     | 4.25E-06 | 6.73E-07 | -5.14 | 4.8779584 | -4.50E-02 | 76628673  | 76628796  | NC_000007.13 |
| cg12278474     | 4.25E-06 | 6.74E-07 | -5.14 | 4.8776954 | -6.06E-02 | 5221357   | 5221480   | NC_000001.10 |
| cg03648361     | 4.25E-06 | 6.74E-07 | -5.14 | 4.8776411 | -2.47E-02 | 73893010  | 73893133  | NC_000017.10 |
| cg01901210     | 4.25E-06 | 6.74E-07 | -5.14 | 4.8776312 | -3.10E-02 | 125758791 | 125758914 | NC_000005.9  |
| ch.10.2544207F | 4.25E-06 | 6.74E-07 | -5.14 | 4.8775936 | -4.30E-02 | 120798819 | 120798942 | NC_000010.10 |
| cg23244698     | 4.25E-06 | 6.74E-07 | -5.14 | 4.8775888 | -2.73E-02 | 50135527  | 50135650  | NC_000012.11 |
| cg18771357     | 4.25E-06 | 6.74E-07 | -5.14 | 4.8773787 | -2.11E-02 | 107186870 | 107186993 | NC_000013.10 |
| cg15453278     | 4.25E-06 | 6.74E-07 | -5.14 | 4.877173  | -8.44E-02 | 67134607  | 67134730  | NC_000011.9  |
| cg21301224     | 4.25E-06 | 6.74E-07 | -5.14 | 4.8766763 | -1.02E-01 | 56813677  | 56813800  | NC_000008.10 |
| cg26741280     | 4.25E-06 | 6.75E-07 | -5.14 | 4.8760543 | -4.57E-02 | 28563089  | 28563212  | NC_000017.10 |
| cg05374718     | 4.26E-06 | 6.75E-07 | -5.14 | 4.8757177 | -1.93E-02 | 112282133 | 112282256 | NC_000001.10 |
| cg00284259     | 4.26E-06 | 6.76E-07 | -5.14 | 4.8746525 | -5.44E-02 | 75827723  | 75827846  | NC_000007.13 |
| cg10746899     | 4.26E-06 | 6.76E-07 | -5.14 | 4.8744595 | -5.66E-02 | 7997653   | 7997776   | NC_000019.9  |
| cg07135942     | 4.26E-06 | 6.76E-07 | -5.14 | 4.8743842 | -5.82E-02 | 11336342  | 11336465  | NC_000016.9  |
| cg00587665     | 4.26E-06 | 6.76E-07 | -5.14 | 4.8743135 | -8.74E-02 | 100533223 | 100533346 | NC_000015.9  |
| cg00524561     | 4.26E-06 | 6.76E-07 | -5.14 | 4.8737295 | -1.05E-01 | 125197665 | 125197788 | NC_000012.11 |
| cg04548483     | 4.27E-06 | 6.77E-07 | -5.14 | 4.8725837 | -6.73E-02 | 145597148 | 145597271 | NC_000008.10 |
| cg20910807     | 4.27E-06 | 6.78E-07 | -5.14 | 4.8720862 | -6.17E-02 | 57875384  | 57875507  | NC_000020.10 |
| cg14992633     | 4.27E-06 | 6.78E-07 | -5.14 | 4.8719787 | -7.87E-02 | 129962562 | 129962685 | NC_000007.13 |
| cg06059810     | 4.28E-06 | 6.78E-07 | -5.14 | 4.8711165 | -6.41E-02 | 71587722  | 71587845  | NC_000004.11 |
| cg05158692     | 4.28E-06 | 6.78E-07 | -5.14 | 4.8710664 | -1.33E-02 | 43568545  | 43568668  | NC_000017.10 |
| cg18237277     | 4.28E-06 | 6.79E-07 | -5.14 | 4.8703161 | -2.42E-02 | 3774198   | 3774321   | NC_000001.10 |
| cg12855547     | 4.28E-06 | 6.79E-07 | -5.14 | 4.8703088 | -7.49E-02 | 112824700 | 112824823 | NC_000005.9  |

|            |          |          |       |           |           |           |           |              |
|------------|----------|----------|-------|-----------|-----------|-----------|-----------|--------------|
| cg19107511 | 4.28E-06 | 6.79E-07 | -5.14 | 4.8698255 | -1.01E-01 | 52476217  | 52476340  | NC_000012.11 |
| cg04391957 | 4.28E-06 | 6.79E-07 | -5.14 | 4.8696708 | -6.32E-02 | 57125654  | 57125777  | NC_000016.9  |
| cg14173033 | 4.28E-06 | 6.80E-07 | -5.14 | 4.8689263 | -1.09E-01 | 80545310  | 80545433  | NC_000017.10 |
| cg15109179 | 4.29E-06 | 6.80E-07 | -5.13 | 4.8679684 | -1.69E-02 | 41323082  | 41323205  | NC_000017.10 |
| cg21824114 | 4.29E-06 | 6.80E-07 | -5.13 | 4.867938  | -7.21E-03 | 41322603  | 41322726  | NC_000017.10 |
| cg13861413 | 4.29E-06 | 6.81E-07 | -5.13 | 4.8670762 | -6.85E-02 | 72941283  | 72941406  | NC_000012.11 |
| cg01975505 | 4.29E-06 | 6.81E-07 | -5.13 | 4.8670331 | -6.44E-02 | 48497828  | 48497951  | NC_000019.9  |
| cg17197519 | 4.30E-06 | 6.82E-07 | -5.13 | 4.8654075 | -7.42E-02 | 65541267  | 65541390  | NC_000015.9  |
| cg08286799 | 4.30E-06 | 6.82E-07 | -5.13 | 4.8651929 | -2.29E-02 | 89989483  | 89989606  | NC_000016.9  |
| cg18461733 | 4.30E-06 | 6.82E-07 | -5.13 | 4.8651524 | -3.20E-02 | 26188268  | 26188391  | NC_000007.13 |
| cg23251640 | 4.30E-06 | 6.83E-07 | -5.13 | 4.8649625 | -1.26E-02 | 14011416  | 14011539  | NC_000005.9  |
| cg23965214 | 4.30E-06 | 6.83E-07 | -5.13 | 4.8646242 | -7.31E-02 | 37123909  | 37124032  | NC_000017.10 |
| cg20409636 | 4.30E-06 | 6.83E-07 | -5.13 | 4.8644755 | -3.90E-02 | 58146180  | 58146303  | NC_000012.11 |
| cg13962943 | 4.30E-06 | 6.83E-07 | -5.13 | 4.8642662 | -2.72E-02 | 33385698  | 33385821  | NC_000006.11 |
| cg02338222 | 4.30E-06 | 6.83E-07 | -5.13 | 4.8639894 | -3.48E-02 | 132245400 | 132245523 | NC_000009.11 |
| cg16451004 | 4.30E-06 | 6.83E-07 | -5.13 | 4.863977  | -2.12E-02 | 27494421  | 27494544  | NC_000011.9  |
| cg09266771 | 4.31E-06 | 6.84E-07 | -5.13 | 4.8635889 | -1.09E-01 | 63207138  | 63207261  | NC_000012.11 |
| cg09006292 | 4.31E-06 | 6.84E-07 | -5.13 | 4.8629331 | -9.77E-02 | 64049408  | 64049531  | NC_000003.11 |
| cg24301690 | 4.31E-06 | 6.84E-07 | -5.13 | 4.8628427 | -4.36E-02 | 128712676 | 128712799 | NC_000003.11 |
| cg03105999 | 4.31E-06 | 6.84E-07 | -5.13 | 4.8624746 | -7.29E-02 | 821075    | 821198    | NC_000004.11 |
| cg19200814 | 4.31E-06 | 6.85E-07 | -5.13 | 4.861958  | -7.10E-02 | 21363835  | 21363958  | NC_000017.10 |
| cg06400699 | 4.32E-06 | 6.85E-07 | -5.13 | 4.8612444 | -2.71E-02 | 228328509 | 228328632 | NC_000001.10 |
| cg15742049 | 4.32E-06 | 6.85E-07 | -5.13 | 4.8611635 | -1.29E-02 | 112679103 | 112679226 | NC_000010.10 |
| cg08366885 | 4.32E-06 | 6.85E-07 | -5.13 | 4.8608706 | -1.62E-02 | 204399371 | 204399494 | NC_000002.11 |
| cg06650786 | 4.32E-06 | 6.86E-07 | -5.13 | 4.8608256 | -9.97E-02 | 15312129  | 15312252  | NC_000019.9  |

|            |          |          |       |           |           |           |           |              |
|------------|----------|----------|-------|-----------|-----------|-----------|-----------|--------------|
| cg04703696 | 4.32E-06 | 6.86E-07 | -5.13 | 4.8606607 | -7.46E-02 | 136036629 | 136036752 | NC_000009.11 |
| cg14137548 | 4.32E-06 | 6.86E-07 | -5.13 | 4.8604348 | -1.15E-01 | 50317924  | 50318047  | NC_000010.10 |
| cg16055869 | 4.32E-06 | 6.86E-07 | -5.13 | 4.8604158 | -1.19E-01 | 74864612  | 74864735  | NC_000004.11 |
| cg13583535 | 4.32E-06 | 6.86E-07 | -5.13 | 4.8603789 | -9.63E-02 | 74768041  | 74768164  | NC_000018.9  |
| cg27019717 | 4.32E-06 | 6.86E-07 | -5.13 | 4.8600638 | -1.28E-01 | 52351055  | 52351178  | NC_000014.8  |
| cg21680719 | 4.32E-06 | 6.86E-07 | -5.13 | 4.8599242 | -9.82E-02 | 38466677  | 38466800  | NC_000001.10 |
| cg14649272 | 4.32E-06 | 6.86E-07 | -5.13 | 4.8598566 | -2.60E-02 | 46402476  | 46402599  | NC_000022.10 |
| cg10848367 | 4.32E-06 | 6.86E-07 | -5.13 | 4.8598074 | -9.36E-02 | 62009065  | 62009188  | NC_000011.9  |
| cg07259660 | 4.32E-06 | 6.86E-07 | -5.13 | 4.8597172 | -1.05E-01 | 49517767  | 49517890  | NC_000010.10 |
| cg27586417 | 4.33E-06 | 6.87E-07 | -5.13 | 4.8584867 | -5.96E-02 | 85577800  | 85577923  | NC_000016.9  |
| cg04488476 | 4.33E-06 | 6.87E-07 | -5.13 | 4.858278  | -6.20E-02 | 33291696  | 33291819  | NC_000006.11 |
| cg07066635 | 4.33E-06 | 6.87E-07 | -5.13 | 4.8581995 | -2.60E-02 | 110434276 | 110434399 | NC_000012.11 |
| cg04128483 | 4.33E-06 | 6.87E-07 | -5.13 | 4.8581158 | -2.95E-02 | 38446099  | 38446222  | NC_000021.8  |
| cg21286117 | 4.33E-06 | 6.88E-07 | -5.13 | 4.857318  | -5.89E-02 | 48286851  | 48286974  | NC_000017.10 |
| cg04784327 | 4.33E-06 | 6.88E-07 | -5.13 | 4.8572874 | -6.18E-02 | 56998712  | 56998835  | NC_000016.9  |
| cg23275158 | 4.33E-06 | 6.88E-07 | -5.13 | 4.8572605 | -4.56E-02 | 77965757  | 77965880  | NC_000014.8  |
| cg00391575 | 4.33E-06 | 6.88E-07 | -5.13 | 4.8566091 | -2.61E-02 | 138554018 | 138554141 | NC_000003.11 |
| cg18807011 | 4.33E-06 | 6.89E-07 | -5.13 | 4.8565403 | -5.75E-02 | 184633572 | 184633695 | NC_000001.10 |
| cg07689821 | 4.34E-06 | 6.89E-07 | -5.13 | 4.8561991 | -3.87E-02 | 33290736  | 33290859  | NC_000006.11 |
| cg09872928 | 4.34E-06 | 6.89E-07 | -5.13 | 4.856097  | -3.68E-02 | 30910646  | 30910769  | NC_000006.11 |
| cg13856340 | 4.34E-06 | 6.89E-07 | -5.13 | 4.8559875 | -1.08E-01 | 127888818 | 127888941 | NC_000009.11 |
| cg08226300 | 4.34E-06 | 6.89E-07 | -5.13 | 4.8553843 | -9.86E-02 | 49695806  | 49695929  | NC_000003.11 |
| cg27466766 | 4.34E-06 | 6.89E-07 | -5.13 | 4.8552853 | -1.44E-02 | 144679319 | 144679442 | NC_000008.10 |
| cg04896949 | 4.34E-06 | 6.90E-07 | -5.13 | 4.8546389 | -9.53E-02 | 28918475  | 28918598  | NC_000001.10 |
| cg10095654 | 4.34E-06 | 6.90E-07 | -5.13 | 4.8540557 | -9.10E-02 | 31847633  | 31847756  | NC_000006.11 |

|            |          |          |       |           |           |           |           |              |
|------------|----------|----------|-------|-----------|-----------|-----------|-----------|--------------|
| cg24645671 | 4.34E-06 | 6.90E-07 | -5.13 | 4.8540218 | -1.09E-01 | 42656871  | 42656994  | NC_000007.13 |
| cg16780078 | 4.35E-06 | 6.91E-07 | -5.13 | 4.8532539 | -7.51E-02 | 88788422  | 88788545  | NC_000014.8  |
| cg02415341 | 4.36E-06 | 6.92E-07 | -5.13 | 4.8512377 | -9.23E-02 | 135146439 | 135146562 | NC_000010.10 |
| cg15782311 | 4.36E-06 | 6.92E-07 | -5.13 | 4.8510168 | -3.91E-02 | 113494031 | 113494154 | NC_000012.11 |
| cg26500144 | 4.36E-06 | 6.93E-07 | -5.13 | 4.8502802 | -2.63E-02 | 36646390  | 36646513  | NC_000006.11 |
| cg13935689 | 4.36E-06 | 6.93E-07 | -5.13 | 4.850061  | -8.69E-02 | 9555691   | 9555814   | NC_000001.10 |
| cg13267747 | 4.37E-06 | 6.94E-07 | -5.13 | 4.8487458 | -1.21E-02 | 141031176 | 141031299 | NC_000005.9  |
| cg21138405 | 4.37E-06 | 6.95E-07 | -5.13 | 4.8481067 | -1.42E-01 | 131827807 | 131827930 | NC_000005.9  |
| cg18282264 | 4.37E-06 | 6.95E-07 | -5.13 | 4.8478149 | -9.94E-03 | 6048883   | 6049006   | NC_000007.13 |
| cg18472410 | 4.37E-06 | 6.95E-07 | -5.13 | 4.8477699 | -1.09E-01 | 42756786  | 42756909  | NC_000005.9  |
| cg13066043 | 4.37E-06 | 6.95E-07 | -5.13 | 4.8477168 | -3.72E-02 | 24808987  | 24809110  | NC_000014.8  |
| cg15554284 | 4.37E-06 | 6.95E-07 | -5.13 | 4.8474071 | -5.83E-02 | 21203359  | 21203482  | NC_000019.9  |
| cg24781699 | 4.38E-06 | 6.96E-07 | -5.13 | 4.8457717 | -1.44E-01 | 93139398  | 93139521  | NC_000015.9  |
| cg20998127 | 4.38E-06 | 6.97E-07 | -5.13 | 4.8450996 | -1.07E-01 | 158859224 | 158859347 | NC_000007.13 |
| cg00643814 | 4.38E-06 | 6.97E-07 | -5.13 | 4.8450193 | -6.77E-02 | 106573195 | 106573318 | NC_000012.11 |
| cg14006239 | 4.38E-06 | 6.97E-07 | -5.13 | 4.8449536 | -1.01E-01 | 133970439 | 133970562 | NC_000009.11 |
| cg26224725 | 4.38E-06 | 6.97E-07 | -5.13 | 4.8446927 | -1.41E-02 | 74489898  | 74490021  | NC_000007.13 |
| cg08092680 | 4.39E-06 | 6.97E-07 | -5.13 | 4.844208  | -7.86E-02 | 96181044  | 96181167  | NC_000014.8  |
| cg14096042 | 4.39E-06 | 6.98E-07 | -5.13 | 4.843893  | -7.54E-02 | 91796464  | 91796587  | NC_000009.11 |
| cg01359534 | 4.39E-06 | 6.98E-07 | -5.13 | 4.8434911 | -7.45E-02 | 154293651 | 154293774 | NC_000001.10 |
| cg00592244 | 4.39E-06 | 6.98E-07 | -5.13 | 4.8432418 | -3.19E-02 | 66392474  | 66392597  | NC_000003.11 |
| cg07740199 | 4.39E-06 | 6.98E-07 | -5.13 | 4.84307   | -4.70E-02 | 14336295  | 14336418  | NC_000018.9  |
| cg05468458 | 4.39E-06 | 6.98E-07 | -5.13 | 4.8429815 | -8.83E-02 | 171059363 | 171059486 | NC_000005.9  |
| cg05433889 | 4.39E-06 | 6.98E-07 | -5.13 | 4.8427118 | -6.22E-02 | 128291613 | 128291736 | NC_000011.9  |
| cg08243728 | 4.39E-06 | 6.98E-07 | -5.13 | 4.8426514 | -7.25E-02 | 45905890  | 45906013  | NC_000019.9  |

|            |          |          |       |           |           |           |           |              |
|------------|----------|----------|-------|-----------|-----------|-----------|-----------|--------------|
| cg09959428 | 4.39E-06 | 6.99E-07 | -5.13 | 4.8423652 | -6.17E-02 | 61322107  | 61322230  | NC_000011.9  |
| cg03147470 | 4.39E-06 | 6.99E-07 | -5.13 | 4.8421619 | -9.35E-02 | 537178    | 537301    | NC_000010.10 |
| cg23172911 | 4.40E-06 | 6.99E-07 | -5.13 | 4.8418242 | -1.31E-01 | 165880082 | 165880205 | NC_000001.10 |
| cg21102950 | 4.40E-06 | 7.00E-07 | -5.13 | 4.8410529 | -1.72E-02 | 155524173 | 155524296 | NC_000003.11 |
| cg26501671 | 4.40E-06 | 7.00E-07 | -5.13 | 4.8408328 | -9.34E-02 | 124406358 | 124406481 | NC_000011.9  |
| cg21412215 | 4.40E-06 | 7.00E-07 | -5.13 | 4.8407276 | -8.56E-02 | 39973292  | 39973415  | NC_000008.10 |
| cg25159610 | 4.40E-06 | 7.01E-07 | -5.13 | 4.8398061 | -2.54E-02 | 57756802  | 57756925  | NC_000005.9  |
| cg00502509 | 4.41E-06 | 7.01E-07 | -5.13 | 4.8391699 | -7.28E-02 | 1956121   | 1956244   | NC_000007.13 |
| cg07531343 | 4.41E-06 | 7.01E-07 | -5.13 | 4.8386889 | -6.76E-02 | 135130472 | 135130595 | NC_000002.11 |
| cg06398908 | 4.41E-06 | 7.02E-07 | -5.13 | 4.8382083 | -1.86E-02 | 6108864   | 6108987   | NC_000019.9  |
| cg13258700 | 4.41E-06 | 7.02E-07 | -5.13 | 4.8379823 | -3.29E-02 | 156433997 | 156434120 | NC_000007.13 |
| cg07065803 | 4.41E-06 | 7.02E-07 | -5.13 | 4.8379288 | -6.49E-02 | 45921557  | 45921680  | NC_000011.9  |
| cg13445230 | 4.41E-06 | 7.02E-07 | -5.13 | 4.8376601 | -7.84E-02 | 89422493  | 89422616  | NC_000009.11 |
| cg26396357 | 4.41E-06 | 7.02E-07 | -5.13 | 4.8374036 | -7.79E-02 | 44324656  | 44324779  | NC_000001.10 |
| cg22239727 | 4.41E-06 | 7.02E-07 | -5.13 | 4.8373715 | -8.27E-02 | 19264434  | 19264557  | NC_000011.9  |
| cg00672277 | 4.42E-06 | 7.03E-07 | -5.13 | 4.8370841 | -9.84E-02 | 138169728 | 138169851 | NC_000003.11 |
| cg00852783 | 4.42E-06 | 7.03E-07 | -5.13 | 4.8370804 | -8.23E-02 | 26633632  | 26633755  | NC_000001.10 |
| cg13494498 | 4.42E-06 | 7.03E-07 | -5.13 | 4.8368896 | -7.31E-02 | 89990214  | 89990337  | NC_000016.9  |
| cg08578212 | 4.42E-06 | 7.03E-07 | -5.13 | 4.8366357 | -6.77E-02 | 1290355   | 1290478   | NC_000016.9  |
| cg05335315 | 4.42E-06 | 7.03E-07 | -5.13 | 4.8364602 | -1.30E-01 | 105635708 | 105635831 | NC_000014.8  |
| cg04310331 | 4.42E-06 | 7.03E-07 | -5.13 | 4.8361175 | -7.56E-02 | 2012332   | 2012455   | NC_000011.9  |
| cg25909396 | 4.42E-06 | 7.03E-07 | -5.13 | 4.8360039 | -9.88E-02 | 64300729  | 64300852  | NC_000017.10 |
| cg01834776 | 4.42E-06 | 7.04E-07 | -5.13 | 4.8353966 | -7.13E-02 | 24898905  | 24899028  | NC_000014.8  |
| cg23081026 | 4.42E-06 | 7.04E-07 | -5.13 | 4.8348523 | -6.55E-02 | 29452103  | 29452226  | NC_000001.10 |
| cg01882871 | 4.43E-06 | 7.04E-07 | -5.13 | 4.8345055 | -1.02E-01 | 32575548  | 32575671  | NC_000017.10 |

|                 |          |          |       |           |           |           |           |              |
|-----------------|----------|----------|-------|-----------|-----------|-----------|-----------|--------------|
| cg01083061      | 4.43E-06 | 7.04E-07 | -5.13 | 4.834414  | -2.06E-02 | 201374447 | 201374570 | NC_000002.11 |
| cg19438860      | 4.43E-06 | 7.05E-07 | -5.13 | 4.8342144 | -1.28E-01 | 11385821  | 11385944  | NC_000005.9  |
| cg08751451      | 4.43E-06 | 7.05E-07 | -5.13 | 4.834048  | -1.21E-01 | 53287690  | 53287813  | NC_000010.10 |
| cg27387222      | 4.43E-06 | 7.06E-07 | -5.13 | 4.8324108 | -1.25E-01 | 32831504  | 32831627  | NC_000012.11 |
| cg08859215      | 4.44E-06 | 7.06E-07 | -5.13 | 4.8318467 | -1.04E-01 | 66573573  | 66573696  | NC_000017.10 |
| ch.2.731300R    | 4.44E-06 | 7.06E-07 | -5.13 | 4.8316502 | -2.81E-02 | 29581438  | 29581561  | NC_000002.11 |
| cg22868518      | 4.44E-06 | 7.07E-07 | -5.13 | 4.8315388 | -3.63E-02 | 507468    | 507591    | NC_000011.9  |
| cg03479065      | 4.44E-06 | 7.07E-07 | -5.13 | 4.830849  | -1.12E-01 | 134124988 | 134125111 | NC_000003.11 |
| cg15960580      | 4.44E-06 | 7.07E-07 | -5.13 | 4.8307602 | -2.84E-02 | 179260060 | 179260183 | NC_000005.9  |
| ch.17.65853408R | 4.44E-06 | 7.07E-07 | -5.13 | 4.8306539 | -3.53E-02 | 68341813  | 68341936  | NC_000017.10 |
| cg01357135      | 4.44E-06 | 7.07E-07 | -5.13 | 4.8306027 | -1.48E-01 | 160475128 | 160475251 | NC_000003.11 |
| cg19864416      | 4.44E-06 | 7.07E-07 | -5.13 | 4.83035   | -4.98E-02 | 42498173  | 42498296  | NC_000019.9  |
| cg11984636      | 4.45E-06 | 7.09E-07 | -5.13 | 4.8285025 | -9.42E-02 | 74845706  | 74845829  | NC_000018.9  |
| cg02332073      | 4.46E-06 | 7.10E-07 | -5.13 | 4.8274651 | -1.15E-01 | 130372419 | 130372542 | NC_000007.13 |
| cg22961459      | 4.46E-06 | 7.10E-07 | -5.13 | 4.8274234 | -7.69E-02 | 54763433  | 54763556  | NC_000012.11 |
| cg12592815      | 4.46E-06 | 7.10E-07 | -5.13 | 4.8273039 | -6.47E-02 | 4300306   | 4300429   | NC_000007.13 |
| cg10442913      | 4.46E-06 | 7.11E-07 | -5.13 | 4.8256347 | -1.79E-02 | 116915309 | 116915432 | NC_000001.10 |
| cg13335341      | 4.47E-06 | 7.11E-07 | -5.13 | 4.8250157 | -7.09E-02 | 7083413   | 7083536   | NC_000017.10 |
| cg02007567      | 4.47E-06 | 7.12E-07 | -5.13 | 4.8247695 | -6.87E-02 | 10912696  | 10912819  | NC_000016.9  |
| cg05093860      | 4.47E-06 | 7.12E-07 | -5.13 | 4.8245145 | -2.50E-02 | 132441075 | 132441198 | NC_000003.11 |
| cg00936935      | 4.47E-06 | 7.12E-07 | -5.13 | 4.8244031 | -1.17E-01 | 52271899  | 52272022  | NC_000010.10 |
| cg19376858      | 4.47E-06 | 7.12E-07 | -5.13 | 4.8238767 | -7.10E-02 | 31980856  | 31980979  | NC_000006.11 |
| cg07533630      | 4.47E-06 | 7.12E-07 | -5.12 | 4.8235073 | -7.61E-02 | 18284235  | 18284358  | NC_000019.9  |
| cg07015511      | 4.48E-06 | 7.13E-07 | -5.12 | 4.8229698 | -3.29E-02 | 76497868  | 76497991  | NC_000017.10 |
| cg25006521      | 4.48E-06 | 7.13E-07 | -5.12 | 4.8227914 | -1.86E-02 | 72932588  | 72932711  | NC_000017.10 |

|            |          |          |       |           |           |           |           |              |
|------------|----------|----------|-------|-----------|-----------|-----------|-----------|--------------|
| cg09175485 | 4.48E-06 | 7.14E-07 | -5.12 | 4.8220118 | -1.02E-01 | 67020555  | 67020678  | NC_000011.9  |
| cg15033031 | 4.48E-06 | 7.14E-07 | -5.12 | 4.8220017 | -1.95E-02 | 48637941  | 48638064  | NC_000017.10 |
| cg08139206 | 4.48E-06 | 7.14E-07 | -5.12 | 4.821919  | -7.73E-02 | 103748318 | 103748441 | NC_000014.8  |
| cg16704464 | 4.48E-06 | 7.14E-07 | -5.12 | 4.8217605 | -5.71E-02 | 2819871   | 2819994   | NC_000019.9  |
| cg11869193 | 4.48E-06 | 7.14E-07 | -5.12 | 4.8208417 | -1.27E-01 | 2839187   | 2839310   | NC_000017.10 |
| cg02402946 | 4.48E-06 | 7.14E-07 | -5.12 | 4.8208293 | -8.14E-02 | 21035079  | 21035202  | NC_000013.10 |
| cg17517458 | 4.49E-06 | 7.15E-07 | -5.12 | 4.8207322 | -6.10E-02 | 11205980  | 11206103  | NC_000002.11 |
| cg19245943 | 4.49E-06 | 7.15E-07 | -5.12 | 4.8203066 | -9.79E-03 | 49403549  | 49403672  | NC_000019.9  |
| cg25606969 | 4.49E-06 | 7.15E-07 | -5.12 | 4.8198406 | -9.33E-02 | 110983728 | 110983851 | NC_000001.10 |
| cg18066182 | 4.49E-06 | 7.15E-07 | -5.12 | 4.8198111 | -7.75E-02 | 14748453  | 14748576  | NC_000011.9  |
| cg11894100 | 4.49E-06 | 7.15E-07 | -5.12 | 4.8197915 | -2.25E-02 | 71705650  | 71705773  | NC_000004.11 |
| cg12226306 | 4.49E-06 | 7.15E-07 | -5.12 | 4.8194398 | -5.79E-02 | 105087718 | 105087841 | NC_000003.11 |
| cg21449150 | 4.49E-06 | 7.16E-07 | -5.12 | 4.819271  | -3.68E-02 | 52917391  | 52917514  | NC_000004.11 |
| cg13803379 | 4.49E-06 | 7.16E-07 | -5.12 | 4.8191619 | -6.50E-02 | 241992272 | 241992395 | NC_000001.10 |
| cg16891104 | 4.49E-06 | 7.16E-07 | -5.12 | 4.8190317 | -7.21E-02 | 45681015  | 45681138  | NC_000022.10 |
| cg04870460 | 4.49E-06 | 7.16E-07 | -5.12 | 4.8189246 | -6.28E-02 | 146644887 | 146645010 | NC_000001.10 |
| cg10350350 | 4.49E-06 | 7.16E-07 | -5.12 | 4.8186179 | -1.10E-01 | 43983977  | 43984100  | NC_000011.9  |
| cg26154534 | 4.49E-06 | 7.16E-07 | -5.12 | 4.8185138 | -6.68E-02 | 241076355 | 241076478 | NC_000002.11 |
| cg08481112 | 4.50E-06 | 7.16E-07 | -5.12 | 4.8183497 | -7.08E-02 | 2544100   | 2544223   | NC_000019.9  |
| cg06107159 | 4.50E-06 | 7.16E-07 | -5.12 | 4.8182407 | -9.62E-02 | 128432243 | 128432366 | NC_000002.11 |
| cg01973771 | 4.50E-06 | 7.17E-07 | -5.12 | 4.8176295 | -2.96E-02 | 2740143   | 2740266   | NC_000019.9  |
| cg01378578 | 4.50E-06 | 7.17E-07 | -5.12 | 4.8173164 | -1.48E-02 | 207226824 | 207226947 | NC_000001.10 |
| cg17334114 | 4.50E-06 | 7.17E-07 | -5.12 | 4.8172563 | -3.43E-02 | 133646504 | 133646627 | NC_000003.11 |
| cg16586023 | 4.50E-06 | 7.18E-07 | -5.12 | 4.816254  | -5.64E-02 | 3002438   | 3002561   | NC_000019.9  |
| cg09256617 | 4.51E-06 | 7.18E-07 | -5.12 | 4.8159984 | -2.64E-02 | 44587148  | 44587271  | NC_000011.9  |



|            |          |          |       |           |           |           |           |              |
|------------|----------|----------|-------|-----------|-----------|-----------|-----------|--------------|
| cg27234786 | 4.51E-06 | 7.18E-07 | -5.12 | 4.8159818 | -6.04E-02 | 204381404 | 204381527 | NC_000001.10 |
| cg06577703 | 4.51E-06 | 7.18E-07 | -5.12 | 4.8155397 | -9.95E-02 | 79431121  | 79431244  | NC_000017.10 |
| cg14222797 | 4.51E-06 | 7.19E-07 | -5.12 | 4.8151903 | -6.71E-02 | 16859974  | 16860097  | NC_000010.10 |
| cg14575053 | 4.51E-06 | 7.19E-07 | -5.12 | 4.8151414 | -2.79E-02 | 61616390  | 61616513  | NC_000018.9  |
| cg17276535 | 4.51E-06 | 7.19E-07 | -5.12 | 4.8148739 | -9.55E-02 | 3372123   | 3372246   | NC_000004.11 |
| cg09015905 | 4.51E-06 | 7.19E-07 | -5.12 | 4.8148557 | -4.82E-02 | 10692435  | 10692558  | NC_000001.10 |
| cg04001726 | 4.51E-06 | 7.19E-07 | -5.12 | 4.8147142 | -1.35E-02 | 112547043 | 112547166 | NC_000012.11 |
| cg04275841 | 4.51E-06 | 7.19E-07 | -5.12 | 4.8142041 | -2.77E-02 | 143105966 | 143106089 | NC_000007.13 |
| cg11682083 | 4.51E-06 | 7.19E-07 | -5.12 | 4.8141859 | -1.00E-01 | 172782844 | 172782967 | NC_000005.9  |
| cg14569837 | 4.51E-06 | 7.19E-07 | -5.12 | 4.8140949 | -1.02E-01 | 55798206  | 55798329  | NC_000011.9  |
| cg12488585 | 4.51E-06 | 7.20E-07 | -5.12 | 4.8137496 | -1.04E-01 | 132434050 | 132434173 | NC_000012.11 |
| cg20124078 | 4.52E-06 | 7.20E-07 | -5.12 | 4.8129999 | -7.54E-02 | 129460903 | 129461026 | NC_000012.11 |
| cg20862309 | 4.52E-06 | 7.21E-07 | -5.12 | 4.8122601 | -7.20E-02 | 89029074  | 89029197  | NC_000014.8  |
| cg10823658 | 4.52E-06 | 7.21E-07 | -5.12 | 4.8119252 | -5.19E-02 | 10919403  | 10919526  | NC_000008.10 |
| cg24010952 | 4.52E-06 | 7.21E-07 | -5.12 | 4.8115532 | -5.57E-02 | 96670862  | 96670985  | NC_000014.8  |
| cg26775289 | 4.53E-06 | 7.22E-07 | -5.12 | 4.8110602 | -6.61E-02 | 820212    | 820335    | NC_000016.9  |
| cg07725198 | 4.53E-06 | 7.22E-07 | -5.12 | 4.8109548 | -5.95E-02 | 27229130  | 27229253  | NC_000001.10 |
| cg02032097 | 4.53E-06 | 7.22E-07 | -5.12 | 4.8109471 | -7.27E-02 | 46755916  | 46756039  | NC_000003.11 |
| cg12914657 | 4.53E-06 | 7.22E-07 | -5.12 | 4.810905  | -1.27E-01 | 150413680 | 150413803 | NC_000007.13 |
| cg27380292 | 4.53E-06 | 7.22E-07 | -5.12 | 4.810618  | -6.04E-02 | 20964888  | 20965011  | NC_000013.10 |
| cg25918833 | 4.53E-06 | 7.22E-07 | -5.12 | 4.8105287 | -9.30E-02 | 4718962   | 4719085   | NC_000011.9  |
| cg21331947 | 4.53E-06 | 7.23E-07 | -5.12 | 4.8098423 | -1.12E-01 | 36720936  | 36721059  | NC_000006.11 |
| cg03547220 | 4.53E-06 | 7.23E-07 | -5.12 | 4.8091165 | -2.98E-02 | 7069348   | 7069471   | NC_000019.9  |
| cg26474270 | 4.54E-06 | 7.23E-07 | -5.12 | 4.8088956 | -3.19E-02 | 73092823  | 73092946  | NC_000016.9  |
| cg20919799 | 4.54E-06 | 7.24E-07 | -5.12 | 4.8084021 | -5.87E-02 | 2906667   | 2906790   | NC_000011.9  |

|            |          |          |       |           |           |           |           |              |
|------------|----------|----------|-------|-----------|-----------|-----------|-----------|--------------|
| cg05155775 | 4.54E-06 | 7.24E-07 | -5.12 | 4.8081313 | -9.85E-02 | 220102434 | 220102557 | NC_000001.10 |
| cg13810385 | 4.54E-06 | 7.24E-07 | -5.12 | 4.8075446 | -6.58E-02 | 59668329  | 59668452  | NC_000011.9  |
| cg00140361 | 4.54E-06 | 7.24E-07 | -5.12 | 4.8073569 | -8.24E-02 | 31700617  | 31700740  | NC_000006.11 |
| cg23013958 | 4.54E-06 | 7.25E-07 | -5.12 | 4.8071692 | -7.63E-02 | 65612865  | 65612988  | NC_000001.10 |
| cg07368069 | 4.55E-06 | 7.25E-07 | -5.12 | 4.8067738 | -1.32E-01 | 107631018 | 107631141 | NC_000012.11 |
| cg00772714 | 4.55E-06 | 7.25E-07 | -5.12 | 4.8066717 | -2.43E-02 | 15479360  | 15479483  | NC_000001.10 |
| cg25796062 | 4.55E-06 | 7.26E-07 | -5.12 | 4.8056331 | -1.84E-02 | 127511723 | 127511846 | NC_000010.10 |
| cg03523835 | 4.56E-06 | 7.27E-07 | -5.12 | 4.8042452 | -6.49E-02 | 207223119 | 207223242 | NC_000001.10 |
| cg24890545 | 4.56E-06 | 7.27E-07 | -5.12 | 4.8041428 | -8.17E-02 | 136934526 | 136934649 | NC_000006.11 |
| cg26362605 | 4.56E-06 | 7.27E-07 | -5.12 | 4.8039314 | -5.99E-02 | 167653982 | 167654105 | NC_000006.11 |
| cg17035539 | 4.56E-06 | 7.27E-07 | -5.12 | 4.8037682 | -7.00E-02 | 229544326 | 229544449 | NC_000001.10 |
| cg10272977 | 4.56E-06 | 7.27E-07 | -5.12 | 4.8034303 | -4.99E-02 | 101674899 | 101675022 | NC_000006.11 |
| cg05132828 | 4.56E-06 | 7.28E-07 | -5.12 | 4.8024342 | -1.10E-01 | 123560479 | 123560602 | NC_000012.11 |
| cg26893451 | 4.57E-06 | 7.30E-07 | -5.12 | 4.8004055 | -7.81E-02 | 227679599 | 227679722 | NC_000001.10 |
| cg14384416 | 4.58E-06 | 7.30E-07 | -5.12 | 4.8000535 | -5.05E-02 | 193393    | 193516    | NC_000002.11 |
| cg02735962 | 4.58E-06 | 7.30E-07 | -5.12 | 4.8000121 | -1.04E-01 | 14740875  | 14740998  | NC_000010.10 |
| cg22647996 | 4.58E-06 | 7.30E-07 | -5.12 | 4.7997787 | -1.34E-01 | 141393674 | 141393797 | NC_000005.9  |
| cg25234117 | 4.58E-06 | 7.31E-07 | -5.12 | 4.7988955 | -8.26E-02 | 155423168 | 155423291 | NC_000003.11 |
| cg02770843 | 4.58E-06 | 7.31E-07 | -5.12 | 4.798861  | -1.02E-01 | 29214454  | 29214577  | NC_000019.9  |
| cg12661316 | 4.58E-06 | 7.31E-07 | -5.12 | 4.79857   | -1.37E-01 | 7029235   | 7029358   | NC_000001.10 |
| cg03655771 | 4.58E-06 | 7.31E-07 | -5.12 | 4.7980702 | -2.63E-02 | 48329672  | 48329795  | NC_000020.10 |
| cg00467326 | 4.58E-06 | 7.31E-07 | -5.12 | 4.7980331 | -2.94E-02 | 2428122   | 2428245   | NC_000019.9  |
| cg15606633 | 4.59E-06 | 7.32E-07 | -5.12 | 4.7976921 | -6.80E-02 | 130824403 | 130824526 | NC_000012.11 |
| cg21515785 | 4.59E-06 | 7.32E-07 | -5.12 | 4.7966981 | -8.24E-02 | 99886768  | 99886891  | NC_000005.9  |
| cg04042468 | 4.59E-06 | 7.33E-07 | -5.12 | 4.796433  | -1.02E-01 | 43506033  | 43506156  | NC_000022.10 |

|               |          |          |       |           |           |           |           |              |
|---------------|----------|----------|-------|-----------|-----------|-----------|-----------|--------------|
| cg02382532    | 4.60E-06 | 7.33E-07 | -5.12 | 4.7954192 | -8.32E-02 | 42110867  | 42110990  | NC_000006.11 |
| cg14765206    | 4.60E-06 | 7.34E-07 | -5.12 | 4.7952969 | -1.12E-01 | 101744219 | 101744342 | NC_000010.10 |
| cg14564558    | 4.60E-06 | 7.34E-07 | -5.12 | 4.7945168 | -1.26E-02 | 111303128 | 111303251 | NC_000006.11 |
| cg21773820    | 4.60E-06 | 7.34E-07 | -5.12 | 4.7944847 | -1.19E-01 | 96497618  | 96497741  | NC_000008.10 |
| cg25539505    | 4.60E-06 | 7.34E-07 | -5.12 | 4.7943329 | -6.88E-02 | 95634103  | 95634226  | NC_000005.9  |
| cg12741645    | 4.60E-06 | 7.34E-07 | -5.12 | 4.794206  | -1.46E-01 | 89167736  | 89167859  | NC_000015.9  |
| cg08181212    | 4.60E-06 | 7.34E-07 | -5.12 | 4.7940701 | -7.07E-02 | 122177231 | 122177354 | NC_000011.9  |
| cg15217978    | 4.60E-06 | 7.35E-07 | -5.12 | 4.7937054 | -2.39E-02 | 65343330  | 65343453  | NC_000011.9  |
| cg09577651    | 4.60E-06 | 7.35E-07 | -5.12 | 4.7936337 | -1.18E-01 | 1600705   | 1600828   | NC_000020.10 |
| cg10588834    | 4.61E-06 | 7.35E-07 | -5.12 | 4.7928789 | -1.13E-01 | 69458326  | 69458449  | NC_000007.13 |
| cg21898708    | 4.61E-06 | 7.36E-07 | -5.12 | 4.7925447 | -5.21E-02 | 31802157  | 31802280  | NC_000006.11 |
| cg06649191    | 4.61E-06 | 7.36E-07 | -5.12 | 4.7922011 | -5.88E-02 | 42908211  | 42908334  | NC_000017.10 |
| cg20421058    | 4.61E-06 | 7.36E-07 | -5.12 | 4.7921607 | -9.36E-02 | 7337225   | 7337348   | NC_000004.11 |
| cg09419444    | 4.61E-06 | 7.36E-07 | -5.12 | 4.7920842 | -1.17E-01 | 69958792  | 69958915  | NC_000016.9  |
| cg03202034    | 4.61E-06 | 7.36E-07 | -5.12 | 4.7914941 | -7.21E-02 | 88730494  | 88730617  | NC_000016.9  |
| cg02658564    | 4.62E-06 | 7.37E-07 | -5.12 | 4.7908586 | -1.11E-01 | 3447935   | 3448058   | NC_000004.11 |
| cg13286351    | 4.62E-06 | 7.37E-07 | -5.12 | 4.7906026 | -2.42E-02 | 128775699 | 128775822 | NC_000011.9  |
| cg08975720    | 4.62E-06 | 7.37E-07 | -5.12 | 4.7905456 | -3.01E-02 | 144815981 | 144816104 | NC_000008.10 |
| ch.2.3753920R | 4.62E-06 | 7.37E-07 | -5.12 | 4.7901365 | -2.92E-02 | 187366017 | 187366140 | NC_000002.11 |
| cg22997177    | 4.62E-06 | 7.38E-07 | -5.12 | 4.7898028 | -8.38E-02 | 54070527  | 54070650  | NC_000012.11 |
| cg19024599    | 4.62E-06 | 7.38E-07 | -5.12 | 4.7892092 | -9.08E-02 | 109886730 | 109886853 | NC_000002.11 |
| cg13694343    | 4.63E-06 | 7.39E-07 | -5.12 | 4.7886912 | -9.87E-02 | 76876206  | 76876329  | NC_000017.10 |
| cg14337655    | 4.63E-06 | 7.39E-07 | -5.12 | 4.7885092 | -1.33E-01 | 2282207   | 2282330   | NC_000019.9  |
| cg03553758    | 4.63E-06 | 7.39E-07 | -5.12 | 4.7884148 | -1.08E-01 | 121456948 | 121457071 | NC_000005.9  |
| cg23973115    | 4.63E-06 | 7.39E-07 | -5.12 | 4.7884131 | -1.01E-01 | 62540149  | 62540272  | NC_000010.10 |

|            |          |          |       |           |           |           |           |              |
|------------|----------|----------|-------|-----------|-----------|-----------|-----------|--------------|
| cg10337290 | 4.63E-06 | 7.39E-07 | -5.12 | 4.7882058 | -6.94E-02 | 79056515  | 79056638  | NC_000015.9  |
| cg15498283 | 4.63E-06 | 7.40E-07 | -5.12 | 4.7873551 | -1.81E-02 | 747520    | 747643    | NC_000011.9  |
| cg02450832 | 4.63E-06 | 7.40E-07 | -5.12 | 4.7871052 | -1.07E-01 | 80308154  | 80308277  | NC_000016.9  |
| cg16815882 | 4.63E-06 | 7.40E-07 | -5.12 | 4.7869663 | -6.59E-02 | 35908609  | 35908732  | NC_000001.10 |
| cg11362192 | 4.63E-06 | 7.40E-07 | -5.12 | 4.7867092 | -2.15E-02 | 50069489  | 50069612  | NC_000013.10 |
| cg05413285 | 4.64E-06 | 7.40E-07 | -5.12 | 4.786199  | -9.27E-02 | 151537993 | 151538116 | NC_000002.11 |
| cg17506563 | 4.64E-06 | 7.41E-07 | -5.12 | 4.7852643 | -8.50E-02 | 57290756  | 57290879  | NC_000001.10 |
| cg23059355 | 4.64E-06 | 7.42E-07 | -5.12 | 4.7846912 | -8.23E-02 | 60994255  | 60994378  | NC_000020.10 |
| cg14144352 | 4.65E-06 | 7.42E-07 | -5.12 | 4.783948  | -1.21E-01 | 145045851 | 145045974 | NC_000008.10 |
| cg07297410 | 4.65E-06 | 7.43E-07 | -5.12 | 4.7830172 | -8.89E-02 | 3006344   | 3006467   | NC_000016.9  |
| cg12017007 | 4.65E-06 | 7.43E-07 | -5.12 | 4.7830167 | -1.14E-02 | 27277572  | 27277695  | NC_000017.10 |
| cg05451842 | 4.65E-06 | 7.43E-07 | -5.12 | 4.7824917 | -2.18E-02 | 93581139  | 93581262  | NC_000014.8  |
| cg19997502 | 4.65E-06 | 7.44E-07 | -5.12 | 4.7821864 | -1.35E-01 | 208492057 | 208492180 | NC_000002.11 |
| cg07934232 | 4.65E-06 | 7.44E-07 | -5.12 | 4.7821285 | -9.82E-03 | 36619082  | 36619205  | NC_000019.9  |
| cg03634854 | 4.66E-06 | 7.44E-07 | -5.12 | 4.7810224 | -8.31E-02 | 18721531  | 18721654  | NC_000019.9  |
| cg01171456 | 4.66E-06 | 7.45E-07 | -5.12 | 4.7807815 | -9.70E-02 | 2726646   | 2726769   | NC_000007.13 |
| cg04602747 | 4.66E-06 | 7.45E-07 | -5.12 | 4.7806842 | -9.63E-02 | 118273169 | 118273292 | NC_000006.11 |
| cg11211563 | 4.67E-06 | 7.45E-07 | -5.12 | 4.7797378 | -7.82E-02 | 58003905  | 58004028  | NC_000012.11 |
| cg06500476 | 4.67E-06 | 7.45E-07 | -5.12 | 4.7796985 | -8.11E-02 | 37584954  | 37585077  | NC_000004.11 |
| cg17498102 | 4.67E-06 | 7.46E-07 | -5.12 | 4.7796298 | -2.38E-02 | 71108199  | 71108322  | NC_000014.8  |
| cg14978267 | 4.67E-06 | 7.46E-07 | -5.12 | 4.7796168 | -2.56E-02 | 161135623 | 161135746 | NC_000001.10 |
| cg04869006 | 4.67E-06 | 7.46E-07 | -5.12 | 4.7795272 | -1.03E-01 | 99178421  | 99178544  | NC_000010.10 |
| cg10171489 | 4.67E-06 | 7.46E-07 | -5.12 | 4.7788557 | -9.90E-02 | 6649662   | 6649785   | NC_000006.11 |
| cg21654404 | 4.67E-06 | 7.46E-07 | -5.12 | 4.778627  | -2.15E-02 | 118814431 | 118814554 | NC_000012.11 |
| cg01996497 | 4.67E-06 | 7.46E-07 | -5.12 | 4.7784548 | -1.97E-02 | 11404592  | 11404715  | NC_000019.9  |

|            |          |          |       |           |           |           |           |              |
|------------|----------|----------|-------|-----------|-----------|-----------|-----------|--------------|
| cg14033806 | 4.67E-06 | 7.46E-07 | -5.12 | 4.7784513 | -7.57E-02 | 40315861  | 40315984  | NC_000011.9  |
| cg08834273 | 4.67E-06 | 7.47E-07 | -5.11 | 4.7782476 | -7.48E-02 | 83588711  | 83588834  | NC_000006.11 |
| cg14491667 | 4.67E-06 | 7.47E-07 | -5.11 | 4.7780845 | -8.54E-02 | 100267701 | 100267824 | NC_000009.11 |
| cg10741418 | 4.67E-06 | 7.47E-07 | -5.11 | 4.7775799 | -1.23E-01 | 73927547  | 73927670  | NC_000014.8  |
| cg05221370 | 4.67E-06 | 7.47E-07 | -5.11 | 4.7774417 | -1.34E-01 | 110738836 | 110738959 | NC_000007.13 |
| cg05203855 | 4.68E-06 | 7.48E-07 | -5.11 | 4.7763251 | -8.12E-02 | 7994445   | 7994568   | NC_000019.9  |
| cg16332159 | 4.68E-06 | 7.48E-07 | -5.11 | 4.7761687 | -9.90E-02 | 28505959  | 28506082  | NC_000016.9  |
| cg26473818 | 4.68E-06 | 7.49E-07 | -5.11 | 4.7756994 | -1.37E-01 | 13945715  | 13945838  | NC_000011.9  |
| cg03490378 | 4.69E-06 | 7.49E-07 | -5.11 | 4.7752295 | -7.06E-02 | 142351010 | 142351133 | NC_000008.10 |
| cg00017826 | 4.69E-06 | 7.49E-07 | -5.11 | 4.7752222 | -7.10E-02 | 30644955  | 30645078  | NC_000002.11 |
| cg15766591 | 4.69E-06 | 7.49E-07 | -5.11 | 4.7750824 | -7.92E-02 | 85664771  | 85664894  | NC_000002.11 |
| cg16673477 | 4.69E-06 | 7.49E-07 | -5.11 | 4.7750091 | -1.41E-01 | 18812017  | 18812140  | NC_000019.9  |
| cg00094735 | 4.69E-06 | 7.49E-07 | -5.11 | 4.7749224 | -7.54E-02 | 1949198   | 1949321   | NC_000005.9  |
| cg02757609 | 4.69E-06 | 7.49E-07 | -5.11 | 4.774787  | -8.80E-02 | 74552994  | 74553117  | NC_000017.10 |
| cg26487966 | 4.69E-06 | 7.49E-07 | -5.11 | 4.7746925 | -4.31E-02 | 54469136  | 54469259  | NC_000005.9  |
| cg03144560 | 4.69E-06 | 7.49E-07 | -5.11 | 4.7744869 | -4.94E-02 | 55043299  | 55043422  | NC_000020.10 |
| cg13494887 | 4.69E-06 | 7.50E-07 | -5.11 | 4.7744198 | -5.55E-02 | 105605477 | 105605600 | NC_000012.11 |
| cg07122006 | 4.69E-06 | 7.50E-07 | -5.11 | 4.7740802 | -8.96E-02 | 54733223  | 54733346  | NC_000007.13 |
| cg15988693 | 4.69E-06 | 7.50E-07 | -5.11 | 4.773408  | -1.21E-02 | 33759875  | 33759998  | NC_000003.11 |
| cg13075456 | 4.69E-06 | 7.50E-07 | -5.11 | 4.773359  | -1.24E-01 | 125116635 | 125116758 | NC_000008.10 |
| cg23447233 | 4.69E-06 | 7.51E-07 | -5.11 | 4.7730387 | -1.13E-01 | 1295047   | 1295170   | NC_000004.11 |
| cg16151362 | 4.70E-06 | 7.51E-07 | -5.11 | 4.7728718 | -1.29E-01 | 167508053 | 167508176 | NC_000006.11 |
| cg24866363 | 4.70E-06 | 7.51E-07 | -5.11 | 4.7728326 | -1.32E-01 | 80050837  | 80050960  | NC_000005.9  |
| cg10785170 | 4.70E-06 | 7.51E-07 | -5.11 | 4.7727313 | -7.36E-02 | 101451162 | 101451285 | NC_000014.8  |
| cg07357683 | 4.70E-06 | 7.51E-07 | -5.11 | 4.7725566 | -7.71E-02 | 52479630  | 52479753  | NC_000003.11 |

|            |          |          |       |           |           |           |           |              |
|------------|----------|----------|-------|-----------|-----------|-----------|-----------|--------------|
| cg14972143 | 4.70E-06 | 7.51E-07 | -5.11 | 4.7723836 | -5.32E-02 | 99851003  | 99851126  | NC_000004.11 |
| cg14659978 | 4.70E-06 | 7.51E-07 | -5.11 | 4.7723017 | -7.90E-02 | 97563966  | 97564089  | NC_000002.11 |
| cg25782445 | 4.70E-06 | 7.51E-07 | -5.11 | 4.7722134 | -6.20E-02 | 99006594  | 99006717  | NC_000007.13 |
| cg19947621 | 4.70E-06 | 7.52E-07 | -5.11 | 4.7716713 | -5.71E-02 | 34263021  | 34263144  | NC_000009.11 |
| cg10052118 | 4.70E-06 | 7.52E-07 | -5.11 | 4.7714294 | -5.63E-02 | 53499747  | 53499870  | NC_000017.10 |
| cg02943194 | 4.71E-06 | 7.53E-07 | -5.11 | 4.7703159 | -3.87E-02 | 49754491  | 49754614  | NC_000003.11 |
| cg02605306 | 4.71E-06 | 7.53E-07 | -5.11 | 4.7702728 | -4.98E-02 | 1243447   | 1243570   | NC_000016.9  |
| cg22146612 | 4.71E-06 | 7.53E-07 | -5.11 | 4.770002  | -8.62E-02 | 17715219  | 17715342  | NC_000006.11 |
| cg12169889 | 4.71E-06 | 7.53E-07 | -5.11 | 4.7698323 | -7.22E-02 | 60969792  | 60969915  | NC_000017.10 |
| cg16326590 | 4.71E-06 | 7.53E-07 | -5.11 | 4.7695879 | -1.20E-01 | 98704858  | 98704981  | NC_000002.11 |
| cg18286850 | 4.71E-06 | 7.54E-07 | -5.11 | 4.7689286 | -1.09E-01 | 133464713 | 133464836 | NC_000003.11 |
| cg15705999 | 4.71E-06 | 7.54E-07 | -5.11 | 4.7687136 | -5.78E-02 | 125093863 | 125093986 | NC_000003.11 |
| cg03358592 | 4.71E-06 | 7.54E-07 | -5.11 | 4.7687058 | -6.27E-02 | 707410    | 707533    | NC_000009.11 |
| cg21431041 | 4.71E-06 | 7.54E-07 | -5.11 | 4.7686905 | -6.36E-02 | 162272536 | 162272659 | NC_000002.11 |
| cg20014063 | 4.71E-06 | 7.54E-07 | -5.11 | 4.7684925 | -1.03E-01 | 65005951  | 65006074  | NC_000014.8  |
| cg06040034 | 4.72E-06 | 7.54E-07 | -5.11 | 4.7680531 | -1.19E-01 | 1618448   | 1618571   | NC_000008.10 |
| cg15169257 | 4.72E-06 | 7.55E-07 | -5.11 | 4.7679613 | -4.81E-02 | 7099543   | 7099666   | NC_000019.9  |
| cg14777519 | 4.72E-06 | 7.56E-07 | -5.11 | 4.76665   | -8.48E-02 | 47890012  | 47890135  | NC_000003.11 |
| cg13511885 | 4.73E-06 | 7.57E-07 | -5.11 | 4.7651301 | -1.03E-01 | 128594740 | 128594863 | NC_000003.11 |
| cg03807330 | 4.73E-06 | 7.57E-07 | -5.11 | 4.7650058 | -8.13E-02 | 76327232  | 76327355  | NC_000011.9  |
| cg10654496 | 4.73E-06 | 7.57E-07 | -5.11 | 4.7647106 | -2.99E-02 | 118609261 | 118609384 | NC_000010.10 |
| cg17284149 | 4.73E-06 | 7.57E-07 | -5.11 | 4.7646031 | -4.06E-02 | 32138270  | 32138393  | NC_000006.11 |
| cg21149266 | 4.73E-06 | 7.57E-07 | -5.11 | 4.7642518 | -1.32E-01 | 59146882  | 59147005  | NC_000015.9  |
| cg09259235 | 4.74E-06 | 7.58E-07 | -5.11 | 4.7637791 | -9.32E-02 | 128110754 | 128110877 | NC_000010.10 |
| cg05976571 | 4.74E-06 | 7.58E-07 | -5.11 | 4.7637342 | -7.39E-02 | 44474732  | 44474855  | NC_000021.8  |

|            |          |          |       |           |           |           |           |              |
|------------|----------|----------|-------|-----------|-----------|-----------|-----------|--------------|
| cg01964337 | 4.74E-06 | 7.58E-07 | -5.11 | 4.7630218 | -9.49E-02 | 105104782 | 105104905 | NC_000012.11 |
| cg19873631 | 4.74E-06 | 7.59E-07 | -5.11 | 4.7620519 | -4.34E-02 | 57509844  | 57509967  | NC_000011.9  |
| cg26288502 | 4.74E-06 | 7.59E-07 | -5.11 | 4.7618269 | -6.79E-02 | 10421582  | 10421705  | NC_000008.10 |
| cg01882395 | 4.75E-06 | 7.60E-07 | -5.11 | 4.7612115 | -4.67E-02 | 43717810  | 43717933  | NC_000017.10 |
| cg25204360 | 4.75E-06 | 7.60E-07 | -5.11 | 4.7611883 | -4.78E-02 | 66033178  | 66033301  | NC_000008.10 |
| cg16356013 | 4.75E-06 | 7.60E-07 | -5.11 | 4.76096   | -7.00E-02 | 134722079 | 134722202 | NC_000005.9  |
| cg22924838 | 4.75E-06 | 7.60E-07 | -5.11 | 4.7608956 | -2.05E-02 | 200715629 | 200715752 | NC_000002.11 |
| cg08508041 | 4.75E-06 | 7.61E-07 | -5.11 | 4.7602098 | -3.46E-02 | 172959675 | 172959798 | NC_000002.11 |
| cg02642117 | 4.75E-06 | 7.61E-07 | -5.11 | 4.7600882 | -1.07E-01 | 21033836  | 21033959  | NC_000006.11 |
| cg19575753 | 4.75E-06 | 7.61E-07 | -5.11 | 4.7600827 | -1.13E-01 | 1948995   | 1949118   | NC_000005.9  |
| cg19763230 | 4.75E-06 | 7.61E-07 | -5.11 | 4.7599413 | -4.73E-02 | 49623634  | 49623757  | NC_000019.9  |
| cg09657136 | 4.75E-06 | 7.61E-07 | -5.11 | 4.7598544 | -4.84E-02 | 67350663  | 67350786  | NC_000011.9  |
| cg09049566 | 4.76E-06 | 7.61E-07 | -5.11 | 4.7594672 | -2.38E-02 | 132165605 | 132165728 | NC_000005.9  |
| cg20094462 | 4.76E-06 | 7.61E-07 | -5.11 | 4.7593862 | -8.74E-02 | 848071    | 848194    | NC_000019.9  |
| cg08276690 | 4.76E-06 | 7.62E-07 | -5.11 | 4.7580225 | -1.70E-02 | 177659919 | 177660042 | NC_000005.9  |
| cg16478145 | 4.76E-06 | 7.62E-07 | -5.11 | 4.757969  | -5.82E-02 | 188419830 | 188419953 | NC_000002.11 |
| cg02096172 | 4.76E-06 | 7.63E-07 | -5.11 | 4.7576201 | -9.10E-02 | 6894163   | 6894286   | NC_000006.11 |
| cg00196474 | 4.76E-06 | 7.63E-07 | -5.11 | 4.7575562 | -2.84E-02 | 71702735  | 71702858  | NC_000003.11 |
| cg01829632 | 4.77E-06 | 7.63E-07 | -5.11 | 4.7573243 | -7.28E-02 | 122836394 | 122836517 | NC_000005.9  |
| cg04973418 | 4.77E-06 | 7.63E-07 | -5.11 | 4.7572475 | -5.27E-02 | 95468544  | 95468667  | NC_000012.11 |
| cg04467334 | 4.77E-06 | 7.64E-07 | -5.11 | 4.7561376 | -8.94E-02 | 6291927   | 6292050   | NC_000011.9  |
| cg08448711 | 4.77E-06 | 7.64E-07 | -5.11 | 4.7559325 | -8.83E-02 | 92794806  | 92794929  | NC_000010.10 |
| cg12689529 | 4.77E-06 | 7.64E-07 | -5.11 | 4.7557441 | -5.86E-02 | 126335883 | 126336006 | NC_000011.9  |
| cg27586596 | 4.77E-06 | 7.64E-07 | -5.11 | 4.7554105 | -1.08E-01 | 41426609  | 41426732  | NC_000007.13 |
| cg20902195 | 4.78E-06 | 7.65E-07 | -5.11 | 4.7550391 | -1.31E-02 | 7383333   | 7383456   | NC_000017.10 |

|            |          |          |       |           |           |           |           |              |
|------------|----------|----------|-------|-----------|-----------|-----------|-----------|--------------|
| cg13832457 | 4.78E-06 | 7.65E-07 | -5.11 | 4.754985  | -5.57E-02 | 590072    | 590195    | NC_000007.13 |
| cg25012274 | 4.78E-06 | 7.65E-07 | -5.11 | 4.7547295 | -9.88E-02 | 9130163   | 9130286   | NC_000017.10 |
| cg03314569 | 4.78E-06 | 7.66E-07 | -5.11 | 4.7536718 | -8.12E-02 | 32041732  | 32041855  | NC_000001.10 |
| cg02605634 | 4.78E-06 | 7.66E-07 | -5.11 | 4.7534078 | -4.49E-02 | 44258384  | 44258507  | NC_000020.10 |
| cg10970124 | 4.78E-06 | 7.66E-07 | -5.11 | 4.7529902 | -4.82E-02 | 31634602  | 31634725  | NC_000006.11 |
| cg16722931 | 4.79E-06 | 7.66E-07 | -5.11 | 4.7528472 | -1.18E-01 | 75312494  | 75312617  | NC_000017.10 |
| cg23656161 | 4.79E-06 | 7.67E-07 | -5.11 | 4.7527273 | -8.78E-02 | 17847424  | 17847547  | NC_000022.10 |
| cg06736139 | 4.79E-06 | 7.67E-07 | -5.11 | 4.7523324 | -8.82E-02 | 2366334   | 2366457   | NC_000011.9  |
| cg06931327 | 4.79E-06 | 7.67E-07 | -5.11 | 4.7522138 | -2.96E-02 | 95297900  | 95298023  | NC_000005.9  |
| cg03169131 | 4.79E-06 | 7.67E-07 | -5.11 | 4.752148  | -7.59E-02 | 73917942  | 73918065  | NC_000008.10 |
| cg12801917 | 4.79E-06 | 7.68E-07 | -5.11 | 4.7511728 | -1.09E-01 | 15417503  | 15417626  | NC_000017.10 |
| cg15981982 | 4.79E-06 | 7.68E-07 | -5.11 | 4.7511212 | -8.44E-02 | 8685837   | 8685960   | NC_000002.11 |
| cg16615058 | 4.79E-06 | 7.68E-07 | -5.11 | 4.7510591 | -2.84E-02 | 31161005  | 31161128  | NC_000016.9  |
| cg08300252 | 4.80E-06 | 7.68E-07 | -5.11 | 4.750615  | -1.17E-01 | 169692731 | 169692854 | NC_000006.11 |
| cg13459217 | 4.80E-06 | 7.68E-07 | -5.11 | 4.7504365 | -5.20E-02 | 205326437 | 205326560 | NC_000001.10 |
| cg20095628 | 4.80E-06 | 7.68E-07 | -5.11 | 4.7502574 | -9.38E-02 | 23572214  | 23572337  | NC_000010.10 |
| cg15924570 | 4.80E-06 | 7.69E-07 | -5.11 | 4.7494301 | -8.33E-02 | 1144724   | 1144847   | NC_000001.10 |
| cg11067786 | 4.80E-06 | 7.69E-07 | -5.11 | 4.749375  | -7.19E-02 | 74780467  | 74780590  | NC_000002.11 |
| cg10791541 | 4.80E-06 | 7.70E-07 | -5.11 | 4.7488878 | -1.04E-01 | 55040617  | 55040740  | NC_000003.11 |
| cg08459087 | 4.81E-06 | 7.70E-07 | -5.11 | 4.7483799 | -2.56E-02 | 45003643  | 45003766  | NC_000015.9  |
| cg06818582 | 4.81E-06 | 7.70E-07 | -5.11 | 4.7483506 | -8.95E-02 | 67286903  | 67287026  | NC_000015.9  |
| cg16361543 | 4.81E-06 | 7.70E-07 | -5.11 | 4.747746  | -5.12E-02 | 1299372   | 1299495   | NC_000011.9  |
| cg08830758 | 4.81E-06 | 7.70E-07 | -5.11 | 4.7477346 | -7.96E-02 | 15374175  | 15374298  | NC_000012.11 |
| cg12355887 | 4.81E-06 | 7.71E-07 | -5.11 | 4.7469359 | -8.12E-02 | 172305927 | 172306050 | NC_000005.9  |
| cg26353484 | 4.81E-06 | 7.71E-07 | -5.11 | 4.7468751 | -1.01E-02 | 128903088 | 128903211 | NC_000003.11 |



|               |          |          |       |           |           |           |           |              |
|---------------|----------|----------|-------|-----------|-----------|-----------|-----------|--------------|
| cg14778711    | 4.82E-06 | 7.72E-07 | -5.11 | 4.7459933 | -4.26E-02 | 42845753  | 42845876  | NC_000001.10 |
| cg09277532    | 4.82E-06 | 7.72E-07 | -5.11 | 4.7453425 | -1.55E-01 | 57571578  | 57571701  | NC_000016.9  |
| cg11401278    | 4.82E-06 | 7.72E-07 | -5.11 | 4.7452989 | -1.03E-01 | 2140096   | 2140219   | NC_000011.9  |
| ch.3.1075622R | 4.82E-06 | 7.73E-07 | -5.11 | 4.7451046 | -1.55E-02 | 50010873  | 50010996  | NC_000003.11 |
| cg02522952    | 4.82E-06 | 7.73E-07 | -5.11 | 4.7450829 | -1.81E-02 | 119671260 | 119671383 | NC_000006.11 |
| cg02351406    | 4.82E-06 | 7.73E-07 | -5.11 | 4.7448397 | -1.20E-01 | 101447389 | 101447512 | NC_000014.8  |
| cg09888012    | 4.82E-06 | 7.73E-07 | -5.11 | 4.7444386 | -9.03E-02 | 234861409 | 234861532 | NC_000001.10 |
| cg15209885    | 4.83E-06 | 7.74E-07 | -5.11 | 4.7438765 | -6.10E-02 | 77753199  | 77753322  | NC_000017.10 |
| cg22307974    | 4.83E-06 | 7.74E-07 | -5.11 | 4.7437049 | -9.31E-02 | 46768111  | 46768234  | NC_000002.11 |
| cg11653966    | 4.83E-06 | 7.74E-07 | -5.11 | 4.7433182 | -9.48E-02 | 24328593  | 24328716  | NC_000007.13 |
| cg03620551    | 4.83E-06 | 7.74E-07 | -5.11 | 4.7431583 | -1.61E-02 | 128886807 | 128886930 | NC_000004.11 |
| cg08679013    | 4.83E-06 | 7.74E-07 | -5.11 | 4.7429051 | -7.73E-02 | 12997997  | 12998120  | NC_000019.9  |
| cg24664855    | 4.83E-06 | 7.75E-07 | -5.11 | 4.7426727 | -6.69E-02 | 161676266 | 161676389 | NC_000001.10 |
| cg22138278    | 4.83E-06 | 7.75E-07 | -5.11 | 4.7424574 | -1.80E-02 | 145158307 | 145158430 | NC_000008.10 |
| cg20300032    | 4.83E-06 | 7.75E-07 | -5.11 | 4.7424362 | -1.53E-02 | 12186105  | 12186228  | NC_000012.11 |
| cg06469440    | 4.83E-06 | 7.75E-07 | -5.11 | 4.7424156 | -6.43E-02 | 1000336   | 1000459   | NC_000007.13 |
| cg23621779    | 4.83E-06 | 7.75E-07 | -5.11 | 4.7421364 | -2.67E-02 | 30658957  | 30659080  | NC_000006.11 |
| cg12454419    | 4.83E-06 | 7.75E-07 | -5.11 | 4.7419934 | -2.52E-02 | 77135195  | 77135318  | NC_000004.11 |
| cg16197636    | 4.84E-06 | 7.76E-07 | -5.11 | 4.7410611 | -7.89E-02 | 42234724  | 42234847  | NC_000008.10 |
| cg22997252    | 4.84E-06 | 7.76E-07 | -5.11 | 4.7407432 | -3.18E-02 | 11643842  | 11643965  | NC_000011.9  |
| cg14270590    | 4.84E-06 | 7.76E-07 | -5.11 | 4.7406603 | -9.64E-02 | 105499706 | 105499829 | NC_000014.8  |
| cg21184806    | 4.85E-06 | 7.77E-07 | -5.11 | 4.7396811 | -5.17E-02 | 34921399  | 34921522  | NC_000022.10 |
| cg23931049    | 4.85E-06 | 7.78E-07 | -5.11 | 4.7388637 | -1.01E-01 | 21452730  | 21452853  | NC_000018.9  |
| cg13906416    | 4.85E-06 | 7.78E-07 | -5.11 | 4.7377769 | -1.91E-02 | 45147440  | 45147563  | NC_000019.9  |
| cg12030298    | 4.86E-06 | 7.79E-07 | -5.11 | 4.7374177 | -9.79E-02 | 62532039  | 62532162  | NC_000015.9  |

|            |          |          |       |           |           |           |           |              |
|------------|----------|----------|-------|-----------|-----------|-----------|-----------|--------------|
| cg05093711 | 4.86E-06 | 7.79E-07 | -5.11 | 4.7373675 | -1.31E-02 | 10674008  | 10674131  | NC_000016.9  |
| cg24303698 | 4.86E-06 | 7.79E-07 | -5.11 | 4.7371759 | -1.70E-02 | 46367351  | 46367474  | NC_000019.9  |
| cg00863893 | 4.86E-06 | 7.80E-07 | -5.11 | 4.7362228 | -8.92E-02 | 76876239  | 76876362  | NC_000017.10 |
| cg24024036 | 4.86E-06 | 7.80E-07 | -5.11 | 4.7361686 | -5.51E-02 | 170101082 | 170101205 | NC_000004.11 |
| cg13225039 | 4.86E-06 | 7.80E-07 | -5.11 | 4.7361488 | -2.67E-02 | 1722160   | 1722283   | NC_000004.11 |
| cg06683723 | 4.86E-06 | 7.80E-07 | -5.11 | 4.7359812 | -6.57E-02 | 80816995  | 80817118  | NC_000017.10 |
| cg06840042 | 4.86E-06 | 7.80E-07 | -5.11 | 4.7359684 | -2.82E-02 | 12598618  | 12598741  | NC_000003.11 |
| cg08743776 | 4.86E-06 | 7.80E-07 | -5.11 | 4.7358997 | -2.99E-02 | 67572988  | 67573111  | NC_000011.9  |
| cg14945937 | 4.86E-06 | 7.80E-07 | -5.11 | 4.7356204 | -1.33E-01 | 30162771  | 30162894  | NC_000019.9  |
| cg25518824 | 4.86E-06 | 7.80E-07 | -5.11 | 4.7355139 | -6.75E-02 | 7819783   | 7819906   | NC_000017.10 |
| cg02571142 | 4.87E-06 | 7.81E-07 | -5.11 | 4.7348962 | -8.01E-02 | 42234803  | 42234926  | NC_000008.10 |
| cg14422240 | 4.87E-06 | 7.81E-07 | -5.11 | 4.7341065 | -6.54E-02 | 37425031  | 37425154  | NC_000006.11 |
| cg11760342 | 4.87E-06 | 7.81E-07 | -5.11 | 4.7340982 | -6.19E-02 | 183290122 | 183290245 | NC_000004.11 |
| cg02706273 | 4.87E-06 | 7.81E-07 | -5.11 | 4.7340228 | -5.80E-02 | 8947967   | 8948090   | NC_000016.9  |
| cg00368022 | 4.88E-06 | 7.82E-07 | -5.1  | 4.7327811 | -9.82E-03 | 31532653  | 31532776  | NC_000005.9  |
| cg25339552 | 4.88E-06 | 7.83E-07 | -5.1  | 4.7325894 | -1.32E-02 | 33165499  | 33165622  | NC_000019.9  |
| cg23641899 | 4.88E-06 | 7.83E-07 | -5.1  | 4.732259  | -7.09E-02 | 32061318  | 32061441  | NC_000006.11 |
| cg23381664 | 4.88E-06 | 7.83E-07 | -5.1  | 4.732076  | -3.70E-02 | 33281712  | 33281835  | NC_000006.11 |
| cg03251655 | 4.88E-06 | 7.83E-07 | -5.1  | 4.7320148 | -1.29E-01 | 33759512  | 33759635  | NC_000017.10 |
| cg24077454 | 4.89E-06 | 7.84E-07 | -5.1  | 4.7305827 | -2.39E-02 | 119134782 | 119134905 | NC_000010.10 |
| cg24115019 | 4.89E-06 | 7.84E-07 | -5.1  | 4.7303753 | -9.99E-02 | 167899230 | 167899353 | NC_000005.9  |
| cg00793450 | 4.89E-06 | 7.85E-07 | -5.1  | 4.7300972 | -4.54E-02 | 22697620  | 22697743  | NC_000012.11 |
| cg05575505 | 4.89E-06 | 7.85E-07 | -5.1  | 4.7298099 | -8.50E-02 | 101262162 | 101262285 | NC_000015.9  |
| cg19752896 | 4.89E-06 | 7.85E-07 | -5.1  | 4.7296738 | -3.07E-02 | 46174395  | 46174518  | NC_000019.9  |
| cg00908323 | 4.89E-06 | 7.85E-07 | -5.1  | 4.729509  | -1.08E-01 | 131501353 | 131501476 | NC_000002.11 |

|            |          |          |      |           |           |           |           |              |
|------------|----------|----------|------|-----------|-----------|-----------|-----------|--------------|
| cg13646917 | 4.89E-06 | 7.85E-07 | -5.1 | 4.7294017 | -4.36E-02 | 48001761  | 48001884  | NC_000011.9  |
| cg19835040 | 4.89E-06 | 7.85E-07 | -5.1 | 4.7293844 | -5.90E-02 | 46538742  | 46538865  | NC_000003.11 |
| cg17001627 | 4.89E-06 | 7.85E-07 | -5.1 | 4.7293336 | -6.13E-02 | 47599391  | 47599514  | NC_000011.9  |
| cg21537623 | 4.90E-06 | 7.86E-07 | -5.1 | 4.728659  | -3.43E-02 | 100113388 | 100113511 | NC_000007.13 |
| cg15957807 | 4.90E-06 | 7.86E-07 | -5.1 | 4.7286489 | -8.45E-02 | 157682848 | 157682971 | NC_000004.11 |
| cg26863600 | 4.90E-06 | 7.86E-07 | -5.1 | 4.7286417 | -1.00E-01 | 2616921   | 2617044   | NC_000019.9  |
| cg03162779 | 4.90E-06 | 7.86E-07 | -5.1 | 4.7285289 | -1.28E-01 | 2308362   | 2308485   | NC_000011.9  |
| cg07760161 | 4.90E-06 | 7.86E-07 | -5.1 | 4.7284913 | -9.61E-02 | 7588378   | 7588501   | NC_000017.10 |
| cg25256661 | 4.90E-06 | 7.86E-07 | -5.1 | 4.7283615 | -2.11E-02 | 7137939   | 7138062   | NC_000017.10 |
| cg21710066 | 4.90E-06 | 7.86E-07 | -5.1 | 4.7279262 | -8.22E-02 | 474967    | 475090    | NC_000006.11 |
| cg07948085 | 4.90E-06 | 7.87E-07 | -5.1 | 4.727114  | -1.01E-01 | 9805340   | 9805463   | NC_000010.10 |
| cg16012690 | 4.90E-06 | 7.87E-07 | -5.1 | 4.7270644 | -6.95E-02 | 46314809  | 46314932  | NC_000011.9  |
| cg14540297 | 4.90E-06 | 7.87E-07 | -5.1 | 4.7268967 | -1.32E-02 | 87597473  | 87597596  | NC_000001.10 |
| cg19378416 | 4.91E-06 | 7.88E-07 | -5.1 | 4.7262971 | -8.12E-02 | 80372775  | 80372898  | NC_000017.10 |
| cg07564598 | 4.91E-06 | 7.88E-07 | -5.1 | 4.7262619 | -1.23E-01 | 25619946  | 25620069  | NC_000017.10 |
| cg14555988 | 4.91E-06 | 7.88E-07 | -5.1 | 4.7262463 | -2.39E-02 | 42623559  | 42623682  | NC_000013.10 |
| cg21969884 | 4.91E-06 | 7.88E-07 | -5.1 | 4.7260531 | -4.26E-02 | 83007744  | 83007867  | NC_000006.11 |
| cg00698263 | 4.91E-06 | 7.89E-07 | -5.1 | 4.7250062 | -4.89E-02 | 78962984  | 78963107  | NC_000017.10 |
| cg07225547 | 4.91E-06 | 7.89E-07 | -5.1 | 4.724484  | -2.66E-02 | 211035530 | 211035653 | NC_000002.11 |
| cg08362589 | 4.92E-06 | 7.89E-07 | -5.1 | 4.7243108 | -3.87E-02 | 88017886  | 88018009  | NC_000016.9  |
| cg03711457 | 4.92E-06 | 7.90E-07 | -5.1 | 4.7236893 | -6.06E-02 | 113746831 | 113746954 | NC_000011.9  |
| cg06547766 | 4.92E-06 | 7.90E-07 | -5.1 | 4.7236802 | -1.19E-01 | 187930704 | 187930827 | NC_000003.11 |
| cg18527276 | 4.92E-06 | 7.90E-07 | -5.1 | 4.7236483 | -6.28E-02 | 134106619 | 134106742 | NC_000010.10 |
| cg02077084 | 4.92E-06 | 7.90E-07 | -5.1 | 4.7232331 | -1.05E-01 | 248549941 | 248550064 | NC_000001.10 |
| cg06676233 | 4.92E-06 | 7.91E-07 | -5.1 | 4.722867  | -2.52E-02 | 182758699 | 182758822 | NC_000001.10 |

|            |          |          |      |           |           |           |           |              |
|------------|----------|----------|------|-----------|-----------|-----------|-----------|--------------|
| cg02896705 | 4.93E-06 | 7.91E-07 | -5.1 | 4.7218532 | -5.37E-02 | 18112042  | 18112165  | NC_000019.9  |
| cg03684807 | 4.93E-06 | 7.92E-07 | -5.1 | 4.7208723 | -1.26E-01 | 46457384  | 46457507  | NC_000022.10 |
| cg14330516 | 4.93E-06 | 7.92E-07 | -5.1 | 4.7205889 | -4.48E-02 | 235701380 | 235701503 | NC_000002.11 |
| cg08584061 | 4.93E-06 | 7.92E-07 | -5.1 | 4.7204996 | -9.39E-02 | 22718926  | 22719049  | NC_000019.9  |
| cg02315187 | 4.94E-06 | 7.94E-07 | -5.1 | 4.7188015 | -6.20E-02 | 46317913  | 46318036  | NC_000021.8  |
| cg09649245 | 4.95E-06 | 7.95E-07 | -5.1 | 4.7176543 | -2.50E-02 | 44332195  | 44332318  | NC_000011.9  |
| cg07169637 | 4.95E-06 | 7.95E-07 | -5.1 | 4.7175817 | -1.12E-01 | 103530461 | 103530584 | NC_000008.10 |
| cg23978357 | 4.95E-06 | 7.96E-07 | -5.1 | 4.7168212 | -6.66E-02 | 69490378  | 69490501  | NC_000011.9  |
| cg16904585 | 4.95E-06 | 7.96E-07 | -5.1 | 4.7167989 | -5.35E-02 | 10276119  | 10276242  | NC_000016.9  |
| cg26243109 | 4.95E-06 | 7.96E-07 | -5.1 | 4.7163119 | -5.58E-02 | 50218922  | 50219045  | NC_000005.9  |
| cg19338844 | 4.95E-06 | 7.96E-07 | -5.1 | 4.7163077 | -1.94E-02 | 105880883 | 105881006 | NC_000010.10 |
| cg20415517 | 4.96E-06 | 7.96E-07 | -5.1 | 4.7158015 | -1.60E-01 | 1444768   | 1444891   | NC_000011.9  |
| cg03586379 | 4.96E-06 | 7.97E-07 | -5.1 | 4.7155029 | -2.71E-02 | 140660603 | 140660726 | NC_000003.11 |
| cg21640432 | 4.96E-06 | 7.97E-07 | -5.1 | 4.7152536 | -9.60E-02 | 35939561  | 35939684  | NC_000019.9  |
| cg13373406 | 4.97E-06 | 7.98E-07 | -5.1 | 4.7133578 | -4.56E-02 | 151150340 | 151150463 | NC_000005.9  |
| cg19640007 | 4.97E-06 | 7.98E-07 | -5.1 | 4.7132667 | -1.15E-01 | 146600771 | 146600894 | NC_000004.11 |
| cg07670566 | 4.97E-06 | 7.99E-07 | -5.1 | 4.7130495 | -7.81E-02 | 139837659 | 139837782 | NC_000009.11 |
| cg16002441 | 4.97E-06 | 7.99E-07 | -5.1 | 4.7126253 | -4.98E-02 | 49621646  | 49621769  | NC_000019.9  |
| cg15363487 | 4.97E-06 | 7.99E-07 | -5.1 | 4.7121523 | -5.46E-02 | 17270592  | 17270715  | NC_000010.10 |
| cg14436231 | 4.98E-06 | 8.00E-07 | -5.1 | 4.7109885 | -9.33E-02 | 3563641   | 3563764   | NC_000017.10 |
| cg01461211 | 4.98E-06 | 8.01E-07 | -5.1 | 4.7102872 | -7.93E-02 | 85478908  | 85479031  | NC_000016.9  |
| cg20929733 | 4.98E-06 | 8.01E-07 | -5.1 | 4.7102552 | -4.11E-02 | 1572082   | 1572205   | NC_000001.10 |
| cg10094624 | 4.98E-06 | 8.01E-07 | -5.1 | 4.7098391 | -3.44E-02 | 18813259  | 18813382  | NC_000016.9  |
| cg00766985 | 4.99E-06 | 8.02E-07 | -5.1 | 4.7092956 | -1.20E-02 | 69745212  | 69745335  | NC_000015.9  |
| cg07856138 | 4.99E-06 | 8.02E-07 | -5.1 | 4.7084364 | -1.31E-01 | 29673465  | 29673588  | NC_000016.9  |

|                |          |          |      |           |           |           |           |              |
|----------------|----------|----------|------|-----------|-----------|-----------|-----------|--------------|
| cg23164327     | 4.99E-06 | 8.02E-07 | -5.1 | 4.7084046 | -1.80E-02 | 40755670  | 40755793  | NC_000005.9  |
| cg00929635     | 4.99E-06 | 8.02E-07 | -5.1 | 4.7083666 | -8.67E-02 | 44035918  | 44036041  | NC_000020.10 |
| cg20378070     | 4.99E-06 | 8.03E-07 | -5.1 | 4.7079664 | -9.46E-02 | 30641179  | 30641302  | NC_000006.11 |
| cg00177431     | 4.99E-06 | 8.03E-07 | -5.1 | 4.7079384 | -1.14E-01 | 56272862  | 56272985  | NC_000020.10 |
| cg16913361     | 4.99E-06 | 8.03E-07 | -5.1 | 4.7078486 | -6.38E-02 | 3250226   | 3250349   | NC_000004.11 |
| cg25803977     | 4.99E-06 | 8.03E-07 | -5.1 | 4.7077387 | -7.00E-02 | 143820035 | 143820158 | NC_000008.10 |
| cg04132452     | 5.00E-06 | 8.03E-07 | -5.1 | 4.7073127 | -1.23E-01 | 160475035 | 160475158 | NC_000003.11 |
| cg13481776     | 5.00E-06 | 8.03E-07 | -5.1 | 4.7072233 | -1.02E-01 | 233320593 | 233320716 | NC_000002.11 |
| cg04117986     | 5.00E-06 | 8.04E-07 | -5.1 | 4.7070078 | -6.17E-02 | 149517768 | 149517891 | NC_000005.9  |
| cg18507365     | 5.00E-06 | 8.04E-07 | -5.1 | 4.7068462 | -5.84E-02 | 78871502  | 78871625  | NC_000010.10 |
| cg05642873     | 5.00E-06 | 8.04E-07 | -5.1 | 4.7066008 | -2.88E-02 | 202858370 | 202858493 | NC_000001.10 |
| cg04983349     | 5.00E-06 | 8.04E-07 | -5.1 | 4.7061623 | -1.01E-01 | 80381447  | 80381570  | NC_000006.11 |
| cg14446979     | 5.00E-06 | 8.04E-07 | -5.1 | 4.7060678 | -5.79E-02 | 97841071  | 97841194  | NC_000007.13 |
| cg13594432     | 5.01E-06 | 8.05E-07 | -5.1 | 4.7049088 | -1.04E-02 | 23451963  | 23452086  | NC_000014.8  |
| cg18967361     | 5.01E-06 | 8.05E-07 | -5.1 | 4.7047971 | -1.64E-02 | 245319978 | 245320101 | NC_000001.10 |
| cg17231677     | 5.01E-06 | 8.06E-07 | -5.1 | 4.7044143 | -8.08E-02 | 102671993 | 102672116 | NC_000010.10 |
| cg26020982     | 5.01E-06 | 8.06E-07 | -5.1 | 4.7043807 | -1.08E-01 | 152196106 | 152196229 | NC_000001.10 |
| ch.9.2223115R  | 5.01E-06 | 8.06E-07 | -5.1 | 4.7038372 | -7.90E-02 | 2233115   | 2233238   | NC_000009.11 |
| cg13937758     | 5.02E-06 | 8.07E-07 | -5.1 | 4.7031986 | -8.33E-02 | 150217448 | 150217571 | NC_000006.11 |
| ch.5.2558853F  | 5.02E-06 | 8.07E-07 | -5.1 | 4.7031435 | -1.65E-02 | 138115063 | 138115186 | NC_000005.9  |
| ch.15.1556816R | 5.02E-06 | 8.07E-07 | -5.1 | 4.702922  | -1.20E-02 | 90750492  | 90750615  | NC_000015.9  |
| cg09040942     | 5.02E-06 | 8.07E-07 | -5.1 | 4.7025541 | -1.15E-01 | 158060003 | 158060126 | NC_000007.13 |
| cg05259881     | 5.02E-06 | 8.08E-07 | -5.1 | 4.7021753 | -1.01E-01 | 49631268  | 49631391  | NC_000016.9  |
| cg22984992     | 5.02E-06 | 8.08E-07 | -5.1 | 4.7020004 | -4.97E-02 | 13056423  | 13056546  | NC_000019.9  |
| cg14170793     | 5.02E-06 | 8.08E-07 | -5.1 | 4.7018502 | -8.51E-02 | 229524651 | 229524774 | NC_000001.10 |

|                 |          |          |      |           |           |           |           |              |
|-----------------|----------|----------|------|-----------|-----------|-----------|-----------|--------------|
| cg27640988      | 5.02E-06 | 8.08E-07 | -5.1 | 4.7017899 | -5.22E-02 | 86850406  | 86850529  | NC_000002.11 |
| cg00834536      | 5.03E-06 | 8.09E-07 | -5.1 | 4.7006075 | -9.89E-02 | 4013537   | 4013660   | NC_000016.9  |
| cg07292311      | 5.03E-06 | 8.09E-07 | -5.1 | 4.7006066 | -7.60E-02 | 124702221 | 124702344 | NC_000012.11 |
| cg27069921      | 5.03E-06 | 8.09E-07 | -5.1 | 4.7003987 | -1.08E-01 | 54523727  | 54523850  | NC_000005.9  |
| cg06604058      | 5.03E-06 | 8.10E-07 | -5.1 | 4.6990838 | -3.27E-02 | 63448992  | 63449115  | NC_000011.9  |
| cg27134767      | 5.04E-06 | 8.10E-07 | -5.1 | 4.6988526 | -6.94E-02 | 89713339  | 89713462  | NC_000016.9  |
| cg06700226      | 5.04E-06 | 8.11E-07 | -5.1 | 4.6981227 | -8.61E-02 | 5198019   | 5198142   | NC_000012.11 |
| cg06195193      | 5.04E-06 | 8.12E-07 | -5.1 | 4.6973306 | -6.58E-02 | 20741008  | 20741131  | NC_000013.10 |
| cg07325168      | 5.05E-06 | 8.12E-07 | -5.1 | 4.6966602 | -7.71E-02 | 38949140  | 38949263  | NC_000007.13 |
| cg04690793      | 5.05E-06 | 8.12E-07 | -5.1 | 4.6966482 | -4.87E-02 | 34723390  | 34723513  | NC_000006.11 |
| cg24802745      | 5.05E-06 | 8.13E-07 | -5.1 | 4.6962846 | -7.95E-02 | 1029654   | 1029777   | NC_000004.11 |
| cg10353388      | 5.05E-06 | 8.13E-07 | -5.1 | 4.6959822 | -3.39E-02 | 93474820  | 93474943  | NC_000011.9  |
| cg15573846      | 5.05E-06 | 8.13E-07 | -5.1 | 4.6959588 | -4.04E-02 | 126152723 | 126152846 | NC_000011.9  |
| cg27132391      | 5.05E-06 | 8.13E-07 | -5.1 | 4.6958634 | -1.03E-01 | 6341850   | 6341973   | NC_000011.9  |
| cg16093537      | 5.05E-06 | 8.13E-07 | -5.1 | 4.6958549 | -6.00E-02 | 81924880  | 81925003  | NC_000010.10 |
| cg05102770      | 5.05E-06 | 8.13E-07 | -5.1 | 4.6955006 | -4.52E-02 | 4806869   | 4806992   | NC_000007.13 |
| cg15835339      | 5.05E-06 | 8.13E-07 | -5.1 | 4.6954115 | -1.07E-01 | 10828105  | 10828228  | NC_000010.10 |
| cg14610973      | 5.05E-06 | 8.13E-07 | -5.1 | 4.6953941 | -1.21E-02 | 10600687  | 10600810  | NC_000017.10 |
| cg17574050      | 5.05E-06 | 8.13E-07 | -5.1 | 4.6953885 | -7.42E-02 | 151120070 | 151120193 | NC_000005.9  |
| cg02588283      | 5.05E-06 | 8.13E-07 | -5.1 | 4.6953643 | -6.78E-02 | 93954346  | 93954469  | NC_000007.13 |
| cg17342247      | 5.05E-06 | 8.13E-07 | -5.1 | 4.6952701 | -5.88E-02 | 3540594   | 3540717   | NC_000017.10 |
| cg13692476      | 5.05E-06 | 8.14E-07 | -5.1 | 4.695092  | -6.29E-02 | 101088828 | 101088951 | NC_000010.10 |
| cg09510180      | 5.05E-06 | 8.14E-07 | -5.1 | 4.6950001 | -1.07E-01 | 10895978  | 10896101  | NC_000001.10 |
| ch.14.83549112R | 5.05E-06 | 8.14E-07 | -5.1 | 4.6948368 | -4.55E-02 | 84479359  | 84479482  | NC_000014.8  |
| cg19811934      | 5.05E-06 | 8.14E-07 | -5.1 | 4.6948193 | -1.17E-01 | 92927763  | 92927886  | NC_000014.8  |

|            |          |          |       |           |           |           |           |              |
|------------|----------|----------|-------|-----------|-----------|-----------|-----------|--------------|
| cg05251190 | 5.06E-06 | 8.14E-07 | -5.1  | 4.694399  | -8.89E-02 | 104196206 | 104196329 | NC_000010.10 |
| cg23053961 | 5.07E-06 | 8.16E-07 | -5.1  | 4.6925508 | -8.97E-02 | 4300432   | 4300555   | NC_000009.11 |
| cg20415811 | 5.07E-06 | 8.16E-07 | -5.1  | 4.6924537 | -5.68E-02 | 74700246  | 74700369  | NC_000002.11 |
| cg13250566 | 5.07E-06 | 8.16E-07 | -5.1  | 4.6922529 | -8.28E-02 | 40799848  | 40799971  | NC_000017.10 |
| cg12451679 | 5.07E-06 | 8.16E-07 | -5.1  | 4.692166  | -3.05E-02 | 47617189  | 47617312  | NC_000019.9  |
| cg08861404 | 5.07E-06 | 8.16E-07 | -5.1  | 4.69212   | -9.74E-02 | 51670315  | 51670438  | NC_000019.9  |
| cg04168554 | 5.07E-06 | 8.17E-07 | -5.1  | 4.691232  | -8.83E-02 | 572062    | 572185    | NC_000016.9  |
| cg02855309 | 5.08E-06 | 8.18E-07 | -5.1  | 4.6900906 | -4.62E-02 | 1107608   | 1107731   | NC_000016.9  |
| cg16461335 | 5.08E-06 | 8.18E-07 | -5.1  | 4.6896082 | -8.46E-02 | 80413489  | 80413612  | NC_000004.11 |
| cg27432036 | 5.08E-06 | 8.19E-07 | -5.1  | 4.6890798 | -4.72E-02 | 7382829   | 7382952   | NC_000017.10 |
| cg03778035 | 5.09E-06 | 8.19E-07 | -5.1  | 4.6884596 | -2.20E-02 | 32821992  | 32822115  | NC_000006.11 |
| cg16269010 | 5.09E-06 | 8.19E-07 | -5.1  | 4.6883756 | -7.57E-02 | 24475786  | 24475909  | NC_000013.10 |
| cg06411506 | 5.09E-06 | 8.19E-07 | -5.1  | 4.6883537 | -8.69E-02 | 31856431  | 31856554  | NC_000006.11 |
| cg01348570 | 5.09E-06 | 8.20E-07 | -5.09 | 4.6879568 | -2.75E-02 | 68566604  | 68566727  | NC_000004.11 |
| cg13133987 | 5.09E-06 | 8.20E-07 | -5.09 | 4.6874831 | -5.32E-02 | 35289677  | 35289800  | NC_000017.10 |
| cg11750116 | 5.09E-06 | 8.20E-07 | -5.09 | 4.6871264 | -1.54E-02 | 155057442 | 155057565 | NC_000001.10 |
| cg23422060 | 5.09E-06 | 8.21E-07 | -5.09 | 4.6865598 | -1.51E-02 | 43916508  | 43916631  | NC_000021.8  |
| cg04361749 | 5.10E-06 | 8.21E-07 | -5.09 | 4.6863323 | -7.17E-02 | 240980455 | 240980578 | NC_000002.11 |
| cg07865418 | 5.10E-06 | 8.21E-07 | -5.09 | 4.6859284 | -1.09E-01 | 6411408   | 6411531   | NC_000005.9  |
| cg06935438 | 5.10E-06 | 8.22E-07 | -5.09 | 4.6856787 | -6.02E-02 | 4116989   | 4117112   | NC_000009.11 |
| cg24376636 | 5.10E-06 | 8.22E-07 | -5.09 | 4.6856212 | -5.62E-02 | 3828008   | 3828131   | NC_000017.10 |
| cg03155301 | 5.10E-06 | 8.22E-07 | -5.09 | 4.6855684 | -9.92E-02 | 12776288  | 12776411  | NC_000011.9  |
| cg18393172 | 5.10E-06 | 8.22E-07 | -5.09 | 4.6855487 | -8.16E-02 | 58837257  | 58837380  | NC_000019.9  |
| cg07213720 | 5.10E-06 | 8.22E-07 | -5.09 | 4.685045  | -2.81E-02 | 35227408  | 35227531  | NC_000006.11 |
| cg11792874 | 5.10E-06 | 8.22E-07 | -5.09 | 4.6850435 | -7.54E-02 | 24014501  | 24014624  | NC_000014.8  |

|            |          |          |       |           |           |           |           |              |
|------------|----------|----------|-------|-----------|-----------|-----------|-----------|--------------|
| cg11710912 | 5.10E-06 | 8.23E-07 | -5.09 | 4.6844953 | -4.98E-02 | 107217605 | 107217728 | NC_000013.10 |
| cg06618968 | 5.11E-06 | 8.23E-07 | -5.09 | 4.68406   | -2.10E-02 | 152373420 | 152373543 | NC_000007.13 |
| cg16922400 | 5.11E-06 | 8.24E-07 | -5.09 | 4.6830696 | -2.64E-02 | 126307682 | 126307805 | NC_000006.11 |
| cg18918116 | 5.11E-06 | 8.24E-07 | -5.09 | 4.6827655 | -8.44E-02 | 7326990   | 7327113   | NC_000011.9  |
| cg10758676 | 5.11E-06 | 8.24E-07 | -5.09 | 4.6826845 | -3.75E-02 | 158010406 | 158010529 | NC_000006.11 |
| cg01771462 | 5.12E-06 | 8.25E-07 | -5.09 | 4.6817147 | -5.58E-02 | 33245281  | 33245404  | NC_000015.9  |
| cg16364467 | 5.12E-06 | 8.26E-07 | -5.09 | 4.6807003 | -3.47E-02 | 22236519  | 22236642  | NC_000014.8  |
| cg26567344 | 5.12E-06 | 8.26E-07 | -5.09 | 4.6805219 | -6.44E-02 | 102077183 | 102077306 | NC_000015.9  |
| cg18224729 | 5.12E-06 | 8.26E-07 | -5.09 | 4.6803729 | -1.25E-01 | 57559066  | 57559189  | NC_000011.9  |
| cg07158339 | 5.13E-06 | 8.27E-07 | -5.09 | 4.6797092 | -6.21E-02 | 71650237  | 71650360  | NC_000009.11 |
| cg00547777 | 5.13E-06 | 8.27E-07 | -5.09 | 4.6795335 | -2.67E-02 | 203736784 | 203736907 | NC_000002.11 |
| cg19009417 | 5.13E-06 | 8.27E-07 | -5.09 | 4.6790955 | -7.87E-02 | 86004704  | 86004827  | NC_000010.10 |
| cg04267101 | 5.13E-06 | 8.27E-07 | -5.09 | 4.678908  | -5.93E-02 | 48619037  | 48619160  | NC_000017.10 |
| cg00108098 | 5.14E-06 | 8.28E-07 | -5.09 | 4.6779236 | -9.66E-02 | 122637664 | 122637787 | NC_000003.11 |
| cg22546775 | 5.14E-06 | 8.28E-07 | -5.09 | 4.677784  | -7.90E-02 | 66697281  | 66697404  | NC_000012.11 |
| cg18745629 | 5.14E-06 | 8.28E-07 | -5.09 | 4.6777625 | -5.67E-02 | 57163527  | 57163650  | NC_000003.11 |
| cg26413192 | 5.15E-06 | 8.30E-07 | -5.09 | 4.6759198 | -1.07E-01 | 80076484  | 80076607  | NC_000010.10 |
| cg00115149 | 5.15E-06 | 8.31E-07 | -5.09 | 4.6747215 | -9.87E-02 | 111735487 | 111735610 | NC_000010.10 |
| cg04167844 | 5.16E-06 | 8.32E-07 | -5.09 | 4.6739267 | -3.00E-02 | 27250204  | 27250327  | NC_000007.13 |
| cg03745372 | 5.16E-06 | 8.32E-07 | -5.09 | 4.67378   | -1.14E-01 | 57197870  | 57197993  | NC_000003.11 |
| cg14365100 | 5.16E-06 | 8.32E-07 | -5.09 | 4.6736781 | -2.76E-02 | 113932889 | 113933012 | NC_000001.10 |
| cg07791997 | 5.16E-06 | 8.32E-07 | -5.09 | 4.6734468 | -1.54E-02 | 73882526  | 73882649  | NC_000011.9  |
| cg27048684 | 5.16E-06 | 8.33E-07 | -5.09 | 4.6726359 | -7.72E-02 | 27791167  | 27791290  | NC_000016.9  |
| cg25802430 | 5.16E-06 | 8.33E-07 | -5.09 | 4.6723011 | -2.28E-02 | 112641397 | 112641520 | NC_000002.11 |
| cg20848619 | 5.17E-06 | 8.33E-07 | -5.09 | 4.6722518 | -1.96E-02 | 99070472  | 99070595  | NC_000007.13 |



|            |          |          |       |           |           |           |           |              |
|------------|----------|----------|-------|-----------|-----------|-----------|-----------|--------------|
| cg12585914 | 5.17E-06 | 8.33E-07 | -5.09 | 4.6718058 | -1.58E-02 | 14530184  | 14530307  | NC_000019.9  |
| cg25734789 | 5.17E-06 | 8.34E-07 | -5.09 | 4.6712996 | -2.02E-02 | 128775685 | 128775808 | NC_000011.9  |
| cg07141622 | 5.17E-06 | 8.34E-07 | -5.09 | 4.6711229 | -3.26E-02 | 70193793  | 70193916  | NC_000014.8  |
| cg19516825 | 5.17E-06 | 8.34E-07 | -5.09 | 4.6711171 | -5.15E-02 | 48686777  | 48686900  | NC_000019.9  |
| cg20418529 | 5.17E-06 | 8.34E-07 | -5.09 | 4.6707822 | -1.31E-01 | 166260012 | 166260135 | NC_000006.11 |
| cg03478719 | 5.17E-06 | 8.34E-07 | -5.09 | 4.6706614 | -5.93E-02 | 126127116 | 126127239 | NC_000009.11 |
| cg04547723 | 5.17E-06 | 8.35E-07 | -5.09 | 4.6705097 | -1.05E-01 | 75421960  | 75422083  | NC_000014.8  |
| cg07680589 | 5.17E-06 | 8.35E-07 | -5.09 | 4.67043   | -2.32E-02 | 146101723 | 146101846 | NC_000004.11 |
| cg19465605 | 5.17E-06 | 8.35E-07 | -5.09 | 4.670377  | -8.10E-02 | 91770229  | 91770352  | NC_000014.8  |
| cg00539716 | 5.18E-06 | 8.35E-07 | -5.09 | 4.6697507 | -1.99E-02 | 48541921  | 48542044  | NC_000002.11 |
| cg12805450 | 5.18E-06 | 8.36E-07 | -5.09 | 4.6691763 | -7.68E-02 | 129838865 | 129838988 | NC_000002.11 |
| cg16480539 | 5.18E-06 | 8.36E-07 | -5.09 | 4.6686179 | -2.15E-02 | 88897556  | 88897679  | NC_000009.11 |
| cg08872493 | 5.18E-06 | 8.36E-07 | -5.09 | 4.6684267 | -9.77E-02 | 23521417  | 23521540  | NC_000001.10 |
| cg00526711 | 5.18E-06 | 8.36E-07 | -5.09 | 4.6683342 | -4.82E-02 | 91477898  | 91478021  | NC_000015.9  |
| cg15748737 | 5.19E-06 | 8.37E-07 | -5.09 | 4.6680547 | -8.48E-02 | 30474819  | 30474942  | NC_000010.10 |
| cg04203702 | 5.19E-06 | 8.37E-07 | -5.09 | 4.6678815 | -6.73E-02 | 11369349  | 11369472  | NC_000004.11 |
| cg08682153 | 5.19E-06 | 8.38E-07 | -5.09 | 4.6670174 | -1.19E-01 | 139223811 | 139223934 | NC_000005.9  |
| cg01763990 | 5.19E-06 | 8.38E-07 | -5.09 | 4.6666367 | -5.12E-02 | 108446486 | 108446609 | NC_000002.11 |
| cg01515960 | 5.20E-06 | 8.38E-07 | -5.09 | 4.6660851 | -8.57E-02 | 2494587   | 2494710   | NC_000019.9  |
| cg10516117 | 5.20E-06 | 8.38E-07 | -5.09 | 4.665951  | -5.61E-02 | 1656147   | 1656270   | NC_000017.10 |
| cg04231042 | 5.20E-06 | 8.39E-07 | -5.09 | 4.665487  | -6.30E-02 | 54729555  | 54729678  | NC_000004.11 |
| cg01966335 | 5.20E-06 | 8.39E-07 | -5.09 | 4.6652178 | -1.54E-02 | 134369605 | 134369728 | NC_000005.9  |
| cg18084554 | 5.20E-06 | 8.40E-07 | -5.09 | 4.6642908 | -9.09E-02 | 929046    | 929169    | NC_000019.9  |
| cg07516958 | 5.21E-06 | 8.41E-07 | -5.09 | 4.6633525 | -9.38E-02 | 57536159  | 57536282  | NC_000005.9  |
| cg16285946 | 5.21E-06 | 8.41E-07 | -5.09 | 4.662622  | -1.30E-01 | 906799    | 906922    | NC_000007.13 |

|            |          |          |       |           |           |           |           |              |
|------------|----------|----------|-------|-----------|-----------|-----------|-----------|--------------|
| cg02369766 | 5.21E-06 | 8.41E-07 | -5.09 | 4.6626162 | -1.31E-01 | 600978    | 601101    | NC_000005.9  |
| cg06616081 | 5.21E-06 | 8.42E-07 | -5.09 | 4.6622278 | -7.20E-02 | 77336938  | 77337061  | NC_000015.9  |
| cg06256856 | 5.22E-06 | 8.42E-07 | -5.09 | 4.6613741 | -8.54E-02 | 71071560  | 71071683  | NC_000016.9  |
| cg22936990 | 5.22E-06 | 8.43E-07 | -5.09 | 4.6612155 | -8.83E-02 | 143505292 | 143505415 | NC_000005.9  |
| cg20728105 | 5.22E-06 | 8.43E-07 | -5.09 | 4.6612097 | -4.38E-02 | 12610689  | 12610812  | NC_000007.13 |
| cg09695033 | 5.22E-06 | 8.43E-07 | -5.09 | 4.660422  | -1.10E-01 | 29337988  | 29338111  | NC_000002.11 |
| cg06550177 | 5.22E-06 | 8.44E-07 | -5.09 | 4.6601001 | -3.95E-02 | 5469535   | 5469658   | NC_000007.13 |
| cg24150244 | 5.23E-06 | 8.44E-07 | -5.09 | 4.6594679 | -8.15E-02 | 28402098  | 28402221  | NC_000022.10 |
| cg14281592 | 5.23E-06 | 8.44E-07 | -5.09 | 4.6593574 | -1.04E-01 | 129884313 | 129884436 | NC_000009.11 |
| cg23517743 | 5.23E-06 | 8.44E-07 | -5.09 | 4.6592215 | -1.05E-01 | 238623585 | 238623708 | NC_000002.11 |
| cg15668074 | 5.23E-06 | 8.45E-07 | -5.09 | 4.6586885 | -5.13E-02 | 16256627  | 16256750  | NC_000022.10 |
| cg03591499 | 5.23E-06 | 8.45E-07 | -5.09 | 4.6584958 | -5.78E-02 | 16555620  | 16555743  | NC_000003.11 |
| cg06280512 | 5.24E-06 | 8.45E-07 | -5.09 | 4.6580247 | -1.61E-02 | 47217267  | 47217390  | NC_000019.9  |
| cg21222007 | 5.24E-06 | 8.45E-07 | -5.09 | 4.6579428 | -7.18E-02 | 38055200  | 38055323  | NC_000009.11 |
| cg25945642 | 5.24E-06 | 8.46E-07 | -5.09 | 4.657444  | -1.12E-01 | 143321098 | 143321221 | NC_000003.11 |
| cg01680844 | 5.24E-06 | 8.46E-07 | -5.09 | 4.6574329 | -4.50E-02 | 776501    | 776624    | NC_000016.9  |
| cg26031288 | 5.24E-06 | 8.46E-07 | -5.09 | 4.6571108 | -1.03E-01 | 40787015  | 40787138  | NC_000007.13 |
| cg12975470 | 5.24E-06 | 8.46E-07 | -5.09 | 4.6568841 | -4.08E-02 | 1533824   | 1533947   | NC_000007.13 |
| cg25692785 | 5.24E-06 | 8.46E-07 | -5.09 | 4.6568285 | -6.33E-02 | 32023996  | 32024119  | NC_000003.11 |
| cg20272423 | 5.24E-06 | 8.47E-07 | -5.09 | 4.6564849 | -3.72E-02 | 6643382   | 6643505   | NC_000004.11 |
| cg00888818 | 5.24E-06 | 8.47E-07 | -5.09 | 4.6564358 | -7.90E-02 | 103019936 | 103020059 | NC_000013.10 |
| cg19295314 | 5.25E-06 | 8.47E-07 | -5.09 | 4.6560253 | -7.89E-02 | 1635640   | 1635763   | NC_000006.11 |
| cg04430835 | 5.25E-06 | 8.48E-07 | -5.09 | 4.6553567 | -1.57E-02 | 52917409  | 52917532  | NC_000004.11 |
| cg11835955 | 5.25E-06 | 8.48E-07 | -5.09 | 4.6548319 | -9.78E-02 | 40142517  | 40142640  | NC_000014.8  |
| cg24103195 | 5.25E-06 | 8.48E-07 | -5.09 | 4.6546312 | -5.28E-02 | 20748468  | 20748591  | NC_000019.9  |

|            |          |          |       |           |           |           |           |              |
|------------|----------|----------|-------|-----------|-----------|-----------|-----------|--------------|
| cg18100347 | 5.25E-06 | 8.49E-07 | -5.09 | 4.6542048 | -5.44E-02 | 127294121 | 127294244 | NC_000003.11 |
| cg11767392 | 5.26E-06 | 8.49E-07 | -5.09 | 4.6537241 | -4.96E-02 | 71814388  | 71814511  | NC_000011.9  |
| cg26407641 | 5.26E-06 | 8.50E-07 | -5.09 | 4.6532368 | -1.81E-02 | 67955870  | 67955993  | NC_000018.9  |
| cg08123067 | 5.26E-06 | 8.50E-07 | -5.09 | 4.6525151 | -1.07E-01 | 81047183  | 81047306  | NC_000017.10 |
| cg24382686 | 5.26E-06 | 8.51E-07 | -5.09 | 4.6521014 | -4.34E-02 | 35053756  | 35053879  | NC_000017.10 |
| cg05948763 | 5.27E-06 | 8.51E-07 | -5.09 | 4.6519674 | -6.08E-02 | 2205824   | 2205947   | NC_000001.10 |
| cg19008088 | 5.27E-06 | 8.51E-07 | -5.09 | 4.6516187 | -5.21E-02 | 102890038 | 102890161 | NC_000010.10 |
| cg25860737 | 5.27E-06 | 8.51E-07 | -5.09 | 4.6514582 | -6.83E-02 | 49462125  | 49462248  | NC_000015.9  |
| cg18950952 | 5.27E-06 | 8.51E-07 | -5.09 | 4.6512651 | -9.82E-02 | 110872655 | 110872778 | NC_000002.11 |
| cg13626654 | 5.28E-06 | 8.52E-07 | -5.09 | 4.6499941 | -6.23E-02 | 80898525  | 80898648  | NC_000017.10 |
| cg02621936 | 5.28E-06 | 8.52E-07 | -5.09 | 4.6499305 | -2.50E-02 | 28480797  | 28480920  | NC_000008.10 |
| cg02738255 | 5.28E-06 | 8.53E-07 | -5.09 | 4.64986   | -1.35E-01 | 25231685  | 25231808  | NC_000020.10 |
| cg22224043 | 5.28E-06 | 8.53E-07 | -5.09 | 4.6497021 | -1.01E-01 | 73429575  | 73429698  | NC_000003.11 |
| cg25082710 | 5.28E-06 | 8.53E-07 | -5.09 | 4.6496072 | -1.11E-01 | 152880108 | 152880231 | NC_000001.10 |
| cg02090742 | 5.28E-06 | 8.53E-07 | -5.09 | 4.6489078 | -6.45E-02 | 30186405  | 30186528  | NC_000017.10 |
| cg01987702 | 5.28E-06 | 8.53E-07 | -5.09 | 4.6488557 | -1.21E-01 | 74264707  | 74264830  | NC_000002.11 |
| cg15859390 | 5.28E-06 | 8.54E-07 | -5.09 | 4.6485339 | -9.72E-02 | 184908510 | 184908633 | NC_000004.11 |
| cg09265563 | 5.29E-06 | 8.54E-07 | -5.09 | 4.6480307 | -1.17E-01 | 72849909  | 72850032  | NC_000007.13 |
| cg02776313 | 5.29E-06 | 8.54E-07 | -5.09 | 4.6479379 | -7.08E-02 | 50965782  | 50965905  | NC_000022.10 |
| cg12451007 | 5.29E-06 | 8.54E-07 | -5.09 | 4.6478921 | -1.57E-02 | 77843567  | 77843690  | NC_000014.8  |
| cg16303353 | 5.29E-06 | 8.55E-07 | -5.09 | 4.646673  | -9.80E-02 | 2393684   | 2393807   | NC_000012.11 |
| cg02024352 | 5.29E-06 | 8.55E-07 | -5.09 | 4.6466465 | -4.57E-02 | 51573586  | 51573709  | NC_000003.11 |
| cg23228779 | 5.29E-06 | 8.56E-07 | -5.09 | 4.6464593 | -4.26E-02 | 70339935  | 70340058  | NC_000003.11 |
| cg03374561 | 5.29E-06 | 8.56E-07 | -5.09 | 4.6463982 | -7.33E-02 | 19247888  | 19248011  | NC_000017.10 |
| cg23656386 | 5.30E-06 | 8.57E-07 | -5.09 | 4.645319  | -3.93E-02 | 68003240  | 68003363  | NC_000016.9  |

|            |          |          |       |           |           |           |           |              |
|------------|----------|----------|-------|-----------|-----------|-----------|-----------|--------------|
| cg09142166 | 5.30E-06 | 8.57E-07 | -5.09 | 4.6447218 | -9.76E-02 | 44276013  | 44276136  | NC_000022.10 |
| cg25734726 | 5.31E-06 | 8.58E-07 | -5.09 | 4.6440141 | -8.52E-02 | 40948296  | 40948419  | NC_000019.9  |
| cg23399279 | 5.31E-06 | 8.58E-07 | -5.09 | 4.6439267 | -4.54E-02 | 69203665  | 69203788  | NC_000014.8  |
| cg19306380 | 5.31E-06 | 8.58E-07 | -5.09 | 4.6432475 | -1.13E-01 | 228463260 | 228463383 | NC_000001.10 |
| cg00498653 | 5.31E-06 | 8.59E-07 | -5.08 | 4.6429974 | -4.29E-02 | 156806902 | 156807025 | NC_000003.11 |
| cg10138970 | 5.31E-06 | 8.59E-07 | -5.08 | 4.6426584 | -5.55E-02 | 223172052 | 223172175 | NC_000002.11 |
| cg25784319 | 5.31E-06 | 8.59E-07 | -5.08 | 4.6423198 | -1.94E-02 | 26156915  | 26157038  | NC_000006.11 |
| cg19705215 | 5.32E-06 | 8.59E-07 | -5.08 | 4.6421008 | -5.23E-02 | 61747501  | 61747624  | NC_000014.8  |
| cg13481974 | 5.32E-06 | 8.60E-07 | -5.08 | 4.6416418 | -4.11E-02 | 42174516  | 42174639  | NC_000015.9  |
| cg19293752 | 5.32E-06 | 8.60E-07 | -5.08 | 4.6412812 | -8.80E-02 | 81840828  | 81840951  | NC_000015.9  |
| cg15234492 | 5.32E-06 | 8.60E-07 | -5.08 | 4.6412384 | -1.60E-01 | 122019076 | 122019199 | NC_000012.11 |
| cg25599573 | 5.32E-06 | 8.61E-07 | -5.08 | 4.6404707 | -1.03E-01 | 175108429 | 175108552 | NC_000005.9  |
| cg26475094 | 5.32E-06 | 8.61E-07 | -5.08 | 4.6403101 | -1.01E-01 | 56891111  | 56891234  | NC_000016.9  |
| cg17972162 | 5.33E-06 | 8.61E-07 | -5.08 | 4.6398407 | -8.85E-02 | 39496387  | 39496510  | NC_000022.10 |
| cg03031009 | 5.33E-06 | 8.62E-07 | -5.08 | 4.6395858 | -1.07E-01 | 10835019  | 10835142  | NC_000010.10 |
| cg19030994 | 5.33E-06 | 8.62E-07 | -5.08 | 4.6394678 | -1.09E-01 | 273394    | 273517    | NC_000005.9  |
| cg02855045 | 5.33E-06 | 8.62E-07 | -5.08 | 4.6392742 | -7.90E-02 | 72777245  | 72777368  | NC_000003.11 |
| cg01104554 | 5.33E-06 | 8.62E-07 | -5.08 | 4.6391575 | -5.29E-02 | 101556628 | 101556751 | NC_000009.11 |
| cg20403541 | 5.33E-06 | 8.62E-07 | -5.08 | 4.6386564 | -5.67E-02 | 3387290   | 3387413   | NC_000004.11 |
| cg08841613 | 5.33E-06 | 8.63E-07 | -5.08 | 4.6385239 | -1.20E-01 | 220553978 | 220554101 | NC_000002.11 |
| cg08120462 | 5.33E-06 | 8.63E-07 | -5.08 | 4.6383665 | -3.23E-02 | 90118174  | 90118297  | NC_000015.9  |
| cg00099976 | 5.34E-06 | 8.63E-07 | -5.08 | 4.6382226 | -8.66E-02 | 26625273  | 26625396  | NC_000013.10 |
| cg15471073 | 5.34E-06 | 8.63E-07 | -5.08 | 4.6381977 | -1.04E-01 | 17714040  | 17714163  | NC_000004.11 |
| cg12799086 | 5.34E-06 | 8.64E-07 | -5.08 | 4.6370273 | -2.32E-02 | 99724835  | 99724958  | NC_000007.13 |
| cg05487105 | 5.35E-06 | 8.65E-07 | -5.08 | 4.6360236 | -1.58E-01 | 137729296 | 137729419 | NC_000003.11 |

|            |          |          |       |           |           |           |           |              |
|------------|----------|----------|-------|-----------|-----------|-----------|-----------|--------------|
| cg22575599 | 5.35E-06 | 8.65E-07 | -5.08 | 4.6356963 | -2.00E-02 | 56211698  | 56211821  | NC_000012.11 |
| cg24643749 | 5.35E-06 | 8.65E-07 | -5.08 | 4.6355973 | -2.63E-02 | 98503874  | 98503997  | NC_000015.9  |
| cg01287833 | 5.35E-06 | 8.65E-07 | -5.08 | 4.6355818 | -1.05E-01 | 31113026  | 31113149  | NC_000006.11 |
| cg02150018 | 5.35E-06 | 8.65E-07 | -5.08 | 4.6352554 | -5.76E-02 | 56781267  | 56781390  | NC_000012.11 |
| cg01258201 | 5.35E-06 | 8.66E-07 | -5.08 | 4.6351143 | -1.11E-01 | 36808494  | 36808617  | NC_000006.11 |
| cg16453673 | 5.35E-06 | 8.66E-07 | -5.08 | 4.6344612 | -4.90E-02 | 105630771 | 105630894 | NC_000012.11 |
| cg14934821 | 5.36E-06 | 8.67E-07 | -5.08 | 4.6339308 | -9.73E-02 | 139228820 | 139228943 | NC_000009.11 |
| cg17353079 | 5.36E-06 | 8.67E-07 | -5.08 | 4.6334075 | -4.53E-02 | 31779020  | 31779143  | NC_000006.11 |
| cg18376692 | 5.36E-06 | 8.67E-07 | -5.08 | 4.6333229 | -9.20E-02 | 48452465  | 48452588  | NC_000001.10 |
| cg15298173 | 5.37E-06 | 8.68E-07 | -5.08 | 4.6321071 | -7.49E-02 | 29903900  | 29904023  | NC_000015.9  |
| cg07070043 | 5.37E-06 | 8.69E-07 | -5.08 | 4.630855  | -7.35E-02 | 48389148  | 48389271  | NC_000010.10 |
| cg16226644 | 5.38E-06 | 8.70E-07 | -5.08 | 4.6304343 | -6.55E-02 | 33246091  | 33246214  | NC_000006.11 |
| cg04454285 | 5.38E-06 | 8.70E-07 | -5.08 | 4.6302548 | -9.69E-02 | 86016317  | 86016440  | NC_000016.9  |
| cg00918738 | 5.38E-06 | 8.70E-07 | -5.08 | 4.6300745 | -8.69E-02 | 589310    | 589433    | NC_000020.10 |
| cg02246130 | 5.38E-06 | 8.70E-07 | -5.08 | 4.6299504 | -5.80E-02 | 64547152  | 64547275  | NC_000003.11 |
| cg04018534 | 5.38E-06 | 8.70E-07 | -5.08 | 4.6298775 | -1.71E-02 | 56426177  | 56426300  | NC_000017.10 |
| cg13862384 | 5.38E-06 | 8.71E-07 | -5.08 | 4.6295848 | -2.21E-02 | 27275341  | 27275464  | NC_000007.13 |
| cg13918640 | 5.38E-06 | 8.71E-07 | -5.08 | 4.6289086 | -1.02E-01 | 94351568  | 94351691  | NC_000009.11 |
| cg06229167 | 5.38E-06 | 8.71E-07 | -5.08 | 4.6289029 | -5.17E-02 | 65658969  | 65659092  | NC_000011.9  |
| cg22469355 | 5.38E-06 | 8.71E-07 | -5.08 | 4.628697  | -1.69E-02 | 73082054  | 73082177  | NC_000007.13 |
| cg15846316 | 5.38E-06 | 8.71E-07 | -5.08 | 4.6285811 | -3.44E-02 | 57371719  | 57371842  | NC_000004.11 |
| cg21082868 | 5.38E-06 | 8.71E-07 | -5.08 | 4.6285757 | -4.32E-02 | 22828849  | 22828972  | NC_000006.11 |
| cg00435064 | 5.39E-06 | 8.72E-07 | -5.08 | 4.6283248 | -5.64E-02 | 76374256  | 76374379  | NC_000017.10 |
| cg04437407 | 5.39E-06 | 8.72E-07 | -5.08 | 4.6283167 | -6.61E-02 | 94760793  | 94760916  | NC_000014.8  |
| cg09762515 | 5.39E-06 | 8.72E-07 | -5.08 | 4.6279247 | -8.35E-02 | 101556588 | 101556711 | NC_000007.13 |

|                |          |          |       |           |           |           |           |              |
|----------------|----------|----------|-------|-----------|-----------|-----------|-----------|--------------|
| cg00459617     | 5.39E-06 | 8.72E-07 | -5.08 | 4.6278256 | -1.11E-01 | 8111382   | 8111505   | NC_000019.9  |
| cg16165294     | 5.39E-06 | 8.72E-07 | -5.08 | 4.6276489 | -1.04E-01 | 152010113 | 152010236 | NC_000001.10 |
| cg10078415     | 5.39E-06 | 8.73E-07 | -5.08 | 4.6272394 | -4.82E-02 | 20775011  | 20775134  | NC_000016.9  |
| cg06890161     | 5.40E-06 | 8.74E-07 | -5.08 | 4.6261431 | -1.12E-01 | 77895596  | 77895719  | NC_000017.10 |
| cg14818176     | 5.40E-06 | 8.74E-07 | -5.08 | 4.625904  | -1.05E-01 | 73148480  | 73148603  | NC_000017.10 |
| cg17004025     | 5.40E-06 | 8.74E-07 | -5.08 | 4.6254346 | -6.82E-02 | 840795    | 840918    | NC_000019.9  |
| cg23831517     | 5.40E-06 | 8.74E-07 | -5.08 | 4.6253291 | -1.03E-01 | 34182528  | 34182651  | NC_000008.10 |
| cg00862770     | 5.40E-06 | 8.75E-07 | -5.08 | 4.6248514 | -1.25E-02 | 35655764  | 35655887  | NC_000006.11 |
| cg05357039     | 5.40E-06 | 8.75E-07 | -5.08 | 4.62468   | -4.57E-02 | 67141686  | 67141809  | NC_000011.9  |
| cg01114217     | 5.41E-06 | 8.75E-07 | -5.08 | 4.6241533 | -1.36E-02 | 150922145 | 150922268 | NC_000006.11 |
| cg02648589     | 5.41E-06 | 8.76E-07 | -5.08 | 4.6239343 | -6.19E-02 | 114877260 | 114877383 | NC_000013.10 |
| ch.7.49004861R | 5.41E-06 | 8.76E-07 | -5.08 | 4.6239001 | -1.49E-02 | 49034315  | 49034438  | NC_000007.13 |
| cg10516516     | 5.41E-06 | 8.76E-07 | -5.08 | 4.6232514 | -9.68E-02 | 54231340  | 54231463  | NC_000003.11 |
| cg08157459     | 5.42E-06 | 8.77E-07 | -5.08 | 4.6225637 | -8.93E-02 | 112176430 | 112176553 | NC_000013.10 |
| cg14162940     | 5.42E-06 | 8.77E-07 | -5.08 | 4.6224804 | -5.76E-02 | 30605868  | 30605991  | NC_000020.10 |
| cg16617297     | 5.42E-06 | 8.77E-07 | -5.08 | 4.6224165 | -1.14E-01 | 130582172 | 130582295 | NC_000007.13 |
| cg08489315     | 5.42E-06 | 8.77E-07 | -5.08 | 4.6220833 | -3.08E-02 | 56153494  | 56153617  | NC_000019.9  |
| cg22129135     | 5.42E-06 | 8.78E-07 | -5.08 | 4.6215384 | -8.75E-02 | 5951943   | 5952066   | NC_000001.10 |
| cg17144548     | 5.42E-06 | 8.78E-07 | -5.08 | 4.6213559 | -8.64E-02 | 5679308   | 5679431   | NC_000002.11 |
| cg12285627     | 5.42E-06 | 8.78E-07 | -5.08 | 4.6213328 | -4.01E-02 | 803059    | 803182    | NC_000001.10 |
| cg03758697     | 5.42E-06 | 8.79E-07 | -5.08 | 4.6207792 | -7.04E-02 | 93160966  | 93161089  | NC_000015.9  |
| cg13098960     | 5.43E-06 | 8.79E-07 | -5.08 | 4.6204905 | -8.55E-02 | 7494151   | 7494274   | NC_000017.10 |
| cg18542495     | 5.43E-06 | 8.79E-07 | -5.08 | 4.6201579 | -7.45E-02 | 43495541  | 43495664  | NC_000002.11 |
| cg01339183     | 5.43E-06 | 8.79E-07 | -5.08 | 4.6200769 | -6.50E-02 | 41751312  | 41751435  | NC_000006.11 |
| cg08336152     | 5.43E-06 | 8.79E-07 | -5.08 | 4.6199606 | -9.94E-03 | 19281512  | 19281635  | NC_000017.10 |

|              |          |          |       |           |           |           |           |              |
|--------------|----------|----------|-------|-----------|-----------|-----------|-----------|--------------|
| cg16773799   | 5.43E-06 | 8.80E-07 | -5.08 | 4.619497  | -2.97E-02 | 10092403  | 10092526  | NC_000002.11 |
| cg22730029   | 5.43E-06 | 8.80E-07 | -5.08 | 4.6190218 | -6.73E-02 | 41593582  | 41593705  | NC_000013.10 |
| cg25864978   | 5.43E-06 | 8.80E-07 | -5.08 | 4.6189024 | -6.88E-02 | 67786269  | 67786392  | NC_000011.9  |
| cg24453438   | 5.43E-06 | 8.80E-07 | -5.08 | 4.6188273 | -1.07E-01 | 38517272  | 38517395  | NC_000001.10 |
| cg24399204   | 5.44E-06 | 8.80E-07 | -5.08 | 4.6187915 | -7.87E-02 | 11636294  | 11636417  | NC_000002.11 |
| cg20384735   | 5.44E-06 | 8.81E-07 | -5.08 | 4.6184893 | -2.11E-02 | 231376893 | 231377016 | NC_000001.10 |
| ch.12.12432R | 5.44E-06 | 8.81E-07 | -5.08 | 4.6182003 | -2.68E-02 | 539860    | 539983    | NC_000012.11 |
| cg20245822   | 5.44E-06 | 8.81E-07 | -5.08 | 4.6180762 | -5.46E-02 | 104734362 | 104734485 | NC_000012.11 |
| cg01396774   | 5.44E-06 | 8.81E-07 | -5.08 | 4.6178924 | -3.65E-02 | 218299024 | 218299147 | NC_000002.11 |
| cg02905426   | 5.44E-06 | 8.82E-07 | -5.08 | 4.6174411 | -9.68E-02 | 28051771  | 28051894  | NC_000001.10 |
| cg03496689   | 5.45E-06 | 8.82E-07 | -5.08 | 4.6168054 | -6.92E-02 | 144359316 | 144359439 | NC_000008.10 |
| cg04543865   | 5.45E-06 | 8.83E-07 | -5.08 | 4.6159666 | -5.60E-02 | 81347551  | 81347674  | NC_000016.9  |
| cg21116266   | 5.45E-06 | 8.83E-07 | -5.08 | 4.6158232 | -1.14E-01 | 102105049 | 102105172 | NC_000013.10 |
| cg08667128   | 5.45E-06 | 8.83E-07 | -5.08 | 4.6155049 | -1.51E-01 | 29886885  | 29887008  | NC_000017.10 |
| cg11080062   | 5.45E-06 | 8.83E-07 | -5.08 | 4.61544   | -2.41E-02 | 53615449  | 53615572  | NC_000012.11 |
| cg07126281   | 5.45E-06 | 8.84E-07 | -5.08 | 4.6151492 | -3.39E-02 | 44351085  | 44351208  | NC_000022.10 |
| cg21761427   | 5.46E-06 | 8.84E-07 | -5.08 | 4.6148111 | -1.53E-02 | 28220064  | 28220187  | NC_000006.11 |
| cg01603146   | 5.46E-06 | 8.84E-07 | -5.08 | 4.6147341 | -1.08E-02 | 152009641 | 152009764 | NC_000001.10 |
| cg00420354   | 5.46E-06 | 8.84E-07 | -5.08 | 4.6144362 | -1.83E-02 | 3251386   | 3251509   | NC_000004.11 |
| cg00303111   | 5.46E-06 | 8.85E-07 | -5.08 | 4.6141183 | -9.40E-02 | 75672723  | 75672846  | NC_000010.10 |
| cg18485877   | 5.46E-06 | 8.85E-07 | -5.08 | 4.6139577 | -9.84E-02 | 94402477  | 94402600  | NC_000014.8  |
| cg03466066   | 5.46E-06 | 8.85E-07 | -5.08 | 4.6135232 | -4.73E-02 | 88154389  | 88154512  | NC_000016.9  |
| cg11453076   | 5.46E-06 | 8.85E-07 | -5.08 | 4.6132727 | -1.31E-01 | 137812735 | 137812858 | NC_000006.11 |
| cg03822198   | 5.46E-06 | 8.86E-07 | -5.08 | 4.6131039 | -8.46E-02 | 116997535 | 116997658 | NC_000012.11 |
| cg06899522   | 5.47E-06 | 8.87E-07 | -5.08 | 4.6117537 | -1.35E-01 | 9355438   | 9355561   | NC_000001.10 |

|            |          |          |       |           |           |           |           |              |
|------------|----------|----------|-------|-----------|-----------|-----------|-----------|--------------|
| cg16832648 | 5.48E-06 | 8.88E-07 | -5.08 | 4.6107692 | -8.67E-02 | 35703322  | 35703445  | NC_000010.10 |
| cg09121378 | 5.48E-06 | 8.88E-07 | -5.08 | 4.6099263 | -6.79E-02 | 45883590  | 45883713  | NC_000021.8  |
| cg20522398 | 5.48E-06 | 8.89E-07 | -5.08 | 4.609847  | -1.22E-01 | 17316151  | 17316274  | NC_000007.13 |
| cg26927231 | 5.49E-06 | 8.89E-07 | -5.08 | 4.6090668 | -5.93E-02 | 3096662   | 3096785   | NC_000016.9  |
| cg16118817 | 5.49E-06 | 8.90E-07 | -5.08 | 4.6085926 | -4.49E-02 | 4792497   | 4792620   | NC_000019.9  |
| cg07667295 | 5.49E-06 | 8.90E-07 | -5.08 | 4.6085217 | -2.95E-02 | 64320118  | 64320241  | NC_000014.8  |
| cg26562638 | 5.49E-06 | 8.90E-07 | -5.08 | 4.60847   | -8.45E-02 | 226130366 | 226130489 | NC_000001.10 |
| cg12329275 | 5.49E-06 | 8.90E-07 | -5.08 | 4.6083229 | -4.60E-02 | 11912597  | 11912720  | NC_000010.10 |
| cg01137737 | 5.49E-06 | 8.91E-07 | -5.08 | 4.6075497 | -2.12E-02 | 19533410  | 19533533  | NC_000016.9  |
| cg27569300 | 5.50E-06 | 8.91E-07 | -5.08 | 4.6071091 | -1.10E-01 | 99645065  | 99645188  | NC_000015.9  |
| cg20564259 | 5.50E-06 | 8.91E-07 | -5.08 | 4.6070991 | -3.11E-02 | 148876033 | 148876156 | NC_000005.9  |
| cg02602915 | 5.50E-06 | 8.91E-07 | -5.08 | 4.6069161 | -3.59E-02 | 171011615 | 171011738 | NC_000004.11 |
| cg23970338 | 5.50E-06 | 8.91E-07 | -5.08 | 4.6067591 | -2.20E-02 | 58176483  | 58176606  | NC_000012.11 |
| cg10061384 | 5.51E-06 | 8.93E-07 | -5.08 | 4.6050236 | -9.03E-02 | 2466275   | 2466398   | NC_000001.10 |
| cg19745934 | 5.51E-06 | 8.93E-07 | -5.08 | 4.6045269 | -7.56E-02 | 60842133  | 60842256  | NC_000013.10 |
| cg05628549 | 5.51E-06 | 8.93E-07 | -5.08 | 4.6045187 | -1.22E-01 | 6341895   | 6342018   | NC_000011.9  |
| cg23304156 | 5.51E-06 | 8.94E-07 | -5.08 | 4.6037238 | -8.53E-02 | 16466421  | 16466544  | NC_000019.9  |
| cg10368641 | 5.52E-06 | 8.96E-07 | -5.08 | 4.6022758 | -8.06E-02 | 88932955  | 88933078  | NC_000016.9  |
| cg03861065 | 5.53E-06 | 8.96E-07 | -5.08 | 4.6014674 | -1.03E-01 | 64344052  | 64344175  | NC_000010.10 |
| cg02156776 | 5.53E-06 | 8.96E-07 | -5.08 | 4.6014209 | -7.17E-02 | 71013139  | 71013262  | NC_000006.11 |
| cg13492337 | 5.53E-06 | 8.96E-07 | -5.08 | 4.6012742 | -7.12E-02 | 52722140  | 52722263  | NC_000008.10 |
| cg04694991 | 5.53E-06 | 8.97E-07 | -5.08 | 4.6008509 | -6.86E-02 | 97219665  | 97219788  | NC_000010.10 |
| cg18084046 | 5.53E-06 | 8.97E-07 | -5.08 | 4.6004949 | -9.17E-02 | 166430853 | 166430976 | NC_000005.9  |
| cg27485687 | 5.53E-06 | 8.97E-07 | -5.08 | 4.6003043 | -6.90E-02 | 52416858  | 52416981  | NC_000012.11 |
| cg00589520 | 5.53E-06 | 8.97E-07 | -5.08 | 4.6002902 | -9.14E-02 | 23513039  | 23513162  | NC_000007.13 |



|               |          |          |       |           |           |           |           |              |
|---------------|----------|----------|-------|-----------|-----------|-----------|-----------|--------------|
| cg11924368    | 5.53E-06 | 8.98E-07 | -5.08 | 4.6000224 | -2.68E-02 | 139682896 | 139683019 | NC_000005.9  |
| cg08423562    | 5.53E-06 | 8.98E-07 | -5.08 | 4.5997782 | -1.07E-01 | 38466544  | 38466667  | NC_000001.10 |
| cg19691505    | 5.54E-06 | 8.98E-07 | -5.08 | 4.5995905 | -1.02E-01 | 4175336   | 4175459   | NC_000007.13 |
| cg00801636    | 5.54E-06 | 8.98E-07 | -5.08 | 4.5994112 | -2.88E-02 | 105956369 | 105956492 | NC_000014.8  |
| cg24475272    | 5.54E-06 | 8.99E-07 | -5.08 | 4.5987648 | -5.70E-02 | 140432613 | 140432736 | NC_000004.11 |
| cg01637218    | 5.54E-06 | 8.99E-07 | -5.08 | 4.598423  | -1.87E-02 | 29063669  | 29063792  | NC_000001.10 |
| cg26189983    | 5.54E-06 | 8.99E-07 | -5.08 | 4.5983602 | -9.90E-02 | 12227700  | 12227823  | NC_000001.10 |
| cg17630771    | 5.54E-06 | 8.99E-07 | -5.08 | 4.5981654 | -2.36E-02 | 101981004 | 101981127 | NC_000011.9  |
| cg05061754    | 5.54E-06 | 9.00E-07 | -5.07 | 4.597902  | -8.81E-02 | 4254313   | 4254436   | NC_000007.13 |
| cg14511768    | 5.55E-06 | 9.01E-07 | -5.07 | 4.5966249 | -2.01E-02 | 26362707  | 26362830  | NC_000001.10 |
| cg17635777    | 5.55E-06 | 9.01E-07 | -5.07 | 4.5966002 | -6.98E-02 | 142446785 | 142446908 | NC_000008.10 |
| cg07595404    | 5.55E-06 | 9.01E-07 | -5.07 | 4.5964058 | -1.30E-02 | 130014885 | 130015008 | NC_000004.11 |
| cg16573726    | 5.55E-06 | 9.01E-07 | -5.07 | 4.5962454 | -5.62E-02 | 56666137  | 56666260  | NC_000001.10 |
| cg24719575    | 5.55E-06 | 9.01E-07 | -5.07 | 4.5958586 | -2.19E-02 | 57773768  | 57773891  | NC_000004.11 |
| cg15465223    | 5.56E-06 | 9.02E-07 | -5.07 | 4.595699  | -2.01E-02 | 44185590  | 44185713  | NC_000010.10 |
| cg10883375    | 5.56E-06 | 9.02E-07 | -5.07 | 4.5949242 | -1.05E-01 | 74210186  | 74210309  | NC_000014.8  |
| cg10700570    | 5.56E-06 | 9.02E-07 | -5.07 | 4.5948949 | -1.73E-02 | 2281743   | 2281866   | NC_000007.13 |
| cg20642630    | 5.57E-06 | 9.03E-07 | -5.07 | 4.593695  | -7.28E-02 | 22846006  | 22846129  | NC_000008.10 |
| cg00238848    | 5.57E-06 | 9.04E-07 | -5.07 | 4.5934936 | -8.35E-02 | 72408252  | 72408375  | NC_000011.9  |
| cg00334821    | 5.57E-06 | 9.04E-07 | -5.07 | 4.5933844 | -1.42E-01 | 73508994  | 73509117  | NC_000007.13 |
| cg00244001    | 5.57E-06 | 9.04E-07 | -5.07 | 4.5927966 | -1.02E-01 | 126336805 | 126336928 | NC_000010.10 |
| ch.16.759907F | 5.57E-06 | 9.04E-07 | -5.07 | 4.5927741 | -1.51E-02 | 24823925  | 24824048  | NC_000016.9  |
| cg14832378    | 5.57E-06 | 9.05E-07 | -5.07 | 4.5922611 | -1.04E-01 | 59038939  | 59039062  | NC_000014.8  |
| cg11654024    | 5.58E-06 | 9.06E-07 | -5.07 | 4.5915335 | -9.03E-02 | 85230119  | 85230242  | NC_000001.10 |
| cg08754967    | 5.58E-06 | 9.06E-07 | -5.07 | 4.5912799 | -4.06E-02 | 736083    | 736206    | NC_000010.10 |

|            |          |          |       |           |           |           |           |              |
|------------|----------|----------|-------|-----------|-----------|-----------|-----------|--------------|
| cg10857250 | 5.58E-06 | 9.06E-07 | -5.07 | 4.5911933 | -1.17E-01 | 122986080 | 122986203 | NC_000012.11 |
| cg18900271 | 5.58E-06 | 9.06E-07 | -5.07 | 4.5909147 | -7.46E-02 | 110863886 | 110864009 | NC_000002.11 |
| cg13576061 | 5.58E-06 | 9.06E-07 | -5.07 | 4.5908975 | -3.94E-02 | 55291172  | 55291295  | NC_000005.9  |
| cg07859359 | 5.58E-06 | 9.06E-07 | -5.07 | 4.5906335 | -1.36E-02 | 84538331  | 84538454  | NC_000016.9  |
| cg27620173 | 5.59E-06 | 9.07E-07 | -5.07 | 4.5900928 | -1.34E-01 | 94017285  | 94017408  | NC_000011.9  |
| cg21215899 | 5.59E-06 | 9.07E-07 | -5.07 | 4.5895379 | -6.89E-02 | 121414425 | 121414548 | NC_000005.9  |
| cg24888989 | 5.59E-06 | 9.08E-07 | -5.07 | 4.5893156 | -2.41E-02 | 44803291  | 44803414  | NC_000003.11 |
| cg05451413 | 5.59E-06 | 9.08E-07 | -5.07 | 4.5889482 | -3.96E-02 | 18691705  | 18691828  | NC_000018.9  |
| cg25969108 | 5.59E-06 | 9.08E-07 | -5.07 | 4.588699  | -2.10E-02 | 35605636  | 35605759  | NC_000019.9  |
| cg05440642 | 5.59E-06 | 9.08E-07 | -5.07 | 4.588406  | -1.03E-01 | 73507806  | 73507929  | NC_000010.10 |
| cg15319470 | 5.59E-06 | 9.09E-07 | -5.07 | 4.5882675 | -1.08E-01 | 62546183  | 62546306  | NC_000012.11 |
| cg16047144 | 5.60E-06 | 9.09E-07 | -5.07 | 4.588022  | -8.44E-02 | 62097953  | 62098076  | NC_000017.10 |
| cg25846336 | 5.60E-06 | 9.10E-07 | -5.07 | 4.5868118 | -8.36E-02 | 60293554  | 60293677  | NC_000015.9  |
| cg12100411 | 5.60E-06 | 9.10E-07 | -5.07 | 4.5864724 | -2.80E-02 | 2518194   | 2518317   | NC_000001.10 |
| cg13000789 | 5.61E-06 | 9.10E-07 | -5.07 | 4.5863878 | -9.43E-02 | 56589255  | 56589378  | NC_000006.11 |
| cg00691974 | 5.61E-06 | 9.11E-07 | -5.07 | 4.5860563 | -9.46E-02 | 185087958 | 185088081 | NC_000004.11 |
| cg14224203 | 5.61E-06 | 9.11E-07 | -5.07 | 4.5858402 | -6.43E-02 | 139716026 | 139716149 | NC_000009.11 |
| cg26486702 | 5.61E-06 | 9.11E-07 | -5.07 | 4.5857408 | -1.71E-02 | 161129448 | 161129571 | NC_000001.10 |
| cg16694634 | 5.61E-06 | 9.11E-07 | -5.07 | 4.5854698 | -5.62E-02 | 144952216 | 144952339 | NC_000008.10 |
| cg01802073 | 5.61E-06 | 9.11E-07 | -5.07 | 4.5853078 | -1.20E-02 | 54976343  | 54976466  | NC_000014.8  |
| cg21661022 | 5.61E-06 | 9.11E-07 | -5.07 | 4.5851992 | -1.34E-01 | 98258709  | 98258832  | NC_000007.13 |
| cg24763869 | 5.61E-06 | 9.12E-07 | -5.07 | 4.585122  | -2.27E-02 | 3572311   | 3572434   | NC_000017.10 |
| cg25401621 | 5.61E-06 | 9.12E-07 | -5.07 | 4.5850644 | -5.00E-02 | 108302825 | 108302948 | NC_000013.10 |
| cg19312427 | 5.61E-06 | 9.12E-07 | -5.07 | 4.5850303 | -1.01E-01 | 198174503 | 198174626 | NC_000001.10 |
| cg01124530 | 5.61E-06 | 9.12E-07 | -5.07 | 4.5849659 | -9.85E-02 | 204344861 | 204344984 | NC_000001.10 |

|            |          |          |       |           |           |           |           |              |
|------------|----------|----------|-------|-----------|-----------|-----------|-----------|--------------|
| cg09439204 | 5.61E-06 | 9.12E-07 | -5.07 | 4.58464   | -1.14E-01 | 54090464  | 54090587  | NC_000012.11 |
| cg15986030 | 5.61E-06 | 9.12E-07 | -5.07 | 4.5845165 | -6.40E-02 | 18902221  | 18902344  | NC_000019.9  |
| cg01626227 | 5.62E-06 | 9.13E-07 | -5.07 | 4.5841059 | -4.42E-02 | 99517289  | 99517412  | NC_000007.13 |
| cg22002668 | 5.62E-06 | 9.13E-07 | -5.07 | 4.5833136 | -1.89E-02 | 131936651 | 131936774 | NC_000009.11 |
| cg22025263 | 5.62E-06 | 9.13E-07 | -5.07 | 4.5832825 | -8.74E-02 | 43419475  | 43419598  | NC_000001.10 |
| cg07794885 | 5.62E-06 | 9.13E-07 | -5.07 | 4.5831888 | -9.91E-02 | 88703611  | 88703734  | NC_000016.9  |
| cg01899937 | 5.62E-06 | 9.14E-07 | -5.07 | 4.5828448 | -5.92E-02 | 185723505 | 185723628 | NC_000004.11 |
| cg18455616 | 5.63E-06 | 9.14E-07 | -5.07 | 4.582495  | -8.56E-02 | 99124870  | 99124993  | NC_000002.11 |
| cg22114501 | 5.63E-06 | 9.15E-07 | -5.07 | 4.5813744 | -2.00E-02 | 158649237 | 158649360 | NC_000007.13 |
| cg22805436 | 5.64E-06 | 9.16E-07 | -5.07 | 4.5806115 | -4.64E-02 | 144822012 | 144822135 | NC_000008.10 |
| cg10113217 | 5.64E-06 | 9.16E-07 | -5.07 | 4.5804284 | -7.85E-02 | 1058077   | 1058200   | NC_000001.10 |
| cg03185794 | 5.64E-06 | 9.16E-07 | -5.07 | 4.5801942 | -8.93E-02 | 101237439 | 101237562 | NC_000013.10 |
| cg14516552 | 5.64E-06 | 9.16E-07 | -5.07 | 4.5800804 | -2.97E-02 | 96213518  | 96213641  | NC_000009.11 |
| cg25980484 | 5.64E-06 | 9.16E-07 | -5.07 | 4.5800414 | -1.10E-01 | 30653512  | 30653635  | NC_000006.11 |
| cg04870415 | 5.65E-06 | 9.18E-07 | -5.07 | 4.5786973 | -3.42E-02 | 7212954   | 7213077   | NC_000008.10 |
| cg07999042 | 5.65E-06 | 9.18E-07 | -5.07 | 4.5783883 | -8.41E-02 | 61598930  | 61599053  | NC_000011.9  |
| cg25937884 | 5.65E-06 | 9.18E-07 | -5.07 | 4.5782148 | -2.85E-02 | 180674133 | 180674256 | NC_000005.9  |
| cg27537164 | 5.65E-06 | 9.18E-07 | -5.07 | 4.5779397 | -1.14E-01 | 168079127 | 168079250 | NC_000006.11 |
| cg23968866 | 5.65E-06 | 9.18E-07 | -5.07 | 4.5778472 | -6.27E-02 | 119955666 | 119955789 | NC_000002.11 |
| cg03719642 | 5.65E-06 | 9.19E-07 | -5.07 | 4.5777033 | -5.96E-02 | 62570072  | 62570195  | NC_000020.10 |
| cg04165366 | 5.65E-06 | 9.19E-07 | -5.07 | 4.5774674 | -4.97E-02 | 131154466 | 131154589 | NC_000008.10 |
| cg11694223 | 5.65E-06 | 9.19E-07 | -5.07 | 4.5772661 | -7.07E-02 | 27473467  | 27473590  | NC_000008.10 |
| cg19026959 | 5.66E-06 | 9.20E-07 | -5.07 | 4.5766539 | -1.49E-02 | 13049204  | 13049327  | NC_000019.9  |
| cg26335578 | 5.66E-06 | 9.20E-07 | -5.07 | 4.5763749 | -6.99E-02 | 68722738  | 68722861  | NC_000011.9  |
| cg15704004 | 5.66E-06 | 9.20E-07 | -5.07 | 4.576374  | -5.41E-02 | 92806448  | 92806571  | NC_000011.9  |

|            |          |          |       |           |           |           |           |              |
|------------|----------|----------|-------|-----------|-----------|-----------|-----------|--------------|
| cg23533683 | 5.66E-06 | 9.20E-07 | -5.07 | 4.5762533 | -3.03E-02 | 46144774  | 46144897  | NC_000019.9  |
| cg04623172 | 5.66E-06 | 9.20E-07 | -5.07 | 4.5758511 | -1.78E-02 | 31607306  | 31607429  | NC_000010.10 |
| cg16358438 | 5.66E-06 | 9.21E-07 | -5.07 | 4.575649  | -5.07E-02 | 36689446  | 36689569  | NC_000001.10 |
| cg09762021 | 5.66E-06 | 9.21E-07 | -5.07 | 4.5755588 | -9.55E-02 | 153762224 | 153762347 | NC_000001.10 |
| cg08991081 | 5.66E-06 | 9.21E-07 | -5.07 | 4.57549   | -7.85E-02 | 154024833 | 154024956 | NC_000005.9  |
| cg12325455 | 5.66E-06 | 9.21E-07 | -5.07 | 4.5754897 | -4.89E-02 | 38092876  | 38092999  | NC_000022.10 |
| cg23055315 | 5.66E-06 | 9.21E-07 | -5.07 | 4.5754194 | -1.27E-02 | 56792234  | 56792357  | NC_000008.10 |
| cg24717490 | 5.66E-06 | 9.21E-07 | -5.07 | 4.5754117 | -6.31E-02 | 37853862  | 37853985  | NC_000003.11 |
| cg17344091 | 5.66E-06 | 9.21E-07 | -5.07 | 4.5751401 | -8.53E-02 | 28885444  | 28885567  | NC_000006.11 |
| cg00046537 | 5.67E-06 | 9.21E-07 | -5.07 | 4.5749443 | -2.85E-02 | 134210707 | 134210830 | NC_000005.9  |
| cg15919431 | 5.67E-06 | 9.21E-07 | -5.07 | 4.5747539 | -9.98E-02 | 147862506 | 147862629 | NC_000005.9  |
| cg21528399 | 5.67E-06 | 9.22E-07 | -5.07 | 4.5744573 | -9.08E-02 | 24771586  | 24771709  | NC_000004.11 |
| cg18614702 | 5.67E-06 | 9.22E-07 | -5.07 | 4.573584  | -9.18E-02 | 72215990  | 72216113  | NC_000010.10 |
| cg05939041 | 5.67E-06 | 9.23E-07 | -5.07 | 4.5734568 | -7.86E-02 | 93474066  | 93474189  | NC_000014.8  |
| cg12126990 | 5.68E-06 | 9.23E-07 | -5.07 | 4.5732372 | -1.18E-01 | 100588044 | 100588167 | NC_000002.11 |
| cg21074190 | 5.68E-06 | 9.23E-07 | -5.07 | 4.5732021 | -7.94E-02 | 56365823  | 56365946  | NC_000012.11 |
| cg17473580 | 5.68E-06 | 9.23E-07 | -5.07 | 4.5731935 | -6.92E-02 | 197382627 | 197382750 | NC_000003.11 |
| cg20744217 | 5.68E-06 | 9.23E-07 | -5.07 | 4.5731402 | -4.71E-02 | 67211017  | 67211140  | NC_000011.9  |
| cg04622164 | 5.68E-06 | 9.23E-07 | -5.07 | 4.5730745 | -7.10E-02 | 85157906  | 85158029  | NC_000016.9  |
| cg19770723 | 5.68E-06 | 9.23E-07 | -5.07 | 4.5730342 | -6.47E-02 | 2174895   | 2175018   | NC_000001.10 |
| cg15656813 | 5.68E-06 | 9.24E-07 | -5.07 | 4.5720148 | -6.87E-02 | 81104695  | 81104818  | NC_000004.11 |
| cg21895377 | 5.68E-06 | 9.24E-07 | -5.07 | 4.5719894 | -1.09E-01 | 148293288 | 148293411 | NC_000005.9  |
| cg16495696 | 5.68E-06 | 9.25E-07 | -5.07 | 4.5714601 | -5.36E-02 | 90792869  | 90792992  | NC_000015.9  |
| cg03431544 | 5.68E-06 | 9.25E-07 | -5.07 | 4.5713603 | -2.97E-02 | 77020867  | 77020990  | NC_000017.10 |
| cg13768503 | 5.68E-06 | 9.25E-07 | -5.07 | 4.5713361 | -4.42E-02 | 72767353  | 72767476  | NC_000009.11 |

|            |          |          |       |           |           |           |           |              |
|------------|----------|----------|-------|-----------|-----------|-----------|-----------|--------------|
| cg24346464 | 5.69E-06 | 9.25E-07 | -5.07 | 4.571111  | -7.98E-02 | 164872273 | 164872396 | NC_000001.10 |
| cg07630189 | 5.69E-06 | 9.25E-07 | -5.07 | 4.5710402 | -4.90E-02 | 40932106  | 40932229  | NC_000019.9  |
| cg22295925 | 5.69E-06 | 9.25E-07 | -5.07 | 4.5710251 | -8.53E-02 | 99153795  | 99153918  | NC_000015.9  |
| cg01026898 | 5.69E-06 | 9.25E-07 | -5.07 | 4.5707784 | -7.88E-02 | 44995262  | 44995385  | NC_000011.9  |
| cg17064564 | 5.69E-06 | 9.25E-07 | -5.07 | 4.5704943 | -3.17E-02 | 29710817  | 29710940  | NC_000022.10 |
| cg26862706 | 5.69E-06 | 9.26E-07 | -5.07 | 4.570203  | -1.01E-01 | 120403285 | 120403408 | NC_000011.9  |
| cg18023263 | 5.69E-06 | 9.26E-07 | -5.07 | 4.5699789 | -1.11E-01 | 84403466  | 84403589  | NC_000011.9  |
| cg03663984 | 5.69E-06 | 9.26E-07 | -5.07 | 4.5694408 | -1.02E-01 | 69171495  | 69171618  | NC_000003.11 |
| cg08860639 | 5.70E-06 | 9.27E-07 | -5.07 | 4.5687887 | -9.85E-02 | 828098    | 828221    | NC_000004.11 |
| cg03130962 | 5.70E-06 | 9.27E-07 | -5.07 | 4.5685803 | -9.73E-02 | 31111088  | 31111211  | NC_000006.11 |
| cg26950568 | 5.70E-06 | 9.27E-07 | -5.07 | 4.5685722 | -1.40E-01 | 30626440  | 30626563  | NC_000013.10 |
| cg11104828 | 5.70E-06 | 9.28E-07 | -5.07 | 4.5679846 | -6.33E-02 | 58869979  | 58870102  | NC_000011.9  |
| cg08830157 | 5.71E-06 | 9.29E-07 | -5.07 | 4.5671803 | -1.03E-01 | 1107192   | 1107315   | NC_000005.9  |
| cg19654437 | 5.71E-06 | 9.29E-07 | -5.07 | 4.5670776 | -9.50E-02 | 202671158 | 202671281 | NC_000002.11 |
| cg13816042 | 5.71E-06 | 9.29E-07 | -5.07 | 4.5669522 | -1.08E-01 | 137615839 | 137615962 | NC_000009.11 |
| cg14897920 | 5.71E-06 | 9.29E-07 | -5.07 | 4.566899  | -6.75E-02 | 11564442  | 11564565  | NC_000019.9  |
| cg17426592 | 5.71E-06 | 9.30E-07 | -5.07 | 4.5660811 | -2.90E-02 | 6712363   | 6712486   | NC_000005.9  |
| cg17239019 | 5.72E-06 | 9.31E-07 | -5.07 | 4.565047  | -1.03E-01 | 41091424  | 41091547  | NC_000007.13 |
| cg21106505 | 5.72E-06 | 9.31E-07 | -5.07 | 4.5646998 | -1.04E-01 | 562547    | 562670    | NC_000011.9  |
| cg20473452 | 5.72E-06 | 9.31E-07 | -5.07 | 4.5642109 | -6.65E-02 | 1036938   | 1037061   | NC_000011.9  |
| cg11845050 | 5.73E-06 | 9.32E-07 | -5.07 | 4.5634513 | -1.77E-02 | 21871914  | 21872037  | NC_000022.10 |
| cg04484415 | 5.73E-06 | 9.32E-07 | -5.07 | 4.5633475 | -1.29E-01 | 58534708  | 58534831  | NC_000016.9  |
| cg02412169 | 5.73E-06 | 9.33E-07 | -5.07 | 4.5629003 | -1.02E-01 | 1732744   | 1732867   | NC_000005.9  |
| cg23328194 | 5.73E-06 | 9.33E-07 | -5.07 | 4.5628133 | -1.00E-01 | 26687962  | 26688085  | NC_000008.10 |
| cg24250492 | 5.74E-06 | 9.34E-07 | -5.07 | 4.5615367 | -8.76E-02 | 184268405 | 184268528 | NC_000001.10 |

|               |          |          |       |           |           |           |           |              |
|---------------|----------|----------|-------|-----------|-----------|-----------|-----------|--------------|
| cg17437218    | 5.74E-06 | 9.34E-07 | -5.07 | 4.5613486 | -7.57E-02 | 2278847   | 2278970   | NC_000019.9  |
| cg14351882    | 5.74E-06 | 9.34E-07 | -5.07 | 4.56123   | -8.83E-02 | 140061878 | 140062001 | NC_000009.11 |
| cg24178500    | 5.74E-06 | 9.35E-07 | -5.07 | 4.5609402 | -2.13E-02 | 43538586  | 43538709  | NC_000020.10 |
| cg13758904    | 5.74E-06 | 9.35E-07 | -5.07 | 4.560716  | -3.17E-02 | 691034    | 691157    | NC_000002.11 |
| cg20347496    | 5.74E-06 | 9.35E-07 | -5.07 | 4.5606484 | -2.77E-02 | 73403631  | 73403754  | NC_000002.11 |
| cg14287565    | 5.74E-06 | 9.35E-07 | -5.07 | 4.5603013 | -3.64E-02 | 127630689 | 127630812 | NC_000009.11 |
| ch.7.2782052F | 5.75E-06 | 9.36E-07 | -5.07 | 4.5596199 | -1.41E-02 | 133596844 | 133596967 | NC_000007.13 |
| cg17466795    | 5.75E-06 | 9.36E-07 | -5.07 | 4.5592081 | -1.08E-01 | 9497330   | 9497453   | NC_000020.10 |
| cg13450549    | 5.75E-06 | 9.36E-07 | -5.07 | 4.5590935 | -4.94E-02 | 125227559 | 125227682 | NC_000009.11 |
| cg15810386    | 5.76E-06 | 9.38E-07 | -5.07 | 4.5578629 | -1.07E-01 | 31362491  | 31362614  | NC_000005.9  |
| cg18594785    | 5.76E-06 | 9.38E-07 | -5.07 | 4.5578326 | -1.09E-02 | 38545531  | 38545654  | NC_000015.9  |
| cg02019125    | 5.76E-06 | 9.38E-07 | -5.07 | 4.5577984 | -7.93E-02 | 156323952 | 156324075 | NC_000003.11 |

---
