# Supplementary material for: circRNA circ_102049 Implicates in Pancreatic Ductal Adenocarcinoma Progression through Activating CD80 by Targeting miR‐455‐3p
Source: Hindawi journal article supplement (doi:10.1155/2021/8819990), 2021-01-01
Supplement: f10 [file 8819990.f10.pdf]

**Supplementary Table S8** The differentially expressed genes of GSE14245, GSE27890, GSE32676, GSE41372, GSE62165, GSE62452, and GSE71989

**GSE14245**

| ID          | adj.P.Val | P.Value    | t         | B     | logFC     | Gene.symbol | Gene.title                                                 |
|-------------|-----------|------------|-----------|-------|-----------|-------------|------------------------------------------------------------|
| 219441_s_at | 0.14      | 0.00000356 | 5.8628901 | -3.12 | 6.2572679 | LRRK1       | leucine rich repeat kinase 1                               |
| 220227_at   | 0.14      | 0.00000879 | 5.5150701 | -3.21 | 2.8356585 | CDH4        | cadherin 4                                                 |
| 211628_x_at | 0.167     | 0.00001545 | 5.2993286 | -3.27 | 4.2741316 | FTH1P5      | ferritin heavy chain 1 pseudogene 5                        |
| 204351_at   | 0.167     | 0.00001837 | 5.2787255 | -3.35 | 3.2890457 | S100P       | S100 calcium binding protein P                             |
| 201809_s_at | 0.259     | 0.00003792 | 4.9578361 | -3.37 | 2.6487957 | ENG         | endoglin                                                   |
| 235721_at   | 0.274     | 0.00005509 | 4.8161369 | -3.41 | 2.3564623 | DTX3        | deltex E3 ubiquitin ligase 3                               |
| 207706_at   | 0.601     | 0.00015389 | 4.4262983 | -3.53 | 2.5315866 | USH2A       | usherin                                                    |
| 208022_s_at | 0.605     | 0.00016589 | 4.3977555 | -3.54 | 2.8320087 | CDC14B      | cell division cycle 14B                                    |
| 214091_s_at | 0.641     | 0.00020031 | 4.3260309 | -3.56 | 2.0954102 | GPX3        | glutathione peroxidase 3                                   |
| 209517_s_at | 0.574     | 0.00013649 | 4.5022248 | -3.56 | 7.3796552 | ASH2L       | ASH2 like histone lysine methyltransferase complex subunit |
| 216956_s_at | 0.641     | 0.00021096 | 4.3063005 | -3.57 | 2.1488537 | ITGA2B      | integrin subunit alpha 2b                                  |
| 208275_x_at | 0.669     | 0.00024192 | 4.2541157 | -3.58 | 3.5111417 | UTF1        | undifferentiated embryonic cell transcription factor 1     |
| 221525_at   | 0.726     | 0.00031849 | 4.149146  | -3.62 | 4.1659539 | ZMIZ2       | zinc finger MIZ-type containing 2                          |
| 240797_at   | 0.726     | 0.00030815 | 4.1869756 | -3.65 | 3.5617015 | PERP        | PERP, TP53 apoptosis effector                              |

|             |       |            |           |       |           |                                                                                                                                                                                                                                                                                        |
|-------------|-------|------------|-----------|-------|-----------|----------------------------------------------------------------------------------------------------------------------------------------------------------------------------------------------------------------------------------------------------------------------------------------|
| 212790_x_at | 0.759 | 0.00038059 | 4.1049615 | -3.68 | 4.4630929 | RPL13AP5///S ribosomal protein L13a pseudogene 5///small<br>NORD32A///S nucleolar RNA, C/D box 32A///small nucleolar<br>NORD33///SN RNA, C/D box 33///small nucleolar RNA, C/D<br>ORD34///SNO box 34///small nucleolar RNA, C/D box<br>RD35A///RPL1 35A///ribosomal protein L13a<br>3A |
| 225792_at   | 0.262 | 0.00004795 | 5.1004271 | -3.68 | 4.6107373 | HOOK1 hook microtubule tethering protein 1                                                                                                                                                                                                                                             |
| 207004_at   | 0.715 | 0.00028791 | 4.2414073 | -3.69 | 4.1355238 | BCL2 BCL2, apoptosis regulator                                                                                                                                                                                                                                                         |
| 1555960_at  | 0.192 | 0.00002457 | 5.4589671 | -3.71 | 5.8192231 | HINT1 histidine triad nucleotide binding protein 1                                                                                                                                                                                                                                     |
| 1569867_at  | 0.945 | 0.00077264 | 3.8084481 | -3.73 | 2.7758833 | EME2 essential meiotic structure-specific endonuclease<br>subunit 2                                                                                                                                                                                                                    |
| 210646_x_at | 0.641 | 0.00019782 | 4.4602862 | -3.74 | 5.6372141 | RPL13AP5///S ribosomal protein L13a pseudogene 5///small<br>NORD32A///S nucleolar RNA, C/D box 32A///small nucleolar<br>NORD33///SN RNA, C/D box 33///small nucleolar RNA, C/D<br>ORD34///SNO box 34///small nucleolar RNA, C/D box<br>RD35A///RPL1 35A///ribosomal protein L13a<br>3A |
| 207857_at   | 0.759 | 0.00041573 | 4.1245217 | -3.77 | 4.0999276 | LILRA2 leukocyte immunoglobulin like receptor A2                                                                                                                                                                                                                                       |
| 1553811_at  | 0.945 | 0.00104382 | 3.6916558 | -3.77 | 2.2149003 | FAM222A-AS1 FAM222A antisense RNA 1                                                                                                                                                                                                                                                    |
| 224941_at   | 0.945 | 0.0011382  | 3.6579108 | -3.78 | 1.9922369 | PAPPA pappalysin 1                                                                                                                                                                                                                                                                     |
| 1558621_at  | 0.945 | 0.00073723 | 3.8690723 | -3.8  | 5.5755548 | CABLES1 Cdk5 and Abl enzyme substrate 1                                                                                                                                                                                                                                                |
| 225246_at   | 0.945 | 0.00060976 | 3.9701402 | -3.81 | 3.5954745 | STIM2 stromal interaction molecule 2                                                                                                                                                                                                                                                   |
| 235004_at   | 0.945 | 0.00119703 | 3.6560192 | -3.82 | 4.4004428 | RBM24 RNA binding motif protein 24                                                                                                                                                                                                                                                     |

|              |       |            |           |       |           |                     |                                                        |
|--------------|-------|------------|-----------|-------|-----------|---------------------|--------------------------------------------------------|
| 1556114_a_at | 0.945 | 0.00121402 | 3.6504442 | -3.82 | 2.0874283 | LOC101928841        | collagen alpha-1(II) chain-like                        |
| 216158_at    | 0.945 | 0.00164009 | 3.5147508 | -3.83 | 3.0272459 |                     |                                                        |
| 220006_at    | 0.945 | 0.00198696 | 3.4390107 | -3.86 | 3.0364632 | EFCC1               | EF-hand and coiled-coil domain containing 1            |
| 1562062_at   | 0.945 | 0.00202838 | 3.4308413 | -3.86 | 2.0745352 |                     |                                                        |
| 207842_s_at  | 0.945 | 0.00137737 | 3.6190953 | -3.87 | 5.4167854 | MIR6866///CA<br>SC3 | microRNA 6866///cancer susceptibility candidate 3      |
| 235416_at    | 0.945 | 0.00114561 | 3.7146619 | -3.88 | 4.4591786 | LOC643201           | centrosomal protein 192kDa pseudogene                  |
| 220620_at    | 0.945 | 0.00267633 | 3.3205726 | -3.9  | 4.7500217 | CRCT1               | cysteine rich C-terminal 1                             |
| 232937_at    | 0.945 | 0.00276631 | 3.3073521 | -3.9  | 2.0061428 |                     |                                                        |
| 1557021_s_at | 0.945 | 0.00227324 | 3.4003574 | -3.91 | 2.1687517 | LOC100507250        | uncharacterized LOC100507250                           |
| 207990_x_at  | 0.945 | 0.0023738  | 3.3829462 | -3.91 | 5.4681509 | ACRV1               | acrosomal vesicle protein 1                            |
| 233220_at    | 0.945 | 0.00189265 | 3.4908377 | -3.91 | 2.0518303 | GRIN3A              | glutamate ionotropic receptor NMDA type subunit 3A     |
| 206367_at    | 0.945 | 0.00323942 | 3.2440256 | -3.93 | 2.1974967 | REN                 | renin                                                  |
| 202173_s_at  | 0.945 | 0.00324289 | 3.2435958 | -3.93 | 2.4741884 | VEZF1               | vascular endothelial zinc finger 1                     |
| 207768_at    | 0.759 | 0.00037106 | 4.3223599 | -3.93 | 3.5437297 | EGR4                | early growth response 4                                |
| 243540_at    | 0.945 | 0.00240747 | 3.3930861 | -3.94 | 2.0466775 |                     |                                                        |
| 218617_at    | 0.945 | 0.00356915 | 3.2049669 | -3.94 | 2.0778704 | TRIT1               | tRNA isopentenyltransferase 1                          |
| 201878_at    | 0.945 | 0.00298653 | 3.2901974 | -3.94 | 1.6990611 | ARIH1               | ariadne RBR E3 ubiquitin protein ligase 1              |
| 1563002_at   | 0.945 | 0.00366512 | 3.1942503 | -3.94 | 1.509713  |                     |                                                        |
| 235215_at    | 0.669 | 0.00025699 | 4.4843196 | -3.95 | 3.9639499 | ERCC4               | ERCC excision repair 4, endonuclease catalytic subunit |

|              |       |            |           |       |           |                 |                                                                                                                                         |
|--------------|-------|------------|-----------|-------|-----------|-----------------|-----------------------------------------------------------------------------------------------------------------------------------------|
| 206037_at    | 0.669 | 0.00025667 | 4.5403052 | -3.95 | 4.0499587 | KYAT1           | kynurenine aminotransferase 1                                                                                                           |
| 230931_at    | 0.759 | 0.00041046 | 4.2779519 | -3.95 | 4.1885334 | PLG             | plasminogen                                                                                                                             |
| 212345_s_at  | 0.945 | 0.0039337  | 3.1656344 | -3.95 | 2.0422238 | CREB3L2         | cAMP responsive element binding protein 3 like<br>2                                                                                     |
| 207660_at    | 0.945 | 0.00333064 | 3.245908  | -3.96 | 2.2492209 | DMD             | dystrophin                                                                                                                              |
| 230096_at    | 0.945 | 0.00402314 | 3.1565207 | -3.96 | 1.9064681 |                 |                                                                                                                                         |
| 202236_s_at  | 0.945 | 0.00126742 | 3.722307  | -3.96 | 3.8348051 | SLC16A1         | solute carrier family 16 member 1                                                                                                       |
| 212999_x_at  | 0.945 | 0.00366014 | 3.2074581 | -3.97 | 4.4548634 | LOC101060835    | HLA class II histocompatibility antigen, DQ beta<br>///HLA-DQB1 1 chain-like///major histocompatibility complex,<br>class II, DQ beta 1 |
| 230578_at    | 0.945 | 0.00392487 | 3.1789132 | -3.98 | 4.6816465 | ZNF471          | zinc finger protein 471                                                                                                                 |
| 1557256_a_at | 0.945 | 0.00478466 | 3.0859679 | -3.98 | 1.5099947 | GABRB1          | gamma-aminobutyric acid type A receptor beta1<br>subunit                                                                                |
| 211927_x_at  | 0.945 | 0.00267659 | 3.3665972 | -3.98 | 1.9473813 | MIR3654///EEF1G | microRNA 3654///eukaryotic translation<br>elongation factor 1 gamma                                                                     |
| 1563143_at   | 0.945 | 0.00202503 | 3.5018628 | -3.98 | 3.3608001 | LOC100507065    | uncharacterized LOC100507065                                                                                                            |
| 1562349_at   | 0.945 | 0.00343076 | 3.2479656 | -3.98 | 5.2297629 | TRAPPC2         | trafficking protein particle complex 2                                                                                                  |
| 236474_at    | 0.945 | 0.00498652 | 3.0690734 | -3.99 | 1.936127  |                 |                                                                                                                                         |
| 204437_s_at  | 0.945 | 0.00371776 | 3.2148255 | -4    | 4.0392946 | FOLR1           | folate receptor 1                                                                                                                       |
| 1558120_at   | 0.945 | 0.00553205 | 3.0264927 | -4    | 3.548794  | DDX3X           | DEAD-box helicase 3, X-linked                                                                                                           |
| 208795_s_at  | 0.945 | 0.00421492 | 3.162867  | -4.01 | 2.1425809 | MCM7            | minichromosome maintenance complex<br>component 7                                                                                       |
| 239666_at    | 0.945 | 0.00413411 | 3.1708969 | -4.01 | 2.9719892 | PYGO2           | pygopus family PHD finger 2                                                                                                             |
| 230285_at    | 0.945 | 0.0060044  | 2.9927478 | -4.01 | 1.765866  | SVIP            | small VCP interacting protein                                                                                                           |

|              |       |            |           |       |           |                    |                                                                                          |
|--------------|-------|------------|-----------|-------|-----------|--------------------|------------------------------------------------------------------------------------------|
| 224375_at    | 0.945 | 0.00510277 | 3.0709424 | -4.01 | 2.8616601 | LOC102724870       | uncharacterized LOC102724870                                                             |
| 204158_s_at  | 0.945 | 0.00215376 | 3.4979991 | -4.02 | 3.5567106 | TCIRG1             | T-cell immune regulator 1, ATPase H+ transporting V0 subunit a3                          |
| 237635_at    | 0.945 | 0.00524923 | 3.0592325 | -4.02 | 2.358315  | LOC100128164       | four and a half LIM domains 1 pseudogene                                                 |
| 241489_at    | 0.945 | 0.00619553 | 2.9798074 | -4.02 | 2.4849523 |                    |                                                                                          |
| 202295_s_at  | 0.945 | 0.00620916 | 2.9788994 | -4.02 | 2.1243945 | CTSH               | cathepsin H                                                                              |
| 232210_at    | 0.945 | 0.00433669 | 3.1510449 | -4.02 | 3.0957672 |                    |                                                                                          |
| 1559140_at   | 0.945 | 0.00227507 | 3.4747112 | -4.02 | 3.4569083 | FAM87B//FA<br>M87A | family with sequence similarity 87 member B//family with sequence similarity 87 member A |
| 209058_at    | 0.945 | 0.00461013 | 3.1256212 | -4.02 | 3.414579  | EDF1               | endothelial differentiation related factor 1                                             |
| 1554976_a_at | 0.945 | 0.00548709 | 3.0408651 | -4.02 | 3.7706456 | LINC00051          | long intergenic non-protein coding RNA 51                                                |
| 225780_at    | 0.945 | 0.00387076 | 3.2130146 | -4.03 | 2.1591636 | DDI2//RSC1A<br>1   | DNA damage inducible 1 homolog 2//regulatory solute carrier protein, family 1, member 1  |
| 237199_at    | 0.945 | 0.00175683 | 3.6103096 | -4.03 | 4.1609479 |                    |                                                                                          |
| 1557709_at   | 0.945 | 0.00673651 | 2.9451426 | -4.03 | 4.9805348 |                    |                                                                                          |
| 203611_at    | 0.945 | 0.00078377 | 4.0352996 | -4.03 | 4.7797117 | TERF2              | telomeric repeat binding factor 2                                                        |
| 220288_at    | 0.945 | 0.00190494 | 3.5753891 | -4.03 | 4.4088833 | MYO15A             | myosin XVA                                                                               |
| 1552456_a_at | 0.945 | 0.00585476 | 3.0139209 | -4.03 | 2.7474998 | MBD3L2             | methyl-CpG binding domain protein 3 like 2                                               |
| 1557775_a_at | 0.945 | 0.00302434 | 3.333677  | -4.04 | 3.5123764 |                    |                                                                                          |

|              |       |            |           |       |           |              |                                                                         |
|--------------|-------|------------|-----------|-------|-----------|--------------|-------------------------------------------------------------------------|
| 225606_at    | 0.945 | 0.00198322 | 3.5580004 | -4.04 | 4.7182517 | BCL2L11      | BCL2 like 11                                                            |
| 207993_s_at  | 0.945 | 0.00278045 | 3.3892446 | -4.04 | 3.6351799 | CHP1         | calcineurin like EF-hand protein 1                                      |
| 219733_s_at  | 0.945 | 0.007321   | 2.9105464 | -4.04 | 1.8051581 | SLC27A5      | solute carrier family 27 member 5                                       |
| 224667_x_at  | 0.945 | 0.00633966 | 2.9807587 | -4.04 | 3.5240787 | ANAPC16      | anaphase promoting complex subunit 16                                   |
| 207368_at    | 0.945 | 0.00537045 | 3.0618862 | -4.05 | 1.6842462 | HTR1D        | 5-hydroxytryptamine receptor 1D                                         |
| 232726_at    | 0.945 | 0.00757869 | 2.8961199 | -4.05 | 2.1345401 |              |                                                                         |
| 1562694_at   | 0.945 | 0.00764284 | 2.8926005 | -4.05 | 4.3410509 | IGF2BP2-AS1  | IGF2BP2 antisense RNA 1                                                 |
| 221589_s_at  | 0.945 | 0.00567758 | 3.0385706 | -4.05 | 3.7287706 | ALDH6A1      | aldehyde dehydrogenase 6 family member A1                               |
| 1562481_at   | 0.945 | 0.00780303 | 2.8839343 | -4.05 | 1.9150281 | PCBP1-AS1    | PCBP1 antisense RNA 1                                                   |
| 220443_s_at  | 0.945 | 0.0057672  | 3.0319949 | -4.05 | 3.1800273 | VAX2         | ventral anterior homeobox 2                                             |
| 222968_at    | 0.945 | 0.00679731 | 2.9516094 | -4.05 | 3.7266926 |              |                                                                         |
| 220547_s_at  | 0.945 | 0.00795232 | 2.8760078 | -4.05 | 1.8983849 | FAM35A       | family with sequence similarity 35 member A                             |
| 244600_at    | 0.945 | 0.00070169 | 4.1338078 | -4.06 | 3.3016308 | LOC100996583 | uncharacterized LOC100996583                                            |
| 219822_at    | 0.945 | 0.00591707 | 3.0212142 | -4.06 | 3.3430804 | MTRF1        | mitochondrial translational release factor 1                            |
| 227249_at    | 0.945 | 0.0082666  | 2.8597721 | -4.06 | 1.5567359 | NDE1         | nudE neurodevelopment protein 1                                         |
| 210441_at    | 0.945 | 0.00114566 | 3.864465  | -4.06 | 5.2222572 | CDC14A       | cell division cycle 14A                                                 |
| 223099_s_at  | 0.945 | 0.00250256 | 3.4573743 | -4.07 | 4.6715694 | LOC100507577 | uncharacterized LOC100507577///lon peptidase<br>///LONP2 2, peroxisomal |
| 221274_s_at  | 0.945 | 0.00743639 | 2.9138877 | -4.07 | 1.9489288 | LMAN2L       | lectin, mannose binding 2 like                                          |
| 223132_s_at  | 0.945 | 0.00254119 | 3.4507349 | -4.07 | 3.2764218 | TRIM8        | tripartite motif containing 8                                           |
| 1552660_a_at | 0.945 | 0.00865534 | 2.8404796 | -4.07 | 4.0834448 | C5orf22      | chromosome 5 open reading frame 22                                      |

|              |       |            |           |       |           |                        |                                                                                                               |
|--------------|-------|------------|-----------|-------|-----------|------------------------|---------------------------------------------------------------------------------------------------------------|
| 207927_at    | 0.945 | 0.00353589 | 3.2863491 | -4.07 | 3.8709022 | HTR7                   | 5-hydroxytryptamine receptor 7                                                                                |
| 235469_at    | 0.945 | 0.00281909 | 3.4057014 | -4.07 | 3.4312552 | FAM133DP///F<br>AM133B | family with sequence similarity 133, member A<br>pseudogene///family with sequence similarity<br>133 member B |
| 210169_at    | 0.945 | 0.00889775 | 2.8288599 | -4.07 | 1.196474  | SEC14L5                | SEC14 like lipid binding 5                                                                                    |
| 206396_at    | 0.945 | 0.0089126  | 2.828158  | -4.07 | 2.6649666 | SLC1A1                 | solute carrier family 1 member 1                                                                              |
| 216678_at    | 0.945 | 0.00784383 | 2.8914171 | -4.07 | 2.0896876 | IFT122                 | intraflagellar transport 122                                                                                  |
| 244456_at    | 0.945 | 0.00794369 | 2.8860797 | -4.08 | 2.3187646 |                        |                                                                                                               |
| 1557701_s_at | 0.945 | 0.00919605 | 2.8149652 | -4.08 | 1.7653064 | POLH                   | DNA polymerase eta                                                                                            |
| 1554039_at   | 0.945 | 0.00930102 | 2.8101767 | -4.08 | 1.8787058 | C14orf159              | chromosome 14 open reading frame 159                                                                          |
| 224256_at    | 0.945 | 0.00933457 | 2.8086568 | -4.08 | 1.8951218 | LOC100129449           | PRO2055                                                                                                       |
| 239115_at    | 0.945 | 0.00935549 | 2.8077115 | -4.08 | 1.8674944 | TMED3                  | transmembrane p24 trafficking protein 3                                                                       |
| 239468_at    | 0.945 | 0.00687008 | 2.9582235 | -4.08 | 4.3978812 | MKX                    | mohawk homeobox                                                                                               |
| 237572_at    | 0.945 | 0.00075208 | 4.1016393 | -4.08 | 4.5212226 | UGT3A1                 | UDP glycosyltransferase family 3 member A1                                                                    |
| 228904_at    | 0.945 | 0.00829293 | 2.8678989 | -4.08 | 2.1018097 | HOXB3                  | homeobox B3                                                                                                   |
| 241978_at    | 0.945 | 0.00364034 | 3.273846  | -4.08 | 3.3290257 | AKR1A1                 | aldo-keto reductase family 1 member A1                                                                        |
| 227254_at    | 0.945 | 0.00302326 | 3.3753124 | -4.08 | 2.6538361 | POU2F1                 | POU class 2 homeobox 1                                                                                        |
| 209048_s_at  | 0.945 | 0.00980123 | 2.7880366 | -4.09 | 1.7977196 | ZMYND8                 | zinc finger MYND-type containing 8                                                                            |
| 217393_x_at  | 0.945 | 0.00625801 | 3.0101852 | -4.09 | 4.4254492 | UBE2NL                 | ubiquitin conjugating enzyme E2 N like<br>(gene/pseudogene)                                                   |
| 201633_s_at  | 0.945 | 0.00986208 | 2.7854164 | -4.09 | 1.6936404 | CYB5B                  | cytochrome b5 type B                                                                                          |

|              |       |            |           |       |           |          |                                                                     |
|--------------|-------|------------|-----------|-------|-----------|----------|---------------------------------------------------------------------|
| 204613_at    | 0.945 | 0.00995107 | 2.7816117 | -4.09 | 1.278237  | PLCG2    | phospholipase C gamma 2                                             |
| 220902_at    | 0.945 | 0.00597312 | 3.0300179 | -4.09 | 3.7202788 |          |                                                                     |
| 201622_at    | 0.945 | 0.00514026 | 3.1085125 | -4.09 | 4.2740387 | SND1     | staphylococcal nuclease and tudor domain containing 1               |
| 1566695_at   | 0.945 | 0.01013695 | 2.7737669 | -4.09 | 2.4947945 |          |                                                                     |
| 237183_at    | 0.945 | 0.00548855 | 3.0804162 | -4.09 | 3.0492631 | GALNT5   | polypeptide N-acetylgalactosaminyltransferase 5                     |
| 1556158_at   | 0.945 | 0.00532819 | 3.0931323 | -4.09 | 3.3046421 | SAXO2    | stabilizer of axonemal microtubules 2                               |
| 1553641_a_at | 0.945 | 0.0040921  | 3.2235078 | -4.09 | 3.4817933 | TSGA13   | testis specific 13                                                  |
| 218010_x_at  | 0.945 | 0.00571791 | 3.0628381 | -4.1  | 3.2364713 | PPDPF    | pancreatic progenitor cell differentiation and proliferation factor |
| 241245_at    | 0.945 | 0.00685997 | 2.9709807 | -4.1  | 1.8440856 | SRSF4    | serine and arginine rich splicing factor 4                          |
| 229837_s_at  | 0.945 | 0.00686904 | 2.9704159 | -4.1  | 3.2913242 | KCTD5    | potassium channel tetramerization domain containing 5               |
| 239541_at    | 0.945 | 0.00581328 | 3.0557289 | -4.1  | 4.0954486 |          |                                                                     |
| 231486_x_at  | 0.945 | 0.00082941 | 4.0098134 | -4.1  | 5.0131573 |          |                                                                     |
| 223745_at    | 0.945 | 0.01086334 | 2.7443568 | -4.1  | 3.070645  | C16orf95 | chromosome 16 open reading frame 95                                 |
| 208736_at    | 0.945 | 0.01089641 | 2.7430622 | -4.1  | 2.7153287 | ARPC3    | actin related protein 2/3 complex subunit 3                         |
| 214937_x_at  | 0.945 | 0.00820592 | 2.8827168 | -4.1  | 2.7204545 | PCM1     | pericentriolar material 1                                           |
| 1555632_at   | 0.945 | 0.00607662 | 3.0366645 | -4.1  | 3.8825    | PIK3IP1  | phosphoinositide-3-kinase interacting protein 1                     |



|             |       |            |           |       |           |           |                                                                           |
|-------------|-------|------------|-----------|-------|-----------|-----------|---------------------------------------------------------------------------|
| 1554745_at  | 0.945 | 0.01116632 | 2.732633  | -4.1  | 1.3087685 | RALGPS1   | Ral GEF with PH domain and SH3 binding motif 1                            |
| 236821_at   | 0.945 | 0.01117768 | 2.7321994 | -4.11 | 1.5276741 |           |                                                                           |
| 239811_at   | 0.945 | 0.01124919 | 2.7294787 | -4.11 | 1.9476992 |           |                                                                           |
| 1553743_at  | 0.945 | 0.00069494 | 4.1382952 | -4.11 | 4.2852389 | METTL21A  | methyltransferase like 21A                                                |
| 203073_at   | 0.945 | 0.01163514 | 2.7150687 | -4.11 | 1.6028398 | COG2      | component of oligomeric golgi complex 2                                   |
| 230196_x_at | 0.945 | 0.00645464 | 3.0106446 | -4.11 | 2.2035261 | ARHGAP23  | Rho GTPase activating protein 23                                          |
| 1566284_at  | 0.945 | 0.01029503 | 2.7758932 | -4.11 | 1.9325943 |           |                                                                           |
| 1556078_at  | 0.945 | 0.01182072 | 2.7082989 | -4.11 | 1.6152816 | LOC143286 | uncharacterized LOC143286                                                 |
| 233798_at   | 0.945 | 0.00916698 | 2.8353219 | -4.11 | 3.8396496 |           |                                                                           |
| 1559332_at  | 0.945 | 0.01191227 | 2.7049959 | -4.11 | 1.9924258 |           |                                                                           |
| 224865_at   | 0.945 | 0.00537701 | 3.1053448 | -4.11 | 4.4263844 | FAR1      | fatty acyl-CoA reductase 1                                                |
| 232510_s_at | 0.945 | 0.00538892 | 3.1043831 | -4.11 | 3.9552364 | DPP3      | dipeptidyl peptidase 3                                                    |
| 224458_at   | 0.945 | 0.00439795 | 3.2116492 | -4.12 | 4.0425579 | TMEM246   | transmembrane protein 246                                                 |
| 222785_x_at | 0.945 | 0.01083402 | 2.7540223 | -4.12 | 4.8876387 | C11orf1   | chromosome 11 open reading frame 1                                        |
| 227615_at   | 0.945 | 0.0125325  | 2.6832264 | -4.12 | 3.5510088 | SRRD      | SRR1 domain containing                                                    |
| 209948_at   | 0.945 | 0.01255936 | 2.6823068 | -4.12 | 1.4310932 | KCNMB1    | potassium calcium-activated channel subfamily M regulatory beta subunit 1 |
| 1556306_at  | 0.945 | 0.00953563 | 2.818385  | -4.12 | 5.006019  |           |                                                                           |
| 208984_x_at | 0.945 | 0.01260179 | 2.6808573 | -4.12 | 4.1162751 | RBM10     | RNA binding motif protein 10                                              |
| 240310_at   | 0.945 | 0.01265632 | 2.6790015 | -4.12 | 1.979111  | TOR1AIP1  | torsin 1A interacting protein 1                                           |
| 1553461_at  | 0.945 | 0.01270875 | 2.6772244 | -4.12 | 5.0346891 | FAM9B     | family with sequence similarity 9 member B                                |
| 208439_s_at | 0.945 | 0.00976747 | 2.8080484 | -4.13 | 2.5700099 | FCN2      | ficolin 2                                                                 |

|              |       |            |           |       |           |               |                                                                              |
|--------------|-------|------------|-----------|-------|-----------|---------------|------------------------------------------------------------------------------|
| 234349_at    | 0.945 | 0.00178989 | 3.7007162 | -4.13 | 3.5813033 | SSPO          | SCO-spondin                                                                  |
| 230390_at    | 0.945 | 0.01298175 | 2.6680798 | -4.13 | 1.6714704 | LOC101928222  | uncharacterized LOC101928222                                                 |
| 239344_at    | 0.945 | 0.0087073  | 2.8684505 | -4.13 | 2.8812435 |               |                                                                              |
| 225385_s_at  | 0.945 | 0.00742633 | 2.9499433 | -4.13 | 3.1509119 | HNRNPLL       | heterogeneous nuclear ribonucleoprotein L like                               |
| 1565820_x_at | 0.945 | 0.01311702 | 2.6636151 | -4.13 | 1.7289342 |               |                                                                              |
| 212277_at    | 0.945 | 0.00377117 | 3.3016445 | -4.13 | 2.9594633 | MTMR4         | myotubularin related protein 4                                               |
| 241657_at    | 0.945 | 0.00284435 | 3.4548546 | -4.13 | 3.9913495 |               |                                                                              |
| 241742_at    | 0.945 | 0.0133293  | 2.656695  | -4.13 | 1.5420824 | PRAM1         | PML-RARA regulated adaptor molecule 1                                        |
| 211282_x_at  | 0.945 | 0.01338731 | 2.6548218 | -4.13 | 1.6633295 | TNFRSF25      | TNF receptor superfamily member 25                                           |
| 1553148_a_at | 0.945 | 0.00906528 | 2.8510148 | -4.13 | 2.5600428 | SNX13         | sorting nexin 13                                                             |
| 242932_at    | 0.945 | 0.01355045 | 2.6495944 | -4.13 | 4.7801261 |               |                                                                              |
| 207726_at    | 0.945 | 0.01369113 | 2.6451336 | -4.14 | 1.5586909 | ESRRB         | estrogen related receptor beta                                               |
| 1555037_a_at | 0.945 | 0.01373096 | 2.6438782 | -4.14 | 1.6051533 | IDH1          | isocitrate dehydrogenase (NADP(+)) 1, cytosolic                              |
| 243045_at    | 0.945 | 0.01382867 | 2.6408136 | -4.14 | 1.3275857 | SMYD1         | SET and MYND domain containing 1                                             |
| 235547_at    | 0.945 | 0.01382928 | 2.6407943 | -4.14 | 2.5045842 | N4BP2L2       | NEDD4 binding protein 2 like 2                                               |
| 242630_at    | 0.945 | 0.00935644 | 2.8373097 | -4.14 | 1.6971852 |               |                                                                              |
| 202913_at    | 0.945 | 0.01405547 | 2.6337769 | -4.14 | 3.1933711 | ARHGEF11      | Rho guanine nucleotide exchange factor 11                                    |
| 221385_s_at  | 0.945 | 0.0140827  | 2.6329393 | -4.14 | 1.8239352 | GPR42///FFAR3 | G protein-coupled receptor 42 (gene/pseudogene)///free fatty acid receptor 3 |
| 210872_x_at  | 0.945 | 0.01408948 | 2.632731  | -4.14 | 1.4009781 | GAS7          | growth arrest specific 7                                                     |

|             |       |            |           |       |           |           |                                                      |
|-------------|-------|------------|-----------|-------|-----------|-----------|------------------------------------------------------|
| 233769_at   | 0.945 | 0.0141728  | 2.630178  | -4.14 | 3.2709782 | LOC284561 | uncharacterized LOC284561                            |
| 1560524_at  | 0.945 | 0.01422394 | 2.6286182 | -4.14 | 3.8728058 | GRAPL     | GRB2 related adaptor protein like                    |
| 224724_at   | 0.945 | 0.00687844 | 2.9978865 | -4.14 | 3.1347923 | SULF2     | sulfatase 2                                          |
| 222066_at   | 0.945 | 0.01436295 | 2.6244044 | -4.14 | 1.9072126 | EPB41L1   | erythrocyte membrane protein band 4.1 like 1         |
| 244381_at   | 0.945 | 0.01438593 | 2.6237115 | -4.14 | 1.5314011 |           |                                                      |
| 1554198_at  | 0.945 | 0.00819007 | 2.9073613 | -4.14 | 1.5543561 | SH3YL1    | SH3 and SYLF domain containing 1                     |
| 228248_at   | 0.945 | 0.0069845  | 2.9911782 | -4.14 | 1.8953242 | RICTOR    | RPTOR independent companion of MTOR complex 2        |
| 221494_x_at | 0.945 | 0.01452766 | 2.6194607 | -4.14 | 1.4601586 | EIF3K     | eukaryotic translation initiation factor 3 subunit K |
| 228120_at   | 0.945 | 0.00226076 | 3.5928631 | -4.14 | 4.0821132 | AGO1      | argonaute 1, RISC catalytic component                |
| 1558168_at  | 0.945 | 0.01147913 | 2.7382199 | -4.14 | 3.7246616 | H1FX-AS1  | H1FX antisense RNA 1                                 |
| 217252_at   | 0.945 | 0.01467029 | 2.6152216 | -4.15 | 1.170494  |           |                                                      |
| 243113_at   | 0.945 | 0.00555465 | 3.1089166 | -4.15 | 4.1737219 |           |                                                      |
| 214892_x_at | 0.945 | 0.01006062 | 2.8057705 | -4.15 | 3.1741052 | CACTIN    | cactin, spliceosome C complex subunit                |
| 225861_at   | 0.945 | 0.01314359 | 2.6706049 | -4.15 | 4.8415034 | MCRIP2    | MAPK regulated corepressor interacting protein 2     |
| 244111_at   | 0.945 | 0.00715706 | 2.980471  | -4.15 | 3.9487203 | KRT222    | keratin 222                                          |
| 222197_s_at | 0.945 | 0.01319205 | 2.6690068 | -4.15 | 2.2689888 |           |                                                      |
| 225967_s_at | 0.945 | 0.01489555 | 2.6086046 | -4.15 | 1.7736048 | C17orf89  | chromosome 17 open reading frame 89                  |

|              |       |            |           |       |           |        |                                                                               |
|--------------|-------|------------|-----------|-------|-----------|--------|-------------------------------------------------------------------------------|
| 240603_s_at  | 0.945 | 0.01495869 | 2.6067665 | -4.15 | 1.1214736 | ERI2   | ERI1 exoribonuclease family member 2                                          |
| 204535_s_at  | 0.945 | 0.00462222 | 3.2109567 | -4.15 | 4.6924031 | REST   | RE1 silencing transcription factor                                            |
| 224329_s_at  | 0.945 | 0.01353818 | 2.6577495 | -4.15 | 3.6357022 | CNFN   | cornifelin                                                                    |
| 208632_at    | 0.945 | 0.01523939 | 2.5986818 | -4.15 | 2.7983916 | RNF10  | ring finger protein 10                                                        |
| 234829_at    | 0.945 | 0.01369782 | 2.6526478 | -4.15 | 1.452572  | DUSP15 | dual specificity phosphatase 15                                               |
| 218167_at    | 0.945 | 0.00619764 | 3.0604832 | -4.15 | 4.3952313 | AMZ2   | archaelysin family metallopeptidase 2                                         |
| 225242_s_at  | 0.945 | 0.0122658  | 2.7093725 | -4.15 | 1.6089473 | CCDC80 | coiled-coil domain containing 80                                              |
| 221627_at    | 0.945 | 0.01235002 | 2.7063882 | -4.15 | 2.0395539 | TRIM10 | tripartite motif containing 10                                                |
| 1566979_at   | 0.945 | 0.00812998 | 2.9105707 | -4.15 | 3.1849425 |        |                                                                               |
| 1552553_a_at | 0.945 | 0.01395052 | 2.6446851 | -4.16 | 3.5500865 | NLRC4  | NLR family CARD domain containing 4                                           |
| 211129_x_at  | 0.945 | 0.01079242 | 2.7751409 | -4.16 | 2.3968025 | EDA    | ectodysplasin A                                                               |
| 208628_s_at  | 0.945 | 0.00904606 | 2.8639321 | -4.16 | 3.1315364 | YBX1   | Y-box binding protein 1                                                       |
| 211061_s_at  | 0.945 | 0.01410224 | 2.6399691 | -4.16 | 3.3147718 | MGAT2  | mannosyl (alpha-1,6)-glycoprotein<br>beta-1,2-N-acetylglucosaminyltransferase |
| 1559139_at   | 0.945 | 0.01036874 | 2.792625  | -4.16 | 1.6602189 | NOC2L  | NOC2 like nucleolar associated transcriptional<br>repressor                   |
| 219892_at    | 0.945 | 0.01095098 | 2.7687643 | -4.16 | 2.8624704 | TM6SF1 | transmembrane 6 superfamily member 1                                          |
| 213796_at    | 0.945 | 0.01418196 | 2.6375101 | -4.16 | 3.730082  | SPRR1A | small proline rich protein 1A                                                 |
| 212905_at    | 0.945 | 0.01420365 | 2.6368433 | -4.16 | 2.2155973 | CSTF2T | cleavage stimulation factor subunit 2, tau variant                            |

|             |       |            |           |       |           |              |                                                    |
|-------------|-------|------------|-----------|-------|-----------|--------------|----------------------------------------------------|
| 226090_x_at | 0.945 | 0.0045536  | 3.2176362 | -4.16 | 3.5307023 | RABL3        | RAB, member of RAS oncogene family like 3          |
| 220016_at   | 0.945 | 0.00457215 | 3.2158208 | -4.16 | 3.7932369 | AHNAK        | AHNAK nucleoprotein                                |
| 217510_at   | 0.945 | 0.01434858 | 2.632412  | -4.16 | 1.2439582 | CRX          | cone-rod homeobox                                  |
| 206137_at   | 0.945 | 0.01607509 | 2.5754076 | -4.16 | 1.1632683 | RIMS2        | regulating synaptic membrane exocytosis 2          |
| 234622_at   | 0.945 | 0.01438147 | 2.6314122 | -4.16 | 3.5404593 |              |                                                    |
| 210983_s_at | 0.945 | 0.01611983 | 2.5741936 | -4.16 | 1.8854286 | MCM7         | minichromosome maintenance complex component 7     |
| 222711_s_at | 0.945 | 0.0046289  | 3.210312  | -4.16 | 1.8450539 | RHBDF1       | rhomboid 5 homolog 1                               |
| 208486_at   | 0.945 | 0.0017062  | 3.7658734 | -4.16 | 4.5667271 | DRD5         | dopamine receptor D5                               |
| 220268_at   | 0.945 | 0.00684927 | 3.0161303 | -4.16 | 3.4885833 | AAMDC        | adipogenesis associated Mth938 domain containing   |
| 216835_s_at | 0.945 | 0.01292859 | 2.6863899 | -4.16 | 3.0525887 | DOK1         | docking protein 1                                  |
| 209388_at   | 0.945 | 0.00386519 | 3.3160153 | -4.16 | 3.3731545 | PAPOLA       | poly(A) polymerase alpha                           |
| 208800_at   | 0.945 | 0.00541696 | 3.139957  | -4.16 | 4.0248618 | SRP72        | signal recognition particle 72                     |
| 232507_at   | 0.945 | 0.01683956 | 2.5550827 | -4.17 | 1.6024121 | C15orf41     | chromosome 15 open reading frame 41                |
| 1558839_at  | 0.945 | 0.00322671 | 3.3978218 | -4.17 | 3.5562085 | MAPKBP1      | mitogen-activated protein kinase binding protein 1 |
| 1554616_at  | 0.945 | 0.01523526 | 2.6061795 | -4.17 | 4.7923998 | SERPINB8     | serpin family B member 8                           |
| 1561459_at  | 0.945 | 0.01194539 | 2.7306612 | -4.17 | 2.5277884 | LOC101929526 | uncharacterized LOC101929526                       |
| 231883_at   | 0.945 | 0.0041223  | 3.2867796 | -4.17 | 2.1466425 | FBXW8        | F-box and WD repeat domain containing 8            |
| 202562_s_at | 0.945 | 0.01549292 | 2.5988237 | -4.17 | 1.3378176 | C14orf1      | chromosome 14 open reading frame 1                 |

|             |       |            |           |       |           |          |                                                                  |
|-------------|-------|------------|-----------|-------|-----------|----------|------------------------------------------------------------------|
| 220552_at   | 0.945 | 0.00314267 | 3.4405944 | -4.17 | 3.7949273 | TRPC5    | transient receptor potential cation channel subfamily C member 5 |
| 226871_s_at | 0.945 | 0.0135969  | 2.6643111 | -4.17 | 3.4174576 | ATG4D    | autophagy related 4D cysteine peptidase                          |
| 204943_at   | 0.945 | 0.01554633 | 2.5973132 | -4.17 | 2.23529   | ADAM12   | ADAM metallopeptidase domain 12                                  |
| 238314_x_at | 0.945 | 0.00520614 | 3.1577473 | -4.17 | 3.5967931 |          |                                                                  |
| 218328_at   | 0.945 | 0.01026987 | 2.8082075 | -4.17 | 1.7408922 | COQ4     | coenzyme Q4                                                      |
| 201139_s_at | 0.945 | 0.01563079 | 2.5949346 | -4.17 | 2.2562821 | SSB      | Sjogren syndrome antigen B                                       |
| 1564449_at  | 0.945 | 0.01062323 | 2.7932932 | -4.17 | 2.7494921 | USP2-AS1 | USP2 antisense RNA 1 (head to head)                              |
| 219407_s_at | 0.945 | 0.01375136 | 2.6593536 | -4.17 | 2.1694621 | LAMC3    | laminin subunit gamma 3                                          |
| 1562777_at  | 0.945 | 0.01750737 | 2.5380172 | -4.17 | 4.5661323 | ERV3-1   | endogenous retrovirus group 3 member 1                           |
| 232428_at   | 0.945 | 0.01234378 | 2.7162318 | -4.17 | 2.8814993 | MOGAT2   | monoacylglycerol O-acyltransferase 2                             |
| 237283_at   | 0.945 | 0.0159326  | 2.5865316 | -4.17 | 1.6159425 |          |                                                                  |
| 219511_s_at | 0.945 | 0.00329919 | 3.4180967 | -4.17 | 4.922431  | SNCAIP   | synuclein alpha interacting protein                              |
| 205436_s_at | 0.945 | 0.01780613 | 2.5305772 | -4.17 | 1.5091366 | H2AFX    | H2A histone family member X                                      |
| 1563179_at  | 0.945 | 0.0160013  | 2.5846395 | -4.17 | 1.9041253 |          |                                                                  |
| 242670_at   | 0.945 | 0.01607395 | 2.5826468 | -4.18 | 1.8514969 | LGI4     | leucine rich repeat LGI family member 4                          |
| 234590_x_at | 0.945 | 0.01446828 | 2.6370061 | -4.18 | 1.9710836 |          |                                                                  |
| 213542_at   | 0.945 | 0.01446833 | 2.6370048 | -4.18 | 3.1714665 | ZNF710   | zinc finger protein 710                                          |
| 235603_at   | 0.945 | 0.01420529 | 2.6450807 | -4.18 | 2.1256619 | HNRNPU   | heterogeneous nuclear ribonucleoprotein U                        |
| 231053_at   | 0.945 | 0.0107967  | 2.7861429 | -4.18 | 2.3968159 | KCNB1    | potassium voltage-gated channel subfamily B member 1             |

|             |       |            |           |       |           |           |                                                     |
|-------------|-------|------------|-----------|-------|-----------|-----------|-----------------------------------------------------|
| 230158_at   | 0.945 | 0.01080201 | 2.7859262 | -4.18 | 3.2668851 | DPY19L2   | dpy-19 like 2                                       |
| 223104_at   | 0.945 | 0.01817644 | 2.5215144 | -4.18 | 1.7207247 | JAGN1     | jagunal homolog 1                                   |
| 226615_at   | 0.945 | 0.00751953 | 2.9745745 | -4.18 | 3.0486429 | XPR1      | xenotropic and polytropic retrovirus receptor 1     |
| 230587_at   | 0.945 | 0.01285028 | 2.6985085 | -4.18 | 1.5783148 | STGC3     | uncharacterized STGC3                               |
| 1565911_at  | 0.945 | 0.00944376 | 2.8580986 | -4.18 | 3.087752  | ACTG1P17  | actin gamma 1 pseudogene 17                         |
| 211167_s_at | 0.945 | 0.00486989 | 3.2109711 | -4.18 | 3.4923016 | GCK       | glucokinase                                         |
| 231373_at   | 0.945 | 0.01830653 | 2.5183713 | -4.18 | 1.6590976 | RNF133    | ring finger protein 133                             |
| 218736_s_at | 0.945 | 0.01097378 | 2.7789561 | -4.18 | 4.7379651 | PALMD     | palmdelphin                                         |
| 206898_at   | 0.945 | 0.01453524 | 2.6349724 | -4.18 | 1.363374  | CDH19     | cadherin 19                                         |
| 240283_at   | 0.945 | 0.01854314 | 2.5127071 | -4.18 | 1.699352  |           |                                                     |
| 228751_at   | 0.945 | 0.01672668 | 2.5651115 | -4.18 | 2.0894413 | CLK4      | CDC like kinase 4                                   |
| 243567_at   | 0.945 | 0.01862499 | 2.5107633 | -4.18 | 1.8310224 |           |                                                     |
| 219745_at   | 0.945 | 0.01870627 | 2.508841  | -4.18 | 3.0603317 | MFSD13A   | major facilitator superfamily domain containing 13A |
| 230986_at   | 0.945 | 0.00784899 | 2.9554411 | -4.18 | 3.1866588 | KLF8      | Kruppel like factor 8                               |
| 215012_at   | 0.945 | 0.00791164 | 2.9518905 | -4.18 | 3.4716332 | ZNF451    | zinc finger protein 451                             |
| 33323_r_at  | 0.945 | 0.01701618 | 2.5575373 | -4.18 | 1.861531  | SFN       | stratifin                                           |
| 232037_at   | 0.945 | 0.01352739 | 2.675817  | -4.18 | 2.6512939 | IGDCC3    | immunoglobulin superfamily DCC subclass member 3    |
| 243926_at   | 0.945 | 0.01363444 | 2.6723278 | -4.19 | 2.8631061 |           |                                                     |
| 232242_at   | 0.945 | 0.00115759 | 4.0065976 | -4.19 | 4.1975817 | PTPRG-AS1 | PTPRG antisense RNA 1                               |
| 235950_at   | 0.945 | 0.01305793 | 2.6914322 | -4.19 | 3.2165595 | ZNF688    | zinc finger protein 688                             |
| 231371_at   | 0.945 | 0.0157267  | 2.6001771 | -4.19 | 2.6087681 | TDRD10    | tudor domain containing 10                          |
| 1570021_at  | 0.945 | 0.00415559 | 3.2831262 | -4.19 | 3.9559778 |           |                                                     |

|              |       |            |           |       |           |              |                                                                        |
|--------------|-------|------------|-----------|-------|-----------|--------------|------------------------------------------------------------------------|
| 1552689_at   | 0.945 | 0.01952621 | 2.4898682 | -4.19 | 1.4653575 | CASKIN1      | CASK interacting protein 1                                             |
| 212959_s_at  | 0.945 | 0.01588192 | 2.5958271 | -4.19 | 2.4517992 | GNPTAB       | N-acetylglucosamine-1-phosphate transferase<br>alpha and beta subunits |
| 239132_at    | 0.945 | 0.01975712 | 2.4846579 | -4.19 | 1.2197128 | NOS1         | nitric oxide synthase 1                                                |
| 235398_at    | 0.945 | 0.01789465 | 2.5352664 | -4.19 | 2.844048  | ZNF805       | zinc finger protein 805                                                |
| 216756_at    | 0.945 | 0.01985525 | 2.4824609 | -4.19 | 1.1042156 |              |                                                                        |
| 231604_at    | 0.945 | 0.01113524 | 2.7724985 | -4.19 | 2.4671499 |              |                                                                        |
| 208697_s_at  | 0.945 | 0.01801234 | 2.5323602 | -4.19 | 2.4007749 | EIF3E        | eukaryotic translation initiation factor 3 subunit<br>E                |
| 222117_s_at  | 0.945 | 0.0071649  | 3.0140801 | -4.19 | 2.7762139 | ADCK2        | aarF domain containing kinase 2                                        |
| 233615_at    | 0.945 | 0.02008104 | 2.4774432 | -4.19 | 1.463051  | CGA          | glycoprotein hormones, alpha polypeptide                               |
| 216667_at    | 0.945 | 0.02017723 | 2.4753214 | -4.19 | 1.7387006 | ECRP         | ribonuclease A family member 2 pseudogene                              |
| 218525_s_at  | 0.945 | 0.02021094 | 2.4745802 | -4.19 | 1.2356879 | HIF1AN       | hypoxia inducible factor 1 alpha subunit<br>inhibitor                  |
| 1557569_at   | 0.945 | 0.01144305 | 2.7604295 | -4.19 | 2.8651657 | MPDU1        | mannose-P-dolichol utilization defect 1                                |
| 235898_at    | 0.945 | 0.02042056 | 2.4699954 | -4.2  | 1.8629345 | LOC102723845 | uncharacterized LOC102723845                                           |
| 210379_s_at  | 0.945 | 0.00670951 | 3.0437295 | -4.2  | 3.4763236 | TLK1         | tousled like kinase 1                                                  |
| 1555420_a_at | 0.945 | 0.02052021 | 2.4678312 | -4.2  | 1.1114276 | KLF7         | Kruppel like factor 7                                                  |
| 234382_x_at  | 0.945 | 0.02053228 | 2.4675698 | -4.2  | 1.7900557 | HHCM         | Mahlavu hepatocellular carcinoma                                       |
| 239644_at    | 0.945 | 0.02055576 | 2.4670616 | -4.2  | 1.2100882 | ZC3H8        | zinc finger CCCH-type containing 8                                     |
| 202630_at    | 0.945 | 0.02067628 | 2.464461  | -4.2  | 1.1687982 | APPBP2       | amyloid beta precursor protein binding protein 2                       |



|              |       |            |           |      |           |                         |                                                                                                                    |
|--------------|-------|------------|-----------|------|-----------|-------------------------|--------------------------------------------------------------------------------------------------------------------|
| 218427_at    | 0.945 | 0.00600003 | 3.1156819 | -4.2 | 2.0003022 | SDCCAG3                 | serologically defined colon cancer antigen 3                                                                       |
| 210615_at    | 0.945 | 0.0207601  | 2.4626608 | -4.2 | 1.4314232 | NRP1                    | neuropilin 1                                                                                                       |
| 202104_s_at  | 0.945 | 0.0104591  | 2.8126596 | -4.2 | 2.9754035 | LOC101930112<br>///SPG7 | uncharacterized LOC101930112///SPG7,<br>paraplegin matrix AAA peptidase subunit                                    |
| 236192_at    | 0.945 | 0.00915158 | 2.8866804 | -4.2 | 3.4046098 | HOOK3                   | hook microtubule tethering protein 3                                                                               |
| 220341_s_at  | 0.945 | 0.0091815  | 2.885214  | -4.2 | 1.520651  | C5orf45                 | chromosome 5 open reading frame 45                                                                                 |
| 1563097_at   | 0.945 | 0.0211174  | 2.4550609 | -4.2 | 3.4474813 | DNAH12                  | dynein axonemal heavy chain 12                                                                                     |
| 1569502_s_at | 0.945 | 0.0212091  | 2.4531295 | -4.2 | 2.3213491 | TP73-AS1                | TP73 antisense RNA 1                                                                                               |
| 1561940_at   | 0.945 | 0.02125606 | 2.4521435 | -4.2 | 2.095517  | LOC100128843<br>///CHFR | uncharacterized LOC100128843///checkpoint<br>with forkhead and ring finger domains, E3<br>ubiquitin protein ligase |
| 202595_s_at  | 0.945 | 0.00460707 | 3.2632222 | -4.2 | 4.1581527 | LEPROTL1                | leptin receptor overlapping transcript-like 1                                                                      |
| 218846_at    | 0.945 | 0.01930461 | 2.5015599 | -4.2 | 2.0058696 | MED23                   | mediator complex subunit 23                                                                                        |
| 203893_at    | 0.945 | 0.01935576 | 2.5003805 | -4.2 | 2.5038344 | AK6                     | adenylate kinase 6                                                                                                 |
| 217471_at    | 0.945 | 0.01752408 | 2.5520905 | -4.2 | 3.1532334 | LINC01482               | long intergenic non-protein coding RNA 1482                                                                        |
| 211051_s_at  | 0.945 | 0.00955563 | 2.8672573 | -4.2 | 2.8039086 | EXTL3                   | exostosin like glycosyltransferase 3                                                                               |
| 210848_at    | 0.945 | 0.00728721 | 3.006428  | -4.2 | 2.5919511 |                         |                                                                                                                    |
| 220095_at    | 0.945 | 0.02158854 | 2.4452188 | -4.2 | 1.2218537 | CNTLN                   | centlein                                                                                                           |
| 241020_at    | 0.945 | 0.01567056 | 2.6104459 | -4.2 | 2.1681616 |                         |                                                                                                                    |
| 233532_x_at  | 0.945 | 0.02168825 | 2.4431613 | -4.2 | 1.527141  | IFT52                   | intraflagellar transport 52                                                                                        |

|              |       |            |           |       |           |             |                                                   |
|--------------|-------|------------|-----------|-------|-----------|-------------|---------------------------------------------------|
| 229618_at    | 0.945 | 0.01744345 | 2.5541468 | -4.2  | 2.6552975 | SNX16       | sorting nexin 16                                  |
| 219708_at    | 0.945 | 0.01748913 | 2.5529808 | -4.2  | 2.996482  | NT5M        | 5',3'-nucleotidase, mitochondrial                 |
| 222165_x_at  | 0.945 | 0.01976249 | 2.4911039 | -4.21 | 1.5543159 | C9orf16     | chromosome 9 open reading frame 16                |
| 1569722_s_at | 0.945 | 0.01786987 | 2.5433701 | -4.21 | 2.6404527 | PROSER2-AS1 | PROSER2 antisense RNA 1                           |
| 227004_at    | 0.945 | 0.00480723 | 3.2434484 | -4.21 | 3.622585  | CDKL5       | cyclin dependent kinase like 5                    |
| 232770_at    | 0.945 | 0.01394253 | 2.6724665 | -4.21 | 3.4153958 | TUSC3       | tumor suppressor candidate 3                      |
| 203896_s_at  | 0.945 | 0.02183141 | 2.4402223 | -4.21 | 1.5383028 | PLCB4       | phospholipase C beta 4                            |
| 1562645_at   | 0.945 | 0.00618058 | 3.1021085 | -4.21 | 3.5428928 | LOC401176   | uncharacterized LOC401176                         |
| 209524_at    | 0.945 | 0.01200827 | 2.7508539 | -4.21 | 3.0614794 | HDGFRP3     | hepatoma-derived growth factor, related protein 3 |
| 230172_at    | 0.945 | 0.02202835 | 2.4362083 | -4.21 | 1.9269955 | IFI27L1     | interferon alpha inducible protein 27 like 1      |
| 227352_at    | 0.945 | 0.01807161 | 2.5383549 | -4.21 | 2.4997459 | SWSAP1      | SWIM-type zinc finger 7 associated protein 1      |
| 223622_s_at  | 0.945 | 0.00829218 | 2.9478843 | -4.21 | 3.0553187 | HYI         | hydroxypyruvate isomerase (putative)              |
| 236698_at    | 0.945 | 0.02207965 | 2.4351681 | -4.21 | 1.9339883 | DYNC1I2     | dynein cytoplasmic 1 intermediate chain 2         |
| 1565934_at   | 0.945 | 0.01781116 | 2.5448398 | -4.21 | 2.0150055 | ZGRF1       | zinc finger GRF-type containing 1                 |
| 1559229_at   | 0.945 | 0.01611574 | 2.5979272 | -4.21 | 2.1796351 |             |                                                   |
| 1554914_at   | 0.945 | 0.00883501 | 2.9024821 | -4.21 | 4.2645367 | PLA2G4D     | phospholipase A2 group IVD                        |
| 232465_at    | 0.945 | 0.01617248 | 2.5963552 | -4.21 | 2.9159813 |             |                                                   |
| 41386_i_at   | 0.945 | 0.01433891 | 2.6599071 | -4.21 | 3.3665817 | KDM6B       | lysine demethylase 6B                             |
| 237493_at    | 0.945 | 0.00679341 | 3.0587587 | -4.21 | 1.8968439 | IL22RA2     | interleukin 22 receptor subunit alpha 2           |
| 227359_at    | 0.945 | 0.02239097 | 2.4289027 | -4.21 | 1.644668  | OSCP1       | organic solute carrier partner 1                  |
| 239092_at    | 0.945 | 0.00724902 | 2.9908978 | -4.21 | 3.2684164 | ITGA8       | integrin subunit alpha 8                          |

|             |       |            |           |       |           |                                     |                                                                                                                                |
|-------------|-------|------------|-----------|-------|-----------|-------------------------------------|--------------------------------------------------------------------------------------------------------------------------------|
| 206151_x_at | 0.945 | 0.0226296  | 2.4241543 | -4.21 | 2.0287169 | CELA3B                              | chymotrypsin like elastase family member 3B                                                                                    |
| 228805_at   | 0.945 | 0.01653656 | 2.586388  | -4.21 | 2.4582405 | SIMC1                               | SUMO interacting motifs containing 1                                                                                           |
| 218054_s_at | 0.945 | 0.016621   | 2.5841058 | -4.21 | 1.9479609 | KXD1                                | KxDL motif containing 1                                                                                                        |
| 211073_x_at | 0.945 | 0.01033282 | 2.8320151 | -4.21 | 3.214621  | SNORD83B///S<br>NORD139///RP        | small nucleolar RNA, C/D box 83B///small<br>nucleolar RNA, C/D box 139///ribosomal protein<br>L3<br>L3                         |
| 244743_x_at | 0.945 | 0.02072417 | 2.4698546 | -4.21 | 2.6072876 | ZNF138                              | zinc finger protein 138                                                                                                        |
| 217606_at   | 0.945 | 0.0103915  | 2.8294585 | -4.21 | 2.5940235 |                                     |                                                                                                                                |
| 1555196_at  | 0.945 | 0.02304684 | 2.4159614 | -4.21 | 1.6808184 | LINC00421                           | long intergenic non-protein coding RNA 421                                                                                     |
| 223083_s_at | 0.945 | 0.02313514 | 2.4142449 | -4.21 | 1.0297324 | RAB4B-EGLN<br>2///EGLN2///R<br>AB4B | RAB4B-EGLN2 readthrough (NMD<br>candidate)///egl-9 family hypoxia inducible<br>factor 2///RAB4B, member RAS oncogene<br>family |
| 1552584_at  | 0.945 | 0.00564361 | 3.1436897 | -4.21 | 3.6575497 | IL12RB1                             | interleukin 12 receptor subunit beta 1                                                                                         |
| 203302_at   | 0.945 | 0.0128715  | 2.7196317 | -4.21 | 3.35718   | DCK                                 | deoxycytidine kinase                                                                                                           |
| 229330_at   | 0.945 | 0.01288102 | 2.7192985 | -4.21 | 2.3265667 |                                     |                                                                                                                                |
| 222132_s_at | 0.945 | 0.01210744 | 2.7471606 | -4.21 | 1.7341629 | AGK                                 | acylglycerol kinase                                                                                                            |
| 233941_at   | 0.945 | 0.0232184  | 2.4126322 | -4.21 | 1.6796882 | LRRC74A                             | leucine rich repeat containing 74A                                                                                             |
| 229016_s_at | 0.945 | 0.01504774 | 2.638242  | -4.21 | 1.5689451 | TRERF1                              | transcriptional regulating factor 1                                                                                            |
| 209240_at   | 0.945 | 0.01929101 | 2.5091063 | -4.22 | 1.4765232 | OGT                                 | O-linked N-acetylglucosamine (GlcNAc)<br>transferase                                                                           |
| 218222_x_at | 0.945 | 0.01714657 | 2.5701396 | -4.22 | 2.7541222 | ARNT                                | aryl hydrocarbon receptor nuclear translocator                                                                                 |

|              |       |            |           |       |           |             |                                                                     |
|--------------|-------|------------|-----------|-------|-----------|-------------|---------------------------------------------------------------------|
| 234396_at    | 0.945 | 0.02345913 | 2.4079984 | -4.22 | 1.4217    |             |                                                                     |
| 233560_x_at  | 0.945 | 0.01524792 | 2.6322976 | -4.22 | 3.1976251 | MCM8        | minichromosome maintenance 8 homologous recombination repair factor |
| 241009_at    | 0.945 | 0.01948546 | 2.5046018 | -4.22 | 3.5912061 | FOXN4       | forkhead box N4                                                     |
| 232339_at    | 0.945 | 0.02362572 | 2.4048173 | -4.22 | 1.8653809 | DCAF8       | DDB1 and CUL4 associated factor 8                                   |
| 212428_at    | 0.945 | 0.01504607 | 2.6382921 | -4.22 | 2.2880745 | KIAA0368    | KIAA0368                                                            |
| 1552767_a_at | 0.945 | 0.00925651 | 2.8978263 | -4.22 | 2.6515871 | HS6ST2      | heparan sulfate 6-O-sulfotransferase 2                              |
| 226521_s_at  | 0.945 | 0.02374475 | 2.402557  | -4.22 | 1.8520601 | FAM175A     | family with sequence similarity 175 member A                        |
| 228826_at    | 0.945 | 0.02163691 | 2.4505136 | -4.22 | 2.3517793 | TSPOAP1-AS1 | TSPOAP1 antisense RNA 1                                             |
| 213924_at    | 0.945 | 0.02381833 | 2.4011651 | -4.22 | 1.4765409 | GNAL        | G protein subunit alpha L                                           |
| 227090_at    | 0.945 | 0.01988128 | 2.4955602 | -4.22 | 2.1990991 | PHF21A      | PHD finger protein 21A                                              |
| 203703_s_at  | 0.945 | 0.02196591 | 2.4437265 | -4.22 | 1.7889432 | TTLL4       | tubulin tyrosine ligase like 4                                      |
| 240446_at    | 0.945 | 0.00867248 | 2.9275039 | -4.22 | 3.7389708 |             |                                                                     |
| 221697_at    | 0.945 | 0.02419574 | 2.3940863 | -4.22 | 1.6512808 | MAP1LC3C    | microtubule associated protein 1 light chain 3 gamma                |
| 219614_s_at  | 0.945 | 0.01287642 | 2.7194594 | -4.22 | 2.5214762 | SLC6A20     | solute carrier family 6 member 20                                   |
| 227165_at    | 0.945 | 0.02446574 | 2.3890841 | -4.22 | 1.8446802 | SKA3        | spindle and kinetochore associated complex subunit 3                |
| 205216_s_at  | 0.945 | 0.01561782 | 2.621504  | -4.22 | 2.1029278 | APOH        | apolipoprotein H                                                    |
| 241032_at    | 0.945 | 0.02233715 | 2.4361798 | -4.22 | 2.1687907 | ANKRD40     | ankyrin repeat domain 40                                            |
| 202128_at    | 0.945 | 0.00746735 | 3.0152789 | -4.22 | 2.8455606 | AREL1       | apoptosis resistant E3 ubiquitin protein ligase 1                   |
| 215604_x_at  | 0.945 | 0.02238031 | 2.4353099 | -4.22 | 4.1306733 |             |                                                                     |

|             |       |            |           |       |           |          |                                                                     |
|-------------|-------|------------|-----------|-------|-----------|----------|---------------------------------------------------------------------|
| 237623_at   | 0.945 | 0.01815274 | 2.5444841 | -4.22 | 1.6650271 | CST3     | cystatin C                                                          |
| 221648_s_at | 0.945 | 0.01389381 | 2.6851273 | -4.22 | 2.9991206 | AGMAT    | agmatinase                                                          |
| 209345_s_at | 0.945 | 0.02466511 | 2.3854227 | -4.22 | 1.6426178 | PI4K2A   | phosphatidylinositol 4-kinase type 2 alpha                          |
| 229134_at   | 0.945 | 0.02482725 | 2.382465  | -4.22 | 1.6685137 | VANGL1   | VANGL planar cell polarity protein 1                                |
| 1558876_at  | 0.945 | 0.01839265 | 2.5385633 | -4.23 | 3.366392  |          |                                                                     |
| 213335_s_at | 0.945 | 0.02509437 | 2.3776308 | -4.23 | 2.5683936 | ST3GAL6  | ST3 beta-galactoside alpha-2,3-sialyltransferase 6                  |
| 231797_at   | 0.945 | 0.00313291 | 3.4773505 | -4.23 | 2.4775914 | SIX4     | SIX homeobox 4                                                      |
| 204375_at   | 0.945 | 0.00424205 | 3.3333422 | -4.23 | 4.3500325 | CLSTN3   | calsyntenin 3                                                       |
| 208610_s_at | 0.945 | 0.02537517 | 2.3725995 | -4.23 | 1.6941875 | SRRM2    | serine/arginine repetitive matrix 2                                 |
| 213745_at   | 0.945 | 0.01208    | 2.7612437 | -4.23 | 3.2591571 | ATRNL1   | attractin like 1                                                    |
| 239524_at   | 0.945 | 0.0125531  | 2.7437631 | -4.23 | 2.3680786 | TSSK6    | testis specific serine kinase 6                                     |
| 219771_at   | 0.945 | 0.02334101 | 2.4163372 | -4.23 | 2.1173292 | TBC1D8B  | TBC1 domain family member 8B                                        |
| 200090_at   | 0.945 | 0.01539895 | 2.6278613 | -4.23 | 3.2082793 | FNTA     | farnesyltransferase, CAAX box, alpha                                |
| 231744_at   | 0.945 | 0.02585361 | 2.3641433 | -4.23 | 1.7344921 | CELF5    | CUGBP, Elav-like family member 5                                    |
| 205086_s_at | 0.945 | 0.02121498 | 2.4662774 | -4.23 | 2.5810799 | NCAPH2   | non-SMC condensin II complex subunit H2                             |
| 242007_at   | 0.945 | 0.00863588 | 2.9482203 | -4.23 | 3.839944  | FBXO30   | F-box protein 30                                                    |
| 213185_at   | 0.945 | 0.02609307 | 2.3599645 | -4.23 | 1.1956214 | KIAA0556 | KIAA0556                                                            |
| 224320_s_at | 0.945 | 0.02614525 | 2.3590586 | -4.23 | 1.4434729 | MCM8     | minichromosome maintenance 8 homologous recombination repair factor |

|              |       |            |           |       |           |                                         |                                                                                 |
|--------------|-------|------------|-----------|-------|-----------|-----------------------------------------|---------------------------------------------------------------------------------|
| 215078_at    | 0.945 | 0.01251624 | 2.7451023 | -4.23 | 3.8037355 | LOC100129518<br>///SOD2                 | uncharacterized<br>dismutase 2, mitochondrial                                   |
| 1563318_s_at | 0.945 | 0.01951157 | 2.5118661 | -4.23 | 2.3334906 | MAGIX                                   | MAGI family member, X-linked                                                    |
| 200839_s_at  | 0.945 | 0.02623334 | 2.357533  | -4.23 | 1.6526091 | CTSB                                    | cathepsin B                                                                     |
| 206036_s_at  | 0.945 | 0.01703828 | 2.582173  | -4.23 | 2.7000178 | REL                                     | REL proto-oncogene, NF-kB subunit                                               |
| 215552_s_at  | 0.945 | 0.00672116 | 3.0871296 | -4.23 | 4.1438932 | ESR1                                    | estrogen receptor 1                                                             |
| 211841_s_at  | 0.945 | 0.02634959 | 2.3555269 | -4.23 | 1.0762903 | TNFRSF25                                | TNF receptor superfamily member 25                                              |
| 1561171_a_at | 0.945 | 0.02408584 | 2.402116  | -4.23 | 1.6126719 | GOLGA6L6///<br>GOLGA6L22///<br>GOLGA6L1 | golgin A6 family-like 6///golgin A6 family-like<br>22///golgin A6 family-like 1 |
| 231104_at    | 0.945 | 0.02639159 | 2.3548041 | -4.23 | 1.5557988 | TDRD5                                   | tudor domain containing 5                                                       |
| 206823_at    | 0.945 | 0.02422293 | 2.3995427 | -4.23 | 2.1785755 | L3MBTL1                                 | l(3)mbt-like 1 (Drosophila)                                                     |
| 1564164_at   | 0.945 | 0.02651729 | 2.352647  | -4.23 | 2.27891   | DENND1B                                 | DENN domain containing 1B                                                       |
| 227482_at    | 0.945 | 0.00349275 | 3.4257168 | -4.23 | 4.3681364 | ADCK1                                   | aarF domain containing kinase 1                                                 |
| 202296_s_at  | 0.945 | 0.01727351 | 2.5759588 | -4.24 | 4.9434878 | RER1                                    | retention in endoplasmic reticulum sorting<br>receptor 1                        |
| 201162_at    | 0.945 | 0.02660497 | 2.351148  | -4.24 | 1.6814502 | IGFBP7                                  | insulin like growth factor binding protein 7                                    |
| 214081_at    | 0.945 | 0.01738148 | 2.5731328 | -4.24 | 3.8611761 | PLXDC1                                  | plexin domain containing 1                                                      |
| 233625_x_at  | 0.945 | 0.02243399 | 2.4409676 | -4.24 | 2.6053836 | MIR6727///<br>F3L                       | microRNA 6727///cleavage and polyadenylation<br>specific factor 3-like          |
| 1558573_at   | 0.945 | 0.02686033 | 2.3468078 | -4.24 | 1.1681304 | MCTS1                                   | MCTS1, re-initiation and release factor                                         |

|             |       |            |           |       |           |                                                                                                                                        |                                                             |
|-------------|-------|------------|-----------|-------|-----------|----------------------------------------------------------------------------------------------------------------------------------------|-------------------------------------------------------------|
| 228609_at   | 0.945 | 0.00345753 | 3.4699629 | -4.24 | 4.6083931 | LOC102723600 uncharacterized<br>//MIR1302-11/ 1302-11//microRNA<br>//MIR1302-10// 1302-9//microRNA 1302-2<br>/MIR1302-9//<br>MIR1302-2 | LOC102723600//microRNA<br>1302-10//microRNA                 |
| 228292_at   | 0.945 | 0.02693877 | 2.345482  | -4.24 | 1.6833599 |                                                                                                                                        |                                                             |
| 203606_at   | 0.945 | 0.0179905  | 2.5574947 | -4.24 | 3.2433154 | NDUFS6                                                                                                                                 | NADH:ubiquinone oxidoreductase subunit S6                   |
| 229499_at   | 0.945 | 0.02257114 | 2.4382    | -4.24 | 2.7016728 | CAPN13                                                                                                                                 | calpain 13                                                  |
| 1563165_at  | 0.945 | 0.02724889 | 2.3402751 | -4.24 | 1.1611175 | LOC101928978 uncharacterized                                                                                                           | LOC101928978                                                |
| 228214_at   | 0.945 | 0.02046231 | 2.4902791 | -4.24 | 1.215908  | SOX6                                                                                                                                   | SRY-box 6                                                   |
| 233863_at   | 0.945 | 0.01505193 | 2.6488301 | -4.24 | 2.6990828 | CASZ1                                                                                                                                  | castor zinc finger 1                                        |
| 219446_at   | 0.945 | 0.02252728 | 2.4390835 | -4.24 | 1.8757131 | RIC8B                                                                                                                                  | RIC8 guanine nucleotide exchange factor B                   |
| 206304_at   | 0.945 | 0.00722476 | 3.0532922 | -4.24 | 4.4811235 | MYBPH                                                                                                                                  | myosin binding protein H                                    |
| 230999_at   | 0.945 | 0.00361572 | 3.448098  | -4.24 | 4.8675941 | ST3GAL4-AS1                                                                                                                            | ST3GAL4 antisense RNA 1 (head to head)                      |
| 234571_at   | 0.945 | 0.02749653 | 2.336156  | -4.24 | 1.0799208 |                                                                                                                                        |                                                             |
| 213080_x_at | 0.945 | 0.0275003  | 2.3360937 | -4.24 | 1.5915912 | RPL5//SNORD                                                                                                                            | ribosomal protein L5//small nucleolar RNA,<br>21 C/D box 21 |
| 1562165_at  | 0.945 | 0.02761973 | 2.3341195 | -4.24 | 2.1484115 |                                                                                                                                        |                                                             |
| 1553775_at  | 0.945 | 0.00640379 | 3.1097532 | -4.24 | 2.8465299 | LOC152048 uncharacterized                                                                                                              | FLJ31715                                                    |
| 225080_at   | 0.945 | 0.01159335 | 2.7947509 | -4.24 | 4.0951463 | MYO1C                                                                                                                                  | myosin IC                                                   |
| 216699_s_at | 0.945 | 0.02316931 | 2.4263086 | -4.24 | 2.6381387 | KLK1                                                                                                                                   | kallikrein 1                                                |
| 234146_at   | 0.945 | 0.01617749 | 2.6159974 | -4.24 | 2.8400641 | B3GAT2                                                                                                                                 | beta-1,3-glucuronyltransferase 2                            |

|             |       |            |           |       |           |          |                                                  |
|-------------|-------|------------|-----------|-------|-----------|----------|--------------------------------------------------|
| 207376_at   | 0.945 | 0.01867701 | 2.5404504 | -4.24 | 4.9601663 | VENTX    | VENT homeobox                                    |
| 232821_at   | 0.945 | 0.02336763 | 2.4224285 | -4.24 | 2.8364892 | GTSF1L   | gametocyte specific factor 1 like                |
| 203956_at   | 0.945 | 0.01637047 | 2.6105854 | -4.24 | 3.6077605 | MORC2    | MORC family CW-type zinc finger 2                |
| 220723_s_at | 0.945 | 0.02794918 | 2.3287138 | -4.24 | 1.7405396 | CWH43    | cell wall biogenesis 43 C-terminal homolog       |
| 242965_at   | 0.945 | 0.0155225  | 2.6348309 | -4.24 | 4.8865655 |          |                                                  |
| 213085_s_at | 0.945 | 0.02803662 | 2.3272887 | -4.24 | 2.061494  | WWC1     | WW and C2 domain containing 1                    |
| 223568_s_at | 0.945 | 0.02355288 | 2.4188314 | -4.24 | 2.593975  | PLPP5    | phospholipid phosphatase 5                       |
| 243052_at   | 0.945 | 0.02359768 | 2.4179655 | -4.24 | 2.1321629 | MOB3C    | MOB kinase activator 3C                          |
| 238330_s_at | 0.945 | 0.01386662 | 2.6860136 | -4.24 | 2.9013561 |          |                                                  |
| 235583_at   | 0.945 | 0.02824232 | 2.3239523 | -4.24 | 1.3345325 | ILDR1    | immunoglobulin like domain containing receptor 1 |
| 212382_at   | 0.945 | 0.01105227 | 2.8167141 | -4.24 | 2.1798583 | TCF4     | transcription factor 4                           |
| 233197_at   | 0.945 | 0.025992   | 2.3674839 | -4.24 | 2.5177569 | KLHL9    | kelch like family member 9                       |
| 212789_at   | 0.945 | 0.02341731 | 2.4214611 | -4.25 | 1.8453018 | NCAPD3   | non-SMC condensin II complex subunit D3          |
| 209117_at   | 0.945 | 0.02606243 | 2.3662495 | -4.25 | 1.7614786 | WBP2     | WW domain binding protein 2                      |
| 234168_at   | 0.945 | 0.02851473 | 2.319568  | -4.25 | 1.2297805 | TAF15    | TATA-box binding protein associated factor 15    |
| 244356_at   | 0.945 | 0.01683231 | 2.5978737 | -4.25 | 3.0301644 |          |                                                  |
| 244373_at   | 0.945 | 0.02858581 | 2.3184303 | -4.25 | 1.450961  |          |                                                  |
| 239619_at   | 0.945 | 0.01219204 | 2.7715651 | -4.25 | 2.6363888 |          |                                                  |
| 230318_at   | 0.945 | 0.01282273 | 2.7340794 | -4.25 | 2.2987742 | SERPINA1 | serpin family A member 1                         |
| 230125_at   | 0.945 | 0.01132395 | 2.8055606 | -4.25 | 3.2103481 | GUSB     | glucuronidase beta                               |



|              |       |            |           |       |           |              |                                                     |
|--------------|-------|------------|-----------|-------|-----------|--------------|-----------------------------------------------------|
| 221074_at    | 0.945 | 0.01230822 | 2.7671923 | -4.25 | 2.9745335 | NCR2         | natural cytotoxicity triggering receptor 2          |
| 237964_at    | 0.945 | 0.02882174 | 2.3146724 | -4.25 | 1.737253  |              |                                                     |
| 238396_at    | 0.945 | 0.00975264 | 2.8918925 | -4.25 | 3.0635002 |              |                                                     |
| 1564240_at   | 0.945 | 0.01438443 | 2.6815343 | -4.25 | 4.6105644 | LOC100130856 | uncharacterized LOC100130856///persephin<br>///PSPN |
| 220663_at    | 0.945 | 0.02898466 | 2.3120935 | -4.25 | 2.024243  | IL1RAPL1     | interleukin 1 receptor accessory protein like 1     |
| 221245_s_at  | 0.945 | 0.02662949 | 2.3564206 | -4.25 | 2.3839218 | FZD5         | frizzled class receptor 5                           |
| 225912_at    | 0.945 | 0.01718006 | 2.5885168 | -4.25 | 2.9657258 | TP53INP1     | tumor protein p53 inducible nuclear protein 1       |
| 1555299_s_at | 0.945 | 0.00982646 | 2.8883922 | -4.25 | 3.4421674 | ERVW-1       | endogenous retrovirus group W member 1              |
| 205755_at    | 0.945 | 0.01249606 | 2.760205  | -4.25 | 2.2552541 | ITIH3        | inter-alpha-trypsin inhibitor heavy chain 3         |
| 1561529_at   | 0.945 | 0.0098626  | 2.8866882 | -4.25 | 3.649888  |              |                                                     |
| 204387_x_at  | 0.945 | 0.0197971  | 2.5138596 | -4.25 | 3.3506953 | MRPL57       | mitochondrial ribosomal protein L57                 |
| 1559629_at   | 0.945 | 0.02922102 | 2.3083757 | -4.25 | 2.5668484 | LOC101927710 | uncharacterized LOC101927710                        |
| 222148_s_at  | 0.945 | 0.02924267 | 2.3080366 | -4.25 | 3.4833808 | RHOT1        | ras homolog family member T1                        |
| 217558_at    | 0.945 | 0.0126051  | 2.7561949 | -4.25 | 3.2754113 | CYP2C9       | cytochrome P450 family 2 subfamily C member<br>9    |
| 236427_at    | 0.945 | 0.01262847 | 2.7553397 | -4.25 | 3.4670766 |              |                                                     |
| 239735_at    | 0.945 | 0.00299037 | 3.4635794 | -4.25 | 4.2464262 |              |                                                     |
| 227844_at    | 0.945 | 0.02427085 | 2.4051327 | -4.25 | 1.4822712 | FMNL3        | formin like 3                                       |
| 204266_s_at  | 0.945 | 0.01049662 | 2.85773   | -4.25 | 4.1090072 | CHKA         | choline kinase alpha                                |

|              |       |            |           |       |           |              |                                                                               |
|--------------|-------|------------|-----------|-------|-----------|--------------|-------------------------------------------------------------------------------|
| 238819_at    | 0.945 | 0.01275169 | 2.7508557 | -4.25 | 3.1250603 | ZNF347       | zinc finger protein 347                                                       |
| 208149_x_at  | 0.945 | 0.02951844 | 2.3037363 | -4.25 | 1.0147036 | DDX11        | DEAD/H-box helicase 11                                                        |
| 242325_at    | 0.945 | 0.00826377 | 2.9902118 | -4.25 | 3.4435576 | YWHAH        | tyrosine 3-monooxygenase/tryptophan<br>5-monooxygenase activation protein eta |
| 211848_s_at  | 0.945 | 0.00140142 | 4.0481891 | -4.25 | 5.3825543 | CEACAM7      | carcinoembryonic antigen related cell adhesion<br>molecule 7                  |
| 230979_at    | 0.945 | 0.02968369 | 2.3011768 | -4.25 | 1.6589206 | BMPRI1A      | bone morphogenetic protein receptor type 1A                                   |
| 1562310_at   | 0.945 | 0.02972655 | 2.3005152 | -4.25 | 2.1304955 | LOC101927165 | uncharacterized LOC101927165                                                  |
| 210052_s_at  | 0.945 | 0.01844675 | 2.5461009 | -4.25 | 1.5617557 | TPX2         | TPX2, microtubule nucleation factor                                           |
| 1563867_at   | 0.945 | 0.01986987 | 2.512181  | -4.25 | 3.3046109 | LOC283194    | uncharacterized LOC283194                                                     |
| 1559668_s_at | 0.945 | 0.00591277 | 3.1751475 | -4.25 | 6.660839  |              |                                                                               |
| 212247_at    | 0.945 | 0.01687523 | 2.596709  | -4.25 | 3.043596  | NUP205       | nucleoporin 205                                                               |
| 200954_at    | 0.945 | 0.02988511 | 2.2980748 | -4.25 | 1.6695182 | ATP6V0C      | ATPase H <sup>+</sup> transporting V0 subunit c                               |
| 1562557_at   | 0.945 | 0.02993354 | 2.2973317 | -4.25 | 1.6943504 | LOC101928144 | uncharacterized LOC101928144                                                  |
| 233927_at    | 0.945 | 0.0275369  | 2.3410844 | -4.25 | 1.6727241 |              |                                                                               |
| 240549_at    | 0.945 | 0.02997261 | 2.296733  | -4.25 | 1.5196652 | NRSN2-AS1    | NRSN2 antisense RNA 1                                                         |
| 235380_at    | 0.945 | 0.02758427 | 2.3402965 | -4.25 | 2.0756257 |              |                                                                               |
| 242596_at    | 0.945 | 0.02759829 | 2.3400635 | -4.25 | 2.1678603 |              |                                                                               |
| 1554119_at   | 0.945 | 0.01317454 | 2.7357767 | -4.25 | 2.2089755 | USB1         | U6 snRNA biogenesis phosphodiesterase 1                                       |
| 203519_s_at  | 0.945 | 0.03022274 | 2.2929171 | -4.25 | 1.6144633 | UPF2         | UPF2 regulator of nonsense transcripts homolog<br>(yeast)                     |

|             |       |            |           |       |           |                            |                                                                                |
|-------------|-------|------------|-----------|-------|-----------|----------------------------|--------------------------------------------------------------------------------|
| 211774_s_at | 0.945 | 0.02781601 | 2.33646   | -4.25 | 3.2207862 | MMACHC                     | methylmalonic aciduria (cobalamin deficiency) cblC type, with homocystinuria   |
| 213840_s_at | 0.945 | 0.03026885 | 2.292217  | -4.25 | 1.2321406 | MRPS12                     | mitochondrial ribosomal protein S12                                            |
| 223044_at   | 0.945 | 0.01103693 | 2.8343536 | -4.26 | 3.7794588 | SLC40A1                    | solute carrier family 40 member 1                                              |
| 227065_at   | 0.945 | 0.03031885 | 2.2914587 | -4.26 | 2.994797  | RNF216                     | ring finger protein 216                                                        |
| 219423_x_at | 0.945 | 0.03033705 | 2.2911829 | -4.26 | 1.4716762 | TNFRSF25                   | TNF receptor superfamily member 25                                             |
| 242686_at   | 0.945 | 0.03035691 | 2.2908822 | -4.26 | 1.2523821 | STARD13                    | StAR related lipid transfer domain containing 13                               |
| 1556937_at  | 0.945 | 0.02319507 | 2.4330502 | -4.26 | 2.4106045 |                            |                                                                                |
| 224625_x_at | 0.945 | 0.02323675 | 2.4322269 | -4.26 | 3.0533647 | MIR1282///HY<br>PK///SERF2 | microRNA 1282///huntingtin interacting protein<br>K///small EDRK-rich factor 2 |
| 204243_at   | 0.945 | 0.02577975 | 2.3775196 | -4.26 | 2.2771269 | RLF                        | rearranged L-myc fusion                                                        |
| 222920_s_at | 0.945 | 0.03053814 | 2.2881464 | -4.26 | 1.4962699 | TESPA1                     | thymocyte expressed, positive selection associated 1                           |
| 212013_at   | 0.945 | 0.03056171 | 2.2877917 | -4.26 | 1.0856733 | PXDN                       | peroxidasin                                                                    |
| 217874_at   | 0.945 | 0.01604311 | 2.6313503 | -4.26 | 3.7604641 | SUCLG1                     | succinate-CoA ligase alpha subunit                                             |
| 219245_s_at | 0.945 | 0.01352055 | 2.7237778 | -4.26 | 3.2414681 | OGFOD2                     | 2-oxoglutarate and iron dependent oxygenase domain containing 2                |
| 208244_at   | 0.945 | 0.02059209 | 2.4958257 | -4.26 | 1.6461318 | BMP3                       | bone morphogenetic protein 3                                                   |
| 208952_s_at | 0.945 | 0.03081945 | 2.2839288 | -4.26 | 1.3901704 | LARP4B                     | La ribonucleoprotein domain family member 4B                                   |
| 235925_at   | 0.945 | 0.02359782 | 2.42515   | -4.26 | 1.5735988 |                            |                                                                                |

|             |       |            |           |       |           |              |                                                               |
|-------------|-------|------------|-----------|-------|-----------|--------------|---------------------------------------------------------------|
| 205948_at   | 0.945 | 0.01864903 | 2.55086   | -4.26 | 2.5104653 | PTPRT        | protein tyrosine phosphatase, receptor type T                 |
| 225277_at   | 0.945 | 0.02369598 | 2.4232434 | -4.26 | 1.3694715 | SLC39A13     | solute carrier family 39 member 13                            |
| 203052_at   | 0.945 | 0.01436039 | 2.6823011 | -4.26 | 3.5924542 | C2           | complement component 2                                        |
| 215937_at   | 0.945 | 0.00643956 | 3.1343827 | -4.26 | 4.2766765 | PTGDR        | prostaglandin D2 receptor                                     |
| 214672_at   | 0.945 | 0.03117891 | 2.2785902 | -4.26 | 1.4122175 | TTLL5        | tubulin tyrosine ligase like 5                                |
| 234127_at   | 0.945 | 0.0214598  | 2.4768685 | -4.26 | 2.5725921 | LOC105378749 | uncharacterized LOC105378749                                  |
| 230974_at   | 0.945 | 0.03125474 | 2.2774711 | -4.26 | 1.6854711 | DDX19B       | DEAD-box helicase 19B                                         |
| 223661_at   | 0.945 | 0.03132306 | 2.276465  | -4.26 | 1.7885021 | NUCKS1       | nuclear casein kinase and cyclin dependent kinase substrate 1 |
| 234216_at   | 0.945 | 0.0215863  | 2.4741645 | -4.26 | 2.6904498 | FLJ21408     | uncharacterized LOC400512                                     |
| 225703_at   | 0.945 | 0.00914998 | 2.9422425 | -4.26 | 4.0714152 | FBRSL1       | fibrosin like 1                                               |
| 237115_at   | 0.945 | 0.01898153 | 2.542724  | -4.26 | 3.7069959 |              |                                                               |
| 205710_at   | 0.945 | 0.01402177 | 2.7069057 | -4.26 | 3.3486199 | LRP2         | LDL receptor related protein 2                                |
| 244888_at   | 0.945 | 0.03147497 | 2.274235  | -4.26 | 2.0308761 |              |                                                               |
| 203597_s_at | 0.945 | 0.02907345 | 2.3161386 | -4.26 | 3.7828318 | WBP4         | WW domain binding protein 4                                   |
| 236411_at   | 0.945 | 0.02425088 | 2.4126009 | -4.26 | 1.1207885 |              |                                                               |
| 244595_at   | 0.945 | 0.03166695 | 2.2714307 | -4.26 | 1.0769184 |              |                                                               |
| 209337_at   | 0.945 | 0.02934141 | 2.3119121 | -4.26 | 2.6357994 | PSIP1        | PC4 and SFRS1 interacting protein 1                           |
| 202934_at   | 0.945 | 0.01643899 | 2.6201007 | -4.26 | 2.2291618 | HK2          | hexokinase 2                                                  |
| 212245_at   | 0.945 | 0.00520598 | 3.2358651 | -4.26 | 4.0809461 | MCFD2        | multiple coagulation factor deficiency 2                      |
| 1556347_at  | 0.945 | 0.01716879 | 2.6000173 | -4.26 | 1.8822843 |              |                                                               |
| 201769_at   | 0.945 | 0.0268889  | 2.3581543 | -4.26 | 4.0081386 | CLINT1       | clathrin interactor 1                                         |
| 207984_s_at | 0.945 | 0.02971494 | 2.3060788 | -4.26 | 1.8776414 | MPP2         | membrane palmitoylated protein 2                              |

|              |       |            |           |       |           |            |                                                                              |
|--------------|-------|------------|-----------|-------|-----------|------------|------------------------------------------------------------------------------|
| 233180_at    | 0.945 | 0.0274201  | 2.3491382 | -4.26 | 2.0013894 |            |                                                                              |
| 208763_s_at  | 0.945 | 0.03232663 | 2.2619108 | -4.26 | 1.4538786 | TSC22D3    | TSC22 domain family member 3                                                 |
| 240701_at    | 0.945 | 0.0323312  | 2.2618455 | -4.26 | 1.1838749 | GSDMB      | gasdermin B                                                                  |
| 215052_at    | 0.945 | 0.02704262 | 2.3555285 | -4.26 | 1.3327633 | FRMPD4     | FERM and PDZ domain containing 4                                             |
| 241495_at    | 0.945 | 0.01227166 | 2.7848203 | -4.27 | 2.6148402 | CCNL1      | cyclin L1                                                                    |
| 223175_s_at  | 0.945 | 0.03254776 | 2.258759  | -4.27 | 2.1573828 | FEM1A      | fem-1 homolog A                                                              |
| 231539_at    | 0.945 | 0.03258838 | 2.2581822 | -4.27 | 1.1853492 |            |                                                                              |
| 233580_at    | 0.945 | 0.03269448 | 2.2566785 | -4.27 | 3.9551235 |            |                                                                              |
| 201187_s_at  | 0.945 | 0.02078272 | 2.4915981 | -4.27 | 2.6502334 | ITPR3      | inositol 1,4,5-trisphosphate receptor type 3                                 |
| 228777_at    | 0.945 | 0.02440698 | 2.4096478 | -4.27 | 2.8710809 | KBTBD3     | kelch repeat and BTB domain containing 3                                     |
| 209905_at    | 0.945 | 0.00718458 | 3.0820102 | -4.27 | 4.7398213 | HOXA10-HOX | HOXA10-HOXA9 readthrough///microRNA A9///MIR196B/ 196b///homeobox A9 //HOXA9 |
| 213962_s_at  | 0.945 | 0.00439953 | 3.352198  | -4.27 | 4.2157209 | ANKLE2     | ankyrin repeat and LEM domain containing 2                                   |
| 233054_at    | 0.945 | 0.01209352 | 2.7916628 | -4.27 | 2.7031928 | CNOT2      | CCR4-NOT transcription complex subunit 2                                     |
| 1558301_a_at | 0.945 | 0.01511337 | 2.6720645 | -4.27 | 4.3315881 | EFCAB5     | EF-hand calcium binding domain 5                                             |
| 233081_at    | 0.945 | 0.01512834 | 2.6716036 | -4.27 | 3.041576  |            |                                                                              |
| 244802_at    | 0.945 | 0.01044021 | 2.8602369 | -4.27 | 3.1365146 |            |                                                                              |
| 1560227_at   | 0.945 | 0.02834537 | 2.3338093 | -4.27 | 1.1793785 | GDPD1      | glycerophosphodiester domain containing 1 phosphodiesterase                  |

|              |       |            |           |       |           |                          |                                                                                                                             |
|--------------|-------|------------|-----------|-------|-----------|--------------------------|-----------------------------------------------------------------------------------------------------------------------------|
| 1553747_at   | 0.945 | 0.01014831 | 2.8933377 | -4.27 | 3.4582179 | MGC16025                 | uncharacterized LOC85009                                                                                                    |
| 204961_s_at  | 0.945 | 0.01804363 | 2.5769779 | -4.27 | 2.9561224 | NCF1C///NCF1<br>B///NCF1 | neutrophil cytosolic factor 1C<br>pseudogene///neutrophil cytosolic factor 1B<br>pseudogene///neutrophil cytosolic factor 1 |
| 1560457_x_at | 0.945 | 0.02334477 | 2.4380291 | -4.27 | 3.0302854 | PLIN5                    | perilipin 5                                                                                                                 |
| 225205_at    | 0.945 | 0.02061433 | 2.5046123 | -4.27 | 3.8447581 | KIF3B                    | kinesin family member 3B                                                                                                    |
| 227034_at    | 0.945 | 0.01225712 | 2.7691107 | -4.27 | 2.9805646 | SOWAHC                   | sosondawah ankyrin repeat domain family member C                                                                            |
| 237510_at    | 0.945 | 0.03395447 | 2.239152  | -4.27 | 1.0882838 | MYNN                     | myoneurin                                                                                                                   |
| 1566288_at   | 0.945 | 0.03138999 | 2.2807155 | -4.27 | 2.2005689 | OR2M4                    | olfactory receptor family 2 subfamily M member 4                                                                            |
| 211600_at    | 0.945 | 0.0262891  | 2.3753486 | -4.27 | 2.2821079 | PTPRO                    | protein tyrosine phosphatase, receptor type O                                                                               |
| 1559706_at   | 0.945 | 0.02101498 | 2.4956929 | -4.27 | 3.1450056 | ARHGEF28                 | Rho guanine nucleotide exchange factor 28                                                                                   |
| 220781_at    | 0.945 | 0.02905896 | 2.3222971 | -4.27 | 3.2461487 | 1-Dec                    | deleted in esophageal cancer 1                                                                                              |
| 203298_s_at  | 0.945 | 0.00599395 | 3.1686375 | -4.27 | 3.0376131 | JARID2                   | jumonji and AT-rich interaction domain containing 2                                                                         |
| 229920_at    | 0.945 | 0.03411588 | 2.2369494 | -4.27 | 2.5663512 | RBCK1                    | RANBP2-type and C3HC4-type zinc finger containing 1                                                                         |
| 203022_at    | 0.945 | 0.03158054 | 2.2779087 | -4.27 | 2.1081202 | RNASEH2A                 | ribonuclease H2 subunit A                                                                                                   |
| 214820_at    | 0.945 | 0.03421999 | 2.2355338 | -4.27 | 1.1676454 | BRWD1                    | bromodomain and WD repeat domain containing 1                                                                               |
| 241568_at    | 0.945 | 0.01064109 | 2.8708941 | -4.27 | 3.6381469 | LOC100506319             | uncharacterized LOC100506319                                                                                                |

|             |       |            |           |       |           |          |                                                           |
|-------------|-------|------------|-----------|-------|-----------|----------|-----------------------------------------------------------|
| 231825_x_at | 0.945 | 0.03426927 | 2.234865  | -4.27 | 3.1332424 | ATF7IP   | activating transcription factor 7 interacting protein     |
| 1562220_at  | 0.945 | 0.03176402 | 2.2752206 | -4.27 | 3.0709792 |          |                                                           |
| 225145_at   | 0.945 | 0.02363337 | 2.4323415 | -4.27 | 3.1129018 | NCOA5    | nuclear receptor coactivator 5                            |
| 216524_x_at | 0.945 | 0.02212096 | 2.4628966 | -4.27 | 4.276496  |          |                                                           |
| 234077_at   | 0.945 | 0.0344059  | 2.2330154 | -4.27 | 3.8949796 |          |                                                           |
| 208386_x_at | 0.945 | 0.00953259 | 2.9229141 | -4.27 | 3.6409863 | DMC1     | DNA meiotic recombinase 1                                 |
| 241882_at   | 0.945 | 0.03441829 | 2.2328481 | -4.27 | 2.1289279 | CAMTA1   | calmodulin binding transcription activator 1              |
| 223243_s_at | 0.945 | 0.01288034 | 2.7621401 | -4.27 | 3.5804977 | EDEM3    | ER degradation enhancing alpha-mannosidase like protein 3 |
| 229240_at   | 0.945 | 0.03186225 | 2.2737874 | -4.27 | 1.3247466 | ZDHHC21  | zinc finger DHHC-type containing 21                       |
| 240885_at   | 0.945 | 0.02912607 | 2.3212279 | -4.28 | 1.9513162 |          |                                                           |
| 230516_at   | 0.945 | 0.01616892 | 2.6405793 | -4.28 | 2.7040914 | MALSU1   | mitochondrial assembly of ribosomal large subunit 1       |
| 237981_at   | 0.945 | 0.03214837 | 2.2696352 | -4.28 | 2.5452636 | CMYA5    | cardiomyopathy associated 5                               |
| 226016_at   | 0.945 | 0.03476667 | 2.2281635 | -4.28 | 1.4141087 | CD47     | CD47 molecule                                             |
| 43544_at    | 0.945 | 0.03218993 | 2.2690349 | -4.28 | 2.2895534 | MED16    | mediator complex subunit 16                               |
| 228966_at   | 0.945 | 0.01624195 | 2.6384738 | -4.28 | 2.5696187 | PANK2    | pantothenate kinase 2                                     |
| 224497_x_at | 0.945 | 0.0322466  | 2.2682174 | -4.28 | 3.9193214 | HSD17B14 | hydroxysteroid 17-beta dehydrogenase 14                   |
| 229876_at   | 0.945 | 0.01513291 | 2.6714629 | -4.28 | 2.7033643 | PHKA1    | phosphorylase kinase regulatory subunit alpha 1           |
| 207609_s_at | 0.945 | 0.03232105 | 2.2671455 | -4.28 | 1.7904629 | CYP1A2   | cytochrome P450 family 1 subfamily A member 2             |

|             |       |            |           |       |           |          |                                                                                                                                  |
|-------------|-------|------------|-----------|-------|-----------|----------|----------------------------------------------------------------------------------------------------------------------------------|
| 226853_at   | 0.945 | 0.02069156 | 2.5028805 | -4.28 | 2.6714106 | BMP2K    | BMP2 inducible kinase                                                                                                            |
| 1555225_at  | 0.945 | 0.01140485 | 2.8190583 | -4.28 | 3.5420054 | C1orf43  | chromosome 1 open reading frame 43                                                                                               |
| 201967_at   | 0.945 | 0.03494599 | 2.2257688 | -4.28 | 1.4352299 | RBM6     | RNA binding motif protein 6                                                                                                      |
| 203365_s_at | 0.945 | 0.01694496 | 2.6060899 | -4.28 | 2.4483034 | MMP15    | matrix metalloproteinase 15                                                                                                      |
| 243815_at   | 0.945 | 0.0351313  | 2.2233057 | -4.28 | 1.3136839 | PGBD4    | piggyBac transposable element derived 4                                                                                          |
| 203889_at   | 0.945 | 0.03015504 | 2.3051085 | -4.28 | 2.8880353 | SCG5     | secretogranin V                                                                                                                  |
| 200885_at   | 0.945 | 0.0352818  | 2.2213138 | -4.28 | 1.5350551 | RHOC     | ras homolog family member C                                                                                                      |
| 205977_s_at | 0.945 | 0.03020462 | 2.3043447 | -4.28 | 2.3312348 | EPHA1    | EPH receptor A1                                                                                                                  |
| 230985_at   | 0.945 | 0.03529936 | 2.221082  | -4.28 | 1.6665756 | C9orf131 | chromosome 9 open reading frame 131                                                                                              |
| 209103_s_at | 0.945 | 0.03531221 | 2.2209123 | -4.28 | 2.2629722 | UFD1L    | ubiquitin fusion degradation 1 like (yeast)                                                                                      |
| 244822_at   | 0.945 | 0.03531222 | 2.2209123 | -4.28 | 1.3861372 | GART     | phosphoribosylglycinamide formyltransferase,<br>phosphoribosylglycinamide synthetase,<br>phosphoribosylaminoimidazole synthetase |
| 221711_s_at | 0.945 | 0.01342009 | 2.742872  | -4.28 | 3.3771193 | BABAM1   | BRISC and BRCA1 A complex member 1                                                                                               |
| 220759_at   | 0.945 | 0.01891864 | 2.5549634 | -4.28 | 3.1235824 | EDDM3B   | epididymal protein 3B                                                                                                            |
| 231951_at   | 0.945 | 0.03025655 | 2.3035457 | -4.28 | 2.1044003 | GNAO1    | G protein subunit alpha o1                                                                                                       |
| 219153_s_at | 0.945 | 0.03543765 | 2.2192594 | -4.28 | 3.0005517 | THSD4    | thrombospondin type 1 domain containing 4                                                                                        |
| 241223_x_at | 0.945 | 0.03548002 | 2.2187023 | -4.28 | 1.2986649 |          |                                                                                                                                  |



|             |       |            |           |       |           |           |                                                 |
|-------------|-------|------------|-----------|-------|-----------|-----------|-------------------------------------------------|
| 215076_s_at | 0.945 | 0.00520647 | 3.269844  | -4.28 | 2.8166707 | COL3A1    | collagen type III alpha 1 chain                 |
| 1560712_at  | 0.945 | 0.01670647 | 2.6252878 | -4.28 | 2.6081374 | TMPRSS11B | transmembrane protease, serine 11B              |
| 242783_at   | 0.945 | 0.01355152 | 2.7382928 | -4.28 | 2.8508224 |           |                                                 |
| 210110_x_at | 0.945 | 0.02466541 | 2.412516  | -4.28 | 2.9852665 | HNRNPH3   | heterogeneous nuclear ribonucleoprotein H3      |
| 213949_s_at | 0.945 | 0.03009403 | 2.3060502 | -4.28 | 2.2889701 | DOHH      | deoxyhypusine hydroxylase/monooxygenase         |
| 239856_at   | 0.945 | 0.03569511 | 2.2158832 | -4.28 | 1.5319125 |           |                                                 |
| 235176_at   | 0.945 | 0.03574281 | 2.21526   | -4.28 | 1.7176105 | ZFP82     | ZFP82 zinc finger protein                       |
| 235889_at   | 0.945 | 0.03589132 | 2.2133248 | -4.28 | 2.8570162 | RSPH3     | radial spoke 3 homolog                          |
| 221653_x_at | 0.945 | 0.01702031 | 2.6165744 | -4.28 | 2.7515205 | APOL2     | apolipoprotein L2                               |
| 201971_s_at | 0.945 | 0.03598848 | 2.2120627 | -4.28 | 1.5672704 | ATP6V1A   | ATPase H <sup>+</sup> transporting V1 subunit A |
| 214134_at   | 0.945 | 0.02497896 | 2.4066448 | -4.28 | 2.4756064 | KIAA1211L | KIAA1211 like                                   |
| 212568_s_at | 0.945 | 0.00538748 | 3.2531227 | -4.28 | 3.9836443 | DLAT      | dihydrolipoamide S-acetyltransferase            |
| 214095_at   | 0.945 | 0.02558024 | 2.3955742 | -4.28 | 1.8382864 | SHMT2     | serine hydroxymethyltransferase 2               |
| 225552_x_at | 0.945 | 0.03344877 | 2.2511771 | -4.28 | 2.6146959 | AURKAIP1  | aurora kinase A interacting protein 1           |
| 222950_at   | 0.945 | 0.03613831 | 2.2101224 | -4.28 | 1.2154653 | NIPAL2    | NIPA like domain containing 2                   |
| 224068_x_at | 0.945 | 0.03617755 | 2.2096155 | -4.28 | 1.606548  | RBM22     | RNA binding motif protein 22                    |
| 239589_at   | 0.945 | 0.02827236 | 2.3415721 | -4.28 | 1.6807649 |           |                                                 |
| 224874_at   | 0.945 | 0.01170913 | 2.8255174 | -4.28 | 1.931243  | POLR1D    | RNA polymerase I subunit D                      |
| 212210_at   | 0.945 | 0.02197775 | 2.4748924 | -4.28 | 2.0636241 | INTS1     | integrator complex subunit 1                    |
| 212081_x_at | 0.945 | 0.01194963 | 2.8158528 | -4.28 | 3.2912858 | PRRC2A    | proline rich coiled-coil 2A                     |
| 204509_at   | 0.945 | 0.03400175 | 2.2435247 | -4.28 | 2.1394087 | CA12      | carbonic anhydrase 12                           |
| 213930_at   | 0.945 | 0.01071106 | 2.8677892 | -4.28 | 2.7405003 | ATG12     | autophagy related 12                            |
| 222192_s_at | 0.945 | 0.03409296 | 2.2422733 | -4.28 | 1.6446041 | LDAH      | lipid droplet associated hydrolase              |

|             |       |            |           |       |           |                |                                                                  |
|-------------|-------|------------|-----------|-------|-----------|----------------|------------------------------------------------------------------|
| 202619_s_at | 0.945 | 0.03679626 | 2.2016866 | -4.28 | 1.768398  | PLOD2          | procollagen-lysine,2-oxoglutarate 5-dioxygenase 2                |
| 225997_at   | 0.945 | 0.03166797 | 2.2822975 | -4.28 | 1.6829698 | MOB1B          | MOB kinase activator 1B                                          |
| 238440_at   | 0.945 | 0.03690847 | 2.2002617 | -4.29 | 1.5641828 | CLYBL          | citrate lyase beta like                                          |
| 231680_at   | 0.945 | 0.0200956  | 2.5268164 | -4.29 | 1.4679454 |                |                                                                  |
| 201306_s_at | 0.945 | 0.01772052 | 2.5976695 | -4.29 | 3.3374522 | ANP32B         | acidic nuclear phosphoprotein 32 family member B                 |
| 225151_at   | 0.945 | 0.01409906 | 2.7043552 | -4.29 | 3.1044021 | RTKN           | rhotekin                                                         |
| 206441_s_at | 0.945 | 0.00700487 | 3.124516  | -4.29 | 4.0045453 | COMMD4         | COMM domain containing 4                                         |
| 203475_at   | 0.945 | 0.03710635 | 2.1977581 | -4.29 | 1.5618955 | CYP19A1        | cytochrome P450 family 19 subfamily A member 1                   |
| 225931_s_at | 0.945 | 0.03712182 | 2.1975628 | -4.29 | 1.9687422 | RNF213         | ring finger protein 213                                          |
| 1554736_at  | 0.945 | 0.02595729 | 2.3887541 | -4.29 | 1.5994688 | ARHGAP29       | Rho GTPase activating protein 29                                 |
| 203543_s_at | 0.945 | 0.01786864 | 2.5937613 | -4.29 | 2.2769166 | KLF9           | Kruppel like factor 9                                            |
| 201757_at   | 0.945 | 0.03450194 | 2.2366994 | -4.29 | 2.1696626 | RPL10//NDUF S5 | ribosomal protein L10//NADH:ubiquinone oxidoreductase subunit S5 |
| 206940_s_at | 0.945 | 0.02915052 | 2.3273072 | -4.29 | 2.0614884 | POU4F1         | POU class 4 homeobox 1                                           |
| 224137_at   | 0.945 | 0.02090671 | 2.5083062 | -4.29 | 2.510928  | CACNG7         | calcium voltage-gated channel auxiliary subunit gamma 7          |
| 228336_at   | 0.945 | 0.0372985  | 2.1953384 | -4.29 | 1.1994304 | PWWP2A         | PWWP domain containing 2A                                        |
| 239545_at   | 0.945 | 0.01466746 | 2.70104   | -4.29 | 1.6541564 |                |                                                                  |
| 1561424_at  | 0.945 | 0.01432487 | 2.6969795 | -4.29 | 2.6471189 | LOC101928907   | uncharacterized LOC101928907                                     |
| 47550_at    | 0.945 | 0.03740811 | 2.1939633 | -4.29 | 2.4280294 | LZTS1          | leucine zipper tumor suppressor 1                                |

|             |       |            |           |       |           |                 |                                                                                                   |
|-------------|-------|------------|-----------|-------|-----------|-----------------|---------------------------------------------------------------------------------------------------|
| 233111_at   | 0.945 | 0.03747806 | 2.1930875 | -4.29 | 1.4460501 | PTCSC1          | papillary thyroid carcinoma susceptibility candidate 1 (non-protein coding)                       |
| 224808_s_at | 0.945 | 0.02680931 | 2.373674  | -4.29 | 3.338387  | GET4            | golgi to ER traffic protein 4                                                                     |
| 212257_s_at | 0.945 | 0.02847518 | 2.3382417 | -4.29 | 2.7321767 | SMARCA2         | SWI/SNF related, matrix associated, actin dependent regulator of chromatin, subfamily a, member 2 |
| 225949_at   | 0.945 | 0.02634836 | 2.3817766 | -4.29 | 3.6642275 | MIR6845//NR BP2 | microRNA 6845//nuclear receptor binding protein 2                                                 |
| 207356_at   | 0.945 | 0.02398625 | 2.4341024 | -4.29 | 2.5155018 | DEFB4B//DEF B4A | defensin beta 4B//defensin beta 4A B4A                                                            |
| 1561516_at  | 0.945 | 0.00989329 | 2.8852455 | -4.29 | 3.5883464 | LOC101928995    | uncharacterized LOC101928995                                                                      |
| 1569763_at  | 0.945 | 0.03774962 | 2.1897017 | -4.29 | 1.433348  | KCNMA1-AS1      | KCNMA1 antisense RNA 1                                                                            |
| 220270_at   | 0.945 | 0.02071028 | 2.5127262 | -4.29 | 2.7761494 | RNF17           | ring finger protein 17                                                                            |
| 229307_at   | 0.945 | 0.03511172 | 2.2284989 | -4.29 | 2.5976812 | ANKRD28         | ankyrin repeat domain 28                                                                          |
| 224151_s_at | 0.945 | 0.03787902 | 2.1880959 | -4.29 | 1.7504604 | AK3             | adenylate kinase 3                                                                                |
| 201016_at   | 0.945 | 0.02659925 | 2.3773503 | -4.29 | 2.4743096 | EIF1AX          | eukaryotic translation initiation factor 1A, X-linked                                             |
| 1554069_at  | 0.945 | 0.02143612 | 2.4965844 | -4.29 | 2.6014048 | EPHA8           | EPH receptor A8                                                                                   |
| 201506_at   | 0.945 | 0.03795509 | 2.1871543 | -4.29 | 1.162434  | TGFBI           | transforming growth factor beta induced                                                           |
| 209701_at   | 0.945 | 0.03800204 | 2.186574  | -4.29 | 1.058275  | ERAP1           | endoplasmic reticulum aminopeptidase 1                                                            |
| 219998_at   | 0.945 | 0.03807328 | 2.1856946 | -4.29 | 2.0478566 | LGALSL          | galectin like                                                                                     |
| 219678_x_at | 0.945 | 0.03812888 | 2.1850094 | -4.29 | 1.9176962 | DCLRE1C         | DNA cross-link repair 1C                                                                          |

|              |       |            |           |       |           |                                                                 |                                                                                                     |
|--------------|-------|------------|-----------|-------|-----------|-----------------------------------------------------------------|-----------------------------------------------------------------------------------------------------|
| 212384_at    | 0.945 | 0.01145501 | 2.8359397 | -4.29 | 3.9124651 | ATP6V1G2-D<br>DX39B///SNO<br>RD84///DDX39<br>84///DEAD-box<br>B | ATP6V1G2-DDX39B<br>readthrough (NMD<br>candidate)///small<br>nucleolar RNA, C/D<br>box helicase 39B |
| 225367_at    | 0.945 | 0.02684001 | 2.3731389 | -4.29 | 1.9721032 | PGM2                                                            | phosphoglucomutase 2                                                                                |
| 242414_at    | 0.945 | 0.03005831 | 2.3129695 | -4.29 | 2.2148046 | QPRT                                                            | quinolinate phosphoribosyltransferase                                                               |
| 201689_s_at  | 0.945 | 0.0186002  | 2.5748966 | -4.29 | 2.8139502 | TPD52                                                           | tumor protein D52                                                                                   |
| 237780_at    | 0.945 | 0.03298056 | 2.2632983 | -4.29 | 3.739573  |                                                                 |                                                                                                     |
| 217918_at    | 0.945 | 0.02690226 | 2.3720556 | -4.29 | 2.7217627 | DYNLRB1                                                         | dynein light chain roadblock-type 1                                                                 |
| 1556186_s_at | 0.945 | 0.00764754 | 3.0520915 | -4.29 | 4.0571492 | EMC1                                                            | ER membrane protein complex subunit 1                                                               |
| 220968_s_at  | 0.945 | 0.01866855 | 2.5731701 | -4.29 | 3.8486031 | TSPAN9                                                          | tetraspanin 9                                                                                       |
| 205968_at    | 0.945 | 0.01867019 | 2.5731288 | -4.29 | 3.1344907 | KCNS3                                                           | potassium voltage-gated channel modifier<br>subfamily S member 3                                    |
| 212996_s_at  | 0.945 | 0.03835479 | 2.1822344 | -4.29 | 1.2861503 | URB1                                                            | URB1 ribosome biogenesis 1 homolog (S.<br>cerevisiae)                                               |
| 227830_at    | 0.945 | 0.02453559 | 2.4235    | -4.29 | 2.7966666 | GABRB3                                                          | gamma-aminobutyric acid type A receptor beta3<br>subunit                                            |
| 210658_s_at  | 0.945 | 0.01293759 | 2.7780268 | -4.29 | 3.3158127 | GGA2                                                            | golgi associated, gamma adaptin ear containing,<br>ARF binding protein 2                            |
| 211901_s_at  | 0.945 | 0.02763757 | 2.3594324 | -4.29 | 2.5040289 | PDE4A                                                           | phosphodiesterase 4A                                                                                |
| 218953_s_at  | 0.945 | 0.03862852 | 2.1788916 | -4.29 | 1.5846839 | PCYOX1L                                                         | prenylcysteine oxidase 1 like                                                                       |
| 209144_s_at  | 0.945 | 0.02720243 | 2.3668646 | -4.29 | 2.8326487 | CBFA2T2                                                         | CBFA2/RUNX1 translocation partner 2                                                                 |
| 1563367_at   | 0.945 | 0.01612329 | 2.6563168 | -4.29 | 2.5777217 | MAPT-AS1                                                        | MAPT antisense RNA 1                                                                                |

|              |       |            |           |       |           |                          |                                                                                                     |
|--------------|-------|------------|-----------|-------|-----------|--------------------------|-----------------------------------------------------------------------------------------------------|
| 210684_s_at  | 0.945 | 0.03287913 | 2.2647417 | -4.29 | 1.6382538 | DLG4                     | discs large MAGUK scaffold protein 4                                                                |
| 1561557_at   | 0.945 | 0.03867129 | 2.1783713 | -4.29 | 1.7831297 | LOC105378419             | uncharacterized LOC105378419                                                                        |
| 217579_x_at  | 0.945 | 0.03871575 | 2.1778308 | -4.29 | 3.1445273 |                          |                                                                                                     |
| 224077_at    | 0.945 | 0.02480938 | 2.4182978 | -4.29 | 3.1571298 | WHSC1L1                  | Wolf-Hirschhorn syndrome candidate 1-like 1                                                         |
| 240880_at    | 0.945 | 0.0360131  | 2.2166101 | -4.29 | 3.1141208 | LOC101927089             | uncharacterized LOC101927089                                                                        |
| 218435_at    | 0.945 | 0.03874712 | 2.1774499 | -4.29 | 2.0798786 | DNAJC15                  | DnaJ heat shock protein family (Hsp40) member C15                                                   |
| 238506_at    | 0.945 | 0.01316174 | 2.769833  | -4.29 | 3.0567294 | LRRC58                   | leucine rich repeat containing 58                                                                   |
| 1560696_x_at | 0.945 | 0.01902987 | 2.564141  | -4.29 | 2.5371333 | QTRT2                    | queuine tRNA-ribosyltransferase accessory subunit 2                                                 |
| 225163_at    | 0.945 | 0.03352881 | 2.2555659 | -4.29 | 2.4074592 | FRMD4A                   | FERM domain containing 4A                                                                           |
| 227530_at    | 0.945 | 0.02491711 | 2.4162656 | -4.29 | 2.7304437 | AKAP12                   | A-kinase anchoring protein 12                                                                       |
| 228184_at    | 0.945 | 0.03359413 | 2.2546522 | -4.29 | 1.515277  | DISP1                    | dispatched RND transporter family member 1                                                          |
| 202599_s_at  | 0.945 | 0.03069873 | 2.3030913 | -4.29 | 2.2735249 | NRIP1                    | nuclear receptor interacting protein 1                                                              |
| 239987_at    | 0.945 | 0.03075198 | 2.3022784 | -4.29 | 2.6806965 |                          |                                                                                                     |
| 1555194_at   | 0.945 | 0.03905279 | 2.1737522 | -4.29 | 1.1350729 |                          |                                                                                                     |
| 205122_at    | 0.945 | 0.03631916 | 2.2126345 | -4.29 | 2.1384227 | MSANTD3-TMMSANTD3-TMEFF1 | EFF1///TMEFF readthrough///transmembrane protein with EGF 1 like and two follistatin like domains 1 |
| 204908_s_at  | 0.945 | 0.036397   | 2.2116282 | -4.29 | 1.8560248 | MIR8085///BC             | microRNA 8085///B-cell CLL/lymphoma 3 L3                                                            |

|             |       |            |           |       |           |                  |                                                    |
|-------------|-------|------------|-----------|-------|-----------|------------------|----------------------------------------------------|
| 1559870_at  | 0.945 | 0.02174149 | 2.4899459 | -4.29 | 2.6859103 | LOC100129129     | uncharacterized LOC100129129                       |
| 221192_x_at | 0.945 | 0.03641022 | 2.2114575 | -4.29 | 3.7208794 | MFSD11           | major facilitator superfamily domain containing 11 |
| 226719_at   | 0.945 | 0.03920365 | 2.171937  | -4.29 | 1.3584773 | DERL2            | derlin 2                                           |
| 236101_at   | 0.945 | 0.01929971 | 2.557503  | -4.29 | 2.5670834 |                  |                                                    |
| 213726_x_at | 0.945 | 0.03924614 | 2.1714268 | -4.29 | 1.2362894 | TUBB4B           | tubulin beta 4B class IVb                          |
| 211241_at   | 0.945 | 0.0219076  | 2.4863712 | -4.29 | 3.1769329 | ANXA2P3          | annexin A2 pseudogene 3                            |
| 1562601_at  | 0.945 | 0.03401695 | 2.2487773 | -4.29 | 2.4798485 | LINC01121        | long intergenic non-protein coding RNA 1121        |
| 243654_at   | 0.945 | 0.03940068 | 2.1695754 | -4.29 | 2.3503358 |                  |                                                    |
| 211213_at   | 0.945 | 0.03943235 | 2.1691969 | -4.3  | 1.2637599 | ORC5             | origin recognition complex subunit 5               |
| 239756_at   | 0.945 | 0.03359492 | 2.2546413 | -4.3  | 1.5822524 |                  |                                                    |
| 236635_at   | 0.945 | 0.03670118 | 2.2077144 | -4.3  | 2.0615975 | ZNF667           | zinc finger protein 667                            |
| 213957_s_at | 0.945 | 0.02848134 | 2.3453232 | -4.3  | 2.5813836 | CEP350           | centrosomal protein 350                            |
| 216483_s_at | 0.945 | 0.0159928  | 2.6601647 | -4.3  | 1.7612158 | MYDGF            | myeloid derived growth factor                      |
| 212172_at   | 0.945 | 0.02543887 | 2.4065364 | -4.3  | 2.9517084 | AK2              | adenylate kinase 2                                 |
| 239536_at   | 0.945 | 0.03686122 | 2.205667  | -4.3  | 2.2070925 |                  |                                                    |
| 210970_s_at | 0.945 | 0.02211098 | 2.4820291 | -4.3  | 1.5355525 | IBTK             | inhibitor of Bruton tyrosine kinase                |
| 232067_at   | 0.945 | 0.02868055 | 2.3420483 | -4.3  | 2.5914262 | FAXC             | failed axon connections homolog                    |
| 1558712_at  | 0.945 | 0.01969256 | 2.5479938 | -4.3  | 2.2806719 | TMEM134          | transmembrane protein 134                          |
| 234861_at   | 0.945 | 0.03393569 | 2.2499011 | -4.3  | 1.3408373 | LOC93463         | uncharacterized LOC93463                           |
| 210746_s_at | 0.945 | 0.03712073 | 2.202364  | -4.3  | 1.8021612 | EPB42            | erythrocyte membrane protein band 4.2              |
| 205871_at   | 0.945 | 0.02829523 | 2.3484018 | -4.3  | 2.8182537 | PLGLB1///PLG LB2 | plasminogen-like B1///plasminogen-like B2          |

|              |       |            |           |      |           |          |                                                                          |
|--------------|-------|------------|-----------|------|-----------|----------|--------------------------------------------------------------------------|
| 1564369_at   | 0.945 | 0.02836093 | 2.3473129 | -4.3 | 2.8417408 |          |                                                                          |
| 1558019_at   | 0.945 | 0.04000312 | 2.1624203 | -4.3 | 1.2138241 |          |                                                                          |
| 224664_at    | 0.945 | 0.02468045 | 2.420741  | -4.3 | 2.3766638 | ANAPC16  | anaphase promoting complex subunit 16                                    |
| 229257_at    | 0.945 | 0.03171462 | 2.287802  | -4.3 | 2.9020535 | TNRC18   | trinucleotide repeat containing 18                                       |
| 234015_at    | 0.945 | 0.01712291 | 2.6277859 | -4.3 | 4.5210039 |          |                                                                          |
| 230565_at    | 0.945 | 0.03740499 | 2.1987699 | -4.3 | 1.1686926 | ATP6V1G3 | ATPase H <sup>+</sup> transporting V1 subunit G3                         |
| 225038_s_at  | 0.945 | 0.02852409 | 2.3446186 | -4.3 | 2.1625569 | SURF6    | surfeit 6                                                                |
| 227280_s_at  | 0.945 | 0.03430697 | 2.2447858 | -4.3 | 1.9591623 | CCNYL1   | cyclin Y like 1                                                          |
| 224408_at    | 0.945 | 0.011289   | 2.8645852 | -4.3 | 2.9309934 | MCHR2    | melanin concentrating hormone receptor 2                                 |
| 234853_s_at  | 0.945 | 0.01873972 | 2.5713786 | -4.3 | 3.354039  | EFCAB6   | EF-hand calcium binding domain 6                                         |
| 244481_at    | 0.945 | 0.02920118 | 2.3335873 | -4.3 | 1.9410388 |          |                                                                          |
| 233015_at    | 0.945 | 0.02328781 | 2.4576138 | -4.3 | 2.2092602 | MBNL1    | muscleblind like splicing regulator 1                                    |
| 220359_s_at  | 0.945 | 0.04036492 | 2.1581695 | -4.3 | 1.6052987 | ARPP21   | cAMP regulated phosphoprotein 21                                         |
| 1555497_a_at | 0.945 | 0.04038336 | 2.1579538 | -4.3 | 1.9558808 | CYP4B1   | cytochrome P450 family 4 subfamily B member 1                            |
| 239635_at    | 0.945 | 0.03760538 | 2.1962509 | -4.3 | 1.5288549 | RBM14    | RNA binding motif protein 14                                             |
| 202714_s_at  | 0.945 | 0.04038923 | 2.1578851 | -4.3 | 2.0927062 | KIAA0391 | KIAA0391                                                                 |
| 231738_at    | 0.945 | 0.03501787 | 2.23513   | -4.3 | 2.2165331 | PCDHB7   | protocadherin beta 7                                                     |
| 228692_at    | 0.945 | 0.01411506 | 2.7364214 | -4.3 | 2.1464612 | PREX2    | phosphatidylinositol-3,4,5-trisphosphate dependent Rac exchange factor 2 |

|             |       |            |           |      |           |                       |                                                        |
|-------------|-------|------------|-----------|------|-----------|-----------------------|--------------------------------------------------------|
| 229129_at   | 0.945 | 0.01453646 | 2.7052698 | -4.3 | 3.3085845 | HNRNPD                | heterogeneous nuclear ribonucleoprotein D              |
| 1568686_at  | 0.945 | 0.03212561 | 2.2817435 | -4.3 | 1.9358204 | ATP8B5P               | ATPase phospholipid transporting 8B5, pseudogene       |
| 212820_at   | 0.945 | 0.03777791 | 2.1940919 | -4.3 | 4.2364165 | DMXL2                 | Dmx like 2                                             |
| 210908_s_at | 0.945 | 0.03119565 | 2.2955557 | -4.3 | 3.3030088 | PFDN5                 | prefoldin subunit 5                                    |
| 209563_x_at | 0.945 | 0.01006291 | 2.8973342 | -4.3 | 3.6348067 | CALM3///CALM2///CALM1 | calmodulin 3///calmodulin 2///calmodulin 1             |
| 233039_at   | 0.945 | 0.02905774 | 2.3359045 | -4.3 | 2.5599276 |                       |                                                        |
| 243702_at   | 0.945 | 0.0108628  | 2.8831957 | -4.3 | 3.5710064 |                       |                                                        |
| 218174_s_at | 0.945 | 0.0324915  | 2.2764091 | -4.3 | 3.0931452 | TMEM254               | transmembrane protein 254                              |
| 209352_s_at | 0.945 | 0.02746736 | 2.3623266 | -4.3 | 3.6068851 | SIN3B                 | SIN3 transcription regulator family member B           |
| 230284_at   | 0.945 | 0.03503085 | 2.2349553 | -4.3 | 4.2352776 | MYOM3                 | myomesin 3                                             |
| 202725_at   | 0.945 | 0.03256687 | 2.275317  | -4.3 | 1.6925594 | POLR2A                | RNA polymerase II subunit A                            |
| 228569_at   | 0.945 | 0.0267202  | 2.3834077 | -4.3 | 1.6078542 | PAPOLA                | poly(A) polymerase alpha                               |
| 237844_at   | 0.945 | 0.04108718 | 2.149785  | -4.3 | 1.030945  | LOC100506639///ZNF131 | uncharacterized LOC100506639///zinc finger protein 131 |
| 231032_at   | 0.945 | 0.03834617 | 2.1870431 | -4.3 | 2.1613553 | LOC286071             | uncharacterized LOC286071                              |
| 220828_s_at | 0.945 | 0.0193232  | 2.5569293 | -4.3 | 1.5622023 | LOC55338              | uncharacterized LOC55338                               |
| 239876_at   | 0.945 | 0.04115944 | 2.1489535 | -4.3 | 1.3351794 |                       |                                                        |
| 227130_s_at | 0.945 | 0.02685486 | 2.381037  | -4.3 | 3.9118777 | TLE1                  | transducin like enhancer of split 1                    |
| 232537_x_at | 0.945 | 0.0207471  | 2.5233253 | -4.3 | 1.9383699 | MARK3                 | microtubule affinity regulating kinase 3               |



|             |       |            |           |       |           |               |                                                                  |
|-------------|-------|------------|-----------|-------|-----------|---------------|------------------------------------------------------------------|
| 214935_at   | 0.945 | 0.00889795 | 2.979381  | -4.3  | 2.749165  | IL4I1///NUP62 | interleukin 4 induced 1///nucleoporin 62                         |
| 230658_at   | 0.945 | 0.03852922 | 2.1847926 | -4.3  | 1.451371  | SLC7A2        | solute carrier family 7 member 2                                 |
| 211359_s_at | 0.945 | 0.02410452 | 2.4413385 | -4.3  | 2.5268296 | OPRM1         | opioid receptor mu 1                                             |
| 240952_at   | 0.945 | 0.04147129 | 2.1453796 | -4.3  | 1.0468885 |               |                                                                  |
| 230776_at   | 0.945 | 0.0386616  | 2.1831711 | -4.3  | 1.7209565 | RNF157-AS1    | RNF157 antisense RNA 1                                           |
| 226707_at   | 0.945 | 0.02969593 | 2.3256745 | -4.3  | 2.3627787 | NAPRT         | nicotinate phosphoribosyltransferase                             |
| 207733_x_at | 0.945 | 0.03874277 | 2.1821793 | -4.3  | 1.6240047 | PSG9          | pregnancy specific beta-1-glycoprotein 9                         |
| 220647_s_at | 0.945 | 0.02971465 | 2.3253775 | -4.3  | 2.4961333 | COA4          | cytochrome c oxidase assembly factor 4 homolog                   |
| 238181_at   | 0.945 | 0.00377479 | 3.4716897 | -4.3  | 3.9300692 |               |                                                                  |
| 241948_at   | 0.945 | 0.01971628 | 2.5474252 | -4.3  | 3.4356032 |               |                                                                  |
| 1554522_at  | 0.945 | 0.02359662 | 2.4417601 | -4.3  | 2.6957488 | CNNM2         | cyclin and CBS domain divalent metal cation transport mediator 2 |
| 204541_at   | 0.945 | 0.03223512 | 2.2801412 | -4.3  | 2.2444457 | SEC14L2       | SEC14 like lipid binding 2                                       |
| 240430_at   | 0.945 | 0.01495789 | 2.7086418 | -4.3  | 2.8155164 | KCMF1         | potassium channel modulatory factor 1                            |
| 208169_s_at | 0.945 | 0.02118884 | 2.5133411 | -4.3  | 2.9778828 | PTGER3        | prostaglandin E receptor 3                                       |
| 204676_at   | 0.945 | 0.02119881 | 2.513118  | -4.3  | 2.9404072 | TMEM186       | transmembrane protein 186                                        |
| 211195_s_at | 0.945 | 0.02383009 | 2.4467491 | -4.3  | 2.8093181 | TP63          | tumor protein p63                                                |
| 221408_x_at | 0.945 | 0.02743488 | 2.3709498 | -4.3  | 2.5875072 | PCDHB12       | protocadherin beta 12                                            |
| 240314_at   | 0.945 | 0.02750088 | 2.3698145 | -4.3  | 2.8262921 |               |                                                                  |
| 214214_s_at | 0.945 | 0.0360517  | 2.2214006 | -4.3  | 2.4891523 | C1QBP         | complement C1q binding protein                                   |
| 205186_at   | 0.945 | 0.03248332 | 2.2765278 | -4.31 | 2.3239214 | DNALI1        | dynein axonemal light intermediate chain 1                       |

|             |       |            |           |       |           |                                                                                                                                    |
|-------------|-------|------------|-----------|-------|-----------|------------------------------------------------------------------------------------------------------------------------------------|
| 206955_at   | 0.945 | 0.01154152 | 2.8538785 | -4.31 | 3.9360021 | LOC101930168 putative aquaporin-7-like protein 3///putative<br>///LOC1005096 aquaporin-7-like protein 3///aquaporin 7<br>20///AQP7 |
| 223671_x_at | 0.945 | 0.04237276 | 2.1351827 | -4.31 | 3.1463144 | DPH5 diphthamide biosynthesis 5                                                                                                    |
| 204663_at   | 0.945 | 0.04239263 | 2.1349601 | -4.31 | 1.6210076 | ME3 malic enzyme 3                                                                                                                 |
| 241718_x_at | 0.945 | 0.04247075 | 2.134086  | -4.31 | 2.3013574 |                                                                                                                                    |
| 225328_at   | 0.945 | 0.01533471 | 2.6967048 | -4.31 | 3.6755036 | FBXO32 F-box protein 32                                                                                                            |
| 1553566_at  | 0.945 | 0.03645904 | 2.2160891 | -4.31 | 3.048731  | PIANP PILR alpha associated neural protein                                                                                         |
| 210044_s_at | 0.945 | 0.04257164 | 2.1329592 | -4.31 | 2.6228328 | LYL1 LYL1, basic helix-loop-helix family member                                                                                    |
| 207572_at   | 0.945 | 0.03399756 | 2.2550135 | -4.31 | 1.3101176 | EFCAB2 EF-hand calcium binding domain 2                                                                                            |
| 236816_at   | 0.945 | 0.02176112 | 2.5006936 | -4.31 | 3.5598451 | NAA25 N(alpha)-acetyltransferase 25, NatB auxiliary<br>subunit                                                                     |
| 208200_at   | 0.945 | 0.02805329 | 2.3604101 | -4.31 | 2.0062097 | IL1A interleukin 1 alpha                                                                                                           |
| 208977_x_at | 0.945 | 0.03986831 | 2.168616  | -4.31 | 1.4301783 | TUBB4B tubulin beta 4B class IVb                                                                                                   |
| 218226_s_at | 0.945 | 0.03718577 | 2.2067446 | -4.31 | 3.5047982 | NDUFB4 NADH:ubiquinone oxidoreductase subunit B4                                                                                   |
| 218670_at   | 0.945 | 0.04278422 | 2.1305929 | -4.31 | 1.0050674 | PUS1 pseudouridylate synthase 1                                                                                                    |
| 1554208_at  | 0.945 | 0.02813706 | 2.3589989 | -4.31 | 2.3235155 | MEI1 meiotic double-stranded break formation protein<br>1                                                                          |
| 243454_at   | 0.945 | 0.04289122 | 2.1294057 | -4.31 | 1.2642756 |                                                                                                                                    |
| 234944_s_at | 0.945 | 0.04289731 | 2.1293382 | -4.31 | 1.4544066 | MTFR2 mitochondrial fission regulator 2                                                                                            |
| 237151_s_at | 0.945 | 0.03689794 | 2.2104257 | -4.31 | 2.6433591 | CFAP221 cilia and flagella associated protein 221                                                                                  |
| 1562396_at  | 0.945 | 0.01903332 | 2.5774101 | -4.31 | 3.0939194 |                                                                                                                                    |

|             |       |            |           |       |           |              |                                                   |
|-------------|-------|------------|-----------|-------|-----------|--------------|---------------------------------------------------|
| 237395_at   | 0.945 | 0.02551773 | 2.4143538 | -4.31 | 2.8359403 | CYP4Z1       | cytochrome P450 family 4 subfamily Z member 1     |
| 210461_s_at | 0.945 | 0.01205291 | 2.832875  | -4.31 | 3.8510284 | ABLIM1       | actin binding LIM protein 1                       |
| 227019_at   | 0.945 | 0.03461688 | 2.2464652 | -4.31 | 2.2533947 | C1orf226     | chromosome 1 open reading frame 226               |
| 240263_at   | 0.945 | 0.04042505 | 2.162034  | -4.31 | 3.2833473 |              |                                                   |
| 235463_s_at | 0.945 | 0.02858228 | 2.3515633 | -4.31 | 2.5400339 | CERS6        | ceramide synthase 6                               |
| 226343_at   | 0.945 | 0.04342808 | 2.1234892 | -4.31 | 2.2159607 | DPP8         | dipeptidyl peptidase 8                            |
| 200716_x_at | 0.945 | 0.04065671 | 2.1593192 | -4.31 | 1.8930335 | RPL13AP5///S | ribosomal protein L13a pseudogene 5///small       |
|             |       |            |           |       |           | NORD32A///S  | nucleolar RNA, C/D box 32A///small nucleolar      |
|             |       |            |           |       |           | NORD33///SN  | RNA, C/D box 33///small nucleolar RNA, C/D        |
|             |       |            |           |       |           | ORD34///SNO  | box 34///small nucleolar RNA, C/D box             |
|             |       |            |           |       |           | RD35A///RPL1 | 35A///ribosomal protein L13a                      |
|             |       |            |           |       |           | 3A           |                                                   |
| 1554455_at  | 0.945 | 0.00981005 | 2.9589092 | -4.31 | 3.0564771 | LINS1        | lines homolog 1                                   |
| 201877_s_at | 0.945 | 0.01601962 | 2.6757103 | -4.31 | 2.3472662 | PPP2R5C      | protein phosphatase 2 regulatory subunit B'gamma  |
| 203844_at   | 0.945 | 0.04364236 | 2.1211459 | -4.31 | 1.3849703 | VHL          | von Hippel-Lindau tumor suppressor                |
| 214275_at   | 0.945 | 0.01832219 | 2.5819815 | -4.31 | 2.9475583 | MED12        | mediator complex subunit 12                       |
| 242671_at   | 0.945 | 0.03160572 | 2.2962248 | -4.31 | 2.8094583 |              |                                                   |
| 203686_at   | 0.945 | 0.03403807 | 2.2544501 | -4.31 | 2.1992645 | MPG          | N-methylpurine DNA glycosylase                    |
| 233239_at   | 0.945 | 0.03182772 | 2.292908  | -4.31 | 3.8306868 |              |                                                   |
| 201979_s_at | 0.945 | 0.03546486 | 2.2349838 | -4.31 | 1.7933333 | PPP5C        | protein phosphatase 5 catalytic subunit           |
| 213136_at   | 0.945 | 0.03574325 | 2.2312689 | -4.31 | 2.227072  | PTPN2        | protein tyrosine phosphatase, non-receptor type 2 |

|              |       |            |           |       |           |                                       |                                                                                                                                             |                |                |
|--------------|-------|------------|-----------|-------|-----------|---------------------------------------|---------------------------------------------------------------------------------------------------------------------------------------------|----------------|----------------|
| 211417_x_at  | 0.945 | 0.03284993 | 2.2779044 | -4.31 | 2.4561354 | GGT2///GGTL<br>C1///GGTLC2//<br>/GGT1 | gamma-glutamyltransferase<br>2///gamma-glutamyltransferase<br>1///gamma-glutamyltransferase<br>2///gamma-glutamyltransferase 1              | light<br>light | chain<br>chain |
| 224391_s_at  | 0.945 | 0.03578074 | 2.2307707 | -4.31 | 2.5076171 | SIAE                                  | sialic acid acetylerase                                                                                                                     |                |                |
| 229059_at    | 0.945 | 0.02657345 | 2.3950884 | -4.31 | 2.4831778 | FAM225B///FA<br>M225A                 | family with sequence similarity 225 member B<br>(non-protein coding)///family with sequence<br>similarity 225 member A (non-protein coding) |                |                |
| 218667_at    | 0.945 | 0.02841618 | 2.3543247 | -4.31 | 2.1245439 | PJA1                                  | praja ring finger ubiquitin ligase 1                                                                                                        |                |                |
| 212441_at    | 0.945 | 0.03848094 | 2.1904937 | -4.31 | 1.6215216 | KIAA0232                              | KIAA0232                                                                                                                                    |                |                |
| 228279_s_at  | 0.945 | 0.02609211 | 2.4037822 | -4.31 | 2.2532056 |                                       |                                                                                                                                             |                |                |
| 1570263_at   | 0.945 | 0.04484449 | 2.1081877 | -4.31 | 1.0580362 |                                       |                                                                                                                                             |                |                |
| 1557828_a_at | 0.945 | 0.02200287 | 2.4954448 | -4.32 | 3.3343116 | TMEM267                               | transmembrane protein 267                                                                                                                   |                |                |
| 1557636_a_at | 0.945 | 0.01530062 | 2.697773  | -4.32 | 2.7608318 | C7orf57                               | chromosome 7 open reading frame 57                                                                                                          |                |                |
| 1563001_at   | 0.945 | 0.03272306 | 2.2797431 | -4.32 | 1.9418412 |                                       |                                                                                                                                             |                |                |
| 1569630_a_at | 0.945 | 0.01533511 | 2.6966921 | -4.32 | 3.5217145 | RUFY2                                 | RUN and FYVE domain containing 2                                                                                                            |                |                |
| 1569739_at   | 0.945 | 0.03892628 | 2.1850199 | -4.32 | 2.2271954 | LOC221946                             | uncharacterized LOC221946                                                                                                                   |                |                |
| 1555855_at   | 0.945 | 0.04513854 | 2.1050653 | -4.32 | 1.3335747 | AKR1C1                                | aldo-keto reductase family 1 member C1                                                                                                      |                |                |
| 215439_x_at  | 0.945 | 0.03341716 | 2.2697621 | -4.32 | 3.2112266 |                                       |                                                                                                                                             |                |                |
| 241013_at    | 0.945 | 0.04516786 | 2.1047549 | -4.32 | 2.9791111 | FAM124A                               | family with sequence similarity 124 member A                                                                                                |                |                |

|             |       |            |           |       |           |                |                                                                           |
|-------------|-------|------------|-----------|-------|-----------|----------------|---------------------------------------------------------------------------|
| 223092_at   | 0.945 | 0.0452419  | 2.103972  | -4.32 | 1.4506559 | ANKH           | ANKH inorganic pyrophosphate transport regulator                          |
| 239267_at   | 0.945 | 0.02372478 | 2.4595513 | -4.32 | 1.4899651 | NEK6           | NIMA related kinase 6                                                     |
| 212226_s_at | 0.945 | 0.02720677 | 2.38387   | -4.32 | 3.0456063 | PLPP3          | phospholipid phosphatase 3                                                |
| 1566183_at  | 0.945 | 0.04535373 | 2.1027917 | -4.32 | 1.3399139 |                |                                                                           |
| 214323_s_at | 0.945 | 0.04541806 | 2.1021139 | -4.32 | 1.3296009 | UPF3A          | UPF3 regulator of nonsense transcripts homolog A (yeast)                  |
| 240659_x_at | 0.945 | 0.04541942 | 2.1020996 | -4.32 | 1.0618681 |                |                                                                           |
| 210942_s_at | 0.945 | 0.04544898 | 2.1017885 | -4.32 | 3.0573948 | ST3GAL6        | ST3 beta-galactoside alpha-2,3-sialyltransferase 6                        |
| 219285_s_at | 0.945 | 0.04544957 | 2.1017823 | -4.32 | 1.3224678 | NIN            | ninein                                                                    |
| 225849_s_at | 0.945 | 0.02383944 | 2.4572488 | -4.32 | 3.1529308 | SFT2D1         | SFT2 domain containing 1                                                  |
| 227668_at   | 0.945 | 0.04548652 | 2.1013936 | -4.32 | 1.1558752 | TEPSIN         | TEPSIN, adaptor related protein complex 4 accessory protein               |
| 204310_s_at | 0.945 | 0.01718388 | 2.6419189 | -4.32 | 3.0297433 | NPR2           | natriuretic peptide receptor 2                                            |
| 228375_at   | 0.945 | 0.04258715 | 2.1372219 | -4.32 | 1.9426202 | IGSF11         | immunoglobulin superfamily member 11                                      |
| 203880_at   | 0.945 | 0.02466702 | 2.4304255 | -4.32 | 2.3955059 | POPDC2///COX17 | popeye domain containing 2///COX17, cytochrome c oxidase copper chaperone |
| 204182_s_at | 0.945 | 0.03326108 | 2.2719899 | -4.32 | 2.5917129 | ZBTB43         | zinc finger and BTB domain containing 43                                  |
| 213929_at   | 0.945 | 0.04565909 | 2.0995819 | -4.32 | 4.0915886 | EXPH5          | exophilin 5                                                               |
| 1566947_at  | 0.945 | 0.03391256 | 2.2627539 | -4.32 | 2.4108297 |                |                                                                           |
| 212399_s_at | 0.945 | 0.02093456 | 2.5318277 | -4.32 | 3.2987332 | VGLL4          | vestigial like family member 4                                            |

|             |       |            |           |       |           |                 |                                                                       |
|-------------|-------|------------|-----------|-------|-----------|-----------------|-----------------------------------------------------------------------|
| 1562910_at  | 0.945 | 0.03696634 | 2.215253  | -4.32 | 1.8330145 | SH3PXD2B        | SH3 and PX domains 2B                                                 |
| 215602_at   | 0.945 | 0.02016668 | 2.5497465 | -4.32 | 2.5918232 | FGD2            | FYVE, RhoGEF and PH domain containing 2                               |
| 211345_x_at | 0.945 | 0.03959843 | 2.1768645 | -4.32 | 1.3488006 | MIR3654///EEF1G | 3654///eukaryotic translation elongation factor 1 gamma               |
| 207891_s_at | 0.945 | 0.01743108 | 2.6350268 | -4.32 | 2.5107948 | HAUS7///TREX2   | HAUS augmin like complex subunit 7///three prime repair exonuclease 2 |
| 239788_at   | 0.945 | 0.01584376 | 2.6810175 | -4.32 | 3.8428971 |                 |                                                                       |
| 233521_at   | 0.945 | 0.01986527 | 2.5438695 | -4.32 | 3.3964305 |                 |                                                                       |
| 211372_s_at | 0.945 | 0.04611939 | 2.0947796 | -4.32 | 1.0043787 | IL1R2           | interleukin 1 receptor type 2                                         |
| 228862_at   | 0.945 | 0.02784894 | 2.3727396 | -4.32 | 2.1420976 | TSNARE1         | t-SNARE domain containing 1                                           |
| 226709_at   | 0.945 | 0.04617284 | 2.0942247 | -4.32 | 1.0734348 | ROBO2           | roundabout guidance receptor 2                                        |
| 204922_at   | 0.945 | 0.03994018 | 2.1727657 | -4.32 | 3.0115754 | C11orf80        | chromosome 11 open reading frame 80                                   |
| 242147_at   | 0.945 | 0.02291913 | 2.47603   | -4.32 | 3.0478573 |                 |                                                                       |
| 206104_at   | 0.945 | 0.02050622 | 2.5417449 | -4.32 | 2.8389944 | ISL1            | ISL LIM homeobox 1                                                    |
| 231699_at   | 0.945 | 0.03743697 | 2.2092182 | -4.32 | 3.14023   | NFKBIA          | NFKB inhibitor alpha                                                  |
| 209280_at   | 0.945 | 0.01774799 | 2.6263263 | -4.32 | 3.2689306 | MRC2            | mannose receptor C type 2                                             |
| 237373_at   | 0.945 | 0.02137732 | 2.5217762 | -4.32 | 2.7066295 | RAB20           | RAB20, member RAS oncogene family                                     |
| 224891_at   | 0.945 | 0.0465248  | 2.0905851 | -4.32 | 1.5899563 | FOXO3           | forkhead box O3                                                       |
| 1556828_at  | 0.945 | 0.04659415 | 2.0898708 | -4.32 | 1.4085482 |                 |                                                                       |
| 212498_at   | 0.945 | 0.01387694 | 2.7644117 | -4.32 | 3.6906412 | 6-Mar           | membrane associated ring-CH-type finger 6                             |

|              |       |            |           |       |           |              |                                                                            |
|--------------|-------|------------|-----------|-------|-----------|--------------|----------------------------------------------------------------------------|
| 230320_at    | 0.945 | 0.04366491 | 2.1252732 | -4.32 | 2.43734   | TBRG1        | transforming growth factor beta regulator 1                                |
| 212613_at    | 0.945 | 0.03136618 | 2.3073574 | -4.32 | 2.5904881 | BTN3A2       | butyrophilin subfamily 3 member A2                                         |
| 1556821_x_at | 0.945 | 0.02072973 | 2.5365459 | -4.32 | 3.5988118 | DLEU2        | deleted in lymphocytic leukemia 2 (non-protein coding)                     |
| 240646_at    | 0.945 | 0.0179258  | 2.6215094 | -4.32 | 2.0026677 | GIMAP8       | GTPase, IMAP family member 8                                               |
| 237998_at    | 0.945 | 0.02325892 | 2.4690147 | -4.32 | 3.5925471 |              |                                                                            |
| 1565633_at   | 0.945 | 0.01399705 | 2.7602147 | -4.32 | 3.1477061 |              |                                                                            |
| 230655_at    | 0.945 | 0.03433372 | 2.256869  | -4.32 | 2.0385708 |              |                                                                            |
| 209508_x_at  | 0.945 | 0.04689695 | 2.0867631 | -4.32 | 2.8955263 | CFLAR        | CASP8 and FADD like apoptosis regulator                                    |
| 203648_at    | 0.945 | 0.04690028 | 2.0867291 | -4.32 | 2.0255751 | TATDN2       | TatD DNase domain containing 2                                             |
| 233866_at    | 0.945 | 0.03037483 | 2.322669  | -4.32 | 2.7374918 | KLHL5        | kelch like family member 5                                                 |
| 208216_at    | 0.945 | 0.02786616 | 2.3724444 | -4.32 | 2.3810391 | DLX4         | distal-less homeobox 4                                                     |
| 243733_at    | 0.945 | 0.03263488 | 2.2810249 | -4.32 | 2.5515577 |              |                                                                            |
| 224755_at    | 0.945 | 0.03453243 | 2.2541152 | -4.32 | 2.2680393 | TM9SF3       | transmembrane 9 superfamily member 3                                       |
| 216724_at    | 0.945 | 0.04716572 | 2.0840198 | -4.32 | 1.3723627 | DCLK2        | doublecortin like kinase 2                                                 |
| 1569132_s_at | 0.945 | 0.0408651  | 2.1618294 | -4.32 | 1.6738466 | ARSK         | arylsulfatase family member K                                              |
| 231553_s_at  | 0.945 | 0.03461814 | 2.2529319 | -4.32 | 2.6390377 | MICAL3       | microtubule associated monooxygenase, calponin and LIM domain containing 3 |
| 1553569_at   | 0.945 | 0.0219215  | 2.5096878 | -4.32 | 2.5176768 | COX2         | cytochrome c oxidase subunit II                                            |
| 237188_x_at  | 0.945 | 0.04427325 | 2.1186449 | -4.32 | 1.2550605 | SUN5         | Sad1 and UNC84 domain containing 5                                         |
| 215229_at    | 0.945 | 0.01510514 | 2.7230563 | -4.32 | 3.3423561 | LOC100129973 | uncharacterized LOC100129973                                               |

|              |       |            |           |       |           |            |                                                  |
|--------------|-------|------------|-----------|-------|-----------|------------|--------------------------------------------------|
| 219731_at    | 0.945 | 0.04738013 | 2.0818412 | -4.32 | 1.6843068 | ENTPD1-AS1 | ENTPD1 antisense RNA 1                           |
| 236260_at    | 0.945 | 0.04740801 | 2.0815586 | -4.32 | 1.3387525 |            |                                                  |
| 211040_x_at  | 0.945 | 0.03849664 | 2.1958783 | -4.32 | 2.7760099 | GTSE1      | G2 and S-phase expressed 1                       |
| 217101_at    | 0.945 | 0.02131725 | 2.5231282 | -4.32 | 2.4732877 | TTC39A     | tetratricopeptide repeat domain 39A              |
| 240033_at    | 0.945 | 0.02839347 | 2.3634865 | -4.32 | 2.4993959 | PLG        | plasminogen                                      |
| 1557030_at   | 0.945 | 0.03099257 | 2.3130748 | -4.32 | 2.9178093 | GAB1       | GRB2 associated binding protein 1                |
| 232590_at    | 0.945 | 0.0186421  | 2.6025552 | -4.32 | 3.3136088 |            |                                                  |
| 1555431_a_at | 0.945 | 0.04783247 | 2.0772737 | -4.32 | 1.2305081 | IL31RA     | interleukin 31 receptor A                        |
| 1561689_at   | 0.945 | 0.04784159 | 2.0771821 | -4.32 | 1.4805485 |            |                                                  |
| 233455_at    | 0.945 | 0.01456641 | 2.7407813 | -4.32 | 3.5343189 |            |                                                  |
| 1557066_at   | 0.945 | 0.04789729 | 2.0766224 | -4.32 | 1.1267185 | LUC7L      | LUC7 like                                        |
| 236879_at    | 0.945 | 0.02927078 | 2.348919  | -4.32 | 2.7144713 |            |                                                  |
| 206744_s_at  | 0.945 | 0.04793835 | 2.0762102 | -4.32 | 1.4111413 | ZMYM5      | zinc finger MYM-type containing 5                |
| 1558779_at   | 0.945 | 0.03891696 | 2.1906792 | -4.32 | 1.5175738 | H2AFY      | H2A histone family member Y                      |
| 217838_s_at  | 0.945 | 0.02870907 | 2.3581985 | -4.33 | 2.5527767 | EVL        | Enah/Vasp-like                                   |
| 218643_s_at  | 0.945 | 0.02123866 | 2.5122275 | -4.33 | 2.7369707 | CRIP1      | CXXC repeat containing interactor of PDZ3 domain |
| 237746_at    | 0.945 | 0.04517345 | 2.1089846 | -4.33 | 1.6225625 |            |                                                  |
| 239342_at    | 0.945 | 0.03916353 | 2.1876527 | -4.33 | 2.3755097 | DGKZ       | diacylglycerol kinase zeta                       |
| 219314_s_at  | 0.945 | 0.0327412  | 2.2868407 | -4.33 | 2.1270423 | ZNF219     | zinc finger protein 219                          |
| 210212_x_at  | 0.945 | 0.0226876  | 2.493141  | -4.33 | 2.8402365 | CMC4       | C-X9-C motif containing 4                        |
| 1570607_at   | 0.945 | 0.03924446 | 2.1866631 | -4.33 | 2.0171351 |            |                                                  |
| 223260_s_at  | 0.945 | 0.04831606 | 2.0724331 | -4.33 | 1.4894806 | POLK       | DNA polymerase kappa                             |
| 205516_x_at  | 0.945 | 0.01547324 | 2.6757892 | -4.33 | 3.2573788 | CIZ1       | CDKN1A interacting zinc finger protein 1         |



|              |       |            |           |       |           |               |                                                             |
|--------------|-------|------------|-----------|-------|-----------|---------------|-------------------------------------------------------------|
| 236483_at    | 0.945 | 0.04834869 | 2.0721079 | -4.33 | 1.1102974 |               |                                                             |
| 227391_x_at  | 0.945 | 0.04536188 | 2.1069843 | -4.33 | 2.1801303 | LRRFIP1       | LRR binding FLII interacting protein 1                      |
| 1563528_at   | 0.945 | 0.03935046 | 2.1853698 | -4.33 | 2.6155984 | RAPGEF4-AS1   | RAPGEF4 antisense RNA 1                                     |
| 215998_at    | 0.945 | 0.04842746 | 2.071324  | -4.33 | 2.7571697 |               |                                                             |
| 211849_s_at  | 0.945 | 0.04543537 | 2.1062063 | -4.33 | 1.3895409 | RNGTT         | RNA guanylyltransferase and 5'-phosphatase                  |
| 242343_x_at  | 0.945 | 0.02683625 | 2.3904034 | -4.33 | 3.0264658 |               |                                                             |
| 214522_x_at  | 0.945 | 0.01493369 | 2.7286303 | -4.33 | 3.6175257 | HIST1H3D///HI | histone cluster 1, H3d///histone cluster 1, H2ad<br>ST1H2AD |
| 202906_s_at  | 0.945 | 0.01218431 | 2.8517924 | -4.33 | 3.6891292 | NBN           | nibrin                                                      |
| 237293_at    | 0.945 | 0.0329837  | 2.2833049 | -4.33 | 1.8890737 |               |                                                             |
| 211817_s_at  | 0.945 | 0.04271109 | 2.1406529 | -4.33 | 2.0618876 | KCNJ5         | potassium voltage-gated channel subfamily J<br>member 5     |
| 238201_at    | 0.945 | 0.04858164 | 2.0697929 | -4.33 | 3.4872195 | LOC105376975  | uncharacterized LOC105376975                                |
| 205066_s_at  | 0.945 | 0.04220756 | 2.1463462 | -4.33 | 1.9757266 | ENPP1         | ectonucleotide<br>pyrophosphatase/phosphodiesterase 1       |
| 56829_at     | 0.945 | 0.02297294 | 2.4871126 | -4.33 | 2.6794198 | TRAPPC9       | trafficking protein particle complex 9                      |
| 1553338_at   | 0.945 | 0.04235857 | 2.1446324 | -4.33 | 2.4531746 | SDE2          | SDE2 telomere maintenance homolog                           |
| 223306_at    | 0.945 | 0.04877963 | 2.067833  | -4.33 | 1.5229489 | EBPL          | emopamil binding protein like                               |
| 1558920_at   | 0.945 | 0.04878361 | 2.0677936 | -4.33 | 1.2616179 | SLC8A1-AS1    | SLC8A1 antisense RNA 1                                      |
| 217863_at    | 0.945 | 0.03006781 | 2.3360306 | -4.33 | 2.1848861 | PIAS1         | protein inhibitor of activated STAT 1                       |
| 244666_at    | 0.945 | 0.0264388  | 2.4076517 | -4.33 | 2.7402882 |               |                                                             |
| 1558354_s_at | 0.945 | 0.04252573 | 2.1427417 | -4.33 | 3.421413  | PLCG1-AS1     | PLCG1 antisense RNA 1                                       |
| 243840_at    | 0.945 | 0.02921958 | 2.3411037 | -4.33 | 2.677362  | CLSPN         | claspin                                                     |
| 1559156_at   | 0.945 | 0.0489467  | 2.0661846 | -4.33 | 1.520058  |               |                                                             |

|              |       |            |           |       |           |                                   |                                                                                                                    |
|--------------|-------|------------|-----------|-------|-----------|-----------------------------------|--------------------------------------------------------------------------------------------------------------------|
| 204239_s_at  | 0.945 | 0.04895627 | 2.0660903 | -4.33 | 1.1665925 | NNAT                              | neuronatin                                                                                                         |
| 210935_s_at  | 0.945 | 0.04600077 | 2.1002571 | -4.33 | 1.1675607 | WDR1                              | WD repeat domain 1                                                                                                 |
| 236207_at    | 0.945 | 0.01620984 | 2.6885409 | -4.33 | 3.7106613 | SSFA2                             | sperm specific antigen 2                                                                                           |
| 241239_at    | 0.945 | 0.04915357 | 2.0641505 | -4.33 | 1.6041053 | EPN2-IT1///EP<br>N2               | EPN2 intronic transcript 1///epsin 2                                                                               |
| 234249_at    | 0.945 | 0.04614176 | 2.0987838 | -4.33 | 2.8852116 |                                   |                                                                                                                    |
| 213142_x_at  | 0.945 | 0.02512372 | 2.4321444 | -4.33 | 3.0028075 | GSAP                              | gamma-secretase activating protein                                                                                 |
| 218302_at    | 0.945 | 0.03036252 | 2.331345  | -4.33 | 2.8993765 | PSENEN                            | presenilin enhancer gamma-secretase subunit                                                                        |
| 234250_at    | 0.945 | 0.03360774 | 2.274314  | -4.33 | 2.3829455 | LOC100506405                      | uncharacterized LOC100506405                                                                                       |
| 1557652_a_at | 0.945 | 0.04933389 | 2.0623836 | -4.33 | 1.4221713 | CCDC13-AS1                        | CCDC13 antisense RNA 1                                                                                             |
| 216340_s_at  | 0.945 | 0.02522015 | 2.4303083 | -4.33 | 3.710516  | CYP2A7P1                          | cytochrome P450 family 2 subfamily A member<br>7 pseudogene 1                                                      |
| 1559800_a_at | 0.945 | 0.04022834 | 2.174778  | -4.33 | 1.7827923 |                                   |                                                                                                                    |
| 240077_at    | 0.945 | 0.01971301 | 2.5754736 | -4.33 | 3.3249033 |                                   |                                                                                                                    |
| 206077_at    | 0.945 | 0.03239984 | 2.2918593 | -4.33 | 4.8643027 | KEL                               | Kell blood group, metallo-endopeptidase                                                                            |
| 229586_at    | 0.945 | 0.04949215 | 2.0608376 | -4.33 | 2.3146835 | CHD9                              | chromodomain helicase DNA binding protein 9                                                                        |
| 216950_s_at  | 0.945 | 0.01284443 | 2.8020128 | -4.33 | 3.1476293 | FCGR1CP///FC<br>GR1B///FCGR1<br>A | Fc fragment of IgG receptor Ic, pseudogene///Fc<br>fragment of IgG receptor Ib///Fc fragment of IgG<br>receptor Ia |
| 200060_s_at  | 0.945 | 0.02992233 | 2.3383594 | -4.33 | 2.1856376 | RNPS1                             | RNA binding protein with serine rich domain 1                                                                      |

|              |       |            |           |       |           |               |                                                                                                                                                                                                                                                                                                                                                                                                                                                                                                                |
|--------------|-------|------------|-----------|-------|-----------|---------------|----------------------------------------------------------------------------------------------------------------------------------------------------------------------------------------------------------------------------------------------------------------------------------------------------------------------------------------------------------------------------------------------------------------------------------------------------------------------------------------------------------------|
| 223086_x_at  | 0.945 | 0.04046763 | 2.1719272 | -4.33 | 2.3357746 | MRPL51        | mitochondrial ribosomal protein L51                                                                                                                                                                                                                                                                                                                                                                                                                                                                            |
| 228031_at    | 0.945 | 0.00308362 | 3.6986861 | -4.33 | 5.1490482 | TTPAL         | alpha tocopherol transfer protein like                                                                                                                                                                                                                                                                                                                                                                                                                                                                         |
| 208123_at    | 0.945 | 0.03257219 | 2.2893194 | -4.33 | 2.5177589 | KCNB2         | potassium voltage-gated channel subfamily B member 2                                                                                                                                                                                                                                                                                                                                                                                                                                                           |
| 1557720_s_at | 0.945 | 0.0438034  | 2.1285068 | -4.33 | 2.0770323 | MYO16         | myosin XVI                                                                                                                                                                                                                                                                                                                                                                                                                                                                                                     |
| 208181_at    | 0.945 | 0.02036183 | 2.5451323 | -4.33 | 3.2429252 | HIST2H4B///HI | histone cluster 2, H4b///histone cluster 4, ST4H4///HIST2 H4///histone cluster 2, H4a///histone cluster 1, H4A///HIST1H H4I///histone cluster 1, H4e///histone cluster 1, 4L///HIST1H4E H4b///histone cluster 1, H4h///histone cluster 1, ///HIST1H4B/// H4c///histone cluster 1, H4j///histone cluster 1, HIST1H4H///HI H4k///histone cluster 1, H4f///histone cluster 1, ST1H4C///HIS H4d///histone cluster 1, H4a///histone cluster 1, T1H4J///HIST1 H4i H4K///HIST1H 4F///HIST1H4D ///HIST1H4A/// HIST1H4I |
| 241915_at    | 0.945 | 0.04054703 | 2.1709847 | -4.33 | 1.965803  | ACSM2B        | acyl-CoA synthetase medium-chain family member 2B                                                                                                                                                                                                                                                                                                                                                                                                                                                              |
| 213430_at    | 0.945 | 0.04974126 | 2.0584131 | -4.33 | 2.0865779 | RUFY3         | RUN and FYVE domain containing 3                                                                                                                                                                                                                                                                                                                                                                                                                                                                               |
| 211673_s_at  | 0.945 | 0.04675174 | 2.0924556 | -4.33 | 2.4727814 | MOCS1         | molybdenum cofactor synthesis 1                                                                                                                                                                                                                                                                                                                                                                                                                                                                                |
| 244078_at    | 0.945 | 0.04980541 | 2.0577904 | -4.33 | 1.4275301 |               |                                                                                                                                                                                                                                                                                                                                                                                                                                                                                                                |
| 1563828_at   | 0.945 | 0.03406322 | 2.2678479 | -4.33 | 2.6252162 |               |                                                                                                                                                                                                                                                                                                                                                                                                                                                                                                                |
| 222517_at    | 0.945 | 0.03755816 | 2.213878  | -4.33 | 1.8489222 | AP3M1         | adaptor related protein complex 3 mu 1 subunit                                                                                                                                                                                                                                                                                                                                                                                                                                                                 |
| 231209_at    | 0.945 | 0.02789081 | 2.3720222 | -4.33 | 2.4234446 | EXOC3L4       | exocyst complex component 3 like 4                                                                                                                                                                                                                                                                                                                                                                                                                                                                             |

|              |       |            |           |       |           |                 |                                                                                   |
|--------------|-------|------------|-----------|-------|-----------|-----------------|-----------------------------------------------------------------------------------|
| 243500_at    | 0.945 | 0.04403713 | 2.1259432 | -4.33 | 2.0649075 |                 |                                                                                   |
| 210320_s_at  | 0.945 | 0.03705713 | 2.2203319 | -4.33 | 2.3687258 | DDX52           | DEAD-box helicase 52                                                              |
| 201464_x_at  | 0.945 | 0.03284941 | 2.28526   | -4.33 | 2.5075115 | JUN             | Jun proto-oncogene, AP-1 transcription factor subunit                             |
| 207048_at    | 0.945 | 0.02734042 | 2.391508  | -4.33 | 1.5619507 | SLC6A11         | solute carrier family 6 member 11                                                 |
| 213299_at    | 0.945 | 0.04423777 | 2.1237523 | -4.33 | 1.6291186 | ZBTB7A          | zinc finger and BTB domain containing 7A                                          |
| 206877_at    | 0.945 | 0.04713891 | 2.088477  | -4.33 | 1.3765242 | MXD1            | MAX dimerization protein 1                                                        |
| 235193_at    | 0.945 | 0.04719135 | 2.0879404 | -4.33 | 2.2517994 | FAM214A         | family with sequence similarity 214 member A                                      |
| 243641_at    | 0.945 | 0.02587654 | 2.417981  | -4.33 | 1.4244259 |                 |                                                                                   |
| 217394_at    | 0.945 | 0.03120212 | 2.3182228 | -4.33 | 2.7046805 |                 |                                                                                   |
| 239608_at    | 0.945 | 0.04723354 | 2.0875091 | -4.33 | 1.5686814 | LPCAT4          | lysophosphatidylcholine acyltransferase 4                                         |
| 234725_s_at  | 0.945 | 0.02330469 | 2.4801912 | -4.33 | 3.3809213 | SEMA4B          | semaphorin 4B                                                                     |
| 1555794_at   | 0.945 | 0.03053176 | 2.3286732 | -4.33 | 2.5985833 | ARL17B///ARL17A | ADP ribosylation factor like GTPase 17B///ADP ribosylation factor like GTPase 17A |
| 214314_s_at  | 0.945 | 0.01320241 | 2.8119932 | -4.33 | 3.0643305 | EIF5B           | eukaryotic translation initiation factor 5B                                       |
| 203220_s_at  | 0.945 | 0.0474792  | 2.0850042 | -4.33 | 1.1944273 | TLE1            | transducin like enhancer of split 1                                               |
| 201734_at    | 0.945 | 0.0446418  | 2.1193672 | -4.33 | 3.8334628 | CLCN3           | chloride voltage-gated channel 3                                                  |
| 1558821_s_at | 0.945 | 0.04768627 | 2.0829018 | -4.33 | 2.9575661 | LOC102723694    | uncharacterized LOC102723694                                                      |

|              |       |            |           |       |           |                                           |                                                             |
|--------------|-------|------------|-----------|-------|-----------|-------------------------------------------|-------------------------------------------------------------|
| 229865_at    | 0.945 | 0.02444812 | 2.4570266 | -4.33 | 3.3443935 | LOC101928615 uncharacterized<br>///FNDC3B | LOC101928615///fibronectin<br>type III domain containing 3B |
| 241680_at    | 0.945 | 0.03841022 | 2.2030799 | -4.33 | 2.4282089 |                                           |                                                             |
| 219626_at    | 0.945 | 0.03086904 | 2.3233891 | -4.33 | 3.0921147 | MAP7D3                                    | MAP7 domain containing 3                                    |
| 1567320_at   | 0.945 | 0.03490614 | 2.2560878 | -4.33 | 2.8833443 |                                           |                                                             |
| 222397_at    | 0.945 | 0.02795503 | 2.3807852 | -4.33 | 1.5686346 | EFTUD2                                    | elongation factor Tu GTP binding domain<br>containing 2     |
| 238754_at    | 0.945 | 0.03788882 | 2.2096614 | -4.33 | 1.9534474 | PTCH1                                     | patched 1                                                   |
| 212003_at    | 0.945 | 0.02082118 | 2.5488849 | -4.33 | 3.6445185 | SZRD1                                     | SUZ RNA binding domain containing 1                         |
| 231311_at    | 0.945 | 0.03117301 | 2.3186723 | -4.33 | 2.1094936 |                                           |                                                             |
| 233920_at    | 0.945 | 0.044701   | 2.1187277 | -4.33 | 1.7619715 |                                           |                                                             |
| 216360_x_at  | 0.945 | 0.03136963 | 2.3156438 | -4.34 | 2.653345  | RRP12                                     | ribosomal RNA processing 12 homolog                         |
| 241625_at    | 0.945 | 0.02409672 | 2.4640352 | -4.34 | 2.4212162 | LOC389834                                 | ankyrin repeat domain 57 pseudogene                         |
| 236015_at    | 0.945 | 0.04839205 | 2.0757966 | -4.34 | 1.8154521 | PCNX4                                     | pecanex homolog 4 (Drosophila)                              |
| 231599_x_at  | 0.945 | 0.04842135 | 2.0755036 | -4.34 | 1.7369627 | DPF1                                      | double PHD fingers 1                                        |
| 240245_at    | 0.945 | 0.04494659 | 2.1160828 | -4.34 | 1.8756621 |                                           |                                                             |
| 208335_s_at  | 0.945 | 0.02682644 | 2.4006491 | -4.34 | 2.7568657 | ACKR1                                     | atypical chemokine receptor 1 (Duffy blood<br>group)        |
| 229734_at    | 0.945 | 0.02845161 | 2.3722808 | -4.34 | 4.0786302 | MIR4697///MI<br>R4697HG                   | microRNA 4697///MIR4697 host gene                           |
| 204857_at    | 0.945 | 0.04502792 | 2.1152098 | -4.34 | 1.8012021 | MAD1L1                                    | MAD1 mitotic arrest deficient like 1                        |
| 1558680_s_at | 0.945 | 0.03921589 | 2.1930682 | -4.34 | 2.2217556 | PDE1A                                     | phosphodiesterase 1A                                        |

|              |       |            |           |       |           |                    |                                                                                  |
|--------------|-------|------------|-----------|-------|-----------|--------------------|----------------------------------------------------------------------------------|
| 1566709_at   | 0.945 | 0.02427875 | 2.4603927 | -4.34 | 3.4564454 |                    |                                                                                  |
| 236091_at    | 0.945 | 0.03164364 | 2.3114525 | -4.34 | 3.0623658 | HMGB2              | high mobility group box 2                                                        |
| 220350_at    | 0.945 | 0.04243879 | 2.1490061 | -4.34 | 2.2896345 | ZNF235             | zinc finger protein 235                                                          |
| 205885_s_at  | 0.945 | 0.02432733 | 2.459425  | -4.34 | 3.6606467 | ITGA4              | integrin subunit alpha 4                                                         |
| 243637_at    | 0.945 | 0.04263552 | 2.1467716 | -4.34 | 2.0547066 |                    |                                                                                  |
| 224565_at    | 0.945 | 0.04268833 | 2.1461733 | -4.34 | 2.3539163 | MIR612///NEA<br>T1 | microRNA 612///nuclear paraspeckle assembly<br>transcript 1 (non-protein coding) |
| 1556988_s_at | 0.945 | 0.04602713 | 2.1045974 | -4.34 | 4.0146723 | CHD1L              | chromodomain helicase DNA binding protein 1<br>like                              |
| 1555179_at   | 0.945 | 0.01415773 | 2.7546543 | -4.34 | 2.3943297 | IGHV7-81           | immunoglobulin heavy variable 7-81<br>(non-functional)                           |
| 238008_at    | 0.945 | 0.03609336 | 2.2399576 | -4.34 | 2.5146031 | PRR18              | proline rich 18                                                                  |
| 240455_at    | 0.945 | 0.02900319 | 2.3629949 | -4.34 | 1.7515582 |                    |                                                                                  |
| 1563681_at   | 0.945 | 0.04916964 | 2.0680746 | -4.34 | 1.5684753 |                    |                                                                                  |
| 234185_at    | 0.945 | 0.02161308 | 2.5306955 | -4.34 | 2.9284406 |                    |                                                                                  |
| 241270_at    | 0.945 | 0.04299586 | 2.1427026 | -4.34 | 4.1173323 |                    |                                                                                  |
| 243860_at    | 0.945 | 0.03627668 | 2.2375103 | -4.34 | 2.5026397 |                    |                                                                                  |
| 220686_s_at  | 0.945 | 0.0372336  | 2.2180498 | -4.34 | 2.3294938 | PIWIL2             | piwi like RNA-mediated gene silencing 2                                          |
| 230726_at    | 0.945 | 0.03207823 | 2.296632  | -4.34 | 2.2532832 | MRPL38             | mitochondrial ribosomal protein L38                                              |
| 209212_s_at  | 0.945 | 0.04319684 | 2.1404464 | -4.34 | 1.2732476 | KLF5               | Kruppel like factor 5                                                            |
| 232791_at    | 0.945 | 0.04954949 | 2.0643419 | -4.34 | 2.2356196 |                    |                                                                                  |
| 1561045_a_at | 0.945 | 0.03651563 | 2.2343372 | -4.34 | 2.9683797 | LOC101928973       | uncharacterized LOC101928973                                                     |
| 236606_at    | 0.945 | 0.03222982 | 2.294377  | -4.34 | 1.9890417 |                    |                                                                                  |

|             |       |            |           |       |           |           |                                              |
|-------------|-------|------------|-----------|-------|-----------|-----------|----------------------------------------------|
| 1554314_at  | 0.945 | 0.02776539 | 2.3840703 | -4.34 | 2.7070128 | C6orf141  | chromosome 6 open reading frame 141          |
| 242392_at   | 0.945 | 0.0395445  | 2.1890382 | -4.34 | 1.9598692 | UBE2U     | ubiquitin conjugating enzyme E2 U (putative) |
| 226086_at   | 0.945 | 0.0366376  | 2.2327249 | -4.34 | 2.6143222 | SYT13     | synaptotagmin 13                             |
| 227769_at   | 0.945 | 0.03342177 | 2.2850398 | -4.34 | 2.3805513 | GPR27     | G protein-coupled receptor 27                |
| 233774_at   | 0.945 | 0.03979055 | 2.1860406 | -4.34 | 1.2020796 |           |                                              |
| 214493_s_at | 0.945 | 0.04370337 | 2.1348019 | -4.34 | 2.1653329 | PATJ      | PATJ, crumbs cell polarity complex component |
| 209638_x_at | 0.945 | 0.04707295 | 2.0937088 | -4.34 | 2.5368324 | RGS12     | regulator of G-protein signaling 12          |
| 1561414_at  | 0.945 | 0.02622269 | 2.4230173 | -4.34 | 2.2619158 | LINC01242 | long intergenic non-protein coding RNA 1242  |
| 216016_at   | 0.945 | 0.04654888 | 2.0991378 | -4.34 | 1.8626402 | NLRP3     | NLR family pyrin domain containing 3         |
| 203985_at   | 0.945 | 0.04062739 | 2.1759696 | -4.34 | 2.3592559 | ZNF212    | zinc finger protein 212                      |
| 225404_at   | 0.945 | 0.04063467 | 2.1758828 | -4.34 | 2.2348976 | SMIM12    | small integral membrane protein 12           |
| 228149_at   | 0.945 | 0.02630284 | 2.4215327 | -4.34 | 3.3488033 | BMT2      | base methyltransferase of 25S rRNA 2 homolog |
| 219749_at   | 0.945 | 0.04261371 | 2.1470189 | -4.34 | 2.5835285 | SH2D4A    | SH2 domain containing 4A                     |
| 240718_at   | 0.945 | 0.04722474 | 2.0921465 | -4.34 | 1.8644165 | LRMP      | lymphoid restricted membrane protein         |
| 232762_at   | 0.945 | 0.03298624 | 2.2913873 | -4.34 | 2.1022894 | KIAA1217  | KIAA1217                                     |
| 216804_s_at | 0.945 | 0.01146685 | 2.910691  | -4.34 | 3.6052674 | PDLIM5    | PDZ and LIM domain 5                         |
| 226143_at   | 0.945 | 0.03011633 | 2.3447442 | -4.34 | 2.9421348 | RAI1      | retinoic acid induced 1                      |
| 211909_x_at | 0.945 | 0.02255706 | 2.5098211 | -4.34 | 2.9856027 | PTGER3    | prostaglandin E receptor 3                   |
| 232453_at   | 0.945 | 0.04761918 | 2.0881074 | -4.34 | 3.9877446 |           |                                              |
| 217142_at   | 0.945 | 0.03413028 | 2.2748747 | -4.34 | 2.2753271 |           |                                              |

|              |       |            |           |       |           |             |                                                                                                                            |
|--------------|-------|------------|-----------|-------|-----------|-------------|----------------------------------------------------------------------------------------------------------------------------|
| 1569538_at   | 0.945 | 0.0302569  | 2.3424842 | -4.34 | 2.4010888 |             |                                                                                                                            |
| 36566_at     | 0.945 | 0.04718822 | 2.0925219 | -4.34 | 2.654784  | CTNS        | cystinosis, lysosomal cystine transporter                                                                                  |
| 229700_at    | 0.945 | 0.01915086 | 2.6066313 | -4.34 | 4.1873924 | ZNF738      | zinc finger protein 738                                                                                                    |
| 224087_at    | 0.945 | 0.04794757 | 2.0847675 | -4.34 | 2.1934284 |             |                                                                                                                            |
| 210679_x_at  | 0.945 | 0.04138151 | 2.1670539 | -4.34 | 2.7271914 |             |                                                                                                                            |
| 241303_x_at  | 0.945 | 0.04079931 | 2.173924  | -4.34 | 2.0422628 |             |                                                                                                                            |
| 233151_s_at  | 0.945 | 0.02886281 | 2.3653425 | -4.34 | 3.0236013 | TTY7B///TTT | testis-specific transcript, Y-linked 7B (non-protein coding)///testis-specific transcript, Y-linked 7 (non-protein coding) |
| 213715_s_at  | 0.945 | 0.02351812 | 2.4757875 | -4.34 | 2.2541501 | KANK3       | KN motif and ankyrin repeat domains 3                                                                                      |
| 1566893_at   | 0.945 | 0.04100715 | 2.1714612 | -4.34 | 1.3188349 |             |                                                                                                                            |
| 212763_at    | 0.945 | 0.0410108  | 2.1714181 | -4.34 | 2.2706518 | CAMSAP2     | calmodulin regulated spectrin associated protein family member 2                                                           |
| 1555526_a_at | 0.945 | 0.0307853  | 2.3340751 | -4.34 | 1.8315659 | SEPT6       | septin 6                                                                                                                   |
| 214251_s_at  | 0.945 | 0.04841291 | 2.0800696 | -4.34 | 1.9365809 | NUMA1       | nuclear mitotic apparatus protein 1                                                                                        |
| 1563016_at   | 0.945 | 0.03084529 | 2.3331287 | -4.34 | 2.6174236 |             |                                                                                                                            |
| 234841_x_at  | 0.945 | 0.02578256 | 2.4197281 | -4.34 | 2.9543725 | OBP2A       | odorant binding protein 2A                                                                                                 |
| 233333_x_at  | 0.945 | 0.0391673  | 2.1936667 | -4.34 | 2.7728103 | AVIL        | advillin                                                                                                                   |
| 244101_at    | 0.945 | 0.03170462 | 2.3105242 | -4.34 | 2.1463559 |             |                                                                                                                            |
| 234518_at    | 0.945 | 0.03831711 | 2.2110076 | -4.35 | 2.2616458 |             |                                                                                                                            |



|              |       |            |           |       |           |                                         |                                                                    |
|--------------|-------|------------|-----------|-------|-----------|-----------------------------------------|--------------------------------------------------------------------|
| 215223_s_at  | 0.945 | 0.03687716 | 2.2295723 | -4.35 | 3.2709315 | LOC100129518 uncharacterized<br>///SOD2 | LOC100129518///superoxide<br>dismutase 2, mitochondrial            |
| 1568689_at   | 0.945 | 0.04522205 | 2.1182245 | -4.35 | 2.4806867 | LOC100631378 uncharacterized            | 100631378                                                          |
| 1564463_at   | 0.945 | 0.01865175 | 2.619642  | -4.35 | 3.1172561 | KLF13                                   | Kruppel like factor 13                                             |
| 1563397_at   | 0.945 | 0.0265928  | 2.416197  | -4.35 | 3.0016277 | LOC105374768 uncharacterized            | LOC105374768                                                       |
| 202333_s_at  | 0.945 | 0.04409623 | 2.1304645 | -4.35 | 2.0344536 | UBE2B                                   | ubiquitin conjugating enzyme E2 B                                  |
| 218707_at    | 0.945 | 0.03702804 | 2.2275963 | -4.35 | 2.9872769 | ZNF444                                  | zinc finger protein 444                                            |
| 242760_x_at  | 0.945 | 0.0187389  | 2.6173464 | -4.35 | 4.3544717 | PIGB                                    | phosphatidylinositol glycan anchor biosynthesis<br>class B         |
| 227156_at    | 0.945 | 0.04219368 | 2.157615  | -4.35 | 2.0675137 | CASK                                    | calcium/calmodulin dependent serine protein<br>kinase              |
| 211851_x_at  | 0.945 | 0.03853348 | 2.2082732 | -4.35 | 2.1396171 | BRCA1                                   | BRCA1, DNA repair associated                                       |
| 1554677_s_at | 0.945 | 0.04549717 | 2.1152751 | -4.35 | 2.2358093 | CMTM4                                   | CKLF like MARVEL transmembrane domain<br>containing 4              |
| 1553437_at   | 0.945 | 0.04891591 | 2.0750366 | -4.35 | 1.6950117 | KLHDC7A                                 | kelch domain containing 7A                                         |
| 244500_s_at  | 0.945 | 0.04557584 | 2.1144346 | -4.35 | 1.9246375 | EVI5L                                   | ecotropic viral integration site 5 like                            |
| 239890_s_at  | 0.945 | 0.02358785 | 2.4879513 | -4.35 | 2.1833969 | SERP2                                   | stress-associated endoplasmic reticulum protein<br>family member 2 |
| 203449_s_at  | 0.945 | 0.02619865 | 2.4120382 | -4.35 | 1.7867887 | TERF1                                   | telomeric repeat binding factor 1                                  |
| 242092_at    | 0.945 | 0.0277437  | 2.3955426 | -4.35 | 2.2728616 | EPB41L2                                 | erythrocyte membrane protein band 4.1 like 2                       |
| 1563259_at   | 0.945 | 0.03873938 | 2.205684  | -4.35 | 2.2893798 |                                         |                                                                    |
| 225265_at    | 0.945 | 0.04179007 | 2.1622849 | -4.35 | 2.5168903 | RBMS1                                   | RNA binding motif single stranded interacting<br>protein 1         |

|             |       |            |           |       |           |                            |                                                                                               |
|-------------|-------|------------|-----------|-------|-----------|----------------------------|-----------------------------------------------------------------------------------------------|
| 242759_at   | 0.945 | 0.01588973 | 2.6983036 | -4.35 | 3.8480967 |                            |                                                                                               |
| 242735_x_at | 0.945 | 0.03538716 | 2.2573102 | -4.35 | 2.2694345 | ELF2                       | E74 like ETS transcription factor 2                                                           |
| 234045_x_at | 0.945 | 0.02377962 | 2.4839824 | -4.35 | 2.6293364 | BHLHE23                    | basic helix-loop-helix family member e23                                                      |
| 1555078_at  | 0.945 | 0.04201099 | 2.1597237 | -4.35 | 3.0332951 | ZNF843                     | zinc finger protein 843                                                                       |
| 229228_at   | 0.945 | 0.02803046 | 2.3905211 | -4.35 | 2.6419016 | LOC401317///C<br>REB5      | uncharacterized LOC401317///cAMP responsive<br>element binding protein 5                      |
| 215601_at   | 0.945 | 0.01916046 | 2.6063843 | -4.35 | 5.5256131 |                            |                                                                                               |
| 1559151_at  | 0.945 | 0.02721098 | 2.4050013 | -4.35 | 3.4313673 |                            |                                                                                               |
| 228087_at   | 0.945 | 0.02399187 | 2.4796249 | -4.35 | 3.6234569 | CCDC126                    | coiled-coil domain containing 126                                                             |
| 214247_s_at | 0.945 | 0.0349856  | 2.2628587 | -4.35 | 3.1064649 | DKK3                       | dickkopf WNT signaling pathway inhibitor 3                                                    |
| 233984_at   | 0.945 | 0.0301215  | 2.3446609 | -4.35 | 2.893417  |                            |                                                                                               |
| 209672_s_at | 0.945 | 0.04302135 | 2.1481633 | -4.35 | 1.9522018 | MIOS                       | meiosis regulator for oocyte development                                                      |
| 1564749_at  | 0.945 | 0.02732705 | 2.4029256 | -4.35 | 1.5369815 | LOC100289045               | uncharacterized LOC100289045                                                                  |
| 217228_s_at | 0.945 | 0.04979831 | 2.0663178 | -4.35 | 2.180471  | ASB4                       | ankyrin repeat and SOCS box containing 4                                                      |
| 235559_at   | 0.945 | 0.03199027 | 2.3153883 | -4.35 | 2.7642765 | INMT-FAM188<br>B///FAM188B | INMT-FAM188B readthrough (NMD<br>candidate)///family with sequence similarity 188<br>member B |
| 227704_at   | 0.945 | 0.03518142 | 2.2601458 | -4.35 | 2.232176  | C19orf12                   | chromosome 19 open reading frame 12                                                           |
| 1553216_at  | 0.945 | 0.02053116 | 2.5722703 | -4.35 | 3.3785907 | ZNF41                      | zinc finger protein 41                                                                        |
| 1561217_at  | 0.945 | 0.0360831  | 2.2478296 | -4.35 | 2.519835  |                            |                                                                                               |

|              |       |            |           |       |           |              |                                                                     |
|--------------|-------|------------|-----------|-------|-----------|--------------|---------------------------------------------------------------------|
| 237626_at    | 0.945 | 0.01949567 | 2.597831  | -4.35 | 3.9288281 |              |                                                                     |
| 1558868_a_at | 0.945 | 0.03964772 | 2.1944094 | -4.35 | 2.3154282 | DSE          | dermatan sulfate epimerase                                          |
| 235877_at    | 0.945 | 0.03620654 | 2.2461656 | -4.35 | 3.0111131 |              |                                                                     |
| 224507_s_at  | 0.945 | 0.04069171 | 2.1752033 | -4.35 | 3.7099067 | MGC12916     | uncharacterized protein MGC12916                                    |
| 222034_at    | 0.945 | 0.04959024 | 2.0683612 | -4.35 | 1.1953863 | SNORD96A///S | small nucleolar RNA, C/D box 96A///small                            |
|              |       |            |           |       |           | NORD95///RA  | nucleolar RNA, C/D box 95///receptor for                            |
|              |       |            |           |       |           | CK1          | activated C kinase 1                                                |
| 1554722_at   | 0.945 | 0.02248038 | 2.5114855 | -4.35 | 2.1259853 | TRPM3        | transient receptor potential cation channel<br>subfamily M member 3 |
| 217056_at    | 0.945 | 0.04679169 | 2.1016085 | -4.35 | 1.157439  | YME1L1       | YME1 like 1 ATPase                                                  |
| 1568805_at   | 0.945 | 0.02869948 | 2.37899   | -4.35 | 2.9091493 | NCOA7        | nuclear receptor coactivator 7                                      |
| 1553918_at   | 0.945 | 0.02873228 | 2.3784312 | -4.35 | 1.8932154 | LINC00479    | long intergenic non-protein coding RNA 479                          |
| 214336_s_at  | 0.945 | 0.03250841 | 2.3075527 | -4.35 | 2.647477  | COPA         | coatamer protein complex subunit alpha                              |
| 237678_at    | 0.945 | 0.04002374 | 2.1898108 | -4.35 | 1.9705041 |              |                                                                     |
| 220151_at    | 0.945 | 0.04308379 | 2.147457  | -4.35 | 2.2588764 | C19orf73     | chromosome 19 open reading frame 73                                 |
| 1569274_at   | 0.945 | 0.04314147 | 2.1468053 | -4.35 | 1.99232   |              |                                                                     |
| 235205_at    | 0.945 | 0.04995964 | 2.0647386 | -4.35 | 1.6205826 | OXR1         | oxidation resistance 1                                              |
| 230394_at    | 0.945 | 0.03090226 | 2.3322318 | -4.35 | 2.790917  | TCP10L       | t-complex 10-like                                                   |
| 203243_s_at  | 0.945 | 0.0366712  | 2.2399479 | -4.35 | 3.2447048 | PDLIM5       | PDZ and LIM domain 5                                                |
| 210002_at    | 0.945 | 0.02907024 | 2.3727072 | -4.35 | 2.310585  | GATA6        | GATA binding protein 6                                              |
| 224815_at    | 0.945 | 0.02910415 | 2.3721363 | -4.35 | 1.288628  | COMM7        | COMM domain containing 7                                            |
| 1568666_at   | 0.945 | 0.04142235 | 2.1665753 | -4.35 | 2.4538788 | PLIN5        | perilipin 5                                                         |

|              |       |            |           |       |           |              |                                                                                                                                                                                                                                                                                                                                                                                                                                             |
|--------------|-------|------------|-----------|-------|-----------|--------------|---------------------------------------------------------------------------------------------------------------------------------------------------------------------------------------------------------------------------------------------------------------------------------------------------------------------------------------------------------------------------------------------------------------------------------------------|
| 222039_at    | 0.945 | 0.03292428 | 2.3013468 | -4.35 | 2.3679367 | KIF18B       | kinesin family member 18B                                                                                                                                                                                                                                                                                                                                                                                                                   |
| 211662_s_at  | 0.945 | 0.02829566 | 2.3859197 | -4.35 | 2.4794105 | VDAC2        | voltage dependent anion channel 2                                                                                                                                                                                                                                                                                                                                                                                                           |
| 243336_at    | 0.945 | 0.00881548 | 3.0438126 | -4.35 | 5.9187705 | LOC101928042 | uncharacterized<br>//LOC1019275 LOC101928042//dynamin-1-like<br>79                                                                                                                                                                                                                                                                                                                                                                          |
| 209312_x_at  | 0.945 | 0.03297654 | 2.300572  | -4.35 | 2.1495226 | LOC101060835 | HLA class II histocompatibility antigen, DQ beta<br>//LOC1009968 1 chain-like//HLA class II histocompatibility<br>09//HLA-DRB antigen, DRB1-10 beta chain-like//major<br>5//HLA-DRB4/histocompatibility complex, class II, DR beta<br>//HLA-DRB1// 5//major histocompatibility complex, class II,<br>HLA-DQB1 DR beta 4//major histocompatibility complex,<br>class II, DR beta 1//major histocompatibility<br>complex, class II, DQ beta 1 |
| 220680_at    | 0.945 | 0.040833   | 2.1800458 | -4.35 | 1.3762137 | RAVER2       | ribonucleoprotein, PTB binding 2                                                                                                                                                                                                                                                                                                                                                                                                            |
| 1554761_a_at | 0.945 | 0.02960062 | 2.3638486 | -4.35 | 2.3491868 | DNAAF5       | dynein axonemal assembly factor 5                                                                                                                                                                                                                                                                                                                                                                                                           |
| 226174_at    | 0.945 | 0.02536085 | 2.4523644 | -4.35 | 2.7488968 | USP42        | ubiquitin specific peptidase 42                                                                                                                                                                                                                                                                                                                                                                                                             |
| 211451_s_at  | 0.945 | 0.03416723 | 2.2743499 | -4.35 | 2.5481482 | KCNJ4        | potassium voltage-gated channel subfamily J<br>member 4                                                                                                                                                                                                                                                                                                                                                                                     |
| 231381_at    | 0.945 | 0.02049546 | 2.5731307 | -4.35 | 3.266501  | MIR4454//ESR | microRNA 4454//embryonic stem cell related<br>G (non-protein coding)                                                                                                                                                                                                                                                                                                                                                                        |
| 225905_s_at  | 0.945 | 0.04806034 | 2.0885402 | -4.35 | 1.8610885 | ST3GAL3      | ST3 beta-galactoside alpha-2,3-sialyltransferase<br>3                                                                                                                                                                                                                                                                                                                                                                                       |
| 219662_at    | 0.945 | 0.03751893 | 2.2287882 | -4.35 | 2.5113554 | C2orf49      | chromosome 2 open reading frame 49                                                                                                                                                                                                                                                                                                                                                                                                          |
| 210721_s_at  | 0.945 | 0.03434658 | 2.2718101 | -4.35 | 2.6999088 | PAK5         | p21 (RAC1) activated kinase 5                                                                                                                                                                                                                                                                                                                                                                                                               |

|              |       |            |           |       |           |           |                                                            |
|--------------|-------|------------|-----------|-------|-----------|-----------|------------------------------------------------------------|
| 241327_at    | 0.945 | 0.03965026 | 2.1943782 | -4.35 | 2.7240306 | LINC01339 | long intergenic non-protein coding RNA 1339                |
| 1552275_s_at | 0.945 | 0.04217403 | 2.1578414 | -4.35 | 3.4748819 | PXK       | PX domain containing serine/threonine kinase like          |
| 1569139_s_at | 0.945 | 0.02355266 | 2.4886827 | -4.35 | 1.9640484 | FAM53A    | family with sequence similarity 53 member A                |
| 231660_at    | 0.945 | 0.04222169 | 2.1572923 | -4.35 | 1.3003581 |           |                                                            |
| 226103_at    | 0.945 | 0.01742659 | 2.6736168 | -4.35 | 3.7333004 | NEXN      | nexilin F-actin binding protein                            |
| 240067_at    | 0.945 | 0.0337515  | 2.2892149 | -4.35 | 3.0378816 |           |                                                            |
| 204050_s_at  | 0.945 | 0.0174792  | 2.6721074 | -4.35 | 2.7677864 | CLTA      | clathrin light chain A                                     |
| 223386_at    | 0.945 | 0.04138443 | 2.173492  | -4.35 | 2.4023272 | FAM118B   | family with sequence similarity 118 member B               |
| 218998_at    | 0.945 | 0.03378645 | 2.2887084 | -4.35 | 2.6263695 | FAM206A   | family with sequence similarity 206 member A               |
| 205506_at    | 0.945 | 0.02191479 | 2.5399725 | -4.35 | 3.4830125 | VIL1      | villin 1                                                   |
| 231224_x_at  | 0.945 | 0.04859329 | 2.0831423 | -4.35 | 1.894464  | PRKAG2    | protein kinase AMP-activated non-catalytic subunit gamma 2 |
| 221785_at    | 0.945 | 0.04002482 | 2.1897977 | -4.35 | 2.5460384 | WIZ       | widely interspaced zinc finger motifs                      |
| 242595_at    | 0.945 | 0.04155362 | 2.1714971 | -4.35 | 2.5073351 | TSSK4     | testis specific serine kinase 4                            |
| 1557293_at   | 0.945 | 0.0372039  | 2.2329082 | -4.35 | 1.6303457 | LINC00969 | long intergenic non-protein coding RNA 969                 |
| 216662_at    | 0.945 | 0.04899007 | 2.0791579 | -4.36 | 1.746888  | MYO7B     | myosin VIIB                                                |
| 226383_at    | 0.945 | 0.04193205 | 2.1670617 | -4.36 | 2.2266414 | ARL14EP   | ADP ribosylation factor like GTPase 14 effector protein    |
| 218022_at    | 0.945 | 0.04222359 | 2.1636693 | -4.36 | 2.0486605 | VRK3      | vaccinia related kinase 3                                  |

|             |       |            |           |       |           |          |                                                                  |
|-------------|-------|------------|-----------|-------|-----------|----------|------------------------------------------------------------------|
| 228517_at   | 0.945 | 0.04224684 | 2.1633998 | -4.36 | 2.2997409 | MEAF6    | MYST/Esal associated factor 6                                    |
| 204409_s_at | 0.945 | 0.01817497 | 2.6323859 | -4.36 | 4.1148754 | EIF1AY   | eukaryotic translation initiation factor 1A, Y-linked            |
| 217448_s_at | 0.945 | 0.02457922 | 2.4677537 | -4.36 | 3.5909061 | TOX4     | TOX high mobility group box family member 4                      |
| 206611_at   | 0.945 | 0.02279218 | 2.5204839 | -4.36 | 3.3386556 | C2orf27A | chromosome 2 open reading frame 27A                              |
| 222127_s_at | 0.945 | 0.04269661 | 2.1582103 | -4.36 | 2.1418231 | EXOC1    | exocyst complex component 1                                      |
| 231321_s_at | 0.945 | 0.02475717 | 2.4642099 | -4.36 | 2.2222751 | ACER3    | alkaline ceramidase 3                                            |
| 210281_s_at | 0.945 | 0.03845354 | 2.2167492 | -4.36 | 2.0033983 | ZMYM2    | zinc finger MYM-type containing 2                                |
| 219846_at   | 0.945 | 0.0384658  | 2.2165931 | -4.36 | 2.6667744 | GON4L    | gon-4 like                                                       |
| 239748_x_at | 0.945 | 0.02191179 | 2.5400403 | -4.36 | 4.4391662 | OCIAD1   | OCIA domain containing 1                                         |
| 225612_s_at | 0.945 | 0.03518706 | 2.2687982 | -4.36 | 2.7588431 | B3GNT5   | UDP-GlcNAc:betaGal<br>beta-1,3-N-acetylglucosaminyltransferase 5 |
| 243259_at   | 0.945 | 0.02747861 | 2.4002278 | -4.36 | 2.7566243 | ATXN7    | ataxin 7                                                         |
| 224108_at   | 0.945 | 0.03599596 | 2.2490075 | -4.36 | 3.3559356 |          |                                                                  |
| 242054_s_at | 0.945 | 0.03143435 | 2.3343203 | -4.36 | 3.9678828 | SIX3     | SIX homeobox 3                                                   |
| 225809_at   | 0.945 | 0.0186673  | 2.6391396 | -4.36 | 3.4128069 | PARM1    | prostate androgen-regulated mucin-like protein 1                 |
| 203856_at   | 0.945 | 0.04699744 | 2.1049279 | -4.36 | 1.9331256 | VRK1     | vaccinia related kinase 1                                        |
| 1554241_at  | 0.945 | 0.0463075  | 2.1121878 | -4.36 | 2.5261263 | COCH     | cochlin                                                          |
| 227449_at   | 0.945 | 0.0441755  | 2.1352541 | -4.36 | 1.4806703 | EPHA4    | EPH receptor A4                                                  |
| 1553140_at  | 0.945 | 0.04706309 | 2.1042421 | -4.36 | 1.9575102 | PELO     | pelota homolog (Drosophila)                                      |
| 214231_s_at | 0.945 | 0.04640865 | 2.1111174 | -4.36 | 2.7702762 | VWA8     | von Willebrand factor A domain containing 8                      |

|             |       |            |           |       |           |          |                                                |
|-------------|-------|------------|-----------|-------|-----------|----------|------------------------------------------------|
| 216565_x_at | 0.945 | 0.04329045 | 2.1514339 | -4.36 | 2.1593526 |          |                                                |
| 206677_at   | 0.945 | 0.04646729 | 2.1104979 | -4.36 | 1.2103678 | KRT31    | keratin 31                                     |
| 236130_at   | 0.945 | 0.03558821 | 2.2632304 | -4.36 | 2.5879551 | SNORA37  | small nucleolar RNA, H/ACA box 37              |
| 237667_at   | 0.945 | 0.02525883 | 2.4543474 | -4.36 | 3.4264625 |          |                                                |
| 229166_s_at | 0.945 | 0.04666391 | 2.1084254 | -4.36 | 2.1600001 | GATAD2A  | GATA zinc finger domain containing 2A          |
| 1554711_at  | 0.945 | 0.02238212 | 2.5295017 | -4.36 | 2.7608163 | CALHM3   | calcium homeostasis modulator 3                |
| 220880_at   | 0.945 | 0.04211458 | 2.1649352 | -4.36 | 2.6987252 |          |                                                |
| 52731_at    | 0.945 | 0.03921876 | 2.2070898 | -4.36 | 2.9890385 | AMBRA1   | autophagy and beclin 1 regulator 1             |
| 207307_at   | 0.945 | 0.04762476 | 2.0984097 | -4.36 | 2.9044663 | HTR2C    | 5-hydroxytryptamine receptor 2C                |
| 216630_at   | 0.945 | 0.04764323 | 2.0982189 | -4.36 | 2.1318826 |          |                                                |
| 229009_at   | 0.945 | 0.04694573 | 2.1054687 | -4.36 | 1.9320041 | SIX5     | SIX homeobox 5                                 |
| 203979_at   | 0.945 | 0.03118673 | 2.3382126 | -4.36 | 2.260145  | CYP27A1  | cytochrome P450 family 27 subfamily A member 1 |
| 208247_at   | 0.945 | 0.04390501 | 2.1445091 | -4.36 | 1.9641367 | ERC2-IT1 | ERC2 intronic transcript 1                     |
| 214531_s_at | 0.945 | 0.04031725 | 2.1935203 | -4.36 | 2.2631345 | SNX1     | sorting nexin 1                                |
| 241178_at   | 0.945 | 0.04783965 | 2.0961946 | -4.36 | 4.5450333 |          |                                                |
| 206128_at   | 0.945 | 0.0042753  | 3.4593007 | -4.36 | 4.4345546 | ADRA2C   | adrenoceptor alpha 2C                          |
| 244548_at   | 0.945 | 0.0395672  | 2.2027484 | -4.36 | 2.0879966 |          |                                                |
| 231948_s_at | 0.945 | 0.03963953 | 2.2018515 | -4.36 | 2.1061004 | UBE2F    | ubiquitin conjugating enzyme E2 F (putative)   |
| 225856_at   | 0.945 | 0.03638935 | 2.2522818 | -4.36 | 3.1218982 | CLOCK    | clock circadian regulator                      |
| 244394_at   | 0.945 | 0.02814762 | 2.4009103 | -4.36 | 1.5822753 |          |                                                |
| 217688_at   | 0.945 | 0.03995059 | 2.1980116 | -4.36 | 2.3657316 |          |                                                |
| 241874_at   | 0.945 | 0.02873056 | 2.3784604 | -4.36 | 2.7381389 | IGIP     | IgA inducing protein                           |

|             |       |            |           |       |           |              |                                                                                |
|-------------|-------|------------|-----------|-------|-----------|--------------|--------------------------------------------------------------------------------|
| 213410_at   | 0.945 | 0.03677034 | 2.2471527 | -4.36 | 2.2296143 | EDRF1        | erythroid differentiation regulatory factor 1                                  |
| 1557052_at  | 0.945 | 0.04465859 | 2.1361367 | -4.36 | 2.6191401 |              |                                                                                |
| 214991_s_at | 0.945 | 0.03191861 | 2.3267902 | -4.36 | 2.5752299 | PIGO         | phosphatidylinositol glycan anchor biosynthesis class O                        |
| 1559891_at  | 0.945 | 0.03194393 | 2.3263994 | -4.36 | 2.7218281 | HMGA2        | high mobility group AT-hook 2                                                  |
| 214094_at   | 0.945 | 0.0486694  | 2.0877245 | -4.36 | 2.9575488 | FUBP1        | far upstream element binding protein 1                                         |
| 218642_s_at | 0.945 | 0.04028054 | 2.1939683 | -4.36 | 2.2958318 | CHCHD7       | coiled-coil-helix-coiled-coil-helix domain containing 7                        |
| 234821_at   | 0.945 | 0.04480458 | 2.1345296 | -4.36 | 2.8350985 | LOC101929645 | uncharacterized LOC101929645                                                   |
| 1565733_at  | 0.945 | 0.03782343 | 2.2248361 | -4.36 | 1.9539649 |              |                                                                                |
| 203216_s_at | 0.945 | 0.02861614 | 2.3927333 | -4.36 | 2.746608  | MYO6         | myosin VI                                                                      |
| 205008_s_at | 0.945 | 0.04044723 | 2.1919371 | -4.36 | 1.9461705 | CIB2         | calcium and integrin binding family member 2                                   |
| 241042_at   | 0.945 | 0.03531984 | 2.2669489 | -4.36 | 2.0124793 |              |                                                                                |
| 202325_s_at | 0.945 | 0.03801088 | 2.2224174 | -4.36 | 1.6458703 | ATP5J        | ATP synthase, H <sup>+</sup> transporting, mitochondrial Fo complex subunit F6 |
| 232138_at   | 0.945 | 0.04516549 | 2.1305767 | -4.37 | 2.115603  | MBNL2        | muscleblind like splicing regulator 2                                          |
| 229667_s_at | 0.945 | 0.03735467 | 2.2393802 | -4.37 | 1.9745486 | HOXB8        | homeobox B8                                                                    |
| 240815_at   | 0.945 | 0.02672957 | 2.4264621 | -4.37 | 3.0731043 |              |                                                                                |
| 1553929_at  | 0.945 | 0.02893622 | 2.3872189 | -4.37 | 2.7851517 | ACER1        | alkaline ceramidase 1                                                          |
| 242011_at   | 0.945 | 0.02901522 | 2.3858667 | -4.37 | 2.9475804 |              |                                                                                |
| 233355_at   | 0.945 | 0.04181496 | 2.1755528 | -4.37 | 2.6955946 | LINC00176    | long intergenic non-protein coding RNA 176                                     |
| 216204_at   | 0.945 | 0.02959203 | 2.3639909 | -4.37 | 2.6153918 | COMT         | catechol-O-methyltransferase                                                   |



|              |       |            |           |       |           |                     |                                                                                       |
|--------------|-------|------------|-----------|-------|-----------|---------------------|---------------------------------------------------------------------------------------|
| 230440_at    | 0.945 | 0.04395779 | 2.1439185 | -4.37 | 2.2711252 | ZNF469              | zinc finger protein 469                                                               |
| 214188_at    | 0.945 | 0.01790122 | 2.6601562 | -4.37 | 3.6589367 |                     |                                                                                       |
| 244823_at    | 0.945 | 0.0131314  | 2.8146706 | -4.37 | 3.7232624 | LOC100129034        | uncharacterized LOC100129034                                                          |
| 226442_at    | 0.945 | 0.0035289  | 3.6246792 | -4.37 | 4.942281  | ABTB1               | ankyrin repeat and BTB domain containing 1                                            |
| 211993_at    | 0.945 | 0.04414904 | 2.1417837 | -4.37 | 2.6707542 | WNK1                | WNK lysine deficient protein kinase 1                                                 |
| 222510_s_at  | 0.945 | 0.04581644 | 2.1235186 | -4.37 | 1.8500891 | MKRN2               | makorin ring finger protein 2                                                         |
| 232672_x_at  | 0.945 | 0.04130615 | 2.1815901 | -4.37 | 2.2174133 | CTXN2///SLC2<br>4A5 | cortexin 2///solute carrier family 24 member 5                                        |
| 1559883_s_at | 0.945 | 0.0379304  | 2.2318309 | -4.37 | 2.9580531 | SAMHD1              | SAM and HD domain containing<br>deoxynucleoside triphosphate<br>triphosphohydrolase 1 |
| 1566585_at   | 0.945 | 0.02054458 | 2.590957  | -4.37 | 2.8958761 |                     |                                                                                       |
| 218551_at    | 0.945 | 0.01807511 | 2.6553106 | -4.37 | 3.04569   | MIIP                | migration and invasion inhibitory protein                                             |
| 220850_at    | 0.945 | 0.04931314 | 2.0812421 | -4.37 | 2.8273302 | MORC1               | MORC family CW-type zinc finger 1                                                     |
| 1560396_at   | 0.945 | 0.02740783 | 2.4140856 | -4.37 | 3.7874066 | KLHL6               | kelch like family member 6                                                            |
| 226953_at    | 0.945 | 0.0382297  | 2.2279476 | -4.37 | 1.5118944 | CADM3///ACK<br>R1   | cell adhesion molecule 3///atypical chemokine<br>receptor 1 (Duffy blood group)       |
| 221845_s_at  | 0.945 | 0.03829689 | 2.2270798 | -4.37 | 2.8098063 | CLPB                | ClpB homolog, mitochondrial AAA ATPase<br>chaperonin                                  |
| 239154_at    | 0.945 | 0.04268494 | 2.1653834 | -4.37 | 1.709534  |                     |                                                                                       |
| 218140_x_at  | 0.945 | 0.02457135 | 2.4830637 | -4.37 | 3.5660059 | SRPRB               | SRP receptor beta subunit                                                             |
| 244288_s_at  | 0.945 | 0.04974271 | 2.0769583 | -4.37 | 2.1044992 | SIX3                | SIX homeobox 3                                                                        |

|              |       |            |           |       |           |          |                                                    |
|--------------|-------|------------|-----------|-------|-----------|----------|----------------------------------------------------|
| 217934_x_at  | 0.945 | 0.02466689 | 2.4811279 | -4.37 | 3.4166146 | STUB1    | STIP1 homology and U-box containing protein 1      |
| 238698_at    | 0.945 | 0.0420864  | 2.1723594 | -4.37 | 2.3404548 | CASK     | calcium/calmodulin dependent serine protein kinase |
| 216964_at    | 0.945 | 0.02471548 | 2.480146  | -4.37 | 1.7957715 | USP22    | ubiquitin specific peptidase 22                    |
| 206932_at    | 0.945 | 0.03697416 | 2.2444288 | -4.37 | 3.1256282 | CH25H    | cholesterol 25-hydroxylase                         |
| 214900_at    | 0.945 | 0.03889592 | 2.2194033 | -4.37 | 1.8969781 | ZKSCAN1  | zinc finger with KRAB and SCAN domains 1           |
| 1552662_a_at | 0.945 | 0.03500216 | 2.2811919 | -4.37 | 2.1039363 | PCDHGB7  | protocadherin gamma subfamily B, 7                 |
| 206832_s_at  | 0.945 | 0.01581629 | 2.7470648 | -4.37 | 3.0707603 | SEMA3F   | semaphorin 3F                                      |
| 226229_s_at  | 0.945 | 0.04571267 | 2.1246376 | -4.37 | 3.0213668 | SSU72    | SSU72 homolog, RNA polymerase II CTD phosphatase   |
| 1562957_at   | 0.945 | 0.0342614  | 2.2917957 | -4.37 | 3.0524101 |          |                                                    |
| 238395_at    | 0.945 | 0.0474667  | 2.1060232 | -4.37 | 2.3932437 |          |                                                    |
| 235419_at    | 0.945 | 0.04747696 | 2.1059161 | -4.37 | 2.3232768 |          |                                                    |
| 244673_at    | 0.945 | 0.0343685  | 2.2902495 | -4.37 | 2.44026   | KIAA1841 | KIAA1841                                           |
| 240062_at    | 0.945 | 0.04289637 | 2.1629404 | -4.37 | 2.2443211 | FAM3C    | family with sequence similarity 3 member C         |
| 243580_at    | 0.945 | 0.03079004 | 2.3563631 | -4.37 | 2.827943  | GNA14    | G protein subunit alpha 14                         |
| 1559633_a_at | 0.945 | 0.03445184 | 2.2890494 | -4.37 | 3.131888  | CHRM3    | cholinergic receptor muscarinic 3                  |
| 243031_at    | 0.945 | 0.03552633 | 2.2738135 | -4.37 | 1.9263783 |          |                                                    |
| 211521_s_at  | 0.945 | 0.02544418 | 2.465637  | -4.37 | 3.4363041 | CYTH4    | cytohesin 4                                        |
| 211474_s_at  | 0.945 | 0.0477233  | 2.1033523 | -4.37 | 1.4244836 | SERPINB6 | serpin family B member 6                           |
| 225734_at    | 0.945 | 0.0477526  | 2.1030481 | -4.37 | 1.9859369 | FBXO22   | F-box protein 22                                   |
| 225335_at    | 0.945 | 0.03099091 | 2.3531249 | -4.37 | 1.8619834 | ZNF496   | zinc finger protein 496                            |

|              |       |            |           |       |           |         |                                                                      |
|--------------|-------|------------|-----------|-------|-----------|---------|----------------------------------------------------------------------|
| 221664_s_at  | 0.945 | 0.03469121 | 2.2856176 | -4.37 | 2.969847  | F11R    | F11 receptor                                                         |
| 220223_at    | 0.945 | 0.04423005 | 2.1477781 | -4.37 | 2.5160364 | ATAD5   | ATPase family, AAA domain containing 5                               |
| 1558722_at   | 0.945 | 0.03990407 | 2.2067254 | -4.37 | 2.6850541 | ZNF252P | zinc finger protein 252, pseudogene                                  |
| 224165_s_at  | 0.945 | 0.04816788 | 2.0987551 | -4.37 | 2.3391264 | IQCH    | IQ motif containing H                                                |
| 244074_at    | 0.945 | 0.0435761  | 2.15516   | -4.37 | 1.8866005 |         |                                                                      |
| 233456_at    | 0.945 | 0.02712589 | 2.4336008 | -4.37 | 2.8108378 |         |                                                                      |
| 211029_x_at  | 0.945 | 0.02911901 | 2.3840956 | -4.37 | 3.1465028 | FGF18   | fibroblast growth factor 18                                          |
| 241777_x_at  | 0.945 | 0.01794187 | 2.6825658 | -4.37 | 3.2240998 |         |                                                                      |
| 235493_at    | 0.945 | 0.03145448 | 2.3457259 | -4.37 | 2.2468493 |         |                                                                      |
| 228542_at    | 0.945 | 0.02726907 | 2.4309606 | -4.37 | 3.2246238 | MRS2    | MRS2, magnesium transporter                                          |
| 228448_at    | 0.945 | 0.04848511 | 2.0954982 | -4.37 | 2.9212864 | MAP6    | microtubule associated protein 6                                     |
| 232873_at    | 0.945 | 0.04687693 | 2.1122117 | -4.37 | 1.9775376 | ZNF33A  | zinc finger protein 33A                                              |
| 217582_at    | 0.945 | 0.04474175 | 2.1420708 | -4.37 | 2.6089525 |         |                                                                      |
| 1554582_a_at | 0.945 | 0.04403501 | 2.1499694 | -4.37 | 2.5152881 | ETFBKMT | electron transfer flavoprotein beta subunit lysine methyltransferase |
| 220919_s_at  | 0.945 | 0.02503024 | 2.4588183 | -4.37 | 3.3467228 | CFAP43  | cilia and flagella associated protein 43                             |
| 237269_at    | 0.945 | 0.04750824 | 2.1055899 | -4.38 | 2.0192167 |         |                                                                      |
| 1569886_a_at | 0.945 | 0.04448246 | 2.1449554 | -4.38 | 2.7480086 | GLB1L3  | galactosidase beta 1 like 3                                          |
| 203805_s_at  | 0.945 | 0.04932213 | 2.0869958 | -4.38 | 1.5018977 | FANCA   | Fanconi anemia complementation group A                               |
| 1561589_a_at | 0.945 | 0.0279807  | 2.4180301 | -4.38 | 1.9916975 | NBEAL1  | neurobeachin like 1                                                  |
| 242439_s_at  | 0.945 | 0.03617421 | 2.2648317 | -4.38 | 3.4784724 | ASXL1   | additional sex combs like 1, transcriptional regulator               |

|             |       |            |           |       |           |                                                                                                                                                                                               |                                                                               |
|-------------|-------|------------|-----------|-------|-----------|-----------------------------------------------------------------------------------------------------------------------------------------------------------------------------------------------|-------------------------------------------------------------------------------|
| 214199_at   | 0.945 | 0.04962485 | 2.0839528 | -4.38 | 2.4517815 | SFTPD                                                                                                                                                                                         | surfactant protein D                                                          |
| 204597_x_at | 0.945 | 0.03627389 | 2.2634629 | -4.38 | 3.5530544 | STC1                                                                                                                                                                                          | stanniocalcin 1                                                               |
| 1560025_at  | 0.945 | 0.03630966 | 2.2629726 | -4.38 | 1.7850716 |                                                                                                                                                                                               |                                                                               |
| 1561014_at  | 0.945 | 0.03951354 | 2.2116012 | -4.38 | 1.8988054 |                                                                                                                                                                                               |                                                                               |
| 1557374_at  | 0.945 | 0.0498342  | 2.0818581 | -4.38 | 2.2815897 | ABCC9                                                                                                                                                                                         | ATP binding cassette subfamily C member 9                                     |
| 208523_x_at | 0.945 | 0.04180804 | 2.1835626 | -4.38 | 2.30974   | HIST1H2BC/// histone cluster 1, H2bc///histone cluster 1, HIST1H2BI///H H2bi///histone cluster 1, H2be///histone cluster 1, IST1H2BE///HI H2bf///histone cluster 1, H2bg ST1H2BF///HIS T1H2BG |                                                                               |
| 1569840_at  | 0.945 | 0.0329509  | 2.3225181 | -4.38 | 3.1889127 | LOC101927798                                                                                                                                                                                  | uncharacterized LOC101927798                                                  |
| 231431_s_at | 0.945 | 0.02740437 | 2.4284778 | -4.38 | 3.4025433 | INAFM2                                                                                                                                                                                        | InaF motif containing 2                                                       |
| 223465_at   | 0.945 | 0.0400453  | 2.2049729 | -4.38 | 1.4703469 | COL4A3BP                                                                                                                                                                                      | collagen type IV alpha 3 binding protein                                      |
| 231875_at   | 0.945 | 0.03093114 | 2.3540865 | -4.38 | 2.0305308 | KIF21A                                                                                                                                                                                        | kinesin family member 21A                                                     |
| 226388_at   | 0.945 | 0.04669565 | 2.1208088 | -4.38 | 2.6344285 | TCEA3                                                                                                                                                                                         | transcription elongation factor A3                                            |
| 209615_s_at | 0.945 | 0.03706386 | 2.2527373 | -4.38 | 2.1446778 | PAK1                                                                                                                                                                                          | p21 (RAC1) activated kinase 1                                                 |
| 214657_s_at | 0.945 | 0.02769672 | 2.4231524 | -4.38 | 1.9860238 | MIR612///NEA T1                                                                                                                                                                               | microRNA 612///nuclear paraspeckle assembly transcript 1 (non-protein coding) |
| 228879_at   | 0.945 | 0.03824803 | 2.2370481 | -4.38 | 2.4347251 | SNORD104///S NORA50C                                                                                                                                                                          | small nucleolar RNA, C/D box 104///small nucleolar RNA, H/ACA box 50C         |
| 220384_at   | 0.945 | 0.03723984 | 2.2503767 | -4.38 | 2.5715209 | NME8                                                                                                                                                                                          | NME/NM23 family member 8                                                      |
| 222293_at   | 0.945 | 0.02912826 | 2.3978181 | -4.38 | 2.6127843 | CADM4                                                                                                                                                                                         | cell adhesion molecule 4                                                      |

|             |       |            |           |       |           |                       |                                                                            |
|-------------|-------|------------|-----------|-------|-----------|-----------------------|----------------------------------------------------------------------------|
| 232180_at   | 0.945 | 0.02787271 | 2.4199722 | -4.38 | 2.2001314 | UGP2                  | UDP-glucose pyrophosphorylase 2                                            |
| 222079_at   | 0.945 | 0.03126003 | 2.348817  | -4.38 | 3.7228644 | ERG                   | ERG, ETS transcription factor                                              |
| 237422_at   | 0.945 | 0.03132083 | 2.3478487 | -4.38 | 2.2476575 |                       |                                                                            |
| 211560_s_at | 0.945 | 0.04277795 | 2.1721316 | -4.38 | 2.9303393 | ALAS2                 | 5'-aminolevulinate synthase 2                                              |
| 206148_at   | 0.945 | 0.04080391 | 2.1956551 | -4.38 | 1.6928055 | IL3RA                 | interleukin 3 receptor subunit alpha                                       |
| 1561038_at  | 0.945 | 0.04740999 | 2.1132363 | -4.38 | 2.3287237 | ZNF81                 | zinc finger protein 81                                                     |
| 201624_at   | 0.945 | 0.03155374 | 2.3441549 | -4.38 | 2.597147  | DARS                  | aspartyl-tRNA synthetase                                                   |
| 46167_at    | 0.945 | 0.03168798 | 2.3420376 | -4.38 | 1.6456777 | MROH7-TTC4/<br>//TTC4 | MROH7-TTC4 readthrough (NMD candidate)///tetratricopeptide repeat domain 4 |
| 202157_s_at | 0.945 | 0.02463493 | 2.4991429 | -4.38 | 2.8210032 | CELF2                 | CUGBP, Elav-like family member 2                                           |
| 234128_at   | 0.945 | 0.03486283 | 2.2831704 | -4.38 | 3.0229134 |                       |                                                                            |
| 208392_x_at | 0.945 | 0.04148092 | 2.1874726 | -4.38 | 2.4638288 | SP110                 | SP110 nuclear body protein                                                 |
| 224419_x_at | 0.945 | 0.04349522 | 2.1638295 | -4.38 | 2.3575444 | PMCHL1                | pro-melanin concentrating hormone like 1 (pseudogene)                      |
| 208659_at   | 0.945 | 0.03449474 | 2.2995829 | -4.38 | 3.5076019 | CLIC1                 | chloride intracellular channel 1                                           |
| 243998_at   | 0.945 | 0.04443929 | 2.1454371 | -4.38 | 3.1579542 | KRT222                | keratin 222                                                                |
| 237010_at   | 0.945 | 0.03953218 | 2.2205328 | -4.38 | 1.7737047 |                       |                                                                            |
| 235096_at   | 0.945 | 0.02043103 | 2.6158633 | -4.38 | 3.817633  | LEO1                  | LEO1 homolog, Paf1/RNA polymerase II complex component                     |
| 244687_at   | 0.945 | 0.04459022 | 2.1437548 | -4.38 | 2.3038765 | DBT                   | dihydroipoamide branched chain transacylase E2                             |
| 207841_at   | 0.945 | 0.02963705 | 2.3632455 | -4.38 | 3.3019288 | SPIN2A                | spindlin family member 2A                                                  |
| 213783_at   | 0.945 | 0.02530161 | 2.4855777 | -4.38 | 3.4573741 | MFNG                  | MFNG O-fucosylpeptide 3-beta-N-acetylglucosaminyltransferase               |

|             |       |            |           |       |           |                            |                                                                                  |
|-------------|-------|------------|-----------|-------|-----------|----------------------------|----------------------------------------------------------------------------------|
| 235794_at   | 0.945 | 0.0400677  | 2.2137911 | -4.38 | 2.8163936 | MOBP                       | myelin-associated oligodendrocyte basic protein                                  |
| 218785_s_at | 0.945 | 0.03901567 | 2.2271154 | -4.38 | 2.2358391 | IFT22                      | intraflagellar transport 22                                                      |
| 1562863_at  | 0.945 | 0.03286753 | 2.3237849 | -4.38 | 2.3953663 |                            |                                                                                  |
| 220817_at   | 0.945 | 0.04447803 | 2.1526543 | -4.38 | 2.4645862 | TRPC4                      | transient receptor potential cation channel subfamily C member 4                 |
| 1568848_at  | 0.945 | 0.04457996 | 2.1515082 | -4.38 | 2.6644738 | LOC101927820               | uncharacterized LOC101927820                                                     |
| 206965_at   | 0.945 | 0.04488892 | 2.1480488 | -4.39 | 2.3734667 | KLF12                      | Kruppel like factor 12                                                           |
| 205633_s_at | 0.945 | 0.0395982  | 2.2196971 | -4.39 | 2.6595992 | ALAS1                      | 5'-aminolevulinate synthase 1                                                    |
| 241880_x_at | 0.945 | 0.04512761 | 2.145391  | -4.39 | 2.3881131 |                            |                                                                                  |
| 232567_at   | 0.945 | 0.0359846  | 2.2783382 | -4.39 | 2.8653316 | PRR5-ARHGA PRR5-ARHGAP8    | readthrough///Rho GTPase P8///ARHGAP8 activating protein 8                       |
| 244588_at   | 0.945 | 0.04529381 | 2.143548  | -4.39 | 2.3715881 |                            |                                                                                  |
| 206467_x_at | 0.945 | 0.03157055 | 2.3571874 | -4.39 | 3.1024897 | RTEL1-TNFRS RTEL1-TNFRSF6B | readthrough (NMD F6B///TNFRSF candidate)///TNF receptor superfamily member 6B 6b |
| 211285_s_at | 0.945 | 0.04915065 | 2.0952074 | -4.39 | 2.7068406 | UBE3A                      | ubiquitin protein ligase E3A                                                     |
| 201585_s_at | 0.945 | 0.01573878 | 2.7495734 | -4.39 | 3.8791603 | SFPQ                       | splicing factor proline and glutamine rich                                       |
| 212300_at   | 0.945 | 0.04941915 | 2.0924781 | -4.39 | 2.2083355 | TXLNA                      | taxilin alpha                                                                    |
| 230274_s_at | 0.945 | 0.04585184 | 2.1374045 | -4.39 | 2.5916597 |                            |                                                                                  |
| 223938_at   | 0.945 | 0.04049868 | 2.2084254 | -4.39 | 2.7229241 | TEX35                      | testis expressed 35                                                              |
| 233490_at   | 0.945 | 0.03665233 | 2.2690808 | -4.39 | 4.6027467 | DCTN4                      | dynactin subunit 4                                                               |
| 1570359_at  | 0.945 | 0.03208603 | 2.3489908 | -4.39 | 3.1669907 | DDX3Y                      | DEAD-box helicase 3, Y-linked                                                    |

|              |       |            |           |       |           |          |                                                              |
|--------------|-------|------------|-----------|-------|-----------|----------|--------------------------------------------------------------|
| 211631_x_at  | 0.945 | 0.04930459 | 2.0871727 | -4.39 | 3.0560491 | B4GALT1  | beta-1,4-galactosyltransferase 1                             |
| 222757_s_at  | 0.945 | 0.0460223  | 2.1355414 | -4.39 | 2.4914832 | ZAK      | sterile alpha motif and leucine zipper containing kinase AZK |
| 211660_at    | 0.945 | 0.00423693 | 3.5988428 | -4.39 | 4.9202073 | POU2F2   | POU class 2 homeobox 2                                       |
| 207528_s_at  | 0.945 | 0.02933432 | 2.3804397 | -4.39 | 2.9801833 | SLC7A11  | solute carrier family 7 member 11                            |
| 214259_s_at  | 0.945 | 0.0498045  | 2.088584  | -4.39 | 2.0524527 | AKR7A2   | aldo-keto reductase family 7 member A2                       |
| 221353_at    | 0.945 | 0.02689286 | 2.4379259 | -4.39 | 2.7498502 | OR3A1    | olfactory receptor family 3 subfamily A member 1             |
| 243424_at    | 0.945 | 0.04621492 | 2.1334436 | -4.39 | 2.2987114 |          |                                                              |
| 235512_at    | 0.945 | 0.02223988 | 2.5721552 | -4.39 | 3.4195817 | CDKL1    | cyclin dependent kinase like 1                               |
| 218602_s_at  | 0.945 | 0.04101473 | 2.2020692 | -4.39 | 2.9729879 | HAUS6    | HAUS augmin like complex subunit 6                           |
| 221735_at    | 0.945 | 0.03729171 | 2.2603621 | -4.39 | 3.3305916 | WDR48    | WD repeat domain 48                                          |
| 1570225_at   | 0.945 | 0.04670477 | 2.1281445 | -4.39 | 2.5603668 | TMEM150B | transmembrane protein 150B                                   |
| 213648_at    | 0.945 | 0.04467059 | 2.1504912 | -4.39 | 2.2310794 | EXOSC7   | exosome component 7                                          |
| 227415_at    | 0.945 | 0.04244036 | 2.184884  | -4.39 | 2.2339908 | DGKH     | diacylglycerol kinase eta                                    |
| 213639_s_at  | 0.945 | 0.03742437 | 2.2585705 | -4.39 | 3.0291161 | ZNF500   | zinc finger protein 500                                      |
| 231804_at    | 0.945 | 0.03805116 | 2.2396252 | -4.39 | 1.7435685 | RXFP1    | relaxin/insulin like family peptide receptor 1               |
| 1554855_at   | 0.945 | 0.02273521 | 2.5607845 | -4.39 | 3.1112796 | PARK2    | parkin RBR E3 ubiquitin protein ligase                       |
| 1562695_at   | 0.945 | 0.02079767 | 2.565891  | -4.39 | 3.2873931 | FOXN4    | forkhead box N4                                              |
| 231090_s_at  | 0.945 | 0.03771866 | 2.2546169 | -4.39 | 3.5185494 | ARID2    | AT-rich interaction domain 2                                 |
| 1558295_a_at | 0.945 | 0.04715848 | 2.1232812 | -4.39 | 2.5055779 | PPFIA2   | PTPRF interacting protein alpha 2                            |
| 233722_at    | 0.945 | 0.03777628 | 2.2538462 | -4.39 | 1.5711356 |          |                                                              |

|              |       |            |           |       |           |            |                                               |
|--------------|-------|------------|-----------|-------|-----------|------------|-----------------------------------------------|
| 212726_at    | 0.945 | 0.01401869 | 2.8396256 | -4.39 | 2.7501596 | PHF2       | PHD finger protein 2                          |
| 1556586_x_at | 0.945 | 0.04179219 | 2.1926306 | -4.39 | 2.6407964 |            |                                               |
| 213413_at    | 0.945 | 0.03189711 | 2.3519803 | -4.39 | 2.4899785 | STON1      | stonin 1                                      |
| 213354_s_at  | 0.945 | 0.04730442 | 2.121726  | -4.39 | 2.7035    | NR2F6      | nuclear receptor subfamily 2 group F member 6 |
| 230477_at    | 0.945 | 0.03194348 | 2.351245  | -4.39 | 2.9307854 | PARD6G-AS1 | PARD6G antisense RNA 1                        |
| 1553272_at   | 0.945 | 0.03196697 | 2.3508729 | -4.39 | 4.134192  | SLC36A1    | solute carrier family 36 member 1             |
| 226109_at    | 0.945 | 0.03797585 | 2.2511852 | -4.39 | 2.2788175 | C21orf91   | chromosome 21 open reading frame 91           |
| 213519_s_at  | 0.945 | 0.02491396 | 2.4934233 | -4.39 | 3.56132   | LAMA2      | laminin subunit alpha 2                       |
| 242598_at    | 0.945 | 0.04199921 | 2.1901444 | -4.39 | 2.808375  |            |                                               |
| 222513_s_at  | 0.945 | 0.03559099 | 2.2838703 | -4.39 | 2.1506987 | SORBS1     | sorbin and SH3 domain containing 1            |
| 233522_at    | 0.945 | 0.03349072 | 2.3272663 | -4.39 | 1.7629631 | MEF2C-AS1  | MEF2C antisense RNA 1                         |
| 210369_at    | 0.945 | 0.0111279  | 3.0013849 | -4.39 | 5.0495648 | SWAP70     | SWAP switching B-cell complex 70kDa subunit   |
| 207567_at    | 0.945 | 0.04759205 | 2.1186733 | -4.39 | 2.4873289 | SLC13A2    | solute carrier family 13 member 2             |
| 229225_at    | 0.945 | 0.04778571 | 2.1166275 | -4.39 | 2.4060892 | NRP2       | neuropilin 2                                  |
| 210479_s_at  | 0.945 | 0.03838997 | 2.2457044 | -4.39 | 2.9580352 | RORA       | RAR related orphan receptor A                 |
| 232579_at    | 0.945 | 0.02838998 | 2.4107333 | -4.39 | 2.9526133 | JHDM1D-AS1 | JHDM1D antisense RNA 1 (head to head)         |
| 200966_x_at  | 0.945 | 0.04383438 | 2.1685845 | -4.39 | 3.0373821 | ALDOA      | aldolase, fructose-bisphosphate A             |
| 236447_at    | 0.945 | 0.04388548 | 2.1679962 | -4.39 | 2.9157193 | GIGYF1     | GRB10 interacting GYF protein 1               |
| 222499_at    | 0.945 | 0.03627084 | 2.2743505 | -4.39 | 2.7566533 | MRPS16     | mitochondrial ribosomal protein S16           |
| 204903_x_at  | 0.945 | 0.03634022 | 2.2733883 | -4.39 | 2.7943215 | ATG4B      | autophagy related 4B cysteine peptidase       |



|              |       |            |           |       |           |          |                                                                   |
|--------------|-------|------------|-----------|-------|-----------|----------|-------------------------------------------------------------------|
| 244884_at    | 0.945 | 0.03420592 | 2.3165312 | -4.39 | 2.1890749 |          |                                                                   |
| 207544_s_at  | 0.945 | 0.02225833 | 2.5717273 | -4.39 | 4.4424914 | ADH6     | alcohol dehydrogenase 6 (class V)                                 |
| 227514_at    | 0.945 | 0.03911674 | 2.2362169 | -4.39 | 2.5646366 | ITPRIPL2 | inositol 1,4,5-trisphosphate receptor interacting protein like 2  |
| 1560917_at   | 0.945 | 0.048757   | 2.1064787 | -4.39 | 1.8469106 |          |                                                                   |
| 230542_at    | 0.945 | 0.04334857 | 2.1742102 | -4.39 | 2.389391  | ZNF597   | zinc finger protein 597                                           |
| 219059_s_at  | 0.945 | 0.04892175 | 2.1047756 | -4.39 | 2.6622099 | LYVE1    | lymphatic vessel endothelial hyaluronan receptor 1                |
| 221987_s_at  | 0.945 | 0.0347712  | 2.3081941 | -4.4  | 2.8164165 | TSR1     | TSR1, ribosome maturation factor                                  |
| 208730_x_at  | 0.945 | 0.0470391  | 2.1245568 | -4.4  | 2.4305938 | RAB2A    | RAB2A, member RAS oncogene family                                 |
| 1558044_s_at | 0.945 | 0.03498751 | 2.3050373 | -4.4  | 2.8010306 | EXOSC6   | exosome component 6                                               |
| 210667_s_at  | 0.945 | 0.04042766 | 2.209306  | -4.4  | 2.7728908 | C21orf33 | chromosome 21 open reading frame 33                               |
| 235208_at    | 0.945 | 0.02295186 | 2.5558858 | -4.4  | 3.3457561 | CCDC112  | coiled-coil domain containing 112                                 |
| 216602_s_at  | 0.945 | 0.04953266 | 2.0985049 | -4.4  | 2.2890189 | FARSA    | phenylalanyl-tRNA synthetase alpha subunit                        |
| 234984_at    | 0.945 | 0.02653474 | 2.4613612 | -4.4  | 2.8568504 | NEDD1    | neural precursor cell expressed, developmentally down-regulated 1 |
| 221561_at    | 0.945 | 0.040059   | 2.2241561 | -4.4  | 2.7645278 | SOAT1    | sterol O-acyltransferase 1                                        |
| 1556017_at   | 0.945 | 0.04049503 | 2.2186635 | -4.4  | 1.8279982 | NBEAL2   | neurobeachin like 2                                               |
| 1566768_at   | 0.945 | 0.02506152 | 2.5103835 | -4.4  | 3.7706657 |          |                                                                   |
| 224990_at    | 0.945 | 0.03435723 | 2.314287  | -4.4  | 2.1232649 | SMIM14   | small integral membrane protein 14                                |
| 1554534_at   | 0.945 | 0.04059768 | 2.2173783 | -4.4  | 3.403483  | DPYD     | dihydropyrimidine dehydrogenase                                   |
| 225601_at    | 0.945 | 0.03026741 | 2.3784834 | -4.4  | 3.5408248 | HMGB3    | high mobility group box 3                                         |

|              |       |            |           |      |           |          |                                                          |
|--------------|-------|------------|-----------|------|-----------|----------|----------------------------------------------------------|
| 1567656_at   | 0.945 | 0.04618299 | 2.1421674 | -4.4 | 3.0270978 | OR2H1    | olfactory receptor family 2 subfamily H member 1         |
| 231770_x_at  | 0.945 | 0.02764263 | 2.4405006 | -4.4 | 2.2943408 | WDPCP    | WD repeat containing planar cell polarity effector       |
| 238293_at    | 0.945 | 0.03869817 | 2.241661  | -4.4 | 2.7907081 |          |                                                          |
| 1557071_s_at | 0.945 | 0.02403529 | 2.5320378 | -4.4 | 2.167737  | NUB1     | negative regulator of ubiquitin like proteins 1          |
| 219751_at    | 0.945 | 0.0454629  | 2.1501338 | -4.4 | 2.447368  | SETD6    | SET domain containing 6                                  |
| 217462_at    | 0.945 | 0.04560727 | 2.1485274 | -4.4 | 1.6540257 | MYRF     | myelin regulatory factor                                 |
| 208403_x_at  | 0.945 | 0.03537116 | 2.2994829 | -4.4 | 3.0740505 | MAX      | MYC associated factor X                                  |
| 222082_at    | 0.945 | 0.03119422 | 2.3786009 | -4.4 | 3.0692548 | ZBTB7A   | zinc finger and BTB domain containing 7A                 |
| 1554579_a_at | 0.945 | 0.00799489 | 3.180028  | -4.4 | 4.8463832 | MYO18B   | myosin XVIIIIB                                           |
| 220621_at    | 0.945 | 0.03391045 | 2.3081484 | -4.4 | 2.4285108 | FOXE3    | forkhead box E3                                          |
| 220396_at    | 0.945 | 0.04189823 | 2.2013508 | -4.4 | 3.1700168 | SLC35E3  | solute carrier family 35 member E3                       |
| 218629_at    | 0.945 | 0.04721058 | 2.1309933 | -4.4 | 1.9434442 | SMO      | smoothened, frizzled class receptor                      |
| 235857_at    | 0.945 | 0.04207772 | 2.199175  | -4.4 | 3.4340403 | KCTD11   | potassium channel tetramerization domain containing 11   |
| 208603_s_at  | 0.945 | 0.03955008 | 2.2306371 | -4.4 | 2.9680969 | MAPK8IP2 | mitogen-activated protein kinase 8 interacting protein 2 |
| 205811_at    | 0.945 | 0.04758778 | 2.1269473 | -4.4 | 3.0846101 | POLG2    | DNA polymerase gamma 2, accessory subunit                |
| 241708_at    | 0.945 | 0.03599485 | 2.2905725 | -4.4 | 2.7523938 | DOCK1    | dedicator of cytokinesis 1                               |
| 224241_s_at  | 0.945 | 0.03967662 | 2.2290185 | -4.4 | 2.6217077 |          |                                                          |

|             |       |            |           |       |           |           |                                                             |
|-------------|-------|------------|-----------|-------|-----------|-----------|-------------------------------------------------------------|
| 201198_s_at | 0.945 | 0.03607088 | 2.2894961 | -4.4  | 2.8948878 | PSMD1     | proteasome 26S subunit, non-ATPase 1                        |
| 201767_s_at | 0.945 | 0.04669861 | 2.1365324 | -4.4  | 2.331615  | ELAC2     | elaC ribonuclease Z 2                                       |
| 1559467_at  | 0.945 | 0.0319315  | 2.3665919 | -4.4  | 2.5734084 |           |                                                             |
| 1570391_at  | 0.945 | 0.02085096 | 2.6310949 | -4.4  | 2.3669572 | CRAT37    | cervical cancer-associated transcript 37                    |
| 226968_at   | 0.945 | 0.03219219 | 2.3624083 | -4.4  | 2.3704273 | KIF1B     | kinesin family member 1B                                    |
| 219687_at   | 0.945 | 0.04704355 | 2.1327944 | -4.4  | 1.5125333 | HHAT      | hedgehog acyltransferase                                    |
| 230347_at   | 0.945 | 0.04660745 | 2.1291933 | -4.4  | 2.1443398 | ORAI2     | ORAI calcium release-activated calcium modulator 2          |
| 242251_at   | 0.945 | 0.03849577 | 2.2562321 | -4.4  | 2.788517  | SPATA5    | spermatogenesis associated 5                                |
| 206273_at   | 0.945 | 0.0205345  | 2.6132642 | -4.4  | 4.1185667 | PRELID3A  | PRELI domain containing 3A                                  |
| 223235_s_at | 0.945 | 0.03726581 | 2.2728522 | -4.4  | 2.5916504 | SMOC2     | SPARC related modular calcium binding 2                     |
| 237675_at   | 0.945 | 0.03294786 | 2.3504594 | -4.4  | 3.4985735 | LINC01351 | long intergenic non-protein coding RNA 1351                 |
| 1553772_at  | 0.945 | 0.04391537 | 2.1773777 | -4.41 | 1.3988217 | GK5       | glycerol kinase 5 (putative)                                |
| 1567079_at  | 0.945 | 0.03751057 | 2.2695044 | -4.41 | 3.0679042 | CLN6      | ceroid-lipofuscinosis, neuronal 6, late infantile, variant  |
| 218149_s_at | 0.945 | 0.03309978 | 2.3332253 | -4.41 | 2.5438431 | ZNF395    | zinc finger protein 395                                     |
| 1556432_at  | 0.945 | 0.0333046  | 2.3300951 | -4.41 | 2.3101355 |           |                                                             |
| 225939_at   | 0.945 | 0.04440249 | 2.1717405 | -4.41 | 2.224469  | EIF4E3    | eukaryotic translation initiation factor 4E family member 3 |
| 204508_s_at | 0.945 | 0.02656497 | 2.4801484 | -4.41 | 2.9930835 | CA12      | carbonic anhydrase 12                                       |

|              |       |            |           |       |           |                                 |                                              |
|--------------|-------|------------|-----------|-------|-----------|---------------------------------|----------------------------------------------|
| 235511_at    | 0.945 | 0.03815017 | 2.2608516 | -4.41 | 3.2532529 | RBM14-RBM4/RBM14-RBM4<br>//RBM4 | readthrough///RNA<br>binding motif protein 4 |
| 1555753_x_at | 0.945 | 0.0396402  | 2.2412058 | -4.41 | 3.0694724 | ERVH-6                          | endogenous retrovirus group H member 6       |
| 215572_at    | 0.945 | 0.0367209  | 2.2681391 | -4.41 | 2.3390758 |                                 |                                              |
| 201096_s_at  | 0.945 | 0.02160465 | 2.5871004 | -4.41 | 3.27806   | ARF4                            | ADP ribosylation factor 4                    |
| 204874_x_at  | 0.945 | 0.04930099 | 2.1089304 | -4.41 | 1.9138411 | BAIAP3                          | BAI1 associated protein 3                    |
| 218797_s_at  | 0.945 | 0.04930322 | 2.1089073 | -4.41 | 2.2160517 | SIRT7                           | sirtuin 7                                    |
| 203729_at    | 0.945 | 0.03422912 | 2.3161864 | -4.41 | 2.830458  | EMP3                            | epithelial membrane protein 3                |
| 203230_at    | 0.945 | 0.03894763 | 2.2502501 | -4.41 | 3.0781639 | DVL1                            | dishevelled segment polarity protein 1       |
| 241545_x_at  | 0.945 | 0.03441086 | 2.3134938 | -4.41 | 2.0147319 |                                 |                                              |
| 220864_s_at  | 0.945 | 0.02766032 | 2.4591357 | -4.41 | 2.6163888 | NDUFA13                         | NADH:ubiquinone oxidoreductase subunit A13   |
| 219898_at    | 0.945 | 0.04595162 | 2.1541836 | -4.41 | 2.3902563 | GPR85                           | G protein-coupled receptor 85                |
| 1552389_at   | 0.945 | 0.0394439  | 2.2437543 | -4.41 | 4.2513852 | ERICH5                          | glutamate rich 5                             |
| 238623_at    | 0.945 | 0.04605975 | 2.1529786 | -4.41 | 3.0606541 |                                 |                                              |
| 203967_at    | 0.945 | 0.0411016  | 2.2225933 | -4.41 | 2.3627756 | CDC6                            | cell division cycle 6                        |
| 236950_s_at  | 0.945 | 0.03526722 | 2.3153337 | -4.41 | 2.479372  | LINC00964                       | long intergenic non-protein coding RNA 964   |
| 226830_x_at  | 0.945 | 0.04364251 | 2.1805605 | -4.41 | 3.0732378 | LINC01578                       | long intergenic non-protein coding RNA 1578  |
| 202910_s_at  | 0.945 | 0.03998395 | 2.2367712 | -4.41 | 2.8295326 | ADGRE5                          | adhesion G protein-coupled receptor E5       |
| 218078_s_at  | 0.945 | 0.03213544 | 2.3633163 | -4.41 | 2.9630649 | ZDHHC3                          | zinc finger DHHC-type containing 3           |
| 236428_at    | 0.945 | 0.04692022 | 2.1434801 | -4.41 | 2.4806278 |                                 |                                              |

|              |       |            |           |       |           |                                  |                                                                                                             |
|--------------|-------|------------|-----------|-------|-----------|----------------------------------|-------------------------------------------------------------------------------------------------------------|
| 225689_at    | 0.945 | 0.02859163 | 2.4418864 | -4.41 | 1.9687516 | POMGNT2                          | protein O-linked mannose<br>N-acetylglucosaminyltransferase 2 (beta 1,4-)                                   |
| 221193_s_at  | 0.945 | 0.04762257 | 2.1265756 | -4.41 | 3.0620812 | ZCCHC10                          | zinc finger CCHC-type containing 10                                                                         |
| 1554883_a_at | 0.945 | 0.047233   | 2.1400671 | -4.41 | 2.2763432 | ERCC8                            | ERCC excision repair 8, CSA ubiquitin ligase<br>complex subunit                                             |
| 222828_at    | 0.945 | 0.04788749 | 2.1237532 | -4.41 | 2.1692492 | IL20RA                           | interleukin 20 receptor subunit alpha                                                                       |
| 202275_at    | 0.945 | 0.03638367 | 2.2991938 | -4.41 | 1.9768533 | G6PD                             | glucose-6-phosphate dehydrogenase                                                                           |
| 1562762_at   | 0.945 | 0.03653356 | 2.2970624 | -4.41 | 3.1527355 | C3orf56                          | chromosome 3 open reading frame 56                                                                          |
| 209866_s_at  | 0.945 | 0.03311726 | 2.3478162 | -4.41 | 1.7711055 | ADGRL3                           | adhesion G protein-coupled receptor L3                                                                      |
| 228815_s_at  | 0.945 | 0.02921744 | 2.4305944 | -4.41 | 2.7496738 | REPIN1                           | replication initiator 1                                                                                     |
| 208727_s_at  | 0.945 | 0.04785807 | 2.1333078 | -4.41 | 1.6470421 | CDC42                            | cell division cycle 42                                                                                      |
| 218373_at    | 0.945 | 0.0263584  | 2.4647578 | -4.41 | 2.8942071 | AKTIP                            | AKT interacting protein                                                                                     |
| 211981_at    | 0.945 | 0.0413351  | 2.2196766 | -4.41 | 1.5448609 | COL4A1                           | collagen type IV alpha 1 chain                                                                              |
| 217112_at    | 0.945 | 0.01087833 | 3.0136344 | -4.41 | 5.0318615 | PDGFB                            | platelet derived growth factor subunit B                                                                    |
| 216275_at    | 0.945 | 0.04836081 | 2.1279298 | -4.41 | 2.6958807 | BUB1                             | BUB1 mitotic checkpoint serine/threonine kinase                                                             |
| 201565_s_at  | 0.945 | 0.04838657 | 2.1276556 | -4.41 | 1.6781528 | ID2                              | inhibitor of DNA binding 2, HLH protein                                                                     |
| 206636_at    | 0.945 | 0.04584444 | 2.1553806 | -4.42 | 2.7308889 | RASA2                            | RAS p21 protein activator 2                                                                                 |
| 212707_s_at  | 0.945 | 0.04585235 | 2.1552922 | -4.42 | 3.0335564 | RASA4B///RA<br>SA4CP///RASA<br>4 | RAS p21 protein activator 4B///RAS p21 protein<br>activator 4C, pseudogene///RAS p21 protein<br>activator 4 |

|              |       |            |            |       |            |                                    |                                                                                     |
|--------------|-------|------------|------------|-------|------------|------------------------------------|-------------------------------------------------------------------------------------|
| 228153_at    | 0.945 | 0.04873752 | 2.1239335  | -4.42 | 1.9909815  | RNF144B                            | ring finger protein 144B                                                            |
| 221840_at    | 0.945 | 0.03397662 | 2.334601   | -4.42 | 3.9194626  | PTPRE                              | protein tyrosine phosphatase, receptor type E                                       |
| 206819_at    | 0.945 | 0.03760714 | 2.2681892  | -4.42 | 2.7334591  | POM121L9P                          |                                                                                     |
| 214551_s_at  | 0.14  | 0.00000577 | -5.9357216 | -3.48 | -3.7612548 | CD7                                | CD7 molecule                                                                        |
| 223982_s_at  | 0.388 | 0.00008523 | -4.6841501 | -3.51 | -4.0378781 | PNPLA8                             | patatin like phospholipase domain containing 8                                      |
| 212289_at    | 0.14  | 0.00001027 | -5.946845  | -3.68 | -9.2218269 | ANKRD12                            | ankyrin repeat domain 12                                                            |
| 208903_at    | 0.945 | 0.00056035 | -3.9324669 | -3.69 | -6.1426433 | RPS28                              | ribosomal protein S28                                                               |
| 217807_s_at  | 0.945 | 0.00064532 | -3.9220138 | -3.78 | -3.8508459 | SNORD23//GL<br>TSCR2               | small nucleolar RNA, C/D box 23//glioma<br>tumor suppressor candidate region gene 2 |
| 1557727_at   | 0.759 | 0.00040445 | -4.1669806 | -3.81 | -5.1416916 | PCBP1-AS1                          | PCBP1 antisense RNA 1                                                               |
| 1556086_at   | 0.262 | 0.00004757 | -5.3196395 | -3.87 | -5.4123506 | HPF1                               | histone PARylation factor 1                                                         |
| 1555847_a_at | 0.945 | 0.00225578 | -3.4034563 | -3.9  | -5.5476469 | MIR24-2//MIR<br>23A//LOC2844<br>54 | microRNA<br>24-2//microRNA<br>23a//uncharacterized LOC284454                        |
| 220863_at    | 0.945 | 0.00171133 | -3.5508167 | -3.93 | -4.1623142 | MIP                                | major intrinsic protein of lens fiber                                               |
| 1560352_at   | 0.945 | 0.00340678 | -3.2237461 | -3.93 | -4.9771081 | LOC101927104<br>//ENTPD1-AS<br>1   | uncharacterized LOC101927104//ENTPD1<br>antisense RNA 1                             |
| 226824_at    | 0.945 | 0.00287535 | -3.3055684 | -3.94 | -5.3617075 | CPXM2                              | carboxypeptidase X, M14 family member 2                                             |
| 218638_s_at  | 0.945 | 0.00250332 | -3.377164  | -3.94 | -2.0959783 | LOC100130872<br>//SPON2            | uncharacterized LOC100130872//spondin 2                                             |
| 203407_at    | 0.945 | 0.00308315 | -3.2772832 | -3.95 | -2.2835954 | PPL                                | periplakin                                                                          |

|              |       |            |            |       |            |              |                                                                          |
|--------------|-------|------------|------------|-------|------------|--------------|--------------------------------------------------------------------------|
| 201810_s_at  | 0.945 | 0.00390837 | -3.168252  | -3.95 | -4.678479  | SH3BP5       | SH3 domain binding protein 5                                             |
| 234074_at    | 0.945 | 0.00462435 | -3.0998779 | -3.98 | -5.5369681 |              |                                                                          |
| 244291_x_at  | 0.945 | 0.00215053 | -3.476745  | -3.98 | -1.9203633 |              |                                                                          |
| 206433_s_at  | 0.945 | 0.00433684 | -3.1379817 | -3.99 | -1.5505655 | SPOCK3       | sparc/osteonectin, cwcv and kazal-like domains proteoglycan (testican) 3 |
| 1558780_a_at | 0.945 | 0.00226857 | -3.4543968 | -3.99 | -2.8803517 | H2AFY        | H2A histone family member Y                                              |
| 216563_at    | 0.945 | 0.00372678 | -3.2138238 | -4    | -3.0164265 | ANKRD12      | ankyrin repeat domain 12                                                 |
| 243999_at    | 0.945 | 0.00313133 | -3.3014728 | -4    | -1.9305816 | SLFN5        | schlafen family member 5                                                 |
| 233846_at    | 0.945 | 0.00551695 | -3.0276168 | -4    | -4.0214016 | CCDC85A      | coiled-coil domain containing 85A                                        |
| 236017_at    | 0.945 | 0.0007049  | -4.0026175 | -4    | -3.2869003 | CDKL3        | cyclin dependent kinase like 3                                           |
| 1563362_at   | 0.945 | 0.00401964 | -3.1825324 | -4.01 | -2.6305849 | D21S2090E    | uncharacterized D21S2090E                                                |
| 224306_at    | 0.945 | 0.00434103 | -3.1506291 | -4.02 | -2.3568062 | NPC1L1       | NPC1 like intracellular cholesterol transporter 1                        |
| 223625_at    | 0.945 | 0.00201184 | -3.5269378 | -4.02 | -5.6981479 | FAM126A      | family with sequence similarity 126 member A                             |
| 241831_at    | 0.945 | 0.0018596  | -3.5857852 | -4.03 | -4.2486458 |              |                                                                          |
| 232345_at    | 0.945 | 0.00189962 | -3.5765953 | -4.03 | -4.0636287 | C18orf8      | chromosome 18 open reading frame 8                                       |
| 218925_s_at  | 0.945 | 0.00709819 | -2.9234142 | -4.04 | -4.6934479 | C11orf1      | chromosome 11 open reading frame 1                                       |
| 231479_at    | 0.945 | 0.00618839 | -2.9908363 | -4.04 | -2.4825276 | TTC33        | tetratricopeptide repeat domain 33                                       |
| 222322_at    | 0.945 | 0.00368769 | -3.2499067 | -4.05 | -3.5937722 |              |                                                                          |
| 242873_at    | 0.945 | 0.00657428 | -2.9655728 | -4.05 | -2.4552752 | LOC101928100 | uncharacterized LOC101928100                                             |
| 227232_at    | 0.945 | 0.00802976 | -2.8719514 | -4.06 | -3.7594618 | EVL          | Enah/Vasp-like                                                           |
| 228241_at    | 0.945 | 0.00392945 | -3.2229845 | -4.06 | -3.0692526 | AGR3         | anterior gradient 3, protein disulphide isomerase family member          |
| 230894_s_at  | 0.945 | 0.00699453 | -2.9396205 | -4.06 | -2.7940088 |              |                                                                          |

|             |       |            |            |       |            |           |                                                    |
|-------------|-------|------------|------------|-------|------------|-----------|----------------------------------------------------|
| 212340_at   | 0.945 | 0.00812165 | -2.8671864 | -4.06 | -1.9667685 | YIPF6     | Yip1 domain family member 6                        |
| 201826_s_at | 0.945 | 0.00818047 | -2.8641627 | -4.06 | -1.7637497 | SCCPDH    | saccharopine dehydrogenase (putative)              |
| 207036_x_at | 0.945 | 0.00361643 | -3.2581707 | -4.06 | -3.4453032 | GRIN2D    | glutamate ionotropic receptor NMDA type subunit 2D |
| 227413_at   | 0.945 | 0.00536829 | -3.0753228 | -4.07 | -3.5759759 | UBLCP1    | ubiquitin like domain containing CTD phosphatase 1 |
| 225494_at   | 0.945 | 0.00634867 | -2.9915689 | -4.07 | -3.7041385 | DYNLL2    | dynein light chain LC8-type 2                      |
| 218792_s_at | 0.945 | 0.00450308 | -3.1650372 | -4.07 | -1.5745779 | BSPRY     | B-box and SPRY domain containing                   |
| 229588_at   | 0.945 | 0.00272725 | -3.4200822 | -4.07 | -4.3252113 | DNAJC10   | DnaJ heat shock protein family (Hsp40) member C10  |
| 202172_at   | 0.945 | 0.00797257 | -2.8845476 | -4.08 | -5.2618737 | VEZF1     | vascular endothelial zinc finger 1                 |
| 227035_x_at | 0.945 | 0.00927931 | -2.8111628 | -4.08 | -4.1879283 | RP9P      | retinitis pigmentosa 9 pseudogene                  |
| 235147_at   | 0.945 | 0.00611228 | -3.0202197 | -4.08 | -3.4435369 |           |                                                    |
| 211550_at   | 0.945 | 0.00578374 | -3.0437104 | -4.08 | -3.363365  | EGFR      | epidermal growth factor receptor                   |
| 232198_at   | 0.945 | 0.00238589 | -3.5044559 | -4.09 | -3.5586686 |           |                                                    |
| 236198_at   | 0.945 | 0.00241446 | -3.4991998 | -4.09 | -4.7680824 | LINC01215 | long intergenic non-protein coding RNA 1215        |
| 216797_at   | 0.945 | 0.00388734 | -3.2456159 | -4.09 | -2.9763304 |           |                                                    |
| 215333_x_at | 0.945 | 0.01022337 | -2.7701656 | -4.09 | -3.6337054 | GSTM1     | glutathione S-transferase mu 1                     |
| 41387_r_at  | 0.945 | 0.01033137 | -2.7657055 | -4.09 | -2.8650417 | KDM6B     | lysine demethylase 6B                              |
| 1552365_at  | 0.945 | 0.00238464 | -3.5046858 | -4.1  | -3.290059  | SCIN      | scinderin                                          |
| 201583_s_at | 0.945 | 0.01073845 | -2.7492791 | -4.1  | -3.9237016 | SEC23B    | Sec23 homolog B, coat complex II component         |



|             |       |            |            |       |            |            |                                                               |
|-------------|-------|------------|------------|-------|------------|------------|---------------------------------------------------------------|
| 1555447_at  | 0.945 | 0.00279272 | -3.4348702 | -4.1  | -4.2518005 | ADGRG5     | adhesion G protein-coupled receptor G5                        |
| 233558_s_at | 0.945 | 0.00959105 | -2.8061465 | -4.1  | -3.3437602 | TRAPPC11   | trafficking protein particle complex 11                       |
| 218614_at   | 0.945 | 0.01094385 | -2.7412117 | -4.1  | -2.9176911 | KIAA1551   | KIAA1551                                                      |
| 210226_at   | 0.945 | 0.00846293 | -2.8695458 | -4.1  | -4.9598848 | NR4A1      | nuclear receptor subfamily 4 group A member 1                 |
| 239984_at   | 0.945 | 0.0010653  | -3.9404301 | -4.1  | -5.0831345 |            |                                                               |
| 232093_at   | 0.945 | 0.00678207 | -2.9758643 | -4.1  | -2.885526  | SPACA6     | sperm acrosome associated 6                                   |
| 235882_at   | 0.945 | 0.0061062  | -3.0345733 | -4.1  | -1.7609932 | VPS53      | VPS53, GARP complex subunit                                   |
| 202109_at   | 0.945 | 0.00843345 | -2.8710374 | -4.11 | -4.6872358 | ARFIP2     | ADP ribosylation factor interacting protein 2                 |
| 242275_at   | 0.945 | 0.00459304 | -3.1736535 | -4.11 | -3.6955139 |            |                                                               |
| 210245_at   | 0.945 | 0.00400691 | -3.252443  | -4.11 | -6.3493887 | ABCC8      | ATP binding cassette subfamily C member 8                     |
| 206685_at   | 0.945 | 0.01149258 | -2.7203382 | -4.11 | -2.6201346 | HCG4       | HLA complex group 4 (non-protein coding)                      |
| 239120_at   | 0.945 | 0.00639269 | -3.0148067 | -4.11 | -2.5160997 | TMEM51-AS1 | TMEM51 antisense RNA 1                                        |
| 229160_at   | 0.945 | 0.0031223  | -3.3854707 | -4.11 | -4.6418853 | MUM1L1     | MUM1 like 1                                                   |
| 210263_at   | 0.945 | 0.00481512 | -3.153221  | -4.11 | -3.6227665 | KCNF1      | potassium voltage-gated channel modifier subfamily F member 1 |
| 243119_at   | 0.945 | 0.00121056 | -3.8813376 | -4.11 | -4.7534993 |            |                                                               |
| 1555135_at  | 0.945 | 0.00918375 | -2.8345377 | -4.11 | -3.9222899 |            |                                                               |
| 209893_s_at | 0.945 | 0.0105402  | -2.7658142 | -4.12 | -1.815104  | FUT4       | fucosyltransferase 4                                          |
| 203876_s_at | 0.945 | 0.00325105 | -3.3675545 | -4.12 | -3.7689774 | MMP11      | matrix metalloproteinase 11                                   |
| 224533_s_at | 0.945 | 0.0064574  | -3.0104602 | -4.12 | -2.9739963 |            |                                                               |

|             |       |            |            |       |            |         |                                                         |
|-------------|-------|------------|------------|-------|------------|---------|---------------------------------------------------------|
| 235959_at   | 0.945 | 0.00096834 | -4.0356152 | -4.12 | -2.8416927 |         |                                                         |
| 222157_s_at | 0.945 | 0.01066431 | -2.7607959 | -4.12 | -1.5054785 | WDR48   | WD repeat domain 48                                     |
| 1560043_at  | 0.945 | 0.00945228 | -2.8221592 | -4.12 | -3.5962315 | CYB5R1  | cytochrome b5 reductase 1                               |
| 236677_at   | 0.945 | 0.0108002  | -2.7553643 | -4.12 | -2.5050392 | NGB     | neuroglobin                                             |
| 207775_at   | 0.945 | 0.00565026 | -3.0837871 | -4.12 | -2.2217721 | MGC4859 | uncharacterized LOC79150                                |
| 1556951_at  | 0.945 | 0.00845377 | -2.8812169 | -4.12 | -3.3947959 |         |                                                         |
| 228175_at   | 0.945 | 0.00804628 | -2.9025207 | -4.13 | -2.6776812 | SLC4A8  | solute carrier family 4 member 8                        |
| 210583_at   | 0.945 | 0.00703785 | -2.9732411 | -4.13 | -2.9190998 | POLDIP3 | DNA polymerase delta interacting protein 3              |
| 213007_at   | 0.945 | 0.01001467 | -2.79728   | -4.13 | -3.1239522 | FANCI   | Fanconi anemia complementation group I                  |
| 201426_s_at | 0.945 | 0.00598107 | -3.0589993 | -4.13 | -3.1527669 | VIM     | vimentin                                                |
| 209660_at   | 0.945 | 0.01292915 | -2.6698275 | -4.13 | -4.6387756 | TTR     | transthyretin                                           |
| 225415_at   | 0.945 | 0.00828129 | -2.8901121 | -4.13 | -4.4824547 | DTX3L   | deltex E3 ubiquitin ligase 3L                           |
| 232343_at   | 0.945 | 0.00878072 | -2.8648194 | -4.13 | -2.0601045 | DCTN5   | dynactin subunit 5                                      |
| 213196_at   | 0.945 | 0.01314916 | -2.6625606 | -4.13 | -4.0377517 | ZNF629  | zinc finger protein 629                                 |
| 230134_s_at | 0.945 | 0.0133068  | -2.6574236 | -4.13 | -3.5644873 | RC3H2   | ring finger and CCCH-type domains 2                     |
| 236241_at   | 0.945 | 0.00634143 | -3.0334599 | -4.13 | -3.5133155 | MED31   | mediator complex subunit 31                             |
| 223195_s_at | 0.945 | 0.0052249  | -3.1359074 | -4.13 | -3.5809623 | SESN2   | sestrin 2                                               |
| 237993_at   | 0.945 | 0.00920102 | -2.8445741 | -4.14 | -2.5427167 | CHCHD5  | coiled-coil-helix-coiled-coil-helix domain containing 5 |
| 200765_x_at | 0.945 | 0.00934092 | -2.8380301 | -4.14 | -2.0416078 | CTNNA1  | catenin alpha 1                                         |
| 231887_s_at | 0.945 | 0.00174836 | -3.7115563 | -4.14 | -4.6038777 | PALD1   | phosphatase domain containing, paladin 1                |
| 210242_x_at | 0.945 | 0.01110389 | -2.7526435 | -4.14 | -3.2897928 | ST20    | suppressor of tumorigenicity 20                         |

|              |       |            |            |       |            |                          |                                                                                    |
|--------------|-------|------------|------------|-------|------------|--------------------------|------------------------------------------------------------------------------------|
| 237393_at    | 0.945 | 0.01438545 | -2.6237259 | -4.14 | -1.8906325 | TPBGL                    | trophoblast glycoprotein-like                                                      |
| 215042_at    | 0.945 | 0.00690969 | -2.9958996 | -4.14 | -3.7655916 | BMP6                     | bone morphogenetic protein 6                                                       |
| 205082_s_at  | 0.945 | 0.0092663  | -2.8415089 | -4.14 | -5.4735352 | AOX1                     | aldehyde oxidase 1                                                                 |
| 212147_at    | 0.945 | 0.00539447 | -3.1218274 | -4.14 | -3.2698472 | SMG5                     | SMG5, nonsense mediated mRNA decay factor                                          |
| 244545_at    | 0.945 | 0.01447167 | -2.6211354 | -4.14 | -2.6884369 |                          |                                                                                    |
| 207414_s_at  | 0.945 | 0.00438214 | -3.2347653 | -4.14 | -3.5803919 | LOC100507472<br>///PCSK6 | uncharacterized<br>LOC100507472///proprotein<br>convertase subtilisin/kexin type 6 |
| 235340_at    | 0.945 | 0.01459445 | -2.617471  | -4.14 | -4.2276432 | GANC                     | glucosidase alpha, neutral C                                                       |
| 232048_at    | 0.945 | 0.01474994 | -2.612871  | -4.15 | -4.2375081 | FAM76B                   | family with sequence similarity 76 member B                                        |
| 227114_at    | 0.945 | 0.01018944 | -2.8002286 | -4.15 | -2.6827461 | RNF214                   | ring finger protein 214                                                            |
| 234383_x_at  | 0.945 | 0.00861759 | -2.8851555 | -4.15 | -2.2338294 | ATP7B                    | ATPase copper transporting beta                                                    |
| 1555342_a_at | 0.945 | 0.0047835  | -3.1956315 | -4.15 | -4.1208612 | UNC5C                    | unc-5 netrin receptor C                                                            |
| 239040_at    | 0.945 | 0.00907579 | -2.8624952 | -4.15 | -2.8931797 | HNRNPD                   | heterogeneous nuclear ribonucleoprotein D                                          |
| 242281_at    | 0.759 | 0.00041641 | -4.4411354 | -4.15 | -6.0673958 | GLUL                     | glutamate-ammonia ligase                                                           |
| 240687_at    | 0.945 | 0.00597883 | -3.0763953 | -4.15 | -5.0550325 | PASD1                    | PAS domain containing 1                                                            |
| 219799_s_at  | 0.945 | 0.01579875 | -2.5829765 | -4.16 | -1.2693705 | DHRS9                    | dehydrogenase/reductase 9                                                          |
| 235847_at    | 0.945 | 0.0072658  | -2.9738503 | -4.16 | -2.6401848 |                          |                                                                                    |
| 227322_s_at  | 0.945 | 0.00785377 | -2.9396234 | -4.16 | -3.1544864 | BCCIP                    | BRCA2 and CDKN1A interacting protein                                               |
| 222226_at    | 0.945 | 0.01096739 | -2.7681095 | -4.16 | -2.9036474 | SAA3P                    | serum amyloid A3 pseudogene                                                        |
| 205696_s_at  | 0.945 | 0.01240309 | -2.7045177 | -4.16 | -1.8629211 | GFRA1                    | GDNF family receptor alpha 1                                                       |

|              |       |            |            |       |            |                                  |                                                                                  |
|--------------|-------|------------|------------|-------|------------|----------------------------------|----------------------------------------------------------------------------------|
| 241326_at    | 0.945 | 0.01269986 | -2.6941933 | -4.16 | -2.3434276 | AK7                              | adenylate kinase 7                                                               |
| 1561596_at   | 0.945 | 0.00555474 | -3.1089089 | -4.16 | -3.929858  |                                  |                                                                                  |
| 238628_s_at  | 0.945 | 0.01636181 | -2.5676814 | -4.16 | -4.0874737 | TRAPPC2L                         | trafficking protein particle complex 2 like                                      |
| 242997_at    | 0.945 | 0.01134221 | -2.7533974 | -4.16 | -3.8976901 |                                  |                                                                                  |
| 1554686_at   | 0.945 | 0.00774084 | -2.9460021 | -4.16 | -3.2236388 | STAU2                            | staufen double-stranded RNA binding protein 2                                    |
| 213610_s_at  | 0.945 | 0.00838695 | -2.9106502 | -4.16 | -1.9261983 | PHOSPHO2-K<br>LHL23///KLHL<br>23 | PHOSPHO2-KLHL23 readthrough///kelch like<br>family member 23                     |
| 206798_x_at  | 0.945 | 0.0168086  | -2.5558888 | -4.17 | -3.2968877 | DLEC1                            | deleted in lung and esophageal cancer 1                                          |
| 1555040_at   | 0.945 | 0.01184407 | -2.7344036 | -4.17 | -2.8470804 | LINC00612                        | long intergenic non-protein coding RNA 612                                       |
| 204992_s_at  | 0.945 | 0.01185447 | -2.734018  | -4.17 | -4.7996465 | PFN2                             | profilin 2                                                                       |
| 1553835_a_at | 0.945 | 0.00803929 | -2.9293338 | -4.17 | -3.7966758 | COL6A5                           | collagen type VI alpha 5 chain                                                   |
| 217757_at    | 0.945 | 0.01732373 | -2.5426487 | -4.17 | -1.575474  | A2M                              | alpha-2-macroglobulin                                                            |
| 227877_at    | 0.945 | 0.00418028 | -3.2804359 | -4.17 | -4.6251849 | ANXA2R                           | annexin A2 receptor                                                              |
| 226859_at    | 0.945 | 0.01745223 | -2.539403  | -4.17 | -4.0608592 | DNAJC25-GN<br>G10///DNAJC2<br>5  | DNAJC25-GNG10 readthrough///DnaJ heat<br>shock protein family (Hsp40) member C25 |
| 1562467_at   | 0.945 | 0.00730494 | -2.9874756 | -4.17 | -2.0715688 |                                  |                                                                                  |
| 220439_at    | 0.945 | 0.01455232 | -2.6344548 | -4.18 | -2.6849974 | RIN3                             | Ras and Rab interactor 3                                                         |
| 1562189_at   | 0.945 | 0.00616056 | -3.0821827 | -4.18 | -3.2043433 |                                  |                                                                                  |

|              |       |            |            |       |            |                     |                                                                                                          |
|--------------|-------|------------|------------|-------|------------|---------------------|----------------------------------------------------------------------------------------------------------|
| 205850_s_at  | 0.945 | 0.01438956 | -2.6394086 | -4.18 | -2.8022954 | GABRB3              | gamma-aminobutyric acid type A receptor beta3 subunit                                                    |
| 218118_s_at  | 0.945 | 0.00624224 | -3.0762552 | -4.18 | -3.2660403 | TIMM23B//TI<br>MM23 | translocase of inner mitochondrial membrane 23 homolog B//translocase of inner mitochondrial membrane 23 |
| 1561846_s_at | 0.945 | 0.01288937 | -2.697168  | -4.18 | -2.7631822 | CCDC168             | coiled-coil domain containing 168                                                                        |
| 227194_at    | 0.945 | 0.01836015 | -2.5170818 | -4.18 | -2.739815  | FAM3B               | family with sequence similarity 3 member B                                                               |
| 200748_s_at  | 0.945 | 0.01836082 | -2.5170658 | -4.18 | -3.1820722 | FTH1                | ferritin heavy chain 1                                                                                   |
| 224027_at    | 0.945 | 0.00217746 | -3.6500448 | -4.18 | -4.2540396 | CCL28               | C-C motif chemokine ligand 28                                                                            |
| 1566518_at   | 0.945 | 0.01659111 | -2.5687006 | -4.18 | -1.4661863 |                     |                                                                                                          |
| 214324_at    | 0.945 | 0.01311014 | -2.6896698 | -4.18 | -2.7748421 | GP2                 | glycoprotein 2                                                                                           |
| 202673_at    | 0.945 | 0.00686109 | -3.0153639 | -4.18 | -2.5024647 | DPM1                | dolichyl-phosphate mannosyltransferase subunit 1, catalytic                                              |
| 215073_s_at  | 0.945 | 0.00985801 | -2.8390218 | -4.18 | -2.8675905 | NR2F2               | nuclear receptor subfamily 2 group F member 2                                                            |
| 224288_x_at  | 0.945 | 0.01364107 | -2.6721127 | -4.19 | -3.9330699 | FKSG49              | FKSG49                                                                                                   |
| 226471_at    | 0.945 | 0.01367209 | -2.6711068 | -4.19 | -3.788192  | GGT7                | gamma-glutamyltransferase 7                                                                              |
| 235474_at    | 0.945 | 0.01012412 | -2.8271671 | -4.19 | -4.0425555 | NEU3                | neuraminidase 3                                                                                          |
| 241216_at    | 0.945 | 0.00054973 | -4.3765477 | -4.19 | -6.0251674 |                     |                                                                                                          |
| 239676_x_at  | 0.945 | 0.01534301 | -2.6111049 | -4.19 | -1.4120915 | FBRSL1              | fibrosin like 1                                                                                          |
| 1569476_at   | 0.945 | 0.01022063 | -2.822941  | -4.19 | -3.0776437 | DKFZP434L18         | uncharacterized LOC26082                                                                                 |

|             |       |            |            |       |            |              |                                             |
|-------------|-------|------------|------------|-------|------------|--------------|---------------------------------------------|
| 204723_at   | 0.945 | 0.01766722 | -2.540933  | -4.19 | -5.0757753 | SCN3B        | sodium voltage-gated channel beta subunit 3 |
| 203947_at   | 0.945 | 0.00838568 | -2.925871  | -4.19 | -3.6084535 | CSTF3        | cleavage stimulation factor subunit 3       |
| 210836_x_at | 0.945 | 0.00554518 | -3.1517291 | -4.19 | -3.1024571 | PDE4D        | phosphodiesterase 4D                        |
| 204656_at   | 0.945 | 0.01411999 | -2.656819  | -4.19 | -2.0242433 | SHB          | SH2 domain containing adaptor protein B     |
| 233663_s_at | 0.945 | 0.01237012 | -2.7258562 | -4.19 | -3.1522189 | CDH26        | cadherin 26                                 |
| 229585_at   | 0.945 | 0.00848041 | -2.9208414 | -4.19 | -3.1638765 | ADAMTSL1     | ADAMTS like 1                               |
| 226756_at   | 0.945 | 0.00404341 | -3.3238245 | -4.19 | -4.6111175 | CCDC71L      | coiled-coil domain containing 71-like       |
| 243141_at   | 0.945 | 0.01580863 | -2.5978762 | -4.19 | -2.3848026 | SGMS2        | sphingomyelin synthase 2                    |
| 201859_at   | 0.945 | 0.01994777 | -2.4803986 | -4.19 | -4.6219718 | SRGN         | serglycin                                   |
| 241695_s_at | 0.945 | 0.01814533 | -2.5290974 | -4.19 | -2.0979157 |              |                                             |
| 222400_s_at | 0.945 | 0.01264681 | -2.7160125 | -4.19 | -3.2237123 | ADI1         | acireductone dioxygenase 1                  |
| 210359_at   | 0.945 | 0.02049848 | -2.4683025 | -4.2  | -2.0273929 | MTSS1        | metastasis suppressor 1                     |
| 210184_at   | 0.945 | 0.00432426 | -3.2926537 | -4.2  | -3.3152176 | ITGAX        | integrin subunit alpha X                    |
| 232557_at   | 0.945 | 0.01881072 | -2.513099  | -4.2  | -2.6674254 | UBAP1L       | ubiquitin associated protein 1 like         |
| 243834_at   | 0.945 | 0.00806271 | -2.9434394 | -4.2  | -3.5133698 | TNRC6A       | trinucleotide repeat containing 6A          |
| 210459_at   | 0.945 | 0.01891201 | -2.5107098 | -4.2  | -2.3270469 | PSMD4        | proteasome 26S subunit, non-ATPase 4        |
| 208175_s_at | 0.945 | 0.01328351 | -2.6941131 | -4.2  | -4.9587717 | DMP1         | dentin matrix acidic phosphoprotein 1       |
| 203261_at   | 0.945 | 0.00576208 | -3.134193  | -4.2  | -3.673786  | DCTN6        | dynactin subunit 6                          |
| 227712_at   | 0.945 | 0.01919913 | -2.5040012 | -4.2  | -1.9190376 | LYRM2        | LYR motif containing 2                      |
| 218019_s_at | 0.945 | 0.0093523  | -2.8769308 | -4.2  | -3.4340661 | PDXK         | pyridoxal (pyridoxine, vitamin B6) kinase   |
| 1560185_at  | 0.945 | 0.00949545 | -2.8556752 | -4.2  | -2.0404878 | LOC105376360 | uncharacterized LOC105376360                |

|             |       |            |            |       |            |               |                                                                            |
|-------------|-------|------------|------------|-------|------------|---------------|----------------------------------------------------------------------------|
| 224432_at   | 0.945 | 0.01096112 | -2.7917274 | -4.2  | -2.8386839 | SH3GLB2       | SH3 domain containing GRB2 like endophilin B2                              |
| 236335_at   | 0.945 | 0.01766066 | -2.5486272 | -4.2  | -2.2461184 | GUCY1A2       | guanylate cyclase 1 soluble subunit alpha 2                                |
| 212473_s_at | 0.945 | 0.00964124 | -2.8632431 | -4.2  | -4.1354723 | MICAL2        | microtubule associated monooxygenase, calponin and LIM domain containing 2 |
| 228728_at   | 0.945 | 0.00968053 | -2.8614126 | -4.2  | -3.3603207 | CPED1         | cadherin like and PC-esterase domain containing 1                          |
| 204880_at   | 0.945 | 0.01750234 | -2.5526439 | -4.2  | -1.8482699 | MGMT          | O-6-methylguanine-DNA methyltransferase                                    |
| 219829_at   | 0.945 | 0.02177884 | -2.4412995 | -4.2  | -2.5423063 | ITGB1BP2      | integrin subunit beta 1 binding protein 2                                  |
| 227982_at   | 0.945 | 0.00614006 | -3.1051205 | -4.21 | -2.7951986 | SEPSECS       | Sep (O-phosphoserine) tRNA:Sec (selenocysteine) tRNA synthase              |
| 218750_at   | 0.945 | 0.01599348 | -2.6013326 | -4.21 | -2.8487109 | TAF1D         | TATA-box binding protein associated factor, RNA polymerase I subunit D     |
| 220420_at   | 0.945 | 0.01528468 | -2.6215697 | -4.21 | -4.1345145 | LMAN1L        | lectin, mannose binding 1 like                                             |
| 203690_at   | 0.945 | 0.01541064 | -2.6179099 | -4.21 | -2.8142944 | TUBGCP3       | tubulin gamma complex associated protein 3                                 |
| 1570422_at  | 0.945 | 0.01541682 | -2.6177311 | -4.21 | -3.7450773 | SNTG2         | syntrophin gamma 2                                                         |
| 235650_at   | 0.945 | 0.01388484 | -2.6743222 | -4.21 | -2.4708683 | CDHR3         | cadherin related family member 3                                           |
| 244889_at   | 0.945 | 0.02026401 | -2.4799058 | -4.21 | -2.7410477 | LOC400499///L | vitellogenin///uncharacterized LOC388210                                   |
| 215715_at   | 0.945 | 0.0223643  | -2.4294362 | -4.21 | -3.6158015 | SLC6A2        | solute carrier family 6 member 2                                           |

|             |       |            |            |       |            |           |                                                 |
|-------------|-------|------------|------------|-------|------------|-----------|-------------------------------------------------|
| 223256_at   | 0.945 | 0.02243066 | -2.4281096 | -4.21 | -1.417033  | G2E3      | G2/M-phase specific E3 ubiquitin protein ligase |
| 215221_at   | 0.945 | 0.02245573 | -2.4276095 | -4.21 | -4.0592299 |           |                                                 |
| 208616_s_at | 0.945 | 0.01643685 | -2.589097  | -4.21 | -4.2500632 | PTP4A2    | protein tyrosine phosphatase type IVA, member 2 |
| 243625_at   | 0.945 | 0.01019545 | -2.8380556 | -4.21 | -2.9062802 |           |                                                 |
| 231688_at   | 0.945 | 0.00246191 | -3.5917646 | -4.21 | -4.1239513 | MMP8      | matrix metalloproteinase 8                      |
| 218227_at   | 0.945 | 0.01463997 | -2.6505848 | -4.21 | -2.1490365 | NUBP2     | nucleotide binding protein 2                    |
| 242555_at   | 0.945 | 0.01181529 | -2.758125  | -4.21 | -3.2446932 | C16orf87  | chromosome 16 open reading frame 87             |
| 221399_at   | 0.945 | 0.01481369 | -2.6452874 | -4.21 | -3.4870817 | EDA2R     | ectodysplasin A2 receptor                       |
| 222934_s_at | 0.945 | 0.01192982 | -2.7537962 | -4.21 | -2.1223253 | CLEC4E    | C-type lectin domain family 4 member E          |
| 1564881_at  | 0.945 | 0.01896814 | -2.5166797 | -4.21 | -4.0028566 | LINC01618 | long intergenic non-protein coding RNA 1618     |
| 207894_s_at | 0.945 | 0.0210448  | -2.4629725 | -4.21 | -3.5135528 | TCL6      | T-cell leukemia/lymphoma 6 (non-protein coding) |
| 233198_at   | 0.945 | 0.0231854  | -2.4132707 | -4.21 | -2.0736346 | GOLGA2P5  | golgin A2 pseudogene 5                          |
| 211799_x_at | 0.945 | 0.00682438 | -3.0566701 | -4.21 | -3.2339879 | HLA-C     | major histocompatibility complex, class I, C    |
| 1557698_at  | 0.945 | 0.01300376 | -2.7150242 | -4.22 | -2.9107779 |           |                                                 |
| 235911_at   | 0.945 | 0.00907004 | -2.907101  | -4.22 | -3.3981188 | MELTF     | melanotransferrin                               |
| 1562103_at  | 0.945 | 0.02347606 | -2.4076742 | -4.22 | -1.6291031 | LINC01359 | long intergenic non-protein coding RNA 1359     |
| 223394_at   | 0.945 | 0.02370837 | -2.4032468 | -4.22 | -2.54459   | SERTAD1   | SERTA domain containing 1                       |



|             |       |            |            |       |            |               |                                                                                          |
|-------------|-------|------------|------------|-------|------------|---------------|------------------------------------------------------------------------------------------|
| 218829_s_at | 0.945 | 0.01260712 | -2.7289774 | -4.22 | -2.9553262 | CHD7          | chromodomain helicase DNA binding protein 7                                              |
| 1560810_at  | 0.945 | 0.02406406 | -2.3965445 | -4.22 | -4.2592342 | LOC101927735  | uncharacterized LOC101927735                                                             |
| 221398_at   | 0.945 | 0.00573992 | -3.1608596 | -4.22 | -3.7827812 | TAS2R8        | taste 2 receptor member 8                                                                |
| 218408_at   | 0.945 | 0.01773799 | -2.5548947 | -4.22 | -2.2487634 | TIMM10        | translocase of inner mitochondrial membrane 10 homolog (yeast)                           |
| 223684_s_at | 0.945 | 0.01722145 | -2.5681825 | -4.22 | -2.7039525 | SMUG1         | single-strand-selective monofunctional uracil-DNA glycosylase 1                          |
| 238519_at   | 0.945 | 0.02020705 | -2.4882431 | -4.22 | -3.1132126 | DDI2///RSC1A1 | DNA damage inducible 1 homolog 2///regulatory solute carrier protein, family 1, member 1 |
| 238901_at   | 0.945 | 0.01801473 | -2.5479234 | -4.22 | -1.4907127 | LINC01133     | long intergenic non-protein coding RNA 1133                                              |
| 244496_at   | 0.945 | 0.01180166 | -2.7718356 | -4.22 | -2.9247818 |               |                                                                                          |
| 243974_at   | 0.945 | 0.02227543 | -2.4374264 | -4.22 | -1.5505569 |               |                                                                                          |
| 241840_at   | 0.945 | 0.01809705 | -2.545869  | -4.22 | -1.6562344 |               |                                                                                          |
| 224662_at   | 0.945 | 0.02032772 | -2.4855606 | -4.22 | -3.2112476 | KIF5B         | kinesin family member 5B                                                                 |
| 244041_at   | 0.945 | 0.01020847 | -2.8374795 | -4.22 | -3.0975411 | STX6          | syntaxin 6                                                                               |
| 236856_x_at | 0.945 | 0.00975916 | -2.8736943 | -4.22 | -3.301036  |               |                                                                                          |
| 211947_s_at | 0.945 | 0.02001977 | -2.4924361 | -4.22 | -2.2497411 | PRRC2C        | proline rich coiled-coil 2C                                                              |
| 214779_s_at | 0.945 | 0.01309635 | -2.7118254 | -4.22 | -2.2138887 | SGSM3         | small G protein signaling modulator 3                                                    |
| 214523_at   | 0.945 | 0.01197639 | -2.7651593 | -4.22 | -3.5972092 | CEBPE         | CCAAT/enhancer binding protein epsilon                                                   |
| 1553428_at  | 0.945 | 0.02253448 | -2.4322152 | -4.22 | -1.8219361 | LY86-AS1      | LY86 antisense RNA 1                                                                     |

|              |       |            |            |       |            |              |                                                        |
|--------------|-------|------------|------------|-------|------------|--------------|--------------------------------------------------------|
| 236237_at    | 0.945 | 0.01206303 | -2.7618829 | -4.22 | -3.4059112 |              |                                                        |
| 236498_s_at  | 0.945 | 0.02483956 | -2.3822413 | -4.22 | -1.9506514 | FAAP20       | Fanconi anemia core complex associated protein 20      |
| 230574_at    | 0.945 | 0.01837475 | -2.5390025 | -4.22 | -2.7887897 | LOC100130938 | uncharacterized LOC100130938                           |
| 215759_at    | 0.945 | 0.0080583  | -2.9801855 | -4.23 | -3.2857998 | ANKRD53      | ankyrin repeat domain 53                               |
| 213537_at    | 0.945 | 0.01764492 | -2.5572618 | -4.23 | -2.6547492 | HLA-DPA1     | major histocompatibility complex, class II, DP alpha 1 |
| 240207_at    | 0.945 | 0.01648383 | -2.5971452 | -4.23 | -2.7481305 |              |                                                        |
| 243510_at    | 0.945 | 0.02507638 | -2.3779549 | -4.23 | -1.836234  |              |                                                        |
| 1555100_at   | 0.945 | 0.02287975 | -2.4253548 | -4.23 | -1.5923241 | APLF         | aprataxin and PNKP like factor                         |
| 1557895_at   | 0.945 | 0.0100854  | -2.8586634 | -4.23 | -2.991644  | FLJ35934     | FLJ35934                                               |
| 229270_x_at  | 0.945 | 0.02306341 | -2.4217443 | -4.23 | -1.4843268 | SSBP4        | single stranded DNA binding protein 4                  |
| 1554459_s_at | 0.945 | 0.01447523 | -2.6665617 | -4.23 | -3.0808833 | CFHR3        | complement factor H related 3                          |
| 223486_at    | 0.945 | 0.02541751 | -2.3718454 | -4.23 | -2.1226261 | GTPBP8       | GTP binding protein 8 (putative)                       |
| 239448_at    | 0.945 | 0.02123181 | -2.4659189 | -4.23 | -1.6427273 |              |                                                        |
| 234255_at    | 0.945 | 0.01919505 | -2.5192703 | -4.23 | -2.9686099 |              |                                                        |
| 1556696_s_at | 0.945 | 0.01923634 | -2.518298  | -4.23 | -2.6163498 | NR2F1-AS1    | NR2F1 antisense RNA 1                                  |
| 241063_at    | 0.945 | 0.01551952 | -2.6243488 | -4.23 | -2.1166266 |              |                                                        |
| 211419_s_at  | 0.945 | 0.01105611 | -2.8014262 | -4.23 | -3.0607438 | CHN2         | chimerin 2                                             |
| 227641_at    | 0.945 | 0.01735188 | -2.5739061 | -4.23 | -2.0276122 | FBXL16       | F-box and leucine rich repeat protein 16               |
| 204930_s_at  | 0.945 | 0.02399748 | -2.4037818 | -4.23 | -1.7051899 | BNIP1        | BCL2 interacting protein 1                             |
| 242695_at    | 0.945 | 0.00990848 | -2.8667554 | -4.23 | -2.9918652 |              |                                                        |
| 208043_at    | 0.945 | 0.02161837 | -2.4577563 | -4.23 | -2.4261934 |              |                                                        |

|              |       |            |            |       |            |               |                                                       |
|--------------|-------|------------|------------|-------|------------|---------------|-------------------------------------------------------|
| 202907_s_at  | 0.945 | 0.02644745 | -2.3538444 | -4.23 | -2.0768666 | NBN           | nibrin                                                |
| 208412_s_at  | 0.945 | 0.01776253 | -2.5632896 | -4.24 | -3.0454614 | RARB          | retinoic acid receptor beta                           |
| 239720_at    | 0.945 | 0.01108654 | -2.815293  | -4.24 | -2.9559879 | ZGLP1         | zinc finger, GATA-like protein 1                      |
| 241547_at    | 0.945 | 0.02452786 | -2.3938666 | -4.24 | -2.4888278 | A1CF          | APOBEC1 complementation factor                        |
| 1563721_at   | 0.945 | 0.02200708 | -2.4496835 | -4.24 | -2.0897329 |               |                                                       |
| 210681_s_at  | 0.945 | 0.0268199  | -2.3474923 | -4.24 | -1.9064407 | MIR6125///USP | microRNA 6125///ubiquitin specific peptidase 15<br>15 |
| 1565666_s_at | 0.945 | 0.01796866 | -2.5580469 | -4.24 | -2.7040447 | MUC6          | mucin 6, oligomeric mucus/gel-forming                 |
| 244082_at    | 0.945 | 0.02705077 | -2.3435953 | -4.24 | -1.0162711 |               |                                                       |
| 1555988_a_at | 0.945 | 0.01484773 | -2.6550341 | -4.24 | -2.5254045 | LINC00661     | long intergenic non-protein coding RNA 661            |
| 212833_at    | 0.945 | 0.01814004 | -2.5537307 | -4.24 | -2.6477171 | SLC25A46      | solute carrier family 25 member 46                    |
| 231764_at    | 0.945 | 0.02484297 | -2.3880687 | -4.24 | -1.2082859 | CHRAC1        | chromatin accessibility complex 1                     |
| 209439_s_at  | 0.945 | 0.02231199 | -2.4434425 | -4.24 | -3.0779668 | PHKA2         | phosphorylase kinase regulatory subunit alpha 2       |
| 1552372_at   | 0.945 | 0.00535466 | -3.2224427 | -4.24 | -2.4103318 | C4orf33       | chromosome 4 open reading frame 33                    |
| 204020_at    | 0.945 | 0.02733433 | -2.3388501 | -4.24 | -2.4874595 | PURA          | purine rich element binding protein A                 |
| 241477_at    | 0.945 | 0.01591559 | -2.6234403 | -4.24 | -3.2124616 | MIR631///NEIL | microRNA 631///nei like DNA glycosylase 1<br>1        |
| 231003_at    | 0.945 | 0.02743184 | -2.3372289 | -4.24 | -1.8397009 | SLC35B3       | solute carrier family 35 member B3                    |
| 204202_at    | 0.945 | 0.01527319 | -2.6421971 | -4.24 | -2.7213802 | IQCE          | IQ motif containing E                                 |
| 230345_at    | 0.945 | 0.02536442 | -2.378621  | -4.24 | -3.3780287 | SEMA7A        | semaphorin 7A (John Milton Hagen blood<br>group)      |
| 1568406_at   | 0.945 | 0.0051084  | -3.2448814 | -4.24 | -4.4983798 |               |                                                       |

|              |       |            |            |       |            |                  |                                                                                |
|--------------|-------|------------|------------|-------|------------|------------------|--------------------------------------------------------------------------------|
| 235846_at    | 0.945 | 0.02094317 | -2.4797138 | -4.24 | -2.2836192 | FSBP///RAD54 B   | fibrinogen silencer binding protein///RAD54 homolog B ( <i>S. cerevisiae</i> ) |
| 219753_at    | 0.945 | 0.01632194 | -2.6119406 | -4.24 | -2.6490541 | STAG3            | stromal antigen 3                                                              |
| 230499_at    | 0.945 | 0.01004516 | -2.8447535 | -4.24 | -3.635711  | BIRC3            | baculoviral IAP repeat containing 3                                            |
| 230063_at    | 0.945 | 0.00238807 | -3.7032063 | -4.24 | -2.699812  | ZNF264           | zinc finger protein 264                                                        |
| 1556201_at   | 0.945 | 0.0202328  | -2.4954034 | -4.24 | -1.4198943 | RNASET2          | ribonuclease T2                                                                |
| 211162_x_at  | 0.945 | 0.02040223 | -2.4916155 | -4.24 | -2.1140046 | SCD              | stearoyl-CoA desaturase                                                        |
| 1557215_at   | 0.945 | 0.0020893  | -3.771017  | -4.24 | -4.826786  | LINC00648        | long intergenic non-protein coding RNA 648                                     |
| 218714_at    | 0.945 | 0.00939129 | -2.9094039 | -4.24 | -3.7610122 | PRR14            | proline rich 14                                                                |
| 1555790_a_at | 0.945 | 0.01906763 | -2.531012  | -4.24 | -2.3670518 | TMEM192///ZNF320 | transmembrane protein 192///zinc finger protein 320                            |
| 213230_at    | 0.945 | 0.00962594 | -2.8979602 | -4.25 | -3.0900238 | CDR2L            | cerebellar degeneration related protein 2 like                                 |
| 216974_at    | 0.945 | 0.02412078 | -2.4079648 | -4.25 | -2.4596806 | KITLG            | KIT ligand                                                                     |
| 218369_s_at  | 0.945 | 0.01602708 | -2.6202577 | -4.25 | -2.6219189 | EXOSC1           | exosome component 1                                                            |
| 209396_s_at  | 0.945 | 0.0238133  | -2.4138188 | -4.25 | -2.2678126 | CHI3L1           | chitinase 3 like 1                                                             |
| 203136_at    | 0.945 | 0.02177115 | -2.4620386 | -4.25 | -2.6267415 | RABAC1           | Rab acceptor 1                                                                 |
| 240506_at    | 0.945 | 0.01236815 | -2.7649518 | -4.25 | -3.1883309 |                  |                                                                                |
| 224687_at    | 0.945 | 0.01713716 | -2.5896613 | -4.25 | -2.9536433 | ANKIB1           | ankyrin repeat and IBR domain containing 1                                     |
| 202281_at    | 0.945 | 0.02660918 | -2.3567693 | -4.25 | -1.9730272 | GAK              | cyclin G associated kinase                                                     |
| 202312_s_at  | 0.945 | 0.02933037 | -2.306665  | -4.25 | -3.1011569 | COL1A1           | collagen type I alpha 1 chain                                                  |
| 238370_x_at  | 0.945 | 0.01950032 | -2.5207654 | -4.25 | -2.4876062 |                  |                                                                                |

|             |       |            |            |       |            |              |                                                                                      |
|-------------|-------|------------|------------|-------|------------|--------------|--------------------------------------------------------------------------------------|
| 237959_at   | 0.945 | 0.01650305 | -2.6069021 | -4.25 | -2.6501324 |              |                                                                                      |
| 241069_at   | 0.945 | 0.01268101 | -2.7534229 | -4.25 | -5.1522907 |              |                                                                                      |
| 218778_x_at | 0.945 | 0.01973354 | -2.5153304 | -4.25 | -2.4325489 | EPS8L1       | EPS8 like 1                                                                          |
| 1561890_at  | 0.945 | 0.01768961 | -2.5751234 | -4.25 | -2.5115008 | C10orf128    | chromosome 10 open reading frame 128                                                 |
| 211640_x_at | 0.945 | 0.02733552 | -2.3444474 | -4.25 | -4.1960792 | IGHM///IGHG1 | immunoglobulin heavy constant mu//immunoglobulin heavy constant gamma 1 (G1m marker) |
| 210964_s_at | 0.945 | 0.01495192 | -2.6637746 | -4.25 | -2.8400234 | GYG2         | glycogenin 2                                                                         |
| 1557139_at  | 0.945 | 0.01776367 | -2.573207  | -4.25 | -2.6528347 | DDX11-AS1    | DDX11 antisense RNA 1                                                                |
| 235039_x_at | 0.945 | 0.01990893 | -2.5112823 | -4.25 | -2.4291121 | LIN9         | lin-9 DREAM MuvB core complex component                                              |
| 209324_s_at | 0.945 | 0.01794115 | -2.5686448 | -4.25 | -2.2852652 | RGS16        | regulator of G-protein signaling 16                                                  |
| 211462_s_at | 0.945 | 0.02499897 | -2.3916165 | -4.25 | -2.2663836 | TBL1Y        | transducin (beta)-like 1, Y-linked                                                   |
| 236634_at   | 0.945 | 0.02292898 | -2.4383398 | -4.25 | -2.0865906 | C8orf48      | chromosome 8 open reading frame 48                                                   |
| 225216_at   | 0.945 | 0.03020335 | -2.293212  | -4.25 | -1.7450436 | FAM199X      | family with sequence similarity 199, X-linked                                        |
| 218521_s_at | 0.945 | 0.02298823 | -2.437157  | -4.25 | -2.2688558 | UBE2W        | ubiquitin conjugating enzyme E2 W (putative)                                         |
| 212764_at   | 0.945 | 0.02778935 | -2.3368998 | -4.25 | -2.6348676 | ZEB1         | zinc finger E-box binding homeobox 1                                                 |
| 1564798_at  | 0.945 | 0.0279336  | -2.3345243 | -4.26 | -2.4416266 |              |                                                                                      |
| 201669_s_at | 0.945 | 0.03039321 | -2.290333  | -4.26 | -1.7735377 | MARCKS       | myristoylated alanine rich protein kinase C substrate                                |
| 243913_at   | 0.945 | 0.02810888 | -2.331653  | -4.26 | -1.6306041 |              |                                                                                      |
| 204717_s_at | 0.945 | 0.01345766 | -2.7259368 | -4.26 | -3.3112487 | SLC29A2      | solute carrier family 29 member 2                                                    |

|             |       |            |            |       |            |                           |                                                                                          |
|-------------|-------|------------|------------|-------|------------|---------------------------|------------------------------------------------------------------------------------------|
| 213539_at   | 0.945 | 0.01845256 | -2.5557317 | -4.26 | -3.0695649 | CD3D                      | CD3d molecule                                                                            |
| 207301_at   | 0.945 | 0.02823991 | -2.3295172 | -4.26 | -1.7917881 | EFNA5                     | ephrin A5                                                                                |
| 1553024_at  | 0.945 | 0.02561095 | -2.3805336 | -4.26 | -1.7435062 | DAOA-AS1                  | DAOA antisense RNA 1                                                                     |
| 233370_at   | 0.945 | 0.0227997  | -2.4409302 | -4.26 | -1.3248549 |                           |                                                                                          |
| 1563250_at  | 0.945 | 0.02632012 | -2.3679912 | -4.26 | -1.6233143 | LOC101927362              | uncharacterized LOC101927362                                                             |
| 226132_s_at | 0.945 | 0.01639989 | -2.6212004 | -4.26 | -1.6541454 | MANEAL                    | mannosidase endo-alpha like                                                              |
| 220553_s_at | 0.945 | 0.00796103 | -3.0077548 | -4.26 | -4.1926326 | PRPF39                    | pre-mRNA processing factor 39                                                            |
| 226105_at   | 0.945 | 0.01389145 | -2.7112366 | -4.26 | -3.0957547 | C1GALT1                   | core 1 synthase,<br>glycoprotein-N-acetylgalactosamine<br>3-beta-galactosyltransferase 1 |
| 204421_s_at | 0.945 | 0.02396877 | -2.4179832 | -4.26 | -2.4841285 | FGF2                      | fibroblast growth factor 2                                                               |
| 226180_at   | 0.945 | 0.02307442 | -2.4354417 | -4.26 | -2.3975952 | WDR36                     | WD repeat domain 36                                                                      |
| 35666_at    | 0.945 | 0.0267107  | -2.3612156 | -4.26 | -3.9869003 | SEMA3F                    | semaphorin 3F                                                                            |
| 230853_at   | 0.945 | 0.02415786 | -2.4143692 | -4.26 | -2.7914672 | FEM1A                     | fem-1 homolog A                                                                          |
| 1570007_at  | 0.945 | 0.02916199 | -2.3147381 | -4.26 | -2.2795894 | LOC101927933<br>///LRRC8C | uncharacterized LOC101927933///leucine rich<br>repeat containing 8 family member C       |
| 1563073_at  | 0.945 | 0.03171124 | -2.2707859 | -4.26 | -3.5704505 | LINC01282                 | long intergenic non-protein coding RNA 1282                                              |
| 211856_x_at | 0.945 | 0.02429943 | -2.4116806 | -4.26 | -2.8988276 | CD28                      | CD28 molecule                                                                            |
| 240972_at   | 0.945 | 0.02696874 | -2.3567887 | -4.26 | -1.6882752 |                           |                                                                                          |
| 237690_at   | 0.945 | 0.0143284  | -2.696865  | -4.26 | -3.3293191 | ADGRF4                    | adhesion G protein-coupled receptor F4                                                   |
| 207031_at   | 0.945 | 0.01649881 | -2.6184231 | -4.26 | -2.3726761 | NKX3-2                    | NK3 homeobox 2                                                                           |
| 241450_at   | 0.945 | 0.01848831 | -2.5548416 | -4.26 | -2.5472099 | RSPO1                     | R-spondin 1                                                                              |

|              |       |            |            |       |            |           |                                                                     |
|--------------|-------|------------|------------|-------|------------|-----------|---------------------------------------------------------------------|
| 222745_s_at  | 0.945 | 0.02220368 | -2.4611759 | -4.26 | -3.1084102 | KATNBL1   | katanin regulatory subunit B1 like 1                                |
| 1557812_a_at | 0.945 | 0.01954286 | -2.5292869 | -4.26 | -2.884553  |           |                                                                     |
| 218351_at    | 0.945 | 0.00520602 | -3.2698865 | -4.26 | -4.260662  | COMM8     | COMM domain containing 8                                            |
| 37145_at     | 0.945 | 0.03241473 | -2.2606528 | -4.27 | -1.8445154 | GNLY      | granulysin                                                          |
| 231418_at    | 0.945 | 0.01466453 | -2.6860907 | -4.27 | -3.3550175 |           |                                                                     |
| 238037_at    | 0.945 | 0.02495653 | -2.3993876 | -4.27 | -4.0854693 | LMLN      | leishmanolysin like peptidase                                       |
| 212213_x_at  | 0.945 | 0.03249531 | -2.2595048 | -4.27 | -2.3012435 | OPA1      | OPA1, mitochondrial dynamin like GTPase                             |
| 222843_at    | 0.945 | 0.02722144 | -2.3524911 | -4.27 | -1.8477589 | FIGNL1    | fidgetin like 1                                                     |
| 1556405_s_at | 0.945 | 0.03258539 | -2.2582246 | -4.27 | -2.4571497 | LOC374890 | uncharacterized LOC374890                                           |
| 233827_s_at  | 0.945 | 0.01698886 | -2.6048929 | -4.27 | -3.0893924 | SUPT16H   | SPT16 homolog, facilitates chromatin remodeling subunit             |
| 237316_at    | 0.945 | 0.01703405 | -2.6036639 | -4.27 | -3.7983912 | ANKDD1A   | ankyrin repeat and death domain containing 1A                       |
| 225862_at    | 0.945 | 0.01486006 | -2.679931  | -4.27 | -3.0218965 | SLC25A26  | solute carrier family 25 member 26                                  |
| 209507_at    | 0.945 | 0.01194098 | -2.7975991 | -4.27 | -3.768616  | RPA3      | replication protein A3                                              |
| 234434_at    | 0.945 | 0.01382441 | -2.7134795 | -4.27 | -3.5902951 |           |                                                                     |
| 234866_s_at  | 0.945 | 0.00877588 | -2.9619155 | -4.27 | -3.8655348 | ZNRD1ASP  | zinc ribbon domain containing 1 antisense, pseudogene               |
| 208619_at    | 0.945 | 0.03033792 | -2.2964971 | -4.27 | -1.9299884 | DDB1      | damage specific DNA binding protein 1                               |
| 1553281_at   | 0.945 | 0.03296524 | -2.2528612 | -4.27 | -1.5497281 | PLCXD2    | phosphatidylinositol specific phospholipase C X domain containing 2 |
| 242088_at    | 0.945 | 0.0202672  | -2.5124721 | -4.27 | -3.2580544 | KLHL24    | kelch like family member 24                                         |

|              |       |            |            |       |            |              |                                                            |
|--------------|-------|------------|------------|-------|------------|--------------|------------------------------------------------------------|
| 221087_s_at  | 0.945 | 0.0246271  | -2.4055126 | -4.27 | -2.3716138 | APOL3        | apolipoprotein L3                                          |
| 204885_s_at  | 0.945 | 0.0078503  | -3.0395433 | -4.27 | -2.1891582 | MSLN         | mesothelin                                                 |
| 237691_x_at  | 0.945 | 0.01738464 | -2.5942317 | -4.27 | -3.1491009 | ENO3         | enolase 3                                                  |
| 1552745_at   | 0.945 | 0.01522364 | -2.6686792 | -4.27 | -3.6429988 | SLCO6A1      | solute carrier organic anion transporter family member 6A1 |
| 1561064_a_at | 0.945 | 0.01226826 | -2.78495   | -4.27 | -3.5505403 |              |                                                            |
| 1559190_s_at | 0.945 | 0.01593221 | -2.6345488 | -4.27 | -3.3749654 | RDH13        | retinol dehydrogenase 13                                   |
| 205564_at    | 0.945 | 0.03098896 | -2.2866735 | -4.27 | -1.0495321 | PAGE4        | PAGE family member 4                                       |
| 218007_s_at  | 0.945 | 0.02070641 | -2.5025482 | -4.27 | -2.0350804 | RPS27L       | ribosomal protein S27 like                                 |
| 1556015_a_at | 0.945 | 0.01240399 | -2.7797992 | -4.27 | -4.0145418 | MESP2        | mesoderm posterior bHLH transcription factor 2             |
| 222129_at    | 0.945 | 0.02084224 | -2.4995188 | -4.27 | -3.3814978 | FAM134A      | family with sequence similarity 134 member A               |
| 220704_at    | 0.945 | 0.02092126 | -2.497765  | -4.27 | -2.8723811 | IKZF1        | IKAROS family zinc finger 1                                |
| 238829_at    | 0.945 | 0.02092702 | -2.4976373 | -4.27 | -2.5659276 |              |                                                            |
| 1553329_at   | 0.945 | 0.02898143 | -2.3235353 | -4.27 | -2.1662265 | SSMEM1       | serine rich single-pass membrane protein 1                 |
| 217884_at    | 0.945 | 0.01322158 | -2.7498705 | -4.27 | -3.5197693 | NAT10        | N-acetyltransferase 10                                     |
| 1556486_at   | 0.945 | 0.03145    | -2.2798299 | -4.27 | -1.960021  | LOC105378577 | basic proline-rich protein-like                            |
| 209651_at    | 0.945 | 0.02634692 | -2.3743312 | -4.27 | -2.6044215 | TGFB1I1      | transforming growth factor beta 1 induced transcript 1     |
| 206350_at    | 0.945 | 0.02386134 | -2.4278941 | -4.27 | -2.0950915 | APCS         | amyloid P component, serum                                 |
| 215503_at    | 0.945 | 0.00359252 | -3.4123372 | -4.27 | -4.3154568 | SPINT3       | serine peptidase inhibitor, Kunitz type 3                  |
| 219040_at    | 0.945 | 0.02119538 | -2.4917286 | -4.27 | -3.0126792 | CORO7        | coronin 7                                                  |



|              |       |            |            |       |            |            |                                                                                        |
|--------------|-------|------------|------------|-------|------------|------------|----------------------------------------------------------------------------------------|
| 213615_at    | 0.945 | 0.03168132 | -2.2764305 | -4.27 | -1.8741541 | LPCAT3     | lysophosphatidylcholine acyltransferase 3                                              |
| 1570337_at   | 0.945 | 0.03429735 | -2.2344843 | -4.27 | -2.4013764 | FIGLA      | folliculogenesis specific bHLH transcription factor                                    |
| 206934_at    | 0.945 | 0.01654044 | -2.6172592 | -4.27 | -4.1306009 | SIRPB1     | signal regulatory protein beta 1                                                       |
| 224712_x_at  | 0.945 | 0.02590933 | -2.3820829 | -4.28 | -1.8187803 | SMIM7      | small integral membrane protein 7                                                      |
| 219148_at    | 0.945 | 0.0296166  | -2.3134796 | -4.28 | -2.474251  | PBK        | PDZ binding kinase                                                                     |
| 220189_s_at  | 0.945 | 0.03477632 | -2.2280344 | -4.28 | -1.6413002 | MGAT4B     | mannosyl (alpha-1,3-)-glycoprotein beta-1,4-N-acetylglucosaminyltransferase, isozyme B |
| 1556872_s_at | 0.945 | 0.0216824  | -2.4811814 | -4.28 | -2.6012664 | IQSEC3     | IQ motif and Sec7 domain 3                                                             |
| 226190_at    | 0.945 | 0.01627241 | -2.6375984 | -4.28 | -2.9782253 | MAP3K13    | mitogen-activated protein kinase kinase kinase 13                                      |
| 238039_at    | 0.945 | 0.03491366 | -2.2261997 | -4.28 | -4.3400776 | SCAMP1-AS1 | SCAMP1 antisense RNA 1                                                                 |
| 218577_at    | 0.945 | 0.02186222 | -2.4773429 | -4.28 | -2.916613  | LRRC40     | leucine rich repeat containing 40                                                      |
| 207109_at    | 0.945 | 0.02198635 | -2.4747104 | -4.28 | -2.7613433 | POU2F3     | POU class 2 homeobox 3                                                                 |
| 228514_at    | 0.945 | 0.01336047 | -2.7449636 | -4.28 | -2.8589989 |            |                                                                                        |
| 1564482_at   | 0.945 | 0.01947484 | -2.5414628 | -4.28 | -2.12274   | ATP5O      | ATP synthase, H <sup>+</sup> transporting, mitochondrial F1 complex, O subunit         |
| 235253_at    | 0.945 | 0.03026508 | -2.3034146 | -4.28 | -1.5086653 | RAD1       | RAD1 checkpoint DNA exonuclease                                                        |
| 225208_s_at  | 0.945 | 0.02505987 | -2.4051408 | -4.28 | -2.5243887 | FAM103A1   | family with sequence similarity 103 member A1                                          |
| 242508_at    | 0.945 | 0.03286506 | -2.2593802 | -4.28 | -2.5753944 | USF3       | upstream transcription factor family member 3                                          |

|              |       |            |            |       |            |              |                                                  |
|--------------|-------|------------|------------|-------|------------|--------------|--------------------------------------------------|
| 223910_at    | 0.945 | 0.02763978 | -2.3521023 | -4.28 | -2.2047671 | ERN2         | endoplasmic reticulum to nucleus signaling 2     |
| 228429_x_at  | 0.945 | 0.01681322 | -2.6223067 | -4.28 | -3.3613108 | KIF9         | kinesin family member 9                          |
| 236185_at    | 0.945 | 0.01143769 | -2.8366582 | -4.28 | -3.1421238 | NHLRC2       | NHL repeat containing 2                          |
| 205417_s_at  | 0.945 | 0.02246711 | -2.4646436 | -4.28 | -2.6055676 | DAG1         | dystroglycan 1                                   |
| 1562718_at   | 0.945 | 0.02493872 | -2.4073944 | -4.28 | -2.2960348 | LOC102724449 | uncharacterized LOC102724449                     |
| 237142_at    | 0.945 | 0.0138301  | -2.7287256 | -4.28 | -2.6940575 | PPARA        | peroxisome proliferator activated receptor alpha |
| 1552612_at   | 0.945 | 0.03043565 | -2.3007999 | -4.28 | -1.5971049 | CDC42SE2     | CDC42 small effector 2                           |
| 238735_at    | 0.945 | 0.00796981 | -3.0072365 | -4.28 | -3.8569891 |              |                                                  |
| 227055_at    | 0.945 | 0.03611985 | -2.210361  | -4.28 | -3.1809083 | METTL7B      | methyltransferase like 7B                        |
| 204929_s_at  | 0.945 | 0.02272937 | -2.4592364 | -4.28 | -2.7907804 | VAMP5        | vesicle associated membrane protein 5            |
| 242028_at    | 0.945 | 0.02825749 | -2.3418172 | -4.28 | -2.2286047 | ZNF709       | zinc finger protein 709                          |
| 211595_s_at  | 0.945 | 0.01959966 | -2.5384829 | -4.28 | -2.983146  | MRPS11       | mitochondrial ribosomal protein S11              |
| 238097_at    | 0.945 | 0.02523375 | -2.4019238 | -4.28 | -1.9635581 | GAS6-AS1     | GAS6 antisense RNA 1                             |
| 1567055_at   | 0.945 | 0.03071702 | -2.2965159 | -4.28 | -1.439421  | OR1C1        | olfactory receptor family 1 subfamily C member 1 |
| 231394_at    | 0.945 | 0.01187183 | -2.8189586 | -4.28 | -3.5860524 | PCDHB3       | protocadherin beta 3                             |
| 1559789_a_at | 0.945 | 0.01746946 | -2.6043651 | -4.28 | -2.7925702 | ZNF781       | zinc finger protein 781                          |
| 203403_s_at  | 0.945 | 0.02868675 | -2.3347908 | -4.28 | -2.6610476 | RNF6         | ring finger protein 6                            |
| 217184_s_at  | 0.945 | 0.01068694 | -2.8688575 | -4.28 | -4.1796276 | LTK          | leukocyte receptor tyrosine kinase               |
| 1565923_at   | 0.945 | 0.01424844 | -2.7146993 | -4.28 | -3.4103103 |              |                                                  |
| 227311_at    | 0.945 | 0.03407776 | -2.2424816 | -4.28 | -2.6659271 | SNX25        | sorting nexin 25                                 |

|             |       |            |            |       |            |           |                                                           |
|-------------|-------|------------|------------|-------|------------|-----------|-----------------------------------------------------------|
| 218588_s_at | 0.945 | 0.01990038 | -2.520916  | -4.28 | -2.908155  | FAM114A2  | family with sequence similarity 114 member A2             |
| 211579_at   | 0.945 | 0.03681902 | -2.2013974 | -4.28 | -1.4166816 | ITGB3     | integrin subunit beta 3                                   |
| 206964_at   | 0.945 | 0.00831435 | -2.9873422 | -4.28 | -3.2510101 | NAT8B     | N-acetyltransferase 8B (putative, gene/pseudogene)        |
| 239825_at   | 0.945 | 0.02568409 | -2.3936865 | -4.28 | -2.7173685 |           |                                                           |
| 242418_at   | 0.945 | 0.03684599 | -2.2010547 | -4.28 | -1.7737382 | C2orf27A  | chromosome 2 open reading frame 27A                       |
| 1556567_at  | 0.945 | 0.01642659 | -2.6331902 | -4.28 | -2.1104964 | NAP1L4    | nucleosome assembly protein 1 like 4                      |
| 234247_at   | 0.945 | 0.01249184 | -2.7764941 | -4.29 | -2.9163926 |           |                                                           |
| 207530_s_at | 0.945 | 0.01651364 | -2.6307189 | -4.29 | -3.2884824 | CDKN2B    | cyclin dependent kinase inhibitor 2B                      |
| 217736_s_at | 0.945 | 0.00697995 | -3.1262642 | -4.29 | -3.6700239 | EIF2AK1   | eukaryotic translation initiation factor 2 alpha kinase 1 |
| 215240_at   | 0.945 | 0.00185947 | -3.897558  | -4.29 | -4.449741  | ITGB3     | integrin subunit beta 3                                   |
| 1552892_at  | 0.945 | 0.03200516 | -2.2773494 | -4.29 | -2.104182  | TNFRSF13C | TNF receptor superfamily member 13C                       |
| 230874_at   | 0.945 | 0.01468296 | -2.7005419 | -4.29 | -3.0377649 | SLC36A4   | solute carrier family 36 member 4                         |
| 211126_s_at | 0.945 | 0.02051333 | -2.5171977 | -4.29 | -3.1396701 | CSRP2     | cysteine and glycine rich protein 2                       |
| 230609_at   | 0.945 | 0.0205345  | -2.5167152 | -4.29 | -2.4160133 | CLINT1    | clathrin interactor 1                                     |
| 1561467_at  | 0.945 | 0.037624   | -2.1912652 | -4.29 | -1.1830555 |           |                                                           |
| 222239_s_at | 0.945 | 0.03244518 | -2.2709631 | -4.29 | -2.6991431 | INTS6     | integrator complex subunit 6                              |
| 214249_at   | 0.945 | 0.02488119 | -2.4084681 | -4.29 | -2.6453156 | TRIM2     | tripartite motif containing 2                             |
| 215722_s_at | 0.945 | 0.02704303 | -2.3696146 | -4.29 | -2.4195972 | SNRPA1    | small nuclear ribonucleoprotein polypeptide A'            |
| 210657_s_at | 0.945 | 0.01836641 | -2.580848  | -4.29 | -2.9970685 | SEPT4     | septin 4                                                  |

|             |       |            |            |       |            |          |                                                        |
|-------------|-------|------------|------------|-------|------------|----------|--------------------------------------------------------|
| 1553369_at  | 0.945 | 0.02984413 | -2.316316  | -4.29 | -2.3256879 | FAM129C  | family with sequence similarity 129 member C           |
| 244399_at   | 0.945 | 0.03810834 | -2.1852625 | -4.29 | -1.9948048 |          |                                                        |
| 1569975_at  | 0.945 | 0.01578851 | -2.6662498 | -4.29 | -3.1573982 |          |                                                        |
| 203709_at   | 0.945 | 0.02099847 | -2.5062546 | -4.29 | -2.8245978 | PHKG2    | phosphorylase kinase catalytic subunit gamma 2         |
| 238909_at   | 0.945 | 0.01854506 | -2.5762939 | -4.29 | -3.1852169 | S100A10  | S100 calcium binding protein A10                       |
| 231324_at   | 0.945 | 0.03016194 | -2.311358  | -4.29 | -1.8626014 |          |                                                        |
| 243067_at   | 0.945 | 0.02451154 | -2.4239594 | -4.29 | -2.6409482 |          |                                                        |
| 1564911_at  | 0.945 | 0.02451261 | -2.423939  | -4.29 | -2.574269  | SNHG4    | small nucleolar RNA host gene 4                        |
| 228982_s_at | 0.945 | 0.02451786 | -2.4238386 | -4.29 | -2.6239116 | USP42    | ubiquitin specific peptidase 42                        |
| 211488_s_at | 0.945 | 0.03259808 | -2.2687624 | -4.29 | -2.3179311 | ITGB8    | integrin subunit beta 8                                |
| 212680_x_at | 0.945 | 0.02116351 | -2.502586  | -4.29 | -2.0993228 | PPP1R14B | protein phosphatase 1 regulatory inhibitor subunit 14B |
| 242655_at   | 0.945 | 0.01934801 | -2.5445093 | -4.29 | -2.911855  | BARD1    | BRCA1 associated RING domain 1                         |
| 242758_x_at | 0.945 | 0.02458853 | -2.42249   | -4.29 | -2.9119888 | KDM3A    | lysine demethylase 3A                                  |
| 214416_at   | 0.945 | 0.02760653 | -2.3599589 | -4.29 | -2.7025464 |          |                                                        |
| 204911_s_at | 0.945 | 0.0357518  | -2.2200286 | -4.29 | -2.0967121 | TRIM3    | tripartite motif containing 3                          |
| 211531_x_at | 0.945 | 0.03853731 | -2.1800032 | -4.29 | -2.3251742 | PRB1     | proline rich protein BstNI subfamily 1                 |
| 210083_at   | 0.945 | 0.03853913 | -2.1799809 | -4.29 | -2.6678852 | SEMA7A   | semaphorin 7A (John Milton Hagen blood group)          |
| 237638_at   | 0.945 | 0.01888976 | -2.5676228 | -4.29 | -2.5913462 |          |                                                        |
| 228401_at   | 0.945 | 0.0278091  | -2.3565322 | -4.29 | -2.3560882 | ATAD2    | ATPase family, AAA domain containing 2                 |
| 1555595_at  | 0.945 | 0.02479187 | -2.418629  | -4.29 | -3.768228  | SCRN3    | secernin 3                                             |

|              |       |            |            |       |            |                                                                                                                                                                                          |                                                      |
|--------------|-------|------------|------------|-------|------------|------------------------------------------------------------------------------------------------------------------------------------------------------------------------------------------|------------------------------------------------------|
| 1555745_a_at | 0.945 | 0.02783522 | -2.3560921 | -4.29 | -2.4634857 | LYZ                                                                                                                                                                                      | lysozyme                                             |
| 224727_at    | 0.945 | 0.03056534 | -2.3051331 | -4.29 | -1.4670885 | EMC10                                                                                                                                                                                    | ER membrane protein complex subunit 10               |
| 226774_at    | 0.945 | 0.02215863 | -2.4810171 | -4.29 | -2.4053029 | FAM120B                                                                                                                                                                                  | family with sequence similarity 120B                 |
| 201899_s_at  | 0.945 | 0.03645321 | -2.2109027 | -4.29 | -2.2916784 | UBE2A                                                                                                                                                                                    | ubiquitin conjugating enzyme E2 A                    |
| 1560028_at   | 0.945 | 0.0311441  | -2.2963323 | -4.3  | -2.2124644 | C11orf57                                                                                                                                                                                 | chromosome 11 open reading frame 57                  |
| 207600_at    | 0.945 | 0.01945426 | -2.5537403 | -4.3  | -2.5614819 | KCNC3                                                                                                                                                                                    | potassium voltage-gated channel subfamily C member 3 |
| 223032_x_at  | 0.945 | 0.02540305 | -2.4071985 | -4.3  | -1.8675321 | PRELID1                                                                                                                                                                                  | PRELI domain containing 1                            |
| 1553849_at   | 0.945 | 0.02546189 | -2.4061115 | -4.3  | -2.5166372 | CCDC26                                                                                                                                                                                   | CCDC26 long non-coding RNA                           |
| 215670_s_at  | 0.945 | 0.00815257 | -3.0214154 | -4.3  | -2.1804389 | SCAND2P                                                                                                                                                                                  | SCAN domain containing 2 pseudogene                  |
| 1564807_at   | 0.945 | 0.02204755 | -2.4833793 | -4.3  | -3.1070965 |                                                                                                                                                                                          |                                                      |
| 234366_x_at  | 0.945 | 0.03680347 | -2.2064049 | -4.3  | -1.491655  | IGLJ3///CKAP2 immunoglobulin lambda joining 3///cytoskeleton<br>///IGLV@///IG associated protein 2///immunoglobulin lambda<br>LC1 variable cluster///immunoglobulin lambda<br>constant 1 |                                                      |
| 218854_at    | 0.945 | 0.02212117 | -2.4818125 | -4.3  | -2.7871    | DSE                                                                                                                                                                                      | dermatan sulfate epimerase                           |
| 1553639_a_at | 0.945 | 0.01960781 | -2.5500298 | -4.3  | -2.6298011 | PPARGC1B                                                                                                                                                                                 | PPARG coactivator 1 beta                             |
| 239587_at    | 0.945 | 0.03138763 | -2.2926738 | -4.3  | -1.8469398 | TLR3                                                                                                                                                                                     | toll like receptor 3                                 |
| 227420_at    | 0.945 | 0.02291329 | -2.4652562 | -4.3  | -3.2091366 | TNFAIP8L1                                                                                                                                                                                | TNF alpha induced protein 8 like 1                   |
| 1559494_at   | 0.945 | 0.00816462 | -3.0492906 | -4.3  | -3.90075   | SLC35G2                                                                                                                                                                                  | solute carrier family 35 member G2                   |
| 222356_at    | 0.945 | 0.0340349  | -2.2485293 | -4.3  | -1.7555101 |                                                                                                                                                                                          |                                                      |

|              |       |            |            |      |            |         |                                                  |
|--------------|-------|------------|------------|------|------------|---------|--------------------------------------------------|
| 243541_at    | 0.945 | 0.02460408 | -2.4221936 | -4.3 | -2.2481353 | IL31RA  | interleukin 31 receptor A                        |
| 217677_at    | 0.945 | 0.03167915 | -2.2883282 | -4.3 | -2.5446298 | PLEKHA2 | pleckstrin homology domain containing A2         |
| 1566294_at   | 0.945 | 0.0111649  | -2.8699327 | -4.3 | -2.7680973 |         |                                                  |
| 1556334_s_at | 0.945 | 0.02473303 | -2.4197432 | -4.3 | -2.4594618 |         |                                                  |
| 1566973_at   | 0.945 | 0.04016184 | -2.1605513 | -4.3 | -2.0740455 |         |                                                  |
| 238745_at    | 0.945 | 0.01864994 | -2.5736395 | -4.3 | -2.551347  |         |                                                  |
| 223736_at    | 0.945 | 0.01714779 | -2.6270962 | -4.3 | -2.9388991 | IFT81   | intraflagellar transport 81                      |
| 1557218_s_at | 0.945 | 0.04021879 | -2.1598822 | -4.3 | -3.5208731 | FANCB   | Fanconi anemia complementation group B           |
| 217364_x_at  | 0.945 | 0.01400274 | -2.7402434 | -4.3 | -2.6980727 |         |                                                  |
| 239841_at    | 0.945 | 0.02003036 | -2.5399589 | -4.3 | -3.3068094 |         |                                                  |
| 230467_at    | 0.945 | 0.01717924 | -2.6262256 | -4.3 | -2.6562521 | TMEM52  | transmembrane protein 52                         |
| 223210_at    | 0.945 | 0.03489444 | -2.2367936 | -4.3 | -1.9849573 | CHURC1  | churchill domain containing 1                    |
| 238912_x_at  | 0.945 | 0.0172831  | -2.6233615 | -4.3 | -2.9011249 | C9orf85 | chromosome 9 open reading frame 85               |
| 221263_s_at  | 0.945 | 0.02335353 | -2.4562846 | -4.3 | -2.0416243 | SF3B5   | splicing factor 3b subunit 5                     |
| 216103_at    | 0.945 | 0.02874391 | -2.3410111 | -4.3 | -2.4241864 | ACOT11  | acyl-CoA thioesterase 11                         |
| 242231_at    | 0.945 | 0.03454091 | -2.2415884 | -4.3 | -1.5080804 |         |                                                  |
| 204552_at    | 0.945 | 0.0320905  | -2.2822582 | -4.3 | -2.5853074 | INPP4A  | inositol polyphosphate-4-phosphatase type I A    |
| 214395_x_at  | 0.945 | 0.04049766 | -2.1566186 | -4.3 | -1.3691457 | EEF1D   | eukaryotic translation elongation factor 1 delta |
| 236070_at    | 0.945 | 0.03458301 | -2.2410151 | -4.3 | -2.6251292 | C2orf81 | chromosome 2 open reading frame 81               |
| 1553378_a_at | 0.945 | 0.0351186  | -2.2337762 | -4.3 | -1.6761653 | HEATR9  | HEAT repeat containing 9                         |

|              |       |            |            |      |            |                                                                      |                                                                                                                                                                |
|--------------|-------|------------|------------|------|------------|----------------------------------------------------------------------|----------------------------------------------------------------------------------------------------------------------------------------------------------------|
| 224752_at    | 0.945 | 0.02348206 | -2.4536951 | -4.3 | -3.2248607 | LOC101930655 uncharacterized LOC101930655///chromosome<br>///C7orf73 | 7 open reading frame 73                                                                                                                                        |
| 227215_at    | 0.945 | 0.01897459 | -2.5655119 | -4.3 | -3.1492189 | GOPC                                                                 | golgi associated PDZ and coiled-coil motif<br>containing                                                                                                       |
| 235057_at    | 0.945 | 0.04065949 | -2.1547338 | -4.3 | -2.8765789 | ITCH                                                                 | itchy E3 ubiquitin protein ligase                                                                                                                              |
| 1562648_at   | 0.945 | 0.03526419 | -2.2318257 | -4.3 | -2.5460442 | CCDC88A                                                              | coiled-coil domain containing 88A                                                                                                                              |
| 1565756_a_at | 0.945 | 0.03798317 | -2.1915349 | -4.3 | -1.9283316 | METAP1D                                                              | methionyl aminopeptidase type 1D<br>(mitochondrial)                                                                                                            |
| 1556613_s_at | 0.945 | 0.02299842 | -2.463509  | -4.3 | -1.2168084 | DPY19L4                                                              | dpy-19 like 4 (C. elegans)                                                                                                                                     |
| 212914_at    | 0.945 | 0.0291104  | -2.3350526 | -4.3 | -2.8172675 | CBX7                                                                 | chromobox 7                                                                                                                                                    |
| 215766_at    | 0.945 | 0.04094702 | -2.1514017 | -4.3 | -1.6488632 | GSTA1                                                                | glutathione S-transferase alpha 1                                                                                                                              |
| 223313_s_at  | 0.945 | 0.02994635 | -2.3217155 | -4.3 | -3.4182433 | SNORA11E///S                                                         | small nucleolar RNA, H/ACA box 11E///small<br>NORA11D///M nucleolar RNA, H/ACA box 11D///MAGE<br>AGED4///MAG family member D4///MAGE family member<br>ED4B D4B |
| 209867_s_at  | 0.945 | 0.03285519 | -2.2711608 | -4.3 | -2.3757929 | ADGRL3                                                               | adhesion G protein-coupled receptor L3                                                                                                                         |
| 214569_at    | 0.945 | 0.03287353 | -2.2708975 | -4.3 | -2.6817207 | IFNA5                                                                | interferon alpha 5                                                                                                                                             |
| 226947_at    | 0.945 | 0.03188368 | -2.2853011 | -4.3 | -2.7326053 | GUSBP1///GUS<br>BP4                                                  | glucuronidase, beta pseudogene<br>1///glucuronidase, beta pseudogene 4                                                                                         |
| 1556469_s_at | 0.945 | 0.03296717 | -2.2695555 | -4.3 | -2.3169787 | LOC105376166                                                         | uncharacterized LOC105376166                                                                                                                                   |
| 213023_at    | 0.945 | 0.041466   | -2.1454401 | -4.3 | -2.6405176 | UTRN                                                                 | utrophin                                                                                                                                                       |
| 212296_at    | 0.945 | 0.02586591 | -2.3987105 | -4.3 | -1.4225047 | PSMD14                                                               | proteasome 26S subunit, non-ATPase 14                                                                                                                          |
| 1554219_at   | 0.945 | 0.03307433 | -2.268024  | -4.3 | -3.9721192 |                                                                      |                                                                                                                                                                |

|              |       |            |            |       |            |              |                                                                     |
|--------------|-------|------------|------------|-------|------------|--------------|---------------------------------------------------------------------|
| 215271_at    | 0.945 | 0.04156559 | -2.1443037 | -4.3  | -1.7817763 | TNN          | tenascin N                                                          |
| 212100_s_at  | 0.945 | 0.03317875 | -2.266536  | -4.3  | -2.0661905 | POLDIP3      | DNA polymerase delta interacting protein 3                          |
| 215490_at    | 0.945 | 0.03890572 | -2.1801939 | -4.3  | -2.2265601 | IBA57        | IBA57 homolog, iron-sulfur cluster assembly                         |
| 1561550_at   | 0.945 | 0.02438177 | -2.4359303 | -4.3  | -3.1774022 | LOC101928012 | uncharacterized LOC101928012                                        |
| 218193_s_at  | 0.945 | 0.02121686 | -2.5127146 | -4.3  | -2.9261774 | GOLT1B       | golgi transport 1B                                                  |
| 226355_at    | 0.945 | 0.01070205 | -2.8681881 | -4.3  | -2.950388  | POC1A        | POC1 centriolar protein A                                           |
| 223444_at    | 0.945 | 0.01762995 | -2.6139143 | -4.3  | -2.6507506 | SEN7         | SUMO1/sentrin specific peptidase 7                                  |
| 1555874_x_at | 0.945 | 0.03011617 | -2.319048  | -4.3  | -1.4666909 | GLIDR        | glioblastoma down-regulated RNA                                     |
| 228492_at    | 0.945 | 0.03654088 | -2.2150283 | -4.3  | -2.4799165 | USP9Y        | ubiquitin specific peptidase 9, Y-linked                            |
| 1570630_at   | 0.945 | 0.04207832 | -2.1384917 | -4.3  | -4.0238073 |              |                                                                     |
| 1568821_at   | 0.945 | 0.03023495 | -2.3171903 | -4.31 | -2.5343863 | TTC23        | tetratricopeptide repeat domain 23                                  |
| 1561104_at   | 0.945 | 0.02394367 | -2.4349337 | -4.31 | -3.1783602 | LOC101926962 | uncharacterized LOC101926962                                        |
| 234881_at    | 0.945 | 0.03083968 | -2.3078359 | -4.31 | -2.1867108 |              |                                                                     |
| 211930_at    | 0.945 | 0.0214617  | -2.5072714 | -4.31 | -3.4484707 | HNRNPA3      | heterogeneous nuclear ribonucleoprotein A3                          |
| 221010_s_at  | 0.945 | 0.03032406 | -2.3158013 | -4.31 | -3.016591  | SIRT5        | sirtuin 5                                                           |
| 224710_at    | 0.945 | 0.02012035 | -2.53784   | -4.31 | -2.5351158 | NARR///RAB34 | nine-amino acid residue-repeats///RAB34, member RAS oncogene family |
| 232808_at    | 0.945 | 0.03273586 | -2.272877  | -4.31 | -1.9301949 |              |                                                                     |
| 1562011_at   | 0.945 | 0.01528196 | -2.6983588 | -4.31 | -3.7775681 | DOCK4-AS1    | DOCK4 antisense RNA 1                                               |
| 239845_at    | 0.945 | 0.02807463 | -2.3600502 | -4.31 | -1.5175388 |              |                                                                     |



|              |       |            |            |       |            |              |                                                                 |
|--------------|-------|------------|------------|-------|------------|--------------|-----------------------------------------------------------------|
| 206099_at    | 0.945 | 0.04294162 | -2.1288475 | -4.31 | -2.9999667 | PRKCH        | protein kinase C eta                                            |
| 232169_x_at  | 0.945 | 0.02831126 | -2.3560767 | -4.31 | -2.9303554 | MIR7113//MI  | microRNA 7113//microRNA                                         |
|              |       |            |            |       |            | R4691//NDUF  | 4691//NADH:ubiquinone oxidoreductase core subunit S8            |
| 205049_s_at  | 0.945 | 0.04313818 | -2.1266759 | -4.31 | -3.3443849 | CD79A        | CD79a molecule                                                  |
| 1553185_at   | 0.945 | 0.01838241 | -2.5940121 | -4.31 | -2.8448829 | RASEF        | RAS and EF-hand domain containing                               |
| 223013_at    | 0.945 | 0.04044439 | -2.1618069 | -4.31 | -1.7258207 | TBL1XR1      | transducin (beta)-like 1 X-linked receptor 1                    |
| 1555772_a_at | 0.945 | 0.02859082 | -2.3514217 | -4.31 | -2.5066432 | CDC25A       | cell division cycle 25A                                         |
| 1566169_at   | 0.945 | 0.02498431 | -2.4243718 | -4.31 | -2.1170819 |              |                                                                 |
| 228259_s_at  | 0.945 | 0.04054237 | -2.1606574 | -4.31 | -3.6714484 | EPB41L4A-AS  | EPB41L4A antisense RNA 1                                        |
|              |       |            |            |       |            | 1            |                                                                 |
| 211836_s_at  | 0.945 | 0.04074827 | -2.1582501 | -4.31 | -2.147612  | MOG          | myelin oligodendrocyte glycoprotein                             |
| 209118_s_at  | 0.945 | 0.03806196 | -2.195696  | -4.31 | -3.0151141 | TUBA1A       | tubulin alpha 1a                                                |
| 241219_at    | 0.945 | 0.02897198 | -2.3451423 | -4.31 | -3.0506794 |              |                                                                 |
| 242458_at    | 0.945 | 0.04093199 | -2.1561113 | -4.31 | -4.3507352 | RALGPS2      | Ral GEF with PH domain and SH3 binding motif 2                  |
| 221874_at    | 0.945 | 0.01887367 | -2.5814319 | -4.31 | -3.4631679 | KIAA1324     | KIAA1324                                                        |
| 1570180_at   | 0.945 | 0.01001019 | -2.9489489 | -4.31 | -2.5057094 |              |                                                                 |
| 203088_at    | 0.945 | 0.02921157 | -2.3412339 | -4.31 | -3.0122369 | FBLN5        | fibulin 5                                                       |
| 218224_at    | 0.945 | 0.01899923 | -2.5782661 | -4.31 | -3.5220396 | PNMA1        | paraneoplastic Ma antigen 1                                     |
| 206451_at    | 0.945 | 0.02797239 | -2.3617766 | -4.31 | -2.0460571 | TBCCD1       | TBCC domain containing 1                                        |
| 224740_at    | 0.945 | 0.03798186 | -2.1966964 | -4.31 | -2.4988186 | SMIM15       | small integral membrane protein 15                              |
| 1568897_at   | 0.945 | 0.02291182 | -2.4761819 | -4.31 | -3.9305366 | LOC100422212 | eukaryotic translation initiation factor 3 subunit J pseudogene |

|              |       |            |            |       |            |              |                                                                      |
|--------------|-------|------------|------------|-------|------------|--------------|----------------------------------------------------------------------|
| 213619_at    | 0.945 | 0.02937191 | -2.338635  | -4.31 | -2.8700504 | HNRNPH1      | heterogeneous nuclear ribonucleoprotein H1 (H)                       |
| 208012_x_at  | 0.945 | 0.03559654 | -2.2332234 | -4.31 | -2.7072437 | SP110        | SP110 nuclear body protein                                           |
| 238025_at    | 0.945 | 0.04152824 | -2.1492289 | -4.31 | -4.3567804 | MLKL         | mixed lineage kinase domain like                                     |
| 228092_at    | 0.945 | 0.02973198 | -2.3328458 | -4.31 | -2.1459489 | CREM         | cAMP responsive element modulator                                    |
| 1563475_s_at | 0.945 | 0.0260438  | -2.404663  | -4.31 | -1.5385892 | ETFBKMT      | electron transfer flavoprotein beta subunit lysine methyltransferase |
| 207042_at    | 0.945 | 0.0284992  | -2.3529426 | -4.31 | -3.3749288 | E2F2         | E2F transcription factor 2                                           |
| 243276_at    | 0.945 | 0.01946069 | -2.5667998 | -4.31 | -2.527208  | ALS2CL       | ALS2 C-terminal like                                                 |
| 234958_at    | 0.945 | 0.02990897 | -2.3300238 | -4.31 | -2.9967655 |              |                                                                      |
| 239074_at    | 0.945 | 0.02345377 | -2.4650352 | -4.32 | -2.2067619 | GRAPL        | GRB2 related adaptor protein like                                    |
| 223478_at    | 0.945 | 0.01963837 | -2.5624534 | -4.32 | -3.2985719 | TIMM8B       | translocase of inner mitochondrial membrane 8 homolog B              |
| 1556798_a_at | 0.945 | 0.04505451 | -2.1059557 | -4.32 | -1.5552632 | RNF144A-AS1  | RNF144A antisense RNA 1                                              |
| 205758_at    | 0.945 | 0.02639553 | -2.3982848 | -4.32 | -2.189581  | CD8A         | CD8a molecule                                                        |
| 237117_at    | 0.945 | 0.03527859 | -2.2374842 | -4.32 | -1.9751059 |              |                                                                      |
| 243553_x_at  | 0.945 | 0.03650229 | -2.2212721 | -4.32 | -2.3202356 | TRAF3IP2-AS1 | TRAF3IP2 antisense RNA 1                                             |
| 225278_at    | 0.945 | 0.03043453 | -2.3217338 | -4.32 | -2.3193256 | PRKAB2       | protein kinase AMP-activated non-catalytic subunit beta 2            |
| 203554_x_at  | 0.945 | 0.03931211 | -2.1803231 | -4.32 | -1.527422  | PTTG1        | pituitary tumor-transforming 1                                       |
| 228323_at    | 0.945 | 0.03683876 | -2.216901  | -4.32 | -2.4935735 | KNL1         | kinetochore scaffold 1                                               |
| 210985_s_at  | 0.945 | 0.01777184 | -2.6101005 | -4.32 | -3.209949  | SP100        | SP100 nuclear antigen                                                |
| 238535_at    | 0.945 | 0.02420598 | -2.4499572 | -4.32 | -2.4045197 | CEP152       | centrosomal protein 152                                              |
| 220512_at    | 0.945 | 0.03595811 | -2.2284197 | -4.32 | -2.1009997 | DLC1         | DLC1 Rho GTPase activating protein                                   |

|              |       |            |            |       |            |                             |                                                                                                   |
|--------------|-------|------------|------------|-------|------------|-----------------------------|---------------------------------------------------------------------------------------------------|
| 1569030_s_at | 0.945 | 0.02111118 | -2.5277943 | -4.32 | -2.5357252 | NUB1                        | negative regulator of ubiquitin like proteins 1                                                   |
| 224204_x_at  | 0.945 | 0.03980368 | -2.1743991 | -4.32 | -1.256194  | ARNTL2                      | aryl hydrocarbon receptor nuclear translocator like 2                                             |
| 211044_at    | 0.945 | 0.02504393 | -2.4232422 | -4.32 | -2.5111677 | TRIM14                      | tripartite motif containing 14                                                                    |
| 1561953_at   | 0.945 | 0.0343669  | -2.256408  | -4.32 | -2.4755536 |                             |                                                                                                   |
| 1553984_s_at | 0.945 | 0.03995701 | -2.1725648 | -4.32 | -2.184519  | DTYMK                       | deoxythymidylate kinase                                                                           |
| 1558470_at   | 0.945 | 0.03733839 | -2.2104766 | -4.32 | -4.2069228 | VWA3B                       | von Willebrand factor A domain containing 3B                                                      |
| 215652_at    | 0.945 | 0.00240615 | -3.8354771 | -4.32 | -4.6580649 | SDHD                        | succinate dehydrogenase complex subunit D                                                         |
| 217963_s_at  | 0.945 | 0.03738176 | -2.2099226 | -4.32 | -1.992524  | BEX3                        | brain expressed X-linked 3                                                                        |
| 208184_s_at  | 0.945 | 0.03740385 | -2.2096407 | -4.32 | -2.1652345 | LOC102724200<br>///TRAPPC10 | trafficking protein particle complex subunit<br>10-like///trafficking protein particle complex 10 |
| 220601_at    | 0.945 | 0.04337122 | -2.1285028 | -4.32 | -4.0766562 | C16orf70                    | chromosome 16 open reading frame 70                                                               |
| 203151_at    | 0.945 | 0.03392983 | -2.2625112 | -4.32 | -1.4861765 | MAP1A                       | microtubule associated protein 1A                                                                 |
| 1558077_s_at | 0.945 | 0.0434942  | -2.127148  | -4.32 | -2.3470303 | MDH1B                       | malate dehydrogenase 1B                                                                           |
| 219507_at    | 0.945 | 0.0375478  | -2.2078071 | -4.32 | -2.9034854 | RSRC1                       | arginine and serine rich coiled-coil 1                                                            |
| 203346_s_at  | 0.945 | 0.03121695 | -2.3096336 | -4.32 | -2.7254703 | MTF2                        | metal response element binding transcription factor 2                                             |
| 1553086_at   | 0.945 | 0.025323   | -2.4179881 | -4.32 | -3.3375257 | C11orf40                    | chromosome 11 open reading frame 40                                                               |
| 1565703_at   | 0.945 | 0.02014185 | -2.5373351 | -4.32 | -2.4861732 | SMAD4                       | SMAD family member 4                                                                              |

|              |       |            |            |       |            |            |                                                                      |
|--------------|-------|------------|------------|-------|------------|------------|----------------------------------------------------------------------|
| 1554420_at   | 0.945 | 0.03465485 | -2.2524259 | -4.32 | -2.2241689 | ATF3       | activating transcription factor 3                                    |
| 227534_at    | 0.945 | 0.03467504 | -2.2521478 | -4.32 | -2.7830417 | AAED1      | AhpC/TSA antioxidant enzyme domain containing 1                      |
| 214368_at    | 0.945 | 0.0403753  | -2.1675927 | -4.32 | -2.2865163 | RASGRP2    | RAS guanyl releasing protein 2                                       |
| 205226_at    | 0.945 | 0.03139057 | -2.3069862 | -4.32 | -2.3518104 | PDGFRL     | platelet derived growth factor receptor like                         |
| 223528_s_at  | 0.945 | 0.02325928 | -2.4690073 | -4.32 | -2.9017994 | METTL17    | methyltransferase like 17                                            |
| 217020_at    | 0.945 | 0.04380638 | -2.1237245 | -4.32 | -1.4795068 | RARB       | retinoic acid receptor beta                                          |
| 207846_at    | 0.945 | 0.02835171 | -2.3641902 | -4.32 | -2.5838    | POU1F1     | POU class 1 homeobox 1                                               |
| 1562010_x_at | 0.945 | 0.03432068 | -2.2570502 | -4.32 | -1.7425103 |            |                                                                      |
| 1559946_s_at | 0.945 | 0.03494291 | -2.2484722 | -4.32 | -2.465924  | RUVBL2     | RuvB like AAA ATPase 2                                               |
| 226770_at    | 0.945 | 0.03028482 | -2.3240818 | -4.32 | -2.6919994 | MAGI3      | membrane associated guanylate kinase, WW and PDZ domain containing 3 |
| 219993_at    | 0.945 | 0.03683024 | -2.2170112 | -4.32 | -2.2376774 | SOX17      | SRY-box 17                                                           |
| 218763_at    | 0.945 | 0.03165137 | -2.3030349 | -4.32 | -2.4688814 | STX18      | syntaxin 18                                                          |
| 209740_s_at  | 0.945 | 0.0278137  | -2.3733441 | -4.32 | -2.8195884 | PNPLA4     | patatin like phospholipase domain containing 4                       |
| 227075_at    | 0.945 | 0.01412003 | -2.7559534 | -4.32 | -3.6846087 | ELP3       | elongator acetyltransferase complex subunit 3                        |
| 1564421_at   | 0.945 | 0.04415681 | -2.1199073 | -4.32 | -1.9763794 | DLGAP2-AS1 | DLGAP2 antisense RNA 1                                               |
| 207272_at    | 0.945 | 0.03180789 | -2.3006779 | -4.32 | -2.9761787 | ZNF80      | zinc finger protein 80                                               |
| 215001_s_at  | 0.945 | 0.04097224 | -2.1605771 | -4.32 | -3.0504858 | GLUL       | glutamate-ammonia ligase                                             |
| 233384_at    | 0.945 | 0.04432961 | -2.118035  | -4.32 | -1.7968435 |            |                                                                      |
| 1552368_at   | 0.945 | 0.02883957 | -2.3560278 | -4.32 | -2.2434303 | CTCF       | CCCTC-binding factor like                                            |

|             |       |            |            |       |            |               |                                              |
|-------------|-------|------------|------------|-------|------------|---------------|----------------------------------------------|
| 218675_at   | 0.945 | 0.03200041 | -2.2977934 | -4.32 | -2.2407217 | SLC22A17      | solute carrier family 22 member 17           |
| 221674_s_at | 0.945 | 0.04443556 | -2.1168902 | -4.32 | -1.705278  | CHRD          | chordin                                      |
| 204227_s_at | 0.945 | 0.03726349 | -2.2114347 | -4.32 | -3.5774261 | TK2           | thymidine kinase 2, mitochondrial            |
| 224193_s_at | 0.945 | 0.01348331 | -2.7583099 | -4.32 | -2.8084394 | FCRL2         | Fc receptor like 2                           |
| 243177_at   | 0.945 | 0.03853567 | -2.1953934 | -4.32 | -3.789374  |               |                                              |
| 205812_s_at | 0.945 | 0.03496752 | -2.2481359 | -4.32 | -2.987758  | TMED9         | transmembrane p24 trafficking protein 9      |
| 1566843_at  | 0.945 | 0.02394561 | -2.4551261 | -4.32 | -3.2247468 | PER4          | period circadian clock 3 pseudogene          |
| 205286_at   | 0.945 | 0.01863562 | -2.6027235 | -4.32 | -3.4956853 | TFAP2C        | transcription factor AP-2 gamma              |
| 201507_at   | 0.945 | 0.04812761 | -2.0743142 | -4.33 | -2.5695729 | PFDN1         | prefoldin subunit 1                          |
| 239829_at   | 0.945 | 0.03265003 | -2.2881764 | -4.33 | -4.1218062 |               |                                              |
| 220202_s_at | 0.945 | 0.02277016 | -2.4913896 | -4.33 | -3.4343927 | RC3H2         | ring finger and CCCH-type domains 2          |
| 214570_x_at | 0.945 | 0.04282761 | -2.139344  | -4.33 | -2.4768229 | LOC102725315  | putative POM121-like protein                 |
|             |       |            |            |       |            | ///LOC1027250 | 1-like///uncharacterized                     |
|             |       |            |            |       |            | 72///LOC72798 | LOC102725072///putative POM121-like protein  |
|             |       |            |            |       |            | 3///POM121L1  | 1-like///POM121 transmembrane nucleoporin    |
|             |       |            |            |       |            | 0P///POM121L  | like 10, pseudogene///POM121 transmembrane   |
|             |       |            |            |       |            | 4P///POM121L  | nucleoporin like 4, pseudogene///POM121      |
|             |       |            |            |       |            | 8P///POM121L  | transmembrane nucleoporin like 8,            |
|             |       |            |            |       |            | 9P///POM121L  | pseudogene///POM121 transmembrane            |
|             |       |            |            |       |            | 1P            | nucleoporin like 9, pseudogene///POM121      |
|             |       |            |            |       |            |               | transmembrane nucleoporin like 1, pseudogene |

|             |       |            |            |       |            |              |                                                                                 |
|-------------|-------|------------|------------|-------|------------|--------------|---------------------------------------------------------------------------------|
| 235537_at   | 0.945 | 0.04576283 | -2.1027527 | -4.33 | -1.4298386 | OCIAD1       | OCIA domain containing 1                                                        |
| 243696_at   | 0.945 | 0.04886186 | -2.067021  | -4.33 | -4.0475604 | CEP104       | centrosomal protein 104                                                         |
| 1561128_at  | 0.945 | 0.02937848 | -2.3471586 | -4.33 | -2.6181074 |              |                                                                                 |
| 242384_at   | 0.945 | 0.02493378 | -2.4357806 | -4.33 | -2.4972042 |              |                                                                                 |
| 1556999_at  | 0.945 | 0.01242806 | -2.8419767 | -4.33 | -3.9119669 | LOC100271832 | uncharacterized LOC100271832                                                    |
| 243359_at   | 0.945 | 0.02183298 | -2.4991277 | -4.33 | -3.7034826 |              |                                                                                 |
| 208187_s_at | 0.945 | 0.02240498 | -2.4991831 | -4.33 | -3.4769052 |              |                                                                                 |
| 225375_at   | 0.945 | 0.04012818 | -2.1759758 | -4.33 | -3.0762337 | MIR4723///TM | microRNA 4723///transmembrane protein 199<br>EM199                              |
| 1569540_at  | 0.945 | 0.02338942 | -2.4784384 | -4.33 | -2.8981484 |              |                                                                                 |
| 226691_at   | 0.945 | 0.03361893 | -2.2741542 | -4.33 | -1.9157202 | TNRC18       | trinucleotide repeat containing 18                                              |
| 207576_x_at | 0.945 | 0.04633883 | -2.0967311 | -4.33 | -4.1222469 | OXT          | oxytocin/neurophysin I prepropeptide                                            |
| 234368_at   | 0.945 | 0.01983594 | -2.5724549 | -4.33 | -2.0821096 |              |                                                                                 |
| 205566_at   | 0.945 | 0.04373022 | -2.129312  | -4.33 | -1.9530903 | ABHD2        | abhydrolase domain containing 2                                                 |
| 238533_at   | 0.945 | 0.02284307 | -2.4898476 | -4.33 | -2.9227339 | EPHA7        | EPH receptor A7                                                                 |
| 243715_at   | 0.945 | 0.0496988  | -2.0588255 | -4.33 | -1.2778955 |              |                                                                                 |
| 1560372_at  | 0.945 | 0.03078236 | -2.3247419 | -4.33 | -2.5842894 | LOC101929713 | uncharacterized LOC101929713                                                    |
| 234047_at   | 0.945 | 0.0438719  | -2.1277542 | -4.33 | -1.1973617 |              |                                                                                 |
| 206720_at   | 0.945 | 0.01824454 | -2.6129876 | -4.33 | -1.9434007 | MGAT5        | mannosyl (alpha-1,6-)-glycoprotein<br>beta-1,6-N-acetyl-glucosaminyltransferase |
| 215979_s_at | 0.945 | 0.0110328  | -2.9009194 | -4.33 | -3.2013625 | SLC7A1       | solute carrier family 7 member 1                                                |
| 226160_at   | 0.945 | 0.02006754 | -2.5668158 | -4.33 | -3.5015173 | H6PD         | hexose-6-phosphate dehydrogenase/glucose<br>1-dehydrogenase                     |

|              |       |            |            |       |            |               |                                                                                                 |
|--------------|-------|------------|------------|-------|------------|---------------|-------------------------------------------------------------------------------------------------|
| 208302_at    | 0.945 | 0.03771302 | -2.2118991 | -4.33 | -2.1786108 | HMHB1         | histocompatibility minor HB-1                                                                   |
| 1561527_at   | 0.945 | 0.02574566 | -2.4204155 | -4.33 | -2.2521429 | LINC01514     | long intergenic non-protein coding RNA 1514                                                     |
| 237435_at    | 0.945 | 0.03432307 | -2.2641944 | -4.33 | -1.8820342 |               |                                                                                                 |
| 234720_s_at  | 0.945 | 0.03786262 | -2.2099943 | -4.33 | -2.1865113 | TOB2          | transducer of ERBB2, 2                                                                          |
| 1562353_x_at | 0.945 | 0.03118755 | -2.3184477 | -4.33 | -2.1694658 | LOC101928583  | uncharacterized LOC101928583                                                                    |
| 216510_x_at  | 0.945 | 0.03307107 | -2.2820367 | -4.33 | -2.304141  | IGHV3-23///IG | immunoglobulin heavy variable                                                                   |
|              |       |            |            |       |            | HV4-31///IGH  | 3-23///immunoglobulin heavy variable                                                            |
|              |       |            |            |       |            | M///IGHG1///I | 4-31///immunoglobulin heavy constant                                                            |
|              |       |            |            |       |            | GHA1          | mu///immunoglobulin heavy constant gamma 1 (G1m marker)///immunoglobulin heavy constant alpha 1 |
| 219663_s_at  | 0.945 | 0.03135763 | -2.3158282 | -4.33 | -3.3156965 | TMEM121       | transmembrane protein 121                                                                       |
| 203323_at    | 0.945 | 0.04743315 | -2.0854729 | -4.33 | -1.7257837 | CAV2          | caveolin 2                                                                                      |
| 224572_s_at  | 0.945 | 0.04759963 | -2.0837805 | -4.33 | -1.9615417 | IRF2BP2       | interferon regulatory factor 2 binding protein 2                                                |
| 231563_at    | 0.945 | 0.03077058 | -2.3249261 | -4.33 | -2.3102828 | LOC100505824  | uncharacterized LOC100505824                                                                    |
| 220616_at    | 0.945 | 0.0476584  | -2.0831843 | -4.33 | -1.4388905 | ZNF384        | zinc finger protein 384                                                                         |
| 210912_x_at  | 0.945 | 0.02357575 | -2.4746049 | -4.33 | -2.673687  | GSTM4         | glutathione S-transferase mu 4                                                                  |
| 45633_at     | 0.945 | 0.04027878 | -2.1741758 | -4.33 | -2.4718056 | GINS3         | GINS complex subunit 3                                                                          |
| 227624_at    | 0.945 | 0.0414803  | -2.1600289 | -4.33 | -2.1745298 | TET2          | tet methylcytosine dioxygenase 2                                                                |
| 204655_at    | 0.945 | 0.04165156 | -2.1580426 | -4.33 | -2.1577037 | CCL5          | C-C motif chemokine ligand 5                                                                    |
| 215769_at    | 0.945 | 0.02117463 | -2.5263529 | -4.33 | -3.8141829 | YME1L1        | YME1 like 1 ATPase                                                                              |
| 238171_at    | 0.945 | 0.04054477 | -2.1710115 | -4.33 | -2.0784512 | SLC25A30      | solute carrier family 25 member 30                                                              |

|              |       |            |            |       |            |              |                                                                                                                                                                                                                                                                                            |
|--------------|-------|------------|------------|-------|------------|--------------|--------------------------------------------------------------------------------------------------------------------------------------------------------------------------------------------------------------------------------------------------------------------------------------------|
| 1556747_a_at | 0.945 | 0.04796627 | -2.0800718 | -4.33 | -1.0924435 | LOC101928343 | uncharacterized LOC101928343                                                                                                                                                                                                                                                               |
| 1563405_at   | 0.945 | 0.04506454 | -2.1148171 | -4.33 | -1.6769528 | ATP4B        | ATPase H <sup>+</sup> /K <sup>+</sup> transporting beta subunit                                                                                                                                                                                                                            |
| 1555741_at   | 0.945 | 0.02078414 | -2.5497517 | -4.33 | -2.9587114 | MRAP         | melanocortin 2 receptor accessory protein                                                                                                                                                                                                                                                  |
| 1554951_at   | 0.945 | 0.02814423 | -2.3775285 | -4.33 | -3.2127556 |              |                                                                                                                                                                                                                                                                                            |
| 211050_x_at  | 0.945 | 0.04807295 | -2.0789975 | -4.33 | -2.0028771 | LOC101929540 | uncharacterized<br>///LOC1019286 LOC101929540///uncharacterized<br>70///LOC10192 LOC101928670///uncharacterized<br>8344///LOC100 LOC101928344///uncharacterized<br>996442///LOC1 LOC100996442///uncharacterized<br>00288069///LO LOC100288069///uncharacterized<br>C100134822 LOC100134822 |
| 205203_at    | 0.945 | 0.02388157 | -2.4683739 | -4.33 | -3.3603853 | PLD1         | phospholipase D1                                                                                                                                                                                                                                                                           |
| 212954_at    | 0.945 | 0.03878259 | -2.1984292 | -4.33 | -1.9806475 | DYRK4        | dual specificity tyrosine phosphorylation regulated kinase 4                                                                                                                                                                                                                               |
| 218991_at    | 0.945 | 0.0419598  | -2.1544862 | -4.34 | -1.7453684 | HEATR6       | HEAT repeat containing 6                                                                                                                                                                                                                                                                   |
| 238187_at    | 0.945 | 0.03533531 | -2.2501997 | -4.34 | -2.9893218 | C2orf57      | chromosome 2 open reading frame 57                                                                                                                                                                                                                                                         |
| 216921_s_at  | 0.945 | 0.02099132 | -2.5449223 | -4.34 | -2.6776639 | KRT35        | keratin 35                                                                                                                                                                                                                                                                                 |
| 239946_at    | 0.945 | 0.01658884 | -2.6772192 | -4.34 | -3.4501275 |              |                                                                                                                                                                                                                                                                                            |
| 205447_s_at  | 0.945 | 0.03541487 | -2.2491154 | -4.34 | -2.4893419 | MAP3K12      | mitogen-activated protein kinase kinase kinase 12                                                                                                                                                                                                                                          |
| 239098_at    | 0.945 | 0.03841642 | -2.2030023 | -4.34 | -2.1835014 | KCNRG        | potassium channel regulator                                                                                                                                                                                                                                                                |



|              |       |            |            |       |            |            |                                                                                                   |
|--------------|-------|------------|------------|-------|------------|------------|---------------------------------------------------------------------------------------------------|
| 201014_s_at  | 0.945 | 0.03920437 | -2.1932101 | -4.34 | -2.5655525 | PAICS      | phosphoribosylaminoimidazole carboxylase; phosphoribosylaminoimidazolesuccinocarboxamide synthase |
| 210112_at    | 0.945 | 0.04579795 | -2.1070131 | -4.34 | -2.0593771 | HPS1       | HPS1, biogenesis of lysosomal organelles complex 3 subunit 1                                      |
| 219271_at    | 0.945 | 0.04875089 | -2.0722194 | -4.34 | -1.3769215 | GALNT14    | polypeptide N-acetylgalactosaminyltransferase 14                                                  |
| 236285_at    | 0.945 | 0.03944233 | -2.190288  | -4.34 | -2.6646107 | KLHDC7B    | kelch domain containing 7B                                                                        |
| 208124_s_at  | 0.945 | 0.04886244 | -2.0711122 | -4.34 | -2.1788578 | SEMA4F     | semaphorin 4F                                                                                     |
| 1557867_s_at | 0.945 | 0.03948656 | -2.1897466 | -4.34 | -2.2160264 | CFAP157    | cilia and flagella associated protein 157                                                         |
| 243432_at    | 0.945 | 0.04888486 | -2.0708899 | -4.34 | -1.6293541 |            |                                                                                                   |
| 243907_at    | 0.945 | 0.04546048 | -2.1105901 | -4.34 | -2.1506761 | GREB1L     | growth regulation by estrogen in breast cancer 1 like                                             |
| 215452_x_at  | 0.945 | 0.04280086 | -2.1449007 | -4.34 | -2.2562211 | SUMO4      | small ubiquitin-like modifier 4                                                                   |
| 38964_r_at   | 0.945 | 0.04619177 | -2.1028687 | -4.34 | -2.1965178 | WAS        | Wiskott-Aldrich syndrome                                                                          |
| 212676_at    | 0.945 | 0.04915966 | -2.068173  | -4.34 | -1.4952792 | NF1P9//NF1 | neurofibromin 1 pseudogene 9//neurofibromin 1                                                     |
| 217647_at    | 0.945 | 0.02561552 | -2.4344038 | -4.34 | -2.642494  | DHODH      | dihydroorotate dehydrogenase (quinone)                                                            |
| 234073_at    | 0.945 | 0.03986259 | -2.1851662 | -4.34 | -2.4875469 | SDK2       | sidekick cell adhesion molecule 2                                                                 |
| 223966_at    | 0.945 | 0.04311974 | -2.1413109 | -4.34 | -2.4810294 | UBE2D3     | ubiquitin conjugating enzyme E2 D3                                                                |
| 218873_at    | 0.945 | 0.03507677 | -2.2537389 | -4.34 | -2.5502487 | GON4L      | gon-4 like                                                                                        |
| 224150_s_at  | 0.945 | 0.04955026 | -2.0643343 | -4.34 | -1.786726  | CEP70      | centrosomal protein 70                                                                            |

|             |       |            |            |       |            |          |                                                                |
|-------------|-------|------------|------------|-------|------------|----------|----------------------------------------------------------------|
| 234295_at   | 0.945 | 0.0143634  | -2.7701016 | -4.34 | -4.2717494 | DBR1     | debranching RNA lariats 1                                      |
| 214604_at   | 0.945 | 0.02935631 | -2.3571358 | -4.34 | -2.5748949 | HOXD11   | homeobox D11                                                   |
| 201206_s_at | 0.945 | 0.03243208 | -2.2995764 | -4.34 | -3.0501675 | RRBP1    | ribosome binding protein 1                                     |
| 228255_at   | 0.945 | 0.03654859 | -2.2339011 | -4.34 | -2.6062696 | TMEM237  | transmembrane protein 237                                      |
| 226609_at   | 0.945 | 0.04610137 | -2.1038172 | -4.34 | -1.8752178 | DCBLD1   | discoidin, CUB and LCCL domain containing 1                    |
| 221632_s_at | 0.945 | 0.02589974 | -2.4290425 | -4.34 | -2.3166665 | WDR4     | WD repeat domain 4                                             |
| 244015_at   | 0.945 | 0.04025372 | -2.1804431 | -4.34 | -3.7863009 |          |                                                                |
| 235122_at   | 0.945 | 0.02509198 | -2.4444271 | -4.34 | -3.0142755 | HIVEP3   | human immunodeficiency virus type I enhancer binding protein 3 |
| 241974_at   | 0.945 | 0.04682113 | -2.0963107 | -4.34 | -1.6776527 |          |                                                                |
| 233843_at   | 0.945 | 0.02602374 | -2.4267207 | -4.34 | -3.289622  | ZBTB12   | zinc finger and BTB domain containing 12                       |
| 210218_s_at | 0.945 | 0.04349715 | -2.1370928 | -4.34 | -2.1978371 | SP100    | SP100 nuclear antigen                                          |
| 215244_at   | 0.945 | 0.04983075 | -2.0615943 | -4.34 | -2.1604744 | DGCR5    | DiGeorge syndrome critical region gene 5 (non-protein coding)  |
| 221967_at   | 0.945 | 0.04632455 | -2.1014784 | -4.34 | -2.2518439 | NXPH4    | neurexophilin 4                                                |
| 230708_at   | 0.945 | 0.04238992 | -2.1495627 | -4.34 | -1.9244714 | PRICKLE1 | prickle planar cell polarity protein 1                         |
| 226713_at   | 0.945 | 0.02025673 | -2.5622553 | -4.34 | -3.0168116 | CCDC50   | coiled-coil domain containing 50                               |
| 232935_at   | 0.945 | 0.02215446 | -2.5186208 | -4.34 | -2.8424157 |          |                                                                |
| 241209_at   | 0.945 | 0.02028609 | -2.5615511 | -4.34 | -2.726211  | DCAF6    | DDB1 and CUL4 associated factor 6                              |
| 203943_at   | 0.945 | 0.0424834  | -2.1484986 | -4.34 | -1.4664444 | KIF3B    | kinesin family member 3B                                       |
| 201679_at   | 0.945 | 0.02620947 | -2.4232626 | -4.34 | -3.439566  | SRRT     | serrate, RNA effector molecule                                 |
| 239537_at   | 0.945 | 0.03991242 | -2.1845621 | -4.34 | -2.1998405 | ST8SIA2  | ST8 alpha-N-acetyl-neuraminide alpha-2,8-sialyltransferase 2   |

|              |       |            |            |       |            |           |                                                    |
|--------------|-------|------------|------------|-------|------------|-----------|----------------------------------------------------|
| 220055_at    | 0.945 | 0.02810408 | -2.378218  | -4.34 | -2.0289283 | ZNF287    | zinc finger protein 287                            |
| 224964_s_at  | 0.945 | 0.04719138 | -2.0924894 | -4.34 | -1.9481421 | GNG2      | G protein subunit gamma 2                          |
| 220784_s_at  | 0.945 | 0.04719219 | -2.0924811 | -4.34 | -1.7818486 | UTS2      | urotensin 2                                        |
| 216918_s_at  | 0.945 | 0.04391117 | -2.1325033 | -4.34 | -2.0577545 | DST       | dystonin                                           |
| 1562016_at   | 0.945 | 0.02248203 | -2.5114497 | -4.34 | -3.1090706 |           |                                                    |
| 204520_x_at  | 0.945 | 0.04029065 | -2.1799994 | -4.34 | -2.847125  | BRD1      | bromodomain containing 1                           |
| 213320_at    | 0.945 | 0.0332846  | -2.2870308 | -4.34 | -4.5124187 | PRMT3     | protein arginine methyltransferase 3               |
| 235294_at    | 0.945 | 0.03746938 | -2.2218584 | -4.34 | -1.9392491 | SIKE1     | suppressor of IKBKE 1                              |
| 244339_at    | 0.945 | 0.02071161 | -2.5514532 | -4.34 | -1.9377672 |           |                                                    |
| 224652_at    | 0.945 | 0.04316831 | -2.1407661 | -4.34 | -2.2065372 | CCNY      | cyclin Y                                           |
| 201552_at    | 0.945 | 0.02080342 | -2.5493003 | -4.34 | -1.7752216 | LAMP1     | lysosomal associated membrane protein 1            |
| 213374_x_at  | 0.945 | 0.02272722 | -2.5061466 | -4.34 | -3.2888572 | HIBCH     | 3-hydroxyisobutyryl-CoA hydrolase                  |
| 207854_at    | 0.945 | 0.04073708 | -2.1746635 | -4.34 | -3.2879412 | GYPE      | glycophorin E (MNS blood group)                    |
| 1557506_a_at | 0.945 | 0.02605102 | -2.4262113 | -4.34 | -1.7222199 |           |                                                    |
| 229104_s_at  | 0.945 | 0.04466682 | -2.1242263 | -4.34 | -2.5397713 | GPR39     | G protein-coupled receptor 39                      |
| 233402_at    | 0.945 | 0.04106196 | -2.1708137 | -4.34 | -3.6856808 |           |                                                    |
| 243051_at    | 0.945 | 0.04497035 | -2.120937  | -4.34 | -2.1615046 | CNIH4     | cornichon family AMPA receptor auxiliary protein 4 |
| 229047_at    | 0.945 | 0.04499033 | -2.1207212 | -4.34 | -1.488164  | PLEKHB1   | pleckstrin homology domain containing B1           |
| 1560762_at   | 0.945 | 0.03164316 | -2.3114598 | -4.34 | -2.4570942 | LINC00996 | long intergenic non-protein coding RNA 996         |
| 200906_s_at  | 0.945 | 0.01958048 | -2.5956893 | -4.34 | -1.9905397 | PALLD     | palladin, cytoskeletal associated protein          |

|              |       |            |            |       |            |              |                                                     |
|--------------|-------|------------|------------|-------|------------|--------------|-----------------------------------------------------|
| 243672_at    | 0.945 | 0.04862977 | -2.077894  | -4.35 | -1.9366906 | SALL3        | spalt like transcription factor 3                   |
| 206983_at    | 0.945 | 0.04203068 | -2.159496  | -4.35 | -2.313435  | CCR6         | C-C motif chemokine receptor 6                      |
| 212116_at    | 0.945 | 0.03853282 | -2.2082815 | -4.35 | -2.5660992 | TRIM27       | tripartite motif containing 27                      |
| 244109_at    | 0.945 | 0.012266   | -2.8034216 | -4.35 | -3.8686124 | WDR38        | WD repeat domain 38                                 |
| 233176_at    | 0.945 | 0.0387166  | -2.2059698 | -4.35 | -1.6517102 | LOC100507642 | uncharacterized LOC100507642                        |
| 224290_at    | 0.945 | 0.04924381 | -2.0717803 | -4.35 | -1.6891365 | VN1R3        | vomer nasal 1 receptor 3 (gene/pseudogene)          |
| 204964_s_at  | 0.945 | 0.04929577 | -2.0712662 | -4.35 | -1.8494737 | SSPN         | sarcospan                                           |
| 232744_x_at  | 0.945 | 0.03156539 | -2.3219018 | -4.35 | -3.1199555 |              |                                                     |
| 205450_at    | 0.945 | 0.04268652 | -2.1519669 | -4.35 | -2.0520309 | PHKA1        | phosphorylase kinase regulatory subunit alpha 1     |
| 244421_at    | 0.945 | 0.02016233 | -2.5812306 | -4.35 | -2.9968776 |              |                                                     |
| 1557571_at   | 0.945 | 0.04945959 | -2.0696481 | -4.35 | -2.5356288 | VPS13D       | vacuolar protein sorting 13 homolog D               |
| 228129_at    | 0.945 | 0.03176586 | -2.3188185 | -4.35 | -3.1414191 | SERBP1       | SERPINE1 mRNA binding protein 1                     |
| 1556891_at   | 0.945 | 0.03499522 | -2.2627252 | -4.35 | -2.4321384 | SORCS1       | sortilin related VPS10 domain containing receptor 1 |
| 236953_s_at  | 0.945 | 0.03192579 | -2.3163717 | -4.35 | -2.6720914 | NHLRC3       | NHL repeat containing 3                             |
| 219719_at    | 0.945 | 0.03789128 | -2.2164304 | -4.35 | -1.9787658 | HIGD1B       | HIG1 hypoxia inducible domain family member 1B      |
| 215285_s_at  | 0.945 | 0.02743047 | -2.4010832 | -4.35 | -3.2879822 | PHTF1        | putative homeodomain transcription factor 1         |
| 229550_at    | 0.945 | 0.03946647 | -2.1966402 | -4.35 | -2.6555401 | UNC79        | unc-79 homolog (C. elegans)                         |
| 1563809_a_at | 0.945 | 0.0274814  | -2.4001784 | -4.35 | -2.7236    | MCF2L        | MCF.2 cell line derived transforming sequence like  |

|              |       |            |            |       |            |              |                                               |
|--------------|-------|------------|------------|-------|------------|--------------|-----------------------------------------------|
| 244739_at    | 0.945 | 0.03542704 | -2.2567623 | -4.35 | -2.8389599 | RDX          | radixin                                       |
| 240868_at    | 0.945 | 0.02713661 | -2.3951135 | -4.35 | -2.8075604 | LOC100129406 | uncharacterized LOC100129406                  |
| 1555856_s_at | 0.945 | 0.0435698  | -2.1419904 | -4.35 | -3.8826272 | AKR1C1       | aldo-keto reductase family 1 member C1        |
| 224029_x_at  | 0.945 | 0.02871915 | -2.3786547 | -4.35 | -2.4350453 | SCN11A       | sodium voltage-gated channel alpha subunit 11 |
| 220045_at    | 0.945 | 0.04566263 | -2.1135089 | -4.35 | -1.7944995 | NEUROD6      | neuronal differentiation 6                    |
| 240744_at    | 0.945 | 0.04987029 | -2.0656126 | -4.35 | -2.7600045 | CPA5         | carboxypeptidase A5                           |
| 237081_at    | 0.945 | 0.03655886 | -2.2414446 | -4.35 | -1.3827688 |              |                                               |
| 216547_at    | 0.945 | 0.03856404 | -2.207888  | -4.35 | -2.4621442 |              |                                               |
| 205563_at    | 0.945 | 0.04998347 | -2.0645057 | -4.35 | -4.1019801 | KISS1        | KiSS-1 metastasis-suppressor                  |
| 204966_at    | 0.945 | 0.01668182 | -2.6954694 | -4.35 | -3.6516931 | ADGRB2       | adhesion G protein-coupled receptor B2        |
| 1556718_s_at | 0.945 | 0.04322203 | -2.1458965 | -4.35 | -1.7814608 | MIR194-2     | microRNA 194-2                                |
| 219535_at    | 0.945 | 0.03302762 | -2.2998159 | -4.35 | -2.1413859 | HUNK         | hormonally up-regulated Neu-associated kinase |
| 219035_s_at  | 0.945 | 0.03637551 | -2.2438962 | -4.35 | -2.9256358 | RNF34        | ring finger protein 34                        |
| 244719_at    | 0.945 | 0.03318345 | -2.2975159 | -4.35 | -2.6228421 |              |                                               |
| 1563903_x_at | 0.945 | 0.033214   | -2.297066  | -4.35 | -2.5431531 |              |                                               |
| 228298_at    | 0.945 | 0.02325978 | -2.4948121 | -4.35 | -2.5993422 | PCED1B       | PC-esterase domain containing 1B              |
| 205772_s_at  | 0.945 | 0.04797425 | -2.0894171 | -4.35 | -1.9750109 | AKAP7        | A-kinase anchoring protein 7                  |
| 233755_at    | 0.945 | 0.03662197 | -2.2406032 | -4.35 | -2.5112896 |              |                                               |
| 235330_at    | 0.945 | 0.02123489 | -2.5249879 | -4.35 | -3.2241061 | CCDC117      | coiled-coil domain containing 117             |
| 235172_at    | 0.945 | 0.04217452 | -2.1578356 | -4.35 | -2.3354038 | GABPB1-AS1   | GABPB1 antisense RNA 1                        |
| 207421_at    | 0.945 | 0.03362142 | -2.2911043 | -4.35 | -2.3889429 | CA5A         | carbonic anhydrase 5A                         |

|              |       |            |            |       |            |                |                                                                                                 |
|--------------|-------|------------|------------|-------|------------|----------------|-------------------------------------------------------------------------------------------------|
| 1552287_s_at | 0.945 | 0.02367711 | -2.4861001 | -4.35 | -2.5996787 | AFG3L1P        | AFG3 like matrix AAA peptidase subunit 1, pseudogene                                            |
| 216043_x_at  | 0.945 | 0.04853362 | -2.0837441 | -4.35 | -1.9572851 |                |                                                                                                 |
| 237369_at    | 0.945 | 0.0485426  | -2.0836534 | -4.35 | -2.3745596 |                |                                                                                                 |
| 202574_s_at  | 0.945 | 0.0291729  | -2.3709809 | -4.35 | -2.7579928 | CSNK1G2        | casein kinase 1 gamma 2                                                                         |
| 1560332_at   | 0.945 | 0.01774639 | -2.6441181 | -4.36 | -2.9170859 |                |                                                                                                 |
| 210996_s_at  | 0.945 | 0.03035472 | -2.3515047 | -4.36 | -3.0509303 | YWHAE          | tyrosine 3-monooxygenase/tryptophan 5-monooxygenase activation protein epsilon                  |
| 237080_at    | 0.945 | 0.03744308 | -2.2297773 | -4.36 | -2.0003561 |                |                                                                                                 |
| 242751_at    | 0.945 | 0.04567954 | -2.1188806 | -4.36 | -2.2019231 |                |                                                                                                 |
| 1561864_at   | 0.945 | 0.0457188  | -2.1184598 | -4.36 | -2.3206153 |                |                                                                                                 |
| 1569861_at   | 0.945 | 0.04903404 | -2.0787181 | -4.36 | -2.0205188 | TRAF5          | TNF receptor associated factor 5                                                                |
| 227320_at    | 0.945 | 0.02619166 | -2.4364894 | -4.36 | -2.4465208 | ZNF664-FAM101A | filamin-interacting protein FAM101A///family 01A///FAM101 with sequence similarity 101 member A |
| 239027_at    | 0.945 | 0.03757654 | -2.2280382 | -4.36 | -1.9122738 | DOCK8          | dedicator of cytokinesis 8                                                                      |
| 241341_at    | 0.945 | 0.04579125 | -2.117684  | -4.36 | -2.2065201 |                |                                                                                                 |
| 230595_at    | 0.945 | 0.02623832 | -2.4356119 | -4.36 | -2.5542643 | PGM5-AS1       | PGM5 antisense RNA 1                                                                            |
| 232752_at    | 0.945 | 0.01794967 | -2.6588015 | -4.36 | -4.5466041 | LOXL1-AS1      | LOXL1 antisense RNA 1                                                                           |
| 234793_at    | 0.945 | 0.01139817 | -2.8848095 | -4.36 | -3.1707102 |                |                                                                                                 |
| 237651_x_at  | 0.945 | 0.04633129 | -2.1119359 | -4.36 | -1.7475321 | LINC00518      | long intergenic non-protein coding RNA 518                                                      |
| 200607_s_at  | 0.945 | 0.04099868 | -2.1780683 | -4.36 | -3.1364673 | RAD21          | RAD21 cohesin complex component                                                                 |
| 219324_at    | 0.945 | 0.04970383 | -2.0720626 | -4.36 | -2.0277695 | NOL12          | nucleolar protein 12                                                                            |

|              |       |            |            |       |            |               |                                                                                    |
|--------------|-------|------------|------------|-------|------------|---------------|------------------------------------------------------------------------------------|
| 232818_at    | 0.945 | 0.03112338 | -2.3392129 | -4.36 | -2.5192908 |               |                                                                                    |
| 216305_s_at  | 0.945 | 0.04980181 | -2.0710957 | -4.36 | -2.4378787 | GCFC2         | GC-rich sequence DNA-binding factor 2                                              |
| 219110_at    | 0.945 | 0.04268006 | -2.1584003 | -4.36 | -2.0751775 | GAR1          | GAR1 ribonucleoprotein                                                             |
| 232381_s_at  | 0.945 | 0.04594069 | -2.1160873 | -4.36 | -4.0710861 | DNAH5         | dynein axonemal heavy chain 5                                                      |
| 240670_at    | 0.945 | 0.03040623 | -2.3506719 | -4.36 | -3.8324122 |               |                                                                                    |
| 222511_x_at  | 0.945 | 0.02702225 | -2.4210856 | -4.36 | -3.0380515 | FAF1          | Fas associated factor 1                                                            |
| 221333_at    | 0.945 | 0.03603744 | -2.2484465 | -4.36 | -2.64022   | FOXP3         | forkhead box P3                                                                    |
| 215642_at    | 0.945 | 0.01865683 | -2.6195081 | -4.36 | -3.9098333 |               |                                                                                    |
| 223575_at    | 0.945 | 0.04630488 | -2.1122156 | -4.36 | -2.3770162 | KIAA1549      | KIAA1549                                                                           |
| 201258_at    | 0.945 | 0.03062573 | -2.3471381 | -4.36 | -2.7060168 | RPS16         | ribosomal protein S16                                                              |
| 203264_s_at  | 0.945 | 0.04322798 | -2.1521426 | -4.36 | -1.8670864 | ARHGEF9       | Cdc42 guanine nucleotide exchange factor 9                                         |
| 1569472_s_at | 0.945 | 0.01877362 | -2.6362889 | -4.36 | -3.6093031 | TTC3P1///TTC3 | tetratricopeptide repeat domain 3 pseudogene 1///tetratricopeptide repeat domain 3 |
| 207033_at    | 0.945 | 0.0317509  | -2.329386  | -4.36 | -2.709441  | GIF           | gastric intrinsic factor                                                           |
| 231397_at    | 0.945 | 0.03192906 | -2.326629  | -4.36 | -2.0321436 | PLPPR5        | phospholipid phosphatase related 5                                                 |
| 218708_at    | 0.945 | 0.0391191  | -2.2083381 | -4.36 | -2.387054  | NXT1          | nuclear transport factor 2 like export factor 1                                    |
| 221345_at    | 0.945 | 0.04690921 | -2.105851  | -4.36 | -2.9450177 | FFAR2         | free fatty acid receptor 2                                                         |
| 227883_at    | 0.945 | 0.04024755 | -2.1943713 | -4.36 | -2.2346339 | CCDC71L       | coiled-coil domain containing 71-like                                              |
| 233635_at    | 0.945 | 0.02138689 | -2.5358256 | -4.36 | -3.8738265 |               |                                                                                    |
| 227960_s_at  | 0.945 | 0.01529398 | -2.6979814 | -4.36 | -3.2436729 | FAHD1         | fumarylacetoacetate hydrolase domain containing 1                                  |

|              |       |            |            |       |            |           |                                                        |
|--------------|-------|------------|------------|-------|------------|-----------|--------------------------------------------------------|
| 216973_s_at  | 0.945 | 0.03449558 | -2.2785346 | -4.36 | -3.0393917 | HOXB7     | homeobox B7                                            |
| 228709_at    | 0.945 | 0.04070035 | -2.1888672 | -4.36 | -2.0728915 | TPR       | translocated promoter region, nuclear basket protein   |
| 206536_s_at  | 0.945 | 0.04779652 | -2.0966385 | -4.36 | -2.3565013 | XIAP      | X-linked inhibitor of apoptosis                        |
| 207076_s_at  | 0.945 | 0.03503008 | -2.270993  | -4.36 | -2.3266048 | ASS1      | argininosuccinate synthase 1                           |
| 203604_at    | 0.945 | 0.04322882 | -2.1521331 | -4.36 | -2.9560665 | ZNF516    | zinc finger protein 516                                |
| 242731_x_at  | 0.945 | 0.01085091 | -2.9386829 | -4.36 | -4.4135575 | BMPRI1A   | bone morphogenetic protein receptor type 1A            |
| 235337_at    | 0.945 | 0.03546549 | -2.2649276 | -4.37 | -2.7397415 | SERTAD4   | SERTA domain containing 4                              |
| 221025_x_at  | 0.945 | 0.01474955 | -2.7826918 | -4.37 | -4.391187  | PUS7L     | pseudouridylate synthase 7 like                        |
| 1570628_at   | 0.945 | 0.03244659 | -2.3187003 | -4.37 | -1.9004321 |           |                                                        |
| 203883_s_at  | 0.945 | 0.04171698 | -2.1767102 | -4.37 | -2.2570152 | RAB11FIP2 | RAB11 family interacting protein 2                     |
| 221536_s_at  | 0.945 | 0.04185539 | -2.175076  | -4.37 | -1.9718592 | LSG1      | large 60S subunit nuclear export GTPase 1              |
| 238917_s_at  | 0.945 | 0.0407975  | -2.1804704 | -4.37 | -4.2325106 | DENND5B   | DENN domain containing 5B                              |
| 238374_at    | 0.945 | 0.02918408 | -2.382988  | -4.37 | -2.7617941 | H1FNT     | H1 histone family member N, testis specific            |
| 1555491_a_at | 0.945 | 0.04885467 | -2.085851  | -4.37 | -2.3650405 | C19orf66  | chromosome 19 open reading frame 66                    |
| 213040_s_at  | 0.945 | 0.0297886  | -2.3607443 | -4.37 | -2.3746582 | NPTXR     | neuronal pentraxin receptor                            |
| 219873_at    | 0.945 | 0.00678442 | -3.2688704 | -4.37 | -4.5313046 | COLEC11   | collectin subfamily member 11                          |
| 223687_s_at  | 0.945 | 0.02941139 | -2.3791373 | -4.37 | -2.4255748 | LY6K      | lymphocyte antigen 6 complex, locus K                  |
| 231164_at    | 0.945 | 0.020654   | -2.5693201 | -4.37 | -3.4141657 | ABCA17P   | ATP binding cassette subfamily A member 17, pseudogene |



|              |       |            |            |       |            |          |                                                  |
|--------------|-------|------------|------------|-------|------------|----------|--------------------------------------------------|
| 1567222_x_at | 0.945 | 0.03826051 | -2.2275494 | -4.37 | -2.5426915 | ELOVL5   | ELOVL fatty acid elongase 5                      |
| 200688_at    | 0.945 | 0.04168679 | -2.1770672 | -4.37 | -2.8155846 | SF3B3    | splicing factor 3b subunit 3                     |
| 208089_s_at  | 0.945 | 0.04956001 | -2.0787762 | -4.37 | -1.3938614 | TDRD3    | tudor domain containing 3                        |
| 215795_at    | 0.945 | 0.02448969 | -2.4847241 | -4.37 | -2.5236611 | MYH7B    | myosin heavy chain 7B                            |
| 239915_at    | 0.945 | 0.03359425 | -2.301529  | -4.37 | -2.9059609 | HOXA-AS3 | HOXA cluster antisense RNA 3                     |
| 228057_at    | 0.945 | 0.042034   | -2.1729744 | -4.37 | -2.1269297 | DDIT4L   | DNA damage inducible transcript 4 like           |
| 1565758_at   | 0.945 | 0.02782566 | -2.4066037 | -4.37 | -3.7073512 |          |                                                  |
| 206935_at    | 0.945 | 0.03869786 | -2.2219293 | -4.37 | -2.0869596 | PCDH8    | protocadherin 8                                  |
| 214562_at    | 0.945 | 0.04520205 | -2.1301778 | -4.37 | -2.3251267 | HIST1H4L | histone cluster 1, H4l                           |
| 235184_at    | 0.945 | 0.04697179 | -2.1112117 | -4.37 | -1.7614439 | AEBP2    | AE binding protein 2                             |
| 202522_at    | 0.945 | 0.04724804 | -2.1083095 | -4.37 | -2.3426209 | PITPNB   | phosphatidylinositol transfer protein beta       |
| 244058_at    | 0.945 | 0.0392295  | -2.2151754 | -4.37 | -2.5141885 | VSTM4    | V-set and transmembrane domain containing 4      |
| 227020_at    | 0.945 | 0.04277616 | -2.164328  | -4.37 | -2.3313432 | YPEL2    | yippee like 2                                    |
| 231498_at    | 0.945 | 0.03940811 | -2.2129252 | -4.37 | -2.7034657 |          |                                                  |
| 236401_at    | 0.945 | 0.04748151 | -2.1058687 | -4.37 | -2.4945838 | GIMAP1   | GTPase, IMAP family member 1                     |
| 1553605_a_at | 0.945 | 0.01909364 | -2.6278006 | -4.37 | -2.948526  | ABCA13   | ATP binding cassette subfamily A member 13       |
| 219369_s_at  | 0.945 | 0.04026875 | -2.1941123 | -4.37 | -3.1570079 | OTUB2    | OTU deubiquitinase, ubiquitin aldehyde binding 2 |
| 237324_s_at  | 0.945 | 0.03945834 | -2.2122939 | -4.37 | -2.3129546 | HKDC1    | hexokinase domain containing 1                   |
| 1569669_at   | 0.945 | 0.04032008 | -2.1934858 | -4.37 | -2.7193111 | FOXR2    | forkhead box R2                                  |

|              |       |            |            |       |            |              |                                                                                          |
|--------------|-------|------------|------------|-------|------------|--------------|------------------------------------------------------------------------------------------|
| 220436_at    | 0.945 | 0.03557178 | -2.2731785 | -4.37 | -3.0998914 | CNTNAP3P2    | contactin associated protein-like 3 pseudogene 2                                         |
| 226118_at    | 0.945 | 0.0218773  | -2.5408216 | -4.37 | -1.7679099 | CENPO        | centromere protein O                                                                     |
| 205744_at    | 0.945 | 0.02555656 | -2.4634348 | -4.37 | -2.9520963 | DOC2A        | double C2 domain alpha                                                                   |
| 212548_s_at  | 0.945 | 0.02889321 | -2.3879566 | -4.37 | -2.4608582 | FRYL         | FRY like transcription coactivator                                                       |
| 218454_at    | 0.945 | 0.04072224 | -2.1886026 | -4.37 | -2.2315606 | PLBD1        | phospholipase B domain containing 1                                                      |
| 1557944_s_at | 0.945 | 0.03993916 | -2.2062894 | -4.37 | -3.0654749 | TMX2-CTNND1  | TMX2-CTNND1 readthrough (NMD candidate)///catenin delta 1                                |
| 210770_s_at  | 0.945 | 0.01646427 | -2.7265506 | -4.37 | -4.0801256 | LOC100507353 | uncharacterized LOC100507353///calcium ///CACNA1A voltage-gated channel subunit alpha1 A |
| 1553082_at   | 0.945 | 0.03606655 | -2.2663139 | -4.37 | -2.6116393 | CRYGN        | crystallin gamma N                                                                       |
| 236488_s_at  | 0.945 | 0.03821748 | -2.2281057 | -4.37 | -2.1156294 |              |                                                                                          |
| 227744_s_at  | 0.945 | 0.04832147 | -2.0971758 | -4.37 | -2.0033096 | HNRNPD       | heterogeneous nuclear ribonucleoprotein D                                                |
| 1568711_a_at | 0.945 | 0.02916859 | -2.3832515 | -4.37 | -2.6598062 | LOC105369860 | uncharacterized LOC105369860                                                             |
| 239691_at    | 0.945 | 0.03621945 | -2.26421   | -4.37 | -2.642759  | C12orf77     | chromosome 12 open reading frame 77                                                      |
| 1552671_a_at | 0.945 | 0.0437802  | -2.1528454 | -4.37 | -2.3316392 | SLC9A7       | solute carrier family 9 member A7                                                        |
| 221352_at    | 0.945 | 0.01976714 | -2.6103754 | -4.37 | -3.170051  |              |                                                                                          |
| 216814_at    | 0.945 | 0.02934257 | -2.3803003 | -4.37 | -2.4783312 |              |                                                                                          |
| 242121_at    | 0.945 | 0.02477936 | -2.4637697 | -4.37 | -3.5044457 | FTX          | FTX transcript, XIST regulator (non-protein coding)                                      |
| 1569234_at   | 0.945 | 0.03181373 | -2.3400617 | -4.37 | -2.6070158 |              |                                                                                          |

|             |       |            |            |       |            |                              |                                                                                      |
|-------------|-------|------------|------------|-------|------------|------------------------------|--------------------------------------------------------------------------------------|
| 1553728_at  | 0.945 | 0.0356285  | -2.2723871 | -4.37 | -3.03688   | LRRC43                       | leucine rich repeat containing 43                                                    |
| 220074_at   | 0.945 | 0.01059883 | -2.9857295 | -4.37 | -2.6431477 | CDHR5                        | cadherin related family member 5                                                     |
| 1569661_at  | 0.945 | 0.03206164 | -2.3361877 | -4.38 | -2.7874877 | NPAS3                        | neuronal PAS domain protein 3                                                        |
| 217742_s_at | 0.945 | 0.04173521 | -2.1764946 | -4.38 | -3.0106894 | WAC                          | WW domain containing adaptor with coiled-coil                                        |
| 222395_s_at | 0.945 | 0.02658994 | -2.4436016 | -4.38 | -2.9650916 | UBE2Z                        | ubiquitin conjugating enzyme E2 Z                                                    |
| 221381_s_at | 0.945 | 0.04754246 | -2.1052332 | -4.38 | -1.1728617 | MORF4L1                      | mortality factor 4 like 1                                                            |
| 213433_at   | 0.945 | 0.04451145 | -2.1446322 | -4.38 | -2.2063079 | ARL3                         | ADP ribosylation factor like GTPase 3                                                |
| 205611_at   | 0.945 | 0.04543246 | -2.1344601 | -4.38 | -1.910898  | TNFSF12-TNF<br>SF13///TNFSF1 | TNFSF12-TNFSF13<br>necrosis factor superfamily member 12<br>2<br>readthrough///tumor |
| 1557783_at  | 0.945 | 0.04484795 | -2.1408938 | -4.38 | -2.7915551 | MAP3K14-AS1                  | MAP3K14 antisense RNA 1                                                              |
| 209379_s_at | 0.945 | 0.03249944 | -2.3294142 | -4.38 | -3.91362   | CCSER2                       | coiled-coil serine rich protein 2                                                    |
| 244222_at   | 0.945 | 0.04139407 | -2.1885154 | -4.38 | -3.0330493 |                              |                                                                                      |
| 1553276_at  | 0.945 | 0.04155175 | -2.1866235 | -4.38 | -2.2895475 | ZNF560                       | zinc finger protein 560                                                              |
| 236939_at   | 0.945 | 0.04156166 | -2.1865049 | -4.38 | -2.1066387 | HACD4                        | 3-hydroxyacyl-CoA dehydratase 4                                                      |
| 229227_at   | 0.945 | 0.01336013 | -2.8330723 | -4.38 | -4.1480322 | DICER1-AS1                   | DICER1 antisense RNA 1                                                               |
| 219742_at   | 0.945 | 0.03981539 | -2.2078287 | -4.38 | -3.1458757 | PRR7                         | proline rich 7 (synaptic)                                                            |
| 243115_at   | 0.945 | 0.0400708  | -2.204657  | -4.38 | -2.5556343 | THCAT158                     | thyroid cancer-associated transcript 158                                             |
| 217096_at   | 0.945 | 0.0336968  | -2.3000212 | -4.38 | -3.640837  | PCLO                         | piccolo presynaptic cytomatrix protein                                               |
| 222647_at   | 0.945 | 0.04880124 | -2.0922716 | -4.38 | -3.180882  | SLC35C1                      | solute carrier family 35 member C1                                                   |
| 228056_s_at | 0.945 | 0.0457919  | -2.130541  | -4.38 | -1.9263778 | NAPSB                        | napsin B aspartic peptidase, pseudogene                                              |

|             |       |            |            |       |            |            |                                                        |
|-------------|-------|------------|------------|-------|------------|------------|--------------------------------------------------------|
| 231163_at   | 0.945 | 0.04589019 | -2.1294742 | -4.38 | -1.1473411 | C1orf111   | chromosome 1 open reading frame 111                    |
| 1557590_at  | 0.945 | 0.04043935 | -2.2001129 | -4.38 | -2.4239656 | PARD6G-AS1 | PARD6G antisense RNA 1                                 |
| 242234_at   | 0.945 | 0.03400852 | -2.2954642 | -4.38 | -2.567069  | XAF1       | XIAP associated factor 1                               |
| 234998_at   | 0.945 | 0.03727083 | -2.249962  | -4.38 | -1.9622269 | RAB11A     | RAB11A, member RAS oncogene family                     |
| 224487_at   | 0.945 | 0.02918318 | -2.3968699 | -4.38 | -3.1795707 |            |                                                        |
| 231720_s_at | 0.945 | 0.03665772 | -2.2486637 | -4.38 | -3.0407247 | JAM3       | junctional adhesion molecule 3                         |
| 206414_s_at | 0.945 | 0.03373504 | -2.3107467 | -4.38 | -2.3903885 | ASAP2      | ArfGAP with SH3 domain, ankyrin repeat and PH domain 2 |
| 242683_at   | 0.945 | 0.04276071 | -2.1723328 | -4.38 | -1.7952784 | LINC00668  | long intergenic non-protein coding RNA 668             |
| 212278_x_at | 0.945 | 0.04282186 | -2.1716197 | -4.38 | -2.4376225 | UBE3A      | ubiquitin protein ligase E3A                           |
| 214266_s_at | 0.945 | 0.04974151 | -2.0827846 | -4.38 | -2.8421607 | PDLIM7     | PDZ and LIM domain 7                                   |
| 221676_s_at | 0.945 | 0.04316437 | -2.1676432 | -4.38 | -2.0677024 | CORO1C     | coronin 1C                                             |
| 202625_at   | 0.945 | 0.04675821 | -2.1201414 | -4.38 | -2.9949811 | LYN        | LYN proto-oncogene, Src family tyrosine kinase         |
| 204807_at   | 0.945 | 0.04400675 | -2.1502876 | -4.38 | -2.2703702 | TMEM5      | transmembrane protein 5                                |
| 1557192_at  | 0.945 | 0.04348043 | -2.1639994 | -4.38 | -2.5169977 | COX10-AS1  | COX10 antisense RNA 1                                  |
| 204036_at   | 0.945 | 0.04708363 | -2.1166831 | -4.38 | -1.5789763 | LPAR1      | lysophosphatidic acid receptor 1                       |
| 241437_s_at | 0.945 | 0.04350931 | -2.1636676 | -4.38 | -2.7727137 | EP400NL    | EP400 N-terminal like                                  |
| 1556402_at  | 0.945 | 0.03941683 | -2.221996  | -4.38 | -2.9801973 |            |                                                        |
| 228400_at   | 0.945 | 0.04724145 | -2.1150136 | -4.38 | -2.6319572 | SHROOM3    | shroom family member 3                                 |
| 244187_at   | 0.945 | 0.04376361 | -2.160755  | -4.38 | -2.6367165 |            |                                                        |

|              |       |            |            |       |            |                    |                                                      |
|--------------|-------|------------|------------|-------|------------|--------------------|------------------------------------------------------|
| 1568658_at   | 0.945 | 0.03519095 | -2.2785227 | -4.38 | -2.3538884 | C2orf74///KIAA1841 | chromosome 2 open reading frame 74///KIAA1841        |
| 213291_s_at  | 0.945 | 0.03781697 | -2.2333098 | -4.38 | -3.5160408 | UBE3A              | ubiquitin protein ligase E3A                         |
| 203828_s_at  | 0.945 | 0.00628373 | -3.3739611 | -4.38 | -4.861958  | IL32               | interleukin 32                                       |
| 202220_at    | 0.945 | 0.04855493 | -2.1013118 | -4.38 | -1.7070336 | KIAA0907           | KIAA0907                                             |
| 233751_at    | 0.945 | 0.03545115 | -2.2748656 | -4.38 | -2.4389242 | ZFHX3              | zinc finger homeobox 3                               |
| 1559513_a_at | 0.945 | 0.01230297 | -2.9078884 | -4.38 | -3.2616232 | FANCC              | Fanconi anemia complementation group C               |
| 242600_at    | 0.945 | 0.02247302 | -2.545678  | -4.38 | -3.2042964 | FRMD3              | FERM domain containing 3                             |
| 230479_at    | 0.945 | 0.04879882 | -2.0988046 | -4.38 | -2.5563569 | EIF3F              | eukaryotic translation initiation factor 3 subunit F |
| 205511_at    | 0.945 | 0.04429176 | -2.1547548 | -4.38 | -2.4328769 | FLJ10038           | uncharacterized protein FLJ10038                     |
| 232281_at    | 0.945 | 0.04229234 | -2.1778248 | -4.38 | -1.6216259 | LINC00662          | long intergenic non-protein coding RNA 662           |
| 220892_s_at  | 0.945 | 0.0328204  | -2.3245024 | -4.38 | -2.9839874 | PSAT1              | phosphoserine aminotransferase 1                     |
| 226818_at    | 0.945 | 0.0480087  | -2.1069687 | -4.38 | -2.3659349 | MPEG1              | macrophage expressed 1                               |
| 218458_at    | 0.945 | 0.02283082 | -2.5376884 | -4.38 | -3.6544384 | GMCL1              | germ cell-less, spermatogenesis associated 1         |
| 209516_at    | 0.945 | 0.04477301 | -2.1493441 | -4.39 | -2.185432  | SMYD5              | SMYD family member 5                                 |
| 233035_at    | 0.945 | 0.03623964 | -2.2639328 | -4.39 | -1.9773237 |                    |                                                      |
| 207531_at    | 0.945 | 0.0396449  | -2.2191069 | -4.39 | -2.7444806 | CRYGC              | crystallin gamma C                                   |
| 201562_s_at  | 0.945 | 0.0430924  | -2.1684764 | -4.39 | -1.7931324 | SORD               | sorbitol dehydrogenase                               |
| 232599_at    | 0.945 | 0.0099731  | -3.0605558 | -4.39 | -3.8485356 | EXOC6              | exocyst complex component 6                          |
| 236775_s_at  | 0.945 | 0.04889856 | -2.0977825 | -4.39 | -2.4130224 |                    |                                                      |

|              |       |            |            |       |            |                   |                                                              |
|--------------|-------|------------|------------|-------|------------|-------------------|--------------------------------------------------------------|
| 223176_at    | 0.945 | 0.03021329 | -2.3793863 | -4.39 | -2.562337  | KCTD20            | potassium channel tetramerization domain containing 20       |
| 205541_s_at  | 0.945 | 0.04894826 | -2.0972738 | -4.39 | -2.1638128 | GSPT2             | G1 to S phase transition 2                                   |
| 229437_at    | 0.945 | 0.04536168 | -2.1427971 | -4.39 | -2.0518452 | MIR155///MIR155HG | microRNA 155///MIR155 host gene 155HG                        |
| 240164_at    | 0.945 | 0.03026525 | -2.3785194 | -4.39 | -3.4029633 | MUC4              | mucin 4, cell surface associated                             |
| 216671_x_at  | 0.945 | 0.04018611 | -2.2123117 | -4.39 | -1.6404533 | MUC8              | mucin 8                                                      |
| 1558815_at   | 0.945 | 0.04643827 | -2.123563  | -4.39 | -2.5358324 | SORBS2            | sorbin and SH3 domain containing 2                           |
| 1561461_at   | 0.945 | 0.02646928 | -2.4458793 | -4.39 | -2.4185401 |                   |                                                              |
| 207165_at    | 0.945 | 0.02657872 | -2.4605174 | -4.39 | -2.8251108 | HMMR              | hyaluronan mediated motility receptor                        |
| 205173_x_at  | 0.945 | 0.03207002 | -2.3492435 | -4.39 | -1.4943883 | CD58              | CD58 molecule                                                |
| 207394_at    | 0.945 | 0.04199716 | -2.1901691 | -4.39 | -1.5460859 | ZNF137P           | zinc finger protein 137, pseudogene                          |
| 221325_at    | 0.945 | 0.03719001 | -2.2617397 | -4.39 | -3.5735477 | KCNK13            | potassium two pore domain channel subfamily K member 13      |
| 221357_at    | 0.945 | 0.0411251  | -2.2007193 | -4.39 | -2.6637503 | CHRM4             | cholinergic receptor muscarinic 4                            |
| 1559167_x_at | 0.945 | 0.04691571 | -2.1258782 | -4.39 | -1.8546247 | MPV17L            | MPV17 mitochondrial inner membrane protein like              |
| 1561306_s_at | 0.945 | 0.0414964  | -2.1962024 | -4.39 | -1.5017369 | LOC101930630      | putative stereocilin-like protein-like///stereocilin ///STRC |
| 1558649_at   | 0.945 | 0.02773215 | -2.4225106 | -4.39 | -3.2228628 | ALDH1A3           | aldehyde dehydrogenase 1 family member A3                    |
| 239201_at    | 0.945 | 0.04816609 | -2.1053327 | -4.39 | -1.976641  | CDK15             | cyclin dependent kinase 15                                   |
| 205697_at    | 0.945 | 0.03871224 | -2.2310199 | -4.39 | -3.2264983 | SCGN              | secretagoin, EF-hand calcium binding protein                 |
| 243559_at    | 0.945 | 0.03361411 | -2.325399  | -4.39 | -1.8887298 |                   |                                                              |

|              |       |            |            |       |            |         |                                                                           |
|--------------|-------|------------|------------|-------|------------|---------|---------------------------------------------------------------------------|
| 1554108_at   | 0.945 | 0.04364869 | -2.1707281 | -4.39 | -2.5525019 |         |                                                                           |
| 239329_at    | 0.945 | 0.02354543 | -2.5426897 | -4.39 | -2.5624358 | RAB21   | RAB21, member RAS oncogene family                                         |
| 214880_x_at  | 0.945 | 0.03394916 | -2.3203608 | -4.39 | -3.6255338 | CALD1   | caldesmon 1                                                               |
| 1556138_a_at | 0.945 | 0.02844532 | -2.4258771 | -4.39 | -2.9469498 |         |                                                                           |
| 214209_s_at  | 0.945 | 0.04269161 | -2.1819104 | -4.39 | -2.4799525 | ABCB9   | ATP binding cassette subfamily B member 9                                 |
| 230686_s_at  | 0.945 | 0.04275079 | -2.1812124 | -4.39 | -2.7647045 | SLC13A3 | solute carrier family 13 member 3                                         |
| 244562_s_at  | 0.945 | 0.03277712 | -2.3381934 | -4.39 | -3.4270128 |         |                                                                           |
| 1556595_at   | 0.945 | 0.04282927 | -2.180288  | -4.39 | -2.215733  |         |                                                                           |
| 244261_at    | 0.945 | 0.03283407 | -2.3373133 | -4.39 | -1.7828724 | IFNLR1  | interferon lambda receptor 1                                              |
| 1569310_at   | 0.945 | 0.04851115 | -2.1090302 | -4.39 | -3.0748676 | IRGQ    | immunity related GTPase Q                                                 |
| 230788_at    | 0.945 | 0.02224705 | -2.571989  | -4.39 | -4.4235847 | GCNT2   | glucosaminyl (N-acetyl) transferase 2, I-branching enzyme (I blood group) |
| 1569949_at   | 0.945 | 0.03683389 | -2.2665908 | -4.39 | -3.806148  | GRK5    | G protein-coupled receptor kinase 5                                       |
| 225261_x_at  | 0.945 | 0.03339631 | -2.3286993 | -4.4  | -3.3327231 | NELFCD  | negative elongation factor complex member C/D                             |
| 242777_at    | 0.945 | 0.04476862 | -2.1579247 | -4.4  | -2.8724857 |         |                                                                           |
| 202616_s_at  | 0.945 | 0.03192834 | -2.3382673 | -4.4  | -2.4114789 | MECP2   | methyl-CpG binding protein 2                                              |
| 233668_at    | 0.945 | 0.02440545 | -2.5241264 | -4.4  | -1.997826  |         |                                                                           |
| 1561564_at   | 0.945 | 0.01868579 | -2.6888582 | -4.4  | -2.2038974 |         |                                                                           |
| 242074_at    | 0.945 | 0.04503859 | -2.1548822 | -4.4  | -3.0754231 |         |                                                                           |
| 233872_x_at  | 0.945 | 0.0399872  | -2.2250658 | -4.4  | -2.4117939 | ARHGAP5 | Rho GTPase activating protein 5                                           |
| 226504_at    | 0.945 | 0.02966592 | -2.3886054 | -4.4  | -2.9721365 | FAM109B | family with sequence similarity 109 member B                              |

|              |       |            |            |      |            |              |                                                                                       |
|--------------|-------|------------|------------|------|------------|--------------|---------------------------------------------------------------------------------------|
| 1556322_a_at | 0.945 | 0.04410252 | -2.1655039 | -4.4 | -2.4557365 |              |                                                                                       |
| 243247_at    | 0.945 | 0.0443378  | -2.1628148 | -4.4 | -2.2878168 |              |                                                                                       |
| 242566_at    | 0.945 | 0.03556361 | -2.2967178 | -4.4 | -2.8360525 | VASH1        | vasohibin 1                                                                           |
| 1570267_at   | 0.945 | 0.03003758 | -2.3979923 | -4.4 | -2.8443919 |              |                                                                                       |
| 204133_at    | 0.945 | 0.04375729 | -2.1608272 | -4.4 | -2.7499536 | RRP9         | ribosomal RNA processing 9, small subunit (SSU) processome component, homolog (yeast) |
| 244372_at    | 0.945 | 0.03814613 | -2.2489248 | -4.4 | -2.5571502 | LOC101060019 | uncharacterized LOC101060019                                                          |
| 202903_at    | 0.945 | 0.03456698 | -2.3111913 | -4.4 | -2.2406774 | LSM5         | LSM5 homolog, U6 small nuclear RNA and mRNA degradation associated                    |
| 1563693_at   | 0.945 | 0.04602212 | -2.1439372 | -4.4 | -2.5634762 |              |                                                                                       |
| 242749_at    | 0.945 | 0.03461948 | -2.3104192 | -4.4 | -2.9215165 |              |                                                                                       |
| 223662_x_at  | 0.945 | 0.01947779 | -2.6670058 | -4.4 | -2.6486399 | DDX59        | DEAD-box helicase 59                                                                  |
| 212767_at    | 0.945 | 0.03873709 | -2.2411523 | -4.4 | -2.7249275 | MTG1         | mitochondrial ribosome associated GTPase 1                                            |
| 1553703_at   | 0.945 | 0.04577626 | -2.1466531 | -4.4 | -2.5280688 | ZNF791       | zinc finger protein 791                                                               |
| 221973_at    | 0.945 | 0.04702135 | -2.1330343 | -4.4 | -2.6936453 | LOC100506123 | uncharacterized<br>///LOC1005060 LOC100506123///uncharacterized<br>76<br>LOC100506076 |
| 221336_at    | 0.945 | 0.03552981 | -2.2972025 | -4.4 | -2.0739176 | ATOH1        | atonal bHLH transcription factor 1                                                    |
| 213899_at    | 0.945 | 0.04738712 | -2.129096  | -4.4 | -2.2468514 | METAP2       | methionyl aminopeptidase 2                                                            |
| 223717_s_at  | 0.945 | 0.04218353 | -2.1978964 | -4.4 | -2.8486159 | ACRBP        | acrosin binding protein                                                               |
| 206192_at    | 0.945 | 0.04629212 | -2.14097   | -4.4 | -2.9381032 | CDSN         | corneodesmosin                                                                        |



|             |       |            |            |       |            |           |                                                         |
|-------------|-------|------------|------------|-------|------------|-----------|---------------------------------------------------------|
| 210926_at   | 0.945 | 0.04750198 | -2.127865  | -4.4  | -3.2220605 | POTEKP    | POTE ankyrin domain family member K, pseudogene         |
| 214713_at   | 0.945 | 0.0423455  | -2.1959448 | -4.4  | -2.9720634 | YLPM1     | YLP motif containing 1                                  |
| 222572_at   | 0.945 | 0.0425115  | -2.1939518 | -4.4  | -2.8405491 | PDP1      | pyruvate dehydrogenase phosphatase catalytic subunit 1  |
| 201911_s_at | 0.945 | 0.03456262 | -2.2985966 | -4.4  | -3.0503346 | FARP1     | FERM, ARH/RhoGEF and pleckstrin domain protein 1        |
| 243679_at   | 0.945 | 0.04790711 | -2.1235447 | -4.4  | -3.1875543 | JPH3      | junctionophilin 3                                       |
| 224022_x_at | 0.945 | 0.04680398 | -2.135388  | -4.4  | -2.1202379 | WNT16     | Wnt family member 16                                    |
| 202605_at   | 0.945 | 0.04334506 | -2.1742511 | -4.4  | -2.6002701 | GUSB      | glucuronidase beta                                      |
| 1554276_at  | 0.945 | 0.02703996 | -2.4709364 | -4.4  | -3.233297  | SART3     | squamous cell carcinoma antigen recognized by T-cells 3 |
| 235151_at   | 0.945 | 0.03686455 | -2.278385  | -4.4  | -2.6485437 | LOC283357 | uncharacterized LOC283357                               |
| 1552990_at  | 0.945 | 0.04355938 | -2.1815337 | -4.4  | -2.784845  | FAM71E2   | family with sequence similarity 71 member E2            |
| 232886_at   | 0.945 | 0.04685711 | -2.1265069 | -4.4  | -2.9990091 |           |                                                         |
| 1556607_at  | 0.945 | 0.04781547 | -2.124519  | -4.4  | -3.1850548 | EHD4      | EH domain containing 4                                  |
| 229762_at   | 0.945 | 0.04785475 | -2.1241012 | -4.4  | -2.0338793 |           |                                                         |
| 238684_at   | 0.945 | 0.0491408  | -2.1105907 | -4.41 | -1.3335723 | SETDB2    | SET domain bifurcated 2                                 |
| 235890_at   | 0.945 | 0.03807029 | -2.2393742 | -4.41 | -2.2163695 | TBL1XR1   | transducin (beta)-like 1 X-linked receptor 1            |
| 238951_at   | 0.945 | 0.03333317 | -2.3444657 | -4.41 | -2.9831432 |           |                                                         |
| 210250_x_at | 0.945 | 0.04850848 | -2.1171927 | -4.41 | -3.1692516 | ADSL      | adenylosuccinate lyase                                  |
| 227902_at   | 0.945 | 0.0285714  | -2.4422554 | -4.41 | -3.5695933 | ZFP41     | ZFP41 zinc finger protein                               |
| 214720_x_at | 0.945 | 0.03390741 | -2.3356536 | -4.41 | -2.527258  | SEPT10    | septin 10                                               |

|              |       |            |            |       |            |           |                                                         |
|--------------|-------|------------|------------|-------|------------|-----------|---------------------------------------------------------|
| 1556528_at   | 0.945 | 0.03074522 | -2.3860465 | -4.41 | -3.4212965 | LINC00692 | long intergenic non-protein coding RNA 692              |
| 239501_at    | 0.945 | 0.04262818 | -2.1925552 | -4.41 | -2.9982996 |           |                                                         |
| 220848_x_at  | 0.945 | 0.02271353 | -2.5859006 | -4.41 | -3.4682047 | OBP2A     | odorant binding protein 2A                              |
| 201919_at    | 0.945 | 0.04970225 | -2.1047931 | -4.41 | -2.6706551 | SLC25A36  | solute carrier family 25 member 36                      |
| 1554542_at   | 0.945 | 0.0390525  | -2.2488711 | -4.41 | -2.583707  | SLC25A48  | solute carrier family 25 member 48                      |
| 1561384_a_at | 0.945 | 0.04352501 | -2.1819367 | -4.41 | -2.2483783 | LOC284661 | uncharacterized LOC284661                               |
| 212786_at    | 0.945 | 0.04631186 | -2.1501789 | -4.41 | -2.1325381 | CLEC16A   | C-type lectin domain family 16 member A                 |
| 224720_at    | 0.945 | 0.03526197 | -2.3010579 | -4.41 | -2.6204698 | MIB1      | mindbomb E3 ubiquitin protein ligase 1                  |
| 244317_at    | 0.945 | 0.04401738 | -2.1761924 | -4.41 | -2.8346423 | KIAA1324L | KIAA1324 like                                           |
| 211390_at    | 0.945 | 0.0467757  | -2.1450642 | -4.41 | -2.9993511 | N4BP2L1   | NEDD4 binding protein 2 like 1                          |
| 218608_at    | 0.945 | 0.04694964 | -2.1431582 | -4.41 | -3.5615472 | ATP13A2   | ATPase 13A2                                             |
| 237947_at    | 0.945 | 0.04203686 | -2.2110016 | -4.41 | -2.3882784 |           |                                                         |
| 222385_x_at  | 0.945 | 0.03606183 | -2.3037983 | -4.41 | -2.5580015 | SEC61A1   | Sec61 translocon alpha 1 subunit                        |
| 220700_at    | 0.945 | 0.04733412 | -2.1389681 | -4.41 | -3.1863998 |           |                                                         |
| 238410_x_at  | 0.945 | 0.04091812 | -2.2248961 | -4.41 | -2.5822259 |           |                                                         |
| 200621_at    | 0.945 | 0.02346959 | -2.5443578 | -4.41 | -2.6825626 | CSRP1     | cysteine and glycine rich protein 1                     |
| 210405_x_at  | 0.945 | 0.0369159  | -2.2916627 | -4.41 | -3.7149785 | TNFRSF10B | TNF receptor superfamily member 10b                     |
| 221606_s_at  | 0.945 | 0.04558896 | -2.1582445 | -4.41 | -2.3060273 | HMG5      | high mobility group nucleosome binding domain 5         |
| 218948_at    | 0.945 | 0.03158942 | -2.389791  | -4.41 | -3.352703  | QRSL1     | glutaminyl-tRNA synthase (glutamine-hydrolyzing)-like 1 |

|              |       |            |            |       |            |         |                                          |
|--------------|-------|------------|------------|-------|------------|---------|------------------------------------------|
| 225738_at    | 0.945 | 0.02500194 | -2.5350598 | -4.41 | -2.6250048 | RAPGEF1 | Rap guanine nucleotide exchange factor 1 |
| 1561480_a_at | 0.945 | 0.04934932 | -2.1084305 | -4.42 | -2.6056534 |         |                                          |

---

**GSE27890**

---

| ID           | adj.P.Val | P.Value   | t         | B     | logFC     | Gene.symbol     |
|--------------|-----------|-----------|-----------|-------|-----------|-----------------|
| 229552_at    | 0.759     | 0.0000958 | 6.0186579 | -4.54 | 4.3593317 | LOC283454///HRK |
| 229638_at    | 0.759     | 0.0001081 | 5.9334785 | -4.54 | 4.1043461 | IRX3            |
| 241141_at    | 0.759     | 0.000141  | 5.7480908 | -4.54 | 5.4058304 | BMP6            |
| 242164_s_at  | 0.759     | 0.0001893 | 5.5463347 | -4.54 | 5.1784128 | LRIG2           |
| 210729_at    | 0.759     | 0.0002153 | 5.4590468 | -4.54 | 5.0229993 | NPY2R           |
| 229889_at    | 0.759     | 0.0004462 | 4.9796686 | -4.55 | 3.2610511 | LRRC75A         |
| 1559134_a_at | 0.759     | 0.0004562 | 4.9654116 | -4.55 | 3.6428686 | ZNF546          |
| 1552484_at   | 0.759     | 0.000464  | 4.9545872 | -4.55 | 3.2132517 | SMCR8           |
| 1557297_at   | 0.759     | 0.0004999 | 4.9068388 | -4.55 | 3.7057512 |                 |
| 234358_at    | 0.759     | 0.0005307 | 4.8686045 | -4.55 | 5.0061014 |                 |
| 211055_s_at  | 0.759     | 0.0005987 | 4.7921026 | -4.55 | 4.1945591 | INVS            |
| 1552763_at   | 0.759     | 0.0006415 | 4.7485124 | -4.55 | 4.2883563 | TMEM67          |
| 237982_at    | 0.759     | 0.0006636 | 4.7271671 | -4.55 | 4.1373508 | LOC101928327    |
| 243877_at    | 0.759     | 0.0007088 | 4.6858018 | -4.55 | 5.0003844 |                 |
| 240093_x_at  | 0.759     | 0.0007437 | 4.65574   | -4.55 | 3.8524909 |                 |

|              |       |           |           |       |           |                   |
|--------------|-------|-----------|-----------|-------|-----------|-------------------|
| 216907_x_at  | 0.759 | 0.0008111 | 4.6016266 | -4.55 | 4.023287  | KIR3DL2///KIR3DL1 |
| 229271_x_at  | 0.759 | 0.0008657 | 4.5611252 | -4.55 | 4.4542988 | COL11A1           |
| 232655_at    | 0.759 | 0.0008879 | 4.5454648 | -4.55 | 4.1552847 | UGT1A1            |
| 217595_at    | 0.759 | 0.0009756 | 4.4872923 | -4.55 | 4.6263943 | GSPT1             |
| 1562850_at   | 0.759 | 0.0010383 | 4.448927  | -4.55 | 4.1682162 | LOC101928283      |
| 234145_at    | 0.759 | 0.001131  | 4.3965243 | -4.55 | 3.3697183 |                   |
| 244613_at    | 0.759 | 0.0012432 | 4.3388464 | -4.55 | 4.3902145 |                   |
| 1569439_at   | 0.759 | 0.0013879 | 4.2719919 | -4.55 | 4.3933241 |                   |
| 1568923_at   | 0.759 | 0.0014264 | 4.2554141 | -4.55 | 3.0555606 |                   |
| 1567334_at   | 0.759 | 0.0014546 | 4.2435833 | -4.55 | 4.4830209 |                   |
| 1556394_a_at | 0.759 | 0.0014601 | 4.2412968 | -4.55 | 2.9059188 |                   |
| 217528_at    | 0.759 | 0.0014978 | 4.2259296 | -4.55 | 4.1050767 | CLCA2             |
| 216891_at    | 0.759 | 0.0015064 | 4.2224658 | -4.55 | 2.7863461 |                   |
| 206149_at    | 0.759 | 0.0015273 | 4.2141534 | -4.55 | 3.8669066 | CHP2              |
| 237939_at    | 0.759 | 0.0015823 | 4.1928346 | -4.55 | 4.28844   | EPHA5             |
| 1557427_at   | 0.759 | 0.001632  | 4.1742555 | -4.55 | 3.1803648 |                   |
| 211269_s_at  | 0.759 | 0.0017109 | 4.145898  | -4.55 | 4.0878713 | IL2RA             |
| 1569504_at   | 0.759 | 0.0017622 | 4.1281956 | -4.55 | 4.3806527 | LILRB4            |
| 239900_x_at  | 0.759 | 0.0018579 | 4.096569  | -4.55 | 4.0384386 |                   |
| 240606_at    | 0.759 | 0.0018713 | 4.0922704 | -4.55 | 3.3695003 |                   |

|              |       |           |           |       |           |                       |
|--------------|-------|-----------|-----------|-------|-----------|-----------------------|
| 214580_x_at  | 0.759 | 0.0018928 | 4.0854601 | -4.55 | 3.3895201 | KRT6C///KRT6B///KRT6A |
| 238490_at    | 0.759 | 0.0018928 | 4.0854551 | -4.55 | 2.8847903 | KIAA2026              |
| 230508_at    | 0.759 | 0.0018955 | 4.0846075 | -4.55 | 3.3924225 | DKK3                  |
| 1561983_at   | 0.759 | 0.0019408 | 4.0705103 | -4.55 | 3.2325989 | LINC01206             |
| 1557838_at   | 0.759 | 0.0019443 | 4.0694412 | -4.55 | 3.9812802 | FAM135B               |
| 1561919_at   | 0.759 | 0.0019939 | 4.0544333 | -4.55 | 2.9589809 |                       |
| 207935_s_at  | 0.759 | 0.0020427 | 4.0400202 | -4.55 | 3.5912971 | KRT13                 |
| 219827_at    | 0.759 | 0.00205   | 4.0379212 | -4.55 | 3.0562615 | UCP3                  |
| 1554059_at   | 0.759 | 0.0020823 | 4.0286212 | -4.55 | 3.335112  | SETMAR                |
| 1559298_a_at | 0.759 | 0.0020843 | 4.0280426 | -4.55 | 2.793844  | SPATA41               |
| 208333_at    | 0.759 | 0.002107  | 4.0216079 | -4.55 | 3.9648009 | LHX5                  |
| 1552661_at   | 0.759 | 0.0021737 | 4.0030997 | -4.55 | 3.4362059 | PCDHGB7               |
| 234473_at    | 0.759 | 0.0021846 | 4.0001217 | -4.55 | 3.3123828 | LOC101928697          |
| 238611_at    | 0.759 | 0.0021951 | 3.9972858 | -4.55 | 3.1334572 |                       |
| 1555394_at   | 0.759 | 0.0022113 | 3.9929202 | -4.55 | 3.5637169 | PIGK                  |
| 1554371_at   | 0.759 | 0.002253  | 3.9818579 | -4.55 | 3.7071936 | PKD1L2                |
| 238250_at    | 0.759 | 0.0022653 | 3.9786314 | -4.55 | 4.02193   |                       |
| 1561062_a_at | 0.759 | 0.0022951 | 3.9708722 | -4.55 | 3.2364854 | LOC101928850          |
| 238284_at    | 0.759 | 0.0023009 | 3.9694029 | -4.55 | 3.6688939 |                       |

|              |       |           |           |       |           |           |
|--------------|-------|-----------|-----------|-------|-----------|-----------|
| 212084_at    | 0.759 | 0.00231   | 3.9670454 | -4.55 | 2.9605327 | TEX261    |
| 234540_at    | 0.759 | 0.002335  | 3.9606945 | -4.55 | 3.4965731 | GCNT7     |
| 1563271_at   | 0.759 | 0.0024452 | 3.9334236 | -4.55 | 3.6620089 |           |
| 206840_at    | 0.759 | 0.002447  | 3.9329813 | -4.55 | 4.149817  | AFM       |
| 244051_at    | 0.759 | 0.0024787 | 3.9253946 | -4.55 | 3.2496967 |           |
| 215469_at    | 0.759 | 0.0025031 | 3.9196089 | -4.55 | 3.5219181 | SLITRK5   |
| 1553526_at   | 0.759 | 0.0025258 | 3.914278  | -4.55 | 2.8833931 | NLRP8     |
| 1553111_a_at | 0.759 | 0.0025332 | 3.9125545 | -4.55 | 4.6570242 | KBTBD6    |
| 224154_at    | 0.759 | 0.002535  | 3.912144  | -4.55 | 3.0243459 | B3GNT2    |
| 234129_at    | 0.759 | 0.0025397 | 3.9110619 | -4.55 | 2.5997741 | ARHGEF12  |
| 237512_at    | 0.759 | 0.0025634 | 3.9055658 | -4.55 | 3.4380213 | NAV2-AS2  |
| 1561371_at   | 0.759 | 0.0026116 | 3.8946075 | -4.55 | 2.9754282 | MIR2052HG |
| 1552890_a_at | 0.759 | 0.0026408 | 3.8880516 | -4.55 | 2.6040219 | CABP4     |
| 208317_at    | 0.759 | 0.0026682 | 3.8819783 | -4.55 | 3.4344407 | XYLB      |
| 1565936_a_at | 0.759 | 0.0026693 | 3.8817294 | -4.55 | 3.0885164 | LMO3      |
| 216868_s_at  | 0.759 | 0.0026746 | 3.8805614 | -4.55 | 3.6603297 |           |
| 1563074_at   | 0.759 | 0.0026873 | 3.8777706 | -4.55 | 3.7910833 | LOC255654 |
| 217953_at    | 0.759 | 0.002696  | 3.8758811 | -4.55 | 3.2736856 | PHF3      |
| 1563894_at   | 0.759 | 0.0027099 | 3.8728485 | -4.55 | 3.0063074 | LOC441178 |
| 237645_at    | 0.759 | 0.0027363 | 3.8671619 | -4.56 | 3.0966303 |           |
| 1570235_at   | 0.759 | 0.002741  | 3.8661529 | -4.56 | 3.6657733 | MGC27382  |
| 206159_at    | 0.759 | 0.002745  | 3.8652857 | -4.56 | 3.8026528 | GDF10     |
| 1556062_at   | 0.759 | 0.00278   | 3.8578472 | -4.56 | 4.717014  | RPP30     |

|              |       |           |           |       |           |                   |
|--------------|-------|-----------|-----------|-------|-----------|-------------------|
| 1563290_at   | 0.759 | 0.0027865 | 3.856467  | -4.56 | 2.9728262 | DNAH3             |
| 241492_at    | 0.759 | 0.0028821 | 3.836657  | -4.56 | 3.0779363 |                   |
| 1568639_a_at | 0.759 | 0.0028859 | 3.835897  | -4.56 | 2.2882212 | GATA2-AS1         |
| 234776_at    | 0.759 | 0.0028889 | 3.8352898 | -4.56 | 3.9397779 | DMBX1             |
| 220811_at    | 0.759 | 0.0028992 | 3.8331866 | -4.56 | 3.5039691 | PRG3              |
| 241915_at    | 0.759 | 0.0029352 | 3.8259558 | -4.56 | 4.1317176 | ACSM2B            |
| 231304_at    | 0.759 | 0.0029434 | 3.8243255 | -4.56 | 3.3948012 | PPP3R2            |
| 1566832_at   | 0.759 | 0.0029463 | 3.8237343 | -4.56 | 3.6993637 | TOP1P2            |
| 219085_s_at  | 0.759 | 0.0029481 | 3.8233844 | -4.56 | 3.6683079 | GEMIN7            |
| 1554918_a_at | 0.759 | 0.0030407 | 3.8052666 | -4.56 | 3.0382499 | ABCC4             |
| 211491_at    | 0.759 | 0.0030568 | 3.8021773 | -4.56 | 3.6311794 | ADRA1A            |
| 217578_at    | 0.759 | 0.0030591 | 3.8017327 | -4.56 | 3.0147292 |                   |
| 209125_at    | 0.759 | 0.0030883 | 3.7961656 | -4.56 | 4.1738869 | KRT6A             |
| 209986_at    | 0.759 | 0.0030948 | 3.7949502 | -4.56 | 3.0482343 | LOC101929036//PAH |
| 1562644_at   | 0.759 | 0.0031184 | 3.7904979 | -4.56 | 2.6548298 | MTHFD2L           |
| 240946_at    | 0.759 | 0.0031463 | 3.7852807 | -4.56 | 3.1085693 |                   |
| 1555048_a_at | 0.759 | 0.0031718 | 3.7805669 | -4.56 | 2.9902037 | TSPEAR            |
| 233722_at    | 0.759 | 0.0032434 | 3.767521  | -4.56 | 3.7863775 |                   |
| 238561_s_at  | 0.759 | 0.003259  | 3.7647206 | -4.56 | 3.0146599 | UTP23             |
| 243107_at    | 0.759 | 0.0032631 | 3.7639782 | -4.56 | 3.3907873 |                   |

|              |       |           |           |       |           |              |
|--------------|-------|-----------|-----------|-------|-----------|--------------|
| 1561517_at   | 0.759 | 0.0033005 | 3.7573396 | -4.56 | 3.7523541 | SSPN         |
| 217068_at    | 0.759 | 0.0033119 | 3.7553263 | -4.56 | 3.3221992 |              |
| 231712_at    | 0.759 | 0.0033128 | 3.7551563 | -4.56 | 4.0778395 | ASCL5        |
| 205710_at    | 0.759 | 0.0033315 | 3.7518742 | -4.56 | 3.2893057 | LRP2         |
| 220664_at    | 0.759 | 0.0033618 | 3.7466001 | -4.56 | 2.7639682 | SPRR2C       |
| 214189_s_at  | 0.759 | 0.0033627 | 3.7464374 | -4.56 | 3.4836462 | GGA2         |
| 208122_x_at  | 0.759 | 0.0033832 | 3.7428991 | -4.56 | 2.3545366 | KIR2DS3      |
| 242138_at    | 0.759 | 0.0033887 | 3.7419384 | -4.56 | 3.4490332 | DLX1         |
| 238947_at    | 0.759 | 0.0034133 | 3.7377243 | -4.56 | 2.5778957 |              |
| 1555662_s_at | 0.759 | 0.0034172 | 3.7370685 | -4.56 | 3.217673  | DAOA         |
| 236857_at    | 0.759 | 0.0035456 | 3.7155659 | -4.56 | 2.783815  | SLC38A1      |
| 1562301_at   | 0.759 | 0.0036693 | 3.6956176 | -4.56 | 3.3019419 | C8orf34      |
| 1559603_at   | 0.759 | 0.0037306 | 3.6859765 | -4.56 | 3.8506821 | GPR12        |
| 1567377_at   | 0.759 | 0.0037331 | 3.6855937 | -4.56 | 3.6194284 | DNAH1        |
| 1570627_at   | 0.759 | 0.003766  | 3.6804942 | -4.56 | 3.3110263 | TCEB3        |
| 220425_x_at  | 0.759 | 0.0038301 | 3.6706779 | -4.56 | 3.6218321 | ROPN1B       |
| 226260_x_at  | 0.759 | 0.0038311 | 3.670528  | -4.56 | 2.9519487 | ZNF358       |
| 224120_at    | 0.759 | 0.0038693 | 3.6647743 | -4.56 | 2.7209983 |              |
| 208339_at    | 0.759 | 0.0038711 | 3.6644985 | -4.56 | 3.7723479 | XKRY2///XKRY |
| 1561402_at   | 0.759 | 0.0038733 | 3.6641789 | -4.56 | 3.1654898 | LINC00880    |



|              |       |           |           |       |           |              |
|--------------|-------|-----------|-----------|-------|-----------|--------------|
| 219346_at    | 0.759 | 0.0038894 | 3.6617708 | -4.56 | 2.8954356 | LRFN3        |
| 1569879_a_at | 0.759 | 0.0039191 | 3.6573479 | -4.56 | 2.32899   | MEGF11       |
| 238355_at    | 0.759 | 0.0039215 | 3.6569932 | -4.56 | 3.5321059 |              |
| 1565338_x_at | 0.759 | 0.0039502 | 3.6527681 | -4.56 | 2.815719  | DNAH6        |
| 1562937_at   | 0.759 | 0.0039827 | 3.6480049 | -4.56 | 2.5387483 |              |
| 204738_s_at  | 0.759 | 0.0039833 | 3.6479194 | -4.56 | 3.5189801 | KRIT1        |
| 1570391_at   | 0.759 | 0.004007  | 3.644485  | -4.56 | 2.6533418 | CRAT37       |
| 236693_at    | 0.759 | 0.0040257 | 3.6417827 | -4.56 | 3.7613698 | MIR124-2HG   |
| 232722_at    | 0.759 | 0.0040444 | 3.639094  | -4.56 | 2.7299972 | RNASET2      |
| 241142_at    | 0.759 | 0.0040664 | 3.6359586 | -4.56 | 3.6890597 |              |
| 1570013_at   | 0.759 | 0.0041237 | 3.6278499 | -4.56 | 2.783448  | LOC101927411 |
| 215916_at    | 0.759 | 0.0041299 | 3.6269714 | -4.56 | 3.5470838 | CHRNE        |
| 233774_at    | 0.759 | 0.0041659 | 3.6219505 | -4.56 | 3.5320852 |              |
| 208305_at    | 0.759 | 0.0042089 | 3.6160014 | -4.56 | 4.2823887 | PGR          |
| 1562738_a_at | 0.759 | 0.0042536 | 3.6098908 | -4.56 | 2.8293685 | USP3-AS1     |
| 1561944_at   | 0.759 | 0.004269  | 3.6077922 | -4.56 | 3.0322475 |              |
| 211525_s_at  | 0.759 | 0.0042769 | 3.6067179 | -4.56 | 2.7363449 | GP5          |
| 215540_at    | 0.759 | 0.004278  | 3.6065681 | -4.56 | 2.4702023 | YME1L1       |
| 215878_at    | 0.759 | 0.0042814 | 3.6061102 | -4.56 | 4.0274608 | ITGB1        |
| 242792_at    | 0.759 | 0.0043052 | 3.6029026 | -4.56 | 2.9350141 |              |
| 237879_at    | 0.759 | 0.0043495 | 3.5969854 | -4.56 | 2.9046297 |              |
| 237828_at    | 0.759 | 0.0044018 | 3.5900791 | -4.56 | 4.0005311 | SRRM4        |
| 234119_at    | 0.759 | 0.0044054 | 3.5895963 | -4.56 | 2.9247195 |              |

|             |       |           |           |       |           |           |
|-------------|-------|-----------|-----------|-------|-----------|-----------|
| 1554424_at  | 0.759 | 0.0044319 | 3.586134  | -4.56 | 2.592822  | FIP1L1    |
| 204270_at   | 0.759 | 0.0045091 | 3.5761624 | -4.56 | 3.3910395 | SKI       |
| 233284_at   | 0.759 | 0.004592  | 3.5656371 | -4.56 | 3.0850712 |           |
| 240959_at   | 0.759 | 0.0046364 | 3.5600814 | -4.56 | 3.4776147 |           |
| 1562528_at  | 0.759 | 0.0046459 | 3.5589    | -4.56 | 2.9065904 |           |
| 234087_at   | 0.759 | 0.0046683 | 3.5561242 | -4.56 | 2.7741828 |           |
| 212275_s_at | 0.759 | 0.0046739 | 3.5554338 | -4.56 | 3.5484397 | SRCAP     |
| 238388_x_at | 0.759 | 0.0046801 | 3.5546606 | -4.56 | 2.6494142 |           |
| 217697_at   | 0.759 | 0.0047328 | 3.5482069 | -4.56 | 3.0277705 |           |
| 231523_at   | 0.759 | 0.0047915 | 3.5410929 | -4.56 | 3.4231098 | FGF14     |
| 1563671_at  | 0.759 | 0.0047986 | 3.5402456 | -4.56 | 3.2510952 | LACE1     |
| 236567_at   | 0.759 | 0.0048196 | 3.53773   | -4.56 | 3.1574472 |           |
| 212258_s_at | 0.759 | 0.0048278 | 3.5367489 | -4.56 | 3.527381  | SMARCA2   |
| 1556456_at  | 0.759 | 0.0048323 | 3.5362052 | -4.56 | 2.6429915 | LINC01138 |
| 216553_x_at | 0.759 | 0.0048655 | 3.532266  | -4.56 | 2.9529788 |           |
| 241029_at   | 0.759 | 0.0049221 | 3.5255992 | -4.56 | 2.7016726 |           |
| 217429_at   | 0.759 | 0.0049599 | 3.5211868 | -4.56 | 3.0794417 |           |
| 1558601_at  | 0.759 | 0.0049964 | 3.5169652 | -4.56 | 3.2756567 | TUSC7     |
| 1556447_at  | 0.759 | 0.0050116 | 3.515217  | -4.56 | 4.5683941 | LINC00606 |
| 239478_x_at | 0.759 | 0.005044  | 3.5115023 | -4.56 | 3.2428161 | GPATCH2L  |
| 237660_at   | 0.759 | 0.0051342 | 3.5012988 | -4.56 | 3.6922435 | UNC80     |
| 207962_at   | 0.759 | 0.0051981 | 3.4941819 | -4.56 | 2.8097081 | CAPN11    |

|                         |       |           |           |       |           |              |
|-------------------------|-------|-----------|-----------|-------|-----------|--------------|
| 241481_at               | 0.759 | 0.005217  | 3.4921023 | -4.56 | 2.6100941 | FAM81A       |
| 1565484_x_at            | 0.759 | 0.0052444 | 3.4890903 | -4.56 | 3.3504333 | EGFR         |
| 1554394_at              | 0.759 | 0.0052485 | 3.4886345 | -4.56 | 4.1036375 | NELL1        |
| 202198_s_at             | 0.759 | 0.0053287 | 3.4799195 | -4.56 | 2.7672087 | MTMR3        |
| 218899_s_at             | 0.759 | 0.0053343 | 3.4793186 | -4.56 | 3.5244172 | BAALC        |
| AFFX-r2-Bs-dap<br>-5_at | 0.759 | 0.0053535 | 3.4772513 | -4.56 | 2.4000887 |              |
| 231935_at               | 0.759 | 0.0053631 | 3.4762171 | -4.56 | 2.3563935 | ARPP21       |
| 206256_at               | 0.759 | 0.0054223 | 3.4699098 | -4.56 | 2.5706572 | CPN1         |
| 233504_at               | 0.759 | 0.0054367 | 3.468387  | -4.56 | 2.4231696 | C9orf84      |
| 1553805_at              | 0.759 | 0.005498  | 3.4619487 | -4.56 | 2.7422417 | C3orf49      |
| 233335_at               | 0.759 | 0.0055321 | 3.4583992 | -4.56 | 3.4899037 | ITGA11       |
| 243620_at               | 0.759 | 0.0055577 | 3.4557455 | -4.56 | 2.3444361 |              |
| 1560425_s_at            | 0.759 | 0.0055667 | 3.4548194 | -4.56 | 3.5922052 | PTPRD-AS1    |
| 1553822_at              | 0.759 | 0.0056076 | 3.4506164 | -4.56 | 3.3293188 | RTP1         |
| 1560758_at              | 0.759 | 0.0056433 | 3.4469647 | -4.56 | 3.9204252 |              |
| 239537_at               | 0.759 | 0.0057078 | 3.4404519 | -4.56 | 5.1091809 | ST8SIA2      |
| 243932_at               | 0.759 | 0.0057417 | 3.437048  | -4.56 | 3.1816412 |              |
| 205243_at               | 0.759 | 0.005801  | 3.4311534 | -4.56 | 2.2078263 | SLC13A3      |
| 240817_at               | 0.759 | 0.0058328 | 3.4280203 | -4.56 | 3.0095317 | LOC101929034 |
| 224185_at               | 0.759 | 0.0058573 | 3.4256188 | -4.56 | 2.3334796 |              |
| 237123_x_at             | 0.759 | 0.0059396 | 3.4176193 | -4.56 | 3.6149455 | KLHL9        |
| 1557480_a_at            | 0.759 | 0.0059528 | 3.4163464 | -4.56 | 3.289825  | PPP1R27      |

|              |       |           |           |       |           |                     |
|--------------|-------|-----------|-----------|-------|-----------|---------------------|
| 1558654_at   | 0.759 | 0.0059572 | 3.4159269 | -4.56 | 2.3215711 | PPM1H               |
| 208026_at    | 0.759 | 0.0060029 | 3.4115424 | -4.56 | 3.6948119 | HIST1H4G///HIST1H4F |
| 208299_at    | 0.759 | 0.0060394 | 3.4080675 | -4.56 | 2.6529409 | CACNA1I             |
| 1562974_at   | 0.759 | 0.0060432 | 3.4077065 | -4.56 | 3.1814828 |                     |
| 240411_at    | 0.759 | 0.0060473 | 3.4073249 | -4.56 | 3.8239171 | MROH2B              |
| 244551_at    | 0.759 | 0.0060493 | 3.4071321 | -4.56 | 2.8426317 | ZNF736              |
| 229244_at    | 0.759 | 0.0060566 | 3.406445  | -4.56 | 2.8217935 | LSAMP               |
| 1557354_at   | 0.759 | 0.0060598 | 3.4061391 | -4.56 | 2.4581375 | SOS1                |
| 1568898_at   | 0.759 | 0.0060799 | 3.4042417 | -4.56 | 3.0850654 | LOC101928140        |
| 233597_at    | 0.759 | 0.0061034 | 3.4020354 | -4.56 | 3.3149174 | PNPLA5              |
| 224110_at    | 0.759 | 0.0061203 | 3.4004452 | -4.56 | 3.0123638 | PRO1804             |
| 1569459_a_at | 0.759 | 0.0061644 | 3.3963322 | -4.56 | 3.7344566 |                     |
| 238224_at    | 0.759 | 0.0061852 | 3.3944064 | -4.56 | 2.9789002 |                     |
| 237116_at    | 0.759 | 0.0062002 | 3.3930194 | -4.56 | 3.0088735 | LOC646903           |
| 216877_at    | 0.759 | 0.0062132 | 3.3918192 | -4.56 | 2.640657  | LOC100505498        |
| 220783_at    | 0.759 | 0.0062726 | 3.3863705 | -4.56 | 3.0778447 | MMP27               |
| 202828_s_at  | 0.759 | 0.0062918 | 3.3846244 | -4.56 | 2.7495774 | MMP14               |
| 1564022_at   | 0.759 | 0.0063196 | 3.3821005 | -4.56 | 2.9329645 | ZNF804B             |
| 1560107_at   | 0.759 | 0.006336  | 3.3806192 | -4.56 | 3.5543233 | LOC105372793        |
| 207841_at    | 0.759 | 0.0063409 | 3.3801774 | -4.56 | 2.5669618 | SPIN2A              |

|              |       |           |           |       |           |              |
|--------------|-------|-----------|-----------|-------|-----------|--------------|
| 1556916_a_at | 0.759 | 0.0063813 | 3.3765448 | -4.56 | 3.3699477 | LOC101928651 |
| 1559204_x_at | 0.759 | 0.0063871 | 3.3760238 | -4.56 | 2.4589622 | KRAS         |
| 217477_at    | 0.759 | 0.0064116 | 3.3738319 | -4.56 | 2.4869325 | PIP5K1B      |
| 209680_s_at  | 0.759 | 0.0064302 | 3.3721709 | -4.56 | 2.6383798 | KIFC1        |
| 211772_x_at  | 0.759 | 0.006438  | 3.3714776 | -4.56 | 2.877623  | CHRNA3       |
| 210760_x_at  | 0.759 | 0.0064415 | 3.3711685 | -4.56 | 3.0356196 | TRIP11       |
| 1562601_at   | 0.759 | 0.0064511 | 3.3703219 | -4.56 | 2.697659  | LINC01121    |
| 213823_at    | 0.759 | 0.006463  | 3.369266  | -4.56 | 3.466264  | HOXA11       |
| 210206_s_at  | 0.759 | 0.0064663 | 3.3689707 | -4.56 | 3.2619941 | DDX11        |
| 221993_s_at  | 0.759 | 0.0064954 | 3.3664037 | -4.56 | 2.3266752 | TSR3         |
| 1555262_a_at | 0.759 | 0.0065424 | 3.3622785 | -4.56 | 3.1815005 | MAG11        |
| 1554743_x_at | 0.759 | 0.0065585 | 3.3608746 | -4.56 | 2.7627525 | PMS1         |
| 1554963_at   | 0.759 | 0.006616  | 3.3558892 | -4.56 | 3.1375427 |              |
| 207262_at    | 0.759 | 0.006625  | 3.3551114 | -4.56 | 2.5139778 | APOF         |
| 229072_at    | 0.759 | 0.006653  | 3.3526977 | -4.56 | 2.4386985 | RAB30        |
| 1564333_a_at | 0.759 | 0.0067296 | 3.3461516 | -4.56 | 2.8570945 | PSAPL1       |
| 237611_at    | 0.759 | 0.0067336 | 3.345815  | -4.56 | 3.7793775 |              |
| 224103_at    | 0.759 | 0.0067555 | 3.3439585 | -4.56 | 3.4703032 | LOC100132661 |
| 237217_at    | 0.759 | 0.0067805 | 3.3418516 | -4.56 | 3.3012789 | ADAMTSL1     |

|              |       |           |           |       |           |                    |
|--------------|-------|-----------|-----------|-------|-----------|--------------------|
| 223674_s_at  | 0.759 | 0.0067927 | 3.340821  | -4.56 | 2.5523453 | CDC42SE1           |
| 228417_at    | 0.759 | 0.0067947 | 3.340655  | -4.56 | 2.3709795 | ISYNA1             |
| 208528_x_at  | 0.759 | 0.0068033 | 3.3399309 | -4.56 | 2.6485445 | SSX7///SSX3///SSX5 |
| 244405_s_at  | 0.759 | 0.0068151 | 3.3389412 | -4.56 | 2.7335035 |                    |
| 1568897_at   | 0.759 | 0.0068227 | 3.3383045 | -4.56 | 3.171237  | LOC100422212       |
| 240442_at    | 0.759 | 0.0068268 | 3.3379661 | -4.56 | 3.0592086 |                    |
| 215958_at    | 0.759 | 0.0068431 | 3.336598  | -4.56 | 3.977628  |                    |
| 1563061_at   | 0.759 | 0.0068789 | 3.3336235 | -4.56 | 3.4234813 |                    |
| 1560467_at   | 0.759 | 0.0069354 | 3.3289497 | -4.56 | 4.2432893 | PAQR9              |
| 1562655_at   | 0.759 | 0.0069539 | 3.3274271 | -4.56 | 4.0208617 | LOC101927447       |
| 1562057_at   | 0.759 | 0.0069615 | 3.3268052 | -4.56 | 3.8740521 |                    |
| 208243_s_at  | 0.759 | 0.0069989 | 3.3237473 | -4.56 | 3.0283055 | CNR1               |
| 227496_at    | 0.759 | 0.007007  | 3.3230864 | -4.56 | 2.1953101 | NR6A1              |
| 1555338_s_at | 0.759 | 0.0070249 | 3.3216321 | -4.56 | 3.0056603 | AQP10              |
| 231555_at    | 0.759 | 0.0070336 | 3.3209184 | -4.56 | 2.7976389 |                    |
| 232329_at    | 0.759 | 0.0070562 | 3.3190944 | -4.56 | 3.0869734 | RANBP10            |
| 237885_at    | 0.759 | 0.0070722 | 3.317797  | -4.56 | 2.2472153 | SOX21-AS1          |
| 236273_at    | 0.759 | 0.0070879 | 3.3165348 | -4.56 | 2.1468326 | NBPF1              |
| 212257_s_at  | 0.759 | 0.0071301 | 3.3131459 | -4.56 | 2.6731431 | SMARCA2            |
| 1553282_at   | 0.759 | 0.0071439 | 3.3120437 | -4.56 | 2.778154  | UMODL1-AS1         |

|             |       |           |           |       |           |                                |
|-------------|-------|-----------|-----------|-------|-----------|--------------------------------|
| 231385_at   | 0.759 | 0.007168  | 3.3101161 | -4.56 | 3.6048588 | LOC101060236///DPPA3P2///DPPA3 |
| 206098_at   | 0.759 | 0.0072177 | 3.3061759 | -4.56 | 3.8755409 | ZBTB6                          |
| 1556465_at  | 0.759 | 0.0072598 | 3.3028587 | -4.56 | 2.5385139 |                                |
| 222567_s_at | 0.759 | 0.0073116 | 3.2988023 | -4.56 | 2.4086437 | MEX3C                          |
| 1553491_at  | 0.759 | 0.0073128 | 3.2987086 | -4.56 | 3.3215311 | KSR2                           |
| 1567286_at  | 0.759 | 0.0073177 | 3.2983259 | -4.56 | 3.1172108 | OR5L2                          |
| 243925_at   | 0.759 | 0.0073457 | 3.2961496 | -4.56 | 3.2227633 |                                |
| 222948_s_at | 0.759 | 0.0073467 | 3.2960693 | -4.56 | 2.872141  | MRPS18C                        |
| 237876_at   | 0.759 | 0.0073625 | 3.2948444 | -4.56 | 2.3842862 |                                |
| 1566821_at  | 0.759 | 0.0073737 | 3.2939773 | -4.56 | 2.3886772 |                                |
| 238483_at   | 0.759 | 0.0073744 | 3.2939305 | -4.56 | 3.3477449 | SSBP2                          |
| 214452_at   | 0.759 | 0.0073973 | 3.2921551 | -4.56 | 3.5803296 | BCAT1                          |
| 206670_s_at | 0.759 | 0.0074051 | 3.2915589 | -4.56 | 2.9833141 | GAD1                           |
| 1565694_at  | 0.759 | 0.0074673 | 3.2867878 | -4.56 | 3.5345709 | DTYMK                          |
| 241493_at   | 0.759 | 0.0074981 | 3.2844428 | -4.56 | 3.1956555 |                                |
| 210493_s_at | 0.759 | 0.0075974 | 3.2769452 | -4.56 | 3.2736141 | MFAP3L                         |
| 213955_at   | 0.759 | 0.007624  | 3.2749511 | -4.56 | 3.4352422 | MYOZ3                          |
| 244047_at   | 0.759 | 0.0077058 | 3.2688707 | -4.56 | 3.4255727 |                                |
| 200865_at   | 0.759 | 0.007711  | 3.2684839 | -4.56 | 3.4341907 | EIF3F                          |
| 237631_at   | 0.759 | 0.0077306 | 3.2670409 | -4.56 | 3.6310557 |                                |

|              |       |           |           |       |           |                   |
|--------------|-------|-----------|-----------|-------|-----------|-------------------|
| 237063_at    | 0.759 | 0.0077329 | 3.266868  | -4.56 | 2.7363799 |                   |
| 242401_x_at  | 0.759 | 0.0077332 | 3.2668479 | -4.56 | 3.6014437 |                   |
| 221373_x_at  | 0.759 | 0.007735  | 3.2667166 | -4.56 | 2.5424143 | PSPN              |
| 216455_at    | 0.759 | 0.0077523 | 3.2654462 | -4.56 | 2.9938274 | LOC101927181      |
| 1570533_at   | 0.759 | 0.0077597 | 3.2649002 | -4.56 | 2.7145645 | CMPK1             |
| 1563001_at   | 0.759 | 0.0078187 | 3.2605881 | -4.56 | 2.9164532 |                   |
| 1566969_at   | 0.759 | 0.007837  | 3.2592564 | -4.56 | 4.3326793 |                   |
| 1569205_at   | 0.759 | 0.0078416 | 3.2589222 | -4.56 | 3.2469343 | PRCP              |
| 232414_at    | 0.759 | 0.0078745 | 3.2565332 | -4.56 | 3.2090115 | HEATR1            |
| 243549_at    | 0.759 | 0.0078771 | 3.256348  | -4.56 | 3.8240275 |                   |
| 1554717_a_at | 0.759 | 0.0078914 | 3.2553129 | -4.56 | 2.8579592 | PDE4D             |
| 238680_at    | 0.759 | 0.0079585 | 3.2504967 | -4.56 | 3.7201702 | METTL12///SNORA57 |
| 1559388_a_at | 0.759 | 0.0079686 | 3.2497749 | -4.56 | 3.0072956 | LYNX1             |
| 239457_at    | 0.759 | 0.007977  | 3.2491742 | -4.56 | 2.3563321 | ATP8B3            |
| 242072_at    | 0.759 | 0.0079884 | 3.2483607 | -4.56 | 4.1806911 |                   |
| 221785_at    | 0.759 | 0.0079976 | 3.2477021 | -4.56 | 2.5561115 | WIZ               |
| 203441_s_at  | 0.759 | 0.0080208 | 3.2460524 | -4.56 | 2.4649304 | CDH2              |
| 221092_at    | 0.759 | 0.0080994 | 3.2405065 | -4.56 | 2.95808   | IKZF3             |
| 1559837_at   | 0.759 | 0.0081148 | 3.2394223 | -4.56 | 2.8411549 | LINC01490         |
| 1561033_at   | 0.759 | 0.0081581 | 3.2363966 | -4.56 | 3.261917  | LOC101927211      |
| 206801_at    | 0.759 | 0.0081709 | 3.2355008 | -4.56 | 2.9566674 | NPPB              |
| 243155_at    | 0.759 | 0.0082432 | 3.2304874 | -4.56 | 3.005101  |                   |



|             |       |           |           |       |           |                 |
|-------------|-------|-----------|-----------|-------|-----------|-----------------|
| 1561055_at  | 0.759 | 0.0082861 | 3.2275346 | -4.56 | 3.5882624 | LOC100507534    |
| 224020_at   | 0.759 | 0.0082887 | 3.2273583 | -4.56 | 3.1046091 | LINC00626       |
| 243884_at   | 0.759 | 0.0083156 | 3.2255167 | -4.56 | 2.7740957 | TEX26           |
| 238240_at   | 0.759 | 0.0084167 | 3.2186389 | -4.56 | 2.8198847 |                 |
| 205062_x_at | 0.759 | 0.0084853 | 3.2140277 | -4.56 | 2.9820494 | ARID4A          |
| 208871_at   | 0.759 | 0.0085012 | 3.2129595 | -4.56 | 3.5801173 | ATN1            |
| 1559949_at  | 0.759 | 0.0085407 | 3.210328  | -4.56 | 2.3885016 |                 |
| 234026_at   | 0.759 | 0.0085519 | 3.2095811 | -4.56 | 2.7138889 | EML2-AS1        |
| 1567359_at  | 0.759 | 0.0085869 | 3.2072561 | -4.56 | 3.4901105 | BDNF-AS         |
| 208577_at   | 0.759 | 0.008627  | 3.2046097 | -4.56 | 2.5322951 | HIST1H3C        |
| 1552372_at  | 0.759 | 0.0086439 | 3.2034959 | -4.56 | 3.4753502 | C4orf33         |
| 231334_at   | 0.759 | 0.0086486 | 3.2031895 | -4.56 | 2.1665117 | LOC101929480    |
| 232672_x_at | 0.759 | 0.00865   | 3.2030988 | -4.56 | 3.0919491 | CTXN2///SLC24A5 |
| 220304_s_at | 0.759 | 0.0086839 | 3.2008758 | -4.56 | 3.0609662 | CNGB3           |
| 237685_at   | 0.759 | 0.0086984 | 3.199927  | -4.56 | 3.0282279 | LOC101929926    |
| 238932_at   | 0.759 | 0.0087253 | 3.1981661 | -4.56 | 2.41075   | TSC22D2         |
| 238499_at   | 0.759 | 0.0087795 | 3.1946521 | -4.56 | 2.5122534 | SLC45A3         |
| 239620_at   | 0.759 | 0.0087938 | 3.193727  | -4.56 | 2.6198075 | TTC23L          |
| 218513_at   | 0.759 | 0.0087987 | 3.1934108 | -4.56 | 2.6938934 | TMA16           |
| 231398_at   | 0.759 | 0.0088444 | 3.1904666 | -4.56 | 2.3132085 | SLC22A7         |
| 238118_s_at | 0.759 | 0.0088468 | 3.1903083 | -4.56 | 2.7709816 | PPOX            |

|              |       |           |           |       |           |               |
|--------------|-------|-----------|-----------|-------|-----------|---------------|
| 232200_at    | 0.759 | 0.0088844 | 3.1878995 | -4.56 | 3.0029372 | HSPA9         |
| 217306_at    | 0.759 | 0.0089349 | 3.1846801 | -4.56 | 3.1210105 |               |
| 229179_at    | 0.759 | 0.0089413 | 3.1842725 | -4.56 | 1.9588213 | RUFY1         |
| 233620_at    | 0.759 | 0.0089481 | 3.1838434 | -4.56 | 3.7450992 | ARHGEF12      |
| 1553740_a_at | 0.759 | 0.0089759 | 3.1820796 | -4.56 | 2.5163758 | IRAK2         |
| 240739_at    | 0.759 | 0.0089911 | 3.1811182 | -4.56 | 3.4875938 |               |
| 1555947_at   | 0.759 | 0.009014  | 3.179673  | -4.56 | 2.5578993 | FAM120A       |
| 215655_at    | 0.759 | 0.0090187 | 3.1793783 | -4.56 | 2.5936612 | GRIK2         |
| 216365_x_at  | 0.759 | 0.0090707 | 3.1761148 | -4.56 | 2.8068931 | IGLJ3///CKAP2 |
| 1560177_at   | 0.759 | 0.0090778 | 3.1756687 | -4.56 | 3.2150249 | CCDC66        |
| 241042_at    | 0.759 | 0.009079  | 3.1755943 | -4.56 | 3.1523563 |               |
| 1563620_at   | 0.759 | 0.0090824 | 3.1753787 | -4.56 | 3.5436691 | BTRC          |
| 237831_x_at  | 0.759 | 0.0091024 | 3.1741293 | -4.56 | 3.3589427 | MMAA          |
| 1562786_at   | 0.759 | 0.0091055 | 3.173938  | -4.56 | 2.8270128 | LOC101928886  |
| 208521_at    | 0.759 | 0.0091254 | 3.1726946 | -4.56 | 3.5445554 | OR5I1         |
| 241638_at    | 0.759 | 0.0091963 | 3.1682993 | -4.56 | 2.9152956 |               |
| 221618_s_at  | 0.759 | 0.009205  | 3.1677668 | -4.56 | 3.0406993 | TAF9B         |
| 204931_at    | 0.759 | 0.009262  | 3.1642614 | -4.56 | 2.842089  | TCF21         |
| 239992_at    | 0.759 | 0.0092737 | 3.1635463 | -4.56 | 3.6765925 |               |

|             |       |           |           |       |           |              |
|-------------|-------|-----------|-----------|-------|-----------|--------------|
| 1554400_at  | 0.759 | 0.0092812 | 3.1630847 | -4.56 | 3.5162394 | TCTE3        |
| 224966_s_at | 0.759 | 0.0092899 | 3.1625519 | -4.56 | 3.1910204 | DUS3L        |
| 214503_x_at | 0.759 | 0.009293  | 3.1623651 | -4.56 | 3.4582575 | GPR135       |
| 1557948_at  | 0.759 | 0.0092949 | 3.1622486 | -4.56 | 3.2651476 | PHLDB3       |
| 234659_at   | 0.759 | 0.009359  | 3.1583431 | -4.56 | 3.0046327 |              |
| 1558852_at  | 0.759 | 0.0094372 | 3.1536249 | -4.56 | 2.7430469 |              |
| 1556914_at  | 0.759 | 0.0094765 | 3.1512646 | -4.56 | 2.3500317 | LOC100652911 |
| 244143_at   | 0.759 | 0.0095131 | 3.1490767 | -4.56 | 3.2552562 |              |
| 229217_at   | 0.759 | 0.0095145 | 3.1489905 | -4.56 | 2.4436915 | SP3          |
| 215796_at   | 0.759 | 0.0095257 | 3.1483234 | -4.56 | 2.4625949 |              |
| 244262_x_at | 0.759 | 0.0095918 | 3.144398  | -4.56 | 3.1937646 |              |
| 210704_at   | 0.759 | 0.0096311 | 3.1420829 | -4.56 | 2.7913987 | FEZ2         |
| 233704_at   | 0.759 | 0.009637  | 3.1417304 | -4.56 | 3.8162549 |              |
| 219990_at   | 0.759 | 0.0096454 | 3.1412366 | -4.56 | 2.3248355 | E2F8         |
| 234481_at   | 0.759 | 0.0096843 | 3.1389548 | -4.56 | 2.2160096 |              |
| 234647_at   | 0.759 | 0.0097221 | 3.1367461 | -4.56 | 2.6729503 | PROM2        |
| 234845_at   | 0.759 | 0.0097421 | 3.1355804 | -4.56 | 2.6070851 | LOC100130370 |
| 204653_at   | 0.759 | 0.0098069 | 3.1318195 | -4.56 | 1.9680905 | TFAP2A       |
| 240893_at   | 0.759 | 0.009836  | 3.1301361 | -4.56 | 2.8698049 |              |
| 234300_s_at | 0.759 | 0.0098691 | 3.1282342 | -4.56 | 2.7187117 | ZFP28        |

|              |       |           |           |       |           |                                                             |
|--------------|-------|-----------|-----------|-------|-----------|-------------------------------------------------------------|
| 208235_x_at  | 0.759 | 0.0099092 | 3.1259324 | -4.56 | 2.6338922 | GAGE12F///GAGE12B///GAGE12G///GAGE12I///GAGE7///GAGE6///GAG |
| 1570274_at   | 0.759 | 0.0099148 | 3.1256103 | -4.56 | 2.4827258 | PRSS55                                                      |
| 1562585_at   | 0.759 | 0.0099218 | 3.1252114 | -4.56 | 3.0295333 | LOC284263                                                   |
| 231330_at    | 0.759 | 0.0099317 | 3.1246444 | -4.56 | 2.5372349 | LINC00445                                                   |
| 1553915_at   | 0.759 | 0.0099757 | 3.1221398 | -4.56 | 2.9866091 | C10orf126                                                   |
| 242250_at    | 0.759 | 0.0100161 | 3.1198451 | -4.56 | 2.5545758 |                                                             |
| 241658_at    | 0.759 | 0.0100419 | 3.1183872 | -4.56 | 2.7603129 | ARIH1                                                       |
| 1563872_at   | 0.759 | 0.0100962 | 3.1153315 | -4.56 | 2.2130973 | LOC284395                                                   |
| 236746_at    | 0.759 | 0.0101013 | 3.1150423 | -4.56 | 3.0847283 | GALNT1                                                      |
| 1558636_s_at | 0.759 | 0.0101199 | 3.1140016 | -4.56 | 3.6524709 | ADAMTS5                                                     |
| 233552_at    | 0.759 | 0.0101661 | 3.111417  | -4.56 | 1.9999284 |                                                             |
| 1553893_at   | 0.759 | 0.0101717 | 3.1111055 | -4.56 | 3.4224259 | CCDC105                                                     |
| 216777_at    | 0.759 | 0.0101824 | 3.110509  | -4.56 | 3.401056  |                                                             |
| 1566598_at   | 0.759 | 0.0102067 | 3.1091573 | -4.56 | 2.7036056 |                                                             |
| 1562074_a_at | 0.759 | 0.010216  | 3.1086407 | -4.56 | 3.2354178 | UNC13C                                                      |
| 237106_at    | 0.759 | 0.0102193 | 3.1084572 | -4.56 | 2.9426974 | SLC11A2                                                     |
| 240488_at    | 0.759 | 0.0102498 | 3.1067684 | -4.56 | 3.3489889 |                                                             |

|              |       |           |           |       |           |                  |
|--------------|-------|-----------|-----------|-------|-----------|------------------|
| 212427_at    | 0.759 | 0.0102551 | 3.1064738 | -4.56 | 2.1910234 | KIAA0368         |
| 206759_at    | 0.759 | 0.0102608 | 3.1061606 | -4.56 | 2.9157113 | FCER2            |
| 206418_at    | 0.759 | 0.0103652 | 3.1004252 | -4.56 | 2.6199073 | NOX1             |
| 1554203_at   | 0.759 | 0.0103776 | 3.0997452 | -4.56 | 2.5445676 | GRIK1-AS1        |
| 210945_at    | 0.759 | 0.0103851 | 3.0993341 | -4.56 | 3.9658289 | COL4A6           |
| 236493_at    | 0.759 | 0.010395  | 3.098796  | -4.56 | 3.3027165 | NKAPP1           |
| 1566403_at   | 0.759 | 0.0104192 | 3.0974793 | -4.56 | 2.5118463 | SNORA68///RPL18A |
| 243214_at    | 0.759 | 0.0104381 | 3.0964487 | -4.56 | 2.8084972 | ZBTB46           |
| 207427_at    | 0.759 | 0.0104806 | 3.0941501 | -4.56 | 2.6724974 | ACR              |
| 224026_at    | 0.759 | 0.0105084 | 3.0926477 | -4.56 | 2.3382332 |                  |
| 243542_at    | 0.759 | 0.0105085 | 3.0926406 | -4.56 | 4.27008   | PREPL            |
| 235356_at    | 0.759 | 0.0105181 | 3.092126  | -4.56 | 3.0372159 | NHLRC2           |
| 216961_s_at  | 0.759 | 0.010539  | 3.0909976 | -4.56 | 2.6863738 | RPAIN            |
| 229411_at    | 0.759 | 0.0105419 | 3.0908415 | -4.56 | 2.2332999 | PNCK             |
| 241103_at    | 0.759 | 0.0105971 | 3.0878859 | -4.56 | 3.7190769 | PPP4R3B          |
| 1568732_at   | 0.759 | 0.0106314 | 3.0860533 | -4.56 | 3.085656  |                  |
| 1558440_at   | 0.759 | 0.0107442 | 3.0800705 | -4.56 | 2.6723066 | LOC100506351     |
| 220895_at    | 0.759 | 0.0108201 | 3.0760867 | -4.56 | 3.8436366 | USP29            |
| 1561473_at   | 0.759 | 0.0108275 | 3.0756962 | -4.56 | 3.0483271 | LOC102546226     |
| 1558400_x_at | 0.759 | 0.0108476 | 3.0746495 | -4.56 | 2.1239863 | ANKRD24          |
| 1552672_a_at | 0.759 | 0.0108598 | 3.0740091 | -4.56 | 3.6477162 | IGSF3            |

|              |       |           |           |       |           |              |
|--------------|-------|-----------|-----------|-------|-----------|--------------|
| 1562562_at   | 0.759 | 0.0108667 | 3.073652  | -4.56 | 2.8564825 | ANKUB1       |
| 1557908_at   | 0.759 | 0.0108778 | 3.0730748 | -4.56 | 2.1422565 | HP11014      |
| 243457_s_at  | 0.759 | 0.0109311 | 3.0703043 | -4.56 | 2.9553119 | ZNF214       |
| 1560510_at   | 0.759 | 0.0109348 | 3.0701131 | -4.56 | 2.3328153 | ARHGEF7-IT1  |
| 220656_at    | 0.759 | 0.0109359 | 3.070053  | -4.56 | 2.9764578 | NAA16        |
| 233911_s_at  | 0.759 | 0.0109519 | 3.0692288 | -4.56 | 2.6166743 | PPM1H        |
| 207599_at    | 0.759 | 0.0109907 | 3.0672244 | -4.56 | 3.1810743 | MMP20        |
| 1555460_a_at | 0.759 | 0.0110667 | 3.0633212 | -4.56 | 2.709302  | SLC39A6      |
| 215289_at    | 0.759 | 0.0110758 | 3.0628557 | -4.56 | 3.1422051 | ZNF749       |
| 224401_s_at  | 0.759 | 0.0110899 | 3.0621357 | -4.56 | 2.30318   | FCRL4        |
| 1560325_at   | 0.759 | 0.0111099 | 3.0611142 | -4.56 | 3.0401826 | LOC105370612 |
| 237596_at    | 0.759 | 0.0111353 | 3.0598238 | -4.56 | 2.7346992 |              |
| 1560241_at   | 0.759 | 0.0111619 | 3.0584682 | -4.56 | 2.4789353 | LOC101928682 |
| 234507_at    | 0.759 | 0.0111746 | 3.0578253 | -4.56 | 3.2266231 |              |
| 1559029_at   | 0.759 | 0.011183  | 3.0573988 | -4.56 | 2.4876058 | LOC286154    |
| 211032_at    | 0.759 | 0.0111947 | 3.0568077 | -4.56 | 3.7624034 | COBLL1       |
| 1555273_at   | 0.759 | 0.0111982 | 3.0566315 | -4.56 | 2.8257502 | GALNTL6      |
| 233181_at    | 0.759 | 0.011203  | 3.0563896 | -4.56 | 2.1209483 |              |
| 216193_at    | 0.759 | 0.0112678 | 3.0531248 | -4.56 | 2.8996835 |              |
| 1559722_at   | 0.759 | 0.0113233 | 3.0503419 | -4.56 | 2.8128468 | C9orf3       |

|              |       |           |           |       |           |            |
|--------------|-------|-----------|-----------|-------|-----------|------------|
| 215637_at    | 0.759 | 0.0113514 | 3.0489362 | -4.56 | 3.4501377 | CEP41      |
| 1566042_at   | 0.759 | 0.0113518 | 3.0489208 | -4.56 | 3.399581  |            |
| 1564413_at   | 0.759 | 0.0114281 | 3.0451279 | -4.56 | 2.1484459 | LINC01356  |
| 232533_at    | 0.759 | 0.0114879 | 3.0421696 | -4.56 | 2.5073704 | METTTL8    |
| 244632_at    | 0.759 | 0.0114881 | 3.0421619 | -4.56 | 3.2558856 | CNTN5      |
| 238166_s_at  | 0.759 | 0.0114952 | 3.0418113 | -4.56 | 3.0162662 | C17orf51   |
| 211079_s_at  | 0.759 | 0.0115282 | 3.0401902 | -4.56 | 2.6912904 | DYRK1A     |
| 232673_at    | 0.759 | 0.0115315 | 3.0400269 | -4.56 | 2.4498667 | LRRFIP2    |
| 211815_s_at  | 0.759 | 0.0115668 | 3.0382983 | -4.56 | 2.6440853 | GGA3       |
| 219764_at    | 0.759 | 0.0115815 | 3.037578  | -4.56 | 2.9241302 | FZD10      |
| 1567558_at   | 0.759 | 0.0115904 | 3.0371444 | -4.56 | 2.2657687 | TREML4     |
| 220478_at    | 0.759 | 0.0116151 | 3.0359396 | -4.56 | 2.8120504 | APOL5      |
| 1554348_s_at | 0.759 | 0.0116418 | 3.0346413 | -4.56 | 2.5105815 | CDKN2AIPNL |
| 1558839_at   | 0.759 | 0.0116845 | 3.0325655 | -4.56 | 2.3717864 | MAPKBP1    |
| 206484_s_at  | 0.759 | 0.0116862 | 3.0324836 | -4.56 | 2.5200748 | XPNPEP2    |
| 1560021_at   | 0.759 | 0.0116911 | 3.0322476 | -4.56 | 3.4836622 |            |
| 217314_at    | 0.759 | 0.0117188 | 3.0309077 | -4.56 | 2.5164562 |            |
| 218413_s_at  | 0.759 | 0.0117264 | 3.0305392 | -4.56 | 2.1461694 | ZNF639     |
| 237209_s_at  | 0.759 | 0.0118168 | 3.026193  | -4.56 | 2.5834684 | NFRKB      |
| 236695_at    | 0.759 | 0.011833  | 3.0254187 | -4.56 | 2.5427079 | STK4-AS1   |
| 1553776_at   | 0.759 | 0.0118384 | 3.025161  | -4.56 | 2.9939107 | UBE2U      |

|              |       |           |           |       |           |                     |
|--------------|-------|-----------|-----------|-------|-----------|---------------------|
| 1556986_at   | 0.759 | 0.0118393 | 3.0251174 | -4.56 | 2.6734486 | OR2H1               |
| 241077_at    | 0.759 | 0.011877  | 3.0233214 | -4.56 | 2.8405284 |                     |
| 240358_at    | 0.759 | 0.0118824 | 3.0230601 | -4.56 | 2.7860507 |                     |
| 1553605_a_at | 0.759 | 0.011936  | 3.0205134 | -4.56 | 2.204606  | ABCA13              |
| 230579_at    | 0.759 | 0.0119671 | 3.0190413 | -4.57 | 2.8940736 | LOC728705///TMEM263 |
| 216605_s_at  | 0.759 | 0.0119732 | 3.0187551 | -4.57 | 2.6974851 | CEACAM21            |
| 1556421_at   | 0.759 | 0.0119809 | 3.0183935 | -4.57 | 2.8658939 | C8orf34-AS1         |
| 232197_x_at  | 0.759 | 0.0119929 | 3.0178237 | -4.57 | 2.2909938 | ARSB                |
| 236613_at    | 0.759 | 0.0120349 | 3.0158455 | -4.57 | 2.9761155 | RBM25               |
| 214557_at    | 0.759 | 0.0120755 | 3.01394   | -4.57 | 2.7712089 | PTTG2               |
| 237129_at    | 0.759 | 0.0120771 | 3.0138651 | -4.57 | 2.579606  | CEP152              |
| 234407_s_at  | 0.759 | 0.0121366 | 3.0110856 | -4.57 | 2.4668994 | TRPC7               |
| 1562812_at   | 0.759 | 0.0121558 | 3.0101928 | -4.57 | 2.5155832 | ZNF32-AS3           |
| 1559595_at   | 0.759 | 0.0122071 | 3.0078109 | -4.57 | 3.032972  | LOC728084           |
| 230272_at    | 0.759 | 0.0122183 | 3.0072924 | -4.57 | 3.4129156 | LINC00461///MIR9-2  |
| 244539_at    | 0.759 | 0.0122424 | 3.0061746 | -4.57 | 3.8708007 |                     |
| 1559105_at   | 0.759 | 0.0122427 | 3.0061635 | -4.57 | 2.3524963 | LEKR1               |
| 1561453_at   | 0.759 | 0.0122564 | 3.0055305 | -4.57 | 2.5695336 |                     |
| 1560962_at   | 0.759 | 0.0122605 | 3.0053402 | -4.57 | 2.9970626 |                     |
| 1566952_at   | 0.759 | 0.0122754 | 3.004655  | -4.57 | 2.3305837 |                     |



|             |       |           |           |       |           |                    |
|-------------|-------|-----------|-----------|-------|-----------|--------------------|
| 234406_at   | 0.759 | 0.0122831 | 3.0043003 | -4.57 | 2.2362942 | RGMA               |
| 202103_at   | 0.759 | 0.012293  | 3.0038421 | -4.57 | 2.221667  | BRD4               |
| 1562715_at  | 0.759 | 0.0123324 | 3.0020319 | -4.57 | 3.0981564 |                    |
| 207105_s_at | 0.759 | 0.0123923 | 2.9992914 | -4.57 | 3.1704701 | PIK3R2             |
| 243234_at   | 0.759 | 0.0124004 | 2.9989215 | -4.57 | 2.9327269 | TBX3               |
| 1552849_at  | 0.759 | 0.0124278 | 2.9976754 | -4.57 | 3.2478425 | M1AP               |
| 230445_at   | 0.759 | 0.0125069 | 2.9940856 | -4.57 | 3.1723892 | BTBD17             |
| 1561765_at  | 0.759 | 0.0125263 | 2.9932066 | -4.57 | 3.9895001 | LOC105377925       |
| 234381_at   | 0.759 | 0.0125302 | 2.9930319 | -4.57 | 2.2895746 |                    |
| 222335_at   | 0.759 | 0.012545  | 2.9923667 | -4.57 | 1.8071095 |                    |
| 243232_at   | 0.759 | 0.012594  | 2.9901588 | -4.57 | 2.7440146 |                    |
| 240375_at   | 0.759 | 0.012599  | 2.9899357 | -4.57 | 2.04186   | PIGV               |
| 243788_at   | 0.759 | 0.0126024 | 2.9897848 | -4.57 | 3.5440441 |                    |
| 203461_at   | 0.759 | 0.0126514 | 2.9875861 | -4.57 | 2.536837  | CHD2               |
| 224074_at   | 0.759 | 0.0126953 | 2.9856307 | -4.57 | 3.1571743 | VSX1               |
| 204936_at   | 0.759 | 0.0126999 | 2.9854232 | -4.57 | 2.9721826 | MAP4K2             |
| 207371_at   | 0.759 | 0.0127042 | 2.9852323 | -4.57 | 2.7339753 |                    |
| 1562988_at  | 0.759 | 0.0127091 | 2.9850132 | -4.57 | 2.8025911 | ZSCAN30            |
| 211672_s_at | 0.759 | 0.0127095 | 2.9849962 | -4.57 | 2.6527659 | ARPC4-TTL3///ARPC4 |
| 206701_x_at | 0.759 | 0.0127158 | 2.9847156 | -4.57 | 4.2356942 | EDNRB              |

|              |       |           |           |       |           |           |
|--------------|-------|-----------|-----------|-------|-----------|-----------|
| 243298_at    | 0.759 | 0.0127203 | 2.9845191 | -4.57 | 2.6693277 |           |
| 216799_at    | 0.759 | 0.0127341 | 2.9839054 | -4.57 | 2.4646747 |           |
| 1557886_at   | 0.759 | 0.0127665 | 2.9824681 | -4.57 | 2.7090873 | CEP112    |
| 231534_at    | 0.759 | 0.012767  | 2.9824425 | -4.57 | 3.0308543 | CDK1      |
| 231670_at    | 0.759 | 0.0127732 | 2.9821722 | -4.57 | 2.393441  |           |
| 1560317_s_at | 0.759 | 0.0128057 | 2.980735  | -4.57 | 2.5168311 | HIP1      |
| 216948_at    | 0.759 | 0.0128413 | 2.9791617 | -4.57 | 3.4578033 |           |
| 213147_at    | 0.759 | 0.0128815 | 2.9773954 | -4.57 | 2.7732288 | HOXA10    |
| 216407_at    | 0.759 | 0.0129134 | 2.9759973 | -4.57 | 2.7443994 | VAC14     |
| 1559166_at   | 0.759 | 0.0129261 | 2.9754428 | -4.57 | 2.7894332 |           |
| 1565817_at   | 0.759 | 0.0129312 | 2.97522   | -4.57 | 2.5457954 | IKZF1     |
| 205732_s_at  | 0.759 | 0.0129334 | 2.9751224 | -4.57 | 2.3719019 | NCOA2     |
| 235663_at    | 0.759 | 0.0129358 | 2.9750178 | -4.57 | 2.2847571 |           |
| 1554386_at   | 0.759 | 0.0129586 | 2.9740224 | -4.57 | 3.5832101 | CST9      |
| 232661_s_at  | 0.759 | 0.012965  | 2.9737425 | -4.57 | 2.5505202 | RBM48     |
| 244733_at    | 0.759 | 0.0129679 | 2.9736169 | -4.57 | 3.4371808 |           |
| 201130_s_at  | 0.759 | 0.0129738 | 2.9733584 | -4.57 | 2.4368384 | CDH1      |
| 1557627_at   | 0.759 | 0.0129775 | 2.9731991 | -4.57 | 3.9231065 | LOC283745 |
| 228808_s_at  | 0.759 | 0.0129853 | 2.9728577 | -4.57 | 2.6240143 | LOXL2     |
| 217163_at    | 0.759 | 0.0129907 | 2.9726233 | -4.57 | 2.7211821 | ESR1      |
| 1552486_s_at | 0.759 | 0.0130028 | 2.9720969 | -4.57 | 2.9834878 | LACTB     |
| 235590_at    | 0.759 | 0.0130053 | 2.9719874 | -4.57 | 2.1714835 | SLF2      |
| 232660_at    | 0.759 | 0.0130247 | 2.9711453 | -4.57 | 2.8856055 | BAD       |
| 1570479_at   | 0.759 | 0.0130496 | 2.9700658 | -4.57 | 2.6830457 | ART1      |
| 1552878_at   | 0.759 | 0.0130694 | 2.9692078 | -4.57 | 3.1384881 | ATOH7     |

|             |       |           |           |       |           |              |
|-------------|-------|-----------|-----------|-------|-----------|--------------|
| 221351_at   | 0.759 | 0.013092  | 2.9682322 | -4.57 | 2.666527  | HTR1A        |
| 1557314_at  | 0.759 | 0.0131303 | 2.9665788 | -4.57 | 2.2056943 | DPY19L2P3    |
| 233858_at   | 0.759 | 0.0131369 | 2.9662953 | -4.57 | 2.5783858 |              |
| 1561670_at  | 0.759 | 0.0131457 | 2.965917  | -4.57 | 2.2125943 |              |
| 238411_x_at | 0.759 | 0.0131604 | 2.965286  | -4.57 | 3.2221747 | NREP         |
| 237080_at   | 0.759 | 0.0132403 | 2.9618617 | -4.57 | 2.2901686 |              |
| 235524_at   | 0.759 | 0.0132467 | 2.9615886 | -4.57 | 2.250066  | RALGAPA1     |
| 233533_at   | 0.759 | 0.0132492 | 2.961484  | -4.57 | 2.9476784 | KRTAP1-5     |
| 230137_at   | 0.759 | 0.0132614 | 2.9609611 | -4.57 | 2.3651509 | TMEM155      |
| 1560371_at  | 0.759 | 0.0132649 | 2.9608159 | -4.57 | 1.9685852 | LINC00997    |
| 233735_at   | 0.759 | 0.0132694 | 2.9606233 | -4.57 | 3.3602452 |              |
| 243845_at   | 0.759 | 0.0132708 | 2.9605646 | -4.57 | 2.5266482 | HSPD1        |
| 230910_s_at | 0.759 | 0.0132847 | 2.9599723 | -4.57 | 3.3682322 | LOC100288181 |
| 241326_at   | 0.759 | 0.0133548 | 2.9569943 | -4.57 | 2.4686914 | AK7          |
| 214571_at   | 0.759 | 0.0133588 | 2.9568249 | -4.57 | 1.97895   | FGF3         |
| 1558532_at  | 0.759 | 0.0134058 | 2.9548429 | -4.57 | 2.6082108 | TPM1         |
| 224244_s_at | 0.759 | 0.0134413 | 2.9533456 | -4.57 | 2.3434715 | APOA5        |
| 234152_at   | 0.759 | 0.0134529 | 2.9528595 | -4.57 | 2.8226337 |              |
| 232252_at   | 0.759 | 0.0134709 | 2.9521049 | -4.57 | 2.9211013 | DUSP27       |
| 1563484_at  | 0.759 | 0.0134761 | 2.9518859 | -4.57 | 2.1978693 | LOC101927766 |
| 207946_at   | 0.759 | 0.0135051 | 2.9506686 | -4.57 | 2.4436029 | MAML3        |
| 217338_at   | 0.759 | 0.0135079 | 2.9505529 | -4.57 | 2.3022973 | KRT19P2      |

|              |       |           |           |       |           |              |
|--------------|-------|-----------|-----------|-------|-----------|--------------|
| 233795_at    | 0.759 | 0.0135283 | 2.9497013 | -4.57 | 2.5550323 | ODF3         |
| 1563805_a_at | 0.759 | 0.0135347 | 2.9494325 | -4.57 | 2.8888508 | FAM83C       |
| 232566_at    | 0.759 | 0.0135717 | 2.9478891 | -4.57 | 2.1352201 | NOL6         |
| 1563539_at   | 0.759 | 0.0135993 | 2.946739  | -4.57 | 2.5276247 | LOC101927610 |
| 1563143_at   | 0.759 | 0.01361   | 2.9462956 | -4.57 | 2.8487316 | LOC100507065 |
| 233020_at    | 0.759 | 0.0136201 | 2.9458781 | -4.57 | 2.108644  | SEC22B       |
| 1557569_at   | 0.759 | 0.0136205 | 2.9458615 | -4.57 | 2.1816663 | MPDU1        |
| 210520_at    | 0.759 | 0.0136283 | 2.9455377 | -4.57 | 2.4563631 | FETUB        |
| 228178_s_at  | 0.759 | 0.0136457 | 2.9448157 | -4.57 | 2.7626316 |              |
| 1558481_s_at | 0.759 | 0.0136475 | 2.9447423 | -4.57 | 3.1137535 | TMCC1-AS1    |
| 219308_s_at  | 0.759 | 0.0136654 | 2.9439997 | -4.57 | 2.2077556 | AK5          |
| 204637_at    | 0.759 | 0.0136786 | 2.9434527 | -4.57 | 3.1190706 | CGA          |
| 207710_at    | 0.759 | 0.0136838 | 2.9432384 | -4.57 | 2.6648768 | LCE2B        |
| 1554187_at   | 0.759 | 0.0136939 | 2.9428233 | -4.57 | 2.0414796 | LOC554206    |
| 217343_at    | 0.759 | 0.0137022 | 2.9424821 | -4.57 | 3.9080769 |              |
| 1564351_at   | 0.759 | 0.0137095 | 2.942181  | -4.57 | 2.8058892 |              |
| 91580_at     | 0.759 | 0.0137098 | 2.9421653 | -4.57 | 2.5686802 | LRTM1        |
| 240736_at    | 0.759 | 0.0137546 | 2.9403219 | -4.57 | 3.1632315 |              |
| 229225_at    | 0.759 | 0.0137984 | 2.938526  | -4.57 | 2.2066509 | NRP2         |
| 1566834_at   | 0.759 | 0.0138142 | 2.9378787 | -4.57 | 3.4753942 |              |

|              |       |           |           |       |           |              |
|--------------|-------|-----------|-----------|-------|-----------|--------------|
| 1562270_at   | 0.759 | 0.0138144 | 2.937871  | -4.57 | 2.9874828 | ARHGEF7      |
| 236397_at    | 0.759 | 0.0138147 | 2.9378588 | -4.57 | 2.4018007 |              |
| 233886_at    | 0.759 | 0.0138406 | 2.9368025 | -4.57 | 3.082341  |              |
| 1570331_at   | 0.759 | 0.0138435 | 2.9366834 | -4.57 | 3.1061892 |              |
| 222124_at    | 0.759 | 0.0138436 | 2.9366771 | -4.57 | 3.7007421 | HIF3A        |
| 238023_at    | 0.759 | 0.0138854 | 2.934973  | -4.57 | 2.0888274 |              |
| 207151_at    | 0.759 | 0.0139071 | 2.9340929 | -4.57 | 2.6235047 | ADCYAP1R1    |
| 241235_at    | 0.759 | 0.0139159 | 2.9337331 | -4.57 | 2.9184977 |              |
| 240043_at    | 0.759 | 0.0139222 | 2.9334777 | -4.57 | 2.2510517 | PRR32        |
| 1556516_at   | 0.759 | 0.0139227 | 2.9334591 | -4.57 | 2.6779267 | LOC100506331 |
| 1563065_at   | 0.759 | 0.013934  | 2.932998  | -4.57 | 3.3527752 |              |
| 1561880_a_at | 0.759 | 0.0139375 | 2.932858  | -4.57 | 3.4677295 | SIGLEC16     |
| 1554041_at   | 0.759 | 0.013967  | 2.9316632 | -4.57 | 3.0193787 | TMEM239      |
| 1554964_x_at | 0.759 | 0.0139953 | 2.9305175 | -4.57 | 1.9833015 |              |
| 1569689_s_at | 0.759 | 0.0140049 | 2.9301318 | -4.57 | 2.9117303 | GABRB3       |
| 237602_at    | 0.759 | 0.014005  | 2.9301296 | -4.57 | 4.0470649 |              |
| 208368_s_at  | 0.759 | 0.0140364 | 2.9288627 | -4.57 | 2.2023532 | BRCA2        |
| 217139_at    | 0.759 | 0.0140908 | 2.9266768 | -4.57 | 2.7529648 | VDAC1        |
| 237271_at    | 0.759 | 0.0141023 | 2.9262142 | -4.57 | 3.4131296 | C7orf77      |
| 222194_at    | 0.759 | 0.0141275 | 2.9252075 | -4.57 | 3.0958279 | FAM66D       |
| 1555717_at   | 0.759 | 0.0141728 | 2.9233973 | -4.57 | 3.5062094 |              |
| 1570301_at   | 0.759 | 0.0141864 | 2.9228571 | -4.57 | 2.8065195 |              |

|              |       |           |           |       |           |                    |
|--------------|-------|-----------|-----------|-------|-----------|--------------------|
| 219488_at    | 0.759 | 0.0142333 | 2.9209912 | -4.57 | 2.7007229 | A4GALT             |
| 230883_at    | 0.759 | 0.0142516 | 2.9202628 | -4.57 | 2.5400355 | NXPH2              |
| 231623_at    | 0.759 | 0.0142578 | 2.9200195 | -4.57 | 2.8520165 | TMEM174            |
| 206887_at    | 0.759 | 0.0142737 | 2.9193902 | -4.57 | 3.0255716 | ACKR2              |
| 1564718_at   | 0.759 | 0.0142741 | 2.9193722 | -4.57 | 3.3679009 |                    |
| 207609_s_at  | 0.759 | 0.0142897 | 2.9187553 | -4.57 | 1.9826743 | CYP1A2             |
| 233683_at    | 0.759 | 0.0142908 | 2.9187142 | -4.57 | 2.8410427 |                    |
| 241801_at    | 0.759 | 0.0143056 | 2.9181276 | -4.57 | 2.4487259 | PGAP1              |
| 241966_at    | 0.759 | 0.014358  | 2.9160608 | -4.57 | 2.1438368 | MYO5A              |
| 241868_at    | 0.759 | 0.0144066 | 2.9141521 | -4.57 | 2.7421451 |                    |
| 1554774_at   | 0.759 | 0.0144365 | 2.9129824 | -4.57 | 2.2884083 | MINA               |
| 1559732_at   | 0.759 | 0.0144483 | 2.91252   | -4.57 | 2.7937893 | NUB1               |
| 227588_s_at  | 0.759 | 0.0144697 | 2.9116814 | -4.57 | 2.4775082 | GET4               |
| 1559843_s_at | 0.759 | 0.0145152 | 2.9099089 | -4.57 | 3.0271442 |                    |
| 1566540_at   | 0.759 | 0.0145355 | 2.9091213 | -4.57 | 2.6806066 |                    |
| 1554610_at   | 0.759 | 0.014554  | 2.9084019 | -4.57 | 2.6349643 | ANKMY1             |
| 214804_at    | 0.759 | 0.0145799 | 2.9073954 | -4.57 | 3.0551611 | CENPI              |
| 241016_at    | 0.759 | 0.0145803 | 2.9073825 | -4.57 | 2.8951398 |                    |
| 1564319_at   | 0.759 | 0.0146191 | 2.9058812 | -4.57 | 2.8156159 | FAM71E2            |
| 243269_s_at  | 0.759 | 0.0146357 | 2.9052377 | -4.57 | 2.9571041 | FAM205BP///FAM205A |
| 234579_at    | 0.759 | 0.0146585 | 2.9043577 | -4.57 | 3.7441348 |                    |
| 1556417_a_at | 0.759 | 0.0146897 | 2.9031583 | -4.57 | 2.9355222 |                    |

|              |       |           |           |       |           |                                                 |
|--------------|-------|-----------|-----------|-------|-----------|-------------------------------------------------|
| 240803_at    | 0.759 | 0.0146971 | 2.9028742 | -4.57 | 2.6109951 |                                                 |
| 232359_at    | 0.759 | 0.0147026 | 2.9026627 | -4.57 | 2.5852319 | RDH11                                           |
| 221982_x_at  | 0.759 | 0.0147171 | 2.9021068 | -4.57 | 2.4991876 | LAGE3                                           |
| 220269_at    | 0.759 | 0.0147517 | 2.9007774 | -4.57 | 3.2000487 | ZBBX                                            |
| 220317_at    | 0.759 | 0.0147694 | 2.9000996 | -4.57 | 2.9618847 | LRAT                                            |
| 243832_at    | 0.759 | 0.0148058 | 2.8987118 | -4.57 | 2.4872087 |                                                 |
| 1553346_a_at | 0.759 | 0.0148516 | 2.8969671 | -4.57 | 2.5918639 | TNRC6A                                          |
| 240517_at    | 0.759 | 0.0148596 | 2.8966604 | -4.57 | 2.8985033 | CBS                                             |
| 230583_s_at  | 0.759 | 0.01486   | 2.8966449 | -4.57 | 3.3033801 | LOC100287728///ZNF75D                           |
| 211403_x_at  | 0.759 | 0.0148756 | 2.8960527 | -4.57 | 2.3881467 | VCX2                                            |
| 1560735_s_at | 0.759 | 0.0148901 | 2.8955021 | -4.57 | 1.9331225 | LOC102723532///LOC101927079///LOC727924///OR4N4 |
| 1554405_a_at | 0.759 | 0.0149059 | 2.8949034 | -4.57 | 2.5825354 | LINC00161                                       |
| 229502_at    | 0.759 | 0.0149103 | 2.8947383 | -4.57 | 2.9319281 | CHDH                                            |
| 240918_at    | 0.759 | 0.0149357 | 2.8937752 | -4.57 | 2.8551772 | LOC101928631///ZNF77                            |
| 240957_at    | 0.759 | 0.0149643 | 2.8926938 | -4.57 | 3.3421289 |                                                 |
| 229051_at    | 0.759 | 0.0149685 | 2.8925362 | -4.57 | 2.1128986 |                                                 |

|              |       |           |           |       |           |                 |
|--------------|-------|-----------|-----------|-------|-----------|-----------------|
| 206447_at    | 0.759 | 0.0149713 | 2.8924295 | -4.57 | 3.5334837 | CELA2A///CELA2B |
| 1553362_at   | 0.759 | 0.0149796 | 2.8921181 | -4.57 | 3.0985805 | DNAH6           |
| 1562006_at   | 0.759 | 0.0150221 | 2.8905174 | -4.57 | 2.9593244 |                 |
| 1561523_at   | 0.759 | 0.0150523 | 2.8893816 | -4.57 | 3.2524255 | CCDC65          |
| 1560480_at   | 0.759 | 0.0150862 | 2.8881135 | -4.57 | 2.7070742 |                 |
| 1570146_at   | 0.759 | 0.0151083 | 2.887284  | -4.57 | 2.9188051 |                 |
| 215897_at    | 0.759 | 0.0151102 | 2.8872143 | -4.57 | 2.5464627 | MED25           |
| 1560979_a_at | 0.759 | 0.0151301 | 2.8864684 | -4.57 | 3.0346402 |                 |
| 1553701_a_at | 0.759 | 0.015174  | 2.884834  | -4.57 | 2.3743326 | DUSP18          |
| 204539_s_at  | 0.759 | 0.0151911 | 2.8841972 | -4.57 | 3.4791111 | CELSR1          |
| 237514_at    | 0.759 | 0.0152265 | 2.8828817 | -4.57 | 3.3751143 | LINC01210       |
| 1567378_x_at | 0.759 | 0.015249  | 2.8820475 | -4.57 | 3.0742608 | DNAH1           |
| 210077_s_at  | 0.759 | 0.0152565 | 2.8817709 | -4.57 | 3.1189711 | SRSF5           |
| 240715_at    | 0.759 | 0.0152829 | 2.880795  | -4.57 | 2.7893217 | TBX5            |
| 218711_s_at  | 0.759 | 0.0153403 | 2.8786749 | -4.57 | 1.8938907 | SDPR            |
| 214923_at    | 0.759 | 0.0153607 | 2.8779267 | -4.57 | 2.5250579 | ATP6V1D         |
| 221109_at    | 0.759 | 0.0153633 | 2.8778291 | -4.57 | 2.7220922 | LOC100506571    |
| 241564_at    | 0.759 | 0.0153933 | 2.87673   | -4.57 | 2.5270603 | GLOD5           |
| 207136_at    | 0.759 | 0.0154346 | 2.8752136 | -4.57 | 2.9269696 | ARR3            |
| 37953_s_at   | 0.759 | 0.0154461 | 2.8747948 | -4.57 | 2.5736515 | ASIC1           |



|             |       |           |           |       |           |              |
|-------------|-------|-----------|-----------|-------|-----------|--------------|
| 235794_at   | 0.759 | 0.01546   | 2.8742852 | -4.57 | 2.6820283 | MOBP         |
| 233517_s_at | 0.759 | 0.0154675 | 2.8740106 | -4.57 | 2.5826693 | HIF3A        |
| 244223_at   | 0.759 | 0.0154789 | 2.8735958 | -4.57 | 2.3464272 |              |
| 206681_x_at | 0.759 | 0.0155097 | 2.8724731 | -4.57 | 2.5413127 | GP2          |
| 220359_s_at | 0.759 | 0.0155246 | 2.8719311 | -4.57 | 3.6203576 | ARPP21       |
| 208334_at   | 0.759 | 0.0155349 | 2.8715549 | -4.57 | 2.4234007 | NDST4        |
| 1553552_at  | 0.759 | 0.0155388 | 2.8714155 | -4.57 | 3.3892989 | TAAR8        |
| 1566527_at  | 0.759 | 0.0155458 | 2.8711617 | -4.57 | 2.8167856 |              |
| 216721_at   | 0.759 | 0.015548  | 2.8710819 | -4.57 | 2.5296367 | SLC25A30     |
| 217476_at   | 0.759 | 0.0155688 | 2.8703242 | -4.57 | 3.1526691 | NR1D1///THRA |
| 240671_at   | 0.759 | 0.0155848 | 2.8697465 | -4.57 | 2.8609857 |              |
| 215282_at   | 0.759 | 0.0156155 | 2.8686317 | -4.57 | 2.5978116 | ANAPC13      |
| 1556319_at  | 0.759 | 0.0156189 | 2.8685097 | -4.57 | 2.2076117 | TRIM44       |
| 220567_at   | 0.759 | 0.0156223 | 2.8683883 | -4.57 | 3.1767243 | IKZF2        |
| 221302_at   | 0.759 | 0.0156239 | 2.8683302 | -4.57 | 2.2286921 | KLF15        |
| 1561140_at  | 0.759 | 0.0156745 | 2.8665015 | -4.57 | 3.1438429 |              |
| 1563224_at  | 0.759 | 0.0157028 | 2.8654845 | -4.57 | 2.9138074 |              |
| 203180_at   | 0.759 | 0.0157185 | 2.864921  | -4.57 | 2.3109027 | ALDH1A3      |
| 242395_at   | 0.759 | 0.0157235 | 2.8647394 | -4.57 | 3.1756997 |              |
| 223587_s_at | 0.759 | 0.0157455 | 2.8639515 | -4.57 | 2.1199332 | AMN          |
| 1556144_at  | 0.759 | 0.0157638 | 2.863293  | -4.57 | 2.4487962 | DHX30        |
| 1554728_at  | 0.759 | 0.0157648 | 2.8632605 | -4.57 | 2.5526803 | SLC9A1       |
| 242782_x_at | 0.759 | 0.0157741 | 2.8629272 | -4.57 | 3.1263576 | TMEM198      |

|              |       |           |           |       |           |              |
|--------------|-------|-----------|-----------|-------|-----------|--------------|
| 237818_at    | 0.759 | 0.0157821 | 2.8626405 | -4.57 | 3.3590537 | LARP6        |
| 1553080_at   | 0.759 | 0.015783  | 2.8626067 | -4.57 | 3.2159939 | CSN1S2AP     |
| 210743_s_at  | 0.759 | 0.015796  | 2.8621434 | -4.57 | 3.2835973 | CDC14A       |
| 209888_s_at  | 0.759 | 0.0158013 | 2.8619517 | -4.57 | 3.509737  | MYL1         |
| 243187_at    | 0.759 | 0.015838  | 2.8606428 | -4.57 | 3.2030381 |              |
| 233366_at    | 0.759 | 0.0158387 | 2.8606165 | -4.57 | 3.16726   | FBXO4        |
| 1555510_at   | 0.759 | 0.0158466 | 2.8603357 | -4.57 | 3.1484    | ZNF215       |
| 228401_at    | 0.759 | 0.0158783 | 2.859208  | -4.57 | 2.4377905 | ATAD2        |
| 224055_x_at  | 0.759 | 0.0159366 | 2.8571369 | -4.57 | 3.3173227 | KCNK7        |
| 239332_at    | 0.759 | 0.0160643 | 2.8526287 | -4.57 | 4.4792498 | LOC105371809 |
| 211380_s_at  | 0.759 | 0.016079  | 2.8521124 | -4.57 | 2.8343571 | PRKG1        |
| 1569237_at   | 0.759 | 0.0160918 | 2.8516624 | -4.57 | 3.1544905 |              |
| 221372_s_at  | 0.759 | 0.0161689 | 2.8489624 | -4.57 | 3.1736978 | P2RX2        |
| 233368_s_at  | 0.759 | 0.0161728 | 2.8488288 | -4.57 | 2.9090773 | DNAJC27      |
| 1552631_a_at | 0.759 | 0.0162014 | 2.8478306 | -4.57 | 2.3207243 | MAP3K6       |
| 1564250_at   | 0.759 | 0.0162166 | 2.847301  | -4.57 | 3.135131  | LINC00693    |
| 239622_at    | 0.759 | 0.016267  | 2.8455481 | -4.57 | 3.0731912 | TRAP1        |
| 1557128_at   | 0.759 | 0.0162972 | 2.8444987 | -4.57 | 2.6312838 | FAM111B      |
| 228576_s_at  | 0.759 | 0.0162996 | 2.8444153 | -4.57 | 3.1789239 | MXRA8        |
| 215150_at    | 0.759 | 0.0163072 | 2.8441544 | -4.57 | 2.2892661 | YOD1         |
| 1559658_at   | 0.759 | 0.01632   | 2.8437108 | -4.57 | 2.1298166 | KATNBL1      |

|             |       |           |           |       |           |                 |
|-------------|-------|-----------|-----------|-------|-----------|-----------------|
| 210333_at   | 0.759 | 0.0163663 | 2.8421097 | -4.57 | 2.5203977 | NR5A1           |
| 208180_s_at | 0.759 | 0.0163747 | 2.8418194 | -4.57 | 2.8039878 | HIST1H4H        |
| 1566709_at  | 0.759 | 0.0163943 | 2.841145  | -4.57 | 2.4590725 |                 |
| 231651_at   | 0.759 | 0.0163977 | 2.8410294 | -4.57 | 2.7352972 | EFCAB13         |
| 216712_at   | 0.759 | 0.0164012 | 2.8409064 | -4.57 | 3.6179202 | SLC25A30        |
| 61734_at    | 0.759 | 0.0164137 | 2.840478  | -4.57 | 2.4096278 | RCN3            |
| 233680_at   | 0.759 | 0.0164282 | 2.83998   | -4.57 | 2.905113  | LOC101929454    |
| 242219_at   | 0.759 | 0.0164331 | 2.839809  | -4.57 | 2.4616079 | LINC01588       |
| 224034_at   | 0.759 | 0.0164436 | 2.8394492 | -4.57 | 2.4583745 |                 |
| 235465_at   | 0.759 | 0.016453  | 2.8391273 | -4.57 | 2.7417329 | AMER2           |
| 1564567_at  | 0.759 | 0.0164567 | 2.8389981 | -4.57 | 3.2337644 |                 |
| 210969_at   | 0.759 | 0.0164568 | 2.8389975 | -4.57 | 2.6959881 | PKN2            |
| 1560133_at  | 0.759 | 0.016458  | 2.8389564 | -4.57 | 2.7484879 |                 |
| 231336_at   | 0.759 | 0.0164865 | 2.8379777 | -4.57 | 3.2798184 | CPNE4           |
| 239430_at   | 0.759 | 0.0164898 | 2.8378639 | -4.57 | 3.758933  | IGFL1           |
| 230869_at   | 0.759 | 0.0165736 | 2.8350013 | -4.57 | 2.3705877 | FAM155A         |
| 1556459_at  | 0.759 | 0.0166014 | 2.8340543 | -4.57 | 2.8372901 | ARHGAP22-IT1    |
| 231064_s_at | 0.759 | 0.016602  | 2.8340354 | -4.57 | 2.8573642 | NUP50           |
| 209465_x_at | 0.759 | 0.0166335 | 2.8329652 | -4.57 | 2.3607141 | PTN             |
| 216169_at   | 0.759 | 0.0166405 | 2.832727  | -4.57 | 2.5594835 |                 |
| 207272_at   | 0.759 | 0.0166416 | 2.8326899 | -4.57 | 3.4589446 | ZNF80           |
| 1556742_at  | 0.759 | 0.0166569 | 2.8321717 | -4.57 | 2.8831819 | GUSBP1///GUSBP4 |

|              |       |           |           |       |           |              |
|--------------|-------|-----------|-----------|-------|-----------|--------------|
| 220876_at    | 0.759 | 0.0166846 | 2.831231  | -4.57 | 2.9350474 |              |
| 220586_at    | 0.759 | 0.0167123 | 2.8302954 | -4.57 | 2.9968757 | CHD9         |
| 232399_at    | 0.759 | 0.0167305 | 2.8296797 | -4.57 | 3.1138167 | DCLK3        |
| 238268_at    | 0.759 | 0.016797  | 2.8274405 | -4.57 | 3.3010711 |              |
| 1556453_at   | 0.759 | 0.0168175 | 2.8267521 | -4.57 | 3.1480594 | LOC100506274 |
| 1554591_at   | 0.759 | 0.0168231 | 2.826565  | -4.57 | 2.0793426 | PCAT4        |
| 242860_at    | 0.759 | 0.0168464 | 2.8257813 | -4.57 | 2.5064149 |              |
| 220915_s_at  | 0.759 | 0.0168652 | 2.8251534 | -4.57 | 2.4155292 |              |
| 228626_at    | 0.759 | 0.0169153 | 2.8234782 | -4.57 | 2.0433067 | URM1         |
| 201564_s_at  | 0.759 | 0.0169344 | 2.8228407 | -4.57 | 2.8284091 | FSCN1        |
| 219650_at    | 0.759 | 0.016937  | 2.8227538 | -4.57 | 2.5610545 | ERCC6L       |
| 1555282_a_at | 0.759 | 0.01697   | 2.8216524 | -4.57 | 2.1272416 | PPARGC1B     |
| 202707_at    | 0.759 | 0.0169767 | 2.8214294 | -4.57 | 2.1811154 | UMPS         |
| 228368_at    | 0.759 | 0.0169837 | 2.8211982 | -4.57 | 2.3807135 | ARHGAP20     |
| 242906_at    | 0.759 | 0.0169925 | 2.8209065 | -4.57 | 3.118949  | SESN3        |
| 235230_at    | 0.759 | 0.0169963 | 2.82078   | -4.57 | 2.1310896 | PLCXD2       |
| 1563062_at   | 0.759 | 0.0170153 | 2.8201489 | -4.57 | 2.6939054 | LINC00460    |
| 244066_at    | 0.759 | 0.0170221 | 2.8199222 | -4.57 | 2.0805559 |              |
| 237170_at    | 0.759 | 0.017031  | 2.8196256 | -4.57 | 3.2426493 | LOC100507384 |
| 210228_at    | 0.759 | 0.0170442 | 2.8191893 | -4.57 | 1.9295231 | CSF2         |

|              |       |           |           |       |           |           |
|--------------|-------|-----------|-----------|-------|-----------|-----------|
| 225700_at    | 0.759 | 0.0170516 | 2.8189434 | -4.57 | 2.648324  | GLCC11    |
| 236323_at    | 0.759 | 0.0170654 | 2.8184868 | -4.57 | 2.21096   | PVRL3-AS1 |
| 220103_s_at  | 0.759 | 0.0170684 | 2.8183882 | -4.57 | 3.1759425 | MRPS18C   |
| 236827_at    | 0.759 | 0.0170736 | 2.8182156 | -4.57 | 2.7475073 |           |
| 1556760_a_at | 0.759 | 0.0170994 | 2.8173637 | -4.57 | 2.9814891 |           |
| 1559965_at   | 0.759 | 0.0171099 | 2.8170173 | -4.57 | 3.873535  | ZFHX4-AS1 |
| 1562383_at   | 0.759 | 0.0171106 | 2.8169943 | -4.57 | 2.4681028 | MIR4313   |
| 1564772_at   | 0.759 | 0.0171267 | 2.8164632 | -4.57 | 2.1607052 |           |
| 240020_at    | 0.759 | 0.0171305 | 2.8163389 | -4.57 | 1.8336279 | CYB5R4    |
| 231748_at    | 0.759 | 0.0171421 | 2.8159549 | -4.57 | 2.4507627 | ULBP3     |
| 229827_at    | 0.759 | 0.0171486 | 2.8157417 | -4.57 | 3.0188266 | BUB3      |
| 241005_at    | 0.759 | 0.0171563 | 2.8154862 | -4.57 | 2.9954461 |           |
| 207145_at    | 0.759 | 0.0171658 | 2.8151758 | -4.57 | 3.1709471 | MSTN      |
| 235090_at    | 0.759 | 0.0171698 | 2.8150437 | -4.57 | 2.6133032 | ZNF710    |
| 236455_at    | 0.759 | 0.0172148 | 2.8135665 | -4.57 | 2.4922115 |           |
| 219748_at    | 0.759 | 0.0172155 | 2.8135412 | -4.57 | 3.0413521 | TREML2    |
| 223897_at    | 0.759 | 0.0172166 | 2.8135075 | -4.57 | 2.9003259 | ZNF765    |
| 236068_s_at  | 0.759 | 0.0172633 | 2.8119746 | -4.57 | 2.1852381 | C3orf14   |
| 218839_at    | 0.759 | 0.0172635 | 2.8119687 | -4.57 | 1.8105216 | HEY1      |
| 1562457_at   | 0.759 | 0.0172815 | 2.8113799 | -4.57 | 2.9331955 | NCKAP5L   |
| 237744_at    | 0.759 | 0.0172956 | 2.8109209 | -4.57 | 2.7465006 |           |
| 1556498_at   | 0.759 | 0.017302  | 2.8107107 | -4.57 | 2.7581641 | FAM69A    |
| 1569006_at   | 0.759 | 0.0173345 | 2.8096516 | -4.57 | 2.2701997 | LOC284379 |

|              |       |           |           |       |           |              |
|--------------|-------|-----------|-----------|-------|-----------|--------------|
| 220588_at    | 0.759 | 0.017347  | 2.8092438 | -4.57 | 2.8984915 | BCAS4        |
| 234889_at    | 0.759 | 0.0173619 | 2.8087601 | -4.57 | 2.5797014 |              |
| 240255_at    | 0.759 | 0.0173656 | 2.8086394 | -4.57 | 2.063779  | LOC100507395 |
| 1561776_at   | 0.759 | 0.017391  | 2.8078127 | -4.57 | 2.9808791 |              |
| 228126_x_at  | 0.759 | 0.0174128 | 2.8071069 | -4.57 | 2.8239175 | CTXN1        |
| 220585_at    | 0.759 | 0.0174369 | 2.8063239 | -4.57 | 2.2210977 | HKDC1        |
| 234818_at    | 0.759 | 0.0174521 | 2.8058328 | -4.57 | 2.6179875 | TMEM108      |
| 1561386_at   | 0.759 | 0.017453  | 2.8058055 | -4.57 | 2.9153875 | LOC102723701 |
| 1556941_a_at | 0.759 | 0.0174542 | 2.8057656 | -4.57 | 3.0936301 | LOC283484    |
| 202210_x_at  | 0.759 | 0.0174741 | 2.8051217 | -4.57 | 2.2757052 | GSK3A        |
| 1560944_at   | 0.759 | 0.017485  | 2.8047708 | -4.57 | 2.4772553 | SLC25A3P1    |
| 239449_at    | 0.759 | 0.017494  | 2.8044803 | -4.57 | 3.2392836 |              |
| 235331_x_at  | 0.759 | 0.0174958 | 2.8044222 | -4.57 | 2.2949275 | PCGF5        |
| 1554920_at   | 0.759 | 0.0174969 | 2.804387  | -4.57 | 3.4276942 | SCEL         |
| 242570_at    | 0.759 | 0.0175025 | 2.8042056 | -4.57 | 2.6534098 |              |
| 238125_at    | 0.759 | 0.0175072 | 2.804054  | -4.57 | 2.9620406 | ADAMTS16     |
| 1561939_at   | 0.759 | 0.0175223 | 2.8035663 | -4.57 | 2.8481144 | DYNC2H1      |
| 207458_at    | 0.759 | 0.0175327 | 2.8032318 | -4.57 | 1.9432924 | RHPN1-AS1    |
| 242063_s_at  | 0.759 | 0.0175755 | 2.8018539 | -4.57 | 3.0212048 |              |
| 244853_at    | 0.759 | 0.0175952 | 2.8012215 | -4.57 | 2.9784494 |              |
| 239369_at    | 0.759 | 0.0175955 | 2.8012128 | -4.57 | 2.3317312 | LCN8         |
| 221394_at    | 0.759 | 0.0176349 | 2.7999478 | -4.57 | 2.6191877 | TAAR2        |

|              |       |           |           |       |           |              |
|--------------|-------|-----------|-----------|-------|-----------|--------------|
| 1561591_at   | 0.759 | 0.0176669 | 2.7989253 | -4.57 | 3.0691394 |              |
| 244541_x_at  | 0.759 | 0.0176695 | 2.7988417 | -4.57 | 3.3025797 |              |
| 1552982_a_at | 0.759 | 0.0176882 | 2.798244  | -4.57 | 3.0867822 | FGF4         |
| 237851_at    | 0.759 | 0.0176886 | 2.7982303 | -4.57 | 2.3464174 |              |
| 1560411_at   | 0.759 | 0.0177127 | 2.7974623 | -4.57 | 2.4395218 |              |
| 1559715_at   | 0.759 | 0.0177346 | 2.7967645 | -4.57 | 2.5012039 | LOC100507391 |
| 1563523_at   | 0.759 | 0.0177832 | 2.7952196 | -4.57 | 3.1656259 |              |
| 238872_at    | 0.759 | 0.0178171 | 2.7941436 | -4.57 | 3.148833  | LOC100128239 |
| 1562820_at   | 0.759 | 0.0178815 | 2.792105  | -4.57 | 3.2633627 |              |
| 218355_at    | 0.759 | 0.0179099 | 2.79121   | -4.57 | 3.69583   | KIF4A        |
| 1562122_at   | 0.759 | 0.0179534 | 2.7898392 | -4.57 | 2.5728843 |              |
| 238276_at    | 0.759 | 0.0180004 | 2.788362  | -4.57 | 2.3765378 |              |
| 206029_at    | 0.759 | 0.0180119 | 2.7880022 | -4.57 | 3.3691562 | ANKRD1       |
| 234247_at    | 0.759 | 0.0180219 | 2.7876903 | -4.57 | 3.9466459 |              |
| 237810_at    | 0.759 | 0.0180272 | 2.7875236 | -4.57 | 2.0144169 | CLDN6        |
| 234784_at    | 0.759 | 0.018057  | 2.7865904 | -4.57 | 2.0734324 |              |
| 1568949_at   | 0.759 | 0.0180682 | 2.7862413 | -4.57 | 2.3227107 | PITPNC1      |
| 234368_at    | 0.759 | 0.0180952 | 2.7853983 | -4.57 | 1.9273119 |              |
| 210311_at    | 0.759 | 0.0181017 | 2.7851954 | -4.57 | 2.7157662 | FGF5         |
| 1566784_at   | 0.759 | 0.0181421 | 2.7839352 | -4.57 | 2.0294308 | NSF          |
| 244452_at    | 0.759 | 0.0181587 | 2.783418  | -4.57 | 2.8038751 | ERLEC1       |

|             |       |           |           |       |           |             |
|-------------|-------|-----------|-----------|-------|-----------|-------------|
| 1559551_at  | 0.759 | 0.0182434 | 2.7807893 | -4.57 | 2.3012044 |             |
| 237677_at   | 0.759 | 0.0182441 | 2.7807685 | -4.57 | 3.3477506 |             |
| 219780_at   | 0.759 | 0.0182585 | 2.7803221 | -4.57 | 2.9338629 | ZNF771      |
| 232880_at   | 0.759 | 0.0182609 | 2.7802484 | -4.57 | 2.64259   |             |
| 234196_at   | 0.759 | 0.0182618 | 2.7802195 | -4.57 | 2.4165193 |             |
| 206356_s_at | 0.759 | 0.0182957 | 2.7791736 | -4.57 | 3.4153145 | GNAL        |
| 230963_at   | 0.759 | 0.0183922 | 2.7762025 | -4.57 | 2.0893229 | EMX2OS      |
| 1559510_at  | 0.759 | 0.0184015 | 2.7759165 | -4.57 | 2.3521447 | LINC00630   |
| 214560_at   | 0.759 | 0.0184259 | 2.7751683 | -4.57 | 2.8540222 | FPR3        |
| 231663_s_at | 0.759 | 0.0184284 | 2.7750923 | -4.57 | 3.0689894 | ARG1        |
| 241229_at   | 0.759 | 0.0184746 | 2.7736783 | -4.57 | 2.0621197 |             |
| 1553032_at  | 0.759 | 0.0185091 | 2.7726225 | -4.57 | 1.8716258 | IL31RA      |
| 209812_x_at | 0.759 | 0.01851   | 2.7725964 | -4.57 | 1.9265174 | CASP2       |
| 211917_s_at | 0.759 | 0.0185481 | 2.7714337 | -4.57 | 2.3542973 | PRLR        |
| 221320_at   | 0.759 | 0.0185558 | 2.7711995 | -4.57 | 2.4759049 | BCL2L10     |
| 237313_at   | 0.759 | 0.0185691 | 2.7707974 | -4.57 | 2.3827839 | C1QTNF1-AS1 |
| 241530_at   | 0.759 | 0.0185734 | 2.7706657 | -4.57 | 2.3401641 |             |
| 217333_at   | 0.759 | 0.0186052 | 2.7696997 | -4.57 | 1.9816969 |             |
| 241876_at   | 0.759 | 0.0186526 | 2.768262  | -4.57 | 2.0406714 | MDM4        |
| 231772_x_at | 0.759 | 0.0186729 | 2.7676475 | -4.57 | 2.833752  | CENPH       |
| 224043_s_at | 0.759 | 0.0186751 | 2.7675823 | -4.57 | 2.7044393 | UPB1        |
| 1552424_at  | 0.759 | 0.018698  | 2.7668894 | -4.57 | 3.3470191 | KLHL10      |
| 1570190_at  | 0.759 | 0.0188169 | 2.7633074 | -4.57 | 2.1214792 | LSAMP       |
| 1554636_at  | 0.759 | 0.0188343 | 2.7627861 | -4.57 | 2.0176209 |             |



|              |       |           |           |       |           |                 |
|--------------|-------|-----------|-----------|-------|-----------|-----------------|
| 215132_at    | 0.759 | 0.0188511 | 2.7622829 | -4.57 | 2.0075005 |                 |
| 219864_s_at  | 0.759 | 0.0188626 | 2.7619398 | -4.57 | 2.163073  | RCAN3           |
| 239467_at    | 0.759 | 0.0188657 | 2.7618453 | -4.57 | 2.3306291 |                 |
| 226876_at    | 0.759 | 0.0188871 | 2.7612041 | -4.57 | 2.2109333 | FAM101B         |
| 1561924_at   | 0.759 | 0.0189119 | 2.7604652 | -4.57 | 3.5828827 |                 |
| 234236_at    | 0.759 | 0.0189524 | 2.7592556 | -4.57 | 2.7814177 | AMBRA1          |
| 207779_at    | 0.759 | 0.0189608 | 2.7590055 | -4.57 | 2.634218  |                 |
| 1555794_at   | 0.759 | 0.0189786 | 2.7584762 | -4.57 | 3.8560894 | ARL17B///ARL17A |
| 1557309_at   | 0.759 | 0.0190315 | 2.7569049 | -4.57 | 2.3374074 | DENND1B         |
| 220118_at    | 0.759 | 0.0190333 | 2.7568515 | -4.57 | 2.6426841 | ZBTB32          |
| 1567333_at   | 0.759 | 0.0190333 | 2.7568487 | -4.57 | 2.3007735 |                 |
| 243152_at    | 0.759 | 0.0190447 | 2.756511  | -4.57 | 2.3705244 | COPS8           |
| 219537_x_at  | 0.759 | 0.0190552 | 2.7562001 | -4.57 | 2.8121006 | DLL3            |
| 224411_at    | 0.759 | 0.0190703 | 2.7557543 | -4.57 | 3.1218112 | PLA2G12B        |
| 211797_s_at  | 0.759 | 0.019125  | 2.7541356 | -4.57 | 2.802915  | NFYC            |
| 1552521_a_at | 0.759 | 0.0191252 | 2.7541283 | -4.57 | 2.9898182 | TMEM74          |
| 233697_at    | 0.759 | 0.0191389 | 2.7537247 | -4.57 | 3.005709  |                 |
| 222966_at    | 0.759 | 0.0191591 | 2.7531278 | -4.57 | 2.421148  | TLK1            |
| 233048_at    | 0.759 | 0.0191795 | 2.752529  | -4.57 | 3.1110809 |                 |
| 243692_at    | 0.759 | 0.0191969 | 2.7520157 | -4.57 | 2.569228  | GATA4           |
| 1565896_at   | 0.759 | 0.0192437 | 2.7506394 | -4.57 | 3.5018209 |                 |
| 1566735_at   | 0.759 | 0.0192493 | 2.7504756 | -4.57 | 2.9386248 | LINC01346       |
| 220787_at    | 0.759 | 0.0192551 | 2.7503074 | -4.57 | 3.0914136 |                 |

|              |       |           |           |       |           |              |
|--------------|-------|-----------|-----------|-------|-----------|--------------|
| 208054_at    | 0.759 | 0.0192727 | 2.74979   | -4.57 | 3.9917299 | HERC4        |
| 1553505_at   | 0.759 | 0.0192964 | 2.7490952 | -4.57 | 2.3874579 | A2ML1        |
| 1564760_at   | 0.759 | 0.0193195 | 2.7484196 | -4.57 | 2.583069  |              |
| 1559469_s_at | 0.759 | 0.0193389 | 2.7478539 | -4.57 | 1.9204156 | SIPA1L2      |
| 1553458_at   | 0.759 | 0.0193628 | 2.7471554 | -4.57 | 2.2391003 | VSTM4        |
| 236502_at    | 0.759 | 0.0194226 | 2.7454146 | -4.57 | 3.8695165 |              |
| 223963_s_at  | 0.759 | 0.0194343 | 2.7450724 | -4.57 | 2.5189514 | IGF2BP2      |
| 238364_x_at  | 0.759 | 0.0194375 | 2.7449798 | -4.57 | 3.2229226 | GLI4         |
| 237213_at    | 0.759 | 0.019484  | 2.7436314 | -4.57 | 2.275618  |              |
| 234520_at    | 0.759 | 0.0194889 | 2.7434871 | -4.57 | 2.6123721 | FLI1         |
| 1553592_x_at | 0.759 | 0.0195036 | 2.7430622 | -4.57 | 2.1185885 | BCRP3        |
| 204473_s_at  | 0.759 | 0.0195055 | 2.743008  | -4.57 | 2.1255969 | ZNF592       |
| 1570536_at   | 0.759 | 0.019516  | 2.7427024 | -4.57 | 2.2899015 |              |
| 1553602_at   | 0.759 | 0.0195219 | 2.7425336 | -4.57 | 2.0551159 | MUCL1        |
| 229680_at    | 0.759 | 0.0195387 | 2.7420457 | -4.57 | 2.1472881 | TACO1        |
| 228194_s_at  | 0.759 | 0.0195399 | 2.7420115 | -4.57 | 3.3054159 | SORCS1       |
| 216703_at    | 0.759 | 0.0195425 | 2.7419378 | -4.57 | 2.4280308 |              |
| 1553765_a_at | 0.759 | 0.0195959 | 2.7403952 | -4.57 | 3.3101101 | KLHL32       |
| 1568190_at   | 0.759 | 0.0195971 | 2.7403596 | -4.57 | 3.0393802 |              |
| 1557431_at   | 0.759 | 0.0196343 | 2.7392888 | -4.57 | 2.914103  |              |
| 236973_at    | 0.759 | 0.0196462 | 2.7389475 | -4.57 | 1.9744818 | LOC100131662 |

|              |       |           |           |       |           |                |
|--------------|-------|-----------|-----------|-------|-----------|----------------|
| 237887_at    | 0.759 | 0.0196624 | 2.7384828 | -4.57 | 2.1973737 |                |
| 240416_at    | 0.759 | 0.0196758 | 2.7380959 | -4.57 | 2.8874212 |                |
| 1562761_at   | 0.759 | 0.0196827 | 2.7378996 | -4.57 | 2.2010663 | NMRK1          |
| 1560407_at   | 0.759 | 0.0197174 | 2.7369035 | -4.57 | 3.0582996 | MARK1          |
| 211045_s_at  | 0.759 | 0.0197294 | 2.7365592 | -4.57 | 2.7282215 | KCNH6          |
| 207635_s_at  | 0.759 | 0.0197381 | 2.73631   | -4.57 | 2.187183  | KCNH1          |
| 1554884_at   | 0.759 | 0.0197622 | 2.7356205 | -4.57 | 3.128082  | PRIM2B///PRIM2 |
| 207395_at    | 0.759 | 0.0198118 | 2.734205  | -4.57 | 2.5944895 | BTN1A1         |
| 237612_at    | 0.759 | 0.0198349 | 2.7335469 | -4.57 | 2.6348154 | SLC14A2-AS1    |
| 206912_at    | 0.759 | 0.0198556 | 2.7329592 | -4.57 | 3.0758943 | FOXE1          |
| 234098_at    | 0.759 | 0.0198593 | 2.7328529 | -4.57 | 2.5235495 | SOBP           |
| 237682_at    | 0.759 | 0.0198601 | 2.7328314 | -4.57 | 2.8142889 |                |
| 220090_at    | 0.759 | 0.01988   | 2.7322634 | -4.57 | 1.9319061 | CRNN           |
| 207854_at    | 0.759 | 0.0199107 | 2.7313932 | -4.57 | 2.5171393 | GYPE           |
| 1555068_at   | 0.759 | 0.0199262 | 2.7309533 | -4.57 | 1.9463507 | WNK1           |
| 240978_at    | 0.759 | 0.0199402 | 2.7305561 | -4.57 | 3.9350221 |                |
| 1561230_at   | 0.759 | 0.0199444 | 2.7304373 | -4.57 | 2.5728216 |                |
| 206615_s_at  | 0.759 | 0.0199562 | 2.7301044 | -4.57 | 2.8539916 | ADAM22         |
| 207451_at    | 0.759 | 0.0199786 | 2.72947   | -4.57 | 2.2841122 | NKX2-8         |
| 1568845_at   | 0.759 | 0.0200688 | 2.7269236 | -4.57 | 2.4312335 |                |
| 1557864_x_at | 0.759 | 0.0200699 | 2.7268932 | -4.57 | 2.8211876 | PLA2G4E-AS1    |

|              |       |           |           |       |           |                   |
|--------------|-------|-----------|-----------|-------|-----------|-------------------|
| 244517_x_at  | 0.759 | 0.0200801 | 2.726606  | -4.57 | 1.9256677 |                   |
| 229188_s_at  | 0.759 | 0.0201119 | 2.7257124 | -4.57 | 2.1270157 | ZNRF2             |
| 1563536_at   | 0.759 | 0.0201464 | 2.7247441 | -4.57 | 2.0361526 |                   |
| 1553366_s_at | 0.759 | 0.020154  | 2.7245316 | -4.57 | 2.6143326 | ANKRD23///ANKRD39 |
| 208346_at    | 0.759 | 0.020169  | 2.7241103 | -4.57 | 2.28452   | PPBPP2            |
| 243128_at    | 0.759 | 0.0201838 | 2.7236957 | -4.57 | 2.0659809 | ZNF175            |
| 1557595_at   | 0.759 | 0.0202251 | 2.7225424 | -4.57 | 2.0420324 | GINS2             |
| 236837_x_at  | 0.759 | 0.0202458 | 2.7219642 | -4.57 | 2.0429824 | MIPEPP3           |
| 209942_x_at  | 0.759 | 0.0202586 | 2.7216062 | -4.57 | 2.8689517 | MAGEA6///MAGEA3   |
| 215715_at    | 0.759 | 0.020292  | 2.7206766 | -4.57 | 2.4118625 | SLC6A2            |
| 1553533_at   | 0.759 | 0.0203185 | 2.7199377 | -4.57 | 2.5012857 | JPH1              |
| 241120_s_at  | 0.759 | 0.0203378 | 2.7194018 | -4.57 | 2.6714897 | CDC20B            |
| 1564933_at   | 0.759 | 0.0203429 | 2.7192614 | -4.57 | 2.8069438 |                   |
| 1560033_at   | 0.759 | 0.0203509 | 2.7190384 | -4.57 | 2.4162984 | MCCC2             |
| 242552_x_at  | 0.759 | 0.0203654 | 2.7186365 | -4.57 | 2.2856505 | ZBED5             |
| 233789_at    | 0.759 | 0.0203706 | 2.7184929 | -4.57 | 2.4296422 |                   |
| 1568836_at   | 0.759 | 0.0204102 | 2.7173939 | -4.57 | 3.6863222 | CLK4              |
| 232364_at    | 0.759 | 0.0204663 | 2.7158432 | -4.57 | 2.7075464 | LOC100506235      |
| 207155_at    | 0.759 | 0.0204939 | 2.7150807 | -4.57 | 3.0464282 | TBX5              |
| 1564763_at   | 0.759 | 0.0205132 | 2.7145496 | -4.57 | 2.5303355 |                   |

|              |       |           |           |       |           |              |
|--------------|-------|-----------|-----------|-------|-----------|--------------|
| 214541_s_at  | 0.759 | 0.0205624 | 2.7131956 | -4.57 | 1.8944371 | QKI          |
| 217636_at    | 0.759 | 0.0205624 | 2.7131953 | -4.57 | 2.7021822 | POLG         |
| 237526_at    | 0.759 | 0.0205698 | 2.7129947 | -4.57 | 2.8844521 |              |
| 1554942_a_at | 0.759 | 0.0205705 | 2.7129733 | -4.57 | 2.2571793 | KLHL14       |
| 1560851_at   | 0.759 | 0.0206022 | 2.7121037 | -4.57 | 2.9482897 | LINC00619    |
| 221048_x_at  | 0.759 | 0.0206116 | 2.7118451 | -4.57 | 2.9639982 | C17orf80     |
| 1566505_at   | 0.759 | 0.020612  | 2.7118356 | -4.57 | 3.1465783 | ERVVK13-1    |
| 238182_at    | 0.759 | 0.0206382 | 2.711117  | -4.57 | 1.816046  |              |
| 1568672_at   | 0.759 | 0.0206424 | 2.7110024 | -4.57 | 2.2416434 | EAF2         |
| 235400_at    | 0.759 | 0.0206585 | 2.7105626 | -4.57 | 3.6743797 | FCRLA        |
| 1556081_at   | 0.759 | 0.0207255 | 2.7087336 | -4.57 | 2.9737752 |              |
| 233989_at    | 0.759 | 0.0207398 | 2.7083428 | -4.57 | 2.411662  |              |
| 231895_at    | 0.759 | 0.0207445 | 2.708215  | -4.57 | 1.8645103 | SASS6        |
| 1567704_at   | 0.759 | 0.0207585 | 2.7078326 | -4.57 | 2.1488944 | TFE3         |
| 207061_at    | 0.759 | 0.020796  | 2.7068124 | -4.57 | 2.0501259 | ERN1         |
| 1561673_at   | 0.759 | 0.0208222 | 2.7061028 | -4.57 | 3.1093604 | LOC101929151 |
| 1553523_at   | 0.759 | 0.0208278 | 2.7059499 | -4.57 | 2.1905753 | NLRP14       |
| 1556357_s_at | 0.759 | 0.0208405 | 2.7056062 | -4.57 | 2.5296926 | ERICH1       |
| 238799_at    | 0.759 | 0.0208786 | 2.7045736 | -4.57 | 3.2237543 | ATP5S        |
| 1560563_at   | 0.759 | 0.0208947 | 2.7041392 | -4.57 | 2.0421968 | LOC101929552 |
| 236169_at    | 0.759 | 0.0209353 | 2.7030415 | -4.57 | 2.3033589 |              |
| 1553789_a_at | 0.759 | 0.0209483 | 2.7026915 | -4.57 | 3.3507358 | C21orf58     |

|              |       |           |           |       |           |         |
|--------------|-------|-----------|-----------|-------|-----------|---------|
| 205768_s_at  | 0.759 | 0.0209586 | 2.7024118 | -4.57 | 2.2218067 | SLC27A2 |
| 205468_s_at  | 0.759 | 0.0209673 | 2.7021785 | -4.57 | 2.1156098 | IRF5    |
| 231054_at    | 0.759 | 0.0209695 | 2.7021179 | -4.57 | 2.4201032 | SPACA4  |
| 1558565_at   | 0.759 | 0.0209779 | 2.7018931 | -4.57 | 1.8978109 | AKNA    |
| 244337_at    | 0.759 | 0.0210202 | 2.7007545 | -4.57 | 2.2152303 |         |
| 1562323_at   | 0.759 | 0.021024  | 2.7006531 | -4.57 | 2.519016  |         |
| 243344_at    | 0.759 | 0.0210351 | 2.7003548 | -4.57 | 2.6227034 |         |
| 1561092_at   | 0.759 | 0.0210377 | 2.7002831 | -4.57 | 2.725013  |         |
| 211873_s_at  | 0.759 | 0.0210429 | 2.7001448 | -4.57 | 2.5665037 | PCDHGA9 |
| 227060_at    | 0.759 | 0.0210675 | 2.699485  | -4.57 | 2.3738383 | RELT    |
| 235312_s_at  | 0.759 | 0.0210803 | 2.6991413 | -4.57 | 2.3170033 | NRAP    |
| 207748_at    | 0.759 | 0.0210912 | 2.6988488 | -4.57 | 1.8258533 |         |
| 235215_at    | 0.759 | 0.0210964 | 2.6987089 | -4.57 | 1.7073548 | ERCC4   |
| 240378_at    | 0.759 | 0.0211058 | 2.6984568 | -4.57 | 2.2627055 |         |
| 242042_s_at  | 0.759 | 0.0211134 | 2.6982546 | -4.57 | 2.6470908 | HAGLR   |
| 244488_at    | 0.759 | 0.0211773 | 2.6965452 | -4.57 | 2.7866263 | LSM14B  |
| 229039_at    | 0.759 | 0.0211927 | 2.6961368 | -4.57 | 1.9596827 | SYN2    |
| 211024_s_at  | 0.759 | 0.0212019 | 2.6958915 | -4.57 | 1.9763546 | NKX2-1  |
| 1562351_at   | 0.759 | 0.0212385 | 2.6949165 | -4.57 | 3.157856  |         |
| 1563532_at   | 0.759 | 0.0212413 | 2.6948419 | -4.57 | 1.9305778 | HMCN2   |
| 1553730_x_at | 0.759 | 0.0212523 | 2.694548  | -4.57 | 2.4037409 | LRRC43  |
| 1566748_at   | 0.759 | 0.0212616 | 2.6943022 | -4.57 | 2.6365848 |         |
| 234745_at    | 0.759 | 0.021331  | 2.6924587 | -4.57 | 2.9861573 |         |

|              |       |           |           |       |           |                        |
|--------------|-------|-----------|-----------|-------|-----------|------------------------|
| 234600_at    | 0.759 | 0.0213334 | 2.6923972 | -4.57 | 3.2826729 |                        |
| 228202_at    | 0.759 | 0.0213377 | 2.6922811 | -4.57 | 2.9001185 |                        |
| 1564391_at   | 0.759 | 0.0213719 | 2.691376  | -4.57 | 2.6274371 |                        |
| 240939_x_at  | 0.759 | 0.0213912 | 2.6908667 | -4.57 | 3.553253  |                        |
| 1553371_at   | 0.759 | 0.0213917 | 2.6908536 | -4.57 | 2.1700256 | EPHA10                 |
| 1553517_at   | 0.759 | 0.0213929 | 2.6908207 | -4.57 | 2.1619868 | FERD3L                 |
| 1556766_at   | 0.759 | 0.0214104 | 2.6903611 | -4.57 | 1.8598254 | ERICH1                 |
| 1565558_at   | 0.759 | 0.0214259 | 2.6899495 | -4.57 | 3.2184271 |                        |
| 233509_at    | 0.759 | 0.0214531 | 2.689234  | -4.57 | 2.3792911 | HERC4                  |
| 1569013_s_at | 0.759 | 0.021483  | 2.6884479 | -4.57 | 1.825919  | LOC101929959///BMS1P20 |
| 1561692_at   | 0.759 | 0.0215013 | 2.6879654 | -4.57 | 2.9809493 |                        |
| 243965_at    | 0.759 | 0.0215156 | 2.6875883 | -4.57 | 2.9656717 |                        |
| 1554954_at   | 0.759 | 0.0215186 | 2.6875109 | -4.57 | 2.9362121 | TSPEAR-AS2             |
| 1556929_at   | 0.759 | 0.0215337 | 2.6871148 | -4.57 | 2.4066693 | PAPOLG                 |
| 216421_at    | 0.759 | 0.0215608 | 2.686404  | -4.57 | 2.406415  |                        |
| 216636_at    | 0.759 | 0.021576  | 2.6860043 | -4.57 | 3.3270078 |                        |
| 1555074_a_at | 0.759 | 0.0216089 | 2.6851446 | -4.57 | 2.9406281 | KCNH5                  |
| 1569235_a_at | 0.759 | 0.021609  | 2.685141  | -4.57 | 2.5301902 |                        |
| 234601_x_at  | 0.759 | 0.0216209 | 2.6848305 | -4.57 | 3.8053603 |                        |
| 211601_at    | 0.759 | 0.0216263 | 2.6846884 | -4.57 | 2.8304553 | CATR1                  |
| 230420_at    | 0.759 | 0.0216623 | 2.68375   | -4.57 | 2.5092848 | CASZ1                  |

|              |       |           |           |       |           |                        |
|--------------|-------|-----------|-----------|-------|-----------|------------------------|
| 1552946_at   | 0.759 | 0.0216745 | 2.6834304 | -4.57 | 1.8385765 | ZNF114                 |
| 1562829_at   | 0.759 | 0.021681  | 2.6832621 | -4.57 | 3.2735686 | LOC339568              |
| 235292_at    | 0.759 | 0.0217114 | 2.6824693 | -4.57 | 1.8214811 | FLJ32255               |
| 1569665_at   | 0.759 | 0.0217256 | 2.6820986 | -4.57 | 2.4768516 |                        |
| 1562835_at   | 0.759 | 0.0217804 | 2.6806758 | -4.57 | 2.0058687 |                        |
| 1570206_at   | 0.759 | 0.0217902 | 2.6804215 | -4.57 | 2.2864841 | LOC101928797           |
| 240186_at    | 0.759 | 0.0217907 | 2.6804086 | -4.57 | 2.9884662 |                        |
| 239994_at    | 0.759 | 0.021847  | 2.6789492 | -4.57 | 2.1232245 | B3GALT5                |
| 1569124_at   | 0.759 | 0.0218543 | 2.6787615 | -4.57 | 2.6087345 | LRRC63                 |
| 1557386_at   | 0.759 | 0.0218621 | 2.6785585 | -4.57 | 2.7616954 | LOC100507600           |
| 238971_at    | 0.759 | 0.0218718 | 2.6783083 | -4.57 | 2.8462297 |                        |
| 236005_at    | 0.759 | 0.0219159 | 2.6771695 | -4.57 | 2.8154437 |                        |
| 244349_at    | 0.759 | 0.0219586 | 2.676069  | -4.57 | 2.891201  |                        |
| 226704_at    | 0.759 | 0.021961  | 2.6760082 | -4.57 | 2.2984559 | UBE2J2                 |
| 235722_at    | 0.759 | 0.0219682 | 2.6758222 | -4.57 | 2.04701   | SYNJ2BP-COX16//SYNJ2BP |
| 1561238_at   | 0.759 | 0.0219894 | 2.6752768 | -4.57 | 2.321466  | PEX2                   |
| 1561244_at   | 0.759 | 0.0219921 | 2.6752084 | -4.57 | 2.8913429 |                        |
| 227355_at    | 0.759 | 0.0219954 | 2.6751235 | -4.57 | 2.561115  | RBM26                  |
| 204858_s_at  | 0.759 | 0.0219993 | 2.675023  | -4.57 | 2.8360594 | TYMP                   |
| 235877_at    | 0.759 | 0.0220108 | 2.6747267 | -4.57 | 3.5101758 |                        |
| 1554681_a_at | 0.759 | 0.0220174 | 2.6745594 | -4.57 | 2.1746455 | CCDC187                |



|             |       |           |           |       |           |                         |
|-------------|-------|-----------|-----------|-------|-----------|-------------------------|
| 205782_at   | 0.759 | 0.0220232 | 2.6744101 | -4.57 | 3.3555524 | FGF7                    |
| 1554264_at  | 0.759 | 0.0220288 | 2.6742663 | -4.57 | 2.0607573 | CKAP2                   |
| 1561204_at  | 0.759 | 0.0220353 | 2.6740994 | -4.57 | 2.7688678 |                         |
| 242944_at   | 0.759 | 0.0220578 | 2.673521  | -4.57 | 2.3228207 | FAM83A                  |
| 219491_at   | 0.759 | 0.0220592 | 2.673485  | -4.57 | 2.5286241 | LRFN4                   |
| 1561398_at  | 0.759 | 0.0220733 | 2.6731249 | -4.57 | 2.6097744 | LINC01505               |
| 1562532_at  | 0.759 | 0.0220942 | 2.6725901 | -4.57 | 1.7399781 |                         |
| 207093_s_at | 0.759 | 0.0221501 | 2.6711612 | -4.57 | 2.0356582 | LOC101927057///OMG      |
| 1553086_at  | 0.759 | 0.0221534 | 2.6710775 | -4.57 | 2.7563513 | C11orf40                |
| 239447_at   | 0.759 | 0.022164  | 2.6708076 | -4.57 | 2.1102946 | TRA2B                   |
| 231924_at   | 0.759 | 0.0221652 | 2.6707769 | -4.57 | 3.295157  | LINC00958               |
| 244727_at   | 0.759 | 0.0221743 | 2.6705434 | -4.57 | 1.9290745 | LOC101927338///KCNQ1OT1 |
| 217044_s_at | 0.759 | 0.0221818 | 2.6703541 | -4.57 | 2.3325832 | PLEKHG3                 |
| 237597_at   | 0.759 | 0.0221916 | 2.6701026 | -4.57 | 3.13213   |                         |
| 1561073_at  | 0.759 | 0.0222019 | 2.6698411 | -4.57 | 2.4276061 |                         |
| 207864_at   | 0.759 | 0.0222151 | 2.6695053 | -4.57 | 3.1050837 | SCN7A                   |
| 1556395_at  | 0.759 | 0.0222361 | 2.6689709 | -4.57 | 3.5480577 |                         |
| 238123_at   | 0.759 | 0.022238  | 2.6689219 | -4.57 | 1.7039337 | GABRQ                   |

|              |       |           |           |       |           |              |
|--------------|-------|-----------|-----------|-------|-----------|--------------|
| 244009_at    | 0.759 | 0.0223396 | 2.6663457 | -4.57 | 2.7843114 |              |
| 211109_at    | 0.759 | 0.0223444 | 2.6662249 | -4.57 | 2.1102162 | JAK3         |
| 1555513_at   | 0.759 | 0.0223815 | 2.6652856 | -4.57 | 2.9482243 | PIAS2        |
| 211736_at    | 0.759 | 0.0223928 | 2.6649996 | -4.57 | 2.7736845 | SP2          |
| 220578_at    | 0.759 | 0.022433  | 2.6639855 | -4.57 | 2.4690479 | ADAMTSL4     |
| 1561450_at   | 0.759 | 0.0224627 | 2.6632389 | -4.57 | 2.6103933 | LOC101928618 |
| 239117_at    | 0.759 | 0.0225204 | 2.6617888 | -4.57 | 2.4210307 |              |
| 242044_at    | 0.759 | 0.0225632 | 2.6607158 | -4.57 | 2.5150323 |              |
| 229378_at    | 0.759 | 0.0225647 | 2.6606779 | -4.57 | 2.7829729 | STOX1        |
| 237062_at    | 0.759 | 0.0225647 | 2.6606778 | -4.57 | 2.1826834 |              |
| 237263_at    | 0.759 | 0.0225855 | 2.6601568 | -4.57 | 2.1523146 |              |
| 237746_at    | 0.759 | 0.0227492 | 2.6560721 | -4.57 | 2.9775365 |              |
| 242597_at    | 0.759 | 0.0227509 | 2.6560302 | -4.57 | 2.8360936 | ZMYM2        |
| 224249_at    | 0.759 | 0.022774  | 2.6554564 | -4.57 | 2.6634711 |              |
| 244650_at    | 0.759 | 0.0228096 | 2.6545728 | -4.57 | 2.9894776 | FAM105A      |
| 1557215_at   | 0.759 | 0.0228562 | 2.6534199 | -4.57 | 2.2160893 | LINC00648    |
| 216451_at    | 0.759 | 0.0228908 | 2.6525639 | -4.57 | 3.423862  | STK38        |
| 1565947_a_at | 0.759 | 0.0228956 | 2.6524458 | -4.57 | 2.5542737 | CHML         |
| 242184_s_at  | 0.759 | 0.0228979 | 2.6523896 | -4.57 | 1.8750233 | SREK1        |
| 206040_s_at  | 0.759 | 0.0228995 | 2.652349  | -4.57 | 2.8298297 | MAPK11       |
| 235650_at    | 0.759 | 0.022908  | 2.652138  | -4.57 | 2.2118088 | CDHR3        |
| 207390_s_at  | 0.759 | 0.0229193 | 2.6518594 | -4.57 | 3.0894315 | SMTN         |
| 232327_at    | 0.759 | 0.0229308 | 2.6515756 | -4.57 | 2.4855066 | THSD7B       |

|              |       |           |           |       |           |                   |
|--------------|-------|-----------|-----------|-------|-----------|-------------------|
| AFFX-ThrX-M_ | 0.759 | 0.022935  | 2.651472  | -4.57 | 2.6018318 |                   |
| at           |       |           |           |       |           |                   |
| 244325_at    | 0.759 | 0.0229491 | 2.6511255 | -4.57 | 3.3943658 | LINC00690         |
| 220752_at    | 0.759 | 0.0229745 | 2.6504989 | -4.57 | 3.4350524 | LOC51145          |
| 240539_at    | 0.759 | 0.0230296 | 2.6491464 | -4.57 | 2.7111719 |                   |
| 1569741_at   | 0.759 | 0.0230448 | 2.6487715 | -4.57 | 2.1719963 | LINC01477         |
| 1561861_a_at | 0.759 | 0.0230885 | 2.6477018 | -4.57 | 2.5735205 |                   |
| 1553328_a_at | 0.759 | 0.0231037 | 2.6473277 | -4.57 | 2.4328004 | SLC18A2           |
| 37831_at     | 0.759 | 0.0231278 | 2.646739  | -4.57 | 1.9638469 | SIPA1L3           |
| 239643_at    | 0.759 | 0.0231587 | 2.6459838 | -4.57 | 2.4347686 | LOC100129516      |
| 243914_at    | 0.759 | 0.0231651 | 2.645827  | -4.57 | 2.1787364 |                   |
| 233747_at    | 0.759 | 0.0231951 | 2.6450964 | -4.57 | 2.5750593 |                   |
| 213700_s_at  | 0.759 | 0.0232181 | 2.6445354 | -4.57 | 2.0307215 | PKM               |
| 236763_at    | 0.759 | 0.0232226 | 2.6444248 | -4.57 | 2.8973525 |                   |
| 206751_s_at  | 0.759 | 0.0232301 | 2.6442429 | -4.57 | 2.0846273 | PCYT1B            |
| 1553579_a_at | 0.759 | 0.0232305 | 2.6442323 | -4.57 | 3.2313778 | SPAG11A///SPAG11B |
| 216896_at    | 0.759 | 0.0232453 | 2.6438733 | -4.57 | 1.8232953 | COL4A3            |
| 1569297_at   | 0.759 | 0.0232497 | 2.6437659 | -4.57 | 1.8764074 | LINC01300         |
| 243043_at    | 0.759 | 0.0232731 | 2.6431971 | -4.57 | 2.664969  | EFCAB10           |
| 242813_at    | 0.759 | 0.0232872 | 2.6428551 | -4.57 | 2.83788   |                   |
| 235873_at    | 0.759 | 0.0233065 | 2.6423872 | -4.57 | 3.3379587 | LOC100506235      |
| 234193_at    | 0.759 | 0.0233198 | 2.6420627 | -4.57 | 2.5594398 |                   |

|              |       |           |           |       |           |                       |
|--------------|-------|-----------|-----------|-------|-----------|-----------------------|
| 240958_at    | 0.759 | 0.0233211 | 2.6420311 | -4.57 | 2.3869833 | UNC5C                 |
| 215661_at    | 0.759 | 0.0233372 | 2.6416421 | -4.57 | 2.9006161 | MAST2                 |
| 216168_at    | 0.759 | 0.023352  | 2.6412823 | -4.57 | 2.4381215 |                       |
| 223465_at    | 0.759 | 0.0233763 | 2.6406939 | -4.57 | 2.4338845 | COL4A3BP              |
| 236852_at    | 0.759 | 0.0233889 | 2.6403903 | -4.57 | 2.5575221 | FBXO43                |
| 237908_at    | 0.759 | 0.0233992 | 2.6401404 | -4.57 | 2.5861263 |                       |
| 237929_at    | 0.759 | 0.0234024 | 2.6400634 | -4.57 | 2.0560792 | C17orf50              |
| 205838_at    | 0.759 | 0.0234373 | 2.6392206 | -4.57 | 2.1046359 | GYPA                  |
| 1552965_a_at | 0.759 | 0.0234736 | 2.6383463 | -4.57 | 2.6295596 | B3GNT7                |
| 206935_at    | 0.759 | 0.0235277 | 2.6370438 | -4.57 | 2.3872492 | PCDH8                 |
| 233966_at    | 0.759 | 0.0235488 | 2.6365364 | -4.57 | 2.1353856 | NTNG1                 |
| 1562944_at   | 0.759 | 0.0235608 | 2.6362483 | -4.57 | 2.6508222 | LOC101928160///ZNF707 |
| 220830_at    | 0.759 | 0.023566  | 2.6361244 | -4.57 | 2.4235136 | IMPG2                 |
| 239829_at    | 0.759 | 0.0236328 | 2.6345216 | -4.57 | 2.074011  |                       |
| 207142_at    | 0.759 | 0.0236496 | 2.6341196 | -4.57 | 2.6953396 | KCNJ3                 |
| 239536_at    | 0.759 | 0.0236533 | 2.6340316 | -4.57 | 1.8338742 |                       |
| 1556494_at   | 0.759 | 0.0236561 | 2.6339646 | -4.57 | 2.6161966 | LINC01365             |
| 201820_at    | 0.759 | 0.0236577 | 2.6339265 | -4.57 | 2.7770329 | KRT5                  |
| 216107_at    | 0.759 | 0.0236591 | 2.6338931 | -4.57 | 1.9236804 | LOC100129503          |
| 232205_at    | 0.759 | 0.0236627 | 2.6338066 | -4.57 | 1.597391  |                       |

|              |       |           |           |       |           |              |
|--------------|-------|-----------|-----------|-------|-----------|--------------|
| 1568879_a_at | 0.759 | 0.0237141 | 2.6325785 | -4.57 | 2.4357656 | LAMA3        |
| 1569823_at   | 0.759 | 0.0237245 | 2.6323305 | -4.57 | 3.1228282 | LOC440346    |
| 1556808_at   | 0.759 | 0.0237314 | 2.6321667 | -4.57 | 2.1013669 | RAP2A        |
| 232255_at    | 0.759 | 0.0237358 | 2.6320621 | -4.57 | 2.1854875 | LINC00997    |
| 233577_at    | 0.759 | 0.0237375 | 2.632022  | -4.57 | 3.5496222 |              |
| 235889_at    | 0.759 | 0.0237397 | 2.6319687 | -4.57 | 1.9276587 | RSPH3        |
| 1565544_at   | 0.759 | 0.0237625 | 2.631427  | -4.57 | 2.7414436 | RNF141       |
| 210713_at    | 0.759 | 0.0237819 | 2.630965  | -4.57 | 1.9928067 | ITSN1        |
| 1563474_at   | 0.759 | 0.0237843 | 2.6309074 | -4.57 | 2.6411396 | ETFBKMT      |
| 1558383_at   | 0.759 | 0.0237914 | 2.6307379 | -4.57 | 2.464905  | KPNA4        |
| 1558708_at   | 0.759 | 0.0238046 | 2.6304258 | -4.57 | 4.0589216 | NRXN1        |
| 217509_x_at  | 0.759 | 0.0238328 | 2.6297548 | -4.57 | 2.5809146 | GRIK5        |
| 237854_at    | 0.759 | 0.0238685 | 2.6289091 | -4.57 | 1.6107308 |              |
| 1561015_at   | 0.759 | 0.0238845 | 2.6285288 | -4.57 | 2.2457112 |              |
| 1569838_at   | 0.759 | 0.0239396 | 2.6272247 | -4.57 | 2.1276401 | LOC101928597 |
| 205021_s_at  | 0.759 | 0.023964  | 2.6266494 | -4.57 | 1.7753811 | FOXN3        |
| 220515_at    | 0.759 | 0.0239819 | 2.6262259 | -4.57 | 2.8903736 | DUSP21       |
| 241691_at    | 0.759 | 0.024007  | 2.6256363 | -4.57 | 2.2453993 | SCARF2       |
| 243277_x_at  | 0.759 | 0.0240177 | 2.6253839 | -4.57 | 2.6591954 | MECOM        |
| 225655_at    | 0.759 | 0.0240239 | 2.6252381 | -4.57 | 1.9388826 | UHRF1        |
| 244218_at    | 0.759 | 0.0240378 | 2.6249089 | -4.57 | 1.7221396 |              |

|              |       |           |           |       |           |         |
|--------------|-------|-----------|-----------|-------|-----------|---------|
| 201787_at    | 0.759 | 0.0240583 | 2.6244281 | -4.57 | 2.6037308 | FBLN1   |
| 221416_at    | 0.759 | 0.0240692 | 2.624171  | -4.57 | 2.8959738 | PLA2G2F |
| 241166_at    | 0.759 | 0.0240718 | 2.6241109 | -4.57 | 2.7667714 | CEP41   |
| 1569058_at   | 0.759 | 0.0240739 | 2.6240612 | -4.57 | 2.5838566 | GTF3C3  |
| 242181_at    | 0.759 | 0.0241124 | 2.6231578 | -4.57 | 1.7081048 |         |
| 221204_s_at  | 0.759 | 0.0241156 | 2.6230819 | -4.57 | 2.0439293 | CRTAC1  |
| 210742_at    | 0.759 | 0.0241311 | 2.6227186 | -4.57 | 2.8081668 | CDC14A  |
| 244617_at    | 0.759 | 0.0241781 | 2.6216178 | -4.57 | 2.4975144 | GPR26   |
| 1556885_at   | 0.759 | 0.0241997 | 2.6211112 | -4.57 | 3.0201316 | LAYN    |
| 243211_at    | 0.759 | 0.0242031 | 2.6210334 | -4.57 | 2.7494981 |         |
| 231430_at    | 0.759 | 0.02421   | 2.6208712 | -4.57 | 2.2806922 | FAM181B |
| 1567380_at   | 0.759 | 0.0242128 | 2.620806  | -4.57 | 3.5976456 |         |
| 210810_s_at  | 0.759 | 0.0242462 | 2.6200269 | -4.57 | 2.0347441 | SLC6A5  |
| 222009_at    | 0.759 | 0.0242726 | 2.6194102 | -4.57 | 2.2485356 | CEMP1   |
| 221623_at    | 0.759 | 0.0242796 | 2.619248  | -4.57 | 2.2361536 | BCAN    |
| 1570490_at   | 0.759 | 0.0242985 | 2.6188056 | -4.57 | 2.8698815 |         |
| 221762_s_at  | 0.759 | 0.0243494 | 2.6176235 | -4.57 | 2.1417231 | PCIF1   |
| 1553138_a_at | 0.759 | 0.0244091 | 2.6162378 | -4.57 | 2.2612937 | ANKLE1  |
| 240662_at    | 0.759 | 0.0244204 | 2.6159759 | -4.57 | 3.0674593 |         |
| 216570_x_at  | 0.759 | 0.0244418 | 2.6154803 | -4.57 | 1.8352239 |         |
| 227675_at    | 0.759 | 0.0244791 | 2.6146176 | -4.57 | 2.2463752 | LRSAM1  |
| 238823_at    | 0.759 | 0.0245001 | 2.6141311 | -4.57 | 2.4259511 | FMNL3   |
| 215476_at    | 0.759 | 0.0245279 | 2.6134886 | -4.57 | 1.7773704 |         |
| 244466_at    | 0.759 | 0.0245384 | 2.6132477 | -4.57 | 2.7882563 | ZNF544  |

|              |       |           |           |       |           |              |
|--------------|-------|-----------|-----------|-------|-----------|--------------|
| 211591_s_at  | 0.759 | 0.0245393 | 2.6132268 | -4.57 | 2.2140607 | PDE4A        |
| 216801_at    | 0.759 | 0.0245801 | 2.6122862 | -4.57 | 2.284114  | CROCC        |
| 244437_at    | 0.759 | 0.0245944 | 2.611957  | -4.57 | 2.2920701 | LOC101927340 |
| 1569909_at   | 0.759 | 0.0246312 | 2.6111102 | -4.57 | 2.0480089 | KRT79        |
| 231879_at    | 0.759 | 0.0246492 | 2.6106972 | -4.57 | 3.1797016 | COL12A1      |
| 220645_at    | 0.759 | 0.0246587 | 2.6104801 | -4.57 | 2.7341951 | NXPE4        |
| 241247_at    | 0.759 | 0.0246808 | 2.6099719 | -4.57 | 2.5858675 | LINC01213    |
| 243831_at    | 0.759 | 0.0246849 | 2.6098799 | -4.57 | 2.0663406 | MAPK6        |
| 237986_at    | 0.759 | 0.0246937 | 2.6096778 | -4.57 | 2.6511788 |              |
| 1563088_a_at | 0.759 | 0.0247204 | 2.6090657 | -4.57 | 2.4154809 | AATBC        |
| 201822_at    | 0.759 | 0.0247294 | 2.6088598 | -4.57 | 2.7197566 | TIMM17A      |
| 1560959_a_at | 0.759 | 0.024763  | 2.6080913 | -4.57 | 3.3429119 |              |
| 206505_at    | 0.759 | 0.0247947 | 2.6073679 | -4.57 | 3.7264834 | UGT2B4       |
| 1566927_at   | 0.759 | 0.0248204 | 2.6067814 | -4.57 | 2.3401226 | LINC00527    |
| 207012_at    | 0.759 | 0.0248388 | 2.6063622 | -4.57 | 3.2127816 | MMP16        |
| 225385_s_at  | 0.759 | 0.0248438 | 2.6062485 | -4.57 | 1.6786208 | HNRNPLL      |
| 228966_at    | 0.759 | 0.0248756 | 2.6055234 | -4.57 | 2.2250801 | PANK2        |
| 1561125_at   | 0.759 | 0.0248921 | 2.605148  | -4.57 | 2.7728927 | MTHFD1L      |
| 231581_at    | 0.759 | 0.0249003 | 2.6049623 | -4.57 | 2.8092527 | LINC00664    |

|              |       |           |           |       |           |               |
|--------------|-------|-----------|-----------|-------|-----------|---------------|
| 1556199_a_at | 0.759 | 0.0249027 | 2.6049072 | -4.57 | 2.3799053 | RGS9BP        |
| 224383_at    | 0.759 | 0.0249451 | 2.6039434 | -4.57 | 2.7214647 | RNF17         |
| 220747_at    | 0.759 | 0.0249769 | 2.603224  | -4.57 | 2.9476826 | LINC00652     |
| 232055_at    | 0.759 | 0.0249983 | 2.602738  | -4.57 | 1.6711415 | SFXN1         |
| 236439_at    | 0.759 | 0.0250181 | 2.6022907 | -4.57 | 2.8101432 | LOC106146153  |
| 232982_at    | 0.759 | 0.0250204 | 2.6022384 | -4.57 | 1.800062  |               |
| 216254_at    | 0.759 | 0.0250372 | 2.6018586 | -4.57 | 1.7672712 | PARVB         |
| 211191_at    | 0.759 | 0.025039  | 2.6018184 | -4.57 | 2.1385497 | CD84          |
| 239844_x_at  | 0.759 | 0.0250556 | 2.6014417 | -4.57 | 2.5036967 | C1orf228      |
| 237555_at    | 0.759 | 0.0251157 | 2.6000866 | -4.57 | 2.9179452 | CARS2         |
| 242574_at    | 0.759 | 0.0251533 | 2.5992393 | -4.57 | 1.9946241 | FKBP15        |
| 1555517_at   | 0.759 | 0.0251749 | 2.598754  | -4.57 | 2.763751  | GABRG3        |
| 224005_at    | 0.759 | 0.0251941 | 2.5983223 | -4.57 | 2.5332778 |               |
| 1552609_s_at | 0.759 | 0.0251979 | 2.5982373 | -4.57 | 2.6494317 | IFNL3///IFNL2 |
| 241350_at    | 0.759 | 0.025209  | 2.5979877 | -4.57 | 3.7392352 | FBXL22        |
| 201926_s_at  | 0.759 | 0.0252245 | 2.5976388 | -4.57 | 1.9141418 | CD55          |
| 237608_at    | 0.759 | 0.0252417 | 2.5972547 | -4.57 | 2.78906   | LOC101929570  |
| 211021_s_at  | 0.759 | 0.0252842 | 2.5963014 | -4.57 | 3.0554008 | RGS14         |
| 237755_s_at  | 0.759 | 0.0252961 | 2.5960356 | -4.57 | 2.8808523 | CFAP52        |
| 244013_at    | 0.759 | 0.0253519 | 2.5947871 | -4.57 | 2.1832274 |               |



|              |       |           |           |       |           |              |
|--------------|-------|-----------|-----------|-------|-----------|--------------|
| 220065_at    | 0.759 | 0.0253608 | 2.5945899 | -4.57 | 2.6146956 | TNMD         |
| 216616_at    | 0.759 | 0.0253814 | 2.5941297 | -4.57 | 1.957628  |              |
| 1561424_at   | 0.759 | 0.0253885 | 2.5939706 | -4.57 | 2.7277188 | LOC101928907 |
| 1554831_x_at | 0.759 | 0.0253959 | 2.5938065 | -4.57 | 2.1685609 | ALS2CR11     |
| 234990_at    | 0.759 | 0.0254004 | 2.5937059 | -4.57 | 2.7483824 | CBX5         |
| 234365_at    | 0.759 | 0.0254023 | 2.5936641 | -4.57 | 2.5051351 |              |
| 215575_at    | 0.759 | 0.0254411 | 2.5928003 | -4.57 | 2.5138964 | PDE4DIP      |
| 1559589_a_at | 0.759 | 0.0254412 | 2.5927967 | -4.57 | 2.3907992 |              |
| 234739_at    | 0.759 | 0.0254549 | 2.5924925 | -4.57 | 2.979815  |              |
| 243258_at    | 0.759 | 0.0254822 | 2.5918847 | -4.57 | 2.1668208 | CLUH         |
| 235304_at    | 0.759 | 0.0254903 | 2.5917057 | -4.57 | 2.4244823 |              |
| 1558814_s_at | 0.759 | 0.0254927 | 2.5916529 | -4.57 | 2.2675285 | TMED5        |
| 1570202_a_at | 0.759 | 0.0255188 | 2.5910722 | -4.57 | 2.6567772 | MKL2         |
| 1555488_at   | 0.759 | 0.0255253 | 2.5909277 | -4.57 | 2.2013032 |              |
| 230580_at    | 0.759 | 0.0255254 | 2.5909257 | -4.57 | 2.1773217 |              |
| 217295_at    | 0.759 | 0.0255376 | 2.5906558 | -4.57 | 2.3455453 | MUC8         |
| 205235_s_at  | 0.759 | 0.0255399 | 2.5906051 | -4.57 | 1.84831   | KIF20B       |
| 230594_at    | 0.759 | 0.0256191 | 2.5888523 | -4.57 | 2.7663907 |              |
| 217683_at    | 0.759 | 0.0256229 | 2.5887668 | -4.57 | 2.5387047 | HBE1         |
| 1569212_at   | 0.759 | 0.0256286 | 2.5886421 | -4.57 | 2.1203366 | SCART1       |
| 1566203_at   | 0.759 | 0.0256339 | 2.5885258 | -4.57 | 3.6463127 |              |
| 233381_at    | 0.759 | 0.0256429 | 2.5883272 | -4.57 | 2.1926482 | RUFY1        |
| 1555926_a_at | 0.759 | 0.0256464 | 2.5882479 | -4.57 | 3.0662657 |              |

|              |       |           |           |       |           |             |
|--------------|-------|-----------|-----------|-------|-----------|-------------|
| 1564683_at   | 0.759 | 0.0256504 | 2.5881613 | -4.57 | 2.3199173 | TBL3        |
| 215644_at    | 0.759 | 0.0256517 | 2.5881328 | -4.57 | 3.1218474 | ZNF518A     |
| 207680_x_at  | 0.759 | 0.0256577 | 2.5879989 | -4.57 | 2.0344822 | PAX3        |
| 237950_s_at  | 0.759 | 0.0256644 | 2.5878519 | -4.57 | 2.4011989 |             |
| 1561065_at   | 0.759 | 0.0256672 | 2.5877908 | -4.57 | 2.764223  |             |
| 207454_at    | 0.759 | 0.0257111 | 2.5868219 | -4.57 | 2.5423618 | GRIK3       |
| 224191_x_at  | 0.759 | 0.0257646 | 2.5856447 | -4.57 | 1.8449188 | ROPN1       |
| 207369_at    | 0.759 | 0.0257662 | 2.5856091 | -4.57 | 2.3017549 | BRS3        |
| 232995_at    | 0.759 | 0.0257675 | 2.5855808 | -4.57 | 2.7964025 |             |
| 240860_at    | 0.759 | 0.0257679 | 2.5855717 | -4.57 | 1.965101  |             |
| 1562509_at   | 0.759 | 0.0257846 | 2.5852069 | -4.57 | 2.097767  | TMEM108-AS1 |
| 215681_at    | 0.759 | 0.0258045 | 2.5847699 | -4.57 | 2.9730619 | KIAA1654    |
| 1569722_s_at | 0.759 | 0.025821  | 2.5844073 | -4.57 | 2.1143021 | PROSER2-AS1 |
| 1569660_at   | 0.759 | 0.0258555 | 2.5836512 | -4.57 | 1.9127087 | PP13439     |
| 1553192_at   | 0.759 | 0.025901  | 2.582655  | -4.57 | 3.1796835 | ZNF441      |
| 1554886_a_at | 0.759 | 0.0259346 | 2.581922  | -4.57 | 2.7963204 | MLXIP       |
| 241232_x_at  | 0.759 | 0.0259425 | 2.5817497 | -4.57 | 2.7927006 |             |
| 207817_at    | 0.759 | 0.0259522 | 2.5815368 | -4.57 | 2.3692112 | IFNW1       |
| 1560946_at   | 0.759 | 0.0259657 | 2.581243  | -4.57 | 2.4520364 |             |
| 202101_s_at  | 0.759 | 0.025972  | 2.5811042 | -4.57 | 2.2388472 | RALB        |
| 220836_at    | 0.759 | 0.0259733 | 2.5810765 | -4.57 | 3.7086782 | ZNF407      |
| 230155_x_at  | 0.759 | 0.0259851 | 2.5808187 | -4.57 | 2.1975197 | MSL1        |

|              |       |           |           |       |           |              |
|--------------|-------|-----------|-----------|-------|-----------|--------------|
| 228233_at    | 0.759 | 0.026004  | 2.5804082 | -4.57 | 2.6729842 | FREM1        |
| 234412_at    | 0.759 | 0.0260121 | 2.5802304 | -4.57 | 1.7538927 |              |
| 207872_s_at  | 0.759 | 0.0260268 | 2.5799123 | -4.57 | 1.9884557 | LILRA1       |
| 228741_s_at  | 0.759 | 0.0260556 | 2.5792851 | -4.57 | 1.7538677 | HCN3         |
| 1559221_at   | 0.759 | 0.0260931 | 2.5784705 | -4.57 | 1.687399  | LINC01013    |
| 219699_at    | 0.759 | 0.0261228 | 2.5778273 | -4.57 | 2.5423139 | LG12         |
| 223243_s_at  | 0.759 | 0.026137  | 2.5775181 | -4.57 | 2.4358617 | EDEM3        |
| 1570574_at   | 0.759 | 0.0262192 | 2.5757412 | -4.57 | 2.6525682 |              |
| 236373_at    | 0.759 | 0.026232  | 2.575463  | -4.57 | 2.2348038 |              |
| 221032_s_at  | 0.759 | 0.0262516 | 2.5750399 | -4.57 | 2.4190244 | TMPRSS5      |
| 1563101_at   | 0.759 | 0.0262588 | 2.5748863 | -4.57 | 2.9731696 | ARNTL2-AS1   |
| 242041_at    | 0.759 | 0.0262655 | 2.5747403 | -4.57 | 2.9328057 | CSPP1        |
| 243272_at    | 0.759 | 0.0262723 | 2.5745947 | -4.57 | 2.6470267 | LOC101593348 |
| 1555950_a_at | 0.759 | 0.0263056 | 2.5738778 | -4.57 | 1.8411421 | CD55         |
| 231942_at    | 0.759 | 0.0263134 | 2.5737094 | -4.57 | 1.824011  | LINC01128    |
| 208359_s_at  | 0.759 | 0.0263139 | 2.5736977 | -4.57 | 2.8853388 | KCNJ4        |
| 1564149_at   | 0.759 | 0.0263204 | 2.5735573 | -4.57 | 3.1133515 | LOC102723927 |
| 1569322_at   | 0.759 | 0.0263313 | 2.5733237 | -4.57 | 2.4722425 | LINC00857    |
| 241138_at    | 0.759 | 0.0263366 | 2.5732093 | -4.57 | 2.4376001 |              |

|              |       |           |           |       |           |           |
|--------------|-------|-----------|-----------|-------|-----------|-----------|
| 1569112_at   | 0.759 | 0.0263594 | 2.5727205 | -4.57 | 2.5762045 | SLC44A5   |
| 210929_s_at  | 0.759 | 0.0264015 | 2.5718156 | -4.57 | 2.861219  | AHSG      |
| 236464_at    | 0.759 | 0.0264446 | 2.5708922 | -4.57 | 2.1959048 |           |
| 1554228_a_at | 0.759 | 0.0264519 | 2.5707354 | -4.57 | 1.7432832 | BAALC-AS2 |
| 208408_at    | 0.759 | 0.0264585 | 2.5705933 | -4.57 | 2.3242251 | PTN       |
| 234728_s_at  | 0.759 | 0.0264695 | 2.5703585 | -4.57 | 1.6674146 | DHX35     |
| 211973_at    | 0.759 | 0.0264697 | 2.5703545 | -4.57 | 2.7700117 | NUDT3     |
| 240413_at    | 0.759 | 0.0264749 | 2.5702427 | -4.57 | 2.9491917 | PYHIN1    |
| 237670_at    | 0.759 | 0.026505  | 2.5695989 | -4.57 | 2.8520995 | MIR663AHG |
| 1559863_a_at | 0.759 | 0.0265127 | 2.5694357 | -4.57 | 2.1342805 | AFG3L1P   |
| 1566861_at   | 0.759 | 0.0265234 | 2.5692069 | -4.57 | 3.226452  | GATM      |
| 207743_at    | 0.759 | 0.0265474 | 2.5686952 | -4.57 | 2.2854779 |           |
| 49051_g_at   | 0.759 | 0.0265478 | 2.5686859 | -4.57 | 2.8152299 | DTX3      |
| 1553451_at   | 0.759 | 0.0265665 | 2.5682876 | -4.57 | 2.0328631 | TERB1     |
| 223955_at    | 0.759 | 0.0265698 | 2.5682164 | -4.57 | 2.1594947 | CRACR2A   |
| 1553016_at   | 0.759 | 0.0266135 | 2.5672861 | -4.57 | 2.1957879 | ADGRF3    |
| 240597_at    | 0.759 | 0.0266328 | 2.5668751 | -4.57 | 3.9152036 |           |
| 203294_s_at  | 0.759 | 0.0266328 | 2.5668748 | -4.57 | 2.9241801 | LMAN1     |
| 1560679_at   | 0.759 | 0.0266331 | 2.5668676 | -4.57 | 2.5887688 | LINC01127 |
| 1558021_at   | 0.759 | 0.0266732 | 2.5660169 | -4.57 | 2.7868792 | RABEPK    |
| 237346_at    | 0.759 | 0.0266814 | 2.5658427 | -4.57 | 2.0910109 | TGDS      |
| 200861_at    | 0.759 | 0.0266893 | 2.5656748 | -4.57 | 2.2006932 | CNOT1     |

|              |       |           |           |       |           |                      |
|--------------|-------|-----------|-----------|-------|-----------|----------------------|
| 239118_at    | 0.759 | 0.0266957 | 2.5655376 | -4.57 | 2.2876248 | KCNA2                |
| 242869_at    | 0.759 | 0.0267103 | 2.5652278 | -4.57 | 2.5235827 |                      |
| 1554317_s_at | 0.759 | 0.026711  | 2.5652134 | -4.57 | 1.9960726 | TRMT61A              |
| 206206_at    | 0.759 | 0.0267257 | 2.5649018 | -4.57 | 2.3852327 | CD180                |
| 220729_at    | 0.759 | 0.0267454 | 2.5644836 | -4.57 | 1.9248576 |                      |
| 220433_at    | 0.759 | 0.0267638 | 2.5640943 | -4.57 | 2.6754133 | PRRG3                |
| 210292_s_at  | 0.759 | 0.0267662 | 2.5640446 | -4.57 | 3.4117467 | PCDH11Y///PCDH11X    |
| 211466_at    | 0.759 | 0.026767  | 2.5640273 | -4.57 | 2.2210638 | NFIB                 |
| 239840_at    | 0.759 | 0.0267749 | 2.5638607 | -4.57 | 2.2901232 | TMEM161B-AS1         |
| 1555722_at   | 0.759 | 0.0267916 | 2.5635065 | -4.57 | 2.3766089 | SCAMPER              |
| 1566041_at   | 0.759 | 0.0268307 | 2.5626806 | -4.57 | 2.1726376 |                      |
| 240224_at    | 0.759 | 0.0268349 | 2.562592  | -4.57 | 2.1871151 |                      |
| 233925_at    | 0.759 | 0.0268358 | 2.5625733 | -4.57 | 2.8302364 |                      |
| 1570244_at   | 0.759 | 0.0268479 | 2.5623179 | -4.57 | 3.2032879 |                      |
| 1554909_at   | 0.759 | 0.0268593 | 2.5620766 | -4.57 | 2.5821947 | CCDC36               |
| 1562022_s_at | 0.759 | 0.0268724 | 2.5617997 | -4.57 | 2.4425747 | LOC100130987///RAD9A |
| 235379_at    | 0.759 | 0.0269006 | 2.5612075 | -4.57 | 1.7836071 | LOC100506114         |
| 216271_x_at  | 0.759 | 0.0269346 | 2.5604904 | -4.57 | 2.2247466 | SYDE1                |
| 241251_at    | 0.759 | 0.0270021 | 2.5590734 | -4.57 | 2.5492491 |                      |

|              |       |           |           |       |           |              |
|--------------|-------|-----------|-----------|-------|-----------|--------------|
| 228897_at    | 0.759 | 0.0270043 | 2.5590262 | -4.57 | 2.3198698 | DERL3        |
| 1568795_at   | 0.759 | 0.0270348 | 2.5583876 | -4.57 | 1.8797193 | LOC105373495 |
| 203864_s_at  | 0.759 | 0.0270375 | 2.5583293 | -4.57 | 2.3930984 | ACTN2        |
| 221375_at    | 0.759 | 0.0270444 | 2.5581854 | -4.57 | 2.1601747 | ORIG1        |
| 228322_at    | 0.759 | 0.0270661 | 2.5577303 | -4.57 | 3.0806344 | NAA30        |
| 1560281_a_at | 0.759 | 0.0270838 | 2.5573616 | -4.57 | 2.3582204 | TMEM95       |
| 242408_at    | 0.759 | 0.0270911 | 2.5572085 | -4.57 | 2.2926335 | STYX         |
| 1553376_a_at | 0.759 | 0.0271079 | 2.5568569 | -4.57 | 2.2881443 | AXDND1       |
| 1566824_at   | 0.759 | 0.0271155 | 2.5566978 | -4.57 | 2.3941109 |              |
| 1566831_at   | 0.759 | 0.0271237 | 2.556527  | -4.57 | 3.1737298 | SBF2-AS1     |
| 1556037_s_at | 0.759 | 0.0271237 | 2.5565263 | -4.57 | 2.7722013 | HHIP         |
| 222963_s_at  | 0.759 | 0.0271442 | 2.5560983 | -4.57 | 2.794089  | IL1RAPL1     |
| 231971_at    | 0.759 | 0.0271456 | 2.5560694 | -4.57 | 2.9083103 | FANCM        |
| 213362_at    | 0.759 | 0.0271478 | 2.556023  | -4.57 | 3.5154073 | PTPRD        |
| 232426_at    | 0.759 | 0.0271532 | 2.5559102 | -4.57 | 3.1882822 | SV2B         |
| 229270_x_at  | 0.759 | 0.0271897 | 2.5551486 | -4.57 | 2.3647976 | SSBP4        |
| 233896_s_at  | 0.759 | 0.0271921 | 2.5550993 | -4.57 | 1.9155107 | PAPLN        |
| 228383_at    | 0.759 | 0.0271929 | 2.5550824 | -4.57 | 2.2169996 | PNPLA7       |
| 217700_at    | 0.759 | 0.0272057 | 2.5548162 | -4.57 | 2.3560836 | CNPY4        |
| 1566438_at   | 0.759 | 0.0272217 | 2.5544823 | -4.57 | 2.5606109 | LOC283475    |
| 1569551_at   | 0.759 | 0.0272536 | 2.5538188 | -4.57 | 2.5015629 |              |

|              |       |           |           |       |           |          |
|--------------|-------|-----------|-----------|-------|-----------|----------|
| 1568801_at   | 0.759 | 0.0272547 | 2.5537953 | -4.57 | 2.1950511 | VWA9     |
| 218029_at    | 0.759 | 0.0272654 | 2.5535732 | -4.57 | 2.1674109 | FAM65A   |
| 1559049_a_at | 0.759 | 0.0272753 | 2.5533677 | -4.57 | 2.6329078 |          |
| 219042_at    | 0.759 | 0.027295  | 2.5529595 | -4.57 | 2.6029118 | LZTS1    |
| 237239_at    | 0.759 | 0.0273058 | 2.5527354 | -4.57 | 2.330208  |          |
| 203059_s_at  | 0.759 | 0.0273296 | 2.5522407 | -4.57 | 2.2036781 | PAPSS2   |
| 238552_at    | 0.759 | 0.0273303 | 2.5522268 | -4.57 | 1.9820172 |          |
| 231238_at    | 0.759 | 0.0273692 | 2.5514194 | -4.57 | 2.638894  |          |
| 221869_at    | 0.759 | 0.0273873 | 2.5510454 | -4.57 | 2.5377653 | ZNF512B  |
| 216084_at    | 0.759 | 0.0274072 | 2.5506342 | -4.57 | 2.9194672 | FAM205BP |
| 215522_at    | 0.759 | 0.0274371 | 2.5500151 | -4.57 | 2.6295082 | SORCS3   |
| 1560893_at   | 0.759 | 0.027442  | 2.5499143 | -4.57 | 3.0707305 |          |
| 237801_at    | 0.759 | 0.0275491 | 2.547707  | -4.57 | 2.8748744 |          |
| 1561638_at   | 0.759 | 0.0275518 | 2.5476521 | -4.57 | 3.4720311 |          |
| 206626_x_at  | 0.759 | 0.0275717 | 2.5472422 | -4.57 | 2.8055453 | SSX1     |
| 220805_at    | 0.759 | 0.0275832 | 2.5470065 | -4.57 | 2.1729928 | HRH2     |
| 242952_at    | 0.759 | 0.0276009 | 2.5466415 | -4.57 | 2.2541566 |          |
| 236161_at    | 0.759 | 0.0276349 | 2.5459446 | -4.57 | 2.6705084 | KCCAT333 |
| 239334_at    | 0.759 | 0.0276452 | 2.5457325 | -4.57 | 2.4603726 |          |
| 208202_s_at  | 0.759 | 0.0276939 | 2.5447366 | -4.57 | 2.7034305 | JADE2    |
| 237294_at    | 0.759 | 0.0277065 | 2.5444776 | -4.57 | 2.4090389 | RASSF4   |
| 222608_s_at  | 0.759 | 0.0277789 | 2.542998  | -4.57 | 1.6656505 | ANLN     |

|              |       |           |           |       |           |           |
|--------------|-------|-----------|-----------|-------|-----------|-----------|
| 231885_at    | 0.759 | 0.0278065 | 2.5424349 | -4.57 | 2.5718206 | ZNF451    |
| 241063_at    | 0.759 | 0.0278272 | 2.5420147 | -4.57 | 2.3975772 |           |
| 240996_at    | 0.759 | 0.0278629 | 2.5412877 | -4.57 | 2.4049281 |           |
| 235336_at    | 0.759 | 0.0278644 | 2.541256  | -4.57 | 2.478238  |           |
| 209908_s_at  | 0.759 | 0.027873  | 2.5410825 | -4.57 | 2.908624  | TGFB2     |
| 1562623_at   | 0.759 | 0.0278833 | 2.5408722 | -4.57 | 2.3511442 | LOC146513 |
| 1553208_s_at | 0.759 | 0.0278859 | 2.5408198 | -4.57 | 1.8896128 | ARL10     |
| 231156_at    | 0.759 | 0.0278935 | 2.5406655 | -4.57 | 2.7177921 | HAO2      |
| 230135_at    | 0.759 | 0.0279121 | 2.5402865 | -4.57 | 3.3789441 | HHIP      |
| 232958_at    | 0.759 | 0.0279288 | 2.5399477 | -4.57 | 2.9006353 |           |
| 221386_at    | 0.759 | 0.0279302 | 2.5399189 | -4.57 | 2.3939767 | OR3A2     |
| 217081_at    | 0.759 | 0.0279346 | 2.5398297 | -4.57 | 2.0251401 | OR2H2     |
| 234021_at    | 0.759 | 0.0279398 | 2.5397249 | -4.57 | 2.2580072 | EML2      |
| 213496_at    | 0.759 | 0.0279512 | 2.5394932 | -4.57 | 3.5444594 | PLPPR4    |
| 216937_s_at  | 0.759 | 0.0279616 | 2.5392826 | -4.57 | 2.279882  | RS1       |
| 1570198_x_at | 0.759 | 0.0279858 | 2.5387915 | -4.57 | 2.2188574 |           |
| 1555595_at   | 0.759 | 0.0280081 | 2.5383402 | -4.57 | 2.7735291 | SCRN3     |
| 219170_at    | 0.759 | 0.0280258 | 2.5379818 | -4.57 | 2.2441008 | FSD1      |
| 231267_at    | 0.759 | 0.0280441 | 2.5376113 | -4.57 | 1.9249443 | FAM163A   |
| 210552_s_at  | 0.759 | 0.0280781 | 2.5369241 | -4.57 | 1.9246642 | RALGPS1   |



|             |       |           |           |       |           |          |
|-------------|-------|-----------|-----------|-------|-----------|----------|
| 244718_at   | 0.759 | 0.0280896 | 2.5366925 | -4.57 | 2.5315388 | MTMR9LP  |
| 235426_at   | 0.759 | 0.0281018 | 2.5364467 | -4.57 | 2.4071288 | GATM     |
| 221100_at   | 0.759 | 0.0281329 | 2.5358195 | -4.57 | 2.5445849 | C6orf15  |
| 243013_at   | 0.759 | 0.0281357 | 2.5357632 | -4.57 | 1.9369553 |          |
| 239712_at   | 0.759 | 0.0281478 | 2.5355198 | -4.57 | 2.8399924 | CCDC171  |
| 1570186_at  | 0.759 | 0.0281647 | 2.5351796 | -4.57 | 2.3819051 | GRASPOS  |
| 239359_at   | 0.759 | 0.0281941 | 2.5345865 | -4.57 | 2.5968756 | 11-Mar   |
| 207260_at   | 0.759 | 0.0282022 | 2.5344251 | -4.57 | 2.6148224 | FEV      |
| 231320_at   | 0.759 | 0.0282113 | 2.5342425 | -4.57 | 1.9850313 | EBP      |
| 240979_at   | 0.759 | 0.0282254 | 2.5339577 | -4.57 | 2.314116  | YWHAEP7  |
| 242432_at   | 0.759 | 0.0282356 | 2.5337531 | -4.57 | 2.5452546 | LRRC37A2 |
| 209352_s_at | 0.759 | 0.0282436 | 2.5335923 | -4.57 | 2.7185291 | SIN3B    |
| 1553298_at  | 0.759 | 0.0282472 | 2.5335201 | -4.57 | 2.8526449 | C17orf77 |
| 214865_at   | 0.759 | 0.0282612 | 2.5332395 | -4.57 | 2.2255617 | DOT1L    |
| 223998_at   | 0.759 | 0.0282851 | 2.5327594 | -4.57 | 3.2883899 | TTLL2    |
| 1561240_at  | 0.759 | 0.0282989 | 2.5324836 | -4.57 | 3.1484169 |          |
| 233343_at   | 0.759 | 0.0283166 | 2.5321284 | -4.57 | 2.4242509 | DEFB127  |
| 240654_at   | 0.759 | 0.028332  | 2.5318213 | -4.57 | 1.9662562 |          |
| 217434_at   | 0.759 | 0.0283638 | 2.5311846 | -4.57 | 2.5325655 | MC2R     |
| 234355_s_at | 0.759 | 0.0283854 | 2.5307525 | -4.57 | 2.4872668 | DISP3    |
| 1564051_at  | 0.759 | 0.0284337 | 2.5297895 | -4.57 | 2.5323108 |          |
| 234427_at   | 0.759 | 0.0284781 | 2.5289041 | -4.57 | 2.5222693 | YME1L1   |

|              |       |           |           |       |           |              |
|--------------|-------|-----------|-----------|-------|-----------|--------------|
| 221421_s_at  | 0.759 | 0.0284893 | 2.5286806 | -4.57 | 2.5563694 | ADAMTS12     |
| 207420_at    | 0.759 | 0.0285037 | 2.5283941 | -4.57 | 3.0039006 | COLEC10      |
| 224051_at    | 0.759 | 0.0285041 | 2.5283867 | -4.57 | 2.1308214 |              |
| 234851_at    | 0.759 | 0.0285124 | 2.5282216 | -4.57 | 2.5991157 | IGLC1        |
| 1568903_at   | 0.759 | 0.0285173 | 2.5281246 | -4.57 | 2.0176659 |              |
| 1556976_s_at | 0.759 | 0.0285181 | 2.528109  | -4.57 | 2.2907724 | LOC105375273 |
| 240864_at    | 0.759 | 0.0285193 | 2.5280843 | -4.57 | 1.8232489 |              |
| 216408_at    | 0.759 | 0.0285475 | 2.5275228 | -4.57 | 1.8987404 | OR2B2        |
| 1565242_at   | 0.759 | 0.0285608 | 2.5272589 | -4.57 | 3.0061299 | TNXB         |
| 230367_at    | 0.759 | 0.0285698 | 2.5270802 | -4.57 | 2.1680649 | SMTNL1       |
| 1554863_s_at | 0.759 | 0.0286194 | 2.5260968 | -4.57 | 1.9832024 | DOK5         |
| 243641_at    | 0.759 | 0.0286384 | 2.5257199 | -4.57 | 2.6714837 |              |
| 233566_at    | 0.759 | 0.0286717 | 2.5250612 | -4.57 | 3.1751776 | LINC00839    |
| 227912_s_at  | 0.759 | 0.0286787 | 2.5249222 | -4.57 | 1.8185243 | EXOSC3       |
| 237370_at    | 0.759 | 0.0286812 | 2.5248745 | -4.57 | 2.4656302 |              |
| 234102_at    | 0.759 | 0.0286838 | 2.5248215 | -4.57 | 1.9385359 | RASL11B      |
| 210536_s_at  | 0.759 | 0.0286972 | 2.5245576 | -4.57 | 2.9640991 | SPAM1        |
| 210012_s_at  | 0.759 | 0.0287389 | 2.5237339 | -4.57 | 2.4017884 | EWSR1        |
| 1569290_s_at | 0.759 | 0.028775  | 2.5230211 | -4.57 | 2.6015065 | GRIA3        |
| 206837_at    | 0.759 | 0.0288058 | 2.5224149 | -4.57 | 2.1082097 | ALX1         |
| 1560098_at   | 0.759 | 0.0288144 | 2.5222465 | -4.57 | 2.3474775 |              |

|              |       |           |           |       |           |              |
|--------------|-------|-----------|-----------|-------|-----------|--------------|
| 207796_x_at  | 0.759 | 0.0288278 | 2.5219823 | -4.57 | 2.0862174 | KLRD1        |
| 1568690_a_at | 0.759 | 0.0288558 | 2.5214312 | -4.57 | 2.8538855 | LOC100631378 |
| 233617_at    | 0.759 | 0.02892   | 2.5201706 | -4.57 | 2.4982013 | TSPY26P      |
| 218756_s_at  | 0.759 | 0.0289382 | 2.5198141 | -4.57 | 1.9702408 | DHRS11       |
| 243499_at    | 0.759 | 0.0289423 | 2.519734  | -4.57 | 1.6868142 |              |
| 243862_at    | 0.759 | 0.0289572 | 2.5194404 | -4.57 | 2.4840267 | RASEF        |
| 232826_at    | 0.759 | 0.0289911 | 2.5187772 | -4.57 | 1.6477856 |              |
| 208538_at    | 0.759 | 0.0290353 | 2.5179133 | -4.57 | 2.6189474 | ANP32C       |
| 228671_at    | 0.759 | 0.0290563 | 2.5175022 | -4.57 | 2.0540371 | TMEM201      |
| 223873_s_at  | 0.759 | 0.0290669 | 2.5172969 | -4.57 | 2.8828397 |              |
| 216220_s_at  | 0.759 | 0.0290892 | 2.5168611 | -4.57 | 2.80703   | ADORA1       |
| 1565580_s_at | 0.759 | 0.0291045 | 2.5165625 | -4.57 | 2.6643284 | TATDN2       |
| 241612_at    | 0.759 | 0.029116  | 2.5163391 | -4.57 | 1.9467752 | FOX3         |
| 1561728_a_at | 0.759 | 0.0291677 | 2.5153313 | -4.57 | 2.7889659 | LINC00642    |
| 221608_at    | 0.759 | 0.0291699 | 2.5152891 | -4.57 | 1.9700724 | WNT6         |
| 242592_at    | 0.759 | 0.02917   | 2.5152869 | -4.57 | 3.1036394 | GPR137C      |
| 233158_at    | 0.759 | 0.0292048 | 2.5146104 | -4.57 | 1.5579299 | KRT82        |
| 1562923_at   | 0.759 | 0.0292104 | 2.5145022 | -4.57 | 2.2125598 | LOC101928449 |
| 241130_at    | 0.759 | 0.029213  | 2.5144524 | -4.57 | 2.5393477 |              |
| 239905_at    | 0.759 | 0.0292713 | 2.51332   | -4.57 | 3.409978  | YTHDC1       |
| 239950_at    | 0.759 | 0.0292772 | 2.5132071 | -4.57 | 3.1767286 | HOXA11-AS    |
| 234093_at    | 0.759 | 0.0292873 | 2.5130112 | -4.57 | 1.901812  | ZNF326       |

|              |       |           |           |       |           |                     |
|--------------|-------|-----------|-----------|-------|-----------|---------------------|
| 216119_s_at  | 0.759 | 0.0292941 | 2.5128797 | -4.57 | 2.4214861 | SPEF1               |
| 1552749_a_at | 0.759 | 0.0293262 | 2.5122572 | -4.57 | 2.2964623 | KLC3                |
| 221411_at    | 0.759 | 0.0293499 | 2.5117984 | -4.57 | 1.982381  | HOXD12              |
| 230183_at    | 0.759 | 0.0293559 | 2.5116831 | -4.57 | 1.715241  | EXT1                |
| 237675_at    | 0.759 | 0.0293678 | 2.5114538 | -4.57 | 2.8985218 | LINC01351           |
| 1556445_at   | 0.759 | 0.0293721 | 2.5113692 | -4.57 | 2.7850129 |                     |
| 225438_at    | 0.759 | 0.0293799 | 2.5112197 | -4.57 | 2.0595296 | NUDCD1              |
| 1560996_at   | 0.759 | 0.0294302 | 2.5102482 | -4.57 | 2.7678769 |                     |
| 1562215_at   | 0.759 | 0.0294379 | 2.5100997 | -4.57 | 2.1912081 |                     |
| 216869_at    | 0.759 | 0.0294597 | 2.509681  | -4.57 | 2.7097328 | PDE1C               |
| 242267_x_at  | 0.759 | 0.0294765 | 2.5093566 | -4.57 | 1.8626466 | LOC105369595        |
| 1569430_at   | 0.759 | 0.0294784 | 2.5093203 | -4.57 | 2.0952173 | PTRH1               |
| 1553202_at   | 0.759 | 0.0295348 | 2.5082352 | -4.57 | 2.4619074 | STOX1               |
| 1560129_at   | 0.759 | 0.0295636 | 2.5076831 | -4.57 | 2.3353636 |                     |
| 233298_at    | 0.759 | 0.0295752 | 2.5074594 | -4.57 | 2.7126766 | CCDC169             |
| 1552412_a_at | 0.759 | 0.0295832 | 2.5073054 | -4.57 | 4.1058243 | DEFB106B///DEFB106A |
| 1559254_at   | 0.759 | 0.0296007 | 2.5069706 | -4.57 | 2.4499062 | PICRAR              |
| 233050_at    | 0.759 | 0.0296066 | 2.5068573 | -4.57 | 3.1445071 | SOGA3///KIAA0408    |
| 231448_at    | 0.759 | 0.0296156 | 2.5066859 | -4.57 | 1.6995471 | ADAD1               |
| 238634_x_at  | 0.759 | 0.0296157 | 2.5066828 | -4.57 | 2.6223097 | LIPJ                |
| 211188_at    | 0.759 | 0.0296158 | 2.5066818 | -4.57 | 2.8082985 | CD84                |

|              |       |           |           |       |           |              |
|--------------|-------|-----------|-----------|-------|-----------|--------------|
| 1561521_at   | 0.759 | 0.0296202 | 2.5065967 | -4.57 | 2.3228319 | S100B        |
| 1561225_at   | 0.759 | 0.0296691 | 2.5056616 | -4.57 | 2.2014048 | ANKRD30BP3   |
| 1560581_at   | 0.759 | 0.0297052 | 2.5049706 | -4.57 | 3.1974026 |              |
| 224234_at    | 0.759 | 0.0297293 | 2.5045112 | -4.57 | 2.2929728 |              |
| 206000_at    | 0.759 | 0.0297327 | 2.5044463 | -4.57 | 2.9010973 | MEP1A        |
| 1558391_s_at | 0.759 | 0.0297772 | 2.5035973 | -4.57 | 2.5622741 | ZNF599       |
| 237532_at    | 0.759 | 0.029806  | 2.5030482 | -4.57 | 1.7906114 |              |
| 1553301_a_at | 0.759 | 0.0298494 | 2.5022225 | -4.57 | 3.0474886 | TMEM182      |
| 1561345_at   | 0.759 | 0.0298498 | 2.502214  | -4.57 | 2.4444005 | LOC101928009 |
| 229987_at    | 0.759 | 0.0298636 | 2.5019518 | -4.57 | 2.51186   |              |
| 1557832_at   | 0.759 | 0.0298874 | 2.5015    | -4.57 | 3.2351525 | LOC101926960 |
| 1559926_at   | 0.759 | 0.0298972 | 2.5013144 | -4.57 | 2.1439937 | LOC728353    |
| 239368_at    | 0.759 | 0.0299125 | 2.5010235 | -4.57 | 2.2824674 |              |
| 226898_s_at  | 0.759 | 0.0299252 | 2.5007824 | -4.57 | 1.9195715 | SFPQ         |
| 233904_at    | 0.759 | 0.0299339 | 2.5006171 | -4.57 | 2.2446389 |              |
| 243345_at    | 0.759 | 0.0299527 | 2.500262  | -4.57 | 1.785877  | RNF14        |
| 239962_at    | 0.759 | 0.0299535 | 2.5002452 | -4.57 | 2.732238  |              |
| 233215_s_at  | 0.759 | 0.0299702 | 2.4999304 | -4.57 | 2.4421966 | ZDHHC21      |
| 1558589_at   | 0.759 | 0.0299794 | 2.4997563 | -4.57 | 1.8703489 | LINC00417    |
| 241593_x_at  | 0.759 | 0.0300444 | 2.4985258 | -4.57 | 2.8068709 |              |
| 1569105_at   | 0.759 | 0.0300532 | 2.49836   | -4.57 | 2.0781744 | SETD5        |
| 1566209_at   | 0.759 | 0.0300609 | 2.4982136 | -4.57 | 2.951942  |              |
| 239548_at    | 0.759 | 0.0300642 | 2.498152  | -4.57 | 2.1947864 | NEGR1        |

|              |       |           |           |       |           |                     |
|--------------|-------|-----------|-----------|-------|-----------|---------------------|
| 1554384_at   | 0.759 | 0.0301191 | 2.4971169 | -4.57 | 2.2950522 | PADI2               |
| 230013_s_at  | 0.759 | 0.03012   | 2.4970996 | -4.57 | 2.0062657 | ARHGAP23            |
| 1560977_a_at | 0.759 | 0.0301338 | 2.4968387 | -4.57 | 1.935683  | BCL2L13             |
| 1565192_at   | 0.759 | 0.0301547 | 2.4964458 | -4.57 | 2.8723653 |                     |
| 207882_at    | 0.759 | 0.0301579 | 2.4963852 | -4.57 | 2.3645286 |                     |
| 1564883_a_at | 0.759 | 0.0301634 | 2.4962818 | -4.57 | 2.093337  | TAS1R1              |
| 207089_at    | 0.759 | 0.0301792 | 2.4959848 | -4.57 | 2.4674938 | NRAP                |
| 244006_at    | 0.759 | 0.0302191 | 2.495235  | -4.57 | 2.907523  | POU2F1              |
| 1553464_at   | 0.759 | 0.030225  | 2.4951228 | -4.57 | 3.0361091 | FLJ40288            |
| 1558573_at   | 0.759 | 0.0302259 | 2.4951069 | -4.57 | 2.1108797 | MCTS1               |
| 237852_at    | 0.759 | 0.0302329 | 2.4949762 | -4.57 | 2.8590958 |                     |
| 217540_at    | 0.759 | 0.0302557 | 2.4945467 | -4.57 | 2.8431375 | NXPE3               |
| 1563376_at   | 0.759 | 0.0302645 | 2.4943818 | -4.57 | 2.4212931 | LOC101929174        |
| 1566949_at   | 0.759 | 0.0302983 | 2.493749  | -4.57 | 1.7915071 |                     |
| 218952_at    | 0.759 | 0.0302991 | 2.4937334 | -4.57 | 2.6612644 | PCSK1N              |
| 214522_x_at  | 0.759 | 0.0303096 | 2.493536  | -4.57 | 1.9659726 | HIST1H3D//HIST1H2AD |
| 237509_at    | 0.759 | 0.0303149 | 2.4934381 | -4.57 | 2.5168454 | LINC01616           |
| 1556233_s_at | 0.759 | 0.0303652 | 2.4924969 | -4.57 | 2.9845819 | KIF6                |
| 1567274_at   | 0.759 | 0.0303745 | 2.4923216 | -4.57 | 2.8070225 |                     |
| 227819_at    | 0.759 | 0.0303768 | 2.4922801 | -4.57 | 2.4194031 | LGR6                |

|             |       |           |           |       |           |             |
|-------------|-------|-----------|-----------|-------|-----------|-------------|
| 237332_at   | 0.759 | 0.0303885 | 2.4920613 | -4.57 | 2.3298626 | MON2        |
| 237277_at   | 0.759 | 0.0304073 | 2.4917093 | -4.57 | 3.3270391 |             |
| 222175_s_at | 0.759 | 0.0304199 | 2.4914747 | -4.57 | 2.084436  | MED15       |
| 239479_x_at | 0.759 | 0.0304217 | 2.4914399 | -4.57 | 2.8650866 |             |
| 210823_s_at | 0.759 | 0.0304397 | 2.4911055 | -4.57 | 2.4569942 | PTPRS       |
| 1562739_at  | 0.759 | 0.0304479 | 2.4909519 | -4.57 | 2.6103259 | LOC285593   |
| 237592_at   | 0.759 | 0.030451  | 2.4908939 | -4.57 | 2.5348567 | ZC2HC1B     |
| 206439_at   | 0.759 | 0.030454  | 2.4908383 | -4.57 | 4.3502169 | EPYC        |
| 241213_x_at | 0.759 | 0.0304648 | 2.490637  | -4.57 | 1.9845477 |             |
| 1556737_at  | 0.759 | 0.030465  | 2.4906339 | -4.57 | 2.6062948 | LINC00671   |
| 232428_at   | 0.759 | 0.0304753 | 2.4904411 | -4.57 | 2.6701572 | MOGAT2      |
| 1559433_at  | 0.759 | 0.0305058 | 2.4898734 | -4.57 | 2.6994255 | APCDD1L-AS1 |
| 209877_at   | 0.759 | 0.0305182 | 2.4896419 | -4.57 | 2.3873242 | SNCG        |
| 205048_s_at | 0.759 | 0.0305309 | 2.4894059 | -4.57 | 2.1352952 | PSPH        |
| 220676_at   | 0.759 | 0.0305377 | 2.4892796 | -4.57 | 2.2851791 | ADAMTS8     |
| 238763_at   | 0.759 | 0.0305388 | 2.4892589 | -4.57 | 2.7618885 | RBM20       |
| 233979_s_at | 0.759 | 0.0306273 | 2.4876168 | -4.57 | 2.6900696 | ESPN        |
| 239989_at   | 0.759 | 0.0306669 | 2.4868828 | -4.57 | 2.1840878 | CNTLN       |
| 1570006_at  | 0.759 | 0.0306914 | 2.4864283 | -4.57 | 2.1977696 | LOC400958   |
| 215396_at   | 0.759 | 0.0307106 | 2.4860743 | -4.57 | 3.3163991 | ADGRV1      |
| 207450_s_at | 0.759 | 0.0307144 | 2.4860025 | -4.57 | 2.1930983 | POU6F2      |
| 228699_at   | 0.759 | 0.0307426 | 2.4854817 | -4.57 | 1.9664719 | NRP2        |

|              |       |           |           |       |           |              |
|--------------|-------|-----------|-----------|-------|-----------|--------------|
| 1556619_at   | 0.759 | 0.0307877 | 2.4846501 | -4.57 | 2.953367  | SHISA9       |
| 1569002_x_at | 0.759 | 0.0307961 | 2.4844951 | -4.57 | 2.6490255 | BMP1         |
| 239662_x_at  | 0.759 | 0.0308156 | 2.484134  | -4.57 | 2.246231  | TMCC1        |
| 219789_at    | 0.759 | 0.0308507 | 2.483489  | -4.57 | 3.2034523 | NPR3         |
| 210654_at    | 0.759 | 0.0308861 | 2.4828362 | -4.57 | 2.1596733 | TNFRSF10D    |
| 1565998_at   | 0.759 | 0.0309294 | 2.4820406 | -4.57 | 2.671134  |              |
| 243378_at    | 0.759 | 0.0309469 | 2.4817192 | -4.57 | 1.6455865 |              |
| 241364_at    | 0.759 | 0.030963  | 2.4814253 | -4.57 | 1.8916542 | TMEM57       |
| 1557739_at   | 0.759 | 0.0309793 | 2.4811257 | -4.57 | 3.8054089 | LOC105372547 |
| 222972_at    | 0.759 | 0.0309807 | 2.4810993 | -4.57 | 2.7261109 | VSX1         |
| 1556542_a_at | 0.759 | 0.0310487 | 2.4798549 | -4.57 | 2.3253183 |              |
| 234018_s_at  | 0.759 | 0.0311348 | 2.4782814 | -4.57 | 2.4290414 | SEL1L2       |
| 239034_at    | 0.759 | 0.0311844 | 2.4773774 | -4.57 | 1.5171893 | LINC01560    |
| 222820_at    | 0.759 | 0.0312175 | 2.4767754 | -4.57 | 2.2334747 | TNRC6C       |
| 239330_at    | 0.759 | 0.031232  | 2.4765116 | -4.57 | 3.3161182 | DCAF12L2     |
| 1553608_a_at | 0.759 | 0.031253  | 2.4761293 | -4.57 | 2.5827994 | LINC00189    |
| 1559707_at   | 0.759 | 0.03129   | 2.4754576 | -4.57 | 2.231055  |              |
| 202654_x_at  | 0.759 | 0.0312949 | 2.4753685 | -4.57 | 1.8407226 | 7-Mar        |
| 1554074_s_at | 0.759 | 0.0313013 | 2.4752518 | -4.57 | 2.372675  | SLFNL1       |
| 221307_at    | 0.759 | 0.0313016 | 2.475246  | -4.57 | 2.7852964 | KCNIP1       |
| 219589_s_at  | 0.759 | 0.031305  | 2.4751845 | -4.57 | 2.4748148 | TMEM143      |
| 207481_at    | 0.759 | 0.0313217 | 2.4748805 | -4.57 | 2.0304731 |              |



|              |       |           |           |       |           |                                                                           |
|--------------|-------|-----------|-----------|-------|-----------|---------------------------------------------------------------------------|
| 213108_at    | 0.759 | 0.0313303 | 2.4747246 | -4.57 | 2.6461845 | CAMK2A                                                                    |
| 210226_at    | 0.759 | 0.0313327 | 2.4746821 | -4.57 | 1.8326749 | NR4A1                                                                     |
| 221038_at    | 0.759 | 0.0313366 | 2.4746108 | -4.57 | 2.1147694 |                                                                           |
| 240051_at    | 0.759 | 0.0313495 | 2.474377  | -4.57 | 1.7778819 | TPD52L3                                                                   |
| 232924_at    | 0.759 | 0.0313502 | 2.4743654 | -4.57 | 2.4596083 | LRRC17                                                                    |
| 1559992_a_at | 0.759 | 0.0313653 | 2.4740911 | -4.57 | 2.00371   | LINC00645                                                                 |
| 216473_x_at  | 0.759 | 0.0313691 | 2.474022  | -4.57 | 1.8013769 | DUX4L24///DBET///LOC100291626///DUX4///LOC100288289///DUX4L2//<br>/DUX4L1 |
| 1552964_at   | 0.759 | 0.0313859 | 2.4737188 | -4.57 | 2.6717166 | CFAP46                                                                    |
| 223083_s_at  | 0.759 | 0.0313973 | 2.4735121 | -4.57 | 2.3050935 | RAB4B-EGLN2///EGLN2///RAB4B                                               |
| 244048_x_at  | 0.759 | 0.0314056 | 2.4733624 | -4.57 | 3.3294117 |                                                                           |
| 243545_at    | 0.759 | 0.0314403 | 2.4727339 | -4.57 | 2.8973109 |                                                                           |

|              |       |           |           |       |           |                 |
|--------------|-------|-----------|-----------|-------|-----------|-----------------|
| 242910_x_at  | 0.759 | 0.0314421 | 2.472701  | -4.57 | 3.1622846 |                 |
| 1562645_at   | 0.759 | 0.0314885 | 2.4718634 | -4.57 | 2.2493202 | LOC401176       |
| 220499_at    | 0.759 | 0.0315085 | 2.4715029 | -4.57 | 2.1109277 | FNDC8           |
| 230710_at    | 0.759 | 0.031527  | 2.4711702 | -4.57 | 2.2363086 | MIR210HG        |
| 1555774_at   | 0.759 | 0.0315948 | 2.4699479 | -4.57 | 2.6054287 | ZAR1            |
| 222558_at    | 0.759 | 0.0316032 | 2.469797  | -4.57 | 2.539108  | RPRD1A          |
| 222260_at    | 0.759 | 0.0316397 | 2.4691423 | -4.57 | 2.1874516 |                 |
| 1566475_at   | 0.759 | 0.0316457 | 2.4690336 | -4.57 | 2.8101031 |                 |
| 237856_at    | 0.759 | 0.0316899 | 2.4682407 | -4.57 | 2.3552163 | RAP1GDS1        |
| 1558251_a_at | 0.759 | 0.0316928 | 2.4681886 | -4.57 | 2.1865523 | ZNF417///ZNF587 |
| 234499_at    | 0.759 | 0.0317062 | 2.4679484 | -4.57 | 2.3838915 |                 |
| 231745_at    | 0.759 | 0.0317416 | 2.4673138 | -4.57 | 2.7262956 | GPR55           |
| 239796_x_at  | 0.759 | 0.0317492 | 2.4671783 | -4.57 | 2.6400632 | TIRAP           |
| 1561459_at   | 0.759 | 0.0317503 | 2.4671578 | -4.57 | 2.0423095 | LOC101929526    |
| 231471_at    | 0.759 | 0.031753  | 2.4671094 | -4.57 | 2.2849946 |                 |
| 240735_at    | 0.759 | 0.0317571 | 2.4670373 | -4.57 | 3.2894692 | CDC42BPA        |
| 206254_at    | 0.759 | 0.0317852 | 2.4665338 | -4.57 | 2.9518408 | EGF             |
| 241576_at    | 0.759 | 0.0317887 | 2.466472  | -4.57 | 2.2179567 |                 |
| 202455_at    | 0.759 | 0.0318011 | 2.4662507 | -4.57 | 1.5583626 | HDAC5           |
| 242594_at    | 0.759 | 0.0318024 | 2.4662265 | -4.57 | 1.7958807 | BOD1L1          |
| 222484_s_at  | 0.759 | 0.0318273 | 2.465782  | -4.57 | 2.6427921 | CXCL14          |

|              |       |           |           |       |           |              |
|--------------|-------|-----------|-----------|-------|-----------|--------------|
| 237538_at    | 0.759 | 0.0318806 | 2.4648305 | -4.57 | 1.9768498 |              |
| 228860_at    | 0.759 | 0.0318917 | 2.4646334 | -4.57 | 2.0973236 | UBE3B        |
| 223729_at    | 0.759 | 0.0318978 | 2.4645238 | -4.57 | 2.2603232 | CECR2        |
| 1556355_x_at | 0.759 | 0.0319166 | 2.46419   | -4.57 | 1.8092889 | RGL3         |
| 1552425_a_at | 0.759 | 0.0319481 | 2.4636287 | -4.57 | 2.5284426 | KLHL10       |
| 1561136_at   | 0.759 | 0.0319555 | 2.4634978 | -4.57 | 3.7495422 | GYPE         |
| 244331_at    | 0.759 | 0.0319611 | 2.4633984 | -4.57 | 3.218799  |              |
| 1563821_at   | 0.759 | 0.0319615 | 2.463391  | -4.57 | 2.2931469 | LINC00858    |
| 1561368_at   | 0.759 | 0.0319666 | 2.4632994 | -4.57 | 2.5450706 | LOC105376081 |
| 216673_at    | 0.759 | 0.0319749 | 2.4631518 | -4.57 | 2.4330339 | TTY1B///TTY1 |
| 1553508_at   | 0.759 | 0.0320037 | 2.4626398 | -4.57 | 1.9000151 | MDS2         |
| 1564962_at   | 0.759 | 0.0320169 | 2.4624053 | -4.57 | 3.16624   | ZNF92        |
| 236143_at    | 0.759 | 0.032041  | 2.4619793 | -4.57 | 1.9559141 |              |
| 220978_at    | 0.759 | 0.0320458 | 2.4618925 | -4.57 | 2.0773476 | KRTAP1-3     |
| 1570001_at   | 0.759 | 0.0320952 | 2.4610183 | -4.57 | 2.5343506 | CASP8AP2     |
| 210408_s_at  | 0.759 | 0.0321016 | 2.4609043 | -4.57 | 2.5169882 | CPNE6        |
| 219427_at    | 0.759 | 0.0321045 | 2.460853  | -4.57 | 1.8604529 | FAT4         |
| 216728_at    | 0.759 | 0.0321094 | 2.4607653 | -4.57 | 1.8181375 |              |
| 211091_s_at  | 0.759 | 0.0321276 | 2.4604445 | -4.57 | 2.6613746 | NF2          |
| 242631_x_at  | 0.759 | 0.0321641 | 2.4597989 | -4.57 | 3.2800726 | DLC1         |

|              |       |           |           |       |           |                        |
|--------------|-------|-----------|-----------|-------|-----------|------------------------|
| 1554885_a_at | 0.759 | 0.0321662 | 2.4597622 | -4.57 | 3.0659877 | PRIM2B//PRIM2          |
| 1570024_at   | 0.759 | 0.0321716 | 2.4596665 | -4.57 | 2.3546078 |                        |
| 216087_at    | 0.759 | 0.032226  | 2.458706  | -4.57 | 2.8064276 |                        |
| 1554324_s_at | 0.759 | 0.0322308 | 2.4586204 | -4.57 | 2.0598539 | DYNC2LI1               |
| 224216_at    | 0.759 | 0.0322439 | 2.4583908 | -4.57 | 3.3896161 |                        |
| 207555_s_at  | 0.759 | 0.0322599 | 2.4581072 | -4.57 | 2.3765816 | TBXA2R                 |
| 220631_at    | 0.759 | 0.0323241 | 2.4569779 | -4.57 | 2.4126902 | OSGEPL1                |
| 213946_s_at  | 0.759 | 0.0323528 | 2.4564732 | -4.57 | 3.0028719 | OBSL1                  |
| 235184_at    | 0.759 | 0.032387  | 2.4558719 | -4.57 | 2.3123881 | AEBP2                  |
| 214599_at    | 0.759 | 0.0323952 | 2.4557292 | -4.57 | 2.1495156 | IVL                    |
| 229298_at    | 0.759 | 0.0324142 | 2.4553944 | -4.57 | 2.2715038 | KBTBD7                 |
| 1554578_at   | 0.759 | 0.0324282 | 2.4551497 | -4.57 | 2.1937374 | ZNF70                  |
| 1553094_at   | 0.759 | 0.0324287 | 2.455141  | -4.57 | 2.4262718 | FLJ45513//TAC4         |
| 244195_at    | 0.759 | 0.0324489 | 2.4547863 | -4.57 | 1.989302  |                        |
| 237791_at    | 0.759 | 0.0324909 | 2.454052  | -4.57 | 1.9345855 | LOC105370178           |
| 221293_s_at  | 0.759 | 0.0325025 | 2.453848  | -4.57 | 2.2350392 | DEF6                   |
| 220594_at    | 0.759 | 0.0325455 | 2.453097  | -4.57 | 2.7798577 | OGT                    |
| 220129_at    | 0.759 | 0.0325568 | 2.4528985 | -4.57 | 3.2299076 | CCDC169-SOHLH2//SOHLH2 |
| 237826_at    | 0.759 | 0.0326141 | 2.4518993 | -4.57 | 2.242249  |                        |

|              |       |           |           |       |           |                 |
|--------------|-------|-----------|-----------|-------|-----------|-----------------|
| 218002_s_at  | 0.759 | 0.0326407 | 2.4514359 | -4.57 | 2.7995349 | CXCL14          |
| 1565722_at   | 0.759 | 0.0326503 | 2.4512687 | -4.57 | 2.6952709 | LOC100128281    |
| 1567223_at   | 0.759 | 0.032661  | 2.4510826 | -4.57 | 2.6131378 | HMGA2           |
| 1553156_at   | 0.759 | 0.0327045 | 2.4503256 | -4.57 | 2.1409662 | LHX4            |
| 1565814_at   | 0.759 | 0.0327076 | 2.4502718 | -4.57 | 2.7726456 | TRIM36          |
| 214382_at    | 0.759 | 0.03274   | 2.4497083 | -4.57 | 2.5786465 | UNC93A          |
| 231303_at    | 0.759 | 0.0327456 | 2.449611  | -4.57 | 2.6731267 | LINC00158       |
| 1557754_at   | 0.759 | 0.0327681 | 2.4492209 | -4.57 | 1.6667845 | LOC401068       |
| 1554762_a_at | 0.759 | 0.0327792 | 2.4490272 | -4.57 | 1.8652687 | WWC2///CLDN22   |
| 234074_at    | 0.759 | 0.032788  | 2.448875  | -4.57 | 2.254793  |                 |
| 239403_at    | 0.759 | 0.0328205 | 2.4483114 | -4.57 | 2.5645486 | CCDC120         |
| 234022_at    | 0.759 | 0.0328374 | 2.4480186 | -4.57 | 2.8298998 |                 |
| 238607_at    | 0.759 | 0.0328485 | 2.447826  | -4.57 | 1.9495813 | ZNF296          |
| 206358_at    | 0.759 | 0.0328583 | 2.4476576 | -4.57 | 1.6956648 | PRM1            |
| 1563015_at   | 0.759 | 0.0328653 | 2.4475364 | -4.57 | 2.6425655 | LOC101928135    |
| 244820_at    | 0.759 | 0.0328776 | 2.4473234 | -4.57 | 1.9037281 |                 |
| 217351_at    | 0.759 | 0.0328921 | 2.4470722 | -4.57 | 1.884899  |                 |
| 242382_at    | 0.759 | 0.0329082 | 2.4467938 | -4.57 | 2.3042334 | LOC100506207    |
| 211870_s_at  | 0.759 | 0.0329422 | 2.4462073 | -4.57 | 2.324457  | PCDHA2///PCDHA3 |
| 219705_at    | 0.759 | 0.0329609 | 2.4458838 | -4.57 | 1.6433822 | QSER1           |

|              |       |           |           |       |           |              |
|--------------|-------|-----------|-----------|-------|-----------|--------------|
| 1555445_at   | 0.759 | 0.0329668 | 2.4457824 | -4.57 | 2.1132273 | CA8          |
| 240724_at    | 0.759 | 0.0330291 | 2.4447085 | -4.57 | 2.6714187 |              |
| 244882_at    | 0.759 | 0.0330451 | 2.444432  | -4.57 | 1.7338783 | TNRC18       |
| 1552791_a_at | 0.759 | 0.0330473 | 2.4443949 | -4.57 | 2.6837945 | TRDN         |
| 1568826_at   | 0.759 | 0.0330534 | 2.4442902 | -4.57 | 2.4389967 | LINC01012    |
| 239697_x_at  | 0.759 | 0.0330765 | 2.443892  | -4.57 | 2.3836393 | C3orf67      |
| 1569750_at   | 0.759 | 0.0330814 | 2.4438087 | -4.57 | 2.8949456 |              |
| 216173_at    | 0.759 | 0.0331113 | 2.4432943 | -4.57 | 2.6651978 |              |
| 231689_at    | 0.759 | 0.033127  | 2.4430248 | -4.57 | 1.5584674 | TRPM7        |
| 243144_at    | 0.759 | 0.0331357 | 2.4428759 | -4.57 | 2.095009  |              |
| 233203_at    | 0.759 | 0.0331427 | 2.4427547 | -4.57 | 2.4281414 | ROPN1        |
| 1561083_at   | 0.759 | 0.0331567 | 2.4425143 | -4.57 | 2.0138112 | LINC01254    |
| 240208_at    | 0.759 | 0.0331574 | 2.4425029 | -4.57 | 2.6473372 |              |
| 242475_at    | 0.759 | 0.0331617 | 2.4424288 | -4.57 | 2.5337743 |              |
| 1566653_at   | 0.759 | 0.0331753 | 2.4421948 | -4.57 | 2.5013997 |              |
| 217229_at    | 0.759 | 0.0331794 | 2.4421244 | -4.57 | 4.2001877 | ASB4         |
| 237245_at    | 0.759 | 0.0331996 | 2.4417791 | -4.57 | 2.2322514 | BUB3         |
| 234027_at    | 0.759 | 0.0332002 | 2.4417686 | -4.57 | 1.9883238 | CCDC129      |
| 237162_at    | 0.759 | 0.0332043 | 2.4416987 | -4.57 | 2.1474658 | KANK1        |
| 243382_at    | 0.759 | 0.0332062 | 2.4416652 | -4.57 | 2.5030128 | LOC101928647 |
| 228668_x_at  | 0.759 | 0.0332631 | 2.4406927 | -4.57 | 1.9933624 | CCDC71L      |
| 221128_at    | 0.759 | 0.0332844 | 2.4403281 | -4.57 | 2.0926056 | ADAM19       |
| 1566599_at   | 0.759 | 0.0332945 | 2.440155  | -4.57 | 2.1311666 |              |

|             |       |           |           |       |           |           |
|-------------|-------|-----------|-----------|-------|-----------|-----------|
| 210128_s_at | 0.759 | 0.0333457 | 2.4392812 | -4.57 | 2.3504504 | LTB4R     |
| 234585_at   | 0.759 | 0.0333583 | 2.4390668 | -4.57 | 1.90506   |           |
| 240569_at   | 0.759 | 0.0333621 | 2.4390018 | -4.57 | 2.9227606 |           |
| 233165_at   | 0.759 | 0.0333735 | 2.4388072 | -4.57 | 2.6387682 | NCKIPSD   |
| 230232_at   | 0.759 | 0.0334004 | 2.4383485 | -4.57 | 1.9349704 | SEL1L3    |
| 1566897_at  | 0.759 | 0.0334508 | 2.4374901 | -4.57 | 2.0616937 | SPPL3     |
| 1563091_at  | 0.759 | 0.0334522 | 2.4374668 | -4.57 | 2.0365163 |           |
| 1556181_at  | 0.759 | 0.033469  | 2.4371806 | -4.57 | 1.8727316 | ANKRD65   |
| 209856_x_at | 0.759 | 0.0334983 | 2.4366831 | -4.57 | 2.1312678 | ABI2      |
| 219701_at   | 0.759 | 0.0335406 | 2.4359654 | -4.57 | 3.1413405 | TMOD2     |
| 240360_at   | 0.759 | 0.0335498 | 2.4358095 | -4.57 | 2.1568481 | BRD4      |
| 233415_at   | 0.759 | 0.0335542 | 2.4357336 | -4.57 | 2.3426995 |           |
| 1566215_at  | 0.759 | 0.0336056 | 2.4348636 | -4.57 | 3.2444406 |           |
| 222774_s_at | 0.759 | 0.0336178 | 2.4346564 | -4.57 | 2.1343621 | NETO2     |
| 244326_at   | 0.759 | 0.0336253 | 2.43453   | -4.57 | 2.4299454 |           |
| 239000_at   | 0.759 | 0.0336434 | 2.4342242 | -4.57 | 1.885552  | BRD4      |
| 235491_at   | 0.759 | 0.0336441 | 2.4342124 | -4.57 | 1.9901958 | ZBTB10    |
| 244369_at   | 0.759 | 0.0336677 | 2.4338122 | -4.57 | 2.2293519 | C21orf59  |
| 206212_at   | 0.759 | 0.0336713 | 2.4337527 | -4.57 | 2.0656198 | CPA2      |
| 243058_at   | 0.759 | 0.033696  | 2.4333349 | -4.57 | 1.8670532 |           |
| 242265_at   | 0.759 | 0.0337324 | 2.4327209 | -4.57 | 1.7796314 | BRD8      |
| 218657_at   | 0.759 | 0.0337392 | 2.4326058 | -4.57 | 2.3348399 | RAPGEFL1  |
| 206668_s_at | 0.759 | 0.0337726 | 2.4320422 | -4.57 | 2.4191617 | SCAMP1    |
| 216829_at   | 0.759 | 0.0337761 | 2.431983  | -4.57 | 3.2940962 | IGK//IGKC |

|              |       |           |           |       |           |                    |
|--------------|-------|-----------|-----------|-------|-----------|--------------------|
| 240350_at    | 0.759 | 0.0337774 | 2.4319622 | -4.57 | 2.7427727 |                    |
| 233659_at    | 0.759 | 0.0337788 | 2.4319385 | -4.57 | 2.0217204 |                    |
| 1561262_at   | 0.759 | 0.033794  | 2.4316814 | -4.57 | 2.0490614 | LINC01516          |
| 233200_at    | 0.759 | 0.0337968 | 2.4316348 | -4.57 | 2.0455093 | LOC731157          |
| 1552360_a_at | 0.759 | 0.0338016 | 2.4315533 | -4.57 | 1.552567  | TIRAP              |
| 1560097_at   | 0.759 | 0.0338106 | 2.431403  | -4.57 | 2.8806085 | FHAD1              |
| 243363_at    | 0.759 | 0.0338161 | 2.4313101 | -4.57 | 2.735049  | LEF1-AS1           |
| 1562112_at   | 0.759 | 0.0338168 | 2.4312982 | -4.57 | 2.744375  |                    |
| 240504_at    | 0.759 | 0.0338606 | 2.430561  | -4.57 | 2.260793  |                    |
| 1557417_s_at | 0.759 | 0.0338611 | 2.4305528 | -4.57 | 2.7179069 | RSPH10B2///RSPH10B |
| 233166_at    | 0.759 | 0.0338694 | 2.4304137 | -4.57 | 3.3627279 | DEFB126            |
| 241296_at    | 0.759 | 0.0338746 | 2.4303257 | -4.57 | 3.6121535 |                    |
| 207804_s_at  | 0.759 | 0.0338766 | 2.4302919 | -4.57 | 2.4222518 | FCN2               |
| 1559535_s_at | 0.759 | 0.0338826 | 2.4301909 | -4.57 | 2.0095994 | LOC100996419       |
| 231505_s_at  | 0.759 | 0.0339007 | 2.4298884 | -4.57 | 1.8717117 | SFXN4              |
| 205485_at    | 0.759 | 0.033915  | 2.4296478 | -4.57 | 1.7888372 | RYR1               |
| 224082_at    | 0.759 | 0.0339306 | 2.429386  | -4.57 | 1.9240532 |                    |
| 1568749_at   | 0.759 | 0.0339347 | 2.4293176 | -4.57 | 2.2234377 | LOC105374928       |
| 213150_at    | 0.759 | 0.0339565 | 2.4289521 | -4.57 | 2.5280067 | HOXA10             |
| 222611_s_at  | 0.759 | 0.0339727 | 2.4286797 | -4.57 | 2.6164041 | PSPC1              |
| 232231_at    | 0.759 | 0.0339761 | 2.4286233 | -4.57 | 1.9699638 | RUNX2              |



|              |       |           |           |       |           |                |
|--------------|-------|-----------|-----------|-------|-----------|----------------|
| 240269_at    | 0.759 | 0.0339791 | 2.4285737 | -4.57 | 1.7386935 |                |
| 216240_at    | 0.759 | 0.0340085 | 2.4280802 | -4.57 | 2.0552767 | MIR1204///PVT1 |
| 217061_s_at  | 0.759 | 0.0340278 | 2.4277574 | -4.57 | 1.6363174 | ETV1           |
| 238543_x_at  | 0.759 | 0.0340285 | 2.4277458 | -4.57 | 2.6841595 | MDGA1          |
| 216959_x_at  | 0.759 | 0.0340359 | 2.4276228 | -4.57 | 1.9735038 | NRCAM          |
| 213023_at    | 0.759 | 0.0340808 | 2.426871  | -4.57 | 1.7153002 | UTRN           |
| 1554652_s_at | 0.759 | 0.034132  | 2.4260168 | -4.57 | 2.0178055 | MAST4          |
| 210670_at    | 0.759 | 0.0341464 | 2.4257767 | -4.57 | 3.1653943 | PPY            |
| 234619_at    | 0.759 | 0.0341888 | 2.4250713 | -4.57 | 2.5629081 |                |
| 1560142_at   | 0.759 | 0.0341943 | 2.4249789 | -4.57 | 2.3925509 | GRIK2          |
| 237781_at    | 0.759 | 0.03425   | 2.4240521 | -4.57 | 2.8049166 | HORMAD2        |
| 236179_at    | 0.759 | 0.0342567 | 2.4239408 | -4.57 | 2.4075061 | CDH11          |
| 233074_at    | 0.759 | 0.0342751 | 2.4236347 | -4.57 | 1.9667725 | LOC100421494   |
| 242411_at    | 0.759 | 0.0342792 | 2.4235676 | -4.57 | 1.6341866 | ARL10          |
| 215349_at    | 0.759 | 0.0342966 | 2.4232791 | -4.57 | 2.6004    | BTBD18         |
| 214729_at    | 0.759 | 0.0343006 | 2.4232123 | -4.57 | 1.8905554 | TWISTNB        |
| 244714_at    | 0.759 | 0.0343062 | 2.4231187 | -4.57 | 2.3338548 |                |
| 1565836_at   | 0.759 | 0.0343463 | 2.4224532 | -4.57 | 2.4241895 | LOC100506411   |
| 244891_x_at  | 0.759 | 0.0343563 | 2.4222885 | -4.57 | 1.9863949 |                |

|              |       |           |           |       |           |              |
|--------------|-------|-----------|-----------|-------|-----------|--------------|
| 216580_at    | 0.759 | 0.0343894 | 2.4217396 | -4.57 | 1.5535259 |              |
| 230699_at    | 0.759 | 0.0344235 | 2.4211748 | -4.57 | 2.4343689 | PGLS         |
| 203382_s_at  | 0.759 | 0.0344484 | 2.4207638 | -4.57 | 2.6077684 | APOE         |
| 1569311_at   | 0.759 | 0.0344651 | 2.4204877 | -4.57 | 2.4852462 |              |
| 244844_at    | 0.759 | 0.0344759 | 2.4203099 | -4.57 | 2.1365006 |              |
| 1567241_at   | 0.759 | 0.0344874 | 2.4201195 | -4.57 | 2.5044471 | OR2L1P       |
| 207036_x_at  | 0.759 | 0.0345047 | 2.4198333 | -4.57 | 2.8199913 | GRIN2D       |
| 238254_at    | 0.759 | 0.0345384 | 2.4192787 | -4.57 | 2.6222562 | ZNF677       |
| 241948_at    | 0.759 | 0.0345949 | 2.418348  | -4.57 | 1.9792984 |              |
| 227023_at    | 0.759 | 0.0346099 | 2.4180998 | -4.57 | 2.485304  | ZFP41///GLI4 |
| 241487_at    | 0.759 | 0.0346366 | 2.4176609 | -4.57 | 2.3444138 |              |
| 223074_s_at  | 0.759 | 0.0346684 | 2.4171389 | -4.57 | 2.4129834 | AIF1L        |
| 208044_s_at  | 0.759 | 0.0346701 | 2.4171105 | -4.57 | 2.4572935 | PPARD        |
| 1558322_a_at | 0.759 | 0.0346776 | 2.4169874 | -4.57 | 2.669533  | PAQR9        |
| 220601_at    | 0.759 | 0.0347039 | 2.4165556 | -4.57 | 1.9913432 | C16orf70     |
| 239752_at    | 0.759 | 0.0347276 | 2.4161673 | -4.57 | 3.2239163 | CECR2        |
| 204960_at    | 0.759 | 0.0347362 | 2.4160253 | -4.57 | 2.5164333 | PTPRCAP      |
| 203798_s_at  | 0.759 | 0.0347374 | 2.4160072 | -4.57 | 2.5810708 | VSNL1        |
| 1553027_a_at | 0.759 | 0.0347446 | 2.4158881 | -4.57 | 1.893762  | KLHL4        |
| 208111_at    | 0.759 | 0.0347608 | 2.415623  | -4.57 | 2.5355926 | AVPR2        |
| 1554086_at   | 0.759 | 0.0347612 | 2.4156155 | -4.57 | 2.3777143 | TUBGCP3      |

|              |       |           |           |       |           |          |
|--------------|-------|-----------|-----------|-------|-----------|----------|
| 216946_at    | 0.759 | 0.03477   | 2.4154722 | -4.57 | 2.4699485 | HLA-DOA  |
| 216478_at    | 0.759 | 0.0347743 | 2.4154011 | -4.57 | 2.6914964 |          |
| 241096_at    | 0.759 | 0.0347744 | 2.4154006 | -4.57 | 2.4488597 |          |
| 205986_at    | 0.759 | 0.0347772 | 2.4153536 | -4.57 | 1.6620237 | AATK     |
| 236702_at    | 0.759 | 0.0347938 | 2.4150832 | -4.57 | 1.7882994 | RTFDC1   |
| 202987_at    | 0.759 | 0.0348157 | 2.4147238 | -4.57 | 1.5352658 | TRAF3IP2 |
| 242115_at    | 0.759 | 0.0348201 | 2.414652  | -4.57 | 2.716642  |          |
| 238713_at    | 0.759 | 0.0348248 | 2.4145759 | -4.57 | 1.6420594 |          |
| 216674_at    | 0.759 | 0.0348546 | 2.4140874 | -4.57 | 2.5163492 | HES2     |
| 1556781_at   | 0.759 | 0.0348609 | 2.4139851 | -4.57 | 3.2178146 |          |
| 207007_at    | 0.759 | 0.0349069 | 2.4132344 | -4.57 | 2.4238753 | NR1I3    |
| 1558247_s_at | 0.759 | 0.0349135 | 2.4131269 | -4.57 | 2.6601091 | NTN5     |
| 233603_at    | 0.759 | 0.0349227 | 2.412976  | -4.57 | 2.4046827 |          |
| 224342_x_at  | 0.759 | 0.0349285 | 2.4128816 | -4.57 | 1.9998187 | BMS1P20  |
| 244244_at    | 0.759 | 0.0349417 | 2.4126659 | -4.57 | 2.3926746 | CD300LG  |
| 1559785_at   | 0.759 | 0.0349574 | 2.4124106 | -4.57 | 2.4177292 | TPPP2    |
| 217179_x_at  | 0.759 | 0.0349644 | 2.4122968 | -4.57 | 1.8279768 | BMS1P20  |
| 242322_at    | 0.759 | 0.0349991 | 2.4117322 | -4.57 | 2.3285554 |          |
| 238755_at    | 0.759 | 0.035004  | 2.4116518 | -4.57 | 2.4958016 | RASSF10  |
| 204888_s_at  | 0.759 | 0.0350309 | 2.4112142 | -4.57 | 1.9691932 | NEURL1   |

|              |       |           |           |       |           |              |
|--------------|-------|-----------|-----------|-------|-----------|--------------|
| 209776_s_at  | 0.759 | 0.0350599 | 2.4107431 | -4.57 | 1.9650254 | SLC19A1      |
| 210913_at    | 0.759 | 0.0350622 | 2.4107055 | -4.57 | 2.097542  | CDH20        |
| 224290_at    | 0.759 | 0.0350818 | 2.4103874 | -4.57 | 2.5329039 | VN1R3        |
| 215801_at    | 0.759 | 0.0350861 | 2.4103178 | -4.57 | 2.2800499 |              |
| 206091_at    | 0.759 | 0.0351301 | 2.4096029 | -4.57 | 1.9842983 | MATN3        |
| 211467_s_at  | 0.759 | 0.0351417 | 2.4094148 | -4.57 | 2.3117636 | NFIB         |
| 211262_at    | 0.759 | 0.0351558 | 2.4091874 | -4.57 | 2.3890695 | PCSK6        |
| 217440_at    | 0.759 | 0.035157  | 2.4091675 | -4.57 | 3.428358  |              |
| 1562945_at   | 0.759 | 0.0351915 | 2.4086093 | -4.57 | 2.5674601 | LOC105378130 |
| 234518_at    | 0.759 | 0.0352026 | 2.4084286 | -4.57 | 2.9097498 |              |
| 210173_at    | 0.759 | 0.0352047 | 2.4083947 | -4.57 | 2.5470597 | PTPRJ        |
| 234716_at    | 0.759 | 0.03522   | 2.4081479 | -4.57 | 2.0940516 | ZIC1         |
| 207800_at    | 0.759 | 0.0352419 | 2.4077928 | -4.57 | 2.7520922 | AKAP5        |
| 208439_s_at  | 0.759 | 0.0352826 | 2.4071359 | -4.57 | 1.7530956 | FCN2         |
| 1565576_at   | 0.759 | 0.035298  | 2.4068864 | -4.57 | 1.9945488 |              |
| 220437_at    | 0.759 | 0.0353329 | 2.4063244 | -4.57 | 2.4907641 | ANGPTL8      |
| 1562732_at   | 0.759 | 0.0353441 | 2.4061435 | -4.57 | 2.0212676 | TMEM232      |
| 1553909_x_at | 0.759 | 0.0353506 | 2.4060392 | -4.57 | 1.9867928 | SLF2         |
| 1552903_at   | 0.759 | 0.0353692 | 2.4057386 | -4.57 | 2.2973588 | B4GALNT2     |
| 231325_at    | 0.759 | 0.0353794 | 2.4055751 | -4.57 | 2.0109344 | UNC5D        |
| 216611_s_at  | 0.759 | 0.03539   | 2.4054036 | -4.57 | 2.8211218 | SLC6A2       |
| 1561857_at   | 0.759 | 0.035402  | 2.4052109 | -4.57 | 2.7538509 |              |
| 205924_at    | 0.759 | 0.0354089 | 2.4050999 | -4.57 | 1.9422463 | RAB3B        |
| 229154_at    | 0.759 | 0.0354213 | 2.4049005 | -4.57 | 2.6176408 | WNT10A       |

|             |       |           |           |       |           |              |
|-------------|-------|-----------|-----------|-------|-----------|--------------|
| 228321_s_at | 0.759 | 0.035431  | 2.404744  | -4.57 | 2.2163649 | NAA30        |
| 227103_s_at | 0.759 | 0.035463  | 2.4042303 | -4.57 | 2.1554589 | ECE2         |
| 1570110_at  | 0.759 | 0.0354772 | 2.4040016 | -4.57 | 2.4921641 | LOC101928730 |
| 204727_at   | 0.759 | 0.0354779 | 2.40399   | -4.57 | 2.0999527 | WDHD1        |
| 230926_s_at | 0.759 | 0.0354829 | 2.4039093 | -4.57 | 1.7784997 | ODF2L        |
| 238445_x_at | 0.759 | 0.0354877 | 2.403833  | -4.57 | 2.2266006 | MGAT5B       |
| 229722_at   | 0.759 | 0.0354986 | 2.4036586 | -4.57 | 2.1817193 | LOC100270804 |
| 217355_at   | 0.759 | 0.0355147 | 2.4034001 | -4.57 | 2.0675115 |              |
| 234830_at   | 0.759 | 0.0355264 | 2.4032111 | -4.57 | 2.1869883 | FRG2EP       |
| 238379_x_at | 0.759 | 0.0355332 | 2.4031036 | -4.57 | 2.4285342 |              |
| 236110_at   | 0.759 | 0.0355346 | 2.4030806 | -4.57 | 1.9793675 | ST8SIA5      |
| 207678_s_at | 0.759 | 0.0355637 | 2.4026135 | -4.57 | 2.455276  | SOX30        |
| 1570065_at  | 0.759 | 0.035587  | 2.4022407 | -4.57 | 2.0354087 | C22orf34     |
| 224008_s_at | 0.759 | 0.0356035 | 2.4019758 | -4.57 | 2.430076  | KCNK7        |
| 207663_x_at | 0.759 | 0.0356063 | 2.4019323 | -4.57 | 2.8132113 | GAGE3        |
| 214012_at   | 0.759 | 0.0356067 | 2.4019256 | -4.57 | 1.5919961 | ERAP1        |

|             |       |           |           |       |           |                  |
|-------------|-------|-----------|-----------|-------|-----------|------------------|
| 237481_at   | 0.759 | 0.0356152 | 2.4017896 | -4.57 | 2.0801626 | ACAD10           |
| 223453_s_at | 0.759 | 0.0356385 | 2.401416  | -4.57 | 1.900202  | ATL3             |
| 217134_at   | 0.759 | 0.0356415 | 2.401368  | -4.57 | 2.1492759 | MTAP             |
| 1553472_at  | 0.759 | 0.0356437 | 2.4013339 | -4.57 | 2.584361  | LOC150596        |
| 224069_x_at | 0.759 | 0.0356638 | 2.4010128 | -4.57 | 2.0836922 | P2RX2            |
| 230483_at   | 0.759 | 0.0357224 | 2.4000764 | -4.57 | 2.2265004 |                  |
| 243221_at   | 0.759 | 0.0357235 | 2.4000581 | -4.57 | 2.3434132 | FAM20A           |
| 216177_at   | 0.759 | 0.035731  | 2.3999398 | -4.57 | 2.1372888 |                  |
| 234614_at   | 0.759 | 0.0357332 | 2.3999046 | -4.57 | 2.4517039 | FLI1             |
| 211822_s_at | 0.759 | 0.0357405 | 2.3997871 | -4.57 | 1.9576355 | NLRP1            |
| 244589_at   | 0.759 | 0.0357716 | 2.3992921 | -4.57 | 1.9627895 | LOC105378470     |
| 1554492_at  | 0.759 | 0.0357914 | 2.3989762 | -4.57 | 3.4171204 | THADA            |
| 1560756_at  | 0.759 | 0.035801  | 2.3988239 | -4.57 | 2.3281751 |                  |
| 1564691_at  | 0.759 | 0.0358273 | 2.398406  | -4.57 | 2.3635682 | LL0XNC01-116E7.2 |
| 240540_at   | 0.759 | 0.0358469 | 2.3980935 | -4.57 | 1.7791729 |                  |
| 212283_at   | 0.759 | 0.0358572 | 2.3979298 | -4.57 | 2.2466956 | AGRN             |
| 236440_at   | 0.759 | 0.0358732 | 2.3976753 | -4.57 | 2.717071  | NETO1            |
| 238227_at   | 0.759 | 0.0358747 | 2.3976518 | -4.57 | 1.8949257 |                  |
| 240510_at   | 0.759 | 0.0358752 | 2.3976442 | -4.57 | 1.7904986 | NBN              |
| 226638_at   | 0.759 | 0.0358878 | 2.3974436 | -4.57 | 1.5766524 | ARHGAP23         |
| 237132_at   | 0.759 | 0.0358936 | 2.3973522 | -4.57 | 2.4404805 | TJP2             |
| 231479_at   | 0.759 | 0.0359166 | 2.3969863 | -4.57 | 1.5542285 | TTC33            |
| 222528_s_at | 0.759 | 0.0359189 | 2.3969492 | -4.57 | 2.6826332 | SLC25A37         |

|                     |       |           |           |       |           |                  |
|---------------------|-------|-----------|-----------|-------|-----------|------------------|
| 241013_at           | 0.759 | 0.035923  | 2.3968846 | -4.57 | 2.4302142 | FAM124A          |
| 229148_at           | 0.759 | 0.0359267 | 2.3968256 | -4.57 | 2.2319605 | HOTAIRM1///HOXA2 |
| 241147_at           | 0.759 | 0.0359513 | 2.3964356 | -4.57 | 2.4676111 |                  |
| 1553973_a_at        | 0.759 | 0.0359737 | 2.3960806 | -4.57 | 2.8162354 | SPINK6           |
| 237905_at           | 0.759 | 0.0359978 | 2.3956994 | -4.57 | 2.1336571 | KRT25            |
| 216004_s_at         | 0.759 | 0.0360065 | 2.395561  | -4.57 | 2.0061139 | PKNOX1           |
| AFFX-r2-Bs-lys-5_at | 0.759 | 0.0360521 | 2.3948395 | -4.57 | 2.5282647 |                  |
| 231997_at           | 0.759 | 0.036062  | 2.3946831 | -4.57 | 1.9761252 | TBCEL            |
| 243785_at           | 0.759 | 0.0360786 | 2.3944203 | -4.57 | 2.2485932 | LOC100272217     |
| 231812_x_at         | 0.759 | 0.0360979 | 2.3941156 | -4.57 | 1.6259112 | PHAX             |
| 244005_at           | 0.759 | 0.0361081 | 2.3939551 | -4.57 | 3.043245  |                  |
| 241858_at           | 0.759 | 0.0361092 | 2.3939383 | -4.57 | 1.6290944 | TNNI3K           |
| 241113_at           | 0.759 | 0.0361455 | 2.3933642 | -4.57 | 2.7514536 |                  |
| 207217_s_at         | 0.759 | 0.0361461 | 2.393356  | -4.57 | 2.3989191 | NOX1             |
| 1570044_at          | 0.759 | 0.0361487 | 2.3933142 | -4.57 | 2.81975   | GTF2IP7          |
| 206802_at           | 0.759 | 0.036159  | 2.3931517 | -4.57 | 2.5849346 | PAX5             |
| 221348_at           | 0.759 | 0.0361763 | 2.3928787 | -4.57 | 2.6800428 | NPPC             |
| 223621_at           | 0.759 | 0.0361834 | 2.3927667 | -4.57 | 1.8083727 | PNMA3            |
| 1562730_a_at        | 0.759 | 0.0361899 | 2.3926646 | -4.57 | 2.669431  |                  |
| 243340_at           | 0.759 | 0.0362019 | 2.3924762 | -4.57 | 2.4676606 |                  |
| 213335_s_at         | 0.759 | 0.036227  | 2.392081  | -4.57 | 2.9085156 | ST3GAL6          |

|              |       |           |           |       |           |              |
|--------------|-------|-----------|-----------|-------|-----------|--------------|
| 242723_at    | 0.759 | 0.0362308 | 2.3920212 | -4.57 | 2.2906052 |              |
| 206795_at    | 0.759 | 0.0362441 | 2.3918113 | -4.57 | 2.150372  | F2RL2        |
| 1569577_x_at | 0.759 | 0.0362976 | 2.3909713 | -4.57 | 2.3251105 | LOC102724927 |
| 228901_at    | 0.759 | 0.0363108 | 2.3907637 | -4.57 | 3.4903652 | CDK9         |
| 220420_at    | 0.759 | 0.0363278 | 2.3904972 | -4.57 | 1.7800003 | LMAN1L       |
| 242971_at    | 0.759 | 0.0363324 | 2.3904247 | -4.57 | 2.127088  |              |
| 1556768_at   | 0.759 | 0.0363645 | 2.389921  | -4.57 | 1.7372315 | LINC00930    |
| 229485_x_at  | 0.759 | 0.0363964 | 2.3894207 | -4.57 | 2.6230027 | SHISA3       |
| 215880_at    | 0.759 | 0.0364149 | 2.3891305 | -4.57 | 2.4661332 | NAGLU        |
| 1555741_at   | 0.759 | 0.0364646 | 2.3883525 | -4.57 | 2.1895535 | MRAP         |
| 216314_at    | 0.759 | 0.0364824 | 2.3880755 | -4.57 | 2.8916733 | CRISP1       |
| 1557984_s_at | 0.759 | 0.0365253 | 2.3874054 | -4.57 | 2.5252712 | RPAP3        |
| 1553685_s_at | 0.759 | 0.0365342 | 2.387266  | -4.57 | 1.9716767 | SP1          |
| 233303_at    | 0.759 | 0.0365452 | 2.3870946 | -4.57 | 2.6401187 |              |
| 1561215_at   | 0.759 | 0.0365783 | 2.3865771 | -4.57 | 2.743241  |              |
| 1555025_at   | 0.759 | 0.0365885 | 2.386419  | -4.57 | 2.5138755 | TMEM26       |
| 1555197_a_at | 0.759 | 0.0365964 | 2.3862955 | -4.57 | 3.4492877 | C21orf58     |
| 239446_x_at  | 0.759 | 0.0366775 | 2.385033  | -4.57 | 2.0244694 | DCBLD2       |
| 215014_at    | 0.759 | 0.0366813 | 2.3849735 | -4.57 | 3.233512  | KCND3        |
| 224253_at    | 0.759 | 0.0366874 | 2.3848787 | -4.57 | 2.7405597 | EXOC5        |



|              |       |           |           |       |           |                                  |
|--------------|-------|-----------|-----------|-------|-----------|----------------------------------|
| 1560734_at   | 0.759 | 0.0366913 | 2.3848182 | -4.57 | 2.8567381 | LOC101927079///LOC727924///OR4N4 |
| 204795_at    | 0.759 | 0.0366953 | 2.3847571 | -4.57 | 2.2635257 | PRR3                             |
| 1568286_at   | 0.759 | 0.0367167 | 2.3844245 | -4.57 | 1.8610931 | HMGA2                            |
| 240667_at    | 0.759 | 0.036717  | 2.3844188 | -4.57 | 2.287642  | SERP2                            |
| 235251_at    | 0.759 | 0.0367298 | 2.3842202 | -4.57 | 1.9737386 |                                  |
| 243227_at    | 0.759 | 0.03676   | 2.3837513 | -4.57 | 2.8437788 |                                  |
| 1567457_at   | 0.759 | 0.0367696 | 2.3836022 | -4.57 | 2.2893367 | RAC1                             |
| 236187_s_at  | 0.759 | 0.0368074 | 2.3830173 | -4.57 | 2.2944326 |                                  |
| 1557012_a_at | 0.759 | 0.0368271 | 2.3827108 | -4.57 | 2.3588708 |                                  |
| 1558177_at   | 0.759 | 0.0368302 | 2.3826641 | -4.57 | 1.9308946 | TMEM229B                         |
| 206146_s_at  | 0.759 | 0.036843  | 2.3824651 | -4.57 | 2.278757  | RHAG                             |
| 204455_at    | 0.759 | 0.0368831 | 2.3818444 | -4.57 | 1.9324437 | DST                              |
| 207144_s_at  | 0.759 | 0.0368991 | 2.3815971 | -4.57 | 2.9527157 | CITED1                           |
| 1558290_a_at | 0.759 | 0.036906  | 2.3814904 | -4.57 | 1.8455937 | MIR1204///PVT1                   |
| 1559678_s_at | 0.759 | 0.0369174 | 2.3813147 | -4.57 | 2.3699751 | GS1-24F4.2                       |
| 214625_s_at  | 0.759 | 0.0369304 | 2.381113  | -4.57 | 2.3969633 | MINK1                            |
| 244547_at    | 0.759 | 0.0369662 | 2.3805616 | -4.57 | 1.9312647 | SGK494                           |

|             |       |           |           |       |           |                      |
|-------------|-------|-----------|-----------|-------|-----------|----------------------|
| 244630_at   | 0.759 | 0.0369813 | 2.3803282 | -4.57 | 2.1870758 | LOC101060747///PDPK1 |
| 219849_at   | 0.759 | 0.0369949 | 2.3801187 | -4.57 | 1.5859706 | ZNF671               |
| 241464_s_at | 0.759 | 0.0370365 | 2.3794765 | -4.57 | 1.7959755 |                      |
| 231141_at   | 0.759 | 0.0370531 | 2.3792212 | -4.57 | 2.0471691 | LOC105370962         |
| 206280_at   | 0.759 | 0.0370552 | 2.3791888 | -4.57 | 1.8255094 | CDH18                |
| 221182_at   | 0.759 | 0.0370592 | 2.3791271 | -4.57 | 2.3363734 | MROH9                |
| 208500_x_at | 0.759 | 0.0370724 | 2.3789247 | -4.57 | 2.9064113 | FOXD3                |
| 243323_s_at | 0.759 | 0.0371035 | 2.3784455 | -4.57 | 1.5600525 | ZFHX3                |
| 216997_x_at | 0.759 | 0.037105  | 2.3784236 | -4.57 | 2.330168  | TLE4                 |
| 235869_at   | 0.759 | 0.0371372 | 2.3779285 | -4.57 | 2.2107062 | SCOC-AS1             |
| 243341_at   | 0.759 | 0.0371873 | 2.3771593 | -4.57 | 2.5119537 |                      |
| 244520_at   | 0.759 | 0.0372044 | 2.3768959 | -4.57 | 1.5833866 |                      |
| 234915_s_at | 0.759 | 0.0372064 | 2.3768654 | -4.57 | 1.8816808 | DENR                 |
| 229924_s_at | 0.759 | 0.0372136 | 2.3767561 | -4.57 | 2.6096681 | JAG1                 |
| 231624_s_at | 0.759 | 0.0372156 | 2.3767245 | -4.57 | 2.0906977 |                      |
| 237167_at   | 0.759 | 0.0372246 | 2.3765872 | -4.57 | 1.7412313 | KIAA1217             |
| 211832_s_at | 0.759 | 0.0372352 | 2.3764245 | -4.57 | 1.6086941 | MDM2                 |
| 229960_at   | 0.759 | 0.0372469 | 2.3762448 | -4.57 | 2.1976582 | MAP3K6               |
| 230689_at   | 0.759 | 0.0372948 | 2.3755116 | -4.57 | 1.7337695 |                      |
| 1561850_at  | 0.759 | 0.0373291 | 2.3749873 | -4.57 | 2.1742708 | LOC100133669         |

|              |       |           |           |       |           |                         |
|--------------|-------|-----------|-----------|-------|-----------|-------------------------|
| 1559579_at   | 0.759 | 0.0373298 | 2.3749762 | -4.57 | 2.1101289 | LINC00927               |
| 217053_x_at  | 0.759 | 0.03733   | 2.3749736 | -4.57 | 1.8351021 | ETV1                    |
| 1560678_at   | 0.759 | 0.0373317 | 2.3749476 | -4.57 | 2.2805169 |                         |
| 1569122_at   | 0.759 | 0.0373517 | 2.3746421 | -4.57 | 3.2839328 | LOC105370697            |
| 240980_at    | 0.759 | 0.0373657 | 2.3744277 | -4.57 | 3.3647194 |                         |
| 231737_at    | 0.759 | 0.037367  | 2.3744087 | -4.57 | 2.1432113 | CACNG4                  |
| 221546_at    | 0.759 | 0.0373765 | 2.3742625 | -4.57 | 2.8616126 | PRPF18                  |
| 216038_x_at  | 0.759 | 0.0374132 | 2.3737023 | -4.57 | 2.0828342 | DAXX                    |
| 205333_s_at  | 0.759 | 0.037452  | 2.3731109 | -4.57 | 2.3535334 | RCE1                    |
| 1567856_x_at | 0.759 | 0.0374607 | 2.3729792 | -4.57 | 2.4821861 | ZNF29P                  |
| 1552960_at   | 0.759 | 0.0374849 | 2.3726109 | -4.57 | 2.7369664 | LRRC15                  |
| 236306_at    | 0.759 | 0.0374879 | 2.3725649 | -4.57 | 2.323096  | KIAA2026                |
| 236203_at    | 0.759 | 0.0375099 | 2.37223   | -4.57 | 3.1196876 | LOC100509457///HLA-DQA1 |
| 219779_at    | 0.759 | 0.0375457 | 2.3716848 | -4.57 | 2.0834729 | ZFHX4                   |
| 221340_at    | 0.759 | 0.03755   | 2.3716199 | -4.57 | 2.8064274 | CDX4                    |
| 223925_s_at  | 0.759 | 0.0375514 | 2.3715982 | -4.57 | 2.1268031 | MTPN                    |
| 239423_at    | 0.759 | 0.0375934 | 2.3709601 | -4.57 | 1.7073527 |                         |
| 239055_at    | 0.759 | 0.0376245 | 2.3704894 | -4.57 | 1.9881728 | LINC-PINT               |
| 241496_at    | 0.759 | 0.0376463 | 2.3701576 | -4.57 | 2.161957  | BTNL9                   |
| 1553697_at   | 0.759 | 0.0376488 | 2.3701201 | -4.57 | 2.8225192 | CCSAP                   |

|              |       |           |           |       |           |           |
|--------------|-------|-----------|-----------|-------|-----------|-----------|
| 217268_at    | 0.759 | 0.037651  | 2.3700875 | -4.57 | 3.3658617 | RAB7A     |
| 1554440_at   | 0.759 | 0.0376966 | 2.3693961 | -4.57 | 2.0873049 | KIAA0513  |
| 202744_at    | 0.759 | 0.0377391 | 2.3687528 | -4.57 | 2.1400536 | SLC20A2   |
| 1566032_at   | 0.759 | 0.0377467 | 2.3686375 | -4.57 | 2.1655043 |           |
| 202234_s_at  | 0.759 | 0.0377596 | 2.3684423 | -4.57 | 1.5384164 | SLC16A1   |
| 213395_at    | 0.759 | 0.0377769 | 2.3681821 | -4.57 | 2.0201413 | MLC1      |
| 212682_s_at  | 0.759 | 0.0377866 | 2.3680355 | -4.57 | 2.7338214 | LMF2      |
| 209639_s_at  | 0.759 | 0.0377886 | 2.368005  | -4.57 | 1.6933965 | RGS12     |
| 235682_s_at  | 0.759 | 0.0377958 | 2.3678967 | -4.57 | 1.874915  | HSPB7     |
| 204188_s_at  | 0.759 | 0.0378063 | 2.3677377 | -4.57 | 2.4872372 | RARG      |
| 1564300_at   | 0.759 | 0.0378128 | 2.3676391 | -4.57 | 1.8767999 | IQCF5-AS1 |
| 241039_at    | 0.759 | 0.0378154 | 2.3676003 | -4.57 | 2.2538886 |           |
| 231619_at    | 0.759 | 0.0378383 | 2.3672551 | -4.57 | 1.8723194 |           |
| 234148_at    | 0.759 | 0.0378445 | 2.3671604 | -4.57 | 1.8653388 |           |
| 240391_at    | 0.759 | 0.0378526 | 2.367039  | -4.57 | 2.1910006 | NDUFB2    |
| 242244_at    | 0.759 | 0.0378582 | 2.3669541 | -4.57 | 2.8951376 |           |
| 214543_x_at  | 0.759 | 0.0378788 | 2.3666432 | -4.57 | 2.2438338 | QKI       |
| 218908_at    | 0.759 | 0.0378941 | 2.3664126 | -4.57 | 2.4158246 | ASPSR1    |
| 1567859_at   | 0.759 | 0.0379    | 2.3663251 | -4.57 | 2.8790752 |           |
| 244164_at    | 0.759 | 0.0379231 | 2.3659762 | -4.57 | 1.875398  | FAM223B   |
| 1552321_a_at | 0.759 | 0.0379357 | 2.3657874 | -4.57 | 2.3696268 | CCDC65    |
| 230094_at    | 0.759 | 0.0379757 | 2.3651845 | -4.57 | 2.2967427 | KLF13     |

|              |       |           |           |       |           |           |
|--------------|-------|-----------|-----------|-------|-----------|-----------|
| 1560935_s_at | 0.759 | 0.0380157 | 2.3645846 | -4.57 | 1.8919022 | LOC284669 |
| 236374_at    | 0.759 | 0.0380263 | 2.3644253 | -4.57 | 2.8519037 | CTXN3     |
| 1564122_at   | 0.759 | 0.0380337 | 2.3643145 | -4.57 | 2.042871  | LINC00514 |
| 1552393_at   | 0.759 | 0.0380537 | 2.3640145 | -4.57 | 2.4771281 | ENTHD1    |
| 207359_at    | 0.759 | 0.0380637 | 2.3638643 | -4.57 | 2.8910718 | CAMKK2    |
| 1555772_a_at | 0.759 | 0.0380647 | 2.3638482 | -4.57 | 2.4918979 | CDC25A    |
| 241011_at    | 0.759 | 0.0380771 | 2.3636632 | -4.57 | 1.8112548 |           |
| 220965_s_at  | 0.759 | 0.0380981 | 2.3633479 | -4.57 | 2.1525574 | RSPH6A    |
| 1563704_at   | 0.759 | 0.0381035 | 2.3632664 | -4.57 | 2.3980934 |           |
| 234725_s_at  | 0.759 | 0.0381042 | 2.3632569 | -4.57 | 1.868628  | SEMA4B    |
| 216788_at    | 0.759 | 0.0381154 | 2.3630892 | -4.57 | 1.8090712 | ZNF443    |
| 240625_at    | 0.759 | 0.038132  | 2.3628404 | -4.57 | 2.2035321 |           |
| 221091_at    | 0.759 | 0.0381699 | 2.3622733 | -4.57 | 2.3259242 | INSL5     |
| 208173_at    | 0.759 | 0.0381797 | 2.3621259 | -4.57 | 2.3541832 | IFNB1     |
| 240338_at    | 0.759 | 0.0381838 | 2.3620645 | -4.57 | 2.0189598 |           |
| 220862_s_at  | 0.759 | 0.0382145 | 2.3616057 | -4.57 | 1.6993201 |           |
| 216270_at    | 0.759 | 0.0382485 | 2.3610986 | -4.57 | 2.8071858 | ILVBL     |
| 1569289_at   | 0.759 | 0.0382535 | 2.3610242 | -4.57 | 3.0469671 | BIVM      |
| 224153_s_at  | 0.759 | 0.0382547 | 2.3610051 | -4.57 | 1.7761353 | DHRS4-AS1 |
| 203862_s_at  | 0.759 | 0.0382796 | 2.3606338 | -4.57 | 2.7133454 | ACTN2     |
| 1570383_at   | 0.759 | 0.0383103 | 2.3601759 | -4.57 | 2.5329008 | BMP1      |
| 242038_at    | 0.759 | 0.038314  | 2.3601216 | -4.57 | 2.2760889 | LRRC8B    |

|              |       |           |           |       |           |                           |
|--------------|-------|-----------|-----------|-------|-----------|---------------------------|
| 231309_at    | 0.759 | 0.0383186 | 2.3600521 | -4.57 | 1.734362  |                           |
| 1552933_at   | 0.759 | 0.0383247 | 2.3599623 | -4.57 | 3.2439597 | AKNAD1                    |
| 220142_at    | 0.759 | 0.0383451 | 2.3596582 | -4.57 | 1.6041138 | HAPLN2                    |
| 210918_at    | 0.759 | 0.038354  | 2.3595254 | -4.57 | 3.0078922 |                           |
| 206320_s_at  | 0.759 | 0.0383599 | 2.3594378 | -4.57 | 2.2180986 | SMAD9                     |
| 237224_at    | 0.759 | 0.0383663 | 2.3593422 | -4.57 | 2.3643726 | LINC00853                 |
| 1569188_s_at | 0.759 | 0.0383908 | 2.3589779 | -4.57 | 1.9149608 |                           |
| 1553023_a_at | 0.759 | 0.0384166 | 2.3585939 | -4.57 | 2.1410073 | NOX5                      |
| 232993_at    | 0.759 | 0.0384173 | 2.3585831 | -4.57 | 3.3926058 | SYNJ1                     |
| 231184_at    | 0.759 | 0.0384309 | 2.3583808 | -4.57 | 1.8581022 | DHX8                      |
| 241231_at    | 0.759 | 0.0384529 | 2.3580551 | -4.57 | 1.8436498 |                           |
| 208332_at    | 0.759 | 0.0384934 | 2.3574534 | -4.57 | 1.8117097 | LOC100509646///PRY2///PRY |
| 243565_at    | 0.759 | 0.0385052 | 2.3572783 | -4.57 | 2.6428067 | CCDC150                   |
| 241855_s_at  | 0.759 | 0.0385128 | 2.3571654 | -4.57 | 1.6687389 |                           |
| 236625_at    | 0.759 | 0.0385187 | 2.3570784 | -4.57 | 2.3033676 |                           |
| 243035_at    | 0.759 | 0.0385399 | 2.3567635 | -4.57 | 2.5708076 | LOC101927038              |
| 236085_at    | 0.759 | 0.0385623 | 2.3564325 | -4.57 | 2.556852  | CAPSL                     |
| 1555277_a_at | 0.759 | 0.0385684 | 2.356342  | -4.57 | 1.9380717 | SLC4A5                    |
| 214717_at    | 0.759 | 0.038583  | 2.3561259 | -4.57 | 2.0763979 | PKI55                     |
| 244329_at    | 0.759 | 0.038586  | 2.3560809 | -4.57 | 2.3560236 |                           |
| 238275_at    | 0.759 | 0.0386169 | 2.3556237 | -4.57 | 2.7820135 | HAP1                      |

|             |       |           |           |       |           |              |
|-------------|-------|-----------|-----------|-------|-----------|--------------|
| 221595_at   | 0.759 | 0.0386489 | 2.3551501 | -4.57 | 2.0951271 | RBM48        |
| 240917_at   | 0.759 | 0.0386634 | 2.3549365 | -4.57 | 2.2851641 | LOC101927640 |
| 243165_at   | 0.759 | 0.0386661 | 2.3548971 | -4.57 | 3.0301157 | BTF3         |
| 243730_at   | 0.759 | 0.0386662 | 2.3548951 | -4.57 | 3.0336231 |              |
| 234375_x_at | 0.759 | 0.0386816 | 2.354668  | -4.57 | 2.5124908 |              |
| 240691_at   | 0.759 | 0.03869   | 2.3545439 | -4.57 | 2.9691895 |              |
| 233005_at   | 0.759 | 0.0386962 | 2.3544524 | -4.57 | 1.9175821 | ZNHIT6       |
| 1553727_at  | 0.759 | 0.038722  | 2.354072  | -4.57 | 2.1134937 | B4GALNT3     |
| 209832_s_at | 0.759 | 0.0387274 | 2.3539914 | -4.57 | 2.4581574 | CDT1         |
| 1553006_at  | 0.759 | 0.0387445 | 2.35374   | -4.57 | 2.5973246 | ADGRG4       |
| 234220_at   | 0.759 | 0.0387531 | 2.3536129 | -4.57 | 1.8508818 | CADPS        |
| 217294_s_at | 0.759 | 0.0387539 | 2.3536005 | -4.57 | 1.6219719 | ENO1         |
| 232393_at   | 0.759 | 0.0387919 | 2.3530407 | -4.57 | 3.0011261 | ZNF462       |
| 206370_at   | 0.759 | 0.0388235 | 2.3525762 | -4.57 | 2.3823973 | PIK3CG       |
| 1561360_at  | 0.759 | 0.0388271 | 2.3525233 | -4.57 | 1.8268605 | LOC101928661 |
| 216564_at   | 0.759 | 0.0388382 | 2.3523596 | -4.57 | 1.7574728 |              |
| 206679_at   | 0.759 | 0.0388414 | 2.3523128 | -4.57 | 1.7331666 | APBA1        |
| 223537_s_at | 0.759 | 0.0388699 | 2.351894  | -4.57 | 2.0801162 | WNT5B        |
| 207415_at   | 0.759 | 0.0388781 | 2.3517724 | -4.57 | 1.8134576 | PLA2R1       |
| 236103_at   | 0.759 | 0.0388951 | 2.3515236 | -4.57 | 1.4287838 |              |

|              |       |           |           |       |           |              |
|--------------|-------|-----------|-----------|-------|-----------|--------------|
| 1565657_at   | 0.759 | 0.0389196 | 2.351164  | -4.57 | 2.1851288 | CMTM6        |
| 216197_at    | 0.759 | 0.0389267 | 2.3510586 | -4.57 | 2.6060051 |              |
| 211314_at    | 0.759 | 0.0389315 | 2.3509895 | -4.57 | 1.9613723 | CACNA1G      |
| 242182_x_at  | 0.759 | 0.0389462 | 2.3507736 | -4.57 | 2.4361517 |              |
| 214270_s_at  | 0.759 | 0.0389605 | 2.3505636 | -4.57 | 2.0678828 | MAPRE3       |
| 240185_at    | 0.759 | 0.0389728 | 2.3503825 | -4.57 | 1.9055326 | LOC100147773 |
| 1554534_at   | 0.759 | 0.0390715 | 2.348938  | -4.57 | 2.0782241 | DPYD         |
| 203919_at    | 0.759 | 0.0390974 | 2.3485592 | -4.57 | 1.5881931 | TCEA2        |
| 244258_at    | 0.759 | 0.0391143 | 2.3483127 | -4.57 | 3.4874367 |              |
| 205889_s_at  | 0.759 | 0.0391441 | 2.3478765 | -4.57 | 2.3549387 | JAKMIP2      |
| 229299_at    | 0.759 | 0.0391624 | 2.3476106 | -4.57 | 1.8264786 | NADK2        |
| 1553711_a_at | 0.759 | 0.0391659 | 2.347559  | -4.57 | 2.3348138 | FAM218A      |
| 231731_at    | 0.759 | 0.039173  | 2.3474551 | -4.57 | 1.923298  | OTX2         |
| 223643_at    | 0.759 | 0.0391953 | 2.3471296 | -4.57 | 2.2454891 | CRYGS        |
| 208242_at    | 0.759 | 0.0392026 | 2.3470243 | -4.57 | 1.7243015 | RAX          |
| 227310_at    | 0.759 | 0.0392079 | 2.3469461 | -4.57 | 2.6785709 | ADSS         |
| 241565_at    | 0.759 | 0.0392427 | 2.3464396 | -4.57 | 2.3417185 | COL4A4       |
| 1565612_at   | 0.759 | 0.0392633 | 2.346139  | -4.57 | 1.8794057 | DYNLRB1      |
| 1568488_at   | 0.759 | 0.0392989 | 2.345622  | -4.57 | 2.4668548 |              |
| 215455_at    | 0.759 | 0.0393079 | 2.3454901 | -4.57 | 1.7088033 | TIMELESS     |



|              |       |           |           |       |           |              |
|--------------|-------|-----------|-----------|-------|-----------|--------------|
| 241304_at    | 0.759 | 0.0393091 | 2.3454738 | -4.57 | 2.5344114 | PIK3C3       |
| 1555560_at   | 0.759 | 0.0393174 | 2.3453531 | -4.57 | 3.9196977 | UGGT2        |
| 1561889_at   | 0.759 | 0.03933   | 2.3451698 | -4.57 | 3.1679766 | LOC105375527 |
| 242867_x_at  | 0.759 | 0.0393358 | 2.3450851 | -4.57 | 2.2214397 | LOC105372179 |
| 207322_at    | 0.759 | 0.0393382 | 2.3450501 | -4.57 | 2.2595191 | ITSN1        |
| 1568638_a_at | 0.759 | 0.0393519 | 2.3448516 | -4.57 | 2.5438047 | IDO2         |
| 202523_s_at  | 0.759 | 0.0394383 | 2.3435981 | -4.57 | 2.1301011 | SPOCK2       |
| 1553810_a_at | 0.759 | 0.039497  | 2.3427473 | -4.57 | 2.0162091 | KIAA1524     |
| 214348_at    | 0.759 | 0.0395651 | 2.3417635 | -4.57 | 2.7581143 | TACR2        |
| 241121_at    | 0.759 | 0.0395723 | 2.3416596 | -4.57 | 1.7680536 |              |
| 233119_at    | 0.759 | 0.0395841 | 2.341488  | -4.57 | 1.8378421 | PRR5L        |
| 214645_at    | 0.759 | 0.0396763 | 2.3401588 | -4.57 | 1.9155329 |              |
| 236433_at    | 0.759 | 0.0396812 | 2.3400883 | -4.57 | 2.6126522 | ALOX12-AS1   |
| 203699_s_at  | 0.759 | 0.0396838 | 2.3400501 | -4.57 | 3.0023635 | DIO2         |
| 214708_at    | 0.759 | 0.0396854 | 2.3400281 | -4.57 | 1.7357129 | SNTB1        |
| 235662_at    | 0.759 | 0.0397097 | 2.3396772 | -4.57 | 1.7016138 |              |
| 243212_at    | 0.759 | 0.0397106 | 2.339664  | -4.57 | 1.7462602 |              |
| 217782_s_at  | 0.759 | 0.0397163 | 2.3395832 | -4.57 | 1.6923679 | GPS1         |
| 1566339_at   | 0.759 | 0.0397164 | 2.3395811 | -4.57 | 3.1476569 | SNORD8       |
| 228460_at    | 0.759 | 0.0397292 | 2.3393977 | -4.57 | 1.5461038 | ZNF319       |

|              |       |           |           |       |           |                                         |
|--------------|-------|-----------|-----------|-------|-----------|-----------------------------------------|
| 1559069_at   | 0.759 | 0.0397349 | 2.3393149 | -4.57 | 1.7250674 | ST20-MTHFS///MTHFS                      |
| 243146_at    | 0.759 | 0.0397421 | 2.339211  | -4.57 | 3.3099763 |                                         |
| 215521_at    | 0.759 | 0.0397838 | 2.3386125 | -4.57 | 1.9902958 | PHC3                                    |
| 230153_at    | 0.759 | 0.0398001 | 2.3383776 | -4.57 | 2.037924  | NEK9                                    |
| 1566145_s_at | 0.759 | 0.0398257 | 2.3380102 | -4.57 | 2.0683599 | LOC101930100///LOC101928669///LOC644450 |
| 230568_x_at  | 0.759 | 0.0398438 | 2.3377502 | -4.57 | 3.3454559 | DLL3                                    |
| 211305_x_at  | 0.759 | 0.0398442 | 2.3377448 | -4.57 | 2.3775199 | FCAR                                    |
| 1565525_a_at | 0.759 | 0.0398454 | 2.3377266 | -4.57 | 2.7206237 | TCP11L2                                 |
| 210327_s_at  | 0.759 | 0.0398538 | 2.3376063 | -4.57 | 2.0967564 | AGXT                                    |
| 211399_at    | 0.759 | 0.0398695 | 2.3373819 | -4.57 | 1.4778179 | FGFR2                                   |
| 211178_s_at  | 0.759 | 0.0399099 | 2.3368026 | -4.57 | 1.5919564 | PSTPIP1                                 |
| 212091_s_at  | 0.759 | 0.0399301 | 2.3365133 | -4.57 | 2.1910509 | COL6A1                                  |
| 206778_at    | 0.759 | 0.0399325 | 2.3364794 | -4.57 | 2.2468594 | CRYBB2                                  |
| 207531_at    | 0.759 | 0.03996   | 2.336085  | -4.57 | 1.8324793 | CRYGC                                   |
| 207096_at    | 0.759 | 0.0399612 | 2.3360676 | -4.57 | 1.744546  | SAA2-SAA4///SAA4                        |
| 244460_at    | 0.759 | 0.0399627 | 2.3360465 | -4.57 | 2.1931094 | TMEM225                                 |
| 1553399_a_at | 0.759 | 0.0399758 | 2.3358595 | -4.57 | 1.5616763 | MGC57346///CRHR1-IT1                    |

|              |       |           |           |       |           |                                 |
|--------------|-------|-----------|-----------|-------|-----------|---------------------------------|
| 1558052_at   | 0.759 | 0.0400241 | 2.3351692 | -4.57 | 1.9885461 | TMED4                           |
| 211459_at    | 0.759 | 0.0400346 | 2.3350193 | -4.57 | 2.484463  |                                 |
| 208241_at    | 0.759 | 0.0400741 | 2.3344545 | -4.57 | 2.7321639 | NRG1                            |
| 230700_at    | 0.759 | 0.0400751 | 2.3344405 | -4.57 | 1.80232   | RTN4RL1                         |
| 240096_at    | 0.759 | 0.0400783 | 2.3343945 | -4.57 | 2.3933489 | LOC100506236                    |
| 201971_s_at  | 0.759 | 0.0401379 | 2.3335449 | -4.57 | 2.0064433 | ATP6V1A                         |
| 1561144_at   | 0.759 | 0.0401429 | 2.3334732 | -4.57 | 1.6795605 |                                 |
| 207022_s_at  | 0.759 | 0.0401498 | 2.3333757 | -4.57 | 1.8967067 | LDHC                            |
| 1567853_at   | 0.759 | 0.0401509 | 2.3333593 | -4.57 | 2.7996688 | ZNF28                           |
| 204166_at    | 0.759 | 0.0401545 | 2.333308  | -4.57 | 2.6420788 | SBNO2                           |
| 224425_x_at  | 0.759 | 0.0401709 | 2.3330748 | -4.57 | 2.0314404 | ACTR3BP2                        |
| 234852_at    | 0.759 | 0.0402187 | 2.3323953 | -4.57 | 2.8590963 |                                 |
| 1561171_a_at | 0.759 | 0.040237  | 2.3321349 | -4.57 | 1.5896514 | GOLGA6L6///GOLGA6L22///GOLGA6L1 |
| 208375_at    | 0.759 | 0.040247  | 2.3319929 | -4.57 | 2.9684476 | IFNA1                           |
| 216842_x_at  | 0.759 | 0.0402625 | 2.3317726 | -4.57 | 2.2499506 |                                 |
| 1570405_at   | 0.759 | 0.040273  | 2.3316237 | -4.57 | 2.0080037 | LOC101929076                    |
| 233549_at    | 0.759 | 0.0402797 | 2.3315284 | -4.57 | 2.6426414 | PDE1A                           |
| 230555_s_at  | 0.759 | 0.0403212 | 2.3309387 | -4.57 | 1.8022533 | MED30                           |
| 217248_s_at  | 0.759 | 0.0403575 | 2.3304238 | -4.57 | 1.686545  | SLC7A8                          |
| 242833_at    | 0.759 | 0.0403905 | 2.3299565 | -4.57 | 2.3926271 |                                 |
| 236661_at    | 0.759 | 0.0404416 | 2.3292338 | -4.57 | 2.081776  | IQCF6                           |

|             |       |           |           |       |           |                                          |
|-------------|-------|-----------|-----------|-------|-----------|------------------------------------------|
| 219651_at   | 0.759 | 0.0404605 | 2.3289668 | -4.57 | 3.0948946 | DPPA4                                    |
| 222695_s_at | 0.759 | 0.0404751 | 2.3287604 | -4.57 | 2.0821307 | AXIN2                                    |
| 220167_s_at | 0.759 | 0.0404923 | 2.3285174 | -4.57 | 2.5970713 | TP53TG3B///TP53TG3D///TP53TG3C///TP53TG3 |
| 224048_at   | 0.759 | 0.0405188 | 2.3281422 | -4.57 | 2.4115353 | USP44                                    |
| 232590_at   | 0.759 | 0.0405286 | 2.3280037 | -4.57 | 1.7459772 |                                          |
| 207634_at   | 0.759 | 0.0405383 | 2.3278682 | -4.58 | 2.2047807 | PDCD1                                    |
| 1554288_at  | 0.759 | 0.0405397 | 2.3278484 | -4.58 | 2.0455664 | FAM160B1                                 |
| 1560405_at  | 0.759 | 0.0405505 | 2.3276949 | -4.58 | 2.5894942 | LOC101928632                             |
| 242490_at   | 0.759 | 0.0405522 | 2.3276713 | -4.58 | 2.1853465 |                                          |
| 1569787_at  | 0.759 | 0.0405898 | 2.3271411 | -4.58 | 2.4476492 | RFTN1                                    |
| 210736_x_at | 0.759 | 0.0406032 | 2.3269521 | -4.58 | 2.7750019 | DTNA                                     |
| 1563252_at  | 0.759 | 0.0406083 | 2.3268809 | -4.58 | 1.8632665 | ERBB3                                    |
| 205602_x_at | 0.759 | 0.0406255 | 2.3266379 | -4.58 | 1.917106  | PSG7                                     |
| 205092_x_at | 0.759 | 0.0406347 | 2.3265087 | -4.58 | 1.8380933 | ZBTB1                                    |
| 233292_s_at | 0.759 | 0.0406466 | 2.3263414 | -4.58 | 2.5534719 | ANKHD1-EIF4EBP3///ANKHD1                 |
| 235928_at   | 0.759 | 0.0406511 | 2.3262785 | -4.58 | 2.2442613 | ZNF503-AS2                               |
| 1557727_at  | 0.759 | 0.0406573 | 2.3261902 | -4.58 | 1.8474383 | PCBP1-AS1                                |
| 1560148_at  | 0.759 | 0.0406687 | 2.3260297 | -4.58 | 2.4344918 | MIA3                                     |

|              |       |           |           |       |           |                 |
|--------------|-------|-----------|-----------|-------|-----------|-----------------|
| 220750_s_at  | 0.759 | 0.0406859 | 2.3257878 | -4.58 | 1.5499216 | P3H1            |
| 216683_at    | 0.759 | 0.0406999 | 2.3255911 | -4.58 | 1.9682742 |                 |
| 1570185_at   | 0.759 | 0.0407111 | 2.3254341 | -4.58 | 1.6377673 | LOC105378568    |
| 237882_at    | 0.759 | 0.0407154 | 2.3253734 | -4.58 | 2.0759876 |                 |
| 217401_at    | 0.759 | 0.040764  | 2.324691  | -4.58 | 1.9935126 |                 |
| 1561261_at   | 0.759 | 0.0407726 | 2.3245707 | -4.58 | 2.4778202 |                 |
| 1559141_s_at | 0.759 | 0.0408    | 2.3241867 | -4.58 | 3.0491364 | FAM87B///FAM87A |
| 1557079_at   | 0.759 | 0.0408117 | 2.3240213 | -4.58 | 2.2185666 | ITGBL1          |
| 1554857_at   | 0.759 | 0.0408244 | 2.3238439 | -4.58 | 1.7714077 | ELMO2           |
| 231384_at    | 0.759 | 0.04084   | 2.3236246 | -4.58 | 2.3613929 | GRIN2A          |
| 236207_at    | 0.759 | 0.040851  | 2.3234717 | -4.58 | 2.4787682 | SSFA2           |
| 227664_at    | 0.759 | 0.0408524 | 2.3234509 | -4.58 | 1.6707826 | FLJ37453        |
| 210578_at    | 0.759 | 0.0408564 | 2.3233952 | -4.58 | 2.2313878 | TRIM10          |
| 241653_x_at  | 0.759 | 0.0408957 | 2.3228452 | -4.58 | 1.8662827 |                 |
| 213481_at    | 0.759 | 0.0409372 | 2.3222644 | -4.58 | 2.3918168 | S100A13         |
| 1569736_at   | 0.759 | 0.0409429 | 2.3221859 | -4.58 | 2.1977128 | EYA1            |
| 226113_at    | 0.759 | 0.0409492 | 2.322097  | -4.58 | 1.4084178 | ZNF436          |
| 234109_x_at  | 0.759 | 0.04096   | 2.3219464 | -4.58 | 1.9000936 | ONECUT3         |
| 207147_at    | 0.759 | 0.0409679 | 2.3218356 | -4.58 | 2.6435451 | DLX2            |
| 205038_at    | 0.759 | 0.0409881 | 2.3215535 | -4.58 | 1.7099194 | IKZF1           |

|              |       |           |           |       |           |          |
|--------------|-------|-----------|-----------|-------|-----------|----------|
| 244634_at    | 0.759 | 0.0410031 | 2.3213439 | -4.58 | 1.8728244 |          |
| 236120_at    | 0.759 | 0.0410458 | 2.3207493 | -4.58 | 1.93388   |          |
| 1570126_at   | 0.759 | 0.0410587 | 2.3205684 | -4.58 | 2.0030489 |          |
| 1556504_at   | 0.759 | 0.0411361 | 2.319491  | -4.58 | 2.0716992 |          |
| 217368_at    | 0.759 | 0.0411571 | 2.3191997 | -4.58 | 1.6709077 | ATP5G2P1 |
| 231803_at    | 0.759 | 0.0411582 | 2.3191832 | -4.58 | 1.8397192 | FGF11    |
| 205365_at    | 0.759 | 0.0411736 | 2.3189703 | -4.58 | 2.3168822 | HOXB6    |
| 1564053_a_at | 0.759 | 0.0411997 | 2.3186067 | -4.58 | 2.1427487 | YTHDF3   |
| 240215_at    | 0.759 | 0.0412012 | 2.3185867 | -4.58 | 3.4855516 |          |
| 1569254_s_at | 0.759 | 0.0412238 | 2.318272  | -4.58 | 1.9625811 | INTS4    |
| 234957_at    | 0.759 | 0.0412388 | 2.3180644 | -4.58 | 2.6320291 |          |
| 240129_at    | 0.759 | 0.0412412 | 2.3180313 | -4.58 | 2.3478604 |          |
| 218812_s_at  | 0.759 | 0.0412444 | 2.3179867 | -4.58 | 1.9054603 | ORAI2    |
| 1563253_s_at | 0.759 | 0.0412511 | 2.3178927 | -4.58 | 1.9339824 | ERBB3    |
| 1561192_at   | 0.759 | 0.0412512 | 2.3178923 | -4.58 | 2.4588044 |          |
| 1562573_at   | 0.759 | 0.0412662 | 2.3176837 | -4.58 | 2.8321657 | CYP17A1  |
| 244107_at    | 0.759 | 0.0413149 | 2.3170093 | -4.58 | 3.0845808 | DSC3     |
| 233639_at    | 0.759 | 0.0413213 | 2.31692   | -4.58 | 2.6247744 | POMGNT1  |
| 1558390_at   | 0.759 | 0.0413574 | 2.3164195 | -4.58 | 2.4989658 | ZNF599   |

|              |       |           |           |       |           |           |
|--------------|-------|-----------|-----------|-------|-----------|-----------|
| 1556381_at   | 0.759 | 0.0413621 | 2.3163549 | -4.58 | 1.5202227 | NAA15     |
| 210274_at    | 0.759 | 0.0413809 | 2.3160949 | -4.58 | 1.775553  | MAGEA8    |
| 1566844_at   | 0.759 | 0.0413865 | 2.3160176 | -4.58 | 1.8451863 | PER4      |
| 234500_at    | 0.759 | 0.0413997 | 2.3158343 | -4.58 | 1.9282103 |           |
| 1557775_a_at | 0.759 | 0.0414126 | 2.3156568 | -4.58 | 2.1358359 |           |
| 222509_s_at  | 0.759 | 0.0414216 | 2.3155318 | -4.58 | 3.7247136 | ZNF672    |
| 207591_s_at  | 0.759 | 0.041452  | 2.3151126 | -4.58 | 2.4383659 | ARID1A    |
| 237395_at    | 0.759 | 0.0414638 | 2.3149498 | -4.58 | 1.9487189 | CYP4Z1    |
| 233945_at    | 0.759 | 0.041471  | 2.3148499 | -4.58 | 3.1626272 | UGGT2     |
| 244163_at    | 0.759 | 0.0415375 | 2.3139327 | -4.58 | 1.7186309 | SEMA3A    |
| 238922_at    | 0.759 | 0.0415426 | 2.3138619 | -4.58 | 2.5719552 |           |
| 230732_s_at  | 0.759 | 0.0415461 | 2.313814  | -4.58 | 2.5557558 | MAPK4     |
| 243105_at    | 0.759 | 0.0415482 | 2.3137847 | -4.58 | 2.5392059 |           |
| 1553460_at   | 0.759 | 0.0415671 | 2.3135241 | -4.58 | 1.9404789 | C2orf61   |
| 228008_at    | 0.759 | 0.0416371 | 2.3125615 | -4.58 | 1.6840086 | ARID3A    |
| 1558603_at   | 0.759 | 0.04165   | 2.3123835 | -4.58 | 2.3441349 | PLGLB2    |
| 235387_at    | 0.759 | 0.041686  | 2.3118898 | -4.58 | 1.8216718 | GSTCD     |
| 1560347_at   | 0.759 | 0.0417266 | 2.3113314 | -4.58 | 2.1898597 |           |
| 228691_at    | 0.759 | 0.0417406 | 2.31114   | -4.58 | 2.2049028 |           |
| 243605_at    | 0.759 | 0.0417413 | 2.3111295 | -4.58 | 3.3844563 |           |
| 1560912_at   | 0.759 | 0.0417569 | 2.3109158 | -4.58 | 2.8615272 | LINC01120 |
| 1570068_at   | 0.759 | 0.0417585 | 2.3108938 | -4.58 | 1.7690408 |           |

|              |       |           |           |       |           |                  |
|--------------|-------|-----------|-----------|-------|-----------|------------------|
| 1567527_at   | 0.759 | 0.0417639 | 2.3108206 | -4.58 | 2.7477093 |                  |
| 1568754_at   | 0.759 | 0.041768  | 2.3107636 | -4.58 | 1.9918102 | LOC101927814     |
| 204825_at    | 0.759 | 0.0417904 | 2.3104564 | -4.58 | 1.9582747 | MELK             |
| 238921_at    | 0.759 | 0.0418032 | 2.3102815 | -4.58 | 1.7998295 | LOC644794        |
| 219082_at    | 0.759 | 0.041843  | 2.3097367 | -4.58 | 2.33841   | CEMP1///AMDHD2   |
| 209516_at    | 0.759 | 0.0418558 | 2.3095615 | -4.58 | 1.7750995 | SMYD5            |
| 237316_at    | 0.759 | 0.0418591 | 2.3095157 | -4.58 | 2.0071557 | ANKDD1A          |
| 1560994_x_at | 0.759 | 0.0418698 | 2.3093697 | -4.58 | 2.4715316 | LOC400590        |
| 207424_at    | 0.759 | 0.0418816 | 2.309209  | -4.58 | 2.0329265 | MYF5             |
| 223324_s_at  | 0.759 | 0.0418965 | 2.3090053 | -4.58 | 1.7509535 | TRPM7            |
| 240930_at    | 0.759 | 0.0419169 | 2.3087257 | -4.58 | 2.2243791 | CRAMP1           |
| 244465_at    | 0.759 | 0.0419313 | 2.3085301 | -4.58 | 2.4410376 |                  |
| 220833_at    | 0.759 | 0.0419315 | 2.3085269 | -4.58 | 2.378343  |                  |
| 205637_s_at  | 0.759 | 0.0419647 | 2.3080731 | -4.58 | 1.9650661 | SH3GL3           |
| 209930_s_at  | 0.759 | 0.0419904 | 2.3077222 | -4.58 | 2.5367802 | NFE2             |
| 229719_s_at  | 0.759 | 0.0419914 | 2.307709  | -4.58 | 2.927985  | DERL3            |
| 233092_s_at  | 0.759 | 0.0420031 | 2.3075496 | -4.58 | 2.5314785 |                  |
| 207403_at    | 0.759 | 0.0420496 | 2.3069156 | -4.58 | 1.8511319 | IRS4             |
| 1562910_at   | 0.759 | 0.0420762 | 2.3065539 | -4.58 | 2.0614928 | SH3PXD2B         |
| 1560300_a_at | 0.759 | 0.0421258 | 2.3058794 | -4.58 | 2.1812687 | DMRTC1B///DMRTC1 |



|                         |       |           |           |       |           |               |
|-------------------------|-------|-----------|-----------|-------|-----------|---------------|
| 216412_x_at             | 0.759 | 0.0421556 | 2.3054742 | -4.58 | 2.1513259 | CKAP2///IGLC1 |
| 234577_at               | 0.759 | 0.0421626 | 2.3053783 | -4.58 | 1.4496287 |               |
| 242781_at               | 0.759 | 0.0421678 | 2.3053086 | -4.58 | 2.763518  | FAM199X       |
| 237902_at               | 0.759 | 0.0421692 | 2.3052889 | -4.58 | 3.650215  |               |
| AFFX-r2-Bs-phe<br>-3_at | 0.759 | 0.0421893 | 2.3050163 | -4.58 | 2.6695039 |               |
| 205666_at               | 0.759 | 0.0422023 | 2.3048392 | -4.58 | 2.3584891 | FMO1          |
| 238531_x_at             | 0.759 | 0.0422056 | 2.3047951 | -4.58 | 1.920916  |               |
| 241853_at               | 0.759 | 0.0422148 | 2.3046697 | -4.58 | 2.9201508 |               |
| 1553666_at              | 0.759 | 0.0422151 | 2.3046658 | -4.58 | 2.1753574 | CCDC34        |
| 1560348_at              | 0.759 | 0.0422158 | 2.3046568 | -4.58 | 1.72044   | ARHGEF28      |
| 226608_at               | 0.759 | 0.0422257 | 2.3045219 | -4.58 | 2.0024825 | C16orf87      |
| 1561556_at              | 0.759 | 0.0422524 | 2.3041605 | -4.58 | 1.7213725 | LOC101929648  |
| 234924_s_at             | 0.759 | 0.0422649 | 2.3039906 | -4.58 | 1.9465398 | ZNF687        |
| 1556643_at              | 0.759 | 0.0423023 | 2.3034845 | -4.58 | 1.7522317 |               |
| 1565661_x_at            | 0.759 | 0.0423037 | 2.3034646 | -4.58 | 2.4291492 | FUT6          |
| 214115_at               | 0.759 | 0.0423579 | 2.302732  | -4.58 | 2.9102074 | VAMP5         |
| 240925_at               | 0.759 | 0.0423692 | 2.3025783 | -4.58 | 1.7685364 |               |
| 227389_x_at             | 0.759 | 0.0423729 | 2.3025282 | -4.58 | 2.3756218 | IRF2BP2       |
| 234076_at               | 0.759 | 0.0423738 | 2.3025159 | -4.58 | 2.5868581 |               |
| 216252_x_at             | 0.759 | 0.0424338 | 2.3017056 | -4.58 | 2.1520377 | FAS           |
| 1553211_at              | 0.759 | 0.0424493 | 2.3014968 | -4.58 | 2.6037451 | ANKFN1        |

|             |       |           |           |       |           |              |
|-------------|-------|-----------|-----------|-------|-----------|--------------|
| 1552948_at  | 0.759 | 0.0424749 | 2.3011509 | -4.58 | 1.852288  | CCDC27       |
| 215665_at   | 0.759 | 0.0424876 | 2.3009791 | -4.58 | 1.7149125 |              |
| 207928_s_at | 0.759 | 0.0424909 | 2.3009357 | -4.58 | 2.5087521 | GLRA3        |
| 1562281_at  | 0.759 | 0.0424934 | 2.3009014 | -4.58 | 1.8566536 |              |
| 236844_at   | 0.759 | 0.042494  | 2.3008933 | -4.58 | 2.9298628 | DHX30        |
| 1561770_at  | 0.759 | 0.0425115 | 2.3006577 | -4.58 | 2.4230481 |              |
| 242149_at   | 0.759 | 0.0425479 | 2.3001665 | -4.58 | 1.6054248 | FAM210A      |
| 224320_s_at | 0.759 | 0.0426046 | 2.2994044 | -4.58 | 1.9311333 | MCM8         |
| 232045_at   | 0.759 | 0.0426179 | 2.2992257 | -4.58 | 2.0048671 | PHACTR1      |
| 218850_s_at | 0.759 | 0.0426307 | 2.2990534 | -4.58 | 2.2662686 | LIMD1        |
| 241744_x_at | 0.759 | 0.0426914 | 2.2982376 | -4.58 | 2.7814228 |              |
| 240876_x_at | 0.759 | 0.0427019 | 2.2980971 | -4.58 | 2.5556093 | TERB2        |
| 241171_at   | 0.759 | 0.0427443 | 2.2975285 | -4.58 | 2.3672279 |              |
| 1566814_at  | 0.759 | 0.0427737 | 2.2971344 | -4.58 | 2.7035604 | FGF22        |
| 234754_at   | 0.759 | 0.0427824 | 2.2970168 | -4.58 | 1.9606636 | SLC37A1      |
| 1555441_at  | 0.759 | 0.0427951 | 2.2968472 | -4.58 | 3.2344044 | UBA6         |
| 1569604_at  | 0.759 | 0.0428175 | 2.2965469 | -4.58 | 1.9360955 | LINC01134    |
| 1564323_at  | 0.759 | 0.0428267 | 2.2964247 | -4.58 | 2.2381854 | LOC101928405 |
| 217109_at   | 0.759 | 0.0428577 | 2.2960092 | -4.58 | 1.8089859 | MUC4         |
| 215414_at   | 0.759 | 0.0428957 | 2.2955017 | -4.58 | 2.4685002 | FARS2        |
| 1563149_at  | 0.759 | 0.042898  | 2.2954711 | -4.58 | 2.4825634 |              |
| 221679_s_at | 0.759 | 0.0429456 | 2.2948352 | -4.58 | 2.2110973 | ABHD6        |

|             |       |           |           |       |           |                                                              |
|-------------|-------|-----------|-----------|-------|-----------|--------------------------------------------------------------|
| 1560262_at  | 0.759 | 0.0429581 | 2.2946689 | -4.58 | 2.2401325 |                                                              |
| 221107_at   | 0.759 | 0.0429658 | 2.2945655 | -4.58 | 2.4810269 | CHRNA9                                                       |
| 236536_at   | 0.759 | 0.0429815 | 2.2943557 | -4.58 | 1.4737139 | GALNT13                                                      |
| 237967_at   | 0.759 | 0.0429882 | 2.2942666 | -4.58 | 2.1660343 | HAL                                                          |
| 213072_at   | 0.759 | 0.0430355 | 2.2936362 | -4.58 | 2.1834962 | CYHR1                                                        |
| 211876_x_at | 0.759 | 0.0430383 | 2.2935997 | -4.58 | 2.4047563 | PCDHGA3///PCDHGA5///PCDHGA6///PCDHGA10///PCDHGA11///PCDHGA12 |
| 211582_x_at | 0.759 | 0.0430596 | 2.2933155 | -4.58 | 2.3231706 | LST1                                                         |
| 209250_at   | 0.759 | 0.0430714 | 2.2931587 | -4.58 | 1.5223757 | DEGS1                                                        |
| 215814_at   | 0.759 | 0.0430721 | 2.2931495 | -4.58 | 2.1654995 | DST                                                          |
| 1555133_at  | 0.759 | 0.0430904 | 2.2929061 | -4.58 | 2.7120519 | FAM9A                                                        |
| 1561289_at  | 0.759 | 0.0430913 | 2.2928941 | -4.58 | 3.7085396 | MIR4290HG                                                    |
| 219148_at   | 0.759 | 0.0431055 | 2.2927045 | -4.58 | 1.9365845 | PBK                                                          |
| 207478_at   | 0.759 | 0.0431312 | 2.292363  | -4.58 | 3.0109532 | PRO2958                                                      |
| 232295_at   | 0.759 | 0.0431708 | 2.2918377 | -4.58 | 2.7100557 | GFM1                                                         |
| 1560646_at  | 0.759 | 0.0431796 | 2.2917207 | -4.58 | 1.9822281 | METTTL21EP                                                   |
| 207899_at   | 0.759 | 0.0432117 | 2.2912944 | -4.58 | 2.4005781 | GIP                                                          |
| 1555842_at  | 0.759 | 0.0432166 | 2.2912291 | -4.58 | 1.7876451 | CYTH2                                                        |
| 1553620_at  | 0.759 | 0.0432366 | 2.2909642 | -4.58 | 2.0548792 | TRIM42                                                       |

|              |       |           |           |       |           |                        |
|--------------|-------|-----------|-----------|-------|-----------|------------------------|
| 215717_s_at  | 0.759 | 0.0432473 | 2.2908216 | -4.58 | 2.639896  | FBN2                   |
| 1557755_at   | 0.759 | 0.0432722 | 2.2904924 | -4.58 | 2.0735439 | CEP128                 |
| 235047_x_at  | 0.759 | 0.0432793 | 2.2903978 | -4.58 | 1.824152  | NACC1                  |
| 241687_at    | 0.759 | 0.0432902 | 2.2902534 | -4.58 | 1.5576541 | WDR12                  |
| 219836_at    | 0.759 | 0.0432913 | 2.2902397 | -4.58 | 2.2870973 | ZBED2                  |
| 208568_at    | 0.759 | 0.0433661 | 2.28925   | -4.58 | 2.0926995 | MC2R                   |
| 240244_at    | 0.759 | 0.0433805 | 2.2890589 | -4.58 | 2.2183185 |                        |
| 237582_at    | 0.759 | 0.0434083 | 2.2886914 | -4.58 | 1.5599989 |                        |
| 242084_at    | 0.759 | 0.0434293 | 2.2884144 | -4.58 | 1.9391886 | THEG5                  |
| 1566873_at   | 0.759 | 0.043465  | 2.2879428 | -4.58 | 1.6375768 |                        |
| 1557341_x_at | 0.759 | 0.0434666 | 2.2879218 | -4.58 | 1.8364409 | PIK3CD-AS2             |
| 1570361_a_at | 0.759 | 0.0434863 | 2.2876626 | -4.58 | 2.4085717 |                        |
| 220102_at    | 0.759 | 0.0434952 | 2.2875445 | -4.58 | 1.9680312 | FOXL2                  |
| 213837_at    | 0.759 | 0.0434954 | 2.2875423 | -4.58 | 1.9971701 | L3MBTL1                |
| 244394_at    | 0.759 | 0.0435035 | 2.2874354 | -4.58 | 1.9619589 |                        |
| 1560836_at   | 0.759 | 0.0435486 | 2.2868411 | -4.58 | 2.5072939 | LINC01241              |
| 237853_x_at  | 0.759 | 0.0435609 | 2.2866794 | -4.58 | 2.1301396 | KRTAP10-12///KRTAP10-7 |
| 241361_at    | 0.759 | 0.0435632 | 2.2866489 | -4.58 | 1.7259062 |                        |
| 241556_at    | 0.759 | 0.0435815 | 2.2864088 | -4.58 | 2.1095927 |                        |
| 243018_at    | 0.759 | 0.0436019 | 2.2861395 | -4.58 | 2.3896738 | BBOX1-AS1              |
| 1570189_at   | 0.759 | 0.0436067 | 2.2860761 | -4.58 | 1.9090975 | LINC00671              |

|              |       |           |           |       |           |                         |
|--------------|-------|-----------|-----------|-------|-----------|-------------------------|
| 213831_at    | 0.759 | 0.0436097 | 2.2860368 | -4.58 | 1.7449753 | LOC100509457///HLA-DQA1 |
| 209829_at    | 0.759 | 0.0436217 | 2.2858796 | -4.58 | 2.0997859 | FAM65B                  |
| 216327_s_at  | 0.759 | 0.0436353 | 2.2857008 | -4.58 | 2.4491524 | SIGLEC8                 |
| 1561085_at   | 0.759 | 0.0437109 | 2.2847077 | -4.58 | 2.6104141 | LOC153910               |
| 238855_at    | 0.759 | 0.0437164 | 2.2846361 | -4.58 | 2.3694667 | AHNAK                   |
| 217481_x_at  | 0.759 | 0.04374   | 2.2843264 | -4.58 | 1.9529735 | SHISA6                  |
| 1554451_s_at | 0.759 | 0.0437519 | 2.2841705 | -4.58 | 1.8175143 | DNAJC14                 |
| 239910_at    | 0.759 | 0.0437707 | 2.2839239 | -4.58 | 2.0087542 | PSG6                    |
| 1561305_at   | 0.759 | 0.0437757 | 2.2838578 | -4.58 | 1.6516364 | LOC101927849            |
| 237841_at    | 0.759 | 0.0437903 | 2.2836677 | -4.58 | 3.7657475 |                         |
| 241836_x_at  | 0.759 | 0.0437945 | 2.2836126 | -4.58 | 2.012944  | CEP97                   |
| 220721_at    | 0.759 | 0.043798  | 2.2835664 | -4.58 | 1.9783837 | ZNF614                  |
| 1567253_at   | 0.759 | 0.0438363 | 2.2830653 | -4.58 | 1.98699   | OR10D3                  |
| 243430_at    | 0.759 | 0.0438431 | 2.2829759 | -4.58 | 2.0365625 | SEZ6                    |
| 217207_s_at  | 0.759 | 0.0438781 | 2.2825179 | -4.58 | 1.9709962 | BTNL3                   |
| 217332_at    | 0.759 | 0.0438786 | 2.2825114 | -4.58 | 1.705663  | CTAGE11P                |
| 219075_at    | 0.759 | 0.0439018 | 2.2822085 | -4.58 | 2.1032622 | YIPF2                   |
| 1557021_s_at | 0.759 | 0.043922  | 2.2819439 | -4.58 | 2.3074588 | LOC100507250            |
| 1555189_a_at | 0.759 | 0.0439698 | 2.2813208 | -4.58 | 2.6848515 | TAT                     |

|              |       |           |           |       |           |              |
|--------------|-------|-----------|-----------|-------|-----------|--------------|
| 233845_at    | 0.759 | 0.0439758 | 2.2812428 | -4.58 | 2.941396  |              |
| 202311_s_at  | 0.759 | 0.044045  | 2.2803408 | -4.58 | 2.7769131 | COL1A1       |
| 1561307_at   | 0.759 | 0.0440583 | 2.2801665 | -4.58 | 2.3110343 | LOC105372550 |
| 1555571_at   | 0.759 | 0.0440771 | 2.2799224 | -4.58 | 2.1718905 | IMMP2L       |
| 234892_at    | 0.759 | 0.0440805 | 2.2798776 | -4.58 | 1.9314606 |              |
| 1567247_at   | 0.759 | 0.0441098 | 2.2794973 | -4.58 | 2.3806085 | OR5H1        |
| 1564072_at   | 0.759 | 0.0441131 | 2.2794539 | -4.58 | 2.9921684 | MYH16        |
| 241012_at    | 0.759 | 0.044125  | 2.2792993 | -4.58 | 2.0073371 |              |
| 222485_at    | 0.759 | 0.0441564 | 2.2788906 | -4.58 | 1.6431135 | FKBP3        |
| 1554614_a_at | 0.759 | 0.0441766 | 2.2786288 | -4.58 | 2.2551041 | PTBP2        |
| 236386_at    | 0.759 | 0.0442425 | 2.2777737 | -4.58 | 2.0199014 | SUZ12P1      |
| 212193_s_at  | 0.759 | 0.0442623 | 2.2775164 | -4.58 | 2.1890165 | LARP1        |
| 242278_at    | 0.759 | 0.0442643 | 2.277491  | -4.58 | 1.8670685 | LOC101930097 |
| 1556903_at   | 0.759 | 0.044282  | 2.2772614 | -4.58 | 2.6304841 | LOC101928335 |
| 244271_at    | 0.759 | 0.0442908 | 2.2771472 | -4.58 | 1.8971083 |              |
| 1566664_at   | 0.759 | 0.0443276 | 2.2766709 | -4.58 | 2.111791  | CCDC168      |
| 1554071_at   | 0.759 | 0.0443411 | 2.2764964 | -4.58 | 3.3644858 | DEUP1        |
| 1566721_at   | 0.759 | 0.0443888 | 2.2758794 | -4.58 | 1.6911122 | SVEP1        |

|                         |       |           |           |       |           |                                |
|-------------------------|-------|-----------|-----------|-------|-----------|--------------------------------|
| 232289_at               | 0.759 | 0.0444045 | 2.275676  | -4.58 | 1.7189127 | LOC100996843///KCNJ18///KCNJ12 |
| 243642_x_at             | 0.759 | 0.044438  | 2.2752434 | -4.58 | 1.9632632 |                                |
| 1552408_at              | 0.759 | 0.0444863 | 2.27462   | -4.58 | 2.2131717 | ODF4                           |
| 1569518_at              | 0.759 | 0.0444882 | 2.2745958 | -4.58 | 2.1624742 |                                |
| 209905_at               | 0.759 | 0.0445039 | 2.2743923 | -4.58 | 3.7660301 | HOXA10-HOXA9///MIR196B///HOXA9 |
| 1555990_at              | 0.759 | 0.0445536 | 2.2737516 | -4.58 | 2.6390178 | C22orf42                       |
| 47560_at                | 0.759 | 0.0445756 | 2.2734685 | -4.58 | 1.6876728 | ADGRL1                         |
| 227774_s_at             | 0.759 | 0.0445975 | 2.2731871 | -4.58 | 3.452708  | IMPAD1                         |
| 1553226_at              | 0.759 | 0.044608  | 2.2730516 | -4.58 | 2.0815259 | LINC00052                      |
| 243948_at               | 0.759 | 0.044638  | 2.272666  | -4.58 | 1.8588704 | ZC3H14                         |
| 200894_s_at             | 0.759 | 0.0446393 | 2.2726491 | -4.58 | 1.6926204 | FKBP4                          |
| 240509_s_at             | 0.759 | 0.0446517 | 2.2724892 | -4.58 | 3.3033081 | GREM2                          |
| AFFX-r2-Bs-phe<br>-M_at | 0.759 | 0.0446667 | 2.2722964 | -4.58 | 3.0723841 |                                |
| 1559993_at              | 0.759 | 0.0446846 | 2.2720675 | -4.58 | 2.313851  | SFXN3                          |
| 237451_x_at             | 0.759 | 0.0446985 | 2.2718886 | -4.58 | 1.8852076 |                                |
| 239009_at               | 0.759 | 0.0446997 | 2.271873  | -4.58 | 2.089391  | KIAA0754                       |
| 203686_at               | 0.759 | 0.0446998 | 2.2718722 | -4.58 | 1.7287148 | MPG                            |
| 1564701_at              | 0.759 | 0.0447023 | 2.2718394 | -4.58 | 2.0331036 |                                |

|             |       |           |           |       |           |              |
|-------------|-------|-----------|-----------|-------|-----------|--------------|
| 216238_s_at | 0.759 | 0.0447263 | 2.2715315 | -4.58 | 2.6642771 | FGB          |
| 1554686_at  | 0.759 | 0.0447503 | 2.2712235 | -4.58 | 2.1270062 | STAU2        |
| 1555868_at  | 0.759 | 0.0447511 | 2.2712133 | -4.58 | 1.8551207 | LOC100507477 |
| 238667_at   | 0.759 | 0.0447591 | 2.2711113 | -4.58 | 2.3824278 |              |
| 241647_x_at | 0.759 | 0.0447646 | 2.2710405 | -4.58 | 2.4346965 |              |
| 217396_at   | 0.759 | 0.0447719 | 2.2709466 | -4.58 | 2.2518734 |              |
| 1560485_at  | 0.759 | 0.0447731 | 2.2709319 | -4.58 | 1.9171115 | HIVEP1       |
| 211248_s_at | 0.759 | 0.0447918 | 2.2706911 | -4.58 | 2.2955902 | CHRD         |
| 231305_at   | 0.759 | 0.0448417 | 2.2700524 | -4.58 | 1.825658  | LOC100507520 |
| 224193_s_at | 0.759 | 0.0448562 | 2.2698669 | -4.58 | 1.6624901 | FCRL2        |
| 227165_at   | 0.759 | 0.044893  | 2.2693955 | -4.58 | 1.9758762 | SKA3         |
| 1565601_at  | 0.759 | 0.0449093 | 2.2691874 | -4.58 | 2.4497457 |              |
| 231554_at   | 0.759 | 0.0449124 | 2.2691478 | -4.58 | 2.7247252 | TPD52L3      |
| 206940_s_at | 0.759 | 0.0449184 | 2.2690717 | -4.58 | 2.5680978 | POU4F1       |
| 1570587_at  | 0.759 | 0.0449358 | 2.268849  | -4.58 | 2.1843102 |              |
| 203784_s_at | 0.759 | 0.0449562 | 2.2685881 | -4.58 | 2.2426474 | DDX28        |
| 239424_at   | 0.759 | 0.0449592 | 2.2685495 | -4.58 | 2.1364747 |              |
| 1564003_at  | 0.759 | 0.0450203 | 2.2677697 | -4.58 | 1.9379442 |              |
| 241217_x_at | 0.759 | 0.0450277 | 2.2676763 | -4.58 | 2.0659631 |              |
| 1564281_at  | 0.759 | 0.0450468 | 2.2674325 | -4.58 | 2.000459  | LINC00491    |
| 201276_at   | 0.759 | 0.0450492 | 2.2674014 | -4.58 | 1.6770809 | RAB5B        |



|              |       |           |           |       |           |              |
|--------------|-------|-----------|-----------|-------|-----------|--------------|
| 222319_at    | 0.759 | 0.0450674 | 2.2671698 | -4.58 | 2.0691943 |              |
| 1566499_at   | 0.759 | 0.0450729 | 2.2670995 | -4.58 | 2.4003267 |              |
| 223906_s_at  | 0.759 | 0.0450949 | 2.2668198 | -4.58 | 1.5772928 | TEX101       |
| 236588_at    | 0.759 | 0.0450981 | 2.2667786 | -4.58 | 1.309723  | CFDP1        |
| 206786_at    | 0.759 | 0.0451017 | 2.2667327 | -4.58 | 2.4434636 | HTN3         |
| 1554232_a_at | 0.759 | 0.0451062 | 2.2666754 | -4.58 | 2.4228525 |              |
| 240970_x_at  | 0.759 | 0.0451217 | 2.2664781 | -4.58 | 2.7190534 | LOC102723684 |
| 241291_at    | 0.759 | 0.0451364 | 2.2662911 | -4.58 | 2.1853814 | LINC01541    |
| 219188_s_at  | 0.759 | 0.045143  | 2.2662072 | -4.58 | 2.0084345 | MACROD1      |
| 208543_at    | 0.759 | 0.0451439 | 2.2661963 | -4.58 | 2.4072574 | OR10H2       |
| 240497_at    | 0.759 | 0.0451538 | 2.2660699 | -4.58 | 1.9381362 |              |
| 216049_at    | 0.759 | 0.0451954 | 2.2655416 | -4.58 | 2.2164392 | RHOBTB3      |
| 1558381_a_at | 0.759 | 0.0451964 | 2.2655284 | -4.58 | 2.0449744 | TMEM147-AS1  |
| 207129_at    | 0.759 | 0.0452072 | 2.2653918 | -4.58 | 1.9742937 | CA5B         |
| 1564545_a_at | 0.759 | 0.04523   | 2.2651017 | -4.58 | 2.6419016 |              |
| 1552520_at   | 0.759 | 0.0452492 | 2.2648587 | -4.58 | 2.2933389 | TMEM74       |
| 244725_at    | 0.759 | 0.0452611 | 2.2647067 | -4.58 | 1.7157368 | DMRTA1       |
| 206387_at    | 0.759 | 0.0452855 | 2.2643975 | -4.58 | 1.8598131 | CDX2         |
| 229538_s_at  | 0.759 | 0.0453009 | 2.2642018 | -4.58 | 2.0962894 | IQGAP3       |
| 242030_at    | 0.759 | 0.0453349 | 2.2637718 | -4.58 | 1.9109434 |              |
| 208331_at    | 0.759 | 0.0453522 | 2.2635519 | -4.58 | 2.3068799 | BPY2         |
| 1562928_at   | 0.759 | 0.0453977 | 2.2629764 | -4.58 | 2.3655534 |              |

|              |       |           |           |       |           |              |
|--------------|-------|-----------|-----------|-------|-----------|--------------|
| 220568_at    | 0.759 | 0.0454135 | 2.2627772 | -4.58 | 2.5203657 | PRO1483      |
| 201958_s_at  | 0.759 | 0.0454151 | 2.2627566 | -4.58 | 2.4332343 | PPP1R12B     |
| 235428_at    | 0.759 | 0.0454339 | 2.2625185 | -4.58 | 1.4673266 | MINCR        |
| 242161_at    | 0.759 | 0.0454934 | 2.2617665 | -4.58 | 2.5595338 |              |
| 1569241_a_at | 0.759 | 0.0455171 | 2.2614678 | -4.58 | 2.8771124 | ZNF93        |
| 237796_at    | 0.759 | 0.045518  | 2.2614562 | -4.58 | 2.9656803 |              |
| 215939_at    | 0.759 | 0.0455242 | 2.2613778 | -4.58 | 1.8155689 |              |
| 1570261_at   | 0.759 | 0.045554  | 2.261002  | -4.58 | 2.2004476 |              |
| 217359_s_at  | 0.759 | 0.0455613 | 2.2609098 | -4.58 | 1.7006056 | NCAM1        |
| 1562537_at   | 0.759 | 0.0455881 | 2.2605727 | -4.58 | 2.3110402 | FCER1A       |
| 244099_at    | 0.759 | 0.0456022 | 2.2603951 | -4.58 | 2.1883996 | CACNG2       |
| 1556999_at   | 0.759 | 0.0456103 | 2.2602931 | -4.58 | 1.9515369 | LOC100271832 |
| 233507_at    | 0.759 | 0.0456132 | 2.2602561 | -4.58 | 1.6326095 |              |
| 242690_at    | 0.759 | 0.0456433 | 2.2598778 | -4.58 | 3.2227731 | ATP11C       |
| 1553465_a_at | 0.759 | 0.045654  | 2.2597432 | -4.58 | 1.8322903 | CES5A        |
| 231175_at    | 0.759 | 0.0456622 | 2.2596402 | -4.58 | 2.550813  | BEND6        |
| 217062_at    | 0.759 | 0.0456884 | 2.2593094 | -4.58 | 1.9018812 | DMPK         |
| 217507_at    | 0.759 | 0.0456951 | 2.2592261 | -4.58 | 2.3978468 | SLC11A1      |
| 216577_at    | 0.759 | 0.0457121 | 2.2590123 | -4.58 | 1.6211283 |              |
| 205699_at    | 0.759 | 0.0457183 | 2.2589344 | -4.58 | 2.5030959 | MAP2K6       |
| 1556584_at   | 0.759 | 0.0457425 | 2.2586301 | -4.58 | 1.5289158 |              |
| 1566948_at   | 0.759 | 0.0457691 | 2.2582961 | -4.58 | 2.2598628 |              |
| 231679_at    | 0.759 | 0.0457716 | 2.2582643 | -4.58 | 2.1325793 |              |

|              |       |           |           |       |           |                 |
|--------------|-------|-----------|-----------|-------|-----------|-----------------|
| 208363_s_at  | 0.759 | 0.0457932 | 2.2579936 | -4.58 | 2.068579  | INPP4A          |
| 215491_at    | 0.759 | 0.0458341 | 2.2574814 | -4.58 | 2.0408418 | MYCL            |
| 220218_at    | 0.759 | 0.0458467 | 2.2573233 | -4.58 | 1.633014  | SPATA6L         |
| 216601_at    | 0.759 | 0.0458475 | 2.2573123 | -4.58 | 2.2858986 | AOC4P           |
| 220810_at    | 0.759 | 0.0458578 | 2.2571839 | -4.58 | 2.654352  | CLCA3P          |
| 230853_at    | 0.759 | 0.0458588 | 2.2571709 | -4.58 | 1.8780731 | FEM1A           |
| 210464_at    | 0.759 | 0.0458782 | 2.2569279 | -4.58 | 3.3274771 | LINC00588       |
| 1564008_at   | 0.759 | 0.0458887 | 2.2567973 | -4.58 | 1.6398188 | COL27A1         |
| 234705_at    | 0.759 | 0.0459031 | 2.2566162 | -4.58 | 1.8555106 | CATX-1          |
| 237449_at    | 0.759 | 0.0459114 | 2.2565126 | -4.58 | 2.1216546 | SP8             |
| 242348_at    | 0.759 | 0.0459239 | 2.2563561 | -4.58 | 3.1320735 | FAM19A4         |
| 242035_at    | 0.759 | 0.0459561 | 2.2559532 | -4.58 | 1.6639041 | LMBR1           |
| 1561280_at   | 0.759 | 0.0459722 | 2.2557517 | -4.58 | 3.1243624 | LEMD1-AS1       |
| 214236_at    | 0.759 | 0.0459801 | 2.2556532 | -4.58 | 1.6667972 |                 |
| 201265_at    | 0.759 | 0.0460066 | 2.2553227 | -4.58 | 2.3096888 |                 |
| 211496_s_at  | 0.759 | 0.0460145 | 2.2552235 | -4.58 | 2.9078541 | PDC             |
| 1558163_at   | 0.759 | 0.046026  | 2.2550804 | -4.58 | 2.2870618 | PEX13           |
| 240083_at    | 0.759 | 0.0460395 | 2.2549113 | -4.58 | 2.7432932 | SNORD112///MEG8 |
| 232894_at    | 0.759 | 0.0460497 | 2.2547849 | -4.58 | 2.6297402 | SEC14L2         |
| 1556786_at   | 0.759 | 0.0460531 | 2.254742  | -4.58 | 3.0407753 | PDE5A           |
| 243947_s_at  | 0.759 | 0.0460622 | 2.2546283 | -4.58 | 2.4118028 |                 |
| 1564373_a_at | 0.759 | 0.046064  | 2.2546061 | -4.58 | 2.210897  | LOC283887       |

|              |       |           |           |       |           |           |
|--------------|-------|-----------|-----------|-------|-----------|-----------|
| 1553060_at   | 0.759 | 0.0460916 | 2.2542615 | -4.58 | 1.7577433 | PSKH2     |
| 236479_at    | 0.759 | 0.0461095 | 2.2540387 | -4.58 | 1.7293872 |           |
| 208080_at    | 0.759 | 0.0461199 | 2.2539085 | -4.58 | 2.3848106 | AURKA     |
| 219989_s_at  | 0.759 | 0.0461473 | 2.2535673 | -4.58 | 2.104795  | ANKS1B    |
| 1563612_at   | 0.759 | 0.0461577 | 2.2534378 | -4.58 | 2.4324002 |           |
| 224860_at    | 0.759 | 0.0461705 | 2.2532787 | -4.58 | 1.5885297 | TMEM261   |
| 237308_at    | 0.759 | 0.0461767 | 2.2532013 | -4.58 | 2.0372018 |           |
| 1557641_at   | 0.759 | 0.0461835 | 2.2531173 | -4.58 | 2.3806565 |           |
| 206990_at    | 0.759 | 0.0461925 | 2.2530046 | -4.58 | 2.483291  | TNR       |
| 206248_at    | 0.759 | 0.046215  | 2.2527247 | -4.58 | 1.6015616 | PRKCE     |
| 1556205_at   | 0.759 | 0.0462182 | 2.2526857 | -4.58 | 1.586366  |           |
| 1560842_a_at | 0.759 | 0.0462191 | 2.2526738 | -4.58 | 1.914456  | TEX26-AS1 |
| 237185_at    | 0.759 | 0.0462218 | 2.2526403 | -4.58 | 2.0938657 |           |
| 1553710_at   | 0.759 | 0.0463146 | 2.2514877 | -4.58 | 2.4279242 | FAM218A   |
| 221445_at    | 0.759 | 0.0463322 | 2.2512693 | -4.58 | 3.3105081 | OR1A2     |
| 243007_at    | 0.759 | 0.0463454 | 2.2511058 | -4.58 | 1.8474219 | TTC5      |
| 207501_s_at  | 0.759 | 0.0463507 | 2.2510396 | -4.58 | 2.1857564 | FGF12     |
| 221013_s_at  | 0.759 | 0.0463578 | 2.2509512 | -4.58 | 1.4871479 | APOL2     |
| 205143_at    | 0.759 | 0.0463655 | 2.250856  | -4.58 | 1.7533644 | NCAN      |
| 1556086_at   | 0.759 | 0.0463678 | 2.2508282 | -4.58 | 2.3869155 | HPF1      |
| 228272_at    | 0.759 | 0.0463792 | 2.2506863 | -4.58 | 2.9098919 | DNLZ      |
| 235517_at    | 0.759 | 0.0464034 | 2.2503871 | -4.58 | 2.1545694 | PACRGL    |
| 1556679_at   | 0.759 | 0.046415  | 2.2502431 | -4.58 | 2.1266786 |           |

|              |       |           |           |       |           |                   |
|--------------|-------|-----------|-----------|-------|-----------|-------------------|
| 1561392_at   | 0.759 | 0.0464165 | 2.2502248 | -4.58 | 1.9561332 |                   |
| 244000_at    | 0.759 | 0.0464288 | 2.2500717 | -4.58 | 3.0610035 |                   |
| 238514_at    | 0.759 | 0.0464363 | 2.2499792 | -4.58 | 2.5640781 | TMEM25            |
| 240421_x_at  | 0.759 | 0.046444  | 2.2498838 | -4.58 | 1.684479  | SAV1              |
| 1553755_at   | 0.759 | 0.0464672 | 2.249597  | -4.58 | 2.4300546 | NXNL1             |
| 1565650_at   | 0.759 | 0.0464672 | 2.2495963 | -4.58 | 2.8768588 |                   |
| 230955_s_at  | 0.759 | 0.0465011 | 2.2491776 | -4.58 | 2.1126071 | NOL4L             |
| 213908_at    | 0.759 | 0.0465333 | 2.2487797 | -4.58 | 1.5389971 | WHAMMP2///WHAMMP3 |
| 224300_x_at  | 0.759 | 0.0465402 | 2.2486946 | -4.58 | 2.0682162 | FTCD              |
| 236903_at    | 0.759 | 0.0465498 | 2.2485757 | -4.58 | 1.6862696 |                   |
| 233189_at    | 0.759 | 0.0465636 | 2.248405  | -4.58 | 2.1829038 |                   |
| 222177_s_at  | 0.759 | 0.0466105 | 2.2478271 | -4.58 | 2.7689408 | SCAND2P           |
| 1556935_at   | 0.759 | 0.0466173 | 2.2477432 | -4.58 | 2.7039033 |                   |
| 244305_at    | 0.759 | 0.0466595 | 2.2472223 | -4.58 | 2.2907124 | GGN               |
| 240519_at    | 0.759 | 0.0466639 | 2.2471687 | -4.58 | 2.0642963 |                   |
| 1568736_s_at | 0.759 | 0.0466949 | 2.2467863 | -4.58 | 2.3123206 | DLGAP1            |
| 206964_at    | 0.759 | 0.0467031 | 2.2466856 | -4.58 | 2.1110076 | NAT8B             |
| 237521_x_at  | 0.759 | 0.0467296 | 2.2463595 | -4.58 | 2.7267085 |                   |
| 1569987_at   | 0.759 | 0.0468248 | 2.2451894 | -4.58 | 2.3447762 | DLEU7-AS1         |

|             |       |           |           |       |           |                          |
|-------------|-------|-----------|-----------|-------|-----------|--------------------------|
| 221359_at   | 0.759 | 0.0468345 | 2.2450702 | -4.58 | 1.7150648 | GDNF                     |
| 216851_at   | 0.759 | 0.0468352 | 2.2450612 | -4.58 | 1.6291586 | IGLL5///IGLJ3///IGLV3-19 |
| 229224_x_at | 0.759 | 0.0468477 | 2.2449086 | -4.58 | 1.8071342 | LOC643085                |
| 230159_at   | 0.759 | 0.0468517 | 2.2448595 | -4.58 | 1.9338961 | C1orf115                 |
| 207632_at   | 0.759 | 0.0468612 | 2.2447419 | -4.58 | 2.5873996 | MUSK                     |
| 207658_s_at | 0.759 | 0.0468888 | 2.2444041 | -4.58 | 2.1290814 | FOXG1                    |
| 230574_at   | 0.759 | 0.0468981 | 2.2442898 | -4.58 | 1.6421503 | LOC100130938             |
| 1555697_at  | 0.759 | 0.0469102 | 2.2441412 | -4.58 | 1.8870841 | KLK4                     |
| 1555205_at  | 0.759 | 0.0469319 | 2.2438755 | -4.58 | 2.1214457 |                          |
| 238881_at   | 0.759 | 0.0469533 | 2.2436127 | -4.58 | 1.4754463 |                          |
| 226286_at   | 0.759 | 0.0469535 | 2.2436109 | -4.58 | 2.1282733 | ELMOD3                   |
| 229110_at   | 0.759 | 0.0470081 | 2.2429424 | -4.58 | 2.1899935 | SLC24A2                  |
| 1557779_at  | 0.759 | 0.0470261 | 2.2427221 | -4.58 | 2.6426894 | LINC01468                |
| 243789_at   | 0.759 | 0.0470577 | 2.2423357 | -4.58 | 3.7920141 |                          |
| 233089_at   | 0.759 | 0.0470632 | 2.2422693 | -4.58 | 1.8190111 | QRSL1                    |
| 237989_at   | 0.759 | 0.0470657 | 2.2422384 | -4.58 | 2.1595289 | IGFBP1                   |
| 1561002_at  | 0.759 | 0.0471081 | 2.2417199 | -4.58 | 2.5456499 |                          |
| 216826_at   | 0.759 | 0.0471161 | 2.2416221 | -4.58 | 2.1350287 |                          |
| 228675_at   | 0.759 | 0.0471225 | 2.241544  | -4.58 | 1.748671  | USP30-AS1                |
| 206304_at   | 0.759 | 0.0471679 | 2.2409908 | -4.58 | 2.0360377 | MYBPH                    |
| 239216_at   | 0.759 | 0.0471728 | 2.2409306 | -4.58 | 2.0949167 | TEKT1                    |

|              |       |           |           |       |           |               |
|--------------|-------|-----------|-----------|-------|-----------|---------------|
| 236774_at    | 0.759 | 0.0471846 | 2.2407866 | -4.58 | 2.2011059 |               |
| 230567_at    | 0.759 | 0.0471859 | 2.2407709 | -4.58 | 2.5143935 | CFAP97        |
| 223745_at    | 0.759 | 0.0471969 | 2.240637  | -4.58 | 2.4486381 | C16orf95      |
| 234677_at    | 0.759 | 0.0472281 | 2.2402573 | -4.58 | 1.6514759 | LOC105376689  |
| 244372_at    | 0.759 | 0.0472717 | 2.2397257 | -4.58 | 1.9850437 | LOC101060019  |
| 221975_s_at  | 0.759 | 0.0472902 | 2.2395008 | -4.58 | 2.1461075 | C21orf2       |
| 1554468_s_at | 0.759 | 0.0472906 | 2.2394963 | -4.58 | 2.0144336 | FBF1          |
| 235596_at    | 0.759 | 0.0473157 | 2.2391915 | -4.58 | 2.2808906 |               |
| 208597_at    | 0.759 | 0.0473186 | 2.2391553 | -4.58 | 2.252616  | CNTF          |
| 1562294_x_at | 0.759 | 0.0473555 | 2.2387068 | -4.58 | 2.5067517 | ANKRD30B      |
| 211426_x_at  | 0.759 | 0.0473667 | 2.2385707 | -4.58 | 1.7156875 | GNAQ          |
| 220779_at    | 0.759 | 0.0473851 | 2.2383473 | -4.58 | 2.066644  | PADI3         |
| 1552480_s_at | 0.759 | 0.0474259 | 2.2378521 | -4.58 | 2.8008119 | PTPRC         |
| 230544_at    | 0.759 | 0.0474729 | 2.2372827 | -4.58 | 2.2104744 | RPS6KA4       |
| 1568865_at   | 0.759 | 0.0474763 | 2.2372416 | -4.58 | 2.2730599 | FNTB          |
| 239729_at    | 0.759 | 0.0474875 | 2.2371055 | -4.58 | 2.2462259 |               |
| 220404_at    | 0.759 | 0.0474949 | 2.2370166 | -4.58 | 2.1114837 | ADGRG3        |
| 241748_x_at  | 0.759 | 0.0475002 | 2.2369524 | -4.58 | 2.0344733 | DGCR14        |
| 214640_at    | 0.759 | 0.0475061 | 2.2368805 | -4.58 | 2.3976438 | UNC93A        |
| 230315_at    | 0.759 | 0.0475479 | 2.2363742 | -4.58 | 2.0578978 |               |
| 234525_at    | 0.759 | 0.0475556 | 2.236281  | -4.58 | 3.1488635 | DKFZP761C1711 |
| 215762_at    | 0.759 | 0.047556  | 2.2362765 | -4.58 | 2.0948427 |               |

|              |       |           |           |       |           |               |
|--------------|-------|-----------|-----------|-------|-----------|---------------|
| 215207_x_at  | 0.759 | 0.047565  | 2.2361672 | -4.58 | 1.4924607 | NUS1///NUS1P3 |
| 1554834_a_at | 0.759 | 0.0475669 | 2.2361451 | -4.58 | 1.9035527 | RASSF5        |
| 233574_at    | 0.759 | 0.0475702 | 2.2361048 | -4.58 | 2.3904209 | BCORL1        |
| 229919_at    | 0.759 | 0.0476451 | 2.2351998 | -4.58 | 1.7022343 | NTPCR         |
| 1553169_at   | 0.759 | 0.0476554 | 2.2350744 | -4.58 | 2.5302969 | LRRN4         |
| 237168_at    | 0.759 | 0.0476677 | 2.2349265 | -4.58 | 1.7611486 | NEK5          |
| 241662_x_at  | 0.759 | 0.0476796 | 2.2347832 | -4.58 | 1.704072  |               |
| 236654_s_at  | 0.759 | 0.0476937 | 2.234613  | -4.58 | 1.6189298 |               |
| 235150_at    | 0.759 | 0.0476969 | 2.2345738 | -4.58 | 1.9212323 | SESN3         |
| 1555626_a_at | 0.759 | 0.0476984 | 2.2345562 | -4.58 | 1.9424546 | SLAMF1        |
| 244660_at    | 0.759 | 0.0477254 | 2.2342307 | -4.58 | 1.3729215 | ELAVL1        |
| 233695_s_at  | 0.759 | 0.047731  | 2.2341633 | -4.58 | 1.8162079 | CECR2         |
| 218887_at    | 0.759 | 0.0477477 | 2.2339613 | -4.58 | 2.0279838 | MRPL2         |
| 1558896_at   | 0.759 | 0.0477537 | 2.2338892 | -4.58 | 2.0973117 | IBA57         |
| 241054_at    | 0.759 | 0.0477679 | 2.2337179 | -4.58 | 1.8972798 |               |
| 1563638_at   | 0.759 | 0.0478017 | 2.2333115 | -4.58 | 2.6721928 | TVP23A        |
| 227419_x_at  | 0.759 | 0.0478073 | 2.233243  | -4.58 | 2.5745391 | PLAC9         |
| 208085_s_at  | 0.759 | 0.0478079 | 2.2332362 | -4.58 | 3.1640883 | ARHGAP6       |
| 207867_at    | 0.759 | 0.0478246 | 2.2330348 | -4.58 | 1.8586378 | PAX4          |
| 240415_at    | 0.759 | 0.0478317 | 2.2329505 | -4.58 | 1.9790002 |               |



|              |       |           |           |       |           |              |
|--------------|-------|-----------|-----------|-------|-----------|--------------|
| 1553004_at   | 0.759 | 0.047855  | 2.23267   | -4.58 | 1.9316945 | PKD1L1       |
| 1560265_at   | 0.759 | 0.0478825 | 2.2323394 | -4.58 | 2.819697  | GRIK2        |
| 1564292_at   | 0.759 | 0.0479002 | 2.2321266 | -4.58 | 2.4536667 |              |
| 1562710_at   | 0.759 | 0.0479052 | 2.2320666 | -4.58 | 2.3859532 | LOC101928553 |
| 223687_s_at  | 0.759 | 0.0479081 | 2.2320312 | -4.58 | 2.0540259 | LY6K         |
| 230803_s_at  | 0.759 | 0.0479168 | 2.2319269 | -4.58 | 1.4667421 | ARHGAP24     |
| 1556361_s_at | 0.759 | 0.0479553 | 2.231465  | -4.58 | 3.0463594 | ANKRD13C     |
| 228637_at    | 0.759 | 0.0479589 | 2.2314212 | -4.58 | 1.6407788 | ZDHHC1       |
| 231461_at    | 0.759 | 0.0479723 | 2.2312607 | -4.58 | 2.0879725 | KRT71        |
| 1557506_a_at | 0.759 | 0.0479832 | 2.2311301 | -4.58 | 2.111356  |              |
| 1554808_at   | 0.759 | 0.0479854 | 2.2311031 | -4.58 | 2.2323596 | ACP1         |
| 207286_at    | 0.759 | 0.0479889 | 2.231061  | -4.58 | 2.8540246 | CEP135       |
| 211923_s_at  | 0.759 | 0.0480206 | 2.2306818 | -4.58 | 2.4325429 | ZNF471       |
| 1570448_at   | 0.759 | 0.0480257 | 2.2306196 | -4.58 | 2.3655469 |              |
| 232154_at    | 0.759 | 0.0480428 | 2.2304148 | -4.58 | 2.1451616 | ADM5         |
| 211363_s_at  | 0.759 | 0.0480589 | 2.2302221 | -4.58 | 1.4800718 | MTAP         |
| 239180_at    | 0.759 | 0.0480695 | 2.2300951 | -4.58 | 1.6311908 | MMP25-AS1    |
| 221199_at    | 0.759 | 0.048097  | 2.2297669 | -4.58 | 2.0845807 | GFRA4        |
| 241196_at    | 0.759 | 0.0481091 | 2.2296216 | -4.58 | 1.391603  |              |
| 206228_at    | 0.759 | 0.0481203 | 2.2294871 | -4.58 | 1.9080132 | PAX2         |
| 237835_at    | 0.759 | 0.0481248 | 2.2294332 | -4.58 | 2.274373  |              |
| 216573_at    | 0.759 | 0.0481342 | 2.2293215 | -4.58 | 2.2984335 | IGLV1-44     |

|              |       |           |           |       |           |           |
|--------------|-------|-----------|-----------|-------|-----------|-----------|
| 1566502_at   | 0.759 | 0.0481357 | 2.2293029 | -4.58 | 2.255253  |           |
| 234682_at    | 0.759 | 0.0481496 | 2.2291365 | -4.58 | 2.812771  | BTBD9     |
| 229290_at    | 0.759 | 0.048153  | 2.2290964 | -4.58 | 1.9763932 | DAPL1     |
| 234038_at    | 0.759 | 0.048155  | 2.2290721 | -4.58 | 2.2235629 |           |
| 242444_at    | 0.759 | 0.0481558 | 2.2290624 | -4.58 | 1.8777657 | C1QTNF6   |
| 244736_at    | 0.759 | 0.0482386 | 2.2280745 | -4.58 | 2.8341164 |           |
| 233856_at    | 0.759 | 0.0482614 | 2.2278017 | -4.58 | 2.383577  |           |
| 215050_x_at  | 0.759 | 0.0482621 | 2.2277931 | -4.58 | 2.2439441 | MAPKAPK2  |
| 232100_at    | 0.759 | 0.0482712 | 2.2276848 | -4.58 | 2.3578331 | RNF217    |
| 216969_s_at  | 0.759 | 0.0482722 | 2.2276726 | -4.58 | 1.4830276 | KIF22     |
| 242437_at    | 0.759 | 0.0482955 | 2.2273948 | -4.58 | 1.6012058 |           |
| 1552769_at   | 0.759 | 0.0483147 | 2.2271661 | -4.58 | 2.1906912 | ZNF625    |
| 242523_at    | 0.759 | 0.0483203 | 2.2270999 | -4.58 | 1.5647507 | LINC00938 |
| 206937_at    | 0.759 | 0.0483437 | 2.2268207 | -4.58 | 1.8862539 | SPTA1     |
| 230500_at    | 0.759 | 0.0483513 | 2.22673   | -4.58 | 2.9203912 | PDE7A     |
| 228740_at    | 0.759 | 0.0483551 | 2.2266848 | -4.58 | 2.5455316 |           |
| 228821_at    | 0.759 | 0.0483712 | 2.2264937 | -4.58 | 2.4466056 | ST6GAL2   |
| 216185_at    | 0.759 | 0.0484016 | 2.2261311 | -4.58 | 2.4487043 | FUT9      |
| 238267_s_at  | 0.759 | 0.0484268 | 2.2258314 | -4.58 | 1.9975907 |           |
| 1564985_a_at | 0.759 | 0.0484605 | 2.225431  | -4.58 | 2.3041601 | SLC8A1    |
| 241696_at    | 0.759 | 0.0484706 | 2.2253116 | -4.58 | 1.9875727 | CNTLN     |
| 229092_at    | 0.759 | 0.0484929 | 2.2250469 | -4.58 | 1.6005139 | NR2F2     |
| 238160_at    | 0.759 | 0.0485006 | 2.2249546 | -4.58 | 1.8328968 | ACOT12    |

|              |       |           |           |       |           |              |
|--------------|-------|-----------|-----------|-------|-----------|--------------|
| 239105_at    | 0.759 | 0.0485118 | 2.2248218 | -4.58 | 1.7930872 |              |
| 1569910_at   | 0.759 | 0.0485745 | 2.2240788 | -4.58 | 2.7798987 |              |
| 1564816_at   | 0.759 | 0.0485905 | 2.2238882 | -4.58 | 1.850592  | C14orf178    |
| 1562055_at   | 0.759 | 0.0486102 | 2.2236556 | -4.58 | 2.2296397 | ZNF91        |
| 226643_s_at  | 0.759 | 0.0486124 | 2.2236289 | -4.58 | 1.3325207 | NUDCD2       |
| 1563250_at   | 0.759 | 0.0486215 | 2.2235212 | -4.58 | 1.8602597 | LOC101927362 |
| 231443_at    | 0.759 | 0.0486229 | 2.2235047 | -4.58 | 2.728421  | ELFN1-AS1    |
| 1556901_s_at | 0.759 | 0.0486488 | 2.2231981 | -4.58 | 2.4173329 | APCDD1L-AS1  |
| 217613_at    | 0.759 | 0.0486787 | 2.2228439 | -4.58 | 2.19845   | TMEM144      |
| 230849_at    | 0.759 | 0.0486803 | 2.2228252 | -4.58 | 2.4441559 | KCNA1        |
| 233182_x_at  | 0.759 | 0.0486804 | 2.2228247 | -4.58 | 1.5223416 | ATXN3        |
| 221297_at    | 0.759 | 0.0486857 | 2.2227612 | -4.58 | 1.6660225 | GPRC5D       |
| 1562905_at   | 0.759 | 0.0487295 | 2.2222441 | -4.58 | 2.4285138 |              |
| 1553630_at   | 0.759 | 0.0487312 | 2.2222232 | -4.58 | 2.2257144 | C10orf107    |
| 243274_x_at  | 0.759 | 0.0487344 | 2.2221857 | -4.58 | 2.9135677 |              |
| 238386_x_at  | 0.759 | 0.0487467 | 2.2220406 | -4.58 | 2.4306384 |              |
| 240167_at    | 0.759 | 0.0487655 | 2.2218184 | -4.58 | 2.4651466 | LINC01085    |
| 1567679_at   | 0.759 | 0.0487871 | 2.2215635 | -4.58 | 2.9794606 | SNORA74A     |
| 240354_at    | 0.759 | 0.0487981 | 2.2214334 | -4.58 | 2.3557167 | C12orf54     |
| 1552919_at   | 0.759 | 0.0488013 | 2.2213958 | -4.58 | 3.0260762 | C4orf36      |
| 1569675_at   | 0.759 | 0.0488042 | 2.2213607 | -4.58 | 2.3642664 | POU2AF1      |

|              |       |           |           |       |           |                 |
|--------------|-------|-----------|-----------|-------|-----------|-----------------|
| 236538_at    | 0.759 | 0.0488199 | 2.2211763 | -4.58 | 2.5071234 | GRIA2           |
| 207428_x_at  | 0.759 | 0.0488248 | 2.2211183 | -4.58 | 1.8648146 | CDK11A///CDK11B |
| 1554880_at   | 0.759 | 0.0488434 | 2.2208987 | -4.58 | 2.7486287 | DKFZP434K028    |
| 232980_at    | 0.759 | 0.0488472 | 2.2208539 | -4.58 | 1.8096406 | LMBRD1          |
| 230090_at    | 0.759 | 0.048865  | 2.2206446 | -4.58 | 2.3024162 | GDNF            |
| 1562719_at   | 0.759 | 0.0489    | 2.2202312 | -4.58 | 1.8087709 | LOC101928476    |
| 237604_at    | 0.759 | 0.0489202 | 2.2199937 | -4.58 | 1.8166276 |                 |
| 1553844_a_at | 0.759 | 0.0489292 | 2.2198884 | -4.58 | 2.1344246 | C10orf67        |
| 1561324_at   | 0.759 | 0.0489702 | 2.2194051 | -4.58 | 2.6870507 |                 |
| 244118_at    | 0.759 | 0.0490104 | 2.2189323 | -4.58 | 1.8025613 | GABRA1          |
| 233503_at    | 0.759 | 0.0490468 | 2.2185047 | -4.58 | 2.406714  | CCDC169         |
| 235770_at    | 0.759 | 0.0490503 | 2.2184643 | -4.58 | 1.9662279 | MASP1           |
| 1559226_x_at | 0.759 | 0.0490542 | 2.2184178 | -4.58 | 1.6078496 | LCE1E           |
| 228717_at    | 0.759 | 0.0490574 | 2.2183806 | -4.58 | 1.6813466 |                 |
| 232040_at    | 0.759 | 0.049084  | 2.2180681 | -4.58 | 1.5818756 | LOC157860       |
| 242699_at    | 0.759 | 0.0491308 | 2.2175192 | -4.58 | 2.1375103 |                 |
| 216909_at    | 0.759 | 0.0491473 | 2.2173251 | -4.58 | 1.8562696 | RRP12           |
| 1557311_at   | 0.759 | 0.0491577 | 2.2172038 | -4.58 | 1.7198214 |                 |
| 211562_s_at  | 0.759 | 0.0491685 | 2.2170774 | -4.58 | 2.6175333 | LMOD1           |
| 1569004_at   | 0.759 | 0.0491783 | 2.2169616 | -4.58 | 2.2594851 | CARD8-AS1       |

|             |       |           |           |       |           |           |
|-------------|-------|-----------|-----------|-------|-----------|-----------|
| 204898_at   | 0.759 | 0.0491916 | 2.216807  | -4.58 | 1.8670682 | SAP30     |
| 229079_at   | 0.759 | 0.0492251 | 2.2164144 | -4.58 | 1.7080374 | EHMT2     |
| 220112_at   | 0.759 | 0.0492602 | 2.2160037 | -4.58 | 1.9110941 | ANKRD55   |
| 223932_at   | 0.759 | 0.0492684 | 2.2159074 | -4.58 | 2.0724912 |           |
| 228683_s_at | 0.759 | 0.0492767 | 2.2158108 | -4.58 | 2.2062388 | KCTD15    |
| 232852_at   | 0.759 | 0.0492945 | 2.2156025 | -4.58 | 1.9203163 |           |
| 1557050_at  | 0.759 | 0.0493092 | 2.2154302 | -4.58 | 2.369722  | HOTAIRM1  |
| 217464_at   | 0.759 | 0.0493235 | 2.2152633 | -4.58 | 1.4351928 |           |
| 237686_at   | 0.759 | 0.0493244 | 2.2152526 | -4.58 | 2.571281  | RNF219    |
| 208280_at   | 0.759 | 0.0493384 | 2.215089  | -4.58 | 1.9254933 | CDRT1     |
| 241525_at   | 0.759 | 0.0493542 | 2.2149048 | -4.58 | 2.4534473 | LOC200772 |
| 1561545_at  | 0.759 | 0.0493904 | 2.2144822 | -4.58 | 1.7701065 | EPN2-AS1  |
| 235975_at   | 0.759 | 0.0493943 | 2.2144369 | -4.58 | 1.4021271 | MTO1      |

|              |       |           |           |       |           |                                                                  |
|--------------|-------|-----------|-----------|-------|-----------|------------------------------------------------------------------|
| 231568_at    | 0.759 | 0.0494021 | 2.2143457 | -4.58 | 2.4828613 | CT47A12///CT47A1///CT47A2///CT47A3///CT47A4///CT47A5///CT47A6/// |
| 240559_at    | 0.759 | 0.0494345 | 2.2139678 | -4.58 | 2.5633411 | IZUMO2                                                           |
| 1554316_at   | 0.759 | 0.049456  | 2.213718  | -4.58 | 1.6307957 | PGLS                                                             |
| 1556850_at   | 0.759 | 0.0494792 | 2.213447  | -4.58 | 1.7018897 | CEP290                                                           |
| 215061_at    | 0.759 | 0.0494848 | 2.2133814 | -4.58 | 2.65402   | METTL10                                                          |
| 243607_at    | 0.759 | 0.0494876 | 2.2133499 | -4.58 | 2.5872977 |                                                                  |
| 211645_x_at  | 0.759 | 0.0494952 | 2.2132607 | -4.58 | 1.7717793 |                                                                  |
| 1559538_at   | 0.759 | 0.0495252 | 2.212912  | -4.58 | 2.8044187 | LOC101929549                                                     |
| 216136_at    | 0.759 | 0.049537  | 2.2127747 | -4.58 | 2.9222607 |                                                                  |
| 231410_at    | 0.759 | 0.0495397 | 2.2127424 | -4.58 | 2.4975502 |                                                                  |
| 1553433_at   | 0.759 | 0.0495566 | 2.2125461 | -4.58 | 2.2537349 | CCDC171                                                          |
| 244229_at    | 0.759 | 0.0495678 | 2.2124159 | -4.58 | 2.0047581 | PARVG                                                            |
| 1561152_a_at | 0.759 | 0.0495767 | 2.2123125 | -4.58 | 2.175767  |                                                                  |

|              |       |           |           |       |           |              |
|--------------|-------|-----------|-----------|-------|-----------|--------------|
| 242009_at    | 0.759 | 0.0495805 | 2.2122685 | -4.58 | 2.6462754 | SLC6A4       |
| 221303_at    | 0.759 | 0.0496286 | 2.2117093 | -4.58 | 1.7937818 | PCDHB1       |
| 212770_at    | 0.759 | 0.0496997 | 2.2108842 | -4.58 | 2.3460193 | TLE3         |
| 1570219_at   | 0.759 | 0.0497025 | 2.2108523 | -4.58 | 2.641143  | LOXL4        |
| 243393_at    | 0.759 | 0.0497161 | 2.2106937 | -4.58 | 2.4221999 |              |
| 1570320_at   | 0.759 | 0.0497227 | 2.2106179 | -4.58 | 1.9835348 |              |
| 236714_at    | 0.759 | 0.0497385 | 2.2104349 | -4.58 | 2.3411031 |              |
| 241971_at    | 0.759 | 0.049745  | 2.2103594 | -4.58 | 1.9859263 |              |
| 243141_at    | 0.759 | 0.0497484 | 2.2103192 | -4.58 | 1.5846815 | SGMS2        |
| 1570534_a_at | 0.759 | 0.0497829 | 2.2099198 | -4.58 | 1.9218138 | ZNF483       |
| 208570_at    | 0.759 | 0.0497834 | 2.2099143 | -4.58 | 2.7384361 | WNT1         |
| 235943_at    | 0.759 | 0.0498275 | 2.2094036 | -4.58 | 2.6620667 |              |
| 213635_s_at  | 0.759 | 0.0498341 | 2.2093272 | -4.58 | 1.7663928 | SAFB         |
| 223825_at    | 0.759 | 0.0498484 | 2.2091622 | -4.58 | 1.3257749 | RIC1         |
| 1570625_at   | 0.759 | 0.0498553 | 2.2090823 | -4.58 | 2.200998  | TCEB3        |
| 1555085_at   | 0.759 | 0.0498889 | 2.2086935 | -4.58 | 2.9307383 | LOC101928751 |
| 237842_at    | 0.759 | 0.0499054 | 2.2085029 | -4.58 | 2.0470847 | MAP7D3       |
| 215079_at    | 0.759 | 0.049908  | 2.2084732 | -4.58 | 2.510603  |              |
| 220171_x_at  | 0.759 | 0.049913  | 2.2084152 | -4.58 | 1.493027  | GPALPP1      |
| 1558195_at   | 0.759 | 0.0499597 | 2.2078767 | -4.58 | 2.0229033 | LINC00592    |
| 235032_at    | 0.759 | 0.0499615 | 2.2078556 | -4.58 | 1.5976868 | DNAJC21      |
| 230984_s_at  | 0.759 | 0.049983  | 2.2076074 | -4.58 | 2.0538001 |              |
| 233145_at    | 0.759 | 0.0499866 | 2.2075659 | -4.58 | 1.9137818 | CSMD2        |

|             |       |           |            |       |            |           |
|-------------|-------|-----------|------------|-------|------------|-----------|
| 37020_at    | 0.759 | 0.0003611 | -5.1167939 | -4.54 | -6.0844282 | CRP       |
| 223509_at   | 0.759 | 0.0003628 | -5.1136843 | -4.54 | -3.7944973 | CLDN2     |
| 204470_at   | 0.759 | 0.0004381 | -4.9915188 | -4.55 | -3.1940919 | CXCL1     |
| 202376_at   | 0.759 | 0.0005087 | -4.8956934 | -4.55 | -3.5278451 | SERPINA3  |
| 232850_at   | 0.759 | 0.0006023 | -4.7883576 | -4.55 | -2.9273507 |           |
| 202859_x_at | 0.759 | 0.000784  | -4.6227586 | -4.55 | -3.4634357 | CXCL8     |
| 213680_at   | 0.759 | 0.0008018 | -4.6087933 | -4.55 | -4.1763175 | KRT6B     |
| 212768_s_at | 0.759 | 0.0008402 | -4.5796777 | -4.55 | -4.6057903 | OLFM4     |
| 231154_x_at | 0.759 | 0.0008851 | -4.5474015 | -4.55 | -4.0402097 | TINAG     |
| 238103_at   | 0.759 | 0.0011589 | -4.381618  | -4.55 | -4.1455515 | LINC01207 |
| 208383_s_at | 0.759 | 0.0015515 | -4.2046642 | -4.55 | -3.4410908 | PCK1      |
| 207430_s_at | 0.759 | 0.0017284 | -4.1398113 | -4.55 | -3.865359  | MSMB      |
| 235229_at   | 0.759 | 0.0017519 | -4.1317087 | -4.55 | -4.4004387 |           |
| 231180_at   | 0.759 | 0.0019785 | -4.0590567 | -4.55 | -3.0922052 |           |
| 229761_at   | 0.759 | 0.0019821 | -4.0579562 | -4.55 | -2.8982171 | LOC440173 |
| 1564451_at  | 0.759 | 0.0019935 | -4.0545378 | -4.55 | -3.5636411 |           |
| 38037_at    | 0.759 | 0.0022353 | -3.9865121 | -4.55 | -4.0768594 | HBEGF     |
| 205815_at   | 0.759 | 0.0023532 | -3.9560856 | -4.55 | -3.8318924 | REG3A     |
| 202833_s_at | 0.759 | 0.0024545 | -3.9311877 | -4.55 | -2.9819832 | SERPINA1  |
| 209774_x_at | 0.759 | 0.0025949 | -3.8983709 | -4.55 | -4.0622593 | CXCL2     |
| 209752_at   | 0.759 | 0.0026158 | -3.8936506 | -4.55 | -3.3740768 | REG1A     |
| 222303_at   | 0.759 | 0.0029392 | -3.8251573 | -4.56 | -3.3014003 |           |
| 243483_at   | 0.759 | 0.0030619 | -3.8012035 | -4.56 | -3.4750853 | TRPM8     |
| 222934_s_at | 0.759 | 0.0032403 | -3.7680911 | -4.56 | -2.9078842 | CLEC4E    |



|             |       |           |            |       |            |                       |
|-------------|-------|-----------|------------|-------|------------|-----------------------|
| 205890_s_at | 0.759 | 0.0032467 | -3.7669322 | -4.56 | -3.1927073 | UBD///GABBR1          |
| 1553062_at  | 0.759 | 0.003258  | -3.7649021 | -4.56 | -4.0567449 | MOGAT1                |
| 204621_s_at | 0.759 | 0.0033807 | -3.7433283 | -4.56 | -3.6763384 | NR4A2                 |
| 203821_at   | 0.759 | 0.0035936 | -3.7077462 | -4.56 | -2.4612493 | HBEGF                 |
| 202672_s_at | 0.759 | 0.0037608 | -3.6812936 | -4.56 | -4.5751806 | ATF3                  |
| 222256_s_at | 0.759 | 0.0039512 | -3.6526235 | -4.56 | -2.5202953 | JMJD7///JMJD7-PLA2G4B |
| 239093_at   | 0.759 | 0.0041145 | -3.6291429 | -4.56 | -2.9377574 | HOGA1                 |
| 205513_at   | 0.759 | 0.0041443 | -3.6249606 | -4.56 | -2.8254585 | TCN1                  |
| 210121_at   | 0.759 | 0.0043179 | -3.601206  | -4.56 | -3.0089341 | B3GALT2               |
| 240259_at   | 0.759 | 0.0045427 | -3.5718688 | -4.56 | -2.7081583 | LOC100506718///FLRT2  |
| 221545_x_at | 0.759 | 0.0045987 | -3.564794  | -4.56 | -2.4518582 | MED16                 |
| 209641_s_at | 0.759 | 0.0049167 | -3.5262329 | -4.56 | -2.330948  | ABCC3                 |
| 215807_s_at | 0.759 | 0.0050091 | -3.5154991 | -4.56 | -2.2795857 | PLXNB1                |
| 229764_at   | 0.759 | 0.0050245 | -3.5137341 | -4.56 | -3.4612991 | TPRG1                 |
| 222271_at   | 0.759 | 0.0050379 | -3.5122039 | -4.56 | -3.4157441 |                       |
| 232593_at   | 0.759 | 0.0051065 | -3.5044198 | -4.56 | -2.9503577 | NEURL3                |
| 223722_at   | 0.759 | 0.0054485 | -3.467138  | -4.56 | -3.551959  | DNAJC12               |
| 208450_at   | 0.759 | 0.0055491 | -3.4566304 | -4.56 | -4.037357  | LGALS2                |
| 241694_at   | 0.759 | 0.0055679 | -3.4546879 | -4.56 | -2.9429478 | PKHD1                 |
| 238625_at   | 0.759 | 0.0056452 | -3.4467785 | -4.56 | -2.3933973 | C1orf168              |

|             |       |           |            |       |            |              |
|-------------|-------|-----------|------------|-------|------------|--------------|
| 243237_at   | 0.759 | 0.0058552 | -3.4258257 | -4.56 | -2.4001448 | CFAP221      |
| 207392_x_at | 0.759 | 0.0060214 | -3.4097802 | -4.56 | -3.504236  | UGT2B15      |
| 206535_at   | 0.759 | 0.0060387 | -3.4081374 | -4.56 | -3.5894674 | SLC2A2       |
| 205969_at   | 0.759 | 0.0063811 | -3.3765642 | -4.56 | -2.7482063 | AADAC        |
| 206239_s_at | 0.759 | 0.0063846 | -3.3762489 | -4.56 | -3.6728666 | SPINK1       |
| 228360_at   | 0.759 | 0.0068302 | -3.3376823 | -4.56 | -2.5548479 | LYPD6B       |
| 208961_s_at | 0.759 | 0.007196  | -3.3078949 | -4.56 | -2.9837931 | KLF6         |
| 210180_s_at | 0.759 | 0.0072382 | -3.3045574 | -4.56 | -2.834716  | TRA2B        |
| 205844_at   | 0.759 | 0.0073324 | -3.2971824 | -4.56 | -3.7683408 | VNN1         |
| 210168_at   | 0.759 | 0.0073809 | -3.293423  | -4.56 | -4.0975526 | C6           |
| 206197_at   | 0.759 | 0.0074033 | -3.2916991 | -4.56 | -2.572105  | NME5         |
| 221265_s_at | 0.759 | 0.0075719 | -3.2788634 | -4.56 | -3.0449919 | VWA9         |
| 223721_s_at | 0.759 | 0.0076308 | -3.2744406 | -4.56 | -2.7429889 | DNAJC12      |
| 231412_at   | 0.759 | 0.0078937 | -3.2551492 | -4.56 | -2.6261008 | LOC101929709 |
| 205043_at   | 0.759 | 0.0079274 | -3.2527251 | -4.56 | -3.0417812 | CFTR         |
| 240861_at   | 0.759 | 0.0079352 | -3.2521652 | -4.56 | -2.0660138 |              |
| 230480_at   | 0.759 | 0.0080315 | -3.2452957 | -4.56 | -2.0966316 | PIWIL4       |
| 224606_at   | 0.759 | 0.0081121 | -3.2396115 | -4.56 | -2.1953866 | KLF6         |
| 239014_at   | 0.759 | 0.0086728 | -3.2015994 | -4.56 | -2.0473163 | CCAR1        |
| 204041_at   | 0.759 | 0.0087362 | -3.1974567 | -4.56 | -3.0316327 | MAOB         |
| 202831_at   | 0.759 | 0.0087824 | -3.1944615 | -4.56 | -2.4779228 | GPX2         |

|              |       |           |            |       |            |            |
|--------------|-------|-----------|------------|-------|------------|------------|
| 201041_s_at  | 0.759 | 0.0089384 | -3.1844605 | -4.56 | -2.7236015 | DUSP1      |
| 212935_at    | 0.759 | 0.0090386 | -3.1781226 | -4.56 | -2.6762506 | MCF2L      |
| 209189_at    | 0.759 | 0.0090452 | -3.1777111 | -4.56 | -3.7175145 | FOS        |
| 242558_at    | 0.759 | 0.0093368 | -3.1596915 | -4.56 | -2.9675113 |            |
| 1559170_at   | 0.759 | 0.0093611 | -3.158221  | -4.56 | -2.2373155 | ANKRD20A5P |
| 239747_s_at  | 0.759 | 0.0094833 | -3.1508572 | -4.56 | -1.973941  |            |
| 210999_s_at  | 0.759 | 0.0095098 | -3.1492739 | -4.56 | -2.192876  | GRB10      |
| 202151_s_at  | 0.759 | 0.0095166 | -3.1488671 | -4.56 | -2.4332352 | UBAC1      |
| 202768_at    | 0.759 | 0.0097715 | -3.1338709 | -4.56 | -4.0907942 | FOSB       |
| 1560527_at   | 0.759 | 0.0098341 | -3.1302449 | -4.56 | -2.8498886 | NFE4       |
| 233030_at    | 0.759 | 0.0098793 | -3.1276469 | -4.56 | -1.9419038 | PNPLA3     |
| 238909_at    | 0.759 | 0.0100732 | -3.1166207 | -4.56 | -3.4282032 | S100A10    |
| 227742_at    | 0.759 | 0.0103331 | -3.1021825 | -4.56 | -3.0902246 | CLIC6      |
| 233223_at    | 0.759 | 0.0105537 | -3.0902066 | -4.56 | -2.3176634 |            |
| 1568924_a_at | 0.759 | 0.0105873 | -3.088408  | -4.56 | -2.2118676 | IQUB       |
| 206350_at    | 0.759 | 0.0111138 | -3.0609142 | -4.56 | -2.4592995 | APCS       |
| 244353_s_at  | 0.759 | 0.0113091 | -3.0510532 | -4.56 | -2.5258787 | SLC2A12    |
| 225516_at    | 0.759 | 0.0113996 | -3.0465378 | -4.56 | -3.8722788 | SLC7A2     |
| 231836_at    | 0.759 | 0.0114782 | -3.0426511 | -4.56 | -2.2376444 | HKR1       |
| 221577_x_at  | 0.759 | 0.0115137 | -3.0409012 | -4.56 | -2.5283876 | GDF15      |
| 220518_at    | 0.759 | 0.0115964 | -3.0368529 | -4.56 | -3.5898445 | ABI3BP     |

|             |       |           |            |       |            |            |
|-------------|-------|-----------|------------|-------|------------|------------|
| 237554_at   | 0.759 | 0.012022  | -3.0164513 | -4.57 | -2.8277218 |            |
| 222314_x_at | 0.759 | 0.0121482 | -3.0105436 | -4.57 | -2.205956  | EGOT       |
| 210382_at   | 0.759 | 0.0122159 | -3.0073993 | -4.57 | -2.9212583 | SCTR       |
| 220376_at   | 0.759 | 0.0122987 | -3.0035782 | -4.57 | -2.3688521 | LRRC19     |
| 207655_s_at | 0.759 | 0.012318  | -3.0026912 | -4.57 | -3.1569226 | BLNK       |
| 201236_s_at | 0.759 | 0.0123217 | -3.0025223 | -4.57 | -2.1680175 | BTG2       |
| 226248_s_at | 0.759 | 0.0123298 | -3.0021514 | -4.57 | -3.0750971 | KIAA1324   |
| 226796_at   | 0.759 | 0.012751  | -2.9831528 | -4.57 | -2.3121339 | ABHD15     |
| 230776_at   | 0.759 | 0.0128454 | -2.9789834 | -4.57 | -2.9463943 | RNF157-AS1 |
| 205799_s_at | 0.759 | 0.012918  | -2.9757974 | -4.57 | -3.003607  | SLC3A1     |
| 202150_s_at | 0.759 | 0.0129953 | -2.9724247 | -4.57 | -2.3189966 | NEDD9      |
| 225911_at   | 0.759 | 0.0129975 | -2.972325  | -4.57 | -3.0576398 | NPNT       |
| 223686_at   | 0.759 | 0.0130051 | -2.9719973 | -4.57 | -2.042914  | TPK1       |
| 243231_at   | 0.759 | 0.0131245 | -2.9668305 | -4.57 | -2.8990854 | SLC38A11   |
| 201170_s_at | 0.759 | 0.0131678 | -2.9649657 | -4.57 | -2.1521266 | BHLHE40    |
| 236561_at   | 0.759 | 0.0131935 | -2.9638646 | -4.57 | -2.3910418 | TGFBR1     |
| 227763_at   | 0.759 | 0.0133191 | -2.9585078 | -4.57 | -2.3566109 | LYPD6      |
| 212533_at   | 0.759 | 0.0133595 | -2.9567964 | -4.57 | -2.4906527 | WEE1       |
| 203491_s_at | 0.759 | 0.0133887 | -2.9555637 | -4.57 | -2.8059228 | CEP57      |
| 217626_at   | 0.759 | 0.0135304 | -2.9496135 | -4.57 | -2.9098215 | AKR1C1     |
| 233317_at   | 0.759 | 0.0135777 | -2.9476383 | -4.57 | -2.4267842 | CD9        |
| 229033_s_at | 0.759 | 0.0136527 | -2.9445258 | -4.57 | -2.2659807 | MUM1       |

|              |       |           |            |       |            |                     |
|--------------|-------|-----------|------------|-------|------------|---------------------|
| 210119_at    | 0.759 | 0.0137486 | -2.9405686 | -4.57 | -2.6271925 | KCNJ15              |
| 203836_s_at  | 0.759 | 0.013757  | -2.9402239 | -4.57 | -2.2715125 | MAP3K5              |
| 1552755_at   | 0.759 | 0.0137629 | -2.9399818 | -4.57 | -2.1674    | C9orf66             |
| 1565705_x_at | 0.759 | 0.0139037 | -2.9342311 | -4.57 | -2.2708672 |                     |
| 218510_x_at  | 0.759 | 0.0142569 | -2.9200534 | -4.57 | -2.8757806 | FAM134B             |
| 212771_at    | 0.759 | 0.014325  | -2.9173603 | -4.57 | -2.3672909 | FAM171A1            |
| 205221_at    | 0.759 | 0.0143308 | -2.9171326 | -4.57 | -3.2291899 | HGD                 |
| 222348_at    | 0.759 | 0.0143865 | -2.914942  | -4.57 | -2.8799777 | MAST4               |
| 237151_s_at  | 0.759 | 0.0144024 | -2.9143187 | -4.57 | -2.3616573 | CFAP221             |
| 228773_at    | 0.759 | 0.0144486 | -2.9125064 | -4.57 | -2.9350636 | LOC100506100        |
| 1557905_s_at | 0.759 | 0.0144503 | -2.9124429 | -4.57 | -2.6544296 | CD44                |
| 215702_s_at  | 0.759 | 0.0145206 | -2.9096995 | -4.57 | -2.0230366 | CFTR                |
| 243296_at    | 0.759 | 0.014551  | -2.9085183 | -4.57 | -2.3542057 | NAMPT               |
| 204714_s_at  | 0.759 | 0.0145981 | -2.9066932 | -4.57 | -2.2219441 | F5                  |
| 210390_s_at  | 0.759 | 0.0146926 | -2.9030481 | -4.57 | -2.2509977 | CCL15-CCL14///CCL15 |
| 214890_s_at  | 0.759 | 0.0148177 | -2.8982544 | -4.57 | -2.7264588 | FAM149A             |
| 205044_at    | 0.759 | 0.0148918 | -2.8954368 | -4.57 | -3.0953665 | GABRP               |

|              |       |           |            |       |            |                                                             |
|--------------|-------|-----------|------------|-------|------------|-------------------------------------------------------------|
| 208670_s_at  | 0.759 | 0.0148947 | -2.8953295 | -4.57 | -2.6770607 | EID1                                                        |
| 228674_s_at  | 0.759 | 0.0150396 | -2.8898596 | -4.57 | -1.7993742 | EML4                                                        |
| 210619_s_at  | 0.759 | 0.0150727 | -2.8886165 | -4.57 | -2.9110491 | HYAL1                                                       |
| 210830_s_at  | 0.759 | 0.0152941 | -2.8803813 | -4.57 | -2.8171262 | PON2                                                        |
| 243168_at    | 0.759 | 0.0152995 | -2.8801806 | -4.57 | -3.2193756 |                                                             |
| 205476_at    | 0.759 | 0.0154375 | -2.8751087 | -4.57 | -2.0934875 | CCL20                                                       |
| 225660_at    | 0.759 | 0.0154692 | -2.8739511 | -4.57 | -1.9085597 | SEMA6A                                                      |
| 220017_x_at  | 0.759 | 0.0155103 | -2.8724515 | -4.57 | -2.3715885 | CYP2C9                                                      |
| 219956_at    | 0.759 | 0.0162383 | -2.8465452 | -4.57 | -2.8093008 | GALNT6                                                      |
| 1569607_s_at | 0.759 | 0.0162771 | -2.8451954 | -4.57 | -3.4817392 | LOC102725051///LOC102723891///ANKRD20A4///ANKRD20A2///ANKRI |
| 239656_at    | 0.759 | 0.0163461 | -2.842807  | -4.57 | -1.9919868 | LHFPL3-AS2                                                  |
| 201169_s_at  | 0.759 | 0.0164538 | -2.8390998 | -4.57 | -2.1782958 | BHLHE40                                                     |
| 212225_at    | 0.759 | 0.0167594 | -2.8287057 | -4.57 | -2.0843377 | EIF1                                                        |

|              |       |           |            |       |            |                   |
|--------------|-------|-----------|------------|-------|------------|-------------------|
| 240156_at    | 0.759 | 0.0168284 | -2.8263849 | -4.57 | -2.099548  |                   |
| 208699_x_at  | 0.759 | 0.0168575 | -2.8254092 | -4.57 | -1.8498117 | TKT               |
| 208791_at    | 0.759 | 0.0169521 | -2.8222507 | -4.57 | -2.1123408 | CLU               |
| 204993_at    | 0.759 | 0.0170622 | -2.818595  | -4.57 | -2.0021086 | GNAZ              |
| 216219_at    | 0.759 | 0.0171002 | -2.8173364 | -4.57 | -2.1984442 | AQP6              |
| 205328_at    | 0.759 | 0.0172018 | -2.8139912 | -4.57 | -2.674278  | CLDN10            |
| 219759_at    | 0.759 | 0.0176687 | -2.7988659 | -4.57 | -1.887685  | ERAP2             |
| 223055_s_at  | 0.759 | 0.0176768 | -2.7986098 | -4.57 | -2.0133177 | XPO5              |
| 201328_at    | 0.759 | 0.0178161 | -2.7941762 | -4.57 | -2.1298177 | ETS2              |
| 218541_s_at  | 0.759 | 0.0182126 | -2.7817459 | -4.57 | -2.254706  | C8orf4            |
| 203946_s_at  | 0.759 | 0.0183513 | -2.7774599 | -4.57 | -2.3659921 | ARG2              |
| 213664_at    | 0.759 | 0.0184141 | -2.7755293 | -4.57 | -3.1466529 | SLC1A1            |
| 237328_at    | 0.759 | 0.0184258 | -2.7751718 | -4.57 | -4.0567011 | C14orf105         |
| 211806_s_at  | 0.759 | 0.018586  | -2.7702832 | -4.57 | -2.2122767 | KCNJ15            |
| 217997_at    | 0.759 | 0.0187877 | -2.7641865 | -4.57 | -2.0043858 | PHLDA1            |
| 235942_at    | 0.759 | 0.0190908 | -2.755145  | -4.57 | -2.1880062 | FAM224A///FAM224B |
| 1558549_s_at | 0.759 | 0.0191297 | -2.7539956 | -4.57 | -2.736953  | VNN1              |
| 215388_s_at  | 0.759 | 0.0191856 | -2.7523483 | -4.57 | -3.0284496 | CFHR1///CFH       |
| 209835_x_at  | 0.759 | 0.0192541 | -2.7503357 | -4.57 | -1.9522804 | CD44              |
| 230027_s_at  | 0.759 | 0.0192634 | -2.7500618 | -4.57 | -1.5686466 | MRPL43            |

|              |       |           |            |       |            |             |
|--------------|-------|-----------|------------|-------|------------|-------------|
| 236251_at    | 0.759 | 0.0194914 | -2.7434174 | -4.57 | -1.7546029 |             |
| 228382_at    | 0.759 | 0.0199596 | -2.7300083 | -4.57 | -1.891683  | OTULIN      |
| 225738_at    | 0.759 | 0.0200309 | -2.7279913 | -4.57 | -2.0650566 | RAPGEF1     |
| 206204_at    | 0.759 | 0.0202225 | -2.7226147 | -4.57 | -2.901046  | GRB14       |
| 206710_s_at  | 0.759 | 0.0203357 | -2.7194617 | -4.57 | -2.1871471 | EPB41L3     |
| 229866_at    | 0.759 | 0.020408  | -2.7174546 | -4.57 | -2.0134258 | STK32A      |
| 216248_s_at  | 0.759 | 0.0204126 | -2.7173266 | -4.57 | -2.0862421 | NR4A2       |
| 1563498_s_at | 0.759 | 0.0206049 | -2.7120296 | -4.57 | -1.9802237 | SLC25A45    |
| 222925_at    | 0.759 | 0.0207316 | -2.7085666 | -4.57 | -2.5932221 | DCDC2       |
| 215672_s_at  | 0.759 | 0.020734  | -2.708502  | -4.57 | -2.2261229 | AHCYL2      |
| 203203_s_at  | 0.759 | 0.0207372 | -2.7084124 | -4.57 | -2.0395092 | KRR1        |
| 243184_at    | 0.759 | 0.0209216 | -2.7034113 | -4.57 | -1.9620218 |             |
| 218182_s_at  | 0.759 | 0.0209927 | -2.701494  | -4.57 | -1.7781306 | CLDN1       |
| 1556364_at   | 0.759 | 0.0210481 | -2.7000045 | -4.57 | -2.063102  | ADAMTS9-AS2 |
| 206947_at    | 0.759 | 0.0211062 | -2.6984468 | -4.57 | -1.8891419 | B3GALT5     |
| 227081_at    | 0.759 | 0.0211937 | -2.6961094 | -4.57 | -2.5427228 | DNALI1      |
| 242011_at    | 0.759 | 0.0215285 | -2.6872509 | -4.57 | -1.7700923 |             |
| 219500_at    | 0.759 | 0.0218793 | -2.6781161 | -4.57 | -2.517657  | CLCF1       |
| 205080_at    | 0.759 | 0.0220183 | -2.6745356 | -4.57 | -1.7549744 | RARB        |
| 213186_at    | 0.759 | 0.0220428 | -2.6739053 | -4.57 | -2.51721   | DZIP3       |
| 226900_at    | 0.759 | 0.0220433 | -2.673894  | -4.57 | -2.2493987 | GABPB1-AS1  |
| 206010_at    | 0.759 | 0.0220677 | -2.6732671 | -4.57 | -1.9616537 | HABP2       |



|              |       |           |            |       |            |                    |
|--------------|-------|-----------|------------|-------|------------|--------------------|
| 227764_at    | 0.759 | 0.0221595 | -2.6709219 | -4.57 | -2.7996789 | LYPD6              |
| 221058_s_at  | 0.759 | 0.022184  | -2.6702966 | -4.57 | -2.1406137 | CKLF               |
| 1569898_a_at | 0.759 | 0.0222103 | -2.6696258 | -4.57 | -1.7042217 | PAXIP1-AS2         |
| 230892_at    | 0.759 | 0.0222337 | -2.6690308 | -4.57 | -2.5706846 |                    |
| 224889_at    | 0.759 | 0.0222341 | -2.6690211 | -4.57 | -2.5778417 | FOXO3              |
| 204622_x_at  | 0.759 | 0.0223296 | -2.6665976 | -4.57 | -2.183536  | NR4A2              |
| 209410_s_at  | 0.759 | 0.0223371 | -2.6664082 | -4.57 | -1.8191031 | GRB10              |
| 244054_at    | 0.759 | 0.0223736 | -2.6654858 | -4.57 | -2.7104292 |                    |
| 229221_at    | 0.759 | 0.0226708 | -2.6580242 | -4.57 | -2.1374695 | CD44               |
| 232959_at    | 0.759 | 0.0227007 | -2.6572794 | -4.57 | -1.8001481 |                    |
| 236952_at    | 0.759 | 0.0229607 | -2.6508398 | -4.57 | -2.3598951 |                    |
| 214889_at    | 0.759 | 0.0233732 | -2.6407692 | -4.57 | -3.0171732 | FAM149A            |
| 204285_s_at  | 0.759 | 0.0235672 | -2.6360939 | -4.57 | -2.2615166 | PMAIP1             |
| 1559039_at   | 0.759 | 0.0235961 | -2.6354017 | -4.57 | -2.0287329 | DHX36              |
| 208627_s_at  | 0.759 | 0.0237802 | -2.6310044 | -4.57 | -2.3832458 | YBX1               |
| 216841_s_at  | 0.759 | 0.0238116 | -2.6302582 | -4.57 | -2.2834497 | LOC100129518//SOD2 |
| 240233_at    | 0.759 | 0.0239304 | -2.627444  | -4.57 | -1.8440819 | NUP50-AS1          |

|             |       |           |            |       |            |                                                             |
|-------------|-------|-----------|------------|-------|------------|-------------------------------------------------------------|
| 211942_x_at | 0.759 | 0.0240497 | -2.6246289 | -4.57 | -1.8467786 | RPL13AP5///RPL13AP6///SNORD32A///SNORD33///SNORD34///SNORD3 |
| 230964_at   | 0.759 | 0.0241663 | -2.6218945 | -4.57 | -2.134109  | FREM2                                                       |
| 204490_s_at | 0.759 | 0.0243069 | -2.6186108 | -4.57 | -1.7587247 | CD44                                                        |
| 242904_x_at | 0.759 | 0.0243659 | -2.6172395 | -4.57 | -2.624664  |                                                             |
| 211833_s_at | 0.759 | 0.0244121 | -2.6161682 | -4.57 | -2.0201063 | BAX                                                         |
| 201693_s_at | 0.759 | 0.0244426 | -2.615461  | -4.57 | -1.6564883 | EGR1                                                        |
| 1562898_at  | 0.759 | 0.0246753 | -2.6100992 | -4.57 | -1.8787089 |                                                             |
| 203346_s_at | 0.759 | 0.0247023 | -2.6094808 | -4.57 | -2.2680776 | MTF2                                                        |
| 204015_s_at | 0.759 | 0.0249786 | -2.6031856 | -4.57 | -1.9576271 | DUSP4                                                       |
| 215089_s_at | 0.759 | 0.0250631 | -2.6012741 | -4.57 | -2.3752986 | RBM10                                                       |
| 208900_s_at | 0.759 | 0.0251817 | -2.5986008 | -4.57 | -1.9942747 | TOP1                                                        |
| 211682_x_at | 0.759 | 0.0254632 | -2.5923067 | -4.57 | -2.1513731 | UGT2B28                                                     |
| 243837_x_at | 0.759 | 0.0254954 | -2.5915926 | -4.57 | -1.881624  |                                                             |
| 211429_s_at | 0.759 | 0.0255653 | -2.5900419 | -4.57 | -1.9512512 | SERPINA1                                                    |
| 208456_s_at | 0.759 | 0.0256654 | -2.5878298 | -4.57 | -2.1711228 | RRAS2                                                       |
| 230432_at   | 0.759 | 0.0258605 | -2.5835418 | -4.57 | -3.1017405 | LOC100422737                                                |

|              |       |           |            |       |            |         |
|--------------|-------|-----------|------------|-------|------------|---------|
| 218801_at    | 0.759 | 0.0258735 | -2.5832563 | -4.57 | -1.9134713 | UGGT2   |
| 244216_at    | 0.759 | 0.0259059 | -2.582548  | -4.57 | -2.6283953 |         |
| 35147_at     | 0.759 | 0.0259102 | -2.5824535 | -4.57 | -1.9860891 | MCF2L   |
| 225826_at    | 0.759 | 0.0260989 | -2.5783458 | -4.57 | -1.7372986 | MMAB    |
| 219564_at    | 0.759 | 0.0262759 | -2.5745169 | -4.57 | -2.635269  | KCNJ16  |
| 1555495_a_at | 0.759 | 0.0263507 | -2.5729059 | -4.57 | -2.3896775 | CWC27   |
| 229596_at    | 0.759 | 0.0264531 | -2.5707092 | -4.57 | -2.4386981 | AMDHD1  |
| 206396_at    | 0.759 | 0.0265562 | -2.5685065 | -4.57 | -2.0246599 | SLC1A1  |
| 201694_s_at  | 0.759 | 0.0266209 | -2.5671288 | -4.57 | -1.6807136 | EGR1    |
| 239806_at    | 0.759 | 0.0266988 | -2.5654736 | -4.57 | -2.3204814 |         |
| 209959_at    | 0.759 | 0.0267794 | -2.563764  | -4.57 | -2.7567962 | NR4A3   |
| 217974_at    | 0.759 | 0.0267802 | -2.5637485 | -4.57 | -1.8263759 | TM7SF3  |
| 240200_at    | 0.759 | 0.0268638 | -2.561981  | -4.57 | -2.2425868 | SULT1C2 |
| 233607_at    | 0.759 | 0.0268906 | -2.561417  | -4.57 | -3.585302  |         |
| 210355_at    | 0.759 | 0.0269019 | -2.5611783 | -4.57 | -2.363955  | PTHLH   |
| 227690_at    | 0.759 | 0.0269336 | -2.5605113 | -4.57 | -2.3414221 | GABRB3  |
| 203304_at    | 0.759 | 0.0269462 | -2.5602469 | -4.57 | -1.5670406 | BAMBI   |
| 201751_at    | 0.759 | 0.0271443 | -2.5560974 | -4.57 | -2.2326413 | JOSD1   |
| 233982_x_at  | 0.759 | 0.0273954 | -2.5508782 | -4.57 | -1.6981916 | STYXL1  |
| 1557222_at   | 0.759 | 0.027486  | -2.5490069 | -4.57 | -1.8120171 |         |

|              |       |           |            |       |            |                                                              |
|--------------|-------|-----------|------------|-------|------------|--------------------------------------------------------------|
| 213988_s_at  | 0.759 | 0.027516  | -2.5483887 | -4.57 | -2.7526425 | SAT1                                                         |
| 215193_x_at  | 0.759 | 0.0275301 | -2.5480983 | -4.57 | -3.0176122 | LOC101060835///LOC100996809///HLA-DRB4///HLA-DRB3///HLA-DRB1 |
| 1562020_s_at | 0.759 | 0.0276977 | -2.5446574 | -4.57 | -1.8699556 | NT5DC4                                                       |
| 1569020_at   | 0.759 | 0.0277935 | -2.5427008 | -4.57 | -2.2695103 | NEDD9                                                        |
| 212871_at    | 0.759 | 0.0278121 | -2.5423218 | -4.57 | -2.3189236 | MAPKAPK5                                                     |
| 224832_at    | 0.759 | 0.0280315 | -2.5378667 | -4.57 | -2.6991029 | DUSP16                                                       |
| 227608_at    | 0.759 | 0.0282923 | -2.5326165 | -4.57 | -1.8570549 | DAP3                                                         |
| 230381_at    | 0.759 | 0.028296  | -2.5325412 | -4.57 | -1.9482398 | LOC101929219///C1orf186                                      |
| 235823_at    | 0.759 | 0.0284906 | -2.5286551 | -4.57 | -2.0562527 | ACSF3                                                        |
| 204148_s_at  | 0.759 | 0.028537  | -2.5277325 | -4.57 | -2.0480467 | POMZP3///ZP3                                                 |
| 1556608_a_at | 0.759 | 0.0285456 | -2.527561  | -4.57 | -2.3750579 | EHD4                                                         |
| 1557136_at   | 0.759 | 0.0286482 | -2.5255257 | -4.57 | -2.4236732 | ATP13A4                                                      |
| 230318_at    | 0.759 | 0.0286804 | -2.5248889 | -4.57 | -2.2701062 | SERPINA1                                                     |
| 244447_at    | 0.759 | 0.0287018 | -2.5244657 | -4.57 | -2.5869442 |                                                              |

|             |       |           |            |       |            |                          |
|-------------|-------|-----------|------------|-------|------------|--------------------------|
| 1554140_at  | 0.759 | 0.0287171 | -2.524165  | -4.57 | -2.0760168 | WDR78                    |
| 210174_at   | 0.759 | 0.0288276 | -2.5219863 | -4.57 | -2.7348214 | NR5A2                    |
| 226086_at   | 0.759 | 0.0289813 | -2.5189696 | -4.57 | -2.0671472 | SYT13                    |
| 221437_s_at | 0.759 | 0.0291839 | -2.5150174 | -4.57 | -2.2598494 | MRPS15                   |
| 231677_at   | 0.759 | 0.0292341 | -2.5140416 | -4.57 | -2.4663213 | LOC105377924             |
| 227251_at   | 0.759 | 0.0292707 | -2.5133328 | -4.57 | -1.8085582 | DCAF5                    |
| 229972_at   | 0.759 | 0.0293091 | -2.5125886 | -4.57 | -1.9935101 | LOC101926963             |
| 219024_at   | 0.759 | 0.029407  | -2.5106958 | -4.57 | -2.257116  | PLEKHA1                  |
| 213659_at   | 0.759 | 0.0295199 | -2.5085221 | -4.57 | -2.8591222 | ZNF75D                   |
| 200984_s_at | 0.759 | 0.0296998 | -2.5050732 | -4.57 | -1.8852787 | CD59                     |
| 225062_at   | 0.759 | 0.0298752 | -2.5017311 | -4.57 | -2.8580551 | LOC102724951///LOC389831 |
| 204734_at   | 0.759 | 0.0299211 | -2.5008601 | -4.57 | -2.3887894 | KRT15                    |
| 200831_s_at | 0.759 | 0.0299634 | -2.5000575 | -4.57 | -1.866177  | SCD                      |
| 218976_at   | 0.759 | 0.029972  | -2.4998947 | -4.57 | -2.339339  | DNAJC12                  |
| 207850_at   | 0.759 | 0.0300565 | -2.4982966 | -4.57 | -2.0345754 | CXCL3                    |
| 220106_at   | 0.759 | 0.0302257 | -2.4951113 | -4.57 | -2.3569325 | NPC1L1                   |
| 222773_s_at | 0.759 | 0.0302352 | -2.4949317 | -4.57 | -2.2331478 | GALNT12                  |
| 201042_at   | 0.759 | 0.0302942 | -2.4938256 | -4.57 | -1.8570315 | TGM2                     |

|             |       |           |            |       |            |              |
|-------------|-------|-----------|------------|-------|------------|--------------|
| 212014_x_at | 0.759 | 0.030337  | -2.4930242 | -4.57 | -1.6283484 | CD44         |
| 219822_at   | 0.759 | 0.0304238 | -2.491402  | -4.57 | -2.6752763 | MTRF1        |
| 203692_s_at | 0.759 | 0.0308221 | -2.4840154 | -4.57 | -2.0630044 | E2F3         |
| 203912_s_at | 0.759 | 0.030964  | -2.481406  | -4.57 | -2.2991632 | DNASE1L1     |
| 209042_s_at | 0.759 | 0.0311044 | -2.4788373 | -4.57 | -1.8082294 | UBE2G2       |
| 1555136_at  | 0.759 | 0.031116  | -2.4786249 | -4.57 | -2.8388594 | FGD6         |
| 1570291_at  | 0.759 | 0.0311348 | -2.4782818 | -4.57 | -1.8077087 | CLDN10-AS1   |
| 209091_s_at | 0.759 | 0.0313281 | -2.4747656 | -4.57 | -2.7171136 | SH3GLB1      |
| 232013_at   | 0.759 | 0.0314429 | -2.4726863 | -4.57 | -1.8729857 | ERCC6L2      |
| 238113_at   | 0.759 | 0.0314732 | -2.4721407 | -4.57 | -2.1205446 | SMIM2-AS1    |
| 203113_s_at | 0.759 | 0.0315425 | -2.4708898 | -4.57 | -2.2548085 | EEF1D        |
| 239157_at   | 0.759 | 0.0315935 | -2.4699715 | -4.57 | -1.8551868 | ZSCAN12P1    |
| 209875_s_at | 0.759 | 0.0316373 | -2.4691854 | -4.57 | -2.6665146 | SPP1         |
| 240382_at   | 0.759 | 0.0316969 | -2.468115  | -4.57 | -2.6216894 | LOC101928076 |
| 214875_x_at | 0.759 | 0.0317286 | -2.4675478 | -4.57 | -1.593228  | APLP2        |
| 223658_at   | 0.759 | 0.0317675 | -2.4668509 | -4.57 | -1.9633197 | KCNK6        |
| 206683_at   | 0.759 | 0.031807  | -2.466144  | -4.57 | -2.8945931 | ZNF165       |
| 1552370_at  | 0.759 | 0.0318529 | -2.4653253 | -4.57 | -2.2434418 | C4orf33      |
| 237242_at   | 0.759 | 0.0319048 | -2.4643995 | -4.57 | -1.737599  | LINC00661    |
| 243637_at   | 0.759 | 0.0319648 | -2.4633322 | -4.57 | -2.0740219 |              |
| 205348_s_at | 0.759 | 0.0321708 | -2.4596809 | -4.57 | -1.5819201 | DYNC1I1      |

|             |       |           |            |       |            |                       |
|-------------|-------|-----------|------------|-------|------------|-----------------------|
| 200920_s_at | 0.759 | 0.0321834 | -2.4594577 | -4.57 | -3.2282111 | BTG1                  |
| 201892_s_at | 0.759 | 0.0322812 | -2.4577327 | -4.57 | -1.9925267 | IMPDH2                |
| 224918_x_at | 0.759 | 0.032369  | -2.4561887 | -4.57 | -2.3304544 | MGST1                 |
| 221215_s_at | 0.759 | 0.0324709 | -2.4544012 | -4.57 | -2.1004107 | RIPK4                 |
| 201411_s_at | 0.759 | 0.0325598 | -2.4528466 | -4.57 | -1.6489971 | PLEKHB2               |
| 220107_s_at | 0.759 | 0.0326345 | -2.4515437 | -4.57 | -1.9251751 | ZC2HC1C               |
| 224566_at   | 0.759 | 0.0327726 | -2.449142  | -4.57 | -2.3510653 | MIR612///NEAT1        |
| 218843_at   | 0.759 | 0.0329114 | -2.4467383 | -4.57 | -2.2309996 | FNDC4                 |
| 229682_at   | 0.759 | 0.0330329 | -2.4446431 | -4.57 | -1.5290933 | MAPRE3                |
| 227647_at   | 0.759 | 0.0331003 | -2.4434838 | -4.57 | -2.3208154 | KCNE3                 |
| 202696_at   | 0.759 | 0.0332954 | -2.4401396 | -4.57 | -2.7824418 | OXR1                  |
| 209699_x_at | 0.759 | 0.0334354 | -2.4377525 | -4.57 | -2.2763867 | LOC101930400///AKR1C2 |
| 240045_at   | 0.759 | 0.0334908 | -2.4368098 | -4.57 | -1.9892442 |                       |
| 226034_at   | 0.759 | 0.0336139 | -2.4347221 | -4.57 | -1.9664144 | DUSP4                 |
| 221781_s_at | 0.759 | 0.0337272 | -2.4328086 | -4.57 | -1.8891626 | DNAJC10               |
| 237056_at   | 0.759 | 0.0338813 | -2.4302127 | -4.57 | -1.7493497 | INSC                  |
| 219474_at   | 0.759 | 0.0339499 | -2.4290614 | -4.57 | -2.9268533 | C3orf52               |
| 210609_s_at | 0.759 | 0.0340734 | -2.4269949 | -4.57 | -1.7434743 | TP53I3                |
| 204340_at   | 0.759 | 0.0340883 | -2.4267462 | -4.57 | -2.0375992 | TMEM187               |
| 240242_at   | 0.759 | 0.0343464 | -2.4224524 | -4.57 | -2.059335  |                       |

|             |       |           |            |       |            |                          |
|-------------|-------|-----------|------------|-------|------------|--------------------------|
| 204363_at   | 0.759 | 0.0343933 | -2.4216751 | -4.57 | -1.8812052 | F3                       |
| 234592_at   | 0.759 | 0.0345263 | -2.4194775 | -4.57 | -1.8372909 |                          |
| 220987_s_at | 0.759 | 0.0345399 | -2.4192533 | -4.57 | -2.2324657 | NUAK2///AKIP1            |
| 211924_s_at | 0.759 | 0.0345401 | -2.4192505 | -4.57 | -1.9488328 | PLAUR                    |
| 235628_x_at | 0.759 | 0.0345944 | -2.4183562 | -4.57 | -1.5099574 | LOC101929964///LINC01184 |
| 226783_at   | 0.759 | 0.03472   | -2.4162914 | -4.57 | -2.2036175 | PHYKPL                   |
| 223395_at   | 0.759 | 0.0347286 | -2.41615   | -4.57 | -2.0167021 | ABI3BP                   |
| 235652_at   | 0.759 | 0.0348809 | -2.413658  | -4.57 | -2.07561   |                          |
| 32811_at    | 0.759 | 0.0352716 | -2.4073135 | -4.57 | -1.5117971 | MYO1C                    |
| 213174_at   | 0.759 | 0.0352761 | -2.407241  | -4.57 | -2.3251101 | TTC9                     |
| 203963_at   | 0.759 | 0.0352945 | -2.4069441 | -4.57 | -1.7732014 | CA12                     |
| 223737_x_at | 0.759 | 0.0354579 | -2.4043111 | -4.57 | -2.5573772 | CHST9                    |
| 204952_at   | 0.759 | 0.0355627 | -2.4026305 | -4.57 | -2.1901789 | LYPD3                    |
| 239350_at   | 0.759 | 0.0356889 | -2.4006105 | -4.57 | -1.7978568 | MARVELD3                 |
| 239345_at   | 0.759 | 0.0357471 | -2.3996818 | -4.57 | -2.4588716 | SLC19A3                  |
| 236340_at   | 0.759 | 0.0357973 | -2.3988826 | -4.57 | -1.9325368 | LINC01006///C7orf13      |
| 204151_x_at | 0.759 | 0.0358004 | -2.3988328 | -4.57 | -2.1753219 | AKR1C1                   |
| 205727_at   | 0.759 | 0.0358064 | -2.3987385 | -4.57 | -1.7037369 | TEP1                     |
| 230757_at   | 0.759 | 0.0358275 | -2.3984023 | -4.57 | -1.5470379 |                          |
| 232769_at   | 0.759 | 0.0358364 | -2.3982608 | -4.57 | -1.8582954 |                          |
| 219583_s_at | 0.759 | 0.0358531 | -2.3979952 | -4.57 | -2.0210123 | SPATA7                   |
| 226992_at   | 0.759 | 0.0358672 | -2.397771  | -4.57 | -1.6504311 | NOSTRIN                  |



|             |       |           |            |       |            |                                          |
|-------------|-------|-----------|------------|-------|------------|------------------------------------------|
| 237204_at   | 0.759 | 0.0358702 | -2.3977224 | -4.57 | -2.1433487 |                                          |
| 220954_s_at | 0.759 | 0.0358804 | -2.3975608 | -4.57 | -1.9370934 | MIR6840///STAG3L5P-PVRIG2P-PILRB///PILRB |
| 226320_at   | 0.759 | 0.0359512 | -2.3964373 | -4.57 | -1.7125136 | ALYREF                                   |
| 223136_at   | 0.759 | 0.036072  | -2.3945259 | -4.57 | -1.8260577 | AIG1                                     |
| 209600_s_at | 0.759 | 0.0361116 | -2.3939002 | -4.57 | -1.8330638 | ACOX1                                    |
| 209021_x_at | 0.759 | 0.03616   | -2.3931363 | -4.57 | -2.0677149 | ATG13                                    |
| 223206_s_at | 0.759 | 0.0363556 | -2.3900604 | -4.57 | -1.9674043 | NMRAL1                                   |
| 213967_at   | 0.759 | 0.036383  | -2.38963   | -4.57 | -3.0614153 | RALYL                                    |
| 211504_x_at | 0.759 | 0.0365155 | -2.3875574 | -4.57 | -2.0935368 | ROCK2                                    |
| 202149_at   | 0.759 | 0.0366793 | -2.3850059 | -4.57 | -1.7268495 | NEDD9                                    |
| 221815_at   | 0.759 | 0.0367034 | -2.384631  | -4.57 | -2.7559937 | ABHD2                                    |
| 244535_at   | 0.759 | 0.0367725 | -2.3835585 | -4.57 | -1.9086086 |                                          |
| 223449_at   | 0.759 | 0.0369176 | -2.3813116 | -4.57 | -2.0234535 | SEMA6A                                   |
| 224896_s_at | 0.759 | 0.0372511 | -2.3761811 | -4.57 | -2.8448723 | TTL                                      |
| 235911_at   | 0.759 | 0.0372884 | -2.3756097 | -4.57 | -2.1599279 | MELTF                                    |
| 215358_x_at | 0.759 | 0.0374727 | -2.372796  | -4.57 | -1.6728068 | ZNF37BP                                  |
| 228359_at   | 0.759 | 0.0375533 | -2.3715692 | -4.57 | -1.8936455 | UBASH3B                                  |

|             |       |           |            |       |            |                      |
|-------------|-------|-----------|------------|-------|------------|----------------------|
| 226485_at   | 0.759 | 0.0375695 | -2.3713235 | -4.57 | -2.3743443 | LOC101928274//VSIG10 |
| 231808_at   | 0.759 | 0.0376206 | -2.3705487 | -4.57 | -1.8124306 | OIP5-AS1             |
| 208310_s_at | 0.759 | 0.0377526 | -2.3685492 | -4.57 | -1.8565295 | CCZ1B//CCZ1          |
| 223358_s_at | 0.759 | 0.0378567 | -2.3669771 | -4.57 | -1.824646  | PDE7A                |
| 224209_s_at | 0.759 | 0.0378871 | -2.3665185 | -4.57 | -3.2144226 | GDA                  |
| 205421_at   | 0.759 | 0.0380711 | -2.3637531 | -4.57 | -2.3057938 | SLC22A3              |
| 203423_at   | 0.759 | 0.0381125 | -2.3631329 | -4.57 | -2.0403895 | RBP1                 |
| 232472_at   | 0.759 | 0.0381217 | -2.3629943 | -4.57 | -1.9788871 |                      |
| 225611_at   | 0.759 | 0.03814   | -2.3627208 | -4.57 | -1.9532423 | MAST4                |
| 204818_at   | 0.759 | 0.0381987 | -2.3618418 | -4.57 | -2.6183053 | HSD17B2              |
| 230084_at   | 0.759 | 0.0383749 | -2.3592144 | -4.57 | -2.3179802 | SLC30A2              |
| 236427_at   | 0.759 | 0.0384359 | -2.358307  | -4.57 | -2.502694  |                      |
| 206027_at   | 0.759 | 0.0384804 | -2.3576463 | -4.57 | -1.782188  | S100A3               |
| 229790_at   | 0.759 | 0.0385471 | -2.3566571 | -4.57 | -2.2176207 | TERF2                |
| 209160_at   | 0.759 | 0.0385956 | -2.3559384 | -4.57 | -1.968567  | AKR1C3               |
| 202628_s_at | 0.759 | 0.0386397 | -2.3552862 | -4.57 | -2.2164131 | SERPINE1             |
| 213649_at   | 0.759 | 0.0387434 | -2.3537562 | -4.57 | -1.9493397 | SRSF7                |
| 212912_at   | 0.759 | 0.0387688 | -2.3533809 | -4.57 | -1.7376893 | RPS6KA2              |
| 201481_s_at | 0.759 | 0.0388205 | -2.3526207 | -4.57 | -1.788211  | PYGB                 |
| 239721_at   | 0.759 | 0.0390382 | -2.3494244 | -4.57 | -1.9720689 |                      |

|              |       |           |            |       |            |           |
|--------------|-------|-----------|------------|-------|------------|-----------|
| 201878_at    | 0.759 | 0.0390625 | -2.3490692 | -4.57 | -1.9442529 | ARIH1     |
| 205590_at    | 0.759 | 0.039078  | -2.3488422 | -4.57 | -1.9365687 | RASGRP1   |
| 217517_x_at  | 0.759 | 0.0392007 | -2.3470508 | -4.57 | -1.6063606 | SRPK2     |
| 211890_x_at  | 0.759 | 0.0392469 | -2.3463786 | -4.57 | -1.7288457 | CAPN3     |
| 228214_at    | 0.759 | 0.0393008 | -2.3455944 | -4.57 | -2.1864967 | SOX6      |
| 227944_at    | 0.759 | 0.0393295 | -2.345177  | -4.57 | -2.1290151 | PTPN3     |
| 225331_at    | 0.759 | 0.039374  | -2.3445301 | -4.57 | -1.7297205 | CCDC50    |
| 226575_at    | 0.759 | 0.0394264 | -2.3437699 | -4.57 | -2.3270289 | ZNF462    |
| 217968_at    | 0.759 | 0.0394652 | -2.3432088 | -4.57 | -1.9690555 | TSSC1     |
| 1565715_at   | 0.759 | 0.0395786 | -2.3415683 | -4.57 | -1.5154786 |           |
| 229845_at    | 0.759 | 0.0398011 | -2.3383629 | -4.57 | -1.6082792 | MAPKAP1   |
| 227113_at    | 0.759 | 0.0398105 | -2.3382282 | -4.57 | -1.7840482 | ADHFE1    |
| 244261_at    | 0.759 | 0.0398764 | -2.3372823 | -4.57 | -1.8126989 | IFNLR1    |
| 1569477_at   | 0.759 | 0.0399417 | -2.336347  | -4.57 | -2.1989706 |           |
| 1562698_x_at | 0.759 | 0.0400984 | -2.3341082 | -4.57 | -2.1582807 | LOC339988 |
| 244383_at    | 0.759 | 0.0401081 | -2.3339697 | -4.57 | -2.8765397 |           |
| 208306_x_at  | 0.759 | 0.0401948 | -2.332735  | -4.57 | -1.841931  | HLA-DRB1  |
| 240038_at    | 0.759 | 0.0403429 | -2.3306314 | -4.57 | -2.8714187 |           |
| 230585_at    | 0.759 | 0.0403464 | -2.3305819 | -4.57 | -2.2400567 | KCNJ15    |
| 230791_at    | 0.759 | 0.0403654 | -2.3303124 | -4.57 | -1.627046  |           |
| 218898_at    | 0.759 | 0.0404147 | -2.329614  | -4.57 | -1.501267  | FAM57A    |

|             |       |           |            |       |            |            |
|-------------|-------|-----------|------------|-------|------------|------------|
| 242134_at   | 0.759 | 0.0404395 | -2.329263  | -4.57 | -2.4045636 |            |
| 219469_at   | 0.759 | 0.040617  | -2.3267583 | -4.58 | -1.5726398 | DYNC2H1    |
| 223568_s_at | 0.759 | 0.0406734 | -2.3259645 | -4.58 | -1.9264692 | PLPP5      |
| 209040_s_at | 0.759 | 0.0407528 | -2.324848  | -4.58 | -2.704386  | PSMB8      |
| 232762_at   | 0.759 | 0.0408137 | -2.3239945 | -4.58 | -2.6760833 | KIAA1217   |
| 1565149_at  | 0.759 | 0.0408496 | -2.3234904 | -4.58 | -1.5979166 | DYNC2H1    |
| 207249_s_at | 0.759 | 0.0409128 | -2.3226058 | -4.58 | -2.3056421 | SLC28A2    |
| 219049_at   | 0.759 | 0.0409877 | -2.3215591 | -4.58 | -2.1015941 | CSGALNACT1 |
| 219718_at   | 0.759 | 0.0412211 | -2.3183094 | -4.58 | -1.5986475 | FGGY       |
| 207784_at   | 0.759 | 0.0412903 | -2.3173497 | -4.58 | -1.7079029 | ARSD       |
| 218995_s_at | 0.759 | 0.041296  | -2.3172705 | -4.58 | -1.4339932 | EDN1       |
| 242467_at   | 0.759 | 0.0413251 | -2.3168675 | -4.58 | -2.0476201 |            |
| 204965_at   | 0.759 | 0.0413865 | -2.3160173 | -4.58 | -3.0286175 | GC         |
| 205778_at   | 0.759 | 0.041488  | -2.3146157 | -4.58 | -1.6730499 | KLK7       |
| 244636_at   | 0.759 | 0.0415704 | -2.3134795 | -4.58 | -2.1230095 |            |
| 217811_at   | 0.759 | 0.0417263 | -2.3113366 | -4.58 | -1.9997067 | SELT       |
| 225484_at   | 0.759 | 0.0420271 | -2.307222  | -4.58 | -1.8522068 | CEP41      |
| 226851_at   | 0.759 | 0.0420437 | -2.3069957 | -4.58 | -2.2571766 | LYPLAL1    |
| 201510_at   | 0.759 | 0.0420494 | -2.3069191 | -4.58 | -1.749283  | ELF3       |
| 210461_s_at | 0.759 | 0.0420925 | -2.3063322 | -4.58 | -1.6390577 | ABLIM1     |
| 243718_at   | 0.759 | 0.0421197 | -2.305962  | -4.58 | -1.4113315 |            |
| 218631_at   | 0.759 | 0.0421545 | -2.3054892 | -4.58 | -1.6075894 | AVPI1      |
| 223033_s_at | 0.759 | 0.042434  | -2.3017029 | -4.58 | -2.0952849 | SCYL1      |
| 209605_at   | 0.759 | 0.0424598 | -2.3013547 | -4.58 | -1.8222214 | TST        |

|              |       |           |            |       |            |             |
|--------------|-------|-----------|------------|-------|------------|-------------|
| 39402_at     | 0.759 | 0.042489  | -2.3009615 | -4.58 | -2.2277329 | IL1B        |
| 209164_s_at  | 0.759 | 0.0424899 | -2.3009481 | -4.58 | -2.1017823 | CYB561      |
| 202893_at    | 0.759 | 0.0425961 | -2.2995178 | -4.58 | -1.7942862 | UNC13B      |
| 209116_x_at  | 0.759 | 0.0426954 | -2.2981837 | -4.58 | -3.6783971 | HBB         |
| 209233_at    | 0.759 | 0.0427595 | -2.297324  | -4.58 | -2.50629   | EMG1        |
| 216526_x_at  | 0.759 | 0.0427679 | -2.2972116 | -4.58 | -1.4506713 | HLA-C       |
| 1561817_at   | 0.759 | 0.0427971 | -2.2968204 | -4.58 | -2.2788601 |             |
| 1554708_s_at | 0.759 | 0.0428382 | -2.2962703 | -4.58 | -1.4826206 | SPATA6L     |
| 242403_at    | 0.759 | 0.0428462 | -2.2961633 | -4.58 | -2.2574531 |             |
| 239638_at    | 0.759 | 0.0428497 | -2.2961168 | -4.58 | -1.8148322 |             |
| 217414_x_at  | 0.759 | 0.0428898 | -2.2955806 | -4.58 | -1.7843482 | HBA2///HBA1 |
| 240383_at    | 0.759 | 0.0429401 | -2.2949084 | -4.58 | -2.158497  | UBE2D3      |
| 213674_x_at  | 0.759 | 0.0429855 | -2.2943035 | -4.58 | -2.8776855 | IGHD        |
| 220040_x_at  | 0.759 | 0.0429958 | -2.2941651 | -4.58 | -1.6684596 | ZC4H2       |
| 236390_at    | 0.759 | 0.0430435 | -2.2935304 | -4.58 | -2.8307382 | SLX4IP      |
| 228325_at    | 0.759 | 0.0432067 | -2.2913601 | -4.58 | -2.7483973 | SPIDR       |
| 228391_at    | 0.759 | 0.0432606 | -2.2906457 | -4.58 | -1.7232675 | CYP4V2      |
| 240024_at    | 0.759 | 0.0435036 | -2.2874337 | -4.58 | -2.0580252 | SEC14L2     |
| 243395_at    | 0.759 | 0.0436035 | -2.2861187 | -4.58 | -1.8298309 |             |
| 209409_at    | 0.759 | 0.0437669 | -2.2839738 | -4.58 | -1.8586007 | GRB10       |
| 1555579_s_at | 0.759 | 0.0437988 | -2.2835561 | -4.58 | -1.7061477 | PTPRM       |
| 202067_s_at  | 0.759 | 0.0438084 | -2.2834303 | -4.58 | -1.8856508 | LDLR        |

|              |       |           |            |       |            |                 |
|--------------|-------|-----------|------------|-------|------------|-----------------|
| 217185_s_at  | 0.759 | 0.0438274 | -2.2831819 | -4.58 | -1.4234647 | ZNF259P1///ZPR1 |
| 228846_at    | 0.759 | 0.0438368 | -2.2830583 | -4.58 | -1.590111  | MXD1            |
| 203632_s_at  | 0.759 | 0.044012  | -2.2807704 | -4.58 | -3.2774442 | GPRC5B          |
| 217767_at    | 0.759 | 0.0440383 | -2.2804277 | -4.58 | -1.7134824 | C3              |
| 202464_s_at  | 0.759 | 0.0440448 | -2.2803427 | -4.58 | -1.4671461 | PFKFB3          |
| 221627_at    | 0.759 | 0.0440654 | -2.2800747 | -4.58 | -2.108247  | TRIM10          |
| 208623_s_at  | 0.759 | 0.0441318 | -2.2792103 | -4.58 | -1.4941821 | EZR             |
| 213423_x_at  | 0.759 | 0.0443379 | -2.2765379 | -4.58 | -2.3899645 | TUSC3           |
| 210987_x_at  | 0.759 | 0.0444017 | -2.2757116 | -4.58 | -1.6695419 | TPM1            |
| 215963_x_at  | 0.759 | 0.0444163 | -2.2755237 | -4.58 | -1.9407379 | RPL3            |
| 201876_at    | 0.759 | 0.0444618 | -2.2749362 | -4.58 | -1.6801597 | PON2            |
| 200838_at    | 0.759 | 0.0445676 | -2.2735718 | -4.58 | -1.5067624 | CTSB            |
| 223569_at    | 0.759 | 0.044611  | -2.2730128 | -4.58 | -2.2551637 | PLPP5           |
| 218307_at    | 0.759 | 0.0446339 | -2.2727193 | -4.58 | -2.1559597 | RSAD1           |
| 200983_x_at  | 0.759 | 0.0446979 | -2.2718965 | -4.58 | -1.7289109 | CD59            |
| 213508_at    | 0.759 | 0.0447631 | -2.2710597 | -4.58 | -2.240826  | SPTSSA          |
| 1556950_s_at | 0.759 | 0.0448303 | -2.2701981 | -4.58 | -1.9017044 | SERPINB6        |
| 215931_s_at  | 0.759 | 0.0448686 | -2.2697077 | -4.58 | -1.9096868 | ARFGEF2         |
| 242055_at    | 0.759 | 0.0449001 | -2.2693049 | -4.58 | -1.6542785 | PSMG4           |
| 213695_at    | 0.759 | 0.0449439 | -2.2687451 | -4.58 | -1.9714329 | PON3            |

|             |       |           |            |       |            |         |
|-------------|-------|-----------|------------|-------|------------|---------|
| 228058_at   | 0.759 | 0.045038  | -2.2675445 | -4.58 | -1.8524339 | ZG16B   |
| 225503_at   | 0.759 | 0.045055  | -2.2673274 | -4.58 | -1.826418  | DHRXS   |
| 201502_s_at | 0.759 | 0.0450972 | -2.26679   | -4.58 | -1.6592502 | NFKBIA  |
| 218723_s_at | 0.759 | 0.0451152 | -2.2665613 | -4.58 | -1.790702  | RGCC    |
| 205650_s_at | 0.759 | 0.0451586 | -2.2660086 | -4.58 | -1.8535028 | FGA     |
| 229899_s_at | 0.759 | 0.0452182 | -2.2652522 | -4.58 | -2.0961193 | ZFAS1   |
| 239561_at   | 0.759 | 0.0453315 | -2.2638147 | -4.58 | -1.7327897 |         |
| 205992_s_at | 0.759 | 0.0453521 | -2.2635538 | -4.58 | -1.9334478 | IL15    |
| 1555884_at  | 0.759 | 0.0453739 | -2.2632781 | -4.58 | -1.9622822 | PSMD6   |
| 219499_at   | 0.759 | 0.0454426 | -2.2624087 | -4.58 | -2.1374077 | SEC61A2 |
| 202284_s_at | 0.759 | 0.0454489 | -2.2623288 | -4.58 | -1.4400156 | CDKN1A  |
| 221449_s_at | 0.759 | 0.0455146 | -2.2614991 | -4.58 | -2.1333196 | ITFG1   |
| 228030_at   | 0.759 | 0.0455164 | -2.2614766 | -4.58 | -2.3746251 | RBM6    |
| 226499_at   | 0.759 | 0.0455331 | -2.2612655 | -4.58 | -2.4112998 | NRARP   |
| 202761_s_at | 0.759 | 0.0456721 | -2.259515  | -4.58 | -2.6983052 | SYNE2   |
| 218864_at   | 0.759 | 0.0456743 | -2.2594871 | -4.58 | -1.902209  | TNS1    |
| 222764_at   | 0.759 | 0.0457772 | -2.2581949 | -4.58 | -1.5834999 | ASRGL1  |
| 226557_at   | 0.759 | 0.0457894 | -2.2580412 | -4.58 | -1.6933865 | TTC5    |
| 202951_at   | 0.759 | 0.0459045 | -2.2565993 | -4.58 | -1.6770872 | STK38   |
| 232357_at   | 0.759 | 0.0459196 | -2.2564101 | -4.58 | -1.5179623 | TTLL9   |
| 204674_at   | 0.759 | 0.045991  | -2.255517  | -4.58 | -2.0425423 | LRMP    |
| 209336_at   | 0.759 | 0.0460463 | -2.2548273 | -4.58 | -2.0520374 | PWP2    |
| 206764_x_at | 0.759 | 0.0460804 | -2.2544019 | -4.58 | -1.83355   | MPPE1   |

|             |       |           |            |       |            |                |
|-------------|-------|-----------|------------|-------|------------|----------------|
| 1560486_at  | 0.759 | 0.046116  | -2.2539573 | -4.58 | -1.6568112 | STXBP3         |
| 223723_at   | 0.759 | 0.0461659 | -2.2533361 | -4.58 | -2.0681969 | MELTF          |
| 219247_s_at | 0.759 | 0.0461748 | -2.2532251 | -4.58 | -2.0984854 | ZDHHC14        |
| 222450_at   | 0.759 | 0.0463052 | -2.2516048 | -4.58 | -1.7271873 | PMEPA1         |
| 244080_at   | 0.759 | 0.0463949 | -2.250492  | -4.58 | -2.1723057 |                |
| 209538_at   | 0.759 | 0.0464103 | -2.2503016 | -4.58 | -1.8532463 | ZNF32          |
| 204627_s_at | 0.759 | 0.0464162 | -2.2502279 | -4.58 | -1.9698923 | ITGB3          |
| 201576_s_at | 0.759 | 0.046641  | -2.24745   | -4.58 | -2.4077513 | TMPPE///GLB1   |
| 201739_at   | 0.759 | 0.0467858 | -2.2456685 | -4.58 | -1.3478515 | SGK1           |
| 200732_s_at | 0.759 | 0.0468378 | -2.245029  | -4.58 | -1.6137835 | PTP4A1         |
| 205380_at   | 0.759 | 0.0472882 | -2.2395252 | -4.58 | -2.3695558 | PDZK1          |
| 203696_s_at | 0.759 | 0.0473048 | -2.2393236 | -4.58 | -1.8422285 | RFC2           |
| 238053_at   | 0.759 | 0.0474307 | -2.237794  | -4.58 | -1.9751768 | DHRX           |
| 210949_s_at | 0.759 | 0.0475778 | -2.2360122 | -4.58 | -1.4400771 | EIF3CL///EIF3C |
| 201650_at   | 0.759 | 0.0476743 | -2.2348466 | -4.58 | -2.3570703 | KRT19          |
| 237223_at   | 0.759 | 0.0477468 | -2.2339718 | -4.58 | -1.6410237 |                |
| 203854_at   | 0.759 | 0.0481186 | -2.2295076 | -4.58 | -1.475211  | CFI            |
| 202083_s_at | 0.759 | 0.048135  | -2.2293112 | -4.58 | -2.0817293 | SEC14L1        |
| 227438_at   | 0.759 | 0.0482378 | -2.228084  | -4.58 | -1.5817052 | ALPK1          |



|             |       |           |            |       |            |                       |
|-------------|-------|-----------|------------|-------|------------|-----------------------|
| 209850_s_at | 0.759 | 0.0482768 | -2.2276181 | -4.58 | -1.6637406 | CDC42EP2              |
| 219181_at   | 0.759 | 0.0483654 | -2.2265622 | -4.58 | -1.7298922 | LIPG                  |
| 211653_x_at | 0.759 | 0.0483909 | -2.2262589 | -4.58 | -2.214124  | LOC101930400///AKR1C2 |
| 1569041_at  | 0.759 | 0.0484765 | -2.2252414 | -4.58 | -2.078822  |                       |
| 218584_at   | 0.759 | 0.0485418 | -2.2244657 | -4.58 | -1.6566287 | TCTN1                 |
| 208679_s_at | 0.759 | 0.0486769 | -2.2228656 | -4.58 | -1.8698733 | ARPC2                 |
| 218784_s_at | 0.759 | 0.0487135 | -2.2224322 | -4.58 | -1.9955822 | SAYSD1                |
| 229202_at   | 0.759 | 0.0493137 | -2.2153781 | -4.58 | -1.5104987 | PCNX2                 |
| 202487_s_at | 0.759 | 0.0495808 | -2.212265  | -4.58 | -1.2989011 | H2AFV                 |
| 201061_s_at | 0.759 | 0.0496137 | -2.211882  | -4.58 | -1.5094857 | STOM                  |
| 220444_at   | 0.759 | 0.0498368 | -2.209296  | -4.58 | -1.7472994 | ZNF557                |
| 202508_s_at | 0.759 | 0.0498481 | -2.2091655 | -4.58 | -2.7700075 | SNAP25                |
| 1557384_at  | 0.759 | 0.0498519 | -2.209122  | -4.58 | -1.9278884 | LOC100506639///ZNF131 |
| 206696_at   | 0.759 | 0.049876  | -2.208843  | -4.58 | -2.0486888 | GPR143                |
| 226082_s_at | 0.759 | 0.0499336 | -2.2081772 | -4.58 | -1.8693486 | SCAF4                 |
| 232406_at   | 0.759 | 0.0499417 | -2.2080838 | -4.58 | -1.7905386 | LOC105372526          |
| 203233_at   | 0.759 | 0.0499682 | -2.2077783 | -4.58 | -1.8208763 | IL4R                  |

---

**GSE32676**

| ID        | adj.P.Val | P.Value  | t    | B         | logFC | Gene.symbol |
|-----------|-----------|----------|------|-----------|-------|-------------|
| 201416_at | 0.0000529 | 1.71E-09 | 8.46 | 11.732533 | 2.34  | SOX4        |

|             |           |          |      |           |      |          |
|-------------|-----------|----------|------|-----------|------|----------|
| 223631_s_at | 0.0000529 | 2.15E-09 | 8.37 | 11.514199 | 5.67 | C19orf33 |
| 204885_s_at | 0.0000529 | 2.90E-09 | 8.25 | 11.227863 | 6.44 | MSLN     |
| 204855_at   | 0.0000736 | 5.39E-09 | 8.01 | 10.638039 | 5.62 | SERPINB5 |
| 223484_at   | 0.0000903 | 8.26E-09 | 7.85 | 10.229196 | 3.77 | C15orf48 |
| 218960_at   | 0.000136  | 1.49E-08 | 7.63 | 9.662555  | 5.76 | TMPRSS4  |
| 201650_at   | 0.0001693 | 2.17E-08 | 7.49 | 9.305284  | 6.22 | KRT19    |
| 202489_s_at | 0.0001866 | 2.73E-08 | 7.4  | 9.083566  | 5.39 | FXYD3    |
| 231211_s_at | 0.0002011 | 3.31E-08 | 7.33 | 8.899194  | 4.54 | YIF1B    |
| 209173_at   | 0.0002504 | 6.00E-08 | 7.11 | 8.327266  | 5.69 | AGR2     |

|             |           |          |      |          |      |          |
|-------------|-----------|----------|------|----------|------|----------|
| 213571_s_at | 0.0002504 | 6.11E-08 | 7.1  | 8.311296 | 1.01 | EIF4E2   |
| 206482_at   | 0.0002504 | 7.06E-08 | 7.05 | 8.17135  | 4.64 | PTK6     |
| 219010_at   | 0.0002504 | 7.32E-08 | 7.04 | 8.137425 | 4.18 | C1orf106 |
| 209270_at   | 0.0002728 | 9.10E-08 | 6.96 | 7.928002 | 4.87 | LAMB3    |
| 202267_at   | 0.0002728 | 9.44E-08 | 6.95 | 7.892391 | 4.93 | LAMC2    |
| 226988_s_at | 0.0002728 | 9.79E-08 | 6.93 | 7.857852 | 2.67 | MYH14    |
| 209212_s_at | 0.0002728 | 1.05E-07 | 6.91 | 7.792327 | 4.14 | KLF5     |
| 218677_at   | 0.0002995 | 1.30E-07 | 6.83 | 7.587519 | 3.12 | S100A14  |
| 203878_s_at | 0.0002995 | 1.37E-07 | 6.81 | 7.534758 | 5.44 | MMP11    |
| 204351_at   | 0.0003364 | 1.60E-07 | 6.75 | 7.385237 | 6.75 | S100P    |
| 218804_at   | 0.0004249 | 2.18E-07 | 6.64 | 7.089446 | 2.83 | ANO1     |
| 209016_s_at | 0.0004267 | 2.34E-07 | 6.62 | 7.019069 | 4.65 | KRT7     |
| 211574_s_at | 0.0004468 | 2.59E-07 | 6.58 | 6.921763 | 1.58 | CD46     |
| 232361_s_at | 0.0004468 | 2.67E-07 | 6.57 | 6.891907 | 2.99 | EHF      |
| 207549_x_at | 0.0004468 | 2.70E-07 | 6.56 | 6.882927 | 1.32 | CD46     |

|             |           |          |      |          |      |         |
|-------------|-----------|----------|------|----------|------|---------|
| 224650_at   | 0.0004557 | 2.83E-07 | 6.55 | 6.835116 | 3.34 | MAL2    |
| 232530_at   | 0.0005182 | 3.39E-07 | 6.48 | 6.661376 | 2.57 | PLD1    |
| 205032_at   | 0.0005182 | 3.58E-07 | 6.46 | 6.608884 | 3.25 | ITGA2   |
| 218186_at   | 0.0005568 | 3.97E-07 | 6.43 | 6.510245 | 3.96 | RAB25   |
| 205640_at   | 0.0006144 | 4.64E-07 | 6.37 | 6.360182 | 2.16 | ALDH3B1 |
| 219684_at   | 0.0006144 | 4.72E-07 | 6.36 | 6.344084 | 2.77 | RTP4    |
| 201548_s_at | 0.0006221 | 4.89E-07 | 6.35 | 6.309498 | 1.49 | KDM5B   |
| 205076_s_at | 0.0006905 | 5.56E-07 | 6.31 | 6.186881 | 3.58 | MTMR11  |

|              |           |          |      |          |      |           |
|--------------|-----------|----------|------|----------|------|-----------|
| 239370_at    | 0.0006964 | 5.73E-07 | 6.29 | 6.157027 | 4.23 | LINC01133 |
| 223000_s_at  | 0.0007451 | 6.29E-07 | 6.26 | 6.067611 | 1.41 | F11R      |
| 223540_at    | 0.0007451 | 6.61E-07 | 6.24 | 6.019985 | 3.26 | NECTIN4   |
| 225436_at    | 0.0007451 | 6.71E-07 | 6.24 | 6.004807 | 3.21 | ABHD17C   |
| 209114_at    | 0.0007451 | 6.91E-07 | 6.23 | 5.977471 | 4.41 | TSPAN1    |
| 33323_r_at   | 0.0007451 | 6.95E-07 | 6.23 | 5.971381 | 5    | SFN       |
| 235871_at    | 0.000778  | 7.54E-07 | 6.2  | 5.892747 | 3.09 | LIPH      |
| 223232_s_at  | 0.0008784 | 8.68E-07 | 6.15 | 5.757788 | 3.32 | CGN       |
| 232164_s_at  | 0.0009141 | 9.19E-07 | 6.13 | 5.701797 | 4.08 | EPPK1     |
| 227372_s_at  | 0.000915  | 9.45E-07 | 6.12 | 5.675138 | 3.45 | BAIAP2L1  |
| 242722_at    | 0.000915  | 9.74E-07 | 6.11 | 5.646243 | 2.93 | LMO7      |
| 1552797_s_at | 0.000915  | 9.87E-07 | 6.1  | 5.633221 | 4.07 | PROM2     |
| 213668_s_at  | 0.0010596 | 1.16E-06 | 6.04 | 5.475659 | 2.69 | SOX4      |
| 201286_at    | 0.0010609 | 1.18E-06 | 6.04 | 5.458571 | 3.43 | SDC1      |
| 60474_at     | 0.0010705 | 1.21E-06 | 6.03 | 5.434267 | 3.71 | FERMT1    |
| 218796_at    | 0.0011006 | 1.28E-06 | 6.01 | 5.379772 | 3.92 | FERMT1    |

|             |           |          |      |          |      |          |
|-------------|-----------|----------|------|----------|------|----------|
| 223949_at   | 0.00111   | 1.35E-06 | 5.99 | 5.33385  | 3.55 | TMPRSS3  |
| 229997_at   | 0.00111   | 1.35E-06 | 5.99 | 5.332549 | 1.63 | VANGL1   |
| 218211_s_at | 0.00111   | 1.36E-06 | 5.99 | 5.322552 | 4.15 | MLPH     |
| 227371_at   | 0.00111   | 1.40E-06 | 5.98 | 5.296281 | 3.07 | BAIAP2L1 |
| 201884_at   | 0.0011281 | 1.45E-06 | 5.96 | 5.260882 | 6.81 | CEACAM5  |
| 205807_s_at | 0.0011281 | 1.46E-06 | 5.96 | 5.253195 | 2.13 | TUFT1    |
| 223278_at   | 0.0011318 | 1.49E-06 | 5.95 | 5.236554 | 4.54 | GJB2     |
| 204990_s_at | 0.0011795 | 1.57E-06 | 5.93 | 5.183468 | 2.87 | ITGB4    |
| 232360_at   | 0.0011854 | 1.61E-06 | 5.93 | 5.163302 | 3    | EHF      |
| 219215_s_at | 0.0011854 | 1.63E-06 | 5.92 | 5.152703 | 2.55 | SLC39A4  |
| 203021_at   | 0.0012104 | 1.68E-06 | 5.91 | 5.119778 | 3.79 | SLPI     |

|             |           |          |      |          |      |                      |
|-------------|-----------|----------|------|----------|------|----------------------|
| 222608_s_at | 0.0012258 | 1.73E-06 | 5.9  | 5.095018 | 3.97 | ANLN                 |
| 219901_at   | 0.001255  | 1.84E-06 | 5.88 | 5.035436 | 2.18 | FGD6                 |
| 226961_at   | 0.001255  | 1.85E-06 | 5.88 | 5.029048 | 3.67 | PRR15                |
| 214088_s_at | 0.001255  | 1.86E-06 | 5.88 | 5.023566 | 2.42 | FUT3                 |
| 226535_at   | 0.0012901 | 1.93E-06 | 5.86 | 4.985174 | 4.96 | LOC100505984///ITGB6 |
| 202504_at   | 0.0012938 | 1.99E-06 | 5.85 | 4.95924  | 5.31 | TRIM29               |
| 220177_s_at | 0.0013039 | 2.03E-06 | 5.85 | 4.939633 | 3.46 | TMPRSS3              |
| 209792_s_at | 0.0013039 | 2.05E-06 | 5.84 | 4.92904  | 5.15 | KLK10                |
| 209211_at   | 0.001448  | 2.36E-06 | 5.79 | 4.795072 | 3.09 | KLF5                 |
| 218451_at   | 0.0014512 | 2.39E-06 | 5.79 | 4.782159 | 2.65 | CDCP1                |
| 222904_s_at | 0.0014658 | 2.45E-06 | 5.78 | 4.75689  | 3.83 | TMC5                 |

|              |           |          |      |          |      |        |
|--------------|-----------|----------|------|----------|------|--------|
| 204678_s_at  | 0.0014658 | 2.47E-06 | 5.78 | 4.751341 | 3.6  | KCNK1  |
| 1558378_a_at | 0.0014868 | 2.53E-06 | 5.77 | 4.727279 | 3.65 | AHNAK2 |
| 33322_i_at   | 0.0014886 | 2.59E-06 | 5.76 | 4.705289 | 3.76 | SFN    |
| 230206_at    | 0.0014886 | 2.61E-06 | 5.76 | 4.697072 | 2.19 | DOCK5  |
| 227475_at    | 0.0014886 | 2.61E-06 | 5.76 | 4.695537 | 4.22 | FOXQ1  |
| 226803_at    | 0.001559  | 2.79E-06 | 5.73 | 4.633131 | 2.87 | CHMP4C |
| 201015_s_at  | 0.0015708 | 2.84E-06 | 5.73 | 4.614093 | 2.86 | JUP    |
| 223233_s_at  | 0.0016163 | 3.02E-06 | 5.71 | 4.557183 | 2.77 | CGN    |
| 226622_at    | 0.0016163 | 3.03E-06 | 5.7  | 4.552386 | 2.93 | MUC20  |
| 206224_at    | 0.0016163 | 3.04E-06 | 5.7  | 4.548465 | 4.9  | CST1   |
| 210715_s_at  | 0.0016624 | 3.16E-06 | 5.69 | 4.512081 | 1.96 | SPINT2 |



|             |           |          |      |          |      |        |
|-------------|-----------|----------|------|----------|------|--------|
| 201830_s_at | 0.0016641 | 3.22E-06 | 5.68 | 4.494397 | 1.71 | NET1   |
| 91826_at    | 0.0016641 | 3.23E-06 | 5.68 | 4.492769 | 3.8  | EPS8L1 |
| 229150_at   | 0.0016713 | 3.32E-06 | 5.67 | 4.465857 | 3.89 |        |
| 203510_at   | 0.0016713 | 3.34E-06 | 5.67 | 4.460129 | 2.71 | MET    |
| 202826_at   | 0.0016713 | 3.35E-06 | 5.67 | 4.455237 | 2.72 | SPINT1 |
| 227196_at   | 0.0016713 | 3.38E-06 | 5.67 | 4.448521 | 2.45 | RHPN2  |
| 209678_s_at | 0.0016713 | 3.39E-06 | 5.66 | 4.444222 | 1.48 | PRKCI  |
| 226799_at   | 0.0017064 | 3.50E-06 | 5.65 | 4.415547 | 2.03 | FGD6   |
| 201829_at   | 0.0017231 | 3.56E-06 | 5.65 | 4.397603 | 1.44 | NET1   |
| 205016_at   | 0.0017469 | 3.67E-06 | 5.64 | 4.367483 | 1.63 | TGFA   |

|              |           |          |      |          |      |          |
|--------------|-----------|----------|------|----------|------|----------|
| 201474_s_at  | 0.0017638 | 3.75E-06 | 5.63 | 4.349122 | 2.59 | ITGA3    |
| 202286_s_at  | 0.0017638 | 3.77E-06 | 5.63 | 4.34165  | 3.98 | TACSTD2  |
| 227314_at    | 0.0018777 | 4.05E-06 | 5.6  | 4.273161 | 3.33 | ITGA2    |
| 225314_at    | 0.0019231 | 4.29E-06 | 5.58 | 4.218769 | 2.27 | OCIAD2   |
| 203287_at    | 0.0019231 | 4.32E-06 | 5.58 | 4.211162 | 2.75 | LAD1     |
| 203892_at    | 0.0019231 | 4.41E-06 | 5.57 | 4.191612 | 3.61 | WFDC2    |
| 1566766_a_at | 0.0019231 | 4.45E-06 | 5.57 | 4.18248  | 2.91 | MACC1    |
| 65517_at     | 0.0019231 | 4.47E-06 | 5.57 | 4.179381 | 2.27 | AP1M2    |
| 203726_s_at  | 0.0019654 | 4.67E-06 | 5.55 | 4.135979 | 3.75 | LAMA3    |
| 210791_s_at  | 0.0019987 | 4.79E-06 | 5.54 | 4.112428 | 2.19 | ARHGAP32 |

|             |           |          |      |          |      |          |
|-------------|-----------|----------|------|----------|------|----------|
| 226129_at   | 0.0020512 | 4.95E-06 | 5.53 | 4.080151 | 2.87 | FAM83H   |
| 238439_at   | 0.0020542 | 5.12E-06 | 5.52 | 4.04867  | 3.13 | ANKRD22  |
| 201287_s_at | 0.0020542 | 5.14E-06 | 5.52 | 4.043887 | 2.68 | SDC1     |
| 213590_at   | 0.0020542 | 5.18E-06 | 5.52 | 4.037711 | 1.88 | SLC16A5  |
| 202488_s_at | 0.0020542 | 5.21E-06 | 5.51 | 4.032148 | 3.75 | FXVD3    |
| 228865_at   | 0.0020542 | 5.26E-06 | 5.51 | 4.022061 | 2.94 | C1orf116 |
| 205597_at   | 0.00206   | 5.33E-06 | 5.5  | 4.009254 | 4.06 | SLC44A4  |
| 219795_at   | 0.0020798 | 5.52E-06 | 5.49 | 3.976363 | 5.88 | SLC6A14  |

|             |           |          |      |          |      |           |
|-------------|-----------|----------|------|----------|------|-----------|
| 1562440_at  | 0.0021533 | 5.79E-06 | 5.48 | 3.92973  | 2.43 | MAP3K13   |
| 230263_s_at | 0.0021938 | 5.96E-06 | 5.47 | 3.901584 | 1.68 | DOCK5     |
| 212992_at   | 0.0021938 | 6.02E-06 | 5.46 | 3.892489 | 3.76 | AHNAK2    |
| 208886_at   | 0.0022115 | 6.13E-06 | 5.46 | 3.874437 | 1.97 | H1F0      |
| 232151_at   | 0.0022115 | 6.17E-06 | 5.45 | 3.868399 | 3.07 | MACC1     |
| 214435_x_at | 0.0022115 | 6.19E-06 | 5.45 | 3.865587 | 1.22 | RALA      |
| 209369_at   | 0.0022201 | 6.29E-06 | 5.45 | 3.850572 | 2.58 | ANXA3     |
| 202708_s_at | 0.0022201 | 6.30E-06 | 5.45 | 3.849081 | 3.08 | HIST2H2BE |
| 219580_s_at | 0.0022201 | 6.33E-06 | 5.44 | 3.843131 | 3.95 | TMC5      |
| 241898_at   | 0.0022628 | 6.50E-06 | 5.44 | 3.818635 | 2.7  | LIPH      |
| 206600_s_at | 0.002271  | 6.59E-06 | 5.43 | 3.805449 | 2.06 | SLC16A5   |
| 224097_s_at | 0.002271  | 6.68E-06 | 5.43 | 3.792412 | 1.34 | F11R      |

|             |           |          |      |          |      |          |
|-------------|-----------|----------|------|----------|------|----------|
| 201340_s_at | 0.002271  | 6.73E-06 | 5.42 | 3.784987 | 2.18 | ENC1     |
| 241994_at   | 0.0022892 | 6.82E-06 | 5.42 | 3.771397 | 4.02 | XDH      |
| 213235_at   | 0.0023145 | 6.94E-06 | 5.41 | 3.754922 | 1.49 | KNOP1    |
| 230336_at   | 0.0023728 | 7.16E-06 | 5.4  | 3.72513  | 1.28 |          |
| 219429_at   | 0.0024556 | 7.46E-06 | 5.39 | 3.686313 | 3.21 | FA2H     |
| 202005_at   | 0.0024661 | 7.53E-06 | 5.38 | 3.676418 | 1.69 | ST14     |
| 219360_s_at | 0.0024732 | 7.60E-06 | 5.38 | 3.6679   | 2.44 | TRPM4    |
| 203431_s_at | 0.0024847 | 7.68E-06 | 5.38 | 3.657719 | 2.12 | ARHGAP32 |
| 205308_at   | 0.0025624 | 8.01E-06 | 5.36 | 3.616795 | 1.34 | ZC2HC1A  |
| 222344_at   | 0.0025792 | 8.16E-06 | 5.35 | 3.599318 | 2.39 |          |

|             |           |          |      |          |      |            |
|-------------|-----------|----------|------|----------|------|------------|
| 218261_at   | 0.002603  | 8.29E-06 | 5.35 | 3.584301 | 2.26 | AP1M2      |
| 205190_at   | 0.002603  | 8.38E-06 | 5.35 | 3.574059 | 3.48 | PLS1       |
| 201590_x_at | 0.002603  | 8.59E-06 | 5.34 | 3.550539 | 1.08 | ANXA2      |
| 208711_s_at | 0.002603  | 8.59E-06 | 5.34 | 3.549736 | 2.13 | CCND1      |
| 219476_at   | 0.002603  | 8.60E-06 | 5.34 | 3.548818 | 3.35 | C1orf116   |
| 227725_at   | 0.002603  | 8.62E-06 | 5.34 | 3.546962 | 3.75 | ST6GALNAC1 |
| 228969_at   | 0.0026291 | 8.82E-06 | 5.33 | 3.52505  | 3.96 | AGR2       |
| 231941_s_at | 0.0026291 | 8.88E-06 | 5.33 | 3.518447 | 2.88 | MUC20      |
| 35148_at    | 0.0026291 | 8.90E-06 | 5.32 | 3.516345 | 2.77 | TJP3       |
| 213503_x_at | 0.0026354 | 8.99E-06 | 5.32 | 3.505707 | 1.1  | ANXA2      |
| 201059_at   | 0.0026354 | 9.01E-06 | 5.32 | 3.503704 | 1.23 | CTTN       |

|             |           |          |      |          |      |         |
|-------------|-----------|----------|------|----------|------|---------|
| 213412_at   | 0.0026645 | 9.39E-06 | 5.31 | 3.46465  | 2.44 | TJP3    |
| 236979_at   | 0.0026645 | 9.41E-06 | 5.3  | 3.462749 | 3.2  | BCL2L15 |
| 232165_at   | 0.0026665 | 9.46E-06 | 5.3  | 3.457055 | 3.54 | EPPK1   |
| 209008_x_at | 0.002672  | 9.53E-06 | 5.3  | 3.45011  | 2.95 | KRT8    |
| 201417_at   | 0.0026927 | 9.65E-06 | 5.3  | 3.437758 | 1.49 | SOX4    |
| 238017_at   | 0.0026992 | 9.73E-06 | 5.29 | 3.430537 | 4.78 | SDR16C5 |
| 203256_at   | 0.0028073 | 1.02E-05 | 5.28 | 3.387891 | 3.65 | CDH3    |
| 34726_at    | 0.0028379 | 1.04E-05 | 5.27 | 3.370355 | 1.49 | CACNB3  |
| 218644_at   | 0.0028379 | 1.04E-05 | 5.27 | 3.366514 | 2.71 | PLEK2   |
| 210427_x_at | 0.0028379 | 1.05E-05 | 5.27 | 3.357554 | 1.09 | ANXA2   |
| 229377_at   | 0.0028379 | 1.06E-05 | 5.26 | 3.350476 | 2.97 | GRTP1   |
| 219121_s_at | 0.0028379 | 1.06E-05 | 5.26 | 3.344167 | 2.71 | ESRP1   |
| 201562_s_at | 0.0028379 | 1.06E-05 | 5.26 | 3.344057 | 1.63 | SORD    |

|             |           |          |      |          |      |          |
|-------------|-----------|----------|------|----------|------|----------|
| 224762_at   | 0.0028637 | 1.08E-05 | 5.26 | 3.330657 | 2.68 | SERINC2  |
| 228708_at   | 0.0029003 | 1.10E-05 | 5.25 | 3.313083 | 3.23 | RAB27B   |
| 211465_x_at | 0.0029003 | 1.10E-05 | 5.25 | 3.309162 | 2.13 | FUT6     |
| 211657_at   | 0.0029107 | 1.11E-05 | 5.25 | 3.299509 | 5.72 | CEACAM6  |
| 218412_s_at | 0.0029107 | 1.12E-05 | 5.24 | 3.29195  | 1.65 | GTF2IRD1 |
| 239196_at   | 0.0029448 | 1.14E-05 | 5.24 | 3.276209 | 2.54 | ANKRD22  |
| 202597_at   | 0.0029862 | 1.16E-05 | 5.23 | 3.258256 | 2.88 | IRF6     |
| 229030_at   | 0.0030735 | 1.20E-05 | 5.22 | 3.226015 | 5.28 | CAPN8    |
| 241397_at   | 0.0031122 | 1.23E-05 | 5.21 | 3.205049 | 2.29 |          |
| 223748_at   | 0.0033301 | 1.35E-05 | 5.18 | 3.115046 | 3.12 | SLC4A11  |
| 240304_s_at | 0.0033501 | 1.37E-05 | 5.17 | 3.103539 | 4.32 | TMC5     |



|             |           |          |      |          |      |         |
|-------------|-----------|----------|------|----------|------|---------|
| 222392_x_at | 0.0035875 | 1.48E-05 | 5.15 | 3.029117 | 2.19 | PERP    |
| 219024_at   | 0.0036455 | 1.51E-05 | 5.14 | 3.009437 | 1.38 | PLEKHA1 |
| 216836_s_at | 0.0036739 | 1.53E-05 | 5.13 | 2.993906 | 2.25 | ERBB2   |
| 238513_at   | 0.0036739 | 1.54E-05 | 5.13 | 2.988929 | 2.25 | PRRG4   |
| 203757_s_at | 0.0036739 | 1.54E-05 | 5.13 | 2.986818 | 5.85 | CEACAM6 |
| 218686_s_at | 0.0036739 | 1.55E-05 | 5.13 | 2.98095  | 1.79 | RHBDF1  |
| 201418_s_at | 0.0037041 | 1.57E-05 | 5.12 | 2.968926 | 1.63 | SOX4    |
| 221664_s_at | 0.0037353 | 1.59E-05 | 5.12 | 2.956739 | 1.33 | F11R    |
| 225645_at   | 0.0038955 | 1.67E-05 | 5.1  | 2.912241 | 2.87 | EHF     |
| 207517_at   | 0.0038994 | 1.70E-05 | 5.1  | 2.89499  | 2.25 | LAMC2   |

|             |           |          |      |          |      |         |
|-------------|-----------|----------|------|----------|------|---------|
| 204679_at   | 0.0040172 | 1.76E-05 | 5.09 | 2.862353 | 2.79 | KCNK1   |
| 220030_at   | 0.0040779 | 1.80E-05 | 5.08 | 2.839926 | 3.34 | STYK1   |
| 230207_s_at | 0.0040864 | 1.81E-05 | 5.08 | 2.833952 | 1.56 | DOCK5   |
| 215243_s_at | 0.0040877 | 1.82E-05 | 5.07 | 2.826752 | 2.41 | GJB3    |
| 201579_at   | 0.0041557 | 1.88E-05 | 5.06 | 2.798531 | 1.71 | FAT1    |
| 208949_s_at | 0.0041557 | 1.88E-05 | 5.06 | 2.797508 | 1.24 | LGALS3  |
| 225412_at   | 0.004202  | 1.92E-05 | 5.05 | 2.775889 | 1.11 | TMEM87B |
| 205455_at   | 0.0043654 | 2.02E-05 | 5.04 | 2.728408 | 3.39 | MST1R   |
| 217728_at   | 0.0043654 | 2.02E-05 | 5.04 | 2.727349 | 1.46 | S100A6  |

|              |           |          |      |          |      |                      |
|--------------|-----------|----------|------|----------|------|----------------------|
| 1552477_a_at | 0.0043654 | 2.03E-05 | 5.03 | 2.723974 | 2.78 | IRF6                 |
| 209035_at    | 0.0044634 | 2.10E-05 | 5.02 | 2.690223 | 2.35 | MDK                  |
| 207291_at    | 0.0044634 | 2.11E-05 | 5.02 | 2.684855 | 1.39 | PRRG4                |
| 229927_at    | 0.0044634 | 2.11E-05 | 5.02 | 2.683924 | 3.74 | LEMD1                |
| 208407_s_at  | 0.0045033 | 2.16E-05 | 5.01 | 2.665341 | 1.12 | TMX2-CTNND1///CTNND1 |
| 201876_at    | 0.0045368 | 2.20E-05 | 5.01 | 2.647089 | 1.23 | PON2                 |
| 210827_s_at  | 0.0045368 | 2.20E-05 | 5.01 | 2.64454  | 3.19 | ELF3                 |
| 226185_at    | 0.0045531 | 2.23E-05 | 5    | 2.63219  | 3.03 | CDS1                 |
| 210830_s_at  | 0.0046014 | 2.28E-05 | 4.99 | 2.611157 | 1.44 | PON2                 |

|             |           |          |      |          |      |          |
|-------------|-----------|----------|------|----------|------|----------|
| 226726_at   | 0.0046766 | 2.33E-05 | 4.99 | 2.592047 | 2.1  | MBOAT2   |
| 223948_s_at | 0.0047088 | 2.35E-05 | 4.98 | 2.581944 | 2.29 | TMPRSS3  |
| 227272_at   | 0.0047374 | 2.38E-05 | 4.98 | 2.56911  | 2.46 | C15orf52 |
| 238593_at   | 0.0047465 | 2.42E-05 | 4.97 | 2.553282 | 1.72 | C11orf80 |
| 210608_s_at | 0.0047465 | 2.43E-05 | 4.97 | 2.550127 | 2.48 | FUT2     |
| 213288_at   | 0.0048512 | 2.50E-05 | 4.96 | 2.523626 | 2.82 | MBOAT2   |
| 208190_s_at | 0.0048512 | 2.50E-05 | 4.96 | 2.522169 | 2.79 | LSR      |
| 228707_at   | 0.0049007 | 2.54E-05 | 4.96 | 2.507176 | 3.21 | CLDN23   |
| 213272_s_at | 0.0049771 | 2.60E-05 | 4.95 | 2.484044 | 1.42 | TMEM159  |

|             |           |          |      |          |      |          |
|-------------|-----------|----------|------|----------|------|----------|
| 227046_at   | 0.0051636 | 2.71E-05 | 4.93 | 2.445363 | 1.43 | SLC39A11 |
| 220468_at   | 0.0051811 | 2.74E-05 | 4.93 | 2.43624  | 4.08 | ARL14    |
| 225864_at   | 0.0051811 | 2.74E-05 | 4.93 | 2.435443 | 1.44 | FAM84B   |
| 206414_s_at | 0.0052525 | 2.79E-05 | 4.92 | 2.418999 | 1.47 | ASAP2    |
| 214168_s_at | 0.0054262 | 2.90E-05 | 4.91 | 2.381151 | 1.17 | TJP1     |
| 221696_s_at | 0.0055452 | 2.97E-05 | 4.9  | 2.357046 | 2.75 | STYK1    |
| 202440_s_at | 0.0055717 | 3.00E-05 | 4.9  | 2.349198 | 1.1  | ST5      |
| 200635_s_at | 0.0057965 | 3.14E-05 | 4.88 | 2.304717 | 1.7  | PTPRF    |
| 217744_s_at | 0.0058129 | 3.16E-05 | 4.88 | 2.298779 | 2.74 | PERP     |

|              |           |          |      |          |      |         |
|--------------|-----------|----------|------|----------|------|---------|
| 243444_at    | 0.0059112 | 3.22E-05 | 4.87 | 2.279453 | 1.63 | SRD5A3  |
| 201131_s_at  | 0.0059962 | 3.30E-05 | 4.86 | 2.256134 | 1.99 | CDH1    |
| 224598_at    | 0.0060524 | 3.35E-05 | 4.86 | 2.242384 | 1.91 | MGAT4B  |
| 238021_s_at  | 0.0060524 | 3.35E-05 | 4.86 | 2.240824 | 3.12 | CRNDE   |
| 226213_at    | 0.0061396 | 3.43E-05 | 4.85 | 2.219689 | 3.34 | ERBB3   |
| 222154_s_at  | 0.0061396 | 3.44E-05 | 4.85 | 2.217639 | 1.19 | SPATS2L |
| 1556034_s_at | 0.0061949 | 3.48E-05 | 4.85 | 2.205913 | 1.85 | MTMR11  |

|             |           |          |      |          |      |          |
|-------------|-----------|----------|------|----------|------|----------|
| 203228_at   | 0.0062181 | 3.50E-05 | 4.84 | 2.199207 | 1.12 | PAFAH1B3 |
| 230518_at   | 0.0063541 | 3.60E-05 | 4.83 | 2.172236 | 2.53 | MPZL2    |
| 205709_s_at | 0.0063763 | 3.63E-05 | 4.83 | 2.16375  | 2.84 | CDS1     |
| 201467_s_at | 0.0063763 | 3.64E-05 | 4.83 | 2.161278 | 3.69 | NQO1     |
| 202454_s_at | 0.0063763 | 3.67E-05 | 4.83 | 2.15478  | 3.15 | ERBB3    |
| 204856_at   | 0.0063763 | 3.67E-05 | 4.83 | 2.154666 | 2.39 | B3GNT3   |
| 202525_at   | 0.0063763 | 3.67E-05 | 4.83 | 2.153526 | 2.73 | PRSS8    |
| 1554438_at  | 0.006583  | 3.82E-05 | 4.81 | 2.116859 | 1.55 | KIAA1217 |

|             |           |          |      |          |      |                        |
|-------------|-----------|----------|------|----------|------|------------------------|
| 37117_at    | 0.0066153 | 3.85E-05 | 4.81 | 2.109137 | 2.73 | PRR5-ARHGAP8///ARHGAP8 |
| 238673_at   | 0.0066352 | 3.87E-05 | 4.81 | 2.102787 | 2.14 | SAMD12                 |
| 201596_x_at | 0.0066795 | 3.94E-05 | 4.8  | 2.086802 | 2.67 | KRT18                  |
| 236215_at   | 0.0066795 | 3.95E-05 | 4.8  | 2.084908 | 1.68 |                        |
| 219630_at   | 0.0067273 | 4.00E-05 | 4.8  | 2.072149 | 3.39 | PDZK1IP1               |
| 208300_at   | 0.0067373 | 4.02E-05 | 4.79 | 2.067768 | 2.64 | PTPRH                  |
| 203215_s_at | 0.0068118 | 4.11E-05 | 4.79 | 2.044915 | 1.66 | MYO6                   |
| 238049_at   | 0.0068118 | 4.12E-05 | 4.79 | 2.042606 | 1.51 | GRAMD3                 |
| 240303_at   | 0.0068118 | 4.13E-05 | 4.78 | 2.041637 | 3.33 | TMC5                   |
| 226767_s_at | 0.0068118 | 4.14E-05 | 4.78 | 2.038654 | 1.04 | FAHD1                  |



|              |           |          |      |          |      |          |
|--------------|-----------|----------|------|----------|------|----------|
| 232476_at    | 0.0068118 | 4.16E-05 | 4.78 | 2.034139 | 1.85 |          |
| 232977_x_at  | 0.0068118 | 4.16E-05 | 4.78 | 2.033977 | 1.9  | MYH14    |
| 209803_s_at  | 0.0068819 | 4.24E-05 | 4.78 | 2.015103 | 3.04 | PHLDA2   |
| 1553589_a_at | 0.0068819 | 4.25E-05 | 4.77 | 2.012737 | 3.22 | PDZK1IP1 |
| 214464_at    | 0.0068897 | 4.28E-05 | 4.77 | 2.008088 | 1.54 | CDC42BPA |
| 219946_x_at  | 0.0068897 | 4.28E-05 | 4.77 | 2.005984 | 1.67 | MYH14    |
| 222675_s_at  | 0.0069313 | 4.34E-05 | 4.77 | 1.994284 | 1.86 | BAIAP2L1 |
| 1555137_a_at | 0.0069313 | 4.35E-05 | 4.77 | 1.991787 | 1.81 | FGD6     |
| 214074_s_at  | 0.0069802 | 4.39E-05 | 4.76 | 1.982255 | 1.77 | CTTN     |

|             |           |          |      |          |      |         |
|-------------|-----------|----------|------|----------|------|---------|
| 225846_at   | 0.0070216 | 4.45E-05 | 4.76 | 1.969816 | 3.05 | ESRP1   |
| 229490_s_at | 0.0070216 | 4.47E-05 | 4.76 | 1.964969 | 2.48 |         |
| 203397_s_at | 0.0070216 | 4.48E-05 | 4.76 | 1.962753 | 2.25 | GALNT3  |
| 235651_at   | 0.0070395 | 4.51E-05 | 4.75 | 1.957557 | 2.28 | TTC22   |
| 211004_s_at | 0.0070679 | 4.54E-05 | 4.75 | 1.950967 | 1.64 | ALDH3B1 |
| 229105_at   | 0.0070906 | 4.59E-05 | 4.75 | 1.940276 | 2.14 | GPR39   |
| 205490_x_at | 0.0070906 | 4.59E-05 | 4.75 | 1.939726 | 2.26 | GJB3    |
| 222549_at   | 0.0071236 | 4.63E-05 | 4.74 | 1.932581 | 2.8  | CLDN1   |
| 203453_at   | 0.0071731 | 4.68E-05 | 4.74 | 1.920513 | 3.39 | SCNN1A  |
| 228450_at   | 0.0071851 | 4.73E-05 | 4.74 | 1.910896 | 1.31 | PLEKHA7 |

|             |           |          |      |          |      |                        |
|-------------|-----------|----------|------|----------|------|------------------------|
| 233565_s_at | 0.0071851 | 4.76E-05 | 4.73 | 1.904507 | 2.64 | FKBP1A-SDCBP2///SDCBP2 |
| 204641_at   | 0.0072015 | 4.79E-05 | 4.73 | 1.898149 | 2.87 | NEK2                   |
| 216905_s_at | 0.0072551 | 4.84E-05 | 4.73 | 1.888409 | 1.84 | ST14                   |
| 219250_s_at | 0.0073219 | 4.90E-05 | 4.72 | 1.876371 | 2.14 | FLRT3                  |
| 205601_s_at | 0.0073219 | 4.94E-05 | 4.72 | 1.869192 | 1.36 | HOXB5                  |
| 215066_at   | 0.0073219 | 4.95E-05 | 4.72 | 1.866943 | 2.23 | PTPRF                  |
| 213425_at   | 0.0073219 | 4.98E-05 | 4.72 | 1.86187  | 2.29 | WNT5A                  |
| 227753_at   | 0.0073219 | 5.01E-05 | 4.72 | 1.856226 | 2.48 | TMEM139                |

|             |           |          |      |          |      |           |
|-------------|-----------|----------|------|----------|------|-----------|
| 222773_s_at | 0.0073219 | 5.04E-05 | 4.71 | 1.850157 | 2.11 | GALNT12   |
| 218779_x_at | 0.0073219 | 5.04E-05 | 4.71 | 1.849551 | 2.9  | EPS8L1    |
| 239272_at   | 0.0073219 | 5.06E-05 | 4.71 | 1.846069 | 3.22 | MMP28     |
| 226324_s_at | 0.0073475 | 5.12E-05 | 4.71 | 1.834549 | 1.46 | IFT172    |
| 202528_at   | 0.0073475 | 5.13E-05 | 4.71 | 1.833297 | 2.41 | GALE      |
| 244056_at   | 0.0073639 | 5.16E-05 | 4.71 | 1.827992 | 4.14 | SFTA2     |
| 207525_s_at | 0.0074365 | 5.22E-05 | 4.7  | 1.816087 | 1.23 | GIPC1     |
| 218963_s_at | 0.0074453 | 5.24E-05 | 4.7  | 1.812469 | 4.41 | KRT23     |
| 212531_at   | 0.0075448 | 5.34E-05 | 4.69 | 1.794325 | 4.59 | LCN2      |
| 229553_at   | 0.0075448 | 5.38E-05 | 4.69 | 1.78845  | 1.4  | PGM2L1    |
| 209911_x_at | 0.0075448 | 5.38E-05 | 4.69 | 1.788187 | 3.02 | HIST1H2BD |
| 214782_at   | 0.0075952 | 5.45E-05 | 4.69 | 1.77609  | 1.53 | CTTN      |

|             |           |          |      |          |      |          |
|-------------|-----------|----------|------|----------|------|----------|
| 200660_at   | 0.0076293 | 5.49E-05 | 4.68 | 1.768992 | 1.35 | S100A11  |
| 210399_x_at | 0.0076293 | 5.50E-05 | 4.68 | 1.766109 | 1.85 | FUT6     |
| 201904_s_at | 0.0076377 | 5.54E-05 | 4.68 | 1.759591 | 1.79 | CTDSPL   |
| 219508_at   | 0.0076377 | 5.55E-05 | 4.68 | 1.758592 | 3.93 | GCNT3    |
| 221794_at   | 0.0076455 | 5.57E-05 | 4.68 | 1.755211 | 1.37 | DOCK6    |
| 210519_s_at | 0.0077605 | 5.69E-05 | 4.67 | 1.733704 | 3.56 | NQO1     |
| 218849_s_at | 0.0079049 | 5.84E-05 | 4.66 | 1.708896 | 2.33 | PPP1R13L |

|             |           |          |      |          |      |         |
|-------------|-----------|----------|------|----------|------|---------|
| 220189_s_at | 0.0080061 | 5.96E-05 | 4.66 | 1.689626 | 1.95 | MGAT4B  |
| 243409_at   | 0.0080642 | 6.02E-05 | 4.65 | 1.680342 | 3.32 | FOXL1   |
| 204702_s_at | 0.0080839 | 6.05E-05 | 4.65 | 1.675667 | 2.23 | NFE2L3  |
| 203407_at   | 0.0082137 | 6.16E-05 | 4.64 | 1.658058 | 2.7  | PPL     |
| 232105_at   | 0.0083007 | 6.24E-05 | 4.64 | 1.645633 | 2.95 | BLACAT1 |
| 216222_s_at | 0.0084146 | 6.34E-05 | 4.63 | 1.630253 | 1.76 | MYO10   |
| 203691_at   | 0.0084767 | 6.42E-05 | 4.63 | 1.618568 | 3.13 | PI3     |
| 202129_s_at | 0.0085038 | 6.50E-05 | 4.62 | 1.606439 | 1.65 | RIOK3   |
| 201563_at   | 0.0085038 | 6.50E-05 | 4.62 | 1.606302 | 1.59 | SORD    |
| 228437_at   | 0.008521  | 6.53E-05 | 4.62 | 1.601773 | 1.08 | CNIH4   |
| 242013_at   | 0.008521  | 6.55E-05 | 4.62 | 1.599798 | 2.38 | BCL2L15 |

|             |           |          |      |          |      |                        |
|-------------|-----------|----------|------|----------|------|------------------------|
| 202239_at   | 0.0086284 | 6.64E-05 | 4.62 | 1.585527 | 1.17 | PARP4                  |
| 1559125_at  | 0.0086471 | 6.67E-05 | 4.62 | 1.581186 | 2.4  |                        |
| 227998_at   | 0.0086713 | 6.73E-05 | 4.61 | 1.572716 | 1.67 | S100A16                |
| 55583_at    | 0.0086713 | 6.74E-05 | 4.61 | 1.571723 | 1.05 | DOCK6                  |
| 212925_at   | 0.0086954 | 6.77E-05 | 4.61 | 1.566816 | 2.39 | MISP                   |
| 218280_x_at | 0.0087552 | 6.86E-05 | 4.61 | 1.554705 | 2.43 | HIST2H2AA4//HIST2H2AA3 |
| 221927_s_at | 0.0087552 | 6.86E-05 | 4.61 | 1.554704 | 1.66 | ABHD11                 |
| 232762_at   | 0.0089575 | 7.07E-05 | 4.6  | 1.526566 | 1.98 | KIAA1217               |
| 224595_at   | 0.0089575 | 7.08E-05 | 4.59 | 1.52427  | 1.35 | SLC44A1                |
| 218856_at   | 0.0089774 | 7.13E-05 | 4.59 | 1.517557 | 1.74 | TNFRSF21               |
| 209691_s_at | 0.0090348 | 7.20E-05 | 4.59 | 1.507929 | 2.2  | DOK4                   |

|             |           |          |      |          |      |          |
|-------------|-----------|----------|------|----------|------|----------|
| 218454_at   | 0.00907   | 7.25E-05 | 4.59 | 1.502012 | 1.4  | PLBD1    |
| 221610_s_at | 0.0090718 | 7.27E-05 | 4.59 | 1.499634 | 1.54 | STAP2    |
| 222456_s_at | 0.009099  | 7.31E-05 | 4.58 | 1.494583 | 2.06 | LIMA1    |
| 228058_at   | 0.0091133 | 7.33E-05 | 4.58 | 1.490903 | 3.94 | ZG16B    |
| 204825_at   | 0.0091571 | 7.39E-05 | 4.58 | 1.484138 | 2.56 | MELK     |
| 219330_at   | 0.0091729 | 7.43E-05 | 4.58 | 1.478159 | 1.28 | VANGL1   |
| 232046_at   | 0.0091826 | 7.46E-05 | 4.58 | 1.474986 | 1.9  | KIAA1217 |
| 226697_at   | 0.0091995 | 7.50E-05 | 4.57 | 1.468922 | 1.29 | FAM114A1 |
| 205927_s_at | 0.009362  | 7.67E-05 | 4.57 | 1.447878 | 5.12 | CTSE     |



|             |           |          |      |          |      |                        |
|-------------|-----------|----------|------|----------|------|------------------------|
| 205980_s_at | 0.0093944 | 7.72E-05 | 4.56 | 1.441875 | 2.63 | PRR5-ARHGAP8///ARHGAP8 |
| 241903_at   | 0.0093944 | 7.73E-05 | 4.56 | 1.440309 | 1.19 |                        |
| 202381_at   | 0.0094716 | 7.81E-05 | 4.56 | 1.430351 | 1.32 | ADAM9                  |
| 241763_s_at | 0.0095169 | 7.87E-05 | 4.56 | 1.423665 | 2.44 | FBXO32                 |
| 202023_at   | 0.0095937 | 7.99E-05 | 4.55 | 1.408368 | 2.01 | EFNA1                  |
| 206994_at   | 0.0095937 | 8.02E-05 | 4.55 | 1.405811 | 2.42 | CST4                   |
| 209950_s_at | 0.0097686 | 8.20E-05 | 4.54 | 1.384006 | 2.98 | VILL                   |
| 219787_s_at | 0.0097686 | 8.20E-05 | 4.54 | 1.383978 | 2.4  | ECT2                   |
| 225119_at   | 0.009825  | 8.30E-05 | 4.54 | 1.372237 | 1    | CHMP4B                 |
| 225536_at   | 0.0098814 | 8.37E-05 | 4.54 | 1.364388 | 2.15 | TMEM54                 |
| 201428_at   | 0.0098814 | 8.40E-05 | 4.53 | 1.361132 | 2    | CLDN4                  |
| 213693_s_at | 0.0098814 | 8.40E-05 | 4.53 | 1.360559 | 3.14 | MUC1                   |

|             |           |          |      |          |      |           |
|-------------|-----------|----------|------|----------|------|-----------|
| 209448_at   | 0.0099214 | 8.47E-05 | 4.53 | 1.352595 | 1.27 | HTATIP2   |
| 239723_at   | 0.0099843 | 8.55E-05 | 4.53 | 1.344493 | 2.6  |           |
| 215071_s_at | 0.0102152 | 8.82E-05 | 4.52 | 1.314478 | 2.3  | HIST1H2AC |
| 209679_s_at | 0.0104007 | 9.00E-05 | 4.51 | 1.295235 | 2.46 | SMAGP     |
| 229163_at   | 0.0105739 | 9.22E-05 | 4.5  | 1.27212  | 2.66 | CAMK2N1   |
| 204653_at   | 0.0105739 | 9.24E-05 | 4.5  | 1.269509 | 3.07 | TFAP2A    |
| 202786_at   | 0.0105739 | 9.25E-05 | 4.5  | 1.268726 | 1.31 | STK39     |
| 201468_s_at | 0.0107335 | 9.44E-05 | 4.49 | 1.249066 | 3.09 | NQO1      |
| 208613_s_at | 0.0108032 | 9.53E-05 | 4.49 | 1.240638 | 1.76 | FLNB      |
| 229492_at   | 0.0108032 | 9.54E-05 | 4.49 | 1.238911 | 1.16 | VANGL1    |

|              |           |          |      |          |      |         |
|--------------|-----------|----------|------|----------|------|---------|
| 1553099_at   | 0.0108309 | 9.59E-05 | 4.49 | 1.233981 | 1.7  | TIGD1   |
| 236094_at    | 0.0108309 | 9.61E-05 | 4.49 | 1.232504 | 1.73 | TCF7L2  |
| 207847_s_at  | 0.0108386 | 9.64E-05 | 4.49 | 1.22934  | 3.83 | MUC1    |
| 214374_s_at  | 0.0108386 | 9.65E-05 | 4.48 | 1.227894 | 1.15 | PPFIBP1 |
| 40472_at     | 0.0109017 | 9.75E-05 | 4.48 | 1.218422 | 2.52 | LPCAT4  |
| 1555136_at   | 0.0109209 | 9.79E-05 | 4.48 | 1.214785 | 1.46 | FGD6    |
| 209498_at    | 0.0109235 | 9.82E-05 | 4.48 | 1.211435 | 3.47 | CEACAM1 |
| 1553768_a_at | 0.0109235 | 9.83E-05 | 4.48 | 1.210658 | 2.26 | DCBLD1  |

|             |           |          |      |          |      |         |
|-------------|-----------|----------|------|----------|------|---------|
| 204026_s_at | 0.0110719 | 1.00E-04 | 4.47 | 1.192526 | 2.3  | ZWINT   |
| 240502_at   | 0.0110719 | 1.01E-04 | 4.47 | 1.187533 | 2.22 |         |
| 202604_x_at | 0.0110762 | 1.01E-04 | 4.47 | 1.182046 | 1.19 | ADAM10  |
| 229538_s_at | 0.011282  | 1.04E-04 | 4.46 | 1.158642 | 2.95 | IQGAP3  |
| 215444_s_at | 0.0113192 | 1.04E-04 | 4.46 | 1.153595 | 3.1  | TRIM31  |
| 228904_at   | 0.0113736 | 1.05E-04 | 4.45 | 1.145224 | 2.08 | HOXB3   |
| 202669_s_at | 0.0114824 | 1.06E-04 | 4.45 | 1.134234 | 1.92 | EFNB2   |
| 226637_at   | 0.0115914 | 1.08E-04 | 4.44 | 1.119567 | 1.13 | UBE2H   |
| 214833_at   | 0.0116003 | 1.09E-04 | 4.44 | 1.11509  | 1.72 | TMEM63A |
| 218542_at   | 0.0116108 | 1.09E-04 | 4.44 | 1.112363 | 2.46 | CEP55   |
| 208712_at   | 0.0118134 | 1.11E-04 | 4.43 | 1.091702 | 1.61 | CCND1   |

|             |           |          |      |          |      |           |
|-------------|-----------|----------|------|----------|------|-----------|
| 235165_at   | 0.01185   | 1.12E-04 | 4.43 | 1.083595 | 1.9  | PARD6B    |
| 220638_s_at | 0.0118899 | 1.13E-04 | 4.43 | 1.077024 | 2.42 | CBLC      |
| 202687_s_at | 0.0118899 | 1.13E-04 | 4.43 | 1.076699 | 1.4  | TNFSF10   |
| 222721_at   | 0.0119011 | 1.14E-04 | 4.43 | 1.072765 | 1.52 | CNIH4     |
| 41469_at    | 0.0119684 | 1.14E-04 | 4.42 | 1.064914 | 3.47 | PI3       |
| 213506_at   | 0.0120203 | 1.15E-04 | 4.42 | 1.057132 | 2.22 | F2RL1     |
| 223779_at   | 0.0121113 | 1.17E-04 | 4.42 | 1.044477 | 2.88 | AFAP1-AS1 |
| 203713_s_at | 0.012144  | 1.18E-04 | 4.41 | 1.037399 | 1.88 | LLGL2     |
| 202421_at   | 0.012144  | 1.18E-04 | 4.41 | 1.036865 | 1.5  | IGSF3     |

|             |           |          |      |          |      |          |
|-------------|-----------|----------|------|----------|------|----------|
| 205780_at   | 0.0123809 | 1.21E-04 | 4.4  | 1.010855 | 2.63 | BIK      |
| 221884_at   | 0.0123918 | 1.22E-04 | 4.4  | 1.000893 | 2.46 | MECOM    |
| 215177_s_at | 0.0123918 | 1.22E-04 | 4.4  | 1.0008   | 1.96 | ITGA6    |
| 232471_at   | 0.0123918 | 1.23E-04 | 4.4  | 0.999887 | 1.07 |          |
| 200923_at   | 0.0123918 | 1.23E-04 | 4.4  | 0.994078 | 1.36 | LGALS3BP |
| 222587_s_at | 0.0125929 | 1.26E-04 | 4.39 | 0.9717   | 1.56 | GALNT7   |
| 206023_at   | 0.012781  | 1.29E-04 | 4.38 | 0.952659 | 3.97 | NMU      |
| 209260_at   | 0.012781  | 1.29E-04 | 4.38 | 0.952323 | 2.64 | SFN      |
| 235286_at   | 0.0128581 | 1.30E-04 | 4.38 | 0.941392 | 1.76 |          |
| 218816_at   | 0.0129937 | 1.32E-04 | 4.37 | 0.926213 | 1.46 | LRRC1    |
| 203585_at   | 0.0130123 | 1.33E-04 | 4.37 | 0.923131 | 1.75 | ZNF185   |
| 225548_at   | 0.0130493 | 1.33E-04 | 4.37 | 0.91871  | 2.66 | SHROOM3  |
| 201291_s_at | 0.0133645 | 1.37E-04 | 4.36 | 0.894213 | 3.95 | TOP2A    |

|             |           |          |      |          |      |         |
|-------------|-----------|----------|------|----------|------|---------|
| 228923_at   | 0.013467  | 1.38E-04 | 4.36 | 0.883509 | 3.11 | S100A6  |
| 202954_at   | 0.0135113 | 1.40E-04 | 4.35 | 0.875788 | 2.44 | UBE2C   |
| 227473_at   | 0.0135113 | 1.40E-04 | 4.35 | 0.873186 | 1.06 |         |
| 241812_at   | 0.0135113 | 1.40E-04 | 4.35 | 0.871885 | 1.51 | SPATS2L |
| 202790_at   | 0.0135113 | 1.41E-04 | 4.35 | 0.869289 | 2.31 | CLDN7   |
| 204779_s_at | 0.0135113 | 1.41E-04 | 4.35 | 0.867919 | 2.53 | HOXB7   |
| 228241_at   | 0.0136175 | 1.43E-04 | 4.35 | 0.854394 | 3.76 | AGR3    |
| 222853_at   | 0.0137031 | 1.44E-04 | 4.34 | 0.846747 | 2.42 | FLRT3   |
| 205009_at   | 0.0137165 | 1.44E-04 | 4.34 | 0.844152 | 5.06 | TFF1    |
| 213929_at   | 0.0137504 | 1.46E-04 | 4.34 | 0.83353  | 2.32 | EXPH5   |

|             |           |          |      |          |      |          |
|-------------|-----------|----------|------|----------|------|----------|
| 227960_s_at | 0.0138289 | 1.47E-04 | 4.33 | 0.823168 | 1.14 | FAHD1    |
| 242196_at   | 0.0139381 | 1.49E-04 | 4.33 | 0.812389 | 1.68 | ARHGAP32 |
| 202949_s_at | 0.0140029 | 1.50E-04 | 4.33 | 0.804665 | 1.58 | FHL2     |
| 206515_at   | 0.0140087 | 1.51E-04 | 4.32 | 0.798036 | 2.85 | CYP4F3   |
| 223249_at   | 0.0140087 | 1.51E-04 | 4.32 | 0.797828 | 1.88 | CLDN12   |
| 219411_at   | 0.014039  | 1.52E-04 | 4.32 | 0.794153 | 1.93 | ELMO3    |
| 217208_s_at | 0.0140889 | 1.54E-04 | 4.32 | 0.784341 | 1.41 | DLG1     |
| 224596_at   | 0.0141464 | 1.55E-04 | 4.32 | 0.774201 | 1.31 | SLC44A1  |
| 201633_s_at | 0.0141573 | 1.57E-04 | 4.31 | 0.762265 | 1.11 | CYB5B    |



|              |           |          |      |          |      |         |
|--------------|-----------|----------|------|----------|------|---------|
| 214352_s_at  | 0.0143225 | 1.59E-04 | 4.31 | 0.749618 | 1.07 | KRAS    |
| 1555326_a_at | 0.0144209 | 1.62E-04 | 4.3  | 0.735746 | 1.98 | ADAM9   |
| 226403_at    | 0.0144209 | 1.62E-04 | 4.3  | 0.733924 | 2.53 | TMC4    |
| 205990_s_at  | 0.0144209 | 1.62E-04 | 4.3  | 0.730614 | 2.19 | WNT5A   |
| 202411_at    | 0.0144464 | 1.63E-04 | 4.3  | 0.72678  | 2.1  | IFI27   |
| 218885_s_at  | 0.0144994 | 1.65E-04 | 4.29 | 0.717467 | 1.77 | GALNT12 |
| 202831_at    | 0.01459   | 1.66E-04 | 4.29 | 0.70871  | 4.2  | GPX2    |
| 227492_at    | 0.0146398 | 1.67E-04 | 4.29 | 0.702201 | 1.78 | OCLN    |
| 218693_at    | 0.0146398 | 1.68E-04 | 4.29 | 0.699665 | 1.61 | TSPAN15 |
| 230398_at    | 0.0146398 | 1.68E-04 | 4.29 | 0.699351 | 2.98 | TNS4    |
| 218815_s_at  | 0.0147117 | 1.69E-04 | 4.28 | 0.691644 | 1.09 | TMEM51  |
| 208540_x_at  | 0.0148732 | 1.72E-04 | 4.28 | 0.677038 | 1.04 |         |

|             |           |          |      |          |      |                         |
|-------------|-----------|----------|------|----------|------|-------------------------|
| 228232_s_at | 0.0148732 | 1.72E-04 | 4.28 | 0.676455 | 2.97 | VSIG2                   |
| 213893_x_at | 0.0152078 | 1.77E-04 | 4.27 | 0.649447 | 1.03 | PMS2P9///PMS2P5         |
| 214290_s_at | 0.0153048 | 1.78E-04 | 4.27 | 0.641793 | 2.21 | HIST2H2AA4///HIST2H2AA3 |
| 217901_at   | 0.0153377 | 1.79E-04 | 4.26 | 0.63685  | 2.33 | DSG2                    |
| 225177_at   | 0.0156774 | 1.84E-04 | 4.25 | 0.611357 | 1.3  | RAB11FIP1               |
| 202145_at   | 0.0156774 | 1.85E-04 | 4.25 | 0.608524 | 2.16 | LY6E                    |

|             |           |          |      |          |      |         |
|-------------|-----------|----------|------|----------|------|---------|
| 203108_at   | 0.015766  | 1.86E-04 | 4.25 | 0.600197 | 3.14 | GPRC5A  |
| 51192_at    | 0.0160211 | 1.90E-04 | 4.24 | 0.580473 | 1.47 | SSH3    |
| 225750_at   | 0.0160945 | 1.91E-04 | 4.24 | 0.574648 | 1.4  | ERO1A   |
| 218585_s_at | 0.0161756 | 1.93E-04 | 4.24 | 0.566929 | 2.35 | DTL     |
| 225320_at   | 0.0163506 | 1.96E-04 | 4.23 | 0.553873 | 1.92 | MCU     |
| 205483_s_at | 0.0163506 | 1.96E-04 | 4.23 | 0.553746 | 1.79 | ISG15   |
| 204136_at   | 0.0164007 | 1.97E-04 | 4.23 | 0.547631 | 1.92 | COL7A1  |
| 226552_at   | 0.0164007 | 1.98E-04 | 4.23 | 0.542093 | 1.51 | IER5L   |
| 202668_at   | 0.0164007 | 1.99E-04 | 4.23 | 0.539088 | 1.43 | EFNB2   |
| 228400_at   | 0.0164007 | 1.99E-04 | 4.23 | 0.538819 | 2.88 | SHROOM3 |

|              |           |          |      |          |      |         |
|--------------|-----------|----------|------|----------|------|---------|
| 232202_at    | 0.0164007 | 1.99E-04 | 4.23 | 0.535514 | 2.39 | FAM83B  |
| 217109_at    | 0.0164007 | 1.99E-04 | 4.23 | 0.534933 | 4.3  | MUC4    |
| 208170_s_at  | 0.0165164 | 2.01E-04 | 4.22 | 0.526802 | 2.86 | TRIM31  |
| 1553105_s_at | 0.0167085 | 2.05E-04 | 4.22 | 0.508398 | 2.71 | DSG2    |
| 212876_at    | 0.01677   | 2.06E-04 | 4.21 | 0.502311 | 1.16 | B4GALT4 |
| 219404_at    | 0.0170772 | 2.12E-04 | 4.2  | 0.47883  | 4.19 | EPS8L3  |
| 210143_at    | 0.0170772 | 2.12E-04 | 4.2  | 0.476831 | 4.32 | ANXA10  |
| 213078_x_at  | 0.0170772 | 2.12E-04 | 4.2  | 0.476555 | 2.62 | LPCAT4  |
| 236513_at    | 0.0173383 | 2.17E-04 | 4.2  | 0.452797 | 1.67 | PRELID2 |
| 223229_at    | 0.0173495 | 2.18E-04 | 4.19 | 0.448908 | 2.17 | UBE2T   |
| 216641_s_at  | 0.0173495 | 2.19E-04 | 4.19 | 0.447551 | 1.66 | LAD1    |
| 201549_x_at  | 0.0174172 | 2.21E-04 | 4.19 | 0.437846 | 1.09 | KDM5B   |

|             |           |          |      |          |      |              |
|-------------|-----------|----------|------|----------|------|--------------|
| 235152_at   | 0.0174172 | 2.21E-04 | 4.19 | 0.435976 | 1.16 | LOC101927204 |
| 217140_s_at | 0.0174657 | 2.22E-04 | 4.19 | 0.431562 | 1.06 | VDAC1        |
| 225803_at   | 0.0176426 | 2.26E-04 | 4.18 | 0.416508 | 1.88 | FBXO32       |
| 203236_s_at | 0.0177116 | 2.28E-04 | 4.18 | 0.408714 | 1.02 | LGALS9       |
| 201341_at   | 0.0177138 | 2.29E-04 | 4.18 | 0.405456 | 1.61 | ENC1         |
| 223078_s_at | 0.0177939 | 2.30E-04 | 4.17 | 0.398355 | 1.19 | TMOD3        |
| 215903_s_at | 0.0179704 | 2.33E-04 | 4.17 | 0.386071 | 1.07 | MAST2        |
| 211002_s_at | 0.0179704 | 2.33E-04 | 4.17 | 0.385142 | 2.81 | TRIM29       |
| 227334_at   | 0.0179704 | 2.34E-04 | 4.17 | 0.382095 | 1.7  | USP54        |
| 242649_x_at | 0.0180357 | 2.36E-04 | 4.17 | 0.374744 | 1.41 | HMG2P46      |
| 1559360_at  | 0.0180357 | 2.39E-04 | 4.16 | 0.364378 | 2.79 |              |
| 230323_s_at | 0.0180357 | 2.39E-04 | 4.16 | 0.364309 | 3.63 | TMEM45B      |

|             |           |          |      |          |      |             |
|-------------|-----------|----------|------|----------|------|-------------|
| 203213_at   | 0.0180357 | 2.39E-04 | 4.16 | 0.362632 | 2.6  | CDK1        |
| 212236_x_at | 0.0180357 | 2.40E-04 | 4.16 | 0.358276 | 3.52 | KRT17///JUP |
| 205339_at   | 0.0180357 | 2.40E-04 | 4.16 | 0.357184 | 1.51 | STIL        |
| 240735_at   | 0.0180357 | 2.40E-04 | 4.16 | 0.35686  | 1.78 | CDC42BPA    |
| 205406_s_at | 0.0180375 | 2.41E-04 | 4.16 | 0.355455 | 1.32 | SPA17       |
| 227431_at   | 0.0181164 | 2.43E-04 | 4.16 | 0.348696 | 1.42 | APTR        |
| 234725_s_at | 0.0183601 | 2.46E-04 | 4.15 | 0.334675 | 1.6  | SEMA4B      |
| 210159_s_at | 0.0188915 | 2.55E-04 | 4.14 | 0.299751 | 2.56 | TRIM31      |
| 210253_at   | 0.0189552 | 2.57E-04 | 4.14 | 0.295259 | 1.47 | HTATIP2     |
| 222750_s_at | 0.0190941 | 2.59E-04 | 4.13 | 0.287026 | 1.93 | SRD5A3      |

|             |           |          |      |          |      |        |
|-------------|-----------|----------|------|----------|------|--------|
| 202935_s_at | 0.0192543 | 2.62E-04 | 4.13 | 0.276504 | 2.42 | SOX9   |
| 201656_at   | 0.0194031 | 2.65E-04 | 4.12 | 0.264069 | 1.37 | ITGA6  |
| 219749_at   | 0.0194034 | 2.66E-04 | 4.12 | 0.262122 | 1.76 | SH2D4A |
| 219513_s_at | 0.019433  | 2.68E-04 | 4.12 | 0.252828 | 1.89 | SH2D3A |
| 218180_s_at | 0.0196711 | 2.73E-04 | 4.11 | 0.237105 | 1.94 | EPS8L2 |
| 238666_at   | 0.0198336 | 2.76E-04 | 4.11 | 0.225517 | 1.82 |        |
| 222810_s_at | 0.0201577 | 2.81E-04 | 4.1  | 0.20885  | 1.3  | RASAL2 |
| 236616_at   | 0.0203725 | 2.85E-04 | 4.1  | 0.196271 | 1.72 | PSD4   |
| 229545_at   | 0.0204231 | 2.86E-04 | 4.1  | 0.192669 | 2.13 | FERMT1 |
| 230229_at   | 0.0207506 | 2.91E-04 | 4.09 | 0.17381  | 1.11 | DLG1   |
| 211184_s_at | 0.0209309 | 2.95E-04 | 4.09 | 0.16311  | 2.74 | USH1C  |
| 202869_at   | 0.0209813 | 2.96E-04 | 4.08 | 0.159586 | 2.51 | OAS1   |

|             |           |          |      |          |      |          |
|-------------|-----------|----------|------|----------|------|----------|
| 213008_at   | 0.0209991 | 2.97E-04 | 4.08 | 0.157546 | 2.24 | FANCI    |
| 239381_at   | 0.0210657 | 2.98E-04 | 4.08 | 0.153307 | 3.31 | KLK7     |
| 201310_s_at | 0.0212139 | 3.01E-04 | 4.08 | 0.144212 | 1.53 | NREP     |
| 212070_at   | 0.0212139 | 3.01E-04 | 4.08 | 0.144182 | 1.65 | ADGRG1   |
| 217419_x_at | 0.0213166 | 3.03E-04 | 4.08 | 0.138364 | 1.86 | AGRN     |
| 216568_x_at | 0.0213707 | 3.04E-04 | 4.07 | 0.132283 | 1.6  |          |
| 238028_at   | 0.0213897 | 3.06E-04 | 4.07 | 0.128998 | 1.96 | C6orf132 |
| 204765_at   | 0.0214401 | 3.07E-04 | 4.07 | 0.123117 | 1.59 | ARHGEF5  |
| 241762_at   | 0.0215962 | 3.12E-04 | 4.06 | 0.107916 | 2.32 | FBXO32   |
| 214476_at   | 0.0215962 | 3.13E-04 | 4.06 | 0.106567 | 5.19 | TFF2     |
| 218182_s_at | 0.0216886 | 3.16E-04 | 4.06 | 0.097718 | 1.97 | CLDN1    |
| 229254_at   | 0.0218487 | 3.19E-04 | 4.06 | 0.088341 | 2.37 | MFSD4A   |



|             |           |          |      |          |      |         |
|-------------|-----------|----------|------|----------|------|---------|
| 239273_s_at | 0.0219116 | 3.21E-04 | 4.06 | 0.083227 | 3.06 | MMP28   |
| 234156_at   | 0.02201   | 3.24E-04 | 4.05 | 0.07376  | 1.5  |         |
| 202185_at   | 0.02201   | 3.24E-04 | 4.05 | 0.073047 | 1.05 | PLOD3   |
| 202096_s_at | 0.02201   | 3.24E-04 | 4.05 | 0.072515 | 1.26 | TSPO    |
| 214329_x_at | 0.02201   | 3.24E-04 | 4.05 | 0.071865 | 1.34 | TNFSF10 |
| 208890_s_at | 0.0220388 | 3.26E-04 | 4.05 | 0.068266 | 1.08 | PLXNB2  |
| 221655_x_at | 0.0221411 | 3.29E-04 | 4.05 | 0.059173 | 2.26 | EPS8L1  |
| 205660_at   | 0.0221724 | 3.30E-04 | 4.05 | 0.05666  | 2.55 | OASL    |
| 212285_s_at | 0.022521  | 3.37E-04 | 4.04 | 0.036006 | 1.82 | AGRN    |
| 239609_s_at | 0.022546  | 3.38E-04 | 4.04 | 0.03379  | 2.15 | LPCAT4  |
| 242881_x_at | 0.0226129 | 3.39E-04 | 4.04 | 0.029817 | 1.91 | DUXAP10 |

|             |           |          |      |           |      |         |
|-------------|-----------|----------|------|-----------|------|---------|
| 235148_at   | 0.0226375 | 3.40E-04 | 4.03 | 0.026465  | 1.82 | KRTCAP3 |
| 235927_at   | 0.0226869 | 3.42E-04 | 4.03 | 0.022085  | 1.27 | XPO1    |
| 201243_s_at | 0.0229415 | 3.47E-04 | 4.03 | 0.007755  | 1.84 | ATP1B1  |
| 230660_at   | 0.02304   | 3.50E-04 | 4.02 | 0.000189  | 2.17 | SERTAD4 |
| 239022_at   | 0.0230679 | 3.51E-04 | 4.02 | -0.00406  | 1.02 |         |
| 214898_x_at | 0.0232811 | 3.57E-04 | 4.02 | -0.019244 | 1.99 | MUC3B   |
| 209222_s_at | 0.0234156 | 3.62E-04 | 4.01 | -0.032305 | 1.08 | OSBPL2  |
| 214073_at   | 0.0234156 | 3.62E-04 | 4.01 | -0.033229 | 2.31 | CTTN    |
| 204401_at   | 0.0234156 | 3.63E-04 | 4.01 | -0.034103 | 2.8  | KCNN4   |
| 222396_at   | 0.0236263 | 3.66E-04 | 4.01 | -0.043734 | 1.31 | HN1     |

|              |           |          |      |           |      |           |
|--------------|-----------|----------|------|-----------|------|-----------|
| 206949_s_at  | 0.0237987 | 3.71E-04 | 4    | -0.054438 | 1.17 | RUSC1     |
| 218309_at    | 0.0238918 | 3.76E-04 | 4    | -0.068598 | 2.08 | CAMK2N1   |
| 231311_at    | 0.0238918 | 3.76E-04 | 4    | -0.069386 | 2.07 |           |
| 222067_x_at  | 0.0239589 | 3.79E-04 | 3.99 | -0.075858 | 2.61 | HIST1H2BD |
| 204073_s_at  | 0.0241775 | 3.83E-04 | 3.99 | -0.0856   | 2.75 | MYRF      |
| 221665_s_at  | 0.0241775 | 3.84E-04 | 3.99 | -0.088864 | 2.1  | EPS8L1    |
| 214235_at    | 0.0242543 | 3.87E-04 | 3.99 | -0.096125 | 3.55 | CYP3A5    |
| 201193_at    | 0.0242543 | 3.88E-04 | 3.99 | -0.097107 | 1.09 | IDH1      |
| 220800_s_at  | 0.0242543 | 3.88E-04 | 3.99 | -0.098576 | 1.01 | TMOD3     |
| 1552502_s_at | 0.0244111 | 3.94E-04 | 3.98 | -0.11221  | 2.6  | RHBDL2    |

|             |           |          |      |           |      |                |
|-------------|-----------|----------|------|-----------|------|----------------|
| 207169_x_at | 0.0244512 | 3.96E-04 | 3.98 | -0.117955 | 2.11 | MIR4640///DDR1 |
| 219439_at   | 0.0244512 | 3.96E-04 | 3.98 | -0.11834  | 1.46 | C1GALT1        |
| 225224_at   | 0.0244512 | 3.97E-04 | 3.98 | -0.119019 | 1.1  | NOL4L          |
| 226609_at   | 0.0247553 | 4.03E-04 | 3.97 | -0.134302 | 1.45 | DCBLD1         |
| 230424_at   | 0.0247553 | 4.03E-04 | 3.97 | -0.135023 | 1.65 | NREP           |
| 214234_s_at | 0.0247748 | 4.05E-04 | 3.97 | -0.138711 | 3.57 | CYP3A5         |
| 227556_at   | 0.0249437 | 4.09E-04 | 3.97 | -0.147529 | 2.14 | NME7           |
| 236083_at   | 0.0249995 | 4.11E-04 | 3.97 | -0.152823 | 2.66 | BCL2L15        |

|             |           |          |      |           |      |                       |
|-------------|-----------|----------|------|-----------|------|-----------------------|
| 210706_s_at | 0.0251074 | 4.16E-04 | 3.96 | -0.163222 | 1.28 | RNF24                 |
| 209605_at   | 0.0251682 | 4.18E-04 | 3.96 | -0.167766 | 1.73 | TST                   |
| 226560_at   | 0.0251682 | 4.18E-04 | 3.96 | -0.169702 | 2.83 | SGPP2                 |
| 231835_at   | 0.0252551 | 4.23E-04 | 3.96 | -0.179304 | 1.93 | FAM213B               |
| 202071_at   | 0.0252551 | 4.23E-04 | 3.96 | -0.179762 | 1.39 | SDC4                  |
| 227452_at   | 0.0252551 | 4.23E-04 | 3.96 | -0.180253 | 2.57 | LINC00673///LINC00511 |
| 218657_at   | 0.0252692 | 4.24E-04 | 3.95 | -0.183206 | 1.98 | RAPGEFL1              |
| 231227_at   | 0.0252692 | 4.25E-04 | 3.95 | -0.184326 | 1.88 |                       |

|              |           |          |      |           |      |                      |
|--------------|-----------|----------|------|-----------|------|----------------------|
| 201189_s_at  | 0.0252692 | 4.25E-04 | 3.95 | -0.184917 | 1.86 | ITPR3                |
| 226485_at    | 0.0253334 | 4.27E-04 | 3.95 | -0.188355 | 1.36 | LOC101928274//VSIG10 |
| 1554897_s_at | 0.0253856 | 4.29E-04 | 3.95 | -0.192367 | 2.4  | RHBDL2               |
| 221879_at    | 0.0256441 | 4.33E-04 | 3.95 | -0.203008 | 2.21 | CALML4               |
| 203824_at    | 0.0257764 | 4.36E-04 | 3.94 | -0.208913 | 3.02 | TSPAN8               |
| 235583_at    | 0.0258692 | 4.38E-04 | 3.94 | -0.213348 | 1.74 | ILDR1                |
| 234290_x_at  | 0.0259171 | 4.41E-04 | 3.94 | -0.219255 | 1.53 | MYH14                |
| 1558216_at   | 0.0259171 | 4.43E-04 | 3.94 | -0.224387 | 3.02 | AFAP1-AS1            |
| 1568857_a_at | 0.0259171 | 4.44E-04 | 3.94 | -0.226538 | 1    | NBR1                 |
| 238967_at    | 0.0259171 | 4.45E-04 | 3.94 | -0.228674 | 1.68 |                      |

|             |           |          |      |           |      |          |
|-------------|-----------|----------|------|-----------|------|----------|
| 221843_s_at | 0.0259171 | 4.46E-04 | 3.94 | -0.229337 | 1.46 | TLDC1    |
| 204378_at   | 0.0259812 | 4.47E-04 | 3.94 | -0.23269  | 2.74 | BCAS1    |
| 224746_at   | 0.0261329 | 4.51E-04 | 3.93 | -0.241294 | 1.65 | KIAA1522 |

208596\_s\_at

0.0261329

4.51E-04 3.93

-0.241534 2.5

UGT1A3///UGT1A1///UGT1A4///UGT1A9///UGT1A5///UGT1A6///UGT1A



|             |           |          |      |           |      |          |
|-------------|-----------|----------|------|-----------|------|----------|
| 202503_s_at | 0.0261329 | 4.53E-04 | 3.93 | -0.244096 | 2.68 | KIAA0101 |
| 214734_at   | 0.0261329 | 4.53E-04 | 3.93 | -0.245243 | 1.68 | EXPH5    |
| 206102_at   | 0.0261625 | 4.54E-04 | 3.93 | -0.247316 | 1.97 | GINS1    |
| 200824_at   | 0.0262039 | 4.55E-04 | 3.93 | -0.249815 | 1.02 | GSTP1    |
| 209529_at   | 0.0263133 | 4.59E-04 | 3.93 | -0.257039 | 2.27 | PLPP2    |
| 206043_s_at | 0.0263133 | 4.59E-04 | 3.93 | -0.25775  | 2.73 | ATP2C2   |
| 225278_at   | 0.0263457 | 4.61E-04 | 3.92 | -0.260902 | 1.1  | PRKAB2   |
| 209635_at   | 0.0266312 | 4.69E-04 | 3.92 | -0.278043 | 1.28 | AP1S1    |
| 226292_at   | 0.0266437 | 4.70E-04 | 3.92 | -0.27947  | 2.8  | CAPN5    |
| 229887_at   | 0.0266704 | 4.71E-04 | 3.92 | -0.282385 | 1.42 | ALS2CL   |
| 201681_s_at | 0.0267263 | 4.74E-04 | 3.91 | -0.28731  | 1.07 | DLG5     |
| 209873_s_at | 0.0268222 | 4.76E-04 | 3.91 | -0.291684 | 1.75 | PKP3     |

|             |           |          |      |           |      |             |
|-------------|-----------|----------|------|-----------|------|-------------|
| 210480_s_at | 0.0268806 | 4.79E-04 | 3.91 | -0.297298 | 1.57 | MYO6        |
| 205157_s_at | 0.0268806 | 4.79E-04 | 3.91 | -0.297489 | 4.01 | KRT17///JUP |
| 212473_s_at | 0.0268806 | 4.79E-04 | 3.91 | -0.297649 | 1.24 | MICAL2      |
| 226456_at   | 0.0269408 | 4.81E-04 | 3.91 | -0.301713 | 1.84 | RMI2        |
| 207828_s_at | 0.027127  | 4.85E-04 | 3.91 | -0.309215 | 2.44 | CENPF       |
| 226455_at   | 0.0272611 | 4.89E-04 | 3.9  | -0.31761  | 1.52 | CREB3L4     |
| 200885_at   | 0.0272611 | 4.90E-04 | 3.9  | -0.318864 | 1.18 | RHOC        |
| 39549_at    | 0.0272611 | 4.90E-04 | 3.9  | -0.319694 | 1.51 | NPAS2       |
| 226226_at   | 0.0273176 | 4.93E-04 | 3.9  | -0.324741 | 3.14 | TMEM45B     |
| 206659_at   | 0.0273176 | 4.93E-04 | 3.9  | -0.325505 | 1.6  |             |

|             |           |          |      |           |      |         |
|-------------|-----------|----------|------|-----------|------|---------|
| 65438_at    | 0.0273235 | 4.95E-04 | 3.9  | -0.328803 | 1.42 | TLDC1   |
| 219919_s_at | 0.0273472 | 4.97E-04 | 3.9  | -0.33273  | 1.32 | SSH3    |
| 200636_s_at | 0.027399  | 5.00E-04 | 3.89 | -0.33788  | 1.4  | PTPRF   |
| 201976_s_at | 0.0275307 | 5.06E-04 | 3.89 | -0.349998 | 1.38 | MYO10   |
| 238022_at   | 0.0277006 | 5.11E-04 | 3.89 | -0.358653 | 2.35 | CRNDE   |
| 219722_s_at | 0.0277302 | 5.12E-04 | 3.89 | -0.360934 | 1.66 | GDPD3   |
| 210540_s_at | 0.0277302 | 5.12E-04 | 3.89 | -0.361793 | 1.12 | B4GALT4 |
| 204608_at   | 0.0277302 | 5.13E-04 | 3.89 | -0.36248  | 1.33 | ASL     |

|             |           |          |      |           |      |                                    |
|-------------|-----------|----------|------|-----------|------|------------------------------------|
| 214355_x_at | 0.0277506 | 5.14E-04 | 3.88 | -0.36547  | 1.58 | CTAGE8///CTAGE4///CTAGE9///CTAGE15 |
| 212611_at   | 0.0277506 | 5.15E-04 | 3.88 | -0.36609  | 1.43 | DTX4                               |
| 226507_at   | 0.0277506 | 5.15E-04 | 3.88 | -0.366921 | 1.33 | PAK1                               |
| 207076_s_at | 0.0277828 | 5.16E-04 | 3.88 | -0.368954 | 1.6  | ASS1                               |
| 213462_at   | 0.028118  | 5.27E-04 | 3.88 | -0.388671 | 1.39 | NPAS2                              |

|             |           |          |      |           |      |                                                      |
|-------------|-----------|----------|------|-----------|------|------------------------------------------------------|
| 204532_x_at | 0.0282436 | 5.30E-04 | 3.87 | -0.393817 | 2.62 | UGT1A1///UGT1A4///UGT1A9///UGT1A6///UGT1A8///UGT1A10 |
|-------------|-----------|----------|------|-----------|------|------------------------------------------------------|

|             |           |          |      |           |      |                 |
|-------------|-----------|----------|------|-----------|------|-----------------|
| 213365_at   | 0.0282821 | 5.32E-04 | 3.87 | -0.396952 | 1.14 | ERI2            |
| 225467_s_at | 0.0283938 | 5.34E-04 | 3.87 | -0.401709 | 1.1  | RDH13           |
| 204272_at   | 0.0283938 | 5.35E-04 | 3.87 | -0.402529 | 3.84 | LGALS4          |
| 243695_at   | 0.0284651 | 5.37E-04 | 3.87 | -0.406248 | 1.2  |                 |
| 1007_s_at   | 0.0284651 | 5.38E-04 | 3.87 | -0.407392 | 1.85 | MIR4640///DDR1  |
| 242979_at   | 0.0284651 | 5.38E-04 | 3.87 | -0.407659 | 1.68 | IRS1            |
| 1558356_at  | 0.0285074 | 5.40E-04 | 3.87 | -0.411813 | 1.34 | UACA            |
| 219395_at   | 0.0285095 | 5.41E-04 | 3.87 | -0.41371  | 2.34 | MIR6773///ESRP2 |

|             |           |          |      |           |      |           |
|-------------|-----------|----------|------|-----------|------|-----------|
| 225325_at   | 0.028714  | 5.46E-04 | 3.86 | -0.421393 | 1.09 | MFSD6     |
| 238715_at   | 0.0288165 | 5.49E-04 | 3.86 | -0.426316 | 1.24 | LOC646014 |
| 218942_at   | 0.0288221 | 5.49E-04 | 3.86 | -0.427697 | 1.03 | PIP4K2C   |
| 210609_s_at | 0.0288688 | 5.52E-04 | 3.86 | -0.431583 | 1.31 | TP53I3    |
| 223382_s_at | 0.0288688 | 5.52E-04 | 3.86 | -0.431937 | 1.11 | ZNRF1     |
| 221256_s_at | 0.0289554 | 5.54E-04 | 3.86 | -0.436355 | 1.92 | HDHD3     |
| 207705_s_at | 0.0289554 | 5.56E-04 | 3.86 | -0.438411 | 1.19 | NINL      |
| 242310_at   | 0.0289554 | 5.56E-04 | 3.86 | -0.438495 | 1.36 |           |

|             |           |          |      |           |      |          |
|-------------|-----------|----------|------|-----------|------|----------|
| 222847_s_at | 0.0289554 | 5.57E-04 | 3.86 | -0.440101 | 2.7  | EGLN3    |
| 205137_x_at | 0.0294827 | 5.74E-04 | 3.84 | -0.468536 | 2.49 | USH1C    |
| 225009_at   | 0.0297619 | 5.81E-04 | 3.84 | -0.481502 | 1.35 | CMTM4    |
| 243462_s_at | 0.0297989 | 5.84E-04 | 3.84 | -0.485234 | 1.59 |          |
| 224204_x_at | 0.0300739 | 5.92E-04 | 3.83 | -0.498339 | 1.94 | ARNTL2   |
| 225150_s_at | 0.0301    | 5.93E-04 | 3.83 | -0.50004  | 1.76 | RTKN     |
| 227943_at   | 0.0301851 | 5.96E-04 | 3.83 | -0.504468 | 1.56 |          |
| 207606_s_at | 0.0303105 | 5.99E-04 | 3.83 | -0.510146 | 1.48 | ARHGAP12 |
| 204669_s_at | 0.030426  | 6.02E-04 | 3.83 | -0.51462  | 1.34 | RNF24    |
| 235452_at   | 0.0304709 | 6.04E-04 | 3.83 | -0.517929 | 1.48 |          |



|             |           |          |      |           |      |                  |
|-------------|-----------|----------|------|-----------|------|------------------|
| 226706_at   | 0.0307313 | 6.15E-04 | 3.82 | -0.535023 | 1.19 | FLJ23867///QSOX1 |
| 211043_s_at | 0.030735  | 6.17E-04 | 3.82 | -0.537214 | 1.06 | CLTB             |
| 226420_at   | 0.0307637 | 6.18E-04 | 3.82 | -0.539485 | 2.13 | MECOM            |
| 211202_s_at | 0.0309034 | 6.24E-04 | 3.81 | -0.549012 | 1.03 | KDM5B            |
| 229648_at   | 0.0310125 | 6.28E-04 | 3.81 | -0.554305 | 1.74 | ARHGAP32         |
| 227177_at   | 0.0310674 | 6.31E-04 | 3.81 | -0.559618 | 2.66 | CORO2A           |
| 214483_s_at | 0.0310674 | 6.32E-04 | 3.81 | -0.5602   | 1.26 | ARFIP1           |
| 201242_s_at | 0.0310674 | 6.33E-04 | 3.81 | -0.561497 | 2.21 | ATP1B1           |
| 210749_x_at | 0.0310674 | 6.33E-04 | 3.81 | -0.562188 | 2.01 | MIR4640///DDR1   |

|           |           |          |      |           |      |        |
|-----------|-----------|----------|------|-----------|------|--------|
| 223586_at | 0.0310674 | 6.33E-04 | 3.81 | -0.562374 | 1.82 | ARNTL2 |
|-----------|-----------|----------|------|-----------|------|--------|

|           |           |          |     |           |      |         |
|-----------|-----------|----------|-----|-----------|------|---------|
| 212336_at | 0.0313069 | 6.40E-04 | 3.8 | -0.572598 | 1.71 | EPB41L1 |
|-----------|-----------|----------|-----|-----------|------|---------|

|             |           |          |     |           |      |                                                      |
|-------------|-----------|----------|-----|-----------|------|------------------------------------------------------|
| 207126_x_at | 0.0313274 | 6.42E-04 | 3.8 | -0.574907 | 3.19 | UGT1A1///UGT1A4///UGT1A9///UGT1A6///UGT1A8///UGT1A10 |
|-------------|-----------|----------|-----|-----------|------|------------------------------------------------------|

|             |           |          |      |           |      |          |
|-------------|-----------|----------|------|-----------|------|----------|
| 235141_at   | 0.0313424 | 6.43E-04 | 3.8  | -0.576203 | 2.14 | MARVELD2 |
| 222819_at   | 0.0313812 | 6.45E-04 | 3.8  | -0.579061 | 1.15 | CTPS2    |
| 201927_s_at | 0.0314038 | 6.46E-04 | 3.8  | -0.580583 | 1.24 | PKP4     |
| 221911_at   | 0.0314797 | 6.48E-04 | 3.8  | -0.584632 | 2.18 | ETV1     |
| 204778_x_at | 0.0314797 | 6.49E-04 | 3.8  | -0.585658 | 1.93 | HOXB7    |
| 228236_at   | 0.0314797 | 6.52E-04 | 3.8  | -0.589387 | 1.66 | SLC52A3  |
| 201481_s_at | 0.0314797 | 6.52E-04 | 3.8  | -0.590107 | 1.47 | PYGB     |
| 202674_s_at | 0.0314797 | 6.53E-04 | 3.8  | -0.591991 | 1.88 | LMO7     |
| 218313_s_at | 0.0314797 | 6.55E-04 | 3.8  | -0.59383  | 1.18 | GALNT7   |
| 231882_at   | 0.0314797 | 6.55E-04 | 3.8  | -0.594136 | 1.85 |          |
| 219127_at   | 0.0314797 | 6.59E-04 | 3.79 | -0.599395 | 2.44 | PRR15L   |
| 235110_at   | 0.0314797 | 6.59E-04 | 3.79 | -0.600375 | 1.75 | PLA2G16  |
| 221173_at   | 0.0315538 | 6.62E-04 | 3.79 | -0.604    | 2.61 | USH1C    |
| 243184_at   | 0.0316022 | 6.65E-04 | 3.79 | -0.60817  | 1.48 |          |

|             |           |          |      |           |      |                     |
|-------------|-----------|----------|------|-----------|------|---------------------|
| 220658_s_at | 0.031948  | 6.77E-04 | 3.78 | -0.625013 | 2.08 | ARNTL2              |
| 243582_at   | 0.0320699 | 6.83E-04 | 3.78 | -0.633898 | 2.67 | SH3RF2              |
| 217755_at   | 0.0322796 | 6.95E-04 | 3.77 | -0.650405 | 1.7  | HN1                 |
| 1558738_at  | 0.0322796 | 6.96E-04 | 3.77 | -0.651393 | 1.4  | NOL3                |
| 242546_at   | 0.0322796 | 6.96E-04 | 3.77 | -0.652063 | 1.73 | LINC01296///DUXAP10 |
| 205778_at   | 0.0322796 | 6.97E-04 | 3.77 | -0.652574 | 3.43 | KLK7                |
| 223363_at   | 0.0324516 | 7.02E-04 | 3.77 | -0.659998 | 1.11 | PSMG3               |

|             |           |          |      |           |      |                   |
|-------------|-----------|----------|------|-----------|------|-------------------|
| 227676_at   | 0.0324539 | 7.03E-04 | 3.77 | -0.660863 | 3.27 | FAM3D             |
| 224623_at   | 0.0324763 | 7.04E-04 | 3.77 | -0.662314 | 1.21 | LOC728554///THOC3 |
| 205366_s_at | 0.03265   | 7.11E-04 | 3.77 | -0.671337 | 1.48 | HOXB6             |
| 223849_s_at | 0.0329487 | 7.19E-04 | 3.76 | -0.682134 | 1.09 | MOV10             |
| 204927_at   | 0.0329487 | 7.19E-04 | 3.76 | -0.682324 | 1.72 | RASSF7            |
| 201292_at   | 0.0330342 | 7.24E-04 | 3.76 | -0.688727 | 2.76 | TOP2A             |
| 218009_s_at | 0.0331429 | 7.29E-04 | 3.76 | -0.695547 | 2.04 | PRC1              |
| 204259_at   | 0.0331429 | 7.29E-04 | 3.76 | -0.695766 | 3.3  | MMP7              |
| 207180_s_at | 0.0332566 | 7.32E-04 | 3.75 | -0.699789 | 1.41 | HTATIP2           |
| 236471_at   | 0.0333912 | 7.37E-04 | 3.75 | -0.705172 | 1.68 | NFE2L3            |

|             |           |          |      |           |      |       |
|-------------|-----------|----------|------|-----------|------|-------|
| 232017_at   | 0.033553  | 7.42E-04 | 3.75 | -0.711578 | 1.35 | TJP2  |
| 90265_at    | 0.0335702 | 7.45E-04 | 3.75 | -0.716064 | 1.98 | ADAP1 |
| 205968_at   | 0.0337925 | 7.52E-04 | 3.75 | -0.724341 | 1.83 | KCNS3 |
| 223452_s_at | 0.0337925 | 7.53E-04 | 3.74 | -0.726495 | 1.21 | ATL3  |
| 218788_s_at | 0.0341021 | 7.62E-04 | 3.74 | -0.737528 | 1.18 | SMYD3 |
| 202516_s_at | 0.0341842 | 7.66E-04 | 3.74 | -0.741674 | 1.15 | DLG1  |
| 205107_s_at | 0.0342116 | 7.69E-04 | 3.74 | -0.745952 | 1.23 | EFNA4 |

215125\_s\_at

0.0343666

7.75E-04 3.73

-0.753153 3.58

UGT1A3///UGT1A1///UGT1A4///UGT1A9///UGT1A5///UGT1A6///UGT1A



|              |           |          |      |           |      |         |
|--------------|-----------|----------|------|-----------|------|---------|
| 211026_s_at  | 0.0344067 | 7.77E-04 | 3.73 | -0.75516  | 1.94 | MGLL    |
| 229097_at    | 0.0347292 | 7.86E-04 | 3.73 | -0.767027 | 1.17 | DIAPH3  |
| 201839_s_at  | 0.0347785 | 7.88E-04 | 3.73 | -0.769129 | 2.6  | EPCAM   |
| 218077_s_at  | 0.0350232 | 7.97E-04 | 3.72 | -0.779178 | 1.04 | ZDHHC3  |
| 221024_s_at  | 0.0350446 | 7.98E-04 | 3.72 | -0.781191 | 1.64 | SLC2A10 |
| 213518_at    | 0.0350446 | 7.99E-04 | 3.72 | -0.781853 | 1.08 | PRKCI   |
| 218826_at    | 0.0350454 | 8.01E-04 | 3.72 | -0.784696 | 1.26 | SLC35F2 |
| 242234_at    | 0.0352393 | 8.09E-04 | 3.72 | -0.793675 | 1.37 | XAF1    |
| 1552619_a_at | 0.0353205 | 8.13E-04 | 3.72 | -0.798124 | 2.39 | ANLN    |
| 203876_s_at  | 0.0353683 | 8.16E-04 | 3.71 | -0.802375 | 2.88 | MMP11   |

|             |           |          |      |           |      |        |
|-------------|-----------|----------|------|-----------|------|--------|
| 1556009_at  | 0.0354197 | 8.19E-04 | 3.71 | -0.805411 | 1.09 | PEX13  |
| 201906_s_at | 0.0354339 | 8.22E-04 | 3.71 | -0.809283 | 1.22 | CTDSPL |
| 203559_s_at | 0.0354477 | 8.23E-04 | 3.71 | -0.810459 | 3.76 | AOC1   |
| 1555842_at  | 0.0355727 | 8.29E-04 | 3.71 | -0.81717  | 1.32 | CYTH2  |
| 244780_at   | 0.0355727 | 8.30E-04 | 3.71 | -0.818027 | 2.69 | SGPP2  |
| 228892_at   | 0.0355727 | 8.30E-04 | 3.71 | -0.818232 | 1.7  | SH3RF2 |
| 201510_at   | 0.0355997 | 8.33E-04 | 3.71 | -0.821346 | 2.31 | ELF3   |
| 201188_s_at | 0.0355997 | 8.34E-04 | 3.71 | -0.822017 | 1.87 | ITPR3  |
| 238567_at   | 0.0356759 | 8.38E-04 | 3.71 | -0.826864 | 2.01 | SGPP2  |

|              |           |          |     |           |      |          |
|--------------|-----------|----------|-----|-----------|------|----------|
| 1567458_s_at | 0.0357095 | 8.39E-04 | 3.7 | -0.828488 | 1.04 | RAC1     |
| 201890_at    | 0.0358383 | 8.45E-04 | 3.7 | -0.834546 | 2.4  | RRM2     |
| 200872_at    | 0.0358383 | 8.48E-04 | 3.7 | -0.837983 | 1.07 | S100A10  |
| 211518_s_at  | 0.0358383 | 8.48E-04 | 3.7 | -0.838769 | 2.83 | BMP4     |
| 218800_at    | 0.0358383 | 8.49E-04 | 3.7 | -0.839006 | 1.35 | SRD5A3   |
| 235955_at    | 0.0358468 | 8.50E-04 | 3.7 | -0.840156 | 1.81 | MARVELD2 |
| 1558695_at   | 0.0359796 | 8.54E-04 | 3.7 | -0.8451   | 1.79 |          |
| 209921_at    | 0.036051  | 8.57E-04 | 3.7 | -0.848058 | 2.15 | SLC7A11  |

|              |           |          |      |           |      |          |
|--------------|-----------|----------|------|-----------|------|----------|
| 229842_at    | 0.036051  | 8.59E-04 | 3.7  | -0.850313 | 2.49 | ELF3     |
| 208161_s_at  | 0.036051  | 8.60E-04 | 3.7  | -0.851324 | 2.07 | ABCC3    |
| 1553764_a_at | 0.0360716 | 8.61E-04 | 3.7  | -0.852588 | 1.37 | AJUBA    |
| 214070_s_at  | 0.0360731 | 8.62E-04 | 3.69 | -0.853349 | 2.67 | ATP10B   |
| 1553530_a_at | 0.0361671 | 8.65E-04 | 3.69 | -0.857249 | 1.16 | ITGB1    |
| 201201_at    | 0.0362227 | 8.68E-04 | 3.69 | -0.860267 | 1.12 | CSTB     |
| 216973_s_at  | 0.0364123 | 8.75E-04 | 3.69 | -0.867942 | 1.95 | HOXB7    |
| 201825_s_at  | 0.0364316 | 8.76E-04 | 3.69 | -0.869159 | 1.4  | SCCPDH   |
| 229964_at    | 0.0366016 | 8.81E-04 | 3.69 | -0.874269 | 3.49 | C9orf152 |
| 219959_at    | 0.0367625 | 8.86E-04 | 3.68 | -0.880088 | 2.04 | MOCOS    |

|             |           |          |      |           |      |         |
|-------------|-----------|----------|------|-----------|------|---------|
| 239010_at   | 0.0367625 | 8.87E-04 | 3.68 | -0.880556 | 1.56 | DUXAP10 |
| 219918_s_at | 0.0367761 | 8.88E-04 | 3.68 | -0.881621 | 2.8  | ASPM    |
| 202894_at   | 0.0371169 | 9.03E-04 | 3.68 | -0.897775 | 1.22 | EPHB4   |
| 225301_s_at | 0.0371169 | 9.04E-04 | 3.68 | -0.898371 | 1.9  | MYO5B   |
| 212022_s_at | 0.0371169 | 9.05E-04 | 3.68 | -0.899904 | 2.2  | MKI67   |
| 203216_s_at | 0.0371621 | 9.08E-04 | 3.68 | -0.902835 | 1.19 | MYO6    |
| 219263_at   | 0.0372438 | 9.13E-04 | 3.67 | -0.908217 | 2.68 | RNF128  |
| 210220_at   | 0.0372438 | 9.14E-04 | 3.67 | -0.909491 | 1.38 | FZD2    |
| 230892_at   | 0.0372438 | 9.17E-04 | 3.67 | -0.911559 | 1.04 |         |
| 209160_at   | 0.0375896 | 9.28E-04 | 3.67 | -0.923454 | 2.2  | AKR1C3  |
| 220021_at   | 0.0377058 | 9.34E-04 | 3.67 | -0.929156 | 1.34 | TMC7    |
| 226187_at   | 0.0377394 | 9.35E-04 | 3.66 | -0.93069  | 1.52 | CDS1    |

|             |           |          |      |           |      |         |
|-------------|-----------|----------|------|-----------|------|---------|
| 209596_at   | 0.0379712 | 9.42E-04 | 3.66 | -0.937684 | 1.88 | MXRA5   |
| 204818_at   | 0.0382953 | 9.58E-04 | 3.66 | -0.953242 | 2.72 | HSD17B2 |
| 219332_at   | 0.0385411 | 9.69E-04 | 3.65 | -0.963989 | 1.53 | MICALL2 |
| 215017_s_at | 0.0385673 | 9.72E-04 | 3.65 | -0.96702  | 1.1  | FNBP1L  |
| 201850_at   | 0.0386414 | 9.75E-04 | 3.65 | -0.970196 | 1.62 | CAPG    |
| 220520_s_at | 0.0386649 | 9.77E-04 | 3.65 | -0.971452 | 1.77 | NUP62CL |
| 214375_at   | 0.0387248 | 9.80E-04 | 3.65 | -0.974276 | 1.36 | PPFIBP1 |
| 237159_x_at | 0.0390521 | 9.92E-04 | 3.64 | -0.98662  | 1.73 | AP1S3   |
| 218900_at   | 0.0391135 | 9.97E-04 | 3.64 | -0.990478 | 1.25 | CNNM4   |

|             |           |          |      |           |      |                |
|-------------|-----------|----------|------|-----------|------|----------------|
| 218400_at   | 0.0391695 | 1.00E-03 | 3.64 | -0.993764 | 1.44 | OAS3           |
| 218687_s_at | 0.0391695 | 1.00E-03 | 3.64 | -0.994158 | 2.6  | MUC13          |
| 226287_at   | 0.0392613 | 1.01E-03 | 3.64 | -0.999453 | 1.1  | CCDC34         |
| 236129_at   | 0.0392613 | 1.01E-03 | 3.64 | -1.000775 | 2.78 | GALNT5         |
| 240770_at   | 0.0394427 | 1.01E-03 | 3.63 | -1.00713  | 1.94 | TMEM171        |
| 235144_at   | 0.0397664 | 1.02E-03 | 3.63 | -1.016735 | 2.36 | RASEF          |
| 222647_at   | 0.0397664 | 1.02E-03 | 3.63 | -1.01684  | 1.01 | SLC35C1        |
| 208779_x_at | 0.0397698 | 1.03E-03 | 3.63 | -1.01759  | 1.66 | MIR4640///DDR1 |
| 64408_s_at  | 0.0398793 | 1.03E-03 | 3.63 | -1.020848 | 1.95 | CALML4         |
| 227955_s_at | 0.0399515 | 1.03E-03 | 3.63 | -1.024553 | 2.12 | EFNA5          |

|             |           |          |      |           |      |         |
|-------------|-----------|----------|------|-----------|------|---------|
| 237554_at   | 0.0400022 | 1.04E-03 | 3.63 | -1.028408 | 1.08 |         |
| 203917_at   | 0.0400482 | 1.04E-03 | 3.63 | -1.030154 | 1.52 | CXADR   |
| 228323_at   | 0.0401248 | 1.04E-03 | 3.62 | -1.03336  | 2.22 | KNL1    |
| 226899_at   | 0.040209  | 1.05E-03 | 3.62 | -1.036583 | 1.39 | UNC5B   |
| 222387_s_at | 0.0403636 | 1.05E-03 | 3.62 | -1.042564 | 1.02 | VPS35   |
| 201251_at   | 0.0403636 | 1.05E-03 | 3.62 | -1.04284  | 1.32 | PKM     |
| 244241_x_at | 0.0406375 | 1.07E-03 | 3.62 | -1.056544 | 1.5  |         |
| 239559_at   | 0.0406682 | 1.07E-03 | 3.61 | -1.058463 | 1.73 |         |
| 230682_x_at | 0.040673  | 1.07E-03 | 3.61 | -1.059229 | 2.02 | ABCC3   |
| 232961_at   | 0.0407665 | 1.08E-03 | 3.61 | -1.064001 | 1.06 | SPATS2L |
| 210150_s_at | 0.0410062 | 1.09E-03 | 3.61 | -1.070824 | 1.19 | LAMA5   |
| 211778_s_at | 0.0411187 | 1.09E-03 | 3.61 | -1.0769   | 1.72 | OVOL2   |



209403\_at

0.0411187

1.09E-03 3.61

-1.077609 1.04

TBC1D3I///TBC1D3E///LOC101060389///TBC1D3L///TBC1D3K///TBC1D3

|             |           |          |      |           |      |         |
|-------------|-----------|----------|------|-----------|------|---------|
| 209373_at   | 0.0411187 | 1.09E-03 | 3.61 | -1.077675 | 2.13 | MALL    |
| 213007_at   | 0.0411187 | 1.09E-03 | 3.61 | -1.078595 | 1.86 | FANCI   |
| 216243_s_at | 0.0412402 | 1.10E-03 | 3.6  | -1.083312 | 1.23 | IL1RN   |
| 239433_at   | 0.0413877 | 1.11E-03 | 3.6  | -1.089255 | 1.49 | LRRC8E  |
| 207265_s_at | 0.0417435 | 1.12E-03 | 3.6  | -1.0986   | 1.49 | KDEL3   |
| 212339_at   | 0.041771  | 1.12E-03 | 3.6  | -1.099889 | 1.76 | EPB41L1 |
| 221815_at   | 0.0419161 | 1.13E-03 | 3.59 | -1.108893 | 1.53 | ABHD2   |

|              |           |          |      |           |      |          |
|--------------|-----------|----------|------|-----------|------|----------|
| 237411_at    | 0.0419523 | 1.13E-03 | 3.59 | -1.110344 | 1.29 | ADAMTS6  |
| 231807_at    | 0.0420814 | 1.14E-03 | 3.59 | -1.115548 | 1.22 | KIAA1217 |
| 229369_at    | 0.0421383 | 1.14E-03 | 3.59 | -1.118328 | 2.36 | VSIG2    |
| 244476_at    | 0.042621  | 1.16E-03 | 3.58 | -1.133487 | 1.2  |          |
| 231646_at    | 0.0431839 | 1.18E-03 | 3.58 | -1.150318 | 4.23 | DPCR1    |
| 1553114_a_at | 0.0436602 | 1.20E-03 | 3.57 | -1.166216 | 1.65 | PTK6     |
| 1562416_at   | 0.0439162 | 1.21E-03 | 3.57 | -1.172965 | 1.24 |          |
| 209262_s_at  | 0.0441697 | 1.22E-03 | 3.57 | -1.180874 | 1.52 | NR2F6    |
| 204034_at    | 0.0444119 | 1.23E-03 | 3.56 | -1.189748 | 1.03 | ETHE1    |

|              |           |          |      |           |      |              |
|--------------|-----------|----------|------|-----------|------|--------------|
| 221215_s_at  | 0.0445459 | 1.24E-03 | 3.56 | -1.195058 | 1.86 | RIPK4        |
| 1555037_a_at | 0.0446852 | 1.25E-03 | 3.56 | -1.200467 | 1    | IDH1         |
| 214697_s_at  | 0.0450241 | 1.26E-03 | 3.55 | -1.210653 | 1.17 | PTBP3        |
| 219916_s_at  | 0.0450942 | 1.27E-03 | 3.55 | -1.215185 | 1.5  | RNF39        |
| 1554609_at   | 0.0451772 | 1.27E-03 | 3.55 | -1.217527 | 1.33 | LOC100287896 |
| 210087_s_at  | 0.0457864 | 1.29E-03 | 3.54 | -1.235582 | 1.08 | MPZL1        |
| 205552_s_at  | 0.0457864 | 1.29E-03 | 3.54 | -1.235615 | 1.97 | OAS1         |
| 209048_s_at  | 0.0458678 | 1.30E-03 | 3.54 | -1.238502 | 1.02 | ZMYND8       |

|              |           |          |      |           |      |                     |
|--------------|-----------|----------|------|-----------|------|---------------------|
| 202740_at    | 0.0458699 | 1.30E-03 | 3.54 | -1.239153 | 1.32 | ABHD14A-ACY1///ACY1 |
| 36936_at     | 0.0458719 | 1.30E-03 | 3.54 | -1.240722 | 1.39 | TSTA3               |
| 218755_at    | 0.0459804 | 1.31E-03 | 3.54 | -1.245657 | 1.87 | KIF20A              |
| 228696_at    | 0.0463527 | 1.32E-03 | 3.54 | -1.255653 | 2.09 | SLC45A3             |
| 242417_at    | 0.0467428 | 1.34E-03 | 3.53 | -1.269542 | 1.67 | PLEKHA7             |
| 229396_at    | 0.0469413 | 1.35E-03 | 3.53 | -1.274976 | 1.59 | OVOL1               |
| 227614_at    | 0.0473872 | 1.36E-03 | 3.52 | -1.285399 | 2.33 | HKDC1               |
| 224209_s_at  | 0.0474517 | 1.37E-03 | 3.52 | -1.288351 | 2.99 | GDA                 |
| 238884_at    | 0.0474517 | 1.37E-03 | 3.52 | -1.288487 | 1.16 |                     |
| 1556211_a_at | 0.0478778 | 1.39E-03 | 3.52 | -1.302215 | 1.56 |                     |

|             |           |          |      |           |      |          |
|-------------|-----------|----------|------|-----------|------|----------|
| 212762_s_at | 0.0481092 | 1.40E-03 | 3.51 | -1.310292 | 1.25 | TCF7L2   |
| 205513_at   | 0.0481311 | 1.40E-03 | 3.51 | -1.3119   | 4.18 | TCN1     |
| 209446_s_at | 0.0487657 | 1.43E-03 | 3.51 | -1.328781 | 1.49 |          |
| 243618_s_at | 0.0487657 | 1.43E-03 | 3.51 | -1.329987 | 1.17 | ZNF827   |
| 214581_x_at | 0.0487657 | 1.43E-03 | 3.51 | -1.33184  | 1.73 | TNFRSF21 |
| 203370_s_at | 0.0489162 | 1.44E-03 | 3.5  | -1.337756 | 1.47 | PDLIM7   |
| 222600_s_at | 0.0489757 | 1.44E-03 | 3.5  | -1.339953 | 1.07 | UBA6     |
| 239155_at   | 0.0490766 | 1.45E-03 | 3.5  | -1.342467 | 1.62 | CXADR    |
| 229795_at   | 0.0490984 | 1.45E-03 | 3.5  | -1.345165 | 1.29 |          |
| 206560_s_at | 0.0490984 | 1.45E-03 | 3.5  | -1.346368 | 3.2  | MIA      |
| 229689_s_at | 0.0491789 | 1.46E-03 | 3.5  | -1.348486 | 1.08 |          |

|             |           |          |      |           |      |                       |
|-------------|-----------|----------|------|-----------|------|-----------------------|
| 210026_s_at | 0.0494165 | 1.47E-03 | 3.5  | -1.354167 | 1.84 | CARD10                |
| 210813_s_at | 0.0495089 | 1.47E-03 | 3.5  | -1.356804 | 1.26 | XRCC4                 |
| 217875_s_at | 0.0496078 | 1.48E-03 | 3.49 | -1.361259 | 1.54 | PMEPA1                |
| 226997_at   | 0.0497022 | 1.48E-03 | 3.49 | -1.364196 | 2.69 | ADAMTS12              |
| 226707_at   | 0.0499882 | 1.49E-03 | 3.49 | -1.371881 | 1.47 | NAPRT                 |
| 231832_at   | 0.0499926 | 1.50E-03 | 3.49 | -1.373876 | 1.75 | POC1B-GALNT4///GALNT4 |

|             |           |          |      |           |      |        |
|-------------|-----------|----------|------|-----------|------|--------|
| 213230_at   | 0.0499926 | 1.50E-03 | 3.49 | -1.37483  | 1.53 | CDR2L  |
| 225496_s_at | 0.050164  | 1.51E-03 | 3.49 | -1.379828 | 1.11 | SYTL2  |
| 224799_at   | 0.0503506 | 1.52E-03 | 3.48 | -1.387671 | 1.09 | NDFIP2 |
| 220289_s_at | 0.0503506 | 1.52E-03 | 3.48 | -1.388816 | 1.92 | AIM1L  |
| 205765_at   | 0.0505159 | 1.53E-03 | 3.48 | -1.393612 | 3.26 | CYP3A5 |
| 226245_at   | 0.0505159 | 1.53E-03 | 3.48 | -1.393714 | 1.34 | KCTD1  |
| 234995_at   | 0.0506022 | 1.54E-03 | 3.48 | -1.398144 | 1.26 | SPICE1 |



|              |           |          |      |           |      |                  |
|--------------|-----------|----------|------|-----------|------|------------------|
| 242662_at    | 0.0507052 | 1.54E-03 | 3.48 | -1.401181 | 1.32 | PCSK6            |
| 218883_s_at  | 0.050955  | 1.55E-03 | 3.48 | -1.408856 | 2.28 | CENPU            |
| 229276_at    | 0.050955  | 1.56E-03 | 3.47 | -1.409732 | 1.78 | IGSF9            |
| 1569150_x_at | 0.0514856 | 1.58E-03 | 3.47 | -1.424709 | 1.83 | PDLIM7           |
| 217730_at    | 0.0515236 | 1.58E-03 | 3.47 | -1.426829 | 1.05 | MIR6513///TMBIM1 |
| 230269_at    | 0.0515236 | 1.59E-03 | 3.47 | -1.42686  | 1.87 | B3GALT5          |
| 235245_at    | 0.0518216 | 1.60E-03 | 3.46 | -1.438581 | 1.53 | TMEM92           |
| 225806_at    | 0.0518216 | 1.61E-03 | 3.46 | -1.438728 | 1.61 | AJUBA            |
| 237183_at    | 0.0519023 | 1.61E-03 | 3.46 | -1.442598 | 2.41 | GALNT5           |

|             |           |          |      |           |      |                |
|-------------|-----------|----------|------|-----------|------|----------------|
| 204268_at   | 0.0519023 | 1.61E-03 | 3.46 | -1.443025 | 4.07 | S100A2         |
| 1569542_at  | 0.0519437 | 1.62E-03 | 3.46 | -1.444461 | 1.11 | ADGRA3         |
| 209925_at   | 0.0524147 | 1.63E-03 | 3.46 | -1.455129 | 1.79 | OCLN           |
| 218039_at   | 0.0527747 | 1.65E-03 | 3.45 | -1.465392 | 2.06 | NUSAP1         |
| 235476_at   | 0.0528438 | 1.66E-03 | 3.45 | -1.468808 | 1.64 | TRIM59///IFT80 |
| 202721_s_at | 0.0528699 | 1.66E-03 | 3.45 | -1.47159  | 1.04 | GFPT1          |
| 218498_s_at | 0.0528699 | 1.66E-03 | 3.45 | -1.472043 | 1.64 | ERO1A          |
| 217518_at   | 0.0528699 | 1.67E-03 | 3.45 | -1.47309  | 1.28 | MYOF           |

|             |           |          |      |           |      |          |
|-------------|-----------|----------|------|-----------|------|----------|
| 228150_at   | 0.0529053 | 1.67E-03 | 3.45 | -1.475893 | 1.42 | SEC16B   |
| 212444_at   | 0.0529573 | 1.68E-03 | 3.45 | -1.479462 | 2.23 | GPRC5A   |
| 204254_s_at | 0.0529573 | 1.68E-03 | 3.45 | -1.481695 | 1.04 | VDR      |
| 244356_at   | 0.0529573 | 1.68E-03 | 3.45 | -1.482159 | 1.18 |          |
| 235924_at   | 0.0529573 | 1.68E-03 | 3.45 | -1.48278  | 1.78 | FRK      |
| 210007_s_at | 0.0529573 | 1.68E-03 | 3.45 | -1.483299 | 1.14 | GPD2     |
| 219233_s_at | 0.0529573 | 1.69E-03 | 3.44 | -1.484215 | 1.59 | GSDMB    |
| 208555_x_at | 0.0532485 | 1.70E-03 | 3.44 | -1.492215 | 1.53 | CST2     |
| 221582_at   | 0.0533107 | 1.71E-03 | 3.44 | -1.497226 | 1.62 | HIST3H2A |
| 203502_at   | 0.0534342 | 1.72E-03 | 3.44 | -1.501368 | 1.16 | BPGM     |
| 203779_s_at | 0.0537202 | 1.73E-03 | 3.44 | -1.506933 | 1.41 | MPZL2    |

|             |           |          |      |           |      |                          |
|-------------|-----------|----------|------|-----------|------|--------------------------|
| 218928_s_at | 0.0537204 | 1.73E-03 | 3.44 | -1.508644 | 1.11 | SLC37A1                  |
| 217620_s_at | 0.0537204 | 1.73E-03 | 3.43 | -1.50957  | 1.14 | PIK3CB                   |
| 213116_at   | 0.0538213 | 1.74E-03 | 3.43 | -1.512392 | 1.05 | NEK3                     |
| 222714_s_at | 0.0538386 | 1.74E-03 | 3.43 | -1.513224 | 1.33 | LACTB2                   |
| 242759_at   | 0.0538433 | 1.74E-03 | 3.43 | -1.513837 | 1.05 |                          |
| 228481_at   | 0.0539281 | 1.74E-03 | 3.43 | -1.516819 | 2.53 |                          |
| 215549_x_at | 0.0540569 | 1.75E-03 | 3.43 | -1.519667 | 1.42 | CTAGE8///CTAGE4///CTAGE9 |
| 217234_s_at | 0.0542897 | 1.76E-03 | 3.43 | -1.52475  | 1.1  | EZR                      |
| 220952_s_at | 0.0543717 | 1.77E-03 | 3.43 | -1.528841 | 1.25 | PLEKHA5                  |
| 1555858_at  | 0.0543717 | 1.77E-03 | 3.43 | -1.52886  | 1.27 | THUMPD3-AS1              |

|             |           |          |      |           |      |         |
|-------------|-----------|----------|------|-----------|------|---------|
| 209205_s_at | 0.0546227 | 1.78E-03 | 3.42 | -1.5347   | 1.17 | LMO4    |
| 217771_at   | 0.0546372 | 1.78E-03 | 3.42 | -1.535475 | 1.96 | GOLM1   |
| 223165_s_at | 0.0548331 | 1.79E-03 | 3.42 | -1.542874 | 1.19 | IP6K2   |
| 241726_at   | 0.0548331 | 1.79E-03 | 3.42 | -1.543026 | 1.61 |         |
| 242635_s_at | 0.0548389 | 1.80E-03 | 3.42 | -1.543649 | 1.26 | NAPEPLD |
| 209627_s_at | 0.0548614 | 1.80E-03 | 3.42 | -1.544556 | 1.63 | OSBPL3  |
| 203955_at   | 0.0549981 | 1.80E-03 | 3.42 | -1.54803  | 1.08 | PPP1R26 |
| 228273_at   | 0.0550183 | 1.81E-03 | 3.42 | -1.550266 | 1.83 | PRR11   |
| 212472_at   | 0.0550183 | 1.81E-03 | 3.42 | -1.550901 | 1.29 | MICAL2  |

|             |           |          |      |           |      |                 |
|-------------|-----------|----------|------|-----------|------|-----------------|
| 227420_at   | 0.0551653 | 1.82E-03 | 3.42 | -1.555467 | 1.28 | TNFAIP8L1       |
| 230100_x_at | 0.0552497 | 1.82E-03 | 3.42 | -1.557936 | 1.62 | PAK1            |
| 208614_s_at | 0.0554296 | 1.84E-03 | 3.41 | -1.565641 | 1.11 | FLNB            |
| 225655_at   | 0.0557009 | 1.85E-03 | 3.41 | -1.571335 | 2.02 | UHRF1           |
| 209365_s_at | 0.0557009 | 1.85E-03 | 3.41 | -1.571761 | 2.27 | ECM1            |
| 235952_at   | 0.0557457 | 1.85E-03 | 3.41 | -1.573159 | 1.23 | DGKH            |
| 226189_at   | 0.0557457 | 1.85E-03 | 3.41 | -1.574218 | 1.7  | ITGB8           |
| 213667_at   | 0.0557457 | 1.86E-03 | 3.41 | -1.575586 | 1.22 | TMEM265///SRCAP |

|             |           |          |      |           |      |                |
|-------------|-----------|----------|------|-----------|------|----------------|
| 202712_s_at | 0.0559023 | 1.87E-03 | 3.41 | -1.579874 | 2.7  | CKMT1A//CKMT1B |
| 243594_x_at | 0.0559023 | 1.87E-03 | 3.41 | -1.580766 | 1.94 | SPIRE2         |
| 225599_s_at | 0.0559153 | 1.87E-03 | 3.41 | -1.581863 | 1.07 | TRIQQ          |
| 201826_s_at | 0.0559153 | 1.87E-03 | 3.41 | -1.582037 | 1.5  | SCCPDH         |
| 209326_at   | 0.0559389 | 1.87E-03 | 3.41 | -1.582944 | 1.14 | SLC35A2        |
| 234000_s_at | 0.0560549 | 1.88E-03 | 3.4  | -1.586651 | 1.1  | HACD3          |
| 209790_s_at | 0.0560549 | 1.88E-03 | 3.4  | -1.586927 | 1.08 | CASP6          |
| 212650_at   | 0.0560595 | 1.88E-03 | 3.4  | -1.588024 | 1.01 | EHBP1          |

206094\_x\_at

0.0563373

1.90E-03 3.4

-1.59469 2.6

UGT1A3///UGT1A1///UGT1A4///UGT1A9///UGT1A5///UGT1A6///UGT1A



|              |           |          |      |           |      |              |
|--------------|-----------|----------|------|-----------|------|--------------|
| 1568877_a_at | 0.0570688 | 1.93E-03 | 3.39 | -1.609934 | 1.43 | ACBD5        |
| 224624_at    | 0.0572197 | 1.93E-03 | 3.39 | -1.613297 | 1.05 | LRRC8A       |
| 230778_at    | 0.057546  | 1.95E-03 | 3.39 | -1.62178  | 1.03 |              |
| 224825_at    | 0.057546  | 1.95E-03 | 3.39 | -1.622054 | 1.18 | DNTTIP1      |
| 225590_at    | 0.0576707 | 1.97E-03 | 3.39 | -1.628255 | 1.46 | SH3RF1       |
| 225871_at    | 0.0576707 | 1.97E-03 | 3.39 | -1.628848 | 1.31 | STEAP2       |
| 214974_x_at  | 0.0576707 | 1.97E-03 | 3.39 | -1.629715 | 3.83 | CXCL5        |
| 212446_s_at  | 0.0580947 | 1.99E-03 | 3.38 | -1.63892  | 1.19 | CERS6        |
| 232406_at    | 0.0582095 | 2.00E-03 | 3.38 | -1.643416 | 1.1  | LOC105372526 |

|             |           |          |      |           |      |          |
|-------------|-----------|----------|------|-----------|------|----------|
| 203794_at   | 0.0585357 | 2.01E-03 | 3.38 | -1.650214 | 1.02 | CDC42BPA |
| 238075_at   | 0.0585357 | 2.01E-03 | 3.38 | -1.651352 | 1.14 | CHEK1    |
| 219978_s_at | 0.0588257 | 2.03E-03 | 3.37 | -1.658239 | 2.29 | NUSAP1   |
| 206249_at   | 0.0593304 | 2.05E-03 | 3.37 | -1.670032 | 1.37 | MAP3K13  |
| 223307_at   | 0.0593678 | 2.06E-03 | 3.37 | -1.671346 | 2.04 | CDCA3    |
| 202962_at   | 0.0598137 | 2.08E-03 | 3.37 | -1.682009 | 1.15 | KIF13B   |
| 222449_at   | 0.0598554 | 2.09E-03 | 3.36 | -1.686294 | 1.56 | PMEPA1   |
| 205319_at   | 0.0600105 | 2.10E-03 | 3.36 | -1.691416 | 3.03 | PSCA     |
| 204519_s_at | 0.0600105 | 2.11E-03 | 3.36 | -1.69262  | 1.98 | PLLP     |

|             |           |          |      |           |      |          |
|-------------|-----------|----------|------|-----------|------|----------|
| 227850_x_at | 0.0600582 | 2.11E-03 | 3.36 | -1.694825 | 2.13 | CDC42EP5 |
| 222848_at   | 0.0602998 | 2.13E-03 | 3.36 | -1.701494 | 2.26 | CENPK    |
| 213865_at   | 0.0604754 | 2.14E-03 | 3.35 | -1.708084 | 1.85 | DCBLD2   |
| 227672_at   | 0.0606907 | 2.15E-03 | 3.35 | -1.7143   | 1.34 | MROH6    |
| 205534_at   | 0.060778  | 2.16E-03 | 3.35 | -1.716711 | 1.75 | PCDH7    |
| 63825_at    | 0.060778  | 2.16E-03 | 3.35 | -1.717077 | 1.31 | ABHD2    |
| 230831_at   | 0.060778  | 2.16E-03 | 3.35 | -1.717087 | 1.33 | FRMD5    |
| 206084_at   | 0.0608482 | 2.16E-03 | 3.35 | -1.718647 | 2.16 | PTPRR    |
| 236279_at   | 0.0610527 | 2.18E-03 | 3.35 | -1.723703 | 1.56 |          |
| 210797_s_at | 0.0611878 | 2.18E-03 | 3.35 | -1.726726 | 1.51 | OASL     |

|             |           |          |      |           |      |         |
|-------------|-----------|----------|------|-----------|------|---------|
| 209969_s_at | 0.0611914 | 2.18E-03 | 3.35 | -1.727261 | 1.18 | STAT1   |
| 222036_s_at | 0.0611982 | 2.19E-03 | 3.35 | -1.728321 | 1.14 | MCM4    |
| 224458_at   | 0.061775  | 2.22E-03 | 3.34 | -1.741381 | 1.64 | TMEM246 |
| 229450_at   | 0.0618726 | 2.22E-03 | 3.34 | -1.744283 | 1.23 | IFIT3   |
| 1555870_at  | 0.0621993 | 2.25E-03 | 3.33 | -1.755934 | 1.94 | RNF207  |
| 204686_at   | 0.0621993 | 2.25E-03 | 3.33 | -1.756304 | 1.24 | IRS1    |
| 205466_s_at | 0.0624792 | 2.27E-03 | 3.33 | -1.762975 | 2.16 | HS3ST1  |
| 214135_at   | 0.0625972 | 2.28E-03 | 3.33 | -1.768838 | 5.29 | CLDN18  |
| 215108_x_at | 0.0628527 | 2.30E-03 | 3.33 | -1.774046 | 3.07 | TOX3    |

|             |           |          |      |           |      |        |
|-------------|-----------|----------|------|-----------|------|--------|
| 204675_at   | 0.0630989 | 2.31E-03 | 3.33 | -1.779098 | 1.82 | SRD5A1 |
| 202338_at   | 0.0634532 | 2.34E-03 | 3.32 | -1.789909 | 1.39 | TK1    |
| 210530_s_at | 0.0636727 | 2.35E-03 | 3.32 | -1.794987 | 1.15 | NR2C1  |
| 220945_x_at | 0.0638286 | 2.36E-03 | 3.32 | -1.799272 | 1.26 | MANSC1 |
| 212442_s_at | 0.0639075 | 2.37E-03 | 3.32 | -1.803169 | 1.27 | CERS6  |
| 201905_s_at | 0.0639075 | 2.37E-03 | 3.32 | -1.803501 | 1.03 | CTDSPL |
| 232103_at   | 0.0639495 | 2.37E-03 | 3.32 | -1.804576 | 1.32 | BPNT1  |
| 201250_s_at | 0.0641161 | 2.39E-03 | 3.31 | -1.810471 | 2.31 | SLC2A1 |
| 201005_at   | 0.0643293 | 2.40E-03 | 3.31 | -1.814692 | 1.08 | CD9    |
| 229256_at   | 0.0643737 | 2.41E-03 | 3.31 | -1.818884 | 1.17 | PGM2L1 |

|             |           |          |      |           |      |                   |
|-------------|-----------|----------|------|-----------|------|-------------------|
| 206576_s_at | 0.0643737 | 2.41E-03 | 3.31 | -1.819068 | 2.2  | CEACAM1           |
| 205044_at   | 0.064687  | 2.43E-03 | 3.31 | -1.826255 | 4.44 | GABRP             |
| 202856_s_at | 0.0651298 | 2.45E-03 | 3.3  | -1.836069 | 2.06 | MIR6787///SLC16A3 |
| 221530_s_at | 0.0651298 | 2.46E-03 | 3.3  | -1.838511 | 1.18 | BHLHE41           |
| 239435_x_at | 0.0651574 | 2.46E-03 | 3.3  | -1.839809 | 1.53 | SHROOM1           |
| 210675_s_at | 0.0655465 | 2.48E-03 | 3.3  | -1.846717 | 1.83 | PTPRR             |
| 209677_at   | 0.0656353 | 2.49E-03 | 3.3  | -1.848431 | 1.17 | PRKCI             |

|             |           |          |      |           |      |                    |
|-------------|-----------|----------|------|-----------|------|--------------------|
| 227062_at   | 0.066032  | 2.51E-03 | 3.29 | -1.856748 | 1.07 | MIR612///NEAT1     |
| 203780_at   | 0.0663967 | 2.53E-03 | 3.29 | -1.864537 | 1.4  | MPZL2              |
| 203035_s_at | 0.0665104 | 2.54E-03 | 3.29 | -1.868407 | 1.03 | PIAS3              |
| 46323_at    | 0.0671913 | 2.58E-03 | 3.28 | -1.883038 | 1.01 | CANT1              |
| 1568865_at  | 0.0673587 | 2.59E-03 | 3.28 | -1.88741  | 1.08 | FNTB               |
| 208002_s_at | 0.0673587 | 2.60E-03 | 3.28 | -1.888671 | 1.13 | ACOT7              |
| 227566_at   | 0.0673806 | 2.60E-03 | 3.28 | -1.889416 | 2.27 | LOC102725271///NTM |
| 204602_at   | 0.0675761 | 2.62E-03 | 3.28 | -1.89523  | 2.73 | DKK1               |
| 230256_at   | 0.0676586 | 2.63E-03 | 3.28 | -1.899424 | 1.07 | RUSC1-AS1          |

|             |           |          |      |           |      |        |
|-------------|-----------|----------|------|-----------|------|--------|
| 230319_at   | 0.0677465 | 2.63E-03 | 3.28 | -1.901892 | 2.24 |        |
| 206857_s_at | 0.0677465 | 2.64E-03 | 3.27 | -1.902508 | 1.44 | FKBP1B |
| 204304_s_at | 0.0677465 | 2.64E-03 | 3.27 | -1.903109 | 2.71 | PROM1  |
| 225687_at   | 0.0678255 | 2.65E-03 | 3.27 | -1.905928 | 2.35 | FAM83D |
| 200612_s_at | 0.0678759 | 2.65E-03 | 3.27 | -1.908985 | 1.27 | AP2B1  |
| 206284_x_at | 0.0678759 | 2.65E-03 | 3.27 | -1.909081 | 1.03 | CLTB   |
| 203918_at   | 0.0679993 | 2.66E-03 | 3.27 | -1.912412 | 1.07 | PCDH1  |
| 214059_at   | 0.068024  | 2.67E-03 | 3.27 | -1.913186 | 2.07 | IFI44  |
| 208209_s_at | 0.068055  | 2.67E-03 | 3.27 | -1.91437  | 1.87 | C4BPB  |
| 210117_at   | 0.068055  | 2.67E-03 | 3.27 | -1.915349 | 1.45 | SPAG1  |
| 229555_at   | 0.068271  | 2.69E-03 | 3.27 | -1.920471 | 1.49 | GALNT5 |



|             |           |          |      |           |      |          |
|-------------|-----------|----------|------|-----------|------|----------|
| 216074_x_at | 0.0683643 | 2.70E-03 | 3.27 | -1.924337 | 1.34 | WWC1     |
| 205941_s_at | 0.0685163 | 2.71E-03 | 3.26 | -1.927271 | 3.83 | COL10A1  |
| 202589_at   | 0.0687606 | 2.72E-03 | 3.26 | -1.932742 | 1.93 | TYMS     |
| 219388_at   | 0.068904  | 2.73E-03 | 3.26 | -1.936628 | 1.56 | GRHL2    |
| 212021_s_at | 0.068904  | 2.73E-03 | 3.26 | -1.936834 | 1.54 | MKI67    |
| 203354_s_at | 0.069494  | 2.77E-03 | 3.26 | -1.949916 | 1.66 | PSD3     |
| 218567_x_at | 0.0695016 | 2.78E-03 | 3.26 | -1.950811 | 1.05 | DPP3     |
| 204981_at   | 0.0695016 | 2.78E-03 | 3.25 | -1.951297 | 1.8  | SLC22A18 |
| 225601_at   | 0.0695842 | 2.78E-03 | 3.25 | -1.953257 | 1.04 | HMGB3    |
| 210177_at   | 0.0696447 | 2.79E-03 | 3.25 | -1.954846 | 1.3  | TRIM15   |

|             |           |          |      |           |      |          |
|-------------|-----------|----------|------|-----------|------|----------|
| 1566465_at  | 0.0697156 | 2.79E-03 | 3.25 | -1.956715 | 1.76 | KCNK1    |
| 241455_at   | 0.0698572 | 2.81E-03 | 3.25 | -1.961362 | 1.62 | C6orf132 |
| 225345_s_at | 0.0702839 | 2.84E-03 | 3.25 | -1.971898 | 1.56 | FBXO32   |
| 204017_at   | 0.0703294 | 2.85E-03 | 3.25 | -1.973766 | 1.33 | KDEL3    |
| 224715_at   | 0.0703629 | 2.85E-03 | 3.24 | -1.975891 | 1.16 | WDR34    |
| 202936_s_at | 0.0706887 | 2.87E-03 | 3.24 | -1.980613 | 1.72 | SOX9     |
| 219637_at   | 0.0707734 | 2.87E-03 | 3.24 | -1.982148 | 1.16 | ARMC9    |
| 228490_at   | 0.0708886 | 2.88E-03 | 3.24 | -1.984897 | 1.43 | ABHD2    |
| 200644_at   | 0.0710472 | 2.89E-03 | 3.24 | -1.988259 | 1.36 | MARCKSL1 |
| 220770_s_at | 0.0712753 | 2.90E-03 | 3.24 | -1.992196 | 1.25 | ZBED8    |

|             |           |          |      |           |      |                                   |
|-------------|-----------|----------|------|-----------|------|-----------------------------------|
| 218847_at   | 0.0712753 | 2.91E-03 | 3.24 | -1.993335 | 1.55 | IGF2BP2                           |
| 226246_at   | 0.0712799 | 2.91E-03 | 3.24 | -1.995495 | 1.35 | KCTD1                             |
| 242354_at   | 0.0712799 | 2.92E-03 | 3.24 | -1.997474 | 1.53 |                                   |
| 223186_at   | 0.0713036 | 2.92E-03 | 3.24 | -1.999155 | 1.02 | TMEM189-UBE2V1///TMEM189///UBE2V1 |
| 1558154_at  | 0.0714232 | 2.93E-03 | 3.23 | -2.002338 | 1.2  |                                   |
| 214924_s_at | 0.0715079 | 2.94E-03 | 3.23 | -2.004683 | 1.49 | TRAK1                             |
| 222258_s_at | 0.0719399 | 2.97E-03 | 3.23 | -2.014007 | 1.14 | SH3BP4                            |

|             |           |          |      |           |      |         |
|-------------|-----------|----------|------|-----------|------|---------|
| 227647_at   | 0.0719585 | 2.97E-03 | 3.23 | -2.015071 | 2.39 | KCNE3   |
| 223185_s_at | 0.07208   | 2.99E-03 | 3.23 | -2.018982 | 1.39 | BHLHE41 |
| 227415_at   | 0.07208   | 2.99E-03 | 3.23 | -2.01911  | 1.13 | DGKH    |
| 228742_at   | 0.072088  | 2.99E-03 | 3.23 | -2.019624 | 1.46 |         |
| 212727_at   | 0.0720917 | 2.99E-03 | 3.23 | -2.020684 | 1.17 | DLG3    |
| 238722_x_at | 0.0724565 | 3.02E-03 | 3.22 | -2.030662 | 1.05 | NAPEPLD |
| 228729_at   | 0.0724651 | 3.03E-03 | 3.22 | -2.032245 | 2.16 | CCNB1   |
| 202998_s_at | 0.0725749 | 3.04E-03 | 3.22 | -2.035554 | 1.87 | LOXL2   |
| 205342_s_at | 0.072732  | 3.05E-03 | 3.22 | -2.038511 | 3.31 | SULT1C2 |

|              |           |          |      |           |      |                              |
|--------------|-----------|----------|------|-----------|------|------------------------------|
| 230135_at    | 0.0729221 | 3.07E-03 | 3.22 | -2.044603 | 1.83 | HHIP                         |
| 240861_at    | 0.0730355 | 3.09E-03 | 3.21 | -2.049081 | 1.74 |                              |
| 219148_at    | 0.0730809 | 3.09E-03 | 3.21 | -2.051119 | 1.92 | PBK                          |
| 228116_at    | 0.0731277 | 3.10E-03 | 3.21 | -2.054709 | 1.56 | LINC01296///DUXAP10///DUXAP8 |
| 210473_s_at  | 0.0731277 | 3.10E-03 | 3.21 | -2.054929 | 1.21 | ADGRA3                       |
| 231822_at    | 0.0731277 | 3.11E-03 | 3.21 | -2.057157 | 1.04 | CTTNBP2NL                    |
| 1557651_x_at | 0.0734018 | 3.13E-03 | 3.21 | -2.06219  | 1.41 | GALE                         |
| 225362_at    | 0.073449  | 3.14E-03 | 3.21 | -2.066802 | 1.34 | FAM122B                      |

|             |           |          |      |           |      |                          |
|-------------|-----------|----------|------|-----------|------|--------------------------|
| 204162_at   | 0.0736713 | 3.16E-03 | 3.21 | -2.071397 | 1.77 | NDC80                    |
| 225062_at   | 0.0736713 | 3.17E-03 | 3.2  | -2.073285 | 1.47 | LOC102724951///LOC389831 |
| 229479_at   | 0.0740684 | 3.19E-03 | 3.2  | -2.08105  | 2.93 |                          |
| 218252_at   | 0.0741493 | 3.20E-03 | 3.2  | -2.082459 | 1.22 | CKAP2                    |
| 239834_at   | 0.0742914 | 3.21E-03 | 3.2  | -2.086152 | 1.3  |                          |
| 204415_at   | 0.0745158 | 3.22E-03 | 3.2  | -2.089799 | 1.91 | IFI6                     |
| 214774_x_at | 0.0745402 | 3.23E-03 | 3.2  | -2.090911 | 3.01 | TOX3                     |
| 218638_s_at | 0.0746371 | 3.24E-03 | 3.2  | -2.095411 | 1.36 | LOC100130872///SPON2     |
| 210719_s_at | 0.0746371 | 3.24E-03 | 3.2  | -2.095555 | 1.05 | HMG20B                   |

|             |           |          |      |           |      |        |
|-------------|-----------|----------|------|-----------|------|--------|
| 242800_at   | 0.0746371 | 3.24E-03 | 3.2  | -2.095624 | 1.78 | NHS    |
| 216623_x_at | 0.0749279 | 3.26E-03 | 3.19 | -2.10093  | 2.97 | TOX3   |
| 226702_at   | 0.0749574 | 3.27E-03 | 3.19 | -2.10195  | 1.39 | CMPK2  |
| 218689_at   | 0.0749833 | 3.27E-03 | 3.19 | -2.104208 | 1.02 | FANCF  |
| 220613_s_at | 0.0752275 | 3.29E-03 | 3.19 | -2.110037 | 1.2  | SYTL2  |
| 203362_s_at | 0.0752275 | 3.30E-03 | 3.19 | -2.110352 | 1.87 | MAD2L1 |
| 209468_at   | 0.0754025 | 3.31E-03 | 3.19 | -2.115223 | 1.54 | LRP5   |
| 236390_at   | 0.0754734 | 3.32E-03 | 3.19 | -2.11692  | 1.07 | SLX4IP |
| 235606_at   | 0.0756445 | 3.34E-03 | 3.18 | -2.122569 | 1.08 | DUBR   |

|              |           |          |      |           |      |              |
|--------------|-----------|----------|------|-----------|------|--------------|
| 226041_at    | 0.0756445 | 3.35E-03 | 3.18 | -2.125625 | 1.41 | NAPEPLD      |
| 31637_s_at   | 0.0756445 | 3.35E-03 | 3.18 | -2.125783 | 1.24 | NR1D1///THRA |
| 1555976_s_at | 0.0756592 | 3.35E-03 | 3.18 | -2.126469 | 1.02 | MYL12A       |
| 219150_s_at  | 0.0757768 | 3.36E-03 | 3.18 | -2.129445 | 1.9  | ADAP1        |
| 209204_at    | 0.0758833 | 3.37E-03 | 3.18 | -2.131133 | 1.44 | LMO4         |
| 205538_at    | 0.0760599 | 3.38E-03 | 3.18 | -2.134058 | 1.62 | CORO2A       |
| 233487_s_at  | 0.0764017 | 3.43E-03 | 3.17 | -2.146716 | 1.44 | LRRC8A       |
| 1559190_s_at | 0.0767613 | 3.45E-03 | 3.17 | -2.153005 | 1.42 | RDH13        |



|              |           |          |      |           |      |                 |
|--------------|-----------|----------|------|-----------|------|-----------------|
| 201609_x_at  | 0.0768298 | 3.46E-03 | 3.17 | -2.155565 | 1.09 | ICMT            |
| 227994_x_at  | 0.0769476 | 3.47E-03 | 3.17 | -2.157365 | 1.16 | PPDPF           |
| 203074_at    | 0.0769896 | 3.47E-03 | 3.17 | -2.158369 | 3.08 | ANXA8L1///ANXA8 |
| 206539_s_at  | 0.0769896 | 3.47E-03 | 3.17 | -2.159412 | 1.58 | CYP4F12         |
| 211089_s_at  | 0.0769896 | 3.48E-03 | 3.17 | -2.160883 | 1.17 | NEK3            |
| 201644_at    | 0.0770238 | 3.48E-03 | 3.17 | -2.162063 | 1.13 | TSTA3           |
| 1555968_a_at | 0.0770238 | 3.49E-03 | 3.17 | -2.162422 | 1.46 |                 |
| 241137_at    | 0.0770587 | 3.49E-03 | 3.17 | -2.163218 | 3.64 | DPCR1           |
| 206884_s_at  | 0.0772573 | 3.50E-03 | 3.17 | -2.166903 | 2.97 | SCEL            |

|              |           |          |      |           |      |         |
|--------------|-----------|----------|------|-----------|------|---------|
| 210652_s_at  | 0.0772573 | 3.50E-03 | 3.17 | -2.166904 | 1.87 | TTC39A  |
| 233908_x_at  | 0.0772573 | 3.51E-03 | 3.16 | -2.168087 | 1.27 |         |
| 1553992_s_at | 0.0772573 | 3.51E-03 | 3.16 | -2.168231 | 1.21 | NBR2    |
| 227949_at    | 0.077818  | 3.54E-03 | 3.16 | -2.177932 | 2.33 | PHACTR3 |
| 204404_at    | 0.0781704 | 3.57E-03 | 3.16 | -2.184787 | 2.1  | SLC12A2 |
| 201798_s_at  | 0.0781704 | 3.58E-03 | 3.16 | -2.186218 | 1.14 | MYOF    |
| 202705_at    | 0.0782441 | 3.59E-03 | 3.16 | -2.188637 | 2.18 | CCNB2   |
| 225337_at    | 0.0783801 | 3.60E-03 | 3.15 | -2.19375  | 1.14 | ABHD2   |
| 1555420_a_at | 0.0783801 | 3.61E-03 | 3.15 | -2.193907 | 1.13 | KLF7    |

|             |           |          |      |           |      |                                                             |
|-------------|-----------|----------|------|-----------|------|-------------------------------------------------------------|
| 220602_s_at | 0.0785649 | 3.62E-03 | 3.15 | -2.198283 | 1.19 | LOC101929479///LOC727751///LOC642423///GOLGA2P7///GOLGA2P10 |
| 209255_at   | 0.0787686 | 3.64E-03 | 3.15 | -2.202525 | 1.39 | KLHDC10                                                     |
| 222646_s_at | 0.078802  | 3.64E-03 | 3.15 | -2.20341  | 1.55 | ERO1A                                                       |
| 209398_at   | 0.0790608 | 3.66E-03 | 3.15 | -2.208529 | 2.09 | HIST1H1C                                                    |
| 239579_at   | 0.0792536 | 3.67E-03 | 3.15 | -2.211623 | 1.35 | EPHX4                                                       |
| 219691_at   | 0.0793972 | 3.69E-03 | 3.15 | -2.215394 | 1.48 | SAMD9                                                       |

|             |           |          |      |           |      |                    |
|-------------|-----------|----------|------|-----------|------|--------------------|
| 226107_at   | 0.0794892 | 3.70E-03 | 3.14 | -2.218027 | 1.55 | C1GALT1            |
| 229661_at   | 0.0794892 | 3.70E-03 | 3.14 | -2.218961 | 1.96 | SALL4              |
| 204740_at   | 0.0795464 | 3.72E-03 | 3.14 | -2.222869 | 1.27 | CNKSRI             |
| 222020_s_at | 0.0795796 | 3.73E-03 | 3.14 | -2.226245 | 2.17 | LOC102725271///NTM |
| 211695_x_at | 0.0797635 | 3.75E-03 | 3.14 | -2.229832 | 1.88 | MUC1               |
| 235638_at   | 0.0799497 | 3.76E-03 | 3.14 | -2.232716 | 1.58 | RASSF6             |
| 235463_s_at | 0.0800139 | 3.77E-03 | 3.14 | -2.234182 | 1.44 | CERS6              |

|              |           |          |      |           |      |          |
|--------------|-----------|----------|------|-----------|------|----------|
| 222528_s_at  | 0.0802284 | 3.78E-03 | 3.14 | -2.238825 | 1.48 | SLC25A37 |
| 206685_at    | 0.080245  | 3.79E-03 | 3.14 | -2.239377 | 1.31 | HCG4     |
| 222830_at    | 0.0803238 | 3.79E-03 | 3.13 | -2.240646 | 1.75 | GRHL1    |
| 225735_at    | 0.0805493 | 3.81E-03 | 3.13 | -2.243964 | 1.12 | ANKRD50  |
| 226132_s_at  | 0.0807325 | 3.82E-03 | 3.13 | -2.247148 | 1.69 | MANEAL   |
| 225568_at    | 0.0807774 | 3.84E-03 | 3.13 | -2.2514   | 1.04 | TMEM141  |
| 231849_at    | 0.0810864 | 3.86E-03 | 3.13 | -2.257992 | 1.57 | KRT80    |
| 1553976_a_at | 0.0812462 | 3.88E-03 | 3.13 | -2.260883 | 1.39 | DPCD     |
| 1552575_a_at | 0.0817486 | 3.92E-03 | 3.12 | -2.272379 | 1.47 | C6orf141 |
| 228531_at    | 0.0817486 | 3.92E-03 | 3.12 | -2.272622 | 1.4  | SAMD9    |

|             |           |          |      |           |      |         |
|-------------|-----------|----------|------|-----------|------|---------|
| 238881_at   | 0.0822656 | 3.97E-03 | 3.12 | -2.283044 | 1.11 |         |
| 203458_at   | 0.0825406 | 3.99E-03 | 3.11 | -2.28719  | 1.25 | SPR     |
| 226829_at   | 0.0826447 | 4.00E-03 | 3.11 | -2.289696 | 1.26 | AFAP1L2 |
| 217867_x_at | 0.0826503 | 4.00E-03 | 3.11 | -2.290173 | 1.31 | BACE2   |
| 230493_at   | 0.0828337 | 4.01E-03 | 3.11 | -2.292927 | 2.65 | SHISA2  |
| 212768_s_at | 0.0828581 | 4.01E-03 | 3.11 | -2.29355  | 3.81 | OLFM4   |
| 209626_s_at | 0.0829489 | 4.02E-03 | 3.11 | -2.295613 | 1.54 | OSBPL3  |
| 236462_at   | 0.0830645 | 4.04E-03 | 3.11 | -2.298649 | 1.19 |         |
| 204822_at   | 0.083473  | 4.08E-03 | 3.11 | -2.30857  | 1.75 | TTK     |
| 209885_at   | 0.0836771 | 4.10E-03 | 3.1  | -2.312057 | 1.59 | RHOD    |
| 229720_at   | 0.083715  | 4.10E-03 | 3.1  | -2.313169 | 1.65 | BAG1    |

|             |           |          |      |           |      |                   |
|-------------|-----------|----------|------|-----------|------|-------------------|
| 203755_at   | 0.0840185 | 4.13E-03 | 3.1  | -2.3193   | 2.12 | BUB1B             |
| 236010_at   | 0.0840268 | 4.13E-03 | 3.1  | -2.320409 | 1.23 |                   |
| 202357_s_at | 0.0841122 | 4.14E-03 | 3.1  | -2.322932 | 1.37 | CFB               |
| 221526_x_at | 0.0841122 | 4.15E-03 | 3.1  | -2.323421 | 1.1  | PARD3             |
| 222077_s_at | 0.0841122 | 4.15E-03 | 3.1  | -2.323543 | 1.31 | RACGAP1           |
| 227966_s_at | 0.0841122 | 4.15E-03 | 3.1  | -2.323758 | 1.08 | CCDC74B///CCDC74A |
| 218966_at   | 0.0845514 | 4.18E-03 | 3.1  | -2.330658 | 1.27 | MYO5C             |
| 219494_at   | 0.0846984 | 4.19E-03 | 3.1  | -2.333441 | 1.2  | RAD54B            |
| 218663_at   | 0.0847355 | 4.20E-03 | 3.09 | -2.336415 | 1.94 | NCAPG             |

|              |           |          |      |           |      |        |
|--------------|-----------|----------|------|-----------|------|--------|
| 204235_s_at  | 0.0853817 | 4.25E-03 | 3.09 | -2.346175 | 1.26 | GULP1  |
| 231022_at    | 0.0857384 | 4.27E-03 | 3.09 | -2.351086 | 1.18 | OCLN   |
| 1552257_a_at | 0.0866925 | 4.34E-03 | 3.08 | -2.365704 | 1.16 | TLL12  |
| 203797_at    | 0.0873103 | 4.38E-03 | 3.08 | -2.374758 | 1.4  | VSNL1  |
| 205668_at    | 0.0874991 | 4.40E-03 | 3.08 | -2.378322 | 1.39 | LY75   |
| 218701_at    | 0.0879611 | 4.46E-03 | 3.07 | -2.390902 | 1.31 | LACTB2 |
| 209546_s_at  | 0.0880117 | 4.47E-03 | 3.07 | -2.392655 | 1.27 | APOL1  |
| 1558748_at   | 0.0880117 | 4.47E-03 | 3.07 | -2.392683 | 1.27 |        |
| 226374_at    | 0.0884324 | 4.51E-03 | 3.07 | -2.400943 | 1.76 | CXADR  |
| 207202_s_at  | 0.0884324 | 4.51E-03 | 3.07 | -2.401131 | 2.44 | NR1I2  |
| 233177_s_at  | 0.0884324 | 4.51E-03 | 3.07 | -2.401854 | 1.46 | PNKD   |



|             |           |          |      |           |      |         |
|-------------|-----------|----------|------|-----------|------|---------|
| 218662_s_at | 0.0890944 | 4.56E-03 | 3.06 | -2.41148  | 1.62 | NCAPG   |
| 220192_x_at | 0.0891326 | 4.57E-03 | 3.06 | -2.413256 | 1.9  | SPDEF   |
| 202688_at   | 0.0891691 | 4.58E-03 | 3.06 | -2.415911 | 1.01 | TNFSF10 |
| 212759_s_at | 0.0898683 | 4.64E-03 | 3.06 | -2.42725  | 1.2  | TCF7L2  |
| 220230_s_at | 0.0898683 | 4.64E-03 | 3.06 | -2.42738  | 1.21 | CYB5R2  |
| 219909_at   | 0.0898683 | 4.64E-03 | 3.06 | -2.428019 | 2.16 | MMP28   |
| 222446_s_at | 0.0898683 | 4.64E-03 | 3.06 | -2.428067 | 1.14 | BACE2   |
| 225418_at   | 0.0899008 | 4.65E-03 | 3.05 | -2.429756 | 1.02 | NECTIN2 |

|              |           |          |      |           |      |         |
|--------------|-----------|----------|------|-----------|------|---------|
| 240081_at    | 0.0899008 | 4.65E-03 | 3.05 | -2.42983  | 1.22 |         |
| 204341_at    | 0.0900132 | 4.67E-03 | 3.05 | -2.433007 | 1.35 | TRIM16  |
| 210625_s_at  | 0.0902715 | 4.70E-03 | 3.05 | -2.439885 | 1.22 | AKAP1   |
| 207165_at    | 0.0903128 | 4.71E-03 | 3.05 | -2.441587 | 2.31 | HMMR    |
| 204623_at    | 0.0904559 | 4.74E-03 | 3.05 | -2.446852 | 3.06 | TFF3    |
| 213352_at    | 0.090915  | 4.77E-03 | 3.04 | -2.453847 | 1.08 | TMCC1   |
| 218795_at    | 0.0910672 | 4.79E-03 | 3.04 | -2.457061 | 1.36 | ACP6    |
| 204078_at    | 0.0913614 | 4.83E-03 | 3.04 | -2.465285 | 1.07 | P3H4    |
| 1556105_at   | 0.0916474 | 4.86E-03 | 3.04 | -2.471216 | 1.57 |         |
| 225598_at    | 0.0917517 | 4.87E-03 | 3.04 | -2.473221 | 1.14 | SLC45A4 |
| 1553995_a_at | 0.0925361 | 4.94E-03 | 3.03 | -2.484876 | 1.72 | NT5E    |

|             |           |          |      |           |      |               |
|-------------|-----------|----------|------|-----------|------|---------------|
| 234207_at   | 0.0930895 | 4.99E-03 | 3.03 | -2.495131 | 1.18 |               |
| 229669_at   | 0.0931377 | 5.00E-03 | 3.03 | -2.497496 | 1.28 | CCDC144NL-AS1 |
| 220180_at   | 0.0932107 | 5.01E-03 | 3.03 | -2.498955 | 1.63 | CCDC68        |
| 204202_at   | 0.0934891 | 5.04E-03 | 3.02 | -2.504359 | 1.16 | IQCE          |
| 229674_at   | 0.0934891 | 5.04E-03 | 3.02 | -2.504573 | 1.39 | SERTAD4       |
| 228933_at   | 0.0934891 | 5.04E-03 | 3.02 | -2.504801 | 1.63 | NHS           |
| 222760_at   | 0.0935919 | 5.07E-03 | 3.02 | -2.510174 | 1.38 | ZNF703        |
| 229223_at   | 0.0935919 | 5.08E-03 | 3.02 | -2.510432 | 1.64 |               |
| 244612_at   | 0.0937782 | 5.10E-03 | 3.02 | -2.515066 | 1.96 |               |
| 204751_x_at | 0.0940263 | 5.14E-03 | 3.02 | -2.521858 | 1.42 | DSC2          |
| 1553986_at  | 0.0946526 | 5.20E-03 | 3.01 | -2.532096 | 2.01 | RASEF         |
| 1562527_at  | 0.0946526 | 5.20E-03 | 3.01 | -2.533184 | 1.75 | LOC441666     |

|             |           |          |      |           |      |         |
|-------------|-----------|----------|------|-----------|------|---------|
| 1566764_at  | 0.0948937 | 5.22E-03 | 3.01 | -2.53708  | 1.44 | MACC1   |
| 59625_at    | 0.0948968 | 5.23E-03 | 3.01 | -2.537598 | 1.12 | NOL3    |
| 238718_at   | 0.0951146 | 5.25E-03 | 3.01 | -2.541153 | 1.94 |         |
| 205566_at   | 0.0951146 | 5.25E-03 | 3.01 | -2.541429 | 1.41 | ABHD2   |
| 240690_at   | 0.0951602 | 5.26E-03 | 3.01 | -2.542976 | 1.43 |         |
| 223251_s_at | 0.0952347 | 5.27E-03 | 3.01 | -2.545279 | 1.08 | ANKRD10 |
| 208079_s_at | 0.0954742 | 5.31E-03 | 3    | -2.551451 | 1.96 | AURKA   |
| 220920_at   | 0.0954742 | 5.31E-03 | 3    | -2.552716 | 1.32 | ATP10B  |
| 203358_s_at | 0.0955351 | 5.32E-03 | 3    | -2.553654 | 1.47 | EZH2    |
| 217110_s_at | 0.0956338 | 5.33E-03 | 3    | -2.5555   | 2.57 | MUC4    |
| 238806_at   | 0.0959312 | 5.36E-03 | 3    | -2.561272 | 1.03 |         |

|             |           |          |      |           |      |          |
|-------------|-----------|----------|------|-----------|------|----------|
| 213324_at   | 0.0961725 | 5.40E-03 | 3    | -2.567625 | 1.12 | SRC      |
| 219727_at   | 0.0965452 | 5.43E-03 | 2.99 | -2.572995 | 3.22 | DUOX2    |
| 229090_at   | 0.0966151 | 5.45E-03 | 2.99 | -2.575269 | 1.12 | ZEB1-AS1 |
| 218990_s_at | 0.0966657 | 5.46E-03 | 2.99 | -2.578331 | 3.33 | SPRR3    |
| 235521_at   | 0.0968776 | 5.49E-03 | 2.99 | -2.582721 | 1.69 | HOXA3    |
| 219856_at   | 0.097263  | 5.53E-03 | 2.99 | -2.589868 | 1.11 | C1orf116 |
| 234942_s_at | 0.0978276 | 5.57E-03 | 2.98 | -2.596474 | 1.23 | DNTTIP1  |
| 232860_x_at | 0.0978861 | 5.58E-03 | 2.98 | -2.597321 | 1    | RBM41    |
| 228302_x_at | 0.0980192 | 5.59E-03 | 2.98 | -2.599179 | 2.57 | CAMK2N1  |

|             |           |          |      |           |      |         |
|-------------|-----------|----------|------|-----------|------|---------|
| 236009_at   | 0.0980416 | 5.59E-03 | 2.98 | -2.599967 | 1.45 | PERP    |
| 225102_at   | 0.0984983 | 5.64E-03 | 2.98 | -2.607401 | 1.56 | MGLL    |
| 221666_s_at | 0.0984983 | 5.64E-03 | 2.98 | -2.607492 | 1.11 | PYCARD  |
| 219850_s_at | 0.0988205 | 5.67E-03 | 2.98 | -2.611883 | 1.43 | EHF     |
| 232322_x_at | 0.0990823 | 5.69E-03 | 2.97 | -2.616274 | 1.58 | STARD10 |
| 211864_s_at | 0.0991466 | 5.70E-03 | 2.97 | -2.617647 | 1.29 | MYOF    |
| 201674_s_at | 0.0992055 | 5.71E-03 | 2.97 | -2.618487 | 1.04 | AKAP1   |
| 228617_at   | 0.0998293 | 5.78E-03 | 2.97 | -2.63097  | 1.08 | XAF1    |
| 214373_at   | 0.0999562 | 5.80E-03 | 2.97 | -2.632759 | 1.28 |         |
| 219771_at   | 0.0999562 | 5.80E-03 | 2.97 | -2.632792 | 1.02 | TBC1D8B |
| 243205_at   | 0.1002699 | 5.83E-03 | 2.97 | -2.638049 | 1.44 |         |

|             |           |          |      |           |      |           |
|-------------|-----------|----------|------|-----------|------|-----------|
| 235085_at   | 0.1002888 | 5.84E-03 | 2.96 | -2.640568 | 1.13 | SGK223    |
| 241036_at   | 0.100291  | 5.86E-03 | 2.96 | -2.643285 | 1.21 |           |
| 208546_x_at | 0.1005199 | 5.89E-03 | 2.96 | -2.648296 | 1.8  | HIST1H2BH |
| 215101_s_at | 0.100714  | 5.91E-03 | 2.96 | -2.650646 | 3.41 | CXCL5     |
| 230972_at   | 0.1009703 | 5.94E-03 | 2.96 | -2.654992 | 1.06 | ANKRD9    |
| 225299_at   | 0.101239  | 5.96E-03 | 2.96 | -2.658375 | 1.78 | MYO5B     |
| 227140_at   | 0.1013579 | 5.97E-03 | 2.96 | -2.660806 | 2.27 | INHBA     |
| 41660_at    | 0.101366  | 5.98E-03 | 2.96 | -2.661164 | 1.61 | CELSR1    |
| 227342_s_at | 0.1014437 | 5.99E-03 | 2.95 | -2.662726 | 2.13 | MYEOV     |
| 202734_at   | 0.102776  | 6.10E-03 | 2.95 | -2.679566 | 1.04 | TRIP10    |
| 211470_s_at | 0.1028597 | 6.11E-03 | 2.95 | -2.681159 | 3.01 | SULT1C2   |

|             |           |          |      |           |      |         |
|-------------|-----------|----------|------|-----------|------|---------|
| 219529_at   | 0.1029404 | 6.12E-03 | 2.95 | -2.682736 | 2.19 | CLIC3   |
| 214981_at   | 0.1033929 | 6.17E-03 | 2.94 | -2.689879 | 2.27 | POSTN   |
| 232459_at   | 0.1035877 | 6.18E-03 | 2.94 | -2.692456 | 1.26 |         |
| 210978_s_at | 0.1036856 | 6.20E-03 | 2.94 | -2.695014 | 1.01 | TAGLN2  |
| 228088_at   | 0.1037502 | 6.21E-03 | 2.94 | -2.696149 | 1.04 | SESTD1  |
| 242271_at   | 0.1037947 | 6.21E-03 | 2.94 | -2.696825 | 3.34 | SLC26A9 |
| 215807_s_at | 0.1039026 | 6.22E-03 | 2.94 | -2.698342 | 1.24 | PLXNB1  |
| 202219_at   | 0.1039666 | 6.23E-03 | 2.94 | -2.699189 | 2.2  | SLC6A8  |
| 208156_x_at | 0.1042967 | 6.28E-03 | 2.94 | -2.706449 | 1.11 | EPPK1   |
| 238827_at   | 0.1042967 | 6.28E-03 | 2.94 | -2.706736 | 1.85 | SH3RF2  |
| 232231_at   | 0.1046045 | 6.31E-03 | 2.93 | -2.710688 | 1.69 | RUNX2   |
| 1569149_at  | 0.1046456 | 6.32E-03 | 2.93 | -2.712412 | 1.5  | PDLIM7  |
| 236422_at   | 0.1046456 | 6.32E-03 | 2.93 | -2.712627 | 1.46 |         |



|             |           |          |      |           |      |         |
|-------------|-----------|----------|------|-----------|------|---------|
| 239246_at   | 0.1049359 | 6.36E-03 | 2.93 | -2.71777  | 1.13 | FARP1   |
| 219789_at   | 0.1050768 | 6.37E-03 | 2.93 | -2.719718 | 2.21 | NPR3    |
| 218986_s_at | 0.1051995 | 6.39E-03 | 2.93 | -2.722503 | 1    | DDX60   |
| 233571_x_at | 0.1052407 | 6.40E-03 | 2.93 | -2.72376  | 1.12 | PPDPF   |
| 204709_s_at | 0.1057463 | 6.44E-03 | 2.93 | -2.729822 | 1.49 | KIF23   |
| 211883_x_at | 0.1058114 | 6.45E-03 | 2.92 | -2.731719 | 1.64 | CEACAM1 |
| 224707_at   | 0.1058114 | 6.47E-03 | 2.92 | -2.733393 | 1.25 | CYSTM1  |
| 227946_at   | 0.1058114 | 6.47E-03 | 2.92 | -2.733832 | 1.65 | OSBPL7  |

|             |           |          |      |           |      |                        |
|-------------|-----------|----------|------|-----------|------|------------------------|
| 206377_at   | 0.1058114 | 6.47E-03 | 2.92 | -2.734581 | 1.47 | FOXF2                  |
| 239091_at   | 0.1058114 | 6.49E-03 | 2.92 | -2.736439 | 1.04 |                        |
| 217428_s_at | 0.1058623 | 6.49E-03 | 2.92 | -2.737156 | 3.44 | COL10A1                |
| 224998_at   | 0.1062534 | 6.52E-03 | 2.92 | -2.741092 | 1.27 | CMTM4                  |
| 210610_at   | 0.1070324 | 6.58E-03 | 2.92 | -2.749172 | 1.44 | CEACAM1                |
| 37005_at    | 0.1072077 | 6.60E-03 | 2.92 | -2.75227  | 1.1  | MINOS1-NBL1///NBL1     |
| 207222_at   | 0.1074285 | 6.62E-03 | 2.91 | -2.754749 | 1.99 | LOC100652777///PLA2G10 |
| 215501_s_at | 0.1084458 | 6.75E-03 | 2.91 | -2.773112 | 1.1  | DUSP10                 |

|             |           |          |      |           |      |         |
|-------------|-----------|----------|------|-----------|------|---------|
| 227801_at   | 0.1084458 | 6.75E-03 | 2.91 | -2.773169 | 1.34 | TRIM59  |
| 233689_at   | 0.1099108 | 6.90E-03 | 2.9  | -2.793301 | 1.27 |         |
| 200752_s_at | 0.1104011 | 6.96E-03 | 2.89 | -2.801627 | 1    | CAPN1   |
| 227163_at   | 0.1104641 | 6.98E-03 | 2.89 | -2.803209 | 1.62 | GSTO2   |
| 210511_s_at | 0.111084  | 7.05E-03 | 2.89 | -2.812325 | 2.21 | INHBA   |
| 209213_at   | 0.111178  | 7.06E-03 | 2.89 | -2.813895 | 1.04 | CBR1    |
| 219352_at   | 0.1128227 | 7.22E-03 | 2.88 | -2.834254 | 1.06 | HERC6   |
| 236489_at   | 0.1129567 | 7.25E-03 | 2.88 | -2.83891  | 2.25 | ADGRF1  |
| 232056_at   | 0.1134994 | 7.33E-03 | 2.87 | -2.848442 | 2.47 | SCEL    |
| 204345_at   | 0.1136469 | 7.36E-03 | 2.87 | -2.852605 | 1.04 | COL16A1 |

|             |           |          |      |           |      |         |
|-------------|-----------|----------|------|-----------|------|---------|
| 238689_at   | 0.1136469 | 7.40E-03 | 2.87 | -2.856669 | 1.58 | ADGRF1  |
| 204503_at   | 0.1136469 | 7.40E-03 | 2.87 | -2.856688 | 1.24 | EVPL    |
| 213797_at   | 0.1136469 | 7.40E-03 | 2.87 | -2.856734 | 1.32 | RSAD2   |
| 225835_at   | 0.1139743 | 7.44E-03 | 2.87 | -2.862713 | 1.39 | SLC12A2 |
| 204324_s_at | 0.1144325 | 7.49E-03 | 2.86 | -2.86844  | 1.02 | GOLIM4  |
| 201896_s_at | 0.1144674 | 7.50E-03 | 2.86 | -2.868976 | 1.55 | PSRC1   |
| 209773_s_at | 0.1146419 | 7.54E-03 | 2.86 | -2.873926 | 2.36 | RRM2    |
| 207109_at   | 0.1146419 | 7.54E-03 | 2.86 | -2.874248 | 1.81 | POU2F3  |
| 230343_at   | 0.1146419 | 7.55E-03 | 2.86 | -2.875399 | 1.33 | CST3    |
| 231033_at   | 0.1148752 | 7.59E-03 | 2.86 | -2.88064  | 1.76 | DSC2    |

|             |           |          |      |           |      |         |
|-------------|-----------|----------|------|-----------|------|---------|
| 207069_s_at | 0.1149686 | 7.60E-03 | 2.86 | -2.881638 | 1.5  | SMAD6   |
| 230795_at   | 0.115034  | 7.61E-03 | 2.86 | -2.882642 | 1.43 |         |
| 238996_x_at | 0.115034  | 7.61E-03 | 2.86 | -2.882919 | 1.15 | ALDOA   |
| 214036_at   | 0.1154478 | 7.67E-03 | 2.86 | -2.889746 | 1.43 | EFNA5   |
| 213700_s_at | 0.1158084 | 7.71E-03 | 2.85 | -2.895372 | 1.41 | PKM     |
| 232481_s_at | 0.1158908 | 7.73E-03 | 2.85 | -2.897832 | 1.67 | SLITRK6 |
| 228596_at   | 0.1158908 | 7.74E-03 | 2.85 | -2.897922 | 1.47 | ARHGEF5 |
| 235425_at   | 0.1158908 | 7.74E-03 | 2.85 | -2.898253 | 1.2  | SGO2    |
| 204237_at   | 0.115976  | 7.76E-03 | 2.85 | -2.900792 | 1.15 | GULP1   |
| 228221_at   | 0.1161988 | 7.79E-03 | 2.85 | -2.904468 | 1.66 | SLC44A3 |
| 208025_s_at | 0.1170322 | 7.87E-03 | 2.84 | -2.914002 | 1.91 | HMGA2   |

|             |           |          |      |           |      |          |
|-------------|-----------|----------|------|-----------|------|----------|
| 201926_s_at | 0.1170417 | 7.88E-03 | 2.84 | -2.914325 | 1.37 | CD55     |
| 224428_s_at | 0.1171121 | 7.88E-03 | 2.84 | -2.915124 | 2.35 | CDCA7    |
| 209215_at   | 0.1173259 | 7.92E-03 | 2.84 | -2.919438 | 1.19 | MFSD10   |
| 212489_at   | 0.1173259 | 7.93E-03 | 2.84 | -2.920132 | 1.88 | COL5A1   |
| 209641_s_at | 0.1173259 | 7.93E-03 | 2.84 | -2.920144 | 1.36 | ABCC3    |
| 239694_at   | 0.1173259 | 7.93E-03 | 2.84 | -2.920368 | 2.08 | TRIM7    |
| 203325_s_at | 0.1173259 | 7.93E-03 | 2.84 | -2.920516 | 1.77 | COL5A1   |
| 1565149_at  | 0.1174263 | 7.95E-03 | 2.84 | -2.923031 | 1.37 | DYNC2H1  |
| 239350_at   | 0.1177354 | 7.99E-03 | 2.84 | -2.927778 | 1.24 | MARVELD3 |

|             |           |          |      |           |      |                                                           |
|-------------|-----------|----------|------|-----------|------|-----------------------------------------------------------|
| 232994_s_at | 0.1177354 | 8.00E-03 | 2.84 | -2.928773 | 1.2  | ARHGEF28                                                  |
| 230710_at   | 0.1182379 | 8.06E-03 | 2.84 | -2.935001 | 1.54 | MIR210HG                                                  |
| 214455_at   | 0.1183176 | 8.08E-03 | 2.83 | -2.938071 | 2.13 | HIST1H2BC///HIST1H2BI///HIST1H2BE///HIST1H2BF///HIST1H2BG |
| 236725_at   | 0.1183776 | 8.10E-03 | 2.83 | -2.939569 | 1.24 | WWC1                                                      |
| 212686_at   | 0.1184312 | 8.11E-03 | 2.83 | -2.941061 | 1.44 | PPM1H                                                     |
| 205073_at   | 0.1184545 | 8.12E-03 | 2.83 | -2.942063 | 1.77 | CYP2J2                                                    |

|              |           |          |      |           |      |                        |
|--------------|-----------|----------|------|-----------|------|------------------------|
| 226764_at    | 0.1185199 | 8.13E-03 | 2.83 | -2.943787 | 1    | ZNF827                 |
| 241607_at    | 0.1192314 | 8.21E-03 | 2.83 | -2.952854 | 1.42 | LOC730102              |
| 1568633_a_at | 0.1192314 | 8.22E-03 | 2.83 | -2.953287 | 1.14 | LOC101927809           |
| 234608_at    | 0.1195722 | 8.28E-03 | 2.82 | -2.959877 | 1.27 | LAMA3                  |
| 204146_at    | 0.1196029 | 8.28E-03 | 2.82 | -2.960367 | 1.64 | RAD51AP1               |
| 232567_at    | 0.1200409 | 8.33E-03 | 2.82 | -2.965387 | 1.3  | PRR5-ARHGAP8///ARHGAP8 |
| 1555950_a_at | 0.1210482 | 8.44E-03 | 2.82 | -2.977739 | 1.41 | CD55                   |
| 214895_s_at  | 0.1210482 | 8.45E-03 | 2.82 | -2.978313 | 1.04 | ADAM10                 |
| 215059_at    | 0.1213213 | 8.50E-03 | 2.81 | -2.984511 | 1.03 |                        |



|             |           |          |      |           |      |          |
|-------------|-----------|----------|------|-----------|------|----------|
| 209615_s_at | 0.1213213 | 8.52E-03 | 2.81 | -2.986086 | 1.15 | PAK1     |
| 205542_at   | 0.1213213 | 8.53E-03 | 2.81 | -2.986997 | 1.23 | STEAP1   |
| 1552930_at  | 0.1213213 | 8.53E-03 | 2.81 | -2.987312 | 1.12 | MMEL1    |
| 40020_at    | 0.1219984 | 8.63E-03 | 2.81 | -2.997829 | 1.28 | CELSR3   |
| 206133_at   | 0.1221228 | 8.65E-03 | 2.81 | -2.99994  | 1.16 | XAF1     |
| 225830_at   | 0.1223793 | 8.68E-03 | 2.8  | -3.003507 | 1.13 | PDZD8    |
| 238617_at   | 0.122593  | 8.70E-03 | 2.8  | -3.005867 | 1.83 | KIF26B   |
| 232465_at   | 0.1226281 | 8.72E-03 | 2.8  | -3.007009 | 1.1  |          |
| 1554003_at  | 0.1227174 | 8.73E-03 | 2.8  | -3.008143 | 1.17 | ARHGEF28 |

|             |           |          |      |           |      |            |
|-------------|-----------|----------|------|-----------|------|------------|
| 206326_at   | 0.1228553 | 8.76E-03 | 2.8  | -3.011283 | 1.82 | GRP        |
| 213094_at   | 0.1230735 | 8.79E-03 | 2.8  | -3.01454  | 1.27 | ADGRG6     |
| 205618_at   | 0.1235607 | 8.85E-03 | 2.8  | -3.020717 | 1.11 | PRRG1      |
| 221241_s_at | 0.123835  | 8.88E-03 | 2.8  | -3.023674 | 1.63 | BCL2L14    |
| 231148_at   | 0.1242306 | 8.94E-03 | 2.79 | -3.030538 | 2.26 | IGFL2      |
| 228485_s_at | 0.1247772 | 9.02E-03 | 2.79 | -3.038504 | 1.17 | SLC44A1    |
| 237864_at   | 0.1247772 | 9.02E-03 | 2.79 | -3.038559 | 1.01 |            |
| 232238_at   | 0.1247772 | 9.03E-03 | 2.79 | -3.039529 | 1.63 | ASPM       |
| 240390_at   | 0.1248216 | 9.05E-03 | 2.79 | -3.040947 | 1.8  | GALNT5     |
| 200637_s_at | 0.1250483 | 9.08E-03 | 2.79 | -3.044605 | 1.03 | PTPRF      |
| 232478_at   | 0.1253217 | 9.12E-03 | 2.79 | -3.04795  | 1.02 | MIR181A2HG |
| 238501_at   | 0.1255346 | 9.15E-03 | 2.78 | -3.050968 | 1.13 |            |

|             |           |          |      |           |      |                  |
|-------------|-----------|----------|------|-----------|------|------------------|
| 208394_x_at | 0.1262503 | 9.24E-03 | 2.78 | -3.059902 | 1.26 | ESM1             |
| 216251_s_at | 0.1265255 | 9.28E-03 | 2.78 | -3.064008 | 1.08 | TLL12            |
| 226553_at   | 0.1276661 | 9.42E-03 | 2.77 | -3.078087 | 1.77 | TMPRSS2          |
| 219747_at   | 0.1277248 | 9.44E-03 | 2.77 | -3.079851 | 1.67 | NDNF             |
| 210868_s_at | 0.1277248 | 9.44E-03 | 2.77 | -3.079916 | 1.7  | ELOVL6           |
| 1553994_at  | 0.128121  | 9.51E-03 | 2.77 | -3.086164 | 1.45 | NT5E             |
| 213577_at   | 0.128121  | 9.51E-03 | 2.77 | -3.086832 | 1.5  | SQLE             |
| 209238_at   | 0.1281229 | 9.53E-03 | 2.77 | -3.088637 | 1.03 | STX3             |
| 231881_at   | 0.1284356 | 9.59E-03 | 2.76 | -3.094247 | 1.21 | CALD1            |
| 237483_at   | 0.1287615 | 9.64E-03 | 2.76 | -3.098543 | 1.46 |                  |
| 223854_at   | 0.1288105 | 9.65E-03 | 2.76 | -3.099916 | 1.39 | PCDHB9///PCDHB10 |
| 228033_at   | 0.1288368 | 9.66E-03 | 2.76 | -3.101197 | 1.25 | E2F7             |

|              |           |          |      |           |      |          |
|--------------|-----------|----------|------|-----------|------|----------|
| 219474_at    | 0.1292715 | 9.71E-03 | 2.76 | -3.105443 | 1.25 | C3orf52  |
| 225618_at    | 0.1292715 | 9.71E-03 | 2.76 | -3.105946 | 1.14 | ARHGAP27 |
| 210233_at    | 0.129768  | 9.77E-03 | 2.76 | -3.110864 | 1.36 | IL1RAP   |
| 218704_at    | 0.1298161 | 9.77E-03 | 2.76 | -3.111423 | 1.68 | RNF43    |
| 215409_at    | 0.1301721 | 9.82E-03 | 2.75 | -3.115846 | 1.32 | LPCAT4   |
| 223284_at    | 0.1301721 | 9.82E-03 | 2.75 | -3.115918 | 1.07 | NAT14    |
| 221566_s_at  | 0.1305814 | 9.89E-03 | 2.75 | -3.122513 | 1.01 | NOL3     |
| 1554408_a_at | 0.1313122 | 9.99E-03 | 2.75 | -3.131325 | 1.21 | TK1      |
| 228873_at    | 0.1314342 | 1.00E-02 | 2.75 | -3.134697 | 1.29 | COL22A1  |
| 1562608_at   | 0.1316107 | 1.00E-02 | 2.75 | -3.136234 | 1.21 |          |

|           |           |          |      |           |      |                          |
|-----------|-----------|----------|------|-----------|------|--------------------------|
| 212488_at | 0.1328923 | 1.02E-02 | 2.74 | -3.152994 | 1.76 | COL5A1                   |
| 227041_at | 0.1328923 | 1.02E-02 | 2.74 | -3.153092 | 1.07 | SESTD1                   |
| 234605_at | 0.1330954 | 1.03E-02 | 2.74 | -3.155346 | 1.12 | CDC14B                   |
| 213285_at | 0.1333564 | 1.03E-02 | 2.73 | -3.159502 | 1.29 | TMEM30B                  |
| 213010_at | 0.1334849 | 1.03E-02 | 2.73 | -3.16079  | 1.19 | PRKCDBP                  |
| 206364_at | 0.1338642 | 1.04E-02 | 2.73 | -3.164036 | 1.51 | KIF14                    |
| 213308_at | 0.1341178 | 1.04E-02 | 2.73 | -3.167836 | 1.35 | SHANK2                   |
| 201621_at | 0.1342578 | 1.04E-02 | 2.73 | -3.170146 | 1.09 | NBL1                     |
| 225046_at | 0.13479   | 1.05E-02 | 2.73 | -3.18089  | 1.33 | LOC102724951///LOC389831 |

|             |           |          |      |           |      |         |
|-------------|-----------|----------|------|-----------|------|---------|
| 204285_s_at | 0.13479   | 1.06E-02 | 2.72 | -3.181421 | 1.53 | PMAIP1  |
| 228654_at   | 0.1353387 | 1.06E-02 | 2.72 | -3.186813 | 1.22 | SPIN4   |
| 208165_s_at | 0.1355207 | 1.06E-02 | 2.72 | -3.188664 | 1.42 | PRSS16  |
| 206558_at   | 0.1355409 | 1.07E-02 | 2.72 | -3.190288 | 1.2  | SIM2    |
| 223672_at   | 0.1355524 | 1.07E-02 | 2.72 | -3.190951 | 1.37 | SGIP1   |
| 213107_at   | 0.1358125 | 1.07E-02 | 2.72 | -3.19368  | 1.44 | TNIK    |
| 240200_at   | 0.1358125 | 1.07E-02 | 2.72 | -3.19416  | 2.61 | SULT1C2 |
| 202404_s_at | 0.1362805 | 1.08E-02 | 2.72 | -3.200295 | 1.53 | COL1A2  |
| 228919_at   | 0.1364992 | 1.08E-02 | 2.71 | -3.203433 | 1.27 |         |
| 242181_at   | 0.1367712 | 1.09E-02 | 2.71 | -3.207898 | 1.75 |         |

|             |           |          |      |           |      |                      |
|-------------|-----------|----------|------|-----------|------|----------------------|
| 207414_s_at | 0.1367712 | 1.09E-02 | 2.71 | -3.207966 | 1.22 | LOC100507472///PCSK6 |
| 205071_x_at | 0.1370895 | 1.09E-02 | 2.71 | -3.211522 | 1.1  | XRCC4                |
| 219858_s_at | 0.1370895 | 1.09E-02 | 2.71 | -3.211773 | 1.2  | MFSD6                |
| 208579_x_at | 0.1395683 | 1.13E-02 | 2.7  | -3.240649 | 1.57 | H2BFS                |
| 205376_at   | 0.1395683 | 1.13E-02 | 2.7  | -3.241089 | 1.12 | INPP4B               |
| 214710_s_at | 0.1395683 | 1.13E-02 | 2.7  | -3.242109 | 1.76 | CCNB1                |
| 243252_at   | 0.1397713 | 1.13E-02 | 2.7  | -3.243839 | 1.4  |                      |
| 203554_x_at | 0.1398594 | 1.13E-02 | 2.7  | -3.245303 | 1.77 | PTTG1                |
| 227862_at   | 0.1398594 | 1.13E-02 | 2.7  | -3.245973 | 2.19 | TRNP1                |
| 203499_at   | 0.140406  | 1.14E-02 | 2.69 | -3.253886 | 1.76 | EPHA2                |

|             |           |          |      |           |      |           |
|-------------|-----------|----------|------|-----------|------|-----------|
| 223385_at   | 0.1407258 | 1.15E-02 | 2.69 | -3.256953 | 2.32 | CYP2S1    |
| 243386_at   | 0.1408077 | 1.15E-02 | 2.69 | -3.259125 | 1.47 | CASZ1     |
| 231070_at   | 0.141352  | 1.16E-02 | 2.69 | -3.265923 | 1.7  | IYD       |
| 213085_s_at | 0.141352  | 1.16E-02 | 2.69 | -3.267011 | 1.2  | WWC1      |
| 204475_at   | 0.141352  | 1.16E-02 | 2.69 | -3.267289 | 3.13 | MMP1      |
| 206548_at   | 0.1414218 | 1.16E-02 | 2.69 | -3.268338 | 1.17 |           |
| 236193_at   | 0.1417005 | 1.17E-02 | 2.68 | -3.271744 | 2.12 | HIST1H2BC |
| 222039_at   | 0.1419976 | 1.17E-02 | 2.68 | -3.275257 | 1.73 | KIF18B    |
| 229053_at   | 0.1421674 | 1.17E-02 | 2.68 | -3.276743 | 1.19 | SYT17     |
| 227019_at   | 0.1422039 | 1.17E-02 | 2.68 | -3.277378 | 1.23 | C1orf226  |



|             |           |          |      |           |      |         |
|-------------|-----------|----------|------|-----------|------|---------|
| 223103_at   | 0.142667  | 1.18E-02 | 2.68 | -3.282174 | 1.62 | STARD10 |
| 202934_at   | 0.1428471 | 1.18E-02 | 2.68 | -3.284148 | 1.54 | HK2     |
| 229245_at   | 0.1428471 | 1.18E-02 | 2.68 | -3.284282 | 1.89 | PLEKHA6 |
| 221922_at   | 0.143288  | 1.19E-02 | 2.68 | -3.290079 | 1.27 | GPSM2   |
| 201984_s_at | 0.1434178 | 1.19E-02 | 2.67 | -3.29114  | 1.04 | EGFR    |
| 232578_at   | 0.1436241 | 1.19E-02 | 2.67 | -3.293452 | 3.99 | CLDN18  |
| 204092_s_at | 0.1436241 | 1.19E-02 | 2.67 | -3.2936   | 1.3  | AURKA   |
| 219232_s_at | 0.1436243 | 1.20E-02 | 2.67 | -3.294797 | 1.99 | EGLN3   |
| 226434_at   | 0.1437451 | 1.20E-02 | 2.67 | -3.296635 | 1.02 | PPP1R35 |
| 224189_x_at | 0.1440327 | 1.20E-02 | 2.67 | -3.299161 | 1.09 | EHF     |
| 221245_s_at | 0.1442332 | 1.21E-02 | 2.67 | -3.302836 | 1.22 | FZD5    |

|             |           |          |      |           |      |                     |
|-------------|-----------|----------|------|-----------|------|---------------------|
| 210904_s_at | 0.1442898 | 1.21E-02 | 2.67 | -3.303865 | 1.19 | IL13RA1             |
| 234331_s_at | 0.1446456 | 1.21E-02 | 2.67 | -3.307767 | 1.41 | FAM84A              |
| 235911_at   | 0.1453436 | 1.22E-02 | 2.66 | -3.316163 | 1.56 | MELTF               |
| 210390_s_at | 0.1454556 | 1.23E-02 | 2.66 | -3.318228 | 1.97 | CCL15-CCL14///CCL15 |
| 226086_at   | 0.1459714 | 1.24E-02 | 2.66 | -3.324171 | 2.76 | SYT13               |
| 202095_s_at | 0.1462432 | 1.24E-02 | 2.66 | -3.327155 | 1.42 | BIRC5               |
| 229500_at   | 0.1465453 | 1.24E-02 | 2.66 | -3.330209 | 1.01 | SLC30A9             |
| 235153_at   | 0.1467051 | 1.25E-02 | 2.66 | -3.331964 | 1.95 | RNF183              |
| 236044_at   | 0.1475036 | 1.26E-02 | 2.65 | -3.340772 | 2.43 | PLPP4               |

|              |           |          |      |           |      |           |
|--------------|-----------|----------|------|-----------|------|-----------|
| 204320_at    | 0.1478649 | 1.26E-02 | 2.65 | -3.344661 | 3.55 | COL11A1   |
| 236055_at    | 0.1484456 | 1.28E-02 | 2.65 | -3.354399 | 1.66 | DQX1      |
| 227260_at    | 0.1487307 | 1.29E-02 | 2.64 | -3.360015 | 1.57 |           |
| 213150_at    | 0.1489846 | 1.29E-02 | 2.64 | -3.362536 | 2.39 | HOXA10    |
| 219194_at    | 0.1492726 | 1.29E-02 | 2.64 | -3.366958 | 1.63 | SEMA4G    |
| 1558508_a_at | 0.1493837 | 1.30E-02 | 2.64 | -3.368529 | 1    | C1orf53   |
| 226013_at    | 0.1494198 | 1.30E-02 | 2.64 | -3.369226 | 1.35 | TRAK1     |
| 204444_at    | 0.1496142 | 1.30E-02 | 2.64 | -3.371502 | 1.67 | KIF11     |
| 1554110_at   | 0.149705  | 1.30E-02 | 2.64 | -3.37252  | 1.31 | CDCP1     |
| 208527_x_at  | 0.1501038 | 1.31E-02 | 2.64 | -3.375788 | 1.62 | HIST1H2BE |
| 238134_at    | 0.1506826 | 1.32E-02 | 2.63 | -3.381923 | 1.69 |           |
| 225681_at    | 0.1512751 | 1.32E-02 | 2.63 | -3.386734 | 1.97 | CTHRC1    |
| 238942_at    | 0.1512751 | 1.32E-02 | 2.63 | -3.386956 | 1.17 |           |

|                  |           |          |      |           |      |        |
|------------------|-----------|----------|------|-----------|------|--------|
| 227240_at        | 0.1526386 | 1.34E-02 | 2.63 | -3.398303 | 1.27 | NGEF   |
| 214068_at        | 0.1527147 | 1.34E-02 | 2.62 | -3.399507 | 1.17 | BEAN1  |
| 229796_at        | 0.1531036 | 1.35E-02 | 2.62 | -3.403497 | 1.21 | SIX4   |
| 1556221_a_at     | 0.1534364 | 1.36E-02 | 2.62 | -3.413147 | 1.32 |        |
| 204033_at        | 0.1534364 | 1.36E-02 | 2.62 | -3.413493 | 1.85 | TRIP13 |
| 204989_s_at      | 0.1536229 | 1.37E-02 | 2.62 | -3.415886 | 1.13 | ITGB4  |
| 219045_at        | 0.1546404 | 1.38E-02 | 2.61 | -3.427407 | 1.06 | RHOF   |
| 239979_at        | 0.1553791 | 1.40E-02 | 2.61 | -3.43576  | 1.06 |        |
| 214319_at        | 0.1558012 | 1.41E-02 | 2.61 | -3.440941 | 1.33 | FRY    |
| 226869_at        | 0.1566023 | 1.42E-02 | 2.6  | -3.448512 | 1.15 | MEGF6  |
| 201301_s_at      | 0.157123  | 1.42E-02 | 2.6  | -3.453148 | 1.16 | ANXA4  |
| AFFX-M27830_5_at | 0.157246  | 1.43E-02 | 2.6  | -3.45555  | 1.4  |        |
| 229659_s_at      | 0.1574774 | 1.43E-02 | 2.6  | -3.458089 | 2.14 |        |

|             |           |          |      |           |      |                                                           |
|-------------|-----------|----------|------|-----------|------|-----------------------------------------------------------|
| 222262_s_at | 0.1581383 | 1.44E-02 | 2.59 | -3.464765 | 1.01 | ETNK1                                                     |
| 208490_x_at | 0.1583263 | 1.45E-02 | 2.59 | -3.467102 | 1.38 | HIST1H2BC///HIST1H2BI///HIST1H2BE///HIST1H2BF///HIST1H2BG |
| 211488_s_at | 0.1585926 | 1.45E-02 | 2.59 | -3.470392 | 1.02 | ITGB8                                                     |
| 204256_at   | 0.1593555 | 1.47E-02 | 2.59 | -3.479224 | 1.27 | ELOVL6                                                    |
| 203997_at   | 0.1594163 | 1.47E-02 | 2.59 | -3.480801 | 1.1  | PTPN3                                                     |
| 202575_at   | 0.160552  | 1.49E-02 | 2.58 | -3.490772 | 1.99 | CRABP2                                                    |
| 219054_at   | 0.1609526 | 1.49E-02 | 2.58 | -3.495015 | 1.88 | NPR3                                                      |

|              |           |          |      |           |      |                 |
|--------------|-----------|----------|------|-----------|------|-----------------|
| 87100_at     | 0.1610015 | 1.49E-02 | 2.58 | -3.495644 | 1.14 | ABHD2           |
| 202311_s_at  | 0.1611124 | 1.50E-02 | 2.58 | -3.497849 | 2.05 | COL1A1          |
| 209806_at    | 0.1612314 | 1.50E-02 | 2.58 | -3.499446 | 1.25 | HIST1H2BK       |
| 1553993_s_at | 0.1615285 | 1.51E-02 | 2.58 | -3.504435 | 1.34 | MIR6800///MED25 |
| 220022_at    | 0.1616216 | 1.51E-02 | 2.57 | -3.506551 | 1.12 | ZNF334          |
| 228624_at    | 0.1620759 | 1.52E-02 | 2.57 | -3.511181 | 1.06 | TMEM144         |
| 202341_s_at  | 0.1622482 | 1.52E-02 | 2.57 | -3.512629 | 1.46 | TRIM2           |
| 1559035_a_at | 0.1623357 | 1.52E-02 | 2.57 | -3.513503 | 1.29 |                 |
| 213787_s_at  | 0.1628359 | 1.53E-02 | 2.57 | -3.519326 | 1.29 | EBP             |
| 201663_s_at  | 0.1628718 | 1.53E-02 | 2.57 | -3.519976 | 1.07 | SMC4            |

|             |           |          |      |           |      |                     |
|-------------|-----------|----------|------|-----------|------|---------------------|
| 203524_s_at | 0.1628934 | 1.53E-02 | 2.57 | -3.520271 | 1.07 | MPST                |
| 226405_s_at | 0.1635152 | 1.54E-02 | 2.57 | -3.52632  | 1.07 | ARRDC1              |
| 213059_at   | 0.16434   | 1.56E-02 | 2.56 | -3.534675 | 1.68 | CREB3L1             |
| 208083_s_at | 0.1651493 | 1.57E-02 | 2.56 | -3.543339 | 1.66 | LOC100505984//ITGB6 |
| 212814_at   | 0.1659761 | 1.59E-02 | 2.55 | -3.551497 | 1.04 | AHCYL2              |
| 229634_at   | 0.1663566 | 1.59E-02 | 2.55 | -3.554968 | 1.36 | TMEM139             |
| 219703_at   | 0.1664625 | 1.60E-02 | 2.55 | -3.556102 | 1.24 | MNS1                |
| 233446_at   | 0.1670136 | 1.60E-02 | 2.55 | -3.560056 | 2.2  | ONECUT2             |
| 214993_at   | 0.1673027 | 1.61E-02 | 2.55 | -3.563152 | 1.75 | ASPHD1              |

|           |           |          |      |           |      |         |
|-----------|-----------|----------|------|-----------|------|---------|
| 230076_at | 0.168568  | 1.63E-02 | 2.54 | -3.572453 | 1.15 | PITPNM3 |
| 219956_at | 0.168653  | 1.63E-02 | 2.54 | -3.573158 | 1.43 | GALNT6  |
| 222740_at | 0.168653  | 1.63E-02 | 2.54 | -3.573282 | 1.01 | ATAD2   |
| 202086_at | 0.1689508 | 1.63E-02 | 2.54 | -3.575038 | 1.13 | MX1     |
| 227660_at | 0.1691144 | 1.63E-02 | 2.54 | -3.576419 | 1.37 | ANTXR1  |
| 219874_at | 0.1693523 | 1.64E-02 | 2.54 | -3.579541 | 1.07 | SLC12A8 |
| 230430_at | 0.1693523 | 1.64E-02 | 2.54 | -3.579553 | 1.55 | ENTPD2  |
| 241140_at | 0.169984  | 1.65E-02 | 2.54 | -3.585128 | 1.55 | LMO7    |



|              |           |          |      |           |      |                                                           |
|--------------|-----------|----------|------|-----------|------|-----------------------------------------------------------|
| 208523_x_at  | 0.170915  | 1.67E-02 | 2.53 | -3.594566 | 1.12 | HIST1H2BC///HIST1H2BI///HIST1H2BE///HIST1H2BF///HIST1H2BG |
| 218355_at    | 0.170915  | 1.67E-02 | 2.53 | -3.594742 | 1.16 | KIF4A                                                     |
| 205774_at    | 0.1717675 | 1.68E-02 | 2.53 | -3.601897 | 1.41 | F12                                                       |
| 201309_x_at  | 0.1718219 | 1.69E-02 | 2.53 | -3.604482 | 1.14 | NREP                                                      |
| 243276_at    | 0.1718288 | 1.69E-02 | 2.53 | -3.605129 | 1.05 | ALS2CL                                                    |
| 1554195_a_at | 0.1723422 | 1.70E-02 | 2.53 | -3.609886 | 1.94 | C5orf46                                                   |
| 205068_s_at  | 0.17299   | 1.71E-02 | 2.52 | -3.616114 | 1.1  | ARHGAP26                                                  |
| 227155_at    | 0.1730535 | 1.71E-02 | 2.52 | -3.616955 | 1.23 | LMO4                                                      |

|             |           |          |      |           |      |                                     |
|-------------|-----------|----------|------|-----------|------|-------------------------------------|
| 212942_s_at | 0.173799  | 1.72E-02 | 2.52 | -3.623635 | 2.58 | CEMIP                               |
| 228824_s_at | 0.1748335 | 1.74E-02 | 2.52 | -3.63165  | 1.13 | PTGR1                               |
| 213802_at   | 0.1749344 | 1.74E-02 | 2.51 | -3.633281 | 1.56 | PRSS12                              |
| 243084_at   | 0.1750604 | 1.74E-02 | 2.51 | -3.634587 | 1.12 | CALD1                               |
| 213680_at   | 0.1753878 | 1.75E-02 | 2.51 | -3.637087 | 2.82 | KRT6B                               |
| 243435_at   | 0.1764936 | 1.77E-02 | 2.51 | -3.646205 | 1.13 | LOC101927338///KCNQ1OT1             |
| 223839_s_at | 0.1772315 | 1.78E-02 | 2.51 | -3.6527   | 1.29 |                                     |
| 210365_at   | 0.1773417 | 1.78E-02 | 2.51 | -3.653584 | 1    | LOC101928269///LOC100506403///RUNX1 |

|              |           |          |      |           |      |         |
|--------------|-----------|----------|------|-----------|------|---------|
| 237654_at    | 0.1777393 | 1.79E-02 | 2.5  | -3.656898 | 1.1  | PPP1R36 |
| 222712_s_at  | 0.1780522 | 1.79E-02 | 2.5  | -3.65929  | 1.58 | MUC13   |
| 205623_at    | 0.1784932 | 1.80E-02 | 2.5  | -3.66281  | 1.23 | ALDH3A1 |
| 1552680_a_at | 0.1796051 | 1.82E-02 | 2.5  | -3.671212 | 1.09 | KNL1    |
| 244665_at    | 0.1796051 | 1.82E-02 | 2.5  | -3.671288 | 1.11 |         |
| 229147_at    | 0.1806937 | 1.84E-02 | 2.49 | -3.680917 | 1.41 | RASSF6  |
| 236429_at    | 0.1811584 | 1.84E-02 | 2.49 | -3.68499  | 1.05 | ZNF83   |
| 228956_at    | 0.1818422 | 1.86E-02 | 2.49 | -3.690776 | 1.57 | UGT8    |
| 231766_s_at  | 0.1825747 | 1.87E-02 | 2.48 | -3.697099 | 2.04 | COL12A1 |
| 226424_at    | 0.1832233 | 1.88E-02 | 2.48 | -3.702176 | 1.31 | CAPS    |

|             |           |          |      |           |      |          |
|-------------|-----------|----------|------|-----------|------|----------|
| 219990_at   | 0.1836525 | 1.89E-02 | 2.48 | -3.704923 | 1.53 | E2F8     |
| 227609_at   | 0.1857762 | 1.93E-02 | 2.47 | -3.72441  | 1.16 | EPSTI1   |
| 236263_at   | 0.1859667 | 1.93E-02 | 2.47 | -3.726034 | 1.3  | SHH      |
| 204636_at   | 0.1870486 | 1.95E-02 | 2.47 | -3.736486 | 1.22 | COL17A1  |
| 219531_at   | 0.187436  | 1.96E-02 | 2.46 | -3.739119 | 1.26 | CEP72    |
| 206595_at   | 0.1879238 | 1.97E-02 | 2.46 | -3.7439   | 1.88 | CST6     |
| 203764_at   | 0.1879935 | 1.97E-02 | 2.46 | -3.744429 | 1.76 | DLGAP5   |
| 230772_at   | 0.1881792 | 1.97E-02 | 2.46 | -3.745623 | 1.75 | HNF4A    |
| 214385_s_at | 0.1883182 | 1.98E-02 | 2.46 | -3.747218 | 2.76 | MUC5AC   |
| 204926_at   | 0.1884492 | 1.98E-02 | 2.46 | -3.748774 | 1.6  | INHBA    |
| 228876_at   | 0.1885832 | 1.98E-02 | 2.46 | -3.749875 | 1.73 | BAIAP2L2 |

|             |           |          |      |           |      |           |
|-------------|-----------|----------|------|-----------|------|-----------|
| 226757_at   | 0.1886645 | 1.98E-02 | 2.46 | -3.751098 | 1.14 | IFIT2     |
| 232290_at   | 0.1886936 | 1.99E-02 | 2.46 | -3.753308 | 1.5  |           |
| 226582_at   | 0.1890544 | 2.00E-02 | 2.46 | -3.755829 | 1.17 | LOC400043 |
| 209581_at   | 0.1898222 | 2.01E-02 | 2.45 | -3.762848 | 1.16 | PLA2G16   |
| 229740_at   | 0.1899103 | 2.02E-02 | 2.45 | -3.764956 | 1.09 | SMIM5     |
| 221133_s_at | 0.1901069 | 2.02E-02 | 2.45 | -3.767111 | 3.29 | CLDN18    |
| 204914_s_at | 0.1905601 | 2.03E-02 | 2.45 | -3.770772 | 1.53 | SOX11     |
| 202870_s_at | 0.1913512 | 2.04E-02 | 2.45 | -3.776839 | 1.97 | CDC20     |
| 223383_at   | 0.1913512 | 2.04E-02 | 2.45 | -3.777074 | 1.12 | ZNRF1     |
| 202079_s_at | 0.1915243 | 2.05E-02 | 2.45 | -3.778411 | 1.25 | TRAK1     |
| 204750_s_at | 0.1919729 | 2.06E-02 | 2.44 | -3.782647 | 1.58 | DSC2      |
| 238632_at   | 0.1920951 | 2.06E-02 | 2.44 | -3.784959 | 1.79 |           |

|             |           |          |      |           |      |          |
|-------------|-----------|----------|------|-----------|------|----------|
| 227055_at   | 0.1921343 | 2.06E-02 | 2.44 | -3.785294 | 1.57 | METTL7B  |
| 230285_at   | 0.192676  | 2.07E-02 | 2.44 | -3.789912 | 1.2  | SVIP     |
| 220082_at   | 0.1929176 | 2.08E-02 | 2.44 | -3.794153 | 1.41 | PPP1R14D |
| 233030_at   | 0.1933346 | 2.09E-02 | 2.44 | -3.797212 | 1.27 | PNPLA3   |
| 206276_at   | 0.1938676 | 2.10E-02 | 2.43 | -3.801361 | 2.94 | LY6D     |
| 223381_at   | 0.1939407 | 2.10E-02 | 2.43 | -3.801964 | 1.71 | NUF2     |
| 201283_s_at | 0.1946811 | 2.12E-02 | 2.43 | -3.809117 | 1.09 | TRAK1    |
| 231726_at   | 0.1955473 | 2.14E-02 | 2.43 | -3.816365 | 1.13 | PCDHB14  |

|             |           |          |      |           |      |                         |
|-------------|-----------|----------|------|-----------|------|-------------------------|
| 205180_s_at | 0.1959676 | 2.14E-02 | 2.43 | -3.819472 | 1.14 | ADAM8                   |
| 235456_at   | 0.1971429 | 2.16E-02 | 2.42 | -3.828519 | 1.79 |                         |
| 229777_at   | 0.1972324 | 2.17E-02 | 2.42 | -3.829369 | 2.57 | CLRN3                   |
| 227921_at   | 0.1972334 | 2.17E-02 | 2.42 | -3.82967  | 1.13 | LOC105379499///FLJ45482 |
| 205535_s_at | 0.1973503 | 2.17E-02 | 2.42 | -3.830703 | 1.13 | PCDH7                   |
| 37892_at    | 0.1973503 | 2.17E-02 | 2.42 | -3.830834 | 3.56 | COL11A1                 |
| 204286_s_at | 0.1974424 | 2.17E-02 | 2.42 | -3.831799 | 1.27 | PMAIP1                  |
| 204972_at   | 0.1975165 | 2.18E-02 | 2.42 | -3.832931 | 1.37 | OAS2                    |
| 239332_at   | 0.1975165 | 2.18E-02 | 2.42 | -3.833287 | 2.36 | LOC105371809            |
| 227626_at   | 0.1977151 | 2.18E-02 | 2.42 | -3.835125 | 1.44 | PAQR8                   |
| 243141_at   | 0.1977651 | 2.18E-02 | 2.42 | -3.835619 | 1.06 | SGMS2                   |

|              |           |          |       |           |       |         |
|--------------|-----------|----------|-------|-----------|-------|---------|
| 204455_at    | 0.1978101 | 2.18E-02 | 2.42  | -3.836707 | 1.99  | DST     |
| 238178_at    | 0.0002098 | 3.84E-08 | -7.28 | 8.75717   | -2.49 |         |
| 237204_at    | 0.0002504 | 5.54E-08 | -7.14 | 8.404259  | -2.36 |         |
| 1568768_s_at | 0.0002728 | 1.02E-07 | -6.92 | 7.818845  | -3.23 | BRE-AS1 |
| 215838_at    | 0.0002995 | 1.24E-07 | -6.84 | 7.626961  | -1.45 | LILRA5  |
| 41386_i_at   | 0.0002995 | 1.32E-07 | -6.82 | 7.572848  | -1.74 | KDM6B   |
| 41387_r_at   | 0.000383  | 1.89E-07 | -6.69 | 7.224267  | -1.32 | KDM6B   |
| 229404_at    | 0.0005182 | 3.48E-07 | -6.47 | 6.637707  | -2.16 | TWIST2  |
| 210162_s_at  | 0.0005182 | 3.60E-07 | -6.46 | 6.604376  | -2.13 | NFATC1  |
| 206211_at    | 0.0007451 | 6.62E-07 | -6.24 | 6.0182    | -4.07 | SELE    |
| 208707_at    | 0.0007455 | 7.09E-07 | -6.22 | 5.952157  | -1.47 | EIF5    |
| 39402_at     | 0.000915  | 9.85E-07 | -6.1  | 5.635074  | -2.93 | IL1B    |
| 205067_at    | 0.00111   | 1.40E-06 | -5.98 | 5.296319  | -3.4  | IL1B    |
| 205207_at    | 0.0012466 | 1.78E-06 | -5.89 | 5.066364  | -5.19 | IL6     |



|              |           |          |       |          |       |         |
|--------------|-----------|----------|-------|----------|-------|---------|
| 220027_s_at  | 0.0014303 | 2.30E-06 | -5.8  | 4.817833 | -1.56 | RASIP1  |
| 226833_at    | 0.001559  | 2.79E-06 | -5.73 | 4.631137 | -1.77 | CYB5D1  |
| 1569136_at   | 0.0015857 | 2.90E-06 | -5.72 | 4.595355 | -1.55 | MGAT4A  |
| 206157_at    | 0.0017333 | 3.61E-06 | -5.64 | 4.383422 | -5.02 | PTX3    |
| 205863_at    | 0.0019075 | 4.15E-06 | -5.59 | 4.249908 | -2.98 | S100A12 |
| 206359_at    | 0.0019219 | 4.22E-06 | -5.59 | 4.234597 | -2.01 | SOCS3   |
| 229407_at    | 0.0019231 | 4.35E-06 | -5.58 | 4.205396 | -1.12 | SDK1    |
| 1552711_a_at | 0.0019231 | 4.43E-06 | -5.57 | 4.187559 | -1.26 | CYB5D1  |

|             |           |          |       |          |       |                       |
|-------------|-----------|----------|-------|----------|-------|-----------------------|
| 204575_s_at | 0.0019468 | 4.56E-06 | -5.56 | 4.160054 | -3    | MMP19                 |
| 207316_at   | 0.0019574 | 4.62E-06 | -5.56 | 4.147335 | -1.51 | HAS1                  |
| 213068_at   | 0.0020542 | 5.02E-06 | -5.53 | 4.0668   | -3.89 | DPT                   |
| 240806_at   | 0.0020542 | 5.13E-06 | -5.52 | 4.046409 | -1.19 | RPL15                 |
| 227859_at   | 0.00206   | 5.39E-06 | -5.5  | 3.998943 | -1.39 | DNAJC27               |
| 228399_at   | 0.0021938 | 6.02E-06 | -5.46 | 3.892351 | -2.21 | OSR1                  |
| 210873_x_at | 0.0025792 | 8.14E-06 | -5.36 | 3.60149  | -2.05 | APOBEC3A_B///APOBEC3A |

|             |           |          |       |          |       |               |
|-------------|-----------|----------|-------|----------|-------|---------------|
| 235597_s_at | 0.002603  | 8.59E-06 | -5.34 | 3.550427 | -1.85 | RGPD2///RGPD1 |
| 210146_x_at | 0.0026291 | 8.81E-06 | -5.33 | 3.525732 | -2.45 | LILRB2        |
| 213146_at   | 0.0026645 | 9.23E-06 | -5.31 | 3.481086 | -1.82 | KDM6B         |
| 202431_s_at | 0.0026645 | 9.24E-06 | -5.31 | 3.47966  | -1.55 | MYC           |
| 226370_at   | 0.0026645 | 9.34E-06 | -5.31 | 3.469521 | -1.26 | KLHL15        |
| 1562275_at  | 0.0028379 | 1.05E-05 | -5.27 | 3.355965 | -4.19 |               |
| 207977_s_at | 0.0031893 | 1.27E-05 | -5.2  | 3.172656 | -2.97 | DPT           |
| 205876_at   | 0.0033301 | 1.35E-05 | -5.18 | 3.113606 | -1.6  | LIFR          |
| 212196_at   | 0.0035026 | 1.44E-05 | -5.16 | 3.05643  | -1.32 | IL6ST         |

|             |           |          |       |          |       |                    |
|-------------|-----------|----------|-------|----------|-------|--------------------|
| 238624_at   | 0.0036739 | 1.55E-05 | -5.13 | 2.984105 | -1.17 | LOC102724517///NLK |
| 203812_at   | 0.0038994 | 1.69E-05 | -5.1  | 2.901515 | -2.07 | SLIT3              |
| 218012_at   | 0.0040779 | 1.80E-05 | -5.08 | 2.840842 | -1.2  | TSPYL2             |
| 213071_at   | 0.0040877 | 1.82E-05 | -5.07 | 2.82573  | -3.12 | DPT                |
| 213791_at   | 0.0040896 | 1.83E-05 | -5.07 | 2.821359 | -2.86 | PENK               |
| 209959_at   | 0.004202  | 1.92E-05 | -5.05 | 2.776058 | -4.06 | NR4A3              |
| 219059_s_at | 0.0044205 | 2.06E-05 | -5.03 | 2.70816  | -2.72 | LYVE1              |
| 205237_at   | 0.0045033 | 2.16E-05 | -5.01 | 2.664302 | -1.38 | FCN1               |
| 204513_s_at | 0.0045368 | 2.19E-05 | -5.01 | 2.649112 | -1.78 | ELMO1              |
| 241272_at   | 0.0045531 | 2.24E-05 | -5    | 2.628648 | -2.13 |                    |
| 239823_at   | 0.0047374 | 2.38E-05 | -4.98 | 2.570977 | -1.52 | LOC101927841       |
| 237252_at   | 0.0047465 | 2.43E-05 | -4.97 | 2.549958 | -2.34 | THBD               |
| 222317_at   | 0.0049007 | 2.55E-05 | -4.96 | 2.505634 | -2.32 | PDE3B              |

|             |           |          |       |          |       |             |
|-------------|-----------|----------|-------|----------|-------|-------------|
| 209074_s_at | 0.0049451 | 2.58E-05 | -4.95 | 2.493601 | -3.01 | FAM107A     |
| 241369_at   | 0.0059962 | 3.29E-05 | -4.86 | 2.259166 | -1.89 | ADAMTS9-AS1 |
| 210432_s_at | 0.0061344 | 3.41E-05 | -4.85 | 2.224747 | -1.77 | SCN3A       |
| 216233_at   | 0.0066352 | 3.88E-05 | -4.81 | 2.100236 | -1.8  | CD163       |
| 238071_at   | 0.0066795 | 3.94E-05 | -4.8  | 2.087273 | -1.55 | LCN10       |
| 226573_at   | 0.0068316 | 4.20E-05 | -4.78 | 2.025454 | -1.03 | DIRAS1      |
| 201531_at   | 0.0069313 | 4.34E-05 | -4.77 | 1.994012 | -1.52 | ZFP36       |
| 226397_s_at | 0.0070003 | 4.42E-05 | -4.76 | 1.97672  | -1.69 | PHACTR1     |
| 243813_at   | 0.0070216 | 4.47E-05 | -4.76 | 1.964924 | -2.34 | LINC00968   |
| 207978_s_at | 0.0070906 | 4.57E-05 | -4.75 | 1.94499  | -1.77 | NR4A3       |

|             |           |          |       |          |       |        |
|-------------|-----------|----------|-------|----------|-------|--------|
| 221031_s_at | 0.0071731 | 4.68E-05 | -4.74 | 1.920477 | -2.16 | APOLD1 |
| 239301_at   | 0.0071822 | 4.72E-05 | -4.74 | 1.913982 | -1.56 |        |
| 239042_at   | 0.0073219 | 4.96E-05 | -4.72 | 1.865798 | -1.02 | TSR1   |
| 241722_x_at | 0.0073219 | 4.97E-05 | -4.72 | 1.863579 | -1.82 |        |
| 229121_at   | 0.0073219 | 5.03E-05 | -4.71 | 1.851264 | -1.1  | CMKLR1 |
| 229452_at   | 0.0073219 | 5.08E-05 | -4.71 | 1.843541 | -1.06 | TMEM88 |
| 219448_at   | 0.0073475 | 5.13E-05 | -4.71 | 1.832634 | -1.15 | TMEM70 |
| 205384_at   | 0.0075481 | 5.40E-05 | -4.69 | 1.784504 | -2.03 | FXYD1  |
| 240165_at   | 0.0076772 | 5.60E-05 | -4.68 | 1.748844 | -1.72 |        |
| 1559362_at  | 0.0079049 | 5.84E-05 | -4.66 | 1.709007 | -1.41 |        |
| 235086_at   | 0.0079051 | 5.86E-05 | -4.66 | 1.706503 | -3.11 | THBS1  |
| 210375_at   | 0.0084584 | 6.39E-05 | -4.63 | 1.622965 | -1.69 | PTGER3 |
| 200790_at   | 0.0084841 | 6.44E-05 | -4.63 | 1.615432 | -1.3  | ODC1   |

|              |           |          |       |          |       |          |
|--------------|-----------|----------|-------|----------|-------|----------|
| 229839_at    | 0.0086713 | 6.74E-05 | -4.61 | 1.572292 | -3.7  | SCARA5   |
| 238649_at    | 0.0087552 | 6.87E-05 | -4.61 | 1.553532 | -1.42 | PITPNC1  |
| 235798_at    | 0.0089575 | 7.09E-05 | -4.59 | 1.522772 | -2.21 | TMEM170B |
| 236090_at    | 0.0091995 | 7.50E-05 | -4.57 | 1.469501 | -1.27 |          |
| 1569484_s_at | 0.00928   | 7.59E-05 | -4.57 | 1.458446 | -1.06 | MDN1     |
| 215311_at    | 0.0095534 | 7.92E-05 | -4.55 | 1.417889 | -1.52 | NTRK3    |
| 219993_at    | 0.0100591 | 8.64E-05 | -4.52 | 1.333677 | -1.73 | SOX17    |
| 228193_s_at  | 0.0102152 | 8.80E-05 | -4.52 | 1.316265 | -1.67 | RGCC     |
| 238695_s_at  | 0.0105739 | 9.19E-05 | -4.5  | 1.275008 | -1.65 | RAB39B   |
| 214913_at    | 0.011052  | 9.97E-05 | -4.47 | 1.197533 | -1.95 | ADAMTS3  |

|            |           |          |       |          |       |         |
|------------|-----------|----------|-------|----------|-------|---------|
| 235849_at  | 0.0110719 | 1.00E-04 | -4.47 | 1.189935 | -2.63 | SCARA5  |
| 217833_at  | 0.0110762 | 1.01E-04 | -4.47 | 1.181962 | -1.08 | SYNCRIP |
| 236383_at  | 0.0115866 | 1.08E-04 | -4.45 | 1.122804 | -1.91 |         |
| 1556989_at | 0.0118134 | 1.12E-04 | -4.43 | 1.088853 | -2.59 |         |
| 229414_at  | 0.0119011 | 1.14E-04 | -4.43 | 1.072131 | -1.7  | PITPNC1 |
| 206432_at  | 0.0119764 | 1.15E-04 | -4.42 | 1.062449 | -2.41 | HAS2    |
| 231907_at  | 0.0120209 | 1.16E-04 | -4.42 | 1.053452 | -1.2  | ABL2    |
| 1569540_at | 0.012144  | 1.18E-04 | -4.41 | 1.032893 | -1.06 |         |
| 214582_at  | 0.0123856 | 1.21E-04 | -4.4  | 1.00871  | -1.88 | PDE3B   |
| 227613_at  | 0.0123858 | 1.22E-04 | -4.4  | 1.006911 | -2.35 | ZNF331  |



|              |           |          |       |          |       |             |
|--------------|-----------|----------|-------|----------|-------|-------------|
| 228831_s_at  | 0.0123918 | 1.23E-04 | -4.4  | 0.994466 | -1.64 | GNG7        |
| 218305_at    | 0.0124044 | 1.24E-04 | -4.4  | 0.991351 | -1.08 | IPO4        |
| 1556321_a_at | 0.0124554 | 1.25E-04 | -4.39 | 0.984138 | -1.38 | MESDC1      |
| 208609_s_at  | 0.0124554 | 1.25E-04 | -4.39 | 0.983932 | -1.57 | TNXB///TNXA |
| 207075_at    | 0.013467  | 1.38E-04 | -4.36 | 0.88509  | -1.35 | NLRP3       |
| 209841_s_at  | 0.0135113 | 1.41E-04 | -4.35 | 0.866877 | -1.99 | LRRN3       |
| 225570_at    | 0.0137504 | 1.45E-04 | -4.34 | 0.836647 | -1.2  | SLC41A1     |
| 203888_at    | 0.0137504 | 1.46E-04 | -4.34 | 0.835136 | -2.5  | THBD        |
| 227697_at    | 0.0137768 | 1.47E-04 | -4.34 | 0.828408 | -2.43 | SOCS3       |
| 218723_s_at  | 0.0140029 | 1.51E-04 | -4.33 | 0.80146  | -1.68 | RGCC        |
| 229934_at    | 0.0140548 | 1.53E-04 | -4.32 | 0.789861 | -1.5  |             |
| 235831_at    | 0.0141166 | 1.54E-04 | -4.32 | 0.780867 | -1.54 |             |
| 1565577_s_at | 0.0141464 | 1.55E-04 | -4.32 | 0.774841 | -1.23 |             |

|             |           |          |       |          |       |         |
|-------------|-----------|----------|-------|----------|-------|---------|
| 209789_at   | 0.0141464 | 1.56E-04 | -4.31 | 0.770773 | -1.04 | CORO2B  |
| 211663_x_at | 0.0141464 | 1.56E-04 | -4.31 | 0.769752 | -2.5  | PTGDS   |
| 213895_at   | 0.0141464 | 1.56E-04 | -4.31 | 0.76931  | -2.72 | EMP1    |
| 236936_at   | 0.014148  | 1.56E-04 | -4.31 | 0.767242 | -2.32 |         |
| 203887_s_at | 0.0141573 | 1.57E-04 | -4.31 | 0.763502 | -2.38 | THBD    |
| 237496_at   | 0.0144209 | 1.62E-04 | -4.3  | 0.732791 | -1.91 |         |
| 214091_s_at | 0.0144209 | 1.62E-04 | -4.3  | 0.732626 | -2.85 | GPX3    |
| 206701_x_at | 0.0144464 | 1.63E-04 | -4.3  | 0.725454 | -2.22 | EDNRB   |
| 230711_at   | 0.0148732 | 1.72E-04 | -4.28 | 0.67518  | -1.55 |         |
| 205839_s_at | 0.0151299 | 1.76E-04 | -4.27 | 0.655848 | -1.15 | TSPOAP1 |
| 213247_at   | 0.0154487 | 1.81E-04 | -4.26 | 0.628479 | -2.73 | SVEP1   |
| 223467_at   | 0.0155534 | 1.82E-04 | -4.26 | 0.620548 | -2.62 | RASD1   |

|             |           |          |       |          |       |                 |
|-------------|-----------|----------|-------|----------|-------|-----------------|
| 227058_at   | 0.0156774 | 1.84E-04 | -4.25 | 0.609842 | -3.52 | MEDAG           |
| 229926_at   | 0.0158074 | 1.87E-04 | -4.25 | 0.596221 | -1.46 | MIR3682         |
| 214696_at   | 0.0164007 | 1.99E-04 | -4.23 | 0.538279 | -1.77 | MIR22///MIR22HG |
| 220370_s_at | 0.0166459 | 2.04E-04 | -4.22 | 0.514816 | -1.19 | USP36           |
| 205792_at   | 0.0172326 | 2.15E-04 | -4.2  | 0.463724 | -1.82 | WISP2           |
| 239544_at   | 0.0173358 | 2.17E-04 | -4.2  | 0.456305 | -1.17 |                 |
| 244251_at   | 0.0173358 | 2.17E-04 | -4.2  | 0.455244 | -1.01 | LCP2            |
| 215330_at   | 0.0173646 | 2.19E-04 | -4.19 | 0.445343 | -1.32 |                 |
| 202768_at   | 0.0174172 | 2.21E-04 | -4.19 | 0.435581 | -3.97 | FOSB            |
| 225557_at   | 0.0176164 | 2.25E-04 | -4.18 | 0.419998 | -1.84 | CSRNPI          |

|             |           |          |       |          |       |         |
|-------------|-----------|----------|-------|----------|-------|---------|
| 207697_x_at | 0.0176164 | 2.25E-04 | -4.18 | 0.419281 | -1.62 | LILRB2  |
| 205945_at   | 0.0176683 | 2.27E-04 | -4.18 | 0.412737 | -1.49 | IL6R    |
| 211143_x_at | 0.0180357 | 2.37E-04 | -4.16 | 0.372263 | -1.51 | NR4A1   |
| 212230_at   | 0.0180357 | 2.38E-04 | -4.16 | 0.368544 | -1.61 | PLPP3   |
| 242384_at   | 0.0180357 | 2.40E-04 | -4.16 | 0.359625 | -1.47 |         |
| 230372_at   | 0.0180357 | 2.40E-04 | -4.16 | 0.358316 | -2.16 | HAS2    |
| 201739_at   | 0.0187698 | 2.53E-04 | -4.14 | 0.308485 | -1.81 | SGK1    |
| 201348_at   | 0.019216  | 2.61E-04 | -4.13 | 0.279681 | -2.83 | GPX3    |
| 236621_at   | 0.0193784 | 2.64E-04 | -4.13 | 0.269112 | -1.32 | RPS27   |
| 223504_at   | 0.0193824 | 2.64E-04 | -4.13 | 0.267636 | -1.16 | DNAJC27 |

|             |           |          |       |          |       |         |
|-------------|-----------|----------|-------|----------|-------|---------|
| 230511_at   | 0.0194031 | 2.65E-04 | -4.12 | 0.264941 | -1.86 | CREM    |
| 207072_at   | 0.0194236 | 2.67E-04 | -4.12 | 0.257746 | -1.42 | IL18RAP |
| 225539_at   | 0.0194236 | 2.67E-04 | -4.12 | 0.256718 | -1.17 | ZBTB21  |
| 207547_s_at | 0.0194922 | 2.70E-04 | -4.12 | 0.248314 | -1.73 | FAM107A |
| 230075_at   | 0.0198336 | 2.76E-04 | -4.11 | 0.226721 | -1.44 | RAB39B  |
| 1564776_at  | 0.0203349 | 2.84E-04 | -4.1  | 0.199274 | -1.18 |         |
| 229544_at   | 0.02043   | 2.86E-04 | -4.1  | 0.1911   | -1.77 |         |
| 220287_at   | 0.0207506 | 2.91E-04 | -4.09 | 0.174893 | -2.82 | ADAMTS9 |
| 205382_s_at | 0.0213707 | 3.04E-04 | -4.07 | 0.13231  | -2.83 | CFD     |

|             |           |          |       |           |       |        |
|-------------|-----------|----------|-------|-----------|-------|--------|
| 206380_s_at | 0.0213897 | 3.05E-04 | -4.07 | 0.129121  | -1.31 | CFP    |
| 227993_at   | 0.021514  | 3.09E-04 | -4.07 | 0.118631  | -1.14 | METAP2 |
| 203665_at   | 0.0216886 | 3.16E-04 | -4.06 | 0.097828  | -2.22 | HMOX1  |
| 243473_at   | 0.0218352 | 3.18E-04 | -4.06 | 0.090118  | -1.08 |        |
| 244546_at   | 0.0221111 | 3.28E-04 | -4.05 | 0.062624  | -1.46 | CYCS   |
| 211105_s_at | 0.0221111 | 3.28E-04 | -4.05 | 0.061631  | -1.99 | NFATC1 |
| 230380_at   | 0.0224437 | 3.35E-04 | -4.04 | 0.041598  | -1.99 | THAP2  |
| 228442_at   | 0.0230679 | 3.51E-04 | -4.02 | -0.004    | -1.93 | NFATC2 |
| 206170_at   | 0.023186  | 3.54E-04 | -4.02 | -0.01005  | -1.78 | ADRB2  |
| 206067_s_at | 0.0234156 | 3.61E-04 | -4.01 | -0.029853 | -2.42 | WT1    |
| 238106_at   | 0.0234156 | 3.63E-04 | -4.01 | -0.033575 | -1.16 |        |

|             |           |          |       |           |       |                                      |
|-------------|-----------|----------|-------|-----------|-------|--------------------------------------|
| 214805_at   | 0.0236571 | 3.67E-04 | -4.01 | -0.04609  | -1.13 | SNORD10///SNORA48///SNORA67///EIF4A1 |
| 208335_s_at | 0.0237987 | 3.71E-04 | -4    | -0.055108 | -3.52 | ACKR1                                |
| 216333_x_at | 0.0238061 | 3.72E-04 | -4    | -0.057511 | -2.19 | TNXB///TNXA                          |
| 226991_at   | 0.0238061 | 3.72E-04 | -4    | -0.058568 | -1.86 | NFATC2                               |
| 210152_at   | 0.0238061 | 3.72E-04 | -4    | -0.058739 | -1.22 | LILRB4                               |
| 240103_at   | 0.0238783 | 3.74E-04 | -4    | -0.062729 | -1.17 |                                      |

|             |           |          |       |           |       |         |
|-------------|-----------|----------|-------|-----------|-------|---------|
| 222486_s_at | 0.0238918 | 3.76E-04 | -4    | -0.068831 | -2.83 | ADAMTS1 |
| 214038_at   | 0.0238918 | 3.76E-04 | -4    | -0.069409 | -3.23 | CCL8    |
| 204642_at   | 0.0241775 | 3.84E-04 | -3.99 | -0.088483 | -1.9  | S1PR1   |
| 244025_at   | 0.0242543 | 3.88E-04 | -3.99 | -0.096963 | -1.14 | ITPRIP  |
| 232307_at   | 0.0242543 | 3.89E-04 | -3.99 | -0.099482 | -1.06 |         |
| 214961_at   | 0.0242543 | 3.89E-04 | -3.99 | -0.101547 | -2.32 | MTUS2   |
| 1569597_at  | 0.0242725 | 3.90E-04 | -3.98 | -0.103453 | -1.13 |         |
| 243509_at   | 0.0249544 | 4.09E-04 | -3.97 | -0.148996 | -2.33 |         |
| 220117_at   | 0.0251016 | 4.14E-04 | -3.96 | -0.158888 | -1.09 | ZNF385D |



|             |           |          |       |           |       |                     |
|-------------|-----------|----------|-------|-----------|-------|---------------------|
| 209967_s_at | 0.0251016 | 4.15E-04 | -3.96 | -0.161501 | -1.62 | CREM                |
| 222164_at   | 0.0251682 | 4.18E-04 | -3.96 | -0.169346 | -1.93 | FGFR1               |
| 226694_at   | 0.0251692 | 4.19E-04 | -3.96 | -0.170786 | -1.27 | PALM2-AKAP2///AKAP2 |
| 239648_at   | 0.0252195 | 4.21E-04 | -3.96 | -0.175801 | -1.32 | DCUN1D3             |
| 235030_at   | 0.0253342 | 4.27E-04 | -3.95 | -0.189416 | -1.37 | NXPE3               |
| 227791_at   | 0.025909  | 4.39E-04 | -3.94 | -0.215833 | -1.63 | SLC9A9              |

|             |           |          |       |           |       |                                   |
|-------------|-----------|----------|-------|-----------|-------|-----------------------------------|
| 226856_at   | 0.0259171 | 4.44E-04 | -3.94 | -0.226445 | -2.47 | TMEM110-MUSTN1///MUSTN1///TMEM110 |
| 213515_x_at | 0.0259171 | 4.45E-04 | -3.94 | -0.227445 | -1.14 | HBG2///HBG1                       |
| 204184_s_at | 0.0261065 | 4.50E-04 | -3.93 | -0.23826  | -1.05 | GRK3                              |
| 213451_x_at | 0.0261329 | 4.53E-04 | -3.93 | -0.245159 | -2.36 | TNXB///TNXA                       |
| 206093_x_at | 0.0262067 | 4.56E-04 | -3.93 | -0.250912 | -2.03 | TNXB///TNXA                       |
| 204591_at   | 0.0262796 | 4.58E-04 | -3.93 | -0.254543 | -2.81 | CHL1                              |
| 233127_at   | 0.026497  | 4.65E-04 | -3.92 | -0.269305 | -2.22 |                                   |

|             |           |          |       |           |       |           |
|-------------|-----------|----------|-------|-----------|-------|-----------|
| 216248_s_at | 0.0267029 | 4.73E-04 | -3.91 | -0.285501 | -2.31 | NR4A2     |
| 206876_at   | 0.0268806 | 4.78E-04 | -3.91 | -0.295051 | -1.57 | SIM1      |
| 1553133_at  | 0.0269408 | 4.81E-04 | -3.91 | -0.301178 | -1.39 | C9orf72   |
| 225571_at   | 0.0271893 | 4.87E-04 | -3.9  | -0.312666 | -2.07 | LIFR      |
| 201236_s_at | 0.0273235 | 4.94E-04 | -3.9  | -0.326858 | -2.17 | BTG2      |
| 238835_at   | 0.0273472 | 4.98E-04 | -3.9  | -0.334184 | -2.6  | AVPR1A    |
| 220244_at   | 0.0275175 | 5.04E-04 | -3.89 | -0.346974 | -1.85 | LINC00312 |
| 227419_x_at | 0.0275267 | 5.05E-04 | -3.89 | -0.348916 | -1.9  | PLAC9     |

|             |           |          |       |           |       |         |
|-------------|-----------|----------|-------|-----------|-------|---------|
| 217540_at   | 0.028001  | 5.21E-04 | -3.88 | -0.378003 | -1.44 | NXPE3   |
| 202340_x_at | 0.028001  | 5.22E-04 | -3.88 | -0.3797   | -2.17 | NR4A1   |
| 235122_at   | 0.028001  | 5.23E-04 | -3.88 | -0.381869 | -1.42 | HIVEP3  |
| 1553645_at  | 0.028001  | 5.24E-04 | -3.88 | -0.382126 | -1.39 | CCDC141 |
| 233952_s_at | 0.0285074 | 5.40E-04 | -3.87 | -0.411331 | -1.16 | ZBTB21  |
| 209304_x_at | 0.0294827 | 5.70E-04 | -3.85 | -0.462465 | -1.98 | GADD45B |

|             |           |          |       |           |       |                   |
|-------------|-----------|----------|-------|-----------|-------|-------------------|
| 219563_at   | 0.0294827 | 5.70E-04 | -3.85 | -0.46318  | -2.25 | SYNE3///LINC00341 |
| 236495_at   | 0.0294827 | 5.73E-04 | -3.84 | -0.468183 | -2.1  |                   |
| 202861_at   | 0.0297394 | 5.80E-04 | -3.84 | -0.478911 | -1.27 | MIR6883///PER1    |
| 205225_at   | 0.0297619 | 5.82E-04 | -3.84 | -0.48229  | -1.47 | ESR1              |
| 205612_at   | 0.029775  | 5.83E-04 | -3.84 | -0.483589 | -2.35 | MMRN1             |
| 213715_s_at | 0.0304709 | 6.04E-04 | -3.83 | -0.518117 | -1.04 | KANK3             |
| 209840_s_at | 0.030594  | 6.11E-04 | -3.82 | -0.528537 | -1.86 | LRRN3             |
| 202242_at   | 0.0307313 | 6.15E-04 | -3.82 | -0.535372 | -2.66 | TSPAN7            |
| 243847_at   | 0.0307637 | 6.18E-04 | -3.82 | -0.53982  | -1.23 |                   |
| 219334_s_at | 0.0307825 | 6.19E-04 | -3.82 | -0.541259 | -1.49 | NABP1             |

|             |           |          |       |           |       |         |
|-------------|-----------|----------|-------|-----------|-------|---------|
| 216598_s_at | 0.0307905 | 6.20E-04 | -3.82 | -0.542363 | -3.71 | CCL2    |
| 229487_at   | 0.0310674 | 6.32E-04 | -3.81 | -0.560844 | -1.87 | EBF1    |
| 225575_at   | 0.0310674 | 6.34E-04 | -3.81 | -0.562791 | -2.01 | LIFR    |
| 209763_at   | 0.0314618 | 6.47E-04 | -3.8  | -0.58317  | -3.85 | CHRD1   |
| 206932_at   | 0.0314797 | 6.50E-04 | -3.8  | -0.587283 | -2.42 | CH25H   |
| 1569477_at  | 0.0314797 | 6.52E-04 | -3.8  | -0.590604 | -1.25 |         |
| 227439_at   | 0.0314797 | 6.54E-04 | -3.8  | -0.593026 | -1.01 | ANKS1B  |
| 219343_at   | 0.0314797 | 6.58E-04 | -3.79 | -0.598147 | -1    | CDC37L1 |
| 204273_at   | 0.0315846 | 6.63E-04 | -3.79 | -0.606104 | -2.13 | EDNRB   |
| 204753_s_at | 0.0316971 | 6.68E-04 | -3.79 | -0.613471 | -1.23 | HLF     |

|             |           |          |       |           |       |            |
|-------------|-----------|----------|-------|-----------|-------|------------|
| 238600_at   | 0.0319009 | 6.74E-04 | -3.79 | -0.62117  | -1.19 | JAKMIP1    |
| 32625_at    | 0.031948  | 6.77E-04 | -3.78 | -0.625017 | -1.1  | NPR1       |
| 205756_s_at | 0.0320699 | 6.81E-04 | -3.78 | -0.630814 | -1.56 | F8         |
| 240467_at   | 0.0320699 | 6.82E-04 | -3.78 | -0.632138 | -1.2  |            |
| 214370_at   | 0.0321266 | 6.86E-04 | -3.78 | -0.63842  | -2.76 | S100A8     |
| 208056_s_at | 0.0321729 | 6.88E-04 | -3.78 | -0.640689 | -1.26 | CBFA2T3    |
| 208438_s_at | 0.0322419 | 6.91E-04 | -3.78 | -0.645037 | -2.01 | FGR        |
| 207442_at   | 0.0325979 | 7.08E-04 | -3.77 | -0.668238 | -1.62 | CSF3       |
| 232355_at   | 0.0330252 | 7.23E-04 | -3.76 | -0.68768  | -1.53 | SNORD114-3 |

|             |           |          |       |           |       |       |
|-------------|-----------|----------|-------|-----------|-------|-------|
| 221795_at   | 0.0330647 | 7.25E-04 | -3.76 | -0.690386 | -2.55 | NTRK2 |
| 209614_at   | 0.0331429 | 7.27E-04 | -3.76 | -0.693418 | -2.23 | ADH1B |
| 224925_at   | 0.0333908 | 7.36E-04 | -3.75 | -0.704379 | -1.43 | PREX1 |
| 226022_at   | 0.033553  | 7.42E-04 | -3.75 | -0.71209  | -1.38 | SASH1 |
| 204271_s_at | 0.0338378 | 7.55E-04 | -3.74 | -0.728632 | -1.74 | EDNRB |



|             |           |          |       |           |       |                                       |
|-------------|-----------|----------|-------|-----------|-------|---------------------------------------|
| 210676_x_at | 0.0341051 | 7.63E-04 | -3.74 | -0.738384 | -1.08 | RGPD6///RGPD8///RGPD3///RGPD4///RGPD5 |
|-------------|-----------|----------|-------|-----------|-------|---------------------------------------|

|           |           |          |       |           |       |      |
|-----------|-----------|----------|-------|-----------|-------|------|
| 228771_at | 0.0342362 | 7.71E-04 | -3.74 | -0.747796 | -1.59 | GRK3 |
|-----------|-----------|----------|-------|-----------|-------|------|

|           |           |          |       |           |       |         |
|-----------|-----------|----------|-------|-----------|-------|---------|
| 239250_at | 0.0343666 | 7.75E-04 | -3.73 | -0.753293 | -1.48 | ZNF542P |
|-----------|-----------|----------|-------|-----------|-------|---------|

|             |           |          |       |           |       |         |
|-------------|-----------|----------|-------|-----------|-------|---------|
| 222162_s_at | 0.0347906 | 7.89E-04 | -3.73 | -0.770221 | -3.02 | ADAMTS1 |
|-------------|-----------|----------|-------|-----------|-------|---------|

|              |           |          |       |           |       |                       |
|--------------|-----------|----------|-------|-----------|-------|-----------------------|
| 1557459_at   | 0.0350232 | 7.97E-04 | -3.72 | -0.779553 | -1.62 |                       |
| 1556185_a_at | 0.0350446 | 8.00E-04 | -3.72 | -0.783708 | -1.85 |                       |
| 200798_x_at  | 0.0350973 | 8.03E-04 | -3.72 | -0.786848 | -1.39 | MCL1                  |
| 212187_x_at  | 0.0351709 | 8.07E-04 | -3.72 | -0.791087 | -2.97 | PTGDS                 |
| 232606_at    | 0.0353683 | 8.16E-04 | -3.71 | -0.802096 | -1.38 | ANK2                  |
| 206896_s_at  | 0.0354339 | 8.22E-04 | -3.71 | -0.808458 | -1.22 | GNG7                  |
| 1553243_at   | 0.0354339 | 8.22E-04 | -3.71 | -0.809341 | -1.64 | ITIH5                 |
| 232257_s_at  | 0.0355851 | 8.31E-04 | -3.71 | -0.819299 | -1.28 |                       |
| 223533_at    | 0.0356159 | 8.35E-04 | -3.71 | -0.823804 | -1.47 | LOC101927933///LRRC8C |
| 229465_s_at  | 0.036051  | 8.58E-04 | -3.7  | -0.849552 | -1.39 | PTPRS                 |

|             |           |          |       |           |       |                        |
|-------------|-----------|----------|-------|-----------|-------|------------------------|
| 209613_s_at | 0.036051  | 8.59E-04 | -3.7  | -0.850713 | -4.3  | ADH1B                  |
| 209612_s_at | 0.0362568 | 8.70E-04 | -3.69 | -0.862466 | -3.97 | ADH1B                  |
| 218032_at   | 0.0364123 | 8.75E-04 | -3.69 | -0.867628 | -1.11 | SNN                    |
| 209193_at   | 0.0367625 | 8.87E-04 | -3.68 | -0.880513 | -1.25 | PIM1                   |
| 64064_at    | 0.0367947 | 8.89E-04 | -3.68 | -0.882812 | -1.68 | GIMAP1-GIMAP5///GIMAP5 |
| 214153_at   | 0.0369242 | 8.95E-04 | -3.68 | -0.888978 | -1.1  | ELOVL5                 |
| 214508_x_at | 0.0371169 | 9.05E-04 | -3.68 | -0.899174 | -1.95 | CREM                   |

|             |           |          |       |           |       |          |
|-------------|-----------|----------|-------|-----------|-------|----------|
| 1564796_at  | 0.0372438 | 9.12E-04 | -3.67 | -0.907068 | -2.63 | EMP1     |
| 206030_at   | 0.0372438 | 9.16E-04 | -3.67 | -0.911106 | -1.91 | ASPA     |
| 229004_at   | 0.0372438 | 9.18E-04 | -3.67 | -0.91302  | -1.96 | ADAMTS15 |
| 215303_at   | 0.0373807 | 9.22E-04 | -3.67 | -0.917501 | -1.53 | DCLK1    |
| 204622_x_at | 0.0376484 | 9.31E-04 | -3.67 | -0.926385 | -2.28 | NR4A2    |
| 214156_at   | 0.0379712 | 9.45E-04 | -3.66 | -0.939937 | -2.26 | MYRIP    |
| 209307_at   | 0.0383115 | 9.60E-04 | -3.66 | -0.955257 | -1.11 | SWAP70   |
| 220037_s_at | 0.038377  | 9.63E-04 | -3.65 | -0.958243 | -2.1  | LYVE1    |

|             |           |          |       |           |       |        |
|-------------|-----------|----------|-------|-----------|-------|--------|
| 228325_at   | 0.0387406 | 9.81E-04 | -3.65 | -0.975342 | -1.96 | SPIDR  |
| 203574_at   | 0.0388107 | 9.83E-04 | -3.65 | -0.977725 | -1.75 | NFIL3  |
| 205813_s_at | 0.038833  | 9.84E-04 | -3.65 | -0.978948 | -1.13 | MAT1A  |
| 1560049_at  | 0.0389922 | 9.89E-04 | -3.64 | -0.983483 | -1.48 |        |
| 229580_at   | 0.0390521 | 9.92E-04 | -3.64 | -0.986207 | -2.36 | CLSTN2 |
| 221796_at   | 0.0390521 | 9.93E-04 | -3.64 | -0.987492 | -3.44 | NTRK2  |
| 205027_s_at | 0.0390785 | 9.95E-04 | -3.64 | -0.988958 | -1.29 | MAP3K8 |
| 205498_at   | 0.0391695 | 1.00E-03 | -3.64 | -0.99453  | -2.38 | GHR    |
| 213236_at   | 0.0391933 | 1.00E-03 | -3.64 | -0.995776 | -1.09 | SASH1  |
| 218730_s_at | 0.0392402 | 1.00E-03 | -3.64 | -0.997576 | -3.2  | OGN    |
| 224450_s_at | 0.039675  | 1.02E-03 | -3.63 | -1.013333 | -1.13 | RIOK1  |
| 232629_at   | 0.0403853 | 1.05E-03 | -3.62 | -1.044007 | -1.06 | PROK2  |

|           |           |          |       |           |       |                |
|-----------|-----------|----------|-------|-----------|-------|----------------|
| 209681_at | 0.0405468 | 1.06E-03 | -3.62 | -1.048425 | -1.3  | SLC19A2        |
| 36829_at  | 0.0405752 | 1.06E-03 | -3.62 | -1.051387 | -1.12 | MIR6883///PER1 |
| 234987_at | 0.0406375 | 1.07E-03 | -3.62 | -1.05682  | -1.55 | SAMHD1         |
| 226333_at | 0.0407184 | 1.07E-03 | -3.61 | -1.061252 | -1.46 | IL6R           |
| 231031_at | 0.0408763 | 1.08E-03 | -3.61 | -1.067185 | -1.05 | FGF7P3         |
| 213960_at | 0.0412034 | 1.10E-03 | -3.61 | -1.081181 | -1.74 | NTRK3          |
| 244860_at | 0.0418454 | 1.13E-03 | -3.6  | -1.106024 | -1.37 |                |
| 213006_at | 0.0418928 | 1.13E-03 | -3.59 | -1.10773  | -2.03 | CEBPD          |

|             |           |          |       |           |       |         |
|-------------|-----------|----------|-------|-----------|-------|---------|
| 242680_at   | 0.0420814 | 1.14E-03 | -3.59 | -1.115784 | -2.36 | AVPR1A  |
| 226911_at   | 0.0421464 | 1.15E-03 | -3.59 | -1.121365 | -1.42 | EGFLAM  |
| 230867_at   | 0.0421464 | 1.15E-03 | -3.59 | -1.121611 | -1.62 | COL6A6  |
| 38487_at    | 0.0427566 | 1.17E-03 | -3.58 | -1.137739 | -1.51 | STAB1   |
| 228749_at   | 0.0428373 | 1.17E-03 | -3.58 | -1.140776 | -1.5  | ZDBF2   |
| 211776_s_at | 0.0432353 | 1.18E-03 | -3.58 | -1.153254 | -1.77 | EPB41L3 |
| 235359_at   | 0.0445059 | 1.24E-03 | -3.56 | -1.193596 | -1.14 | NRROS   |
| 216979_at   | 0.0446203 | 1.24E-03 | -3.56 | -1.197865 | -1.81 | NR4A3   |
| 211748_x_at | 0.0450942 | 1.26E-03 | -3.55 | -1.214904 | -2.79 | PTGDS   |

|            |           |          |       |           |       |                 |
|------------|-----------|----------|-------|-----------|-------|-----------------|
| 227550_at  | 0.0450942 | 1.27E-03 | -3.55 | -1.215153 | -1.84 | GFRA1           |
| 220088_at  | 0.0454334 | 1.28E-03 | -3.55 | -1.224679 | -1.87 | C5AR1           |
| 218625_at  | 0.0459804 | 1.31E-03 | -3.54 | -1.244846 | -1.56 | NRN1            |
| 240410_at  | 0.0462908 | 1.32E-03 | -3.54 | -1.25319  | -1.93 |                 |
| 1554182_at | 0.0463857 | 1.32E-03 | -3.54 | -1.257889 | -1.35 | TRIM74///TRIM73 |
| 235735_at  | 0.0463857 | 1.32E-03 | -3.54 | -1.258027 | -2.3  | TNFSF8          |
| 223623_at  | 0.0465883 | 1.34E-03 | -3.53 | -1.265831 | -2.97 | C2orf40         |
| 239262_at  | 0.0467455 | 1.34E-03 | -3.53 | -1.270195 | -2.2  |                 |
| 201963_at  | 0.0477459 | 1.38E-03 | -3.52 | -1.29606  | -1.16 | ACSL1           |



|             |           |          |       |           |       |         |
|-------------|-----------|----------|-------|-----------|-------|---------|
| 209305_s_at | 0.0477792 | 1.38E-03 | -3.52 | -1.298175 | -1.93 | GADD45B |
| 205858_at   | 0.0477792 | 1.38E-03 | -3.52 | -1.299061 | -1.2  | NGFR    |
| 233057_at   | 0.0477792 | 1.38E-03 | -3.52 | -1.299092 | -1.21 | HSPB8   |
| 204154_at   | 0.0479137 | 1.39E-03 | -3.52 | -1.303511 | -2.39 | CDO1    |
| 226811_at   | 0.0479984 | 1.39E-03 | -3.52 | -1.305762 | -1.99 | FAM46C  |
| 229687_s_at | 0.0482026 | 1.41E-03 | -3.51 | -1.313882 | -1.06 | PRDM11  |
| 1569482_at  | 0.0487657 | 1.43E-03 | -3.51 | -1.330899 | -1.03 | TNRC6C  |
| 205478_at   | 0.0487657 | 1.43E-03 | -3.51 | -1.331932 | -2.42 | PPP1R1A |

|             |           |          |       |           |       |        |
|-------------|-----------|----------|-------|-----------|-------|--------|
| 239427_at   | 0.0487841 | 1.44E-03 | -3.51 | -1.333941 | -1.08 | SLAMF1 |
| 227178_at   | 0.0488625 | 1.44E-03 | -3.5  | -1.336032 | -1.5  | CELF2  |
| 223960_s_at | 0.0490984 | 1.45E-03 | -3.5  | -1.345159 | -1.26 | CDIP1  |
| 235024_at   | 0.0490984 | 1.45E-03 | -3.5  | -1.346179 | -1.75 | JADE1  |
| 220358_at   | 0.0493953 | 1.47E-03 | -3.5  | -1.353186 | -1.28 | BATF3  |
| 233674_at   | 0.0496078 | 1.48E-03 | -3.49 | -1.360977 | -1.11 |        |
| 244654_at   | 0.0497022 | 1.48E-03 | -3.49 | -1.364024 | -1.63 | MYO1G  |
| 233648_at   | 0.0499926 | 1.50E-03 | -3.49 | -1.373939 | -1.25 |        |
| 219298_at   | 0.050164  | 1.51E-03 | -3.49 | -1.379205 | -1.25 | ECHDC3 |

|             |           |          |       |           |       |                        |
|-------------|-----------|----------|-------|-----------|-------|------------------------|
| 218805_at   | 0.0503506 | 1.52E-03 | -3.48 | -1.388599 | -2.05 | GIMAP1-GIMAP5///GIMAP5 |
| 228376_at   | 0.050551  | 1.53E-03 | -3.48 | -1.396628 | -2.21 | GGTA1P                 |
| 235885_at   | 0.0509017 | 1.55E-03 | -3.48 | -1.406268 | -1.84 | P2RY12                 |
| 212486_s_at | 0.0509818 | 1.56E-03 | -3.47 | -1.410788 | -1.58 | FYN                    |
| 229367_s_at | 0.0514856 | 1.58E-03 | -3.47 | -1.425041 | -2.15 | GIMAP6                 |
| 220416_at   | 0.0516957 | 1.59E-03 | -3.47 | -1.431407 | -1.23 | ATP8B4                 |
| 203845_at   | 0.0516957 | 1.60E-03 | -3.46 | -1.434438 | -1.12 | KAT2B                  |

|             |           |          |       |           |       |         |
|-------------|-----------|----------|-------|-----------|-------|---------|
| 227708_at   | 0.0518535 | 1.61E-03 | -3.46 | -1.440067 | -1.3  | EEF1A1  |
| 203320_at   | 0.0520514 | 1.62E-03 | -3.46 | -1.446954 | -1.2  | SH2B3   |
| 210858_x_at | 0.0528438 | 1.66E-03 | -3.45 | -1.467736 | -1.01 | ATM     |
| 207574_s_at | 0.0528699 | 1.66E-03 | -3.45 | -1.470513 | -1.89 | GADD45B |
| 212226_s_at | 0.0528699 | 1.66E-03 | -3.45 | -1.471923 | -1.31 | PLPP3   |
| 1562194_at  | 0.0528699 | 1.66E-03 | -3.45 | -1.472316 | -1.57 |         |
| 207610_s_at | 0.0528699 | 1.66E-03 | -3.45 | -1.472953 | -1.25 | ADGRE2  |
| 235529_x_at | 0.0528746 | 1.67E-03 | -3.45 | -1.474805 | -1.07 | SAMHD1  |

|             |           |          |       |           |       |                     |
|-------------|-----------|----------|-------|-----------|-------|---------------------|
| 220038_at   | 0.0529532 | 1.67E-03 | -3.45 | -1.477284 | -1.19 | C8orf44-SGK3///SGK3 |
| 236651_at   | 0.0533107 | 1.71E-03 | -3.44 | -1.495592 | -1.12 | KALRN               |
| 219183_s_at | 0.0533107 | 1.71E-03 | -3.44 | -1.496693 | -1.06 | CYTH4               |
| 229910_at   | 0.0537202 | 1.73E-03 | -3.44 | -1.507437 | -1.75 | SHE                 |
| 213221_s_at | 0.0539281 | 1.74E-03 | -3.43 | -1.516252 | -1.2  | SIK2                |
| 234072_at   | 0.054131  | 1.75E-03 | -3.43 | -1.52148  | -1.22 | SEMA4A              |
| 219228_at   | 0.0547656 | 1.79E-03 | -3.42 | -1.538776 | -1.96 | ZNF331              |
| 1566518_at  | 0.0547656 | 1.79E-03 | -3.42 | -1.53925  | -1.85 |                     |
| 204829_s_at | 0.0548066 | 1.79E-03 | -3.42 | -1.541525 | -1.79 | FOLR2               |
| 214617_at   | 0.0550183 | 1.81E-03 | -3.42 | -1.551405 | -1.55 | PRF1                |
| 241679_at   | 0.0551653 | 1.82E-03 | -3.42 | -1.555605 | -1.76 |                     |
| 223316_at   | 0.0551653 | 1.82E-03 | -3.42 | -1.555847 | -2.13 | CCDC3               |

|             |           |          |       |           |       |                 |
|-------------|-----------|----------|-------|-----------|-------|-----------------|
| 213245_at   | 0.0553033 | 1.83E-03 | -3.41 | -1.559881 | -1.72 | ADCY1           |
| 204621_s_at | 0.0553119 | 1.83E-03 | -3.41 | -1.560545 | -1.99 | NR4A2           |
| 212681_at   | 0.0554032 | 1.83E-03 | -3.41 | -1.562608 | -1.75 | EPB41L3         |
| 205200_at   | 0.0554296 | 1.84E-03 | -3.41 | -1.565465 | -1.83 | EXOSC7///CLEC3B |
| 213974_at   | 0.0557457 | 1.85E-03 | -3.41 | -1.573695 | -1.81 | ADAMTSL3        |
| 201325_s_at | 0.0557457 | 1.86E-03 | -3.41 | -1.575541 | -1.75 | EMP1            |
| 217504_at   | 0.0557457 | 1.86E-03 | -3.41 | -1.575603 | -1.93 | ABCA6           |
| 227243_s_at | 0.0559023 | 1.87E-03 | -3.41 | -1.580794 | -1.25 | EBF3            |

|             |           |          |       |           |       |                     |
|-------------|-----------|----------|-------|-----------|-------|---------------------|
| 202759_s_at | 0.0560549 | 1.88E-03 | -3.4  | -1.586903 | -1.41 | PALM2-AKAP2///AKAP2 |
| 201427_s_at | 0.0560595 | 1.88E-03 | -3.4  | -1.587889 | -1.55 | SEPP1               |
| 223640_at   | 0.0561916 | 1.89E-03 | -3.4  | -1.590737 | -1.43 | HCST                |
| 233289_at   | 0.0562057 | 1.89E-03 | -3.4  | -1.591482 | -1.36 |                     |
| 202920_at   | 0.0576707 | 1.96E-03 | -3.39 | -1.62704  | -3.05 | ANK2                |
| 227771_at   | 0.0576707 | 1.97E-03 | -3.39 | -1.62968  | -1.51 | LIFR                |
| 229497_at   | 0.0580527 | 1.98E-03 | -3.38 | -1.637394 | -1.35 | ANKDD1A             |
| 243296_at   | 0.0581091 | 1.99E-03 | -3.38 | -1.641302 | -1.9  | NAMPT               |
| 226931_at   | 0.0585357 | 2.01E-03 | -3.38 | -1.651317 | -1.28 | TMTC1               |

|             |           |          |       |           |       |        |
|-------------|-----------|----------|-------|-----------|-------|--------|
| 209542_x_at | 0.0586382 | 2.02E-03 | -3.38 | -1.65426  | -1.97 | IGF1   |
| 226571_s_at | 0.0589972 | 2.04E-03 | -3.37 | -1.661459 | -1.56 | PTPRS  |
| 219368_at   | 0.0593304 | 2.05E-03 | -3.37 | -1.668573 | -1.61 | NAP1L2 |
| 244464_at   | 0.0593304 | 2.05E-03 | -3.37 | -1.669546 | -1.26 |        |
| 238780_s_at | 0.0593678 | 2.06E-03 | -3.37 | -1.671765 | -2.3  | KCNJ5  |
| 235964_x_at | 0.0598137 | 2.08E-03 | -3.36 | -1.682211 | -1.07 | SAMHD1 |
| 215151_at   | 0.0602127 | 2.12E-03 | -3.36 | -1.69925  | -1.07 | DOCK10 |



|             |           |          |       |           |       |          |
|-------------|-----------|----------|-------|-----------|-------|----------|
| 238018_at   | 0.060379  | 2.13E-03 | -3.36 | -1.70369  | -3.47 | FAM150B  |
| 229912_at   | 0.060444  | 2.13E-03 | -3.36 | -1.705181 | -1.16 | SDK1     |
| 228063_s_at | 0.0604754 | 2.14E-03 | -3.35 | -1.707714 | -1.33 | NAP1L5   |
| 224341_x_at | 0.060687  | 2.15E-03 | -3.35 | -1.713762 | -1.4  | TLR4     |
| 239808_at   | 0.0611878 | 2.18E-03 | -3.35 | -1.726269 | -1.29 |          |
| 211000_s_at | 0.0612445 | 2.19E-03 | -3.35 | -1.729506 | -1.05 | IL6ST    |
| 232313_at   | 0.0612558 | 2.19E-03 | -3.35 | -1.730634 | -1.11 | TMEM132C |
| 240652_at   | 0.0612879 | 2.20E-03 | -3.34 | -1.732078 | -1.23 |          |
| 224822_at   | 0.0617768 | 2.22E-03 | -3.34 | -1.742012 | -1.62 | DLC1     |
| 225747_at   | 0.0620138 | 2.24E-03 | -3.34 | -1.749804 | -1.02 | COQ10A   |
| 237176_at   | 0.062085  | 2.25E-03 | -3.34 | -1.753609 | -1.05 |          |
| 229312_s_at | 0.0623643 | 2.26E-03 | -3.33 | -1.760639 | -1.16 | GKAP1    |

|              |           |          |       |           |       |         |
|--------------|-----------|----------|-------|-----------|-------|---------|
| 205098_at    | 0.0624792 | 2.27E-03 | -3.33 | -1.763571 | -2.06 | CCR1    |
| 1553494_at   | 0.0624841 | 2.27E-03 | -3.33 | -1.764336 | -1.82 | TDH     |
| 213733_at    | 0.0625972 | 2.28E-03 | -3.33 | -1.767906 | -1.16 | MYO1F   |
| 210762_s_at  | 0.0625972 | 2.28E-03 | -3.33 | -1.768465 | -1.66 | DLC1    |
| 235593_at    | 0.0626811 | 2.29E-03 | -3.33 | -1.770719 | -1.49 | ZEB2    |
| 230052_s_at  | 0.0630989 | 2.31E-03 | -3.33 | -1.778863 | -1.22 | NFKBID  |
| 205932_s_at  | 0.0632358 | 2.32E-03 | -3.32 | -1.782054 | -1.24 | MSX1    |
| 1554462_a_at | 0.0632384 | 2.32E-03 | -3.32 | -1.783026 | -1.24 | DNAJB9  |
| 204521_at    | 0.063277  | 2.32E-03 | -3.32 | -1.784526 | -1.02 | FAM216A |
| 211456_x_at  | 0.0633565 | 2.33E-03 | -3.32 | -1.788022 | -1.61 | MT1HL1  |

|              |           |          |       |           |       |           |
|--------------|-----------|----------|-------|-----------|-------|-----------|
| 1566825_at   | 0.0638286 | 2.36E-03 | -3.32 | -1.798959 | -1.87 |           |
| 1556300_s_at | 0.0638286 | 2.36E-03 | -3.32 | -1.799456 | -2.06 | SIM1      |
| 227923_at    | 0.0638286 | 2.36E-03 | -3.32 | -1.800458 | -1.22 | SHANK3    |
| 244592_at    | 0.0638286 | 2.36E-03 | -3.32 | -1.800595 | -1.37 |           |
| 214735_at    | 0.0641161 | 2.39E-03 | -3.31 | -1.810678 | -1.43 | IPCEF1    |
| 228766_at    | 0.0643737 | 2.41E-03 | -3.31 | -1.819775 | -2.95 | CD36      |
| 220327_at    | 0.0643737 | 2.41E-03 | -3.31 | -1.820358 | -1.66 | VGLL3     |
| 219820_at    | 0.064606  | 2.42E-03 | -3.31 | -1.824175 | -1.11 | SLC6A16   |
| 230943_at    | 0.0646702 | 2.43E-03 | -3.31 | -1.825557 | -1.61 | SOX17     |
| 1556474_a_at | 0.0651298 | 2.46E-03 | -3.3  | -1.836741 | -2.29 | LOC285097 |
| 242809_at    | 0.0651724 | 2.47E-03 | -3.3  | -1.840474 | -1.28 | IL1RL1    |

|              |           |          |       |           |       |                     |
|--------------|-----------|----------|-------|-----------|-------|---------------------|
| 201694_s_at  | 0.0654256 | 2.48E-03 | -3.3  | -1.844544 | -1.69 | EGR1                |
| 215049_x_at  | 0.0656424 | 2.49E-03 | -3.3  | -1.848981 | -2.41 | CD163               |
| 210155_at    | 0.0656981 | 2.49E-03 | -3.3  | -1.850222 | -1.41 | MYOC                |
| 1552509_a_at | 0.0660873 | 2.51E-03 | -3.29 | -1.857979 | -1.54 | CD300LG             |
| 207277_at    | 0.0663967 | 2.53E-03 | -3.29 | -1.863525 | -1.57 | CD209               |
| 241925_x_at  | 0.0664736 | 2.54E-03 | -3.29 | -1.867445 | -1.57 | SLC16A7             |
| 230962_at    | 0.0665771 | 2.54E-03 | -3.29 | -1.869789 | -1.11 | DCLK1               |
| 227811_at    | 0.0666797 | 2.55E-03 | -3.29 | -1.872117 | -1.59 | FGD3                |
| 218711_s_at  | 0.0669306 | 2.56E-03 | -3.29 | -1.876858 | -1.01 | SDPR                |
| 202760_s_at  | 0.0671913 | 2.58E-03 | -3.28 | -1.883248 | -1.2  | PALM2-AKAP2///AKAP2 |
| 201041_s_at  | 0.0672101 | 2.58E-03 | -3.28 | -1.883953 | -1.73 | DUSP1               |

|             |           |          |       |           |       |                      |
|-------------|-----------|----------|-------|-----------|-------|----------------------|
| 227646_at   | 0.0672959 | 2.59E-03 | -3.28 | -1.88597  | -1.59 | EBF1                 |
| 209291_at   | 0.0676235 | 2.62E-03 | -3.28 | -1.897566 | -2.01 | ID4                  |
| 235077_at   | 0.0677465 | 2.63E-03 | -3.28 | -1.902189 | -2.33 | MEG3                 |
| 216813_at   | 0.0678759 | 2.65E-03 | -3.27 | -1.908496 | -1.25 |                      |
| 230158_at   | 0.0678759 | 2.66E-03 | -3.27 | -1.909849 | -1.4  | DPY19L2              |
| 216920_s_at | 0.0685163 | 2.71E-03 | -3.26 | -1.92716  | -1.7  | TARP///TRGV9///TRGC2 |
| 242868_at   | 0.0685685 | 2.71E-03 | -3.26 | -1.928519 | -1.49 |                      |
| 216005_at   | 0.0690429 | 2.74E-03 | -3.26 | -1.939138 | -2.33 | TNC                  |
| 212558_at   | 0.0690531 | 2.74E-03 | -3.26 | -1.939851 | -1.24 | SPRY1                |

|             |           |          |       |           |       |         |
|-------------|-----------|----------|-------|-----------|-------|---------|
| 207630_s_at | 0.0693349 | 2.76E-03 | -3.26 | -1.946498 | -1.74 | CREM    |
| 226322_at   | 0.0693845 | 2.77E-03 | -3.26 | -1.947591 | -1.74 | TMTC1   |
| 204897_at   | 0.0696602 | 2.79E-03 | -3.25 | -1.95555  | -1.7  | PTGER4  |
| 214056_at   | 0.0697161 | 2.80E-03 | -3.25 | -1.957147 | -1.21 | MCL1    |
| 203710_at   | 0.0697174 | 2.80E-03 | -3.25 | -1.958086 | -1.54 | ITPR1   |
| 1554676_at  | 0.0701946 | 2.83E-03 | -3.25 | -1.969448 | -1.73 | SRGN    |
| 222722_at   | 0.0710813 | 2.89E-03 | -3.24 | -1.989124 | -3.49 | OGN     |
| 206710_s_at | 0.0712753 | 2.90E-03 | -3.24 | -1.992982 | -2.02 | EPB41L3 |
| 214470_at   | 0.0712799 | 2.91E-03 | -3.24 | -1.994295 | -2.24 | KLRB1   |

|             |           |          |       |           |       |         |
|-------------|-----------|----------|-------|-----------|-------|---------|
| 202747_s_at | 0.0712799 | 2.91E-03 | -3.24 | -1.995705 | -2.34 | ITM2A   |
| 215058_at   | 0.0712799 | 2.92E-03 | -3.24 | -1.996852 | -1.39 | DENND5B |

228370\_at

0.0712799

2.92E-03

-3.24

-1.997723

-1.75

LOC101930404///SNORD116-28///SNORD115-26///SNORD115-13///SNOR  
SNORD107///IPW



|             |           |          |       |           |       |          |
|-------------|-----------|----------|-------|-----------|-------|----------|
| 204036_at   | 0.0712818 | 2.92E-03 | -3.24 | -1.998418 | -1.4  | LPAR1    |
| 202842_s_at | 0.0713036 | 2.93E-03 | -3.23 | -1.999533 | -1.23 | DNAJB9   |
| 205119_s_at | 0.0714177 | 2.93E-03 | -3.23 | -2.001436 | -1.83 | FPR1     |
| 201289_at   | 0.071523  | 2.94E-03 | -3.23 | -2.005707 | -1.83 | CYR61    |
| 205099_s_at | 0.0715335 | 2.95E-03 | -3.23 | -2.006258 | -1.42 | CCR1     |
| 201324_at   | 0.07208   | 2.99E-03 | -3.23 | -2.018393 | -1.38 | EMP1     |
| 205883_at   | 0.0722711 | 3.00E-03 | -3.22 | -2.024444 | -2.55 | ZBTB16   |
| 229177_at   | 0.0722981 | 3.01E-03 | -3.22 | -2.025201 | -1.98 | C16orf89 |
| 226778_at   | 0.0724565 | 3.03E-03 | -3.22 | -2.031133 | -1.12 | TDRP     |

|             |           |          |       |           |       |           |
|-------------|-----------|----------|-------|-----------|-------|-----------|
| 229800_at   | 0.0724578 | 3.03E-03 | -3.22 | -2.031745 | -2.47 | DCLK1     |
| 209292_at   | 0.0725749 | 3.04E-03 | -3.22 | -2.035676 | -1.9  | ID4       |
| 244313_at   | 0.0730355 | 3.08E-03 | -3.22 | -2.047086 | -2.11 | CR1       |
| 213560_at   | 0.0730355 | 3.08E-03 | -3.21 | -2.047737 | -1.35 | GADD45B   |
| 219471_at   | 0.0730355 | 3.08E-03 | -3.21 | -2.048341 | -1.94 | KIAA0226L |
| 211685_s_at | 0.0730355 | 3.09E-03 | -3.21 | -2.049257 | -1.31 | NCALD     |
| 209760_at   | 0.0730809 | 3.10E-03 | -3.21 | -2.052477 | -1.85 | KIAA0922  |
| 203685_at   | 0.0731277 | 3.11E-03 | -3.21 | -2.056346 | -1.77 | BCL2      |

|              |           |          |       |           |       |                                                                |
|--------------|-----------|----------|-------|-----------|-------|----------------------------------------------------------------|
| 232291_at    | 0.0731277 | 3.11E-03 | -3.21 | -2.056842 | -1.42 | MIR17HG///MIR92A1///MIR20A///MIR19B1///MIR19A///MIR18A///MIR17 |
| 209355_s_at  | 0.0734018 | 3.13E-03 | -3.21 | -2.061922 | -1.58 | PLPP3                                                          |
| 1553102_a_at | 0.0734018 | 3.14E-03 | -3.21 | -2.064719 | -2.31 | CCDC69                                                         |
| 221928_at    | 0.0734393 | 3.14E-03 | -3.21 | -2.065592 | -1.09 | ACACB                                                          |
| 226773_at    | 0.0737551 | 3.17E-03 | -3.2  | -2.074843 | -1.36 | PPM1K                                                          |
| 228532_at    | 0.0738308 | 3.18E-03 | -3.2  | -2.076628 | -1.81 | C1orf162                                                       |

|             |           |          |       |           |       |        |
|-------------|-----------|----------|-------|-----------|-------|--------|
| 1556606_at  | 0.0740342 | 3.19E-03 | -3.2  | -2.079831 | -1.06 | NAV2   |
| 211577_s_at | 0.0740684 | 3.19E-03 | -3.2  | -2.080944 | -1.67 | IGF1   |
| 228007_at   | 0.0742164 | 3.20E-03 | -3.2  | -2.083694 | -1.22 | CEP85L |
| 206488_s_at | 0.0742895 | 3.21E-03 | -3.2  | -2.085004 | -3    | CD36   |
| 235979_at   | 0.0745402 | 3.23E-03 | -3.2  | -2.091272 | -2.32 | C7     |
| 212886_at   | 0.0749279 | 3.26E-03 | -3.19 | -2.101194 | -2.14 | CCDC69 |
| 210222_s_at | 0.0753136 | 3.30E-03 | -3.19 | -2.112391 | -1.1  | RTN1   |
| 229116_at   | 0.0754734 | 3.32E-03 | -3.19 | -2.117643 | -1.14 | CNKS2  |
| 232951_at   | 0.0755386 | 3.33E-03 | -3.18 | -2.11997  | -1.01 |        |
| 220170_at   | 0.0755386 | 3.33E-03 | -3.18 | -2.12017  | -1.66 | FHL5   |
| 209447_at   | 0.0756445 | 3.35E-03 | -3.18 | -2.124644 | -1.57 | SYNE1  |
| 241791_at   | 0.0758977 | 3.37E-03 | -3.18 | -2.131692 | -1.62 | TTN    |

|             |           |          |       |           |       |                     |
|-------------|-----------|----------|-------|-----------|-------|---------------------|
| 207822_at   | 0.0761712 | 3.39E-03 | -3.18 | -2.137325 | -1.37 | FGFR1               |
| 231067_s_at | 0.0762066 | 3.41E-03 | -3.18 | -2.140804 | -1.67 | AKAP12              |
| 204042_at   | 0.0762826 | 3.41E-03 | -3.18 | -2.14287  | -1.44 | WASF3               |
| 203543_s_at | 0.076359  | 3.42E-03 | -3.17 | -2.145317 | -1.4  | KLF9                |
| 226099_at   | 0.0764017 | 3.43E-03 | -3.17 | -2.14631  | -1.38 | ELL2                |
| 201811_x_at | 0.0764017 | 3.43E-03 | -3.17 | -2.146973 | -1.23 | SH3BP5              |
| 205392_s_at | 0.0768298 | 3.46E-03 | -3.17 | -2.155232 | -2.6  | CCL15-CCL14///CCL14 |
| 222820_at   | 0.0769896 | 3.47E-03 | -3.17 | -2.15899  | -1    | TNRC6C              |
| 227099_s_at | 0.0769896 | 3.47E-03 | -3.17 | -2.159434 | -1.61 | C11orf96            |

|             |           |          |       |           |       |              |
|-------------|-----------|----------|-------|-----------|-------|--------------|
| 224646_x_at | 0.0777487 | 3.54E-03 | -3.16 | -2.176732 | -2.42 | MIR675///H19 |
| 205639_at   | 0.0781704 | 3.57E-03 | -3.16 | -2.185447 | -1.27 | AOAH         |
| 236075_s_at | 0.0781704 | 3.57E-03 | -3.16 | -2.185922 | -1.18 | LOC101928000 |
| 205083_at   | 0.0782441 | 3.58E-03 | -3.16 | -2.187834 | -2.96 | AOX1         |
| 202746_at   | 0.0782441 | 3.59E-03 | -3.16 | -2.188947 | -2.41 | ITM2A        |
| 206210_s_at | 0.0786821 | 3.63E-03 | -3.15 | -2.200771 | -1.63 | CETP         |
| 227478_at   | 0.0787014 | 3.63E-03 | -3.15 | -2.201365 | -1.43 | SETBP1       |
| 226982_at   | 0.078802  | 3.64E-03 | -3.15 | -2.20402  | -1.38 | ELL2         |
| 228854_at   | 0.0792876 | 3.68E-03 | -3.15 | -2.213173 | -2.74 |              |

|              |           |          |       |           |       |                           |
|--------------|-----------|----------|-------|-----------|-------|---------------------------|
| 238488_at    | 0.0794892 | 3.70E-03 | -3.14 | -2.217699 | -1.25 | LRRC70///IPO11            |
| 1557419_a_at | 0.0795464 | 3.71E-03 | -3.14 | -2.221119 | -1.28 | ACSL4                     |
| 203799_at    | 0.0795475 | 3.72E-03 | -3.14 | -2.223754 | -1.44 | LY75-CD302///CD302///LY75 |
| 214032_at    | 0.0795475 | 3.73E-03 | -3.14 | -2.225404 | -1.49 | ZAP70                     |
| 227265_at    | 0.0795475 | 3.73E-03 | -3.14 | -2.225508 | -1.97 | FGL2                      |
| 41644_at     | 0.0801824 | 3.78E-03 | -3.14 | -2.237495 | -1.11 | SASH1                     |
| 203761_at    | 0.0807132 | 3.81E-03 | -3.13 | -2.246208 | -1.8  | SLA                       |
| 210764_s_at  | 0.0807439 | 3.82E-03 | -3.13 | -2.247995 | -1.99 | CYR61                     |
| 218517_at    | 0.0807774 | 3.83E-03 | -3.13 | -2.250979 | -1.43 | JADE1                     |

|             |           |          |       |           |       |           |
|-------------|-----------|----------|-------|-----------|-------|-----------|
| 213933_at   | 0.0808544 | 3.84E-03 | -3.13 | -2.253196 | -1.67 | PTGER3    |
| 202877_s_at | 0.0810254 | 3.85E-03 | -3.13 | -2.255512 | -1.22 | CD93      |
| 237442_at   | 0.0810864 | 3.86E-03 | -3.13 | -2.257893 | -1.5  |           |
| 222717_at   | 0.0812801 | 3.88E-03 | -3.13 | -2.262691 | -2.14 | SDPR      |
| 228410_at   | 0.0813302 | 3.89E-03 | -3.12 | -2.263617 | -1.16 | GAB3      |
| 230276_at   | 0.0820147 | 3.95E-03 | -3.12 | -2.278579 | -1.07 | FAM49A    |
| 207526_s_at | 0.0825465 | 3.99E-03 | -3.11 | -2.287606 | -1.66 | IL1RL1    |
| 243601_at   | 0.0826544 | 4.00E-03 | -3.11 | -2.290569 | -1.02 | LOC285957 |
| 215785_s_at | 0.0829489 | 4.02E-03 | -3.11 | -2.295372 | -1.49 | CYFIP2    |
| 203645_s_at | 0.0833855 | 4.06E-03 | -3.11 | -2.303268 | -2.35 | CD163     |
| 237230_at   | 0.0834629 | 4.07E-03 | -3.11 | -2.305172 | -1.78 | GPHA2     |
| 235670_at   | 0.083473  | 4.07E-03 | -3.11 | -2.306206 | -1.71 | STX11     |
| 225820_at   | 0.083473  | 4.07E-03 | -3.11 | -2.306627 | -1.49 | JADE1     |



|             |           |          |       |           |       |         |
|-------------|-----------|----------|-------|-----------|-------|---------|
| 43427_at    | 0.083473  | 4.07E-03 | -3.11 | -2.307097 | -1.37 | ACACB   |
| 217738_at   | 0.083473  | 4.08E-03 | -3.11 | -2.308103 | -1.25 | NAMPT   |
| 227762_at   | 0.083473  | 4.08E-03 | -3.11 | -2.30878  | -1.69 |         |
| 207761_s_at | 0.0838445 | 4.11E-03 | -3.1  | -2.315983 | -1.4  | METTL7A |
| 212185_x_at | 0.0839507 | 4.12E-03 | -3.1  | -2.318191 | -1.53 | MT2A    |
| 207275_s_at | 0.0843005 | 4.16E-03 | -3.1  | -2.326516 | -1.26 | ACSL1   |
| 203881_s_at | 0.0847039 | 4.20E-03 | -3.09 | -2.335386 | -2.02 | DMD     |
| 227645_at   | 0.0847087 | 4.20E-03 | -3.09 | -2.335781 | -1.74 | PIK3R5  |
| 242388_x_at | 0.084952  | 4.22E-03 | -3.09 | -2.339656 | -1.93 | TAGAP   |

|             |           |          |       |           |       |                      |
|-------------|-----------|----------|-------|-----------|-------|----------------------|
| 215806_x_at | 0.084952  | 4.22E-03 | -3.09 | -2.339801 | -1.55 | TARP///TRGV9///TRGC2 |
| 1557418_at  | 0.0860042 | 4.29E-03 | -3.09 | -2.355617 | -1.5  | ACSL4                |
| 208581_x_at | 0.0862774 | 4.31E-03 | -3.08 | -2.359931 | -1.69 | MT1X                 |
| 219312_s_at | 0.0867561 | 4.35E-03 | -3.08 | -2.367058 | -1.48 | ZBTB10               |
| 209894_at   | 0.0873103 | 4.38E-03 | -3.08 | -2.374976 | -1.15 | LEPROT///LEPR        |
| 1552318_at  | 0.0875592 | 4.41E-03 | -3.08 | -2.380639 | -1.16 | GIMAP1               |
| 203438_at   | 0.0878011 | 4.43E-03 | -3.07 | -2.383872 | -1.24 | STC2                 |

|             |           |          |       |           |       |        |
|-------------|-----------|----------|-------|-----------|-------|--------|
| 202843_at   | 0.0878011 | 4.43E-03 | -3.07 | -2.384199 | -1.5  | DNAJB9 |
| 203542_s_at | 0.0879611 | 4.45E-03 | -3.07 | -2.389343 | -1.02 | KLF9   |
| 244358_at   | 0.0879611 | 4.45E-03 | -3.07 | -2.3896   | -1.15 |        |
| 209683_at   | 0.0880117 | 4.47E-03 | -3.07 | -2.392768 | -1.63 | FAM49A |
| 207092_at   | 0.0880647 | 4.47E-03 | -3.07 | -2.393657 | -2.34 | LEP    |
| 204502_at   | 0.0882548 | 4.48E-03 | -3.07 | -2.395986 | -1.11 | SAMHD1 |
| 206115_at   | 0.0883142 | 4.49E-03 | -3.07 | -2.39694  | -2.07 | EGR3   |
| 239835_at   | 0.0883895 | 4.50E-03 | -3.07 | -2.399259 | -1.78 | KBTBD8 |

|             |           |          |       |           |       |        |
|-------------|-----------|----------|-------|-----------|-------|--------|
| 235740_at   | 0.0884324 | 4.51E-03 | -3.07 | -2.401517 | -1.56 | MCTP1  |
| 217739_s_at | 0.0884324 | 4.51E-03 | -3.07 | -2.401642 | -1.23 | NAMPT  |
| 217546_at   | 0.0888861 | 4.55E-03 | -3.06 | -2.40855  | -3.15 | MT1M   |
| 239946_at   | 0.0889179 | 4.55E-03 | -3.06 | -2.409212 | -2.27 |        |
| 217552_x_at | 0.0891326 | 4.57E-03 | -3.06 | -2.4142   | -1.71 | CR1    |
| 206181_at   | 0.0892105 | 4.59E-03 | -3.06 | -2.416867 | -1.35 | SLAMF1 |
| 205374_at   | 0.0895139 | 4.61E-03 | -3.06 | -2.421701 | -1.44 | SLN    |
| 204236_at   | 0.0895634 | 4.62E-03 | -3.06 | -2.422817 | -1.66 | FLI1   |

|             |           |          |       |           |       |              |
|-------------|-----------|----------|-------|-----------|-------|--------------|
| 206208_at   | 0.0898683 | 4.64E-03 | -3.06 | -2.426884 | -1.58 | CA4          |
| 206856_at   | 0.0899329 | 4.66E-03 | -3.05 | -2.430857 | -1.19 | LILRB5       |
| 230003_at   | 0.0899329 | 4.66E-03 | -3.05 | -2.431729 | -1.73 | SLC16A7      |
| 226933_s_at | 0.0899329 | 4.66E-03 | -3.05 | -2.431856 | -1.57 | ID4          |
| 225516_at   | 0.0902715 | 4.70E-03 | -3.05 | -2.439871 | -2.31 | SLC7A2       |
| 238559_at   | 0.0904288 | 4.72E-03 | -3.05 | -2.443438 | -1.05 | LOC101927402 |
| 208078_s_at | 0.0904559 | 4.73E-03 | -3.05 | -2.445967 | -1.5  | SIK1         |
| 214467_at   | 0.0904559 | 4.74E-03 | -3.05 | -2.446609 | -1.59 | GPR65        |
| 235497_at   | 0.0905263 | 4.74E-03 | -3.05 | -2.448088 | -1.21 | LINC01128    |

|              |           |          |       |           |       |        |
|--------------|-----------|----------|-------|-----------|-------|--------|
| 206118_at    | 0.090587  | 4.75E-03 | -3.05 | -2.449897 | -1.87 | STAT4  |
| 204037_at    | 0.0910672 | 4.79E-03 | -3.04 | -2.457677 | -1.12 | LPAR1  |
| 1555938_x_at | 0.0912719 | 4.81E-03 | -3.04 | -2.460763 | -1.74 | VIM    |
| 204150_at    | 0.0913614 | 4.83E-03 | -3.04 | -2.465036 | -1.43 | STAB1  |
| 205100_at    | 0.0913614 | 4.84E-03 | -3.04 | -2.466147 | -2.33 | GFPT2  |
| 204719_at    | 0.0915501 | 4.86E-03 | -3.04 | -2.469598 | -3.02 | ABCA8  |
| 203813_s_at  | 0.0922412 | 4.91E-03 | -3.03 | -2.479287 | -1.55 | SLIT3  |
| 204326_x_at  | 0.0926473 | 4.95E-03 | -3.03 | -2.486632 | -1.67 | MT1X   |
| 219777_at    | 0.0927307 | 4.96E-03 | -3.03 | -2.488307 | -1.68 | GIMAP6 |
| 232068_s_at  | 0.0927307 | 4.96E-03 | -3.03 | -2.4889   | -1.42 | TLR4   |
| 202917_s_at  | 0.0927307 | 4.96E-03 | -3.03 | -2.488999 | -2.97 | S100A8 |

|              |           |          |       |           |       |           |
|--------------|-----------|----------|-------|-----------|-------|-----------|
| 1569004_at   | 0.0927509 | 4.96E-03 | -3.03 | -2.489875 | -1.26 | CARD8-AS1 |
| 232383_at    | 0.092879  | 4.97E-03 | -3.03 | -2.491466 | -1.22 | TFEC      |
| 220306_at    | 0.0929358 | 4.98E-03 | -3.03 | -2.492883 | -1.42 | FAM46C    |
| 216080_s_at  | 0.0930701 | 4.99E-03 | -3.03 | -2.494624 | -1.22 | FADS3     |
| 219064_at    | 0.0931023 | 5.00E-03 | -3.03 | -2.495708 | -1.85 | ITIH5     |
| 1557797_a_at | 0.0933807 | 5.03E-03 | -3.02 | -2.5021   | -1.28 |           |
| 228062_at    | 0.0935877 | 5.05E-03 | -3.02 | -2.50661  | -1.54 | NAP1L5    |
| 209687_at    | 0.0936307 | 5.08E-03 | -3.02 | -2.511126 | -2.77 | CXCL12    |
| 209555_s_at  | 0.0939473 | 5.12E-03 | -3.02 | -2.517938 | -2.76 | CD36      |
| 218764_at    | 0.0939473 | 5.12E-03 | -3.02 | -2.517969 | -1.23 | PRKCH     |

|             |           |          |       |           |       |         |
|-------------|-----------|----------|-------|-----------|-------|---------|
| 208116_s_at | 0.0939616 | 5.13E-03 | -3.02 | -2.519732 | -1.23 | MAN1A1  |
| 203373_at   | 0.0939616 | 5.13E-03 | -3.02 | -2.519995 | -1.54 | SOCS2   |
| 202974_at   | 0.0939616 | 5.13E-03 | -3.02 | -2.520145 | -1.59 | MPP1    |
| 229584_at   | 0.09423   | 5.16E-03 | -3.01 | -2.525378 | -1.54 | LRRK2   |
| 210184_at   | 0.0947002 | 5.21E-03 | -3.01 | -2.534276 | -1.11 | ITGAX   |
| 209829_at   | 0.0949917 | 5.24E-03 | -3.01 | -2.539257 | -2.38 | FAM65B  |
| 229521_at   | 0.0950893 | 5.24E-03 | -3.01 | -2.54051  | -1.24 | CCDC71L |
| 228551_at   | 0.0951799 | 5.27E-03 | -3.01 | -2.544443 | -1.13 | DENND5B |
| 205752_s_at | 0.0954742 | 5.29E-03 | -3    | -2.548706 | -1    | GSTM5   |
| 201859_at   | 0.0954742 | 5.30E-03 | -3    | -2.550419 | -1.26 | SRGN    |



|             |           |          |       |           |       |           |
|-------------|-----------|----------|-------|-----------|-------|-----------|
| 210299_s_at | 0.0954742 | 5.31E-03 | -3    | -2.552433 | -2.34 | FHL1      |
| 44790_s_at  | 0.0956338 | 5.33E-03 | -3    | -2.555515 | -2.02 | KIAA0226L |
| 210090_at   | 0.0956691 | 5.33E-03 | -3    | -2.556158 | -1.03 | ARC       |
| 202878_s_at | 0.0959312 | 5.36E-03 | -3    | -2.561176 | -1.3  | CD93      |
| 225092_at   | 0.0959312 | 5.36E-03 | -3    | -2.5614   | -1.06 | RABEP1    |
| 229383_at   | 0.0959736 | 5.37E-03 | -3    | -2.563245 | -1.56 | 1-Mar     |
| 201060_x_at | 0.0959736 | 5.38E-03 | -3    | -2.564217 | -1    | STOM      |
| 235121_at   | 0.0965017 | 5.43E-03 | -2.99 | -2.57198  | -1.09 | ZNF542P   |
| 230866_at   | 0.0966151 | 5.44E-03 | -2.99 | -2.574943 | -1.08 | CYSLTR1   |
| 224964_s_at | 0.0966167 | 5.45E-03 | -2.99 | -2.5759   | -1.94 | GNG2      |
| 232330_at   | 0.0966657 | 5.46E-03 | -2.99 | -2.578014 | -1.47 | COA1      |

|             |           |          |       |           |       |         |
|-------------|-----------|----------|-------|-----------|-------|---------|
| 203088_at   | 0.0967286 | 5.47E-03 | -2.99 | -2.580024 | -2.16 | FBLN5   |
| 228233_at   | 0.096925  | 5.49E-03 | -2.99 | -2.583482 | -1.23 | FREM1   |
| 226771_at   | 0.0971892 | 5.52E-03 | -2.99 | -2.5875   | -1.11 | ATP8B2  |
| 224840_at   | 0.097263  | 5.53E-03 | -2.99 | -2.588846 | -1.5  | FKBP5   |
| 201810_s_at | 0.0975221 | 5.55E-03 | -2.98 | -2.592704 | -1.35 | SH3BP5  |
| 205307_s_at | 0.0980971 | 5.60E-03 | -2.98 | -2.601078 | -1.04 | KMO     |
| 1569940_at  | 0.0981003 | 5.60E-03 | -2.98 | -2.601819 | -1.11 | SLC6A16 |
| 1564077_at  | 0.0989191 | 5.68E-03 | -2.98 | -2.613771 | -1.37 |         |
| 213438_at   | 0.0989254 | 5.68E-03 | -2.98 | -2.614123 | -2    | NFASC   |
| 243606_at   | 0.099253  | 5.71E-03 | -2.97 | -2.61922  | -1.46 | NXPE3   |

|             |           |          |       |           |       |        |
|-------------|-----------|----------|-------|-----------|-------|--------|
| 1569599_at  | 0.0993331 | 5.74E-03 | -2.97 | -2.624047 | -1.46 | SAMSN1 |
| 231484_at   | 0.0995369 | 5.76E-03 | -2.97 | -2.627449 | -1.75 |        |
| 226673_at   | 0.1002048 | 5.82E-03 | -2.97 | -2.63617  | -1.03 | SH2D3C |
| 235674_at   | 0.1002699 | 5.83E-03 | -2.97 | -2.637981 | -1.03 |        |
| 235020_at   | 0.1002699 | 5.83E-03 | -2.97 | -2.638067 | -1.11 | TAF4B  |
| 213262_at   | 0.1002888 | 5.84E-03 | -2.96 | -2.639244 | -1.1  | SACS   |
| 205758_at   | 0.1002888 | 5.84E-03 | -2.96 | -2.640456 | -2.28 | CD8A   |
| 203666_at   | 0.100291  | 5.86E-03 | -2.96 | -2.643414 | -1.98 | CXCL12 |
| 206978_at   | 0.1002926 | 5.87E-03 | -2.96 | -2.644775 | -1.68 | CCR2   |
| 203372_s_at | 0.1004341 | 5.89E-03 | -2.96 | -2.647044 | -1.54 | SOCS2  |
| 231947_at   | 0.1005507 | 5.90E-03 | -2.96 | -2.648865 | -1.33 | MYCT1  |

|             |           |          |       |           |       |        |
|-------------|-----------|----------|-------|-----------|-------|--------|
| 207735_at   | 0.1009395 | 5.93E-03 | -2.96 | -2.653565 | -1.28 | RNF125 |
| 235306_at   | 0.1009529 | 5.93E-03 | -2.96 | -2.654261 | -1.61 | GIMAP8 |
| 209220_at   | 0.1012945 | 5.97E-03 | -2.96 | -2.659944 | -1.84 | GPC3   |
| 213436_at   | 0.1015642 | 6.00E-03 | -2.95 | -2.664388 | -1.35 | CNR1   |
| 203400_s_at | 0.1024818 | 6.07E-03 | -2.95 | -2.675225 | -1.56 | TF     |
| 239803_at   | 0.1029431 | 6.13E-03 | -2.95 | -2.68365  | -1.03 |        |
| 206974_at   | 0.1037975 | 6.22E-03 | -2.94 | -2.697131 | -1.01 | CXCR6  |
| 226806_s_at | 0.1041718 | 6.25E-03 | -2.94 | -2.702685 | -1.01 | NFIA   |
| 228097_at   | 0.1042561 | 6.26E-03 | -2.94 | -2.703708 | -1.02 | MYLIP  |
| 1561181_at  | 0.1046456 | 6.32E-03 | -2.93 | -2.712722 | -1.16 |        |
| 215630_at   | 0.1048194 | 6.33E-03 | -2.93 | -2.714526 | -1.11 |        |
| 208914_at   | 0.1051279 | 6.38E-03 | -2.93 | -2.720559 | -1.04 | GGA2   |
| 49452_at    | 0.1051967 | 6.39E-03 | -2.93 | -2.721929 | -1.44 | ACACB  |

|             |           |          |       |           |       |         |
|-------------|-----------|----------|-------|-----------|-------|---------|
| 206461_x_at | 0.1051995 | 6.39E-03 | -2.93 | -2.722667 | -1.62 | MT1H    |
| 204959_at   | 0.1051995 | 6.39E-03 | -2.93 | -2.722847 | -1.64 | MNDA    |
| 220012_at   | 0.1057196 | 6.44E-03 | -2.93 | -2.729314 | -2.51 | ERO1B   |
| 210031_at   | 0.1058114 | 6.48E-03 | -2.92 | -2.734794 | -1.28 | CD247   |
| 223395_at   | 0.1058114 | 6.48E-03 | -2.92 | -2.736042 | -2.57 | ABI3BP  |
| 228339_at   | 0.1068265 | 6.56E-03 | -2.92 | -2.746581 | -1.33 | ECSCR   |
| 227404_s_at | 0.1076068 | 6.63E-03 | -2.91 | -2.757039 | -1.57 | EGR1    |
| 227239_at   | 0.1083805 | 6.74E-03 | -2.91 | -2.771005 | -1.35 | FAM126A |

|             |           |          |       |           |       |            |
|-------------|-----------|----------|-------|-----------|-------|------------|
| 227799_at   | 0.1084458 | 6.75E-03 | -2.91 | -2.772704 | -1.11 | MYO1G      |
| 239205_s_at | 0.1087731 | 6.78E-03 | -2.9  | -2.776848 | -1.35 | CR1L///CR1 |
| 228357_at   | 0.1088072 | 6.79E-03 | -2.9  | -2.77784  | -1.06 | UNK        |
| 224856_at   | 0.1088574 | 6.79E-03 | -2.9  | -2.778802 | -1.69 | FKBP5      |
| 230081_at   | 0.1090987 | 6.82E-03 | -2.9  | -2.782179 | -2.21 | PLCXD3     |
| 228665_at   | 0.1096473 | 6.87E-03 | -2.9  | -2.789378 | -1.36 | CYYR1      |
| 201743_at   | 0.1096759 | 6.88E-03 | -2.9  | -2.790188 | -1.72 | CD14       |
| 209539_at   | 0.1099108 | 6.90E-03 | -2.9  | -2.793383 | -1.47 | ARHGEF6    |
| 232712_at   | 0.1102781 | 6.95E-03 | -2.89 | -2.79977  | -1.21 |            |

|             |           |          |       |           |       |         |
|-------------|-----------|----------|-------|-----------|-------|---------|
| 201693_s_at | 0.1102781 | 6.95E-03 | -2.89 | -2.799805 | -1.81 | EGR1    |
| 224909_s_at | 0.1104005 | 6.96E-03 | -2.89 | -2.801316 | -1.12 | PREX1   |
| 201110_s_at | 0.1104641 | 6.97E-03 | -2.89 | -2.802587 | -1.58 | THBS1   |
| 210401_at   | 0.1104641 | 6.98E-03 | -2.89 | -2.803213 | -2.15 | P2RX1   |
| 207008_at   | 0.111084  | 7.03E-03 | -2.89 | -2.810473 | -1.16 | CXCR2   |
| 216766_at   | 0.111084  | 7.05E-03 | -2.89 | -2.812207 | -1.22 |         |
| 238987_at   | 0.1123655 | 7.16E-03 | -2.88 | -2.827069 | -1.16 | B4GALT1 |
| 225816_at   | 0.1126493 | 7.20E-03 | -2.88 | -2.832011 | -1.43 | JADE1   |
| 229937_x_at | 0.1128227 | 7.22E-03 | -2.88 | -2.83447  | -1.75 |         |
| 232204_at   | 0.1129567 | 7.25E-03 | -2.88 | -2.838208 | -1.5  | EBF1    |
| 205741_s_at | 0.1134793 | 7.32E-03 | -2.87 | -2.84736  | -1.01 | DTNA    |

|             |           |          |       |           |       |          |
|-------------|-----------|----------|-------|-----------|-------|----------|
| 205933_at   | 0.1134994 | 7.33E-03 | -2.87 | -2.848821 | -1.11 | SETBP1   |
| 212956_at   | 0.1135015 | 7.34E-03 | -2.87 | -2.849464 | -1    | TBC1D9   |
| 206209_s_at | 0.1135015 | 7.34E-03 | -2.87 | -2.849616 | -1.83 | CA4      |
| 230309_at   | 0.1136469 | 7.39E-03 | -2.87 | -2.855977 | -1.47 | BHMT2    |
| 235061_at   | 0.1139392 | 7.43E-03 | -2.87 | -2.861225 | -1.28 | PPM1K    |
| 226959_at   | 0.1140799 | 7.46E-03 | -2.87 | -2.864312 | -1.24 |          |
| 1554636_at  | 0.1146419 | 7.53E-03 | -2.86 | -2.87327  | -1.47 |          |
| 235708_at   | 0.1146419 | 7.53E-03 | -2.86 | -2.873388 | -1.21 | KLB      |
| 1556451_at  | 0.1146419 | 7.54E-03 | -2.86 | -2.874025 | -1.32 |          |
| 202957_at   | 0.1146419 | 7.54E-03 | -2.86 | -2.874728 | -1.83 | HCLS1    |
| 41577_at    | 0.1147782 | 7.57E-03 | -2.86 | -2.877581 | -1.75 | PPP1R16B |



|             |           |          |       |           |       |        |
|-------------|-----------|----------|-------|-----------|-------|--------|
| 221760_at   | 0.1148258 | 7.57E-03 | -2.86 | -2.87847  | -1.19 | MAN1A1 |
| 209774_x_at | 0.1148506 | 7.58E-03 | -2.86 | -2.879307 | -2.2  | CXCL2  |
| 204955_at   | 0.1148752 | 7.59E-03 | -2.86 | -2.880393 | -2.31 | SRPX   |
| 244885_at   | 0.1154478 | 7.65E-03 | -2.86 | -2.887704 | -1.82 | EBF2   |
| 225389_at   | 0.1154478 | 7.65E-03 | -2.86 | -2.888026 | -1.1  | BTBD6  |
| 242563_at   | 0.1155688 | 7.69E-03 | -2.85 | -2.892217 | -1.12 |        |
| 226810_at   | 0.1158792 | 7.73E-03 | -2.85 | -2.896937 | -1.08 | OGFRL1 |
| 201540_at   | 0.115976  | 7.76E-03 | -2.85 | -2.900756 | -1.93 | FHL1   |
| 208788_at   | 0.1160356 | 7.77E-03 | -2.85 | -2.901931 | -1.06 | ELOVL5 |
| 204103_at   | 0.1162643 | 7.80E-03 | -2.85 | -2.905732 | -1.94 | CCL4   |

|             |           |          |       |           |       |                      |
|-------------|-----------|----------|-------|-----------|-------|----------------------|
| 228636_at   | 0.1164206 | 7.82E-03 | -2.85 | -2.907461 | -1.39 | BHLHE22              |
| 207175_at   | 0.1166249 | 7.84E-03 | -2.85 | -2.910561 | -3.3  | ADIPOQ               |
| 203865_s_at | 0.1171303 | 7.89E-03 | -2.84 | -2.915515 | -1.23 | ADARB1               |
| 208195_at   | 0.1172525 | 7.90E-03 | -2.84 | -2.917464 | -1.18 | TTN                  |
| 1558686_at  | 0.1173259 | 7.93E-03 | -2.84 | -2.920496 | -1.1  | MPV17L               |
| 229656_s_at | 0.117446  | 7.96E-03 | -2.84 | -2.923927 | -1.27 | EML6                 |
| 228314_at   | 0.1178527 | 8.02E-03 | -2.84 | -2.93054  | -1.05 | LOC101927933//LRRC8C |

|             |           |          |       |           |       |         |
|-------------|-----------|----------|-------|-----------|-------|---------|
| 226304_at   | 0.1183776 | 8.10E-03 | -2.83 | -2.939758 | -1.12 | HSPB6   |
| 228750_at   | 0.1185199 | 8.13E-03 | -2.83 | -2.94365  | -2.55 | COL14A1 |
| 209243_s_at | 0.1190678 | 8.19E-03 | -2.83 | -2.949931 | -1.2  | PEG3    |
| 226627_at   | 0.1193498 | 8.24E-03 | -2.83 | -2.956001 | -1.15 | SEPT8   |
| 222326_at   | 0.1203275 | 8.35E-03 | -2.82 | -2.968291 | -1.46 |         |
| 225809_at   | 0.1204869 | 8.37E-03 | -2.82 | -2.970464 | -1.51 | PARM1   |
| 229560_at   | 0.1211548 | 8.46E-03 | -2.82 | -2.979889 | -1.57 | TLR8    |
| 244276_at   | 0.1212736 | 8.48E-03 | -2.81 | -2.982266 | -1.33 | KLB     |
| 205440_s_at | 0.1212736 | 8.48E-03 | -2.81 | -2.982404 | -2.04 | NPY1R   |
| 213547_at   | 0.1212736 | 8.49E-03 | -2.81 | -2.982769 | -1.11 | CAND2   |
| 242836_at   | 0.1213213 | 8.51E-03 | -2.81 | -2.984722 | -1.88 |         |
| 206049_at   | 0.1213213 | 8.52E-03 | -2.81 | -2.985774 | -1.29 | SELP    |

|              |           |          |       |           |       |                      |
|--------------|-----------|----------|-------|-----------|-------|----------------------|
| 211144_x_at  | 0.1213213 | 8.53E-03 | -2.81 | -2.987343 | -1.23 | TARP///TRGV9///TRGC2 |
| 226382_at    | 0.1213213 | 8.53E-03 | -2.81 | -2.987531 | -1.71 |                      |
| 209357_at    | 0.1214682 | 8.56E-03 | -2.81 | -2.990549 | -1.26 | CITED2               |
| 1563498_s_at | 0.1215379 | 8.58E-03 | -2.81 | -2.992245 | -1.21 | SLC25A45             |
| 209795_at    | 0.121722  | 8.59E-03 | -2.81 | -2.994101 | -2.26 | CD69                 |
| 213541_s_at  | 0.1218038 | 8.61E-03 | -2.81 | -2.995425 | -1.64 | ERG                  |
| 200811_at    | 0.1218705 | 8.62E-03 | -2.81 | -2.996398 | -1.08 | CIRBP                |

|             |           |          |       |           |       |         |
|-------------|-----------|----------|-------|-----------|-------|---------|
| 215671_at   | 0.122159  | 8.66E-03 | -2.81 | -3.000854 | -1.15 | PDE4B   |
| 232614_at   | 0.1225719 | 8.70E-03 | -2.8  | -3.005414 | -1.33 |         |
| 203657_s_at | 0.1228085 | 8.74E-03 | -2.8  | -3.009582 | -1    | CTSF    |
| 241844_x_at | 0.1229953 | 8.77E-03 | -2.8  | -3.013024 | -1.27 | TMEM156 |
| 242751_at   | 0.1231199 | 8.80E-03 | -2.8  | -3.015352 | -1.14 |         |
| 219191_s_at | 0.1232798 | 8.81E-03 | -2.8  | -3.017238 | -1.25 | BIN2    |
| 204796_at   | 0.1233475 | 8.82E-03 | -2.8  | -3.017974 | -1.29 | EML1    |
| 225987_at   | 0.1235607 | 8.85E-03 | -2.8  | -3.020582 | -1.71 | STEAP4  |
| 235213_at   | 0.1240385 | 8.91E-03 | -2.79 | -3.026951 | -1.13 | ITPKB   |
| 32502_at    | 0.1243657 | 8.96E-03 | -2.79 | -3.031762 | -1.03 | GDPD5   |
| 229686_at   | 0.1246263 | 8.99E-03 | -2.79 | -3.035294 | -1.86 | P2RY8   |
| 241302_at   | 0.1247772 | 9.01E-03 | -2.79 | -3.037084 | -1.39 |         |

|              |           |          |       |           |       |          |
|--------------|-----------|----------|-------|-----------|-------|----------|
| 226625_at    | 0.1247772 | 9.01E-03 | -2.79 | -3.037154 | -1.14 | TGFBR3   |
| 206002_at    | 0.1247772 | 9.03E-03 | -2.79 | -3.039187 | -1.61 | ADGRG2   |
| 207980_s_at  | 0.125095  | 9.09E-03 | -2.79 | -3.045176 | -1.12 | CITED2   |
| 205399_at    | 0.1253472 | 9.12E-03 | -2.78 | -3.048391 | -1.08 | DCLK1    |
| 209821_at    | 0.1254258 | 9.13E-03 | -2.78 | -3.049651 | -2.2  | IL33     |
| 244370_at    | 0.1254977 | 9.14E-03 | -2.78 | -3.050402 | -1.33 | KIAA2022 |
| 235209_at    | 0.1260111 | 9.20E-03 | -2.78 | -3.056416 | -1.01 | SBSPON   |
| 1565228_s_at | 0.1262503 | 9.24E-03 | -2.78 | -3.0602   | -2.15 | ALB      |
| 1559663_at   | 0.1269301 | 9.32E-03 | -2.78 | -3.068395 | -1.26 |          |

|             |           |          |       |           |       |                     |
|-------------|-----------|----------|-------|-----------|-------|---------------------|
| 215332_s_at | 0.1274147 | 9.39E-03 | -2.77 | -3.075162 | -1.03 | LOC100996919///CD8B |
| 209568_s_at | 0.1274147 | 9.39E-03 | -2.77 | -3.075331 | -1.32 | RGL1                |
| 203485_at   | 0.1276661 | 9.42E-03 | -2.77 | -3.07788  | -1.82 | RTN1                |
| 209199_s_at | 0.1277248 | 9.44E-03 | -2.77 | -3.080046 | -1.49 | MEF2C               |
| 204745_x_at | 0.1280004 | 9.48E-03 | -2.77 | -3.083404 | -1.73 | MT1G                |
| 232473_at   | 0.128121  | 9.50E-03 | -2.77 | -3.08601  | -1.25 | LOC101928524        |
| 231181_at   | 0.128121  | 9.51E-03 | -2.77 | -3.086139 | -1.25 |                     |
| 242521_at   | 0.1281397 | 9.54E-03 | -2.77 | -3.089113 | -1.11 | CARD8-AS1           |
| 241505_at   | 0.1282043 | 9.55E-03 | -2.77 | -3.090468 | -2.41 |                     |
| 232543_x_at | 0.1284356 | 9.58E-03 | -2.76 | -3.093174 | -1.71 | ARHGAP9             |

|             |           |          |       |           |       |         |
|-------------|-----------|----------|-------|-----------|-------|---------|
| 220330_s_at | 0.1286183 | 9.62E-03 | -2.76 | -3.096756 | -1.96 | SAMSN1  |
| 204430_s_at | 0.1288105 | 9.64E-03 | -2.76 | -3.099434 | -1.25 | SLC2A5  |
| 203680_at   | 0.1288261 | 9.66E-03 | -2.76 | -3.100891 | -2.15 | PRKAR2B |
| 203471_s_at | 0.1288748 | 9.67E-03 | -2.76 | -3.101688 | -1.77 | PLEK    |
| 202075_s_at | 0.1293097 | 9.72E-03 | -2.76 | -3.106533 | -1.46 | PLTP    |
| 239006_at   | 0.1301722 | 9.83E-03 | -2.75 | -3.116641 | -1.32 | SLC26A7 |
| 205518_s_at | 0.1303516 | 9.87E-03 | -2.75 | -3.120029 | -1.62 | CMAHP   |
| 230958_s_at | 0.1308698 | 9.93E-03 | -2.75 | -3.12628  | -1.01 |         |



|             |           |          |       |           |       |          |
|-------------|-----------|----------|-------|-----------|-------|----------|
| 219505_at   | 0.1310845 | 9.95E-03 | -2.75 | -3.128168 | -1.99 | CECR1    |
| 221541_at   | 0.1311943 | 9.97E-03 | -2.75 | -3.129193 | -1.27 | CRISPLD2 |
| 204501_at   | 0.1312256 | 9.98E-03 | -2.75 | -3.130286 | -1.43 | NOV      |
| 204912_at   | 0.1313122 | 9.99E-03 | -2.75 | -3.131138 | -1.76 | IL10RA   |
| 202644_s_at | 0.1314342 | 1.00E-02 | -2.75 | -3.134522 | -1.45 | TNFAIP3  |
| 227530_at   | 0.1320298 | 1.01E-02 | -2.74 | -3.141961 | -1.71 | AKAP12   |
| 210839_s_at | 0.132074  | 1.01E-02 | -2.74 | -3.1427   | -1.84 | ENPP2    |
| 210039_s_at | 0.1324566 | 1.02E-02 | -2.74 | -3.146429 | -1.02 | PRKCQ    |
| 219279_at   | 0.1324566 | 1.02E-02 | -2.74 | -3.146854 | -1.92 | DOCK10   |

|             |           |          |       |           |       |         |
|-------------|-----------|----------|-------|-----------|-------|---------|
| 244598_at   | 0.1326866 | 1.02E-02 | -2.74 | -3.149614 | -1.02 | LCP2    |
| 209541_at   | 0.133289  | 1.03E-02 | -2.74 | -3.158459 | -2.6  | IGF1    |
| 201858_s_at | 0.1338402 | 1.03E-02 | -2.73 | -3.163442 | -1.74 | SRGN    |
| 237624_at   | 0.1340184 | 1.04E-02 | -2.73 | -3.165944 | -1.29 |         |
| 202992_at   | 0.1340358 | 1.04E-02 | -2.73 | -3.166277 | -2.75 | C7      |
| 239533_at   | 0.1340395 | 1.04E-02 | -2.73 | -3.166749 | -1.39 | GPR155  |
| 206618_at   | 0.1342553 | 1.04E-02 | -2.73 | -3.169669 | -1.46 | IL18R1  |
| 234192_s_at | 0.1342578 | 1.04E-02 | -2.73 | -3.170387 | -1.16 | GKAP1   |
| 1558397_at  | 0.1343458 | 1.04E-02 | -2.73 | -3.171381 | -1.08 | PECAM1  |
| 219155_at   | 0.1344314 | 1.05E-02 | -2.73 | -3.174329 | -1.1  | PITPNC1 |

|             |           |          |       |           |       |         |
|-------------|-----------|----------|-------|-----------|-------|---------|
| 221667_s_at | 0.13479   | 1.05E-02 | -2.73 | -3.180214 | -1.85 | HSPB8   |
| 229477_at   | 0.1347949 | 1.06E-02 | -2.72 | -3.181666 | -1.36 | THRSP   |
| 213135_at   | 0.1353249 | 1.06E-02 | -2.72 | -3.186508 | -1.51 | TIAM1   |
| 205961_s_at | 0.1355207 | 1.06E-02 | -2.72 | -3.188706 | -1    | PSIP1   |
| 1559776_at  | 0.1358125 | 1.07E-02 | -2.72 | -3.19398  | -1    |         |
| 232687_at   | 0.1358125 | 1.07E-02 | -2.72 | -3.194089 | -1.26 | GPRIN3  |
| 227232_at   | 0.1358283 | 1.07E-02 | -2.72 | -3.194803 | -1.01 | EVL     |
| 229011_at   | 0.1358283 | 1.07E-02 | -2.72 | -3.195136 | -1.32 | EMP1    |
| 226906_s_at | 0.1364191 | 1.08E-02 | -2.72 | -3.20248  | -1.5  | ARHGAP9 |
| 210613_s_at | 0.1364992 | 1.08E-02 | -2.71 | -3.203421 | -1.18 | SYNGR1  |
| 205419_at   | 0.1366426 | 1.08E-02 | -2.71 | -3.205436 | -2.08 | GPR183  |

|             |           |          |       |           |       |                      |
|-------------|-----------|----------|-------|-----------|-------|----------------------|
| 209277_at   | 0.1371662 | 1.09E-02 | -2.71 | -3.214079 | -2.69 | TFPI2                |
| 203104_at   | 0.1378069 | 1.10E-02 | -2.71 | -3.22045  | -1.52 | CSF1R                |
| 235978_at   | 0.1383089 | 1.11E-02 | -2.7  | -3.225414 | -2.06 | FABP4                |
| 203185_at   | 0.1383379 | 1.11E-02 | -2.7  | -3.226798 | -1.41 | RASSF2               |
| 209813_x_at | 0.1385039 | 1.11E-02 | -2.7  | -3.228352 | -1.32 | TARP///TRGV9///TRGC2 |
| 224997_x_at | 0.1385599 | 1.11E-02 | -2.7  | -3.228938 | -2.01 | MIR675///H19         |

|              |           |          |       |           |       |          |
|--------------|-----------|----------|-------|-----------|-------|----------|
| 226705_at    | 0.1385599 | 1.11E-02 | -2.7  | -3.229276 | -1.5  | FGFR1    |
| 1555638_a_at | 0.1386423 | 1.11E-02 | -2.7  | -3.2305   | -1.64 | SAMSN1   |
| 204834_at    | 0.1391789 | 1.12E-02 | -2.7  | -3.236034 | -1.97 | FGL2     |
| 205357_s_at  | 0.1391789 | 1.12E-02 | -2.7  | -3.236073 | -1.63 | AGTR1    |
| 228434_at    | 0.1395683 | 1.13E-02 | -2.7  | -3.241523 | -1.18 | BTNL9    |
| 206366_x_at  | 0.1395683 | 1.13E-02 | -2.7  | -3.241794 | -1.39 | XCL1     |
| 212750_at    | 0.1395683 | 1.13E-02 | -2.7  | -3.241817 | -1.68 | PPP1R16B |
| 239183_at    | 0.1395683 | 1.13E-02 | -2.7  | -3.241985 | -1.71 | ANGPTL1  |
| 209828_s_at  | 0.1398624 | 1.13E-02 | -2.7  | -3.247096 | -1.03 | IL16     |
| 224451_x_at  | 0.1399168 | 1.14E-02 | -2.69 | -3.247858 | -1.76 | ARHGAP9  |

|             |           |          |       |           |       |         |
|-------------|-----------|----------|-------|-----------|-------|---------|
| 217966_s_at | 0.140406  | 1.14E-02 | -2.69 | -3.25252  | -1.31 | FAM129A |
| 206707_x_at | 0.140406  | 1.14E-02 | -2.69 | -3.253038 | -1.44 | FAM65B  |
| 220187_at   | 0.1407152 | 1.15E-02 | -2.69 | -3.256493 | -1.35 | STEAP4  |
| 238458_at   | 0.1407258 | 1.15E-02 | -2.69 | -3.25697  | -1.12 | MICU3   |
| 240173_at   | 0.1408995 | 1.15E-02 | -2.69 | -3.26078  | -1.2  | GPRIN3  |
| 227929_at   | 0.1408995 | 1.15E-02 | -2.69 | -3.261341 | -1.03 | LIN7A   |
| 236907_at   | 0.1414218 | 1.16E-02 | -2.69 | -3.267957 | -1.12 |         |
| 206761_at   | 0.1414218 | 1.16E-02 | -2.69 | -3.268543 | -1.26 | CD96    |
| 1566079_at  | 0.1416897 | 1.17E-02 | -2.68 | -3.271474 | -1.44 | RPS16P5 |

|             |           |          |       |           |       |                         |
|-------------|-----------|----------|-------|-----------|-------|-------------------------|
| 212636_at   | 0.1422039 | 1.17E-02 | -2.68 | -3.277298 | -1.46 | QKI                     |
| 241278_at   | 0.1425052 | 1.18E-02 | -2.68 | -3.280683 | -1.2  |                         |
| 218870_at   | 0.1436243 | 1.20E-02 | -2.67 | -3.29461  | -1.84 | LOC101928361///ARHGAP15 |
| 222043_at   | 0.1437451 | 1.20E-02 | -2.67 | -3.296753 | -1.96 | CLU                     |
| 215775_at   | 0.1442023 | 1.20E-02 | -2.67 | -3.300825 | -1.06 | THBS1                   |
| 202156_s_at | 0.1442332 | 1.21E-02 | -2.67 | -3.302538 | -1.62 | CELF2                   |
| 243915_at   | 0.1442367 | 1.21E-02 | -2.67 | -3.303223 | -1.29 |                         |
| 239336_at   | 0.1442898 | 1.21E-02 | -2.67 | -3.303952 | -1.5  | THBS1                   |
| 209540_at   | 0.1445516 | 1.21E-02 | -2.67 | -3.306387 | -2.25 | IGF1                    |
| 216944_s_at | 0.1447355 | 1.21E-02 | -2.67 | -3.309121 | -1.48 | ITPR1                   |
| 203980_at   | 0.1449386 | 1.22E-02 | -2.67 | -3.311181 | -3.35 | FABP4                   |

|             |           |          |       |           |       |                 |
|-------------|-----------|----------|-------|-----------|-------|-----------------|
| 1557166_at  | 0.1454674 | 1.23E-02 | -2.66 | -3.318614 | -1.33 | PDCD4           |
| 225282_at   | 0.1454857 | 1.23E-02 | -2.66 | -3.318925 | -1.29 | SMAP2           |
| 201109_s_at | 0.1459714 | 1.24E-02 | -2.66 | -3.324514 | -1.78 | THBS1           |
| 228528_at   | 0.1465168 | 1.24E-02 | -2.66 | -3.32963  | -1.09 | MIR29C//MIR29B2 |
| 229127_at   | 0.1467686 | 1.25E-02 | -2.66 | -3.332551 | -1.52 | JAM2            |
| 231773_at   | 0.1471895 | 1.25E-02 | -2.65 | -3.336256 | -2.17 | ANGPTL1         |
| 211535_s_at | 0.1475036 | 1.26E-02 | -2.65 | -3.340495 | -1.17 | FGFR1           |
| 205901_at   | 0.1476793 | 1.26E-02 | -2.65 | -3.342238 | -1.51 | PNOC            |
| 235666_at   | 0.1484456 | 1.28E-02 | -2.65 | -3.354501 | -1.58 | ITGA8           |
| 214434_at   | 0.1484456 | 1.28E-02 | -2.65 | -3.355203 | -1.23 | HSPA12A         |



|             |           |          |       |           |       |                     |
|-------------|-----------|----------|-------|-----------|-------|---------------------|
| 202628_s_at | 0.1484456 | 1.28E-02 | -2.65 | -3.355389 | -1.85 | SERPINE1            |
| 225602_at   | 0.1486538 | 1.28E-02 | -2.64 | -3.357664 | -1.15 | GLIPR2              |
| 235626_at   | 0.1487307 | 1.29E-02 | -2.64 | -3.360036 | -1.02 | CAMK1D              |
| 241926_s_at | 0.1491152 | 1.29E-02 | -2.64 | -3.364285 | -1.16 | ERG                 |
| 223809_at   | 0.1492726 | 1.29E-02 | -2.64 | -3.366024 | -1.05 | RGS18               |
| 213309_at   | 0.1493546 | 1.30E-02 | -2.64 | -3.368027 | -1.22 | PLCL2               |
| 244026_at   | 0.1493837 | 1.30E-02 | -2.64 | -3.368629 | -1.29 |                     |
| 237459_at   | 0.1494198 | 1.30E-02 | -2.64 | -3.369374 | -1.03 |                     |
| 205821_at   | 0.1496142 | 1.30E-02 | -2.64 | -3.371362 | -1.69 | KLRC4-KLRK1///KLRK1 |
| 202037_s_at | 0.149705  | 1.30E-02 | -2.64 | -3.372621 | -2.47 | SFRP1               |
| 220065_at   | 0.1502304 | 1.31E-02 | -2.64 | -3.377072 | -1.51 | TNMD                |
| 214954_at   | 0.1512751 | 1.32E-02 | -2.63 | -3.387209 | -1.53 | SUSD5               |

|             |           |          |       |           |       |          |
|-------------|-----------|----------|-------|-----------|-------|----------|
| 231944_at   | 0.1513406 | 1.33E-02 | -2.63 | -3.387943 | -2.31 | ERO1B    |
| 205653_at   | 0.1518182 | 1.33E-02 | -2.63 | -3.392301 | -1.18 | CTSG     |
| 224348_s_at | 0.1527147 | 1.34E-02 | -2.63 | -3.399099 | -1.22 | HOTS     |
| 205269_at   | 0.1528911 | 1.34E-02 | -2.62 | -3.401249 | -1.41 | LCP2     |
| 244289_at   | 0.1529514 | 1.35E-02 | -2.62 | -3.402121 | -1.39 | ZNF300P1 |
| 214063_s_at | 0.153195  | 1.35E-02 | -2.62 | -3.404974 | -1.04 | TF       |
| 219689_at   | 0.1533298 | 1.36E-02 | -2.62 | -3.408163 | -1.6  | SEMA3G   |
| 203708_at   | 0.1533298 | 1.36E-02 | -2.62 | -3.409521 | -1.68 | PDE4B    |
| 202743_at   | 0.1533298 | 1.36E-02 | -2.62 | -3.40978  | -1.05 | PIK3R3   |
| 231192_at   | 0.1533298 | 1.36E-02 | -2.62 | -3.409793 | -1.22 | LPAR3    |
| 230048_at   | 0.1533298 | 1.36E-02 | -2.62 | -3.410694 | -1.38 | IFRD1    |

|             |           |          |       |           |       |             |
|-------------|-----------|----------|-------|-----------|-------|-------------|
| 220423_at   | 0.1534364 | 1.36E-02 | -2.62 | -3.413336 | -1.12 | PLA2G2D     |
| 226271_at   | 0.1535306 | 1.36E-02 | -2.62 | -3.414605 | -1.09 | GDAP1       |
| 211138_s_at | 0.1536229 | 1.37E-02 | -2.62 | -3.415891 | -1.34 | KMO         |
| 227113_at   | 0.1537813 | 1.37E-02 | -2.62 | -3.417717 | -1.13 | ADHFE1      |
| 214567_s_at | 0.1544115 | 1.38E-02 | -2.61 | -3.425203 | -1.27 | XCL2///XCL1 |
| 226591_at   | 0.1544115 | 1.38E-02 | -2.61 | -3.42551  | -1.48 | PWAR6       |
| 229623_at   | 0.1554222 | 1.40E-02 | -2.61 | -3.436614 | -1.18 | TMEM150C    |

|             |           |          |       |           |       |          |
|-------------|-----------|----------|-------|-----------|-------|----------|
| 214078_at   | 0.1554222 | 1.40E-02 | -2.61 | -3.436907 | -2    | PAK3     |
| 219574_at   | 0.1554222 | 1.40E-02 | -2.61 | -3.436928 | -1.48 | 1-Mar    |
| 225212_at   | 0.1557688 | 1.40E-02 | -2.61 | -3.440405 | -1.1  | SLC25A25 |
| 203296_s_at | 0.1561804 | 1.41E-02 | -2.6  | -3.443989 | -2.13 | ATP1A2   |
| 200670_at   | 0.1561804 | 1.41E-02 | -2.6  | -3.444068 | -1.05 | XBP1     |
| 203130_s_at | 0.1565971 | 1.42E-02 | -2.6  | -3.448134 | -1.17 | KIF5C    |
| 230237_at   | 0.1565971 | 1.42E-02 | -2.6  | -3.4483   | -1.68 | ADCYAP1  |
| 232843_s_at | 0.1567473 | 1.42E-02 | -2.6  | -3.449894 | -1.44 | DOCK8    |
| 202498_s_at | 0.1568253 | 1.42E-02 | -2.6  | -3.450708 | -1.56 | SLC2A3   |

|             |           |          |       |           |       |         |
|-------------|-----------|----------|-------|-----------|-------|---------|
| 202158_s_at | 0.1568461 | 1.42E-02 | -2.6  | -3.451374 | -1.58 | CELF2   |
| 235129_at   | 0.1573546 | 1.43E-02 | -2.6  | -3.456477 | -1.12 | PPP1R1A |
| 229199_at   | 0.1574774 | 1.43E-02 | -2.6  | -3.457785 | -1.03 | SCN9A   |
| 230550_at   | 0.1577829 | 1.44E-02 | -2.6  | -3.460583 | -1.6  | MS4A6A  |
| 1563469_at  | 0.1577985 | 1.44E-02 | -2.6  | -3.46192  | -1.23 |         |
| 205354_at   | 0.1581774 | 1.44E-02 | -2.59 | -3.465711 | -1.33 | GAMT    |
| 228409_at   | 0.1585318 | 1.45E-02 | -2.59 | -3.469715 | -1.56 | PLIN4   |
| 228737_at   | 0.1586475 | 1.45E-02 | -2.59 | -3.470914 | -1.39 | TOX2    |
| 227084_at   | 0.1586575 | 1.45E-02 | -2.59 | -3.471151 | -1.66 | DTNA    |

|             |           |          |       |           |       |         |
|-------------|-----------|----------|-------|-----------|-------|---------|
| 203603_s_at | 0.1590683 | 1.46E-02 | -2.59 | -3.474964 | -1.35 | ZEB2    |
| 210517_s_at | 0.1590683 | 1.46E-02 | -2.59 | -3.475196 | -1.69 | AKAP12  |
| 206296_x_at | 0.1590683 | 1.46E-02 | -2.59 | -3.475785 | -1.51 | MAP4K1  |
| 206702_at   | 0.1590683 | 1.46E-02 | -2.59 | -3.476312 | -1.15 | TEK     |
| 205407_at   | 0.1598289 | 1.48E-02 | -2.59 | -3.484796 | -1.5  | RECK    |
| 209392_at   | 0.1603768 | 1.48E-02 | -2.58 | -3.489292 | -1.76 | ENPP2   |
| 203470_s_at | 0.1607346 | 1.49E-02 | -2.58 | -3.492548 | -1.25 | PLEK    |
| 226641_at   | 0.1609416 | 1.49E-02 | -2.58 | -3.494471 | -1.39 | ANKRD44 |
| 222872_x_at | 0.1609416 | 1.49E-02 | -2.58 | -3.494598 | -1.05 | NABP1   |

|             |           |          |       |           |       |         |
|-------------|-----------|----------|-------|-----------|-------|---------|
| 228333_at   | 0.1610344 | 1.50E-02 | -2.58 | -3.496865 | -1.39 | ZEB2    |
| 206682_at   | 0.1610344 | 1.50E-02 | -2.58 | -3.496894 | -1.29 | CLEC10A |
| 218559_s_at | 0.1612314 | 1.50E-02 | -2.58 | -3.499192 | -1.33 | MAFB    |
| 230391_at   | 0.1632    | 1.54E-02 | -2.57 | -3.522838 | -1.8  | CD84    |
| 229024_at   | 0.1635055 | 1.54E-02 | -2.57 | -3.525958 | -1.59 | RNF150  |
| 238668_at   | 0.164063  | 1.55E-02 | -2.56 | -3.530202 | -1.71 | NCKAP1L |
| 203413_at   | 0.1641796 | 1.55E-02 | -2.56 | -3.531213 | -1.76 | NELL2   |
| 228176_at   | 0.1641796 | 1.56E-02 | -2.56 | -3.532188 | -1.38 | S1PR3   |
| 222670_s_at | 0.1641796 | 1.56E-02 | -2.56 | -3.532417 | -1.15 | MAFB    |
| 220276_at   | 0.1641796 | 1.56E-02 | -2.56 | -3.532442 | -1.47 | RERGL   |
| 202157_s_at | 0.1643212 | 1.56E-02 | -2.56 | -3.534399 | -1.55 | CELF2   |

|              |           |          |       |           |       |        |
|--------------|-----------|----------|-------|-----------|-------|--------|
| 240665_at    | 0.1645056 | 1.56E-02 | -2.56 | -3.536622 | -1.47 |        |
| 213924_at    | 0.1645676 | 1.56E-02 | -2.56 | -3.537135 | -1.02 | GNAL   |
| 230030_at    | 0.1648027 | 1.57E-02 | -2.56 | -3.538939 | -1.22 | HS6ST2 |
| 1552474_a_at | 0.1651493 | 1.57E-02 | -2.56 | -3.543029 | -1.56 | GAMT   |
| 227826_s_at  | 0.1651493 | 1.57E-02 | -2.56 | -3.543423 | -2.32 | SORBS2 |
| 232262_at    | 0.1652283 | 1.58E-02 | -2.56 | -3.544337 | -1.11 | PIGL   |
| 205913_at    | 0.1652491 | 1.58E-02 | -2.56 | -3.545002 | -2    | PLIN1  |
| 241765_at    | 0.1659337 | 1.59E-02 | -2.55 | -3.550616 | -1.06 | CPM    |
| 235042_at    | 0.166093  | 1.59E-02 | -2.55 | -3.552763 | -1.22 | XIRP1  |
| 210889_s_at  | 0.1670522 | 1.61E-02 | -2.55 | -3.560968 | -1.64 | FCGR2B |
| 236506_at    | 0.1676925 | 1.62E-02 | -2.55 | -3.56627  | -1.02 |        |



|              |           |          |       |           |       |         |
|--------------|-----------|----------|-------|-----------|-------|---------|
| 212845_at    | 0.168568  | 1.63E-02 | -2.54 | -3.572487 | -1.2  | SAMD4A  |
| 217967_s_at  | 0.1692692 | 1.64E-02 | -2.54 | -3.578262 | -1.29 | FAM129A |
| 235385_at    | 0.1693845 | 1.64E-02 | -2.54 | -3.579893 | -1.75 | 1-Mar   |
| 204224_s_at  | 0.1694896 | 1.64E-02 | -2.54 | -3.58062  | -1.01 | GCH1    |
| 237201_at    | 0.1695378 | 1.64E-02 | -2.54 | -3.581555 | -1.05 |         |
| 236359_at    | 0.1696174 | 1.64E-02 | -2.54 | -3.582316 | -1.58 | SCN4B   |
| 221602_s_at  | 0.169984  | 1.65E-02 | -2.54 | -3.585273 | -1.51 | FCMR    |
| 205270_s_at  | 0.1700314 | 1.65E-02 | -2.54 | -3.585693 | -1.25 | LCP2    |
| 222168_at    | 0.1700644 | 1.65E-02 | -2.54 | -3.586206 | -1.08 |         |
| 218236_s_at  | 0.1703625 | 1.66E-02 | -2.54 | -3.589367 | -1.02 | PRKD3   |
| 1552497_a_at | 0.1703625 | 1.66E-02 | -2.54 | -3.589471 | -1.17 | SLAMF6  |

|             |           |          |       |           |       |                  |
|-------------|-----------|----------|-------|-----------|-------|------------------|
| 227061_at   | 0.171139  | 1.67E-02 | -2.53 | -3.596423 | -2.37 | LINC01279        |
| 217165_x_at | 0.1718064 | 1.68E-02 | -2.53 | -3.603936 | -1.49 | MT1F             |
| 231109_at   | 0.1723506 | 1.70E-02 | -2.53 | -3.610469 | -1.22 |                  |
| 205771_s_at | 0.1724499 | 1.70E-02 | -2.53 | -3.611153 | -2.06 | AKAP7            |
| 226909_at   | 0.172652  | 1.70E-02 | -2.52 | -3.613538 | -1.47 | ZNF518B          |
| 222088_s_at | 0.172947  | 1.71E-02 | -2.52 | -3.615486 | -1.83 | SLC2A14///SLC2A3 |
| 210439_at   | 0.172947  | 1.71E-02 | -2.52 | -3.61557  | -1.49 | ICOS             |
| 220518_at   | 0.1730535 | 1.71E-02 | -2.52 | -3.616791 | -1.51 | ABI3BP           |
| 229476_s_at | 0.1733044 | 1.71E-02 | -2.52 | -3.619086 | -1.46 | THRSP            |
| 228071_at   | 0.1736824 | 1.72E-02 | -2.52 | -3.622535 | -1.77 | GIMAP7           |

|             |           |          |       |           |       |                       |
|-------------|-----------|----------|-------|-----------|-------|-----------------------|
| 227002_at   | 0.17549   | 1.75E-02 | -2.51 | -3.638377 | -1.03 | LOC101927137///FAM78A |
| 238429_at   | 0.1758548 | 1.75E-02 | -2.51 | -3.640789 | -1.38 | TMEM71                |
| 222073_at   | 0.176366  | 1.76E-02 | -2.51 | -3.644214 | -1.65 | COL4A3                |
| 223553_s_at | 0.176732  | 1.77E-02 | -2.51 | -3.649025 | -1.39 | DOK3                  |
| 244375_at   | 0.1780522 | 1.79E-02 | -2.5  | -3.659202 | -1.02 |                       |
| 229670_at   | 0.1781117 | 1.79E-02 | -2.5  | -3.659915 | -1.55 |                       |
| 225502_at   | 0.178775  | 1.80E-02 | -2.5  | -3.664712 | -1.39 | DOCK8                 |
| 221933_at   | 0.1794648 | 1.81E-02 | -2.5  | -3.66995  | -1.37 | NLGN4X                |
| 227529_s_at | 0.1802927 | 1.83E-02 | -2.49 | -3.677312 | -1.99 | AKAP12                |
| 205820_s_at | 0.180497  | 1.83E-02 | -2.49 | -3.678976 | -1.78 | APOC3                 |
| 209906_at   | 0.1813041 | 1.85E-02 | -2.49 | -3.685872 | -1.34 | C3AR1                 |

|             |           |          |       |           |       |           |
|-------------|-----------|----------|-------|-----------|-------|-----------|
| 229461_x_at | 0.1818405 | 1.85E-02 | -2.49 | -3.689573 | -1.83 | NEGR1     |
| 1552280_at  | 0.1818422 | 1.85E-02 | -2.49 | -3.690305 | -1.09 | TIMD4     |
| 227554_at   | 0.1821398 | 1.86E-02 | -2.49 | -3.694324 | -1.37 | MAGI2-AS3 |
| 202643_s_at | 0.1822501 | 1.86E-02 | -2.49 | -3.695026 | -1.46 | TNFAIP3   |
| 212713_at   | 0.1836752 | 1.89E-02 | -2.48 | -3.705194 | -2.22 | MFAP4     |
| 204204_at   | 0.1843899 | 1.90E-02 | -2.48 | -3.713281 | -1.08 | SLC31A2   |
| 220418_at   | 0.1846258 | 1.91E-02 | -2.48 | -3.715376 | -1    | UBASH3A   |
| 235438_at   | 0.184799  | 1.91E-02 | -2.48 | -3.716551 | -1.22 | CYP7B1    |

|             |           |          |       |           |       |             |
|-------------|-----------|----------|-------|-----------|-------|-------------|
| 214265_at   | 0.1848415 | 1.91E-02 | -2.47 | -3.717053 | -1.18 | ITGA8       |
| 215039_at   | 0.1857762 | 1.93E-02 | -2.47 | -3.724354 | -1.44 | LINC01140   |
| 205789_at   | 0.185821  | 1.93E-02 | -2.47 | -3.724783 | -1.64 | CD1D        |
| 217227_x_at | 0.1858377 | 1.93E-02 | -2.47 | -3.725021 | -2.41 | IGLV1-44    |
| 221259_s_at | 0.1859667 | 1.93E-02 | -2.47 | -3.72643  | -1.69 | TEX11       |
| 210658_s_at | 0.1859677 | 1.93E-02 | -2.47 | -3.726868 | -1.01 | GGA2        |
| 227030_at   | 0.1859677 | 1.93E-02 | -2.47 | -3.727537 | -1.4  | IKZF3       |
| 228828_at   | 0.1860845 | 1.93E-02 | -2.47 | -3.728255 | -1    | TSPOAP1-AS1 |
| 236796_at   | 0.1867129 | 1.94E-02 | -2.47 | -3.732821 | -1.47 |             |
| 213160_at   | 0.1867323 | 1.95E-02 | -2.47 | -3.73359  | -1.68 | DOCK2       |

|             |           |          |       |           |       |         |
|-------------|-----------|----------|-------|-----------|-------|---------|
| 206028_s_at | 0.1869847 | 1.95E-02 | -2.47 | -3.735711 | -1.19 | MERTK   |
| 227817_at   | 0.1869975 | 1.95E-02 | -2.47 | -3.735929 | -1.47 | PRKCB   |
| 212977_at   | 0.187513  | 1.96E-02 | -2.46 | -3.740111 | -1.09 | ACKR3   |
| 224061_at   | 0.1879238 | 1.97E-02 | -2.46 | -3.743942 | -1.38 | INMT    |
| 239122_at   | 0.1881983 | 1.97E-02 | -2.46 | -3.74587  | -1.16 |         |
| 237945_at   | 0.1883129 | 1.98E-02 | -2.46 | -3.747037 | -1.2  |         |
| 226818_at   | 0.1886645 | 1.99E-02 | -2.46 | -3.752678 | -1.95 | MPEG1   |
| 236307_at   | 0.1893365 | 2.00E-02 | -2.45 | -3.758089 | -1.45 |         |
| 205159_at   | 0.1898259 | 2.01E-02 | -2.45 | -3.763482 | -1.79 | CSF2RB  |
| 209191_at   | 0.1898645 | 2.01E-02 | -2.45 | -3.763971 | -1.15 | TUBB6   |
| 239237_at   | 0.1911259 | 2.04E-02 | -2.45 | -3.774443 | -1.03 | TRG-AS1 |

|             |           |          |       |           |       |          |
|-------------|-----------|----------|-------|-----------|-------|----------|
| 243357_at   | 0.1913512 | 2.04E-02 | -2.45 | -3.776923 | -1.54 | NEGR1    |
| 205551_at   | 0.1918459 | 2.05E-02 | -2.44 | -3.781516 | -1.6  | SV2B     |
| 1559425_at  | 0.1919852 | 2.06E-02 | -2.44 | -3.783079 | -1.16 |          |
| 229309_at   | 0.192676  | 2.07E-02 | -2.44 | -3.789932 | -1.32 | ADRB1    |
| 200962_at   | 0.1926825 | 2.07E-02 | -2.44 | -3.790361 | -1.11 | RPL31    |
| 243771_at   | 0.1926825 | 2.07E-02 | -2.44 | -3.790509 | -1.13 |          |
| 203760_s_at | 0.1927368 | 2.08E-02 | -2.44 | -3.792041 | -1.52 | SLA      |
| 209734_at   | 0.1927368 | 2.08E-02 | -2.44 | -3.792485 | -1.2  | NCKAP1L  |
| 225424_at   | 0.1928928 | 2.08E-02 | -2.44 | -3.793812 | -1.33 | GPAM     |
| 226344_at   | 0.1933809 | 2.09E-02 | -2.44 | -3.797728 | -1.01 | ZMAT1    |
| 213407_at   | 0.193488  | 2.09E-02 | -2.44 | -3.798975 | -1.05 | PHLPP2   |
| 215275_at   | 0.1949521 | 2.12E-02 | -2.43 | -3.811555 | -1.07 | TRAF3IP3 |

|             |           |          |       |           |       |             |
|-------------|-----------|----------|-------|-----------|-------|-------------|
| 202497_x_at | 0.195068  | 2.13E-02 | -2.43 | -3.812708 | -1.59 | SLC2A3      |
| 212732_at   | 0.1958648 | 2.14E-02 | -2.43 | -3.818408 | -1.9  | MEG3        |
| 208981_at   | 0.1959878 | 2.14E-02 | -2.43 | -3.819751 | -1.02 | PECAM1      |
| 227344_at   | 0.1959878 | 2.15E-02 | -2.42 | -3.820574 | -1.23 | IKZF1       |
| 240450_at   | 0.1959878 | 2.15E-02 | -2.42 | -3.820607 | -1.26 |             |
| 216331_at   | 0.196505  | 2.15E-02 | -2.42 | -3.823849 | -1.27 | ITGA7       |
| 203387_s_at | 0.1970468 | 2.16E-02 | -2.42 | -3.827694 | -1.11 | TBC1D4      |
| 228826_at   | 0.1975165 | 2.17E-02 | -2.42 | -3.832438 | -1.27 | TSPOAP1-AS1 |
| 207002_s_at | 0.1975827 | 2.18E-02 | -2.42 | -3.834354 | -1.08 | PLAGL1      |
| 227677_at   | 0.19777   | 2.18E-02 | -2.42 | -3.835789 | -1.39 | JAK3        |

---

**GSE41372**

---

| ID | adj.P.Val | P.Value | t | B | logFC | Gene.symbol | Gene.title |
|----|-----------|---------|---|---|-------|-------------|------------|
|----|-----------|---------|---|---|-------|-------------|------------|

---



---

|         |          |          |          |           |      |         |                                              |
|---------|----------|----------|----------|-----------|------|---------|----------------------------------------------|
| 7971077 | 4.00E-08 | 1.38E-12 | 2.57E+01 | 18.390565 | 6.14 | POSTN   | periostin                                    |
| 7953603 | 5.17E-08 | 4.16E-12 | 2.35E+01 | 17.528426 | 2.6  | C1S     | complement component 1, s subcomponent       |
| 7920128 | 7.34E-08 | 1.02E-11 | 2.20E+01 | 16.801415 | 2.43 | S100A11 | S100 calcium binding protein A11             |
| 7908072 | 1.50E-07 | 2.60E-11 | 2.04E+01 | 16.01109  | 4.43 | LAMC2   | laminin subunit gamma 2                      |
| 8146863 | 2.14E-07 | 4.43E-11 | 1.96E+01 | 15.553041 | 4.96 | SULF1   | sulfatase 1                                  |
| 8056860 | 2.19E-07 | 5.30E-11 | 1.93E+01 | 15.397494 | 2.26 | WIPF1   | WAS/WASL interacting protein family member 1 |
| 7995681 | 4.01E-07 | 1.25E-10 | 1.80E+01 | 14.643232 | 3.41 | MMP2    | matrix metalloproteinase 2                   |

|         |          |          |          |           |      |        |                                           |
|---------|----------|----------|----------|-----------|------|--------|-------------------------------------------|
| 8058765 | 6.45E-07 | 2.23E-10 | 1.72E+01 | 14.121596 | 4.6  | FN1    | fibronectin 1                             |
| 7919815 | 7.83E-07 | 2.98E-10 | 1.68E+01 | 13.858927 | 3.32 | CTSK   | cathepsin K                               |
| 7971296 | 8.26E-07 | 3.62E-10 | 1.66E+01 | 13.681818 | 2.77 | EPSTI1 | epithelial stromal interaction 1 (breast) |
| 7965403 | 8.26E-07 | 3.71E-10 | 1.65E+01 | 13.658242 | 2.08 | LUM    | lumican                                   |
| 8170648 | 8.74E-07 | 4.42E-10 | 1.63E+01 | 13.498322 | 3.35 | BGN    | biglycan                                  |
| 8059905 | 8.74E-07 | 4.53E-10 | 1.63E+01 | 13.47535  | 3.52 | COL6A3 | collagen type VI alpha 3 chain            |
| 8066214 | 1.27E-06 | 7.50E-10 | 1.56E+01 | 13.009744 | 1.88 | TGM2   | transglutaminase 2                        |
| 8106743 | 1.27E-06 | 8.02E-10 | 1.55E+01 | 12.948021 | 4.18 | VCAN   | versican                                  |

|         |          |          |          |           |      |                                                                                                                                                                                                                                                                                                                                                                 |
|---------|----------|----------|----------|-----------|------|-----------------------------------------------------------------------------------------------------------------------------------------------------------------------------------------------------------------------------------------------------------------------------------------------------------------------------------------------------------------|
| 8179041 | 1.27E-06 | 8.31E-10 | 1.55E+01 | 12.914649 | 1.66 | major histocompatibility complex, class I, H<br>(pseudogene)//major histocompatibility<br>HLA-H//HLA-complex, class I, C//major<br>C//HLA-B//H histocompatibility complex, class I,<br>LA-A//HLA-B B//major histocompatibility complex, class<br>//HLA-A I, A//major histocompatibility complex,<br>class I, B//major histocompatibility<br>complex, class I, A |
|---------|----------|----------|----------|-----------|------|-----------------------------------------------------------------------------------------------------------------------------------------------------------------------------------------------------------------------------------------------------------------------------------------------------------------------------------------------------------------|

|         |          |          |          |           |      |         |                                           |
|---------|----------|----------|----------|-----------|------|---------|-------------------------------------------|
| 8115327 | 1.27E-06 | 8.31E-10 | 1.55E+01 | 12.913892 | 2.61 | SPARC   | secreted protein acidic and cysteine rich |
| 8020110 | 1.29E-06 | 8.92E-10 | 1.54E+01 | 12.848629 | 3.49 | RAB31   | RAB31, member RAS oncogene family         |
| 8045688 | 1.40E-06 | 1.07E-09 | 1.52E+01 | 12.676725 | 4.35 | TNFAIP6 | TNF alpha induced protein 6               |
| 8150509 | 1.40E-06 | 1.13E-09 | 1.51E+01 | 12.630084 | 1.88 | PLAT    | plasminogen activator, tissue type        |
| 8106393 | 1.40E-06 | 1.24E-09 | 1.50E+01 | 12.537268 | 2.78 | F2R     | coagulation factor II thrombin receptor   |

|         |          |          |          |           |      |       |                                     |
|---------|----------|----------|----------|-----------|------|-------|-------------------------------------|
| 7960744 | 1.40E-06 | 1.28E-09 | 1.50E+01 | 12.508682 | 2.38 | C1R   | complement C1r subcomponent         |
| 7950933 | 1.40E-06 | 1.33E-09 | 1.49E+01 | 12.473807 | 3.56 | NOX4  | NADPH oxidase 4                     |
| 8139087 | 1.40E-06 | 1.39E-09 | 1.49E+01 | 12.434215 | 3.89 | SFRP4 | secreted frizzled related protein 4 |
| 7903893 | 1.40E-06 | 1.40E-09 | 1.49E+01 | 12.424007 | 3.27 | CD53  | CD53 molecule                       |
| 7902553 | 1.41E-06 | 1.50E-09 | 1.48E+01 | 12.364264 | 2.34 | IFI44 | interferon induced protein 44       |
| 8001800 | 1.41E-06 | 1.52E-09 | 1.48E+01 | 12.352359 | 3.52 | CDH11 | cadherin 11                         |
| 8167185 | 1.51E-06 | 1.76E-09 | 1.46E+01 | 12.210357 | 3.52 | TIMP1 | TIMP metalloproteinase inhibitor 1  |
| 8102232 | 1.51E-06 | 1.77E-09 | 1.46E+01 | 12.206293 | 3.69 | LEF1  | lymphoid enhancer binding factor 1  |

|         |          |          |          |           |      |        |                              |
|---------|----------|----------|----------|-----------|------|--------|------------------------------|
| 7926545 | 1.55E-06 | 1.88E-09 | 1.45E+01 | 12.148668 | 2.57 | PLXDC2 | plexin domain containing 2   |
| 8162394 | 1.57E-06 | 1.97E-09 | 1.45E+01 | 12.105202 | 2.41 | ASPN   | asporin                      |
| 8042439 | 1.60E-06 | 2.10E-09 | 1.44E+01 | 12.04605  | 3.55 | ANTXR1 | anthrax toxin receptor 1     |
| 8012896 | 1.78E-06 | 2.46E-09 | 1.42E+01 | 11.894451 | 2.37 | PMP22  | peripheral myelin protein 22 |
| 8046861 | 1.82E-06 | 2.58E-09 | 1.41E+01 | 11.84773  | 1.33 | ITGAV  | integrin subunit alpha V     |

|         |          |          |          |           |      |                               |                                                                                                                                                                                                        |
|---------|----------|----------|----------|-----------|------|-------------------------------|--------------------------------------------------------------------------------------------------------------------------------------------------------------------------------------------------------|
| 8117777 | 1.82E-06 | 2.64E-09 | 1.41E+01 | 11.828505 | 1.41 | HLA-H///HLA-G///HLA-A///HLA-A | major histocompatibility complex, class I, H (pseudogene)///major histocompatibility complex, class I, G///major histocompatibility complex, class I, A///major histocompatibility complex, class I, A |
| 8103563 | 1.84E-06 | 2.86E-09 | 1.40E+01 | 11.752255 | 2.06 | DDX60                         | DEXD/H-box helicase 60                                                                                                                                                                                 |

|         |          |          |          |           |      |             |                                                                |
|---------|----------|----------|----------|-----------|------|-------------|----------------------------------------------------------------|
| 7918902 | 1.84E-06 | 2.86E-09 | 1.40E+01 | 11.750886 | 1.79 | CD58        | CD58 molecule                                                  |
| 8131844 | 1.84E-06 | 2.89E-09 | 1.40E+01 | 11.740938 | 2.85 | GPNMB       | glycoprotein nmb                                               |
| 8155849 | 1.84E-06 | 2.98E-09 | 1.40E+01 | 11.713739 | 2.46 | ANXA1       | annexin A1                                                     |
| 8167965 | 1.84E-06 | 3.05E-09 | 1.40E+01 | 11.68888  | 2.21 | MSN         | moesin                                                         |
| 8089835 | 1.84E-06 | 3.06E-09 | 1.40E+01 | 11.68595  | 2.26 | FSTL1       | follistatin like 1                                             |
| 8115147 | 1.93E-06 | 3.34E-09 | 1.39E+01 | 11.602787 | 2.68 | CD74///ROS1 | CD74 molecule///ROS proto-oncogene 1, receptor tyrosine kinase |
| 8091715 | 1.99E-06 | 3.51E-09 | 1.38E+01 | 11.555699 | 1.9  | LXN         | latexin                                                        |



|         |          |          |          |           |      |                                                                                                                                                                                                   |
|---------|----------|----------|----------|-----------|------|---------------------------------------------------------------------------------------------------------------------------------------------------------------------------------------------------|
| 8044333 | 2.01E-06 | 3.68E-09 | 1.37E+01 | 11.511915 | 1.36 | LIMS4///LIMS LIM zinc finger domain containing<br>3-LOC440895/ 4///LIMS3-LOC440895 readthrough///LIM<br>//LIMS3///LIM zinc finger domain containing 3///LIM zinc<br>S1 finger domain containing 1 |
|---------|----------|----------|----------|-----------|------|---------------------------------------------------------------------------------------------------------------------------------------------------------------------------------------------------|

|         |          |          |          |           |      |                                                                                                                                                                                                   |
|---------|----------|----------|----------|-----------|------|---------------------------------------------------------------------------------------------------------------------------------------------------------------------------------------------------|
| 8054519 | 2.01E-06 | 3.68E-09 | 1.37E+01 | 11.511915 | 1.36 | LIMS4///LIMS LIM zinc finger domain containing<br>3-LOC440895/ 4///LIMS3-LOC440895 readthrough///LIM<br>//LIMS3///LIM zinc finger domain containing 3///LIM zinc<br>S1 finger domain containing 1 |
| 7943413 | 2.28E-06 | 4.26E-09 | 1.36E+01 | 11.370403 | 2.42 | BIRC3 baculoviral IAP repeat containing 3                                                                                                                                                         |

|         |          |          |          |           |      |           |                                            |
|---------|----------|----------|----------|-----------|------|-----------|--------------------------------------------|
| 7910680 | 2.36E-06 | 4.56E-09 | 1.35E+01 | 11.306624 | 1.83 | GPR137B   | G protein-coupled receptor 137B            |
| 7956878 | 2.36E-06 | 4.56E-09 | 1.35E+01 | 11.305173 | 3.02 | IRAK3     | interleukin 1 receptor associated kinase 3 |
| 7937330 | 2.39E-06 | 4.72E-09 | 1.35E+01 | 11.273564 | 1.43 | IFITM2    | interferon induced transmembrane protein 2 |
| 7904018 | 2.62E-06 | 5.31E-09 | 1.33E+01 | 11.15935  | 1.69 | CTTNBP2NL | CTTNBP2 N-terminal like                    |
| 8097692 | 2.62E-06 | 5.35E-09 | 1.33E+01 | 11.152544 | 3.14 | EDNRA     | endothelin receptor type A                 |
| 8129573 | 2.75E-06 | 5.69E-09 | 1.33E+01 | 11.092881 | 3.64 | MOXD1     | monooxygenase DBH like 1                   |

|         |          |          |          |           |      |                       |                                                                                                |
|---------|----------|----------|----------|-----------|------|-----------------------|------------------------------------------------------------------------------------------------|
| 8043945 | 2.80E-06 | 6.04E-09 | 1.32E+01 | 11.036779 | 1.71 | MAP4K4                | mitogen-activated protein kinase kinase kinase kinase 4                                        |
| 8124911 | 2.98E-06 | 6.59E-09 | 1.31E+01 | 10.952728 | 1.79 | HLA-C///HLA-B///HLA-C | major histocompatibility complex, class I, I, B///major histocompatibility complex, class I, B |
| 7935058 | 2.98E-06 | 6.71E-09 | 1.31E+01 | 10.935458 | 2.76 | MYOF                  | myoferlin                                                                                      |
| 8146957 | 3.08E-06 | 7.13E-09 | 1.30E+01 | 10.876068 | 3.06 | PI15                  | peptidase inhibitor 15                                                                         |

|         |          |          |          |           |      |         |                                                                  |
|---------|----------|----------|----------|-----------|------|---------|------------------------------------------------------------------|
| 8101260 | 3.08E-06 | 7.18E-09 | 1.30E+01 | 10.8696   | 1.8  | ANTXR2  | anthrax toxin receptor 2                                         |
| 8066822 | 3.08E-06 | 7.24E-09 | 1.30E+01 | 10.86138  | 2.86 | SULF2   | sulfatase 2                                                      |
| 7908614 | 3.23E-06 | 7.86E-09 | 1.29E+01 | 10.782699 | 1.4  | CAMSAP2 | calmodulin regulated spectrin associated protein family member 2 |

|         |          |          |          |           |      |                                                                                                                                                                                                                                      |
|---------|----------|----------|----------|-----------|------|--------------------------------------------------------------------------------------------------------------------------------------------------------------------------------------------------------------------------------------|
| 8179731 | 3.23E-06 | 7.91E-09 | 1.29E+01 | 10.775797 | 1.78 | major histocompatibility complex, class I,<br>HLA-C///HLA-C///major histocompatibility complex, class<br>B///HLA-C///H I, B///major histocompatibility complex,<br>LA-B class I, C///major histocompatibility<br>complex, class I, B |
|---------|----------|----------|----------|-----------|------|--------------------------------------------------------------------------------------------------------------------------------------------------------------------------------------------------------------------------------------|

|         |          |          |          |           |      |                     |                                                                                                   |
|---------|----------|----------|----------|-----------|------|---------------------|---------------------------------------------------------------------------------------------------|
| 8115099 | 3.23E-06 | 8.01E-09 | 1.29E+01 | 10.764405 | 1.21 | PDGFRB///PD<br>GFRB | platelet derived growth factor receptor<br>beta///platelet derived growth factor receptor<br>beta |
| 7968800 | 3.23E-06 | 8.05E-09 | 1.29E+01 | 10.759606 | 2.31 | DGKH                | diacylglycerol kinase eta                                                                         |
| 8092251 | 3.38E-06 | 8.53E-09 | 1.28E+01 | 10.703419 | 2.11 | GNB4                | G protein subunit beta 4                                                                          |
| 7983360 | 3.46E-06 | 8.96E-09 | 1.28E+01 | 10.656213 | 1.14 | B2M                 | beta-2-microglobulin                                                                              |
| 7988467 | 3.46E-06 | 8.98E-09 | 1.28E+01 | 10.653534 | 3.28 | FBN1                | fibrillin 1                                                                                       |
| 7918426 | 3.65E-06 | 9.71E-09 | 1.27E+01 | 10.577934 | 2.71 | SLC16A4             | solute carrier family 16 member 4                                                                 |

|         |          |          |          |           |      |                       |                                                                                                                 |
|---------|----------|----------|----------|-----------|------|-----------------------|-----------------------------------------------------------------------------------------------------------------|
| 8122756 | 3.65E-06 | 9.87E-09 | 1.27E+01 | 10.561857 | 1.86 | PLEKHG1///P<br>LEKHG1 | pleckstrin homology and RhoGEF domain<br>containing G1///pleckstrin homology and<br>RhoGEF domain containing G1 |
|---------|----------|----------|----------|-----------|------|-----------------------|-----------------------------------------------------------------------------------------------------------------|



|         |          |          |          |           |      |                                                                                                                          |
|---------|----------|----------|----------|-----------|------|--------------------------------------------------------------------------------------------------------------------------|
| 8178498 | 3.65E-06 | 9.96E-09 | 1.27E+01 | 10.553398 | 1.8  | HLA-C///HLA-C///major histocompatibility complex, class I, B///HLA-B I, B///major histocompatibility complex, class I, B |
| 7896722 | 3.78E-06 | 1.05E-08 | 1.26E+01 | 10.505468 | 1.71 |                                                                                                                          |
| 8117760 | 3.82E-06 | 1.07E-08 | 1.26E+01 | 10.484182 | 1.6  | HLA-F///HLA-B major histocompatibility complex, class I, F///major histocompatibility complex, class I, B                |

|         |          |          |          |           |      |        |                                        |
|---------|----------|----------|----------|-----------|------|--------|----------------------------------------|
| 8010454 | 3.83E-06 | 1.10E-08 | 1.26E+01 | 10.45308  | 1.17 | RNF213 | ring finger protein 213                |
| 7900382 | 3.83E-06 | 1.11E-08 | 1.26E+01 | 10.44461  | 1.43 | CAP1   | adenylate cyclase associated protein 1 |
| 8111739 | 3.83E-06 | 1.13E-08 | 1.25E+01 | 10.433726 | 2.81 | FYB    | FYN binding protein                    |
| 7908459 | 4.01E-06 | 1.19E-08 | 1.25E+01 | 10.37977  | 2.38 | CFH    | complement factor H                    |
| 8063444 | 4.21E-06 | 1.26E-08 | 1.24E+01 | 10.32144  | 1.88 | TSHZ2  | teashirt zinc finger homeobox 2        |
| 8101126 | 4.21E-06 | 1.28E-08 | 1.24E+01 | 10.309021 | 4.59 | CXCL10 | C-X-C motif chemokine ligand 10        |

|         |          |          |          |           |      |          |                                      |
|---------|----------|----------|----------|-----------|------|----------|--------------------------------------|
| 8057599 | 4.40E-06 | 1.35E-08 | 1.24E+01 | 10.256361 | 1.61 | TFPI     | tissue factor pathway inhibitor      |
| 7917532 | 4.66E-06 | 1.47E-08 | 1.23E+01 | 10.177767 | 2.77 | GBP2     | guanylate binding protein 2          |
| 8021653 | 4.69E-06 | 1.49E-08 | 1.23E+01 | 10.161682 | 1.47 | SERPINB8 | serpin family B member 8             |
| 8173444 | 4.70E-06 | 1.51E-08 | 1.22E+01 | 10.148243 | 3.7  | IL2RG    | interleukin 2 receptor subunit gamma |
| 7921882 | 4.71E-06 | 1.53E-08 | 1.22E+01 | 10.135061 | 2.47 | OLFML2B  | olfactomedin like 2B                 |
| 7901175 | 4.97E-06 | 1.69E-08 | 1.21E+01 | 10.039095 | 3.64 | TSPAN1   | tetraspanin 1                        |
| 8113709 | 4.97E-06 | 1.72E-08 | 1.21E+01 | 10.019377 | 3.03 | LOX      | lysyl oxidase                        |

|         |          |          |          |           |      |        |                                                   |
|---------|----------|----------|----------|-----------|------|--------|---------------------------------------------------|
| 8113130 | 4.97E-06 | 1.74E-08 | 1.21E+01 | 10.010933 | 2.39 | MCTP1  | multiple C2 and transmembrane domain containing 1 |
| 7945371 | 4.97E-06 | 1.75E-08 | 1.21E+01 | 10.007545 | 1.42 | IFITM3 | interferon induced transmembrane protein 3        |
| 8105267 | 4.97E-06 | 1.77E-08 | 1.21E+01 | 9.995237  | 2.94 | ITGA2  | integrin subunit alpha 2                          |
| 8082100 | 4.97E-06 | 1.77E-08 | 1.21E+01 | 9.994116  | 1.4  | PARP14 | poly(ADP-ribose) polymerase family member 14      |
| 8009417 | 4.97E-06 | 1.77E-08 | 1.21E+01 | 9.993792  | 1.87 | KPNA2  | karyopherin subunit alpha 2                       |

|         |          |          |          |          |      |                 |                                                               |
|---------|----------|----------|----------|----------|------|-----------------|---------------------------------------------------------------|
| 7920258 | 5.08E-06 | 1.83E-08 | 1.21E+01 | 9.962607 | 2.72 | S100A6          | S100 calcium binding protein A6                               |
| 8134263 | 5.19E-06 | 1.90E-08 | 1.20E+01 | 9.924118 | 3.04 | COL1A2///COL1A2 | collagen type I alpha 2 chain///collagen type I alpha 2 chain |
| 7938035 | 5.32E-06 | 1.98E-08 | 1.20E+01 | 9.884455 | 2.02 | TRIM22          | tripartite motif containing 22                                |
| 8019737 | 5.32E-06 | 1.99E-08 | 1.20E+01 | 9.880666 | 1.81 | KPNA2           | karyopherin subunit alpha 2                                   |
| 8088919 | 5.37E-06 | 2.03E-08 | 1.20E+01 | 9.862417 | 1.77 | ROBO1           | roundabout guidance receptor 1                                |

|         |          |          |          |          |      |                                                                                                                                                                                                                              |
|---------|----------|----------|----------|----------|------|------------------------------------------------------------------------------------------------------------------------------------------------------------------------------------------------------------------------------|
|         |          |          |          |          |      | major histocompatibility complex, class I, H<br>(pseudogene)//major histocompatibility                                                                                                                                       |
|         |          |          |          |          |      | HLA-H//HLA-complex, class I, F//major                                                                                                                                                                                        |
| 8177788 | 5.53E-06 | 2.16E-08 | 1.19E+01 | 9.798811 | 1.44 | F//HLA-E//H histocompatibility complex, class I,<br>LA-B//HLA-A E//major histocompatibility complex, class<br>//HLA-A I, B//major histocompatibility complex,<br>class I, A//major histocompatibility<br>complex, class I, A |

|         |          |          |          |          |      |                                                                                                                                                                                                                              |
|---------|----------|----------|----------|----------|------|------------------------------------------------------------------------------------------------------------------------------------------------------------------------------------------------------------------------------|
|         |          |          |          |          |      | major histocompatibility complex, class I, H<br>(pseudogene)//major histocompatibility                                                                                                                                       |
|         |          |          |          |          |      | HLA-H//HLA-complex, class I, F//major                                                                                                                                                                                        |
| 8179103 | 5.53E-06 | 2.16E-08 | 1.19E+01 | 9.798811 | 1.44 | F//HLA-E//H histocompatibility complex, class I,<br>LA-B//HLA-A E//major histocompatibility complex, class<br>//HLA-A I, B//major histocompatibility complex,<br>class I, A//major histocompatibility<br>complex, class I, A |

|         |          |          |          |          |      |        |                                    |
|---------|----------|----------|----------|----------|------|--------|------------------------------------|
| 8066905 | 5.53E-06 | 2.16E-08 | 1.19E+01 | 9.798746 | 1.28 | ZNFX1  | zinc finger NFX1-type containing 1 |
| 8085914 | 5.77E-06 | 2.28E-08 | 1.18E+01 | 9.748419 | 1.92 | SLC4A7 | solute carrier family 4 member 7   |



|         |          |          |          |          |      |                                                                                                                                                                                                                                                                                                                |
|---------|----------|----------|----------|----------|------|----------------------------------------------------------------------------------------------------------------------------------------------------------------------------------------------------------------------------------------------------------------------------------------------------------------|
| 8177732 | 5.78E-06 | 2.31E-08 | 1.18E+01 | 9.735364 | 1.89 | major histocompatibility complex, class I, H<br>(pseudogene)///major histocompatibility<br>HLA-H///HLA-complex, class I, B///major<br>B///HLA-A///H histocompatibility complex, class I,<br>LA-B///HLA-A A///major histocompatibility complex, class<br>I, B///major histocompatibility complex,<br>class I, A |
|---------|----------|----------|----------|----------|------|----------------------------------------------------------------------------------------------------------------------------------------------------------------------------------------------------------------------------------------------------------------------------------------------------------------|

|         |          |          |          |          |      |        |                         |
|---------|----------|----------|----------|----------|------|--------|-------------------------|
| 8021442 | 5.78E-06 | 2.32E-08 | 1.18E+01 | 9.730397 | 1.66 | ZNF532 | zinc finger protein 532 |
|---------|----------|----------|----------|----------|------|--------|-------------------------|

|         |          |          |          |          |      |                                                                                                                                                                                                                                                                                                               |
|---------|----------|----------|----------|----------|------|---------------------------------------------------------------------------------------------------------------------------------------------------------------------------------------------------------------------------------------------------------------------------------------------------------------|
| 8117800 | 5.84E-06 | 2.36E-08 | 1.18E+01 | 9.712067 | 1.87 | major histocompatibility complex, class I, H<br>(pseudogene)///major histocompatibility<br>HLA-H///HLA-complex, class I, C///major<br>C///HLA-B///H histocompatibility complex, class I,<br>LA-A///HLA-AB///major histocompatibility complex, class<br>I, A///major histocompatibility complex,<br>class I, A |
|---------|----------|----------|----------|----------|------|---------------------------------------------------------------------------------------------------------------------------------------------------------------------------------------------------------------------------------------------------------------------------------------------------------------|

|         |          |          |          |          |      |        |                                                                |
|---------|----------|----------|----------|----------|------|--------|----------------------------------------------------------------|
| 8103601 | 5.84E-06 | 2.40E-08 | 1.18E+01 | 9.696883 | 1.67 | DDX60L | DEAD-box helicase 60-like                                      |
| 8122336 | 5.84E-06 | 2.42E-08 | 1.18E+01 | 9.688575 | 1.85 | ABRACL | ABRA C-terminal like                                           |
| 8022674 | 5.84E-06 | 2.46E-08 | 1.18E+01 | 9.673705 | 2.09 | CDH2   | cadherin 2                                                     |
| 8105061 | 6.45E-06 | 2.74E-08 | 1.17E+01 | 9.565441 | 3.14 | FYB    | FYN binding protein                                            |
| 8174610 | 6.56E-06 | 2.83E-08 | 1.16E+01 | 9.534816 | 2.1  | LRCH2  | leucine rich repeats and calponin homology domain containing 2 |
| 8130867 | 6.56E-06 | 2.84E-08 | 1.16E+01 | 9.531489 | 3.8  | THBS2  | thrombospondin 2                                               |

|         |          |          |          |          |      |        |                                  |
|---------|----------|----------|----------|----------|------|--------|----------------------------------|
| 8089544 | 6.62E-06 | 2.93E-08 | 1.16E+01 | 9.50103  | 2.17 | CCDC80 | coiled-coil domain containing 80 |
| 8092392 | 6.65E-06 | 2.97E-08 | 1.16E+01 | 9.48859  | 2.14 | KLHL6  | kelch like family member 6       |
| 8104901 | 6.74E-06 | 3.04E-08 | 1.16E+01 | 9.464205 | 3.29 | IL7R   | interleukin 7 receptor           |
| 7963054 | 6.74E-06 | 3.06E-08 | 1.15E+01 | 9.458422 | 1.49 | TUBA1A | tubulin alpha 1a                 |
| 8058477 | 6.74E-06 | 3.08E-08 | 1.15E+01 | 9.452599 | 1.39 | KLF7   | Kruppel like factor 7            |
| 8146000 | 6.80E-06 | 3.15E-08 | 1.15E+01 | 9.429335 | 1.73 | ADAM9  | ADAM metallopeptidase domain 9   |

|         |          |          |          |          |      |               |                                                                                             |
|---------|----------|----------|----------|----------|------|---------------|---------------------------------------------------------------------------------------------|
| 8052355 | 6.80E-06 | 3.15E-08 | 1.15E+01 | 9.428941 | 1.82 | EFEMP1        | EGF containing fibulin like extracellular matrix protein 1                                  |
| 7964757 | 6.80E-06 | 3.17E-08 | 1.15E+01 | 9.422728 | 2.35 |               |                                                                                             |
| 7954711 | 6.84E-06 | 3.21E-08 | 1.15E+01 | 9.40945  | 1.22 | KIAA1551      | KIAA1551                                                                                    |
| 8179019 | 6.99E-06 | 3.33E-08 | 1.15E+01 | 9.3748   | 1.7  | HLA-F///HLA-B | major histocompatibility complex, class I, F///major histocompatibility complex, class I, B |
| 8155214 | 6.99E-06 | 3.36E-08 | 1.15E+01 | 9.365246 | 1.7  | MELK          | maternal embryonic leucine zipper kinase                                                    |

|         |          |          |          |          |      |        |                                 |
|---------|----------|----------|----------|----------|------|--------|---------------------------------|
| 8048926 | 6.99E-06 | 3.39E-08 | 1.14E+01 | 9.357343 | 1.45 | SP140L | SP140 nuclear body protein like |
|---------|----------|----------|----------|----------|------|--------|---------------------------------|

|         |          |          |          |          |      |                                                                                                                                                                                                                                                                                                                                                                 |
|---------|----------|----------|----------|----------|------|-----------------------------------------------------------------------------------------------------------------------------------------------------------------------------------------------------------------------------------------------------------------------------------------------------------------------------------------------------------------|
| 8117890 | 6.99E-06 | 3.41E-08 | 1.14E+01 | 9.352802 | 1.41 | major histocompatibility complex, class I, H<br>(pseudogene)//major histocompatibility<br>HLA-H//HLA-complex, class I, F//major<br>F//HLA-E//H histocompatibility complex, class I,<br>LA-B//HLA-A E//major histocompatibility complex, class<br>//HLA-A I, B//major histocompatibility complex,<br>class I, A//major histocompatibility<br>complex, class I, A |
|---------|----------|----------|----------|----------|------|-----------------------------------------------------------------------------------------------------------------------------------------------------------------------------------------------------------------------------------------------------------------------------------------------------------------------------------------------------------------|



|         |          |          |          |          |      |         |                                     |
|---------|----------|----------|----------|----------|------|---------|-------------------------------------|
| 8046333 | 7.00E-06 | 3.48E-08 | 1.14E+01 | 9.33134  | 2.04 | CYBRD1  | cytochrome b reductase 1            |
| 8056257 | 7.00E-06 | 3.50E-08 | 1.14E+01 | 9.32608  | 3.92 | FAP     | fibroblast activation protein alpha |
| 8115734 | 7.00E-06 | 3.50E-08 | 1.14E+01 | 9.324694 | 2.59 | LCP2    | lymphocyte cytosolic protein 2      |
| 7920123 | 7.00E-06 | 3.51E-08 | 1.14E+01 | 9.323732 | 1.71 | S100A10 | S100 calcium binding protein A10    |

|         |          |          |          |          |      |                        |                                                                                                                     |
|---------|----------|----------|----------|----------|------|------------------------|---------------------------------------------------------------------------------------------------------------------|
| 8178193 | 7.20E-06 | 3.68E-08 | 1.14E+01 | 9.277265 | 2.33 | HLA-DRA///H<br>LA-DQA1 | major histocompatibility complex, class II,<br>DR alpha///major histocompatibility<br>complex, class II, DQ alpha 1 |
| 8015349 | 7.20E-06 | 3.68E-08 | 1.14E+01 | 9.275824 | 2.2  | KRT19                  | keratin 19                                                                                                          |
| 8053064 | 7.45E-06 | 3.86E-08 | 1.13E+01 | 9.228753 | 1.18 | MOB1A                  | MOB kinase activator 1A                                                                                             |
| 8050007 | 7.82E-06 | 4.08E-08 | 1.13E+01 | 9.174533 | 2.06 | PXDN                   | peroxidasin                                                                                                         |
| 8108873 | 7.82E-06 | 4.16E-08 | 1.13E+01 | 9.154737 | 1.77 | ARHGAP26               | Rho GTPase activating protein 26                                                                                    |

|         |          |          |          |          |      |        |                                           |
|---------|----------|----------|----------|----------|------|--------|-------------------------------------------|
| 8046922 | 7.82E-06 | 4.19E-08 | 1.12E+01 | 9.147778 | 2.73 | COL3A1 | collagen type III alpha 1 chain           |
| 8118158 | 7.82E-06 | 4.23E-08 | 1.12E+01 | 9.139796 | 2.28 | AIF1   | allograft inflammatory factor 1           |
| 8177996 | 7.82E-06 | 4.23E-08 | 1.12E+01 | 9.139796 | 2.28 | AIF1   | allograft inflammatory factor 1           |
| 8179276 | 7.82E-06 | 4.23E-08 | 1.12E+01 | 9.139796 | 2.28 | AIF1   | allograft inflammatory factor 1           |
| 7965941 | 7.82E-06 | 4.25E-08 | 1.12E+01 | 9.135616 | 2.75 | GLT8D2 | glycosyltransferase 8 domain containing 2 |

|         |          |          |          |          |      |                    |                                                                                                               |
|---------|----------|----------|----------|----------|------|--------------------|---------------------------------------------------------------------------------------------------------------|
| 8177717 | 7.96E-06 | 4.35E-08 | 1.12E+01 | 9.112331 | 1.7  | HLA-F///HLA-B      | major histocompatibility complex, class I, F///major histocompatibility complex, class I, B                   |
| 8137979 | 7.96E-06 | 4.38E-08 | 1.12E+01 | 9.104969 | 1.83 | ACTB               | actin beta                                                                                                    |
| 8179481 | 7.96E-06 | 4.41E-08 | 1.12E+01 | 9.097925 | 2.44 | HLA-DRA///HLA-DQA1 | major histocompatibility complex, class II, DR alpha///major histocompatibility complex, class II, DQ alpha 1 |

|         |          |          |          |          |      |               |                                                   |
|---------|----------|----------|----------|----------|------|---------------|---------------------------------------------------|
| 8055702 | 7.96E-06 | 4.48E-08 | 1.12E+01 | 9.083508 | 1.65 | NMI           | N-myc and STAT interactor                         |
| 8103415 | 7.96E-06 | 4.49E-08 | 1.12E+01 | 9.081049 | 1.86 | FAM198B       | family with sequence similarity 198 member B      |
| 8047763 | 8.19E-06 | 4.67E-08 | 1.11E+01 | 9.041364 | 3.47 | NRP2          | neuropilin 2                                      |
| 8056184 | 8.35E-06 | 4.82E-08 | 1.11E+01 | 9.011329 | 3.29 | ITGB6///ITGB6 | integrin subunit beta 6///integrin subunit beta 6 |
| 8128956 | 8.35E-06 | 4.83E-08 | 1.11E+01 | 9.008906 | 1.74 | FYN           | FYN proto-oncogene, Src family tyrosine kinase    |

|         |          |          |          |          |      |                       |                                                                                                                               |
|---------|----------|----------|----------|----------|------|-----------------------|-------------------------------------------------------------------------------------------------------------------------------|
| 7914270 | 8.35E-06 | 4.85E-08 | 1.11E+01 | 9.00476  | 3.13 | LAPTM5                | lysosomal protein transmembrane 5                                                                                             |
| 7986214 | 8.35E-06 | 4.88E-08 | 1.11E+01 | 8.998595 | 1.47 | SLCO3A1///SL<br>CO3A1 | solute carrier organic anion transporter<br>family member 3A1///solute carrier organic<br>anion transporter family member 3A1 |
| 7931951 | 8.36E-06 | 4.91E-08 | 1.11E+01 | 8.991104 | 1.38 | SFMBT2                | Scm-like with four mbt domains 2                                                                                              |

|         |          |          |          |          |      |                        |                                                                                                                     |
|---------|----------|----------|----------|----------|------|------------------------|---------------------------------------------------------------------------------------------------------------------|
| 8118548 | 8.71E-06 | 5.18E-08 | 1.11E+01 | 8.939691 | 2.46 | HLA-DRA///H<br>LA-DQA1 | major histocompatibility complex, class II,<br>DR alpha///major histocompatibility<br>complex, class II, DQ alpha 1 |
| 7926916 | 9.01E-06 | 5.39E-08 | 1.10E+01 | 8.900078 | 1.88 | ZEB1                   | zinc finger E-box binding homeobox 1                                                                                |
| 8056113 | 9.09E-06 | 5.48E-08 | 1.10E+01 | 8.882916 | 3.02 | LY75-CD302//<br>/LY75  | LY75-CD302 readthrough///lymphocyte<br>antigen 75                                                                   |

|         |          |          |          |          |      |        |                                                     |
|---------|----------|----------|----------|----------|------|--------|-----------------------------------------------------|
| 7952268 | 9.09E-06 | 5.50E-08 | 1.10E+01 | 8.880553 | 2.52 | THY1   | Thy-1 cell surface antigen                          |
| 7957570 | 9.10E-06 | 5.56E-08 | 1.10E+01 | 8.868894 | 2.43 | PLXNC1 | plexin C1                                           |
| 7929511 | 9.10E-06 | 5.57E-08 | 1.10E+01 | 8.867706 | 2.42 | ENTPD1 | ectonucleoside triphosphate<br>diphosphohydrolase 1 |
| 7985493 | 9.21E-06 | 5.67E-08 | 1.10E+01 | 8.850048 | 2.66 | TM6SF1 | transmembrane 6 superfamily member 1                |
| 8063437 | 9.34E-06 | 5.78E-08 | 1.09E+01 | 8.830885 | 1.73 | TSHZ2  | teashirt zinc finger homeobox 2                     |



|         |          |          |          |          |      |         |                                                       |
|---------|----------|----------|----------|----------|------|---------|-------------------------------------------------------|
| 7954527 | 9.36E-06 | 5.86E-08 | 1.09E+01 | 8.817737 | 2.32 | ARNTL2  | aryl hydrocarbon receptor nuclear translocator like 2 |
| 8089011 | 9.81E-06 | 6.22E-08 | 1.09E+01 | 8.75814  | 2.05 | PROS1   | protein S (alpha)                                     |
| 8104788 | 9.81E-06 | 6.22E-08 | 1.09E+01 | 8.757947 | 1.69 | RAI14   | retinoic acid induced 14                              |
| 8100541 | 9.81E-06 | 6.24E-08 | 1.09E+01 | 8.75476  | 1.21 | IGFBP7  | insulin like growth factor binding protein 7          |
| 7961532 | 9.83E-06 | 6.29E-08 | 1.09E+01 | 8.747573 | 2.39 | ARHGDIB | Rho GDP dissociation inhibitor beta                   |

|         |          |          |          |          |      |        |                                         |
|---------|----------|----------|----------|----------|------|--------|-----------------------------------------|
| 8169541 | 9.98E-06 | 6.41E-08 | 1.09E+01 | 8.727771 | 3.46 | DOCK11 | dedicator of cytokinesis 11             |
| 8149448 | 1.07E-05 | 6.93E-08 | 1.08E+01 | 8.651269 | 2.52 | MSR1   | macrophage scavenger receptor 1         |
| 8108217 | 1.07E-05 | 6.95E-08 | 1.08E+01 | 8.647885 | 2.09 | TGFBI  | transforming growth factor beta induced |
| 7972750 | 1.07E-05 | 7.00E-08 | 1.08E+01 | 8.64057  | 1.1  | COL4A1 | collagen type IV alpha 1 chain          |
| 7945262 | 1.07E-05 | 7.01E-08 | 1.08E+01 | 8.639334 | 1.56 | JAM3   | junctional adhesion molecule 3          |

|         |          |          |          |          |      |                               |                                                                                                                                                                                                                     |
|---------|----------|----------|----------|----------|------|-------------------------------|---------------------------------------------------------------------------------------------------------------------------------------------------------------------------------------------------------------------|
| 8179049 | 1.08E-05 | 7.10E-08 | 1.08E+01 | 8.62737  | 1.47 | HLA-J///HLA-H///HLA-A///HLA-A | major histocompatibility complex, class I, J (pseudogene)///major histocompatibility complex, class I, H (pseudogene)///major histocompatibility complex, class I, A///major histocompatibility complex, class I, A |
| 7980958 | 1.10E-05 | 7.32E-08 | 1.07E+01 | 8.597132 | 1.22 | LGMN                          | legumain                                                                                                                                                                                                            |

|         |          |          |          |          |      |         |                                                              |
|---------|----------|----------|----------|----------|------|---------|--------------------------------------------------------------|
| 8004184 | 1.12E-05 | 7.50E-08 | 1.07E+01 | 8.572437 | 2.49 | XAF1    | XIAP associated factor 1                                     |
| 8158167 | 1.12E-05 | 7.53E-08 | 1.07E+01 | 8.568579 | 3.5  | LCN2    | lipocalin 2                                                  |
| 7908940 | 1.14E-05 | 7.70E-08 | 1.07E+01 | 8.546928 | 1.34 | ATP2B4  | ATPase plasma membrane Ca <sup>2+</sup> transporting 4       |
| 8113358 | 1.15E-05 | 7.80E-08 | 1.07E+01 | 8.533732 | 2.62 | ST8SIA4 | ST8 alpha-N-acetyl-neuraminide alpha-2,8-sialyltransferase 4 |
| 7934906 | 1.15E-05 | 7.82E-08 | 1.07E+01 | 8.531605 | 3.01 | ACTA2   | actin, alpha 2, smooth muscle, aorta                         |

|         |          |          |          |          |      |        |                                              |
|---------|----------|----------|----------|----------|------|--------|----------------------------------------------|
| 8068238 | 1.15E-05 | 7.93E-08 | 1.07E+01 | 8.516967 | 1.47 | IFNAR2 | interferon alpha and beta receptor subunit 2 |
| 7906564 | 1.15E-05 | 7.99E-08 | 1.07E+01 | 8.510219 | 1.47 | PEA15  | phosphoprotein enriched in astrocytes 15     |
| 8045539 | 1.15E-05 | 8.03E-08 | 1.06E+01 | 8.504948 | 3.64 | KYNU   | kynureninase                                 |
| 8141076 | 1.15E-05 | 8.07E-08 | 1.06E+01 | 8.499708 | 1.12 | PON2   | paraoxonase 2                                |
| 7956301 | 1.15E-05 | 8.10E-08 | 1.06E+01 | 8.496594 | 1.66 | LRP1   | LDL receptor related protein 1               |
| 7969861 | 1.15E-05 | 8.13E-08 | 1.06E+01 | 8.49305  | 2.07 | ITGBL1 | integrin subunit beta like 1                 |

|         |          |          |          |          |      |              |                                                       |
|---------|----------|----------|----------|----------|------|--------------|-------------------------------------------------------|
| 8125530 | 1.15E-05 | 8.22E-08 | 1.06E+01 | 8.481645 | 2.64 | HLA-DMB      | major histocompatibility complex, class II, DM beta   |
| 7907893 | 1.16E-05 | 8.44E-08 | 1.06E+01 | 8.455745 | 1.56 | MR1          | major histocompatibility complex, class I-related     |
| 8105229 | 1.16E-05 | 8.47E-08 | 1.06E+01 | 8.452415 | 1.65 | PELO///ITGA1 | pelota homolog (Drosophila)//integrin subunit alpha 1 |
| 7969613 | 1.16E-05 | 8.47E-08 | 1.06E+01 | 8.451633 | 2.2  | GPC6         | glypican 6                                            |

|         |          |          |          |          |      |          |                                                                |
|---------|----------|----------|----------|----------|------|----------|----------------------------------------------------------------|
| 8096808 | 1.16E-05 | 8.48E-08 | 1.06E+01 | 8.451013 | 2.12 | MCUB     | mitochondrial calcium uniporter dominant negative beta subunit |
| 8136347 | 1.19E-05 | 8.85E-08 | 1.06E+01 | 8.408629 | 2.31 | CALD1    | caldesmon 1                                                    |
| 8027778 | 1.19E-05 | 8.88E-08 | 1.06E+01 | 8.405339 | 2.01 | FXYD5    | FXYD domain containing ion transport regulator 5               |
| 7953218 | 1.19E-05 | 8.91E-08 | 1.06E+01 | 8.402199 | 1.88 | RAD51AP1 | RAD51 associated protein 1                                     |
| 8131614 | 1.20E-05 | 8.99E-08 | 1.05E+01 | 8.39295  | 2.16 | AHR      | aryl hydrocarbon receptor                                      |

|         |          |          |          |          |      |        |                                                           |
|---------|----------|----------|----------|----------|------|--------|-----------------------------------------------------------|
| 7907092 | 1.23E-05 | 9.25E-08 | 1.05E+01 | 8.364317 | 1.07 | MPZL1  | myelin protein zero like 1                                |
| 8160260 | 1.25E-05 | 9.51E-08 | 1.05E+01 | 8.337367 | 2.41 | BNC2   | basonuclin 2                                              |
| 8056005 | 1.25E-05 | 9.56E-08 | 1.05E+01 | 8.331725 | 1.11 | ACVR1  | activin A receptor type 1                                 |
| 8059413 | 1.25E-05 | 9.58E-08 | 1.05E+01 | 8.329675 | 2.61 | DOCK10 | dedicator of cytokinesis 10                               |
| 8103254 | 1.26E-05 | 9.69E-08 | 1.05E+01 | 8.31841  | 3.13 | SFRP2  | secreted frizzled related protein 2                       |
| 8096602 | 1.27E-05 | 9.79E-08 | 1.05E+01 | 8.308178 | 2.24 | DAPP1  | dual adaptor of phosphotyrosine and 3-phosphoinositides 1 |



|         |          |          |          |          |      |         |                                               |
|---------|----------|----------|----------|----------|------|---------|-----------------------------------------------|
| 7905147 | 1.34E-05 | 1.05E-07 | 1.04E+01 | 8.243051 | 2.74 | C1orf54 | chromosome 1 open reading frame 54            |
| 8121588 | 1.37E-05 | 1.08E-07 | 1.04E+01 | 8.212101 | 2.36 | DSE     | dermatan sulfate epimerase                    |
| 7908553 | 1.38E-05 | 1.09E-07 | 1.04E+01 | 8.202867 | 2.97 | PTPRC   | protein tyrosine phosphatase, receptor type C |
| 7908488 | 1.39E-05 | 1.10E-07 | 1.04E+01 | 8.191416 | 1.92 | CFHR1   | complement factor H related 1                 |
| 8014974 | 1.39E-05 | 1.10E-07 | 1.04E+01 | 8.188682 | 2.76 | TOP2A   | topoisomerase (DNA) II alpha                  |
| 8155192 | 1.48E-05 | 1.19E-07 | 1.03E+01 | 8.116176 | 1.6  | GLIPR2  | GLI pathogenesis related 2                    |

|         |          |          |          |          |      |         |                                                     |
|---------|----------|----------|----------|----------|------|---------|-----------------------------------------------------|
| 8164607 | 1.51E-05 | 1.22E-07 | 1.03E+01 | 8.092347 | 1.37 | FNBP1   | formin binding protein 1                            |
| 7907222 | 1.51E-05 | 1.22E-07 | 1.03E+01 | 8.087959 | 2.59 | PRRX1   | paired related homeobox 1                           |
| 8180078 | 1.52E-05 | 1.23E-07 | 1.03E+01 | 8.078142 | 2.59 | HLA-DMB | major histocompatibility complex, class II, DM beta |
| 8059650 | 1.59E-05 | 1.30E-07 | 1.02E+01 | 8.02618  | 1.7  | SP110   | SP110 nuclear body protein                          |
| 8140967 | 1.61E-05 | 1.32E-07 | 1.02E+01 | 8.014391 | 2.6  | SAMD9   | sterile alpha motif domain containing 9             |

|         |          |          |          |          |      |        |                                                         |
|---------|----------|----------|----------|----------|------|--------|---------------------------------------------------------|
| 8056206 | 1.62E-05 | 1.33E-07 | 1.02E+01 | 8.002482 | 1.23 | RBMS1  | RNA binding motif single stranded interacting protein 1 |
| 8138613 | 1.68E-05 | 1.40E-07 | 1.02E+01 | 7.952929 | 2.2  | OSBPL3 | oxysterol binding protein like 3                        |

|         |          |          |          |          |      |                                                                                                                                                                                                                                                                                                                                                                                                                                                                                                                      |
|---------|----------|----------|----------|----------|------|----------------------------------------------------------------------------------------------------------------------------------------------------------------------------------------------------------------------------------------------------------------------------------------------------------------------------------------------------------------------------------------------------------------------------------------------------------------------------------------------------------------------|
|         |          |          |          |          |      | HLA class II histocompatibility antigen, DRB1-7 beta chain///major                                                                                                                                                                                                                                                                                                                                                                                                                                                   |
|         |          |          |          |          |      | histocompatibility complex, class II, DR beta 6 (pseudogene)///major histocompatibility complex, class II, DR beta 5///major                                                                                                                                                                                                                                                                                                                                                                                         |
|         |          |          |          |          |      | histocompatibility complex, class II, DR beta 4///major histocompatibility complex, class II, DR beta 3///major histocompatibility complex, class II, DR beta 1///HLA class II histocompatibility antigen, DRB1-7 beta chain///major histocompatibility complex, class II, DR beta 5///major histocompatibility complex, class II, DR beta 4///major histocompatibility complex, class II, DR beta 3///major histocompatibility complex, class II, DR beta 1///major histocompatibility complex, class II, DQ beta 1 |
| 8178811 | 1.70E-05 | 1.42E-07 | 1.01E+01 | 7.937115 | 2.28 |                                                                                                                                                                                                                                                                                                                                                                                                                                                                                                                      |

|         |          |          |          |          |      |        |                                                          |
|---------|----------|----------|----------|----------|------|--------|----------------------------------------------------------|
| 8041383 | 1.70E-05 | 1.43E-07 | 1.01E+01 | 7.931535 | 2.25 | LTBP1  | latent transforming growth factor beta binding protein 1 |
| 8043100 | 1.70E-05 | 1.43E-07 | 1.01E+01 | 7.929231 | 1.41 | TMSB10 | thymosin beta 10                                         |
| 8128991 | 1.72E-05 | 1.46E-07 | 1.01E+01 | 7.91143  | 2.55 | LAMA4  | laminin subunit alpha 4                                  |
| 8050160 | 1.73E-05 | 1.47E-07 | 1.01E+01 | 7.903994 | 2.26 | MBOAT2 | membrane bound O-acyltransferase domain containing 2     |
| 7951217 | 1.73E-05 | 1.48E-07 | 1.01E+01 | 7.899347 | 2.84 | MMP7   | matrix metalloproteinase 7                               |

|         |          |          |          |          |      |          |                                              |
|---------|----------|----------|----------|----------|------|----------|----------------------------------------------|
| 7952601 | 1.77E-05 | 1.52E-07 | 1.01E+01 | 7.872687 | 1.44 | ETS1     | ETS proto-oncogene 1, transcription factor   |
| 8140971 | 1.77E-05 | 1.52E-07 | 1.01E+01 | 7.870096 | 2.1  | SAMD9L   | sterile alpha motif domain containing 9 like |
| 8105191 | 1.78E-05 | 1.54E-07 | 1.01E+01 | 7.855749 | 1.12 | PARP8    | poly(ADP-ribose) polymerase family member 8  |
| 8018975 | 1.78E-05 | 1.56E-07 | 1.01E+01 | 7.845281 | 1.45 | LGALS3BP | galectin 3 binding protein                   |
| 8138689 | 1.78E-05 | 1.56E-07 | 1.01E+01 | 7.841846 | 1.57 | SKAP2    | src kinase associated phosphoprotein 2       |

|         |          |          |          |          |      |        |                                                   |
|---------|----------|----------|----------|----------|------|--------|---------------------------------------------------|
| 7957260 | 1.78E-05 | 1.58E-07 | 1.01E+01 | 7.830999 | 2.38 | GLIPR1 | GLI pathogenesis related 1                        |
| 7948399 | 1.81E-05 | 1.61E-07 | 1.00E+01 | 7.811491 | 1    | PATL1  | PAT1 homolog 1, processing body mRNA decay factor |
| 7906400 | 1.81E-05 | 1.62E-07 | 1.00E+01 | 7.807935 | 2.68 | IFI16  | interferon gamma inducible protein 16             |

|         |          |          |          |        |      |                         |                                                                                                                       |
|---------|----------|----------|----------|--------|------|-------------------------|-----------------------------------------------------------------------------------------------------------------------|
| 8178199 | 1.82E-05 | 1.65E-07 | 1.00E+01 | 7.7857 | 2.71 | HLA-DQA2///<br>HLA-DQA1 | major histocompatibility complex, class II,<br>DQ alpha 2///major histocompatibility<br>complex, class II, DQ alpha 1 |
|---------|----------|----------|----------|--------|------|-------------------------|-----------------------------------------------------------------------------------------------------------------------|

|         |          |          |          |        |      |                         |                                                                                                                       |
|---------|----------|----------|----------|--------|------|-------------------------|-----------------------------------------------------------------------------------------------------------------------|
| 8179489 | 1.82E-05 | 1.65E-07 | 1.00E+01 | 7.7857 | 2.71 | HLA-DQA2///<br>HLA-DQA1 | major histocompatibility complex, class II,<br>DQ alpha 2///major histocompatibility<br>complex, class II, DQ alpha 1 |
|---------|----------|----------|----------|--------|------|-------------------------|-----------------------------------------------------------------------------------------------------------------------|



|         |          |          |          |          |      |        |                                    |
|---------|----------|----------|----------|----------|------|--------|------------------------------------|
| 8011713 | 1.82E-05 | 1.66E-07 | 1.00E+01 | 7.782856 | 2.17 | CXCL16 | C-X-C motif chemokine ligand 16    |
| 7943998 | 1.82E-05 | 1.66E-07 | 1.00E+01 | 7.779845 | 2.14 | NNMT   | nicotinamide N-methyltransferase   |
| 7902541 | 1.82E-05 | 1.67E-07 | 1.00E+01 | 7.774633 | 2.8  | IFI44L | interferon induced protein 44 like |
| 7979658 | 1.82E-05 | 1.68E-07 | 1.00E+01 | 7.771398 | 3.31 | GPX2   | glutathione peroxidase 2           |
| 8152703 | 1.84E-05 | 1.70E-07 | 9.99     | 7.758177 | 2.39 | FBXO32 | F-box protein 32                   |

|         |          |          |      |          |      |                                                                                                                                                                                                                                                                                                                              |
|---------|----------|----------|------|----------|------|------------------------------------------------------------------------------------------------------------------------------------------------------------------------------------------------------------------------------------------------------------------------------------------------------------------------------|
| 8117813 | 1.84E-05 | 1.71E-07 | 9.99 | 7.752723 | 1.38 | major histocompatibility complex, class I, J<br>(pseudogene)///major histocompatibility<br>HLA-J///HLA- complex, class I, H (pseudogene)///major<br>H///HLA-B///H histocompatibility complex, class I,<br>LA-A///HLA-A B///major histocompatibility complex, class<br>I, A///major histocompatibility complex,<br>class I, A |
|---------|----------|----------|------|----------|------|------------------------------------------------------------------------------------------------------------------------------------------------------------------------------------------------------------------------------------------------------------------------------------------------------------------------------|

|         |          |          |      |          |      |        |                                                |
|---------|----------|----------|------|----------|------|--------|------------------------------------------------|
| 8082058 | 1.87E-05 | 1.74E-07 | 9.97 | 7.733885 | 2.74 | CSTA   | cystatin A                                     |
| 7917530 | 1.87E-05 | 1.75E-07 | 9.97 | 7.7301   | 2.8  | GBP2   | guanylate binding protein 2                    |
| 7930498 | 1.89E-05 | 1.77E-07 | 9.96 | 7.718431 | 2.46 | ACSL5  | acyl-CoA synthetase long-chain family member 5 |
| 7929032 | 1.89E-05 | 1.78E-07 | 9.95 | 7.711246 | 1.92 | FAS    | Fas cell surface death receptor                |
| 8010426 | 1.94E-05 | 1.84E-07 | 9.93 | 7.681676 | 1.15 | RNF213 | ring finger protein 213                        |
| 8063458 | 1.96E-05 | 1.87E-07 | 9.91 | 7.664975 | 2.25 | DOK5   | docking protein 5                              |
| 7955179 | 1.96E-05 | 1.87E-07 | 9.91 | 7.664737 | 1.54 | TUBA1C | tubulin alpha 1c                               |

|         |          |          |     |          |      |                                                                                                                                                                                                                                                                           |
|---------|----------|----------|-----|----------|------|---------------------------------------------------------------------------------------------------------------------------------------------------------------------------------------------------------------------------------------------------------------------------|
| 7996290 | 2.21E-05 | 2.14E-07 | 9.8 | 7.527498 | 1.16 | CKLF-CMTM1 readthrough///CKLF like<br>1///CMTM1///MARVEL transmembrane domain<br>CKLF///RHOQ containing 1///chemokine like factor///ras<br>homolog family member Q///CKLF like<br>///CMTM1///C<br>KLF MARVEL transmembrane domain<br>containing 1///chemokine like factor |
|---------|----------|----------|-----|----------|------|---------------------------------------------------------------------------------------------------------------------------------------------------------------------------------------------------------------------------------------------------------------------------|

|         |          |          |      |          |      |        |                            |
|---------|----------|----------|------|----------|------|--------|----------------------------|
| 8126784 | 2.21E-05 | 2.15E-07 | 9.79 | 7.523951 | 3.43 | PLA2G7 | phospholipase A2 group VII |
| 8046695 | 2.24E-05 | 2.18E-07 | 9.78 | 7.507192 | 2.45 | ITGA4  | integrin subunit alpha 4   |

|         |          |          |      |          |      |                                                                                                                                                                                                                                                                                                                                                                                                                                                                                                                      |
|---------|----------|----------|------|----------|------|----------------------------------------------------------------------------------------------------------------------------------------------------------------------------------------------------------------------------------------------------------------------------------------------------------------------------------------------------------------------------------------------------------------------------------------------------------------------------------------------------------------------|
|         |          |          |      |          |      | HLA class II histocompatibility antigen, DRB1-7 beta chain///major                                                                                                                                                                                                                                                                                                                                                                                                                                                   |
|         |          |          |      |          |      | histocompatibility complex, class II, DR beta 6 (pseudogene)///major histocompatibility complex, class II, DR beta 5///major                                                                                                                                                                                                                                                                                                                                                                                         |
|         |          |          |      |          |      | histocompatibility complex, class II, DR beta 4///major histocompatibility complex, class II, DR beta 3///major histocompatibility complex, class II, DR beta 1///HLA class II histocompatibility antigen, DRB1-7 beta chain///major histocompatibility complex, class II, DR beta 5///major histocompatibility complex, class II, DR beta 4///major histocompatibility complex, class II, DR beta 3///major histocompatibility complex, class II, DR beta 1///major histocompatibility complex, class II, DQ beta 1 |
| 8178802 | 2.28E-05 | 2.23E-07 | 9.76 | 7.486633 | 2.25 |                                                                                                                                                                                                                                                                                                                                                                                                                                                                                                                      |

|         |          |          |      |          |      |          |                                                            |
|---------|----------|----------|------|----------|------|----------|------------------------------------------------------------|
| 8030866 | 2.28E-05 | 2.24E-07 | 9.76 | 7.481946 | 2.67 | FPR3     | formyl peptide receptor 3                                  |
| 8155169 | 2.29E-05 | 2.25E-07 | 9.75 | 7.475735 | 1.22 | RECK     | reversion inducing cysteine rich protein with kazal motifs |
| 7997642 | 2.31E-05 | 2.29E-07 | 9.74 | 7.460684 | 2    | CRISPLD2 | cysteine rich secretory protein LCCL domain containing 2   |
| 8168749 | 2.32E-05 | 2.32E-07 | 9.73 | 7.446617 | 1.86 | SRPX2    | sushi repeat containing protein, X-linked 2                |

|         |          |          |      |          |      |         |                                                          |
|---------|----------|----------|------|----------|------|---------|----------------------------------------------------------|
| 7971461 | 2.32E-05 | 2.32E-07 | 9.73 | 7.445065 | 2.71 | LCP1    | lymphocyte cytosolic protein 1                           |
| 8023415 | 2.37E-05 | 2.39E-07 | 9.7  | 7.4182   | 1.9  | TCF4    | transcription factor 4                                   |
| 7973101 | 2.45E-05 | 2.51E-07 | 9.66 | 7.369503 | 2.62 | RNASE6  | ribonuclease A family member k6                          |
| 7966135 | 2.45E-05 | 2.51E-07 | 9.66 | 7.369258 | 1.97 | CORO1C  | coronin 1C                                               |
| 8086125 | 2.45E-05 | 2.51E-07 | 9.66 | 7.366974 | 1.41 | TRANK1  | tetratricopeptide repeat and ankyrin repeat containing 1 |
| 7974816 | 2.45E-05 | 2.52E-07 | 9.66 | 7.36368  | 1.25 | SLC38A6 | solute carrier family 38 member 6                        |



|         |          |          |      |          |      |         |                                                                        |
|---------|----------|----------|------|----------|------|---------|------------------------------------------------------------------------|
| 8149330 | 2.47E-05 | 2.56E-07 | 9.65 | 7.349764 | 1.89 | CTSB    | cathepsin B                                                            |
| 8171684 | 2.48E-05 | 2.57E-07 | 9.64 | 7.344595 | 1.88 | SH3KBP1 | SH3 domain containing kinase binding protein 1                         |
| 8127563 | 2.48E-05 | 2.60E-07 | 9.63 | 7.333794 | 3.64 | COL12A1 | collagen type XII alpha 1 chain                                        |
| 8098263 | 2.48E-05 | 2.61E-07 | 9.63 | 7.330068 | 1.75 | PALLD   | palladin, cytoskeletal associated protein                              |
| 8135363 | 2.48E-05 | 2.61E-07 | 9.63 | 7.328787 | 2.4  | PIK3CG  | phosphatidylinositol-4,5-bisphosphate 3-kinase catalytic subunit gamma |

|         |          |          |      |          |      |        |                                                        |
|---------|----------|----------|------|----------|------|--------|--------------------------------------------------------|
| 8140668 | 2.51E-05 | 2.64E-07 | 9.62 | 7.316756 | 3.02 | SEMA3A | semaphorin 3A                                          |
| 8047738 | 2.52E-05 | 2.68E-07 | 9.61 | 7.300775 | 1.93 | NRP2   | neuropilin 2                                           |
| 7937335 | 2.52E-05 | 2.69E-07 | 9.61 | 7.299621 | 1.99 | IFITM1 | interferon induced transmembrane protein 1             |
| 7937020 | 2.54E-05 | 2.72E-07 | 9.6  | 7.288401 | 1.87 | MKI67  | marker of proliferation Ki-67                          |
| 8151447 | 2.54E-05 | 2.73E-07 | 9.59 | 7.285364 | 1.56 | IL7    | interleukin 7                                          |
| 8089299 | 2.54E-05 | 2.73E-07 | 9.59 | 7.282782 | 1.17 | CD47   | CD47 molecule                                          |
| 8134030 | 2.57E-05 | 2.78E-07 | 9.58 | 7.265692 | 2.15 | STEAP1 | six transmembrane epithelial antigen of the prostate 1 |
| 8140556 | 2.58E-05 | 2.80E-07 | 9.57 | 7.260342 | 1.73 | HGF    | hepatocyte growth factor                               |

|         |          |          |      |          |      |         |                                       |
|---------|----------|----------|------|----------|------|---------|---------------------------------------|
| 8162388 | 2.65E-05 | 2.90E-07 | 9.54 | 7.224905 | 2.48 | OMD     | osteomodulin                          |
| 8091723 | 2.80E-05 | 3.12E-07 | 9.48 | 7.150398 | 2.52 | RARRES1 | retinoic acid receptor responder 1    |
| 8147019 | 2.80E-05 | 3.13E-07 | 9.48 | 7.145984 | 1.06 | ZC2HC1A | zinc finger C2HC-type containing 1A   |
| 7960874 | 2.80E-05 | 3.14E-07 | 9.48 | 7.143163 | 2.83 | C3AR1   | complement component 3a receptor 1    |
| 7923086 | 2.82E-05 | 3.19E-07 | 9.46 | 7.128141 | 2.04 | ASPM    | abnormal spindle microtubule assembly |

|         |          |          |      |          |      |        |                                                       |
|---------|----------|----------|------|----------|------|--------|-------------------------------------------------------|
| 8109843 | 2.83E-05 | 3.21E-07 | 9.46 | 7.120415 | 2.01 | DOCK2  | dedicator of cytokinesis 2                            |
| 8133788 | 2.84E-05 | 3.24E-07 | 9.45 | 7.111818 | 1.35 | PTPN12 | protein tyrosine phosphatase, non-receptor type 12    |
| 7980438 | 2.88E-05 | 3.31E-07 | 9.43 | 7.091055 | 1.04 | SPTLC2 | serine palmitoyltransferase long chain base subunit 2 |
| 8178295 | 2.89E-05 | 3.34E-07 | 9.43 | 7.082565 | 2.49 | UBD    | ubiquitin D                                           |

|         |          |          |      |          |      |                                                                                                                                                                                                                                                                                                                                                                                                                                                                                                                      |
|---------|----------|----------|------|----------|------|----------------------------------------------------------------------------------------------------------------------------------------------------------------------------------------------------------------------------------------------------------------------------------------------------------------------------------------------------------------------------------------------------------------------------------------------------------------------------------------------------------------------|
|         |          |          |      |          |      | HLA class II histocompatibility antigen, DRB1-7 beta chain///major                                                                                                                                                                                                                                                                                                                                                                                                                                                   |
|         |          |          |      |          |      | histocompatibility complex, class II, DR beta 6 (pseudogene)///major histocompatibility complex, class II, DR beta 5///major                                                                                                                                                                                                                                                                                                                                                                                         |
|         |          |          |      |          |      | histocompatibility complex, class II, DR beta 4///major histocompatibility complex, class II, DR beta 3///major histocompatibility complex, class II, DR beta 1///HLA class II histocompatibility antigen, DRB1-7 beta chain///major histocompatibility complex, class II, DR beta 5///major histocompatibility complex, class II, DR beta 4///major histocompatibility complex, class II, DR beta 3///major histocompatibility complex, class II, DR beta 1///major histocompatibility complex, class II, DQ beta 1 |
| 8180003 | 2.89E-05 | 3.35E-07 | 9.42 | 7.079164 | 2.26 |                                                                                                                                                                                                                                                                                                                                                                                                                                                                                                                      |

|         |          |          |      |          |      |        |                                                    |
|---------|----------|----------|------|----------|------|--------|----------------------------------------------------|
| 7908204 | 2.96E-05 | 3.47E-07 | 9.4  | 7.044158 | 2.77 | HMCN1  | hemicentin 1                                       |
| 8152453 | 2.96E-05 | 3.48E-07 | 9.39 | 7.039378 | 1.86 | TRPS1  | transcriptional repressor GATA binding 1           |
| 7925320 | 2.96E-05 | 3.49E-07 | 9.39 | 7.038986 | 1.52 | NID1   | nidogen 1                                          |
| 8163637 | 2.96E-05 | 3.50E-07 | 9.39 | 7.033683 | 2.04 | TNC    | tenascin C                                         |
| 8165735 | 2.96E-05 | 3.53E-07 | 9.38 | 7.02484  | 1.35 | CSF2RA | colony stimulating factor 2 receptor alpha subunit |
| 8176306 | 2.96E-05 | 3.53E-07 | 9.38 | 7.02484  | 1.35 | CSF2RA | colony stimulating factor 2 receptor alpha subunit |
| 8157605 | 2.96E-05 | 3.56E-07 | 9.37 | 7.018008 | 1.4  |        |                                                    |

|         |          |          |      |          |      |         |                           |
|---------|----------|----------|------|----------|------|---------|---------------------------|
| 8033257 | 2.96E-05 | 3.61E-07 | 9.36 | 7.004098 | 2.85 | C3      | complement component 3    |
| 8103226 | 2.96E-05 | 3.62E-07 | 9.36 | 7.002026 | 2.84 | TMEM154 | transmembrane protein 154 |
| 8118571 | 2.96E-05 | 3.62E-07 | 9.36 | 7.000942 | 2.06 | PSMB9   | proteasome subunit beta 9 |
| 8178211 | 2.96E-05 | 3.62E-07 | 9.36 | 7.000942 | 2.06 | PSMB9   | proteasome subunit beta 9 |
| 8179495 | 2.96E-05 | 3.62E-07 | 9.36 | 7.000942 | 2.06 | PSMB9   | proteasome subunit beta 9 |

|         |          |          |      |          |      |         |                                                                          |
|---------|----------|----------|------|----------|------|---------|--------------------------------------------------------------------------|
| 8114287 | 3.05E-05 | 3.74E-07 | 9.33 | 6.968106 | 1.24 | SPOCK1  | sparc/osteonectin, cwcw and kazal-like domains proteoglycan (testican) 1 |
| 8124650 | 3.05E-05 | 3.76E-07 | 9.33 | 6.9639   | 2.5  | UBD     | ubiquitin D                                                              |
| 8037205 | 3.11E-05 | 3.84E-07 | 9.31 | 6.94042  | 1.76 | CEACAM1 | carcinoembryonic antigen related cell adhesion molecule 1                |
| 8132318 | 3.18E-05 | 3.94E-07 | 9.29 | 6.914923 | 2.84 | ANLN    | anillin actin binding protein                                            |



|         |          |          |      |          |      |         |                                                                            |
|---------|----------|----------|------|----------|------|---------|----------------------------------------------------------------------------|
| 7955908 | 3.19E-05 | 4.00E-07 | 9.28 | 6.900092 | 2.47 | NCKAP1L | NCK associated protein 1 like                                              |
| 8109830 | 3.24E-05 | 4.08E-07 | 9.26 | 6.879996 | 1.28 | SPDL1   | spindle apparatus coiled-coil protein 1                                    |
| 8094556 | 3.25E-05 | 4.11E-07 | 9.26 | 6.873436 | 1.25 | PGM2    | phosphoglucomutase 2                                                       |
| 7938485 | 3.25E-05 | 4.11E-07 | 9.26 | 6.872649 | 1.6  | MICAL2  | microtubule associated monooxygenase, calponin and LIM domain containing 2 |

|         |          |          |      |          |      |        |                                        |
|---------|----------|----------|------|----------|------|--------|----------------------------------------|
| 8127145 | 3.26E-05 | 4.14E-07 | 9.25 | 6.866401 | 1.9  | ELOVL5 | ELOVL fatty acid elongase 5            |
| 7972682 | 3.29E-05 | 4.20E-07 | 9.24 | 6.851532 | 2.58 | KDELC1 | KDEL motif containing 1                |
| 7951397 | 3.30E-05 | 4.22E-07 | 9.24 | 6.847225 | 2.27 | CASP1  | caspase 1                              |
| 7961083 | 3.35E-05 | 4.29E-07 | 9.22 | 6.82965  | 2.38 | CLEC2B | C-type lectin domain family 2 member B |
| 8140534 | 3.38E-05 | 4.35E-07 | 9.21 | 6.816407 | 3.52 | SEMA3C | semaphorin 3C                          |

|         |          |          |      |          |      |        |                                                                                                      |
|---------|----------|----------|------|----------|------|--------|------------------------------------------------------------------------------------------------------|
| 7989094 | 3.38E-05 | 4.36E-07 | 9.21 | 6.814385 | 1.37 | NEDD4  | neural precursor cell expressed,<br>developmentally down-regulated 4, E3<br>ubiquitin protein ligase |
| 7909175 | 3.42E-05 | 4.42E-07 | 9.2  | 6.79929  | 1.42 | SRGAP2 | SLIT-ROBO Rho GTPase activating protein<br>2                                                         |
| 7961546 | 3.44E-05 | 4.47E-07 | 9.19 | 6.788559 | 1.5  | EPS8   | epidermal growth factor receptor pathway<br>substrate 8                                              |

|         |          |          |      |          |      |         |                                     |
|---------|----------|----------|------|----------|------|---------|-------------------------------------|
| 7906307 | 3.49E-05 | 4.57E-07 | 9.17 | 6.766705 | 1.22 | KIRREL  | kin of IRRE like (Drosophila)       |
| 7993638 | 3.49E-05 | 4.57E-07 | 9.17 | 6.766195 | 2.69 | TMC5    | transmembrane channel like 5        |
| 7970844 | 3.49E-05 | 4.57E-07 | 9.17 | 6.766181 | 1.62 | KATNAL1 | katanin catalytic subunit A1 like 1 |

|         |          |          |      |          |      |                                |                                                                                                                                                |
|---------|----------|----------|------|----------|------|--------------------------------|------------------------------------------------------------------------------------------------------------------------------------------------|
| 7904452 | 3.50E-05 | 4.60E-07 | 9.17 | 6.76064  | 1.39 | FAM72A//FA<br>M72D//FAM7<br>2B | family with sequence similarity 72 member<br>A//family with sequence similarity 72<br>member D//family with sequence similarity<br>72 member B |
| 8004510 | 3.53E-05 | 4.65E-07 | 9.16 | 6.749435 | 2.38 | CD68                           | CD68 molecule                                                                                                                                  |
| 7971565 | 3.58E-05 | 4.79E-07 | 9.14 | 6.720194 | 1.7  | LPAR6                          | lysophosphatidic acid receptor 6                                                                                                               |

|         |          |          |      |         |      |                                                                                                                                                                                                                                                                                                                |
|---------|----------|----------|------|---------|------|----------------------------------------------------------------------------------------------------------------------------------------------------------------------------------------------------------------------------------------------------------------------------------------------------------------|
| 8177725 | 3.58E-05 | 4.79E-07 | 9.14 | 6.71923 | 1.28 | major histocompatibility complex, class I, H<br>(pseudogene)///major histocompatibility<br>HLA-H///HLA-complex, class I, G///major<br>G///HLA-C///H histocompatibility complex, class I,<br>LA-A///HLA-A C///major histocompatibility complex, class<br>I, A///major histocompatibility complex,<br>class I, A |
|---------|----------|----------|------|---------|------|----------------------------------------------------------------------------------------------------------------------------------------------------------------------------------------------------------------------------------------------------------------------------------------------------------------|

|         |          |          |      |         |      |                                                                                                                                                                                                                                                                                                                |
|---------|----------|----------|------|---------|------|----------------------------------------------------------------------------------------------------------------------------------------------------------------------------------------------------------------------------------------------------------------------------------------------------------------|
| 8179034 | 3.58E-05 | 4.79E-07 | 9.14 | 6.71923 | 1.28 | major histocompatibility complex, class I, H<br>(pseudogene)///major histocompatibility<br>HLA-H///HLA-complex, class I, G///major<br>G///HLA-C///H histocompatibility complex, class I,<br>LA-A///HLA-A C///major histocompatibility complex, class<br>I, A///major histocompatibility complex,<br>class I, A |
|---------|----------|----------|------|---------|------|----------------------------------------------------------------------------------------------------------------------------------------------------------------------------------------------------------------------------------------------------------------------------------------------------------------|

|         |          |          |      |          |      |        |                                                  |
|---------|----------|----------|------|----------|------|--------|--------------------------------------------------|
| 7957850 | 3.64E-05 | 4.88E-07 | 9.12 | 6.700664 | 1.68 | GAS2L3 | growth arrest specific 2 like 3                  |
| 7964701 | 3.64E-05 | 4.89E-07 | 9.12 | 6.697838 | 1.13 | GNS    | glucosamine (N-acetyl)-6-sulfatase               |
| 8102328 | 3.65E-05 | 4.92E-07 | 9.11 | 6.691343 | 1.19 | CFI    | complement factor I                              |
| 8050190 | 3.68E-05 | 4.97E-07 | 9.11 | 6.682001 | 1.22 | ADAM17 | ADAM metallopeptidase domain 17                  |
| 7939120 | 3.69E-05 | 5.00E-07 | 9.1  | 6.676098 | 1.08 | RCN1   | reticulocalbin 1                                 |
| 7902874 | 3.69E-05 | 5.01E-07 | 9.1  | 6.674158 | 1.35 | LRRC8C | leucine rich repeat containing 8 family member C |



|         |          |          |      |          |      |          |                                          |
|---------|----------|----------|------|----------|------|----------|------------------------------------------|
| 7974851 | 3.71E-05 | 5.06E-07 | 9.09 | 6.664399 | 1.23 | HIF1A    | hypoxia inducible factor 1 alpha subunit |
| 8147837 | 3.80E-05 | 5.21E-07 | 9.07 | 6.634688 | 2.28 | ZFPM2    | zinc finger protein, FOG family member 2 |
| 7979133 | 3.81E-05 | 5.23E-07 | 9.07 | 6.631233 | 1.52 | NID2     | nidogen 2                                |
| 8056151 | 3.99E-05 | 5.54E-07 | 9.02 | 6.572829 | 1.74 | PLA2R1   | phospholipase A2 receptor 1              |
| 8160274 | 3.99E-05 | 5.55E-07 | 9.02 | 6.570928 | 2.51 | MGC24103 | uncharacterized MGC24103                 |
| 7906720 | 4.02E-05 | 5.62E-07 | 9.01 | 6.557648 | 2.97 | FCER1G   | Fc fragment of IgE receptor Ig           |
| 8011759 | 4.02E-05 | 5.71E-07 | 9    | 6.541986 | 1.02 | PFN1     | profilin 1                               |

|         |          |          |      |          |      |         |                                        |
|---------|----------|----------|------|----------|------|---------|----------------------------------------|
| 7979824 | 4.02E-05 | 5.71E-07 | 9    | 6.541314 | 1.68 | ACTN1   | actinin alpha 1                        |
| 8125500 | 4.02E-05 | 5.72E-07 | 8.99 | 6.541133 | 1.59 | PSMB8   | proteasome subunit beta 8              |
| 8178855 | 4.02E-05 | 5.72E-07 | 8.99 | 6.541133 | 1.59 | PSMB8   | proteasome subunit beta 8              |
| 8180049 | 4.02E-05 | 5.72E-07 | 8.99 | 6.541133 | 1.59 | PSMB8   | proteasome subunit beta 8              |
| 8138977 | 4.05E-05 | 5.76E-07 | 8.99 | 6.532632 | 1.41 | DPY19L1 | dpy-19 like 1                          |
| 8072710 | 4.06E-05 | 5.80E-07 | 8.98 | 6.527193 | 1.18 | APOL6   | apolipoprotein L6                      |
| 8049246 | 4.10E-05 | 5.87E-07 | 8.97 | 6.513519 | 1.25 | INPP5D  | inositol polyphosphate-5-phosphatase D |

|         |          |          |      |          |      |         |                                                  |
|---------|----------|----------|------|----------|------|---------|--------------------------------------------------|
| 8014233 | 4.16E-05 | 5.97E-07 | 8.96 | 6.496623 | 1.94 | SLFN11  | schlafen family member 11                        |
| 8135601 | 4.23E-05 | 6.14E-07 | 8.94 | 6.469706 | 1.51 | MET     | MET proto-oncogene, receptor tyrosine kinase     |
| 8134552 | 4.26E-05 | 6.20E-07 | 8.93 | 6.45894  | 1.39 | ARPC1B  | actin related protein 2/3 complex subunit 1B     |
| 7944722 | 4.32E-05 | 6.35E-07 | 8.91 | 6.434975 | 1.32 | UBASH3B | ubiquitin associated and SH3 domain containing B |

|         |          |          |      |          |      |         |                                              |
|---------|----------|----------|------|----------|------|---------|----------------------------------------------|
| 7974366 | 4.32E-05 | 6.37E-07 | 8.91 | 6.432197 | 1.43 | PTGER2  | prostaglandin E receptor 2                   |
| 7936673 | 4.32E-05 | 6.38E-07 | 8.91 | 6.430885 | 1.68 | RGS10   | regulator of G-protein signaling 10          |
| 8127051 | 4.33E-05 | 6.41E-07 | 8.9  | 6.42576  | 1.44 | TRAM2   | translocation associated membrane protein 2  |
| 8166730 | 4.39E-05 | 6.52E-07 | 8.89 | 6.40912  | 2.72 | CYBB    | cytochrome b-245 beta chain                  |
| 7903507 | 4.42E-05 | 6.58E-07 | 8.88 | 6.399127 | 1.27 | FAM102B | family with sequence similarity 102 member B |
| 8006531 | 4.42E-05 | 6.59E-07 | 8.88 | 6.397172 | 1.59 | SLFN5   | schlafen family member 5                     |

|         |          |          |      |          |      |       |                                  |
|---------|----------|----------|------|----------|------|-------|----------------------------------|
| 8055465 | 4.65E-05 | 6.98E-07 | 8.84 | 6.340235 | 3.06 | CXCR4 | C-X-C motif chemokine receptor 4 |
|---------|----------|----------|------|----------|------|-------|----------------------------------|

|         |          |          |      |          |      |                                       |                                                                                                                                                                                                                                          |
|---------|----------|----------|------|----------|------|---------------------------------------|------------------------------------------------------------------------------------------------------------------------------------------------------------------------------------------------------------------------------------------|
| 8124901 | 4.65E-05 | 7.00E-07 | 8.84 | 6.337406 | 1.32 | HLA-C///HLA-B///HLA-A///HLA-B///HLA-A | major histocompatibility complex, class I, C///major histocompatibility complex, class I, B///major histocompatibility complex, class I, A///major histocompatibility complex, class I, B///major histocompatibility complex, class I, A |
|---------|----------|----------|------|----------|------|---------------------------------------|------------------------------------------------------------------------------------------------------------------------------------------------------------------------------------------------------------------------------------------|

|         |          |          |      |          |      |         |                                                        |
|---------|----------|----------|------|----------|------|---------|--------------------------------------------------------|
| 7960919 | 4.68E-05 | 7.07E-07 | 8.83 | 6.326709 | 3.76 | MFAP5   | microfibrillar associated protein 5                    |
| 7896726 | 4.74E-05 | 7.18E-07 | 8.82 | 6.311538 | 2.35 |         |                                                        |
| 8121749 | 4.74E-05 | 7.19E-07 | 8.82 | 6.309981 | 2.19 | GJA1    | gap junction protein alpha 1                           |
| 7972713 | 4.74E-05 | 7.21E-07 | 8.81 | 6.306907 | 1.94 | EFNB2   | ephrin B2                                              |
| 8068697 | 4.77E-05 | 7.29E-07 | 8.8  | 6.29571  | 1.95 | MX2     | MX dynamin like GTPase 2                               |
| 8166805 | 4.79E-05 | 7.34E-07 | 8.8  | 6.289238 | 1.01 | ATP6AP2 | ATPase H <sup>+</sup> transporting accessory protein 2 |

|         |          |          |      |          |      |                                |                                                                                                                                                  |
|---------|----------|----------|------|----------|------|--------------------------------|--------------------------------------------------------------------------------------------------------------------------------------------------|
| 7909146 | 4.81E-05 | 7.38E-07 | 8.79 | 6.283587 | 1.35 | FAM72A//FA<br>M72D//FAM7<br>2B | family with sequence similarity 72 member<br>A///family with sequence similarity 72<br>member D///family with sequence similarity<br>72 member B |
| 8043995 | 4.85E-05 | 7.50E-07 | 8.78 | 6.26752  | 1.41 | IL1R1                          | interleukin 1 receptor type 1                                                                                                                    |
| 8178115 | 4.89E-05 | 7.60E-07 | 8.77 | 6.253355 | 2.29 | CFB                            | complement factor B                                                                                                                              |



|         |          |          |      |          |      |        |                                             |
|---------|----------|----------|------|----------|------|--------|---------------------------------------------|
| 8089015 | 4.89E-05 | 7.63E-07 | 8.77 | 6.249675 | 1.68 | PROS1  | protein S (alpha)                           |
| 7906900 | 4.89E-05 | 7.63E-07 | 8.77 | 6.249204 | 2.08 | DDR2   | discoidin domain receptor tyrosine kinase 2 |
| 7927658 | 4.89E-05 | 7.65E-07 | 8.77 | 6.247057 | 1.33 | UBE2D1 | ubiquitin conjugating enzyme E2 D1          |
| 8043981 | 4.94E-05 | 7.78E-07 | 8.75 | 6.229493 | 1.59 | IL1R2  | interleukin 1 receptor type 2               |

|         |          |          |      |          |      |                                       |                                                                                                                                                                                                                                          |
|---------|----------|----------|------|----------|------|---------------------------------------|------------------------------------------------------------------------------------------------------------------------------------------------------------------------------------------------------------------------------------------|
| 8178489 | 5.01E-05 | 7.91E-07 | 8.74 | 6.213407 | 1.34 | HLA-C///HLA-B///HLA-A///HLA-B///HLA-A | major histocompatibility complex, class I, C///major histocompatibility complex, class I, B///major histocompatibility complex, class I, A///major histocompatibility complex, class I, B///major histocompatibility complex, class I, A |
|---------|----------|----------|------|----------|------|---------------------------------------|------------------------------------------------------------------------------------------------------------------------------------------------------------------------------------------------------------------------------------------|

|         |          |          |      |          |      |          |                                                        |
|---------|----------|----------|------|----------|------|----------|--------------------------------------------------------|
| 8152867 | 5.02E-05 | 7.95E-07 | 8.74 | 6.208395 | 1.48 | ASAP1    | ArfGAP with SH3 domain, ankyrin repeat and PH domain 1 |
| 8178220 | 5.03E-05 | 7.97E-07 | 8.73 | 6.20513  | 2.53 | HLA-DPB1 | major histocompatibility complex, class II, DP beta 1  |
| 8127346 | 5.07E-05 | 8.06E-07 | 8.73 | 6.193847 | 2.19 | RAB23    | RAB23, member RAS oncogene family                      |
| 8104022 | 5.12E-05 | 8.17E-07 | 8.72 | 6.1801   | 2.05 | PDLIM3   | PDZ and LIM domain 3                                   |

|         |          |          |      |          |      |          |                                                          |
|---------|----------|----------|------|----------|------|----------|----------------------------------------------------------|
| 8118594 | 5.15E-05 | 8.29E-07 | 8.71 | 6.166465 | 2.51 | HLA-DPB1 | major histocompatibility complex, class II, DP beta 1    |
| 8099982 | 5.15E-05 | 8.32E-07 | 8.7  | 6.162484 | 1.23 | APBB2    | amyloid beta precursor protein binding family B member 2 |
| 8117321 | 5.15E-05 | 8.32E-07 | 8.7  | 6.162425 | 1.39 | TRIM38   | tripartite motif containing 38                           |
| 8118345 | 5.15E-05 | 8.33E-07 | 8.7  | 6.161318 | 2.27 | CFB      | complement factor B                                      |
| 8126018 | 5.15E-05 | 8.34E-07 | 8.7  | 6.160116 | 1.2  | STK38    | serine/threonine kinase 38                               |

|         |          |          |      |          |      |                     |                                                                                                            |
|---------|----------|----------|------|----------|------|---------------------|------------------------------------------------------------------------------------------------------------|
| 8045835 | 5.23E-05 | 8.49E-07 | 8.69 | 6.142298 | 3.99 | GALNT5///GA<br>LNT5 | polypeptide<br>N-acetylgalactosaminyltransferase<br>5///polypeptide<br>N-acetylgalactosaminyltransferase 5 |
| 7958913 | 5.27E-05 | 8.57E-07 | 8.68 | 6.131981 | 2.11 | OAS2                | 2'-5'-oligoadenylate synthetase 2                                                                          |
| 7974316 | 5.28E-05 | 8.63E-07 | 8.67 | 6.125752 | 1.74 | FRMD6               | FERM domain containing 6                                                                                   |

|         |          |          |      |          |      |          |                                                      |
|---------|----------|----------|------|----------|------|----------|------------------------------------------------------|
| 8085999 | 5.28E-05 | 8.63E-07 | 8.67 | 6.125409 | 1.08 | CMTM6    | CKLF like MARVEL transmembrane domain containing 6   |
| 8089372 | 5.34E-05 | 8.75E-07 | 8.66 | 6.111006 | 1.47 | KIAA1524 | KIAA1524                                             |
| 8150698 | 5.46E-05 | 9.07E-07 | 8.64 | 6.075331 | 1.99 | SNAI2    | snail family transcriptional repressor 2             |
| 8151816 | 5.46E-05 | 9.10E-07 | 8.63 | 6.072252 | 2.05 | GEM      | GTP binding protein overexpressed in skeletal muscle |

|         |          |          |      |          |      |           |                                                     |
|---------|----------|----------|------|----------|------|-----------|-----------------------------------------------------|
| 7965723 | 5.50E-05 | 9.18E-07 | 8.63 | 6.062457 | 1.13 | UHRF1BP1L | UHRF1 binding protein 1 like                        |
| 7958202 | 5.52E-05 | 9.24E-07 | 8.62 | 6.056409 | 1.84 | CHST11    | carbohydrate (chondroitin 4) sulfotransferase<br>11 |
| 8050427 | 5.54E-05 | 9.31E-07 | 8.62 | 6.048832 | 1.74 | FAM49A    | family with sequence similarity 49 member<br>A      |
| 8120043 | 5.59E-05 | 9.44E-07 | 8.61 | 6.034829 | 1.32 | RUNX2     | runt related transcription factor 2                 |
| 7950307 | 5.62E-05 | 9.52E-07 | 8.6  | 6.026612 | 1.89 | UCP2      | uncoupling protein 2                                |

|         |          |          |      |          |      |         |                                                   |
|---------|----------|----------|------|----------|------|---------|---------------------------------------------------|
| 7965166 | 5.66E-05 | 9.64E-07 | 8.59 | 6.013739 | 2.12 | PPFIA2  | PTPRF interacting protein alpha 2                 |
| 8016832 | 5.66E-05 | 9.65E-07 | 8.59 | 6.012911 | 1.71 | MMD     | monocyte to macrophage differentiation associated |
| 8129497 | 5.70E-05 | 9.74E-07 | 8.58 | 6.003256 | 1.26 | EPB41L2 | erythrocyte membrane protein band 4.1 like 2      |
| 8163402 | 5.77E-05 | 9.88E-07 | 8.57 | 5.989075 | 1.12 | PTBP3   | polypyrimidine tract binding protein 3            |
| 7995258 | 5.82E-05 | 9.98E-07 | 8.56 | 5.978816 | 1.65 | ZNF267  | zinc finger protein 267                           |



|         |          |          |      |          |      |        |                                              |
|---------|----------|----------|------|----------|------|--------|----------------------------------------------|
| 8095680 | 5.82E-05 | 1.01E-06 | 8.56 | 5.970857 | 3.04 | CXCL8  | C-X-C motif chemokine ligand 8               |
| 7927964 | 5.82E-05 | 1.01E-06 | 8.56 | 5.969595 | 1.92 | SRGN   | serglycin                                    |
| 7909708 | 5.83E-05 | 1.01E-06 | 8.55 | 5.966267 | 2.09 | CENPF  | centromere protein F                         |
| 8007100 | 5.83E-05 | 1.01E-06 | 8.55 | 5.964698 | 1.28 | IGFBP4 | insulin like growth factor binding protein 4 |
| 8035896 | 5.85E-05 | 1.02E-06 | 8.55 | 5.958342 | 1.61 | TSHZ3  | teashirt zinc finger homeobox 3              |
| 7906878 | 5.90E-05 | 1.03E-06 | 8.54 | 5.947854 | 2.14 | DDR2   | discoidin domain receptor tyrosine kinase 2  |

|         |          |          |      |          |      |          |                                                       |
|---------|----------|----------|------|----------|------|----------|-------------------------------------------------------|
| 7908041 | 5.93E-05 | 1.03E-06 | 8.54 | 5.941882 | 1.14 | LAMC1    | laminin subunit gamma 1                               |
| 8179519 | 5.99E-05 | 1.05E-06 | 8.52 | 5.928139 | 2.57 | HLA-DPB1 | major histocompatibility complex, class II, DP beta 1 |
| 8089911 | 6.02E-05 | 1.06E-06 | 8.51 | 5.914191 | 2.03 | HCLS1    | hematopoietic cell-specific Lyn substrate 1           |
| 7982889 | 6.07E-05 | 1.07E-06 | 8.51 | 5.903688 | 1.2  | NUSAP1   | nucleolar and spindle associated protein 1            |
| 7989335 | 6.07E-05 | 1.08E-06 | 8.51 | 5.90243  | 1.12 | ANXA2    | annexin A2                                            |
| 8146550 | 6.18E-05 | 1.10E-06 | 8.49 | 5.8799   | 1.13 | SDCBP    | syndecan binding protein                              |

|         |          |          |      |          |      |       |                                                |
|---------|----------|----------|------|----------|------|-------|------------------------------------------------|
| 8018966 | 6.18E-05 | 1.10E-06 | 8.49 | 5.878994 | 1.56 | TIMP2 | TIMP metallopeptidase inhibitor 2              |
| 8113214 | 6.19E-05 | 1.11E-06 | 8.48 | 5.87475  | 2.38 | GLRX  | glutaredoxin                                   |
| 8068305 | 6.24E-05 | 1.12E-06 | 8.48 | 5.864701 | 1.18 | ITSN1 | intersectin 1                                  |
| 8129618 | 6.29E-05 | 1.13E-06 | 8.47 | 5.852503 | 2.9  | VNN1  | vanin 1                                        |
| 7919800 | 6.30E-05 | 1.14E-06 | 8.47 | 5.848335 | 2.34 | CTSS  | cathepsin S                                    |
| 7910001 | 6.40E-05 | 1.16E-06 | 8.45 | 5.828538 | 1.11 | DEGS1 | delta 4-desaturase, sphingolipid 1             |
| 8103769 | 6.44E-05 | 1.17E-06 | 8.44 | 5.819979 | 2.26 | HPGD  | hydroxyprostaglandin dehydrogenase<br>15-(NAD) |

|         |          |          |      |          |      |         |                                             |
|---------|----------|----------|------|----------|------|---------|---------------------------------------------|
| 8090018 | 6.44E-05 | 1.17E-06 | 8.44 | 5.817865 | 1.32 | PARP9   | poly(ADP-ribose) polymerase family member 9 |
| 7958884 | 6.45E-05 | 1.17E-06 | 8.44 | 5.814382 | 2.79 | OAS1    | 2'-5'-oligoadenylate synthetase 1           |
| 8047419 | 6.47E-05 | 1.18E-06 | 8.43 | 5.807394 | 1.01 | CASP8   | caspase 8                                   |
| 8123315 | 6.47E-05 | 1.18E-06 | 8.43 | 5.806796 | 1.07 | QKI     | QKI, KH domain containing RNA binding       |
| 8154836 | 6.48E-05 | 1.19E-06 | 8.43 | 5.802598 | 1.01 | ANXA2P2 | annexin A2 pseudogene 2                     |
| 7995697 | 6.52E-05 | 1.20E-06 | 8.43 | 5.794635 | 1.21 | LPCAT2  | lysophosphatidylcholine acyltransferase 2   |

|         |          |          |      |          |      |                   |                                                    |
|---------|----------|----------|------|----------|------|-------------------|----------------------------------------------------|
| 8146934 | 6.52E-05 | 1.20E-06 | 8.42 | 5.793267 | 2.24 | LY96              | lymphocyte antigen 96                              |
| 8139207 | 6.59E-05 | 1.22E-06 | 8.41 | 5.778277 | 3.37 | INHBA///INH<br>BA | inhibin beta A subunit///inhibin beta A<br>subunit |
| 7952341 | 6.71E-05 | 1.24E-06 | 8.4  | 5.757847 | 1.52 | CLMP              | CXADR like membrane protein                        |
| 8055624 | 6.74E-05 | 1.25E-06 | 8.39 | 5.749121 | 2.17 | ZEB2              | zinc finger E-box binding homeobox 2               |
| 8047174 | 6.76E-05 | 1.26E-06 | 8.39 | 5.744602 | 1.05 | SLC39A10          | solute carrier family 39 member 10                 |

|         |          |          |      |          |      |                   |                                                                    |
|---------|----------|----------|------|----------|------|-------------------|--------------------------------------------------------------------|
| 7982564 | 6.76E-05 | 1.26E-06 | 8.39 | 5.74095  | 1.24 | SPRED1            | sprouty related EVH1 domain containing 1                           |
| 8132557 | 6.76E-05 | 1.27E-06 | 8.38 | 5.737317 | 1.9  | AEBP1             | AE binding protein 1                                               |
| 8014063 | 6.88E-05 | 1.29E-06 | 8.37 | 5.715371 | 1.43 | EVI2B             | ecotropic viral integration site 2B                                |
| 8171248 | 6.88E-05 | 1.30E-06 | 8.37 | 5.71433  | 2.52 | ANOS1             | anosmin 1                                                          |
| 7989277 | 6.88E-05 | 1.30E-06 | 8.37 | 5.713837 | 1.73 | MYO1E             | myosin IE                                                          |
| 7940259 | 6.93E-05 | 1.31E-06 | 8.36 | 5.704921 | 2.09 | MS4A14//MS<br>4A7 | membrane spanning 4-domains<br>A14//membrane spanning 4-domains A7 |

|         |          |          |      |          |      |          |                                                        |
|---------|----------|----------|------|----------|------|----------|--------------------------------------------------------|
| 8180100 | 7.02E-05 | 1.33E-06 | 8.34 | 5.684708 | 2.06 | HLA-DPA1 | major histocompatibility complex, class II, DP alpha 1 |
| 8094259 | 7.02E-05 | 1.34E-06 | 8.34 | 5.681726 | 1.08 | LAP3     | leucine aminopeptidase 3                               |
| 8064790 | 7.03E-05 | 1.34E-06 | 8.34 | 5.678726 | 1.71 | RASSF2   | Ras association domain family member 2                 |
| 7951686 | 7.21E-05 | 1.38E-06 | 8.32 | 5.649574 | 1.59 | IL18     | interleukin 18                                         |
| 7932966 | 7.33E-05 | 1.41E-06 | 8.3  | 5.630473 | 1.13 | ITGB1    | integrin subunit beta 1                                |
| 7931914 | 7.33E-05 | 1.41E-06 | 8.3  | 5.630082 | 2.33 | IL2RA    | interleukin 2 receptor subunit alpha                   |

|         |          |          |      |          |      |          |                                              |
|---------|----------|----------|------|----------|------|----------|----------------------------------------------|
| 7970602 | 7.41E-05 | 1.43E-06 | 8.29 | 5.614281 | 1.07 | PARP4    | poly(ADP-ribose) polymerase family member 4  |
| 8145317 | 7.49E-05 | 1.46E-06 | 8.28 | 5.5963   | 2.68 | ADAMDEC1 | ADAM like decysin 1                          |
| 7906486 | 7.49E-05 | 1.46E-06 | 8.28 | 5.591441 | 1.82 | SLAMF8   | SLAM family member 8                         |
| 7938608 | 7.49E-05 | 1.47E-06 | 8.27 | 5.58887  | 2.01 | SPON1    | spondin 1                                    |
| 8122261 | 7.51E-05 | 1.47E-06 | 8.27 | 5.58512  | 1.11 |          |                                              |
| 7948455 | 7.52E-05 | 1.48E-06 | 8.27 | 5.580128 | 2.31 | MS4A6A   | membrane spanning 4-domains A6A              |
| 7909164 | 7.56E-05 | 1.49E-06 | 8.26 | 5.571024 | 4.13 | CTSE     | cathepsin E                                  |
| 8058857 | 7.62E-05 | 1.51E-06 | 8.25 | 5.560104 | 3.1  | IGFBP5   | insulin like growth factor binding protein 5 |



|         |          |          |      |          |      |       |                                                                       |
|---------|----------|----------|------|----------|------|-------|-----------------------------------------------------------------------|
| 8009075 | 7.70E-05 | 1.53E-06 | 8.24 | 5.546093 | 1.1  | TANC2 | tetratricopeptide repeat, ankyrin repeat and coiled-coil containing 2 |
| 7909371 | 7.70E-05 | 1.53E-06 | 8.24 | 5.546063 | 1.87 | CR1   | complement component 3b/4b receptor 1 (Knops blood group)             |

|         |          |          |      |          |   |                         |                                                                                                                     |
|---------|----------|----------|------|----------|---|-------------------------|---------------------------------------------------------------------------------------------------------------------|
| 8178826 | 7.77E-05 | 1.55E-06 | 8.23 | 5.530941 | 3 | HLA-DQB2///<br>HLA-DQB1 | major histocompatibility complex, class II,<br>DQ beta 2///major histocompatibility<br>complex, class II, DQ beta 1 |
|---------|----------|----------|------|----------|---|-------------------------|---------------------------------------------------------------------------------------------------------------------|

|         |          |          |      |          |   |                         |                                                                                                                     |
|---------|----------|----------|------|----------|---|-------------------------|---------------------------------------------------------------------------------------------------------------------|
| 8180022 | 7.77E-05 | 1.55E-06 | 8.23 | 5.530941 | 3 | HLA-DQB2///<br>HLA-DQB1 | major histocompatibility complex, class II,<br>DQ beta 2///major histocompatibility<br>complex, class II, DQ beta 1 |
|---------|----------|----------|------|----------|---|-------------------------|---------------------------------------------------------------------------------------------------------------------|

|         |          |          |      |          |      |                          |                                                                                                            |
|---------|----------|----------|------|----------|------|--------------------------|------------------------------------------------------------------------------------------------------------|
| 8048898 | 7.92E-05 | 1.60E-06 | 8.21 | 5.503046 | 2.16 | SP140                    | SP140 nuclear body protein                                                                                 |
| 7974689 | 7.94E-05 | 1.61E-06 | 8.21 | 5.497244 | 1.14 | DACT1                    | dishevelled binding antagonist of beta catenin 1                                                           |
| 7917516 | 7.97E-05 | 1.61E-06 | 8.2  | 5.491433 | 2.17 | GBP1P1///GBP<br>3///GBP1 | guanylate binding protein 1 pseudogene<br>1///guanylate binding protein 3///guanylate<br>binding protein 1 |

|         |          |          |      |          |      |                                  |                                                                                                                                                  |
|---------|----------|----------|------|----------|------|----------------------------------|--------------------------------------------------------------------------------------------------------------------------------------------------|
| 8083941 | 8.03E-05 | 1.63E-06 | 8.2  | 5.48264  | 2.31 | ECT2                             | epithelial cell transforming 2                                                                                                                   |
| 8039928 | 8.06E-05 | 1.64E-06 | 8.19 | 5.476127 | 1.32 | FAM72A///FA<br>M72D///FAM7<br>2B | family with sequence similarity 72 member<br>A///family with sequence similarity 72<br>member D///family with sequence similarity<br>72 member B |
| 8040365 | 8.14E-05 | 1.66E-06 | 8.18 | 5.463338 | 1.14 | TRIB2                            | tribbles pseudokinase 2                                                                                                                          |

|         |          |          |      |          |      |        |                                                     |
|---------|----------|----------|------|----------|------|--------|-----------------------------------------------------|
| 7940237 | 8.26E-05 | 1.69E-06 | 8.17 | 5.442538 | 2.83 | MS4A4A | membrane spanning 4-domains A4A                     |
| 8107307 | 8.29E-05 | 1.70E-06 | 8.16 | 5.4373   | 2.04 | CAMK4  | calcium/calmodulin dependent protein kinase IV      |
| 7913169 | 8.37E-05 | 1.73E-06 | 8.15 | 5.424157 | 1.46 | CAPZB  | capping actin protein of muscle Z-line beta subunit |
| 7950906 | 8.43E-05 | 1.74E-06 | 8.15 | 5.415879 | 1.54 | CTSC   | cathepsin C                                         |
| 7923426 | 8.52E-05 | 1.76E-06 | 8.14 | 5.403029 | 2.13 | UBE2T  | ubiquitin conjugating enzyme E2 T                   |

|         |          |          |      |          |      |         |                                              |
|---------|----------|----------|------|----------|------|---------|----------------------------------------------|
| 7921868 | 8.53E-05 | 1.77E-06 | 8.14 | 5.400414 | 3.12 | FCGR3A  | Fc fragment of IgG receptor IIIa             |
| 7916584 | 8.56E-05 | 1.78E-06 | 8.13 | 5.392776 | 1.1  | TACSTD2 | tumor-associated calcium signal transducer 2 |
| 8156826 | 8.57E-05 | 1.78E-06 | 8.13 | 5.390374 | 1.63 | TGFBR1  | transforming growth factor beta receptor 1   |
| 8008646 | 8.69E-05 | 1.82E-06 | 8.12 | 5.372549 | 1.17 | SCPEP1  | serine carboxypeptidase 1                    |
| 8123744 | 8.74E-05 | 1.83E-06 | 8.11 | 5.365871 | 2.87 | F13A1   | coagulation factor XIII A chain              |

|         |          |          |      |          |      |        |                                     |
|---------|----------|----------|------|----------|------|--------|-------------------------------------|
| 8014066 | 8.82E-05 | 1.85E-06 | 8.1  | 5.352795 | 2.48 | EVI2A  | ecotropic viral integration site 2A |
| 8083876 | 8.82E-05 | 1.85E-06 | 8.1  | 5.352674 | 1.52 | SKIL   | SKI-like proto-oncogene             |
| 7945245 | 9.03E-05 | 1.91E-06 | 8.08 | 5.320823 | 1.91 | NTM    | neurotrimin                         |
| 8057620 | 9.19E-05 | 1.95E-06 | 8.06 | 5.298381 | 2.1  | COL5A2 | collagen type V alpha 2 chain       |
| 7906061 | 9.23E-05 | 1.97E-06 | 8.06 | 5.29057  | 1.21 | SYT11  | synaptotagmin 11                    |
| 8059680 | 9.33E-05 | 2.00E-06 | 8.05 | 5.275894 | 1.93 | HTR2B  | 5-hydroxytryptamine receptor 2B     |
| 7961654 | 9.38E-05 | 2.01E-06 | 8.04 | 5.269332 | 1.07 | RECQL  | RecQ like helicase                  |

|         |          |          |      |          |      |         |                                                           |
|---------|----------|----------|------|----------|------|---------|-----------------------------------------------------------|
| 8100870 | 9.38E-05 | 2.02E-06 | 8.04 | 5.266275 | 1.2  | ADAMTS3 | ADAM metalloproteinase with thrombospondin type 1 motif 3 |
| 8160346 | 9.38E-05 | 2.02E-06 | 8.04 | 5.266077 | 1.86 | HACD4   | 3-hydroxyacyl-CoA dehydratase 4                           |
| 8138289 | 9.43E-05 | 2.04E-06 | 8.03 | 5.25575  | 2.19 | ETV1    | ETS variant 1                                             |
| 8102076 | 9.53E-05 | 2.06E-06 | 8.02 | 5.242645 | 1.27 | CENPE   | centromere protein E                                      |
| 8046086 | 9.61E-05 | 2.08E-06 | 8.01 | 5.232642 | 1.1  | CERS6   | ceramide synthase 6                                       |
| 8117476 | 9.78E-05 | 2.14E-06 | 8    | 5.20762  | 1.42 | BTN3A3  | butyrophilin subfamily 3 member A3                        |



|         |          |          |      |          |      |         |                                   |
|---------|----------|----------|------|----------|------|---------|-----------------------------------|
| 8152988 | 9.81E-05 | 2.15E-06 | 7.99 | 5.201304 | 1.83 | SLA     | Src-like-adaptor                  |
| 8014241 | 9.83E-05 | 2.16E-06 | 7.99 | 5.197396 | 1.78 | SLFN12  | schlafen family member 12         |
| 8065359 | 9.83E-05 | 2.16E-06 | 7.99 | 5.196003 | 1.36 | CD93    | CD93 molecule                     |
| 8025601 | 9.87E-05 | 2.18E-06 | 7.98 | 5.188345 | 1.33 | ICAM1   | intercellular adhesion molecule 1 |
| 7963046 | 9.89E-05 | 2.19E-06 | 7.98 | 5.183963 | 1.47 | TUBA1B  | tubulin alpha 1b                  |
| 8085984 | 9.89E-05 | 2.19E-06 | 7.98 | 5.181998 | 1.55 | OSBPL10 | oxysterol binding protein like 10 |
| 8121257 | 9.89E-05 | 2.20E-06 | 7.98 | 5.179359 | 2.74 | PRDM1   | PR/SET domain 1                   |
| 8097288 | 9.93E-05 | 2.21E-06 | 7.97 | 5.173955 | 1.48 | FAT4    | FAT atypical cadherin 4           |

|         |          |          |      |          |      |         |                                                        |
|---------|----------|----------|------|----------|------|---------|--------------------------------------------------------|
| 7938225 | 9.97E-05 | 2.22E-06 | 7.97 | 5.168054 | 2.11 | OLFML1  | olfactomedin like 1                                    |
| 8017599 | 9.97E-05 | 2.22E-06 | 7.97 | 5.166189 | 1.53 | PECAM1  | platelet and endothelial cell adhesion molecule 1      |
| 8127234 | 9.97E-05 | 2.23E-06 | 7.96 | 5.161932 | 1.04 | DST     | dystonin                                               |
| 7932530 | 1.02E-04 | 2.30E-06 | 7.94 | 5.131966 | 1.57 | PIP4K2A | phosphatidylinositol-5-phosphate 4-kinase type 2 alpha |
| 7954065 | 1.03E-04 | 2.34E-06 | 7.93 | 5.116936 | 3.35 | GPRC5A  | G protein-coupled receptor class C group 5 member A    |

|         |          |          |      |          |      |          |                                               |
|---------|----------|----------|------|----------|------|----------|-----------------------------------------------|
| 7931353 | 1.04E-04 | 2.35E-06 | 7.93 | 5.110711 | 1.47 | PTPRE    | protein tyrosine phosphatase, receptor type E |
| 8095854 | 1.05E-04 | 2.39E-06 | 7.92 | 5.09554  | 1.02 | SEPT11   | septin 11                                     |
| 8176026 | 1.05E-04 | 2.40E-06 | 7.91 | 5.089989 | 1.73 | FLNA     | filamin A                                     |
| 8095080 | 1.06E-04 | 2.44E-06 | 7.9  | 5.074312 | 1.95 | PDGFRA   | platelet derived growth factor receptor alpha |
| 7943349 | 1.08E-04 | 2.49E-06 | 7.89 | 5.051821 | 2.11 | ARHGAP42 | Rho GTPase activating protein 42              |
| 7925525 | 1.09E-04 | 2.50E-06 | 7.88 | 5.046237 | 1.83 | CEP170   | centrosomal protein 170                       |
| 8036710 | 1.09E-04 | 2.53E-06 | 7.88 | 5.037207 | 2.41 | GMFG     | glia maturation factor gamma                  |

|         |          |          |      |          |      |      |                                                        |
|---------|----------|----------|------|----------|------|------|--------------------------------------------------------|
| 7996393 | 1.09E-04 | 2.53E-06 | 7.88 | 5.037003 | 1.03 | CBFB | core-binding factor beta subunit                       |
| 8125512 | 1.09E-04 | 2.54E-06 | 7.87 | 5.032175 | 1.14 | TAP1 | transporter 1, ATP binding cassette subfamily B member |
| 8178867 | 1.09E-04 | 2.54E-06 | 7.87 | 5.032175 | 1.14 | TAP1 | transporter 1, ATP binding cassette subfamily B member |
| 8180061 | 1.09E-04 | 2.54E-06 | 7.87 | 5.032175 | 1.14 | TAP1 | transporter 1, ATP binding cassette subfamily B member |

|         |          |          |      |          |      |         |                                                |
|---------|----------|----------|------|----------|------|---------|------------------------------------------------|
| 7968344 | 1.12E-04 | 2.61E-06 | 7.85 | 5.004131 | 3.07 | ALOX5AP | arachidonate 5-lipoxygenase activating protein |
| 7981514 | 1.13E-04 | 2.65E-06 | 7.84 | 4.988335 | 1.92 | AHNAK2  | AHNAK nucleoprotein 2                          |
| 7957023 | 1.13E-04 | 2.65E-06 | 7.84 | 4.987198 | 2.66 | LYZ     | lysozyme                                       |
| 8057486 | 1.14E-04 | 2.70E-06 | 7.83 | 4.969434 | 2.06 | PDE1A   | phosphodiesterase 1A                           |
| 7922773 | 1.15E-04 | 2.73E-06 | 7.82 | 4.958627 | 2.33 | NCF2    | neutrophil cytosolic factor 2                  |
| 8117435 | 1.16E-04 | 2.75E-06 | 7.82 | 4.952224 | 1.3  | BTN3A2  | butyrophilin subfamily 3 member A2             |
| 8137250 | 1.16E-04 | 2.75E-06 | 7.82 | 4.951802 | 2.38 | GIMAP2  | GTPase, IMAP family member 2                   |

|         |          |          |      |          |      |                             |                                                                     |
|---------|----------|----------|------|----------|------|-----------------------------|---------------------------------------------------------------------|
| 8149071 | 1.16E-04 | 2.76E-06 | 7.81 | 4.945735 | 1.99 | ANGPT2                      | angiopoietin 2                                                      |
| 7927786 | 1.16E-04 | 2.78E-06 | 7.81 | 4.938594 | 1.23 | REEP3                       | receptor accessory protein 3                                        |
| 7927146 | 1.17E-04 | 2.80E-06 | 7.8  | 4.932262 | 1.52 | CSGALNACT<br>2              | chondroitin sulfate<br>N-acetylgalactosaminyltransferase 2          |
| 8043363 | 1.17E-04 | 2.80E-06 | 7.8  | 4.931104 | 1.72 | MIR4435-2HG<br>///LINC00152 | MIR4435-2 host gene///long intergenic<br>non-protein coding RNA 152 |

|         |          |          |      |          |      |          |                                        |
|---------|----------|----------|------|----------|------|----------|----------------------------------------|
| 8122365 | 1.17E-04 | 2.81E-06 | 7.8  | 4.929111 | 1.33 | ADGRG6   | adhesion G protein-coupled receptor G6 |
| 7979400 | 1.17E-04 | 2.82E-06 | 7.8  | 4.925636 | 1.54 | C14orf37 | chromosome 14 open reading frame 37    |
| 8111892 | 1.18E-04 | 2.83E-06 | 7.79 | 4.920205 | 1.21 | OXCT1    | 3-oxoacid CoA-transferase 1            |
| 8104663 | 1.18E-04 | 2.84E-06 | 7.79 | 4.916768 | 1.84 | CDH6     | cadherin 6                             |
| 8070194 | 1.18E-04 | 2.85E-06 | 7.79 | 4.915571 | 1.44 | RUNX1    | runt related transcription factor 1    |
| 7898057 | 1.18E-04 | 2.85E-06 | 7.79 | 4.913877 | 1.76 | PDPN     | podoplanin                             |

|         |          |          |      |          |      |          |                                         |
|---------|----------|----------|------|----------|------|----------|-----------------------------------------|
| 8126839 | 1.18E-04 | 2.86E-06 | 7.79 | 4.911527 | 1.46 | TNFRSF21 | TNF receptor superfamily member 21      |
| 8120967 | 1.19E-04 | 2.89E-06 | 7.78 | 4.901057 | 2.41 | NT5E     | 5'-nucleotidase ecto                    |
| 8082035 | 1.19E-04 | 2.90E-06 | 7.78 | 4.896119 | 2.67 | CD86     | CD86 molecule                           |
| 8066493 | 1.21E-04 | 2.93E-06 | 7.77 | 4.885114 | 2.58 | SLPI     | secretory leukocyte peptidase inhibitor |
| 7978776 | 1.21E-04 | 2.94E-06 | 7.77 | 4.883113 | 1.01 | MIS18BP1 | MIS18 binding protein 1                 |
| 8169504 | 1.21E-04 | 2.94E-06 | 7.77 | 4.88239  | 4.02 | SLC6A14  | solute carrier family 6 member 14       |



|         |          |          |      |          |      |         |                                                     |
|---------|----------|----------|------|----------|------|---------|-----------------------------------------------------|
| 8049544 | 1.21E-04 | 2.96E-06 | 7.76 | 4.875092 | 1.35 | LRRFIP1 | LRR binding FLII interacting protein 1              |
| 7898988 | 1.24E-04 | 3.06E-06 | 7.74 | 4.840741 | 1.05 | CLIC4   | chloride intracellular channel 4                    |
| 7945132 | 1.25E-04 | 3.09E-06 | 7.73 | 4.831395 | 1.35 | FLI1    | Fli-1 proto-oncogene, ETS transcription factor      |
| 8156538 | 1.26E-04 | 3.15E-06 | 7.72 | 4.813014 | 1.15 | MFSD14B | major facilitator superfamily domain containing 14B |
| 8062908 | 1.27E-04 | 3.16E-06 | 7.72 | 4.808597 | 1.42 | STK4    | serine/threonine kinase 4                           |

|         |          |          |      |          |      |        |                                                                    |
|---------|----------|----------|------|----------|------|--------|--------------------------------------------------------------------|
| 8112376 | 1.28E-04 | 3.20E-06 | 7.71 | 4.797453 | 1.61 | CENPK  | centromere protein K                                               |
| 8105077 | 1.29E-04 | 3.23E-06 | 7.7  | 4.787033 | 1.25 | CARD6  | caspase recruitment domain family member<br>6                      |
| 8138231 | 1.30E-04 | 3.28E-06 | 7.69 | 4.773132 | 1.49 | THSD7A | thrombospondin type 1 domain containing<br>7A                      |
| 7905329 | 1.30E-04 | 3.28E-06 | 7.69 | 4.771111 | 1.57 | MLLT11 | myeloid/lymphoid or mixed-lineage<br>leukemia; translocated to, 11 |
| 8151101 | 1.31E-04 | 3.30E-06 | 7.69 | 4.765042 | 1.88 | MYBL1  | MYB proto-oncogene like 1                                          |

|         |          |          |      |          |      |       |                                                         |
|---------|----------|----------|------|----------|------|-------|---------------------------------------------------------|
| 7923043 | 1.33E-04 | 3.37E-06 | 7.67 | 4.742918 | 2.2  | KCNT2 | potassium sodium-activated channel subfamily T member 2 |
| 8055688 | 1.35E-04 | 3.42E-06 | 7.66 | 4.727943 | 2.25 | RND3  | Rho family GTPase 3                                     |
| 8147000 | 1.36E-04 | 3.45E-06 | 7.65 | 4.720177 | 1.88 | ZFHX4 | zinc finger homeobox 4                                  |
| 8105348 | 1.37E-04 | 3.48E-06 | 7.65 | 4.711838 | 1.98 | GPX8  | glutathione peroxidase 8 (putative)                     |
| 8174692 | 1.37E-04 | 3.48E-06 | 7.65 | 4.711442 | 1.68 | SEPT6 | septin 6                                                |

|         |          |          |      |          |      |                                                                                              |
|---------|----------|----------|------|----------|------|----------------------------------------------------------------------------------------------|
| 8054611 | 1.38E-04 | 3.53E-06 | 7.64 | 4.695735 | 1.74 | MIR4435-2HG MIR4435-2 host gene///long intergenic<br>///LINC00152 non-protein coding RNA 152 |
| 8139033 | 1.38E-04 | 3.55E-06 | 7.63 | 4.692079 | 2.69 | AOAH acyloxyacyl hydrolase                                                                   |
| 8163896 | 1.39E-04 | 3.57E-06 | 7.63 | 4.685898 | 1.14 | STOM stomatin                                                                                |
| 8142452 | 1.40E-04 | 3.61E-06 | 7.62 | 4.674039 | 2.66 | TFEC transcription factor EC                                                                 |
| 8069541 | 1.40E-04 | 3.62E-06 | 7.62 | 4.670942 | 2.63 | SAMSN1 SAM domain, SH3 domain and nuclear<br>localization signals 1                          |
| 7896700 | 1.41E-04 | 3.65E-06 | 7.61 | 4.663625 | 2.8  |                                                                                              |

|         |          |          |      |          |      |       |                                            |
|---------|----------|----------|------|----------|------|-------|--------------------------------------------|
| 8047538 | 1.47E-04 | 3.82E-06 | 7.58 | 4.617217 | 1.15 | BMPR2 | bone morphogenetic protein receptor type 2 |
| 7949588 | 1.49E-04 | 3.90E-06 | 7.57 | 4.595187 | 1.65 | CD248 | CD248 molecule                             |
| 7987145 | 1.49E-04 | 3.92E-06 | 7.56 | 4.591403 | 1.63 | FMN1  | formin 1                                   |
| 8113504 | 1.50E-04 | 3.93E-06 | 7.56 | 4.589042 | 1.77 | NREP  | neuronal regeneration related protein      |
| 7982757 | 1.50E-04 | 3.93E-06 | 7.56 | 4.587333 | 1.51 | KNL1  | kinetochore scaffold 1                     |
| 8016094 | 1.51E-04 | 3.98E-06 | 7.55 | 4.574893 | 1.59 | GJC1  | gap junction protein gamma 1               |
| 8129590 | 1.52E-04 | 4.00E-06 | 7.55 | 4.570126 | 1.02 | STX7  | syntaxin 7                                 |
| 7994131 | 1.52E-04 | 4.01E-06 | 7.55 | 4.567917 | 1.72 | PRKCB | protein kinase C beta                      |

|         |          |          |      |          |      |         |                                                   |
|---------|----------|----------|------|----------|------|---------|---------------------------------------------------|
| 8151756 | 1.52E-04 | 4.04E-06 | 7.54 | 4.560952 | 1.4  | TMEM55A | transmembrane protein 55A                         |
| 8116734 | 1.52E-04 | 4.04E-06 | 7.54 | 4.558722 | 2.01 | LY86    | lymphocyte antigen 86                             |
| 8048139 | 1.52E-04 | 4.06E-06 | 7.54 | 4.555309 | 1.88 | DNAPTP3 | histone demethylase UTY-like                      |
| 8088952 | 1.52E-04 | 4.06E-06 | 7.54 | 4.55458  | 1.52 |         |                                                   |
| 7979307 | 1.54E-04 | 4.11E-06 | 7.53 | 4.541688 | 1.85 | DLGAP5  | DLG associated protein 5                          |
| 8171297 | 1.54E-04 | 4.12E-06 | 7.53 | 4.539432 | 1.06 | MID1    | midline 1                                         |
| 8040080 | 1.55E-04 | 4.16E-06 | 7.52 | 4.530775 | 2.16 | RSAD2   | radical S-adenosyl methionine domain containing 2 |
| 8122807 | 1.59E-04 | 4.27E-06 | 7.51 | 4.5041   | 1.62 | AKAP12  | A-kinase anchoring protein 12                     |

|         |          |          |      |          |      |         |                                             |
|---------|----------|----------|------|----------|------|---------|---------------------------------------------|
| 7961142 | 1.60E-04 | 4.32E-06 | 7.5  | 4.490646 | 3.78 | OLR1    | oxidized low density lipoprotein receptor 1 |
| 7984112 | 1.60E-04 | 4.33E-06 | 7.49 | 4.489108 | 1.74 | RAB8B   | RAB8B, member RAS oncogene family           |
| 8049512 | 1.61E-04 | 4.37E-06 | 7.49 | 4.479534 | 1.1  | LRRFIP1 | LRR binding FLII interacting protein 1      |
| 8099340 | 1.61E-04 | 4.37E-06 | 7.49 | 4.479088 | 1.22 | WDR1    | WD repeat domain 1                          |

|         |          |          |      |          |      |          |                                                        |
|---------|----------|----------|------|----------|------|----------|--------------------------------------------------------|
| 8125556 | 1.61E-04 | 4.38E-06 | 7.49 | 4.477242 | 2.08 | HLA-DPA1 | major histocompatibility complex, class II, DP alpha 1 |
| 8178891 | 1.61E-04 | 4.38E-06 | 7.49 | 4.477242 | 2.08 | HLA-DPA1 | major histocompatibility complex, class II, DP alpha 1 |
| 7973067 | 1.62E-04 | 4.40E-06 | 7.48 | 4.473261 | 1.84 | PNP      | purine nucleoside phosphorylase                        |
| 7961120 | 1.62E-04 | 4.43E-06 | 7.48 | 4.466217 | 1.85 | CLEC7A   | C-type lectin domain family 7 member A                 |



|         |          |          |      |          |      |        |                                                          |
|---------|----------|----------|------|----------|------|--------|----------------------------------------------------------|
| 7930162 | 1.63E-04 | 4.47E-06 | 7.47 | 4.45777  | 1.12 | WBP1L  | WW domain binding protein 1-like                         |
| 8145470 | 1.63E-04 | 4.47E-06 | 7.47 | 4.457118 | 1.16 | DPYSL2 | dihydropyrimidinase like 2                               |
| 7900426 | 1.65E-04 | 4.52E-06 | 7.47 | 4.446003 | 1.18 | SMAP2  | small ArfGAP2                                            |
| 8142345 | 1.65E-04 | 4.52E-06 | 7.46 | 4.444889 | 1.23 | DOCK4  | dedicator of cytokinesis 4                               |
| 8041179 | 1.66E-04 | 4.58E-06 | 7.46 | 4.431464 | 1.17 | CLIP4  | CAP-Gly domain containing linker protein family member 4 |

|         |          |          |      |          |      |        |                                               |
|---------|----------|----------|------|----------|------|--------|-----------------------------------------------|
| 8080810 | 1.67E-04 | 4.60E-06 | 7.45 | 4.427839 | 1.01 | PTPRG  | protein tyrosine phosphatase, receptor type G |
| 7953878 | 1.67E-04 | 4.62E-06 | 7.45 | 4.422841 | 1.62 | CLEC2D | C-type lectin domain family 2 member D        |
| 8063078 | 1.69E-04 | 4.68E-06 | 7.44 | 4.409211 | 1.18 | CTSA   | cathepsin A                                   |
| 8103389 | 1.70E-04 | 4.74E-06 | 7.43 | 4.397279 | 1.03 | CTSO   | cathepsin O                                   |
| 7982377 | 1.70E-04 | 4.74E-06 | 7.43 | 4.396477 | 3.16 | GREM1  | gremlin 1, DAN family BMP antagonist          |
| 7946228 | 1.72E-04 | 4.80E-06 | 7.42 | 4.383981 | 1.13 | TPP1   | tripeptidyl peptidase 1                       |

|         |          |          |      |          |      |        |                                                        |
|---------|----------|----------|------|----------|------|--------|--------------------------------------------------------|
| 8121277 | 1.72E-04 | 4.81E-06 | 7.42 | 4.383183 | 1.03 | AIM1   | absent in melanoma 1                                   |
| 8094625 | 1.72E-04 | 4.84E-06 | 7.42 | 4.376818 | 1.09 | KLHL5  | kelch like family member 5                             |
| 8040113 | 1.72E-04 | 4.85E-06 | 7.42 | 4.374416 | 1.19 | ASAP2  | ArfGAP with SH3 domain, ankyrin repeat and PH domain 2 |
| 7965410 | 1.72E-04 | 4.86E-06 | 7.41 | 4.370868 | 1.6  | DCN    | decorin                                                |
| 8152845 | 1.73E-04 | 4.87E-06 | 7.41 | 4.368571 | 1.13 | FAM49B | family with sequence similarity 49 member B            |
| 7927732 | 1.74E-04 | 4.92E-06 | 7.41 | 4.358344 | 1.39 | ARID5B | AT-rich interaction domain 5B                          |

|         |          |          |      |          |      |        |                                   |
|---------|----------|----------|------|----------|------|--------|-----------------------------------|
| 8057578 | 1.74E-04 | 4.94E-06 | 7.4  | 4.355245 | 2.13 | CALCRL | calcitonin receptor like receptor |
| 7963786 | 1.75E-04 | 4.97E-06 | 7.4  | 4.348944 | 1.33 | ITGA5  | integrin subunit alpha 5          |
| 7969438 | 1.77E-04 | 5.03E-06 | 7.39 | 4.335896 | 1.09 | LMO7   | LIM domain 7                      |
| 8178598 | 1.78E-04 | 5.08E-06 | 7.38 | 4.327216 | 1.44 | CLIC1  | chloride intracellular channel 1  |
| 8179351 | 1.79E-04 | 5.12E-06 | 7.38 | 4.319151 | 1.92 | CFB    | complement factor B               |
| 8089261 | 1.79E-04 | 5.12E-06 | 7.38 | 4.319014 | 1.31 | CBLB   | Cbl proto-oncogene B              |

|         |          |          |      |          |      |        |                                                                    |
|---------|----------|----------|------|----------|------|--------|--------------------------------------------------------------------|
| 7957478 | 1.79E-04 | 5.12E-06 | 7.38 | 4.318475 | 1.1  | TMTC3  | transmembrane and tetratricopeptide repeat containing 3            |
| 8066925 | 1.79E-04 | 5.14E-06 | 7.38 | 4.314875 | 2.71 | PTGIS  | prostaglandin I2 (prostacyclin) synthase                           |
| 7938777 | 1.81E-04 | 5.21E-06 | 7.37 | 4.300434 | 1.21 | LDHA   | lactate dehydrogenase A                                            |
| 8142194 | 1.82E-04 | 5.26E-06 | 7.36 | 4.290591 | 1.25 | LAMB1  | laminin subunit beta 1                                             |
| 7975799 | 1.82E-04 | 5.28E-06 | 7.36 | 4.288005 | 1.2  | FLVCR2 | feline leukemia virus subgroup C cellular receptor family member 2 |

|         |          |          |      |          |      |         |                                                                                          |
|---------|----------|----------|------|----------|------|---------|------------------------------------------------------------------------------------------|
| 8105040 | 1.85E-04 | 5.35E-06 | 7.35 | 4.273419 | 2.13 | OSMR    | oncostatin M receptor                                                                    |
| 8010983 | 1.85E-04 | 5.37E-06 | 7.35 | 4.270256 | 1.27 | ABR     | active BCR-related                                                                       |
| 7956795 | 1.85E-04 | 5.40E-06 | 7.34 | 4.264519 | 1.01 | TBK1    | TANK binding kinase 1                                                                    |
| 8131475 | 1.86E-04 | 5.43E-06 | 7.34 | 4.259232 | 1.64 | C1GALT1 | core 1 synthase,<br>glycoprotein-N-acetylgalactosamine<br>3-beta-galactosyltransferase 1 |
| 7896718 | 1.89E-04 | 5.55E-06 | 7.32 | 4.237117 | 2.78 |         |                                                                                          |

|         |          |          |      |          |      |          |                                                                           |
|---------|----------|----------|------|----------|------|----------|---------------------------------------------------------------------------|
| 7966202 | 1.90E-04 | 5.58E-06 | 7.32 | 4.231242 | 1.13 | KCTD10   | potassium channel tetramerization domain containing 10                    |
| 7958644 | 1.90E-04 | 5.59E-06 | 7.32 | 4.228685 | 1    | ATP2A2   | ATPase sarcoplasmic/endoplasmic reticulum Ca <sup>2+</sup> transporting 2 |
| 8137264 | 1.93E-04 | 5.69E-06 | 7.31 | 4.210674 | 2.03 | TMEM176A | transmembrane protein 176A                                                |
| 8059279 | 1.94E-04 | 5.72E-06 | 7.3  | 4.206266 | 1.66 | EPHA4    | EPH receptor A4                                                           |
| 8003068 | 1.95E-04 | 5.78E-06 | 7.3  | 4.195972 | 1.24 | MPHOSPH6 | M-phase phosphoprotein 6                                                  |

|         |          |          |      |          |      |        |                                                                 |
|---------|----------|----------|------|----------|------|--------|-----------------------------------------------------------------|
| 8022612 | 1.98E-04 | 5.89E-06 | 7.28 | 4.175574 | 2.14 | ZNF521 | zinc finger protein 521                                         |
| 8125059 | 1.99E-04 | 5.91E-06 | 7.28 | 4.171897 | 1.38 | CLIC1  | chloride intracellular channel 1                                |
| 8051583 | 2.02E-04 | 6.04E-06 | 7.27 | 4.150569 | 3.06 | CYP1B1 | cytochrome P450 family 1 subfamily B member 1                   |
| 8084742 | 2.03E-04 | 6.09E-06 | 7.26 | 4.142351 | 1.16 | LPP    | LIM domain containing preferred translocation partner in lipoma |
| 8179827 | 2.05E-04 | 6.15E-06 | 7.25 | 4.131619 | 1.43 | CLIC1  | chloride intracellular channel 1                                |



|         |          |          |      |          |      |        |                                   |
|---------|----------|----------|------|----------|------|--------|-----------------------------------|
| 8012906 | 2.06E-04 | 6.19E-06 | 7.25 | 4.125235 | 1.91 |        |                                   |
| 8063000 | 2.10E-04 | 6.36E-06 | 7.23 | 4.097841 | 1.04 | WFDC2  | WAP four-disulfide core domain 2  |
| 7970954 | 2.10E-04 | 6.39E-06 | 7.23 | 4.093581 | 1.66 | DCLK1  | doublecortin like kinase 1        |
| 7915184 | 2.12E-04 | 6.46E-06 | 7.22 | 4.081642 | 1.64 | RHBDL2 | rhomboid like 2                   |
| 8067985 | 2.14E-04 | 6.55E-06 | 7.21 | 4.067387 | 1.39 | NCAM2  | neural cell adhesion molecule 2   |
| 8079950 | 2.16E-04 | 6.64E-06 | 7.2  | 4.054083 | 1.26 | GNAI2  | G protein subunit alpha i2        |
| 7969243 | 2.16E-04 | 6.66E-06 | 7.2  | 4.051136 | 1.6  | CKAP2  | cytoskeleton associated protein 2 |

|         |          |          |     |          |     |       |                                                            |
|---------|----------|----------|-----|----------|-----|-------|------------------------------------------------------------|
| 8056201 | 2.16E-04 | 6.68E-06 | 7.2 | 4.046986 | 1.5 | RBMS1 | RNA binding motif single stranded<br>interacting protein 1 |
|---------|----------|----------|-----|----------|-----|-------|------------------------------------------------------------|

|         |          |          |      |          |      |                                                            |
|---------|----------|----------|------|----------|------|------------------------------------------------------------|
|         |          |          |      |          |      | POTE ankyrin domain family member                          |
|         |          |          |      |          |      | POTEF///POT F///POTE ankyrin domain family member          |
| 8055151 | 2.19E-04 | 6.80E-06 | 7.19 | 4.029302 | 1.38 | EJ///POTEM/// J///POTE ankyrin domain family member        |
|         |          |          |      |          |      | POTEE///POT M///POTE ankyrin domain family member          |
|         |          |          |      |          |      | EKP E///POTE ankyrin domain family member K,<br>pseudogene |

|         |          |          |      |          |      |        |                                                |
|---------|----------|----------|------|----------|------|--------|------------------------------------------------|
| 8101762 | 2.19E-04 | 6.84E-06 | 7.18 | 4.02424  | 1.03 | SNCA   | synuclein alpha                                |
| 8166906 | 2.21E-04 | 6.91E-06 | 7.17 | 4.013466 | 2.33 | GPR34  | G protein-coupled receptor 34                  |
| 7953211 | 2.21E-04 | 6.91E-06 | 7.17 | 4.012485 | 1.09 | TIGAR  | TP53 induced glycolysis regulatory phosphatase |
| 7942957 | 2.25E-04 | 7.03E-06 | 7.16 | 3.995401 | 1.58 | PRSS23 | protease, serine 23                            |
| 8112980 | 2.27E-04 | 7.11E-06 | 7.16 | 3.983864 | 3.17 | EDIL3  | EGF like repeats and discoidin domains 3       |

|         |          |          |      |          |      |                    |                                                                                          |
|---------|----------|----------|------|----------|------|--------------------|------------------------------------------------------------------------------------------|
| 7906767 | 2.30E-04 | 7.24E-06 | 7.14 | 3.965297 | 2.3  | FCGR2C//FC<br>GR2B | Fc fragment of IgG receptor IIc<br>(gene/pseudogene)//Fc fragment of IgG<br>receptor IIb |
| 7926410 | 2.31E-04 | 7.29E-06 | 7.14 | 3.958702 | 2.91 | MRC1               | mannose receptor, C type 1                                                               |
| 7926451 | 2.31E-04 | 7.29E-06 | 7.14 | 3.958702 | 2.91 | MRC1               | mannose receptor, C type 1                                                               |
| 7979085 | 2.31E-04 | 7.29E-06 | 7.14 | 3.958021 | 1.6  | PYGL               | phosphorylase, glycogen, liver                                                           |
| 8068713 | 2.34E-04 | 7.43E-06 | 7.13 | 3.939487 | 1.91 | MX1                | MX dynamin like GTPase 1                                                                 |

|         |          |          |      |          |      |                       |                                                                            |
|---------|----------|----------|------|----------|------|-----------------------|----------------------------------------------------------------------------|
| 8152522 | 2.35E-04 | 7.47E-06 | 7.12 | 3.933807 | 1.6  | ENPP2                 | ectonucleotide<br>pyrophosphatase/phosphodiesterase 2                      |
| 7940775 | 2.36E-04 | 7.50E-06 | 7.12 | 3.929006 | 2.54 | RARRES3///R<br>ARRES3 | retinoic acid receptor responder 3///retinoic<br>acid receptor responder 3 |
| 7908694 | 2.39E-04 | 7.60E-06 | 7.11 | 3.915641 | 1.03 | NAV1                  | neuron navigator 1                                                         |
| 7962250 | 2.40E-04 | 7.68E-06 | 7.1  | 3.904883 | 1.15 | CPNE8                 | copine 8                                                                   |

|         |          |          |      |          |      |                                |                                                                                                                                                |
|---------|----------|----------|------|----------|------|--------------------------------|------------------------------------------------------------------------------------------------------------------------------------------------|
| 7919591 | 2.40E-04 | 7.69E-06 | 7.1  | 3.90428  | 2.29 | FAM72A//FA<br>M72D//FAM7<br>2B | family with sequence similarity 72 member<br>A//family with sequence similarity 72<br>member D//family with sequence similarity<br>72 member B |
| 8002303 | 2.45E-04 | 7.91E-06 | 7.08 | 3.875976 | 2.75 | NQO1                           | NAD(P)H quinone dehydrogenase 1                                                                                                                |
| 8090433 | 2.46E-04 | 7.93E-06 | 7.08 | 3.872641 | 1.32 | MGLL                           | monoglyceride lipase                                                                                                                           |

|         |          |          |      |          |      |                         |                                                                                                                       |
|---------|----------|----------|------|----------|------|-------------------------|-----------------------------------------------------------------------------------------------------------------------|
| 8118564 | 2.46E-04 | 7.95E-06 | 7.08 | 3.87045  | 2.25 | HLA-DQA2///<br>HLA-DQA1 | major histocompatibility complex, class II,<br>DQ alpha 2///major histocompatibility<br>complex, class II, DQ alpha 1 |
| 8057394 | 2.46E-04 | 7.95E-06 | 7.08 | 3.869998 | 1.08 | SESTD1                  | SEC14 and spectrin domain containing 1                                                                                |
| 8085665 | 2.46E-04 | 7.96E-06 | 7.08 | 3.868983 | 1.1  | RFTN1                   | raftlin, lipid raft linker 1                                                                                          |
| 8073775 | 2.47E-04 | 8.03E-06 | 7.07 | 3.859858 | 1.46 | FBLN1                   | fibulin 1                                                                                                             |



|         |          |          |      |          |      |       |                                                                      |
|---------|----------|----------|------|----------|------|-------|----------------------------------------------------------------------|
| 8124307 | 2.48E-04 | 8.09E-06 | 7.07 | 3.851907 | 1.79 | CMAHP | cytidine monophospho-N-acetylneuraminic acid hydroxylase, pseudogene |
| 8161044 | 2.50E-04 | 8.18E-06 | 7.06 | 3.841092 | 1.99 | TPM2  | tropomyosin 2 (beta)                                                 |
| 7942135 | 2.51E-04 | 8.23E-06 | 7.06 | 3.834701 | 1.28 | ANO1  | anoctamin 1                                                          |
| 7898805 | 2.51E-04 | 8.24E-06 | 7.06 | 3.833351 | 2.1  | C1QB  | complement C1q B chain                                               |
| 8099841 | 2.51E-04 | 8.27E-06 | 7.05 | 3.830394 | 1.74 | TLR6  | toll like receptor 6                                                 |

|         |          |          |      |          |      |                         |                                                                                                                       |
|---------|----------|----------|------|----------|------|-------------------------|-----------------------------------------------------------------------------------------------------------------------|
| 8178205 | 2.57E-04 | 8.53E-06 | 7.03 | 3.798872 | 2.25 | HLA-DQA2///<br>HLA-DQA1 | major histocompatibility complex, class II,<br>DQ alpha 2///major histocompatibility<br>complex, class II, DQ alpha 1 |
| 8095187 | 2.58E-04 | 8.55E-06 | 7.03 | 3.796558 | 1.28 | CEP135                  | centrosomal protein 135                                                                                               |
| 8140463 | 2.59E-04 | 8.63E-06 | 7.03 | 3.786677 | 1.89 | FGL2                    | fibrinogen like 2                                                                                                     |
| 7971150 | 2.60E-04 | 8.67E-06 | 7.02 | 3.78244  | 1.14 | LHFP                    | lipoma HMGIC fusion partner                                                                                           |
| 7922669 | 2.60E-04 | 8.67E-06 | 7.02 | 3.781558 | 1.13 | STX6                    | syntaxin 6                                                                                                            |
| 7921625 | 2.60E-04 | 8.68E-06 | 7.02 | 3.780222 | 1.7  | SLAMF6                  | SLAM family member 6                                                                                                  |

|         |          |          |      |          |      |        |                                        |
|---------|----------|----------|------|----------|------|--------|----------------------------------------|
| 7918593 | 2.61E-04 | 8.71E-06 | 7.02 | 3.77754  | 1.07 | RHOC   | ras homolog family member C            |
| 8043468 | 2.66E-04 | 9.00E-06 | 7    | 3.744201 | 3.57 | IGKC   | immunoglobulin kappa constant          |
| 8114920 | 2.66E-04 | 9.01E-06 | 7    | 3.742117 | 1.83 | DPYSL3 | dihydropyrimidinase like 3             |
| 8152976 | 2.66E-04 | 9.02E-06 | 7    | 3.741103 | 1.6  | TMEM71 | transmembrane protein 71               |
| 8135594 | 2.70E-04 | 9.20E-06 | 6.98 | 3.721855 | 1.39 | CAV1   | caveolin 1                             |
| 7898799 | 2.73E-04 | 9.30E-06 | 6.98 | 3.709833 | 1.98 | C1QC   | complement C1q C chain                 |
| 8059854 | 2.75E-04 | 9.44E-06 | 6.97 | 3.69527  | 1.7  | ARL4C  | ADP ribosylation factor like GTPase 4C |

|         |          |          |      |          |      |        |                                           |
|---------|----------|----------|------|----------|------|--------|-------------------------------------------|
| 8122554 | 2.77E-04 | 9.52E-06 | 6.96 | 3.686116 | 1.32 | RAB32  | RAB32, member RAS oncogene family         |
| 8112428 | 2.79E-04 | 9.59E-06 | 6.96 | 3.679499 | 2.31 | CD180  | CD180 molecule                            |
| 8094278 | 2.79E-04 | 9.61E-06 | 6.95 | 3.676839 | 1.28 | NCAPG  | non-SMC condensin I complex subunit G     |
| 8103508 | 2.79E-04 | 9.65E-06 | 6.95 | 3.672469 | 1.19 | 1-Mar  | membrane associated ring-CH-type finger 1 |
| 8084794 | 2.81E-04 | 9.74E-06 | 6.94 | 3.663055 | 2.4  | IL1RAP | interleukin 1 receptor accessory protein  |
| 7917954 | 2.81E-04 | 9.75E-06 | 6.94 | 3.661787 | 1.42 | FRRS1  | ferric chelate reductase 1                |

|         |          |          |      |          |      |          |                                                       |
|---------|----------|----------|------|----------|------|----------|-------------------------------------------------------|
| 7903980 | 2.81E-04 | 9.77E-06 | 6.94 | 3.660083 | 1.85 | C1orf162 | chromosome 1 open reading frame 162                   |
| 8154178 | 2.81E-04 | 9.77E-06 | 6.94 | 3.65982  | 1.14 | JAK2     | Janus kinase 2                                        |
| 7899160 | 2.81E-04 | 9.79E-06 | 6.94 | 3.658138 | 2.47 | CD52     | CD52 molecule                                         |
| 8137244 | 2.81E-04 | 9.80E-06 | 6.94 | 3.657392 | 2.23 | GIMAP4   | GTPase, IMAP family member 4                          |
| 8163383 | 2.83E-04 | 9.89E-06 | 6.93 | 3.64787  | 1.22 | SUSD1    | sushi domain containing 1                             |
| 7910950 | 2.84E-04 | 9.95E-06 | 6.93 | 3.641773 | 1.69 | KMO      | kynurenine 3-monooxygenase (kynurenine 3-hydroxylase) |

|         |          |          |      |          |      |          |                                      |
|---------|----------|----------|------|----------|------|----------|--------------------------------------|
| 7977786 | 2.84E-04 | 9.97E-06 | 6.93 | 3.639437 | 1.66 | SLC7A7   | solute carrier family 7 member 7     |
| 8053417 | 2.90E-04 | 1.02E-05 | 6.91 | 3.612348 | 1.78 | CAPG     | capping actin protein, gelsolin like |
| 8178095 | 2.90E-04 | 1.03E-05 | 6.91 | 3.610418 | 2.47 | C2       | complement component 2               |
| 8179331 | 2.90E-04 | 1.03E-05 | 6.91 | 3.610418 | 2.47 | C2       | complement component 2               |
| 7940028 | 2.90E-04 | 1.03E-05 | 6.91 | 3.610261 | 1.33 | SERPING1 | serpin family G member 1             |
| 8096635 | 2.91E-04 | 1.03E-05 | 6.91 | 3.604411 | 1.02 | NFKB1    | nuclear factor kappa B subunit 1     |
| 7955613 | 2.92E-04 | 1.04E-05 | 6.9  | 3.599212 | 2.1  | KRT7     | keratin 7                            |
| 7896724 | 2.92E-04 | 1.04E-05 | 6.9  | 3.59852  | 3.15 |          |                                      |

|         |          |          |      |          |      |         |                                                |
|---------|----------|----------|------|----------|------|---------|------------------------------------------------|
| 8096004 | 2.92E-04 | 1.04E-05 | 6.9  | 3.598209 | 1.14 | BMP2K   | BMP2 inducible kinase                          |
| 8046895 | 2.92E-04 | 1.04E-05 | 6.9  | 3.597052 | 1.26 | FAM171B | family with sequence similarity 171 member B   |
| 8175393 | 2.93E-04 | 1.04E-05 | 6.9  | 3.59331  | 1.82 | ARHGEF6 | Rac/Cdc42 guanine nucleotide exchange factor 6 |
| 8121685 | 2.95E-04 | 1.05E-05 | 6.89 | 3.582795 | 1.15 | DCBLD1  | discoidin, CUB and LCCL domain containing 1    |
| 7952022 | 2.98E-04 | 1.07E-05 | 6.88 | 3.569395 | 2.64 | JAML    | junction adhesion molecule like                |

|         |          |          |      |          |      |          |                                                 |
|---------|----------|----------|------|----------|------|----------|-------------------------------------------------|
| 7983940 | 2.99E-04 | 1.08E-05 | 6.88 | 3.561634 | 1.2  | FAM63B   | family with sequence similarity 63 member B     |
| 7990839 | 3.02E-04 | 1.09E-05 | 6.87 | 3.548226 | 1.09 | STARD5   | StAR related lipid transfer domain containing 5 |
| 8072735 | 3.04E-04 | 1.10E-05 | 6.87 | 3.539843 | 2.56 | APOL1    | apolipoprotein L1                               |
| 8102950 | 3.04E-04 | 1.10E-05 | 6.86 | 3.53851  | 1.43 | INPP4B   | inositol polyphosphate-4-phosphatase type II B  |
| 8045563 | 3.10E-04 | 1.13E-05 | 6.85 | 3.512775 | 2.27 | ARHGAP15 | Rho GTPase activating protein 15                |



|         |          |          |      |          |      |          |                                                               |
|---------|----------|----------|------|----------|------|----------|---------------------------------------------------------------|
| 7990632 | 3.10E-04 | 1.13E-05 | 6.85 | 3.510813 | 1.46 | PEAK1    | pseudopodium enriched atypical kinase 1                       |
| 8140579 | 3.15E-04 | 1.15E-05 | 6.83 | 3.489374 | 2.12 | CACNA2D1 | calcium voltage-gated channel auxiliary subunit alpha2delta 1 |
| 8145293 | 3.15E-04 | 1.16E-05 | 6.83 | 3.486367 | 2.12 | ADAM28   | ADAM metallopeptidase domain 28                               |
| 8167973 | 3.16E-04 | 1.16E-05 | 6.83 | 3.483248 | 1.47 | HEPH     | hephaestin                                                    |
| 8113433 | 3.16E-04 | 1.17E-05 | 6.83 | 3.478836 | 1.53 | EFNA5    | ephrin A5                                                     |
| 7914603 | 3.19E-04 | 1.18E-05 | 6.82 | 3.468569 | 1.32 | RNF19B   | ring finger protein 19B                                       |

|         |          |          |      |          |      |        |                                                |
|---------|----------|----------|------|----------|------|--------|------------------------------------------------|
| 7906757 | 3.25E-04 | 1.21E-05 | 6.8  | 3.441045 | 2.89 | FCGR2A | Fc fragment of IgG receptor IIa                |
| 8101118 | 3.25E-04 | 1.21E-05 | 6.8  | 3.43962  | 2.38 | CXCL9  | C-X-C motif chemokine ligand 9                 |
| 8084732 | 3.26E-04 | 1.22E-05 | 6.8  | 3.431885 | 1.33 | RTP4   | receptor transporter protein 4                 |
| 8118324 | 3.29E-04 | 1.23E-05 | 6.79 | 3.42215  | 2.36 | C2     | complement component 2                         |
| 8174474 | 3.32E-04 | 1.25E-05 | 6.78 | 3.411787 | 1.52 | ACSL4  | acyl-CoA synthetase long-chain family member 4 |

|         |          |          |      |          |      |         |                                                            |
|---------|----------|----------|------|----------|------|---------|------------------------------------------------------------|
| 7961059 | 3.32E-04 | 1.25E-05 | 6.78 | 3.411236 | 2.04 | KLRB1   | killer cell lectin like receptor B1                        |
| 8023043 | 3.33E-04 | 1.25E-05 | 6.78 | 3.408316 | 1.38 | PSTPIP2 | proline-serine-threonine phosphatase interacting protein 2 |
| 8101780 | 3.33E-04 | 1.26E-05 | 6.78 | 3.404366 | 2.4  | HPGDS   | hematopoietic prostaglandin D synthase                     |
| 7957665 | 3.34E-04 | 1.27E-05 | 6.77 | 3.395621 | 1.67 | ELK3    | ELK3, ETS transcription factor                             |

|         |          |          |      |          |      |                    |                                                                                              |
|---------|----------|----------|------|----------|------|--------------------|----------------------------------------------------------------------------------------------|
| 7948229 | 3.35E-04 | 1.27E-05 | 6.77 | 3.393613 | 1.41 | SLC43A3///PR<br>G2 | solute carrier family 43 member<br>3///proteoglycan 2, pro eosinophil major<br>basic protein |
| 8016646 | 3.35E-04 | 1.27E-05 | 6.77 | 3.391333 | 1.69 | COL1A1             | collagen type I alpha 1 chain                                                                |
| 7954717 | 3.36E-04 | 1.27E-05 | 6.77 | 3.388925 | 1.25 | BICD1              | BICD cargo adaptor 1                                                                         |
| 8068280 | 3.37E-04 | 1.28E-05 | 6.76 | 3.38269  | 1.06 | IFNGR2             | interferon gamma receptor 2 (interferon<br>gamma transducer 1)                               |

|         |          |          |      |          |      |          |                                                  |
|---------|----------|----------|------|----------|------|----------|--------------------------------------------------|
| 8043431 | 3.39E-04 | 1.30E-05 | 6.76 | 3.372245 | 3.93 | IGKC     | immunoglobulin kappa constant                    |
| 8106730 | 3.44E-04 | 1.32E-05 | 6.75 | 3.3538   | 1.21 | XRCC4    | X-ray repair cross complementing 4               |
| 7978595 | 3.44E-04 | 1.32E-05 | 6.75 | 3.35275  | 1.07 | BAZ1A    | bromodomain adjacent to zinc finger domain<br>1A |
| 8057045 | 3.45E-04 | 1.33E-05 | 6.74 | 3.347229 | 1.55 | FKBP7    | FK506 binding protein 7                          |
| 7934920 | 3.46E-04 | 1.33E-05 | 6.74 | 3.344581 | 1.39 | LIPA     | lipase A, lysosomal acid type                    |
| 8115814 | 3.47E-04 | 1.34E-05 | 6.74 | 3.340437 | 1.26 | SH3PXD2B | SH3 and PX domains 2B                            |

|         |          |          |      |          |      |         |                                                           |
|---------|----------|----------|------|----------|------|---------|-----------------------------------------------------------|
| 8024572 | 3.47E-04 | 1.34E-05 | 6.74 | 3.338828 | 1.02 | GNA15   | G protein subunit alpha 15                                |
| 8029098 | 3.53E-04 | 1.37E-05 | 6.72 | 3.316915 | 3.93 | CEACAM6 | carcinoembryonic antigen related cell adhesion molecule 6 |
| 7979281 | 3.53E-04 | 1.37E-05 | 6.72 | 3.315697 | 1.37 | WDHD1   | WD repeat and HMG-box DNA binding protein 1               |
| 7927215 | 3.65E-04 | 1.43E-05 | 6.69 | 3.274059 | 1.13 | ALOX5   | arachidonate 5-lipoxygenase                               |

|         |          |          |      |          |      |         |                                                    |
|---------|----------|----------|------|----------|------|---------|----------------------------------------------------|
| 7917182 | 3.66E-04 | 1.44E-05 | 6.69 | 3.26723  | 2.21 | ADGRL4  | adhesion G protein-coupled receptor L4             |
| 7951408 | 3.68E-04 | 1.44E-05 | 6.69 | 3.260902 | 1.9  | CARD16  | caspase recruitment domain family member 16        |
| 8077899 | 3.69E-04 | 1.45E-05 | 6.68 | 3.255107 | 2.2  | PPARG   | peroxisome proliferator activated receptor gamma   |
| 8084717 | 3.70E-04 | 1.46E-05 | 6.68 | 3.25039  | 2.3  | ST6GAL1 | ST6 beta-galactoside alpha-2,6-sialyltransferase 1 |

|         |          |          |      |          |      |                 |                                                   |
|---------|----------|----------|------|----------|------|-----------------|---------------------------------------------------|
| 7982597 | 3.74E-04 | 1.48E-05 | 6.67 | 3.239397 | 2.14 | THBS1           | thrombospondin 1                                  |
| 8070297 | 3.77E-04 | 1.49E-05 | 6.67 | 3.228969 | 1.66 | ERG             | ERG, ETS transcription factor                     |
| 7932867 | 3.80E-04 | 1.51E-05 | 6.66 | 3.218776 | 1.07 | ZNF438///ZNF438 | zinc finger protein 438///zinc finger protein 438 |
| 8166469 | 3.80E-04 | 1.51E-05 | 6.66 | 3.215206 | 1.24 | SAT1            | spermidine/spermine N1-acetyltransferase 1        |
| 7907135 | 3.85E-04 | 1.53E-05 | 6.65 | 3.199324 | 1    | SFT2D2          | SFT2 domain containing 2                          |
| 8157524 | 3.86E-04 | 1.54E-05 | 6.65 | 3.195782 | 2.23 | TLR4            | toll like receptor 4                              |



|         |          |          |      |          |      |          |                                                           |
|---------|----------|----------|------|----------|------|----------|-----------------------------------------------------------|
| 8060940 | 3.92E-04 | 1.57E-05 | 6.63 | 3.174969 | 2.41 | LAMP5    | lysosomal associated membrane protein family member 5     |
| 8111387 | 3.94E-04 | 1.59E-05 | 6.63 | 3.164711 | 1.81 | ADAMTS12 | ADAM metallopeptidase with thrombospondin type 1 motif 12 |
| 7963289 | 3.96E-04 | 1.59E-05 | 6.62 | 3.160274 | 1.46 | BIN2     | bridging integrator 2                                     |

|         |          |          |      |          |      |                       |                                                                                                                        |
|---------|----------|----------|------|----------|------|-----------------------|------------------------------------------------------------------------------------------------------------------------|
| 8017210 | 3.96E-04 | 1.60E-05 | 6.62 | 3.158455 | 1.04 | LOC653653///<br>AP1S2 | adaptor related protein complex 1 sigma 2<br>subunit pseudogene///adaptor related protein<br>complex 1 sigma 2 subunit |
| 8072876 | 3.97E-04 | 1.60E-05 | 6.62 | 3.154824 | 2.28 | LGALS1                | galectin 1                                                                                                             |
| 7928444 | 3.99E-04 | 1.62E-05 | 6.61 | 3.145391 | 1.06 | VCL                   | vinculin                                                                                                               |
| 8094228 | 4.02E-04 | 1.63E-05 | 6.61 | 3.134781 | 1.04 | BST1                  | bone marrow stromal cell antigen 1                                                                                     |
| 8129861 | 4.03E-04 | 1.64E-05 | 6.6  | 3.131018 | 1.08 | IFNGR1                | interferon gamma receptor 1                                                                                            |
| 7990151 | 4.03E-04 | 1.64E-05 | 6.6  | 3.129998 | 1.6  | PKM                   | pyruvate kinase, muscle                                                                                                |

|         |          |          |      |          |      |         |                                     |
|---------|----------|----------|------|----------|------|---------|-------------------------------------|
| 8100318 | 4.13E-04 | 1.70E-05 | 6.58 | 3.096968 | 1.22 | SGCB    | sarcoglycan beta                    |
| 7943369 | 4.14E-04 | 1.71E-05 | 6.58 | 3.090556 | 1.93 | TMEM133 | transmembrane protein 133           |
| 8081235 | 4.16E-04 | 1.72E-05 | 6.57 | 3.082359 | 1.5  | COL8A1  | collagen type VIII alpha 1 chain    |
| 8047161 | 4.17E-04 | 1.73E-05 | 6.57 | 3.079396 | 1.57 | NABP1   | nucleic acid binding protein 1      |
| 7914342 | 4.19E-04 | 1.73E-05 | 6.57 | 3.074309 | 2.19 | FABP3   | fatty acid binding protein 3        |
| 8000184 | 4.19E-04 | 1.74E-05 | 6.57 | 3.073013 | 2.31 | IGSF6   | immunoglobulin superfamily member 6 |
| 7915733 | 4.24E-04 | 1.76E-05 | 6.56 | 3.058462 | 1.04 | PRDX1   | peroxiredoxin 1                     |

|         |          |          |      |          |      |        |                                                           |
|---------|----------|----------|------|----------|------|--------|-----------------------------------------------------------|
| 7908924 | 4.25E-04 | 1.77E-05 | 6.56 | 3.053163 | 1.33 | PRELP  | proline and arginine rich end leucine rich repeat protein |
| 8078330 | 4.25E-04 | 1.77E-05 | 6.55 | 3.051366 | 1.19 | RBMS3  | RNA binding motif single stranded interacting protein 3   |
| 7972557 | 4.25E-04 | 1.77E-05 | 6.55 | 3.05116  | 2    | GPR183 | G protein-coupled receptor 183                            |
| 8123104 | 4.27E-04 | 1.78E-05 | 6.55 | 3.045236 | 2.26 | FNDC1  | fibronectin type III domain containing 1                  |

|         |          |          |      |          |      |         |                                                      |
|---------|----------|----------|------|----------|------|---------|------------------------------------------------------|
| 8173287 | 4.29E-04 | 1.80E-05 | 6.55 | 3.036994 | 2.51 | VSIG4   | V-set and immunoglobulin domain containing 4         |
| 8011826 | 4.33E-04 | 1.83E-05 | 6.53 | 3.01985  | 1.91 | SCIMP   | SLP adaptor and CSK interacting membrane protein     |
| 8139488 | 4.35E-04 | 1.84E-05 | 6.53 | 3.014111 | 2.05 | IGFBP3  | insulin like growth factor binding protein 3         |
| 8112007 | 4.35E-04 | 1.84E-05 | 6.53 | 3.012251 | 2.05 | EMB     | embigin                                              |
| 8178884 | 4.35E-04 | 1.85E-05 | 6.53 | 3.009515 | 1.89 | HLA-DMA | major histocompatibility complex, class II, DM alpha |

|         |          |          |      |          |      |         |                                                      |
|---------|----------|----------|------|----------|------|---------|------------------------------------------------------|
| 8180086 | 4.35E-04 | 1.85E-05 | 6.53 | 3.009515 | 1.89 | HLA-DMA | major histocompatibility complex, class II, DM alpha |
| 7896714 | 4.36E-04 | 1.85E-05 | 6.53 | 3.007124 | 2    |         |                                                      |
| 8161563 | 4.36E-04 | 1.85E-05 | 6.53 | 3.006702 | 1.15 | IGKC    | immunoglobulin kappa constant                        |
| 7972003 | 4.36E-04 | 1.86E-05 | 6.52 | 3.001826 | 1.46 | KLF12   | Kruppel like factor 12                               |
| 7925876 | 4.41E-04 | 1.89E-05 | 6.52 | 2.988595 | 1.41 | PFKP    | phosphofructokinase, platelet                        |
| 8171172 | 4.42E-04 | 1.89E-05 | 6.51 | 2.984662 | 2.09 | MXRA5   | matrix remodeling associated 5                       |
| 7943749 | 4.43E-04 | 1.90E-05 | 6.51 | 2.980951 | 1.63 | LAYN    | layilin                                              |

|         |          |          |      |          |      |       |                                                                |
|---------|----------|----------|------|----------|------|-------|----------------------------------------------------------------|
| 7968976 | 4.43E-04 | 1.91E-05 | 6.51 | 2.978261 | 1.18 | LRCH1 | leucine rich repeats and calponin homology domain containing 1 |
| 8074237 | 4.45E-04 | 1.92E-05 | 6.5  | 2.971416 | 1.33 | CECR1 | cat eye syndrome chromosome region, candidate 1                |
| 7948364 | 4.45E-04 | 1.92E-05 | 6.5  | 2.971219 | 1.91 | MPEG1 | macrophage expressed 1                                         |
| 7958019 | 4.49E-04 | 1.95E-05 | 6.5  | 2.956591 | 1.3  | DRAM1 | DNA damage regulated autophagy modulator 1                     |

|         |          |          |      |          |      |         |                                                      |
|---------|----------|----------|------|----------|------|---------|------------------------------------------------------|
| 8101322 | 4.49E-04 | 1.95E-05 | 6.5  | 2.956532 | 1.89 | MOP-1   | MOP-1                                                |
| 8125537 | 4.49E-04 | 1.95E-05 | 6.49 | 2.95504  | 1.83 | HLA-DMA | major histocompatibility complex, class II, DM alpha |
| 8055426 | 4.51E-04 | 1.96E-05 | 6.49 | 2.949663 | 1.13 | MCM6    | minichromosome maintenance complex component 6       |
| 8091385 | 4.54E-04 | 1.98E-05 | 6.48 | 2.938527 | 3.07 | CP      | ceruloplasmin (ferroxidase)                          |
| 8018305 | 4.54E-04 | 1.98E-05 | 6.48 | 2.937707 | 1.28 | HN1     | hematological and neurological expressed 1           |



|         |          |          |      |          |      |        |                                                                 |
|---------|----------|----------|------|----------|------|--------|-----------------------------------------------------------------|
| 8057898 | 4.55E-04 | 1.98E-05 | 6.48 | 2.936651 | 1.33 | HECW2  | HECT, C2 and WW domain containing E3 ubiquitin protein ligase 2 |
| 8078014 | 4.55E-04 | 1.99E-05 | 6.48 | 2.933467 | 1.87 | SLC6A6 | solute carrier family 6 member 6                                |
| 8062312 | 4.57E-04 | 2.01E-05 | 6.48 | 2.926004 | 1.57 | MYL9   | myosin light chain 9                                            |
| 7917433 | 4.58E-04 | 2.02E-05 | 6.47 | 2.920192 | 1.22 | ODF2L  | outer dense fiber of sperm tails 2 like                         |
| 7949496 | 4.58E-04 | 2.02E-05 | 6.47 | 2.918373 | 1.07 | CFL1   | cofilin 1                                                       |

|         |          |          |      |          |      |       |                                                    |
|---------|----------|----------|------|----------|------|-------|----------------------------------------------------|
| 8081537 | 4.64E-04 | 2.06E-05 | 6.46 | 2.900209 | 2.91 | TRAT1 | T cell receptor associated transmembrane adaptor 1 |
| 7965541 | 4.66E-04 | 2.07E-05 | 6.46 | 2.894703 | 1.16 | FGD6  | FYVE, RhoGEF and PH domain containing 6            |
| 8133818 | 4.70E-04 | 2.09E-05 | 6.45 | 2.885944 | 1.03 | PHTF2 | putative homeodomain transcription factor 2        |
| 7906930 | 4.73E-04 | 2.10E-05 | 6.45 | 2.877396 | 1.26 | NUF2  | NUF2, NDC80 kinetochore complex component          |

|         |          |          |      |          |      |          |                                                    |
|---------|----------|----------|------|----------|------|----------|----------------------------------------------------|
| 8058708 | 4.77E-04 | 2.13E-05 | 6.44 | 2.865346 | 1.37 | ABCA12   | ATP binding cassette subfamily A member 12         |
| 7956046 | 4.82E-04 | 2.16E-05 | 6.43 | 2.84897  | 1.29 | DGKA     | diacylglycerol kinase alpha                        |
| 8021584 | 4.84E-04 | 2.17E-05 | 6.43 | 2.844484 | 2.08 | SERPINB5 | serpin family B member 5                           |
| 7943293 | 4.85E-04 | 2.18E-05 | 6.42 | 2.841018 | 1.11 | ENDOD1   | endonuclease domain containing 1                   |
| 8057744 | 4.85E-04 | 2.18E-05 | 6.42 | 2.838575 | 1.14 | STAT1    | signal transducer and activator of transcription 1 |

|         |          |          |      |          |      |         |                                                |
|---------|----------|----------|------|----------|------|---------|------------------------------------------------|
| 7953291 | 4.86E-04 | 2.19E-05 | 6.42 | 2.836638 | 1.38 | CD9     | CD9 molecule                                   |
| 7974461 | 4.88E-04 | 2.21E-05 | 6.42 | 2.828563 | 1.11 | LGALS3  | lectin, galactoside binding soluble 3          |
| 8162404 | 4.89E-04 | 2.22E-05 | 6.41 | 2.822999 | 1.09 | ECM2    | extracellular matrix protein 2                 |
| 8097903 | 4.91E-04 | 2.23E-05 | 6.41 | 2.817395 | 1.9  | TLR2    | toll like receptor 2                           |
| 7918622 | 4.93E-04 | 2.24E-05 | 6.41 | 2.81197  | 1.69 | SLC16A1 | solute carrier family 16 member 1              |
| 8146159 | 5.05E-04 | 2.31E-05 | 6.39 | 2.78085  | 1.2  | AP3M2   | adaptor related protein complex 3 mu 2 subunit |
| 8131631 | 5.10E-04 | 2.33E-05 | 6.38 | 2.770711 | 1.01 | HDAC9   | histone deacetylase 9                          |

|         |          |          |      |          |      |                     |                                                 |
|---------|----------|----------|------|----------|------|---------------------|-------------------------------------------------|
| 7988644 | 5.17E-04 | 2.38E-05 | 6.37 | 2.753134 | 1.93 | ATP8B4              | ATPase phospholipid transporting 8B4 (putative) |
| 7980044 | 5.22E-04 | 2.41E-05 | 6.36 | 2.738604 | 1.1  | PNMA1               | paraneoplastic Ma antigen 1                     |
| 7929334 | 5.25E-04 | 2.43E-05 | 6.35 | 2.730204 | 1.74 | CEP55               | centrosomal protein 55                          |
| 8101659 | 5.29E-04 | 2.47E-05 | 6.35 | 2.715173 | 1.39 | SPARCL1             | SPARC like 1                                    |
| 7917576 | 5.31E-04 | 2.48E-05 | 6.34 | 2.710587 | 2.79 | GBP5                | guanylate binding protein 5                     |
| 7933312 | 5.34E-04 | 2.50E-05 | 6.34 | 2.701662 | 1.56 | ANXA8L1///A<br>NXA8 | annexin A8-like 1///annexin A8                  |
| 8026971 | 5.36E-04 | 2.51E-05 | 6.33 | 2.697873 | 1.82 | IFI30               | IFI30, lysosomal thiol reductase                |

|         |          |          |      |          |      |        |                                                  |
|---------|----------|----------|------|----------|------|--------|--------------------------------------------------|
| 8169115 | 5.38E-04 | 2.52E-05 | 6.33 | 2.691847 | 2.21 | NRK    | Nik related kinase                               |
| 8106098 | 5.39E-04 | 2.53E-05 | 6.33 | 2.687623 | 1.62 | MAP1B  | microtubule associated protein 1B                |
| 8151219 | 5.39E-04 | 2.53E-05 | 6.33 | 2.686733 | 1.34 |        |                                                  |
| 8151684 | 5.39E-04 | 2.54E-05 | 6.33 | 2.685375 | 1.07 | MMP16  | matrix metalloproteinase 16                      |
| 7990818 | 5.40E-04 | 2.54E-05 | 6.33 | 2.683686 | 2.93 | BCL2A1 | BCL2 related protein A1                          |
| 8134814 | 5.45E-04 | 2.57E-05 | 6.32 | 2.672598 | 1.29 | PILRA  | paired immunoglobulin like type 2 receptor alpha |
| 7960794 | 5.48E-04 | 2.59E-05 | 6.31 | 2.663796 | 2.28 | CD163  | CD163 molecule                                   |

|         |          |          |      |          |      |                     |                                              |
|---------|----------|----------|------|----------|------|---------------------|----------------------------------------------|
| 7969986 | 5.53E-04 | 2.62E-05 | 6.31 | 2.652419 | 1.17 | TNFSF13B            | tumor necrosis factor superfamily member 13b |
| 8167006 | 5.53E-04 | 2.63E-05 | 6.31 | 2.649567 | 1.32 | RP2                 | retinitis pigmentosa 2 (X-linked recessive)  |
| 7927367 | 5.57E-04 | 2.65E-05 | 6.3  | 2.640164 | 1.01 | ANXA8L1///A<br>NXA8 | annexin A8-like 1///annexin A8               |

|         |          |          |      |          |      |                                      |                                                                                                                                    |
|---------|----------|----------|------|----------|------|--------------------------------------|------------------------------------------------------------------------------------------------------------------------------------|
| 7981728 | 5.65E-04 | 2.70E-05 | 6.29 | 2.624125 | 3.97 | IGHM///IGHV<br>3-48///IGHV3-<br>69-1 | immunoglobulin heavy constant<br>mu///immunoglobulin heavy variable<br>3-48///immunoglobulin heavy variable<br>3-69-1 (pseudogene) |
| 7929258 | 5.67E-04 | 2.71E-05 | 6.29 | 2.61732  | 1.32 | KIF11                                | kinesin family member 11                                                                                                           |



|         |          |          |      |          |      |                     |                                                             |
|---------|----------|----------|------|----------|------|---------------------|-------------------------------------------------------------|
| 7929052 | 5.75E-04 | 2.76E-05 | 6.27 | 2.59845  | 1.61 | IFIT3               | interferon induced protein with tetratricopeptide repeats 3 |
| 7927307 | 5.75E-04 | 2.76E-05 | 6.27 | 2.598202 | 1.07 | ANXA8L1///A<br>NXA8 | annexin A8-like 1///annexin A8                              |
| 7931097 | 5.79E-04 | 2.80E-05 | 6.27 | 2.585352 | 1.05 | HTRA1               | HtrA serine peptidase 1                                     |
| 7951077 | 5.82E-04 | 2.82E-05 | 6.26 | 2.577771 | 1.21 | SESN3               | sestrin 3                                                   |
| 7902127 | 5.84E-04 | 2.83E-05 | 6.26 | 2.573874 | 1.69 | SGIP1               | SH3 domain GRB2 like endophilin interacting protein 1       |

|         |          |          |      |          |      |        |                                 |
|---------|----------|----------|------|----------|------|--------|---------------------------------|
| 8081564 | 5.84E-04 | 2.84E-05 | 6.26 | 2.571861 | 2.17 | CD96   | CD96 molecule                   |
| 8014891 | 5.93E-04 | 2.88E-05 | 6.25 | 2.555453 | 1.61 | IKZF3  | IKAROS family zinc finger 3     |
| 8133983 | 5.93E-04 | 2.89E-05 | 6.25 | 2.554385 | 1.68 | ADAM22 | ADAM metallopeptidase domain 22 |

|         |          |          |      |          |     |                                                                                                                                                                                                                                                      |
|---------|----------|----------|------|----------|-----|------------------------------------------------------------------------------------------------------------------------------------------------------------------------------------------------------------------------------------------------------|
| 7904469 | 5.96E-04 | 2.90E-05 | 6.24 | 2.548581 | 1.3 | SLIT-ROBO Rho GTPase activating protein<br>SRGAP2D///S 2D (pseudogene)///SLIT-ROBO Rho<br>RGAP2C///SR GTPase activating protein 2C///SLIT-ROBO<br>GAP2B///SRG Rho GTPase activating protein<br>AP2 2B///SLIT-ROBO Rho GTPase activating<br>protein 2 |
|---------|----------|----------|------|----------|-----|------------------------------------------------------------------------------------------------------------------------------------------------------------------------------------------------------------------------------------------------------|

|         |          |          |      |          |      |        |                                           |
|---------|----------|----------|------|----------|------|--------|-------------------------------------------|
| 8174051 | 5.96E-04 | 2.91E-05 | 6.24 | 2.546833 | 1.5  | BTK    | Bruton tyrosine kinase                    |
| 8147777 | 6.06E-04 | 2.97E-05 | 6.23 | 2.525346 | 1.04 | CTHRC1 | collagen triple helix repeat containing 1 |
| 8075635 | 6.08E-04 | 2.98E-05 | 6.23 | 2.519896 | 1.62 | TIMP3  | TIMP metalloproteinase inhibitor 3        |
| 7984540 | 6.08E-04 | 2.99E-05 | 6.22 | 2.517655 | 1.45 | KIF23  | kinesin family member 23                  |
| 8104930 | 6.10E-04 | 3.00E-05 | 6.22 | 2.513258 | 2.17 | SLC1A3 | solute carrier family 1 member 3          |
| 8023757 | 6.10E-04 | 3.01E-05 | 6.22 | 2.512238 | 1.96 | CD226  | CD226 molecule                            |

|         |          |          |      |          |      |           |                                              |
|---------|----------|----------|------|----------|------|-----------|----------------------------------------------|
| 8083094 | 6.10E-04 | 3.01E-05 | 6.22 | 2.510911 | 1.09 | RASA2     | RAS p21 protein activator 2                  |
| 8082086 | 6.12E-04 | 3.02E-05 | 6.22 | 2.506662 | 1.43 | PARP15    | poly(ADP-ribose) polymerase family member 15 |
| 8102050 | 6.19E-04 | 3.08E-05 | 6.21 | 2.488555 | 2.02 | SLC9B2    | solute carrier family 9 member B2            |
| 8156290 | 6.26E-04 | 3.14E-05 | 6.19 | 2.468533 | 2.04 | CKS2      | CDC28 protein kinase regulatory subunit 2    |
| 7929026 | 6.28E-04 | 3.15E-05 | 6.19 | 2.464743 | 1.41 | ACTA2-AS1 | ACTA2 antisense RNA 1                        |
| 8160297 | 6.34E-04 | 3.20E-05 | 6.18 | 2.449546 | 1.75 | PLIN2     | perilipin 2                                  |

|         |          |          |      |          |      |        |                                                                  |
|---------|----------|----------|------|----------|------|--------|------------------------------------------------------------------|
| 8072626 | 6.35E-04 | 3.20E-05 | 6.18 | 2.44834  | 1.4  | TIMP3  | TIMP metallopeptidase inhibitor 3                                |
| 8022283 | 6.35E-04 | 3.21E-05 | 6.18 | 2.446527 | 2.32 | PIEZO2 | piezo type mechanosensitive ion channel component 2              |
| 8083166 | 6.36E-04 | 3.22E-05 | 6.18 | 2.443735 | 1.58 | TRPC1  | transient receptor potential cation channel subfamily C member 1 |
| 8031047 | 6.37E-04 | 3.23E-05 | 6.18 | 2.439958 | 1.4  | MYADM  | myeloid associated differentiation marker                        |

|         |          |          |      |          |      |          |                                                |
|---------|----------|----------|------|----------|------|----------|------------------------------------------------|
| 8146500 | 6.37E-04 | 3.23E-05 | 6.18 | 2.438803 | 1.41 | LYN      | LYN proto-oncogene, Src family tyrosine kinase |
| 7917561 | 6.38E-04 | 3.24E-05 | 6.18 | 2.436433 | 2.02 | GBP4     | guanylate binding protein 4                    |
| 8085774 | 6.39E-04 | 3.25E-05 | 6.17 | 2.433033 | 1.42 | ZNF385D  | zinc finger protein 385D                       |
| 8101304 | 6.46E-04 | 3.30E-05 | 6.16 | 2.418612 | 1.54 | RASGEF1B | RasGEF domain family member 1B                 |
| 8120719 | 6.47E-04 | 3.30E-05 | 6.16 | 2.41681  | 2.08 | CD109    | CD109 molecule                                 |

|         |          |          |      |          |      |          |                                                           |
|---------|----------|----------|------|----------|------|----------|-----------------------------------------------------------|
| 8112342 | 6.56E-04 | 3.36E-05 | 6.15 | 2.399338 | 1.32 | ADAMTS6  | ADAM metalloproteinase with thrombospondin type 1 motif 6 |
| 8144931 | 6.60E-04 | 3.39E-05 | 6.15 | 2.390734 | 1.02 | ATP6V1B2 | ATPase H <sup>+</sup> transporting V1 subunit B2          |
| 8057990 | 6.60E-04 | 3.39E-05 | 6.15 | 2.38885  | 1.14 | ANKRD44  | ankyrin repeat domain 44                                  |
| 8131867 | 6.70E-04 | 3.45E-05 | 6.14 | 2.370685 | 1.24 |          |                                                           |
| 8169473 | 6.72E-04 | 3.48E-05 | 6.13 | 2.363321 | 1.04 | PLS3     | plastin 3                                                 |
| 8034873 | 6.83E-04 | 3.55E-05 | 6.12 | 2.342678 | 1.12 | ADGRE2   | adhesion G protein-coupled receptor E2                    |



|         |          |          |      |          |      |                                    |                                                                                                                                              |
|---------|----------|----------|------|----------|------|------------------------------------|----------------------------------------------------------------------------------------------------------------------------------------------|
| 8065412 | 6.88E-04 | 3.58E-05 | 6.11 | 2.332815 | 3.34 | CST1                               | cystatin SN                                                                                                                                  |
| 7904482 | 6.88E-04 | 3.59E-05 | 6.11 | 2.33126  | 1.01 | SRGAP2C///S<br>RGAP2B///SR<br>GAP2 | SLIT-ROBO Rho GTPase activating protein<br>2C///SLIT-ROBO Rho GTPase activating<br>protein 2B///SLIT-ROBO Rho GTPase<br>activating protein 2 |
| 8056890 | 6.89E-04 | 3.60E-05 | 6.11 | 2.328286 | 1.85 | CHN1                               | chimerin 1                                                                                                                                   |
| 8161580 | 6.99E-04 | 3.66E-05 | 6.1  | 2.312607 | 1.03 |                                    |                                                                                                                                              |

|         |          |          |      |          |      |                         |                                                                                                                     |
|---------|----------|----------|------|----------|------|-------------------------|---------------------------------------------------------------------------------------------------------------------|
| 8086600 | 7.00E-04 | 3.67E-05 | 6.1  | 2.30911  | 1.25 | CCR1                    | C-C motif chemokine receptor 1                                                                                      |
| 8174076 | 7.01E-04 | 3.68E-05 | 6.1  | 2.305393 | 1.13 | GLA                     | galactosidase alpha                                                                                                 |
| 8180029 | 7.02E-04 | 3.69E-05 | 6.1  | 2.304007 | 1.51 | HLA-DQB2///<br>HLA-DQB1 | major histocompatibility complex, class II,<br>DQ beta 2///major histocompatibility<br>complex, class II, DQ beta 1 |
| 8053690 | 7.02E-04 | 3.69E-05 | 6.09 | 2.303027 | 3.29 |                         |                                                                                                                     |
| 8051762 | 7.06E-04 | 3.72E-05 | 6.09 | 2.294153 | 1.63 | SLC8A1                  | solute carrier family 8 member A1                                                                                   |

|         |          |          |      |          |      |         |                                                                              |
|---------|----------|----------|------|----------|------|---------|------------------------------------------------------------------------------|
| 8135705 | 7.08E-04 | 3.74E-05 | 6.09 | 2.288301 | 1.59 | KCND2   | potassium voltage-gated channel subfamily D member 2                         |
| 8153959 | 7.08E-04 | 3.75E-05 | 6.09 | 2.2874   | 1.23 | DOCK8   | dedicator of cytokinesis 8                                                   |
| 7926786 | 7.09E-04 | 3.76E-05 | 6.08 | 2.284748 | 1.22 | APBB1IP | amyloid beta precursor protein binding family B member 1 interacting protein |
| 7953901 | 7.15E-04 | 3.81E-05 | 6.07 | 2.269603 | 1.79 | CLEC12A | C-type lectin domain family 12 member A                                      |

|         |          |          |      |          |      |         |                                                  |
|---------|----------|----------|------|----------|------|---------|--------------------------------------------------|
| 8027748 | 7.17E-04 | 3.83E-05 | 6.07 | 2.265961 | 1.63 | FXVD3   | FXVD domain containing ion transport regulator 3 |
| 8102200 | 7.22E-04 | 3.86E-05 | 6.07 | 2.258122 | 1.11 | DKK2    | dickkopf WNT signaling pathway inhibitor 2       |
| 7978718 | 7.24E-04 | 3.87E-05 | 6.07 | 2.254706 | 1.38 | SEC23A  | Sec23 homolog A, coat complex II component       |
| 8122265 | 7.33E-04 | 3.93E-05 | 6.06 | 2.238762 | 1.85 | TNFAIP3 | TNF alpha induced protein 3                      |

|         |          |          |      |          |      |           |                                                 |
|---------|----------|----------|------|----------|------|-----------|-------------------------------------------------|
| 8054580 | 7.43E-04 | 4.00E-05 | 6.04 | 2.219763 | 1.35 | BUB1      | BUB1 mitotic checkpoint serine/threonine kinase |
| 8043480 | 7.45E-04 | 4.02E-05 | 6.04 | 2.215185 | 2.38 | IGKC      | immunoglobulin kappa constant                   |
| 8152512 | 7.45E-04 | 4.03E-05 | 6.04 | 2.213418 | 1.71 | TNFRSF11B | TNF receptor superfamily member 11b             |
| 8105331 | 7.45E-04 | 4.03E-05 | 6.04 | 2.21315  | 3.5  | GZMK      | granzyme K                                      |
| 7976443 | 7.46E-04 | 4.05E-05 | 6.04 | 2.208373 | 2.05 | IFI27     | interferon alpha inducible protein 27           |

|         |          |          |      |          |      |              |                                                  |
|---------|----------|----------|------|----------|------|--------------|--------------------------------------------------|
| 8092702 | 7.47E-04 | 4.07E-05 | 6.04 | 2.204066 | 1.27 | LOC100132319 | uncharacterized LOC100132319                     |
| 8036591 | 7.47E-04 | 4.07E-05 | 6.04 | 2.203954 | 1.67 | LGALS4       | galectin 4                                       |
| 8106475 | 7.48E-04 | 4.08E-05 | 6.03 | 2.201485 | 1.23 |              |                                                  |
| 8113039 | 7.49E-04 | 4.09E-05 | 6.03 | 2.19888  | 1.41 | MEF2C        | myocyte enhancer factor 2C                       |
| 7999468 | 7.52E-04 | 4.11E-05 | 6.03 | 2.193141 | 1.04 | LITAF        | lipopolysaccharide induced TNF factor            |
| 8061579 | 7.64E-04 | 4.18E-05 | 6.02 | 2.17531  | 1.5  | TPX2         | TPX2, microtubule nucleation factor              |
| 7909568 | 7.67E-04 | 4.20E-05 | 6.01 | 2.170223 | 1.8  | DTL          | denticleless E3 ubiquitin protein ligase homolog |

|         |          |          |      |          |      |        |                                                      |
|---------|----------|----------|------|----------|------|--------|------------------------------------------------------|
| 8090098 | 7.70E-04 | 4.22E-05 | 6.01 | 2.164841 | 1.54 | MYLK   | myosin light chain kinase                            |
| 7958207 | 7.77E-04 | 4.27E-05 | 6    | 2.153659 | 1.33 |        |                                                      |
| 8043436 | 7.85E-04 | 4.34E-05 | 6    | 2.138203 | 3.93 | IGKC   | immunoglobulin kappa constant                        |
| 7999553 | 7.96E-04 | 4.40E-05 | 5.99 | 2.122533 | 1.18 | CPPED1 | calcineurin like phosphoesterase domain containing 1 |
| 7927799 | 7.99E-04 | 4.43E-05 | 5.98 | 2.117399 | 1.35 | REEP3  | receptor accessory protein 3                         |
| 7991234 | 8.02E-04 | 4.45E-05 | 5.98 | 2.111084 | 1.55 | MFGE8  | milk fat globule-EGF factor 8 protein                |

|         |          |          |      |          |      |         |                                             |
|---------|----------|----------|------|----------|------|---------|---------------------------------------------|
| 8089714 | 8.02E-04 | 4.46E-05 | 5.98 | 2.109968 | 1.49 | LSAMP   | limbic system-associated membrane protein   |
| 8145365 | 8.05E-04 | 4.47E-05 | 5.98 | 2.106624 | 1.05 | DOCK5   | dedicator of cytokinesis 5                  |
| 8043476 | 8.08E-04 | 4.50E-05 | 5.97 | 2.100418 | 2.94 |         |                                             |
| 8089082 | 8.14E-04 | 4.54E-05 | 5.97 | 2.091709 | 1.36 | DCBLD2  | discoidin, CUB and LCCL domain containing 2 |
| 8164200 | 8.18E-04 | 4.57E-05 | 5.96 | 2.084784 | 1.41 | ANGPTL2 | angiopoietin like 2                         |
| 8052654 | 8.21E-04 | 4.59E-05 | 5.96 | 2.079545 | 1.57 | PELI1   | pellino E3 ubiquitin protein ligase 1       |



|         |          |          |      |          |      |                         |                                                                                                                     |
|---------|----------|----------|------|----------|------|-------------------------|---------------------------------------------------------------------------------------------------------------------|
| 8094301 | 8.26E-04 | 4.63E-05 | 5.96 | 2.071316 | 1.6  | SLIT2                   | slit guidance ligand 2                                                                                              |
| 8012475 | 8.28E-04 | 4.65E-05 | 5.95 | 2.06644  | 1.28 | MYH10                   | myosin, heavy chain 10, non-muscle                                                                                  |
| 8125463 | 8.30E-04 | 4.67E-05 | 5.95 | 2.062387 | 1.79 | HLA-DQB2///<br>HLA-DQB1 | major histocompatibility complex, class II,<br>DQ beta 2///major histocompatibility<br>complex, class II, DQ beta 1 |
| 7921434 | 8.32E-04 | 4.69E-05 | 5.95 | 2.058174 | 1.74 | AIM2                    | absent in melanoma 2                                                                                                |

|         |          |          |      |          |      |         |                                        |
|---------|----------|----------|------|----------|------|---------|----------------------------------------|
| 8017843 | 8.32E-04 | 4.69E-05 | 5.95 | 2.057488 | 1.93 | SLC16A6 | solute carrier family 16 member 6      |
| 8109712 | 8.33E-04 | 4.71E-05 | 5.95 | 2.054829 | 1.56 | HMMR    | hyaluronan mediated motility receptor  |
| 8114612 | 8.45E-04 | 4.79E-05 | 5.94 | 2.037231 | 1.39 | CD14    | CD14 molecule                          |
| 8143471 | 8.51E-04 | 4.83E-05 | 5.93 | 2.027318 | 2.45 | CLEC5A  | C-type lectin domain family 5 member A |

|         |          |          |      |          |      |                                                                                                                                                                                                                                                         |
|---------|----------|----------|------|----------|------|---------------------------------------------------------------------------------------------------------------------------------------------------------------------------------------------------------------------------------------------------------|
| 7981720 | 8.51E-04 | 4.84E-05 | 5.93 | 2.026745 | 1.63 | immunoglobulin heavy constant alpha<br>IGHA1///SCFV 1///single-chain Fv<br>///C14orf99///I fragment///uncharacterized<br>GHV3-48///IG LOC317730///immunoglobulin heavy<br>HV3-69-1 variable 3-48///immunoglobulin heavy<br>variable 3-69-1 (pseudogene) |
|---------|----------|----------|------|----------|------|---------------------------------------------------------------------------------------------------------------------------------------------------------------------------------------------------------------------------------------------------------|

|         |          |          |      |          |      |        |                                        |
|---------|----------|----------|------|----------|------|--------|----------------------------------------|
| 8075728 | 8.54E-04 | 4.86E-05 | 5.93 | 2.021321 | 1    | MYH9   | myosin, heavy chain 9, non-muscle      |
| 8103166 | 8.54E-04 | 4.87E-05 | 5.93 | 2.020518 | 1.03 | SH3D19 | SH3 domain containing 19               |
| 8057506 | 8.57E-04 | 4.89E-05 | 5.92 | 2.015268 | 1.85 | FRZB   | frizzled-related protein               |
| 7944185 | 8.59E-04 | 4.90E-05 | 5.92 | 2.012965 | 1.83 | CD3G   | CD3g molecule                          |
| 8101429 | 8.77E-04 | 5.03E-05 | 5.91 | 1.986884 | 2.61 | PLAC8  | placenta specific 8                    |
| 7905220 | 8.79E-04 | 5.05E-05 | 5.9  | 1.982359 | 1.36 | ECM1   | extracellular matrix protein 1         |
| 7912198 | 8.83E-04 | 5.09E-05 | 5.9  | 1.97361  | 1.4  | ENO1   | enolase 1                              |
| 7927606 | 8.84E-04 | 5.11E-05 | 5.9  | 1.97013  | 1.1  | PRKG1  | protein kinase, cGMP-dependent, type I |

|         |          |          |      |          |      |        |                                              |
|---------|----------|----------|------|----------|------|--------|----------------------------------------------|
| 8053735 | 8.85E-04 | 5.13E-05 | 5.89 | 1.966392 | 2.24 | IGKC   | immunoglobulin kappa constant                |
| 7933855 | 8.85E-04 | 5.13E-05 | 5.89 | 1.965985 | 1.48 | RTKN2  | rhotekin 2                                   |
| 8017867 | 8.87E-04 | 5.15E-05 | 5.89 | 1.961704 | 1.09 | FAM20A | family with sequence similarity 20 member A  |
| 8019046 | 8.95E-04 | 5.22E-05 | 5.88 | 1.949068 | 1.08 | EIF4A3 | eukaryotic translation initiation factor 4A3 |
| 8111772 | 9.01E-04 | 5.25E-05 | 5.88 | 1.942282 | 1.04 | DAB2   | DAB2, clathrin adaptor protein               |
| 7921667 | 9.03E-04 | 5.27E-05 | 5.88 | 1.938288 | 1.93 | CD48   | CD48 molecule                                |

|         |          |          |      |          |      |         |                                    |
|---------|----------|----------|------|----------|------|---------|------------------------------------|
| 8171896 | 9.10E-04 | 5.36E-05 | 5.87 | 1.922304 | 1.54 | CXorf21 | chromosome X open reading frame 21 |
|---------|----------|----------|------|----------|------|---------|------------------------------------|

|         |          |          |      |          |     |                                                                                                                                                                                                                                                                                                                                                                                                                                                                                                                                                                                                                                                                                                                                                                                                                                                                                                                                                                                                                              |
|---------|----------|----------|------|----------|-----|------------------------------------------------------------------------------------------------------------------------------------------------------------------------------------------------------------------------------------------------------------------------------------------------------------------------------------------------------------------------------------------------------------------------------------------------------------------------------------------------------------------------------------------------------------------------------------------------------------------------------------------------------------------------------------------------------------------------------------------------------------------------------------------------------------------------------------------------------------------------------------------------------------------------------------------------------------------------------------------------------------------------------|
| 7981730 | 9.14E-04 | 5.40E-05 | 5.86 | 1.914189 | 3.1 | <p>single-chain Fv fragment///immunoglobulin<br/> lambda joining 3///immunoglobulin heavy<br/> variable 3-23///immunoglobulin heavy<br/> SCFV///IGLJ3/ variable 4-31///immunoglobulin heavy<br/> //IGHV3-23///I constant mu///immunoglobulin heavy<br/> GHV4-31///IG constant gamma 2 (G2m<br/> HM///IGHG2/// marker)///immunoglobulin heavy constant<br/> IGHG1///IGHA gamma 1 (G1m marker)///immunoglobulin<br/> 1///SCFV///C14 heavy constant alpha 1///single-chain Fv<br/> orf99///IGK///I fragment///uncharacterized<br/> GKV3-20///IG LOC317730///immunoglobulin kappa<br/> HV3-23///IGH locus///immunoglobulin kappa variable<br/> V3-30///IGHV 3-20///immunoglobulin heavy variable<br/> 3-48///IGHV3- 3-23///immunoglobulin heavy variable<br/> 75///IGHV3-69 3-30///immunoglobulin heavy variable<br/> -1///IGHV3OR 3-48///immunoglobulin heavy variable 3-75<br/> 16-7 (pseudogene)///immunoglobulin heavy<br/> variable 3-69-1<br/> (pseudogene)///immunoglobulin heavy<br/> variable 3/OR16-7 (pseudogene)</p> |
|---------|----------|----------|------|----------|-----|------------------------------------------------------------------------------------------------------------------------------------------------------------------------------------------------------------------------------------------------------------------------------------------------------------------------------------------------------------------------------------------------------------------------------------------------------------------------------------------------------------------------------------------------------------------------------------------------------------------------------------------------------------------------------------------------------------------------------------------------------------------------------------------------------------------------------------------------------------------------------------------------------------------------------------------------------------------------------------------------------------------------------|

|         |          |          |      |          |      |        |                                                |
|---------|----------|----------|------|----------|------|--------|------------------------------------------------|
| 7929078 | 9.19E-04 | 5.44E-05 | 5.86 | 1.906782 | 1.3  | KIF20B | kinesin family member 20B                      |
| 8096617 | 9.26E-04 | 5.50E-05 | 5.85 | 1.895895 | 2.2  | BANK1  | B-cell scaffold protein with ankyrin repeats 1 |
| 8081081 | 9.26E-04 | 5.50E-05 | 5.85 | 1.895622 | 1.95 | EPHA3  | EPH receptor A3                                |
| 8037374 | 9.27E-04 | 5.51E-05 | 5.85 | 1.893821 | 2.11 | PLAUR  | plasminogen activator, urokinase receptor      |
| 8043470 | 9.37E-04 | 5.58E-05 | 5.84 | 1.880807 | 3.19 |        |                                                |
| 7906613 | 9.38E-04 | 5.60E-05 | 5.84 | 1.877049 | 2.3  | SLAMF7 | SLAM family member 7                           |



|         |          |          |      |          |      |          |                                                          |
|---------|----------|----------|------|----------|------|----------|----------------------------------------------------------|
| 8175492 | 9.40E-04 | 5.62E-05 | 5.84 | 1.873354 | 1.12 | ATP11C   | ATPase phospholipid transporting 11C                     |
| 8036224 | 9.45E-04 | 5.69E-05 | 5.83 | 1.86139  | 1.47 | TYROBP   | TYRO protein tyrosine kinase binding protein             |
| 8146967 | 9.45E-04 | 5.69E-05 | 5.83 | 1.861203 | 2.04 | CRISPLD1 | cysteine rich secretory protein LCCL domain containing 1 |
| 8043484 | 9.45E-04 | 5.70E-05 | 5.83 | 1.859737 | 1.21 | IGKC     | immunoglobulin kappa constant                            |
| 8090162 | 9.46E-04 | 5.70E-05 | 5.83 | 1.85813  | 1.1  | ITGB5    | integrin subunit beta 5                                  |

|         |          |          |      |          |      |        |                                    |
|---------|----------|----------|------|----------|------|--------|------------------------------------|
| 8094240 | 9.48E-04 | 5.72E-05 | 5.83 | 1.854476 | 1.52 | CD38   | CD38 molecule                      |
| 8078252 | 9.58E-04 | 5.79E-05 | 5.82 | 1.842157 | 1.09 | UBE2E2 | ubiquitin conjugating enzyme E2 E2 |
| 8006594 | 9.63E-04 | 5.84E-05 | 5.82 | 1.834905 | 2.68 | CCL18  | C-C motif chemokine ligand 18      |
| 8048864 | 9.73E-04 | 5.91E-05 | 5.81 | 1.822238 | 3.02 | CCL20  | C-C motif chemokine ligand 20      |
| 8014248 | 9.73E-04 | 5.91E-05 | 5.81 | 1.822141 | 1.33 | SLFN13 | schlafen family member 13          |
| 8157105 | 9.76E-04 | 5.94E-05 | 5.8  | 1.816156 | 1.16 | ZNF462 | zinc finger protein 462            |
| 7919669 | 9.80E-04 | 5.98E-05 | 5.8  | 1.809528 | 1.24 | MTMR11 | myotubularin related protein 11    |

|         |          |          |      |          |      |        |                                        |
|---------|----------|----------|------|----------|------|--------|----------------------------------------|
| 8107044 | 9.82E-04 | 6.00E-05 | 5.8  | 1.805776 | 2.34 | ERAP2  | endoplasmic reticulum aminopeptidase 2 |
| 8097991 | 1.00E-03 | 6.15E-05 | 5.78 | 1.781921 | 2.67 | TDO2   | tryptophan 2,3-dioxygenase             |
| 8117458 | 1.01E-03 | 6.23E-05 | 5.78 | 1.767336 | 1    | BTN3A1 | butyrophilin subfamily 3 member A1     |
| 7925492 | 1.01E-03 | 6.24E-05 | 5.78 | 1.766965 | 1.21 | OPN3   | opsin 3                                |
| 8043459 | 1.02E-03 | 6.29E-05 | 5.77 | 1.759084 | 2.92 | IGKC   | immunoglobulin kappa constant          |
| 8091515 | 1.02E-03 | 6.37E-05 | 5.76 | 1.745376 | 2.04 | GPR87  | G protein-coupled receptor 87          |

|         |          |          |      |          |      |       |                                                |
|---------|----------|----------|------|----------|------|-------|------------------------------------------------|
| 8162940 | 1.03E-03 | 6.45E-05 | 5.76 | 1.731989 | 1.53 | ABCA1 | ATP binding cassette subfamily A member 1      |
| 7909332 | 1.04E-03 | 6.48E-05 | 5.75 | 1.728037 | 1.35 | CD55  | CD55 molecule (Cromer blood group)             |
| 7923978 | 1.04E-03 | 6.50E-05 | 5.75 | 1.725388 | 1.14 | CD34  | CD34 molecule                                  |
| 8020090 | 1.04E-03 | 6.51E-05 | 5.75 | 1.723168 | 1.39 | TWSG1 | twisted gastrulation BMP signaling modulator 1 |
| 8078286 | 1.05E-03 | 6.60E-05 | 5.74 | 1.709558 | 1.31 | RARB  | retinoic acid receptor beta                    |

|         |          |          |      |          |      |         |                                                            |
|---------|----------|----------|------|----------|------|---------|------------------------------------------------------------|
| 8109639 | 1.05E-03 | 6.61E-05 | 5.74 | 1.707951 | 1.2  | PTTG1   | pituitary tumor-transforming 1                             |
| 7913237 | 1.06E-03 | 6.66E-05 | 5.74 | 1.700502 | 1.36 | CAMK2N1 | calcium/calmodulin dependent protein kinase II inhibitor 1 |
| 8116418 | 1.06E-03 | 6.69E-05 | 5.73 | 1.695354 | 2.17 | GFPT2   | glutamine-fructose-6-phosphate transaminase 2              |
| 8146660 | 1.07E-03 | 6.79E-05 | 5.73 | 1.680504 | 1.42 | DNAJC5B | DnaJ heat shock protein family (Hsp40) member C5 beta      |
| 8109490 | 1.08E-03 | 6.83E-05 | 5.72 | 1.67472  | 1.57 | SGCD    | sarcoglycan delta                                          |

|         |          |          |      |          |      |                    |                                                                                       |
|---------|----------|----------|------|----------|------|--------------------|---------------------------------------------------------------------------------------|
| 8012931 | 1.11E-03 | 7.12E-05 | 5.7  | 1.631541 | 1.07 | CDRT1///FBX<br>W10 | CMT1A duplicated region transcript<br>1///F-box and WD repeat domain containing<br>10 |
| 8154233 | 1.12E-03 | 7.16E-05 | 5.69 | 1.625541 | 1.2  | CD274              | CD274 molecule                                                                        |
| 8166079 | 1.14E-03 | 7.38E-05 | 5.68 | 1.595731 | 2.26 | EGFL6              | EGF like domain multiple 6                                                            |
| 7929065 | 1.15E-03 | 7.42E-05 | 5.67 | 1.589827 | 1.61 | IFIT1              | interferon induced protein with<br>tetratricopeptide repeats 1                        |
| 7973336 | 1.15E-03 | 7.43E-05 | 5.67 | 1.588504 | 1.23 | MMP14              | matrix metalloproteinase 14                                                           |

|         |          |          |      |          |      |           |                                                              |
|---------|----------|----------|------|----------|------|-----------|--------------------------------------------------------------|
| 8008237 | 1.15E-03 | 7.48E-05 | 5.67 | 1.580856 | 1.27 | ITGA3     | integrin subunit alpha 3                                     |
| 7908388 | 1.16E-03 | 7.51E-05 | 5.66 | 1.576864 | 2.82 | RGS1      | regulator of G-protein signaling 1                           |
| 7953723 | 1.16E-03 | 7.52E-05 | 5.66 | 1.575283 | 1.66 | CLEC4A    | C-type lectin domain family 4 member A                       |
| 8043449 | 1.16E-03 | 7.53E-05 | 5.66 | 1.574876 | 3.33 | IGK//IGKC | immunoglobulin kappa<br>locus//immunoglobulin kappa constant |
| 7950810 | 1.16E-03 | 7.53E-05 | 5.66 | 1.574037 | 2    | SYTL2     | synaptotagmin like 2                                         |

|         |          |          |      |          |      |         |                                                                                               |
|---------|----------|----------|------|----------|------|---------|-----------------------------------------------------------------------------------------------|
| 8151768 | 1.16E-03 | 7.59E-05 | 5.66 | 1.566288 | 1.7  | RUNX1T1 | RUNX1 translocation partner 1                                                                 |
| 8075910 | 1.18E-03 | 7.78E-05 | 5.64 | 1.541488 | 1.17 | RAC2    | ras-related C3 botulinum toxin substrate 2<br>(rho family, small GTP binding protein<br>Rac2) |
| 7914127 | 1.19E-03 | 7.87E-05 | 5.64 | 1.529918 | 1.59 | IFI6    | interferon alpha inducible protein 6                                                          |
| 8147112 | 1.20E-03 | 7.95E-05 | 5.63 | 1.519717 | 1.04 | CA13    | carbonic anhydrase 13                                                                         |



|         |          |          |      |          |      |                                  |                                                                       |
|---------|----------|----------|------|----------|------|----------------------------------|-----------------------------------------------------------------------|
| 8020551 | 1.20E-03 | 7.96E-05 | 5.63 | 1.518342 | 1.87 | LAMA3                            | laminin subunit alpha 3                                               |
| 8157153 | 1.20E-03 | 7.97E-05 | 5.63 | 1.516438 | 1.02 | PALM2-AKAP2<br>2///PALM2///AKAP2 | PALM2-AKAP2 readthrough///paralemmin 2///A-kinase anchoring protein 2 |
| 8139212 | 1.21E-03 | 8.08E-05 | 5.62 | 1.502693 | 1.5  | GLI3                             | GLI family zinc finger 3                                              |
| 8058390 | 1.22E-03 | 8.10E-05 | 5.62 | 1.500325 | 1.25 | RAPH1                            | Ras association (RalGDS/AF-6) and pleckstrin homology domains 1       |

|         |          |          |      |          |      |                                           |                                                                                                                                                                         |
|---------|----------|----------|------|----------|------|-------------------------------------------|-------------------------------------------------------------------------------------------------------------------------------------------------------------------------|
| 7918533 | 1.22E-03 | 8.11E-05 | 5.62 | 1.499242 | 1.79 | TMIGD3///AD<br>ORA3///TMIG<br>D3///ADORA3 | transmembrane and immunoglobulin domain<br>containing 3///adenosine A3<br>receptor///transmembrane and<br>immunoglobulin domain containing<br>3///adenosine A3 receptor |
| 8093950 | 1.24E-03 | 8.27E-05 | 5.61 | 1.478966 | 2.37 | S100P                                     | S100 calcium binding protein P                                                                                                                                          |
| 8043465 | 1.24E-03 | 8.33E-05 | 5.6  | 1.471719 | 2.63 | IGKC                                      | immunoglobulin kappa constant                                                                                                                                           |

8103399

1.26E-03

8.46E-05

5.59

1.455075

1.03

PDGFC

platelet derived growth factor C

|         |          |          |      |          |      |                                                                                                                                                                                                                                                                                                                                                                                                                                    |
|---------|----------|----------|------|----------|------|------------------------------------------------------------------------------------------------------------------------------------------------------------------------------------------------------------------------------------------------------------------------------------------------------------------------------------------------------------------------------------------------------------------------------------|
| 7981724 | 1.27E-03 | 8.56E-05 | 5.59 | 1.443417 | 3.32 | SCFV///IGLJ3/<br>//IGHM///IGH<br>G1///IGHD///C<br>14orf99///IGH<br>V3-48///IGHV<br>3-69-1<br>single-chain Fv fragment///immunoglobulin<br>lambda joining 3///immunoglobulin heavy<br>constant mu///immunoglobulin heavy<br>constant gamma 1 (G1m<br>marker)///immunoglobulin heavy constant<br>delta///uncharacterized<br>LOC317730///immunoglobulin heavy<br>variable 3-48///immunoglobulin heavy<br>variable 3-69-1 (pseudogene) |
|---------|----------|----------|------|----------|------|------------------------------------------------------------------------------------------------------------------------------------------------------------------------------------------------------------------------------------------------------------------------------------------------------------------------------------------------------------------------------------------------------------------------------------|

|         |          |          |      |          |      |                                       |                                                                                                                                      |
|---------|----------|----------|------|----------|------|---------------------------------------|--------------------------------------------------------------------------------------------------------------------------------------|
| 7981718 | 1.27E-03 | 8.58E-05 | 5.59 | 1.440932 | 3.04 | SCFV///IGHM/<br>//SCFV///IGH<br>V3-30 | single-chain Fv fragment///immunoglobulin<br>heavy constant mu///single-chain Fv<br>fragment///immunoglobulin heavy variable<br>3-30 |
| 8094520 | 1.27E-03 | 8.59E-05 | 5.59 | 1.439487 | 1.32 | PCDH7                                 | protocadherin 7                                                                                                                      |
| 7909306 | 1.35E-03 | 9.24E-05 | 5.54 | 1.366099 | 1.13 | C4BPB                                 | complement component 4 binding protein<br>beta                                                                                       |

|         |          |          |      |          |      |        |                                            |
|---------|----------|----------|------|----------|------|--------|--------------------------------------------|
| 7951297 | 1.38E-03 | 9.53E-05 | 5.52 | 1.334234 | 2.75 | MMP12  | matrix metalloproteinase 12                |
| 7896708 | 1.41E-03 | 9.84E-05 | 5.51 | 1.301181 | 2.7  |        |                                            |
| 7994826 | 1.42E-03 | 9.91E-05 | 5.5  | 1.293985 | 1.01 | ITGAL  | integrin subunit alpha L                   |
| 7908003 | 1.42E-03 | 9.92E-05 | 5.5  | 1.292792 | 1.83 | NPL    | N-acetylneuraminase pyruvate lyase         |
| 7968883 | 1.43E-03 | 9.97E-05 | 5.5  | 1.287743 | 1.24 | LACC1  | laccase domain containing 1                |
| 8163629 | 1.43E-03 | 9.98E-05 | 5.5  | 1.287032 | 1.23 | TNFSF8 | tumor necrosis factor superfamily member 8 |

|         |          |          |      |          |      |           |                                                              |
|---------|----------|----------|------|----------|------|-----------|--------------------------------------------------------------|
| 8099807 | 1.43E-03 | 1.00E-04 | 5.49 | 1.281775 | 1.02 | GAF3      | FGF-2 activity-associated protein 3                          |
| 8134869 | 1.43E-03 | 1.01E-04 | 5.49 | 1.277797 | 1.48 | PCOLCE    | procollagen C-endopeptidase enhancer                         |
| 8043360 | 1.44E-03 | 1.01E-04 | 5.49 | 1.275551 | 2.79 | IGK//IGKC | immunoglobulin kappa<br>locus//immunoglobulin kappa constant |
| 7896717 | 1.44E-03 | 1.01E-04 | 5.49 | 1.269966 | 1.6  |           |                                                              |
| 8131957 | 1.45E-03 | 1.02E-04 | 5.48 | 1.261704 | 1.42 | SNX10     | sorting nexin 10                                             |

|         |          |          |      |          |      |         |                                                     |
|---------|----------|----------|------|----------|------|---------|-----------------------------------------------------|
| 7925062 | 1.47E-03 | 1.04E-04 | 5.48 | 1.249647 | 1.02 | SIPA1L2 | signal induced proliferation associated 1 like<br>2 |
| 8122426 | 1.47E-03 | 1.04E-04 | 5.47 | 1.244401 | 1.08 | PHACTR2 | phosphatase and actin regulator 2                   |
| 8070826 | 1.49E-03 | 1.06E-04 | 5.46 | 1.228087 | 1.23 | ITGB2   | integrin subunit beta 2                             |
| 8109507 | 1.51E-03 | 1.08E-04 | 5.45 | 1.209999 | 1.67 | ITK     | IL2 inducible T-cell kinase                         |
| 7896701 | 1.52E-03 | 1.09E-04 | 5.45 | 1.200944 | 1.55 |         |                                                     |
| 8042391 | 1.52E-03 | 1.09E-04 | 5.45 | 1.196031 | 2.56 | PLEK    | pleckstrin                                          |
| 8092177 | 1.53E-03 | 1.10E-04 | 5.44 | 1.189003 | 1.19 | NCEH1   | neutral cholesterol ester hydrolase 1               |



|         |          |          |      |          |      |         |                                      |
|---------|----------|----------|------|----------|------|---------|--------------------------------------|
| 8060736 | 1.53E-03 | 1.10E-04 | 5.44 | 1.187159 | 1.01 | PANK2   | pantothenate kinase 2                |
| 8019857 | 1.53E-03 | 1.10E-04 | 5.44 | 1.185816 | 1.74 | NDC80   | NDC80, kinetochore complex component |
| 8098259 | 1.53E-03 | 1.10E-04 | 5.44 | 1.184046 | 1.81 |         |                                      |
| 7920291 | 1.53E-03 | 1.11E-04 | 5.44 | 1.181401 | 1.48 | S100A16 | S100 calcium binding protein A16     |
| 8084757 | 1.54E-03 | 1.11E-04 | 5.44 | 1.178326 | 1.44 | TPRG1   | tumor protein p63 regulated 1        |

|         |          |          |      |          |      |                                                     |
|---------|----------|----------|------|----------|------|-----------------------------------------------------|
|         |          |          |      |          |      | immunoglobulin lambda joining                       |
|         |          |          |      |          |      | 3//immunoglobulin heavy variable                    |
|         |          |          |      |          |      | IGLJ3//IGHV 3-23//immunoglobulin heavy variable     |
|         |          |          |      |          |      | 3-23//IGHV4- 4-31//immunoglobulin heavy constant    |
|         |          |          |      |          |      | 31//IGHM//I mu//immunoglobulin heavy constant gamma |
|         |          |          |      |          |      | GHG1//IGHA 1 (G1m marker)//immunoglobulin heavy     |
|         |          |          |      |          |      | 1//SCFV//C14constant alpha 1//single-chain Fv       |
| 7981722 | 1.54E-03 | 1.11E-04 | 5.43 | 1.176618 | 2.68 | orf99//IGK//I fragment//uncharacterized             |
|         |          |          |      |          |      | GKV3-20//IG LOC317730//immunoglobulin kappa         |
|         |          |          |      |          |      | HV3-23//IGH locus//immunoglobulin kappa variable    |
|         |          |          |      |          |      | V3-48//IGHV 3-20//immunoglobulin heavy variable     |
|         |          |          |      |          |      | 3-69-1//IGHV 3-23//immunoglobulin heavy variable    |
|         |          |          |      |          |      | 3OR16-7 3-48//immunoglobulin heavy variable         |
|         |          |          |      |          |      | 3-69-1 (pseudogene)//immunoglobulin                 |
|         |          |          |      |          |      | heavy variable 3/OR16-7 (pseudogene)                |

|         |          |          |      |          |      |         |                                               |
|---------|----------|----------|------|----------|------|---------|-----------------------------------------------|
| 8129037 | 1.55E-03 | 1.13E-04 | 5.43 | 1.163832 | 1.32 |         |                                               |
| 7950391 | 1.56E-03 | 1.13E-04 | 5.42 | 1.159773 | 1.25 | PGM2L1  | phosphoglucomutase 2 like 1                   |
| 7939839 | 1.56E-03 | 1.14E-04 | 5.42 | 1.153949 | 1.07 | PTPRJ   | protein tyrosine phosphatase, receptor type J |
| 7904287 | 1.56E-03 | 1.14E-04 | 5.42 | 1.153472 | 1.66 | CD2     | CD2 molecule                                  |
| 7946661 | 1.57E-03 | 1.14E-04 | 5.42 | 1.148769 | 1.01 | DKK3    | dickkopf WNT signaling pathway inhibitor 3    |
| 8176234 | 1.58E-03 | 1.15E-04 | 5.42 | 1.143472 | 1.86 | CLIC2   | chloride intracellular channel 2              |
| 8173745 | 1.58E-03 | 1.15E-04 | 5.41 | 1.140725 | 1.66 | CYSLTR1 | cysteinyl leukotriene receptor 1              |

|         |          |          |      |          |      |         |                                                      |
|---------|----------|----------|------|----------|------|---------|------------------------------------------------------|
| 7902913 | 1.58E-03 | 1.15E-04 | 5.41 | 1.140617 | 1.45 | CDC7    | cell division cycle 7                                |
| 8160637 | 1.58E-03 | 1.15E-04 | 5.41 | 1.13962  | 1.05 | B4GALT1 | beta-1,4-galactosyltransferase 1                     |
| 8136557 | 1.58E-03 | 1.16E-04 | 5.41 | 1.135279 | 1.24 | TBXAS1  | thromboxane A synthase 1                             |
| 8139057 | 1.58E-03 | 1.16E-04 | 5.41 | 1.135186 | 1.44 | ELMO1   | engulfment and cell motility 1                       |
| 8091283 | 1.58E-03 | 1.16E-04 | 5.41 | 1.134191 | 1.12 | PLOD2   | procollagen-lysine,2-oxoglutarate<br>5-dioxygenase 2 |
| 8107769 | 1.58E-03 | 1.16E-04 | 5.41 | 1.133725 | 1.41 | SLC12A2 | solute carrier family 12 member 2                    |

|         |          |          |      |          |      |           |                                                      |
|---------|----------|----------|------|----------|------|-----------|------------------------------------------------------|
| 7946275 | 1.60E-03 | 1.18E-04 | 5.4  | 1.119888 | 1.51 | GVINP1    | GTPase, very large interferon inducible pseudogene 1 |
| 8030007 | 1.61E-03 | 1.19E-04 | 5.4  | 1.110629 | 1.67 | EMP3      | epithelial membrane protein 3                        |
| 8166632 | 1.62E-03 | 1.19E-04 | 5.39 | 1.107278 | 1.39 | GK3P///GK | glycerol kinase 3 pseudogene///glycerol kinase       |
| 8127534 | 1.62E-03 | 1.19E-04 | 5.39 | 1.104579 | 1.21 | MB21D1    | Mab-21 domain containing 1                           |
| 7956856 | 1.63E-03 | 1.20E-04 | 5.39 | 1.095317 | 1.2  | MSRB3     | methionine sulfoxide reductase B3                    |

|         |          |          |      |          |      |         |                                       |
|---------|----------|----------|------|----------|------|---------|---------------------------------------|
| 7944769 | 1.64E-03 | 1.22E-04 | 5.38 | 1.086068 | 1.45 | GRAMD1B | GRAM domain containing 1B             |
| 8115464 | 1.68E-03 | 1.26E-04 | 5.36 | 1.052502 | 1.22 | HAVCR2  | hepatitis A virus cellular receptor 2 |
| 8094743 | 1.69E-03 | 1.27E-04 | 5.36 | 1.042182 | 1.41 | RHOH    | ras homolog family member H           |
| 8091260 | 1.72E-03 | 1.29E-04 | 5.35 | 1.024852 | 1.71 | SLC9A9  | solute carrier family 9 member A9     |
| 8169792 | 1.72E-03 | 1.29E-04 | 5.35 | 1.024416 | 1.48 | SH2D1A  | SH2 domain containing 1A              |
| 7922174 | 1.72E-03 | 1.30E-04 | 5.34 | 1.018616 | 1.94 | F5      | coagulation factor V                  |

|         |          |          |      |          |      |          |                                                    |
|---------|----------|----------|------|----------|------|----------|----------------------------------------------------|
| 8080964 | 1.74E-03 | 1.31E-04 | 5.34 | 1.005795 | 1.48 | GXYLT2   | glucoside xylosyltransferase 2                     |
| 7928318 | 1.75E-03 | 1.32E-04 | 5.33 | 0.998941 | 1.42 | MCU      | mitochondrial calcium uniporter                    |
| 7896699 | 1.76E-03 | 1.34E-04 | 5.33 | 0.988168 | 1.47 |          |                                                    |
| 7960947 | 1.76E-03 | 1.34E-04 | 5.33 | 0.984187 | 1.23 | A2M      | alpha-2-macroglobulin                              |
| 8081818 | 1.77E-03 | 1.35E-04 | 5.32 | 0.980238 | 2.2  |          |                                                    |
| 8095744 | 1.77E-03 | 1.35E-04 | 5.32 | 0.977544 | 2.84 | AREG     | amphiregulin                                       |
| 8081838 | 1.77E-03 | 1.35E-04 | 5.32 | 0.975889 | 1.2  | ARHGAP31 | Rho GTPase activating protein 31                   |
| 8159961 | 1.78E-03 | 1.36E-04 | 5.32 | 0.971175 | 1.3  |          |                                                    |
| 7918657 | 1.79E-03 | 1.37E-04 | 5.31 | 0.963822 | 1.51 | PTPN22   | protein tyrosine phosphatase, non-receptor type 22 |

|         |          |          |      |          |      |         |                                                               |
|---------|----------|----------|------|----------|------|---------|---------------------------------------------------------------|
| 7936968 | 1.79E-03 | 1.38E-04 | 5.31 | 0.959062 | 2.4  | ADAM12  | ADAM metallopeptidase domain 12                               |
| 8022118 | 1.79E-03 | 1.38E-04 | 5.31 | 0.95787  | 1.38 | EPB41L3 | erythrocyte membrane protein band 4.1 like<br>3               |
| 8106660 | 1.82E-03 | 1.40E-04 | 5.3  | 0.939477 | 1.52 | RASGRF2 | Ras protein specific guanine nucleotide<br>releasing factor 2 |
| 8092654 | 1.82E-03 | 1.41E-04 | 5.3  | 0.936015 | 1.06 | RPL39L  | ribosomal protein L39 like                                    |



|         |          |          |      |          |      |                     |                                                          |
|---------|----------|----------|------|----------|------|---------------------|----------------------------------------------------------|
| 7909446 | 1.87E-03 | 1.46E-04 | 5.28 | 0.901303 | 1.44 | HSD11B1             | hydroxysteroid 11-beta dehydrogenase 1                   |
| 8044035 | 1.92E-03 | 1.51E-04 | 5.26 | 0.865898 | 1.15 | IL18R1///IL18<br>R1 | interleukin 18 receptor 1///interleukin 18<br>receptor 1 |
| 8173917 | 1.94E-03 | 1.52E-04 | 5.25 | 0.856705 | 1.12 | NAP1L3              | nucleosome assembly protein 1 like 3                     |
| 7896727 | 1.94E-03 | 1.53E-04 | 5.25 | 0.852108 | 1.49 |                     |                                                          |
| 7896687 | 1.96E-03 | 1.55E-04 | 5.24 | 0.837785 | 2.06 |                     |                                                          |
| 8091327 | 1.97E-03 | 1.56E-04 | 5.24 | 0.834052 | 1.01 | PLSCR1              | phospholipid scramblase 1                                |
| 7970441 | 1.98E-03 | 1.57E-04 | 5.24 | 0.82727  | 1.98 | GJB2                | gap junction protein beta 2                              |

|         |          |          |      |          |      |          |                                                        |
|---------|----------|----------|------|----------|------|----------|--------------------------------------------------------|
| 8118556 | 1.98E-03 | 1.57E-04 | 5.24 | 0.824683 | 2.46 | HLA-DQA1 | major histocompatibility complex, class II, DQ alpha 1 |
| 7947248 | 2.01E-03 | 1.60E-04 | 5.22 | 0.806303 | 1.23 | KIF18A   | kinesin family member 18A                              |
| 8013341 | 2.02E-03 | 1.61E-04 | 5.22 | 0.798784 | 1.54 | MFAP4    | microfibrillar associated protein 4                    |
| 8125149 | 2.04E-03 | 1.63E-04 | 5.21 | 0.78484  | 2.09 | SLC44A4  | solute carrier family 44 member 4                      |
| 8178653 | 2.04E-03 | 1.63E-04 | 5.21 | 0.78484  | 2.09 | SLC44A4  | solute carrier family 44 member 4                      |

|         |          |          |      |          |      |           |                                                   |
|---------|----------|----------|------|----------|------|-----------|---------------------------------------------------|
| 8179861 | 2.04E-03 | 1.63E-04 | 5.21 | 0.78484  | 2.09 | SLC44A4   | solute carrier family 44 member 4                 |
| 7921487 | 2.06E-03 | 1.66E-04 | 5.2  | 0.766626 | 1.15 | TAGLN2    | transgelin 2                                      |
| 7944164 | 2.07E-03 | 1.68E-04 | 5.2  | 0.756265 | 1.7  | TMPRSS4   | transmembrane protease, serine 4                  |
| 8174103 | 2.10E-03 | 1.71E-04 | 5.19 | 0.738804 | 1.31 | GK3P///GK | glycerol kinase 3 pseudogene///glycerol kinase    |
| 7906386 | 2.14E-03 | 1.74E-04 | 5.18 | 0.71789  | 1.63 | PYHIN1    | pyrin and HIN domain family member 1              |
| 8059350 | 2.21E-03 | 1.82E-04 | 5.15 | 0.672807 | 1.31 | AP1S3     | adaptor related protein complex 1 sigma 3 subunit |

|         |          |          |      |          |      |         |                                             |
|---------|----------|----------|------|----------|------|---------|---------------------------------------------|
| 7930980 | 2.22E-03 | 1.84E-04 | 5.15 | 0.665231 | 1.85 | PLPP4   | phospholipid phosphatase 4                  |
| 7909789 | 2.23E-03 | 1.84E-04 | 5.14 | 0.660044 | 1.39 | TGFB2   | transforming growth factor beta 2           |
| 8121601 | 2.25E-03 | 1.88E-04 | 5.13 | 0.643331 | 1.65 | FAM26E  | family with sequence similarity 26 member E |
| 7953428 | 2.27E-03 | 1.90E-04 | 5.13 | 0.632682 | 1.13 | CD4     | CD4 molecule                                |
| 8102720 | 2.27E-03 | 1.90E-04 | 5.13 | 0.630023 | 1.03 | ANKRD50 | ankyrin repeat domain 50                    |
| 8043474 | 2.29E-03 | 1.92E-04 | 5.12 | 0.616894 | 2.55 | IGKC    | immunoglobulin kappa constant               |

|         |          |          |      |          |      |                                     |                                                                                          |
|---------|----------|----------|------|----------|------|-------------------------------------|------------------------------------------------------------------------------------------|
| 8016414 | 2.30E-03 | 1.93E-04 | 5.12 | 0.611957 | 1.07 | SKAP1                               | src kinase associated phosphoprotein 1                                                   |
| 8116983 | 2.31E-03 | 1.94E-04 | 5.11 | 0.608641 | 1.45 | CD83                                | CD83 molecule                                                                            |
| 8041940 | 2.36E-03 | 2.00E-04 | 5.1  | 0.578227 | 1.48 | STON1-GTF2 A1L///STON1//1///GTF2A1L | STON1-GTF2A1L readthrough///stonin<br>general transcription factor IIA subunit 1<br>like |
| 7929012 | 2.36E-03 | 2.00E-04 | 5.1  | 0.575538 | 1.3  | STAMBPL1                            | STAM binding protein like 1                                                              |

|         |          |          |      |          |      |         |                                                             |
|---------|----------|----------|------|----------|------|---------|-------------------------------------------------------------|
| 8152617 | 2.42E-03 | 2.06E-04 | 5.08 | 0.545224 | 2.9  | HAS2    | hyaluronan synthase 2                                       |
| 7940147 | 2.44E-03 | 2.09E-04 | 5.07 | 0.531207 | 1.55 | FAM111B | family with sequence similarity 111 member B                |
| 7896703 | 2.47E-03 | 2.12E-04 | 5.06 | 0.518169 | 2.24 |         |                                                             |
| 7929047 | 2.47E-03 | 2.12E-04 | 5.06 | 0.516249 | 1.68 | IFIT2   | interferon induced protein with tetratricopeptide repeats 2 |
| 7974404 | 2.50E-03 | 2.15E-04 | 5.06 | 0.502268 | 1.34 | CDKN3   | cyclin dependent kinase inhibitor 3                         |

|         |          |          |      |          |      |                                               |                                               |
|---------|----------|----------|------|----------|------|-----------------------------------------------|-----------------------------------------------|
| 8155930 | 2.50E-03 | 2.16E-04 | 5.05 | 0.501215 | 1.53 | GCNT1                                         | glucosaminyl (N-acetyl) transferase 1, core 2 |
| 8157216 | 2.50E-03 | 2.16E-04 | 5.05 | 0.500693 | 1.14 | UGCG                                          | UDP-glucose ceramide glucosyltransferase      |
| 8028924 | 2.51E-03 | 2.17E-04 | 5.05 | 0.496032 | 1.81 | MIA-RAB4B///MIA-RAB4B readthrough (NMD<br>MIA | candidate)///melanoma inhibitory activity     |
| 8144802 | 2.52E-03 | 2.19E-04 | 5.05 | 0.486321 | 1.53 | PDGFRL                                        | platelet derived growth factor receptor like  |

|         |          |          |      |          |      |       |                                   |
|---------|----------|----------|------|----------|------|-------|-----------------------------------|
| 7922219 | 2.53E-03 | 2.20E-04 | 5.04 | 0.482632 | 1.97 | SELL  | selectin L                        |
| 7976080 | 2.54E-03 | 2.21E-04 | 5.04 | 0.47728  | 1.61 | GPR65 | G protein-coupled receptor 65     |
| 7979131 | 2.54E-03 | 2.21E-04 | 5.04 | 0.475355 | 1.42 | GNG2  | G protein subunit gamma 2         |
| 7902104 | 2.54E-03 | 2.22E-04 | 5.04 | 0.473257 | 1.33 | PDE4B | phosphodiesterase 4B              |
| 7950671 | 2.54E-03 | 2.22E-04 | 5.04 | 0.471855 | 1.07 | GAB2  | GRB2 associated binding protein 2 |
| 7980316 | 2.58E-03 | 2.26E-04 | 5.03 | 0.454479 | 1.44 | TGFB3 | transforming growth factor beta 3 |
| 8043438 | 2.63E-03 | 2.31E-04 | 5.01 | 0.428879 | 3.16 | IGKC  | immunoglobulin kappa constant     |



|         |          |          |      |          |      |          |                                                     |
|---------|----------|----------|------|----------|------|----------|-----------------------------------------------------|
| 8178833 | 2.68E-03 | 2.38E-04 | 5    | 0.402536 | 1.12 | HLA-DOB  | major histocompatibility complex, class II, DO beta |
| 7919888 | 2.69E-03 | 2.38E-04 | 5    | 0.399064 | 1.15 | CDC42SE1 | CDC42 small effector 1                              |
| 7920297 | 2.70E-03 | 2.40E-04 | 4.99 | 0.392563 | 1.26 | S100A14  | S100 calcium binding protein A14                    |
| 8042416 | 2.71E-03 | 2.41E-04 | 4.99 | 0.386621 | 1.26 | ARHGAP25 | Rho GTPase activating protein 25                    |
| 8168531 | 2.76E-03 | 2.48E-04 | 4.98 | 0.359661 | 2.13 | GPR174   | G protein-coupled receptor 174                      |
| 8105340 | 2.76E-03 | 2.48E-04 | 4.98 | 0.358303 | 2.18 | GZMA     | granzyme A                                          |
| 8043441 | 2.76E-03 | 2.48E-04 | 4.97 | 0.356773 | 4.16 |          |                                                     |

|         |          |          |      |          |      |        |                                   |
|---------|----------|----------|------|----------|------|--------|-----------------------------------|
| 7944082 | 2.77E-03 | 2.49E-04 | 4.97 | 0.353041 | 1.91 | TAGLN  | transgelin                        |
| 7903358 | 2.78E-03 | 2.51E-04 | 4.97 | 0.347623 | 1.97 | VCAM1  | vascular cell adhesion molecule 1 |
| 7906777 | 2.79E-03 | 2.51E-04 | 4.97 | 0.344786 | 1.72 | FCGR2B | Fc fragment of IgG receptor IIb   |
| 8148280 | 2.80E-03 | 2.53E-04 | 4.96 | 0.336685 | 1.28 | SQLE   | squalene epoxidase                |
| 7896719 | 2.80E-03 | 2.54E-04 | 4.96 | 0.336163 | 1.52 |        |                                   |
| 7952046 | 2.80E-03 | 2.54E-04 | 4.96 | 0.332754 | 1.17 | MPZL2  | myelin protein zero like 2        |
| 8001102 | 2.81E-03 | 2.55E-04 | 4.96 | 0.3303   | 1.21 |        |                                   |
| 8043433 | 2.85E-03 | 2.59E-04 | 4.95 | 0.313117 | 2.96 | IGKC   | immunoglobulin kappa constant     |

|         |          |          |      |          |      |                                 |                                                                                                           |
|---------|----------|----------|------|----------|------|---------------------------------|-----------------------------------------------------------------------------------------------------------|
| 8156905 | 2.87E-03 | 2.62E-04 | 4.94 | 0.301584 | 1.25 | MSANTD3-T<br>MEFF1///TME<br>FF1 | MSANTD3-TMEFF1<br>readthrough///transmembrane protein with<br>EGF like and two follistatin like domains 1 |
| 7896721 | 2.89E-03 | 2.65E-04 | 4.94 | 0.292003 | 2.42 |                                 |                                                                                                           |
| 8022295 | 2.90E-03 | 2.66E-04 | 4.94 | 0.288467 | 1.45 | PIEZO2                          | piezo type mechanosensitive ion channel<br>component 2                                                    |

|         |          |          |      |          |      |        |                                                |
|---------|----------|----------|------|----------|------|--------|------------------------------------------------|
| 8105481 | 2.90E-03 | 2.66E-04 | 4.94 | 0.286816 | 1.98 | GAPT   | GRB2-binding adaptor protein,<br>transmembrane |
| 7937772 | 2.92E-03 | 2.69E-04 | 4.93 | 0.275914 | 2.15 |        |                                                |
| 8151686 | 2.95E-03 | 2.73E-04 | 4.92 | 0.261806 | 1.14 | MMP16  | matrix metalloproteinase 16                    |
| 8053713 | 2.98E-03 | 2.77E-04 | 4.91 | 0.245668 | 3.02 | IGKC   | immunoglobulin kappa constant                  |
| 8130674 | 3.08E-03 | 2.89E-04 | 4.89 | 0.201937 | 1.1  | PDE10A | phosphodiesterase 10A                          |

|         |          |          |      |         |      |                                             |                                                                                                                                                       |
|---------|----------|----------|------|---------|------|---------------------------------------------|-------------------------------------------------------------------------------------------------------------------------------------------------------|
| 8001104 | 3.10E-03 | 2.92E-04 | 4.88 | 0.19309 | 2.13 | IGHV3-48///IG<br>HV3-69-1///IG<br>HV3OR16-7 | immunoglobulin heavy variable<br>3-48///immunoglobulin heavy variable<br>3-69-1 (pseudogene)///immunoglobulin<br>heavy variable 3/OR16-7 (pseudogene) |
|---------|----------|----------|------|---------|------|---------------------------------------------|-------------------------------------------------------------------------------------------------------------------------------------------------------|

|         |          |          |      |          |      |                                   |                                                                                                                    |
|---------|----------|----------|------|----------|------|-----------------------------------|--------------------------------------------------------------------------------------------------------------------|
| 7905047 | 3.11E-03 | 2.93E-04 | 4.88 | 0.190115 | 2.13 | FCGR1CP///F<br>CGR1B///FCG<br>R1A | Fc fragment of IgG receptor Ic,<br>pseudogene///Fc fragment of IgG receptor<br>Ib///Fc fragment of IgG receptor Ia |
| 8129082 | 3.16E-03 | 2.99E-04 | 4.87 | 0.16794  | 1.21 | COL10A1                           | collagen type X alpha 1 chain                                                                                      |
| 8115076 | 3.19E-03 | 3.03E-04 | 4.86 | 0.155451 | 1.15 | CSF1R                             | colony stimulating factor 1 receptor                                                                               |

|         |          |          |      |          |      |          |                                             |
|---------|----------|----------|------|----------|------|----------|---------------------------------------------|
| 7922343 | 3.20E-03 | 3.05E-04 | 4.86 | 0.149459 | 1.01 | TNFSF4   | tumor necrosis factor superfamily member 4  |
| 7962375 | 3.21E-03 | 3.05E-04 | 4.86 | 0.147599 | 1.36 | PRICKLE1 | prickle planar cell polarity protein 1      |
| 8022531 | 3.24E-03 | 3.09E-04 | 4.85 | 0.133914 | 1.59 | NPC1     | NPC intracellular cholesterol transporter 1 |

|         |          |          |      |          |      |                                                                           |                                                                                                                                                                                                                                                                                                                                                                               |
|---------|----------|----------|------|----------|------|---------------------------------------------------------------------------|-------------------------------------------------------------------------------------------------------------------------------------------------------------------------------------------------------------------------------------------------------------------------------------------------------------------------------------------------------------------------------|
| 7981601 | 3.24E-03 | 3.10E-04 | 4.85 | 0.131341 | 1.52 | IGHM///IGHG<br>1///IGHD///IG<br>HA2///IGHA1//<br>/IGHA2///IGH<br>A1///IGH | immunoglobulin heavy constant<br>mu///immunoglobulin heavy constant gamma<br>1 (G1m marker)///immunoglobulin heavy<br>constant delta///immunoglobulin heavy<br>constant alpha 2 (A2m<br>marker)///immunoglobulin heavy constant<br>alpha 1///immunoglobulin heavy constant<br>alpha 2 (A2m marker)///immunoglobulin<br>heavy constant alpha 1///immunoglobulin<br>heavy locus |
|---------|----------|----------|------|----------|------|---------------------------------------------------------------------------|-------------------------------------------------------------------------------------------------------------------------------------------------------------------------------------------------------------------------------------------------------------------------------------------------------------------------------------------------------------------------------|



|         |          |          |      |          |      |           |                                                   |
|---------|----------|----------|------|----------|------|-----------|---------------------------------------------------|
| 8014316 | 3.25E-03 | 3.11E-04 | 4.85 | 0.128116 | 1.78 | CCL5      | C-C motif chemokine ligand 5                      |
| 8047692 | 3.32E-03 | 3.20E-04 | 4.83 | 0.099745 | 1.45 | CTLA4     | cytotoxic T-lymphocyte associated protein 4       |
| 8021470 | 3.33E-03 | 3.21E-04 | 4.83 | 0.094832 | 1.71 | PMAIP1    | phorbol-12-myristate-13-acetate-induced protein 1 |
| 7977270 | 3.36E-03 | 3.25E-04 | 4.82 | 0.083771 | 1.49 | LOC388022 | uncharacterized LOC388022                         |
| 8090180 | 3.38E-03 | 3.28E-04 | 4.82 | 0.074587 | 2.74 | MUC13     | mucin 13, cell surface associated                 |

|         |          |          |      |          |      |               |                                                                              |
|---------|----------|----------|------|----------|------|---------------|------------------------------------------------------------------------------|
| 8015607 | 3.40E-03 | 3.31E-04 | 4.81 | 0.064316 | 1.03 | STAT3         | signal transducer and activator of transcription 3                           |
| 7974902 | 3.40E-03 | 3.31E-04 | 4.81 | 0.063997 | 1.07 | RHOJ          | ras homolog family member J                                                  |
| 7942998 | 3.40E-03 | 3.32E-04 | 4.81 | 0.062198 | 1.4  | FOLH1B//FOLH1 | folate hydrolase 1B//folate hydrolase (prostate-specific membrane antigen) 1 |
| 7942372 | 3.42E-03 | 3.34E-04 | 4.81 | 0.055299 | 1.64 | FOLR2         | folate receptor beta                                                         |
| 7924029 | 3.42E-03 | 3.34E-04 | 4.81 | 0.055013 | 1.11 | LAMB3         | laminin subunit beta 3                                                       |

|         |          |          |      |          |      |                                   |                                                                                                                    |
|---------|----------|----------|------|----------|------|-----------------------------------|--------------------------------------------------------------------------------------------------------------------|
| 7989985 | 3.42E-03 | 3.35E-04 | 4.81 | 0.052375 | 1.56 | ITGA11                            | integrin subunit alpha 11                                                                                          |
| 7905060 | 3.48E-03 | 3.42E-04 | 4.8  | 0.030696 | 1.88 | FCGR1CP///F<br>CGR1B///FCG<br>R1A | Fc fragment of IgG receptor Ic,<br>pseudogene///Fc fragment of IgG receptor<br>Ib///Fc fragment of IgG receptor Ia |
| 8095343 | 3.48E-03 | 3.43E-04 | 4.79 | 0.028554 | 2.05 | STAP1                             | signal transducing adaptor family member 1                                                                         |
| 7952056 | 3.52E-03 | 3.48E-04 | 4.79 | 0.013005 | 1.66 | CD3D                              | CD3d molecule                                                                                                      |

|         |          |          |      |           |      |          |                                                           |
|---------|----------|----------|------|-----------|------|----------|-----------------------------------------------------------|
| 8095697 | 3.52E-03 | 3.49E-04 | 4.78 | 0.010847  | 1.01 | CXCL1    | C-X-C motif chemokine ligand 1                            |
| 8163908 | 3.53E-03 | 3.50E-04 | 4.78 | 0.007531  | 1.5  | GGTA1P   | glycoprotein, alpha-galactosyltransferase 1<br>pseudogene |
| 8041422 | 3.54E-03 | 3.51E-04 | 4.78 | 0.00455   | 1.2  | RASGRP3  | RAS guanyl releasing protein 3                            |
| 8124430 | 3.54E-03 | 3.52E-04 | 4.78 | 0.002298  | 2.02 | HIST1H1D | histone cluster 1, H1d                                    |
| 8081657 | 3.55E-03 | 3.53E-04 | 4.78 | -0.000664 | 1.22 | CD200    | CD200 molecule                                            |

|         |          |          |      |           |      |         |                                                     |
|---------|----------|----------|------|-----------|------|---------|-----------------------------------------------------|
| 8125470 | 3.55E-03 | 3.53E-04 | 4.78 | -0.000834 | 1.04 | HLA-DOB | major histocompatibility complex, class II, DO beta |
| 8047677 | 3.56E-03 | 3.55E-04 | 4.78 | -0.006552 | 1.64 | CD28    | CD28 molecule                                       |
| 8168524 | 3.68E-03 | 3.70E-04 | 4.75 | -0.04974  | 2.21 | P2RY10  | purinergic receptor P2Y10                           |
| 7920285 | 3.71E-03 | 3.76E-04 | 4.74 | -0.064969 | 1.04 | S100A2  | S100 calcium binding protein A2                     |
| 8021946 | 3.73E-03 | 3.79E-04 | 4.74 | -0.072247 | 1.17 | COLEC12 | collectin subfamily member 12                       |

|         |          |          |      |           |      |                   |                                                                                 |
|---------|----------|----------|------|-----------|------|-------------------|---------------------------------------------------------------------------------|
| 7948058 | 3.76E-03 | 3.83E-04 | 4.73 | -0.084321 | 1.33 | FOLH1B//FO<br>LH1 | folate hydrolase 1B//folate hydrolase<br>(prostate-specific membrane antigen) 1 |
| 8122038 | 3.77E-03 | 3.84E-04 | 4.73 | -0.085626 | 1.22 | TMEM200A          | transmembrane protein 200A                                                      |
| 7935776 | 3.78E-03 | 3.87E-04 | 4.73 | -0.092998 | 2.04 |                   |                                                                                 |
| 8102792 | 3.83E-03 | 3.93E-04 | 4.72 | -0.108943 | 1.85 | PCDH18            | protocadherin 18                                                                |
| 7962183 | 3.84E-03 | 3.95E-04 | 4.72 | -0.114064 | 1.22 | AK4               | adenylate kinase 4                                                              |
| 8050537 | 3.85E-03 | 3.96E-04 | 4.71 | -0.118204 | 1.63 | MATN3             | matrilin 3                                                                      |
| 8112841 | 3.88E-03 | 4.00E-04 | 4.71 | -0.128188 | 1.13 | HOMER1            | homer scaffolding protein 1                                                     |

|         |          |          |      |           |      |       |                                                                      |
|---------|----------|----------|------|-----------|------|-------|----------------------------------------------------------------------|
| 8123936 | 3.89E-03 | 4.02E-04 | 4.71 | -0.133931 | 1.03 | NEDD9 | neural precursor cell expressed,<br>developmentally down-regulated 9 |
|---------|----------|----------|------|-----------|------|-------|----------------------------------------------------------------------|

|         |          |          |     |           |      |                                                                                                                                                                                                                                                                                                                                                                                                                                                                                                                      |
|---------|----------|----------|-----|-----------|------|----------------------------------------------------------------------------------------------------------------------------------------------------------------------------------------------------------------------------------------------------------------------------------------------------------------------------------------------------------------------------------------------------------------------------------------------------------------------------------------------------------------------|
| 7981740 | 3.92E-03 | 4.06E-04 | 4.7 | -0.141813 | 2.26 | single-chain Fv fragment///immunoglobulin<br>lambda joining 3///immunoglobulin heavy<br>constant mu///immunoglobulin heavy<br>constant alpha 1///single-chain Fv<br>fragment///uncharacterized<br>LOC317730///immunoglobulin kappa<br>locus///immunoglobulin kappa variable<br>3-20///immunoglobulin heavy variable<br>3-23///immunoglobulin heavy variable<br>3-30///immunoglobulin heavy variable<br>3-48///immunoglobulin heavy variable<br>3-69-1<br>3-48///immunoglobulin heavy variable<br>3-69-1 (pseudogene) |
|---------|----------|----------|-----|-----------|------|----------------------------------------------------------------------------------------------------------------------------------------------------------------------------------------------------------------------------------------------------------------------------------------------------------------------------------------------------------------------------------------------------------------------------------------------------------------------------------------------------------------------|



|         |          |          |      |           |      |           |                                                         |
|---------|----------|----------|------|-----------|------|-----------|---------------------------------------------------------|
| 8163672 | 3.92E-03 | 4.07E-04 | 4.7  | -0.144774 | 1.5  | PAPPA-AS1 | PAPPA antisense RNA 1                                   |
| 7923917 | 3.93E-03 | 4.08E-04 | 4.7  | -0.148731 | 1.46 | FCMR      | Fc fragment of IgM receptor                             |
| 8124280 | 3.94E-03 | 4.09E-04 | 4.7  | -0.150735 | 1.27 | FAM65B    | family with sequence similarity 65 member B             |
| 7965156 | 3.95E-03 | 4.11E-04 | 4.69 | -0.154809 | 1.3  | LIN7A     | lin-7 homolog A, crumbs cell polarity complex component |
| 8092095 | 3.99E-03 | 4.17E-04 | 4.69 | -0.169038 | 1.07 | TNIK      | TRAF2 and NCK interacting kinase                        |
| 8163000 | 4.01E-03 | 4.18E-04 | 4.68 | -0.173608 | 1.23 |           |                                                         |

|         |          |          |      |           |      |         |                                                           |
|---------|----------|----------|------|-----------|------|---------|-----------------------------------------------------------|
| 8029086 | 4.01E-03 | 4.20E-04 | 4.68 | -0.176435 | 3.37 | CEACAM5 | carcinoembryonic antigen related cell adhesion molecule 5 |
| 7964834 | 4.05E-03 | 4.24E-04 | 4.68 | -0.187971 | 1.32 | CPM     | carboxypeptidase M                                        |
| 7917503 | 4.05E-03 | 4.25E-04 | 4.68 | -0.189644 | 2.15 | GBP3    | guanylate binding protein 3                               |
| 7972601 | 4.05E-03 | 4.26E-04 | 4.68 | -0.190608 | 1.09 | NALCN   | sodium leak channel, non-selective                        |
| 7984001 | 4.06E-03 | 4.27E-04 | 4.67 | -0.192942 | 2.34 | GCNT3   | glucosaminyl (N-acetyl) transferase 3, mucin type         |

|         |          |          |      |           |      |          |                                            |
|---------|----------|----------|------|-----------|------|----------|--------------------------------------------|
| 8130556 | 4.14E-03 | 4.39E-04 | 4.66 | -0.222395 | 1.49 | SOD2     | superoxide dismutase 2, mitochondrial      |
| 8068593 | 4.19E-03 | 4.46E-04 | 4.65 | -0.238028 | 1.54 | ETS2     | ETS proto-oncogene 2, transcription factor |
| 7932254 | 4.22E-03 | 4.51E-04 | 4.64 | -0.249401 | 1.45 | ITGA8    | integrin subunit alpha 8                   |
| 7942596 | 4.23E-03 | 4.52E-04 | 4.64 | -0.250921 | 1.52 | SERPINH1 | serpin family H member 1                   |
| 7983630 | 4.24E-03 | 4.53E-04 | 4.64 | -0.254136 | 2.11 | FGF7     | fibroblast growth factor 7                 |

|         |          |          |      |           |      |          |                                                     |
|---------|----------|----------|------|-----------|------|----------|-----------------------------------------------------|
| 8092552 | 4.25E-03 | 4.56E-04 | 4.64 | -0.260124 | 1.03 | IGF2BP2  | insulin like growth factor 2 mRNA binding protein 2 |
| 7962579 | 4.30E-03 | 4.62E-04 | 4.63 | -0.27484  | 1.25 | AMIGO2   | adhesion molecule with Ig like domain 2             |
| 8067932 | 4.30E-03 | 4.63E-04 | 4.63 | -0.275317 | 1.56 | MIR99AHG | mir-99a-let-7c cluster host gene                    |
| 7957298 | 4.31E-03 | 4.64E-04 | 4.63 | -0.278299 | 1.31 | NAV3     | neuron navigator 3                                  |
| 7981068 | 4.32E-03 | 4.65E-04 | 4.63 | -0.281175 | 1.33 | SERPINA1 | serpin family A member 1                            |
| 7896702 | 4.35E-03 | 4.69E-04 | 4.62 | -0.288789 | 1.03 |          |                                                     |

|         |          |          |      |           |      |                                                                                                                                                                                                                                                                                                                                                                                                                                                                                                                                                                                                                   |
|---------|----------|----------|------|-----------|------|-------------------------------------------------------------------------------------------------------------------------------------------------------------------------------------------------------------------------------------------------------------------------------------------------------------------------------------------------------------------------------------------------------------------------------------------------------------------------------------------------------------------------------------------------------------------------------------------------------------------|
| 7981732 | 4.37E-03 | 4.72E-04 | 4.62 | -0.294984 | 2.58 | <p>putative V-set and immunoglobulin domain-containing-like protein IGHV4OR15-8///immunoglobulin heavy</p> <p>LOC10272340 variable 4-31///immunoglobulin heavy 7///IGHV4-31// constant mu///immunoglobulin heavy /IGHM///IGHD constant delta///immunoglobulin heavy ///IGHA2///LO constant alpha 2 (A2m marker)///putative C102723407/// V-set and immunoglobulin SKAP2///IGH domain-containing-like protein A2///IGHA1///I IGHV4OR15-8///src kinase associated GH phosphoprotein 2///immunoglobulin heavy constant alpha 2 (A2m marker)///immunoglobulin heavy constant alpha 1///immunoglobulin heavy locus</p> |
|---------|----------|----------|------|-----------|------|-------------------------------------------------------------------------------------------------------------------------------------------------------------------------------------------------------------------------------------------------------------------------------------------------------------------------------------------------------------------------------------------------------------------------------------------------------------------------------------------------------------------------------------------------------------------------------------------------------------------|

|         |          |          |      |           |      |                                   |                                                                                                                    |
|---------|----------|----------|------|-----------|------|-----------------------------------|--------------------------------------------------------------------------------------------------------------------|
| 7993588 | 4.39E-03 | 4.75E-04 | 4.62 | -0.301691 | 1.21 | TMC7                              | transmembrane channel like 7                                                                                       |
| 8097080 | 4.39E-03 | 4.75E-04 | 4.62 | -0.30174  | 1.63 | SYNPO2                            | synaptopodin 2                                                                                                     |
| 7919133 | 4.41E-03 | 4.78E-04 | 4.61 | -0.307961 | 1.83 | FCGR1CP///F<br>CGR1B///FCG<br>R1A | Fc fragment of IgG receptor Ic,<br>pseudogene///Fc fragment of IgG receptor<br>Ib///Fc fragment of IgG receptor Ia |

|         |          |          |      |           |      |                              |                                                                                                         |
|---------|----------|----------|------|-----------|------|------------------------------|---------------------------------------------------------------------------------------------------------|
| 7917728 | 4.42E-03 | 4.80E-04 | 4.61 | -0.312456 | 1.15 | FAM69A                       | family with sequence similarity 69 member A                                                             |
| 7981737 | 4.43E-03 | 4.81E-04 | 4.61 | -0.315962 | 1.96 | IGHV3-69-1///1<br>GHV3OR16-7 | immunoglobulin heavy variable 3-69-1 (pseudogene)///immunoglobulin heavy variable 3/OR16-7 (pseudogene) |
| 7963817 | 4.45E-03 | 4.84E-04 | 4.6  | -0.321984 | 1.33 | GTSF1                        | gametocyte specific factor 1                                                                            |

|         |          |          |     |           |      |                                                                                                                                                                                                                                                                                                                                                                                                                                                                                                                                                                                                                                                                                                                                                                                                                                                                                                                                                                                                                                            |
|---------|----------|----------|-----|-----------|------|--------------------------------------------------------------------------------------------------------------------------------------------------------------------------------------------------------------------------------------------------------------------------------------------------------------------------------------------------------------------------------------------------------------------------------------------------------------------------------------------------------------------------------------------------------------------------------------------------------------------------------------------------------------------------------------------------------------------------------------------------------------------------------------------------------------------------------------------------------------------------------------------------------------------------------------------------------------------------------------------------------------------------------------------|
| 7995263 | 4.47E-03 | 4.88E-04 | 4.6 | -0.329582 | 2.22 | single-chain Fv fragment///immunoglobulin<br>lambda joining 3///immunoglobulin heavy<br>variable 3-23///immunoglobulin heavy<br>variable 3-41<br>SCFV///IGLJ3/<br>//IGHV3-23///I<br>GHV3-41///IG<br>HV4-31///IGH<br>M///IGHG2///I<br>GHG1///IGHA<br>1///IGH///C14o<br>rf99///IGK///IG<br>KV3-20///IGH<br>V3-23///IGHV<br>3-48///IGHV3-<br>75///IGHV3-69<br>-1///IGHV3OR<br>16-7<br>(pseudogene)///immunoglobulin heavy<br>variable 4-31///immunoglobulin heavy<br>constant mu///immunoglobulin heavy<br>constant gamma 2 (G2m<br>marker)///immunoglobulin heavy constant<br>gamma 1 (G1m marker)///immunoglobulin<br>heavy constant alpha 1///immunoglobulin<br>heavy locus///uncharacterized<br>LOC317730///immunoglobulin kappa<br>locus///immunoglobulin kappa variable<br>3-20///immunoglobulin heavy variable<br>3-23///immunoglobulin heavy variable<br>3-48///immunoglobulin heavy variable 3-75<br>(pseudogene)///immunoglobulin heavy<br>variable 3-69-1<br>(pseudogene)///immunoglobulin heavy<br>variable 3/OR16-7 (pseudogene) |
|---------|----------|----------|-----|-----------|------|--------------------------------------------------------------------------------------------------------------------------------------------------------------------------------------------------------------------------------------------------------------------------------------------------------------------------------------------------------------------------------------------------------------------------------------------------------------------------------------------------------------------------------------------------------------------------------------------------------------------------------------------------------------------------------------------------------------------------------------------------------------------------------------------------------------------------------------------------------------------------------------------------------------------------------------------------------------------------------------------------------------------------------------------|



|         |          |          |      |           |      |          |                                                         |
|---------|----------|----------|------|-----------|------|----------|---------------------------------------------------------|
| 7904131 | 4.53E-03 | 4.96E-04 | 4.59 | -0.346826 | 1.08 | DCLRE1B  | DNA cross-link repair 1B                                |
| 7923386 | 4.54E-03 | 4.98E-04 | 4.59 | -0.349887 | 1.12 | LMOD1    | leiomodin 1                                             |
| 7983478 | 4.54E-03 | 4.99E-04 | 4.59 | -0.352061 | 2.02 | C15orf48 | chromosome 15 open reading frame 48                     |
| 8031238 | 4.55E-03 | 4.99E-04 | 4.59 | -0.352459 | 1.17 | LILRB4   | leukocyte immunoglobulin like receptor B4               |
| 7918457 | 4.55E-03 | 5.00E-04 | 4.59 | -0.353683 | 1.22 | KCNA3    | potassium voltage-gated channel subfamily<br>A member 3 |
| 7960514 | 4.56E-03 | 5.02E-04 | 4.58 | -0.358639 | 2.32 |          |                                                         |

|         |          |          |      |           |      |         |                                                        |
|---------|----------|----------|------|-----------|------|---------|--------------------------------------------------------|
| 8129482 | 4.57E-03 | 5.04E-04 | 4.58 | -0.363287 | 1.45 | SAMD3   | sterile alpha motif domain containing 3                |
| 8057887 | 4.57E-03 | 5.05E-04 | 4.58 | -0.364096 | 1.05 | STK17B  | serine/threonine kinase 17b                            |
| 8166065 | 4.58E-03 | 5.05E-04 | 4.58 | -0.365249 | 1.48 | TLR8    | toll like receptor 8                                   |
| 8049528 | 4.61E-03 | 5.10E-04 | 4.58 | -0.37407  | 1.17 | LRRFIP1 | LRR binding FLII interacting protein 1                 |
| 8150962 | 4.62E-03 | 5.12E-04 | 4.57 | -0.378339 | 1.08 | TOX     | thymocyte selection associated high mobility group box |

|         |          |          |      |           |      |        |                                                           |
|---------|----------|----------|------|-----------|------|--------|-----------------------------------------------------------|
| 7995096 | 4.62E-03 | 5.12E-04 | 4.57 | -0.379252 | 1.34 | ITGAM  | integrin subunit alpha M                                  |
| 7921652 | 4.68E-03 | 5.21E-04 | 4.56 | -0.396105 | 1    | SLAMF1 | signaling lymphocytic activation molecule family member 1 |
| 8112033 | 4.73E-03 | 5.28E-04 | 4.56 | -0.409711 | 1.03 | ARL15  | ADP ribosylation factor like GTPase 15                    |
| 8038899 | 4.76E-03 | 5.34E-04 | 4.55 | -0.420829 | 2.13 | FPR1   | formyl peptide receptor 1                                 |
| 8155898 | 4.78E-03 | 5.37E-04 | 4.55 | -0.425952 | 1.03 | PCSK5  | proprotein convertase subtilisin/kexin type 5             |

|         |          |          |      |           |      |         |                                |
|---------|----------|----------|------|-----------|------|---------|--------------------------------|
| 8095736 | 4.85E-03 | 5.48E-04 | 4.54 | -0.447427 | 2.19 | AREG    | amphiregulin                   |
| 7960771 | 4.85E-03 | 5.49E-04 | 4.54 | -0.449466 | 1.46 | CD163L1 | CD163 molecule like 1          |
| 8041206 | 4.85E-03 | 5.49E-04 | 4.54 | -0.449706 | 1.45 | LBH     | limb bud and heart development |
| 8112018 | 4.90E-03 | 5.58E-04 | 4.53 | -0.465488 | 1.07 | PELO    | pelota homolog (Drosophila)    |
| 8091503 | 4.96E-03 | 5.67E-04 | 4.52 | -0.482712 | 1.46 | GPR171  | G protein-coupled receptor 171 |

|         |          |          |      |           |      |           |                                                                                     |
|---------|----------|----------|------|-----------|------|-----------|-------------------------------------------------------------------------------------|
| 8122202 | 4.98E-03 | 5.70E-04 | 4.52 | -0.486684 | 1.09 | MYB///MYB | MYB proto-oncogene, transcription factor///MYB proto-oncogene, transcription factor |
| 7915472 | 5.15E-03 | 5.96E-04 | 4.49 | -0.533196 | 1.5  | SLC2A1    | solute carrier family 2 member 1                                                    |
| 8054712 | 5.15E-03 | 5.97E-04 | 4.49 | -0.535003 | 2    | IL1A      | interleukin 1 alpha                                                                 |
| 7969493 | 5.16E-03 | 6.00E-04 | 4.49 | -0.539264 | 1.91 | SCEL      | sciellin                                                                            |
| 8129410 | 5.21E-03 | 6.10E-04 | 4.48 | -0.555338 | 1.66 | THEMIS    | thymocyte selection associated                                                      |
| 7928429 | 5.23E-03 | 6.12E-04 | 4.48 | -0.560185 | 1.03 | PLAU      | plasminogen activator, urokinase                                                    |
| 7896729 | 5.28E-03 | 6.21E-04 | 4.47 | -0.573529 | 2.17 |           |                                                                                     |

|         |          |          |      |           |      |          |                                       |
|---------|----------|----------|------|-----------|------|----------|---------------------------------------|
| 8138805 | 5.34E-03 | 6.31E-04 | 4.46 | -0.590847 | 1.11 | CPVL     | carboxypeptidase, vitellogenic like   |
| 8048717 | 5.36E-03 | 6.35E-04 | 4.46 | -0.596463 | 1.24 | SGPP2    | sphingosine-1-phosphate phosphatase 2 |
| 8089771 | 5.43E-03 | 6.44E-04 | 4.45 | -0.610831 | 1.04 | CD80     | CD80 molecule                         |
| 8021685 | 5.49E-03 | 6.56E-04 | 4.44 | -0.629417 | 1.35 | CCDC102B | coiled-coil domain containing 102B    |
| 8048761 | 5.50E-03 | 6.57E-04 | 4.44 | -0.631421 | 1.16 |          |                                       |
| 8136938 | 5.69E-03 | 6.89E-04 | 4.41 | -0.678929 | 1.09 |          |                                       |
| 8143599 | 5.69E-03 | 6.89E-04 | 4.41 | -0.678929 | 1.09 |          |                                       |
| 7979710 | 5.69E-03 | 6.90E-04 | 4.41 | -0.680951 | 1.16 | PLEK2    | pleckstrin 2                          |
| 8126428 | 5.72E-03 | 6.95E-04 | 4.41 | -0.68872  | 1.15 | TRERF1   | transcriptional regulating factor 1   |

|         |          |          |      |           |      |         |                                             |
|---------|----------|----------|------|-----------|------|---------|---------------------------------------------|
| 7933872 | 5.82E-03 | 7.12E-04 | 4.39 | -0.713484 | 1.46 | EGR2    | early growth response 2                     |
| 7986068 | 5.83E-03 | 7.13E-04 | 4.39 | -0.714743 | 1.27 | BLM     | Bloom syndrome RecQ like helicase           |
| 7948904 | 5.83E-03 | 7.13E-04 | 4.39 | -0.714864 | 1.16 | SNORD28 | small nucleolar RNA, C/D box 28             |
| 8166705 | 5.91E-03 | 7.28E-04 | 4.38 | -0.735    | 1.13 | PRRG1   | proline rich and Gla domain 1               |
| 8172270 | 5.95E-03 | 7.35E-04 | 4.38 | -0.744485 | 1.59 |         |                                             |
| 8120335 | 5.95E-03 | 7.35E-04 | 4.38 | -0.745696 | 1.1  | FAM83B  | family with sequence similarity 83 member B |
| 8091735 | 6.07E-03 | 7.55E-04 | 4.36 | -0.772303 | 1.48 |         |                                             |

|         |          |          |      |           |      |        |                                        |
|---------|----------|----------|------|-----------|------|--------|----------------------------------------|
| 8078442 | 6.13E-03 | 7.65E-04 | 4.36 | -0.785884 | 1.37 | CCR4   | C-C motif chemokine receptor 4         |
| 7896710 | 6.14E-03 | 7.66E-04 | 4.36 | -0.78739  | 2.51 |        |                                        |
| 8006602 | 6.14E-03 | 7.67E-04 | 4.35 | -0.788578 | 1.98 | CCL4   | C-C motif chemokine ligand 4           |
| 8096959 | 6.17E-03 | 7.73E-04 | 4.35 | -0.79624  | 1.27 | ANK2   | ankyrin 2, neuronal                    |
| 8126820 | 6.31E-03 | 7.98E-04 | 4.33 | -0.828602 | 1.42 | ADGRF1 | adhesion G protein-coupled receptor F1 |
| 7989073 | 6.35E-03 | 8.06E-04 | 4.33 | -0.838095 | 1.03 | PRTG   | protogenin                             |
| 8029536 | 6.43E-03 | 8.18E-04 | 4.32 | -0.853669 | 1.57 | APOC1  | apolipoprotein C1                      |



|         |          |          |      |           |      |                                 |                                                                                                                                                |
|---------|----------|----------|------|-----------|------|---------------------------------|------------------------------------------------------------------------------------------------------------------------------------------------|
| 8006621 | 6.50E-03 | 8.32E-04 | 4.31 | -0.870049 | 2.15 | CCL4L1///CCL4L2///CCL4///CCL4L1 | C-C motif chemokine ligand 4 like 1///C-C motif chemokine ligand 4 like 2///C-C motif chemokine ligand 4///C-C motif chemokine ligand 4 like 1 |
|---------|----------|----------|------|-----------|------|---------------------------------|------------------------------------------------------------------------------------------------------------------------------------------------|

|         |          |          |      |           |      |                          |                                                                                                                                                |
|---------|----------|----------|------|-----------|------|--------------------------|------------------------------------------------------------------------------------------------------------------------------------------------|
| 8019651 | 6.50E-03 | 8.32E-04 | 4.31 | -0.870049 | 2.15 | CCL4L1///CCL4L2///CCL4L1 | C-C motif chemokine ligand 4 like 1///C-C motif chemokine ligand 4 like 2///C-C motif chemokine ligand 4///C-C motif chemokine ligand 4 like 1 |
| 8035304 | 6.60E-03 | 8.51E-04 | 4.3  | -0.893636 | 1.14 | BST2                     | bone marrow stromal cell antigen 2                                                                                                             |

|         |          |          |      |           |      |         |                                      |
|---------|----------|----------|------|-----------|------|---------|--------------------------------------|
| 8100798 | 6.61E-03 | 8.53E-04 | 4.3  | -0.895862 | 2.51 | SULT1B1 | sulfotransferase family 1B member 1  |
| 7971311 | 6.71E-03 | 8.67E-04 | 4.29 | -0.912799 | 1.06 | ENOX1   | ecto-NOX disulfide-thiol exchanger 1 |
| 8105300 | 6.71E-03 | 8.68E-04 | 4.29 | -0.913075 | 1.94 |         |                                      |
| 8166059 | 6.84E-03 | 8.90E-04 | 4.27 | -0.939277 | 1.39 | TLR7    | toll like receptor 7                 |
| 8148070 | 6.92E-03 | 9.02E-04 | 4.27 | -0.95196  | 1.85 | COL14A1 | collagen type XIV alpha 1 chain      |
| 8092541 | 6.95E-03 | 9.08E-04 | 4.26 | -0.958676 | 1.62 | LIPH    | lipase H                             |

|         |          |          |      |           |      |               |                                                                       |
|---------|----------|----------|------|-----------|------|---------------|-----------------------------------------------------------------------|
| 8135015 | 7.03E-03 | 9.21E-04 | 4.26 | -0.973614 | 1.06 | MUC3B///MUC3A | mucin 3B, cell surface associated///mucin 3A, cell surface associated |
| 7954090 | 7.07E-03 | 9.31E-04 | 4.25 | -0.984823 | 1.27 | EMP1          | epithelial membrane protein 1                                         |
| 8057771 | 7.16E-03 | 9.48E-04 | 4.24 | -1.002205 | 1.05 | STAT4         | signal transducer and activator of transcription 4                    |
| 7906377 | 7.16E-03 | 9.49E-04 | 4.24 | -1.003464 | 1.91 | MNDA          | myeloid cell nuclear differentiation antigen                          |

|         |          |          |      |           |      |         |                                            |
|---------|----------|----------|------|-----------|------|---------|--------------------------------------------|
| 8114249 | 7.16E-03 | 9.50E-04 | 4.24 | -1.00461  | 1.91 | CXCL14  | C-X-C motif chemokine ligand 14            |
| 8146092 | 7.16E-03 | 9.50E-04 | 4.24 | -1.005152 | 1.45 | IDO1    | indoleamine 2,3-dioxygenase 1              |
| 7927631 | 7.17E-03 | 9.52E-04 | 4.24 | -1.006345 | 1.77 | DKK1    | dickkopf WNT signaling pathway inhibitor 1 |
| 7997504 | 7.20E-03 | 9.57E-04 | 4.24 | -1.012136 | 1.06 | CDH13   | cadherin 13                                |
| 8049542 | 7.24E-03 | 9.64E-04 | 4.23 | -1.019632 | 1.15 | LRRFIP1 | LRR binding FLII interacting protein 1     |
| 8101828 | 7.28E-03 | 9.72E-04 | 4.23 | -1.027554 | 1.39 | TSPAN5  | tetraspanin 5                              |

|         |          |          |      |           |      |                 |                                                                     |
|---------|----------|----------|------|-----------|------|-----------------|---------------------------------------------------------------------|
| 8135734 | 7.31E-03 | 9.78E-04 | 4.22 | -1.034464 | 1.46 | CPED1           | cadherin like and PC-esterase domain containing 1                   |
| 8123246 | 7.33E-03 | 9.82E-04 | 4.22 | -1.038602 | 1.39 | SLC22A3         | solute carrier family 22 member 3                                   |
| 7921873 | 7.35E-03 | 9.87E-04 | 4.22 | -1.043191 | 2.61 | FCGR3B///FCGR3A | Fc fragment of IgG receptor IIIb///Fc fragment of IgG receptor IIIa |
| 7965873 | 7.36E-03 | 9.89E-04 | 4.22 | -1.045769 | 2.53 | IGF1            | insulin like growth factor 1                                        |
| 8119076 | 7.61E-03 | 1.04E-03 | 4.19 | -1.094094 | 1.18 |                 |                                                                     |
| 7986637 | 7.69E-03 | 1.05E-03 | 4.18 | -1.110197 | 2.03 |                 |                                                                     |

|         |          |          |      |           |      |                         |                                                                                                                     |
|---------|----------|----------|------|-----------|------|-------------------------|---------------------------------------------------------------------------------------------------------------------|
| 7999674 | 7.69E-03 | 1.05E-03 | 4.18 | -1.110623 | 2.09 | MYH11                   | myosin heavy chain 11                                                                                               |
| 8015133 | 7.74E-03 | 1.06E-03 | 4.18 | -1.119629 | 2.16 | KRT23                   | keratin 23                                                                                                          |
| 7915504 | 8.18E-03 | 1.15E-03 | 4.14 | -1.19768  | 1.02 | ELOVL1                  | ELOVL fatty acid elongase 1                                                                                         |
| 8091523 | 8.22E-03 | 1.16E-03 | 4.13 | -1.20595  | 1.83 | P2RY13                  | purinergic receptor P2Y13                                                                                           |
| 8125447 | 8.27E-03 | 1.17E-03 | 4.13 | -1.214034 | 2.89 | HLA-DRB1///<br>HLA-DQB1 | major histocompatibility complex, class II,<br>DR beta 1///major histocompatibility<br>complex, class II, DQ beta 1 |

|         |          |          |      |           |      |        |                                                                    |
|---------|----------|----------|------|-----------|------|--------|--------------------------------------------------------------------|
| 8135048 | 8.27E-03 | 1.17E-03 | 4.13 | -1.214287 | 2.02 | MUC17  | mucin 17, cell surface associated                                  |
| 8044080 | 8.33E-03 | 1.18E-03 | 4.12 | -1.225045 | 1.51 | SLC9A2 | solute carrier family 9 member A2                                  |
| 7896697 | 8.34E-03 | 1.18E-03 | 4.12 | -1.225869 | 1.9  |        |                                                                    |
| 8134036 | 8.36E-03 | 1.19E-03 | 4.12 | -1.23413  | 1.08 | STEAP2 | STEAP2 metalloredutase                                             |
| 7944179 | 8.48E-03 | 1.21E-03 | 4.11 | -1.253237 | 1.39 | CD3E   | CD3e molecule                                                      |
| 8083136 | 8.53E-03 | 1.23E-03 | 4.1  | -1.261727 | 1.47 | ATP1B3 | ATPase Na <sup>+</sup> /K <sup>+</sup> transporting subunit beta 3 |
| 8047788 | 8.57E-03 | 1.23E-03 | 4.1  | -1.267398 | 1.04 | ADAM23 | ADAM metallopeptidase domain 23                                    |



|         |          |          |      |           |      |                                                    |                                                        |
|---------|----------|----------|------|-----------|------|----------------------------------------------------|--------------------------------------------------------|
| 8062927 | 8.59E-03 | 1.23E-03 | 4.1  | -1.269728 | 1.84 | PI3                                                | peptidase inhibitor 3                                  |
| 7961151 | 8.68E-03 | 1.25E-03 | 4.09 | -1.285374 | 1.76 | KLRC4-KLRK1 readthrough///killer cell<br>1///KLRK1 | lectin like receptor K1                                |
| 7918064 | 8.74E-03 | 1.27E-03 | 4.09 | -1.295283 | 1.64 | COL11A1                                            | collagen type XI alpha 1 chain                         |
| 8131550 | 8.97E-03 | 1.31E-03 | 4.07 | -1.332524 | 1.29 | SCIN                                               | scinderin                                              |
| 8039257 | 9.14E-03 | 1.35E-03 | 4.05 | -1.359556 | 1.08 | LAIR1                                              | leukocyte associated immunoglobulin like<br>receptor 1 |

|         |          |          |      |           |      |      |                               |
|---------|----------|----------|------|-----------|------|------|-------------------------------|
| 8089519 | 9.44E-03 | 1.41E-03 | 4.03 | -1.405175 | 1.18 | BTLA | B and T lymphocyte associated |
| 8043443 | 9.56E-03 | 1.44E-03 | 4.02 | -1.42178  | 2.33 |      |                               |
| 8115074 | 9.57E-03 | 1.44E-03 | 4.02 | -1.423013 | 1.34 |      |                               |
| 8084810 | 9.76E-03 | 1.48E-03 | 4    | -1.449746 | 1.39 |      |                               |
| 7922200 | 9.86E-03 | 1.50E-03 | 4    | -1.466852 | 1.13 | SELP | selectin P                    |
| 7922229 | 1.01E-02 | 1.55E-03 | 3.98 | -1.501498 | 1.51 | SELE | selectin E                    |

|         |          |          |      |           |      |                                 |                                                                                                                                                |
|---------|----------|----------|------|-----------|------|---------------------------------|------------------------------------------------------------------------------------------------------------------------------------------------|
| 8006608 | 1.01E-02 | 1.56E-03 | 3.98 | -1.504041 | 1.75 | CCL4L1///CCL4L2///CCL4///CCL4L1 | C-C motif chemokine ligand 4 like 1///C-C motif chemokine ligand 4 like 2///C-C motif chemokine ligand 4///C-C motif chemokine ligand 4 like 1 |
| 8059376 | 1.02E-02 | 1.56E-03 | 3.97 | -1.508224 | 1.85 | SERPINE2                        | serpin family E member 2                                                                                                                       |
| 8056222 | 1.02E-02 | 1.58E-03 | 3.97 | -1.519554 | 1.55 | DPP4                            | dipeptidyl peptidase 4                                                                                                                         |

|         |          |          |      |           |      |          |                                           |
|---------|----------|----------|------|-----------|------|----------|-------------------------------------------|
| 8022488 | 1.04E-02 | 1.61E-03 | 3.96 | -1.535512 | 1.4  | ABHD3    | abhydrolase domain containing 3           |
| 8154245 | 1.04E-02 | 1.62E-03 | 3.96 | -1.540675 | 1.22 | PDCD1LG2 | programmed cell death 1 ligand 2          |
| 7933084 | 1.04E-02 | 1.62E-03 | 3.96 | -1.541289 | 1.09 | NAMPT    | nicotinamide phosphoribosyltransferase    |
| 8055980 | 1.05E-02 | 1.63E-03 | 3.95 | -1.546737 | 1.81 | CYTIP    | cytohesin 1 interacting protein           |
| 8165866 | 1.05E-02 | 1.63E-03 | 3.95 | -1.54966  | 1    | STS      | steroid sulfatase (microsomal), isozyme S |
| 7934916 | 1.05E-02 | 1.64E-03 | 3.95 | -1.552517 | 1.32 | CH25H    | cholesterol 25-hydroxylase                |

|         |          |          |      |           |      |        |                                                  |
|---------|----------|----------|------|-----------|------|--------|--------------------------------------------------|
| 7896720 | 1.05E-02 | 1.64E-03 | 3.95 | -1.556744 | 1.15 |        |                                                  |
| 8020164 | 1.05E-02 | 1.65E-03 | 3.95 | -1.558822 | 1.06 | GNAL   | G protein subunit alpha L                        |
| 7896693 | 1.06E-02 | 1.67E-03 | 3.94 | -1.570979 | 1.91 |        |                                                  |
| 7961075 | 1.06E-02 | 1.67E-03 | 3.94 | -1.570979 | 1.91 | CD69   | CD69 molecule                                    |
| 8072587 | 1.06E-02 | 1.67E-03 | 3.94 | -1.576279 | 1.11 | SLC5A1 | solute carrier family 5 member 1                 |
| 8126303 | 1.08E-02 | 1.69E-03 | 3.93 | -1.588604 | 2.55 | TREM1  | triggering receptor expressed on myeloid cells 1 |
| 7896728 | 1.09E-02 | 1.73E-03 | 3.92 | -1.612143 | 1.84 |        |                                                  |
| 8042942 | 1.10E-02 | 1.74E-03 | 3.92 | -1.614236 | 1.05 | HK2    | hexokinase 2                                     |
| 8148325 | 1.10E-02 | 1.75E-03 | 3.91 | -1.622229 | 1.24 |        |                                                  |
| 8007990 | 1.11E-02 | 1.78E-03 | 3.91 | -1.637151 | 1.33 |        |                                                  |

|         |          |          |      |           |      |                        |                                                                                                          |
|---------|----------|----------|------|-----------|------|------------------------|----------------------------------------------------------------------------------------------------------|
| 8123951 | 1.14E-02 | 1.84E-03 | 3.89 | -1.671035 | 2.03 | ADTRP                  | androgen dependent TFPI regulating protein                                                               |
| 8100474 | 1.15E-02 | 1.85E-03 | 3.88 | -1.678679 | 1.35 |                        |                                                                                                          |
| 8014391 | 1.15E-02 | 1.86E-03 | 3.88 | -1.679482 | 1.39 | CCL3L3///CCL3L1///CCL3 | C-C motif chemokine ligand 3 like 3///C-C motif chemokine ligand 3 like 1///C-C motif chemokine ligand 3 |

|         |          |          |      |           |      |                        |                                                                                                          |
|---------|----------|----------|------|-----------|------|------------------------|----------------------------------------------------------------------------------------------------------|
| 8014414 | 1.15E-02 | 1.86E-03 | 3.88 | -1.679482 | 1.39 | CCL3L3///CCL3L1///CCL3 | C-C motif chemokine ligand 3 like 3///C-C motif chemokine ligand 3 like 1///C-C motif chemokine ligand 3 |
|---------|----------|----------|------|-----------|------|------------------------|----------------------------------------------------------------------------------------------------------|

|         |          |          |      |           |      |                        |                                                                                                          |
|---------|----------|----------|------|-----------|------|------------------------|----------------------------------------------------------------------------------------------------------|
| 8019731 | 1.15E-02 | 1.86E-03 | 3.88 | -1.679482 | 1.39 | CCL3L3///CCL3L1///CCL3 | C-C motif chemokine ligand 3 like 3///C-C motif chemokine ligand 3 like 1///C-C motif chemokine ligand 3 |
|---------|----------|----------|------|-----------|------|------------------------|----------------------------------------------------------------------------------------------------------|

|         |          |          |      |           |      |                                                                                                                             |
|---------|----------|----------|------|-----------|------|-----------------------------------------------------------------------------------------------------------------------------|
| 8111443 | 1.15E-02 | 1.86E-03 | 3.88 | -1.681649 | 1.29 | C1QTNF3-AM C1QTNF3-AMACR readthrough (NMD<br>ACR///C1QTN candidate)///C1q and tumor necrosis factor<br>F3 related protein 3 |
| 8043036 | 1.15E-02 | 1.88E-03 | 3.88 | -1.690552 | 1.01 | LOC1720///DH dihydrofolate reductase<br>FR pseudogene///dihydrofolate reductase                                             |
| 8100827 | 1.16E-02 | 1.89E-03 | 3.87 | -1.697994 | 2.66 | JCHAIN joining chain of multimeric IgA and IgM                                                                              |
| 7908312 | 1.17E-02 | 1.93E-03 | 3.86 | -1.717478 | 1.53 | PRG4 proteoglycan 4                                                                                                         |



|         |          |          |      |           |      |        |                                                        |
|---------|----------|----------|------|-----------|------|--------|--------------------------------------------------------|
| 7910611 | 1.19E-02 | 1.96E-03 | 3.86 | -1.735369 | 1.41 | KCNK1  | potassium two pore domain channel subfamily K member 1 |
| 8137240 | 1.20E-02 | 1.98E-03 | 3.85 | -1.744864 | 1.51 | GIMAP7 | GTPase, IMAP family member 7                           |
| 7973303 | 1.21E-02 | 2.00E-03 | 3.84 | -1.755408 | 1.13 | OR6C4  | olfactory receptor family 6 subfamily C member 4       |
| 8115455 | 1.22E-02 | 2.04E-03 | 3.84 | -1.773182 | 1.51 | HAVCR1 | hepatitis A virus cellular receptor 1                  |
| 8038683 | 1.22E-02 | 2.04E-03 | 3.83 | -1.776623 | 2.01 | KLK6   | kallikrein related peptidase 6                         |

|         |          |          |      |           |      |         |                                     |
|---------|----------|----------|------|-----------|------|---------|-------------------------------------|
| 7913216 | 1.24E-02 | 2.10E-03 | 3.82 | -1.803683 | 2.27 | PLA2G2A | phospholipase A2 group IIA          |
| 8083494 | 1.24E-02 | 2.10E-03 | 3.82 | -1.805317 | 1.37 | MME     | membrane metallo-endopeptidase      |
| 7953835 | 1.30E-02 | 2.23E-03 | 3.79 | -1.866026 | 1.26 | KLRG1   | killer cell lectin like receptor G1 |
| 7940226 | 1.30E-02 | 2.24E-03 | 3.79 | -1.869234 | 1.51 | MS4A2   | membrane spanning 4-domains A2      |
| 8099834 | 1.31E-02 | 2.26E-03 | 3.78 | -1.877064 | 1.24 | TLR1    | toll like receptor 1                |
| 7923547 | 1.36E-02 | 2.39E-03 | 3.75 | -1.931971 | 1.34 | CHI3L1  | chitinase 3 like 1                  |
| 8071642 | 1.36E-02 | 2.40E-03 | 3.75 | -1.937206 | 1.43 |         |                                     |
| 7923929 | 1.37E-02 | 2.41E-03 | 3.75 | -1.941019 | 2    | PIGR    | polymeric immunoglobulin receptor   |

|         |          |          |      |           |      |           |                                     |
|---------|----------|----------|------|-----------|------|-----------|-------------------------------------|
| 7929816 | 1.37E-02 | 2.42E-03 | 3.75 | -1.944262 | 1.47 | SCD       | stearoyl-CoA desaturase             |
| 8168622 | 1.38E-02 | 2.44E-03 | 3.74 | -1.955688 | 1.34 | KLHL4     | kelch like family member 4          |
| 7908376 | 1.41E-02 | 2.52E-03 | 3.72 | -1.98544  | 1.19 | RGS18     | regulator of G-protein signaling 18 |
| 7964927 | 1.45E-02 | 2.61E-03 | 3.7  | -2.02379  | 1.25 | TSPAN8    | tetraspanin 8                       |
| 7996022 | 1.47E-02 | 2.66E-03 | 3.7  | -2.040451 | 1.55 | CCL22     | C-C motif chemokine ligand 22       |
| 8098287 | 1.48E-02 | 2.69E-03 | 3.69 | -2.052932 | 1.1  |           |                                     |
| 8143790 | 1.50E-02 | 2.73E-03 | 3.68 | -2.068572 | 1.08 | TMEM176B  | transmembrane protein 176B          |
| 8094028 | 1.50E-02 | 2.74E-03 | 3.68 | -2.071977 | 1.52 | AFAP1-AS1 | AFAP1 antisense RNA 1               |

|         |          |          |      |           |      |          |                                                       |
|---------|----------|----------|------|-----------|------|----------|-------------------------------------------------------|
| 8117018 | 1.52E-02 | 2.80E-03 | 3.67 | -2.09218  | 1.96 |          |                                                       |
| 7960865 | 1.53E-02 | 2.81E-03 | 3.67 | -2.096274 | 1.76 | SLC2A3   | solute carrier family 2 member 3                      |
| 8038695 | 1.53E-02 | 2.81E-03 | 3.67 | -2.096776 | 1.1  | KLK7     | kallikrein related peptidase 7                        |
| 8125436 | 1.53E-02 | 2.83E-03 | 3.66 | -2.103163 | 2.38 | HLA-DRB5 | major histocompatibility complex, class II, DR beta 5 |
| 8097857 | 1.54E-02 | 2.86E-03 | 3.66 | -2.112089 | 1.57 | MND1     | meiotic nuclear divisions 1                           |
| 7907249 | 1.55E-02 | 2.88E-03 | 3.65 | -2.121965 | 1.06 | FMO3     | flavin containing monooxygenase 3                     |

|         |          |          |      |           |      |                                                                                          |
|---------|----------|----------|------|-----------|------|------------------------------------------------------------------------------------------|
| 7934278 | 1.56E-02 | 2.89E-03 | 3.65 | -2.125125 | 1.04 | P4HA1///P4HA prolyl 4-hydroxylase subunit alpha 1///prolyl 4-hydroxylase subunit alpha 1 |
| 8112731 | 1.59E-02 | 2.98E-03 | 3.64 | -2.155805 | 1.44 | F2RL2 coagulation factor II thrombin receptor like 2                                     |
| 8109926 | 1.59E-02 | 3.01E-03 | 3.63 | -2.162987 | 2.9  | GABRP gamma-aminobutyric acid type A receptor pi subunit                                 |
| 8042788 | 1.60E-02 | 3.01E-03 | 3.63 | -2.16374  | 2.93 | ACTG2 actin, gamma 2, smooth muscle, enteric                                             |

|         |          |          |      |           |      |                                                                                     |
|---------|----------|----------|------|-----------|------|-------------------------------------------------------------------------------------|
| 8137257 | 1.61E-02 | 3.04E-03 | 3.63 | -2.174287 | 1.15 | GIMAP1-GIM GIMAP1-GIMAP5 readthrough///GTPase,<br>AP5///GIMAP5 IMAP family member 5 |
| 8077499 | 1.64E-02 | 3.10E-03 | 3.62 | -2.193731 | 1.35 | LINC00312 long intergenic non-protein coding RNA 312                                |
| 8044499 | 1.66E-02 | 3.16E-03 | 3.61 | -2.212774 | 1.14 | SLC20A1 solute carrier family 20 member 1                                           |

|         |          |          |      |           |      |                            |                                                                                                                      |
|---------|----------|----------|------|-----------|------|----------------------------|----------------------------------------------------------------------------------------------------------------------|
| 8067839 | 1.66E-02 | 3.17E-03 | 3.6  | -2.217778 | 1.26 | FGF7P3///FGF<br>7P6///FGF7 | fibroblast growth factor 7 pseudogene<br>3///fibroblast growth factor 7 pseudogene<br>6///fibroblast growth factor 7 |
| 8047702 | 1.69E-02 | 3.23E-03 | 3.59 | -2.236252 | 1.14 | ICOS                       | inducible T-cell costimulator                                                                                        |

|         |          |          |      |           |     |                                                                                                                                                                                                                                             |
|---------|----------|----------|------|-----------|-----|---------------------------------------------------------------------------------------------------------------------------------------------------------------------------------------------------------------------------------------------|
|         |          |          |      |           |     | UDP glucuronosyltransferase family 1<br>member A3//UDP glucuronosyltransferase<br>family 1 member A1//UDP                                                                                                                                   |
|         |          |          |      |           |     | UGT1A3//UG glucuronosyltransferase family 1 member<br>T1A1//UGT1 A4//UDP glucuronosyltransferase family 1<br>A4//UGT1A9/ member A9//UDP glucuronosyltransferase<br>//UGT1A5//U family 1 member A5//UDP                                      |
| 8049349 | 1.70E-02 | 3.27E-03 | 3.59 | -2.246428 | 1.1 | GT1A6//UGT glucuronosyltransferase family 1 member<br>1A7//UGT1A8 A6//UDP glucuronosyltransferase family 1<br>//UGT1A10 member A7//UDP glucuronosyltransferase<br>family 1 member A8//UDP<br>glucuronosyltransferase family 1 member<br>A10 |



|         |          |          |      |           |      |         |                                              |
|---------|----------|----------|------|-----------|------|---------|----------------------------------------------|
| 8094533 | 1.75E-02 | 3.40E-03 | 3.57 | -2.286113 | 1.19 | DTHD1   | death domain containing 1                    |
| 7909946 | 1.78E-02 | 3.49E-03 | 3.55 | -2.312229 | 2.39 | FAM177B | family with sequence similarity 177 member B |
| 8152863 | 1.80E-02 | 3.53E-03 | 3.55 | -2.324727 | 1.14 |         |                                              |
| 8089145 | 1.80E-02 | 3.54E-03 | 3.55 | -2.325652 | 1.45 | ABI3BP  | ABI family member 3 binding protein          |
| 7957431 | 1.83E-02 | 3.62E-03 | 3.54 | -2.348745 | 1    |         |                                              |

|         |          |          |      |           |      |                       |                                                                                                                                                   |
|---------|----------|----------|------|-----------|------|-----------------------|---------------------------------------------------------------------------------------------------------------------------------------------------|
| 8118409 | 1.86E-02 | 3.70E-03 | 3.52 | -2.371025 | 1.33 | C4B_2///C4B///<br>C4A | complement component 4B (Chido blood group), copy 2///complement component 4B (Chido blood group)///complement component 4A (Rodgers blood group) |
|---------|----------|----------|------|-----------|------|-----------------------|---------------------------------------------------------------------------------------------------------------------------------------------------|

|         |          |          |      |           |      |                       |                                                                                                                                                   |
|---------|----------|----------|------|-----------|------|-----------------------|---------------------------------------------------------------------------------------------------------------------------------------------------|
| 8118455 | 1.86E-02 | 3.70E-03 | 3.52 | -2.371025 | 1.33 | C4B_2///C4B///<br>C4A | complement component 4B (Chido blood group), copy 2///complement component 4B (Chido blood group)///complement component 4A (Rodgers blood group) |
|---------|----------|----------|------|-----------|------|-----------------------|---------------------------------------------------------------------------------------------------------------------------------------------------|

|         |          |          |      |           |      |                       |                                                                                                                                                   |
|---------|----------|----------|------|-----------|------|-----------------------|---------------------------------------------------------------------------------------------------------------------------------------------------|
| 8179399 | 1.86E-02 | 3.70E-03 | 3.52 | -2.371025 | 1.33 | C4B_2///C4B///<br>C4A | complement component 4B (Chido blood group), copy 2///complement component 4B (Chido blood group)///complement component 4A (Rodgers blood group) |
|---------|----------|----------|------|-----------|------|-----------------------|---------------------------------------------------------------------------------------------------------------------------------------------------|

|         |          |          |      |           |      |          |                                            |
|---------|----------|----------|------|-----------|------|----------|--------------------------------------------|
| 7968351 | 1.87E-02 | 3.73E-03 | 3.52 | -2.379821 | 1.54 | MEDAG    | mesenteric estrogen dependent adipogenesis |
| 7896715 | 1.88E-02 | 3.75E-03 | 3.52 | -2.383942 | 1.65 |          |                                            |
| 8121911 | 1.90E-02 | 3.82E-03 | 3.51 | -2.402795 | 1.07 | CENPW    | centromere protein W                       |
| 8044605 | 1.91E-02 | 3.85E-03 | 3.5  | -2.410548 | 1.46 | PAX8-AS1 | PAX8 antisense RNA 1                       |
| 7922976 | 1.92E-02 | 3.86E-03 | 3.5  | -2.413646 | 2.04 | PTGS2    | prostaglandin-endoperoxide synthase 2      |
| 8060897 | 1.93E-02 | 3.89E-03 | 3.5  | -2.419915 | 1.23 | PLCB4    | phospholipase C beta 4                     |
| 8082928 | 1.93E-02 | 3.89E-03 | 3.5  | -2.420963 | 2.18 | CLDN18   | claudin 18                                 |

|         |          |          |      |           |      |         |                                                    |
|---------|----------|----------|------|-----------|------|---------|----------------------------------------------------|
| 7985317 | 1.95E-02 | 3.95E-03 | 3.49 | -2.435267 | 1.04 | CEMIP   | cell migration inducing hyaluronan binding protein |
| 7929466 | 1.97E-02 | 4.01E-03 | 3.48 | -2.450992 | 1.93 | CYP2C18 | cytochrome P450 family 2 subfamily C member 18     |
| 8100154 | 1.97E-02 | 4.01E-03 | 3.48 | -2.451812 | 1.26 | CORIN   | corin, serine peptidase                            |
| 8160879 | 1.98E-02 | 4.05E-03 | 3.48 | -2.460263 | 2.55 | CCL19   | C-C motif chemokine ligand 19                      |
| 8117286 | 1.98E-02 | 4.06E-03 | 3.48 | -2.462236 | 1.21 |         |                                                    |

|         |          |          |      |           |      |        |                                                                  |
|---------|----------|----------|------|-----------|------|--------|------------------------------------------------------------------|
| 8084206 | 2.01E-02 | 4.13E-03 | 3.47 | -2.479456 | 1    | B3GNT5 | UDP-GlcNAc:betaGal<br>beta-1,3-N-acetylglucosaminyltransferase 5 |
| 8092970 | 2.01E-02 | 4.13E-03 | 3.47 | -2.479925 | 1.1  | APOD   | apolipoprotein D                                                 |
| 7939052 | 2.02E-02 | 4.15E-03 | 3.46 | -2.485975 | 1.2  | FIBIN  | fin bud initiation factor homolog (zebrafish)                    |
| 8095886 | 2.03E-02 | 4.18E-03 | 3.46 | -2.493106 | 1.1  | CXCL13 | C-X-C motif chemokine ligand 13                                  |
| 8128553 | 2.03E-02 | 4.20E-03 | 3.46 | -2.496441 | 1.37 | BVES   | blood vessel epicardial substance                                |

|         |          |          |      |           |      |                                            |                                                                                                                                                     |
|---------|----------|----------|------|-----------|------|--------------------------------------------|-----------------------------------------------------------------------------------------------------------------------------------------------------|
| 7980485 | 2.06E-02 | 4.29E-03 | 3.45 | -2.518024 | 1.56 | DIO2                                       | deiodinase, iodothyronine, type II                                                                                                                  |
| 7983239 | 2.07E-02 | 4.31E-03 | 3.44 | -2.522642 | 1.18 | CKMT1A//CK<br>MT1B//CKM<br>T1A//CKMT1<br>B | creatine kinase, mitochondrial 1A//creatine<br>kinase, mitochondrial 1B//creatine kinase,<br>mitochondrial 1A//creatine kinase,<br>mitochondrial 1B |



|         |          |          |      |           |      |                                                                                                                                                                                       |
|---------|----------|----------|------|-----------|------|---------------------------------------------------------------------------------------------------------------------------------------------------------------------------------------|
| 7983256 | 2.07E-02 | 4.31E-03 | 3.44 | -2.522642 | 1.18 | CKMT1A//CK creatine kinase, mitochondrial 1A//creatine<br>MT1B//CKM kinase, mitochondrial 1B//creatine kinase,<br>T1A//CKMT1 mitochondrial 1A//creatine kinase,<br>B mitochondrial 1B |
| 8125461 | 2.08E-02 | 4.35E-03 | 3.44 | -2.530873 | 1.77 | HLA-DQB1 major histocompatibility complex, class II,<br>DQ beta 1                                                                                                                     |

|         |          |          |      |           |      |        |                                                                 |
|---------|----------|----------|------|-----------|------|--------|-----------------------------------------------------------------|
| 7923772 | 2.14E-02 | 4.52E-03 | 3.42 | -2.569354 | 1.71 | LEMD1  | LEM domain containing 1                                         |
| 8138392 | 2.14E-02 | 4.52E-03 | 3.42 | -2.569619 | 1.74 | AGR3   | anterior gradient 3, protein disulphide isomerase family member |
| 8099467 | 2.15E-02 | 4.55E-03 | 3.42 | -2.576804 | 1.47 | FGFBP1 | fibroblast growth factor binding protein 1                      |
| 8100977 | 2.18E-02 | 4.65E-03 | 3.41 | -2.597356 | 2.67 | CXCL5  | C-X-C motif chemokine ligand 5                                  |
| 8179617 | 2.21E-02 | 4.73E-03 | 3.4  | -2.614918 | 1.01 | TRIM31 | tripartite motif containing 31                                  |

|         |          |          |      |           |      |          |                                            |
|---------|----------|----------|------|-----------|------|----------|--------------------------------------------|
| 7920271 | 2.21E-02 | 4.74E-03 | 3.4  | -2.616593 | 2.11 | S100A4   | S100 calcium binding protein A4            |
| 8095467 | 2.22E-02 | 4.79E-03 | 3.39 | -2.627855 | 1.01 | FDCSP    | follicular dendritic cell secreted protein |
| 7983910 | 2.23E-02 | 4.80E-03 | 3.39 | -2.630629 | 1.91 | AQP9     | aquaporin 9                                |
| 8067125 | 2.23E-02 | 4.81E-03 | 3.39 | -2.632002 | 1.62 | BCAS1    | breast carcinoma amplified sequence 1      |
| 8053715 | 2.23E-02 | 4.81E-03 | 3.39 | -2.632171 | 1.55 |          |                                            |
| 8160889 | 2.24E-02 | 4.84E-03 | 3.38 | -2.638545 | 1.37 | CCL21    | C-C motif chemokine ligand 21              |
| 8021635 | 2.25E-02 | 4.89E-03 | 3.38 | -2.648255 | 1.9  | SERPINB2 | serpin family B member 2                   |

|         |          |          |      |           |      |       |                                                           |
|---------|----------|----------|------|-----------|------|-------|-----------------------------------------------------------|
| 8077366 | 2.28E-02 | 4.96E-03 | 3.37 | -2.662083 | 1.16 | LRRN1 | leucine rich repeat neuronal 1                            |
| 7978544 | 2.30E-02 | 5.05E-03 | 3.36 | -2.680101 | 1.11 | EGLN3 | egl-9 family hypoxia inducible factor 3                   |
| 8129637 | 2.31E-02 | 5.08E-03 | 3.36 | -2.685401 | 1.68 | VNN2  | vanin 2                                                   |
| 7909730 | 2.32E-02 | 5.11E-03 | 3.36 | -2.692102 | 1.13 | KCNK2 | potassium two pore domain channel<br>subfamily K member 2 |
| 8028652 | 2.32E-02 | 5.12E-03 | 3.36 | -2.692762 | 1.03 | ZFP36 | ZFP36 ring finger protein                                 |
| 8077323 | 2.34E-02 | 5.17E-03 | 3.35 | -2.703274 | 1.09 | CNTN4 | contactin 4                                               |

|         |          |          |      |           |      |        |                                       |
|---------|----------|----------|------|-----------|------|--------|---------------------------------------|
| 7997712 | 2.36E-02 | 5.23E-03 | 3.34 | -2.715323 | 1.15 | IRF8   | interferon regulatory factor 8        |
| 8098246 | 2.37E-02 | 5.25E-03 | 3.34 | -2.719392 | 2.72 | ANXA10 | annexin A10                           |
| 8104746 | 2.37E-02 | 5.28E-03 | 3.34 | -2.723549 | 1.9  | NPR3   | natriuretic peptide receptor 3        |
| 7951309 | 2.38E-02 | 5.29E-03 | 3.34 | -2.726651 | 1.59 | MMP13  | matrix metalloproteinase 13           |
| 7963946 | 2.39E-02 | 5.34E-03 | 3.33 | -2.734485 | 1.16 | MMP19  | matrix metalloproteinase 19           |
| 8070574 | 2.39E-02 | 5.34E-03 | 3.33 | -2.735742 | 1.14 | TFF2   | trefoil factor 2                      |
| 8157650 | 2.42E-02 | 5.40E-03 | 3.33 | -2.746452 | 1.01 | PTGS1  | prostaglandin-endoperoxide synthase 1 |
| 8091511 | 2.46E-02 | 5.53E-03 | 3.32 | -2.769224 | 1.53 | P2RY14 | purinergic receptor P2Y14             |

|         |          |          |      |           |      |          |                                            |
|---------|----------|----------|------|-----------|------|----------|--------------------------------------------|
| 8118061 | 2.50E-02 | 5.66E-03 | 3.3  | -2.793765 | 3.3  | DPCR1    | diffuse panbronchiolitis critical region 1 |
| 8091411 | 2.50E-02 | 5.67E-03 | 3.3  | -2.795623 | 1.11 | TM4SF1   | transmembrane 4 L six family member 1      |
| 7988350 | 2.50E-02 | 5.68E-03 | 3.3  | -2.795686 | 1.68 | DUOX2    | dual oxidase 2                             |
| 7993267 | 2.53E-02 | 5.77E-03 | 3.29 | -2.811688 | 1.51 | TNFRSF17 | TNF receptor superfamily member 17         |
| 8138337 | 2.54E-02 | 5.77E-03 | 3.29 | -2.812744 | 1.2  | AGMO     | alkylglycerol monooxygenase                |
| 8099850 | 2.59E-02 | 5.93E-03 | 3.28 | -2.839092 | 1.39 | TMEM156  | transmembrane protein 156                  |

|         |          |          |      |           |      |          |                                                           |
|---------|----------|----------|------|-----------|------|----------|-----------------------------------------------------------|
| 8095110 | 2.62E-02 | 6.02E-03 | 3.27 | -2.853408 | 1.13 | KIT      | KIT proto-oncogene receptor tyrosine kinase               |
| 8121916 | 2.74E-02 | 6.41E-03 | 3.24 | -2.915973 | 1.3  | RSPO3    | R-spondin 3                                               |
| 8043743 | 2.75E-02 | 6.46E-03 | 3.23 | -2.924038 | 1.03 |          |                                                           |
| 7956271 | 2.81E-02 | 6.65E-03 | 3.22 | -2.952071 | 1.64 | HSD17B6  | hydroxysteroid 17-beta dehydrogenase 6                    |
| 8073088 | 2.84E-02 | 6.76E-03 | 3.21 | -2.969036 | 1.11 | APOBEC3G | apolipoprotein B mRNA editing enzyme catalytic subunit 3G |
| 8020762 | 2.85E-02 | 6.80E-03 | 3.21 | -2.974257 | 1.33 | DSG3     | desmoglein 3                                              |

|         |          |          |      |           |      |         |                                           |
|---------|----------|----------|------|-----------|------|---------|-------------------------------------------|
| 8049540 | 2.86E-02 | 6.82E-03 | 3.21 | -2.977426 | 1.27 | LRRFIP1 | LRR binding FLII interacting protein 1    |
| 7962312 | 2.86E-02 | 6.83E-03 | 3.21 | -2.979009 | 1.16 | ABCD2   | ATP binding cassette subfamily D member 2 |
| 7940287 | 2.93E-02 | 7.10E-03 | 3.19 | -3.017249 | 1.78 | MS4A1   | membrane spanning 4-domains A1            |
| 8071036 | 3.00E-02 | 7.33E-03 | 3.17 | -3.048171 | 1.19 | S100B   | S100 calcium binding protein B            |
| 8042503 | 3.04E-02 | 7.48E-03 | 3.16 | -3.068134 | 1.24 | MXD1    | MAX dimerization protein 1                |



|         |          |          |      |           |      |        |                                                    |
|---------|----------|----------|------|-----------|------|--------|----------------------------------------------------|
| 7906348 | 3.04E-02 | 7.48E-03 | 3.16 | -3.068161 | 1.46 | CD1C   | CD1c molecule                                      |
| 8162117 | 3.05E-02 | 7.52E-03 | 3.16 | -3.073254 | 1.06 | GOLM1  | golgi membrane protein 1                           |
| 8169263 | 3.08E-02 | 7.62E-03 | 3.15 | -3.086864 | 3.25 | VSIG1  | V-set and immunoglobulin domain containing 1       |
| 8105596 | 3.09E-02 | 7.64E-03 | 3.15 | -3.089809 | 1.17 | RGS7BP | regulator of G-protein signaling 7 binding protein |
| 7906919 | 3.13E-02 | 7.79E-03 | 3.14 | -3.107993 | 1.14 | RGS4   | regulator of G-protein signaling 4                 |
| 8079237 | 3.17E-02 | 7.96E-03 | 3.13 | -3.129857 | 1.26 | KIF15  | kinesin family member 15                           |

|         |          |          |      |           |      |                            |                                                                                                                      |
|---------|----------|----------|------|-----------|------|----------------------------|----------------------------------------------------------------------------------------------------------------------|
| 8179221 | 3.17E-02 | 7.97E-03 | 3.13 | -3.130433 | 3.09 | DPCR1                      | diffuse panbronchiolitis critical region 1                                                                           |
| 8155487 | 3.25E-02 | 8.21E-03 | 3.11 | -3.160679 | 1.16 | FGF7P3///FGF<br>7P6///FGF7 | fibroblast growth factor 7 pseudogene<br>3///fibroblast growth factor 7 pseudogene<br>6///fibroblast growth factor 7 |

|         |          |          |      |           |      |                            |                                                                                                                      |
|---------|----------|----------|------|-----------|------|----------------------------|----------------------------------------------------------------------------------------------------------------------|
| 8161423 | 3.25E-02 | 8.21E-03 | 3.11 | -3.160679 | 1.16 | FGF7P3///FGF<br>7P6///FGF7 | fibroblast growth factor 7 pseudogene<br>3///fibroblast growth factor 7 pseudogene<br>6///fibroblast growth factor 7 |
|---------|----------|----------|------|-----------|------|----------------------------|----------------------------------------------------------------------------------------------------------------------|

|         |          |          |      |           |      |                            |                                                                                                                      |
|---------|----------|----------|------|-----------|------|----------------------------|----------------------------------------------------------------------------------------------------------------------|
| 8161455 | 3.25E-02 | 8.21E-03 | 3.11 | -3.160679 | 1.16 | FGF7P3///FGF<br>7P6///FGF7 | fibroblast growth factor 7 pseudogene<br>3///fibroblast growth factor 7 pseudogene<br>6///fibroblast growth factor 7 |
| 8083229 | 3.26E-02 | 8.26E-03 | 3.11 | -3.165894 | 1.03 |                            |                                                                                                                      |
| 8026490 | 3.27E-02 | 8.30E-03 | 3.1  | -3.17089  | 1.84 | UCA1                       | urothelial cancer associated 1 (non-protein coding)                                                                  |
| 8099826 | 3.29E-02 | 8.35E-03 | 3.1  | -3.176957 | 1.04 | TLR10                      | toll like receptor 10                                                                                                |

|         |          |          |      |           |      |         |                                          |
|---------|----------|----------|------|-----------|------|---------|------------------------------------------|
| 8163002 | 3.31E-02 | 8.44E-03 | 3.1  | -3.187646 | 1.25 | KLF4    | Kruppel like factor 4                    |
| 7948444 | 3.31E-02 | 8.46E-03 | 3.1  | -3.18913  | 2.72 | TCN1    | transcobalamin 1                         |
| 8150373 | 3.32E-02 | 8.48E-03 | 3.09 | -3.191431 | 1.27 |         |                                          |
| 7909350 | 3.34E-02 | 8.54E-03 | 3.09 | -3.198729 | 1.3  | CR2     | complement component 3d receptor 2       |
| 8077441 | 3.41E-02 | 8.81E-03 | 3.07 | -3.229719 | 1.12 | BHLHE40 | basic helix-loop-helix family member e40 |
| 7896706 | 3.43E-02 | 8.88E-03 | 3.07 | -3.237397 | 1.42 |         |                                          |
| 8151795 | 3.45E-02 | 8.95E-03 | 3.07 | -3.245248 | 1.7  | CDH17   | cadherin 17                              |
| 8102587 | 3.49E-02 | 9.10E-03 | 3.06 | -3.261807 | 1.16 | NDNF    | neuron derived neurotrophic factor       |

|         |          |          |      |           |      |         |                                                             |
|---------|----------|----------|------|-----------|------|---------|-------------------------------------------------------------|
| 8006459 | 3.62E-02 | 9.59E-03 | 3.03 | -3.312996 | 1.86 | CCL13   | C-C motif chemokine ligand 13                               |
| 7929487 | 3.64E-02 | 9.68E-03 | 3.03 | -3.321464 | 1.36 | CYP2C9  | cytochrome P450 family 2 subfamily C member 9               |
| 7896712 | 3.65E-02 | 9.70E-03 | 3.02 | -3.324355 | 1.37 |         |                                                             |
| 7957140 | 3.72E-02 | 9.94E-03 | 3.01 | -3.347617 | 1.95 | LGR5    | leucine rich repeat containing G protein-coupled receptor 5 |
| 8053718 | 3.78E-02 | 1.02E-02 | 3    | -3.37421  | 1.36 |         |                                                             |
| 8043456 | 3.80E-02 | 1.03E-02 | 2.99 | -3.381492 | 1.18 |         |                                                             |
| 8089568 | 4.13E-02 | 1.15E-02 | 2.93 | -3.494459 | 1.13 | CD200R1 | CD200 receptor 1                                            |

|         |          |          |      |           |      |          |                                               |
|---------|----------|----------|------|-----------|------|----------|-----------------------------------------------|
| 7964907 | 4.15E-02 | 1.16E-02 | 2.93 | -3.500579 | 1.76 | PTPRR    | protein tyrosine phosphatase, receptor type R |
| 7934898 | 4.22E-02 | 1.19E-02 | 2.92 | -3.521014 | 1.86 | ANKRD22  | ankyrin repeat domain 22                      |
| 8104758 | 4.24E-02 | 1.20E-02 | 2.91 | -3.531635 | 1.57 | NPR3     | natriuretic peptide receptor 3                |
| 8030860 | 4.31E-02 | 1.23E-02 | 2.9  | -3.554246 | 1.11 | FPR2     | formyl peptide receptor 2                     |
| 8135069 | 4.31E-02 | 1.23E-02 | 2.9  | -3.554382 | 1.22 | SERPINE1 | serpin family E member 1                      |
| 8046124 | 4.47E-02 | 1.29E-02 | 2.88 | -3.603821 | 1.54 | DHRS9    | dehydrogenase/reductase 9                     |

|         |          |          |      |           |      |         |                                                           |
|---------|----------|----------|------|-----------|------|---------|-----------------------------------------------------------|
| 7908397 | 4.48E-02 | 1.29E-02 | 2.87 | -3.606141 | 1.13 | RGS13   | regulator of G-protein signaling 13                       |
| 8043446 | 4.58E-02 | 1.34E-02 | 2.86 | -3.637127 | 2.17 |         |                                                           |
| 8088560 | 4.61E-02 | 1.35E-02 | 2.85 | -3.64422  | 1.02 | ADAMTS9 | ADAM metalloproteinase with thrombospondin type 1 motif 9 |
| 8070579 | 4.63E-02 | 1.36E-02 | 2.85 | -3.651736 | 2.36 | TFF1    | trefoil factor 1                                          |
| 7961069 | 4.71E-02 | 1.39E-02 | 2.84 | -3.673267 | 1.13 | CLECL1  | C-type lectin like 1                                      |
| 7951271 | 4.78E-02 | 1.42E-02 | 2.83 | -3.692985 | 2.33 | MMP1    | matrix metalloproteinase 1                                |
| 7931108 | 4.81E-02 | 1.43E-02 | 2.82 | -3.701886 | 1.56 | DMBT1   | deleted in malignant brain tumors 1                       |



|         |          |          |      |           |      |           |                                                   |
|---------|----------|----------|------|-----------|------|-----------|---------------------------------------------------|
| 8114572 | 4.86E-02 | 1.45E-02 | 2.82 | -3.714967 | 1.26 | HBEGF     | heparin binding EGF like growth factor            |
| 7902808 | 5.04E-02 | 1.53E-02 | 2.79 | -3.766121 | 1.43 | LINC01140 | long intergenic non-protein coding RNA<br>1140    |
| 8136336 | 5.17E-02 | 1.59E-02 | 2.77 | -3.803345 | 1.29 | AKR1B10   | aldo-keto reductase family 1 member B10           |
| 7954899 | 5.20E-02 | 1.60E-02 | 2.77 | -3.809985 | 1.25 | CNTN1     | contactin 1                                       |
| 7929478 | 5.33E-02 | 1.66E-02 | 2.75 | -3.845281 | 1.59 | CYP2C19   | cytochrome P450 family 2 subfamily C<br>member 19 |

|         |          |          |      |           |      |             |                                                             |
|---------|----------|----------|------|-----------|------|-------------|-------------------------------------------------------------|
| 8070584 | 5.41E-02 | 1.69E-02 | 2.73 | -3.865767 | 1.11 | TMPRSS3     | transmembrane protease, serine 3                            |
| 7965398 | 5.52E-02 | 1.73E-02 | 2.72 | -3.889631 | 1.15 | KERA        | keratocan                                                   |
| 8054722 | 5.73E-02 | 1.84E-02 | 2.69 | -3.945971 | 1.2  | IL1B        | interleukin 1 beta                                          |
| 8041508 | 5.79E-02 | 1.86E-02 | 2.68 | -3.959308 | 1.25 | QPCT        | glutaminy-peptide cyclotransferase                          |
| 8040430 | 5.82E-02 | 1.88E-02 | 2.68 | -3.96606  | 1.4  | VSNL1       | visinin like 1                                              |
| 8006433 | 5.94E-02 | 1.94E-02 | 2.66 | -3.996682 | 1.28 | CCL2///CCL2 | C-C motif chemokine ligand 2///C-C motif chemokine ligand 2 |
| 8101957 | 6.06E-02 | 1.99E-02 | 2.65 | -4.023767 | 1.07 | EMCN        | endomucin                                                   |
| 8154295 | 6.08E-02 | 2.00E-02 | 2.65 | -4.027845 | 1.23 | IL33        | interleukin 33                                              |
| 7969288 | 6.10E-02 | 2.01E-02 | 2.64 | -4.032131 | 1.78 | OLFM4       | olfactomedin 4                                              |

|         |          |          |      |           |      |        |                                     |
|---------|----------|----------|------|-----------|------|--------|-------------------------------------|
| 8044021 | 6.11E-02 | 2.02E-02 | 2.64 | -4.036748 | 1.44 | IL1RL1 | interleukin 1 receptor like 1       |
| 7918794 | 6.16E-02 | 2.04E-02 | 2.64 | -4.047933 | 1.29 | AMPD1  | adenosine monophosphate deaminase 1 |
| 8140686 | 6.42E-02 | 2.17E-02 | 2.61 | -4.103799 | 1.21 | SEMA3D | semaphorin 3D                       |
| 7963406 | 6.46E-02 | 2.18E-02 | 2.6  | -4.111158 | 1.04 | KRT6B  | keratin 6B                          |
| 7907286 | 6.78E-02 | 2.34E-02 | 2.56 | -4.178007 | 1.04 | FMO1   | flavin containing monooxygenase 1   |

|         |          |          |      |           |      |                     |                                                                                                           |
|---------|----------|----------|------|-----------|------|---------------------|-----------------------------------------------------------------------------------------------------------|
| 7985555 | 6.91E-02 | 2.41E-02 | 2.55 | -4.206489 | 1.09 | EFTUD1P1///E<br>FL1 | elongation factor Tu GTP binding domain<br>containing 1 pseudogene 1///elongation<br>factor like GTPase 1 |
| 7967322 | 6.95E-02 | 2.43E-02 | 2.54 | -4.214471 | 1.11 | HCAR3               | hydroxycarboxylic acid receptor 3                                                                         |
| 8163181 | 7.00E-02 | 2.46E-02 | 2.54 | -4.224024 | 1.1  | C9orf152            | chromosome 9 open reading frame 152                                                                       |

|         |          |          |      |           |      |                  |                                                |
|---------|----------|----------|------|-----------|------|------------------|------------------------------------------------|
| 7961413 | 7.15E-02 | 2.54E-02 | 2.52 | -4.254062 | 1.01 | LINC01559        | long intergenic non-protein coding RNA<br>1559 |
| 7921099 | 7.17E-02 | 2.55E-02 | 2.52 | -4.258317 | 1.02 | CRABP2           | cellular retinoic acid binding protein 2       |
| 8044574 | 7.17E-02 | 2.55E-02 | 2.52 | -4.258458 | 1    | IL1RN            | interleukin 1 receptor antagonist              |
| 8096415 | 7.46E-02 | 2.69E-02 | 2.49 | -4.311839 | 1.02 | MMRN1            | multimerin 1                                   |
| 8157446 | 7.53E-02 | 2.74E-02 | 2.48 | -4.326455 | 1.35 | ORM1             | orosomuroid 1                                  |
| 8043993 | 7.53E-02 | 2.74E-02 | 2.48 | -4.326594 | 1    | LOC10013113<br>1 | AHPA9419                                       |
| 7965390 | 7.98E-02 | 2.98E-02 | 2.44 | -4.407264 | 2.12 | EPYC             | epiphycan                                      |
| 8124160 | 8.79E-02 | 3.43E-02 | 2.36 | -4.539618 | 1.32 |                  |                                                |
| 8144917 | 8.98E-02 | 3.53E-02 | 2.35 | -4.566607 | 1.19 | LPL              | lipoprotein lipase                             |

|         |          |          |      |           |      |        |                                                                 |
|---------|----------|----------|------|-----------|------|--------|-----------------------------------------------------------------|
| 7923440 | 9.05E-02 | 3.57E-02 | 2.34 | -4.577344 | 1.24 |        |                                                                 |
| 8138381 | 9.08E-02 | 3.59E-02 | 2.34 | -4.582914 | 1.71 | AGR2   | anterior gradient 2, protein disulphide isomerase family member |
| 7960900 | 9.46E-02 | 3.81E-02 | 2.31 | -4.638274 | 1.16 | CLEC4E | C-type lectin domain family 4 member E                          |
| 8074980 | 9.76E-02 | 3.97E-02 | 2.28 | -4.678681 | 1.25 | GSTT1  | glutathione S-transferase theta 1                               |
| 8037387 | 9.90E-02 | 4.06E-02 | 2.27 | -4.699993 | 1.05 |        |                                                                 |
| 7946579 | 1.01E-01 | 4.16E-02 | 2.26 | -4.722221 | 1.02 | LYVE1  | lymphatic vessel endothelial hyaluronan receptor 1              |

|         |          |          |           |           |       |         |                                    |
|---------|----------|----------|-----------|-----------|-------|---------|------------------------------------|
| 8079392 | 1.05E-01 | 4.44E-02 | 2.22      | -4.782644 | 1.04  | CCR2    | C-C motif chemokine receptor 2     |
| 7938687 | 5.17E-08 | 5.36E-12 | -2.31E+01 | 17.323072 | -1.93 | NUCB2   | nucleobindin 2                     |
| 8020197 | 3.61E-07 | 9.98E-11 | -1.83E+01 | 14.840861 | -1.77 | ANKRD62 | ankyrin repeat domain 62           |
| 8166455 | 1.29E-06 | 9.38E-10 | -1.53E+01 | 12.801212 | -2.09 | PRDX4   | peroxiredoxin 4                    |
| 8116402 | 1.40E-06 | 1.21E-09 | -1.50E+01 | 12.560241 | -1.35 | MAPK9   | mitogen-activated protein kinase 9 |
| 7951910 | 1.49E-06 | 1.65E-09 | -1.47E+01 | 12.271307 | -2.73 | BACE1   | beta-secretase 1                   |
| 7949320 | 1.57E-06 | 2.00E-09 | -1.44E+01 | 12.088469 | -2.79 | GPHA2   | glycoprotein hormone alpha 2       |

|         |          |          |           |           |       |         |                                           |
|---------|----------|----------|-----------|-----------|-------|---------|-------------------------------------------|
| 8079615 | 1.71E-06 | 2.31E-09 | -1.43E+01 | 11.954263 | -2.13 | FBXW12  | F-box and WD repeat domain containing 12  |
| 8150276 | 1.84E-06 | 3.11E-09 | -1.39E+01 | 11.671244 | -1.62 | PLPP5   | phospholipid phosphatase 5                |
| 7965979 | 2.80E-06 | 5.99E-09 | -1.32E+01 | 11.04436  | -1.9  | ALDH1L2 | aldehyde dehydrogenase 1 family member L2 |
| 7917276 | 2.80E-06 | 6.09E-09 | -1.32E+01 | 11.028053 | -2.47 | LPAR3   | lysophosphatidic acid receptor 3          |
| 8092277 | 3.65E-06 | 9.74E-09 | -1.27E+01 | 10.574622 | -2.49 | PEX5L   | peroxisomal biogenesis factor 5 like      |



|         |          |          |           |           |       |         |                                                   |
|---------|----------|----------|-----------|-----------|-------|---------|---------------------------------------------------|
| 7922846 | 3.83E-06 | 1.11E-08 | -1.26E+01 | 10.450329 | -1.98 | FAM129A | family with sequence similarity 129 member A      |
| 8021453 | 4.42E-06 | 1.38E-08 | -1.23E+01 | 10.238955 | -1.7  | SEC11C  | SEC11 homolog C, signal peptidase complex subunit |
| 8173924 | 4.88E-06 | 1.60E-08 | -1.22E+01 | 10.090968 | -3.08 |         |                                                   |
| 8144656 | 5.19E-06 | 1.90E-08 | -1.20E+01 | 9.926234  | -2.66 | C8orf49 | chromosome 8 open reading frame 49                |
| 7962895 | 5.53E-06 | 2.11E-08 | -1.19E+01 | 9.820782  | -1.08 | FKBP11  | FK506 binding protein 11                          |
| 8091637 | 5.84E-06 | 2.46E-08 | -1.18E+01 | 9.671162  | -1.44 | SLC33A1 | solute carrier family 33 member 1                 |

|         |          |          |           |          |       |                     |                                      |
|---------|----------|----------|-----------|----------|-------|---------------------|--------------------------------------|
| 8060126 | 6.56E-06 | 2.86E-08 | -1.16E+01 | 9.524873 | -1.22 | AQP12B///AQ<br>P12A | aquaporin 12B///aquaporin 12A        |
| 7948973 | 6.62E-06 | 2.91E-08 | -1.16E+01 | 9.505823 | -2.06 | HRASLS5             | HRAS like suppressor family member 5 |
| 8122242 | 6.99E-06 | 3.35E-08 | -1.15E+01 | 9.367579 | -1.49 | PEX7                | peroxisomal biogenesis factor 7      |
| 8088535 | 7.10E-06 | 3.59E-08 | -1.14E+01 | 9.302115 | -1.37 | PSMD6               | proteasome 26S subunit, non-ATPase 6 |
| 8156043 | 7.26E-06 | 3.74E-08 | -1.14E+01 | 9.260232 | -3.69 | PSAT1               | phosphoserine aminotransferase 1     |
| 8144239 | 7.96E-06 | 4.44E-08 | -1.12E+01 | 9.091596 | -1.09 | FBXO25              | F-box protein 25                     |
| 7954398 | 8.18E-06 | 4.64E-08 | -1.12E+01 | 9.048742 | -3.5  | SPX                 | spexin hormone                       |

|         |          |          |           |          |       |                     |                                      |
|---------|----------|----------|-----------|----------|-------|---------------------|--------------------------------------|
| 8123695 | 8.44E-06 | 4.99E-08 | -1.11E+01 | 8.975686 | -2.19 | ECI2                | enoyl-CoA delta isomerase 2          |
| 8013581 | 9.36E-06 | 5.84E-08 | -1.09E+01 | 8.820977 | -1.98 | IFT20               | intraflagellar transport 20          |
| 7904433 | 1.15E-05 | 7.95E-08 | -1.07E+01 | 8.515555 | -1.45 | PHGDH               | phosphoglycerate dehydrogenase       |
| 7992934 | 1.15E-05 | 8.12E-08 | -1.06E+01 | 8.493718 | -1.83 | DNASE1              | deoxyribonuclease 1                  |
| 7980547 | 1.16E-05 | 8.48E-08 | -1.06E+01 | 8.450497 | -2.18 | SEL1L               | SEL1L ERAD E3 ligase adaptor subunit |
| 8049729 | 1.19E-05 | 8.70E-08 | -1.06E+01 | 8.425886 | -1.25 | AQP12B///AQ<br>P12A | aquaporin 12B///aquaporin 12A        |

|         |          |          |           |          |       |        |                                            |
|---------|----------|----------|-----------|----------|-------|--------|--------------------------------------------|
| 8164535 | 1.19E-05 | 8.76E-08 | -1.06E+01 | 8.418597 | -1.2  | CRAT   | carnitine O-acetyltransferase              |
| 8163839 | 1.34E-05 | 1.04E-07 | -1.04E+01 | 8.246839 | -3.3  | C5     | complement component 5                     |
| 7977615 | 1.41E-05 | 1.12E-07 | -1.04E+01 | 8.170789 | -1.87 | RNASE1 | ribonuclease A family member 1, pancreatic |
| 7904340 | 1.63E-05 | 1.35E-07 | -1.02E+01 | 7.988699 | -1.02 | MAN1A2 | mannosidase alpha class 1A member 2        |

|         |          |          |           |          |       |         |                                                                         |
|---------|----------|----------|-----------|----------|-------|---------|-------------------------------------------------------------------------|
| 8111998 | 1.68E-05 | 1.40E-07 | -1.02E+01 | 7.950819 | -1.4  | HCN1    | hyperpolarization activated cyclic nucleotide gated potassium channel 1 |
| 8044700 | 1.78E-05 | 1.56E-07 | -1.01E+01 | 7.841059 | -3.53 | DPP10   | dipeptidyl peptidase like 10                                            |
| 7948249 | 1.78E-05 | 1.57E-07 | -1.01E+01 | 7.837828 | -2.49 | SLC43A1 | solute carrier family 43 member 1                                       |
| 8108905 | 1.78E-05 | 1.57E-07 | -1.01E+01 | 7.835693 | -1.61 | KCTD16  | potassium channel tetramerization domain containing 16                  |
| 7956229 | 1.78E-05 | 1.58E-07 | -1.01E+01 | 7.832527 | -1.65 | SLC39A5 | solute carrier family 39 member 5                                       |

|         |          |          |           |          |       |         |                                                                             |
|---------|----------|----------|-----------|----------|-------|---------|-----------------------------------------------------------------------------|
| 8065136 | 1.81E-05 | 1.63E-07 | -1.00E+01 | 7.802263 | -1.38 | RRBP1   | ribosome binding protein 1                                                  |
| 8020209 | 1.89E-05 | 1.77E-07 | -9.95     | 7.715385 | -2.52 |         |                                                                             |
| 8036033 | 2.02E-05 | 1.93E-07 | -9.88     | 7.628783 | -1.35 | SCGB2B2 | secretoglobin family 2B member 2                                            |
| 8154100 | 2.13E-05 | 2.04E-07 | -9.83     | 7.573761 | -1.74 | VLDLR   | very low density lipoprotein receptor                                       |
| 7926672 | 2.21E-05 | 2.13E-07 | -9.8      | 7.531169 | -2.58 |         |                                                                             |
| 8062948 | 2.32E-05 | 2.30E-07 | -9.73     | 7.454645 | -2.07 | RBPJL   | recombination signal binding protein for immunoglobulin kappa J region like |

|         |          |          |       |          |       |        |                                                  |
|---------|----------|----------|-------|----------|-------|--------|--------------------------------------------------|
| 7926638 | 2.32E-05 | 2.33E-07 | -9.73 | 7.443797 | -2.65 | ARMC3  | armadillo repeat containing 3                    |
| 8023855 | 2.43E-05 | 2.46E-07 | -9.68 | 7.387769 | -1.85 | CYB5A  | cytochrome b5 type A                             |
| 7991815 | 2.48E-05 | 2.58E-07 | -9.64 | 7.339747 | -2.86 | PDIA2  | protein disulfide isomerase family A member<br>2 |
| 7961829 | 2.51E-05 | 2.66E-07 | -9.62 | 7.311251 | -2.03 | BCAT1  | branched chain amino acid transaminase 1         |
| 8088908 | 2.57E-05 | 2.78E-07 | -9.58 | 7.266779 | -1.44 |        |                                                  |
| 7910030 | 2.59E-05 | 2.82E-07 | -9.56 | 7.250353 | -1.48 | DNAH14 | dynein axonemal heavy chain 14                   |
| 7994252 | 2.67E-05 | 2.93E-07 | -9.53 | 7.21326  | -2.75 | AQP8   | aquaporin 8                                      |

|         |          |          |       |          |       |                                                                                                                                                                                                                                                               |
|---------|----------|----------|-------|----------|-------|---------------------------------------------------------------------------------------------------------------------------------------------------------------------------------------------------------------------------------------------------------------|
| 7944799 | 2.79E-05 | 3.09E-07 | -9.49 | 7.160709 | -1.78 | olfactory receptor family 10 subfamily G<br>OR10G7///OR1 member 7///olfactory receptor family 10<br>0G4///OR10G9 subfamily G member 4///olfactory receptor<br>///OR10G8 family 10 subfamily G member 9///olfactory<br>receptor family 10 subfamily G member 8 |
|---------|----------|----------|-------|----------|-------|---------------------------------------------------------------------------------------------------------------------------------------------------------------------------------------------------------------------------------------------------------------|



|         |          |          |       |          |       |           |                                            |
|---------|----------|----------|-------|----------|-------|-----------|--------------------------------------------|
| 8102567 | 2.79E-05 | 3.09E-07 | -9.49 | 7.159488 | -1.14 | PRDM5     | PR/SET domain 5                            |
| 7898736 | 2.82E-05 | 3.18E-07 | -9.47 | 7.132108 | -2.71 | LINC00339 | long intergenic non-protein coding RNA 339 |
| 8078933 | 2.85E-05 | 3.26E-07 | -9.45 | 7.107355 | -1.11 | MYRIP     | myosin VIIA and Rab interacting protein    |
| 8075106 | 2.90E-05 | 3.37E-07 | -9.42 | 7.072809 | -2.24 | TPST2     | tyrosylprotein sulfotransferase 2          |
| 8141371 | 2.96E-05 | 3.57E-07 | -9.37 | 7.015406 | -1.36 | GJC3      | gap junction protein gamma 3               |
| 8072931 | 2.96E-05 | 3.60E-07 | -9.36 | 7.005117 | -1.19 | GCAT      | glycine C-acetyltransferase                |

|         |          |          |       |          |       |           |                                              |
|---------|----------|----------|-------|----------|-------|-----------|----------------------------------------------|
| 8118622 | 3.19E-05 | 4.00E-07 | -9.28 | 6.899897 | -1.35 | HSD17B8   | hydroxysteroid 17-beta dehydrogenase 8       |
| 8178234 | 3.19E-05 | 4.00E-07 | -9.28 | 6.899897 | -1.35 | HSD17B8   | hydroxysteroid 17-beta dehydrogenase 8       |
| 8179534 | 3.19E-05 | 4.00E-07 | -9.28 | 6.899897 | -1.35 | HSD17B8   | hydroxysteroid 17-beta dehydrogenase 8       |
| 8097388 | 3.58E-05 | 4.73E-07 | -9.15 | 6.73267  | -1.51 | LARP1B    | La ribonucleoprotein domain family member 1B |
| 8159850 | 3.58E-05 | 4.76E-07 | -9.14 | 6.725945 | -1.7  | VLDLR-AS1 | VLDLR antisense RNA 1                        |

|         |          |          |       |          |       |       |                                                     |
|---------|----------|----------|-------|----------|-------|-------|-----------------------------------------------------|
| 8170775 | 3.80E-05 | 5.19E-07 | -9.07 | 6.637561 | -1.42 | SSR4  | signal sequence receptor subunit 4                  |
| 8078397 | 3.88E-05 | 5.34E-07 | -9.05 | 6.609519 | -1.54 | CMTM8 | CKLF like MARVEL transmembrane domain containing 8  |
| 8053278 | 3.88E-05 | 5.36E-07 | -9.05 | 6.606105 | -1.32 | EVA1A | eva-1 homolog A, regulator of programmed cell death |
| 8171161 | 3.88E-05 | 5.37E-07 | -9.04 | 6.604225 | -2.89 | ARSE  | arylsulfatase E (chondrodysplasia punctata 1)       |

|         |          |          |       |          |       |                                                                                             |                                                 |
|---------|----------|----------|-------|----------|-------|---------------------------------------------------------------------------------------------|-------------------------------------------------|
| 8093451 | 3.99E-05 | 5.55E-07 | -9.02 | 6.569936 | -1.93 |                                                                                             |                                                 |
| 8145532 | 3.99E-05 | 5.57E-07 | -9.02 | 6.567719 | -2.12 | EPHX2                                                                                       | epoxide hydrolase 2                             |
| 7930181 | 4.16E-05 | 5.99E-07 | -8.96 | 6.493326 | -1.45 | BORCS7-ASMBORCS7-ASMT readthrough (NMD<br>T///AS3MT candidate)///arsenite methyltransferase |                                                 |
| 8074201 | 4.23E-05 | 6.12E-07 | -8.94 | 6.472079 | -2.89 | ANKRD62                                                                                     | ankyrin repeat domain 62                        |
| 8111490 | 4.32E-05 | 6.33E-07 | -8.91 | 6.438746 | -2.6  | PRLR                                                                                        | prolactin receptor                              |
| 7928695 | 4.32E-05 | 6.33E-07 | -8.91 | 6.437936 | -1.07 | FAM213A                                                                                     | family with sequence similarity 213 member<br>A |

|         |          |          |       |          |       |                        |                                                     |
|---------|----------|----------|-------|----------|-------|------------------------|-----------------------------------------------------|
| 8046726 | 4.43E-05 | 6.62E-07 | -8.88 | 6.393297 | -1.39 | SSFA2                  | sperm specific antigen 2                            |
| 8049957 | 4.55E-05 | 6.81E-07 | -8.86 | 6.3652   | -1.93 | LOC285097              | uncharacterized FLJ38379                            |
| 7952390 | 4.84E-05 | 7.45E-07 | -8.79 | 6.273565 | -2.16 |                        |                                                     |
| 7923824 | 4.89E-05 | 7.59E-07 | -8.77 | 6.25532  | -1.74 | SLC41A1                | solute carrier family 41 member 1                   |
| 8094759 | 4.93E-05 | 7.73E-07 | -8.76 | 6.236288 | -1.26 | NSUN7                  | NOP2/Sun RNA methyltransferase family member 7      |
| 7940914 | 4.94E-05 | 7.79E-07 | -8.75 | 6.229329 | -1.17 | FKBP2                  | FK506 binding protein 2                             |
| 8049961 | 5.07E-05 | 8.09E-07 | -8.72 | 6.191239 | -1.36 | LOC728323///<br>FBXO25 | uncharacterized LOC728323///<br>F-box protein<br>25 |

|         |          |          |       |          |       |          |                                              |
|---------|----------|----------|-------|----------|-------|----------|----------------------------------------------|
| 8104014 | 5.23E-05 | 8.50E-07 | -8.69 | 6.140939 | -2.77 | CCDC110  | coiled-coil domain containing 110            |
| 8116696 | 5.34E-05 | 8.77E-07 | -8.66 | 6.109653 | -1.15 | C6orf201 | chromosome 6 open reading frame 201          |
| 8000574 | 5.39E-05 | 8.87E-07 | -8.65 | 6.097799 | -1.84 | NUPR1    | nuclear protein 1, transcriptional regulator |
| 7997525 | 5.40E-05 | 8.91E-07 | -8.65 | 6.092782 | -1.02 | MLYCD    | malonyl-CoA decarboxylase                    |
| 8075956 | 5.40E-05 | 8.93E-07 | -8.65 | 6.091074 | -3.31 | LGALS2   | galectin 2                                   |
| 7968734 | 5.41E-05 | 8.96E-07 | -8.65 | 6.08735  | -2.11 | SLC25A15 | solute carrier family 25 member 15           |

|         |          |          |       |          |       |       |                                                  |
|---------|----------|----------|-------|----------|-------|-------|--------------------------------------------------|
| 7915846 | 5.46E-05 | 9.09E-07 | -8.63 | 6.072357 | -1.57 | MKNK1 | MAP kinase interacting serine/threonine kinase 1 |
| 8162823 | 5.54E-05 | 9.33E-07 | -8.61 | 6.046504 | -1.22 |       |                                                  |
| 7938090 | 5.99E-05 | 1.05E-06 | -8.52 | 5.926649 | -1.02 | CCKBR | cholecystokinin B receptor                       |
| 8144213 | 6.28E-05 | 1.13E-06 | -8.47 | 5.856158 | -1.04 | VIPR2 | vasoactive intestinal peptide receptor 2         |
| 8166202 | 6.46E-05 | 1.18E-06 | -8.44 | 5.811533 | -3.17 | GRPR  | gastrin releasing peptide receptor               |
| 7993126 | 6.96E-05 | 1.32E-06 | -8.35 | 5.698644 | -2.48 | ABAT  | 4-aminobutyrate aminotransferase                 |

|         |          |          |       |          |       |         |                                                  |
|---------|----------|----------|-------|----------|-------|---------|--------------------------------------------------|
| 7952382 | 7.35E-05 | 1.42E-06 | -8.3  | 5.625008 | -3.29 | OR6T1   | olfactory receptor family 6 subfamily T member 1 |
| 8096845 | 7.49E-05 | 1.46E-06 | -8.28 | 5.594318 | -4.56 | EGF     | epidermal growth factor                          |
| 8061122 | 7.52E-05 | 1.48E-06 | -8.27 | 5.577982 | -2.5  | BANF2   | barrier to autointegration factor 2              |
| 8082066 | 7.61E-05 | 1.50E-06 | -8.25 | 5.562784 | -1.5  | FAM162A | family with sequence similarity 162 member A     |
| 7998637 | 7.73E-05 | 1.54E-06 | -8.24 | 5.539177 | -1.1  | MSRB1   | methionine sulfoxide reductase B1                |



|         |          |          |       |          |       |                    |                                                                                         |
|---------|----------|----------|-------|----------|-------|--------------------|-----------------------------------------------------------------------------------------|
| 8052940 | 7.78E-05 | 1.56E-06 | -8.23 | 5.525823 | -3.36 | PAIP2B///VPS<br>36 | poly(A) binding protein interacting protein<br>2B///vacuolar protein sorting 36 homolog |
| 8092328 | 7.88E-05 | 1.58E-06 | -8.22 | 5.511074 | -1.42 | MCCC1              | methylcrotonoyl-CoA carboxylase 1                                                       |
| 8172425 | 7.94E-05 | 1.61E-06 | -8.21 | 5.497289 | -1.87 | SLC38A5            | solute carrier family 38 member 5                                                       |
| 8111552 | 8.12E-05 | 1.65E-06 | -8.18 | 5.467882 | -1.02 | NADK2              | NAD kinase 2, mitochondrial                                                             |

|         |          |          |       |          |       |        |                                                       |
|---------|----------|----------|-------|----------|-------|--------|-------------------------------------------------------|
| 8089402 | 8.20E-05 | 1.68E-06 | -8.17 | 5.453939 | -5.25 | GUCA1C | guanylate cyclase activator 1C                        |
| 8122099 | 8.33E-05 | 1.71E-06 | -8.16 | 5.431396 | -1.66 | ENPP1  | ectonucleotide<br>pyrophosphatase/phosphodiesterase 1 |
| 7910792 | 8.58E-05 | 1.79E-06 | -8.13 | 5.387298 | -2.41 | RYR2   | ryanodine receptor 2                                  |
| 8019250 | 8.82E-05 | 1.86E-06 | -8.1  | 5.349487 | -1.72 | P4HB   | prolyl 4-hydroxylase subunit beta                     |
| 8004416 | 8.95E-05 | 1.89E-06 | -8.09 | 5.333095 | -1.05 | CHRNB1 | cholinergic receptor nicotinic beta 1 subunit         |
| 8036699 | 9.09E-05 | 1.93E-06 | -8.07 | 5.31038  | -4.18 | SYCN   | syncollin                                             |

|         |          |          |       |          |       |         |                                                 |
|---------|----------|----------|-------|----------|-------|---------|-------------------------------------------------|
| 7934334 | 9.28E-05 | 1.98E-06 | -8.05 | 5.28263  | -1.35 | CFAP70  | cilia and flagella associated protein 70        |
| 7986394 | 9.65E-05 | 2.10E-06 | -8.01 | 5.223412 | -1.06 | LRRC28  | leucine rich repeat containing 28               |
| 7993453 | 9.97E-05 | 2.23E-06 | -7.96 | 5.162226 | -2.06 | MPV17L  | MPV17 mitochondrial inner membrane protein like |
| 7975081 | 1.02E-04 | 2.30E-06 | -7.94 | 5.130577 | -1.44 | PPP1R36 | protein phosphatase 1 regulatory subunit 36     |

|         |          |          |       |          |       |                 |                                                                   |
|---------|----------|----------|-------|----------|-------|-----------------|-------------------------------------------------------------------|
| 7904843 | 1.06E-04 | 2.42E-06 | -7.91 | 5.08264  | -3.08 | PDZK1P1///PDZK1 | PDZ domain containing 1 pseudogene<br>1///PDZ domain containing 1 |
| 7947199 | 1.07E-04 | 2.45E-06 | -7.9  | 5.067627 | -1.48 | LGR4            | leucine rich repeat containing G<br>protein-coupled receptor 4    |
| 7925229 | 1.07E-04 | 2.47E-06 | -7.89 | 5.060591 | -1.16 | B3GALNT2        | beta-1,3-N-acetylgalactosaminyltransferase 2                      |

|         |          |          |       |          |       |       |                                                  |
|---------|----------|----------|-------|----------|-------|-------|--------------------------------------------------|
| 7944793 | 1.09E-04 | 2.55E-06 | -7.87 | 5.026929 | -2.12 | OR8D4 | olfactory receptor family 8 subfamily D member 4 |
| 8085358 | 1.13E-04 | 2.64E-06 | -7.84 | 4.991608 | -1.43 |       |                                                  |
| 7934755 | 1.13E-04 | 2.67E-06 | -7.84 | 4.981197 | -1.16 | MAT1A | methionine adenosyltransferase 1A                |
| 7936949 | 1.14E-04 | 2.69E-06 | -7.83 | 4.973457 | -1.03 | DHX32 | DEAH-box helicase 32 (putative)                  |
| 8096917 | 1.16E-04 | 2.74E-06 | -7.82 | 4.955169 | -2.04 |       |                                                  |
| 8002283 | 1.16E-04 | 2.79E-06 | -7.81 | 4.937676 | -4.55 | TMED6 | transmembrane p24 trafficking protein 6          |
| 8091241 | 1.22E-04 | 2.99E-06 | -7.76 | 4.867535 | -1.21 |       |                                                  |

|         |          |          |       |          |       |         |                                                       |
|---------|----------|----------|-------|----------|-------|---------|-------------------------------------------------------|
| 7933982 | 1.23E-04 | 3.03E-06 | -7.75 | 4.851765 | -2.08 | PBLD    | phenazine biosynthesis like protein domain containing |
| 7932094 | 1.23E-04 | 3.04E-06 | -7.74 | 4.848208 | -1.09 | PHYH    | phytanoyl-CoA 2-hydroxylase                           |
| 8057377 | 1.24E-04 | 3.06E-06 | -7.74 | 4.843223 | -2.19 | CCDC141 | coiled-coil domain containing 141                     |
| 8006319 | 1.25E-04 | 3.11E-06 | -7.73 | 4.827503 | -1.18 |         |                                                       |
| 8157300 | 1.36E-04 | 3.45E-06 | -7.65 | 4.720877 | -1.23 | BSPRY   | B-box and SPRY domain containing                      |
| 8146225 | 1.37E-04 | 3.49E-06 | -7.65 | 4.709059 | -1.14 | SMIM19  | small integral membrane protein 19                    |

|         |          |          |       |          |       |          |                                                  |
|---------|----------|----------|-------|----------|-------|----------|--------------------------------------------------|
| 7944795 | 1.38E-04 | 3.52E-06 | -7.64 | 4.699973 | -1.98 | OR4D5    | olfactory receptor family 4 subfamily D member 5 |
| 8095628 | 1.41E-04 | 3.64E-06 | -7.62 | 4.666759 | -4.92 | ALB      | albumin                                          |
| 7961983 | 1.46E-04 | 3.78E-06 | -7.59 | 4.628625 | -1.12 | TM7SF3   | transmembrane 7 superfamily member 3             |
| 8083779 | 1.47E-04 | 3.83E-06 | -7.58 | 4.614731 | -2.08 | SERPINI1 | serpin family I member 1                         |
| 8082816 | 1.52E-04 | 4.01E-06 | -7.55 | 4.566778 | -1.34 | SRPRB    | SRP receptor beta subunit                        |
| 8065351 | 1.52E-04 | 4.04E-06 | -7.54 | 4.559429 | -1.01 |          |                                                  |
| 7952557 | 1.54E-04 | 4.11E-06 | -7.53 | 4.541474 | -1.1  | SRPRA    | SRP receptor alpha subunit                       |

|         |          |          |       |          |       |       |                                    |
|---------|----------|----------|-------|----------|-------|-------|------------------------------------|
| 8057719 | 1.55E-04 | 4.16E-06 | -7.52 | 4.530887 | -1.11 | HIBCH | 3-hydroxyisobutyryl-CoA hydrolase  |
| 8019762 | 1.60E-04 | 4.32E-06 | -7.5  | 4.491919 | -1.61 | P4HB  | prolyl 4-hydroxylase subunit beta  |
| 8146427 | 1.63E-04 | 4.47E-06 | -7.47 | 4.456807 | -1.04 |       |                                    |
| 7943605 | 1.78E-04 | 5.08E-06 | -7.38 | 4.327287 | -1.67 | ACAT1 | acetyl-CoA acetyltransferase 1     |
| 8096765 | 1.79E-04 | 5.11E-06 | -7.38 | 4.321455 | -1.22 | RPL34 | ribosomal protein L34              |
| 8119620 | 1.80E-04 | 5.18E-06 | -7.37 | 4.307083 | -3.26 | GNMT  | glycine N-methyltransferase        |
| 7944049 | 1.81E-04 | 5.22E-06 | -7.37 | 4.299376 | -1.7  | SIDT2 | SID1 transmembrane family member 2 |



|         |          |          |       |          |       |       |                                        |
|---------|----------|----------|-------|----------|-------|-------|----------------------------------------|
| 7990564 | 1.84E-04 | 5.32E-06 | -7.35 | 4.280126 | -2.28 |       |                                        |
| 8096251 | 1.85E-04 | 5.40E-06 | -7.34 | 4.265322 | -1.12 | NUDT9 | nudix hydrolase 9                      |
| 7905283 | 1.86E-04 | 5.43E-06 | -7.34 | 4.258777 | -1.32 | ANXA9 | annexin A9                             |
| 8015712 | 1.95E-04 | 5.80E-06 | -7.29 | 4.192183 | -1.23 | COA3  | cytochrome c oxidase assembly factor 3 |
| 7913593 | 2.00E-04 | 5.96E-06 | -7.27 | 4.163732 | -2.37 | TCEA3 | transcription elongation factor A3     |
| 8150580 | 2.08E-04 | 6.28E-06 | -7.24 | 4.110622 | -1.62 |       |                                        |
| 8067305 | 2.10E-04 | 6.37E-06 | -7.23 | 4.096038 | -1.88 | SYCP2 | synaptonemal complex protein 2         |
| 7910111 | 2.11E-04 | 6.42E-06 | -7.22 | 4.088558 | -1.46 | EPHX1 | epoxide hydrolase 1                    |

|         |          |          |       |          |       |            |                                                                   |
|---------|----------|----------|-------|----------|-------|------------|-------------------------------------------------------------------|
| 8098671 | 2.12E-04 | 6.49E-06 | -7.22 | 4.077656 | -4.17 | F11        | coagulation factor XI                                             |
| 8139640 | 2.16E-04 | 6.63E-06 | -7.2  | 4.055974 | -2.3  | DDC        | dopa decarboxylase                                                |
| 8070632 | 2.16E-04 | 6.64E-06 | -7.2  | 4.053939 | -1.14 | CBSL///CBS | cystathionine-beta-synthase<br>like///cystathionine-beta-synthase |
| 7997962 | 2.17E-04 | 6.72E-06 | -7.19 | 4.04199  | -1.35 | DPEP1      | dipeptidase 1 (renal)                                             |
| 8062728 | 2.18E-04 | 6.75E-06 | -7.19 | 4.037477 | -1.13 | SGK2       | SGK2, serine/threonine kinase 2                                   |
| 8023228 | 2.26E-04 | 7.08E-06 | -7.16 | 3.988734 | -1.23 | DYM        | dymeclin                                                          |
| 8149725 | 2.28E-04 | 7.15E-06 | -7.15 | 3.979089 | -1.89 | PEBP4      | phosphatidylethanolamine binding protein 4                        |

|         |          |          |       |          |       |              |                                                   |
|---------|----------|----------|-------|----------|-------|--------------|---------------------------------------------------|
| 8099860 | 2.39E-04 | 7.63E-06 | -7.11 | 3.912588 | -1.06 | RFC1         | replication factor C subunit 1                    |
| 8127087 | 2.40E-04 | 7.68E-06 | -7.1  | 3.906072 | -1.38 | GSTA3        | glutathione S-transferase alpha 3                 |
| 8168179 | 2.40E-04 | 7.70E-06 | -7.1  | 3.903512 | -1.14 | DLG3         | discs large MAGUK scaffold protein 3              |
| 7942647 | 2.41E-04 | 7.75E-06 | -7.1  | 3.895608 | -1.36 | LOC100506127 | putative uncharacterized protein<br>FLJ37770-like |
| 7902290 | 2.46E-04 | 7.95E-06 | -7.08 | 3.870814 | -1.71 | CTH          | cystathionine gamma-lyase                         |
| 7995362 | 2.46E-04 | 7.99E-06 | -7.08 | 3.865524 | -2.04 | GPT2         | glutamic--pyruvic transaminase 2                  |

|         |          |          |       |          |       |          |                                               |
|---------|----------|----------|-------|----------|-------|----------|-----------------------------------------------|
| 8092750 | 2.47E-04 | 8.05E-06 | -7.07 | 3.858101 | -1.23 | FGF12    | fibroblast growth factor 12                   |
| 7952377 | 2.47E-04 | 8.06E-06 | -7.07 | 3.856785 | -2.99 | TMEM225  | transmembrane protein 225                     |
| 7924309 | 2.48E-04 | 8.08E-06 | -7.07 | 3.853642 | -2.14 | ESRRG    | estrogen related receptor gamma               |
| 8097801 | 2.50E-04 | 8.20E-06 | -7.06 | 3.838566 | -2.18 | FAM160A1 | family with sequence similarity 160 member A1 |
| 8051998 | 2.53E-04 | 8.35E-06 | -7.05 | 3.820006 | -1.13 | MCFD2    | multiple coagulation factor deficiency 2      |
| 7938989 | 2.54E-04 | 8.37E-06 | -7.05 | 3.817473 | -2.79 | GAS2     | growth arrest specific 2                      |

|         |          |          |       |          |       |         |                                              |
|---------|----------|----------|-------|----------|-------|---------|----------------------------------------------|
| 8056837 | 2.54E-04 | 8.40E-06 | -7.04 | 3.814297 | -1.26 | GPR155  | G protein-coupled receptor 155               |
| 8038633 | 2.59E-04 | 8.63E-06 | -7.03 | 3.786716 | -3.87 | KLK1    | kallikrein 1                                 |
| 8106827 | 2.62E-04 | 8.80E-06 | -7.01 | 3.76646  | -1.41 | ADGRV1  | adhesion G protein-coupled receptor V1       |
| 8154841 | 2.64E-04 | 8.88E-06 | -7.01 | 3.757737 | -1.17 |         |                                              |
| 7956826 | 2.66E-04 | 9.00E-06 | -7    | 3.743643 | -1.48 | TBC1D30 | TBC1 domain family member 30                 |
| 8048205 | 2.68E-04 | 9.11E-06 | -6.99 | 3.731445 | -1.49 | IGFBP2  | insulin like growth factor binding protein 2 |

|         |          |          |       |          |       |        |                                          |
|---------|----------|----------|-------|----------|-------|--------|------------------------------------------|
| 8146687 | 2.79E-04 | 9.62E-06 | -6.95 | 3.676328 | -1.88 | ADHFE1 | alcohol dehydrogenase, iron containing 1 |
| 7994615 | 2.81E-04 | 9.71E-06 | -6.95 | 3.665902 | -1    | ZG16   | zymogen granule protein 16               |
| 7947496 | 2.81E-04 | 9.80E-06 | -6.94 | 3.657239 | -2.41 | SLC1A2 | solute carrier family 1 member 2         |
| 7980906 | 2.83E-04 | 9.87E-06 | -6.94 | 3.649168 | -3.16 |        |                                          |
| 7956242 | 2.85E-04 | 1.00E-05 | -6.93 | 3.632677 | -1.06 | COQ10A | coenzyme Q10A                            |

|         |          |          |       |          |       |                                                  |                                                                                                                                                                                                 |
|---------|----------|----------|-------|----------|-------|--------------------------------------------------|-------------------------------------------------------------------------------------------------------------------------------------------------------------------------------------------------|
| 8138151 | 2.86E-04 | 1.01E-05 | -6.92 | 3.626907 | -1.09 | OR7E37P///M<br>GC72080///DA<br>PL1///OR7E12<br>P | olfactory receptor family 7 subfamily E<br>member 37 pseudogene///MGC72080<br>pseudogene///death associated protein like<br>1///olfactory receptor family 7 subfamily E<br>member 12 pseudogene |
|---------|----------|----------|-------|----------|-------|--------------------------------------------------|-------------------------------------------------------------------------------------------------------------------------------------------------------------------------------------------------|

|         |          |          |       |          |       |          |                                     |
|---------|----------|----------|-------|----------|-------|----------|-------------------------------------|
| 7937079 | 2.94E-04 | 1.05E-05 | -6.9  | 3.58804  | -1.97 | BNIP3    | BCL2 interacting protein 3          |
| 7936507 | 2.97E-04 | 1.06E-05 | -6.89 | 3.575195 | -1.27 | C10orf82 | chromosome 10 open reading frame 82 |
| 8047784 | 2.98E-04 | 1.07E-05 | -6.88 | 3.568442 | -1.11 | ZDBF2    | zinc finger DBF-type containing 2   |
| 7961024 | 2.98E-04 | 1.07E-05 | -6.88 | 3.565924 | -1.07 |          |                                     |
| 8134018 | 2.99E-04 | 1.07E-05 | -6.88 | 3.56388  | -1.07 | ZNF804B  | zinc finger protein 804B            |
| 8117225 | 3.00E-04 | 1.08E-05 | -6.88 | 3.555821 | -2.58 | GMNN     | geminin, DNA replication inhibitor  |



|         |          |          |       |          |       |        |                                                       |
|---------|----------|----------|-------|----------|-------|--------|-------------------------------------------------------|
| 7946365 | 3.01E-04 | 1.09E-05 | -6.87 | 3.551821 | -1.4  | STK33  | serine/threonine kinase 33                            |
| 8143461 | 3.06E-04 | 1.11E-05 | -6.86 | 3.528378 | -1.02 |        |                                                       |
| 8151423 | 3.11E-04 | 1.14E-05 | -6.84 | 3.504793 | -1.25 | JPH1   | junctophilin 1                                        |
| 7961702 | 3.15E-04 | 1.15E-05 | -6.83 | 3.489552 | -1.43 | KCNJ8  | potassium voltage-gated channel subfamily J member 8  |
| 8135876 | 3.16E-04 | 1.17E-05 | -6.83 | 3.478573 | -1.03 | SND1   | staphylococcal nuclease and tudor domain containing 1 |
| 8089489 | 3.19E-04 | 1.18E-05 | -6.82 | 3.469356 | -1.05 | SLC9C1 | solute carrier family 9 member C1                     |

|         |          |          |       |          |       |                           |                                                                                                             |
|---------|----------|----------|-------|----------|-------|---------------------------|-------------------------------------------------------------------------------------------------------------|
| 7971027 | 3.20E-04 | 1.19E-05 | -6.81 | 3.461482 | -1.26 | ALG5///ALG5               | ALG5, dolichyl-phosphate<br>beta-glucosyltransferase///ALG5,<br>dolichyl-phosphate beta-glucosyltransferase |
| 8058627 | 3.24E-04 | 1.20E-05 | -6.81 | 3.447842 | -1.61 | ERBB4                     | erb-b2 receptor tyrosine kinase 4                                                                           |
| 8102321 | 3.25E-04 | 1.21E-05 | -6.8  | 3.443745 | -1.15 | PLA2G12AP1/<br>//PLA2G12A | phospholipase A2 group XIIA pseudogene<br>1///phospholipase A2 group XIIA                                   |

|         |          |          |       |          |       |         |                                                          |
|---------|----------|----------|-------|----------|-------|---------|----------------------------------------------------------|
| 8152355 | 3.33E-04 | 1.25E-05 | -6.78 | 3.406581 | -2.41 | SYBU    | syntabulin                                               |
| 8102362 | 3.34E-04 | 1.26E-05 | -6.78 | 3.400577 | -1.49 | TIFA    | TRAF interacting protein with forkhead associated domain |
| 7972231 | 3.34E-04 | 1.26E-05 | -6.77 | 3.397742 | -1.08 | SLITRK1 | SLIT and NTRK like family member 1                       |
| 8024238 | 3.38E-04 | 1.29E-05 | -6.76 | 3.377789 | -1.39 | CIRBP   | cold inducible RNA binding protein                       |
| 8003578 | 3.38E-04 | 1.29E-05 | -6.76 | 3.375004 | -1.27 | ZG16    | zymogen granule protein 16                               |
| 8127065 | 3.42E-04 | 1.31E-05 | -6.75 | 3.360626 | -4.23 | GSTA2   | glutathione S-transferase alpha 2                        |
| 8176566 | 3.45E-04 | 1.32E-05 | -6.74 | 3.349557 | -1.31 |         |                                                          |

|         |          |          |       |          |       |            |                                                |
|---------|----------|----------|-------|----------|-------|------------|------------------------------------------------|
| 8011499 | 3.50E-04 | 1.35E-05 | -6.73 | 3.32983  | -1.04 | P2RX1      | purinergic receptor P2X 1                      |
| 7912638 | 3.51E-04 | 1.36E-05 | -6.73 | 3.325323 | -1.08 | TMEM51-AS1 | TMEM51 antisense RNA 1                         |
| 8102948 | 3.53E-04 | 1.37E-05 | -6.72 | 3.312734 | -1.94 |            |                                                |
| 7991034 | 3.57E-04 | 1.39E-05 | -6.71 | 3.297459 | -2.94 | HOMER2     | homer scaffolding protein 2                    |
| 8127094 | 3.59E-04 | 1.40E-05 | -6.71 | 3.293257 | -1.12 | GSTA4      | glutathione S-transferase alpha 4              |
| 8060949 | 3.66E-04 | 1.43E-05 | -6.69 | 3.268296 | -2.29 | ANKEF1     | ankyrin repeat and EF-hand domain containing 1 |

|         |          |          |       |          |       |          |                                               |
|---------|----------|----------|-------|----------|-------|----------|-----------------------------------------------|
| 7934936 | 3.70E-04 | 1.46E-05 | -6.68 | 3.25153  | -2.71 | SLC16A12 | solute carrier family 16 member 12            |
| 8101728 | 3.75E-04 | 1.48E-05 | -6.67 | 3.235101 | -1.03 | FAM13A   | family with sequence similarity 13 member A   |
| 8141150 | 3.86E-04 | 1.54E-05 | -6.65 | 3.195878 | -1.6  | ASNS     | asparagine synthetase (glutamine-hydrolyzing) |
| 7990555 | 3.90E-04 | 1.56E-05 | -6.64 | 3.180383 | -3.34 | NRG4     | neuregulin 4                                  |
| 7954436 | 3.91E-04 | 1.57E-05 | -6.63 | 3.17782  | -1.12 | LRMP     | lymphoid restricted membrane protein          |

|         |          |          |       |          |       |          |                                                          |
|---------|----------|----------|-------|----------|-------|----------|----------------------------------------------------------|
| 8009241 | 3.96E-04 | 1.60E-05 | -6.62 | 3.158831 | -2.01 | SNORD104 | small nucleolar RNA, C/D box 104                         |
| 8044882 | 3.96E-04 | 1.60E-05 | -6.62 | 3.157165 | -1.2  | EPB41L5  | erythrocyte membrane protein band 4.1 like<br>5          |
| 7968761 | 3.99E-04 | 1.62E-05 | -6.61 | 3.144213 | -1.44 | NAA16    | N(alpha)-acetyltransferase 16, NatA<br>auxiliary subunit |
| 8005839 | 4.20E-04 | 1.74E-05 | -6.57 | 3.068436 | -2.85 | TMEM97   | transmembrane protein 97                                 |
| 8027744 | 4.25E-04 | 1.77E-05 | -6.55 | 3.050864 | -1.11 | HPN-AS1  | HPN antisense RNA 1                                      |

|         |          |          |       |          |       |        |                                                |
|---------|----------|----------|-------|----------|-------|--------|------------------------------------------------|
| 7957221 | 4.28E-04 | 1.79E-05 | -6.55 | 3.041343 | -3.74 | TRHDE  | thyrotropin releasing hormone degrading enzyme |
| 8002121 | 4.30E-04 | 1.81E-05 | -6.54 | 3.033146 | -4.27 | CTRL   | chymotrypsin like                              |
| 7917304 | 4.31E-04 | 1.81E-05 | -6.54 | 3.031511 | -1.89 | MCOLN3 | mucolipin 3                                    |
| 7952386 | 4.31E-04 | 1.82E-05 | -6.54 | 3.02622  | -2.87 |        |                                                |
| 8144121 | 4.34E-04 | 1.83E-05 | -6.53 | 3.017356 | -1.29 | PTPRN2 | protein tyrosine phosphatase, receptor type N2 |
| 8052372 | 4.36E-04 | 1.86E-05 | -6.52 | 3.001963 | -2.32 | MIR217 | microRNA 217                                   |
| 8020183 | 4.42E-04 | 1.89E-05 | -6.51 | 2.986614 | -2.08 | IMPA2  | inositol monophosphatase 2                     |
| 7912473 | 4.42E-04 | 1.89E-05 | -6.51 | 2.986537 | -1.34 | FBXO2  | F-box protein 2                                |

|         |          |          |       |          |       |                   |                                                            |
|---------|----------|----------|-------|----------|-------|-------------------|------------------------------------------------------------|
| 7929383 | 4.44E-04 | 1.91E-05 | -6.51 | 2.97595  | -1.7  | SLC35G1           | solute carrier family 35 member G1                         |
| 8103494 | 4.64E-04 | 2.05E-05 | -6.46 | 2.901424 | -1.81 | NPY1R///NPY<br>1R | neuropeptide Y receptor Y1///neuropeptide<br>Y receptor Y1 |
| 8006181 | 4.70E-04 | 2.09E-05 | -6.45 | 2.884729 | -1.11 |                   |                                                            |
| 7895139 | 4.77E-04 | 2.13E-05 | -6.44 | 2.864077 | -1.1  |                   |                                                            |
| 8160769 | 4.82E-04 | 2.16E-05 | -6.43 | 2.849736 | -1.2  |                   |                                                            |
| 7904361 | 4.85E-04 | 2.18E-05 | -6.42 | 2.841464 | -1.33 | FAM46C            | family with sequence similarity 46 member<br>C             |
| 7938951 | 4.87E-04 | 2.20E-05 | -6.42 | 2.832265 | -1.72 | ANO5              | anoctamin 5                                                |
| 8057056 | 4.87E-04 | 2.20E-05 | -6.42 | 2.831468 | -1.92 | TTN               | titin                                                      |



|         |          |          |       |          |       |         |                                                              |
|---------|----------|----------|-------|----------|-------|---------|--------------------------------------------------------------|
| 8053668 | 4.99E-04 | 2.28E-05 | -6.39 | 2.795262 | -1.24 | EIF2AK3 | eukaryotic translation initiation factor 2<br>alpha kinase 3 |
|---------|----------|----------|-------|----------|-------|---------|--------------------------------------------------------------|

|         |          |          |       |          |       |                                                                                                                                                                                                                                                                                                                                                                                                                                                                                                              |
|---------|----------|----------|-------|----------|-------|--------------------------------------------------------------------------------------------------------------------------------------------------------------------------------------------------------------------------------------------------------------------------------------------------------------------------------------------------------------------------------------------------------------------------------------------------------------------------------------------------------------|
| 7945873 | 5.15E-04 | 2.37E-05 | -6.37 | 2.757399 | -1.17 | <p>olfactory receptor family 7 subfamily E<br/> member 37 pseudogene///olfactory receptor<br/> OR7E37P///OR family 7 subfamily E member 35<br/> 7E35P///MGC7 pseudogene///MGC72080<br/> 2080///DAPL1/ pseudogene///death associated protein like<br/> //OR7E47P///O 1///olfactory receptor family 7 subfamily E<br/> R7E12P///OR7 member 47 pseudogene///olfactory receptor<br/> E14P family 7 subfamily E member 12<br/> pseudogene///olfactory receptor family 7<br/> subfamily E member 14 pseudogene</p> |
|---------|----------|----------|-------|----------|-------|--------------------------------------------------------------------------------------------------------------------------------------------------------------------------------------------------------------------------------------------------------------------------------------------------------------------------------------------------------------------------------------------------------------------------------------------------------------------------------------------------------------|

|         |          |          |       |          |       |         |                                                   |
|---------|----------|----------|-------|----------|-------|---------|---------------------------------------------------|
| 7991335 | 5.20E-04 | 2.39E-05 | -6.36 | 2.745185 | -2.91 | ANPEP   | alanyl aminopeptidase, membrane                   |
| 8020847 | 5.34E-04 | 2.50E-05 | -6.34 | 2.701815 | -1.54 | DTNA    | dystrobrevin alpha                                |
| 8091678 | 5.42E-04 | 2.56E-05 | -6.32 | 2.678501 | -2.47 | VEPH1   | ventricular zone expressed PH domain containing 1 |
| 8123685 | 5.60E-04 | 2.67E-05 | -6.3  | 2.634546 | -1.31 | FAM217A | family with sequence similarity 217 member A      |
| 8101992 | 5.69E-04 | 2.72E-05 | -6.28 | 2.612998 | -1.66 | SLC39A8 | solute carrier family 39 member 8                 |

|         |          |          |       |          |       |          |                           |
|---------|----------|----------|-------|----------|-------|----------|---------------------------|
| 7929388 | 5.75E-04 | 2.76E-05 | -6.27 | 2.599945 | -1.28 | PLCE1    | phospholipase C epsilon 1 |
| 8091910 | 5.75E-04 | 2.77E-05 | -6.27 | 2.596149 | -4.68 | SERPINI2 | serpin family I member 2  |

|         |          |          |       |          |       |                                                                                                                                                                                                                                                                                                                                                                                                                                                                                                                                                                                                                    |
|---------|----------|----------|-------|----------|-------|--------------------------------------------------------------------------------------------------------------------------------------------------------------------------------------------------------------------------------------------------------------------------------------------------------------------------------------------------------------------------------------------------------------------------------------------------------------------------------------------------------------------------------------------------------------------------------------------------------------------|
| 8082248 | 5.79E-04 | 2.79E-05 | -6.27 | 2.587365 | -1.09 | <p>olfactory receptor family 7 subfamily E member 37 pseudogene///olfactory receptor family 7 subfamily E member 35</p> <p>OR7E37P///OR pseudogene///MGC72080</p> <p>7E35P///MGC7 pseudogene///olfactory receptor family 7 2080///OR7E5 subfamily E member 5 pseudogene///death P///DAPL1///O associated protein like 1///olfactory receptor R7E24///OR7E family 7 subfamily E member 24///olfactory 47P///OR7E12 receptor family 7 subfamily E member 47 P///OR7E14P pseudogene///olfactory receptor family 7 subfamily E member 12 pseudogene///olfactory receptor family 7 subfamily E member 14 pseudogene</p> |
|---------|----------|----------|-------|----------|-------|--------------------------------------------------------------------------------------------------------------------------------------------------------------------------------------------------------------------------------------------------------------------------------------------------------------------------------------------------------------------------------------------------------------------------------------------------------------------------------------------------------------------------------------------------------------------------------------------------------------------|

|         |          |          |       |          |       |          |                                                     |
|---------|----------|----------|-------|----------|-------|----------|-----------------------------------------------------|
| 7974533 | 5.96E-04 | 2.91E-05 | -6.24 | 2.545675 | -1.28 | PELI2    | pellino E3 ubiquitin protein ligase family member 2 |
| 8053366 | 6.02E-04 | 2.94E-05 | -6.23 | 2.533679 | -1.01 | SUCLG1   | succinate-CoA ligase alpha subunit                  |
| 8077526 | 6.13E-04 | 3.03E-05 | -6.22 | 2.505667 | -1.26 |          |                                                     |
| 7898167 | 6.15E-04 | 3.05E-05 | -6.21 | 2.497608 | -3.85 | CTRC     | chymotrypsin C                                      |
| 8121515 | 6.17E-04 | 3.07E-05 | -6.21 | 2.492015 | -2.9  | SLC16A10 | solute carrier family 16 member 10                  |
| 8091554 | 6.19E-04 | 3.08E-05 | -6.21 | 2.487549 | -1.06 |          |                                                     |

|         |          |          |      |          |    |                                                                                                                  |
|---------|----------|----------|------|----------|----|------------------------------------------------------------------------------------------------------------------|
|         |          |          |      |          |    | olfactory receptor family 7 subfamily E member 37 pseudogene///olfactory receptor family 7 subfamily E member 35 |
|         |          |          |      |          |    | OR7E37P///OR pseudogene///MGC72080                                                                               |
|         |          |          |      |          |    | 7E35P///MGC7 pseudogene///olfactory receptor family 7                                                            |
| 8082244 | 6.22E-04 | 3.11E-05 | -6.2 | 2.477353 | -1 | 2080///OR7E5 subfamily E member 5 pseudogene///death                                                             |
|         |          |          |      |          |    | P///DAPL1///O associated protein like 1///olfactory receptor                                                     |
|         |          |          |      |          |    | R7E24///OR7E family 7 subfamily E member 24///olfactory                                                          |
|         |          |          |      |          |    | 47P///OR7E12 receptor family 7 subfamily E member 47                                                             |
|         |          |          |      |          |    | P///OR7E14P pseudogene///olfactory receptor family 7 subfamily E member 12                                       |
|         |          |          |      |          |    | pseudogene///olfactory receptor family 7 subfamily E member 14 pseudogene                                        |

|         |          |          |       |          |       |         |                                                  |
|---------|----------|----------|-------|----------|-------|---------|--------------------------------------------------|
| 8105067 | 6.31E-04 | 3.17E-05 | -6.19 | 2.457398 | -1.08 | PTGER4  | prostaglandin E receptor 4                       |
| 8052374 | 6.32E-04 | 3.18E-05 | -6.19 | 2.454587 | -2.16 | MIR216A | microRNA 216a                                    |
| 8140852 | 6.32E-04 | 3.18E-05 | -6.19 | 2.453532 | -2.4  | C7orf62 | chromosome 7 open reading frame 62               |
| 7929497 | 6.38E-04 | 3.24E-05 | -6.17 | 2.435297 | -1.66 | ACSM6   | acyl-CoA synthetase medium-chain family member 6 |
| 7902518 | 6.39E-04 | 3.25E-05 | -6.17 | 2.433412 | -2.09 | GIPC2   | GIPC PDZ domain containing family member 2       |
| 7903959 | 6.42E-04 | 3.27E-05 | -6.17 | 2.426412 | -1.49 | PIFO    | primary cilia formation                          |



8137526

6.72E-04

3.47E-05

-6.13

2.365987

-1.38

INSIG1

insulin induced gene 1

|         |          |          |       |          |      |                                                                                                                                                                                                                                                                                                                                                                                                                                                                                                                                      |
|---------|----------|----------|-------|----------|------|--------------------------------------------------------------------------------------------------------------------------------------------------------------------------------------------------------------------------------------------------------------------------------------------------------------------------------------------------------------------------------------------------------------------------------------------------------------------------------------------------------------------------------------|
| 7968787 | 6.81E-04 | 3.54E-05 | -6.12 | 2.345282 | -1.1 | <p>olfactory receptor family 7 subfamily E member 37 pseudogene///olfactory receptor family 7 subfamily E member 35</p> <p>OR7E37P///OR7E35P///MGC72080///DAPL1//OR7E24///OR7E47P///OR7E12P///OR7E14P</p> <p>pseudogene///MGC72080 pseudogene///death associated protein like 1///olfactory receptor family 7 subfamily E member 24///olfactory receptor family 7 subfamily E member 47 pseudogene///olfactory receptor family 7 subfamily E member 12 pseudogene///olfactory receptor family 7 subfamily E member 14 pseudogene</p> |
|---------|----------|----------|-------|----------|------|--------------------------------------------------------------------------------------------------------------------------------------------------------------------------------------------------------------------------------------------------------------------------------------------------------------------------------------------------------------------------------------------------------------------------------------------------------------------------------------------------------------------------------------|

|         |          |          |       |          |       |        |                                         |
|---------|----------|----------|-------|----------|-------|--------|-----------------------------------------|
| 7917322 | 6.84E-04 | 3.56E-05 | -6.12 | 2.339139 | -1.3  | SYDE2  | synapse defective Rho GTPase homolog 2  |
| 8006423 | 6.84E-04 | 3.56E-05 | -6.12 | 2.33908  | -1.2  | SPACA3 | sperm acrosome associated 3             |
| 7910047 | 6.99E-04 | 3.66E-05 | -6.1  | 2.311408 | -1.34 | DNAH14 | dynein axonemal heavy chain 14          |
| 8163535 | 7.08E-04 | 3.75E-05 | -6.09 | 2.287542 | -1.93 | AMBP   | alpha-1-microglobulin/bikunin precursor |
| 8075182 | 7.08E-04 | 3.75E-05 | -6.08 | 2.28712  | -1.34 | XBP1   | X-box binding protein 1                 |

|         |          |          |       |          |       |         |                                                     |
|---------|----------|----------|-------|----------|-------|---------|-----------------------------------------------------|
| 8076515 | 7.12E-04 | 3.78E-05 | -6.08 | 2.278741 | -1.13 | ARFGAP3 | ADP ribosylation factor GTPase activating protein 3 |
| 8137448 | 7.12E-04 | 3.78E-05 | -6.08 | 2.277761 | -1.06 | GALNT11 | polypeptide<br>N-acetylgalactosaminyltransferase 11 |

|         |          |          |       |          |       |                                                                                                                                                                                                                                                                                                                                                                                                                                                                      |
|---------|----------|----------|-------|----------|-------|----------------------------------------------------------------------------------------------------------------------------------------------------------------------------------------------------------------------------------------------------------------------------------------------------------------------------------------------------------------------------------------------------------------------------------------------------------------------|
|         |          |          |       |          |       | olfactory receptor family 7 subfamily E<br>member 37 pseudogene///MGC72080                                                                                                                                                                                                                                                                                                                                                                                           |
|         |          |          |       |          |       | OR7E37P///M pseudogene///olfactory receptor family 7<br>GC72080///OR subfamily E member 5 pseudogene///death<br>7E5P///DAPL1 associated protein like 1///olfactory receptor<br>///OR7E24///O family 7 subfamily E member 24///olfactory<br>R7E47P///OR7 receptor family 7 subfamily E member 47<br>E12P///OR7E1 pseudogene///olfactory receptor family 7<br>4P subfamily E member 12<br>pseudogene///olfactory receptor family 7<br>subfamily E member 14 pseudogene |
| 8156319 | 7.12E-04 | 3.78E-05 | -6.08 | 2.277372 | -1.04 |                                                                                                                                                                                                                                                                                                                                                                                                                                                                      |

|         |          |          |       |          |       |       |           |
|---------|----------|----------|-------|----------|-------|-------|-----------|
| 7988876 | 7.12E-04 | 3.79E-05 | -6.08 | 2.276481 | -1.58 | MYO5C | myosin VC |
|---------|----------|----------|-------|----------|-------|-------|-----------|

|         |          |          |       |          |       |                                                                                                                                                                                                                                                                                                                                                                                                                                                                                                                                                                                                                    |
|---------|----------|----------|-------|----------|-------|--------------------------------------------------------------------------------------------------------------------------------------------------------------------------------------------------------------------------------------------------------------------------------------------------------------------------------------------------------------------------------------------------------------------------------------------------------------------------------------------------------------------------------------------------------------------------------------------------------------------|
| 7971241 | 7.29E-04 | 3.91E-05 | -6.06 | 2.245002 | -1.09 | <p>olfactory receptor family 7 subfamily E member 37 pseudogene///olfactory receptor family 7 subfamily E member 35</p> <p>OR7E37P///OR pseudogene///MGC72080</p> <p>7E35P///MGC7 pseudogene///olfactory receptor family 7 2080///OR7E5 subfamily E member 5 pseudogene///death P///DAPL1///O associated protein like 1///olfactory receptor R7E24///OR7E family 7 subfamily E member 24///olfactory 47P///OR7E12 receptor family 7 subfamily E member 47 P///OR7E14P pseudogene///olfactory receptor family 7 subfamily E member 12 pseudogene///olfactory receptor family 7 subfamily E member 14 pseudogene</p> |
|---------|----------|----------|-------|----------|-------|--------------------------------------------------------------------------------------------------------------------------------------------------------------------------------------------------------------------------------------------------------------------------------------------------------------------------------------------------------------------------------------------------------------------------------------------------------------------------------------------------------------------------------------------------------------------------------------------------------------------|

|         |          |          |       |          |       |
|---------|----------|----------|-------|----------|-------|
| 7933045 | 7.34E-04 | 3.94E-05 | -6.05 | 2.236898 | -1.11 |
|---------|----------|----------|-------|----------|-------|



|         |          |          |       |          |      |                                                                                                                                                                                                                                                                                                                                                                                                                                                                                                                                                                                                                    |
|---------|----------|----------|-------|----------|------|--------------------------------------------------------------------------------------------------------------------------------------------------------------------------------------------------------------------------------------------------------------------------------------------------------------------------------------------------------------------------------------------------------------------------------------------------------------------------------------------------------------------------------------------------------------------------------------------------------------------|
| 8045887 | 7.43E-04 | 4.00E-05 | -6.04 | 2.220219 | -1.1 | <p>olfactory receptor family 7 subfamily E member 37 pseudogene///olfactory receptor family 7 subfamily E member 35</p> <p>OR7E37P///OR pseudogene///MGC72080</p> <p>7E35P///MGC7 pseudogene///olfactory receptor family 7 2080///OR7E5 subfamily E member 5 pseudogene///death P///DAPL1///O associated protein like 1///olfactory receptor R7E24///OR7E family 7 subfamily E member 24///olfactory 47P///OR7E12 receptor family 7 subfamily E member 47 P///OR7E14P pseudogene///olfactory receptor family 7 subfamily E member 12 pseudogene///olfactory receptor family 7 subfamily E member 14 pseudogene</p> |
|---------|----------|----------|-------|----------|------|--------------------------------------------------------------------------------------------------------------------------------------------------------------------------------------------------------------------------------------------------------------------------------------------------------------------------------------------------------------------------------------------------------------------------------------------------------------------------------------------------------------------------------------------------------------------------------------------------------------------|

|         |          |          |       |          |       |         |                                               |
|---------|----------|----------|-------|----------|-------|---------|-----------------------------------------------|
| 8015735 | 7.43E-04 | 4.01E-05 | -6.04 | 2.218836 | -2.26 |         |                                               |
| 8097809 | 7.45E-04 | 4.04E-05 | -6.04 | 2.211077 | -1.4  |         |                                               |
| 8135514 | 7.48E-04 | 4.08E-05 | -6.03 | 2.200866 | -1.59 | IFRD1   | interferon related developmental regulator 1  |
| 8103094 | 7.72E-04 | 4.24E-05 | -6.01 | 2.161453 | -1.23 | NR3C2   | nuclear receptor subfamily 3 group C member 2 |
| 7933640 | 7.77E-04 | 4.28E-05 | -6    | 2.152422 | -2.2  | A1CF    | APOBEC1 complementation factor                |
| 7973054 | 7.82E-04 | 4.31E-05 | -6    | 2.143378 | -1.48 |         |                                               |
| 8121838 | 7.82E-04 | 4.32E-05 | -6    | 2.142534 | -1.42 | TPD52L1 | tumor protein D52-like 1                      |

|         |          |          |       |          |       |          |                                                     |
|---------|----------|----------|-------|----------|-------|----------|-----------------------------------------------------|
| 8141374 | 7.99E-04 | 4.42E-05 | -5.98 | 2.117662 | -3.5  | AZGP1    | alpha-2-glycoprotein 1, zinc-binding                |
| 8163116 | 8.15E-04 | 4.54E-05 | -5.97 | 2.090611 | -1.75 | EPB41L4B | erythrocyte membrane protein band 4.1 like<br>4B    |
| 7952375 | 8.24E-04 | 4.61E-05 | -5.96 | 2.075643 | -1.89 | OR6M1    | olfactory receptor family 6 subfamily M<br>member 1 |
| 8142497 | 8.33E-04 | 4.70E-05 | -5.95 | 2.055692 | -1.22 | CTTNBP2  | cortactin binding protein 2                         |
| 7910915 | 8.33E-04 | 4.70E-05 | -5.95 | 2.055497 | -2.15 | CHRM3    | cholinergic receptor muscarinic 3                   |

|         |          |          |       |          |       |       |                            |
|---------|----------|----------|-------|----------|-------|-------|----------------------------|
| 8040211 | 8.42E-04 | 4.77E-05 | -5.94 | 2.040744 | -1.09 | KLF11 | Kruppel like factor 11     |
| 8100362 | 8.48E-04 | 4.81E-05 | -5.93 | 2.032879 | -1.15 | LNK1  | ligand of numb-protein X 1 |

|         |          |          |       |          |       |                                                  |                                                                                                                                                                                                 |
|---------|----------|----------|-------|----------|-------|--------------------------------------------------|-------------------------------------------------------------------------------------------------------------------------------------------------------------------------------------------------|
| 8138145 | 8.54E-04 | 4.86E-05 | -5.93 | 2.020732 | -1.06 | OR7E37P///M<br>GC72080///DA<br>PL1///OR7E47<br>P | olfactory receptor family 7 subfamily E<br>member 37 pseudogene///MGC72080<br>pseudogene///death associated protein like<br>1///olfactory receptor family 7 subfamily E<br>member 47 pseudogene |
|---------|----------|----------|-------|----------|-------|--------------------------------------------------|-------------------------------------------------------------------------------------------------------------------------------------------------------------------------------------------------|

|         |          |          |       |          |       |        |                                             |
|---------|----------|----------|-------|----------|-------|--------|---------------------------------------------|
| 8098856 | 8.65E-04 | 4.94E-05 | -5.92 | 2.004453 | -1.5  | RNF212 | ring finger protein 212                     |
| 8041727 | 8.80E-04 | 5.06E-05 | -5.9  | 1.980131 | -2.46 | SLC3A1 | solute carrier family 3 member 1            |
| 8134024 | 9.10E-04 | 5.36E-05 | -5.87 | 1.922258 | -1.12 |        |                                             |
| 8167027 | 9.17E-04 | 5.42E-05 | -5.86 | 1.911181 | -2.33 | RGN    | regucalcin                                  |
| 7898723 | 9.33E-04 | 5.55E-05 | -5.85 | 1.885477 | -2.47 |        |                                             |
| 7925342 | 9.33E-04 | 5.55E-05 | -5.85 | 1.885435 | -2.77 | ERO1B  | endoplasmic reticulum oxidoreductase 1 beta |
| 8169389 | 9.37E-04 | 5.58E-05 | -5.84 | 1.880584 | -2.26 | PAK3   | p21 (RAC1) activated kinase 3               |
| 8094719 | 9.50E-04 | 5.74E-05 | -5.83 | 1.852066 | -1.03 | N4BP2  | NEDD4 binding protein 2                     |

|         |          |          |       |          |       |         |                                   |
|---------|----------|----------|-------|----------|-------|---------|-----------------------------------|
| 8074969 | 9.74E-04 | 5.92E-05 | -5.81 | 1.820985 | -1.2  | DDT     | D-dopachrome tautomerase          |
| 7944867 | 1.01E-03 | 6.22E-05 | -5.78 | 1.769665 | -1.48 |         |                                   |
| 7944147 | 1.03E-03 | 6.45E-05 | -5.76 | 1.733029 | -2.23 |         |                                   |
| 8145334 | 1.04E-03 | 6.54E-05 | -5.75 | 1.718873 | -1.58 | ADAM7   | ADAM metallopeptidase domain 7    |
| 7961524 | 1.05E-03 | 6.60E-05 | -5.74 | 1.708928 | -3.78 | ERP27   | endoplasmic reticulum protein 27  |
| 8113483 | 1.07E-03 | 6.80E-05 | -5.72 | 1.678678 | -1.19 | TMEM232 | transmembrane protein 232         |
| 8127072 | 1.08E-03 | 6.88E-05 | -5.72 | 1.66711  | -3.34 | GSTA1   | glutathione S-transferase alpha 1 |
| 7910636 | 1.10E-03 | 6.99E-05 | -5.71 | 1.650236 | -1.23 |         |                                   |

|         |          |          |       |          |       |                                                      |                                                |
|---------|----------|----------|-------|----------|-------|------------------------------------------------------|------------------------------------------------|
| 8027685 | 1.12E-03 | 7.15E-05 | -5.69 | 1.626948 | -1.1  | ZNF181                                               | zinc finger protein 181                        |
| 7951966 | 1.14E-03 | 7.34E-05 | -5.68 | 1.600782 | -1.44 | FXVD6-FXVD FXVD6-FXVD2 readthrough//FXVD<br>2//FXVD2 | domain containing ion transport regulator 2    |
| 7898184 | 1.14E-03 | 7.39E-05 | -5.67 | 1.594161 | -3.86 | CELA2B                                               | chymotrypsin like elastase family member<br>2B |
| 7973446 | 1.15E-03 | 7.46E-05 | -5.67 | 1.583755 | -1.13 | DHRS4-AS1                                            | DHRS4 antisense RNA 1                          |
| 8158976 | 1.16E-03 | 7.54E-05 | -5.66 | 1.572813 | -3.67 | CEL                                                  | carboxyl ester lipase                          |



|         |          |          |       |          |       |        |                                           |
|---------|----------|----------|-------|----------|-------|--------|-------------------------------------------|
| 8122125 | 1.16E-03 | 7.55E-05 | -5.66 | 1.572228 | -1.49 |        |                                           |
| 7969640 | 1.17E-03 | 7.68E-05 | -5.65 | 1.55488  | -2.94 | CLDN10 | claudin 10                                |
| 8056343 | 1.19E-03 | 7.87E-05 | -5.64 | 1.529981 | -1.14 | COBLL1 | cordon-bleu WH2 repeat protein like 1     |
| 8081903 | 1.20E-03 | 7.89E-05 | -5.64 | 1.526605 | -2.16 | MAATS1 | MYCBP associated and testis expressed 1   |
| 8047379 | 1.21E-03 | 8.08E-05 | -5.62 | 1.502708 | -1.08 |        |                                           |
| 8111677 | 1.24E-03 | 8.34E-05 | -5.6  | 1.470059 | -1.52 | LIFR   | leukemia inhibitory factor receptor alpha |
| 7981383 | 1.26E-03 | 8.48E-05 | -5.59 | 1.453524 | -1    |        |                                           |
| 7933139 | 1.31E-03 | 8.98E-05 | -5.56 | 1.395162 | -1.33 | ZNF33B | zinc finger protein 33B                   |

|         |          |          |       |          |       |                               |                                                        |
|---------|----------|----------|-------|----------|-------|-------------------------------|--------------------------------------------------------|
| 7968254 | 1.32E-03 | 9.02E-05 | -5.56 | 1.389923 | -1.06 | POLR1D                        | RNA polymerase I subunit D                             |
| 7903162 | 1.33E-03 | 9.07E-05 | -5.55 | 1.384809 | -1.93 | TMEM56-RW<br>DD3///TMEM5<br>6 | TMEM56-RWDD3<br>readthrough///transmembrane protein 56 |
| 8056327 | 1.33E-03 | 9.11E-05 | -5.55 | 1.380163 | -2.94 | GRB14                         | growth factor receptor bound protein 14                |
| 7970842 | 1.34E-03 | 9.19E-05 | -5.55 | 1.371269 | -1.06 |                               |                                                        |
| 8111136 | 1.35E-03 | 9.30E-05 | -5.54 | 1.359108 | -1.58 | FAM134B                       | family with sequence similarity 134 member<br>B        |
| 7980891 | 1.36E-03 | 9.39E-05 | -5.53 | 1.349275 | -1.53 | TC2N                          | tandem C2 domains, nuclear                             |

|         |          |          |       |          |       |         |                                                                   |
|---------|----------|----------|-------|----------|-------|---------|-------------------------------------------------------------------|
| 8158987 | 1.37E-03 | 9.42E-05 | -5.53 | 1.346093 | -1.47 | CELP    | carboxyl ester lipase pseudogene                                  |
| 7898176 | 1.37E-03 | 9.47E-05 | -5.53 | 1.340685 | -3.32 | CELA2A  | chymotrypsin like elastase family member<br>2A                    |
| 8174141 | 1.43E-03 | 9.98E-05 | -5.5  | 1.286895 | -2.35 | BEX5    | brain expressed X-linked 5                                        |
| 7995895 | 1.45E-03 | 1.02E-04 | -5.49 | 1.267345 | -1.1  | HERPUD1 | homocysteine inducible ER protein with<br>ubiquitin like domain 1 |
| 7964183 | 1.47E-03 | 1.04E-04 | -5.47 | 1.244552 | -1.56 | GLS2    | glutaminase 2                                                     |

|         |          |          |       |          |       |         |                                                      |
|---------|----------|----------|-------|----------|-------|---------|------------------------------------------------------|
| 7898734 | 1.47E-03 | 1.04E-04 | -5.47 | 1.240766 | -2.66 |         |                                                      |
| 8134351 | 1.49E-03 | 1.06E-04 | -5.46 | 1.223396 | -1.43 | PPP1R9A | protein phosphatase 1 regulatory subunit 9A          |
| 8095562 | 1.50E-03 | 1.06E-04 | -5.46 | 1.22268  | -1.07 |         |                                                      |
| 8081758 | 1.53E-03 | 1.11E-04 | -5.44 | 1.182907 | -1.44 | GRAMD1C | GRAM domain containing 1C                            |
| 8092523 | 1.53E-03 | 1.11E-04 | -5.44 | 1.182129 | -1.02 | EHHADH  | enoyl-CoA, hydratase/3-hydroxyacyl CoA dehydrogenase |
| 8124498 | 1.58E-03 | 1.15E-04 | -5.41 | 1.141166 | -1.49 | ZNF204P | zinc finger protein 204, pseudogene                  |

|         |          |          |       |          |       |                        |                                                                                    |
|---------|----------|----------|-------|----------|-------|------------------------|------------------------------------------------------------------------------------|
| 7970716 | 1.58E-03 | 1.15E-04 | -5.41 | 1.140106 | -1.21 | LNK2                   | ligand of numb-protein X 2                                                         |
| 7979378 | 1.61E-03 | 1.18E-04 | -5.4  | 1.113231 | -2.03 | C14orf105              | chromosome 14 open reading frame 105                                               |
| 7906954 | 1.62E-03 | 1.19E-04 | -5.4  | 1.108104 | -1.12 | PBX1                   | PBX homeobox 1                                                                     |
| 8162006 | 1.67E-03 | 1.25E-04 | -5.37 | 1.058888 | -1.08 | GKAP1                  | G kinase anchoring protein 1                                                       |
| 7950641 | 1.70E-03 | 1.27E-04 | -5.36 | 1.037305 | -1.35 | NDUFC2-KCTD14///KCTD14 | NDUFC2-KCTD14 readthrough///potassium channel tetramerization domain containing 14 |

|         |          |          |       |          |       |                       |                                                       |
|---------|----------|----------|-------|----------|-------|-----------------------|-------------------------------------------------------|
| 7903592 | 1.70E-03 | 1.28E-04 | -5.35 | 1.034834 | -2.88 | KIAA1324              | KIAA1324                                              |
| 7976481 | 1.76E-03 | 1.34E-04 | -5.33 | 0.989499 | -1.57 | SERPINA4              | serpin family A member 4                              |
| 8090988 | 1.78E-03 | 1.36E-04 | -5.32 | 0.974775 | -1.39 | CEP70                 | centrosomal protein 70                                |
| 7923974 | 1.80E-03 | 1.39E-04 | -5.31 | 0.951087 | -1.93 | C1orf132///MI<br>R29C | chromosome 1 open reading frame<br>132///microRNA 29c |
| 8144604 | 1.81E-03 | 1.39E-04 | -5.3  | 0.947331 | -2.28 | TDH                   | L-threonine dehydrogenase (pseudogene)                |
| 7962557 | 1.82E-03 | 1.41E-04 | -5.3  | 0.937706 | -1.32 |                       |                                                       |
| 8063174 | 1.83E-03 | 1.42E-04 | -5.29 | 0.92745  | -1.76 |                       |                                                       |

|         |          |          |       |          |       |         |                                                    |
|---------|----------|----------|-------|----------|-------|---------|----------------------------------------------------|
| 7910022 | 1.86E-03 | 1.44E-04 | -5.28 | 0.910876 | -1.46 | CNIH3   | cornichon family AMPA receptor auxiliary protein 3 |
| 8079931 | 1.86E-03 | 1.45E-04 | -5.28 | 0.90655  | -1.48 | SLC38A3 | solute carrier family 38 member 3                  |
| 8058591 | 1.90E-03 | 1.49E-04 | -5.27 | 0.880305 | -3.28 | ACADL   | acyl-CoA dehydrogenase, long chain                 |
| 7913768 | 1.92E-03 | 1.51E-04 | -5.26 | 0.866336 | -2.52 | IL22RA1 | interleukin 22 receptor subunit alpha 1            |
| 8050111 | 1.96E-03 | 1.55E-04 | -5.24 | 0.837953 | -1.51 |         |                                                    |

|         |          |          |       |          |       |                                                                                                                                                                                           |
|---------|----------|----------|-------|----------|-------|-------------------------------------------------------------------------------------------------------------------------------------------------------------------------------------------|
| 7987279 | 1.97E-03 | 1.56E-04 | -5.24 | 0.828668 | -1.53 | GOLGA8DP/// golgin A8 family member D,<br>GOLGA8CP/// pseudogene///golgin A8 family member C,<br>GOLGA8B///G pseudogene///golgin A8 family member<br>OLGA8A B///golgin A8 family member A |
| 7910600 | 1.97E-03 | 1.56E-04 | -5.24 | 0.828495 | -1.27 | KIAA1804 mixed lineage kinase 4                                                                                                                                                           |



|         |          |          |       |          |       |          |                                                   |
|---------|----------|----------|-------|----------|-------|----------|---------------------------------------------------|
| 7943162 | 2.01E-03 | 1.60E-04 | -5.22 | 0.806286 | -1.14 | C11orf54 | chromosome 11 open reading frame 54               |
| 7952384 | 2.04E-03 | 1.64E-04 | -5.21 | 0.780459 | -1.5  | OR10S1   | olfactory receptor family 10 subfamily S member 1 |
| 8145122 | 2.05E-03 | 1.65E-04 | -5.21 | 0.77532  | -1.35 | SLC39A14 | solute carrier family 39 member 14                |

|         |          |          |       |          |       |               |                                                                                             |
|---------|----------|----------|-------|----------|-------|---------------|---------------------------------------------------------------------------------------------|
| 7909866 | 2.08E-03 | 1.68E-04 | -5.19 | 0.752542 | -1.15 | MARC2///MARC2 | mitochondrial amidoxime reducing component 2///mitochondrial amidoxime reducing component 2 |
| 8098326 | 2.08E-03 | 1.69E-04 | -5.19 | 0.751652 | -1.16 |               |                                                                                             |
| 8135480 | 2.10E-03 | 1.71E-04 | -5.19 | 0.740343 | -1.11 | DNAJB9        | DnaJ heat shock protein family (Hsp40) member B9                                            |

|         |          |          |       |          |       |        |                                            |
|---------|----------|----------|-------|----------|-------|--------|--------------------------------------------|
| 8088192 | 2.13E-03 | 1.74E-04 | -5.18 | 0.722329 | -1.03 | ERC2   | ELKS/RAB6-interacting/CAST family member 2 |
| 8110990 | 2.20E-03 | 1.81E-04 | -5.15 | 0.679794 | -1.62 | CTNND2 | catenin delta 2                            |
| 7915207 | 2.23E-03 | 1.85E-04 | -5.14 | 0.65744  | -1.56 | PABPC4 | poly(A) binding protein cytoplasmic 4      |
| 8161839 | 2.25E-03 | 1.87E-04 | -5.14 | 0.648172 | -1.28 | NMRK1  | nicotinamide riboside kinase 1             |
| 8089851 | 2.26E-03 | 1.89E-04 | -5.13 | 0.638046 | -2.09 | HGD    | homogentisate 1,2-dioxygenase              |
| 8093278 | 2.26E-03 | 1.89E-04 | -5.13 | 0.638046 | -2.09 | HGD    | homogentisate 1,2-dioxygenase              |

|         |          |          |       |          |       |       |                                      |
|---------|----------|----------|-------|----------|-------|-------|--------------------------------------|
| 7961580 | 2.26E-03 | 1.89E-04 | -5.13 | 0.636758 | -2.59 | LMO3  | LIM domain only 3                    |
| 8031933 | 2.30E-03 | 1.93E-04 | -5.12 | 0.615142 | -1.06 | RPS5  | ribosomal protein S5                 |
| 8142270 | 2.42E-03 | 2.06E-04 | -5.08 | 0.547037 | -2.76 | NRCAM | neuronal cell adhesion molecule      |
| 8135544 | 2.43E-03 | 2.08E-04 | -5.07 | 0.537148 | -1.57 | FOXP2 | forkhead box P2                      |
| 7908917 | 2.51E-03 | 2.16E-04 | -5.05 | 0.49792  | -1.84 | BTG2  | BTG anti-proliferation factor 2      |
| 7998643 | 2.51E-03 | 2.17E-04 | -5.05 | 0.494854 | -1.04 | RPL3L | ribosomal protein L3 like            |
| 7893306 | 2.52E-03 | 2.17E-04 | -5.05 | 0.492343 | -1.09 |       |                                      |
| 7956668 | 2.54E-03 | 2.21E-04 | -5.04 | 0.477514 | -1.02 |       |                                      |
| 7901765 | 2.54E-03 | 2.21E-04 | -5.04 | 0.473966 | -1.77 | HOOK1 | hook microtubule tethering protein 1 |

|         |          |          |       |          |       |       |                                                      |
|---------|----------|----------|-------|----------|-------|-------|------------------------------------------------------|
| 7947156 | 2.54E-03 | 2.22E-04 | -5.04 | 0.472146 | -2.85 | MUC15 | mucin 15, cell surface associated                    |
| 7908610 | 2.55E-03 | 2.23E-04 | -5.04 | 0.467877 | -3.45 |       |                                                      |
| 8132013 | 2.62E-03 | 2.29E-04 | -5.02 | 0.438372 | -1.58 | CHN2  | chimerin 2                                           |
| 8072946 | 2.68E-03 | 2.37E-04 | -5    | 0.406703 | -1.04 | EIF3L | eukaryotic translation initiation factor 3 subunit L |
| 7910146 | 2.68E-03 | 2.37E-04 | -5    | 0.404898 | -1.09 | PSEN2 | presenilin 2                                         |
| 8031867 | 2.78E-03 | 2.50E-04 | -4.97 | 0.349326 | -1.26 |       |                                                      |
| 7973869 | 2.80E-03 | 2.53E-04 | -4.96 | 0.337656 | -1.12 |       |                                                      |
| 7908597 | 2.80E-03 | 2.54E-04 | -4.96 | 0.334347 | -2.79 | NR5A2 | nuclear receptor subfamily 5 group A member 2        |

|         |          |          |       |          |       |                 |                                                  |
|---------|----------|----------|-------|----------|-------|-----------------|--------------------------------------------------|
| 8156935 | 2.83E-03 | 2.57E-04 | -4.96 | 0.321589 | -1.06 | ZNF189          | zinc finger protein 189                          |
| 7960863 | 2.87E-03 | 2.62E-04 | -4.94 | 0.302442 | -1.08 |                 |                                                  |
| 7983650 | 2.89E-03 | 2.65E-04 | -4.94 | 0.291933 | -1.5  | SLC27A2         | solute carrier family 27 member 2                |
| 7993756 | 2.93E-03 | 2.70E-04 | -4.93 | 0.271535 | -2.04 | ACSM3           | acyl-CoA synthetase medium-chain family member 3 |
| 8144621 | 2.95E-03 | 2.74E-04 | -4.92 | 0.258164 | -1.2  | FAM167A-AS<br>1 | FAM167A antisense RNA 1                          |
| 8027437 | 2.96E-03 | 2.75E-04 | -4.92 | 0.254463 | -1.12 |                 |                                                  |
| 8047300 | 2.99E-03 | 2.79E-04 | -4.91 | 0.240322 | -2.73 | AOX1            | aldehyde oxidase 1                               |
| 7932727 | 2.99E-03 | 2.79E-04 | -4.91 | 0.238965 | -1.54 | PTCHD3          | patched domain containing 3                      |

|         |          |          |       |          |       |          |                                                               |
|---------|----------|----------|-------|----------|-------|----------|---------------------------------------------------------------|
| 8087224 | 3.00E-03 | 2.81E-04 | -4.91 | 0.232256 | -1.14 | SLC25A20 | solute carrier family 25 member 20                            |
| 7930790 | 3.04E-03 | 2.85E-04 | -4.9  | 0.217022 | -3.49 | PNLIPRP1 | pancreatic lipase related protein 1                           |
| 8107996 | 3.09E-03 | 2.90E-04 | -4.89 | 0.199187 | -1.23 |          |                                                               |
| 7930454 | 3.12E-03 | 2.94E-04 | -4.88 | 0.18587  | -1.37 | PDCD4    | programmed cell death 4 (neoplastic transformation inhibitor) |
| 8129231 | 3.12E-03 | 2.94E-04 | -4.88 | 0.183749 | -1.05 | FAM184A  | family with sequence similarity 184 member A                  |

|         |          |          |       |          |       |         |                                                                  |
|---------|----------|----------|-------|----------|-------|---------|------------------------------------------------------------------|
| 8106986 | 3.15E-03 | 2.98E-04 | -4.87 | 0.172802 | -1.11 | RHOBTB3 | Rho related BTB domain containing 3                              |
| 7898732 | 3.19E-03 | 3.02E-04 | -4.86 | 0.157632 | -4.15 |         |                                                                  |
| 8126954 | 3.19E-03 | 3.02E-04 | -4.86 | 0.156942 | -2.8  | PKHD1   | polycystic kidney and hepatic disease 1<br>(autosomal recessive) |
| 8154848 | 3.22E-03 | 3.06E-04 | -4.86 | 0.143238 | -2.34 | PRSS3   | protease, serine 3                                               |
| 7898721 | 3.24E-03 | 3.09E-04 | -4.85 | 0.133383 | -3.67 |         |                                                                  |
| 8009493 | 3.45E-03 | 3.39E-04 | -4.8  | 0.041194 | -3.5  | KCNJ16  | potassium voltage-gated channel subfamily J<br>member 16         |



|         |          |          |       |           |       |         |                                               |
|---------|----------|----------|-------|-----------|-------|---------|-----------------------------------------------|
| 7936734 | 3.50E-03 | 3.46E-04 | -4.79 | 0.019795  | -1.07 | FGFR2   | fibroblast growth factor receptor 2           |
| 8097417 | 3.52E-03 | 3.48E-04 | -4.79 | 0.013015  | -1.28 | JADE1   | jade family PHD finger 1                      |
| 8139816 | 3.54E-03 | 3.52E-04 | -4.78 | 0.00268   | -1.43 |         |                                               |
| 8095907 | 3.54E-03 | 3.52E-04 | -4.78 | 0.001405  | -1.29 | FRAS1   | Fraser extracellular matrix complex subunit 1 |
| 8117304 | 3.56E-03 | 3.55E-04 | -4.78 | -0.00595  | -2.6  | SLC17A4 | solute carrier family 17 member 4             |
| 7954377 | 3.62E-03 | 3.63E-04 | -4.76 | -0.02909  | -4.27 | IAPP    | islet amyloid polypeptide                     |
| 8073680 | 3.62E-03 | 3.64E-04 | -4.76 | -0.031103 | -1.04 |         |                                               |

|         |          |          |       |           |       |        |                                               |
|---------|----------|----------|-------|-----------|-------|--------|-----------------------------------------------|
| 7931643 | 3.63E-03 | 3.65E-04 | -4.76 | -0.034463 | -1.1  | CYP2E1 | cytochrome P450 family 2 subfamily E member 1 |
| 7965884 | 3.66E-03 | 3.69E-04 | -4.75 | -0.044978 | -2.14 | PAH    | phenylalanine hydroxylase                     |
| 8135943 | 3.69E-03 | 3.72E-04 | -4.75 | -0.053934 | -1.63 |        |                                               |
| 8091078 | 3.75E-03 | 3.82E-04 | -4.74 | -0.080047 | -1.94 | RBP1   | retinol binding protein 1                     |

|         |          |          |       |           |       |                                                                                                                                                                                                                                                                                                                                                                                                                                                                                                    |
|---------|----------|----------|-------|-----------|-------|----------------------------------------------------------------------------------------------------------------------------------------------------------------------------------------------------------------------------------------------------------------------------------------------------------------------------------------------------------------------------------------------------------------------------------------------------------------------------------------------------|
| 8053744 | 3.78E-03 | 3.86E-04 | -4.73 | -0.092698 | -1.04 | <p>ANKRD20A21 ankyrin repeat domain 20 family member<br/> P///ANKRD20 A21, pseudogene///ankyrin repeat domain 20<br/> A8P///ANKRD family member A8, pseudogene///ankyrin<br/> repeat domain 20 family member<br/> 20A4///ANKR A4///ankyrin repeat domain 20 family<br/> D20A2///ANK member A2///ankyrin repeat domain 20<br/> RD20A3///AN family member A3///ankyrin repeat domain<br/> KRD20A5P/// 20 family member A5, pseudogene///ankyrin<br/> ANKRD20A1 repeat domain 20 family member A1</p> |
|---------|----------|----------|-------|-----------|-------|----------------------------------------------------------------------------------------------------------------------------------------------------------------------------------------------------------------------------------------------------------------------------------------------------------------------------------------------------------------------------------------------------------------------------------------------------------------------------------------------------|

|         |          |          |       |           |       |                 |                                                            |
|---------|----------|----------|-------|-----------|-------|-----------------|------------------------------------------------------------|
| 8130422 | 3.79E-03 | 3.87E-04 | -4.73 | -0.094965 | -1.38 | CNKSR3///CNKSR3 | CNKSR family member 3///CNKSR family member 3              |
| 8157246 | 3.83E-03 | 3.93E-04 | -4.72 | -0.108554 | -1.02 | KIAA1958        | KIAA1958                                                   |
| 8145776 | 3.89E-03 | 4.02E-04 | -4.71 | -0.132241 | -1.09 |                 |                                                            |
| 7923991 | 3.95E-03 | 4.11E-04 | -4.69 | -0.155173 | -1.18 | PLXNA2          | plexin A2                                                  |
| 8163149 | 3.96E-03 | 4.12E-04 | -4.69 | -0.157021 | -1.14 | PTPN3           | protein tyrosine phosphatase, non-receptor type 3          |
| 8113369 | 4.01E-03 | 4.19E-04 | -4.68 | -0.175499 | -1.57 | SLCO4C1         | solute carrier organic anion transporter family member 4C1 |

|         |          |          |       |           |       |                                                     |                                                                                                                                                |
|---------|----------|----------|-------|-----------|-------|-----------------------------------------------------|------------------------------------------------------------------------------------------------------------------------------------------------|
| 7919067 | 4.06E-03 | 4.27E-04 | -4.67 | -0.193288 | -1.16 | REG4                                                | regenerating family member 4                                                                                                                   |
| 7987248 | 4.08E-03 | 4.30E-04 | -4.67 | -0.200735 | -1.4  | GOLGA8DP///<br>GOLGA8CP///<br>GOLGA8B///G<br>OLGA8A | golgin A8 family member D,<br>pseudogene///golgin A8 family member C,<br>pseudogene///golgin A8 family member<br>B///golgin A8 family member A |
| 8027312 | 4.08E-03 | 4.30E-04 | -4.67 | -0.201452 | -1.2  | ZNF429                                              | zinc finger protein 429                                                                                                                        |

|         |          |          |       |           |       |                   |                                              |
|---------|----------|----------|-------|-----------|-------|-------------------|----------------------------------------------|
| 8002845 | 4.10E-03 | 4.33E-04 | -4.67 | -0.207543 | -2.89 | CTRB2///CTR<br>B1 | chymotrypsinogen B2///chymotrypsinogen<br>B1 |
| 8016739 | 4.14E-03 | 4.39E-04 | -4.66 | -0.221574 | -1.03 | TOB1              | transducer of ERBB2, 1                       |
| 8141066 | 4.16E-03 | 4.42E-04 | -4.65 | -0.229228 | -1.17 | PON3              | paraoxonase 3                                |
| 8143772 | 4.17E-03 | 4.43E-04 | -4.65 | -0.231698 | -1.46 | RARRES2           | retinoic acid receptor responder 2           |
| 7973797 | 4.20E-03 | 4.47E-04 | -4.65 | -0.241055 | -1.45 | COCH              | cochlin                                      |
| 7981059 | 4.22E-03 | 4.49E-04 | -4.65 | -0.246153 | -1.2  | SERPINA6          | serpin family A member 6                     |
| 8149521 | 4.24E-03 | 4.54E-04 | -4.64 | -0.255313 | -4.01 | FGL1              | fibrinogen like 1                            |

|         |          |          |       |           |       |               |                                                  |
|---------|----------|----------|-------|-----------|-------|---------------|--------------------------------------------------|
| 8095751 | 4.24E-03 | 4.54E-04 | -4.64 | -0.256379 | -1.05 | PARM1         | prostate androgen-regulated mucin-like protein 1 |
| 8125936 | 4.36E-03 | 4.70E-04 | -4.62 | -0.292515 | -2.55 | CLPS          | colipase                                         |
| 8009515 | 4.37E-03 | 4.72E-04 | -4.62 | -0.295327 | -1.38 | LINC01152     | long intergenic non-protein coding RNA 1152      |
| 8081645 | 4.44E-03 | 4.83E-04 | -4.61 | -0.318989 | -1.4  | C3orf52       | chromosome 3 open reading frame 52               |
| 7997264 | 4.47E-03 | 4.87E-04 | -4.6  | -0.326642 | -2.63 | CTRB2///CTRB1 | chymotrypsinogen B2///chymotrypsinogen B1        |

|         |          |          |       |           |       |        |                                  |
|---------|----------|----------|-------|-----------|-------|--------|----------------------------------|
| 8049969 | 4.65E-03 | 5.17E-04 | -4.57 | -0.387621 | -1.3  | SH3YL1 | SH3 and SYLF domain containing 1 |
| 8057821 | 4.71E-03 | 5.26E-04 | -4.56 | -0.404947 | -1.14 | DNAH7  | dynein axonemal heavy chain 7    |
| 8104068 | 4.75E-03 | 5.32E-04 | -4.55 | -0.417868 | -1.75 |        |                                  |
| 7984985 | 4.82E-03 | 5.42E-04 | -4.54 | -0.435434 | -1.01 |        |                                  |
| 7983867 | 4.83E-03 | 5.45E-04 | -4.54 | -0.442119 | -1.05 | CGNL1  | cingulin like 1                  |
| 8132998 | 4.98E-03 | 5.70E-04 | -4.52 | -0.486955 | -1.51 |        |                                  |
| 8095585 | 5.00E-03 | 5.73E-04 | -4.51 | -0.492439 | -2.8  | SLC4A4 | solute carrier family 4 member 4 |
| 8078956 | 5.04E-03 | 5.80E-04 | -4.51 | -0.504291 | -2.32 |        |                                  |
| 8102468 | 5.05E-03 | 5.81E-04 | -4.51 | -0.50618  | -1.14 | PRSS12 | protease, serine 12              |
| 7995825 | 5.15E-03 | 5.96E-04 | -4.49 | -0.533127 | -1.77 | MT1F   | metallothionein 1F               |



|         |          |          |       |           |       |                   |                                                                 |
|---------|----------|----------|-------|-----------|-------|-------------------|-----------------------------------------------------------------|
| 7983890 | 5.16E-03 | 5.98E-04 | -4.49 | -0.536847 | -1.35 | MYZAP///GC<br>OM1 | myocardial zonula adherens<br>protein///GRINL1A complex locus 1 |
| 7965565 | 5.19E-03 | 6.06E-04 | -4.48 | -0.549029 | -1.22 | USP44             | ubiquitin specific peptidase 44                                 |
| 8097867 | 5.26E-03 | 6.18E-04 | -4.47 | -0.56925  | -1.04 | KIAA0922          | KIAA0922                                                        |
| 8149097 | 5.29E-03 | 6.22E-04 | -4.47 | -0.575715 | -2.77 | DEFB1             | defensin beta 1                                                 |
| 8079163 | 5.34E-03 | 6.30E-04 | -4.46 | -0.588969 | -1.01 |                   |                                                                 |

|         |          |          |       |           |       |                                                                |                                             |
|---------|----------|----------|-------|-----------|-------|----------------------------------------------------------------|---------------------------------------------|
| 8147351 | 5.49E-03 | 6.54E-04 | -4.44 | -0.627428 | -1.14 | ESRP1///RAF1 1///Raf-1 proto-oncogene, serine/threonine kinase | epithelial splicing regulatory protein      |
| 8104066 | 5.49E-03 | 6.55E-04 | -4.44 | -0.628196 | -1.46 | SORBS2                                                         | sorbin and SH3 domain containing 2          |
| 7988414 | 5.51E-03 | 6.59E-04 | -4.44 | -0.634808 | -2.83 | GATM                                                           | glycine amidinotransferase                  |
| 7898713 | 5.64E-03 | 6.79E-04 | -4.42 | -0.664935 | -2.5  | CELA3B                                                         | chymotrypsin like elastase family member 3B |

|         |          |          |       |           |       |                        |                                                                              |
|---------|----------|----------|-------|-----------|-------|------------------------|------------------------------------------------------------------------------|
| 7897953 | 5.65E-03 | 6.81E-04 | -4.42 | -0.667993 | -1.01 | SNORA59A//<br>SNORA59B | small nucleolar RNA, H/ACA box<br>59A//small nucleolar RNA, H/ACA box<br>59B |
|---------|----------|----------|-------|-----------|-------|------------------------|------------------------------------------------------------------------------|

|         |          |          |       |           |       |                        |                                                                              |
|---------|----------|----------|-------|-----------|-------|------------------------|------------------------------------------------------------------------------|
| 8005626 | 5.65E-03 | 6.81E-04 | -4.42 | -0.667993 | -1.01 | SNORA59A//<br>SNORA59B | small nucleolar RNA, H/ACA box<br>59A//small nucleolar RNA, H/ACA box<br>59B |
|---------|----------|----------|-------|-----------|-------|------------------------|------------------------------------------------------------------------------|

|         |          |          |       |           |       |        |                                            |
|---------|----------|----------|-------|-----------|-------|--------|--------------------------------------------|
| 7946340 | 5.68E-03 | 6.88E-04 | -4.41 | -0.677853 | -1.29 | RIC3   | RIC3 acetylcholine receptor chaperone      |
| 7922130 | 5.69E-03 | 6.88E-04 | -4.41 | -0.678609 | -1.09 | DPT    | dermatopontin                              |
| 7999920 | 5.72E-03 | 6.97E-04 | -4.41 | -0.690971 | -3.36 | GP2    | glycoprotein 2                             |
| 8139656 | 5.84E-03 | 7.15E-04 | -4.39 | -0.717442 | -1.33 | GRB10  | growth factor receptor bound protein 10    |
| 7965573 | 5.95E-03 | 7.36E-04 | -4.38 | -0.746348 | -1.3  | NTN4   | netrin 4                                   |
| 8108697 | 5.97E-03 | 7.38E-04 | -4.38 | -0.749652 | -1.02 | PCDHB5 | protocadherin beta 5                       |
| 8068684 | 5.99E-03 | 7.41E-04 | -4.37 | -0.753673 | -2.27 | FAM3B  | family with sequence similarity 3 member B |

|         |          |          |       |           |       |        |                                                                                                           |
|---------|----------|----------|-------|-----------|-------|--------|-----------------------------------------------------------------------------------------------------------|
| 8110971 | 6.19E-03 | 7.76E-04 | -4.35 | -0.799851 | -1.14 | CMBL   | carboxymethylenebutenolidase homolog                                                                      |
| 8102869 | 6.30E-03 | 7.97E-04 | -4.33 | -0.826832 | -1    |        |                                                                                                           |
| 8021376 | 6.30E-03 | 7.97E-04 | -4.33 | -0.827644 | -1.19 | NEDD4L | neural precursor cell expressed,<br>developmentally down-regulated 4-like, E3<br>ubiquitin protein ligase |
| 8148317 | 6.47E-03 | 8.25E-04 | -4.32 | -0.861859 | -1.14 | MYC    | v-myc avian myelocytomatosis viral<br>oncogene homolog                                                    |

|         |          |          |       |           |       |                     |                                                                         |
|---------|----------|----------|-------|-----------|-------|---------------------|-------------------------------------------------------------------------|
| 8150689 | 6.64E-03 | 8.57E-04 | -4.29 | -0.900604 | -1.06 |                     |                                                                         |
| 8114209 | 6.72E-03 | 8.70E-04 | -4.29 | -0.916104 | -1.01 |                     |                                                                         |
| 8123303 | 6.76E-03 | 8.77E-04 | -4.28 | -0.923325 | -1.19 | PACRG               | PARK2 coregulated                                                       |
| 8052370 | 6.84E-03 | 8.90E-04 | -4.27 | -0.938739 | -1.51 |                     |                                                                         |
| 7952249 | 6.90E-03 | 8.99E-04 | -4.27 | -0.948556 | -1.19 | USP2                | ubiquitin specific peptidase 2                                          |
| 7981943 | 6.99E-03 | 9.13E-04 | -4.26 | -0.964706 | -1.15 | SNORD64///P<br>WAR5 | small nucleolar RNA, C/D box 64///Prader<br>Willi/Angelman region RNA 5 |
| 8055486 | 6.99E-03 | 9.15E-04 | -4.26 | -0.966895 | -1.17 |                     |                                                                         |
| 7939024 | 7.13E-03 | 9.41E-04 | -4.24 | -0.995412 | -1.12 | ANO3                | anoctamin 3                                                             |

|         |          |          |       |           |       |        |                                               |
|---------|----------|----------|-------|-----------|-------|--------|-----------------------------------------------|
| 8117288 | 7.16E-03 | 9.49E-04 | -4.24 | -1.003517 | -2.49 | SCGN   | secretagogin, EF-hand calcium binding protein |
| 8174201 | 7.27E-03 | 9.71E-04 | -4.23 | -1.026397 | -2.34 | BEX1   | brain expressed X-linked 1                    |
| 7917199 | 7.32E-03 | 9.80E-04 | -4.22 | -1.03606  | -1.3  | TTLL7  | tubulin tyrosine ligase like 7                |
| 7932765 | 7.36E-03 | 9.89E-04 | -4.22 | -1.045012 | -1.59 | MPP7   | membrane palmitoylated protein 7              |
| 7923837 | 7.39E-03 | 9.94E-04 | -4.22 | -1.050112 | -3.46 | PM20D1 | peptidase M20 domain containing 1             |
| 7944970 | 7.49E-03 | 1.01E-03 | -4.21 | -1.069577 | -1.08 |        |                                               |
| 8169291 | 7.52E-03 | 1.02E-03 | -4.2  | -1.075076 | -1.85 |        |                                               |

|         |          |          |       |           |       |         |                                                   |
|---------|----------|----------|-------|-----------|-------|---------|---------------------------------------------------|
| 8146024 | 7.53E-03 | 1.02E-03 | -4.2  | -1.078222 | -1.19 | ADAM32  | ADAM metallopeptidase domain 32                   |
| 8084589 | 7.55E-03 | 1.02E-03 | -4.2  | -1.081302 | -1.1  | MAP3K13 | mitogen-activated protein kinase kinase kinase 13 |
| 8078971 | 7.61E-03 | 1.04E-03 | -4.19 | -1.09415  | -1.3  | ENTPD3  | ectonucleoside triphosphate diphosphohydrolase 3  |
| 8174239 | 7.66E-03 | 1.05E-03 | -4.19 | -1.103947 | -1    | BEX2    | brain expressed X-linked 2                        |



|         |          |          |       |           |       |                           |                                                                           |
|---------|----------|----------|-------|-----------|-------|---------------------------|---------------------------------------------------------------------------|
| 8104035 | 7.68E-03 | 1.05E-03 | -4.19 | -1.106339 | -1.53 | SORBS2                    | sorbin and SH3 domain containing 2                                        |
| 8095819 | 7.70E-03 | 1.06E-03 | -4.18 | -1.112327 | -1.83 | FAM47E-STB<br>D1///FAM47E | FAM47E-STBD1 readthrough///family with<br>sequence similarity 47 member E |
| 7983051 | 7.88E-03 | 1.09E-03 | -4.17 | -1.145345 | -1.07 | LOC10537079<br>2          | uncharacterized LOC105370792                                              |
| 8088642 | 7.96E-03 | 1.11E-03 | -4.16 | -1.162501 | -1.24 | LRIG1                     | leucine rich repeats and immunoglobulin like<br>domains 1                 |

|         |          |          |       |           |       |                          |                                                                     |
|---------|----------|----------|-------|-----------|-------|--------------------------|---------------------------------------------------------------------|
| 8005753 | 8.02E-03 | 1.12E-03 | -4.15 | -1.172779 | -1.16 |                          |                                                                     |
| 8135661 | 8.09E-03 | 1.13E-03 | -4.15 | -1.182995 | -2.68 | CFTR                     | cystic fibrosis transmembrane conductance regulator                 |
| 8046018 | 8.20E-03 | 1.16E-03 | -4.14 | -1.202481 | -1.82 |                          |                                                                     |
| 7936798 | 8.25E-03 | 1.16E-03 | -4.13 | -1.210787 | -3.68 | FAM24B-CUZ<br>D1///CUZD1 | FAM24B-CUZD1 readthrough///CUB and<br>zona pellucida like domains 1 |
| 7933263 | 8.26E-03 | 1.17E-03 | -4.13 | -1.21142  | -1.29 | PTPN20                   | protein tyrosine phosphatase, non-receptor<br>type 20               |
| 7960355 | 8.27E-03 | 1.17E-03 | -4.13 | -1.214154 | -1.1  |                          |                                                                     |

|         |          |          |       |           |       |                             |                                                            |
|---------|----------|----------|-------|-----------|-------|-----------------------------|------------------------------------------------------------|
| 7993371 | 8.35E-03 | 1.19E-03 | -4.12 | -1.230165 | -1.06 | NOMO3//NO<br>MO2//NOMO<br>1 | NODAL modulator 3//NODAL modulator<br>2//NODAL modulator 1 |
|---------|----------|----------|-------|-----------|-------|-----------------------------|------------------------------------------------------------|

|         |          |          |       |           |       |                             |                                                            |
|---------|----------|----------|-------|-----------|-------|-----------------------------|------------------------------------------------------------|
| 7993511 | 8.35E-03 | 1.19E-03 | -4.12 | -1.230165 | -1.06 | NOMO3//NO<br>MO2//NOMO<br>1 | NODAL modulator 3//NODAL modulator<br>2//NODAL modulator 1 |
|---------|----------|----------|-------|-----------|-------|-----------------------------|------------------------------------------------------------|

|         |          |          |       |           |       |                     |                                                         |
|---------|----------|----------|-------|-----------|-------|---------------------|---------------------------------------------------------|
| 7999791 | 8.35E-03 | 1.19E-03 | -4.12 | -1.230165 | -1.06 | NOMO3//NOMO2//NOMO1 | NODAL modulator 3//NODAL modulator 2//NODAL modulator 1 |
| 8059708 | 8.35E-03 | 1.19E-03 | -4.12 | -1.231153 | -1.58 | SNORA75             | small nucleolar RNA, H/ACA box 75                       |
| 8124385 | 8.46E-03 | 1.21E-03 | -4.11 | -1.249562 | -1.05 | HIST1H4B            | histone cluster 1, H4b                                  |
| 8027354 | 8.48E-03 | 1.22E-03 | -4.11 | -1.253588 | -1    | RPSAP58             | ribosomal protein SA pseudogene 58                      |
| 7981333 | 8.49E-03 | 1.22E-03 | -4.11 | -1.254835 | -3.14 |                     |                                                         |
| 7978376 | 8.52E-03 | 1.22E-03 | -4.1  | -1.260728 | -1.15 | STXBP6              | syntaxin binding protein 6                              |

|         |          |          |       |           |       |         |                                              |
|---------|----------|----------|-------|-----------|-------|---------|----------------------------------------------|
| 8098620 | 8.54E-03 | 1.23E-03 | -4.1  | -1.263148 | -1.12 | FAM149A | family with sequence similarity 149 member A |
| 8156134 | 8.73E-03 | 1.26E-03 | -4.09 | -1.293528 | -1.54 | NTRK2   | neurotrophic receptor tyrosine kinase 2      |
| 7976350 | 8.87E-03 | 1.29E-03 | -4.08 | -1.315283 | -1.36 | UNC79   | unc-79 homolog (C. elegans)                  |
| 7996260 | 8.91E-03 | 1.30E-03 | -4.07 | -1.322525 | -2.13 |         |                                              |
| 8166747 | 8.93E-03 | 1.31E-03 | -4.07 | -1.327295 | -1.52 | SYTL5   | synaptotagmin like 5                         |
| 8106448 | 9.03E-03 | 1.32E-03 | -4.06 | -1.340338 | -1.17 | PDE8B   | phosphodiesterase 8B                         |
| 7996943 | 9.25E-03 | 1.37E-03 | -4.04 | -1.375446 | -1.04 |         |                                              |

|         |          |          |       |           |       |         |                                                       |
|---------|----------|----------|-------|-----------|-------|---------|-------------------------------------------------------|
| 8162492 | 9.36E-03 | 1.39E-03 | -4.04 | -1.392382 | -1.21 | FBP2    | fructose-bisphosphatase 2                             |
| 8042466 | 9.37E-03 | 1.40E-03 | -4.03 | -1.395033 | -1.58 |         |                                                       |
| 7908409 | 9.43E-03 | 1.41E-03 | -4.03 | -1.403822 | -1.46 | RGS2    | regulator of G-protein signaling 2                    |
| 8113346 | 9.61E-03 | 1.45E-03 | -4.02 | -1.428158 | -1.25 |         |                                                       |
| 7931405 | 9.81E-03 | 1.49E-03 | -4    | -1.458301 | -1.27 | PPP2R2D | protein phosphatase 2 regulatory subunit<br>Bdelta    |
| 8168079 | 9.81E-03 | 1.49E-03 | -4    | -1.458394 | -1.06 |         |                                                       |
| 8092800 | 1.00E-02 | 1.53E-03 | -3.99 | -1.484707 | -1.14 | ATP13A4 | ATPase 13A4                                           |
| 7933379 | 1.01E-02 | 1.56E-03 | -3.98 | -1.503491 | -1.27 | PTPN20  | protein tyrosine phosphatase, non-receptor<br>type 20 |

|         |          |          |       |           |       |         |                                                                     |
|---------|----------|----------|-------|-----------|-------|---------|---------------------------------------------------------------------|
| 8083000 | 1.03E-02 | 1.60E-03 | -3.96 | -1.529343 | -1.12 | FAIM    | Fas apoptotic inhibitory molecule                                   |
| 8068620 | 1.05E-02 | 1.64E-03 | -3.95 | -1.55719  | -1.02 | SH3BGR  | SH3 domain binding glutamate rich protein                           |
| 8143499 | 1.09E-02 | 1.72E-03 | -3.92 | -1.604597 | -1.14 | TRPV6   | transient receptor potential cation channel<br>subfamily V member 6 |
| 8038326 | 1.10E-02 | 1.74E-03 | -3.92 | -1.613257 | -1    | SLC6A16 | solute carrier family 6 member 16                                   |

|         |          |          |       |           |       |                                                                                                                   |                                                                                                                                                                                                                                                                                                                                                                                |
|---------|----------|----------|-------|-----------|-------|-------------------------------------------------------------------------------------------------------------------|--------------------------------------------------------------------------------------------------------------------------------------------------------------------------------------------------------------------------------------------------------------------------------------------------------------------------------------------------------------------------------|
| 8155397 | 1.10E-02 | 1.74E-03 | -3.92 | -1.614724 | -1.13 | ANKRD20A21<br>P///ANKRD20<br>A8P///ANKRD<br>20A4///ANKR<br>D20A2///ANK<br>RD20A3///AN<br>KRD20A5P///<br>ANKRD20A1 | ankyrin repeat domain 20 family member<br>A21, pseudogene///ankyrin repeat domain 20<br>family member A8, pseudogene///ankyrin<br>repeat domain 20 family member<br>A4///ankyrin repeat domain 20 family<br>member A2///ankyrin repeat domain 20<br>family member A3///ankyrin repeat domain<br>20 family member A5, pseudogene///ankyrin<br>repeat domain 20 family member A1 |
|---------|----------|----------|-------|-----------|-------|-------------------------------------------------------------------------------------------------------------------|--------------------------------------------------------------------------------------------------------------------------------------------------------------------------------------------------------------------------------------------------------------------------------------------------------------------------------------------------------------------------------|



|         |          |          |       |           |       |                                                                                                                                                                                                                                                                                                                                                                                                                                                                                                    |
|---------|----------|----------|-------|-----------|-------|----------------------------------------------------------------------------------------------------------------------------------------------------------------------------------------------------------------------------------------------------------------------------------------------------------------------------------------------------------------------------------------------------------------------------------------------------------------------------------------------------|
| 8161388 | 1.10E-02 | 1.74E-03 | -3.92 | -1.614724 | -1.13 | <p>ANKRD20A21 ankyrin repeat domain 20 family member<br/> P///ANKRD20 A21, pseudogene///ankyrin repeat domain 20<br/> A8P///ANKRD family member A8, pseudogene///ankyrin<br/> 20A4///ANKR repeat domain 20 family member<br/> D20A2///ANK A4///ankyrin repeat domain 20 family<br/> RD20A3///AN member A2///ankyrin repeat domain 20<br/> KRD20A5P/// family member A3///ankyrin repeat domain<br/> ANKRD20A1 20 family member A5, pseudogene///ankyrin<br/> repeat domain 20 family member A1</p> |
|---------|----------|----------|-------|-----------|-------|----------------------------------------------------------------------------------------------------------------------------------------------------------------------------------------------------------------------------------------------------------------------------------------------------------------------------------------------------------------------------------------------------------------------------------------------------------------------------------------------------|

|         |          |          |       |           |      |                                                                                                                   |                                                                                                                                                                                                                                                                                                                                                                                |
|---------|----------|----------|-------|-----------|------|-------------------------------------------------------------------------------------------------------------------|--------------------------------------------------------------------------------------------------------------------------------------------------------------------------------------------------------------------------------------------------------------------------------------------------------------------------------------------------------------------------------|
| 8155574 | 1.10E-02 | 1.74E-03 | -3.92 | -1.615896 | -1.1 | ANKRD20A21<br>P///ANKRD20<br>A8P///ANKRD<br>20A4///ANKR<br>D20A2///ANK<br>RD20A3///AN<br>KRD20A5P///<br>ANKRD20A1 | ankyrin repeat domain 20 family member<br>A21, pseudogene///ankyrin repeat domain 20<br>family member A8, pseudogene///ankyrin<br>repeat domain 20 family member<br>A4///ankyrin repeat domain 20 family<br>member A2///ankyrin repeat domain 20<br>family member A3///ankyrin repeat domain<br>20 family member A5, pseudogene///ankyrin<br>repeat domain 20 family member A1 |
|---------|----------|----------|-------|-----------|------|-------------------------------------------------------------------------------------------------------------------|--------------------------------------------------------------------------------------------------------------------------------------------------------------------------------------------------------------------------------------------------------------------------------------------------------------------------------------------------------------------------------|

|         |          |          |       |           |       |                                                  |                                               |
|---------|----------|----------|-------|-----------|-------|--------------------------------------------------|-----------------------------------------------|
| 7903407 | 1.11E-02 | 1.77E-03 | -3.91 | -1.630545 | -1.03 | RNPC3///AMY RNA binding region (RNP1, RRM)<br>2B | containing 3///amylase, alpha 2B (pancreatic) |
| 8018038 | 1.11E-02 | 1.77E-03 | -3.91 | -1.630771 | -1.2  | ABCA5                                            | ATP binding cassette subfamily A member 5     |
| 8160168 | 1.12E-02 | 1.79E-03 | -3.9  | -1.641935 | -1.21 | FREM1                                            | FRAS1 related extracellular matrix 1          |
| 8117187 | 1.12E-02 | 1.79E-03 | -3.9  | -1.643584 | -1    |                                                  |                                               |

|         |          |          |       |           |       |         |                                                      |
|---------|----------|----------|-------|-----------|-------|---------|------------------------------------------------------|
| 8095395 | 1.15E-02 | 1.87E-03 | -3.88 | -1.685082 | -1.61 | UGT2B7  | UDP glucuronosyltransferase family 2 member B7       |
| 8082797 | 1.15E-02 | 1.88E-03 | -3.88 | -1.691185 | -1.94 | TF      | transferrin                                          |
| 8161913 | 1.16E-02 | 1.88E-03 | -3.88 | -1.692408 | -1.03 |         |                                                      |
| 7927694 | 1.16E-02 | 1.89E-03 | -3.87 | -1.700299 | -1.97 | PHYHIPL | phytanoyl-CoA 2-hydroxylase interacting protein like |
| 8177222 | 1.18E-02 | 1.94E-03 | -3.86 | -1.726806 | -1.12 | CD24    | CD24 molecule                                        |
| 7919055 | 1.19E-02 | 1.97E-03 | -3.85 | -1.738697 | -1.8  | HMGCS2  | 3-hydroxy-3-methylglutaryl-CoA synthase 2            |

|         |          |          |       |           |       |                 |                                                       |
|---------|----------|----------|-------|-----------|-------|-----------------|-------------------------------------------------------|
| 7918936 | 1.22E-02 | 2.05E-03 | -3.83 | -1.780785 | -1.46 | VTCN1           | V-set domain containing T cell activation inhibitor 1 |
| 7961844 | 1.22E-02 | 2.06E-03 | -3.83 | -1.782703 | -1.16 | CASC1           | cancer susceptibility candidate 1                     |
| 8168274 | 1.23E-02 | 2.07E-03 | -3.83 | -1.790029 | -1.15 | GJB1            | gap junction protein beta 1                           |
| 8035793 | 1.23E-02 | 2.08E-03 | -3.82 | -1.796467 | -1.34 | ZNF737///ZNF737 | zinc finger protein 737///zinc finger protein 737     |
| 7992893 | 1.24E-02 | 2.10E-03 | -3.82 | -1.801818 | -1.14 |                 |                                                       |

|         |          |          |       |           |       |          |                            |
|---------|----------|----------|-------|-----------|-------|----------|----------------------------|
| 8098146 | 1.24E-02 | 2.10E-03 | -3.82 | -1.806123 | -1.15 | NPY5R    | neuropeptide Y receptor Y5 |
| 7976488 | 1.24E-02 | 2.11E-03 | -3.82 | -1.809468 | -1.77 | SERPINA5 | serpin family A member 5   |

|         |          |          |       |           |       |                                                                                                 |                                                                                                                                                                                                                                                                                                                    |
|---------|----------|----------|-------|-----------|-------|-------------------------------------------------------------------------------------------------|--------------------------------------------------------------------------------------------------------------------------------------------------------------------------------------------------------------------------------------------------------------------------------------------------------------------|
| 8053741 | 1.26E-02 | 2.15E-03 | -3.81 | -1.828681 | -1.44 | ANKRD20A8P<br>///ANKRD20A<br>4///ANKRD20<br>A2///ANKRD2<br>0A3///ANKRD<br>20A5P///ANK<br>RD20A1 | ankyrin repeat domain 20 family member<br>A8, pseudogene///ankyrin repeat domain 20<br>family member A4///ankyrin repeat domain<br>20 family member A2///ankyrin repeat<br>domain 20 family member A3///ankyrin<br>repeat domain 20 family member A5,<br>pseudogene///ankyrin repeat domain 20<br>family member A1 |
|---------|----------|----------|-------|-----------|-------|-------------------------------------------------------------------------------------------------|--------------------------------------------------------------------------------------------------------------------------------------------------------------------------------------------------------------------------------------------------------------------------------------------------------------------|

|         |          |          |       |           |       |        |                                                |
|---------|----------|----------|-------|-----------|-------|--------|------------------------------------------------|
| 7909681 | 1.26E-02 | 2.15E-03 | -3.81 | -1.829179 | -1.9  | PROX1  | prospero homeobox 1                            |
| 8121559 | 1.27E-02 | 2.16E-03 | -3.8  | -1.834458 | -1.41 |        |                                                |
| 8103360 | 1.29E-02 | 2.22E-03 | -3.79 | -1.860662 | -1.16 |        |                                                |
| 8169145 | 1.31E-02 | 2.27E-03 | -3.78 | -1.881204 | -1.1  | MUM1L1 | MUM1 like 1                                    |
| 7898725 | 1.31E-02 | 2.28E-03 | -3.78 | -1.88475  | -2.37 | CELA3A | chymotrypsin like elastase family member<br>3A |
| 8114964 | 1.33E-02 | 2.32E-03 | -3.77 | -1.905361 | -2.35 | SPINK1 | serine peptidase inhibitor, Kazal type 1       |



|         |          |          |       |           |       |                                                                                                                                                                                                                                                                                                                                                                                                                                                                                                                                                 |
|---------|----------|----------|-------|-----------|-------|-------------------------------------------------------------------------------------------------------------------------------------------------------------------------------------------------------------------------------------------------------------------------------------------------------------------------------------------------------------------------------------------------------------------------------------------------------------------------------------------------------------------------------------------------|
| 8155602 | 1.38E-02 | 2.43E-03 | -3.74 | -1.952251 | -1.22 | <p>putative ankyrin repeat domain-containing protein 20A12 pseudogene///ankyrin repeat domain 20 family member A21, pseudogene///ankyrin repeat domain-containing protein 18A-like///ankyrin repeat domain 20 family member A12, pseudogene///ankyrin repeat domain 20 family member A8, pseudogene///ankyrin repeat domain 20 family member A4///ankyrin repeat domain 20 family member A2///ankyrin repeat domain 20 family member A3///ankyrin repeat domain 20 family member A5, pseudogene///ankyrin repeat domain 20 family member A1</p> |
|---------|----------|----------|-------|-----------|-------|-------------------------------------------------------------------------------------------------------------------------------------------------------------------------------------------------------------------------------------------------------------------------------------------------------------------------------------------------------------------------------------------------------------------------------------------------------------------------------------------------------------------------------------------------|

|         |          |          |       |           |       |                    |                                                      |
|---------|----------|----------|-------|-----------|-------|--------------------|------------------------------------------------------|
| 8173156 | 1.44E-02 | 2.60E-03 | -3.71 | -2.016873 | -1.28 |                    |                                                      |
| 7930777 | 1.51E-02 | 2.75E-03 | -3.68 | -2.0742   | -1.19 | PNLIP///COL1<br>A2 | pancreatic lipase///collagen type I alpha 2<br>chain |
| 7969091 | 1.51E-02 | 2.76E-03 | -3.68 | -2.076785 | -1.31 |                    |                                                      |
| 8022045 | 1.57E-02 | 2.93E-03 | -3.65 | -2.137306 | -1.17 | MYOM1              | myomesin 1                                           |
| 7999362 | 1.61E-02 | 3.04E-03 | -3.63 | -2.174584 | -1.34 |                    |                                                      |
| 8147697 | 1.67E-02 | 3.19E-03 | -3.6  | -2.221223 | -1.11 | GRHL2              | grainyhead like transcription factor 2               |

|         |          |          |       |           |       |                                                                                     |                                                                                                                                                                                                    |
|---------|----------|----------|-------|-----------|-------|-------------------------------------------------------------------------------------|----------------------------------------------------------------------------------------------------------------------------------------------------------------------------------------------------|
| 7981953 | 1.71E-02 | 3.30E-03 | -3.58 | -2.257319 | -1.01 | SNORD116-9//<br>//SNORD116-8/<br>//SNORD116-7<br>///SNORD116-<br>5///SNORD116<br>-3 | small nucleolar RNA, C/D box 116-9///small<br>nucleolar RNA, C/D box 116-8///small<br>nucleolar RNA, C/D box 116-7///small<br>nucleolar RNA, C/D box 116-5///small<br>nucleolar RNA, C/D box 116-3 |
|---------|----------|----------|-------|-----------|-------|-------------------------------------------------------------------------------------|----------------------------------------------------------------------------------------------------------------------------------------------------------------------------------------------------|

|         |          |          |       |           |       |                                                                                     |                                                                                                                                                                                                    |
|---------|----------|----------|-------|-----------|-------|-------------------------------------------------------------------------------------|----------------------------------------------------------------------------------------------------------------------------------------------------------------------------------------------------|
| 7981966 | 1.71E-02 | 3.30E-03 | -3.58 | -2.257319 | -1.01 | SNORD116-9//<br>//SNORD116-8/<br>//SNORD116-7<br>///SNORD116-<br>5///SNORD116<br>-3 | small nucleolar RNA, C/D box 116-9///small<br>nucleolar RNA, C/D box 116-8///small<br>nucleolar RNA, C/D box 116-7///small<br>nucleolar RNA, C/D box 116-5///small<br>nucleolar RNA, C/D box 116-3 |
|---------|----------|----------|-------|-----------|-------|-------------------------------------------------------------------------------------|----------------------------------------------------------------------------------------------------------------------------------------------------------------------------------------------------|

|         |          |          |       |           |       |             |                                                          |
|---------|----------|----------|-------|-----------|-------|-------------|----------------------------------------------------------|
| 8136235 | 1.71E-02 | 3.31E-03 | -3.58 | -2.259828 | -1.85 | CPA1        | carboxypeptidase A1                                      |
| 7930804 | 1.72E-02 | 3.33E-03 | -3.58 | -2.265783 | -2.78 | PNLIPRP2    | pancreatic lipase related protein 2<br>(gene/pseudogene) |
| 7981976 | 1.73E-02 | 3.34E-03 | -3.58 | -2.268956 | -1.27 | SNORD116-14 | small nucleolar RNA, C/D box 116-14                      |
| 8017766 | 1.74E-02 | 3.37E-03 | -3.57 | -2.277227 | -2.07 | APOH        | apolipoprotein H                                         |
| 8124196 | 1.76E-02 | 3.43E-03 | -3.56 | -2.296368 | -2.26 | DCDC2       | doublecortin domain containing 2                         |
| 8151559 | 1.92E-02 | 3.87E-03 | -3.5  | -2.414334 | -1.26 | SLC10A5     | solute carrier family 10 member 5                        |

|         |          |          |       |           |       |         |                                  |
|---------|----------|----------|-------|-----------|-------|---------|----------------------------------|
| 7986195 | 1.93E-02 | 3.89E-03 | -3.5  | -2.420835 | -1.49 | SV2B    | synaptic vesicle glycoprotein 2B |
| 8064098 | 1.94E-02 | 3.93E-03 | -3.49 | -2.430533 | -1.02 |         |                                  |
| 8043276 | 1.95E-02 | 3.94E-03 | -3.49 | -2.434467 | -1.11 | SNORD94 | small nucleolar RNA, C/D box 94  |

|         |          |          |       |           |       |                                                                    |                                                                                                                                                            |
|---------|----------|----------|-------|-----------|-------|--------------------------------------------------------------------|------------------------------------------------------------------------------------------------------------------------------------------------------------|
| 7981958 | 1.96E-02 | 3.99E-03 | -3.49 | -2.444748 | -1.08 | SNORD116-9//<br>/SNORD116-7//<br>//SNORD116-5<br>///SNORD116-<br>3 | small nucleolar RNA, C/D box 116-9///small<br>nucleolar RNA, C/D box 116-7///small<br>nucleolar RNA, C/D box 116-5///small<br>nucleolar RNA, C/D box 116-3 |
|---------|----------|----------|-------|-----------|-------|--------------------------------------------------------------------|------------------------------------------------------------------------------------------------------------------------------------------------------------|

|         |          |          |       |           |       |                                                                    |                                                                                                                                                            |
|---------|----------|----------|-------|-----------|-------|--------------------------------------------------------------------|------------------------------------------------------------------------------------------------------------------------------------------------------------|
| 7981962 | 1.96E-02 | 3.99E-03 | -3.49 | -2.444748 | -1.08 | SNORD116-9//<br>/SNORD116-7//<br>//SNORD116-5<br>///SNORD116-<br>3 | small nucleolar RNA, C/D box 116-9///small<br>nucleolar RNA, C/D box 116-7///small<br>nucleolar RNA, C/D box 116-5///small<br>nucleolar RNA, C/D box 116-3 |
| 8096682 | 1.98E-02 | 4.05E-03 | -3.48 | -2.461822 | -1.19 | ARHGEF38                                                           | Rho guanine nucleotide exchange factor 38                                                                                                                  |



|         |          |          |       |           |       |           |                                                    |
|---------|----------|----------|-------|-----------|-------|-----------|----------------------------------------------------|
| 8165656 | 2.10E-02 | 4.39E-03 | -3.44 | -2.540441 | -1.01 |           |                                                    |
| 7971239 | 2.10E-02 | 4.40E-03 | -3.43 | -2.543626 | -1.05 |           |                                                    |
| 7933437 | 2.11E-02 | 4.42E-03 | -3.43 | -2.547303 | -1.37 | PTPN20    | protein tyrosine phosphatase, non-receptor type 20 |
| 8157231 | 2.11E-02 | 4.43E-03 | -3.43 | -2.550579 | -1.84 |           |                                                    |
| 8086752 | 2.13E-02 | 4.49E-03 | -3.42 | -2.564335 | -1.35 | SNORD13P3 | small nucleolar RNA, C/D box 13 pseudogene 3       |
| 8054846 | 2.15E-02 | 4.55E-03 | -3.42 | -2.577415 | -1.4  | SCTR      | secretin receptor                                  |
| 8136187 | 2.15E-02 | 4.57E-03 | -3.41 | -2.580951 | -1.98 | CPA2      | carboxypeptidase A2                                |
| 8156358 | 2.16E-02 | 4.58E-03 | -3.41 | -2.58264  | -1.02 |           |                                                    |

7981982      2.19E-02      4.67E-03      -3.4      -2.602846      -1.15

SNORD116-22 small nucleolar RNA, C/D box  
///SNORD116- 116-22///small nucleolar RNA, C/D box  
21///SNORD11 116-21///small nucleolar RNA, C/D box  
6-20///SNORD 116-20///small nucleolar RNA, C/D box  
116-18///SNOR 116-18///small nucleolar RNA, C/D box  
D116-17///SN 116-17///small nucleolar RNA, C/D box  
ORD116-16///S 116-16///small nucleolar RNA, C/D box  
NORD116-15// 116-15///small nucleolar RNA, C/D box  
/SNORD116-1 116-14///small nucleolar RNA, C/D box  
4///SNORD116 116-19///small nuclear ribonucleoprotein  
-19///SNRPN polypeptide N

7981986 2.19E-02 4.67E-03 -3.4 -2.602846 -1.15

SNORD116-22 small nucleolar RNA, C/D box  
///SNORD116- 116-22///small nucleolar RNA, C/D box  
21///SNORD11 116-21///small nucleolar RNA, C/D box  
6-20///SNORD 116-20///small nucleolar RNA, C/D box  
116-18///SNOR 116-18///small nucleolar RNA, C/D box  
D116-17///SN 116-17///small nucleolar RNA, C/D box  
ORD116-16///S 116-16///small nucleolar RNA, C/D box  
NORD116-15// 116-15///small nucleolar RNA, C/D box  
/SNORD116-1 116-14///small nucleolar RNA, C/D box  
4///SNORD116 116-19///small nuclear ribonucleoprotein  
-19///SNRPN polypeptide N

|         |          |          |      |           |       |         |                                                               |
|---------|----------|----------|------|-----------|-------|---------|---------------------------------------------------------------|
| 8107129 | 2.19E-02 | 4.68E-03 | -3.4 | -2.604162 | -1.23 | SLCO4C1 | solute carrier organic anion transporter<br>family member 4C1 |
| 7933080 | 2.20E-02 | 4.70E-03 | -3.4 | -2.608795 | -1.16 |         |                                                               |

|         |          |          |      |           |       |                                                      |                                                                                                                                                                                            |
|---------|----------|----------|------|-----------|-------|------------------------------------------------------|--------------------------------------------------------------------------------------------------------------------------------------------------------------------------------------------|
| 8053737 | 2.20E-02 | 4.71E-03 | -3.4 | -2.609888 | -1.17 | LOC10272510<br>4///LOC101059<br>935///ANKRD<br>20A8P | putative ankyrin repeat domain-containing<br>protein 20A12 pseudogene///ankyrin repeat<br>domain-containing protein<br>18A-like///ankyrin repeat domain 20 family<br>member A8, pseudogene |
|---------|----------|----------|------|-----------|-------|------------------------------------------------------|--------------------------------------------------------------------------------------------------------------------------------------------------------------------------------------------|

|         |          |          |       |           |       |         |                                                  |
|---------|----------|----------|-------|-----------|-------|---------|--------------------------------------------------|
| 8136709 | 2.20E-02 | 4.71E-03 | -3.4  | -2.611728 | -1.52 | MGAM2   | maltase-glucoamylase 2 (putative)                |
| 8095535 | 2.25E-02 | 4.87E-03 | -3.38 | -2.644743 | -1.35 | ENAM    | enamelin                                         |
| 7976073 | 2.25E-02 | 4.87E-03 | -3.38 | -2.644949 | -1.1  | FLRT2   | fibronectin leucine rich transmembrane protein 2 |
| 8126770 | 2.28E-02 | 5.00E-03 | -3.37 | -2.669282 | -1    | CYP39A1 | cytochrome P450 family 39 subfamily A member 1   |

|         |          |          |       |           |       |                                                      |                                                                                                                                                                                            |
|---------|----------|----------|-------|-----------|-------|------------------------------------------------------|--------------------------------------------------------------------------------------------------------------------------------------------------------------------------------------------|
| 8155414 | 2.36E-02 | 5.25E-03 | -3.34 | -2.718234 | -1.31 | LOC10272510<br>4///LOC101059<br>935///ANKRD<br>20A8P | putative ankyrin repeat domain-containing<br>protein 20A12 pseudogene///ankyrin repeat<br>domain-containing protein<br>18A-like///ankyrin repeat domain 20 family<br>member A8, pseudogene |
|---------|----------|----------|-------|-----------|-------|------------------------------------------------------|--------------------------------------------------------------------------------------------------------------------------------------------------------------------------------------------|

|         |          |          |       |           |       |                                                      |                                                                                                                                                                                            |
|---------|----------|----------|-------|-----------|-------|------------------------------------------------------|--------------------------------------------------------------------------------------------------------------------------------------------------------------------------------------------|
| 8161384 | 2.36E-02 | 5.25E-03 | -3.34 | -2.718234 | -1.31 | LOC10272510<br>4///LOC101059<br>935///ANKRD<br>20A8P | putative ankyrin repeat domain-containing<br>protein 20A12 pseudogene///ankyrin repeat<br>domain-containing protein<br>18A-like///ankyrin repeat domain 20 family<br>member A8, pseudogene |
| 8098654 | 2.41E-02 | 5.38E-03 | -3.33 | -2.743573 | -1.76 | KLKB1                                                | kallikrein B1                                                                                                                                                                              |



|         |          |          |       |           |       |         |                                 |
|---------|----------|----------|-------|-----------|-------|---------|---------------------------------|
| 8136801 | 2.43E-02 | 5.45E-03 | -3.32 | -2.755012 | -1.36 | PRSS3P2 | protease, serine 3 pseudogene 2 |
| 8097955 | 2.45E-02 | 5.49E-03 | -3.32 | -2.763651 | -1.13 |         |                                 |
| 8106512 | 2.45E-02 | 5.51E-03 | -3.32 | -2.767317 | -1.05 |         |                                 |
| 8147988 | 2.49E-02 | 5.64E-03 | -3.31 | -2.789562 | -1.56 |         |                                 |
| 8022666 | 2.55E-02 | 5.80E-03 | -3.29 | -2.817898 | -2.17 | CHST9   | carbohydrate sulfotransferase 9 |
| 8001531 | 2.57E-02 | 5.87E-03 | -3.28 | -2.829114 | -1.96 | MT1G    | metallothionein 1G              |
| 8045533 | 2.61E-02 | 6.00E-03 | -3.27 | -2.850723 | -1.37 |         |                                 |
| 8013354 | 2.61E-02 | 6.01E-03 | -3.27 | -2.851782 | -1.06 |         |                                 |
| 7930714 | 2.61E-02 | 6.01E-03 | -3.27 | -2.852008 | -1.39 | ATRNL1  | attractin like 1                |
| 8055202 | 2.65E-02 | 6.11E-03 | -3.26 | -2.868961 | -1.42 |         |                                 |
| 7896752 | 2.71E-02 | 6.32E-03 | -3.25 | -2.9021   | -1.15 |         |                                 |
| 8165667 | 2.71E-02 | 6.32E-03 | -3.25 | -2.9021   | -1.15 |         |                                 |
| 8165663 | 2.77E-02 | 6.52E-03 | -3.23 | -2.933648 | -2.18 |         |                                 |

|         |          |          |       |           |       |        |                                                |
|---------|----------|----------|-------|-----------|-------|--------|------------------------------------------------|
| 8046116 | 2.83E-02 | 6.73E-03 | -3.21 | -2.963991 | -1.95 | G6PC2  | glucose-6-phosphatase catalytic subunit 2      |
| 8136795 | 2.83E-02 | 6.74E-03 | -3.21 | -2.965865 | -1.04 | PRSS1  | protease, serine 1                             |
| 7918923 | 2.84E-02 | 6.75E-03 | -3.21 | -2.966999 | -1.08 |        |                                                |
| 8176193 | 2.84E-02 | 6.78E-03 | -3.21 | -2.971833 | -1.7  | F8     | coagulation factor VIII                        |
| 8112611 | 2.85E-02 | 6.81E-03 | -3.21 | -2.975578 | -1.42 |        |                                                |
| 8100760 | 2.86E-02 | 6.82E-03 | -3.21 | -2.977175 | -2.42 | UGT2A3 | UDP glucuronosyltransferase family 2 member A3 |
| 8133012 | 2.92E-02 | 7.04E-03 | -3.19 | -3.008234 | -1.01 |        |                                                |

|         |          |          |       |           |       |                                                                             |
|---------|----------|----------|-------|-----------|-------|-----------------------------------------------------------------------------|
| 7923976 | 2.96E-02 | 7.19E-03 | -3.18 | -3.028845 | -1    | C1orf132///MI chromosome 1 open reading frame<br>R29B2 132///microRNA 29b-2 |
| 7981990 | 2.97E-02 | 7.22E-03 | -3.18 | -3.034026 | -1.17 | SNORD116-21 small nucleolar RNA, C/D box 116-21                             |
| 8133038 | 2.98E-02 | 7.26E-03 | -3.17 | -3.039264 | -1.17 |                                                                             |
| 7896750 | 3.00E-02 | 7.33E-03 | -3.17 | -3.047977 | -2.04 |                                                                             |
| 7967034 | 3.05E-02 | 7.50E-03 | -3.16 | -3.071569 | -1.51 | PLA2G1B phospholipase A2 group IB                                           |
| 8128892 | 3.05E-02 | 7.50E-03 | -3.16 | -3.071613 | -1.19 |                                                                             |
| 8141094 | 3.11E-02 | 7.71E-03 | -3.14 | -3.098672 | -1.65 | PDK4 pyruvate dehydrogenase kinase 4                                        |
| 7900652 | 3.18E-02 | 7.98E-03 | -3.13 | -3.131796 | -1.25 |                                                                             |

|         |          |          |       |           |       |                                   |                                                                                                                 |
|---------|----------|----------|-------|-----------|-------|-----------------------------------|-----------------------------------------------------------------------------------------------------------------|
| 8161415 | 3.19E-02 | 8.00E-03 | -3.12 | -3.135263 | -1.13 | LOC10105993<br>5///ANKRD20<br>A8P | ankyrin repeat domain-containing protein<br>18A-like///ankyrin repeat domain 20 family<br>member A8, pseudogene |
| 7995829 | 3.23E-02 | 8.13E-03 | -3.12 | -3.150983 | -1.72 | MT1H                              | metallothionein 1H                                                                                              |
| 8043375 | 3.23E-02 | 8.16E-03 | -3.11 | -3.154116 | -1.04 |                                   |                                                                                                                 |
| 7968678 | 3.24E-02 | 8.19E-03 | -3.11 | -3.157257 | -1.28 | FREM2                             | FRAS1 related extracellular matrix protein 2                                                                    |

|         |          |          |       |           |       |                                                      |                                                                                                                                                                                            |
|---------|----------|----------|-------|-----------|-------|------------------------------------------------------|--------------------------------------------------------------------------------------------------------------------------------------------------------------------------------------------|
| 8155591 | 3.32E-02 | 8.47E-03 | -3.09 | -3.190756 | -1.22 | LOC10272510<br>4///LOC101059<br>935///ANKRD<br>20A8P | putative ankyrin repeat domain-containing<br>protein 20A12 pseudogene///ankyrin repeat<br>domain-containing protein<br>18A-like///ankyrin repeat domain 20 family<br>member A8, pseudogene |
| 8114213 | 3.43E-02 | 8.87E-03 | -3.07 | -3.235913 | -1.08 |                                                      |                                                                                                                                                                                            |
| 8130660 | 3.43E-02 | 8.88E-03 | -3.07 | -3.236985 | -1.03 |                                                      |                                                                                                                                                                                            |

|         |          |          |       |           |       |       |                                    |
|---------|----------|----------|-------|-----------|-------|-------|------------------------------------|
| 8042986 | 3.44E-02 | 8.92E-03 | -3.07 | -3.241835 | -2    | REG1A | regenerating family member 1 alpha |
| 7989501 | 3.56E-02 | 9.35E-03 | -3.04 | -3.288353 | -1.68 | CA12  | carbonic anhydrase 12              |
| 8053057 | 3.60E-02 | 9.50E-03 | -3.03 | -3.303722 | -1.18 |       |                                    |

|         |          |          |       |           |       |                                                                                                                                                                                                                                                          |
|---------|----------|----------|-------|-----------|-------|----------------------------------------------------------------------------------------------------------------------------------------------------------------------------------------------------------------------------------------------------------|
| 8100758 | 3.61E-02 | 9.54E-03 | -3.03 | -3.307498 | -2.04 | UDP glucuronosyltransferase family 2<br>member B11///UDP glucuronosyltransferase<br>family 2 member B17///UDP<br>glucuronosyltransferase family 2 member<br>B15///UGT2<br>B10///UGT2B7<br>member B10///UDP glucuronosyltransferase<br>family 2 member B7 |
|---------|----------|----------|-------|-----------|-------|----------------------------------------------------------------------------------------------------------------------------------------------------------------------------------------------------------------------------------------------------------|

|         |          |          |       |           |       |            |                                    |
|---------|----------|----------|-------|-----------|-------|------------|------------------------------------|
| 8099633 | 3.65E-02 | 9.68E-03 | -3.03 | -3.321927 | -1.08 | PPARGC1A   | PPARG coactivator 1 alpha          |
| 8083246 | 3.75E-02 | 1.01E-02 | -3.01 | -3.359274 | -1.1  | CPB1       | carboxypeptidase B1                |
| 8045882 | 3.76E-02 | 1.01E-02 | -3    | -3.366041 | -1.43 | DAPL1      | death associated protein like 1    |
| 7965036 | 3.76E-02 | 1.01E-02 | -3    | -3.366876 | -1.05 |            |                                    |
| 8045279 | 3.88E-02 | 1.06E-02 | -2.98 | -3.407163 | -1.13 |            |                                    |
| 7991171 | 3.95E-02 | 1.08E-02 | -2.97 | -3.429993 | -1.2  |            |                                    |
| 7970737 | 4.01E-02 | 1.10E-02 | -2.96 | -3.450343 | -1.13 | FLT3       | fms related tyrosine kinase 3      |
| 8033362 | 4.07E-02 | 1.13E-02 | -2.95 | -3.47138  | -1.1  | INSR       | insulin receptor                   |
| 8114006 | 4.07E-02 | 1.13E-02 | -2.95 | -3.471752 | -1    |            |                                    |
| 8058104 | 4.07E-02 | 1.13E-02 | -2.94 | -3.474499 | -1.26 |            |                                    |
| 7981949 | 4.12E-02 | 1.15E-02 | -2.94 | -3.489112 | -1.04 | SNORD116-1 | small nucleolar RNA, C/D box 116-1 |



|         |          |          |       |           |       |          |                                               |
|---------|----------|----------|-------|-----------|-------|----------|-----------------------------------------------|
| 8113234 | 4.18E-02 | 1.17E-02 | -2.93 | -3.509678 | -1.06 | PCSK1    | proprotein convertase subtilisin/kexin type 1 |
| 8092682 | 4.36E-02 | 1.25E-02 | -2.89 | -3.570574 | -2.15 | SST      | somatostatin                                  |
| 7924307 | 4.63E-02 | 1.36E-02 | -2.85 | -3.651461 | -1.16 |          |                                               |
| 8105899 | 4.72E-02 | 1.39E-02 | -2.84 | -3.67833  | -1.04 | MARVELD2 | MARVEL domain containing 2                    |
| 8177498 | 4.72E-02 | 1.39E-02 | -2.84 | -3.67833  | -1.04 | MARVELD2 | MARVEL domain containing 2                    |
| 8003605 | 4.74E-02 | 1.40E-02 | -2.83 | -3.681916 | -1.29 |          |                                               |
| 7912157 | 4.86E-02 | 1.45E-02 | -2.82 | -3.716033 | -1.22 | ERRFI1   | ERBB receptor feedback inhibitor 1            |
| 8128618 | 4.88E-02 | 1.46E-02 | -2.81 | -3.722233 | -1.18 |          |                                               |

|         |          |          |       |           |       |          |                                     |
|---------|----------|----------|-------|-----------|-------|----------|-------------------------------------|
| 8115851 | 4.95E-02 | 1.49E-02 | -2.8  | -3.742402 | -1.11 | STC2     | stanniocalcin 2                     |
| 7986327 | 5.06E-02 | 1.54E-02 | -2.79 | -3.772182 | -1.04 |          |                                     |
| 8121152 | 5.10E-02 | 1.55E-02 | -2.78 | -3.783121 | -1.27 | FUT9     | fucosyltransferase 9                |
| 7982593 | 5.10E-02 | 1.56E-02 | -2.78 | -3.785511 | -1.48 | C15orf54 | chromosome 15 open reading frame 54 |
| 8165672 | 5.17E-02 | 1.58E-02 | -2.77 | -3.802012 | -1.4  |          |                                     |
| 8111864 | 5.70E-02 | 1.82E-02 | -2.7  | -3.938373 | -2.08 | C6       | complement component 6              |
| 8101131 | 5.75E-02 | 1.85E-02 | -2.69 | -3.949685 | -1.2  | CXCL11   | C-X-C motif chemokine ligand 11     |
| 7952339 | 5.76E-02 | 1.85E-02 | -2.69 | -3.951957 | -1.51 | SNORD14C | small nucleolar RNA, C/D box 14C    |
| 8104348 | 5.88E-02 | 1.91E-02 | -2.67 | -3.983089 | -1.06 |          |                                     |

|         |          |          |       |           |       |         |                                   |
|---------|----------|----------|-------|-----------|-------|---------|-----------------------------------|
| 8053330 | 6.01E-02 | 1.97E-02 | -2.66 | -4.011136 | -3.15 | REG1B   | regenerating family member 1 beta |
| 8113356 | 6.41E-02 | 2.16E-02 | -2.61 | -4.099829 | -1.65 |         |                                   |
| 7928308 | 6.59E-02 | 2.25E-02 | -2.59 | -4.139566 | -1.06 | DDIT4   | DNA damage inducible transcript 4 |
| 8145793 | 6.64E-02 | 2.27E-02 | -2.58 | -4.149066 | -1.01 | SNORD13 | small nucleolar RNA, C/D box 13   |
| 7983718 | 6.66E-02 | 2.28E-02 | -2.58 | -4.153482 | -1.86 | SCG3    | secretogranin III                 |
| 8020795 | 6.79E-02 | 2.35E-02 | -2.56 | -4.181168 | -2.51 | TTR     | transthyretin                     |
| 8056250 | 7.07E-02 | 2.49E-02 | -2.53 | -4.236225 | -3.42 | GCG     | glucagon                          |

|         |          |          |       |           |       |             |                                                       |
|---------|----------|----------|-------|-----------|-------|-------------|-------------------------------------------------------|
| 8068583 | 7.47E-02 | 2.70E-02 | -2.49 | -4.315699 | -1.37 | KCNJ15      | potassium voltage-gated channel subfamily J member 15 |
| 8166769 | 7.78E-02 | 2.88E-02 | -2.46 | -4.37385  | -1.09 | OTC         | ornithine carbamoyltransferase                        |
| 7981992 | 7.97E-02 | 2.97E-02 | -2.44 | -4.40485  | -1.24 | SNORD116-22 | small nucleolar RNA, C/D box 116-22                   |
| 8103483 | 8.10E-02 | 3.04E-02 | -2.43 | -4.427807 | -1.03 |             |                                                       |
| 8113344 | 8.10E-02 | 3.04E-02 | -2.43 | -4.427807 | -1.03 |             |                                                       |
| 8114207 | 8.10E-02 | 3.04E-02 | -2.43 | -4.427807 | -1.03 |             |                                                       |

|         |          |          |       |           |       |          |                                                        |
|---------|----------|----------|-------|-----------|-------|----------|--------------------------------------------------------|
| 7980861 | 8.36E-02 | 3.18E-02 | -2.4  | -4.470499 | -1.4  | CATSPERB | cation channel sperm associated auxiliary subunit beta |
| 8129876 | 8.43E-02 | 3.23E-02 | -2.39 | -4.482724 | -1.21 | PBOV1    | prostate and breast cancer overexpressed 1             |
| 7896748 | 8.70E-02 | 3.38E-02 | -2.37 | -4.527132 | -1.19 |          |                                                        |
| 8139482 | 9.05E-02 | 3.57E-02 | -2.34 | -4.578608 | -1.21 | SNORA5A  | small nucleolar RNA, H/ACA box 5A                      |
| 8144786 | 9.06E-02 | 3.57E-02 | -2.34 | -4.579306 | -1.39 | SLC7A2   | solute carrier family 7 member 2                       |
| 7973867 | 9.59E-02 | 3.87E-02 | -2.3  | -4.653861 | -1.32 |          |                                                        |
| 7995797 | 9.88E-02 | 4.05E-02 | -2.27 | -4.696503 | -1.07 | MT1E     | metallothionein 1E                                     |

|         |          |          |       |           |       |
|---------|----------|----------|-------|-----------|-------|
| 8165684 | 1.05E-01 | 4.42E-02 | -2.23 | -4.779286 | -1.27 |
| 7999999 | 1.08E-01 | 4.63E-02 | -2.2  | -4.820953 | -1.67 |

---

**GSE62165**

---

| ID            | adj.P.Val | P.Value  | t        | B          | logFC | Gene.Symb<br>ol | GB_LIST                                                               |
|---------------|-----------|----------|----------|------------|-------|-----------------|-----------------------------------------------------------------------|
| 11743282_a_at | 1.87E-44  | 3.79E-49 | 2.36E+01 | 101.235356 | 4.74  | SULF1           | NM_001128204,NM_001128205,NM_001128206,NM_015170                      |
| 11758071_s_at | 9.90E-43  | 4.01E-47 | 2.26E+01 | 96.647773  | 4.49  | SULF1           | NM_001128204,NM_001128205,NM_001128206,NM_015170                      |
| 11737874_a_at | 6.53E-41  | 3.97E-45 | 2.16E+01 | 92.120645  | 4.76  | SULF1           | NM_001128204,NM_001128205,NM_001128206,NM_015170                      |
| 11748905_a_at | 9.52E-41  | 7.71E-45 | 2.15E+01 | 91.46556   | 4.97  | CTHRC1          | NM_138455                                                             |
| 11716018_s_at | 1.26E-37  | 1.79E-41 | 1.99E+01 | 83.817419  | 3.4   | RAB31           | NM_006868                                                             |
| 11756071_x_at | 5.13E-36  | 1.14E-39 | 1.91E+01 | 79.709076  | 1.77  | ACTB            | NM_001101                                                             |
| 11739534_a_at | 5.14E-36  | 1.25E-39 | 1.90E+01 | 79.620827  | 4.51  | FN1             | NM_002026,NM_054034,NM_212474,NM_212475,NM_212476,NM_212478,NM_212482 |
| 11748311_s_at | 9.38E-36  | 2.47E-39 | 1.89E+01 | 78.947316  | 4.04  | VCAN            | NM_001126336,NM_001164097,NM_001164098,NM_004385                      |
| 11749485_x_at | 2.37E-35  | 7.66E-39 | 1.87E+01 | 77.827301  | 2.4   | SEC23A          | NM_006364                                                             |

|                             |          |          |          |           |      |               |                                                                       |
|-----------------------------|----------|----------|----------|-----------|------|---------------|-----------------------------------------------------------------------|
| 11746931_a_at               | 2.67E-35 | 9.21E-39 | 1.87E+01 | 77.645827 | 4.54 | INHBA         | NM_002192                                                             |
| AFFX-HSAC07/<br>X00351_3_at | 3.48E-35 | 1.41E-38 | 1.86E+01 | 77.225823 | 1.32 | ACTB          | NM_001101                                                             |
| 11738808_a_at               | 3.58E-35 | 1.59E-38 | 1.86E+01 | 77.10315  | 3.3  | OSBPL10       | NM_001174060,NM_017784                                                |
| 11739535_s_at               | 6.34E-35 | 2.95E-38 | 1.84E+01 | 76.492946 | 3.98 | FN1           | NM_002026,NM_054034,NM_212474,NM_212475,NM_212476,NM_212478,NM_212482 |
| AFFX-HSAC07/<br>X00351_M_at | 7.04E-35 | 3.42E-38 | 1.84E+01 | 76.347817 | 1.53 | ACTB          | NM_001101                                                             |
| 11739536_x_at               | 2.66E-34 | 1.67E-37 | 1.81E+01 | 74.778686 | 4.59 | FN1           | NM_002026,NM_054034,NM_212474,NM_212475,NM_212476,NM_212478,NM_212482 |
| 11757833_a_at               | 2.97E-34 | 1.98E-37 | 1.81E+01 | 74.609026 | 2.94 | RAB31         | NM_006868                                                             |
| 11749460_x_at               | 3.73E-34 | 2.66E-37 | 1.80E+01 | 74.317123 | 4.6  | FN1           | NM_002026,NM_054034,NM_212474,NM_212475,NM_212476,NM_212478,NM_212482 |
| 11745837_x_at               | 3.73E-34 | 2.72E-37 | 1.80E+01 | 74.297876 | 4.65 | FN1           | NM_002026,NM_054034,NM_212474,NM_212475,NM_212476,NM_212478,NM_212482 |
| 11748164_a_at               | 4.35E-34 | 3.35E-37 | 1.80E+01 | 74.090474 | 4.03 | VCAN          | NM_001126336,NM_001164097,NM_001164098,NM_004385                      |
| 11730864_s_at               | 5.65E-34 | 4.46E-37 | 1.79E+01 | 73.805779 | 1.59 | CTTNBP2<br>NL | NM_018704                                                             |

|               |          |          |          |           |      |        |                                                             |
|---------------|----------|----------|----------|-----------|------|--------|-------------------------------------------------------------|
| 11716019_at   | 5.86E-34 | 4.75E-37 | 1.79E+01 | 73.745264 | 3.18 | RAB31  | NM_006868                                                   |
| 11721135_s_at | 5.94E-34 | 4.93E-37 | 1.79E+01 | 73.707694 | 4.3  | IGFBP3 | NM_000598,NM_001013398                                      |
| 11726070_s_at | 7.53E-34 | 6.56E-37 | 1.78E+01 | 73.425665 | 2.29 | MAP4K4 | NM_004834,NM_145686,NM_145687                               |
| 11715604_x_at | 1.33E-33 | 1.23E-36 | 1.77E+01 | 72.806267 | 2.61 | SPARC  | NM_003118                                                   |
| 11757409_x_at | 1.75E-33 | 1.70E-36 | 1.77E+01 | 72.481183 | 1.87 | TMSB10 | NM_021103                                                   |
| 11728776_s_at | 2.52E-33 | 2.65E-36 | 1.76E+01 | 72.043236 | 2.78 | VDR    | NM_000376,NM_001017535                                      |
| 11749980_x_at | 2.66E-33 | 2.90E-36 | 1.76E+01 | 71.952577 | 4.13 | HOPX   | NM_001145459,NM_001145460,NM_032495,<br>NM_139211,NM_139212 |
| 11743191_a_at | 2.66E-33 | 2.91E-36 | 1.75E+01 | 71.949836 | 4.31 | NTM    | NM_001048209,NM_001144058,NM_0011440<br>59,NM_016522        |
| 11726333_s_at | 3.70E-33 | 4.20E-36 | 1.75E+01 | 71.586957 | 4.16 | LEF1   | NM_001130713,NM_001130714,NM_0011661<br>19,NM_016269        |
| 11719377_x_at | 5.16E-33 | 6.17E-36 | 1.74E+01 | 71.206731 | 1.6  | CAP1   | NM_001105530,NM_006367                                      |
| 11745004_x_at | 6.65E-33 | 8.48E-36 | 1.73E+01 | 70.891305 | 3.92 | HOPX   | NM_001145459,NM_001145460,NM_032495,<br>NM_139211,NM_139212 |
| 11747925_a_at | 1.06E-32 | 1.39E-35 | 1.73E+01 | 70.399664 | 2.23 | SEC23A | NM_006364                                                   |
| 11757731_s_at | 1.06E-32 | 1.42E-35 | 1.72E+01 | 70.379596 | 2.85 | RAB31  | NM_006868                                                   |



|               |          |          |          |           |      |        |                                                                 |
|---------------|----------|----------|----------|-----------|------|--------|-----------------------------------------------------------------|
| 11753549_a_at | 1.14E-32 | 1.55E-35 | 1.72E+01 | 70.294018 | 3.02 | CMTM3  | NM_001048251,NM_144601,NM_181553,NM_181554                      |
| 11727782_a_at | 1.20E-32 | 1.65E-35 | 1.72E+01 | 70.231245 | 2.37 | TPM4   | NM_001145160,NM_003290                                          |
| 11743856_a_at | 1.24E-32 | 1.73E-35 | 1.72E+01 | 70.183846 | 4.47 | CTHRC1 | NM_138455                                                       |
| 11758546_x_at | 1.37E-32 | 1.97E-35 | 1.72E+01 | 70.056228 | 2.67 | VDR    | NM_000376,NM_001017535                                          |
| 11727401_x_at | 1.95E-32 | 2.92E-35 | 1.71E+01 | 69.666158 | 4.11 | HOPX   | NM_001145459,NM_001145460,NM_032495,<br>NM_139211,NM_139212     |
| 11729190_a_at | 2.38E-32 | 3.80E-35 | 1.71E+01 | 69.405126 | 1.72 | MAX    | NM_002382,NM_145112,NM_145113,NM_145114,<br>NM_145116,NM_197957 |
| 11728374_s_at | 3.04E-32 | 5.05E-35 | 1.70E+01 | 69.12388  | 1.72 | ACTN1  | NM_001102,NM_001130004,NM_001130005                             |
| 11744718_a_at | 4.03E-32 | 6.93E-35 | 1.70E+01 | 68.8109   | 4    | CTHRC1 | NM_138455                                                       |
| 11728761_a_at | 4.03E-32 | 7.07E-35 | 1.69E+01 | 68.791272 | 3.02 | RUNX1  | NM_001001890,NM_001122607,NM_001754                             |
| 11718168_a_at | 4.03E-32 | 7.11E-35 | 1.69E+01 | 68.786069 | 2.84 | MYOF   | NM_013451,NM_133337                                             |
| 11754928_x_at | 4.51E-32 | 8.22E-35 | 1.69E+01 | 68.641779 | 2.85 | MYOF   | NM_013451,NM_133337                                             |
| 11740181_a_at | 4.51E-32 | 8.29E-35 | 1.69E+01 | 68.633408 | 2.22 | PTPN12 | NM_001131008,NM_001131009,NM_002835                             |
| 11742191_a_at | 4.51E-32 | 8.30E-35 | 1.69E+01 | 68.63222  | 3.16 | RUNX1  | NM_001001890,NM_001122607,NM_001754                             |

|               |          |          |          |           |      |          |                                                                 |
|---------------|----------|----------|----------|-----------|------|----------|-----------------------------------------------------------------|
| 11715603_s_at | 4.70E-32 | 8.75E-35 | 1.69E+01 | 68.580074 | 2.7  | SPARC    | NM_003118                                                       |
| 11722354_at   | 7.74E-32 | 1.55E-34 | 1.68E+01 | 68.013364 | 1.66 | SEC23A   | NM_006364                                                       |
| 11749275_a_at | 8.42E-32 | 1.71E-34 | 1.68E+01 | 67.919329 | 2.15 | SKAP2    | NM_003930                                                       |
| 11727783_s_at | 8.55E-32 | 1.75E-34 | 1.68E+01 | 67.894816 | 2.1  | LOC64363 | NM_001145160,NM_003290,XR_016808,XR_4 /// TPM4 019021,XR_039579 |
| 11747841_a_at | 9.61E-32 | 2.04E-34 | 1.68E+01 | 67.74012  | 1.97 | ACVR1    | NM_001105,NM_001111067                                          |
| 11740879_s_at | 1.03E-31 | 2.21E-34 | 1.67E+01 | 67.663934 | 2.11 | ANXA2    | NM_001002857,NM_001002858,NM_001136015,NM_004039                |
| 11742712_a_at | 1.17E-31 | 2.53E-34 | 1.67E+01 | 67.528851 | 4.23 | THBS2    | NM_003247                                                       |
| 11718648_s_at | 1.27E-31 | 2.80E-34 | 1.67E+01 | 67.428249 | 1.76 | ACVR1    | NM_001105,NM_001111067                                          |
| 11746471_s_at | 1.29E-31 | 2.87E-34 | 1.67E+01 | 67.402701 | 2.37 | MAP4K4   | NM_004834,NM_145686,NM_145687                                   |
| 11755955_a_at | 1.52E-31 | 3.42E-34 | 1.67E+01 | 67.230108 | 3.72 | FAP      | NM_004460                                                       |
| 11718068_at   | 2.35E-31 | 5.51E-34 | 1.66E+01 | 66.757265 | 2.17 | MYO1E    | NM_004998                                                       |
| 11735218_at   | 2.37E-31 | 5.61E-34 | 1.66E+01 | 66.740073 | 5.12 | COL10A1  | NM_000493                                                       |
| 11739134_a_at | 3.31E-31 | 7.97E-34 | 1.65E+01 | 66.39178  | 3.57 | COL5A2   | NM_000393                                                       |

|               |          |          |          |           |      |         |                                                                           |
|---------------|----------|----------|----------|-----------|------|---------|---------------------------------------------------------------------------|
| 11737050_x_at | 5.92E-31 | 1.51E-33 | 1.64E+01 | 65.757892 | 3.27 | HRH1    | NM_000861,NM_001098211,NM_001098212,<br>NM_001098213                      |
| 11739135_s_at | 5.92E-31 | 1.52E-33 | 1.64E+01 | 65.751014 | 3.38 | COL5A2  | NM_000393                                                                 |
| 11740475_x_at | 5.99E-31 | 1.55E-33 | 1.64E+01 | 65.731777 | 4.2  | NOX4    | NM_001143836,NM_001143837,NM_016931,<br>NR_026571                         |
| 11739435_a_at | 6.18E-31 | 1.62E-33 | 1.64E+01 | 65.688547 | 4.28 | FN1     | NM_002026,NM_054034,NM_212474,NM_212<br>475,NM_212476,NM_212478,NM_212482 |
| 11723903_at   | 6.28E-31 | 1.68E-33 | 1.64E+01 | 65.654169 | 2.41 | PLEKHG1 | NM_001029884                                                              |
| 11720754_x_at | 6.50E-31 | 1.76E-33 | 1.64E+01 | 65.604603 | 1.24 | ACTB    | NM_001101                                                                 |
| 11747282_x_at | 7.16E-31 | 1.96E-33 | 1.63E+01 | 65.502191 | 1.31 | ANXA2P2 | NR_003573                                                                 |
| 11744033_s_at | 7.70E-31 | 2.15E-33 | 1.63E+01 | 65.407518 | 2.53 | S100A11 | NM_005620                                                                 |
| 11743031_a_at | 7.79E-31 | 2.19E-33 | 1.63E+01 | 65.388574 | 2.1  | S100A6  | NM_014624                                                                 |
| 11747923_s_at | 7.93E-31 | 2.25E-33 | 1.63E+01 | 65.364109 | 4.37 | LAMC2   | NM_005562,NM_018891                                                       |
| 11743062_a_at | 9.45E-31 | 2.72E-33 | 1.63E+01 | 65.176565 | 4.06 | PLAUR   | NM_001005376,NM_001005377,NM_002659                                       |
| 11722352_s_at | 1.07E-30 | 3.09E-33 | 1.62E+01 | 65.047755 | 2.74 | ACTA2   | NM_001141945,NM_001613                                                    |
| 11737219_a_at | 1.24E-30 | 3.67E-33 | 1.62E+01 | 64.877768 | 1.98 | ITGB1   | NM_002211,NM_033666,NM_033667,NM_033<br>668,NM_033669,NM_133376           |

|               |          |          |          |           |      |        |                                                                                         |
|---------------|----------|----------|----------|-----------|------|--------|-----------------------------------------------------------------------------------------|
| 11743721_at   | 1.60E-30 | 4.86E-33 | 1.62E+01 | 64.601131 | 2.4  | LGALS1 | NM_002305                                                                               |
| 11759402_s_at | 1.60E-30 | 4.89E-33 | 1.62E+01 | 64.593519 | 3.69 | VCAN   | NM_001126336,NM_001164097,NM_001164098,NM_004385                                        |
| 11733383_a_at | 1.60E-30 | 4.92E-33 | 1.62E+01 | 64.587381 | 2.17 | AFAP1  | NM_001134647,NM_198595                                                                  |
| 11756577_a_at | 1.77E-30 | 5.51E-33 | 1.61E+01 | 64.475504 | 1.82 | PEA15  | NM_003768                                                                               |
| 11749912_x_at | 1.87E-30 | 5.86E-33 | 1.61E+01 | 64.414499 | 4.36 | IGFBP3 | NM_000598,NM_001013398                                                                  |
| 11735744_a_at | 1.91E-30 | 6.06E-33 | 1.61E+01 | 64.382304 | 2.96 | RAB34  | NM_001142624,NM_001142625,NM_001144942,NM_001144943,NM_031934,NR_024575,NR_024579       |
| 11740133_a_at | 1.91E-30 | 6.11E-33 | 1.61E+01 | 64.373401 | 2.94 | CALD1  | NM_004342,NM_033138,NM_033139,NM_033140,NM_033157                                       |
| 11759403_x_at | 1.92E-30 | 6.18E-33 | 1.61E+01 | 64.361818 | 3.46 | VCAN   | NM_001126336,NM_001164097,NM_001164098,NM_004385                                        |
| 11716015_a_at | 2.46E-30 | 8.03E-33 | 1.61E+01 | 64.102505 | 2.94 | CMTM3  | NM_001048251,NM_144601,NM_181553,NM_181554                                              |
| 11746476_x_at | 2.57E-30 | 8.43E-33 | 1.61E+01 | 64.054815 | 2.62 | CALD1  | NM_004342,NM_033138,NM_033139,NM_033140,NM_033157                                       |
| 11756134_a_at | 2.63E-30 | 8.69E-33 | 1.61E+01 | 64.024917 | 2.88 | FHL2   | NM_001039492,NM_001450,NM_201555,NM_201557                                              |
| 11724821_a_at | 2.77E-30 | 9.24E-33 | 1.60E+01 | 63.96389  | 2    | NEK6   | NM_001145001,NM_001166167,NM_001166168,NM_001166169,NM_001166170,NM_001166171,NM_014397 |

|               |          |          |          |           |      |               |                                                  |
|---------------|----------|----------|----------|-----------|------|---------------|--------------------------------------------------|
| 11745932_x_at | 2.79E-30 | 9.37E-33 | 1.60E+01 | 63.949817 | 1.47 | TMSB10        | NM_021103                                        |
| 11755009_s_at | 2.92E-30 | 9.87E-33 | 1.60E+01 | 63.898045 | 3.44 | VCAN          | NM_001126336,NM_001164097,NM_001164098,NM_004385 |
| 11743969_s_at | 2.97E-30 | 1.01E-32 | 1.60E+01 | 63.876348 | 2.47 | ACTN1         | NM_0011102,NM_001130004,NM_001130005             |
| 11715746_a_at | 3.08E-30 | 1.06E-32 | 1.60E+01 | 63.832204 | 2.89 | NBL1          | NM_005380,NM_182744                              |
| 11735219_at   | 3.18E-30 | 1.09E-32 | 1.60E+01 | 63.796114 | 5.27 | COL10A1       | NM_000493                                        |
| 11741105_a_at | 3.36E-30 | 1.17E-32 | 1.60E+01 | 63.729072 | 3.23 | FHL2          | NM_001039492,NM_001450,NM_201555,NM_201557       |
| 11742873_a_at | 3.39E-30 | 1.19E-32 | 1.60E+01 | 63.715053 | 3.64 | CDH11         | NM_001797                                        |
| 11759497_at   | 3.92E-30 | 1.40E-32 | 1.60E+01 | 63.554842 | 3.01 | CHST11        | NM_001173982,NM_018413                           |
| 11763872_x_at | 4.01E-30 | 1.44E-32 | 1.60E+01 | 63.525199 | 2.89 | SPARC         | NM_003118                                        |
| 11757290_s_at | 4.29E-30 | 1.55E-32 | 1.59E+01 | 63.44834  | 2.92 | COL5A2        | NM_000393                                        |
| 11741106_x_at | 4.33E-30 | 1.58E-32 | 1.59E+01 | 63.432196 | 3.26 | FHL2          | NM_001039492,NM_001450,NM_201555,NM_201557       |
| 11742208_a_at | 4.37E-30 | 1.60E-32 | 1.59E+01 | 63.419719 | 3.57 | VCAN          | NM_001126336,NM_001164097,NM_001164098,NM_004385 |
| 11715777_s_at | 6.37E-30 | 2.39E-32 | 1.59E+01 | 63.022735 | 1.35 | LUZP6<br>MTPN | ///<br>NM_001128619,NM_145808                    |

|               |          |          |          |           |      |        |                                                  |
|---------------|----------|----------|----------|-----------|------|--------|--------------------------------------------------|
| 11733946_at   | 8.22E-30 | 3.20E-32 | 1.58E+01 | 62.733994 | 1.76 | RAP2B  | NM_002886                                        |
| 11742207_a_at | 1.01E-29 | 4.08E-32 | 1.58E+01 | 62.492781 | 3.59 | VCAN   | NM_001126336,NM_001164097,NM_001164098,NM_004385 |
| 11718073_at   | 1.06E-29 | 4.32E-32 | 1.58E+01 | 62.434926 | 1.92 | IL4R   | NM_000418,NM_001008699                           |
| 11743970_x_at | 1.24E-29 | 5.22E-32 | 1.57E+01 | 62.247351 | 2.06 | ACTN1  | NM_001102,NM_001130004,NM_001130005              |
| 11740880_x_at | 1.26E-29 | 5.33E-32 | 1.57E+01 | 62.226985 | 1.47 | ANXA2  | NM_001002857,NM_001002858,NM_001136015,NM_004039 |
| 11757941_s_at | 1.26E-29 | 5.35E-32 | 1.57E+01 | 62.22392  | 3.67 | THBS2  | NM_003247                                        |
| 11755553_a_at | 1.30E-29 | 5.60E-32 | 1.57E+01 | 62.178011 | 1.71 | WDR1   | NM_005112,NM_017491                              |
| 11757818_x_at | 1.79E-29 | 7.89E-32 | 1.57E+01 | 61.837762 | 1.88 | CFL1   | NM_005507                                        |
| 11749461_a_at | 1.91E-29 | 8.56E-32 | 1.56E+01 | 61.757361 | 3.61 | CDH11  | NM_001797                                        |
| 11739641_a_at | 2.13E-29 | 9.71E-32 | 1.56E+01 | 61.632489 | 2.13 | AFAP1  | NM_001134647,NM_198595                           |
| 11755122_a_at | 2.35E-29 | 1.08E-31 | 1.56E+01 | 61.530507 | 2.92 | PALLD  | NM_001166108,NM_001166109,NM_001166110,NM_016081 |
| 11718523_s_at | 3.03E-29 | 1.40E-31 | 1.55E+01 | 61.271846 | 3.22 | ANTXR1 | NM_018153,NM_032208,NM_053034                    |
| 11725180_a_at | 3.10E-29 | 1.47E-31 | 1.55E+01 | 61.220897 | 3.7  | RUNX2  | NM_001015051,NM_001024630,NM_004348              |

|               |          |          |          |           |      |               |                                                   |
|---------------|----------|----------|----------|-----------|------|---------------|---------------------------------------------------|
| 11742711_at   | 3.32E-29 | 1.59E-31 | 1.55E+01 | 61.145698 | 3.68 | THBS2         | NM_003247                                         |
| 11727085_s_at | 3.40E-29 | 1.64E-31 | 1.55E+01 | 61.109987 | 5.13 | GJB2          | NM_004004                                         |
| 11745801_s_at | 3.86E-29 | 1.88E-31 | 1.55E+01 | 60.975657 | 1.54 | CAP1          | NM_001105530,NM_006367                            |
| 11757783_s_at | 4.68E-29 | 2.30E-31 | 1.55E+01 | 60.779519 | 3.5  | VCAN          | NM_001126336,NM_001164097,NM_001164098,NM_004385  |
| 11743618_at   | 5.03E-29 | 2.50E-31 | 1.54E+01 | 60.696066 | 3.53 | ITGA2         | NM_002203                                         |
| 11722759_a_at | 5.23E-29 | 2.63E-31 | 1.54E+01 | 60.646309 | 2.28 | CAMSAP1<br>L1 | NM_203459                                         |
| 11720044_at   | 5.32E-29 | 2.68E-31 | 1.54E+01 | 60.625769 | 1.96 | SKAP2         | NM_003930                                         |
| 11730862_at   | 5.48E-29 | 2.79E-31 | 1.54E+01 | 60.587507 | 1.73 | CTTNBP2<br>NL | NM_018704                                         |
| 11743617_at   | 5.53E-29 | 2.83E-31 | 1.54E+01 | 60.57115  | 3.69 | ITGA2         | NM_002203                                         |
| 11754266_s_at | 5.57E-29 | 2.87E-31 | 1.54E+01 | 60.556802 | 2.07 | E2F3          | NM_001949                                         |
| 11736423_a_at | 5.57E-29 | 2.89E-31 | 1.54E+01 | 60.552283 | 4.51 | POSTN         | NM_001135934,NM_001135935,NM_001135936,NM_006475  |
| 11746872_a_at | 5.85E-29 | 3.04E-31 | 1.54E+01 | 60.499615 | 4.25 | COL1A1        | NM_000088                                         |
| 11718292_s_at | 5.91E-29 | 3.09E-31 | 1.54E+01 | 60.484924 | 2.21 | HK1           | NM_000188,NM_033496,NM_033497,NM_033498,NM_033500 |

|               |          |          |          |           |      |         |                                                             |
|---------------|----------|----------|----------|-----------|------|---------|-------------------------------------------------------------|
| 11743976_at   | 6.52E-29 | 3.45E-31 | 1.54E+01 | 60.376773 | 1.69 | MYL12A  | NM_006471                                                   |
| 11747928_x_at | 7.30E-29 | 3.95E-31 | 1.54E+01 | 60.242648 | 4.26 | POSTN   | NM_001135934,NM_001135935,NM_001135936,NM_006475            |
| 11743636_at   | 7.94E-29 | 4.33E-31 | 1.53E+01 | 60.151416 | 3.38 | TNFAIP6 | NM_007115                                                   |
| 11747298_a_at | 8.31E-29 | 4.56E-31 | 1.53E+01 | 60.099858 | 3.13 | S100A16 | NM_080388                                                   |
| 11749094_a_at | 9.27E-29 | 5.16E-31 | 1.53E+01 | 59.976256 | 2.7  | DSE     | NM_001080976,NM_013352                                      |
| 11721993_at   | 9.29E-29 | 5.19E-31 | 1.53E+01 | 59.970442 | 3.31 | SLC6A6  | NM_001134367,NM_001134368,NM_003043                         |
| 11758648_s_at | 1.04E-28 | 5.86E-31 | 1.53E+01 | 59.850484 | 1.92 | KCTD10  | NM_031954                                                   |
| 11743515_s_at | 1.06E-28 | 6.00E-31 | 1.53E+01 | 59.827169 | 4.35 | LAMC2   | NM_005562,NM_018891                                         |
| 11715716_at   | 1.08E-28 | 6.17E-31 | 1.53E+01 | 59.799752 | 2    | MSN     | NM_002444                                                   |
| 11758189_s_at | 1.08E-28 | 6.21E-31 | 1.53E+01 | 59.792781 | 1.56 | ITGB1   | NM_002211,NM_033666,NM_033667,NM_033668,NM_033669,NM_133376 |
| 11719488_at   | 1.17E-28 | 6.70E-31 | 1.53E+01 | 59.717119 | 3.24 | EDNRA   | NM_001166055,NM_001957,NR_028596                            |
| 11715350_a_at | 1.21E-28 | 7.01E-31 | 1.53E+01 | 59.673117 | 4.06 | COL1A1  | NM_000088                                                   |
| 11715355_at   | 1.22E-28 | 7.08E-31 | 1.53E+01 | 59.662451 | 3.24 | COL1A2  | NM_000089                                                   |



|               |          |          |          |           |      |                           |                                                   |
|---------------|----------|----------|----------|-----------|------|---------------------------|---------------------------------------------------|
| 11717272_at   | 1.22E-28 | 7.11E-31 | 1.53E+01 | 59.658173 | 3.8  | COL5A1                    | NM_000093                                         |
| 11721493_a_at | 1.33E-28 | 7.84E-31 | 1.52E+01 | 59.561811 | 2.42 | SULF2                     | NM_001161841,NM_018837,NM_198596                  |
| 11744077_at   | 1.44E-28 | 8.58E-31 | 1.52E+01 | 59.472025 | 2.13 | ARPC1B<br>///<br>LOC65388 | NM_005720,XM_936251                               |
| 11753623_s_at | 1.57E-28 | 9.44E-31 | 1.52E+01 | 59.378014 | 1.8  | RAP1B                     | NM_001010942,NM_015646                            |
| 11716883_s_at | 1.58E-28 | 9.55E-31 | 1.52E+01 | 59.36677  | 1.51 | RAP1B                     | NM_001010942,NM_015646                            |
| 11740238_a_at | 1.64E-28 | 9.94E-31 | 1.52E+01 | 59.326212 | 2.72 | SULF2                     | NM_001161841,NM_018837,NM_198596                  |
| 11715717_s_at | 1.83E-28 | 1.12E-30 | 1.52E+01 | 59.208118 | 1.98 | MSN                       | NM_002444                                         |
| 11731680_a_at | 2.05E-28 | 1.27E-30 | 1.51E+01 | 59.083418 | 3.7  | NOX4                      | NM_001143836,NM_001143837,NM_016931,<br>NR_026571 |
| 11758114_x_at | 2.77E-28 | 1.76E-30 | 1.51E+01 | 58.761465 | 1.92 | SKAP2                     | NM_003930                                         |
| 11725988_at   | 2.90E-28 | 1.85E-30 | 1.51E+01 | 58.709166 | 2.25 | MMP14                     | NM_004995                                         |
| 11740743_a_at | 3.83E-28 | 2.50E-30 | 1.50E+01 | 58.41377  | 3.09 | TPM2                      | NM_003289,NM_213674                               |
| 11720849_a_at | 3.99E-28 | 2.62E-30 | 1.50E+01 | 58.367002 | 2.87 | RAB23                     | NM_016277,NM_183227                               |

|               |          |          |          |           |      |          |                                                                       |
|---------------|----------|----------|----------|-----------|------|----------|-----------------------------------------------------------------------|
| 11757650_s_at | 4.09E-28 | 2.70E-30 | 1.50E+01 | 58.337648 | 3.02 | FN1      | NM_002026,NM_054034,NM_212474,NM_212475,NM_212476,NM_212478,NM_212482 |
| 11715876_at   | 4.09E-28 | 2.70E-30 | 1.50E+01 | 58.335442 | 1.18 | TAX1BP3  | NM_014604                                                             |
| 11754058_a_at | 4.39E-28 | 2.94E-30 | 1.50E+01 | 58.252606 | 2.96 | SPARC    | NM_003118                                                             |
| 11749527_a_at | 4.87E-28 | 3.28E-30 | 1.50E+01 | 58.143807 | 4.48 | POSTN    | NM_001135934,NM_001135935,NM_001135936,NM_006475                      |
| 11722532_s_at | 5.38E-28 | 3.64E-30 | 1.50E+01 | 58.039488 | 2.18 | CALD1    | NM_004342,NM_033138,NM_033139,NM_033140,NM_033157                     |
| 11754064_x_at | 5.73E-28 | 3.90E-30 | 1.49E+01 | 57.971852 | 1.4  | ANXA2    | NM_001002857,NM_001002858,NM_001136015,NM_004039                      |
| 11737127_a_at | 6.43E-28 | 4.45E-30 | 1.49E+01 | 57.840095 | 2.53 | ITGA1    | NM_181501                                                             |
| 11718154_a_at | 6.72E-28 | 4.67E-30 | 1.49E+01 | 57.793319 | 3.29 | HEPH     | NM_001130860,NM_014799,NM_138737                                      |
| 11754593_x_at | 7.09E-28 | 4.96E-30 | 1.49E+01 | 57.732067 | 3.15 | TUBB3    | NM_006086                                                             |
| 11744277_x_at | 7.91E-28 | 5.62E-30 | 1.49E+01 | 57.60913  | 2.7  | CAPG     | NM_001747                                                             |
| 11755137_a_at | 8.00E-28 | 5.72E-30 | 1.49E+01 | 57.591851 | 2.41 | CCDC109B | NM_017918                                                             |
| 11724983_at   | 8.26E-28 | 5.92E-30 | 1.49E+01 | 57.557664 | 3.96 | PCDH7    | NM_001173523,NM_002589,NM_032456,NM_032457                            |
| 11744735_a_at | 8.26E-28 | 5.94E-30 | 1.49E+01 | 57.554785 | 3.31 | TMEM200A | NM_052913                                                             |

|               |          |          |          |           |      |                |                                                   |
|---------------|----------|----------|----------|-----------|------|----------------|---------------------------------------------------|
| 11732701_a_at | 8.28E-28 | 5.97E-30 | 1.49E+01 | 57.549466 | 1.89 | CSGALNA<br>CT2 | NM_018590                                         |
| 11727084_at   | 9.27E-28 | 6.72E-30 | 1.48E+01 | 57.432093 | 5    | GJB2           | NM_004004                                         |
| 11717275_s_at | 1.01E-27 | 7.41E-30 | 1.48E+01 | 57.334881 | 3.46 | COL5A1         | NM_000093                                         |
| 11722531_a_at | 1.01E-27 | 7.44E-30 | 1.48E+01 | 57.331362 | 2.74 | CALD1          | NM_004342,NM_033138,NM_033139,NM_033140,NM_033157 |
| 11744276_a_at | 1.17E-27 | 8.63E-30 | 1.48E+01 | 57.183291 | 2.92 | CAPG           | NM_001747                                         |
| 11747927_a_at | 1.22E-27 | 9.05E-30 | 1.48E+01 | 57.136837 | 4.43 | POSTN          | NM_001135934,NM_001135935,NM_001135936,NM_006475  |
| 11728375_x_at | 1.26E-27 | 9.39E-30 | 1.48E+01 | 57.099485 | 1.64 | ACTN1          | NM_001102,NM_001130004,NM_001130005               |
| 11731500_a_at | 1.34E-27 | 1.01E-29 | 1.48E+01 | 57.032214 | 3.29 | KRT19          | NM_002276                                         |
| 11740134_a_at | 1.58E-27 | 1.20E-29 | 1.47E+01 | 56.85914  | 1.92 | CALD1          | NM_004342,NM_033138,NM_033139,NM_033140,NM_033157 |
| 11757405_a_at | 1.70E-27 | 1.30E-29 | 1.47E+01 | 56.776325 | 1.53 | MSRB2          | NM_012228                                         |
| 11741143_x_at | 1.85E-27 | 1.43E-29 | 1.47E+01 | 56.685912 | 3.6  | NOX4           | NM_001143836,NM_001143837,NM_016931, NR_026571    |
| 11725766_x_at | 1.90E-27 | 1.47E-29 | 1.47E+01 | 56.658721 | 5.96 | COL11A1        | NM_001168249,NM_001854,NM_080629,NM_080630        |
| 11715354_a_at | 2.27E-27 | 1.77E-29 | 1.47E+01 | 56.470361 | 3.42 | COL1A2         | NM_000089                                         |

|               |          |          |          |           |      |        |                                                                                         |
|---------------|----------|----------|----------|-----------|------|--------|-----------------------------------------------------------------------------------------|
| 11719447_s_at | 2.46E-27 | 1.93E-29 | 1.47E+01 | 56.384876 | 2.42 | GBP2   | NM_004120                                                                               |
| 11725042_a_at | 2.50E-27 | 1.97E-29 | 1.47E+01 | 56.363114 | 1.04 | YWHAB  | NM_003404,NM_139323                                                                     |
| 11736047_a_at | 2.61E-27 | 2.07E-29 | 1.46E+01 | 56.315721 | 2.62 | ANTXR2 | NM_001145794,NM_058172                                                                  |
| 11736422_s_at | 2.80E-27 | 2.23E-29 | 1.46E+01 | 56.243199 | 4.19 | POSTN  | NM_001135934,NM_001135935,NM_001135936,NM_006475                                        |
| 11715751_a_at | 3.34E-27 | 2.68E-29 | 1.46E+01 | 56.058158 | 3.11 | DPYSL3 | NM_001387                                                                               |
| 11743063_x_at | 3.37E-27 | 2.71E-29 | 1.46E+01 | 56.047926 | 3.31 | PLAUR  | NM_001005376,NM_001005377,NM_002659                                                     |
| 11728809_a_at | 3.38E-27 | 2.73E-29 | 1.46E+01 | 56.041454 | 3.75 | COL8A1 | NM_001850,NM_020351                                                                     |
| 11746555_x_at | 3.90E-27 | 3.16E-29 | 1.46E+01 | 55.896302 | 2.69 | SPARC  | NM_003118                                                                               |
| 11717281_a_at | 3.98E-27 | 3.26E-29 | 1.46E+01 | 55.867195 | 2.34 | ASAP1  | NM_018482                                                                               |
| 11739574_x_at | 5.76E-27 | 4.84E-29 | 1.45E+01 | 55.473522 | 2.37 | ZNF532 | NM_018181                                                                               |
| 11724006_a_at | 6.11E-27 | 5.16E-29 | 1.45E+01 | 55.411039 | 2.83 | ENTPD1 | NM_001098175,NM_001164178,NM_001164179,NM_001164181,NM_001164182,NM_001164183,NM_001776 |
| 11719487_a_at | 6.13E-27 | 5.19E-29 | 1.45E+01 | 55.404534 | 4.14 | LAMB3  | NM_000228,NM_001017402,NM_001127641                                                     |

|               |          |          |          |           |      |         |                                                   |
|---------------|----------|----------|----------|-----------|------|---------|---------------------------------------------------|
| 11717131_a_at | 6.33E-27 | 5.39E-29 | 1.45E+01 | 55.36779  | 4.68 | AHNAK2  | NM_138420                                         |
| 11742819_at   | 6.48E-27 | 5.53E-29 | 1.45E+01 | 55.341118 | 3.33 | PLAUR   | NM_001005376,NM_001005377,NM_002659               |
| 11746554_a_at | 6.70E-27 | 5.76E-29 | 1.45E+01 | 55.300668 | 2.91 | SPARC   | NM_003118                                         |
| 11716870_a_at | 7.15E-27 | 6.18E-29 | 1.45E+01 | 55.231726 | 1.47 | PHC2    | NM_004427,NM_198040                               |
| 11726218_a_at | 7.37E-27 | 6.40E-29 | 1.44E+01 | 55.196169 | 2.83 | PRDM1   | NM_001198,NM_182907                               |
| 11725765_a_at | 7.67E-27 | 6.70E-29 | 1.44E+01 | 55.151844 | 5.92 | COL11A1 | NM_001168249,NM_001854,NM_080629,NM_080630        |
| 11730900_s_at | 8.01E-27 | 7.02E-29 | 1.44E+01 | 55.104601 | 3.6  | MBOAT2  | NM_138799                                         |
| 11754202_a_at | 8.93E-27 | 7.94E-29 | 1.44E+01 | 54.982697 | 2.66 | CAPG    | NM_001747                                         |
| 11715356_x_at | 8.95E-27 | 7.97E-29 | 1.44E+01 | 54.979163 | 3.08 | COL1A2  | NM_000089                                         |
| 11722530_a_at | 9.10E-27 | 8.16E-29 | 1.44E+01 | 54.955331 | 2.02 | CALD1   | NM_004342,NM_033138,NM_033139,NM_033140,NM_033157 |
| 11722533_x_at | 9.27E-27 | 8.35E-29 | 1.44E+01 | 54.933182 | 2.39 | CALD1   | NM_004342,NM_033138,NM_033139,NM_033140,NM_033157 |
| 11753213_x_at | 1.05E-26 | 9.56E-29 | 1.44E+01 | 54.79833  | 1.76 | GNAI2   | NM_001166425,NM_002070                            |
| 11757887_x_at | 1.08E-26 | 9.95E-29 | 1.44E+01 | 54.759043 | 1.12 | YWHAB   | NM_003404,NM_139323                               |

|               |          |          |          |           |      |          |                                                               |
|---------------|----------|----------|----------|-----------|------|----------|---------------------------------------------------------------|
| 11720384_at   | 1.24E-26 | 1.15E-28 | 1.43E+01 | 54.616573 | 1.35 | STX6     | NM_005819                                                     |
| 11763528_s_at | 1.25E-26 | 1.16E-28 | 1.43E+01 | 54.610813 | 1.79 | SLC12A4  | NM_001145961,NM_001145962,NM_001145963,NM_001145964,NM_005072 |
| 11739573_s_at | 1.32E-26 | 1.22E-28 | 1.43E+01 | 54.554577 | 3.05 | ZNF532   | NM_018181                                                     |
| 11723439_at   | 1.35E-26 | 1.27E-28 | 1.43E+01 | 54.519893 | 2.97 | SRPX2    | NM_014467                                                     |
| 11758282_s_at | 1.41E-26 | 1.33E-28 | 1.43E+01 | 54.472288 | 1.5  | TUBA1C   | NM_032704                                                     |
| 11758556_s_at | 1.47E-26 | 1.38E-28 | 1.43E+01 | 54.432447 | 2.06 | PGM2     | NM_018290                                                     |
| 11743516_s_at | 1.49E-26 | 1.41E-28 | 1.43E+01 | 54.414913 | 4.29 | LAMC2    | NM_005562,NM_018891                                           |
| 11758342_s_at | 1.64E-26 | 1.58E-28 | 1.43E+01 | 54.302219 | 2.66 | COL3A1   | NM_000090                                                     |
| 11742870_at   | 1.67E-26 | 1.61E-28 | 1.43E+01 | 54.282074 | 1.02 | ARPC2    | NM_005731,NM_152862                                           |
| 11716687_x_at | 1.85E-26 | 1.79E-28 | 1.43E+01 | 54.175078 | 1.96 | ABR      | NM_001092,NM_001159746,NM_021962                              |
| 11758279_s_at | 1.87E-26 | 1.81E-28 | 1.43E+01 | 54.164884 | 1.64 | CORO1C   | NM_014325                                                     |
| 11729035_at   | 1.87E-26 | 1.82E-28 | 1.43E+01 | 54.160094 | 1.22 | ITPRIPL2 | NM_001034841,NR_028028                                        |
| 11726839_s_at | 2.07E-26 | 2.03E-28 | 1.42E+01 | 54.051431 | 1.64 | RELL1    | NM_001085399,NM_001085400                                     |

|               |          |          |          |           |      |          |                                            |
|---------------|----------|----------|----------|-----------|------|----------|--------------------------------------------|
| 11744209_s_at | 2.09E-26 | 2.05E-28 | 1.42E+01 | 54.040742 | 2.48 | SERPINH1 | NM_001235                                  |
| 11723829_s_at | 2.12E-26 | 2.10E-28 | 1.42E+01 | 54.020112 | 3.39 | ANO1     | NM_018043,NR_030691                        |
| 11716104_a_at | 2.28E-26 | 2.27E-28 | 1.42E+01 | 53.94304  | 1.55 | MPZL1    | NM_001146191,NM_003953,NM_024569           |
| 11725306_s_at | 2.43E-26 | 2.42E-28 | 1.42E+01 | 53.878025 | 1.8  | CALU     | NM_001130674,NM_001219                     |
| 11733707_x_at | 2.50E-26 | 2.49E-28 | 1.42E+01 | 53.847434 | 5.66 | COL11A1  | NM_001168249,NM_001854,NM_080629,NM_080630 |
| 11753646_x_at | 2.70E-26 | 2.72E-28 | 1.42E+01 | 53.761078 | 1.49 | CFL1     | NM_005507                                  |
| 11720382_at   | 2.83E-26 | 2.85E-28 | 1.42E+01 | 53.713979 | 1.93 | STX6     | NM_005819                                  |
| 11732331_s_at | 3.17E-26 | 3.22E-28 | 1.42E+01 | 53.593539 | 2.4  | ARL4C    | NM_005737                                  |
| 11717726_s_at | 3.19E-26 | 3.25E-28 | 1.42E+01 | 53.58585  | 2.81 | HN1      | NM_001002032,NM_001002033,NM_016185        |
| 11731496_at   | 3.38E-26 | 3.47E-28 | 1.41E+01 | 53.521089 | 3.67 | INHBA    | NM_002192                                  |
| 11739989_a_at | 4.02E-26 | 4.17E-28 | 1.41E+01 | 53.337744 | 2    | CPPED1   | NM_001099455,NM_018340                     |
| 11717274_s_at | 4.07E-26 | 4.24E-28 | 1.41E+01 | 53.322615 | 3.22 | COL5A1   | NM_000093                                  |
| 11757843_s_at | 4.14E-26 | 4.35E-28 | 1.41E+01 | 53.295964 | 1.42 | PEA15    | NM_003768                                  |

|               |          |          |          |           |      |         |                                                                                    |
|---------------|----------|----------|----------|-----------|------|---------|------------------------------------------------------------------------------------|
| 11756670_x_at | 4.24E-26 | 4.47E-28 | 1.41E+01 | 53.268031 | 1.89 | TUBA1C  | NM_032704                                                                          |
| 11726004_a_at | 4.41E-26 | 4.67E-28 | 1.41E+01 | 53.226188 | 2.4  | LAYN    | NM_178834                                                                          |
| 11724397_s_at | 4.68E-26 | 4.98E-28 | 1.41E+01 | 53.162235 | 2.46 | PRRG1   | NM_000950,NM_001142395,NM_001173486,<br>NM_001173489,NM_001173490                  |
| 11743253_x_at | 4.76E-26 | 5.08E-28 | 1.41E+01 | 53.141318 | 2.14 | CALD1   | NM_004342,NM_033138,NM_033139,NM_033<br>140,NM_033157                              |
| 11733084_a_at | 5.09E-26 | 5.48E-28 | 1.41E+01 | 53.066598 | 2.27 | PALLD   | NM_001166108,NM_001166109,NM_0011661<br>10,NM_016081                               |
| 11747922_a_at | 5.44E-26 | 5.89E-28 | 1.41E+01 | 52.996217 | 1.61 | RBM9    | NM_001031695,NM_001082576,NM_0010825<br>77,NM_001082578,NM_001082579,NM_01430<br>9 |
| 11731491_a_at | 5.50E-26 | 5.96E-28 | 1.40E+01 | 52.984101 | 1.58 | HK1     | NM_000188,NM_033496,NM_033497,NM_033<br>498,NM_033500                              |
| 11743960_a_at | 5.69E-26 | 6.19E-28 | 1.40E+01 | 52.946929 | 3.89 | SLC16A3 | NM_001042422,NM_001042423,NM_004207                                                |
| 11732037_a_at | 5.69E-26 | 6.20E-28 | 1.40E+01 | 52.944365 | 1.56 | PTPN12  | NM_001131008,NM_001131009,NM_002835                                                |
| 11718647_at   | 5.99E-26 | 6.55E-28 | 1.40E+01 | 52.890612 | 1.83 | ACVR1   | NM_001105,NM_001111067                                                             |
| 11764247_s_at | 6.11E-26 | 6.71E-28 | 1.40E+01 | 52.865519 | 3.55 | ---     | AI917494                                                                           |
| 11724229_s_at | 6.13E-26 | 6.76E-28 | 1.40E+01 | 52.859365 | 1.36 | RBMS1   | NM_002897,NM_016836                                                                |



|               |          |          |          |           |      |                |                                                                              |
|---------------|----------|----------|----------|-----------|------|----------------|------------------------------------------------------------------------------|
| 11716715_a_at | 6.27E-26 | 6.93E-28 | 1.40E+01 | 52.834492 | 1.72 | CTSB           | NM_001908,NM_147780,NM_147781,NM_147782,NM_147783                            |
| 11715353_s_at | 6.29E-26 | 6.96E-28 | 1.40E+01 | 52.829564 | 2.55 | COL1A2         | NM_000089                                                                    |
| 11720404_at   | 6.35E-26 | 7.05E-28 | 1.40E+01 | 52.816509 | 2.63 | EFNB2          | NM_004093                                                                    |
| 11732330_s_at | 6.53E-26 | 7.27E-28 | 1.40E+01 | 52.786734 | 1.39 | MAP7D1         | NM_018067                                                                    |
| 11715352_x_at | 6.53E-26 | 7.28E-28 | 1.40E+01 | 52.784862 | 3.95 | COL1A1         | NM_000088                                                                    |
| 11723669_s_at | 7.30E-26 | 8.21E-28 | 1.40E+01 | 52.666207 | 3.24 | SEMA3C         | NM_006379                                                                    |
| 11740496_x_at | 7.52E-26 | 8.51E-28 | 1.40E+01 | 52.629981 | 1.86 | ST3GAL2        | NM_006927                                                                    |
| 11743514_a_at | 7.56E-26 | 8.59E-28 | 1.40E+01 | 52.621691 | 4.09 | LAMC2          | NM_005562,NM_018891                                                          |
| 11746874_a_at | 7.67E-26 | 8.75E-28 | 1.40E+01 | 52.603311 | 1.88 | GNAI2          | NM_001166425,NM_002070                                                       |
| 11737791_s_at | 7.69E-26 | 8.78E-28 | 1.40E+01 | 52.599281 | 3.33 | APOL1<br>APOL2 | ///<br>NM_001136540,NM_001136541,NM_003661,<br>NM_030882,NM_145343,NM_145637 |
| 11715415_a_at | 7.89E-26 | 9.04E-28 | 1.40E+01 | 52.570628 | 2.43 | COL3A1         | NM_000090                                                                    |
| 11744379_a_at | 8.37E-26 | 9.64E-28 | 1.40E+01 | 52.506889 | 2.4  | COL3A1         | NM_000090                                                                    |
| 11744345_x_at | 8.37E-26 | 9.66E-28 | 1.40E+01 | 52.504286 | 1.26 | TUBA1B         | NM_006082                                                                    |

|               |          |          |          |           |      |         |                                                                                   |
|---------------|----------|----------|----------|-----------|------|---------|-----------------------------------------------------------------------------------|
| 11752865_x_at | 9.22E-26 | 1.08E-27 | 1.39E+01 | 52.395297 | 1.38 | ACTB    | NM_001101                                                                         |
| 11719489_a_at | 9.63E-26 | 1.13E-27 | 1.39E+01 | 52.346963 | 2.99 | EDNRA   | NM_001166055,NM_001957,NR_028596                                                  |
| 11738684_x_at | 9.67E-26 | 1.14E-27 | 1.39E+01 | 52.340549 | 2.38 | RAB34   | NM_001142624,NM_001142625,NM_001144942,NM_001144943,NM_031934,NR_024575,NR_024579 |
| 11724816_a_at | 1.08E-25 | 1.30E-27 | 1.39E+01 | 52.210719 | 2.15 | SH3KBP1 | NM_001024666,NM_031892                                                            |
| 11724387_at   | 1.10E-25 | 1.33E-27 | 1.39E+01 | 52.189457 | 3.03 | HOXB2   | NM_002145                                                                         |
| 11754313_s_at | 1.11E-25 | 1.34E-27 | 1.39E+01 | 52.182939 | 2.76 | ARL4C   | NM_005737                                                                         |
| 11715359_a_at | 1.15E-25 | 1.39E-27 | 1.39E+01 | 52.145386 | 3.06 | TIMP1   | NM_003254                                                                         |
| 11746028_x_at | 1.16E-25 | 1.40E-27 | 1.39E+01 | 52.135582 | 1.82 | NMI     | NM_004688                                                                         |
| 11724611_a_at | 1.18E-25 | 1.43E-27 | 1.39E+01 | 52.113533 | 1.7  | DYRK2   | NM_003583,NM_006482                                                               |
| 11748492_a_at | 1.19E-25 | 1.45E-27 | 1.39E+01 | 52.102921 | 2.29 | LAYN    | NM_178834                                                                         |
| 11745433_a_at | 1.22E-25 | 1.49E-27 | 1.39E+01 | 52.071698 | 1.52 | PHC2    | NM_004427,NM_198040                                                               |
| 11743681_at   | 1.22E-25 | 1.50E-27 | 1.39E+01 | 52.068008 | 2.68 | S100A16 | NM_080388                                                                         |

|               |          |          |          |           |      |          |                                                  |
|---------------|----------|----------|----------|-----------|------|----------|--------------------------------------------------|
| 11757519_x_at | 1.24E-25 | 1.53E-27 | 1.39E+01 | 52.046776 | 2.36 | CAPG     | NM_001747                                        |
| 11724901_s_at | 1.28E-25 | 1.58E-27 | 1.39E+01 | 52.013694 | 2.5  | SCHIP1   | NM_014575                                        |
| 11723104_at   | 1.40E-25 | 1.75E-27 | 1.39E+01 | 51.917495 | 2.28 | GNB4     | NM_021629                                        |
| 11717886_a_at | 1.51E-25 | 1.91E-27 | 1.38E+01 | 51.830781 | 3.31 | PLAU     | NM_001145031,NM_002658                           |
| 11751921_s_at | 1.53E-25 | 1.93E-27 | 1.38E+01 | 51.818868 | 2.01 | AHR      | NM_001621                                        |
| 11723668_at   | 1.59E-25 | 2.01E-27 | 1.38E+01 | 51.777004 | 3.32 | SEMA3C   | NM_006379                                        |
| 11715687_x_at | 1.59E-25 | 2.01E-27 | 1.38E+01 | 51.776193 | 1.03 | ARPC5    | NM_005717                                        |
| 11746320_x_at | 1.59E-25 | 2.02E-27 | 1.38E+01 | 51.773247 | 2.59 | SERPINH1 | NM_001235                                        |
| 11755062_a_at | 1.59E-25 | 2.02E-27 | 1.38E+01 | 51.771096 | 2.09 | KDEL1C   | NM_024089                                        |
| 11731650_a_at | 1.66E-25 | 2.13E-27 | 1.38E+01 | 51.72176  | 3.12 | NTM      | NM_001048209,NM_001144058,NM_001144059,NM_016522 |
| 11731197_a_at | 1.74E-25 | 2.23E-27 | 1.38E+01 | 51.672937 | 2.76 | PRR5L    | NM_001160167,NM_001160168,NM_001160169,NM_024841 |
| 11721124_s_at | 1.78E-25 | 2.29E-27 | 1.38E+01 | 51.648026 | 4.86 | MMP11    | NM_005940                                        |
| 11753399_x_at | 1.83E-25 | 2.37E-27 | 1.38E+01 | 51.615364 | 1.58 | ANXA2    | NM_001002857,NM_001002858,NM_001136015,NM_004039 |

|                             |          |          |          |           |      |          |                                            |
|-----------------------------|----------|----------|----------|-----------|------|----------|--------------------------------------------|
| 11723830_x_at               | 1.88E-25 | 2.44E-27 | 1.38E+01 | 51.585186 | 3.32 | ANO1     | NM_018043,NR_030691                        |
| 11756403_s_at               | 2.06E-25 | 2.70E-27 | 1.38E+01 | 51.484254 | 1.74 | KCTD10   | NM_031954                                  |
| 11746321_s_at               | 2.08E-25 | 2.74E-27 | 1.38E+01 | 51.469603 | 2.49 | SERPINH1 | NM_001235                                  |
| 11749744_a_at               | 2.24E-25 | 2.96E-27 | 1.38E+01 | 51.395174 | 1.48 | TBL1XR1  | NM_024665                                  |
| 11721574_a_at               | 2.30E-25 | 3.06E-27 | 1.38E+01 | 51.360931 | 2.04 | ELF4     | NM_001127197,NM_001421                     |
| 11716262_a_at               | 2.31E-25 | 3.08E-27 | 1.38E+01 | 51.355385 | 1.77 | AP2B1    | NM_001030006,NM_001282                     |
| 11751904_x_at               | 2.32E-25 | 3.09E-27 | 1.38E+01 | 51.352791 | 5.66 | COL11A1  | NM_001168249,NM_001854,NM_080629,NM_080630 |
| AFFX-HSAC07/<br>X00351_5_at | 2.59E-25 | 3.46E-27 | 1.37E+01 | 51.238258 | 1.64 | ACTB     | NM_001101                                  |
| 11754059_x_at               | 2.67E-25 | 3.59E-27 | 1.37E+01 | 51.203572 | 2.66 | SPARC    | NM_003118                                  |
| 11753645_a_at               | 2.75E-25 | 3.71E-27 | 1.37E+01 | 51.170962 | 1.46 | CFL1     | NM_005507                                  |
| 11744380_s_at               | 2.76E-25 | 3.73E-27 | 1.37E+01 | 51.166004 | 1.66 | COL3A1   | NM_000090                                  |
| 11746875_x_at               | 2.91E-25 | 3.94E-27 | 1.37E+01 | 51.111012 | 1.78 | GNAI2    | NM_001166425,NM_002070                     |

|               |          |          |          |           |      |         |                                     |
|---------------|----------|----------|----------|-----------|------|---------|-------------------------------------|
| 11744339_a_at | 3.07E-25 | 4.17E-27 | 1.37E+01 | 51.053504 | 1.98 | PRMT2   | NM_001535,NM_206962                 |
| 11717132_s_at | 3.14E-25 | 4.27E-27 | 1.37E+01 | 51.02991  | 4.09 | AHNAK2  | NM_138420                           |
| 11719018_at   | 3.16E-25 | 4.31E-27 | 1.37E+01 | 51.020776 | 1.27 | CBFB    | NM_001755,NM_022845                 |
| 11742818_a_at | 3.29E-25 | 4.51E-27 | 1.37E+01 | 50.976975 | 3.23 | PLAUR   | NM_001005376,NM_001005377,NM_002659 |
| 11743112_at   | 3.30E-25 | 4.52E-27 | 1.37E+01 | 50.974027 | 1.87 | S100A10 | NM_002966                           |
| 11753294_a_at | 3.52E-25 | 4.84E-27 | 1.37E+01 | 50.905432 | 2.93 | COL1A2  | NM_000089                           |
| 11729870_x_at | 3.65E-25 | 5.03E-27 | 1.37E+01 | 50.868506 | 2.28 | EMILIN1 | NM_007046                           |
| 11715971_a_at | 3.69E-25 | 5.11E-27 | 1.37E+01 | 50.853405 | 2.98 | PFKP    | NM_002627                           |
| 11717154_a_at | 4.00E-25 | 5.54E-27 | 1.37E+01 | 50.771869 | 3.79 | PLAU    | NM_001145031,NM_002658              |
| 11720441_x_at | 4.18E-25 | 5.80E-27 | 1.36E+01 | 50.726139 | 3.26 | OLFML2B | NM_015441                           |
| 11740744_x_at | 4.46E-25 | 6.22E-27 | 1.36E+01 | 50.657561 | 2.91 | TPM2    | NM_003289,NM_213674                 |
| 11717057_x_at | 4.70E-25 | 6.60E-27 | 1.36E+01 | 50.598962 | 1.97 | CORO1C  | NM_014325                           |

|               |          |          |          |           |      |             |                                                                                         |
|---------------|----------|----------|----------|-----------|------|-------------|-----------------------------------------------------------------------------------------|
| 11724008_a_at | 4.72E-25 | 6.65E-27 | 1.36E+01 | 50.591563 | 2.26 | ENTPD1      | NM_001098175,NM_001164178,NM_001164179,NM_001164181,NM_001164182,NM_001164183,NM_001776 |
| 11715452_s_at | 4.76E-25 | 6.73E-27 | 1.36E+01 | 50.580022 | 2.13 | COL4A2      | NM_001846                                                                               |
| 11737325_a_at | 4.80E-25 | 6.81E-27 | 1.36E+01 | 50.56796  | 3.49 | LAMC2       | NM_005562,NM_018891                                                                     |
| 11728763_x_at | 5.05E-25 | 7.17E-27 | 1.36E+01 | 50.516973 | 2.85 | GAL3ST4     | NM_024637                                                                               |
| 11719689_a_at | 5.10E-25 | 7.25E-27 | 1.36E+01 | 50.505205 | 2.23 | TWSG1       | NM_020648                                                                               |
| 11720600_a_at | 5.27E-25 | 7.52E-27 | 1.36E+01 | 50.46914  | 1.49 | CAPZB       | NM_004930                                                                               |
| 11749023_a_at | 5.31E-25 | 7.59E-27 | 1.36E+01 | 50.460424 | 4.21 | SLC16A4     | NM_004696                                                                               |
| 11756947_a_at | 5.43E-25 | 7.79E-27 | 1.36E+01 | 50.434187 | 1.54 | CTSB        | NM_001908,NM_147780,NM_147781,NM_147782,NM_147783                                       |
| 11758942_s_at | 5.63E-25 | 8.08E-27 | 1.36E+01 | 50.397607 | 1.26 | MOBKL1<br>B | NM_018221                                                                               |
| 11757474_x_at | 5.99E-25 | 8.63E-27 | 1.36E+01 | 50.332649 | 1.57 | CLIC1       | NM_001288                                                                               |
| 11738053_x_at | 6.13E-25 | 8.86E-27 | 1.36E+01 | 50.307075 | 2.83 | PLAUR       | NM_001005376,NM_001005377,NM_002659                                                     |
| 11756979_x_at | 6.59E-25 | 9.60E-27 | 1.36E+01 | 50.226591 | 1.1  | TUBA1B      | NM_006082                                                                               |

|               |          |          |          |           |      |         |                                                                                         |
|---------------|----------|----------|----------|-----------|------|---------|-----------------------------------------------------------------------------------------|
| 11731397_a_at | 7.07E-25 | 1.04E-26 | 1.35E+01 | 50.150689 | 1.08 | YWHAB   | NM_003404,NM_139323                                                                     |
| 11726433_a_at | 7.20E-25 | 1.06E-26 | 1.35E+01 | 50.129383 | 2.81 | OSBPL3  | NM_015550,NM_145320,NM_145321,NM_145322                                                 |
| 11744776_a_at | 7.70E-25 | 1.14E-26 | 1.35E+01 | 50.057415 | 2.54 | NNMT    | NM_006169                                                                               |
| 11731181_a_at | 7.79E-25 | 1.16E-26 | 1.35E+01 | 50.042093 | 3.26 | EPSTI1  | NM_001002264,NM_033255                                                                  |
| 11722849_a_at | 7.82E-25 | 1.16E-26 | 1.35E+01 | 50.036535 | 1.26 | PPP3CA  | NM_000944,NM_001130691,NM_001130692                                                     |
| 11727219_a_at | 7.92E-25 | 1.18E-26 | 1.35E+01 | 50.022609 | 2.24 | DSE     | NM_001080976,NM_013352                                                                  |
| 11742924_a_at | 8.17E-25 | 1.22E-26 | 1.35E+01 | 49.985611 | 1.13 | PRDX1   | NM_002574,NM_181696,NM_181697                                                           |
| 11717067_a_at | 8.21E-25 | 1.23E-26 | 1.35E+01 | 49.980255 | 4.35 | GREM1   | NM_013372                                                                               |
| 11724819_a_at | 8.47E-25 | 1.27E-26 | 1.35E+01 | 49.947343 | 2.23 | SH3KBP1 | NM_001024666,NM_031892                                                                  |
| 11749188_a_at | 8.90E-25 | 1.34E-26 | 1.35E+01 | 49.895896 | 2.58 | ENTPD1  | NM_001098175,NM_001164178,NM_001164179,NM_001164181,NM_001164182,NM_001164183,NM_001776 |
| 11715542_s_at | 8.92E-25 | 1.35E-26 | 1.35E+01 | 49.88915  | 2.8  | THY1    | NM_006288                                                                               |
| 11716139_s_at | 9.44E-25 | 1.44E-26 | 1.35E+01 | 49.826882 | 1.7  | SMS     | NM_004595                                                                               |

|               |          |          |          |           |      |          |                                                                         |
|---------------|----------|----------|----------|-----------|------|----------|-------------------------------------------------------------------------|
| 11718067_at   | 9.49E-25 | 1.45E-26 | 1.35E+01 | 49.820084 | 1.91 | MYO1E    | NM_004998                                                               |
| 11754993_s_at | 9.73E-25 | 1.49E-26 | 1.35E+01 | 49.792685 | 2.91 | PXDN     | NM_012293                                                               |
| 11722178_at   | 1.05E-24 | 1.61E-26 | 1.35E+01 | 49.714679 | 1.95 | DR1      | NM_001938                                                               |
| 11733078_a_at | 1.14E-24 | 1.75E-26 | 1.35E+01 | 49.629693 | 1.53 | PPP1R12A | NM_001143885,NM_001143886,NM_002480                                     |
| 11717401_at   | 1.34E-24 | 2.08E-26 | 1.34E+01 | 49.457914 | 1.42 | ARF6     | NM_001663                                                               |
| 11715586_at   | 1.37E-24 | 2.13E-26 | 1.34E+01 | 49.436917 | 1.39 | MAPRE1   | NM_012325                                                               |
| 11728289_a_at | 1.38E-24 | 2.16E-26 | 1.34E+01 | 49.423223 | 2.69 | TBC1D2   | NM_018421                                                               |
| 11756279_a_at | 1.51E-24 | 2.37E-26 | 1.34E+01 | 49.330359 | 1.81 | FAM118B  | NM_024556                                                               |
| 11717283_a_at | 1.52E-24 | 2.39E-26 | 1.34E+01 | 49.32177  | 1.93 | ASAP1    | NM_018482                                                               |
| 11756723_x_at | 1.56E-24 | 2.47E-26 | 1.34E+01 | 49.289545 | 1.67 | LDHA     | NM_001135239,NM_001165414,NM_001165415,NM_001165416,NM_005566,NR_028500 |
| 11717727_s_at | 1.68E-24 | 2.69E-26 | 1.34E+01 | 49.206233 | 2.44 | HN1      | NM_001002032,NM_001002033,NM_016185                                     |
| 11758995_at   | 1.72E-24 | 2.75E-26 | 1.34E+01 | 49.1823   | 3.07 | LOX      | NM_001178102,NM_002317                                                  |



|               |          |          |          |           |      |              |                                                                         |
|---------------|----------|----------|----------|-----------|------|--------------|-------------------------------------------------------------------------|
| 11716724_x_at | 1.83E-24 | 2.92E-26 | 1.34E+01 | 49.123113 | 2.02 | DPY19L1      | NM_015283                                                               |
| 11726432_a_at | 1.87E-24 | 2.99E-26 | 1.34E+01 | 49.098935 | 2.66 | OSBPL3       | NM_015550,NM_145320,NM_145321,NM_145322                                 |
| 11754664_x_at | 1.94E-24 | 3.13E-26 | 1.34E+01 | 49.053415 | 1.11 | RAP2C        | NM_021183                                                               |
| 11725249_at   | 1.94E-24 | 3.13E-26 | 1.34E+01 | 49.053283 | 2.7  | LY75         | NM_002349                                                               |
| 11754601_s_at | 2.08E-24 | 3.37E-26 | 1.33E+01 | 48.982248 | 2.8  | SPON2        | NM_001128325,NM_012445                                                  |
| 11733020_s_at | 2.11E-24 | 3.42E-26 | 1.33E+01 | 48.966313 | 1.45 | LDHA         | NM_001135239,NM_001165414,NM_001165415,NM_001165416,NM_005566,NR_028500 |
| 11726331_a_at | 2.12E-24 | 3.44E-26 | 1.33E+01 | 48.960182 | 1.69 | CEP170       | NM_001042404,NM_001042405,NM_014812                                     |
| 11715414_x_at | 2.17E-24 | 3.53E-26 | 1.33E+01 | 48.935751 | 2.81 | COL3A1       | NM_000090                                                               |
| 11719791_s_at | 2.18E-24 | 3.55E-26 | 1.33E+01 | 48.929146 | 4.32 | GPRC5A       | NM_003979                                                               |
| 11740170_s_at | 2.19E-24 | 3.58E-26 | 1.33E+01 | 48.921564 | 2.52 | ARHGAP4<br>2 | NM_152432                                                               |
| 11716941_at   | 2.22E-24 | 3.64E-26 | 1.33E+01 | 48.906109 | 2.2  | TRIB2        | NM_021643,NR_027303                                                     |
| 11757652_x_at | 2.39E-24 | 3.94E-26 | 1.33E+01 | 48.826202 | 2.06 | LEPRE1       | NM_001146289,NM_022356                                                  |

|               |          |          |          |           |      |        |                                            |
|---------------|----------|----------|----------|-----------|------|--------|--------------------------------------------|
| 11723947_a_at | 2.72E-24 | 4.52E-26 | 1.33E+01 | 48.691134 | 3.75 | ACSL5  | NM_016234,NM_203379,NM_203380              |
| 11759022_s_at | 2.84E-24 | 4.72E-26 | 1.33E+01 | 48.647157 | 1.47 | ELK3   | NM_005230                                  |
| 11717887_s_at | 3.22E-24 | 5.41E-26 | 1.33E+01 | 48.512712 | 1.24 | PTPN12 | NM_001131008,NM_001131009,NM_002835        |
| 11743150_s_at | 3.27E-24 | 5.49E-26 | 1.33E+01 | 48.496567 | 1.64 | ZNF143 | NM_003442                                  |
| 11732735_s_at | 3.28E-24 | 5.52E-26 | 1.33E+01 | 48.491701 | 2.38 | CHSY3  | NM_175856                                  |
| 11717273_at   | 3.36E-24 | 5.66E-26 | 1.32E+01 | 48.467896 | 3.15 | COL5A1 | NM_000093                                  |
| 11745421_a_at | 3.36E-24 | 5.67E-26 | 1.32E+01 | 48.465921 | 2.02 | BID    | NM_001196,NM_197966,NM_197967              |
| 11718050_a_at | 3.44E-24 | 5.82E-26 | 1.32E+01 | 48.43999  | 2.67 | BASP1  | NM_006317                                  |
| 11735189_s_at | 3.59E-24 | 6.09E-26 | 1.32E+01 | 48.394011 | 1.13 | H2AFY  | NM_001040158,NM_004893,NM_138609,NM_138610 |
| 11717889_s_at | 3.64E-24 | 6.19E-26 | 1.32E+01 | 48.378715 | 1.65 | GNAI2  | NM_001166425,NM_002070                     |
| 11759496_at   | 3.71E-24 | 6.33E-26 | 1.32E+01 | 48.355695 | 2.51 | CHST11 | NM_001173982,NM_018413                     |
| 11751527_s_at | 3.82E-24 | 6.54E-26 | 1.32E+01 | 48.323999 | 1.78 | WDR1   | NM_005112,NM_017491                        |
| 11744054_a_at | 3.82E-24 | 6.55E-26 | 1.32E+01 | 48.322852 | 1.74 | ZNFX1  | NM_021035                                  |

|               |          |          |          |           |      |                                                                                          |
|---------------|----------|----------|----------|-----------|------|------------------------------------------------------------------------------------------|
| 11749326_s_at | 4.08E-24 | 7.04E-26 | 1.32E+01 | 48.25117  | 3.05 | OLFML2B NM_015441                                                                        |
| 11716638_s_at | 4.09E-24 | 7.06E-26 | 1.32E+01 | 48.247979 | 1.92 | COL4A1 NM_001845                                                                         |
| 11746059_a_at | 4.22E-24 | 7.31E-26 | 1.32E+01 | 48.213318 | 1.73 | PSMD7 NM_002811                                                                          |
| 11721596_s_at | 4.22E-24 | 7.31E-26 | 1.32E+01 | 48.213209 | 1.31 | CDYL NM_001143970,NM_001143971,NM_004824,<br>NR_026590                                   |
| 11739681_x_at | 4.24E-24 | 7.35E-26 | 1.32E+01 | 48.207739 | 1.73 | AHR NM_001621                                                                            |
| 11752165_s_at | 4.61E-24 | 8.05E-26 | 1.32E+01 | 48.118194 | 2.63 | LOC65279 NM_002654,NM_182470,NM_182471,XM_001<br>7 /// PKM2 719890                       |
| 11723902_at   | 4.63E-24 | 8.10E-26 | 1.32E+01 | 48.111469 | 1.52 | PLEKHG1 NM_001029884                                                                     |
| 11721245_s_at | 5.31E-24 | 9.36E-26 | 1.32E+01 | 47.96868  | 2.66 | BGN NM_001711                                                                            |
| 11717480_a_at | 5.37E-24 | 9.48E-26 | 1.32E+01 | 47.955977 | 2.55 | FKBP10 NM_021939                                                                         |
| 11732299_at   | 5.64E-24 | 9.98E-26 | 1.31E+01 | 47.904556 | 1.91 | KIAA1715 NM_030650                                                                       |
| 11716775_a_at | 5.71E-24 | 1.01E-25 | 1.31E+01 | 47.891951 | 1.82 | RAI14 NM_001145520,NM_001145521,NM_0011455<br>22,NM_001145523,NM_001145525,NM_01557<br>7 |
| 11720440_at   | 5.82E-24 | 1.03E-25 | 1.31E+01 | 47.869099 | 2.92 | OLFML2B NM_015441                                                                        |

|               |          |          |          |           |      |         |                                                                         |
|---------------|----------|----------|----------|-----------|------|---------|-------------------------------------------------------------------------|
| 11746251_x_at | 6.06E-24 | 1.08E-25 | 1.31E+01 | 47.827216 | 1.56 | CLIC1   | NM_001288                                                               |
| 11718875_a_at | 6.19E-24 | 1.10E-25 | 1.31E+01 | 47.80368  | 1.89 | PNMA1   | NM_006029                                                               |
| 11718656_at   | 6.52E-24 | 1.17E-25 | 1.31E+01 | 47.749308 | 2.81 | SLC16A1 | NM_001166496,NM_003051                                                  |
| 11716587_at   | 6.64E-24 | 1.19E-25 | 1.31E+01 | 47.729509 | 2.3  | AXL     | NM_001699,NM_021913                                                     |
| 11757950_s_at | 6.68E-24 | 1.20E-25 | 1.31E+01 | 47.72017  | 1.81 | CHSY1   | NM_014918                                                               |
| 11719227_x_at | 6.69E-24 | 1.20E-25 | 1.31E+01 | 47.718156 | 3.59 | KCNN4   | NM_002250                                                               |
| 11742116_x_at | 6.79E-24 | 1.22E-25 | 1.31E+01 | 47.70247  | 1.39 | LDHA    | NM_001135239,NM_001165414,NM_001165415,NM_001165416,NM_005566,NR_028500 |
| 11742800_s_at | 6.96E-24 | 1.26E-25 | 1.31E+01 | 47.67483  | 1.83 | E2F3    | NM_001949                                                               |
| 11764077_s_at | 6.98E-24 | 1.26E-25 | 1.31E+01 | 47.669925 | 3.32 | EDIL3   | NM_005711                                                               |
| 11758751_at   | 7.53E-24 | 1.37E-25 | 1.31E+01 | 47.590742 | 1.32 | YWHAZ   | NM_001135699,NM_001135700,NM_001135701,NM_001135702,NM_003406,NM_145690 |
| 11734827_at   | 7.63E-24 | 1.39E-25 | 1.31E+01 | 47.574941 | 1.82 | SPRED1  | NM_152594                                                               |
| 11726704_x_at | 7.70E-24 | 1.41E-25 | 1.31E+01 | 47.563473 | 1.83 | BCL10   | NM_003921                                                               |

|               |          |          |           |           |       |                                                      |
|---------------|----------|----------|-----------|-----------|-------|------------------------------------------------------|
| 11718843_s_at | 8.00E-24 | 1.47E-25 | 1.31E+01  | 47.521456 | 1     | DNAJC25-<br>GNG10 ///NM_001017998,NM_004125<br>GNG10 |
| 11730863_at   | 8.10E-24 | 1.49E-25 | 1.31E+01  | 47.508754 | 1.57  | CTTNBP2<br>NL NM_018704                              |
| 11716639_a_at | 8.11E-24 | 1.49E-25 | 1.31E+01  | 47.506831 | 2.33  | COL4A1 NM_001845                                     |
| 11730922_at   | 1.45E-40 | 1.47E-44 | -2.13E+01 | 90.827475 | -1.8  | NHLRC4 NM_176677                                     |
| 11759074_at   | 1.56E-40 | 1.90E-44 | -2.13E+01 | 90.577781 | -2.6  | BRSK2 NM_003957                                      |
| 11715173_s_at | 4.41E-37 | 7.53E-41 | -1.96E+01 | 82.39686  | -1.75 | KRTAP10-<br>12 NM_198699                             |
| 11738461_x_at | 4.41E-37 | 8.04E-41 | -1.96E+01 | 82.332481 | -1.46 | FAM22F NM_017561                                     |
| 11749010_a_at | 5.13E-36 | 1.08E-39 | -1.91E+01 | 79.768477 | -2.77 | BRSK2 NM_003957                                      |
| 11751277_a_at | 1.08E-35 | 3.07E-39 | -1.89E+01 | 78.733596 | -2.46 | AMHR2 NM_001164690,NM_001164691,NM_020547            |
| 11722293_a_at | 2.14E-35 | 6.51E-39 | -1.87E+01 | 77.988514 | -1.67 | NAPSA NM_004851                                      |
| 11728434_a_at | 2.94E-35 | 1.07E-38 | -1.86E+01 | 77.495231 | -1.64 | GH2 NM_002059,NM_022556,NM_022557,NM_022558          |
| 11763240_s_at | 2.96E-35 | 1.14E-38 | -1.86E+01 | 77.435851 | -3.43 | TRAJ17 L34698.1                                      |

|               |          |          |           |           |       |         |                                                            |
|---------------|----------|----------|-----------|-----------|-------|---------|------------------------------------------------------------|
| 11732026_a_at | 3.58E-35 | 1.56E-38 | -1.86E+01 | 77.123936 | -3.02 | CRIP3   | NM_206922                                                  |
| 11759390_at   | 1.35E-34 | 6.85E-38 | -1.83E+01 | 75.660975 | -1.62 | OR2A14  | NM_001001659                                               |
| 11734227_at   | 1.40E-34 | 7.36E-38 | -1.83E+01 | 75.589146 | -1.98 | PRDM9   | NM_020227                                                  |
| 11735888_at   | 1.56E-34 | 8.58E-38 | -1.82E+01 | 75.438068 | -1.5  | NTN3    | NM_006181                                                  |
| 11752059_a_at | 1.56E-34 | 8.83E-38 | -1.82E+01 | 75.410003 | -1.75 | SARDH   | NM_001134707,NM_007101                                     |
| 11759204_a_at | 1.69E-34 | 9.92E-38 | -1.82E+01 | 75.294341 | -2.25 | SLC2A14 | NM_153449                                                  |
| 11749011_x_at | 2.03E-34 | 1.23E-37 | -1.82E+01 | 75.080797 | -2.92 | BRSK2   | NM_003957                                                  |
| 11748134_x_at | 2.74E-34 | 1.77E-37 | -1.81E+01 | 74.719895 | -1.48 | SLC2A11 | NM_001024938,NM_001024939,NM_030807                        |
| 11731307_a_at | 2.99E-34 | 2.06E-37 | -1.81E+01 | 74.572345 | -1.57 | AMHR2   | NM_001164690,NM_001164691,NM_020547                        |
| 11735342_s_at | 3.94E-34 | 2.95E-37 | -1.80E+01 | 74.214929 | -1.68 | TBXA2R  | NM_001060,NM_201636                                        |
| 11726825_at   | 7.12E-34 | 6.06E-37 | -1.78E+01 | 73.50409  | -1.79 | VPS37D  | NM_001077621                                               |
| 11740737_a_at | 1.15E-33 | 1.02E-36 | -1.77E+01 | 72.984783 | -1.54 | ECE2    | NM_001037324,NM_001100120,NM_001100121,NM_014693,NM_032331 |
| 11761569_x_at | 1.33E-33 | 1.24E-36 | -1.77E+01 | 72.792096 | -2.08 | TMC6    | NM_001127198,NM_007267                                     |

|               |          |          |           |           |       |          |                                                   |
|---------------|----------|----------|-----------|-----------|-------|----------|---------------------------------------------------|
| 11725593_s_at | 1.74E-33 | 1.65E-36 | -1.77E+01 | 72.509494 | -1.8  | SPATA2   | NM_001135773,NM_006038                            |
| 11761568_at   | 1.92E-33 | 1.93E-36 | -1.76E+01 | 72.356691 | -2.33 | TMC6     | NM_001127198,NM_007267                            |
| 11749743_a_at | 1.92E-33 | 1.94E-36 | -1.76E+01 | 72.350785 | -1.37 | MST1R    | NM_002447                                         |
| 11762299_x_at | 1.98E-33 | 2.04E-36 | -1.76E+01 | 72.299829 | -1.46 | COMMD4   | NM_017828                                         |
| 11749966_a_at | 3.25E-33 | 3.62E-36 | -1.75E+01 | 71.733347 | -1.6  | CCDC78   | NM_001031737                                      |
| 11753948_a_at | 4.72E-33 | 5.45E-36 | -1.74E+01 | 71.329479 | -1.23 | FBXW8    | NM_012174,NM_153348                               |
| 11754372_x_at | 4.95E-33 | 5.82E-36 | -1.74E+01 | 71.264657 | -2.12 | LASS4    | NM_024552                                         |
| 11730002_x_at | 6.48E-33 | 7.88E-36 | -1.74E+01 | 70.964262 | -2.1  | NRTN     | NM_004558                                         |
| 11748743_a_at | 6.65E-33 | 8.25E-36 | -1.74E+01 | 70.918742 | -1.86 | ADD2     | NM_001617,NM_017482,NM_017483,NM_017484,NM_017488 |
| 11756749_a_at | 6.65E-33 | 8.42E-36 | -1.73E+01 | 70.898255 | -2.58 | EGF      | NM_001178130,NM_001178131,NM_001963               |
| 11761205_a_at | 8.22E-33 | 1.07E-35 | -1.73E+01 | 70.665535 | -1.21 | NUDT16   | NM_001171905,NM_001171906,NM_152395, NR_033268    |
| 11715325_at   | 1.37E-32 | 1.95E-35 | -1.72E+01 | 70.067863 | -2.43 | C11orf90 | NM_001144871                                      |
| 11736078_a_at | 1.89E-32 | 2.76E-35 | -1.71E+01 | 69.723027 | -1.7  | NEK9     | NM_033116                                         |

|               |          |          |           |           |       |                      |                        |
|---------------|----------|----------|-----------|-----------|-------|----------------------|------------------------|
| 11733609_x_at | 1.95E-32 | 2.90E-35 | -1.71E+01 | 69.672461 | -2.12 | TRIM73 ///<br>TRIM74 | NM_198853,NM_198924    |
| 11746741_a_at | 2.16E-32 | 3.28E-35 | -1.71E+01 | 69.552736 | -1.39 | HRH3                 | NM_007232              |
| 11753644_a_at | 2.21E-32 | 3.42E-35 | -1.71E+01 | 69.510739 | -1.4  | ADM2                 | NM_024866              |
| 11763924_at   | 2.21E-32 | 3.48E-35 | -1.71E+01 | 69.493733 | -1.2  | SNORD9               | NR_003029              |
| 11737165_at   | 2.21E-32 | 3.48E-35 | -1.71E+01 | 69.492457 | -5.05 | RBPJL                | NM_014276              |
| 11741080_a_at | 2.67E-32 | 4.32E-35 | -1.70E+01 | 69.278058 | -1.86 | SARDH                | NM_001134707,NM_007101 |
| 11760149_a_at | 3.03E-32 | 4.96E-35 | -1.70E+01 | 69.141539 | -3.93 | PRSS1                | NM_002769              |
| 11738368_a_at | 3.40E-32 | 5.72E-35 | -1.70E+01 | 69.001961 | -2.32 | C6orf126             | NM_207409              |
| 11759055_at   | 3.87E-32 | 6.59E-35 | -1.70E+01 | 68.861306 | -2.1  | TMEM72               | NM_001123376           |
| 11731279_a_at | 4.51E-32 | 8.04E-35 | -1.69E+01 | 68.663749 | -1.68 | IGFN1                | NM_001164586,NM_178275 |
| 11738978_x_at | 4.77E-32 | 8.99E-35 | -1.69E+01 | 68.553181 | -1.32 | KRTAP23-<br>1        | NM_181624              |
| 11715243_x_at | 4.91E-32 | 9.34E-35 | -1.69E+01 | 68.515623 | -1.67 | LCE1F                | NM_178354              |
| 11737576_at   | 5.45E-32 | 1.05E-34 | -1.69E+01 | 68.401847 | -2.54 | NPHS1                | NM_004646              |



|               |          |          |           |           |       |                      |                                                             |
|---------------|----------|----------|-----------|-----------|-------|----------------------|-------------------------------------------------------------|
| 11757270_x_at | 5.93E-32 | 1.15E-34 | -1.69E+01 | 68.307906 | -1.25 | SFTPC                | NM_001172357,NM_001172410,NM_003018                         |
| 11730460_a_at | 7.64E-32 | 1.50E-34 | -1.68E+01 | 68.045924 | -1.37 | C17orf74             | NM_175734                                                   |
| 11738679_a_at | 7.74E-32 | 1.55E-34 | -1.68E+01 | 68.014638 | -1.24 | NCR1                 | NM_001145457,NM_001145458,NM_004829,<br>NR_027041,NR_027043 |
| 11763689_x_at | 8.77E-32 | 1.81E-34 | -1.68E+01 | 67.859271 | -1.82 | FMNL1                | NM_005892                                                   |
| 11734490_a_at | 8.91E-32 | 1.87E-34 | -1.68E+01 | 67.828643 | -1.16 | VSX1                 | NM_014588,NM_199425                                         |
| 11762917_at   | 8.91E-32 | 1.88E-34 | -1.68E+01 | 67.824741 | -1.28 | CCDC159              | NM_001080503                                                |
| 11763688_at   | 1.24E-31 | 2.72E-34 | -1.67E+01 | 67.457946 | -2.22 | FMNL1                | NM_005892                                                   |
| 11716154_x_at | 1.68E-31 | 3.81E-34 | -1.66E+01 | 67.122776 | -1.3  | B4GALT1              | NM_001497                                                   |
| 11745019_a_at | 2.04E-31 | 4.66E-34 | -1.66E+01 | 66.922857 | -3.07 | CBS                  | NM_000071,NM_001178008,NM_001178009                         |
| 11738579_s_at | 2.33E-31 | 5.38E-34 | -1.66E+01 | 66.780711 | -1.39 | OR10A2 ///<br>OR10A5 | NM_001004460,NM_178168                                      |
| 11748322_a_at | 2.34E-31 | 5.44E-34 | -1.66E+01 | 66.769391 | -1.34 | HEYL                 | NM_014571                                                   |
| 11738564_at   | 3.07E-31 | 7.34E-34 | -1.65E+01 | 66.472796 | -1.59 | OR8D4                | NM_001005197                                                |
| 11738129_x_at | 3.71E-31 | 9.10E-34 | -1.65E+01 | 66.260693 | -1.74 | SARDH                | NM_001134707,NM_007101                                      |

|               |          |          |           |           |       |                          |                                                                       |
|---------------|----------|----------|-----------|-----------|-------|--------------------------|-----------------------------------------------------------------------|
| 11725113_at   | 4.10E-31 | 1.01E-33 | -1.65E+01 | 66.153609 | -1.55 | SLC38A3                  | NM_006841                                                             |
| 11746926_a_at | 4.38E-31 | 1.09E-33 | -1.64E+01 | 66.081141 | -3.76 | CCDC110                  | NM_001145411,NM_152775                                                |
| 11736537_a_at | 4.61E-31 | 1.16E-33 | -1.64E+01 | 66.022264 | -1.59 | RHCE<br>RHD              | ///<br>NM_001127691,NM_016124,NM_020485,NM_138616,NM_138617,NM_138618 |
| 11729342_a_at | 5.24E-31 | 1.33E-33 | -1.64E+01 | 65.886453 | -1.61 | POU2F2                   | NM_002698                                                             |
| 11735728_x_at | 6.18E-31 | 1.63E-33 | -1.64E+01 | 65.681624 | -1.32 | ZNF385A                  | NM_001130967,NM_001130968,NM_015481                                   |
| 11731041_a_at | 6.18E-31 | 1.64E-33 | -1.64E+01 | 65.676568 | -3.29 | FBXO24                   | NM_001163499,NM_012172,NM_033506                                      |
| 11720341_at   | 6.43E-31 | 1.73E-33 | -1.64E+01 | 65.622662 | -2.66 | NDUFA13<br>///<br>YJEFN3 | NM_015965,NM_198537                                                   |
| 11752785_a_at | 7.31E-31 | 2.01E-33 | -1.63E+01 | 65.474046 | -1.52 | ZBTB7C                   | NM_001039360                                                          |
| 11737555_s_at | 7.68E-31 | 2.13E-33 | -1.63E+01 | 65.417524 | -1.08 | NUDT17                   | NM_001012758                                                          |
| 11715996_a_at | 8.09E-31 | 2.31E-33 | -1.63E+01 | 65.337687 | -1.98 | NOSIP                    | NM_015953                                                             |
| 11763092_at   | 1.07E-30 | 3.13E-33 | -1.62E+01 | 65.037528 | -1.46 | GYPB                     | NM_002100                                                             |
| 11736490_at   | 1.24E-30 | 3.68E-33 | -1.62E+01 | 64.87702  | -2.29 | KCNJ5                    | NM_000890                                                             |
| 11729311_a_at | 1.28E-30 | 3.80E-33 | -1.62E+01 | 64.843912 | -3.96 | C12orf39                 | NM_030572                                                             |

|               |          |          |           |           |       |                         |                                     |
|---------------|----------|----------|-----------|-----------|-------|-------------------------|-------------------------------------|
| 11715178_s_at | 1.57E-30 | 4.71E-33 | -1.62E+01 | 64.631946 | -1.79 | OR2A14                  | NM_001001659                        |
| 11715174_s_at | 1.60E-30 | 4.86E-33 | -1.62E+01 | 64.601202 | -1.39 | KRTAP10-<br>1           | NM_198691                           |
| 11752505_x_at | 1.67E-30 | 5.16E-33 | -1.62E+01 | 64.541101 | -1.43 | MAPK8IP<br>1            | NM_005456                           |
| 11738460_at   | 1.87E-30 | 5.91E-33 | -1.61E+01 | 64.406642 | -1.62 | FAM22F<br>///<br>FAM22G | NM_001045477,NM_001170741,NM_017561 |
| 11749069_a_at | 2.35E-30 | 7.62E-33 | -1.61E+01 | 64.155283 | -1.55 | PAQR4                   | NM_152341                           |
| 11752600_a_at | 2.75E-30 | 9.14E-33 | -1.60E+01 | 63.97426  | -1.71 | IL22RA1                 | NM_021258                           |
| 11742534_at   | 3.20E-30 | 1.11E-32 | -1.60E+01 | 63.784281 | -1.44 | FAM58B                  | NM_001105517                        |
| 11754701_a_at | 3.46E-30 | 1.22E-32 | -1.60E+01 | 63.688611 | -1.15 | SLC5A2                  | NM_003041                           |
| 11725907_at   | 3.62E-30 | 1.28E-32 | -1.60E+01 | 63.63851  | -1.47 | SIX2                    | NM_016932                           |
| 11732516_a_at | 4.09E-30 | 1.48E-32 | -1.60E+01 | 63.499707 | -2.39 | LASS4                   | NM_024552                           |
| 11739355_at   | 4.92E-30 | 1.81E-32 | -1.59E+01 | 63.296623 | -1.46 | CHDH                    | NM_018397                           |
| 11744287_x_at | 5.91E-30 | 2.19E-32 | -1.59E+01 | 63.109239 | -3.81 | CBS                     | NM_000071,NM_001178008,NM_001178009 |

|               |          |          |           |           |       |               |                                                                                              |
|---------------|----------|----------|-----------|-----------|-------|---------------|----------------------------------------------------------------------------------------------|
| 11736205_a_at | 6.71E-30 | 2.53E-32 | -1.59E+01 | 62.966414 | -1.98 | OSBP2         | NM_030758                                                                                    |
| 11750267_x_at | 6.87E-30 | 2.60E-32 | -1.59E+01 | 62.937596 | -1.45 | INPP5J        | NM_001002837                                                                                 |
| 11727260_x_at | 7.55E-30 | 2.87E-32 | -1.58E+01 | 62.839591 | -1.99 | C19orf36      | NM_001031735,NM_001039846                                                                    |
| 11727974_at   | 7.80E-30 | 2.99E-32 | -1.58E+01 | 62.801205 | -1.36 | FAM171A<br>2  | NM_198475                                                                                    |
| 11754882_x_at | 7.85E-30 | 3.02E-32 | -1.58E+01 | 62.789427 | -2.64 | BRSK2         | NM_003957                                                                                    |
| 11715175_x_at | 7.94E-30 | 3.07E-32 | -1.58E+01 | 62.773092 | -1.29 | KRTAP10-<br>3 | NM_198696                                                                                    |
| 11755731_a_at | 8.78E-30 | 3.45E-32 | -1.58E+01 | 62.657943 | -3.58 | KLK3          | NM_001030047,NM_001030048,NM_001030049,NM_001030050,NM_001648                                |
| 11751278_x_at | 9.43E-30 | 3.72E-32 | -1.58E+01 | 62.582726 | -2.22 | AMHR2         | NM_001164690,NM_001164691,NM_020547                                                          |
| 11729205_a_at | 9.97E-30 | 3.96E-32 | -1.58E+01 | 62.521835 | -2.11 | DTNA          | NM_001128175,NM_001390,NM_001391,NM_001392,NM_032975,NM_032978,NM_032979,NM_032980,NM_032981 |
| 11721848_at   | 1.01E-29 | 4.03E-32 | -1.58E+01 | 62.50345  | -1.33 | REEP2         | NM_016606                                                                                    |
| 11751079_a_at | 1.01E-29 | 4.04E-32 | -1.58E+01 | 62.502438 | -1.62 | GPR114        | NM_153837                                                                                    |
| 11738408_a_at | 1.06E-29 | 4.32E-32 | -1.58E+01 | 62.434293 | -3.84 | SPACA3        | NM_173847                                                                                    |

|               |          |          |           |           |       |          |                                         |
|---------------|----------|----------|-----------|-----------|-------|----------|-----------------------------------------|
| 11736330_a_at | 1.06E-29 | 4.35E-32 | -1.58E+01 | 62.428996 | -1.31 | SLC2A11  | NM_001024938,NM_001024939,NM_030807     |
| 11741862_x_at | 1.12E-29 | 4.58E-32 | -1.58E+01 | 62.376265 | -1.4  | AGER     | NM_001136,NM_172197                     |
| 11761334_at   | 1.16E-29 | 4.78E-32 | -1.57E+01 | 62.335898 | -1.17 | TROAP    | NM_001100620,NM_005480                  |
| 11749594_a_at | 1.20E-29 | 4.99E-32 | -1.57E+01 | 62.292268 | -1.12 | ZNF213   | NM_001134655,NM_004220                  |
| 11737163_a_at | 1.20E-29 | 5.00E-32 | -1.57E+01 | 62.290182 | -1.32 | ATP13A2  | NM_001141973,NM_001141974,NM_022089     |
| 11730093_a_at | 1.22E-29 | 5.13E-32 | -1.57E+01 | 62.265125 | -1.19 | FTCD     | NM_006657,NM_206965                     |
| 11741512_a_at | 1.28E-29 | 5.46E-32 | -1.57E+01 | 62.20285  | -1.99 | SEC14L3  | NM_174975                               |
| 11740202_at   | 1.45E-29 | 6.30E-32 | -1.57E+01 | 62.060592 | -1.27 | KISS1R   | NM_032551                               |
| 11750262_a_at | 1.50E-29 | 6.52E-32 | -1.57E+01 | 62.026979 | -3.07 | BRSK2    | NM_003957                               |
| 11727961_a_at | 1.79E-29 | 7.88E-32 | -1.57E+01 | 61.839171 | -1.14 | ING1     | NM_005537,NM_198217,NM_198218,NM_198219 |
| 11735367_a_at | 1.79E-29 | 7.95E-32 | -1.57E+01 | 61.831232 | -1.83 | BANF2    | NM_001014977,NM_001159495,NM_178477     |
| 11756033_x_at | 1.85E-29 | 8.22E-32 | -1.56E+01 | 61.796976 | -1.21 | AGER     | NM_001136,NM_172197                     |
| 11724400_a_at | 2.08E-29 | 9.40E-32 | -1.56E+01 | 61.664788 | -2.3  | C16orf48 | NM_032140                               |

|               |          |          |           |           |       |                                       |                                                                                                         |
|---------------|----------|----------|-----------|-----------|-------|---------------------------------------|---------------------------------------------------------------------------------------------------------|
| 11730119_at   | 2.08E-29 | 9.41E-32 | -1.56E+01 | 61.663753 | -1.36 | CLDND2                                | NM_152353                                                                                               |
| 11752816_a_at | 2.08E-29 | 9.43E-32 | -1.56E+01 | 61.660948 | -1.18 | LIG1                                  | NM_000234                                                                                               |
| 11753584_x_at | 2.75E-29 | 1.26E-31 | -1.56E+01 | 61.372549 | -1.39 | MADCAM<br>1                           | NM_130760,NM_130762                                                                                     |
| 11729012_at   | 3.08E-29 | 1.43E-31 | -1.55E+01 | 61.249025 | -1.24 | CCDC108                               | NM_152389,NM_194302                                                                                     |
| 11751325_a_at | 3.10E-29 | 1.46E-31 | -1.55E+01 | 61.230035 | -1.41 | FYCO1                                 | NM_024513                                                                                               |
| 11718812_a_at | 3.10E-29 | 1.46E-31 | -1.55E+01 | 61.229924 | -2.02 | MKNK1                                 | NM_001135553,NM_003684,NM_198973,NR_024174,NR_024176                                                    |
| 11754275_s_at | 3.10E-29 | 1.46E-31 | -1.55E+01 | 61.227199 | -1.61 | ST6GALN<br>AC4<br>LOC10028<br>8299    | NM_175039,NM_175040<br>///                                                                              |
| 11747712_s_at | 3.10E-29 | 1.47E-31 | -1.55E+01 | 61.223209 | -1.37 | LOC39949<br>1<br>///<br>///<br>PKD1P1 | NM_000296,NM_001009944,NM_006985,XM_024174,NR_024176<br>NPIP002343423,XR_041580,XR_078513<br>///<br>/// |
| 11739181_a_at | 3.32E-29 | 1.58E-31 | -1.55E+01 | 61.151094 | -1.17 | ST6GALN<br>AC4                        | NM_175039,NM_175040                                                                                     |
| 11735345_at   | 3.32E-29 | 1.59E-31 | -1.55E+01 | 61.140758 | -1.05 | C1QTNF5<br>///<br>MFRP                | NM_015645,NM_031433                                                                                     |
| 11762427_at   | 3.40E-29 | 1.64E-31 | -1.55E+01 | 61.113861 | -1.25 | FLJ43826                              | XR_017719,XR_040619,XR_040620                                                                           |

|               |          |          |           |           |       |          |                                                                                                             |
|---------------|----------|----------|-----------|-----------|-------|----------|-------------------------------------------------------------------------------------------------------------|
| 11744035_x_at | 3.53E-29 | 1.71E-31 | -1.55E+01 | 61.068678 | -1.36 | ZNF358   | NM_018083                                                                                                   |
| 11738128_a_at | 4.80E-29 | 2.36E-31 | -1.55E+01 | 60.750834 | -1.82 | SARDH    | NM_001134707,NM_007101                                                                                      |
| 11724896_a_at | 5.03E-29 | 2.49E-31 | -1.54E+01 | 60.699752 | -1.28 | FZR1     | NM_001136197,NM_001136198,NM_016263                                                                         |
| 11749070_x_at | 5.11E-29 | 2.54E-31 | -1.54E+01 | 60.677744 | -1.39 | PAQR4    | NM_152341                                                                                                   |
| 11761687_a_at | 5.13E-29 | 2.57E-31 | -1.54E+01 | 60.669442 | -1.61 | ENTPD6   | NM_001114089,NM_001247                                                                                      |
| 11737515_at   | 5.50E-29 | 2.81E-31 | -1.54E+01 | 60.580343 | -1.03 | MEFV     | NM_000243                                                                                                   |
| 11733272_x_at | 5.57E-29 | 2.89E-31 | -1.54E+01 | 60.551338 | -1.07 | NAT8L    | NM_178557                                                                                                   |
|               |          |          |           |           |       | DUX4     | ///                                                                                                         |
|               |          |          |           |           |       | LOC44105 |                                                                                                             |
|               |          |          |           |           |       | 6        | ///                                                                                                         |
|               |          |          |           |           |       | LOC65354 |                                                                                                             |
|               |          |          |           |           |       | 3        | ///                                                                                                         |
| 11715201_s_at | 6.72E-29 | 3.57E-31 | -1.54E+01 | 60.342627 | -1.22 | LOC65354 | NM_001127386,NM_001127387,NM_001127388,NM_001127389,NM_001164467,NM_001177376,NM_033178,XM_496731,XM_928023 |
|               |          |          |           |           |       | 4        | ///                                                                                                         |
|               |          |          |           |           |       | LOC65354 |                                                                                                             |
|               |          |          |           |           |       | 5        | ///                                                                                                         |
|               |          |          |           |           |       | LOC65354 |                                                                                                             |
|               |          |          |           |           |       | 8        | ///                                                                                                         |
|               |          |          |           |           |       | LOC72841 |                                                                                                             |

0

|               |          |          |           |           |       |                      |                                                      |
|---------------|----------|----------|-----------|-----------|-------|----------------------|------------------------------------------------------|
| 11748830_a_at | 6.76E-29 | 3.60E-31 | -1.54E+01 | 60.333629 | -1.63 | MKNK1                | NM_001135553,NM_003684,NM_198973,NR_024174,NR_024176 |
| 11731280_x_at | 6.93E-29 | 3.70E-31 | -1.54E+01 | 60.305426 | -1.91 | IGFN1                | NM_001164586,NM_178275                               |
| 11748446_a_at | 7.01E-29 | 3.76E-31 | -1.54E+01 | 60.289962 | -1.3  | IL17RC               | NM_032732,NM_153460,NM_153461                        |
| 11744981_a_at | 7.30E-29 | 3.94E-31 | -1.54E+01 | 60.243172 | -1.41 | ZNF541               | NM_001101419                                         |
| 11742325_s_at | 8.31E-29 | 4.56E-31 | -1.53E+01 | 60.098743 | -1.23 | OR10H1 ///<br>OR10H5 | NM_001004466,NM_013940                               |
| 11755672_a_at | 8.49E-29 | 4.67E-31 | -1.53E+01 | 60.074805 | -1.15 | GRIK5                | NM_002088                                            |
| 11740849_at   | 8.51E-29 | 4.71E-31 | -1.53E+01 | 60.067791 | -1.17 | C19orf35             | NM_198532                                            |



|               |          |          |           |           |       |             |                                                                                           |
|---------------|----------|----------|-----------|-----------|-------|-------------|-------------------------------------------------------------------------------------------|
| 11763478_x_at | 9.05E-29 | 5.02E-31 | -1.53E+01 | 60.004187 | -3.79 | PIF1        | NM_025049                                                                                 |
| 11742876_a_at | 9.79E-29 | 5.49E-31 | -1.53E+01 | 59.91507  | -1.56 | SGSM3       | NM_015705                                                                                 |
| 11753120_x_at | 9.89E-29 | 5.57E-31 | -1.53E+01 | 59.900784 | -1.36 | MADCAM<br>1 | NM_130760,NM_130762                                                                       |
| 11761383_a_at | 1.22E-28 | 7.12E-31 | -1.53E+01 | 59.657432 | -1.21 | SPATA9      | NM_031952                                                                                 |
| 11720412_a_at | 1.28E-28 | 7.47E-31 | -1.52E+01 | 59.609966 | -2.24 | SLC41A1     | NM_173854                                                                                 |
| 11741325_x_at | 1.32E-28 | 7.72E-31 | -1.52E+01 | 59.576838 | -1.03 | SPRYD5      | NM_032681                                                                                 |
| 11723510_a_at | 1.37E-28 | 8.12E-31 | -1.52E+01 | 59.526581 | -1.35 | PLEKHH3     | NM_024927                                                                                 |
| 11750631_a_at | 1.44E-28 | 8.59E-31 | -1.52E+01 | 59.471768 | -1.39 | MAP3K9      | NM_033141                                                                                 |
| 11730598_at   | 1.52E-28 | 9.10E-31 | -1.52E+01 | 59.414128 | -1.01 | CCDC13      | NM_144719                                                                                 |
| 11763241_x_at | 1.54E-28 | 9.21E-31 | -1.52E+01 | 59.402047 | -1.5  | TRAJ17      | L34698.1                                                                                  |
| 11715284_x_at | 1.58E-28 | 9.59E-31 | -1.52E+01 | 59.362041 | -1.26 | C15orf40    | NM_001160113,NM_001160114,NM_0011601<br>15,NM_001160116,NM_144597,NR_027649,N<br>R_027650 |
| 11744941_a_at | 1.64E-28 | 1.00E-30 | -1.52E+01 | 59.320043 | -1.31 | AQP7        | NM_001170                                                                                 |

|               |          |          |           |           |       |          |                                          |
|---------------|----------|----------|-----------|-----------|-------|----------|------------------------------------------|
| 11735023_s_at | 1.99E-28 | 1.22E-30 | -1.52E+01 | 59.123813 | -1.21 | ZBTB7B   | NM_015872                                |
| 11744213_a_at | 2.05E-28 | 1.27E-30 | -1.51E+01 | 59.082666 | -2.48 | TRAFD1   | NM_001143906,NM_006700                   |
|               |          |          |           |           |       | DUX4     | ///                                      |
|               |          |          |           |           |       | LOC44105 |                                          |
|               |          |          |           |           |       | 6        | ///                                      |
|               |          |          |           |           |       | LOC65354 |                                          |
|               |          |          |           |           |       | 3        | ///                                      |
| 11715200_s_at | 2.14E-28 | 1.33E-30 | -1.51E+01 | 59.036403 | -1.16 | LOC65354 | NM_001127386,NM_001127387,NM_0011273     |
|               |          |          |           |           |       | 4        | ///88,NM_001127389,NM_001164467,NM_00117 |
|               |          |          |           |           |       | LOC65354 | 7376,NM_033178,XM_496731,XM_928023       |
|               |          |          |           |           |       | 5        | ///                                      |
|               |          |          |           |           |       | LOC65354 |                                          |
|               |          |          |           |           |       | 8        | ///                                      |
|               |          |          |           |           |       | LOC72841 |                                          |
|               |          |          |           |           |       | 0        |                                          |
| 11726866_at   | 2.16E-28 | 1.35E-30 | -1.51E+01 | 59.02446  | -1.35 | FOXO4    | NM_001170931,NM_005938                   |
| 11731484_s_at | 2.56E-28 | 1.61E-30 | -1.51E+01 | 58.84903  | -1.21 | NFIC     | NM_005597,NM_205843                      |
| 11741150_a_at | 2.62E-28 | 1.65E-30 | -1.51E+01 | 58.824404 | -1.89 | NRCAM    | NM_001037132,NM_001037133,NM_005010      |
| 11732619_at   | 2.65E-28 | 1.68E-30 | -1.51E+01 | 58.808623 | -1.18 | CD164L2  | NM_207397                                |

|               |          |          |           |           |       |                                                                    |
|---------------|----------|----------|-----------|-----------|-------|--------------------------------------------------------------------|
| 11760114_s_at | 2.90E-28 | 1.84E-30 | -1.51E+01 | 58.71499  | -1.72 | HERC2P2<br>/// NR_002824<br>HERC2P3                                |
| 11756231_a_at | 2.97E-28 | 1.90E-30 | -1.51E+01 | 58.685152 | -1.08 | TAF6L NM_006473                                                    |
| 11750601_a_at | 3.05E-28 | 1.96E-30 | -1.51E+01 | 58.653283 | -1.18 | ZC3H12D NM_207360                                                  |
| 11715473_at   | 3.14E-28 | 2.02E-30 | -1.51E+01 | 58.622449 | -1.42 | SRPR NM_001177842,NM_003139                                        |
| 11755118_a_at | 3.70E-28 | 2.40E-30 | -1.50E+01 | 58.453632 | -1.41 | MYOZ3 NM_001122853,NM_133371                                       |
| 11754641_x_at | 3.76E-28 | 2.44E-30 | -1.50E+01 | 58.435937 | -1.23 | SFTPC NM_001172357,NM_001172410,NM_003018                          |
| 11758349_s_at | 3.98E-28 | 2.60E-30 | -1.50E+01 | 58.371869 | -1.78 | RORC NM_001001523,NM_005060                                        |
| 11731162_a_at | 4.21E-28 | 2.79E-30 | -1.50E+01 | 58.304504 | -1.42 | VIPR2 NM_003382                                                    |
| 11752656_a_at | 4.32E-28 | 2.87E-30 | -1.50E+01 | 58.276125 | -1.76 | CBS NM_000071,NM_001178008,NM_001178009                            |
| 11727771_a_at | 4.37E-28 | 2.91E-30 | -1.50E+01 | 58.260847 | -4.14 | KIRREL2 NM_032123,NM_199179,NM_199180                              |
| 11755749_x_at | 4.79E-28 | 3.21E-30 | -1.50E+01 | 58.16478  | -1.06 | C5orf38 NM_178569                                                  |
| 11733614_a_at | 5.13E-28 | 3.46E-30 | -1.50E+01 | 58.089712 | -1.29 | SEMA6D NM_020858,NM_024966,NM_153616,NM_153617,NM_153618,NM_153619 |

|               |          |          |           |           |       |         |           |
|---------------|----------|----------|-----------|-----------|-------|---------|-----------|
| 11746684_a_at | 5.50E-28 | 3.73E-30 | -1.50E+01 | 58.014495 | -1.14 | PXK     | NM_017771 |
| 11730001_at   | 5.99E-28 | 4.08E-30 | -1.49E+01 | 57.925438 | -1.84 | NRTN    | NM_004558 |
| 11731884_x_at | 6.22E-28 | 4.29E-30 | -1.49E+01 | 57.875888 | -1.29 | PTCRA   | NM_138296 |
| 11730955_a_at | 6.76E-28 | 4.71E-30 | -1.49E+01 | 57.784294 | -4.14 | P2RX1   | NM_002558 |
| 11746077_a_at | 6.85E-28 | 4.78E-30 | -1.49E+01 | 57.768907 | -1.34 | NARFL   | NM_022493 |
| 11761772_at   | 7.09E-28 | 4.98E-30 | -1.49E+01 | 57.729175 | -1.41 | PCOLCE  | NM_002593 |
| 11728526_at   | 7.52E-28 | 5.31E-30 | -1.49E+01 | 57.665047 | -1.76 | PEX5L   | NM_016559 |
| 11741909_a_at | 7.56E-28 | 5.36E-30 | -1.49E+01 | 57.656396 | -1.29 | PKNOX2  | NM_022062 |
| 11762208_a_at | 7.91E-28 | 5.64E-30 | -1.49E+01 | 57.605929 | -1.31 | ATG16L2 | NM_033388 |
| 11751045_a_at | 9.06E-28 | 6.55E-30 | -1.49E+01 | 57.457751 | -1.55 | GPR114  | NM_153837 |
| 11718099_a_at | 9.55E-28 | 6.94E-30 | -1.48E+01 | 57.399273 | -1.96 | IFT20   | NM_174887 |
| 11738607_a_at | 1.15E-27 | 8.46E-30 | -1.48E+01 | 57.203095 | -1.47 | KCTD16  | NM_020768 |
| 11764049_at   | 1.26E-27 | 9.42E-30 | -1.48E+01 | 57.097306 | -1.47 | DPYSL4  | NM_006426 |

|               |          |          |           |           |       |            |                                                                                                                  |
|---------------|----------|----------|-----------|-----------|-------|------------|------------------------------------------------------------------------------------------------------------------|
| 11731250_a_at | 1.27E-27 | 9.47E-30 | -1.48E+01 | 57.091821 | -1.03 | EPHA8      | NM_001006943,NM_020526                                                                                           |
| 11737253_x_at | 1.43E-27 | 1.08E-29 | -1.48E+01 | 56.964171 | -1.51 | SLC16A11   | NM_153357                                                                                                        |
| 11715337_s_at | 1.53E-27 | 1.16E-29 | -1.48E+01 | 56.894338 | -1.14 | GH1<br>GH2 | ///NM_000515,NM_002059,NM_022556,NM_022557,NM_022558,NM_022559,NM_022560,NM_022561,NM_022562                     |
| 11749296_a_at | 1.61E-27 | 1.23E-29 | -1.47E+01 | 56.835453 | -1.14 | GDAP1L1    | NM_024034                                                                                                        |
|               |          |          |           |           |       | DUX4       | ///                                                                                                              |
|               |          |          |           |           |       | LOC44105   |                                                                                                                  |
|               |          |          |           |           |       | 6          | ///                                                                                                              |
|               |          |          |           |           |       | LOC65354   |                                                                                                                  |
|               |          |          |           |           |       | 3          | ///                                                                                                              |
| 11715199_s_at | 1.62E-27 | 1.23E-29 | -1.47E+01 | 56.829619 | -1.15 | LOC65354   | NM_001127386,NM_001127387,NM_001127388,///88,NM_001127389,NM_001164467,NM_00117376,NM_033178,XM_496731,XM_928023 |
|               |          |          |           |           |       | 5          | ///                                                                                                              |
|               |          |          |           |           |       | LOC65354   |                                                                                                                  |
|               |          |          |           |           |       | 8          | ///                                                                                                              |
|               |          |          |           |           |       | LOC72841   |                                                                                                                  |
|               |          |          |           |           |       | 0          |                                                                                                                  |
|               |          |          |           |           |       | CYP4A11    |                                                                                                                  |
| 11741459_s_at | 1.76E-27 | 1.35E-29 | -1.47E+01 | 56.741917 | -1.71 | ///        | NM_000778,NM_001010969                                                                                           |
|               |          |          |           |           |       | CYP4A22    |                                                                                                                  |

|               |          |          |           |           |       |          |                                         |
|---------------|----------|----------|-----------|-----------|-------|----------|-----------------------------------------|
| 11730209_x_at | 1.85E-27 | 1.43E-29 | -1.47E+01 | 56.685269 | -1.32 | TRIM46   | NM_025058                               |
| 11761556_at   | 2.01E-27 | 1.55E-29 | -1.47E+01 | 56.600856 | -2.24 | ACADL    | NM_001608                               |
| 11751771_a_at | 2.02E-27 | 1.56E-29 | -1.47E+01 | 56.594321 | -1.52 | KLK2     | NM_001002231,NM_005551                  |
| 11735457_at   | 2.06E-27 | 1.60E-29 | -1.47E+01 | 56.569202 | -1.25 | LENG9    | NM_198988                               |
| 11725204_a_at | 2.28E-27 | 1.78E-29 | -1.47E+01 | 56.463232 | -1.94 | RPH3AL   | NM_006987                               |
| 11763961_x_at | 2.33E-27 | 1.83E-29 | -1.47E+01 | 56.439658 | -1.29 | SFTPC    | NM_001172357,NM_001172410,NM_003018     |
| 11722361_a_at | 2.46E-27 | 1.94E-29 | -1.47E+01 | 56.380202 | -1.22 | LMBR1L   | NM_018113                               |
| 11747955_a_at | 2.50E-27 | 1.98E-29 | -1.47E+01 | 56.361155 | -1.85 | PDZD3    | NM_001168468,NM_024791,NR_033122        |
| 11748781_a_at | 2.85E-27 | 2.28E-29 | -1.46E+01 | 56.222147 | -1.58 | FBXO24   | NM_001163499,NM_012172,NM_033506        |
| 11736322_a_at | 3.25E-27 | 2.61E-29 | -1.46E+01 | 56.087068 | -1.14 | BAIAP3   | NM_003933                               |
| 11748569_a_at | 3.91E-27 | 3.18E-29 | -1.46E+01 | 55.891367 | -2.31 | C19orf36 | NM_001031735,NM_001039846               |
| 11732786_at   | 3.92E-27 | 3.19E-29 | -1.46E+01 | 55.886779 | -1.13 | FFAR1    | NM_005303                               |
| 11749940_a_at | 3.98E-27 | 3.25E-29 | -1.46E+01 | 55.868082 | -3.41 | BACE1    | NM_012104,NM_138971,NM_138972,NM_138973 |

|               |          |          |           |           |       |                                 |                                                                                   |
|---------------|----------|----------|-----------|-----------|-------|---------------------------------|-----------------------------------------------------------------------------------|
| 11715303_s_at | 4.05E-27 | 3.32E-29 | -1.46E+01 | 55.84831  | -1.02 | CEMP1                           | NM_001048212                                                                      |
| 11752322_a_at | 4.17E-27 | 3.43E-29 | -1.46E+01 | 55.815254 | -1.14 | PANX2                           | NM_001160300,NM_052839,NR_027691                                                  |
| 11715253_s_at | 4.66E-27 | 3.85E-29 | -1.45E+01 | 55.701007 | -1.26 | KRTAP10-<br>10<br>KRTAP10-<br>6 | ///<br>NM_181688,NM_198688                                                        |
| 11715244_x_at | 4.76E-27 | 3.94E-29 | -1.45E+01 | 55.677791 | -1.16 | LCE1A                           | NM_178348                                                                         |
| 11748795_x_at | 4.94E-27 | 4.10E-29 | -1.45E+01 | 55.637737 | -2.15 | HEXDC                           | NM_173620                                                                         |
| 11756629_a_at | 5.08E-27 | 4.22E-29 | -1.45E+01 | 55.608781 | -1.04 | MTHFSD                          | NM_001159377,NM_001159378,NM_001159379,NM_001159380,NM_022764,NR_027489,NR_027490 |
| 11724069_at   | 5.47E-27 | 4.56E-29 | -1.45E+01 | 55.532805 | -1.68 | PELI2                           | NM_021255                                                                         |
| 11726345_at   | 5.51E-27 | 4.61E-29 | -1.45E+01 | 55.52312  | -1.03 | GPA33                           | NM_005814                                                                         |
| 11750448_a_at | 5.56E-27 | 4.66E-29 | -1.45E+01 | 55.511726 | -1.32 | SLC8A2                          | NM_015063                                                                         |
| 11763957_at   | 6.09E-27 | 5.13E-29 | -1.45E+01 | 55.415644 | -1.96 | SCARNA2<br>0                    | NR_002999                                                                         |
| 11738787_a_at | 6.32E-27 | 5.36E-29 | -1.45E+01 | 55.372407 | -1.02 | DEFB119                         | NM_153289,NM_153323,NM_173460                                                     |

|               |          |          |           |           |       |              |                                                                |
|---------------|----------|----------|-----------|-----------|-------|--------------|----------------------------------------------------------------|
| 11744514_a_at | 6.48E-27 | 5.55E-29 | -1.45E+01 | 55.33851  | -1.46 | YIPF2        | NM_024029                                                      |
| 11744560_s_at | 6.53E-27 | 5.61E-29 | -1.45E+01 | 55.32795  | -1.7  | IFT20        | NM_174887                                                      |
| 11756535_a_at | 6.79E-27 | 5.85E-29 | -1.45E+01 | 55.285317 | -1.99 | SLC25A45     | NM_001077241,NM_182556                                         |
| 11736824_at   | 7.45E-27 | 6.48E-29 | -1.44E+01 | 55.183677 | -1.1  | C10orf95     | NM_024886                                                      |
| 11718031_a_at | 7.88E-27 | 6.90E-29 | -1.44E+01 | 55.122762 | -1.17 | ATP6V0A<br>1 | NM_001130020,NM_001130021,NM_005177                            |
| 11716570_a_at | 8.23E-27 | 7.24E-29 | -1.44E+01 | 55.074895 | -1    | NOTCH3       | NM_000435                                                      |
| 11762035_a_at | 8.31E-27 | 7.32E-29 | -1.44E+01 | 55.063775 | -1.11 | FLJ40448     | XR_039971,XR_039972,XR_039973                                  |
| 11750508_a_at | 8.51E-27 | 7.51E-29 | -1.44E+01 | 55.038042 | -1.11 | PTPRN        | NM_002846                                                      |
| 11757877_a_at | 8.76E-27 | 7.75E-29 | -1.44E+01 | 55.006722 | -1.5  | KIF1A        | NM_004321                                                      |
| 11730448_a_at | 8.76E-27 | 7.77E-29 | -1.44E+01 | 55.003931 | -1.96 | DHRS12       | NM_001031719,NM_024705                                         |
| 11741615_at   | 9.03E-27 | 8.06E-29 | -1.44E+01 | 54.967792 | -1.62 | KPNA7        | NM_001145715                                                   |
| 11723306_s_at | 9.10E-27 | 8.15E-29 | -1.44E+01 | 54.956675 | -1.76 | PYGO2        | NM_138300                                                      |
| 11740738_x_at | 9.20E-27 | 8.27E-29 | -1.44E+01 | 54.942224 | -1.04 | ECE2         | NM_001037324,NM_001100120,NM_0011001<br>21,NM_014693,NM_032331 |



|               |          |          |           |           |       |              |                                                                            |
|---------------|----------|----------|-----------|-----------|-------|--------------|----------------------------------------------------------------------------|
| 11740313_s_at | 9.27E-27 | 8.37E-29 | -1.44E+01 | 54.93026  | -1.31 | MYH6<br>MYH7 | ///<br>NM_000257,NM_002471                                                 |
| 11747950_a_at | 9.51E-27 | 8.61E-29 | -1.44E+01 | 54.902777 | -1.11 | DMRTC2       | NM_001040283                                                               |
| 11722294_x_at | 1.03E-26 | 9.37E-29 | -1.44E+01 | 54.818335 | -1.03 | NAPSA        | NM_004851                                                                  |
| 11715296_s_at | 1.05E-26 | 9.50E-29 | -1.44E+01 | 54.804718 | -1.61 | KRT33A       | NM_004138                                                                  |
| 11762050_x_at | 1.07E-26 | 9.73E-29 | -1.44E+01 | 54.781444 | -1.14 | ZFYVE28      | NM_001172656,NM_001172657,NM_001172658,NM_001172659,NM_001172660,NM_020972 |
| 11722036_a_at | 1.08E-26 | 9.84E-29 | -1.44E+01 | 54.769681 | -1.37 | SND1         | NM_014390                                                                  |
| 11749433_a_at | 1.18E-26 | 1.08E-28 | -1.44E+01 | 54.675067 | -2.4  | KIAA1324     | NM_020775                                                                  |
| 11731410_a_at | 1.23E-26 | 1.14E-28 | -1.43E+01 | 54.628089 | -1.24 | SLC8A2       | NM_015063                                                                  |
| 11735225_x_at | 1.33E-26 | 1.24E-28 | -1.43E+01 | 54.540202 | -2.89 | GAMT         | NM_000156,NM_138924                                                        |
| 11737351_a_at | 1.34E-26 | 1.25E-28 | -1.43E+01 | 54.535312 | -1.08 | ANO7         | NM_001001666,NM_001001891                                                  |
| 11759005_a_at | 1.38E-26 | 1.30E-28 | -1.43E+01 | 54.497249 | -5.68 | C12orf39     | NM_030572                                                                  |
| 11760492_x_at | 1.52E-26 | 1.44E-28 | -1.43E+01 | 54.389752 | -1.26 | PRMT1        | NM_001536,NM_198318,NM_198319,NR_033397                                    |

|               |          |          |           |           |       |                  |                                                   |
|---------------|----------|----------|-----------|-----------|-------|------------------|---------------------------------------------------|
| 11761759_at   | 1.57E-26 | 1.49E-28 | -1.43E+01 | 54.355818 | -1.28 | CAMK2G           | NM_001222,NM_172169,NM_172170,NM_172171,NM_172173 |
| 11718343_a_at | 1.57E-26 | 1.50E-28 | -1.43E+01 | 54.351856 | -1.25 | TUBGCP2          | NM_006659                                         |
| 11724009_a_at | 1.57E-26 | 1.50E-28 | -1.43E+01 | 54.350892 | -1.04 | GPR162           | NM_014449,NM_019858                               |
| 11755913_a_at | 1.66E-26 | 1.59E-28 | -1.43E+01 | 54.293035 | -1.14 | LPO              | NM_001160102,NM_006151,NR_027647                  |
| 11715313_s_at | 1.84E-26 | 1.78E-28 | -1.43E+01 | 54.184724 | -1.31 | LHB              | NM_000894                                         |
| 11730693_a_at | 1.92E-26 | 1.87E-28 | -1.43E+01 | 54.131186 | -1.2  | C6orf146         | NM_173563                                         |
| 11744285_a_at | 2.04E-26 | 2.00E-28 | -1.42E+01 | 54.068339 | -4.15 | CBS              | NM_000071,NM_001178008,NM_001178009               |
| 11761773_x_at | 2.05E-26 | 2.01E-28 | -1.42E+01 | 54.061728 | -1.5  | PCOLCE           | NM_002593                                         |
| 11730449_a_at | 2.21E-26 | 2.19E-28 | -1.42E+01 | 53.975884 | -2.56 | DHRS12           | NM_001031719,NM_024705                            |
| 11729744_a_at | 2.41E-26 | 2.40E-28 | -1.42E+01 | 53.886256 | -3.74 | SLC39A5          | NM_001135195,NM_173596                            |
| 11744040_a_at | 2.60E-26 | 2.60E-28 | -1.42E+01 | 53.805324 | -1.49 | CCDC56           | NM_001040431                                      |
| 11743329_a_at | 2.68E-26 | 2.68E-28 | -1.42E+01 | 53.775889 | -1.08 | PGP              | NM_001042371                                      |
| 11735852_s_at | 2.70E-26 | 2.71E-28 | -1.42E+01 | 53.764512 | -1.1  | OR10H1<br>OR10H5 | ///<br>NM_001004466,NM_013940                     |

|               |          |          |           |           |       |           |                                     |
|---------------|----------|----------|-----------|-----------|-------|-----------|-------------------------------------|
| 11738963_at   | 3.02E-26 | 3.05E-28 | -1.42E+01 | 53.647695 | -1.14 | KRTAP12-3 | NM_198697                           |
| 11761220_x_at | 3.04E-26 | 3.08E-28 | -1.42E+01 | 53.637794 | -1.03 | EFCAB4A   | NM_173584                           |
| 11762014_at   | 3.07E-26 | 3.11E-28 | -1.42E+01 | 53.628447 | -1.04 | PTCHD1    | NM_173495                           |
| 11742297_a_at | 3.31E-26 | 3.38E-28 | -1.42E+01 | 53.547116 | -1.18 | FBXO24    | NM_001163499,NM_012172,NM_033506    |
| 11740275_a_at | 3.34E-26 | 3.41E-28 | -1.41E+01 | 53.537332 | -1.16 | LRRC25    | NM_145256                           |
| 11731844_a_at | 3.35E-26 | 3.43E-28 | -1.41E+01 | 53.531558 | -4.36 | DNASE1    | NM_005223                           |
| 11756728_a_at | 3.61E-26 | 3.71E-28 | -1.41E+01 | 53.454099 | -2.4  | GAS2      | NM_001143830,NM_005256,NM_177553    |
| 11756057_a_at | 3.64E-26 | 3.75E-28 | -1.41E+01 | 53.443851 | -1.34 | MED16     | NM_005481                           |
| 11740825_a_at | 3.67E-26 | 3.79E-28 | -1.41E+01 | 53.433808 | -1.14 | C10orf27  | NM_152710                           |
| 11731163_at   | 3.72E-26 | 3.84E-28 | -1.41E+01 | 53.41874  | -1.52 | VIPR2     | NM_003382                           |
| 11752811_a_at | 4.10E-26 | 4.27E-28 | -1.41E+01 | 53.314271 | -1.4  | TTYH1     | NM_001005367,NM_020659              |
| 11750743_x_at | 4.14E-26 | 4.33E-28 | -1.41E+01 | 53.300457 | -1.11 | EPN1      | NM_001130071,NM_001130072,NM_013333 |
| 11763650_a_at | 4.14E-26 | 4.34E-28 | -1.41E+01 | 53.297946 | -1    | GET4      | NM_015949                           |

|               |          |          |           |           |       |          |                                                               |
|---------------|----------|----------|-----------|-----------|-------|----------|---------------------------------------------------------------|
| 11761409_at   | 4.22E-26 | 4.45E-28 | -1.41E+01 | 53.273991 | -1.52 | ---      | AK300656.1                                                    |
| 11741166_a_at | 4.39E-26 | 4.64E-28 | -1.41E+01 | 53.232958 | -2.48 | DPP10    | NM_001004360,NM_001178034,NM_001178036,NM_001178037,NM_020868 |
| 11737375_x_at | 4.68E-26 | 4.98E-28 | -1.41E+01 | 53.16264  | -1.6  | RUNDC3A  | NM_001144825,NM_001144826,NM_006695                           |
| 11761584_x_at | 4.85E-26 | 5.19E-28 | -1.41E+01 | 53.120837 | -1.14 | DNM1     | NM_001005336,NM_004408                                        |
| 11756339_x_at | 4.85E-26 | 5.19E-28 | -1.41E+01 | 53.120656 | -2.4  | SARDH    | NM_001134707,NM_007101                                        |
| 11747028_at   | 4.94E-26 | 5.30E-28 | -1.41E+01 | 53.100479 | -1.06 | HMCN2    | XM_001715154,XM_001726942,XM_002347078                        |
| 11732029_a_at | 4.94E-26 | 5.31E-28 | -1.41E+01 | 53.097599 | -1.2  | SPEM1    | NM_199339                                                     |
| 11753030_a_at | 5.27E-26 | 5.69E-28 | -1.41E+01 | 53.029664 | -1.38 | NLGN3    | NM_001166660,NM_018977,NM_181303                              |
| 11761321_at   | 5.56E-26 | 6.03E-28 | -1.40E+01 | 52.971416 | -1.37 | ANXA8L1  | NM_001098845                                                  |
| 11723132_a_at | 5.81E-26 | 6.34E-28 | -1.40E+01 | 52.922953 | -1.38 | RGS9     | NM_001081955,NM_001165933,NM_003835                           |
| 11722228_at   | 6.05E-26 | 6.62E-28 | -1.40E+01 | 52.879272 | -1.88 | DNAJC30  | NM_032317                                                     |
| 11726818_at   | 6.09E-26 | 6.68E-28 | -1.40E+01 | 52.870779 | -1.04 | TMEM201  | NM_001010866,NM_001130924                                     |
| 11750369_x_at | 6.25E-26 | 6.89E-28 | -1.40E+01 | 52.839487 | -1.3  | KRTAP5-2 | NM_001004325                                                  |

|               |          |          |           |           |       |          |                                                               |
|---------------|----------|----------|-----------|-----------|-------|----------|---------------------------------------------------------------|
| 11751163_a_at | 6.35E-26 | 7.05E-28 | -1.40E+01 | 52.817329 | -1.46 | PSEN2    | NM_000447,NM_012486                                           |
| 11718493_a_at | 7.26E-26 | 8.13E-28 | -1.40E+01 | 52.676141 | -2.59 | SLC1A2   | NM_004171                                                     |
| 11739520_a_at | 7.26E-26 | 8.15E-28 | -1.40E+01 | 52.673921 | -1.46 | CHID1    | NM_001142674,NM_001142675,NM_001142676,NM_001142677,NM_023947 |
| 11748906_a_at | 7.36E-26 | 8.29E-28 | -1.40E+01 | 52.656672 | -1.22 | NPM2     | NM_182795                                                     |
| 11747273_a_at | 7.52E-26 | 8.51E-28 | -1.40E+01 | 52.630359 | -1.22 | BAIAP3   | NM_003933                                                     |
| 11751082_a_at | 7.55E-26 | 8.56E-28 | -1.40E+01 | 52.625111 | -1.13 | MLC1     | NM_015166,NM_139202                                           |
| 11761191_a_at | 7.66E-26 | 8.71E-28 | -1.40E+01 | 52.607135 | -1.06 | C16orf57 | NM_024598                                                     |
| 11751161_a_at | 7.88E-26 | 9.02E-28 | -1.40E+01 | 52.573125 | -1.07 | TTYH1    | NM_001005367,NM_020659                                        |
| 11722328_a_at | 8.13E-26 | 9.33E-28 | -1.40E+01 | 52.539405 | -1.08 | PGBD5    | NM_024554                                                     |
| 11753426_x_at | 8.18E-26 | 9.41E-28 | -1.40E+01 | 52.531032 | -1.06 | SLC25A45 | NM_001077241,NM_182556                                        |
| 11759447_at   | 8.46E-26 | 9.78E-28 | -1.40E+01 | 52.492781 | -2.76 | GJC3     | NM_181538                                                     |
| 11739130_a_at | 8.53E-26 | 9.90E-28 | -1.40E+01 | 52.480565 | -1.64 | ABAT     | NM_000663,NM_001127448,NM_020686                              |
| 11750340_s_at | 8.58E-26 | 9.97E-28 | -1.40E+01 | 52.473716 | -1.14 | GPR144   | NM_001161808,XM_002342934,XM_002346195,XM_002347085           |

|               |          |          |           |           |       |               |                                                                |
|---------------|----------|----------|-----------|-----------|-------|---------------|----------------------------------------------------------------|
| 11763877_at   | 8.65E-26 | 1.01E-27 | -1.40E+01 | 52.463964 | -1.31 | ---           | XM_001718745.1                                                 |
| 11734566_a_at | 8.88E-26 | 1.04E-27 | -1.40E+01 | 52.435796 | -1.3  | FAM188B       | NM_032222                                                      |
| 11740538_at   | 9.16E-26 | 1.07E-27 | -1.39E+01 | 52.402644 | -1.83 | LOC65348<br>6 | ///NM_001097610,NM_145651<br>SCGB1C1                           |
| 11745479_a_at | 9.26E-26 | 1.09E-27 | -1.39E+01 | 52.388621 | -1.47 | GLYCTK        | NM_001144951,NM_145262,NR_026699,NR_026700,NR_026701,NR_026702 |
| 11730009_a_at | 9.59E-26 | 1.13E-27 | -1.39E+01 | 52.352181 | -1.2  | MTUS2         | NM_001033602,NM_015233                                         |
| 11734561_a_at | 9.70E-26 | 1.15E-27 | -1.39E+01 | 52.335111 | -1.75 | WBSCR17       | NM_022479                                                      |
| 11719128_a_at | 9.70E-26 | 1.15E-27 | -1.39E+01 | 52.334326 | -1.82 | LMF2          | NM_033200                                                      |
| 11727259_a_at | 9.89E-26 | 1.17E-27 | -1.39E+01 | 52.313373 | -1.59 | C19orf36      | NM_001031735,NM_001039846                                      |
| 11747174_x_at | 1.01E-25 | 1.19E-27 | -1.39E+01 | 52.294143 | -2.93 | ERO1LB        | NM_019891                                                      |
| 11747611_a_at | 1.01E-25 | 1.20E-27 | -1.39E+01 | 52.29048  | -1.06 | TMCO6         | NM_018502                                                      |
| 11760534_a_at | 1.05E-25 | 1.25E-27 | -1.39E+01 | 52.246012 | -3.73 | NRG4          | NM_138573                                                      |
| 11741281_a_at | 1.05E-25 | 1.26E-27 | -1.39E+01 | 52.241877 | -1.6  | AKAP7         | NM_004842,NM_016377,NM_138633                                  |

|               |          |          |           |           |       |               |                                                                                 |
|---------------|----------|----------|-----------|-----------|-------|---------------|---------------------------------------------------------------------------------|
| 11733168_at   | 1.18E-25 | 1.43E-27 | -1.39E+01 | 52.11403  | -1.12 | TSSK3         | NM_052841                                                                       |
|               |          |          |           |           |       | AZGP1P1       |                                                                                 |
| 11757090_s_at | 1.19E-25 | 1.44E-27 | -1.39E+01 | 52.105766 | -1.13 | /// GJC3 ///  | NM_181538, XM_001718225, XM_001724501, LOC10012 XM_001725084, XM_002344373 8334 |
| 11726098_a_at | 1.20E-25 | 1.46E-27 | -1.39E+01 | 52.095685 | -1.41 | NKAIN1        | NM_024522                                                                       |
| 11756008_a_at | 1.22E-25 | 1.49E-27 | -1.39E+01 | 52.074508 | -1.29 | AGBL4         | NM_032785                                                                       |
| 11715120_s_at | 1.22E-25 | 1.49E-27 | -1.39E+01 | 52.074309 | -1.24 | HIST1H2B<br>E | NM_003523                                                                       |
| 11739449_s_at | 1.22E-25 | 1.49E-27 | -1.39E+01 | 52.07318  | -1.18 | ROCK1         | NM_005406                                                                       |
| 11755566_a_at | 1.27E-25 | 1.57E-27 | -1.39E+01 | 52.02262  | -2.47 | HEATR7A       | NM_001099280, NM_001099281, NM_032450                                           |
| 11739760_a_at | 1.31E-25 | 1.62E-27 | -1.39E+01 | 51.991823 | -1.05 | ASB10         | NM_001142459, NM_001142460, NM_080871                                           |
| 11747934_x_at | 1.31E-25 | 1.63E-27 | -1.39E+01 | 51.985935 | -1.04 | PMS2L11       | NR_023383                                                                       |
| 11752890_a_at | 1.33E-25 | 1.66E-27 | -1.39E+01 | 51.966452 | -1.17 | SNTA1         | NM_003098                                                                       |
| 11762477_at   | 1.34E-25 | 1.67E-27 | -1.39E+01 | 51.959558 | -1.36 | CPXM2         | NM_198148                                                                       |
| 11756514_a_at | 1.42E-25 | 1.79E-27 | -1.39E+01 | 51.894785 | -1.05 | TEKT5         | NM_144674                                                                       |

|               |          |          |           |           |       |              |                        |
|---------------|----------|----------|-----------|-----------|-------|--------------|------------------------|
| 11760783_at   | 1.45E-25 | 1.82E-27 | -1.39E+01 | 51.874142 | -1.13 | FN3K         | NM_022158              |
| 11736534_s_at | 1.64E-25 | 2.09E-27 | -1.38E+01 | 51.738409 | -1.99 | NELL1        | NM_006157,NM_201551    |
| 11748577_a_at | 1.66E-25 | 2.12E-27 | -1.38E+01 | 51.725966 | -1.71 | IFT20        | NM_174887              |
| 11736040_a_at | 1.69E-25 | 2.16E-27 | -1.38E+01 | 51.707467 | -2.82 | KIF1A        | NM_004321              |
| 11761547_at   | 1.70E-25 | 2.18E-27 | -1.38E+01 | 51.695445 | -1.15 | NOP16        | NM_016391              |
| 11737803_a_at | 1.73E-25 | 2.22E-27 | -1.38E+01 | 51.678592 | -1.28 | YIPF2        | NM_024029              |
| 11724899_a_at | 1.83E-25 | 2.36E-27 | -1.38E+01 | 51.619288 | -1.16 | TMEM198      | NM_001005209           |
| 11757171_x_at | 1.83E-25 | 2.36E-27 | -1.38E+01 | 51.617445 | -1.51 | SNORA71<br>D | NR_003018              |
| 11751746_a_at | 1.85E-25 | 2.40E-27 | -1.38E+01 | 51.602685 | -3.34 | GAMT         | NM_000156,NM_138924    |
| 11722724_a_at | 1.85E-25 | 2.41E-27 | -1.38E+01 | 51.599699 | -1.24 | CSF2RB       | NM_000395              |
| 11728188_at   | 1.94E-25 | 2.53E-27 | -1.38E+01 | 51.550521 | -1.15 | DHRS12       | NM_001031719,NM_024705 |
| 11715230_s_at | 2.05E-25 | 2.69E-27 | -1.38E+01 | 51.490724 | -2.2  | PARD6A       | NM_001037281,NM_016948 |
| 11743198_a_at | 2.05E-25 | 2.69E-27 | -1.38E+01 | 51.489075 | -1.02 | SLC6A16      | NM_014037              |



|               |          |          |           |           |       |           |                               |
|---------------|----------|----------|-----------|-----------|-------|-----------|-------------------------------|
| 11753063_a_at | 2.05E-25 | 2.69E-27 | -1.38E+01 | 51.488236 | -1.09 | SIDT2     | NM_001040455                  |
| 11763522_a_at | 2.08E-25 | 2.73E-27 | -1.38E+01 | 51.475242 | -2.63 | RYR2      | NM_001035                     |
| 11731813_a_at | 2.10E-25 | 2.76E-27 | -1.38E+01 | 51.462295 | -1.48 | GATA1     | NM_002049                     |
| 11747189_a_at | 2.24E-25 | 2.95E-27 | -1.38E+01 | 51.396564 | -1.11 | BCL11A    | NM_018014,NM_022893,NM_138559 |
| 11745867_x_at | 2.30E-25 | 3.05E-27 | -1.38E+01 | 51.363565 | -1.08 | PSEN2     | NM_000447,NM_012486           |
| 11754022_s_at | 2.56E-25 | 3.43E-27 | -1.37E+01 | 51.248781 | -1.49 | GAP43     | NM_001130064,NM_002045        |
| 11742213_x_at | 2.65E-25 | 3.55E-27 | -1.37E+01 | 51.214458 | -1.25 | CDH24     | NM_022478,NM_144985           |
| 11715321_x_at | 2.95E-25 | 4.00E-27 | -1.37E+01 | 51.095468 | -1.22 | KRTAP10-8 | NM_198695                     |
| 11742502_at   | 3.12E-25 | 4.25E-27 | -1.37E+01 | 51.036436 | -1.07 | PRR25     | NM_001013638,XM_002344945     |
| 11737969_a_at | 3.20E-25 | 4.37E-27 | -1.37E+01 | 51.007306 | -1.08 | PCDHGA7   | NM_018920,NM_032087           |
| 11742367_at   | 3.30E-25 | 4.53E-27 | -1.37E+01 | 50.971536 | -1.34 | OR4N2     | NM_001004723                  |
| 11757108_a_at | 3.75E-25 | 5.20E-27 | -1.37E+01 | 50.835706 | -1.31 | GSTTP1    | NR_003081                     |
| 11739858_a_at | 4.58E-25 | 6.39E-27 | -1.36E+01 | 50.630133 | -1.14 | PACSIN1   | NM_020804                     |

|               |          |          |           |           |       |               |                                                             |
|---------------|----------|----------|-----------|-----------|-------|---------------|-------------------------------------------------------------|
| 11744967_x_at | 4.64E-25 | 6.50E-27 | -1.36E+01 | 50.613579 | -1.06 | HSD11B1<br>L  | NM_198533,NM_198704,NM_198705,NM_198706,NM_198707,NM_198708 |
| 11749431_a_at | 4.78E-25 | 6.77E-27 | -1.36E+01 | 50.573919 | -1.42 | PIGQ          | NM_004204,NM_148920                                         |
| 11749994_a_at | 5.90E-25 | 8.48E-27 | -1.36E+01 | 50.349687 | -1.21 | CD300LG       | NM_001168322,NM_001168323,NM_001168324,NM_145273            |
| 11731411_a_at | 6.03E-25 | 8.70E-27 | -1.36E+01 | 50.324712 | -1.21 | SLC8A2        | NM_015063                                                   |
| 11762953_a_at | 6.59E-25 | 9.59E-27 | -1.36E+01 | 50.227889 | -1.58 | NARFL         | NM_022493                                                   |
| 11744171_a_at | 6.71E-25 | 9.80E-27 | -1.36E+01 | 50.206468 | -1.4  | DNAJC4        | NM_005528                                                   |
| 11729403_a_at | 6.84E-25 | 1.00E-26 | -1.36E+01 | 50.186547 | -1.22 | SLC30A3       | NM_003459                                                   |
| 11746089_a_at | 7.15E-25 | 1.05E-26 | -1.35E+01 | 50.139186 | -1.15 | LTBP4         | NM_001042544,NM_001042545,NM_003573                         |
| 11761993_a_at | 7.70E-25 | 1.14E-26 | -1.35E+01 | 50.055168 | -1.2  | THRA          | NM_003250,NM_199334                                         |
| 11762195_a_at | 7.82E-25 | 1.16E-26 | -1.35E+01 | 50.037051 | -1.35 | TCEA3         | NM_003196                                                   |
| 11751809_a_at | 7.99E-25 | 1.19E-26 | -1.35E+01 | 50.01255  | -1.54 | LOC38838<br>7 | NR_027254                                                   |
| 11733775_a_at | 8.15E-25 | 1.22E-26 | -1.35E+01 | 49.989851 | -1.25 | UMOD          | NM_001008389,NM_003361                                      |
| 11745106_x_at | 8.77E-25 | 1.32E-26 | -1.35E+01 | 49.911154 | -1.31 | MEIS3         | NM_001009813,NM_020160                                      |

|               |          |          |           |           |       |         |                                                                                                                                                                                     |
|---------------|----------|----------|-----------|-----------|-------|---------|-------------------------------------------------------------------------------------------------------------------------------------------------------------------------------------|
| 11745625_a_at | 8.90E-25 | 1.34E-26 | -1.35E+01 | 49.894257 | -1.14 | PCDHGA2 | NM_018915,NM_032009                                                                                                                                                                 |
| 11756333_a_at | 8.92E-25 | 1.35E-26 | -1.35E+01 | 49.890243 | -1.22 | CROCC   | NM_014675                                                                                                                                                                           |
| 11722060_at   | 9.29E-25 | 1.41E-26 | -1.35E+01 | 49.846201 | -1.55 | PPP1R1A | NM_006741                                                                                                                                                                           |
| 11762663_at   | 9.43E-25 | 1.43E-26 | -1.35E+01 | 49.829345 | -1.29 | SEL1L   | NM_005065                                                                                                                                                                           |
| 11715150_s_at | 9.51E-25 | 1.45E-26 | -1.35E+01 | 49.81681  | -1.15 | PCDHA4  | NM_018907,NM_031500                                                                                                                                                                 |
| 11722992_a_at | 1.05E-24 | 1.61E-26 | -1.35E+01 | 49.716448 | -2.43 | DMD     | NM_000109,NM_004006,NM_004007,NM_004009,NM_004010,NM_004011,NM_004012,NM_004013,NM_004014,NM_004015,NM_004016,NM_004017,NM_004018,NM_004019,NM_004020,NM_004021,NM_004022,NM_004023 |
| 11742501_a_at | 1.06E-24 | 1.63E-26 | -1.35E+01 | 49.701107 | -1.27 | CLTA    | NM_001076677,NM_001184760,NM_001184761,NM_001184762,NM_001833,NM_007096                                                                                                             |

|               |          |          |           |           |       |                                                |
|---------------|----------|----------|-----------|-----------|-------|------------------------------------------------|
|               |          |          |           |           |       | DUX4 ///                                       |
|               |          |          |           |           |       | LOC44105                                       |
|               |          |          |           |           |       | 6 ///                                          |
|               |          |          |           |           |       | LOC65354                                       |
|               |          |          |           |           |       | 3 ///                                          |
| 11715198_s_at | 1.10E-24 | 1.69E-26 | -1.35E+01 | 49.665682 | -1.18 | LOC65354 NM_001127386,NM_001127387,NM_0011273  |
|               |          |          |           |           |       | 4 ///<br>88,NM_001127389,NM_001164467,NM_00117 |
|               |          |          |           |           |       | LOC65354 7376,NM_033178,XM_496731,XM_928023    |
|               |          |          |           |           |       | 5 ///                                          |
|               |          |          |           |           |       | LOC65354                                       |
|               |          |          |           |           |       | 8 ///                                          |
|               |          |          |           |           |       | LOC72841                                       |
|               |          |          |           |           |       | 0                                              |
| 11742381_at   | 1.15E-24 | 1.77E-26 | -1.35E+01 | 49.617927 | -1.28 | OR5H1 NM_001005338                             |
| 11729577_a_at | 1.16E-24 | 1.80E-26 | -1.34E+01 | 49.603222 | -1.02 | ATP1A3 NM_152296                               |
| 11717570_s_at | 1.21E-24 | 1.87E-26 | -1.34E+01 | 49.565539 | -1.08 | MYH7 NM_000257                                 |
| 11725434_a_at | 1.21E-24 | 1.88E-26 | -1.34E+01 | 49.562238 | -1.27 | RUNDC3A NM_001144825,NM_001144826,NM_006695    |
| 11720059_a_at | 1.21E-24 | 1.88E-26 | -1.34E+01 | 49.559106 | -1.91 | TTYH1 NM_001005367,NM_020659                   |
| 11759603_at   | 1.44E-24 | 2.25E-26 | -1.34E+01 | 49.380058 | -2.5  | BCL2L13 NM_015367                              |

|               |          |          |           |           |       |          |                                                               |
|---------------|----------|----------|-----------|-----------|-------|----------|---------------------------------------------------------------|
| 11736188_a_at | 1.46E-24 | 2.29E-26 | -1.34E+01 | 49.363991 | -1.34 | ORMDL3   | NM_139280                                                     |
| 11728299_x_at | 1.47E-24 | 2.30E-26 | -1.34E+01 | 49.360194 | -1    | AP2A1    | NM_014203,NM_130787                                           |
| 11745240_a_at | 1.52E-24 | 2.40E-26 | -1.34E+01 | 49.319539 | -1.05 | TIE1     | NM_005424                                                     |
| 11722364_at   | 1.56E-24 | 2.47E-26 | -1.34E+01 | 49.287821 | -1.04 | COX6A2   | NM_005205                                                     |
| 11761606_at   | 1.62E-24 | 2.56E-26 | -1.34E+01 | 49.254482 | -1.13 | CDH22    | NM_021248                                                     |
| 11760454_x_at | 1.62E-24 | 2.56E-26 | -1.34E+01 | 49.25246  | -1.15 | CASZ1    | NM_001079843,NM_017766                                        |
| 11760626_at   | 1.68E-24 | 2.69E-26 | -1.34E+01 | 49.205762 | -1.02 | DYRK3    | NM_001004023,NM_003582                                        |
| 11762332_at   | 1.88E-24 | 3.02E-26 | -1.34E+01 | 49.090418 | -1.1  | NDUFA13  | NM_015965                                                     |
| 11726221_a_at | 1.89E-24 | 3.03E-26 | -1.34E+01 | 49.087049 | -1.11 | SYPL2    | NM_001040709                                                  |
| 11752736_x_at | 1.92E-24 | 3.09E-26 | -1.34E+01 | 49.067753 | -1.41 | CHID1    | NM_001142674,NM_001142675,NM_001142676,NM_001142677,NM_023947 |
| 11752706_x_at | 2.06E-24 | 3.32E-26 | -1.33E+01 | 48.994905 | -1.12 | SEC14L4  | NM_001161368,NM_174977                                        |
| 11723794_a_at | 2.11E-24 | 3.44E-26 | -1.33E+01 | 48.962188 | -1.09 | SLC29A2  | NM_001532                                                     |
| 11730019_a_at | 2.20E-24 | 3.60E-26 | -1.33E+01 | 48.917058 | -1.08 | C6orf142 | NM_138569                                                     |

|                      |          |          |           |           |       |              |                                                            |
|----------------------|----------|----------|-----------|-----------|-------|--------------|------------------------------------------------------------|
| 11760019_x_at        | 2.23E-24 | 3.65E-26 | -1.33E+01 | 48.901039 | -1.23 | GALNT9       | NM_001122636,NM_021808                                     |
| 11732650_a_at        | 2.27E-24 | 3.73E-26 | -1.33E+01 | 48.880112 | -2.18 | HEXDC        | NM_173620                                                  |
| 11741926_x_at        | 2.29E-24 | 3.77E-26 | -1.33E+01 | 48.871029 | -1.14 | FUT5         | NM_002034                                                  |
| 11741578_a_at        | 2.56E-24 | 4.22E-26 | -1.33E+01 | 48.759042 | -1.36 | SLC30A2      | NM_001004434,NM_032513                                     |
| 11734070_x_at        | 2.62E-24 | 4.32E-26 | -1.33E+01 | 48.734038 | -1.4  | SSR3         | NM_007107                                                  |
| 11755685_s_at        | 2.63E-24 | 4.35E-26 | -1.33E+01 | 48.729305 | -1.46 | LOC100130872 | BC030552.1                                                 |
| 11715320_s_at        | 2.71E-24 | 4.49E-26 | -1.33E+01 | 48.697488 | -2.63 | TTN          | NM_003319,NM_133378,NM_133379,NM_133432,NM_133437          |
| 11740551_a_at        | 3.53E-24 | 5.98E-26 | -1.32E+01 | 48.412133 | -1.1  | ASPG         | NM_001080464                                               |
| 11735652_at          | 3.69E-24 | 6.29E-26 | -1.32E+01 | 48.363158 | -1    | TMEM105      | NM_178520                                                  |
| AFFX-r2-Ec-bioB-3_at | 3.74E-24 | 6.38E-26 | -1.32E+01 | 48.348046 | -1.33 | ---          |                                                            |
| 11731339_a_at        | 3.79E-24 | 6.47E-26 | -1.32E+01 | 48.333767 | -2.04 | ECE2         | NM_001037324,NM_001100120,NM_001100121,NM_014693,NM_032331 |
| 11750548_s_at        | 3.86E-24 | 6.62E-26 | -1.32E+01 | 48.311242 | -1.03 | CYP4A11      | NM_000778                                                  |

|               |          |          |           |           |       |          |                                                               |
|---------------|----------|----------|-----------|-----------|-------|----------|---------------------------------------------------------------|
| 11738097_x_at | 3.87E-24 | 6.66E-26 | -1.32E+01 | 48.305263 | -1.3  | C2orf62  | NM_198559                                                     |
| 11751800_a_at | 3.87E-24 | 6.67E-26 | -1.32E+01 | 48.304617 | -1.47 | MDC1     | NM_014641                                                     |
| 11715156_s_at | 4.25E-24 | 7.38E-26 | -1.32E+01 | 48.203683 | -1.25 | KRTAP6-1 | NM_181602                                                     |
| 11763786_x_at | 4.30E-24 | 7.47E-26 | -1.32E+01 | 48.191832 | -1.26 | NARFL    | NM_022493                                                     |
| 11735334_a_at | 4.67E-24 | 8.17E-26 | -1.32E+01 | 48.102954 | -1.02 | HRH3     | NM_007232                                                     |
| 11756776_a_at | 4.88E-24 | 8.55E-26 | -1.32E+01 | 48.057677 | -1.09 | GCGR     | NM_000160                                                     |
| 11734508_at   | 5.08E-24 | 8.93E-26 | -1.32E+01 | 48.015418 | -1.04 | FOXI2    | NM_207426                                                     |
| 11745115_a_at | 5.28E-24 | 9.29E-26 | -1.32E+01 | 47.976015 | -2.36 | SLC1A2   | NM_004171                                                     |
| 11716738_at   | 5.45E-24 | 9.61E-26 | -1.32E+01 | 47.941621 | -2.39 | SEPX1    | NM_016332                                                     |
| 11736677_a_at | 5.84E-24 | 1.04E-25 | -1.31E+01 | 47.865237 | -3.46 | DPP10    | NM_001004360,NM_001178034,NM_001178036,NM_001178037,NM_020868 |
| 11754653_a_at | 5.95E-24 | 1.06E-25 | -1.31E+01 | 47.846133 | -3.13 | BACE1    | NM_012104,NM_138971,NM_138972,NM_138973                       |
| 11721325_a_at | 6.21E-24 | 1.11E-25 | -1.31E+01 | 47.799366 | -3.11 | GCAT     | NM_001171690,NM_014291                                        |
| 11729851_a_at | 6.64E-24 | 1.19E-25 | -1.31E+01 | 47.729537 | -1.71 | RADIL    | NM_018059                                                     |

|               |          |          |           |           |       |         |                                     |
|---------------|----------|----------|-----------|-----------|-------|---------|-------------------------------------|
| 11728779_a_at | 6.66E-24 | 1.20E-25 | -1.31E+01 | 47.724872 | -1.27 | ZAP70   | NM_001079,NM_207519                 |
| 11747674_a_at | 6.88E-24 | 1.24E-25 | -1.31E+01 | 47.687795 | -1.01 | ATP1A2  | NM_000702                           |
| 11724628_a_at | 6.95E-24 | 1.25E-25 | -1.31E+01 | 47.677488 | -4.08 | MAT1A   | NM_000429                           |
| 11720545_at   | 7.06E-24 | 1.28E-25 | -1.31E+01 | 47.658019 | -1.77 | ANGEL1  | NM_015305                           |
| 11760179_x_at | 7.06E-24 | 1.28E-25 | -1.31E+01 | 47.656626 | -1.06 | WASH3P  | NR_003659                           |
| 11747348_a_at | 7.48E-24 | 1.36E-25 | -1.31E+01 | 47.599245 | -3.35 | PSAT1   | NM_021154,NM_058179                 |
| 11726475_a_at | 7.59E-24 | 1.38E-25 | -1.31E+01 | 47.581942 | -3.76 | TMEM52  | NM_178545                           |
| 11737183_at   | 7.61E-24 | 1.39E-25 | -1.31E+01 | 47.578413 | -1.13 | EXOC3L2 | NM_138568                           |
| 11732410_a_at | 7.77E-24 | 1.42E-25 | -1.31E+01 | 47.553075 | -1.12 | GPER    | NM_001039966,NM_001098201,NM_001505 |
| 11729485_a_at | 7.82E-24 | 1.43E-25 | -1.31E+01 | 47.545371 | -1.1  | RGS6    | NM_004296                           |
| 11753147_a_at | 8.28E-24 | 1.53E-25 | -1.31E+01 | 47.48372  | -1.08 | GATA1   | NM_002049                           |

---

**GSE62452**

---

| ID      | adj.P.Val | P.Value  | t        | B         | logFC | Gene.symbol | Gene.title              |
|---------|-----------|----------|----------|-----------|-------|-------------|-------------------------|
| 7908072 | 1.36E-16  | 4.10E-21 | 1.13E+01 | 37.271717 | 2.65  | LAMC2       | laminin subunit gamma 2 |

---



|         |          |          |          |           |      |         |                                                                                                           |
|---------|----------|----------|----------|-----------|------|---------|-----------------------------------------------------------------------------------------------------------|
| 7924029 | 6.69E-16 | 4.02E-20 | 1.09E+01 | 35.059259 | 2.08 | LAMB3   | laminin subunit beta 3                                                                                    |
| 7901175 | 1.44E-15 | 1.30E-19 | 1.07E+01 | 33.925447 | 2.38 | TSPAN1  | tetraspanin 1                                                                                             |
| 8045835 | 2.24E-15 | 2.69E-19 | 1.06E+01 | 33.217026 | 2.46 | GALNT5  | polypeptide N-acetylgalactosaminyltransferase 5<br>5///polypeptide<br>N-acetylgalactosaminyltransferase 5 |
| 8050160 | 3.69E-15 | 5.54E-19 | 1.05E+01 | 32.516171 | 1.55 | MBOAT2  | membrane bound O-acyltransferase domain containing 2                                                      |
| 7981514 | 4.38E-15 | 7.88E-19 | 1.04E+01 | 32.174554 | 1.51 | AHNAK2  | AHNAK nucleoprotein 2                                                                                     |
| 7915472 | 4.57E-15 | 9.61E-19 | 1.04E+01 | 31.982275 | 1.67 | SLC2A1  | solute carrier family 2 member 1                                                                          |
| 7944164 | 5.75E-15 | 1.38E-18 | 1.03E+01 | 31.630673 | 2.06 | TMPRSS4 | transmembrane protease, serine 4                                                                          |
| 8040113 | 9.43E-15 | 2.89E-18 | 1.02E+01 | 30.914733 | 1.03 | ASAP2   | ArfGAP with SH3 domain, ankyrin repeat and PH domain 2                                                    |
| 8020551 | 9.43E-15 | 3.04E-18 | 1.02E+01 | 30.865807 | 1.24 | LAMA3   | laminin subunit alpha 3                                                                                   |
| 8049487 | 1.03E-14 | 3.71E-18 | 1.01E+01 | 30.672266 | 1.24 | MLPH    | melanophilin                                                                                              |
| 7909164 | 1.62E-14 | 6.32E-18 | 1.00E+01 | 30.155874 | 2.55 | CTSE    | cathepsin E                                                                                               |
| 7936144 | 1.84E-14 | 7.85E-18 | 9.99     | 29.945471 | 1.65 | COL17A1 | collagen type XVII alpha 1 chain                                                                          |
| 8009951 | 1.97E-14 | 9.48E-18 | 9.96     | 29.762674 | 1.23 | ITGB4   | integrin subunit beta 4                                                                                   |
| 7993588 | 2.58E-14 | 1.31E-17 | 9.9      | 29.445673 | 1.14 | TMC7    | transmembrane channel like 7                                                                              |

|         |          |          |      |           |      |          |                                                                            |
|---------|----------|----------|------|-----------|------|----------|----------------------------------------------------------------------------|
| 7996819 | 3.93E-14 | 2.25E-17 | 9.81 | 28.926889 | 1.43 | CDH3     | cadherin 3                                                                 |
| 7961215 | 7.07E-14 | 4.25E-17 | 9.7  | 28.308879 | 1.03 | STYK1    | serine/threonine/tyrosine kinase 1                                         |
| 8169504 | 1.63E-13 | 1.08E-16 | 9.54 | 27.406181 | 2.66 | SLC6A14  | solute carrier family 6 member 14                                          |
| 8152703 | 1.83E-13 | 1.26E-16 | 9.51 | 27.252543 | 1.45 | FBXO32   | F-box protein 32                                                           |
| 8105267 | 1.85E-13 | 1.33E-16 | 9.5  | 27.198774 | 2.14 | ITGA2    | integrin subunit alpha 2                                                   |
| 8129082 | 1.89E-13 | 1.42E-16 | 9.49 | 27.138301 | 1.42 | COL10A1  | collagen type X alpha 1 chain                                              |
| 8021584 | 1.98E-13 | 1.54E-16 | 9.47 | 27.057531 | 1.97 | SERPINB5 | serpin family B member 5                                                   |
| 8015349 | 2.31E-13 | 1.87E-16 | 9.44 | 26.868885 | 1.83 | KRT19    | keratin 19                                                                 |
| 7938485 | 6.07E-13 | 5.47E-16 | 9.25 | 25.830046 | 1.13 | MICAL2   | microtubule associated monooxygenase, calponin and LIM domain containing 2 |
| 7950933 | 6.32E-13 | 6.10E-16 | 9.23 | 25.723257 | 1.41 | NOX4     | NADPH oxidase 4                                                            |
| 7952290 | 6.32E-13 | 6.26E-16 | 9.23 | 25.698928 | 1.28 | TRIM29   | tripartite motif containing 29                                             |
| 8081818 | 8.72E-13 | 8.91E-16 | 9.16 | 25.356645 | 1.67 |          |                                                                            |
| 7965541 | 1.21E-12 | 1.38E-15 | 9.08 | 24.930078 | 1.18 | FGD6     | FYVE, RhoGEF and PH domain containing 6                                    |
| 7918064 | 1.25E-12 | 1.46E-15 | 9.07 | 24.876163 | 1.85 | COL11A1  | collagen type XI alpha 1 chain                                             |
| 8029086 | 1.35E-12 | 1.62E-15 | 9.06 | 24.778976 | 2.79 | CEACAM5  | carcinoembryonic antigen related cell adhesion molecule 5                  |

|         |          |          |      |           |      |         |                                                           |
|---------|----------|----------|------|-----------|------|---------|-----------------------------------------------------------|
| 8064904 | 1.80E-12 | 2.27E-15 | 9    | 24.451083 | 1.34 | FERMT1  | fermitin family member 1                                  |
| 8029098 | 1.99E-12 | 2.64E-15 | 8.97 | 24.302113 | 2.42 | CEACAM6 | carcinoembryonic antigen related cell adhesion molecule 6 |
| 8042439 | 2.30E-12 | 3.30E-15 | 8.93 | 24.085885 | 1.55 | ANTXR1  | anthrax toxin receptor 1                                  |
| 8058765 | 2.30E-12 | 3.32E-15 | 8.93 | 24.081064 | 2.19 | FN1     | fibronectin 1                                             |
| 8146863 | 2.40E-12 | 3.54E-15 | 8.92 | 24.018439 | 1.98 | SULF1   | sulfatase 1                                               |
| 7971077 | 2.43E-12 | 3.76E-15 | 8.91 | 23.960814 | 2.5  | POSTN   | periostin                                                 |
| 8102232 | 2.43E-12 | 3.80E-15 | 8.91 | 23.950557 | 1.23 | LEF1    | lymphoid enhancer binding factor 1                        |
| 8120043 | 2.63E-12 | 4.31E-15 | 8.88 | 23.828197 | 1.03 | RUNX2   | runt related transcription factor 2                       |
| 8150889 | 3.06E-12 | 5.14E-15 | 8.85 | 23.656643 | 1.2  | SDR16C5 | short chain dehydrogenase/reductase family 16C, member 5  |
| 8072735 | 3.34E-12 | 5.72E-15 | 8.83 | 23.553507 | 1.43 | APOL1   | apolipoprotein L1                                         |
| 7942135 | 4.40E-12 | 7.97E-15 | 8.77 | 23.231626 | 1.2  | ANO1    | anoctamin 1                                               |
| 8113433 | 4.40E-12 | 8.07E-15 | 8.77 | 23.219146 | 1    | EFNA5   | ephrin A5                                                 |
| 7969493 | 5.30E-12 | 9.91E-15 | 8.73 | 23.019956 | 1.55 | SCEL    | sciellin                                                  |
| 7989985 | 5.30E-12 | 1.01E-14 | 8.73 | 22.997307 | 1.09 | ITGA11  | integrin subunit alpha 11                                 |
| 8083941 | 5.30E-12 | 1.02E-14 | 8.73 | 22.993426 | 1.19 | ECT2    | epithelial cell transforming 2                            |
| 7935058 | 6.27E-12 | 1.29E-14 | 8.69 | 22.76449  | 1.39 | MYOF    | myoferlin                                                 |
| 7979710 | 6.70E-12 | 1.41E-14 | 8.67 | 22.678923 | 1.09 | PLEK2   | pleckstrin 2                                              |

|         |          |          |      |           |      |            |                                                                 |
|---------|----------|----------|------|-----------|------|------------|-----------------------------------------------------------------|
| 7928429 | 7.60E-12 | 1.67E-14 | 8.64 | 22.515644 | 1.29 | PLAU       | plasminogen activator, urokinase                                |
| 8053417 | 8.48E-12 | 1.90E-14 | 8.62 | 22.390788 | 1.22 | CAPG       | capping actin protein, gelsolin like                            |
| 8056113 | 8.58E-12 | 1.96E-14 | 8.61 | 22.35927  | 1.39 | LY75-CD302 | LY75-CD302 readthrough///lymphocyte antigen 02///LY75 75        |
| 8138613 | 8.62E-12 | 1.99E-14 | 8.61 | 22.342452 | 1.16 | OSBPL3     | oxysterol binding protein like 3                                |
| 8002303 | 9.16E-12 | 2.18E-14 | 8.59 | 22.256677 | 1.31 | NQO1       | NAD(P)H quinone dehydrogenase 1                                 |
| 8102950 | 9.16E-12 | 2.20E-14 | 8.59 | 22.246505 | 1.18 | INPP4B     | inositol polyphosphate-4-phosphatase type II B                  |
| 8027748 | 9.18E-12 | 2.23E-14 | 8.59 | 22.232118 | 1.32 | FXVD3      | FXVD domain containing ion transport regulator 3                |
| 7978544 | 9.24E-12 | 2.28E-14 | 8.59 | 22.213336 | 1.39 | EGLN3      | egl-9 family hypoxia inducible factor 3                         |
| 7920291 | 9.39E-12 | 2.34E-14 | 8.58 | 22.186523 | 1    | S100A16    | S100 calcium binding protein A16                                |
| 8105300 | 1.24E-11 | 3.31E-14 | 8.52 | 21.851754 | 1.53 |            |                                                                 |
| 8015016 | 1.54E-11 | 4.18E-14 | 8.48 | 21.625118 | 1.31 | TNS4       | tensin 4                                                        |
| 7976443 | 1.55E-11 | 4.29E-14 | 8.47 | 21.599544 | 1.23 | IFI27      | interferon alpha inducible protein 27                           |
| 8138381 | 1.87E-11 | 5.39E-14 | 8.43 | 21.377094 | 1.86 | AGR2       | anterior gradient 2, protein disulphide isomerase family member |

|         |          |          |      |           |      |        |                                                     |
|---------|----------|----------|------|-----------|------|--------|-----------------------------------------------------|
| 7985317 | 2.06E-11 | 6.13E-14 | 8.41 | 21.252953 | 1.39 | CEMIP  | cell migration inducing hyaluronan binding protein  |
| 8008237 | 2.14E-11 | 6.48E-14 | 8.4  | 21.198815 | 1.43 | ITGA3  | integrin subunit alpha 3                            |
| 8066493 | 2.37E-11 | 7.27E-14 | 8.38 | 21.088129 | 1.73 | SLPI   | secretory leukocyte peptidase inhibitor             |
| 7969438 | 2.43E-11 | 7.51E-14 | 8.37 | 21.055997 | 1.17 | LMO7   | LIM domain 7                                        |
| 8078014 | 2.47E-11 | 7.80E-14 | 8.36 | 21.019625 | 1.2  | SLC6A6 | solute carrier family 6 member 6                    |
| 7954065 | 2.61E-11 | 8.40E-14 | 8.35 | 20.947177 | 1.01 | GPRC5A | G protein-coupled receptor class C group 5 member A |
| 8084794 | 3.55E-11 | 1.20E-13 | 8.28 | 20.598007 | 1.08 | IL1RAP | interleukin 1 receptor accessory protein            |
| 8001800 | 4.77E-11 | 1.72E-13 | 8.22 | 20.254021 | 1.51 | CDH11  | cadherin 11                                         |
| 7950810 | 4.96E-11 | 1.82E-13 | 8.21 | 20.199139 | 1.06 | SYTL2  | synaptotagmin like 2                                |
| 8135601 | 5.81E-11 | 2.14E-13 | 8.18 | 20.038763 | 1.35 | MET    | MET proto-oncogene, receptor tyrosine kinase        |
| 7973336 | 5.86E-11 | 2.18E-13 | 8.18 | 20.022426 | 1.19 | MMP14  | matrix metalloproteinase 14                         |
| 8097692 | 6.46E-11 | 2.43E-13 | 8.16 | 19.919686 | 1.32 | EDNRA  | endothelin receptor type A                          |
| 7964907 | 6.61E-11 | 2.54E-13 | 8.15 | 19.874288 | 1.01 | PTPRR  | protein tyrosine phosphatase, receptor type R       |
| 8056151 | 6.73E-11 | 2.61E-13 | 8.14 | 19.849209 | 1.11 | PLA2R1 | phospholipase A2 receptor 1                         |

|         |          |          |      |           |      |               |                                                   |
|---------|----------|----------|------|-----------|------|---------------|---------------------------------------------------|
| 8056184 | 6.81E-11 | 2.66E-13 | 8.14 | 19.830819 | 2.02 | ITGB6///ITGB6 | integrin subunit beta 6///integrin subunit beta 6 |
| 8042942 | 6.93E-11 | 2.73E-13 | 8.14 | 19.806326 | 1.16 | HK2           | hexokinase 2                                      |
| 8067125 | 8.86E-11 | 3.73E-13 | 8.08 | 19.503367 | 1.21 | BCAS1         | breast carcinoma amplified sequence 1             |
| 8101429 | 1.04E-10 | 4.58E-13 | 8.04 | 19.30413  | 1.76 | PLAC8         | placenta specific 8                               |
| 7958884 | 1.18E-10 | 5.28E-13 | 8.02 | 19.166342 | 1    | OAS1          | 2'-5'-oligoadenylate synthetase 1                 |
| 8132318 | 1.19E-10 | 5.39E-13 | 8.01 | 19.14491  | 1.47 | ANLN          | anillin actin binding protein                     |



|         |          |          |      |           |      |                     |                                                                                |
|---------|----------|----------|------|-----------|------|---------------------|--------------------------------------------------------------------------------|
| 8112980 | 1.42E-10 | 6.86E-13 | 7.97 | 18.91228  | 1.61 | EDIL3               | EGF like repeats and discoidin domains 3                                       |
| 8071758 | 1.47E-10 | 7.16E-13 | 7.96 | 18.871142 | 1.23 | MMP11               | matrix metalloproteinase 11                                                    |
| 7934278 | 1.47E-10 | 7.22E-13 | 7.96 | 18.86196  | 1.05 | P4HA1///P<br>4HA1   | prolyl 4-hydroxylase subunit alpha 1///prolyl<br>4-hydroxylase subunit alpha 1 |
| 8103563 | 1.73E-10 | 8.80E-13 | 7.92 | 18.67066  | 1.13 | DDX60               | DEXD/H-box helicase 60                                                         |
| 8086517 | 1.86E-10 | 9.70E-13 | 7.9  | 18.57639  | 1.01 | CDCP1               | CUB domain containing protein 1                                                |
| 7958913 | 1.89E-10 | 1.00E-12 | 7.9  | 18.547007 | 1.04 | OAS2                | 2'-5'-oligoadenylate synthetase 2                                              |
| 8015387 | 1.95E-10 | 1.04E-12 | 7.89 | 18.511522 | 1.45 | KRT17               | keratin 17                                                                     |
| 8028924 | 2.72E-10 | 1.54E-12 | 7.82 | 18.127458 | 1.04 | MIA-RAB<br>4B///MIA | MIA-RAB4B readthrough (NMD<br>candidate)///melanoma inhibitory activity        |
| 7979179 | 2.83E-10 | 1.62E-12 | 7.81 | 18.077497 | 1.09 | ERO1A               | endoplasmic reticulum oxidoreductase 1 alpha                                   |
| 8089082 | 2.94E-10 | 1.72E-12 | 7.8  | 18.021056 | 1.1  | DCBLD2              | discoidin, CUB and LCCL domain containing 2                                    |
| 8167973 | 3.68E-10 | 2.21E-12 | 7.75 | 17.778873 | 1.07 | HEPH                | hephaestin                                                                     |
| 8111387 | 3.74E-10 | 2.27E-12 | 7.75 | 17.752562 | 1.14 | ADAMTS1<br>2        | ADAM metalloproteinase with thrombospondin<br>type 1 motif 12                  |



|         |          |          |      |           |      |         |                                                           |
|---------|----------|----------|------|-----------|------|---------|-----------------------------------------------------------|
| 8065416 | 4.78E-10 | 3.03E-12 | 7.69 | 17.473631 | 1.04 | CST2    | cystatin SA                                               |
| 8130867 | 4.89E-10 | 3.13E-12 | 7.69 | 17.44194  | 1.53 | THBS2   | thrombospondin 2                                          |
| 8041383 | 5.22E-10 | 3.42E-12 | 7.67 | 17.355585 | 1.1  | LTBP1   | latent transforming growth factor beta binding protein 1  |
| 8126820 | 5.44E-10 | 3.62E-12 | 7.66 | 17.299374 | 1.38 | ADGRF1  | adhesion G protein-coupled receptor F1                    |
| 8081235 | 5.50E-10 | 3.69E-12 | 7.66 | 17.283005 | 1.37 | COL8A1  | collagen type VIII alpha 1 chain                          |
| 7954527 | 5.72E-10 | 3.90E-12 | 7.65 | 17.228588 | 1.08 | ARNTL2  | aryl hydrocarbon receptor nuclear translocator like 2     |
| 8120719 | 5.80E-10 | 4.00E-12 | 7.64 | 17.203495 | 1.25 | CD109   | CD109 molecule                                            |
| 8029773 | 5.89E-10 | 4.13E-12 | 7.64 | 17.172123 | 1.08 | IGFL2   | IGF like family member 2                                  |
| 8037205 | 6.20E-10 | 4.41E-12 | 7.62 | 17.109357 | 1.1  | CEACAM1 | carcinoembryonic antigen related cell adhesion molecule 1 |
| 8116579 | 6.20E-10 | 4.43E-12 | 7.62 | 17.105224 | 1    | FOXQ1   | forkhead box Q1                                           |
| 8101260 | 6.31E-10 | 4.53E-12 | 7.62 | 17.084413 | 1.03 | ANTXR2  | anthrax toxin receptor 2                                  |
| 7974335 | 6.41E-10 | 4.66E-12 | 7.61 | 17.057038 | 1.28 |         |                                                           |
| 8146000 | 7.47E-10 | 5.52E-12 | 7.58 | 16.892241 | 1.2  | ADAM9   | ADAM metallopeptidase domain 9                            |
| 7930498 | 8.95E-10 | 6.85E-12 | 7.54 | 16.682951 | 1.42 | ACSL5   | acyl-CoA synthetase long-chain family member 5            |
| 8059279 | 1.08E-09 | 8.50E-12 | 7.5  | 16.47409  | 1.02 | EPHA4   | EPH receptor A4                                           |
| 8013042 | 1.10E-09 | 8.71E-12 | 7.5  | 16.450043 | 1.05 | KRT17   | keratin 17                                                |

|         |          |          |      |           |      |         |                                    |
|---------|----------|----------|------|-----------|------|---------|------------------------------------|
| 8106743 | 1.18E-09 | 9.57E-12 | 7.48 | 16.359713 | 1.76 | VCAN    | versican                           |
| 7909708 | 1.19E-09 | 9.65E-12 | 7.48 | 16.351204 | 1.12 | CENPF   | centromere protein F               |
| 7898413 | 1.25E-09 | 1.04E-11 | 7.46 | 16.282331 | 1.14 | PADI1   | peptidyl arginine deiminase 1      |
| 8066214 | 1.55E-09 | 1.38E-11 | 7.41 | 16.005562 | 1.26 | TGM2    | transglutaminase 2                 |
| 8092541 | 1.77E-09 | 1.61E-11 | 7.38 | 15.853666 | 1.47 | LIPH    | lipase H                           |
| 8138289 | 1.86E-09 | 1.70E-11 | 7.37 | 15.802511 | 1.02 | ETV1    | ETS variant 1                      |
| 8005449 | 2.01E-09 | 1.86E-11 | 7.35 | 15.714914 | 1.03 | KRT17   | keratin 17                         |
| 8145293 | 2.32E-09 | 2.25E-11 | 7.32 | 15.533236 | 1.23 | ADAM28  | ADAM metallopeptidase domain 28    |
| 8127563 | 2.57E-09 | 2.53E-11 | 7.3  | 15.417338 | 1.65 | COL12A1 | collagen type XII alpha 1 chain    |
| 8065412 | 2.63E-09 | 2.60E-11 | 7.29 | 15.393482 | 1.65 | CST1    | cystatin SN                        |
| 8098246 | 2.82E-09 | 2.82E-11 | 7.28 | 15.315163 | 1.94 | ANXA10  | annexin A10                        |
| 8150509 | 2.92E-09 | 2.92E-11 | 7.27 | 15.280626 | 1.41 | PLAT    | plasminogen activator, tissue type |
| 8100298 | 3.24E-09 | 3.34E-11 | 7.24 | 15.148647 | 1    | OCIAD2  | OCIA domain containing 2           |
| 7968800 | 3.32E-09 | 3.46E-11 | 7.24 | 15.116654 | 1.02 | DGKH    | diacylglycerol kinase eta          |
| 8123246 | 3.68E-09 | 3.88E-11 | 7.21 | 15.005546 | 1.13 | SLC22A3 | solute carrier family 22 member 3  |
| 8132557 | 4.04E-09 | 4.33E-11 | 7.19 | 14.898971 | 1.07 | AEBP1   | AE binding protein 1               |
| 8014974 | 4.08E-09 | 4.39E-11 | 7.19 | 14.885159 | 1.16 | TOP2A   | topoisomerase (DNA) II alpha       |

|         |          |          |      |           |      |                     |                                                    |
|---------|----------|----------|------|-----------|------|---------------------|----------------------------------------------------|
| 7927307 | 4.37E-09 | 4.74E-11 | 7.18 | 14.812146 | 1.32 | ANXA8L1<br>///ANXA8 | annexin A8-like 1///annexin A8                     |
| 7927367 | 5.13E-09 | 5.68E-11 | 7.14 | 14.636391 | 1.32 | ANXA8L1<br>///ANXA8 | annexin A8-like 1///annexin A8                     |
| 7933312 | 5.28E-09 | 5.87E-11 | 7.14 | 14.605254 | 1.35 | ANXA8L1<br>///ANXA8 | annexin A8-like 1///annexin A8                     |
| 8139207 | 5.57E-09 | 6.24E-11 | 7.12 | 14.546103 | 1.38 | INHBA///I<br>NHBA   | inhibin beta A subunit///inhibin beta A subunit    |
| 7982377 | 6.05E-09 | 7.03E-11 | 7.1  | 14.430227 | 1.03 | GREM1               | gremlin 1, DAN family BMP antagonist               |
| 8170648 | 6.45E-09 | 7.58E-11 | 7.09 | 14.356857 | 1.23 | BGN                 | biglycan                                           |
| 8179617 | 6.68E-09 | 7.88E-11 | 7.08 | 14.319741 | 1.35 | TRIM31              | tripartite motif containing 31                     |
| 8033674 | 6.81E-09 | 8.10E-11 | 7.07 | 14.292992 | 1.19 | MUC16               | mucin 16, cell surface associated                  |
| 8105348 | 7.26E-09 | 8.85E-11 | 7.06 | 14.208065 | 1.08 | GPX8                | glutathione peroxidase 8 (putative)                |
| 8109926 | 7.58E-09 | 9.35E-11 | 7.05 | 14.154231 | 1.86 | GABRP               | gamma-aminobutyric acid type A receptor pi subunit |
| 7937020 | 8.82E-09 | 1.12E-10 | 7.01 | 13.979733 | 1    | MKI67               | marker of proliferation Ki-67                      |
| 8058857 | 9.60E-09 | 1.23E-10 | 6.99 | 13.885735 | 1.49 | IGFBP5              | insulin like growth factor binding protein 5       |
| 8104746 | 9.68E-09 | 1.25E-10 | 6.99 | 13.871688 | 1.15 | NPR3                | natriuretic peptide receptor 3                     |

|         |          |          |      |           |      |         |                                                     |
|---------|----------|----------|------|-----------|------|---------|-----------------------------------------------------|
| 8056257 | 1.11E-08 | 1.48E-10 | 6.96 | 13.708641 | 1.61 | FAP     | fibroblast activation protein alpha                 |
| 8082928 | 1.16E-08 | 1.57E-10 | 6.95 | 13.655686 | 1.72 | CLDN18  | claudin 18                                          |
| 8120967 | 1.28E-08 | 1.76E-10 | 6.92 | 13.543377 | 1.24 | NT5E    | 5'-nucleotidase ecto                                |
| 8045539 | 1.35E-08 | 1.89E-10 | 6.91 | 13.472173 | 1.17 | KYNU    | kynureninase                                        |
| 7951297 | 1.38E-08 | 1.94E-10 | 6.91 | 13.447103 | 1.41 | MMP12   | matrix metalloproteinase 12                         |
| 7920297 | 1.39E-08 | 1.97E-10 | 6.9  | 13.434686 | 1.08 | S100A14 | S100 calcium binding protein A14                    |
| 8104758 | 1.42E-08 | 2.01E-10 | 6.9  | 13.415032 | 1.27 | NPR3    | natriuretic peptide receptor 3                      |
| 8047763 | 1.48E-08 | 2.10E-10 | 6.89 | 13.371274 | 1.16 | NRP2    | neuropilin 2                                        |
| 8178330 | 1.62E-08 | 2.34E-10 | 6.87 | 13.265921 | 1.33 | TRIM31  | tripartite motif containing 31                      |
| 8050537 | 1.90E-08 | 2.86E-10 | 6.83 | 13.07515  | 1.23 | MATN3   | matrilin 3                                          |
| 8138566 | 1.92E-08 | 2.92E-10 | 6.83 | 13.055466 | 1    | IGF2BP3 | insulin like growth factor 2 mRNA binding protein 3 |
| 8057620 | 2.15E-08 | 3.35E-10 | 6.8  | 12.922082 | 1.36 | COL5A2  | collagen type V alpha 2 chain                       |
| 7955613 | 2.21E-08 | 3.49E-10 | 6.79 | 12.881495 | 1.49 | KRT7    | keratin 7                                           |
| 7993638 | 2.22E-08 | 3.51E-10 | 6.79 | 12.877252 | 1.55 | TMC5    | transmembrane channel like 5                        |
| 8100977 | 2.68E-08 | 4.36E-10 | 6.75 | 12.667303 | 1.23 | CXCL5   | C-X-C motif chemokine ligand 5                      |
| 7923086 | 3.07E-08 | 5.15E-10 | 6.72 | 12.506678 | 1.03 | ASPM    | abnormal spindle microtubule assembly               |

|         |          |          |      |           |      |                     |                                                                  |
|---------|----------|----------|------|-----------|------|---------------------|------------------------------------------------------------------|
| 7902541 | 4.04E-08 | 7.29E-10 | 6.65 | 12.170561 | 1.42 | IFI44L              | interferon induced protein 44 like                               |
| 8048864 | 5.25E-08 | 1.01E-09 | 6.58 | 11.855848 | 1.26 | CCL20               | C-C motif chemokine ligand 20                                    |
| 8123104 | 5.58E-08 | 1.08E-09 | 6.57 | 11.790541 | 1.31 | FNDC1               | fibronectin type III domain containing 1                         |
| 8169263 | 5.94E-08 | 1.16E-09 | 6.56 | 11.723566 | 1.6  | VSIG1               | V-set and immunoglobulin domain containing 1                     |
| 8134263 | 6.08E-08 | 1.19E-09 | 6.55 | 11.697614 | 1.53 | COL1A2///<br>COL1A2 | collagen type I alpha 2 chain///collagen type I<br>alpha 2 chain |
| 8124707 | 6.10E-08 | 1.20E-09 | 6.55 | 11.692335 | 1.13 | TRIM31              | tripartite motif containing 31                                   |
| 7902553 | 6.39E-08 | 1.27E-09 | 6.54 | 11.633895 | 1.09 | IFI44               | interferon induced protein 44                                    |
| 8046124 | 7.08E-08 | 1.43E-09 | 6.51 | 11.522859 | 1.25 | DHRS9               | dehydrogenase/reductase 9                                        |
| 7934906 | 8.15E-08 | 1.69E-09 | 6.48 | 11.358177 | 1.23 | ACTA2               | actin, alpha 2, smooth muscle, aorta                             |
| 8066822 | 9.93E-08 | 2.14E-09 | 6.43 | 11.129558 | 1.09 | SULF2               | sulfatase 2                                                      |
| 8114920 | 1.02E-07 | 2.24E-09 | 6.42 | 11.088701 | 1.1  | DPYSL3              | dihydropyrimidinase like 3                                       |
| 8060940 | 1.09E-07 | 2.46E-09 | 6.41 | 10.997131 | 1.16 | LAMP5               | lysosomal associated membrane protein family<br>member 5         |

|         |          |          |      |           |      |         |                                                   |
|---------|----------|----------|------|-----------|------|---------|---------------------------------------------------|
| 7945169 | 1.16E-07 | 2.66E-09 | 6.39 | 10.922201 | 1.12 | TMEM45B | transmembrane protein 45B                         |
| 8077366 | 1.19E-07 | 2.74E-09 | 6.38 | 10.892254 | 1    | LRRN1   | leucine rich repeat neuronal 1                    |
| 8016646 | 1.19E-07 | 2.75E-09 | 6.38 | 10.89135  | 1.53 | COL1A1  | collagen type I alpha 1 chain                     |
| 7984001 | 1.19E-07 | 2.77E-09 | 6.38 | 10.884419 | 1.34 | GCNT3   | glucosaminyl (N-acetyl) transferase 3, mucin type |
| 8125149 | 1.24E-07 | 2.91E-09 | 6.37 | 10.836133 | 1.08 | SLC44A4 | solute carrier family 44 member 4                 |
| 8178653 | 1.24E-07 | 2.91E-09 | 6.37 | 10.836133 | 1.08 | SLC44A4 | solute carrier family 44 member 4                 |
| 8179861 | 1.24E-07 | 2.91E-09 | 6.37 | 10.836133 | 1.08 | SLC44A4 | solute carrier family 44 member 4                 |
| 8118061 | 1.50E-07 | 3.67E-09 | 6.33 | 10.612372 | 1.81 | DPCR1   | diffuse panbronchiolitis critical region 1        |
| 8035517 | 1.70E-07 | 4.25E-09 | 6.3  | 10.470639 | 1.2  | COMP    | cartilage oligomeric matrix protein               |
| 7929466 | 1.70E-07 | 4.28E-09 | 6.29 | 10.463604 | 1.26 | CYP2C18 | cytochrome P450 family 2 subfamily C member 18    |
| 8070579 | 2.27E-07 | 6.08E-09 | 6.22 | 10.125091 | 1.51 | TFF1    | trefoil factor 1                                  |
| 8108217 | 2.31E-07 | 6.23E-09 | 6.22 | 10.101358 | 1.02 | TGFBI   | transforming growth factor beta induced           |
| 7979658 | 3.41E-07 | 1.00E-08 | 6.12 | 9.644416  | 1.07 | GPX2    | glutathione peroxidase 2                          |
| 8179221 | 3.45E-07 | 1.02E-08 | 6.12 | 9.629002  | 1.75 | DPCR1   | diffuse panbronchiolitis critical region 1        |

|         |          |          |      |          |      |                                     |                                                       |
|---------|----------|----------|------|----------|------|-------------------------------------|-------------------------------------------------------|
| 7963410 | 3.87E-07 | 1.18E-08 | 6.09 | 9.48463  | 1.34 | KRT6C///K<br>RT6B///KR<br>T6A///KRT | keratin 6C///keratin 6B///keratin 6A///keratin 5<br>5 |
| 7957023 | 3.87E-07 | 1.19E-08 | 6.09 | 9.481407 | 1.05 | LYZ                                 | lysozyme                                              |
| 8046922 | 4.20E-07 | 1.33E-08 | 6.06 | 9.372749 | 1.42 | COL3A1                              | collagen type III alpha 1 chain                       |
| 8059905 | 4.22E-07 | 1.33E-08 | 6.06 | 9.368106 | 1.27 | COL6A3                              | collagen type VI alpha 3 chain                        |
| 8090180 | 4.82E-07 | 1.56E-08 | 6.03 | 9.217066 | 1.51 | MUC13                               | mucin 13, cell surface associated                     |
| 8162394 | 4.90E-07 | 1.59E-08 | 6.03 | 9.199761 | 1.16 | ASPN                                | asporin                                               |
| 8168749 | 5.54E-07 | 1.87E-08 | 5.99 | 9.045678 | 1.07 | SRPX2                               | sushi repeat containing protein, X-linked 2           |
| 7896722 | 6.87E-07 | 2.39E-08 | 5.94 | 8.808424 | 1.24 |                                     |                                                       |
| 8140534 | 7.29E-07 | 2.57E-08 | 5.93 | 8.738226 | 1.26 | SEMA3C                              | semaphorin 3C                                         |
| 7934898 | 7.78E-07 | 2.78E-08 | 5.91 | 8.662651 | 1.14 | ANKRD22                             | ankyrin repeat domain 22                              |
| 7919815 | 8.70E-07 | 3.20E-08 | 5.88 | 8.526324 | 1.19 | CTSK                                | cathepsin K                                           |
| 8115327 | 1.41E-06 | 5.79E-08 | 5.76 | 7.95792  | 1.03 | SPARC                               | secreted protein acidic and cysteine rich             |
| 8091385 | 2.14E-06 | 9.59E-08 | 5.65 | 7.473538 | 1.67 | CP                                  | ceruloplasmin (ferroxidase)                           |
| 8148220 | 2.15E-06 | 9.66E-08 | 5.65 | 7.466368 | 1.07 | FER1L6                              | fer-1 like family member 6                            |
| 8135048 | 2.57E-06 | 1.21E-07 | 5.6  | 7.252905 | 1.3  | MUC17                               | mucin 17, cell surface associated                     |

|         |          |          |       |           |       |          |                                             |
|---------|----------|----------|-------|-----------|-------|----------|---------------------------------------------|
| 7964927 | 2.69E-06 | 1.28E-07 | 5.59  | 7.192772  | 1.39  | TSPAN8   | tetraspanin 8                               |
| 7988467 | 3.92E-06 | 2.02E-07 | 5.49  | 6.761423  | 1.19  | FBN1     | fibrillin 1                                 |
| 8158167 | 4.54E-06 | 2.41E-07 | 5.45  | 6.592062  | 1.12  | LCN2     | lipocalin 2                                 |
| 7948444 | 4.71E-06 | 2.51E-07 | 5.44  | 6.549529  | 1.59  | TCN1     | transcobalamin 1                            |
| 7961142 | 6.66E-06 | 3.79E-07 | 5.35  | 6.156738  | 1.24  | OLR1     | oxidized low density lipoprotein receptor 1 |
| 8103769 | 1.08E-05 | 6.90E-07 | 5.22  | 5.584379  | 1.06  | HPGD     | hydroxyprostaglandin dehydrogenase 15-(NAD) |
| 8045688 | 1.73E-05 | 1.22E-06 | 5.09  | 5.037804  | 1.15  | TNFAIP6  | TNF alpha induced protein 6                 |
| 8020762 | 2.53E-05 | 1.97E-06 | 4.98  | 4.58267   | 1.04  | DSG3     | desmoglein 3                                |
| 7963421 | 3.39E-05 | 2.82E-06 | 4.9   | 4.241976  | 1.02  | KRT6A    | keratin 6A                                  |
| 7951271 | 9.21E-05 | 9.75E-06 | 4.6   | 3.062391  | 1.19  | MMP1     | matrix metalloproteinase 1                  |
| 8023696 | 1.03E-04 | 1.11E-05 | 4.57  | 2.936007  | 1.1   | SERPINB3 | serpin family B member 3                    |
| 7960919 | 1.13E-04 | 1.26E-05 | 4.54  | 2.816153  | 1.06  | MFAP5    | microfibrillar associated protein 5         |
| 8095744 | 1.57E-04 | 1.88E-05 | 4.44  | 2.440636  | 1.08  | AREG     | amphiregulin                                |
| 7951217 | 2.63E-04 | 3.58E-05 | 4.28  | 1.832066  | 1.2   | MMP7     | matrix metalloproteinase 7                  |
| 7988350 | 1.15E-03 | 2.29E-04 | 3.79  | 0.091088  | 1.03  | DUOX2    | dual oxidase 2                              |
| 8144786 | 3.87E-11 | 1.34E-13 | -8.27 | 20.497087 | -1.39 | SLC7A2   | solute carrier family 7 member 2            |
| 8047300 | 1.04E-10 | 4.56E-13 | -8.04 | 19.307694 | -1.77 | AOX1     | aldehyde oxidase 1                          |
| 8057056 | 3.18E-10 | 1.89E-12 | -7.78 | 17.9292   | -1.2  | TTN      | titin                                       |
| 7908917 | 3.23E-10 | 1.93E-12 | -7.78 | 17.909334 | -1.12 | BTG2     | BTG anti-proliferation factor 2             |



|         |          |          |       |           |       |                     |                                             |
|---------|----------|----------|-------|-----------|-------|---------------------|---------------------------------------------|
| 8145532 | 5.36E-10 | 3.54E-12 | -7.66 | 17.321477 | -1.05 | EPHX2               | epoxide hydrolase 2                         |
| 7925342 | 1.37E-09 | 1.18E-11 | -7.44 | 16.158242 | -1.62 | ERO1B               | endoplasmic reticulum oxidoreductase 1 beta |
| 7961580 | 1.48E-09 | 1.30E-11 | -7.42 | 16.062702 | -1.12 | LMO3                | LIM domain only 3                           |
| 8141094 | 4.65E-09 | 5.08E-11 | -7.16 | 14.744465 | -1.52 | PDK4                | pyruvate dehydrogenase kinase 4             |
| 8058591 | 1.42E-08 | 2.01E-10 | -6.9  | 13.413989 | -1.45 | ACADL               | acyl-CoA dehydrogenase, long chain          |
| 7954377 | 1.92E-08 | 2.90E-10 | -6.83 | 13.061002 | -2.31 | IAPP                | islet amyloid polypeptide                   |
| 7934936 | 2.39E-08 | 3.80E-10 | -6.77 | 12.798368 | -1.52 | SLC16A12            | solute carrier family 16 member 12          |
| 8002283 | 2.59E-08 | 4.20E-10 | -6.76 | 12.702837 | -1.73 | TMED6               | transmembrane p24 trafficking protein 6     |
| 8095628 | 3.52E-08 | 6.14E-10 | -6.68 | 12.336439 | -2.51 | ALB                 | albumin                                     |
| 8163839 | 3.62E-08 | 6.42E-10 | -6.67 | 12.293608 | -1.13 | C5                  | complement component 5                      |
| 8174201 | 4.11E-08 | 7.50E-10 | -6.64 | 12.143161 | -1.07 | BEX1                | brain expressed X-linked 1                  |
| 8110990 | 4.34E-08 | 8.07E-10 | -6.63 | 12.072116 | -1.19 | CTNND2              | catenin delta 2                             |
| 8142270 | 5.75E-08 | 1.12E-09 | -6.56 | 11.758801 | -1.33 | NRCAM               | neuronal cell adhesion molecule             |
| 7991335 | 6.95E-08 | 1.40E-09 | -6.52 | 11.543858 | -1.78 | ANPEP               | alanyl aminopeptidase, membrane             |
| 8060126 | 8.15E-08 | 1.69E-09 | -6.48 | 11.359367 | -1.13 | AQP12B///<br>AQP12A | aquaporin 12B///aquaporin 12A               |
| 8049729 | 1.01E-07 | 2.21E-09 | -6.43 | 11.101649 | -1.11 | AQP12B///<br>AQP12A | aquaporin 12B///aquaporin 12A               |

|         |          |          |       |           |       |                    |                                                                                         |
|---------|----------|----------|-------|-----------|-------|--------------------|-----------------------------------------------------------------------------------------|
| 7948249 | 1.12E-07 | 2.57E-09 | -6.4  | 10.956249 | -1.12 | SLC43A1            | solute carrier family 43 member 1                                                       |
| 7908597 | 1.37E-07 | 3.29E-09 | -6.35 | 10.715848 | -1.85 | NR5A2              | nuclear receptor subfamily 5 group A member 2                                           |
| 8167027 | 1.49E-07 | 3.63E-09 | -6.33 | 10.621448 | -1.03 | RGN                | regucalcin                                                                              |
| 8052940 | 1.61E-07 | 3.99E-09 | -6.31 | 10.532172 | -1.54 | PAIP2B///<br>VPS36 | poly(A) binding protein interacting protein<br>2B///vacuolar protein sorting 36 homolog |
| 8127065 | 2.14E-07 | 5.66E-09 | -6.24 | 10.19488  | -1.38 | GSTA2              | glutathione S-transferase alpha 2                                                       |
| 7951910 | 2.55E-07 | 7.03E-09 | -6.19 | 9.985271  | -1.14 | BACE1              | beta-secretase 1                                                                        |
| 7908610 | 2.66E-07 | 7.39E-09 | -6.18 | 9.937381  | -1.96 |                    |                                                                                         |
| 7903592 | 2.69E-07 | 7.50E-09 | -6.18 | 9.923568  | -1.78 | KIAA1324           | KIAA1324                                                                                |
| 7989473 | 2.79E-07 | 7.82E-09 | -6.17 | 9.882686  | -1.12 | C2CD4B             | C2 calcium dependent domain containing 4B                                               |
| 8098671 | 2.81E-07 | 7.89E-09 | -6.17 | 9.874503  | -1.67 | F11                | coagulation factor XI                                                                   |
| 8044700 | 3.10E-07 | 8.95E-09 | -6.14 | 9.752926  | -1.1  | DPP10              | dipeptidyl peptidase like 10                                                            |
| 8056327 | 3.80E-07 | 1.15E-08 | -6.09 | 9.508555  | -1.04 | GRB14              | growth factor receptor bound protein 14                                                 |
| 7944793 | 4.82E-07 | 1.56E-08 | -6.03 | 9.217983  | -1.31 | OR8D4              | olfactory receptor family 8 subfamily D member<br>4                                     |
| 8089402 | 5.17E-07 | 1.70E-08 | -6.01 | 9.136638  | -1.17 | GUCA1C             | guanylate cyclase activator 1C                                                          |

|         |          |          |       |          |       |          |                                                                             |
|---------|----------|----------|-------|----------|-------|----------|-----------------------------------------------------------------------------|
| 7957221 | 5.32E-07 | 1.77E-08 | -6    | 9.097515 | -1.61 | TRHDE    | thyrotropin releasing hormone degrading enzyme                              |
| 7938687 | 6.18E-07 | 2.11E-08 | -5.97 | 8.926266 | -1.02 | NUCB2    | nucleobindin 2                                                              |
| 7991815 | 6.56E-07 | 2.27E-08 | -5.95 | 8.858128 | -1.94 | PDIA2    | protein disulfide isomerase family A member 2                               |
| 8015735 | 7.22E-07 | 2.53E-08 | -5.93 | 8.754014 | -1.34 |          |                                                                             |
| 7956229 | 7.54E-07 | 2.67E-08 | -5.92 | 8.699638 | -1.29 | SLC39A5  | solute carrier family 39 member 5                                           |
| 8062948 | 7.75E-07 | 2.77E-08 | -5.91 | 8.666585 | -1.52 | RBPJL    | recombination signal binding protein for immunoglobulin kappa J region like |
| 8169389 | 8.25E-07 | 2.99E-08 | -5.9  | 8.592624 | -1.19 | PAK3     | p21 (RAC1) activated kinase 3                                               |
| 8176193 | 8.43E-07 | 3.08E-08 | -5.89 | 8.56514  | -1.07 | F8       | coagulation factor VIII                                                     |
| 8091910 | 8.58E-07 | 3.15E-08 | -5.88 | 8.542364 | -2.3  | SERPINI2 | serpin family I member 2                                                    |
| 7991034 | 9.47E-07 | 3.55E-08 | -5.86 | 8.428693 | -1.15 | HOMER2   | homer scaffolding protein 2                                                 |
| 8001531 | 1.03E-06 | 3.95E-08 | -5.84 | 8.324385 | -1.22 | MT1G     | metallothionein 1G                                                          |
| 8074201 | 1.04E-06 | 3.98E-08 | -5.84 | 8.318858 | -1.2  | ANKRD62  | ankyrin repeat domain 62                                                    |
| 7994252 | 1.15E-06 | 4.52E-08 | -5.81 | 8.194617 | -1.46 | AQP8     | aquaporin 8                                                                 |
| 7923837 | 1.25E-06 | 5.02E-08 | -5.79 | 8.095404 | -1.35 | PM20D1   | peptidase M20 domain containing 1                                           |
| 8052372 | 1.30E-06 | 5.28E-08 | -5.78 | 8.045449 | -1.3  | MIR217   | microRNA 217                                                                |

|         |          |          |       |          |       |          |                                     |
|---------|----------|----------|-------|----------|-------|----------|-------------------------------------|
| 8158987 | 1.52E-06 | 6.37E-08 | -5.74 | 7.866466 | -1.45 | CELP     | carboxyl ester lipase pseudogene    |
| 8002121 | 1.66E-06 | 7.07E-08 | -5.71 | 7.766205 | -2.06 | CTRL     | chymotrypsin like                   |
| 8149521 | 1.78E-06 | 7.69E-08 | -5.7  | 7.685459 | -1.67 | FGL1     | fibrinogen like 1                   |
| 7961524 | 1.97E-06 | 8.66E-08 | -5.67 | 7.570978 | -2.42 | ERP27    | endoplasmic reticulum protein 27    |
| 7937079 | 2.19E-06 | 9.88E-08 | -5.64 | 7.444541 | -1.13 | BNIP3    | BCL2 interacting protein 3          |
| 8038633 | 2.42E-06 | 1.13E-07 | -5.61 | 7.319167 | -1.79 | KLK1     | kallikrein 1                        |
| 7990555 | 2.74E-06 | 1.31E-07 | -5.58 | 7.171457 | -1.53 | NRG4     | neuregulin 4                        |
| 7930790 | 3.06E-06 | 1.51E-07 | -5.55 | 7.037571 | -2.84 | PNLIPRP1 | pancreatic lipase related protein 1 |
| 8096845 | 3.49E-06 | 1.76E-07 | -5.52 | 6.890988 | -1.82 | EGF      | epidermal growth factor             |
| 7949320 | 3.82E-06 | 1.96E-07 | -5.5  | 6.790114 | -1.05 | GPHA2    | glycoprotein hormone alpha 2        |
| 7910915 | 4.13E-06 | 2.14E-07 | -5.48 | 6.702274 | -1.02 | CHRM3    | cholinergic receptor muscarinic 3   |
| 8141016 | 5.08E-06 | 2.75E-07 | -5.42 | 6.464718 | -1.11 | TFPI2    | tissue factor pathway inhibitor 2   |
| 8166202 | 5.11E-06 | 2.77E-07 | -5.42 | 6.456185 | -1.2  | GRPR     | gastrin releasing peptide receptor  |
| 8111864 | 5.26E-06 | 2.87E-07 | -5.41 | 6.423687 | -1.18 | C6       | complement component 6              |
| 7898723 | 5.44E-06 | 2.99E-07 | -5.4  | 6.383139 | -1.23 |          |                                     |
| 7898732 | 6.17E-06 | 3.47E-07 | -5.37 | 6.242125 | -2.34 |          |                                     |
| 7898167 | 8.46E-06 | 5.05E-07 | -5.29 | 5.882723 | -2.57 | CTRC     | chymotrypsin C                      |

|         |          |          |       |          |       |                                                                  |
|---------|----------|----------|-------|----------|-------|------------------------------------------------------------------|
| 7895058 | 8.98E-06 | 5.46E-07 | -5.27 | 5.807845 | -1.18 |                                                                  |
| 8046116 | 1.01E-05 | 6.36E-07 | -5.24 | 5.66178  | -1.09 | G6PC2 glucose-6-phosphatase catalytic subunit 2                  |
| 8119620 | 1.17E-05 | 7.59E-07 | -5.2  | 5.492879 | -1.28 | GNMT glycine N-methyltransferase                                 |
| 8124196 | 1.32E-05 | 8.77E-07 | -5.16 | 5.354794 | -1.18 | DCDC2 doublecortin domain containing 2                           |
| 8036699 | 1.43E-05 | 9.75E-07 | -5.14 | 5.253522 | -1.25 | SYCN syncollin                                                   |
| 7999920 | 1.53E-05 | 1.06E-06 | -5.12 | 5.176254 | -2.6  | GP2 glycoprotein 2                                               |
| 7930804 | 1.59E-05 | 1.10E-06 | -5.11 | 5.136382 | -2.6  | PNLIPRP2 pancreatic lipase related protein 2 (gene/pseudogene)   |
| 7898184 | 1.77E-05 | 1.26E-06 | -5.08 | 5.006161 | -2.09 | CELA2B chymotrypsin like elastase family member 2B               |
| 7898734 | 1.81E-05 | 1.30E-06 | -5.07 | 4.980186 | -1.58 |                                                                  |
| 7936798 | 2.11E-05 | 1.58E-06 | -5.03 | 4.793894 | -2.52 | FAM24B-CUZD1 readthrough///CUB and zona pellucida like domains 1 |
| 7980906 | 2.16E-05 | 1.62E-06 | -5.02 | 4.771456 | -1.31 |                                                                  |
| 8169291 | 2.32E-05 | 1.78E-06 | -5    | 4.681931 | -1.5  |                                                                  |
| 8092682 | 2.49E-05 | 1.94E-06 | -4.98 | 4.59932  | -1.03 | SST somatostatin                                                 |
| 7898176 | 2.55E-05 | 2.00E-06 | -4.98 | 4.568545 | -2.14 | CELA2A chymotrypsin like elastase family member 2A               |
| 8117304 | 2.58E-05 | 2.03E-06 | -4.97 | 4.554524 | -1.15 | SLC17A4 solute carrier family 17 member 4                        |

|         |          |          |       |          |       |                   |                                                       |
|---------|----------|----------|-------|----------|-------|-------------------|-------------------------------------------------------|
| 7898713 | 2.60E-05 | 2.05E-06 | -4.97 | 4.546923 | -1.96 | CELA3B            | chymotrypsin like elastase family member 3B           |
| 8125936 | 2.66E-05 | 2.10E-06 | -4.96 | 4.52213  | -2.35 | CLPS              | colipase                                              |
| 7967034 | 2.75E-05 | 2.19E-06 | -4.96 | 4.482931 | -2.22 | PLA2G1B           | phospholipase A2 group IB                             |
| 7898721 | 2.76E-05 | 2.20E-06 | -4.95 | 4.478404 | -1.97 |                   |                                                       |
| 8117288 | 2.82E-05 | 2.25E-06 | -4.95 | 4.455616 | -1.28 | SCGN              | secretagoin, EF-hand calcium binding protein          |
| 8009493 | 3.06E-05 | 2.49E-06 | -4.93 | 4.361013 | -1.35 | KCNJ16            | potassium voltage-gated channel subfamily J member 16 |
| 8158976 | 3.11E-05 | 2.54E-06 | -4.92 | 4.338912 | -2.46 | CEL               | carboxyl ester lipase                                 |
| 8136187 | 4.51E-05 | 4.02E-06 | -4.81 | 3.90361  | -2.5  | CPA2              | carboxypeptidase A2                                   |
| 8154848 | 4.81E-05 | 4.34E-06 | -4.8  | 3.831727 | -1.25 | PRSS3             | protease, serine 3                                    |
| 7913768 | 4.91E-05 | 4.46E-06 | -4.79 | 3.805736 | -1.04 | IL22RA1           | interleukin 22 receptor subunit alpha 1               |
| 7898725 | 5.30E-05 | 4.89E-06 | -4.77 | 3.717826 | -2.12 | CELA3A            | chymotrypsin like elastase family member 3A           |
| 8101881 | 8.35E-05 | 8.64E-06 | -4.63 | 3.176751 | -1.11 | ADH1B             | alcohol dehydrogenase 1B (class I), beta polypeptide  |
| 7988987 | 9.40E-05 | 1.00E-05 | -4.6  | 3.037957 | -1.02 | ONECUT1           | one cut homeobox 1                                    |
| 8002845 | 1.12E-04 | 1.24E-05 | -4.54 | 2.831995 | -2.01 | CTRB2///C<br>TRB1 | chymotrypsinogen B2///chymotrypsinogen B1             |
| 7988414 | 1.50E-04 | 1.78E-05 | -4.46 | 2.495168 | -1.54 | GATM              | glycine amidinotransferase                            |

|         |          |          |       |          |       |                                                       |                                                                                                                                                                       |
|---------|----------|----------|-------|----------|-------|-------------------------------------------------------|-----------------------------------------------------------------------------------------------------------------------------------------------------------------------|
| 8068684 | 1.62E-04 | 1.96E-05 | -4.43 | 2.400699 | -1.03 | FAM3B                                                 | family with sequence similarity 3 member B                                                                                                                            |
| 7997264 | 1.80E-04 | 2.24E-05 | -4.4  | 2.276569 | -1.84 | CTRB2///C<br>TRB1                                     | chymotrypsinogen B2///chymotrypsinogen B1                                                                                                                             |
| 7930777 | 2.01E-04 | 2.57E-05 | -4.36 | 2.146352 | -2.03 | PNLIP///C<br>OL1A2                                    | pancreatic lipase///collagen type I alpha 2 chain                                                                                                                     |
| 7918134 | 2.30E-04 | 3.03E-05 | -4.32 | 1.990058 | -1.19 | AMY2B///<br>AMY2A///<br>AMY1C///<br>AMY1B///<br>AMY1A | amylase, alpha 2B (pancreatic)///amylase, alpha<br>2A (pancreatic)///amylase, alpha 1C<br>(salivary)///amylase, alpha 1B<br>(salivary)///amylase, alpha 1A (salivary) |
| 7903425 | 2.30E-04 | 3.03E-05 | -4.32 | 1.99005  | -1.19 | AMY2B///<br>AMY2A///<br>AMY1C///<br>AMY1B///<br>AMY1A | amylase, alpha 2B (pancreatic)///amylase, alpha<br>2A (pancreatic)///amylase, alpha 1C<br>(salivary)///amylase, alpha 1B<br>(salivary)///amylase, alpha 1A (salivary) |

|         |          |          |       |          |       |                                                       |                                                                                                                                                                       |
|---------|----------|----------|-------|----------|-------|-------------------------------------------------------|-----------------------------------------------------------------------------------------------------------------------------------------------------------------------|
| 7903440 | 2.30E-04 | 3.03E-05 | -4.32 | 1.99005  | -1.19 | AMY2B///<br>AMY2A///<br>AMY1C///<br>AMY1B///<br>AMY1A | amylase, alpha 2B (pancreatic)///amylase, alpha<br>2A (pancreatic)///amylase, alpha 1C<br>(salivary)///amylase, alpha 1B<br>(salivary)///amylase, alpha 1A (salivary) |
| 8136235 | 2.36E-04 | 3.14E-05 | -4.31 | 1.957935 | -1.9  | CPA1                                                  | carboxypeptidase A1                                                                                                                                                   |
| 8136801 | 2.42E-04 | 3.24E-05 | -4.3  | 1.925764 | -1.5  | PRSS3P2                                               | protease, serine 3 pseudogene 2                                                                                                                                       |
| 8095585 | 3.37E-04 | 4.87E-05 | -4.2  | 1.542518 | -1.39 | SLC4A4                                                | solute carrier family 4 member 4                                                                                                                                      |
| 7903414 | 3.54E-04 | 5.17E-05 | -4.19 | 1.48591  | -1.49 | AMY2B///<br>AMY2A///<br>AMY1C///<br>AMY1B///<br>AMY1A | amylase, alpha 2B (pancreatic)///amylase, alpha<br>2A (pancreatic)///amylase, alpha 1C<br>(salivary)///amylase, alpha 1B<br>(salivary)///amylase, alpha 1A (salivary) |
| 8053337 | 3.98E-04 | 6.00E-05 | -4.15 | 1.34618  | -1.98 | REG1CP                                                | regenerating family member 1 gamma,<br>pseudogene                                                                                                                     |



|         |          |          |       |           |       |                                               |                                                                                                             |
|---------|----------|----------|-------|-----------|-------|-----------------------------------------------|-------------------------------------------------------------------------------------------------------------|
| 8136790 | 5.27E-04 | 8.50E-05 | -4.06 | 1.019337  | -1.28 | PRSS2///P<br>RSS3P2///P<br>RSS2               | protease, serine 2///protease, serine 3 pseudogene 2///protease, serine 2                                   |
| 8136795 | 5.38E-04 | 8.74E-05 | -4.05 | 0.993629  | -1.64 | PRSS1                                         | protease, serine 1                                                                                          |
| 8083246 | 5.61E-04 | 9.24E-05 | -4.03 | 0.940974  | -1.71 | CPB1                                          | carboxypeptidase B1                                                                                         |
| 8053330 | 7.83E-04 | 1.41E-04 | -3.92 | 0.546139  | -1.96 | REG1B                                         | regenerating family member 1 beta                                                                           |
| 8042978 | 8.21E-04 | 1.49E-04 | -3.91 | 0.492128  | -1.27 | REG3G                                         | regenerating family member 3 gamma                                                                          |
| 8151532 | 8.56E-04 | 1.57E-04 | -3.89 | 0.443075  | -1.25 | FABP4                                         | fatty acid binding protein 4                                                                                |
| 8042986 | 9.91E-04 | 1.89E-04 | -3.84 | 0.269753  | -1.58 | REG1A                                         | regenerating family member 1 alpha                                                                          |
| 8126954 | 1.84E-03 | 4.13E-04 | -3.62 | -0.456741 | -1.03 | PKHD1                                         | polycystic kidney and hepatic disease 1 (autosomal recessive)                                               |
| 8053341 | 3.03E-03 | 7.73E-04 | -3.44 | -1.036173 | -1.49 | REG3A                                         | regenerating family member 3 alpha                                                                          |
| 8136807 | 3.04E-03 | 7.76E-04 | -3.44 | -1.039822 | -1.06 | PRSS3P2///<br>PRSS2///P<br>RSS3P2///P<br>RSS2 | protease, serine 3 pseudogene 2///protease, serine 2///protease, serine 3 pseudogene 2///protease, serine 2 |
| 8114964 | 4.71E-03 | 1.33E-03 | -3.28 | -1.534464 | -1.3  | SPINK1                                        | serine peptidase inhibitor, Kazal type 1                                                                    |

|         |          |          |       |           |       |      |                                                     |
|---------|----------|----------|-------|-----------|-------|------|-----------------------------------------------------|
| 8135661 | 5.31E-03 | 1.55E-03 | -3.23 | -1.672537 | -1.28 | CFTR | cystic fibrosis transmembrane conductance regulator |
| 8020795 | 2.71E-02 | 1.18E-02 | -2.55 | -3.505797 | -1.04 | TTR  | transthyretin                                       |

---

**GSE71989**

---

| ID           | adj.P.Val | P.Value  | t          | B         | logFC     | Gene.symbol | Gene.title                                   |
|--------------|-----------|----------|------------|-----------|-----------|-------------|----------------------------------------------|
| 218248_at    | 5.05E-09  | 9.24E-14 | 15.9263679 | 21.101948 | 1.9487238 | FAM111A     | family with sequence similarity 111 member A |
| 1558048_x_at | 1.98E-08  | 7.24E-13 | 14.4130138 | 19.243497 | 3.727645  |             |                                              |
| 208718_at    | 1.77E-07  | 1.05E-11 | 12.6255273 | 16.774251 | 1.3639446 | DDX17       | DEAD-box helicase 17                         |
| 220917_s_at  | 1.77E-07  | 1.92E-11 | 12.2456161 | 16.206772 | 1.6357048 | WDR19       | WD repeat domain 19                          |
| 239577_at    | 1.77E-07  | 2.16E-11 | 12.1716833 | 16.094482 | 2.2056275 |             |                                              |

|             |          |          |            |           |           |        |                                           |
|-------------|----------|----------|------------|-----------|-----------|--------|-------------------------------------------|
| 225505_s_at | 1.77E-07 | 2.27E-11 | 12.1417796 | 16.04889  | 1.203835  | PCED1A | PC-esterase domain containing 1A          |
| 208956_x_at | 2.55E-07 | 4.09E-11 | 11.7821953 | 15.49269  | 1.4939541 | DUT    | deoxyuridine triphosphatase               |
| 227070_at   | 2.55E-07 | 4.20E-11 | 11.7650734 | 15.465835 | 3.4444686 | GLT8D2 | glycosyltransferase 8 domain containing 2 |
| 201744_s_at | 3.24E-07 | 6.52E-11 | 11.5024448 | 15.049611 | 3.3916309 | LUM    | lumican                                   |
| 214241_at   | 3.29E-07 | 7.22E-11 | 11.4424381 | 14.953366 | 1.4113561 | NDUFB8 | NADH:ubiquinone oxidoreductase subunit B8 |

|             |          |          |            |           |                                         |                                                                                  |
|-------------|----------|----------|------------|-----------|-----------------------------------------|----------------------------------------------------------------------------------|
| 212359_s_at | 3.41E-07 | 8.11E-11 | 11.3736743 | 14.842546 | 1.047027ZSWIM8                          | zinc finger SWIM-type containing 8                                               |
| 205249_at   | 3.62E-07 | 9.94E-11 | 11.254864  | 14.649729 | 3.2356827EGR2                           | early growth response 2                                                          |
| 225017_at   | 3.79E-07 | 1.11E-10 | 11.1908305 | 14.5451   | 2.2986725CCDC14                         | coiled-coil domain containing 14                                                 |
| 211068_x_at | 4.01E-07 | 1.25E-10 | 11.1234084 | 14.434394 | 1.1143021<br>LOC101930591<br>1///FAM21C | uncharacterized<br>LOC101930591///family with<br>sequence similarity 21 member C |

|              |          |          |            |           |                  |                                                          |
|--------------|----------|----------|------------|-----------|------------------|----------------------------------------------------------|
| 219833_s_at  | 4.33E-07 | 1.42E-10 | 11.0464063 | 14.307275 | 2.2409971 EFHC1  | EF-hand domain containing 1                              |
| 221264_s_at  | 4.83E-07 | 1.79E-10 | 10.9155559 | 14.08958  | 1.405658 TARDBP  | TAR DNA binding protein                                  |
| 232458_at    | 4.83E-07 | 1.85E-10 | 10.8957729 | 14.056481 | 4.4936971 COL3A1 | collagen type III alpha 1 chain                          |
| 225022_at    | 4.83E-07 | 1.94E-10 | 10.8683269 | 14.010482 | 1.4092152 GOPC   | golgi associated PDZ and<br>coiled-coil motif containing |
| 1555938_x_at | 5.41E-07 | 2.35E-10 | 10.7611418 | 13.829934 | 2.9063111 VIM    | vimentin                                                 |

|              |          |          |            |           |           |                                      |                                                             |
|--------------|----------|----------|------------|-----------|-----------|--------------------------------------|-------------------------------------------------------------|
| 209110_s_at  | 5.41E-07 | 2.67E-10 | 10.688843  | 13.707332 | 1.2844568 | RGL2                                 | ral guanine nucleotide dissociation stimulator like 2       |
| 1555847_a_at | 5.41E-07 | 2.76E-10 | 10.6692769 | 13.674039 | 2.627478  | MIR24-2///MI<br>R23A///LOC2<br>84454 | microRNA 24-2///microRNA<br>23a///uncharacterized LOC284454 |
| 205081_at    | 5.41E-07 | 2.78E-10 | 10.6656123 | 13.667798 | 4.323558  | CRIP1                                | cysteine rich protein 1                                     |

|             |          |          |            |           |                          |                                               |
|-------------|----------|----------|------------|-----------|--------------------------|-----------------------------------------------|
| 221973_at   | 5.41E-07 | 2.85E-10 | 10.652253  | 13.645032 | 1.95502463//LOC100506076 | LOC100506123//uncharacterized<br>LOC100506076 |
| 235094_at   | 5.41E-07 | 3.32E-10 | 10.5670913 | 13.49937  | 2.9863918                |                                               |
| 225496_s_at | 5.41E-07 | 3.33E-10 | 10.5640158 | 13.494092 | 3.1780438                | SYTL2<br>synaptotagmin like 2                 |
| 201289_at   | 5.41E-07 | 3.43E-10 | 10.5488114 | 13.467983 | 3.5708888                | CYR61<br>cysteine rich angiogenic inducer 61  |
| 227025_at   | 5.41E-07 | 3.50E-10 | 10.5364024 | 13.446652 | 1.0978463                | PPHLN1<br>periphilin 1                        |
| 208922_s_at | 5.41E-07 | 3.62E-10 | 10.5177396 | 13.414533 | 1.178697                 | NXF1<br>nuclear RNA export factor 1           |

|             |          |          |            |           |           |        |                                                       |
|-------------|----------|----------|------------|-----------|-----------|--------|-------------------------------------------------------|
| 220079_s_at | 5.41E-07 | 3.75E-10 | 10.4980607 | 13.380618 | 1.4066898 | USP48  | ubiquitin specific peptidase 48                       |
| 242558_at   | 5.41E-07 | 3.75E-10 | 10.4979299 | 13.380392 | 2.1821639 |        |                                                       |
| 219087_at   | 5.41E-07 | 3.87E-10 | 10.4817047 | 13.352391 | 3.8863545 | ASPN   | asporin                                               |
| 38241_at    | 5.41E-07 | 4.05E-10 | 10.4560219 | 13.307999 | 2.7723296 | BTN3A3 | butyrophilin subfamily 3 member A3                    |
| 209101_at   | 5.41E-07 | 4.25E-10 | 10.4290603 | 13.261304 | 3.7809045 | CTGF   | connective tissue growth factor                       |
| 209268_at   | 5.41E-07 | 4.45E-10 | 10.4037272 | 13.217345 | 1.5186529 | VPS45  | vacuolar protein sorting 45 homolog                   |
| 209189_at   | 5.41E-07 | 4.53E-10 | 10.3943539 | 13.201059 | 3.5152686 | FOS    | Fos proto-oncogene, AP-1 transcription factor subunit |



|             |          |          |            |           |           |       |                                                                            |
|-------------|----------|----------|------------|-----------|-----------|-------|----------------------------------------------------------------------------|
| 226334_s_at | 5.41E-07 | 4.53E-10 | 10.3933142 | 13.199251 | 2.0158427 | AHSA2 | AHA1, activator of heat shock<br>90kDa protein ATPase homolog 2<br>(yeast) |
| 242471_at   | 5.41E-07 | 4.75E-10 | 10.3677039 | 13.154692 | 2.3306711 |       |                                                                            |
| 212621_at   | 5.41E-07 | 4.91E-10 | 10.3498485 | 13.123574 | 1.7204579 | NEMP1 | nuclear envelope integral<br>membrane protein 1                            |

|             |          |          |            |           |           |                         |                                                                                           |
|-------------|----------|----------|------------|-----------|-----------|-------------------------|-------------------------------------------------------------------------------------------|
| 205788_s_at | 5.41E-07 | 4.96E-10 | 10.3442604 | 13.113827 | 1.0824573 | LOC441155///<br>ZC3H11A | zinc finger CCCH-type<br>domain-containing-like///zinc<br>finger CCCH-type containing 11A |
| 236114_at   | 5.41E-07 | 5.05E-10 | 10.3342616 | 13.096377 | 3.2221148 |                         |                                                                                           |
| 209272_at   | 5.62E-07 | 5.49E-10 | 10.2879905 | 13.015451 | 1.9960673 | NAB1                    | NGFI-A binding protein 1                                                                  |
| 212725_s_at | 5.62E-07 | 5.62E-10 | 10.2755112 | 12.993578 | 1.3595675 | TUG1                    | taurine up-regulated 1 (non-protein<br>coding)                                            |

|             |          |          |            |           |                                  |                                                                                    |
|-------------|----------|----------|------------|-----------|----------------------------------|------------------------------------------------------------------------------------|
| 201448_at   | 5.62E-07 | 5.68E-10 | 10.269421  | 12.982896 | 2.038793 TIA1                    | TIA1 cytotoxic granule-associated RNA binding protein                              |
| 214494_s_at | 5.62E-07 | 5.84E-10 | 10.2540718 | 12.955952 | 1.1017989<br>LOC101930112///SPG7 | uncharacterized<br>LOC101930112///SPG7,<br>paraplegin matrix AAA peptidase subunit |
| 235008_at   | 5.62E-07 | 5.86E-10 | 10.2519822 | 12.952282 | 3.231938                         |                                                                                    |
| 201449_at   | 5.72E-07 | 6.07E-10 | 10.2330983 | 12.919085 | 1.3179755 TIA1                   | TIA1 cytotoxic granule-associated RNA binding protein                              |

|             |          |          |            |           |                 |                                                       |
|-------------|----------|----------|------------|-----------|-----------------|-------------------------------------------------------|
| 226363_at   | 5.86E-07 | 6.32E-10 | 10.2110704 | 12.880303 | 1.8272111ABCC5  | ATP binding cassette subfamily C member 5             |
| 201967_at   | 6.14E-07 | 6.82E-10 | 10.1693576 | 12.806689 | 1.5494605RBM6   | RNA binding motif protein 6                           |
| 209884_s_at | 6.15E-07 | 7.05E-10 | 10.1510572 | 12.774321 | 1.7941632SLC4A7 | solute carrier family 4 member 7                      |
| 205583_s_at | 6.24E-07 | 7.45E-10 | 10.1215292 | 12.722001 | 2.7998684ALG13  | ALG13,<br>UDP-N-acetylglucosaminyltransferase subunit |
| 201324_at   | 6.24E-07 | 7.75E-10 | 10.0998476 | 12.68351  | 3.3773405EMP1   | epithelial membrane protein 1                         |

|             |          |          |            |           |           |                    |                                                                                        |
|-------------|----------|----------|------------|-----------|-----------|--------------------|----------------------------------------------------------------------------------------|
| 219151_s_at | 6.24E-07 | 8.03E-10 | 10.0805252 | 12.649156 | 1.9743534 | RABL2A//R<br>ABL2B | RAB, member of RAS oncogene family-like 2A//RAB, member of RAS oncogene family-like 2B |
| 213238_at   | 6.24E-07 | 8.07E-10 | 10.0782239 | 12.645061 | 1.8217486 | ATP10D             | ATPase phospholipid transporting 10D (putative)                                        |
| 233223_at   | 6.27E-07 | 8.41E-10 | 10.0556028 | 12.604771 | 3.0574711 |                    |                                                                                        |
| 201310_s_at | 6.27E-07 | 8.48E-10 | 10.0512572 | 12.597023 | 3.4560536 | NREP               | neuronal regeneration related protein                                                  |

|             |          |          |            |           |           |                                                                                                                                                   |                                                  |
|-------------|----------|----------|------------|-----------|-----------|---------------------------------------------------------------------------------------------------------------------------------------------------|--------------------------------------------------|
| 225656_at   | 6.41E-07 | 8.91E-10 | 10.0244319 | 12.549142 | 1.8299502 | EFHC1                                                                                                                                             | EF-hand domain containing 1                      |
| 235613_at   | 6.56E-07 | 9.24E-10 | 10.0047672 | 12.513982 | 1.5502939 |                                                                                                                                                   |                                                  |
| 209360_s_at | 7.08E-07 | 1.06E-09 | 9.9333594  | 12.38587  | 2.6380432 | LOC10192826 uncharacterized<br>9///LOC10050 LOC101928269///uncharacterized<br>6403///RUNX LOC100506403///runt related<br>1 transcription factor 1 |                                                  |
| 227426_at   | 7.08E-07 | 1.06E-09 | 9.9317467  | 12.382969 | 1.3982507 | SOS1                                                                                                                                              | SOS Ras/Rac guanine nucleotide exchange factor 1 |
| 241786_at   | 7.08E-07 | 1.07E-09 | 9.9251559  | 12.371109 | 1.9265704 |                                                                                                                                                   |                                                  |

|             |          |          |           |           |                  |                                                       |
|-------------|----------|----------|-----------|-----------|------------------|-------------------------------------------------------|
| 228046_at   | 7.08E-07 | 1.07E-09 | 9.9239537 | 12.368945 | 1.9527138 ZNF827 | zinc finger protein 827                               |
| 227199_at   | 7.29E-07 | 1.12E-09 | 9.9017117 | 12.328873 | 1.4952888 DIP2A  | disco interacting protein 2<br>homolog A              |
| 212153_at   | 7.45E-07 | 1.20E-09 | 9.8632735 | 12.259467 | 1.2419123 POGZ   | pogo transposable element with<br>ZNF domain          |
| 201936_s_at | 7.45E-07 | 1.21E-09 | 9.8591209 | 12.251957 | 1.4047282 EIF4G3 | eukaryotic translation initiation<br>factor 4 gamma 3 |
| 227017_at   | 7.68E-07 | 1.28E-09 | 9.8311167 | 12.20125  | 1.5705968 ERICH1 | glutamate rich 1                                      |

|             |          |          |           |           |                |                                    |
|-------------|----------|----------|-----------|-----------|----------------|------------------------------------|
| 202949_s_at | 7.68E-07 | 1.28E-09 | 9.8309393 | 12.200928 | 3.100067FHL2   | four and a half LIM domains 2      |
| 226098_at   | 7.85E-07 | 1.32E-09 | 9.8135258 | 12.169344 | 2.2306207IFT80 | intraflagellar transport 80        |
| 209335_at   | 8.07E-07 | 1.45E-09 | 9.7647456 | 12.08065  | 2.1670404DCN   | decorin                            |
| 228617_at   | 8.07E-07 | 1.46E-09 | 9.7600643 | 12.072121 | 3.8262459XAF1  | XIAP associated factor 1           |
| 225180_at   | 8.13E-07 | 1.51E-09 | 9.7437383 | 12.042354 | 2.5269754TTC14 | tetratricopeptide repeat domain 14 |
| 212387_at   | 8.13E-07 | 1.52E-09 | 9.7398922 | 12.035337 | 2.2939507TCF4  | transcription factor 4             |
| 228623_at   | 8.13E-07 | 1.53E-09 | 9.7371456 | 12.030324 | 1.9666766      |                                    |
| 213557_at   | 8.13E-07 | 1.53E-09 | 9.7353956 | 12.02713  | 1.237518CDK12  | cyclin dependent kinase 12         |



|             |          |          |           |           |           |         |                                               |
|-------------|----------|----------|-----------|-----------|-----------|---------|-----------------------------------------------|
| 235432_at   | 8.26E-07 | 1.59E-09 | 9.7164115 | 11.99245  | 1.9965863 | NPHP3   | nephronophthisis 3 (adolescent)               |
| 226837_at   | 8.52E-07 | 1.67E-09 | 9.6904623 | 11.944967 | 2.2850386 | SPRED1  | sprouty related EVH1 domain containing 1      |
| 213891_s_at | 8.57E-07 | 1.71E-09 | 9.6774202 | 11.921067 | 2.5126495 | TCF4    | transcription factor 4                        |
| 226932_at   | 8.57E-07 | 1.71E-09 | 9.6768004 | 11.919931 | 2.0279771 | SSPN    | sarcospan                                     |
| 201719_s_at | 8.57E-07 | 1.74E-09 | 9.6689964 | 11.905619 | 1.8476025 | EPB41L2 | erythrocyte membrane protein band 4.1 like 2  |
| 204791_at   | 8.57E-07 | 1.77E-09 | 9.6585926 | 11.886525 | 1.6564568 | NR2C1   | nuclear receptor subfamily 2 group C member 1 |

|             |          |          |           |           |           |        |                                                    |
|-------------|----------|----------|-----------|-----------|-----------|--------|----------------------------------------------------|
| 225636_at   | 8.89E-07 | 1.88E-09 | 9.6280984 | 11.830477 | 1.8367311 | STAT2  | signal transducer and activator of transcription 2 |
| 225814_at   | 8.89E-07 | 1.89E-09 | 9.624265  | 11.823422 | 1.75584   | XRN1   | 5'-3' exoribonuclease 1                            |
| 222150_s_at | 8.89E-07 | 1.92E-09 | 9.6170831 | 11.8102   | 2.4459163 | GSAP   | gamma-secretase activating protein                 |
| 1557081_at  | 8.89E-07 | 1.92E-09 | 9.6164764 | 11.809082 | 1.9809262 | RBM25  | RNA binding motif protein 25                       |
| 203146_s_at | 9.03E-07 | 1.96E-09 | 9.6041261 | 11.786327 | 1.2923857 | GABBR1 | gamma-aminobutyric acid type B receptor subunit 1  |
| 227576_at   | 9.11E-07 | 2.04E-09 | 9.5837102 | 11.748665 | 1.7835982 |        |                                                    |

|              |          |          |           |           |           |        |                                                           |
|--------------|----------|----------|-----------|-----------|-----------|--------|-----------------------------------------------------------|
| 227087_at    | 9.11E-07 | 2.09E-09 | 9.570879  | 11.724965 | 1.8969148 | INPP4A | inositol<br>polyphosphate-4-phosphatase type<br>I A       |
| 225821_s_at  | 9.11E-07 | 2.10E-09 | 9.5695278 | 11.722468 | 1.7918123 | BOD1L1 | biorientation of chromosomes in<br>cell division 1 like 1 |
| 1556658_a_at | 9.42E-07 | 2.21E-09 | 9.5434982 | 11.674317 | 2.2792259 |        |                                                           |
| 232914_s_at  | 9.52E-07 | 2.32E-09 | 9.5173601 | 11.625872 | 3.5061923 | SYTL2  | synaptotagmin like 2                                      |
| 224635_s_at  | 9.52E-07 | 2.33E-09 | 9.5158837 | 11.623133 | 1.1756098 | BIRC6  | baculoviral IAP repeat containing<br>6                    |

|             |          |          |           |           |           |        |                                                     |
|-------------|----------|----------|-----------|-----------|-----------|--------|-----------------------------------------------------|
| 228670_at   | 1.01E-06 | 2.52E-09 | 9.4734349 | 11.544248 | 2.0525098 | TEP1   | telomerase associated protein 1                     |
| 202771_at   | 1.01E-06 | 2.57E-09 | 9.4642724 | 11.527189 | 2.4127188 | PIEZO1 | piezo type mechanosensitive ion channel component 1 |
| 221221_s_at | 1.01E-06 | 2.59E-09 | 9.4601227 | 11.519459 | 1.2313957 | KLHL3  | kelch like family member 3                          |
| 238558_at   | 1.01E-06 | 2.60E-09 | 9.4570886 | 11.513805 | 2.1840432 |        |                                                     |
| 213142_x_at | 1.01E-06 | 2.68E-09 | 9.4414686 | 11.484681 | 2.001918  | GSAP   | gamma-secretase activating protein                  |
| 213241_at   | 1.01E-06 | 2.71E-09 | 9.4362278 | 11.474901 | 2.9741143 | PLXNC1 | plexin C1                                           |
| 202310_s_at | 1.01E-06 | 2.77E-09 | 9.4242874 | 11.452606 | 5.199103  | COL1A1 | collagen type I alpha 1 chain                       |

|             |          |          |           |           |           |                                                                                                                                                                                                                                          |
|-------------|----------|----------|-----------|-----------|-----------|------------------------------------------------------------------------------------------------------------------------------------------------------------------------------------------------------------------------------------------|
| 209607_x_at | 1.01E-06 | 2.79E-09 | 9.4209408 | 11.446354 | 1.2544532 | SLX1B-SULT1A4 readthrough<br>SLX1B-SULT (NMD<br>1A4///SLX1A-candidate)///SLX1A-SULT1A3<br>SULT1A3///S readthrough (NMD<br>ULT1A4///SU candidate)///sulfotransferase family<br>LT1A3 1A member 4///sulfotransferase<br>family 1A member 3 |
| 222803_at   | 1.01E-06 | 2.80E-09 | 9.4200025 | 11.444601 | 2.3111595 | PRTFDC1 phosphoribosyl transferase domain<br>containing 1                                                                                                                                                                                |

|             |          |          |           |           |                   |                                                                  |
|-------------|----------|----------|-----------|-----------|-------------------|------------------------------------------------------------------|
| 203856_at   | 1.01E-06 | 2.83E-09 | 9.4130269 | 11.431563 | 1.7653284VRK1     | vaccinia related kinase 1                                        |
| 227623_at   | 1.01E-06 | 2.85E-09 | 9.4092833 | 11.424563 | 2.4485796CACNA2D1 | calcium voltage-gated channel<br>auxiliary subunit alpha2delta 1 |
| 203651_at   | 1.01E-06 | 2.86E-09 | 9.4085184 | 11.423132 | 2.0672254ZFYVE16  | zinc finger FYVE-type containing<br>16                           |
| 222629_at   | 1.02E-06 | 2.96E-09 | 9.3913471 | 11.390998 | 1.4304245REV1     | REV1, DNA directed polymerase                                    |
| 201680_x_at | 1.02E-06 | 2.99E-09 | 9.3855693 | 11.380177 | 1.1146139SRRT     | serrate, RNA effector molecule                                   |

|             |          |          |           |           |           |                  |                                             |
|-------------|----------|----------|-----------|-----------|-----------|------------------|---------------------------------------------|
| 224917_at   | 1.03E-06 | 3.03E-09 | 9.3791204 | 11.368093 | 3.6272073 | MIR21///VMP<br>1 | microRNA 21///vacuole membrane<br>protein 1 |
| 213761_at   | 1.03E-06 | 3.05E-09 | 9.374323  | 11.3591   | 1.5314059 | MDM1             | Mdm1 nuclear protein                        |
| 221729_at   | 1.04E-06 | 3.12E-09 | 9.3633474 | 11.338513 | 4.6793121 | COL5A2           | collagen type V alpha 2 chain               |
| 227140_at   | 1.04E-06 | 3.18E-09 | 9.3538078 | 11.320606 | 6.3315538 | INHBA            | inhibin beta A subunit                      |
| 214092_x_at | 1.04E-06 | 3.19E-09 | 9.3514522 | 11.316183 | 1.5543266 | SUGP2            | SURP and G-patch domain<br>containing 2     |

|             |          |          |           |           |           |                       |                                                                      |
|-------------|----------|----------|-----------|-----------|-----------|-----------------------|----------------------------------------------------------------------|
| 1294_at     | 1.04E-06 | 3.21E-09 | 9.3488238 | 11.311246 | 1.121712  | MIR5193///U<br>BA7    | microRNA 5193///ubiquitin like<br>modifier activating enzyme 7       |
| 203580_s_at | 1.04E-06 | 3.22E-09 | 9.3469324 | 11.307693 | 1.4804646 | SLC7A6                | solute carrier family 7 member 6                                     |
| 207719_x_at | 1.04E-06 | 3.24E-09 | 9.3435961 | 11.301424 | 2.4335139 | CEP170P1///C<br>EP170 | centrosomal protein 170<br>pseudogene 1///centrosomal<br>protein 170 |



|             |          |          |           |           |                    |                                                 |
|-------------|----------|----------|-----------|-----------|--------------------|-------------------------------------------------|
| 219778_at   | 1.06E-06 | 3.35E-09 | 9.3261201 | 11.268563 | 2.7013005 ZFPM2    | zinc finger protein, FOG family member 2        |
| 221427_s_at | 1.06E-06 | 3.37E-09 | 9.3240034 | 11.26458  | 1.4765248 CCNL2    | cyclin L2                                       |
| 221447_s_at | 1.07E-06 | 3.39E-09 | 9.3203724 | 11.257746 | 2.1245782 GLT8D2   | glycosyltransferase 8 domain containing 2       |
| 223122_s_at | 1.07E-06 | 3.43E-09 | 9.3141271 | 11.245987 | 3.2896891 SFRP2    | secreted frizzled related protein 2             |
| 213905_x_at | 1.07E-06 | 3.47E-09 | 9.309093  | 11.236505 | 3.3294761 BGN      | biglycan                                        |
| 203763_at   | 1.07E-06 | 3.48E-09 | 9.3074985 | 11.233501 | 1.4470161 DYNC2LI1 | dynein cytoplasmic 2 light intermediate chain 1 |
| 225227_at   | 1.07E-06 | 3.49E-09 | 9.304924  | 11.228649 | 2.7812963 SKIL     | SKI-like proto-oncogene                         |

|              |          |          |           |           |           |         |                                          |
|--------------|----------|----------|-----------|-----------|-----------|---------|------------------------------------------|
| 225883_at    | 1.08E-06 | 3.61E-09 | 9.2886091 | 11.197885 | 1.3811596 | ATG16L2 | autophagy related 16 like 2              |
| 207173_x_at  | 1.08E-06 | 3.63E-09 | 9.2847442 | 11.190592 | 4.4921082 | CDH11   | cadherin 11                              |
| 222047_s_at  | 1.08E-06 | 3.64E-09 | 9.2838205 | 11.188849 | 1.4144475 | SRRT    | serrate, RNA effector molecule           |
| 228216_at    | 1.08E-06 | 3.65E-09 | 9.2825281 | 11.186409 | 1.35658   | ZBTB37  | zinc finger and BTB domain containing 37 |
| 1558956_s_at | 1.09E-06 | 3.69E-09 | 9.276189  | 11.17444  | 2.7254779 | IFT80   | intraflagellar transport 80              |
| 202403_s_at  | 1.09E-06 | 3.71E-09 | 9.2736099 | 11.169569 | 3.8649573 | COL1A2  | collagen type I alpha 2 chain            |

|             |          |          |           |           |           |        |                                             |
|-------------|----------|----------|-----------|-----------|-----------|--------|---------------------------------------------|
| 228999_at   | 1.09E-06 | 3.72E-09 | 9.2726868 | 11.167826 | 2.3948693 | CHD2   | chromodomain helicase DNA binding protein 2 |
| 203229_s_at | 1.09E-06 | 3.77E-09 | 9.2658392 | 11.154887 | 1.0130314 | CLK2   | CDC like kinase 2                           |
| 228465_at   | 1.09E-06 | 3.77E-09 | 9.2654798 | 11.154208 | 1.5661063 |        |                                             |
| 211986_at   | 1.10E-06 | 3.94E-09 | 9.2429489 | 11.11159  | 2.026938  | AHNAK  | AHNAK nucleoprotein                         |
| 203753_at   | 1.10E-06 | 4.02E-09 | 9.2328172 | 11.092402 | 2.5353688 | TCF4   | transcription factor 4                      |
| 209561_at   | 1.10E-06 | 4.10E-09 | 9.2228324 | 11.073478 | 1.3854939 | THBS3  | thrombospondin 3                            |
| 202311_s_at | 1.10E-06 | 4.11E-09 | 9.2213393 | 11.070647 | 5.8551877 | COL1A1 | collagen type I alpha 1 chain               |
| 202766_s_at | 1.10E-06 | 4.13E-09 | 9.219635  | 11.067416 | 3.379587  | FBN1   | fibrillin 1                                 |

|             |          |          |           |           |           |         |                                                            |
|-------------|----------|----------|-----------|-----------|-----------|---------|------------------------------------------------------------|
| 226939_at   | 1.10E-06 | 4.15E-09 | 9.2166338 | 11.061724 | 1.5555155 | CPEB2   | cytoplasmic polyadenylation<br>element binding protein 2   |
| 211896_s_at | 1.10E-06 | 4.16E-09 | 9.2156687 | 11.059893 | 2.3037148 | DCN     | decorin                                                    |
| 225786_at   | 1.10E-06 | 4.18E-09 | 9.2123488 | 11.053595 | 2.8319859 |         |                                                            |
| 225269_s_at | 1.11E-06 | 4.27E-09 | 9.2017588 | 11.033493 | 2.3198914 | RBMS1   | RNA binding motif single stranded<br>interacting protein 1 |
| 203253_s_at | 1.11E-06 | 4.31E-09 | 9.1967456 | 11.023972 | 1.632823  | PPIP5K2 | diphosphoinositol<br>pentakisphosphate kinase 2            |
| 202450_s_at | 1.12E-06 | 4.37E-09 | 9.1899246 | 11.011012 | 3.6342257 | CTSK    | cathepsin K                                                |

|           |          |          |           |           |           |            |                                   |
|-----------|----------|----------|-----------|-----------|-----------|------------|-----------------------------------|
| 227003_at | 1.13E-06 | 4.50E-09 | 9.1756478 | 10.983865 | 1.7320118 | RAB28      | RAB28, member RAS oncogene family |
| 212386_at | 1.13E-06 | 4.52E-09 | 9.1733489 | 10.979491 | 2.4632866 | TCF4       | transcription factor 4            |
| 235879_at | 1.13E-06 | 4.58E-09 | 9.166579  | 10.966606 | 2.4334554 |            |                                   |
| 226865_at | 1.14E-06 | 4.66E-09 | 9.157712  | 10.949719 | 2.9159102 | PLXDC2     | plexin domain containing 2        |
| 230304_at | 1.17E-06 | 4.86E-09 | 9.1363749 | 10.90904  | 1.3225082 |            |                                   |
| 227074_at | 1.17E-06 | 4.88E-09 | 9.1337509 | 10.904033 | 1.2452804 | CCDC18-AS1 | CCDC18 antisense RNA 1            |
| 230728_at | 1.17E-06 | 4.91E-09 | 9.130594  | 10.898008 | 1.4504938 | FKBP14     | FK506 binding protein 14          |
| 227261_at | 1.17E-06 | 4.95E-09 | 9.1265897 | 10.890364 | 1.9626525 | KLF12      | Kruppel like factor 12            |

|             |          |          |           |           |                 |                                                  |
|-------------|----------|----------|-----------|-----------|-----------------|--------------------------------------------------|
| 212488_at   | 1.17E-06 | 4.97E-09 | 9.1247798 | 10.886908 | 4.5385884COL5A1 | collagen type V alpha 1 chain                    |
| 225176_at   | 1.19E-06 | 5.09E-09 | 9.1124888 | 10.863426 | 1.7455521LNPEP  | leucyl and cystinyl aminopeptidase               |
| 212176_at   | 1.19E-06 | 5.15E-09 | 9.1066476 | 10.852259 | 2.0172991PNISR  | PNN interacting serine and arginine rich protein |
| 211161_s_at | 1.20E-06 | 5.28E-09 | 9.0941654 | 10.828381 | 4.8369COL3A1    | collagen type III alpha 1 chain                  |
| 202963_at   | 1.20E-06 | 5.31E-09 | 9.0911306 | 10.822572 | 1.6714461RFX5   | regulatory factor X5                             |
| 236561_at   | 1.21E-06 | 5.40E-09 | 9.0820606 | 10.805203 | 2.9257848TGFB1  | transforming growth factor beta receptor 1       |

|             |          |          |           |           |           |           |                                            |
|-------------|----------|----------|-----------|-----------|-----------|-----------|--------------------------------------------|
| 232180_at   | 1.21E-06 | 5.46E-09 | 9.0766633 | 10.794862 | 1.4347077 | UGP2      | UDP-glucose pyrophosphorylase 2            |
| 223227_at   | 1.21E-06 | 5.47E-09 | 9.0756086 | 10.792841 | 1.5043618 | BBS2      | Bardet-Biedl syndrome 2                    |
| 211813_x_at | 1.21E-06 | 5.53E-09 | 9.0703192 | 10.782702 | 2.1197107 | DCN       | decorin                                    |
| 215076_s_at | 1.25E-06 | 5.93E-09 | 9.0349172 | 10.71474  | 3.840505  | COL3A1    | collagen type III alpha 1 chain            |
| 226330_s_at | 1.25E-06 | 5.96E-09 | 9.0325263 | 10.710144 | 1.7244414 | SUPT20H   | SPT20 homolog, SAGA complex component      |
| 213703_at   | 1.25E-06 | 6.10E-09 | 9.0206842 | 10.687368 | 2.3041845 | LINC00342 | long intergenic non-protein coding RNA 342 |

|             |          |          |           |           |           |              |                                               |
|-------------|----------|----------|-----------|-----------|-----------|--------------|-----------------------------------------------|
| 201852_x_at | 1.25E-06 | 6.12E-09 | 9.0187458 | 10.683638 | 4.5475064 | COL3A1       | collagen type III alpha 1 chain               |
| 228751_at   | 1.25E-06 | 6.14E-09 | 9.017403  | 10.681053 | 1.6480171 | CLK4         | CDC like kinase 4                             |
| 220990_s_at | 1.28E-06 | 6.36E-09 | 9.0000783 | 10.647688 | 2.3196479 | MIR21///VMP1 | microRNA 21///vacuole membrane protein 1      |
| 201221_s_at | 1.30E-06 | 6.48E-09 | 8.9905799 | 10.629378 | 1.3862709 | SNRNP70      | small nuclear ribonucleoprotein U1 subunit 70 |
| 224694_at   | 1.30E-06 | 6.52E-09 | 8.9868479 | 10.62218  | 3.8526373 | ANTXR1       | anthrax toxin receptor 1                      |
| 222999_s_at | 1.30E-06 | 6.56E-09 | 8.9840453 | 10.616773 | 2.0840445 | CCNL2        | cyclin L2                                     |



|             |          |          |           |           |                                |                                                                                                                                                 |
|-------------|----------|----------|-----------|-----------|--------------------------------|-------------------------------------------------------------------------------------------------------------------------------------------------|
| 225477_s_at | 1.31E-06 | 6.71E-09 | 8.9723907 | 10.594278 | 1.1413289NR2C2                 | nuclear receptor subfamily 2 group C member 2                                                                                                   |
| 201893_x_at | 1.33E-06 | 6.89E-09 | 8.9596985 | 10.569758 | 1.9579304DCN                   | decorin                                                                                                                                         |
| 212929_s_at | 1.33E-06 | 7.02E-09 | 8.9500109 | 10.551028 | 1.0561831//FAM21A//<br>/FAM21C | uncharacterized<br>LOC10193059LOC101930591///family with<br>sequence similarity 21 member<br>A///family with sequence similarity<br>21 member C |
| 242008_at   | 1.33E-06 | 7.05E-09 | 8.9476822 | 10.546523 | 1.8056745                      |                                                                                                                                                 |

|             |          |          |           |           |           |        |                                                       |
|-------------|----------|----------|-----------|-----------|-----------|--------|-------------------------------------------------------|
| 226993_at   | 1.33E-06 | 7.06E-09 | 8.9474844 | 10.546141 | 1.5608734 | TRIP12 | thyroid hormone receptor<br>interactor 12             |
| 226291_at   | 1.33E-06 | 7.06E-09 | 8.9471934 | 10.545578 | 1.2470413 | ALS2   | ALS2, alsin Rho guanine<br>nucleotide exchange factor |
| 218067_s_at | 1.33E-06 | 7.13E-09 | 8.9418758 | 10.535289 | 2.2846955 | ARGLU1 | arginine and glutamate rich 1                         |
| 36711_at    | 1.33E-06 | 7.15E-09 | 8.9407596 | 10.533129 | 2.8920845 | MAFF   | MAF bZIP transcription factor F                       |
| 208030_s_at | 1.33E-06 | 7.16E-09 | 8.9403407 | 10.532318 | 1.045367  | ADD1   | adducin 1                                             |

|             |          |          |           |           |           |        |                                                   |
|-------------|----------|----------|-----------|-----------|-----------|--------|---------------------------------------------------|
| 212307_s_at | 1.33E-06 | 7.18E-09 | 8.9386642 | 10.529073 | 1.886815  | OGT    | O-linked N-acetylglucosamine (GlcNAc) transferase |
| 244579_at   | 1.34E-06 | 7.27E-09 | 8.9323797 | 10.516905 | 2.0611618 |        |                                                   |
| 206011_at   | 1.34E-06 | 7.35E-09 | 8.9268711 | 10.506235 | 2.0933911 | CASP1  | caspase 1                                         |
| 225242_s_at | 1.34E-06 | 7.40E-09 | 8.923582  | 10.499862 | 3.6640298 | CCDC80 | coiled-coil domain containing 80                  |
| 202404_s_at | 1.34E-06 | 7.43E-09 | 8.9216098 | 10.49604  | 5.3686193 | COL1A2 | collagen type I alpha 2 chain                     |
| 204821_at   | 1.35E-06 | 7.55E-09 | 8.9136217 | 10.480553 | 1.8528621 | BTN3A3 | butyrophilin subfamily 3 member A3                |

|             |          |          |           |           |           |        |                                     |
|-------------|----------|----------|-----------|-----------|-----------|--------|-------------------------------------|
| 210764_s_at | 1.35E-06 | 7.61E-09 | 8.9097175 | 10.472981 | 3.3819279 | CYR61  | cysteine rich angiogenic inducer 61 |
| 217828_at   | 1.35E-06 | 7.63E-09 | 8.9082494 | 10.470133 | 1.6071277 | SLTM   | SAFB like transcription modulator   |
| 213684_s_at | 1.38E-06 | 7.90E-09 | 8.8905572 | 10.435788 | 2.2056109 | PDLIM5 | PDZ and LIM domain 5                |
| 244015_at   | 1.39E-06 | 8.00E-09 | 8.8841488 | 10.423336 | 1.491762  |        |                                     |
| 227900_at   | 1.41E-06 | 8.17E-09 | 8.8741998 | 10.403995 | 1.4028548 | CBLB   | Cbl proto-oncogene B                |
| 202081_at   | 1.46E-06 | 8.54E-09 | 8.8516519 | 10.360107 | 1.7339136 | IER2   | immediate early response 2          |
| 225931_s_at | 1.46E-06 | 8.54E-09 | 8.8515064 | 10.359824 | 1.9774886 | RNF213 | ring finger protein 213             |

|             |          |          |           |           |                 |                                            |
|-------------|----------|----------|-----------|-----------|-----------------|--------------------------------------------|
| 217591_at   | 1.46E-06 | 8.60E-09 | 8.8484425 | 10.353854 | 2.0154934SKIL   | SKI-like proto-oncogene                    |
| 221730_at   | 1.46E-06 | 8.65E-09 | 8.8455849 | 10.348286 | 4.8402629COL5A2 | collagen type V alpha 2 chain              |
| 218428_s_at | 1.46E-06 | 8.65E-09 | 8.8451851 | 10.347507 | 1.6806196REV1   | REV1, DNA directed polymerase              |
| 214247_s_at | 1.46E-06 | 8.72E-09 | 8.841585  | 10.34049  | 2.8440939DKK3   | dickkopf WNT signaling pathway inhibitor 3 |
| 212513_s_at | 1.46E-06 | 8.76E-09 | 8.8389589 | 10.33537  | 1.341498USP33   | ubiquitin specific peptidase 33            |

|             |          |          |           |           |           |                |                                                               |
|-------------|----------|----------|-----------|-----------|-----------|----------------|---------------------------------------------------------------|
| 218659_at   | 1.46E-06 | 8.77E-09 | 8.8383594 | 10.334201 | 1.0505227 | ASXL2          | additional sex combs like 2,<br>transcriptional regulator     |
| 202664_at   | 1.46E-06 | 8.88E-09 | 8.8324455 | 10.322667 | 2.8768577 | WIPF1          | WAS/WASL interacting protein<br>family member 1               |
| 218871_x_at | 1.46E-06 | 8.94E-09 | 8.8290566 | 10.316055 | 2.3116582 | CSGALNAC<br>T2 | chondroitin sulfate<br>N-acetylgalactosaminyltransferase<br>2 |
| 213656_s_at | 1.46E-06 | 8.95E-09 | 8.8283472 | 10.314671 | 1.4570286 | KLC1           | kinesin light chain 1                                         |

|             |          |          |           |           |                 |                                         |
|-------------|----------|----------|-----------|-----------|-----------------|-----------------------------------------|
| 228793_at   | 1.46E-06 | 8.97E-09 | 8.8274095 | 10.312841 | 2.586398JMJD1C  | jumonji domain containing 1C            |
| 208988_at   | 1.46E-06 | 8.98E-09 | 8.8267897 | 10.311632 | 2.0006611KDM2A  | lysine demethylase 2A                   |
| 228946_at   | 1.46E-06 | 9.02E-09 | 8.8242949 | 10.306763 | 1.7178164INTU   | inturned planar cell polarity protein   |
| 213387_at   | 1.46E-06 | 9.07E-09 | 8.8218051 | 10.301903 | 1.7782998ATAD2B | ATPase family, AAA domain containing 2B |
| 232113_at   | 1.46E-06 | 9.09E-09 | 8.8206721 | 10.299691 | 3.6342746       |                                         |
| 223716_s_at | 1.47E-06 | 9.27E-09 | 8.8106535 | 10.280123 | 1.6962305ZRANB2 | zinc finger RANBP2-type containing 2    |

|           |          |          |           |           |           |          |                                       |
|-----------|----------|----------|-----------|-----------|-----------|----------|---------------------------------------|
| 202892_at | 1.48E-06 | 9.39E-09 | 8.8042227 | 10.267556 | 1.4352841 | CDC23    | cell division cycle 23                |
| 204206_at | 1.49E-06 | 9.56E-09 | 8.7954667 | 10.250435 | 1.0502005 | MNT      | MAX network transcriptional repressor |
| 235444_at | 1.49E-06 | 9.57E-09 | 8.7952441 | 10.25     | 1.5938464 | FOXP1    | forkhead box P1                       |
| 225381_at | 1.49E-06 | 9.57E-09 | 8.7949511 | 10.249427 | 2.4629682 | MIR100HG | mir-100-let-7a-2 cluster host gene    |
| 232333_at | 1.50E-06 | 9.87E-09 | 8.7796684 | 10.219517 | 1.8160352 |          |                                       |
| 203668_at | 1.50E-06 | 9.88E-09 | 8.7791692 | 10.218539 | 1.4492625 | MAN2C1   | mannosidase alpha class 2C member 1   |
| 223679_at | 1.50E-06 | 9.91E-09 | 8.7778387 | 10.215934 | 2.3145611 | CTNNB1   | catenin beta 1                        |



|           |          |          |           |           |           |           |                                                                |
|-----------|----------|----------|-----------|-----------|-----------|-----------|----------------------------------------------------------------|
| 211990_at | 1.50E-06 | 9.91E-09 | 8.7777288 | 10.215718 | 2.7469229 | HLA-DPA1  | major histocompatibility complex, class II, DP alpha 1         |
| 242405_at | 1.53E-06 | 1.02E-08 | 8.7628447 | 10.186553 | 2.1312264 |           |                                                                |
| 226441_at | 1.53E-06 | 1.02E-08 | 8.7626586 | 10.186188 | 1.49345   | MAP3K2    | mitogen-activated protein kinase kinase kinase 2               |
| 226795_at | 1.54E-06 | 1.03E-08 | 8.758154  | 10.177355 | 2.2729275 | LRCH1     | leucine rich repeats and calponin homology domain containing 1 |
| 225724_at | 1.54E-06 | 1.03E-08 | 8.7564056 | 10.173926 | 1.9277625 | PSMA3-AS1 | PSMA3 antisense RNA 1                                          |

|              |          |          |           |           |           |        |                                                       |
|--------------|----------|----------|-----------|-----------|-----------|--------|-------------------------------------------------------|
| 200665_s_at  | 1.54E-06 | 1.04E-08 | 8.7556735 | 10.17249  | 3.6204684 | SPARC  | secreted protein acidic and cysteine rich             |
| 208851_s_at  | 1.54E-06 | 1.05E-08 | 8.7483518 | 10.158124 | 2.7073759 | THY1   | Thy-1 cell surface antigen                            |
| 1556499_s_at | 1.54E-06 | 1.05E-08 | 8.746995  | 10.155461 | 3.4945652 | COL1A1 | collagen type I alpha 1 chain                         |
| 212724_at    | 1.54E-06 | 1.06E-08 | 8.7462417 | 10.153982 | 2.9004038 | RND3   | Rho family GTPase 3                                   |
| 205584_at    | 1.54E-06 | 1.06E-08 | 8.7449597 | 10.151465 | 1.4298589 | ALG13  | ALG13,<br>UDP-N-acetylglucosaminyltransferase subunit |

|             |          |          |           |           |           |          |                                                                          |
|-------------|----------|----------|-----------|-----------|-----------|----------|--------------------------------------------------------------------------|
| 223121_s_at | 1.55E-06 | 1.07E-08 | 8.7410593 | 10.143807 | 4.0162855 | SFRP2    | secreted frizzled related protein 2                                      |
| 200816_s_at | 1.58E-06 | 1.09E-08 | 8.7300531 | 10.122187 | 1.406137  | PAFAH1B1 | platelet activating factor<br>acetylhydrolase 1b regulatory<br>subunit 1 |

|             |          |          |           |           |               |                                               |
|-------------|----------|----------|-----------|-----------|---------------|-----------------------------------------------|
|             |          |          |           |           |               | putative NPIP-like protein                    |
|             |          |          |           |           |               | LOC613037///nuclear pore                      |
|             |          |          |           |           |               | complex interacting protein family            |
|             |          |          |           |           |               | member A5///nuclear pore complex              |
|             |          |          |           |           | LOC10106027   | interacting protein family member             |
|             |          |          |           |           | 5///NPIPA5/// | B5///nuclear pore complex                     |
| 211996_s_at | 1.58E-06 | 1.10E-08 | 8.7274589 | 10.117088 | 2.278832      | NPIP5///NPI interacting protein family member |
|             |          |          |           |           |               | PB11///LOC6 B11///nuclear pore complex        |
|             |          |          |           |           |               | 13037///NPIP interacting protein              |
|             |          |          |           |           |               | B4///NPIP3 member///nuclear pore complex      |
|             |          |          |           |           |               | interacting protein family member             |
|             |          |          |           |           |               | B4///nuclear pore complex                     |
|             |          |          |           |           |               | interacting protein family member             |
|             |          |          |           |           |               | B3                                            |

|             |          |          |           |           |                   |                                         |
|-------------|----------|----------|-----------|-----------|-------------------|-----------------------------------------|
| 218370_s_at | 1.58E-06 | 1.11E-08 | 8.7203369 | 10.103085 | 1.6366743 S100PBP | S100P binding protein                   |
| 211709_s_at | 1.58E-06 | 1.11E-08 | 8.719557  | 10.101552 | 2.4330507 CLEC11A | C-type lectin domain family 11 member A |
| 232231_at   | 1.61E-06 | 1.15E-08 | 8.7037286 | 10.070404 | 3.6707487 RUNX2   | runt related transcription factor 2     |
| 203132_at   | 1.61E-06 | 1.15E-08 | 8.7031759 | 10.069316 | 1.9464629 RB1     | RB transcriptional corepressor 1        |
| 225085_at   | 1.62E-06 | 1.16E-08 | 8.6980038 | 10.05913  | 1.4926779 USP40   | ubiquitin specific peptidase 40         |

|             |          |          |           |           |           |         |                                                          |
|-------------|----------|----------|-----------|-----------|-----------|---------|----------------------------------------------------------|
| 204049_s_at | 1.62E-06 | 1.18E-08 | 8.692933  | 10.04914  | 1.8361188 | PHACTR2 | phosphatase and actin regulator 2                        |
| 202369_s_at | 1.62E-06 | 1.18E-08 | 8.6921818 | 10.047659 | 1.6073896 | TRAM2   | translocation associated membrane protein 2              |
| 219922_s_at | 1.67E-06 | 1.23E-08 | 8.6721538 | 10.008164 | 2.0875871 | LTBP3   | latent transforming growth factor beta binding protein 3 |
| 208850_s_at | 1.67E-06 | 1.25E-08 | 8.6640408 | 9.992149  | 3.5319196 | THY1    | Thy-1 cell surface antigen                               |
| 212382_at   | 1.67E-06 | 1.25E-08 | 8.6637576 | 9.99159   | 2.1617443 | TCF4    | transcription factor 4                                   |

|             |          |          |           |          |                 |                                                            |
|-------------|----------|----------|-----------|----------|-----------------|------------------------------------------------------------|
| 227395_at   | 1.67E-06 | 1.25E-08 | 8.6626496 | 9.989402 | 1.4341316TBCEL  | tubulin folding cofactor E like                            |
| 218838_s_at | 1.68E-06 | 1.26E-08 | 8.6579791 | 9.980177 | 1.0417475TTC31  | tetratricopeptide repeat domain 31                         |
| 210561_s_at | 1.68E-06 | 1.28E-08 | 8.6511097 | 9.966604 | 1.8781934WSB1   | WD repeat and SOCS box containing 1                        |
| 217525_at   | 1.68E-06 | 1.28E-08 | 8.6501965 | 9.964799 | 2.2021625OLFML1 | olfactomedin like 1                                        |
| 201843_s_at | 1.68E-06 | 1.29E-08 | 8.6457256 | 9.95596  | 2.4471921EFEMP1 | EGF containing fibulin like extracellular matrix protein 1 |

|             |          |          |           |          |           |          |                                                          |
|-------------|----------|----------|-----------|----------|-----------|----------|----------------------------------------------------------|
| 208306_x_at | 1.68E-06 | 1.30E-08 | 8.6424883 | 9.949559 | 2.5498518 | HLA-DRB1 | major histocompatibility complex, class II, DR beta 1    |
| 204759_at   | 1.68E-06 | 1.31E-08 | 8.6410585 | 9.946731 | 1.8347891 | RCBTB2   | RCC1 and BTB domain containing protein 2                 |
| 201935_s_at | 1.68E-06 | 1.31E-08 | 8.6409776 | 9.946571 | 1.5093    | EIF4G3   | eukaryotic translation initiation factor 4 gamma 3       |
| 226164_x_at | 1.69E-06 | 1.31E-08 | 8.6377061 | 9.9401   | 1.80464   | RIMKLB   | ribosomal modification protein rimK like family member B |



|             |          |          |           |          |           |                                                                                                                                                                                                                                                                                                                                                                                                                                                                                                                                           |
|-------------|----------|----------|-----------|----------|-----------|-------------------------------------------------------------------------------------------------------------------------------------------------------------------------------------------------------------------------------------------------------------------------------------------------------------------------------------------------------------------------------------------------------------------------------------------------------------------------------------------------------------------------------------------|
| 225035_x_at | 1.70E-06 | 1.34E-08 | 8.6279011 | 9.920695 | 1.3743146 | <p>WAS protein family homolog<br/> 2-like///microRNA<br/> LOC10272389<br/> 6859-1///microRNA 6859-2///WAS<br/> 7///MIR6859-<br/> protein family homolog<br/> 1///MIR6859-<br/> 6-like///WAS protein family<br/> 2///LOC10193<br/> homolog 1 pseudogene///WAS<br/> 0154///LOC10<br/> protein family homolog 1///WAS<br/> 0288778///WA<br/> protein family homolog 7<br/> SH1///WASH<br/> pseudogene///WAS protein family<br/> 7P///WASH2P<br/> homolog 2 pseudogene///WAS<br/> ///WASH3P<br/> protein family homolog 3<br/> pseudogene</p> |
|-------------|----------|----------|-----------|----------|-----------|-------------------------------------------------------------------------------------------------------------------------------------------------------------------------------------------------------------------------------------------------------------------------------------------------------------------------------------------------------------------------------------------------------------------------------------------------------------------------------------------------------------------------------------------|

|              |          |          |           |          |           |                    |                                                            |
|--------------|----------|----------|-----------|----------|-----------|--------------------|------------------------------------------------------------|
| 213483_at    | 1.70E-06 | 1.35E-08 | 8.6252106 | 9.915368 | 1.6124821 | PPWD1              | peptidylprolyl isomerase domain and WD repeat containing 1 |
| 204464_s_at  | 1.70E-06 | 1.35E-08 | 8.6249301 | 9.914813 | 3.3575448 | EDNRA              | endothelin receptor type A                                 |
| 1552703_s_at | 1.70E-06 | 1.35E-08 | 8.6244981 | 9.913958 | 2.8289086 | CARD16///C<br>ASP1 | caspase recruitment domain family member 16///caspase 1    |
| 233632_s_at  | 1.70E-06 | 1.35E-08 | 8.6229357 | 9.910863 | 1.3469334 | XRN1               | 5'-3' exoribonuclease 1                                    |
| 215000_s_at  | 1.70E-06 | 1.36E-08 | 8.6209149 | 9.906861 | 1.7615959 | FEZ2               | fasciculation and elongation protein zeta 2                |

|             |          |          |           |          |           |                       |                                                                               |
|-------------|----------|----------|-----------|----------|-----------|-----------------------|-------------------------------------------------------------------------------|
| 217317_s_at | 1.70E-06 | 1.37E-08 | 8.6173825 | 9.899864 | 1.9716334 | HERC2P9///H<br>ERC2P2 | hect domain and RLD 2<br>pseudogene 9///hect domain and<br>RLD 2 pseudogene 2 |
| 206115_at   | 1.70E-06 | 1.38E-08 | 8.6135593 | 9.892288 | 3.6955127 | EGR3                  | early growth response 3                                                       |
| 213293_s_at | 1.71E-06 | 1.40E-08 | 8.6060685 | 9.877439 | 2.7332618 | TRIM22                | tripartite motif containing 22                                                |
| 212222_at   | 1.72E-06 | 1.41E-08 | 8.6034061 | 9.872159 | 1.2032652 | PSME4                 | proteasome activator subunit 4                                                |

|             |          |          |           |          |           |       |                                              |
|-------------|----------|----------|-----------|----------|-----------|-------|----------------------------------------------|
| 1555960_at  | 1.72E-06 | 1.41E-08 | 8.6020037 | 9.869378 | 1.7163246 | HINT1 | histidine triad nucleotide binding protein 1 |
| 200680_x_at | 1.72E-06 | 1.42E-08 | 8.5988999 | 9.863221 | 1.1845536 | HMGB1 | high mobility group box 1                    |
| 215287_at   | 1.74E-06 | 1.45E-08 | 8.5887165 | 9.843011 | 1.0880771 | STRN  | striatin                                     |
| 228397_at   | 1.75E-06 | 1.47E-08 | 8.5836572 | 9.832965 | 1.9580886 | TUG1  | taurine up-regulated 1 (non-protein coding)  |
| 240499_at   | 1.77E-06 | 1.51E-08 | 8.5704501 | 9.806723 | 1.9000782 |       |                                              |

|             |          |          |           |          |                    |                                                                                                                          |
|-------------|----------|----------|-----------|----------|--------------------|--------------------------------------------------------------------------------------------------------------------------|
| 223197_s_at | 1.77E-06 | 1.52E-08 | 8.5672108 | 9.800283 | 1.2448868 SMARCAD1 | SWI/SNF-related,<br>matrix-associated actin-dependent<br>regulator of chromatin, subfamily<br>a, containing DEAD/H box 1 |
| 209553_at   | 1.78E-06 | 1.53E-08 | 8.5617033 | 9.78933  | 1.2292327 VPS8     | VPS8, CORVET complex subunit                                                                                             |
| 203232_s_at | 1.80E-06 | 1.56E-08 | 8.5544582 | 9.774915 | 1.722955 ATXN1     | ataxin 1                                                                                                                 |
| 203743_s_at | 1.80E-06 | 1.56E-08 | 8.5542993 | 9.774599 | 2.0565495 TDG      | thymine DNA glycosylase                                                                                                  |

|             |          |          |           |          |           |             |                                                        |
|-------------|----------|----------|-----------|----------|-----------|-------------|--------------------------------------------------------|
| 213125_at   | 1.83E-06 | 1.61E-08 | 8.5387733 | 9.743682 | 3.5831832 | OLFML2B     | olfactomedin like 2B                                   |
| 40569_at    | 1.85E-06 | 1.63E-08 | 8.5333471 | 9.732868 | 1.0709334 | MZF1        | myeloid zinc finger 1                                  |
| 212899_at   | 1.85E-06 | 1.64E-08 | 8.5303707 | 9.726935 | 1.2536696 | CDK19       | cyclin dependent kinase 19                             |
| 215388_s_at | 1.85E-06 | 1.64E-08 | 8.5297721 | 9.725742 | 3.1373973 | CFHR1///CFH | complement factor H related<br>1///complement factor H |
| 213313_at   | 1.86E-06 | 1.65E-08 | 8.5251742 | 9.716574 | 1.050852  | RABGAP1     | RAB GTPase activating protein 1                        |
| 220940_at   | 1.86E-06 | 1.66E-08 | 8.5239917 | 9.714215 | 2.2137121 | ANKRD36B    | ankyrin repeat domain 36B                              |

|              |          |          |           |          |                    |                                                   |
|--------------|----------|----------|-----------|----------|--------------------|---------------------------------------------------|
| 225537_at    | 1.87E-06 | 1.67E-08 | 8.5205762 | 9.707402 | 1.2366743 TRAPPC6B | trafficking protein particle complex<br>6B        |
| 201041_s_at  | 1.87E-06 | 1.68E-08 | 8.5169746 | 9.700216 | 2.1513304 DUSP1    | dual specificity phosphatase 1                    |
| 214085_x_at  | 1.90E-06 | 1.72E-08 | 8.5064037 | 9.679114 | 2.3104325 GLIPR1   | GLI pathogenesis related 1                        |
| 225673_at    | 1.91E-06 | 1.73E-08 | 8.5023786 | 9.671074 | 2.0142202 MYADM    | myeloid associated differentiation<br>marker      |
| 1554168_a_at | 1.92E-06 | 1.74E-08 | 8.4998769 | 9.666076 | 2.4114136 SH3KBP1  | SH3 domain containing kinase<br>binding protein 1 |

|             |          |          |           |          |           |          |                                                          |
|-------------|----------|----------|-----------|----------|-----------|----------|----------------------------------------------------------|
| 202270_at   | 1.93E-06 | 1.75E-08 | 8.4968928 | 9.660114 | 3.2740684 | GBP1     | guanylate binding protein 1                              |
| 201694_s_at | 1.94E-06 | 1.77E-08 | 8.4918595 | 9.650054 | 2.5372938 | EGR1     | early growth response 1                                  |
| 222127_s_at | 1.94E-06 | 1.77E-08 | 8.4910647 | 9.648465 | 1.8684288 | EXOC1    | exocyst complex component 1                              |
| 209780_at   | 1.96E-06 | 1.80E-08 | 8.4828622 | 9.632061 | 2.2612282 | PHTF2    | putative homeodomain<br>transcription factor 2           |
| 231577_s_at | 1.96E-06 | 1.81E-08 | 8.4823053 | 9.630947 | 3.5896504 | GBP1     | guanylate binding protein 1                              |
| 201137_s_at | 1.97E-06 | 1.82E-08 | 8.4785035 | 9.623341 | 2.3318348 | HLA-DPB1 | major histocompatibility complex,<br>class II, DP beta 1 |



|             |          |          |           |          |           |        |                                            |
|-------------|----------|----------|-----------|----------|-----------|--------|--------------------------------------------|
| 202465_at   | 1.98E-06 | 1.83E-08 | 8.4749574 | 9.616244 | 2.5793045 | PCOLCE | procollagen C-endopeptidase enhancer       |
| 203567_s_at | 2.00E-06 | 1.85E-08 | 8.4703083 | 9.606937 | 1.4997716 | TRIM38 | tripartite motif containing 38             |
| 202196_s_at | 2.00E-06 | 1.85E-08 | 8.4691098 | 9.604538 | 2.8207855 | DKK3   | dickkopf WNT signaling pathway inhibitor 3 |
| 213243_at   | 2.01E-06 | 1.87E-08 | 8.46397   | 9.594244 | 1.449313  | VPS13B | vacuolar protein sorting 13 homolog B      |
| 226237_at   | 2.01E-06 | 1.88E-08 | 8.4618531 | 9.590004 | 4.7713079 | COL8A1 | collagen type VIII alpha 1 chain           |
| 226203_at   | 2.01E-06 | 1.89E-08 | 8.4604906 | 9.587274 | 1.5908132 | MYO9A  | myosin IXA                                 |

|             |          |          |           |          |           |          |                                                        |
|-------------|----------|----------|-----------|----------|-----------|----------|--------------------------------------------------------|
| 211991_s_at | 2.02E-06 | 1.91E-08 | 8.4547977 | 9.575865 | 3.1534925 | HLA-DPA1 | major histocompatibility complex, class II, DP alpha 1 |
| 225681_at   | 2.03E-06 | 1.93E-08 | 8.4494185 | 9.565081 | 5.1875159 | CTHRC1   | collagen triple helix repeat containing 1              |
| 212667_at   | 2.04E-06 | 1.95E-08 | 8.4446054 | 9.555429 | 2.8940602 | SPARC    | secreted protein acidic and cysteine rich              |
| 204319_s_at | 2.04E-06 | 1.96E-08 | 8.4429544 | 9.552117 | 2.3879732 | RGS10    | regulator of G-protein signaling 10                    |

|             |          |          |           |          |           |                              |                                                                                                        |
|-------------|----------|----------|-----------|----------|-----------|------------------------------|--------------------------------------------------------------------------------------------------------|
| 227628_at   | 2.04E-06 | 1.96E-08 | 8.4420759 | 9.550355 | 1.880283  | GPX8                         | glutathione peroxidase 8 (putative)                                                                    |
| 225361_x_at | 2.04E-06 | 1.96E-08 | 8.4415106 | 9.54922  | 1.4171643 | FAM122B                      | family with sequence similarity 122B                                                                   |
| 221833_at   | 2.05E-06 | 1.98E-08 | 8.4383179 | 9.542814 | 1.5912127 | LOC10050757<br>LONP2<br>IAH1 | uncharacterized<br>LOC100507577<br>lon peptidase 2,<br>peroxisomal<br>E3 ubiquitin<br>protein ligase 1 |

|             |          |          |           |          |           |         |                                              |
|-------------|----------|----------|-----------|----------|-----------|---------|----------------------------------------------|
| 213194_at   | 2.05E-06 | 1.98E-08 | 8.4374647 | 9.541102 | 2.8769312 | ROBO1   | roundabout guidance receptor 1               |
| 216526_x_at | 2.07E-06 | 2.00E-08 | 8.431294  | 9.528716 | 1.4626429 | HLA-C   | major histocompatibility complex, class I, C |
| 219078_at   | 2.07E-06 | 2.01E-08 | 8.4299322 | 9.525981 | 1.3567105 | GPATCH2 | G-patch domain containing 2                  |
| 226676_at   | 2.08E-06 | 2.03E-08 | 8.42599   | 9.518065 | 2.3509848 | ZNF521  | zinc finger protein 521                      |
| 200897_s_at | 2.08E-06 | 2.03E-08 | 8.4253114 | 9.516702 | 2.790137  | PALLD   | palladin, cytoskeletal associated protein    |
| 224673_at   | 2.11E-06 | 2.06E-08 | 8.4175871 | 9.501182 | 1.218952  | LENG8   | leukocyte receptor cluster member 8          |

|              |          |          |           |          |                  |                                                                  |
|--------------|----------|----------|-----------|----------|------------------|------------------------------------------------------------------|
| 205803_s_at  | 2.11E-06 | 2.07E-08 | 8.4161421 | 9.498278 | 2.1501532 TRPC1  | transient receptor potential cation channel subfamily C member 1 |
| 201296_s_at  | 2.11E-06 | 2.08E-08 | 8.4135237 | 9.493015 | 2.0728652 WSB1   | WD repeat and SOCS box containing 1                              |
| 203789_s_at  | 2.11E-06 | 2.08E-08 | 8.41258   | 9.491118 | 4.2743452 SEMA3C | semaphorin 3C                                                    |
| 204872_at    | 2.11E-06 | 2.10E-08 | 8.4090681 | 9.484057 | 1.37501 TLE4     | transducin like enhancer of split 4                              |
| 1555832_s_at | 2.11E-06 | 2.10E-08 | 8.4086206 | 9.483157 | 1.9478332 KLF6   | Kruppel like factor 6                                            |
| 209795_at    | 2.11E-06 | 2.11E-08 | 8.4071045 | 9.480108 | 3.1997984 CD69   | CD69 molecule                                                    |

|             |          |          |           |          |                 |                                                        |
|-------------|----------|----------|-----------|----------|-----------------|--------------------------------------------------------|
| 202642_s_at | 2.11E-06 | 2.11E-08 | 8.4064828 | 9.478857 | 1.1170277 TRRAP | transformation/transcription domain associated protein |
| 218683_at   | 2.11E-06 | 2.11E-08 | 8.4061661 | 9.47822  | 1.4772921 PTBP2 | polypyrimidine tract binding protein 2                 |
| 224606_at   | 2.13E-06 | 2.14E-08 | 8.3989984 | 9.4638   | 1.855737 KLF6   | Kruppel like factor 6                                  |

|             |          |          |           |          |           |                                                                                                                                                                                                                                          |
|-------------|----------|----------|-----------|----------|-----------|------------------------------------------------------------------------------------------------------------------------------------------------------------------------------------------------------------------------------------------|
| 210580_x_at | 2.16E-06 | 2.19E-08 | 8.3879171 | 9.441492 | 1.4539246 | SLX1B-SULT1A4 readthrough<br>SLX1B-SULT (NMD<br>1A4///SLX1A-candidate)///SLX1A-SULT1A3<br>SULT1A3///S readthrough (NMD<br>ULT1A4///SU candidate)///sulfotransferase family<br>LT1A3 1A member 4///sulfotransferase<br>family 1A member 3 |
| 213065_at   | 2.16E-06 | 2.20E-08 | 8.3859247 | 9.437479 | 1.7967886 | ZFC3H1 zinc finger C3H1-type containing                                                                                                                                                                                                  |
| 226848_at   | 2.16E-06 | 2.21E-08 | 8.383468  | 9.43253  | 1.6038577 |                                                                                                                                                                                                                                          |

|             |          |          |           |          |                   |                                    |
|-------------|----------|----------|-----------|----------|-------------------|------------------------------------|
| 1557049_at  | 2.17E-06 | 2.23E-08 | 8.3797026 | 9.424944 | 2.1775945BTBD19   | BTB domain containing 19           |
| 201012_at   | 2.18E-06 | 2.26E-08 | 8.373156  | 9.411749 | 3.7860636ANXA1    | annexin A1                         |
| 219506_at   | 2.18E-06 | 2.27E-08 | 8.371684  | 9.408781 | 2.2981686C1orf54  | chromosome 1 open reading frame 54 |
| 241681_at   | 2.18E-06 | 2.29E-08 | 8.3669229 | 9.39918  | 2.3273393         |                                    |
| 1556049_at  | 2.18E-06 | 2.29E-08 | 8.3668691 | 9.399071 | 1.4260286RTN4     | reticulon 4                        |
| 216264_s_at | 2.19E-06 | 2.31E-08 | 8.3631821 | 9.391634 | 1.7785479LAMB2    | laminin subunit beta 2             |
| 203903_s_at | 2.19E-06 | 2.31E-08 | 8.362854  | 9.390972 | 3.3735573HEPH     | hephaestin                         |
| 212918_at   | 2.20E-06 | 2.32E-08 | 8.3594154 | 9.384033 | 2.1792416RECQL    | RecQ like helicase                 |
| 1568765_at  | 2.20E-06 | 2.34E-08 | 8.357099  | 9.379359 | 2.9773754SERPINE1 | serpin family E member 1           |
| 223513_at   | 2.20E-06 | 2.34E-08 | 8.3564192 | 9.377987 | 1.8493396CENPJ    | centromere protein J               |



|             |          |          |           |          |                  |                                                |
|-------------|----------|----------|-----------|----------|------------------|------------------------------------------------|
| 203900_at   | 2.22E-06 | 2.39E-08 | 8.3453018 | 9.355538 | 1.0228948 SZT2   | seizure threshold 2 homolog<br>(mouse)         |
| 224591_at   | 2.23E-06 | 2.41E-08 | 8.3426815 | 9.350244 | 1.1408113 HP1BP3 | heterochromatin protein 1 binding<br>protein 3 |
| 227595_at   | 2.23E-06 | 2.41E-08 | 8.3417283 | 9.348319 | 1.2466545 ZMYM6  | zinc finger MYM-type containing<br>6           |
| 235318_at   | 2.24E-06 | 2.44E-08 | 8.3359798 | 9.336701 | 2.7750227 FBN1   | fibrillin 1                                    |
| 1564796_at  | 2.24E-06 | 2.46E-08 | 8.3321201 | 9.328898 | 2.9155905 EMP1   | epithelial membrane protein 1                  |
| 214736_s_at | 2.24E-06 | 2.47E-08 | 8.3307869 | 9.326203 | 1.2824023 ADD1   | adducin 1                                      |
| 226695_at   | 2.25E-06 | 2.48E-08 | 8.3288806 | 9.322348 | 2.8335555 PRRX1  | paired related homeobox 1                      |

|             |          |          |           |          |                 |                                                             |
|-------------|----------|----------|-----------|----------|-----------------|-------------------------------------------------------------|
| 226392_at   | 2.27E-06 | 2.52E-08 | 8.3201106 | 9.304606 | 2.2110677RASA2  | RAS p21 protein activator 2                                 |
| 227624_at   | 2.29E-06 | 2.57E-08 | 8.3115524 | 9.287282 | 1.6665559TET2   | tet methylcytosine dioxygenase 2                            |
| 202499_s_at | 2.30E-06 | 2.59E-08 | 8.3075769 | 9.279231 | 3.5660668SLC2A3 | solute carrier family 2 member 3                            |
| 204051_s_at | 2.31E-06 | 2.60E-08 | 8.3048491 | 9.273706 | 4.2392357SFRP4  | secreted frizzled related protein 4                         |
| 226329_s_at | 2.31E-06 | 2.61E-08 | 8.3037007 | 9.271379 | 2.173937MITD1   | microtubule interacting and trafficking domain containing 1 |

|             |          |          |           |          |           |         |                                      |
|-------------|----------|----------|-----------|----------|-----------|---------|--------------------------------------|
| 230000_at   | 2.31E-06 | 2.63E-08 | 8.2989104 | 9.261673 | 2.1417668 | RNF213  | ring finger protein 213              |
| 241435_at   | 2.31E-06 | 2.64E-08 | 8.2979338 | 9.259694 | 2.5397329 |         |                                      |
| 213269_at   | 2.32E-06 | 2.65E-08 | 8.2964405 | 9.256667 | 1.0149982 | ZNF248  | zinc finger protein 248              |
| 226474_at   | 2.34E-06 | 2.69E-08 | 8.2886987 | 9.24097  | 2.0162039 | NLRC5   | NLR family CARD domain containing 5  |
| 204094_s_at | 2.36E-06 | 2.75E-08 | 8.2777432 | 9.218742 | 1.6728002 | TSC22D2 | TSC22 domain family member 2         |
| 213994_s_at | 2.37E-06 | 2.77E-08 | 8.2747222 | 9.21261  | 3.115313  | SPON1   | spondin 1                            |
| 203603_s_at | 2.37E-06 | 2.78E-08 | 8.2723626 | 9.20782  | 2.6593877 | ZEB2    | zinc finger E-box binding homeobox 2 |

|             |          |          |           |          |                 |                                                   |
|-------------|----------|----------|-----------|----------|-----------------|---------------------------------------------------|
| 229554_at   | 2.38E-06 | 2.82E-08 | 8.2660908 | 9.195082 | 3.5482943LUM    | lumican                                           |
| 228282_at   | 2.41E-06 | 2.87E-08 | 8.2576513 | 9.177934 | 1.4602943MFSD8  | major facilitator superfamily domain containing 8 |
| 224900_at   | 2.41E-06 | 2.88E-08 | 8.2556365 | 9.173838 | 1.1563314ANKFY1 | ankyrin repeat and FYVE domain containing 1       |
| 203325_s_at | 2.41E-06 | 2.89E-08 | 8.2551472 | 9.172843 | 4.0726157COL5A1 | collagen type V alpha 1 chain                     |
| 212177_at   | 2.44E-06 | 2.93E-08 | 8.2484457 | 9.159217 | 1.9583639PNISR  | PNN interacting serine and arginine rich protein  |

|             |          |          |           |          |                     |                                                                                                 |
|-------------|----------|----------|-----------|----------|---------------------|-------------------------------------------------------------------------------------------------|
| 213931_at   | 2.45E-06 | 2.95E-08 | 8.2448113 | 9.151824 | 2.5612227ID2B///ID2 | inhibitor of DNA binding 2B, HLH protein (pseudogene)///inhibitor of DNA binding 2, HLH protein |
| 201836_s_at | 2.46E-06 | 2.98E-08 | 8.2395906 | 9.141201 | 1.1959814SUPT7L     | SPT7-like STAGA complex gamma subunit                                                           |
| 212489_at   | 2.47E-06 | 3.01E-08 | 8.2354226 | 9.132718 | 4.4764364COL5A1     | collagen type V alpha 1 chain                                                                   |

|             |          |          |           |          |                  |                                            |
|-------------|----------|----------|-----------|----------|------------------|--------------------------------------------|
| 228628_at   | 2.49E-06 | 3.04E-08 | 8.2307277 | 9.123158 | 2.0063518SRGAP2C | SLIT-ROBO Rho GTPase activating protein 2C |
| 215016_x_at | 2.49E-06 | 3.07E-08 | 8.2256712 | 9.112859 | 1.5067596DST     | dystonin                                   |
| 228964_at   | 2.52E-06 | 3.15E-08 | 8.2138226 | 9.088712 | 3.0381125PRDM1   | PR/SET domain 1                            |
| 211368_s_at | 2.52E-06 | 3.15E-08 | 8.2130706 | 9.087179 | 2.6154854CASP1   | caspase 1                                  |
| 228837_at   | 2.52E-06 | 3.15E-08 | 8.2128583 | 9.086746 | 1.6961032TCF4    | transcription factor 4                     |
| 204345_at   | 2.52E-06 | 3.17E-08 | 8.2100434 | 9.081006 | 1.9769213COL16A1 | collagen type XVI alpha 1 chain            |
| 212847_at   | 2.52E-06 | 3.17E-08 | 8.209978  | 9.080873 | 1.6137868FUBP1   | far upstream element binding protein 1     |
| 244414_at   | 2.54E-06 | 3.20E-08 | 8.204803  | 9.070317 | 2.2570546        |                                            |

|              |          |          |           |          |           |          |                                             |
|--------------|----------|----------|-----------|----------|-----------|----------|---------------------------------------------|
| 1552701_a_at | 2.54E-06 | 3.21E-08 | 8.2044824 | 9.069663 | 2.069917  | CARD16   | caspase recruitment domain family member 16 |
| 202820_at    | 2.54E-06 | 3.22E-08 | 8.2026739 | 9.065974 | 1.9976373 | AHR      | aryl hydrocarbon receptor                   |
| 219700_at    | 2.54E-06 | 3.28E-08 | 8.1942634 | 9.048808 | 2.7531388 | PLXDC1   | plexin domain containing 1                  |
| 202628_s_at  | 2.54E-06 | 3.28E-08 | 8.1932036 | 9.046644 | 3.7111646 | SERPINE1 | serpin family E member 1                    |
| 233480_at    | 2.54E-06 | 3.28E-08 | 8.1931772 | 9.04659  | 1.9842607 | TMEM43   | transmembrane protein 43                    |
| 203024_s_at  | 2.54E-06 | 3.28E-08 | 8.1930176 | 9.046264 | 1.5007334 | C5orf15  | chromosome 5 open reading frame 15          |

|             |          |          |           |          |           |             |                                                                            |
|-------------|----------|----------|-----------|----------|-----------|-------------|----------------------------------------------------------------------------|
| 238025_at   | 2.54E-06 | 3.29E-08 | 8.1917927 | 9.043763 | 1.30942   | MLKL        | mixed lineage kinase domain like                                           |
| 226251_at   | 2.54E-06 | 3.30E-08 | 8.1909403 | 9.042022 | 1.2667764 | ASXL2       | additional sex combs like 2,<br>transcriptional regulator                  |
| 220617_s_at | 2.56E-06 | 3.32E-08 | 8.1873214 | 9.034631 | 1.9124702 | ZNF532      | zinc finger protein 532                                                    |
| 222266_at   | 2.56E-06 | 3.34E-08 | 8.1849072 | 9.0297   | 1.3484711 |             |                                                                            |
| 37005_at    | 2.56E-06 | 3.35E-08 | 8.1842219 | 9.0283   | 2.3856282 | MINOS1-NBL1 | MINOS1-NBL1<br>readthrough///neuroblastoma 1,<br>DAN family BMP antagonist |



|             |          |          |           |          |                  |                                                  |
|-------------|----------|----------|-----------|----------|------------------|--------------------------------------------------|
| 225639_at   | 2.56E-06 | 3.36E-08 | 8.1822137 | 9.024196 | 2.64336 SKAP2    | src kinase associated phosphoprotein 2           |
| 206854_s_at | 2.57E-06 | 3.39E-08 | 8.1782188 | 9.016032 | 1.3482882 MAP3K7 | mitogen-activated protein kinase kinase kinase 7 |
| 212354_at   | 2.57E-06 | 3.39E-08 | 8.1773611 | 9.014279 | 5.0389423 SULF1  | sulfatase 1                                      |
| 229310_at   | 2.57E-06 | 3.40E-08 | 8.1766784 | 9.012884 | 1.8200105 KLHL29 | kelch like family member 29                      |
| 209932_s_at | 2.59E-06 | 3.46E-08 | 8.1678989 | 8.994932 | 1.1205802 DUT    | deoxyuridine triphosphatase                      |
| 222146_s_at | 2.60E-06 | 3.49E-08 | 8.1635771 | 8.986091 | 2.2277305 TCF4   | transcription factor 4                           |

|             |          |          |           |          |                   |                                         |
|-------------|----------|----------|-----------|----------|-------------------|-----------------------------------------|
| 202656_s_at | 2.61E-06 | 3.51E-08 | 8.1616501 | 8.982148 | 1.2470341 SERTAD2 | SERTA domain containing 2               |
| 238534_at   | 2.63E-06 | 3.56E-08 | 8.1542875 | 8.967078 | 2.0363911 LRRFIP1 | LRR binding FLII interacting protein 1  |
| 225913_at   | 2.65E-06 | 3.62E-08 | 8.1466606 | 8.951459 | 1.4194345 PEAK1   | pseudopodium enriched atypical kinase 1 |
| 213800_at   | 2.65E-06 | 3.63E-08 | 8.1458804 | 8.949861 | 2.3955505 CFH     | complement factor H                     |
| 232597_x_at | 2.65E-06 | 3.65E-08 | 8.1425786 | 8.943096 | 1.5957384 SCAF11  | SR-related CTD associated factor 11     |

1555889\_a\_at 2.65E-06 3.65E-08 8.141981 8.941872 1.0842679 CRTAP cartilage associated protein

|             |          |          |           |          |           |                                              |
|-------------|----------|----------|-----------|----------|-----------|----------------------------------------------|
|             |          |          |           |          |           | microRNA 6859-1///microRNA                   |
|             |          |          |           |          |           | MIR6859-1/// 6859-2///WAS protein family     |
|             |          |          |           |          |           | MIR6859-2/// homolog 6-like///WAS protein    |
|             |          |          |           |          |           | LOC10193015 family homolog 1                 |
| 233929_x_at | 2.67E-06 | 3.70E-08 | 8.1364448 | 8.930526 | 1.2592945 | 4///LOC10028 pseudogene///WAS protein family |
|             |          |          |           |          |           | 8778///WASH homolog 1///WAS protein family   |
|             |          |          |           |          |           | 1///WASH7P// homolog 7 pseudogene///WAS      |
|             |          |          |           |          |           | /WASH2P/// protein family homolog 2          |
|             |          |          |           |          |           | WASH3P pseudogene///WAS protein family       |
|             |          |          |           |          |           | homolog 3 pseudogene                         |

|             |          |          |           |          |           |         |                                         |
|-------------|----------|----------|-----------|----------|-----------|---------|-----------------------------------------|
| 208634_s_at | 2.68E-06 | 3.72E-08 | 8.1333938 | 8.924271 | 1.6511307 | MACF1   | microtubule-actin crosslinking factor 1 |
| 219073_s_at | 2.68E-06 | 3.72E-08 | 8.1331085 | 8.923686 | 2.7948045 | OSBPL10 | oxysterol binding protein like 10       |
| 218396_at   | 2.68E-06 | 3.73E-08 | 8.1325952 | 8.922633 | 1.9094663 | VPS13C  | vacuolar protein sorting 13 homolog C   |
| 228722_at   | 2.68E-06 | 3.74E-08 | 8.1303877 | 8.918107 | 1.0911525 | PRMT2   | protein arginine methyltransferase 2    |
| 227947_at   | 2.68E-06 | 3.75E-08 | 8.1290889 | 8.915443 | 2.106268  | PHACTR2 | phosphatase and actin regulator 2       |

|           |          |          |           |          |                   |                                             |
|-----------|----------|----------|-----------|----------|-------------------|---------------------------------------------|
| 229694_at | 2.68E-06 | 3.79E-08 | 8.1243131 | 8.905647 | 1.4962395 WDR11   | WD repeat domain 11                         |
| 218854_at | 2.68E-06 | 3.81E-08 | 8.1215885 | 8.900056 | 2.9147591 DSE     | dermatan sulfate epimerase                  |
| 218456_at | 2.71E-06 | 3.88E-08 | 8.1140562 | 8.884596 | 2.2522691 CAPRIN2 | caprin family member 2                      |
| 209115_at | 2.71E-06 | 3.90E-08 | 8.1109824 | 8.878285 | 1.6584766 UBA3    | ubiquitin like modifier activating enzyme 3 |

|             |          |          |           |          |             |                                                                                                                          |
|-------------|----------|----------|-----------|----------|-------------|--------------------------------------------------------------------------------------------------------------------------|
| 209412_at   | 2.73E-06 | 3.95E-08 | 8.1055045 | 8.867033 | LOC10272420 | trafficking protein particle complex<br>1.38170///TRAPPC1 subunit 10-like///trafficking protein<br>0 particle complex 10 |
| 218249_at   | 2.74E-06 | 3.97E-08 | 8.102533  | 8.860929 | 1.3533832   | ZDHHC6 zinc finger DHHC-type containing<br>6                                                                             |
| 235072_s_at | 2.74E-06 | 3.97E-08 | 8.1022238 | 8.860293 | 1.1660009   | KIF13A kinesin family member 13A                                                                                         |
| 212820_at   | 2.75E-06 | 4.00E-08 | 8.0988745 | 8.85341  | 2.5732073   | DMXL2 Dmx like 2                                                                                                         |
| 212254_s_at | 2.76E-06 | 4.02E-08 | 8.0970895 | 8.849742 | 1.4121789   | DST dystonin                                                                                                             |

|           |          |          |           |          |           |          |                                                |
|-----------|----------|----------|-----------|----------|-----------|----------|------------------------------------------------|
| 201938_at | 2.77E-06 | 4.04E-08 | 8.0936929 | 8.842759 | 1.2528232 | CDK2AP1  | cyclin dependent kinase 2 associated protein 1 |
| 225275_at | 2.78E-06 | 4.07E-08 | 8.09106   | 8.837345 | 3.0836384 | EDIL3    | EGF like repeats and discoidin domains 3       |
| 224817_at | 2.78E-06 | 4.07E-08 | 8.0904601 | 8.836112 | 1.9753388 | SH3PXD2A | SH3 and PX domains 2A                          |



|             |          |          |           |          |           |                       |                                                                                                                                             |
|-------------|----------|----------|-----------|----------|-----------|-----------------------|---------------------------------------------------------------------------------------------------------------------------------------------|
| 207856_s_at | 2.78E-06 | 4.10E-08 | 8.0874453 | 8.829911 | 1.1249195 | LOC150776///<br>SMPD4 | sphingomyelin phosphodiesterase<br>4, neutral membrane (neutral<br>sphingomyelinase-3)<br>pseudogene///sphingomyelin<br>phosphodiesterase 4 |
| 227861_at   | 2.78E-06 | 4.10E-08 | 8.0873778 | 8.829772 | 1.3245987 | TMEM161B              | transmembrane protein 161B                                                                                                                  |
| 221774_x_at | 2.78E-06 | 4.11E-08 | 8.0864029 | 8.827767 | 1.0716836 | SUPT20H               | SPT20 homolog, SAGA complex<br>component                                                                                                    |

|             |          |          |           |          |           |         |                                                                  |
|-------------|----------|----------|-----------|----------|-----------|---------|------------------------------------------------------------------|
| 217196_s_at | 2.78E-06 | 4.12E-08 | 8.0848634 | 8.8246   | 1.8921664 | CAMSAP2 | calmodulin regulated spectrin associated protein family member 2 |
| 236251_at   | 2.80E-06 | 4.16E-08 | 8.0804963 | 8.815615 | 1.8162129 |         |                                                                  |
| 225123_at   | 2.80E-06 | 4.16E-08 | 8.0802391 | 8.815085 | 1.8415721 | SESN3   | sestrin 3                                                        |
| 209006_s_at | 2.86E-06 | 4.33E-08 | 8.0616032 | 8.776709 | 2.3629536 | RSRP1   | arginine and serine rich protein 1                               |
| 235421_at   | 2.86E-06 | 4.34E-08 | 8.0604528 | 8.774339 | 2.4365307 | MAP3K8  | mitogen-activated protein kinase kinase kinase 8                 |
| 201655_s_at | 2.87E-06 | 4.37E-08 | 8.0567269 | 8.76666  | 2.0490307 | HSPG2   | heparan sulfate proteoglycan 2                                   |

|             |          |          |           |          |           |       |                                                                            |
|-------------|----------|----------|-----------|----------|-----------|-------|----------------------------------------------------------------------------|
| 204472_at   | 2.87E-06 | 4.38E-08 | 8.055734  | 8.764613 | 3.3700168 | GEM   | GTP binding protein overexpressed in skeletal muscle                       |
| 203518_at   | 2.88E-06 | 4.42E-08 | 8.0517483 | 8.756396 | 1.7954271 | LYST  | lysosomal trafficking regulator                                            |
| 230387_at   | 2.88E-06 | 4.44E-08 | 8.0488979 | 8.750518 | 2.2419018 |       |                                                                            |
| 209341_s_at | 2.88E-06 | 4.45E-08 | 8.0484373 | 8.749568 | 1.6873936 | IKBKB | inhibitor of kappa light polypeptide gene enhancer in B-cells, kinase beta |
| 212353_at   | 2.89E-06 | 4.49E-08 | 8.0443941 | 8.741228 | 5.3117462 | SULF1 | sulfatase 1                                                                |
| 202269_x_at | 2.90E-06 | 4.53E-08 | 8.039684  | 8.731509 | 3.2955534 | GBP1  | guanylate binding protein 1                                                |

|              |          |          |           |          |           |                                                                                           |
|--------------|----------|----------|-----------|----------|-----------|-------------------------------------------------------------------------------------------|
| 1555630_a_at | 2.91E-06 | 4.54E-08 | 8.0384619 | 8.728987 | 2.5383539 | NARR///RAB34<br>nine-amino acid<br>residue-repeats///RAB34, member<br>RAS oncogene family |
| 225021_at    | 2.93E-06 | 4.61E-08 | 8.0320537 | 8.715758 | 2.423737  | ZNF532<br>zinc finger protein 532                                                         |
| 234995_at    | 2.94E-06 | 4.62E-08 | 8.0305805 | 8.712716 | 1.5791588 | SPICE1<br>spindle and centriole associated<br>protein 1                                   |
| 222872_x_at  | 2.94E-06 | 4.65E-08 | 8.0277554 | 8.706882 | 2.6541836 | NABP1<br>nucleic acid binding protein 1                                                   |
| 221911_at    | 2.94E-06 | 4.67E-08 | 8.0256539 | 8.702541 | 2.3802818 | ETV1<br>ETS variant 1                                                                     |

|             |          |          |           |          |           |        |                                                      |
|-------------|----------|----------|-----------|----------|-----------|--------|------------------------------------------------------|
| 208882_s_at | 2.94E-06 | 4.70E-08 | 8.0228836 | 8.696818 | 1.5908132 | UBR5   | ubiquitin protein ligase E3<br>component n-recogin 5 |
| 228640_at   | 2.94E-06 | 4.70E-08 | 8.0223598 | 8.695735 | 3.8660296 | PCDH7  | protocadherin 7                                      |
| 225646_at   | 2.94E-06 | 4.71E-08 | 8.0218094 | 8.694598 | 2.2717471 | CTSC   | cathepsin C                                          |
| 226875_at   | 2.96E-06 | 4.75E-08 | 8.0178689 | 8.686455 | 2.5500905 | DOCK11 | dedicator of cytokinesis 11                          |

|             |          |          |           |          |             |                                                                                                                                                                                             |
|-------------|----------|----------|-----------|----------|-------------|---------------------------------------------------------------------------------------------------------------------------------------------------------------------------------------------|
|             |          |          |           |          |             | HLA class II histocompatibility antigen, DQ beta 1 chain-like///HLA class II                                                                                                                |
|             |          |          |           |          | LOC10106083 | histocompatibility antigen, 5///LOC10099 DRB1-10 beta chain-like///major 6809///HLA-D histocompatibility complex, class RB5///HLA-D II, DR beta 5///major                                   |
| 209312_x_at | 2.96E-06 | 4.75E-08 | 8.0173312 | 8.685344 | 2.6476305   | RB4///HLA-D histocompatibility complex, class RB1///HLA-D II, DR beta 4///major QB1 histocompatibility complex, class II, DR beta 1///major histocompatibility complex, class II, DQ beta 1 |

|             |          |          |           |          |           |                    |                                                             |
|-------------|----------|----------|-----------|----------|-----------|--------------------|-------------------------------------------------------------|
| 211675_s_at | 2.96E-06 | 4.76E-08 | 8.0163111 | 8.683235 | 1.7420716 | MDFIC              | MyoD family inhibitor domain containing                     |
| 240307_at   | 2.96E-06 | 4.78E-08 | 8.0142573 | 8.678989 | 1.6117057 |                    |                                                             |
| 225524_at   | 2.96E-06 | 4.79E-08 | 8.0139022 | 8.678255 | 2.4591929 | ANTXR2             | anthrax toxin receptor 2                                    |
| 219165_at   | 2.96E-06 | 4.81E-08 | 8.0111104 | 8.672483 | 1.9113713 | PDLIM2             | PDZ and LIM domain 2                                        |
| 204176_at   | 2.97E-06 | 4.83E-08 | 8.0090095 | 8.668139 | 1.5960377 | KLHL20             | kelch like family member 20                                 |
| 221989_at   | 2.97E-06 | 4.84E-08 | 8.0085309 | 8.667149 | 1.9221452 | SNORA70//R<br>PL10 | small nucleolar RNA, H/ACA box<br>70//ribosomal protein L10 |

|             |          |          |           |          |           |       |                                                         |
|-------------|----------|----------|-----------|----------|-----------|-------|---------------------------------------------------------|
| 209682_at   | 2.97E-06 | 4.85E-08 | 8.0073636 | 8.664734 | 1.9366429 | CBLB  | Cbl proto-oncogene B                                    |
| 215127_s_at | 2.97E-06 | 4.86E-08 | 8.0068369 | 8.663645 | 1.9579821 | RBMS1 | RNA binding motif single stranded interacting protein 1 |
| 212895_s_at | 2.98E-06 | 4.91E-08 | 8.0020417 | 8.653725 | 1.3234841 | ABR   | active BCR-related                                      |
| 224778_s_at | 2.98E-06 | 4.92E-08 | 8.0006448 | 8.650835 | 1.4318318 | TAOK1 | TAO kinase 1                                            |
| 225077_at   | 2.98E-06 | 4.93E-08 | 7.9995242 | 8.648516 | 1.2368455 | CHD2  | chromodomain helicase DNA binding protein 2             |



|             |          |          |           |          |           |         |                                   |
|-------------|----------|----------|-----------|----------|-----------|---------|-----------------------------------|
| 209084_s_at | 2.98E-06 | 4.93E-08 | 7.9994536 | 8.64837  | 1.3459888 | RAB28   | RAB28, member RAS oncogene family |
| 212599_at   | 3.03E-06 | 5.04E-08 | 7.9892118 | 8.627167 | 2.0530213 | AUTS2   | autism susceptibility candidate 2 |
| 201987_at   | 3.04E-06 | 5.07E-08 | 7.9863158 | 8.621169 | 1.029962  | MED13   | mediator complex subunit 13       |
| 225045_at   | 3.04E-06 | 5.09E-08 | 7.984804  | 8.618038 | 2.2277888 | CCDC88A | coiled-coil domain containing 88A |

|             |          |          |           |         |            |                                                                                                                                  |
|-------------|----------|----------|-----------|---------|------------|----------------------------------------------------------------------------------------------------------------------------------|
| 211656_x_at | 3.04E-06 | 5.12E-08 | 7.9814747 | 8.61114 | 2.62613665 | HLA class II histocompatibility<br>antigen, DQ beta 1<br>chain-like//major<br>histocompatibility complex, class<br>II, DQ beta 1 |
|-------------|----------|----------|-----------|---------|------------|----------------------------------------------------------------------------------------------------------------------------------|

|             |          |          |           |          |           |                               |                                                                                                                       |
|-------------|----------|----------|-----------|----------|-----------|-------------------------------|-----------------------------------------------------------------------------------------------------------------------|
| 215629_s_at | 3.04E-06 | 5.13E-08 | 7.9808922 | 8.609933 | 1.4844768 | MIR15A//DL<br>EU2L//DLEU<br>2 | microRNA 15a//deleted in<br>lymphocytic leukemia<br>2-like//deleted in lymphocytic<br>leukemia 2 (non-protein coding) |
| 229218_at   | 3.04E-06 | 5.15E-08 | 7.9794883 | 8.607024 | 3.6445152 | COL1A2                        | collagen type I alpha 2 chain                                                                                         |
| 201325_s_at | 3.04E-06 | 5.16E-08 | 7.9786051 | 8.605194 | 2.4274943 | EMP1                          | epithelial membrane protein 1                                                                                         |

|             |          |          |           |          |                 |                                                |
|-------------|----------|----------|-----------|----------|-----------------|------------------------------------------------|
| 225461_at   | 3.06E-06 | 5.21E-08 | 7.9735784 | 8.594774 | 1.2363521 EHMT1 | euchromatic histone lysine methyltransferase 1 |
| 218656_s_at | 3.07E-06 | 5.27E-08 | 7.9683275 | 8.583886 | 1.795123 LHFP   | lipoma HMGIC fusion partner                    |
| 202202_s_at | 3.07E-06 | 5.27E-08 | 7.9678683 | 8.582934 | 3.4489655 LAMA4 | laminin subunit alpha 4                        |
| 37408_at    | 3.07E-06 | 5.29E-08 | 7.9662268 | 8.57953  | 2.1001363 MRC2  | mannose receptor C type 2                      |
| 225364_at   | 3.09E-06 | 5.32E-08 | 7.9637058 | 8.5743   | 1.3289484 STK4  | serine/threonine kinase 4                      |
| 225921_at   | 3.11E-06 | 5.37E-08 | 7.9591412 | 8.564829 | 1.8047925 NIN   | ninein                                         |
| 221011_s_at | 3.11E-06 | 5.41E-08 | 7.9561512 | 8.558623 | 2.5653295 LBH   | limb bud and heart development                 |

|           |          |          |           |          |                     |                                               |
|-----------|----------|----------|-----------|----------|---------------------|-----------------------------------------------|
| 226743_at | 3.14E-06 | 5.50E-08 | 7.9479938 | 8.541687 | 1.6236661 SLFN11    | schlafen family member 11                     |
| 227061_at | 3.14E-06 | 5.50E-08 | 7.9477659 | 8.541214 | 2.9944443 LINC01279 | long intergenic non-protein coding RNA 1279   |
| 232098_at | 3.15E-06 | 5.54E-08 | 7.9447429 | 8.534935 | 2.162598 DST        | dystonin                                      |
| 239014_at | 3.15E-06 | 5.54E-08 | 7.9446942 | 8.534833 | 1.4654191 CCAR1     | cell division cycle and apoptosis regulator 1 |
| 226831_at | 3.15E-06 | 5.56E-08 | 7.9427551 | 8.530805 | 1.2697695 SLC25A46  | solute carrier family 25 member 46            |
| 233314_at | 3.15E-06 | 5.57E-08 | 7.942336  | 8.529935 | 1.6585493           |                                               |

|             |          |          |           |          |           |         |                                                           |
|-------------|----------|----------|-----------|----------|-----------|---------|-----------------------------------------------------------|
| 203688_at   | 3.16E-06 | 5.58E-08 | 7.9415377 | 8.528276 | 1.450078  | PKD2    | polycystin 2, transient receptor potential cation channel |
| 209285_s_at | 3.16E-06 | 5.61E-08 | 7.9390206 | 8.523046 | 1.5308964 | FAM208A | family with sequence similarity 208 member A              |
| 205422_s_at | 3.16E-06 | 5.61E-08 | 7.9386942 | 8.522367 | 3.5586421 | ITGBL1  | integrin subunit beta like 1                              |
| 201664_at   | 3.18E-06 | 5.65E-08 | 7.935074  | 8.514843 | 2.691747  | SMC4    | structural maintenance of chromosomes 4                   |
| 201141_at   | 3.18E-06 | 5.66E-08 | 7.9345417 | 8.513737 | 3.2287305 | GPNMB   | glycoprotein nmb                                          |

|           |          |          |           |          |           |                           |                                                                                                    |
|-----------|----------|----------|-----------|----------|-----------|---------------------------|----------------------------------------------------------------------------------------------------|
| 212511_at | 3.20E-06 | 5.70E-08 | 7.9309048 | 8.506176 | 1.7831513 | PICALM                    | phosphatidylinositol binding<br>clathrin assembly protein                                          |
| 226208_at | 3.20E-06 | 5.75E-08 | 7.9271671 | 8.498403 | 1.3981359 | ZSWIM6                    | zinc finger SWIM-type containing<br>6                                                              |
| 232207_at | 3.20E-06 | 5.75E-08 | 7.927008  | 8.498072 | 1.0318489 | LOC10065306<br>1///GUSBP4 | putative inactive<br>beta-glucuronidase-like protein<br>SMA3///glucuronidase, beta<br>pseudogene 4 |

|             |          |          |           |          |           |                                  |                                                        |
|-------------|----------|----------|-----------|----------|-----------|----------------------------------|--------------------------------------------------------|
| 221698_s_at | 3.21E-06 | 5.77E-08 | 7.9257963 | 8.495552 | 2.515273  | CLEC7A                           | C-type lectin domain family 7 member A                 |
| 225886_at   | 3.21E-06 | 5.78E-08 | 7.9246042 | 8.493072 | 1.3904032 | DDX5                             | DEAD-box helicase 5                                    |
| 221778_at   | 3.21E-06 | 5.79E-08 | 7.9235438 | 8.490867 | 1.2539682 | KDM7A                            | lysine demethylase 7A                                  |
| 242467_at   | 3.21E-06 | 5.80E-08 | 7.9230618 | 8.489864 | 1.8435627 |                                  |                                                        |
| 219371_s_at | 3.29E-06 | 6.00E-08 | 7.9067805 | 8.455974 | 2.3356196 | KLF2                             | Kruppel like factor 2                                  |
| 200033_at   | 3.29E-06 | 6.02E-08 | 7.9052078 | 8.452698 | 1.8469327 | MIR5047///MI<br>R3064///DDX<br>5 | microRNA 5047///microRNA<br>3064///DEAD-box helicase 5 |



|             |          |          |           |          |                   |                                            |
|-------------|----------|----------|-----------|----------|-------------------|--------------------------------------------|
| 225758_s_at | 3.29E-06 | 6.04E-08 | 7.9044219 | 8.451061 | 1.0418571 TUBGCP6 | tubulin gamma complex associated protein 6 |
| 203706_s_at | 3.29E-06 | 6.04E-08 | 7.9041095 | 8.450411 | 2.5915784 FZD7    | frizzled class receptor 7                  |
| 204963_at   | 3.30E-06 | 6.07E-08 | 7.9019107 | 8.44583  | 1.6610204 SSPN    | sarcospan                                  |
| 227276_at   | 3.30E-06 | 6.10E-08 | 7.899591  | 8.440997 | 2.7398436 PLXDC2  | plexin domain containing 2                 |
| 227040_at   | 3.32E-06 | 6.13E-08 | 7.8967239 | 8.435022 | 2.1595416 NHLRC3  | NHL repeat containing 3                    |
| 215111_s_at | 3.32E-06 | 6.14E-08 | 7.8965215 | 8.4346   | 1.7521625 TSC22D1 | TSC22 domain family member 1               |
| 213883_s_at | 3.33E-06 | 6.18E-08 | 7.8932308 | 8.427741 | 1.2290371 TM2D1   | TM2 domain containing 1                    |

|             |          |          |           |          |           |         |                                             |
|-------------|----------|----------|-----------|----------|-----------|---------|---------------------------------------------|
| 224560_at   | 3.33E-06 | 6.22E-08 | 7.8902108 | 8.421445 | 2.2077486 | TIMP2   | TIMP metalloproteinase inhibitor 2          |
| 226103_at   | 3.33E-06 | 6.24E-08 | 7.8886512 | 8.418193 | 2.0347782 | NEXN    | nexilin F-actin binding protein             |
| 204881_s_at | 3.33E-06 | 6.25E-08 | 7.8877033 | 8.416216 | 1.6668725 | UGCG    | UDP-glucose ceramide<br>glucosyltransferase |
| 215446_s_at | 3.33E-06 | 6.26E-08 | 7.8873264 | 8.41543  | 3.4415623 | LOX     | lysyl oxidase                               |
| 205976_at   | 3.33E-06 | 6.27E-08 | 7.8866439 | 8.414007 | 1.0719545 | FASTKD2 | FAST kinase domains 2                       |
| 242907_at   | 3.33E-06 | 6.28E-08 | 7.8856708 | 8.411977 | 2.4575766 | GBP2    | guanylate binding protein 2                 |
| 203156_at   | 3.35E-06 | 6.31E-08 | 7.8834244 | 8.407292 | 1.3765032 | AKAP11  | A-kinase anchoring protein 11               |

|             |          |          |           |          |                   |                                              |
|-------------|----------|----------|-----------|----------|-------------------|----------------------------------------------|
| 201431_s_at | 3.35E-06 | 6.32E-08 | 7.8828713 | 8.406138 | 2.5968473 DPYSL3  | dihydropyrimidinase like 3                   |
| 204663_at   | 3.36E-06 | 6.39E-08 | 7.8778052 | 8.395568 | 1.1909305 ME3     | malic enzyme 3                               |
| 208611_s_at | 3.40E-06 | 6.49E-08 | 7.8706316 | 8.380594 | 1.1842914 SPTAN1  | spectrin alpha, non-erythrocytic 1           |
| 230389_at   | 3.41E-06 | 6.53E-08 | 7.867112  | 8.373245 | 1.5658146 FNBP1   | formin binding protein 1                     |
| 226294_x_at | 3.41E-06 | 6.54E-08 | 7.8668115 | 8.372617 | 1.3917273 FAM91A1 | family with sequence similarity 91 member A1 |
| 217728_at   | 3.41E-06 | 6.58E-08 | 7.863928  | 8.366595 | 2.9200175 S100A6  | S100 calcium binding protein A6              |
| 201261_x_at | 3.41E-06 | 6.59E-08 | 7.8632121 | 8.3651   | 2.8287811 BGN     | biglycan                                     |

|             |          |          |           |          |                    |                                          |
|-------------|----------|----------|-----------|----------|--------------------|------------------------------------------|
| 214927_at   | 3.41E-06 | 6.63E-08 | 7.8605303 | 8.359497 | 3.2088277ITGBL1    | integrin subunit beta like 1             |
| 212447_at   | 3.43E-06 | 6.66E-08 | 7.8579847 | 8.354178 | 1.3901339KBTBD2    | kelch repeat and BTB domain containing 2 |
| 213376_at   | 3.44E-06 | 6.73E-08 | 7.8535534 | 8.344917 | 1.6863463ZBTB1     | zinc finger and BTB domain containing 1  |
| 243874_at   | 3.45E-06 | 6.79E-08 | 7.8489715 | 8.335338 | 2.0132114          |                                          |
| 207081_s_at | 3.45E-06 | 6.79E-08 | 7.84897   | 8.335335 | 1.7581988PI4KA     | phosphatidylinositol 4-kinase alpha      |
| 236079_at   | 3.46E-06 | 6.83E-08 | 7.8462746 | 8.329699 | 1.3402802LOC202025 | uncharacterized LOC202025                |

|             |          |          |           |          |           |        |                                                        |
|-------------|----------|----------|-----------|----------|-----------|--------|--------------------------------------------------------|
| 238327_at   | 3.46E-06 | 6.84E-08 | 7.8456872 | 8.32847  | 2.539382  | ODF3B  | outer dense fiber of sperm tails 3B                    |
| 201798_s_at | 3.46E-06 | 6.85E-08 | 7.8448518 | 8.326723 | 3.0976388 | MYOF   | myoferlin                                              |
| 219372_at   | 3.46E-06 | 6.89E-08 | 7.8422553 | 8.321292 | 1.4021113 | IFT81  | intraflagellar transport 81                            |
| 226040_at   | 3.46E-06 | 6.89E-08 | 7.8421125 | 8.320993 | 1.2898646 | TRIM56 | tripartite motif containing 56                         |
| 224791_at   | 3.46E-06 | 6.90E-08 | 7.8416226 | 8.319968 | 2.158317  | ASAP1  | ArfGAP with SH3 domain, ankyrin repeat and PH domain 1 |
| 218397_at   | 3.54E-06 | 7.12E-08 | 7.8271885 | 8.289758 | 1.6630123 | FANCL  | Fanconi anemia complementation group L                 |

|             |          |          |           |          |                   |                                                   |
|-------------|----------|----------|-----------|----------|-------------------|---------------------------------------------------|
| 222673_x_at | 3.54E-06 | 7.14E-08 | 7.8257711 | 8.28679  | 1.2327341 FAM122B | family with sequence similarity 122B              |
| 227111_at   | 3.59E-06 | 7.24E-08 | 7.8189253 | 8.27245  | 1.0212188 ZBTB34  | zinc finger and BTB domain containing 34          |
| 201899_s_at | 3.60E-06 | 7.28E-08 | 7.8163863 | 8.267129 | 1.0348382 UBE2A   | ubiquitin conjugating enzyme E2 A                 |
| 225842_at   | 3.60E-06 | 7.29E-08 | 7.8158667 | 8.266041 | 2.1989338 PHLDA1  | pleckstrin homology like domain family A member 1 |
| 209156_s_at | 3.60E-06 | 7.30E-08 | 7.8150646 | 8.26436  | 3.0110911 COL6A2  | collagen type VI alpha 2 chain                    |

|             |          |          |           |          |           |                     |                                             |
|-------------|----------|----------|-----------|----------|-----------|---------------------|---------------------------------------------|
| 225147_at   | 3.61E-06 | 7.36E-08 | 7.8115278 | 8.256947 | 1.2513663 | CYTH3               | cytohesin 3                                 |
| 227566_at   | 3.61E-06 | 7.36E-08 | 7.81133   | 8.256532 | 4.0181595 | LOC102725271<br>NTM | neurotrimin-like///neurotrimin              |
| 212785_s_at | 3.61E-06 | 7.37E-08 | 7.8107775 | 8.255374 | 1.3271086 | LARP7               | La ribonucleoprotein domain family member 7 |
| 218962_s_at | 3.61E-06 | 7.37E-08 | 7.8107574 | 8.255331 | 1.2273129 | TMEM168             | transmembrane protein 168                   |
| 209348_s_at | 3.61E-06 | 7.37E-08 | 7.8107399 | 8.255295 | 2.101618  | MAF                 | MAF bZIP transcription factor               |
| 208782_at   | 3.62E-06 | 7.39E-08 | 7.8094345 | 8.252558 | 2.4026602 | FSTL1               | follistatin like 1                          |
| 236297_at   | 3.63E-06 | 7.43E-08 | 7.80706   | 8.247579 | 2.9903973 | PLXDC2              | plexin domain containing 2                  |

|             |          |          |           |          |           |         |                                                       |
|-------------|----------|----------|-----------|----------|-----------|---------|-------------------------------------------------------|
| 201450_s_at | 3.63E-06 | 7.43E-08 | 7.807018  | 8.247491 | 1.8033007 | TIA1    | TIA1 cytotoxic granule-associated RNA binding protein |
| 212622_at   | 3.63E-06 | 7.46E-08 | 7.8048657 | 8.242978 | 1.1297289 | TMEM41B | transmembrane protein 41B                             |
| 203241_at   | 3.63E-06 | 7.50E-08 | 7.8028862 | 8.238826 | 1.0887334 | UVRAG   | UV radiation resistance associated                    |
| 218247_s_at | 3.63E-06 | 7.50E-08 | 7.8025892 | 8.238203 | 1.1846382 | MEX3C   | mex-3 RNA binding family member C                     |



|             |          |          |           |          |           |                                                                                                                                                                                                                                                                                                                                                                   |
|-------------|----------|----------|-----------|----------|-----------|-------------------------------------------------------------------------------------------------------------------------------------------------------------------------------------------------------------------------------------------------------------------------------------------------------------------------------------------------------------------|
| 215193_x_at | 3.63E-06 | 7.51E-08 | 7.8020484 | 8.237069 | 2.8043129 | HLA class II histocompatibility antigen, DQ beta 1 chain-like///HLA class II                                                                                                                                                                                                                                                                                      |
|             |          |          |           |          |           | LOC10106083 histocompatibility antigen, 5///LOC10099 DRB1-10 beta chain-like///major 6809///HLA-D histocompatibility complex, class RB4///HLA-D II, DR beta 4///major RB3///HLA-D histocompatibility complex, class RB1///HLA-D II, DR beta 3///major QB1 histocompatibility complex, class II, DR beta 1///major histocompatibility complex, class II, DQ beta 1 |

|             |          |          |           |          |                 |                                             |
|-------------|----------|----------|-----------|----------|-----------------|---------------------------------------------|
| 208679_s_at | 3.63E-06 | 7.51E-08 | 7.8018172 | 8.236584 | 1.6974714ARPC2  | actin related protein 2/3 complex subunit 2 |
| 231579_s_at | 3.64E-06 | 7.57E-08 | 7.7979659 | 8.228504 | 2.1167527TIMP2  | TIMP metalloproteinase inhibitor 2          |
| 227930_at   | 3.64E-06 | 7.57E-08 | 7.79793   | 8.228429 | 1.3022016AGO4   | argonaute 4, RISC catalytic component       |
| 236179_at   | 3.66E-06 | 7.63E-08 | 7.7946443 | 8.221534 | 3.0590313CDH11  | cadherin 11                                 |
| 205269_at   | 3.67E-06 | 7.68E-08 | 7.7913672 | 8.214656 | 2.697222LCP2    | lymphocyte cytosolic protein 2              |
| 227485_at   | 3.67E-06 | 7.69E-08 | 7.790716  | 8.213289 | 1.3938386INTS6L | integrator complex subunit 6 like           |

|              |          |          |           |          |           |          |                                                          |
|--------------|----------|----------|-----------|----------|-----------|----------|----------------------------------------------------------|
| 213261_at    | 3.68E-06 | 7.70E-08 | 7.790014  | 8.211815 | 1.2722409 | TRANK1   | tetratricopeptide repeat and ankyrin repeat containing 1 |
| 1556126_s_at | 3.68E-06 | 7.72E-08 | 7.788888  | 8.209451 | 1.2226414 |          |                                                          |
| 217478_s_at  | 3.68E-06 | 7.72E-08 | 7.7888669 | 8.209407 | 2.5058036 | HLA-DMA  | major histocompatibility complex, class II, DM alpha     |
| 230071_at    | 3.72E-06 | 7.86E-08 | 7.7806019 | 8.19205  | 1.8067    | SEPT11   | septin 11                                                |
| 232568_at    | 3.73E-06 | 7.90E-08 | 7.7782723 | 8.187156 | 2.7249373 | MGC24103 | uncharacterized MGC24103                                 |
| 202066_at    | 3.73E-06 | 7.91E-08 | 7.7778061 | 8.186176 | 1.1998512 | PPFIA1   | PTPRF interacting protein alpha 1                        |

|             |          |          |           |          |           |                 |                                                                         |
|-------------|----------|----------|-----------|----------|-----------|-----------------|-------------------------------------------------------------------------|
| 236600_at   | 3.75E-06 | 7.98E-08 | 7.7735412 | 8.177214 | 1.1505073 | SPG20           | spastic paraplegia 20 (Troyer syndrome)                                 |
| 206133_at   | 3.76E-06 | 8.02E-08 | 7.7713158 | 8.172537 | 2.9713764 | XAF1            | XIAP associated factor 1                                                |
| 226917_s_at | 3.78E-06 | 8.08E-08 | 7.7679101 | 8.165378 | 1.3854241 | ANAPC4          | anaphase promoting complex subunit 4                                    |
| 235925_at   | 3.78E-06 | 8.09E-08 | 7.7673876 | 8.164279 | 1.6116877 |                 |                                                                         |
| 204820_s_at | 3.78E-06 | 8.10E-08 | 7.7666713 | 8.162773 | 2.0961588 | BTN3A2///BTN3A3 | butyrophilin subfamily 3 member A2///butyrophilin subfamily 3 member A3 |

|             |          |          |           |          |                  |                                                     |
|-------------|----------|----------|-----------|----------|------------------|-----------------------------------------------------|
| 223204_at   | 3.78E-06 | 8.10E-08 | 7.7666364 | 8.1627   | 2.2795018FAM198B | family with sequence similarity<br>198 member B     |
| 218579_s_at | 3.78E-06 | 8.12E-08 | 7.7653211 | 8.159934 | 1.3106552DHX35   | DEAH-box helicase 35                                |
| 232304_at   | 3.78E-06 | 8.14E-08 | 7.7644838 | 8.158173 | 2.7208646PELI1   | pellino E3 ubiquitin protein ligase<br>1            |
| 243303_at   | 3.78E-06 | 8.15E-08 | 7.7639121 | 8.156971 | 1.178292         |                                                     |
| 235811_at   | 3.78E-06 | 8.19E-08 | 7.7616259 | 8.152163 | 1.2909811        |                                                     |
| 221517_s_at | 3.78E-06 | 8.20E-08 | 7.7611852 | 8.151236 | 1.7342398MED17   | mediator complex subunit 17                         |
| 216199_s_at | 3.79E-06 | 8.25E-08 | 7.7583339 | 8.145238 | 1.0785455MAP3K4  | mitogen-activated protein kinase<br>kinase kinase 4 |

|             |          |          |           |          |           |         |                                                      |
|-------------|----------|----------|-----------|----------|-----------|---------|------------------------------------------------------|
| 210982_s_at | 3.81E-06 | 8.37E-08 | 7.7516068 | 8.131082 | 3.0545405 | HLA-DRA | major histocompatibility complex, class II, DR alpha |
| 225302_at   | 3.82E-06 | 8.39E-08 | 7.7504788 | 8.128708 | 1.6356271 | TMX3    | thioredoxin related transmembrane protein 3          |
| 237006_at   | 3.82E-06 | 8.43E-08 | 7.7480708 | 8.123638 | 1.5754389 |         |                                                      |
| 201828_x_at | 3.82E-06 | 8.44E-08 | 7.7474364 | 8.122303 | 1.2152659 | FAM127A | family with sequence similarity 127 member A         |
| 226877_at   | 3.83E-06 | 8.49E-08 | 7.7449041 | 8.116971 | 1.1847202 | RPL32P3 | ribosomal protein L32 pseudogene 3                   |

|             |          |          |           |          |           |                   |                                                  |
|-------------|----------|----------|-----------|----------|-----------|-------------------|--------------------------------------------------|
| 203960_s_at | 3.85E-06 | 8.57E-08 | 7.7403938 | 8.107472 | 1.6363132 | HSPB11            | heat shock protein family B (small)<br>member 11 |
| 212414_s_at | 3.86E-06 | 8.61E-08 | 7.7383343 | 8.103134 | 2.2387073 | GLYR1///SEP<br>T6 | glyoxylate reductase 1<br>homolog///septin 6     |
| 209140_x_at | 3.90E-06 | 8.71E-08 | 7.7326939 | 8.091249 | 1.621025  | HLA-B             | major histocompatibility complex,<br>class I, B  |
| 209662_at   | 3.91E-06 | 8.78E-08 | 7.7292245 | 8.083937 | 1.3560543 | CETN3             | centrin 3                                        |
| 202951_at   | 3.91E-06 | 8.80E-08 | 7.7283326 | 8.082056 | 1.9951793 | STK38             | serine/threonine kinase 38                       |
| 214807_at   | 3.91E-06 | 8.82E-08 | 7.7271541 | 8.079572 | 2.2266968 | PLXDC2            | plexin domain containing 2                       |
| 222303_at   | 3.91E-06 | 8.82E-08 | 7.7270463 | 8.079345 | 2.7869788 |                   |                                                  |

|           |          |          |           |          |                     |                                                |
|-----------|----------|----------|-----------|----------|---------------------|------------------------------------------------|
| 223082_at | 3.91E-06 | 8.82E-08 | 7.7268679 | 8.078969 | 1.6923071 SH3KBP1   | SH3 domain containing kinase binding protein 1 |
| 214791_at | 3.92E-06 | 9.00E-08 | 7.7178188 | 8.059885 | 1.677942 SP140L     | SP140 nuclear body protein like                |
| 213552_at | 3.92E-06 | 9.01E-08 | 7.7169464 | 8.058044 | 1.4242961 GLCE      | glucuronic acid epimerase                      |
| 212163_at | 3.92E-06 | 9.02E-08 | 7.7164625 | 8.057024 | 1.4820202 KIDINS220 | kinase D-interacting substrate 220kDa          |
| 229011_at | 3.96E-06 | 9.21E-08 | 7.7071259 | 8.037319 | 2.1747925 EMP1      | epithelial membrane protein 1                  |
| 232797_at | 3.97E-06 | 9.23E-08 | 7.7057216 | 8.034355 | 2.117298            |                                                |



|             |          |          |           |          |           |        |                                                                                      |
|-------------|----------|----------|-----------|----------|-----------|--------|--------------------------------------------------------------------------------------|
| 218589_at   | 3.97E-06 | 9.25E-08 | 7.7048933 | 8.032606 | 2.1652782 | LPAR6  | lysophosphatidic acid receptor 6                                                     |
| 218729_at   | 3.97E-06 | 9.31E-08 | 7.7019338 | 8.026357 | 2.1085686 | LXN    | latexin                                                                              |
| 226290_at   | 3.97E-06 | 9.31E-08 | 7.7017931 | 8.026059 | 1.8576723 | BDP1   | B double prime 1, subunit of RNA polymerase III transcription initiation factor IIIB |
| 201584_s_at | 3.98E-06 | 9.36E-08 | 7.6995954 | 8.021418 | 1.678363  | DDX39A | DEAD-box helicase 39A                                                                |
| 215235_at   | 3.98E-06 | 9.37E-08 | 7.6988119 | 8.019763 | 1.2340246 | SPTAN1 | spectrin alpha, non-erythrocytic 1                                                   |
| 213993_at   | 3.99E-06 | 9.40E-08 | 7.6974656 | 8.016919 | 2.7440977 | SPON1  | spondin 1                                                                            |

|             |          |          |           |          |           |                                                                   |
|-------------|----------|----------|-----------|----------|-----------|-------------------------------------------------------------------|
| 1556818_at  | 3.99E-06 | 9.43E-08 | 7.6959763 | 8.013773 | 1.4409886 |                                                                   |
| 203886_s_at | 3.99E-06 | 9.44E-08 | 7.6954163 | 8.01259  | 2.0214079 | FBLN2<br>fibulin 2                                                |
| 215691_x_at | 3.99E-06 | 9.46E-08 | 7.6942836 | 8.010197 | 1.4259064 | HSPB11<br>heat shock protein family B (small)<br>member 11        |
| 228754_at   | 3.99E-06 | 9.53E-08 | 7.6909569 | 8.003167 | 3.6663154 | SLC6A6<br>solute carrier family 6 member 6                        |
| 217886_at   | 3.99E-06 | 9.54E-08 | 7.6907304 | 8.002688 | 1.7468579 | EPS15<br>epidermal growth factor receptor<br>pathway substrate 15 |
| 200907_s_at | 3.99E-06 | 9.54E-08 | 7.6906454 | 8.002508 | 2.5866755 | PALLD<br>palladin, cytoskeletal associated<br>protein             |

|             |          |          |           |          |           |         |                                              |
|-------------|----------|----------|-----------|----------|-----------|---------|----------------------------------------------|
| 203935_at   | 3.99E-06 | 9.56E-08 | 7.689615  | 8.000331 | 1.7276205 | ACVR1   | activin A receptor type 1                    |
| 200964_at   | 3.99E-06 | 9.57E-08 | 7.6890963 | 7.999234 | 1.1912407 | UBA1    | ubiquitin like modifier activating enzyme 1  |
| 221751_at   | 4.00E-06 | 9.61E-08 | 7.6869827 | 7.994767 | 1.3948068 | PANK3   | pantothenate kinase 3                        |
| 208965_s_at | 4.00E-06 | 9.62E-08 | 7.6865108 | 7.993769 | 2.8032602 | IFI16   | interferon gamma inducible protein 16        |
| 204048_s_at | 4.00E-06 | 9.63E-08 | 7.6859948 | 7.992678 | 1.7422746 | PHACTR2 | phosphatase and actin regulator 2            |
| 208729_x_at | 4.01E-06 | 9.70E-08 | 7.6830979 | 7.986553 | 1.809675  | HLA-B   | major histocompatibility complex, class I, B |

|             |          |          |           |          |           |                                                                                                                              |                          |
|-------------|----------|----------|-----------|----------|-----------|------------------------------------------------------------------------------------------------------------------------------|--------------------------|
| 218706_s_at | 4.03E-06 | 9.77E-08 | 7.6793285 | 7.978582 | 1.6986202 | GRAMD3                                                                                                                       | GRAM domain containing 3 |
| 213331_s_at | 4.05E-06 | 9.88E-08 | 7.6743484 | 7.968047 | 1.5455604 | NEK1                                                                                                                         | NIMA related kinase 1    |
| 230872_s_at | 4.05E-06 | 9.92E-08 | 7.6725858 | 7.964318 | 1.1956698 | ARPC4-TTL3<br>ARPC4-TTL3<br>readthrough///tubulin tyrosine<br>ligase like 3///actin related protein<br>2/3 complex subunit 4 |                          |

|             |          |          |           |          |           |                         |                                                              |
|-------------|----------|----------|-----------|----------|-----------|-------------------------|--------------------------------------------------------------|
| 202760_s_at | 4.05E-06 | 9.93E-08 | 7.671929  | 7.962928 | 2.1872145 | PALM2-AKA<br>P2///AKAP2 | PALM2-AKAP2<br>readthrough///A-kinase anchoring<br>protein 2 |
| 203047_at   | 4.05E-06 | 9.97E-08 | 7.6700474 | 7.958946 | 1.3687591 | STK10                   | serine/threonine kinase 10                                   |
| 226136_at   | 4.05E-06 | 9.98E-08 | 7.669731  | 7.958277 | 2.107857  | GLIPR1                  | GLI pathogenesis related 1                                   |
| 201965_s_at | 4.06E-06 | 1.00E-07 | 7.6678764 | 7.954351 | 1.2024046 | SETX                    | senataxin                                                    |
| 201837_s_at | 4.07E-06 | 1.01E-07 | 7.6657383 | 7.949825 | 1.0762325 | SUPT7L                  | SPT7-like STAGA complex<br>gamma subunit                     |
| 203821_at   | 4.09E-06 | 1.01E-07 | 7.6628185 | 7.943644 | 2.8927059 | HBEGF                   | heparin binding EGF like growth<br>factor                    |

|             |          |          |           |          |           |                    |                                                             |
|-------------|----------|----------|-----------|----------|-----------|--------------------|-------------------------------------------------------------|
| 219698_s_at | 4.11E-06 | 1.02E-07 | 7.6593689 | 7.936339 | 1.1297159 | METTL4             | methyltransferase like 4                                    |
| 222453_at   | 4.11E-06 | 1.02E-07 | 7.6590775 | 7.935721 | 2.0448455 | CYBRD1             | cytochrome b reductase 1                                    |
| 212401_s_at | 4.14E-06 | 1.03E-07 | 7.6535285 | 7.923967 | 1.218483  | CDK11A//C<br>DK11B | cyclin dependent kinase<br>11A//cyclin dependent kinase 11B |
| 239277_at   | 4.16E-06 | 1.04E-07 | 7.6508636 | 7.918321 | 1.0650121 |                    |                                                             |
| 239251_at   | 4.16E-06 | 1.04E-07 | 7.6500364 | 7.916568 | 1.6876739 |                    |                                                             |
| 232213_at   | 4.18E-06 | 1.05E-07 | 7.64651   | 7.909094 | 1.9271575 | PELI1              | pellino E3 ubiquitin protein ligase<br>1                    |

|             |          |          |           |          |           |        |                                                          |
|-------------|----------|----------|-----------|----------|-----------|--------|----------------------------------------------------------|
| 208789_at   | 4.20E-06 | 1.06E-07 | 7.6435886 | 7.902901 | 1.9941507 | PTRF   | polymerase I and transcript release factor               |
| 200762_at   | 4.20E-06 | 1.06E-07 | 7.6430128 | 7.90168  | 1.9039636 | DPYSL2 | dihydropyrimidinase like 2                               |
| 221840_at   | 4.24E-06 | 1.07E-07 | 7.6376158 | 7.890235 | 2.3766216 | PTPRE  | protein tyrosine phosphatase, receptor type E            |
| 202729_s_at | 4.27E-06 | 1.08E-07 | 7.6342379 | 7.88307  | 2.2757977 | LTBP1  | latent transforming growth factor beta binding protein 1 |
| 221773_at   | 4.27E-06 | 1.08E-07 | 7.6341908 | 7.88297  | 2.2680657 | ELK3   | ELK3, ETS transcription factor                           |

|             |          |          |           |          |           |         |                                              |
|-------------|----------|----------|-----------|----------|-----------|---------|----------------------------------------------|
| 224865_at   | 4.27E-06 | 1.08E-07 | 7.6336465 | 7.881816 | 1.2608946 | FAR1    | fatty acyl-CoA reductase 1                   |
| 242059_at   | 4.27E-06 | 1.08E-07 | 7.6331386 | 7.880738 | 1.490253  |         |                                              |
| 218085_at   | 4.27E-06 | 1.08E-07 | 7.6328265 | 7.880076 | 1.3428704 | CHMP5   | charged multivesicular body protein 5        |
| 226568_at   | 4.29E-06 | 1.09E-07 | 7.6303286 | 7.874776 | 2.1650246 | FAM102B | family with sequence similarity 102 member B |
| 207358_x_at | 4.30E-06 | 1.09E-07 | 7.6271381 | 7.868005 | 1.33488   | MACF1   | microtubule-actin crosslinking factor 1      |
| 201939_at   | 4.30E-06 | 1.09E-07 | 7.6270749 | 7.867871 | 2.261047  | PLK2    | polo like kinase 2                           |



|             |          |          |           |          |                  |                                                            |
|-------------|----------|----------|-----------|----------|------------------|------------------------------------------------------------|
| 36552_at    | 4.32E-06 | 1.10E-07 | 7.6233204 | 7.859901 | 1.1548721 C2CD3  | C2 calcium dependent domain containing 3                   |
| 228131_at   | 4.32E-06 | 1.11E-07 | 7.6217674 | 7.856604 | 1.0646134 ERCC1  | ERCC excision repair 1, endonuclease non-catalytic subunit |
| 212919_at   | 4.33E-06 | 1.11E-07 | 7.6199803 | 7.85281  | 1.5947098 DCP2   | decapping mRNA 2                                           |
| 1559496_at  | 4.34E-06 | 1.11E-07 | 7.6190702 | 7.850877 | 1.2992505 PPA2   | pyrophosphatase (inorganic) 2                              |
| 236924_at   | 4.34E-06 | 1.12E-07 | 7.6183741 | 7.849399 | 1.1551148        |                                                            |
| 209627_s_at | 4.36E-06 | 1.12E-07 | 7.6155552 | 7.843412 | 2.5865921 OSBPL3 | oxysterol binding protein like 3                           |

|             |          |          |           |          |                |                                             |
|-------------|----------|----------|-----------|----------|----------------|---------------------------------------------|
| 242918_at   | 4.36E-06 | 1.12E-07 | 7.6145425 | 7.841261 | 1.7051732NASP  | nuclear autoantigenic sperm protein         |
| 230913_at   | 4.36E-06 | 1.12E-07 | 7.6143397 | 7.84083  | 1.2002795ABCG1 | ATP binding cassette subfamily G member 1   |
| 213513_x_at | 4.37E-06 | 1.13E-07 | 7.6136318 | 7.839326 | 1.5577661ARPC2 | actin related protein 2/3 complex subunit 2 |
| 240146_at   | 4.37E-06 | 1.13E-07 | 7.6123858 | 7.836679 | 1.8015337      |                                             |
| 204567_s_at | 4.39E-06 | 1.14E-07 | 7.6088707 | 7.829211 | 2.5552305ABCG1 | ATP binding cassette subfamily G member 1   |

|             |          |          |           |          |           |        |                                      |
|-------------|----------|----------|-----------|----------|-----------|--------|--------------------------------------|
| 227036_at   | 4.39E-06 | 1.14E-07 | 7.6083752 | 7.828158 | 1.8977114 | RASAL2 | RAS protein activator like 2         |
| 202778_s_at | 4.39E-06 | 1.14E-07 | 7.6073501 | 7.825979 | 1.7874893 | ZMYM2  | zinc finger MYM-type containing<br>2 |
| 223300_s_at | 4.40E-06 | 1.15E-07 | 7.6051351 | 7.821271 | 1.3487871 | CCDC82 | coiled-coil domain containing 82     |
| 203855_at   | 4.40E-06 | 1.15E-07 | 7.6047187 | 7.820386 | 1.4584618 | WDR47  | WD repeat domain 47                  |
| 214988_s_at | 4.41E-06 | 1.16E-07 | 7.6003836 | 7.811171 | 1.141702  | SON    | SON DNA binding protein              |
| 209748_at   | 4.41E-06 | 1.16E-07 | 7.6000389 | 7.810438 | 1.2139111 | SPAST  | spastin                              |
| 218184_at   | 4.41E-06 | 1.16E-07 | 7.5995796 | 7.809461 | 1.0494984 | TULP4  | tubby like protein 4                 |

|           |          |          |           |          |          |        |                                                |
|-----------|----------|----------|-----------|----------|----------|--------|------------------------------------------------|
| 209271_at | 4.41E-06 | 1.16E-07 | 7.5992455 | 7.808751 | 1.149102 | BPTF   | bromodomain PHD finger<br>transcription factor |
| 219947_at | 4.43E-06 | 1.17E-07 | 7.5962821 | 7.802449 | 2.199872 | CLEC4A | C-type lectin domain family 4<br>member A      |

|           |          |          |           |         |           |                                                                                                                                                                                                                                                                                                         |
|-----------|----------|----------|-----------|---------|-----------|---------------------------------------------------------------------------------------------------------------------------------------------------------------------------------------------------------------------------------------------------------------------------------------------------------|
| 215921_at | 4.43E-06 | 1.17E-07 | 7.5960102 | 7.80187 | 1.2219696 | nuclear pore complex interacting<br>protein family member<br>A5///nuclear pore complex<br>NPIPA5///NPI interacting protein family member<br>PB6///NPIP8 B6///nuclear pore complex<br>///NPIP3 interacting protein family member<br>B8///nuclear pore complex<br>interacting protein family member<br>B3 |
|-----------|----------|----------|-----------|---------|-----------|---------------------------------------------------------------------------------------------------------------------------------------------------------------------------------------------------------------------------------------------------------------------------------------------------------|

|             |          |          |           |          |           |                                                                |
|-------------|----------|----------|-----------|----------|-----------|----------------------------------------------------------------|
| 229141_at   | 4.43E-06 | 1.17E-07 | 7.5953004 | 7.800361 | 1.0716795 | SFT2D3///WD SFT2 domain containing 3///WD R33 repeat domain 33 |
| 231716_at   | 4.45E-06 | 1.18E-07 | 7.592641  | 7.794704 | 1.3909464 | RC3H2 ring finger and CCCH-type domains 2                      |
| 240432_x_at | 4.45E-06 | 1.18E-07 | 7.5912359 | 7.791715 | 1.8464789 | KLF7 Kruppel like factor 7                                     |
| 225162_at   | 4.45E-06 | 1.19E-07 | 7.5901739 | 7.789455 | 1.4720657 | SH3D19 SH3 domain containing 19                                |
| 229802_at   | 4.45E-06 | 1.19E-07 | 7.5880612 | 7.78496  | 4.1633516 | WISP1 WNT1 inducible signaling pathway protein 1               |

|           |          |          |           |          |           |       |                             |
|-----------|----------|----------|-----------|----------|-----------|-------|-----------------------------|
| 218224_at | 4.46E-06 | 1.19E-07 | 7.5866645 | 7.781988 | 1.9807577 | PNMA1 | paraneoplastic Ma antigen 1 |
| 201792_at | 4.47E-06 | 1.20E-07 | 7.5846148 | 7.777625 | 3.6221543 | AEBP1 | AE binding protein 1        |

|           |          |          |           |          |           |                                               |                                                                                                                                                                 |
|-----------|----------|----------|-----------|----------|-----------|-----------------------------------------------|-----------------------------------------------------------------------------------------------------------------------------------------------------------------|
| 214805_at | 4.48E-06 | 1.21E-07 | 7.5825234 | 7.773174 | 1.5156118 | SNORD10//S<br>NORA48//SN<br>ORA67//EIF4<br>A1 | small nucleolar RNA, C/D box<br>10//small nucleolar RNA, H/ACA<br>box 48//small nucleolar RNA,<br>H/ACA box 67//eukaryotic<br>translation initiation factor 4A1 |
| 218519_at | 4.48E-06 | 1.21E-07 | 7.5824556 | 7.77303  | 1.3382005 | SLC35A5                                       | solute carrier family 35 member<br>A5                                                                                                                           |



|             |          |          |           |          |                        |             |                                                      |
|-------------|----------|----------|-----------|----------|------------------------|-------------|------------------------------------------------------|
| 228937_at   | 4.48E-06 | 1.21E-07 | 7.5824364 | 7.772989 | 2.0479014              | LACC1       | laccase domain containing 1                          |
| 230292_at   | 4.49E-06 | 1.21E-07 | 7.5808923 | 7.769702 | 1.3237061 <sub>2</sub> | LOC10099641 | uncharacterized LOC100996412                         |
| 200037_s_at | 4.49E-06 | 1.21E-07 | 7.5797541 | 7.767278 | 1.348498               | CBX3        | chromobox 3                                          |
| 208894_at   | 4.49E-06 | 1.21E-07 | 7.579056  | 7.765792 | 2.7405682              | HLA-DRA     | major histocompatibility complex, class II, DR alpha |
| 202251_at   | 4.49E-06 | 1.22E-07 | 7.5787723 | 7.765188 | 1.5174114              | PRPF3       | pre-mRNA processing factor 3                         |
| 221755_at   | 4.50E-06 | 1.22E-07 | 7.5768278 | 7.761047 | 2.2803113              | EHBP1L1     | EH domain binding protein 1 like 1                   |

|              |          |          |           |          |                   |                                                              |
|--------------|----------|----------|-----------|----------|-------------------|--------------------------------------------------------------|
| 226641_at    | 4.52E-06 | 1.23E-07 | 7.5735429 | 7.754051 | 2.4852211 ANKRD44 | ankyrin repeat domain 44                                     |
| 1567214_a_at | 4.52E-06 | 1.23E-07 | 7.5735098 | 7.753981 | 1.7957321 PNN     | pinin, desmosome associated protein                          |
| 225988_at    | 4.52E-06 | 1.23E-07 | 7.5731388 | 7.75319  | 1.8440036 HERC4   | HECT and RLD domain containing E3 ubiquitin protein ligase 4 |
| 231956_at    | 4.53E-06 | 1.24E-07 | 7.5702152 | 7.746962 | 2.3874454 RNF213  | ring finger protein 213                                      |
| 223886_s_at  | 4.53E-06 | 1.24E-07 | 7.569773  | 7.746021 | 1.0261325 RNF146  | ring finger protein 146                                      |
| 210809_s_at  | 4.54E-06 | 1.24E-07 | 7.5684802 | 7.743266 | 5.7580043 POSTN   | periostin                                                    |

|             |          |          |           |          |           |          |                                             |
|-------------|----------|----------|-----------|----------|-----------|----------|---------------------------------------------|
| 225442_at   | 4.55E-06 | 1.25E-07 | 7.5652191 | 7.736317 | 2.0544912 | DDR2     | discoidin domain receptor tyrosine kinase 2 |
| 233898_s_at | 4.56E-06 | 1.25E-07 | 7.5645693 | 7.734932 | 1.6144404 | FGFR1OP2 | FGFR1 oncogene partner 2                    |
| 227386_s_at | 4.56E-06 | 1.26E-07 | 7.5633378 | 7.732307 | 1.8942045 | TMEM200B | transmembrane protein 200B                  |
| 244197_x_at | 4.57E-06 | 1.26E-07 | 7.5624869 | 7.730494 | 1.3772829 |          |                                             |
| 242233_at   | 4.57E-06 | 1.26E-07 | 7.5619605 | 7.729371 | 1.0139512 |          |                                             |
| 226609_at   | 4.59E-06 | 1.27E-07 | 7.5570726 | 7.718951 | 2.398925  | DCBLD1   | discoidin, CUB and LCCL domain containing 1 |
| 212982_at   | 4.59E-06 | 1.27E-07 | 7.5567298 | 7.71822  | 1.5510777 | ZDHHC17  | zinc finger DHHC-type containing 17         |

|             |          |          |           |          |           |          |                                          |
|-------------|----------|----------|-----------|----------|-----------|----------|------------------------------------------|
| 202994_s_at | 4.63E-06 | 1.29E-07 | 7.5518008 | 7.707708 | 2.03225   | FBLN1    | fibulin 1                                |
| 202548_s_at | 4.65E-06 | 1.30E-07 | 7.5487082 | 7.70111  | 1.3876509 | ARHGEF7  | Rho guanine nucleotide exchange factor 7 |
| 226316_at   | 4.68E-06 | 1.32E-07 | 7.5417506 | 7.686263 | 1.6755541 | RBM26    | RNA binding motif protein 26             |
| 234762_x_at | 4.69E-06 | 1.32E-07 | 7.5407893 | 7.684211 | 1.1218704 | NLN      | neurolysin                               |
| 212791_at   | 4.71E-06 | 1.34E-07 | 7.5347691 | 7.671358 | 1.3549718 | C1orf216 | chromosome 1 open reading frame 216      |
| 232524_x_at | 4.72E-06 | 1.34E-07 | 7.5337735 | 7.669232 | 1.1529613 | ANAPC4   | anaphase promoting complex subunit 4     |
| 210139_s_at | 4.74E-06 | 1.35E-07 | 7.530022  | 7.661219 | 2.2722407 | PMP22    | peripheral myelin protein 22             |

|             |          |          |           |          |           |         |                                                            |
|-------------|----------|----------|-----------|----------|-----------|---------|------------------------------------------------------------|
| 206580_s_at | 4.75E-06 | 1.36E-07 | 7.5282132 | 7.657355 | 1.3443486 | EFEMP2  | EGF containing fibulin like extracellular matrix protein 2 |
| 206101_at   | 4.75E-06 | 1.36E-07 | 7.5281547 | 7.65723  | 2.2672898 | ECM2    | extracellular matrix protein 2                             |
| 239379_at   | 4.79E-06 | 1.37E-07 | 7.5222511 | 7.644616 | 1.3743023 |         |                                                            |
| 238430_x_at | 4.85E-06 | 1.41E-07 | 7.5102543 | 7.618966 | 1.8721579 | SLFN5   | schlafen family member 5                                   |
| 225658_at   | 4.86E-06 | 1.42E-07 | 7.508504  | 7.615222 | 1.1548339 | SPOPL   | speckle type BTB/POZ protein like                          |
| 212467_at   | 4.86E-06 | 1.42E-07 | 7.5078622 | 7.613849 | 1.7078014 | DNAJC13 | DnaJ heat shock protein family (Hsp40) member C13          |

|             |          |          |           |          |            |                                                                                                                                                                             |
|-------------|----------|----------|-----------|----------|------------|-----------------------------------------------------------------------------------------------------------------------------------------------------------------------------|
| 239809_at   | 4.86E-06 | 1.43E-07 | 7.5052011 | 7.608156 | 1.8282136  |                                                                                                                                                                             |
| 224842_at   | 4.86E-06 | 1.43E-07 | 7.5049664 | 7.607654 | 1.53734596 | putative uncharacterized<br>LOC10106038 SMG1-like protein///bolA family<br>BOLA2///S member 2///SMG1, nonsense<br>MG1 mediated mRNA decay associated<br>PI3K related kinase |
| 205250_s_at | 4.87E-06 | 1.43E-07 | 7.5029193 | 7.603273 | 1.3502773  | CEP290 centrosomal protein 290                                                                                                                                              |

|             |          |          |           |          |           |        |                                                                                         |
|-------------|----------|----------|-----------|----------|-----------|--------|-----------------------------------------------------------------------------------------|
| 213603_s_at | 4.87E-06 | 1.44E-07 | 7.5016793 | 7.60062  | 2.4604432 | RAC2   | ras-related C3 botulinum toxin substrate 2 (rho family, small GTP binding protein Rac2) |
| 218781_at   | 4.89E-06 | 1.44E-07 | 7.5001748 | 7.5974   | 1.7205952 | SMC6   | structural maintenance of chromosomes 6                                                 |
| 227200_at   | 4.90E-06 | 1.45E-07 | 7.4981303 | 7.593024 | 1.4596482 | ETV3   | ETS variant 3                                                                           |
| 215116_s_at | 4.90E-06 | 1.45E-07 | 7.4966329 | 7.589818 | 1.4484241 | DNM1   | dynammin 1                                                                              |
| 240061_at   | 4.91E-06 | 1.46E-07 | 7.4950807 | 7.586495 | 1.3051704 |        |                                                                                         |
| 228157_at   | 4.93E-06 | 1.47E-07 | 7.4905946 | 7.576889 | 2.275473  | ZNF207 | zinc finger protein 207                                                                 |

|            |          |          |           |          |           |        |                                       |
|------------|----------|----------|-----------|----------|-----------|--------|---------------------------------------|
| 222630_at  | 4.94E-06 | 1.48E-07 | 7.4890251 | 7.573527 | 1.170255  | RFX7   | regulatory factor X7                  |
| 235023_at  | 4.94E-06 | 1.48E-07 | 7.4881514 | 7.571656 | 2.1009352 | VPS13C | vacuolar protein sorting 13 homolog C |
| 1558111_at | 4.97E-06 | 1.49E-07 | 7.4836941 | 7.562107 | 1.8648913 | MBNL1  | muscleblind like splicing regulator 1 |
| 226142_at  | 4.98E-06 | 1.50E-07 | 7.482322  | 7.559167 | 2.0206648 | GLIPR1 | GLI pathogenesis related 1            |
| 228478_at  | 4.98E-06 | 1.50E-07 | 7.4822259 | 7.558961 | 1.1989013 | SPPL2A | signal peptide peptidase like 2A      |



|             |          |          |           |          |           |         |                                                              |
|-------------|----------|----------|-----------|----------|-----------|---------|--------------------------------------------------------------|
| 207996_s_at | 4.99E-06 | 1.50E-07 | 7.4807379 | 7.555772 | 1.8680504 | LDLRAD4 | low density lipoprotein receptor class A domain containing 4 |
| 228827_at   | 5.00E-06 | 1.51E-07 | 7.4786693 | 7.551339 | 1.8823841 | RUNX1T1 | RUNX1 translocation partner 1                                |
| 210944_s_at | 5.00E-06 | 1.51E-07 | 7.4784874 | 7.550949 | 1.5727375 | CAPN3   | calpain 3                                                    |
| 235231_at   | 5.04E-06 | 1.53E-07 | 7.4722924 | 7.537668 | 1.4698316 | ZNF789  | zinc finger protein 789                                      |
| 233380_s_at | 5.06E-06 | 1.54E-07 | 7.4697936 | 7.53231  | 1.0212757 | RUFY1   | RUN and FYVE domain containing 1                             |

|             |          |          |           |          |                 |                                                               |
|-------------|----------|----------|-----------|----------|-----------------|---------------------------------------------------------------|
| 203301_s_at | 5.06E-06 | 1.54E-07 | 7.4692874 | 7.531224 | 1.5195964DMTF1  | cyclin D binding myb like transcription factor 1              |
| 225594_at   | 5.10E-06 | 1.56E-07 | 7.4634683 | 7.518742 | 1.8541252CREBZF | CREB/ATF bZIP transcription factor                            |
| 214757_at   | 5.14E-06 | 1.58E-07 | 7.4576936 | 7.50635  | 1.2249898PMS2P2 | PMS1 homolog 2, mismatch repair system component pseudogene 2 |
| 202765_s_at | 5.14E-06 | 1.58E-07 | 7.4568207 | 7.504477 | 2.5078918FBN1   | fibrillin 1                                                   |

|             |          |          |           |          |           |        |                                                                             |
|-------------|----------|----------|-----------|----------|-----------|--------|-----------------------------------------------------------------------------|
| 226753_at   | 5.15E-06 | 1.59E-07 | 7.4555782 | 7.50181  | 1.2974943 | FAM76B | family with sequence similarity 76 member B                                 |
| 242853_at   | 5.16E-06 | 1.60E-07 | 7.4538359 | 7.498069 | 2.0697309 |        |                                                                             |
| 224559_at   | 5.17E-06 | 1.60E-07 | 7.4517724 | 7.493639 | 2.0583041 | MALAT1 | metastasis associated lung adenocarcinoma transcript 1 (non-protein coding) |
| 201153_s_at | 5.17E-06 | 1.60E-07 | 7.4515869 | 7.493241 | 1.7064864 | MBNL1  | muscleblind like splicing regulator 1                                       |
| 221841_s_at | 5.17E-06 | 1.61E-07 | 7.4508357 | 7.491628 | 2.8728491 | KLF4   | Kruppel like factor 4                                                       |
| 243591_at   | 5.17E-06 | 1.61E-07 | 7.4504527 | 7.490806 | 1.9293779 |        |                                                                             |

|             |          |          |           |          |           |        |                                          |
|-------------|----------|----------|-----------|----------|-----------|--------|------------------------------------------|
| 225512_at   | 5.20E-06 | 1.62E-07 | 7.4463058 | 7.4819   | 1.3240993 | ZBTB38 | zinc finger and BTB domain containing 38 |
| 230263_s_at | 5.22E-06 | 1.63E-07 | 7.443784  | 7.476483 | 1.8417507 | DOCK5  | dedicator of cytokinesis 5               |
| 217762_s_at | 5.22E-06 | 1.64E-07 | 7.4424163 | 7.473545 | 3.3394739 | RAB31  | RAB31, member RAS oncogene family        |
| 224698_at   | 5.23E-06 | 1.64E-07 | 7.4401833 | 7.468747 | 1.2892471 | ESYT2  | extended synaptotagmin 2                 |
| 213416_at   | 5.23E-06 | 1.64E-07 | 7.4399291 | 7.468201 | 2.2359838 | ITGA4  | integrin subunit alpha 4                 |
| 208966_x_at | 5.23E-06 | 1.65E-07 | 7.4392005 | 7.466635 | 2.5622009 | IFI16  | interferon gamma inducible protein 16    |

|             |          |          |           |          |                    |                                      |
|-------------|----------|----------|-----------|----------|--------------------|--------------------------------------|
| 229765_at   | 5.25E-06 | 1.66E-07 | 7.436846  | 7.461575 | 1.1834493 ZNF207   | zinc finger protein 207              |
| 203182_s_at | 5.25E-06 | 1.66E-07 | 7.436326  | 7.460458 | 1.0753448 SRPK2    | SRSF protein kinase 2                |
| 225813_at   | 5.26E-06 | 1.66E-07 | 7.4342968 | 7.456096 | 1.3327525 RC3H2    | ring finger and CCCH-type domains 2  |
| 223095_at   | 5.26E-06 | 1.67E-07 | 7.4341544 | 7.45579  | 1.9455425 MARVELD1 | MARVEL domain containing 1           |
| 202396_at   | 5.26E-06 | 1.67E-07 | 7.4340429 | 7.45555  | 1.5939091 TCERG1   | transcription elongation regulator 1 |
| 201088_at   | 5.28E-06 | 1.68E-07 | 7.4310237 | 7.44906  | 2.4910945 KPNA2    | karyopherin subunit alpha 2          |

|             |          |          |           |          |           |        |                                                     |
|-------------|----------|----------|-----------|----------|-----------|--------|-----------------------------------------------------|
| 225610_at   | 5.31E-06 | 1.69E-07 | 7.4277515 | 7.442024 | 1.136442  | UHRF2  | ubiquitin like with PHD and ring finger domains 2   |
| 226016_at   | 5.33E-06 | 1.70E-07 | 7.4252476 | 7.436639 | 1.5862011 | CD47   | CD47 molecule                                       |
| 203298_s_at | 5.35E-06 | 1.71E-07 | 7.4223419 | 7.430388 | 1.0037298 | JARID2 | jumonji and AT-rich interaction domain containing 2 |
| 201663_s_at | 5.35E-06 | 1.71E-07 | 7.4211204 | 7.427761 | 2.1947398 | SMC4   | structural maintenance of chromosomes 4             |
| 233614_at   | 5.36E-06 | 1.72E-07 | 7.4190547 | 7.423316 | 1.7642866 |        |                                                     |
| 226077_at   | 5.36E-06 | 1.72E-07 | 7.4185109 | 7.422146 | 1.9838518 | RNF145 | ring finger protein 145                             |

|             |          |          |           |          |           |        |                                            |
|-------------|----------|----------|-----------|----------|-----------|--------|--------------------------------------------|
| 212887_at   | 5.37E-06 | 1.73E-07 | 7.4179682 | 7.420978 | 2.2846198 | SEC23A | Sec23 homolog A, coat complex II component |
| 244341_at   | 5.37E-06 | 1.73E-07 | 7.416995  | 7.418884 | 1.5896032 |        |                                            |
| 241769_at   | 5.37E-06 | 1.73E-07 | 7.4161072 | 7.416974 | 1.735558  |        |                                            |
| 221763_at   | 5.38E-06 | 1.74E-07 | 7.4148295 | 7.414224 | 2.2728139 | JMJD1C | jumonji domain containing 1C               |
| 202380_s_at | 5.39E-06 | 1.75E-07 | 7.4127376 | 7.409721 | 1.3906532 | NKTR   | natural killer cell triggering receptor    |
| 226677_at   | 5.41E-06 | 1.75E-07 | 7.4103912 | 7.40467  | 2.5766584 | ZNF521 | zinc finger protein 521                    |
| 229285_at   | 5.42E-06 | 1.76E-07 | 7.4091796 | 7.402061 | 1.6531091 | RNASEL | ribonuclease L                             |

|           |          |          |           |          |           |        |                                               |
|-----------|----------|----------|-----------|----------|-----------|--------|-----------------------------------------------|
| 225144_at | 5.46E-06 | 1.78E-07 | 7.4035189 | 7.389871 | 2.0805661 | BMPR2  | bone morphogenetic protein<br>receptor type 2 |
| 230141_at | 5.46E-06 | 1.78E-07 | 7.4025144 | 7.387708 | 1.2519046 | ARID4A | AT-rich interaction domain 4A                 |



|             |          |          |           |          |           |                                                |                                                                                                                                                                                                    |
|-------------|----------|----------|-----------|----------|-----------|------------------------------------------------|----------------------------------------------------------------------------------------------------------------------------------------------------------------------------------------------------|
| 204670_x_at | 5.47E-06 | 1.79E-07 | 7.4011525 | 7.384774 | 2.5804732 | LOC10099680<br>9///HLA-DRB<br>4///HLA-DRB<br>1 | HLA class II histocompatibility<br>antigen, DRB1-10 beta<br>chain-like///major<br>histocompatibility complex, class<br>II, DR beta 4///major<br>histocompatibility complex, class<br>II, DR beta 1 |
| 208986_at   | 5.49E-06 | 1.80E-07 | 7.398499  | 7.379058 | 1.4309213 | TCF12                                          | transcription factor 12                                                                                                                                                                            |

|             |          |          |           |          |                  |                                                             |
|-------------|----------|----------|-----------|----------|------------------|-------------------------------------------------------------|
| 203566_s_at | 5.51E-06 | 1.81E-07 | 7.3952452 | 7.372046 | 1.6663266 AGL    | amylo-alpha-1, 6-glucosidase,<br>4-alpha-glucanotransferase |
| 238431_at   | 5.51E-06 | 1.81E-07 | 7.3949858 | 7.371487 | 1.3463986        |                                                             |
| 214686_at   | 5.53E-06 | 1.82E-07 | 7.3931593 | 7.367551 | 1.5678586 ZNF266 | zinc finger protein 266                                     |
| 206332_s_at | 5.53E-06 | 1.82E-07 | 7.3928018 | 7.36678  | 2.7925273 IFI16  | interferon gamma inducible protein<br>16                    |
| 1558620_at  | 5.53E-06 | 1.82E-07 | 7.3925085 | 7.366148 | 1.0145757 ZNF621 | zinc finger protein 621                                     |
| 202633_at   | 5.56E-06 | 1.84E-07 | 7.3888301 | 7.358219 | 1.0952061 TOPBP1 | topoisomerase (DNA) II binding<br>protein 1                 |

|             |          |          |           |          |           |              |                                                          |
|-------------|----------|----------|-----------|----------|-----------|--------------|----------------------------------------------------------|
| 218217_at   | 5.57E-06 | 1.85E-07 | 7.3872103 | 7.354727 | 1.7601532 | SCPEP1       | serine carboxypeptidase 1                                |
| 225710_at   | 5.59E-06 | 1.85E-07 | 7.3859491 | 7.352007 | 2.8677707 | GNB4         | G protein subunit beta 4                                 |
| 225159_s_at | 5.59E-06 | 1.85E-07 | 7.3857139 | 7.3515   | 1.0757882 | ELK4         | ELK4, ETS transcription factor                           |
| 203302_at   | 5.59E-06 | 1.85E-07 | 7.3854407 | 7.350911 | 1.4353566 | DCK          | deoxycytidine kinase                                     |
| 224929_at   | 5.59E-06 | 1.86E-07 | 7.3848418 | 7.349619 | 1.5363588 | TMEM173      | transmembrane protein 173                                |
| 221044_s_at | 5.60E-06 | 1.86E-07 | 7.3833626 | 7.34643  | 1.4405443 | TRIM6-TRIM34 | TRIM6-TRIM34 readthrough//tripartite motif containing 34 |

|             |          |          |           |          |           |        |                                      |
|-------------|----------|----------|-----------|----------|-----------|--------|--------------------------------------|
| 214684_at   | 5.60E-06 | 1.86E-07 | 7.3830015 | 7.345651 | 1.7954604 | MEF2A  | myocyte enhancer factor 2A           |
| 229366_at   | 5.61E-06 | 1.87E-07 | 7.3810085 | 7.341352 | 1.7514096 |        |                                      |
| 236494_x_at | 5.63E-06 | 1.88E-07 | 7.3791925 | 7.337435 | 1.3650286 |        |                                      |
| 232174_at   | 5.63E-06 | 1.88E-07 | 7.378524  | 7.335993 | 2.1004784 |        |                                      |
| 218669_at   | 5.63E-06 | 1.88E-07 | 7.3784479 | 7.335828 | 1.2896995 | RAP2C  | RAP2C, member of RAS oncogene family |
| 219957_at   | 5.64E-06 | 1.89E-07 | 7.3763736 | 7.331353 | 2.1898975 | RUFY2  | RUN and FYVE domain containing 2     |
| 221478_at   | 5.64E-06 | 1.89E-07 | 7.3762792 | 7.331149 | 1.6780407 | BNIP3L | BCL2 interacting protein 3 like      |
| 203620_s_at | 5.66E-06 | 1.90E-07 | 7.3740536 | 7.326347 | 1.424105  | FCHSD2 | FCH and double SH3 domains 2         |

|              |          |          |           |          |           |                                        |                                                                                                       |
|--------------|----------|----------|-----------|----------|-----------|----------------------------------------|-------------------------------------------------------------------------------------------------------|
| 222476_at    | 5.66E-06 | 1.90E-07 | 7.3733759 | 7.324885 | 1.480465  | CNOT6                                  | CCR4-NOT transcription complex subunit 6                                                              |
| 228812_at    | 5.66E-06 | 1.90E-07 | 7.3729164 | 7.323893 | 2.286683  | REL                                    | REL proto-oncogene, NF-kB subunit                                                                     |
| 1555411_a_at | 5.66E-06 | 1.91E-07 | 7.3721066 | 7.322145 | 2.0956045 | CCNL1                                  | cyclin L1                                                                                             |
| 220954_s_at  | 5.67E-06 | 1.91E-07 | 7.3714629 | 7.320756 | 1.6430254 | MIR6840//STAG3L5P-PVRIG2P-PILRB//PILRB | microRNA<br>6840//STAG3L5P-PVRIG2P-PILRB readthrough//paired immunoglobulin-like type 2 receptor beta |

|             |          |          |           |          |           |        |                                           |
|-------------|----------|----------|-----------|----------|-----------|--------|-------------------------------------------|
| 226395_at   | 5.67E-06 | 1.91E-07 | 7.3705877 | 7.318867 | 1.555532  | HOOK3  | hook microtubule tethering protein<br>3   |
| 214093_s_at | 5.67E-06 | 1.92E-07 | 7.3700422 | 7.31769  | 1.6451005 | FUBP1  | far upstream element binding<br>protein 1 |
| 219885_at   | 5.67E-06 | 1.92E-07 | 7.3698463 | 7.317267 | 1.5198798 | SLFN12 | schlafen family member 12                 |
| 220044_x_at | 5.67E-06 | 1.92E-07 | 7.3688369 | 7.315088 | 1.930415  | LUC7L3 | LUC7 like 3 pre-mRNA splicing<br>factor   |

|              |          |          |           |          |           |        |                                         |
|--------------|----------|----------|-----------|----------|-----------|--------|-----------------------------------------|
| 201294_s_at  | 5.67E-06 | 1.92E-07 | 7.368368  | 7.314076 | 1.934507  | WSB1   | WD repeat and SOCS box containing 1     |
| 1558953_s_at | 5.68E-06 | 1.93E-07 | 7.3672154 | 7.311587 | 1.1612761 | CEP164 | centrosomal protein 164                 |
| 229419_at    | 5.68E-06 | 1.93E-07 | 7.366852  | 7.310803 | 1.2151661 | FBXW7  | F-box and WD repeat domain containing 7 |
| 238002_at    | 5.69E-06 | 1.93E-07 | 7.3661435 | 7.309273 | 1.6428343 | GOLIM4 | golgi integral membrane protein 4       |
| 209298_s_at  | 5.74E-06 | 1.96E-07 | 7.3600129 | 7.296034 | 1.4199673 | ITSN1  | intersectin 1                           |

|             |          |          |           |          |           |        |                                                     |
|-------------|----------|----------|-----------|----------|-----------|--------|-----------------------------------------------------|
| 206853_s_at | 5.76E-06 | 1.97E-07 | 7.3571964 | 7.28995  | 1.0432102 | MAP3K7 | mitogen-activated protein kinase<br>kinase kinase 7 |
| 224914_s_at | 5.77E-06 | 1.97E-07 | 7.3566935 | 7.288864 | 1.013453  | SARNP  | SAP domain containing<br>ribonucleoprotein          |
| 207988_s_at | 5.77E-06 | 1.98E-07 | 7.3564663 | 7.288373 | 1.4171248 | ARPC2  | actin related protein 2/3 complex<br>subunit 2      |
| 212646_at   | 5.78E-06 | 1.98E-07 | 7.3545492 | 7.284231 | 2.1989788 | RFTN1  | raftlin, lipid raft linker 1                        |
| 212709_at   | 5.79E-06 | 1.99E-07 | 7.3530628 | 7.281019 | 1.2341023 | NUP160 | nucleoporin 160                                     |



|             |          |          |           |          |           |                                                |                                                                                                                                                                                                    |
|-------------|----------|----------|-----------|----------|-----------|------------------------------------------------|----------------------------------------------------------------------------------------------------------------------------------------------------------------------------------------------------|
| 212671_s_at | 5.79E-06 | 1.99E-07 | 7.3528432 | 7.280545 | 3.5178995 | LOC10050945<br>7///HLA-DQA<br>2///HLA-DQA<br>1 | HLA class II histocompatibility<br>antigen, DQ alpha 1<br>chain-like///major<br>histocompatibility complex, class<br>II, DQ alpha 2///major<br>histocompatibility complex, class<br>II, DQ alpha 1 |
| 218395_at   | 5.79E-06 | 1.99E-07 | 7.3526305 | 7.280085 | 1.5612884 | ACTR6                                          | ARP6 actin-related protein 6<br>homolog                                                                                                                                                            |

|             |          |          |           |          |           |          |                                      |
|-------------|----------|----------|-----------|----------|-----------|----------|--------------------------------------|
| 209970_x_at | 5.79E-06 | 2.00E-07 | 7.3511574 | 7.276902 | 1.9072709 | CASP1    | caspase 1                            |
| 225475_at   | 5.79E-06 | 2.00E-07 | 7.3499836 | 7.274365 | 1.4386964 | MIER1    | MIER1 transcriptional regulator      |
| 235190_at   | 5.79E-06 | 2.00E-07 | 7.3499437 | 7.274278 | 1.7631618 |          |                                      |
| 213982_s_at | 5.84E-06 | 2.03E-07 | 7.3438024 | 7.261003 | 1.7100591 | RABGAP1L | RAB GTPase activating protein 1 like |
| 227751_at   | 5.85E-06 | 2.04E-07 | 7.342384  | 7.257936 | 1.3002575 | PDCD5    | programmed cell death 5              |
| 219492_at   | 5.89E-06 | 2.06E-07 | 7.3374589 | 7.247284 | 1.3092189 | CHIC2    | cysteine rich hydrophobic domain 2   |
| 209007_s_at | 5.90E-06 | 2.06E-07 | 7.3365485 | 7.245315 | 2.3006941 | RSRP1    | arginine and serine rich protein 1   |

|             |          |          |           |          |                  |                                         |
|-------------|----------|----------|-----------|----------|------------------|-----------------------------------------|
| 209974_s_at | 5.91E-06 | 2.07E-07 | 7.3353246 | 7.242667 | 1.4245011 BUB3   | BUB3, mitotic checkpoint protein        |
| 230550_at   | 5.91E-06 | 2.07E-07 | 7.3352165 | 7.242433 | 2.2183613 MS4A6A | membrane spanning 4-domains<br>A6A      |
| 225128_at   | 5.91E-06 | 2.08E-07 | 7.3338961 | 7.239577 | 1.1858661 KDELC2 | KDEL motif containing 2                 |
| 206335_at   | 5.91E-06 | 2.08E-07 | 7.3334818 | 7.23868  | 1.4278895 GALNS  | galactosamine<br>(N-acetyl)-6-sulfatase |
| 221229_s_at | 5.96E-06 | 2.10E-07 | 7.3283764 | 7.227633 | 1.131448 TRMT61B | tRNA methyltransferase 61B              |

|             |          |          |           |          |           |        |                                                           |
|-------------|----------|----------|-----------|----------|-----------|--------|-----------------------------------------------------------|
| 208091_s_at | 5.96E-06 | 2.10E-07 | 7.3278251 | 7.226439 | 1.3464307 | VOPP1  | vesicular, overexpressed in cancer, prosurvival protein 1 |
| 221645_s_at | 5.96E-06 | 2.11E-07 | 7.3262061 | 7.222935 | 2.6722407 | ZNF83  | zinc finger protein 83                                    |
| 212031_at   | 5.96E-06 | 2.11E-07 | 7.3261226 | 7.222754 | 1.6172509 | RBM25  | RNA binding motif protein 25                              |
| 230229_at   | 5.99E-06 | 2.13E-07 | 7.3231696 | 7.216361 | 2.334188  | DLG1   | discs large MAGUK scaffold protein 1                      |
| 201163_s_at | 5.99E-06 | 2.13E-07 | 7.3227494 | 7.215452 | 1.5409789 | IGFBP7 | insulin like growth factor binding protein 7              |

|              |          |          |           |          |                   |                                         |
|--------------|----------|----------|-----------|----------|-------------------|-----------------------------------------|
| 224916_at    | 5.99E-06 | 2.13E-07 | 7.3224761 | 7.21486  | 2.1639352 TMEM173 | transmembrane protein 173               |
| 228531_at    | 6.02E-06 | 2.14E-07 | 7.3195454 | 7.208514 | 3.1063039 SAMD9   | sterile alpha motif domain containing 9 |
| 212043_at    | 6.03E-06 | 2.15E-07 | 7.3185893 | 7.206443 | 1.0398804 TGOLN2  | trans-golgi network protein 2           |
| 223595_at    | 6.03E-06 | 2.15E-07 | 7.3177165 | 7.204553 | 2.1828713 TMEM133 | transmembrane protein 133               |
| 1556006_s_at | 6.03E-06 | 2.15E-07 | 7.317108  | 7.203235 | 1.9037279 CSNK1A1 | casein kinase 1 alpha 1                 |
| 243993_at    | 6.03E-06 | 2.16E-07 | 7.3168544 | 7.202686 | 1.8359282         |                                         |
| 226169_at    | 6.05E-06 | 2.17E-07 | 7.3145829 | 7.197766 | 1.5572075 SBF2    | SET binding factor 2                    |

|              |          |          |           |          |                  |                                  |
|--------------|----------|----------|-----------|----------|------------------|----------------------------------|
| 207922_s_at  | 6.06E-06 | 2.17E-07 | 7.313569  | 7.195569 | 1.2112111MAEA    | macrophage erythroblast attacher |
| 219286_s_at  | 6.06E-06 | 2.17E-07 | 7.3133392 | 7.195071 | 1.2723634RBM15   | RNA binding motif protein 15     |
| 225969_at    | 6.09E-06 | 2.19E-07 | 7.3100742 | 7.187997 | 1.2964548ALKBH6  | alkB homolog 6                   |
| 236545_at    | 6.09E-06 | 2.19E-07 | 7.3098804 | 7.187578 | 1.7210718        |                                  |
| 1556007_s_at | 6.12E-06 | 2.21E-07 | 7.3053606 | 7.177782 | 1.8719663CSNK1A1 | casein kinase 1 alpha 1          |
| 226942_at    | 6.12E-06 | 2.21E-07 | 7.3053254 | 7.177706 | 1.2630459PHF20L1 | PHD finger protein 20-like 1     |
| 236322_at    | 6.15E-06 | 2.23E-07 | 7.3011744 | 7.168707 | 2.3804061        |                                  |
| 233595_at    | 6.15E-06 | 2.23E-07 | 7.3010999 | 7.168546 | 1.6442898USP34   | ubiquitin specific peptidase 34  |
| 212632_at    | 6.15E-06 | 2.23E-07 | 7.3004391 | 7.167113 | 1.6030991STX7    | syntaxin 7                       |

|             |          |          |           |          |                   |                                                            |
|-------------|----------|----------|-----------|----------|-------------------|------------------------------------------------------------|
| 225929_s_at | 6.16E-06 | 2.24E-07 | 7.2995997 | 7.165293 | 1.8053521 RNF213  | ring finger protein 213                                    |
| 209356_x_at | 6.18E-06 | 2.26E-07 | 7.2961781 | 7.157873 | 1.6935504 EFEMP2  | EGF containing fibulin like extracellular matrix protein 2 |
| 215269_at   | 6.19E-06 | 2.26E-07 | 7.2947241 | 7.15472  | 1.401298 TRAPPC10 | trafficking protein particle complex 10                    |
| 224764_at   | 6.20E-06 | 2.27E-07 | 7.2929475 | 7.150866 | 1.576553 ARHGAP21 | Rho GTPase activating protein 21                           |
| 222843_at   | 6.20E-06 | 2.27E-07 | 7.2927769 | 7.150496 | 1.508718 FIGNL1   | fidgetin like 1                                            |

|             |          |          |           |          |           |        |                                                                |
|-------------|----------|----------|-----------|----------|-----------|--------|----------------------------------------------------------------|
| 225617_at   | 6.21E-06 | 2.28E-07 | 7.2920436 | 7.148905 | 1.1036664 | ODF2   | outer dense fiber of sperm tails 2                             |
| 224973_at   | 6.22E-06 | 2.28E-07 | 7.2908222 | 7.146256 | 1.85627   | FAM46A | family with sequence similarity 46 member A                    |
| 204512_at   | 6.24E-06 | 2.30E-07 | 7.2879578 | 7.140041 | 1.5162432 | HIVEP1 | human immunodeficiency virus type I enhancer binding protein 1 |
| 204052_s_at | 6.24E-06 | 2.30E-07 | 7.2878162 | 7.139733 | 3.7626514 | SFRP4  | secreted frizzled related protein 4                            |



|              |          |          |           |          |                 |                                                  |
|--------------|----------|----------|-----------|----------|-----------------|--------------------------------------------------|
| 1555844_s_at | 6.24E-06 | 2.30E-07 | 7.28659   | 7.137073 | 1.1204316HNRNPM | heterogeneous nuclear ribonucleoprotein M        |
| 223218_s_at  | 6.25E-06 | 2.31E-07 | 7.2844653 | 7.132461 | 3.1058873NFKBIZ | NFKB inhibitor zeta                              |
| 205474_at    | 6.26E-06 | 2.32E-07 | 7.2835334 | 7.130439 | 1.3499723CRLF3  | cytokine receptor like factor 3                  |
| 201908_at    | 6.29E-06 | 2.33E-07 | 7.2807393 | 7.124373 | 1.0789032DVL3   | dishevelled segment polarity protein 3           |
| 212780_at    | 6.30E-06 | 2.34E-07 | 7.2796979 | 7.122113 | 1.7060971SOS1   | SOS Ras/Rac guanine nucleotide exchange factor 1 |

|                                 |          |          |           |          |                  |                                                            |
|---------------------------------|----------|----------|-----------|----------|------------------|------------------------------------------------------------|
| 225456_at                       | 6.31E-06 | 2.35E-07 | 7.2782892 | 7.119054 | 1.4168127MED1    | mediator complex subunit 1                                 |
| 218181_s_at                     | 6.31E-06 | 2.35E-07 | 7.2774815 | 7.1173   | 2.1087646MAP4K4  | mitogen-activated protein kinase<br>kinase kinase kinase 4 |
| 218236_s_at                     | 6.32E-06 | 2.35E-07 | 7.276851  | 7.115931 | 1.4897077PRKD3   | protein kinase D3                                          |
| AFFX-HSAC<br>07/X00351_3<br>_at | 6.32E-06 | 2.36E-07 | 7.276314  | 7.114765 | 1.5028732ACTB    | actin beta                                                 |
| 227247_at                       | 6.33E-06 | 2.36E-07 | 7.2758507 | 7.113759 | 1.2975464PLEKHA8 | pleckstrin homology domain<br>containing A8                |

|             |          |          |           |          |           |        |                                                        |
|-------------|----------|----------|-----------|----------|-----------|--------|--------------------------------------------------------|
| 221039_s_at | 6.34E-06 | 2.38E-07 | 7.2728197 | 7.107176 | 1.767157  | ASAP1  | ArfGAP with SH3 domain, ankyrin repeat and PH domain 1 |
| 201613_s_at | 6.34E-06 | 2.38E-07 | 7.2720638 | 7.105534 | 1.2184746 | AP1G2  | adaptor related protein complex 1 gamma 2 subunit      |
| 220731_s_at | 6.34E-06 | 2.38E-07 | 7.2720233 | 7.105447 | 1.3405163 | NECAP2 | NECAP endocytosis associated 2                         |

|             |          |          |           |          |           |          |                                                                    |
|-------------|----------|----------|-----------|----------|-----------|----------|--------------------------------------------------------------------|
| 204559_s_at | 6.37E-06 | 2.40E-07 | 7.2675651 | 7.095761 | 1.4293221 | LSM7     | LSM7 homolog, U6 small nuclear RNA and mRNA degradation associated |
| 221935_s_at | 6.39E-06 | 2.42E-07 | 7.2644929 | 7.089086 | 2.260193  | EOGT     | EGF domain specific O-linked N-acetylglucosamine transferase       |
| 213373_s_at | 6.40E-06 | 2.43E-07 | 7.2625812 | 7.084931 | 1.7517036 | CASP8    | caspase 8                                                          |
| 201603_at   | 6.40E-06 | 2.43E-07 | 7.2624213 | 7.084583 | 1.9167461 | PPP1R12A | protein phosphatase 1 regulatory subunit 12A                       |

|             |          |          |           |          |                  |                                                 |
|-------------|----------|----------|-----------|----------|------------------|-------------------------------------------------|
| 224833_at   | 6.40E-06 | 2.43E-07 | 7.2621647 | 7.084026 | 2.1686568ETS1    | ETS proto-oncogene 1,<br>transcription factor   |
| 224701_at   | 6.42E-06 | 2.45E-07 | 7.2592368 | 7.077661 | 1.7125564PARP14  | poly(ADP-ribose) polymerase<br>family member 14 |
| 212651_at   | 6.43E-06 | 2.45E-07 | 7.2587619 | 7.076629 | 1.6782509RHOBTB1 | Rho related BTB domain<br>containing 1          |
| 233364_s_at | 6.43E-06 | 2.45E-07 | 7.2581253 | 7.075245 | 2.6071238        |                                                 |
| 225731_at   | 6.43E-06 | 2.46E-07 | 7.2573158 | 7.073485 | 1.59718ANKRD50   | ankyrin repeat domain 50                        |

|             |          |          |           |          |                   |                                                         |
|-------------|----------|----------|-----------|----------|-------------------|---------------------------------------------------------|
| 226409_at   | 6.45E-06 | 2.48E-07 | 7.253566  | 7.065331 | 1.1070505 TBC1D20 | TBC1 domain family member 20                            |
| 217733_s_at | 6.48E-06 | 2.50E-07 | 7.2501166 | 7.057829 | 1.8107393 TMSB10  | thymosin beta 10                                        |
| 218652_s_at | 6.48E-06 | 2.50E-07 | 7.2495761 | 7.056654 | 1.2282337 PIGG    | phosphatidylinositol glycan anchor biosynthesis class G |
| 227489_at   | 6.49E-06 | 2.51E-07 | 7.2486395 | 7.054616 | 1.3425652 SMURF2  | SMAD specific E3 ubiquitin protein ligase 2             |
| 207850_at   | 6.50E-06 | 2.51E-07 | 7.2476011 | 7.052357 | 3.4485218 CXCL3   | C-X-C motif chemokine ligand 3                          |

|             |          |          |           |          |                 |                                                  |
|-------------|----------|----------|-----------|----------|-----------------|--------------------------------------------------|
| 223257_at   | 6.50E-06 | 2.51E-07 | 7.2473801 | 7.051876 | 1.0086159G2E3   | G2/M-phase specific E3 ubiquitin protein ligase  |
| 218628_at   | 6.50E-06 | 2.52E-07 | 7.2457607 | 7.048353 | 1.2704257CCDC53 | coiled-coil domain containing 53                 |
| 239654_at   | 6.50E-06 | 2.52E-07 | 7.2457163 | 7.048257 | 1.1683521CHD9   | chromodomain helicase DNA binding protein 9      |
| 203569_s_at | 6.50E-06 | 2.52E-07 | 7.2456946 | 7.048209 | 1.3506268OFD1   | OFD1, centriole and centriolar satellite protein |
| 220974_x_at | 6.50E-06 | 2.52E-07 | 7.2455232 | 7.047836 | 1.4691739SFXN3  | sideroflexin 3                                   |

|              |          |          |           |          |           |         |                                              |
|--------------|----------|----------|-----------|----------|-----------|---------|----------------------------------------------|
| 1557080_s_at | 6.50E-06 | 2.53E-07 | 7.2446269 | 7.045886 | 2.7138605 | ITGBL1  | integrin subunit beta like 1                 |
| 214683_s_at  | 6.52E-06 | 2.54E-07 | 7.2429003 | 7.042129 | 1.8243255 | CLK1    | CDC like kinase 1                            |
| 208812_x_at  | 6.54E-06 | 2.55E-07 | 7.2399531 | 7.035715 | 1.3317893 | HLA-C   | major histocompatibility complex, class I, C |
| 225136_at    | 6.55E-06 | 2.57E-07 | 7.2378752 | 7.031192 | 1.5853254 | PLEKHA2 | pleckstrin homology domain containing A2     |
| 213077_at    | 6.56E-06 | 2.57E-07 | 7.2366372 | 7.028497 | 1.4233986 | YTHDC2  | YTH domain containing 2                      |
| 226771_at    | 6.56E-06 | 2.58E-07 | 7.2355155 | 7.026055 | 1.7237125 | ATP8B2  | ATPase phospholipid transporting 8B2         |



|             |          |          |           |          |           |        |                                                                                   |
|-------------|----------|----------|-----------|----------|-----------|--------|-----------------------------------------------------------------------------------|
| 210976_s_at | 6.57E-06 | 2.59E-07 | 7.2339826 | 7.022717 | 1.0163323 | PFKM   | phosphofructokinase, muscle                                                       |
| 226015_at   | 6.57E-06 | 2.59E-07 | 7.2328909 | 7.02034  | 1.5610407 | ZNF12  | zinc finger protein 12                                                            |
| 224733_at   | 6.57E-06 | 2.60E-07 | 7.2324572 | 7.019396 | 2.1667539 | CMTM3  | CKLF like MARVEL<br>transmembrane domain containing<br>3                          |
| 224558_s_at | 6.59E-06 | 2.61E-07 | 7.229932  | 7.013897 | 2.1423904 | MALAT1 | metastasis associated lung<br>adenocarcinoma transcript 1<br>(non-protein coding) |

|             |          |          |           |          |           |         |                                               |
|-------------|----------|----------|-----------|----------|-----------|---------|-----------------------------------------------|
| 204221_x_at | 6.62E-06 | 2.63E-07 | 7.2275404 | 7.008688 | 1.588745  | GLIPR1  | GLI pathogenesis related 1                    |
| 217763_s_at | 6.63E-06 | 2.64E-07 | 7.2251706 | 7.003525 | 3.1109509 | RAB31   | RAB31, member RAS oncogene family             |
| 214124_x_at | 6.64E-06 | 2.65E-07 | 7.2234109 | 6.999691 | 1.0639166 | FGFR1OP | FGFR1 oncogene partner                        |
| 201621_at   | 6.64E-06 | 2.66E-07 | 7.2216429 | 6.995839 | 2.41183   | NBL1    | neuroblastoma 1, DAN family<br>BMP antagonist |
| 201964_at   | 6.64E-06 | 2.66E-07 | 7.2214609 | 6.995442 | 1.3697905 | SETX    | senataxin                                     |
| 241893_at   | 6.64E-06 | 2.66E-07 | 7.2213623 | 6.995227 | 1.809025  |         |                                               |
| 223215_s_at | 6.65E-06 | 2.67E-07 | 7.2201841 | 6.99266  | 1.0074655 | JKAMP   | JNK1/MAPK8-associated<br>membrane protein     |

|             |          |          |           |          |           |          |                                             |
|-------------|----------|----------|-----------|----------|-----------|----------|---------------------------------------------|
| 209012_at   | 6.70E-06 | 2.70E-07 | 7.2155222 | 6.982499 | 1.8103886 | TRIO     | trio Rho guanine nucleotide exchange factor |
| 227568_at   | 6.72E-06 | 2.71E-07 | 7.2133546 | 6.977773 | 1.6873484 | HECTD2   | HECT domain E3 ubiquitin protein ligase 2   |
| 223343_at   | 6.74E-06 | 2.72E-07 | 7.2117609 | 6.974298 | 3.0433016 | MS4A7    | membrane spanning 4-domains A7              |
| 202627_s_at | 6.76E-06 | 2.73E-07 | 7.2099115 | 6.970266 | 2.9586384 | SERPINE1 | serpin family E member 1                    |
| 212764_at   | 6.79E-06 | 2.75E-07 | 7.2067068 | 6.963277 | 2.3505038 | ZEB1     | zinc finger E-box binding homeobox 1        |

|             |          |          |           |          |           |        |                                        |
|-------------|----------|----------|-----------|----------|-----------|--------|----------------------------------------|
| 231940_at   | 6.79E-06 | 2.75E-07 | 7.2065896 | 6.963021 | 1.4029727 | ZNF529 | zinc finger protein 529                |
| 227266_s_at | 6.79E-06 | 2.76E-07 | 7.2052555 | 6.960111 | 2.9668129 | FYB    | FYN binding protein                    |
| 244659_at   | 6.82E-06 | 2.78E-07 | 7.201281  | 6.95144  | 1.2174125 | TRIP12 | thyroid hormone receptor interactor 12 |
| 40420_at    | 6.82E-06 | 2.79E-07 | 7.20096   | 6.95074  | 1.48907   | STK10  | serine/threonine kinase 10             |
| 221731_x_at | 6.83E-06 | 2.79E-07 | 7.2000968 | 6.948856 | 3.9880498 | VCAN   | versican                               |
| 212033_at   | 6.86E-06 | 2.81E-07 | 7.1972113 | 6.942559 | 1.3111139 | RBM25  | RNA binding motif protein 25           |
| 224691_at   | 6.87E-06 | 2.82E-07 | 7.1949897 | 6.937711 | 1.4760459 | UHMK1  | U2AF homology motif (UHM) kinase 1     |

|             |          |          |           |          |           |       |                                                     |
|-------------|----------|----------|-----------|----------|-----------|-------|-----------------------------------------------------|
| 37012_at    | 6.87E-06 | 2.82E-07 | 7.1946257 | 6.936916 | 1.5298841 | CAPZB | capping actin protein of muscle Z-line beta subunit |
| 219179_at   | 6.87E-06 | 2.83E-07 | 7.1939078 | 6.935349 | 2.201815  | DACT1 | dishevelled binding antagonist of beta catenin 1    |
| 239740_at   | 6.90E-06 | 2.85E-07 | 7.1911298 | 6.929284 | 1.4603629 | ETV6  | ETS variant 6                                       |
| 200797_s_at | 6.90E-06 | 2.85E-07 | 7.1910445 | 6.929098 | 1.3862196 | MCL1  | BCL2 family apoptosis regulator                     |
| 235078_at   | 6.91E-06 | 2.85E-07 | 7.1902708 | 6.927409 | 1.5912323 |       |                                                     |
| 212917_x_at | 6.91E-06 | 2.86E-07 | 7.1889668 | 6.924562 | 1.9875245 | RECQL | RecQ like helicase                                  |
| 207168_s_at | 6.91E-06 | 2.86E-07 | 7.1887445 | 6.924076 | 1.4572991 | H2AFY | H2A histone family member Y                         |

|           |          |          |           |          |                   |                                                                  |
|-----------|----------|----------|-----------|----------|-------------------|------------------------------------------------------------------|
| 204362_at | 6.91E-06 | 2.86E-07 | 7.1884697 | 6.923476 | 2.0317877 SKAP2   | src kinase associated phosphoprotein 2                           |
| 212223_at | 6.91E-06 | 2.86E-07 | 7.188381  | 6.923282 | 1.2866514 IDS     | iduronate 2-sulfatase                                            |
| 202808_at | 6.91E-06 | 2.87E-07 | 7.1879404 | 6.92232  | 1.4405911 WBP1L   | WW domain binding protein 1-like                                 |
| 212765_at | 6.94E-06 | 2.88E-07 | 7.1853183 | 6.916594 | 1.6634648 CAMSAP2 | calmodulin regulated spectrin associated protein family member 2 |
| 239336_at | 6.95E-06 | 2.89E-07 | 7.184521  | 6.914853 | 1.8720295 THBS1   | thrombospondin 1                                                 |
| 228335_at | 6.95E-06 | 2.89E-07 | 7.1841248 | 6.913987 | 2.3616091 CLDN11  | claudin 11                                                       |

|             |          |          |           |          |           |                |                                                                      |
|-------------|----------|----------|-----------|----------|-----------|----------------|----------------------------------------------------------------------|
| 211784_s_at | 6.98E-06 | 2.91E-07 | 7.1816588 | 6.9086   | 1.512498  | SRSF1          | serine and arginine rich splicing factor 1                           |
| 222235_s_at | 7.00E-06 | 2.93E-07 | 7.1783374 | 6.901344 | 2.0634693 | CSGALNAC<br>T2 | chondroitin sulfate<br>N-acetylgalactosaminyltransferase<br>2        |
| 225612_s_at | 7.00E-06 | 2.93E-07 | 7.1783257 | 6.901318 | 2.4618113 | B3GNT5         | UDP-GlcNAc:betaGal<br>beta-1,3-N-acetylglucosaminyltran<br>sferase 5 |

|             |          |          |           |          |           |                                                                     |
|-------------|----------|----------|-----------|----------|-----------|---------------------------------------------------------------------|
| 207243_s_at | 7.01E-06 | 2.93E-07 | 7.1775903 | 6.899711 | 1.1677857 | CALM3///CALM2///CALM1<br>calmodulin 3///calmodulin 2///calmodulin 1 |
| 203570_at   | 7.03E-06 | 2.95E-07 | 7.1753216 | 6.894754 | 2.7430268 | LOXL1<br>lysyl oxidase like 1                                       |
| 1555852_at  | 7.03E-06 | 2.95E-07 | 7.1751199 | 6.894313 | 1.8021471 | PSMB8-AS1<br>PSMB8 antisense RNA 1 (head to head)                   |
| 235352_at   | 7.05E-06 | 2.96E-07 | 7.1735454 | 6.890872 | 2.1254341 | MR1<br>major histocompatibility complex, class I-related            |
| 211185_s_at | 7.06E-06 | 2.97E-07 | 7.1717517 | 6.886951 | 1.1034429 | SF3B1<br>splicing factor 3b subunit 1                               |
| 202668_at   | 7.07E-06 | 2.98E-07 | 7.1708452 | 6.884969 | 2.8473016 | EFNB2<br>ephrin B2                                                  |



|             |          |          |           |          |                    |                                                        |
|-------------|----------|----------|-----------|----------|--------------------|--------------------------------------------------------|
| 224796_at   | 7.07E-06 | 2.99E-07 | 7.1695922 | 6.88223  | 1.499442 ASAP1     | ArfGAP with SH3 domain, ankyrin repeat and PH domain 1 |
| 1555827_at  | 7.08E-06 | 2.99E-07 | 7.1685884 | 6.880036 | 1.4943579 CCNL1    | cyclin L1                                              |
| 223502_s_at | 7.08E-06 | 3.00E-07 | 7.1681017 | 6.878971 | 2.8143448 TNFSF13B | tumor necrosis factor superfamily member 13b           |
| 228396_at   | 7.08E-06 | 3.00E-07 | 7.1678172 | 6.878349 | 1.4903641 PRKG1    | protein kinase, cGMP-dependent, type I                 |
| 202207_at   | 7.08E-06 | 3.00E-07 | 7.1671528 | 6.876897 | 2.9110263 ARL4C    | ADP ribosylation factor like GTPase 4C                 |

|             |          |          |           |          |           |                  |                                               |
|-------------|----------|----------|-----------|----------|-----------|------------------|-----------------------------------------------|
| 202273_at   | 7.08E-06 | 3.01E-07 | 7.1662236 | 6.874865 | 2.0670657 | PDGFRB           | platelet derived growth factor receptor beta  |
| 208747_s_at | 7.08E-06 | 3.01E-07 | 7.1660186 | 6.874417 | 2.0456568 | C1S              | complement component 1, s subcomponent        |
| 225685_at   | 7.09E-06 | 3.01E-07 | 7.1653193 | 6.872887 | 2.0868934 | CDC42EP3         | CDC42 effector protein 3                      |
| 226066_at   | 7.09E-06 | 3.03E-07 | 7.1637481 | 6.869451 | 1.6262198 | MITF             | melanogenesis associated transcription factor |
| 224656_s_at | 7.10E-06 | 3.03E-07 | 7.162901  | 6.867599 | 1.3209371 | LUZP6///MTP<br>N | leucine zipper protein<br>6///myotrophin      |

|             |          |          |           |          |                 |                                                   |
|-------------|----------|----------|-----------|----------|-----------------|---------------------------------------------------|
| 200899_s_at | 7.14E-06 | 3.06E-07 | 7.1586083 | 6.858209 | 1.0775239MGEA5  | meningioma expressed antigen 5<br>(hyaluronidase) |
| 213869_x_at | 7.15E-06 | 3.07E-07 | 7.1576642 | 6.856143 | 2.4224671THY1   | Thy-1 cell surface antigen                        |
| 218761_at   | 7.15E-06 | 3.07E-07 | 7.1567552 | 6.854154 | 1.4233359RNF111 | ring finger protein 111                           |
| 202804_at   | 7.15E-06 | 3.08E-07 | 7.1561289 | 6.852784 | 1.4539218ABCC1  | ATP binding cassette subfamily C<br>member 1      |
| 205330_at   | 7.15E-06 | 3.08E-07 | 7.1557697 | 6.851998 | 2.1618621MN1    | MN1 proto-oncogene,<br>transcriptional regulator  |

|             |          |          |           |          |           |       |                                       |
|-------------|----------|----------|-----------|----------|-----------|-------|---------------------------------------|
| 209308_s_at | 7.15E-06 | 3.08E-07 | 7.155498  | 6.851403 | 1.4600486 | BNIP2 | BCL2 interacting protein 2            |
| 201152_s_at | 7.15E-06 | 3.09E-07 | 7.1543328 | 6.848854 | 1.662092  | MBNL1 | muscleblind like splicing regulator 1 |
| 216834_at   | 7.16E-06 | 3.10E-07 | 7.1533975 | 6.846807 | 3.8500252 | RGS1  | regulator of G-protein signaling 1    |
| 225464_at   | 7.17E-06 | 3.10E-07 | 7.152875  | 6.845663 | 2.3394337 | FRMD6 | FERM domain containing 6              |
| 203741_s_at | 7.17E-06 | 3.10E-07 | 7.152477  | 6.844792 | 2.6267445 | ADCY7 | adenylate cyclase 7                   |
| 233300_at   | 7.17E-06 | 3.11E-07 | 7.1516363 | 6.842952 | 2.1061023 |       |                                       |
| 213939_s_at | 7.18E-06 | 3.11E-07 | 7.1508617 | 6.841257 | 1.5582879 | RUFY3 | RUN and FYVE domain containing 3      |

|            |          |          |           |          |           |        |                                               |
|------------|----------|----------|-----------|----------|-----------|--------|-----------------------------------------------|
| 1554149_at | 7.18E-06 | 3.12E-07 | 7.1502527 | 6.839924 | 1.1041688 | CLDND1 | claudin domain containing 1                   |
| 213817_at  | 7.18E-06 | 3.13E-07 | 7.1491818 | 6.83758  | 2.4871543 | IRAK3  | interleukin 1 receptor associated<br>kinase 3 |
| 212647_at  | 7.18E-06 | 3.13E-07 | 7.1487694 | 6.836677 | 1.7508157 | RRAS   | related RAS viral (r-ras) oncogene<br>homolog |

|             |          |          |           |          |           |                                              |
|-------------|----------|----------|-----------|----------|-----------|----------------------------------------------|
|             |          |          |           |          |           | microRNA 6859-1///microRNA                   |
|             |          |          |           |          |           | MIR6859-1/// 6859-2///WAS protein family     |
|             |          |          |           |          |           | MIR6859-2/// homolog 6-like///WAS protein    |
|             |          |          |           |          |           | LOC10193015 family homolog 1                 |
| 226340_x_at | 7.18E-06 | 3.13E-07 | 7.1485274 | 6.836147 | 1.0254759 | 4///LOC10028 pseudogene///WAS protein family |
|             |          |          |           |          |           | 8778///WASH homolog 1///WAS protein family   |
|             |          |          |           |          |           | 1///WASH7P// homolog 7 pseudogene///WAS      |
|             |          |          |           |          |           | /WASH2P/// protein family homolog 2          |
|             |          |          |           |          |           | WASH3P pseudogene///WAS protein family       |
|             |          |          |           |          |           | homolog 3 pseudogene                         |

|             |          |          |           |          |                  |                                                      |
|-------------|----------|----------|-----------|----------|------------------|------------------------------------------------------|
| 222018_at   | 7.18E-06 | 3.13E-07 | 7.1484868 | 6.836058 | 1.4844248NACA    | nascent polypeptide-associated complex alpha subunit |
| 226575_at   | 7.20E-06 | 3.14E-07 | 7.1468677 | 6.832514 | 1.3715473 ZNF462 | zinc finger protein 462                              |
| 202411_at   | 7.20E-06 | 3.15E-07 | 7.1462623 | 6.831188 | 3.372323 IFI27   | interferon alpha inducible protein 27                |
| 202611_s_at | 7.21E-06 | 3.15E-07 | 7.1458807 | 6.830353 | 1.5263439 MED14  | mediator complex subunit 14                          |
| 224002_s_at | 7.21E-06 | 3.15E-07 | 7.1457949 | 6.830165 | 1.6046282 FKBP7  | FK506 binding protein 7                              |

|             |          |          |           |          |                  |                                                                             |
|-------------|----------|----------|-----------|----------|------------------|-----------------------------------------------------------------------------|
| 224567_x_at | 7.22E-06 | 3.16E-07 | 7.1441287 | 6.826517 | 1.1726232MALAT1  | metastasis associated lung adenocarcinoma transcript 1 (non-protein coding) |
| 201564_s_at | 7.23E-06 | 3.16E-07 | 7.1435795 | 6.825314 | 1.9448693FSCN1   | fascin actin-bundling protein 1                                             |
| 203346_s_at | 7.24E-06 | 3.17E-07 | 7.1421927 | 6.822277 | 1.3311554MTF2    | metal response element binding transcription factor 2                       |
| 227300_at   | 7.28E-06 | 3.19E-07 | 7.1394059 | 6.816174 | 2.6861689TMEM119 | transmembrane protein 119                                                   |



|             |          |          |           |          |                 |                                                     |
|-------------|----------|----------|-----------|----------|-----------------|-----------------------------------------------------|
| 227529_s_at | 7.29E-06 | 3.20E-07 | 7.138271  | 6.813688 | 2.2346727AKAP12 | A-kinase anchoring protein 12                       |
| 226785_at   | 7.31E-06 | 3.22E-07 | 7.1358587 | 6.808403 | 1.9641525ATP11C | ATPase phospholipid transporting<br>11C             |
| 224866_at   | 7.31E-06 | 3.22E-07 | 7.1358378 | 6.808358 | 1.7554227FAR1   | fatty acyl-CoA reductase 1                          |
| 204552_at   | 7.33E-06 | 3.23E-07 | 7.1337554 | 6.803795 | 1.3238939INPP4A | inositol<br>polyphosphate-4-phosphatase type<br>I A |
| 217764_s_at | 7.34E-06 | 3.24E-07 | 7.132493  | 6.801029 | 3.3542846RAB31  | RAB31, member RAS oncogene<br>family                |

|             |          |          |           |          |           |         |                                                |
|-------------|----------|----------|-----------|----------|-----------|---------|------------------------------------------------|
| 224800_at   | 7.36E-06 | 3.26E-07 | 7.130585  | 6.796848 | 1.2248054 | WDFY1   | WD repeat and FYVE domain containing 1         |
| 244286_at   | 7.36E-06 | 3.26E-07 | 7.1304727 | 6.796601 | 1.3084414 |         |                                                |
| 212443_at   | 7.39E-06 | 3.28E-07 | 7.1279169 | 6.791    | 1.2247254 | NBEAL2  | neurobeachin like 2                            |
| 225385_s_at | 7.39E-06 | 3.28E-07 | 7.1274595 | 6.789997 | 1.2194788 | HNRNPLL | heterogeneous nuclear ribonucleoprotein L like |
| 211911_x_at | 7.45E-06 | 3.31E-07 | 7.123064  | 6.780361 | 1.7405304 | HLA-B   | major histocompatibility complex, class I, B   |

|             |          |          |           |          |                   |                                                                                                      |
|-------------|----------|----------|-----------|----------|-------------------|------------------------------------------------------------------------------------------------------|
| 226421_at   | 7.45E-06 | 3.31E-07 | 7.1229327 | 6.780073 | 1.351613 AMMECR1  | Alport syndrome, mental retardation, midface hypoplasia and elliptocytosis chromosomal region gene 1 |
| 212792_at   | 7.46E-06 | 3.32E-07 | 7.1215338 | 6.777006 | 1.8549773 DPY19L1 | dpy-19 like 1                                                                                        |
| 200686_s_at | 7.46E-06 | 3.32E-07 | 7.1214568 | 6.776837 | 1.2458289 SRSF11  | serine and arginine rich splicing factor 11                                                          |

|             |          |          |           |          |                    |                                                              |
|-------------|----------|----------|-----------|----------|--------------------|--------------------------------------------------------------|
| 207191_s_at | 7.49E-06 | 3.35E-07 | 7.1182188 | 6.769736 | 2.8471771 ISLR     | immunoglobulin superfamily<br>containing leucine rich repeat |
| 211864_s_at | 7.51E-06 | 3.36E-07 | 7.1170379 | 6.767146 | 2.8591468 MYOF     | myoferlin                                                    |
| 238617_at   | 7.52E-06 | 3.37E-07 | 7.114994  | 6.762662 | 2.7736038 KIF26B   | kinesin family member 26B                                    |
| 226633_at   | 7.52E-06 | 3.38E-07 | 7.1145825 | 6.76176  | 1.8628014 RAB8B    | RAB8B, member RAS oncogene<br>family                         |
| 225295_at   | 7.52E-06 | 3.38E-07 | 7.1141236 | 6.760753 | 2.0384202 SLC39A10 | solute carrier family 39 member 10                           |

|             |          |          |           |          |           |          |                                               |
|-------------|----------|----------|-----------|----------|-----------|----------|-----------------------------------------------|
| 202594_at   | 7.53E-06 | 3.39E-07 | 7.1132313 | 6.758795 | 1.0703648 | LEPROTL1 | leptin receptor overlapping transcript-like 1 |
| 224872_at   | 7.54E-06 | 3.40E-07 | 7.1108513 | 6.753573 | 1.0532341 | DIP2B    | disco interacting protein 2 homolog B         |
| 232909_s_at | 7.54E-06 | 3.40E-07 | 7.110831  | 6.753529 | 1.3378009 | BPTF     | bromodomain PHD finger transcription factor   |
| 212066_s_at | 7.55E-06 | 3.41E-07 | 7.1095336 | 6.750682 | 1.0066457 | USP34    | ubiquitin specific peptidase 34               |

|             |          |          |           |          |                   |                                                          |
|-------------|----------|----------|-----------|----------|-------------------|----------------------------------------------------------|
| 226311_at   | 7.56E-06 | 3.42E-07 | 7.1087846 | 6.749038 | 3.4236545 ADAMTS2 | ADAM metallopeptidase with thrombospondin type 1 motif 2 |
| 213526_s_at | 7.57E-06 | 3.44E-07 | 7.1060258 | 6.742983 | 1.3864425 LIN37   | lin-37 DREAM MuvB core complex component                 |
| 212412_at   | 7.57E-06 | 3.45E-07 | 7.1054313 | 6.741678 | 1.1136375 PDLIM5  | PDZ and LIM domain 5                                     |
| 227995_at   | 7.58E-06 | 3.46E-07 | 7.1041155 | 6.73879  | 1.7989961 PLXDC2  | plexin domain containing 2                               |
| 202686_s_at | 7.60E-06 | 3.47E-07 | 7.1016695 | 6.733421 | 2.4975841 AXL     | AXL receptor tyrosine kinase                             |

|             |          |          |           |          |           |          |                                                                     |
|-------------|----------|----------|-----------|----------|-----------|----------|---------------------------------------------------------------------|
| 203375_s_at | 7.61E-06 | 3.48E-07 | 7.1012689 | 6.732541 | 1.4657695 | TPP2     | tripeptidyl peptidase 2                                             |
| 229114_at   | 7.62E-06 | 3.49E-07 | 7.0999347 | 6.729612 | 1.2564836 | GAB1     | GRB2 associated binding protein 1                                   |
| 212959_s_at | 7.63E-06 | 3.50E-07 | 7.0981946 | 6.725791 | 2.05541   | GNPTAB   | N-acetylglucosamine-1-phosphate transferase alpha and beta subunits |
| 224810_s_at | 7.64E-06 | 3.51E-07 | 7.0976465 | 6.724587 | 1.07847   | ANKRD13A | ankyrin repeat domain 13A                                           |

|             |          |          |           |          |           |         |                                                   |
|-------------|----------|----------|-----------|----------|-----------|---------|---------------------------------------------------|
| 225406_at   | 7.71E-06 | 3.57E-07 | 7.0897013 | 6.707135 | 1.8733109 | TWSG1   | twisted gastrulation BMP signaling modulator 1    |
| 221522_at   | 7.72E-06 | 3.58E-07 | 7.0888791 | 6.705328 | 1.3161288 | ANKRD27 | ankyrin repeat domain 27                          |
| 203044_at   | 7.72E-06 | 3.58E-07 | 7.0879156 | 6.703211 | 2.5970513 | CHSY1   | chondroitin sulfate synthase 1                    |
| 213140_s_at | 7.73E-06 | 3.59E-07 | 7.0871309 | 6.701487 | 1.3773993 | SS18L1  | SS18L1, nBAF chromatin remodeling complex subunit |
| 224587_at   | 7.75E-06 | 3.61E-07 | 7.084947  | 6.696687 | 1.0854836 | SUB1    | SUB1 homolog, transcriptional regulator           |
| 232356_at   | 7.76E-06 | 3.62E-07 | 7.0838368 | 6.694247 | 1.6983604 |         |                                                   |



|             |          |          |           |          |                   |                                              |
|-------------|----------|----------|-----------|----------|-------------------|----------------------------------------------|
| 222209_s_at | 7.76E-06 | 3.62E-07 | 7.0835262 | 6.693565 | 1.0630341 TMEM135 | transmembrane protein 135                    |
| 202988_s_at | 7.76E-06 | 3.62E-07 | 7.0830751 | 6.692573 | 3.7792373 RGS1    | regulator of G-protein signaling 1           |
| 204806_x_at | 7.77E-06 | 3.64E-07 | 7.0811788 | 6.688405 | 1.995958 HLA-F    | major histocompatibility complex, class I, F |
| 213199_at   | 7.79E-06 | 3.65E-07 | 7.0793261 | 6.684332 | 1.0633213 C2CD3   | C2 calcium dependent domain containing 3     |
| 221875_x_at | 7.81E-06 | 3.67E-07 | 7.076987  | 6.679189 | 2.0262934 HLA-F   | major histocompatibility complex, class I, F |

|           |          |          |           |          |                   |                                    |
|-----------|----------|----------|-----------|----------|-------------------|------------------------------------|
| 201531_at | 7.81E-06 | 3.67E-07 | 7.0766415 | 6.678429 | 2.27905 ZFP36     | ZFP36 ring finger protein          |
| 204163_at | 7.81E-06 | 3.68E-07 | 7.0758827 | 6.67676  | 2.5547293 EMILIN1 | elastin microfibril interfacier 1  |
| 226178_at | 7.81E-06 | 3.68E-07 | 7.0755801 | 6.676095 | 1.3286427 SOCS4   | suppressor of cytokine signaling 4 |
| 227577_at | 7.82E-06 | 3.69E-07 | 7.0746042 | 6.673949 | 1.3648123 EXOC8   | exocyst complex component 8        |
| 212753_at | 7.83E-06 | 3.70E-07 | 7.0736428 | 6.671834 | 1.2947141 PCGF3   | polycomb group ring finger 3       |
| 226280_at | 7.83E-06 | 3.70E-07 | 7.0732007 | 6.670862 | 1.6824864 BNIP2   | BCL2 interacting protein 2         |

|             |          |          |           |          |                    |                                                  |
|-------------|----------|----------|-----------|----------|--------------------|--------------------------------------------------|
| 224996_at   | 7.84E-06 | 3.71E-07 | 7.0729211 | 6.670247 | 1.9808723 ASPH     | aspartate beta-hydroxylase                       |
| 213649_at   | 7.84E-06 | 3.71E-07 | 7.0721757 | 6.668608 | 1.7011088 SRSF7    | serine and arginine rich splicing factor 7       |
| 244433_at   | 7.89E-06 | 3.75E-07 | 7.0670159 | 6.657257 | 1.9492973          |                                                  |
| 226463_at   | 7.91E-06 | 3.77E-07 | 7.0657596 | 6.654493 | 1.4564543 ATP6V1C1 | ATPase H <sup>+</sup> transporting V1 subunit C1 |
| 201288_at   | 7.92E-06 | 3.78E-07 | 7.0644833 | 6.651684 | 2.1382248 ARHGDIB  | Rho GDP dissociation inhibitor beta              |
| 216231_s_at | 7.93E-06 | 3.78E-07 | 7.0636477 | 6.649845 | 1.2428446 B2M      | beta-2-microglobulin                             |
| 208999_at   | 7.93E-06 | 3.78E-07 | 7.0636436 | 6.649836 | 1.3941379 SEPT8    | septin 8                                         |

|             |          |          |           |          |           |          |                                                     |
|-------------|----------|----------|-----------|----------|-----------|----------|-----------------------------------------------------|
| 225761_at   | 7.93E-06 | 3.79E-07 | 7.0633613 | 6.649215 | 1.4973436 | PAPD4    | poly(A) RNA polymerase D4,<br>non-canonical         |
| 201069_at   | 7.94E-06 | 3.80E-07 | 7.0615667 | 6.645265 | 2.9819312 | MMP2     | matrix metalloproteinase 2                          |
| 225508_at   | 7.94E-06 | 3.80E-07 | 7.0615155 | 6.645153 | 1.2640284 | KIAA1468 | KIAA1468                                            |
| 216194_s_at | 7.98E-06 | 3.83E-07 | 7.0577302 | 6.63682  | 1.3915289 | TBCB     | tubulin folding cofactor B                          |
| 209473_at   | 7.98E-06 | 3.85E-07 | 7.056316  | 6.633707 | 1.9328413 | ENTPD1   | ectonucleoside triphosphate<br>diphosphohydrolase 1 |
| 213110_s_at | 7.98E-06 | 3.85E-07 | 7.0561085 | 6.63325  | 2.1224504 | COL4A5   | collagen type IV alpha 5 chain                      |

|             |          |          |           |          |           |           |                                       |
|-------------|----------|----------|-----------|----------|-----------|-----------|---------------------------------------|
| 236155_at   | 7.98E-06 | 3.85E-07 | 7.0560718 | 6.633169 | 1.2238918 | ZCCHC6    | zinc finger CCHC-type containing<br>6 |
| 212867_at   | 7.99E-06 | 3.85E-07 | 7.0552371 | 6.631332 | 1.3290143 | NCOA2     | nuclear receptor coactivator 2        |
| 225074_at   | 8.00E-06 | 3.87E-07 | 7.0538659 | 6.628312 | 1.0335164 | RAB2B     | RAB2B, member RAS oncogene<br>family  |
| 218649_x_at | 8.00E-06 | 3.87E-07 | 7.0537801 | 6.628123 | 1.4965218 | NEMF      | nuclear export mediator factor        |
| 235151_at   | 8.02E-06 | 3.89E-07 | 7.051124  | 6.622274 | 1.068605  | LOC283357 | uncharacterized LOC283357             |

|             |          |          |           |          |           |         |                                     |
|-------------|----------|----------|-----------|----------|-----------|---------|-------------------------------------|
| 225893_at   | 8.02E-06 | 3.90E-07 | 7.0505493 | 6.621009 | 1.167512  | RC3H1   | ring finger and CCCH-type domains 1 |
| 208798_x_at | 8.03E-06 | 3.91E-07 | 7.0490755 | 6.617763 | 2.4103764 | GOLGA8A | golgin A8 family member A           |
| 230218_at   | 8.06E-06 | 3.94E-07 | 7.04545   | 6.609776 | 1.5620971 | HIC1    | hypermethylated in cancer 1         |
| 225102_at   | 8.08E-06 | 3.96E-07 | 7.0435871 | 6.605672 | 2.4885986 | MGLL    | monoglyceride lipase                |
| 207541_s_at | 8.12E-06 | 3.98E-07 | 7.0406881 | 6.599283 | 1.089713  | EXOSC10 | exosome component 10                |
| 205907_s_at | 8.12E-06 | 3.99E-07 | 7.0399394 | 6.597633 | 2.0105696 | OMD     | osteomodulin                        |
| 204194_at   | 8.12E-06 | 3.99E-07 | 7.0398501 | 6.597437 | 1.2439455 | BACH1   | BTB domain and CNC homolog 1        |

|              |          |          |           |          |           |         |                                                  |
|--------------|----------|----------|-----------|----------|-----------|---------|--------------------------------------------------|
| 218574_s_at  | 8.12E-06 | 3.99E-07 | 7.0396182 | 6.596925 | 1.5792654 | LMCD1   | LIM and cysteine rich domains 1                  |
| 232431_at    | 8.13E-06 | 4.00E-07 | 7.0384771 | 6.59441  | 1.8902868 | NR3C1   | nuclear receptor subfamily 3 group C member 1    |
| 1556043_a_at | 8.15E-06 | 4.02E-07 | 7.0370383 | 6.591239 | 1.0291727 | TTN-AS1 | TTN antisense RNA 1                              |
| 1556053_at   | 8.19E-06 | 4.05E-07 | 7.0331383 | 6.582641 | 1.4426323 | DNAJC7  | DnaJ heat shock protein family (Hsp40) member C7 |
| 213186_at    | 8.19E-06 | 4.06E-07 | 7.0325473 | 6.581338 | 1.6840648 | DZIP3   | DAZ interacting zinc finger protein 3            |

|             |          |          |           |          |                 |                                                     |
|-------------|----------|----------|-----------|----------|-----------------|-----------------------------------------------------|
| 203080_s_at | 8.22E-06 | 4.08E-07 | 7.0295145 | 6.574651 | 1.4647868BAZ2B  | bromodomain adjacent to zinc finger domain 2B       |
| 201949_x_at | 8.24E-06 | 4.11E-07 | 7.0270653 | 6.569249 | 1.1981888CAPZB  | capping actin protein of muscle Z-line beta subunit |
| 232946_s_at | 8.25E-06 | 4.11E-07 | 7.0268662 | 6.56881  | 1.177002NADSYN1 | NAD synthetase 1                                    |
| 239901_at   | 8.25E-06 | 4.11E-07 | 7.0262492 | 6.567449 | 1.1181643       |                                                     |
| 216903_s_at | 8.25E-06 | 4.12E-07 | 7.0260867 | 6.567091 | 1.0385379MICU1  | mitochondrial calcium uptake 1                      |
| 209583_s_at | 8.27E-06 | 4.13E-07 | 7.0242208 | 6.562975 | 2.1218039CD200  | CD200 molecule                                      |



|             |          |          |           |          |           |        |                                               |
|-------------|----------|----------|-----------|----------|-----------|--------|-----------------------------------------------|
| 200625_s_at | 8.28E-06 | 4.14E-07 | 7.0233809 | 6.561122 | 1.8118938 | CAP1   | adenylate cyclase associated protein 1        |
| 213505_s_at | 8.29E-06 | 4.15E-07 | 7.0227449 | 6.559719 | 1.047063  | SUGP2  | SURP and G-patch domain containing 2          |
| 213596_at   | 8.33E-06 | 4.18E-07 | 7.0195959 | 6.552771 | 1.2385661 | CASP4  | caspase 4                                     |
| 214298_x_at | 8.33E-06 | 4.18E-07 | 7.0192016 | 6.551901 | 1.9416896 | SEPT6  | septin 6                                      |
| 212587_s_at | 8.33E-06 | 4.18E-07 | 7.0186785 | 6.550747 | 3.1251566 | PTPRC  | protein tyrosine phosphatase, receptor type C |
| 222288_at   | 8.33E-06 | 4.19E-07 | 7.0184435 | 6.550228 | 2.4031016 |        |                                               |
| 214163_at   | 8.34E-06 | 4.19E-07 | 7.0175549 | 6.548267 | 1.1616379 | HSPB11 | heat shock protein family B (small) member 11 |

|             |          |          |           |          |                |                                             |
|-------------|----------|----------|-----------|----------|----------------|---------------------------------------------|
| 219666_at   | 8.36E-06 | 4.21E-07 | 7.0156501 | 6.544063 | 2.214825MS4A6A | membrane spanning 4-domains A6A             |
| 218014_at   | 8.36E-06 | 4.22E-07 | 7.0144896 | 6.541502 | 1.2699175NUP85 | nucleoporin 85                              |
| 209436_at   | 8.36E-06 | 4.23E-07 | 7.0142775 | 6.541033 | 1.906187SPON1  | spondin 1                                   |
| 201068_s_at | 8.36E-06 | 4.23E-07 | 7.0142148 | 6.540895 | 1.0477355PSMC2 | proteasome 26S subunit, ATPase 2            |
| 205168_at   | 8.38E-06 | 4.24E-07 | 7.0125292 | 6.537174 | 1.531462DDR2   | discoidin domain receptor tyrosine kinase 2 |
| 229422_at   | 8.38E-06 | 4.25E-07 | 7.012131  | 6.536295 | 1.2508402NRDC  | nardilysin convertase                       |
| 230069_at   | 8.41E-06 | 4.27E-07 | 7.009132  | 6.529674 | 1.3727075SFXN1 | sideroflexin 1                              |
| 204517_at   | 8.44E-06 | 4.30E-07 | 7.0065371 | 6.523944 | 1.1391552PPIC  | peptidylprolyl isomerase C                  |

|              |          |          |           |          |           |        |                                                        |
|--------------|----------|----------|-----------|----------|-----------|--------|--------------------------------------------------------|
| 204749_at    | 8.44E-06 | 4.31E-07 | 7.0059141 | 6.522568 | 1.7540304 | NAP1L3 | nucleosome assembly protein 1 like 3                   |
| 204620_s_at  | 8.45E-06 | 4.33E-07 | 7.003466  | 6.517161 | 3.8616461 | VCAN   | versican                                               |
| 239893_at    | 8.46E-06 | 4.34E-07 | 7.0028497 | 6.5158   | 1.5633941 |        |                                                        |
| 211946_s_at  | 8.46E-06 | 4.34E-07 | 7.0024211 | 6.514853 | 1.2437695 | PRRC2C | proline rich coiled-coil 2C                            |
| 1556821_x_at | 8.53E-06 | 4.39E-07 | 6.9968775 | 6.502605 | 2.4270868 | DLEU2  | deleted in lymphocytic leukemia 2 (non-protein coding) |
| 225040_s_at  | 8.55E-06 | 4.42E-07 | 6.9947226 | 6.497843 | 1.2467484 | RPE    | ribulose-5-phosphate-3-epimerase                       |

|             |          |          |           |          |           |        |                                                              |
|-------------|----------|----------|-----------|----------|-----------|--------|--------------------------------------------------------------|
| 225585_at   | 8.57E-06 | 4.43E-07 | 6.9936009 | 6.495364 | 1.8173609 | RAP2A  | RAP2A, member of RAS oncogene family                         |
| 57715_at    | 8.62E-06 | 4.47E-07 | 6.9890609 | 6.485329 | 1.0309213 | CALHM2 | calcium homeostasis modulator 2                              |
| 227139_s_at | 8.62E-06 | 4.48E-07 | 6.9886482 | 6.484417 | 1.659163  | HPS3   | HPS3, biogenesis of lysosomal organelles complex 2 subunit 1 |
| 204202_at   | 8.64E-06 | 4.50E-07 | 6.9866778 | 6.48006  | 1.1893034 | IQCE   | IQ motif containing E                                        |
| 206584_at   | 8.65E-06 | 4.50E-07 | 6.9861516 | 6.478897 | 3.0431327 | LY96   | lymphocyte antigen 96                                        |

|             |          |          |           |          |           |          |                                    |
|-------------|----------|----------|-----------|----------|-----------|----------|------------------------------------|
| 227776_at   | 8.68E-06 | 4.53E-07 | 6.9835623 | 6.473171 | 1.4019977 | ACER3    | alkaline ceramidase 3              |
| 230599_at   | 8.68E-06 | 4.53E-07 | 6.9832063 | 6.472384 | 1.954505  |          |                                    |
| 203411_s_at | 8.71E-06 | 4.55E-07 | 6.9812333 | 6.46802  | 1.7350741 | LMNA     | lamin A/C                          |
| 224254_x_at | 8.72E-06 | 4.56E-07 | 6.9803997 | 6.466177 | 1.5400443 |          |                                    |
| 214475_x_at | 8.72E-06 | 4.56E-07 | 6.9802523 | 6.46585  | 1.8409009 | CAPN3    | calpain 3                          |
| 201307_at   | 8.72E-06 | 4.57E-07 | 6.9798586 | 6.46498  | 1.3770696 | SEPT11   | septin 11                          |
| 214181_x_at | 8.74E-06 | 4.59E-07 | 6.977626  | 6.460041 | 1.9056479 | LST1     | leukocyte specific transcript 1    |
| 219423_x_at | 8.76E-06 | 4.60E-07 | 6.9760944 | 6.456652 | 1.8563898 | TNFRSF25 | TNF receptor superfamily member 25 |
| 209619_at   | 8.76E-06 | 4.61E-07 | 6.9755399 | 6.455426 | 2.1175195 | CD74     | CD74 molecule                      |

|             |          |          |           |          |           |        |                                                      |
|-------------|----------|----------|-----------|----------|-----------|--------|------------------------------------------------------|
| 207564_x_at | 8.80E-06 | 4.65E-07 | 6.9719976 | 6.447587 | 1.7126402 | OGT    | O-linked N-acetylglucosamine<br>(GlcNAc) transferase |
| 212360_at   | 8.81E-06 | 4.66E-07 | 6.9711404 | 6.44569  | 1.0899921 | AMPD2  | adenosine monophosphate<br>deaminase 2               |
| 205525_at   | 8.81E-06 | 4.66E-07 | 6.971105  | 6.445612 | 2.6407502 | CALD1  | caldesmon 1                                          |
| 218230_at   | 8.83E-06 | 4.68E-07 | 6.9684751 | 6.439791 | 1.1852677 | ARFIP1 | ADP ribosylation factor interacting<br>protein 1     |

|             |          |          |           |          |           |                                                                                                |
|-------------|----------|----------|-----------|----------|-----------|------------------------------------------------------------------------------------------------|
| 225321_s_at | 8.85E-06 | 4.70E-07 | 6.9665372 | 6.435501 | 1.7692989 | MIR6840///STAG3L5P-PVRIG2P-PILRB readthrough///paired immunoglobulin-like type 2 receptor beta |
| 226965_at   | 8.86E-06 | 4.71E-07 | 6.9659537 | 6.434209 | 1.2802786 | DENND6A DENN domain containing 6A                                                              |
| 202351_at   | 8.89E-06 | 4.73E-07 | 6.9640197 | 6.429928 | 1.6312955 | ITGAV integrin subunit alpha V                                                                 |
| 224436_s_at | 8.90E-06 | 4.74E-07 | 6.9629875 | 6.427642 | 1.1152545 | NIPSNAP3A nipsnap homolog 3A                                                                   |
| 212174_at   | 8.91E-06 | 4.75E-07 | 6.9625226 | 6.426613 | 1.501748  | AK2 adenylate kinase 2                                                                         |

|              |          |          |           |          |           |         |                                    |
|--------------|----------|----------|-----------|----------|-----------|---------|------------------------------------|
| 223451_s_at  | 8.91E-06 | 4.75E-07 | 6.9620856 | 6.425645 | 2.1760713 | CKLF    | chemokine like factor              |
| 209648_x_at  | 8.94E-06 | 4.78E-07 | 6.9599041 | 6.420814 | 1.4167589 | SOCS5   | suppressor of cytokine signaling 5 |
| 222186_at    | 8.97E-06 | 4.80E-07 | 6.9577402 | 6.416022 | 1.3254804 |         |                                    |
| 244050_at    | 8.98E-06 | 4.81E-07 | 6.9568637 | 6.41408  | 1.9146321 | HACD4   | 3-hydroxyacyl-CoA dehydratase 4    |
| 212907_at    | 8.99E-06 | 4.82E-07 | 6.9560928 | 6.412373 | 1.246673  | SLC30A1 | solute carrier family 30 member 1  |
| 1560199_x_at | 8.99E-06 | 4.82E-07 | 6.9560314 | 6.412237 | 1.1404852 |         |                                    |
| 1556060_a_at | 8.99E-06 | 4.82E-07 | 6.9553301 | 6.410683 | 1.212795  | ZNF451  | zinc finger protein 451            |



|             |          |          |           |          |           |        |                                                      |
|-------------|----------|----------|-----------|----------|-----------|--------|------------------------------------------------------|
| 225481_at   | 8.99E-06 | 4.83E-07 | 6.9551103 | 6.410196 | 2.593588  | FRMD6  | FERM domain containing 6                             |
| 212410_at   | 8.99E-06 | 4.83E-07 | 6.9546404 | 6.409155 | 1.1886721 | MICU2  | mitochondrial calcium uptake 2                       |
| 202880_s_at | 9.05E-06 | 4.89E-07 | 6.9493449 | 6.397422 | 1.5330984 | CYTH1  | cytohesin 1                                          |
| 221613_s_at | 9.11E-06 | 4.94E-07 | 6.9452387 | 6.388321 | 1.3238496 | ZFAND6 | zinc finger AN1-type containing 6                    |
| 202391_at   | 9.11E-06 | 4.95E-07 | 6.9443329 | 6.386314 | 2.6498625 | BASP1  | brain abundant membrane attached<br>signal protein 1 |
| 225782_at   | 9.11E-06 | 4.95E-07 | 6.9443232 | 6.386292 | 2.7509032 | MSRB3  | methionine sulfoxide reductase B3                    |

|             |          |          |           |          |                   |                                                            |
|-------------|----------|----------|-----------|----------|-------------------|------------------------------------------------------------|
| 228109_at   | 9.11E-06 | 4.95E-07 | 6.9442851 | 6.386208 | 1.6680827 RASGRF2 | Ras protein specific guanine nucleotide releasing factor 2 |
| 221903_s_at | 9.13E-06 | 4.96E-07 | 6.9427952 | 6.382905 | 1.3429923 CYLD    | CYLD lysine 63 deubiquitinase                              |
| 225019_at   | 9.14E-06 | 4.97E-07 | 6.942229  | 6.38165  | 1.0952061 CAMK2D  | calcium/calmodulin dependent protein kinase II delta       |
| 225338_at   | 9.15E-06 | 4.99E-07 | 6.9402206 | 6.377197 | 1.2412171 ZYG11B  | zyg-11 family member B, cell cycle regulator               |

|             |          |          |           |          |           |          |                                                          |
|-------------|----------|----------|-----------|----------|-----------|----------|----------------------------------------------------------|
| 212476_at   | 9.15E-06 | 4.99E-07 | 6.9400805 | 6.376886 | 1.6447932 | ACAP2    | ArfGAP with coiled-coil, ankyrin repeat and PH domains 2 |
| 205488_at   | 9.15E-06 | 5.00E-07 | 6.9399189 | 6.376528 | 2.2934859 | GZMA     | granzyme A                                               |
| 232090_at   | 9.19E-06 | 5.03E-07 | 6.9367845 | 6.369577 | 2.3332743 | DNM3OS   | DNM3 opposite strand/antisense RNA                       |
| 215268_at   | 9.26E-06 | 5.09E-07 | 6.93161   | 6.3581   | 2.0370918 | KIAA0754 | KIAA0754                                                 |
| 218051_s_at | 9.28E-06 | 5.11E-07 | 6.9296095 | 6.353661 | 1.8691745 | NT5DC2   | 5'-nucleotidase domain containing 2                      |

|             |          |          |           |          |                  |                                                          |
|-------------|----------|----------|-----------|----------|------------------|----------------------------------------------------------|
| 224876_at   | 9.29E-06 | 5.13E-07 | 6.9283566 | 6.350881 | 1.22758C5orf24   | chromosome 5 open reading frame 24                       |
| 239258_at   | 9.32E-06 | 5.16E-07 | 6.92518   | 6.343833 | 2.1935459        |                                                          |
| 223085_at   | 9.33E-06 | 5.18E-07 | 6.9238161 | 6.340805 | 1.4424971RNF19A  | ring finger protein 19A, RBR E3 ubiquitin protein ligase |
| 211719_x_at | 9.34E-06 | 5.20E-07 | 6.9217361 | 6.336189 | 3.6120827FN1     | fibronectin 1                                            |
| 221257_x_at | 9.34E-06 | 5.21E-07 | 6.9215925 | 6.33587  | 1.1845629FBXO38  | F-box protein 38                                         |
| 226109_at   | 9.35E-06 | 5.21E-07 | 6.9211128 | 6.334805 | 1.171272C21orf91 | chromosome 21 open reading frame 91                      |
| 241916_at   | 9.35E-06 | 5.22E-07 | 6.9204445 | 6.333322 | 2.2736359        |                                                          |

|             |          |          |           |          |           |        |                                              |
|-------------|----------|----------|-----------|----------|-----------|--------|----------------------------------------------|
| 214459_x_at | 9.37E-06 | 5.24E-07 | 6.9186722 | 6.329387 | 1.3665607 | HLA-C  | major histocompatibility complex, class I, C |
| 203989_x_at | 9.41E-06 | 5.28E-07 | 6.915315  | 6.321933 | 2.0771539 | F2R    | coagulation factor II thrombin receptor      |
| 213428_s_at | 9.41E-06 | 5.29E-07 | 6.9146132 | 6.320374 | 2.1521821 | COL6A1 | collagen type VI alpha 1 chain               |
| 227415_at   | 9.45E-06 | 5.32E-07 | 6.9118905 | 6.314328 | 2.0647355 | DGKH   | diacylglycerol kinase eta                    |
| 1559663_at  | 9.46E-06 | 5.33E-07 | 6.9109855 | 6.312318 | 2.1919564 |        |                                              |

|             |          |          |           |          |           |              |                                                                           |
|-------------|----------|----------|-----------|----------|-----------|--------------|---------------------------------------------------------------------------|
| 224710_at   | 9.46E-06 | 5.33E-07 | 6.9107888 | 6.311881 | 2.2744593 | NARR///RAB34 | nine-amino acid<br>residue-repeats///RAB34, member<br>RAS oncogene family |
| 201731_s_at | 9.46E-06 | 5.34E-07 | 6.9107168 | 6.311721 | 1.5591207 | TPR          | translocated promoter region,<br>nuclear basket protein                   |
| 216442_x_at | 9.48E-06 | 5.36E-07 | 6.9090084 | 6.307926 | 3.5541063 | FN1          | fibronectin 1                                                             |
| 210495_x_at | 9.51E-06 | 5.39E-07 | 6.9060459 | 6.301344 | 3.4550045 | FN1          | fibronectin 1                                                             |
| 201693_s_at | 9.55E-06 | 5.42E-07 | 6.9039687 | 6.296729 | 2.2376296 | EGR1         | early growth response 1                                                   |

|             |          |          |           |          |                  |                                              |
|-------------|----------|----------|-----------|----------|------------------|----------------------------------------------|
| 213009_s_at | 9.56E-06 | 5.42E-07 | 6.9033923 | 6.295448 | 1.0184252 TRIM37 | tripartite motif containing 37               |
| 226873_at   | 9.56E-06 | 5.43E-07 | 6.9025838 | 6.293651 | 1.8580914 FAM63B | family with sequence similarity 63 member B  |
| 212535_at   | 9.58E-06 | 5.45E-07 | 6.9016721 | 6.291625 | 1.3644334 MEF2A  | myocyte enhancer factor 2A                   |
| 209451_at   | 9.60E-06 | 5.47E-07 | 6.8994276 | 6.286637 | 1.7823923 TANK   | TRAF family member associated NFKB activator |

|             |          |          |           |          |           |                          |                                                                                             |
|-------------|----------|----------|-----------|----------|-----------|--------------------------|---------------------------------------------------------------------------------------------|
| 215113_s_at | 9.65E-06 | 5.52E-07 | 6.8954406 | 6.277774 | 1.1474454 | SENK3-EIF4<br>A1///SENK3 | SENK3-EIF4A1 readthrough<br>(NMD<br>candidate)///SUMO1/sentrin/SMT3<br>specific peptidase 3 |
| 213517_at   | 9.65E-06 | 5.53E-07 | 6.894909  | 6.276592 | 1.0605923 | PCBP2                    | poly(rC) binding protein 2                                                                  |
| 227013_at   | 9.70E-06 | 5.57E-07 | 6.8916937 | 6.269443 | 1.814643  | LATS2                    | large tumor suppressor kinase 2                                                             |
| 212464_s_at | 9.71E-06 | 5.58E-07 | 6.890712  | 6.26726  | 3.8556252 | FN1                      | fibronectin 1                                                                               |
| 219284_at   | 9.71E-06 | 5.59E-07 | 6.8904206 | 6.266612 | 1.3296164 | HSPBAP1                  | HSPB1 associated protein 1                                                                  |



|           |          |          |           |          |                |                                                           |
|-----------|----------|----------|-----------|----------|----------------|-----------------------------------------------------------|
| 235410_at | 9.72E-06 | 5.60E-07 | 6.8892779 | 6.26407  | 1.7147757NPHP3 | nephronophthisis 3 (adolescent)                           |
| 212506_at | 9.75E-06 | 5.63E-07 | 6.8870936 | 6.259212 | 1.136577PICALM | phosphatidylinositol binding<br>clathrin assembly protein |
| 212628_at | 9.76E-06 | 5.64E-07 | 6.8864481 | 6.257776 | 1.4283114PKN2  | protein kinase N2                                         |

|             |          |          |           |          |           |                                                                                                       |
|-------------|----------|----------|-----------|----------|-----------|-------------------------------------------------------------------------------------------------------|
| 225573_at   | 9.80E-06 | 5.66E-07 | 6.8842256 | 6.252832 | 1.1383375 | NPHP3-ACA (NMD candidate)///acyl-CoA dehydrogenase family member 11///nephronophthisis 3 (adolescent) |
| 1556657_at  | 9.80E-06 | 5.67E-07 | 6.8837158 | 6.251698 | 1.4349943 |                                                                                                       |
| 242695_at   | 9.81E-06 | 5.68E-07 | 6.8833043 | 6.250782 | 1.1714321 |                                                                                                       |
| 212221_x_at | 9.81E-06 | 5.68E-07 | 6.88271   | 6.24946  | 1.3535595 | IDS iduronate 2-sulfatase                                                                             |

|             |          |          |           |          |                   |                                                          |
|-------------|----------|----------|-----------|----------|-------------------|----------------------------------------------------------|
| 212985_at   | 9.81E-06 | 5.69E-07 | 6.8824124 | 6.248798 | 2.029397 APBB2    | amyloid beta precursor protein binding family B member 2 |
| 214719_at   | 9.82E-06 | 5.71E-07 | 6.8809852 | 6.245622 | 1.3489227 SLC46A3 | solute carrier family 46 member 3                        |
| 234723_x_at | 9.84E-06 | 5.72E-07 | 6.8802842 | 6.244063 | 1.4554609         |                                                          |
| 227232_at   | 9.87E-06 | 5.76E-07 | 6.8767085 | 6.236105 | 1.2525748 EVL     | Enah/Vasp-like                                           |
| 212486_s_at | 9.87E-06 | 5.76E-07 | 6.8765145 | 6.235673 | 1.6278755 FYN     | FYN proto-oncogene, Src family tyrosine kinase           |
| 235556_at   | 9.88E-06 | 5.79E-07 | 6.8747493 | 6.231744 | 1.1619093 CREBRF  | CREB3 regulatory factor                                  |

|             |          |          |           |          |           |        |                                             |
|-------------|----------|----------|-----------|----------|-----------|--------|---------------------------------------------|
| 235051_at   | 9.88E-06 | 5.79E-07 | 6.8744897 | 6.231166 | 1.1616268 | CCDC50 | coiled-coil domain containing 50            |
| 1560271_at  | 9.88E-06 | 5.80E-07 | 6.8741628 | 6.230438 | 1.5461986 |        |                                             |
| 217028_at   | 9.89E-06 | 5.81E-07 | 6.8733576 | 6.228646 | 3.7345979 | CXCR4  | C-X-C motif chemokine receptor 4            |
| 228333_at   | 9.93E-06 | 5.84E-07 | 6.8707081 | 6.222747 | 2.05691   | ZEB2   | zinc finger E-box binding<br>homeobox 2     |
| 224967_at   | 9.93E-06 | 5.84E-07 | 6.8705337 | 6.222359 | 1.5714771 | UGCG   | UDP-glucose ceramide<br>glucosyltransferase |
| 208961_s_at | 9.93E-06 | 5.85E-07 | 6.8701091 | 6.221414 | 1.8173388 | KLF6   | Kruppel like factor 6                       |

|             |          |          |           |          |           |        |                                                     |
|-------------|----------|----------|-----------|----------|-----------|--------|-----------------------------------------------------|
| 204299_at   | 9.94E-06 | 5.86E-07 | 6.8695347 | 6.220135 | 1.3812911 | SRSF10 | serine and arginine rich splicing factor 10         |
| 228164_at   | 9.94E-06 | 5.86E-07 | 6.8691834 | 6.219352 | 1.467675  | AP4E1  | adaptor related protein complex 4 epsilon 1 subunit |
| 205582_s_at | 9.99E-06 | 5.91E-07 | 6.8657258 | 6.211653 | 1.3099021 | GGT5   | gamma-glutamyltransferase 5                         |
| 213798_s_at | 1.00E-05 | 5.93E-07 | 6.8643633 | 6.208618 | 1.6159089 | CAP1   | adenylate cyclase associated protein 1              |
| 212067_s_at | 1.00E-05 | 5.93E-07 | 6.8640419 | 6.207902 | 2.0410534 | C1R    | complement C1r subcomponent                         |

|             |          |          |           |          |                 |                                                         |
|-------------|----------|----------|-----------|----------|-----------------|---------------------------------------------------------|
| 210511_s_at | 1.00E-05 | 5.94E-07 | 6.8628871 | 6.20533  | 4.513107INHBA   | inhibin beta A subunit                                  |
| 227594_at   | 1.00E-05 | 5.95E-07 | 6.8625279 | 6.20453  | 1.4922655ZMYM6  | zinc finger MYM-type containing<br>6                    |
| 202763_at   | 1.00E-05 | 5.96E-07 | 6.8614875 | 6.202212 | 1.5682582CASP3  | caspase 3                                               |
| 201954_at   | 1.00E-05 | 5.98E-07 | 6.8603099 | 6.199589 | 2.3042414ARPC1B | actin related protein 2/3 complex<br>subunit 1B         |
| 209430_at   | 1.00E-05 | 5.98E-07 | 6.8599341 | 6.198751 | 1.9427334BTAF1  | B-TFIID TATA-box binding<br>protein associated factor 1 |

|             |          |          |           |          |                    |                                                     |
|-------------|----------|----------|-----------|----------|--------------------|-----------------------------------------------------|
| 219279_at   | 1.01E-05 | 6.02E-07 | 6.8574511 | 6.193219 | 2.2470111 DOCK10   | dedicator of cytokinesis 10                         |
| 239102_s_at | 1.01E-05 | 6.07E-07 | 6.8536426 | 6.184732 | 1.7950552          |                                                     |
| 218940_at   | 1.01E-05 | 6.07E-07 | 6.8534088 | 6.184211 | 1.7897093 VCPKMT   | valosin containing protein lysine methyltransferase |
| 212923_s_at | 1.01E-05 | 6.10E-07 | 6.8515181 | 6.179996 | 1.5189166 PXDC1    | PX domain containing 1                              |
| 219002_at   | 1.01E-05 | 6.11E-07 | 6.850853  | 6.178514 | 1.081385 FASTKD1   | FAST kinase domains 1                               |
| 235217_at   | 1.02E-05 | 6.12E-07 | 6.8503057 | 6.177294 | 1.069745 LINC01004 | long intergenic non-protein coding RNA 1004         |

|             |          |          |           |          |                     |                                                  |
|-------------|----------|----------|-----------|----------|---------------------|--------------------------------------------------|
| 203884_s_at | 1.02E-05 | 6.12E-07 | 6.8499612 | 6.176526 | 1.1097021 RAB11FIP2 | RAB11 family interacting protein 2               |
| 225633_at   | 1.02E-05 | 6.15E-07 | 6.8482708 | 6.172757 | 1.0745825 DPY19L3   | dpy-19 like 3 (C. elegans)                       |
| 219678_x_at | 1.02E-05 | 6.15E-07 | 6.8481406 | 6.172467 | 1.0436921 DCLRE1C   | DNA cross-link repair 1C                         |
| 212539_at   | 1.02E-05 | 6.16E-07 | 6.8474598 | 6.170949 | 1.0813988 CHD1L     | chromodomain helicase DNA binding protein 1 like |
| 217943_s_at | 1.02E-05 | 6.17E-07 | 6.8465284 | 6.168873 | 1.473953 MAP7D1     | MAP7 domain containing 1                         |



|             |          |          |           |          |           |                                                                                                                                  |
|-------------|----------|----------|-----------|----------|-----------|----------------------------------------------------------------------------------------------------------------------------------|
| 212998_x_at | 1.02E-05 | 6.17E-07 | 6.8464837 | 6.168773 | 3.4204825 | LOC10106083 HLA class II histocompatibility antigen, DQ beta 1 chain-like//major histocompatibility complex, class II, DQ beta 1 |
| 243109_at   | 1.02E-05 | 6.23E-07 | 6.8423993 | 6.159665 | 1.4188939 | MCTP2 multiple C2 and transmembrane domain containing 2                                                                          |
| 234994_at   | 1.02E-05 | 6.25E-07 | 6.8408486 | 6.156206 | 2.7293011 | TMEM200A transmembrane protein 200A                                                                                              |

|           |          |          |           |          |                  |                                             |
|-----------|----------|----------|-----------|----------|------------------|---------------------------------------------|
| 213532_at | 1.02E-05 | 6.25E-07 | 6.8406705 | 6.155809 | 1.6097852 ADAM17 | ADAM metallopeptidase domain<br>17          |
| 232544_at | 1.03E-05 | 6.28E-07 | 6.8387032 | 6.151421 | 2.4033732        |                                             |
| 238706_at | 1.03E-05 | 6.29E-07 | 6.8377129 | 6.149212 | 1.225147 PAPD4   | poly(A) RNA polymerase D4,<br>non-canonical |
| 219540_at | 1.03E-05 | 6.32E-07 | 6.8361695 | 6.145769 | 2.0432993 ZNF267 | zinc finger protein 267                     |
| 225073_at | 1.03E-05 | 6.32E-07 | 6.8358003 | 6.144945 | 1.3271718 PPHLN1 | periphilin 1                                |
| 235365_at | 1.03E-05 | 6.35E-07 | 6.8340355 | 6.141007 | 1.1462504 DFNB59 | deafness, autosomal recessive 59            |
| 239409_at | 1.04E-05 | 6.37E-07 | 6.8327154 | 6.138061 | 1.5232148        |                                             |

|             |          |          |           |          |           |       |                                                |
|-------------|----------|----------|-----------|----------|-----------|-------|------------------------------------------------|
| 221830_at   | 1.04E-05 | 6.39E-07 | 6.8310886 | 6.134431 | 1.4601466 | RAP2A | RAP2A, member of RAS oncogene family           |
| 213151_s_at | 1.04E-05 | 6.42E-07 | 6.8292055 | 6.130228 | 1.7394912 | SEPT7 | septin 7                                       |
| 244383_at   | 1.04E-05 | 6.42E-07 | 6.8290815 | 6.129952 | 1.1088229 |       |                                                |
| 228345_at   | 1.04E-05 | 6.44E-07 | 6.8276258 | 6.126702 | 1.3118738 | CHIC1 | cysteine rich hydrophobic domain 1             |
| 210105_s_at | 1.04E-05 | 6.45E-07 | 6.8270162 | 6.125341 | 1.7269977 | FYN   | FYN proto-oncogene, Src family tyrosine kinase |
| 208808_s_at | 1.04E-05 | 6.47E-07 | 6.8256789 | 6.122356 | 1.7638598 | HMGB2 | high mobility group box 2                      |

|             |          |          |           |          |                    |                                                                |
|-------------|----------|----------|-----------|----------|--------------------|----------------------------------------------------------------|
| 53720_at    | 1.04E-05 | 6.47E-07 | 6.825417  | 6.121771 | 1.5806561 C19orf66 | chromosome 19 open reading frame 66                            |
| 214016_s_at | 1.05E-05 | 6.48E-07 | 6.8248891 | 6.120593 | 1.768983 SFPQ      | splicing factor proline and glutamine rich                     |
| 225643_at   | 1.05E-05 | 6.49E-07 | 6.8244806 | 6.119681 | 1.599483 MAPK1IP1L | mitogen-activated protein kinase 1 interacting protein 1 like  |
| 218802_at   | 1.05E-05 | 6.49E-07 | 6.8241111 | 6.118856 | 2.2625688 MCUB     | mitochondrial calcium uniporter dominant negative beta subunit |

|             |          |          |           |          |                    |                                                           |
|-------------|----------|----------|-----------|----------|--------------------|-----------------------------------------------------------|
| 209584_x_at | 1.05E-05 | 6.50E-07 | 6.8238068 | 6.118177 | 1.0659575 APOBEC3C | apolipoprotein B mRNA editing enzyme catalytic subunit 3C |
| 203615_x_at | 1.05E-05 | 6.50E-07 | 6.8233051 | 6.117056 | 1.1648375 SULT1A1  | sulfotransferase family 1A member 1                       |
| 52164_at    | 1.05E-05 | 6.53E-07 | 6.8215361 | 6.113106 | 1.0403964 C11orf24 | chromosome 11 open reading frame 24                       |
| 202809_s_at | 1.05E-05 | 6.53E-07 | 6.8213186 | 6.112621 | 1.1028359 INTS3    | integrator complex subunit 3                              |

|             |          |          |           |          |                 |                                                         |
|-------------|----------|----------|-----------|----------|-----------------|---------------------------------------------------------|
| 203748_x_at | 1.05E-05 | 6.57E-07 | 6.8188002 | 6.106997 | 1.6732455RBMS1  | RNA binding motif single stranded interacting protein 1 |
| 238455_at   | 1.06E-05 | 6.58E-07 | 6.8178512 | 6.104877 | 2.2598045PLXDC2 | plexin domain containing 2                              |
| 205191_at   | 1.06E-05 | 6.61E-07 | 6.8162326 | 6.101262 | 1.5584439RP2    | retinitis pigmentosa 2 (X-linked recessive)             |
| 1561167_at  | 1.06E-05 | 6.66E-07 | 6.8130349 | 6.094119 | 2.0337846       |                                                         |

|              |          |          |           |          |                 |                                                                      |
|--------------|----------|----------|-----------|----------|-----------------|----------------------------------------------------------------------|
| 225611_at    | 1.06E-05 | 6.68E-07 | 6.8114294 | 6.090532 | 1.5576975 MAST4 | microtubule associated<br>serine/threonine kinase family<br>member 4 |
| 1553117_a_at | 1.06E-05 | 6.69E-07 | 6.8105331 | 6.088529 | 1.6141568 STK38 | serine/threonine kinase 38                                           |
| 200959_at    | 1.06E-05 | 6.70E-07 | 6.8103028 | 6.088014 | 1.308922 FUS    | FUS RNA binding protein                                              |
| 229206_at    | 1.06E-05 | 6.70E-07 | 6.8100327 | 6.087411 | 1.0133261       |                                                                      |
| 238481_at    | 1.06E-05 | 6.70E-07 | 6.8099078 | 6.087132 | 3.3040838 MGP   | matrix Gla protein                                                   |
| 210017_at    | 1.07E-05 | 6.73E-07 | 6.8080785 | 6.083044 | 1.4533766 MALT1 | MALT1 paracaspase                                                    |
| 211367_s_at  | 1.07E-05 | 6.74E-07 | 6.8077231 | 6.08225  | 1.8646107 CASP1 | caspase 1                                                            |

|             |          |          |           |          |           |          |                                                  |
|-------------|----------|----------|-----------|----------|-----------|----------|--------------------------------------------------|
| 212027_at   | 1.07E-05 | 6.75E-07 | 6.8068099 | 6.080209 | 1.4258927 | RBM25    | RNA binding motif protein 25                     |
| 207691_x_at | 1.07E-05 | 6.76E-07 | 6.8063634 | 6.079211 | 2.54585   | ENTPD1   | ectonucleoside triphosphate diphosphohydrolase 1 |
| 226155_at   | 1.07E-05 | 6.76E-07 | 6.8059543 | 6.078297 | 1.133712  | FAM160B1 | family with sequence similarity 160 member B1    |
| 202653_s_at | 1.07E-05 | 6.81E-07 | 6.803287  | 6.072335 | 1.992343  | 7-Mar    | membrane associated ring-CH-type finger 7        |
| 232095_at   | 1.07E-05 | 6.83E-07 | 6.8017316 | 6.068858 | 1.5432518 |          |                                                  |



|              |          |          |           |          |                  |                                                        |
|--------------|----------|----------|-----------|----------|------------------|--------------------------------------------------------|
| 201473_at    | 1.08E-05 | 6.85E-07 | 6.8002994 | 6.065656 | 2.0314545 JUNB   | JunB proto-oncogene, AP-1 transcription factor subunit |
| 226126_at    | 1.08E-05 | 6.87E-07 | 6.7994484 | 6.063753 | 1.36828 TBCK     | TBC1 domain containing kinase                          |
| 219848_s_at  | 1.08E-05 | 6.87E-07 | 6.7993566 | 6.063548 | 1.3682091 ZNF432 | zinc finger protein 432                                |
| 228220_at    | 1.08E-05 | 6.88E-07 | 6.7983644 | 6.061329 | 1.8950079 FCHO2  | FCH domain only 2                                      |
| 1555778_a_at | 1.08E-05 | 6.91E-07 | 6.7965246 | 6.057215 | 4.8716429 POSTN  | periostin                                              |
| 209422_at    | 1.08E-05 | 6.94E-07 | 6.7949022 | 6.053587 | 1.275243 PHF20   | PHD finger protein 20                                  |

|             |          |          |           |          |                   |                                                     |
|-------------|----------|----------|-----------|----------|-------------------|-----------------------------------------------------|
| 211038_s_at | 1.08E-05 | 6.94E-07 | 6.7944126 | 6.052492 | 1.423603 CROCCP2  | ciliary rootlet coiled-coil, rootletin pseudogene 2 |
| 202163_s_at | 1.08E-05 | 6.95E-07 | 6.7937614 | 6.051036 | 1.0132121 CNOT8   | CCR4-NOT transcription complex subunit 8            |
| 1553955_at  | 1.09E-05 | 7.00E-07 | 6.7909887 | 6.044834 | 1.2237629 PPP1R21 | protein phosphatase 1 regulatory subunit 21         |
| 209345_s_at | 1.09E-05 | 7.01E-07 | 6.7903512 | 6.043407 | 1.1202514 PI4K2A  | phosphatidylinositol 4-kinase type 2 alpha          |
| 225112_at   | 1.09E-05 | 7.04E-07 | 6.7886572 | 6.039618 | 1.0334196 ABI2    | abl-interactor 2                                    |

|             |          |          |           |          |           |        |                                                                   |
|-------------|----------|----------|-----------|----------|-----------|--------|-------------------------------------------------------------------|
| 208949_s_at | 1.09E-05 | 7.04E-07 | 6.7885808 | 6.039447 | 1.8025786 | LGALS3 | lectin, galactoside binding soluble<br>3                          |
| 212399_s_at | 1.09E-05 | 7.05E-07 | 6.7878538 | 6.03782  | 1.3044675 | VGLL4  | vestigial like family member 4                                    |
| 235521_at   | 1.09E-05 | 7.05E-07 | 6.7876284 | 6.037316 | 2.3618288 | HOXA3  | homeobox A3                                                       |
| 223279_s_at | 1.10E-05 | 7.10E-07 | 6.784906  | 6.031224 | 2.4582398 | UACA   | uveal autoantigen with coiled-coil<br>domains and ankyrin repeats |
| 230233_at   | 1.10E-05 | 7.11E-07 | 6.7843059 | 6.029881 | 2.2730532 |        |                                                                   |

|            |          |          |           |          |                 |                                                                      |
|------------|----------|----------|-----------|----------|-----------------|----------------------------------------------------------------------|
| 222348_at  | 1.10E-05 | 7.11E-07 | 6.7841673 | 6.029571 | 1.9071757MAST4  | microtubule associated<br>serine/threonine kinase family<br>member 4 |
| 229287_at  | 1.10E-05 | 7.12E-07 | 6.7836299 | 6.028369 | 1.4714509PCNX1  | pecanex homolog 1 (Drosophila)                                       |
| 232024_at  | 1.10E-05 | 7.12E-07 | 6.7836037 | 6.02831  | 2.1605595GIMAP2 | GTPase, IMAP family member 2                                         |
| 1557302_at | 1.10E-05 | 7.13E-07 | 6.7830741 | 6.027125 | 1.076082ZNF585B | zinc finger protein 585B                                             |

|             |          |          |           |          |           |        |                                             |
|-------------|----------|----------|-----------|----------|-----------|--------|---------------------------------------------|
| 224955_at   | 1.10E-05 | 7.14E-07 | 6.7821339 | 6.025021 | 1.3145643 | TEAD1  | TEA domain transcription factor 1           |
| 222371_at   | 1.10E-05 | 7.14E-07 | 6.7819688 | 6.024651 | 1.4887396 |        |                                             |
| 209049_s_at | 1.10E-05 | 7.17E-07 | 6.7806292 | 6.021653 | 1.0825261 | ZMYND8 | zinc finger MYND-type containing 8          |
| 204860_s_at | 1.11E-05 | 7.22E-07 | 6.7775576 | 6.014777 | 1.5495916 | NAIP   | NLR family apoptosis inhibitory protein     |
| 201487_at   | 1.11E-05 | 7.24E-07 | 6.7760562 | 6.011415 | 1.621325  | CTSC   | cathepsin C                                 |
| 235791_x_at | 1.11E-05 | 7.25E-07 | 6.7755326 | 6.010243 | 1.714922  | CHD1   | chromodomain helicase DNA binding protein 1 |
| 225256_at   | 1.11E-05 | 7.27E-07 | 6.7741213 | 6.007083 | 1.307905  |        |                                             |

|             |          |          |           |          |                  |                                              |
|-------------|----------|----------|-----------|----------|------------------|----------------------------------------------|
| 213056_at   | 1.11E-05 | 7.29E-07 | 6.7730323 | 6.004644 | 1.7414436FRMD4B  | FERM domain containing 4B                    |
| 205745_x_at | 1.11E-05 | 7.31E-07 | 6.7719272 | 6.00217  | 1.0669021ADAM17  | ADAM metallopeptidase domain<br>17           |
| 204773_at   | 1.12E-05 | 7.32E-07 | 6.7712033 | 6.000549 | 1.2783873IL11RA  | interleukin 11 receptor subunit<br>alpha     |
| 230270_at   | 1.12E-05 | 7.33E-07 | 6.7708233 | 5.999698 | 1.7917307PRPF38B | pre-mRNA processing factor 38B               |
| 224920_x_at | 1.12E-05 | 7.35E-07 | 6.7693075 | 5.996303 | 1.5912427MYADM   | myeloid associated differentiation<br>marker |

|             |          |          |           |          |           |         |                                                     |
|-------------|----------|----------|-----------|----------|-----------|---------|-----------------------------------------------------|
| 203932_at   | 1.12E-05 | 7.37E-07 | 6.7685176 | 5.994533 | 2.0634984 | HLA-DMB | major histocompatibility complex, class II, DM beta |
| 212613_at   | 1.12E-05 | 7.38E-07 | 6.7678484 | 5.993034 | 1.3237029 | BTN3A2  | butyrophilin subfamily 3 member A2                  |
| 201549_x_at | 1.12E-05 | 7.38E-07 | 6.7674943 | 5.992241 | 1.0206271 | KDM5B   | lysine demethylase 5B                               |
| 216268_s_at | 1.13E-05 | 7.47E-07 | 6.7623114 | 5.98063  | 1.722237  | JAG1    | jagged 1                                            |
| 230078_at   | 1.13E-05 | 7.51E-07 | 6.7597508 | 5.974891 | 1.3841659 | RAPGEF6 | Rap guanine nucleotide exchange factor 6            |

|             |          |          |           |          |                   |                                             |
|-------------|----------|----------|-----------|----------|-------------------|---------------------------------------------|
| 221766_s_at | 1.14E-05 | 7.53E-07 | 6.7590506 | 5.973322 | 1.5922829FAM46A   | family with sequence similarity 46 member A |
| 237768_x_at | 1.14E-05 | 7.53E-07 | 6.7588177 | 5.9728   | 1.3628711         |                                             |
| 202995_s_at | 1.14E-05 | 7.55E-07 | 6.7574026 | 5.969629 | 2.2031932FBLN1    | fibulin 1                                   |
| 203306_s_at | 1.14E-05 | 7.58E-07 | 6.7559417 | 5.966354 | 1.4287268SLC35A1  | solute carrier family 35 member A1          |
| 227607_at   | 1.14E-05 | 7.61E-07 | 6.7540864 | 5.962195 | 1.8855163STAMBPL1 | STAM binding protein like 1                 |
| 227041_at   | 1.14E-05 | 7.63E-07 | 6.7532598 | 5.960342 | 1.5116398SESTD1   | SEC14 and spectrin domain containing 1      |
| 215083_at   | 1.15E-05 | 7.65E-07 | 6.7519855 | 5.957485 | 1.3353514         |                                             |



|             |          |          |           |          |           |           |                                                     |
|-------------|----------|----------|-----------|----------|-----------|-----------|-----------------------------------------------------|
| 212572_at   | 1.15E-05 | 7.65E-07 | 6.7518987 | 5.957291 | 1.2650618 | STK38L    | serine/threonine kinase 38 like                     |
| 226711_at   | 1.15E-05 | 7.68E-07 | 6.750286  | 5.953675 | 1.333632  | FOXN2     | forkhead box N2                                     |
| 212444_at   | 1.15E-05 | 7.68E-07 | 6.7501943 | 5.953469 | 3.4641286 | GPRC5A    | G protein-coupled receptor class C group 5 member A |
| 226000_at   | 1.15E-05 | 7.68E-07 | 6.7501629 | 5.953399 | 1.8494577 | CTTNBP2NL | CTTNBP2 N-terminal like                             |
| 202258_s_at | 1.15E-05 | 7.71E-07 | 6.7485391 | 5.949757 | 1.1746714 | N4BP2L2   | NEDD4 binding protein 2 like 2                      |

|            |          |          |             |           |                                                |                                                            |
|------------|----------|----------|-------------|-----------|------------------------------------------------|------------------------------------------------------------|
| 242781_at  | 1.77E-07 | 1.63E-11 | -12.3477661 | 16.360917 | -1.0276718FAM199X                              | family with sequence similarity 199, X-linked              |
| 1552893_at | 3.43E-07 | 8.79E-11 | -11.3267458 | 14.766589 | -1.3494595CAMK2N2                              | calcium/calmodulin dependent protein kinase II inhibitor 2 |
| 221186_at  | 5.41E-07 | 2.54E-10 | -10.7172956 | 13.75566  | -1.0015818 <sub>2</sub> <sup>LOC10013153</sup> | uncharacterized LOC100131532                               |
| 208486_at  | 5.41E-07 | 4.41E-10 | -10.4090192 | 13.226535 | -1.0344495DRD5                                 | dopamine receptor D5                                       |
| 217548_at  | 6.14E-07 | 6.85E-10 | -10.1669389 | 12.802414 | -1.3145289ARPIN                                | actin-related protein 2/3 complex inhibitor                |

|             |          |          |             |           |            |                          |                                                          |
|-------------|----------|----------|-------------|-----------|------------|--------------------------|----------------------------------------------------------|
| 213014_at   | 6.24E-07 | 8.11E-10 | -10.0754712 | 12.640161 | -1.5057605 | MAPK8IP1                 | mitogen-activated protein kinase 8 interacting protein 1 |
| 209567_at   | 6.29E-07 | 8.63E-10 | -10.0415928 | 12.579784 | -1.2819389 | RRS1                     | ribosome biogenesis regulator homolog                    |
| 216376_x_at | 7.45E-07 | 1.19E-09 | -9.869316   | 12.270391 | -1.1833186 |                          |                                                          |
| 239470_at   | 7.92E-07 | 1.41E-09 | -9.780744   | 12.109774 | -1.2814405 | C15orf56                 | chromosome 15 open reading frame 56                      |
| 203575_at   | 8.52E-07 | 1.66E-09 | -9.6923625  | 11.948447 | -1.1572384 | CSNK2A2                  | casein kinase 2 alpha 2                                  |
| 1561314_at  | 9.08E-07 | 2.01E-09 | -9.5922168  | 11.764364 | -1.1058612 | LOC10192865 <sub>8</sub> | uncharacterized LOC101928658                             |

|             |          |          |            |           |            |          |                                                    |
|-------------|----------|----------|------------|-----------|------------|----------|----------------------------------------------------|
| 230070_at   | 9.11E-07 | 2.08E-09 | -9.5738665 | 11.730485 | -1.0940986 | CNIH2    | cornichon family AMPA receptor auxiliary protein 2 |
| 216986_s_at | 9.52E-07 | 2.32E-09 | -9.5168426 | 11.624912 | -1.0141843 | IRF4     | interferon regulatory factor 4                     |
| 205138_s_at | 1.01E-06 | 2.64E-09 | -9.4498835 | 11.500375 | -1.2280127 | UST      | uronyl 2-sulfotransferase                          |
| 234880_x_at | 1.01E-06 | 2.81E-09 | -9.4179539 | 11.440773 | -1.0843705 | KRTAP1-3 | keratin associated protein 1-3                     |
| 217087_at   | 1.01E-06 | 2.84E-09 | -9.4118495 | 11.429361 | -1.2093639 | C1orf68  | chromosome 1 open reading frame 68                 |

|             |          |          |            |           |                  |                                                  |
|-------------|----------|----------|------------|-----------|------------------|--------------------------------------------------|
| 214395_x_at | 1.01E-06 | 2.89E-09 | -9.4028809 | 11.412587 | -1.0259202EEF1D  | eukaryotic translation elongation factor 1 delta |
| 216382_s_at | 1.10E-06 | 4.01E-09 | -9.2345014 | 11.095592 | -1.1670696KMT2D  | lysine methyltransferase 2D                      |
| 228924_s_at | 1.11E-06 | 4.33E-09 | -9.1954859 | 11.021579 | -1.1914612UBE2J1 | ubiquitin conjugating enzyme E2 J1               |
| 208221_s_at | 1.13E-06 | 4.43E-09 | -9.183381  | 10.998573 | -1.0082123SLIT1  | slit guidance ligand 1                           |

|             |          |          |            |           |            |                                                                                             |
|-------------|----------|----------|------------|-----------|------------|---------------------------------------------------------------------------------------------|
| 216351_x_at | 1.13E-06 | 4.46E-09 | -9.1793642 | 10.990934 | -1.1667443 | DAZ4///DAZ2<br>in azoospermia 2///deleted in<br>azoospermia 3///deleted in<br>azoospermia 1 |
| 1566277_at  | 1.13E-06 | 4.48E-09 | -9.1772661 | 10.986943 | -1.0430782 | OR5E1P<br>olfactory receptor family 5<br>subfamily E member 1 pseudogene                    |

|             |          |          |            |           |            |          |                                               |
|-------------|----------|----------|------------|-----------|------------|----------|-----------------------------------------------|
| 214171_s_at | 1.13E-06 | 4.59E-09 | -9.1648094 | 10.963236 | -1.0185777 | U2AF2    | U2 small nuclear RNA auxiliary factor 2       |
| 216842_x_at | 1.17E-06 | 4.82E-09 | -9.1404661 | 10.916845 | -1.3638034 |          |                                               |
| 219138_at   | 1.17E-06 | 4.93E-09 | -9.1289615 | 10.894892 | -1.1062759 | RPL14    | ribosomal protein L14                         |
| 235024_at   | 1.17E-06 | 4.99E-09 | -9.1229063 | 10.88333  | -1.2049812 | JADE1    | jade family PHD finger 1                      |
| 1569465_at  | 1.20E-06 | 5.21E-09 | -9.1002734 | 10.840068 | -1.1603557 | FAM160A1 | family with sequence similarity 160 member A1 |
| 223157_at   | 1.20E-06 | 5.23E-09 | -9.0982791 | 10.836253 | -1.1292957 | NOA1     | nitric oxide associated 1                     |

|             |          |          |            |           |            |          |                                                     |
|-------------|----------|----------|------------|-----------|------------|----------|-----------------------------------------------------|
| 237536_at   | 1.20E-06 | 5.26E-09 | -9.096173  | 10.832223 | -1.3550552 | MAPT-AS1 | MAPT antisense RNA 1                                |
| 216485_s_at | 1.21E-06 | 5.42E-09 | -9.0802264 | 10.801689 | -1.0142536 | TPSAB1   | tryptase alpha/beta 1                               |
| 1569644_at  | 1.21E-06 | 5.43E-09 | -9.0798624 | 10.800992 | -1.2004993 |          |                                                     |
| 206419_at   | 1.25E-06 | 5.85E-09 | -9.0419454 | 10.728247 | -1.2487164 | RORC     | RAR related orphan receptor C                       |
| 213276_at   | 1.25E-06 | 6.06E-09 | -9.0238762 | 10.693509 | -1.2420129 | CAMK2B   | calcium/calmodulin dependent protein kinase II beta |
| 224203_at   | 1.31E-06 | 6.67E-09 | -8.9755143 | 10.600309 | -1.0692548 | SUFU     | SUFU negative regulator of hedgehog signaling       |



|             |          |          |            |           |            |         |                                                  |
|-------------|----------|----------|------------|-----------|------------|---------|--------------------------------------------------|
| 227389_x_at | 1.44E-06 | 8.34E-09 | -8.8635949 | 10.383362 | -1.095028  | IRF2BP2 | interferon regulatory factor 2 binding protein 2 |
| 210130_s_at | 1.44E-06 | 8.37E-09 | -8.8616137 | 10.379506 | -1.679295  | TM7SF2  | transmembrane 7 superfamily member 2             |
| 229458_s_at | 1.46E-06 | 8.97E-09 | -8.8272108 | 10.312453 | -1.1395289 | GALK1   | galactokinase 1                                  |
| 213087_s_at | 1.46E-06 | 9.02E-09 | -8.8242686 | 10.306711 | -1.360415  | EEF1D   | eukaryotic translation elongation factor 1 delta |
| 227118_s_at | 1.46E-06 | 9.14E-09 | -8.8181401 | 10.294747 | -1.0186486 | MRPS26  | mitochondrial ribosomal protein S26              |
| 222831_at   | 1.47E-06 | 9.24E-09 | -8.8126569 | 10.284037 | -1.3053273 | SAP30L  | SAP30 like                                       |

|              |          |          |            |           |            |                                                                          |
|--------------|----------|----------|------------|-----------|------------|--------------------------------------------------------------------------|
| 244221_at    | 1.49E-06 | 9.54E-09 | -8.7964496 | 10.252357 | -1.033447  |                                                                          |
| 1565843_s_at | 1.50E-06 | 9.81E-09 | -8.7827982 | 10.225645 | -1.0470962 | BRPF3<br>bromodomain and PHD finger<br>containing 3                      |
| 1557679_at   | 1.61E-06 | 1.16E-08 | -8.7012373 | 10.065498 | -1.15458   | ERICH1-AS1<br>ERICH1 antisense RNA 1                                     |
| 1564706_s_at | 1.67E-06 | 1.24E-08 | -8.6683799 | 10.000716 | -2.9936543 | GLS2<br>glutaminase 2                                                    |
| 1562836_at   | 1.67E-06 | 1.25E-08 | -8.662766  | 9.989632  | -1.5615545 | DDX6<br>DEAD-box helicase 6                                              |
| 230706_s_at  | 1.68E-06 | 1.29E-08 | -8.6460375 | 9.956577  | -2.374872  | CAMK2N2<br>calcium/calmodulin dependent<br>protein kinase II inhibitor 2 |
| 212844_at    | 1.68E-06 | 1.31E-08 | -8.6404266 | 9.945481  | -1.1680098 | RRP1B<br>ribosomal RNA processing 1B                                     |

|             |          |          |            |          |                      |                                                |
|-------------|----------|----------|------------|----------|----------------------|------------------------------------------------|
| 229079_at   | 1.69E-06 | 1.32E-08 | -8.6350385 | 9.934822 | -1.0517461 EHMT2     | euchromatic histone lysine methyltransferase 2 |
| 231475_at   | 1.70E-06 | 1.37E-08 | -8.6169351 | 9.898977 | -1.0543863 TBC1D21   | TBC1 domain family member 21                   |
| 207290_at   | 1.70E-06 | 1.37E-08 | -8.6167519 | 9.898614 | -1.3835146 PLXNA2    | plexin A2                                      |
| 213651_at   | 1.72E-06 | 1.42E-08 | -8.5986672 | 9.86276  | -1.204815 INPP5J     | inositol polyphosphate-5-phosphatase J         |
| 209978_s_at | 1.82E-06 | 1.59E-08 | -8.5429706 | 9.752043 | -1.4731716 PLG///LPA | plasminogen///lipoprotein(a)                   |
| 214556_at   | 2.02E-06 | 1.92E-08 | -8.4526838 | 9.571628 | -1.2011245 SSTR4     | somatostatin receptor 4                        |

|             |          |          |            |          |            |                            |                                                                                          |
|-------------|----------|----------|------------|----------|------------|----------------------------|------------------------------------------------------------------------------------------|
| 201064_s_at | 2.08E-06 | 2.02E-08 | -8.4285878 | 9.523282 | -1.8978221 | LOC100996696<br>6///PABPC4 | polyadenylate-binding protein 4<br>pseudogene///poly(A) binding<br>protein cytoplasmic 4 |
| 241540_at   | 2.16E-06 | 2.21E-08 | -8.3833099 | 9.432212 | -1.0328966 |                            |                                                                                          |
| 232491_at   | 2.17E-06 | 2.23E-08 | -8.3793256 | 9.424184 | -1.0824346 |                            |                                                                                          |
| 1554151_at  | 2.18E-06 | 2.25E-08 | -8.3758905 | 9.417261 | -1.0941982 | OGDH                       | oxoglutarate dehydrogenase                                                               |
| 207341_at   | 2.18E-06 | 2.28E-08 | -8.3685533 | 9.402468 | -1.0055543 | PRTN3                      | proteinase 3                                                                             |
| 1561019_at  | 2.23E-06 | 2.42E-08 | -8.3391681 | 9.343145 | -1.1621141 |                            |                                                                                          |
| 211870_s_at | 2.24E-06 | 2.43E-08 | -8.3374915 | 9.339757 | -1.0542339 | PCDHA2///PC<br>DHA3        | protocadherin alpha<br>2///protocadherin alpha 3                                         |
| 234360_at   | 2.24E-06 | 2.46E-08 | -8.3313996 | 9.327441 | -1.0490477 |                            |                                                                                          |

|             |          |          |            |          |            |                         |                                                                        |
|-------------|----------|----------|------------|----------|------------|-------------------------|------------------------------------------------------------------------|
| 234002_at   | 2.25E-06 | 2.48E-08 | -8.3279776 | 9.320521 | -1.0572873 | ABHD16B                 | abhydrolase domain containing 16B                                      |
| 224468_s_at | 2.27E-06 | 2.53E-08 | -8.3177809 | 9.299891 | -1.6306989 | SNORD88C///<br>C19orf48 | small nucleolar RNA, C/D box 88C///chromosome 19 open reading frame 48 |
| 212811_x_at | 2.31E-06 | 2.61E-08 | -8.3041904 | 9.272372 | -1.3453018 | SLC1A4                  | solute carrier family 1 member 4                                       |
| 215880_at   | 2.31E-06 | 2.63E-08 | -8.2999557 | 9.263791 | -1.1609791 | NAGLU                   | N-acetyl-alpha-glucosaminidase                                         |
| 233941_at   | 2.34E-06 | 2.68E-08 | -8.2908431 | 9.245319 | -1.0114341 | LRRC74A                 | leucine rich repeat containing 74A                                     |

|             |          |          |            |          |            |          |                                            |
|-------------|----------|----------|------------|----------|------------|----------|--------------------------------------------|
| 207680_x_at | 2.36E-06 | 2.73E-08 | -8.2817969 | 9.226969 | -1.0026323 | PAX3     | paired box 3                               |
| 1553893_at  | 2.36E-06 | 2.73E-08 | -8.2811603 | 9.225677 | -1.2054479 | CCDC105  | coiled-coil domain containing 105          |
| 241839_at   | 2.36E-06 | 2.74E-08 | -8.2799181 | 9.223156 | -1.0115741 | DLG3-AS1 | DLG3 antisense RNA 1                       |
| 208277_at   | 2.37E-06 | 2.79E-08 | -8.2708567 | 9.204762 | -1.0090066 | PITX3    | paired like homeodomain 3                  |
| 213563_s_at | 2.45E-06 | 2.96E-08 | -8.242536  | 9.147195 | -1.0378346 | TUBGCP2  | tubulin gamma complex associated protein 2 |
| 234717_at   | 2.49E-06 | 3.05E-08 | -8.2293348 | 9.120322 | -1.7279677 |          |                                            |
| 244272_s_at | 2.49E-06 | 3.07E-08 | -8.2247721 | 9.111028 | -1.0033537 | TC2N     | tandem C2 domains, nuclear                 |

|             |          |          |            |          |            |            |                                                         |
|-------------|----------|----------|------------|----------|------------|------------|---------------------------------------------------------|
| 205531_s_at | 2.51E-06 | 3.10E-08 | -8.2200566 | 9.10142  | -2.5081182 | GLS2       | glutaminase 2                                           |
| 217040_x_at | 2.56E-06 | 3.35E-08 | -8.1841984 | 9.028252 | -1.7591698 | SOX15      | SRY-box 15                                              |
| 1558450_at  | 2.57E-06 | 3.39E-08 | -8.1778222 | 9.015222 | -1.0162245 | A2M        | alpha-2-macroglobulin                                   |
| 215819_s_at | 2.61E-06 | 3.51E-08 | -8.1616791 | 8.982207 | -1.1718462 | RHD///RHCE | Rh blood group D antigen///Rh blood group CcEe antigens |
| 242411_at   | 2.70E-06 | 3.85E-08 | -8.1176    | 8.891871 | -1.1840516 | ARL10      | ADP ribosylation factor like GTPase 10                  |
| 237263_at   | 2.86E-06 | 4.31E-08 | -8.0634156 | 8.780444 | -1.1412368 |            |                                                         |
| 207368_at   | 2.86E-06 | 4.34E-08 | -8.0602225 | 8.773864 | -1.0230864 | HTR1D      | 5-hydroxytryptamine receptor 1D                         |

|              |          |          |            |          |            |         |                                    |
|--------------|----------|----------|------------|----------|------------|---------|------------------------------------|
| 1555165_a_at | 2.87E-06 | 4.35E-08 | -8.0590159 | 8.771378 | -1.0411639 | PGPEP1  | pyroglutamyl-peptidase I           |
| 221162_at    | 2.87E-06 | 4.38E-08 | -8.0559174 | 8.764991 | -1.2613009 | HHLA1   | HERV-H LTR-associating 1           |
| 1568997_at   | 2.88E-06 | 4.45E-08 | -8.0483701 | 8.749429 | -1.2777636 | POLR1E  | RNA polymerase I subunit E         |
| 208466_at    | 2.90E-06 | 4.52E-08 | -8.0407565 | 8.733722 | -1.1475354 | RAB3D   | RAB3D, member RAS oncogene family  |
| 1565879_at   | 2.94E-06 | 4.63E-08 | -8.029099  | 8.709657 | -1.0629821 |         |                                    |
| 238582_at    | 2.94E-06 | 4.64E-08 | -8.0287744 | 8.708986 | -1.2016114 | C21orf2 | chromosome 21 open reading frame 2 |



|             |          |          |            |          |            |                            |                                                                          |
|-------------|----------|----------|------------|----------|------------|----------------------------|--------------------------------------------------------------------------|
| 233325_at   | 2.94E-06 | 4.69E-08 | -8.0232512 | 8.697577 | -1.1228045 | SLC35D2                    | solute carrier family 35 member D2                                       |
| 237853_x_at | 2.94E-06 | 4.70E-08 | -8.0227985 | 8.696642 | -1.156092  | KRTAP10-12/<br>//KRTAP10-7 | keratin associated protein<br>10-12///keratin associated protein<br>10-7 |
| 224485_s_at | 2.94E-06 | 4.71E-08 | -8.0211995 | 8.693338 | -2.7681727 | SLC30A2                    | solute carrier family 30 member 2                                        |
| 220130_x_at | 2.96E-06 | 4.77E-08 | -8.0153866 | 8.681324 | -1.1056796 | LTB4R2                     | leukotriene B4 receptor 2                                                |
| 217723_x_at | 3.03E-06 | 5.04E-08 | -7.989326  | 8.627404 | -1.2070377 | RPS12                      | ribosomal protein S12                                                    |

|             |          |          |            |          |            |           |                                       |
|-------------|----------|----------|------------|----------|------------|-----------|---------------------------------------|
| 222705_s_at | 3.04E-06 | 5.08E-08 | -7.9854305 | 8.619335 | -2.1192705 | SLC25A15  | solute carrier family 25 member 15    |
| 223653_x_at | 3.04E-06 | 5.11E-08 | -7.9829657 | 8.614229 | -1.2812977 | CELF4     | CUGBP, Elav-like family member<br>4   |
| 224000_at   | 3.10E-06 | 5.35E-08 | -7.9611065 | 8.568907 | -1.1246402 | C2orf16   | chromosome 2 open reading frame<br>16 |
| 238196_at   | 3.15E-06 | 5.55E-08 | -7.9435769 | 8.532512 | -2.2888362 | LOC285095 | uncharacterized LOC285095             |
| 201848_s_at | 3.20E-06 | 5.72E-08 | -7.9292791 | 8.502795 | -3.6802161 | BNIP3     | BCL2 interacting protein 3            |

|                  |          |          |            |          |            |          |                                                          |
|------------------|----------|----------|------------|----------|------------|----------|----------------------------------------------------------|
| 223427_s_at      | 3.22E-06 | 5.84E-08 | -7.9200672 | 8.483633 | -4.0119102 | EPB41L4B | erythrocyte membrane protein band 4.1 like 4B            |
| AFFX-M27830_M_at | 3.30E-06 | 6.07E-08 | -7.9018501 | 8.445704 | -1.0488614 |          |                                                          |
| 207873_x_at      | 3.32E-06 | 6.16E-08 | -7.8950136 | 8.431457 | -1.0065129 | SEZ6L    | seizure related 6 homolog like                           |
| 207311_at        | 3.33E-06 | 6.21E-08 | -7.8909314 | 8.422947 | -1.0176532 | DOC2B    | double C2 domain beta                                    |
| 238858_at        | 3.37E-06 | 6.42E-08 | -7.8752678 | 8.390272 | -1.2441693 | TIFA     | TRAF interacting protein with forkhead associated domain |

|             |          |          |            |          |                         |                                                                     |
|-------------|----------|----------|------------|----------|-------------------------|---------------------------------------------------------------------|
| 1556453_at  | 3.41E-06 | 6.61E-08 | -7.8614927 | 8.361508 | -1.1317825 <sub>4</sub> | LOC10050627<br>uncharacterized LOC100506274                         |
| 211195_s_at | 3.47E-06 | 6.92E-08 | -7.8404881 | 8.317595 | -1.0833798              | TP63<br>tumor protein p63                                           |
| 235971_at   | 3.51E-06 | 7.04E-08 | -7.8323972 | 8.300663 | -1.5796832              | TIFA<br>TRAF interacting protein with<br>forkhead associated domain |
| 1568649_at  | 3.63E-06 | 7.46E-08 | -7.805271  | 8.243828 | -1.3757337 <sub>3</sub> | LOC10537094<br>uncharacterized LOC105370943                         |
| 223754_at   | 3.72E-06 | 7.86E-08 | -7.7809352 | 8.19275  | -1.4550987              | C2orf88<br>chromosome 2 open reading frame<br>88                    |

|             |          |          |            |          |            |         |                                             |
|-------------|----------|----------|------------|----------|------------|---------|---------------------------------------------|
| 206999_at   | 3.79E-06 | 8.22E-08 | -7.7598897 | 8.14851  | -1.2494134 | IL12RB2 | interleukin 12 receptor subunit beta<br>2   |
| 230084_at   | 3.79E-06 | 8.26E-08 | -7.7572846 | 8.14303  | -3.2428211 | SLC30A2 | solute carrier family 30 member 2           |
| 221067_s_at | 3.82E-06 | 8.43E-08 | -7.7479779 | 8.123443 | -1.9096236 | SPX     | spexin hormone                              |
| 205947_s_at | 3.82E-06 | 8.45E-08 | -7.7471207 | 8.121638 | -1.2220441 | VIPR2   | vasoactive intestinal peptide<br>receptor 2 |
| 213809_x_at | 3.91E-06 | 8.83E-08 | -7.7264036 | 8.07799  | -1.0089129 | TCF3    | transcription factor 3                      |
| 221429_x_at | 3.92E-06 | 8.86E-08 | -7.725022  | 8.075077 | -1.1562795 | TEX13A  | testis expressed 13A                        |

|             |          |          |            |          |            |           |                                             |
|-------------|----------|----------|------------|----------|------------|-----------|---------------------------------------------|
| 231360_at   | 3.92E-06 | 8.89E-08 | -7.723318  | 8.071484 | -1.0517702 | C20orf141 | chromosome 20 open reading frame 141        |
| 1562581_at  | 3.92E-06 | 8.90E-08 | -7.7227928 | 8.070376 | -1.0263979 | LOC254028 | uncharacterized LOC254028                   |
| 1566136_at  | 3.92E-06 | 8.94E-08 | -7.7204841 | 8.065507 | -1.0048093 |           |                                             |
| 213990_s_at | 3.93E-06 | 9.12E-08 | -7.7116757 | 8.046923 | -1.0039554 | PAK5      | p21 (RAC1) activated kinase 5               |
| 231707_at   | 3.96E-06 | 9.19E-08 | -7.7078844 | 8.03892  | -1.0995204 |           |                                             |
| 209618_at   | 3.96E-06 | 9.21E-08 | -7.7066932 | 8.036406 | -2.3223577 | CTNND2    | catenin delta 2                             |
| 214842_s_at | 3.97E-06 | 9.30E-08 | -7.7024249 | 8.027394 | -3.7683216 | ALB       | albumin                                     |
| 228666_at   | 3.99E-06 | 9.43E-08 | -7.6959319 | 8.013679 | -1.309348  | ARPIN     | actin-related protein 2/3 complex inhibitor |

|             |          |          |            |          |            |          |                                                 |
|-------------|----------|----------|------------|----------|------------|----------|-------------------------------------------------|
| 203867_s_at | 3.99E-06 | 9.44E-08 | -7.6956751 | 8.013136 | -1.490355  | NLE1     | notchless homolog 1                             |
| 216848_at   | 3.99E-06 | 9.45E-08 | -7.6951712 | 8.012072 | -1.0749196 |          |                                                 |
| 210332_at   | 3.99E-06 | 9.50E-08 | -7.6925851 | 8.006607 | -1.0550934 | ACHE     | acetylcholinesterase (Cartwright blood group)   |
| 216567_at   | 3.99E-06 | 9.58E-08 | -7.68883   | 7.998671 | -1.0884873 | MBP      | myelin basic protein                            |
| 239894_at   | 4.01E-06 | 9.70E-08 | -7.6826409 | 7.985587 | -1.3627223 | NEBL-AS1 | NEBL antisense RNA 1                            |
| 237437_s_at | 4.03E-06 | 9.77E-08 | -7.679657  | 7.979277 | -1.0149402 | ADARB2   | adenosine deaminase, RNA specific B2 (inactive) |
| 1558586_at  | 4.03E-06 | 9.78E-08 | -7.6791537 | 7.978212 | -1.3566486 | ZNF33B   | zinc finger protein 33B                         |

|             |          |          |            |          |            |                         |                                                                                                                            |
|-------------|----------|----------|------------|----------|------------|-------------------------|----------------------------------------------------------------------------------------------------------------------------|
| 1561390_at  | 4.06E-06 | 1.00E-07 | -7.6671477 | 7.952809 | -1.0861259 | FAM41AY2///<br>FAM41AY1 | family with sequence similarity 41<br>member A, Y-linked 2///family<br>with sequence similarity 41<br>member A, Y-linked 1 |
| 227730_at   | 4.16E-06 | 1.04E-07 | -7.6494503 | 7.915325 | -1.4707955 | DYM                     | dymeclin                                                                                                                   |
| 207732_s_at | 4.18E-06 | 1.05E-07 | -7.6464274 | 7.908919 | -1.0850105 | DLG3                    | discs large MAGUK scaffold<br>protein 3                                                                                    |
| 241934_at   | 4.30E-06 | 1.10E-07 | -7.6262844 | 7.866193 | -1.12978   | NTM                     | neurotrimin                                                                                                                |



|             |          |          |            |          |            |         |                                                                    |
|-------------|----------|----------|------------|----------|------------|---------|--------------------------------------------------------------------|
| 220816_at   | 4.34E-06 | 1.12E-07 | -7.6180629 | 7.848738 | -1.5214275 | LPAR3   | lysophosphatidic acid receptor 3                                   |
| 221426_s_at | 4.41E-06 | 1.15E-07 | -7.6029652 | 7.816659 | -1.0371359 | OR3A3   | olfactory receptor family 3<br>subfamily A member 3                |
| 231452_at   | 4.45E-06 | 1.18E-07 | -7.5904571 | 7.790058 | -1.216373  | HRASLS5 | HRAS like suppressor family<br>member 5                            |
| 235488_at   | 4.47E-06 | 1.20E-07 | -7.5859519 | 7.780471 | -1.0313798 | RASL10B | RAS like family 10 member B                                        |
| 231211_s_at | 4.48E-06 | 1.21E-07 | -7.5820454 | 7.772156 | -1.6618834 | YIF1B   | Yip1 interacting factor homolog B,<br>membrane trafficking protein |

|            |          |          |            |          |            |                                                 |
|------------|----------|----------|------------|----------|------------|-------------------------------------------------|
| 237752_at  | 4.54E-06 | 1.24E-07 | -7.5675955 | 7.741381 | -1.1809893 |                                                 |
| 238347_at  | 4.54E-06 | 1.25E-07 | -7.5668753 | 7.739846 | -1.0777873 | SLC38A10 solute carrier family 38 member 10     |
| 228420_at  | 4.57E-06 | 1.26E-07 | -7.5609913 | 7.727305 | -1.0679041 | PDCD2 programmed cell death 2                   |
| 1557680_at | 4.64E-06 | 1.29E-07 | -7.5505401 | 7.705019 | -2.1898241 | SAMD15 sterile alpha motif domain containing 15 |
| 242200_at  | 4.68E-06 | 1.32E-07 | -7.5415285 | 7.685789 | -1.0804073 | ADAMTSL5 ADAMTS like 5                          |
| 239127_at  | 4.70E-06 | 1.33E-07 | -7.5378181 | 7.677868 | -1.0887545 | LOC10028886 uncharacterized LOC100288860        |

|              |          |          |            |          |            |            |                                                            |
|--------------|----------|----------|------------|----------|------------|------------|------------------------------------------------------------|
| 234554_at    | 4.74E-06 | 1.35E-07 | -7.5306169 | 7.66249  | -1.0313477 | KCNK16     | potassium two pore domain<br>channel subfamily K member 16 |
| 232684_at    | 4.78E-06 | 1.37E-07 | -7.5249407 | 7.650363 | -1.2840605 | ZNF503-AS1 | ZNF503 antisense RNA 1                                     |
| 1559926_at   | 4.84E-06 | 1.40E-07 | -7.5121997 | 7.623126 | -1.0333418 | LOC728353  | uncharacterized LOC728353                                  |
| 1563327_a_at | 4.86E-06 | 1.42E-07 | -7.5059874 | 7.609838 | -1.1005837 | LINC01545  | long intergenic non-protein coding<br>RNA 1545             |
| 221382_at    | 4.90E-06 | 1.45E-07 | -7.4978457 | 7.592414 | -1.3492414 |            |                                                            |

|              |          |          |            |          |            |        |                                                         |
|--------------|----------|----------|------------|----------|------------|--------|---------------------------------------------------------|
| 1566989_at   | 4.92E-06 | 1.47E-07 | -7.4926665 | 7.581326 | -1.109753  | ARID1B | AT-rich interaction domain 1B                           |
| 237257_at    | 4.93E-06 | 1.47E-07 | -7.4914425 | 7.578705 | -1.0930532 | RAB4B  | RAB4B, member RAS oncogene family                       |
| 242071_x_at  | 4.96E-06 | 1.49E-07 | -7.485733  | 7.566475 | -1.0356557 | ITGA8  | integrin subunit alpha 8                                |
| 1562254_at   | 5.14E-06 | 1.58E-07 | -7.4574354 | 7.505796 | -1.1309004 | STK35  | serine/threonine kinase 35                              |
| 233586_s_at  | 5.15E-06 | 1.59E-07 | -7.454985  | 7.500536 | -1.036423  | KLK12  | kallikrein related peptidase 12                         |
| 1568986_x_at | 5.16E-06 | 1.60E-07 | -7.4530149 | 7.496307 | -1.2086568 | PIGT   | phosphatidylinositol glycan anchor biosynthesis class T |

|             |          |          |            |          |            |              |                                                   |
|-------------|----------|----------|------------|----------|------------|--------------|---------------------------------------------------|
| 233640_x_at | 5.21E-06 | 1.63E-07 | -7.4449963 | 7.479087 | -1.0032568 | KRTAP9-4     | keratin associated protein 9-4                    |
| 1560911_at  | 5.22E-06 | 1.64E-07 | -7.4423452 | 7.473392 | -1.1420395 | LOC100133461 | uncharacterized LOC100133461                      |
| 209610_s_at | 5.23E-06 | 1.64E-07 | -7.439932  | 7.468207 | -1.432995  | SLC1A4       | solute carrier family 1 member 4                  |
| 241486_at   | 5.23E-06 | 1.65E-07 | -7.4394438 | 7.467158 | -1.0393446 |              |                                                   |
| 231686_at   | 5.23E-06 | 1.65E-07 | -7.4389154 | 7.466023 | -1.7443396 | GATM         | glycine amidinotransferase                        |
| 234617_at   | 5.37E-06 | 1.73E-07 | -7.4171926 | 7.419309 | -1.0098168 | OR52D1       | olfactory receptor family 52 subfamily D member 1 |
| 71933_at    | 5.39E-06 | 1.75E-07 | -7.4125509 | 7.409319 | -1.3080541 | WNT6         | Wnt family member 6                               |

|              |          |          |            |          |            |                 |                                              |
|--------------|----------|----------|------------|----------|------------|-----------------|----------------------------------------------|
| 220519_s_at  | 5.41E-06 | 1.76E-07 | -7.4098001 | 7.403397 | -1.0078905 | LIM2            | lens intrinsic membrane protein 2            |
| 203866_at    | 5.49E-06 | 1.80E-07 | -7.399212  | 7.380594 | -1.0604252 | NLE1            | notchless homolog 1                          |
| 1554344_s_at | 5.51E-06 | 1.81E-07 | -7.3954062 | 7.372393 | -2.34456   | AQP12B///AQP12A | aquaporin 12B///aquaporin 12A                |
| 204943_at    | 5.55E-06 | 1.83E-07 | -7.3901507 | 7.361066 | -1.3973909 | ADAM12          | ADAM metallopeptidase domain 12              |
| 224501_at    | 5.56E-06 | 1.84E-07 | -7.3889561 | 7.358491 | -1.0287621 | PERM1           | PPARGC1 and ESRR induced regulator, muscle 1 |
| 241427_x_at  | 5.61E-06 | 1.87E-07 | -7.3819413 | 7.343364 | -1.3860514 |                 |                                              |
| 227963_at    | 5.64E-06 | 1.89E-07 | -7.3762089 | 7.330998 | -1.2160116 |                 |                                              |
| 244273_at    | 5.66E-06 | 1.91E-07 | -7.3722046 | 7.322357 | -1.0053493 |                 |                                              |

|             |          |          |            |          |            |                         |                                                  |
|-------------|----------|----------|------------|----------|------------|-------------------------|--------------------------------------------------|
| 223373_s_at | 5.67E-06 | 1.92E-07 | -7.3683079 | 7.313946 | -1.0713234 | PLA2G12A                | phospholipase A2 group XIIA                      |
| 226870_at   | 5.76E-06 | 1.97E-07 | -7.3576081 | 7.29084  | -1.9970214 | COMTD1                  | catechol-O-methyltransferase domain containing 1 |
| 1553478_at  | 5.79E-06 | 2.00E-07 | -7.3517973 | 7.278284 | -1.2473193 | <sup>3</sup> KIRREL3-AS | KIRREL3 antisense RNA 3                          |
| 234580_at   | 5.81E-06 | 2.02E-07 | -7.3472963 | 7.268556 | -1.0924754 | TMEM106A                | transmembrane protein 106A                       |
| 230911_at   | 5.85E-06 | 2.04E-07 | -7.3422078 | 7.257555 | -1.1209543 | SIX1                    | SIX homeobox 1                                   |

|             |          |          |            |          |            |           |                                                                          |
|-------------|----------|----------|------------|----------|------------|-----------|--------------------------------------------------------------------------|
| 221409_at   | 5.95E-06 | 2.10E-07 | -7.3294363 | 7.229926 | -1.1219882 | OR2S2     | olfactory receptor family 2<br>subfamily S member 2<br>(gene/pseudogene) |
| 218225_at   | 6.03E-06 | 2.16E-07 | -7.316694  | 7.202339 | -1.1501959 | ECSIT     | ECSIT signalling integrator                                              |
| 230184_at   | 6.05E-06 | 2.17E-07 | -7.3146093 | 7.197823 | -1.1473148 | LINC01158 | long intergenic non-protein coding<br>RNA 1158                           |
| 237775_x_at | 6.18E-06 | 2.25E-07 | -7.2965481 | 7.158676 | -1.2606214 |           |                                                                          |
| 204800_s_at | 6.18E-06 | 2.26E-07 | -7.296034  | 7.157561 | -1.2809511 | DHRS12    | dehydrogenase/reductase 12                                               |
| 221124_s_at | 6.23E-06 | 2.29E-07 | -7.2891352 | 7.142595 | -1.020688  | VSX1      | visual system homeobox 1                                                 |



|             |          |          |            |          |            |         |                                                 |
|-------------|----------|----------|------------|----------|------------|---------|-------------------------------------------------|
| 239265_at   | 6.25E-06 | 2.31E-07 | -7.2849235 | 7.133456 | -1.1116939 | SLC35G1 | solute carrier family 35 member G1              |
| 224393_s_at | 6.37E-06 | 2.41E-07 | -7.2660103 | 7.092383 | -1.1434043 | CECR6   | cat eye syndrome chromosome region, candidate 6 |
| 220290_at   | 6.40E-06 | 2.43E-07 | -7.2618723 | 7.08339  | -1.1739371 | AIM1L   | absent in melanoma 1-like                       |
| 206469_x_at | 6.44E-06 | 2.47E-07 | -7.2553193 | 7.069144 | -2.6141236 | AKR7A3  | aldo-keto reductase family 7 member A3          |
| 213770_at   | 6.45E-06 | 2.48E-07 | -7.253423  | 7.06502  | -1.1877262 | KSR1    | kinase suppressor of ras 1                      |
| 211235_s_at | 6.50E-06 | 2.53E-07 | -7.2451329 | 7.046987 | -1.0650259 | ESR1    | estrogen receptor 1                             |

|             |          |          |            |          |            |         |                                                      |
|-------------|----------|----------|------------|----------|------------|---------|------------------------------------------------------|
| 217254_s_at | 6.72E-06 | 2.71E-07 | -7.2139448 | 6.97906  | -1.2592187 | EPO     | erythropoietin                                       |
| 1568191_at  | 6.72E-06 | 2.71E-07 | -7.2135993 | 6.978307 | -1.0283095 | MCAM    | melanoma cell adhesion molecule                      |
| 208474_at   | 6.76E-06 | 2.73E-07 | -7.2099275 | 6.970301 | -1.068177  | CLDN6   | claudin 6                                            |
| 242998_at   | 6.77E-06 | 2.74E-07 | -7.2089709 | 6.968214 | -1.5044007 | RDH12   | retinol dehydrogenase 12<br>(all-trans/9-cis/11-cis) |
| 210684_s_at | 6.77E-06 | 2.74E-07 | -7.2083363 | 6.966831 | -1.0719859 | DLG4    | discs large MAGUK scaffold<br>protein 4              |
| 236219_at   | 6.81E-06 | 2.77E-07 | -7.203411  | 6.956087 | -1.0846802 | SLC35G1 | solute carrier family 35 member<br>G1                |

|             |          |          |            |          |            |          |                                       |
|-------------|----------|----------|------------|----------|------------|----------|---------------------------------------|
| 1555697_at  | 6.83E-06 | 2.79E-07 | -7.2003256 | 6.949355 | -1.0791486 | KLK4     | kallikrein related peptidase 4        |
| 231463_at   | 6.83E-06 | 2.79E-07 | -7.1997559 | 6.948112 | -1.1093211 | CNTD1    | cyclin N-terminal domain containing 1 |
| 227890_at   | 6.90E-06 | 2.84E-07 | -7.191606  | 6.930324 | -1.0539737 | TMEM198  | transmembrane protein 198             |
| 214309_s_at | 6.91E-06 | 2.86E-07 | -7.1892868 | 6.92526  | -2.352185  |          |                                       |
| 237583_at   | 6.99E-06 | 2.92E-07 | -7.179985  | 6.904944 | -1.1374932 |          |                                       |
| 212810_s_at | 7.02E-06 | 2.94E-07 | -7.1767358 | 6.897844 | -1.3635209 | SLC1A4   | solute carrier family 1 member 4      |
| 234875_at   | 7.06E-06 | 2.97E-07 | -7.1722911 | 6.88813  | -1.1504462 | RPL7AP10 | ribosomal protein L7a pseudogene 10   |
| 217224_at   | 7.08E-06 | 3.01E-07 | -7.1663634 | 6.875171 | -1.0540562 |          |                                       |

|           |          |          |            |          |            |         |                                                                                       |
|-----------|----------|----------|------------|----------|------------|---------|---------------------------------------------------------------------------------------|
| 206716_at | 7.09E-06 | 3.02E-07 | -7.1643417 | 6.87075  | -1.3540095 | UMOD    | uromodulin                                                                            |
| 227287_at | 7.14E-06 | 3.06E-07 | -7.1591404 | 6.859373 | -1.046697  | CITED2  | Cbp/p300 interacting transactivator<br>with Glu/Asp rich<br>carboxy-terminal domain 2 |
| 231200_at | 7.14E-06 | 3.06E-07 | -7.1585013 | 6.857975 | -1.0254136 | LSM14B  | LSM family member 14B                                                                 |
| 214630_at | 7.17E-06 | 3.11E-07 | -7.1515608 | 6.842787 | -1.0164986 | CYP11B2 | cytochrome P450 family 11<br>subfamily B member 2                                     |

|             |          |          |            |          |            |           |                                            |
|-------------|----------|----------|------------|----------|------------|-----------|--------------------------------------------|
| 243261_at   | 7.39E-06 | 3.28E-07 | -7.1275506 | 6.790197 | -1.0921636 | LINC00689 | long intergenic non-protein coding RNA 689 |
| 231590_at   | 7.39E-06 | 3.28E-07 | -7.1273092 | 6.789668 | -1.2004496 | GATM      | glycine amidinotransferase                 |
| 239128_at   | 7.48E-06 | 3.34E-07 | -7.119379  | 6.77228  | -1.0264368 | TMEM221   | transmembrane protein 221                  |
| 244500_s_at | 7.51E-06 | 3.36E-07 | -7.1172897 | 6.767698 | -1.1668691 | EVI5L     | ecotropic viral integration site 5 like    |

|             |          |          |            |          |            |                                                         |                                                                                                                                             |
|-------------|----------|----------|------------|----------|------------|---------------------------------------------------------|---------------------------------------------------------------------------------------------------------------------------------------------|
| 239754_at   | 7.51E-06 | 3.36E-07 | -7.1169613 | 6.766978 | -1.018163  | SNORD65///S<br>NORD49B///L<br>RRC75A-AS1<br>///SNORD49A | small nucleolar RNA, C/D box<br>65///small nucleolar RNA, C/D box<br>49B///LRRC75A antisense RNA<br>1///small nucleolar RNA, C/D box<br>49A |
| 216381_x_at | 7.54E-06 | 3.40E-07 | -7.1107924 | 6.753444 | -2.7635586 | AKR7A3                                                  | aldo-keto reductase family 7<br>member A3                                                                                                   |

|             |          |          |            |          |                  |                                              |
|-------------|----------|----------|------------|----------|------------------|----------------------------------------------|
| 223018_at   | 7.62E-06 | 3.49E-07 | -7.1000387 | 6.72984  | -1.1141002NOB1   | NIN1/PSMD8 binding protein 1 homolog         |
| 241600_at   | 7.64E-06 | 3.51E-07 | -7.097446  | 6.724147 | -1.1150729WIPF3  | WAS/WASL interacting protein family member 3 |
| 206728_at   | 7.81E-06 | 3.67E-07 | -7.0773092 | 6.679897 | -2.1206525ECE2   | endothelin converting enzyme 2               |
| 207555_s_at | 7.96E-06 | 3.81E-07 | -7.0598834 | 6.641561 | -1.1799361TBXA2R | thromboxane A2 receptor                      |
| 217095_x_at | 7.96E-06 | 3.82E-07 | -7.059474  | 6.640659 | -1.0786375NCR1   | natural cytotoxicity triggering receptor 1   |

|              |          |          |            |          |                                                |                                             |
|--------------|----------|----------|------------|----------|------------------------------------------------|---------------------------------------------|
| 211172_x_at  | 8.00E-06 | 3.87E-07 | -7.0534257 | 6.627343 | -1.2187823 AKAP7                               | A-kinase anchoring protein 7                |
| 1564339_a_at | 8.08E-06 | 3.96E-07 | -7.0436829 | 6.605883 | -1.7425493 CHRM3                               | cholinergic receptor muscarinic 3           |
| 225698_at    | 8.15E-06 | 4.02E-07 | -7.0364539 | 6.589951 | -1.4573589 <sup>EPB41L4A-A</sup> <sub>S1</sub> | EPB41L4A antisense RNA 1                    |
| 217162_at    | 8.22E-06 | 4.08E-07 | -7.0300254 | 6.575778 | -1.0704007 TSPY1                               | testis specific protein, Y-linked 1         |
| 230572_at    | 8.24E-06 | 4.11E-07 | -7.0271488 | 6.569433 | -1.0417604 WWC2-AS2                            | WWC2 antisense RNA 2                        |
| 235136_at    | 8.32E-06 | 4.17E-07 | -7.0205679 | 6.554916 | -1.2540841 ORMDL3                              | ORMDL sphingolipid biosynthesis regulator 3 |



|             |          |          |            |          |            |          |                                                       |
|-------------|----------|----------|------------|----------|------------|----------|-------------------------------------------------------|
| 235129_at   | 8.33E-06 | 4.19E-07 | -7.0183183 | 6.549952 | -1.3739666 | PPP1R1A  | protein phosphatase 1 regulatory inhibitor subunit 1A |
| 241285_at   | 8.41E-06 | 4.28E-07 | -7.008571  | 6.528435 | -1.0165557 |          |                                                       |
| 1552473_at  | 8.48E-06 | 4.36E-07 | -7.0007003 | 6.511052 | -1.1967968 | GAMT     | guanidinoacetate N-methyltransferase                  |
| 236188_s_at | 8.53E-06 | 4.40E-07 | -6.996437  | 6.501632 | -1.0908111 | NAP1L4   | nucleosome assembly protein 1 like 4                  |
| 242942_at   | 8.58E-06 | 4.44E-07 | -6.9927406 | 6.493463 | -1.0932496 | SLC38A10 | solute carrier family 38 member 10                    |
| 237611_at   | 8.60E-06 | 4.45E-07 | -6.9914902 | 6.490699 | -1.0501918 |          |                                                       |

|              |          |          |            |          |                 |                                          |
|--------------|----------|----------|------------|----------|-----------------|------------------------------------------|
| 1555306_a_at | 8.76E-06 | 4.60E-07 | -6.9761847 | 6.456852 | -1.3291682ECE2  | endothelin converting enzyme 2           |
| 240831_at    | 8.77E-06 | 4.62E-07 | -6.9746395 | 6.453433 | -1.1320548      |                                          |
| 212246_at    | 8.91E-06 | 4.75E-07 | -6.9624437 | 6.426438 | -1.168595MCFD2  | multiple coagulation factor deficiency 2 |
| 223319_at    | 8.99E-06 | 4.83E-07 | -6.9547297 | 6.409353 | -1.1142284GPHN  | gephyrin                                 |
| 202753_at    | 9.01E-06 | 4.85E-07 | -6.9529201 | 6.405344 | -1.7040518PSMD6 | proteasome 26S subunit, non-ATPase 6     |
| 239000_at    | 9.01E-06 | 4.85E-07 | -6.9529108 | 6.405324 | -1.1557507BRD4  | bromodomain containing 4                 |
| 205305_at    | 9.05E-06 | 4.89E-07 | -6.9496195 | 6.398031 | -4.7110136FGL1  | fibrinogen like 1                        |
| 241125_at    | 9.11E-06 | 4.93E-07 | -6.9460525 | 6.390125 | -1.0609763      |                                          |

|             |          |          |            |          |            |                  |                                      |
|-------------|----------|----------|------------|----------|------------|------------------|--------------------------------------|
| 220465_at   | 9.15E-06 | 4.97E-07 | -6.9417238 | 6.380529 | -1.1148359 | CEBPA-AS1        | CEBPA antisense RNA 1 (head to head) |
| 1555616_at  | 9.15E-06 | 4.99E-07 | -6.9403278 | 6.377434 | -1.4393634 |                  |                                      |
| 208417_at   | 9.18E-06 | 5.02E-07 | -6.9373733 | 6.370883 | -1.0430066 | FGF6             | fibroblast growth factor 6           |
| 210328_at   | 9.31E-06 | 5.15E-07 | -6.9264955 | 6.346752 | -4.7996073 | GNMT             | glycine N-methyltransferase          |
| 238326_at   | 9.31E-06 | 5.15E-07 | -6.926245  | 6.346196 | -1.0509357 | ODF3B            | outer dense fiber of sperm tails 3B  |
| 213987_s_at | 9.32E-06 | 5.16E-07 | -6.9253884 | 6.344295 | -1.0720043 | CDK13            | cyclin dependent kinase 13           |
| 1559877_at  | 9.33E-06 | 5.17E-07 | -6.924627  | 6.342605 | -2.4106082 | LOC10028909<br>4 | uncharacterized LOC100289094         |
| 229544_at   | 9.33E-06 | 5.18E-07 | -6.9235351 | 6.340182 | -1.9154455 |                  |                                      |

|             |          |          |            |          |            |                                                                        |
|-------------|----------|----------|------------|----------|------------|------------------------------------------------------------------------|
| 240670_at   | 9.33E-06 | 5.18E-07 | -6.9234938 | 6.34009  | -1.1420393 |                                                                        |
| 239993_at   | 9.40E-06 | 5.26E-07 | -6.916823  | 6.325281 | -1.1098375 | LOC390705 protein phosphatase 2 regulatory subunit B", beta pseudogene |
| 233743_x_at | 9.48E-06 | 5.36E-07 | -6.9086193 | 6.307062 | -1.2357796 | S1PR5 sphingosine-1-phosphate receptor 5                               |
| 217341_at   | 9.50E-06 | 5.38E-07 | -6.9070555 | 6.303587 | -1.0121514 | DNM1 dynamin 1                                                         |
| 223426_s_at | 9.60E-06 | 5.47E-07 | -6.8997936 | 6.28745  | -1.8898775 | EPB41L4B erythrocyte membrane protein band 4.1 like 4B                 |
| 215005_at   | 9.65E-06 | 5.53E-07 | -6.8948589 | 6.276481 | -1.0395391 | NECAB2 N-terminal EF-hand calcium binding protein 2                    |

|             |          |          |            |          |            |           |                                                |
|-------------|----------|----------|------------|----------|------------|-----------|------------------------------------------------|
| 1569452_at  | 9.70E-06 | 5.56E-07 | -6.8920825 | 6.270307 | -1.0045227 | LOC692247 | uncharacterized LOC692247                      |
| 231011_at   | 9.71E-06 | 5.59E-07 | -6.8904772 | 6.266737 | -1.6753602 | LARP1B    | La ribonucleoprotein domain family member 1B   |
| 227432_s_at | 9.80E-06 | 5.67E-07 | -6.883641  | 6.251532 | -1.8975946 |           |                                                |
| 237900_at   | 9.82E-06 | 5.70E-07 | -6.8813913 | 6.246526 | -1.0151155 | KLHDC4    | kelch domain containing 4                      |
| 221868_at   | 9.86E-06 | 5.74E-07 | -6.8782059 | 6.239437 | -2.9990161 | PAIP2B    | poly(A) binding protein interacting protein 2B |
| 221462_x_at | 9.87E-06 | 5.76E-07 | -6.8767471 | 6.236191 | -1.1055586 | KLK15     | kallikrein related peptidase 15                |

|              |          |          |            |          |            |          |                                                                  |
|--------------|----------|----------|------------|----------|------------|----------|------------------------------------------------------------------|
| 1555808_a_at | 9.99E-06 | 5.90E-07 | -6.8659041 | 6.21205  | -1.0828955 | EXD2     | exonuclease 3'-5' domain<br>containing 2                         |
| 216597_at    | 1.01E-05 | 6.03E-07 | -6.8567763 | 6.191715 | -1.6308173 |          |                                                                  |
| 1566168_at   | 1.01E-05 | 6.07E-07 | -6.853994  | 6.185515 | -1.0321073 |          |                                                                  |
| 207567_at    | 1.01E-05 | 6.07E-07 | -6.8534785 | 6.184366 | -1.0046498 | SLC13A2  | solute carrier family 13 member 2                                |
| 208550_x_at  | 1.01E-05 | 6.11E-07 | -6.8507495 | 6.178283 | -1.0431314 | KCNG2    | potassium voltage-gated channel<br>modifier subfamily G member 2 |
| 204583_x_at  | 1.02E-05 | 6.20E-07 | -6.8446105 | 6.164596 | -1.132305  | KLK3     | kallikrein related peptidase 3                                   |
| 213861_s_at  | 1.02E-05 | 6.24E-07 | -6.8413132 | 6.157242 | -1.4246514 | METTL21B | methyltransferase like 21B                                       |

|              |          |          |            |          |            |            |                                                           |
|--------------|----------|----------|------------|----------|------------|------------|-----------------------------------------------------------|
| 221713_s_at  | 1.03E-05 | 6.27E-07 | -6.8396964 | 6.153636 | -1.1932418 | MAP6D1     | MAP6 domain containing 1                                  |
| 1566178_x_at | 1.03E-05 | 6.31E-07 | -6.8368035 | 6.147183 | -1.1629073 |            |                                                           |
| 238209_at    | 1.03E-05 | 6.36E-07 | -6.8330641 | 6.13884  | -1.0459191 |            |                                                           |
| 231268_at    | 1.04E-05 | 6.39E-07 | -6.831104  | 6.134465 | -1.0657587 | MYBL1      | MYB proto-oncogene like 1                                 |
| 206014_at    | 1.04E-05 | 6.44E-07 | -6.827495  | 6.12641  | -1.046818  | ACTL6B     | actin like 6B                                             |
| 223285_s_at  | 1.05E-05 | 6.48E-07 | -6.8250106 | 6.120864 | -1.0931596 | ST6GALNAC4 | ST6 N-acetylgalactosaminide alpha-2,6-sialyltransferase 4 |
| 226597_at    | 1.06E-05 | 6.68E-07 | -6.8112694 | 6.090174 | -1.2034605 | REEP6      | receptor accessory protein 6                              |
| 231135_at    | 1.07E-05 | 6.72E-07 | -6.8091647 | 6.085471 | -1.1030443 | LOC151174  | uncharacterized LOC151174                                 |

|              |          |          |            |          |            |          |                                               |
|--------------|----------|----------|------------|----------|------------|----------|-----------------------------------------------|
| 220161_s_at  | 1.07E-05 | 6.76E-07 | -6.8060281 | 6.078462 | -3.4758457 | EPB41L4B | erythrocyte membrane protein band 4.1 like 4B |
| 214325_at    | 1.07E-05 | 6.83E-07 | -6.8015271 | 6.068401 | -5.3307379 | GP2      | glycoprotein 2                                |
| 216579_at    | 1.08E-05 | 6.89E-07 | -6.7976783 | 6.059795 | -1.0434296 | GJB4     | gap junction protein beta 4                   |
| 221295_at    | 1.08E-05 | 6.96E-07 | -6.7936264 | 6.050734 | -1.192687  | CIDEA    | cell death-inducing DFFA-like effector a      |
| 1566990_x_at | 1.10E-05 | 7.09E-07 | -6.7852425 | 6.031977 | -1.2925462 | ARID1B   | AT-rich interaction domain 1B                 |



|             |          |          |            |          |            |          |                                       |
|-------------|----------|----------|------------|----------|------------|----------|---------------------------------------|
| 218653_at   | 1.10E-05 | 7.11E-07 | -6.7837346 | 6.028603 | -1.6838404 | SLC25A15 | solute carrier family 25 member 15    |
| 227032_at   | 1.10E-05 | 7.20E-07 | -6.7785067 | 6.016902 | -1.7185337 | PLXNA2   | plexin A2                             |
| 223788_at   | 1.13E-05 | 7.43E-07 | -6.7646229 | 5.985809 | -1.0363048 | GTPBP2   | GTP binding protein 2                 |
| 218725_at   | 1.14E-05 | 7.59E-07 | -6.7554201 | 5.965185 | -1.1937409 | SLC25A22 | solute carrier family 25 member 22    |
| 216535_at   | 1.14E-05 | 7.62E-07 | -6.7535116 | 5.960907 | -1.0185143 | CADM3    | cell adhesion molecule 3              |
| 220705_s_at | 1.15E-05 | 7.74E-07 | -6.7464844 | 5.94515  | -1.0452248 | ADAMTS7  | ADAM metallopeptidase with thrombospo |

---
